# Supplementary material for: MAgPIE 4 – A modular open source framework for modeling global land-systems
Source: Copernicus journal article supplement (doi:10.5194/gmd-2018-295), 2018-12-07
Supplement: Supplementary file 3 [file gmd-2018-295-supplement.zip]

# MAGPIE run analysis

Aperture Science Enrichment Center

October 16, 2018

## Contents

|            |                                                     |          |
|------------|-----------------------------------------------------|----------|
| <b>I</b>   | <b>Basics</b>                                       | <b>1</b> |
| 0.1        | World regions . . . . .                             | 1        |
| 0.2        | Modelstat . . . . .                                 | 2        |
| 0.3        | Food Modelstat . . . . .                            | 2        |
| 0.4        | Goal function value . . . . .                       | 3        |
| 0.4.1      | Total costs decomposition . . . . .                 | 4        |
| <b>II</b>  | <b>Costs</b>                                        | <b>6</b> |
| 1          | MainSolve                                           | 6        |
| 2          | MainSolve w/o GHG Emissions                         | 6        |
| <b>III</b> | <b>Demand</b>                                       | <b>7</b> |
| <b>3</b>   | <b>Agricultural Supply Chain Loss</b>               | <b>9</b> |
| 3.1        | Crops . . . . .                                     | 18       |
| 3.1.1      | Cereals . . . . .                                   | 21       |
| 3.1.2      | Cereals—Maize . . . . .                             | 24       |
| 3.1.3      | Cereals—Rice . . . . .                              | 27       |
| 3.1.4      | Cereals—Temperate cereals . . . . .                 | 30       |
| 3.1.5      | Cereals—Tropical cereals . . . . .                  | 33       |
| 3.1.6      | Oil crops . . . . .                                 | 36       |
| 3.1.7      | Oil crops—Cotton seed . . . . .                     | 39       |
| 3.1.8      | Oil crops—Groundnuts . . . . .                      | 42       |
| 3.1.9      | Oil crops—Other oil crops (incl rapeseed) . . . . . | 45       |
| 3.1.10     | Oil crops—Soybean . . . . .                         | 48       |
| 3.1.11     | Oil crops—Sunflower . . . . .                       | 51       |
| 3.1.12     | Other crops . . . . .                               | 54       |
| 3.1.13     | Other crops—Fruits Vegetables Nuts . . . . .        | 57       |
| 3.1.14     | Other crops—Potatoes . . . . .                      | 60       |
| 3.1.15     | Other crops—Pulses . . . . .                        | 63       |
| 3.1.16     | Other crops—Tropical roots . . . . .                | 66       |
| 3.1.17     | Sugar crops . . . . .                               | 69       |
| 3.1.18     | Sugar crops—Sugar beet . . . . .                    | 72       |
| 3.1.19     | Sugar crops—Sugar cane . . . . .                    | 75       |
| 3.2        | Livestock products . . . . .                        | 82       |
| 3.2.1      | Dairy . . . . .                                     | 85       |
| 3.2.2      | Eggs . . . . .                                      | 88       |
| 3.2.3      | Monogastric meat . . . . .                          | 91       |
| 3.2.4      | Poultry meat . . . . .                              | 94       |
| 3.2.5      | Ruminant meat . . . . .                             | 97       |
| 3.3        | Secondary products . . . . .                        | 102      |
| 3.3.1      | Alcoholic beverages . . . . .                       | 105      |
| 3.3.2      | Brans . . . . .                                     | 108      |

|          |                                                     |            |
|----------|-----------------------------------------------------|------------|
| 3.3.3    | Molasses . . . . .                                  | 111        |
| 3.3.4    | Oils . . . . .                                      | 114        |
| 3.3.5    | Sugar . . . . .                                     | 117        |
| <b>4</b> | <b>Bioenergy</b>                                    | <b>120</b> |
| 4.1      | 1st generation . . . . .                            | 127        |
| 4.2      | 2nd generation . . . . .                            | 130        |
| 4.3      | Crop residues . . . . .                             | 135        |
| 4.3.1    | Non fibrous crop residues . . . . .                 | 138        |
| 4.3.2    | Other fibrous crop residues . . . . .               | 141        |
| 4.3.3    | Straw . . . . .                                     | 144        |
| 4.4      | Secondary products . . . . .                        | 155        |
| 4.4.1    | Ethanol . . . . .                                   | 158        |
| 4.4.2    | Oils . . . . .                                      | 161        |
| <b>5</b> | <b>Domestic Balanceflow</b>                         | <b>164</b> |
| 5.1      | Crops . . . . .                                     | 173        |
| 5.1.1    | Cereals . . . . .                                   | 176        |
| 5.1.2    | Cereals—Maize . . . . .                             | 179        |
| 5.1.3    | Cereals—Rice . . . . .                              | 182        |
| 5.1.4    | Cereals—Temperate cereals . . . . .                 | 185        |
| 5.1.5    | Cereals—Tropical cereals . . . . .                  | 188        |
| 5.1.6    | Oil crops . . . . .                                 | 191        |
| 5.1.7    | Oil crops—Cotton seed . . . . .                     | 194        |
| 5.1.8    | Oil crops—Groundnuts . . . . .                      | 197        |
| 5.1.9    | Oil crops—Other oil crops (incl rapeseed) . . . . . | 200        |
| 5.1.10   | Oil crops—Soybean . . . . .                         | 203        |
| 5.1.11   | Oil crops—Sunflower . . . . .                       | 206        |
| 5.1.12   | Other crops . . . . .                               | 209        |
| 5.1.13   | Other crops—Fruits Vegetables Nuts . . . . .        | 212        |
| 5.1.14   | Other crops—Potatoes . . . . .                      | 215        |
| 5.1.15   | Other crops—Pulses . . . . .                        | 218        |
| 5.1.16   | Other crops—Tropical roots . . . . .                | 221        |
| 5.1.17   | Sugar crops . . . . .                               | 224        |
| 5.1.18   | Sugar crops—Sugar beet . . . . .                    | 227        |
| 5.2      | Fish . . . . .                                      | 230        |
| 5.3      | Livestock products . . . . .                        | 237        |
| 5.3.1    | Dairy . . . . .                                     | 240        |
| 5.3.2    | Eggs . . . . .                                      | 243        |
| 5.3.3    | Monogastric meat . . . . .                          | 246        |
| 5.3.4    | Poultry meat . . . . .                              | 249        |
| 5.3.5    | Ruminant meat . . . . .                             | 252        |
| 5.4      | Secondary products . . . . .                        | 257        |
| 5.4.1    | Alcoholic beverages . . . . .                       | 260        |
| 5.4.2    | Brans . . . . .                                     | 263        |
| 5.4.3    | Cotton lint . . . . .                               | 266        |
| 5.4.4    | Oilcakes . . . . .                                  | 269        |
| 5.4.5    | Oils . . . . .                                      | 272        |
| 5.4.6    | Sugar . . . . .                                     | 275        |
| <b>6</b> | <b>Feed</b>                                         | <b>278</b> |
| 6.1      | Crop residues . . . . .                             | 285        |
| 6.1.1    | Non fibrous crop residues . . . . .                 | 288        |
| 6.1.2    | Other fibrous crop residues . . . . .               | 291        |
| 6.1.3    | Straw . . . . .                                     | 294        |
| 6.2      | Crops . . . . .                                     | 299        |
| 6.2.1    | Cereals . . . . .                                   | 302        |
| 6.2.2    | Cereals—Maize . . . . .                             | 305        |
| 6.2.3    | Cereals—Rice . . . . .                              | 308        |
| 6.2.4    | Cereals—Temperate cereals . . . . .                 | 311        |
| 6.2.5    | Cereals—Tropical cereals . . . . .                  | 314        |

|          |                                                     |            |
|----------|-----------------------------------------------------|------------|
| 6.2.6    | Oil crops . . . . .                                 | 317        |
| 6.2.7    | Oil crops—Cotton seed . . . . .                     | 320        |
| 6.2.8    | Oil crops—Groundnuts . . . . .                      | 323        |
| 6.2.9    | Oil crops—Other oil crops (incl rapeseed) . . . . . | 326        |
| 6.2.10   | Oil crops—Soybean . . . . .                         | 329        |
| 6.2.11   | Oil crops—Sunflower . . . . .                       | 332        |
| 6.2.12   | Other crops . . . . .                               | 335        |
| 6.2.13   | Other crops—Fruits Vegetables Nuts . . . . .        | 338        |
| 6.2.14   | Other crops—Potatoes . . . . .                      | 341        |
| 6.2.15   | Other crops—Pulses . . . . .                        | 344        |
| 6.2.16   | Other crops—Tropical roots . . . . .                | 347        |
| 6.2.17   | Sugar crops . . . . .                               | 350        |
| 6.2.18   | Sugar crops—Sugar beet . . . . .                    | 353        |
| 6.2.19   | Sugar crops—Sugar cane . . . . .                    | 356        |
| 6.3      | Fish . . . . .                                      | 359        |
| 6.4      | Forage . . . . .                                    | 362        |
| 6.5      | Livestock products . . . . .                        | 369        |
| 6.5.1    | Dairy . . . . .                                     | 372        |
| 6.5.2    | Eggs . . . . .                                      | 375        |
| 6.5.3    | Ruminant meat . . . . .                             | 378        |
| 6.6      | Pasture . . . . .                                   | 381        |
| 6.7      | Secondary products . . . . .                        | 386        |
| 6.7.1    | Brans . . . . .                                     | 389        |
| 6.7.2    | Distillers grains . . . . .                         | 392        |
| 6.7.3    | Molasses . . . . .                                  | 395        |
| 6.7.4    | Oilcakes . . . . .                                  | 398        |
| 6.7.5    | Oils . . . . .                                      | 401        |
| 6.7.6    | Sugar . . . . .                                     | 404        |
| <b>7</b> | <b>Food</b>                                         | <b>407</b> |
| 7.1      | Crops . . . . .                                     | 416        |
| 7.1.1    | Cereals . . . . .                                   | 419        |
| 7.1.2    | Cereals—Maize . . . . .                             | 422        |
| 7.1.3    | Cereals—Rice . . . . .                              | 425        |
| 7.1.4    | Cereals—Temperate cereals . . . . .                 | 428        |
| 7.1.5    | Cereals—Tropical cereals . . . . .                  | 431        |
| 7.1.6    | Oil crops . . . . .                                 | 434        |
| 7.1.7    | Oil crops—Groundnuts . . . . .                      | 437        |
| 7.1.8    | Oil crops—Other oil crops (incl rapeseed) . . . . . | 440        |
| 7.1.9    | Oil crops—Soybean . . . . .                         | 443        |
| 7.1.10   | Oil crops—Sunflower . . . . .                       | 446        |
| 7.1.11   | Other crops . . . . .                               | 449        |
| 7.1.12   | Other crops—Fruits Vegetables Nuts . . . . .        | 452        |
| 7.1.13   | Other crops—Potatoes . . . . .                      | 455        |
| 7.1.14   | Other crops—Pulses . . . . .                        | 458        |
| 7.1.15   | Other crops—Tropical roots . . . . .                | 461        |
| 7.1.16   | Sugar crops . . . . .                               | 464        |
| 7.1.17   | Sugar crops—Sugar beet . . . . .                    | 467        |
| 7.1.18   | Sugar crops—Sugar cane . . . . .                    | 470        |
| 7.2      | Fish . . . . .                                      | 473        |
| 7.3      | Livestock products . . . . .                        | 480        |
| 7.3.1    | Dairy . . . . .                                     | 483        |
| 7.3.2    | Eggs . . . . .                                      | 486        |
| 7.3.3    | Monogastric meat . . . . .                          | 489        |
| 7.3.4    | Poultry meat . . . . .                              | 492        |
| 7.3.5    | Ruminant meat . . . . .                             | 495        |
| 7.4      | Secondary products . . . . .                        | 500        |
| 7.4.1    | Alcoholic beverages . . . . .                       | 503        |
| 7.4.2    | Brans . . . . .                                     | 506        |
| 7.4.3    | Molasses . . . . .                                  | 509        |
| 7.4.4    | Oils . . . . .                                      | 512        |

|          |                                                     |            |
|----------|-----------------------------------------------------|------------|
| 7.4.5    | Sugar . . . . .                                     | 515        |
| <b>8</b> | <b>Material . . . . .</b>                           | <b>518</b> |
| 8.1      | Crop residues . . . . .                             | 525        |
| 8.1.1    | Straw . . . . .                                     | 528        |
| 8.2      | Crops . . . . .                                     | 533        |
| 8.2.1    | Cereals . . . . .                                   | 536        |
| 8.2.2    | Cereals—Rice . . . . .                              | 539        |
| 8.2.3    | Cereals—Tropical cereals . . . . .                  | 542        |
| 8.2.4    | Oil crops . . . . .                                 | 545        |
| 8.2.5    | Oil crops—Cotton seed . . . . .                     | 548        |
| 8.2.6    | Oil crops—Groundnuts . . . . .                      | 551        |
| 8.2.7    | Oil crops—Other oil crops (incl rapeseed) . . . . . | 554        |
| 8.2.8    | Oil crops—Soybean . . . . .                         | 557        |
| 8.2.9    | Oil crops—Sunflower . . . . .                       | 560        |
| 8.2.10   | Other crops . . . . .                               | 563        |
| 8.2.11   | Other crops—Fruits Vegetables Nuts . . . . .        | 566        |
| 8.2.12   | Other crops—Potatoes . . . . .                      | 569        |
| 8.2.13   | Other crops—Pulses . . . . .                        | 572        |
| 8.2.14   | Other crops—Tropical roots . . . . .                | 575        |
| 8.2.15   | Sugar crops . . . . .                               | 578        |
| 8.2.16   | Sugar crops—Sugar beet . . . . .                    | 581        |
| 8.3      | Fish . . . . .                                      | 584        |
| 8.4      | Forest products . . . . .                           | 589        |
| 8.4.1    | Industrial roundwood . . . . .                      | 592        |
| 8.4.2    | Wood fuel . . . . .                                 | 595        |
| 8.5      | Livestock products . . . . .                        | 600        |
| 8.5.1    | Dairy . . . . .                                     | 603        |
| 8.5.2    | Eggs . . . . .                                      | 606        |
| 8.5.3    | Monogastric meat . . . . .                          | 609        |
| 8.5.4    | Poultry meat . . . . .                              | 612        |
| 8.5.5    | Ruminant meat . . . . .                             | 615        |
| 8.6      | Secondary products . . . . .                        | 620        |
| 8.6.1    | Alcoholic beverages . . . . .                       | 623        |
| 8.6.2    | Brans . . . . .                                     | 626        |
| 8.6.3    | Cotton lint . . . . .                               | 629        |
| 8.6.4    | Ethanol . . . . .                                   | 632        |
| 8.6.5    | Molasses . . . . .                                  | 635        |
| 8.6.6    | Oilcakes . . . . .                                  | 638        |
| 8.6.7    | Oils . . . . .                                      | 641        |
| 8.6.8    | Sugar . . . . .                                     | 644        |
| <b>9</b> | <b>Processing . . . . .</b>                         | <b>647</b> |
| 9.1      | Crops . . . . .                                     | 656        |
| 9.1.1    | Cereals . . . . .                                   | 659        |
| 9.1.2    | Cereals—Maize . . . . .                             | 662        |
| 9.1.3    | Cereals—Rice . . . . .                              | 665        |
| 9.1.4    | Cereals—Temperate cereals . . . . .                 | 668        |
| 9.1.5    | Cereals—Tropical cereals . . . . .                  | 671        |
| 9.1.6    | Oil crops . . . . .                                 | 674        |
| 9.1.7    | Oil crops—Cotton seed . . . . .                     | 677        |
| 9.1.8    | Oil crops—Groundnuts . . . . .                      | 680        |
| 9.1.9    | Oil crops—Oilpalms . . . . .                        | 683        |
| 9.1.10   | Oil crops—Other oil crops (incl rapeseed) . . . . . | 686        |
| 9.1.11   | Oil crops—Soybean . . . . .                         | 689        |
| 9.1.12   | Oil crops—Sunflower . . . . .                       | 692        |
| 9.1.13   | Other crops . . . . .                               | 695        |
| 9.1.14   | Other crops—Fruits Vegetables Nuts . . . . .        | 698        |
| 9.1.15   | Other crops—Potatoes . . . . .                      | 701        |
| 9.1.16   | Other crops—Tropical roots . . . . .                | 704        |
| 9.1.17   | Sugar crops . . . . .                               | 707        |



|           |                                                                      |            |
|-----------|----------------------------------------------------------------------|------------|
| 9.1.18    | Sugar crops—Sugar beet . . . . .                                     | 710        |
| 9.1.19    | Sugar crops—Sugar cane . . . . .                                     | 713        |
| 9.2       | Secondary products . . . . .                                         | 722        |
| 9.2.1     | Brans . . . . .                                                      | 725        |
| 9.2.2     | Molasses . . . . .                                                   | 728        |
| 9.2.3     | Sugar . . . . .                                                      | 731        |
| <b>10</b> | <b>Seed</b>                                                          | <b>734</b> |
| 10.1      | Crops . . . . .                                                      | 743        |
| 10.1.1    | Cereals . . . . .                                                    | 746        |
| 10.1.2    | Cereals—Maize . . . . .                                              | 749        |
| 10.1.3    | Cereals—Rice . . . . .                                               | 752        |
| 10.1.4    | Cereals—Temperate cereals . . . . .                                  | 755        |
| 10.1.5    | Cereals—Tropical cereals . . . . .                                   | 758        |
| 10.1.6    | Oil crops . . . . .                                                  | 761        |
| 10.1.7    | Oil crops—Cotton seed . . . . .                                      | 764        |
| 10.1.8    | Oil crops—Groundnuts . . . . .                                       | 767        |
| 10.1.9    | Oil crops—Other oil crops (incl rapeseed) . . . . .                  | 770        |
| 10.1.10   | Oil crops—Soybean . . . . .                                          | 773        |
| 10.1.11   | Oil crops—Sunflower . . . . .                                        | 776        |
| 10.1.12   | Other crops . . . . .                                                | 779        |
| 10.1.13   | Other crops—Fruits Vegetables Nuts . . . . .                         | 782        |
| 10.1.14   | Other crops—Potatoes . . . . .                                       | 785        |
| 10.1.15   | Other crops—Pulses . . . . .                                         | 788        |
| 10.1.16   | Other crops—Tropical roots . . . . .                                 | 791        |
| 10.1.17   | Sugar crops . . . . .                                                | 794        |
| 10.1.18   | Sugar crops—Sugar cane . . . . .                                     | 797        |
| <b>IV</b> | <b>Emissions</b>                                                     | <b>806</b> |
| <b>11</b> | <b>CH<sub>4</sub></b>                                                | <b>806</b> |
| 11.1      | Land . . . . .                                                       | 808        |
| 11.1.1    | Agriculture . . . . .                                                | 808        |
| 11.1.2    | Agriculture—Animal waste management . . . . .                        | 819        |
| 11.1.3    | Agriculture—Rice . . . . .                                           | 824        |
| <b>12</b> | <b>CO<sub>2</sub></b>                                                | <b>829</b> |
| 12.1      | Land . . . . .                                                       | 831        |
| 12.1.1    | Land-use Change . . . . .                                            | 831        |
| <b>13</b> | <b>N<sub>2</sub>O</b>                                                | <b>842</b> |
| 13.1      | Land . . . . .                                                       | 844        |
| 13.1.1    | Agriculture . . . . .                                                | 844        |
| 13.1.2    | Agriculture—Agricultural Soils . . . . .                             | 854        |
| 13.1.3    | Agriculture—Agricultural Soils—Decay of Crop Residues . . . . .      | 858        |
| 13.1.4    | Agriculture—Agricultural Soils—Inorganic Fertilizers . . . . .       | 861        |
| 13.1.5    | Agriculture—Agricultural Soils—Manure applied to Croplands . . . . . | 864        |
| 13.1.6    | Agriculture—Agricultural Soils—Pasture . . . . .                     | 867        |
| 13.1.7    | Agriculture—Animal Waste Management . . . . .                        | 871        |
| <b>14</b> | <b>NH<sub>3</sub></b>                                                | <b>875</b> |
| 14.1      | Land . . . . .                                                       | 877        |
| 14.1.1    | Agriculture . . . . .                                                | 877        |
| 14.1.2    | Agriculture—Agricultural Soils . . . . .                             | 881        |
| 14.1.3    | Agriculture—Agricultural Soils—Inorganic Fertilizers . . . . .       | 885        |
| 14.1.4    | Agriculture—Agricultural Soils—Manure applied to Croplands . . . . . | 888        |
| 14.1.5    | Agriculture—Agricultural Soils—Pasture . . . . .                     | 891        |
| 14.1.6    | Agriculture—Animal Waste Management . . . . .                        | 895        |

|                                                                             |            |
|-----------------------------------------------------------------------------|------------|
| <b>15 NO<sub>2</sub></b>                                                    | <b>899</b> |
| 15.1 Land . . . . .                                                         | 901        |
| 15.1.1 Agriculture . . . . .                                                | 901        |
| 15.1.2 Agriculture—Agricultural Soils . . . . .                             | 905        |
| 15.1.3 Agriculture—Agricultural Soils—Inorganic Fertilizers . . . . .       | 909        |
| 15.1.4 Agriculture—Agricultural Soils—Manure applied to Croplands . . . . . | 912        |
| 15.1.5 Agriculture—Agricultural Soils—Pasture . . . . .                     | 915        |
| 15.1.6 Agriculture—Animal Waste Management . . . . .                        | 919        |
| <b>16 NO<sub>3</sub>Land</b>                                                | <b>923</b> |
| 16.1 Agriculture . . . . .                                                  | 923        |
| 16.1.1 Agricultural Soils . . . . .                                         | 927        |
| 16.1.2 Agricultural Soils—Decay of Crop Residues . . . . .                  | 931        |
| 16.1.3 Agricultural Soils—Inorganic Fertilizers . . . . .                   | 934        |
| 16.1.4 Agricultural Soils—Manure applied to Croplands . . . . .             | 937        |
| 16.1.5 Agricultural Soils—Pasture . . . . .                                 | 940        |
| 16.1.6 Animal Waste Management . . . . .                                    | 944        |
| <b>V Food Consumption Value</b>                                             | <b>948</b> |
| <b>17 Bioenergy crops</b>                                                   | <b>948</b> |
| <b>18 Crop residues</b>                                                     | <b>948</b> |
| <b>19 Crops</b>                                                             | <b>948</b> |
| <b>20 Fish</b>                                                              | <b>948</b> |
| <b>21 Forage</b>                                                            | <b>948</b> |
| <b>22 Livestock products</b>                                                | <b>948</b> |
| <b>23 Pasture</b>                                                           | <b>948</b> |
| <b>24 Secondary products</b>                                                | <b>948</b> |
| <b>VI Food Expenditure Share</b>                                            | <b>949</b> |
| <b>25 Bioenergy crops</b>                                                   | <b>949</b> |
| <b>26 Crop residues</b>                                                     | <b>949</b> |
| <b>27 Crops</b>                                                             | <b>949</b> |
| <b>28 Fish</b>                                                              | <b>949</b> |
| <b>29 Forage</b>                                                            | <b>949</b> |
| <b>30 Livestock products</b>                                                | <b>949</b> |
| <b>31 Pasture</b>                                                           | <b>949</b> |
| <b>32 Secondary products</b>                                                | <b>949</b> |
| <b>VII Household Expenditure</b>                                            | <b>950</b> |

|                                                      |                 |
|------------------------------------------------------|-----------------|
| <b>33 Food</b>                                       | <b>950</b>      |
| 33.1 Expenditure . . . . .                           | 950             |
| 33.1.1 Crops . . . . .                               | 951             |
| 33.1.2 Crops—Cereals . . . . .                       | 952             |
| 33.1.3 Crops—Oil crops . . . . .                     | 953             |
| 33.1.4 Crops—Other crops . . . . .                   | 955             |
| 33.1.5 Crops—Sugar crops . . . . .                   | 956             |
| 33.1.6 Fish . . . . .                                | 957             |
| 33.1.7 Livestock products . . . . .                  | 958             |
| 33.1.8 Secondary products . . . . .                  | 960             |
| <br><b>VIII Income</b>                               | <br><b>962</b>  |
| <br><b>IX Nutrition</b>                              | <br><b>967</b>  |
| <b>34 Calorie Supply</b>                             | <b>967</b>      |
| 34.1 Crops . . . . .                                 | 974             |
| 34.1.1 Cereals . . . . .                             | 977             |
| 34.1.2 Oil crops . . . . .                           | 980             |
| 34.1.3 Other crops . . . . .                         | 983             |
| 34.1.4 Sugar crops . . . . .                         | 986             |
| 34.2 Fish . . . . .                                  | 989             |
| 34.3 Livestock products . . . . .                    | 992             |
| 34.4 Secondary products . . . . .                    | 995             |
| <br><b>35 Dietary Composition</b>                    | <br><b>998</b>  |
| 35.1 Livestock Demand Structure . . . . .            | 998             |
| 35.1.1 Livestock products—Dairy . . . . .            | 998             |
| 35.1.2 Livestock products—Eggs . . . . .             | 1001            |
| 35.1.3 Livestock products—Monogastric meat . . . . . | 1004            |
| 35.1.4 Livestock products—Poultry meat . . . . .     | 1007            |
| 35.1.5 Livestock products—Ruminant meat . . . . .    | 1010            |
| 35.2 Livestock Share . . . . .                       | 1013            |
| 35.3 Vegetables Fruits Nuts Share . . . . .          | 1016            |
| <br><b>X Population</b>                              | <br><b>1019</b> |
| <br><b>XI Prices</b>                                 | <br><b>1024</b> |
| <b>36 Agriculture</b>                                | <b>1024</b>     |
| 36.1 Alcoholic beverages . . . . .                   | 1024            |
| 36.2 Brans . . . . .                                 | 1029            |
| 36.3 Cotton lint . . . . .                           | 1030            |
| 36.4 Cotton seed . . . . .                           | 1036            |
| 36.5 Dairy . . . . .                                 | 1044            |
| 36.6 Distillers grains . . . . .                     | 1050            |
| 36.7 Eggs . . . . .                                  | 1052            |
| 36.8 Ethanol . . . . .                               | 1058            |
| 36.9 Fish . . . . .                                  | 1059            |
| 36.10 Forage . . . . .                               | 1061            |
| 36.11 Fruits Vegetables Nuts . . . . .               | 1066            |
| 36.12 Groundnuts . . . . .                           | 1074            |
| 36.13 Maize . . . . .                                | 1080            |
| 36.14 Molasses . . . . .                             | 1088            |
| 36.15 Monogastric meat . . . . .                     | 1090            |
| 36.16 Non fibrous crop residues . . . . .            | 1096            |
| 36.17 Oilcakes . . . . .                             | 1098            |
| 36.18 Oilpalms . . . . .                             | 1100            |

|            |                                           |             |
|------------|-------------------------------------------|-------------|
| 36.19      | Oils . . . . .                            | 1102        |
| 36.20      | Other fibrous crop residues . . . . .     | 1110        |
| 36.21      | Other oil crops (incl rapeseed) . . . . . | 1112        |
| 36.22      | Pasture . . . . .                         | 1118        |
| 36.23      | Potatoes . . . . .                        | 1119        |
| 36.24      | Poultry meat . . . . .                    | 1125        |
| 36.25      | Pulses . . . . .                          | 1133        |
| 36.26      | Rice . . . . .                            | 1139        |
| 36.27      | Ruminant meat . . . . .                   | 1147        |
| 36.28      | Short rotation grasses . . . . .          | 1155        |
| 36.29      | Soybean . . . . .                         | 1157        |
| 36.30      | Straw . . . . .                           | 1165        |
| 36.31      | Sugar . . . . .                           | 1167        |
| 36.32      | Sugar beet . . . . .                      | 1175        |
| 36.33      | Sugar cane . . . . .                      | 1181        |
| 36.34      | Sunflower . . . . .                       | 1186        |
| 36.35      | Temperate cereals . . . . .               | 1192        |
| 36.36      | Tropical cereals . . . . .                | 1200        |
| 36.37      | Tropical roots . . . . .                  | 1208        |
| <b>37</b>  | <b>Bioenergy</b>                          | <b>1214</b> |
| <b>38</b>  | <b>Food Price Index</b>                   | <b>1217</b> |
| <b>39</b>  | <b>GHG Emission</b>                       | <b>1221</b> |
| <b>40</b>  | <b>Land</b>                               | <b>1221</b> |
| <b>41</b>  | <b>Water</b>                              | <b>1221</b> |
| <b>XII</b> | <b>Production</b>                         | <b>1222</b> |
| <b>42</b>  | <b>Bioenergy crops</b>                    | <b>1227</b> |
| <b>43</b>  | <b>Crop residues</b>                      | <b>1227</b> |
| 43.1       | Non fibrous crop residues . . . . .       | 1232        |
| 43.2       | Other fibrous crop residues . . . . .     | 1235        |
| 43.3       | Straw . . . . .                           | 1238        |
| <b>44</b>  | <b>Crops</b>                              | <b>1241</b> |
| 44.1       | Cereals . . . . .                         | 1248        |
| 44.1.1     | Maize . . . . .                           | 1251        |
| 44.1.2     | Rice . . . . .                            | 1254        |
| 44.1.3     | Temperate cereals . . . . .               | 1257        |
| 44.1.4     | Tropical cereals . . . . .                | 1260        |
| 44.2       | Oil crops . . . . .                       | 1265        |
| 44.2.1     | Cotton seed . . . . .                     | 1268        |
| 44.2.2     | Groundnuts . . . . .                      | 1271        |
| 44.2.3     | Oilpalms . . . . .                        | 1274        |
| 44.2.4     | Other oil crops (incl rapeseed) . . . . . | 1277        |
| 44.2.5     | Soybean . . . . .                         | 1280        |
| 44.2.6     | Sunflower . . . . .                       | 1283        |
| 44.3       | Other crops . . . . .                     | 1288        |
| 44.3.1     | Fruits Vegetables Nuts . . . . .          | 1291        |
| 44.3.2     | Potatoes . . . . .                        | 1294        |
| 44.3.3     | Pulses . . . . .                          | 1297        |
| 44.3.4     | Tropical roots . . . . .                  | 1300        |
| 44.4       | Sugar crops . . . . .                     | 1305        |
| 44.4.1     | Sugar beet . . . . .                      | 1308        |
| 44.4.2     | Sugar cane . . . . .                      | 1311        |

|                                                             |             |
|-------------------------------------------------------------|-------------|
| <b>45 Fish</b>                                              | <b>1314</b> |
| <b>46 Forage</b>                                            | <b>1317</b> |
| <b>47 Forest products</b>                                   | <b>1320</b> |
| <b>48 Livestock products</b>                                | <b>1322</b> |
| 48.1 Dairy . . . . .                                        | 1327        |
| 48.2 Eggs . . . . .                                         | 1330        |
| 48.3 Monogastric meat . . . . .                             | 1333        |
| 48.4 Poultry meat . . . . .                                 | 1336        |
| 48.5 Ruminant meat . . . . .                                | 1339        |
| <b>49 Pasture</b>                                           | <b>1342</b> |
| <b>50 Secondary products</b>                                | <b>1345</b> |
| 50.1 Alcoholic beverages . . . . .                          | 1350        |
| 50.2 Brans . . . . .                                        | 1353        |
| 50.3 Cotton lint . . . . .                                  | 1356        |
| 50.4 Distillers grains . . . . .                            | 1359        |
| 50.5 Ethanol . . . . .                                      | 1362        |
| 50.6 Molasses . . . . .                                     | 1365        |
| 50.7 Oilcakes . . . . .                                     | 1368        |
| 50.8 Oils . . . . .                                         | 1371        |
| 50.9 Sugar . . . . .                                        | 1374        |
| <b>XIII Productivity</b>                                    | <b>1377</b> |
| <b>51 Landuse Intensity Indicator Tau</b>                   | <b>1377</b> |
| <b>52 Yield</b>                                             | <b>1382</b> |
| 52.1 Crops . . . . .                                        | 1386        |
| 52.1.1 Cereals . . . . .                                    | 1389        |
| 52.1.2 Cereals—Maize . . . . .                              | 1392        |
| 52.1.3 Cereals—Rice . . . . .                               | 1395        |
| 52.1.4 Cereals—Temperate cereals . . . . .                  | 1398        |
| 52.1.5 Cereals—Tropical cereals . . . . .                   | 1401        |
| 52.1.6 Oil crops . . . . .                                  | 1404        |
| 52.1.7 Oil crops—Cotton seed . . . . .                      | 1407        |
| 52.1.8 Oil crops—Groundnuts . . . . .                       | 1410        |
| 52.1.9 Oil crops—Oilpalms . . . . .                         | 1413        |
| 52.1.10 Oil crops—Other oil crops (incl rapeseed) . . . . . | 1416        |
| 52.1.11 Oil crops—Soybean . . . . .                         | 1419        |
| 52.1.12 Oil crops—Sunflower . . . . .                       | 1422        |
| 52.1.13 Other crops . . . . .                               | 1425        |
| 52.1.14 Other crops—Fruits Vegetables Nuts . . . . .        | 1428        |
| 52.1.15 Other crops—Potatoes . . . . .                      | 1431        |
| 52.1.16 Other crops—Pulses . . . . .                        | 1434        |
| 52.1.17 Other crops—Tropical roots . . . . .                | 1437        |
| 52.1.18 Sugar crops . . . . .                               | 1440        |
| 52.1.19 Sugar crops—Sugar beet . . . . .                    | 1443        |
| 52.1.20 Sugar crops—Sugar cane . . . . .                    | 1446        |
| 52.2 Forage . . . . .                                       | 1449        |
| 52.3 Pasture . . . . .                                      | 1452        |
| <b>53 Yield-increasing technological change</b>             | <b>1454</b> |
| <b>XIV Resources</b>                                        | <b>1455</b> |

|                                                                        |             |
|------------------------------------------------------------------------|-------------|
| <b>54 Land Cover</b>                                                   | <b>1455</b> |
| 54.1 Cropland . . . . .                                                | 1462        |
| 54.1.1 Area actually irrigated . . . . .                               | 1466        |
| 54.1.2 Area equipped for irrigation . . . . .                          | 1470        |
| 54.1.3 Bioenergy crops . . . . .                                       | 1474        |
| 54.1.4 Crops . . . . .                                                 | 1477        |
| 54.1.5 Crops—Cereals . . . . .                                         | 1480        |
| 54.1.6 Crops—Cereals—Maize . . . . .                                   | 1483        |
| 54.1.7 Crops—Cereals—Rice . . . . .                                    | 1486        |
| 54.1.8 Crops—Cereals—Temperate cereals . . . . .                       | 1489        |
| 54.1.9 Crops—Cereals—Tropical cereals . . . . .                        | 1492        |
| 54.1.10 Crops—Oil crops . . . . .                                      | 1495        |
| 54.1.11 Crops—Oil crops—Cotton seed . . . . .                          | 1498        |
| 54.1.12 Crops—Oil crops—Groundnuts . . . . .                           | 1501        |
| 54.1.13 Crops—Oil crops—Oilpalms . . . . .                             | 1504        |
| 54.1.14 Crops—Oil crops—Other oil crops (incl rapeseed) . . . . .      | 1507        |
| 54.1.15 Crops—Oil crops—Soybean . . . . .                              | 1510        |
| 54.1.16 Crops—Oil crops—Sunflower . . . . .                            | 1513        |
| 54.1.17 Crops—Other crops . . . . .                                    | 1516        |
| 54.1.18 Crops—Other crops—Fruits Vegetables Nuts . . . . .             | 1519        |
| 54.1.19 Crops—Other crops—Potatoes . . . . .                           | 1522        |
| 54.1.20 Crops—Other crops—Pulses . . . . .                             | 1525        |
| 54.1.21 Crops—Other crops—Tropical roots . . . . .                     | 1528        |
| 54.1.22 Crops—Sugar crops . . . . .                                    | 1531        |
| 54.1.23 Crops—Sugar crops—Sugar beet . . . . .                         | 1534        |
| 54.1.24 Crops—Sugar crops—Sugar cane . . . . .                         | 1537        |
| 54.1.25 Forage . . . . .                                               | 1540        |
| 54.2 Forest . . . . .                                                  | 1545        |
| 54.2.1 Managed Forest . . . . .                                        | 1549        |
| 54.2.2 Natural Forest . . . . .                                        | 1552        |
| 54.2.3 Natural Forest—Primary Forest . . . . .                         | 1555        |
| 54.2.4 Natural Forest—Secondary Forest . . . . .                       | 1558        |
| 54.3 Other Land . . . . .                                              | 1561        |
| 54.4 Pastures and Rangelands . . . . .                                 | 1565        |
| 54.5 Urban Area . . . . .                                              | 1569        |
| <b>55 Land Cover Change</b>                                            | <b>1573</b> |
| 55.1 Cropland . . . . .                                                | 1575        |
| 55.2 Forest . . . . .                                                  | 1581        |
| 55.2.1 Managed Forest . . . . .                                        | 1585        |
| 55.2.2 Natural Forest . . . . .                                        | 1588        |
| 55.2.3 Natural Forest—Primary Forest . . . . .                         | 1591        |
| 55.2.4 Natural Forest—Secondary Forest . . . . .                       | 1594        |
| 55.3 Other Land . . . . .                                              | 1597        |
| 55.4 Pastures and Rangelands . . . . .                                 | 1601        |
| <b>56 Nitrogen</b>                                                     | <b>1605</b> |
| 56.1 Cropland Budget . . . . .                                         | 1605        |
| 56.1.1 Balance . . . . .                                               | 1605        |
| 56.1.2 Balance—Balanceflow . . . . .                                   | 1608        |
| 56.1.3 Balance—Nutrient Surplus . . . . .                              | 1611        |
| 56.1.4 Inputs . . . . .                                                | 1614        |
| 56.1.5 Inputs—Ash from Burned Crop Residues . . . . .                  | 1617        |
| 56.1.6 Inputs—Atmospheric Deposition . . . . .                         | 1620        |
| 56.1.7 Inputs—Biological Fixation Freelifving Microorganisms . . . . . | 1625        |
| 56.1.8 Inputs—Biological Fixation Symbiotic Crops . . . . .            | 1628        |
| 56.1.9 Inputs—Fertilizer . . . . .                                     | 1633        |
| 56.1.10 Inputs—Manure Recycled from Confinements . . . . .             | 1639        |
| 56.1.11 Inputs—Recycled Aboveground Crop Residues . . . . .            | 1645        |
| 56.1.12 Inputs—Recycled Belowground Crop Residues . . . . .            | 1649        |
| 56.1.13 Inputs—Seed . . . . .                                          | 1652        |

|                                                                        |      |
|------------------------------------------------------------------------|------|
| 56.1.14 Withdrawals . . . . .                                          | 1655 |
| 56.1.15 Withdrawals—Aboveground Crop Residues . . . . .                | 1658 |
| 56.1.16 Withdrawals—Belowground Crop Residues . . . . .                | 1661 |
| 56.1.17 Withdrawals—Harvested Crops . . . . .                          | 1664 |
| 56.2 Manure . . . . .                                                  | 1673 |
| 56.2.1 Dairy . . . . .                                                 | 1676 |
| 56.2.2 Eggs . . . . .                                                  | 1680 |
| 56.2.3 Manure Collected As Fuel . . . . .                              | 1684 |
| 56.2.4 Manure From Grazing . . . . .                                   | 1687 |
| 56.2.5 Manure From Stubble Grazing . . . . .                           | 1690 |
| 56.2.6 Manure In Confinements . . . . .                                | 1693 |
| 56.2.7 Monogastric meat . . . . .                                      | 1696 |
| 56.2.8 Poultry meat . . . . .                                          | 1700 |
| 56.2.9 Ruminant meat . . . . .                                         | 1704 |
| 56.3 Pasture Budget . . . . .                                          | 1708 |
| 56.3.1 Balance . . . . .                                               | 1708 |
| 56.3.2 Balance—Nutrient Surplus . . . . .                              | 1711 |
| 56.3.3 Inputs . . . . .                                                | 1714 |
| 56.3.4 Inputs—Atmospheric Deposition . . . . .                         | 1717 |
| 56.3.5 Inputs—Biological Fixation Freelifving Microorganisms . . . . . | 1720 |
| 56.3.6 Inputs—Fertilizer . . . . .                                     | 1723 |
| 56.3.7 Inputs—Manure From Grazing . . . . .                            | 1726 |
| 56.3.8 Withdrawals . . . . .                                           | 1729 |
| 56.3.9 Withdrawals—Harvested Crops . . . . .                           | 1732 |

|                              |             |
|------------------------------|-------------|
| <b>57 Water</b>              | <b>1735</b> |
| 57.1 Withdrawal . . . . .    | 1735        |
| 57.1.1 Agriculture . . . . . | 1735        |

## **XV Trade 1737**

|                                                            |             |
|------------------------------------------------------------|-------------|
| <b>58 Net-Trade</b>                                        | <b>1737</b> |
| 58.1 Crops . . . . .                                       | 1744        |
| 58.1.1 Cereals . . . . .                                   | 1747        |
| 58.1.2 Cereals—Maize . . . . .                             | 1750        |
| 58.1.3 Cereals—Rice . . . . .                              | 1753        |
| 58.1.4 Cereals—Temperate cereals . . . . .                 | 1756        |
| 58.1.5 Cereals—Tropical cereals . . . . .                  | 1759        |
| 58.1.6 Oil crops . . . . .                                 | 1762        |
| 58.1.7 Oil crops—Cotton seed . . . . .                     | 1765        |
| 58.1.8 Oil crops—Groundnuts . . . . .                      | 1768        |
| 58.1.9 Oil crops—Other oil crops (incl rapeseed) . . . . . | 1771        |
| 58.1.10 Oil crops—Soybean . . . . .                        | 1774        |
| 58.1.11 Oil crops—Sunflower . . . . .                      | 1777        |
| 58.1.12 Other crops . . . . .                              | 1780        |
| 58.1.13 Other crops—Fruits Vegetables Nuts . . . . .       | 1783        |
| 58.1.14 Other crops—Potatoes . . . . .                     | 1786        |
| 58.1.15 Other crops—Pulses . . . . .                       | 1789        |
| 58.1.16 Other crops—Tropical roots . . . . .               | 1792        |
| 58.1.17 Sugar crops . . . . .                              | 1795        |
| 58.1.18 Sugar crops—Sugar beet . . . . .                   | 1798        |
| 58.1.19 Sugar crops—Sugar cane . . . . .                   | 1801        |
| 58.2 Fish . . . . .                                        | 1804        |
| 58.3 Livestock products . . . . .                          | 1807        |
| 58.3.1 Dairy . . . . .                                     | 1810        |
| 58.3.2 Eggs . . . . .                                      | 1813        |
| 58.3.3 Monogastric meat . . . . .                          | 1816        |
| 58.3.4 Poultry meat . . . . .                              | 1819        |
| 58.3.5 Ruminant meat . . . . .                             | 1822        |
| 58.4 Secondary products . . . . .                          | 1825        |

|             |                                    |             |
|-------------|------------------------------------|-------------|
| 58.4.1      | Alcoholic beverages                | 1828        |
| 58.4.2      | Brans                              | 1831        |
| 58.4.3      | Cotton lint                        | 1834        |
| 58.4.4      | Molasses                           | 1837        |
| 58.4.5      | Oilcakes                           | 1840        |
| 58.4.6      | Oils                               | 1843        |
| 58.4.7      | Sugar                              | 1846        |
| <b>59</b>   | <b>Self-sufficiency</b>            | <b>1849</b> |
| 59.1        | Crops                              | 1849        |
| 59.1.1      | Cereals                            | 1849        |
| 59.1.2      | Cereals—Maize                      | 1852        |
| 59.1.3      | Cereals—Rice                       | 1855        |
| 59.1.4      | Cereals—Temperate cereals          | 1858        |
| 59.1.5      | Cereals—Tropical cereals           | 1861        |
| 59.1.6      | Other crops                        | 1864        |
| 59.1.7      | Other crops—Fruits Vegetables Nuts | 1867        |
| 59.1.8      | Other crops—Potatoes               | 1870        |
| 59.1.9      | Other crops—Pulses                 | 1873        |
| 59.1.10     | Other crops—Tropical roots         | 1876        |
| 59.1.11     | Sugar crops                        | 1879        |
| 59.1.12     | Sugar crops—Sugar beet             | 1882        |
| 59.1.13     | Sugar crops—Sugar cane             | 1885        |
| 59.2        | Fish                               | 1888        |
| 59.3        | Livestock products                 | 1891        |
| 59.3.1      | Dairy                              | 1894        |
| 59.3.2      | Eggs                               | 1897        |
| 59.3.3      | Monogastric meat                   | 1900        |
| 59.3.4      | Poultry meat                       | 1903        |
| 59.3.5      | Ruminant meat                      | 1906        |
| 59.4        | Secondary products                 | 1909        |
| 59.4.1      | Alcoholic beverages                | 1909        |
| 59.4.2      | Brans                              | 1912        |
| 59.4.3      | Cotton lint                        | 1915        |
| 59.4.4      | Distillers grains                  | 1918        |
| 59.4.5      | Ethanol                            | 1921        |
| 59.4.6      | Molasses                           | 1924        |
| 59.4.7      | Oilcakes                           | 1927        |
| 59.4.8      | Oils                               | 1930        |
| 59.4.9      | Sugar                              | 1933        |
| <b>XVI</b>  | <b>Trade Value</b>                 | <b>1936</b> |
| <b>60</b>   | <b>Exports</b>                     | <b>1936</b> |
| <b>61</b>   | <b>Imports</b>                     | <b>1936</b> |
| <b>62</b>   | <b>Net-Exports</b>                 | <b>1936</b> |
| <b>XVII</b> | <b>Statistics</b>                  | <b>1937</b> |
| <b>63</b>   | <b>Traffic Lights</b>              | <b>1937</b> |
| 63.1        | Total                              | 1937        |
| 63.2        | Trend                              | 1937        |
| 63.3        | Overlap                            | 1937        |
| 63.4        | Level                              | 1937        |
| <b>64</b>   | <b>Ignored data</b>                | <b>1938</b> |



---

|                                                      |                 |
|------------------------------------------------------|-----------------|
| <b>65 Non-Matching Data</b>                          | <b>1941</b>     |
| 65.1 Model outputs . . . . .                         | 1941            |
| 65.2 Validation data . . . . .                       | 1944            |
| <br><b>XVIII Run Information</b>                     | <br><b>1956</b> |
| <b>66 Calibration</b>                                | <b>1956</b>     |
| 66.1 Yield calibration factors . . . . .             | 1956            |
| 66.2 Land use change in 1995 (reshuffling) . . . . . | 1956            |
| <br><b>67 Model settings</b>                         | <br><b>1956</b> |
| 67.1 Code settings . . . . .                         | 1956            |
| 67.2 Dataset . . . . .                               | 1958            |
| 67.3 R Information . . . . .                         | 1959            |
| <br><b>68 Runtime information</b>                    | <br><b>1970</b> |

Part I

Basics

0.1 World regions

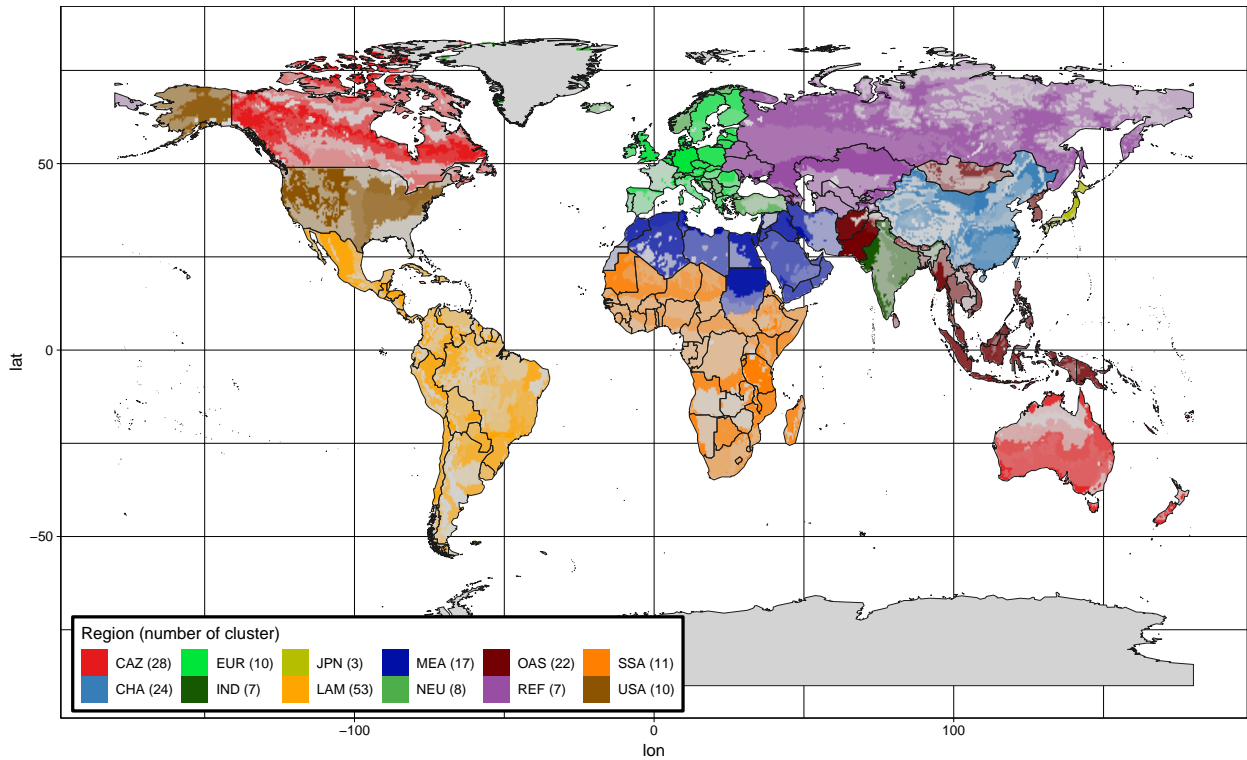

## 0.2 Modelstat

Table 1: main

|       | GLO  |
|-------|------|
| y1995 | 2.00 |
| y2000 | 2.00 |
| y2005 | 2.00 |
| y2010 | 2.00 |
| y2015 | 2.00 |
| y2020 | 2.00 |
| y2025 | 2.00 |
| y2030 | 2.00 |
| y2035 | 2.00 |
| y2040 | 2.00 |
| y2045 | 2.00 |
| y2050 | 2.00 |
| y2055 | 2.00 |
| y2060 | 2.00 |
| y2070 | 2.00 |
| y2080 | 2.00 |
| y2090 | 2.00 |
| y2100 | 2.00 |

## 0.3 Food Modelstat

Table 2: main

|       | convergence (limit = 0.005) | iterations (limit = 5) |
|-------|-----------------------------|------------------------|
| y1995 | 0.19                        | 1.00                   |
| y2000 | 0.21                        | 1.00                   |
| y2005 | 0.05                        | 1.00                   |
| y2010 | 0.02                        | 1.00                   |
| y2015 | 0.00                        | 3.00                   |
| y2020 | 0.00                        | 4.00                   |
| y2025 | 0.00                        | 3.00                   |
| y2030 | 0.00                        | 2.00                   |
| y2035 | 0.00                        | 3.00                   |
| y2040 | 0.00                        | 2.00                   |
| y2045 | 0.00                        | 2.00                   |
| y2050 | 0.00                        | 2.00                   |
| y2055 | 0.00                        | 2.00                   |
| y2060 | 0.00                        | 2.00                   |
| y2070 | 0.00                        | 2.00                   |
| y2080 | 0.00                        | 2.00                   |
| y2090 | 0.00                        | 1.00                   |
| y2100 | 0.00                        | 1.00                   |

## 0.4 Goal function value

Table 3: Global costs (billion USD)

|       | GLO     |
|-------|---------|
| y1995 | 1766.16 |
| y2000 | 2063.26 |
| y2005 | 2365.80 |
| y2010 | 2740.46 |
| y2015 | 3301.42 |
| y2020 | 3718.75 |
| y2025 | 4076.11 |
| y2030 | 4494.69 |
| y2035 | 4852.05 |
| y2040 | 5192.66 |
| y2045 | 5494.82 |
| y2050 | 5737.03 |
| y2055 | 5778.46 |
| y2060 | 5753.89 |
| y2070 | 5555.72 |
| y2080 | 5257.02 |
| y2090 | 4930.13 |
| y2100 | 4598.34 |

0.4.1 Total costs decomposition

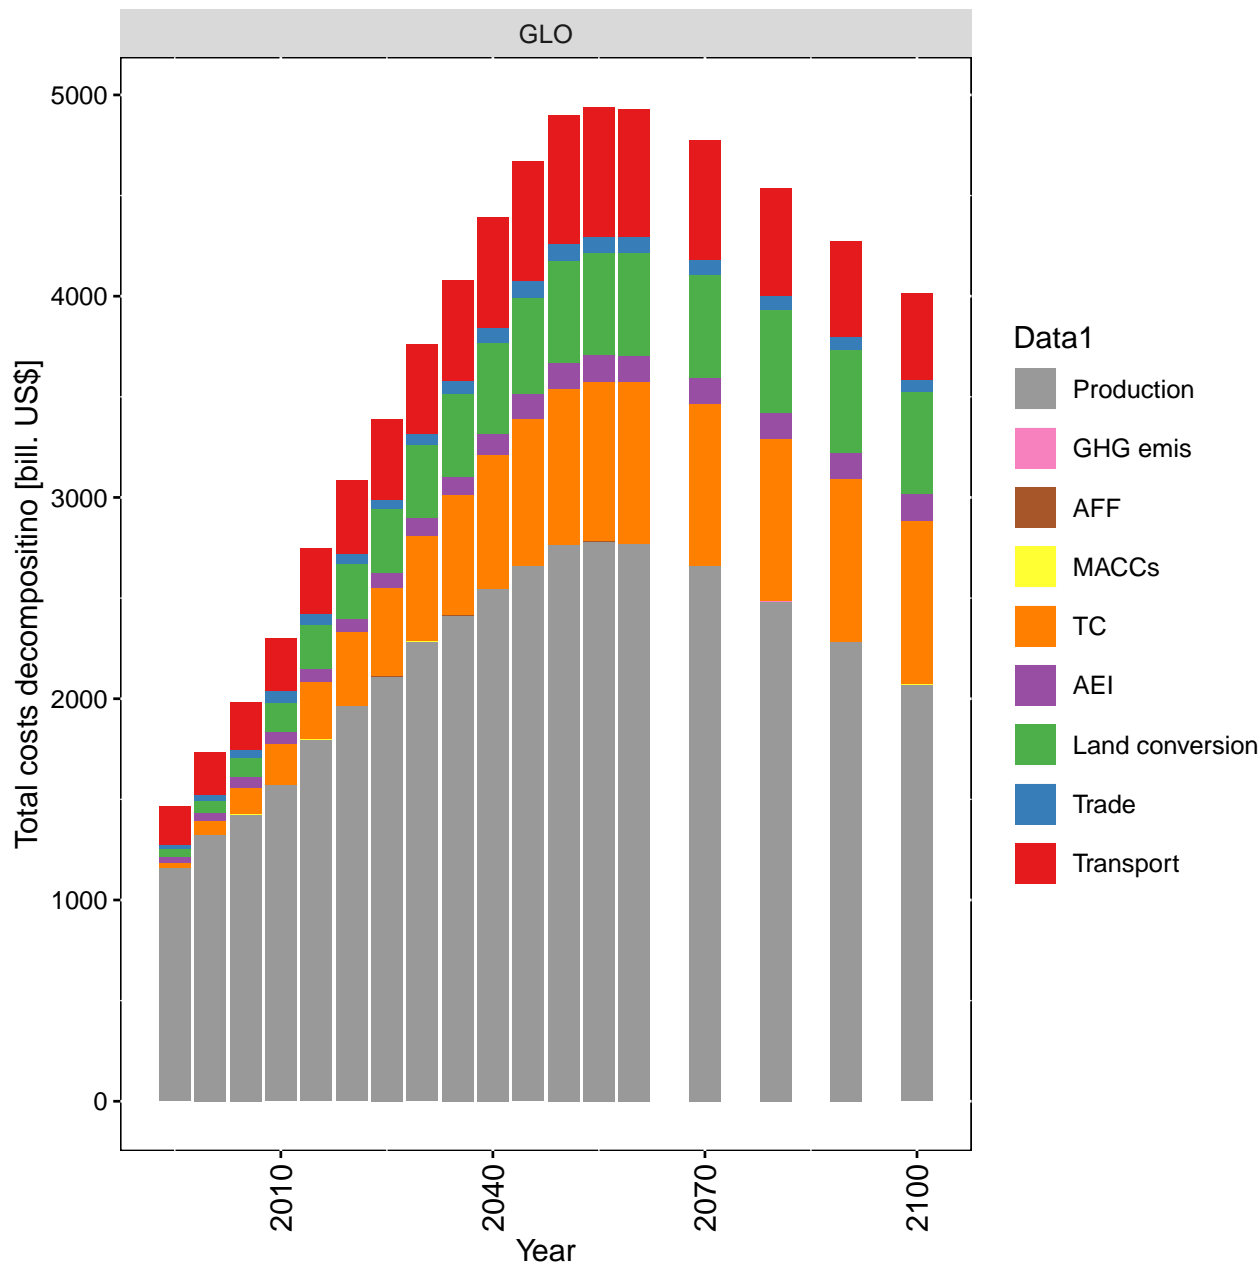

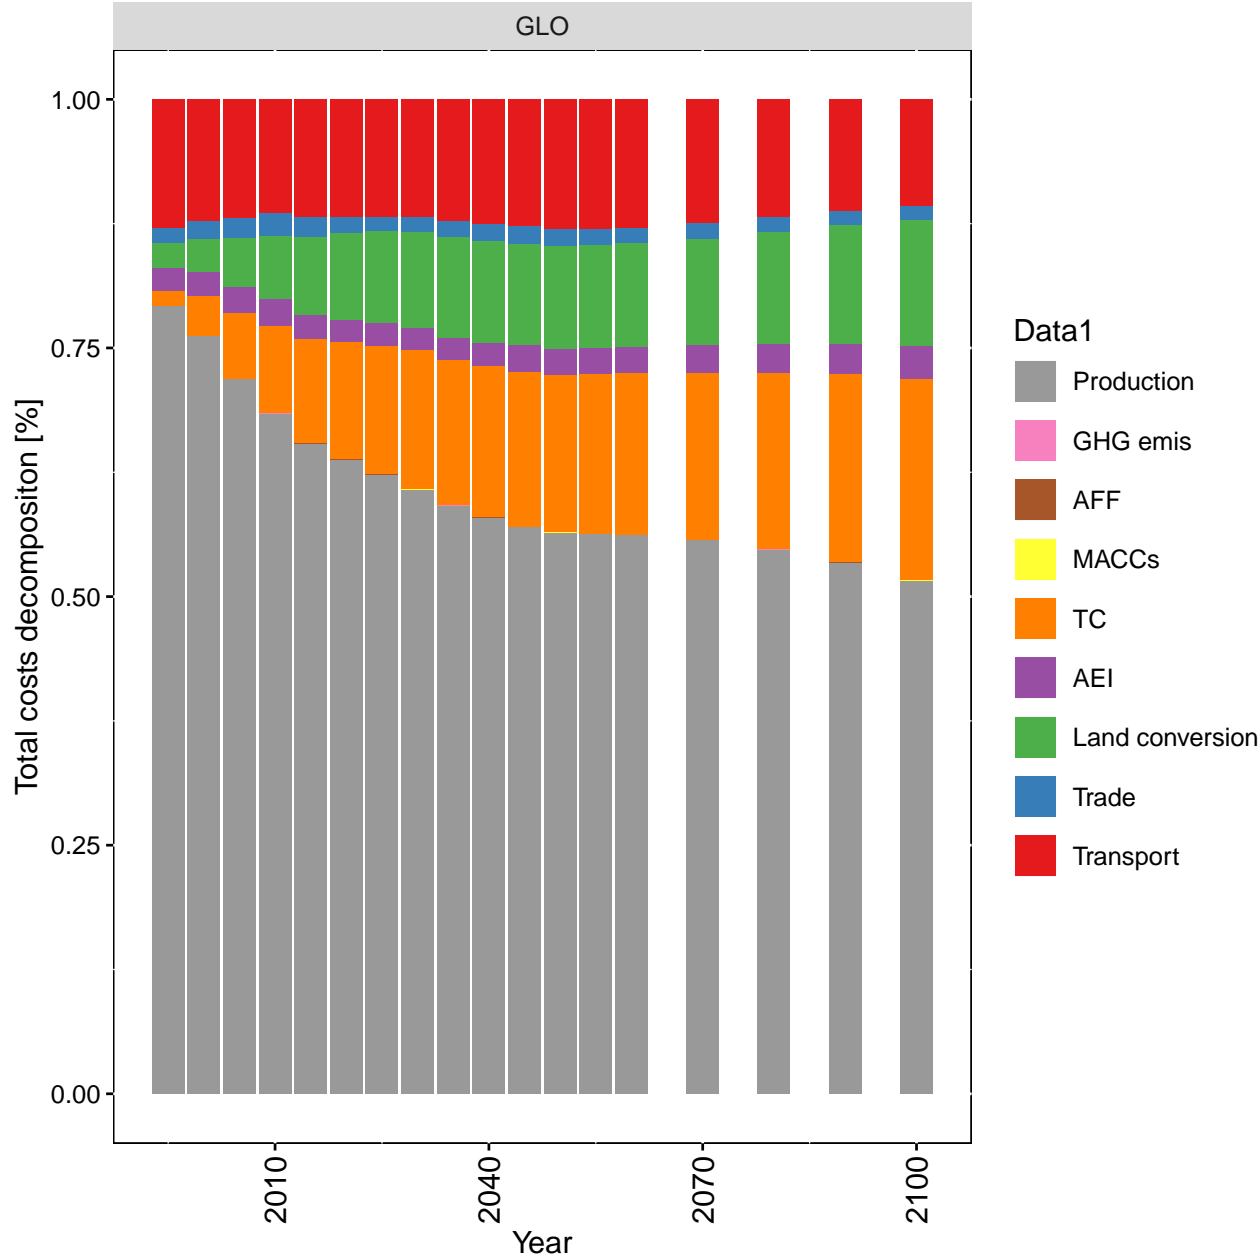

## Part II

# Costs

### 1 MainSolve

### 2 MainSolve w/o GHG Emissions

Part III

# Demand

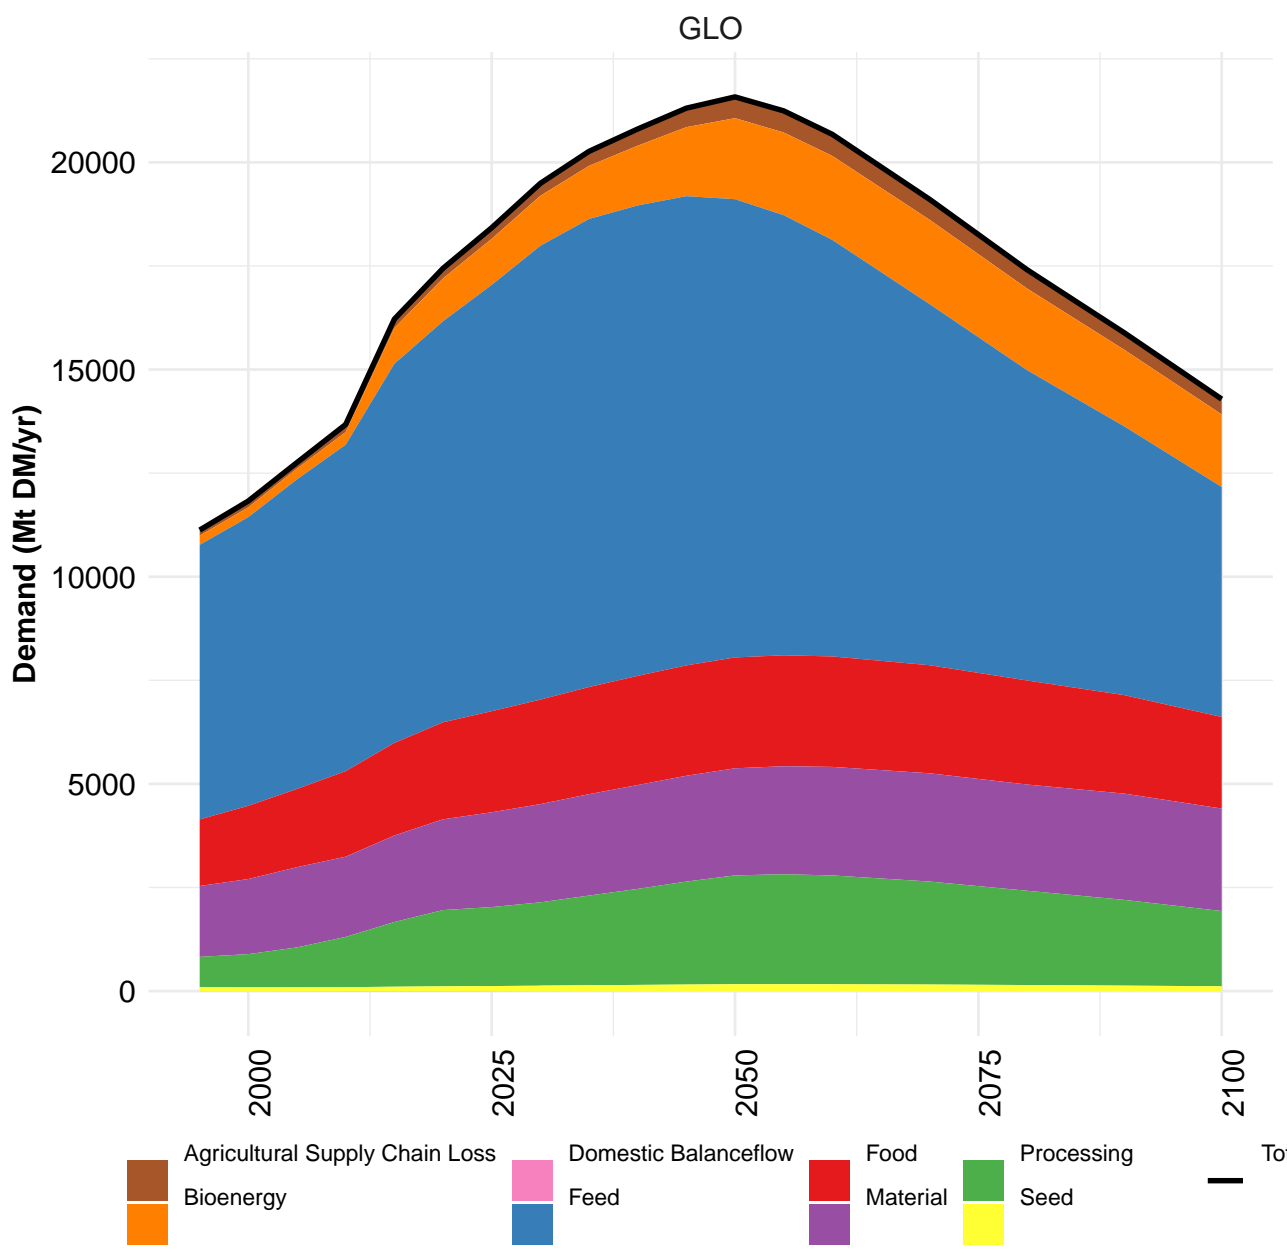

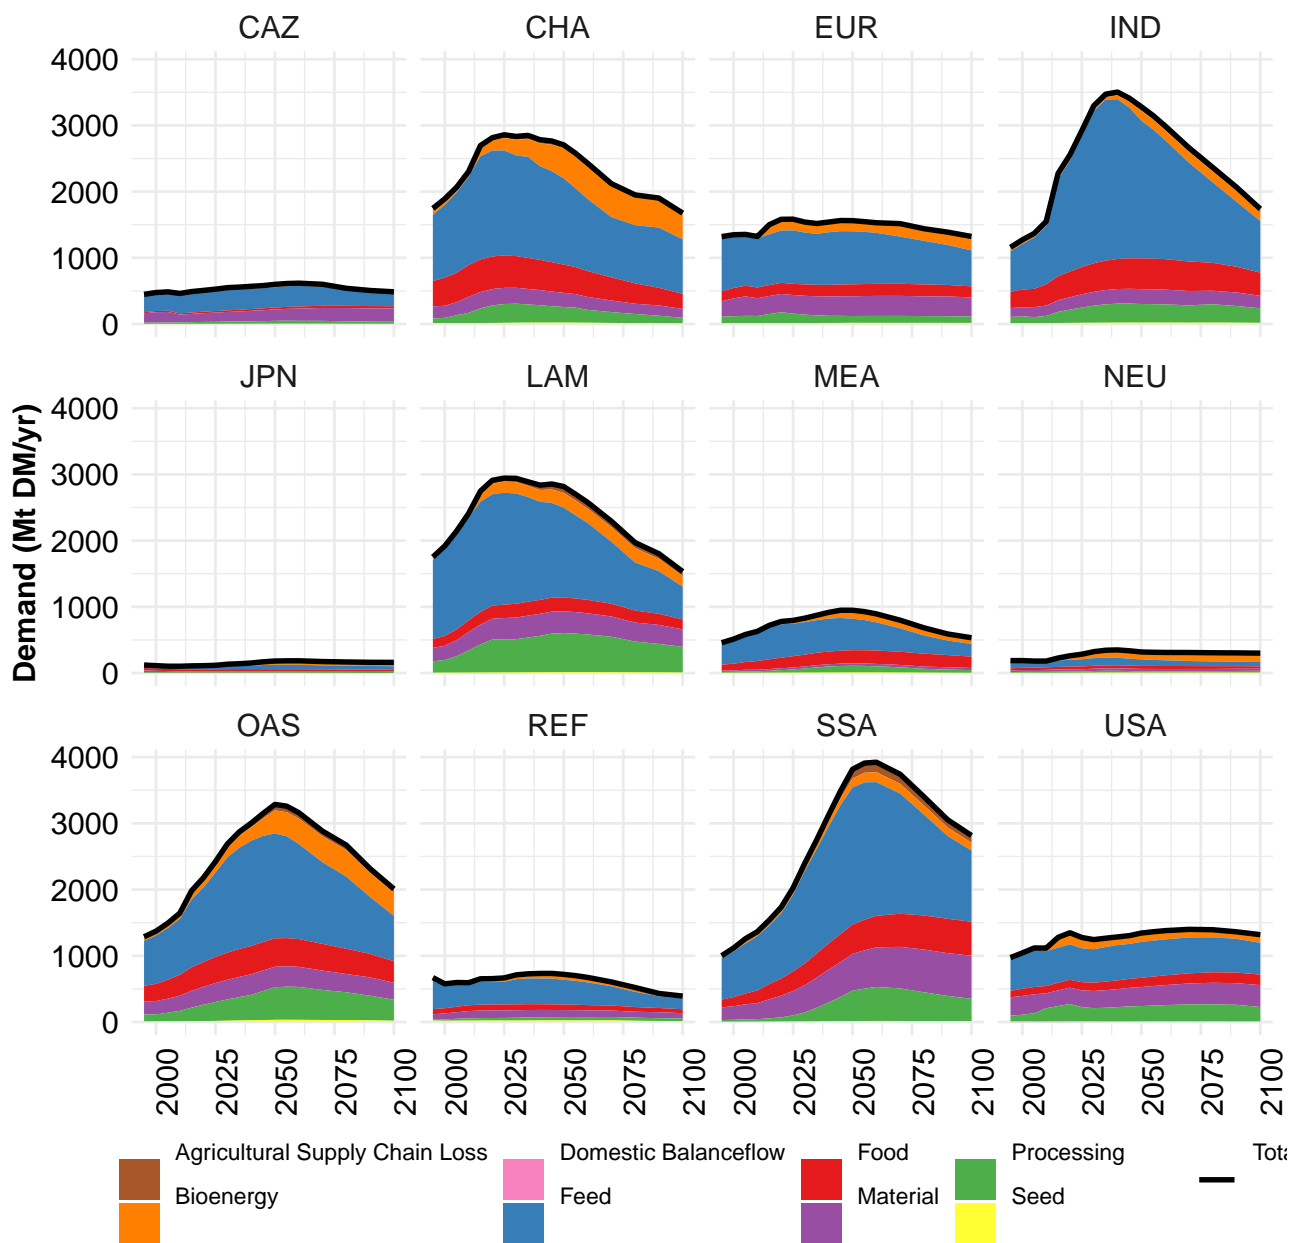



### 3 Agricultural Supply Chain Loss

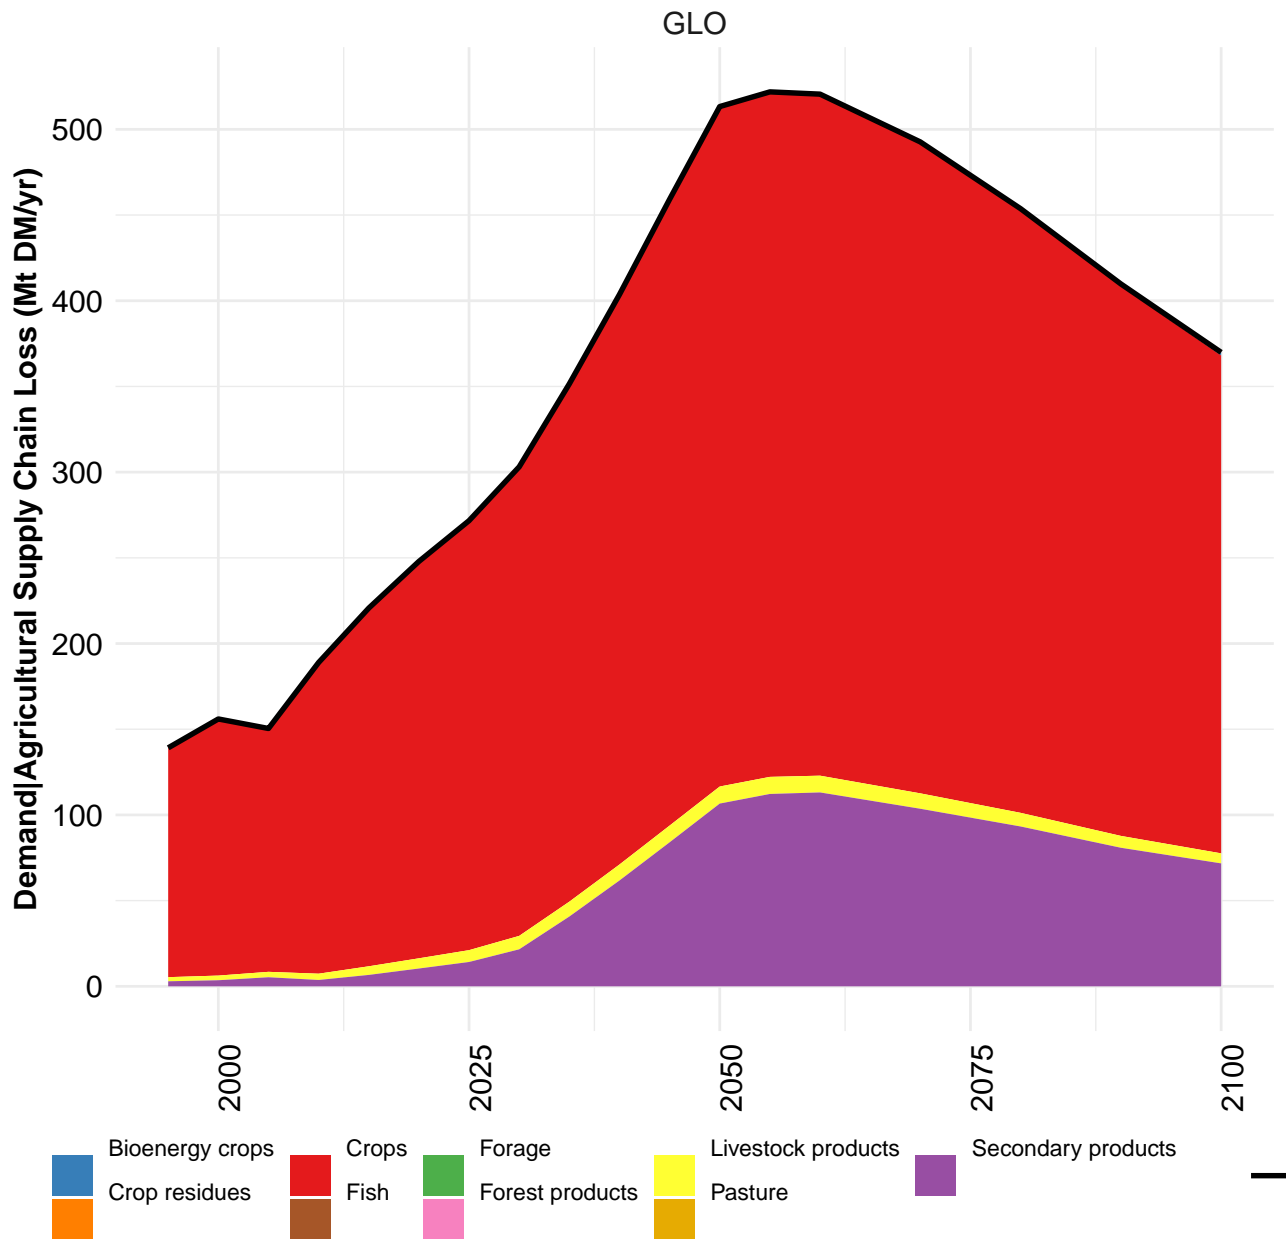

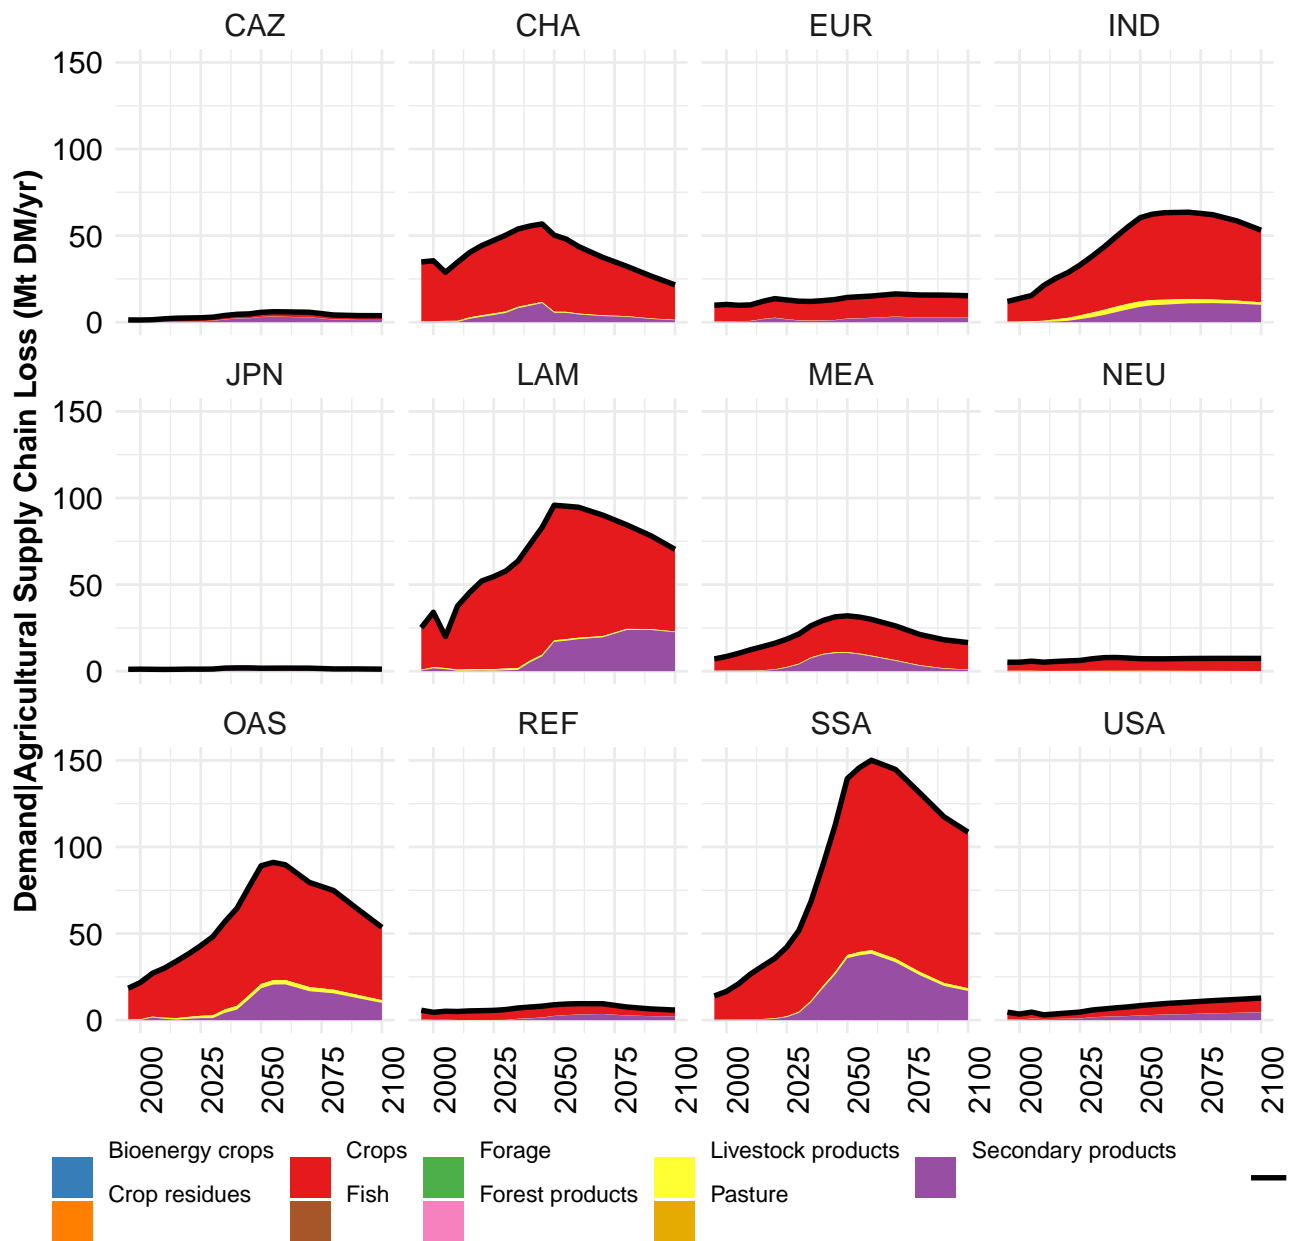

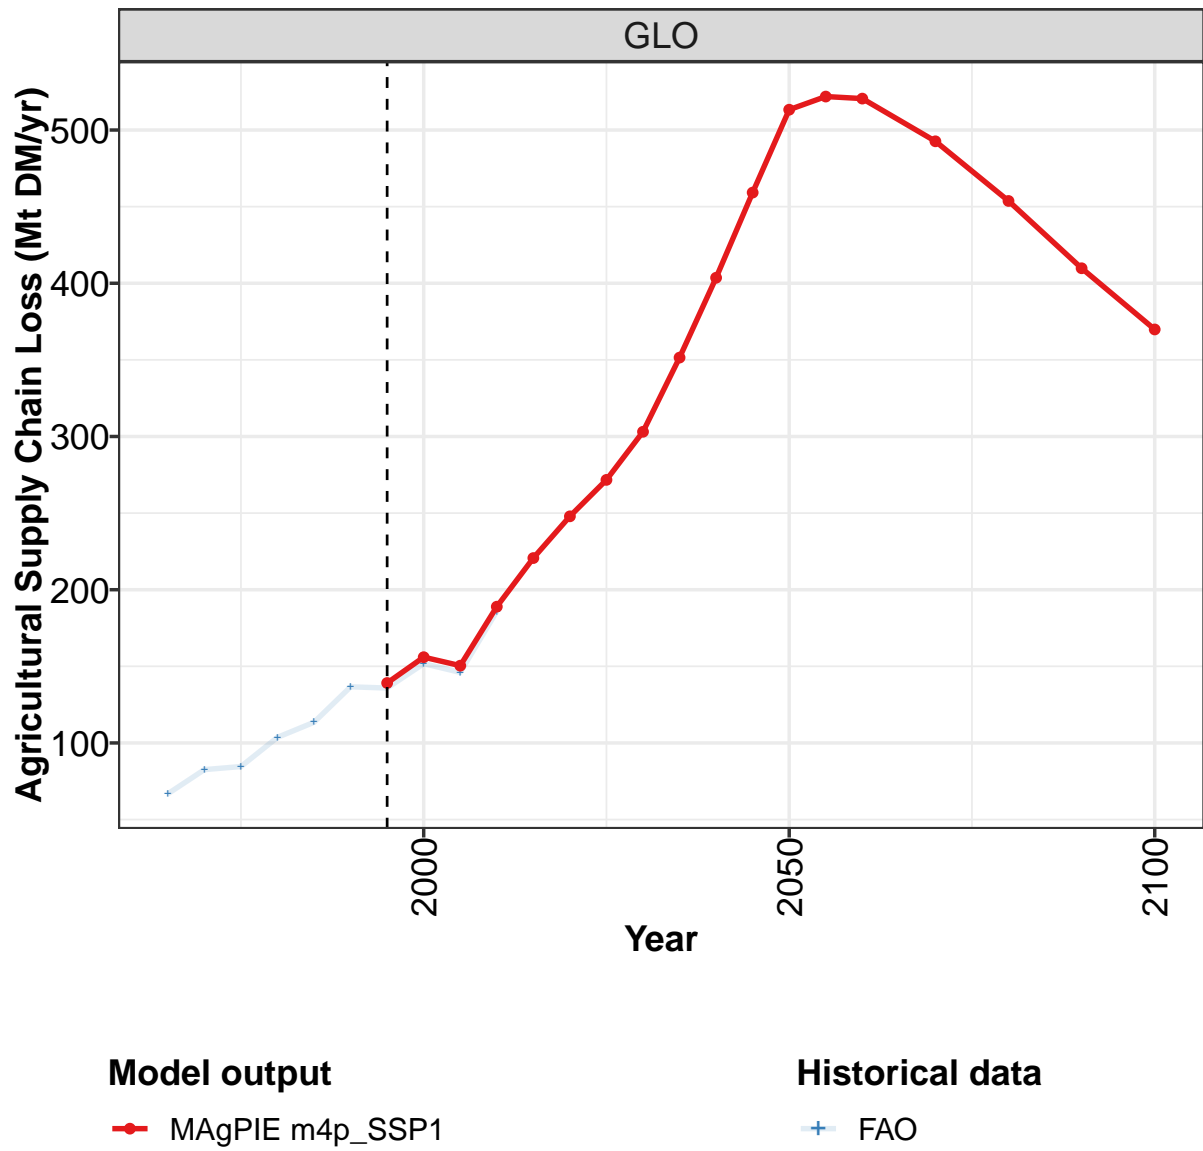

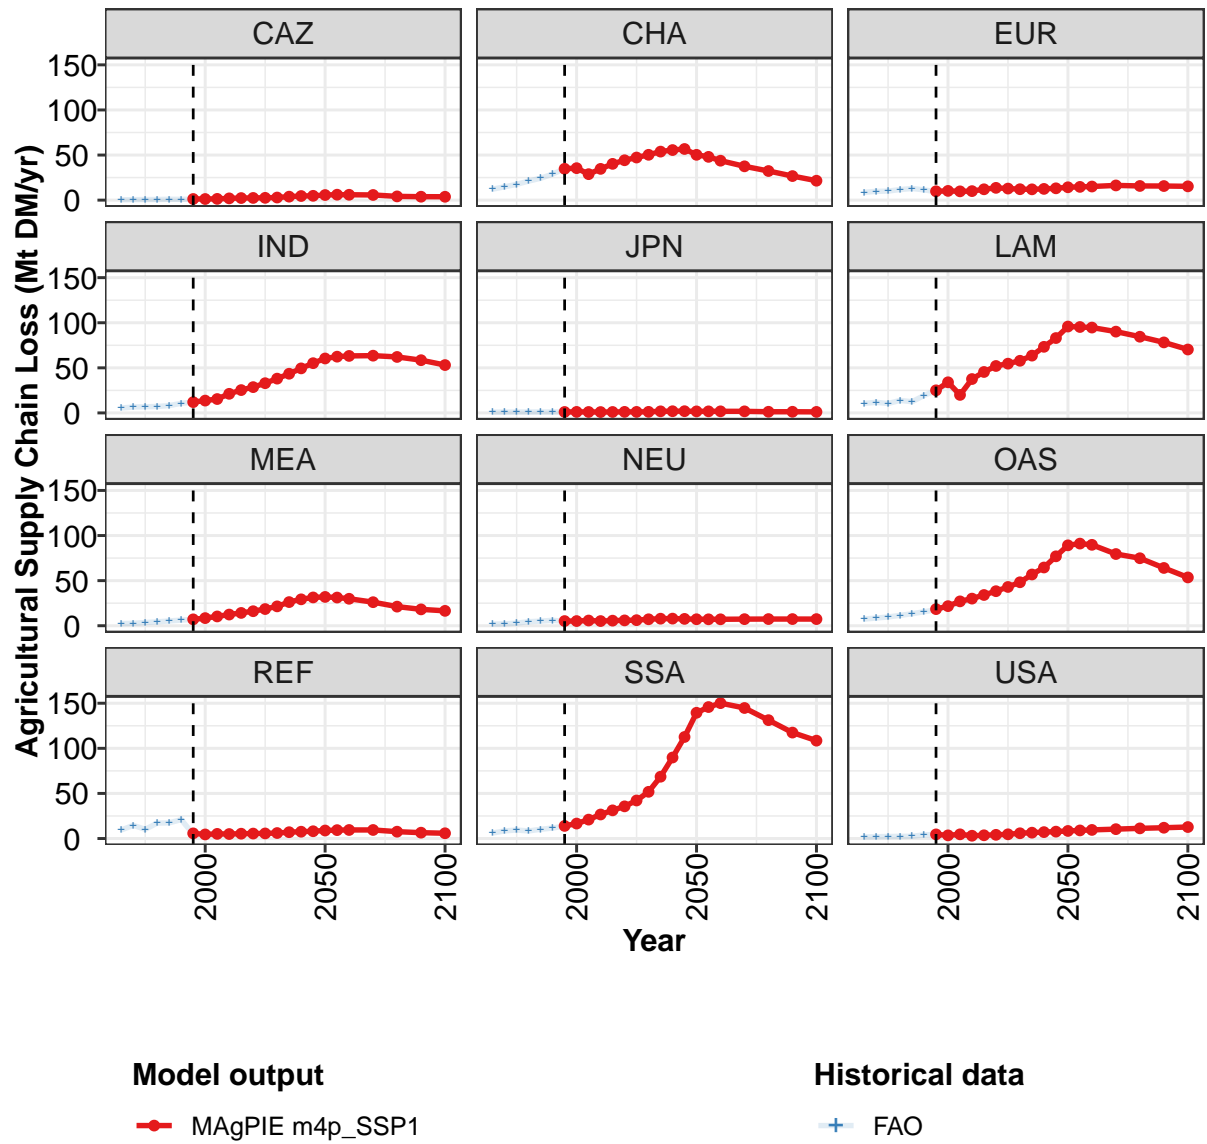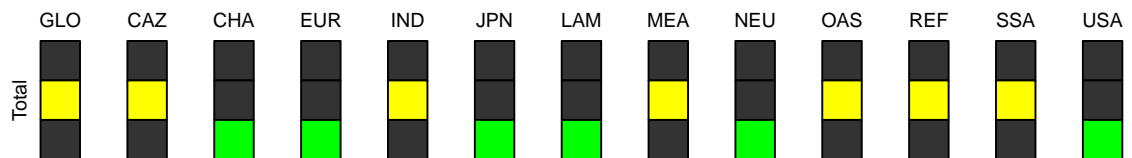

Figure 1: MAgPIE m4p\_SSP1 — Demand—Agricultural Supply Chain Loss (Mt DM/yr)

|     | 1995 | 2000 | 2005 | 2010 | 2015 | 2020 | 2025 | 2030 | 2035 | 2040 | 2045 |
|-----|------|------|------|------|------|------|------|------|------|------|------|
| GLO | 139  | 156  | 150  | 189  | 221  | 248  | 272  | 303  | 352  | 404  | 459  |
| CAZ | 1    | 1    | 1    | 2    | 2    | 2    | 3    | 3    | 4    | 5    | 5    |
| CHA | 35   | 35   | 29   | 35   | 40   | 44   | 47   | 50   | 54   | 56   | 57   |
| EUR | 10   | 10   | 10   | 10   | 12   | 14   | 13   | 12   | 12   | 12   | 13   |
| IND | 12   | 14   | 15   | 21   | 25   | 29   | 33   | 38   | 43   | 49   | 55   |
| JPN | 1    | 1    | 1    | 1    | 1    | 1    | 1    | 1    | 2    | 2    | 2    |
| LAM | 25   | 34   | 20   | 38   | 45   | 52   | 55   | 58   | 64   | 73   | 83   |
| MEA | 7    | 8    | 10   | 12   | 14   | 16   | 19   | 21   | 26   | 29   | 31   |
| NEU | 5    | 5    | 6    | 5    | 6    | 6    | 6    | 7    | 8    | 8    | 8    |
| OAS | 18   | 22   | 27   | 30   | 34   | 38   | 43   | 48   | 57   | 65   | 77   |
| REF | 6    | 5    | 5    | 5    | 5    | 5    | 6    | 6    | 7    | 8    | 8    |
| SSA | 14   | 17   | 21   | 27   | 31   | 36   | 42   | 52   | 69   | 90   | 113  |
| USA | 5    | 4    | 5    | 3    | 4    | 4    | 5    | 6    | 6    | 7    | 8    |

Table 4: MAgPIE m4p-SSP1 — Demand—Agricultural Supply Chain Loss (Mt DM/yr) [PART 1/2]

|     | 2050 | 2055 | 2060 | 2070 | 2080 | 2090 | 2100 |
|-----|------|------|------|------|------|------|------|
| GLO | 513  | 522  | 521  | 493  | 454  | 410  | 370  |
| CAZ | 6    | 6    | 6    | 6    | 4    | 4    | 4    |
| CHA | 50   | 48   | 44   | 38   | 32   | 27   | 22   |
| EUR | 14   | 15   | 15   | 16   | 16   | 16   | 15   |
| IND | 60   | 62   | 63   | 64   | 62   | 59   | 53   |
| JPN | 2    | 2    | 2    | 2    | 1    | 1    | 1    |
| LAM | 96   | 95   | 95   | 90   | 85   | 78   | 70   |
| MEA | 32   | 31   | 30   | 26   | 21   | 18   | 17   |
| NEU | 7    | 7    | 7    | 7    | 7    | 7    | 7    |
| OAS | 89   | 91   | 90   | 80   | 75   | 64   | 54   |
| REF | 9    | 9    | 10   | 9    | 8    | 6    | 6    |
| SSA | 139  | 146  | 150  | 145  | 131  | 117  | 109  |
| USA | 8    | 9    | 10   | 10   | 11   | 12   | 13   |

Table 5: MAgPIE m4p-SSP1 — Demand—Agricultural Supply Chain Loss (Mt DM/yr) [PART 2/2]

|     | 1965 | 1970 | 1975 | 1980 | 1985 | 1990 | 1995 | 2000 | 2005 | 2010 |
|-----|------|------|------|------|------|------|------|------|------|------|
| GLO | 67   | 83   | 85   | 104  | 113  | 137  | 136  | 152  | 146  | 186  |
| CAZ | 0    | 1    | 1    | 1    | 1    | 1    | 1    | 1    | 1    | 2    |
| CHA | 12   | 15   | 17   | 21   | 24   | 29   | 35   | 35   | 29   | 35   |
| EUR | 9    | 10   | 10   | 12   | 13   | 11   | 9    | 10   | 9    | 9    |
| IND | 6    | 6    | 7    | 7    | 8    | 11   | 12   | 14   | 15   | 21   |
| JPN | 1    | 1    | 1    | 1    | 1    | 1    | 1    | 1    | 1    | 1    |
| LAM | 11   | 12   | 10   | 14   | 12   | 19   | 25   | 32   | 19   | 37   |
| MEA | 2    | 3    | 4    | 4    | 5    | 6    | 7    | 8    | 10   | 12   |
| NEU | 2    | 2    | 3    | 4    | 5    | 6    | 5    | 5    | 6    | 5    |
| OAS | 7    | 9    | 10   | 11   | 13   | 16   | 18   | 21   | 25   | 29   |
| REF | 9    | 15   | 10   | 17   | 17   | 21   | 5    | 4    | 5    | 5    |
| SSA | 6    | 8    | 9    | 8    | 10   | 12   | 14   | 16   | 21   | 26   |
| USA | 2    | 2    | 2    | 2    | 2    | 4    | 5    | 3    | 5    | 3    |

Table 6: FAO — Demand—Agricultural Supply Chain Loss (Mt DM/yr)

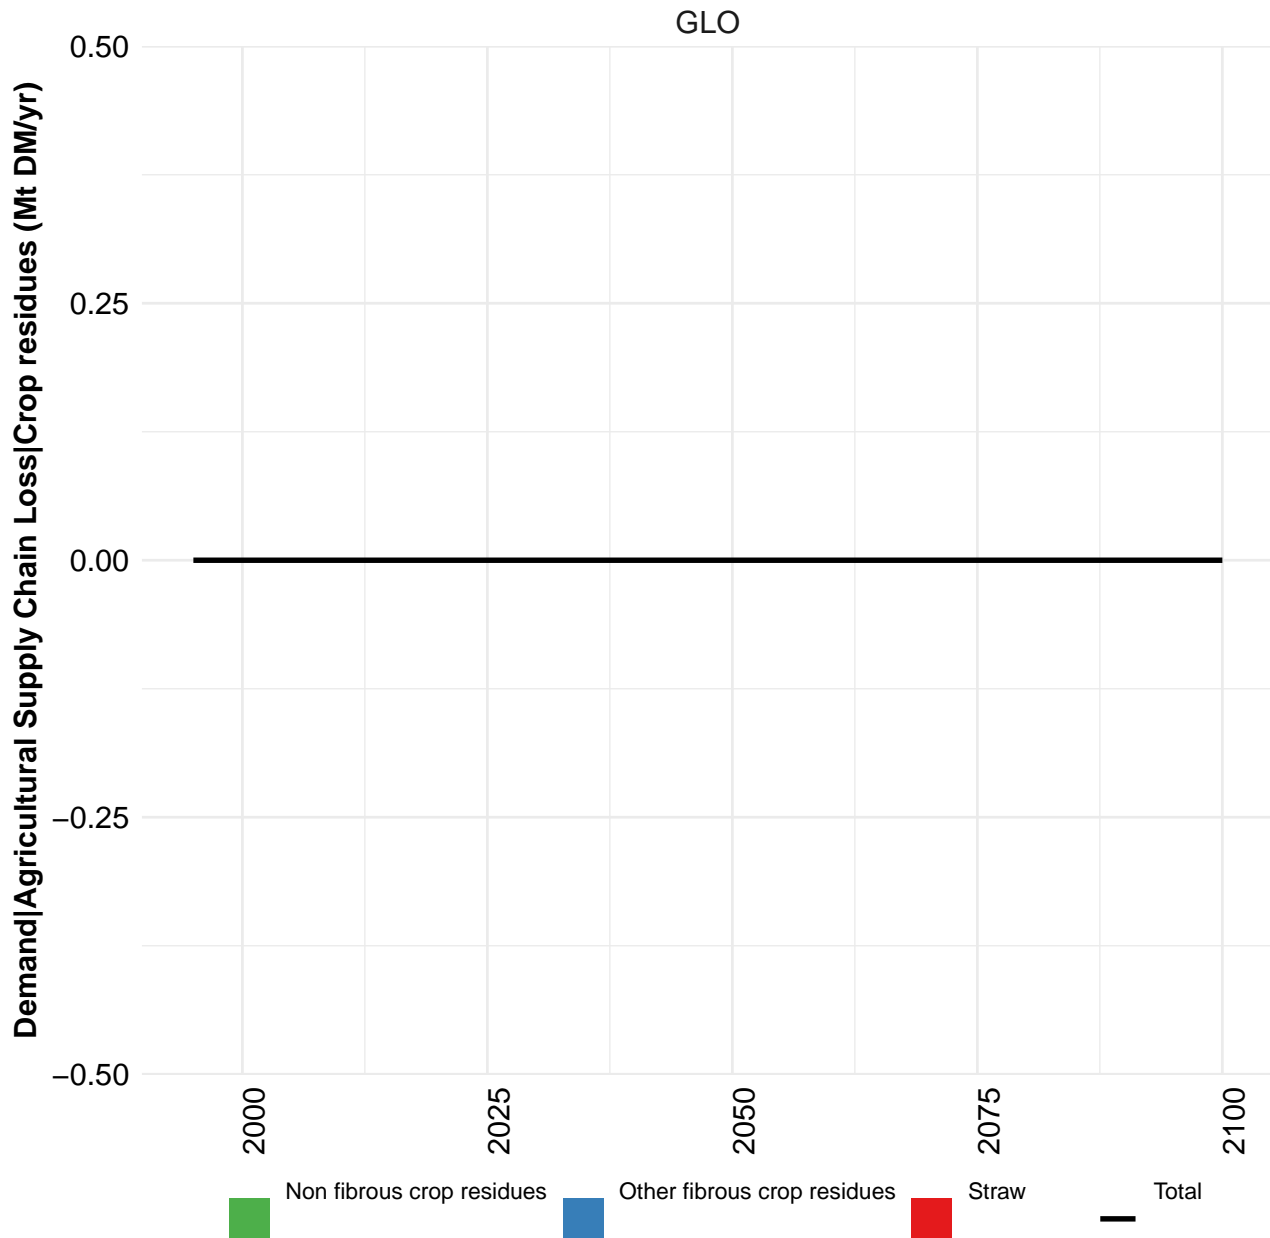

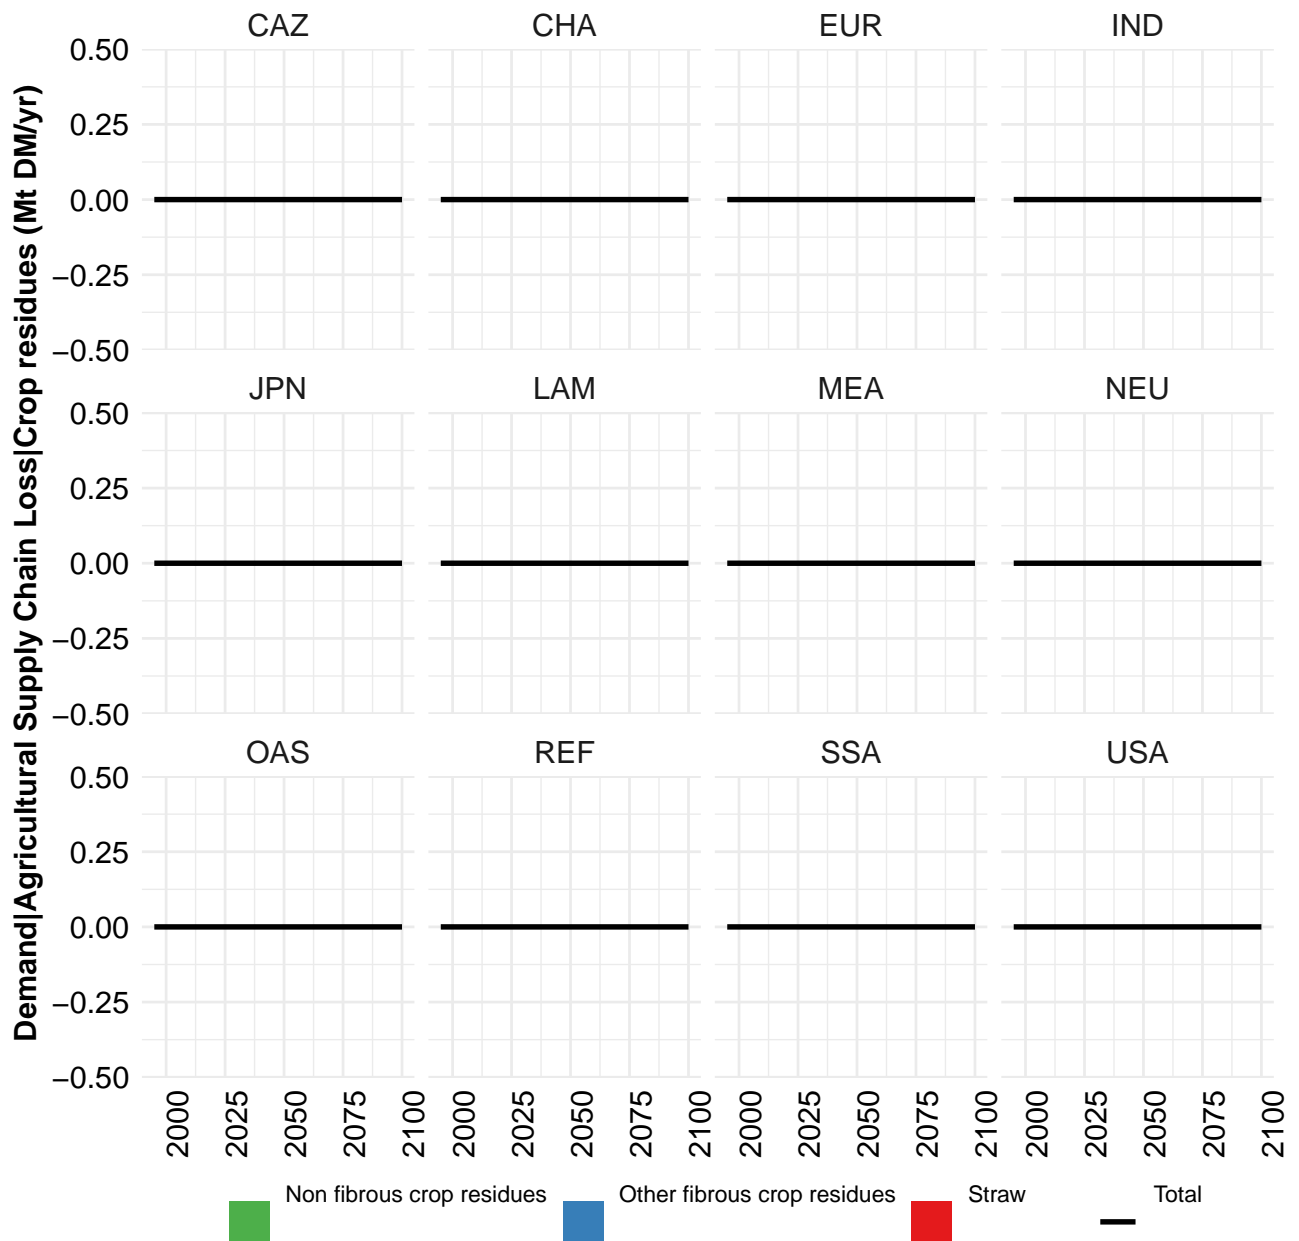

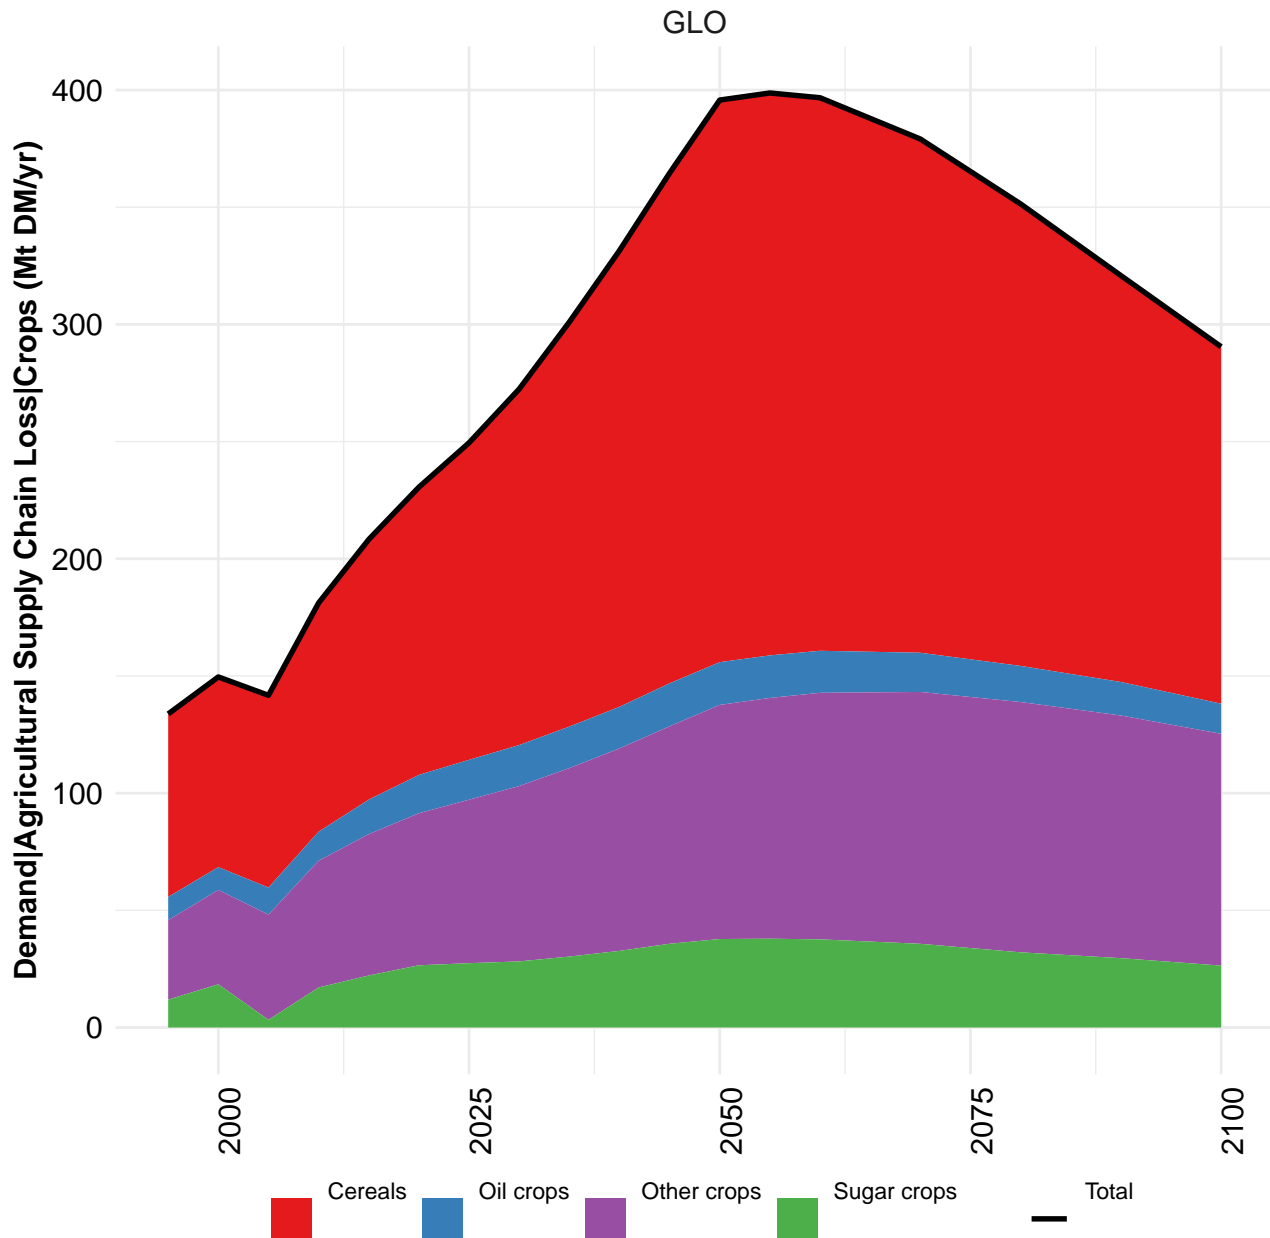



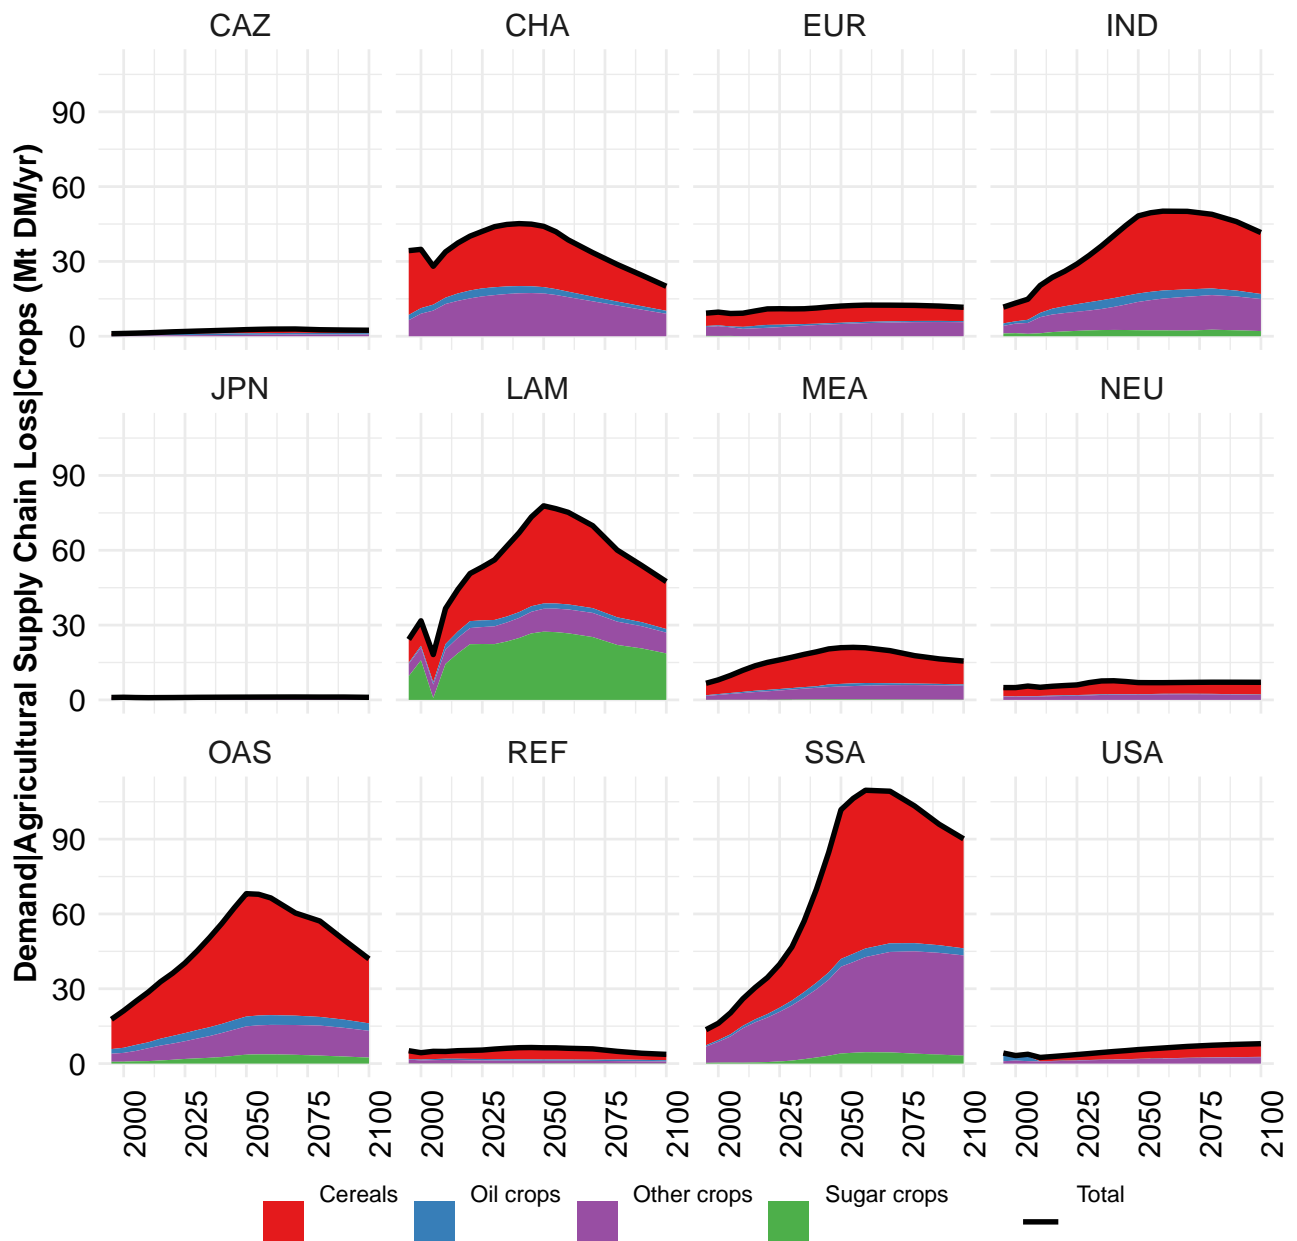

3.1 Crops

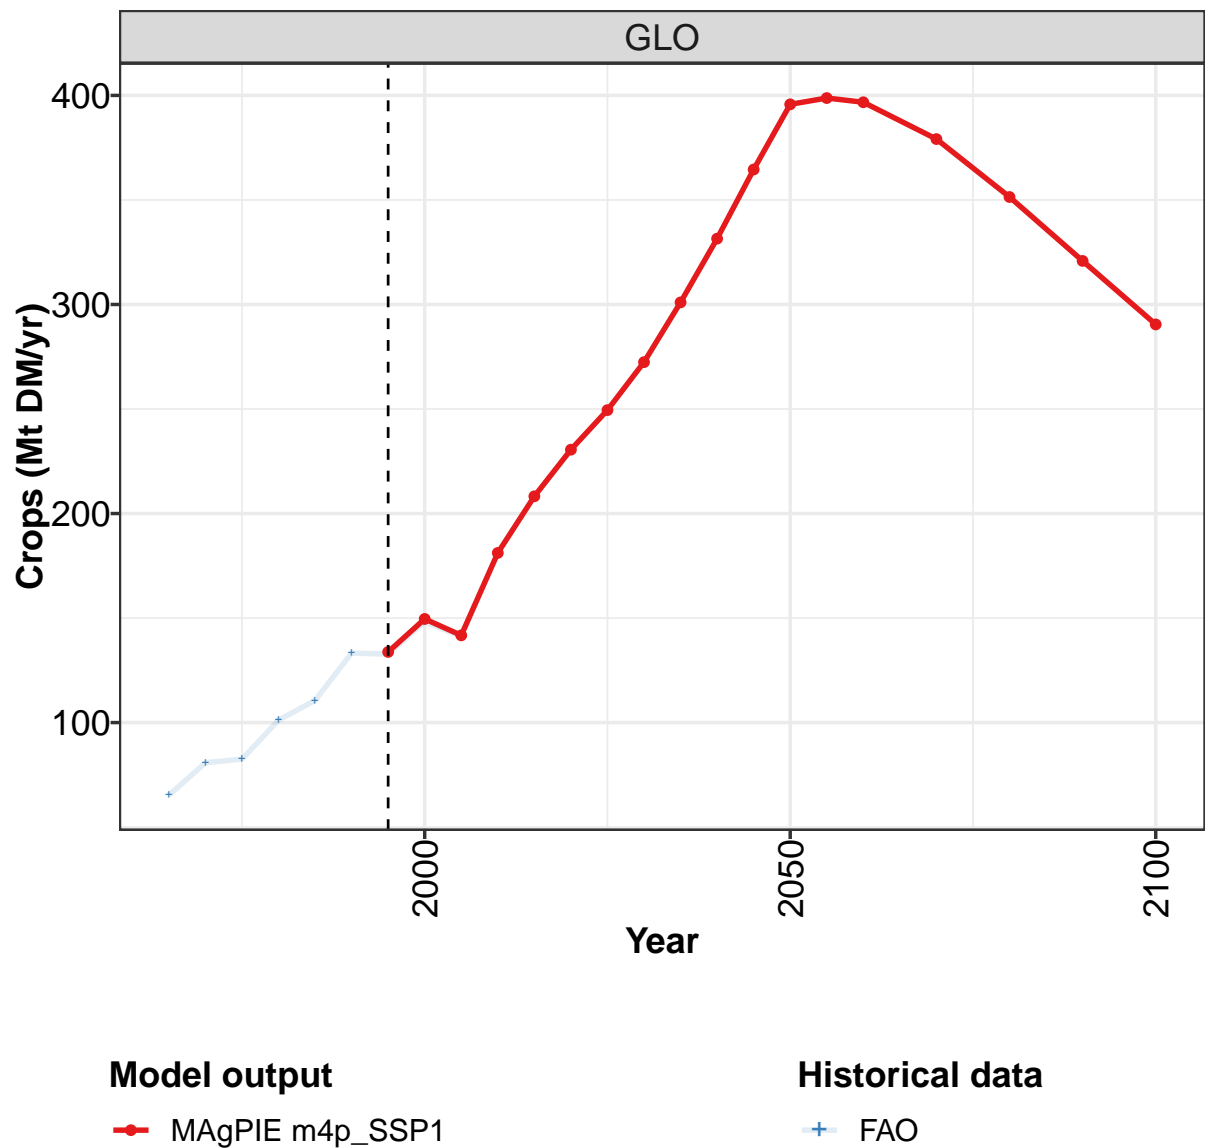

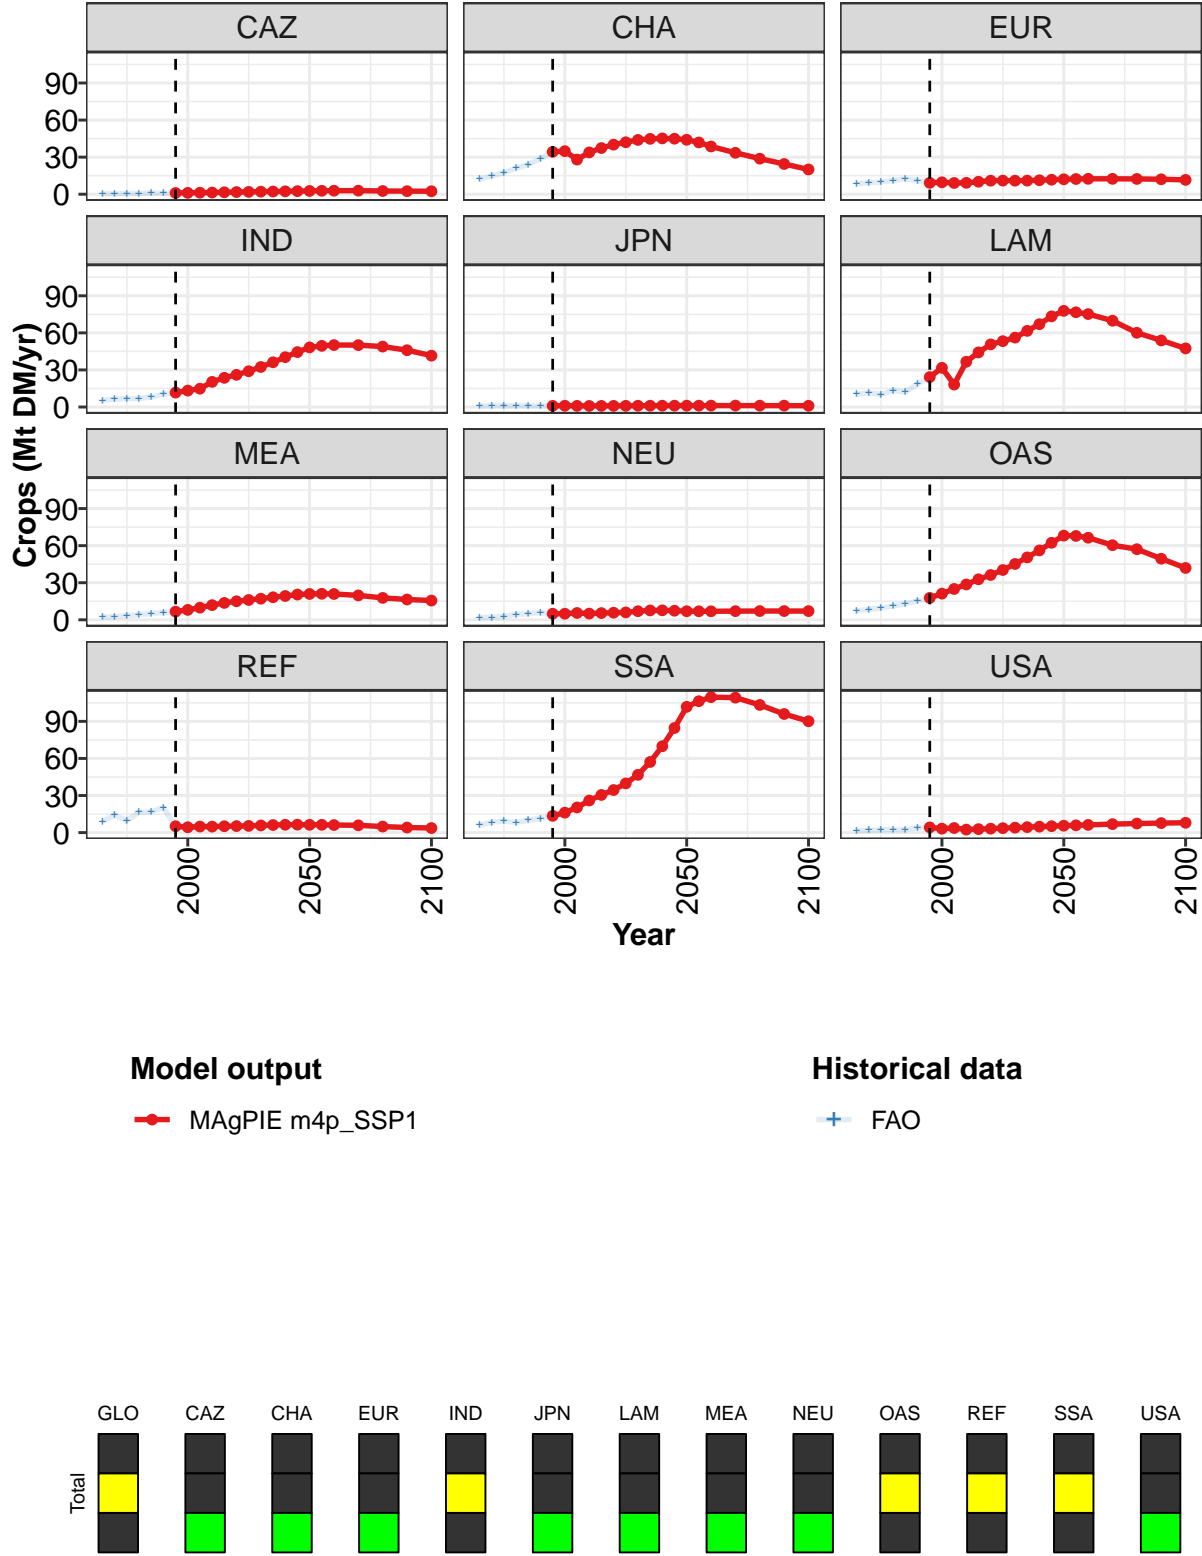

Figure 2: MAgPIE m4p\_SSP1 — Demand—Agricultural Supply Chain Loss—Crops (Mt DM/yr)

|     | 1995 | 2000 | 2005 | 2010 | 2015 | 2020 | 2025 | 2030 | 2035 | 2040 | 2045 |
|-----|------|------|------|------|------|------|------|------|------|------|------|
| GLO | 134  | 150  | 142  | 181  | 208  | 231  | 249  | 272  | 301  | 331  | 365  |
| CAZ | 1    | 1    | 1    | 1    | 2    | 2    | 2    | 2    | 2    | 2    | 2    |
| CHA | 34   | 35   | 28   | 34   | 37   | 40   | 42   | 44   | 45   | 45   | 45   |
| EUR | 9    | 10   | 9    | 9    | 10   | 11   | 11   | 11   | 11   | 11   | 12   |
| IND | 12   | 13   | 15   | 20   | 24   | 26   | 29   | 32   | 36   | 40   | 44   |
| JPN | 1    | 1    | 1    | 1    | 1    | 1    | 1    | 1    | 1    | 1    | 1    |
| LAM | 24   | 32   | 18   | 37   | 44   | 51   | 53   | 56   | 62   | 67   | 73   |
| MEA | 7    | 8    | 10   | 12   | 14   | 15   | 16   | 17   | 18   | 19   | 20   |
| NEU | 5    | 5    | 6    | 5    | 5    | 6    | 6    | 7    | 8    | 8    | 7    |
| OAS | 18   | 21   | 25   | 29   | 33   | 36   | 40   | 45   | 50   | 56   | 62   |
| REF | 5    | 4    | 5    | 5    | 5    | 5    | 5    | 6    | 6    | 6    | 6    |
| SSA | 14   | 16   | 20   | 26   | 30   | 34   | 40   | 47   | 57   | 70   | 85   |
| USA | 4    | 3    | 4    | 2    | 3    | 3    | 4    | 4    | 4    | 5    | 5    |

Table 7: MAgPIE m4p-SSP1 — Demand—Agricultural Supply Chain Loss—Crops (Mt DM/yr) [PART 1/2]

|     | 2050 | 2055 | 2060 | 2070 | 2080 | 2090 | 2100 |
|-----|------|------|------|------|------|------|------|
| GLO | 396  | 399  | 397  | 379  | 351  | 321  | 290  |
| CAZ | 3    | 3    | 3    | 3    | 3    | 2    | 2    |
| CHA | 44   | 42   | 39   | 34   | 29   | 24   | 20   |
| EUR | 12   | 12   | 12   | 12   | 12   | 12   | 12   |
| IND | 48   | 50   | 50   | 50   | 49   | 46   | 42   |
| JPN | 1    | 1    | 1    | 1    | 1    | 1    | 1    |
| LAM | 78   | 77   | 75   | 70   | 60   | 54   | 47   |
| MEA | 21   | 21   | 21   | 20   | 18   | 16   | 16   |
| NEU | 7    | 7    | 7    | 7    | 7    | 7    | 7    |
| OAS | 68   | 68   | 66   | 60   | 57   | 49   | 42   |
| REF | 6    | 6    | 6    | 6    | 5    | 4    | 4    |
| SSA | 102  | 106  | 110  | 109  | 103  | 96   | 90   |
| USA | 6    | 6    | 6    | 7    | 7    | 8    | 8    |

Table 8: MAgPIE m4p-SSP1 — Demand—Agricultural Supply Chain Loss—Crops (Mt DM/yr) [PART 2/2]

|     | 1965 | 1970 | 1975 | 1980 | 1985 | 1990 | 1995 | 2000 | 2005 | 2010 |
|-----|------|------|------|------|------|------|------|------|------|------|
| GLO | 65   | 81   | 83   | 101  | 111  | 133  | 133  | 148  | 141  | 181  |
| CAZ | 0    | 0    | 1    | 1    | 1    | 1    | 1    | 1    | 1    | 1    |
| CHA | 12   | 15   | 17   | 21   | 24   | 29   | 34   | 35   | 28   | 34   |
| EUR | 8    | 9    | 10   | 11   | 12   | 11   | 9    | 9    | 9    | 9    |
| IND | 5    | 6    | 7    | 7    | 8    | 10   | 12   | 13   | 15   | 20   |
| JPN | 1    | 1    | 1    | 1    | 1    | 1    | 1    | 1    | 1    | 1    |
| LAM | 10   | 12   | 10   | 13   | 12   | 19   | 24   | 32   | 18   | 36   |
| MEA | 2    | 3    | 3    | 4    | 5    | 6    | 7    | 8    | 10   | 12   |
| NEU | 2    | 2    | 3    | 4    | 5    | 6    | 5    | 5    | 5    | 5    |
| OAS | 7    | 8    | 10   | 11   | 13   | 15   | 17   | 21   | 25   | 29   |
| REF | 9    | 14   | 10   | 16   | 17   | 20   | 5    | 4    | 5    | 5    |
| SSA | 6    | 8    | 9    | 8    | 10   | 11   | 14   | 16   | 20   | 26   |
| USA | 2    | 2    | 2    | 2    | 2    | 4    | 4    | 3    | 4    | 2    |

Table 9: FAO — Demand—Agricultural Supply Chain Loss—Crops (Mt DM/yr)

3.1.1 Cereals

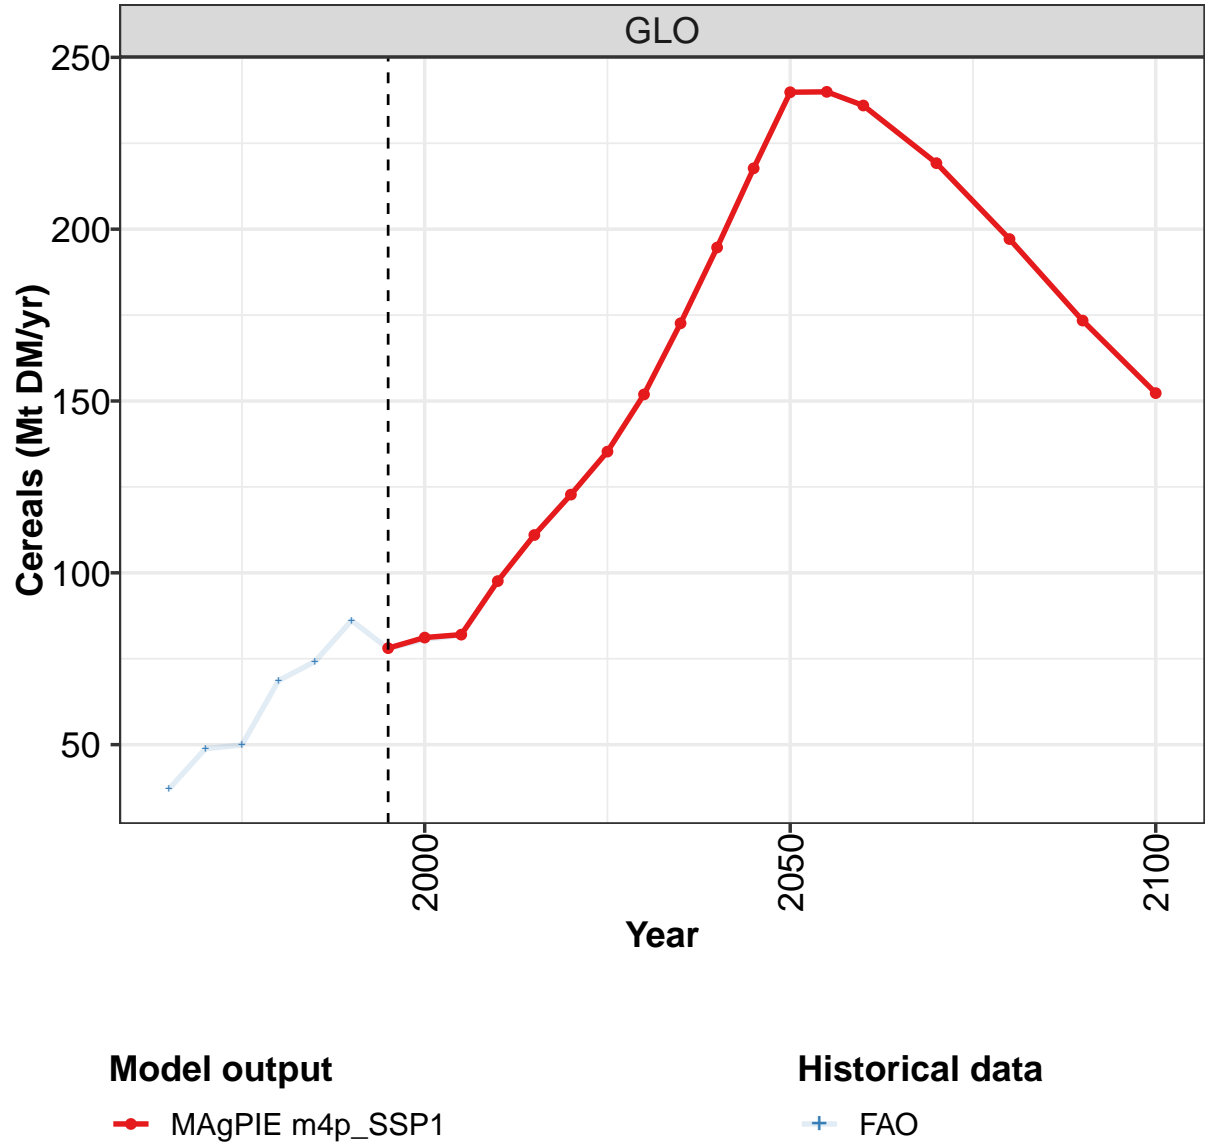

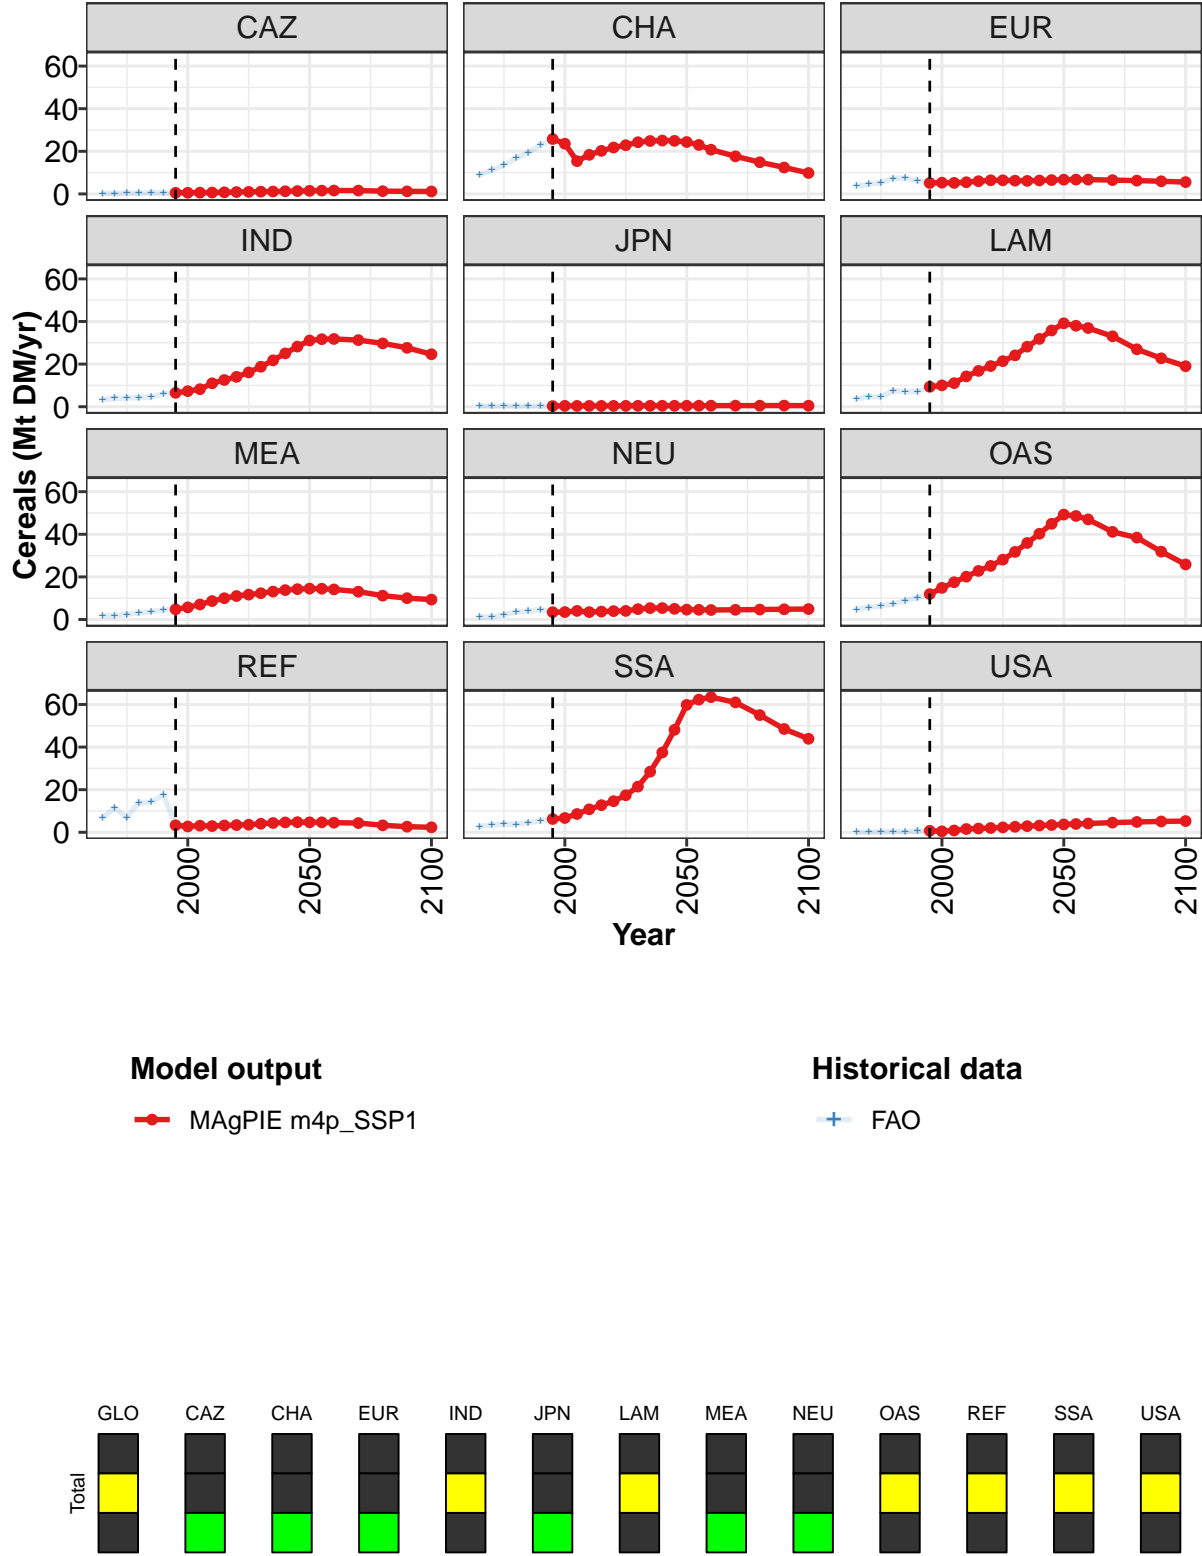

Figure 3: MAgPIE m4p\_SSP1 — Demand—Agricultural Supply Chain Loss—Crops—Cereals (Mt DM/yr)

|     | 1995 | 2000 | 2005 | 2010 | 2015 | 2020 | 2025 | 2030 | 2035 | 2040 | 2045 |
|-----|------|------|------|------|------|------|------|------|------|------|------|
| GLO | 78   | 81   | 82   | 98   | 111  | 123  | 135  | 152  | 173  | 195  | 218  |
| CAZ | 1    | 1    | 1    | 1    | 1    | 1    | 1    | 1    | 1    | 1    | 1    |
| CHA | 26   | 24   | 15   | 18   | 20   | 22   | 23   | 24   | 25   | 25   | 25   |
| EUR | 5    | 5    | 5    | 5    | 6    | 6    | 6    | 6    | 6    | 6    | 7    |
| IND | 7    | 7    | 8    | 11   | 13   | 14   | 16   | 19   | 22   | 25   | 28   |
| JPN | 0    | 0    | 0    | 0    | 0    | 0    | 0    | 0    | 0    | 0    | 0    |
| LAM | 9    | 10   | 11   | 14   | 17   | 19   | 21   | 24   | 28   | 32   | 36   |
| MEA | 5    | 6    | 7    | 9    | 10   | 11   | 12   | 12   | 13   | 14   | 14   |
| NEU | 3    | 4    | 4    | 3    | 4    | 4    | 4    | 5    | 5    | 5    | 5    |
| OAS | 12   | 15   | 18   | 20   | 23   | 25   | 28   | 32   | 36   | 40   | 45   |
| REF | 3    | 3    | 3    | 3    | 3    | 3    | 4    | 4    | 4    | 5    | 5    |
| SSA | 6    | 7    | 9    | 11   | 13   | 15   | 17   | 21   | 28   | 37   | 48   |
| USA | 1    | 0    | 1    | 2    | 2    | 2    | 2    | 3    | 3    | 3    | 3    |

Table 10: MAgPIE m4p\_SSP1 — Demand—Agricultural Supply Chain Loss—Crops—Cereals (Mt DM/yr)  
[PART 1/2]

|     | 2050 | 2055 | 2060 | 2070 | 2080 | 2090 | 2100 |
|-----|------|------|------|------|------|------|------|
| GLO | 240  | 240  | 236  | 219  | 197  | 173  | 152  |
| CAZ | 1    | 2    | 2    | 2    | 1    | 1    | 1    |
| CHA | 24   | 23   | 21   | 18   | 15   | 12   | 10   |
| EUR | 7    | 7    | 7    | 6    | 6    | 6    | 6    |
| IND | 31   | 32   | 32   | 31   | 30   | 28   | 25   |
| JPN | 0    | 0    | 0    | 1    | 1    | 1    | 0    |
| LAM | 39   | 38   | 37   | 33   | 27   | 23   | 19   |
| MEA | 15   | 14   | 14   | 13   | 11   | 10   | 9    |
| NEU | 5    | 5    | 4    | 5    | 5    | 5    | 5    |
| OAS | 49   | 49   | 47   | 41   | 38   | 32   | 26   |
| REF | 5    | 5    | 5    | 4    | 3    | 3    | 2    |
| SSA | 60   | 62   | 63   | 61   | 55   | 48   | 44   |
| USA | 4    | 4    | 4    | 5    | 5    | 5    | 5    |

Table 11: MAgPIE m4p\_SSP1 — Demand—Agricultural Supply Chain Loss—Crops—Cereals (Mt DM/yr)  
[PART 2/2]

|     | 1965 | 1970 | 1975 | 1980 | 1985 | 1990 | 1995 | 2000 | 2005 | 2010 |
|-----|------|------|------|------|------|------|------|------|------|------|
| GLO | 37.1 | 48.8 | 49.9 | 68.6 | 74.2 | 86.1 | 77.9 | 80.6 | 81.9 | 97.7 |
| CAZ | 0.2  | 0.3  | 0.4  | 0.4  | 0.6  | 0.5  | 0.5  | 0.6  | 0.7  | 0.7  |
| CHA | 9.0  | 11.1 | 13.5 | 16.9 | 19.3 | 22.9 | 26.0 | 23.7 | 15.5 | 18.5 |
| EUR | 3.6  | 4.6  | 5.3  | 7.3  | 7.4  | 6.2  | 5.0  | 5.1  | 5.0  | 5.3  |
| IND | 3.3  | 4.0  | 4.1  | 4.2  | 4.4  | 6.2  | 6.5  | 7.3  | 8.3  | 11.0 |
| JPN | 0.3  | 0.3  | 0.3  | 0.3  | 0.3  | 0.3  | 0.3  | 0.4  | 0.4  | 0.4  |
| LAM | 3.6  | 4.8  | 4.6  | 7.6  | 7.0  | 7.1  | 9.3  | 10.0 | 11.2 | 14.2 |
| MEA | 1.6  | 1.9  | 2.4  | 3.0  | 3.7  | 4.4  | 4.9  | 5.7  | 7.0  | 8.7  |
| NEU | 1.1  | 1.3  | 2.1  | 3.5  | 3.9  | 4.7  | 3.4  | 3.4  | 4.0  | 3.5  |
| OAS | 4.7  | 5.7  | 6.3  | 7.3  | 8.8  | 10.3 | 11.6 | 14.5 | 17.3 | 20.2 |
| REF | 6.8  | 11.4 | 7.0  | 14.0 | 14.1 | 17.6 | 3.4  | 2.8  | 3.1  | 2.9  |
| SSA | 2.8  | 3.4  | 3.8  | 3.8  | 4.5  | 5.3  | 6.2  | 6.7  | 8.6  | 10.8 |
| USA | 0.1  | 0.1  | 0.1  | 0.3  | 0.1  | 0.7  | 0.7  | 0.5  | 0.9  | 1.6  |

Table 12: FAO — Demand—Agricultural Supply Chain Loss—Crops—Cereals (Mt DM/yr)

3.1.2
Cereals—Maize

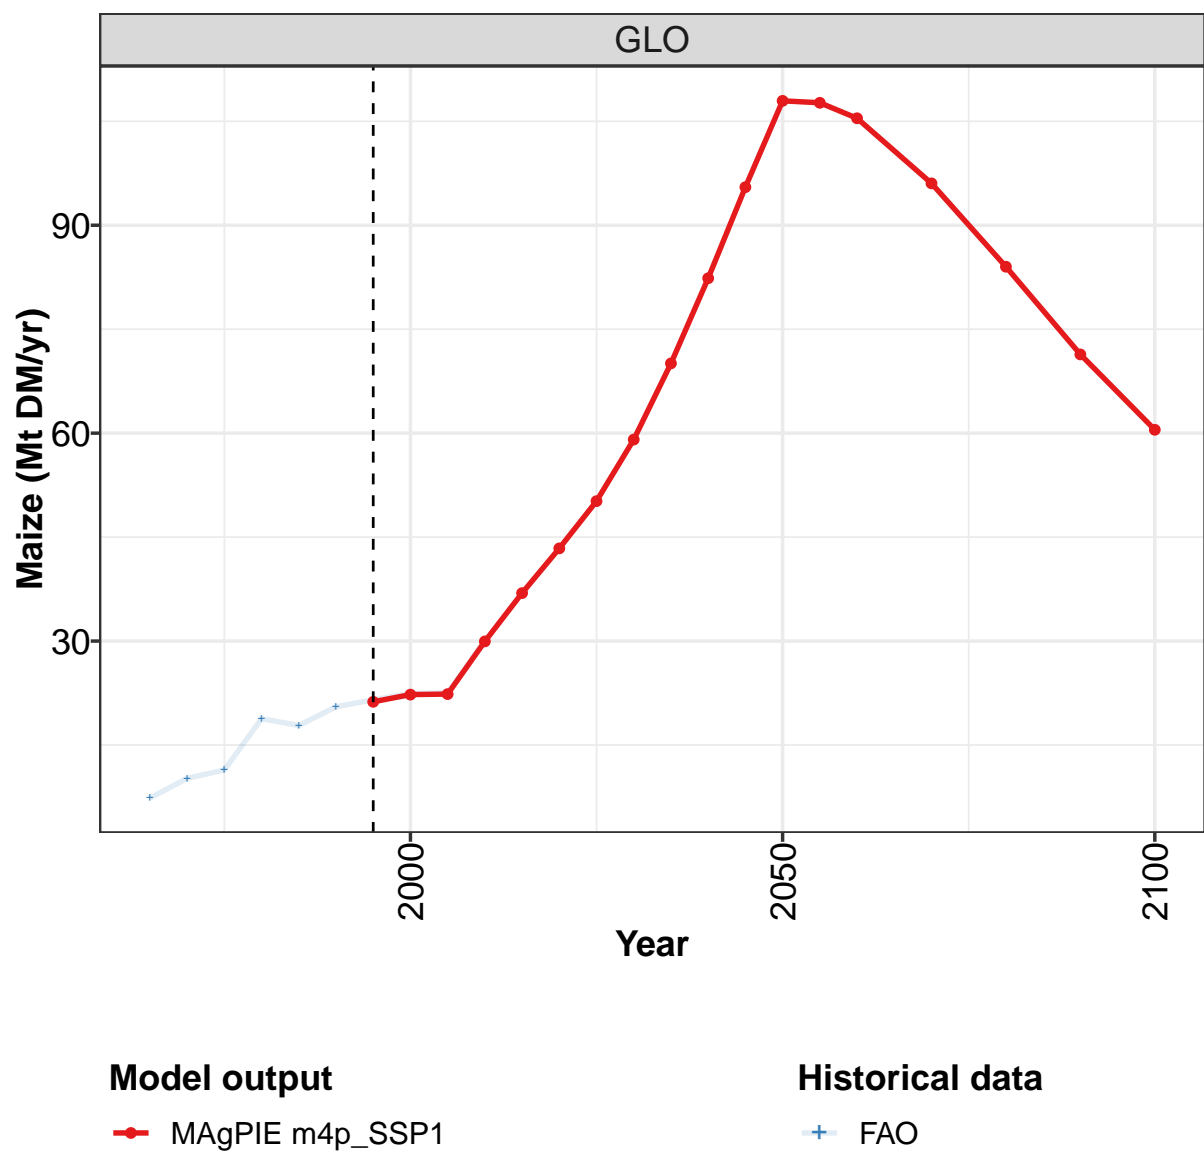



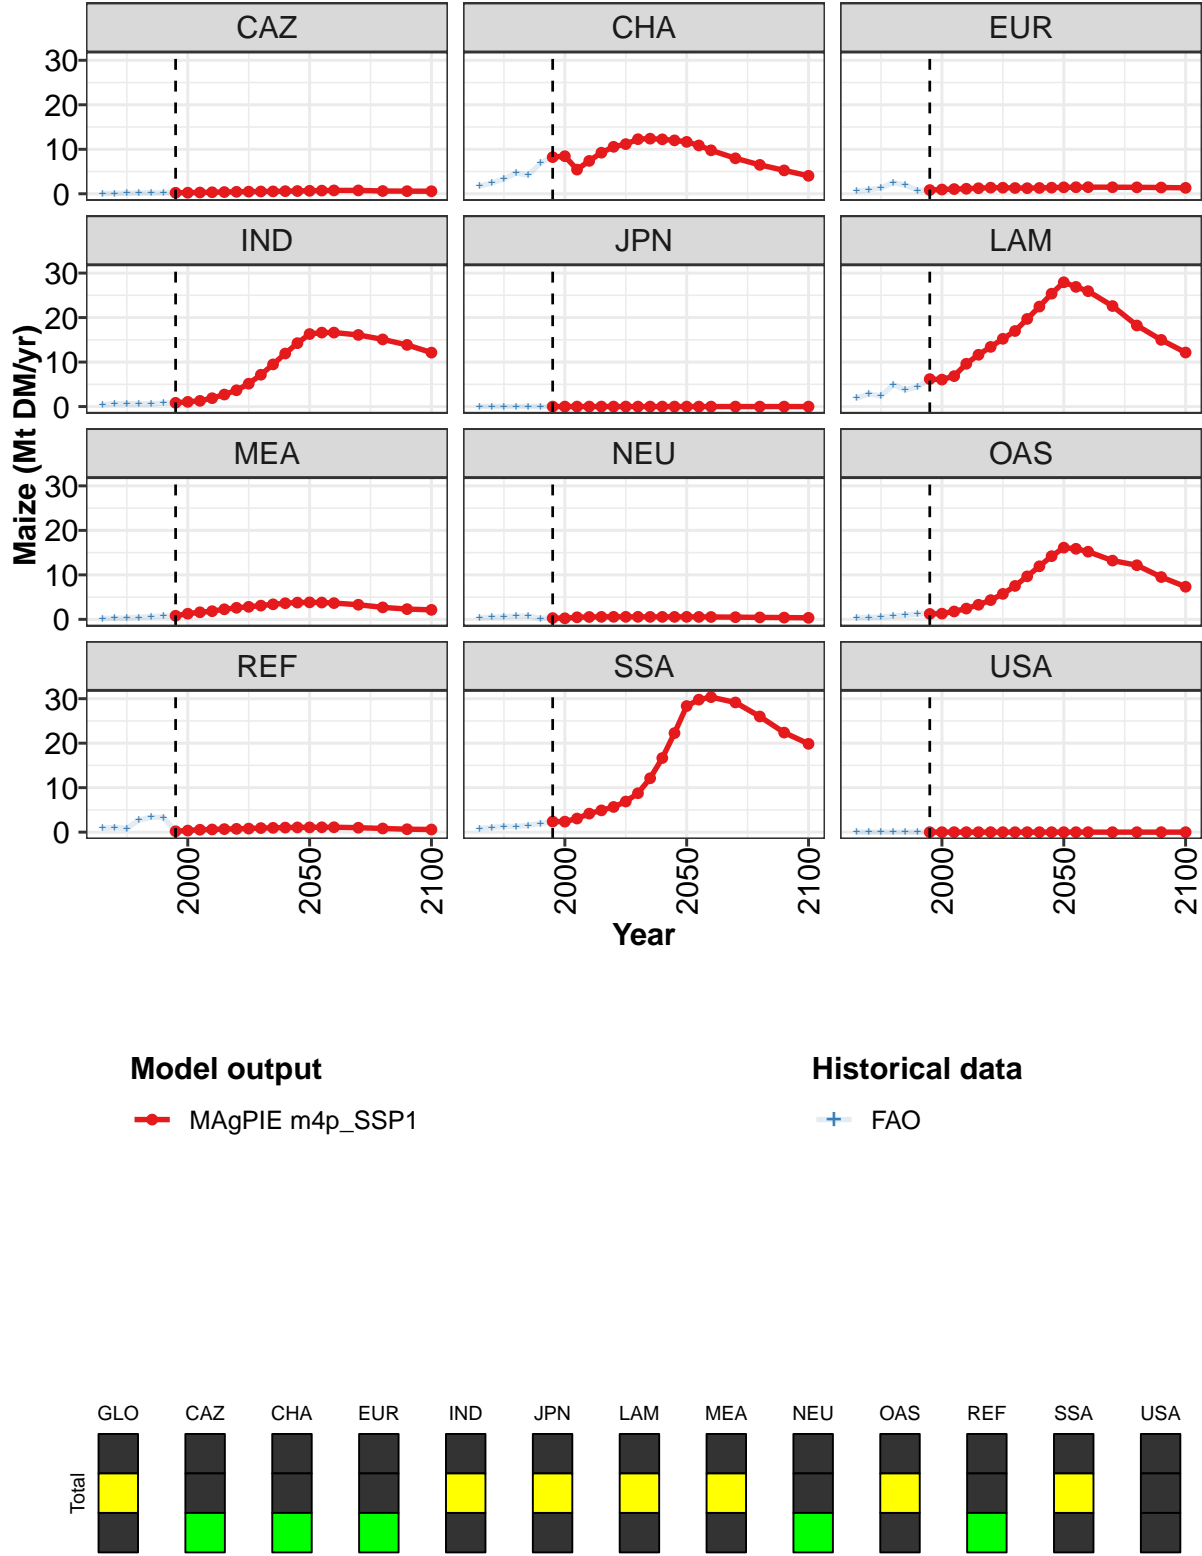

Figure 4: MAgPIE m4p\_SSP1 — Demand—Agricultural Supply Chain Loss—Crops—Cereals—Maize (Mt DM/yr)

|     | 1995 | 2000 | 2005 | 2010 | 2015 | 2020 | 2025 | 2030 | 2035 | 2040 | 2045 |
|-----|------|------|------|------|------|------|------|------|------|------|------|
| GLO | 21   | 22   | 22   | 30   | 37   | 43   | 50   | 59   | 70   | 82   | 95   |
| CAZ | 0    | 0    | 0    | 0    | 0    | 0    | 0    | 1    | 1    | 1    | 1    |
| CHA | 8    | 8    | 5    | 7    | 9    | 11   | 11   | 12   | 12   | 12   | 12   |
| EUR | 1    | 1    | 1    | 1    | 1    | 1    | 1    | 1    | 1    | 1    | 1    |
| IND | 1    | 1    | 1    | 2    | 3    | 4    | 5    | 7    | 9    | 12   | 14   |
| JPN | 0    | 0    | 0    | 0    | 0    | 0    | 0    | 0    | 0    | 0    | 0    |
| LAM | 6    | 6    | 7    | 10   | 12   | 13   | 15   | 17   | 20   | 22   | 25   |
| MEA | 1    | 1    | 2    | 2    | 2    | 3    | 3    | 3    | 3    | 4    | 4    |
| NEU | 0    | 0    | 0    | 1    | 1    | 1    | 1    | 1    | 1    | 1    | 1    |
| OAS | 1    | 1    | 2    | 2    | 3    | 4    | 6    | 8    | 10   | 12   | 14   |
| REF | 0    | 0    | 1    | 1    | 1    | 1    | 1    | 1    | 1    | 1    | 1    |
| SSA | 2    | 2    | 3    | 4    | 5    | 6    | 7    | 9    | 12   | 17   | 22   |
| USA | 0    | 0    | 0    | 0    | 0    | 0    | 0    | 0    | 0    | 0    | 0    |

Table 13: MAgPIE m4p\_SSP1 — Demand—Agricultural Supply Chain Loss—Crops—Cereals—Maize (Mt DM/yr) [PART 1/2]

|     | 2050 | 2055 | 2060 | 2070 | 2080 | 2090 | 2100 |
|-----|------|------|------|------|------|------|------|
| GLO | 108  | 108  | 105  | 96   | 84   | 71   | 60   |
| CAZ | 1    | 1    | 1    | 1    | 1    | 1    | 1    |
| CHA | 12   | 11   | 10   | 8    | 6    | 5    | 4    |
| EUR | 1    | 1    | 1    | 1    | 1    | 1    | 1    |
| IND | 16   | 17   | 17   | 16   | 15   | 14   | 12   |
| JPN | 0    | 0    | 0    | 0    | 0    | 0    | 0    |
| LAM | 28   | 27   | 26   | 23   | 18   | 15   | 12   |
| MEA | 4    | 4    | 4    | 3    | 3    | 2    | 2    |
| NEU | 1    | 1    | 1    | 0    | 0    | 0    | 0    |
| OAS | 16   | 16   | 15   | 13   | 12   | 10   | 7    |
| REF | 1    | 1    | 1    | 1    | 1    | 1    | 1    |
| SSA | 28   | 30   | 30   | 29   | 26   | 22   | 20   |
| USA | 0    | 0    | 0    | 0    | 0    | 0    | 0    |

Table 14: MAgPIE m4p\_SSP1 — Demand—Agricultural Supply Chain Loss—Crops—Cereals—Maize (Mt DM/yr) [PART 2/2]

|     | 1965 | 1970 | 1975 | 1980 | 1985 | 1990 | 1995 | 2000 | 2005 | 2010 |
|-----|------|------|------|------|------|------|------|------|------|------|
| GLO | 7.3  | 10.2 | 11.4 | 18.8 | 17.8 | 20.5 | 21.5 | 22.4 | 22.5 | 30.1 |
| CAZ | 0.1  | 0.1  | 0.1  | 0.2  | 0.2  | 0.2  | 0.2  | 0.3  | 0.3  | 0.4  |
| CHA | 1.7  | 2.4  | 3.4  | 4.7  | 4.2  | 6.9  | 8.4  | 8.6  | 5.5  | 7.5  |
| EUR | 0.6  | 0.9  | 1.3  | 2.5  | 2.0  | 0.7  | 0.8  | 0.9  | 1.0  | 1.1  |
| IND | 0.4  | 0.7  | 0.6  | 0.6  | 0.6  | 0.8  | 0.8  | 1.1  | 1.3  | 1.9  |
| JPN | 0.0  | 0.0  | 0.0  | 0.0  | 0.0  | 0.0  | 0.0  | 0.0  | 0.0  | 0.0  |
| LAM | 1.9  | 2.8  | 2.4  | 4.9  | 3.7  | 4.5  | 6.1  | 6.0  | 6.9  | 9.6  |
| MEA | 0.2  | 0.2  | 0.3  | 0.4  | 0.6  | 0.7  | 0.8  | 1.2  | 1.5  | 1.9  |
| NEU | 0.3  | 0.5  | 0.6  | 0.7  | 0.7  | 0.2  | 0.4  | 0.3  | 0.5  | 0.5  |
| OAS | 0.4  | 0.4  | 0.5  | 0.7  | 0.9  | 1.2  | 1.3  | 1.4  | 1.8  | 2.5  |
| REF | 0.9  | 1.1  | 0.8  | 2.7  | 3.3  | 3.3  | 0.2  | 0.4  | 0.6  | 0.6  |
| SSA | 0.8  | 1.1  | 1.3  | 1.3  | 1.5  | 1.9  | 2.4  | 2.4  | 3.1  | 4.2  |
| USA | 0.0  | 0.0  | 0.0  | 0.0  | 0.0  | 0.0  | 0.0  | 0.0  | 0.0  | 0.0  |

Table 15: FAO — Demand—Agricultural Supply Chain Loss—Crops—Cereals—Maize (Mt DM/yr)

3.1.3 Cereals—Rice

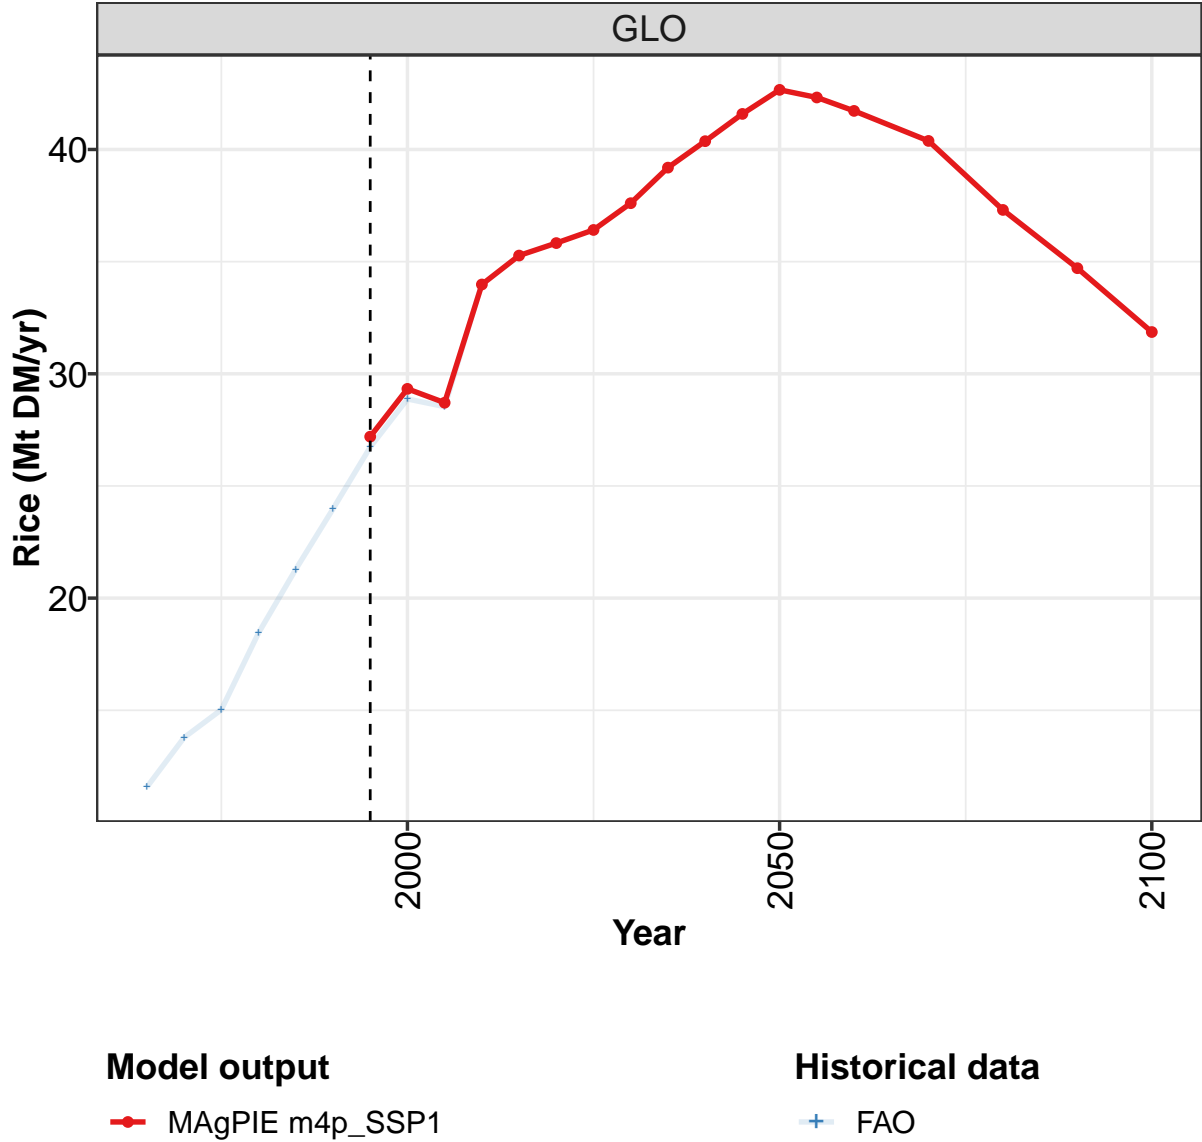

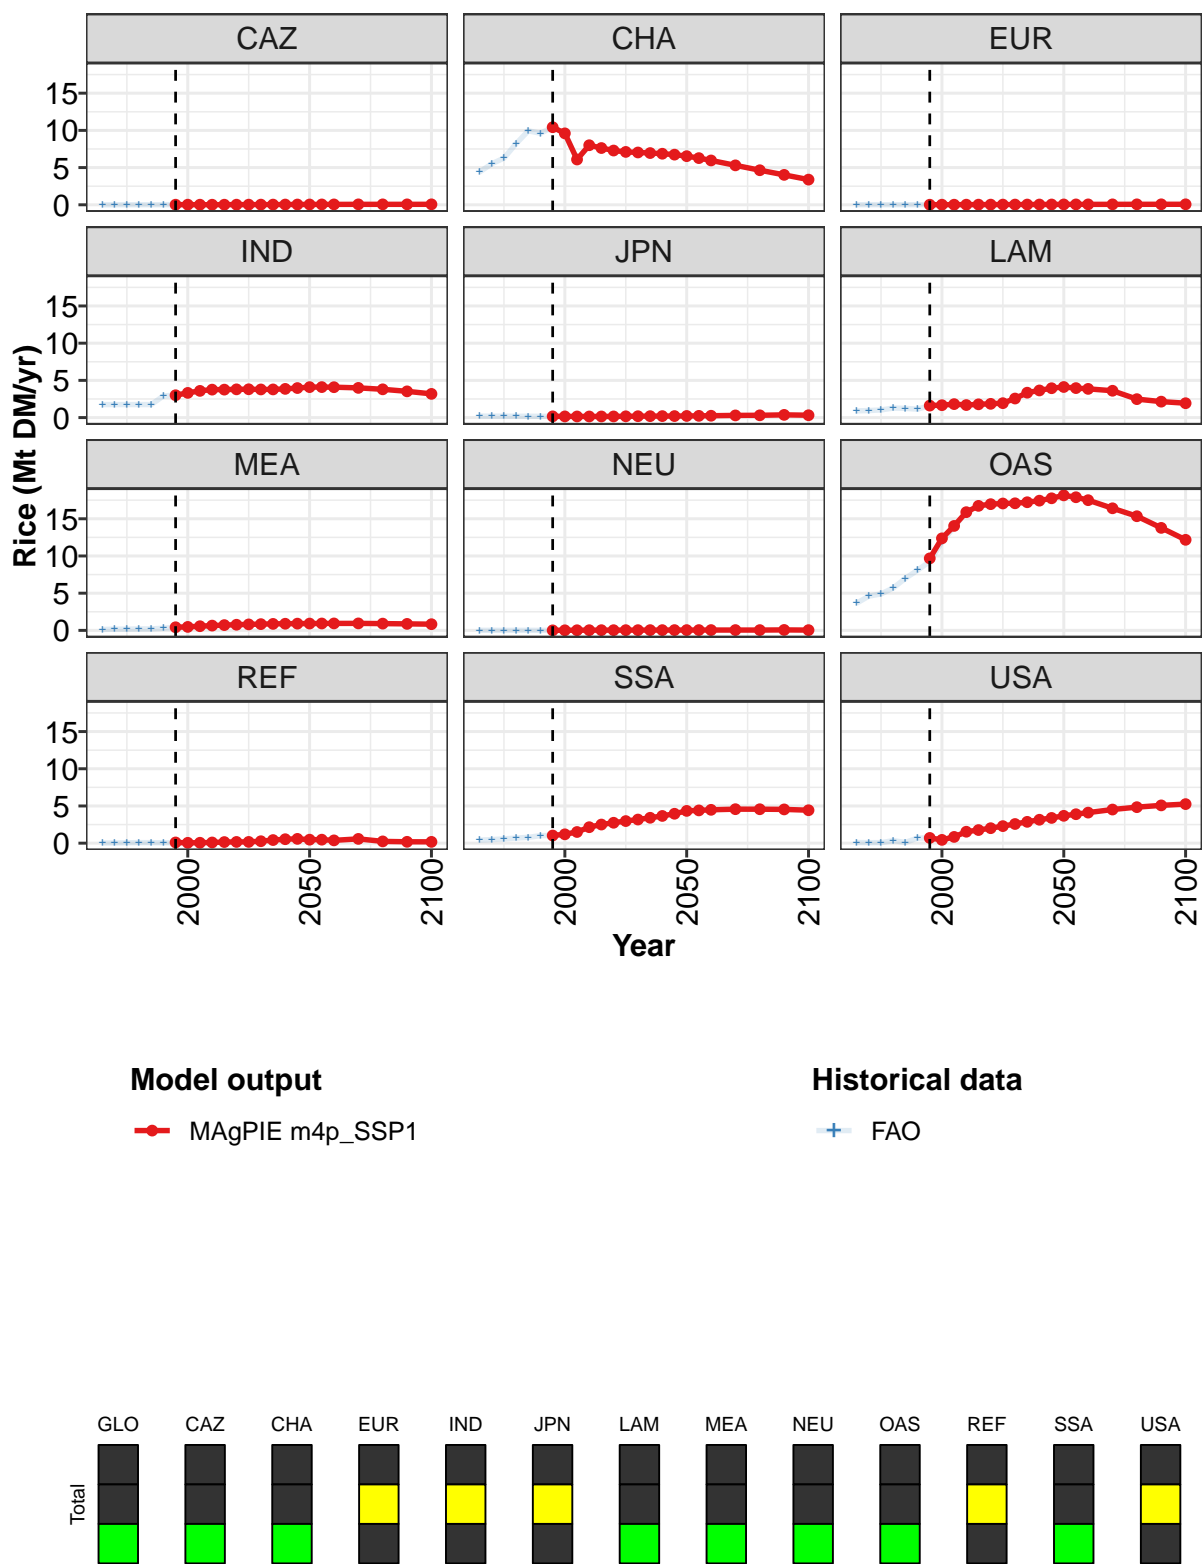

Figure 5: MAgPIE m4p\_SSP1 — Demand—Agricultural Supply Chain Loss—Crops—Cereals—Rice (Mt DM/yr)

|     | 1995 | 2000 | 2005 | 2010 | 2015 | 2020 | 2025 | 2030 | 2035 | 2040 | 2045 |
|-----|------|------|------|------|------|------|------|------|------|------|------|
| GLO | 27.2 | 29.3 | 28.7 | 34.0 | 35.3 | 35.8 | 36.4 | 37.6 | 39.2 | 40.4 | 41.6 |
| CAZ | 0.0  | 0.0  | 0.0  | 0.0  | 0.0  | 0.0  | 0.0  | 0.0  | 0.0  | 0.0  | 0.0  |
| CHA | 10.4 | 9.6  | 6.1  | 8.0  | 7.6  | 7.3  | 7.1  | 7.0  | 7.0  | 6.9  | 6.7  |
| EUR | 0.0  | 0.0  | 0.0  | 0.0  | 0.0  | 0.0  | 0.0  | 0.0  | 0.0  | 0.0  | 0.0  |
| IND | 3.0  | 3.3  | 3.6  | 3.8  | 3.8  | 3.8  | 3.8  | 3.8  | 3.8  | 3.9  | 4.0  |
| JPN | 0.2  | 0.2  | 0.2  | 0.1  | 0.2  | 0.2  | 0.2  | 0.2  | 0.2  | 0.2  | 0.2  |
| LAM | 1.6  | 1.7  | 1.8  | 1.7  | 1.8  | 1.8  | 1.9  | 2.6  | 3.3  | 3.7  | 3.9  |
| MEA | 0.4  | 0.5  | 0.6  | 0.6  | 0.7  | 0.8  | 0.8  | 0.8  | 0.9  | 0.9  | 0.9  |
| NEU | 0.0  | 0.0  | 0.0  | 0.0  | 0.0  | 0.0  | 0.0  | 0.0  | 0.0  | 0.0  | 0.0  |
| OAS | 9.7  | 12.4 | 14.0 | 15.9 | 16.7 | 17.0 | 17.1 | 17.1 | 17.2 | 17.4 | 17.8 |
| REF | 0.1  | 0.1  | 0.1  | 0.1  | 0.2  | 0.2  | 0.2  | 0.3  | 0.4  | 0.5  | 0.6  |
| SSA | 1.0  | 1.2  | 1.5  | 2.1  | 2.5  | 2.7  | 3.0  | 3.2  | 3.4  | 3.7  | 4.0  |
| USA | 0.7  | 0.4  | 0.8  | 1.5  | 1.8  | 2.0  | 2.3  | 2.6  | 2.9  | 3.1  | 3.4  |

Table 16: MAgPIE m4p\_SSP1 — Demand—Agricultural Supply Chain Loss—Crops—Cereals—Rice (Mt DM/yr) [PART 1/2]

|     | 2050 | 2055 | 2060 | 2070 | 2080 | 2090 | 2100 |
|-----|------|------|------|------|------|------|------|
| GLO | 42.7 | 42.3 | 41.7 | 40.4 | 37.3 | 34.7 | 31.9 |
| CAZ | 0.0  | 0.1  | 0.1  | 0.1  | 0.1  | 0.1  | 0.1  |
| CHA | 6.5  | 6.3  | 6.0  | 5.3  | 4.6  | 4.0  | 3.4  |
| EUR | 0.1  | 0.1  | 0.1  | 0.1  | 0.1  | 0.1  | 0.1  |
| IND | 4.1  | 4.1  | 4.1  | 4.0  | 3.8  | 3.5  | 3.2  |
| JPN | 0.2  | 0.2  | 0.3  | 0.3  | 0.3  | 0.4  | 0.3  |
| LAM | 4.1  | 4.0  | 3.9  | 3.6  | 2.5  | 2.1  | 1.9  |
| MEA | 0.9  | 0.9  | 0.9  | 0.9  | 0.9  | 0.9  | 0.8  |
| NEU | 0.0  | 0.0  | 0.0  | 0.0  | 0.0  | 0.1  | 0.0  |
| OAS | 18.1 | 17.9 | 17.5 | 16.4 | 15.3 | 13.8 | 12.2 |
| REF | 0.5  | 0.5  | 0.4  | 0.6  | 0.2  | 0.2  | 0.2  |
| SSA | 4.3  | 4.4  | 4.5  | 4.6  | 4.6  | 4.5  | 4.4  |
| USA | 3.7  | 3.9  | 4.1  | 4.5  | 4.8  | 5.1  | 5.3  |

Table 17: MAgPIE m4p\_SSP1 — Demand—Agricultural Supply Chain Loss—Crops—Cereals—Rice (Mt DM/yr) [PART 2/2]

|     | 1965 | 1970 | 1975 | 1980 | 1985 | 1990 | 1995 | 2000 | 2005 | 2010 |
|-----|------|------|------|------|------|------|------|------|------|------|
| GLO | 11.6 | 13.8 | 15.0 | 18.4 | 21.3 | 24.0 | 26.7 | 28.9 | 28.5 | 34.0 |
| CAZ | 0.0  | 0.0  | 0.0  | 0.0  | 0.0  | 0.0  | 0.0  | 0.0  | 0.0  | 0.0  |
| CHA | 4.4  | 5.5  | 6.3  | 8.2  | 9.9  | 9.6  | 10.4 | 9.6  | 6.1  | 8.0  |
| EUR | 0.0  | 0.0  | 0.0  | 0.0  | 0.0  | 0.0  | 0.0  | 0.0  | 0.0  | 0.0  |
| IND | 1.7  | 1.7  | 1.7  | 1.7  | 1.7  | 2.9  | 3.0  | 3.3  | 3.6  | 3.8  |
| JPN | 0.2  | 0.2  | 0.2  | 0.2  | 0.2  | 0.2  | 0.2  | 0.2  | 0.2  | 0.1  |
| LAM | 0.9  | 0.9  | 1.0  | 1.3  | 1.2  | 1.1  | 1.6  | 1.7  | 1.8  | 1.7  |
| MEA | 0.1  | 0.2  | 0.2  | 0.2  | 0.2  | 0.3  | 0.4  | 0.5  | 0.6  | 0.6  |
| NEU | 0.0  | 0.0  | 0.0  | 0.0  | 0.0  | 0.0  | 0.0  | 0.0  | 0.0  | 0.0  |
| OAS | 3.7  | 4.6  | 4.9  | 5.7  | 7.0  | 8.1  | 9.3  | 11.9 | 13.8 | 15.9 |
| REF | 0.0  | 0.0  | 0.1  | 0.1  | 0.1  | 0.1  | 0.0  | 0.1  | 0.1  | 0.1  |
| SSA | 0.4  | 0.5  | 0.6  | 0.7  | 0.8  | 1.0  | 1.0  | 1.2  | 1.5  | 2.2  |
| USA | 0.1  | 0.1  | 0.1  | 0.3  | 0.1  | 0.7  | 0.7  | 0.4  | 0.8  | 1.5  |

Table 18: FAO — Demand—Agricultural Supply Chain Loss—Crops—Cereals—Rice (Mt DM/yr)

3.1.4
Cereals—Temperate cereals

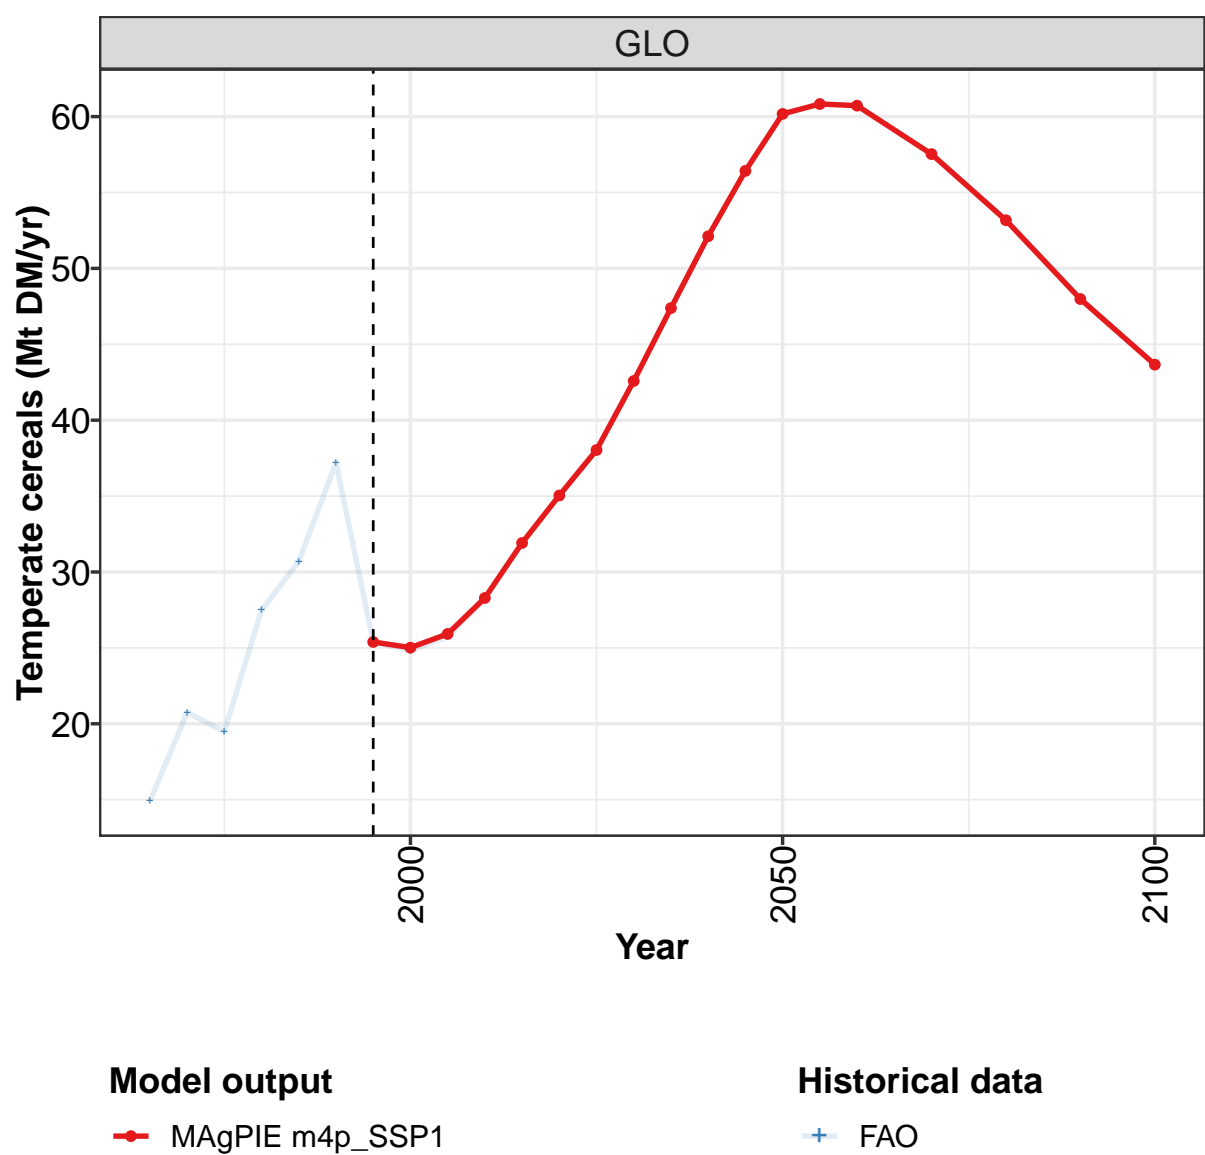

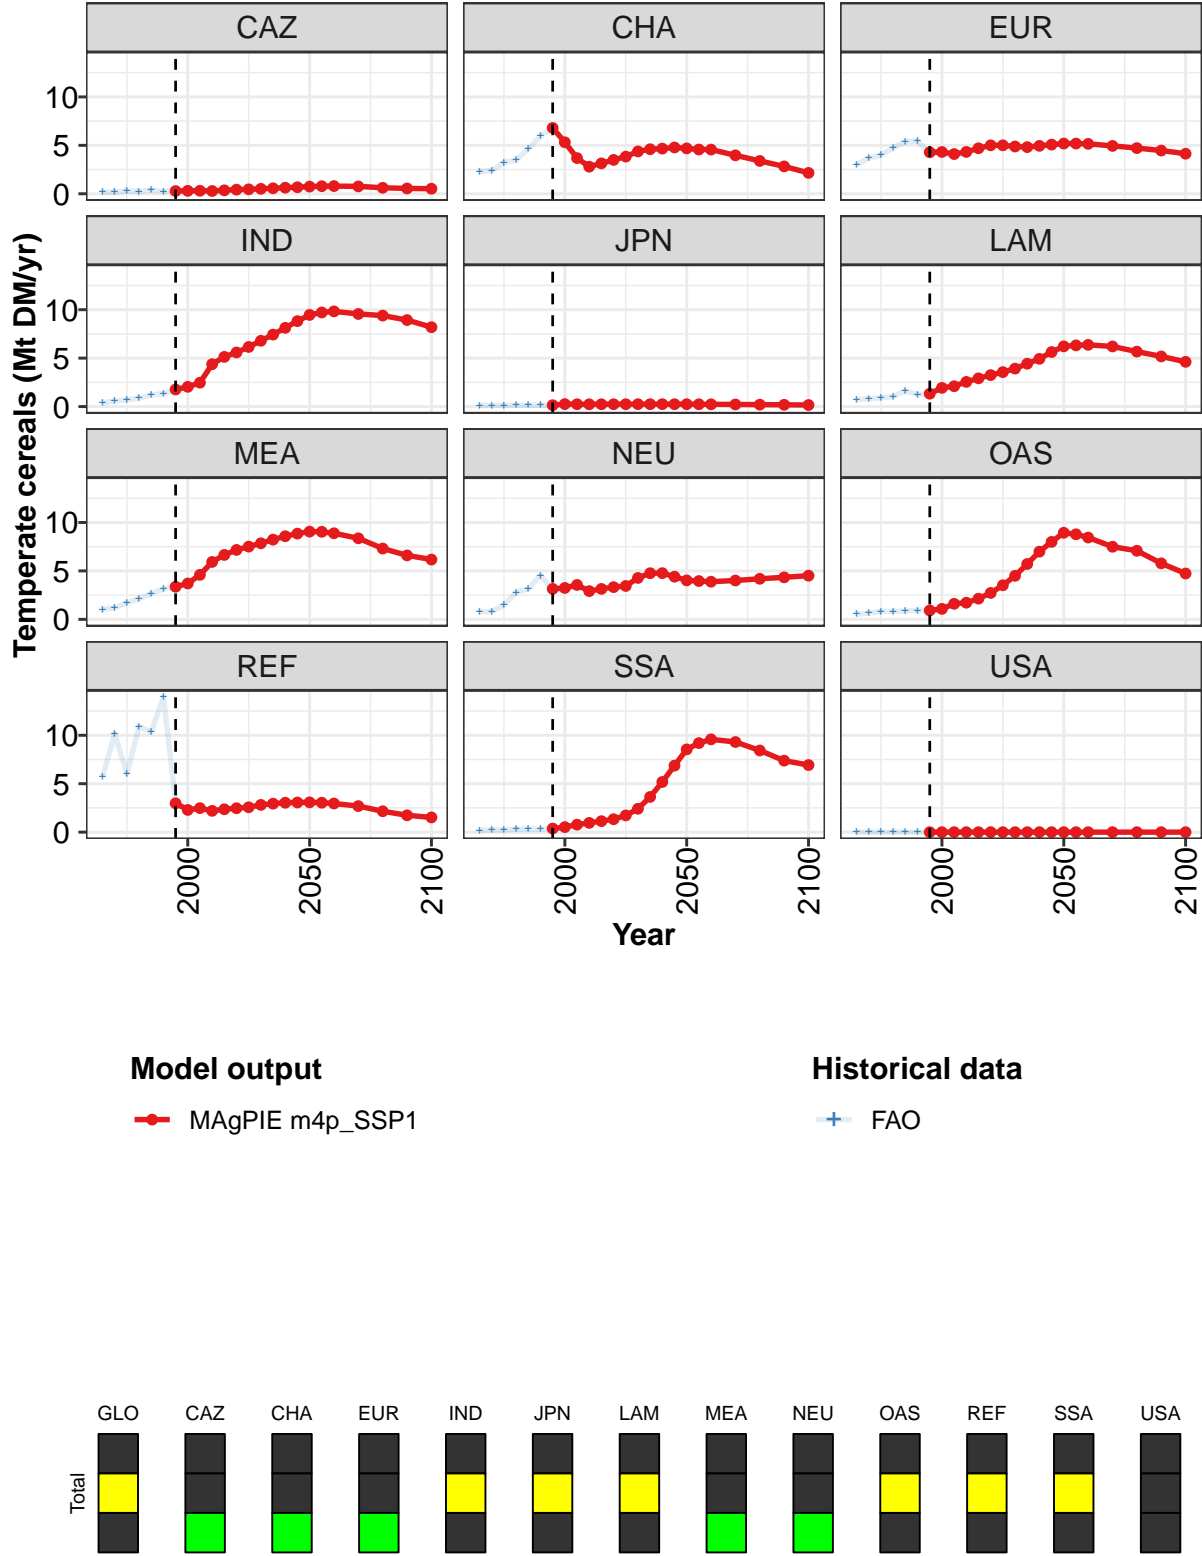

Figure 6: MAgPIE m4p\_SSP1 — Demand—Agricultural Supply Chain Loss—Crops—Cereals—Temperate cereals (Mt DM/yr)

|     | 1995 | 2000 | 2005 | 2010 | 2015 | 2020 | 2025 | 2030 | 2035 | 2040 | 2045 |
|-----|------|------|------|------|------|------|------|------|------|------|------|
| GLO | 25.4 | 25.0 | 25.9 | 28.3 | 31.9 | 35.0 | 38.0 | 42.6 | 47.4 | 52.1 | 56.4 |
| CAZ | 0.3  | 0.3  | 0.3  | 0.3  | 0.4  | 0.4  | 0.5  | 0.5  | 0.6  | 0.6  | 0.7  |
| CHA | 6.8  | 5.3  | 3.7  | 2.8  | 3.1  | 3.5  | 3.8  | 4.4  | 4.6  | 4.7  | 4.8  |
| EUR | 4.3  | 4.3  | 4.1  | 4.3  | 4.7  | 5.0  | 5.0  | 4.9  | 4.8  | 4.9  | 5.1  |
| IND | 1.8  | 2.0  | 2.5  | 4.4  | 5.1  | 5.6  | 6.2  | 6.8  | 7.4  | 8.1  | 8.8  |
| JPN | 0.1  | 0.3  | 0.2  | 0.2  | 0.2  | 0.2  | 0.2  | 0.2  | 0.2  | 0.2  | 0.2  |
| LAM | 1.3  | 1.9  | 2.1  | 2.5  | 2.9  | 3.2  | 3.6  | 3.9  | 4.4  | 4.9  | 5.6  |
| MEA | 3.4  | 3.7  | 4.6  | 5.9  | 6.7  | 7.2  | 7.5  | 7.9  | 8.2  | 8.6  | 8.9  |
| NEU | 3.1  | 3.2  | 3.6  | 2.9  | 3.1  | 3.3  | 3.4  | 4.3  | 4.8  | 4.8  | 4.4  |
| OAS | 0.9  | 1.1  | 1.6  | 1.7  | 2.1  | 2.7  | 3.5  | 4.5  | 5.7  | 7.0  | 8.0  |
| REF | 3.0  | 2.3  | 2.5  | 2.2  | 2.4  | 2.5  | 2.6  | 2.8  | 2.9  | 3.0  | 3.1  |
| SSA | 0.4  | 0.5  | 0.8  | 1.0  | 1.1  | 1.3  | 1.7  | 2.4  | 3.6  | 5.2  | 6.9  |
| USA | 0.0  | 0.0  | 0.0  | 0.0  | 0.0  | 0.0  | 0.0  | 0.0  | 0.0  | 0.0  | 0.0  |

Table 19: MAgPIE m4p\_SSP1 — Demand—Agricultural Supply Chain Loss—Crops—Cereals—Temperate cereals (Mt DM/yr) [PART 1/2]

|     | 2050 | 2055 | 2060 | 2070 | 2080 | 2090 | 2100 |
|-----|------|------|------|------|------|------|------|
| GLO | 60.2 | 60.8 | 60.7 | 57.5 | 53.2 | 48.0 | 43.7 |
| CAZ | 0.7  | 0.8  | 0.8  | 0.8  | 0.6  | 0.5  | 0.5  |
| CHA | 4.7  | 4.6  | 4.6  | 4.0  | 3.4  | 2.8  | 2.2  |
| EUR | 5.2  | 5.2  | 5.2  | 4.9  | 4.7  | 4.5  | 4.1  |
| IND | 9.5  | 9.7  | 9.8  | 9.6  | 9.4  | 8.9  | 8.2  |
| JPN | 0.2  | 0.2  | 0.2  | 0.2  | 0.2  | 0.2  | 0.2  |
| LAM | 6.2  | 6.3  | 6.4  | 6.2  | 5.7  | 5.2  | 4.6  |
| MEA | 9.1  | 9.0  | 8.9  | 8.4  | 7.3  | 6.6  | 6.2  |
| NEU | 4.0  | 4.0  | 3.9  | 4.0  | 4.2  | 4.3  | 4.5  |
| OAS | 8.9  | 8.8  | 8.4  | 7.5  | 7.1  | 5.8  | 4.7  |
| REF | 3.1  | 3.0  | 3.0  | 2.7  | 2.2  | 1.7  | 1.5  |
| SSA | 8.5  | 9.2  | 9.6  | 9.3  | 8.4  | 7.4  | 6.9  |
| USA | 0.0  | 0.0  | 0.0  | 0.0  | 0.0  | 0.0  | 0.0  |

Table 20: MAgPIE m4p\_SSP1 — Demand—Agricultural Supply Chain Loss—Crops—Cereals—Temperate cereals (Mt DM/yr) [PART 2/2]

|     | 1965 | 1970 | 1975 | 1980 | 1985 | 1990 | 1995 | 2000 | 2005 | 2010 |
|-----|------|------|------|------|------|------|------|------|------|------|
| GLO | 14.9 | 20.7 | 19.5 | 27.5 | 30.7 | 37.2 | 25.4 | 24.8 | 25.7 | 28.2 |
| CAZ | 0.2  | 0.2  | 0.3  | 0.2  | 0.4  | 0.3  | 0.3  | 0.3  | 0.4  | 0.3  |
| CHA | 2.3  | 2.4  | 3.2  | 3.5  | 4.6  | 5.9  | 6.8  | 5.3  | 3.7  | 2.8  |
| EUR | 3.0  | 3.7  | 4.0  | 4.8  | 5.4  | 5.4  | 4.2  | 4.2  | 4.0  | 4.2  |
| IND | 0.4  | 0.6  | 0.7  | 0.9  | 1.2  | 1.3  | 1.8  | 2.0  | 2.5  | 4.4  |
| JPN | 0.1  | 0.1  | 0.1  | 0.1  | 0.1  | 0.1  | 0.1  | 0.3  | 0.2  | 0.2  |
| LAM | 0.8  | 0.8  | 0.9  | 1.1  | 1.6  | 1.2  | 1.3  | 1.9  | 2.1  | 2.6  |
| MEA | 1.0  | 1.2  | 1.7  | 2.1  | 2.7  | 3.1  | 3.4  | 3.7  | 4.6  | 6.0  |
| NEU | 0.8  | 0.8  | 1.5  | 2.8  | 3.2  | 4.5  | 3.0  | 3.1  | 3.4  | 2.9  |
| OAS | 0.5  | 0.6  | 0.8  | 0.8  | 0.8  | 0.9  | 0.9  | 1.1  | 1.6  | 1.7  |
| REF | 5.7  | 10.1 | 6.0  | 10.9 | 10.4 | 13.9 | 3.1  | 2.3  | 2.5  | 2.2  |
| SSA | 0.2  | 0.2  | 0.2  | 0.3  | 0.3  | 0.3  | 0.4  | 0.5  | 0.8  | 1.0  |
| USA | 0.0  | 0.0  | 0.0  | 0.0  | 0.0  | 0.0  | 0.0  | 0.0  | 0.0  | 0.0  |

Table 21: FAO — Demand—Agricultural Supply Chain Loss—Crops—Cereals—Temperate cereals (Mt DM/yr)



3.1.5
Cereals—Tropical cereals

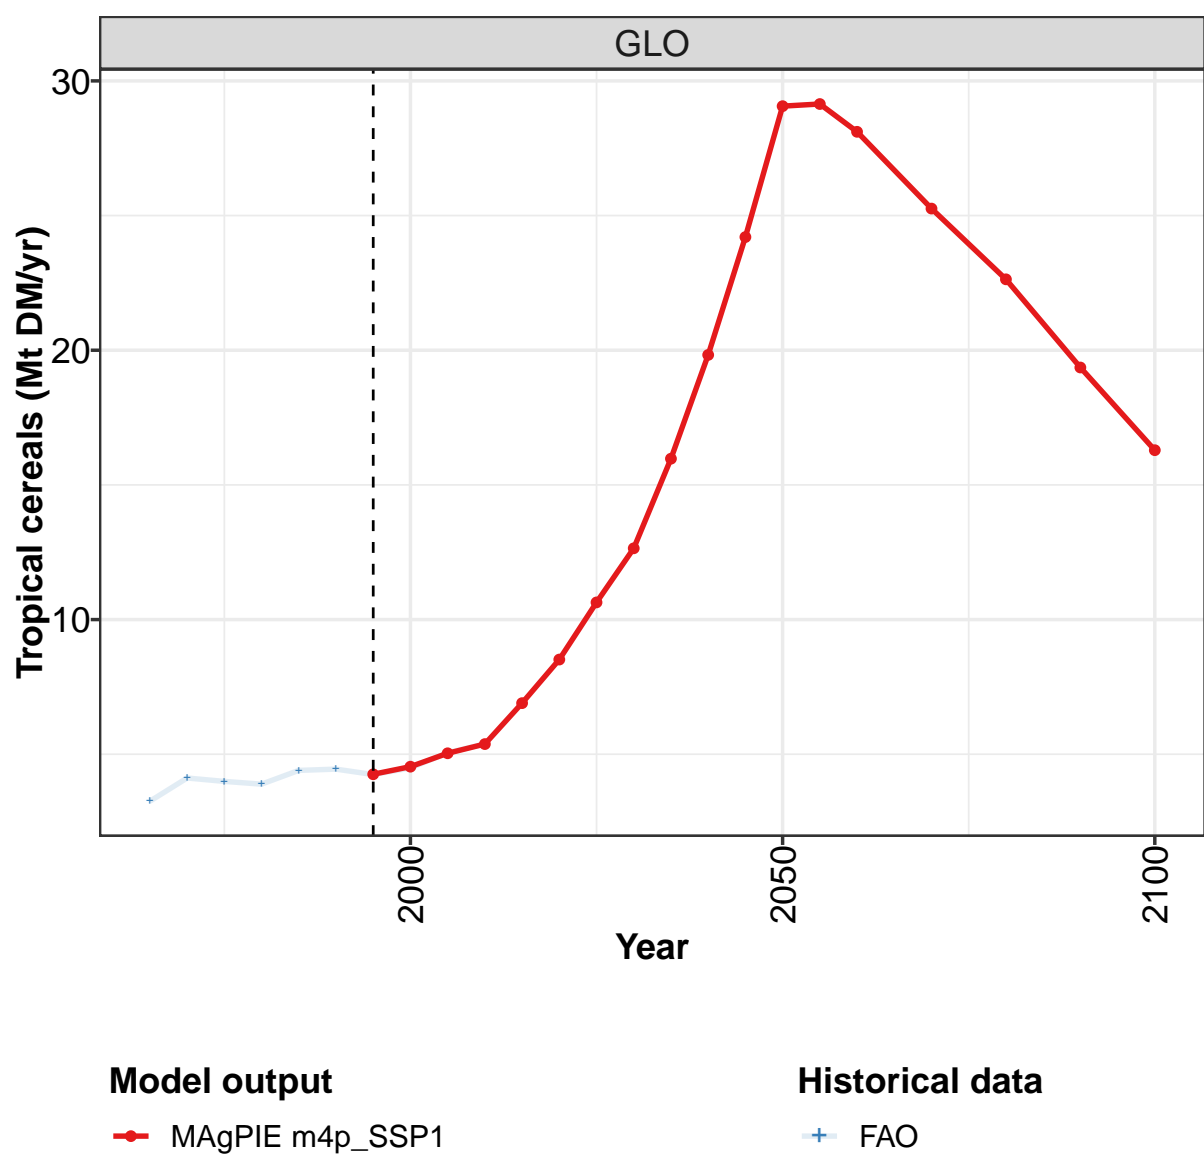

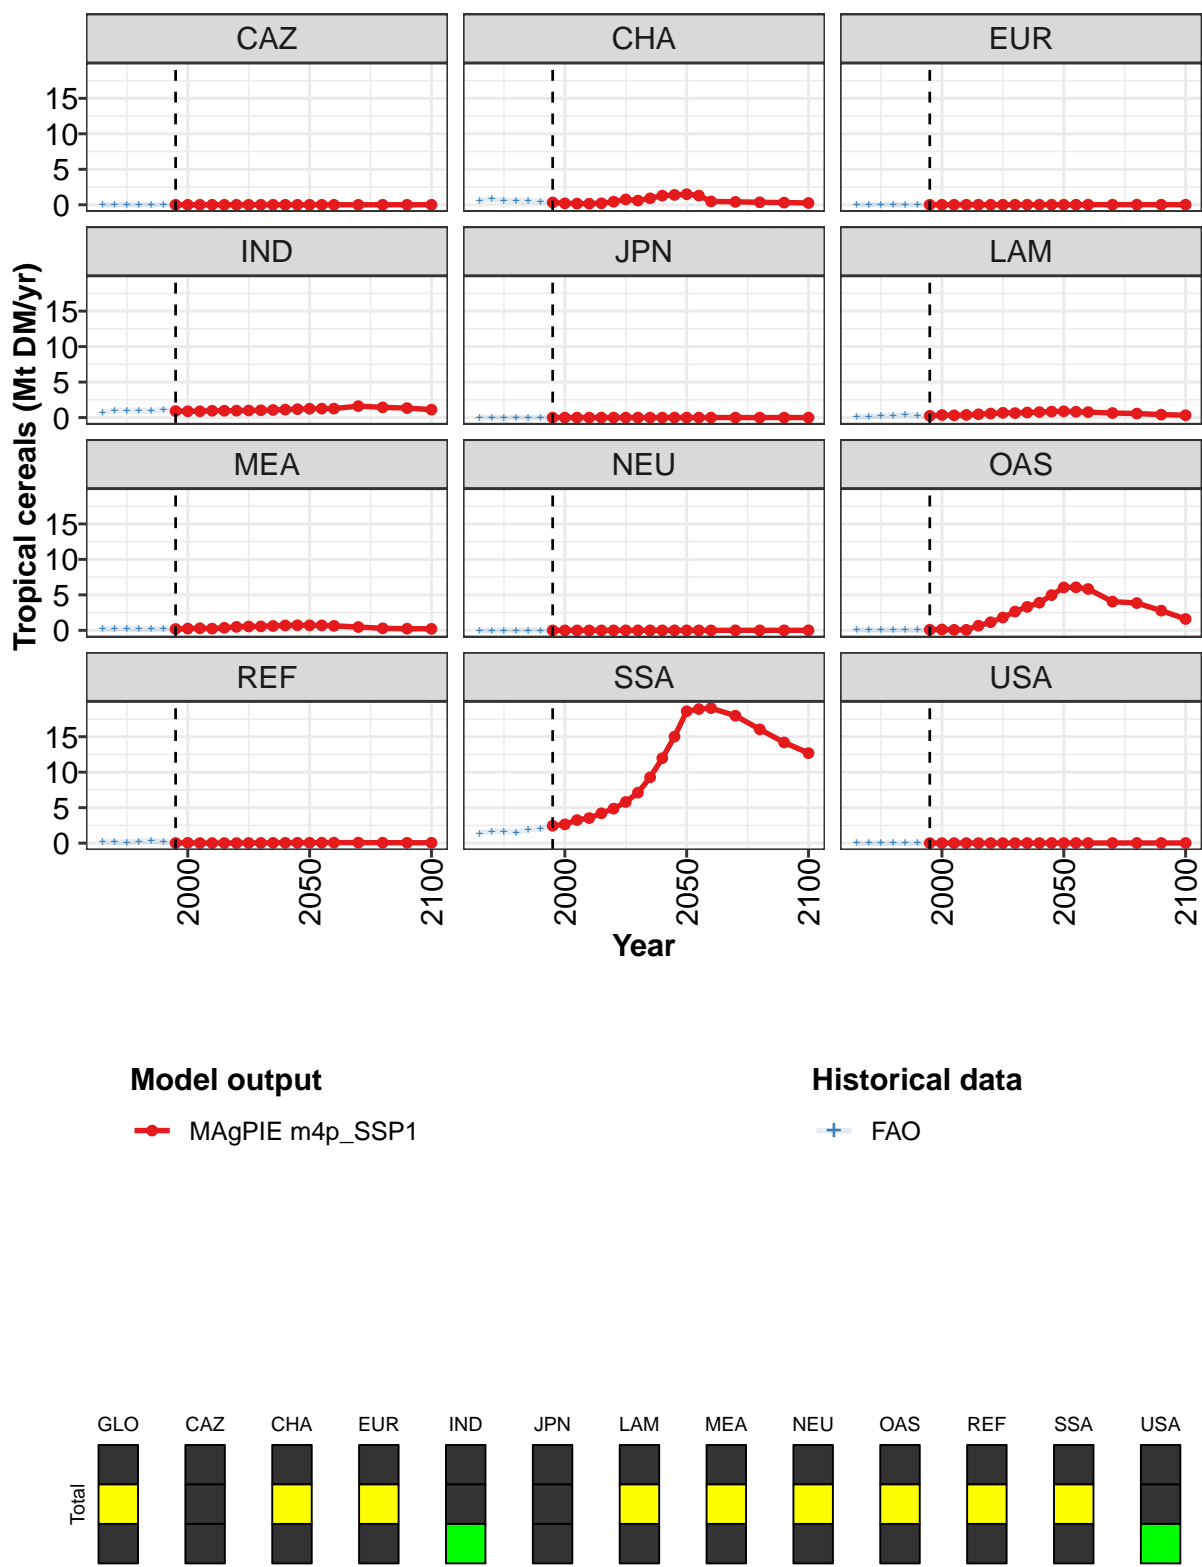

Figure 7: MAgPIE m4p\_SSP1 — Demand—Agricultural Supply Chain Loss—Crops—Cereals—Tropical cereals (Mt DM/yr)

|     | 1995 | 2000 | 2005 | 2010 | 2015 | 2020 | 2025 | 2030 | 2035 | 2040 | 2045 |
|-----|------|------|------|------|------|------|------|------|------|------|------|
| GLO | 4.3  | 4.5  | 5.0  | 5.4  | 6.9  | 8.5  | 10.6 | 12.6 | 16.0 | 19.8 | 24.2 |
| CAZ | 0.0  | 0.0  | 0.0  | 0.0  | 0.0  | 0.0  | 0.0  | 0.0  | 0.0  | 0.0  | 0.0  |
| CHA | 0.3  | 0.2  | 0.2  | 0.2  | 0.2  | 0.4  | 0.8  | 0.6  | 0.9  | 1.3  | 1.4  |
| EUR | 0.0  | 0.0  | 0.0  | 0.0  | 0.0  | 0.0  | 0.0  | 0.0  | 0.0  | 0.0  | 0.0  |
| IND | 0.9  | 0.9  | 0.9  | 1.0  | 1.0  | 1.0  | 1.0  | 1.0  | 1.1  | 1.1  | 1.2  |
| JPN | 0.0  | 0.0  | 0.0  | 0.0  | 0.0  | 0.0  | 0.0  | 0.0  | 0.0  | 0.0  | 0.0  |
| LAM | 0.2  | 0.4  | 0.3  | 0.4  | 0.5  | 0.6  | 0.7  | 0.6  | 0.7  | 0.8  | 0.8  |
| MEA | 0.2  | 0.3  | 0.3  | 0.2  | 0.4  | 0.5  | 0.5  | 0.6  | 0.6  | 0.7  | 0.7  |
| NEU | 0.0  | 0.0  | 0.0  | 0.0  | 0.0  | 0.0  | 0.0  | 0.0  | 0.0  | 0.0  | 0.0  |
| OAS | 0.1  | 0.1  | 0.1  | 0.1  | 0.7  | 1.1  | 1.8  | 2.7  | 3.3  | 3.9  | 5.0  |
| REF | 0.0  | 0.0  | 0.0  | 0.0  | 0.0  | 0.0  | 0.0  | 0.0  | 0.0  | 0.0  | 0.1  |
| SSA | 2.4  | 2.6  | 3.3  | 3.5  | 4.2  | 4.9  | 5.8  | 7.1  | 9.3  | 12.0 | 15.0 |
| USA | 0.0  | 0.0  | 0.0  | 0.0  | 0.0  | 0.0  | 0.0  | 0.0  | 0.0  | 0.0  | 0.0  |

Table 22: MAgPIE m4p\_SSP1 — Demand—Agricultural Supply Chain Loss—Crops—Cereals—Tropical cereals (Mt DM/yr) [PART 1/2]

|     | 2050 | 2055 | 2060 | 2070 | 2080 | 2090 | 2100 |
|-----|------|------|------|------|------|------|------|
| GLO | 29.1 | 29.1 | 28.1 | 25.3 | 22.6 | 19.4 | 16.3 |
| CAZ | 0.0  | 0.0  | 0.0  | 0.0  | 0.0  | 0.0  | 0.0  |
| CHA | 1.5  | 1.3  | 0.5  | 0.4  | 0.4  | 0.3  | 0.3  |
| EUR | 0.0  | 0.0  | 0.0  | 0.0  | 0.0  | 0.0  | 0.0  |
| IND | 1.2  | 1.3  | 1.3  | 1.6  | 1.4  | 1.3  | 1.1  |
| JPN | 0.0  | 0.0  | 0.0  | 0.0  | 0.0  | 0.0  | 0.0  |
| LAM | 0.9  | 0.8  | 0.8  | 0.6  | 0.6  | 0.4  | 0.3  |
| MEA | 0.7  | 0.7  | 0.6  | 0.5  | 0.3  | 0.2  | 0.2  |
| NEU | 0.0  | 0.0  | 0.0  | 0.0  | 0.0  | 0.0  | 0.0  |
| OAS | 6.0  | 6.1  | 5.8  | 4.1  | 3.8  | 2.8  | 1.6  |
| REF | 0.1  | 0.1  | 0.1  | 0.1  | 0.1  | 0.1  | 0.1  |
| SSA | 18.6 | 18.9 | 19.0 | 18.0 | 16.0 | 14.2 | 12.7 |
| USA | 0.0  | 0.0  | 0.0  | 0.0  | 0.0  | 0.0  | 0.0  |

Table 23: MAgPIE m4p\_SSP1 — Demand—Agricultural Supply Chain Loss—Crops—Cereals—Tropical cereals (Mt DM/yr) [PART 2/2]

|     | 1965 | 1970 | 1975 | 1980 | 1985 | 1990 | 1995 | 2000 | 2005 | 2010 |
|-----|------|------|------|------|------|------|------|------|------|------|
| GLO | 3.26 | 4.12 | 3.99 | 3.89 | 4.40 | 4.45 | 4.25 | 4.49 | 5.05 | 5.39 |
| CAZ | 0.00 | 0.00 | 0.00 | 0.00 | 0.00 | 0.00 | 0.00 | 0.00 | 0.00 | 0.00 |
| CHA | 0.61 | 0.78 | 0.63 | 0.53 | 0.52 | 0.42 | 0.32 | 0.20 | 0.17 | 0.16 |
| EUR | 0.00 | 0.00 | 0.01 | 0.01 | 0.00 | 0.00 | 0.01 | 0.00 | 0.00 | 0.00 |
| IND | 0.72 | 1.02 | 0.99 | 1.01 | 0.93 | 1.15 | 0.92 | 0.89 | 0.89 | 0.97 |
| JPN | 0.00 | 0.00 | 0.00 | 0.00 | 0.00 | 0.00 | 0.00 | 0.00 | 0.00 | 0.00 |
| LAM | 0.07 | 0.17 | 0.27 | 0.30 | 0.42 | 0.31 | 0.27 | 0.39 | 0.32 | 0.37 |
| MEA | 0.25 | 0.27 | 0.27 | 0.25 | 0.23 | 0.26 | 0.20 | 0.23 | 0.30 | 0.25 |
| NEU | 0.00 | 0.01 | 0.00 | 0.00 | 0.00 | 0.00 | 0.00 | 0.00 | 0.00 | 0.00 |
| OAS | 0.05 | 0.06 | 0.06 | 0.05 | 0.07 | 0.06 | 0.06 | 0.07 | 0.07 | 0.08 |
| REF | 0.16 | 0.15 | 0.10 | 0.26 | 0.33 | 0.25 | 0.02 | 0.03 | 0.02 | 0.01 |
| SSA | 1.39 | 1.66 | 1.66 | 1.49 | 1.90 | 1.99 | 2.44 | 2.65 | 3.27 | 3.54 |
| USA | 0.01 | 0.01 | 0.00 | 0.01 | 0.01 | 0.01 | 0.01 | 0.01 | 0.01 | 0.01 |

Table 24: FAO — Demand—Agricultural Supply Chain Loss—Crops—Cereals—Tropical cereals (Mt DM/yr)

3.1.6 Oil crops

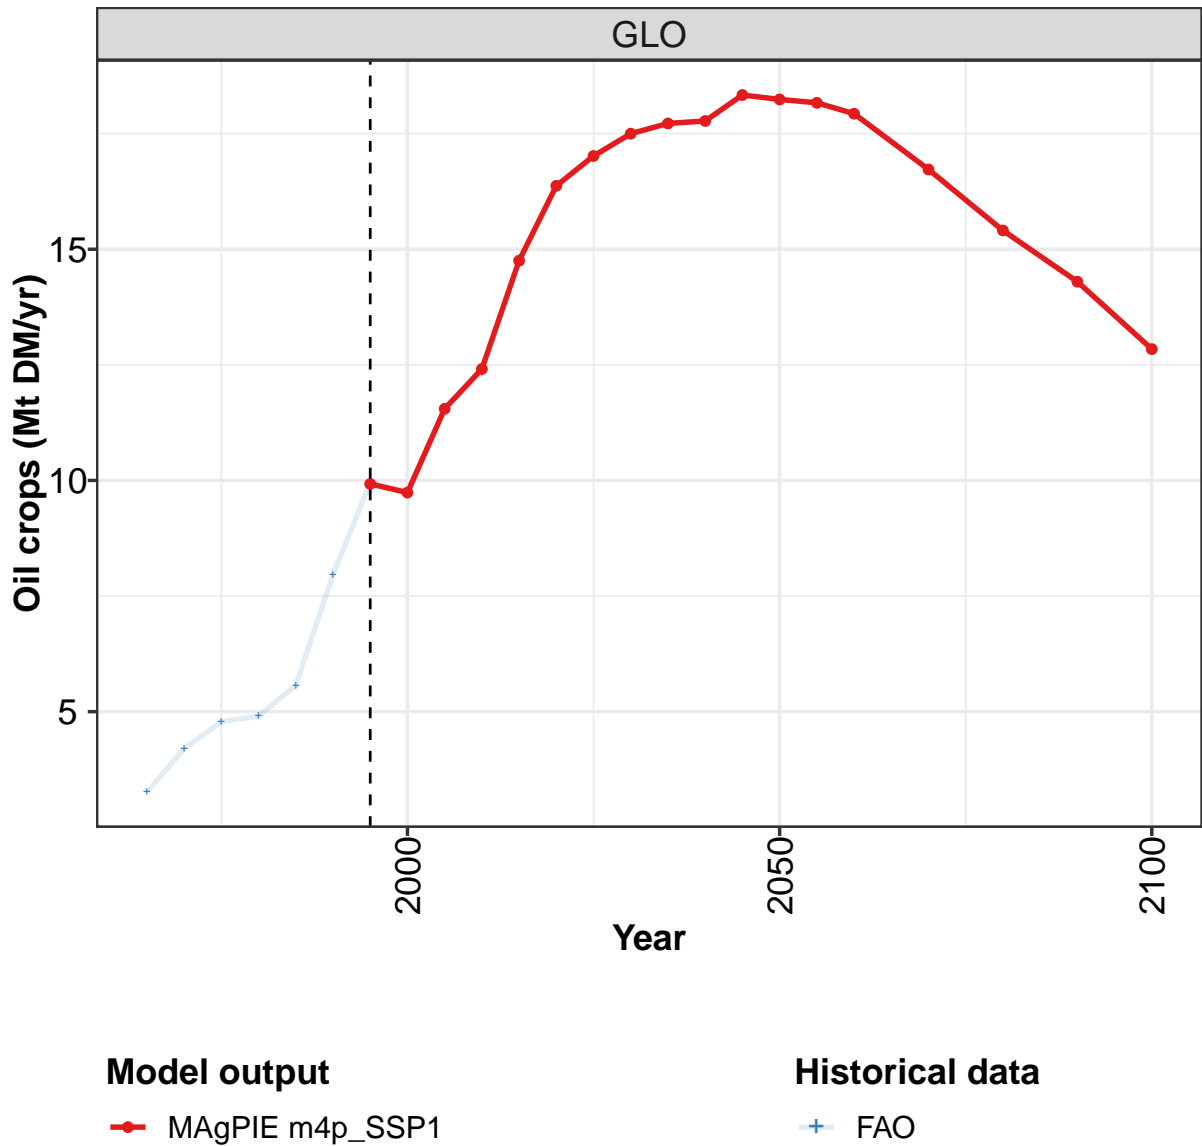

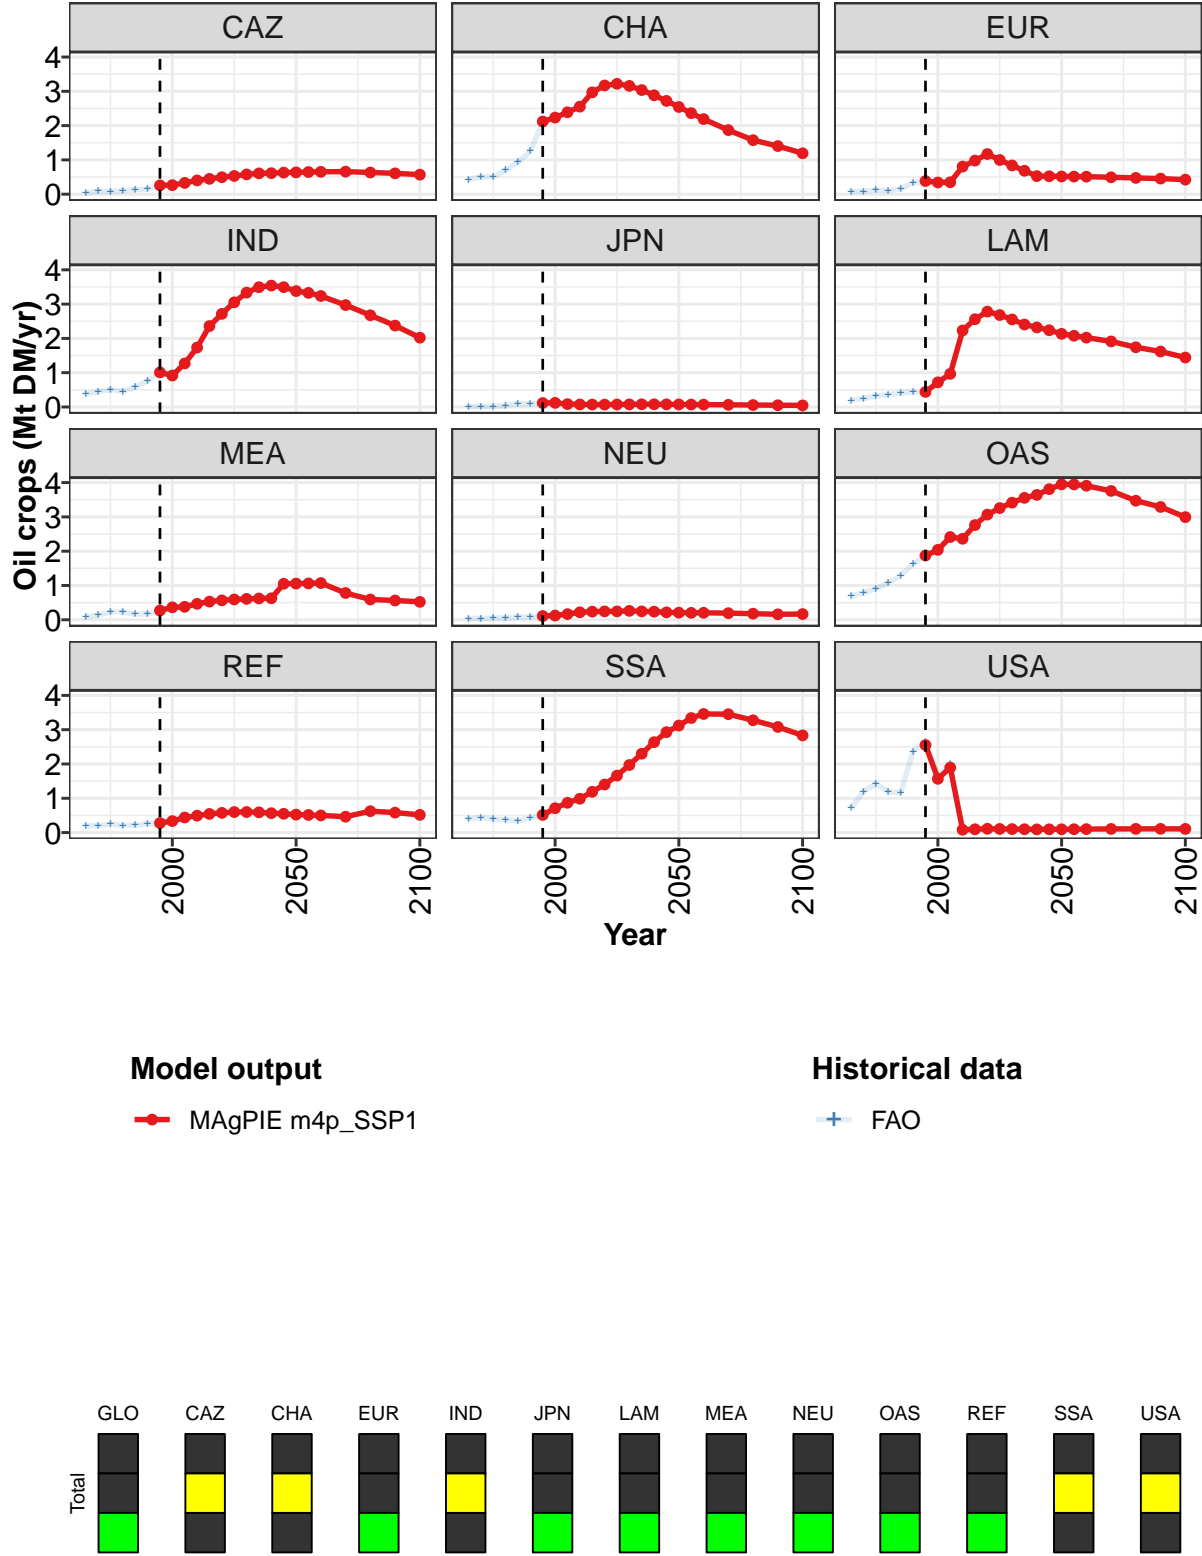

Figure 8: MAgPIE m4p\_SSP1 — Demand—Agricultural Supply Chain Loss—Crops—Oil crops (Mt DM/yr)

|     | 1995 | 2000 | 2005 | 2010 | 2015 | 2020 | 2025 | 2030 | 2035 | 2040 | 2045 |
|-----|------|------|------|------|------|------|------|------|------|------|------|
| GLO | 9.9  | 9.7  | 11.5 | 12.4 | 14.8 | 16.4 | 17.0 | 17.5 | 17.7 | 17.8 | 18.3 |
| CAZ | 0.3  | 0.3  | 0.3  | 0.4  | 0.4  | 0.5  | 0.5  | 0.6  | 0.6  | 0.6  | 0.6  |
| CHA | 2.1  | 2.2  | 2.4  | 2.6  | 3.0  | 3.2  | 3.2  | 3.2  | 3.0  | 2.9  | 2.7  |
| EUR | 0.4  | 0.3  | 0.3  | 0.8  | 1.0  | 1.2  | 1.0  | 0.8  | 0.7  | 0.5  | 0.5  |
| IND | 1.0  | 0.9  | 1.3  | 1.7  | 2.4  | 2.7  | 3.1  | 3.3  | 3.5  | 3.5  | 3.5  |
| JPN | 0.1  | 0.1  | 0.1  | 0.1  | 0.1  | 0.1  | 0.1  | 0.1  | 0.1  | 0.1  | 0.1  |
| LAM | 0.4  | 0.7  | 1.0  | 2.2  | 2.6  | 2.8  | 2.7  | 2.6  | 2.4  | 2.3  | 2.2  |
| MEA | 0.3  | 0.4  | 0.4  | 0.5  | 0.5  | 0.6  | 0.6  | 0.6  | 0.6  | 0.6  | 1.1  |
| NEU | 0.1  | 0.1  | 0.2  | 0.2  | 0.2  | 0.2  | 0.2  | 0.3  | 0.2  | 0.2  | 0.2  |
| OAS | 1.9  | 2.0  | 2.4  | 2.4  | 2.8  | 3.1  | 3.3  | 3.4  | 3.6  | 3.6  | 3.8  |
| REF | 0.3  | 0.3  | 0.4  | 0.5  | 0.5  | 0.6  | 0.6  | 0.6  | 0.6  | 0.6  | 0.5  |
| SSA | 0.5  | 0.7  | 0.9  | 1.0  | 1.2  | 1.4  | 1.7  | 2.0  | 2.3  | 2.6  | 2.9  |
| USA | 2.6  | 1.6  | 1.9  | 0.1  | 0.1  | 0.1  | 0.1  | 0.1  | 0.1  | 0.1  | 0.1  |

Table 25: MAgPIE m4p\_SSP1 — Demand—Agricultural Supply Chain Loss—Crops—Oil crops (Mt DM/yr)  
[PART 1/2]

|     | 2050 | 2055 | 2060 | 2070 | 2080 | 2090 | 2100 |
|-----|------|------|------|------|------|------|------|
| GLO | 18.2 | 18.2 | 17.9 | 16.7 | 15.4 | 14.3 | 12.8 |
| CAZ | 0.6  | 0.6  | 0.7  | 0.7  | 0.6  | 0.6  | 0.6  |
| CHA | 2.5  | 2.4  | 2.2  | 1.9  | 1.6  | 1.4  | 1.2  |
| EUR | 0.5  | 0.5  | 0.5  | 0.5  | 0.5  | 0.5  | 0.4  |
| IND | 3.4  | 3.3  | 3.2  | 3.0  | 2.7  | 2.4  | 2.0  |
| JPN | 0.1  | 0.1  | 0.1  | 0.1  | 0.1  | 0.1  | 0.0  |
| LAM | 2.1  | 2.1  | 2.0  | 1.9  | 1.7  | 1.6  | 1.4  |
| MEA | 1.1  | 1.1  | 1.1  | 0.8  | 0.6  | 0.6  | 0.5  |
| NEU | 0.2  | 0.2  | 0.2  | 0.2  | 0.2  | 0.2  | 0.2  |
| OAS | 3.9  | 3.9  | 3.9  | 3.8  | 3.5  | 3.3  | 3.0  |
| REF | 0.5  | 0.5  | 0.5  | 0.5  | 0.6  | 0.6  | 0.5  |
| SSA | 3.1  | 3.3  | 3.5  | 3.5  | 3.3  | 3.1  | 2.8  |
| USA | 0.1  | 0.1  | 0.1  | 0.1  | 0.1  | 0.1  | 0.1  |

Table 26: MAgPIE m4p\_SSP1 — Demand—Agricultural Supply Chain Loss—Crops—Oil crops (Mt DM/yr)  
[PART 2/2]

|     | 1965 | 1970 | 1975 | 1980 | 1985 | 1990 | 1995 | 2000 | 2005 | 2010 |
|-----|------|------|------|------|------|------|------|------|------|------|
| GLO | 3.3  | 4.2  | 4.8  | 4.9  | 5.6  | 8.0  | 10.0 | 9.7  | 11.6 | 12.3 |
| CAZ | 0.0  | 0.1  | 0.1  | 0.1  | 0.1  | 0.1  | 0.2  | 0.3  | 0.3  | 0.4  |
| CHA | 0.4  | 0.5  | 0.5  | 0.7  | 0.9  | 1.3  | 2.1  | 2.2  | 2.4  | 2.6  |
| EUR | 0.1  | 0.1  | 0.1  | 0.1  | 0.2  | 0.3  | 0.4  | 0.3  | 0.3  | 0.8  |
| IND | 0.4  | 0.5  | 0.5  | 0.5  | 0.6  | 0.8  | 1.0  | 0.9  | 1.3  | 1.7  |
| JPN | 0.0  | 0.0  | 0.0  | 0.0  | 0.1  | 0.1  | 0.1  | 0.1  | 0.1  | 0.1  |
| LAM | 0.2  | 0.3  | 0.3  | 0.4  | 0.4  | 0.4  | 0.4  | 0.7  | 1.0  | 2.1  |
| MEA | 0.1  | 0.1  | 0.2  | 0.2  | 0.2  | 0.2  | 0.3  | 0.4  | 0.4  | 0.5  |
| NEU | 0.0  | 0.0  | 0.0  | 0.1  | 0.1  | 0.1  | 0.1  | 0.1  | 0.2  | 0.2  |
| OAS | 0.7  | 0.8  | 0.9  | 1.1  | 1.3  | 1.6  | 1.9  | 2.0  | 2.4  | 2.4  |
| REF | 0.2  | 0.2  | 0.2  | 0.2  | 0.2  | 0.3  | 0.3  | 0.3  | 0.4  | 0.5  |
| SSA | 0.4  | 0.4  | 0.4  | 0.4  | 0.3  | 0.4  | 0.5  | 0.7  | 0.9  | 1.0  |
| USA | 0.7  | 1.2  | 1.4  | 1.2  | 1.2  | 2.4  | 2.7  | 1.7  | 2.0  | 0.1  |

Table 27: FAO — Demand—Agricultural Supply Chain Loss—Crops—Oil crops (Mt DM/yr)

3.1.1.7
Oil crops—Cotton seed

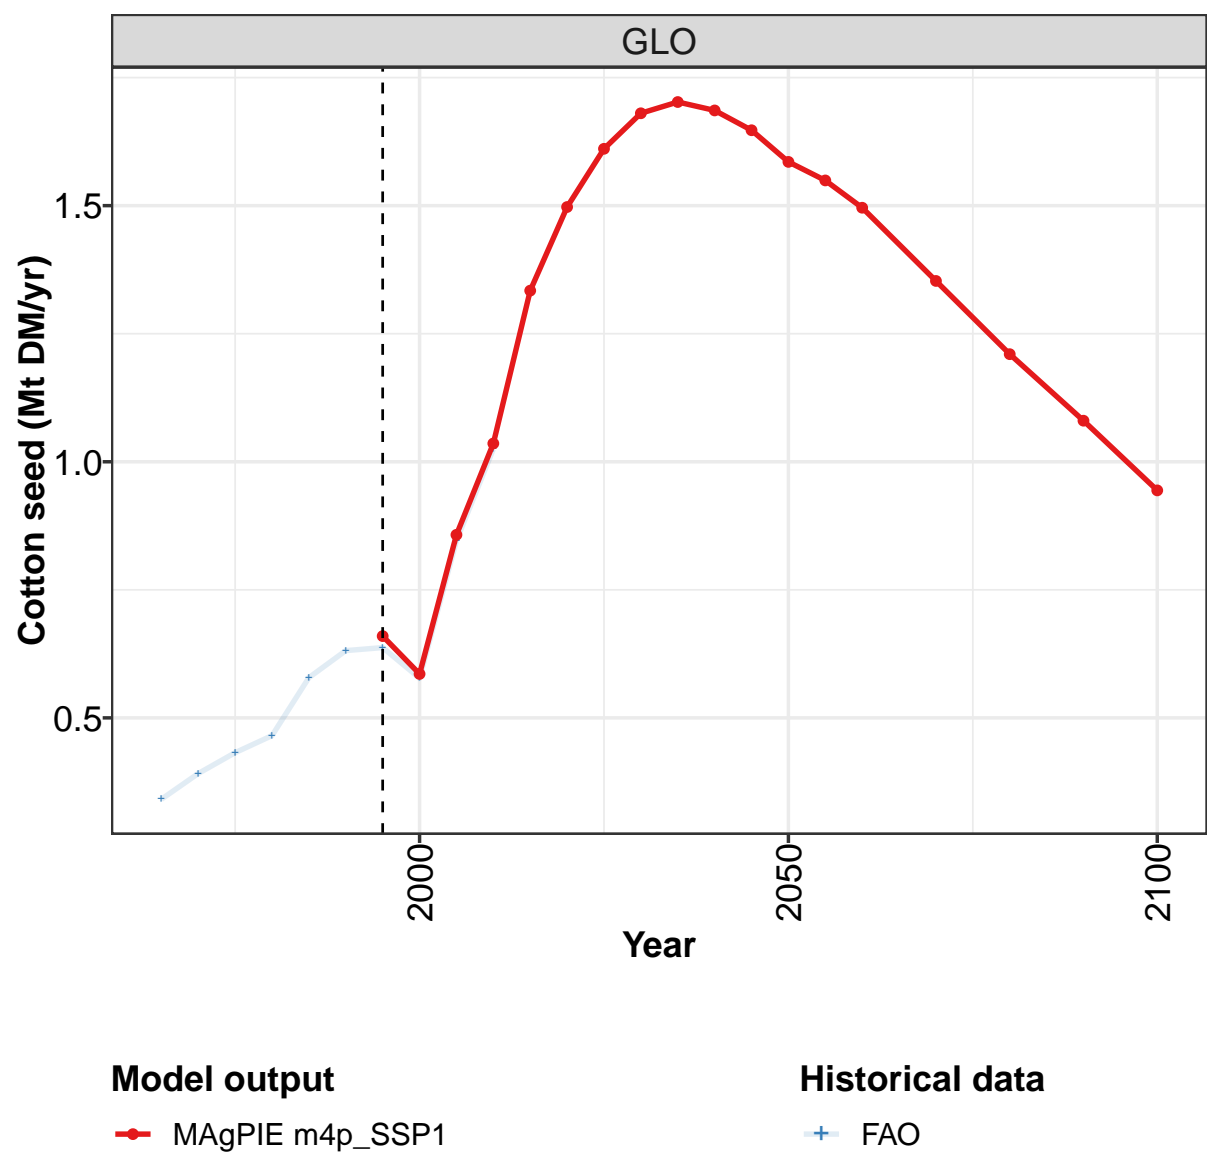

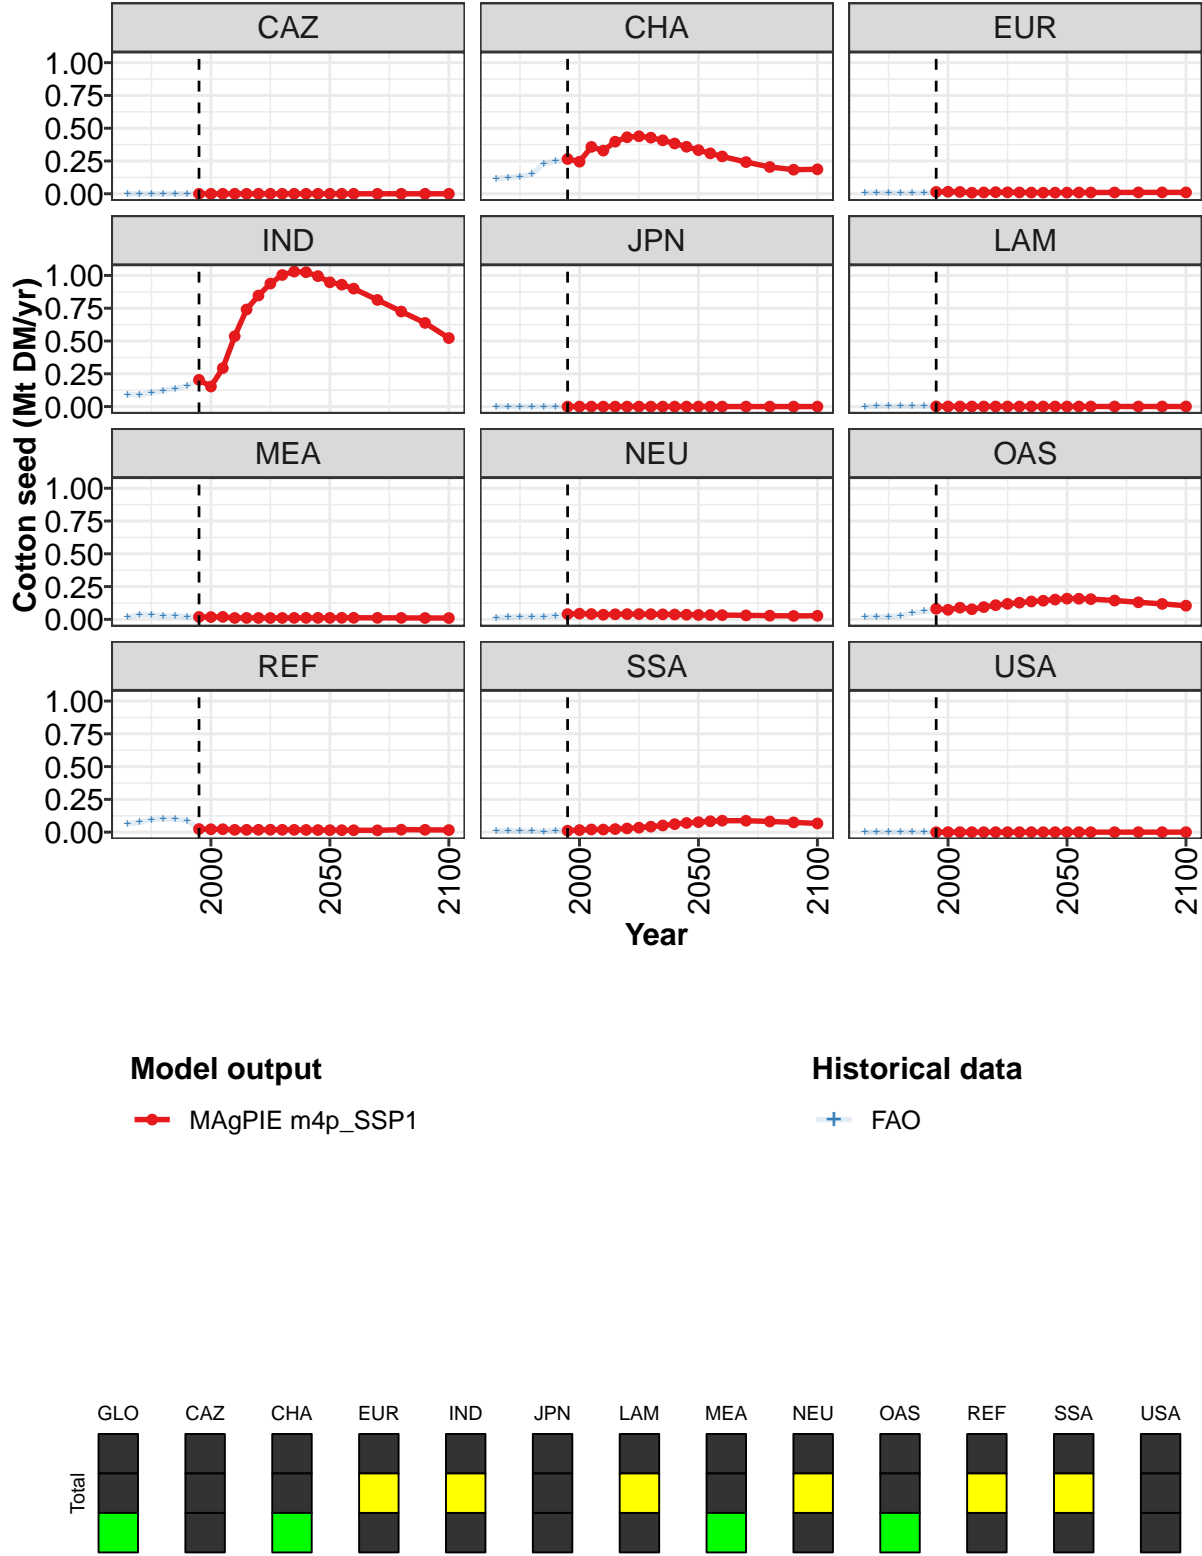

Figure 9: MAgPIE m4p\_SSP1 — Demand—Agricultural Supply Chain Loss—Crops—Oil crops—Cotton seed (Mt DM/yr)



|     | 1995 | 2000 | 2005 | 2010 | 2015 | 2020 | 2025 | 2030 | 2035 | 2040 | 2045 |
|-----|------|------|------|------|------|------|------|------|------|------|------|
| GLO | 0.66 | 0.59 | 0.86 | 1.04 | 1.33 | 1.50 | 1.61 | 1.68 | 1.70 | 1.69 | 1.65 |
| CAZ | 0.00 | 0.00 | 0.00 | 0.00 | 0.00 | 0.00 | 0.00 | 0.00 | 0.00 | 0.00 | 0.00 |
| CHA | 0.27 | 0.24 | 0.36 | 0.33 | 0.40 | 0.43 | 0.44 | 0.43 | 0.41 | 0.38 | 0.36 |
| EUR | 0.01 | 0.02 | 0.01 | 0.01 | 0.01 | 0.01 | 0.01 | 0.01 | 0.01 | 0.01 | 0.01 |
| IND | 0.20 | 0.15 | 0.29 | 0.54 | 0.74 | 0.85 | 0.94 | 1.00 | 1.03 | 1.02 | 1.00 |
| JPN | 0.00 | 0.00 | 0.00 | 0.00 | 0.00 | 0.00 | 0.00 | 0.00 | 0.00 | 0.00 | 0.00 |
| LAM | 0.00 | 0.00 | 0.00 | 0.00 | 0.00 | 0.00 | 0.00 | 0.00 | 0.00 | 0.00 | 0.00 |
| MEA | 0.02 | 0.02 | 0.02 | 0.01 | 0.01 | 0.01 | 0.01 | 0.01 | 0.01 | 0.01 | 0.01 |
| NEU | 0.04 | 0.04 | 0.04 | 0.04 | 0.04 | 0.04 | 0.04 | 0.04 | 0.04 | 0.04 | 0.04 |
| OAS | 0.08 | 0.07 | 0.09 | 0.08 | 0.09 | 0.11 | 0.12 | 0.13 | 0.14 | 0.14 | 0.15 |
| REF | 0.02 | 0.02 | 0.02 | 0.02 | 0.02 | 0.02 | 0.02 | 0.02 | 0.02 | 0.02 | 0.02 |
| SSA | 0.01 | 0.02 | 0.02 | 0.02 | 0.02 | 0.03 | 0.03 | 0.04 | 0.05 | 0.06 | 0.07 |
| USA | 0.00 | 0.00 | 0.00 | 0.00 | 0.00 | 0.00 | 0.00 | 0.00 | 0.00 | 0.00 | 0.00 |

Table 28: MAgPIE m4p\_SSP1 — Demand—Agricultural Supply Chain Loss—Crops—Oil crops—Cotton seed (Mt DM/yr) [PART 1/2]

|     | 2050 | 2055 | 2060 | 2070 | 2080 | 2090 | 2100 |
|-----|------|------|------|------|------|------|------|
| GLO | 1.59 | 1.55 | 1.50 | 1.35 | 1.21 | 1.08 | 0.94 |
| CAZ | 0.00 | 0.00 | 0.00 | 0.00 | 0.00 | 0.00 | 0.00 |
| CHA | 0.33 | 0.31 | 0.28 | 0.24 | 0.20 | 0.18 | 0.19 |
| EUR | 0.01 | 0.01 | 0.01 | 0.01 | 0.01 | 0.01 | 0.01 |
| IND | 0.95 | 0.93 | 0.90 | 0.81 | 0.72 | 0.64 | 0.52 |
| JPN | 0.00 | 0.00 | 0.00 | 0.00 | 0.00 | 0.00 | 0.00 |
| LAM | 0.00 | 0.00 | 0.00 | 0.00 | 0.00 | 0.00 | 0.00 |
| MEA | 0.01 | 0.01 | 0.01 | 0.01 | 0.01 | 0.01 | 0.01 |
| NEU | 0.03 | 0.03 | 0.03 | 0.03 | 0.03 | 0.03 | 0.03 |
| OAS | 0.16 | 0.16 | 0.15 | 0.14 | 0.13 | 0.12 | 0.10 |
| REF | 0.02 | 0.02 | 0.01 | 0.01 | 0.02 | 0.02 | 0.02 |
| SSA | 0.08 | 0.08 | 0.09 | 0.09 | 0.08 | 0.07 | 0.07 |
| USA | 0.00 | 0.00 | 0.00 | 0.00 | 0.00 | 0.00 | 0.00 |

Table 29: MAgPIE m4p\_SSP1 — Demand—Agricultural Supply Chain Loss—Crops—Oil crops—Cotton seed (Mt DM/yr) [PART 2/2]

|     | 1965 | 1970 | 1975 | 1980 | 1985 | 1990 | 1995 | 2000 | 2005 | 2010 |
|-----|------|------|------|------|------|------|------|------|------|------|
| GLO | 0.34 | 0.39 | 0.43 | 0.47 | 0.58 | 0.63 | 0.64 | 0.58 | 0.85 | 1.02 |
| CAZ | 0.00 | 0.00 | 0.00 | 0.00 | 0.00 | 0.00 | 0.00 | 0.00 | 0.00 | 0.00 |
| CHA | 0.12 | 0.13 | 0.13 | 0.15 | 0.23 | 0.25 | 0.26 | 0.24 | 0.36 | 0.33 |
| EUR | 0.01 | 0.01 | 0.01 | 0.01 | 0.01 | 0.01 | 0.01 | 0.02 | 0.01 | 0.01 |
| IND | 0.09 | 0.09 | 0.11 | 0.12 | 0.14 | 0.16 | 0.20 | 0.15 | 0.29 | 0.53 |
| JPN | 0.00 | 0.00 | 0.00 | 0.00 | 0.00 | 0.00 | 0.00 | 0.00 | 0.00 | 0.00 |
| LAM | 0.00 | 0.00 | 0.00 | 0.00 | 0.00 | 0.00 | 0.00 | 0.00 | 0.00 | 0.00 |
| MEA | 0.02 | 0.04 | 0.04 | 0.03 | 0.03 | 0.02 | 0.02 | 0.02 | 0.02 | 0.01 |
| NEU | 0.01 | 0.02 | 0.02 | 0.02 | 0.02 | 0.03 | 0.04 | 0.04 | 0.04 | 0.04 |
| OAS | 0.02 | 0.02 | 0.02 | 0.03 | 0.05 | 0.06 | 0.07 | 0.07 | 0.09 | 0.08 |
| REF | 0.06 | 0.08 | 0.10 | 0.10 | 0.10 | 0.09 | 0.02 | 0.02 | 0.02 | 0.02 |
| SSA | 0.01 | 0.01 | 0.01 | 0.01 | 0.01 | 0.01 | 0.01 | 0.02 | 0.02 | 0.02 |
| USA | 0.00 | 0.00 | 0.00 | 0.00 | 0.00 | 0.00 | 0.00 | 0.00 | 0.00 | 0.00 |

Table 30: FAO — Demand—Agricultural Supply Chain Loss—Crops—Oil crops—Cotton seed (Mt DM/yr)

3.1.8
Oil crops—Groundnuts

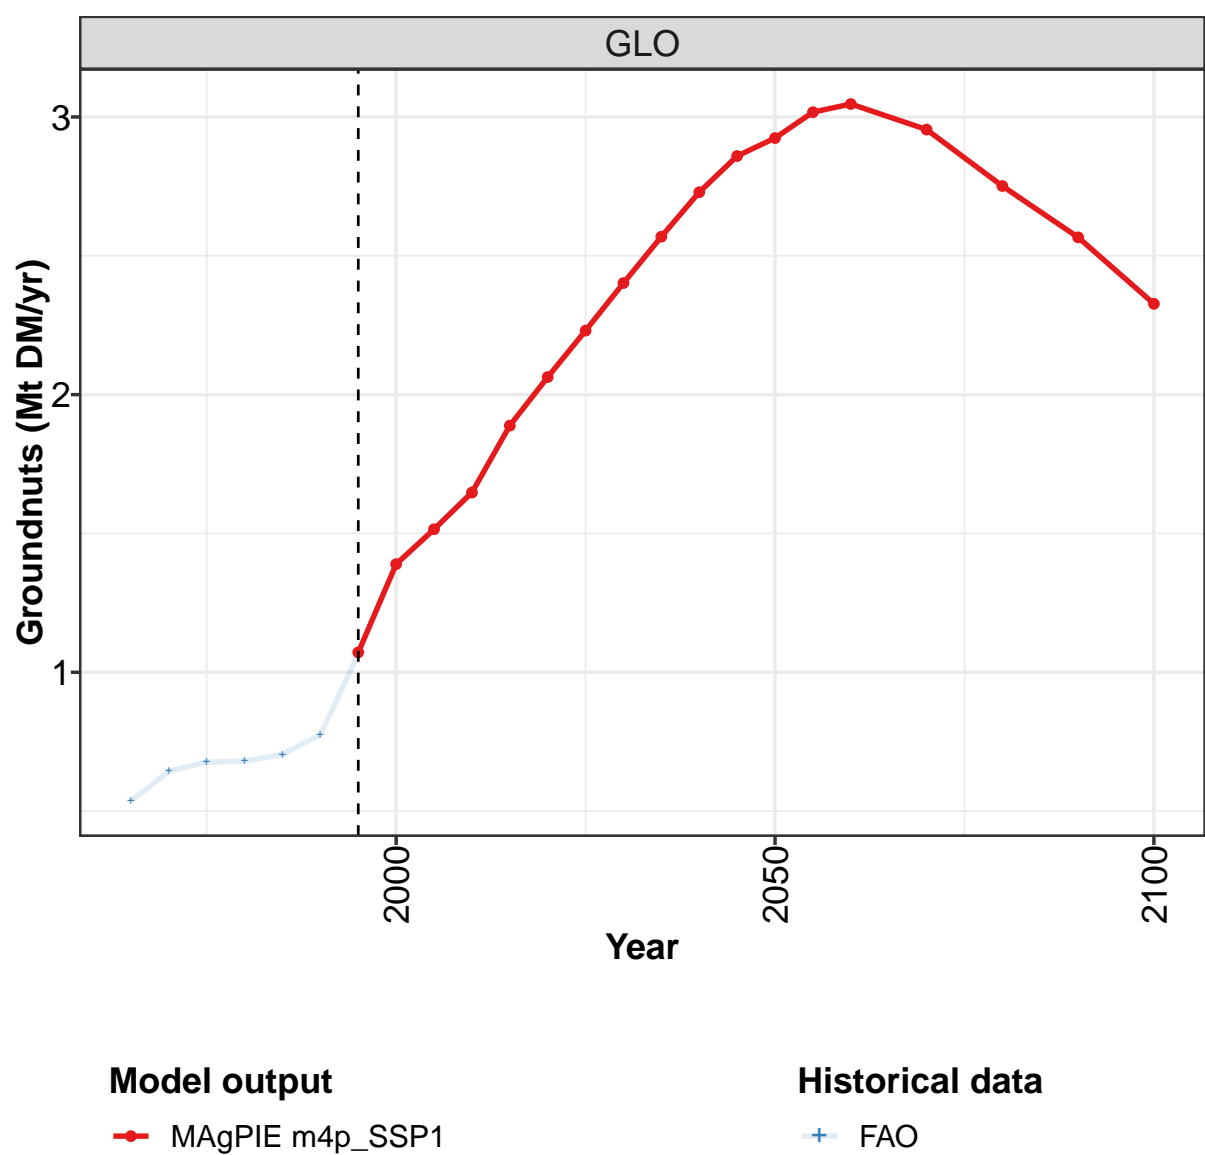

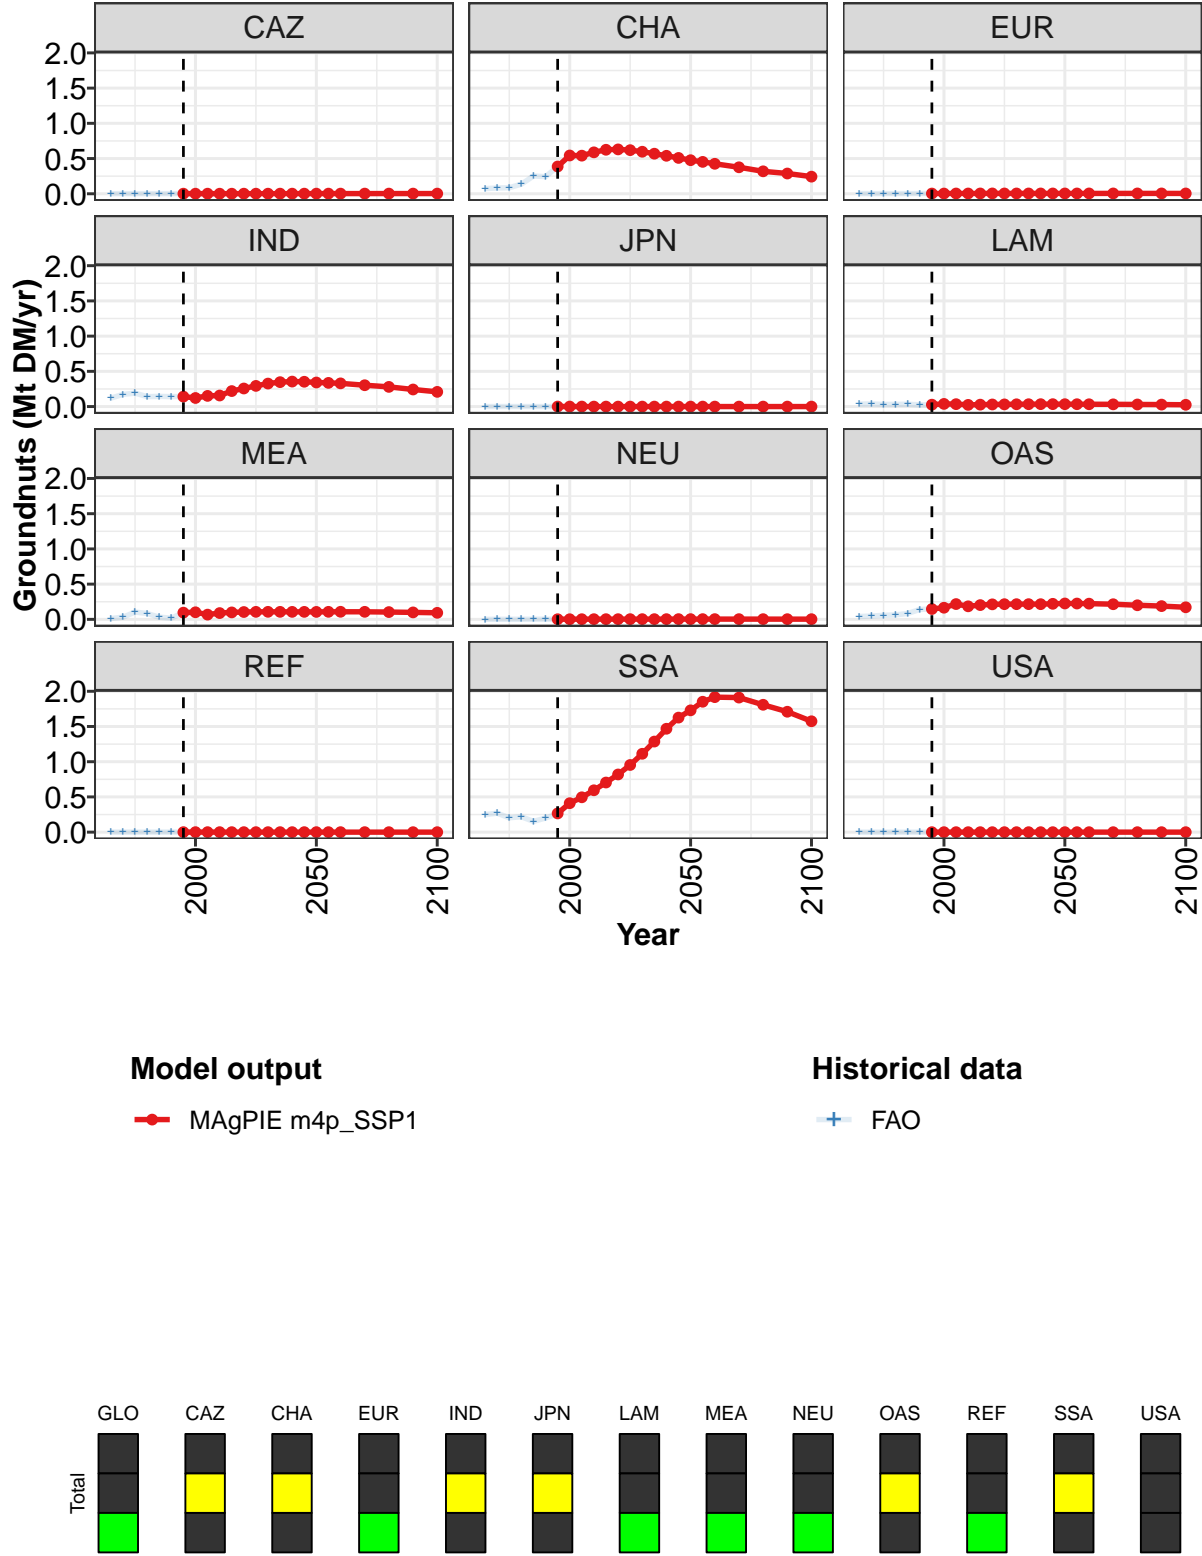

Figure 10: MAgPIE m4p\_SSP1 — Demand—Agricultural Supply Chain Loss—Crops—Oil crops—Groundnuts (Mt DM/yr)

|     | 1995 | 2000 | 2005 | 2010 | 2015 | 2020 | 2025 | 2030 | 2035 | 2040 | 2045 |
|-----|------|------|------|------|------|------|------|------|------|------|------|
| GLO | 1.07 | 1.39 | 1.52 | 1.65 | 1.89 | 2.06 | 2.23 | 2.40 | 2.57 | 2.73 | 2.86 |
| CAZ | 0.00 | 0.00 | 0.00 | 0.00 | 0.00 | 0.00 | 0.00 | 0.00 | 0.00 | 0.00 | 0.00 |
| CHA | 0.39 | 0.54 | 0.54 | 0.59 | 0.62 | 0.63 | 0.62 | 0.60 | 0.57 | 0.54 | 0.51 |
| EUR | 0.00 | 0.00 | 0.00 | 0.00 | 0.00 | 0.00 | 0.00 | 0.00 | 0.00 | 0.00 | 0.00 |
| IND | 0.14 | 0.12 | 0.15 | 0.16 | 0.22 | 0.26 | 0.29 | 0.33 | 0.35 | 0.35 | 0.35 |
| JPN | 0.00 | 0.00 | 0.00 | 0.00 | 0.00 | 0.00 | 0.00 | 0.00 | 0.00 | 0.00 | 0.00 |
| LAM | 0.03 | 0.04 | 0.03 | 0.02 | 0.03 | 0.03 | 0.03 | 0.03 | 0.03 | 0.03 | 0.03 |
| MEA | 0.10 | 0.10 | 0.07 | 0.09 | 0.10 | 0.10 | 0.11 | 0.11 | 0.11 | 0.11 | 0.11 |
| NEU | 0.00 | 0.00 | 0.00 | 0.00 | 0.00 | 0.00 | 0.00 | 0.00 | 0.00 | 0.00 | 0.00 |
| OAS | 0.15 | 0.17 | 0.22 | 0.19 | 0.20 | 0.21 | 0.22 | 0.22 | 0.22 | 0.22 | 0.22 |
| REF | 0.00 | 0.00 | 0.00 | 0.00 | 0.00 | 0.00 | 0.00 | 0.00 | 0.00 | 0.00 | 0.00 |
| SSA | 0.27 | 0.41 | 0.49 | 0.59 | 0.70 | 0.82 | 0.95 | 1.11 | 1.29 | 1.47 | 1.63 |
| USA | 0.00 | 0.00 | 0.00 | 0.00 | 0.00 | 0.00 | 0.00 | 0.00 | 0.00 | 0.00 | 0.00 |

Table 31: MAgPIE m4p\_SSP1 — Demand—Agricultural Supply Chain Loss—Crops—Oil crops—Groundnuts (Mt DM/yr) [PART 1/2]

|     | 2050 | 2055 | 2060 | 2070 | 2080 | 2090 | 2100 |
|-----|------|------|------|------|------|------|------|
| GLO | 2.92 | 3.02 | 3.05 | 2.95 | 2.75 | 2.57 | 2.33 |
| CAZ | 0.00 | 0.00 | 0.00 | 0.00 | 0.00 | 0.00 | 0.00 |
| CHA | 0.48 | 0.45 | 0.43 | 0.38 | 0.32 | 0.29 | 0.24 |
| EUR | 0.00 | 0.00 | 0.00 | 0.00 | 0.00 | 0.00 | 0.00 |
| IND | 0.34 | 0.34 | 0.33 | 0.30 | 0.28 | 0.24 | 0.21 |
| JPN | 0.00 | 0.00 | 0.00 | 0.00 | 0.00 | 0.00 | 0.00 |
| LAM | 0.03 | 0.03 | 0.03 | 0.03 | 0.03 | 0.03 | 0.03 |
| MEA | 0.11 | 0.11 | 0.11 | 0.11 | 0.10 | 0.10 | 0.09 |
| NEU | 0.00 | 0.00 | 0.00 | 0.00 | 0.00 | 0.00 | 0.00 |
| OAS | 0.23 | 0.22 | 0.22 | 0.22 | 0.20 | 0.19 | 0.17 |
| REF | 0.00 | 0.00 | 0.00 | 0.00 | 0.00 | 0.00 | 0.00 |
| SSA | 1.73 | 1.85 | 1.92 | 1.91 | 1.81 | 1.71 | 1.57 |
| USA | 0.00 | 0.00 | 0.00 | 0.00 | 0.00 | 0.00 | 0.00 |

Table 32: MAgPIE m4p\_SSP1 — Demand—Agricultural Supply Chain Loss—Crops—Oil crops—Groundnuts (Mt DM/yr) [PART 2/2]

|     | 1965 | 1970 | 1975 | 1980 | 1985 | 1990 | 1995 | 2000 | 2005 | 2010 |
|-----|------|------|------|------|------|------|------|------|------|------|
| GLO | 0.54 | 0.64 | 0.68 | 0.68 | 0.70 | 0.78 | 1.07 | 1.39 | 1.51 | 1.66 |
| CAZ | 0.00 | 0.00 | 0.00 | 0.00 | 0.00 | 0.00 | 0.00 | 0.00 | 0.00 | 0.00 |
| CHA | 0.07 | 0.08 | 0.09 | 0.14 | 0.25 | 0.24 | 0.39 | 0.54 | 0.54 | 0.59 |
| EUR | 0.00 | 0.00 | 0.00 | 0.00 | 0.00 | 0.00 | 0.00 | 0.00 | 0.00 | 0.00 |
| IND | 0.12 | 0.17 | 0.19 | 0.14 | 0.14 | 0.14 | 0.14 | 0.12 | 0.15 | 0.16 |
| JPN | 0.00 | 0.00 | 0.00 | 0.00 | 0.00 | 0.00 | 0.00 | 0.00 | 0.00 | 0.00 |
| LAM | 0.04 | 0.04 | 0.03 | 0.03 | 0.03 | 0.03 | 0.03 | 0.04 | 0.03 | 0.04 |
| MEA | 0.01 | 0.03 | 0.10 | 0.08 | 0.03 | 0.02 | 0.09 | 0.10 | 0.07 | 0.09 |
| NEU | 0.00 | 0.00 | 0.00 | 0.00 | 0.00 | 0.00 | 0.00 | 0.00 | 0.00 | 0.00 |
| OAS | 0.04 | 0.05 | 0.06 | 0.06 | 0.08 | 0.14 | 0.15 | 0.17 | 0.22 | 0.19 |
| REF | 0.00 | 0.00 | 0.00 | 0.00 | 0.00 | 0.00 | 0.00 | 0.00 | 0.00 | 0.00 |
| SSA | 0.25 | 0.27 | 0.20 | 0.22 | 0.15 | 0.20 | 0.26 | 0.41 | 0.49 | 0.59 |
| USA | 0.00 | 0.00 | 0.00 | 0.00 | 0.00 | 0.00 | 0.00 | 0.00 | 0.00 | 0.00 |

Table 33: FAO — Demand—Agricultural Supply Chain Loss—Crops—Oil crops—Groundnuts (Mt DM/yr)

3.1.9
Oil crops—Other oil crops (incl rapeseed)

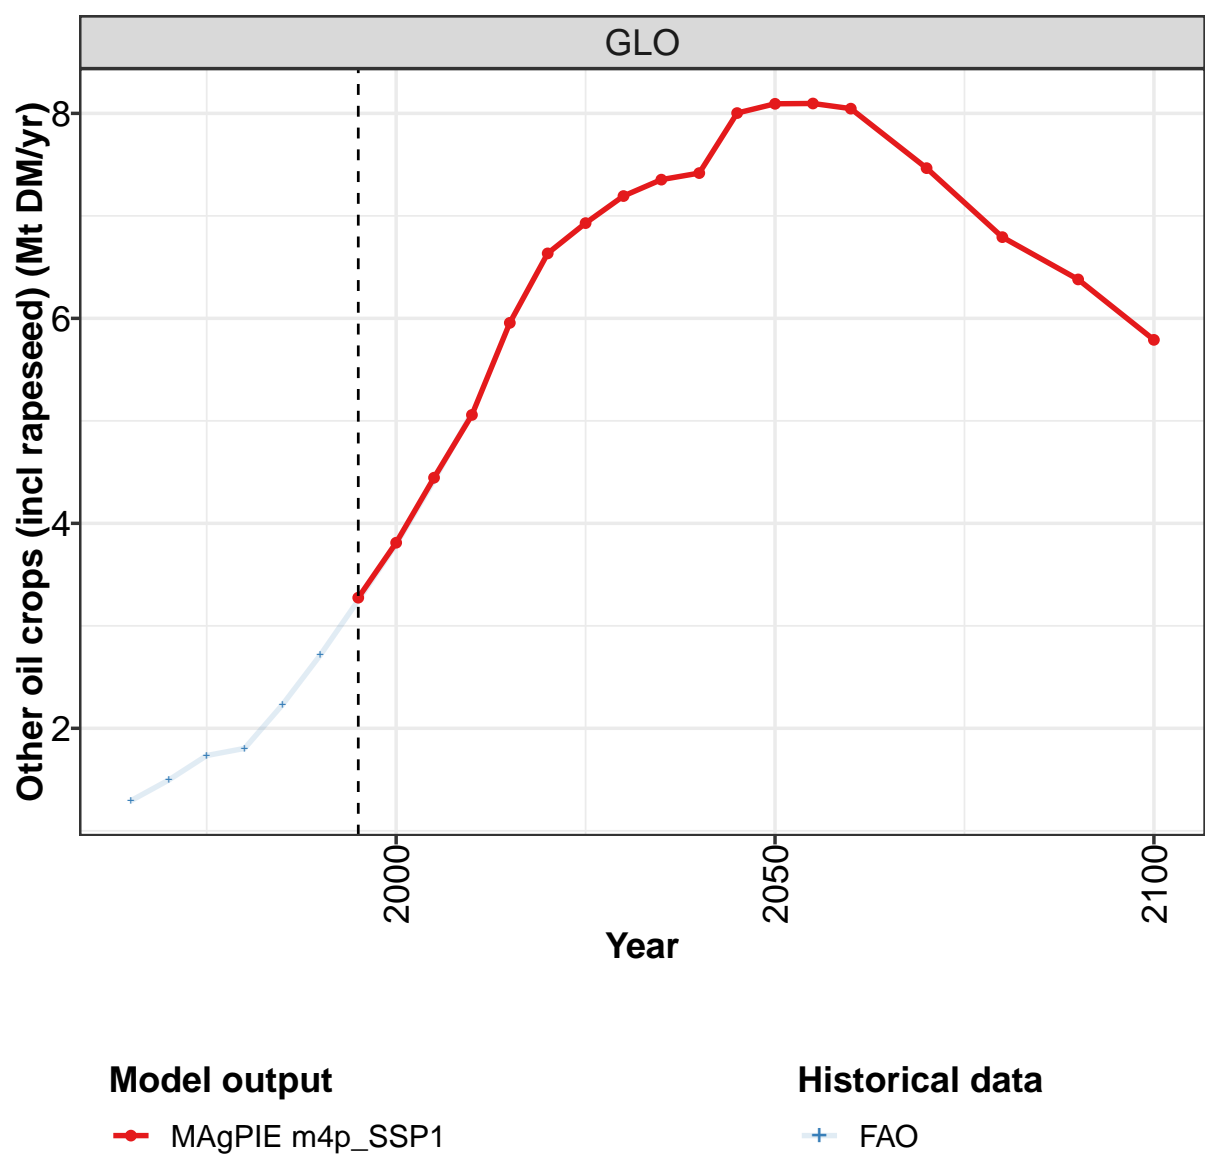

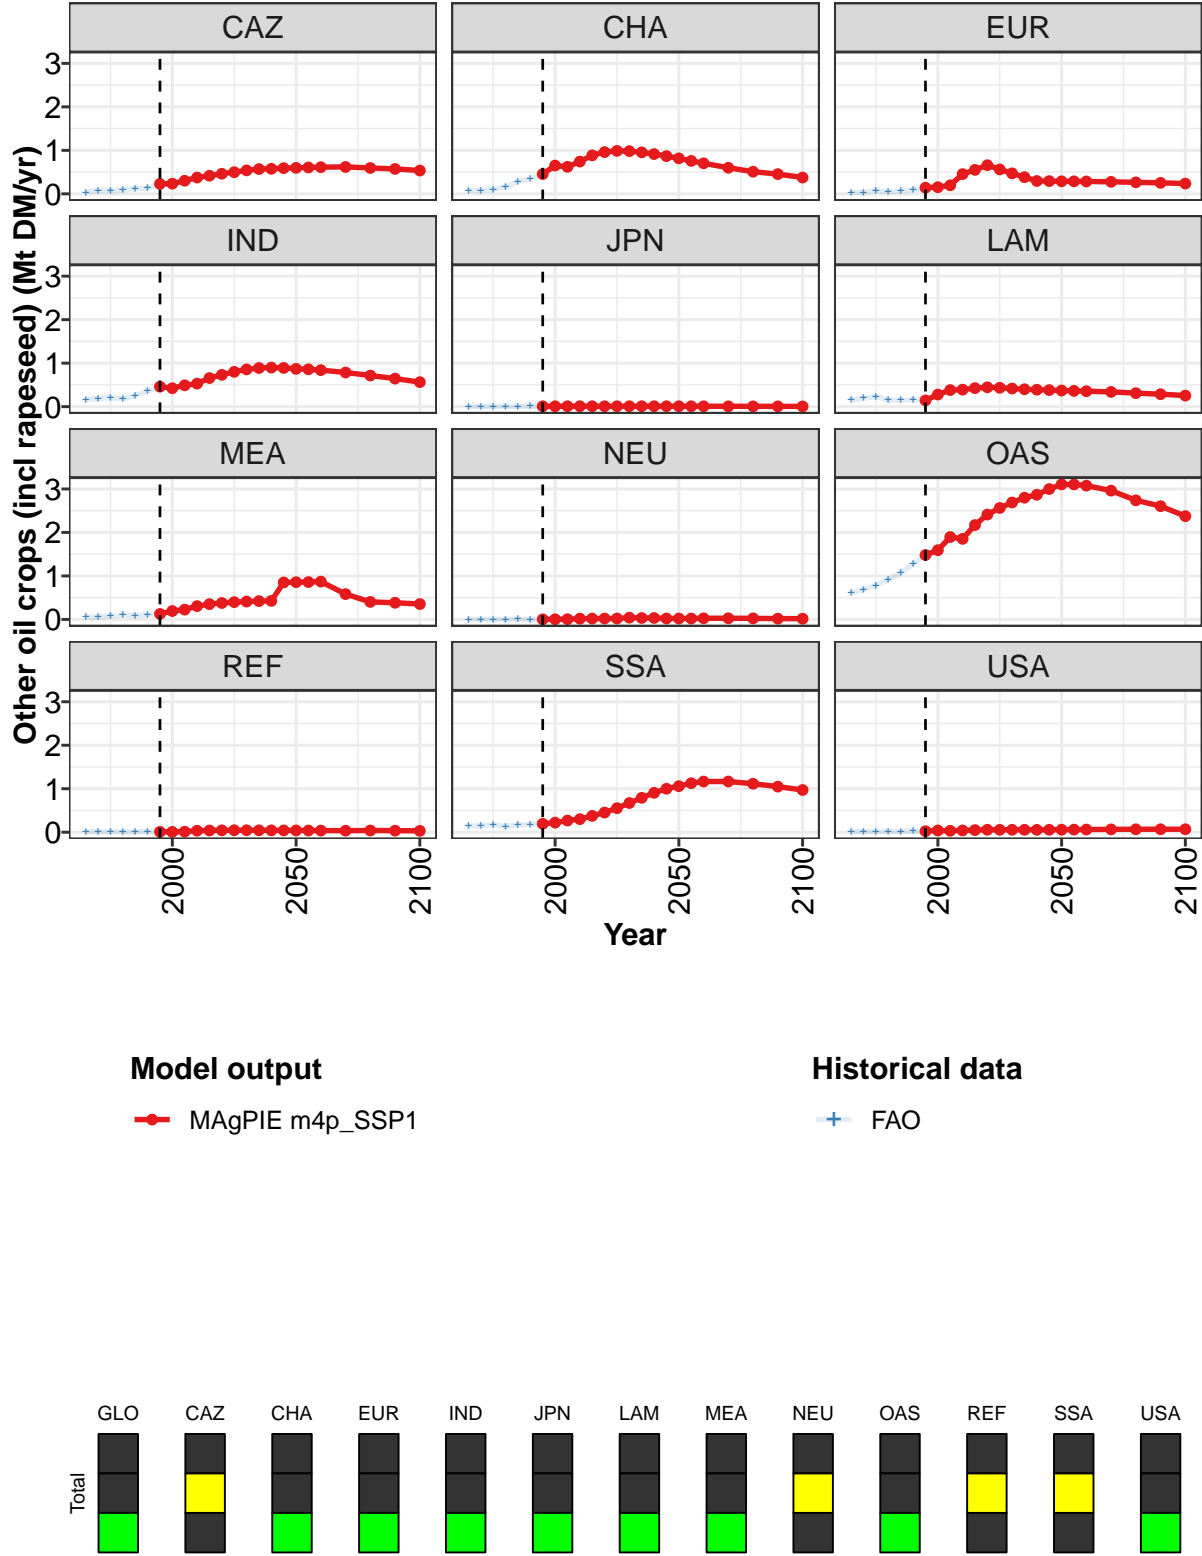

Figure 11: MAgPIE m4p\_SSP1 — Demand—Agricultural Supply Chain Loss—Crops—Oil crops—Other oil crops (incl rapeseed) (Mt DM/yr)

|     | 1995 | 2000 | 2005 | 2010 | 2015 | 2020 | 2025 | 2030 | 2035 | 2040 | 2045 |
|-----|------|------|------|------|------|------|------|------|------|------|------|
| GLO | 3.27 | 3.81 | 4.45 | 5.06 | 5.96 | 6.63 | 6.93 | 7.19 | 7.35 | 7.42 | 8.00 |
| CAZ | 0.23 | 0.23 | 0.30 | 0.38 | 0.42 | 0.46 | 0.50 | 0.54 | 0.57 | 0.58 | 0.59 |
| CHA | 0.45 | 0.65 | 0.62 | 0.74 | 0.89 | 0.96 | 0.99 | 0.98 | 0.95 | 0.91 | 0.87 |
| EUR | 0.14 | 0.15 | 0.20 | 0.45 | 0.55 | 0.66 | 0.56 | 0.47 | 0.38 | 0.30 | 0.29 |
| IND | 0.46 | 0.42 | 0.49 | 0.53 | 0.66 | 0.73 | 0.80 | 0.86 | 0.89 | 0.90 | 0.89 |
| JPN | 0.01 | 0.01 | 0.01 | 0.01 | 0.01 | 0.01 | 0.01 | 0.01 | 0.01 | 0.01 | 0.01 |
| LAM | 0.14 | 0.28 | 0.38 | 0.39 | 0.43 | 0.45 | 0.43 | 0.42 | 0.40 | 0.39 | 0.38 |
| MEA | 0.13 | 0.19 | 0.23 | 0.31 | 0.35 | 0.38 | 0.40 | 0.41 | 0.42 | 0.43 | 0.85 |
| NEU | 0.00 | 0.00 | 0.01 | 0.02 | 0.02 | 0.02 | 0.02 | 0.04 | 0.03 | 0.03 | 0.02 |
| OAS | 1.48 | 1.59 | 1.89 | 1.85 | 2.17 | 2.41 | 2.56 | 2.69 | 2.80 | 2.87 | 3.00 |
| REF | 0.01 | 0.01 | 0.01 | 0.04 | 0.04 | 0.04 | 0.05 | 0.05 | 0.04 | 0.04 | 0.04 |
| SSA | 0.19 | 0.22 | 0.27 | 0.30 | 0.38 | 0.45 | 0.55 | 0.67 | 0.79 | 0.91 | 1.00 |
| USA | 0.02 | 0.04 | 0.03 | 0.04 | 0.05 | 0.06 | 0.06 | 0.06 | 0.06 | 0.05 | 0.06 |

Table 34: MAgPIE m4p\_SSP1 — Demand—Agricultural Supply Chain Loss—Crops—Oil crops—Other oil crops (incl rapeseed) (Mt DM/yr) [PART 1/2]

|     | 2050 | 2055 | 2060 | 2070 | 2080 | 2090 | 2100 |
|-----|------|------|------|------|------|------|------|
| GLO | 8.09 | 8.10 | 8.05 | 7.47 | 6.79 | 6.38 | 5.79 |
| CAZ | 0.60 | 0.61 | 0.61 | 0.62 | 0.60 | 0.57 | 0.54 |
| CHA | 0.82 | 0.76 | 0.70 | 0.60 | 0.51 | 0.45 | 0.38 |
| EUR | 0.29 | 0.29 | 0.29 | 0.28 | 0.27 | 0.25 | 0.24 |
| IND | 0.87 | 0.86 | 0.84 | 0.79 | 0.72 | 0.65 | 0.56 |
| JPN | 0.01 | 0.01 | 0.01 | 0.01 | 0.01 | 0.01 | 0.01 |
| LAM | 0.37 | 0.36 | 0.35 | 0.34 | 0.31 | 0.29 | 0.25 |
| MEA | 0.86 | 0.86 | 0.87 | 0.58 | 0.40 | 0.38 | 0.36 |
| NEU | 0.02 | 0.02 | 0.03 | 0.03 | 0.02 | 0.02 | 0.02 |
| OAS | 3.11 | 3.10 | 3.08 | 2.96 | 2.74 | 2.60 | 2.37 |
| REF | 0.04 | 0.04 | 0.04 | 0.04 | 0.04 | 0.04 | 0.03 |
| SSA | 1.06 | 1.13 | 1.17 | 1.17 | 1.11 | 1.05 | 0.97 |
| USA | 0.06 | 0.06 | 0.06 | 0.07 | 0.07 | 0.07 | 0.07 |

Table 35: MAgPIE m4p\_SSP1 — Demand—Agricultural Supply Chain Loss—Crops—Oil crops—Other oil crops (incl rapeseed) (Mt DM/yr) [PART 2/2]

|     | 1965 | 1970 | 1975 | 1980 | 1985 | 1990 | 1995 | 2000 | 2005 | 2010 |
|-----|------|------|------|------|------|------|------|------|------|------|
| GLO | 1.29 | 1.50 | 1.73 | 1.80 | 2.23 | 2.72 | 3.25 | 3.79 | 4.42 | 5.08 |
| CAZ | 0.03 | 0.08 | 0.06 | 0.09 | 0.12 | 0.13 | 0.21 | 0.23 | 0.29 | 0.40 |
| CHA | 0.08 | 0.08 | 0.10 | 0.15 | 0.29 | 0.35 | 0.45 | 0.65 | 0.62 | 0.74 |
| EUR | 0.03 | 0.04 | 0.08 | 0.04 | 0.06 | 0.10 | 0.14 | 0.15 | 0.19 | 0.45 |
| IND | 0.16 | 0.19 | 0.21 | 0.18 | 0.25 | 0.35 | 0.46 | 0.42 | 0.49 | 0.53 |
| JPN | 0.01 | 0.01 | 0.01 | 0.01 | 0.01 | 0.01 | 0.01 | 0.01 | 0.01 | 0.01 |
| LAM | 0.15 | 0.19 | 0.23 | 0.15 | 0.15 | 0.17 | 0.14 | 0.27 | 0.38 | 0.38 |
| MEA | 0.06 | 0.05 | 0.08 | 0.10 | 0.08 | 0.11 | 0.13 | 0.19 | 0.22 | 0.31 |
| NEU | 0.00 | 0.00 | 0.00 | 0.00 | 0.00 | 0.00 | 0.00 | 0.00 | 0.01 | 0.02 |
| OAS | 0.61 | 0.69 | 0.79 | 0.92 | 1.07 | 1.28 | 1.48 | 1.59 | 1.89 | 1.87 |
| REF | 0.01 | 0.01 | 0.01 | 0.01 | 0.01 | 0.02 | 0.01 | 0.01 | 0.01 | 0.04 |
| SSA | 0.14 | 0.15 | 0.17 | 0.14 | 0.17 | 0.18 | 0.19 | 0.22 | 0.27 | 0.30 |
| USA | 0.01 | 0.01 | 0.02 | 0.02 | 0.02 | 0.03 | 0.02 | 0.04 | 0.04 | 0.04 |

Table 36: FAO — Demand—Agricultural Supply Chain Loss—Crops—Oil crops—Other oil crops (incl rapeseed) (Mt DM/yr)

3.1.10
Oil crops—Soybean

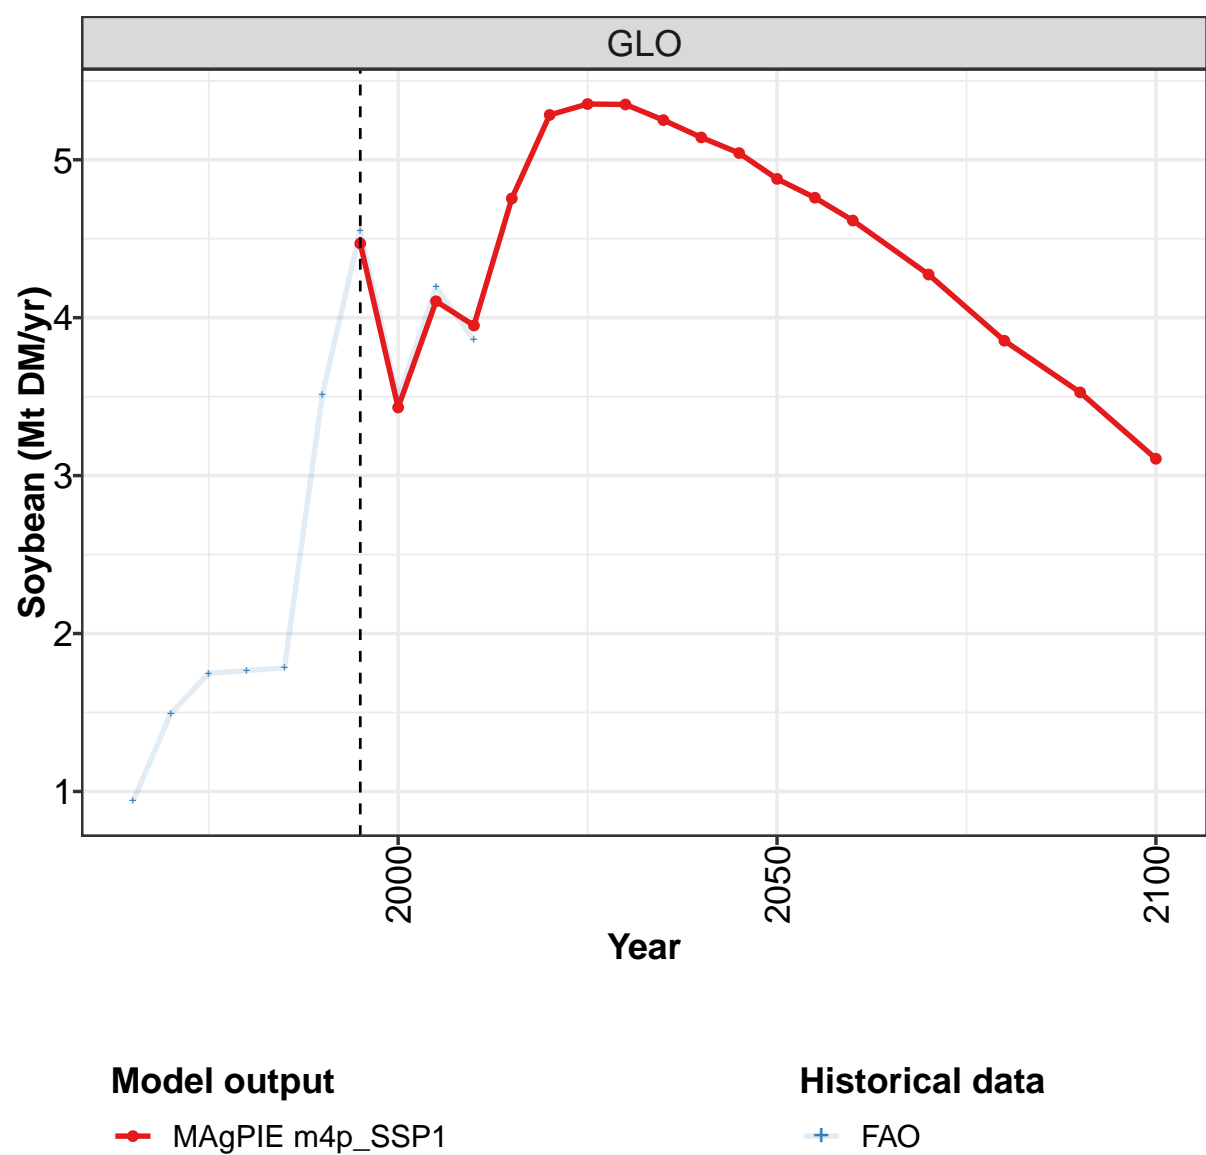



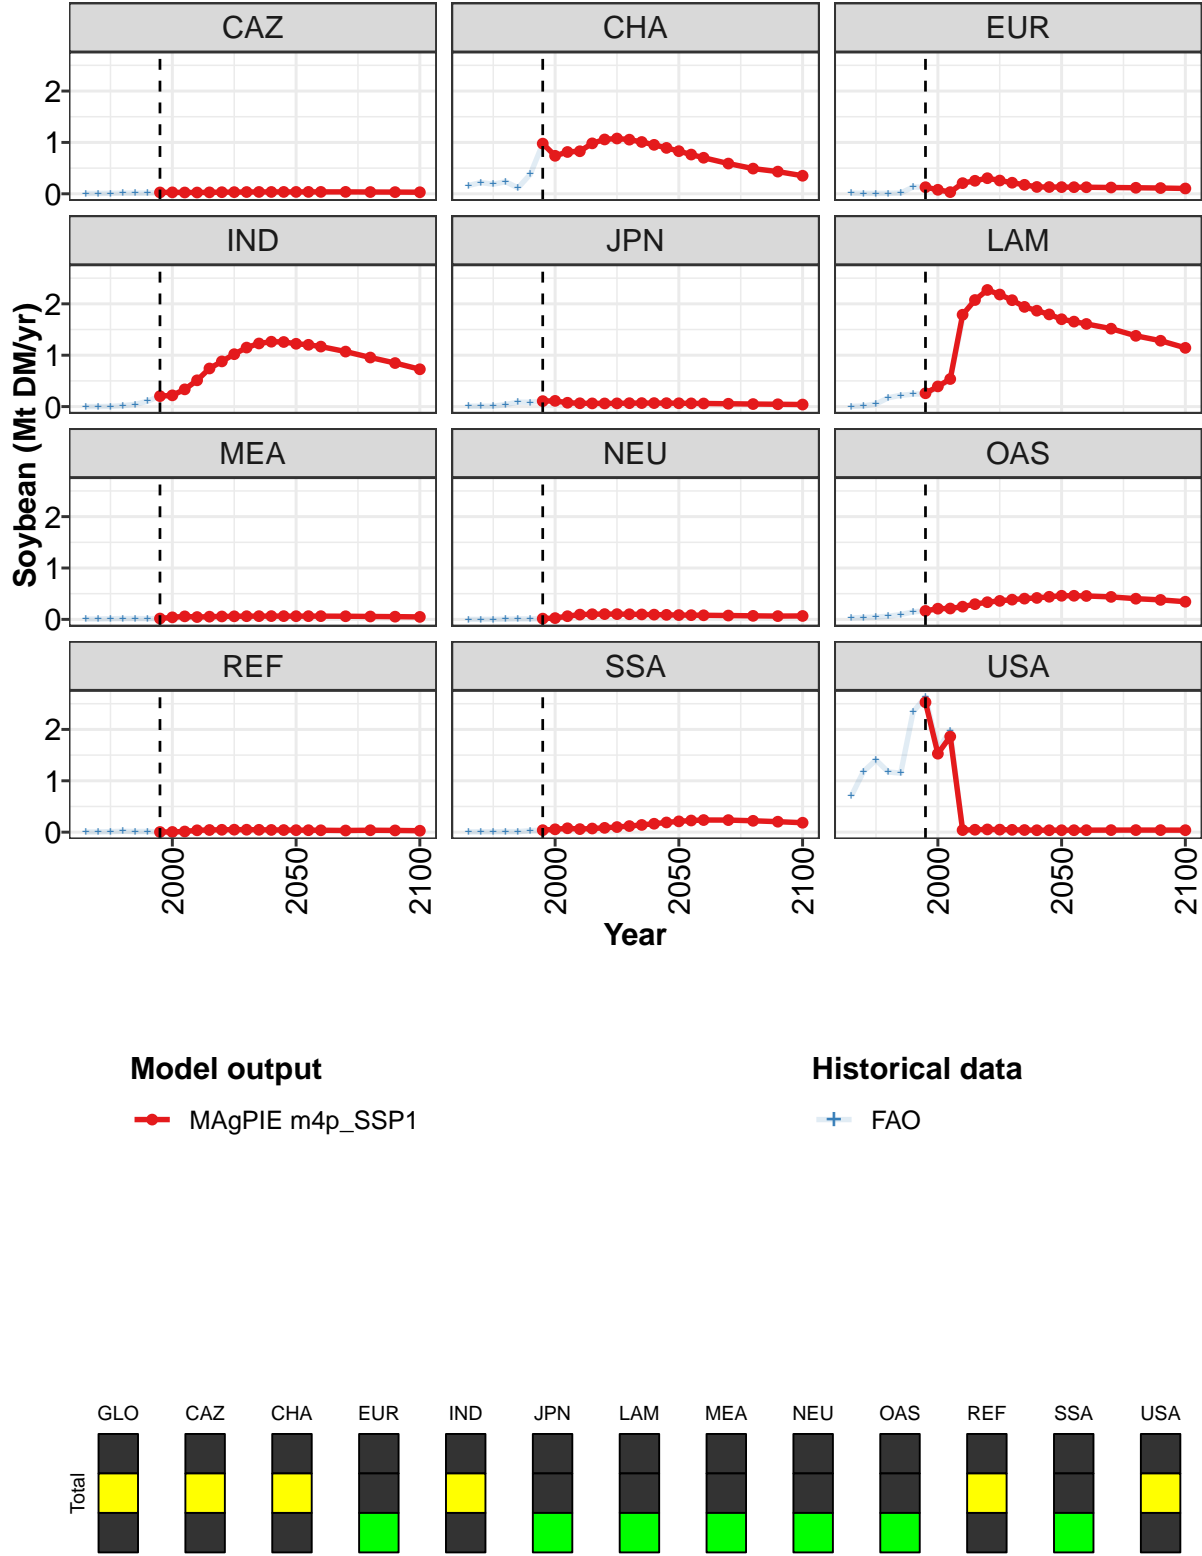

Figure 12: MAgPIE m4p\_SSP1 — Demand—Agricultural Supply Chain Loss—Crops—Oil crops—Soybean (Mt DM/yr)

|     | 1995 | 2000 | 2005 | 2010 | 2015 | 2020 | 2025 | 2030 | 2035 | 2040 | 2045 |
|-----|------|------|------|------|------|------|------|------|------|------|------|
| GLO | 4.47 | 3.43 | 4.10 | 3.95 | 4.75 | 5.28 | 5.35 | 5.35 | 5.25 | 5.14 | 5.04 |
| CAZ | 0.03 | 0.03 | 0.03 | 0.03 | 0.03 | 0.03 | 0.03 | 0.03 | 0.04 | 0.04 | 0.04 |
| CHA | 0.98 | 0.74 | 0.81 | 0.83 | 0.98 | 1.06 | 1.08 | 1.05 | 1.01 | 0.95 | 0.89 |
| EUR | 0.13 | 0.08 | 0.03 | 0.21 | 0.25 | 0.30 | 0.26 | 0.22 | 0.17 | 0.13 | 0.13 |
| IND | 0.20 | 0.22 | 0.34 | 0.51 | 0.74 | 0.88 | 1.02 | 1.15 | 1.23 | 1.26 | 1.26 |
| JPN | 0.11 | 0.11 | 0.07 | 0.07 | 0.06 | 0.06 | 0.06 | 0.07 | 0.07 | 0.07 | 0.07 |
| LAM | 0.26 | 0.39 | 0.54 | 1.79 | 2.07 | 2.27 | 2.18 | 2.07 | 1.94 | 1.87 | 1.79 |
| MEA | 0.02 | 0.04 | 0.06 | 0.05 | 0.05 | 0.06 | 0.06 | 0.06 | 0.06 | 0.06 | 0.06 |
| NEU | 0.01 | 0.03 | 0.06 | 0.09 | 0.10 | 0.10 | 0.10 | 0.10 | 0.10 | 0.09 | 0.09 |
| OAS | 0.17 | 0.21 | 0.21 | 0.25 | 0.30 | 0.33 | 0.36 | 0.38 | 0.40 | 0.42 | 0.44 |
| REF | 0.00 | 0.00 | 0.01 | 0.04 | 0.04 | 0.05 | 0.05 | 0.05 | 0.05 | 0.04 | 0.04 |
| SSA | 0.04 | 0.06 | 0.08 | 0.06 | 0.07 | 0.08 | 0.10 | 0.12 | 0.14 | 0.16 | 0.19 |
| USA | 2.53 | 1.53 | 1.86 | 0.04 | 0.05 | 0.05 | 0.05 | 0.05 | 0.04 | 0.04 | 0.04 |

Table 37: MAgPIE m4p\_SSP1 — Demand—Agricultural Supply Chain Loss—Crops—Oil crops—Soybean (Mt DM/yr) [PART 1/2]

|     | 2050 | 2055 | 2060 | 2070 | 2080 | 2090 | 2100 |
|-----|------|------|------|------|------|------|------|
| GLO | 4.88 | 4.76 | 4.62 | 4.27 | 3.85 | 3.53 | 3.11 |
| CAZ | 0.04 | 0.04 | 0.04 | 0.04 | 0.03 | 0.03 | 0.03 |
| CHA | 0.83 | 0.76 | 0.70 | 0.59 | 0.49 | 0.43 | 0.35 |
| EUR | 0.13 | 0.13 | 0.13 | 0.12 | 0.12 | 0.11 | 0.10 |
| IND | 1.22 | 1.20 | 1.17 | 1.07 | 0.96 | 0.85 | 0.73 |
| JPN | 0.06 | 0.06 | 0.06 | 0.06 | 0.05 | 0.05 | 0.04 |
| LAM | 1.70 | 1.65 | 1.61 | 1.52 | 1.38 | 1.28 | 1.14 |
| MEA | 0.06 | 0.06 | 0.06 | 0.06 | 0.06 | 0.05 | 0.05 |
| NEU | 0.08 | 0.08 | 0.08 | 0.07 | 0.07 | 0.06 | 0.07 |
| OAS | 0.46 | 0.46 | 0.46 | 0.44 | 0.40 | 0.38 | 0.34 |
| REF | 0.04 | 0.04 | 0.04 | 0.03 | 0.04 | 0.03 | 0.03 |
| SSA | 0.21 | 0.23 | 0.24 | 0.24 | 0.22 | 0.20 | 0.18 |
| USA | 0.04 | 0.04 | 0.04 | 0.04 | 0.04 | 0.04 | 0.04 |

Table 38: MAgPIE m4p\_SSP1 — Demand—Agricultural Supply Chain Loss—Crops—Oil crops—Soybean (Mt DM/yr) [PART 2/2]

|     | 1965 | 1970 | 1975 | 1980 | 1985 | 1990 | 1995 | 2000 | 2005 | 2010 |
|-----|------|------|------|------|------|------|------|------|------|------|
| GLO | 0.94 | 1.49 | 1.75 | 1.77 | 1.78 | 3.51 | 4.55 | 3.49 | 4.20 | 3.86 |
| CAZ | 0.01 | 0.01 | 0.01 | 0.01 | 0.01 | 0.01 | 0.03 | 0.03 | 0.03 | 0.03 |
| CHA | 0.16 | 0.22 | 0.19 | 0.23 | 0.12 | 0.38 | 0.97 | 0.74 | 0.81 | 0.83 |
| EUR | 0.01 | 0.01 | 0.01 | 0.01 | 0.01 | 0.13 | 0.13 | 0.08 | 0.03 | 0.20 |
| IND | 0.00 | 0.00 | 0.00 | 0.02 | 0.04 | 0.10 | 0.20 | 0.22 | 0.33 | 0.51 |
| JPN | 0.01 | 0.01 | 0.01 | 0.04 | 0.09 | 0.08 | 0.11 | 0.11 | 0.07 | 0.06 |
| LAM | 0.00 | 0.01 | 0.05 | 0.17 | 0.22 | 0.24 | 0.25 | 0.37 | 0.53 | 1.70 |
| MEA | 0.01 | 0.01 | 0.01 | 0.02 | 0.02 | 0.01 | 0.02 | 0.04 | 0.06 | 0.05 |
| NEU | 0.00 | 0.00 | 0.00 | 0.00 | 0.01 | 0.01 | 0.01 | 0.02 | 0.06 | 0.09 |
| OAS | 0.03 | 0.04 | 0.04 | 0.06 | 0.09 | 0.15 | 0.17 | 0.21 | 0.21 | 0.25 |
| REF | 0.00 | 0.01 | 0.01 | 0.02 | 0.01 | 0.01 | 0.00 | 0.00 | 0.01 | 0.04 |
| SSA | 0.01 | 0.01 | 0.01 | 0.01 | 0.01 | 0.03 | 0.04 | 0.06 | 0.08 | 0.06 |
| USA | 0.70 | 1.18 | 1.40 | 1.17 | 1.15 | 2.34 | 2.63 | 1.61 | 1.97 | 0.04 |

Table 39: FAO — Demand—Agricultural Supply Chain Loss—Crops—Oil crops—Soybean (Mt DM/yr)

3.1.11
Oil crops—Sunflower

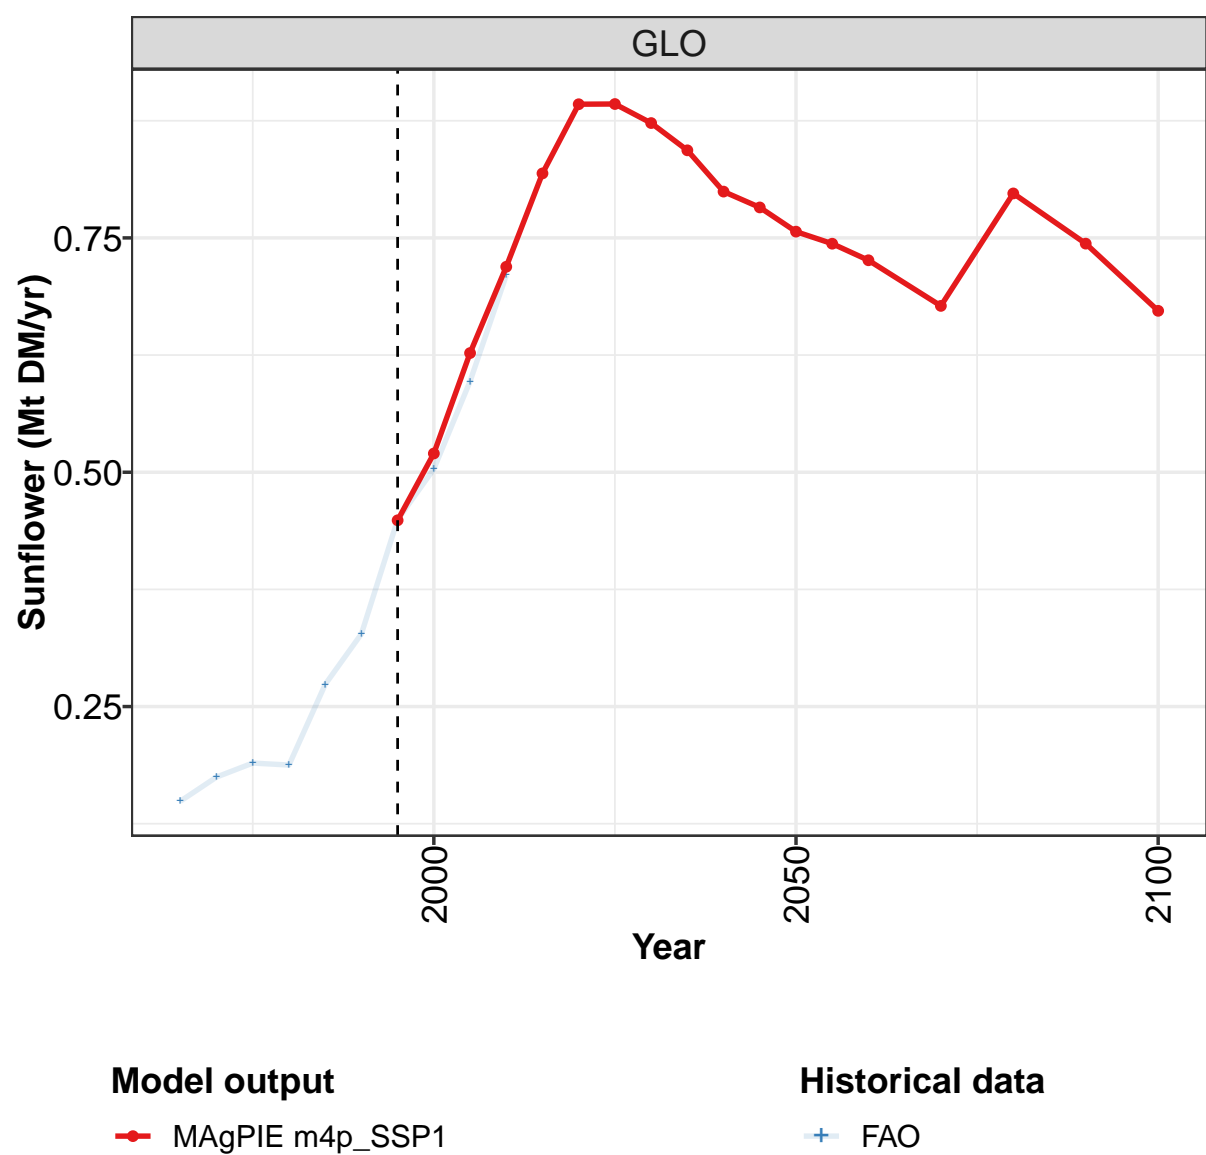

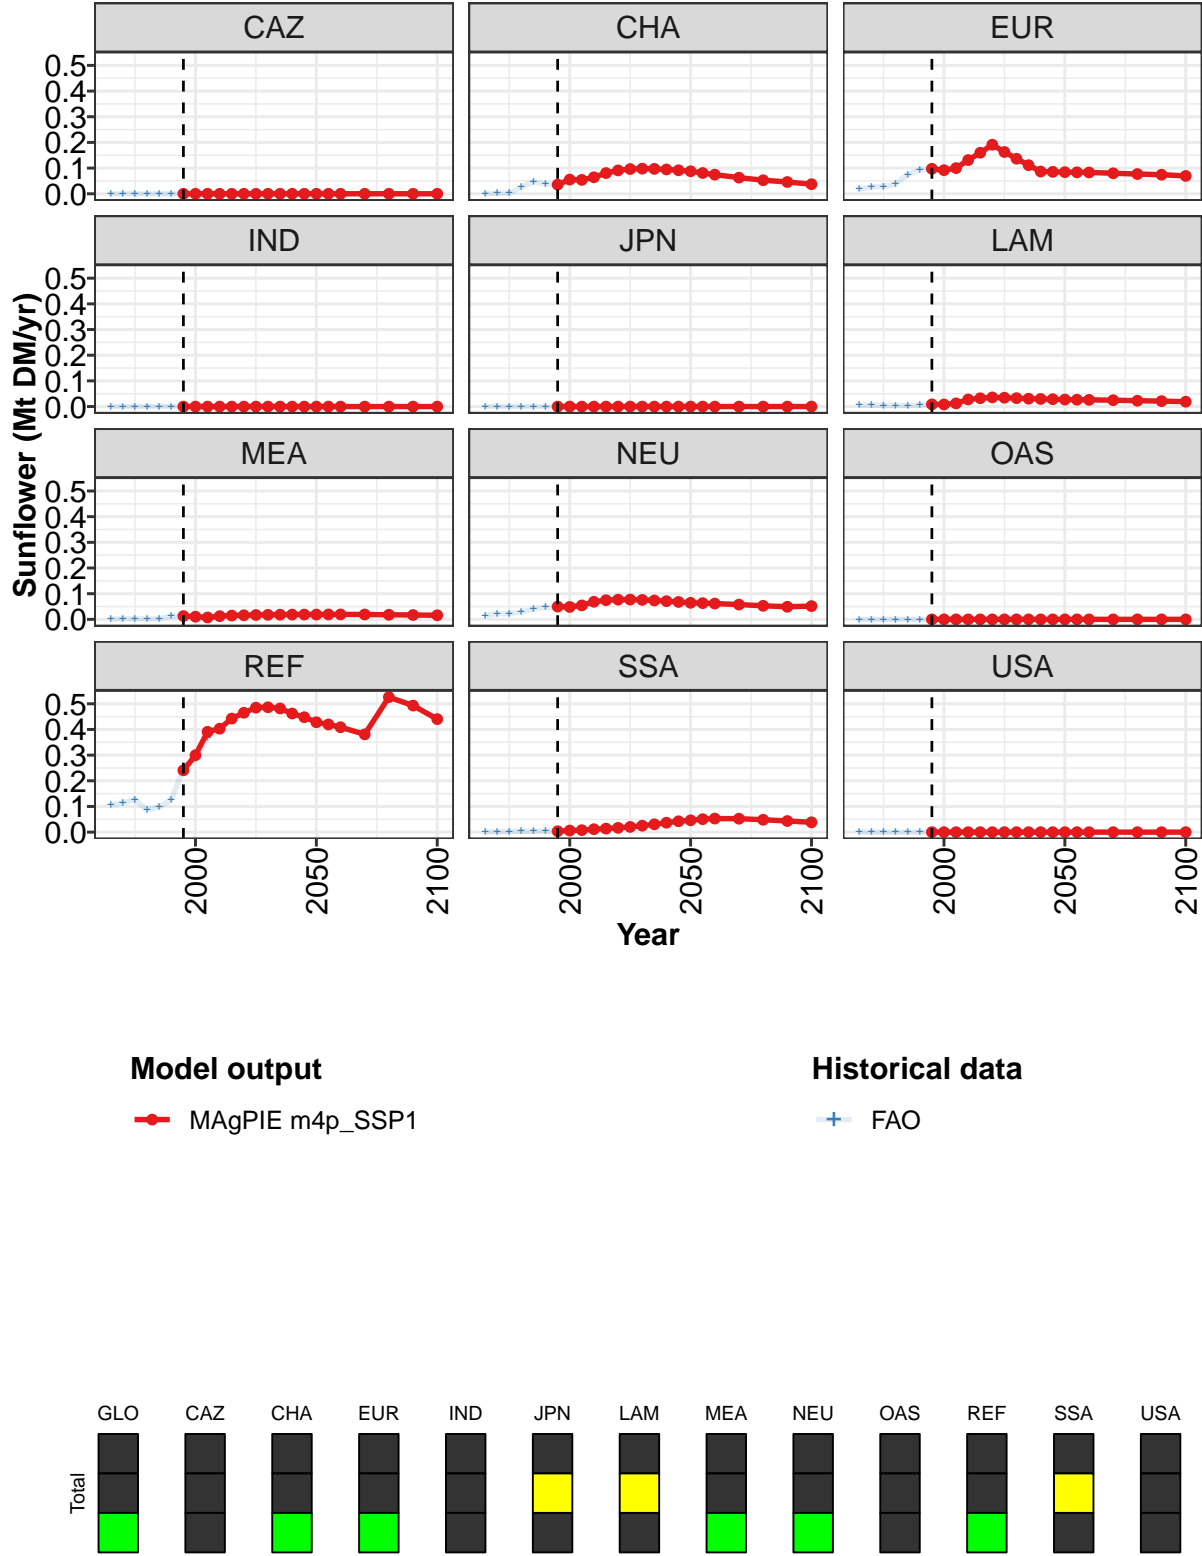

Figure 13: MAgPIE m4p\_SSP1 — Demand—Agricultural Supply Chain Loss—Crops—Oil crops—Sunflower (Mt DM/yr)

|     | 1995  | 2000  | 2005  | 2010  | 2015  | 2020  | 2025  | 2030  | 2035  | 2040  | 2045  |
|-----|-------|-------|-------|-------|-------|-------|-------|-------|-------|-------|-------|
| GLO | 0.449 | 0.520 | 0.627 | 0.719 | 0.819 | 0.893 | 0.893 | 0.873 | 0.843 | 0.799 | 0.783 |
| CAZ | 0.000 | 0.000 | 0.000 | 0.000 | 0.000 | 0.000 | 0.000 | 0.000 | 0.000 | 0.000 | 0.000 |
| CHA | 0.036 | 0.055 | 0.054 | 0.064 | 0.081 | 0.091 | 0.096 | 0.098 | 0.097 | 0.095 | 0.092 |
| EUR | 0.097 | 0.092 | 0.100 | 0.131 | 0.160 | 0.191 | 0.163 | 0.137 | 0.111 | 0.087 | 0.085 |
| IND | 0.000 | 0.000 | 0.000 | 0.000 | 0.000 | 0.000 | 0.000 | 0.000 | 0.000 | 0.000 | 0.000 |
| JPN | 0.000 | 0.000 | 0.000 | 0.000 | 0.000 | 0.000 | 0.000 | 0.000 | 0.000 | 0.000 | 0.000 |
| LAM | 0.009 | 0.008 | 0.012 | 0.028 | 0.032 | 0.036 | 0.034 | 0.033 | 0.031 | 0.030 | 0.029 |
| MEA | 0.013 | 0.010 | 0.007 | 0.013 | 0.015 | 0.016 | 0.017 | 0.018 | 0.018 | 0.019 | 0.019 |
| NEU | 0.050 | 0.048 | 0.054 | 0.069 | 0.075 | 0.077 | 0.077 | 0.076 | 0.074 | 0.071 | 0.068 |
| OAS | 0.000 | 0.000 | 0.000 | 0.000 | 0.000 | 0.000 | 0.000 | 0.000 | 0.000 | 0.000 | 0.000 |
| REF | 0.241 | 0.300 | 0.391 | 0.403 | 0.443 | 0.465 | 0.485 | 0.487 | 0.482 | 0.462 | 0.448 |
| SSA | 0.004 | 0.006 | 0.008 | 0.012 | 0.014 | 0.017 | 0.020 | 0.025 | 0.031 | 0.037 | 0.042 |
| USA | 0.000 | 0.000 | 0.000 | 0.000 | 0.000 | 0.000 | 0.000 | 0.000 | 0.000 | 0.000 | 0.000 |

Table 40: MAgPIE m4p\_SSP1 — Demand—Agricultural Supply Chain Loss—Crops—Oil crops—Sunflower (Mt DM/yr) [PART 1/2]

|     | 2050  | 2055  | 2060  | 2070  | 2080  | 2090  | 2100  |
|-----|-------|-------|-------|-------|-------|-------|-------|
| GLO | 0.757 | 0.744 | 0.726 | 0.677 | 0.797 | 0.744 | 0.672 |
| CAZ | 0.000 | 0.000 | 0.000 | 0.000 | 0.000 | 0.000 | 0.000 |
| CHA | 0.088 | 0.081 | 0.074 | 0.063 | 0.053 | 0.046 | 0.037 |
| EUR | 0.084 | 0.084 | 0.083 | 0.080 | 0.077 | 0.074 | 0.070 |
| IND | 0.000 | 0.000 | 0.000 | 0.000 | 0.000 | 0.000 | 0.000 |
| JPN | 0.000 | 0.000 | 0.000 | 0.000 | 0.000 | 0.000 | 0.000 |
| LAM | 0.027 | 0.027 | 0.026 | 0.025 | 0.023 | 0.021 | 0.019 |
| MEA | 0.019 | 0.019 | 0.019 | 0.019 | 0.018 | 0.017 | 0.016 |
| NEU | 0.065 | 0.063 | 0.062 | 0.057 | 0.053 | 0.049 | 0.052 |
| OAS | 0.000 | 0.000 | 0.000 | 0.000 | 0.000 | 0.000 | 0.000 |
| REF | 0.428 | 0.420 | 0.409 | 0.381 | 0.526 | 0.493 | 0.440 |
| SSA | 0.046 | 0.051 | 0.053 | 0.052 | 0.048 | 0.043 | 0.038 |
| USA | 0.000 | 0.000 | 0.000 | 0.000 | 0.000 | 0.000 | 0.000 |

Table 41: MAgPIE m4p\_SSP1 — Demand—Agricultural Supply Chain Loss—Crops—Oil crops—Sunflower (Mt DM/yr) [PART 2/2]

|     | 1965  | 1970  | 1975  | 1980  | 1985  | 1990  | 1995  | 2000  | 2005  | 2010  |
|-----|-------|-------|-------|-------|-------|-------|-------|-------|-------|-------|
| GLO | 0.149 | 0.175 | 0.190 | 0.188 | 0.274 | 0.328 | 0.449 | 0.503 | 0.597 | 0.710 |
| CAZ | 0.000 | 0.000 | 0.000 | 0.000 | 0.000 | 0.000 | 0.000 | 0.000 | 0.000 | 0.000 |
| CHA | 0.002 | 0.002 | 0.002 | 0.025 | 0.048 | 0.037 | 0.035 | 0.055 | 0.054 | 0.064 |
| EUR | 0.018 | 0.027 | 0.028 | 0.038 | 0.075 | 0.094 | 0.096 | 0.092 | 0.098 | 0.129 |
| IND | 0.000 | 0.000 | 0.000 | 0.000 | 0.000 | 0.000 | 0.000 | 0.000 | 0.000 | 0.000 |
| JPN | 0.000 | 0.000 | 0.000 | 0.000 | 0.000 | 0.000 | 0.000 | 0.000 | 0.000 | 0.000 |
| LAM | 0.005 | 0.006 | 0.005 | 0.004 | 0.005 | 0.006 | 0.008 | 0.008 | 0.012 | 0.026 |
| MEA | 0.000 | 0.003 | 0.002 | 0.002 | 0.003 | 0.012 | 0.013 | 0.010 | 0.007 | 0.013 |
| NEU | 0.016 | 0.022 | 0.022 | 0.029 | 0.040 | 0.047 | 0.045 | 0.047 | 0.052 | 0.068 |
| OAS | 0.000 | 0.000 | 0.000 | 0.000 | 0.000 | 0.000 | 0.000 | 0.000 | 0.000 | 0.000 |
| REF | 0.107 | 0.114 | 0.127 | 0.086 | 0.098 | 0.126 | 0.248 | 0.285 | 0.366 | 0.398 |
| SSA | 0.001 | 0.001 | 0.002 | 0.004 | 0.004 | 0.005 | 0.004 | 0.006 | 0.008 | 0.011 |
| USA | 0.000 | 0.000 | 0.000 | 0.000 | 0.000 | 0.000 | 0.000 | 0.000 | 0.000 | 0.000 |

Table 42: FAO — Demand—Agricultural Supply Chain Loss—Crops—Oil crops—Sunflower (Mt DM/yr)

3.1.12
Other crops

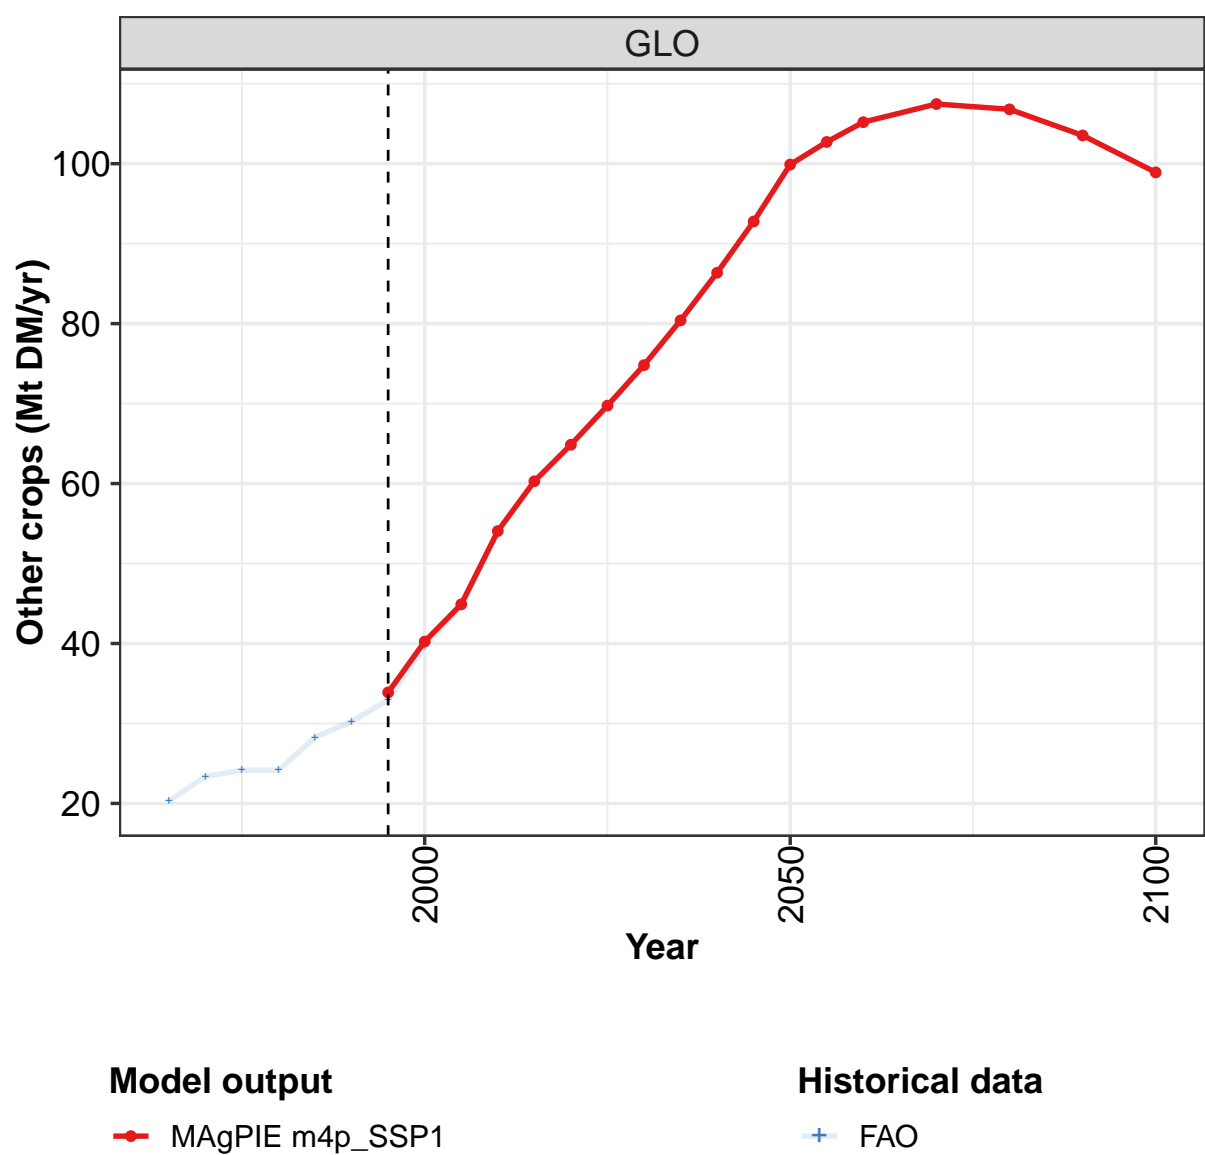

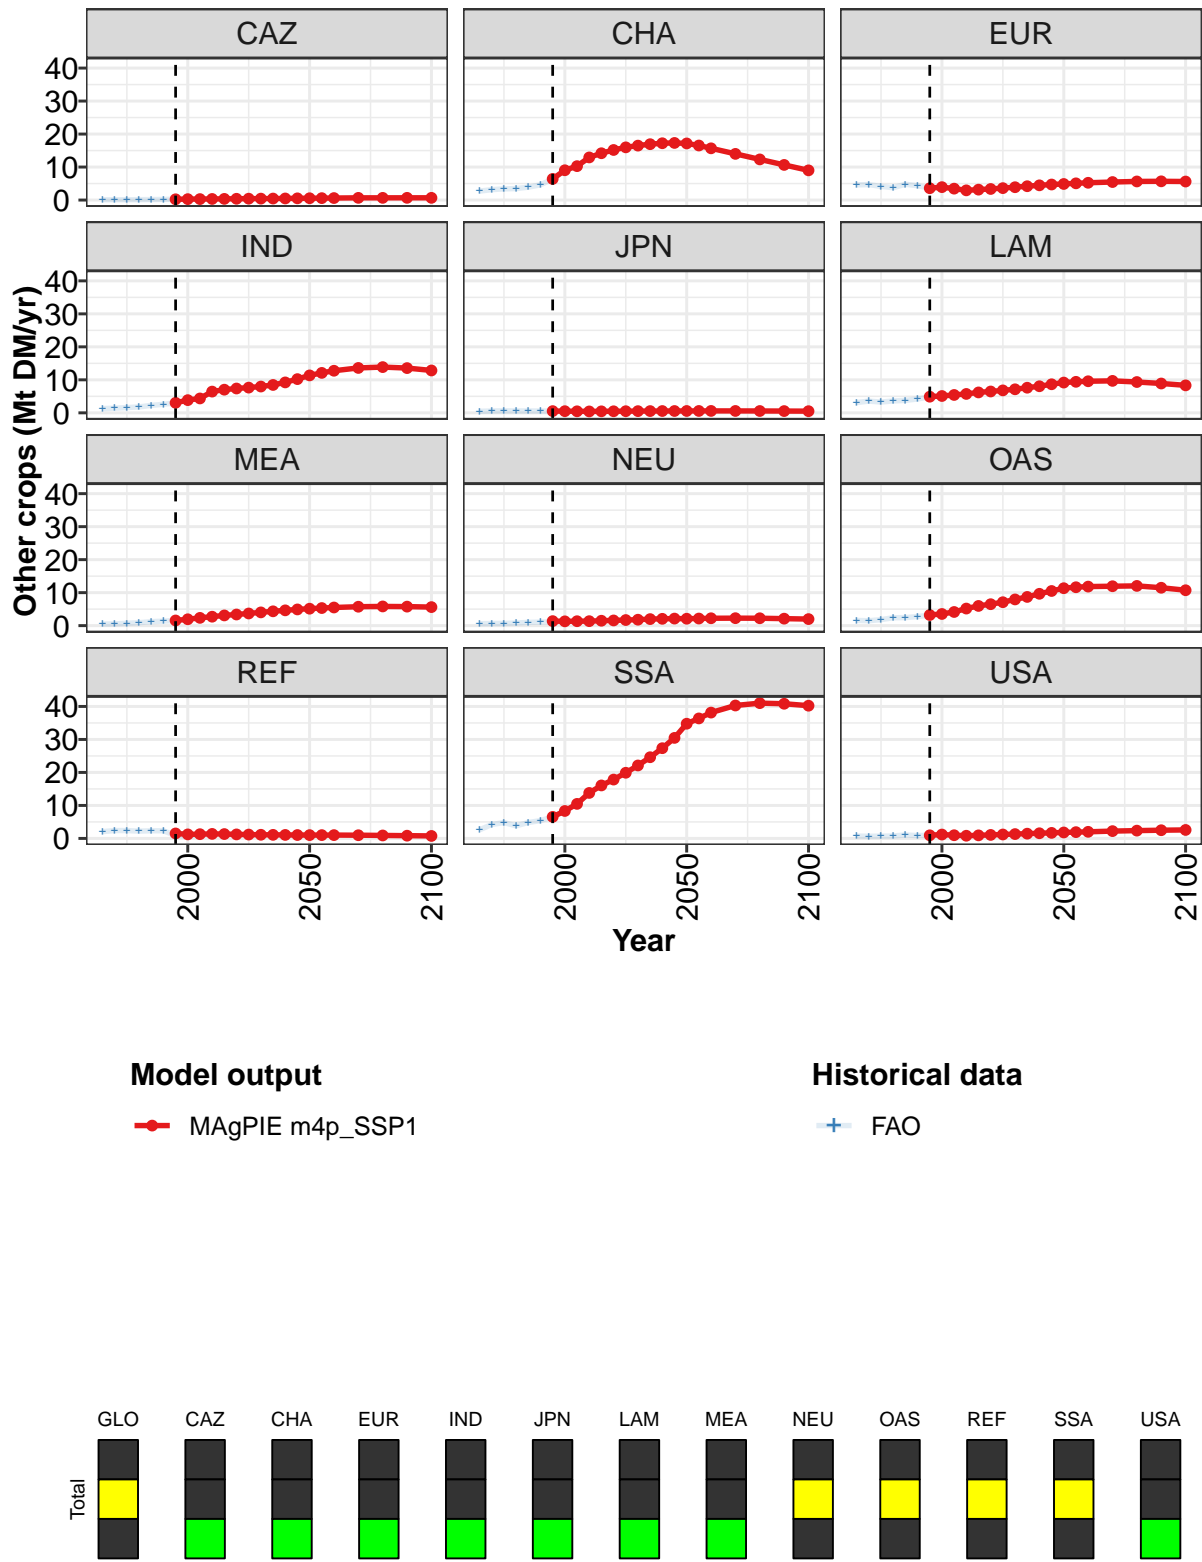

Figure 14: MAgPIE m4p\_SSP1 — Demand—Agricultural Supply Chain Loss—Crops—Other crops (Mt DM/yr)

|     | 1995 | 2000 | 2005 | 2010 | 2015 | 2020 | 2025 | 2030 | 2035 | 2040 | 2045 |
|-----|------|------|------|------|------|------|------|------|------|------|------|
| GLO | 34   | 40   | 45   | 54   | 60   | 65   | 70   | 75   | 80   | 86   | 93   |
| CAZ | 0    | 0    | 0    | 0    | 0    | 0    | 0    | 0    | 0    | 0    | 1    |
| CHA | 6    | 9    | 10   | 13   | 14   | 15   | 16   | 17   | 17   | 17   | 17   |
| EUR | 4    | 4    | 3    | 3    | 3    | 3    | 4    | 4    | 4    | 4    | 5    |
| IND | 3    | 4    | 4    | 6    | 7    | 7    | 8    | 8    | 8    | 9    | 10   |
| JPN | 1    | 1    | 0    | 0    | 0    | 0    | 0    | 1    | 1    | 1    | 1    |
| LAM | 5    | 5    | 5    | 6    | 6    | 6    | 7    | 7    | 8    | 8    | 9    |
| MEA | 2    | 2    | 2    | 3    | 3    | 3    | 4    | 4    | 4    | 5    | 5    |
| NEU | 1    | 1    | 1    | 1    | 1    | 2    | 2    | 2    | 2    | 2    | 2    |
| OAS | 3    | 4    | 4    | 5    | 6    | 7    | 7    | 8    | 9    | 10   | 11   |
| REF | 2    | 1    | 1    | 1    | 1    | 1    | 1    | 1    | 1    | 1    | 1    |
| SSA | 7    | 8    | 10   | 14   | 16   | 18   | 20   | 22   | 25   | 27   | 30   |
| USA | 1    | 1    | 1    | 1    | 1    | 1    | 1    | 1    | 1    | 2    | 2    |

Table 43: MAgPIE m4p\_SSP1 — Demand—Agricultural Supply Chain Loss—Crops—Other crops (Mt DM/yr)  
[PART 1/2]

|     | 2050 | 2055 | 2060 | 2070 | 2080 | 2090 | 2100 |
|-----|------|------|------|------|------|------|------|
| GLO | 100  | 103  | 105  | 107  | 107  | 104  | 99   |
| CAZ | 1    | 1    | 1    | 1    | 1    | 1    | 1    |
| CHA | 17   | 17   | 16   | 14   | 12   | 11   | 9    |
| EUR | 5    | 5    | 5    | 5    | 6    | 6    | 6    |
| IND | 11   | 12   | 13   | 14   | 14   | 14   | 13   |
| JPN | 1    | 1    | 1    | 1    | 1    | 1    | 1    |
| LAM | 9    | 9    | 10   | 10   | 9    | 9    | 8    |
| MEA | 5    | 5    | 6    | 6    | 6    | 6    | 6    |
| NEU | 2    | 2    | 2    | 2    | 2    | 2    | 2    |
| OAS | 11   | 12   | 12   | 12   | 12   | 11   | 11   |
| REF | 1    | 1    | 1    | 1    | 1    | 1    | 1    |
| SSA | 35   | 36   | 38   | 40   | 41   | 41   | 40   |
| USA | 2    | 2    | 2    | 2    | 2    | 2    | 3    |

Table 44: MAgPIE m4p\_SSP1 — Demand—Agricultural Supply Chain Loss—Crops—Other crops (Mt DM/yr)  
[PART 2/2]

|     | 1965 | 1970 | 1975 | 1980 | 1985 | 1990 | 1995 | 2000 | 2005 | 2010 |
|-----|------|------|------|------|------|------|------|------|------|------|
| GLO | 20.3 | 23.4 | 24.2 | 24.2 | 28.3 | 30.2 | 33.0 | 39.7 | 44.6 | 53.8 |
| CAZ | 0.1  | 0.1  | 0.1  | 0.1  | 0.2  | 0.2  | 0.3  | 0.3  | 0.3  | 0.3  |
| CHA | 2.7  | 3.2  | 3.4  | 3.5  | 3.9  | 4.6  | 6.4  | 9.0  | 10.3 | 12.9 |
| EUR | 4.6  | 4.7  | 4.1  | 3.7  | 4.8  | 4.3  | 3.6  | 3.9  | 3.4  | 2.9  |
| IND | 1.3  | 1.4  | 1.6  | 1.8  | 2.3  | 2.6  | 3.0  | 3.9  | 4.4  | 6.5  |
| JPN | 0.5  | 0.6  | 0.6  | 0.6  | 0.6  | 0.6  | 0.5  | 0.5  | 0.5  | 0.4  |
| LAM | 3.1  | 3.6  | 3.3  | 3.6  | 3.8  | 4.2  | 4.8  | 5.1  | 5.4  | 5.7  |
| MEA | 0.5  | 0.5  | 0.7  | 0.9  | 1.2  | 1.4  | 1.6  | 1.9  | 2.4  | 2.7  |
| NEU | 0.6  | 0.6  | 0.7  | 0.8  | 1.0  | 1.1  | 1.2  | 1.3  | 1.3  | 1.4  |
| OAS | 1.6  | 1.5  | 1.8  | 2.4  | 2.4  | 2.8  | 3.2  | 3.5  | 4.1  | 5.2  |
| REF | 2.1  | 2.4  | 2.4  | 2.2  | 2.3  | 2.3  | 0.9  | 0.7  | 1.1  | 1.2  |
| SSA | 2.6  | 4.2  | 4.8  | 3.8  | 4.8  | 5.4  | 6.5  | 8.3  | 10.5 | 13.8 |
| USA | 0.7  | 0.6  | 0.7  | 0.7  | 1.1  | 0.9  | 1.0  | 1.2  | 1.0  | 0.8  |

Table 45: FAO — Demand—Agricultural Supply Chain Loss—Crops—Other crops (Mt DM/yr)



3.1.13
Other crops—Fruits Vegetables Nuts

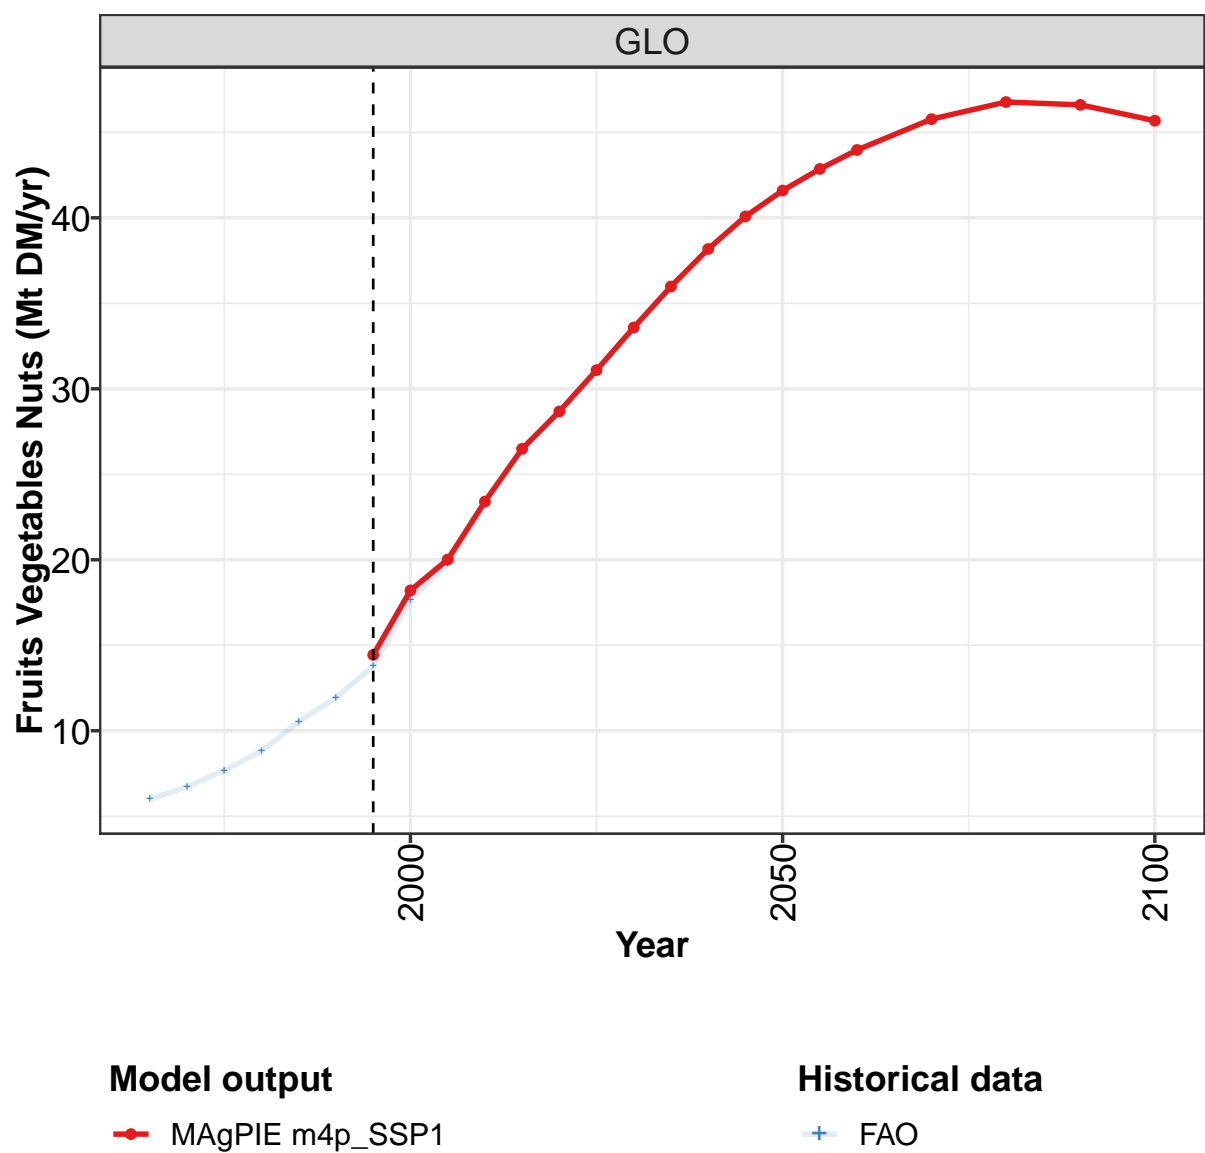

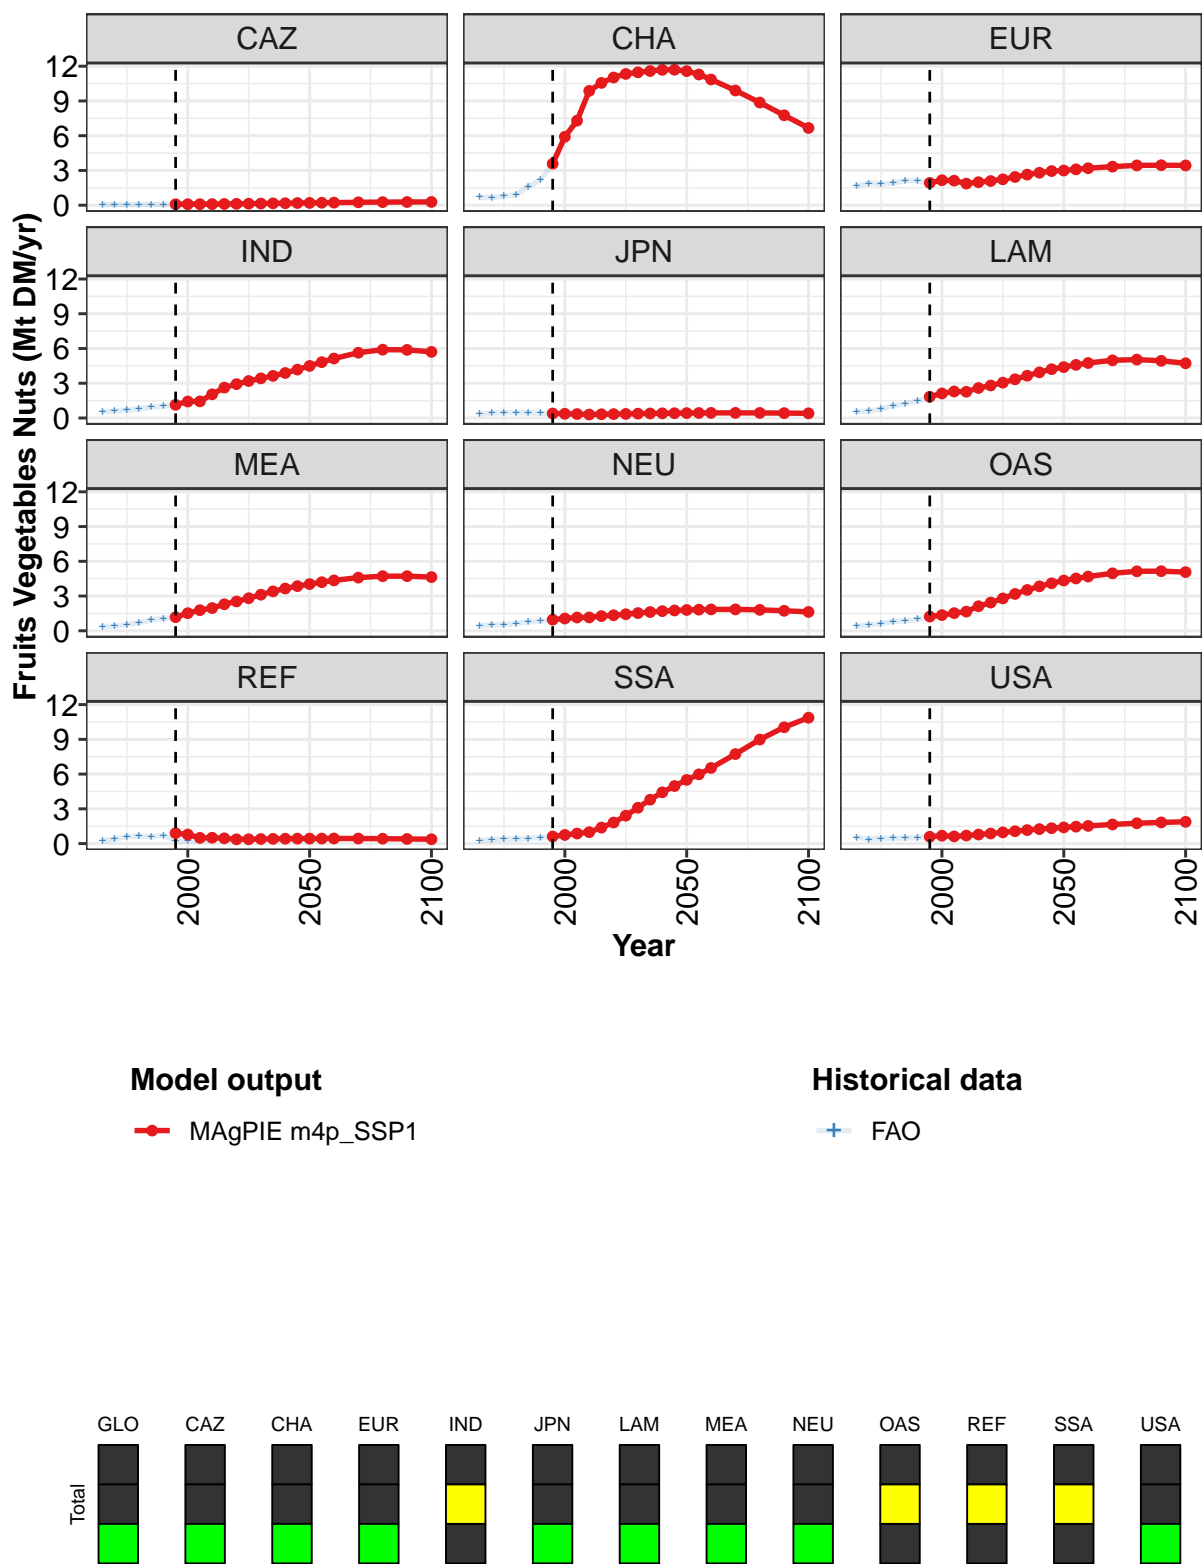

Figure 15: MAgPIE m4p\_SSP1 — Demand—Agricultural Supply Chain Loss—Crops—Other crops—Fruits Vegetables Nuts (Mt DM/yr)

|     | 1995 | 2000 | 2005 | 2010 | 2015 | 2020 | 2025 | 2030 | 2035 | 2040 | 2045 |
|-----|------|------|------|------|------|------|------|------|------|------|------|
| GLO | 14.4 | 18.2 | 20.0 | 23.4 | 26.5 | 28.7 | 31.1 | 33.6 | 36.0 | 38.2 | 40.1 |
| CAZ | 0.1  | 0.1  | 0.1  | 0.1  | 0.1  | 0.1  | 0.1  | 0.1  | 0.2  | 0.2  | 0.2  |
| CHA | 3.6  | 5.9  | 7.3  | 9.9  | 10.6 | 11.0 | 11.3 | 11.5 | 11.6 | 11.7 | 11.7 |
| EUR | 1.9  | 2.2  | 2.1  | 1.9  | 2.0  | 2.1  | 2.2  | 2.4  | 2.6  | 2.8  | 2.9  |
| IND | 1.1  | 1.4  | 1.4  | 2.0  | 2.6  | 2.9  | 3.2  | 3.4  | 3.6  | 3.9  | 4.2  |
| JPN | 0.4  | 0.4  | 0.3  | 0.3  | 0.3  | 0.3  | 0.4  | 0.4  | 0.4  | 0.4  | 0.4  |
| LAM | 1.8  | 2.1  | 2.3  | 2.3  | 2.6  | 2.8  | 3.1  | 3.3  | 3.7  | 3.9  | 4.2  |
| MEA | 1.2  | 1.5  | 1.8  | 2.0  | 2.3  | 2.5  | 2.8  | 3.1  | 3.4  | 3.7  | 3.9  |
| NEU | 1.0  | 1.1  | 1.1  | 1.2  | 1.3  | 1.3  | 1.4  | 1.5  | 1.6  | 1.7  | 1.8  |
| OAS | 1.2  | 1.4  | 1.5  | 1.7  | 2.1  | 2.4  | 2.8  | 3.2  | 3.5  | 3.8  | 4.1  |
| REF | 0.9  | 0.8  | 0.5  | 0.5  | 0.5  | 0.4  | 0.4  | 0.4  | 0.4  | 0.4  | 0.4  |
| SSA | 0.6  | 0.7  | 0.9  | 1.0  | 1.4  | 1.8  | 2.4  | 3.1  | 3.8  | 4.4  | 5.0  |
| USA | 0.6  | 0.7  | 0.6  | 0.7  | 0.8  | 0.9  | 1.0  | 1.1  | 1.2  | 1.3  | 1.3  |

Table 46: MAgPIE m4p\_SSP1 — Demand—Agricultural Supply Chain Loss—Crops—Other crops—Fruits Vegetables Nuts (Mt DM/yr) [PART 1/2]

|     | 2050 | 2055 | 2060 | 2070 | 2080 | 2090 | 2100 |
|-----|------|------|------|------|------|------|------|
| GLO | 41.6 | 42.9 | 44.0 | 45.8 | 46.8 | 46.6 | 45.7 |
| CAZ | 0.2  | 0.2  | 0.2  | 0.3  | 0.3  | 0.3  | 0.3  |
| CHA | 11.6 | 11.3 | 10.9 | 9.9  | 8.9  | 7.8  | 6.7  |
| EUR | 3.0  | 3.1  | 3.2  | 3.3  | 3.4  | 3.5  | 3.4  |
| IND | 4.5  | 4.8  | 5.1  | 5.6  | 5.9  | 5.9  | 5.7  |
| JPN | 0.4  | 0.4  | 0.4  | 0.4  | 0.4  | 0.4  | 0.4  |
| LAM | 4.4  | 4.6  | 4.7  | 5.0  | 5.0  | 4.9  | 4.7  |
| MEA | 4.0  | 4.2  | 4.3  | 4.6  | 4.7  | 4.7  | 4.6  |
| NEU | 1.8  | 1.8  | 1.8  | 1.8  | 1.8  | 1.7  | 1.6  |
| OAS | 4.3  | 4.5  | 4.7  | 5.0  | 5.1  | 5.1  | 5.1  |
| REF | 0.4  | 0.4  | 0.4  | 0.4  | 0.4  | 0.4  | 0.4  |
| SSA | 5.5  | 6.0  | 6.5  | 7.7  | 9.0  | 10.0 | 10.9 |
| USA | 1.4  | 1.5  | 1.5  | 1.7  | 1.8  | 1.8  | 1.9  |

Table 47: MAgPIE m4p\_SSP1 — Demand—Agricultural Supply Chain Loss—Crops—Other crops—Fruits Vegetables Nuts (Mt DM/yr) [PART 2/2]

|     | 1965 | 1970 | 1975 | 1980 | 1985 | 1990 | 1995 | 2000 | 2005 | 2010 |
|-----|------|------|------|------|------|------|------|------|------|------|
| GLO | 6.0  | 6.7  | 7.7  | 8.8  | 10.5 | 11.9 | 13.8 | 17.6 | 19.8 | 23.2 |
| CAZ | 0.0  | 0.0  | 0.0  | 0.1  | 0.1  | 0.1  | 0.1  | 0.1  | 0.1  | 0.1  |
| CHA | 0.7  | 0.7  | 0.8  | 0.9  | 1.6  | 2.2  | 3.6  | 5.9  | 7.3  | 9.9  |
| EUR | 1.6  | 1.9  | 1.8  | 1.9  | 2.1  | 2.1  | 1.9  | 2.2  | 2.1  | 1.9  |
| IND | 0.5  | 0.6  | 0.7  | 0.8  | 0.9  | 1.0  | 1.1  | 1.4  | 1.4  | 2.0  |
| JPN | 0.3  | 0.4  | 0.5  | 0.5  | 0.5  | 0.4  | 0.4  | 0.4  | 0.3  | 0.3  |
| LAM | 0.5  | 0.6  | 0.8  | 1.0  | 1.2  | 1.5  | 1.8  | 2.1  | 2.3  | 2.3  |
| MEA | 0.4  | 0.4  | 0.6  | 0.7  | 0.9  | 1.1  | 1.2  | 1.5  | 1.8  | 2.0  |
| NEU | 0.4  | 0.5  | 0.5  | 0.6  | 0.8  | 0.8  | 0.9  | 1.1  | 1.1  | 1.2  |
| OAS | 0.4  | 0.5  | 0.6  | 0.8  | 0.9  | 1.0  | 1.2  | 1.4  | 1.5  | 1.7  |
| REF | 0.2  | 0.4  | 0.6  | 0.6  | 0.6  | 0.7  | 0.3  | 0.2  | 0.3  | 0.3  |
| SSA | 0.3  | 0.3  | 0.4  | 0.4  | 0.5  | 0.5  | 0.6  | 0.7  | 0.9  | 1.0  |
| USA | 0.5  | 0.4  | 0.4  | 0.5  | 0.5  | 0.5  | 0.6  | 0.7  | 0.6  | 0.7  |

Table 48: FAO — Demand—Agricultural Supply Chain Loss—Crops—Other crops—Fruits Vegetables Nuts (Mt DM/yr)

3.1.14
Other crops—Potatoes

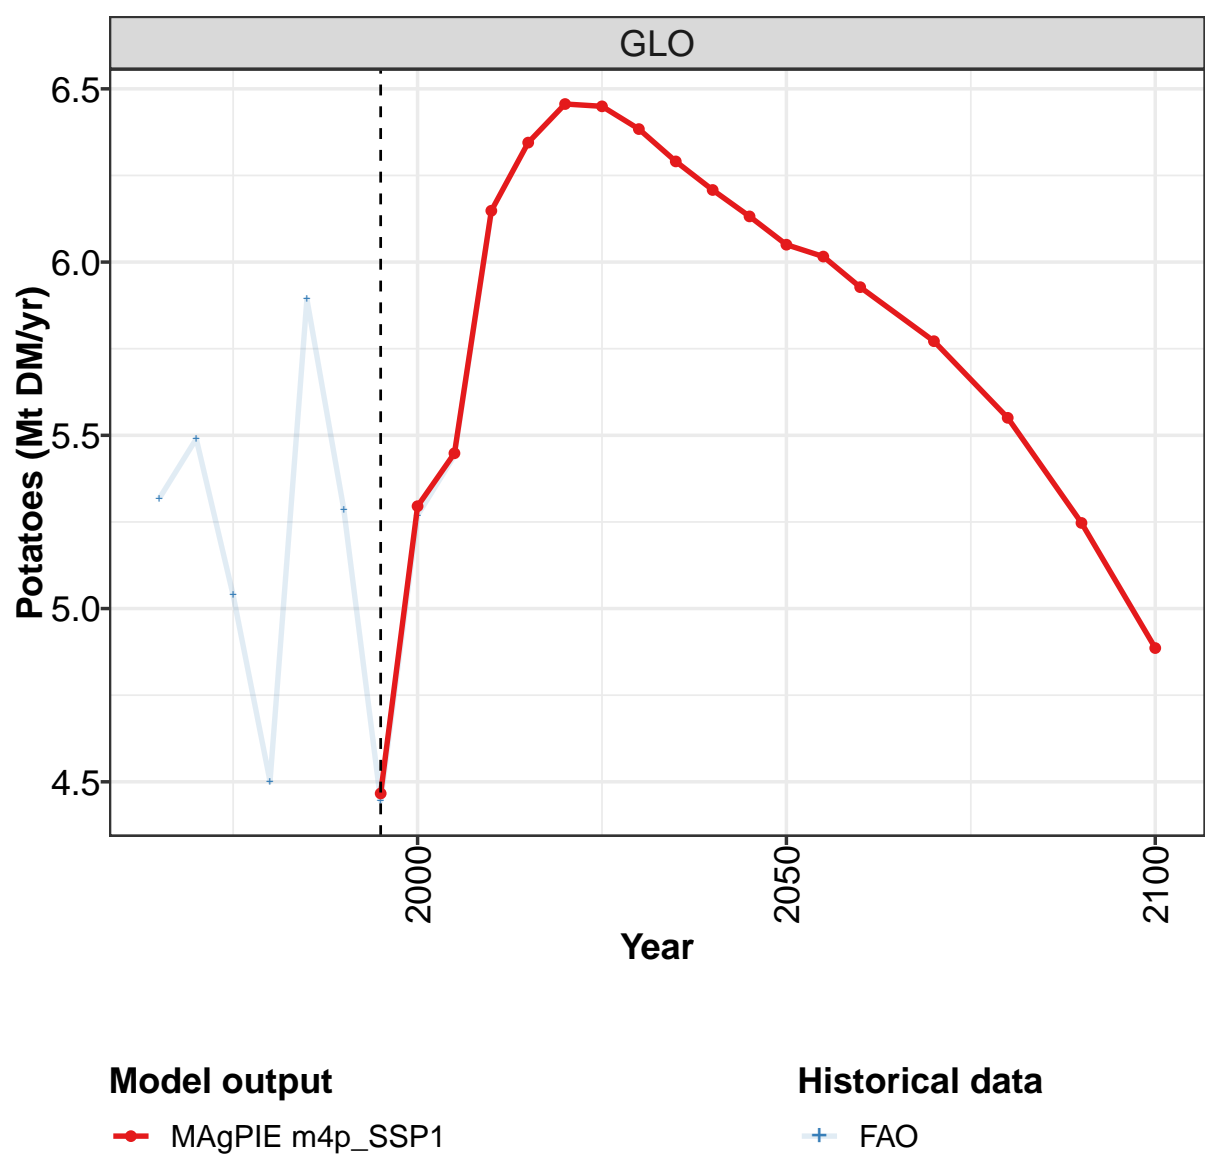

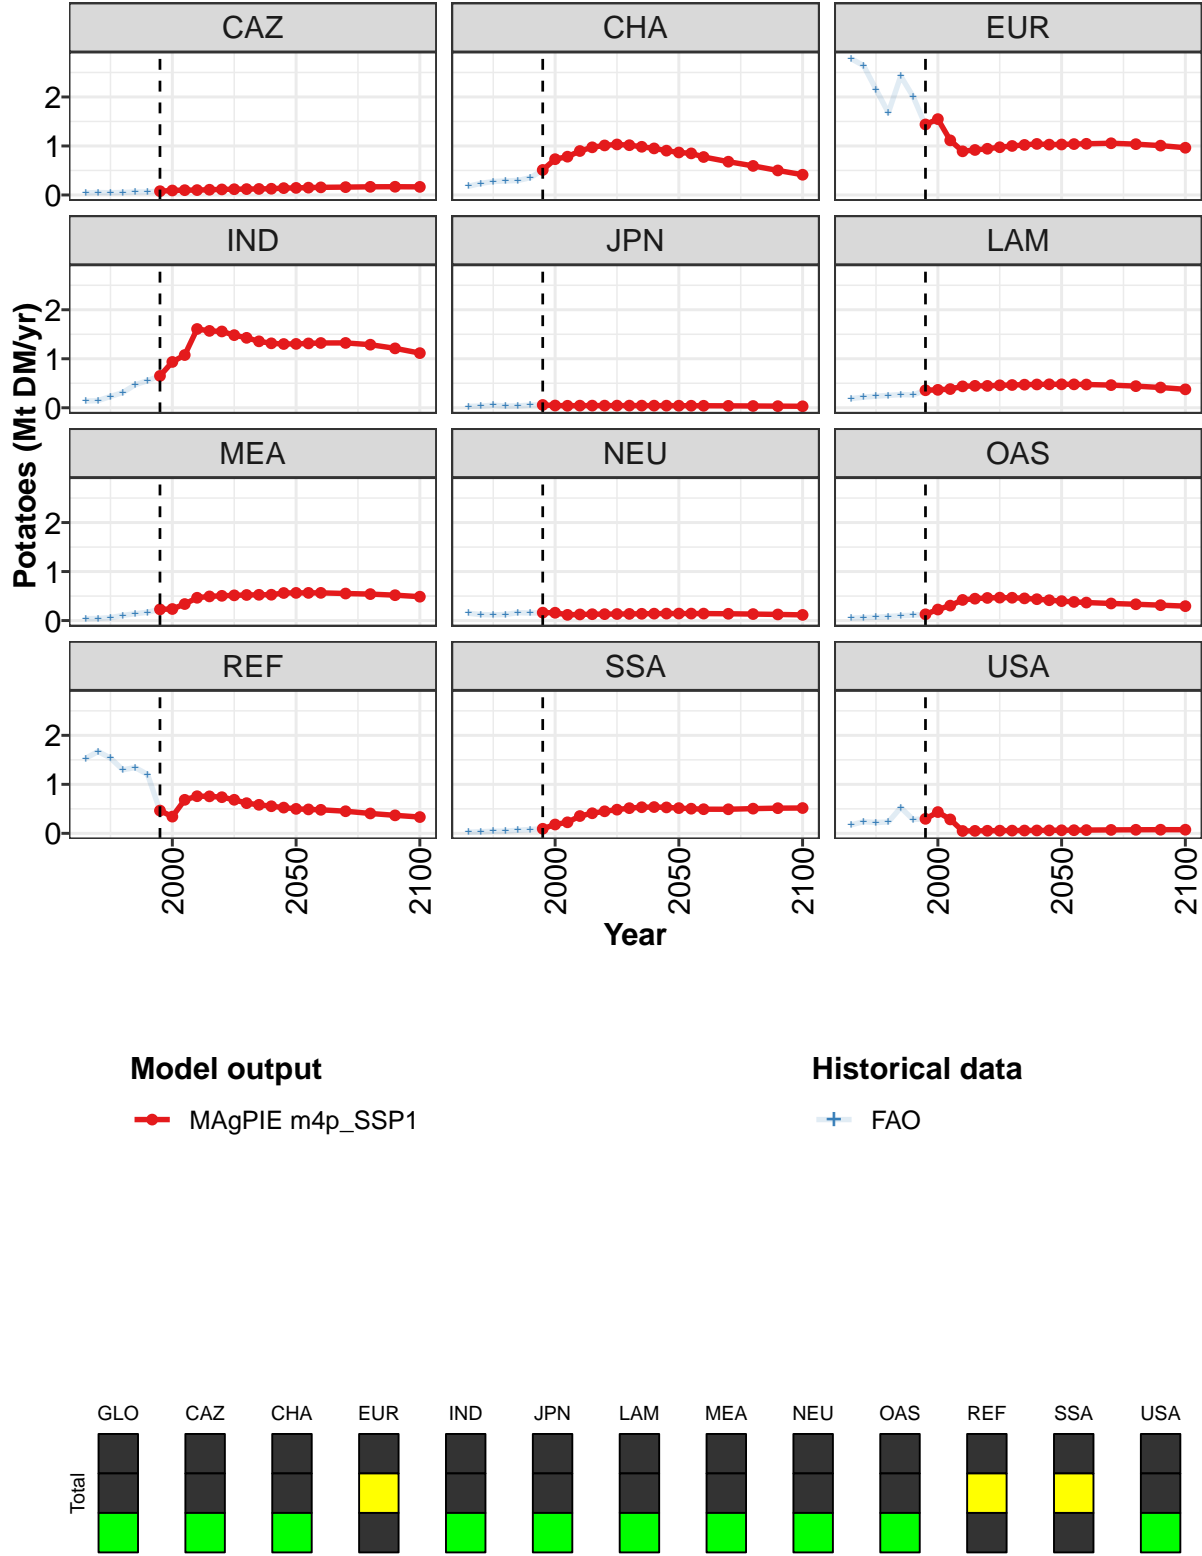

Figure 16: MAgPIE m4p\_SSP1 — Demand—Agricultural Supply Chain Loss—Crops—Other crops—Potatoes (Mt DM/yr)

|     | 1995 | 2000 | 2005 | 2010 | 2015 | 2020 | 2025 | 2030 | 2035 | 2040 | 2045 |
|-----|------|------|------|------|------|------|------|------|------|------|------|
| GLO | 4.47 | 5.30 | 5.45 | 6.15 | 6.34 | 6.46 | 6.45 | 6.38 | 6.29 | 6.21 | 6.13 |
| CAZ | 0.08 | 0.09 | 0.10 | 0.10 | 0.11 | 0.11 | 0.12 | 0.12 | 0.12 | 0.13 | 0.14 |
| CHA | 0.51 | 0.73 | 0.78 | 0.90 | 0.97 | 1.01 | 1.03 | 1.02 | 0.98 | 0.95 | 0.90 |
| EUR | 1.44 | 1.55 | 1.12 | 0.89 | 0.92 | 0.94 | 0.97 | 1.00 | 1.02 | 1.04 | 1.03 |
| IND | 0.65 | 0.94 | 1.08 | 1.61 | 1.57 | 1.56 | 1.48 | 1.43 | 1.36 | 1.32 | 1.30 |
| JPN | 0.06 | 0.05 | 0.04 | 0.04 | 0.04 | 0.04 | 0.04 | 0.04 | 0.04 | 0.04 | 0.04 |
| LAM | 0.36 | 0.37 | 0.38 | 0.44 | 0.45 | 0.45 | 0.46 | 0.46 | 0.47 | 0.48 | 0.48 |
| MEA | 0.23 | 0.24 | 0.34 | 0.47 | 0.49 | 0.50 | 0.51 | 0.52 | 0.53 | 0.53 | 0.56 |
| NEU | 0.16 | 0.16 | 0.12 | 0.12 | 0.13 | 0.13 | 0.13 | 0.14 | 0.14 | 0.14 | 0.14 |
| OAS | 0.13 | 0.23 | 0.31 | 0.42 | 0.45 | 0.46 | 0.47 | 0.47 | 0.45 | 0.44 | 0.42 |
| REF | 0.47 | 0.34 | 0.68 | 0.76 | 0.76 | 0.74 | 0.69 | 0.62 | 0.58 | 0.55 | 0.53 |
| SSA | 0.09 | 0.18 | 0.23 | 0.35 | 0.41 | 0.45 | 0.48 | 0.51 | 0.53 | 0.54 | 0.53 |
| USA | 0.30 | 0.43 | 0.28 | 0.05 | 0.05 | 0.05 | 0.06 | 0.06 | 0.06 | 0.06 | 0.06 |

Table 49: MAgPIE m4p\_SSP1 — Demand—Agricultural Supply Chain Loss—Crops—Other crops—Potatoes (Mt DM/yr) [PART 1/2]

|     | 2050 | 2055 | 2060 | 2070 | 2080 | 2090 | 2100 |
|-----|------|------|------|------|------|------|------|
| GLO | 6.05 | 6.02 | 5.93 | 5.77 | 5.55 | 5.25 | 4.89 |
| CAZ | 0.14 | 0.15 | 0.16 | 0.16 | 0.17 | 0.17 | 0.17 |
| CHA | 0.87 | 0.85 | 0.77 | 0.68 | 0.59 | 0.50 | 0.41 |
| EUR | 1.03 | 1.04 | 1.04 | 1.06 | 1.04 | 1.01 | 0.96 |
| IND | 1.30 | 1.31 | 1.32 | 1.32 | 1.29 | 1.21 | 1.12 |
| JPN | 0.04 | 0.04 | 0.04 | 0.04 | 0.04 | 0.03 | 0.03 |
| LAM | 0.48 | 0.48 | 0.47 | 0.46 | 0.44 | 0.41 | 0.38 |
| MEA | 0.56 | 0.56 | 0.57 | 0.55 | 0.54 | 0.52 | 0.49 |
| NEU | 0.14 | 0.14 | 0.14 | 0.14 | 0.13 | 0.12 | 0.12 |
| OAS | 0.40 | 0.38 | 0.37 | 0.35 | 0.33 | 0.31 | 0.29 |
| REF | 0.50 | 0.49 | 0.48 | 0.45 | 0.41 | 0.37 | 0.33 |
| SSA | 0.52 | 0.50 | 0.49 | 0.49 | 0.50 | 0.51 | 0.52 |
| USA | 0.06 | 0.06 | 0.07 | 0.07 | 0.07 | 0.07 | 0.07 |

Table 50: MAgPIE m4p\_SSP1 — Demand—Agricultural Supply Chain Loss—Crops—Other crops—Potatoes (Mt DM/yr) [PART 2/2]

|     | 1965 | 1970 | 1975 | 1980 | 1985 | 1990 | 1995 | 2000 | 2005 | 2010 |
|-----|------|------|------|------|------|------|------|------|------|------|
| GLO | 5.32 | 5.49 | 5.04 | 4.50 | 5.89 | 5.29 | 4.44 | 5.27 | 5.44 | 6.14 |
| CAZ | 0.04 | 0.05 | 0.05 | 0.05 | 0.06 | 0.06 | 0.08 | 0.09 | 0.10 | 0.10 |
| CHA | 0.18 | 0.24 | 0.28 | 0.29 | 0.30 | 0.35 | 0.51 | 0.73 | 0.78 | 0.90 |
| EUR | 2.78 | 2.64 | 2.15 | 1.68 | 2.43 | 2.01 | 1.42 | 1.52 | 1.11 | 0.89 |
| IND | 0.14 | 0.15 | 0.23 | 0.31 | 0.47 | 0.55 | 0.65 | 0.94 | 1.08 | 1.61 |
| JPN | 0.03 | 0.03 | 0.05 | 0.04 | 0.04 | 0.05 | 0.06 | 0.05 | 0.04 | 0.04 |
| LAM | 0.19 | 0.22 | 0.24 | 0.25 | 0.27 | 0.26 | 0.36 | 0.36 | 0.38 | 0.44 |
| MEA | 0.04 | 0.04 | 0.06 | 0.11 | 0.14 | 0.17 | 0.23 | 0.24 | 0.34 | 0.46 |
| NEU | 0.15 | 0.12 | 0.12 | 0.12 | 0.16 | 0.15 | 0.16 | 0.16 | 0.12 | 0.12 |
| OAS | 0.05 | 0.06 | 0.07 | 0.08 | 0.10 | 0.11 | 0.13 | 0.23 | 0.31 | 0.42 |
| REF | 1.53 | 1.67 | 1.53 | 1.30 | 1.34 | 1.20 | 0.46 | 0.34 | 0.68 | 0.76 |
| SSA | 0.02 | 0.03 | 0.04 | 0.05 | 0.06 | 0.08 | 0.09 | 0.18 | 0.22 | 0.35 |
| USA | 0.17 | 0.24 | 0.22 | 0.23 | 0.53 | 0.28 | 0.30 | 0.44 | 0.29 | 0.05 |

Table 51: FAO — Demand—Agricultural Supply Chain Loss—Crops—Other crops—Potatoes (Mt DM/yr)

3.1.15
Other crops—Pulses

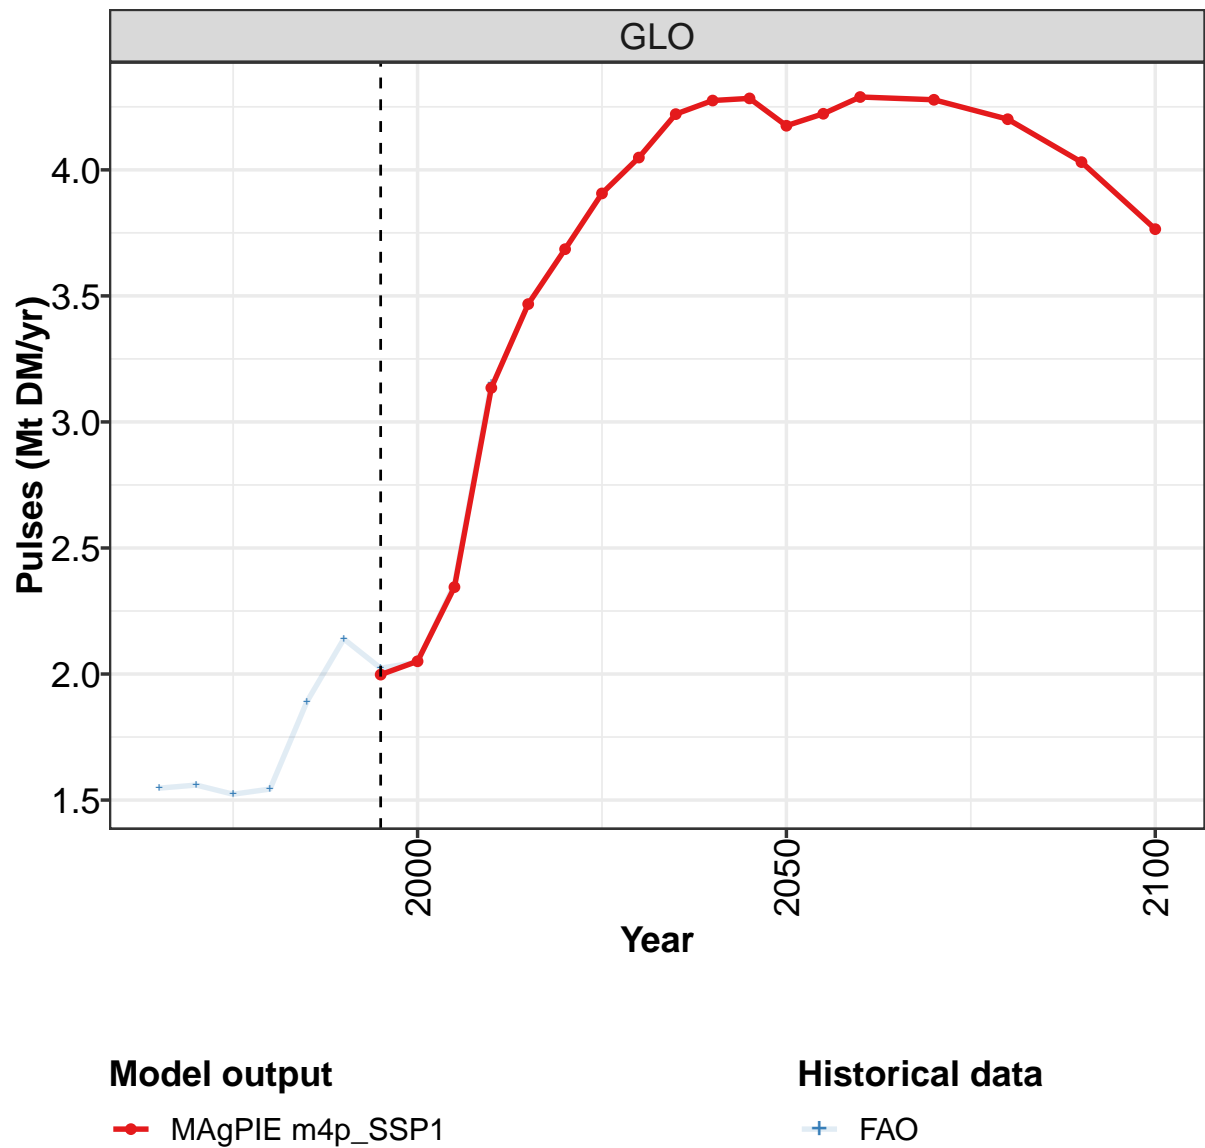

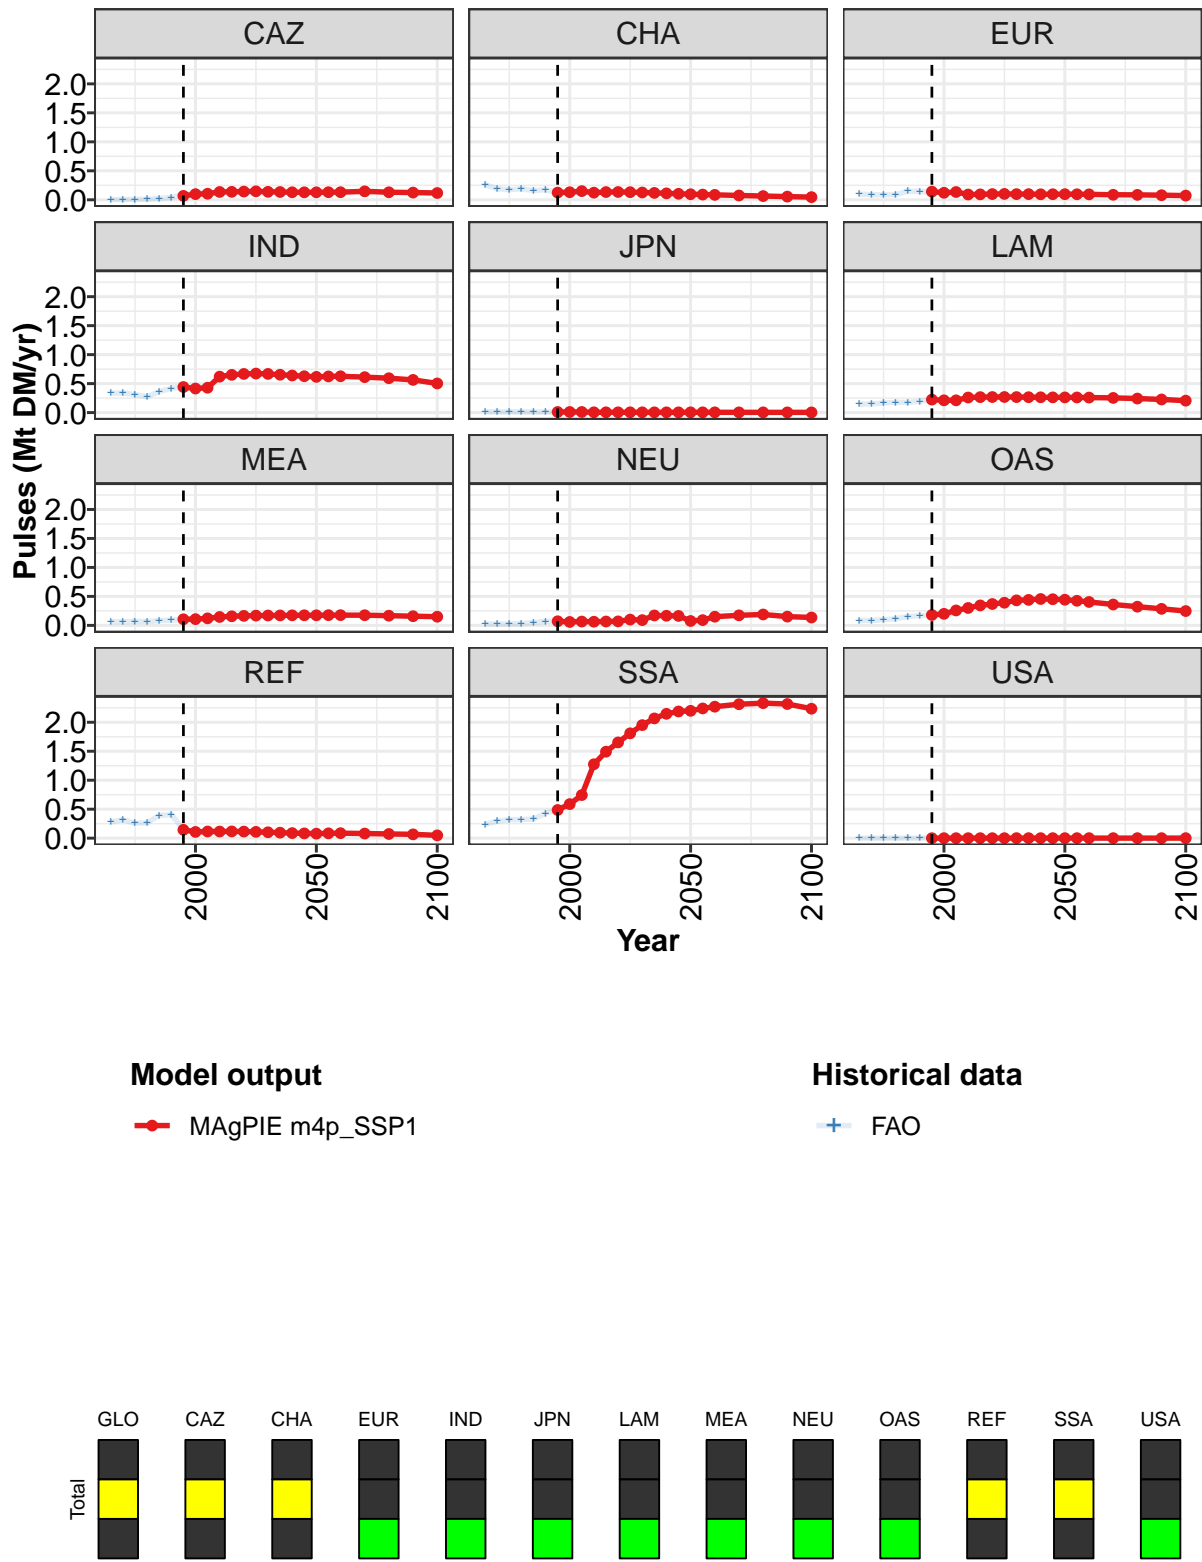

Figure 17: MAgPIE m4p\_SSP1 — Demand—Agricultural Supply Chain Loss—Crops—Other crops—Pulses (Mt DM/yr)



|     | 1995 | 2000 | 2005 | 2010 | 2015 | 2020 | 2025 | 2030 | 2035 | 2040 | 2045 |
|-----|------|------|------|------|------|------|------|------|------|------|------|
| GLO | 2.00 | 2.05 | 2.34 | 3.14 | 3.47 | 3.69 | 3.91 | 4.05 | 4.22 | 4.28 | 4.28 |
| CAZ | 0.07 | 0.10 | 0.10 | 0.14 | 0.14 | 0.14 | 0.15 | 0.14 | 0.14 | 0.13 | 0.13 |
| CHA | 0.12 | 0.13 | 0.15 | 0.12 | 0.13 | 0.13 | 0.13 | 0.13 | 0.12 | 0.11 | 0.10 |
| EUR | 0.14 | 0.12 | 0.13 | 0.09 | 0.09 | 0.10 | 0.10 | 0.10 | 0.10 | 0.10 | 0.10 |
| IND | 0.44 | 0.42 | 0.43 | 0.62 | 0.65 | 0.67 | 0.67 | 0.67 | 0.65 | 0.64 | 0.63 |
| JPN | 0.01 | 0.01 | 0.01 | 0.01 | 0.01 | 0.01 | 0.01 | 0.00 | 0.00 | 0.00 | 0.00 |
| LAM | 0.22 | 0.21 | 0.21 | 0.26 | 0.27 | 0.27 | 0.27 | 0.27 | 0.27 | 0.26 | 0.26 |
| MEA | 0.11 | 0.11 | 0.12 | 0.15 | 0.16 | 0.16 | 0.17 | 0.17 | 0.17 | 0.17 | 0.17 |
| NEU | 0.07 | 0.06 | 0.07 | 0.06 | 0.07 | 0.07 | 0.10 | 0.09 | 0.17 | 0.17 | 0.16 |
| OAS | 0.18 | 0.20 | 0.26 | 0.30 | 0.35 | 0.37 | 0.39 | 0.43 | 0.44 | 0.46 | 0.45 |
| REF | 0.14 | 0.11 | 0.12 | 0.11 | 0.12 | 0.11 | 0.11 | 0.10 | 0.09 | 0.09 | 0.08 |
| SSA | 0.49 | 0.59 | 0.74 | 1.28 | 1.49 | 1.65 | 1.81 | 1.95 | 2.07 | 2.15 | 2.19 |
| USA | 0.00 | 0.00 | 0.00 | 0.00 | 0.00 | 0.00 | 0.00 | 0.00 | 0.00 | 0.00 | 0.00 |

Table 52: MAgPIE m4p\_SSP1 — Demand—Agricultural Supply Chain Loss—Crops—Other crops—Pulses (Mt DM/yr) [PART 1/2]

|     | 2050 | 2055 | 2060 | 2070 | 2080 | 2090 | 2100 |
|-----|------|------|------|------|------|------|------|
| GLO | 4.18 | 4.22 | 4.29 | 4.28 | 4.20 | 4.03 | 3.76 |
| CAZ | 0.13 | 0.13 | 0.13 | 0.15 | 0.13 | 0.12 | 0.12 |
| CHA | 0.10 | 0.09 | 0.09 | 0.07 | 0.06 | 0.06 | 0.05 |
| EUR | 0.10 | 0.10 | 0.09 | 0.09 | 0.09 | 0.08 | 0.07 |
| IND | 0.62 | 0.62 | 0.63 | 0.61 | 0.59 | 0.56 | 0.50 |
| JPN | 0.00 | 0.00 | 0.00 | 0.00 | 0.00 | 0.00 | 0.00 |
| LAM | 0.26 | 0.26 | 0.26 | 0.25 | 0.24 | 0.23 | 0.21 |
| MEA | 0.17 | 0.18 | 0.18 | 0.18 | 0.17 | 0.16 | 0.15 |
| NEU | 0.08 | 0.09 | 0.15 | 0.17 | 0.19 | 0.15 | 0.14 |
| OAS | 0.44 | 0.42 | 0.40 | 0.36 | 0.32 | 0.29 | 0.25 |
| REF | 0.08 | 0.08 | 0.09 | 0.08 | 0.07 | 0.07 | 0.05 |
| SSA | 2.20 | 2.24 | 2.27 | 2.31 | 2.33 | 2.31 | 2.23 |
| USA | 0.00 | 0.00 | 0.00 | 0.00 | 0.00 | 0.00 | 0.00 |

Table 53: MAgPIE m4p\_SSP1 — Demand—Agricultural Supply Chain Loss—Crops—Other crops—Pulses (Mt DM/yr) [PART 2/2]

|     | 1965 | 1970 | 1975 | 1980 | 1985 | 1990 | 1995 | 2000 | 2005 | 2010 |
|-----|------|------|------|------|------|------|------|------|------|------|
| GLO | 1.55 | 1.56 | 1.52 | 1.54 | 1.89 | 2.14 | 2.02 | 2.05 | 2.36 | 3.15 |
| CAZ | 0.00 | 0.00 | 0.01 | 0.01 | 0.02 | 0.04 | 0.09 | 0.12 | 0.13 | 0.14 |
| CHA | 0.26 | 0.19 | 0.17 | 0.19 | 0.16 | 0.17 | 0.12 | 0.13 | 0.15 | 0.12 |
| EUR | 0.10 | 0.09 | 0.09 | 0.09 | 0.15 | 0.14 | 0.14 | 0.12 | 0.13 | 0.09 |
| IND | 0.33 | 0.34 | 0.31 | 0.27 | 0.36 | 0.42 | 0.44 | 0.42 | 0.43 | 0.62 |
| JPN | 0.01 | 0.01 | 0.01 | 0.01 | 0.01 | 0.01 | 0.01 | 0.01 | 0.01 | 0.01 |
| LAM | 0.14 | 0.15 | 0.16 | 0.18 | 0.18 | 0.19 | 0.22 | 0.21 | 0.21 | 0.26 |
| MEA | 0.07 | 0.06 | 0.07 | 0.06 | 0.08 | 0.09 | 0.11 | 0.11 | 0.12 | 0.15 |
| NEU | 0.02 | 0.02 | 0.02 | 0.03 | 0.05 | 0.07 | 0.07 | 0.06 | 0.07 | 0.06 |
| OAS | 0.08 | 0.08 | 0.10 | 0.11 | 0.15 | 0.17 | 0.17 | 0.17 | 0.23 | 0.30 |
| REF | 0.28 | 0.32 | 0.26 | 0.26 | 0.39 | 0.41 | 0.15 | 0.11 | 0.12 | 0.12 |
| SSA | 0.24 | 0.29 | 0.32 | 0.32 | 0.33 | 0.43 | 0.49 | 0.59 | 0.76 | 1.29 |
| USA | 0.00 | 0.00 | 0.00 | 0.00 | 0.00 | 0.00 | 0.00 | 0.00 | 0.00 | 0.00 |

Table 54: FAO — Demand—Agricultural Supply Chain Loss—Crops—Other crops—Pulses (Mt DM/yr)

3.1.16
Other crops—Tropical roots

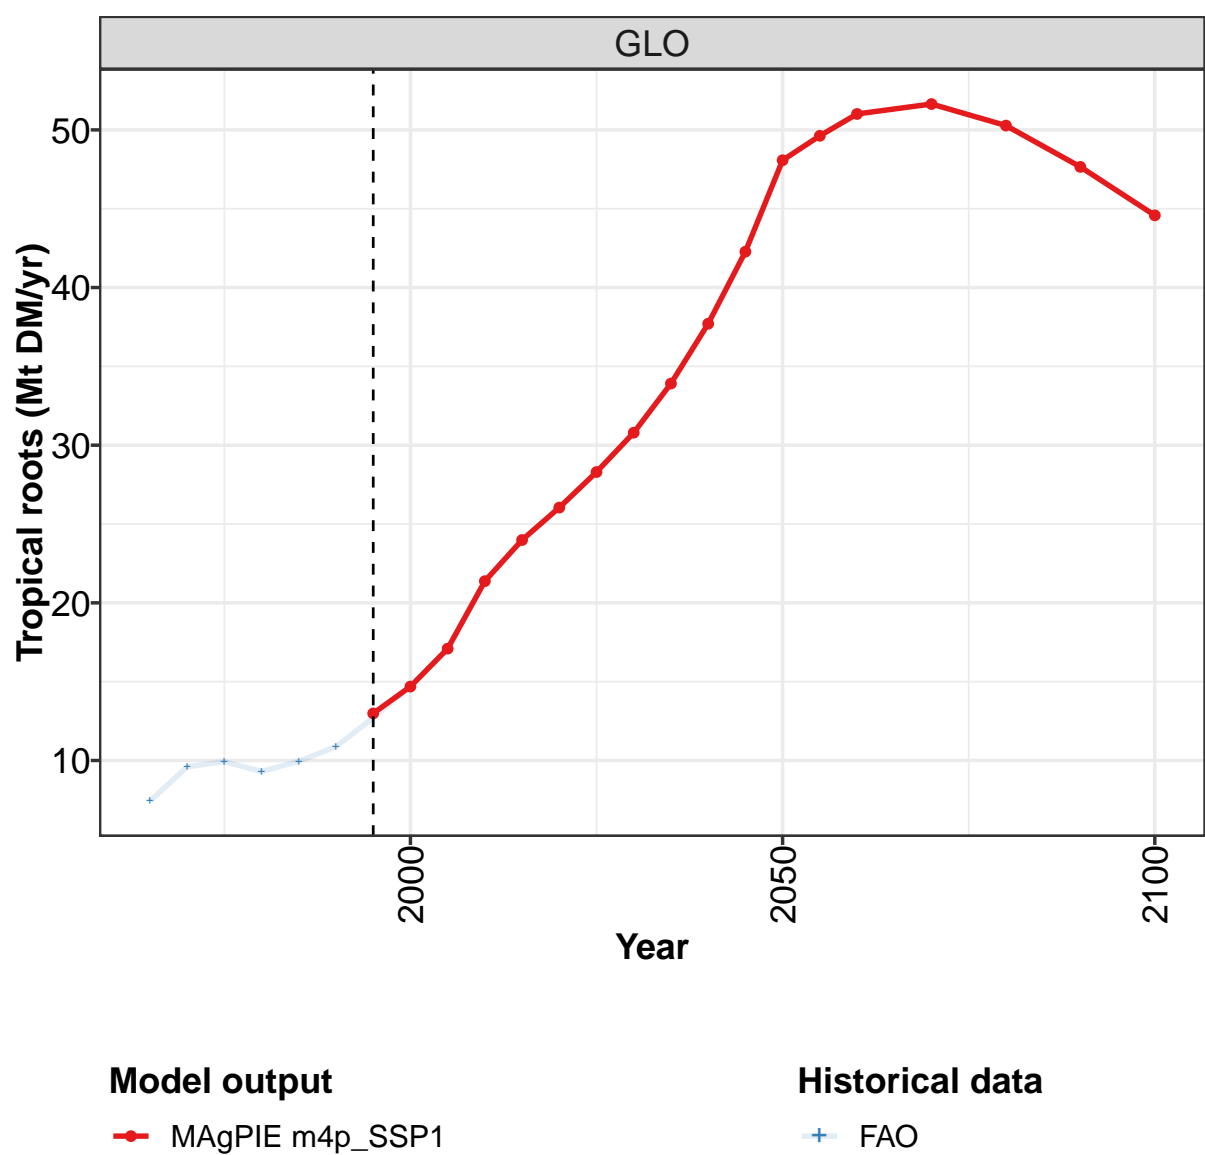

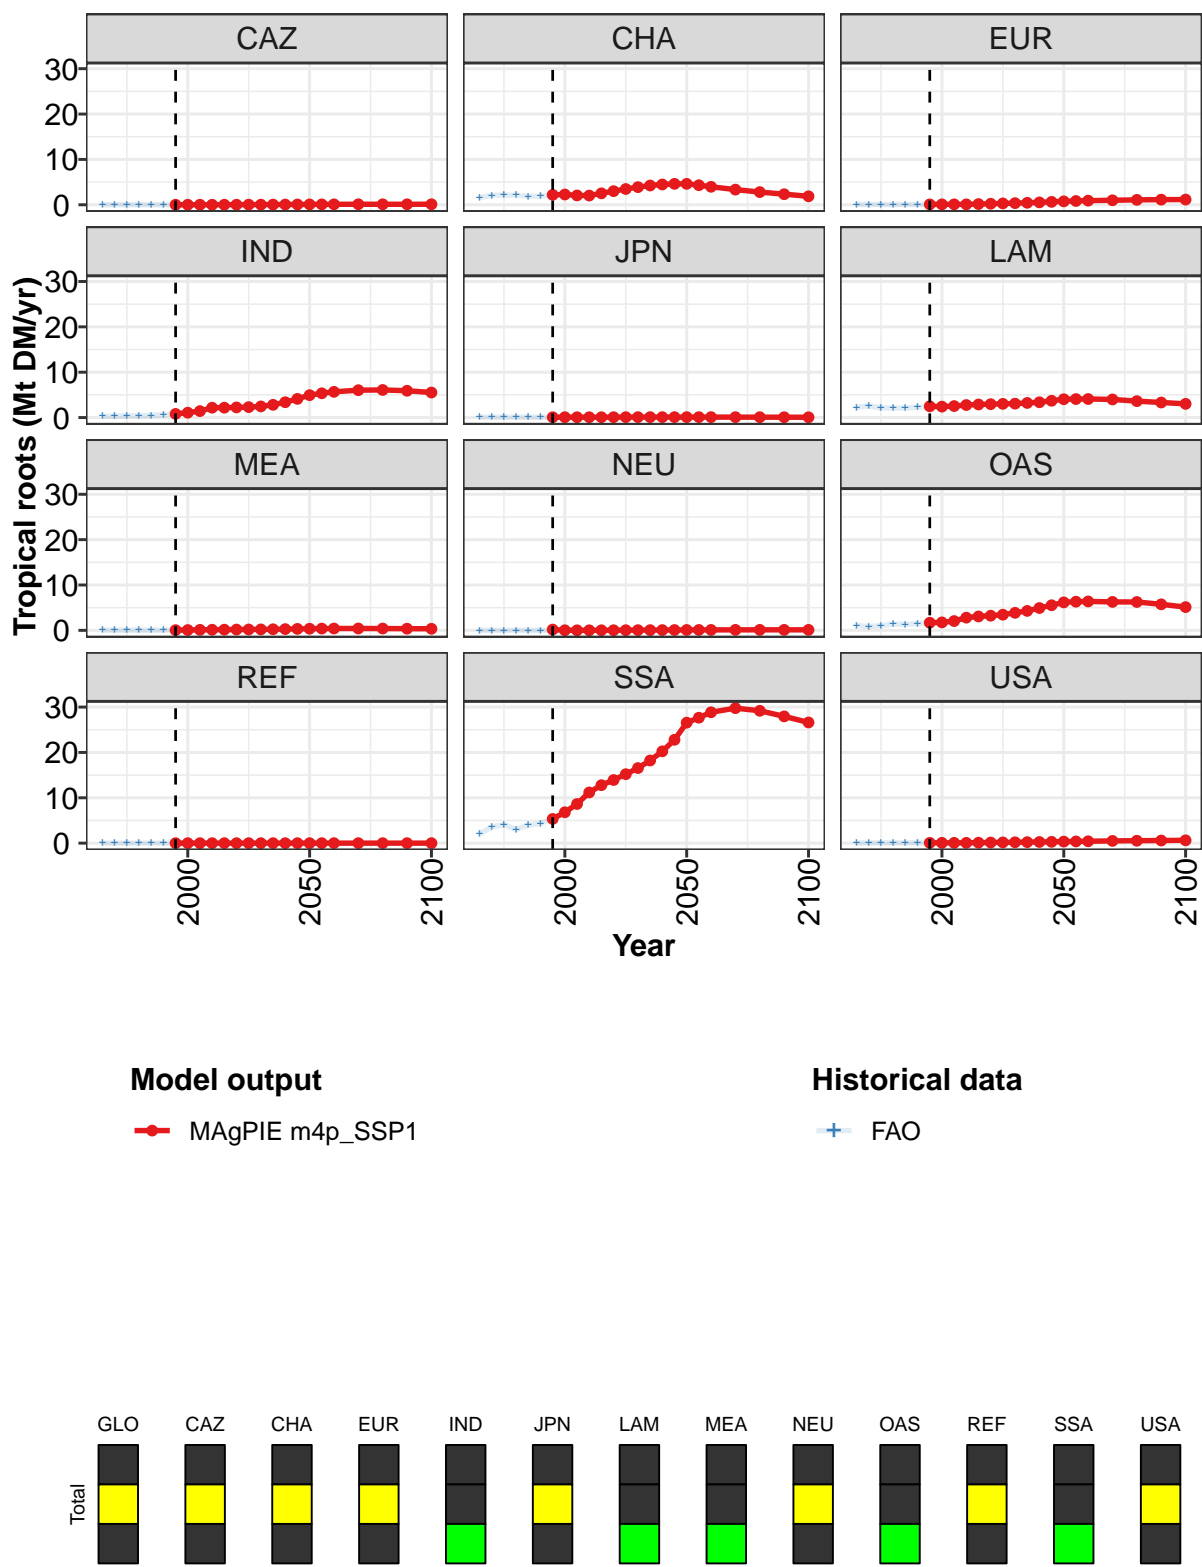

Figure 18: MAgPIE m4p\_SSP1 — Demand—Agricultural Supply Chain Loss—Crops—Other crops—Tropical roots (Mt DM/yr)

|     | 1995 | 2000 | 2005 | 2010 | 2015 | 2020 | 2025 | 2030 | 2035 | 2040 | 2045 |
|-----|------|------|------|------|------|------|------|------|------|------|------|
| GLO | 13.0 | 14.7 | 17.1 | 21.4 | 24.0 | 26.0 | 28.3 | 30.8 | 33.9 | 37.7 | 42.3 |
| CAZ | 0.0  | 0.0  | 0.0  | 0.0  | 0.0  | 0.0  | 0.0  | 0.0  | 0.0  | 0.1  | 0.1  |
| CHA | 2.2  | 2.3  | 2.1  | 2.0  | 2.5  | 3.0  | 3.5  | 3.9  | 4.2  | 4.5  | 4.6  |
| EUR | 0.1  | 0.1  | 0.1  | 0.1  | 0.2  | 0.2  | 0.3  | 0.4  | 0.4  | 0.5  | 0.6  |
| IND | 0.8  | 1.1  | 1.4  | 2.2  | 2.2  | 2.2  | 2.3  | 2.5  | 2.8  | 3.4  | 4.1  |
| JPN | 0.1  | 0.1  | 0.1  | 0.1  | 0.1  | 0.1  | 0.1  | 0.1  | 0.1  | 0.1  | 0.1  |
| LAM | 2.5  | 2.4  | 2.5  | 2.8  | 2.9  | 3.0  | 3.0  | 3.1  | 3.2  | 3.4  | 3.7  |
| MEA | 0.1  | 0.1  | 0.1  | 0.1  | 0.2  | 0.2  | 0.2  | 0.2  | 0.2  | 0.3  | 0.3  |
| NEU | 0.2  | 0.0  | 0.0  | 0.0  | 0.0  | 0.0  | 0.0  | 0.0  | 0.1  | 0.1  | 0.1  |
| OAS | 1.7  | 1.8  | 2.1  | 2.8  | 3.1  | 3.2  | 3.5  | 3.9  | 4.3  | 4.9  | 5.5  |
| REF | 0.0  | 0.0  | 0.0  | 0.0  | 0.0  | 0.0  | 0.0  | 0.0  | 0.0  | 0.0  | 0.0  |
| SSA | 5.3  | 6.8  | 8.6  | 11.2 | 12.8 | 13.9 | 15.2 | 16.6 | 18.2 | 20.2 | 22.8 |
| USA | 0.1  | 0.1  | 0.1  | 0.1  | 0.1  | 0.1  | 0.2  | 0.2  | 0.2  | 0.3  | 0.3  |

Table 55: MAgPIE m4p.SSP1 — Demand—Agricultural Supply Chain Loss—Crops—Other crops—Tropical roots (Mt DM/yr) [PART 1/2]

|     | 2050 | 2055 | 2060 | 2070 | 2080 | 2090 | 2100 |
|-----|------|------|------|------|------|------|------|
| GLO | 48.1 | 49.6 | 51.0 | 51.6 | 50.3 | 47.7 | 44.6 |
| CAZ | 0.1  | 0.1  | 0.1  | 0.1  | 0.1  | 0.1  | 0.1  |
| CHA | 4.6  | 4.3  | 4.0  | 3.3  | 2.8  | 2.3  | 1.9  |
| EUR | 0.8  | 0.8  | 0.9  | 1.0  | 1.1  | 1.1  | 1.2  |
| IND | 4.9  | 5.4  | 5.7  | 6.0  | 6.1  | 5.9  | 5.5  |
| JPN | 0.1  | 0.1  | 0.1  | 0.1  | 0.1  | 0.1  | 0.1  |
| LAM | 4.0  | 4.1  | 4.1  | 4.0  | 3.6  | 3.3  | 3.0  |
| MEA | 0.4  | 0.4  | 0.4  | 0.4  | 0.4  | 0.4  | 0.3  |
| NEU | 0.1  | 0.1  | 0.1  | 0.1  | 0.1  | 0.1  | 0.1  |
| OAS | 6.2  | 6.3  | 6.4  | 6.3  | 6.3  | 5.7  | 5.1  |
| REF | 0.0  | 0.0  | 0.0  | 0.0  | 0.0  | 0.0  | 0.0  |
| SSA | 26.6 | 27.7 | 28.9 | 29.8 | 29.2 | 27.9 | 26.6 |
| USA | 0.3  | 0.4  | 0.4  | 0.5  | 0.5  | 0.6  | 0.6  |

Table 56: MAgPIE m4p.SSP1 — Demand—Agricultural Supply Chain Loss—Crops—Other crops—Tropical roots (Mt DM/yr) [PART 2/2]

|     | 1965 | 1970 | 1975 | 1980 | 1985 | 1990 | 1995 | 2000 | 2005 | 2010 |
|-----|------|------|------|------|------|------|------|------|------|------|
| GLO | 7.4  | 9.6  | 9.9  | 9.3  | 9.9  | 10.9 | 12.7 | 14.7 | 17.0 | 21.3 |
| CAZ | 0.0  | 0.0  | 0.0  | 0.0  | 0.0  | 0.0  | 0.0  | 0.0  | 0.0  | 0.0  |
| CHA | 1.6  | 2.1  | 2.2  | 2.1  | 1.9  | 1.9  | 2.2  | 2.3  | 2.0  | 2.0  |
| EUR | 0.1  | 0.1  | 0.1  | 0.1  | 0.1  | 0.1  | 0.1  | 0.1  | 0.1  | 0.1  |
| IND | 0.3  | 0.3  | 0.4  | 0.4  | 0.5  | 0.6  | 0.8  | 1.1  | 1.4  | 2.2  |
| JPN | 0.1  | 0.1  | 0.1  | 0.1  | 0.1  | 0.1  | 0.1  | 0.1  | 0.1  | 0.1  |
| LAM | 2.3  | 2.6  | 2.1  | 2.1  | 2.1  | 2.3  | 2.4  | 2.4  | 2.5  | 2.7  |
| MEA | 0.0  | 0.0  | 0.0  | 0.0  | 0.0  | 0.0  | 0.1  | 0.1  | 0.1  | 0.1  |
| NEU | 0.0  | 0.0  | 0.0  | 0.0  | 0.0  | 0.0  | 0.0  | 0.0  | 0.0  | 0.0  |
| OAS | 1.0  | 0.8  | 1.0  | 1.4  | 1.3  | 1.5  | 1.7  | 1.7  | 2.0  | 2.8  |
| REF | 0.0  | 0.0  | 0.0  | 0.0  | 0.0  | 0.0  | 0.0  | 0.0  | 0.0  | 0.0  |
| SSA | 2.1  | 3.6  | 4.1  | 3.0  | 4.0  | 4.4  | 5.3  | 6.8  | 8.6  | 11.2 |
| USA | 0.0  | 0.0  | 0.0  | 0.0  | 0.1  | 0.1  | 0.1  | 0.1  | 0.1  | 0.1  |

Table 57: FAO — Demand—Agricultural Supply Chain Loss—Crops—Other crops—Tropical roots (Mt DM/yr)

3.1.17 Sugar crops

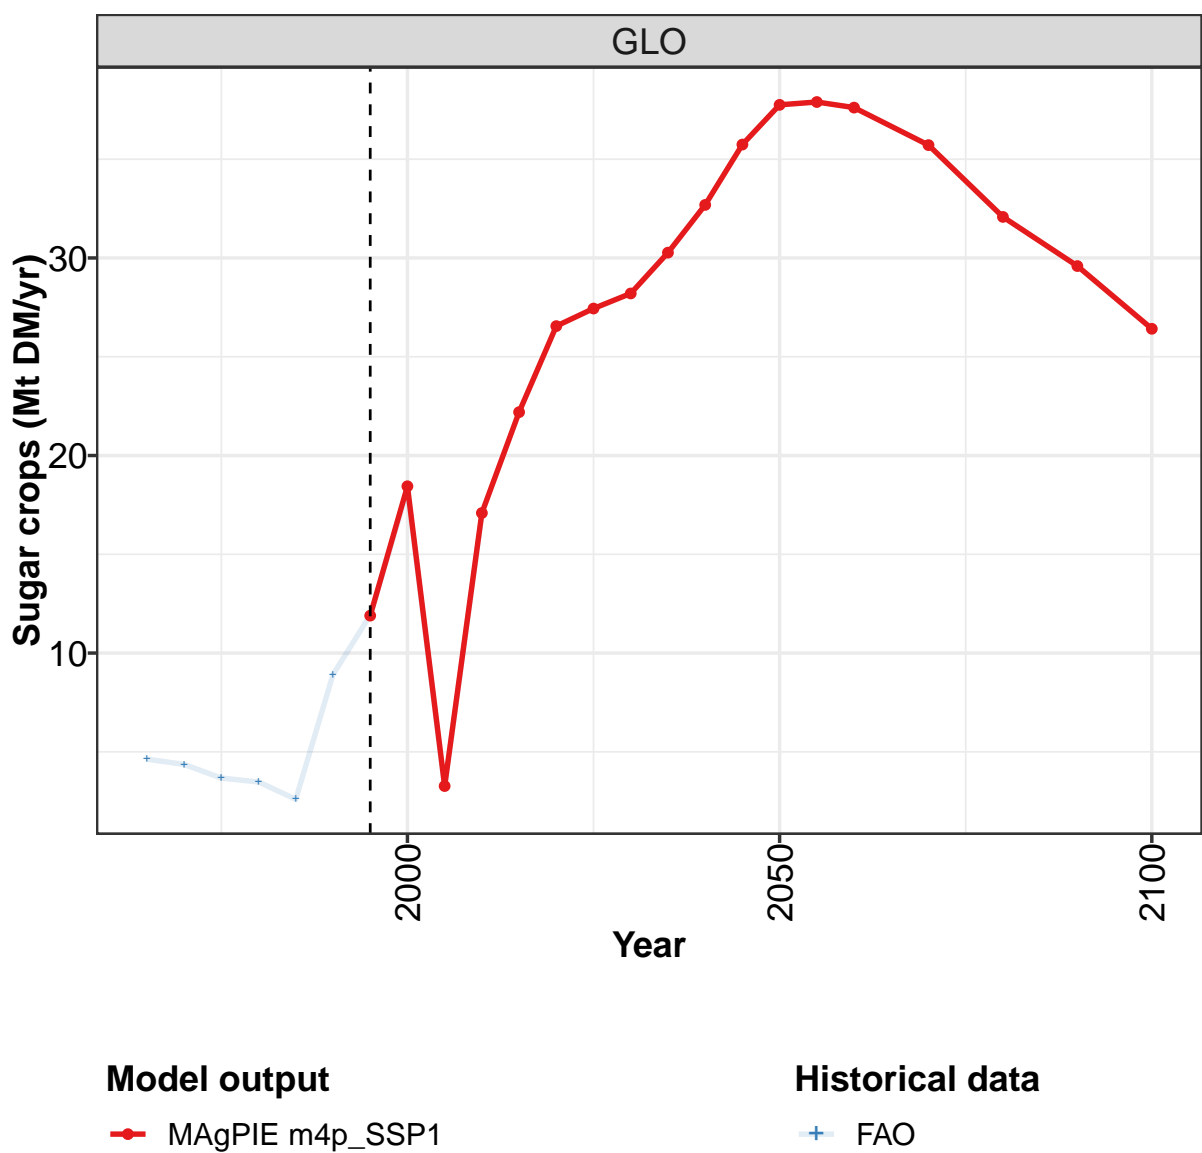

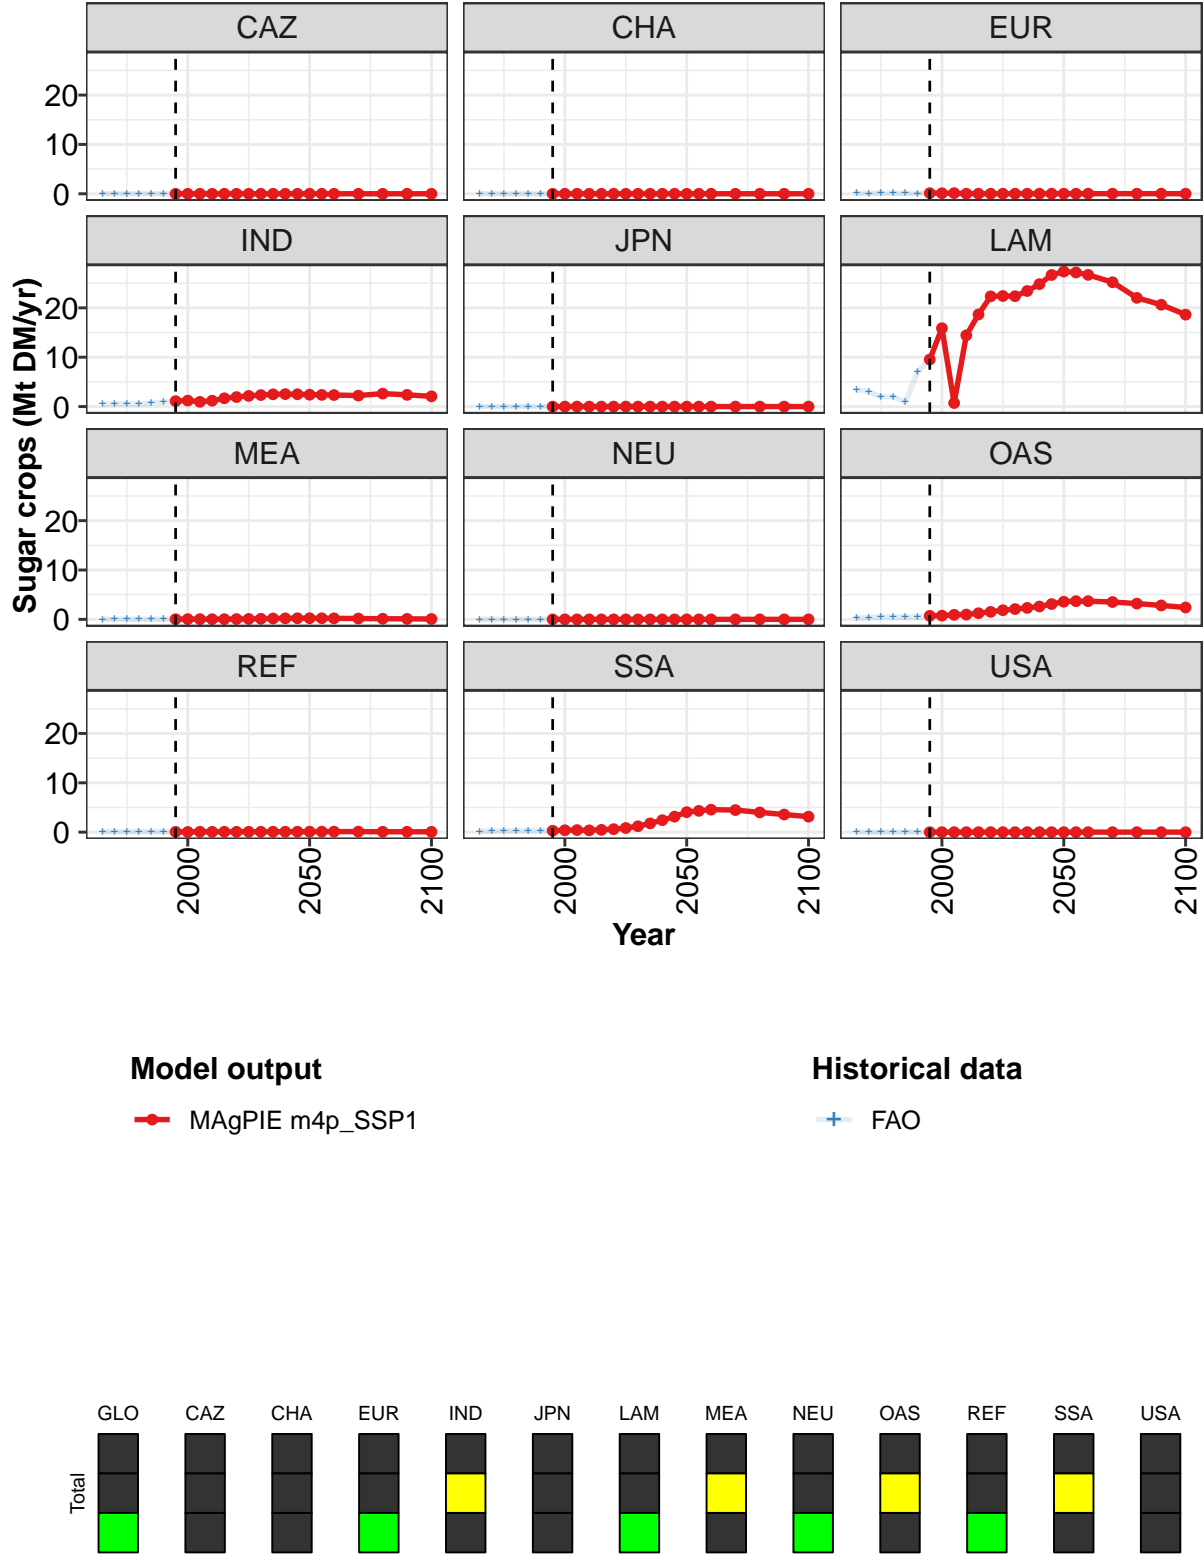

Figure 19: MAgPIE m4p\_SSP1 — Demand—Agricultural Supply Chain Loss—Crops—Sugar crops (Mt DM/yr)

|     | 1995 | 2000 | 2005 | 2010 | 2015 | 2020 | 2025 | 2030 | 2035 | 2040 | 2045 |
|-----|------|------|------|------|------|------|------|------|------|------|------|
| GLO | 11.9 | 18.4 | 3.3  | 17.1 | 22.2 | 26.6 | 27.4 | 28.2 | 30.3 | 32.7 | 35.7 |
| CAZ | 0.0  | 0.0  | 0.0  | 0.0  | 0.0  | 0.0  | 0.0  | 0.0  | 0.0  | 0.0  | 0.0  |
| CHA | 0.0  | 0.0  | 0.0  | 0.0  | 0.0  | 0.0  | 0.0  | 0.0  | 0.0  | 0.0  | 0.0  |
| EUR | 0.1  | 0.1  | 0.1  | 0.0  | 0.0  | 0.0  | 0.0  | 0.0  | 0.0  | 0.0  | 0.0  |
| IND | 1.1  | 1.2  | 1.0  | 1.2  | 1.7  | 1.9  | 2.2  | 2.3  | 2.5  | 2.5  | 2.5  |
| JPN | 0.0  | 0.0  | 0.0  | 0.0  | 0.0  | 0.0  | 0.0  | 0.0  | 0.0  | 0.0  | 0.0  |
| LAM | 9.5  | 15.9 | 0.7  | 14.4 | 18.7 | 22.3 | 22.4 | 22.4 | 23.4 | 24.8 | 26.7 |
| MEA | 0.0  | 0.0  | 0.0  | 0.0  | 0.0  | 0.1  | 0.1  | 0.1  | 0.2  | 0.2  | 0.2  |
| NEU | 0.0  | 0.0  | 0.0  | 0.0  | 0.0  | 0.0  | 0.0  | 0.0  | 0.0  | 0.0  | 0.0  |
| OAS | 0.7  | 0.8  | 0.9  | 1.0  | 1.2  | 1.5  | 1.9  | 2.1  | 2.3  | 2.6  | 3.1  |
| REF | 0.1  | 0.0  | 0.1  | 0.1  | 0.1  | 0.1  | 0.1  | 0.1  | 0.1  | 0.1  | 0.1  |
| SSA | 0.3  | 0.4  | 0.4  | 0.4  | 0.5  | 0.6  | 0.8  | 1.2  | 1.8  | 2.4  | 3.1  |
| USA | 0.0  | 0.0  | 0.0  | 0.0  | 0.0  | 0.0  | 0.0  | 0.0  | 0.0  | 0.0  | 0.0  |

Table 58: MAgPIE m4p\_SSP1 — Demand—Agricultural Supply Chain Loss—Crops—Sugar crops (Mt DM/yr)  
[PART 1/2]

|     | 2050 | 2055 | 2060 | 2070 | 2080 | 2090 | 2100 |
|-----|------|------|------|------|------|------|------|
| GLO | 37.8 | 37.9 | 37.6 | 35.7 | 32.1 | 29.6 | 26.4 |
| CAZ | 0.0  | 0.0  | 0.0  | 0.0  | 0.0  | 0.0  | 0.0  |
| CHA | 0.0  | 0.0  | 0.0  | 0.0  | 0.0  | 0.0  | 0.0  |
| EUR | 0.0  | 0.0  | 0.0  | 0.0  | 0.0  | 0.0  | 0.0  |
| IND | 2.4  | 2.4  | 2.3  | 2.2  | 2.6  | 2.4  | 2.1  |
| JPN | 0.0  | 0.0  | 0.0  | 0.0  | 0.0  | 0.0  | 0.0  |
| LAM | 27.4 | 27.2 | 26.7 | 25.2 | 22.0 | 20.6 | 18.6 |
| MEA | 0.2  | 0.2  | 0.2  | 0.2  | 0.1  | 0.1  | 0.1  |
| NEU | 0.0  | 0.0  | 0.0  | 0.0  | 0.0  | 0.0  | 0.0  |
| OAS | 3.6  | 3.7  | 3.7  | 3.5  | 3.2  | 2.8  | 2.4  |
| REF | 0.1  | 0.1  | 0.1  | 0.1  | 0.1  | 0.1  | 0.1  |
| SSA | 4.1  | 4.3  | 4.6  | 4.5  | 4.0  | 3.6  | 3.1  |
| USA | 0.0  | 0.0  | 0.0  | 0.0  | 0.0  | 0.0  | 0.0  |

Table 59: MAgPIE m4p\_SSP1 — Demand—Agricultural Supply Chain Loss—Crops—Sugar crops (Mt DM/yr)  
[PART 2/2]

|     | 1965 | 1970 | 1975 | 1980 | 1985 | 1990 | 1995 | 2000 | 2005 | 2010 |
|-----|------|------|------|------|------|------|------|------|------|------|
| GLO | 4.6  | 4.4  | 3.7  | 3.5  | 2.6  | 8.9  | 11.9 | 18.2 | 3.2  | 17.0 |
| CAZ | 0.0  | 0.0  | 0.0  | 0.0  | 0.0  | 0.0  | 0.0  | 0.0  | 0.0  | 0.0  |
| CHA | 0.0  | 0.0  | 0.0  | 0.0  | 0.0  | 0.0  | 0.0  | 0.0  | 0.0  | 0.0  |
| EUR | 0.1  | 0.1  | 0.2  | 0.1  | 0.1  | 0.1  | 0.1  | 0.1  | 0.1  | 0.0  |
| IND | 0.5  | 0.5  | 0.6  | 0.5  | 0.7  | 0.9  | 1.1  | 1.2  | 1.0  | 1.2  |
| JPN | 0.0  | 0.0  | 0.0  | 0.0  | 0.0  | 0.0  | 0.0  | 0.0  | 0.0  | 0.0  |
| LAM | 3.4  | 3.0  | 2.0  | 2.0  | 0.9  | 7.0  | 9.7  | 15.7 | 0.7  | 14.4 |
| MEA | 0.0  | 0.0  | 0.0  | 0.0  | 0.0  | 0.0  | 0.0  | 0.0  | 0.0  | 0.0  |
| NEU | 0.0  | 0.0  | 0.0  | 0.0  | 0.0  | 0.0  | 0.0  | 0.0  | 0.0  | 0.0  |
| OAS | 0.3  | 0.4  | 0.5  | 0.5  | 0.5  | 0.5  | 0.6  | 0.8  | 0.8  | 0.9  |
| REF | 0.1  | 0.1  | 0.1  | 0.1  | 0.1  | 0.1  | 0.1  | 0.0  | 0.1  | 0.1  |
| SSA | 0.2  | 0.2  | 0.3  | 0.3  | 0.3  | 0.3  | 0.3  | 0.4  | 0.4  | 0.4  |
| USA | 0.0  | 0.0  | 0.0  | 0.0  | 0.0  | 0.0  | 0.0  | 0.0  | 0.0  | 0.0  |

Table 60: FAO — Demand—Agricultural Supply Chain Loss—Crops—Sugar crops (Mt DM/yr)

3.1.18
Sugar crops—Sugar beet

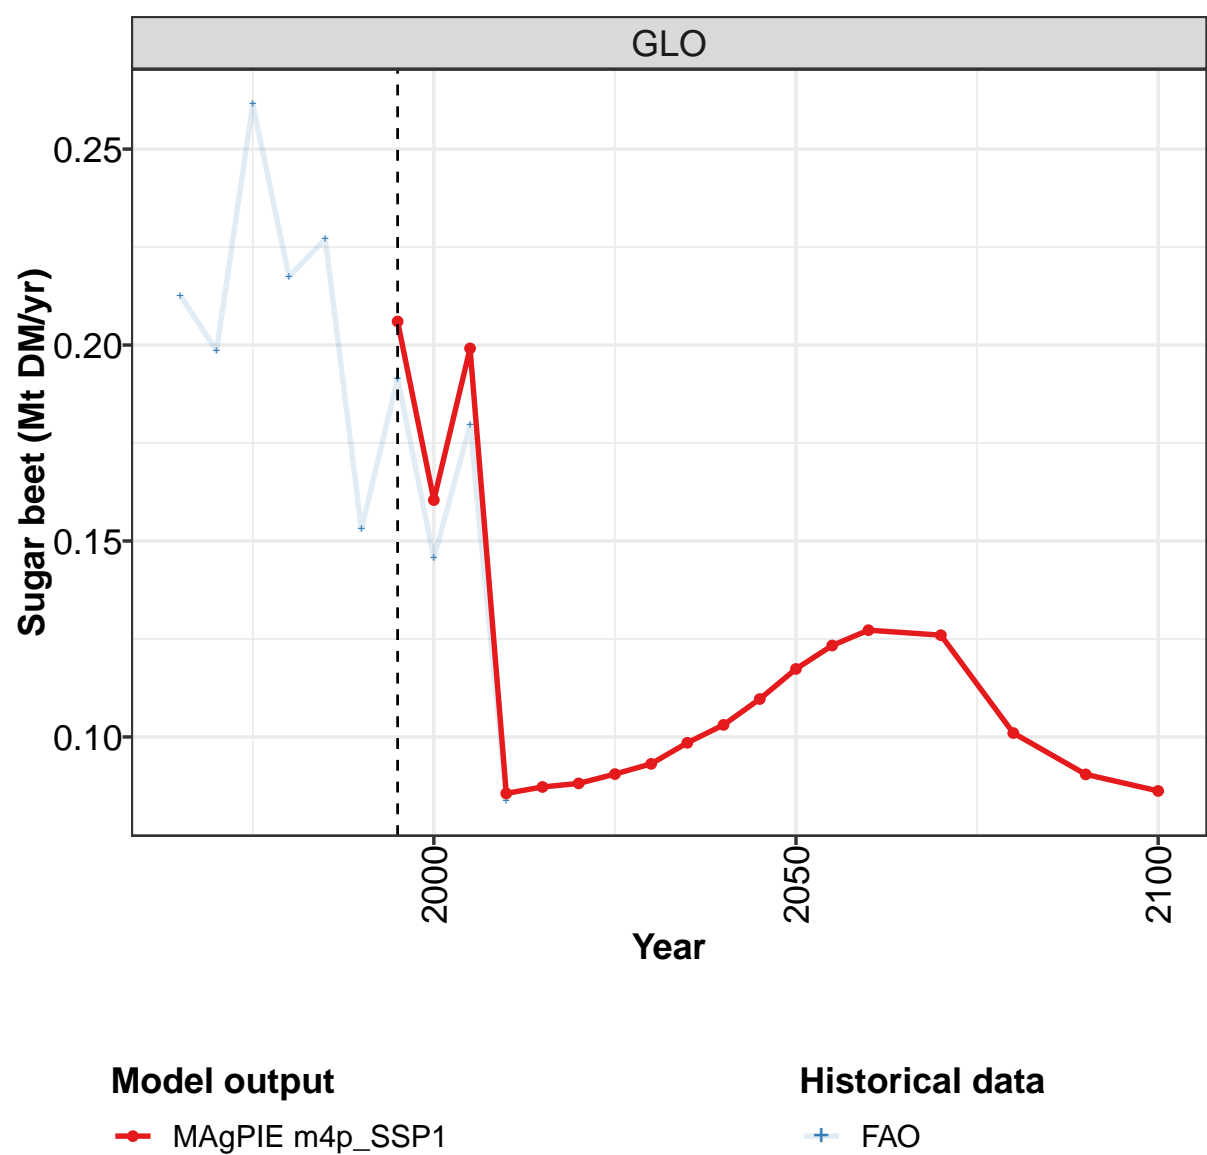



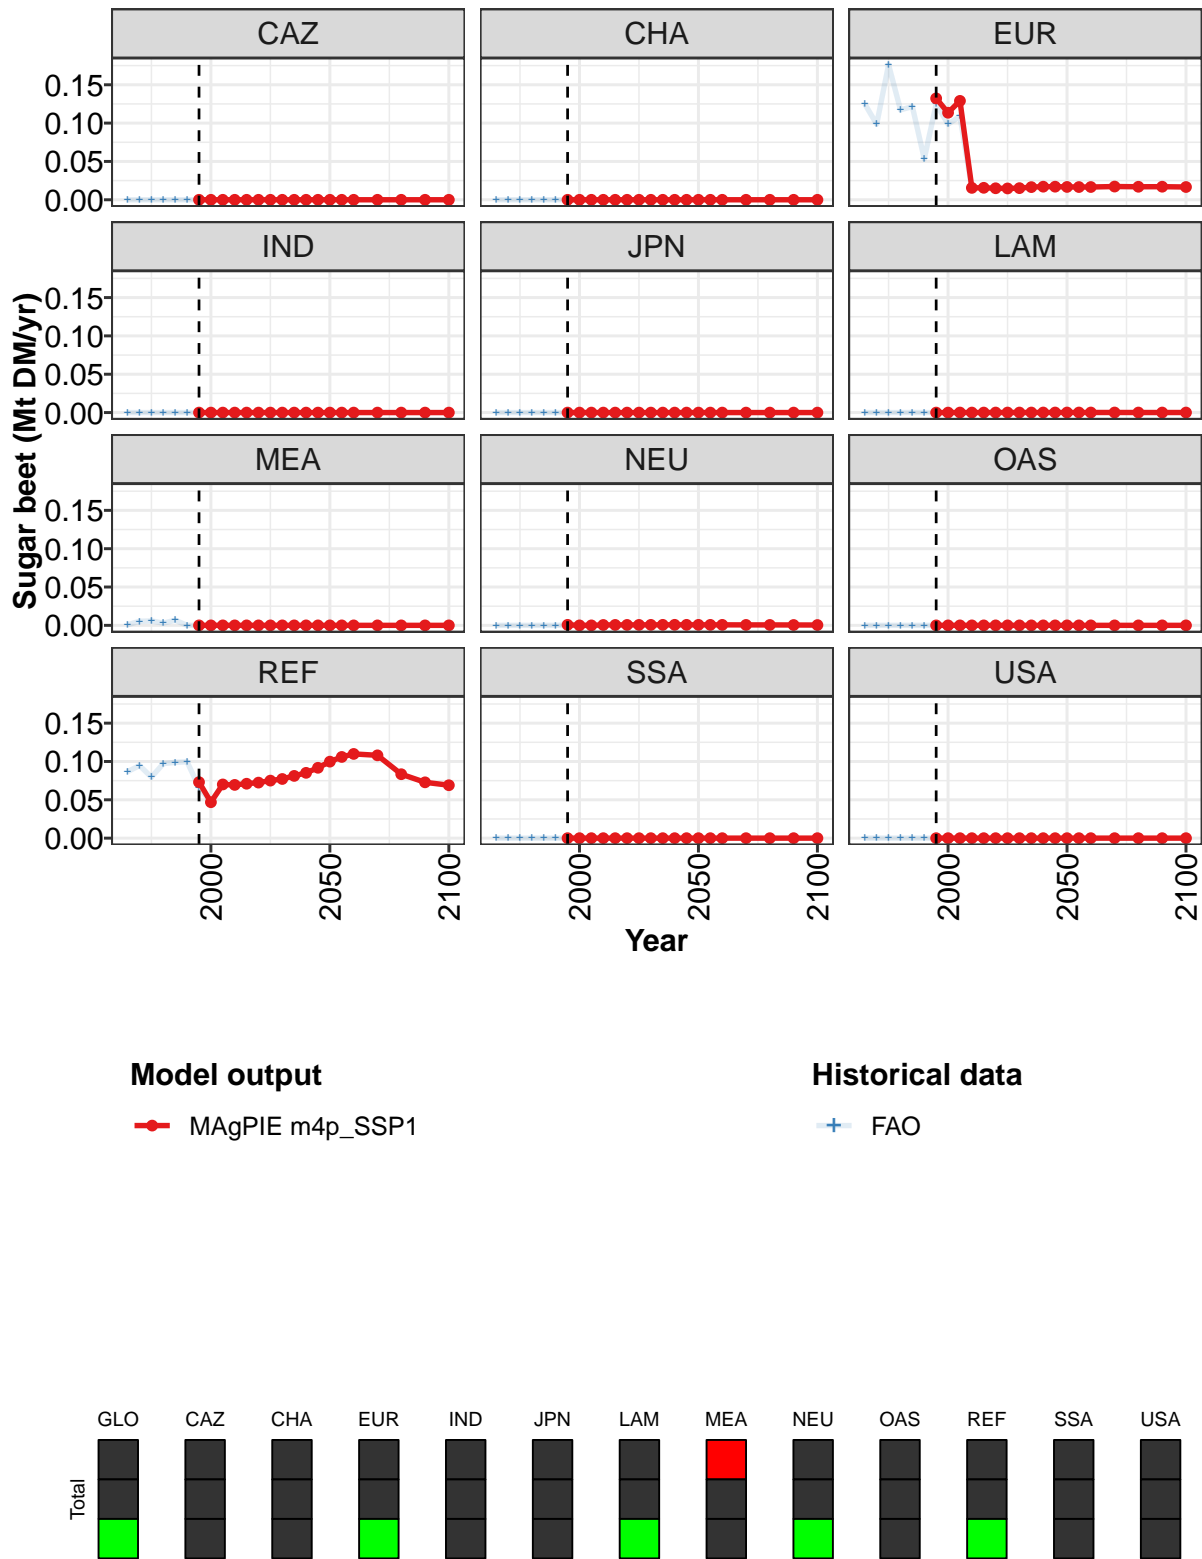

Figure 20: MAgPIE m4p\_SSP1 — Demand—Agricultural Supply Chain Loss—Crops—Sugar crops—Sugar beet (Mt DM/yr)

|     | 1995  | 2000  | 2005  | 2010  | 2015  | 2020  | 2025  | 2030  | 2035  | 2040  | 2045  |
|-----|-------|-------|-------|-------|-------|-------|-------|-------|-------|-------|-------|
| GLO | 0.206 | 0.160 | 0.199 | 0.086 | 0.087 | 0.088 | 0.091 | 0.093 | 0.099 | 0.103 | 0.110 |
| CAZ | 0.000 | 0.000 | 0.000 | 0.000 | 0.000 | 0.000 | 0.000 | 0.000 | 0.000 | 0.000 | 0.000 |
| CHA | 0.000 | 0.000 | 0.000 | 0.000 | 0.000 | 0.000 | 0.000 | 0.000 | 0.000 | 0.000 | 0.000 |
| EUR | 0.132 | 0.114 | 0.129 | 0.016 | 0.016 | 0.015 | 0.015 | 0.015 | 0.017 | 0.017 | 0.017 |
| IND | 0.000 | 0.000 | 0.000 | 0.000 | 0.000 | 0.000 | 0.000 | 0.000 | 0.000 | 0.000 | 0.000 |
| JPN | 0.000 | 0.000 | 0.000 | 0.000 | 0.000 | 0.000 | 0.000 | 0.000 | 0.000 | 0.000 | 0.000 |
| LAM | 0.000 | 0.000 | 0.000 | 0.000 | 0.000 | 0.000 | 0.000 | 0.000 | 0.000 | 0.000 | 0.000 |
| MEA | 0.000 | 0.000 | 0.000 | 0.000 | 0.000 | 0.000 | 0.000 | 0.000 | 0.000 | 0.000 | 0.000 |
| NEU | 0.001 | 0.000 | 0.000 | 0.001 | 0.001 | 0.001 | 0.001 | 0.001 | 0.001 | 0.001 | 0.001 |
| OAS | 0.000 | 0.000 | 0.000 | 0.000 | 0.000 | 0.000 | 0.000 | 0.000 | 0.000 | 0.000 | 0.000 |
| REF | 0.073 | 0.047 | 0.070 | 0.069 | 0.071 | 0.072 | 0.075 | 0.077 | 0.081 | 0.085 | 0.092 |
| SSA | 0.000 | 0.000 | 0.000 | 0.000 | 0.000 | 0.000 | 0.000 | 0.000 | 0.000 | 0.000 | 0.000 |
| USA | 0.000 | 0.000 | 0.000 | 0.000 | 0.000 | 0.000 | 0.000 | 0.000 | 0.000 | 0.000 | 0.000 |

Table 61: MAgPIE m4p\_SSP1 — Demand—Agricultural Supply Chain Loss—Crops—Sugar crops—Sugar beet (Mt DM/yr) [PART 1/2]

|     | 2050  | 2055  | 2060  | 2070  | 2080  | 2090  | 2100  |
|-----|-------|-------|-------|-------|-------|-------|-------|
| GLO | 0.117 | 0.123 | 0.127 | 0.126 | 0.101 | 0.090 | 0.086 |
| CAZ | 0.000 | 0.000 | 0.000 | 0.000 | 0.000 | 0.000 | 0.000 |
| CHA | 0.000 | 0.000 | 0.000 | 0.000 | 0.000 | 0.000 | 0.000 |
| EUR | 0.017 | 0.017 | 0.017 | 0.017 | 0.017 | 0.017 | 0.017 |
| IND | 0.000 | 0.000 | 0.000 | 0.000 | 0.000 | 0.000 | 0.000 |
| JPN | 0.000 | 0.000 | 0.000 | 0.000 | 0.000 | 0.000 | 0.000 |
| LAM | 0.000 | 0.000 | 0.000 | 0.000 | 0.000 | 0.000 | 0.000 |
| MEA | 0.000 | 0.000 | 0.000 | 0.000 | 0.000 | 0.000 | 0.000 |
| NEU | 0.001 | 0.001 | 0.001 | 0.001 | 0.001 | 0.000 | 0.000 |
| OAS | 0.000 | 0.000 | 0.000 | 0.000 | 0.000 | 0.000 | 0.000 |
| REF | 0.100 | 0.106 | 0.110 | 0.108 | 0.083 | 0.073 | 0.069 |
| SSA | 0.000 | 0.000 | 0.000 | 0.000 | 0.000 | 0.000 | 0.000 |
| USA | 0.000 | 0.000 | 0.000 | 0.000 | 0.000 | 0.000 | 0.000 |

Table 62: MAgPIE m4p\_SSP1 — Demand—Agricultural Supply Chain Loss—Crops—Sugar crops—Sugar beet (Mt DM/yr) [PART 2/2]

|     | 1965  | 1970  | 1975  | 1980  | 1985  | 1990  | 1995  | 2000  | 2005  | 2010  |
|-----|-------|-------|-------|-------|-------|-------|-------|-------|-------|-------|
| GLO | 0.213 | 0.199 | 0.262 | 0.217 | 0.227 | 0.153 | 0.192 | 0.146 | 0.180 | 0.084 |
| CAZ | 0.000 | 0.000 | 0.000 | 0.000 | 0.000 | 0.000 | 0.000 | 0.000 | 0.000 | 0.000 |
| CHA | 0.000 | 0.000 | 0.000 | 0.000 | 0.000 | 0.000 | 0.000 | 0.000 | 0.000 | 0.000 |
| EUR | 0.125 | 0.099 | 0.176 | 0.117 | 0.121 | 0.053 | 0.125 | 0.099 | 0.109 | 0.015 |
| IND | 0.000 | 0.000 | 0.000 | 0.000 | 0.000 | 0.000 | 0.000 | 0.000 | 0.000 | 0.000 |
| JPN | 0.000 | 0.000 | 0.000 | 0.000 | 0.000 | 0.000 | 0.000 | 0.000 | 0.000 | 0.000 |
| LAM | 0.000 | 0.000 | 0.000 | 0.000 | 0.000 | 0.000 | 0.000 | 0.000 | 0.000 | 0.000 |
| MEA | 0.001 | 0.005 | 0.006 | 0.003 | 0.007 | 0.000 | 0.000 | 0.000 | 0.000 | 0.000 |
| NEU | 0.000 | 0.000 | 0.000 | 0.000 | 0.000 | 0.000 | 0.001 | 0.000 | 0.000 | 0.000 |
| OAS | 0.000 | 0.000 | 0.000 | 0.000 | 0.000 | 0.000 | 0.000 | 0.000 | 0.000 | 0.000 |
| REF | 0.087 | 0.095 | 0.080 | 0.097 | 0.099 | 0.100 | 0.066 | 0.047 | 0.071 | 0.069 |
| SSA | 0.000 | 0.000 | 0.000 | 0.000 | 0.000 | 0.000 | 0.000 | 0.000 | 0.000 | 0.000 |
| USA | 0.000 | 0.000 | 0.000 | 0.000 | 0.000 | 0.000 | 0.000 | 0.000 | 0.000 | 0.000 |

Table 63: FAO — Demand—Agricultural Supply Chain Loss—Crops—Sugar crops—Sugar beet (Mt DM/yr)

3.1.19
Sugar crops—Sugar cane

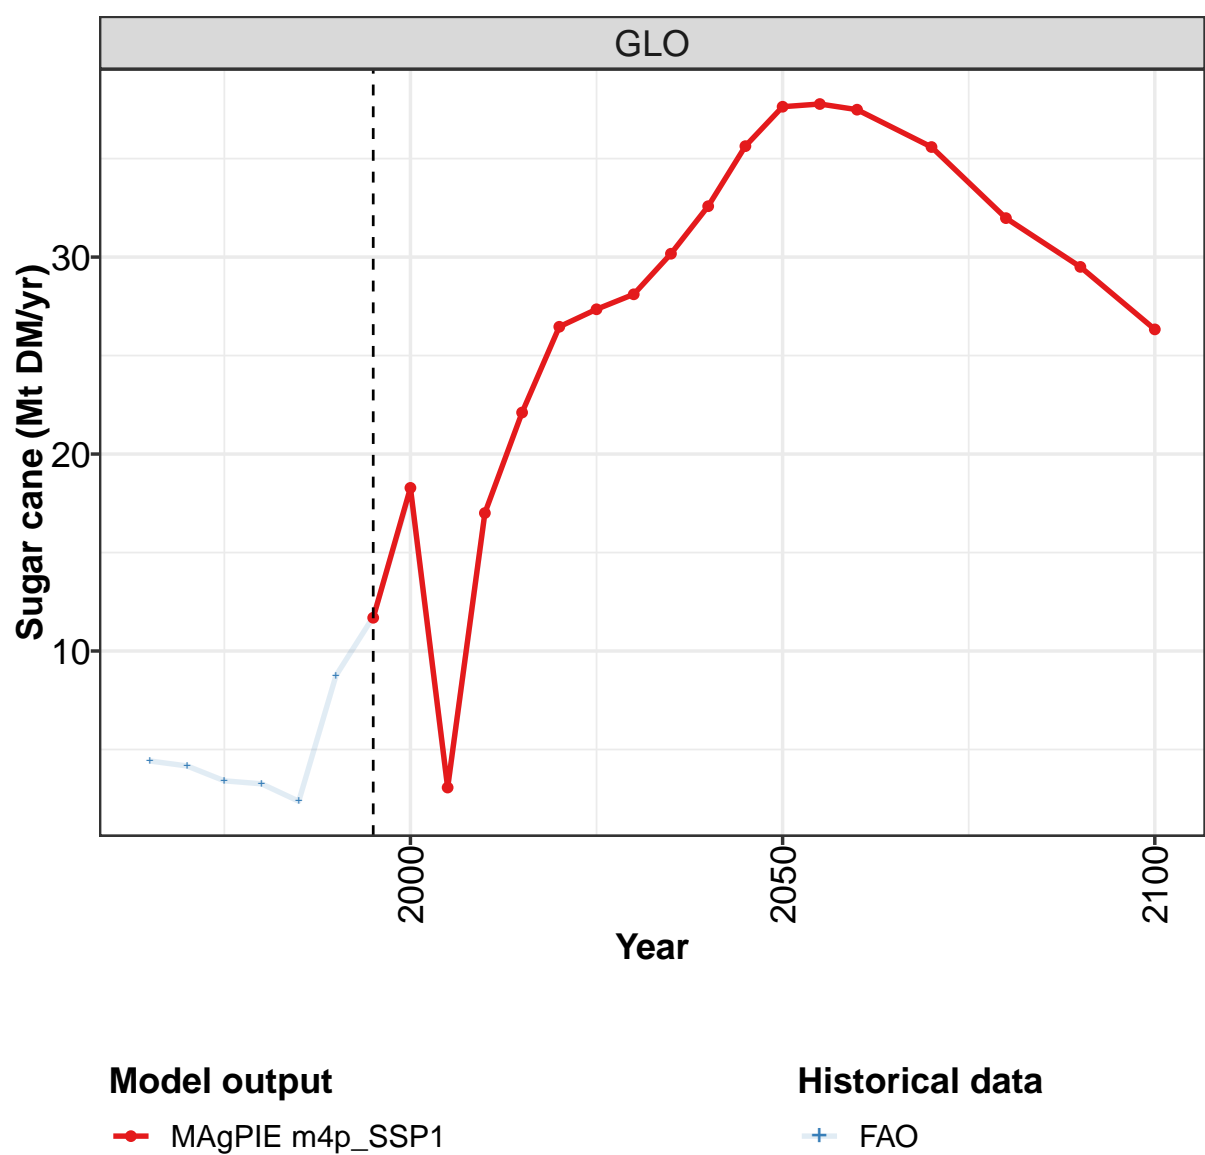

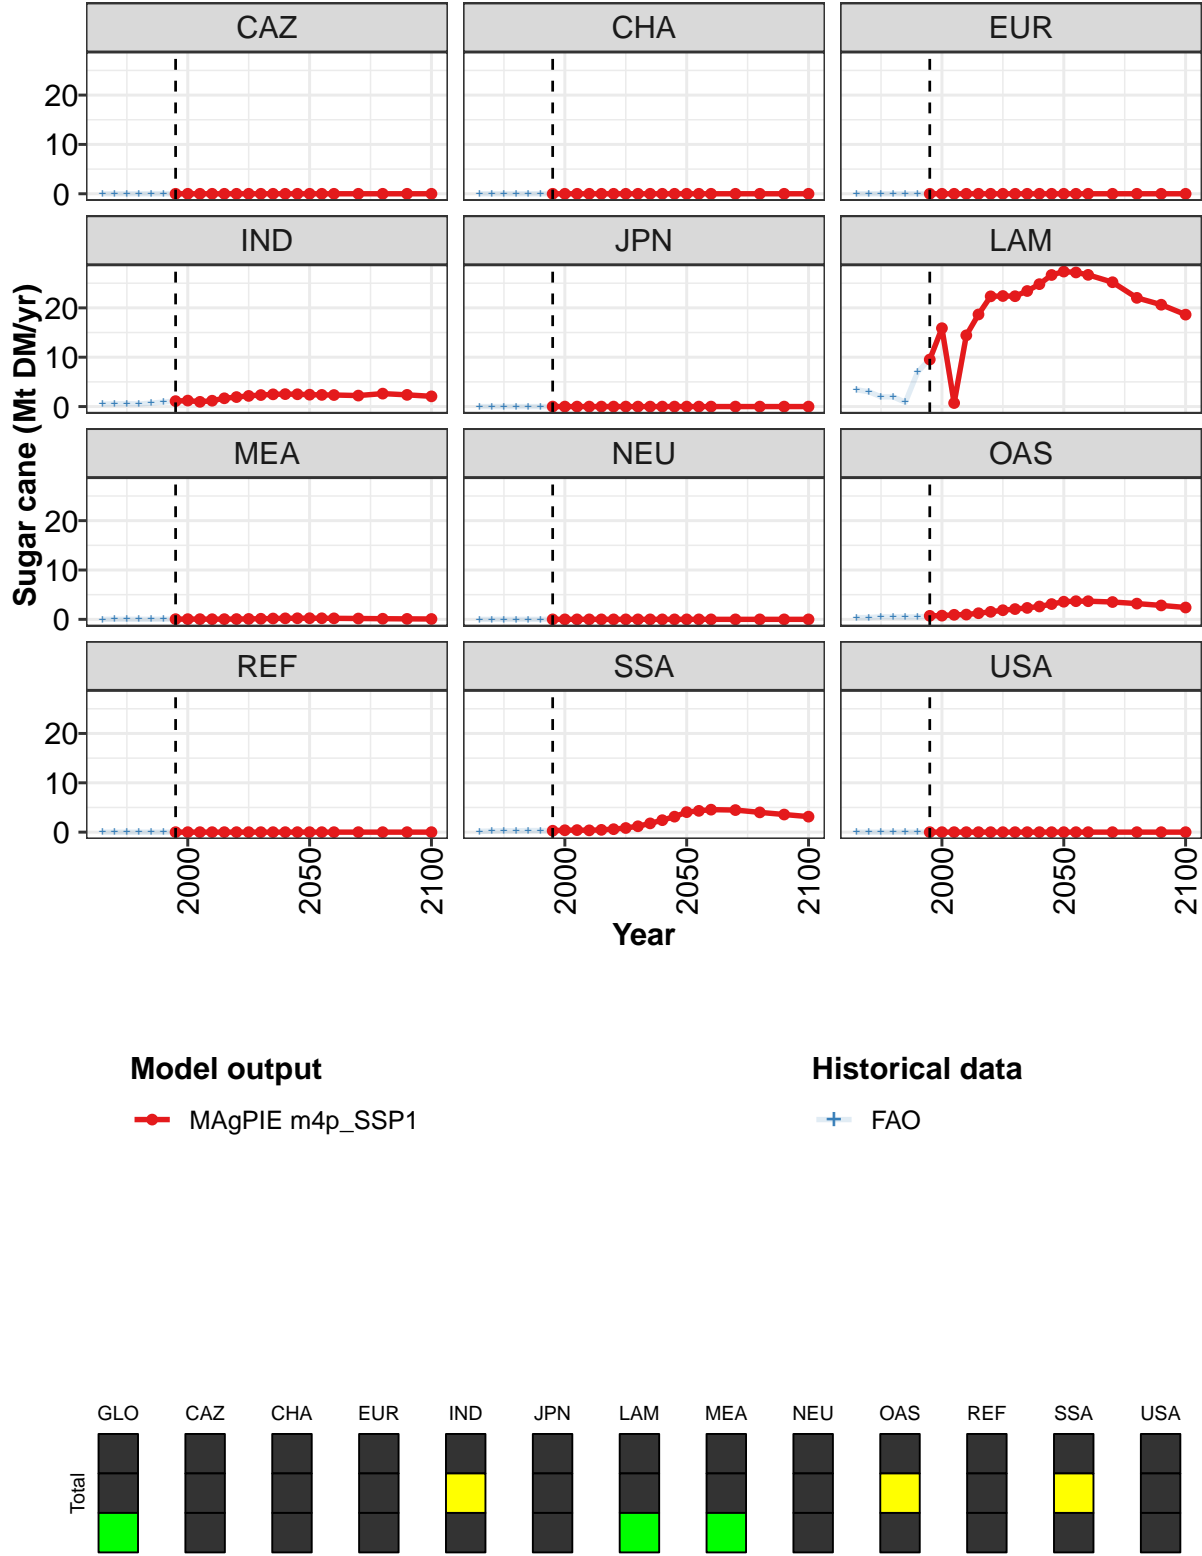

Figure 21: MAgPIE m4p\_SSP1 — Demand—Agricultural Supply Chain Loss—Crops—Sugar crops—Sugar cane (Mt DM/yr)

|     | 1995 | 2000 | 2005 | 2010 | 2015 | 2020 | 2025 | 2030 | 2035 | 2040 | 2045 |
|-----|------|------|------|------|------|------|------|------|------|------|------|
| GLO | 11.7 | 18.3 | 3.1  | 17.0 | 22.1 | 26.5 | 27.3 | 28.1 | 30.2 | 32.6 | 35.6 |
| CAZ | 0.0  | 0.0  | 0.0  | 0.0  | 0.0  | 0.0  | 0.0  | 0.0  | 0.0  | 0.0  | 0.0  |
| CHA | 0.0  | 0.0  | 0.0  | 0.0  | 0.0  | 0.0  | 0.0  | 0.0  | 0.0  | 0.0  | 0.0  |
| EUR | 0.0  | 0.0  | 0.0  | 0.0  | 0.0  | 0.0  | 0.0  | 0.0  | 0.0  | 0.0  | 0.0  |
| IND | 1.1  | 1.2  | 1.0  | 1.2  | 1.7  | 1.9  | 2.2  | 2.3  | 2.5  | 2.5  | 2.5  |
| JPN | 0.0  | 0.0  | 0.0  | 0.0  | 0.0  | 0.0  | 0.0  | 0.0  | 0.0  | 0.0  | 0.0  |
| LAM | 9.5  | 15.9 | 0.7  | 14.4 | 18.7 | 22.3 | 22.4 | 22.4 | 23.4 | 24.8 | 26.7 |
| MEA | 0.0  | 0.0  | 0.0  | 0.0  | 0.0  | 0.1  | 0.1  | 0.1  | 0.2  | 0.2  | 0.2  |
| NEU | 0.0  | 0.0  | 0.0  | 0.0  | 0.0  | 0.0  | 0.0  | 0.0  | 0.0  | 0.0  | 0.0  |
| OAS | 0.7  | 0.8  | 0.9  | 1.0  | 1.2  | 1.5  | 1.9  | 2.1  | 2.3  | 2.6  | 3.1  |
| REF | 0.0  | 0.0  | 0.0  | 0.0  | 0.0  | 0.0  | 0.0  | 0.0  | 0.0  | 0.0  | 0.0  |
| SSA | 0.3  | 0.4  | 0.4  | 0.4  | 0.5  | 0.6  | 0.8  | 1.2  | 1.8  | 2.4  | 3.1  |
| USA | 0.0  | 0.0  | 0.0  | 0.0  | 0.0  | 0.0  | 0.0  | 0.0  | 0.0  | 0.0  | 0.0  |

Table 64: MAgPIE m4p\_SSP1 — Demand—Agricultural Supply Chain Loss—Crops—Sugar crops—Sugar cane (Mt DM/yr) [PART 1/2]

|     | 2050 | 2055 | 2060 | 2070 | 2080 | 2090 | 2100 |
|-----|------|------|------|------|------|------|------|
| GLO | 37.6 | 37.8 | 37.5 | 35.6 | 32.0 | 29.5 | 26.3 |
| CAZ | 0.0  | 0.0  | 0.0  | 0.0  | 0.0  | 0.0  | 0.0  |
| CHA | 0.0  | 0.0  | 0.0  | 0.0  | 0.0  | 0.0  | 0.0  |
| EUR | 0.0  | 0.0  | 0.0  | 0.0  | 0.0  | 0.0  | 0.0  |
| IND | 2.4  | 2.4  | 2.3  | 2.2  | 2.6  | 2.4  | 2.1  |
| JPN | 0.0  | 0.0  | 0.0  | 0.0  | 0.0  | 0.0  | 0.0  |
| LAM | 27.4 | 27.2 | 26.7 | 25.2 | 22.0 | 20.6 | 18.6 |
| MEA | 0.2  | 0.2  | 0.2  | 0.2  | 0.1  | 0.1  | 0.1  |
| NEU | 0.0  | 0.0  | 0.0  | 0.0  | 0.0  | 0.0  | 0.0  |
| OAS | 3.6  | 3.7  | 3.7  | 3.5  | 3.2  | 2.8  | 2.4  |
| REF | 0.0  | 0.0  | 0.0  | 0.0  | 0.0  | 0.0  | 0.0  |
| SSA | 4.1  | 4.3  | 4.6  | 4.5  | 4.0  | 3.6  | 3.1  |
| USA | 0.0  | 0.0  | 0.0  | 0.0  | 0.0  | 0.0  | 0.0  |

Table 65: MAgPIE m4p\_SSP1 — Demand—Agricultural Supply Chain Loss—Crops—Sugar crops—Sugar cane (Mt DM/yr) [PART 2/2]

|     | 1965 | 1970 | 1975 | 1980 | 1985 | 1990 | 1995 | 2000 | 2005 | 2010 |
|-----|------|------|------|------|------|------|------|------|------|------|
| GLO | 4.4  | 4.2  | 3.4  | 3.3  | 2.4  | 8.8  | 11.7 | 18.1 | 3.0  | 16.9 |
| CAZ | 0.0  | 0.0  | 0.0  | 0.0  | 0.0  | 0.0  | 0.0  | 0.0  | 0.0  | 0.0  |
| CHA | 0.0  | 0.0  | 0.0  | 0.0  | 0.0  | 0.0  | 0.0  | 0.0  | 0.0  | 0.0  |
| EUR | 0.0  | 0.0  | 0.0  | 0.0  | 0.0  | 0.0  | 0.0  | 0.0  | 0.0  | 0.0  |
| IND | 0.5  | 0.5  | 0.6  | 0.5  | 0.7  | 0.9  | 1.1  | 1.2  | 1.0  | 1.2  |
| JPN | 0.0  | 0.0  | 0.0  | 0.0  | 0.0  | 0.0  | 0.0  | 0.0  | 0.0  | 0.0  |
| LAM | 3.4  | 3.0  | 2.0  | 2.0  | 0.9  | 7.0  | 9.7  | 15.7 | 0.7  | 14.4 |
| MEA | 0.0  | 0.0  | 0.0  | 0.0  | 0.0  | 0.0  | 0.0  | 0.0  | 0.0  | 0.0  |
| NEU | 0.0  | 0.0  | 0.0  | 0.0  | 0.0  | 0.0  | 0.0  | 0.0  | 0.0  | 0.0  |
| OAS | 0.3  | 0.4  | 0.5  | 0.5  | 0.5  | 0.5  | 0.6  | 0.8  | 0.8  | 0.9  |
| REF | 0.0  | 0.0  | 0.0  | 0.0  | 0.0  | 0.0  | 0.0  | 0.0  | 0.0  | 0.0  |
| SSA | 0.2  | 0.2  | 0.3  | 0.3  | 0.3  | 0.3  | 0.3  | 0.4  | 0.4  | 0.4  |
| USA | 0.0  | 0.0  | 0.0  | 0.0  | 0.0  | 0.0  | 0.0  | 0.0  | 0.0  | 0.0  |

Table 66: FAO — Demand—Agricultural Supply Chain Loss—Crops—Sugar crops—Sugar cane (Mt DM/yr)

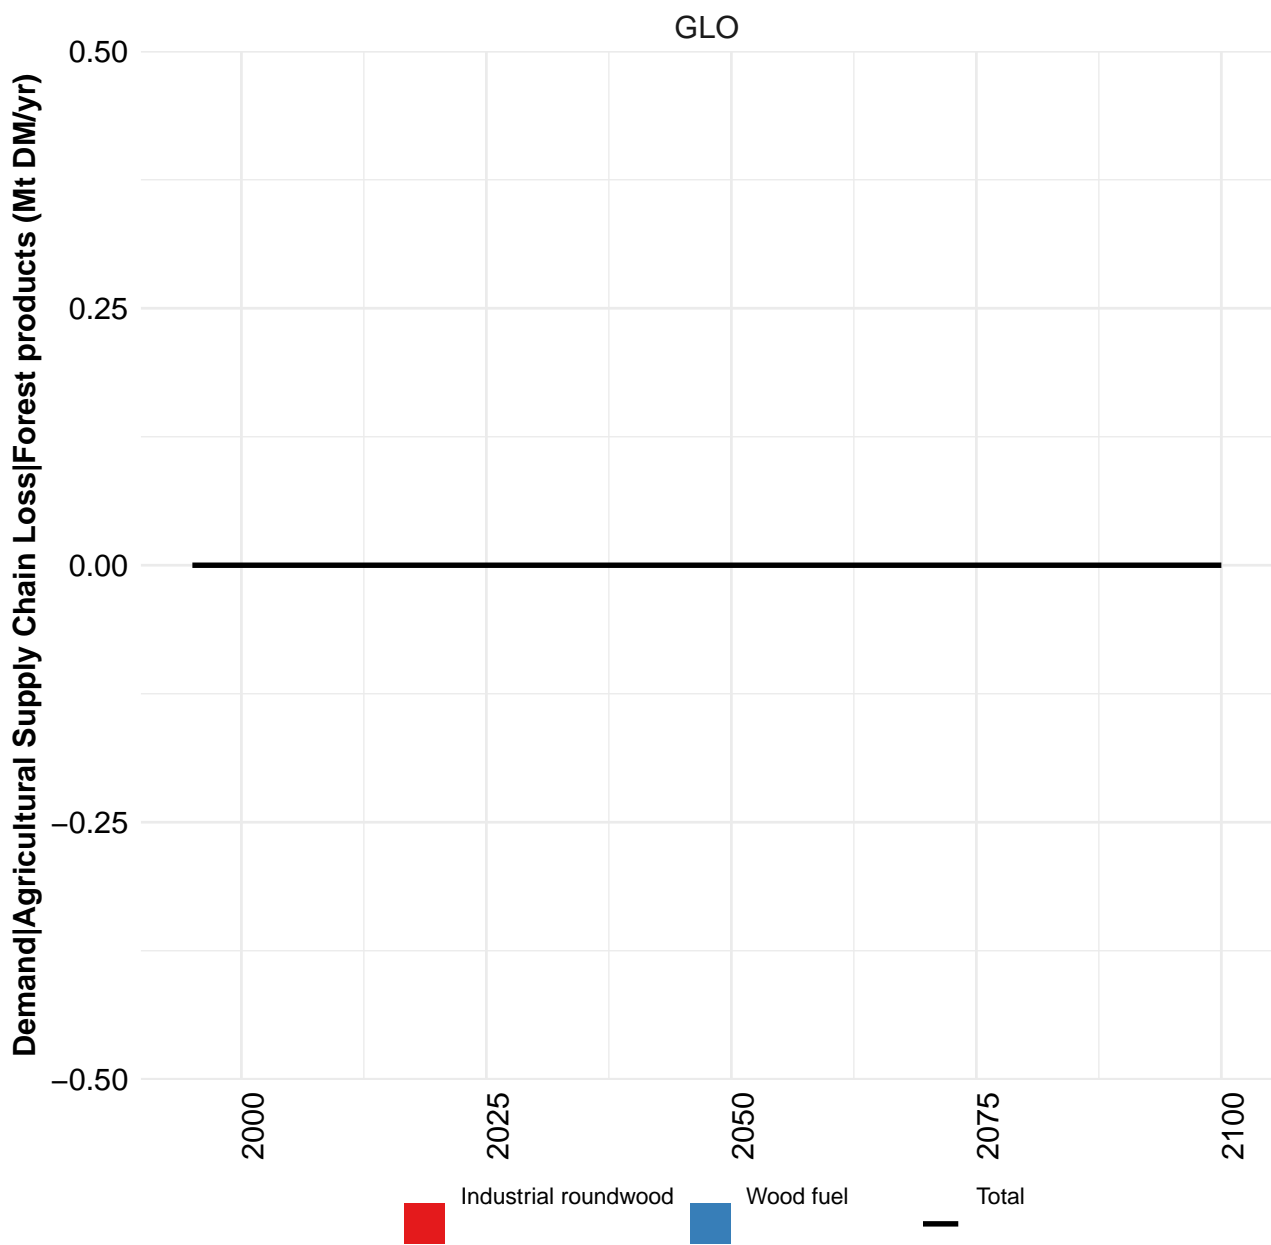

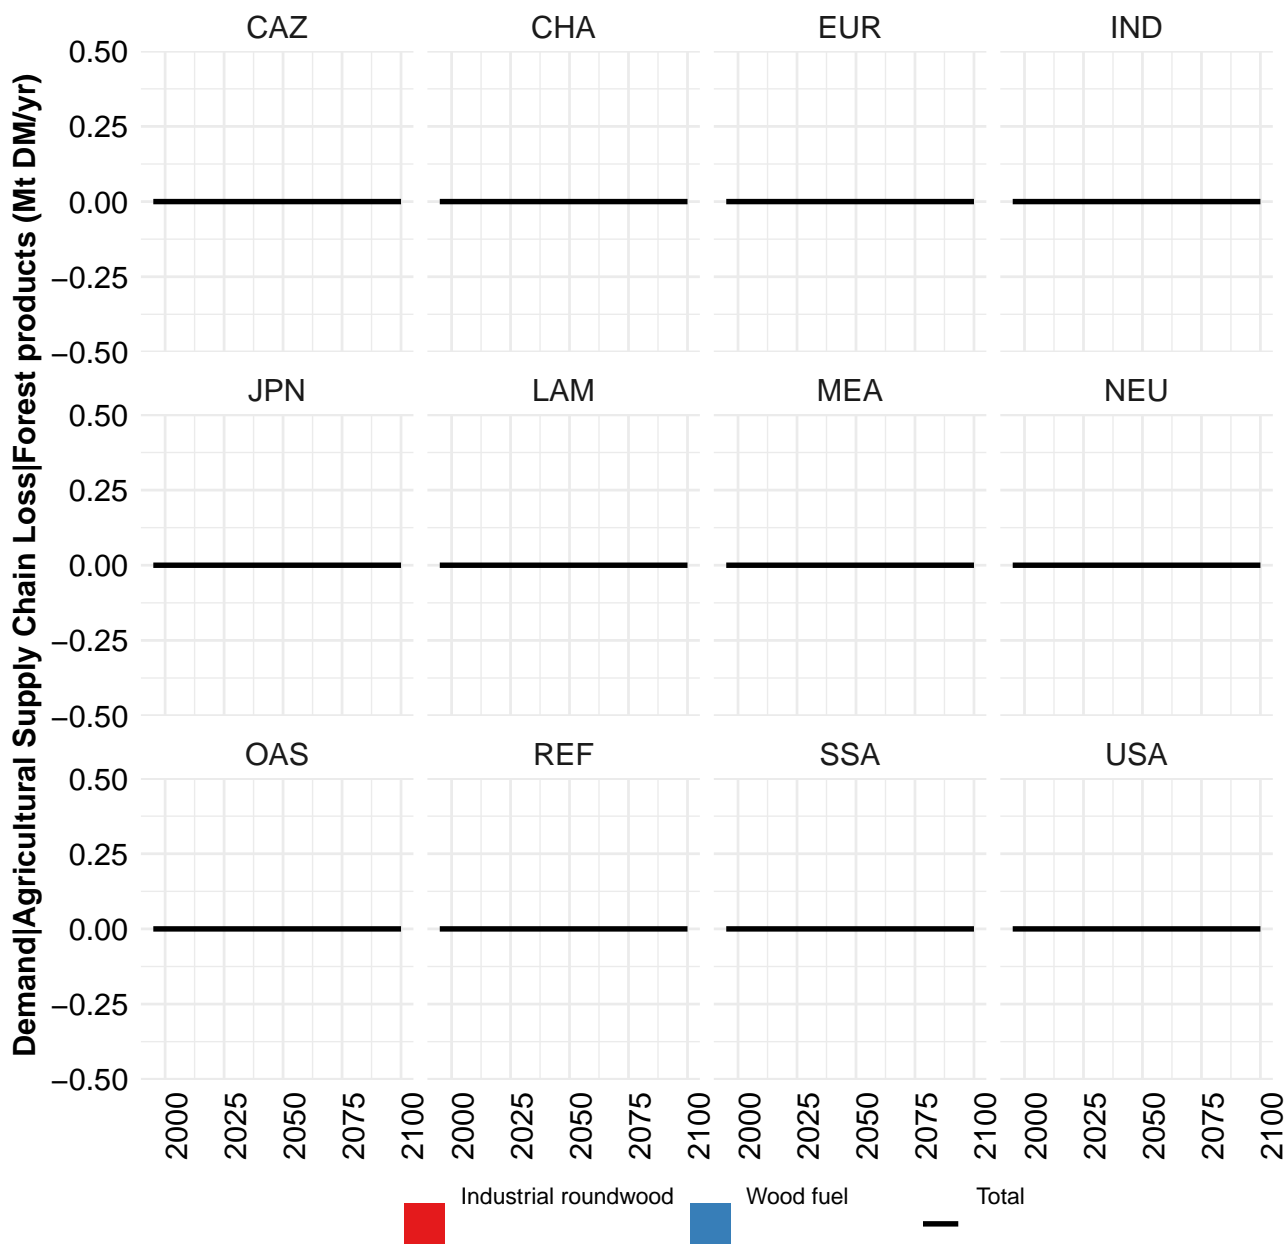

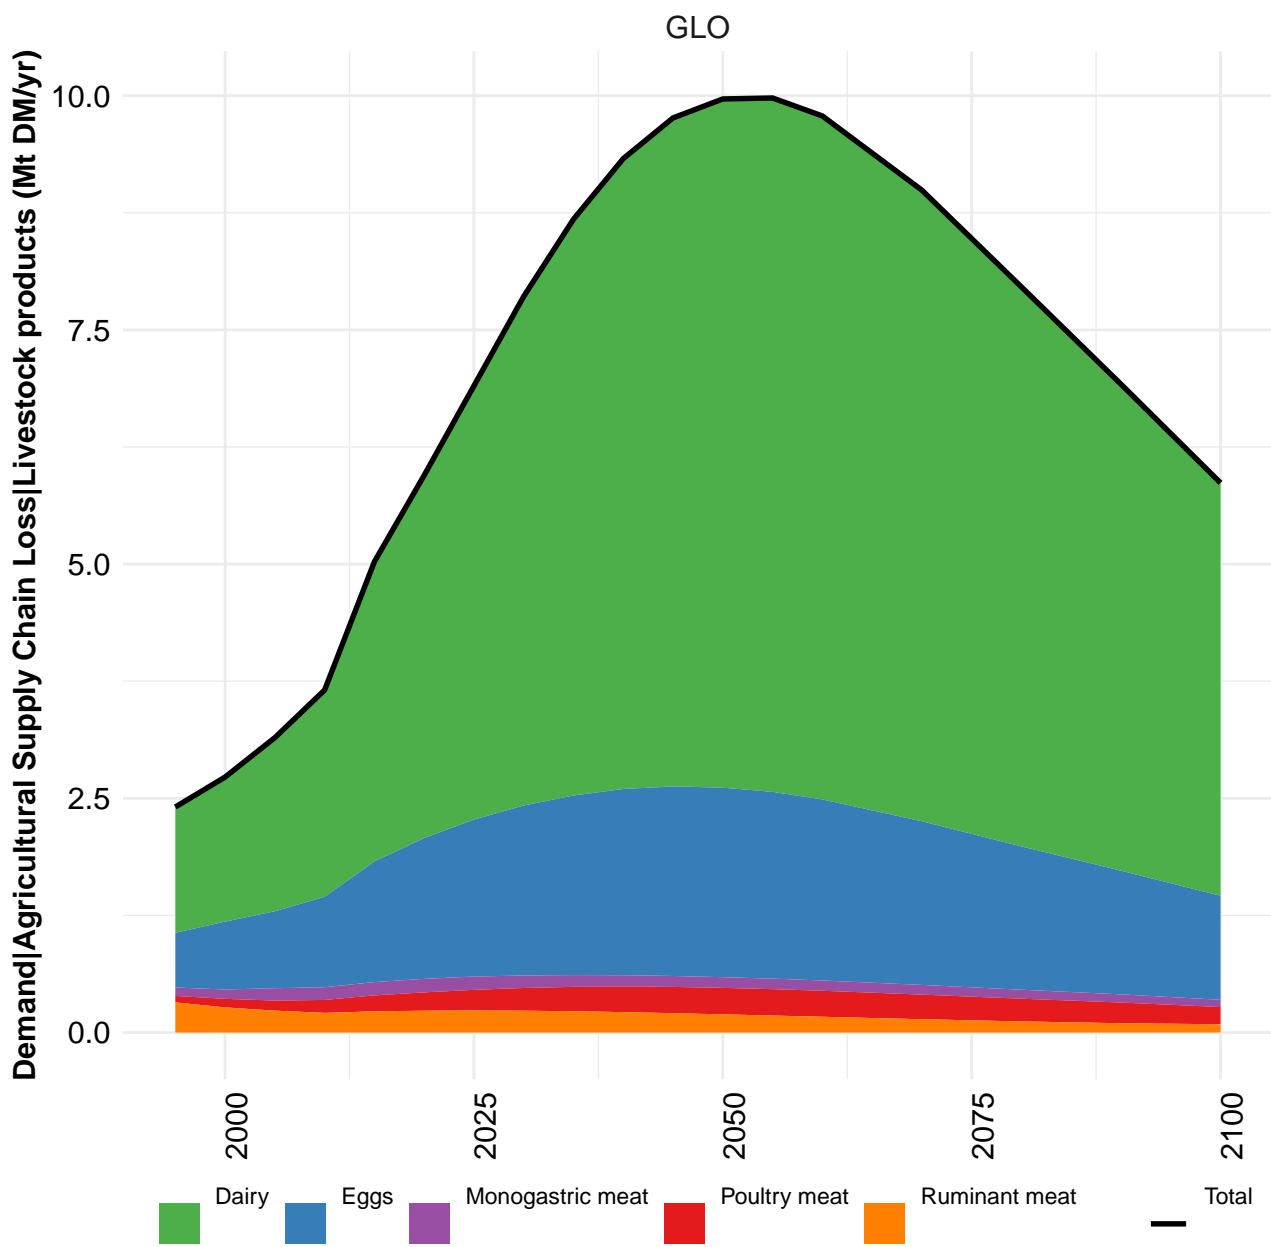



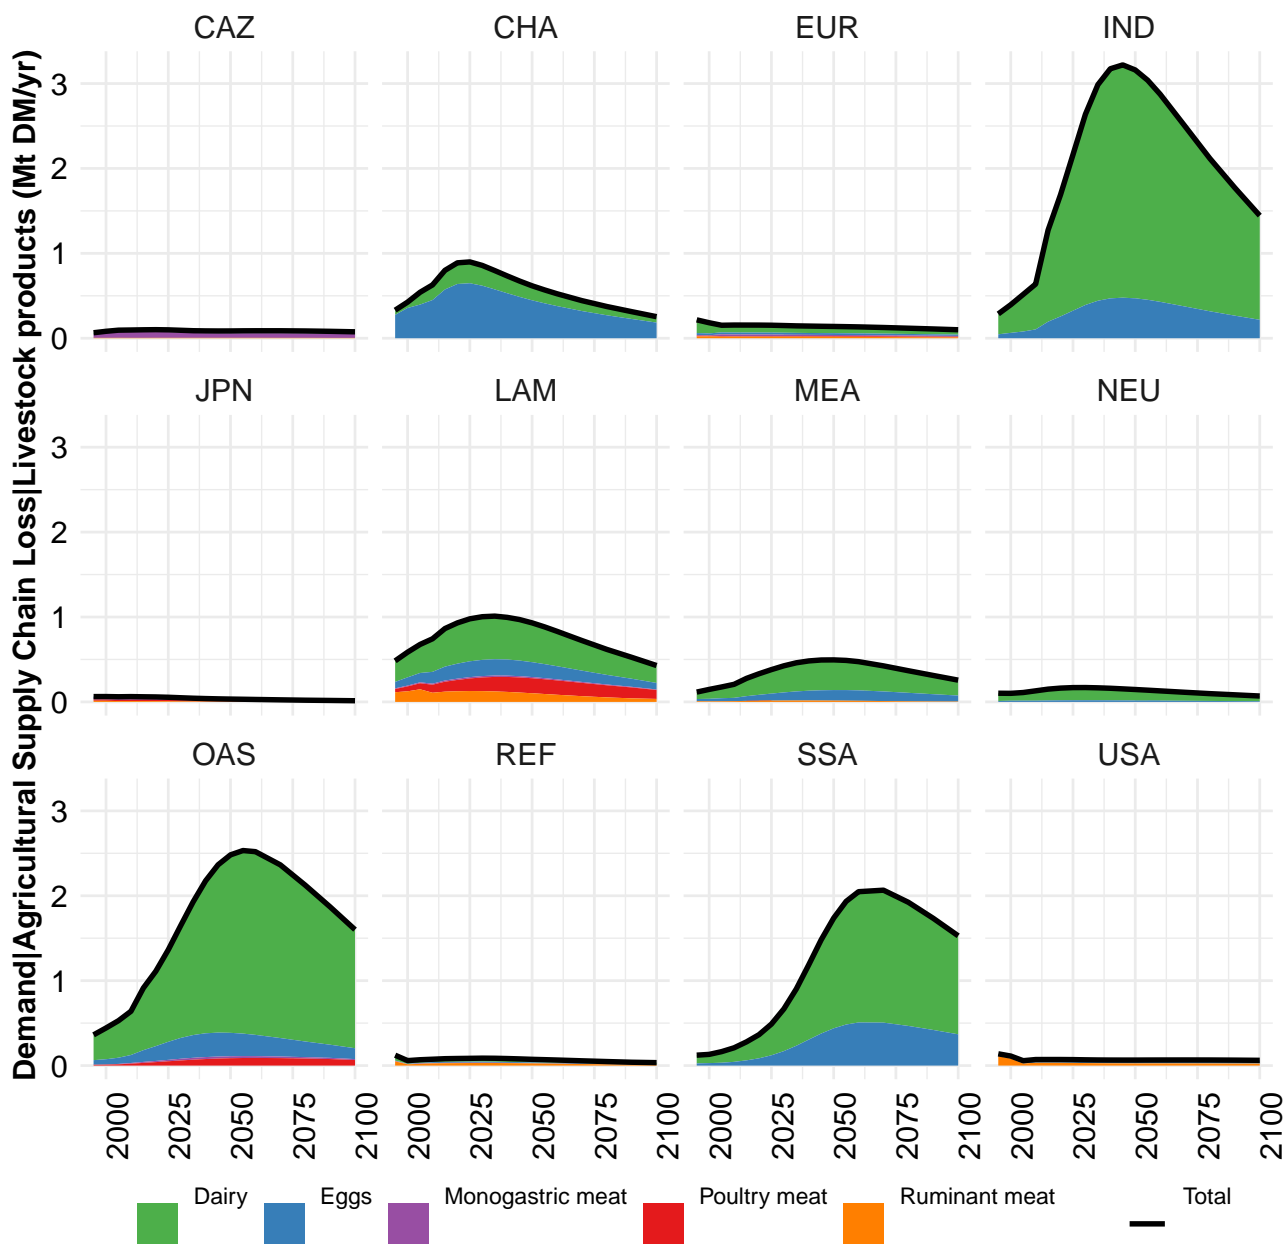

3.2 Livestock products

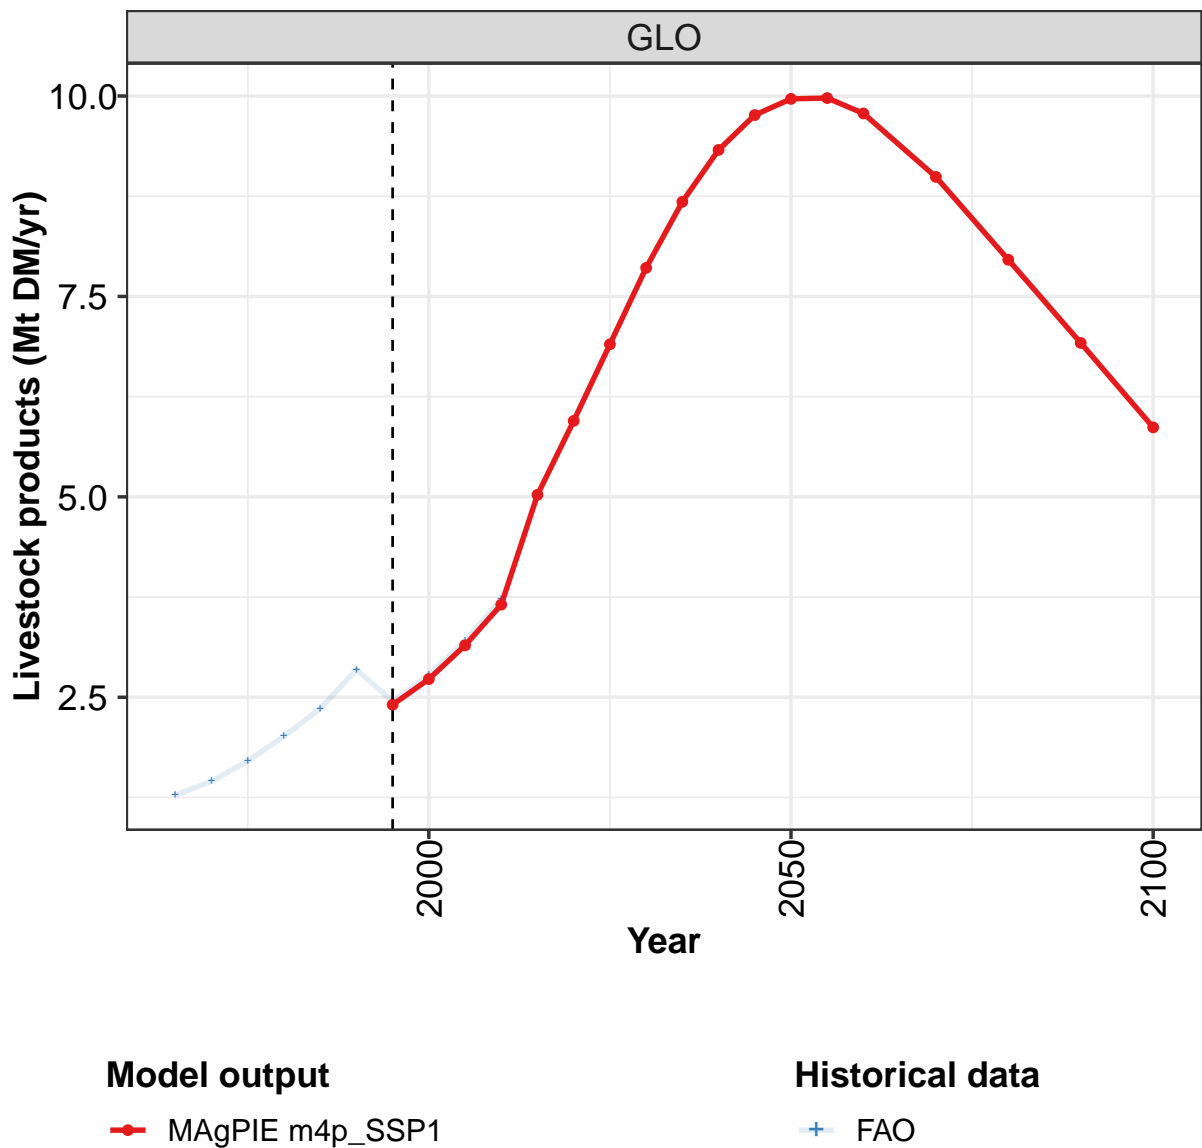

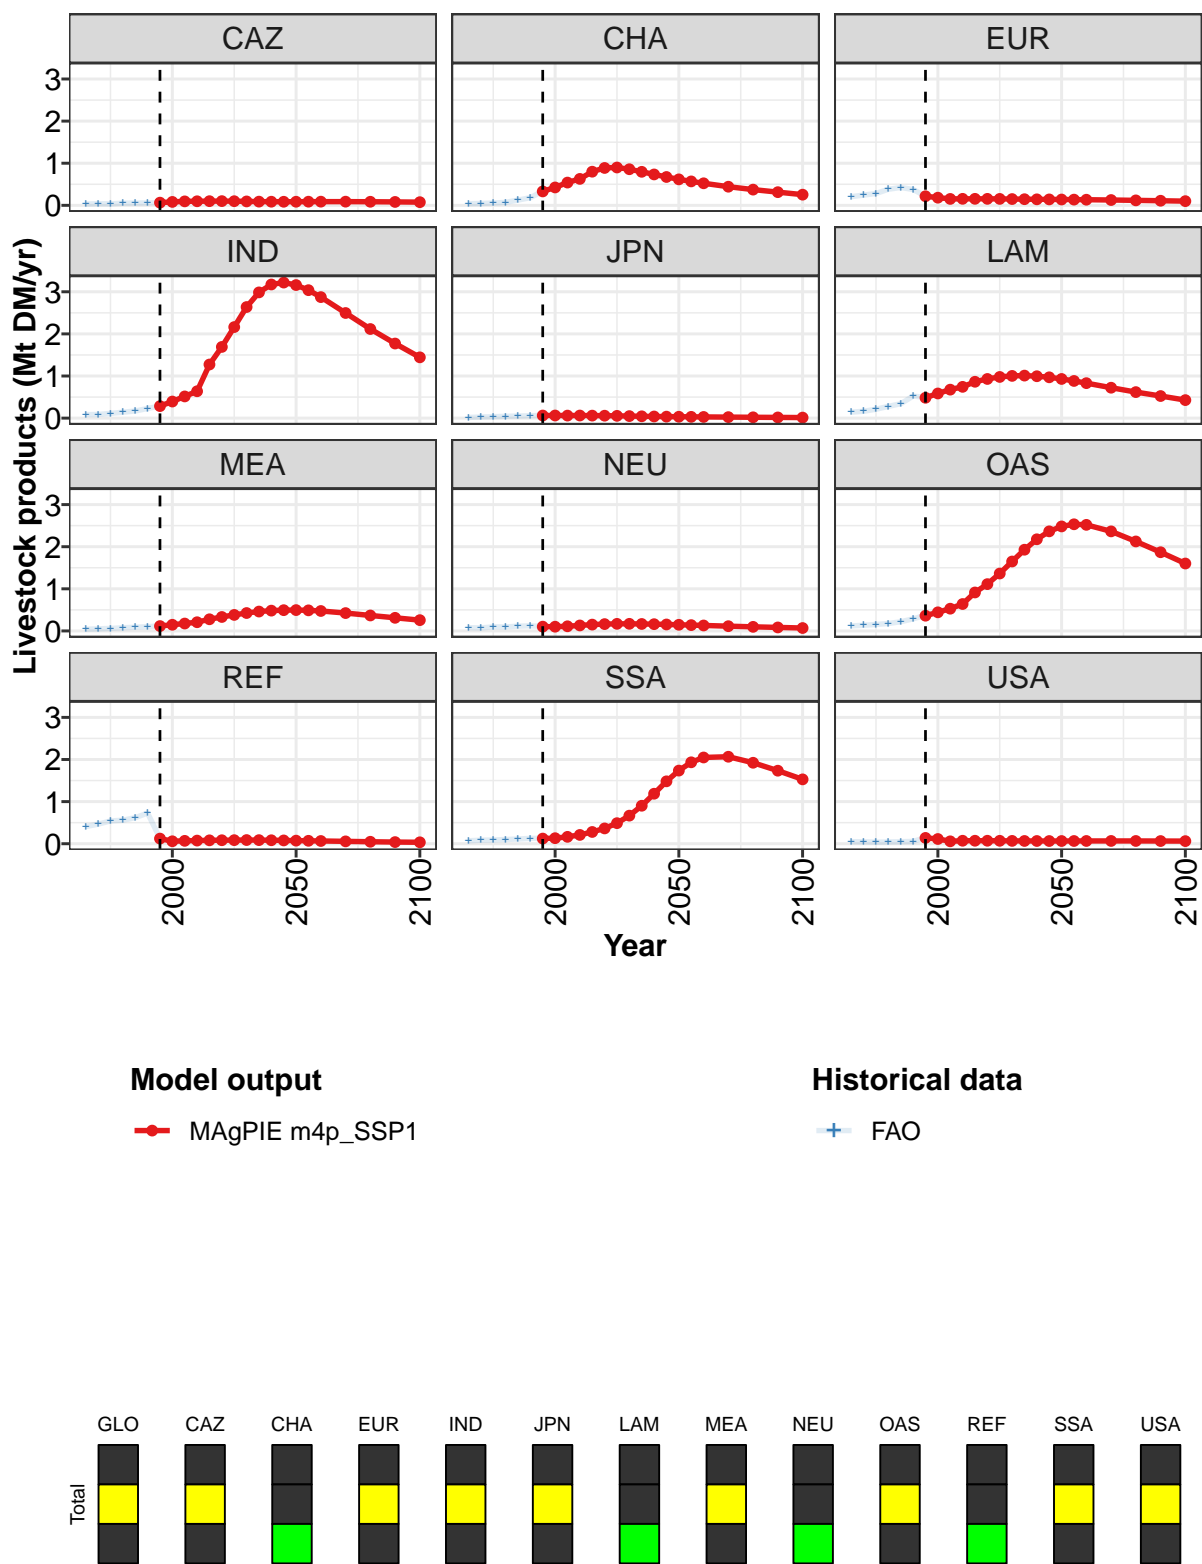

Figure 22: MAgPIE m4p\_SSP1 — Demand—Agricultural Supply Chain Loss—Livestock products (Mt DM/yr)

|     | 1995 | 2000 | 2005 | 2010 | 2015 | 2020 | 2025 | 2030 | 2035 | 2040 | 2045 |
|-----|------|------|------|------|------|------|------|------|------|------|------|
| GLO | 2.41 | 2.73 | 3.15 | 3.66 | 5.03 | 5.95 | 6.90 | 7.86 | 8.68 | 9.33 | 9.76 |
| CAZ | 0.06 | 0.08 | 0.09 | 0.10 | 0.10 | 0.10 | 0.10 | 0.09 | 0.09 | 0.09 | 0.09 |
| CHA | 0.33 | 0.43 | 0.54 | 0.63 | 0.80 | 0.89 | 0.90 | 0.86 | 0.80 | 0.73 | 0.67 |
| EUR | 0.22 | 0.18 | 0.15 | 0.16 | 0.15 | 0.15 | 0.15 | 0.15 | 0.15 | 0.14 | 0.14 |
| IND | 0.29 | 0.39 | 0.52 | 0.64 | 1.27 | 1.69 | 2.16 | 2.64 | 2.99 | 3.17 | 3.22 |
| JPN | 0.06 | 0.06 | 0.06 | 0.06 | 0.06 | 0.06 | 0.05 | 0.05 | 0.04 | 0.04 | 0.04 |
| LAM | 0.48 | 0.59 | 0.68 | 0.74 | 0.86 | 0.93 | 0.98 | 1.00 | 1.01 | 1.00 | 0.97 |
| MEA | 0.12 | 0.15 | 0.18 | 0.21 | 0.28 | 0.33 | 0.38 | 0.43 | 0.46 | 0.48 | 0.49 |
| NEU | 0.10 | 0.10 | 0.11 | 0.13 | 0.15 | 0.16 | 0.17 | 0.17 | 0.17 | 0.16 | 0.15 |
| OAS | 0.36 | 0.44 | 0.53 | 0.64 | 0.91 | 1.11 | 1.36 | 1.65 | 1.93 | 2.18 | 2.36 |
| REF | 0.12 | 0.06 | 0.07 | 0.07 | 0.08 | 0.08 | 0.09 | 0.09 | 0.09 | 0.08 | 0.08 |
| SSA | 0.12 | 0.13 | 0.16 | 0.21 | 0.28 | 0.36 | 0.49 | 0.67 | 0.90 | 1.19 | 1.48 |
| USA | 0.14 | 0.11 | 0.06 | 0.07 | 0.07 | 0.07 | 0.07 | 0.07 | 0.07 | 0.07 | 0.06 |

Table 67: MAgPIE m4p\_SSP1 — Demand—Agricultural Supply Chain Loss—Livestock products (Mt DM/yr)  
[PART 1/2]

|     | 2050 | 2055 | 2060 | 2070 | 2080 | 2090 | 2100 |
|-----|------|------|------|------|------|------|------|
| GLO | 9.96 | 9.98 | 9.78 | 8.99 | 7.96 | 6.92 | 5.87 |
| CAZ | 0.09 | 0.09 | 0.09 | 0.09 | 0.09 | 0.08 | 0.08 |
| CHA | 0.62 | 0.57 | 0.52 | 0.44 | 0.37 | 0.31 | 0.25 |
| EUR | 0.14 | 0.14 | 0.13 | 0.13 | 0.12 | 0.11 | 0.10 |
| IND | 3.16 | 3.04 | 2.87 | 2.50 | 2.12 | 1.77 | 1.44 |
| JPN | 0.03 | 0.03 | 0.03 | 0.02 | 0.02 | 0.02 | 0.01 |
| LAM | 0.93 | 0.88 | 0.83 | 0.72 | 0.62 | 0.53 | 0.43 |
| MEA | 0.49 | 0.49 | 0.47 | 0.42 | 0.37 | 0.31 | 0.26 |
| NEU | 0.15 | 0.14 | 0.13 | 0.11 | 0.10 | 0.08 | 0.07 |
| OAS | 2.48 | 2.53 | 2.52 | 2.36 | 2.12 | 1.87 | 1.60 |
| REF | 0.07 | 0.07 | 0.07 | 0.06 | 0.05 | 0.04 | 0.03 |
| SSA | 1.74 | 1.93 | 2.05 | 2.07 | 1.92 | 1.73 | 1.53 |
| USA | 0.06 | 0.07 | 0.07 | 0.07 | 0.07 | 0.06 | 0.06 |

Table 68: MAgPIE m4p\_SSP1 — Demand—Agricultural Supply Chain Loss—Livestock products (Mt DM/yr)  
[PART 2/2]

|     | 1965 | 1970 | 1975 | 1980 | 1985 | 1990 | 1995 | 2000 | 2005 | 2010 |
|-----|------|------|------|------|------|------|------|------|------|------|
| GLO | 1.28 | 1.45 | 1.70 | 2.01 | 2.36 | 2.84 | 2.45 | 2.78 | 3.21 | 3.72 |
| CAZ | 0.03 | 0.04 | 0.04 | 0.05 | 0.05 | 0.06 | 0.06 | 0.08 | 0.10 | 0.10 |
| CHA | 0.04 | 0.04 | 0.05 | 0.07 | 0.13 | 0.18 | 0.34 | 0.44 | 0.55 | 0.64 |
| EUR | 0.21 | 0.24 | 0.28 | 0.38 | 0.42 | 0.38 | 0.22 | 0.18 | 0.15 | 0.16 |
| IND | 0.08 | 0.09 | 0.11 | 0.14 | 0.17 | 0.23 | 0.29 | 0.40 | 0.52 | 0.64 |
| JPN | 0.02 | 0.03 | 0.03 | 0.04 | 0.05 | 0.06 | 0.06 | 0.06 | 0.06 | 0.06 |
| LAM | 0.14 | 0.16 | 0.21 | 0.28 | 0.34 | 0.52 | 0.49 | 0.60 | 0.69 | 0.76 |
| MEA | 0.04 | 0.05 | 0.06 | 0.08 | 0.09 | 0.10 | 0.12 | 0.15 | 0.18 | 0.21 |
| NEU | 0.08 | 0.07 | 0.10 | 0.10 | 0.11 | 0.12 | 0.10 | 0.10 | 0.11 | 0.13 |
| OAS | 0.12 | 0.13 | 0.15 | 0.18 | 0.22 | 0.29 | 0.37 | 0.45 | 0.54 | 0.65 |
| REF | 0.41 | 0.46 | 0.54 | 0.56 | 0.62 | 0.73 | 0.13 | 0.06 | 0.07 | 0.08 |
| SSA | 0.07 | 0.08 | 0.09 | 0.10 | 0.11 | 0.13 | 0.13 | 0.14 | 0.17 | 0.21 |
| USA | 0.05 | 0.05 | 0.04 | 0.04 | 0.05 | 0.06 | 0.14 | 0.12 | 0.06 | 0.08 |

Table 69: FAO — Demand—Agricultural Supply Chain Loss—Livestock products (Mt DM/yr)

3.2.1 Dairy

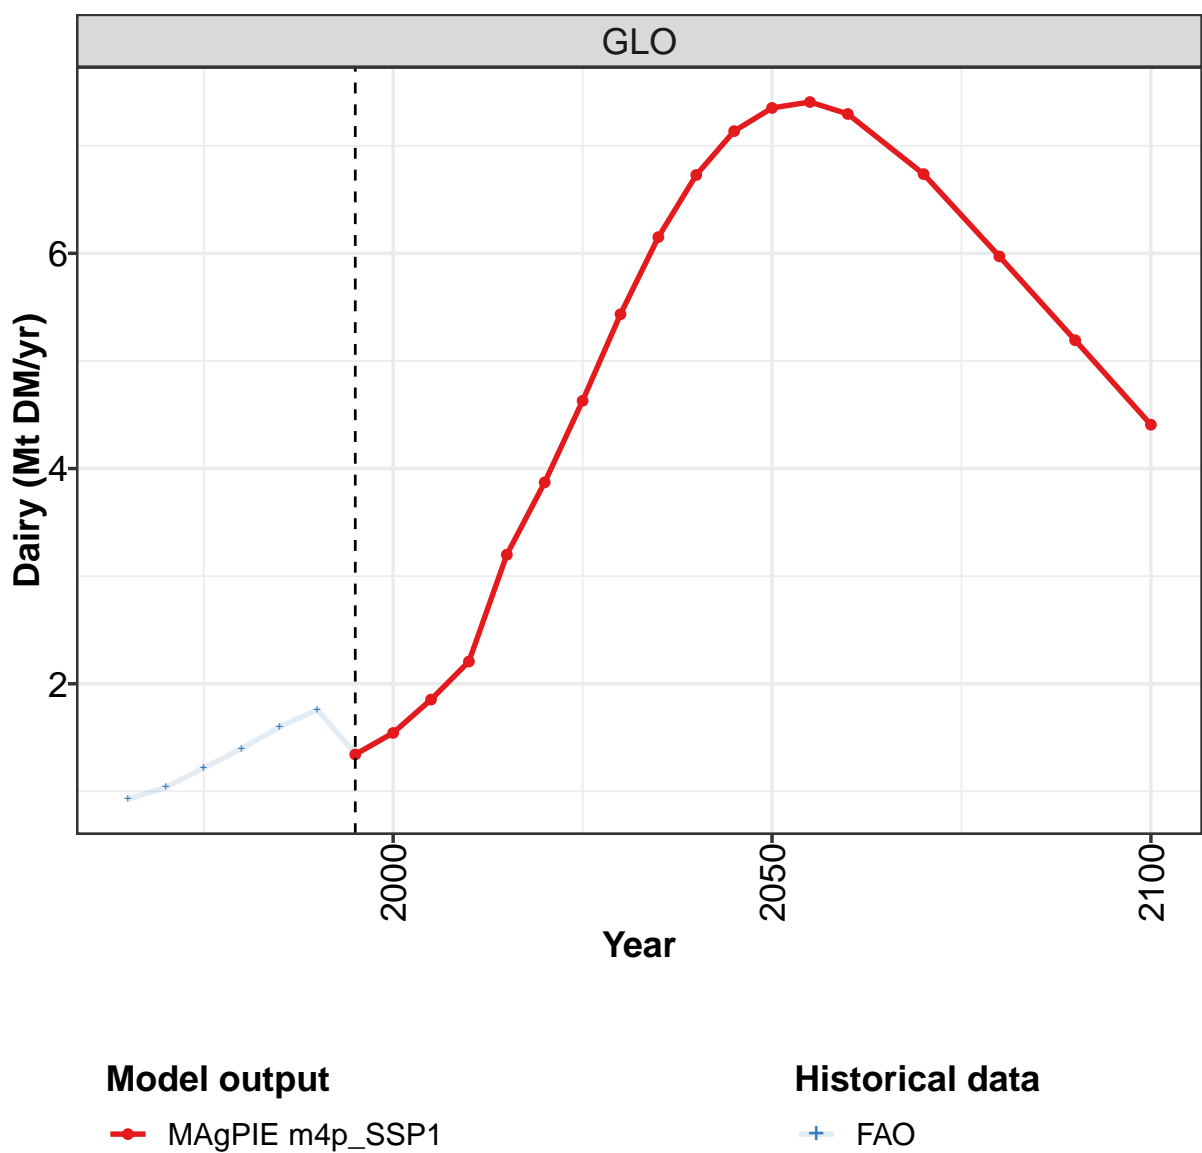

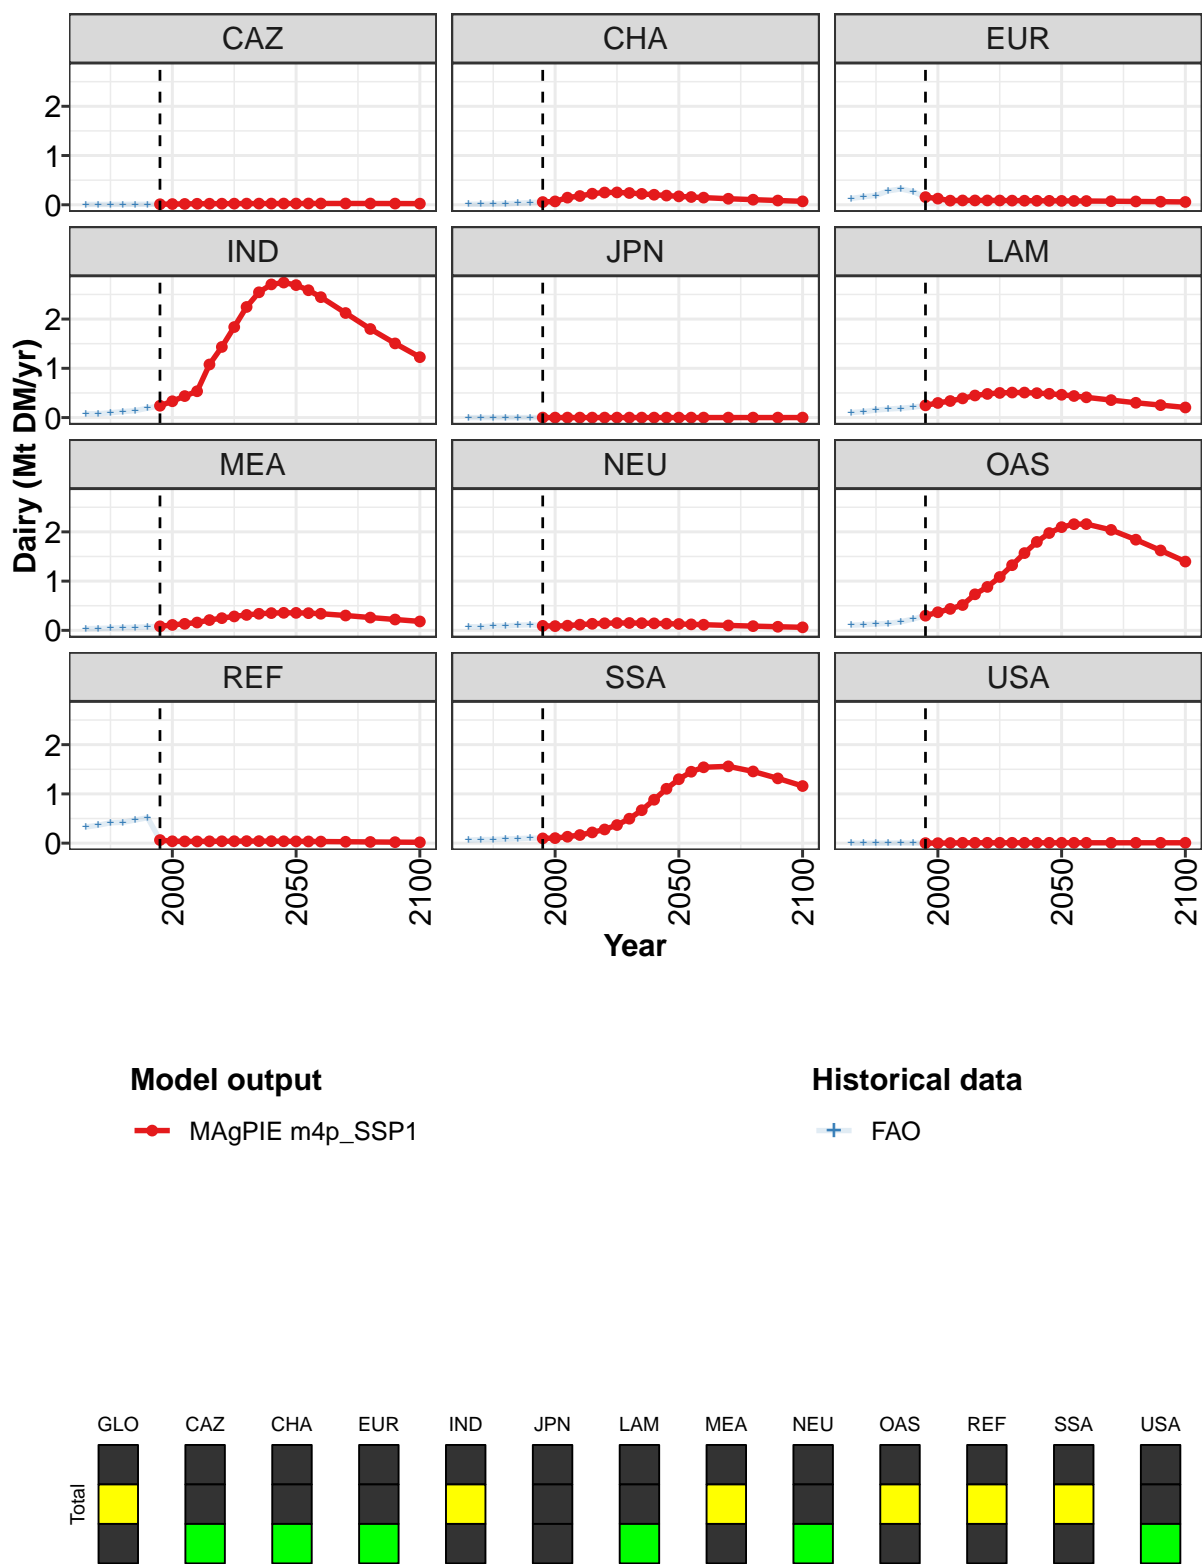

Figure 23: MAgPIE m4p\_SSP1 — Demand—Agricultural Supply Chain Loss—Livestock products—Dairy (Mt DM/yr)

|     | 1995 | 2000 | 2005 | 2010 | 2015 | 2020 | 2025 | 2030 | 2035 | 2040 | 2045 |
|-----|------|------|------|------|------|------|------|------|------|------|------|
| GLO | 1.34 | 1.54 | 1.85 | 2.21 | 3.20 | 3.87 | 4.63 | 5.43 | 6.15 | 6.73 | 7.14 |
| CAZ | 0.01 | 0.01 | 0.02 | 0.02 | 0.02 | 0.02 | 0.02 | 0.02 | 0.02 | 0.02 | 0.02 |
| CHA | 0.06 | 0.07 | 0.14 | 0.18 | 0.23 | 0.25 | 0.25 | 0.24 | 0.22 | 0.20 | 0.19 |
| EUR | 0.16 | 0.13 | 0.08 | 0.09 | 0.09 | 0.09 | 0.09 | 0.08 | 0.08 | 0.08 | 0.08 |
| IND | 0.24 | 0.33 | 0.44 | 0.53 | 1.08 | 1.43 | 1.84 | 2.25 | 2.54 | 2.70 | 2.74 |
| JPN | 0.00 | 0.00 | 0.00 | 0.00 | 0.00 | 0.00 | 0.00 | 0.00 | 0.00 | 0.00 | 0.00 |
| LAM | 0.25 | 0.30 | 0.34 | 0.39 | 0.45 | 0.48 | 0.50 | 0.51 | 0.51 | 0.50 | 0.48 |
| MEA | 0.08 | 0.11 | 0.13 | 0.16 | 0.21 | 0.25 | 0.28 | 0.31 | 0.34 | 0.35 | 0.36 |
| NEU | 0.09 | 0.09 | 0.10 | 0.12 | 0.13 | 0.14 | 0.15 | 0.15 | 0.15 | 0.14 | 0.14 |
| OAS | 0.30 | 0.37 | 0.44 | 0.52 | 0.73 | 0.88 | 1.08 | 1.32 | 1.57 | 1.80 | 1.98 |
| REF | 0.06 | 0.04 | 0.04 | 0.03 | 0.04 | 0.04 | 0.04 | 0.04 | 0.04 | 0.04 | 0.04 |
| SSA | 0.10 | 0.10 | 0.13 | 0.17 | 0.22 | 0.28 | 0.37 | 0.50 | 0.67 | 0.88 | 1.10 |
| USA | 0.00 | 0.00 | 0.00 | 0.01 | 0.01 | 0.01 | 0.01 | 0.01 | 0.01 | 0.01 | 0.01 |

Table 70: MAgPIE m4p\_SSP1 — Demand—Agricultural Supply Chain Loss—Livestock products—Dairy (Mt DM/yr) [PART 1/2]

|     | 2050 | 2055 | 2060 | 2070 | 2080 | 2090 | 2100 |
|-----|------|------|------|------|------|------|------|
| GLO | 7.35 | 7.41 | 7.30 | 6.74 | 5.97 | 5.19 | 4.41 |
| CAZ | 0.03 | 0.03 | 0.03 | 0.03 | 0.03 | 0.02 | 0.02 |
| CHA | 0.17 | 0.16 | 0.15 | 0.12 | 0.10 | 0.09 | 0.07 |
| EUR | 0.08 | 0.08 | 0.08 | 0.07 | 0.07 | 0.06 | 0.06 |
| IND | 2.69 | 2.59 | 2.45 | 2.12 | 1.80 | 1.51 | 1.23 |
| JPN | 0.00 | 0.00 | 0.00 | 0.00 | 0.00 | 0.00 | 0.00 |
| LAM | 0.46 | 0.44 | 0.41 | 0.35 | 0.30 | 0.25 | 0.21 |
| MEA | 0.36 | 0.35 | 0.34 | 0.30 | 0.26 | 0.22 | 0.18 |
| NEU | 0.13 | 0.12 | 0.11 | 0.10 | 0.09 | 0.07 | 0.06 |
| OAS | 2.10 | 2.16 | 2.16 | 2.04 | 1.84 | 1.62 | 1.40 |
| REF | 0.04 | 0.03 | 0.03 | 0.03 | 0.02 | 0.02 | 0.02 |
| SSA | 1.30 | 1.45 | 1.54 | 1.56 | 1.46 | 1.32 | 1.16 |
| USA | 0.01 | 0.01 | 0.01 | 0.01 | 0.01 | 0.01 | 0.01 |

Table 71: MAgPIE m4p\_SSP1 — Demand—Agricultural Supply Chain Loss—Livestock products—Dairy (Mt DM/yr) [PART 2/2]

|     | 1965 | 1970 | 1975 | 1980 | 1985 | 1990 | 1995 | 2000 | 2005 | 2010 |
|-----|------|------|------|------|------|------|------|------|------|------|
| GLO | 0.93 | 1.04 | 1.22 | 1.40 | 1.60 | 1.76 | 1.35 | 1.55 | 1.86 | 2.21 |
| CAZ | 0.01 | 0.01 | 0.01 | 0.01 | 0.01 | 0.01 | 0.01 | 0.01 | 0.02 | 0.02 |
| CHA | 0.01 | 0.01 | 0.02 | 0.02 | 0.03 | 0.04 | 0.06 | 0.07 | 0.14 | 0.18 |
| EUR | 0.13 | 0.16 | 0.19 | 0.28 | 0.32 | 0.27 | 0.15 | 0.12 | 0.08 | 0.09 |
| IND | 0.08 | 0.08 | 0.10 | 0.12 | 0.14 | 0.19 | 0.24 | 0.33 | 0.44 | 0.53 |
| JPN | 0.00 | 0.00 | 0.00 | 0.00 | 0.00 | 0.00 | 0.00 | 0.00 | 0.00 | 0.00 |
| LAM | 0.10 | 0.12 | 0.15 | 0.17 | 0.19 | 0.21 | 0.25 | 0.30 | 0.34 | 0.39 |
| MEA | 0.03 | 0.04 | 0.05 | 0.06 | 0.06 | 0.07 | 0.08 | 0.11 | 0.14 | 0.16 |
| NEU | 0.08 | 0.07 | 0.09 | 0.09 | 0.10 | 0.11 | 0.09 | 0.09 | 0.10 | 0.12 |
| OAS | 0.10 | 0.11 | 0.13 | 0.14 | 0.17 | 0.23 | 0.30 | 0.37 | 0.44 | 0.52 |
| REF | 0.33 | 0.36 | 0.41 | 0.42 | 0.47 | 0.52 | 0.07 | 0.04 | 0.04 | 0.03 |
| SSA | 0.06 | 0.07 | 0.07 | 0.08 | 0.09 | 0.10 | 0.10 | 0.10 | 0.13 | 0.17 |
| USA | 0.00 | 0.00 | 0.00 | 0.00 | 0.00 | 0.00 | 0.00 | 0.00 | 0.00 | 0.01 |

Table 72: FAO — Demand—Agricultural Supply Chain Loss—Livestock products—Dairy (Mt DM/yr)

3.2.2 Eggs

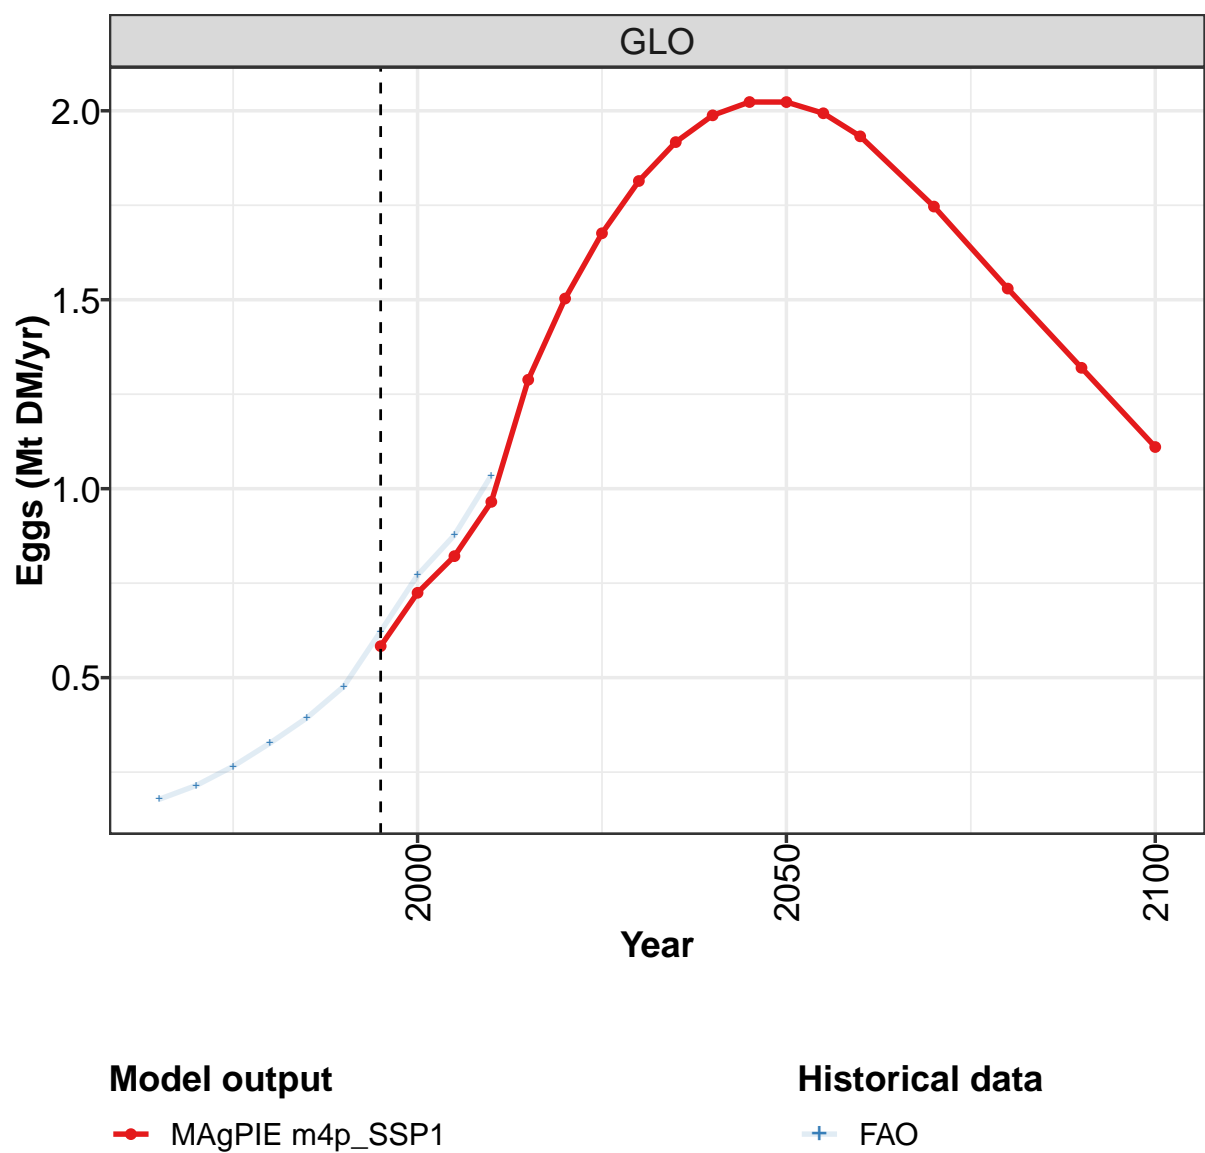



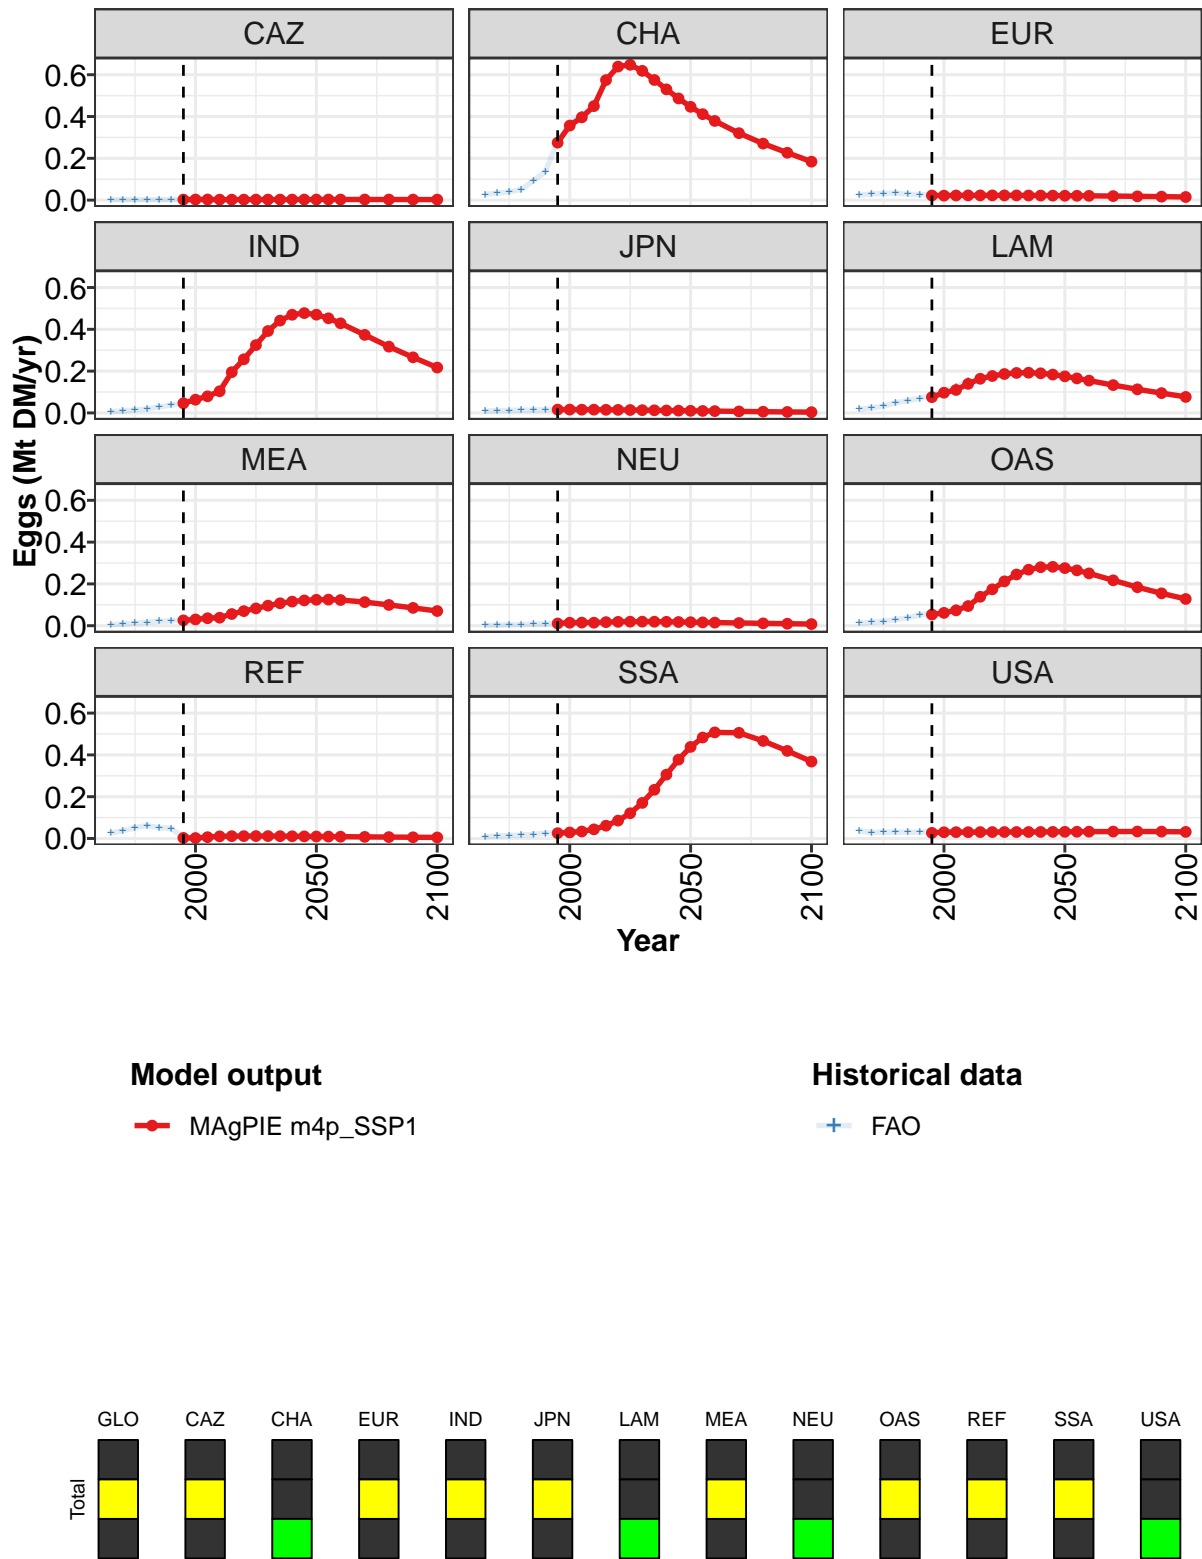

Figure 24: MAgPIE m4p\_SSP1 — Demand—Agricultural Supply Chain Loss—Livestock products—Eggs (Mt DM/yr)

|     | 1995 | 2000 | 2005 | 2010 | 2015 | 2020 | 2025 | 2030 | 2035 | 2040 | 2045 |
|-----|------|------|------|------|------|------|------|------|------|------|------|
| GLO | 0.58 | 0.72 | 0.82 | 0.97 | 1.29 | 1.50 | 1.68 | 1.81 | 1.92 | 1.99 | 2.02 |
| CAZ | 0.00 | 0.00 | 0.00 | 0.00 | 0.00 | 0.00 | 0.00 | 0.00 | 0.00 | 0.00 | 0.00 |
| CHA | 0.28 | 0.36 | 0.40 | 0.45 | 0.57 | 0.64 | 0.65 | 0.62 | 0.58 | 0.53 | 0.49 |
| EUR | 0.02 | 0.02 | 0.02 | 0.02 | 0.02 | 0.02 | 0.02 | 0.02 | 0.02 | 0.02 | 0.02 |
| IND | 0.05 | 0.06 | 0.08 | 0.10 | 0.20 | 0.26 | 0.32 | 0.39 | 0.44 | 0.47 | 0.48 |
| JPN | 0.02 | 0.02 | 0.02 | 0.02 | 0.01 | 0.01 | 0.01 | 0.01 | 0.01 | 0.01 | 0.01 |
| LAM | 0.08 | 0.10 | 0.11 | 0.14 | 0.16 | 0.18 | 0.19 | 0.19 | 0.19 | 0.19 | 0.18 |
| MEA | 0.03 | 0.03 | 0.04 | 0.04 | 0.06 | 0.07 | 0.08 | 0.10 | 0.11 | 0.12 | 0.12 |
| NEU | 0.01 | 0.01 | 0.01 | 0.01 | 0.02 | 0.02 | 0.02 | 0.02 | 0.02 | 0.02 | 0.02 |
| OAS | 0.05 | 0.06 | 0.07 | 0.09 | 0.14 | 0.17 | 0.21 | 0.25 | 0.27 | 0.28 | 0.28 |
| REF | 0.00 | 0.00 | 0.01 | 0.01 | 0.01 | 0.01 | 0.01 | 0.01 | 0.01 | 0.01 | 0.01 |
| SSA | 0.03 | 0.03 | 0.03 | 0.04 | 0.06 | 0.09 | 0.12 | 0.17 | 0.23 | 0.31 | 0.38 |
| USA | 0.03 | 0.03 | 0.03 | 0.03 | 0.03 | 0.03 | 0.03 | 0.03 | 0.03 | 0.03 | 0.03 |

Table 73: MAgPIE m4p\_SSP1 — Demand—Agricultural Supply Chain Loss—Livestock products—Eggs (Mt DM/yr) [PART 1/2]

|     | 2050 | 2055 | 2060 | 2070 | 2080 | 2090 | 2100 |
|-----|------|------|------|------|------|------|------|
| GLO | 2.02 | 1.99 | 1.93 | 1.75 | 1.53 | 1.32 | 1.11 |
| CAZ | 0.00 | 0.00 | 0.00 | 0.00 | 0.00 | 0.00 | 0.00 |
| CHA | 0.45 | 0.41 | 0.38 | 0.32 | 0.27 | 0.23 | 0.18 |
| EUR | 0.02 | 0.02 | 0.02 | 0.02 | 0.02 | 0.02 | 0.02 |
| IND | 0.47 | 0.45 | 0.43 | 0.37 | 0.32 | 0.27 | 0.22 |
| JPN | 0.01 | 0.01 | 0.01 | 0.01 | 0.01 | 0.00 | 0.00 |
| LAM | 0.17 | 0.17 | 0.15 | 0.13 | 0.11 | 0.09 | 0.08 |
| MEA | 0.12 | 0.12 | 0.12 | 0.11 | 0.10 | 0.09 | 0.07 |
| NEU | 0.02 | 0.02 | 0.02 | 0.01 | 0.01 | 0.01 | 0.01 |
| OAS | 0.28 | 0.26 | 0.25 | 0.22 | 0.18 | 0.16 | 0.13 |
| REF | 0.01 | 0.01 | 0.01 | 0.01 | 0.01 | 0.01 | 0.01 |
| SSA | 0.44 | 0.48 | 0.51 | 0.51 | 0.47 | 0.42 | 0.37 |
| USA | 0.03 | 0.03 | 0.03 | 0.03 | 0.03 | 0.03 | 0.03 |

Table 74: MAgPIE m4p\_SSP1 — Demand—Agricultural Supply Chain Loss—Livestock products—Eggs (Mt DM/yr) [PART 2/2]

|     | 1965 | 1970 | 1975 | 1980 | 1985 | 1990 | 1995 | 2000 | 2005 | 2010 |
|-----|------|------|------|------|------|------|------|------|------|------|
| GLO | 0.18 | 0.21 | 0.27 | 0.33 | 0.39 | 0.48 | 0.62 | 0.77 | 0.88 | 1.04 |
| CAZ | 0.00 | 0.00 | 0.00 | 0.00 | 0.00 | 0.00 | 0.00 | 0.00 | 0.00 | 0.00 |
| CHA | 0.03 | 0.03 | 0.04 | 0.05 | 0.09 | 0.14 | 0.28 | 0.37 | 0.41 | 0.46 |
| EUR | 0.02 | 0.03 | 0.03 | 0.03 | 0.03 | 0.03 | 0.02 | 0.02 | 0.02 | 0.02 |
| IND | 0.01 | 0.01 | 0.01 | 0.02 | 0.03 | 0.04 | 0.05 | 0.07 | 0.08 | 0.11 |
| JPN | 0.01 | 0.01 | 0.01 | 0.01 | 0.01 | 0.02 | 0.02 | 0.02 | 0.02 | 0.02 |
| LAM | 0.02 | 0.02 | 0.03 | 0.05 | 0.06 | 0.07 | 0.08 | 0.11 | 0.12 | 0.16 |
| MEA | 0.01 | 0.01 | 0.01 | 0.02 | 0.02 | 0.02 | 0.03 | 0.03 | 0.04 | 0.05 |
| NEU | 0.00 | 0.00 | 0.00 | 0.01 | 0.01 | 0.01 | 0.01 | 0.01 | 0.02 | 0.02 |
| OAS | 0.01 | 0.02 | 0.02 | 0.03 | 0.04 | 0.05 | 0.06 | 0.07 | 0.08 | 0.11 |
| REF | 0.03 | 0.04 | 0.05 | 0.06 | 0.05 | 0.05 | 0.00 | 0.00 | 0.01 | 0.01 |
| SSA | 0.01 | 0.01 | 0.01 | 0.02 | 0.02 | 0.02 | 0.03 | 0.03 | 0.04 | 0.05 |
| USA | 0.03 | 0.03 | 0.03 | 0.03 | 0.03 | 0.03 | 0.03 | 0.03 | 0.04 | 0.04 |

Table 75: FAO — Demand—Agricultural Supply Chain Loss—Livestock products—Eggs (Mt DM/yr)

3.2.3 Monogastric meat

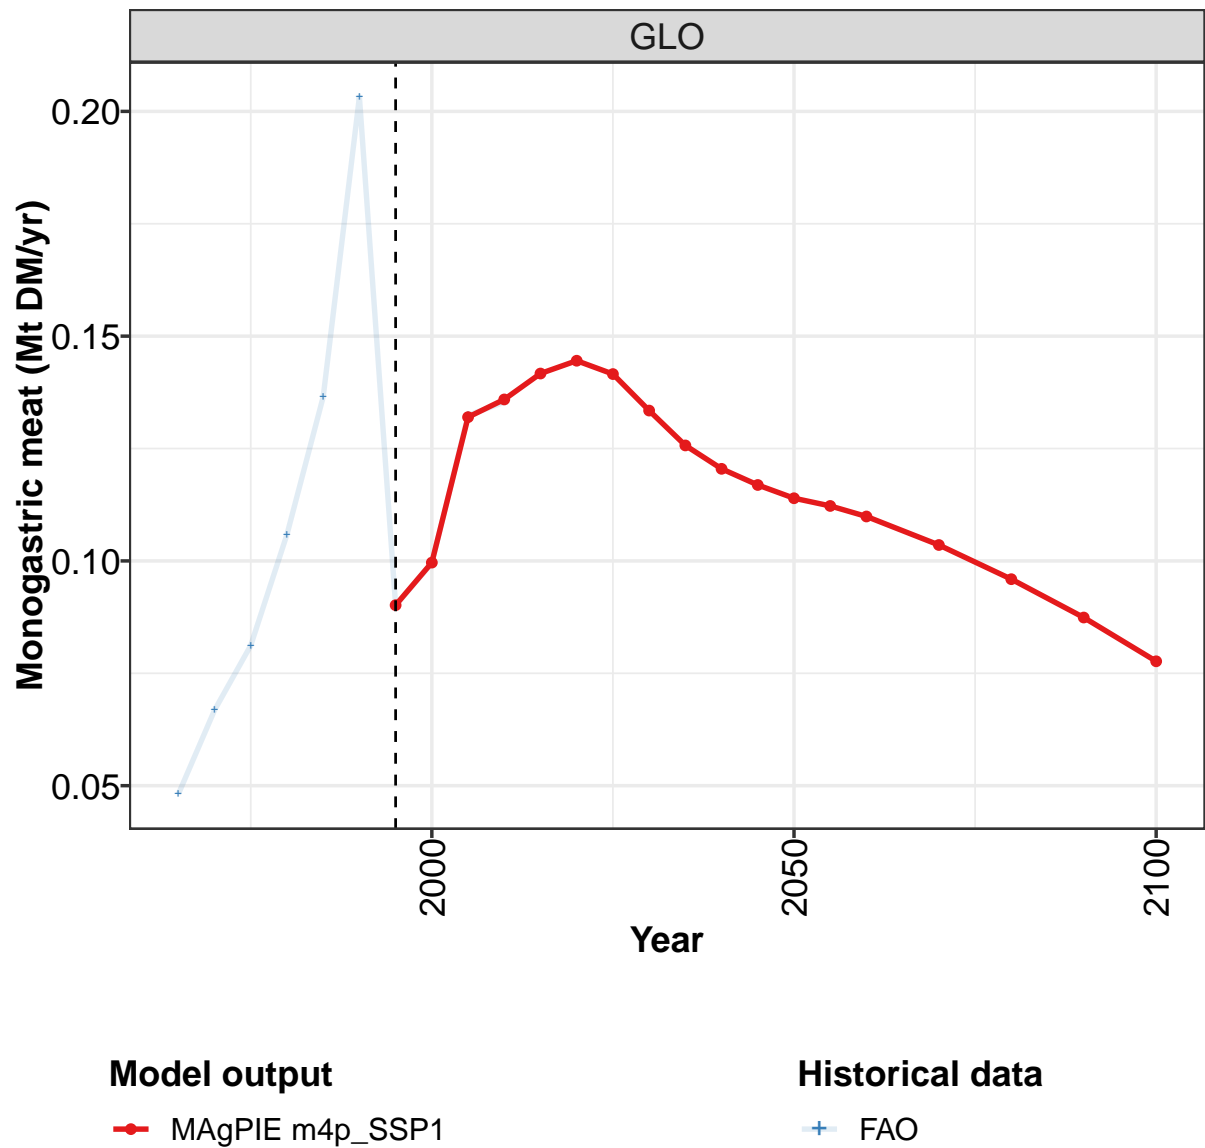

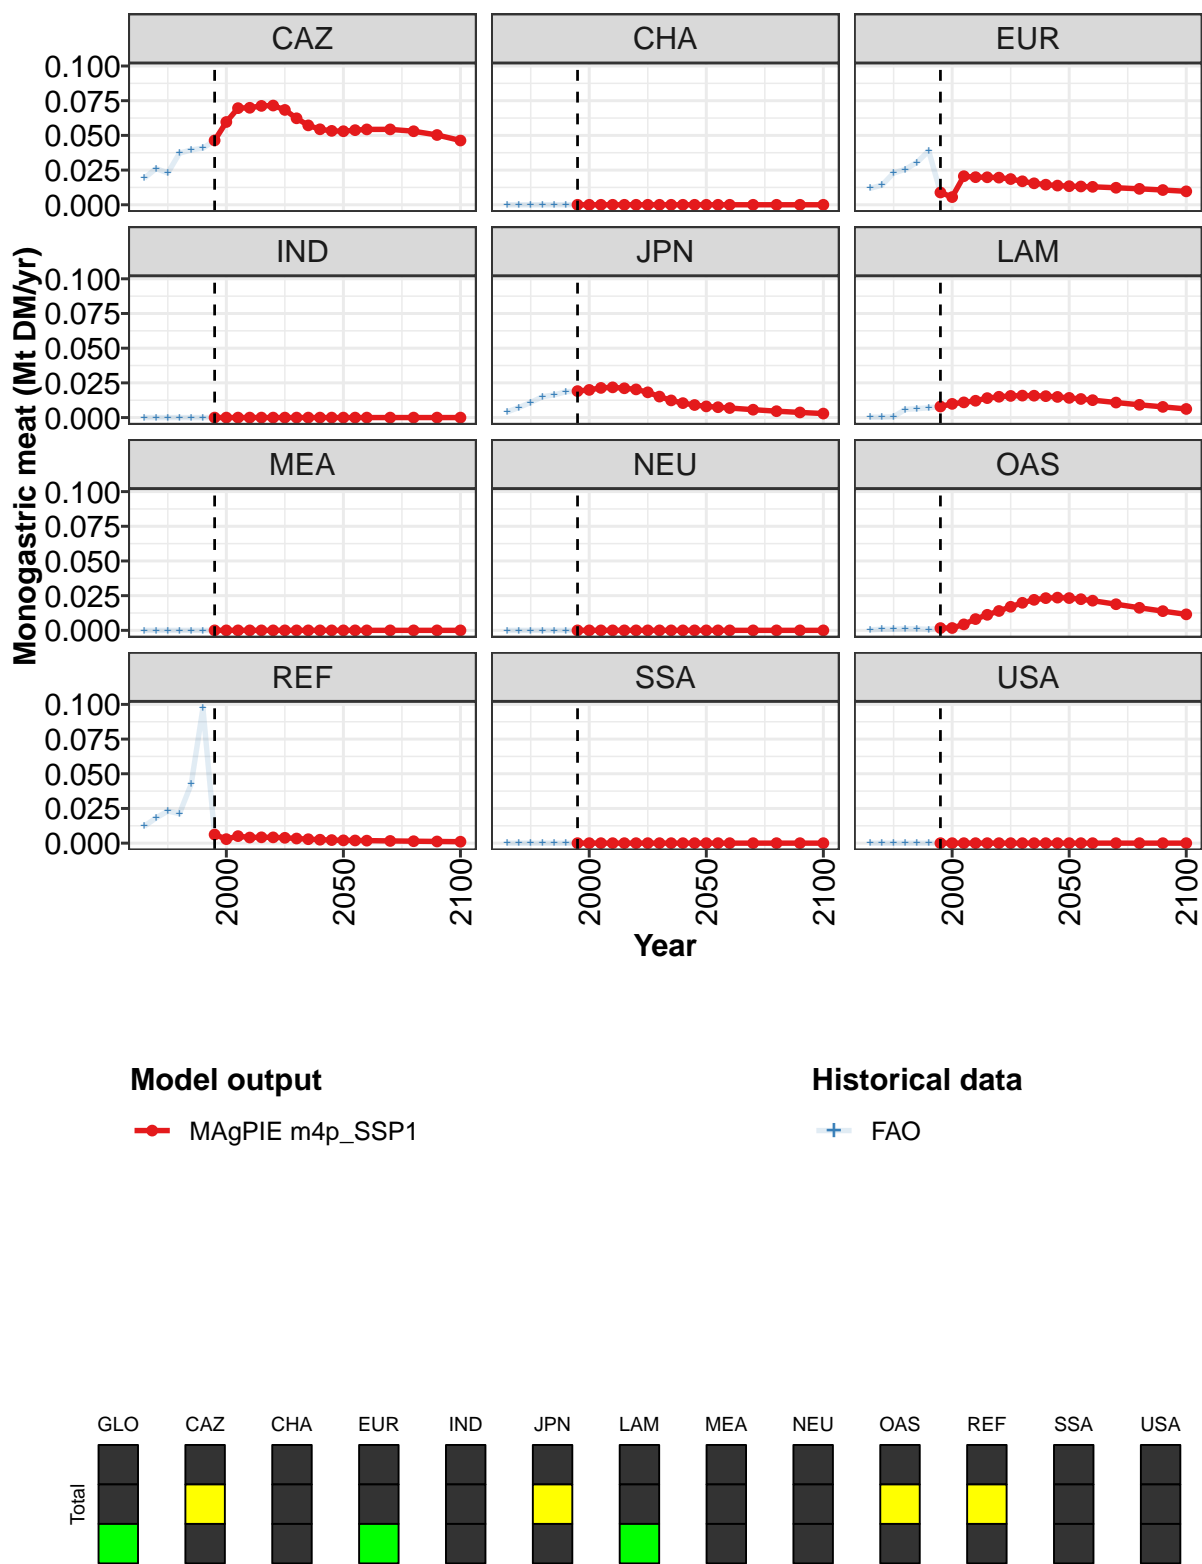

Figure 25: MAgPIE m4p\_SSP1 — Demand—Agricultural Supply Chain Loss—Livestock products—Monogastric meat (Mt DM/yr)

|     | 1995  | 2000  | 2005  | 2010  | 2015  | 2020  | 2025  | 2030  | 2035  | 2040  | 2045  |
|-----|-------|-------|-------|-------|-------|-------|-------|-------|-------|-------|-------|
| GLO | 0.090 | 0.100 | 0.132 | 0.136 | 0.142 | 0.145 | 0.142 | 0.133 | 0.126 | 0.120 | 0.117 |
| CAZ | 0.046 | 0.060 | 0.070 | 0.070 | 0.071 | 0.072 | 0.068 | 0.062 | 0.057 | 0.054 | 0.053 |
| CHA | 0.000 | 0.000 | 0.000 | 0.000 | 0.000 | 0.000 | 0.000 | 0.000 | 0.000 | 0.000 | 0.000 |
| EUR | 0.009 | 0.006 | 0.021 | 0.020 | 0.020 | 0.020 | 0.019 | 0.017 | 0.015 | 0.014 | 0.014 |
| IND | 0.000 | 0.000 | 0.000 | 0.000 | 0.000 | 0.000 | 0.000 | 0.000 | 0.000 | 0.000 | 0.000 |
| JPN | 0.019 | 0.020 | 0.021 | 0.022 | 0.021 | 0.020 | 0.018 | 0.015 | 0.012 | 0.010 | 0.009 |
| LAM | 0.008 | 0.010 | 0.011 | 0.012 | 0.014 | 0.015 | 0.016 | 0.016 | 0.016 | 0.015 | 0.015 |
| MEA | 0.000 | 0.000 | 0.000 | 0.000 | 0.000 | 0.000 | 0.000 | 0.000 | 0.000 | 0.000 | 0.000 |
| NEU | 0.000 | 0.000 | 0.000 | 0.000 | 0.000 | 0.000 | 0.000 | 0.000 | 0.000 | 0.000 | 0.000 |
| OAS | 0.002 | 0.002 | 0.004 | 0.008 | 0.011 | 0.014 | 0.017 | 0.020 | 0.022 | 0.023 | 0.024 |
| REF | 0.006 | 0.003 | 0.005 | 0.004 | 0.004 | 0.004 | 0.004 | 0.003 | 0.003 | 0.002 | 0.002 |
| SSA | 0.000 | 0.000 | 0.000 | 0.000 | 0.000 | 0.000 | 0.000 | 0.000 | 0.000 | 0.000 | 0.000 |
| USA | 0.000 | 0.000 | 0.000 | 0.000 | 0.000 | 0.000 | 0.000 | 0.000 | 0.000 | 0.000 | 0.000 |

Table 76: MAgPIE m4p\_SSP1 — Demand—Agricultural Supply Chain Loss—Livestock products—Monogastric meat (Mt DM/yr) [PART 1/2]

|     | 2050  | 2055  | 2060  | 2070  | 2080  | 2090  | 2100  |
|-----|-------|-------|-------|-------|-------|-------|-------|
| GLO | 0.114 | 0.112 | 0.110 | 0.104 | 0.096 | 0.087 | 0.078 |
| CAZ | 0.053 | 0.054 | 0.054 | 0.054 | 0.053 | 0.050 | 0.046 |
| CHA | 0.000 | 0.000 | 0.000 | 0.000 | 0.000 | 0.000 | 0.000 |
| EUR | 0.013 | 0.013 | 0.013 | 0.012 | 0.011 | 0.011 | 0.010 |
| IND | 0.000 | 0.000 | 0.000 | 0.000 | 0.000 | 0.000 | 0.000 |
| JPN | 0.008 | 0.007 | 0.007 | 0.006 | 0.005 | 0.004 | 0.003 |
| LAM | 0.014 | 0.013 | 0.013 | 0.011 | 0.009 | 0.008 | 0.006 |
| MEA | 0.000 | 0.000 | 0.000 | 0.000 | 0.000 | 0.000 | 0.000 |
| NEU | 0.000 | 0.000 | 0.000 | 0.000 | 0.000 | 0.000 | 0.000 |
| OAS | 0.023 | 0.022 | 0.021 | 0.019 | 0.016 | 0.014 | 0.012 |
| REF | 0.002 | 0.002 | 0.002 | 0.002 | 0.001 | 0.001 | 0.001 |
| SSA | 0.000 | 0.000 | 0.000 | 0.000 | 0.000 | 0.000 | 0.000 |
| USA | 0.000 | 0.000 | 0.000 | 0.000 | 0.000 | 0.000 | 0.000 |

Table 77: MAgPIE m4p\_SSP1 — Demand—Agricultural Supply Chain Loss—Livestock products—Monogastric meat (Mt DM/yr) [PART 2/2]

|     | 1965  | 1970  | 1975  | 1980  | 1985  | 1990  | 1995  | 2000  | 2005  | 2010  |
|-----|-------|-------|-------|-------|-------|-------|-------|-------|-------|-------|
| GLO | 0.048 | 0.067 | 0.081 | 0.106 | 0.137 | 0.203 | 0.090 | 0.100 | 0.132 | 0.135 |
| CAZ | 0.019 | 0.026 | 0.023 | 0.037 | 0.040 | 0.041 | 0.046 | 0.060 | 0.070 | 0.070 |
| CHA | 0.000 | 0.000 | 0.000 | 0.000 | 0.000 | 0.000 | 0.000 | 0.000 | 0.000 | 0.000 |
| EUR | 0.012 | 0.014 | 0.023 | 0.025 | 0.031 | 0.039 | 0.009 | 0.005 | 0.021 | 0.020 |
| IND | 0.000 | 0.000 | 0.000 | 0.000 | 0.000 | 0.000 | 0.000 | 0.000 | 0.000 | 0.000 |
| JPN | 0.004 | 0.007 | 0.011 | 0.015 | 0.016 | 0.019 | 0.019 | 0.020 | 0.021 | 0.022 |
| LAM | 0.000 | 0.000 | 0.001 | 0.006 | 0.006 | 0.007 | 0.008 | 0.010 | 0.011 | 0.012 |
| MEA | 0.000 | 0.000 | 0.000 | 0.000 | 0.000 | 0.000 | 0.000 | 0.000 | 0.000 | 0.000 |
| NEU | 0.000 | 0.000 | 0.000 | 0.000 | 0.000 | 0.000 | 0.000 | 0.000 | 0.000 | 0.000 |
| OAS | 0.000 | 0.001 | 0.001 | 0.001 | 0.001 | 0.001 | 0.002 | 0.002 | 0.004 | 0.008 |
| REF | 0.012 | 0.018 | 0.023 | 0.021 | 0.043 | 0.097 | 0.006 | 0.003 | 0.005 | 0.004 |
| SSA | 0.000 | 0.000 | 0.000 | 0.000 | 0.000 | 0.000 | 0.000 | 0.000 | 0.000 | 0.000 |
| USA | 0.000 | 0.000 | 0.000 | 0.000 | 0.000 | 0.000 | 0.000 | 0.000 | 0.000 | 0.000 |

Table 78: FAO — Demand—Agricultural Supply Chain Loss—Livestock products—Monogastric meat (Mt DM/yr)

3.2.4
Poultry meat

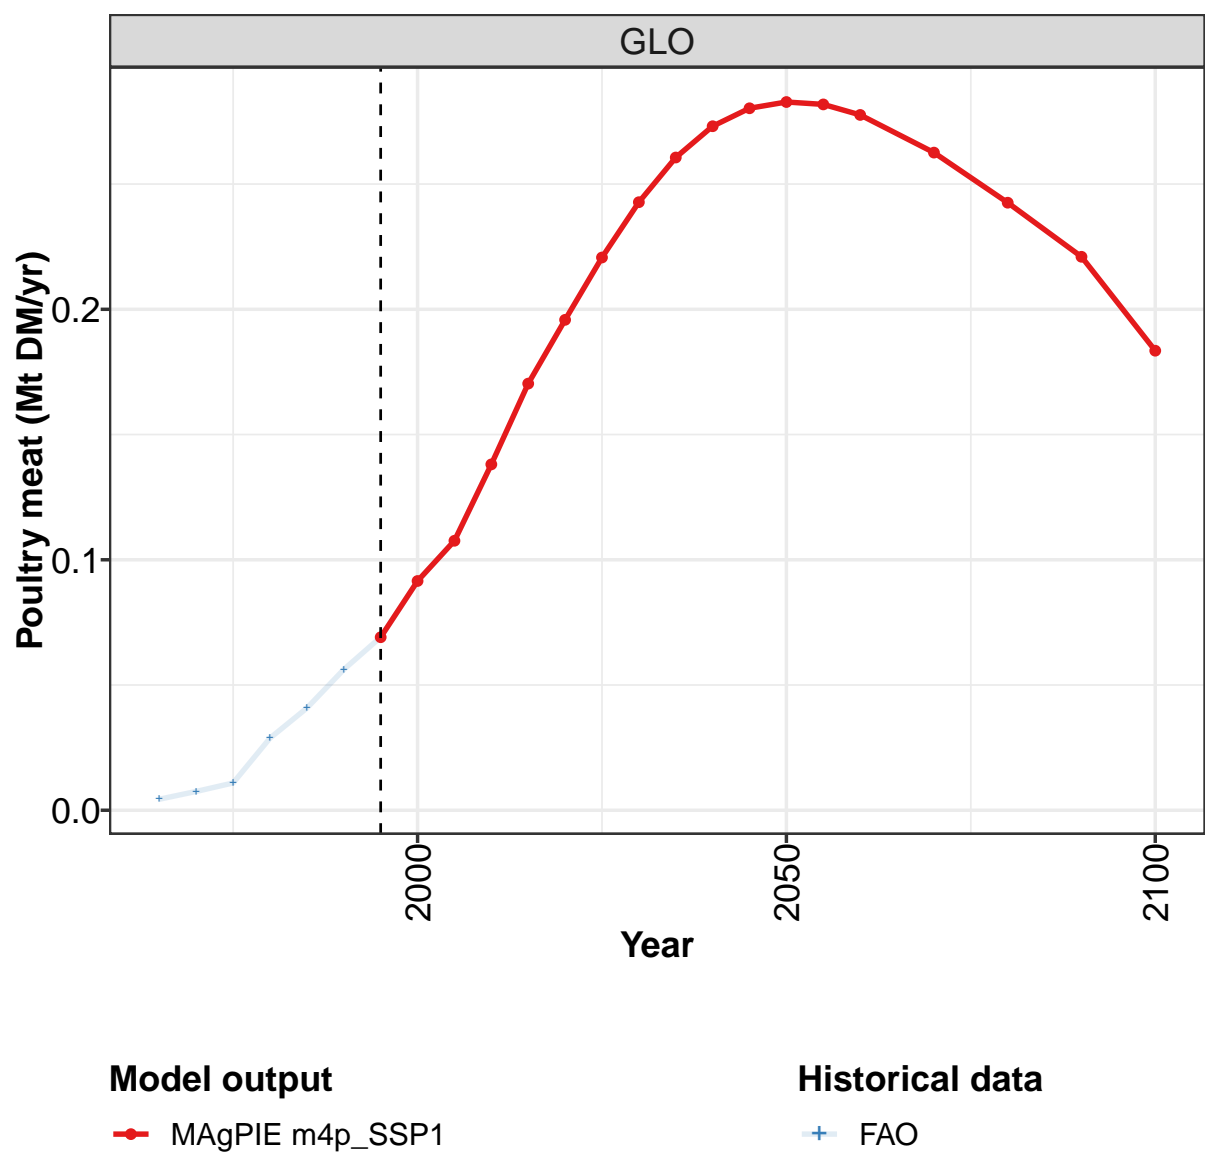

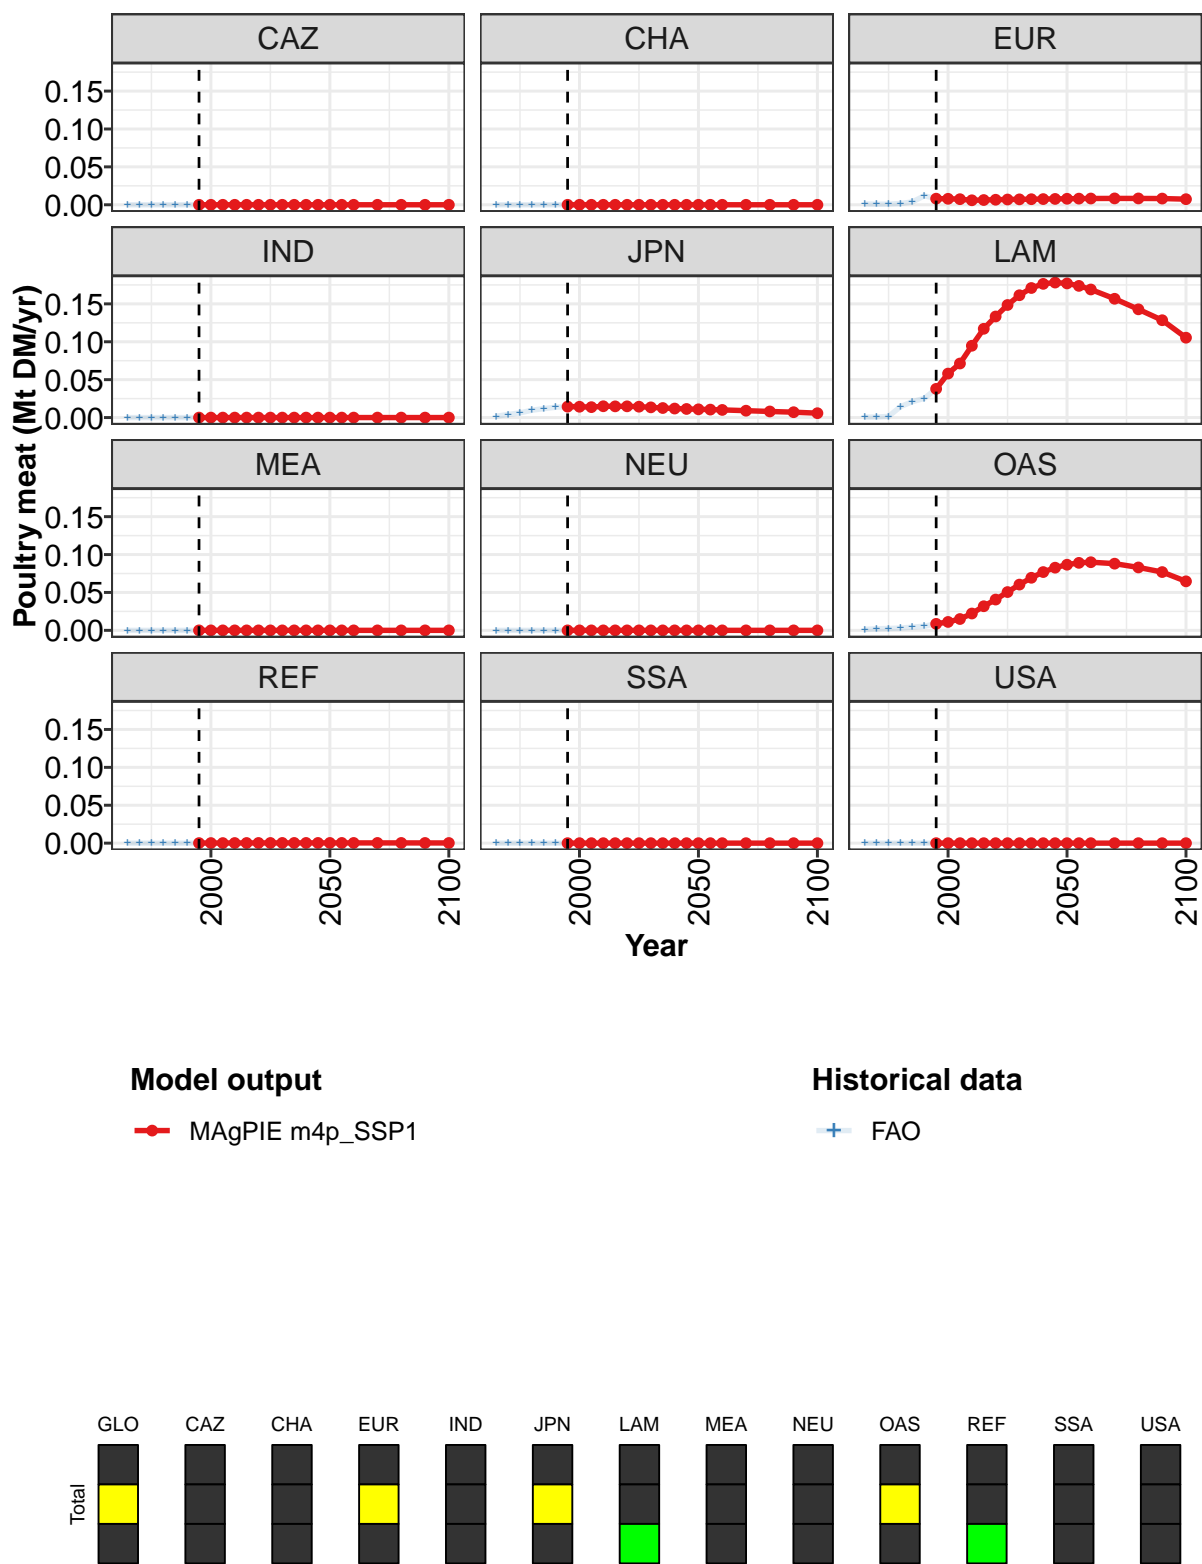

Figure 26: MAgPIE m4p\_SSP1 — Demand—Agricultural Supply Chain Loss—Livestock products—Poultry meat (Mt DM/yr)

|     | 1995  | 2000  | 2005  | 2010  | 2015  | 2020  | 2025  | 2030  | 2035  | 2040  | 2045  |
|-----|-------|-------|-------|-------|-------|-------|-------|-------|-------|-------|-------|
| GLO | 0.069 | 0.092 | 0.108 | 0.138 | 0.170 | 0.196 | 0.221 | 0.243 | 0.261 | 0.273 | 0.280 |
| CAZ | 0.000 | 0.000 | 0.000 | 0.000 | 0.000 | 0.000 | 0.000 | 0.000 | 0.000 | 0.000 | 0.000 |
| CHA | 0.000 | 0.000 | 0.000 | 0.000 | 0.000 | 0.000 | 0.000 | 0.000 | 0.000 | 0.000 | 0.000 |
| EUR | 0.008 | 0.008 | 0.007 | 0.006 | 0.006 | 0.007 | 0.007 | 0.007 | 0.007 | 0.008 | 0.008 |
| IND | 0.000 | 0.000 | 0.000 | 0.000 | 0.000 | 0.000 | 0.000 | 0.000 | 0.000 | 0.000 | 0.000 |
| JPN | 0.014 | 0.014 | 0.014 | 0.015 | 0.015 | 0.015 | 0.014 | 0.013 | 0.013 | 0.012 | 0.011 |
| LAM | 0.038 | 0.058 | 0.071 | 0.095 | 0.117 | 0.133 | 0.149 | 0.161 | 0.171 | 0.176 | 0.178 |
| MEA | 0.000 | 0.000 | 0.000 | 0.000 | 0.000 | 0.000 | 0.000 | 0.000 | 0.000 | 0.000 | 0.000 |
| NEU | 0.000 | 0.000 | 0.000 | 0.000 | 0.000 | 0.000 | 0.000 | 0.000 | 0.000 | 0.000 | 0.000 |
| OAS | 0.009 | 0.011 | 0.015 | 0.022 | 0.032 | 0.041 | 0.051 | 0.060 | 0.069 | 0.077 | 0.083 |
| REF | 0.000 | 0.000 | 0.000 | 0.000 | 0.000 | 0.000 | 0.000 | 0.000 | 0.000 | 0.000 | 0.000 |
| SSA | 0.000 | 0.000 | 0.000 | 0.000 | 0.000 | 0.000 | 0.000 | 0.000 | 0.000 | 0.000 | 0.000 |
| USA | 0.000 | 0.000 | 0.000 | 0.000 | 0.000 | 0.000 | 0.000 | 0.000 | 0.000 | 0.000 | 0.000 |

Table 79: MAgPIE m4p\_SSP1 — Demand—Agricultural Supply Chain Loss—Livestock products—Poultry meat (Mt DM/yr) [PART 1/2]

|     | 2050  | 2055  | 2060  | 2070  | 2080  | 2090  | 2100  |
|-----|-------|-------|-------|-------|-------|-------|-------|
| GLO | 0.283 | 0.282 | 0.278 | 0.263 | 0.243 | 0.221 | 0.183 |
| CAZ | 0.000 | 0.000 | 0.000 | 0.000 | 0.000 | 0.000 | 0.000 |
| CHA | 0.000 | 0.000 | 0.000 | 0.000 | 0.000 | 0.000 | 0.000 |
| EUR | 0.008 | 0.008 | 0.008 | 0.008 | 0.008 | 0.008 | 0.007 |
| IND | 0.000 | 0.000 | 0.000 | 0.000 | 0.000 | 0.000 | 0.000 |
| JPN | 0.011 | 0.011 | 0.010 | 0.009 | 0.008 | 0.007 | 0.006 |
| LAM | 0.177 | 0.174 | 0.169 | 0.157 | 0.143 | 0.128 | 0.105 |
| MEA | 0.000 | 0.000 | 0.000 | 0.000 | 0.000 | 0.000 | 0.000 |
| NEU | 0.000 | 0.000 | 0.000 | 0.000 | 0.000 | 0.000 | 0.000 |
| OAS | 0.087 | 0.089 | 0.090 | 0.088 | 0.083 | 0.077 | 0.065 |
| REF | 0.000 | 0.000 | 0.000 | 0.000 | 0.000 | 0.000 | 0.000 |
| SSA | 0.000 | 0.000 | 0.000 | 0.000 | 0.000 | 0.000 | 0.000 |
| USA | 0.000 | 0.000 | 0.000 | 0.000 | 0.000 | 0.000 | 0.000 |

Table 80: MAgPIE m4p\_SSP1 — Demand—Agricultural Supply Chain Loss—Livestock products—Poultry meat (Mt DM/yr) [PART 2/2]

|     | 1965  | 1970  | 1975  | 1980  | 1985  | 1990  | 1995  | 2000  | 2005  | 2010  |
|-----|-------|-------|-------|-------|-------|-------|-------|-------|-------|-------|
| GLO | 0.004 | 0.007 | 0.011 | 0.029 | 0.041 | 0.056 | 0.069 | 0.091 | 0.108 | 0.138 |
| CAZ | 0.000 | 0.000 | 0.000 | 0.000 | 0.000 | 0.000 | 0.000 | 0.000 | 0.000 | 0.000 |
| CHA | 0.000 | 0.000 | 0.000 | 0.000 | 0.000 | 0.000 | 0.000 | 0.000 | 0.000 | 0.000 |
| EUR | 0.001 | 0.001 | 0.001 | 0.002 | 0.004 | 0.012 | 0.008 | 0.008 | 0.007 | 0.006 |
| IND | 0.000 | 0.000 | 0.000 | 0.000 | 0.000 | 0.000 | 0.000 | 0.000 | 0.000 | 0.000 |
| JPN | 0.002 | 0.004 | 0.006 | 0.010 | 0.012 | 0.014 | 0.015 | 0.014 | 0.014 | 0.015 |
| LAM | 0.001 | 0.001 | 0.002 | 0.014 | 0.021 | 0.025 | 0.038 | 0.058 | 0.071 | 0.095 |
| MEA | 0.000 | 0.000 | 0.000 | 0.000 | 0.000 | 0.000 | 0.000 | 0.000 | 0.000 | 0.000 |
| NEU | 0.000 | 0.000 | 0.000 | 0.000 | 0.000 | 0.000 | 0.000 | 0.000 | 0.000 | 0.000 |
| OAS | 0.001 | 0.002 | 0.003 | 0.003 | 0.004 | 0.005 | 0.009 | 0.011 | 0.015 | 0.022 |
| REF | 0.000 | 0.000 | 0.000 | 0.000 | 0.000 | 0.000 | 0.000 | 0.000 | 0.000 | 0.000 |
| SSA | 0.000 | 0.000 | 0.000 | 0.000 | 0.000 | 0.000 | 0.000 | 0.000 | 0.000 | 0.000 |
| USA | 0.000 | 0.000 | 0.000 | 0.000 | 0.000 | 0.000 | 0.000 | 0.000 | 0.000 | 0.000 |

Table 81: FAO — Demand—Agricultural Supply Chain Loss—Livestock products—Poultry meat (Mt DM/yr)



3.2.5
Ruminant meat

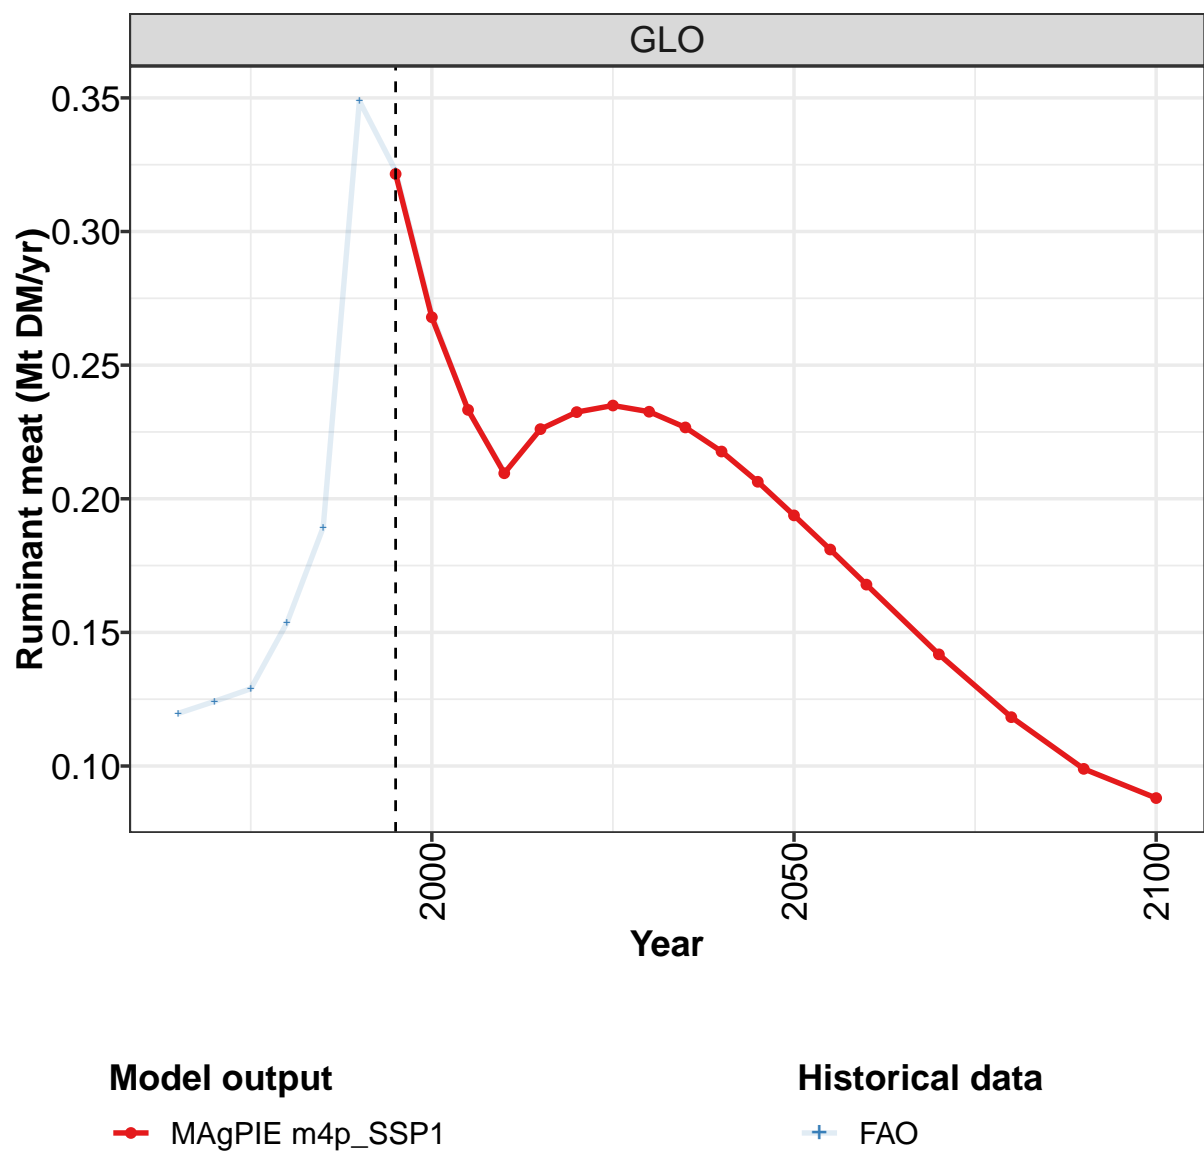

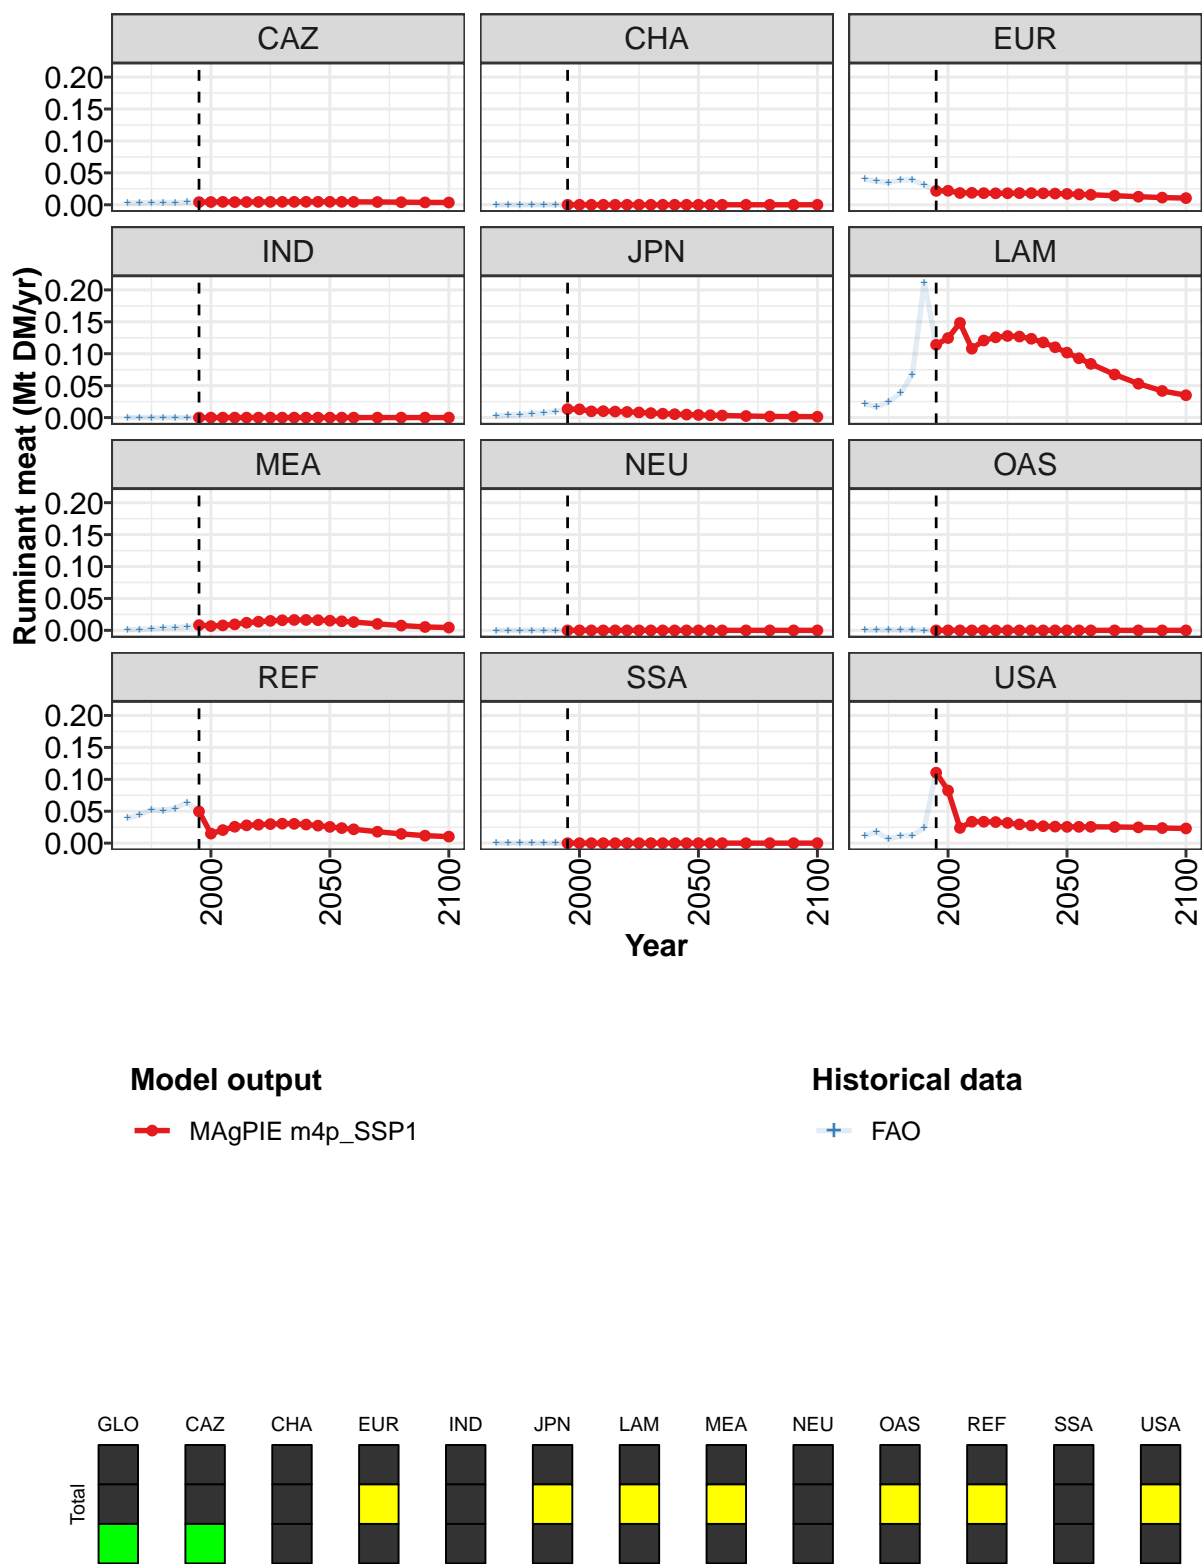

Figure 27: MAgPIE m4p\_SSP1 — Demand—Agricultural Supply Chain Loss—Livestock products—Ruminant meat (Mt DM/yr)

|     | 1995  | 2000  | 2005  | 2010  | 2015  | 2020  | 2025  | 2030  | 2035  | 2040  | 2045  |
|-----|-------|-------|-------|-------|-------|-------|-------|-------|-------|-------|-------|
| GLO | 0.322 | 0.268 | 0.233 | 0.210 | 0.226 | 0.232 | 0.235 | 0.233 | 0.227 | 0.218 | 0.206 |
| CAZ | 0.004 | 0.004 | 0.005 | 0.004 | 0.004 | 0.004 | 0.004 | 0.005 | 0.005 | 0.005 | 0.005 |
| CHA | 0.000 | 0.000 | 0.000 | 0.000 | 0.000 | 0.000 | 0.000 | 0.000 | 0.000 | 0.000 | 0.000 |
| EUR | 0.022 | 0.022 | 0.018 | 0.019 | 0.018 | 0.018 | 0.018 | 0.018 | 0.018 | 0.018 | 0.018 |
| IND | 0.000 | 0.000 | 0.000 | 0.000 | 0.000 | 0.000 | 0.000 | 0.000 | 0.000 | 0.000 | 0.000 |
| JPN | 0.013 | 0.013 | 0.010 | 0.010 | 0.009 | 0.009 | 0.008 | 0.007 | 0.006 | 0.005 | 0.005 |
| LAM | 0.114 | 0.125 | 0.148 | 0.108 | 0.121 | 0.126 | 0.128 | 0.127 | 0.123 | 0.118 | 0.110 |
| MEA | 0.008 | 0.007 | 0.008 | 0.009 | 0.012 | 0.014 | 0.015 | 0.016 | 0.016 | 0.016 | 0.016 |
| NEU | 0.000 | 0.000 | 0.000 | 0.000 | 0.000 | 0.000 | 0.000 | 0.000 | 0.000 | 0.000 | 0.000 |
| OAS | 0.000 | 0.000 | 0.000 | 0.000 | 0.000 | 0.000 | 0.000 | 0.000 | 0.000 | 0.000 | 0.000 |
| REF | 0.050 | 0.015 | 0.021 | 0.026 | 0.028 | 0.029 | 0.030 | 0.031 | 0.030 | 0.029 | 0.027 |
| SSA | 0.000 | 0.000 | 0.000 | 0.000 | 0.000 | 0.000 | 0.000 | 0.000 | 0.000 | 0.000 | 0.000 |
| USA | 0.110 | 0.082 | 0.024 | 0.034 | 0.034 | 0.033 | 0.032 | 0.029 | 0.028 | 0.027 | 0.026 |

Table 82: MAgPIE m4p\_SSP1 — Demand—Agricultural Supply Chain Loss—Livestock products—Ruminant meat (Mt DM/yr) [PART 1/2]

|     | 2050  | 2055  | 2060  | 2070  | 2080  | 2090  | 2100  |
|-----|-------|-------|-------|-------|-------|-------|-------|
| GLO | 0.194 | 0.181 | 0.168 | 0.142 | 0.118 | 0.099 | 0.088 |
| CAZ | 0.005 | 0.005 | 0.005 | 0.004 | 0.004 | 0.004 | 0.004 |
| CHA | 0.000 | 0.000 | 0.000 | 0.000 | 0.000 | 0.000 | 0.000 |
| EUR | 0.017 | 0.016 | 0.016 | 0.014 | 0.013 | 0.011 | 0.010 |
| IND | 0.000 | 0.000 | 0.000 | 0.000 | 0.000 | 0.000 | 0.000 |
| JPN | 0.004 | 0.004 | 0.003 | 0.002 | 0.002 | 0.001 | 0.001 |
| LAM | 0.102 | 0.093 | 0.084 | 0.068 | 0.053 | 0.042 | 0.035 |
| MEA | 0.015 | 0.014 | 0.013 | 0.010 | 0.007 | 0.005 | 0.004 |
| NEU | 0.000 | 0.000 | 0.000 | 0.000 | 0.000 | 0.000 | 0.000 |
| OAS | 0.000 | 0.000 | 0.000 | 0.000 | 0.000 | 0.000 | 0.000 |
| REF | 0.026 | 0.024 | 0.022 | 0.018 | 0.014 | 0.012 | 0.010 |
| SSA | 0.000 | 0.000 | 0.000 | 0.000 | 0.000 | 0.000 | 0.000 |
| USA | 0.026 | 0.026 | 0.026 | 0.025 | 0.025 | 0.024 | 0.023 |

Table 83: MAgPIE m4p\_SSP1 — Demand—Agricultural Supply Chain Loss—Livestock products—Ruminant meat (Mt DM/yr) [PART 2/2]

|     | 1965  | 1970  | 1975  | 1980  | 1985  | 1990  | 1995  | 2000  | 2005  | 2010  |
|-----|-------|-------|-------|-------|-------|-------|-------|-------|-------|-------|
| GLO | 0.120 | 0.124 | 0.129 | 0.154 | 0.189 | 0.349 | 0.323 | 0.269 | 0.233 | 0.210 |
| CAZ | 0.003 | 0.003 | 0.004 | 0.004 | 0.003 | 0.004 | 0.004 | 0.004 | 0.005 | 0.004 |
| CHA | 0.000 | 0.000 | 0.000 | 0.000 | 0.000 | 0.000 | 0.000 | 0.000 | 0.000 | 0.000 |
| EUR | 0.040 | 0.037 | 0.035 | 0.039 | 0.039 | 0.031 | 0.022 | 0.022 | 0.018 | 0.019 |
| IND | 0.000 | 0.000 | 0.000 | 0.000 | 0.000 | 0.000 | 0.000 | 0.000 | 0.000 | 0.000 |
| JPN | 0.002 | 0.004 | 0.005 | 0.006 | 0.007 | 0.010 | 0.013 | 0.013 | 0.010 | 0.010 |
| LAM | 0.021 | 0.017 | 0.024 | 0.038 | 0.068 | 0.211 | 0.115 | 0.125 | 0.148 | 0.108 |
| MEA | 0.001 | 0.001 | 0.003 | 0.003 | 0.005 | 0.005 | 0.008 | 0.007 | 0.008 | 0.009 |
| NEU | 0.000 | 0.000 | 0.000 | 0.000 | 0.000 | 0.000 | 0.000 | 0.000 | 0.000 | 0.000 |
| OAS | 0.001 | 0.001 | 0.001 | 0.001 | 0.001 | 0.000 | 0.000 | 0.000 | 0.000 | 0.000 |
| REF | 0.039 | 0.044 | 0.052 | 0.051 | 0.055 | 0.064 | 0.050 | 0.015 | 0.021 | 0.026 |
| SSA | 0.000 | 0.000 | 0.000 | 0.000 | 0.000 | 0.000 | 0.000 | 0.000 | 0.000 | 0.000 |
| USA | 0.012 | 0.017 | 0.006 | 0.011 | 0.012 | 0.024 | 0.111 | 0.083 | 0.024 | 0.034 |

Table 84: FAO — Demand—Agricultural Supply Chain Loss—Livestock products—Ruminant meat (Mt DM/yr)

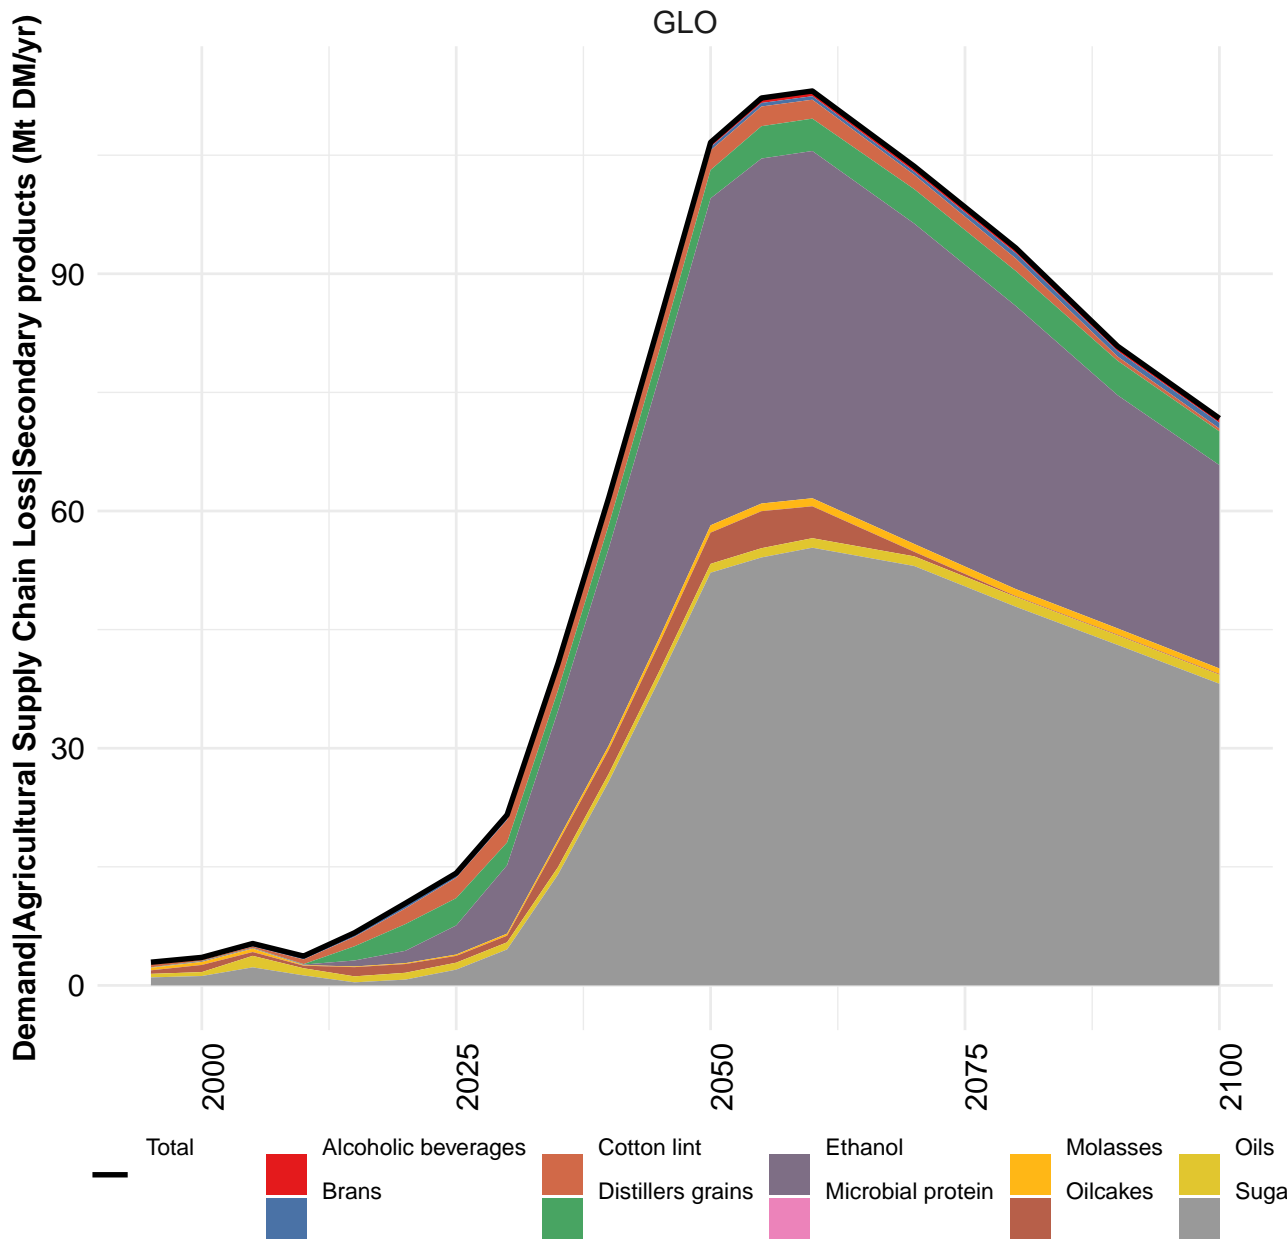

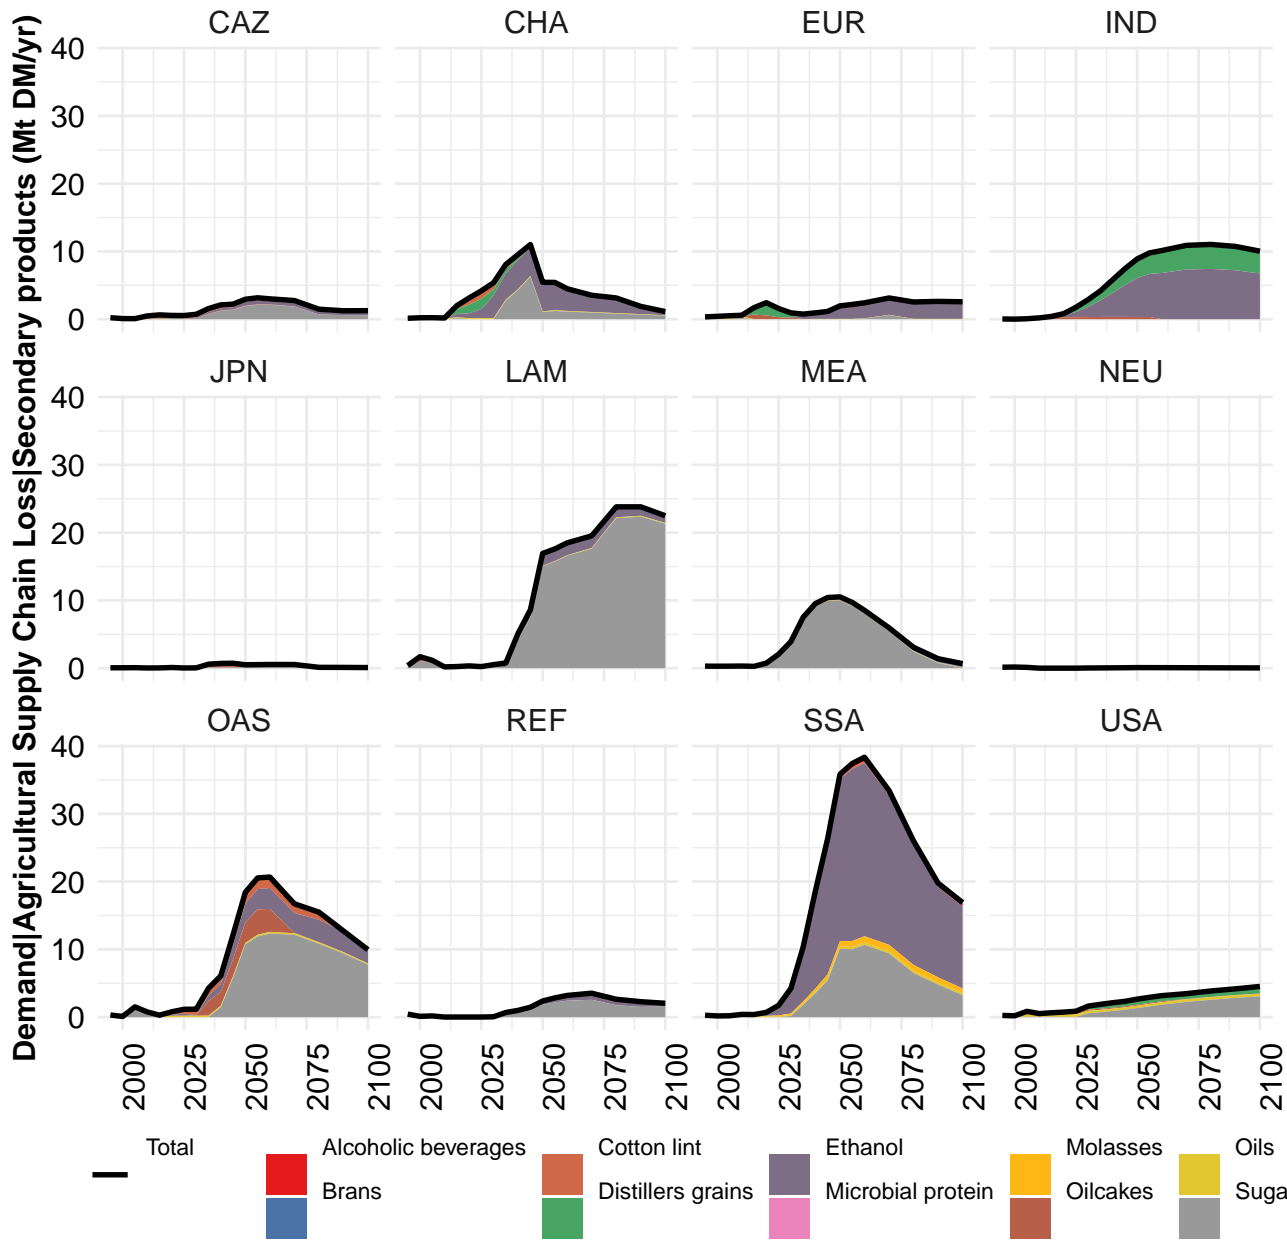

3.3 Secondary products

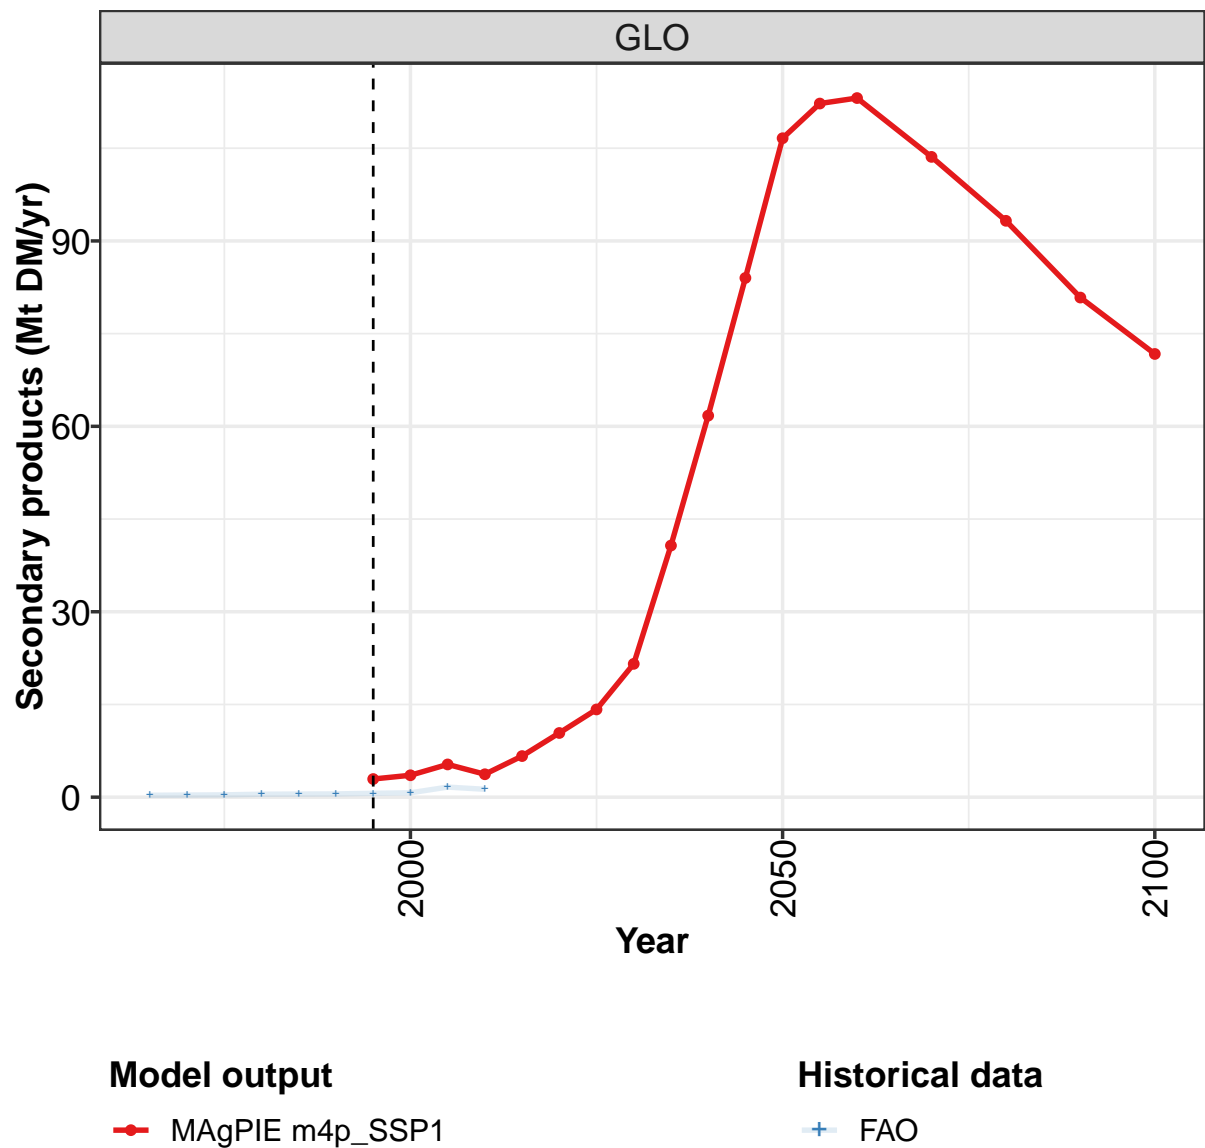

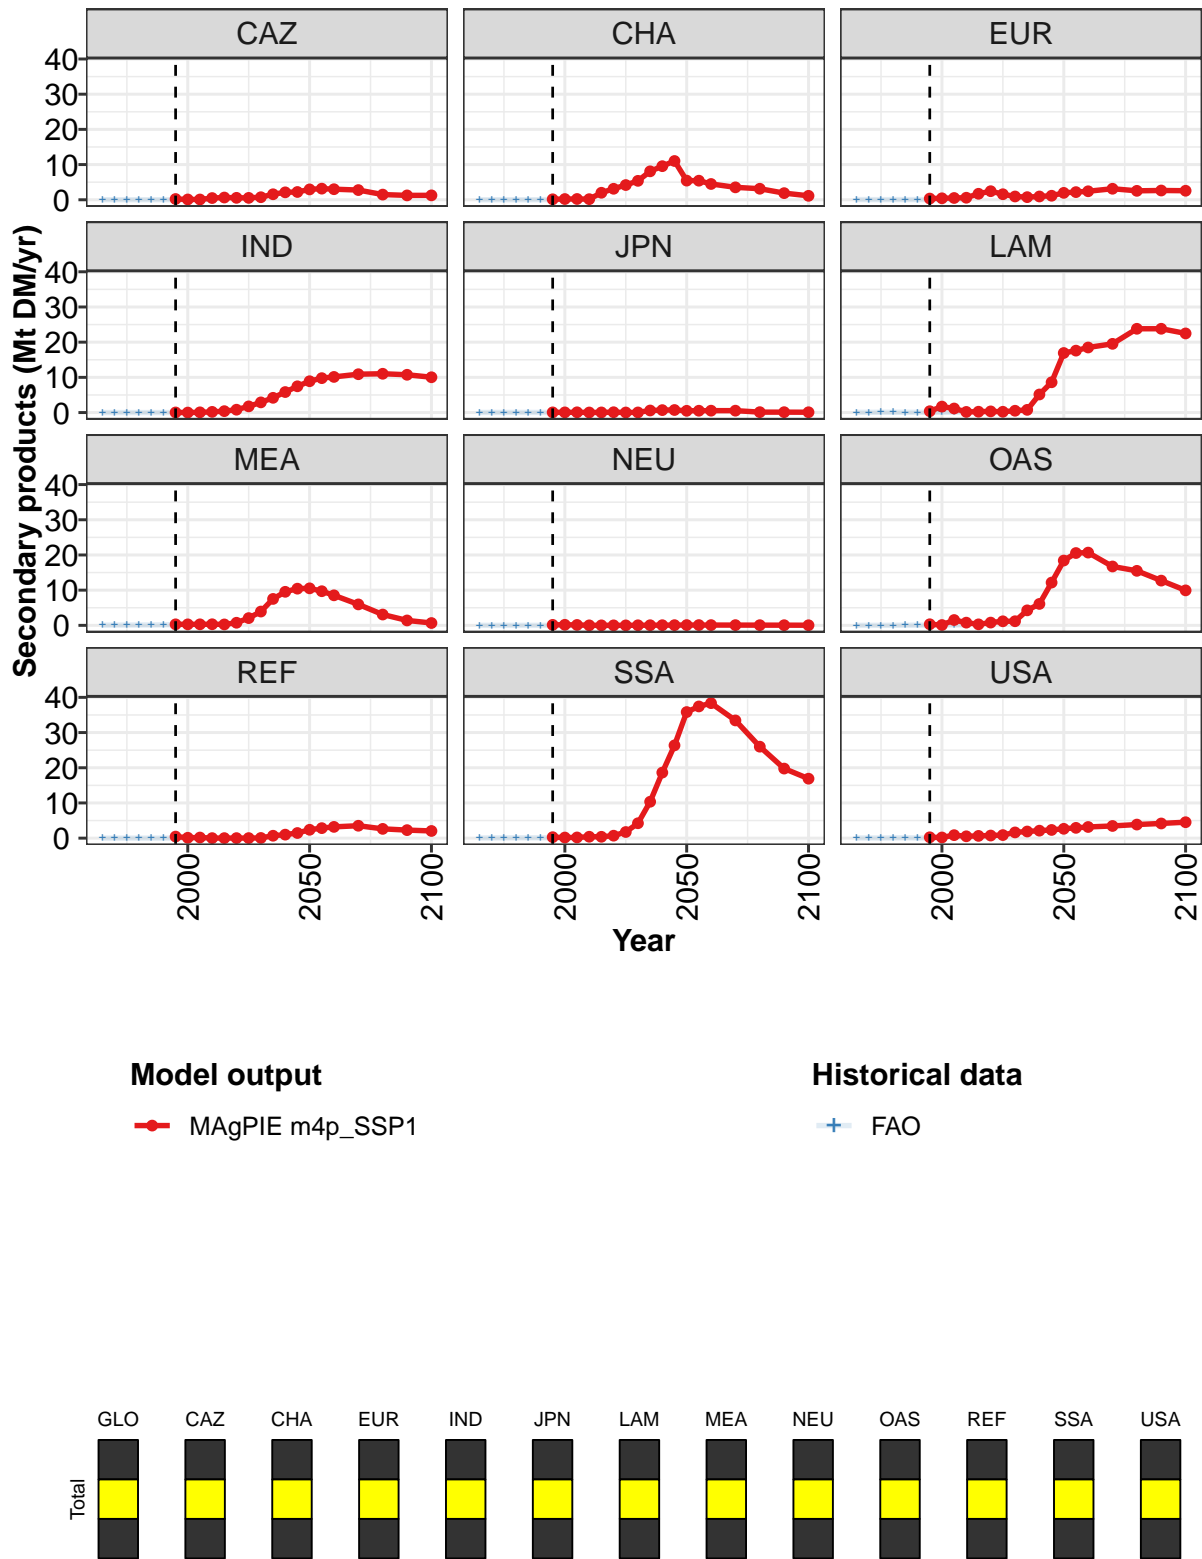

Figure 28: MAgPIE m4p\_SSP1 — Demand—Agricultural Supply Chain Loss—Secondary products (Mt DM/yr)

|     | 1995 | 2000 | 2005 | 2010 | 2015 | 2020 | 2025 | 2030 | 2035 | 2040 | 2045 |
|-----|------|------|------|------|------|------|------|------|------|------|------|
| GLO | 3    | 4    | 5    | 4    | 7    | 10   | 14   | 22   | 41   | 62   | 84   |
| CAZ | 0    | 0    | 0    | 0    | 1    | 1    | 1    | 1    | 2    | 2    | 2    |
| CHA | 0    | 0    | 0    | 0    | 2    | 3    | 4    | 5    | 8    | 10   | 11   |
| EUR | 0    | 0    | 1    | 1    | 2    | 2    | 2    | 1    | 1    | 1    | 1    |
| IND | 0    | 0    | 0    | 0    | 0    | 1    | 2    | 3    | 4    | 6    | 7    |
| JPN | 0    | 0    | 0    | 0    | 0    | 0    | 0    | 0    | 1    | 1    | 1    |
| LAM | 0    | 2    | 1    | 0    | 0    | 0    | 0    | 1    | 1    | 5    | 9    |
| MEA | 0    | 0    | 0    | 0    | 0    | 1    | 2    | 4    | 8    | 10   | 10   |
| NEU | 0    | 0    | 0    | 0    | 0    | 0    | 0    | 0    | 0    | 0    | 0    |
| OAS | 0    | 0    | 2    | 1    | 0    | 1    | 1    | 1    | 4    | 6    | 12   |
| REF | 0    | 0    | 0    | 0    | 0    | 0    | 0    | 0    | 1    | 1    | 1    |
| SSA | 0    | 0    | 0    | 0    | 0    | 1    | 2    | 4    | 10   | 19   | 26   |
| USA | 0    | 0    | 1    | 1    | 1    | 1    | 1    | 2    | 2    | 2    | 2    |

Table 85: MAgPIE m4p\_SSP1 — Demand—Agricultural Supply Chain Loss—Secondary products (Mt DM/yr)  
[PART 1/2]

|     | 2050 | 2055 | 2060 | 2070 | 2080 | 2090 | 2100 |
|-----|------|------|------|------|------|------|------|
| GLO | 107  | 112  | 113  | 104  | 93   | 81   | 72   |
| CAZ | 3    | 3    | 3    | 3    | 1    | 1    | 1    |
| CHA | 5    | 5    | 4    | 4    | 3    | 2    | 1    |
| EUR | 2    | 2    | 2    | 3    | 3    | 3    | 3    |
| IND | 9    | 10   | 10   | 11   | 11   | 11   | 10   |
| JPN | 1    | 1    | 1    | 1    | 0    | 0    | 0    |
| LAM | 17   | 18   | 18   | 20   | 24   | 24   | 22   |
| MEA | 11   | 10   | 9    | 6    | 3    | 1    | 1    |
| NEU | 0    | 0    | 0    | 0    | 0    | 0    | 0    |
| OAS | 18   | 21   | 21   | 17   | 15   | 13   | 10   |
| REF | 2    | 3    | 3    | 4    | 3    | 2    | 2    |
| SSA | 36   | 37   | 38   | 33   | 26   | 20   | 17   |
| USA | 3    | 3    | 3    | 3    | 4    | 4    | 5    |

Table 86: MAgPIE m4p\_SSP1 — Demand—Agricultural Supply Chain Loss—Secondary products (Mt DM/yr)  
[PART 2/2]

|     | 1965 | 1970 | 1975 | 1980 | 1985 | 1990 | 1995 | 2000 | 2005 | 2010 |
|-----|------|------|------|------|------|------|------|------|------|------|
| GLO | 0.31 | 0.35 | 0.38 | 0.48 | 0.50 | 0.53 | 0.63 | 0.71 | 1.63 | 1.28 |
| CAZ | 0.01 | 0.02 | 0.02 | 0.02 | 0.02 | 0.02 | 0.02 | 0.03 | 0.04 | 0.04 |
| CHA | 0.00 | 0.00 | 0.00 | 0.00 | 0.01 | 0.03 | 0.03 | 0.04 | 0.10 | 0.12 |
| EUR | 0.07 | 0.04 | 0.03 | 0.05 | 0.04 | 0.05 | 0.03 | 0.03 | 0.04 | 0.03 |
| IND | 0.00 | 0.00 | 0.00 | 0.00 | 0.00 | 0.00 | 0.00 | 0.00 | 0.00 | 0.00 |
| JPN | 0.02 | 0.03 | 0.03 | 0.03 | 0.03 | 0.03 | 0.03 | 0.03 | 0.03 | 0.03 |
| LAM | 0.06 | 0.07 | 0.09 | 0.09 | 0.07 | 0.06 | 0.07 | 0.09 | 0.11 | 0.14 |
| MEA | 0.05 | 0.06 | 0.08 | 0.10 | 0.11 | 0.16 | 0.20 | 0.22 | 0.21 | 0.22 |
| NEU | 0.00 | 0.00 | 0.00 | 0.00 | 0.00 | 0.00 | 0.00 | 0.00 | 0.00 | 0.00 |
| OAS | 0.00 | 0.00 | 0.01 | 0.02 | 0.03 | 0.04 | 0.05 | 0.07 | 0.10 | 0.13 |
| REF | 0.00 | 0.00 | 0.00 | 0.00 | 0.00 | 0.00 | 0.02 | 0.01 | 0.01 | 0.01 |
| SSA | 0.06 | 0.07 | 0.08 | 0.10 | 0.10 | 0.10 | 0.11 | 0.13 | 0.19 | 0.23 |
| USA | 0.04 | 0.05 | 0.03 | 0.07 | 0.11 | 0.05 | 0.06 | 0.06 | 0.81 | 0.34 |

Table 87: FAO — Demand—Agricultural Supply Chain Loss—Secondary products (Mt DM/yr)



3.3.1 Alcoholic beverages

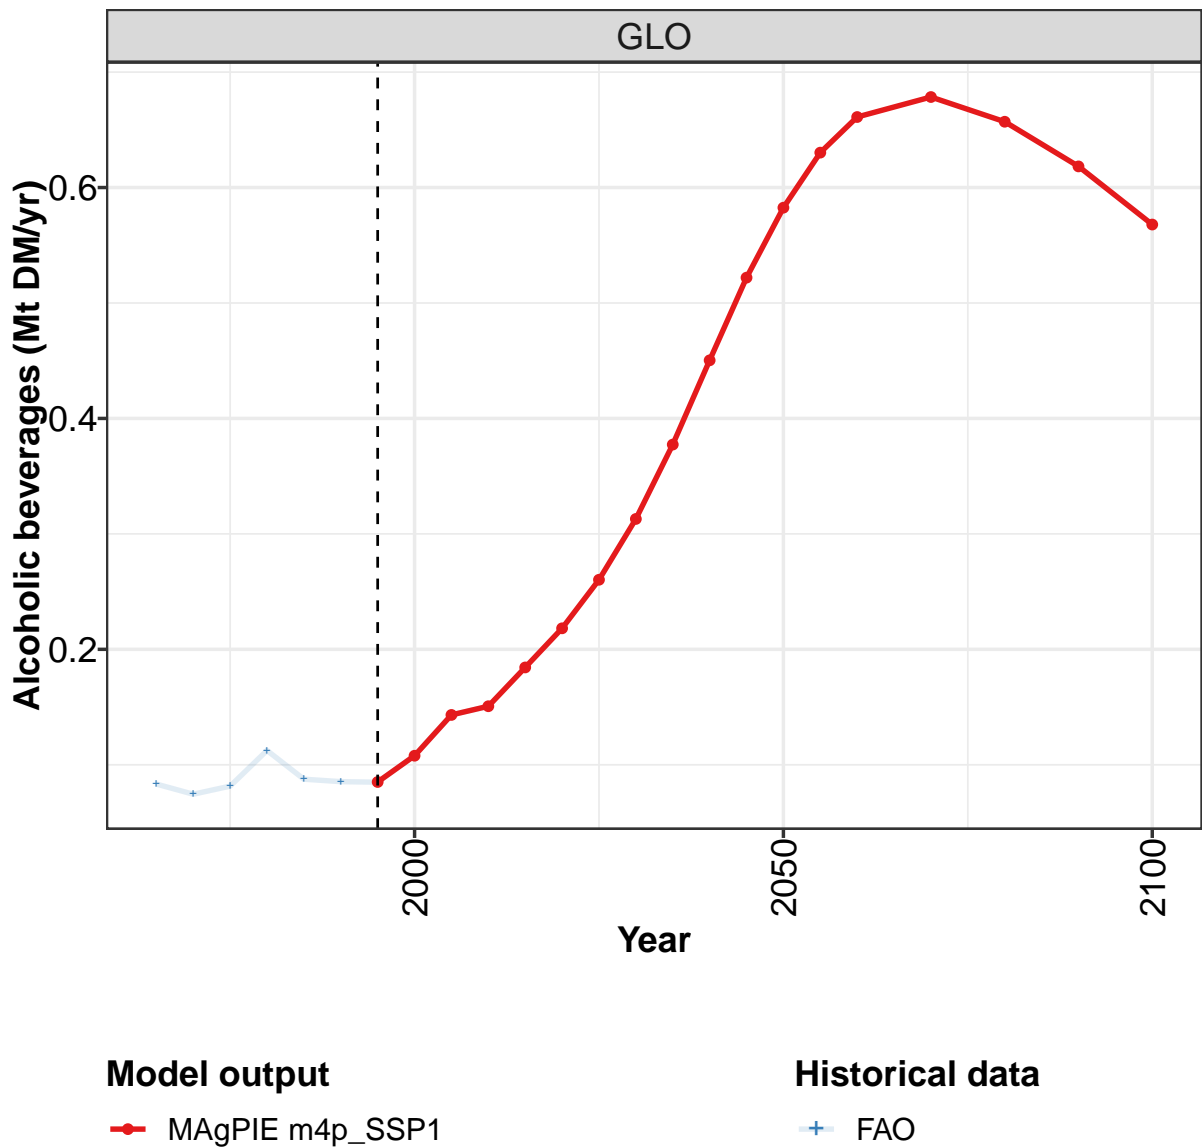

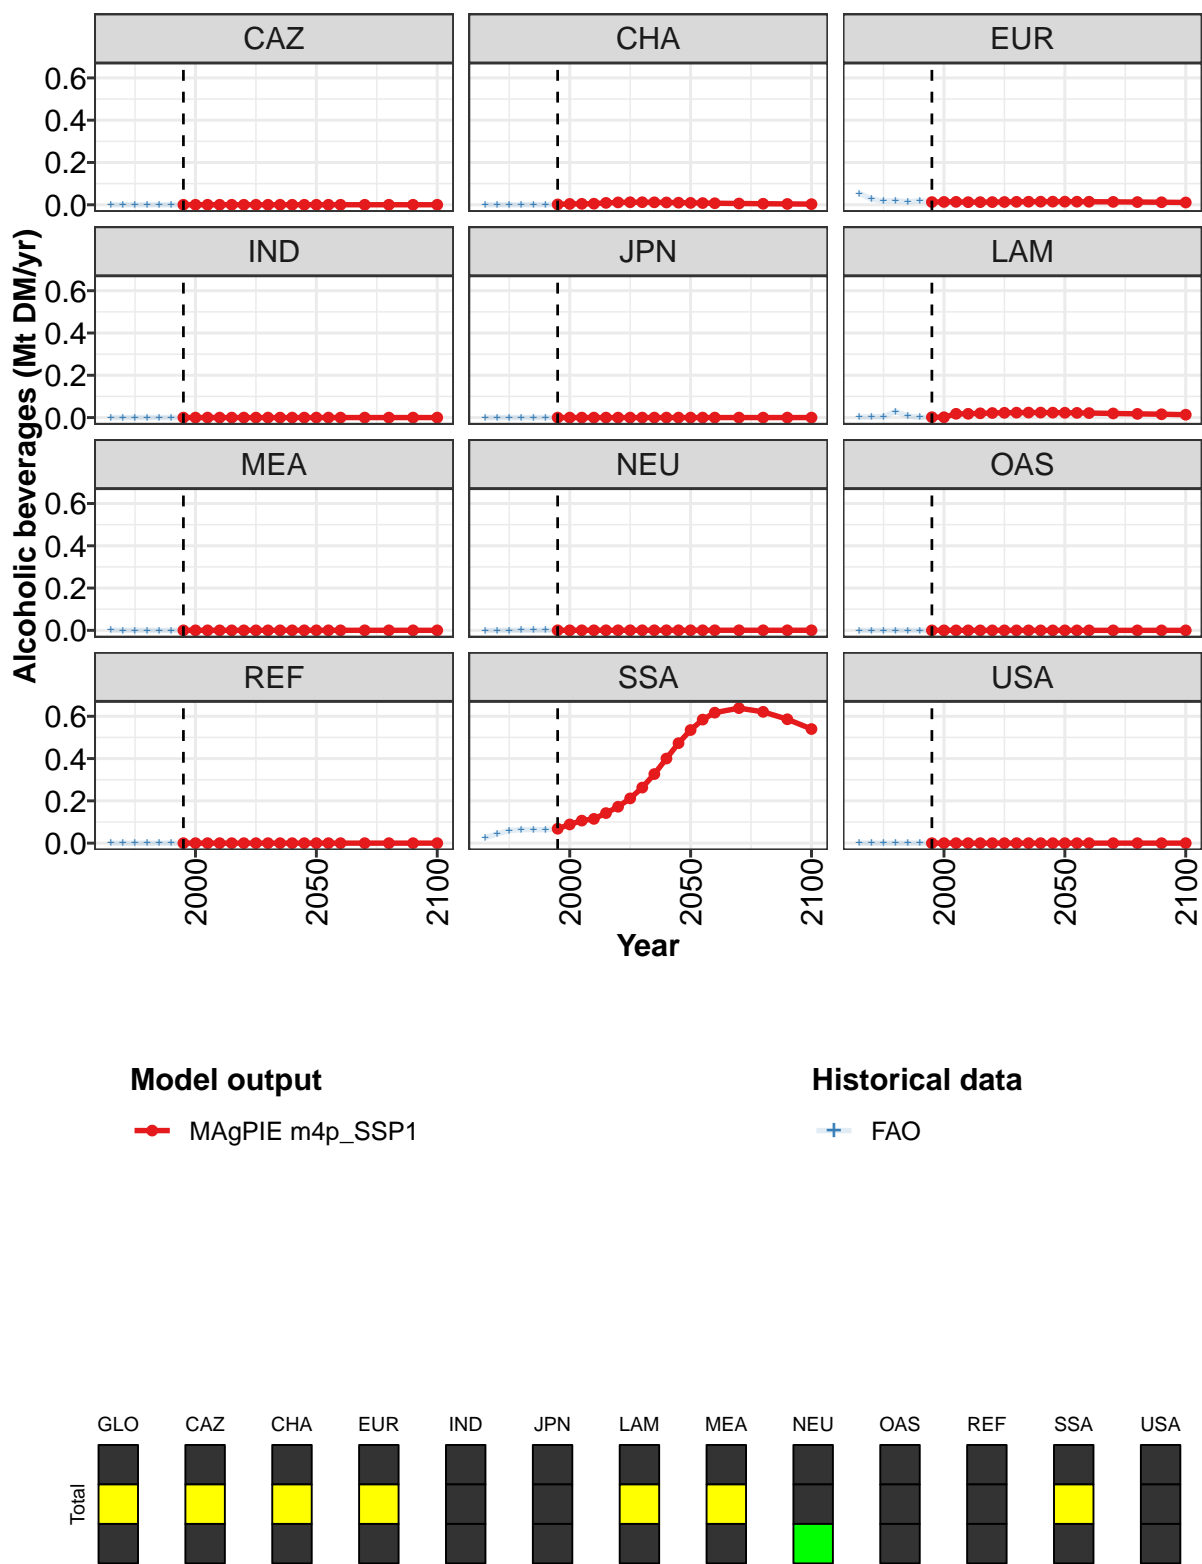

Figure 29: MAgPIE m4p\_SSP1 — Demand—Agricultural Supply Chain Loss—Secondary products—Alcoholic beverages (Mt DM/yr)

|     | 1995  | 2000  | 2005  | 2010  | 2015  | 2020  | 2025  | 2030  | 2035  | 2040  | 2045  |
|-----|-------|-------|-------|-------|-------|-------|-------|-------|-------|-------|-------|
| GLO | 0.085 | 0.108 | 0.143 | 0.151 | 0.184 | 0.218 | 0.260 | 0.313 | 0.377 | 0.450 | 0.522 |
| CAZ | 0.000 | 0.000 | 0.000 | 0.000 | 0.000 | 0.000 | 0.000 | 0.000 | 0.000 | 0.000 | 0.000 |
| CHA | 0.002 | 0.004 | 0.005 | 0.005 | 0.009 | 0.011 | 0.012 | 0.012 | 0.012 | 0.011 | 0.010 |
| EUR | 0.013 | 0.013 | 0.014 | 0.012 | 0.012 | 0.013 | 0.013 | 0.014 | 0.014 | 0.015 | 0.015 |
| IND | 0.000 | 0.000 | 0.000 | 0.000 | 0.000 | 0.000 | 0.000 | 0.000 | 0.000 | 0.000 | 0.000 |
| JPN | 0.000 | 0.000 | 0.000 | 0.000 | 0.000 | 0.000 | 0.000 | 0.000 | 0.000 | 0.000 | 0.000 |
| LAM | 0.002 | 0.002 | 0.018 | 0.018 | 0.020 | 0.022 | 0.023 | 0.023 | 0.024 | 0.024 | 0.023 |
| MEA | 0.000 | 0.000 | 0.000 | 0.000 | 0.000 | 0.000 | 0.000 | 0.000 | 0.000 | 0.000 | 0.000 |
| NEU | 0.000 | 0.000 | 0.000 | 0.000 | 0.000 | 0.000 | 0.000 | 0.000 | 0.000 | 0.001 | 0.001 |
| OAS | 0.000 | 0.000 | 0.000 | 0.000 | 0.000 | 0.000 | 0.000 | 0.000 | 0.000 | 0.000 | 0.000 |
| REF | 0.000 | 0.000 | 0.000 | 0.000 | 0.000 | 0.000 | 0.000 | 0.000 | 0.000 | 0.000 | 0.000 |
| SSA | 0.068 | 0.088 | 0.107 | 0.115 | 0.142 | 0.172 | 0.212 | 0.263 | 0.327 | 0.400 | 0.473 |
| USA | 0.000 | 0.000 | 0.000 | 0.000 | 0.000 | 0.000 | 0.000 | 0.000 | 0.000 | 0.000 | 0.000 |

Table 88: MAgPIE m4p\_SSP1 — Demand—Agricultural Supply Chain Loss—Secondary products—Alcoholic beverages (Mt DM/yr) [PART 1/2]

|     | 2050  | 2055  | 2060  | 2070  | 2080  | 2090  | 2100  |
|-----|-------|-------|-------|-------|-------|-------|-------|
| GLO | 0.583 | 0.630 | 0.661 | 0.678 | 0.657 | 0.618 | 0.568 |
| CAZ | 0.000 | 0.000 | 0.000 | 0.000 | 0.000 | 0.000 | 0.000 |
| CHA | 0.009 | 0.008 | 0.007 | 0.006 | 0.005 | 0.004 | 0.003 |
| EUR | 0.015 | 0.015 | 0.014 | 0.014 | 0.013 | 0.012 | 0.011 |
| IND | 0.000 | 0.000 | 0.000 | 0.000 | 0.000 | 0.000 | 0.000 |
| JPN | 0.000 | 0.000 | 0.000 | 0.000 | 0.000 | 0.000 | 0.000 |
| LAM | 0.023 | 0.022 | 0.021 | 0.019 | 0.017 | 0.016 | 0.014 |
| MEA | 0.000 | 0.000 | 0.000 | 0.000 | 0.000 | 0.000 | 0.000 |
| NEU | 0.001 | 0.000 | 0.000 | 0.000 | 0.000 | 0.000 | 0.000 |
| OAS | 0.000 | 0.000 | 0.000 | 0.000 | 0.000 | 0.000 | 0.000 |
| REF | 0.000 | 0.000 | 0.000 | 0.000 | 0.000 | 0.000 | 0.000 |
| SSA | 0.535 | 0.585 | 0.617 | 0.639 | 0.621 | 0.586 | 0.540 |
| USA | 0.000 | 0.000 | 0.000 | 0.000 | 0.000 | 0.000 | 0.000 |

Table 89: MAgPIE m4p\_SSP1 — Demand—Agricultural Supply Chain Loss—Secondary products—Alcoholic beverages (Mt DM/yr) [PART 2/2]

|     | 1965  | 1970  | 1975  | 1980  | 1985  | 1990  | 1995  | 2000  | 2005  | 2010  |
|-----|-------|-------|-------|-------|-------|-------|-------|-------|-------|-------|
| GLO | 0.083 | 0.074 | 0.082 | 0.112 | 0.087 | 0.085 | 0.085 | 0.108 | 0.143 | 0.150 |
| CAZ | 0.000 | 0.000 | 0.000 | 0.000 | 0.000 | 0.000 | 0.000 | 0.000 | 0.000 | 0.000 |
| CHA | 0.000 | 0.000 | 0.000 | 0.000 | 0.000 | 0.000 | 0.002 | 0.004 | 0.005 | 0.005 |
| EUR | 0.054 | 0.027 | 0.017 | 0.019 | 0.015 | 0.019 | 0.013 | 0.014 | 0.014 | 0.013 |
| IND | 0.000 | 0.000 | 0.000 | 0.000 | 0.000 | 0.000 | 0.000 | 0.000 | 0.000 | 0.000 |
| JPN | 0.000 | 0.000 | 0.000 | 0.000 | 0.000 | 0.000 | 0.000 | 0.000 | 0.000 | 0.000 |
| LAM | 0.002 | 0.003 | 0.004 | 0.029 | 0.007 | 0.001 | 0.002 | 0.002 | 0.018 | 0.018 |
| MEA | 0.001 | 0.000 | 0.000 | 0.000 | 0.000 | 0.000 | 0.000 | 0.000 | 0.000 | 0.000 |
| NEU | 0.000 | 0.000 | 0.000 | 0.001 | 0.001 | 0.001 | 0.000 | 0.000 | 0.000 | 0.000 |
| OAS | 0.000 | 0.000 | 0.000 | 0.000 | 0.000 | 0.000 | 0.000 | 0.000 | 0.000 | 0.000 |
| REF | 0.000 | 0.000 | 0.000 | 0.000 | 0.000 | 0.000 | 0.000 | 0.000 | 0.000 | 0.000 |
| SSA | 0.026 | 0.044 | 0.060 | 0.064 | 0.065 | 0.063 | 0.068 | 0.088 | 0.107 | 0.115 |
| USA | 0.000 | 0.000 | 0.000 | 0.000 | 0.000 | 0.000 | 0.000 | 0.000 | 0.000 | 0.000 |

Table 90: FAO — Demand—Agricultural Supply Chain Loss—Secondary products—Alcoholic beverages (Mt DM/yr)

3.3.2 Brans

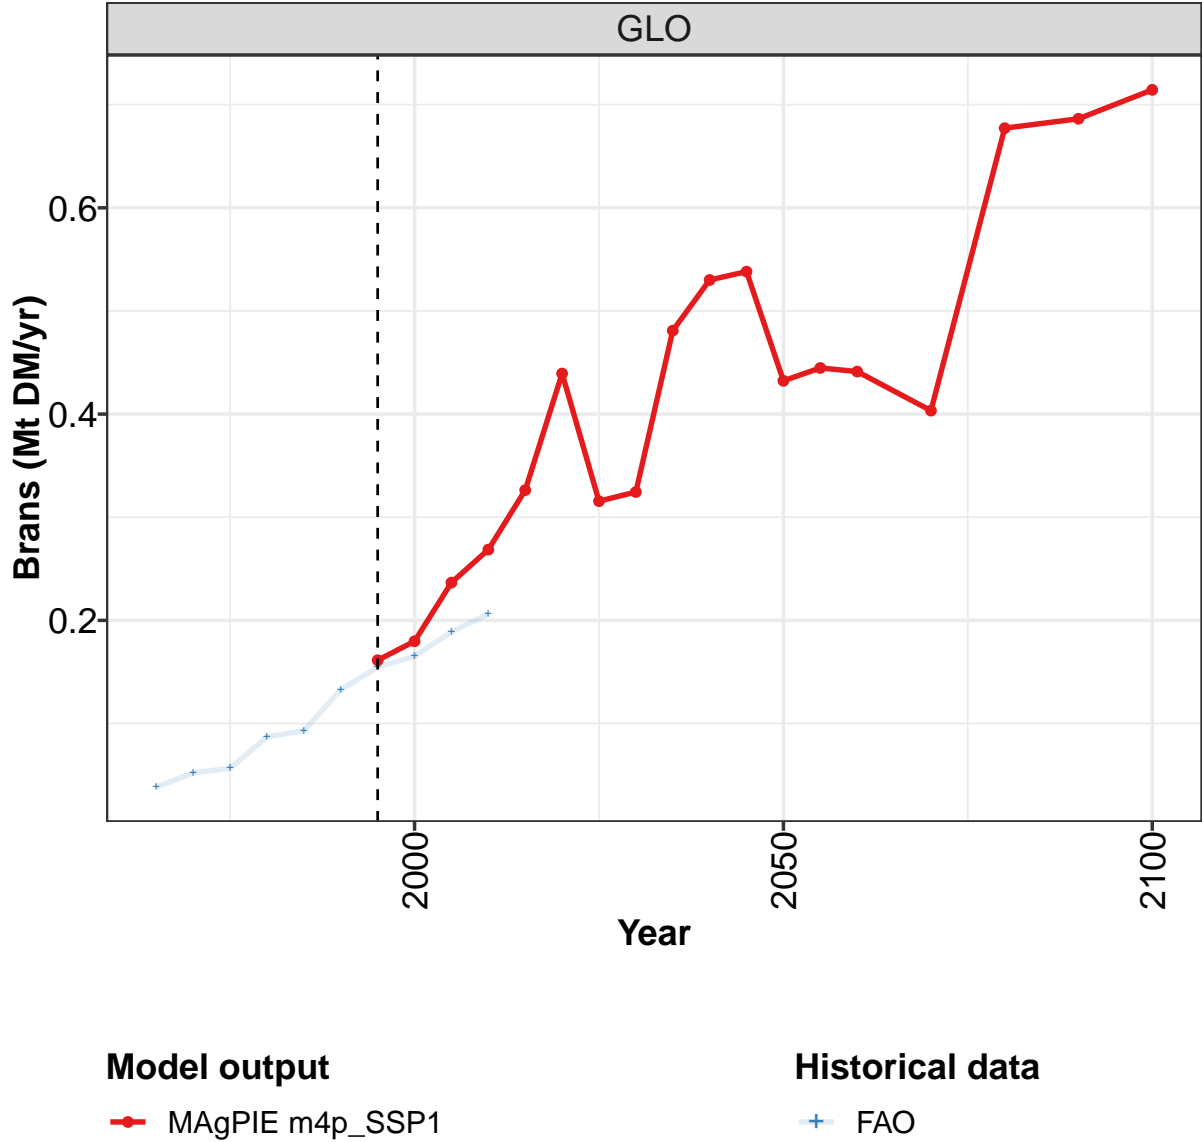

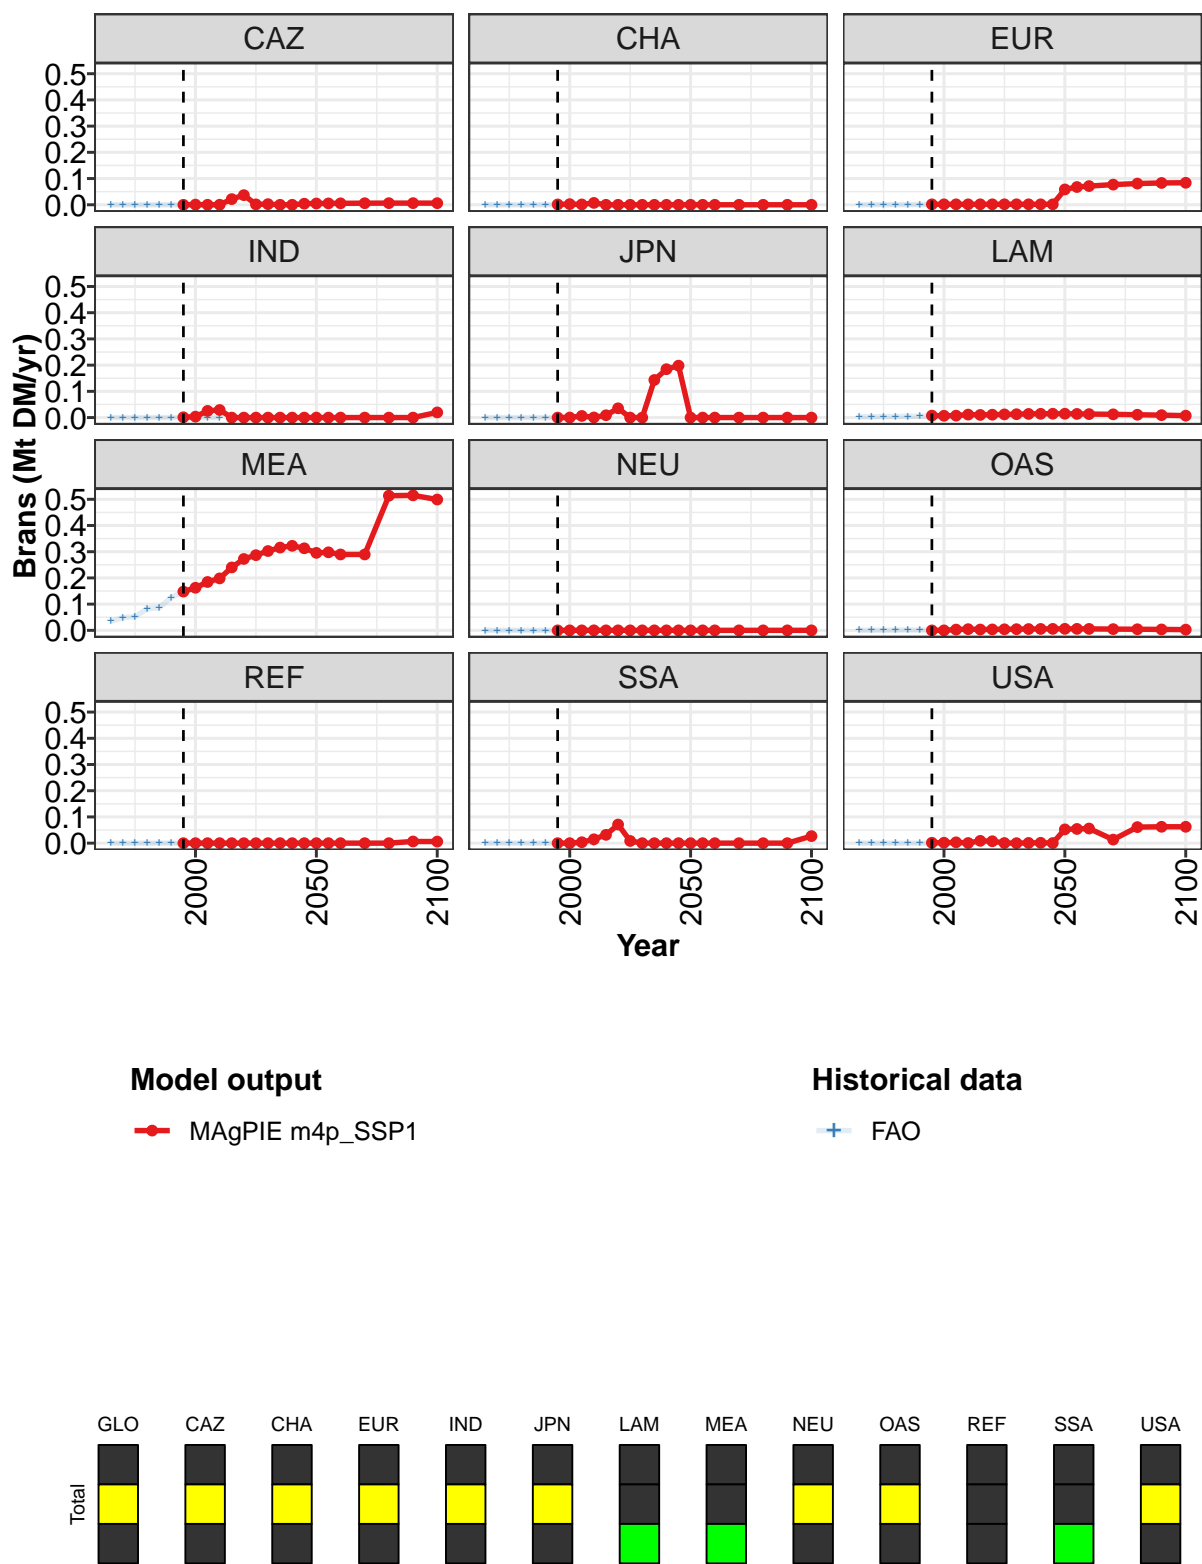

Figure 30: MAgPIE m4p\_SSP1 — Demand—Agricultural Supply Chain Loss—Secondary products—Brans (Mt DM/yr)

|     | 1995  | 2000  | 2005  | 2010  | 2015  | 2020  | 2025  | 2030  | 2035  | 2040  | 2045  |
|-----|-------|-------|-------|-------|-------|-------|-------|-------|-------|-------|-------|
| GLO | 0.161 | 0.180 | 0.237 | 0.269 | 0.326 | 0.439 | 0.316 | 0.324 | 0.481 | 0.530 | 0.538 |
| CAZ | 0.000 | 0.001 | 0.000 | 0.000 | 0.022 | 0.037 | 0.002 | 0.002 | 0.000 | 0.000 | 0.004 |
| CHA | 0.001 | 0.003 | 0.001 | 0.007 | 0.000 | 0.000 | 0.000 | 0.000 | 0.000 | 0.000 | 0.000 |
| EUR | 0.002 | 0.002 | 0.002 | 0.002 | 0.002 | 0.002 | 0.002 | 0.002 | 0.002 | 0.002 | 0.002 |
| IND | 0.001 | 0.004 | 0.026 | 0.029 | 0.000 | 0.000 | 0.000 | 0.000 | 0.000 | 0.000 | 0.000 |
| JPN | 0.000 | 0.000 | 0.006 | 0.001 | 0.009 | 0.035 | 0.000 | 0.000 | 0.143 | 0.185 | 0.198 |
| LAM | 0.008 | 0.007 | 0.007 | 0.011 | 0.010 | 0.011 | 0.012 | 0.013 | 0.014 | 0.014 | 0.015 |
| MEA | 0.148 | 0.163 | 0.185 | 0.198 | 0.240 | 0.272 | 0.287 | 0.303 | 0.316 | 0.322 | 0.313 |
| NEU | 0.000 | 0.000 | 0.000 | 0.000 | 0.000 | 0.000 | 0.000 | 0.000 | 0.000 | 0.000 | 0.000 |
| OAS | 0.000 | 0.000 | 0.003 | 0.005 | 0.003 | 0.004 | 0.004 | 0.005 | 0.005 | 0.005 | 0.006 |
| REF | 0.000 | 0.000 | 0.000 | 0.000 | 0.000 | 0.000 | 0.000 | 0.000 | 0.000 | 0.000 | 0.000 |
| SSA | 0.000 | 0.000 | 0.004 | 0.015 | 0.032 | 0.071 | 0.008 | 0.000 | 0.000 | 0.000 | 0.000 |
| USA | 0.002 | 0.002 | 0.003 | 0.001 | 0.009 | 0.007 | 0.001 | 0.000 | 0.001 | 0.001 | 0.000 |

Table 91: MAGPIE m4p\_SSP1 — Demand—Agricultural Supply Chain Loss—Secondary products—Brans (Mt DM/yr) [PART 1/2]

|     | 2050  | 2055  | 2060  | 2070  | 2080  | 2090  | 2100  |
|-----|-------|-------|-------|-------|-------|-------|-------|
| GLO | 0.432 | 0.445 | 0.441 | 0.403 | 0.677 | 0.686 | 0.714 |
| CAZ | 0.005 | 0.005 | 0.006 | 0.006 | 0.006 | 0.006 | 0.006 |
| CHA | 0.000 | 0.000 | 0.000 | 0.000 | 0.000 | 0.000 | 0.000 |
| EUR | 0.059 | 0.068 | 0.071 | 0.077 | 0.081 | 0.083 | 0.084 |
| IND | 0.000 | 0.000 | 0.000 | 0.000 | 0.000 | 0.000 | 0.020 |
| JPN | 0.000 | 0.000 | 0.000 | 0.000 | 0.000 | 0.000 | 0.000 |
| LAM | 0.015 | 0.014 | 0.013 | 0.012 | 0.011 | 0.009 | 0.007 |
| MEA | 0.296 | 0.298 | 0.290 | 0.290 | 0.514 | 0.515 | 0.499 |
| NEU | 0.000 | 0.000 | 0.000 | 0.000 | 0.000 | 0.000 | 0.000 |
| OAS | 0.006 | 0.006 | 0.006 | 0.005 | 0.004 | 0.004 | 0.003 |
| REF | 0.000 | 0.000 | 0.000 | 0.000 | 0.000 | 0.006 | 0.006 |
| SSA | 0.000 | 0.000 | 0.000 | 0.000 | 0.000 | 0.000 | 0.027 |
| USA | 0.053 | 0.054 | 0.056 | 0.014 | 0.061 | 0.062 | 0.063 |

Table 92: MAGPIE m4p\_SSP1 — Demand—Agricultural Supply Chain Loss—Secondary products—Brans (Mt DM/yr) [PART 2/2]

|     | 1965  | 1970  | 1975  | 1980  | 1985  | 1990  | 1995  | 2000  | 2005  | 2010  |
|-----|-------|-------|-------|-------|-------|-------|-------|-------|-------|-------|
| GLO | 0.038 | 0.052 | 0.057 | 0.087 | 0.093 | 0.133 | 0.155 | 0.165 | 0.189 | 0.206 |
| CAZ | 0.000 | 0.000 | 0.000 | 0.000 | 0.000 | 0.000 | 0.000 | 0.000 | 0.000 | 0.000 |
| CHA | 0.000 | 0.000 | 0.000 | 0.000 | 0.000 | 0.000 | 0.000 | 0.000 | 0.000 | 0.000 |
| EUR | 0.001 | 0.001 | 0.001 | 0.001 | 0.001 | 0.001 | 0.001 | 0.001 | 0.001 | 0.001 |
| IND | 0.000 | 0.000 | 0.000 | 0.000 | 0.000 | 0.000 | 0.000 | 0.000 | 0.000 | 0.000 |
| JPN | 0.000 | 0.000 | 0.000 | 0.000 | 0.000 | 0.000 | 0.000 | 0.000 | 0.000 | 0.000 |
| LAM | 0.002 | 0.003 | 0.004 | 0.004 | 0.004 | 0.005 | 0.006 | 0.007 | 0.007 | 0.009 |
| MEA | 0.035 | 0.048 | 0.052 | 0.082 | 0.086 | 0.126 | 0.147 | 0.157 | 0.178 | 0.194 |
| NEU | 0.000 | 0.000 | 0.000 | 0.000 | 0.000 | 0.000 | 0.000 | 0.000 | 0.000 | 0.000 |
| OAS | 0.001 | 0.000 | 0.001 | 0.001 | 0.002 | 0.001 | 0.001 | 0.001 | 0.002 | 0.003 |
| REF | 0.000 | 0.000 | 0.000 | 0.000 | 0.000 | 0.000 | 0.000 | 0.000 | 0.000 | 0.000 |
| SSA | 0.000 | 0.000 | 0.000 | 0.000 | 0.000 | 0.000 | 0.000 | 0.000 | 0.000 | 0.000 |
| USA | 0.000 | 0.000 | 0.000 | 0.000 | 0.000 | 0.000 | 0.000 | 0.000 | 0.000 | 0.000 |

Table 93: FAO — Demand—Agricultural Supply Chain Loss—Secondary products—Brans (Mt DM/yr)

3.3.3 Molasses

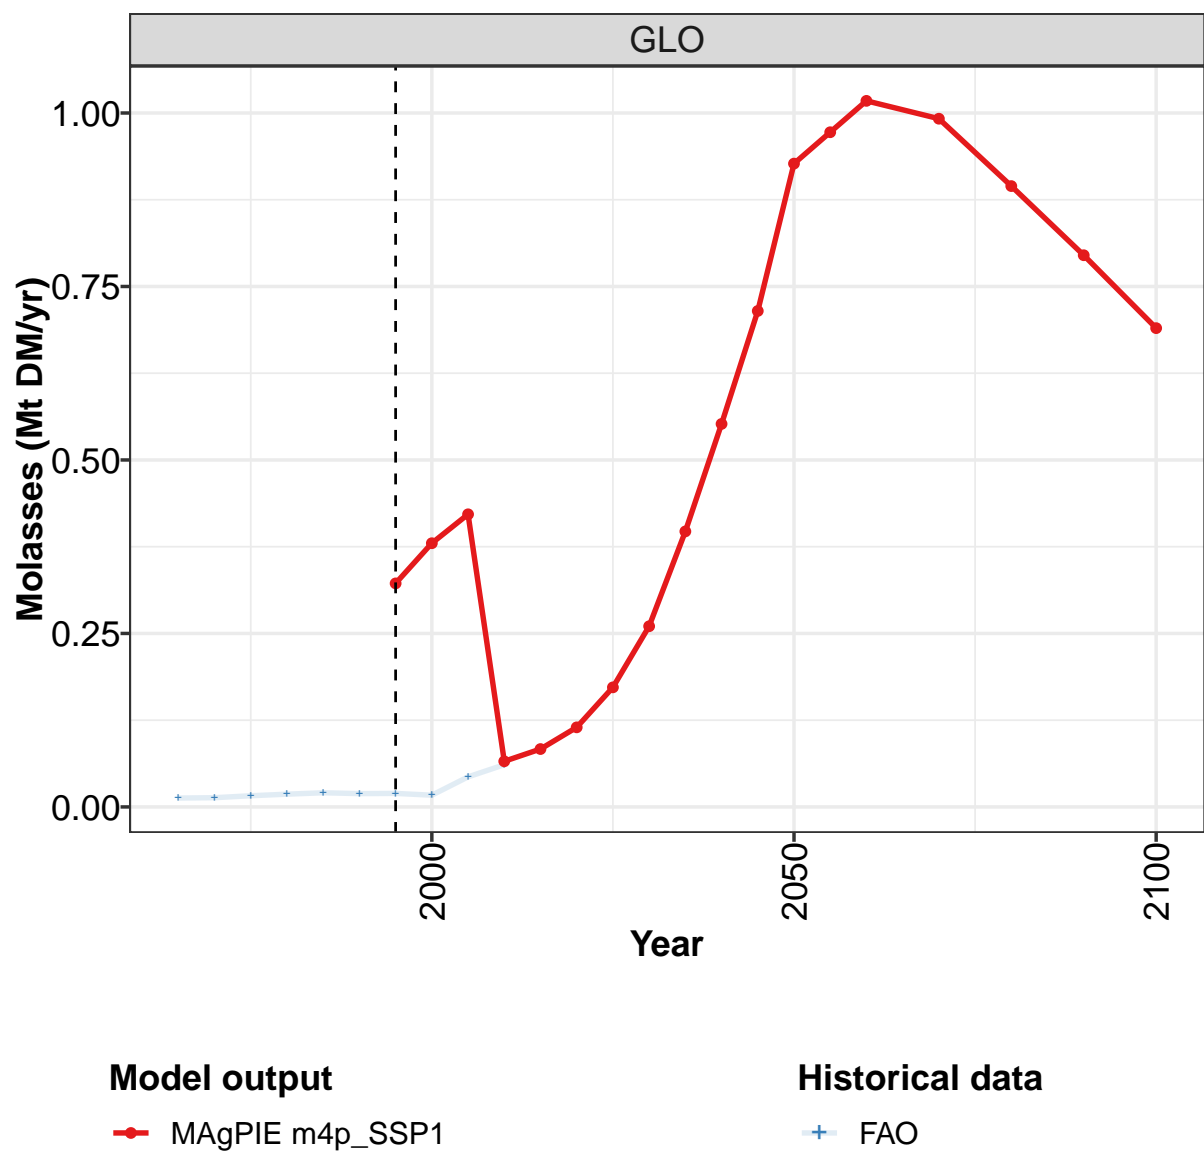

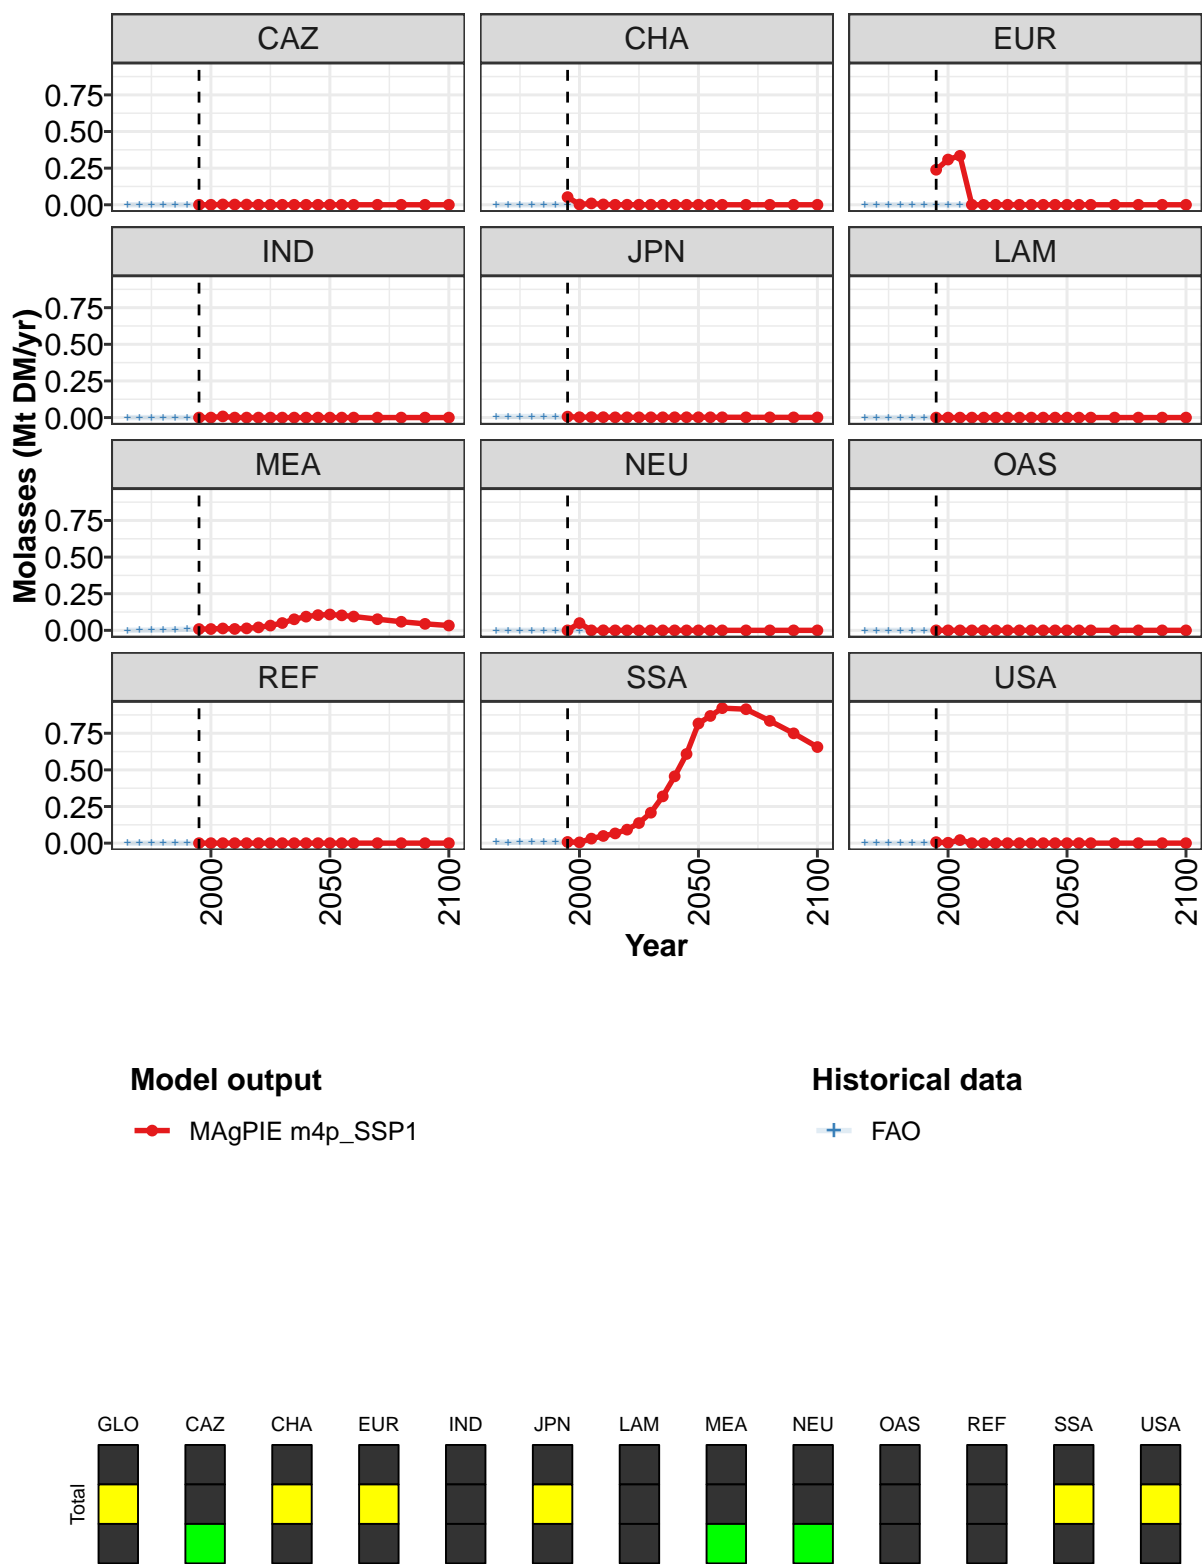

Figure 31: MAgPIE m4p\_SSP1 — Demand—Agricultural Supply Chain Loss—Secondary products—Molasses (Mt DM/yr)



|     | 1995 | 2000 | 2005 | 2010 | 2015 | 2020 | 2025 | 2030 | 2035 | 2040 | 2045 |
|-----|------|------|------|------|------|------|------|------|------|------|------|
| GLO | 0.32 | 0.38 | 0.42 | 0.07 | 0.08 | 0.11 | 0.17 | 0.26 | 0.40 | 0.55 | 0.71 |
| CAZ | 0.00 | 0.00 | 0.00 | 0.00 | 0.00 | 0.00 | 0.00 | 0.00 | 0.00 | 0.00 | 0.00 |
| CHA | 0.05 | 0.00 | 0.01 | 0.00 | 0.00 | 0.00 | 0.00 | 0.00 | 0.00 | 0.00 | 0.00 |
| EUR | 0.24 | 0.31 | 0.33 | 0.00 | 0.00 | 0.00 | 0.00 | 0.00 | 0.00 | 0.00 | 0.00 |
| IND | 0.00 | 0.00 | 0.01 | 0.00 | 0.00 | 0.00 | 0.00 | 0.00 | 0.00 | 0.00 | 0.00 |
| JPN | 0.01 | 0.00 | 0.00 | 0.00 | 0.00 | 0.00 | 0.00 | 0.00 | 0.00 | 0.00 | 0.00 |
| LAM | 0.00 | 0.00 | 0.00 | 0.00 | 0.00 | 0.00 | 0.00 | 0.00 | 0.00 | 0.00 | 0.00 |
| MEA | 0.01 | 0.01 | 0.01 | 0.01 | 0.01 | 0.02 | 0.03 | 0.05 | 0.08 | 0.09 | 0.10 |
| NEU | 0.00 | 0.05 | 0.00 | 0.00 | 0.00 | 0.00 | 0.00 | 0.00 | 0.00 | 0.00 | 0.00 |
| OAS | 0.00 | 0.00 | 0.00 | 0.00 | 0.00 | 0.00 | 0.00 | 0.00 | 0.00 | 0.00 | 0.00 |
| REF | 0.00 | 0.00 | 0.00 | 0.00 | 0.00 | 0.00 | 0.00 | 0.00 | 0.00 | 0.00 | 0.00 |
| SSA | 0.01 | 0.01 | 0.03 | 0.05 | 0.07 | 0.09 | 0.14 | 0.21 | 0.32 | 0.46 | 0.61 |
| USA | 0.01 | 0.00 | 0.02 | 0.00 | 0.00 | 0.00 | 0.00 | 0.00 | 0.00 | 0.00 | 0.00 |

Table 94: MAgPIE m4p\_SSP1 — Demand—Agricultural Supply Chain Loss—Secondary products—Molasses (Mt DM/yr) [PART 1/2]

|     | 2050 | 2055 | 2060 | 2070 | 2080 | 2090 | 2100 |
|-----|------|------|------|------|------|------|------|
| GLO | 0.93 | 0.97 | 1.02 | 0.99 | 0.89 | 0.80 | 0.69 |
| CAZ | 0.00 | 0.00 | 0.00 | 0.00 | 0.00 | 0.00 | 0.00 |
| CHA | 0.00 | 0.00 | 0.00 | 0.00 | 0.00 | 0.00 | 0.00 |
| EUR | 0.00 | 0.00 | 0.00 | 0.00 | 0.00 | 0.00 | 0.00 |
| IND | 0.00 | 0.00 | 0.00 | 0.00 | 0.00 | 0.00 | 0.00 |
| JPN | 0.00 | 0.00 | 0.00 | 0.00 | 0.00 | 0.00 | 0.00 |
| LAM | 0.00 | 0.00 | 0.00 | 0.00 | 0.00 | 0.00 | 0.00 |
| MEA | 0.11 | 0.10 | 0.09 | 0.08 | 0.06 | 0.04 | 0.03 |
| NEU | 0.00 | 0.00 | 0.00 | 0.00 | 0.00 | 0.00 | 0.00 |
| OAS | 0.00 | 0.00 | 0.00 | 0.00 | 0.00 | 0.00 | 0.00 |
| REF | 0.00 | 0.00 | 0.00 | 0.00 | 0.00 | 0.00 | 0.00 |
| SSA | 0.82 | 0.87 | 0.92 | 0.91 | 0.83 | 0.75 | 0.66 |
| USA | 0.00 | 0.00 | 0.00 | 0.00 | 0.00 | 0.00 | 0.00 |

Table 95: MAgPIE m4p\_SSP1 — Demand—Agricultural Supply Chain Loss—Secondary products—Molasses (Mt DM/yr) [PART 2/2]

|     | 1965   | 1970   | 1975   | 1980   | 1985   | 1990   | 1995   | 2000   | 2005   | 2010   |
|-----|--------|--------|--------|--------|--------|--------|--------|--------|--------|--------|
| GLO | 0.0128 | 0.0133 | 0.0161 | 0.0184 | 0.0204 | 0.0192 | 0.0195 | 0.0169 | 0.0433 | 0.0608 |
| CAZ | 0.0000 | 0.0000 | 0.0000 | 0.0000 | 0.0000 | 0.0000 | 0.0000 | 0.0000 | 0.0000 | 0.0000 |
| CHA | 0.0000 | 0.0000 | 0.0000 | 0.0000 | 0.0000 | 0.0000 | 0.0000 | 0.0000 | 0.0000 | 0.0000 |
| EUR | 0.0000 | 0.0000 | 0.0000 | 0.0000 | 0.0000 | 0.0000 | 0.0000 | 0.0000 | 0.0000 | 0.0000 |
| IND | 0.0000 | 0.0000 | 0.0000 | 0.0000 | 0.0000 | 0.0000 | 0.0000 | 0.0000 | 0.0000 | 0.0000 |
| JPN | 0.0063 | 0.0071 | 0.0073 | 0.0069 | 0.0069 | 0.0045 | 0.0037 | 0.0022 | 0.0020 | 0.0016 |
| LAM | 0.0000 | 0.0000 | 0.0000 | 0.0000 | 0.0000 | 0.0000 | 0.0000 | 0.0000 | 0.0000 | 0.0000 |
| MEA | 0.0002 | 0.0010 | 0.0017 | 0.0028 | 0.0066 | 0.0075 | 0.0087 | 0.0094 | 0.0107 | 0.0098 |
| NEU | 0.0000 | 0.0000 | 0.0000 | 0.0000 | 0.0000 | 0.0000 | 0.0000 | 0.0000 | 0.0000 | 0.0000 |
| OAS | 0.0000 | 0.0000 | 0.0000 | 0.0000 | 0.0000 | 0.0000 | 0.0000 | 0.0000 | 0.0000 | 0.0000 |
| REF | 0.0000 | 0.0000 | 0.0000 | 0.0000 | 0.0000 | 0.0000 | 0.0000 | 0.0000 | 0.0000 | 0.0000 |
| SSA | 0.0062 | 0.0051 | 0.0072 | 0.0087 | 0.0069 | 0.0071 | 0.0071 | 0.0054 | 0.0306 | 0.0494 |
| USA | 0.0000 | 0.0000 | 0.0000 | 0.0000 | 0.0000 | 0.0000 | 0.0000 | 0.0000 | 0.0000 | 0.0000 |

Table 96: FAO — Demand—Agricultural Supply Chain Loss—Secondary products—Molasses (Mt DM/yr)

3.3.4 Oils

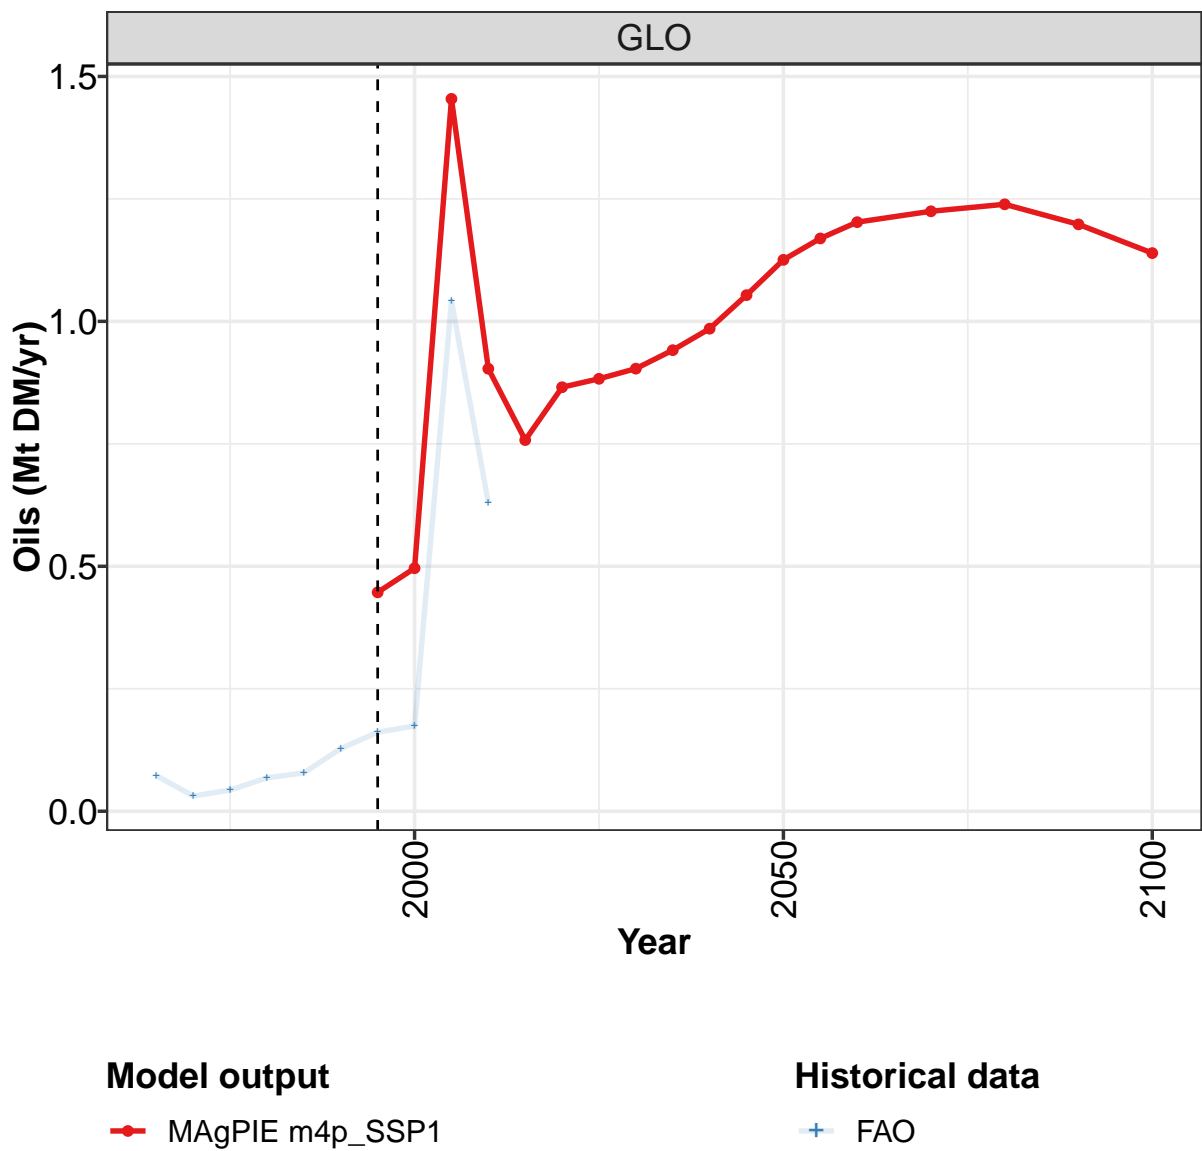

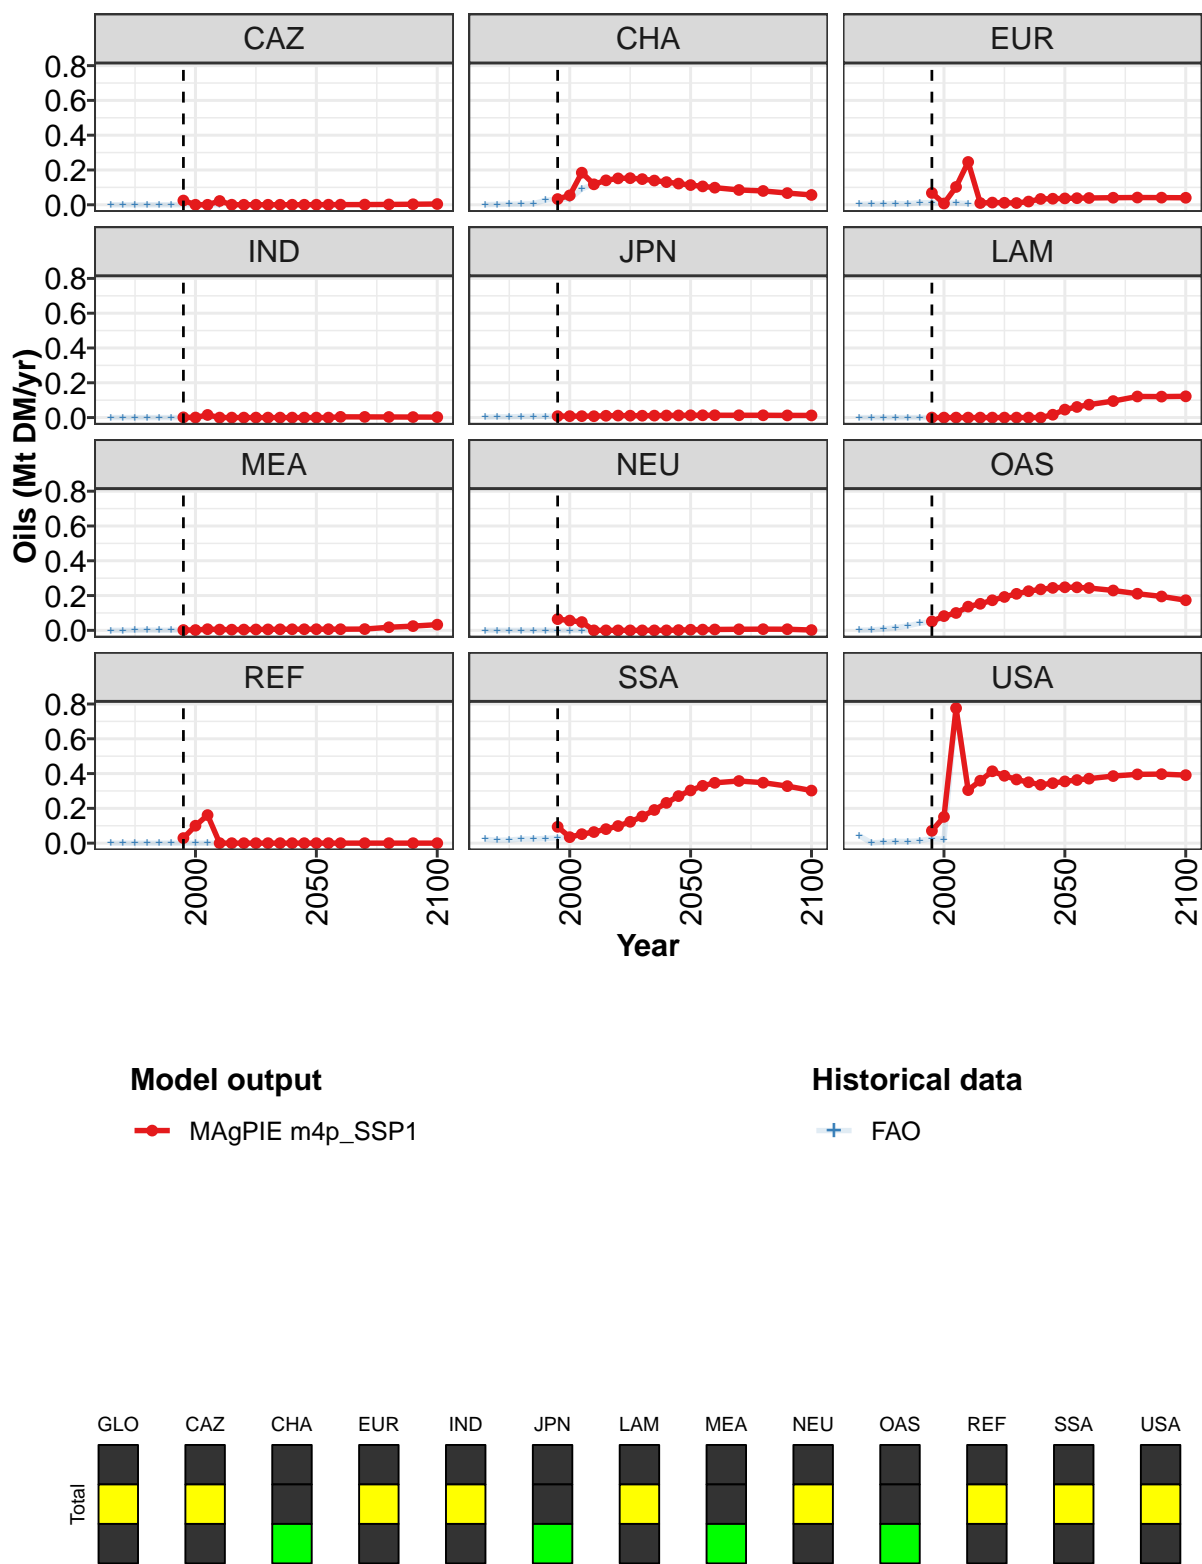

Figure 32: MAgPIE m4p\_SSP1 — Demand—Agricultural Supply Chain Loss—Secondary products—Oils (Mt DM/yr)

|     | 1995 | 2000 | 2005 | 2010 | 2015 | 2020 | 2025 | 2030 | 2035 | 2040 | 2045 |
|-----|------|------|------|------|------|------|------|------|------|------|------|
| GLO | 0.45 | 0.50 | 1.45 | 0.90 | 0.76 | 0.87 | 0.88 | 0.90 | 0.94 | 0.99 | 1.05 |
| CAZ | 0.02 | 0.00 | 0.00 | 0.02 | 0.00 | 0.00 | 0.00 | 0.00 | 0.00 | 0.00 | 0.00 |
| CHA | 0.03 | 0.05 | 0.18 | 0.12 | 0.14 | 0.15 | 0.15 | 0.15 | 0.14 | 0.13 | 0.12 |
| EUR | 0.07 | 0.01 | 0.10 | 0.25 | 0.01 | 0.01 | 0.01 | 0.01 | 0.02 | 0.03 | 0.03 |
| IND | 0.00 | 0.00 | 0.02 | 0.00 | 0.00 | 0.00 | 0.00 | 0.00 | 0.00 | 0.00 | 0.00 |
| JPN | 0.01 | 0.01 | 0.01 | 0.01 | 0.01 | 0.01 | 0.01 | 0.01 | 0.01 | 0.01 | 0.01 |
| LAM | 0.00 | 0.00 | 0.00 | 0.00 | 0.00 | 0.00 | 0.00 | 0.00 | 0.00 | 0.00 | 0.02 |
| MEA | 0.00 | 0.00 | 0.01 | 0.00 | 0.00 | 0.00 | 0.01 | 0.01 | 0.01 | 0.01 | 0.01 |
| NEU | 0.06 | 0.06 | 0.05 | 0.00 | 0.00 | 0.00 | 0.00 | 0.00 | 0.00 | 0.00 | 0.00 |
| OAS | 0.05 | 0.08 | 0.10 | 0.14 | 0.15 | 0.17 | 0.19 | 0.21 | 0.23 | 0.24 | 0.24 |
| REF | 0.03 | 0.10 | 0.16 | 0.00 | 0.00 | 0.00 | 0.00 | 0.00 | 0.00 | 0.00 | 0.00 |
| SSA | 0.09 | 0.03 | 0.05 | 0.06 | 0.08 | 0.10 | 0.12 | 0.15 | 0.19 | 0.23 | 0.27 |
| USA | 0.07 | 0.15 | 0.78 | 0.30 | 0.36 | 0.41 | 0.39 | 0.37 | 0.35 | 0.34 | 0.34 |

Table 97: MAgPIE m4p\_SSP1 — Demand—Agricultural Supply Chain Loss—Secondary products—Oils (Mt DM/yr) [PART 1/2]

|     | 2050 | 2055 | 2060 | 2070 | 2080 | 2090 | 2100 |
|-----|------|------|------|------|------|------|------|
| GLO | 1.13 | 1.17 | 1.20 | 1.22 | 1.24 | 1.20 | 1.14 |
| CAZ | 0.00 | 0.00 | 0.00 | 0.00 | 0.00 | 0.00 | 0.00 |
| CHA | 0.11 | 0.11 | 0.10 | 0.09 | 0.08 | 0.07 | 0.06 |
| EUR | 0.04 | 0.04 | 0.04 | 0.04 | 0.04 | 0.04 | 0.04 |
| IND | 0.00 | 0.00 | 0.00 | 0.00 | 0.00 | 0.00 | 0.00 |
| JPN | 0.01 | 0.01 | 0.01 | 0.01 | 0.01 | 0.01 | 0.01 |
| LAM | 0.05 | 0.06 | 0.07 | 0.09 | 0.12 | 0.12 | 0.12 |
| MEA | 0.01 | 0.01 | 0.01 | 0.01 | 0.02 | 0.02 | 0.03 |
| NEU | 0.00 | 0.00 | 0.01 | 0.01 | 0.01 | 0.01 | 0.00 |
| OAS | 0.25 | 0.25 | 0.24 | 0.23 | 0.21 | 0.19 | 0.17 |
| REF | 0.00 | 0.00 | 0.00 | 0.00 | 0.00 | 0.00 | 0.00 |
| SSA | 0.30 | 0.33 | 0.35 | 0.36 | 0.35 | 0.33 | 0.30 |
| USA | 0.36 | 0.36 | 0.37 | 0.39 | 0.40 | 0.40 | 0.39 |

Table 98: MAgPIE m4p\_SSP1 — Demand—Agricultural Supply Chain Loss—Secondary products—Oils (Mt DM/yr) [PART 2/2]

|     | 1965 | 1970 | 1975 | 1980 | 1985 | 1990 | 1995 | 2000 | 2005 | 2010 |
|-----|------|------|------|------|------|------|------|------|------|------|
| GLO | 0.07 | 0.03 | 0.04 | 0.07 | 0.08 | 0.13 | 0.16 | 0.17 | 1.04 | 0.63 |
| CAZ | 0.00 | 0.00 | 0.00 | 0.00 | 0.00 | 0.00 | 0.00 | 0.00 | 0.00 | 0.00 |
| CHA | 0.00 | 0.00 | 0.00 | 0.00 | 0.01 | 0.03 | 0.03 | 0.03 | 0.09 | 0.12 |
| EUR | 0.00 | 0.00 | 0.00 | 0.01 | 0.01 | 0.01 | 0.01 | 0.01 | 0.01 | 0.01 |
| IND | 0.00 | 0.00 | 0.00 | 0.00 | 0.00 | 0.00 | 0.00 | 0.00 | 0.00 | 0.00 |
| JPN | 0.00 | 0.00 | 0.00 | 0.01 | 0.01 | 0.01 | 0.01 | 0.01 | 0.01 | 0.01 |
| LAM | 0.00 | 0.00 | 0.00 | 0.00 | 0.00 | 0.00 | 0.00 | 0.00 | 0.00 | 0.00 |
| MEA | 0.00 | 0.00 | 0.00 | 0.00 | 0.00 | 0.00 | 0.00 | 0.00 | 0.01 | 0.00 |
| NEU | 0.00 | 0.00 | 0.00 | 0.00 | 0.00 | 0.00 | 0.00 | 0.00 | 0.00 | 0.00 |
| OAS | 0.00 | 0.00 | 0.01 | 0.02 | 0.03 | 0.04 | 0.05 | 0.07 | 0.10 | 0.12 |
| REF | 0.00 | 0.00 | 0.00 | 0.00 | 0.00 | 0.00 | 0.00 | 0.00 | 0.00 | 0.00 |
| SSA | 0.02 | 0.02 | 0.02 | 0.02 | 0.02 | 0.03 | 0.03 | 0.03 | 0.05 | 0.06 |
| USA | 0.04 | 0.00 | 0.01 | 0.01 | 0.01 | 0.01 | 0.03 | 0.02 | 0.77 | 0.30 |

Table 99: FAO — Demand—Agricultural Supply Chain Loss—Secondary products—Oils (Mt DM/yr)

3.3.5 Sugar

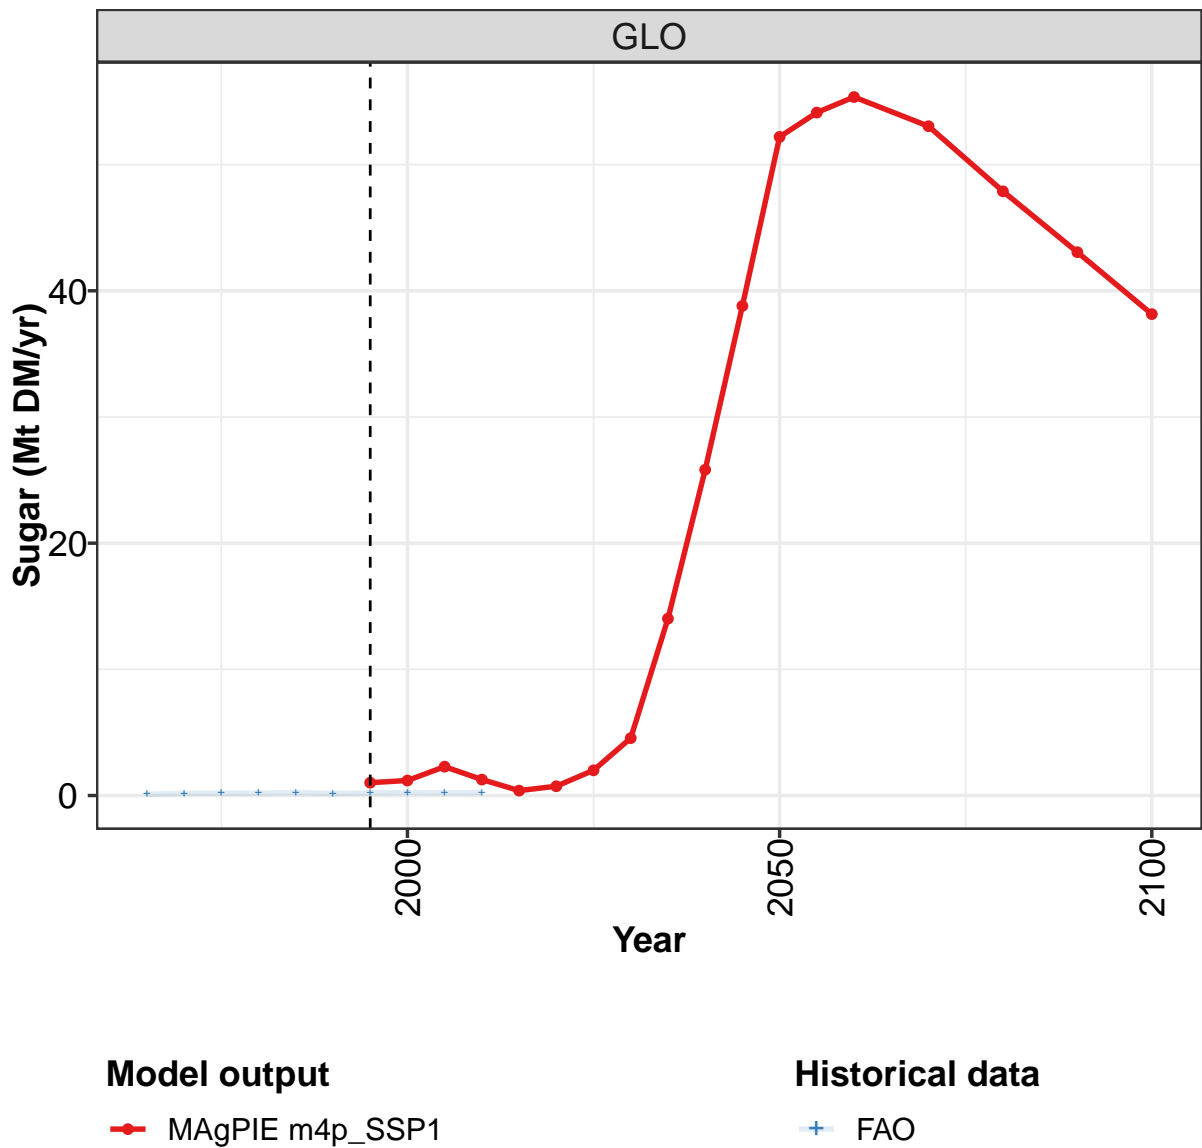

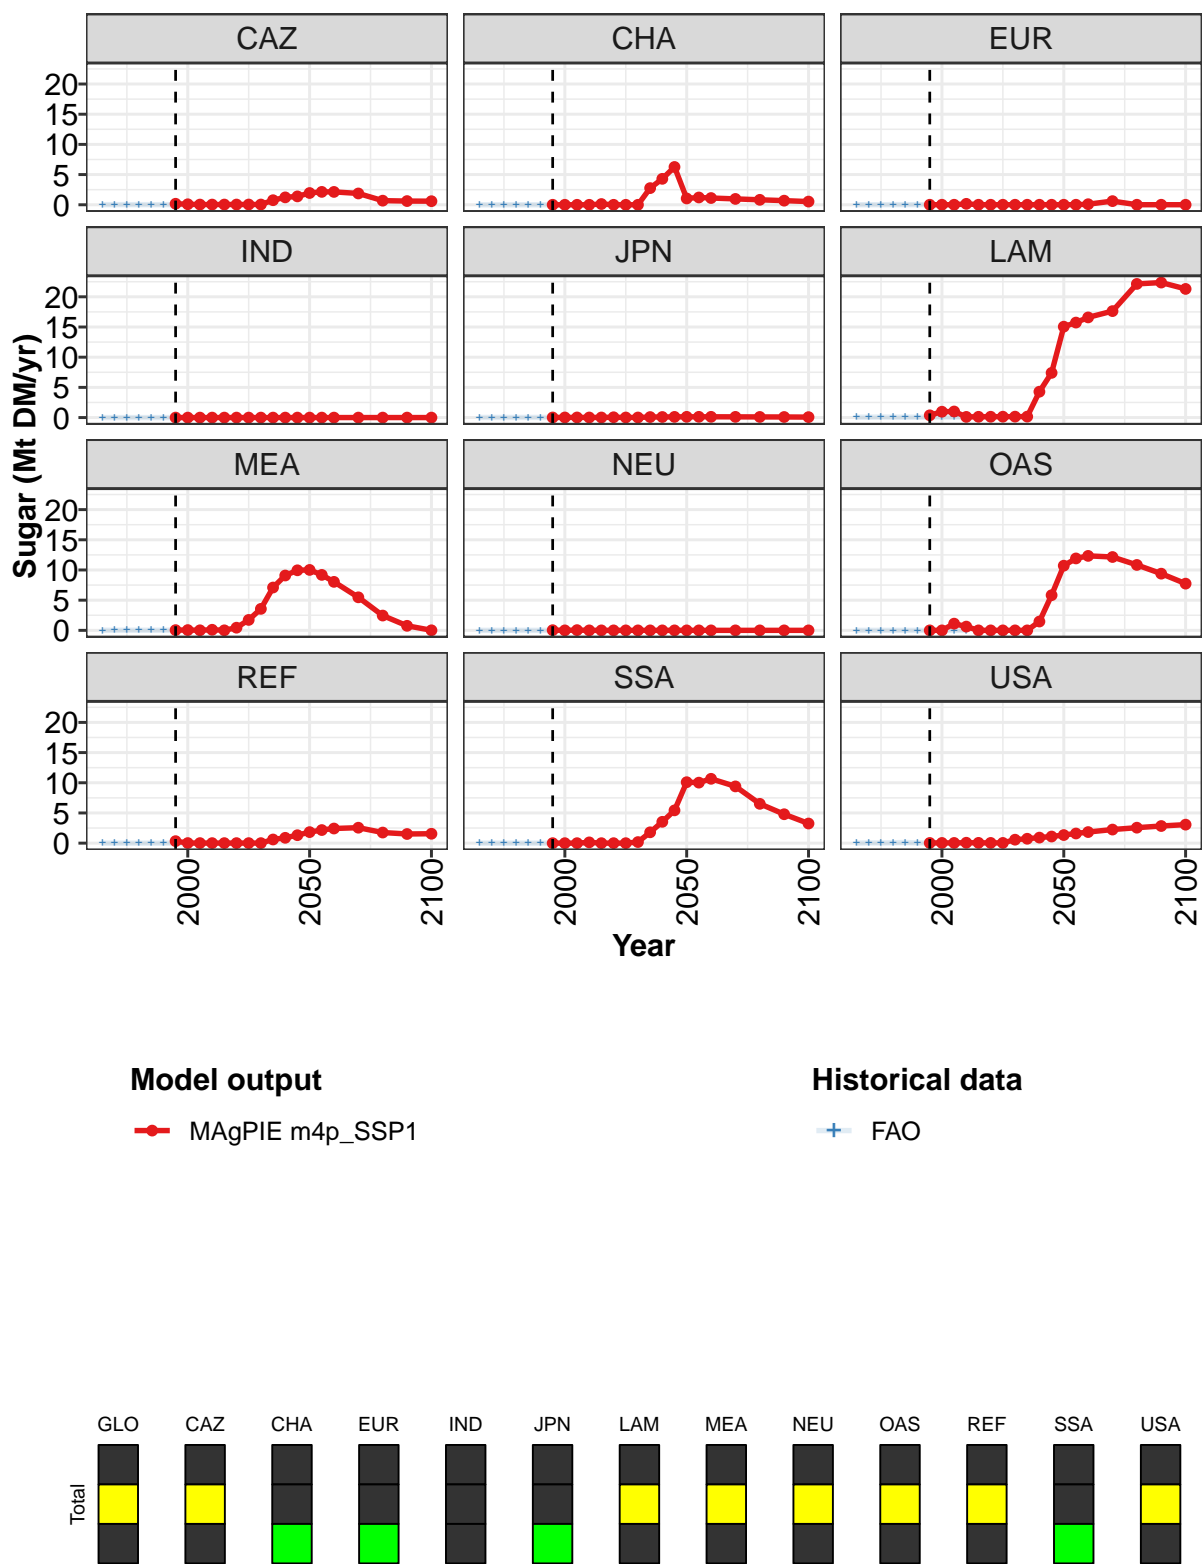

Figure 33: MAgPIE m4p\_SSP1 — Demand—Agricultural Supply Chain Loss—Secondary products—Sugar (Mt DM/yr)

|     | 1995 | 2000 | 2005 | 2010 | 2015 | 2020 | 2025 | 2030 | 2035 | 2040 | 2045 |
|-----|------|------|------|------|------|------|------|------|------|------|------|
| GLO | 1.0  | 1.2  | 2.3  | 1.3  | 0.4  | 0.7  | 2.0  | 4.6  | 14.0 | 25.8 | 38.8 |
| CAZ | 0.2  | 0.1  | 0.0  | 0.0  | 0.0  | 0.0  | 0.0  | 0.0  | 0.8  | 1.2  | 1.4  |
| CHA | 0.0  | 0.0  | 0.0  | 0.0  | 0.1  | 0.0  | 0.0  | 0.0  | 2.8  | 4.3  | 6.3  |
| EUR | 0.0  | 0.0  | 0.0  | 0.2  | 0.0  | 0.0  | 0.0  | 0.0  | 0.0  | 0.0  | 0.0  |
| IND | 0.0  | 0.0  | 0.0  | 0.0  | 0.0  | 0.0  | 0.0  | 0.0  | 0.0  | 0.0  | 0.0  |
| JPN | 0.0  | 0.0  | 0.0  | 0.0  | 0.0  | 0.1  | 0.0  | 0.0  | 0.1  | 0.1  | 0.1  |
| LAM | 0.4  | 1.0  | 1.0  | 0.1  | 0.1  | 0.1  | 0.1  | 0.2  | 0.2  | 4.3  | 7.4  |
| MEA | 0.0  | 0.0  | 0.0  | 0.1  | 0.0  | 0.4  | 1.7  | 3.6  | 7.1  | 9.1  | 10.0 |
| NEU | 0.0  | 0.0  | 0.0  | 0.0  | 0.0  | 0.0  | 0.0  | 0.0  | 0.0  | 0.0  | 0.0  |
| OAS | 0.0  | 0.0  | 1.1  | 0.6  | 0.0  | 0.0  | 0.0  | 0.0  | 0.0  | 1.5  | 5.8  |
| REF | 0.3  | 0.0  | 0.0  | 0.0  | 0.0  | 0.0  | 0.0  | 0.0  | 0.6  | 0.9  | 1.3  |
| SSA | 0.0  | 0.0  | 0.0  | 0.1  | 0.0  | 0.0  | 0.0  | 0.2  | 1.8  | 3.5  | 5.4  |
| USA | 0.0  | 0.0  | 0.0  | 0.1  | 0.1  | 0.0  | 0.0  | 0.6  | 0.7  | 0.9  | 1.1  |

Table 100: MAgPIE m4p\_SSP1 — Demand—Agricultural Supply Chain Loss—Secondary products—Sugar (Mt DM/yr) [PART 1/2]

|     | 2050 | 2055 | 2060 | 2070 | 2080 | 2090 | 2100 |
|-----|------|------|------|------|------|------|------|
| GLO | 52.2 | 54.1 | 55.4 | 53.0 | 47.9 | 43.1 | 38.2 |
| CAZ | 1.9  | 2.1  | 2.1  | 1.9  | 0.7  | 0.6  | 0.6  |
| CHA | 1.0  | 1.2  | 1.1  | 1.0  | 0.8  | 0.7  | 0.5  |
| EUR | 0.0  | 0.0  | 0.1  | 0.6  | 0.0  | 0.0  | 0.0  |
| IND | 0.0  | 0.0  | 0.0  | 0.0  | 0.0  | 0.0  | 0.0  |
| JPN | 0.1  | 0.1  | 0.1  | 0.1  | 0.1  | 0.1  | 0.1  |
| LAM | 15.1 | 15.7 | 16.6 | 17.6 | 22.1 | 22.4 | 21.3 |
| MEA | 10.0 | 9.2  | 8.0  | 5.5  | 2.5  | 0.8  | 0.0  |
| NEU | 0.0  | 0.0  | 0.0  | 0.0  | 0.0  | 0.0  | 0.0  |
| OAS | 10.7 | 11.9 | 12.3 | 12.2 | 10.8 | 9.4  | 7.7  |
| REF | 1.8  | 2.2  | 2.4  | 2.6  | 1.8  | 1.5  | 1.6  |
| SSA | 10.1 | 10.0 | 10.7 | 9.4  | 6.5  | 4.8  | 3.3  |
| USA | 1.3  | 1.6  | 1.8  | 2.3  | 2.6  | 2.8  | 3.1  |

Table 101: MAgPIE m4p\_SSP1 — Demand—Agricultural Supply Chain Loss—Secondary products—Sugar (Mt DM/yr) [PART 2/2]

|     | 1965  | 1970  | 1975  | 1980  | 1985  | 1990  | 1995  | 2000  | 2005  | 2010  |
|-----|-------|-------|-------|-------|-------|-------|-------|-------|-------|-------|
| GLO | 0.104 | 0.174 | 0.180 | 0.196 | 0.225 | 0.164 | 0.208 | 0.244 | 0.214 | 0.230 |
| CAZ | 0.014 | 0.021 | 0.016 | 0.021 | 0.017 | 0.017 | 0.020 | 0.033 | 0.035 | 0.038 |
| CHA | 0.000 | 0.000 | 0.000 | 0.000 | 0.000 | 0.000 | 0.001 | 0.000 | 0.000 | 0.000 |
| EUR | 0.007 | 0.008 | 0.011 | 0.022 | 0.018 | 0.014 | 0.008 | 0.009 | 0.010 | 0.007 |
| IND | 0.000 | 0.000 | 0.000 | 0.000 | 0.000 | 0.000 | 0.000 | 0.000 | 0.000 | 0.000 |
| JPN | 0.014 | 0.022 | 0.021 | 0.020 | 0.020 | 0.020 | 0.018 | 0.019 | 0.019 | 0.018 |
| LAM | 0.057 | 0.060 | 0.083 | 0.054 | 0.056 | 0.055 | 0.064 | 0.085 | 0.089 | 0.110 |
| MEA | 0.011 | 0.014 | 0.021 | 0.015 | 0.016 | 0.021 | 0.042 | 0.049 | 0.012 | 0.008 |
| NEU | 0.000 | 0.000 | 0.000 | 0.000 | 0.000 | 0.000 | 0.000 | 0.000 | 0.000 | 0.000 |
| OAS | 0.000 | 0.000 | 0.000 | 0.000 | 0.000 | 0.000 | 0.000 | 0.000 | 0.000 | 0.000 |
| REF | 0.000 | 0.000 | 0.000 | 0.000 | 0.000 | 0.000 | 0.021 | 0.008 | 0.010 | 0.008 |
| SSA | 0.000 | 0.000 | 0.000 | 0.000 | 0.000 | 0.000 | 0.000 | 0.000 | 0.000 | 0.000 |
| USA | 0.000 | 0.049 | 0.029 | 0.064 | 0.100 | 0.038 | 0.035 | 0.040 | 0.040 | 0.040 |

Table 102: FAO — Demand—Agricultural Supply Chain Loss—Secondary products—Sugar (Mt DM/yr)

## 4 Bioenergy

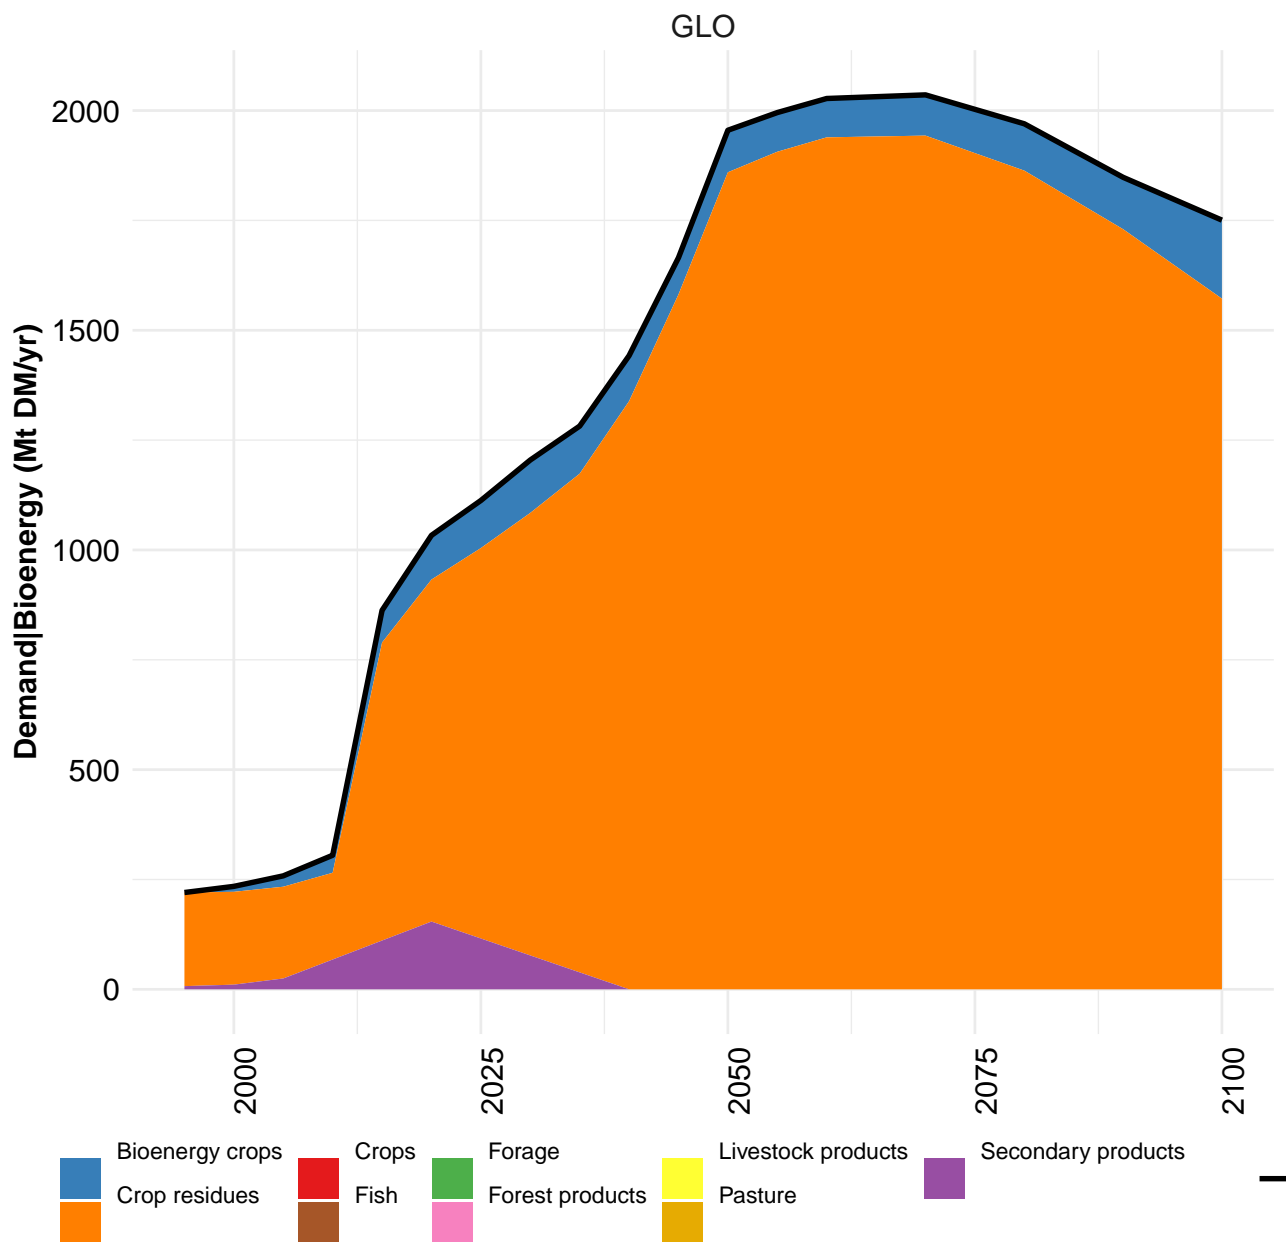



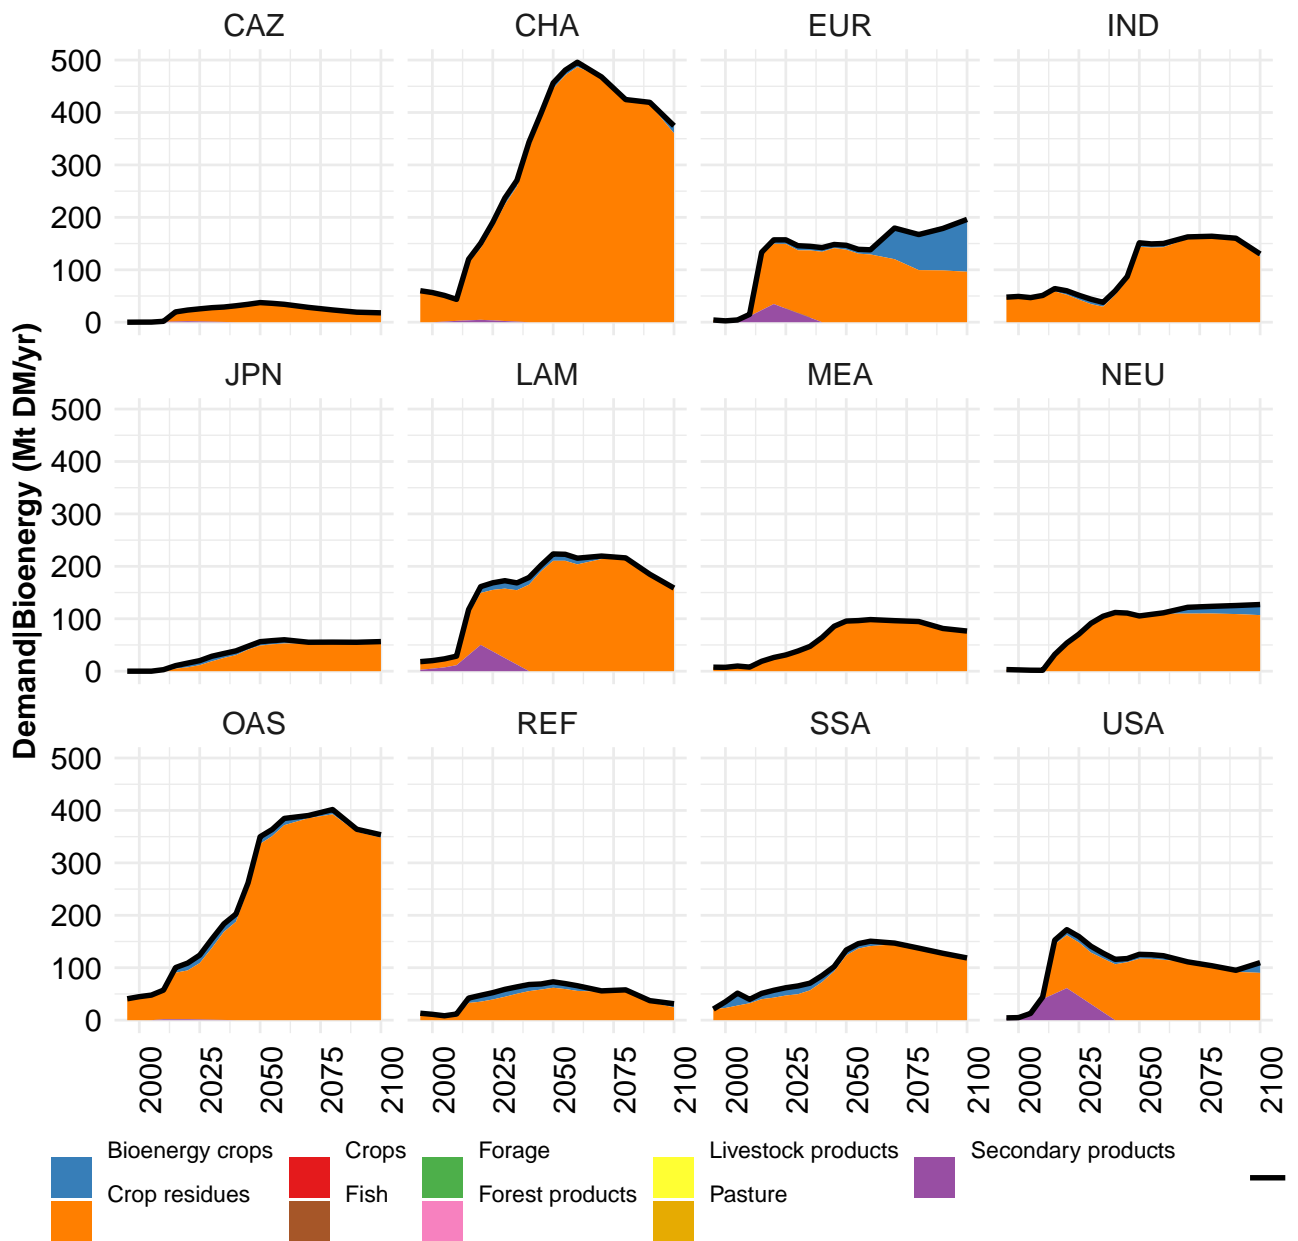

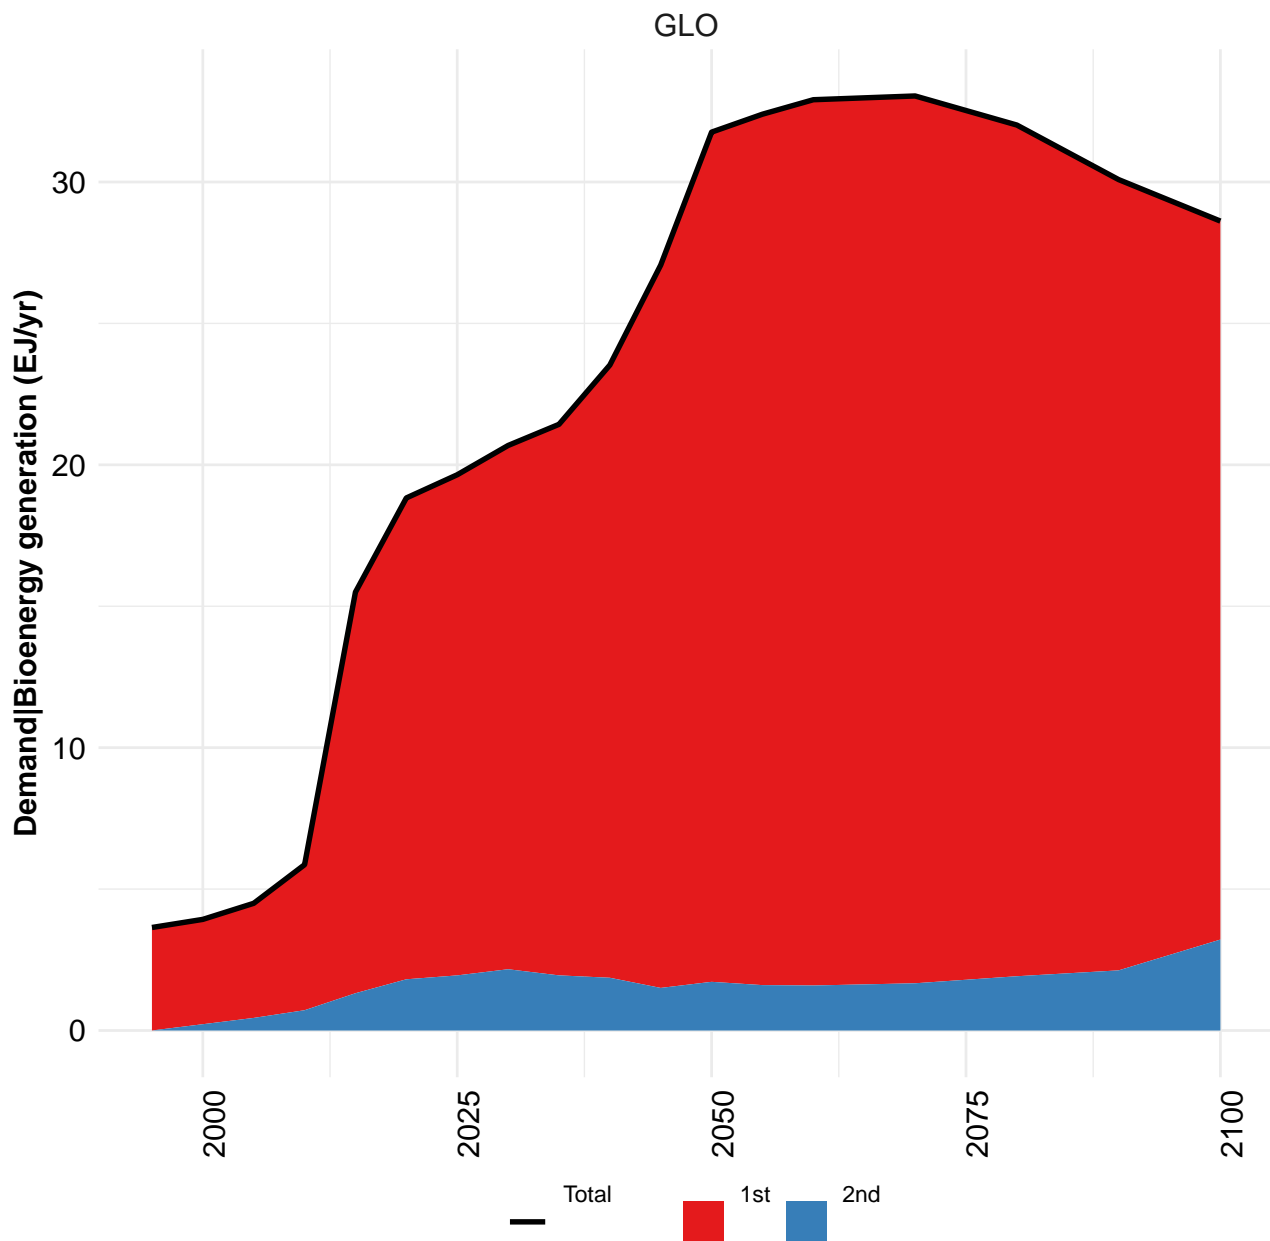

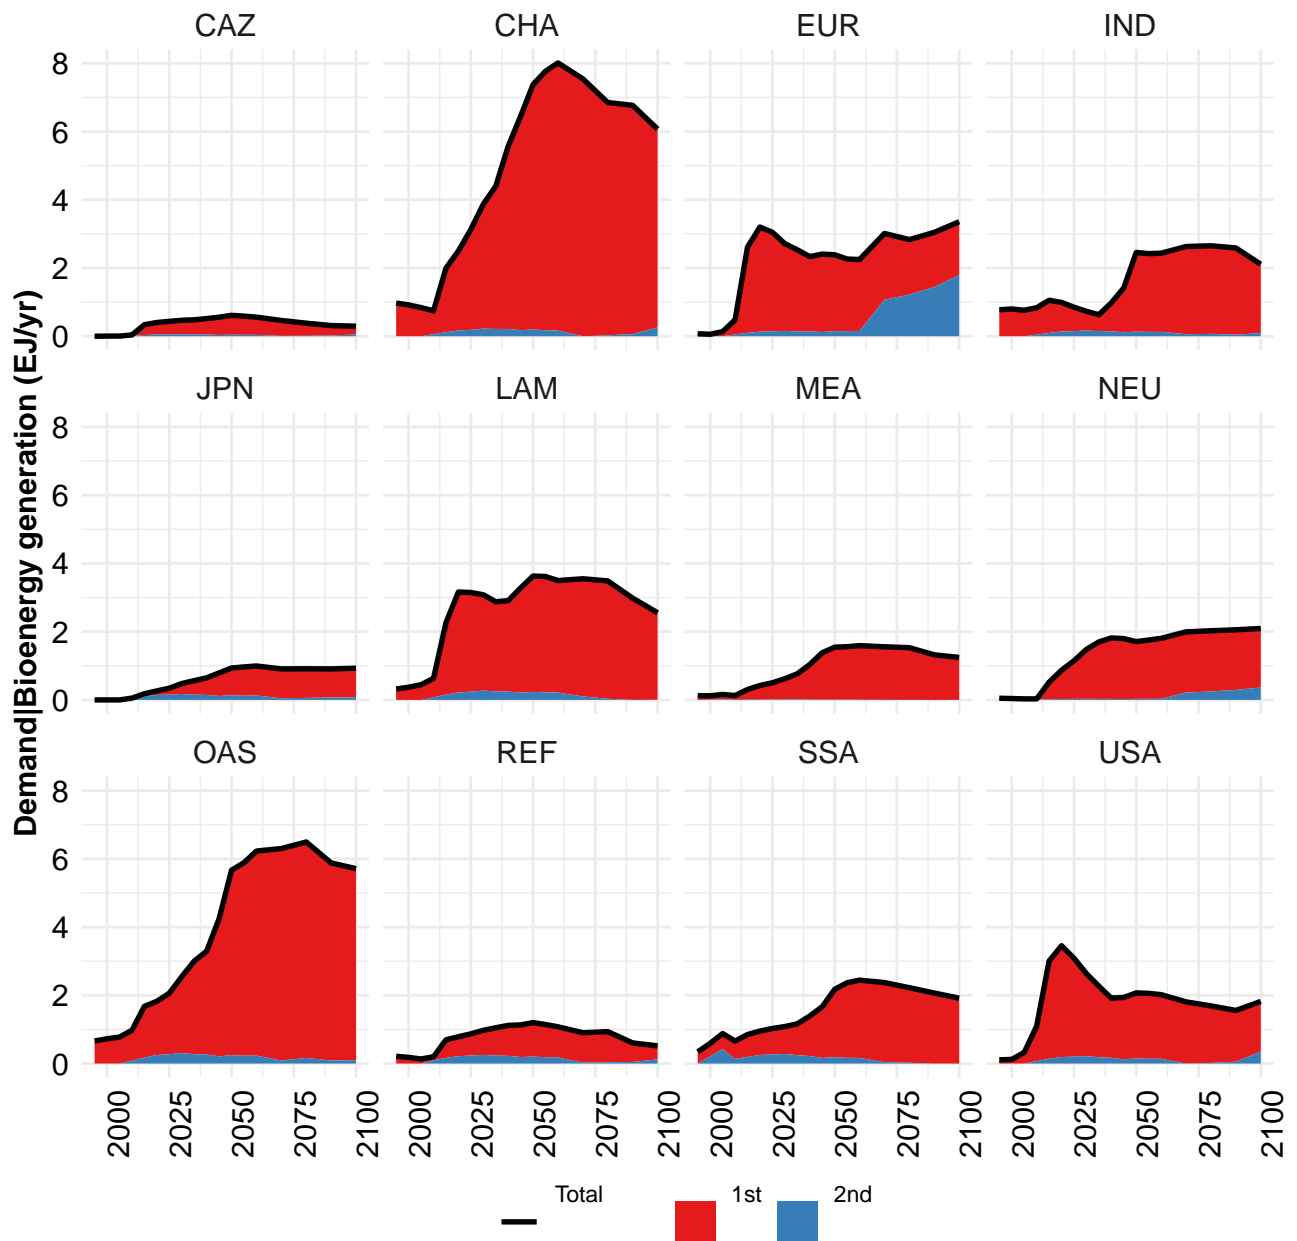

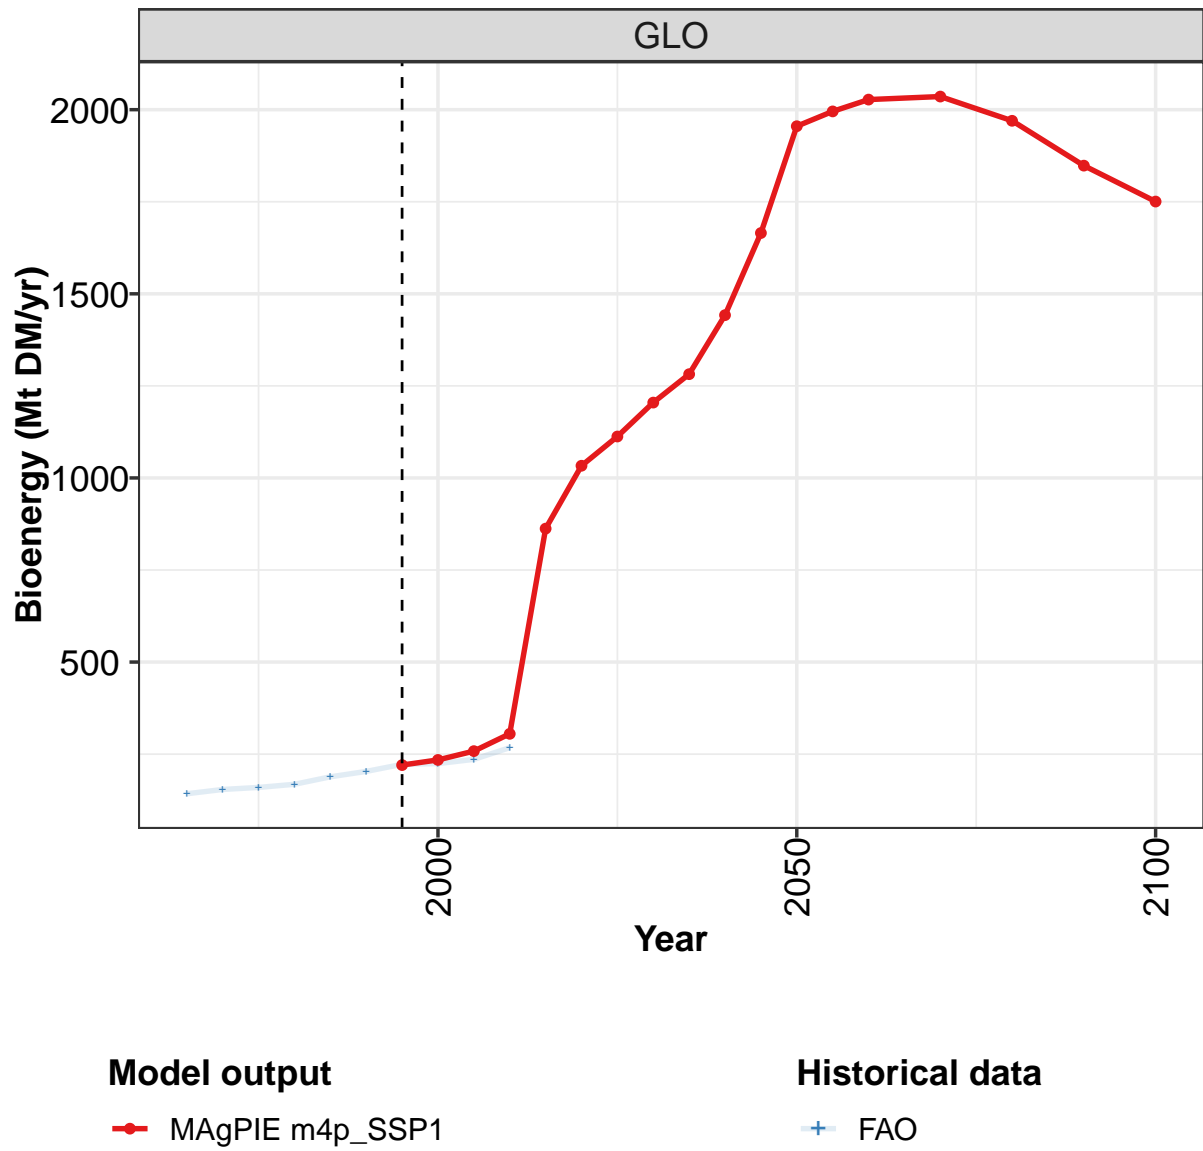

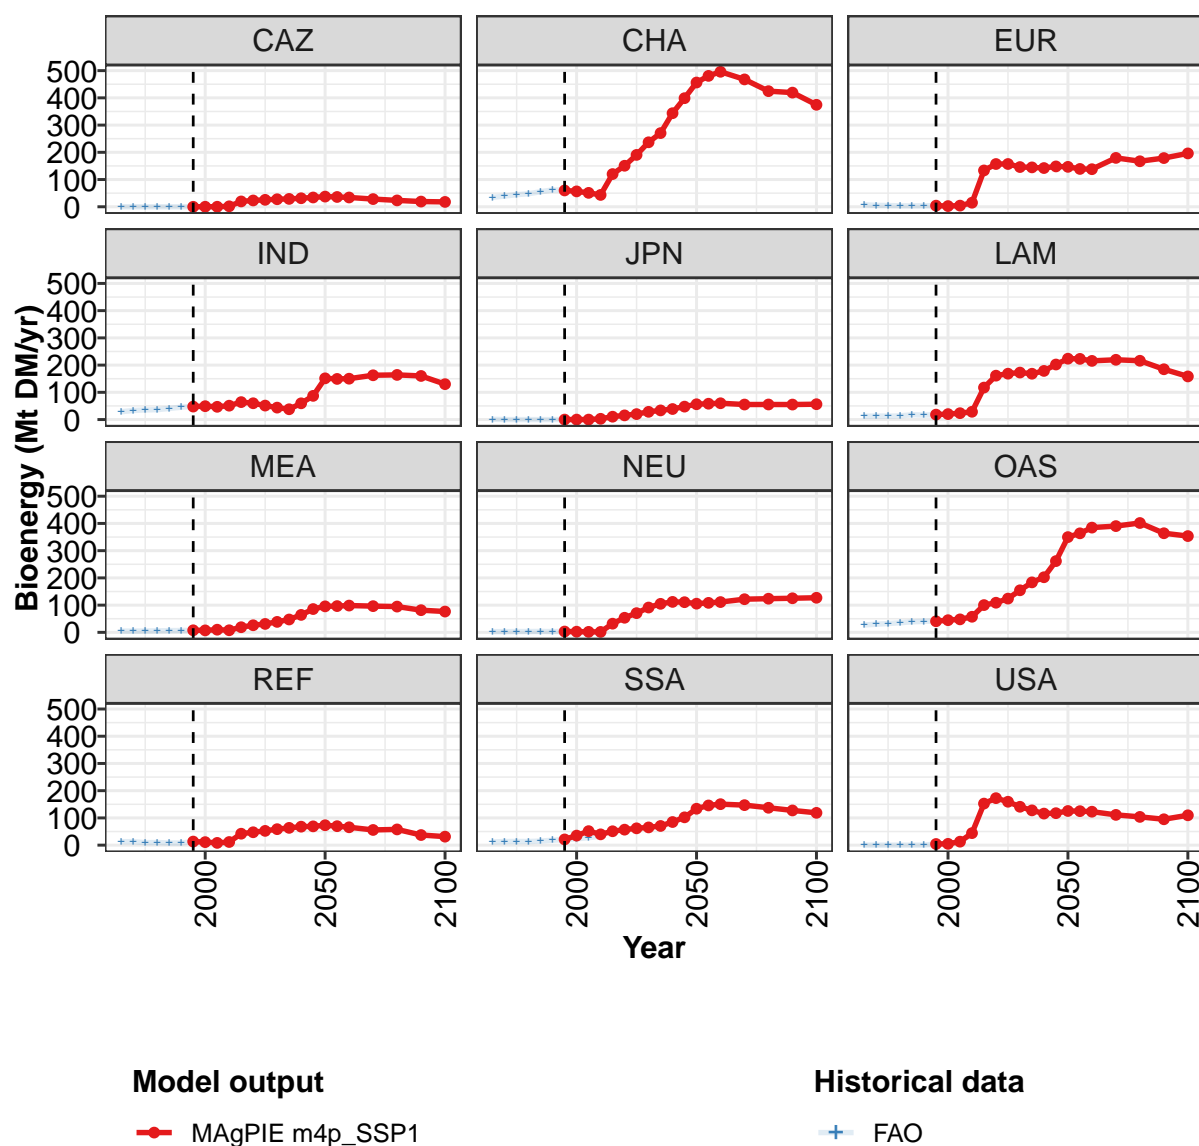

Figure 34: MAgPIE m4p\_SSP1 — Demand—Bioenergy (Mt DM/yr)

|     | 1995 | 2000 | 2005 | 2010 | 2015 | 2020 | 2025 | 2030 | 2035 | 2040 | 2045 |
|-----|------|------|------|------|------|------|------|------|------|------|------|
| GLO | 220  | 234  | 258  | 305  | 862  | 1033 | 1113 | 1205 | 1282 | 1442 | 1665 |
| CAZ | 0    | 0    | 0    | 2    | 20   | 23   | 25   | 28   | 29   | 31   | 34   |
| CHA | 60   | 57   | 51   | 44   | 120  | 151  | 191  | 237  | 271  | 344  | 399  |
| EUR | 4    | 3    | 4    | 15   | 133  | 157  | 157  | 146  | 145  | 142  | 148  |
| IND | 48   | 49   | 47   | 51   | 64   | 60   | 51   | 44   | 38   | 60   | 87   |
| JPN | 0    | 0    | 0    | 3    | 11   | 15   | 20   | 28   | 34   | 39   | 48   |
| LAM | 18   | 20   | 24   | 29   | 118  | 161  | 169  | 173  | 168  | 179  | 202  |
| MEA | 8    | 7    | 10   | 8    | 19   | 26   | 31   | 38   | 47   | 64   | 86   |
| NEU | 3    | 2    | 2    | 2    | 32   | 54   | 71   | 91   | 105  | 112  | 111  |
| OAS | 41   | 45   | 48   | 57   | 100  | 109  | 124  | 155  | 184  | 202  | 262  |
| REF | 13   | 11   | 8    | 12   | 42   | 47   | 52   | 59   | 63   | 68   | 69   |
| SSA | 21   | 35   | 52   | 40   | 51   | 57   | 62   | 65   | 71   | 85   | 102  |
| USA | 4    | 5    | 13   | 44   | 153  | 173  | 159  | 141  | 128  | 116  | 117  |

Table 103: MAgPIE m4p\_SSP1 — Demand—Bioenergy (Mt DM/yr) [PART 1/2]

|     | 2050 | 2055 | 2060 | 2070 | 2080 | 2090 | 2100 |
|-----|------|------|------|------|------|------|------|
| GLO | 1955 | 1995 | 2027 | 2036 | 1970 | 1848 | 1751 |
| CAZ | 37   | 36   | 34   | 28   | 23   | 19   | 18   |
| CHA | 456  | 481  | 496  | 468  | 425  | 419  | 375  |
| EUR | 147  | 139  | 138  | 180  | 167  | 179  | 196  |
| IND | 151  | 149  | 150  | 163  | 164  | 160  | 130  |
| JPN | 56   | 58   | 60   | 55   | 55   | 55   | 56   |
| LAM | 224  | 223  | 216  | 220  | 216  | 185  | 158  |
| MEA | 96   | 96   | 98   | 96   | 95   | 81   | 77   |
| NEU | 105  | 108  | 111  | 122  | 124  | 125  | 127  |
| OAS | 350  | 364  | 385  | 390  | 402  | 364  | 354  |
| REF | 73   | 70   | 66   | 56   | 58   | 37   | 31   |
| SSA | 134  | 146  | 151  | 147  | 137  | 128  | 119  |
| USA | 126  | 125  | 123  | 111  | 104  | 95   | 110  |

Table 104: MAgPIE m4p\_SSP1 — Demand—Bioenergy (Mt DM/yr) [PART 2/2]

|     | 1965 | 1970 | 1975 | 1980 | 1985 | 1990 | 1995 | 2000 | 2005 | 2010 |
|-----|------|------|------|------|------|------|------|------|------|------|
| GLO | 142  | 154  | 160  | 168  | 188  | 203  | 222  | 224  | 236  | 268  |
| CAZ | 0    | 0    | 0    | 0    | 0    | 0    | 0    | 0    | 0    | 1    |
| CHA | 35   | 39   | 44   | 48   | 55   | 62   | 61   | 57   | 52   | 40   |
| EUR | 7    | 5    | 4    | 4    | 3    | 4    | 4    | 3    | 4    | 12   |
| IND | 29   | 33   | 35   | 36   | 41   | 45   | 49   | 50   | 48   | 49   |
| JPN | 1    | 0    | 0    | 0    | 0    | 0    | 0    | 0    | 0    | 0    |
| LAM | 12   | 13   | 13   | 13   | 18   | 16   | 18   | 20   | 23   | 24   |
| MEA | 5    | 5    | 5    | 6    | 6    | 7    | 8    | 7    | 9    | 7    |
| NEU | 3    | 3    | 3    | 3    | 3    | 3    | 3    | 2    | 2    | 1    |
| OAS | 27   | 30   | 32   | 35   | 39   | 40   | 42   | 46   | 50   | 54   |
| REF | 13   | 13   | 9    | 10   | 8    | 8    | 13   | 11   | 8    | 6    |
| SSA | 12   | 13   | 13   | 13   | 15   | 18   | 21   | 23   | 28   | 32   |
| USA | 0    | 0    | 0    | 0    | 0    | 0    | 4    | 5    | 13   | 40   |

Table 105: FAO — Demand—Bioenergy (Mt DM/yr)

4.1 1st generation

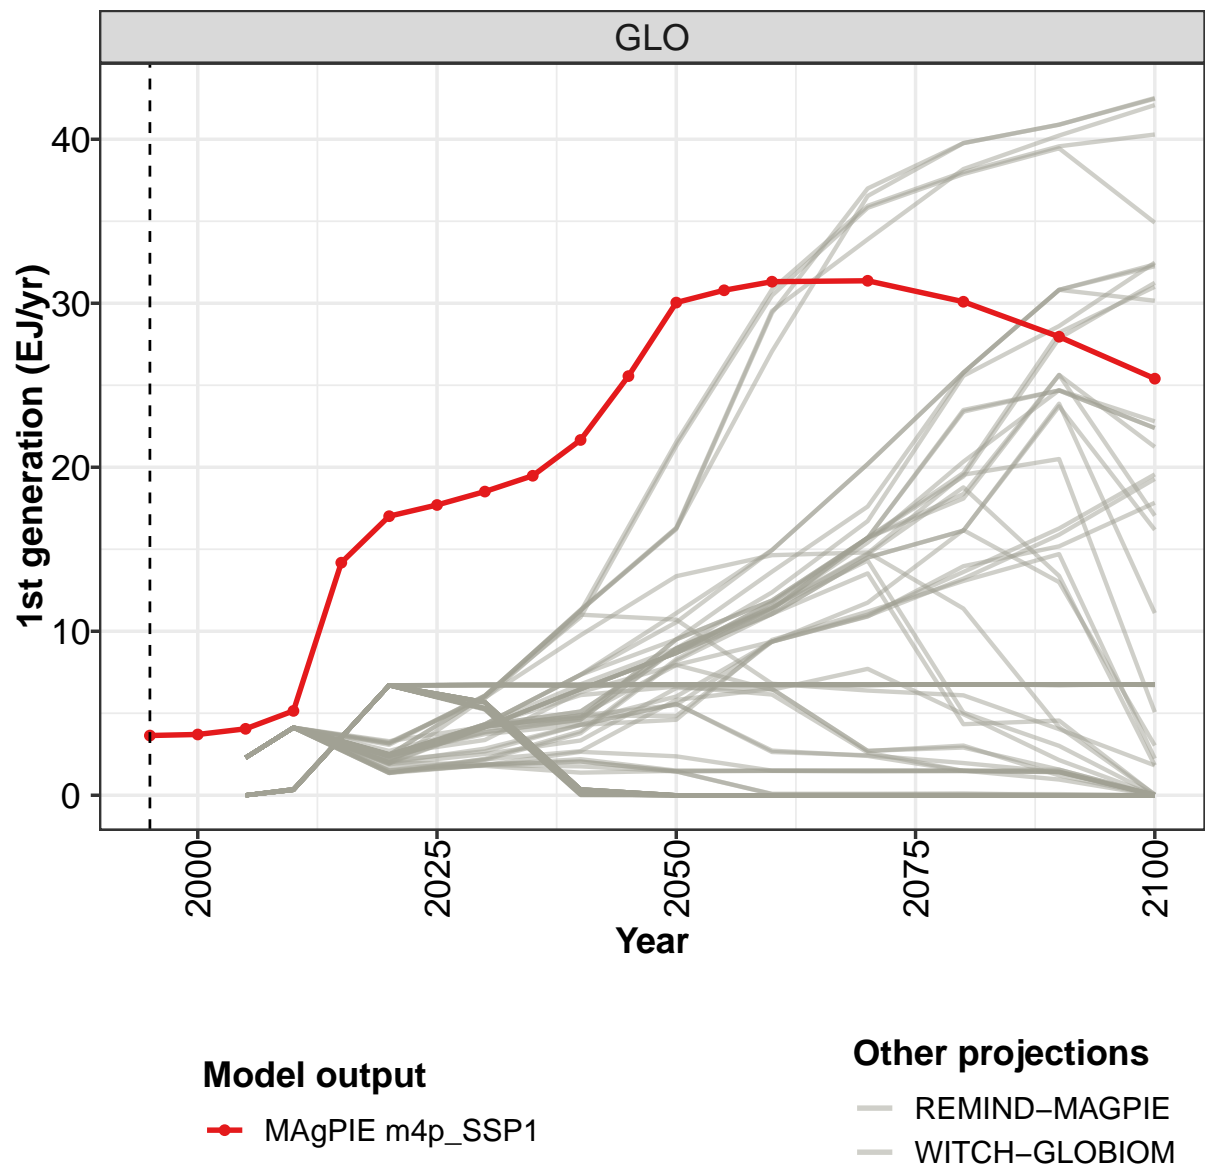

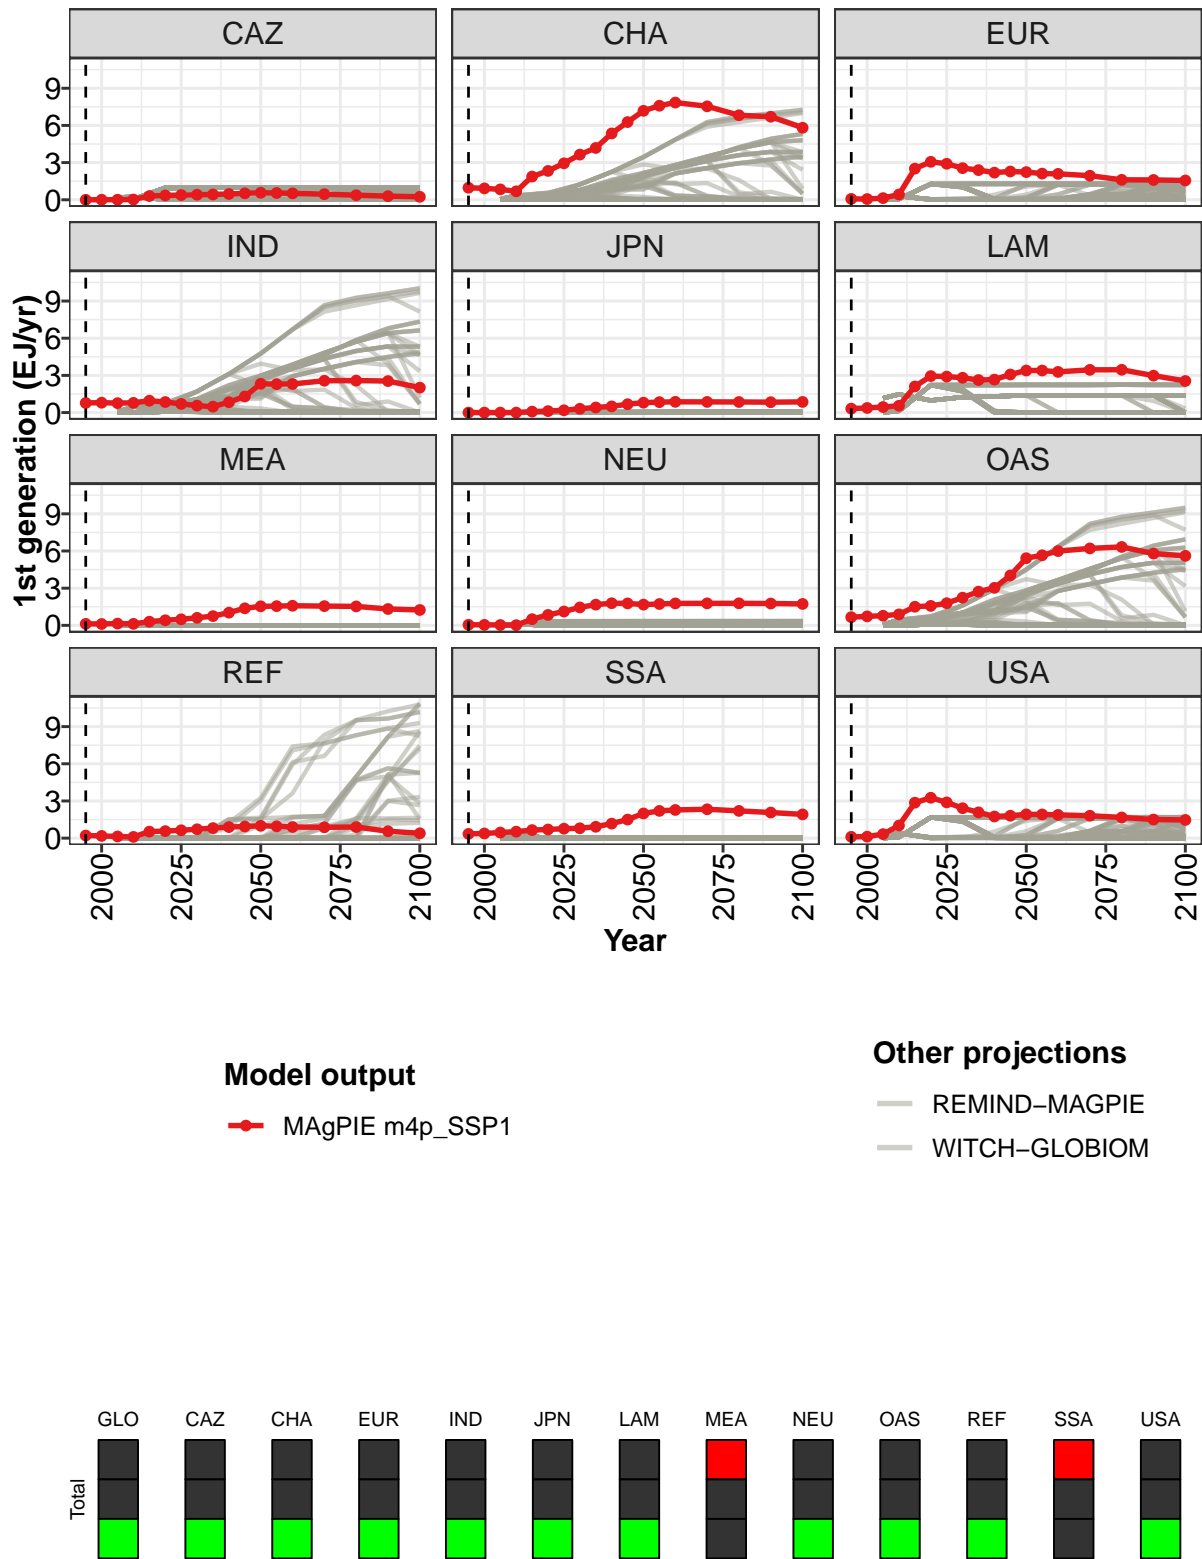

Figure 35: MAgPIE m4p\_SSP1 — Demand—Bioenergy—1st generation (EJ/yr)



|     | 1995 | 2000 | 2005 | 2010 | 2015 | 2020 | 2025 | 2030 | 2035 | 2040 | 2045 |
|-----|------|------|------|------|------|------|------|------|------|------|------|
| GLO | 3.6  | 3.7  | 4.1  | 5.1  | 14.2 | 17.0 | 17.7 | 18.5 | 19.5 | 21.7 | 25.6 |
| CAZ | 0.0  | 0.0  | 0.0  | 0.0  | 0.3  | 0.4  | 0.4  | 0.4  | 0.4  | 0.5  | 0.5  |
| CHA | 1.0  | 0.9  | 0.8  | 0.7  | 1.9  | 2.3  | 2.9  | 3.6  | 4.2  | 5.4  | 6.3  |
| EUR | 0.1  | 0.1  | 0.1  | 0.4  | 2.5  | 3.1  | 2.9  | 2.6  | 2.4  | 2.2  | 2.3  |
| IND | 0.8  | 0.8  | 0.8  | 0.8  | 1.0  | 0.9  | 0.7  | 0.6  | 0.5  | 0.8  | 1.3  |
| JPN | 0.0  | 0.0  | 0.0  | 0.0  | 0.1  | 0.1  | 0.2  | 0.3  | 0.4  | 0.5  | 0.7  |
| LAM | 0.3  | 0.4  | 0.4  | 0.6  | 2.1  | 2.9  | 2.9  | 2.8  | 2.6  | 2.7  | 3.1  |
| MEA | 0.1  | 0.1  | 0.1  | 0.1  | 0.3  | 0.4  | 0.5  | 0.6  | 0.7  | 1.0  | 1.4  |
| NEU | 0.0  | 0.0  | 0.0  | 0.0  | 0.5  | 0.8  | 1.1  | 1.4  | 1.7  | 1.8  | 1.8  |
| OAS | 0.7  | 0.7  | 0.8  | 0.9  | 1.5  | 1.6  | 1.8  | 2.2  | 2.7  | 3.0  | 4.0  |
| REF | 0.2  | 0.2  | 0.1  | 0.1  | 0.5  | 0.6  | 0.6  | 0.7  | 0.8  | 0.9  | 0.9  |
| SSA | 0.3  | 0.4  | 0.5  | 0.5  | 0.7  | 0.7  | 0.8  | 0.8  | 0.9  | 1.2  | 1.5  |
| USA | 0.1  | 0.1  | 0.3  | 1.0  | 2.9  | 3.3  | 2.9  | 2.4  | 2.1  | 1.7  | 1.8  |

Table 106: MAgPIE m4p-SSP1 — Demand—Bioenergy—1st generation (EJ/yr) [PART 1/2]

|     | 2050 | 2055 | 2060 | 2070 | 2080 | 2090 | 2100 |
|-----|------|------|------|------|------|------|------|
| GLO | 30.0 | 30.8 | 31.3 | 31.4 | 30.1 | 28.0 | 25.4 |
| CAZ | 0.6  | 0.5  | 0.5  | 0.5  | 0.4  | 0.3  | 0.2  |
| CHA | 7.2  | 7.6  | 7.8  | 7.5  | 6.8  | 6.7  | 5.8  |
| EUR | 2.2  | 2.1  | 2.1  | 1.9  | 1.6  | 1.6  | 1.6  |
| IND | 2.3  | 2.3  | 2.3  | 2.6  | 2.6  | 2.5  | 2.0  |
| JPN | 0.8  | 0.8  | 0.9  | 0.9  | 0.9  | 0.8  | 0.9  |
| LAM | 3.4  | 3.4  | 3.3  | 3.4  | 3.5  | 3.0  | 2.6  |
| MEA | 1.5  | 1.6  | 1.6  | 1.6  | 1.5  | 1.3  | 1.2  |
| NEU | 1.7  | 1.7  | 1.8  | 1.8  | 1.8  | 1.8  | 1.7  |
| OAS | 5.4  | 5.7  | 6.0  | 6.2  | 6.3  | 5.8  | 5.6  |
| REF | 1.0  | 1.0  | 0.9  | 0.9  | 0.9  | 0.6  | 0.4  |
| SSA | 2.0  | 2.2  | 2.3  | 2.3  | 2.2  | 2.1  | 1.9  |
| USA | 1.9  | 1.9  | 1.9  | 1.8  | 1.7  | 1.5  | 1.5  |

Table 107: MAgPIE m4p-SSP1 — Demand—Bioenergy—1st generation (EJ/yr) [PART 2/2]

4.2 2nd generation

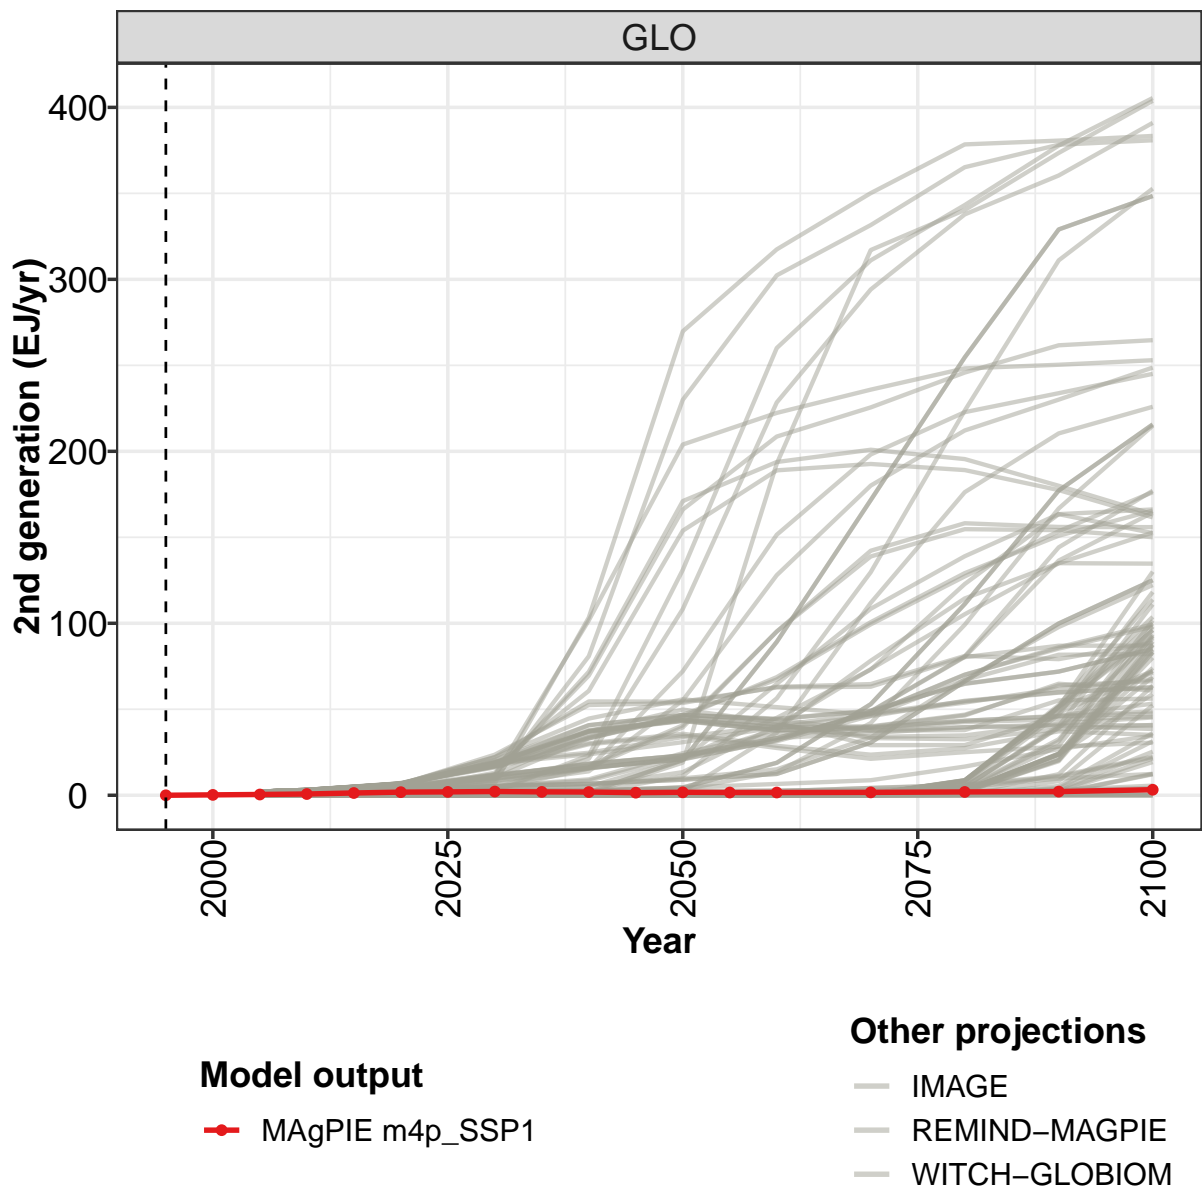

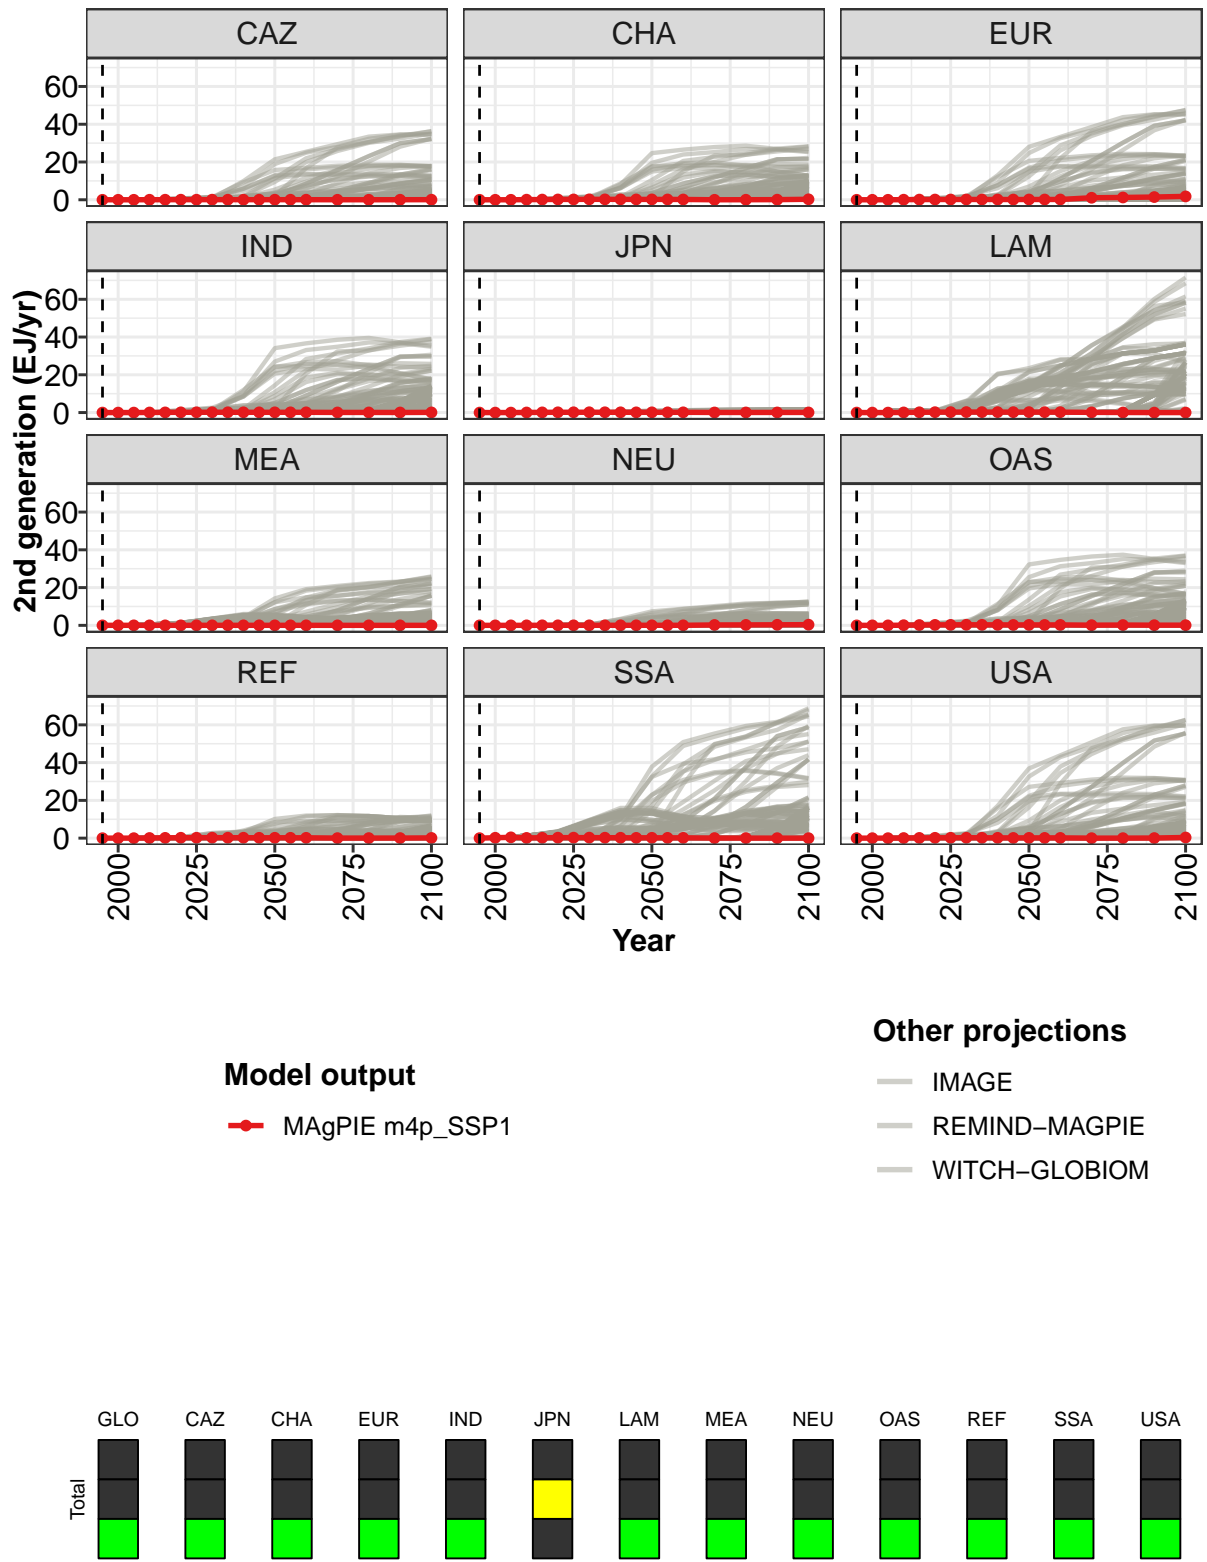

Figure 36: MAgPIE m4p\_SSP1 — Demand—Bioenergy—2nd generation (EJ/yr)

|     | 1995 | 2000 | 2005 | 2010 | 2015 | 2020 | 2025 | 2030 | 2035 | 2040 | 2045 |
|-----|------|------|------|------|------|------|------|------|------|------|------|
| GLO | 0.00 | 0.22 | 0.45 | 0.72 | 1.32 | 1.81 | 1.95 | 2.17 | 1.95 | 1.86 | 1.51 |
| CAZ | 0.00 | 0.00 | 0.00 | 0.02 | 0.04 | 0.05 | 0.05 | 0.06 | 0.05 | 0.05 | 0.04 |
| CHA | 0.00 | 0.00 | 0.00 | 0.06 | 0.12 | 0.17 | 0.19 | 0.22 | 0.22 | 0.21 | 0.18 |
| EUR | 0.00 | 0.00 | 0.00 | 0.05 | 0.10 | 0.14 | 0.14 | 0.16 | 0.14 | 0.14 | 0.12 |
| IND | 0.00 | 0.00 | 0.00 | 0.05 | 0.10 | 0.14 | 0.15 | 0.17 | 0.15 | 0.15 | 0.12 |
| JPN | 0.00 | 0.00 | 0.00 | 0.05 | 0.10 | 0.15 | 0.16 | 0.17 | 0.15 | 0.15 | 0.12 |
| LAM | 0.00 | 0.00 | 0.00 | 0.08 | 0.15 | 0.22 | 0.24 | 0.27 | 0.25 | 0.25 | 0.21 |
| MEA | 0.00 | 0.01 | 0.02 | 0.01 | 0.01 | 0.01 | 0.01 | 0.01 | 0.02 | 0.01 | 0.01 |
| NEU | 0.00 | 0.00 | 0.00 | 0.01 | 0.02 | 0.03 | 0.03 | 0.03 | 0.03 | 0.03 | 0.03 |
| OAS | 0.00 | 0.00 | 0.00 | 0.09 | 0.18 | 0.25 | 0.27 | 0.31 | 0.28 | 0.27 | 0.21 |
| REF | 0.00 | 0.00 | 0.00 | 0.10 | 0.17 | 0.22 | 0.23 | 0.26 | 0.24 | 0.23 | 0.19 |
| SSA | 0.00 | 0.21 | 0.43 | 0.13 | 0.20 | 0.25 | 0.27 | 0.28 | 0.25 | 0.22 | 0.17 |
| USA | 0.00 | 0.00 | 0.00 | 0.07 | 0.14 | 0.19 | 0.20 | 0.22 | 0.18 | 0.17 | 0.13 |

Table 108: MAgPIE m4p\_SSP1 — Demand—Bioenergy—2nd generation (EJ/yr) [PART 1/2]

|     | 2050 | 2055 | 2060 | 2070 | 2080 | 2090 | 2100 |
|-----|------|------|------|------|------|------|------|
| GLO | 1.72 | 1.61 | 1.59 | 1.67 | 1.92 | 2.13 | 3.22 |
| CAZ | 0.04 | 0.04 | 0.04 | 0.01 | 0.01 | 0.02 | 0.05 |
| CHA | 0.20 | 0.18 | 0.16 | 0.00 | 0.03 | 0.06 | 0.26 |
| EUR | 0.15 | 0.15 | 0.16 | 1.07 | 1.22 | 1.44 | 1.80 |
| IND | 0.14 | 0.13 | 0.13 | 0.06 | 0.07 | 0.04 | 0.10 |
| JPN | 0.13 | 0.12 | 0.13 | 0.05 | 0.06 | 0.07 | 0.07 |
| LAM | 0.24 | 0.22 | 0.21 | 0.10 | 0.03 | 0.00 | 0.00 |
| MEA | 0.01 | 0.01 | 0.01 | 0.00 | 0.00 | 0.00 | 0.00 |
| NEU | 0.03 | 0.03 | 0.03 | 0.22 | 0.25 | 0.29 | 0.36 |
| OAS | 0.25 | 0.23 | 0.23 | 0.09 | 0.16 | 0.09 | 0.10 |
| REF | 0.20 | 0.19 | 0.18 | 0.03 | 0.04 | 0.05 | 0.12 |
| SSA | 0.18 | 0.17 | 0.17 | 0.04 | 0.02 | 0.00 | 0.00 |
| USA | 0.15 | 0.14 | 0.14 | 0.00 | 0.02 | 0.05 | 0.35 |

Table 109: MAgPIE m4p\_SSP1 — Demand—Bioenergy—2nd generation (EJ/yr) [PART 2/2]

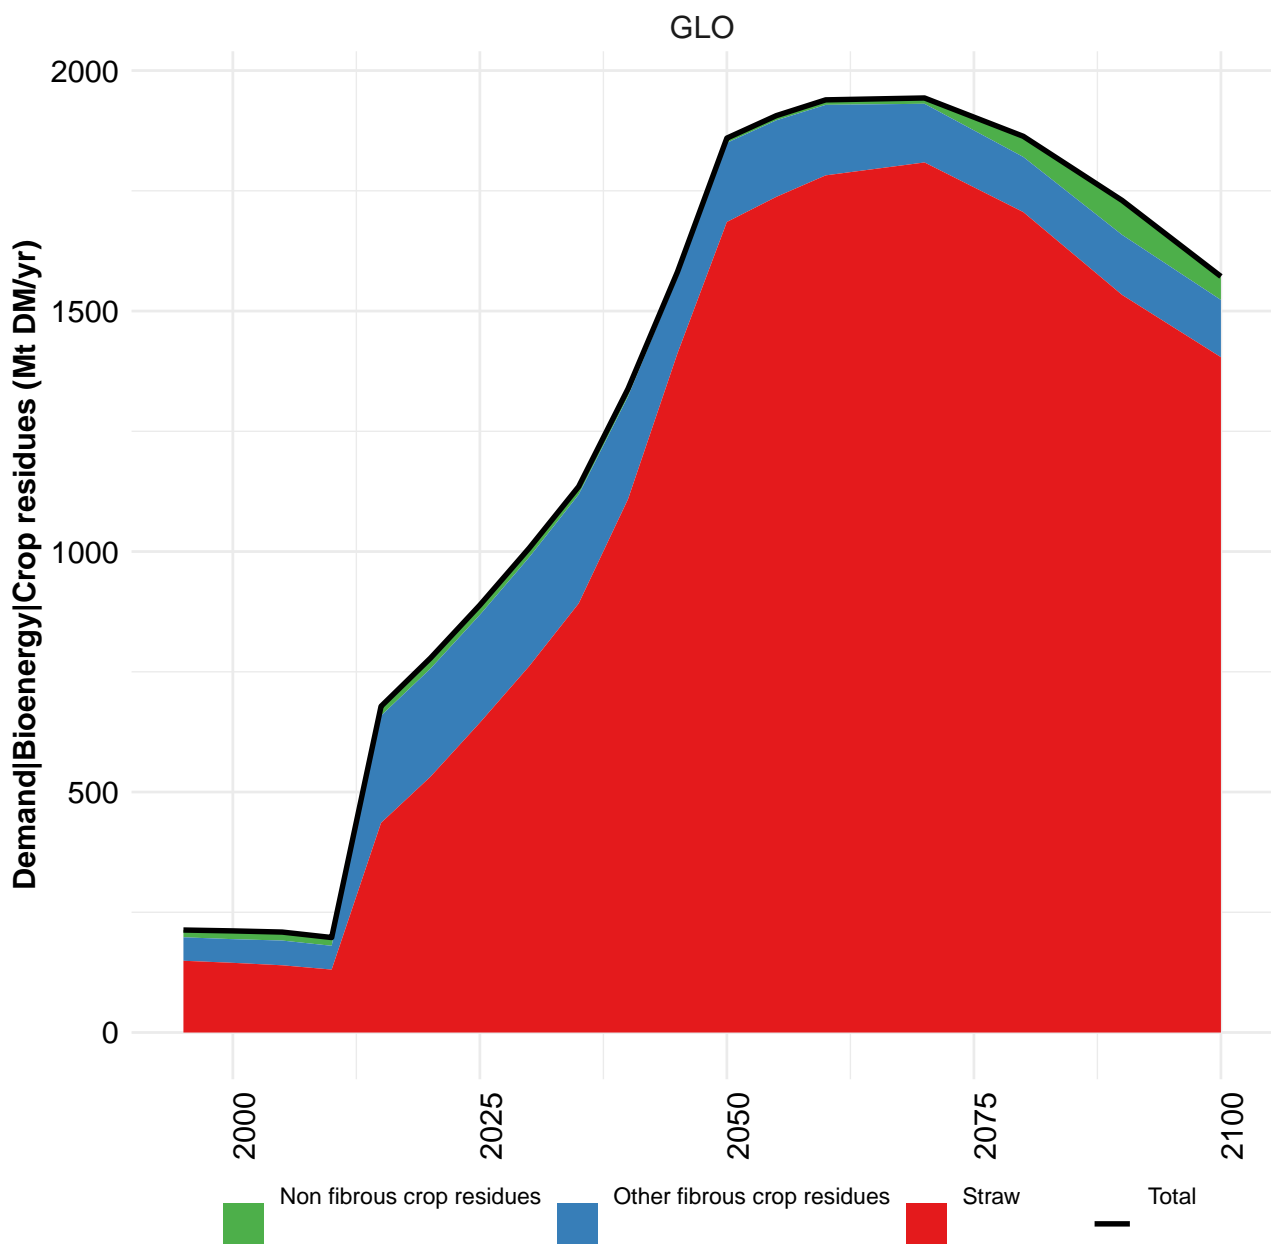

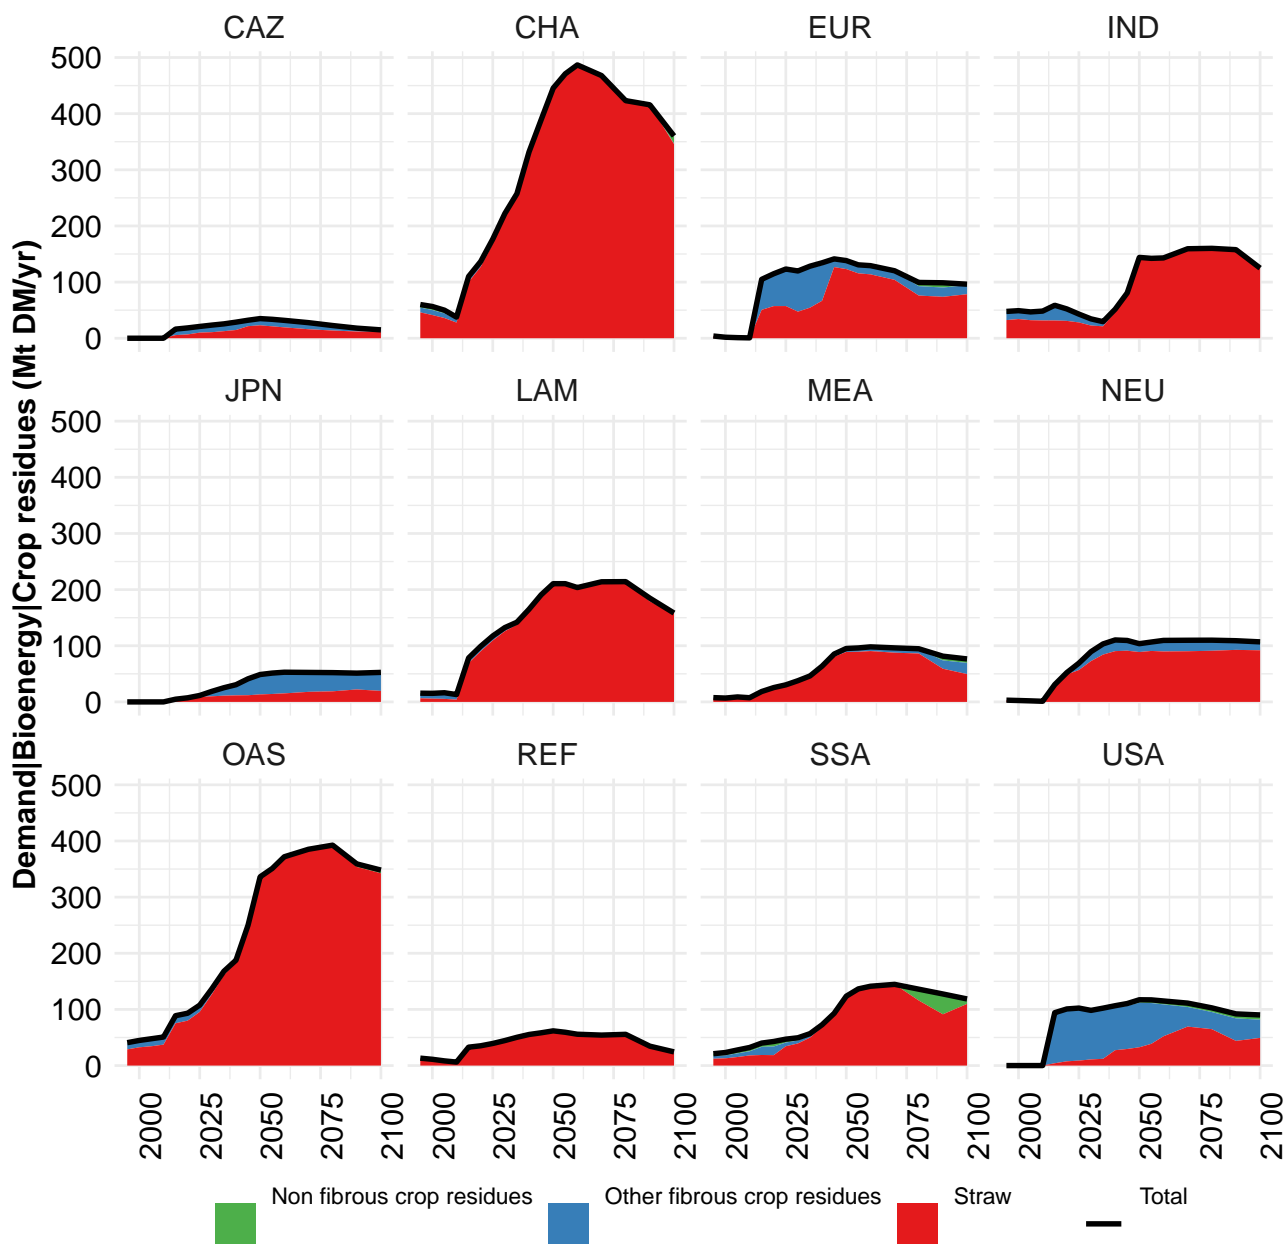

4.3 Crop residues

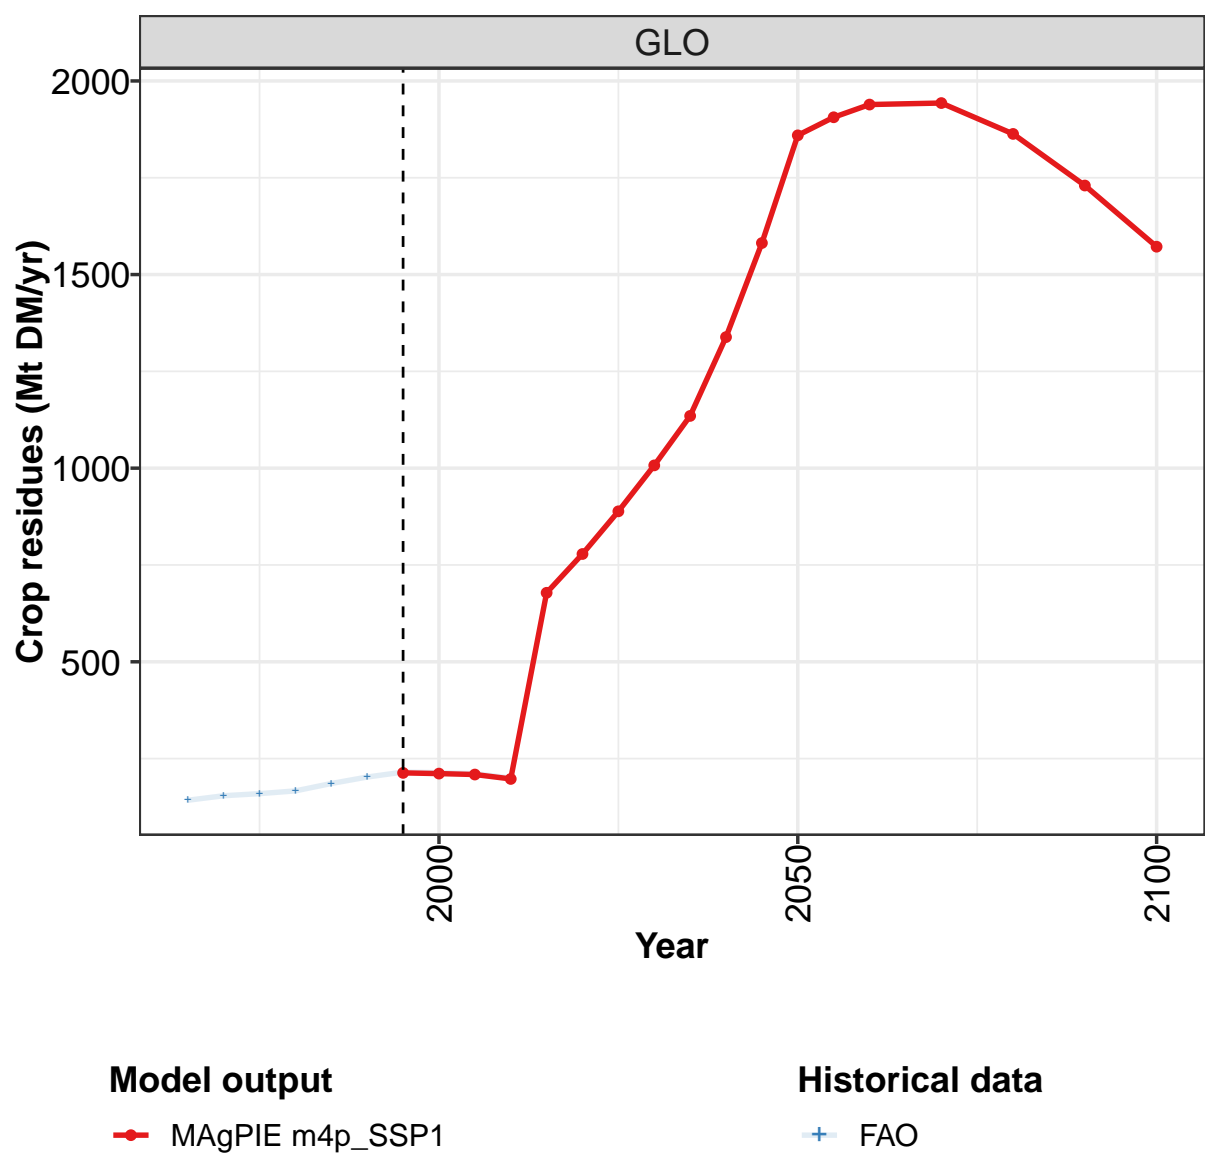

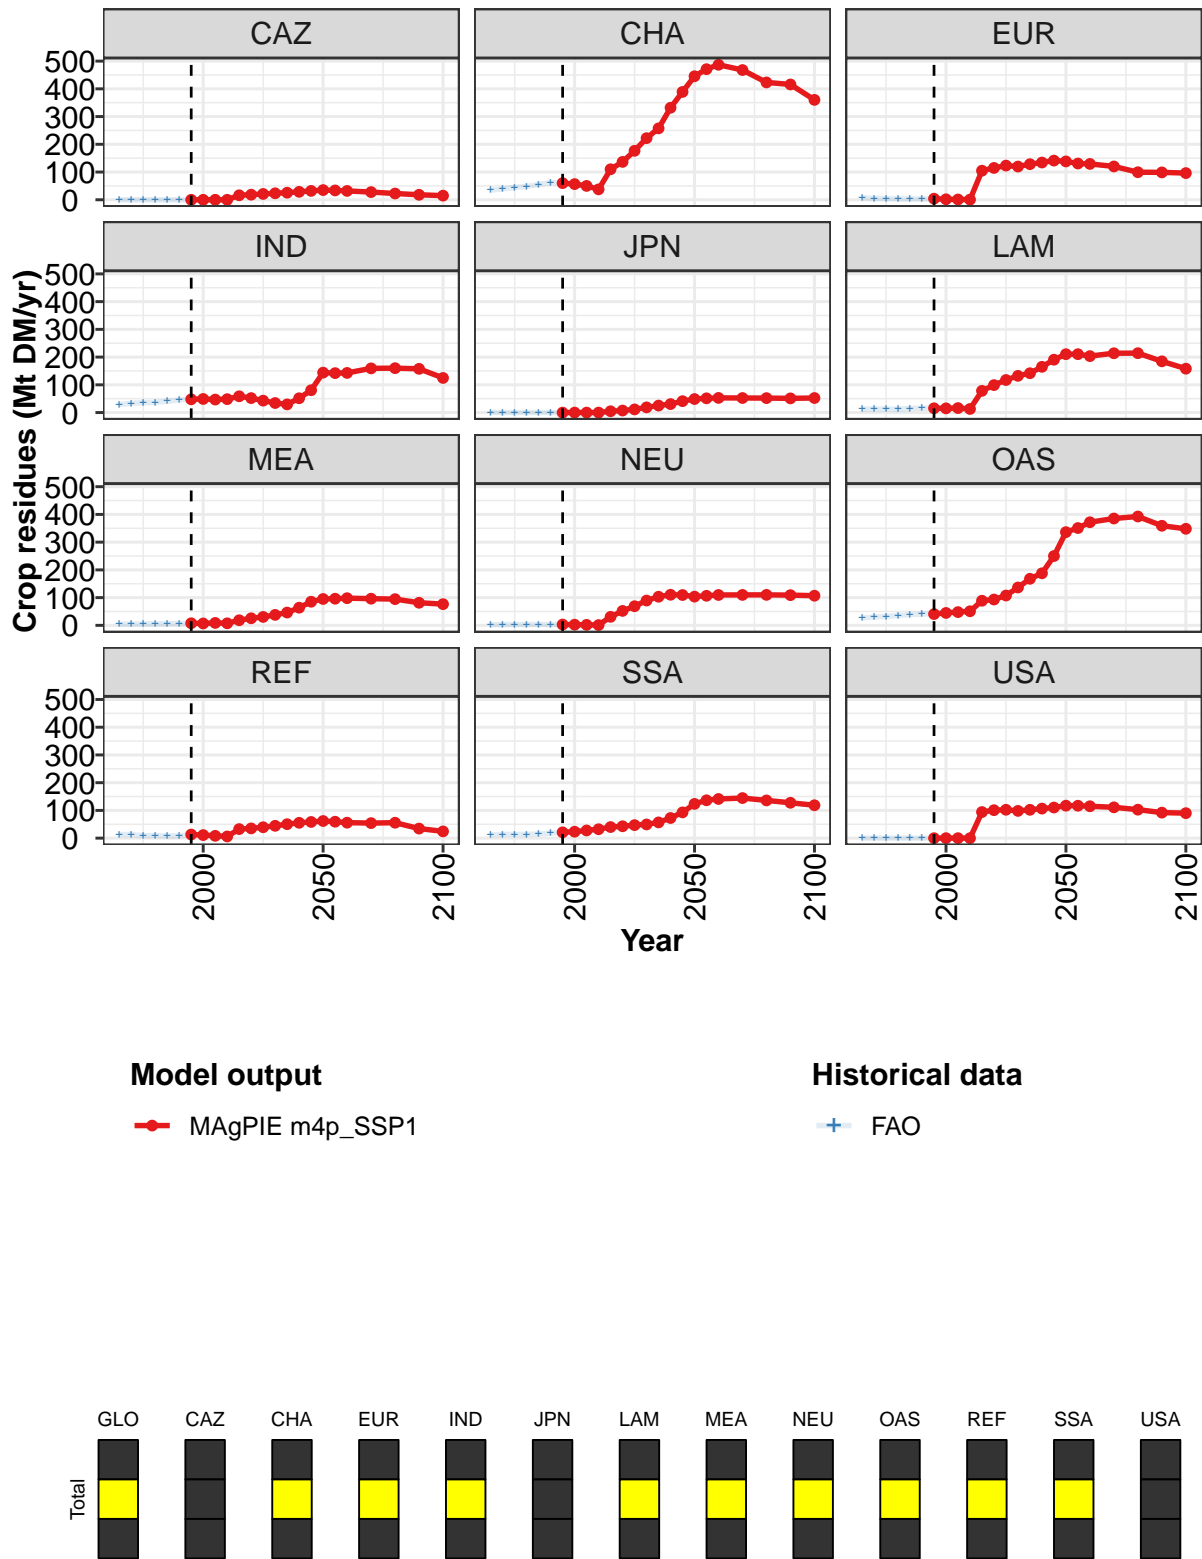

Figure 37: MAgPIE m4p\_SSP1 — Demand—Bioenergy—Crop residues (Mt DM/yr)



|     | 1995 | 2000 | 2005 | 2010 | 2015 | 2020 | 2025 | 2030 | 2035 | 2040 | 2045 |
|-----|------|------|------|------|------|------|------|------|------|------|------|
| GLO | 213  | 211  | 209  | 197  | 678  | 778  | 889  | 1007 | 1135 | 1339 | 1581 |
| CAZ | 0    | 0    | 0    | 0    | 16   | 18   | 21   | 23   | 26   | 29   | 32   |
| CHA | 60   | 57   | 50   | 38   | 110  | 137  | 177  | 222  | 257  | 332  | 389  |
| EUR | 4    | 2    | 1    | 1    | 105  | 115  | 123  | 120  | 128  | 134  | 141  |
| IND | 48   | 49   | 47   | 48   | 59   | 52   | 43   | 34   | 30   | 52   | 81   |
| JPN | 0    | 0    | 0    | 0    | 5    | 7    | 11   | 19   | 25   | 31   | 41   |
| LAM | 16   | 15   | 16   | 13   | 78   | 99   | 117  | 132  | 142  | 165  | 191  |
| MEA | 8    | 7    | 9    | 7    | 18   | 26   | 30   | 38   | 46   | 64   | 85   |
| NEU | 3    | 2    | 2    | 1    | 31   | 52   | 69   | 89   | 103  | 110  | 109  |
| OAS | 41   | 45   | 48   | 51   | 89   | 93   | 108  | 137  | 168  | 188  | 250  |
| REF | 13   | 11   | 8    | 6    | 33   | 35   | 39   | 45   | 50   | 55   | 58   |
| SSA | 21   | 23   | 28   | 32   | 40   | 43   | 47   | 49   | 57   | 73   | 93   |
| USA | 0    | 0    | 0    | 0    | 94   | 101  | 102  | 98   | 102  | 107  | 110  |

Table 110: MAgPIE m4p\_SSP1 — Demand—Bioenergy—Crop residues (Mt DM/yr) [PART 1/2]

|     | 2050 | 2055 | 2060 | 2070 | 2080 | 2090 | 2100 |
|-----|------|------|------|------|------|------|------|
| GLO | 1860 | 1906 | 1939 | 1943 | 1863 | 1730 | 1572 |
| CAZ | 35   | 34   | 32   | 28   | 23   | 18   | 15   |
| CHA | 445  | 471  | 487  | 468  | 423  | 416  | 360  |
| EUR | 138  | 131  | 129  | 120  | 99   | 99   | 96   |
| IND | 144  | 142  | 143  | 159  | 160  | 158  | 125  |
| JPN | 49   | 51   | 53   | 53   | 52   | 51   | 53   |
| LAM | 211  | 211  | 204  | 214  | 214  | 185  | 158  |
| MEA | 95   | 96   | 98   | 96   | 95   | 81   | 77   |
| NEU | 104  | 107  | 110  | 110  | 110  | 109  | 107  |
| OAS | 336  | 351  | 372  | 385  | 393  | 359  | 348  |
| REF | 62   | 59   | 56   | 54   | 56   | 35   | 24   |
| SSA | 124  | 137  | 141  | 145  | 136  | 128  | 119  |
| USA | 117  | 117  | 115  | 111  | 103  | 92   | 90   |

Table 111: MAgPIE m4p\_SSP1 — Demand—Bioenergy—Crop residues (Mt DM/yr) [PART 2/2]

|     | 1965 | 1970 | 1975 | 1980 | 1985 | 1990 | 1995 | 2000 | 2005 | 2010 |
|-----|------|------|------|------|------|------|------|------|------|------|
| GLO | 142  | 154  | 159  | 167  | 186  | 202  | 215  | 214  | 211  | 200  |
| CAZ | 0    | 0    | 0    | 0    | 0    | 0    | 0    | 0    | 0    | 0    |
| CHA | 35   | 39   | 44   | 48   | 55   | 62   | 61   | 57   | 50   | 38   |
| EUR | 7    | 5    | 4    | 4    | 3    | 4    | 4    | 2    | 1    | 1    |
| IND | 29   | 33   | 35   | 36   | 41   | 45   | 49   | 50   | 48   | 49   |
| JPN | 1    | 0    | 0    | 0    | 0    | 0    | 0    | 0    | 0    | 0    |
| LAM | 12   | 13   | 12   | 12   | 15   | 16   | 15   | 15   | 16   | 13   |
| MEA | 5    | 5    | 5    | 6    | 6    | 7    | 8    | 7    | 9    | 7    |
| NEU | 3    | 3    | 3    | 3    | 3    | 3    | 3    | 2    | 2    | 1    |
| OAS | 27   | 30   | 32   | 35   | 39   | 40   | 42   | 46   | 49   | 53   |
| REF | 13   | 13   | 9    | 10   | 8    | 8    | 13   | 11   | 8    | 6    |
| SSA | 12   | 13   | 13   | 13   | 15   | 18   | 21   | 23   | 28   | 32   |
| USA | 0    | 0    | 0    | 0    | 0    | 0    | 0    | 0    | 0    | 0    |

Table 112: FAO — Demand—Bioenergy—Crop residues (Mt DM/yr)

4.3.1 Non fibrous crop residues

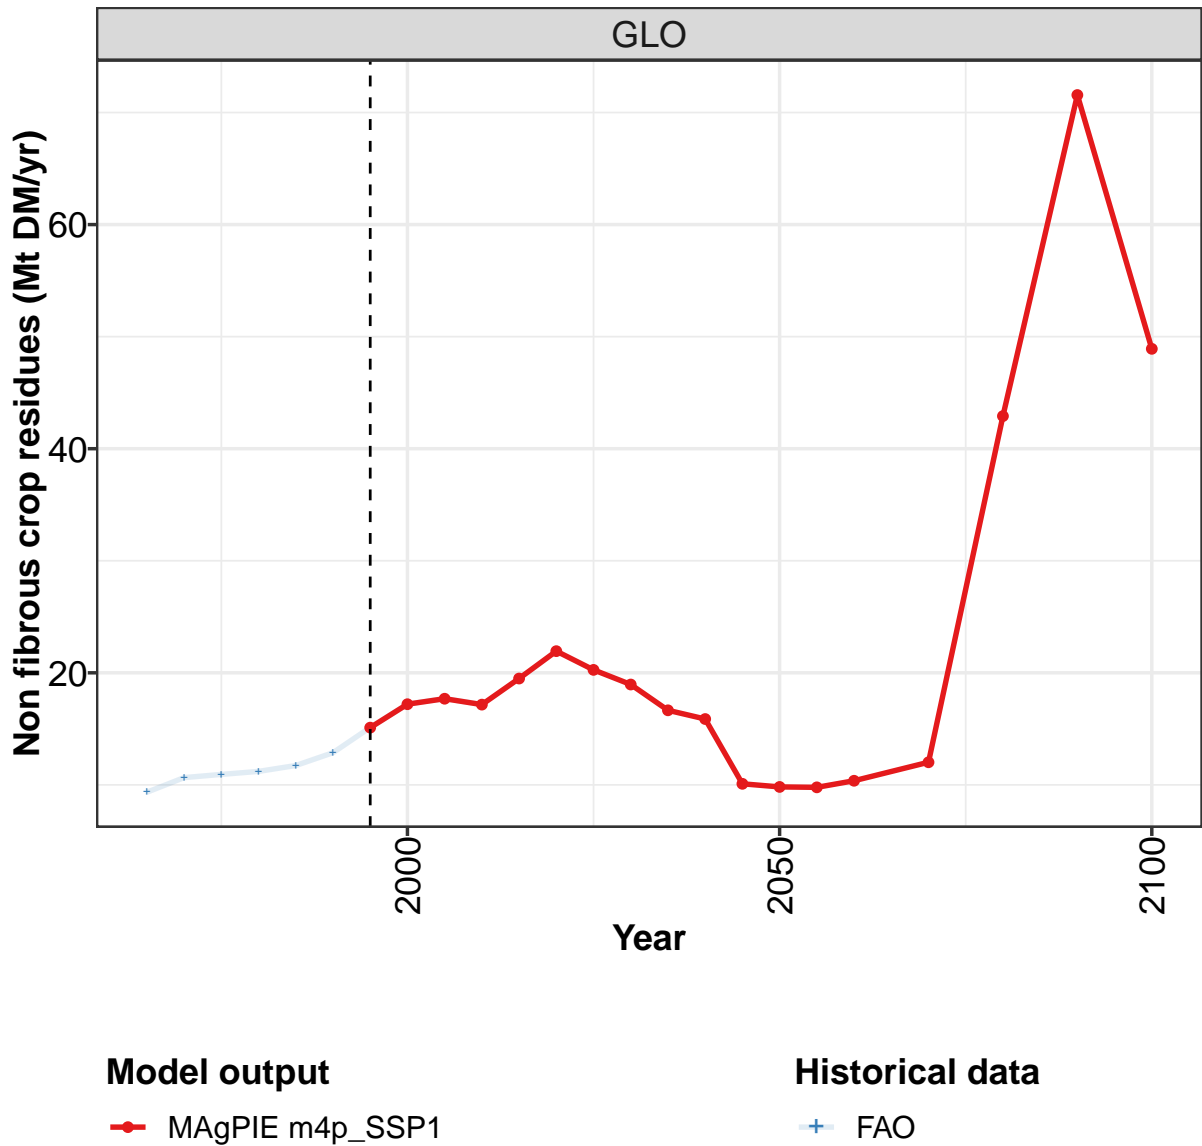

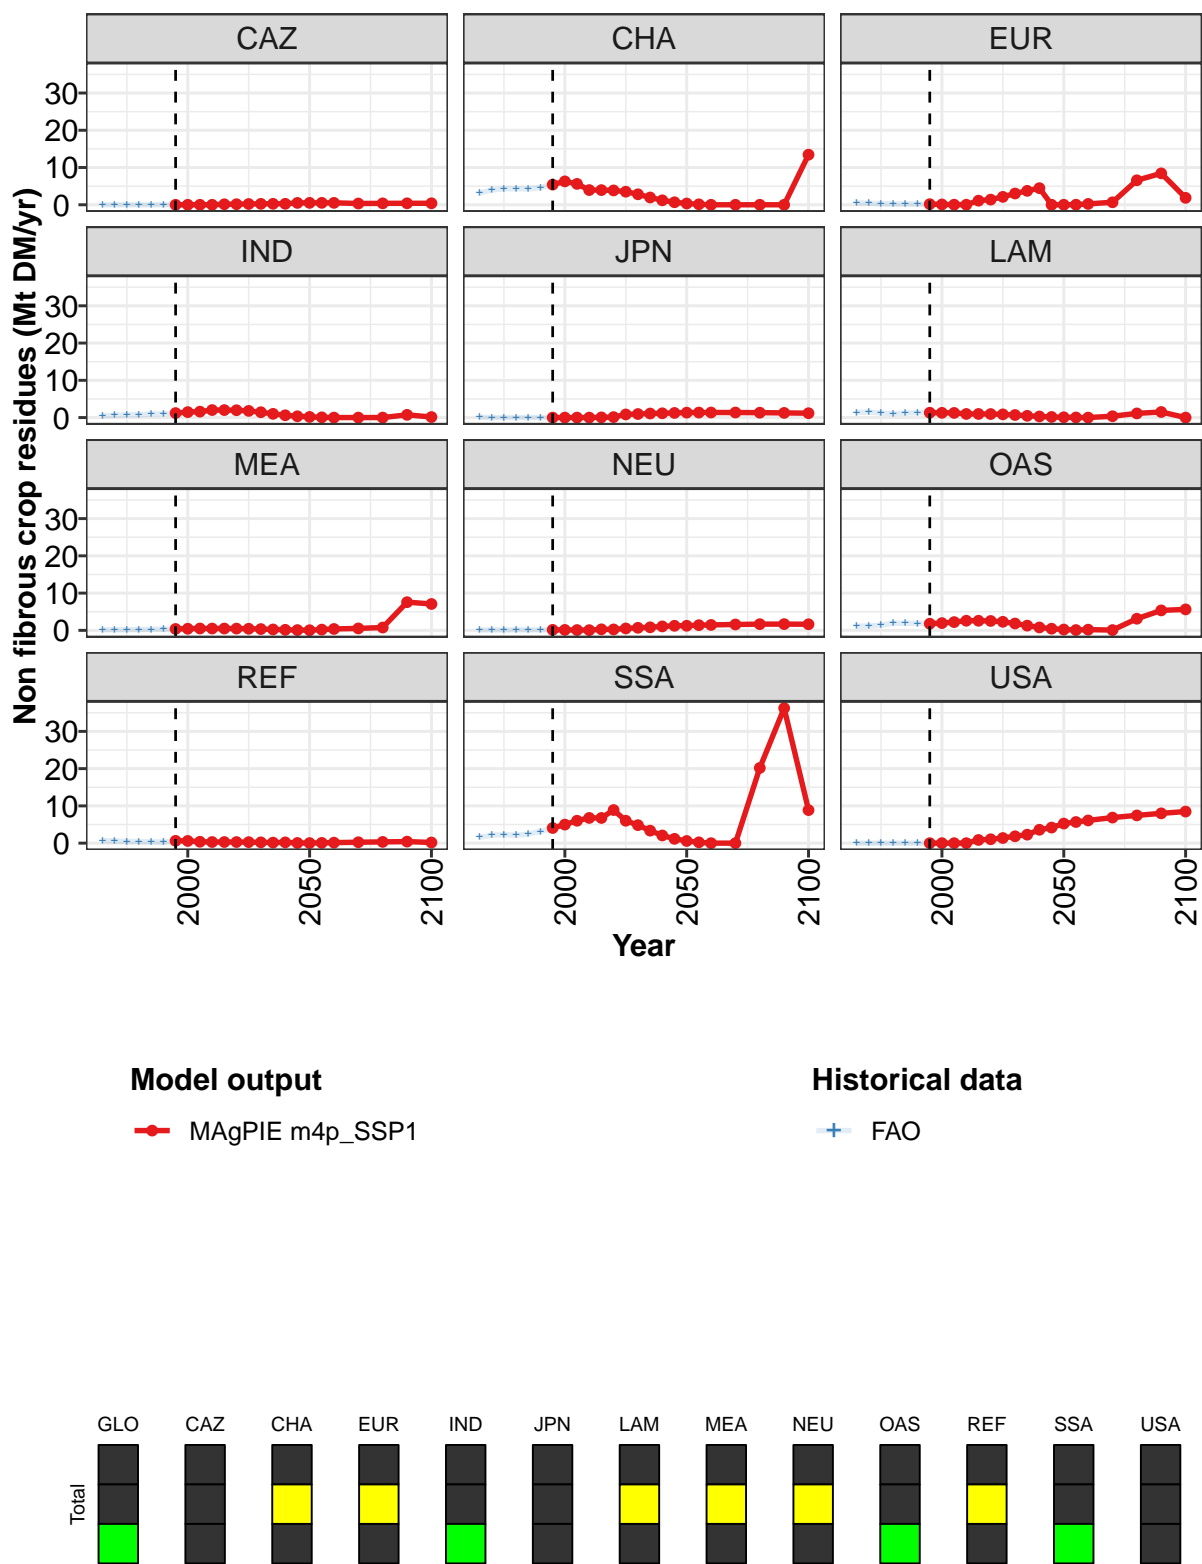

Figure 38: MAgPIE m4p\_SSP1 — Demand—Bioenergy—Crop residues—Non fibrous crop residues (Mt DM/yr)

|     | 1995 | 2000 | 2005 | 2010 | 2015 | 2020 | 2025 | 2030 | 2035 | 2040 | 2045 |
|-----|------|------|------|------|------|------|------|------|------|------|------|
| GLO | 15.1 | 17.2 | 17.7 | 17.2 | 19.5 | 21.9 | 20.3 | 19.0 | 16.7 | 15.9 | 10.1 |
| CAZ | 0.0  | 0.0  | 0.0  | 0.0  | 0.1  | 0.2  | 0.2  | 0.3  | 0.3  | 0.3  | 0.5  |
| CHA | 5.4  | 6.3  | 5.6  | 3.9  | 3.9  | 3.9  | 3.5  | 2.8  | 2.0  | 1.2  | 0.7  |
| EUR | 0.2  | 0.1  | 0.0  | 0.0  | 1.1  | 1.4  | 2.1  | 3.0  | 3.7  | 4.5  | 0.0  |
| IND | 1.2  | 1.5  | 1.6  | 2.0  | 2.0  | 2.0  | 1.8  | 1.4  | 1.0  | 0.6  | 0.3  |
| JPN | 0.0  | 0.0  | 0.0  | 0.0  | 0.1  | 0.1  | 0.8  | 1.0  | 1.1  | 1.2  | 1.2  |
| LAM | 1.3  | 1.3  | 1.3  | 1.0  | 1.0  | 0.9  | 0.9  | 0.7  | 0.5  | 0.3  | 0.2  |
| MEA | 0.4  | 0.4  | 0.5  | 0.5  | 0.5  | 0.5  | 0.4  | 0.4  | 0.2  | 0.2  | 0.1  |
| NEU | 0.1  | 0.1  | 0.1  | 0.1  | 0.3  | 0.3  | 0.5  | 0.7  | 0.8  | 1.1  | 1.2  |
| OAS | 1.8  | 1.9  | 2.2  | 2.6  | 2.6  | 2.5  | 2.3  | 1.8  | 1.3  | 0.8  | 0.4  |
| REF | 0.6  | 0.6  | 0.4  | 0.3  | 0.3  | 0.3  | 0.3  | 0.2  | 0.2  | 0.2  | 0.1  |
| SSA | 4.1  | 5.0  | 6.0  | 6.8  | 6.8  | 8.9  | 6.0  | 4.8  | 3.4  | 2.1  | 1.2  |
| USA | 0.0  | 0.0  | 0.0  | 0.0  | 0.9  | 1.0  | 1.4  | 1.8  | 2.3  | 3.6  | 4.2  |

Table 113: MAgPIE m4p\_SSP1 — Demand—Bioenergy—Crop residues—Non fibrous crop residues (Mt DM/yr)  
[PART 1/2]

|     | 2050 | 2055 | 2060 | 2070 | 2080 | 2090 | 2100 |
|-----|------|------|------|------|------|------|------|
| GLO | 9.8  | 9.8  | 10.4 | 12.0 | 42.9 | 71.6 | 48.9 |
| CAZ | 0.5  | 0.5  | 0.5  | 0.3  | 0.4  | 0.4  | 0.4  |
| CHA | 0.3  | 0.1  | 0.0  | 0.0  | 0.0  | 0.0  | 13.5 |
| EUR | 0.0  | 0.0  | 0.2  | 0.7  | 6.6  | 8.4  | 1.9  |
| IND | 0.2  | 0.1  | 0.0  | 0.0  | 0.0  | 0.7  | 0.1  |
| JPN | 1.3  | 1.3  | 1.4  | 1.4  | 1.3  | 1.3  | 1.2  |
| LAM | 0.1  | 0.0  | 0.0  | 0.4  | 1.1  | 1.5  | 0.0  |
| MEA | 0.0  | 0.2  | 0.4  | 0.5  | 0.8  | 7.6  | 7.1  |
| NEU | 1.2  | 1.4  | 1.5  | 1.6  | 1.7  | 1.7  | 1.6  |
| OAS | 0.2  | 0.1  | 0.2  | 0.1  | 3.1  | 5.4  | 5.6  |
| REF | 0.0  | 0.1  | 0.1  | 0.2  | 0.3  | 0.4  | 0.2  |
| SSA | 0.6  | 0.2  | 0.0  | 0.0  | 20.2 | 36.2 | 8.9  |
| USA | 5.3  | 5.7  | 6.1  | 6.9  | 7.4  | 8.0  | 8.5  |

Table 114: MAgPIE m4p\_SSP1 — Demand—Bioenergy—Crop residues—Non fibrous crop residues (Mt DM/yr)  
[PART 2/2]

|     | 1965 | 1970 | 1975 | 1980 | 1985 | 1990 | 1995 | 2000 | 2005 | 2010 |
|-----|------|------|------|------|------|------|------|------|------|------|
| GLO | 9.3  | 10.6 | 10.9 | 11.2 | 11.7 | 12.9 | 15.1 | 17.2 | 17.7 | 17.2 |
| CAZ | 0.0  | 0.0  | 0.0  | 0.0  | 0.0  | 0.0  | 0.0  | 0.0  | 0.0  | 0.0  |
| CHA | 3.1  | 4.0  | 4.3  | 4.3  | 4.2  | 4.6  | 5.4  | 6.3  | 5.6  | 3.9  |
| EUR | 0.6  | 0.4  | 0.3  | 0.2  | 0.2  | 0.2  | 0.2  | 0.1  | 0.0  | 0.0  |
| IND | 0.5  | 0.6  | 0.7  | 0.8  | 0.9  | 1.0  | 1.2  | 1.5  | 1.6  | 2.0  |
| JPN | 0.1  | 0.0  | 0.0  | 0.0  | 0.0  | 0.0  | 0.0  | 0.0  | 0.0  | 0.0  |
| LAM | 1.4  | 1.5  | 1.2  | 1.1  | 1.2  | 1.3  | 1.3  | 1.3  | 1.3  | 1.0  |
| MEA | 0.2  | 0.2  | 0.2  | 0.2  | 0.3  | 0.3  | 0.4  | 0.4  | 0.5  | 0.5  |
| NEU | 0.1  | 0.1  | 0.1  | 0.1  | 0.1  | 0.1  | 0.1  | 0.1  | 0.1  | 0.1  |
| OAS | 1.1  | 1.2  | 1.4  | 1.9  | 1.9  | 1.9  | 1.8  | 2.0  | 2.2  | 2.6  |
| REF | 0.7  | 0.6  | 0.5  | 0.4  | 0.4  | 0.3  | 0.6  | 0.6  | 0.4  | 0.3  |
| SSA | 1.6  | 2.1  | 2.3  | 2.1  | 2.4  | 3.1  | 4.1  | 5.0  | 6.0  | 6.8  |
| USA | 0.0  | 0.0  | 0.0  | 0.0  | 0.0  | 0.0  | 0.0  | 0.0  | 0.0  | 0.0  |

Table 115: FAO — Demand—Bioenergy—Crop residues—Non fibrous crop residues (Mt DM/yr)

4.3.2 Other fibrous crop residues

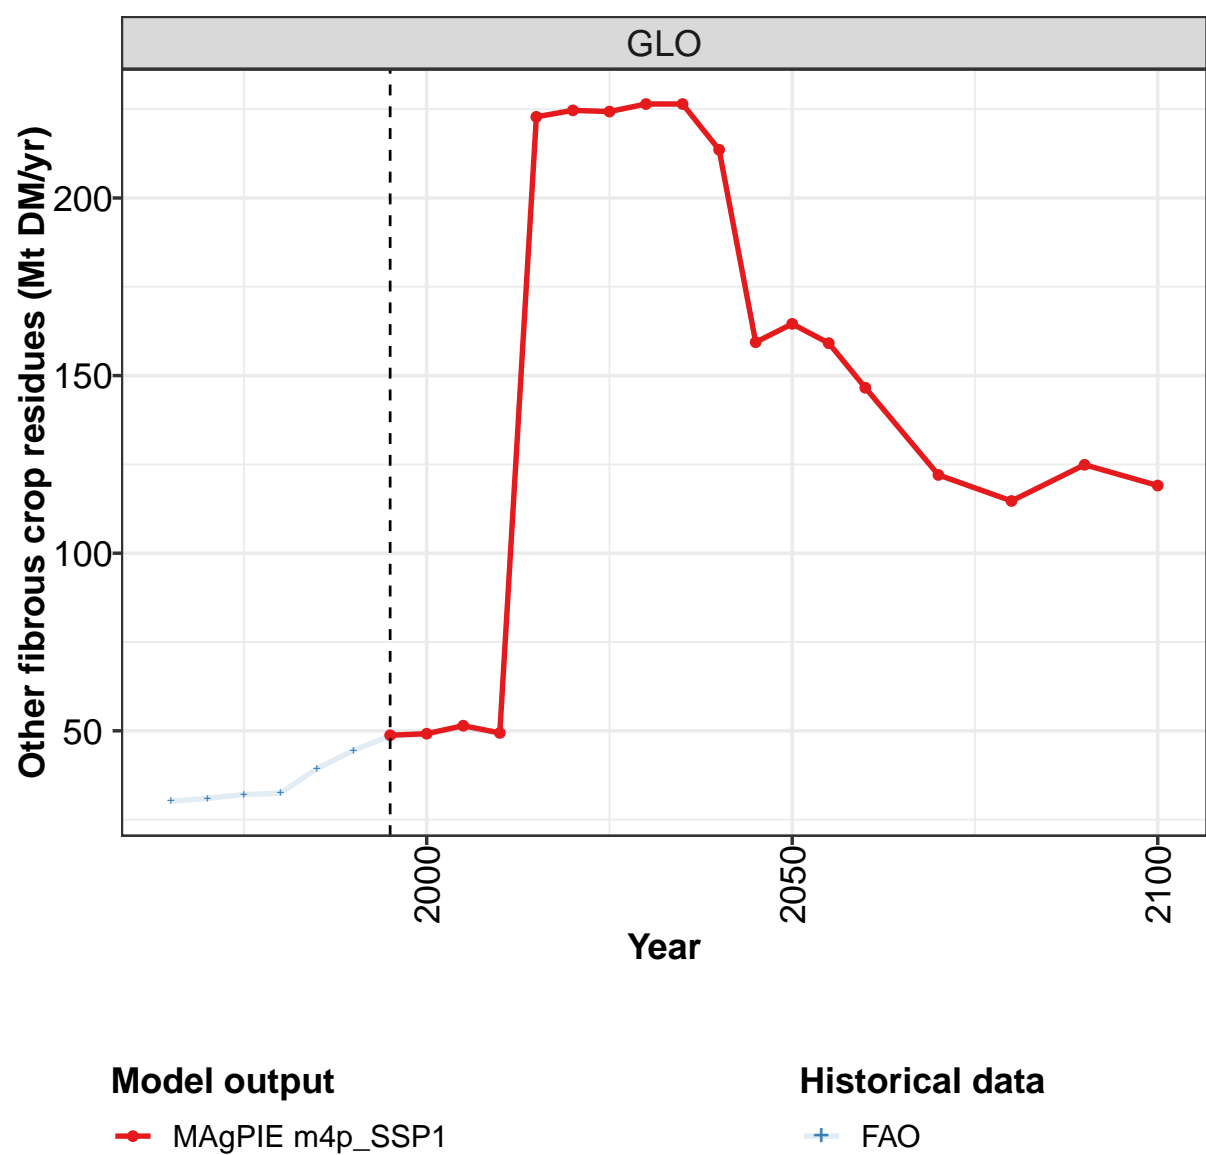

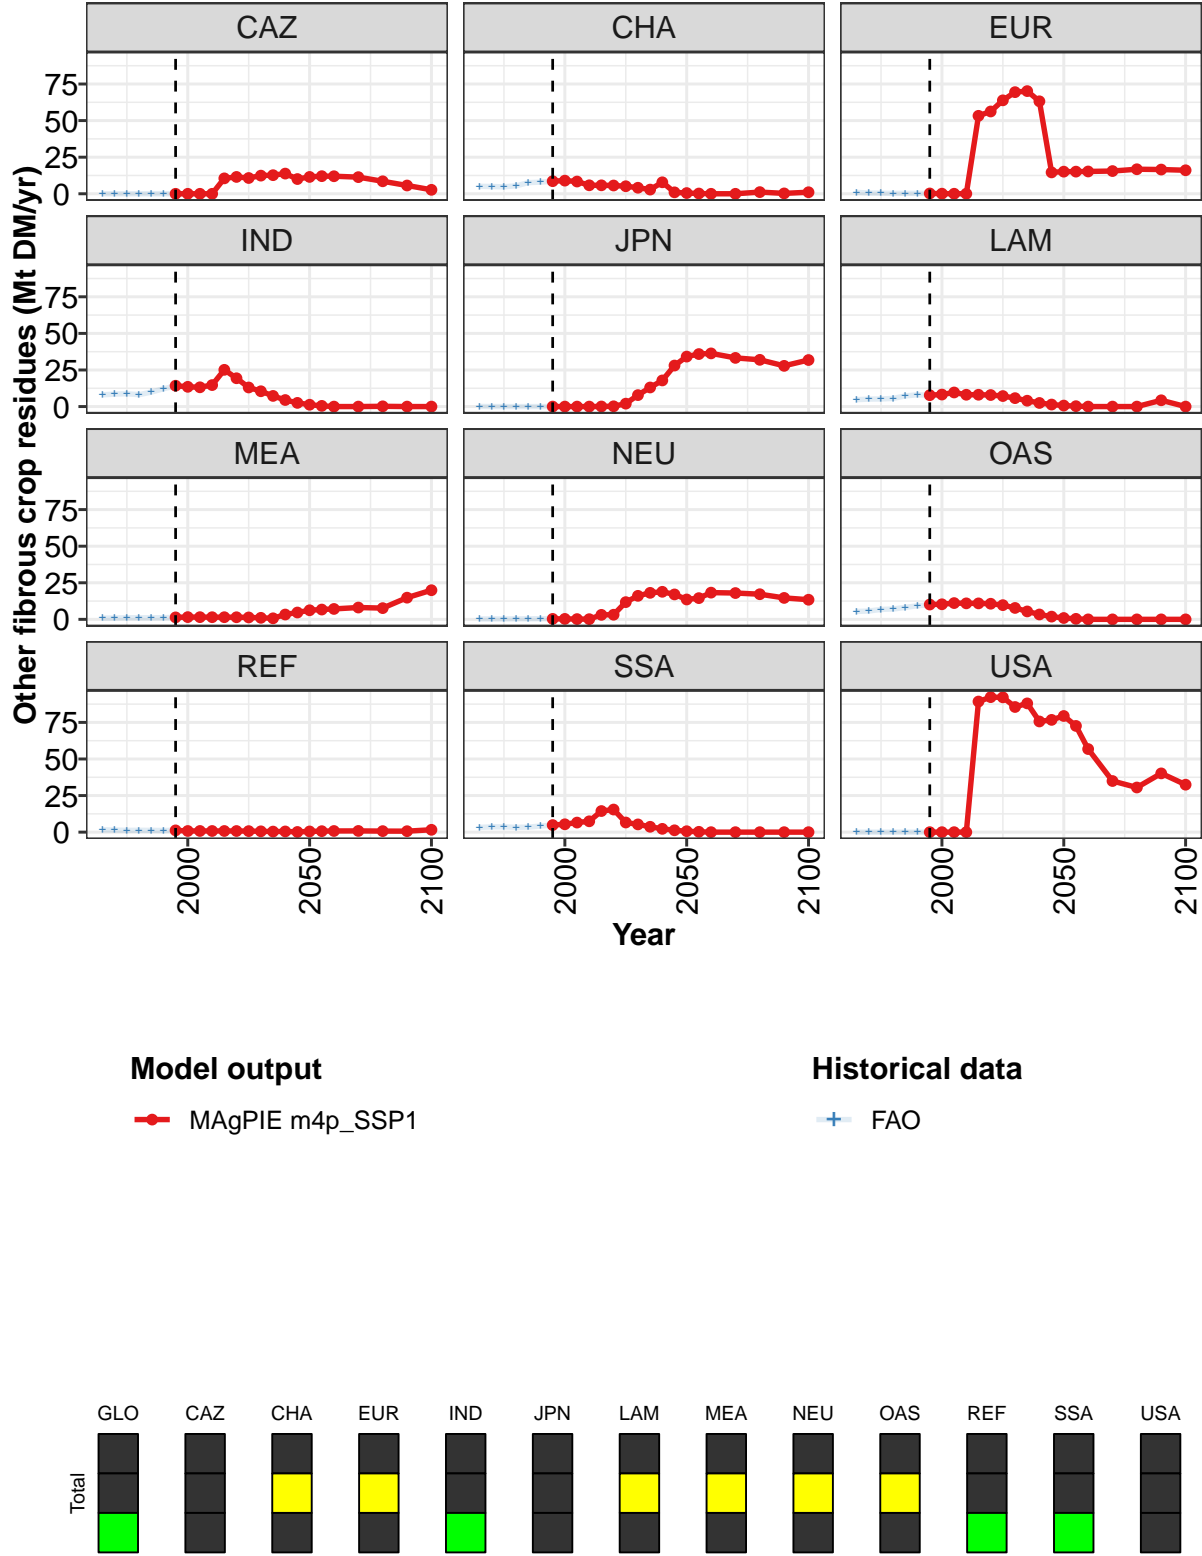

Figure 39: MAgPIE m4p\_SSP1 — Demand—Bioenergy—Crop residues—Other fibrous crop residues (Mt DM/yr)

|     | 1995 | 2000 | 2005 | 2010 | 2015 | 2020 | 2025 | 2030 | 2035 | 2040 | 2045 |
|-----|------|------|------|------|------|------|------|------|------|------|------|
| GLO | 49   | 49   | 51   | 49   | 223  | 225  | 224  | 226  | 226  | 214  | 159  |
| CAZ | 0    | 0    | 0    | 0    | 11   | 12   | 11   | 12   | 13   | 14   | 10   |
| CHA | 9    | 9    | 8    | 6    | 6    | 6    | 5    | 4    | 3    | 8    | 1    |
| EUR | 0    | 0    | 0    | 0    | 53   | 56   | 64   | 69   | 70   | 63   | 15   |
| IND | 14   | 14   | 13   | 15   | 25   | 19   | 13   | 10   | 7    | 4    | 3    |
| JPN | 0    | 0    | 0    | 0    | 0    | 0    | 2    | 8    | 13   | 18   | 28   |
| LAM | 8    | 8    | 10   | 8    | 8    | 8    | 7    | 6    | 4    | 2    | 1    |
| MEA | 1    | 2    | 2    | 1    | 1    | 1    | 1    | 1    | 1    | 3    | 5    |
| NEU | 0    | 0    | 0    | 0    | 3    | 3    | 12   | 16   | 18   | 19   | 17   |
| OAS | 10   | 10   | 11   | 11   | 11   | 11   | 10   | 8    | 5    | 3    | 2    |
| REF | 1    | 1    | 1    | 1    | 1    | 1    | 1    | 1    | 0    | 0    | 0    |
| SSA | 5    | 5    | 7    | 7    | 14   | 15   | 7    | 5    | 4    | 2    | 1    |
| USA | 0    | 0    | 0    | 0    | 89   | 92   | 92   | 86   | 88   | 76   | 77   |

Table 116: MAgPIE m4p\_SSP1 — Demand—Bioenergy—Crop residues—Other fibrous crop residues (Mt DM/yr) [PART 1/2]

|     | 2050 | 2055 | 2060 | 2070 | 2080 | 2090 | 2100 |
|-----|------|------|------|------|------|------|------|
| GLO | 165  | 159  | 147  | 122  | 115  | 125  | 119  |
| CAZ | 12   | 12   | 12   | 11   | 9    | 6    | 3    |
| CHA | 0    | 0    | 0    | 0    | 1    | 0    | 1    |
| EUR | 15   | 15   | 15   | 16   | 17   | 17   | 16   |
| IND | 1    | 0    | 0    | 0    | 0    | 0    | 0    |
| JPN | 34   | 36   | 36   | 33   | 32   | 28   | 32   |
| LAM | 1    | 0    | 0    | 0    | 0    | 4    | 0    |
| MEA | 6    | 7    | 7    | 8    | 8    | 15   | 20   |
| NEU | 14   | 15   | 18   | 18   | 17   | 15   | 13   |
| OAS | 1    | 0    | 0    | 0    | 0    | 0    | 0    |
| REF | 0    | 1    | 1    | 1    | 1    | 1    | 2    |
| SSA | 1    | 0    | 0    | 0    | 0    | 0    | 0    |
| USA | 79   | 73   | 57   | 35   | 31   | 40   | 32   |

Table 117: MAgPIE m4p\_SSP1 — Demand—Bioenergy—Crop residues—Other fibrous crop residues (Mt DM/yr) [PART 2/2]

|     | 1965 | 1970 | 1975 | 1980 | 1985 | 1990 | 1995 | 2000 | 2005 | 2010 |
|-----|------|------|------|------|------|------|------|------|------|------|
| GLO | 30.2 | 31.0 | 32.1 | 32.4 | 39.4 | 44.5 | 48.5 | 48.9 | 51.1 | 49.1 |
| CAZ | 0.0  | 0.0  | 0.0  | 0.0  | 0.0  | 0.0  | 0.0  | 0.0  | 0.0  | 0.0  |
| CHA | 5.1  | 4.9  | 4.7  | 5.4  | 7.6  | 7.9  | 8.6  | 9.0  | 8.4  | 5.8  |
| EUR | 0.9  | 0.5  | 0.4  | 0.3  | 0.3  | 0.3  | 0.2  | 0.1  | 0.0  | 0.1  |
| IND | 8.0  | 8.5  | 8.8  | 8.1  | 9.9  | 12.2 | 14.1 | 13.4 | 13.1 | 14.6 |
| JPN | 0.1  | 0.0  | 0.0  | 0.0  | 0.0  | 0.0  | 0.0  | 0.0  | 0.0  | 0.0  |
| LAM | 4.7  | 5.1  | 5.2  | 5.6  | 7.3  | 8.0  | 7.7  | 8.1  | 9.5  | 8.0  |
| MEA | 0.8  | 0.9  | 1.1  | 1.1  | 1.1  | 1.1  | 1.4  | 1.6  | 1.5  | 1.5  |
| NEU | 0.3  | 0.3  | 0.3  | 0.4  | 0.4  | 0.4  | 0.3  | 0.4  | 0.2  | 0.1  |
| OAS | 5.4  | 5.7  | 6.8  | 7.1  | 8.2  | 9.3  | 10.1 | 10.2 | 11.1 | 10.9 |
| REF | 1.6  | 1.4  | 1.2  | 1.3  | 1.2  | 1.1  | 1.3  | 0.9  | 0.9  | 0.8  |
| SSA | 3.2  | 3.6  | 3.6  | 3.3  | 3.5  | 4.1  | 4.8  | 5.4  | 6.5  | 7.4  |
| USA | 0.0  | 0.0  | 0.0  | 0.0  | 0.0  | 0.0  | 0.0  | 0.0  | 0.0  | 0.0  |

Table 118: FAO — Demand—Bioenergy—Crop residues—Other fibrous crop residues (Mt DM/yr)

4.3.3 Straw

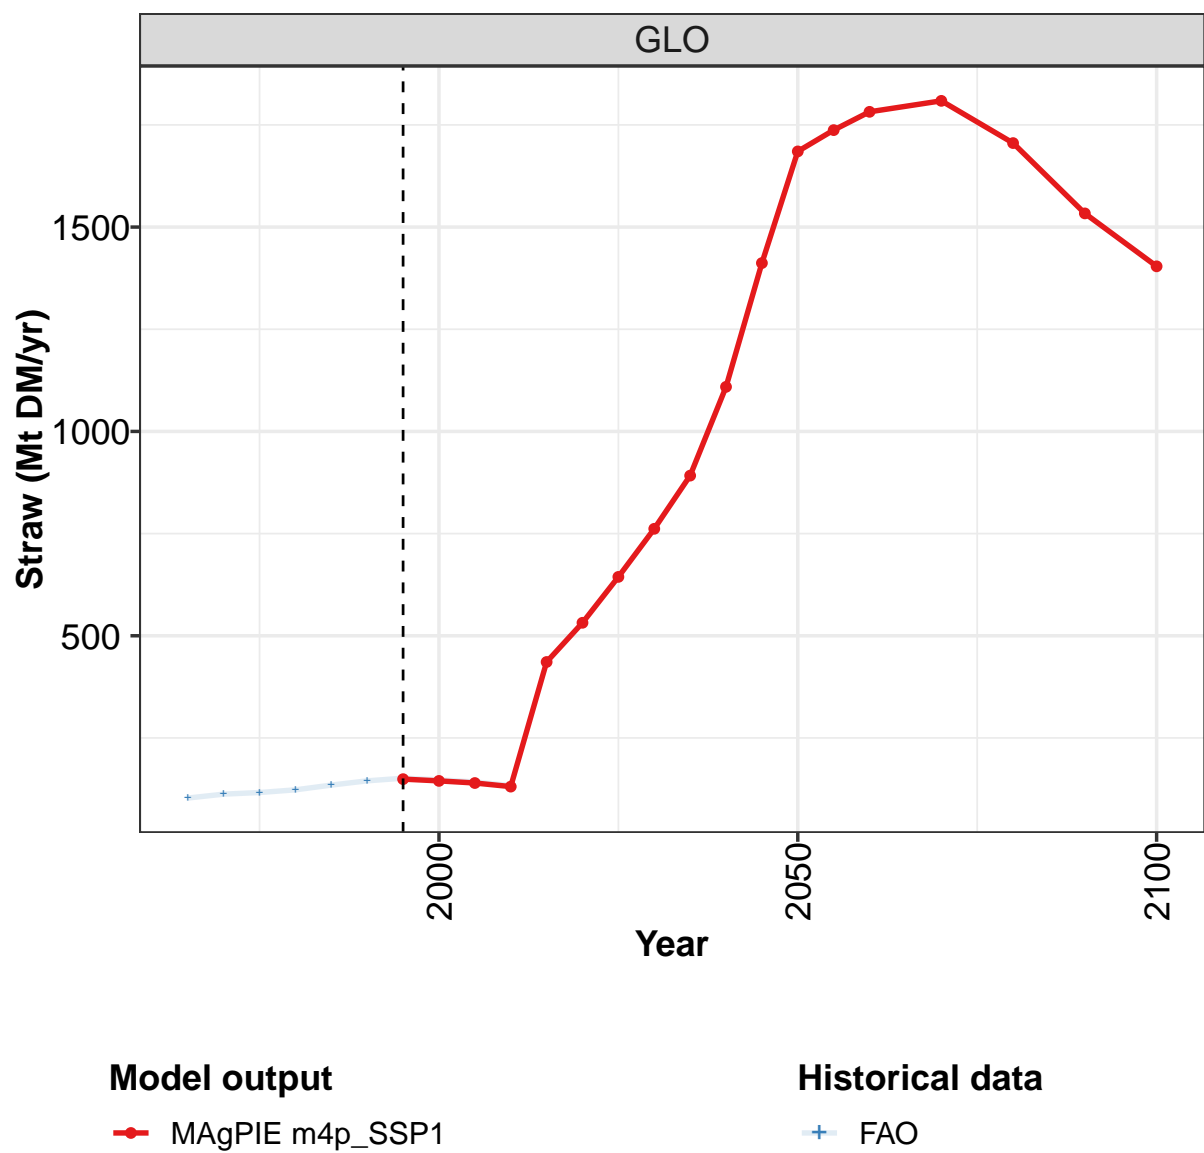



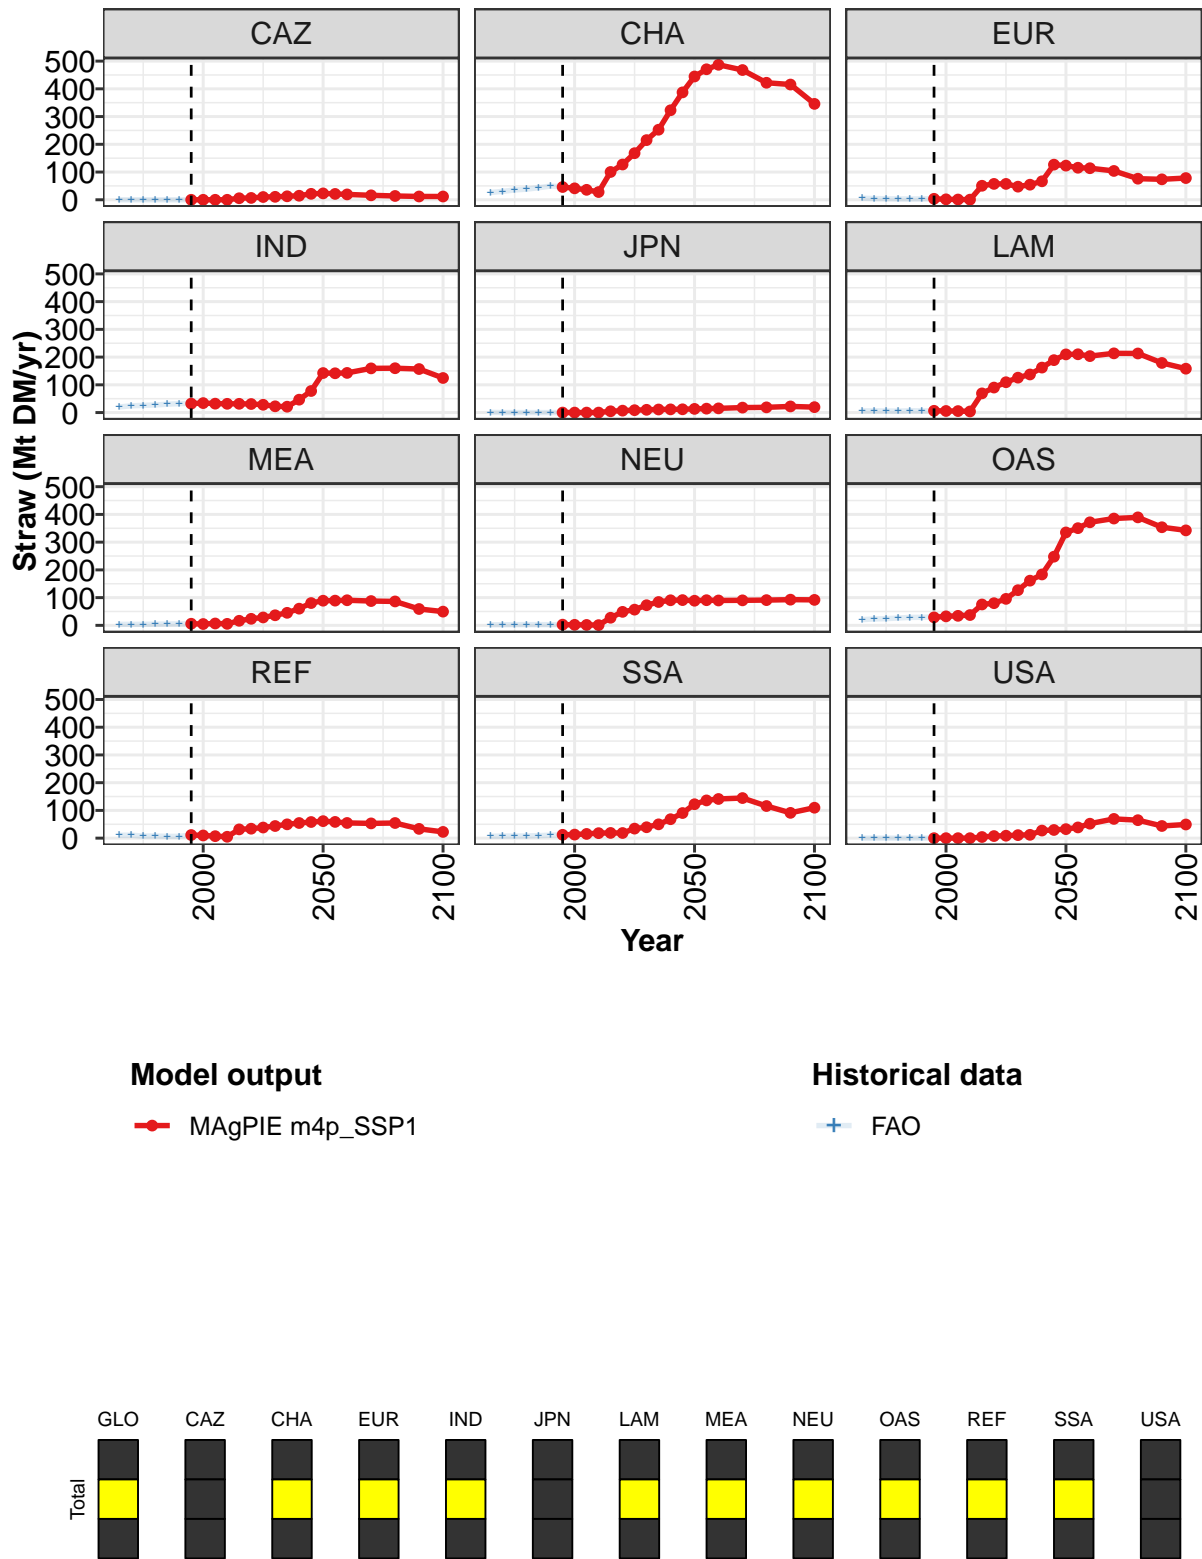

Figure 40: MAgPIE m4p\_SSP1 — Demand—Bioenergy—Crop residues—Straw (Mt DM/yr)

|     | 1995 | 2000 | 2005 | 2010 | 2015 | 2020 | 2025 | 2030 | 2035 | 2040 | 2045 |
|-----|------|------|------|------|------|------|------|------|------|------|------|
| GLO | 149  | 145  | 140  | 131  | 436  | 532  | 644  | 762  | 892  | 1109 | 1412 |
| CAZ | 0    | 0    | 0    | 0    | 6    | 7    | 10   | 11   | 13   | 15   | 21   |
| CHA | 46   | 41   | 36   | 28   | 100  | 127  | 168  | 215  | 253  | 323  | 387  |
| EUR | 4    | 2    | 1    | 1    | 51   | 57   | 57   | 47   | 54   | 67   | 127  |
| IND | 32   | 34   | 32   | 32   | 32   | 31   | 28   | 23   | 21   | 47   | 78   |
| JPN | 0    | 0    | 0    | 0    | 5    | 7    | 9    | 10   | 11   | 12   | 12   |
| LAM | 6    | 6    | 5    | 4    | 69   | 90   | 109  | 126  | 137  | 162  | 189  |
| MEA | 6    | 5    | 7    | 5    | 17   | 24   | 29   | 36   | 45   | 60   | 80   |
| NEU | 3    | 2    | 2    | 1    | 27   | 49   | 57   | 73   | 84   | 90   | 91   |
| OAS | 29   | 33   | 34   | 37   | 75   | 80   | 96   | 127  | 161  | 184  | 248  |
| REF | 11   | 10   | 7    | 5    | 32   | 34   | 38   | 44   | 50   | 55   | 58   |
| SSA | 12   | 13   | 15   | 18   | 19   | 19   | 34   | 39   | 50   | 68   | 91   |
| USA | 0    | 0    | 0    | 0    | 4    | 8    | 9    | 11   | 12   | 27   | 30   |

Table 119: MAgPIE m4p\_SSP1 — Demand—Bioenergy—Crop residues—Straw (Mt DM/yr) [PART 1/2]

|     | 2050 | 2055 | 2060 | 2070 | 2080 | 2090 | 2100 |
|-----|------|------|------|------|------|------|------|
| GLO | 1685 | 1737 | 1782 | 1809 | 1706 | 1534 | 1404 |
| CAZ | 23   | 21   | 19   | 16   | 14   | 12   | 12   |
| CHA | 445  | 471  | 487  | 468  | 422  | 415  | 346  |
| EUR | 123  | 116  | 114  | 104  | 76   | 74   | 78   |
| IND | 143  | 142  | 143  | 159  | 160  | 157  | 125  |
| JPN | 13   | 14   | 15   | 18   | 19   | 22   | 20   |
| LAM | 210  | 210  | 204  | 214  | 213  | 179  | 158  |
| MEA | 89   | 89   | 91   | 88   | 86   | 59   | 50   |
| NEU | 89   | 91   | 90   | 90   | 91   | 93   | 92   |
| OAS | 335  | 351  | 372  | 385  | 389  | 354  | 343  |
| REF | 61   | 59   | 55   | 53   | 55   | 33   | 23   |
| SSA | 122  | 136  | 141  | 145  | 116  | 91   | 110  |
| USA | 33   | 39   | 52   | 69   | 65   | 44   | 49   |

Table 120: MAgPIE m4p\_SSP1 — Demand—Bioenergy—Crop residues—Straw (Mt DM/yr) [PART 2/2]

|     | 1965 | 1970 | 1975 | 1980 | 1985 | 1990 | 1995 | 2000 | 2005 | 2010 |
|-----|------|------|------|------|------|------|------|------|------|------|
| GLO | 103  | 112  | 116  | 123  | 135  | 145  | 151  | 148  | 142  | 133  |
| CAZ | 0    | 0    | 0    | 0    | 0    | 0    | 0    | 0    | 0    | 0    |
| CHA | 26   | 30   | 35   | 38   | 43   | 49   | 47   | 42   | 36   | 28   |
| EUR | 6    | 4    | 4    | 3    | 3    | 3    | 3    | 2    | 1    | 1    |
| IND | 20   | 24   | 26   | 27   | 30   | 32   | 33   | 35   | 33   | 32   |
| JPN | 1    | 0    | 0    | 0    | 0    | 0    | 0    | 0    | 0    | 0    |
| LAM | 6    | 6    | 6    | 5    | 7    | 6    | 6    | 6    | 5    | 4    |
| MEA | 4    | 4    | 4    | 4    | 5    | 5    | 6    | 5    | 7    | 5    |
| NEU | 2    | 2    | 3    | 3    | 3    | 2    | 3    | 2    | 2    | 1    |
| OAS | 21   | 23   | 24   | 26   | 29   | 29   | 30   | 34   | 36   | 39   |
| REF | 10   | 11   | 7    | 8    | 6    | 6    | 11   | 9    | 7    | 5    |
| SSA | 7    | 8    | 8    | 8    | 9    | 11   | 12   | 13   | 15   | 18   |
| USA | 0    | 0    | 0    | 0    | 0    | 0    | 0    | 0    | 0    | 0    |

Table 121: FAO — Demand—Bioenergy—Crop residues—Straw (Mt DM/yr)

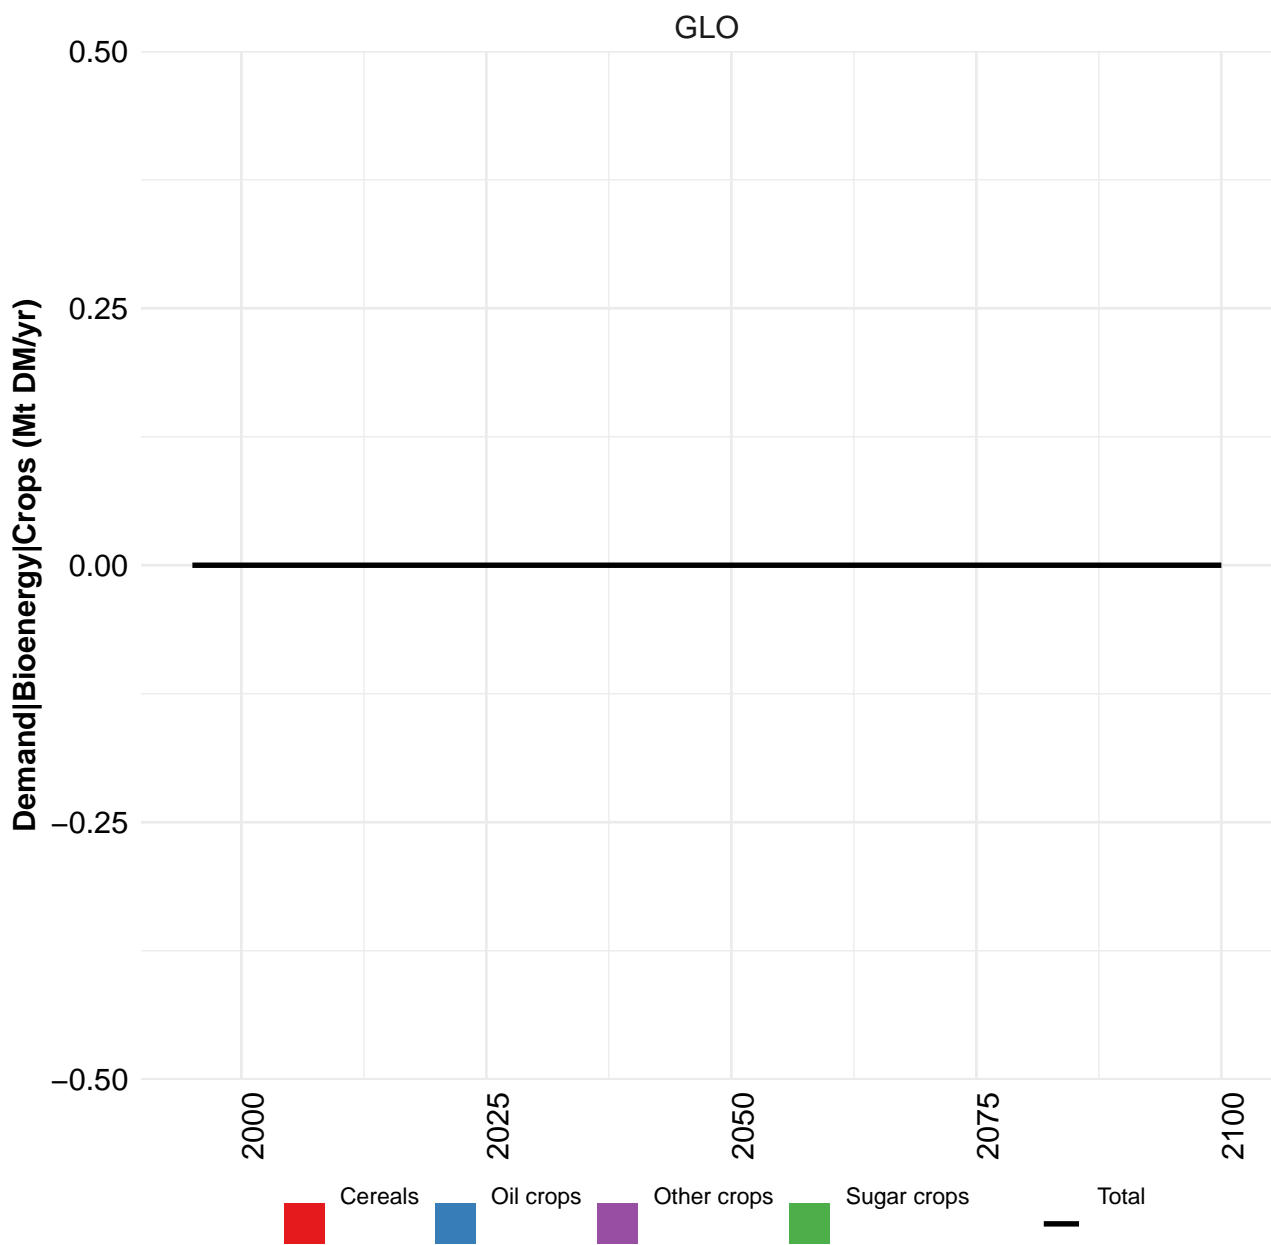

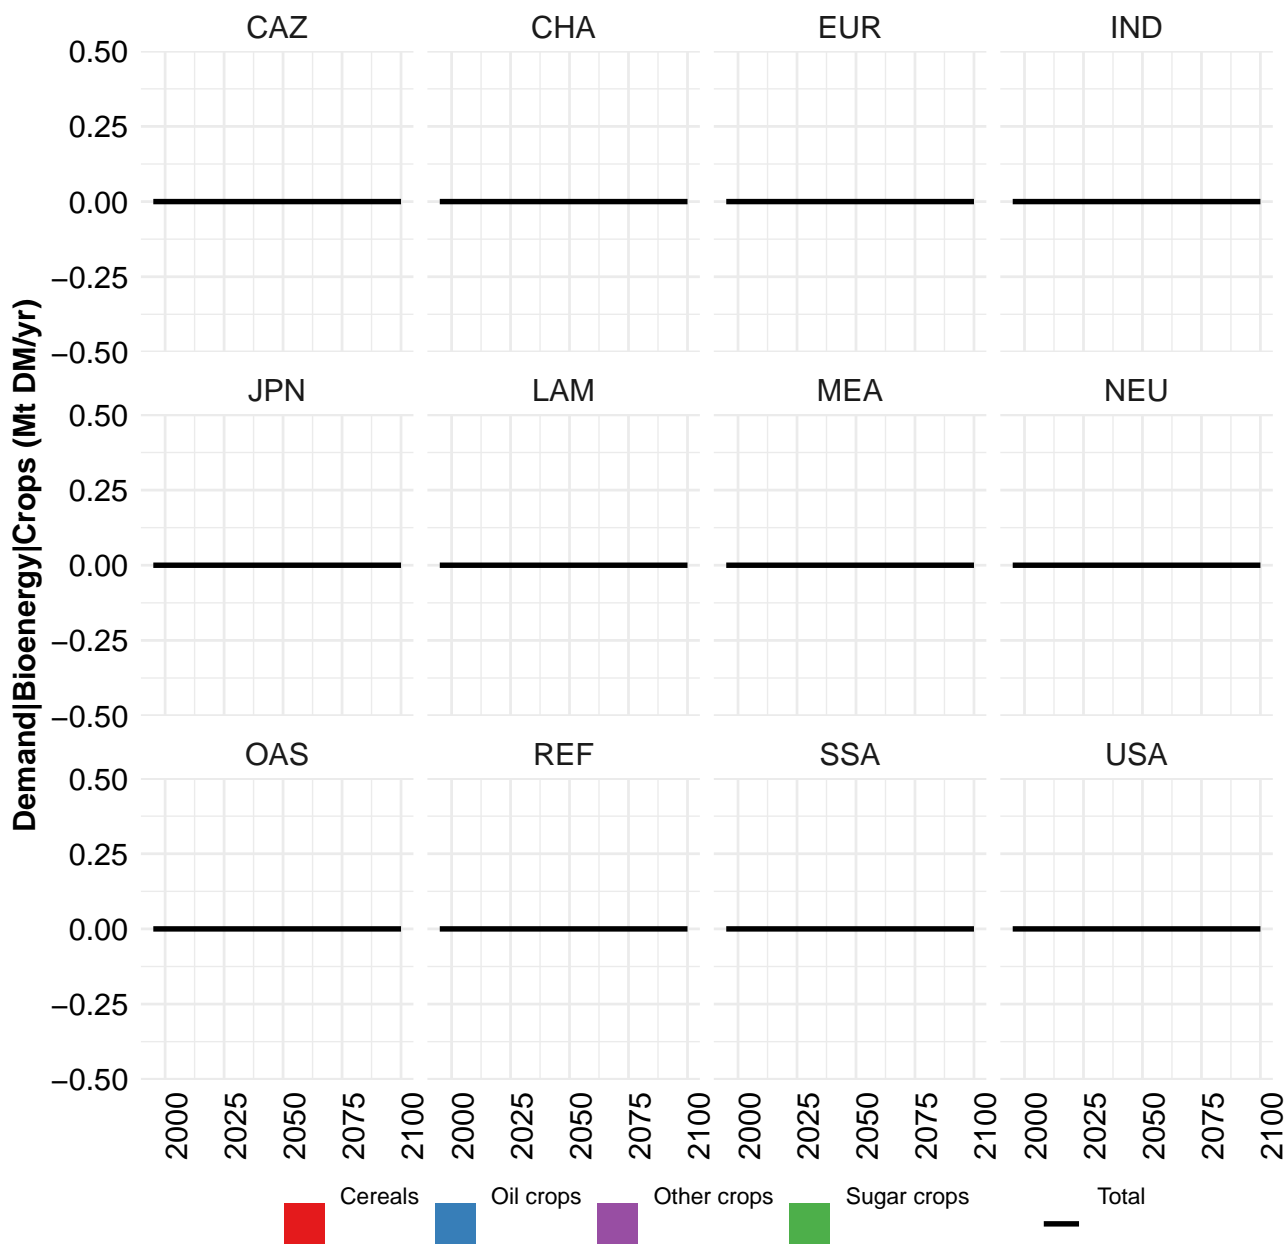

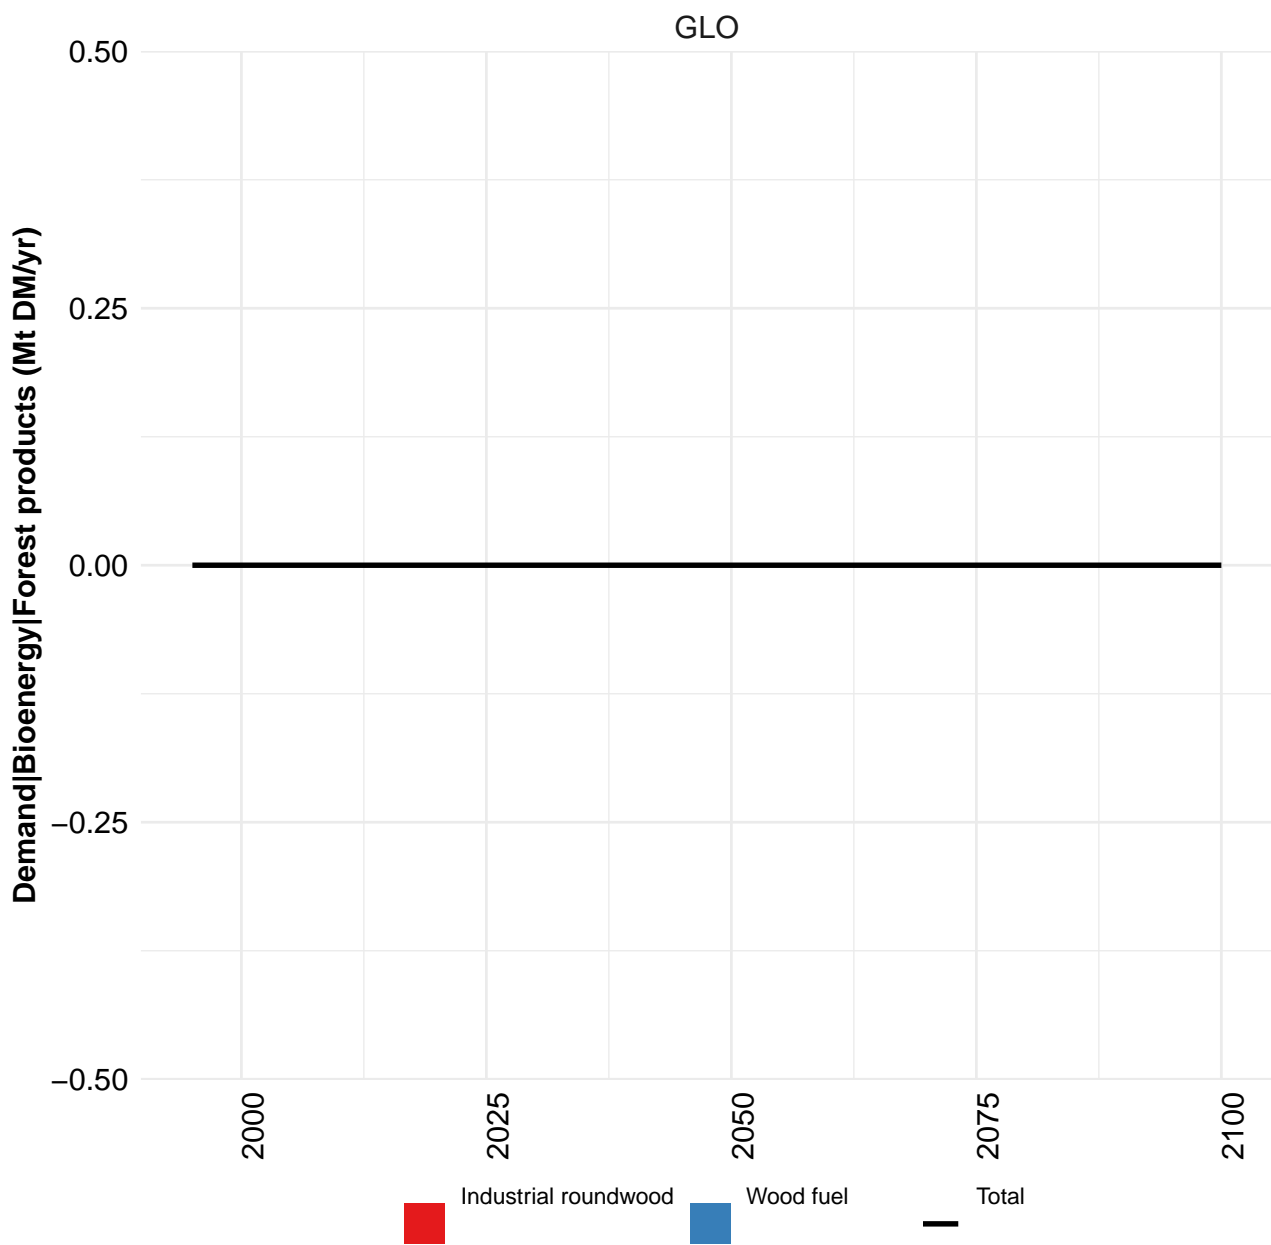

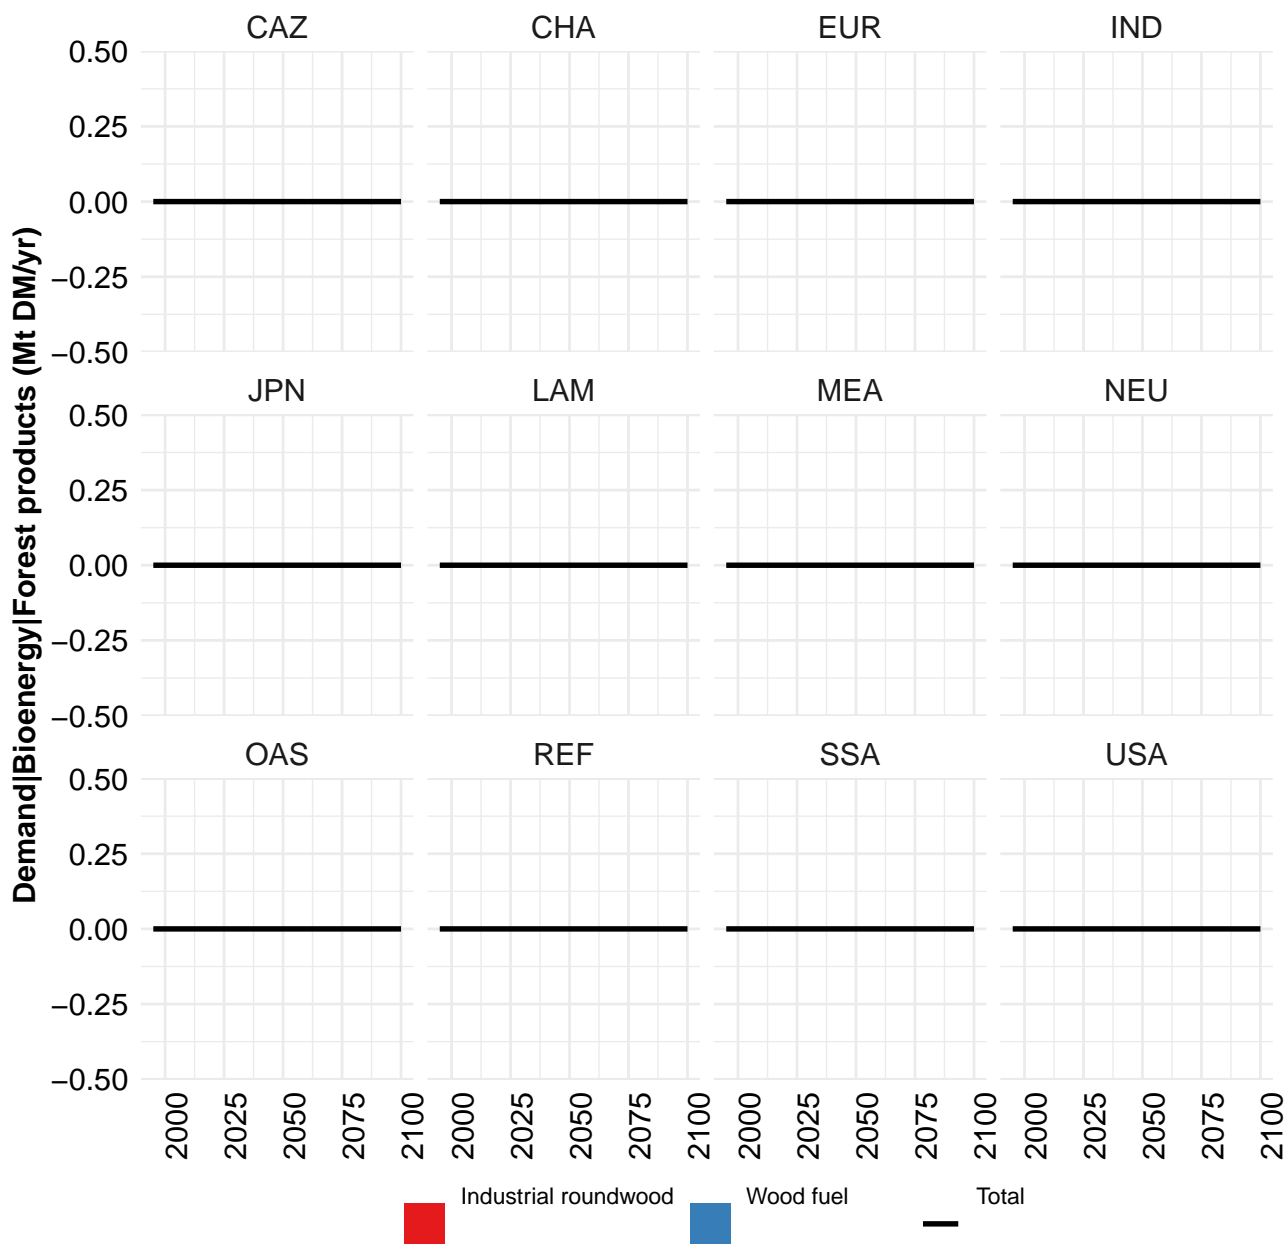

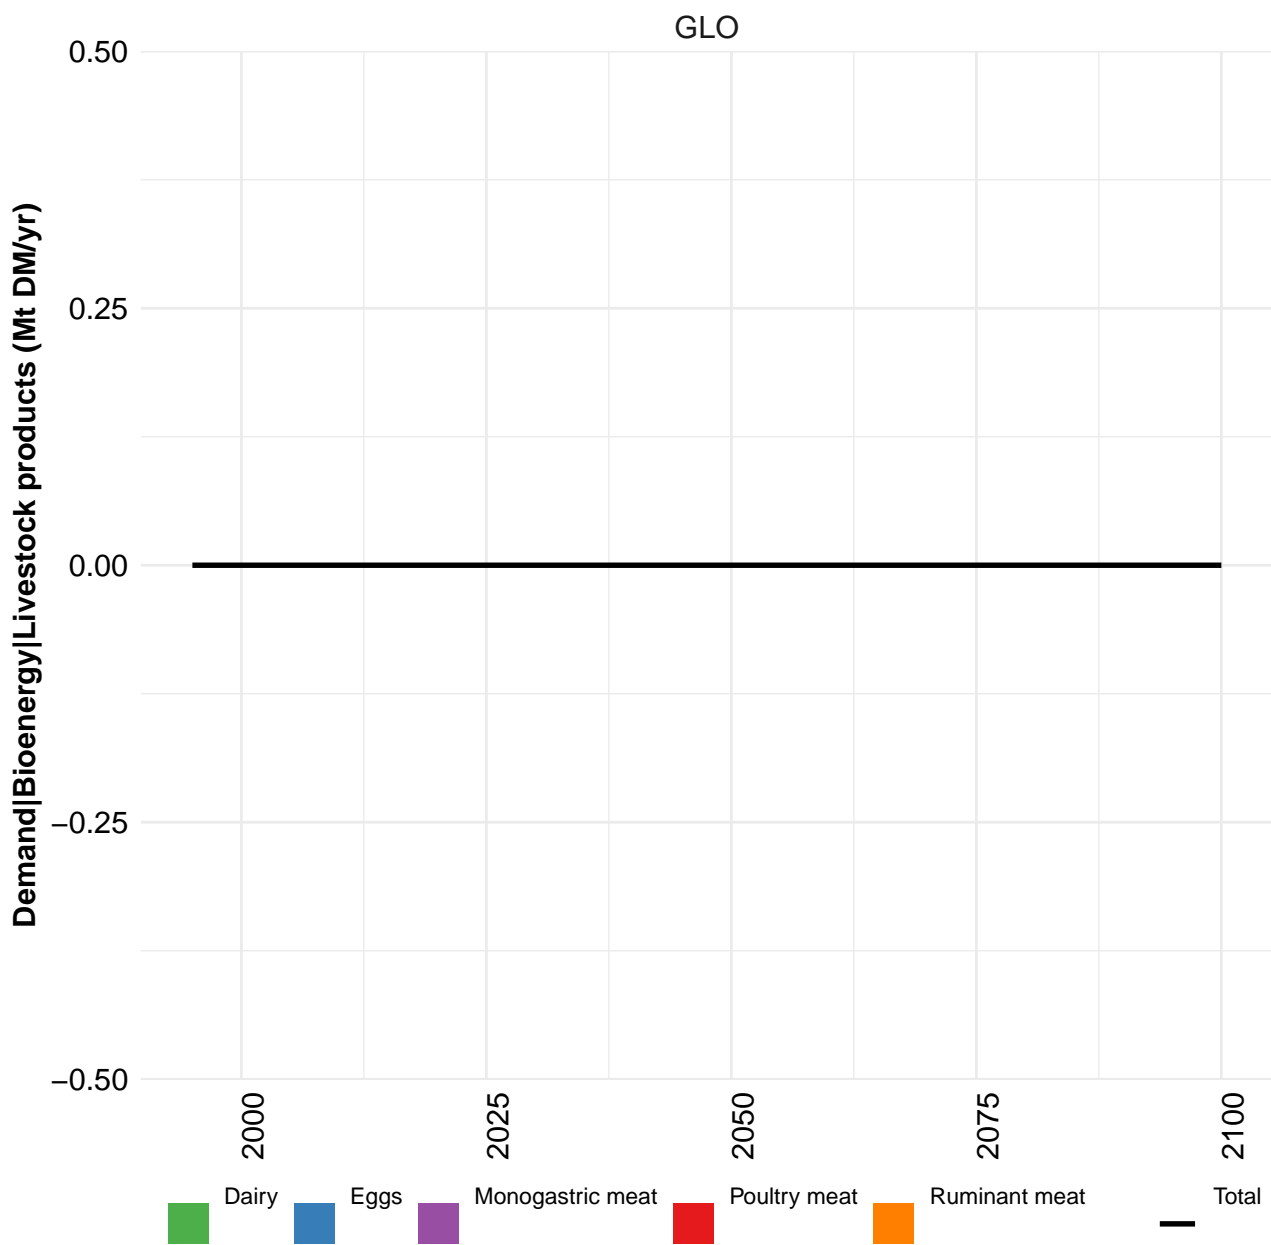

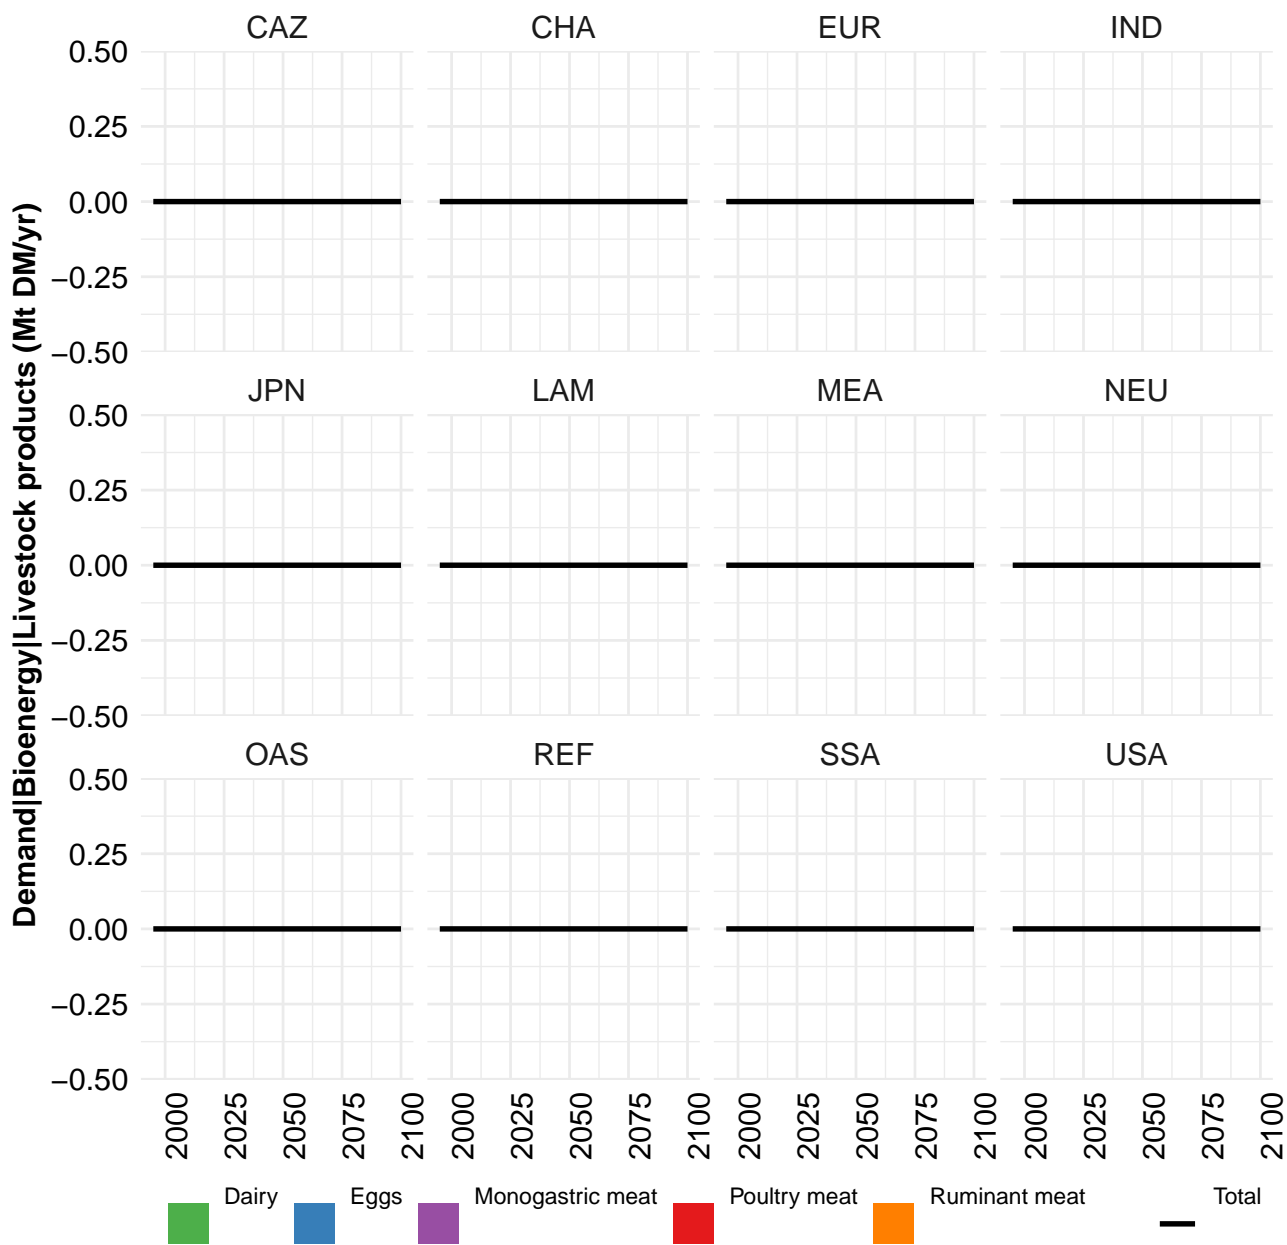



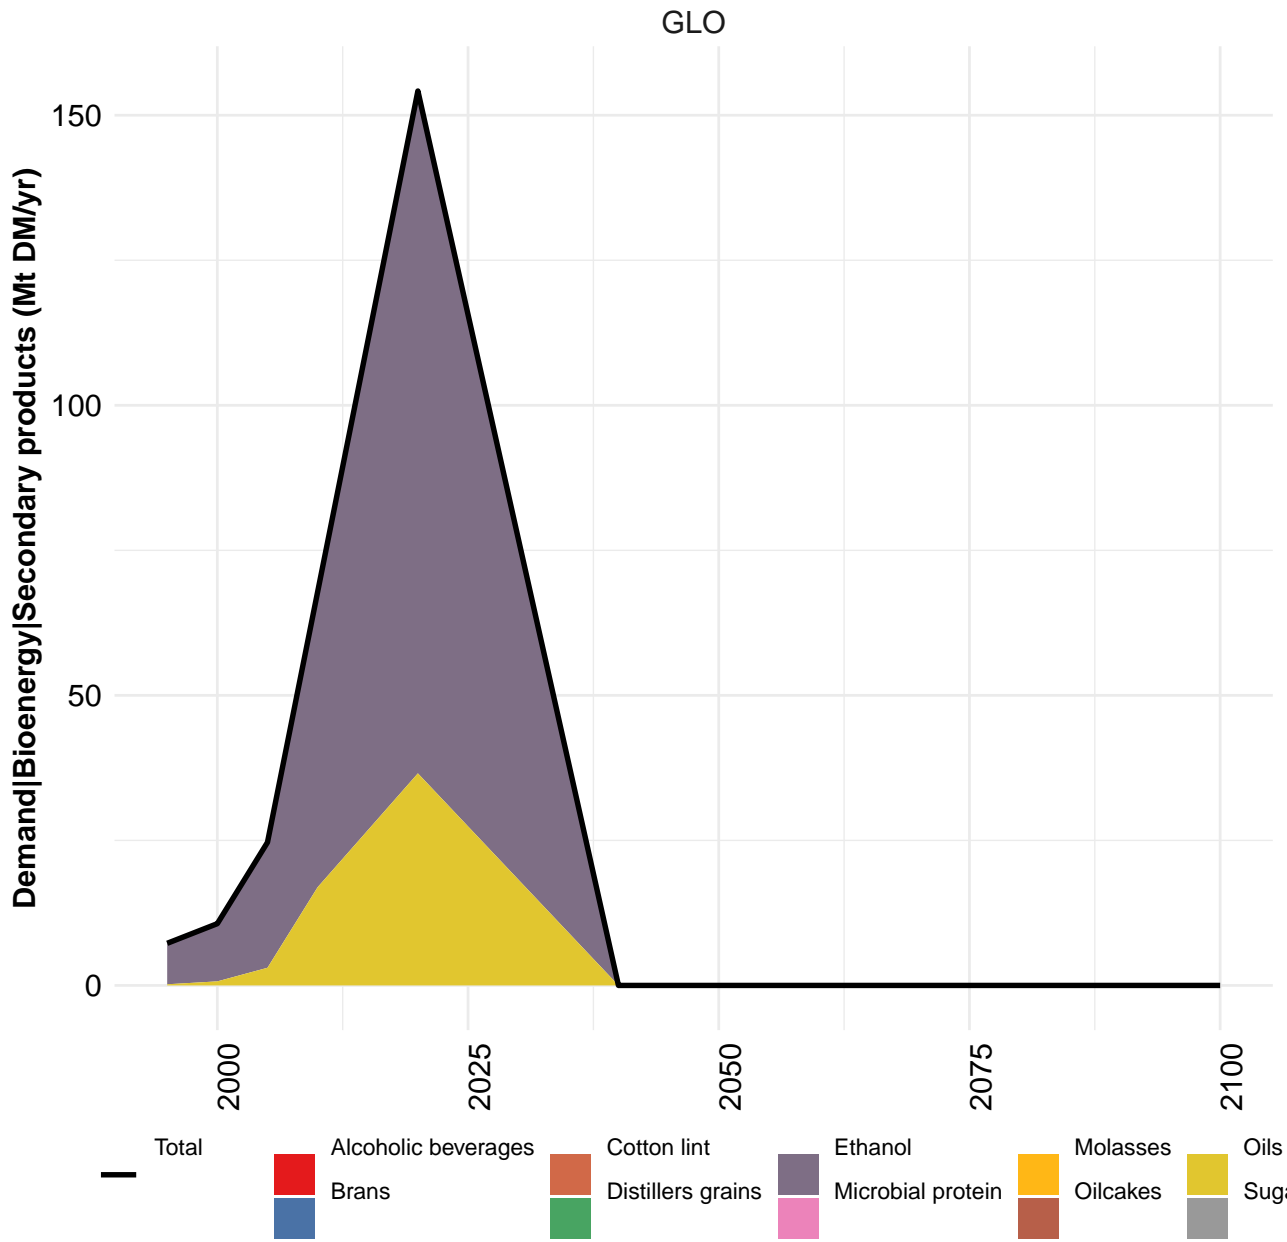

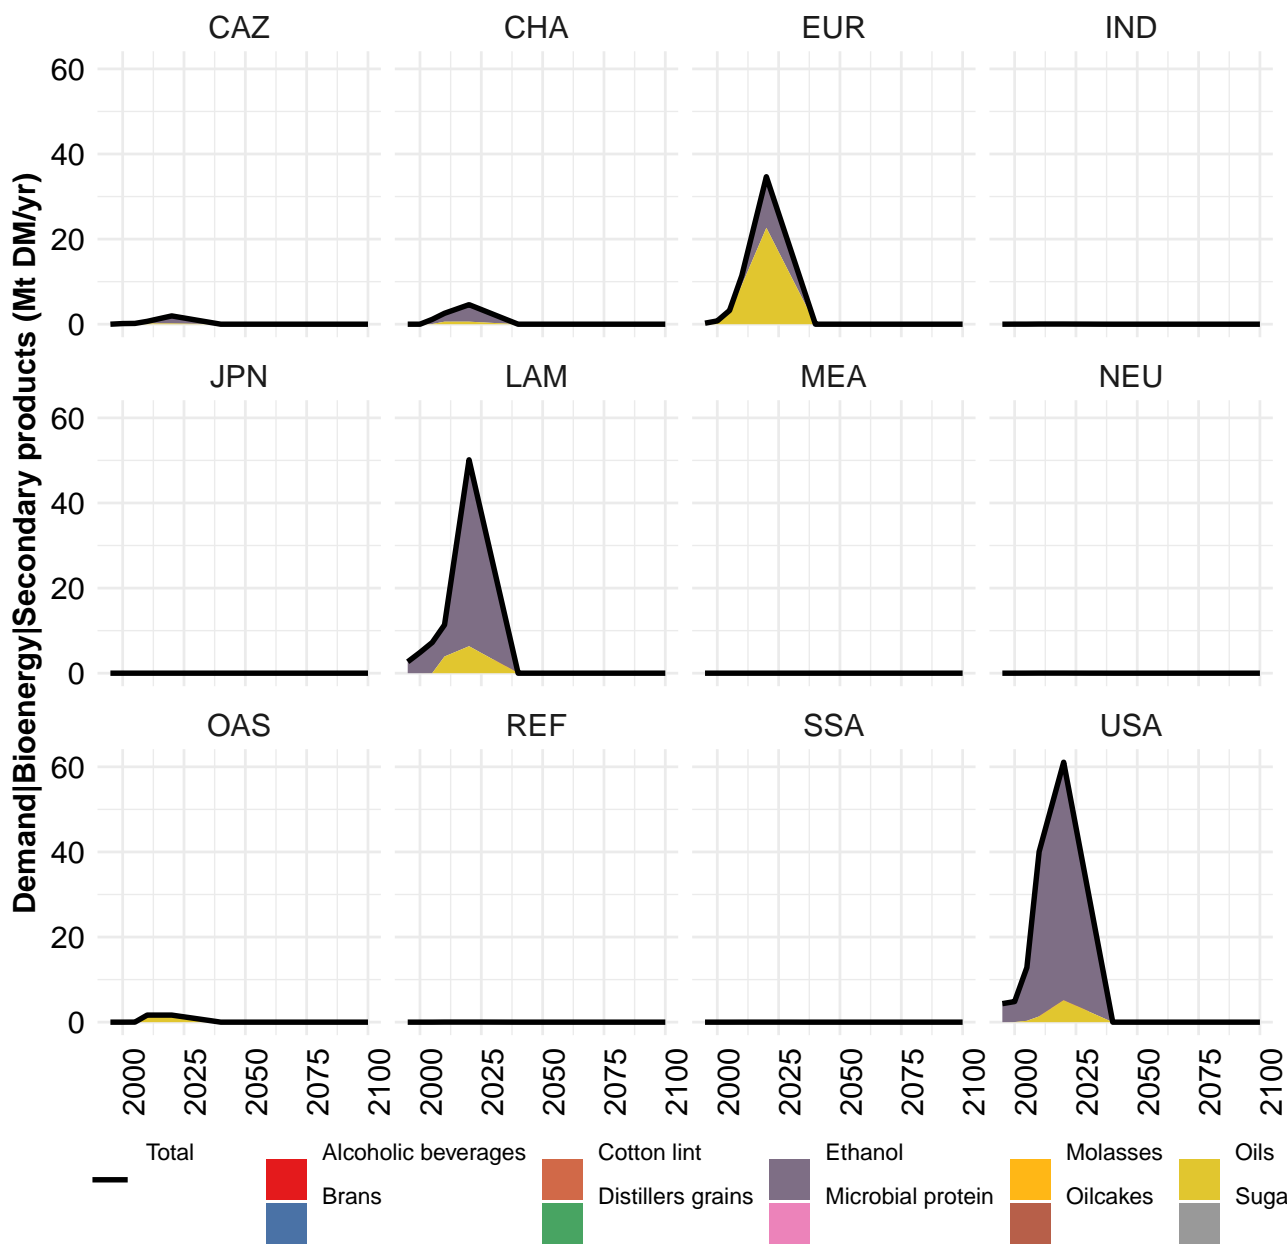

4.4 Secondary products

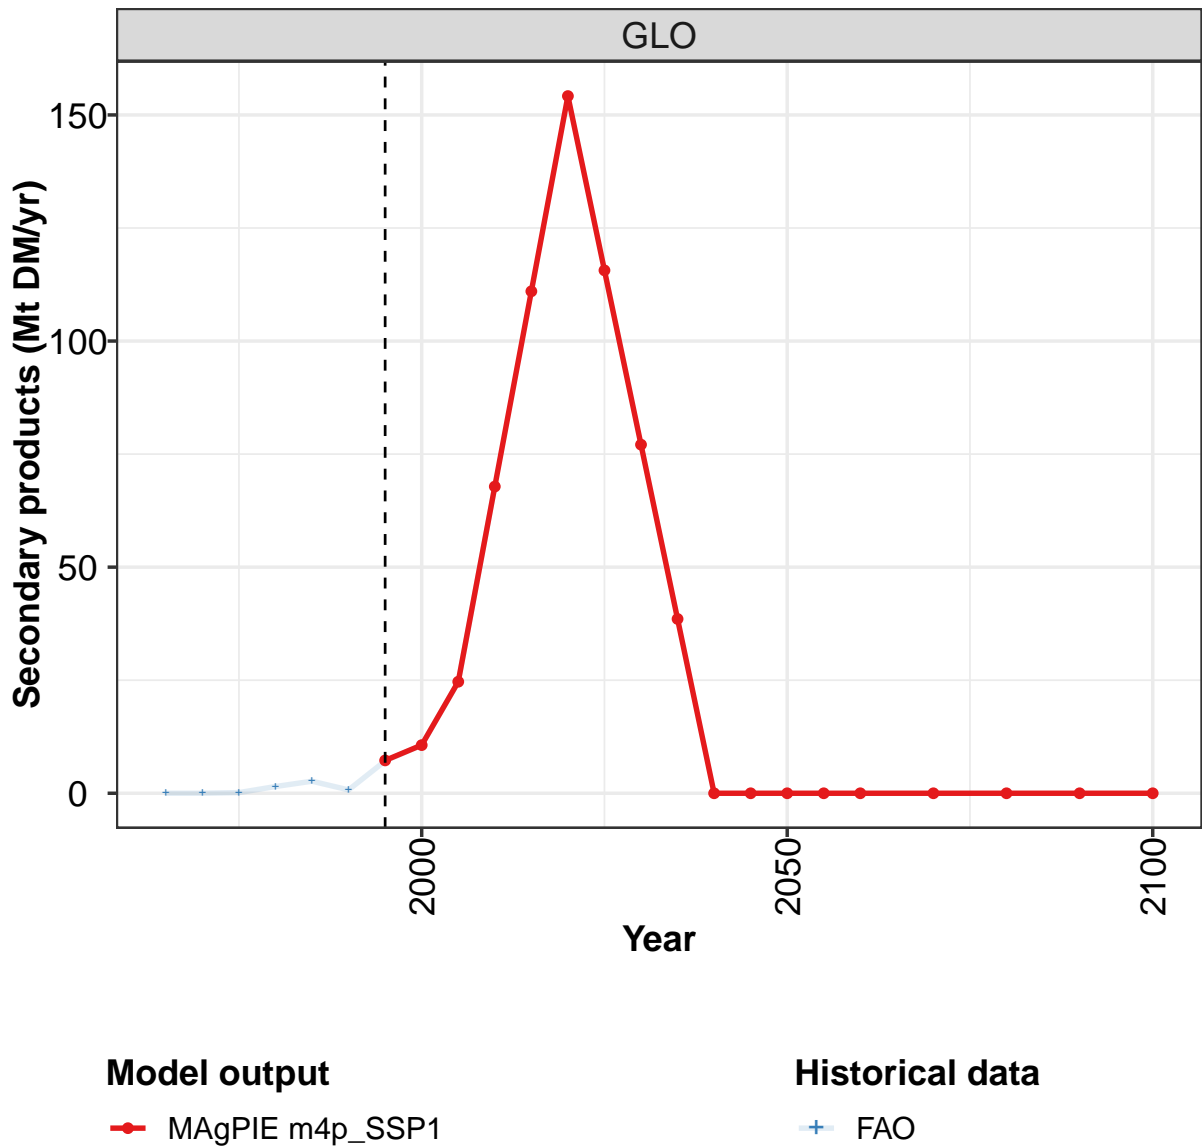

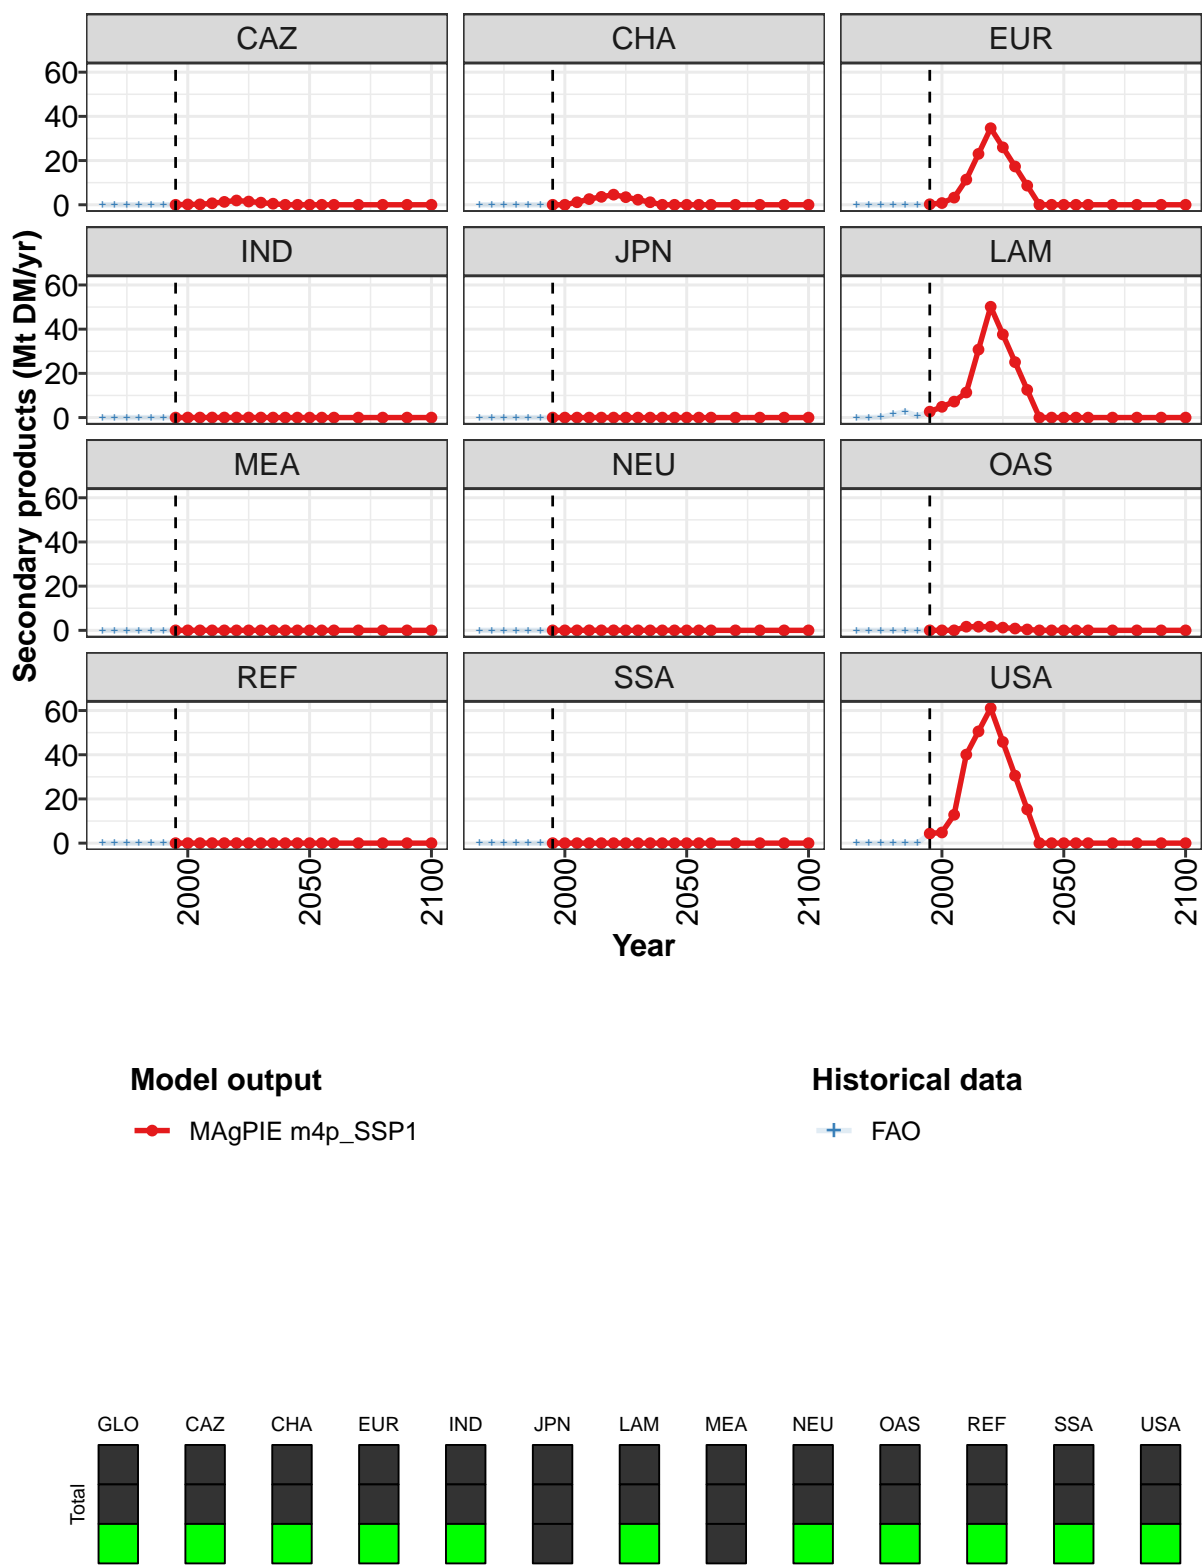

Figure 41: MAgPIE m4p\_SSP1 — Demand—Bioenergy—Secondary products (Mt DM/yr)

|     | 1995 | 2000 | 2005 | 2010 | 2015 | 2020 | 2025 | 2030 | 2035 | 2040 | 2045 |
|-----|------|------|------|------|------|------|------|------|------|------|------|
| GLO | 7    | 11   | 25   | 68   | 111  | 154  | 116  | 77   | 39   | 0    | 0    |
| CAZ | 0    | 0    | 0    | 1    | 1    | 2    | 1    | 1    | 0    | 0    | 0    |
| CHA | 0    | 0    | 1    | 3    | 4    | 5    | 3    | 2    | 1    | 0    | 0    |
| EUR | 0    | 1    | 3    | 11   | 23   | 35   | 26   | 17   | 9    | 0    | 0    |
| IND | 0    | 0    | 0    | 0    | 0    | 0    | 0    | 0    | 0    | 0    | 0    |
| JPN | 0    | 0    | 0    | 0    | 0    | 0    | 0    | 0    | 0    | 0    | 0    |
| LAM | 3    | 5    | 7    | 11   | 31   | 50   | 38   | 25   | 13   | 0    | 0    |
| MEA | 0    | 0    | 0    | 0    | 0    | 0    | 0    | 0    | 0    | 0    | 0    |
| NEU | 0    | 0    | 0    | 0    | 0    | 0    | 0    | 0    | 0    | 0    | 0    |
| OAS | 0    | 0    | 0    | 2    | 2    | 2    | 1    | 1    | 0    | 0    | 0    |
| REF | 0    | 0    | 0    | 0    | 0    | 0    | 0    | 0    | 0    | 0    | 0    |
| SSA | 0    | 0    | 0    | 0    | 0    | 0    | 0    | 0    | 0    | 0    | 0    |
| USA | 4    | 5    | 13   | 40   | 51   | 61   | 46   | 31   | 15   | 0    | 0    |

Table 122: MAgPIE m4p-SSP1 — Demand—Bioenergy—Secondary products (Mt DM/yr) [PART 1/2]

|     | 2050 | 2055 | 2060 | 2070 | 2080 | 2090 | 2100 |
|-----|------|------|------|------|------|------|------|
| GLO | 0    | 0    | 0    | 0    | 0    | 0    | 0    |
| CAZ | 0    | 0    | 0    | 0    | 0    | 0    | 0    |
| CHA | 0    | 0    | 0    | 0    | 0    | 0    | 0    |
| EUR | 0    | 0    | 0    | 0    | 0    | 0    | 0    |
| IND | 0    | 0    | 0    | 0    | 0    | 0    | 0    |
| JPN | 0    | 0    | 0    | 0    | 0    | 0    | 0    |
| LAM | 0    | 0    | 0    | 0    | 0    | 0    | 0    |
| MEA | 0    | 0    | 0    | 0    | 0    | 0    | 0    |
| NEU | 0    | 0    | 0    | 0    | 0    | 0    | 0    |
| OAS | 0    | 0    | 0    | 0    | 0    | 0    | 0    |
| REF | 0    | 0    | 0    | 0    | 0    | 0    | 0    |
| SSA | 0    | 0    | 0    | 0    | 0    | 0    | 0    |
| USA | 0    | 0    | 0    | 0    | 0    | 0    | 0    |

Table 123: MAgPIE m4p-SSP1 — Demand—Bioenergy—Secondary products (Mt DM/yr) [PART 2/2]

|     | 1965 | 1970 | 1975 | 1980 | 1985 | 1990 | 1995 | 2000 | 2005 | 2010 |
|-----|------|------|------|------|------|------|------|------|------|------|
| GLO | 0.0  | 0.0  | 0.1  | 1.5  | 2.7  | 0.7  | 7.2  | 10.6 | 24.6 | 67.8 |
| CAZ | 0.0  | 0.0  | 0.0  | 0.0  | 0.0  | 0.0  | 0.0  | 0.2  | 0.1  | 0.7  |
| CHA | 0.0  | 0.0  | 0.0  | 0.0  | 0.0  | 0.0  | 0.0  | 0.0  | 1.1  | 2.6  |
| EUR | 0.0  | 0.0  | 0.0  | 0.0  | 0.0  | 0.0  | 0.2  | 0.8  | 3.2  | 11.4 |
| IND | 0.0  | 0.0  | 0.0  | 0.0  | 0.0  | 0.0  | 0.0  | 0.0  | 0.0  | 0.0  |
| JPN | 0.0  | 0.0  | 0.0  | 0.0  | 0.0  | 0.0  | 0.0  | 0.0  | 0.0  | 0.0  |
| LAM | 0.0  | 0.0  | 0.1  | 1.5  | 2.7  | 0.7  | 2.6  | 4.8  | 7.2  | 11.4 |
| MEA | 0.0  | 0.0  | 0.0  | 0.0  | 0.0  | 0.0  | 0.0  | 0.0  | 0.0  | 0.0  |
| NEU | 0.0  | 0.0  | 0.0  | 0.0  | 0.0  | 0.0  | 0.0  | 0.0  | 0.0  | 0.0  |
| OAS | 0.0  | 0.0  | 0.0  | 0.0  | 0.0  | 0.0  | 0.0  | 0.0  | 0.0  | 1.7  |
| REF | 0.0  | 0.0  | 0.0  | 0.0  | 0.0  | 0.0  | 0.0  | 0.0  | 0.0  | 0.0  |
| SSA | 0.0  | 0.0  | 0.0  | 0.0  | 0.0  | 0.0  | 0.0  | 0.0  | 0.0  | 0.0  |
| USA | 0.0  | 0.0  | 0.0  | 0.0  | 0.0  | 0.0  | 4.3  | 4.8  | 12.8 | 40.1 |

Table 124: FAO — Demand—Bioenergy—Secondary products (Mt DM/yr)

4.4.1 Ethanol

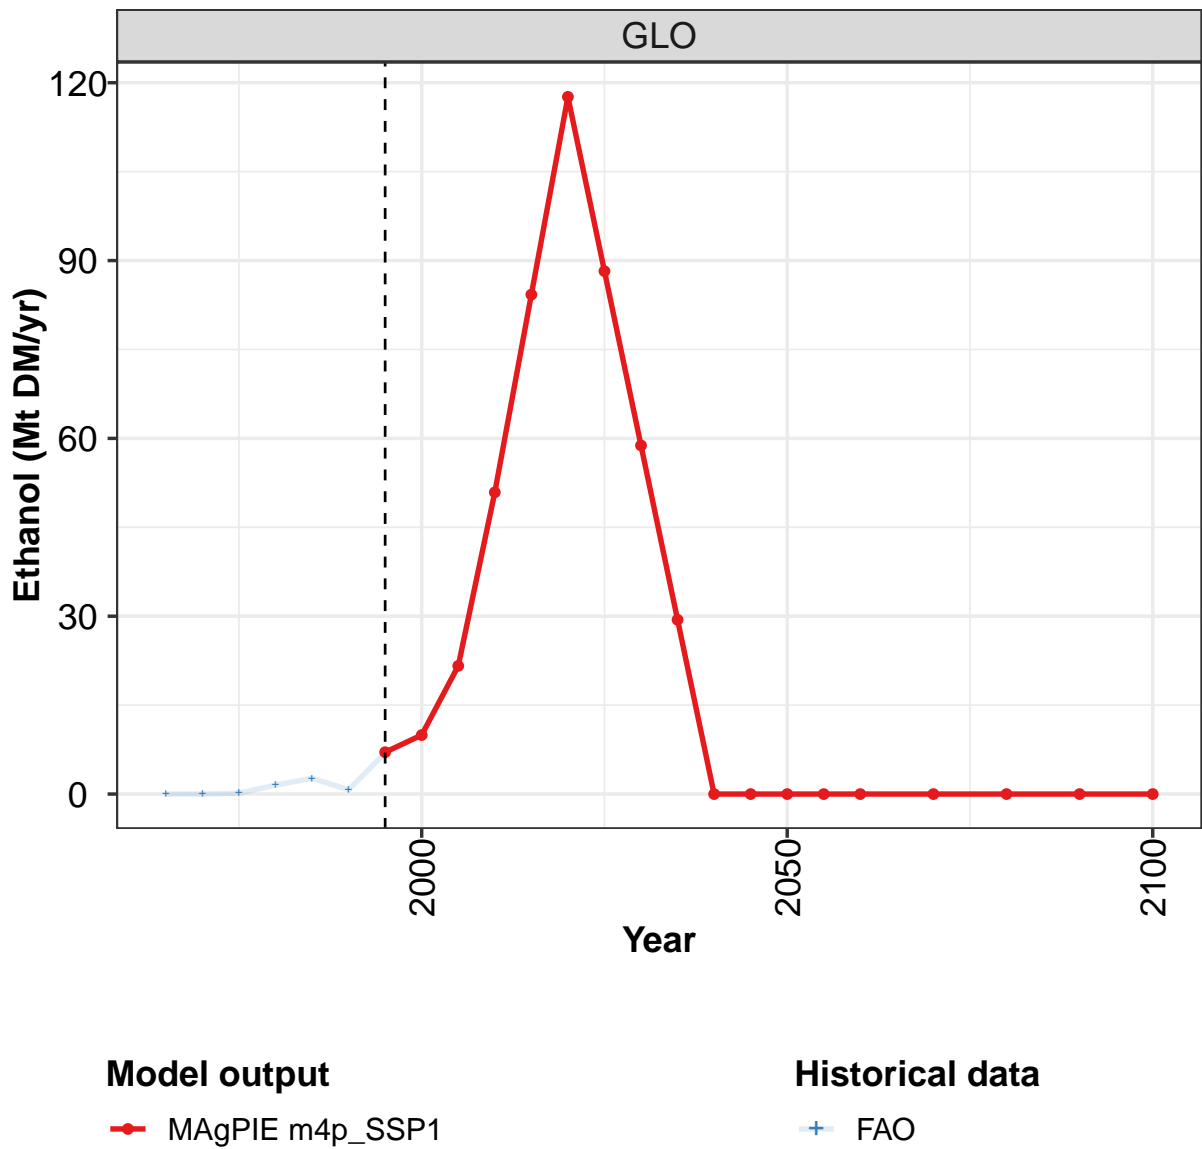

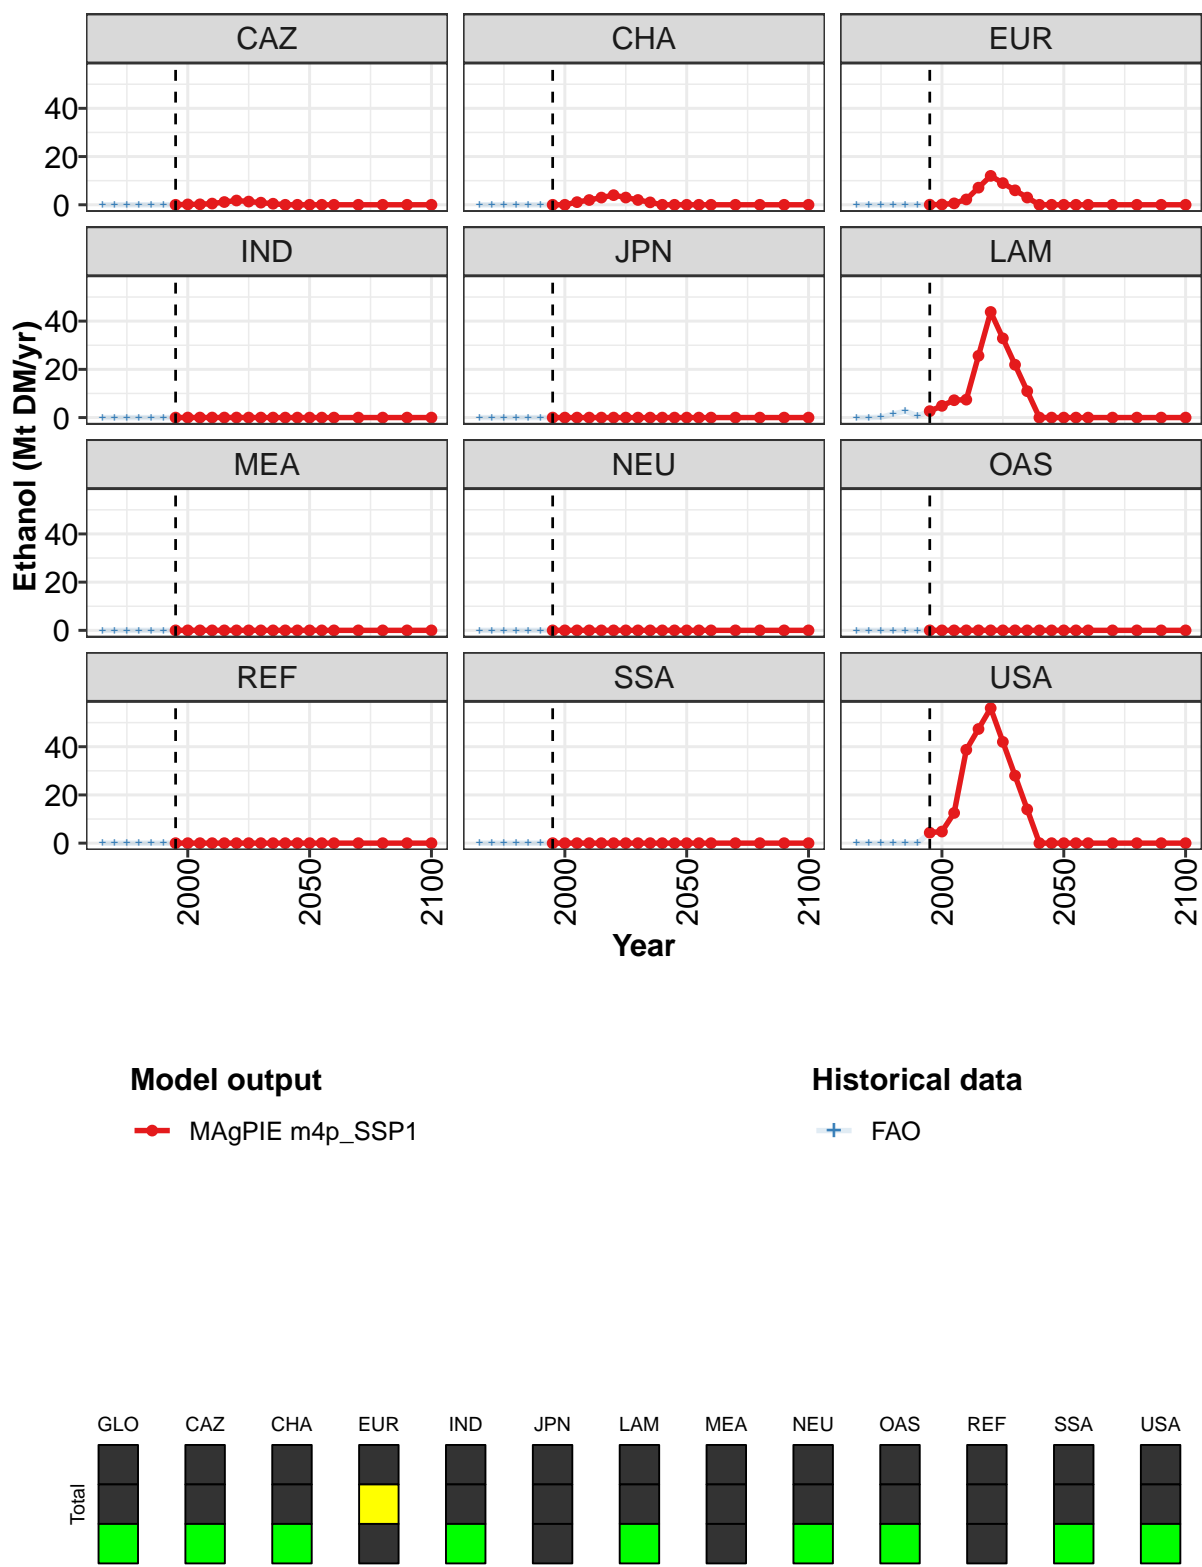

Figure 42: MAgPIE m4p\_SSP1 — Demand—Bioenergy—Secondary products—Ethanol (Mt DM/yr)

|     | 1995 | 2000 | 2005 | 2010 | 2015 | 2020 | 2025 | 2030 | 2035 | 2040 | 2045 |
|-----|------|------|------|------|------|------|------|------|------|------|------|
| GLO | 7    | 10   | 22   | 51   | 84   | 118  | 88   | 59   | 29   | 0    | 0    |
| CAZ | 0    | 0    | 0    | 1    | 1    | 2    | 1    | 1    | 0    | 0    | 0    |
| CHA | 0    | 0    | 1    | 2    | 3    | 4    | 3    | 2    | 1    | 0    | 0    |
| EUR | 0    | 0    | 1    | 2    | 7    | 12   | 9    | 6    | 3    | 0    | 0    |
| IND | 0    | 0    | 0    | 0    | 0    | 0    | 0    | 0    | 0    | 0    | 0    |
| JPN | 0    | 0    | 0    | 0    | 0    | 0    | 0    | 0    | 0    | 0    | 0    |
| LAM | 3    | 5    | 7    | 7    | 26   | 44   | 33   | 22   | 11   | 0    | 0    |
| MEA | 0    | 0    | 0    | 0    | 0    | 0    | 0    | 0    | 0    | 0    | 0    |
| NEU | 0    | 0    | 0    | 0    | 0    | 0    | 0    | 0    | 0    | 0    | 0    |
| OAS | 0    | 0    | 0    | 0    | 0    | 0    | 0    | 0    | 0    | 0    | 0    |
| REF | 0    | 0    | 0    | 0    | 0    | 0    | 0    | 0    | 0    | 0    | 0    |
| SSA | 0    | 0    | 0    | 0    | 0    | 0    | 0    | 0    | 0    | 0    | 0    |
| USA | 4    | 5    | 13   | 39   | 47   | 56   | 42   | 28   | 14   | 0    | 0    |

Table 125: MAgPIE m4p\_SSP1 — Demand—Bioenergy—Secondary products—Ethanol (Mt DM/yr) [PART 1/2]

|     | 2050 | 2055 | 2060 | 2070 | 2080 | 2090 | 2100 |
|-----|------|------|------|------|------|------|------|
| GLO | 0    | 0    | 0    | 0    | 0    | 0    | 0    |
| CAZ | 0    | 0    | 0    | 0    | 0    | 0    | 0    |
| CHA | 0    | 0    | 0    | 0    | 0    | 0    | 0    |
| EUR | 0    | 0    | 0    | 0    | 0    | 0    | 0    |
| IND | 0    | 0    | 0    | 0    | 0    | 0    | 0    |
| JPN | 0    | 0    | 0    | 0    | 0    | 0    | 0    |
| LAM | 0    | 0    | 0    | 0    | 0    | 0    | 0    |
| MEA | 0    | 0    | 0    | 0    | 0    | 0    | 0    |
| NEU | 0    | 0    | 0    | 0    | 0    | 0    | 0    |
| OAS | 0    | 0    | 0    | 0    | 0    | 0    | 0    |
| REF | 0    | 0    | 0    | 0    | 0    | 0    | 0    |
| SSA | 0    | 0    | 0    | 0    | 0    | 0    | 0    |
| USA | 0    | 0    | 0    | 0    | 0    | 0    | 0    |

Table 126: MAgPIE m4p\_SSP1 — Demand—Bioenergy—Secondary products—Ethanol (Mt DM/yr) [PART 2/2]

|     | 1965 | 1970 | 1975 | 1980 | 1985 | 1990 | 1995 | 2000 | 2005 | 2010 |
|-----|------|------|------|------|------|------|------|------|------|------|
| GLO | 0.0  | 0.0  | 0.1  | 1.5  | 2.7  | 0.7  | 7.0  | 9.9  | 21.6 | 50.9 |
| CAZ | 0.0  | 0.0  | 0.0  | 0.0  | 0.0  | 0.0  | 0.0  | 0.2  | 0.1  | 0.5  |
| CHA | 0.0  | 0.0  | 0.0  | 0.0  | 0.0  | 0.0  | 0.0  | 0.0  | 1.1  | 2.0  |
| EUR | 0.0  | 0.0  | 0.0  | 0.0  | 0.0  | 0.0  | 0.0  | 0.1  | 0.6  | 2.2  |
| IND | 0.0  | 0.0  | 0.0  | 0.0  | 0.0  | 0.0  | 0.0  | 0.0  | 0.0  | 0.0  |
| JPN | 0.0  | 0.0  | 0.0  | 0.0  | 0.0  | 0.0  | 0.0  | 0.0  | 0.0  | 0.0  |
| LAM | 0.0  | 0.0  | 0.1  | 1.5  | 2.7  | 0.7  | 2.6  | 4.8  | 7.2  | 7.4  |
| MEA | 0.0  | 0.0  | 0.0  | 0.0  | 0.0  | 0.0  | 0.0  | 0.0  | 0.0  | 0.0  |
| NEU | 0.0  | 0.0  | 0.0  | 0.0  | 0.0  | 0.0  | 0.0  | 0.0  | 0.0  | 0.0  |
| OAS | 0.0  | 0.0  | 0.0  | 0.0  | 0.0  | 0.0  | 0.0  | 0.0  | 0.0  | 0.0  |
| REF | 0.0  | 0.0  | 0.0  | 0.0  | 0.0  | 0.0  | 0.0  | 0.0  | 0.0  | 0.0  |
| SSA | 0.0  | 0.0  | 0.0  | 0.0  | 0.0  | 0.0  | 0.0  | 0.0  | 0.0  | 0.0  |
| USA | 0.0  | 0.0  | 0.0  | 0.0  | 0.0  | 0.0  | 4.3  | 4.8  | 12.5 | 38.7 |

Table 127: FAO — Demand—Bioenergy—Secondary products—Ethanol (Mt DM/yr)



4.4.2 Oils

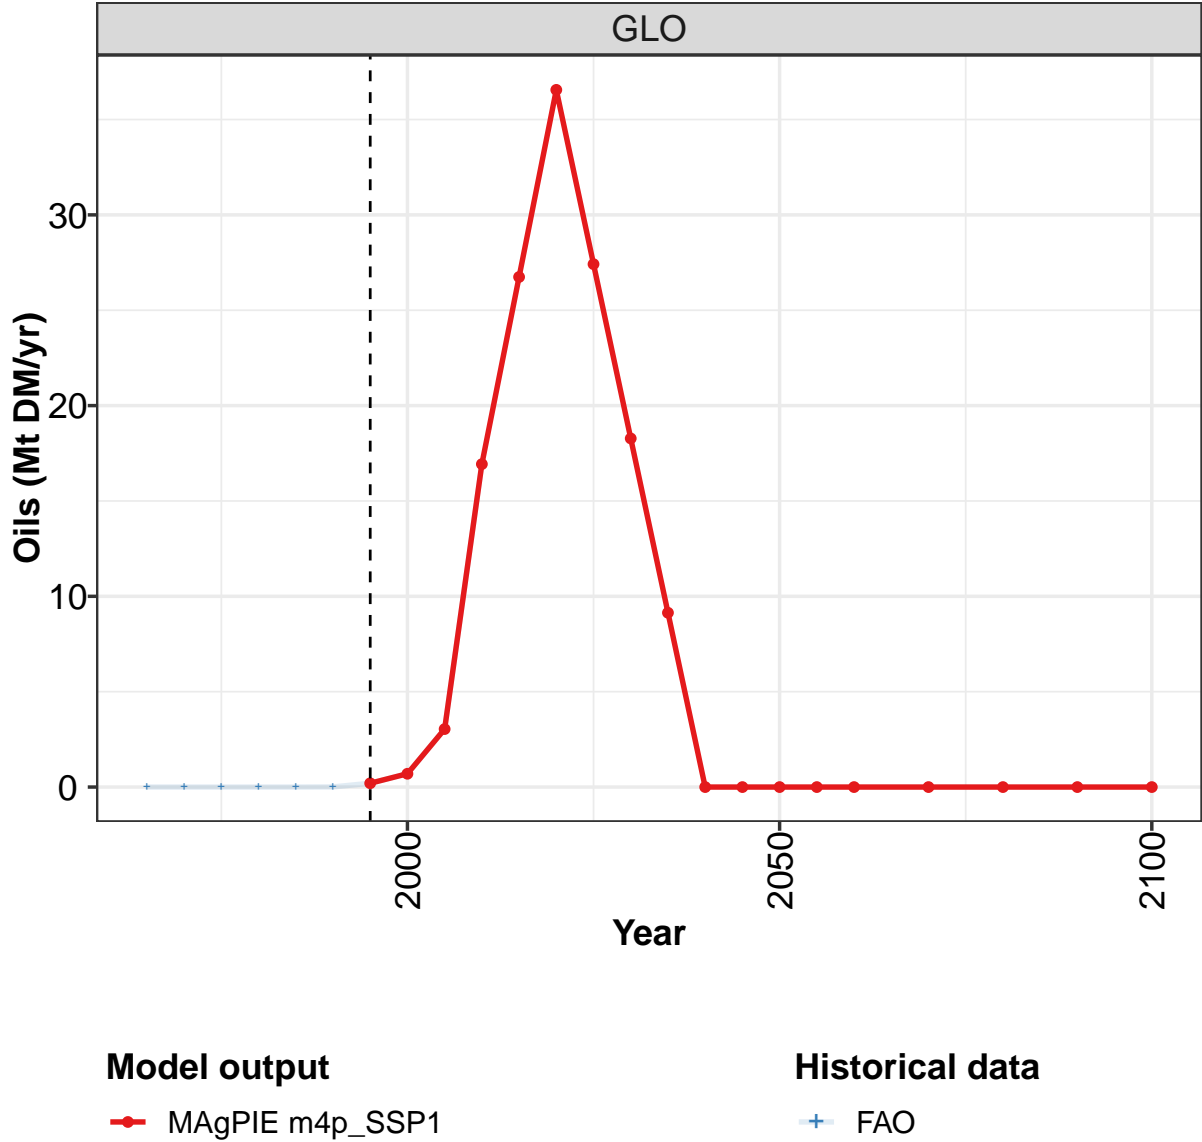

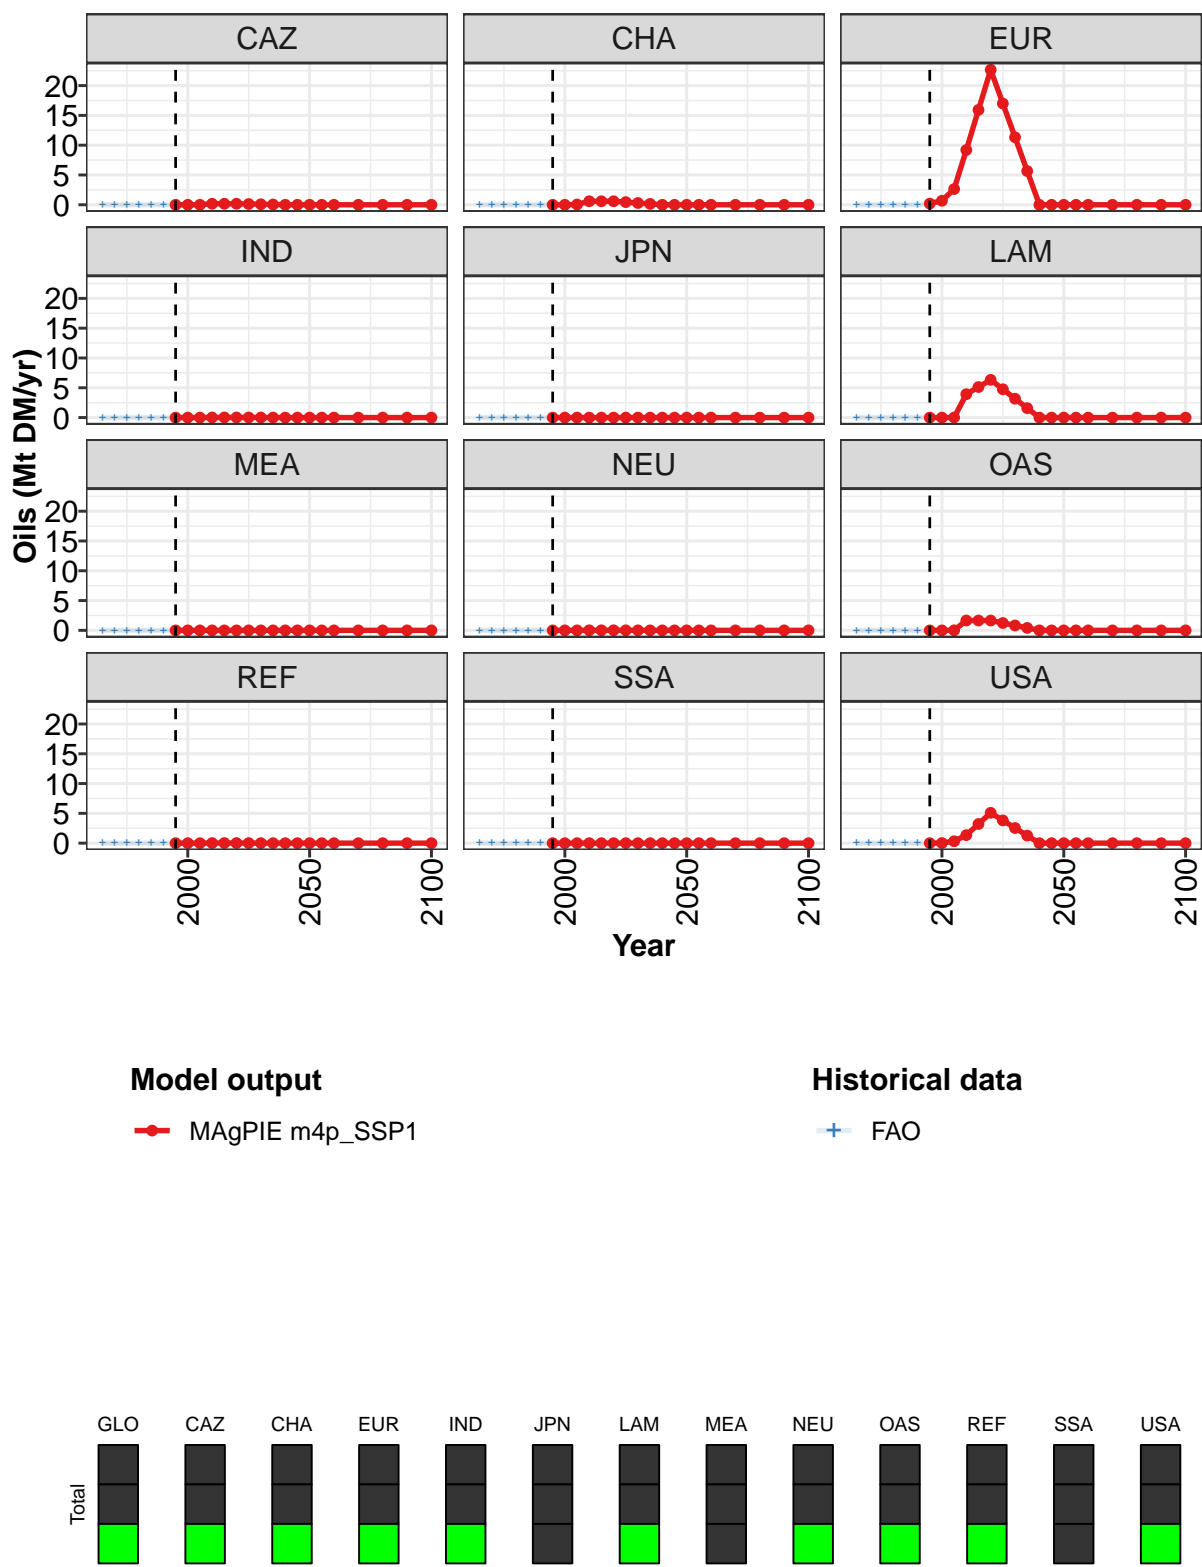

Figure 43: MAgPIE m4p\_SSP1 — Demand—Bioenergy—Secondary products—Oils (Mt DM/yr)

|     | 1995 | 2000 | 2005 | 2010 | 2015 | 2020 | 2025 | 2030 | 2035 | 2040 | 2045 |
|-----|------|------|------|------|------|------|------|------|------|------|------|
| GLO | 0.2  | 0.7  | 3.0  | 16.9 | 26.7 | 36.6 | 27.4 | 18.3 | 9.1  | 0.0  | 0.0  |
| CAZ | 0.0  | 0.0  | 0.0  | 0.2  | 0.2  | 0.2  | 0.1  | 0.1  | 0.0  | 0.0  | 0.0  |
| CHA | 0.0  | 0.0  | 0.0  | 0.6  | 0.6  | 0.6  | 0.4  | 0.3  | 0.1  | 0.0  | 0.0  |
| EUR | 0.2  | 0.7  | 2.6  | 9.2  | 15.9 | 22.7 | 17.0 | 11.3 | 5.7  | 0.0  | 0.0  |
| IND | 0.0  | 0.0  | 0.0  | 0.0  | 0.0  | 0.0  | 0.0  | 0.0  | 0.0  | 0.0  | 0.0  |
| JPN | 0.0  | 0.0  | 0.0  | 0.0  | 0.0  | 0.0  | 0.0  | 0.0  | 0.0  | 0.0  | 0.0  |
| LAM | 0.0  | 0.0  | 0.0  | 3.9  | 5.1  | 6.3  | 4.8  | 3.2  | 1.6  | 0.0  | 0.0  |
| MEA | 0.0  | 0.0  | 0.0  | 0.0  | 0.0  | 0.0  | 0.0  | 0.0  | 0.0  | 0.0  | 0.0  |
| NEU | 0.0  | 0.0  | 0.0  | 0.0  | 0.0  | 0.0  | 0.0  | 0.0  | 0.0  | 0.0  | 0.0  |
| OAS | 0.0  | 0.0  | 0.0  | 1.7  | 1.7  | 1.7  | 1.2  | 0.8  | 0.4  | 0.0  | 0.0  |
| REF | 0.0  | 0.0  | 0.0  | 0.0  | 0.0  | 0.0  | 0.0  | 0.0  | 0.0  | 0.0  | 0.0  |
| SSA | 0.0  | 0.0  | 0.0  | 0.0  | 0.0  | 0.0  | 0.0  | 0.0  | 0.0  | 0.0  | 0.0  |
| USA | 0.0  | 0.0  | 0.3  | 1.3  | 3.2  | 5.1  | 3.8  | 2.5  | 1.3  | 0.0  | 0.0  |

Table 128: MAgPIE m4p\_SSP1 — Demand—Bioenergy—Secondary products—Oils (Mt DM/yr) [PART 1/2]

|     | 2050 | 2055 | 2060 | 2070 | 2080 | 2090 | 2100 |
|-----|------|------|------|------|------|------|------|
| GLO | 0.0  | 0.0  | 0.0  | 0.0  | 0.0  | 0.0  | 0.0  |
| CAZ | 0.0  | 0.0  | 0.0  | 0.0  | 0.0  | 0.0  | 0.0  |
| CHA | 0.0  | 0.0  | 0.0  | 0.0  | 0.0  | 0.0  | 0.0  |
| EUR | 0.0  | 0.0  | 0.0  | 0.0  | 0.0  | 0.0  | 0.0  |
| IND | 0.0  | 0.0  | 0.0  | 0.0  | 0.0  | 0.0  | 0.0  |
| JPN | 0.0  | 0.0  | 0.0  | 0.0  | 0.0  | 0.0  | 0.0  |
| LAM | 0.0  | 0.0  | 0.0  | 0.0  | 0.0  | 0.0  | 0.0  |
| MEA | 0.0  | 0.0  | 0.0  | 0.0  | 0.0  | 0.0  | 0.0  |
| NEU | 0.0  | 0.0  | 0.0  | 0.0  | 0.0  | 0.0  | 0.0  |
| OAS | 0.0  | 0.0  | 0.0  | 0.0  | 0.0  | 0.0  | 0.0  |
| REF | 0.0  | 0.0  | 0.0  | 0.0  | 0.0  | 0.0  | 0.0  |
| SSA | 0.0  | 0.0  | 0.0  | 0.0  | 0.0  | 0.0  | 0.0  |
| USA | 0.0  | 0.0  | 0.0  | 0.0  | 0.0  | 0.0  | 0.0  |

Table 129: MAgPIE m4p\_SSP1 — Demand—Bioenergy—Secondary products—Oils (Mt DM/yr) [PART 2/2]

|     | 1965 | 1970 | 1975 | 1980 | 1985 | 1990 | 1995 | 2000 | 2005 | 2010 |
|-----|------|------|------|------|------|------|------|------|------|------|
| GLO | 0.0  | 0.0  | 0.0  | 0.0  | 0.0  | 0.0  | 0.2  | 0.7  | 3.0  | 16.9 |
| CAZ | 0.0  | 0.0  | 0.0  | 0.0  | 0.0  | 0.0  | 0.0  | 0.0  | 0.0  | 0.2  |
| CHA | 0.0  | 0.0  | 0.0  | 0.0  | 0.0  | 0.0  | 0.0  | 0.0  | 0.0  | 0.6  |
| EUR | 0.0  | 0.0  | 0.0  | 0.0  | 0.0  | 0.0  | 0.2  | 0.7  | 2.6  | 9.2  |
| IND | 0.0  | 0.0  | 0.0  | 0.0  | 0.0  | 0.0  | 0.0  | 0.0  | 0.0  | 0.0  |
| JPN | 0.0  | 0.0  | 0.0  | 0.0  | 0.0  | 0.0  | 0.0  | 0.0  | 0.0  | 0.0  |
| LAM | 0.0  | 0.0  | 0.0  | 0.0  | 0.0  | 0.0  | 0.0  | 0.0  | 0.0  | 3.9  |
| MEA | 0.0  | 0.0  | 0.0  | 0.0  | 0.0  | 0.0  | 0.0  | 0.0  | 0.0  | 0.0  |
| NEU | 0.0  | 0.0  | 0.0  | 0.0  | 0.0  | 0.0  | 0.0  | 0.0  | 0.0  | 0.0  |
| OAS | 0.0  | 0.0  | 0.0  | 0.0  | 0.0  | 0.0  | 0.0  | 0.0  | 0.0  | 1.7  |
| REF | 0.0  | 0.0  | 0.0  | 0.0  | 0.0  | 0.0  | 0.0  | 0.0  | 0.0  | 0.0  |
| SSA | 0.0  | 0.0  | 0.0  | 0.0  | 0.0  | 0.0  | 0.0  | 0.0  | 0.0  | 0.0  |
| USA | 0.0  | 0.0  | 0.0  | 0.0  | 0.0  | 0.0  | 0.0  | 0.0  | 0.3  | 1.3  |

Table 130: FAO — Demand—Bioenergy—Secondary products—Oils (Mt DM/yr)

## 5 Domestic Balanceflow

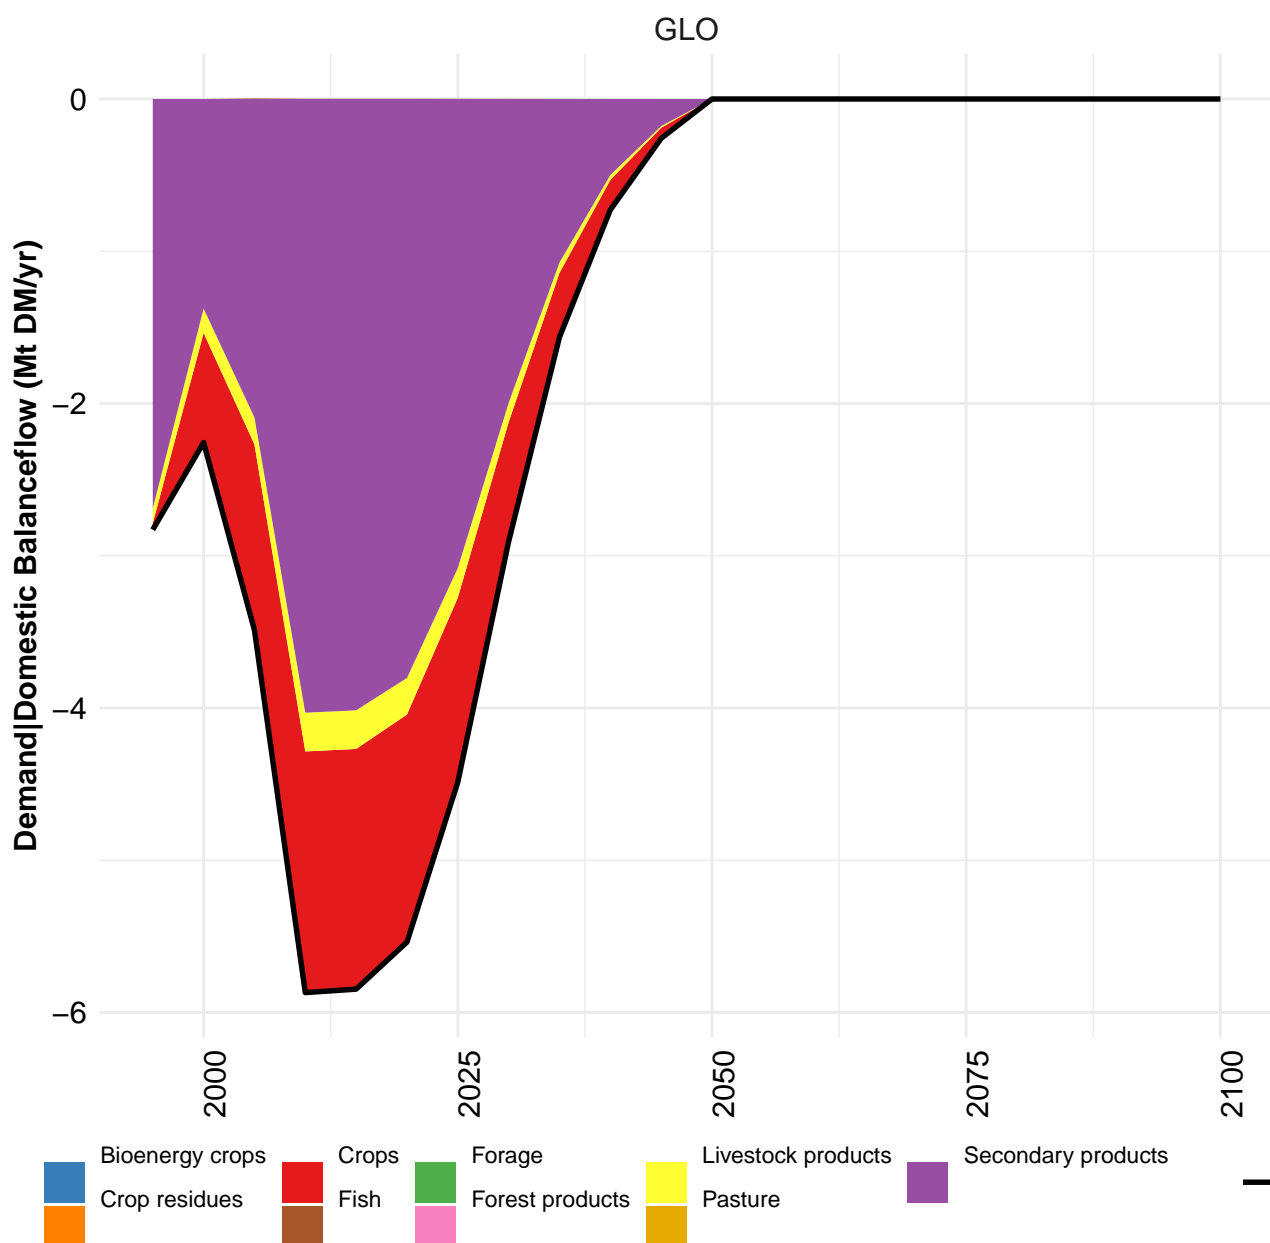

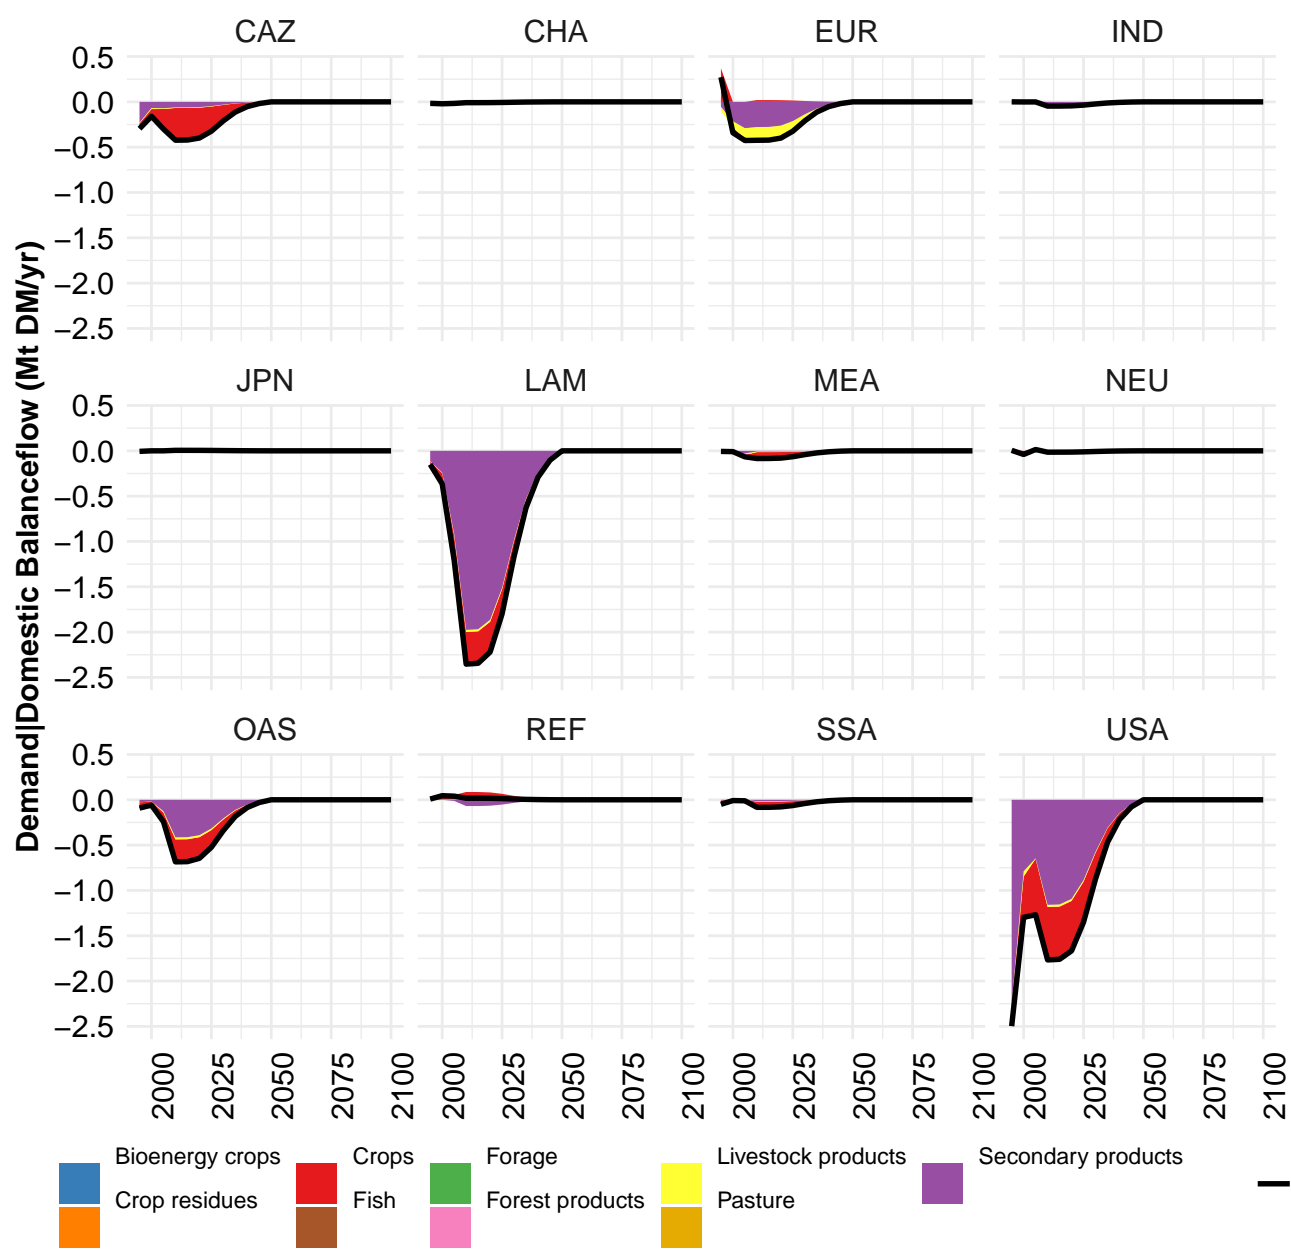

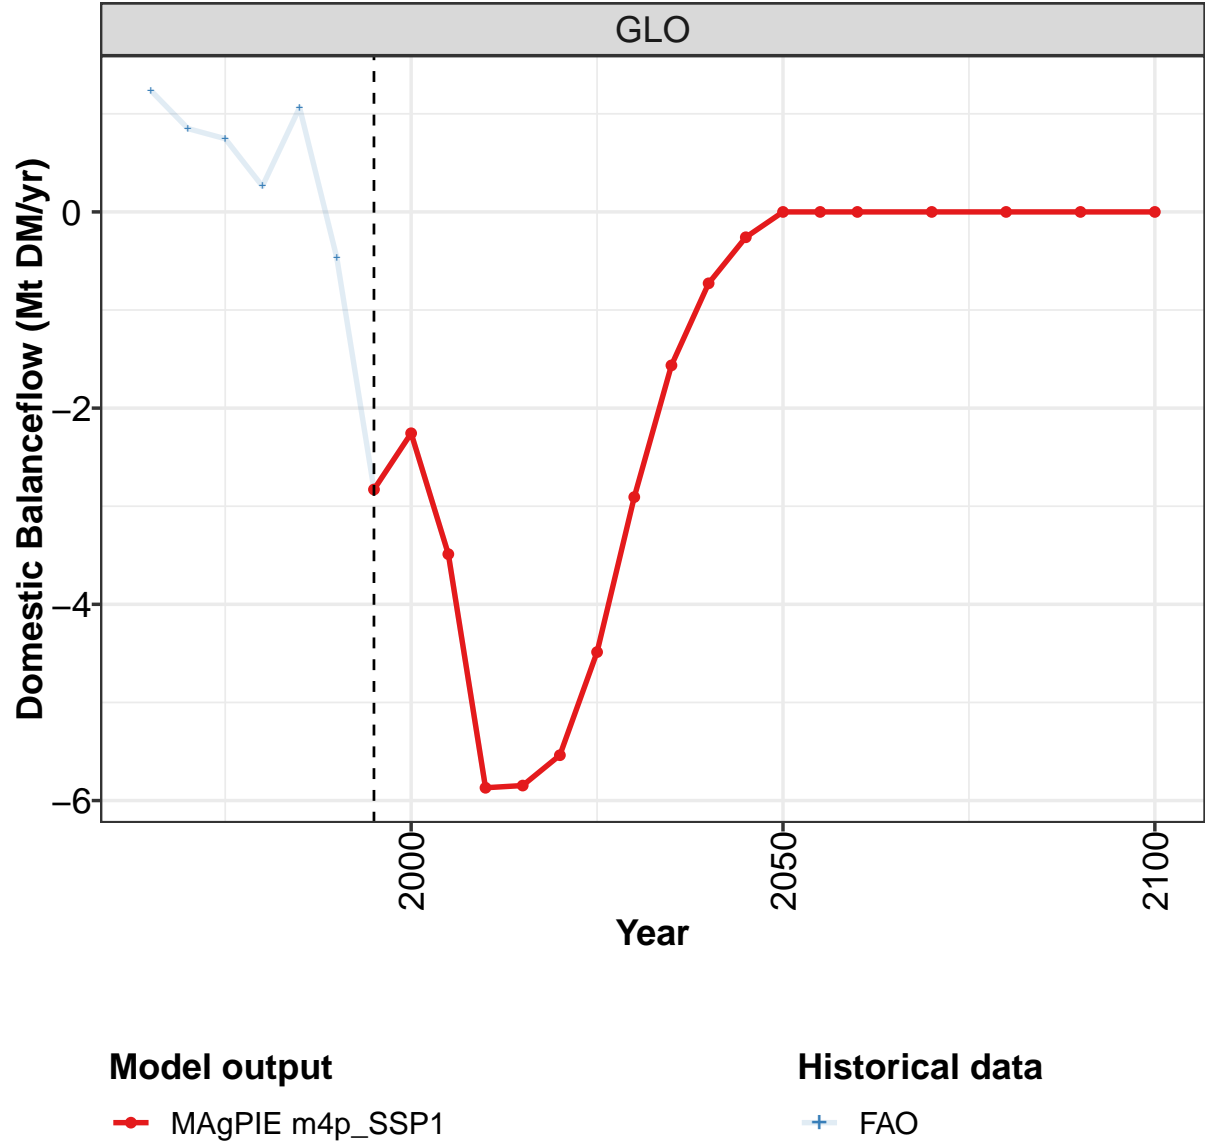

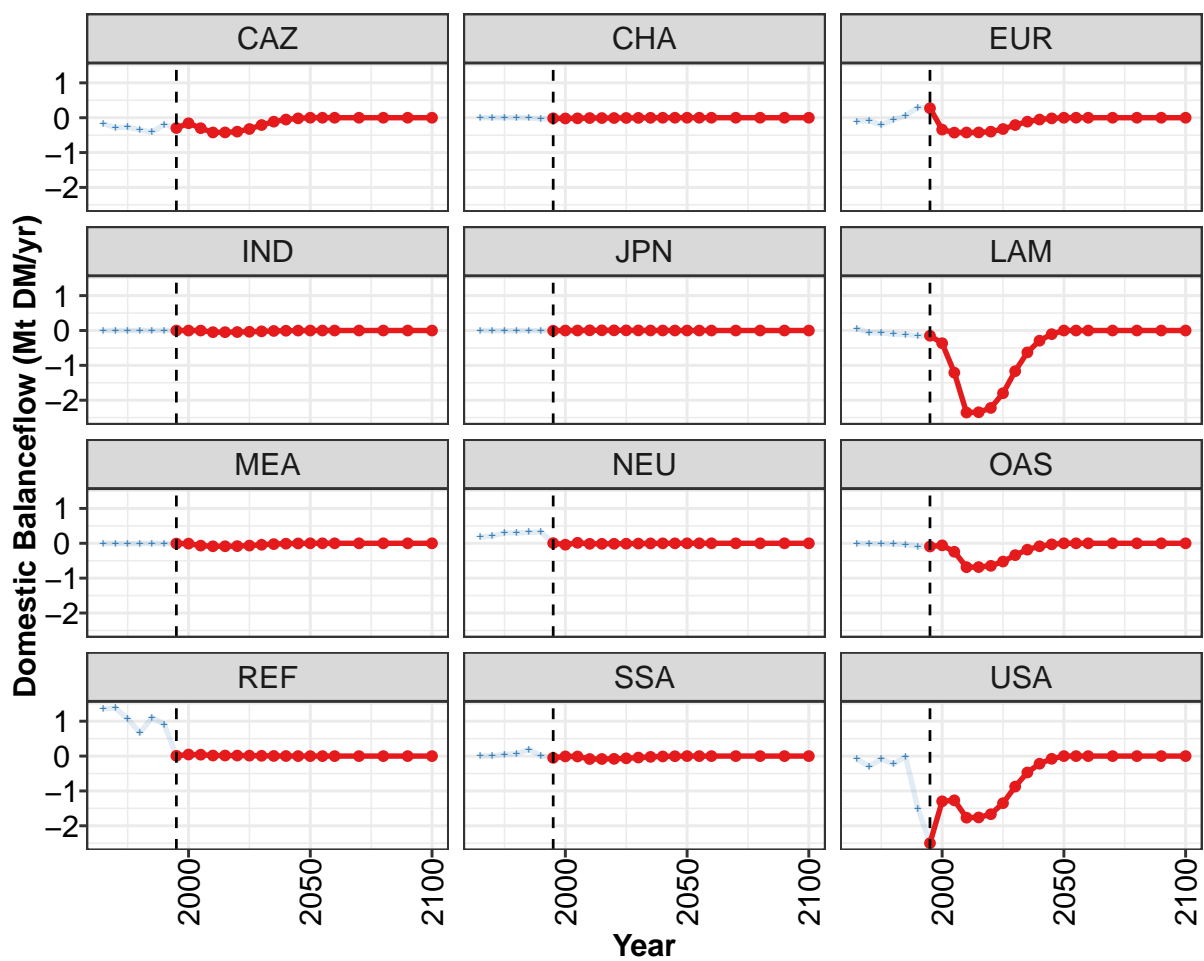

Model output

MAgPIE m4p\_SSP1

Historical data

FAO

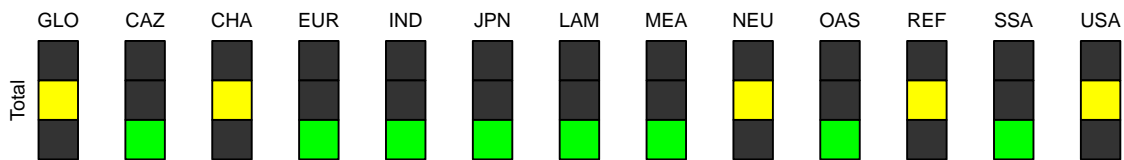

Figure 44: MAgPIE m4p\_SSP1 — Demand—Domestic Balanceflow (Mt DM/yr)

|     | 1995   | 2000   | 2005   | 2010   | 2015   | 2020   | 2025   | 2030   | 2035   | 2040   | 2045   |
|-----|--------|--------|--------|--------|--------|--------|--------|--------|--------|--------|--------|
| GLO | -2.829 | -2.256 | -3.488 | -5.870 | -5.847 | -5.538 | -4.486 | -2.907 | -1.564 | -0.728 | -0.258 |
| CAZ | -0.296 | -0.159 | -0.300 | -0.423 | -0.421 | -0.399 | -0.324 | -0.210 | -0.113 | -0.052 | -0.019 |
| CHA | -0.017 | -0.021 | -0.018 | -0.009 | -0.009 | -0.009 | -0.007 | -0.004 | -0.002 | -0.001 | -0.000 |
| EUR | 0.272  | -0.341 | -0.427 | -0.424 | -0.423 | -0.400 | -0.324 | -0.210 | -0.113 | -0.053 | -0.019 |
| IND | 0.000  | -0.001 | -0.001 | -0.047 | -0.047 | -0.044 | -0.036 | -0.023 | -0.013 | -0.006 | -0.002 |
| JPN | -0.006 | -0.000 | -0.000 | 0.005  | 0.005  | 0.005  | 0.004  | 0.003  | 0.002  | 0.001  | 0.000  |
| LAM | -0.150 | -0.365 | -1.209 | -2.354 | -2.345 | -2.220 | -1.799 | -1.166 | -0.627 | -0.291 | -0.104 |
| MEA | -0.006 | -0.009 | -0.066 | -0.085 | -0.085 | -0.081 | -0.065 | -0.042 | -0.023 | -0.011 | -0.004 |
| NEU | 0.005  | -0.040 | 0.014  | -0.015 | -0.015 | -0.014 | -0.011 | -0.007 | -0.004 | -0.002 | -0.001 |
| OAS | -0.092 | -0.059 | -0.242 | -0.685 | -0.682 | -0.646 | -0.524 | -0.339 | -0.183 | -0.085 | -0.030 |
| REF | 0.008  | 0.045  | 0.040  | 0.017  | 0.017  | 0.016  | 0.013  | 0.009  | 0.005  | 0.002  | 0.001  |
| SSA | -0.050 | -0.009 | -0.011 | -0.083 | -0.083 | -0.078 | -0.064 | -0.041 | -0.022 | -0.010 | -0.004 |
| USA | -2.498 | -1.297 | -1.269 | -1.767 | -1.760 | -1.667 | -1.350 | -0.875 | -0.471 | -0.219 | -0.078 |

Table 131: MAgPIE m4p\_SSP1 — Demand—Domestic Balanceflow (Mt DM/yr) [PART 1/2]

|     | 2050  | 2055  | 2060  | 2070  | 2080  | 2090  | 2100  |
|-----|-------|-------|-------|-------|-------|-------|-------|
| GLO | 0.000 | 0.000 | 0.000 | 0.000 | 0.000 | 0.000 | 0.000 |
| CAZ | 0.000 | 0.000 | 0.000 | 0.000 | 0.000 | 0.000 | 0.000 |
| CHA | 0.000 | 0.000 | 0.000 | 0.000 | 0.000 | 0.000 | 0.000 |
| EUR | 0.000 | 0.000 | 0.000 | 0.000 | 0.000 | 0.000 | 0.000 |
| IND | 0.000 | 0.000 | 0.000 | 0.000 | 0.000 | 0.000 | 0.000 |
| JPN | 0.000 | 0.000 | 0.000 | 0.000 | 0.000 | 0.000 | 0.000 |
| LAM | 0.000 | 0.000 | 0.000 | 0.000 | 0.000 | 0.000 | 0.000 |
| MEA | 0.000 | 0.000 | 0.000 | 0.000 | 0.000 | 0.000 | 0.000 |
| NEU | 0.000 | 0.000 | 0.000 | 0.000 | 0.000 | 0.000 | 0.000 |
| OAS | 0.000 | 0.000 | 0.000 | 0.000 | 0.000 | 0.000 | 0.000 |
| REF | 0.000 | 0.000 | 0.000 | 0.000 | 0.000 | 0.000 | 0.000 |
| SSA | 0.000 | 0.000 | 0.000 | 0.000 | 0.000 | 0.000 | 0.000 |
| USA | 0.000 | 0.000 | 0.000 | 0.000 | 0.000 | 0.000 | 0.000 |

Table 132: MAgPIE m4p\_SSP1 — Demand—Domestic Balanceflow (Mt DM/yr) [PART 2/2]

|     | 1965  | 1970  | 1975  | 1980  | 1985  | 1990  | 1995  | 2000  | 2005  | 2010  |
|-----|-------|-------|-------|-------|-------|-------|-------|-------|-------|-------|
| GLO | 1.24  | 0.85  | 0.75  | 0.26  | 1.06  | -0.47 | -2.83 | -2.26 | -3.49 | -5.87 |
| CAZ | -0.17 | -0.29 | -0.27 | -0.35 | -0.42 | -0.20 | -0.30 | -0.16 | -0.30 | -0.42 |
| CHA | -0.00 | -0.00 | -0.00 | -0.00 | -0.00 | -0.04 | -0.02 | -0.02 | -0.02 | -0.01 |
| EUR | -0.10 | -0.08 | -0.21 | -0.06 | 0.05  | 0.30  | 0.27  | -0.34 | -0.43 | -0.42 |
| IND | 0.00  | 0.00  | -0.00 | -0.00 | -0.00 | 0.00  | 0.00  | -0.00 | -0.00 | -0.05 |
| JPN | -0.00 | -0.01 | -0.01 | -0.00 | -0.01 | -0.01 | -0.01 | -0.00 | -0.00 | 0.01  |
| LAM | 0.06  | -0.06 | -0.07 | -0.10 | -0.12 | -0.15 | -0.15 | -0.36 | -1.21 | -2.35 |
| MEA | -0.00 | -0.00 | -0.02 | -0.01 | -0.00 | -0.01 | -0.01 | -0.01 | -0.07 | -0.09 |
| NEU | 0.18  | 0.21  | 0.30  | 0.29  | 0.32  | 0.32  | 0.01  | -0.04 | 0.01  | -0.01 |
| OAS | -0.00 | -0.00 | -0.01 | -0.02 | -0.03 | -0.09 | -0.09 | -0.06 | -0.24 | -0.69 |
| REF | 1.36  | 1.38  | 1.07  | 0.67  | 1.10  | 0.91  | 0.01  | 0.04  | 0.04  | 0.02  |
| SSA | 0.00  | 0.00  | 0.05  | 0.06  | 0.19  | 0.00  | -0.05 | -0.01 | -0.01 | -0.08 |
| USA | -0.08 | -0.29 | -0.09 | -0.22 | -0.03 | -1.50 | -2.50 | -1.30 | -1.27 | -1.77 |

Table 133: FAO — Demand—Domestic Balanceflow (Mt DM/yr)



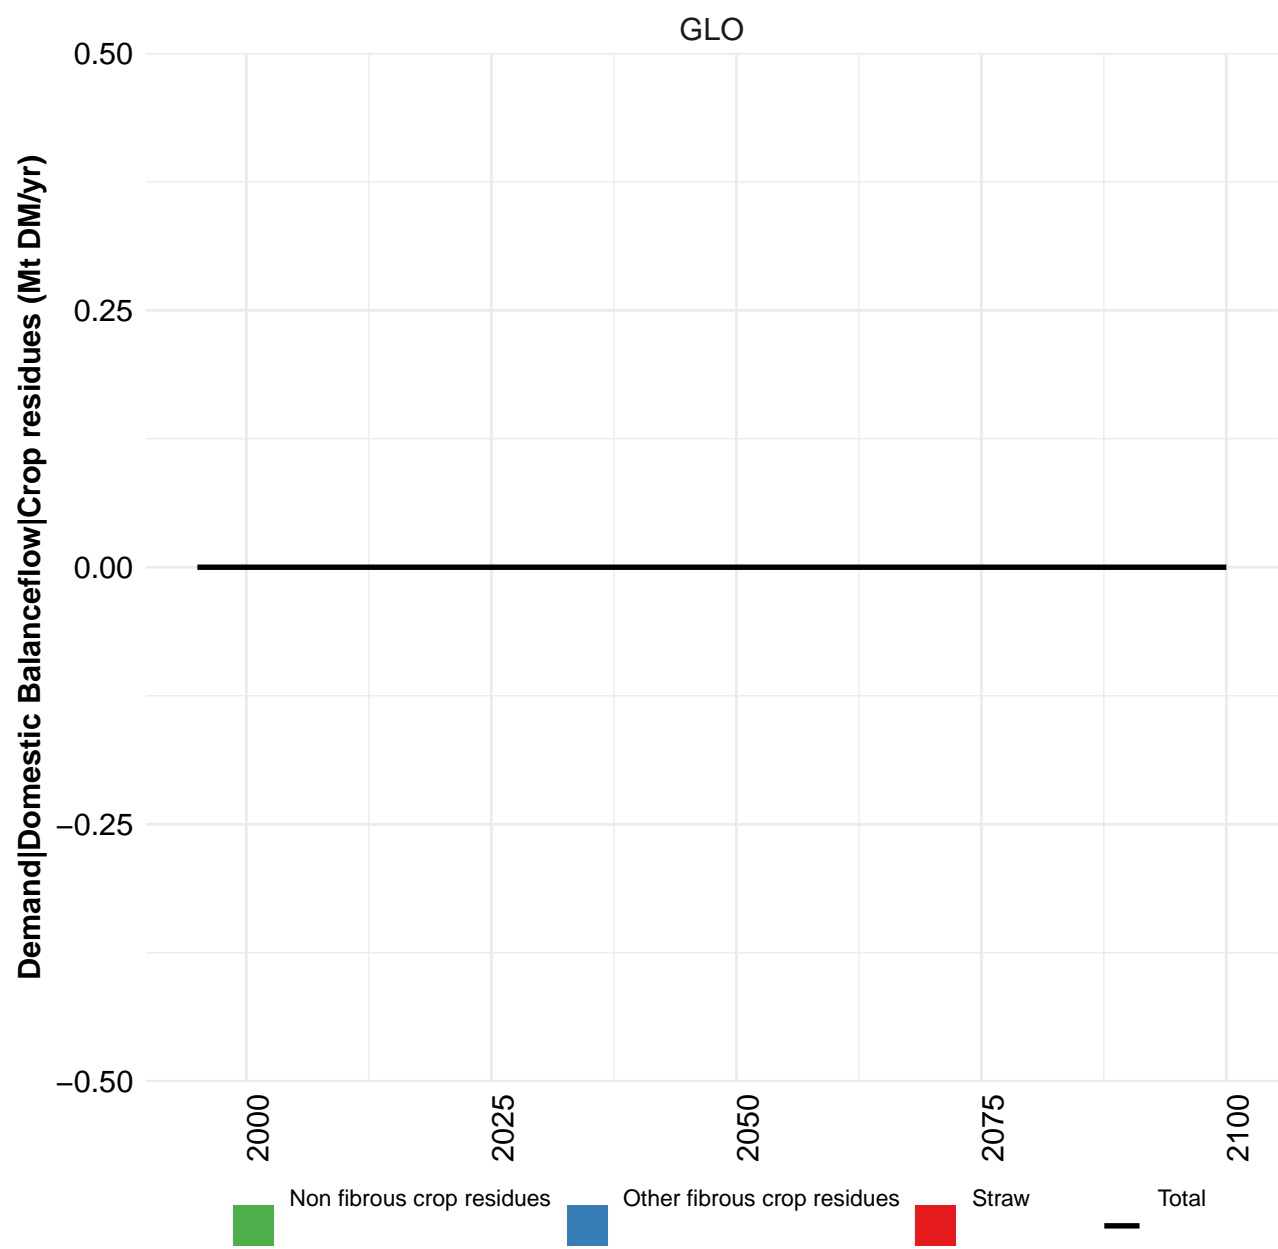

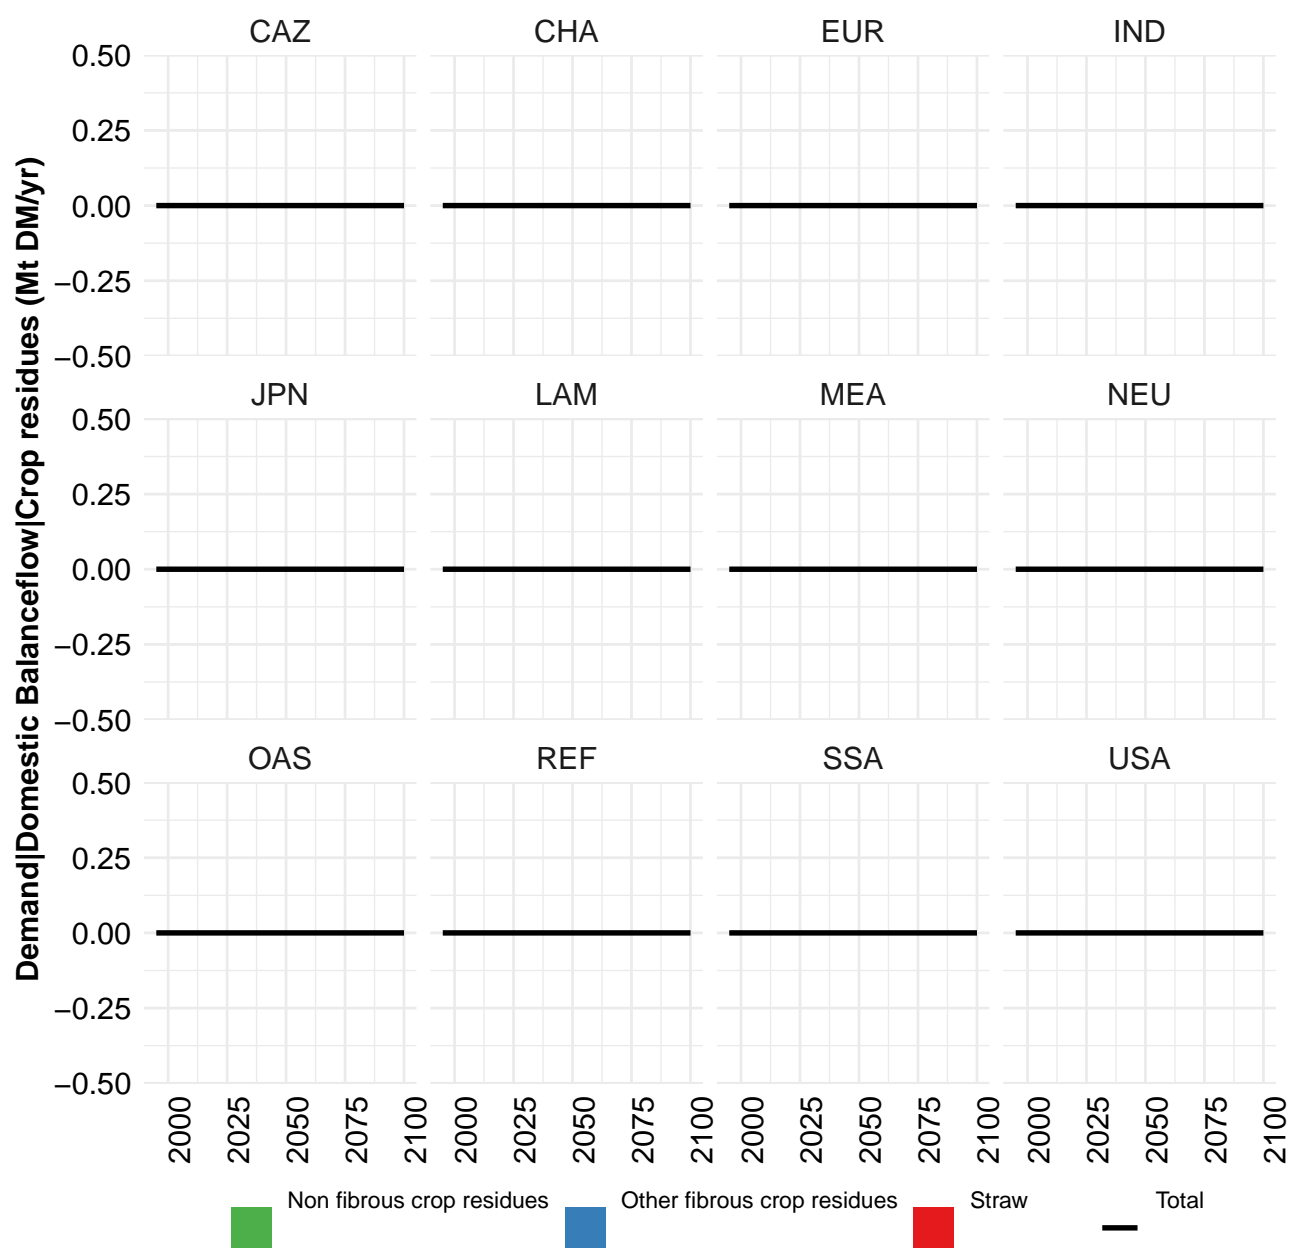

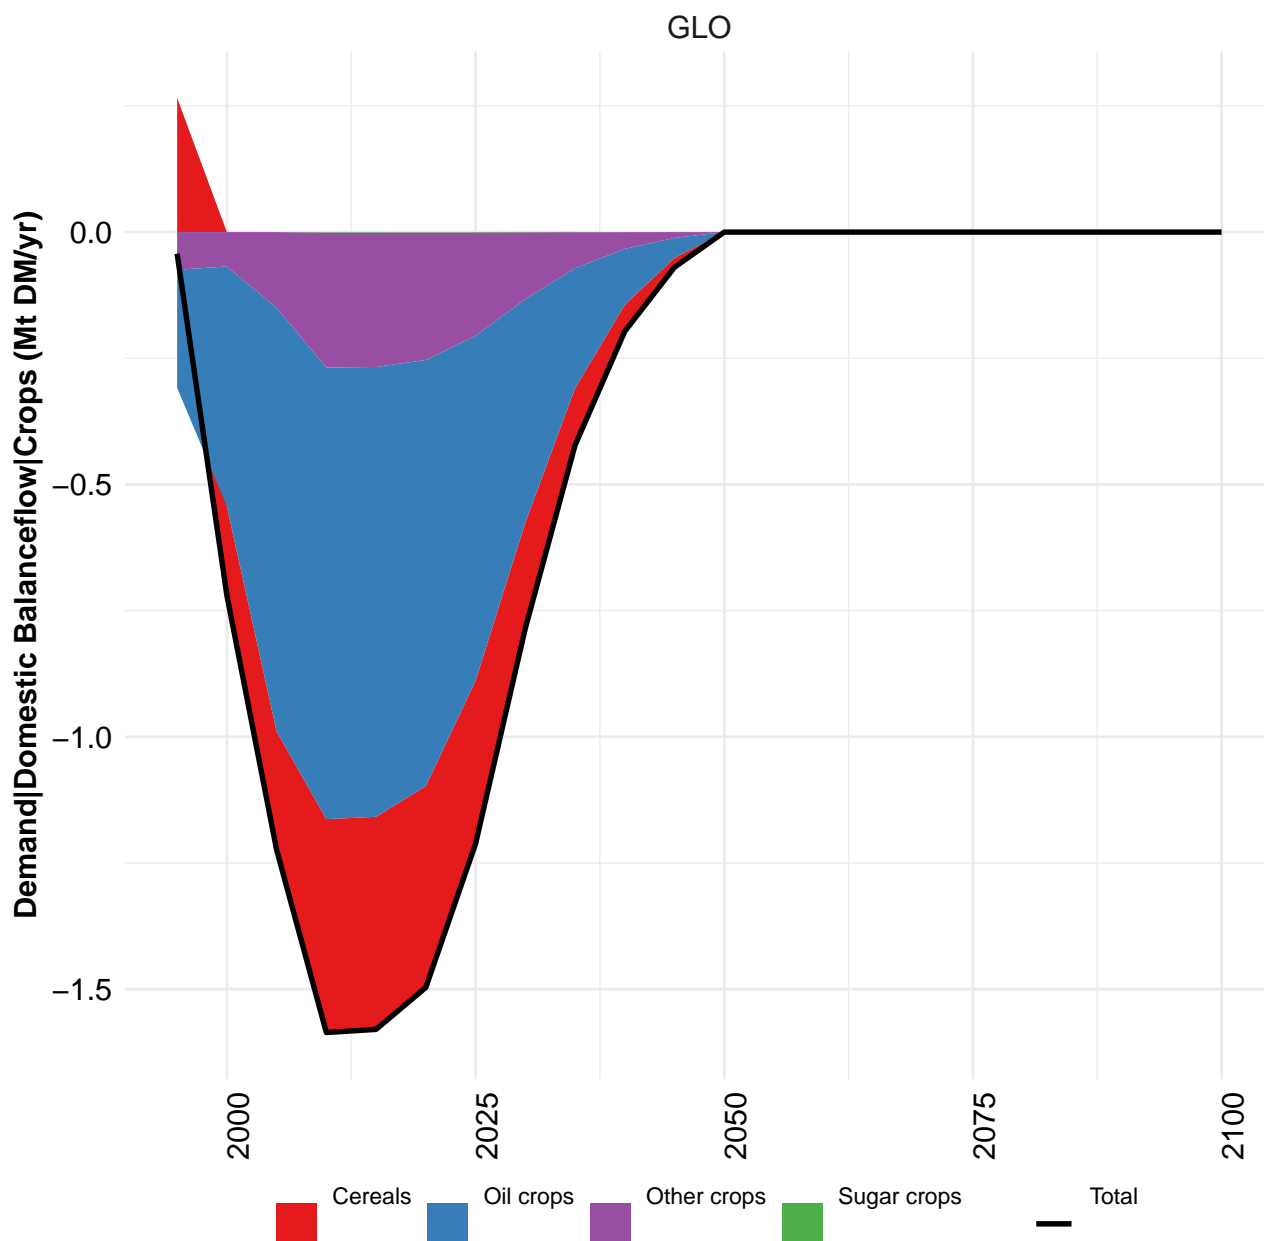

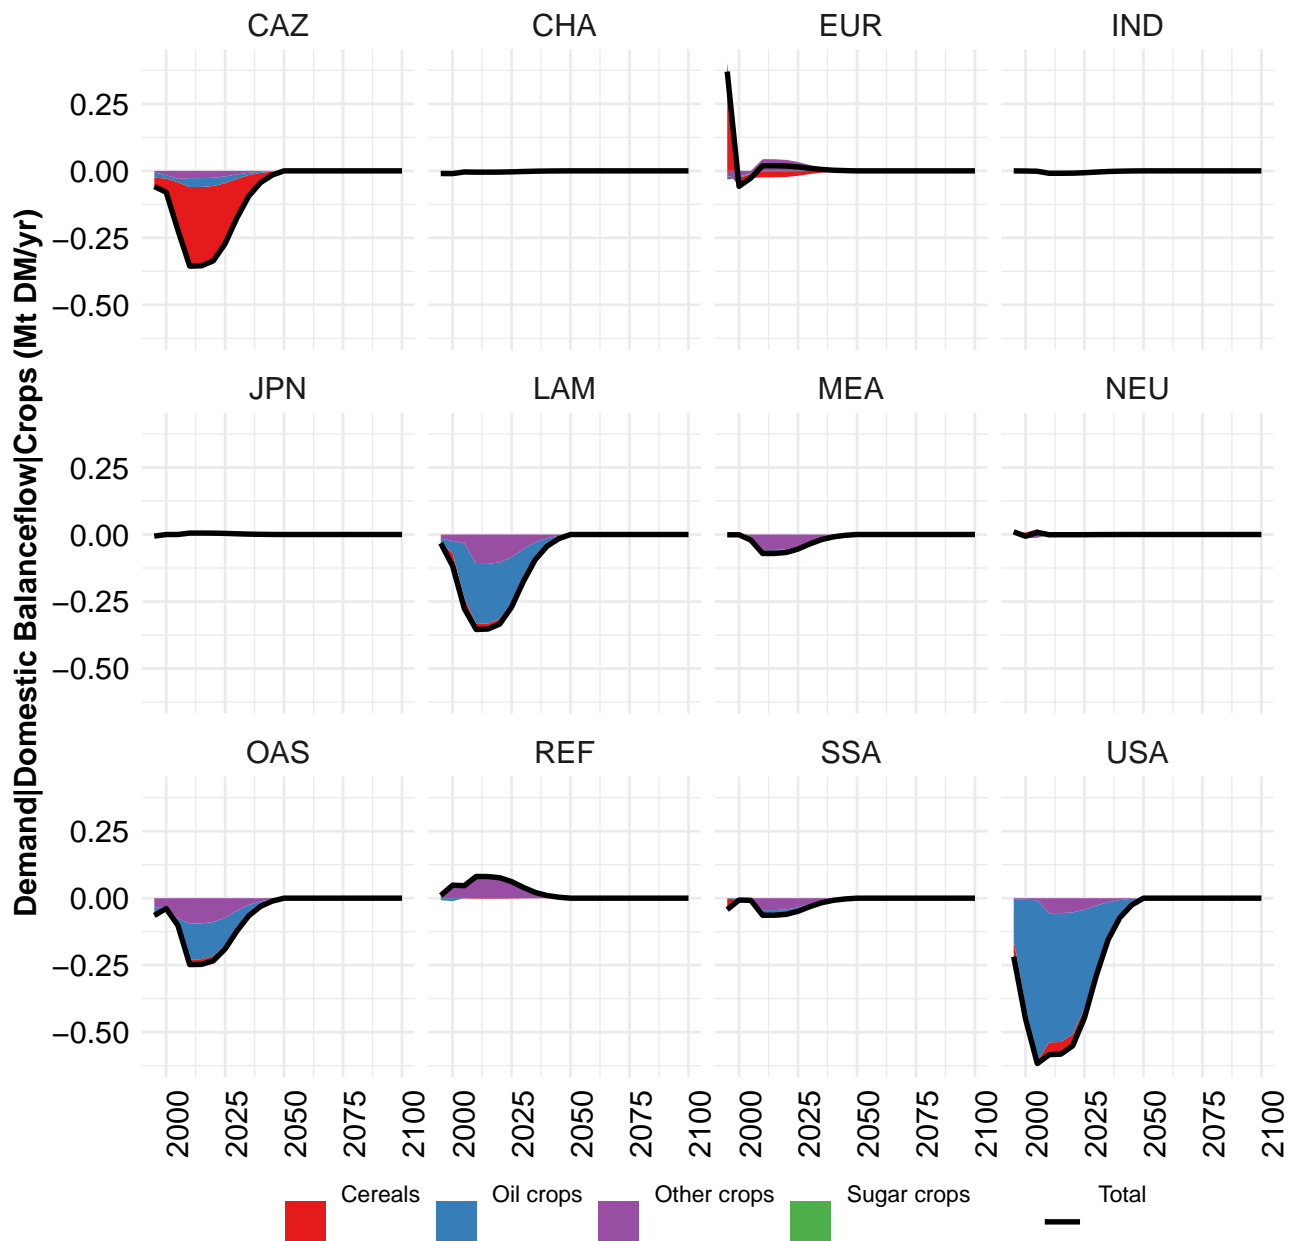

5.1 Crops

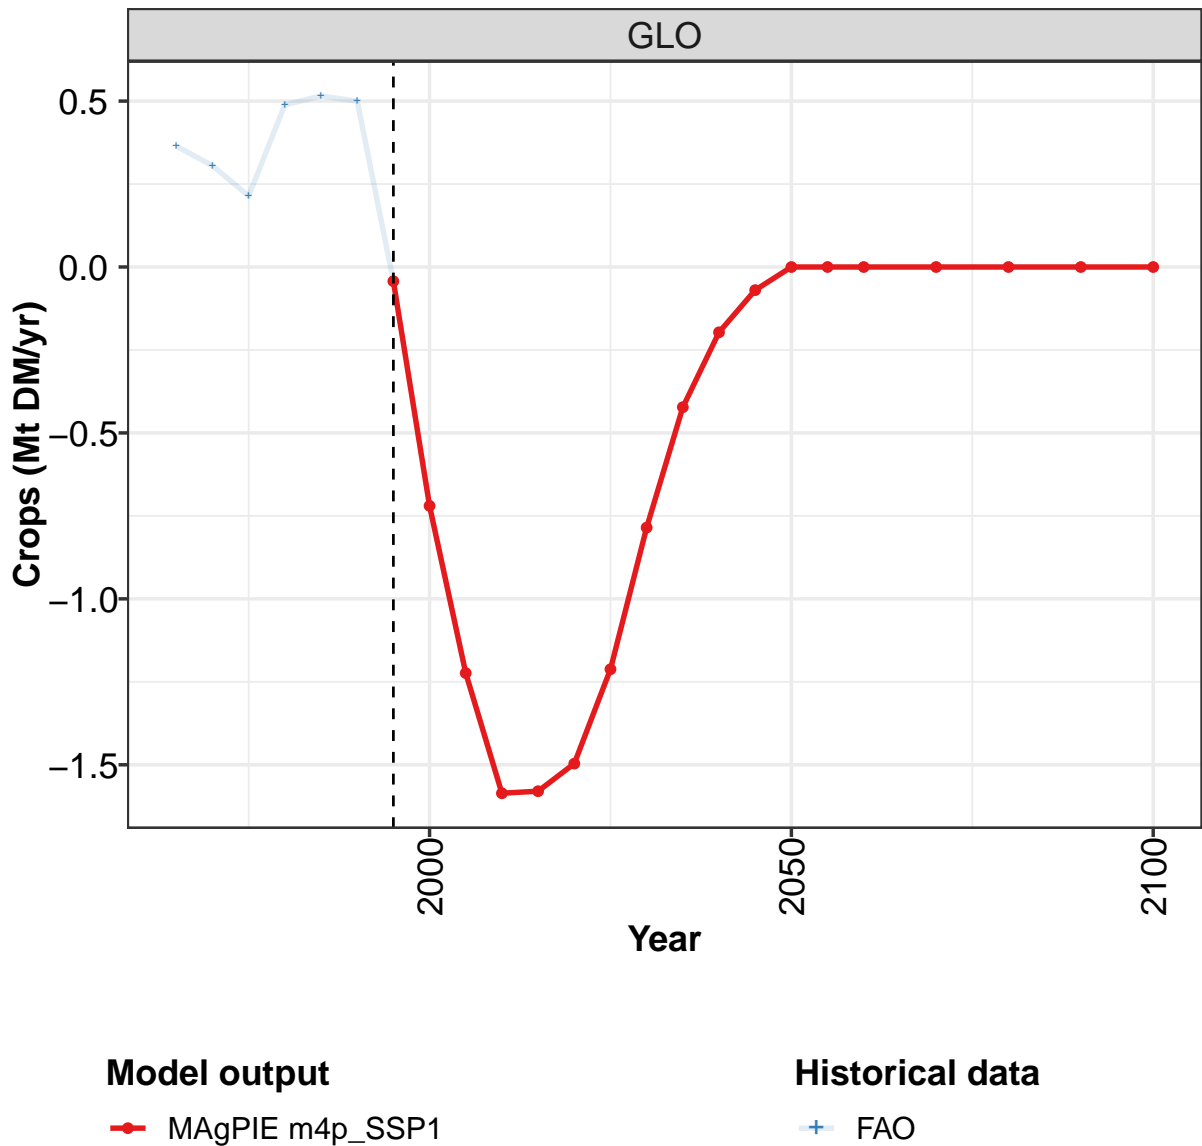

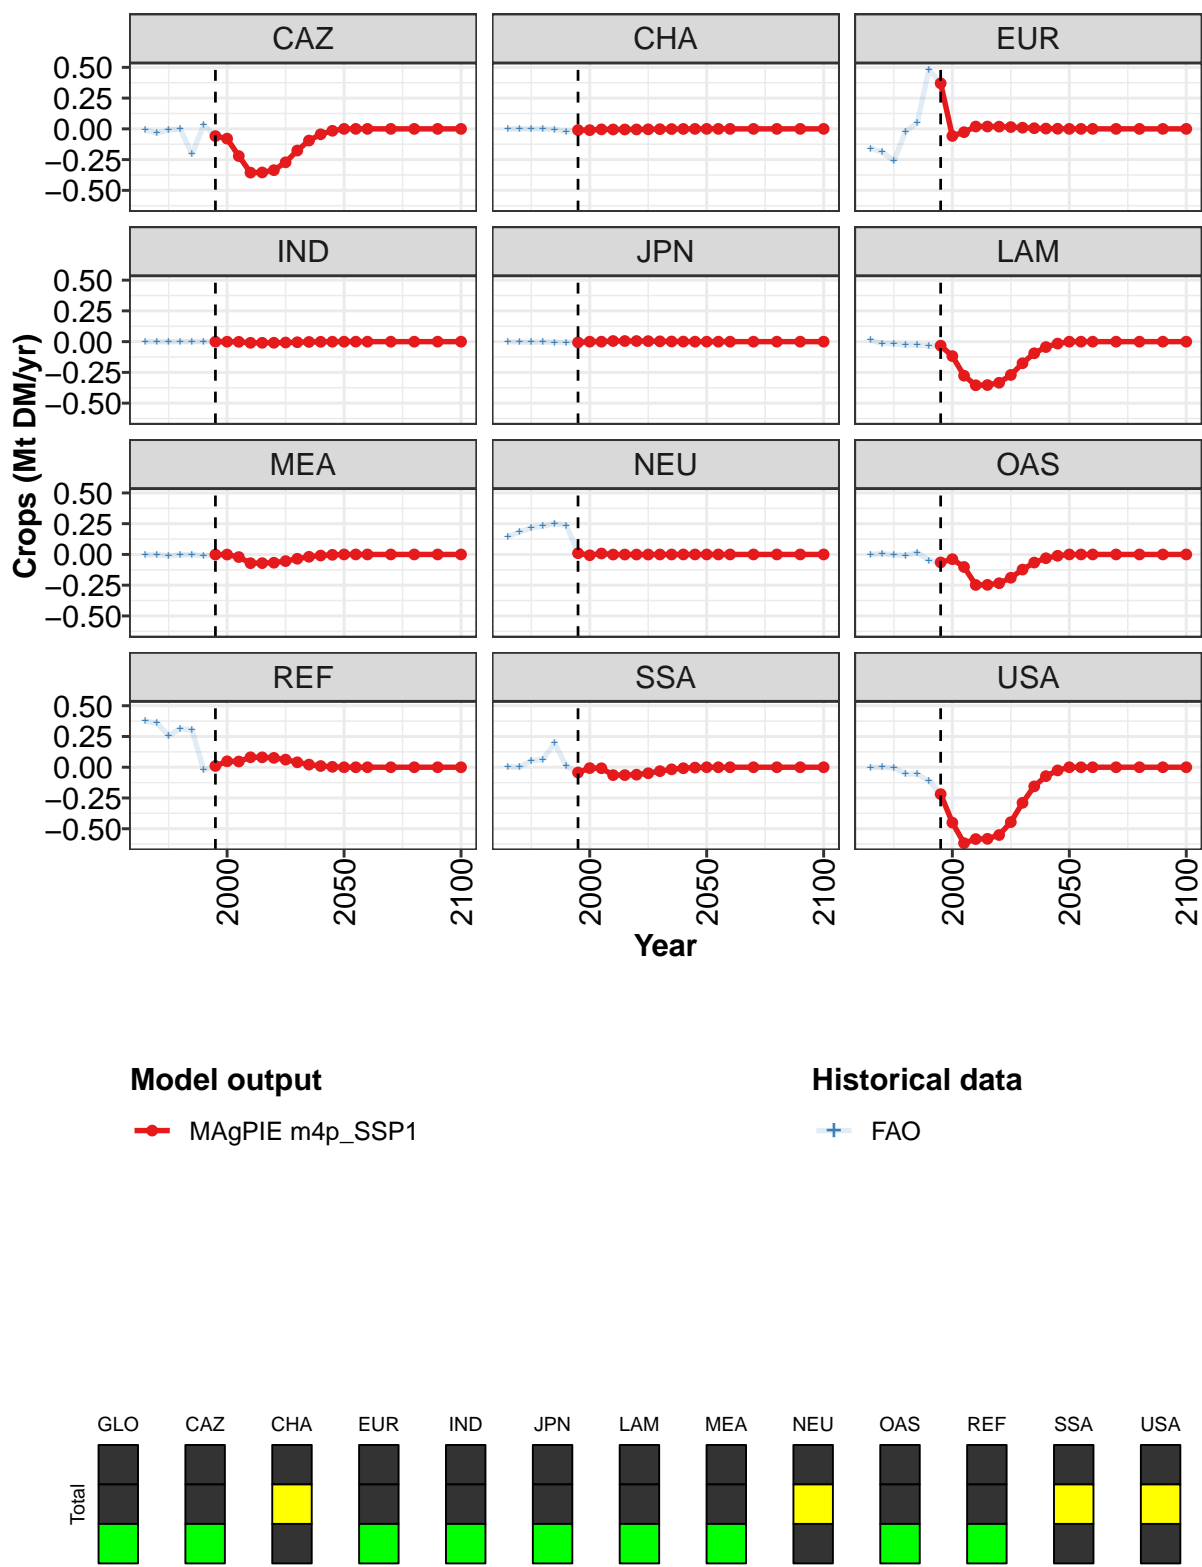

Figure 45: MAgPIE m4p\_SSP1 — Demand—Domestic Balanceflow—Crops (Mt DM/yr)

|     | 1995   | 2000   | 2005   | 2010   | 2015   | 2020   | 2025   | 2030   | 2035   | 2040   | 2045   |
|-----|--------|--------|--------|--------|--------|--------|--------|--------|--------|--------|--------|
| GLO | -0.043 | -0.720 | -1.224 | -1.586 | -1.580 | -1.496 | -1.212 | -0.785 | -0.422 | -0.197 | -0.070 |
| CAZ | -0.059 | -0.080 | -0.221 | -0.356 | -0.354 | -0.336 | -0.272 | -0.176 | -0.095 | -0.044 | -0.016 |
| CHA | -0.010 | -0.010 | -0.004 | -0.005 | -0.005 | -0.005 | -0.004 | -0.002 | -0.001 | -0.001 | -0.000 |
| EUR | 0.370  | -0.058 | -0.027 | 0.019  | 0.019  | 0.018  | 0.015  | 0.010  | 0.005  | 0.002  | 0.001  |
| IND | -0.000 | -0.001 | -0.002 | -0.009 | -0.009 | -0.009 | -0.007 | -0.005 | -0.002 | -0.001 | -0.000 |
| JPN | -0.006 | 0.000  | 0.000  | 0.005  | 0.005  | 0.005  | 0.004  | 0.003  | 0.002  | 0.001  | 0.000  |
| LAM | -0.032 | -0.117 | -0.277 | -0.354 | -0.353 | -0.334 | -0.271 | -0.176 | -0.094 | -0.044 | -0.016 |
| MEA | -0.001 | -0.001 | -0.021 | -0.071 | -0.071 | -0.067 | -0.054 | -0.035 | -0.019 | -0.009 | -0.003 |
| NEU | 0.010  | -0.006 | 0.008  | -0.001 | -0.001 | -0.001 | -0.001 | -0.000 | -0.000 | -0.000 | 0.000  |
| OAS | -0.065 | -0.038 | -0.102 | -0.248 | -0.247 | -0.234 | -0.190 | -0.123 | -0.066 | -0.031 | -0.011 |
| REF | 0.010  | 0.048  | 0.047  | 0.081  | 0.081  | 0.076  | 0.062  | 0.040  | 0.021  | 0.010  | 0.004  |
| SSA | -0.043 | -0.007 | -0.008 | -0.064 | -0.064 | -0.060 | -0.049 | -0.032 | -0.017 | -0.008 | -0.003 |
| USA | -0.218 | -0.450 | -0.617 | -0.584 | -0.582 | -0.551 | -0.446 | -0.289 | -0.156 | -0.072 | -0.026 |

Table 134: MAgPIE m4p\_SSP1 — Demand—Domestic Balanceflow—Crops (Mt DM/yr) [PART 1/2]

|     | 2050  | 2055  | 2060  | 2070  | 2080  | 2090  | 2100  |
|-----|-------|-------|-------|-------|-------|-------|-------|
| GLO | 0.000 | 0.000 | 0.000 | 0.000 | 0.000 | 0.000 | 0.000 |
| CAZ | 0.000 | 0.000 | 0.000 | 0.000 | 0.000 | 0.000 | 0.000 |
| CHA | 0.000 | 0.000 | 0.000 | 0.000 | 0.000 | 0.000 | 0.000 |
| EUR | 0.000 | 0.000 | 0.000 | 0.000 | 0.000 | 0.000 | 0.000 |
| IND | 0.000 | 0.000 | 0.000 | 0.000 | 0.000 | 0.000 | 0.000 |
| JPN | 0.000 | 0.000 | 0.000 | 0.000 | 0.000 | 0.000 | 0.000 |
| LAM | 0.000 | 0.000 | 0.000 | 0.000 | 0.000 | 0.000 | 0.000 |
| MEA | 0.000 | 0.000 | 0.000 | 0.000 | 0.000 | 0.000 | 0.000 |
| NEU | 0.000 | 0.000 | 0.000 | 0.000 | 0.000 | 0.000 | 0.000 |
| OAS | 0.000 | 0.000 | 0.000 | 0.000 | 0.000 | 0.000 | 0.000 |
| REF | 0.000 | 0.000 | 0.000 | 0.000 | 0.000 | 0.000 | 0.000 |
| SSA | 0.000 | 0.000 | 0.000 | 0.000 | 0.000 | 0.000 | 0.000 |
| USA | 0.000 | 0.000 | 0.000 | 0.000 | 0.000 | 0.000 | 0.000 |

Table 135: MAgPIE m4p\_SSP1 — Demand—Domestic Balanceflow—Crops (Mt DM/yr) [PART 2/2]

|     | 1965   | 1970   | 1975   | 1980   | 1985   | 1990   | 1995   | 2000   | 2005   | 2010   |
|-----|--------|--------|--------|--------|--------|--------|--------|--------|--------|--------|
| GLO | 0.364  | 0.305  | 0.214  | 0.489  | 0.515  | 0.500  | -0.043 | -0.720 | -1.224 | -1.586 |
| CAZ | -0.007 | -0.035 | -0.010 | -0.001 | -0.206 | 0.033  | -0.059 | -0.079 | -0.221 | -0.356 |
| CHA | -0.001 | 0.000  | -0.000 | -0.000 | -0.004 | -0.022 | -0.010 | -0.010 | -0.004 | -0.005 |
| EUR | -0.158 | -0.189 | -0.260 | -0.022 | 0.050  | 0.480  | 0.370  | -0.058 | -0.027 | 0.019  |
| IND | 0.000  | 0.000  | -0.000 | 0.000  | 0.000  | 0.001  | -0.000 | -0.001 | -0.002 | -0.009 |
| JPN | 0.000  | -0.004 | -0.004 | -0.003 | -0.005 | -0.006 | -0.006 | 0.000  | 0.000  | 0.005  |
| LAM | 0.012  | -0.014 | -0.017 | -0.028 | -0.028 | -0.036 | -0.032 | -0.117 | -0.277 | -0.354 |
| MEA | -0.004 | -0.003 | -0.011 | -0.003 | -0.001 | -0.011 | -0.001 | -0.001 | -0.021 | -0.071 |
| NEU | 0.146  | 0.183  | 0.216  | 0.230  | 0.252  | 0.236  | 0.010  | -0.006 | 0.008  | -0.001 |
| OAS | -0.001 | 0.006  | -0.004 | -0.008 | 0.015  | -0.048 | -0.065 | -0.039 | -0.102 | -0.248 |
| REF | 0.375  | 0.359  | 0.256  | 0.315  | 0.301  | -0.024 | 0.010  | 0.048  | 0.047  | 0.081  |
| SSA | 0.003  | 0.002  | 0.052  | 0.065  | 0.197  | 0.008  | -0.043 | -0.007 | -0.008 | -0.064 |
| USA | -0.001 | -0.000 | -0.004 | -0.055 | -0.055 | -0.111 | -0.218 | -0.450 | -0.617 | -0.584 |

Table 136: FAO — Demand—Domestic Balanceflow—Crops (Mt DM/yr)

5.1.1 Cereals

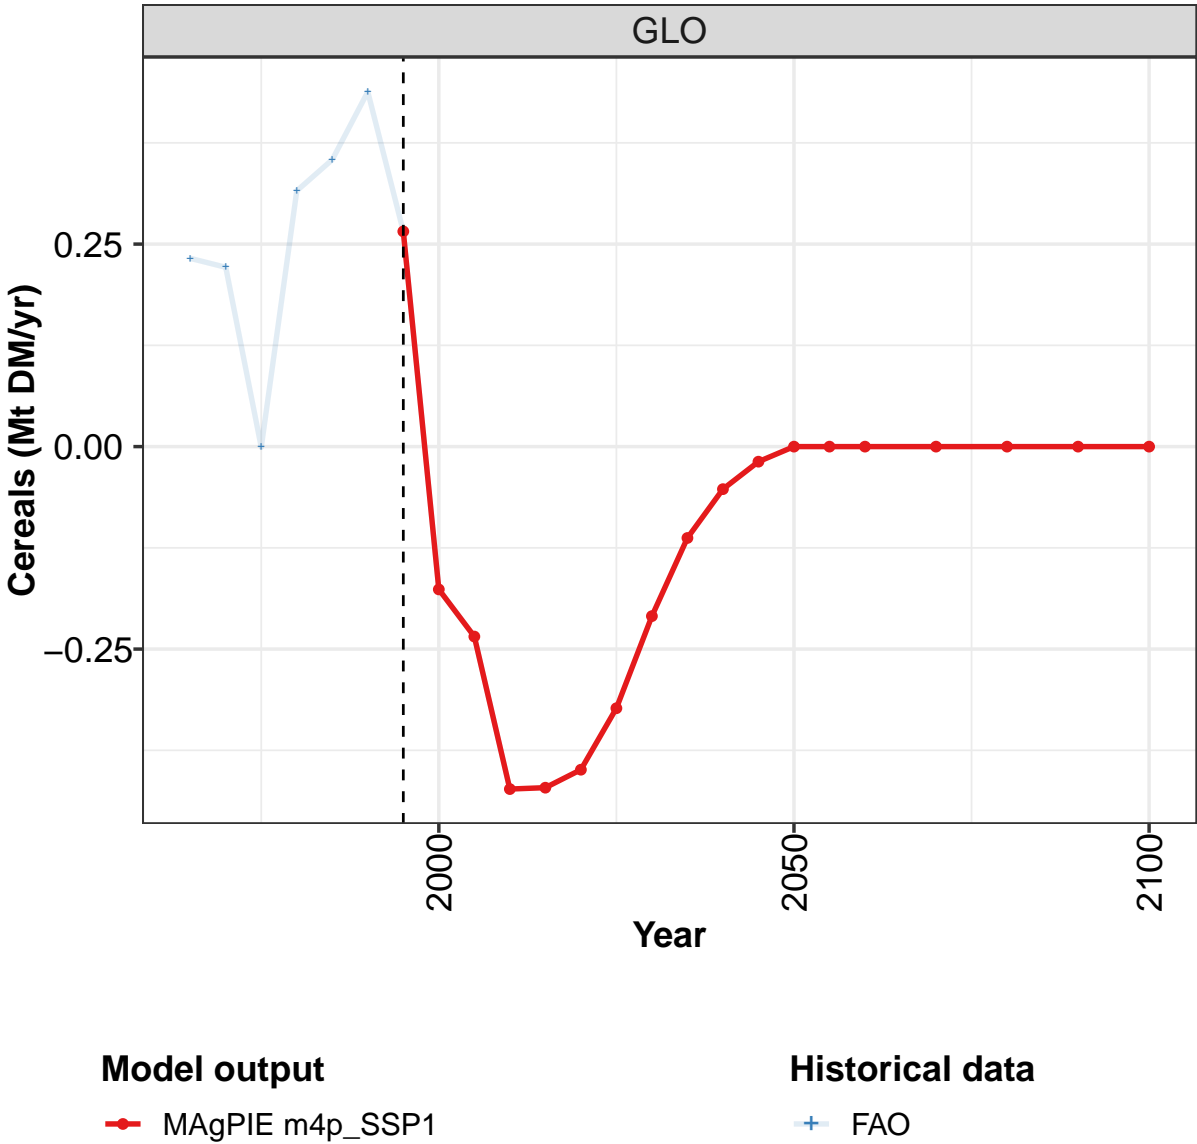



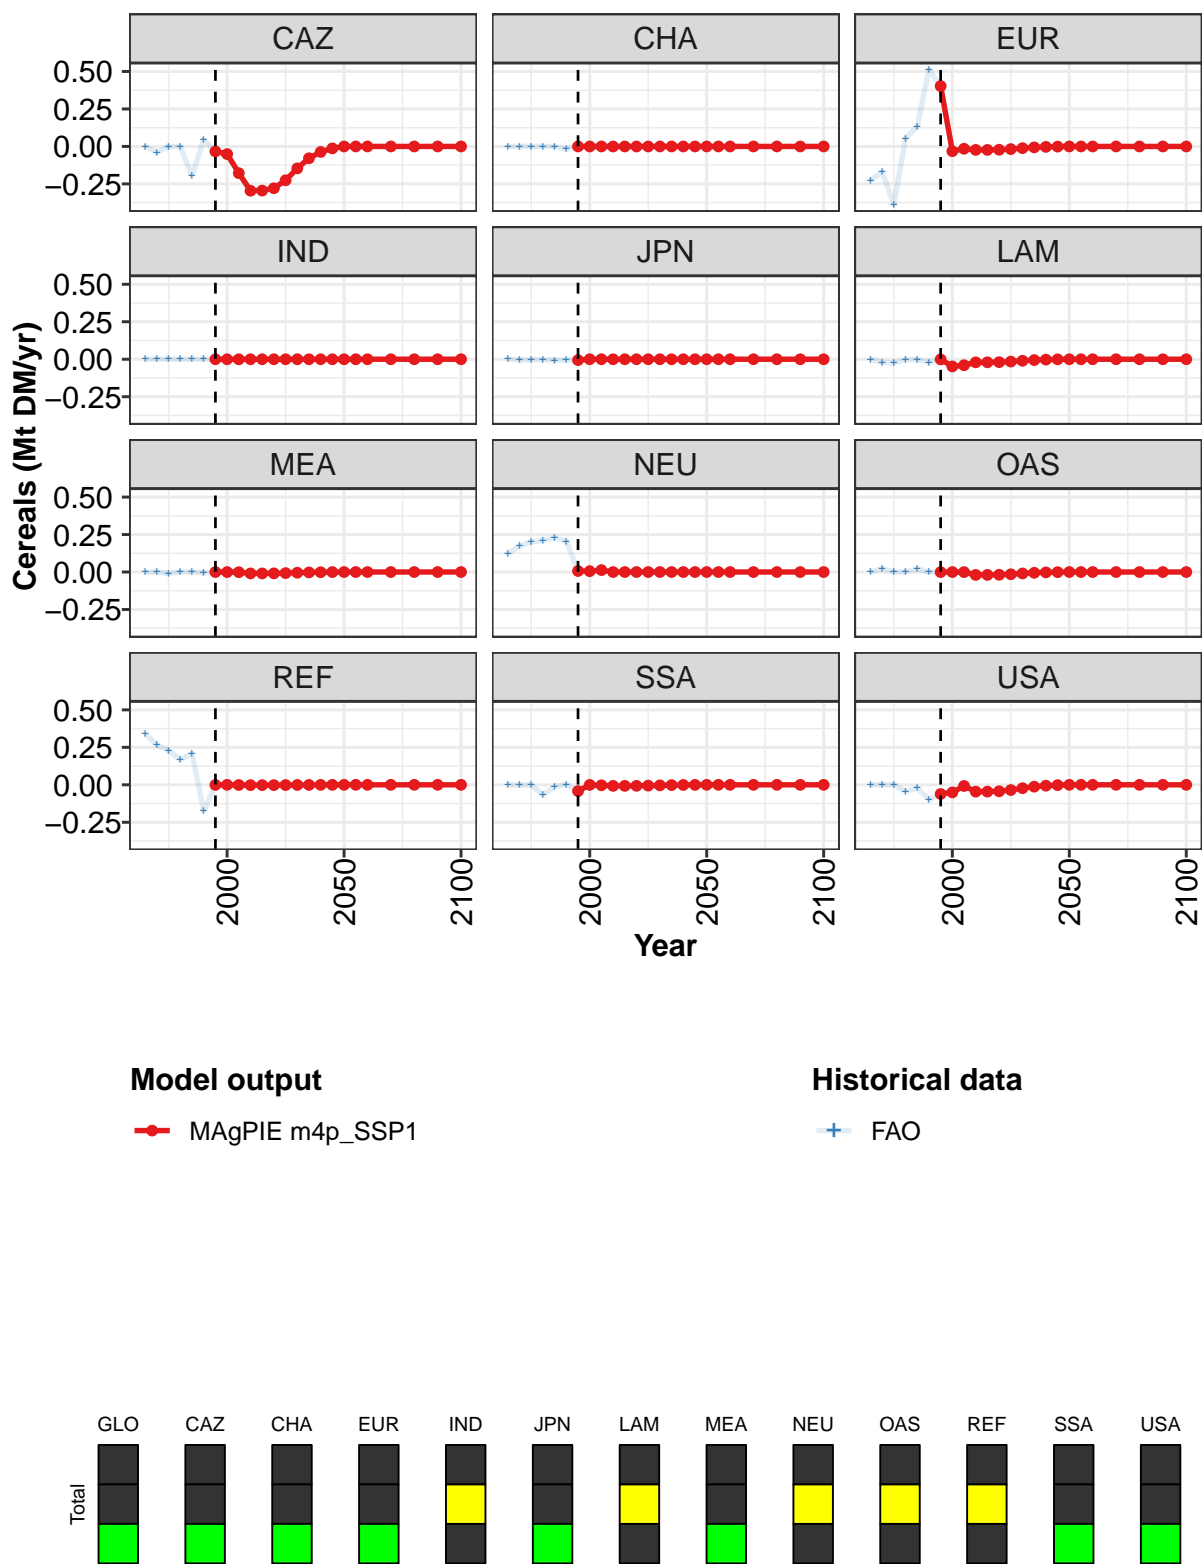

Figure 46: MAgPIE m4p\_SSP1 — Demand—Domestic Balanceflow—Crops—Cereals (Mt DM/yr)

|     | 1995   | 2000   | 2005   | 2010   | 2015   | 2020   | 2025   | 2030   | 2035   | 2040   | 2045   |
|-----|--------|--------|--------|--------|--------|--------|--------|--------|--------|--------|--------|
| GLO | 0.266  | -0.176 | -0.234 | -0.423 | -0.421 | -0.399 | -0.323 | -0.209 | -0.113 | -0.052 | -0.019 |
| CAZ | -0.033 | -0.051 | -0.178 | -0.295 | -0.294 | -0.279 | -0.226 | -0.146 | -0.079 | -0.037 | -0.013 |
| CHA | 0.000  | -0.000 | -0.000 | -0.000 | -0.000 | -0.000 | -0.000 | -0.000 | -0.000 | 0.000  | 0.000  |
| EUR | 0.403  | -0.032 | -0.015 | -0.023 | -0.023 | -0.022 | -0.018 | -0.011 | -0.006 | -0.003 | -0.001 |
| IND | 0.000  | -0.000 | -0.000 | -0.000 | -0.000 | -0.000 | -0.000 | -0.000 | 0.000  | 0.000  | 0.000  |
| JPN | -0.006 | 0.000  | 0.000  | 0.000  | 0.000  | 0.000  | 0.000  | 0.000  | 0.000  | 0.000  | 0.000  |
| LAM | -0.001 | -0.048 | -0.040 | -0.021 | -0.020 | -0.019 | -0.016 | -0.010 | -0.005 | -0.003 | -0.001 |
| MEA | 0.000  | -0.000 | -0.001 | -0.009 | -0.009 | -0.009 | -0.007 | -0.005 | -0.003 | -0.001 | -0.000 |
| NEU | 0.007  | 0.006  | 0.013  | 0.000  | 0.000  | 0.000  | 0.000  | 0.000  | 0.000  | 0.000  | 0.000  |
| OAS | -0.000 | 0.000  | -0.001 | -0.019 | -0.019 | -0.018 | -0.015 | -0.010 | -0.005 | -0.002 | -0.001 |
| REF | -0.001 | 0.000  | -0.001 | -0.002 | -0.002 | -0.002 | -0.002 | -0.001 | -0.001 | -0.000 | -0.000 |
| SSA | -0.042 | -0.001 | -0.003 | -0.007 | -0.007 | -0.007 | -0.005 | -0.003 | -0.002 | -0.001 | -0.000 |
| USA | -0.061 | -0.051 | -0.008 | -0.045 | -0.045 | -0.043 | -0.035 | -0.023 | -0.012 | -0.006 | -0.002 |

Table 137: MAgPIE m4p\_SSP1 — Demand—Domestic Balanceflow—Crops—Cereals (Mt DM/yr) [PART 1/2]

|     | 2050  | 2055  | 2060  | 2070  | 2080  | 2090  | 2100  |
|-----|-------|-------|-------|-------|-------|-------|-------|
| GLO | 0.000 | 0.000 | 0.000 | 0.000 | 0.000 | 0.000 | 0.000 |
| CAZ | 0.000 | 0.000 | 0.000 | 0.000 | 0.000 | 0.000 | 0.000 |
| CHA | 0.000 | 0.000 | 0.000 | 0.000 | 0.000 | 0.000 | 0.000 |
| EUR | 0.000 | 0.000 | 0.000 | 0.000 | 0.000 | 0.000 | 0.000 |
| IND | 0.000 | 0.000 | 0.000 | 0.000 | 0.000 | 0.000 | 0.000 |
| JPN | 0.000 | 0.000 | 0.000 | 0.000 | 0.000 | 0.000 | 0.000 |
| LAM | 0.000 | 0.000 | 0.000 | 0.000 | 0.000 | 0.000 | 0.000 |
| MEA | 0.000 | 0.000 | 0.000 | 0.000 | 0.000 | 0.000 | 0.000 |
| NEU | 0.000 | 0.000 | 0.000 | 0.000 | 0.000 | 0.000 | 0.000 |
| OAS | 0.000 | 0.000 | 0.000 | 0.000 | 0.000 | 0.000 | 0.000 |
| REF | 0.000 | 0.000 | 0.000 | 0.000 | 0.000 | 0.000 | 0.000 |
| SSA | 0.000 | 0.000 | 0.000 | 0.000 | 0.000 | 0.000 | 0.000 |
| USA | 0.000 | 0.000 | 0.000 | 0.000 | 0.000 | 0.000 | 0.000 |

Table 138: MAgPIE m4p\_SSP1 — Demand—Domestic Balanceflow—Crops—Cereals (Mt DM/yr) [PART 2/2]

|     | 1965   | 1970   | 1975   | 1980   | 1985   | 1990   | 1995   | 2000   | 2005   | 2010   |
|-----|--------|--------|--------|--------|--------|--------|--------|--------|--------|--------|
| GLO | 0.232  | 0.221  | -0.001 | 0.316  | 0.354  | 0.438  | 0.266  | -0.176 | -0.234 | -0.423 |
| CAZ | 0.000  | -0.040 | -0.001 | -0.000 | -0.195 | 0.045  | -0.033 | -0.051 | -0.178 | -0.295 |
| CHA | 0.000  | 0.000  | 0.000  | 0.000  | -0.001 | -0.018 | 0.000  | -0.000 | 0.000  | -0.000 |
| EUR | -0.227 | -0.169 | -0.389 | 0.054  | 0.134  | 0.511  | 0.403  | -0.031 | -0.015 | -0.023 |
| IND | 0.000  | 0.000  | 0.000  | 0.000  | 0.000  | 0.001  | 0.000  | -0.000 | -0.000 | -0.000 |
| JPN | 0.000  | -0.004 | -0.005 | -0.003 | -0.007 | -0.006 | -0.006 | 0.000  | 0.000  | 0.000  |
| LAM | -0.000 | -0.021 | -0.026 | -0.003 | -0.002 | -0.021 | -0.001 | -0.048 | -0.040 | -0.021 |
| MEA | -0.002 | -0.000 | -0.010 | -0.001 | -0.000 | -0.005 | 0.000  | -0.000 | -0.001 | -0.009 |
| NEU | 0.122  | 0.172  | 0.201  | 0.211  | 0.229  | 0.205  | 0.007  | 0.006  | 0.013  | 0.000  |
| OAS | 0.000  | 0.022  | 0.001  | 0.000  | 0.021  | -0.000 | -0.000 | 0.000  | -0.001 | -0.019 |
| REF | 0.340  | 0.265  | 0.229  | 0.168  | 0.209  | -0.175 | -0.001 | 0.000  | -0.001 | -0.002 |
| SSA | -0.000 | -0.003 | -0.000 | -0.067 | -0.011 | 0.000  | -0.042 | -0.001 | -0.003 | -0.007 |
| USA | 0.000  | 0.000  | 0.000  | -0.043 | -0.021 | -0.098 | -0.061 | -0.051 | -0.008 | -0.045 |

Table 139: FAO — Demand—Domestic Balanceflow—Crops—Cereals (Mt DM/yr)

5.1.2 Cereals—Maize

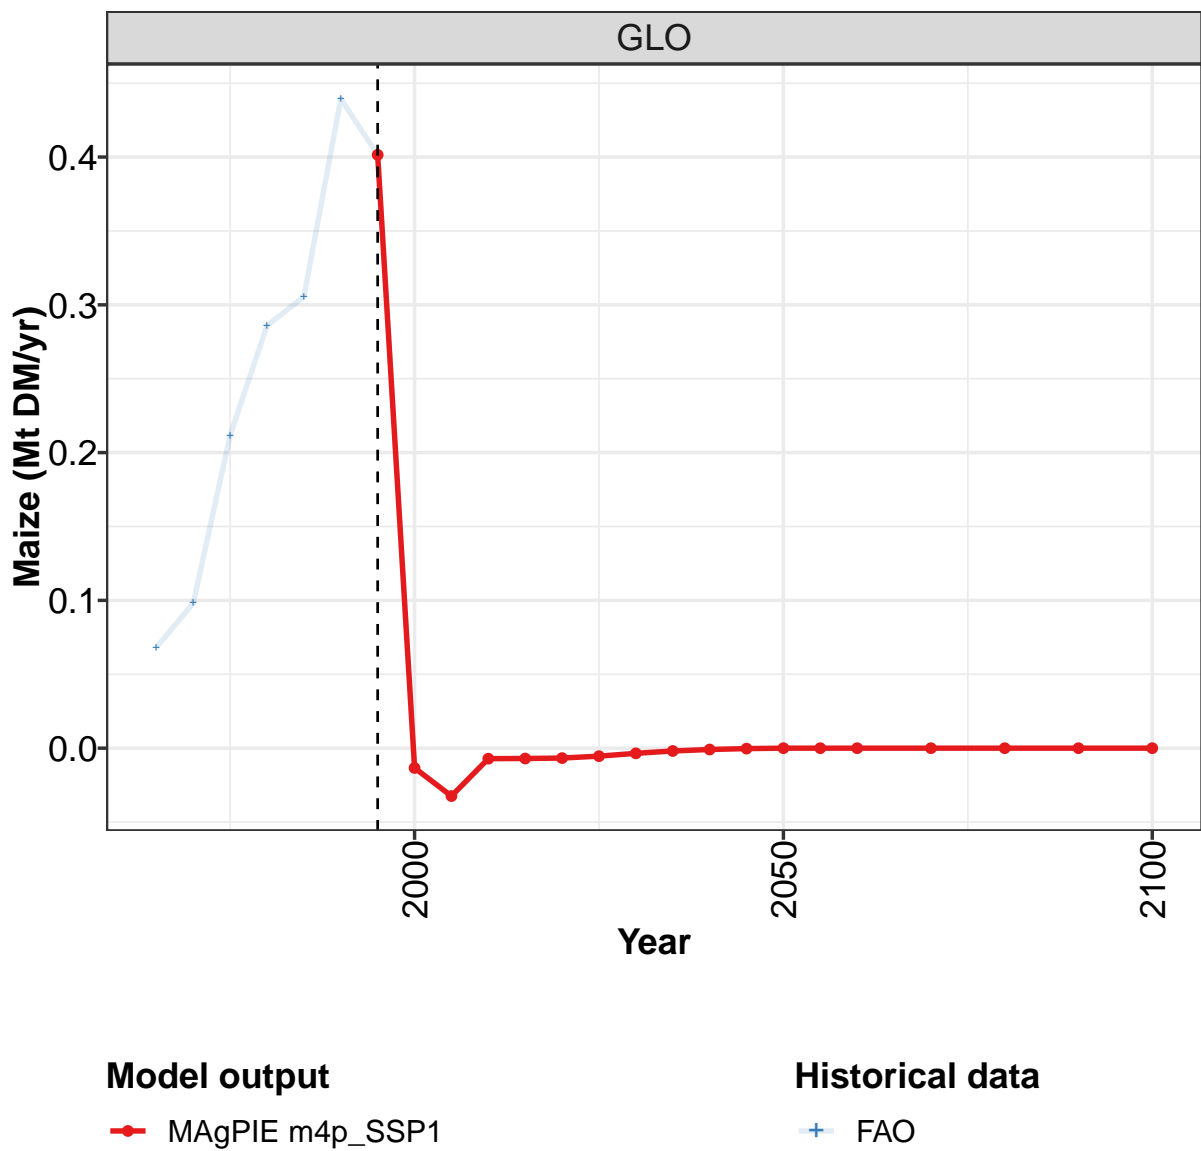

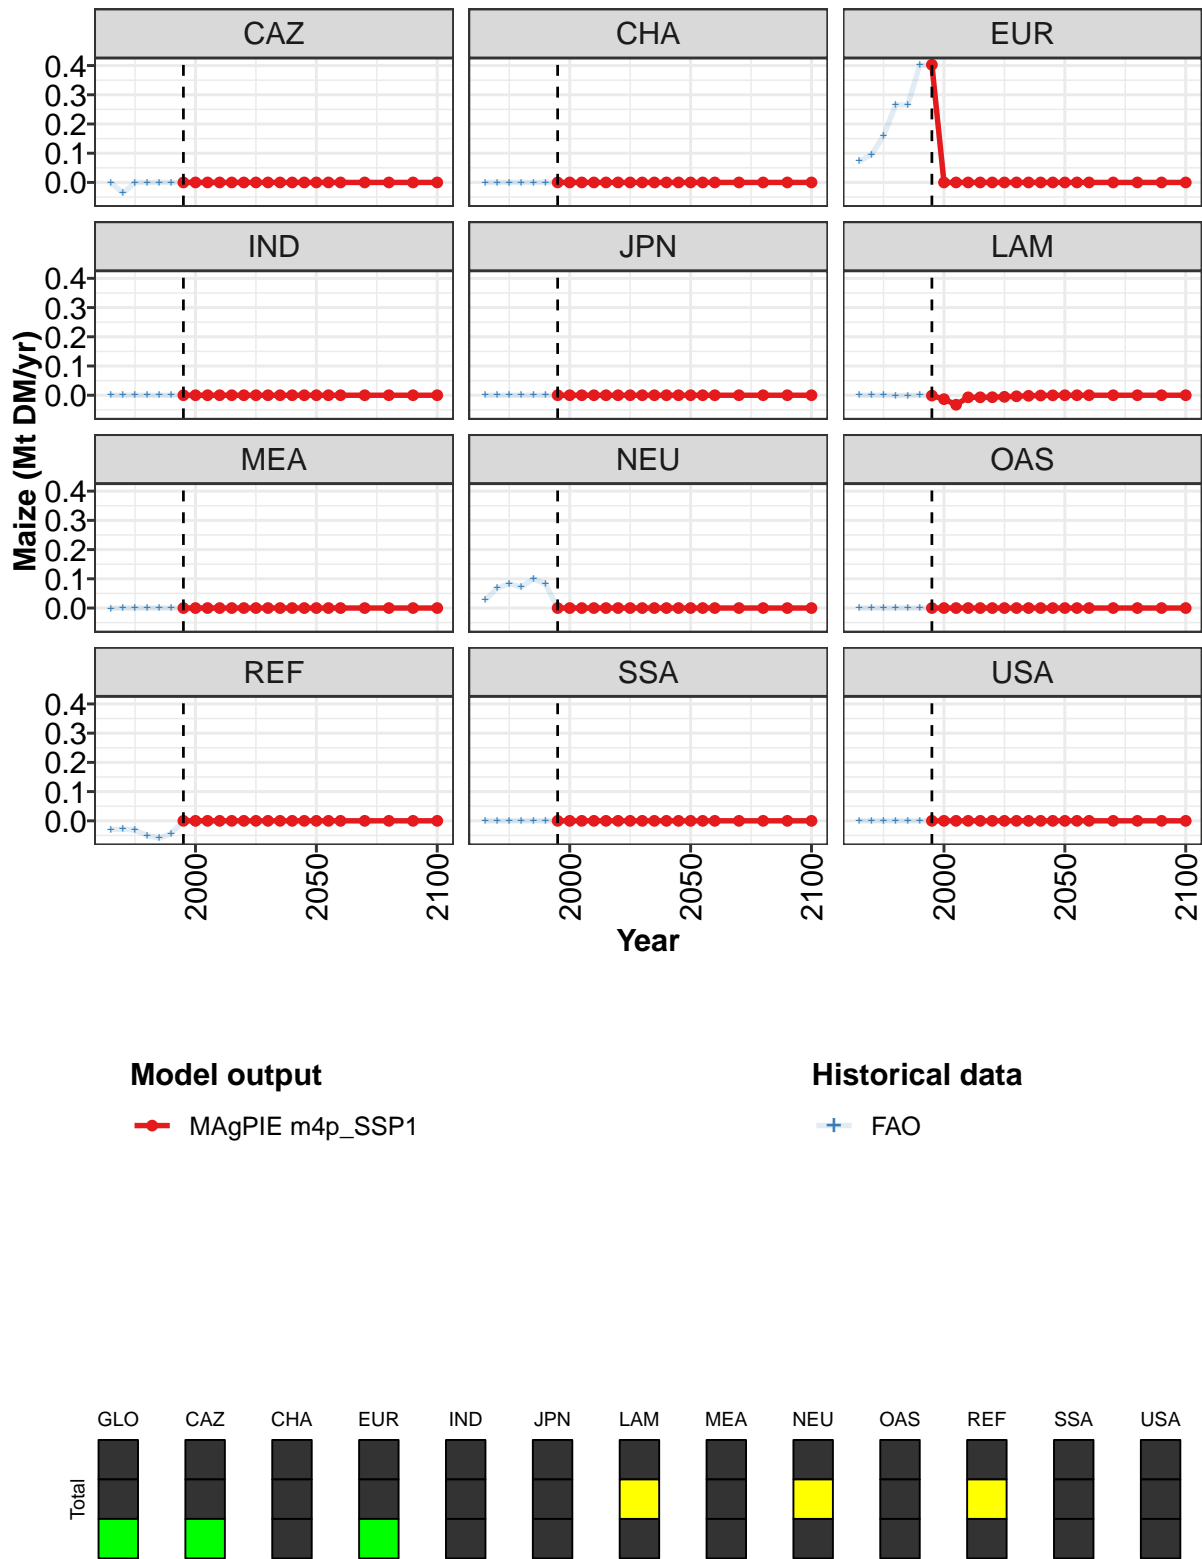

Figure 47: MAgPIE m4p\_SSP1 — Demand—Domestic Balanceflow—Crops—Cereals—Maize (Mt DM/yr)

|     | 1995   | 2000   | 2005   | 2010   | 2015   | 2020   | 2025   | 2030   | 2035   | 2040   | 2045   |
|-----|--------|--------|--------|--------|--------|--------|--------|--------|--------|--------|--------|
| GLO | 0.402  | -0.013 | -0.032 | -0.007 | -0.007 | -0.007 | -0.005 | -0.004 | -0.002 | -0.001 | -0.000 |
| CAZ | 0.000  | 0.000  | 0.000  | 0.000  | 0.000  | 0.000  | 0.000  | 0.000  | 0.000  | 0.000  | 0.000  |
| CHA | 0.000  | 0.000  | 0.000  | 0.000  | 0.000  | 0.000  | 0.000  | 0.000  | 0.000  | 0.000  | 0.000  |
| EUR | 0.403  | 0.000  | 0.000  | 0.000  | 0.000  | 0.000  | 0.000  | 0.000  | 0.000  | 0.000  | 0.000  |
| IND | 0.000  | 0.000  | 0.000  | 0.000  | 0.000  | 0.000  | 0.000  | 0.000  | 0.000  | 0.000  | 0.000  |
| JPN | 0.000  | 0.000  | 0.000  | 0.000  | 0.000  | 0.000  | 0.000  | 0.000  | 0.000  | 0.000  | 0.000  |
| LAM | -0.001 | -0.013 | -0.032 | -0.007 | -0.007 | -0.007 | -0.005 | -0.004 | -0.002 | -0.001 | -0.000 |
| MEA | 0.000  | 0.000  | 0.000  | 0.000  | 0.000  | 0.000  | 0.000  | 0.000  | 0.000  | 0.000  | 0.000  |
| NEU | 0.000  | 0.000  | 0.000  | 0.000  | 0.000  | 0.000  | 0.000  | 0.000  | 0.000  | 0.000  | 0.000  |
| OAS | 0.000  | 0.000  | 0.000  | 0.000  | 0.000  | 0.000  | 0.000  | 0.000  | 0.000  | 0.000  | 0.000  |
| REF | 0.000  | 0.000  | 0.000  | 0.000  | 0.000  | 0.000  | 0.000  | 0.000  | 0.000  | 0.000  | 0.000  |
| SSA | 0.000  | 0.000  | 0.000  | 0.000  | 0.000  | 0.000  | 0.000  | 0.000  | 0.000  | 0.000  | 0.000  |
| USA | 0.000  | 0.000  | 0.000  | 0.000  | 0.000  | 0.000  | 0.000  | 0.000  | 0.000  | 0.000  | 0.000  |

Table 140: MAgPIE m4p\_SSP1 — Demand—Domestic Balanceflow—Crops—Cereals—Maize (Mt DM/yr)  
[PART 1/2]

|     | 2050  | 2055  | 2060  | 2070  | 2080  | 2090  | 2100  |
|-----|-------|-------|-------|-------|-------|-------|-------|
| GLO | 0.000 | 0.000 | 0.000 | 0.000 | 0.000 | 0.000 | 0.000 |
| CAZ | 0.000 | 0.000 | 0.000 | 0.000 | 0.000 | 0.000 | 0.000 |
| CHA | 0.000 | 0.000 | 0.000 | 0.000 | 0.000 | 0.000 | 0.000 |
| EUR | 0.000 | 0.000 | 0.000 | 0.000 | 0.000 | 0.000 | 0.000 |
| IND | 0.000 | 0.000 | 0.000 | 0.000 | 0.000 | 0.000 | 0.000 |
| JPN | 0.000 | 0.000 | 0.000 | 0.000 | 0.000 | 0.000 | 0.000 |
| LAM | 0.000 | 0.000 | 0.000 | 0.000 | 0.000 | 0.000 | 0.000 |
| MEA | 0.000 | 0.000 | 0.000 | 0.000 | 0.000 | 0.000 | 0.000 |
| NEU | 0.000 | 0.000 | 0.000 | 0.000 | 0.000 | 0.000 | 0.000 |
| OAS | 0.000 | 0.000 | 0.000 | 0.000 | 0.000 | 0.000 | 0.000 |
| REF | 0.000 | 0.000 | 0.000 | 0.000 | 0.000 | 0.000 | 0.000 |
| SSA | 0.000 | 0.000 | 0.000 | 0.000 | 0.000 | 0.000 | 0.000 |
| USA | 0.000 | 0.000 | 0.000 | 0.000 | 0.000 | 0.000 | 0.000 |

Table 141: MAgPIE m4p\_SSP1 — Demand—Domestic Balanceflow—Crops—Cereals—Maize (Mt DM/yr)  
[PART 2/2]

|     | 1965   | 1970   | 1975   | 1980   | 1985   | 1990   | 1995   | 2000   | 2005   | 2010   |
|-----|--------|--------|--------|--------|--------|--------|--------|--------|--------|--------|
| GLO | 0.068  | 0.098  | 0.212  | 0.286  | 0.305  | 0.439  | 0.402  | -0.013 | -0.032 | -0.007 |
| CAZ | 0.000  | -0.037 | 0.000  | 0.000  | 0.000  | 0.000  | 0.000  | 0.000  | 0.000  | 0.000  |
| CHA | 0.000  | 0.000  | 0.000  | 0.000  | 0.000  | 0.000  | 0.000  | 0.000  | 0.000  | 0.000  |
| EUR | 0.073  | 0.095  | 0.159  | 0.265  | 0.266  | 0.401  | 0.403  | 0.000  | 0.000  | 0.000  |
| IND | 0.000  | 0.000  | 0.000  | 0.000  | 0.000  | 0.000  | 0.000  | 0.000  | 0.000  | 0.000  |
| JPN | 0.000  | 0.000  | 0.000  | 0.000  | 0.000  | 0.000  | 0.000  | 0.000  | 0.000  | 0.000  |
| LAM | 0.000  | -0.000 | 0.000  | -0.001 | -0.001 | 0.000  | -0.001 | -0.013 | -0.032 | -0.007 |
| MEA | -0.001 | 0.000  | 0.000  | 0.000  | 0.000  | 0.000  | 0.000  | 0.000  | 0.000  | 0.000  |
| NEU | 0.027  | 0.068  | 0.083  | 0.072  | 0.100  | 0.081  | 0.000  | 0.000  | 0.000  | 0.000  |
| OAS | 0.000  | 0.000  | 0.000  | 0.000  | 0.000  | 0.000  | 0.000  | 0.000  | 0.000  | 0.000  |
| REF | -0.030 | -0.028 | -0.031 | -0.050 | -0.059 | -0.043 | 0.000  | 0.000  | 0.000  | 0.000  |
| SSA | 0.000  | 0.000  | 0.000  | 0.000  | 0.000  | 0.000  | 0.000  | 0.000  | 0.000  | 0.000  |
| USA | 0.000  | 0.000  | 0.000  | 0.000  | 0.000  | 0.000  | 0.000  | 0.000  | 0.000  | 0.000  |

Table 142: FAO — Demand—Domestic Balanceflow—Crops—Cereals—Maize (Mt DM/yr)

5.1.3 Cereals—Rice

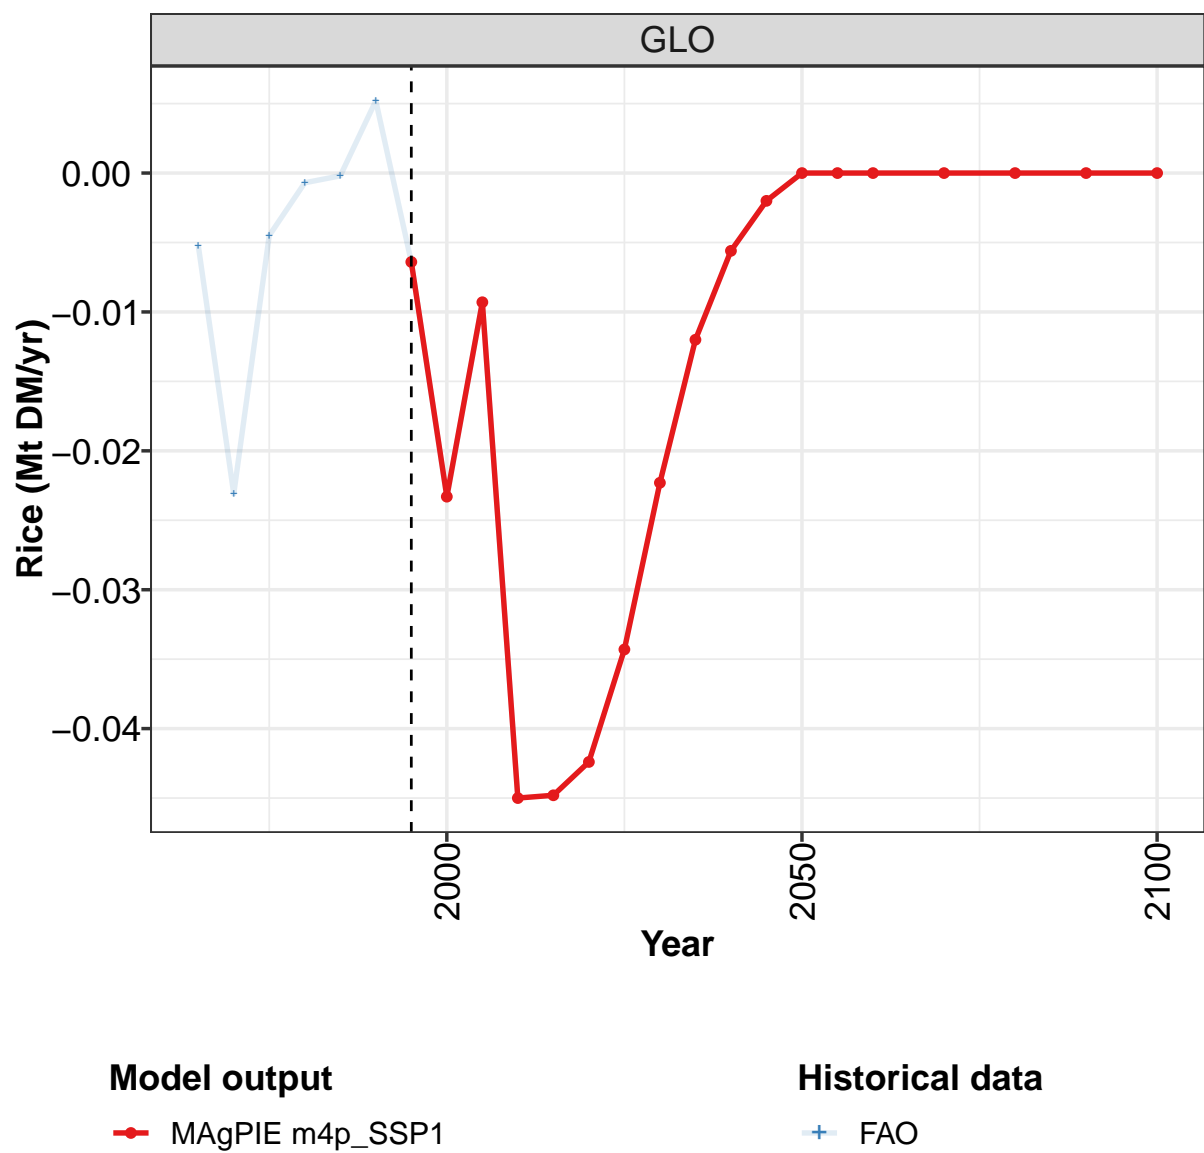

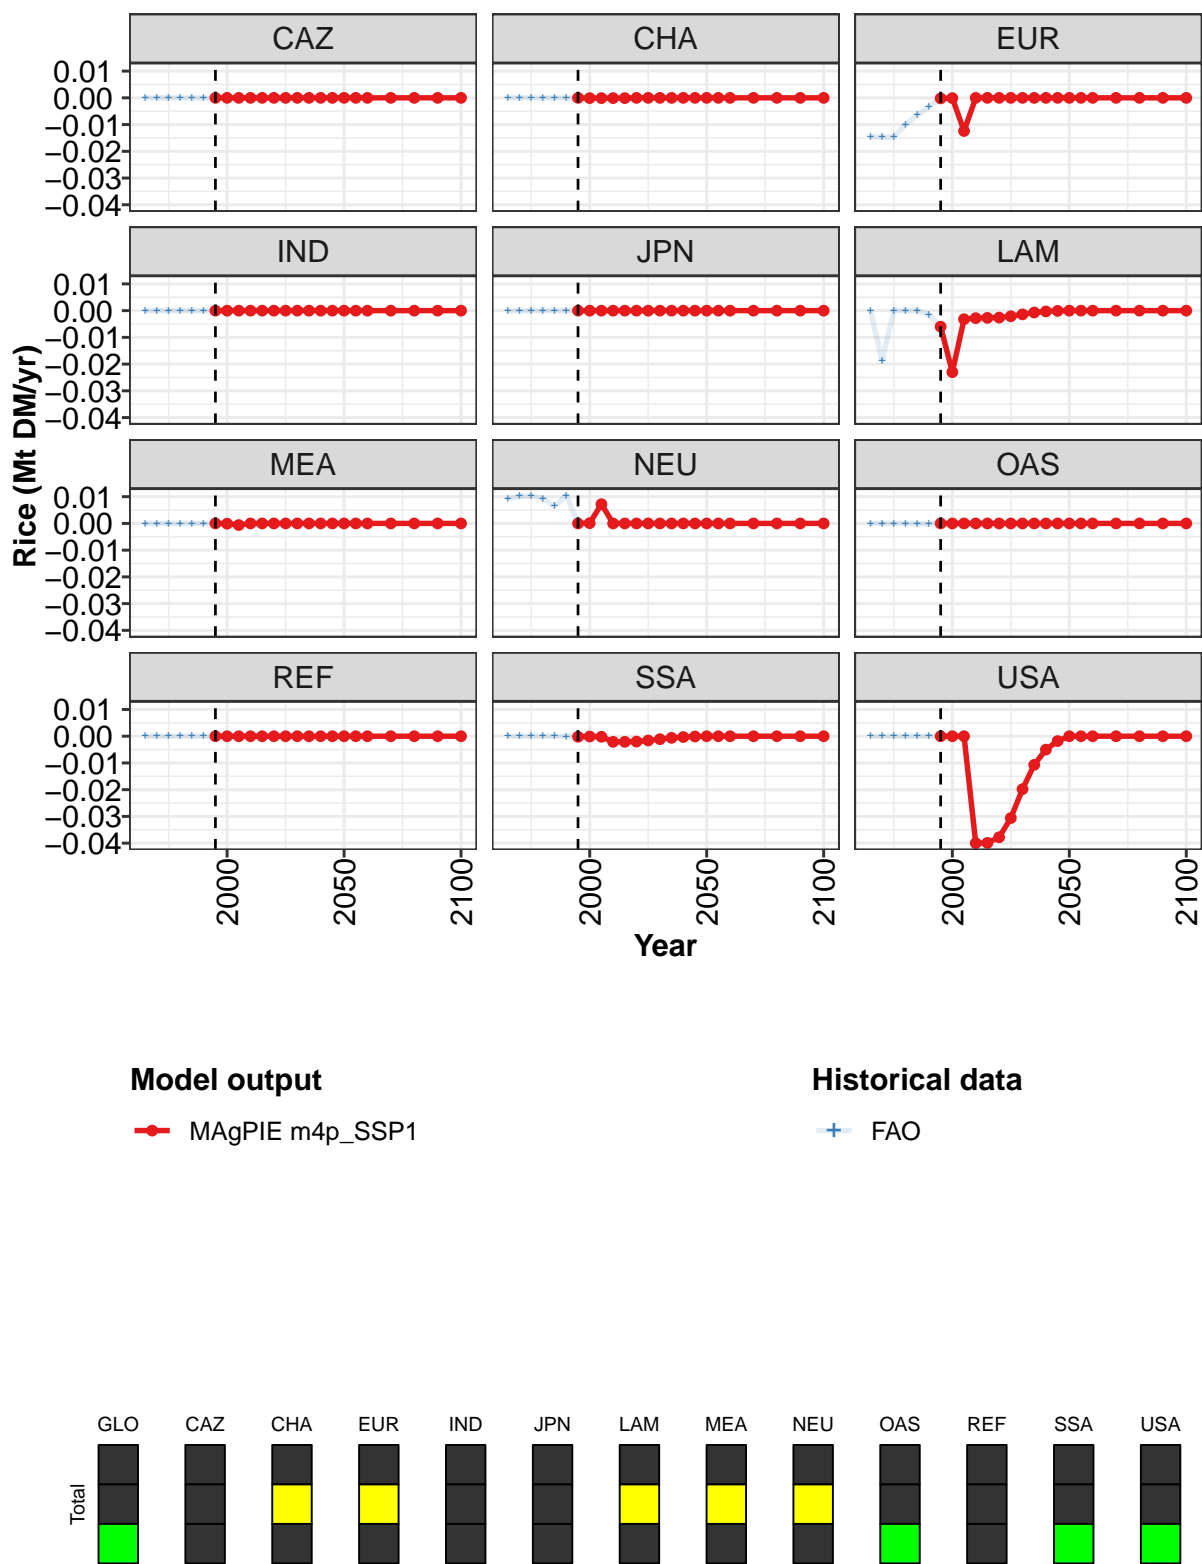

Figure 48: MAgPIE m4p\_SSP1 — Demand—Domestic Balanceflow—Crops—Cereals—Rice (Mt DM/yr)

|     | 1995     | 2000     | 2005     | 2010     | 2015     | 2020     | 2025     | 2030     | 2035     | 2040     | 2045     |
|-----|----------|----------|----------|----------|----------|----------|----------|----------|----------|----------|----------|
| GLO | -0.00640 | -0.02330 | -0.00930 | -0.04500 | -0.04480 | -0.04240 | -0.03430 | -0.02230 | -0.01200 | -0.00560 | -0.00000 |
| CAZ | 0.00000  | 0.00000  | 0.00000  | 0.00000  | 0.00000  | 0.00000  | 0.00000  | 0.00000  | 0.00000  | 0.00000  | 0.00000  |
| CHA | 0.00000  | -0.00010 | -0.00010 | -0.00010 | -0.00010 | 0.00000  | 0.00000  | 0.00000  | 0.00000  | 0.00000  | 0.00000  |
| EUR | -0.00020 | -0.00010 | -0.01240 | 0.00000  | 0.00000  | 0.00000  | 0.00000  | 0.00000  | 0.00000  | 0.00000  | 0.00000  |
| IND | 0.00000  | 0.00000  | 0.00000  | 0.00000  | 0.00000  | 0.00000  | 0.00000  | 0.00000  | 0.00000  | 0.00000  | 0.00000  |
| JPN | 0.00000  | 0.00000  | 0.00000  | 0.00000  | 0.00000  | 0.00000  | 0.00000  | 0.00000  | 0.00000  | 0.00000  | 0.00000  |
| LAM | -0.00600 | -0.02300 | -0.00320 | -0.00280 | -0.00270 | -0.00260 | -0.00210 | -0.00140 | -0.00070 | -0.00030 | -0.00000 |
| MEA | 0.00000  | -0.00010 | -0.00060 | 0.00000  | 0.00000  | 0.00000  | 0.00000  | 0.00000  | 0.00000  | 0.00000  | 0.00000  |
| NEU | 0.00000  | 0.00010  | 0.00720  | 0.00000  | 0.00000  | 0.00000  | 0.00000  | 0.00000  | 0.00000  | 0.00000  | 0.00000  |
| OAS | 0.00000  | 0.00000  | 0.00000  | 0.00000  | 0.00000  | 0.00000  | 0.00000  | 0.00000  | 0.00000  | 0.00000  | 0.00000  |
| REF | 0.00000  | 0.00000  | 0.00000  | 0.00000  | 0.00000  | 0.00000  | 0.00000  | 0.00000  | 0.00000  | 0.00000  | 0.00000  |
| SSA | -0.00020 | -0.00010 | -0.00020 | -0.00210 | -0.00210 | -0.00200 | -0.00160 | -0.00110 | -0.00060 | -0.00030 | -0.00000 |
| USA | 0.00000  | 0.00000  | 0.00000  | -0.04000 | -0.03990 | -0.03780 | -0.03060 | -0.01980 | -0.01070 | -0.00500 | -0.00000 |

Table 143: MAgPIE m4p\_SSP1 — Demand—Domestic Balanceflow—Crops—Cereals—Rice (Mt DM/yr)  
[PART 1/2]

|     | 2050    | 2055    | 2060    | 2070    | 2080    | 2090    | 2100    |
|-----|---------|---------|---------|---------|---------|---------|---------|
| GLO | 0.00000 | 0.00000 | 0.00000 | 0.00000 | 0.00000 | 0.00000 | 0.00000 |
| CAZ | 0.00000 | 0.00000 | 0.00000 | 0.00000 | 0.00000 | 0.00000 | 0.00000 |
| CHA | 0.00000 | 0.00000 | 0.00000 | 0.00000 | 0.00000 | 0.00000 | 0.00000 |
| EUR | 0.00000 | 0.00000 | 0.00000 | 0.00000 | 0.00000 | 0.00000 | 0.00000 |
| IND | 0.00000 | 0.00000 | 0.00000 | 0.00000 | 0.00000 | 0.00000 | 0.00000 |
| JPN | 0.00000 | 0.00000 | 0.00000 | 0.00000 | 0.00000 | 0.00000 | 0.00000 |
| LAM | 0.00000 | 0.00000 | 0.00000 | 0.00000 | 0.00000 | 0.00000 | 0.00000 |
| MEA | 0.00000 | 0.00000 | 0.00000 | 0.00000 | 0.00000 | 0.00000 | 0.00000 |
| NEU | 0.00000 | 0.00000 | 0.00000 | 0.00000 | 0.00000 | 0.00000 | 0.00000 |
| OAS | 0.00000 | 0.00000 | 0.00000 | 0.00000 | 0.00000 | 0.00000 | 0.00000 |
| REF | 0.00000 | 0.00000 | 0.00000 | 0.00000 | 0.00000 | 0.00000 | 0.00000 |
| SSA | 0.00000 | 0.00000 | 0.00000 | 0.00000 | 0.00000 | 0.00000 | 0.00000 |
| USA | 0.00000 | 0.00000 | 0.00000 | 0.00000 | 0.00000 | 0.00000 | 0.00000 |

Table 144: MAgPIE m4p\_SSP1 — Demand—Domestic Balanceflow—Crops—Cereals—Rice (Mt DM/yr)  
[PART 2/2]

|     | 1965    | 1970    | 1975    | 1980    | 1985    | 1990    | 1995    | 2000    | 2005    | 2010    |
|-----|---------|---------|---------|---------|---------|---------|---------|---------|---------|---------|
| GLO | -0.0052 | -0.0231 | -0.0045 | -0.0007 | -0.0002 | 0.0052  | -0.0064 | -0.0234 | -0.0093 | -0.0450 |
| CAZ | 0.0000  | 0.0000  | 0.0000  | 0.0000  | 0.0000  | 0.0000  | 0.0000  | 0.0000  | 0.0000  | 0.0000  |
| CHA | 0.0000  | 0.0000  | 0.0000  | 0.0000  | 0.0000  | 0.0000  | 0.0000  | -0.0001 | -0.0001 | -0.0001 |
| EUR | -0.0144 | -0.0147 | -0.0147 | -0.0100 | -0.0065 | -0.0033 | -0.0002 | -0.0001 | -0.0124 | 0.0000  |
| IND | 0.0000  | 0.0000  | 0.0000  | 0.0000  | 0.0000  | 0.0000  | 0.0000  | 0.0000  | 0.0000  | 0.0000  |
| JPN | 0.0000  | 0.0000  | 0.0000  | 0.0000  | 0.0000  | 0.0000  | 0.0000  | 0.0000  | 0.0000  | 0.0000  |
| LAM | 0.0000  | -0.0187 | 0.0000  | 0.0000  | 0.0000  | -0.0016 | -0.0060 | -0.0230 | -0.0032 | -0.0028 |
| MEA | 0.0000  | 0.0000  | 0.0000  | 0.0000  | 0.0000  | 0.0000  | 0.0000  | -0.0001 | -0.0006 | 0.0000  |
| NEU | 0.0092  | 0.0102  | 0.0102  | 0.0093  | 0.0065  | 0.0105  | 0.0000  | 0.0001  | 0.0072  | 0.0000  |
| OAS | 0.0000  | 0.0000  | 0.0000  | 0.0000  | -0.0001 | -0.0003 | 0.0000  | 0.0000  | 0.0000  | 0.0000  |
| REF | 0.0000  | 0.0000  | 0.0000  | 0.0000  | 0.0000  | 0.0000  | 0.0000  | 0.0000  | 0.0000  | 0.0000  |
| SSA | 0.0000  | 0.0000  | 0.0000  | 0.0000  | 0.0000  | -0.0001 | -0.0002 | -0.0001 | -0.0002 | -0.0021 |
| USA | 0.0000  | 0.0000  | 0.0000  | 0.0000  | 0.0000  | 0.0000  | 0.0000  | 0.0000  | 0.0000  | -0.0400 |

Table 145: FAO — Demand—Domestic Balanceflow—Crops—Cereals—Rice (Mt DM/yr)



5.1.4 Cereals—Temperate cereals

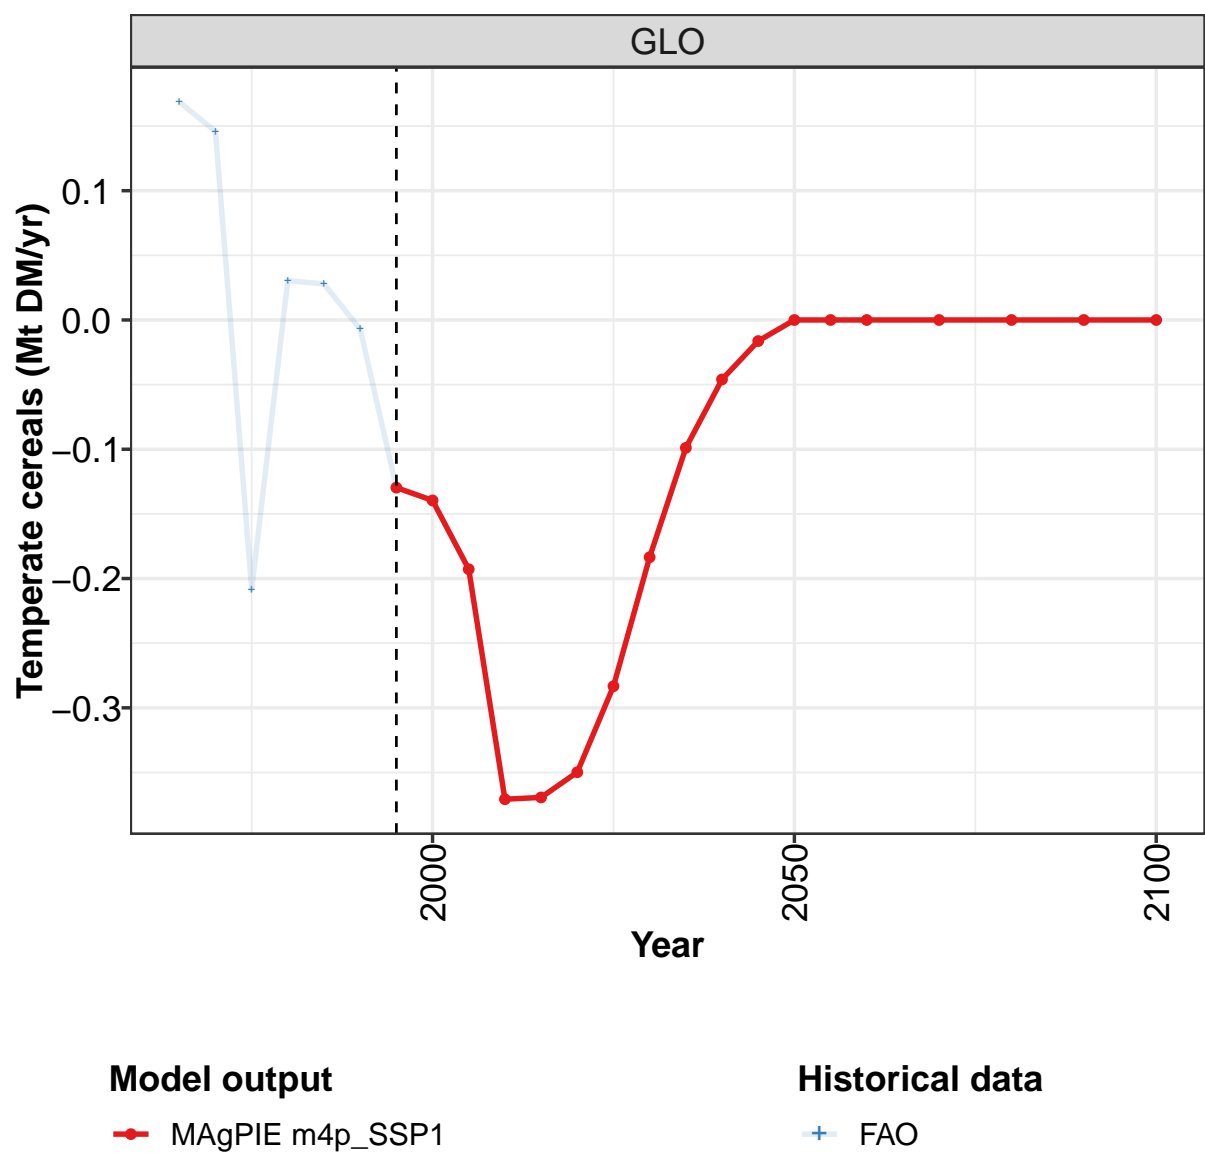

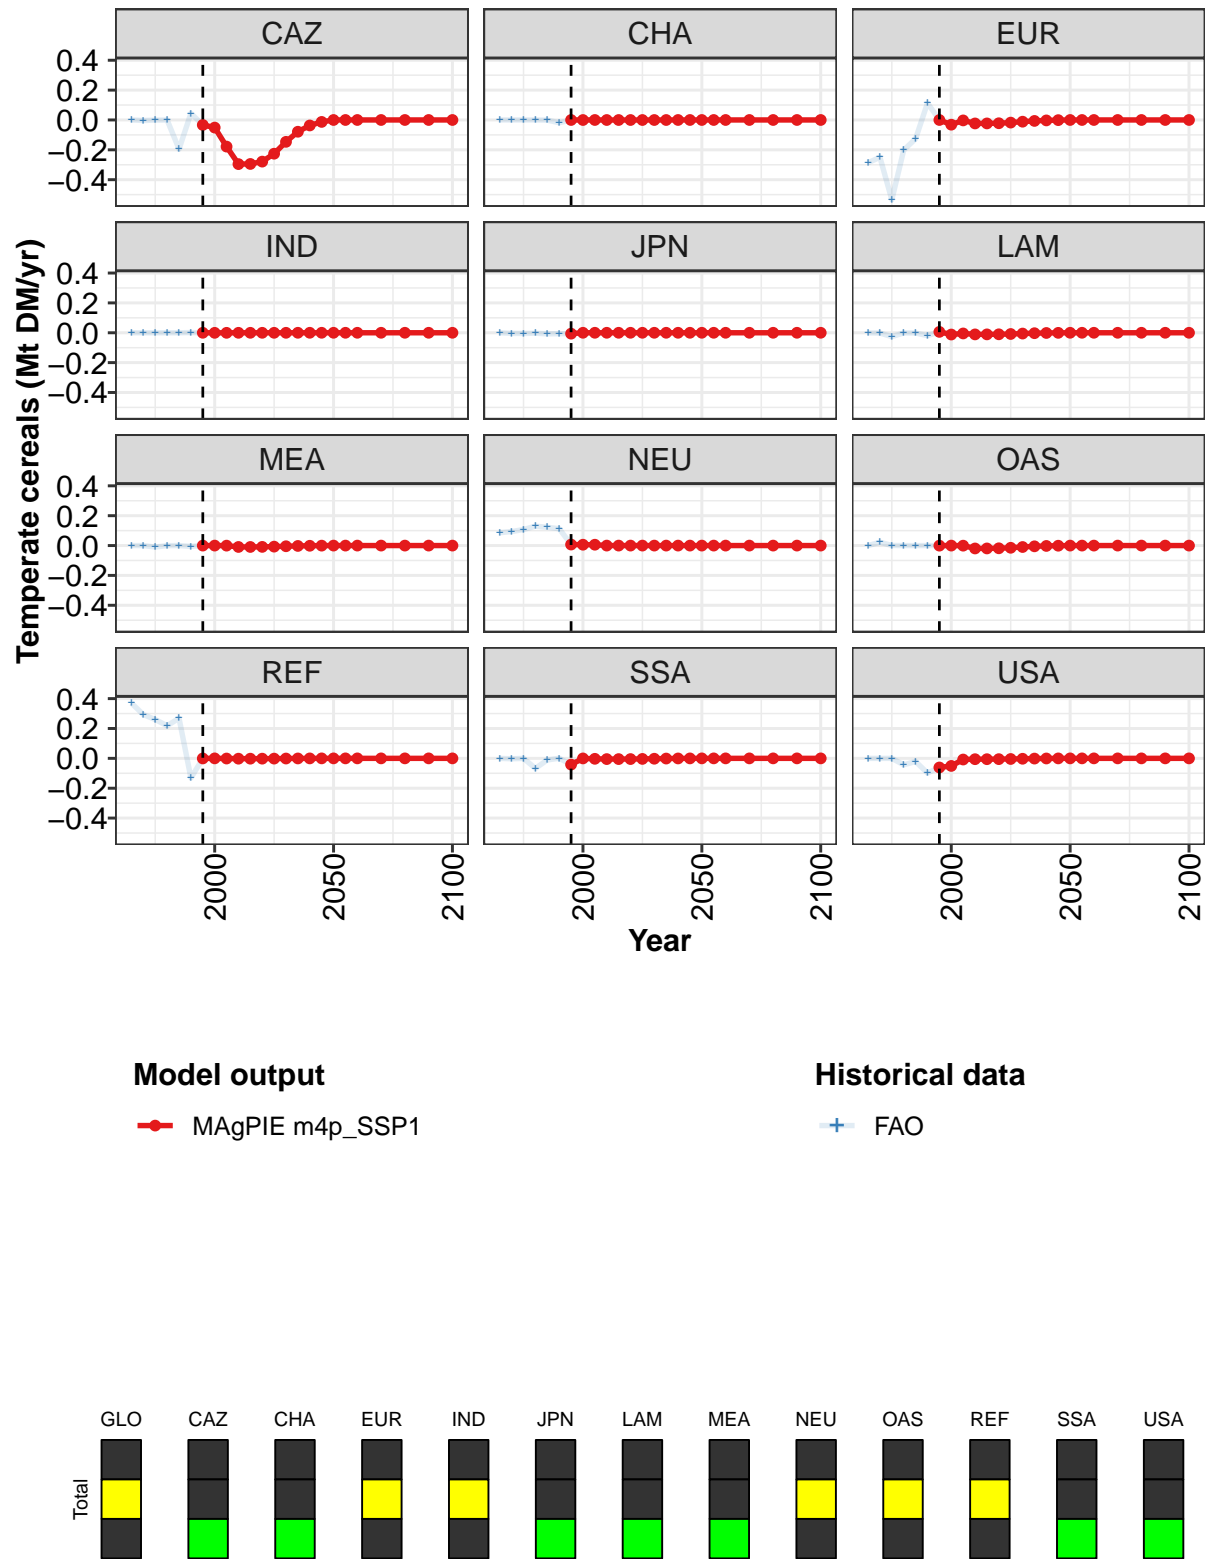

Figure 49: MAgPIE m4p\_SSP1 — Demand—Domestic Balanceflow—Crops—Cereals—Temperate cereals (Mt DM/yr)

|     | 1995     | 2000     | 2005     | 2010     | 2015     | 2020     | 2025     | 2030     | 2035     | 2040     | 2045     |
|-----|----------|----------|----------|----------|----------|----------|----------|----------|----------|----------|----------|
| GLO | -0.12970 | -0.13960 | -0.19280 | -0.37070 | -0.36930 | -0.34980 | -0.28330 | -0.18350 | -0.09890 | -0.04600 | -0.00000 |
| CAZ | -0.03320 | -0.05090 | -0.17820 | -0.29550 | -0.29440 | -0.27880 | -0.22580 | -0.14630 | -0.07870 | -0.03660 | -0.00000 |
| CHA | 0.00000  | -0.00010 | 0.00000  | -0.00020 | -0.00020 | -0.00020 | -0.00020 | -0.00010 | -0.00010 | 0.00000  | 0.00000  |
| EUR | 0.00000  | -0.03140 | -0.00290 | -0.02310 | -0.02300 | -0.02180 | -0.01760 | -0.01140 | -0.00620 | -0.00290 | -0.00000 |
| IND | 0.00000  | -0.00020 | -0.00020 | -0.00010 | -0.00010 | -0.00010 | -0.00010 | -0.00010 | 0.00000  | 0.00000  | 0.00000  |
| JPN | -0.00590 | 0.00000  | 0.00000  | 0.00000  | 0.00000  | 0.00000  | 0.00000  | 0.00000  | 0.00000  | 0.00000  | 0.00000  |
| LAM | 0.00610  | -0.01170 | -0.00450 | -0.01080 | -0.01070 | -0.01010 | -0.00820 | -0.00530 | -0.00290 | -0.00130 | -0.00000 |
| MEA | 0.00000  | 0.00000  | -0.00040 | -0.00930 | -0.00930 | -0.00880 | -0.00710 | -0.00460 | -0.00250 | -0.00120 | -0.00000 |
| NEU | 0.00690  | 0.00570  | 0.00570  | 0.00000  | 0.00000  | 0.00000  | 0.00000  | 0.00000  | 0.00000  | 0.00000  | 0.00000  |
| OAS | -0.00040 | 0.00000  | -0.00060 | -0.01930 | -0.01920 | -0.01820 | -0.01480 | -0.00960 | -0.00510 | -0.00240 | -0.00000 |
| REF | -0.00050 | 0.00000  | -0.00110 | -0.00210 | -0.00210 | -0.00200 | -0.00160 | -0.00100 | -0.00060 | -0.00030 | -0.00000 |
| SSA | -0.04160 | -0.00040 | -0.00290 | -0.00480 | -0.00480 | -0.00460 | -0.00370 | -0.00240 | -0.00130 | -0.00060 | -0.00000 |
| USA | -0.06110 | -0.05060 | -0.00770 | -0.00550 | -0.00550 | -0.00520 | -0.00420 | -0.00270 | -0.00150 | -0.00070 | -0.00000 |

Table 146: MAGPIE m4p\_SSP1 — Demand—Domestic Balanceflow—Crops—Cereals—Temperate cereals (Mt DM/yr) [PART 1/2]

|     | 2050    | 2055    | 2060    | 2070    | 2080    | 2090    | 2100    |
|-----|---------|---------|---------|---------|---------|---------|---------|
| GLO | 0.00000 | 0.00000 | 0.00000 | 0.00000 | 0.00000 | 0.00000 | 0.00000 |
| CAZ | 0.00000 | 0.00000 | 0.00000 | 0.00000 | 0.00000 | 0.00000 | 0.00000 |
| CHA | 0.00000 | 0.00000 | 0.00000 | 0.00000 | 0.00000 | 0.00000 | 0.00000 |
| EUR | 0.00000 | 0.00000 | 0.00000 | 0.00000 | 0.00000 | 0.00000 | 0.00000 |
| IND | 0.00000 | 0.00000 | 0.00000 | 0.00000 | 0.00000 | 0.00000 | 0.00000 |
| JPN | 0.00000 | 0.00000 | 0.00000 | 0.00000 | 0.00000 | 0.00000 | 0.00000 |
| LAM | 0.00000 | 0.00000 | 0.00000 | 0.00000 | 0.00000 | 0.00000 | 0.00000 |
| MEA | 0.00000 | 0.00000 | 0.00000 | 0.00000 | 0.00000 | 0.00000 | 0.00000 |
| NEU | 0.00000 | 0.00000 | 0.00000 | 0.00000 | 0.00000 | 0.00000 | 0.00000 |
| OAS | 0.00000 | 0.00000 | 0.00000 | 0.00000 | 0.00000 | 0.00000 | 0.00000 |
| REF | 0.00000 | 0.00000 | 0.00000 | 0.00000 | 0.00000 | 0.00000 | 0.00000 |
| SSA | 0.00000 | 0.00000 | 0.00000 | 0.00000 | 0.00000 | 0.00000 | 0.00000 |
| USA | 0.00000 | 0.00000 | 0.00000 | 0.00000 | 0.00000 | 0.00000 | 0.00000 |

Table 147: MAGPIE m4p\_SSP1 — Demand—Domestic Balanceflow—Crops—Cereals—Temperate cereals (Mt DM/yr) [PART 2/2]

|     | 1965   | 1970   | 1975   | 1980   | 1985   | 1990   | 1995   | 2000   | 2005   | 2010   |
|-----|--------|--------|--------|--------|--------|--------|--------|--------|--------|--------|
| GLO | 0.169  | 0.146  | -0.208 | 0.030  | 0.028  | -0.007 | -0.130 | -0.140 | -0.193 | -0.371 |
| CAZ | 0.000  | -0.004 | -0.001 | -0.000 | -0.195 | 0.045  | -0.033 | -0.051 | -0.178 | -0.295 |
| CHA | 0.000  | 0.000  | 0.000  | 0.000  | -0.001 | -0.018 | 0.000  | -0.000 | 0.000  | -0.000 |
| EUR | -0.286 | -0.250 | -0.534 | -0.202 | -0.126 | 0.113  | 0.000  | -0.031 | -0.003 | -0.023 |
| IND | 0.000  | 0.000  | 0.000  | 0.000  | 0.000  | 0.001  | 0.000  | -0.000 | -0.000 | -0.000 |
| JPN | 0.000  | -0.004 | -0.005 | -0.003 | -0.007 | -0.006 | -0.006 | 0.000  | 0.000  | 0.000  |
| LAM | -0.001 | -0.002 | -0.026 | -0.001 | -0.002 | -0.019 | 0.006  | -0.012 | -0.004 | -0.011 |
| MEA | -0.000 | -0.000 | -0.010 | -0.001 | -0.000 | -0.005 | 0.000  | 0.000  | -0.000 | -0.009 |
| NEU | 0.086  | 0.094  | 0.107  | 0.130  | 0.122  | 0.113  | 0.007  | 0.006  | 0.006  | 0.000  |
| OAS | 0.000  | 0.022  | 0.001  | 0.000  | -0.000 | 0.000  | -0.000 | 0.000  | -0.001 | -0.019 |
| REF | 0.370  | 0.293  | 0.260  | 0.218  | 0.269  | -0.132 | -0.001 | 0.000  | -0.001 | -0.002 |
| SSA | -0.000 | -0.003 | -0.000 | -0.067 | -0.011 | 0.000  | -0.042 | -0.000 | -0.003 | -0.005 |
| USA | 0.000  | 0.000  | 0.000  | -0.043 | -0.021 | -0.098 | -0.061 | -0.051 | -0.008 | -0.005 |

Table 148: FAO — Demand—Domestic Balanceflow—Crops—Cereals—Temperate cereals (Mt DM/yr)

5.1.5
Cereals—Tropical cereals

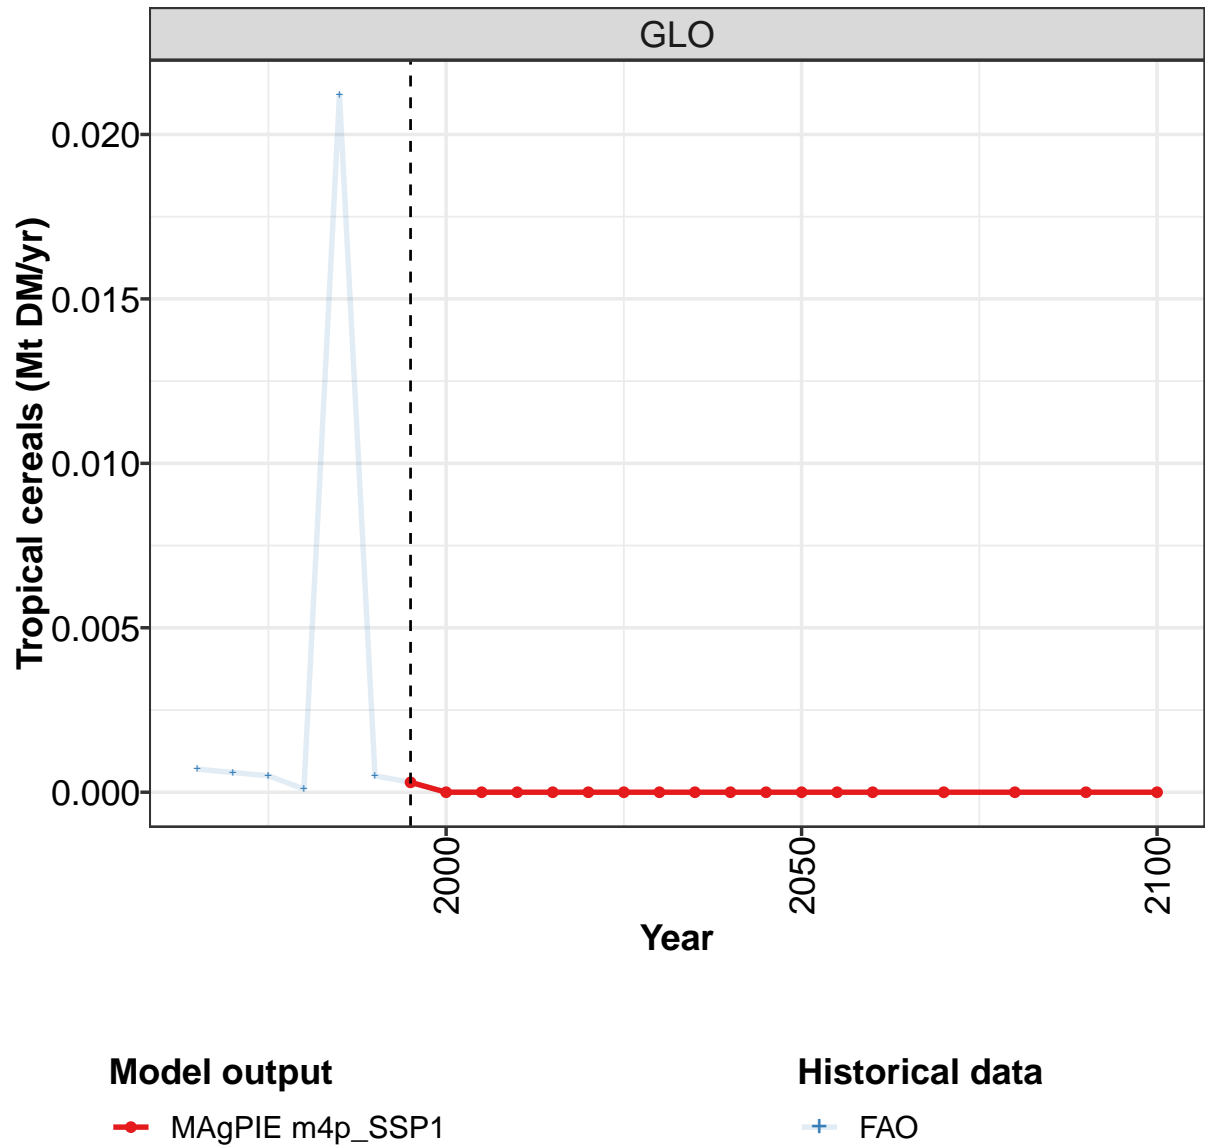

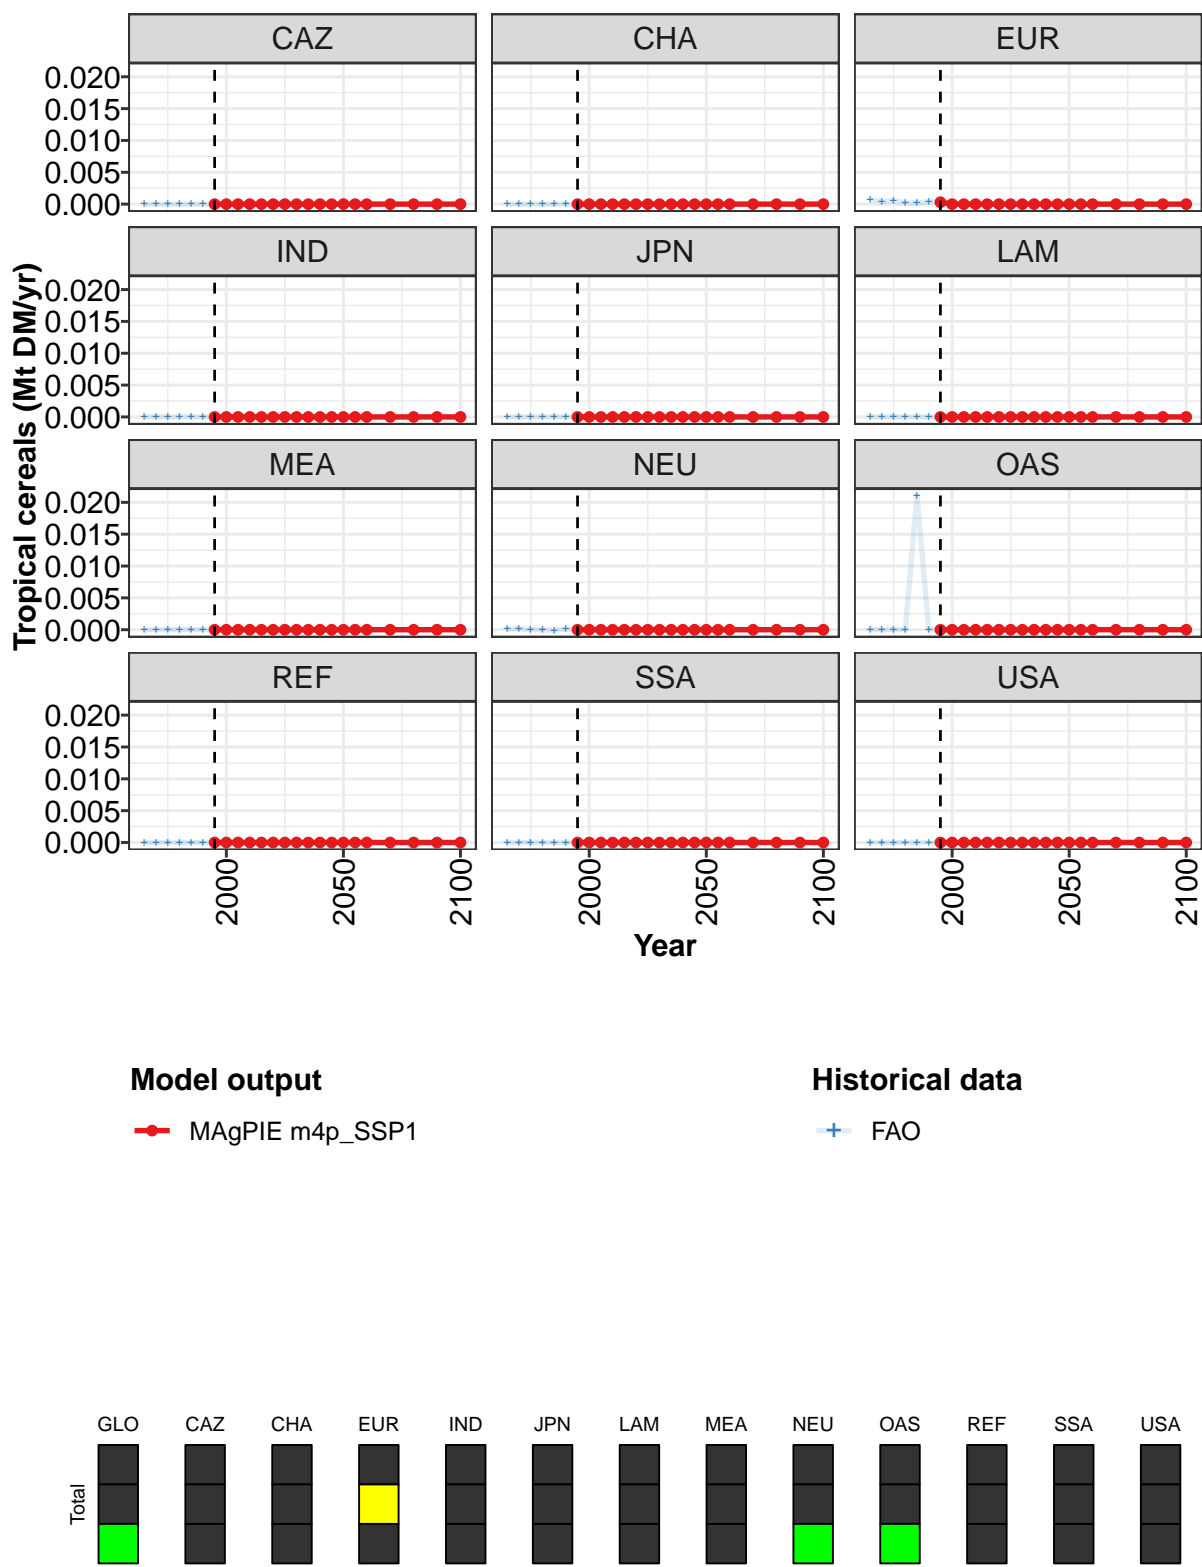

Figure 50: MAgPIE m4p\_SSP1 — Demand—Domestic Balanceflow—Crops—Cereals—Tropical cereals (Mt DM/yr)

|     | 1995     | 2000     | 2005     | 2010     | 2015     | 2020     | 2025     | 2030     | 2035     | 2040     |
|-----|----------|----------|----------|----------|----------|----------|----------|----------|----------|----------|
| GLO | 0.000300 | 0.000000 | 0.000000 | 0.000000 | 0.000000 | 0.000000 | 0.000000 | 0.000000 | 0.000000 | 0.000000 |
| CAZ | 0.000000 | 0.000000 | 0.000000 | 0.000000 | 0.000000 | 0.000000 | 0.000000 | 0.000000 | 0.000000 | 0.000000 |
| CHA | 0.000000 | 0.000000 | 0.000000 | 0.000000 | 0.000000 | 0.000000 | 0.000000 | 0.000000 | 0.000000 | 0.000000 |
| EUR | 0.000300 | 0.000000 | 0.000000 | 0.000000 | 0.000000 | 0.000000 | 0.000000 | 0.000000 | 0.000000 | 0.000000 |
| IND | 0.000000 | 0.000000 | 0.000000 | 0.000000 | 0.000000 | 0.000000 | 0.000000 | 0.000000 | 0.000000 | 0.000000 |
| JPN | 0.000000 | 0.000000 | 0.000000 | 0.000000 | 0.000000 | 0.000000 | 0.000000 | 0.000000 | 0.000000 | 0.000000 |
| LAM | 0.000000 | 0.000000 | 0.000000 | 0.000000 | 0.000000 | 0.000000 | 0.000000 | 0.000000 | 0.000000 | 0.000000 |
| MEA | 0.000000 | 0.000000 | 0.000000 | 0.000000 | 0.000000 | 0.000000 | 0.000000 | 0.000000 | 0.000000 | 0.000000 |
| NEU | 0.000000 | 0.000000 | 0.000000 | 0.000000 | 0.000000 | 0.000000 | 0.000000 | 0.000000 | 0.000000 | 0.000000 |
| OAS | 0.000000 | 0.000000 | 0.000000 | 0.000000 | 0.000000 | 0.000000 | 0.000000 | 0.000000 | 0.000000 | 0.000000 |
| REF | 0.000000 | 0.000000 | 0.000000 | 0.000000 | 0.000000 | 0.000000 | 0.000000 | 0.000000 | 0.000000 | 0.000000 |
| SSA | 0.000000 | 0.000000 | 0.000000 | 0.000000 | 0.000000 | 0.000000 | 0.000000 | 0.000000 | 0.000000 | 0.000000 |
| USA | 0.000000 | 0.000000 | 0.000000 | 0.000000 | 0.000000 | 0.000000 | 0.000000 | 0.000000 | 0.000000 | 0.000000 |

Table 149: MAgPIE m4p\_SSP1 — Demand—Domestic Balanceflow—Crops—Cereals—Tropical cereals (Mt DM/yr) [PART 1/2]

|     | 2050     | 2055     | 2060     | 2070     | 2080     | 2090     | 2100     |
|-----|----------|----------|----------|----------|----------|----------|----------|
| GLO | 0.000000 | 0.000000 | 0.000000 | 0.000000 | 0.000000 | 0.000000 | 0.000000 |
| CAZ | 0.000000 | 0.000000 | 0.000000 | 0.000000 | 0.000000 | 0.000000 | 0.000000 |
| CHA | 0.000000 | 0.000000 | 0.000000 | 0.000000 | 0.000000 | 0.000000 | 0.000000 |
| EUR | 0.000000 | 0.000000 | 0.000000 | 0.000000 | 0.000000 | 0.000000 | 0.000000 |
| IND | 0.000000 | 0.000000 | 0.000000 | 0.000000 | 0.000000 | 0.000000 | 0.000000 |
| JPN | 0.000000 | 0.000000 | 0.000000 | 0.000000 | 0.000000 | 0.000000 | 0.000000 |
| LAM | 0.000000 | 0.000000 | 0.000000 | 0.000000 | 0.000000 | 0.000000 | 0.000000 |
| MEA | 0.000000 | 0.000000 | 0.000000 | 0.000000 | 0.000000 | 0.000000 | 0.000000 |
| NEU | 0.000000 | 0.000000 | 0.000000 | 0.000000 | 0.000000 | 0.000000 | 0.000000 |
| OAS | 0.000000 | 0.000000 | 0.000000 | 0.000000 | 0.000000 | 0.000000 | 0.000000 |
| REF | 0.000000 | 0.000000 | 0.000000 | 0.000000 | 0.000000 | 0.000000 | 0.000000 |
| SSA | 0.000000 | 0.000000 | 0.000000 | 0.000000 | 0.000000 | 0.000000 | 0.000000 |
| USA | 0.000000 | 0.000000 | 0.000000 | 0.000000 | 0.000000 | 0.000000 | 0.000000 |

Table 150: MAgPIE m4p\_SSP1 — Demand—Domestic Balanceflow—Crops—Cereals—Tropical cereals (Mt DM/yr) [PART 2/2]

|     | 1965   | 1970   | 1975   | 1980   | 1985    | 1990   | 1995   | 2000   | 2005   | 2010   |
|-----|--------|--------|--------|--------|---------|--------|--------|--------|--------|--------|
| GLO | 0.0007 | 0.0006 | 0.0005 | 0.0001 | 0.0212  | 0.0005 | 0.0003 | 0.0000 | 0.0000 | 0.0000 |
| CAZ | 0.0000 | 0.0000 | 0.0000 | 0.0000 | 0.0000  | 0.0000 | 0.0000 | 0.0000 | 0.0000 | 0.0000 |
| CHA | 0.0000 | 0.0000 | 0.0000 | 0.0000 | 0.0000  | 0.0000 | 0.0000 | 0.0000 | 0.0000 | 0.0000 |
| EUR | 0.0007 | 0.0004 | 0.0005 | 0.0002 | 0.0002  | 0.0004 | 0.0003 | 0.0000 | 0.0000 | 0.0000 |
| IND | 0.0000 | 0.0000 | 0.0000 | 0.0000 | 0.0000  | 0.0000 | 0.0000 | 0.0000 | 0.0000 | 0.0000 |
| JPN | 0.0000 | 0.0000 | 0.0000 | 0.0000 | 0.0000  | 0.0000 | 0.0000 | 0.0000 | 0.0000 | 0.0000 |
| LAM | 0.0000 | 0.0000 | 0.0000 | 0.0000 | 0.0000  | 0.0000 | 0.0000 | 0.0000 | 0.0000 | 0.0000 |
| MEA | 0.0000 | 0.0000 | 0.0000 | 0.0000 | 0.0000  | 0.0000 | 0.0000 | 0.0000 | 0.0000 | 0.0000 |
| NEU | 0.0001 | 0.0002 | 0.0000 | 0.0000 | -0.0001 | 0.0001 | 0.0000 | 0.0000 | 0.0000 | 0.0000 |
| OAS | 0.0000 | 0.0000 | 0.0000 | 0.0000 | 0.0211  | 0.0000 | 0.0000 | 0.0000 | 0.0000 | 0.0000 |
| REF | 0.0000 | 0.0000 | 0.0000 | 0.0000 | 0.0000  | 0.0000 | 0.0000 | 0.0000 | 0.0000 | 0.0000 |
| SSA | 0.0000 | 0.0000 | 0.0000 | 0.0000 | 0.0000  | 0.0000 | 0.0000 | 0.0000 | 0.0000 | 0.0000 |
| USA | 0.0000 | 0.0000 | 0.0000 | 0.0000 | 0.0000  | 0.0000 | 0.0000 | 0.0000 | 0.0000 | 0.0000 |

Table 151: FAO — Demand—Domestic Balanceflow—Crops—Cereals—Tropical cereals (Mt DM/yr)

5.1.6 Oil crops

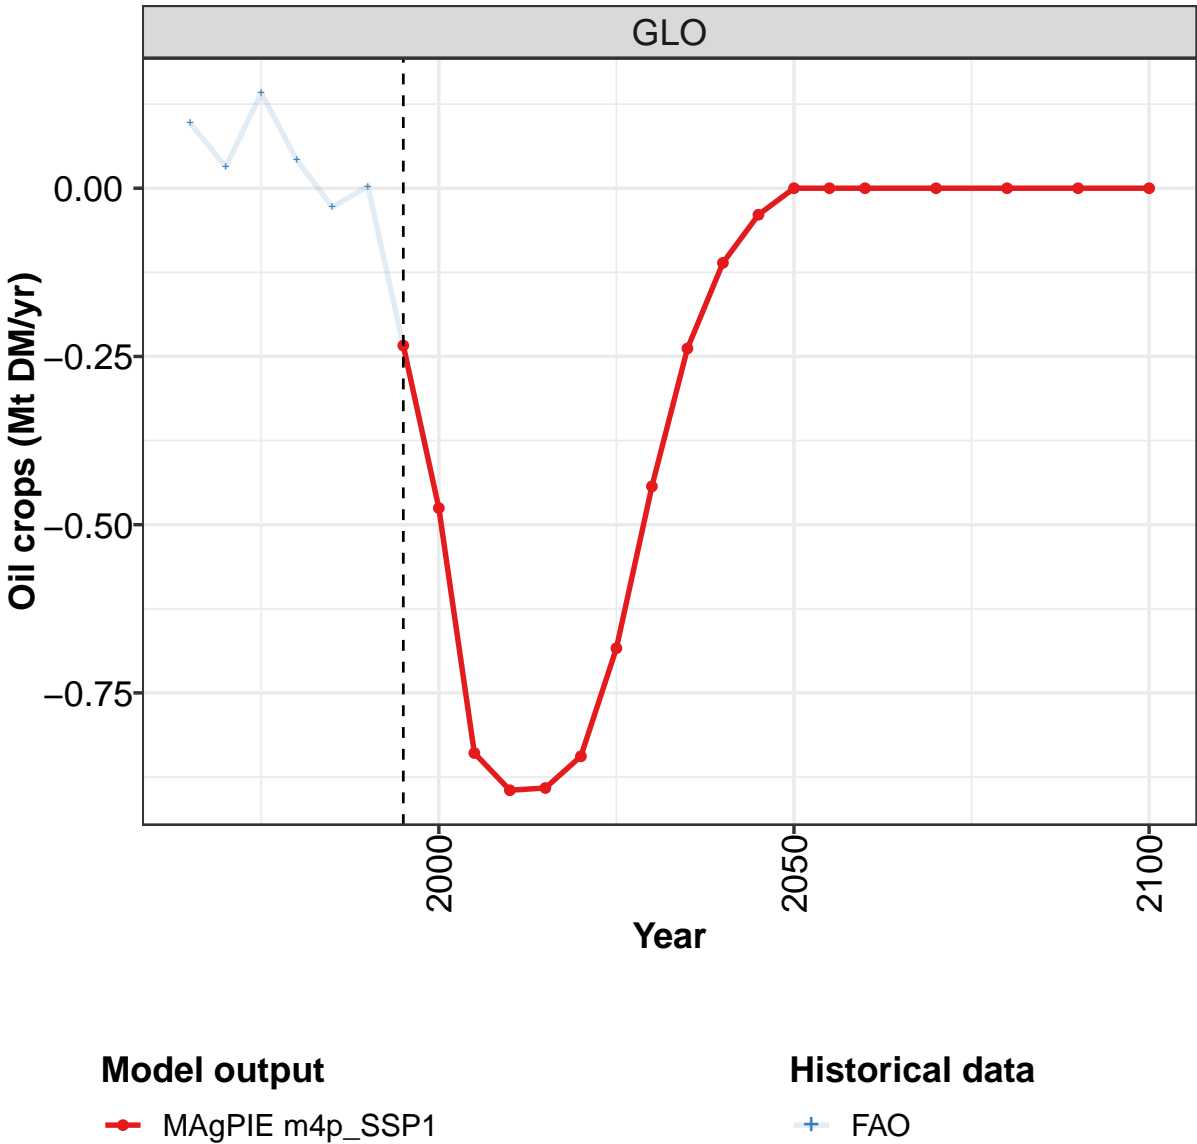

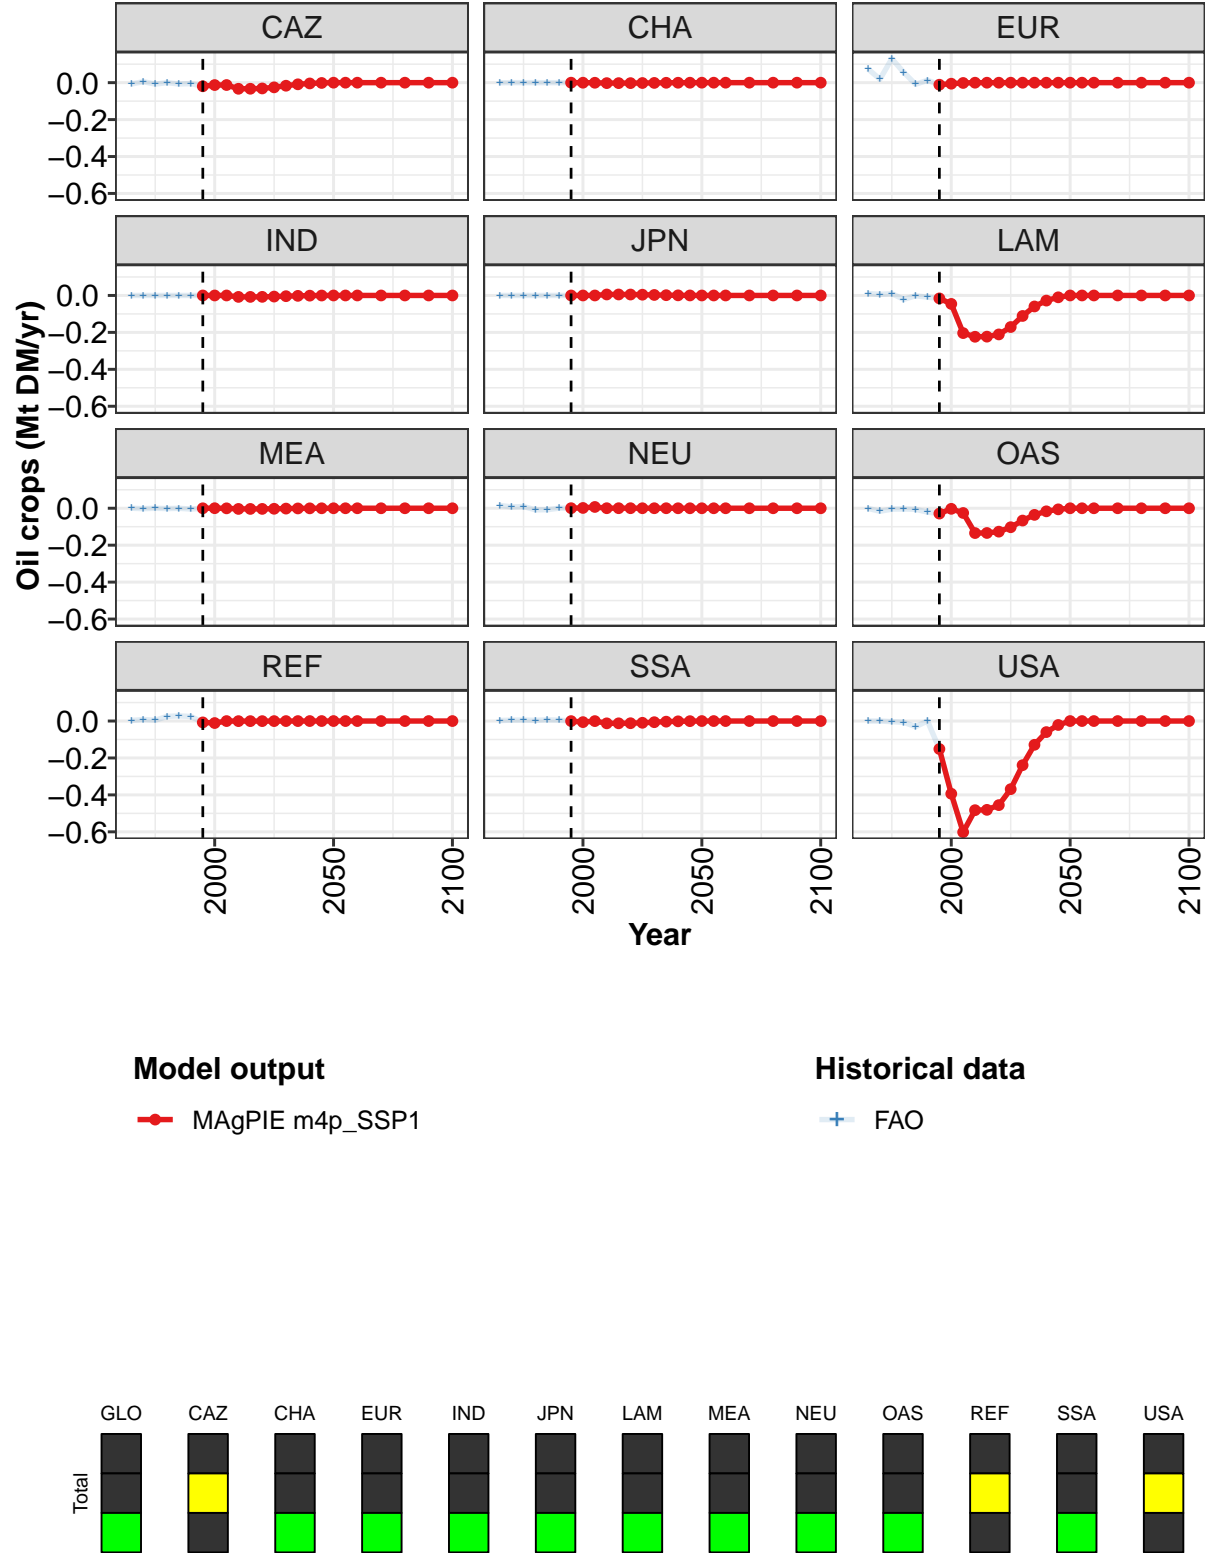

Figure 51: MAgPIE m4p\_SSP1 — Demand—Domestic Balanceflow—Crops—Oil crops (Mt DM/yr)



|     | 1995     | 2000     | 2005     | 2010     | 2015     | 2020     | 2025     | 2030     | 2035     | 2040     | 2045     |
|-----|----------|----------|----------|----------|----------|----------|----------|----------|----------|----------|----------|
| GLO | -0.23380 | -0.47530 | -0.83930 | -0.89460 | -0.89130 | -0.84420 | -0.68360 | -0.44310 | -0.23820 | -0.11090 | -0.03090 |
| CAZ | -0.01950 | -0.01280 | -0.01270 | -0.03300 | -0.03290 | -0.03120 | -0.02530 | -0.01640 | -0.00880 | -0.00410 | -0.00190 |
| CHA | 0.00000  | -0.00010 | -0.00040 | -0.00240 | -0.00240 | -0.00230 | -0.00180 | -0.00120 | -0.00060 | -0.00030 | -0.00010 |
| EUR | -0.01110 | -0.00550 | -0.00160 | -0.00010 | -0.00010 | -0.00010 | 0.00000  | -0.00000 | -0.00000 | -0.00010 | 0.00000  |
| IND | 0.00000  | 0.00000  | 0.00000  | -0.00780 | -0.00780 | -0.00740 | -0.00600 | -0.00390 | -0.00210 | -0.00100 | -0.00050 |
| JPN | 0.00000  | 0.00000  | 0.00000  | 0.00540  | 0.00540  | 0.00510  | 0.00420  | 0.00270  | 0.00150  | 0.00070  | 0.00030  |
| LAM | -0.01590 | -0.04570 | -0.20370 | -0.22370 | -0.22290 | -0.21100 | -0.17090 | -0.11090 | -0.05960 | -0.02780 | -0.01390 |
| MEA | -0.00010 | 0.00030  | -0.00040 | -0.00360 | -0.00360 | -0.00350 | -0.00280 | -0.00180 | -0.00090 | -0.00040 | -0.00020 |
| NEU | 0.00040  | 0.00170  | 0.00700  | 0.00030  | 0.00030  | 0.00030  | 0.00020  | 0.00020  | 0.00010  | 0.00000  | 0.00000  |
| OAS | -0.02880 | -0.00300 | -0.02550 | -0.13430 | -0.13380 | -0.12670 | -0.10270 | -0.06650 | -0.03580 | -0.01660 | -0.00830 |
| REF | -0.00730 | -0.01080 | -0.00010 | -0.00040 | -0.00040 | -0.00040 | -0.00030 | -0.00010 | -0.00010 | 0.00000  | 0.00000  |
| SSA | -0.00020 | -0.00580 | -0.00020 | -0.01240 | -0.01230 | -0.01170 | -0.00940 | -0.00620 | -0.00330 | -0.00150 | -0.00070 |
| USA | -0.15130 | -0.39360 | -0.60170 | -0.48260 | -0.48080 | -0.45530 | -0.36880 | -0.23900 | -0.12860 | -0.05980 | -0.03090 |

Table 152: MAgPIE m4p\_SSP1 — Demand—Domestic Balanceflow—Crops—Oil crops (Mt DM/yr) [PART 1/2]

|     | 2050    | 2055    | 2060    | 2070    | 2080    | 2090    | 2100    |
|-----|---------|---------|---------|---------|---------|---------|---------|
| GLO | 0.00000 | 0.00000 | 0.00000 | 0.00000 | 0.00000 | 0.00000 | 0.00000 |
| CAZ | 0.00000 | 0.00000 | 0.00000 | 0.00000 | 0.00000 | 0.00000 | 0.00000 |
| CHA | 0.00000 | 0.00000 | 0.00000 | 0.00000 | 0.00000 | 0.00000 | 0.00000 |
| EUR | 0.00000 | 0.00000 | 0.00000 | 0.00000 | 0.00000 | 0.00000 | 0.00000 |
| IND | 0.00000 | 0.00000 | 0.00000 | 0.00000 | 0.00000 | 0.00000 | 0.00000 |
| JPN | 0.00000 | 0.00000 | 0.00000 | 0.00000 | 0.00000 | 0.00000 | 0.00000 |
| LAM | 0.00000 | 0.00000 | 0.00000 | 0.00000 | 0.00000 | 0.00000 | 0.00000 |
| MEA | 0.00000 | 0.00000 | 0.00000 | 0.00000 | 0.00000 | 0.00000 | 0.00000 |
| NEU | 0.00000 | 0.00000 | 0.00000 | 0.00000 | 0.00000 | 0.00000 | 0.00000 |
| OAS | 0.00000 | 0.00000 | 0.00000 | 0.00000 | 0.00000 | 0.00000 | 0.00000 |
| REF | 0.00000 | 0.00000 | 0.00000 | 0.00000 | 0.00000 | 0.00000 | 0.00000 |
| SSA | 0.00000 | 0.00000 | 0.00000 | 0.00000 | 0.00000 | 0.00000 | 0.00000 |
| USA | 0.00000 | 0.00000 | 0.00000 | 0.00000 | 0.00000 | 0.00000 | 0.00000 |

Table 153: MAgPIE m4p\_SSP1 — Demand—Domestic Balanceflow—Crops—Oil crops (Mt DM/yr) [PART 2/2]

|     | 1965   | 1970   | 1975   | 1980   | 1985   | 1990   | 1995   | 2000   | 2005   | 2010   |
|-----|--------|--------|--------|--------|--------|--------|--------|--------|--------|--------|
| GLO | 0.097  | 0.032  | 0.141  | 0.042  | -0.028 | 0.003  | -0.234 | -0.475 | -0.840 | -0.895 |
| CAZ | -0.007 | 0.005  | -0.008 | 0.000  | -0.007 | -0.005 | -0.019 | -0.013 | -0.013 | -0.033 |
| CHA | -0.001 | 0.000  | 0.000  | 0.000  | -0.000 | 0.000  | 0.000  | -0.000 | -0.000 | -0.002 |
| EUR | 0.074  | 0.019  | 0.129  | 0.056  | -0.009 | 0.013  | -0.011 | -0.005 | -0.002 | -0.000 |
| IND | 0.000  | 0.000  | 0.000  | 0.000  | 0.000  | 0.000  | 0.000  | 0.000  | 0.000  | -0.008 |
| JPN | 0.000  | 0.000  | 0.000  | 0.000  | 0.000  | 0.000  | 0.000  | 0.000  | 0.000  | 0.005  |
| LAM | 0.010  | 0.006  | 0.009  | -0.021 | -0.002 | -0.009 | -0.016 | -0.046 | -0.204 | -0.224 |
| MEA | 0.000  | -0.002 | -0.000 | -0.002 | -0.000 | -0.004 | -0.000 | 0.000  | -0.000 | -0.004 |
| NEU | 0.015  | 0.007  | 0.009  | -0.009 | -0.008 | 0.000  | 0.000  | 0.002  | 0.007  | 0.000  |
| OAS | -0.001 | -0.016 | -0.005 | -0.004 | -0.006 | -0.021 | -0.029 | -0.003 | -0.025 | -0.134 |
| REF | 0.003  | 0.008  | 0.004  | 0.025  | 0.028  | 0.024  | -0.007 | -0.011 | -0.000 | -0.000 |
| SSA | 0.003  | 0.005  | 0.005  | 0.004  | 0.007  | 0.005  | -0.000 | -0.006 | -0.000 | -0.012 |
| USA | 0.000  | 0.000  | -0.003 | -0.007 | -0.030 | 0.000  | -0.151 | -0.394 | -0.602 | -0.483 |

Table 154: FAO — Demand—Domestic Balanceflow—Crops—Oil crops (Mt DM/yr)

5.1.7 Oil crops—Cotton seed

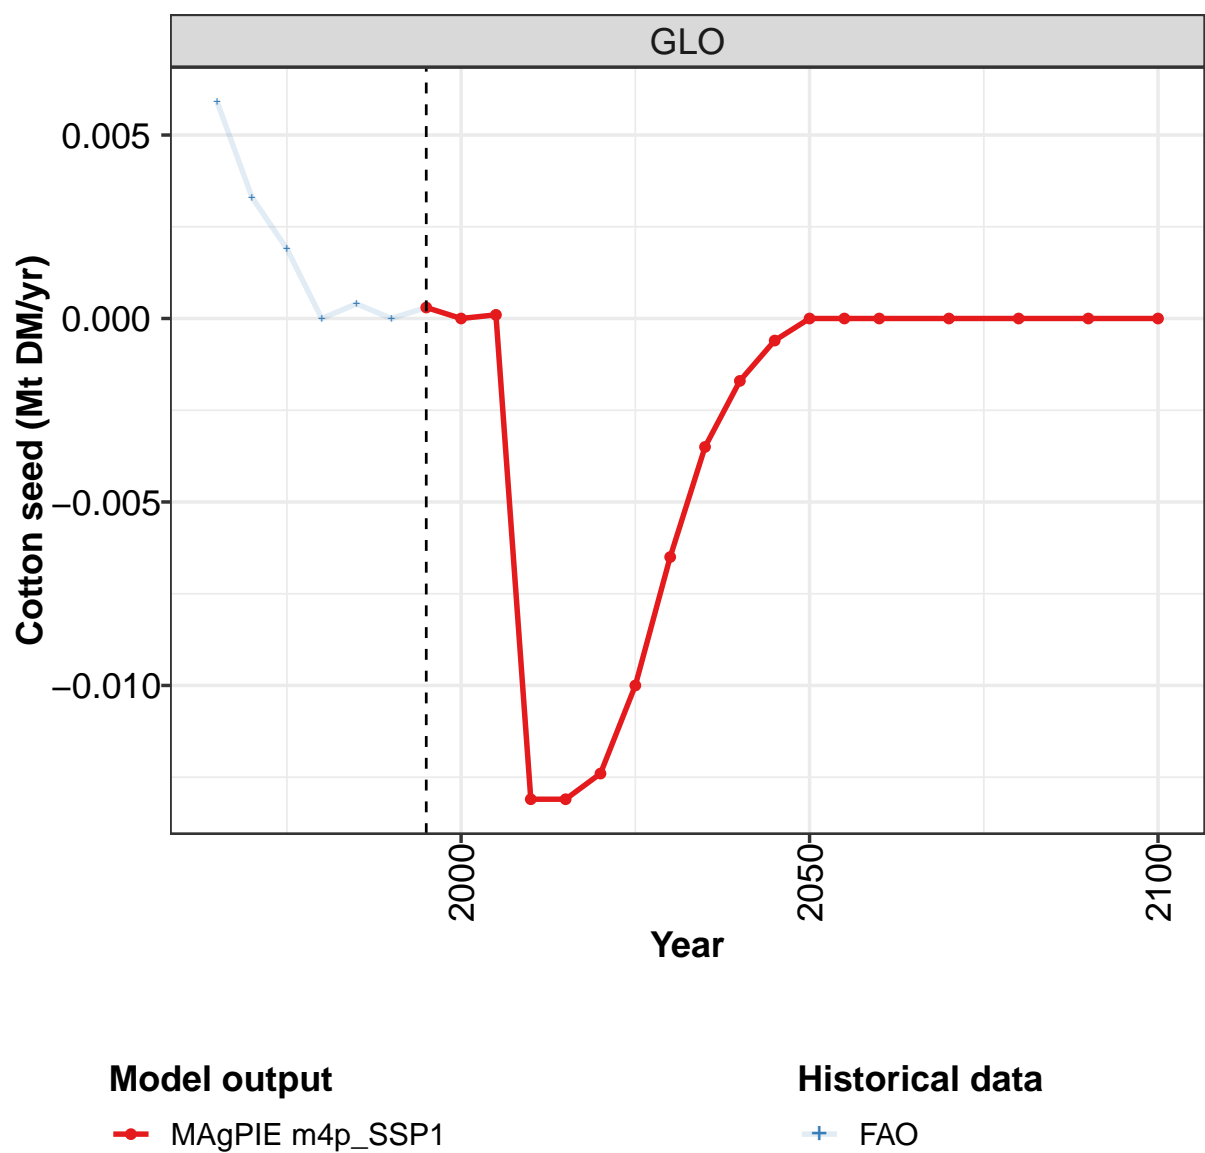

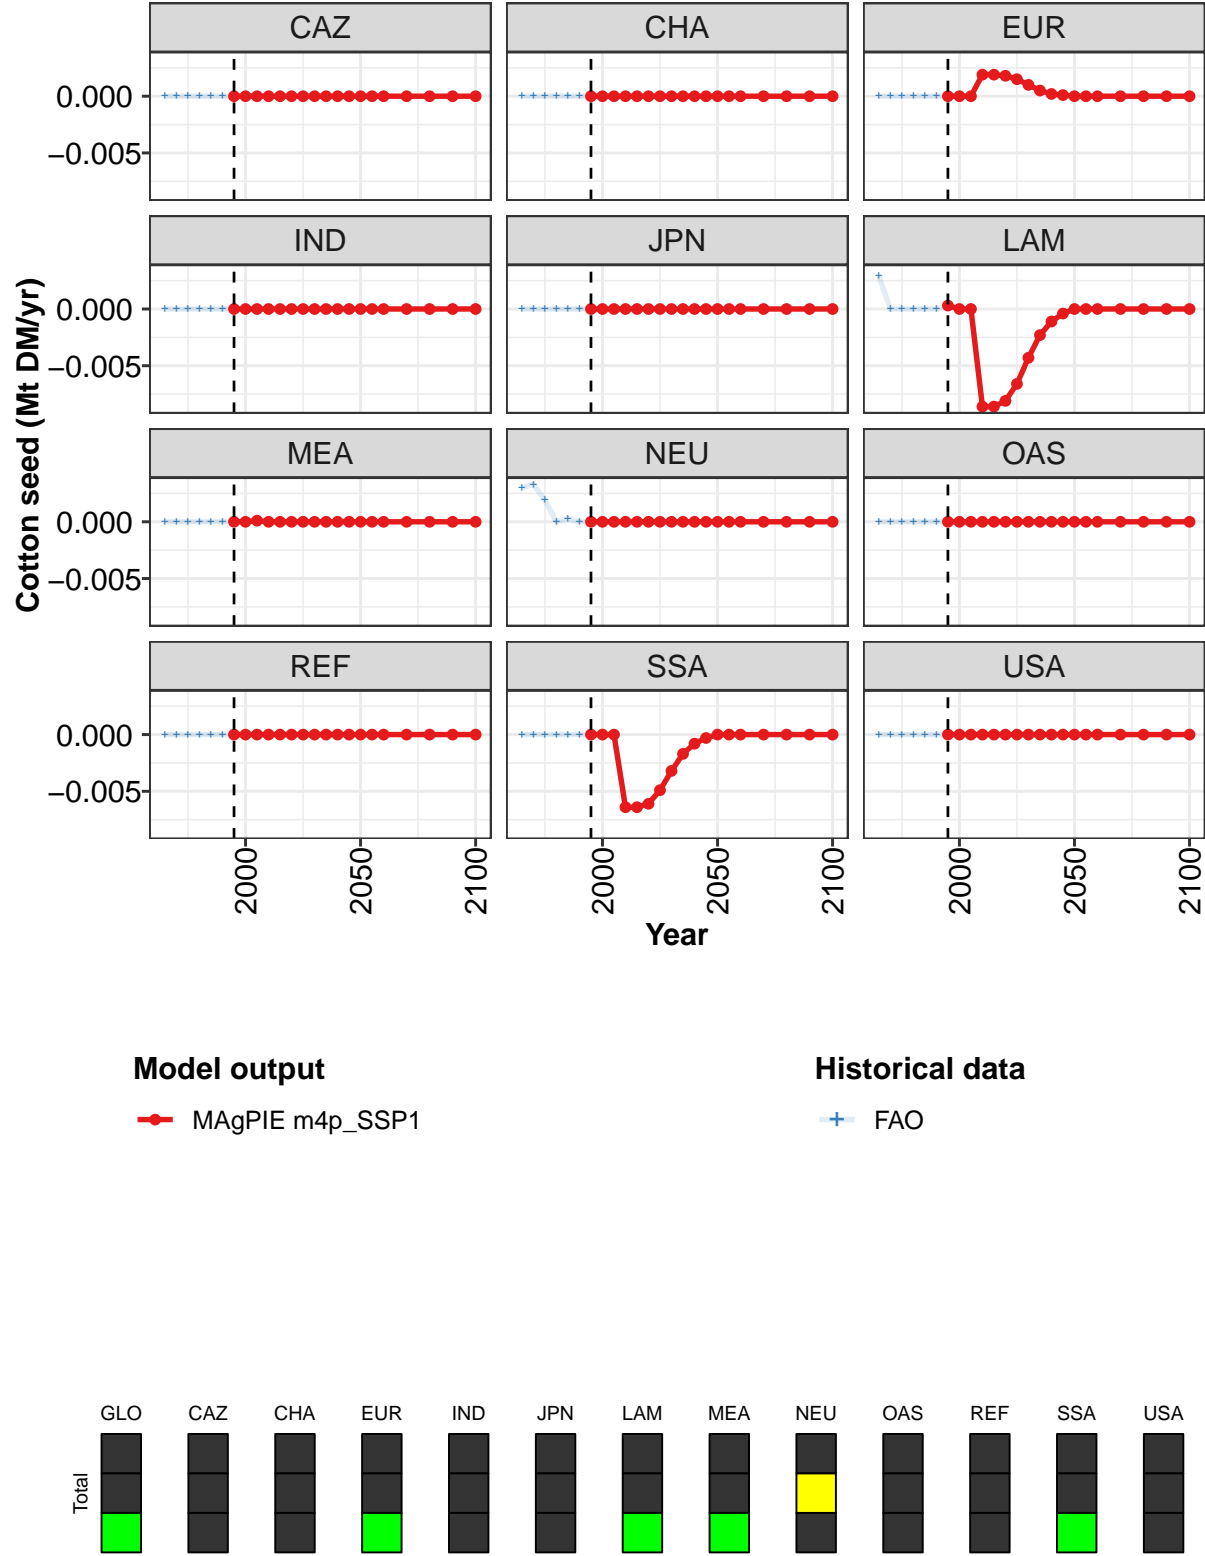

Figure 52: MAgPIE m4p\_SSP1 — Demand—Domestic Balanceflow—Crops—Oil crops—Cotton seed (Mt DM/yr)

|     | 1995    | 2000    | 2005    | 2010     | 2015     | 2020     | 2025     | 2030     | 2035     | 2040     | 2045     |
|-----|---------|---------|---------|----------|----------|----------|----------|----------|----------|----------|----------|
| GLO | 0.00030 | 0.00000 | 0.00010 | -0.01310 | -0.01310 | -0.01240 | -0.01000 | -0.00650 | -0.00350 | -0.00170 | -0.00000 |
| CAZ | 0.00000 | 0.00000 | 0.00000 | 0.00000  | 0.00000  | 0.00000  | 0.00000  | 0.00000  | 0.00000  | 0.00000  | 0.00000  |
| CHA | 0.00000 | 0.00000 | 0.00000 | 0.00000  | 0.00000  | 0.00000  | 0.00000  | 0.00000  | 0.00000  | 0.00000  | 0.00000  |
| EUR | 0.00000 | 0.00000 | 0.00000 | 0.00190  | 0.00190  | 0.00180  | 0.00150  | 0.00100  | 0.00050  | 0.00020  | 0.00000  |
| IND | 0.00000 | 0.00000 | 0.00000 | 0.00000  | 0.00000  | 0.00000  | 0.00000  | 0.00000  | 0.00000  | 0.00000  | 0.00000  |
| JPN | 0.00000 | 0.00000 | 0.00000 | 0.00000  | 0.00000  | 0.00000  | 0.00000  | 0.00000  | 0.00000  | 0.00000  | 0.00000  |
| LAM | 0.00030 | 0.00000 | 0.00000 | -0.00860 | -0.00860 | -0.00810 | -0.00660 | -0.00430 | -0.00230 | -0.00110 | -0.00000 |
| MEA | 0.00000 | 0.00000 | 0.00010 | 0.00000  | 0.00000  | 0.00000  | 0.00000  | 0.00000  | 0.00000  | 0.00000  | 0.00000  |
| NEU | 0.00000 | 0.00000 | 0.00000 | 0.00000  | 0.00000  | 0.00000  | 0.00000  | 0.00000  | 0.00000  | 0.00000  | 0.00000  |
| OAS | 0.00000 | 0.00000 | 0.00000 | 0.00000  | 0.00000  | 0.00000  | 0.00000  | 0.00000  | 0.00000  | 0.00000  | 0.00000  |
| REF | 0.00000 | 0.00000 | 0.00000 | 0.00000  | 0.00000  | 0.00000  | 0.00000  | 0.00000  | 0.00000  | 0.00000  | 0.00000  |
| SSA | 0.00000 | 0.00000 | 0.00000 | -0.00640 | -0.00640 | -0.00610 | -0.00490 | -0.00320 | -0.00170 | -0.00080 | -0.00000 |
| USA | 0.00000 | 0.00000 | 0.00000 | 0.00000  | 0.00000  | 0.00000  | 0.00000  | 0.00000  | 0.00000  | 0.00000  | 0.00000  |

Table 155: MAgPIE m4p\_SSP1 — Demand—Domestic Balanceflow—Crops—Oil crops—Cotton seed (Mt DM/yr) [PART 1/2]

|     | 2050    | 2055    | 2060    | 2070    | 2080    | 2090    | 2100    |
|-----|---------|---------|---------|---------|---------|---------|---------|
| GLO | 0.00000 | 0.00000 | 0.00000 | 0.00000 | 0.00000 | 0.00000 | 0.00000 |
| CAZ | 0.00000 | 0.00000 | 0.00000 | 0.00000 | 0.00000 | 0.00000 | 0.00000 |
| CHA | 0.00000 | 0.00000 | 0.00000 | 0.00000 | 0.00000 | 0.00000 | 0.00000 |
| EUR | 0.00000 | 0.00000 | 0.00000 | 0.00000 | 0.00000 | 0.00000 | 0.00000 |
| IND | 0.00000 | 0.00000 | 0.00000 | 0.00000 | 0.00000 | 0.00000 | 0.00000 |
| JPN | 0.00000 | 0.00000 | 0.00000 | 0.00000 | 0.00000 | 0.00000 | 0.00000 |
| LAM | 0.00000 | 0.00000 | 0.00000 | 0.00000 | 0.00000 | 0.00000 | 0.00000 |
| MEA | 0.00000 | 0.00000 | 0.00000 | 0.00000 | 0.00000 | 0.00000 | 0.00000 |
| NEU | 0.00000 | 0.00000 | 0.00000 | 0.00000 | 0.00000 | 0.00000 | 0.00000 |
| OAS | 0.00000 | 0.00000 | 0.00000 | 0.00000 | 0.00000 | 0.00000 | 0.00000 |
| REF | 0.00000 | 0.00000 | 0.00000 | 0.00000 | 0.00000 | 0.00000 | 0.00000 |
| SSA | 0.00000 | 0.00000 | 0.00000 | 0.00000 | 0.00000 | 0.00000 | 0.00000 |
| USA | 0.00000 | 0.00000 | 0.00000 | 0.00000 | 0.00000 | 0.00000 | 0.00000 |

Table 156: MAgPIE m4p\_SSP1 — Demand—Domestic Balanceflow—Crops—Oil crops—Cotton seed (Mt DM/yr) [PART 2/2]

|     | 1965    | 1970    | 1975    | 1980    | 1985    | 1990    | 1995    | 2000    | 2005    | 2010     |
|-----|---------|---------|---------|---------|---------|---------|---------|---------|---------|----------|
| GLO | 0.00590 | 0.00330 | 0.00190 | 0.00000 | 0.00040 | 0.00000 | 0.00030 | 0.00000 | 0.00010 | -0.01310 |
| CAZ | 0.00000 | 0.00000 | 0.00000 | 0.00000 | 0.00000 | 0.00000 | 0.00000 | 0.00000 | 0.00000 | 0.00000  |
| CHA | 0.00000 | 0.00000 | 0.00000 | 0.00000 | 0.00000 | 0.00000 | 0.00000 | 0.00000 | 0.00000 | 0.00000  |
| EUR | 0.00000 | 0.00000 | 0.00000 | 0.00000 | 0.00000 | 0.00000 | 0.00000 | 0.00000 | 0.00000 | 0.00190  |
| IND | 0.00000 | 0.00000 | 0.00000 | 0.00000 | 0.00000 | 0.00000 | 0.00000 | 0.00000 | 0.00000 | 0.00000  |
| JPN | 0.00000 | 0.00000 | 0.00000 | 0.00000 | 0.00000 | 0.00000 | 0.00000 | 0.00000 | 0.00000 | 0.00000  |
| LAM | 0.00290 | 0.00000 | 0.00000 | 0.00000 | 0.00000 | 0.00000 | 0.00030 | 0.00000 | 0.00000 | -0.00860 |
| MEA | 0.00000 | 0.00000 | 0.00000 | 0.00000 | 0.00000 | 0.00000 | 0.00000 | 0.00000 | 0.00010 | 0.00000  |
| NEU | 0.00300 | 0.00330 | 0.00190 | 0.00000 | 0.00030 | 0.00000 | 0.00000 | 0.00000 | 0.00000 | 0.00000  |
| OAS | 0.00000 | 0.00000 | 0.00000 | 0.00000 | 0.00000 | 0.00000 | 0.00000 | 0.00000 | 0.00000 | 0.00000  |
| REF | 0.00000 | 0.00000 | 0.00000 | 0.00000 | 0.00000 | 0.00000 | 0.00000 | 0.00000 | 0.00000 | 0.00000  |
| SSA | 0.00000 | 0.00000 | 0.00000 | 0.00000 | 0.00000 | 0.00000 | 0.00000 | 0.00000 | 0.00000 | -0.00640 |
| USA | 0.00000 | 0.00000 | 0.00000 | 0.00000 | 0.00000 | 0.00000 | 0.00000 | 0.00000 | 0.00000 | 0.00000  |

Table 157: FAO — Demand—Domestic Balanceflow—Crops—Oil crops—Cotton seed (Mt DM/yr)

5.1.8
Oil crops—Groundnuts

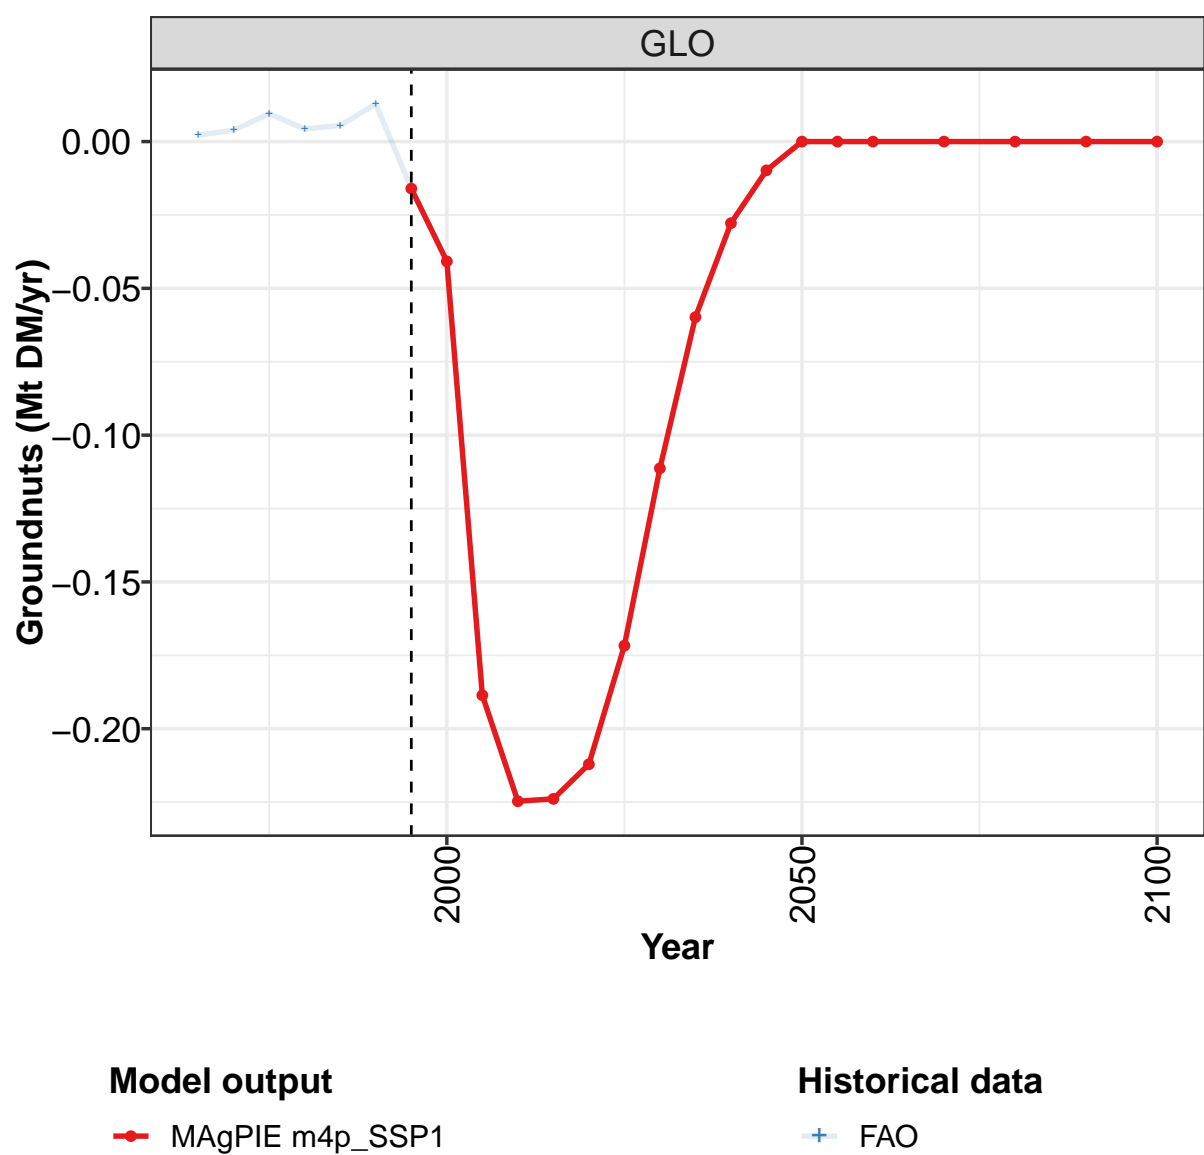

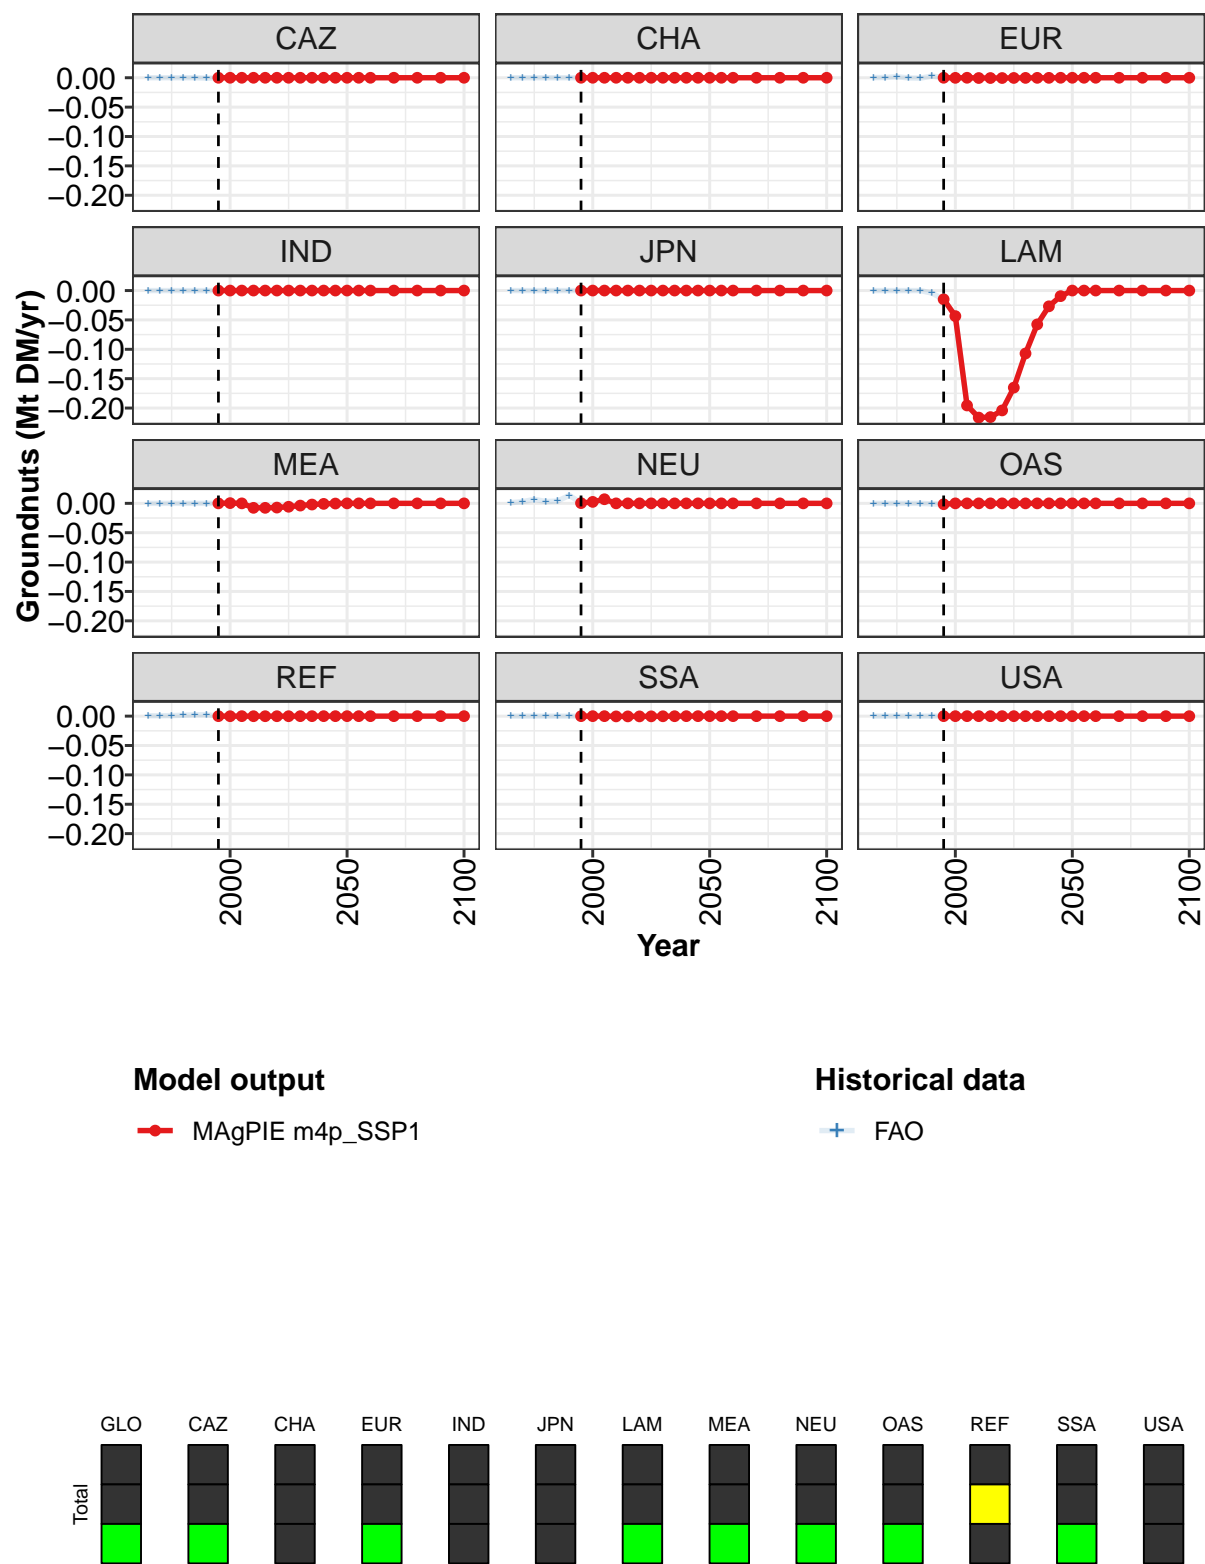

Figure 53: MAgPIE m4p\_SSP1 — Demand—Domestic Balanceflow—Crops—Oil crops—Groundnuts (Mt DM/yr)

|     | 1995     | 2000     | 2005     | 2010     | 2015     | 2020     | 2025     | 2030     | 2035     | 2040     | 2045     |
|-----|----------|----------|----------|----------|----------|----------|----------|----------|----------|----------|----------|
| GLO | -0.01600 | -0.04080 | -0.18860 | -0.22470 | -0.22390 | -0.21210 | -0.17170 | -0.11130 | -0.05980 | -0.02780 | -0.00000 |
| CAZ | 0.00000  | 0.00000  | 0.00000  | 0.00000  | 0.00000  | 0.00000  | 0.00000  | 0.00000  | 0.00000  | 0.00000  | 0.00000  |
| CHA | 0.00000  | 0.00000  | 0.00000  | 0.00000  | 0.00000  | 0.00000  | 0.00000  | 0.00000  | 0.00000  | 0.00000  | 0.00000  |
| EUR | 0.00000  | -0.00010 | 0.00000  | -0.00040 | -0.00040 | -0.00040 | -0.00030 | -0.00020 | -0.00010 | -0.00010 | 0.00000  |
| IND | 0.00000  | 0.00000  | 0.00000  | 0.00000  | 0.00000  | 0.00000  | 0.00000  | 0.00000  | 0.00000  | 0.00000  | 0.00000  |
| JPN | 0.00000  | 0.00000  | 0.00000  | 0.00000  | 0.00000  | 0.00000  | 0.00000  | 0.00000  | 0.00000  | 0.00000  | 0.00000  |
| LAM | -0.01490 | -0.04350 | -0.19560 | -0.21620 | -0.21540 | -0.20400 | -0.16520 | -0.10710 | -0.05760 | -0.02680 | -0.00000 |
| MEA | 0.00000  | 0.00040  | 0.00000  | -0.00760 | -0.00760 | -0.00720 | -0.00580 | -0.00380 | -0.00200 | -0.00090 | -0.00000 |
| NEU | 0.00040  | 0.00250  | 0.00700  | 0.00000  | 0.00000  | 0.00000  | 0.00000  | 0.00000  | 0.00000  | 0.00000  | 0.00000  |
| OAS | -0.00150 | 0.00000  | 0.00000  | 0.00000  | 0.00000  | 0.00000  | 0.00000  | 0.00000  | 0.00000  | 0.00000  | 0.00000  |
| REF | 0.00000  | -0.00010 | 0.00000  | -0.00010 | -0.00010 | -0.00010 | -0.00010 | 0.00000  | 0.00000  | 0.00000  | 0.00000  |
| SSA | 0.00000  | 0.00000  | 0.00000  | -0.00040 | -0.00040 | -0.00040 | -0.00030 | -0.00020 | -0.00010 | 0.00000  | 0.00000  |
| USA | 0.00000  | 0.00000  | 0.00000  | 0.00000  | 0.00000  | 0.00000  | 0.00000  | 0.00000  | 0.00000  | 0.00000  | 0.00000  |

Table 158: MAGPIE m4p\_SSP1 — Demand—Domestic Balanceflow—Crops—Oil crops—Groundnuts (Mt DM/yr) [PART 1/2]

|     | 2050    | 2055    | 2060    | 2070    | 2080    | 2090    | 2100    |
|-----|---------|---------|---------|---------|---------|---------|---------|
| GLO | 0.00000 | 0.00000 | 0.00000 | 0.00000 | 0.00000 | 0.00000 | 0.00000 |
| CAZ | 0.00000 | 0.00000 | 0.00000 | 0.00000 | 0.00000 | 0.00000 | 0.00000 |
| CHA | 0.00000 | 0.00000 | 0.00000 | 0.00000 | 0.00000 | 0.00000 | 0.00000 |
| EUR | 0.00000 | 0.00000 | 0.00000 | 0.00000 | 0.00000 | 0.00000 | 0.00000 |
| IND | 0.00000 | 0.00000 | 0.00000 | 0.00000 | 0.00000 | 0.00000 | 0.00000 |
| JPN | 0.00000 | 0.00000 | 0.00000 | 0.00000 | 0.00000 | 0.00000 | 0.00000 |
| LAM | 0.00000 | 0.00000 | 0.00000 | 0.00000 | 0.00000 | 0.00000 | 0.00000 |
| MEA | 0.00000 | 0.00000 | 0.00000 | 0.00000 | 0.00000 | 0.00000 | 0.00000 |
| NEU | 0.00000 | 0.00000 | 0.00000 | 0.00000 | 0.00000 | 0.00000 | 0.00000 |
| OAS | 0.00000 | 0.00000 | 0.00000 | 0.00000 | 0.00000 | 0.00000 | 0.00000 |
| REF | 0.00000 | 0.00000 | 0.00000 | 0.00000 | 0.00000 | 0.00000 | 0.00000 |
| SSA | 0.00000 | 0.00000 | 0.00000 | 0.00000 | 0.00000 | 0.00000 | 0.00000 |
| USA | 0.00000 | 0.00000 | 0.00000 | 0.00000 | 0.00000 | 0.00000 | 0.00000 |

Table 159: MAGPIE m4p\_SSP1 — Demand—Domestic Balanceflow—Crops—Oil crops—Groundnuts (Mt DM/yr) [PART 2/2]

|     | 1965   | 1970   | 1975   | 1980    | 1985    | 1990    | 1995    | 2000    | 2005    | 2010    |
|-----|--------|--------|--------|---------|---------|---------|---------|---------|---------|---------|
| GLO | 0.0022 | 0.0039 | 0.0095 | 0.0043  | 0.0055  | 0.0128  | -0.0160 | -0.0408 | -0.1887 | -0.2247 |
| CAZ | 0.0000 | 0.0000 | 0.0000 | 0.0000  | 0.0000  | -0.0008 | 0.0000  | 0.0000  | 0.0000  | 0.0000  |
| CHA | 0.0000 | 0.0000 | 0.0000 | 0.0000  | 0.0000  | 0.0000  | 0.0000  | 0.0000  | 0.0000  | 0.0000  |
| EUR | 0.0003 | 0.0005 | 0.0018 | -0.0003 | -0.0008 | 0.0030  | 0.0000  | -0.0001 | 0.0000  | -0.0004 |
| IND | 0.0000 | 0.0000 | 0.0000 | 0.0000  | 0.0000  | 0.0000  | 0.0000  | 0.0000  | 0.0000  | 0.0000  |
| JPN | 0.0000 | 0.0000 | 0.0000 | 0.0000  | 0.0000  | 0.0000  | 0.0000  | 0.0000  | 0.0000  | 0.0000  |
| LAM | 0.0000 | 0.0000 | 0.0000 | 0.0000  | 0.0000  | -0.0044 | -0.0149 | -0.0435 | -0.1956 | -0.2162 |
| MEA | 0.0000 | 0.0000 | 0.0000 | 0.0000  | 0.0000  | 0.0000  | 0.0000  | 0.0004  | 0.0000  | -0.0076 |
| NEU | 0.0012 | 0.0028 | 0.0068 | 0.0031  | 0.0039  | 0.0136  | 0.0004  | 0.0025  | 0.0070  | 0.0000  |
| OAS | 0.0000 | 0.0000 | 0.0000 | 0.0000  | 0.0000  | -0.0010 | -0.0015 | 0.0000  | 0.0000  | 0.0000  |
| REF | 0.0007 | 0.0006 | 0.0009 | 0.0015  | 0.0024  | 0.0023  | 0.0000  | -0.0001 | 0.0000  | -0.0001 |
| SSA | 0.0000 | 0.0000 | 0.0000 | 0.0000  | 0.0000  | 0.0000  | 0.0000  | 0.0000  | 0.0000  | -0.0004 |
| USA | 0.0000 | 0.0000 | 0.0000 | 0.0000  | 0.0000  | 0.0000  | 0.0000  | 0.0000  | 0.0000  | 0.0000  |

Table 160: FAO — Demand—Domestic Balanceflow—Crops—Oil crops—Groundnuts (Mt DM/yr)

5.1.9 Oil crops—Other oil crops (incl rapeseed)

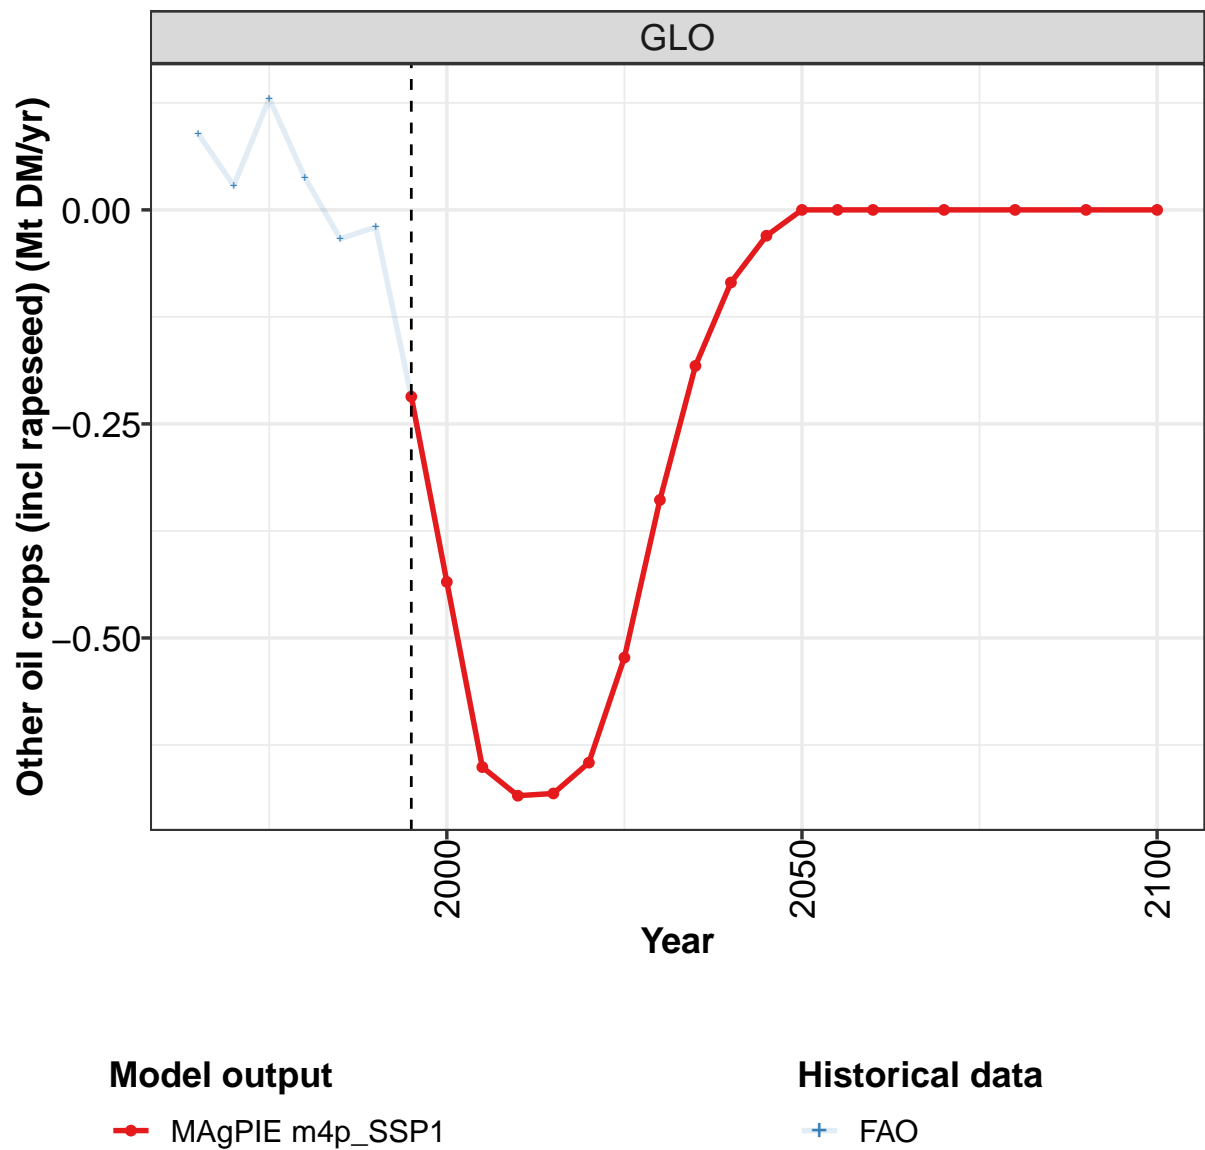



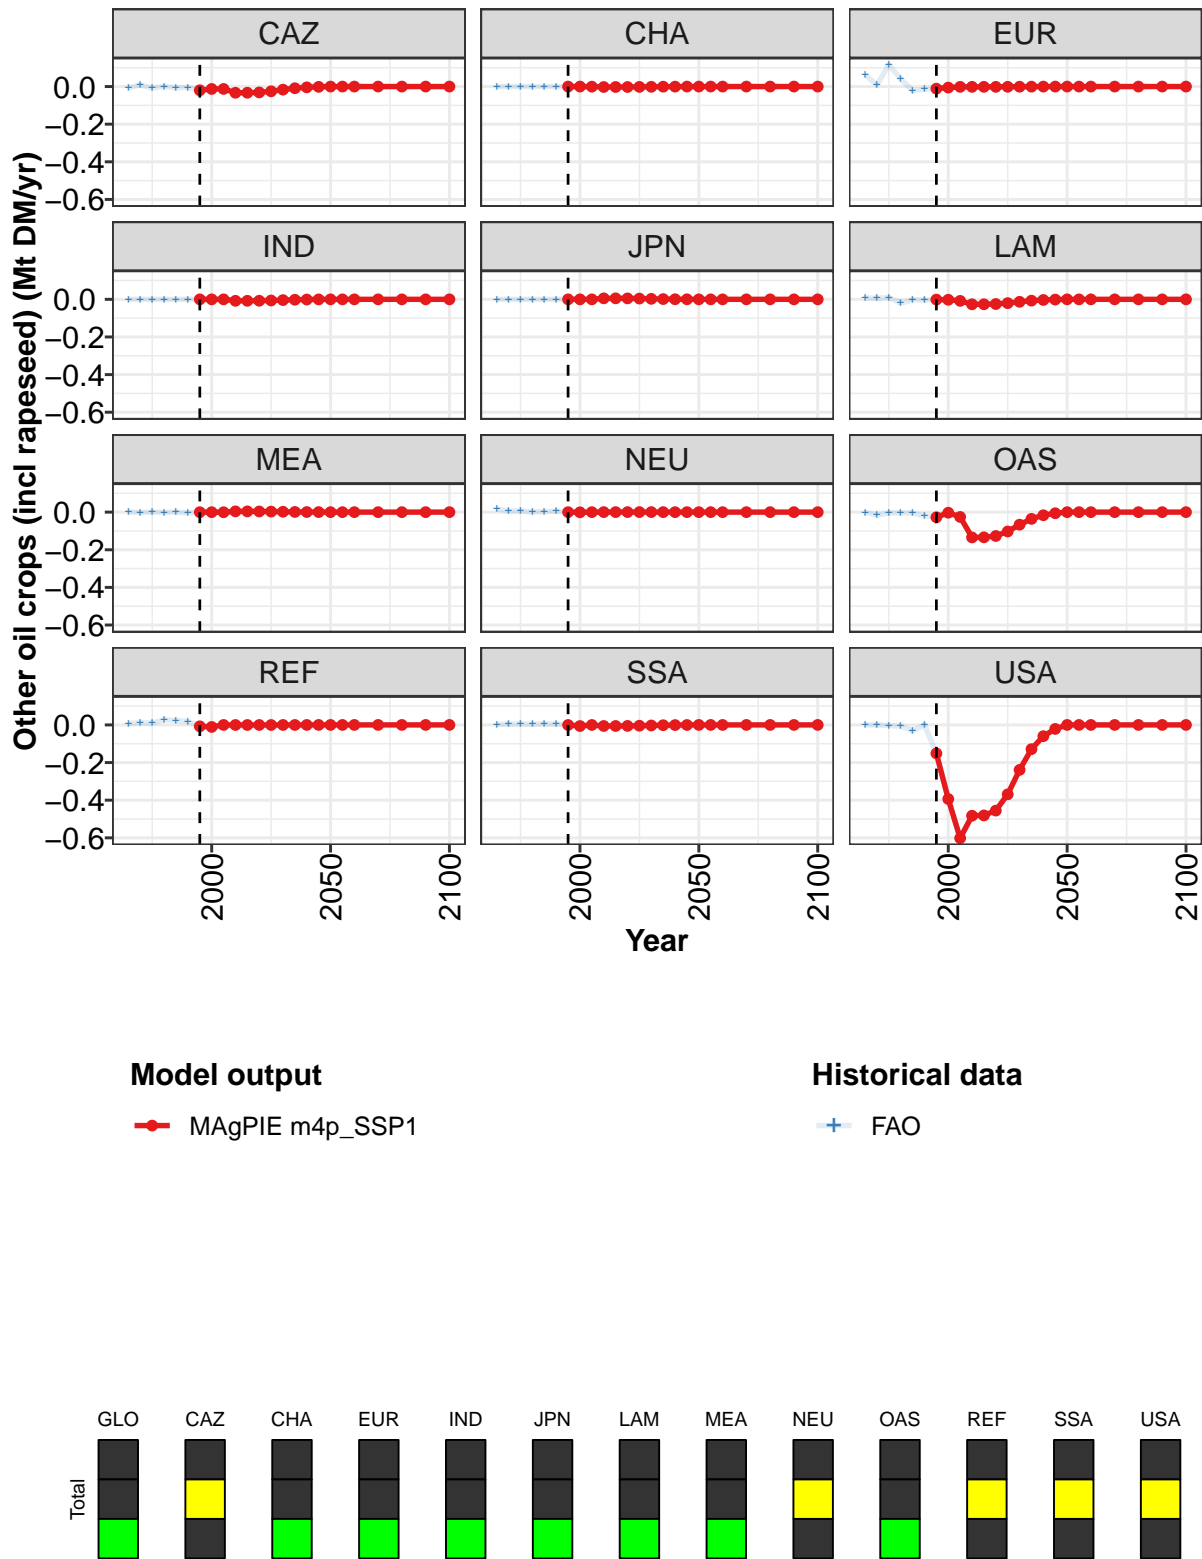

Figure 54: MAgPIE m4p\_SSP1 — Demand—Domestic Balanceflow—Crops—Oil crops—Other oil crops (incl rapeseed) (Mt DM/yr)

|     | 1995     | 2000     | 2005     | 2010     | 2015     | 2020     | 2025     | 2030     | 2035     | 2040     | 2045     |
|-----|----------|----------|----------|----------|----------|----------|----------|----------|----------|----------|----------|
| GLO | -0.21810 | -0.43450 | -0.65080 | -0.68420 | -0.68160 | -0.64560 | -0.52290 | -0.33880 | -0.18220 | -0.08480 | -0.03480 |
| CAZ | -0.01950 | -0.01280 | -0.01270 | -0.03300 | -0.03290 | -0.03120 | -0.02530 | -0.01640 | -0.00880 | -0.00410 | -0.00190 |
| CHA | 0.00000  | -0.00010 | -0.00040 | -0.00240 | -0.00240 | -0.00230 | -0.00180 | -0.00120 | -0.00060 | -0.00030 | -0.00010 |
| EUR | -0.01110 | -0.00540 | -0.00160 | -0.00160 | -0.00160 | -0.00150 | -0.00120 | -0.00080 | -0.00040 | -0.00020 | -0.00010 |
| IND | 0.00000  | 0.00000  | 0.00000  | -0.00780 | -0.00780 | -0.00740 | -0.00600 | -0.00390 | -0.00210 | -0.00100 | -0.00050 |
| JPN | 0.00000  | 0.00000  | 0.00000  | 0.00540  | 0.00540  | 0.00510  | 0.00420  | 0.00270  | 0.00150  | 0.00070  | 0.00030  |
| LAM | -0.00130 | -0.00220 | -0.00810 | -0.02630 | -0.02620 | -0.02480 | -0.02010 | -0.01300 | -0.00700 | -0.00330 | -0.00160 |
| MEA | -0.00010 | -0.00010 | -0.00050 | 0.00400  | 0.00400  | 0.00370  | 0.00300  | 0.00200  | 0.00110  | 0.00050  | 0.00020  |
| NEU | 0.00000  | -0.00080 | 0.00000  | 0.00030  | 0.00030  | 0.00030  | 0.00020  | 0.00020  | 0.00010  | 0.00000  | 0.00000  |
| OAS | -0.02730 | -0.00300 | -0.02550 | -0.13430 | -0.13380 | -0.12670 | -0.10270 | -0.06650 | -0.03580 | -0.01660 | -0.00830 |
| REF | -0.00730 | -0.01070 | -0.00010 | -0.00030 | -0.00030 | -0.00030 | -0.00020 | -0.00010 | -0.00010 | 0.00000  | 0.00000  |
| SSA | -0.00020 | -0.00580 | -0.00020 | -0.00560 | -0.00550 | -0.00520 | -0.00420 | -0.00280 | -0.00150 | -0.00070 | -0.00030 |
| USA | -0.15130 | -0.39360 | -0.60170 | -0.48260 | -0.48080 | -0.45530 | -0.36880 | -0.23900 | -0.12860 | -0.05980 | -0.02990 |

Table 161: MAGPIE m4p\_SSP1 — Demand—Domestic Balanceflow—Crops—Oil crops—Other oil crops (incl rapeseed) (Mt DM/yr) [PART 1/2]

|     | 2050    | 2055    | 2060    | 2070    | 2080    | 2090    | 2100    |
|-----|---------|---------|---------|---------|---------|---------|---------|
| GLO | 0.00000 | 0.00000 | 0.00000 | 0.00000 | 0.00000 | 0.00000 | 0.00000 |
| CAZ | 0.00000 | 0.00000 | 0.00000 | 0.00000 | 0.00000 | 0.00000 | 0.00000 |
| CHA | 0.00000 | 0.00000 | 0.00000 | 0.00000 | 0.00000 | 0.00000 | 0.00000 |
| EUR | 0.00000 | 0.00000 | 0.00000 | 0.00000 | 0.00000 | 0.00000 | 0.00000 |
| IND | 0.00000 | 0.00000 | 0.00000 | 0.00000 | 0.00000 | 0.00000 | 0.00000 |
| JPN | 0.00000 | 0.00000 | 0.00000 | 0.00000 | 0.00000 | 0.00000 | 0.00000 |
| LAM | 0.00000 | 0.00000 | 0.00000 | 0.00000 | 0.00000 | 0.00000 | 0.00000 |
| MEA | 0.00000 | 0.00000 | 0.00000 | 0.00000 | 0.00000 | 0.00000 | 0.00000 |
| NEU | 0.00000 | 0.00000 | 0.00000 | 0.00000 | 0.00000 | 0.00000 | 0.00000 |
| OAS | 0.00000 | 0.00000 | 0.00000 | 0.00000 | 0.00000 | 0.00000 | 0.00000 |
| REF | 0.00000 | 0.00000 | 0.00000 | 0.00000 | 0.00000 | 0.00000 | 0.00000 |
| SSA | 0.00000 | 0.00000 | 0.00000 | 0.00000 | 0.00000 | 0.00000 | 0.00000 |
| USA | 0.00000 | 0.00000 | 0.00000 | 0.00000 | 0.00000 | 0.00000 | 0.00000 |

Table 162: MAGPIE m4p\_SSP1 — Demand—Domestic Balanceflow—Crops—Oil crops—Other oil crops (incl rapeseed) (Mt DM/yr) [PART 2/2]

|     | 1965   | 1970   | 1975   | 1980   | 1985   | 1990   | 1995   | 2000   | 2005   | 2010   |
|-----|--------|--------|--------|--------|--------|--------|--------|--------|--------|--------|
| GLO | 0.089  | 0.028  | 0.130  | 0.038  | -0.034 | -0.020 | -0.218 | -0.434 | -0.651 | -0.684 |
| CAZ | -0.007 | 0.009  | -0.008 | 0.000  | -0.007 | -0.004 | -0.019 | -0.013 | -0.013 | -0.033 |
| CHA | -0.001 | 0.000  | 0.000  | -0.000 | -0.000 | 0.000  | 0.000  | -0.000 | -0.000 | -0.002 |
| EUR | 0.063  | 0.009  | 0.116  | 0.040  | -0.021 | -0.015 | -0.011 | -0.005 | -0.002 | -0.002 |
| IND | 0.000  | 0.000  | 0.000  | 0.000  | 0.000  | 0.000  | 0.000  | 0.000  | 0.000  | -0.008 |
| JPN | 0.000  | 0.000  | 0.000  | 0.000  | 0.000  | 0.000  | 0.000  | 0.000  | 0.000  | 0.005  |
| LAM | 0.007  | 0.006  | 0.009  | -0.021 | -0.002 | -0.005 | -0.001 | -0.002 | -0.008 | -0.026 |
| MEA | 0.000  | -0.002 | -0.000 | -0.002 | -0.000 | -0.004 | -0.000 | -0.000 | -0.001 | 0.004  |
| NEU | 0.017  | 0.006  | 0.006  | 0.001  | 0.003  | 0.005  | 0.000  | -0.001 | 0.000  | 0.000  |
| OAS | -0.001 | -0.016 | -0.005 | -0.004 | -0.006 | -0.020 | -0.027 | -0.003 | -0.025 | -0.134 |
| REF | 0.007  | 0.013  | 0.010  | 0.028  | 0.024  | 0.018  | -0.007 | -0.011 | -0.000 | -0.000 |
| SSA | 0.003  | 0.005  | 0.005  | 0.004  | 0.007  | 0.005  | -0.000 | -0.006 | -0.000 | -0.006 |
| USA | 0.000  | 0.000  | -0.003 | -0.007 | -0.030 | 0.000  | -0.151 | -0.394 | -0.602 | -0.483 |

Table 163: FAO — Demand—Domestic Balanceflow—Crops—Oil crops—Other oil crops (incl rapeseed) (Mt DM/yr)

5.1.10
Oil crops—Soybean

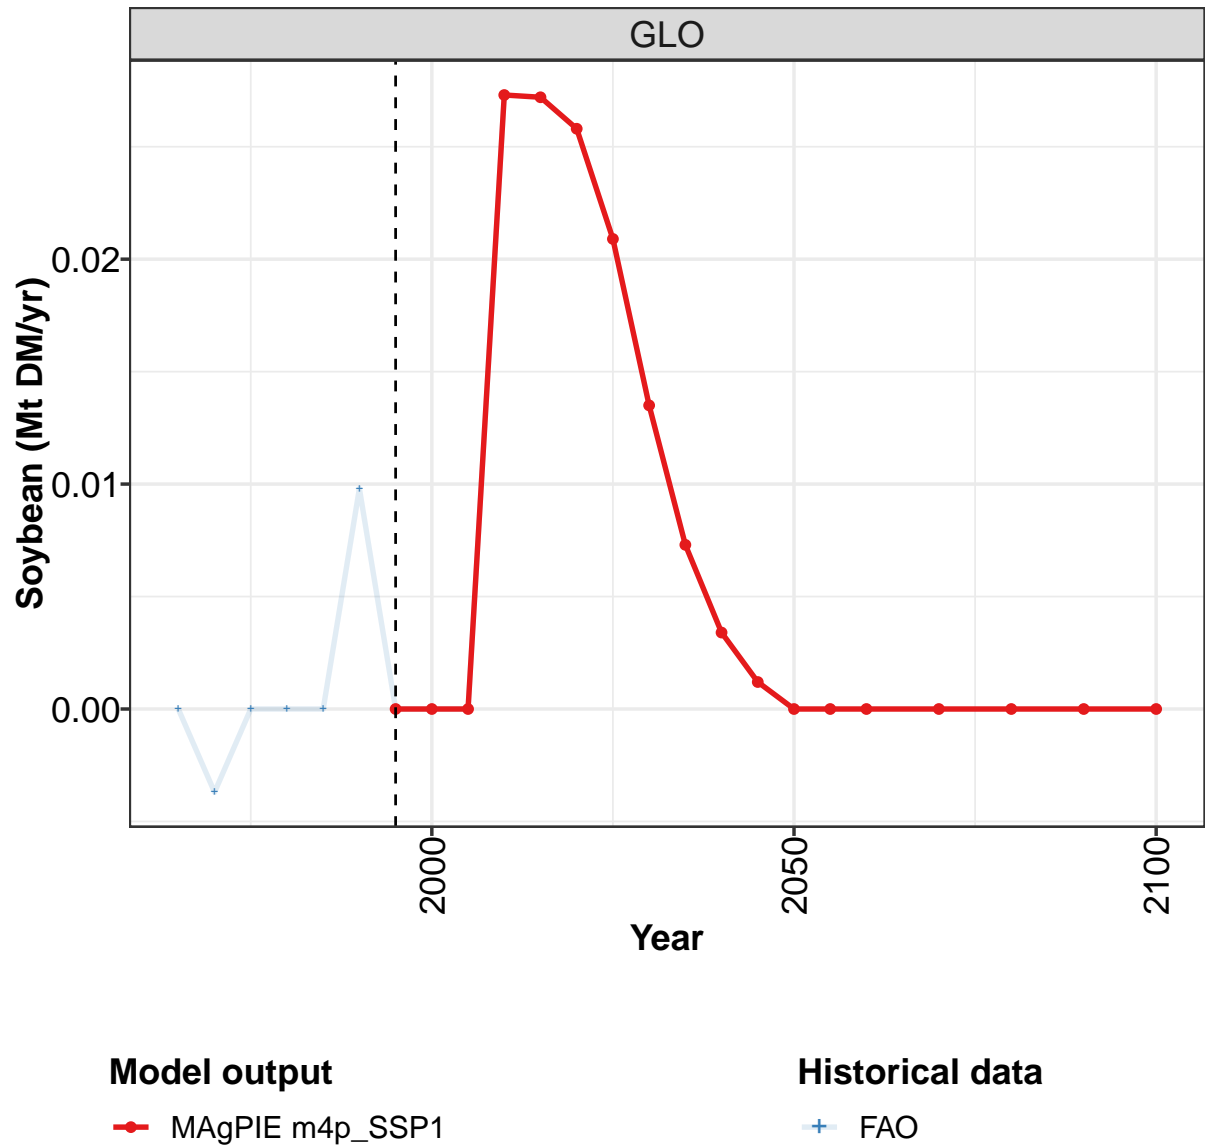

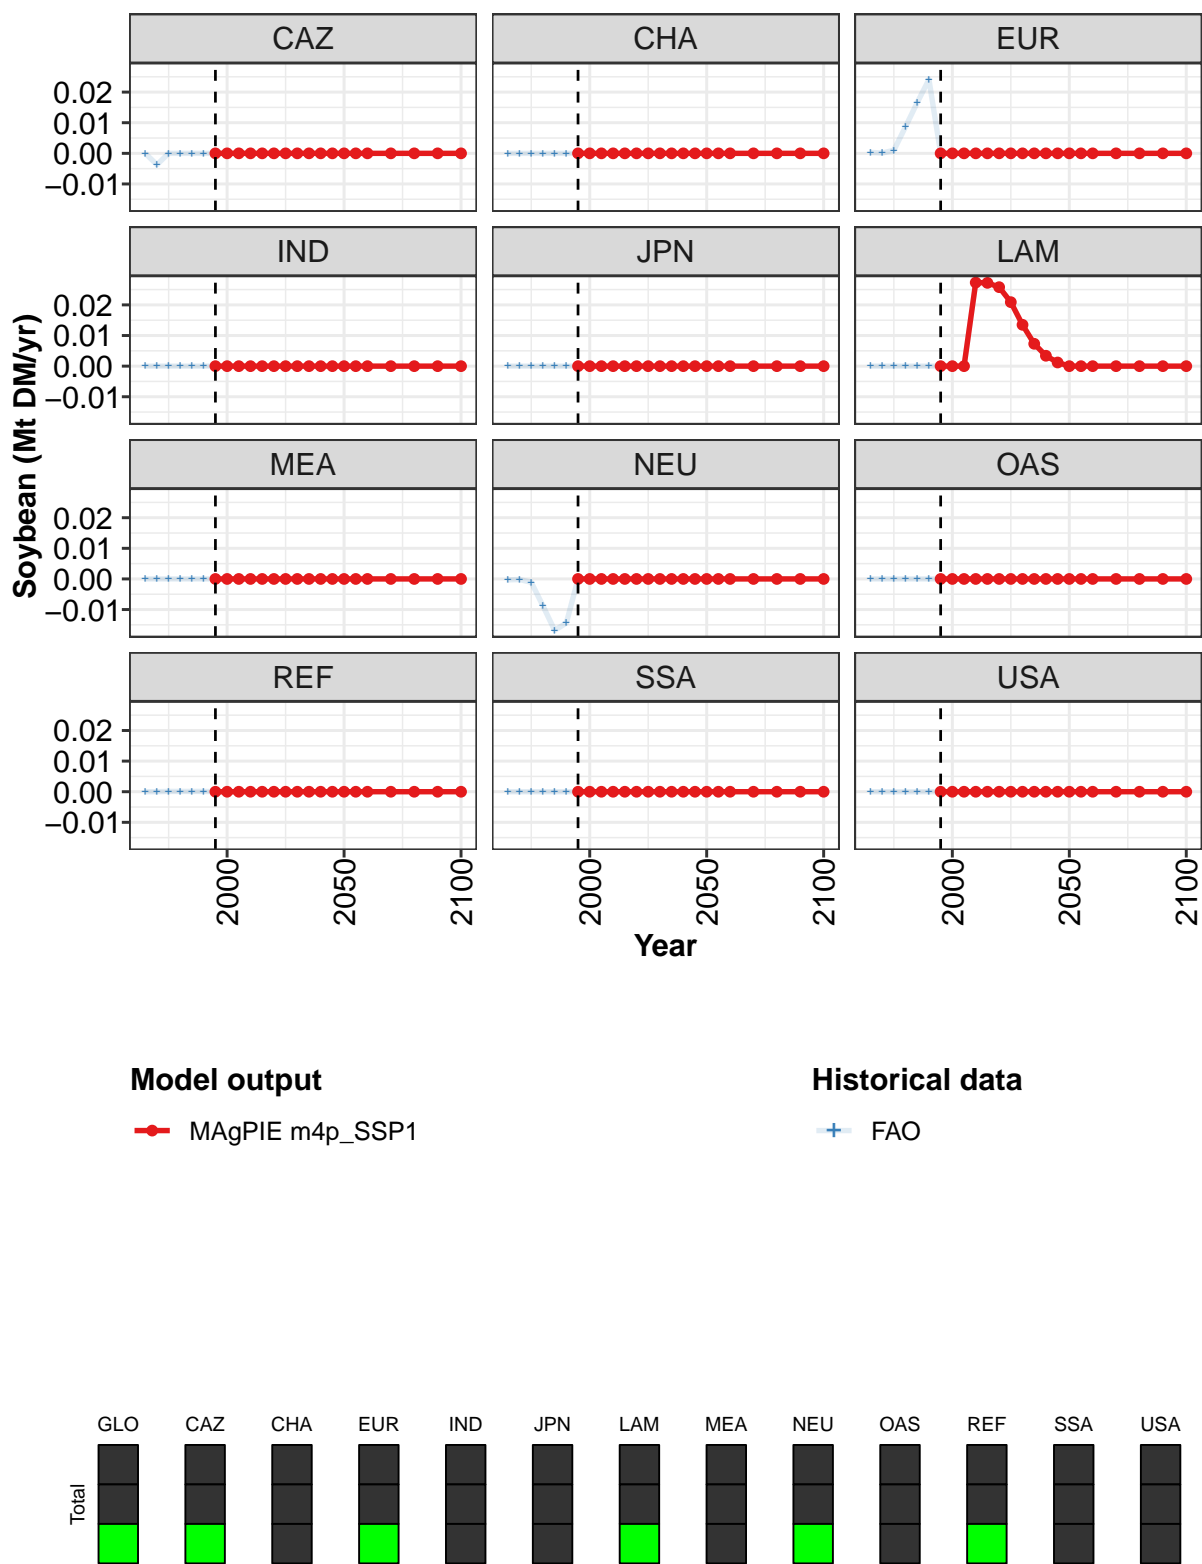

Figure 55: MAgPIE m4p\_SSP1 — Demand—Domestic Balanceflow—Crops—Oil crops—Soybean (Mt DM/yr)

|     | 1995   | 2000   | 2005   | 2010   | 2015   | 2020   | 2025   | 2030   | 2035   | 2040   | 2045   |
|-----|--------|--------|--------|--------|--------|--------|--------|--------|--------|--------|--------|
| GLO | 0.0000 | 0.0000 | 0.0000 | 0.0273 | 0.0272 | 0.0258 | 0.0209 | 0.0135 | 0.0073 | 0.0034 | 0.0012 |
| CAZ | 0.0000 | 0.0000 | 0.0000 | 0.0000 | 0.0000 | 0.0000 | 0.0000 | 0.0000 | 0.0000 | 0.0000 | 0.0000 |
| CHA | 0.0000 | 0.0000 | 0.0000 | 0.0000 | 0.0000 | 0.0000 | 0.0000 | 0.0000 | 0.0000 | 0.0000 | 0.0000 |
| EUR | 0.0000 | 0.0000 | 0.0000 | 0.0000 | 0.0000 | 0.0000 | 0.0000 | 0.0000 | 0.0000 | 0.0000 | 0.0000 |
| IND | 0.0000 | 0.0000 | 0.0000 | 0.0000 | 0.0000 | 0.0000 | 0.0000 | 0.0000 | 0.0000 | 0.0000 | 0.0000 |
| JPN | 0.0000 | 0.0000 | 0.0000 | 0.0000 | 0.0000 | 0.0000 | 0.0000 | 0.0000 | 0.0000 | 0.0000 | 0.0000 |
| LAM | 0.0000 | 0.0000 | 0.0000 | 0.0273 | 0.0272 | 0.0258 | 0.0209 | 0.0135 | 0.0073 | 0.0034 | 0.0012 |
| MEA | 0.0000 | 0.0000 | 0.0000 | 0.0000 | 0.0000 | 0.0000 | 0.0000 | 0.0000 | 0.0000 | 0.0000 | 0.0000 |
| NEU | 0.0000 | 0.0000 | 0.0000 | 0.0000 | 0.0000 | 0.0000 | 0.0000 | 0.0000 | 0.0000 | 0.0000 | 0.0000 |
| OAS | 0.0000 | 0.0000 | 0.0000 | 0.0000 | 0.0000 | 0.0000 | 0.0000 | 0.0000 | 0.0000 | 0.0000 | 0.0000 |
| REF | 0.0000 | 0.0000 | 0.0000 | 0.0000 | 0.0000 | 0.0000 | 0.0000 | 0.0000 | 0.0000 | 0.0000 | 0.0000 |
| SSA | 0.0000 | 0.0000 | 0.0000 | 0.0000 | 0.0000 | 0.0000 | 0.0000 | 0.0000 | 0.0000 | 0.0000 | 0.0000 |
| USA | 0.0000 | 0.0000 | 0.0000 | 0.0000 | 0.0000 | 0.0000 | 0.0000 | 0.0000 | 0.0000 | 0.0000 | 0.0000 |

Table 164: MAgPIE m4p\_SSP1 — Demand—Domestic Balanceflow—Crops—Oil crops—Soybean (Mt DM/yr)  
[PART 1/2]

|     | 2050   | 2055   | 2060   | 2070   | 2080   | 2090   | 2100   |
|-----|--------|--------|--------|--------|--------|--------|--------|
| GLO | 0.0000 | 0.0000 | 0.0000 | 0.0000 | 0.0000 | 0.0000 | 0.0000 |
| CAZ | 0.0000 | 0.0000 | 0.0000 | 0.0000 | 0.0000 | 0.0000 | 0.0000 |
| CHA | 0.0000 | 0.0000 | 0.0000 | 0.0000 | 0.0000 | 0.0000 | 0.0000 |
| EUR | 0.0000 | 0.0000 | 0.0000 | 0.0000 | 0.0000 | 0.0000 | 0.0000 |
| IND | 0.0000 | 0.0000 | 0.0000 | 0.0000 | 0.0000 | 0.0000 | 0.0000 |
| JPN | 0.0000 | 0.0000 | 0.0000 | 0.0000 | 0.0000 | 0.0000 | 0.0000 |
| LAM | 0.0000 | 0.0000 | 0.0000 | 0.0000 | 0.0000 | 0.0000 | 0.0000 |
| MEA | 0.0000 | 0.0000 | 0.0000 | 0.0000 | 0.0000 | 0.0000 | 0.0000 |
| NEU | 0.0000 | 0.0000 | 0.0000 | 0.0000 | 0.0000 | 0.0000 | 0.0000 |
| OAS | 0.0000 | 0.0000 | 0.0000 | 0.0000 | 0.0000 | 0.0000 | 0.0000 |
| REF | 0.0000 | 0.0000 | 0.0000 | 0.0000 | 0.0000 | 0.0000 | 0.0000 |
| SSA | 0.0000 | 0.0000 | 0.0000 | 0.0000 | 0.0000 | 0.0000 | 0.0000 |
| USA | 0.0000 | 0.0000 | 0.0000 | 0.0000 | 0.0000 | 0.0000 | 0.0000 |

Table 165: MAgPIE m4p\_SSP1 — Demand—Domestic Balanceflow—Crops—Oil crops—Soybean (Mt DM/yr)  
[PART 2/2]

|     | 1965    | 1970    | 1975    | 1980    | 1985    | 1990    | 1995   | 2000   | 2005   | 2010   |
|-----|---------|---------|---------|---------|---------|---------|--------|--------|--------|--------|
| GLO | 0.0000  | -0.0037 | 0.0000  | 0.0000  | 0.0000  | 0.0098  | 0.0000 | 0.0000 | 0.0000 | 0.0273 |
| CAZ | 0.0000  | -0.0037 | 0.0000  | 0.0000  | 0.0000  | 0.0000  | 0.0000 | 0.0000 | 0.0000 | 0.0000 |
| CHA | 0.0000  | 0.0000  | 0.0000  | 0.0000  | 0.0000  | 0.0000  | 0.0000 | 0.0000 | 0.0000 | 0.0000 |
| EUR | 0.0003  | 0.0001  | 0.0010  | 0.0087  | 0.0166  | 0.0241  | 0.0000 | 0.0000 | 0.0000 | 0.0000 |
| IND | 0.0000  | 0.0000  | 0.0000  | 0.0000  | 0.0000  | 0.0000  | 0.0000 | 0.0000 | 0.0000 | 0.0000 |
| JPN | 0.0000  | 0.0000  | 0.0000  | 0.0000  | 0.0000  | 0.0000  | 0.0000 | 0.0000 | 0.0000 | 0.0000 |
| LAM | 0.0000  | 0.0000  | 0.0000  | 0.0000  | 0.0000  | 0.0000  | 0.0000 | 0.0000 | 0.0000 | 0.0273 |
| MEA | 0.0000  | 0.0000  | 0.0000  | 0.0000  | 0.0000  | 0.0000  | 0.0000 | 0.0000 | 0.0000 | 0.0000 |
| NEU | -0.0003 | -0.0002 | -0.0011 | -0.0088 | -0.0168 | -0.0144 | 0.0000 | 0.0000 | 0.0000 | 0.0000 |
| OAS | 0.0000  | 0.0000  | 0.0000  | 0.0000  | 0.0000  | 0.0000  | 0.0000 | 0.0000 | 0.0000 | 0.0000 |
| REF | 0.0000  | 0.0000  | 0.0001  | 0.0001  | 0.0001  | 0.0001  | 0.0000 | 0.0000 | 0.0000 | 0.0000 |
| SSA | 0.0000  | 0.0000  | 0.0000  | 0.0000  | 0.0000  | 0.0000  | 0.0000 | 0.0000 | 0.0000 | 0.0000 |
| USA | 0.0000  | 0.0000  | 0.0000  | 0.0000  | 0.0000  | 0.0000  | 0.0000 | 0.0000 | 0.0000 | 0.0000 |

Table 166: FAO — Demand—Domestic Balanceflow—Crops—Oil crops—Soybean (Mt DM/yr)

5.1.11
Oil crops—Sunflower

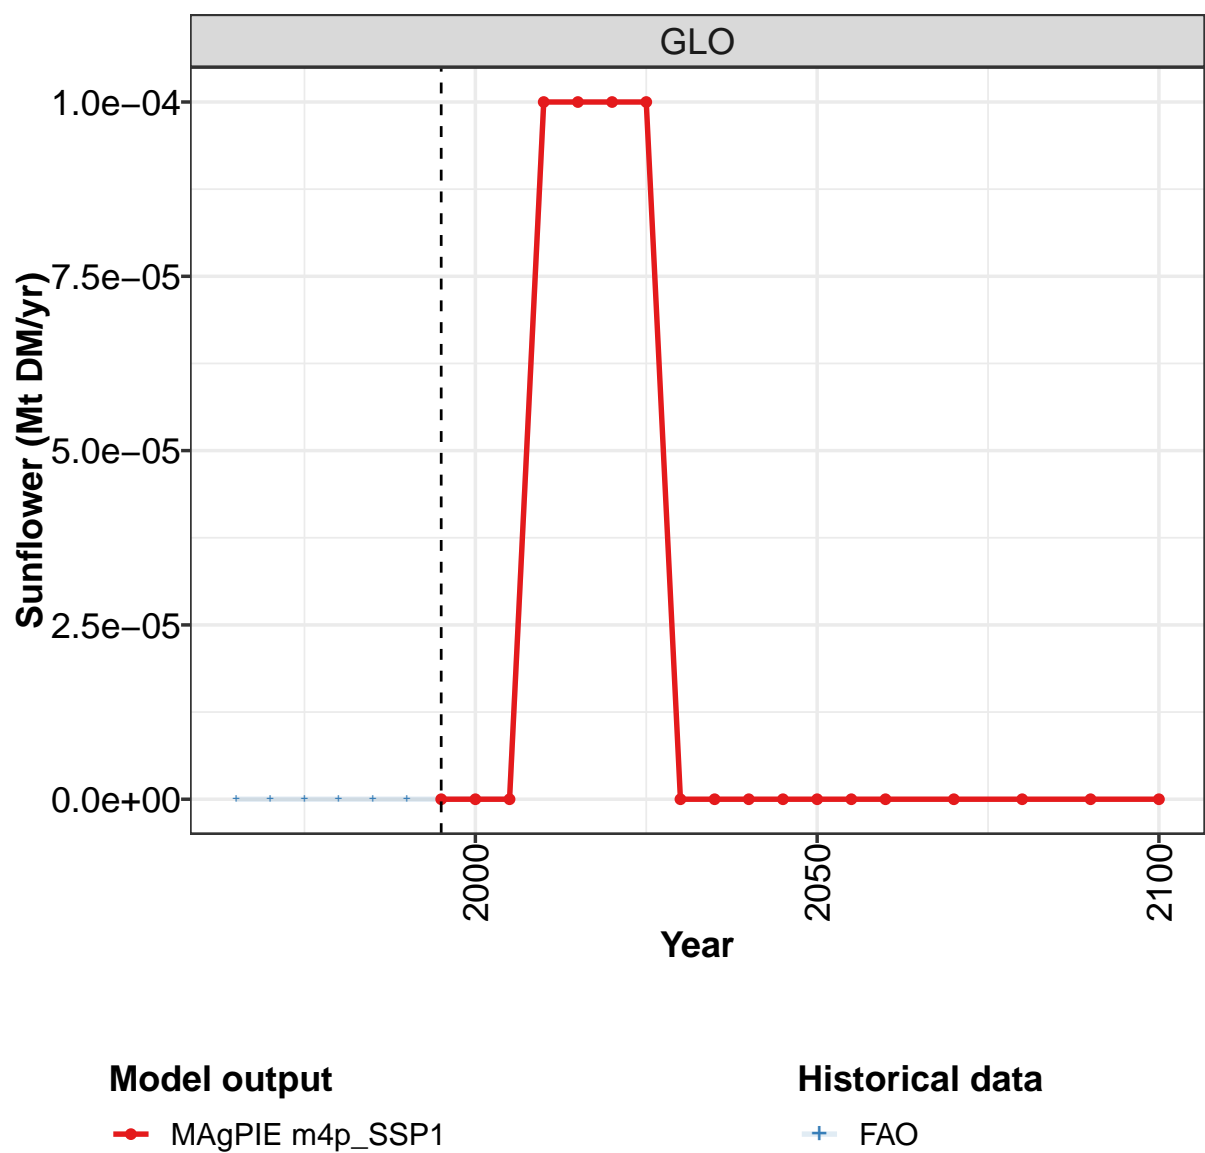

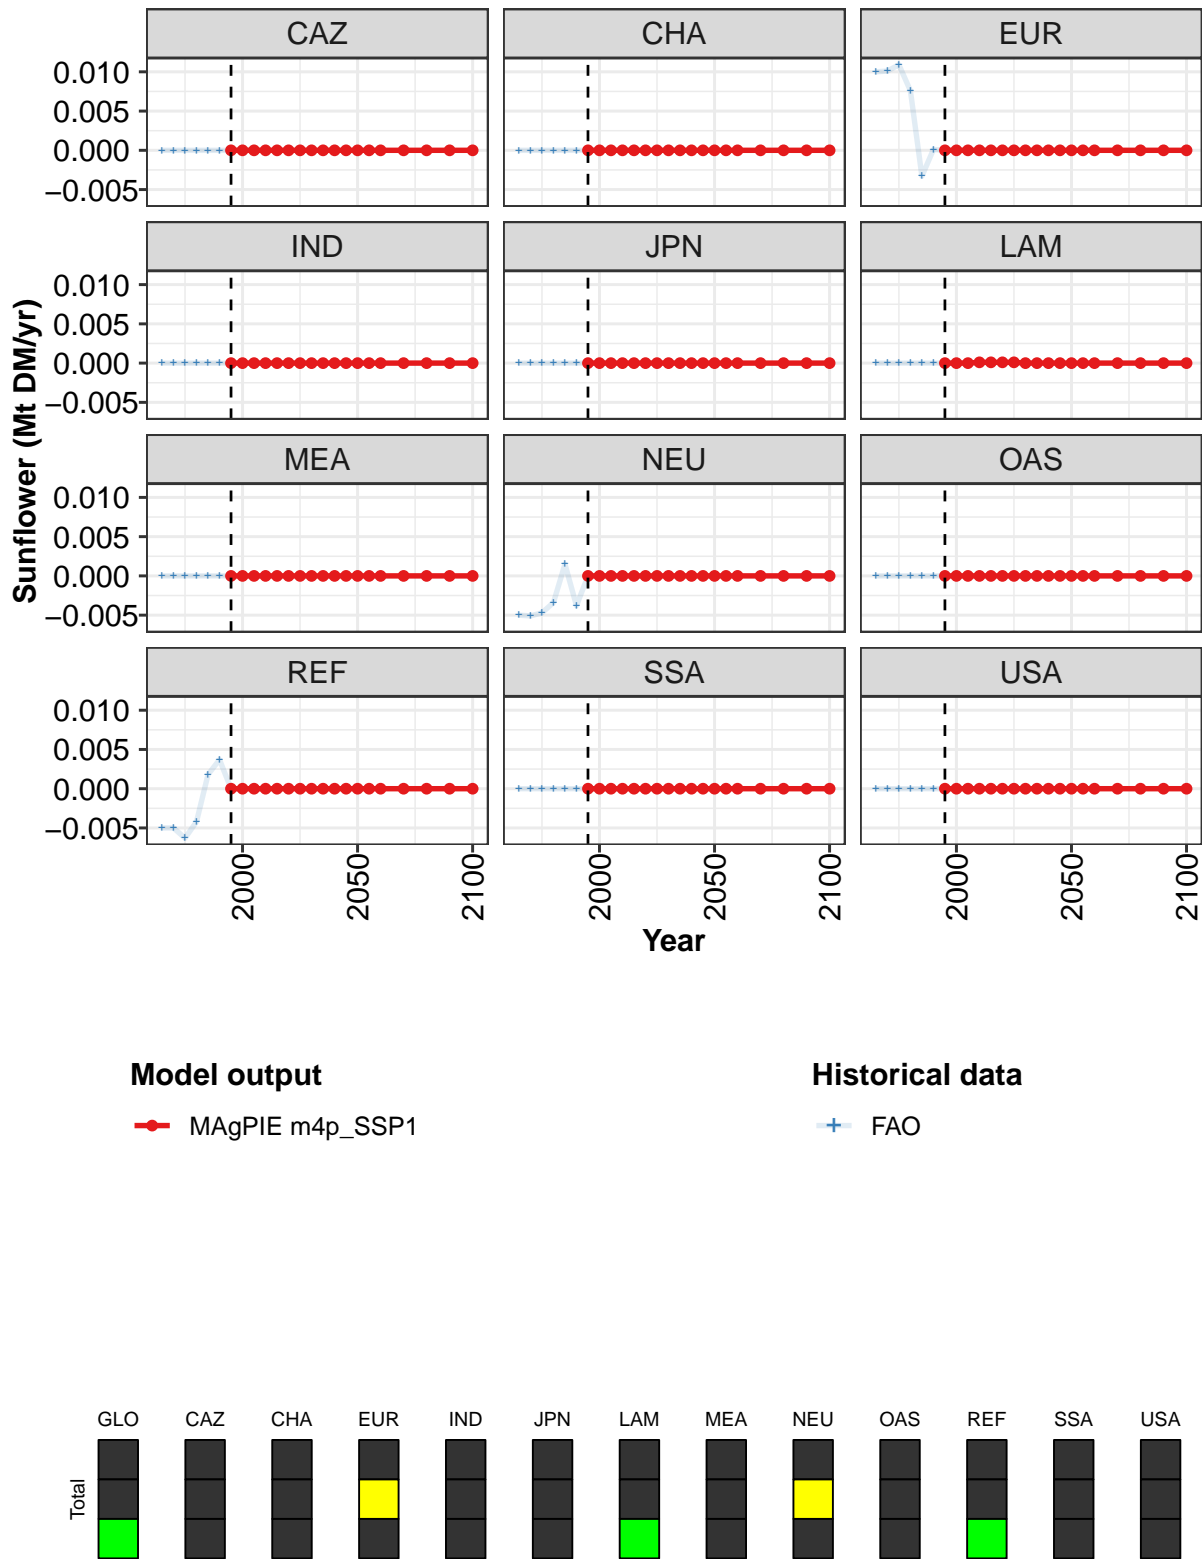

Figure 56: MAgPIE m4p\_SSP1 — Demand—Domestic Balanceflow—Crops—Oil crops—Sunflower (Mt DM/yr)

|     | 1995      | 2000      | 2005      | 2010      | 2015      | 2020      | 2025      | 2030      | 2035      |    |
|-----|-----------|-----------|-----------|-----------|-----------|-----------|-----------|-----------|-----------|----|
| GLO | 0.0000000 | 0.0000000 | 0.0000000 | 0.0001000 | 0.0001000 | 0.0001000 | 0.0001000 | 0.0000000 | 0.0000000 | 0. |
| CAZ | 0.0000000 | 0.0000000 | 0.0000000 | 0.0000000 | 0.0000000 | 0.0000000 | 0.0000000 | 0.0000000 | 0.0000000 | 0. |
| CHA | 0.0000000 | 0.0000000 | 0.0000000 | 0.0000000 | 0.0000000 | 0.0000000 | 0.0000000 | 0.0000000 | 0.0000000 | 0. |
| EUR | 0.0000000 | 0.0000000 | 0.0000000 | 0.0000000 | 0.0000000 | 0.0000000 | 0.0000000 | 0.0000000 | 0.0000000 | 0. |
| IND | 0.0000000 | 0.0000000 | 0.0000000 | 0.0000000 | 0.0000000 | 0.0000000 | 0.0000000 | 0.0000000 | 0.0000000 | 0. |
| JPN | 0.0000000 | 0.0000000 | 0.0000000 | 0.0000000 | 0.0000000 | 0.0000000 | 0.0000000 | 0.0000000 | 0.0000000 | 0. |
| LAM | 0.0000000 | 0.0000000 | 0.0000000 | 0.0001000 | 0.0001000 | 0.0001000 | 0.0001000 | 0.0000000 | 0.0000000 | 0. |
| MEA | 0.0000000 | 0.0000000 | 0.0000000 | 0.0000000 | 0.0000000 | 0.0000000 | 0.0000000 | 0.0000000 | 0.0000000 | 0. |
| NEU | 0.0000000 | 0.0000000 | 0.0000000 | 0.0000000 | 0.0000000 | 0.0000000 | 0.0000000 | 0.0000000 | 0.0000000 | 0. |
| OAS | 0.0000000 | 0.0000000 | 0.0000000 | 0.0000000 | 0.0000000 | 0.0000000 | 0.0000000 | 0.0000000 | 0.0000000 | 0. |
| REF | 0.0000000 | 0.0000000 | 0.0000000 | 0.0000000 | 0.0000000 | 0.0000000 | 0.0000000 | 0.0000000 | 0.0000000 | 0. |
| SSA | 0.0000000 | 0.0000000 | 0.0000000 | 0.0000000 | 0.0000000 | 0.0000000 | 0.0000000 | 0.0000000 | 0.0000000 | 0. |
| USA | 0.0000000 | 0.0000000 | 0.0000000 | 0.0000000 | 0.0000000 | 0.0000000 | 0.0000000 | 0.0000000 | 0.0000000 | 0. |

Table 167: MAgPIE m4p\_SSP1 — Demand—Domestic Balanceflow—Crops—Oil crops—Sunflower (Mt DM/yr)  
[PART 1/2]

|     | 2050      | 2055      | 2060      | 2070      | 2080      | 2090      | 2100      |
|-----|-----------|-----------|-----------|-----------|-----------|-----------|-----------|
| GLO | 0.0000000 | 0.0000000 | 0.0000000 | 0.0000000 | 0.0000000 | 0.0000000 | 0.0000000 |
| CAZ | 0.0000000 | 0.0000000 | 0.0000000 | 0.0000000 | 0.0000000 | 0.0000000 | 0.0000000 |
| CHA | 0.0000000 | 0.0000000 | 0.0000000 | 0.0000000 | 0.0000000 | 0.0000000 | 0.0000000 |
| EUR | 0.0000000 | 0.0000000 | 0.0000000 | 0.0000000 | 0.0000000 | 0.0000000 | 0.0000000 |
| IND | 0.0000000 | 0.0000000 | 0.0000000 | 0.0000000 | 0.0000000 | 0.0000000 | 0.0000000 |
| JPN | 0.0000000 | 0.0000000 | 0.0000000 | 0.0000000 | 0.0000000 | 0.0000000 | 0.0000000 |
| LAM | 0.0000000 | 0.0000000 | 0.0000000 | 0.0000000 | 0.0000000 | 0.0000000 | 0.0000000 |
| MEA | 0.0000000 | 0.0000000 | 0.0000000 | 0.0000000 | 0.0000000 | 0.0000000 | 0.0000000 |
| NEU | 0.0000000 | 0.0000000 | 0.0000000 | 0.0000000 | 0.0000000 | 0.0000000 | 0.0000000 |
| OAS | 0.0000000 | 0.0000000 | 0.0000000 | 0.0000000 | 0.0000000 | 0.0000000 | 0.0000000 |
| REF | 0.0000000 | 0.0000000 | 0.0000000 | 0.0000000 | 0.0000000 | 0.0000000 | 0.0000000 |
| SSA | 0.0000000 | 0.0000000 | 0.0000000 | 0.0000000 | 0.0000000 | 0.0000000 | 0.0000000 |
| USA | 0.0000000 | 0.0000000 | 0.0000000 | 0.0000000 | 0.0000000 | 0.0000000 | 0.0000000 |

Table 168: MAgPIE m4p\_SSP1 — Demand—Domestic Balanceflow—Crops—Oil crops—Sunflower (Mt DM/yr)  
[PART 2/2]

|     | 1965    | 1970    | 1975    | 1980    | 1985    | 1990    | 1995   | 2000   | 2005   | 2010   |
|-----|---------|---------|---------|---------|---------|---------|--------|--------|--------|--------|
| GLO | 0.0000  | 0.0000  | 0.0000  | 0.0000  | 0.0000  | 0.0000  | 0.0000 | 0.0000 | 0.0000 | 0.0001 |
| CAZ | 0.0000  | 0.0000  | 0.0000  | 0.0000  | 0.0000  | 0.0000  | 0.0000 | 0.0000 | 0.0000 | 0.0000 |
| CHA | 0.0000  | 0.0000  | 0.0000  | 0.0000  | 0.0000  | 0.0000  | 0.0000 | 0.0000 | 0.0000 | 0.0000 |
| EUR | 0.0100  | 0.0101  | 0.0109  | 0.0076  | -0.0033 | 0.0001  | 0.0000 | 0.0000 | 0.0000 | 0.0000 |
| IND | 0.0000  | 0.0000  | 0.0000  | 0.0000  | 0.0000  | 0.0000  | 0.0000 | 0.0000 | 0.0000 | 0.0000 |
| JPN | 0.0000  | 0.0000  | 0.0000  | 0.0000  | 0.0000  | 0.0000  | 0.0000 | 0.0000 | 0.0000 | 0.0000 |
| LAM | 0.0000  | 0.0000  | 0.0000  | 0.0000  | 0.0000  | 0.0000  | 0.0000 | 0.0000 | 0.0000 | 0.0001 |
| MEA | 0.0000  | 0.0000  | 0.0000  | 0.0000  | 0.0000  | 0.0000  | 0.0000 | 0.0000 | 0.0000 | 0.0000 |
| NEU | -0.0050 | -0.0051 | -0.0047 | -0.0034 | 0.0015  | -0.0038 | 0.0000 | 0.0000 | 0.0000 | 0.0000 |
| OAS | 0.0000  | 0.0000  | 0.0000  | 0.0000  | 0.0000  | 0.0000  | 0.0000 | 0.0000 | 0.0000 | 0.0000 |
| REF | -0.0050 | -0.0050 | -0.0063 | -0.0042 | 0.0018  | 0.0037  | 0.0000 | 0.0000 | 0.0000 | 0.0000 |
| SSA | 0.0000  | 0.0000  | 0.0000  | 0.0000  | 0.0000  | 0.0000  | 0.0000 | 0.0000 | 0.0000 | 0.0000 |
| USA | 0.0000  | 0.0000  | 0.0000  | 0.0000  | 0.0000  | 0.0000  | 0.0000 | 0.0000 | 0.0000 | 0.0000 |

Table 169: FAO — Demand—Domestic Balanceflow—Crops—Oil crops—Sunflower (Mt DM/yr)



5.1.12
Other crops

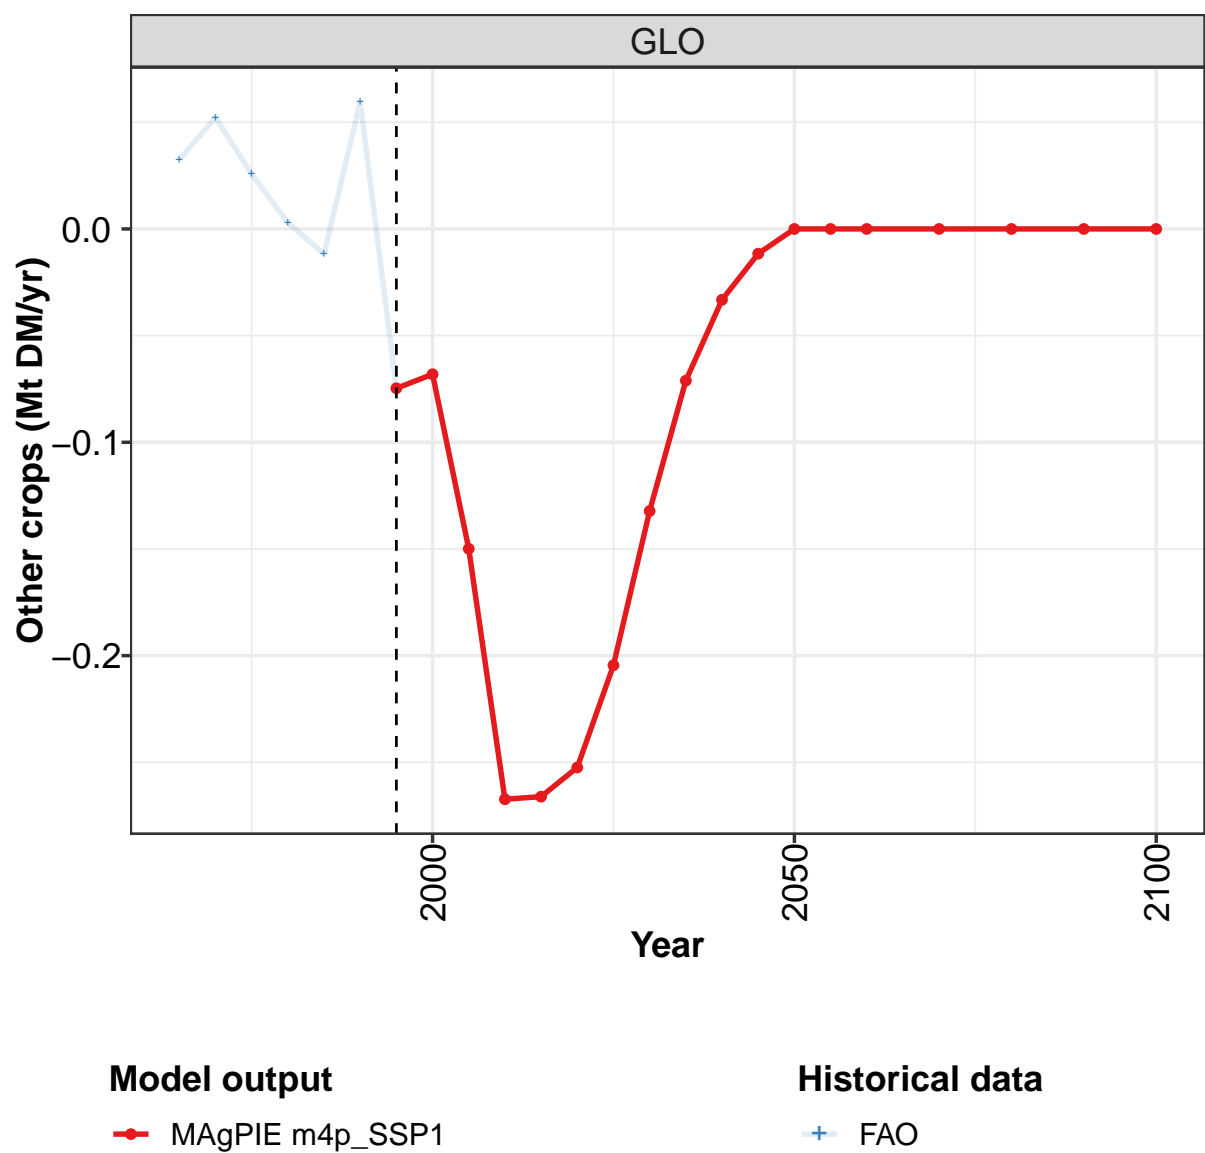

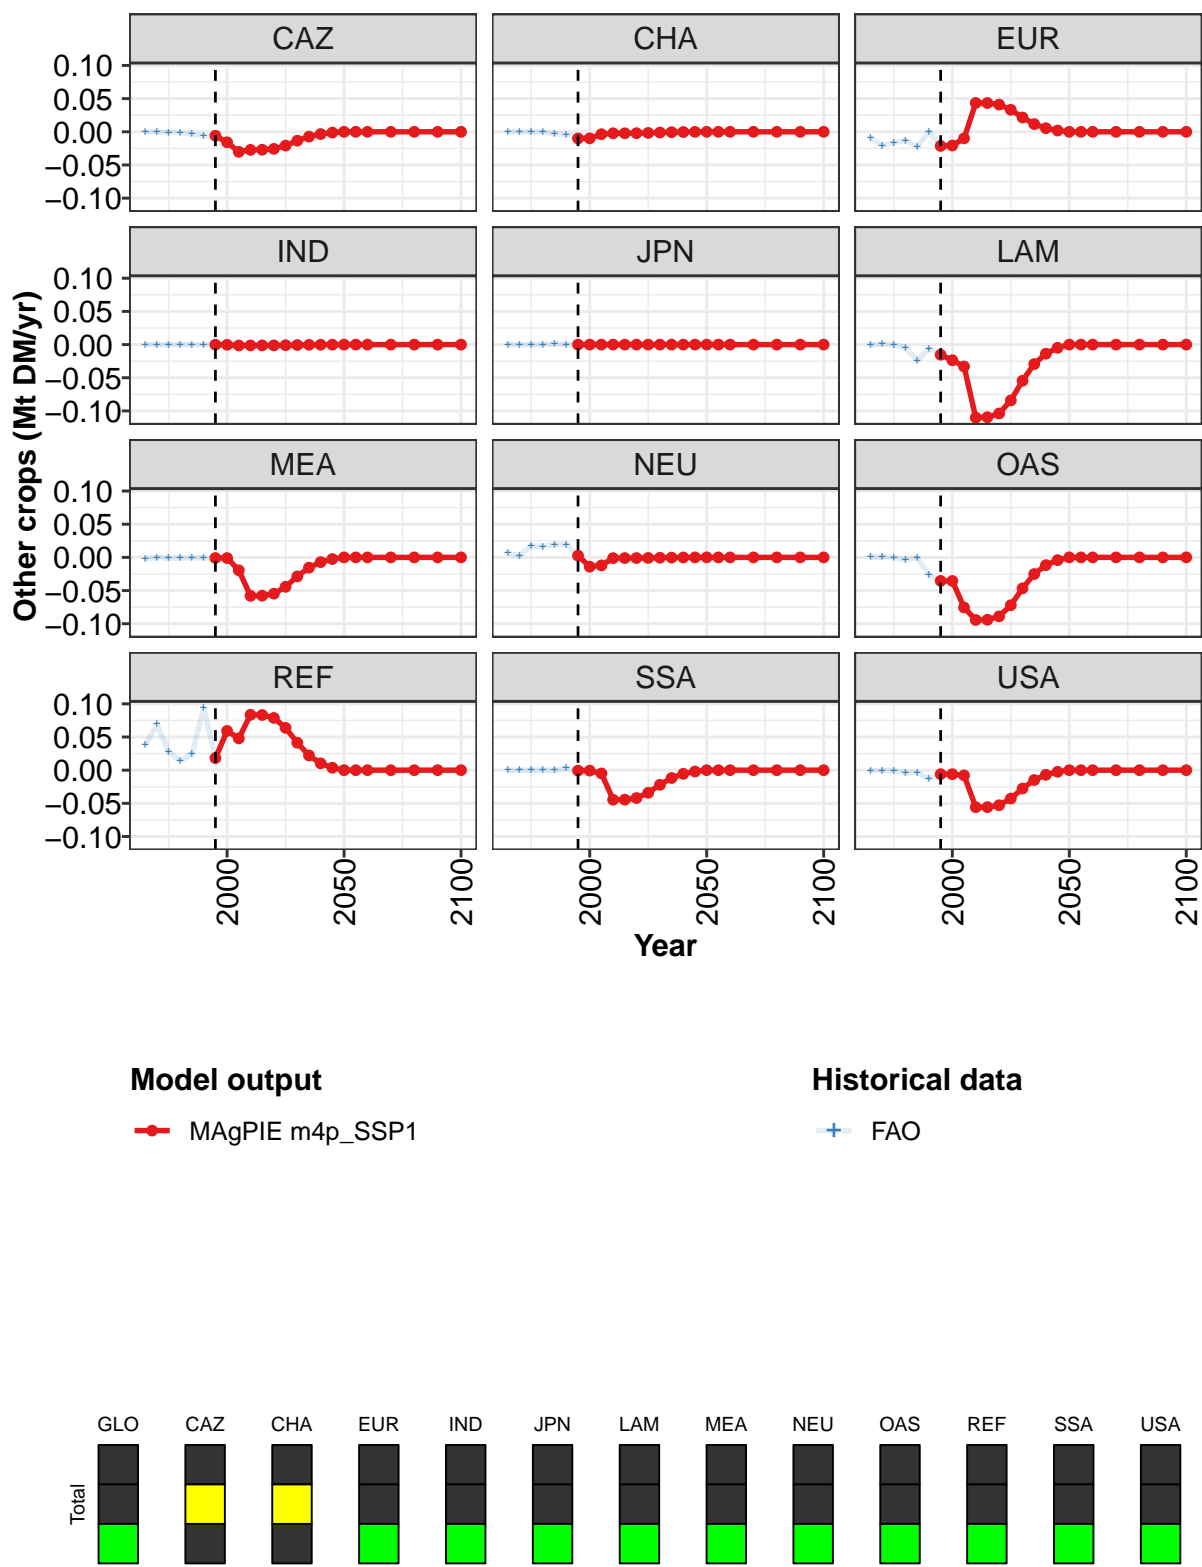

Figure 57: MAgPIE m4p\_SSP1 — Demand—Domestic Balanceflow—Crops—Other crops (Mt DM/yr)

|     | 1995    | 2000    | 2005    | 2010    | 2015    | 2020    | 2025    | 2030    | 2035    | 2040    | 2045    |
|-----|---------|---------|---------|---------|---------|---------|---------|---------|---------|---------|---------|
| GLO | -0.0747 | -0.0681 | -0.1499 | -0.2673 | -0.2661 | -0.2524 | -0.2045 | -0.1322 | -0.0711 | -0.0332 | -0.0116 |
| CAZ | -0.0059 | -0.0158 | -0.0302 | -0.0272 | -0.0270 | -0.0257 | -0.0208 | -0.0134 | -0.0073 | -0.0034 | -0.0012 |
| CHA | -0.0100 | -0.0099 | -0.0036 | -0.0022 | -0.0022 | -0.0021 | -0.0017 | -0.0011 | -0.0006 | -0.0003 | -0.0001 |
| EUR | -0.0213 | -0.0206 | -0.0099 | 0.0435  | 0.0434  | 0.0410  | 0.0332  | 0.0216  | 0.0117  | 0.0054  | 0.0019  |
| IND | -0.0001 | -0.0003 | -0.0013 | -0.0012 | -0.0012 | -0.0012 | -0.0009 | -0.0006 | -0.0003 | -0.0002 | -0.0001 |
| JPN | 0.0000  | 0.0000  | 0.0000  | 0.0000  | 0.0000  | 0.0000  | 0.0000  | 0.0000  | 0.0000  | 0.0000  | 0.0000  |
| LAM | -0.0153 | -0.0236 | -0.0330 | -0.1100 | -0.1095 | -0.1038 | -0.0841 | -0.0545 | -0.0293 | -0.0137 | -0.0048 |
| MEA | -0.0009 | -0.0010 | -0.0195 | -0.0580 | -0.0577 | -0.0547 | -0.0443 | -0.0287 | -0.0155 | -0.0071 | -0.0025 |
| NEU | 0.0026  | -0.0140 | -0.0121 | -0.0011 | -0.0010 | -0.0010 | -0.0008 | -0.0005 | -0.0003 | -0.0001 | 0.0000  |
| OAS | -0.0354 | -0.0355 | -0.0755 | -0.0943 | -0.0940 | -0.0889 | -0.0721 | -0.0467 | -0.0251 | -0.0117 | -0.0041 |
| REF | 0.0182  | 0.0592  | 0.0479  | 0.0835  | 0.0832  | 0.0788  | 0.0638  | 0.0414  | 0.0222  | 0.0103  | 0.0037  |
| SSA | -0.0006 | -0.0006 | -0.0049 | -0.0445 | -0.0444 | -0.0420 | -0.0341 | -0.0220 | -0.0118 | -0.0055 | -0.0020 |
| USA | -0.0060 | -0.0060 | -0.0078 | -0.0558 | -0.0557 | -0.0528 | -0.0427 | -0.0277 | -0.0148 | -0.0069 | -0.0024 |

Table 170: MAgPIE m4p\_SSP1 — Demand—Domestic Balanceflow—Crops—Other crops (Mt DM/yr) [PART 1/2]

|     | 2050   | 2055   | 2060   | 2070   | 2080   | 2090   | 2100   |
|-----|--------|--------|--------|--------|--------|--------|--------|
| GLO | 0.0000 | 0.0000 | 0.0000 | 0.0000 | 0.0000 | 0.0000 | 0.0000 |
| CAZ | 0.0000 | 0.0000 | 0.0000 | 0.0000 | 0.0000 | 0.0000 | 0.0000 |
| CHA | 0.0000 | 0.0000 | 0.0000 | 0.0000 | 0.0000 | 0.0000 | 0.0000 |
| EUR | 0.0000 | 0.0000 | 0.0000 | 0.0000 | 0.0000 | 0.0000 | 0.0000 |
| IND | 0.0000 | 0.0000 | 0.0000 | 0.0000 | 0.0000 | 0.0000 | 0.0000 |
| JPN | 0.0000 | 0.0000 | 0.0000 | 0.0000 | 0.0000 | 0.0000 | 0.0000 |
| LAM | 0.0000 | 0.0000 | 0.0000 | 0.0000 | 0.0000 | 0.0000 | 0.0000 |
| MEA | 0.0000 | 0.0000 | 0.0000 | 0.0000 | 0.0000 | 0.0000 | 0.0000 |
| NEU | 0.0000 | 0.0000 | 0.0000 | 0.0000 | 0.0000 | 0.0000 | 0.0000 |
| OAS | 0.0000 | 0.0000 | 0.0000 | 0.0000 | 0.0000 | 0.0000 | 0.0000 |
| REF | 0.0000 | 0.0000 | 0.0000 | 0.0000 | 0.0000 | 0.0000 | 0.0000 |
| SSA | 0.0000 | 0.0000 | 0.0000 | 0.0000 | 0.0000 | 0.0000 | 0.0000 |
| USA | 0.0000 | 0.0000 | 0.0000 | 0.0000 | 0.0000 | 0.0000 | 0.0000 |

Table 171: MAgPIE m4p\_SSP1 — Demand—Domestic Balanceflow—Crops—Other crops (Mt DM/yr) [PART 2/2]

|     | 1965    | 1970    | 1975    | 1980    | 1985    | 1990    | 1995    | 2000    | 2005    | 2010    |
|-----|---------|---------|---------|---------|---------|---------|---------|---------|---------|---------|
| GLO | 0.0324  | 0.0523  | 0.0257  | 0.0030  | -0.0117 | 0.0595  | -0.0748 | -0.0681 | -0.1500 | -0.2672 |
| CAZ | 0.0000  | -0.0003 | -0.0008 | -0.0011 | -0.0037 | -0.0064 | -0.0060 | -0.0157 | -0.0303 | -0.0272 |
| CHA | 0.0000  | 0.0000  | -0.0002 | -0.0001 | -0.0029 | -0.0042 | -0.0100 | -0.0099 | -0.0036 | -0.0022 |
| EUR | -0.0086 | -0.0206 | -0.0163 | -0.0130 | -0.0226 | 0.0004  | -0.0213 | -0.0205 | -0.0099 | 0.0435  |
| IND | 0.0000  | 0.0000  | -0.0001 | 0.0003  | 0.0000  | -0.0002 | -0.0001 | -0.0003 | -0.0013 | -0.0012 |
| JPN | 0.0000  | 0.0000  | 0.0004  | 0.0004  | 0.0018  | 0.0000  | 0.0000  | 0.0000  | 0.0000  | 0.0000  |
| LAM | -0.0008 | 0.0012  | -0.0005 | -0.0046 | -0.0237 | -0.0062 | -0.0153 | -0.0236 | -0.0330 | -0.1099 |
| MEA | -0.0023 | -0.0002 | -0.0013 | -0.0011 | -0.0006 | -0.0008 | -0.0009 | -0.0010 | -0.0196 | -0.0580 |
| NEU | 0.0064  | 0.0026  | 0.0173  | 0.0164  | 0.0189  | 0.0196  | 0.0025  | -0.0140 | -0.0122 | -0.0010 |
| OAS | 0.0002  | 0.0007  | -0.0002 | -0.0036 | -0.0002 | -0.0263 | -0.0355 | -0.0355 | -0.0754 | -0.0943 |
| REF | 0.0380  | 0.0693  | 0.0281  | 0.0138  | 0.0247  | 0.0935  | 0.0182  | 0.0591  | 0.0479  | 0.0835  |
| SSA | 0.0000  | 0.0000  | -0.0001 | 0.0001  | 0.0000  | 0.0029  | -0.0005 | -0.0007 | -0.0049 | -0.0445 |
| USA | -0.0006 | -0.0004 | -0.0004 | -0.0045 | -0.0034 | -0.0129 | -0.0060 | -0.0060 | -0.0078 | -0.0559 |

Table 172: FAO — Demand—Domestic Balanceflow—Crops—Other crops (Mt DM/yr)

5.1.13 Other crops—Fruits Vegetables Nuts

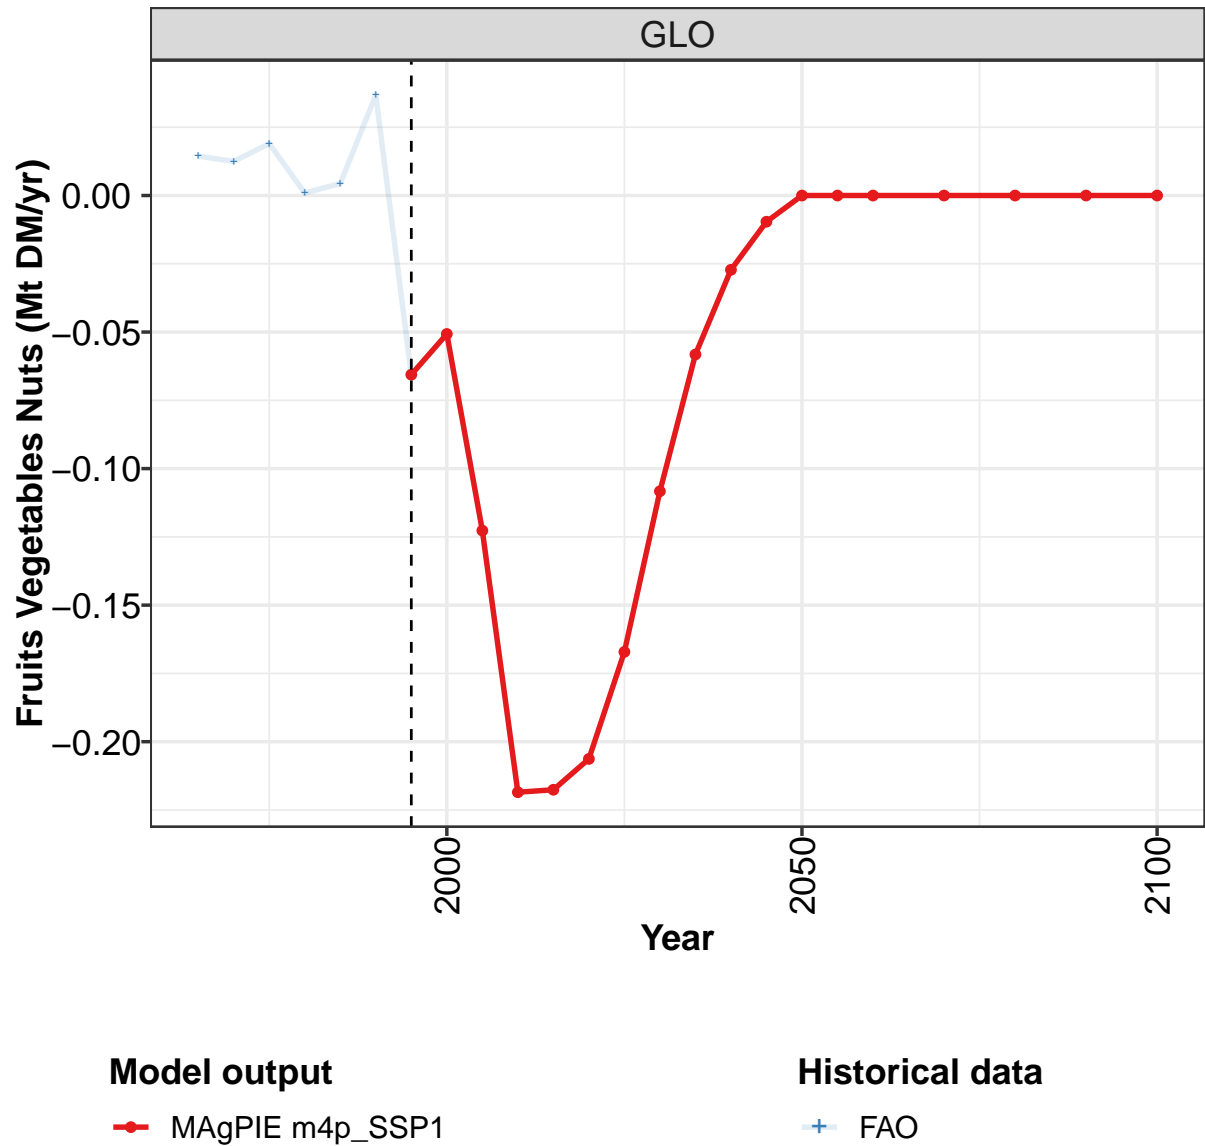

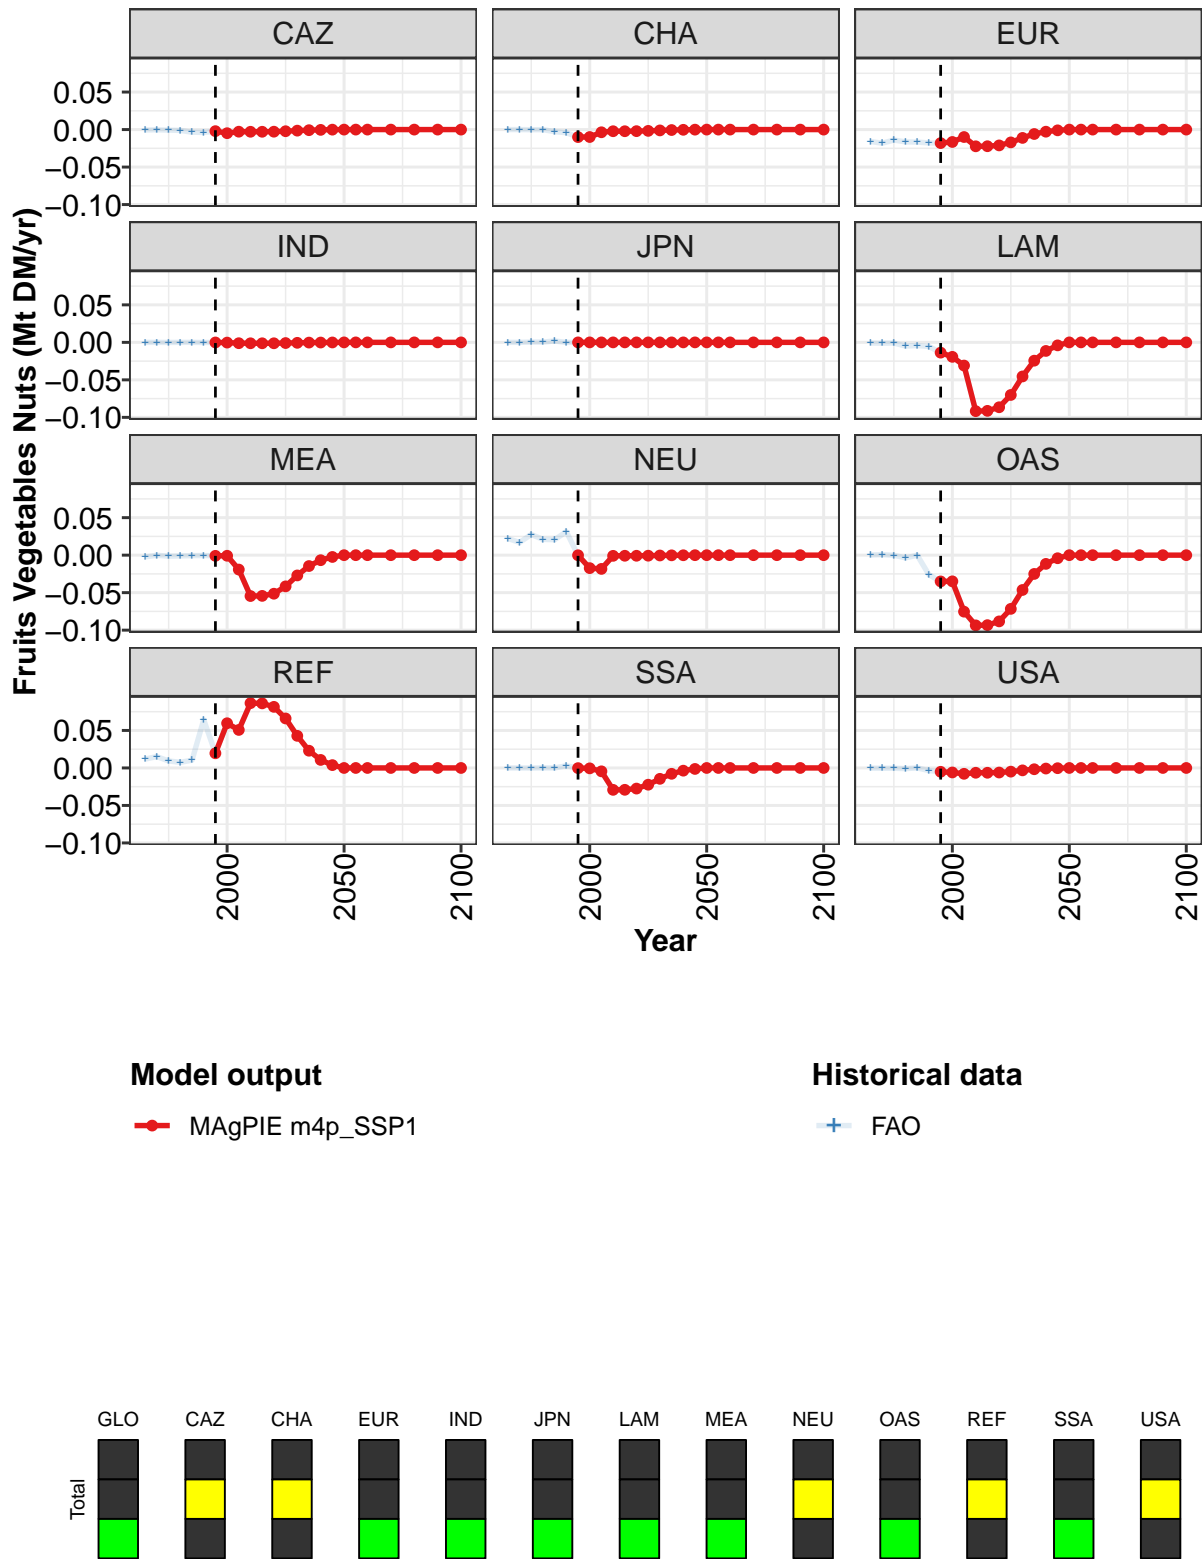

Figure 58: MAgPIE m4p\_SSP1 — Demand—Domestic Balanceflow—Crops—Other crops—Fruits Vegetables Nuts (Mt DM/yr)

|     | 1995    | 2000    | 2005    | 2010    | 2015    | 2020    | 2025    | 2030    | 2035    | 2040    | 2045    |
|-----|---------|---------|---------|---------|---------|---------|---------|---------|---------|---------|---------|
| GLO | -0.0656 | -0.0507 | -0.1227 | -0.2185 | -0.2176 | -0.2063 | -0.1671 | -0.1083 | -0.0582 | -0.0272 | -0.0096 |
| CAZ | -0.0021 | -0.0048 | -0.0028 | -0.0029 | -0.0029 | -0.0028 | -0.0022 | -0.0014 | -0.0008 | -0.0004 | -0.0001 |
| CHA | -0.0100 | -0.0099 | -0.0036 | -0.0022 | -0.0022 | -0.0021 | -0.0017 | -0.0011 | -0.0006 | -0.0003 | -0.0001 |
| EUR | -0.0180 | -0.0165 | -0.0099 | -0.0223 | -0.0222 | -0.0211 | -0.0171 | -0.0111 | -0.0059 | -0.0028 | -0.0010 |
| IND | -0.0001 | -0.0003 | -0.0011 | -0.0012 | -0.0012 | -0.0012 | -0.0009 | -0.0006 | -0.0003 | -0.0002 | -0.0001 |
| JPN | 0.0000  | 0.0000  | 0.0000  | 0.0000  | 0.0000  | 0.0000  | 0.0000  | 0.0000  | 0.0000  | 0.0000  | 0.0000  |
| LAM | -0.0137 | -0.0193 | -0.0309 | -0.0917 | -0.0913 | -0.0865 | -0.0701 | -0.0454 | -0.0244 | -0.0114 | -0.0040 |
| MEA | -0.0009 | -0.0008 | -0.0192 | -0.0545 | -0.0543 | -0.0514 | -0.0416 | -0.0270 | -0.0145 | -0.0067 | -0.0024 |
| NEU | -0.0001 | -0.0173 | -0.0183 | -0.0009 | -0.0008 | -0.0008 | -0.0007 | -0.0004 | -0.0002 | -0.0001 | 0.0000  |
| OAS | -0.0350 | -0.0349 | -0.0753 | -0.0936 | -0.0933 | -0.0883 | -0.0716 | -0.0464 | -0.0250 | -0.0116 | -0.0041 |
| REF | 0.0196  | 0.0596  | 0.0507  | 0.0864  | 0.0861  | 0.0815  | 0.0660  | 0.0428  | 0.0230  | 0.0107  | 0.0038  |
| SSA | -0.0002 | -0.0005 | -0.0045 | -0.0292 | -0.0291 | -0.0275 | -0.0223 | -0.0145 | -0.0078 | -0.0036 | -0.0013 |
| USA | -0.0051 | -0.0060 | -0.0078 | -0.0064 | -0.0064 | -0.0061 | -0.0049 | -0.0032 | -0.0017 | -0.0008 | -0.0003 |

Table 173: MAGPIE m4p\_SSP1 — Demand—Domestic Balanceflow—Crops—Other crops—Fruits Vegetables Nuts (Mt DM/yr) [PART 1/2]

|     | 2050   | 2055   | 2060   | 2070   | 2080   | 2090   | 2100   |
|-----|--------|--------|--------|--------|--------|--------|--------|
| GLO | 0.0000 | 0.0000 | 0.0000 | 0.0000 | 0.0000 | 0.0000 | 0.0000 |
| CAZ | 0.0000 | 0.0000 | 0.0000 | 0.0000 | 0.0000 | 0.0000 | 0.0000 |
| CHA | 0.0000 | 0.0000 | 0.0000 | 0.0000 | 0.0000 | 0.0000 | 0.0000 |
| EUR | 0.0000 | 0.0000 | 0.0000 | 0.0000 | 0.0000 | 0.0000 | 0.0000 |
| IND | 0.0000 | 0.0000 | 0.0000 | 0.0000 | 0.0000 | 0.0000 | 0.0000 |
| JPN | 0.0000 | 0.0000 | 0.0000 | 0.0000 | 0.0000 | 0.0000 | 0.0000 |
| LAM | 0.0000 | 0.0000 | 0.0000 | 0.0000 | 0.0000 | 0.0000 | 0.0000 |
| MEA | 0.0000 | 0.0000 | 0.0000 | 0.0000 | 0.0000 | 0.0000 | 0.0000 |
| NEU | 0.0000 | 0.0000 | 0.0000 | 0.0000 | 0.0000 | 0.0000 | 0.0000 |
| OAS | 0.0000 | 0.0000 | 0.0000 | 0.0000 | 0.0000 | 0.0000 | 0.0000 |
| REF | 0.0000 | 0.0000 | 0.0000 | 0.0000 | 0.0000 | 0.0000 | 0.0000 |
| SSA | 0.0000 | 0.0000 | 0.0000 | 0.0000 | 0.0000 | 0.0000 | 0.0000 |
| USA | 0.0000 | 0.0000 | 0.0000 | 0.0000 | 0.0000 | 0.0000 | 0.0000 |

Table 174: MAGPIE m4p\_SSP1 — Demand—Domestic Balanceflow—Crops—Other crops—Fruits Vegetables Nuts (Mt DM/yr) [PART 2/2]

|     | 1965    | 1970    | 1975    | 1980    | 1985    | 1990    | 1995    | 2000    | 2005    | 2010    |
|-----|---------|---------|---------|---------|---------|---------|---------|---------|---------|---------|
| GLO | 0.0144  | 0.0125  | 0.0190  | 0.0009  | 0.0044  | 0.0368  | -0.0656 | -0.0508 | -0.1227 | -0.2185 |
| CAZ | -0.0006 | -0.0003 | -0.0008 | -0.0011 | -0.0036 | -0.0038 | -0.0021 | -0.0048 | -0.0028 | -0.0029 |
| CHA | 0.0000  | 0.0000  | -0.0002 | -0.0001 | -0.0028 | -0.0042 | -0.0100 | -0.0099 | -0.0036 | -0.0022 |
| EUR | -0.0159 | -0.0182 | -0.0140 | -0.0164 | -0.0167 | -0.0178 | -0.0180 | -0.0165 | -0.0099 | -0.0223 |
| IND | 0.0000  | 0.0000  | -0.0001 | 0.0000  | 0.0000  | -0.0002 | -0.0001 | -0.0003 | -0.0011 | -0.0012 |
| JPN | 0.0000  | 0.0000  | 0.0004  | 0.0004  | 0.0018  | 0.0000  | 0.0000  | 0.0000  | 0.0000  | 0.0000  |
| LAM | -0.0009 | -0.0012 | -0.0009 | -0.0049 | -0.0043 | -0.0055 | -0.0137 | -0.0193 | -0.0309 | -0.0917 |
| MEA | -0.0023 | -0.0002 | -0.0014 | -0.0011 | -0.0006 | -0.0005 | -0.0009 | -0.0008 | -0.0192 | -0.0545 |
| NEU | 0.0222  | 0.0170  | 0.0275  | 0.0210  | 0.0206  | 0.0313  | -0.0001 | -0.0173 | -0.0183 | -0.0009 |
| OAS | 0.0002  | 0.0007  | -0.0002 | -0.0036 | -0.0002 | -0.0262 | -0.0350 | -0.0349 | -0.0753 | -0.0936 |
| REF | 0.0119  | 0.0151  | 0.0093  | 0.0075  | 0.0103  | 0.0642  | 0.0196  | 0.0596  | 0.0507  | 0.0864  |
| SSA | 0.0000  | 0.0000  | -0.0001 | 0.0001  | 0.0000  | 0.0029  | -0.0002 | -0.0005 | -0.0045 | -0.0292 |
| USA | -0.0002 | -0.0004 | -0.0004 | -0.0009 | 0.0000  | -0.0035 | -0.0051 | -0.0060 | -0.0078 | -0.0064 |

Table 175: FAO — Demand—Domestic Balanceflow—Crops—Other crops—Fruits Vegetables Nuts (Mt DM/yr)

5.1.14 Other crops—Potatoes

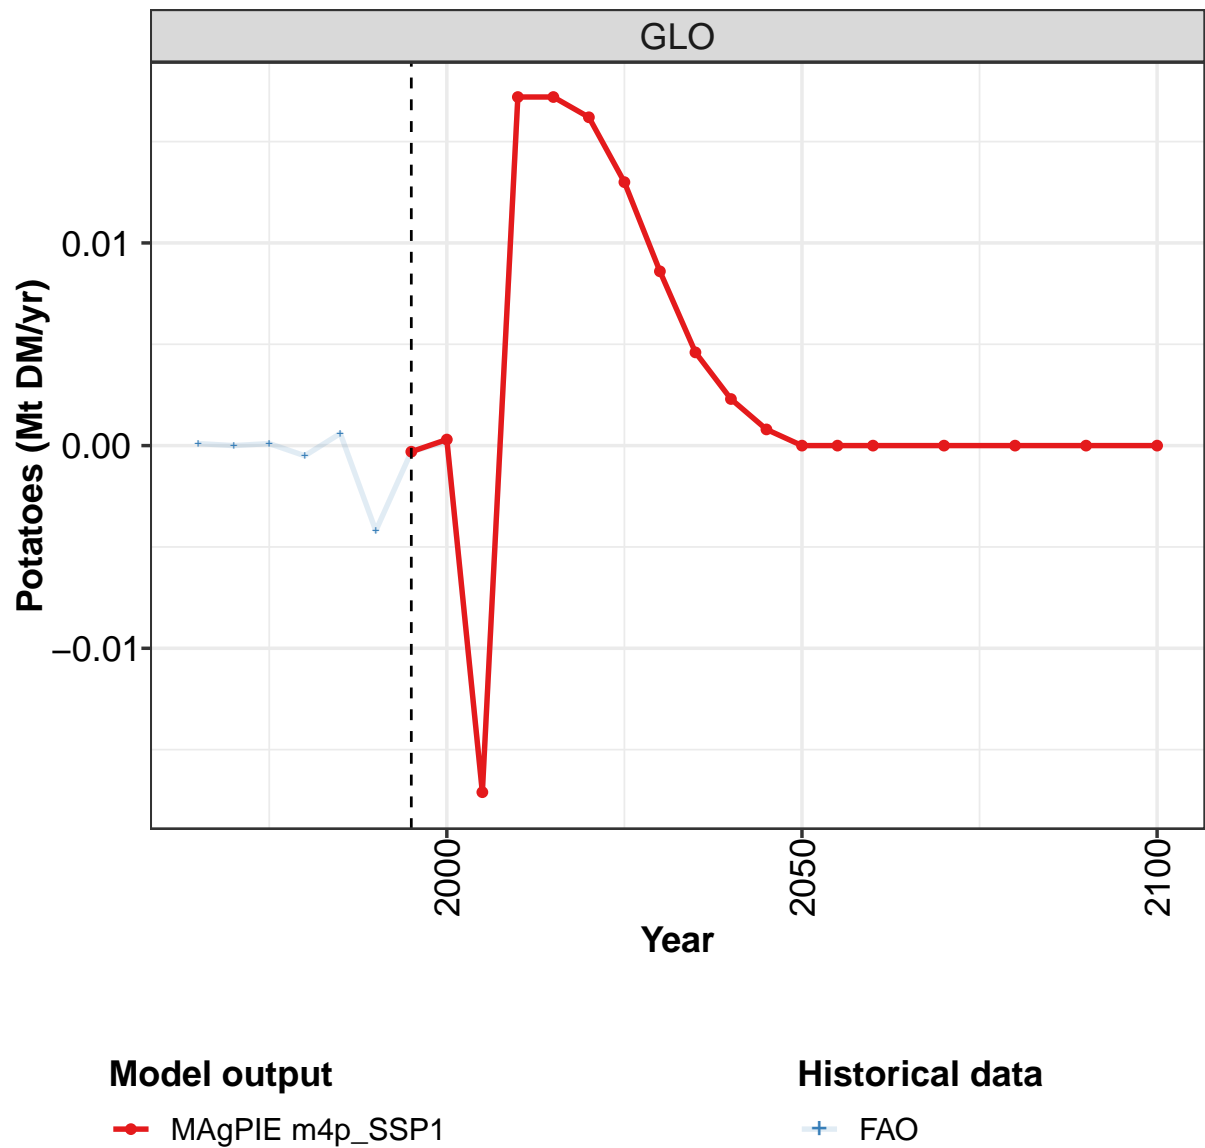

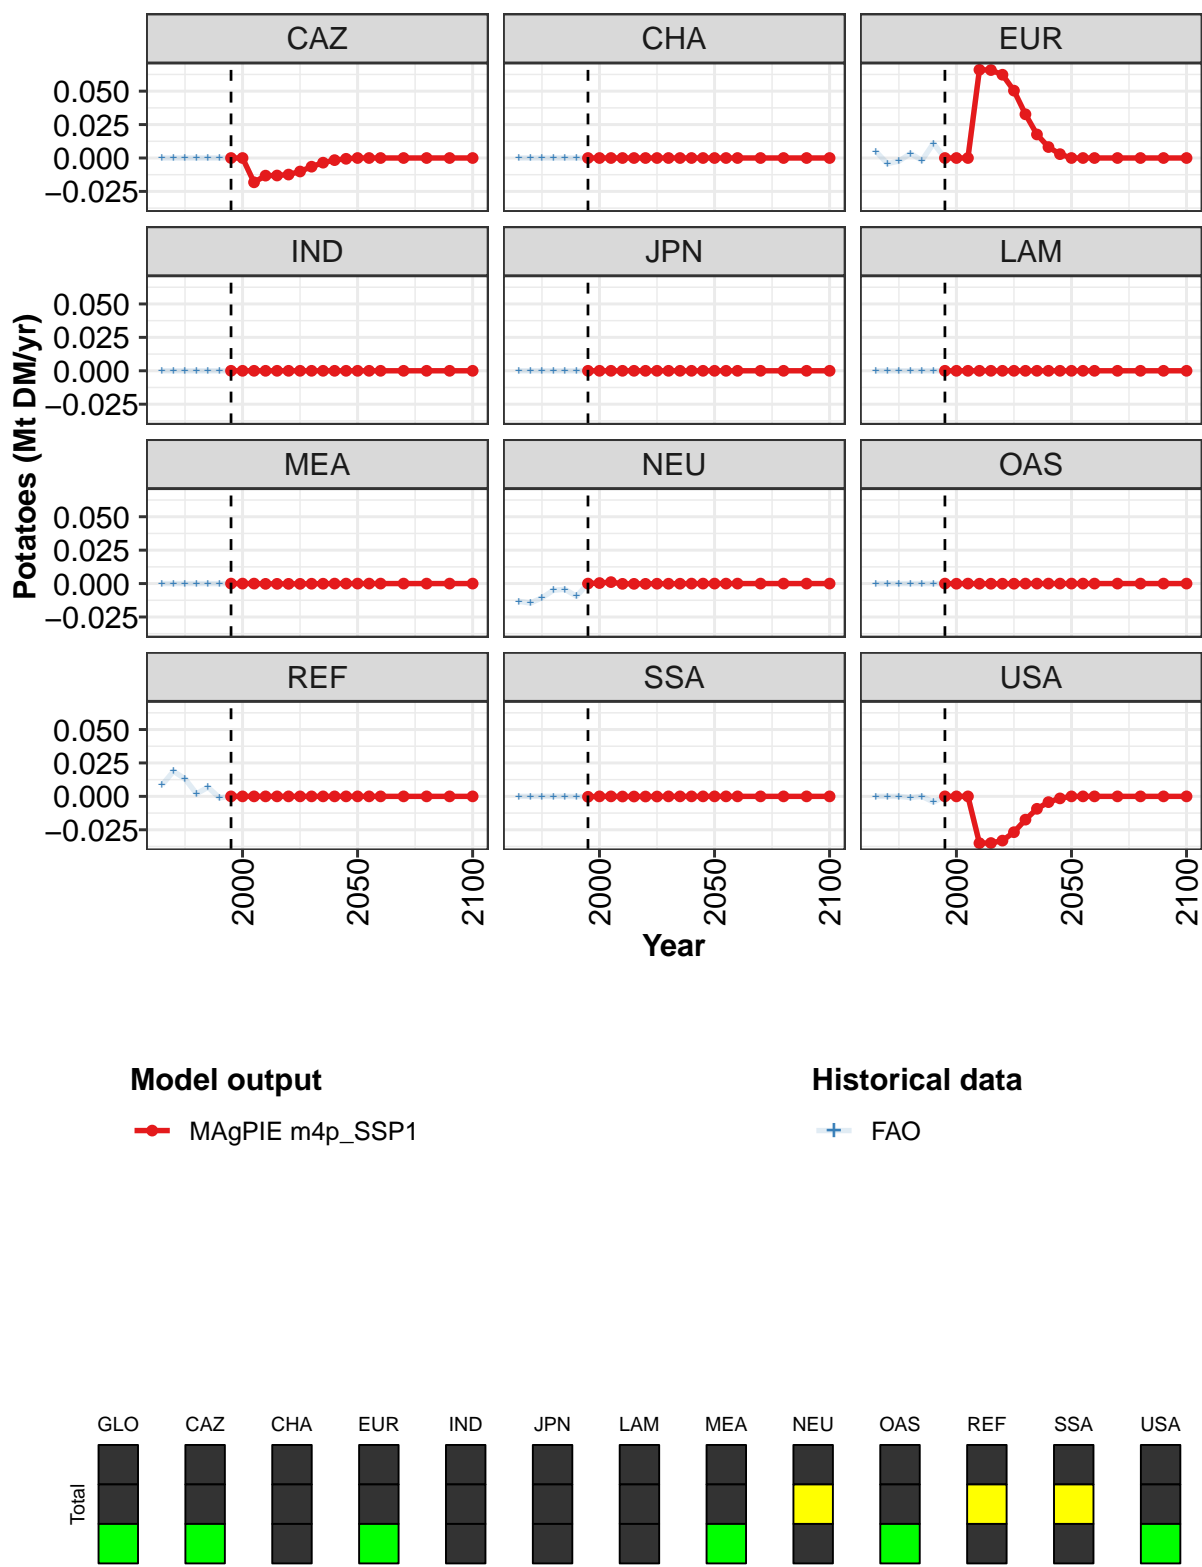

Figure 59: MAgPIE m4p\_SSP1 — Demand—Domestic Balanceflow—Crops—Other crops—Potatoes (Mt DM/yr)



|     | 1995    | 2000    | 2005    | 2010    | 2015    | 2020    | 2025    | 2030    | 2035    | 2040    | 2045    |
|-----|---------|---------|---------|---------|---------|---------|---------|---------|---------|---------|---------|
| GLO | -0.0003 | 0.0003  | -0.0171 | 0.0172  | 0.0172  | 0.0162  | 0.0130  | 0.0086  | 0.0046  | 0.0023  | 0.0008  |
| CAZ | 0.0000  | 0.0000  | -0.0182 | -0.0132 | -0.0131 | -0.0124 | -0.0101 | -0.0065 | -0.0035 | -0.0016 | -0.0006 |
| CHA | 0.0000  | 0.0000  | 0.0000  | 0.0000  | 0.0000  | 0.0000  | 0.0000  | 0.0000  | 0.0000  | 0.0000  | 0.0000  |
| EUR | 0.0000  | 0.0000  | 0.0000  | 0.0660  | 0.0658  | 0.0623  | 0.0504  | 0.0327  | 0.0176  | 0.0082  | 0.0029  |
| IND | 0.0000  | 0.0000  | 0.0000  | 0.0000  | 0.0000  | 0.0000  | 0.0000  | 0.0000  | 0.0000  | 0.0000  | 0.0000  |
| JPN | 0.0000  | 0.0000  | 0.0000  | 0.0000  | 0.0000  | 0.0000  | 0.0000  | 0.0000  | 0.0000  | 0.0000  | 0.0000  |
| LAM | 0.0000  | 0.0000  | 0.0000  | 0.0000  | 0.0000  | 0.0000  | 0.0000  | 0.0000  | 0.0000  | 0.0000  | 0.0000  |
| MEA | 0.0000  | 0.0000  | 0.0000  | -0.0002 | -0.0002 | -0.0002 | -0.0002 | -0.0001 | -0.0001 | 0.0000  | 0.0000  |
| NEU | 0.0000  | 0.0004  | 0.0011  | -0.0002 | -0.0002 | -0.0002 | -0.0001 | -0.0001 | -0.0001 | 0.0000  | 0.0000  |
| OAS | 0.0000  | -0.0001 | 0.0000  | -0.0001 | -0.0001 | -0.0001 | -0.0001 | 0.0000  | 0.0000  | 0.0000  | 0.0000  |
| REF | 0.0000  | 0.0000  | 0.0000  | 0.0000  | 0.0000  | 0.0000  | 0.0000  | 0.0000  | 0.0000  | 0.0000  | 0.0000  |
| SSA | -0.0003 | 0.0000  | 0.0000  | -0.0001 | -0.0001 | -0.0001 | -0.0001 | 0.0000  | 0.0000  | 0.0000  | 0.0000  |
| USA | 0.0000  | 0.0000  | 0.0000  | -0.0350 | -0.0349 | -0.0331 | -0.0268 | -0.0174 | -0.0093 | -0.0043 | -0.0015 |

Table 176: MAgPIE m4p\_SSP1 — Demand—Domestic Balanceflow—Crops—Other crops—Potatoes (Mt DM/yr) [PART 1/2]

|     | 2050   | 2055   | 2060   | 2070   | 2080   | 2090   | 2100   |
|-----|--------|--------|--------|--------|--------|--------|--------|
| GLO | 0.0000 | 0.0000 | 0.0000 | 0.0000 | 0.0000 | 0.0000 | 0.0000 |
| CAZ | 0.0000 | 0.0000 | 0.0000 | 0.0000 | 0.0000 | 0.0000 | 0.0000 |
| CHA | 0.0000 | 0.0000 | 0.0000 | 0.0000 | 0.0000 | 0.0000 | 0.0000 |
| EUR | 0.0000 | 0.0000 | 0.0000 | 0.0000 | 0.0000 | 0.0000 | 0.0000 |
| IND | 0.0000 | 0.0000 | 0.0000 | 0.0000 | 0.0000 | 0.0000 | 0.0000 |
| JPN | 0.0000 | 0.0000 | 0.0000 | 0.0000 | 0.0000 | 0.0000 | 0.0000 |
| LAM | 0.0000 | 0.0000 | 0.0000 | 0.0000 | 0.0000 | 0.0000 | 0.0000 |
| MEA | 0.0000 | 0.0000 | 0.0000 | 0.0000 | 0.0000 | 0.0000 | 0.0000 |
| NEU | 0.0000 | 0.0000 | 0.0000 | 0.0000 | 0.0000 | 0.0000 | 0.0000 |
| OAS | 0.0000 | 0.0000 | 0.0000 | 0.0000 | 0.0000 | 0.0000 | 0.0000 |
| REF | 0.0000 | 0.0000 | 0.0000 | 0.0000 | 0.0000 | 0.0000 | 0.0000 |
| SSA | 0.0000 | 0.0000 | 0.0000 | 0.0000 | 0.0000 | 0.0000 | 0.0000 |
| USA | 0.0000 | 0.0000 | 0.0000 | 0.0000 | 0.0000 | 0.0000 | 0.0000 |

Table 177: MAgPIE m4p\_SSP1 — Demand—Domestic Balanceflow—Crops—Other crops—Potatoes (Mt DM/yr) [PART 2/2]

|     | 1965    | 1970    | 1975    | 1980    | 1985    | 1990    | 1995    | 2000    | 2005    | 2010    |
|-----|---------|---------|---------|---------|---------|---------|---------|---------|---------|---------|
| GLO | 0.0001  | 0.0000  | 0.0001  | -0.0005 | 0.0006  | -0.0042 | -0.0003 | 0.0002  | -0.0172 | 0.0172  |
| CAZ | 0.0000  | 0.0000  | 0.0000  | 0.0000  | 0.0000  | 0.0000  | 0.0000  | 0.0000  | -0.0182 | -0.0132 |
| CHA | 0.0000  | 0.0000  | 0.0000  | 0.0000  | 0.0000  | 0.0000  | 0.0000  | 0.0000  | 0.0000  | 0.0000  |
| EUR | 0.0049  | -0.0042 | -0.0024 | 0.0034  | -0.0018 | 0.0109  | 0.0000  | 0.0000  | 0.0000  | 0.0660  |
| IND | 0.0000  | 0.0000  | 0.0000  | 0.0000  | 0.0000  | 0.0000  | 0.0000  | 0.0000  | 0.0000  | 0.0000  |
| JPN | 0.0000  | 0.0000  | 0.0000  | 0.0000  | 0.0000  | 0.0000  | 0.0000  | 0.0000  | 0.0000  | 0.0000  |
| LAM | 0.0000  | 0.0000  | 0.0000  | 0.0000  | 0.0000  | 0.0000  | 0.0000  | 0.0000  | 0.0000  | 0.0000  |
| MEA | 0.0000  | 0.0000  | 0.0000  | 0.0000  | 0.0000  | -0.0001 | 0.0000  | 0.0000  | 0.0000  | -0.0002 |
| NEU | -0.0133 | -0.0146 | -0.0106 | -0.0050 | -0.0043 | -0.0095 | 0.0000  | 0.0004  | 0.0011  | -0.0002 |
| OAS | 0.0000  | 0.0000  | 0.0000  | 0.0000  | 0.0000  | 0.0000  | 0.0000  | -0.0001 | 0.0000  | -0.0001 |
| REF | 0.0085  | 0.0188  | 0.0131  | 0.0020  | 0.0068  | -0.0011 | 0.0000  | 0.0000  | 0.0000  | 0.0000  |
| SSA | 0.0000  | 0.0000  | 0.0000  | 0.0000  | 0.0000  | -0.0001 | -0.0003 | 0.0000  | 0.0000  | -0.0001 |
| USA | 0.0000  | 0.0000  | 0.0000  | -0.0009 | 0.0000  | -0.0043 | 0.0000  | 0.0000  | 0.0000  | -0.0350 |

Table 178: FAO — Demand—Domestic Balanceflow—Crops—Other crops—Potatoes (Mt DM/yr)

5.1.15 Other crops—Pulses

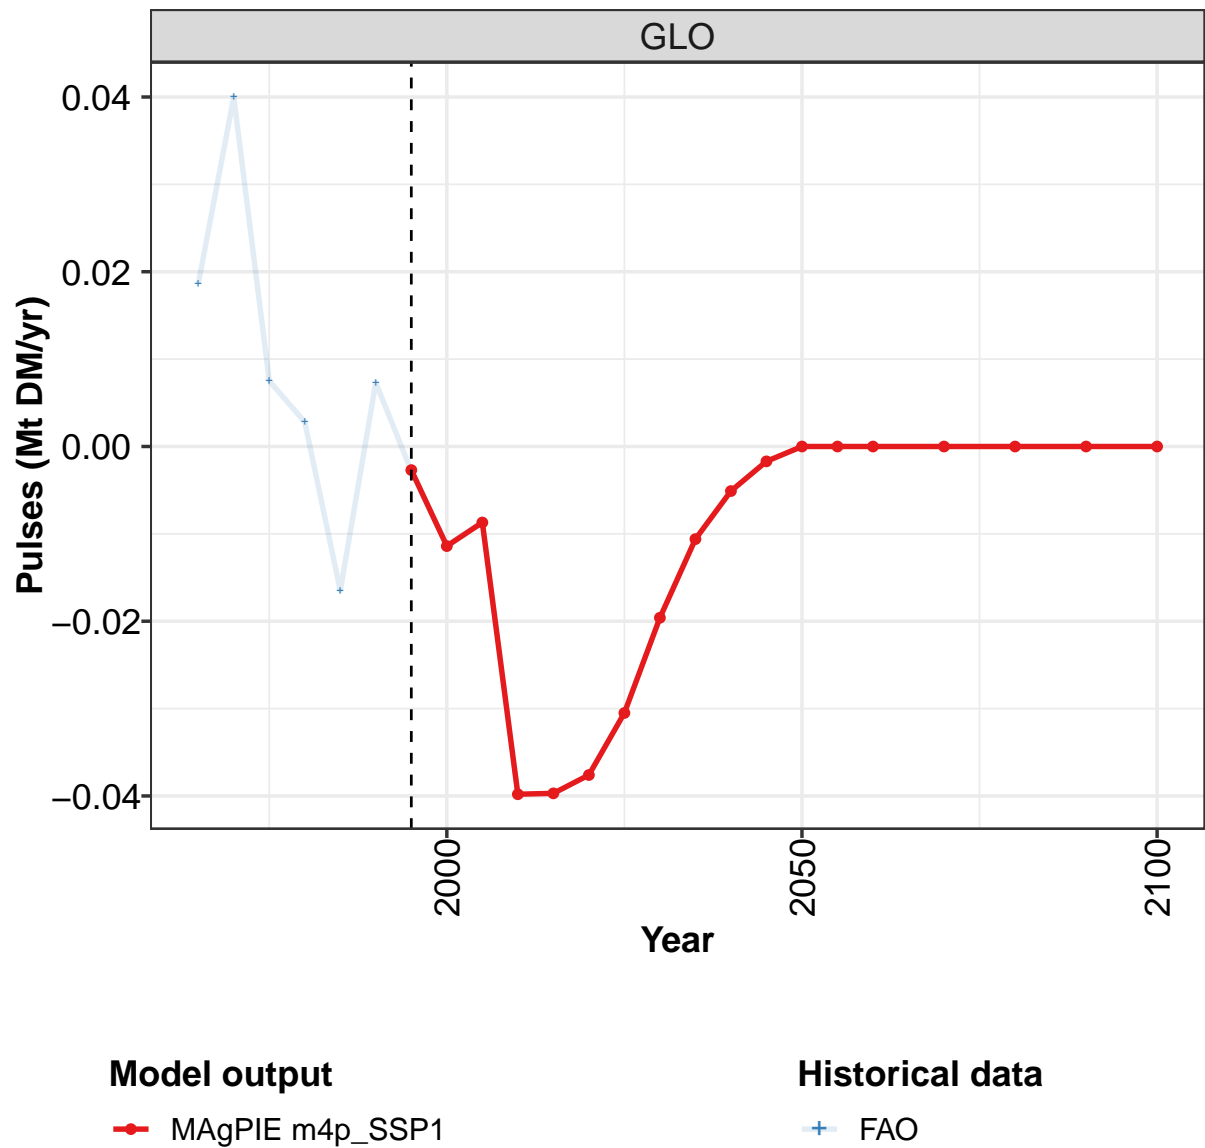

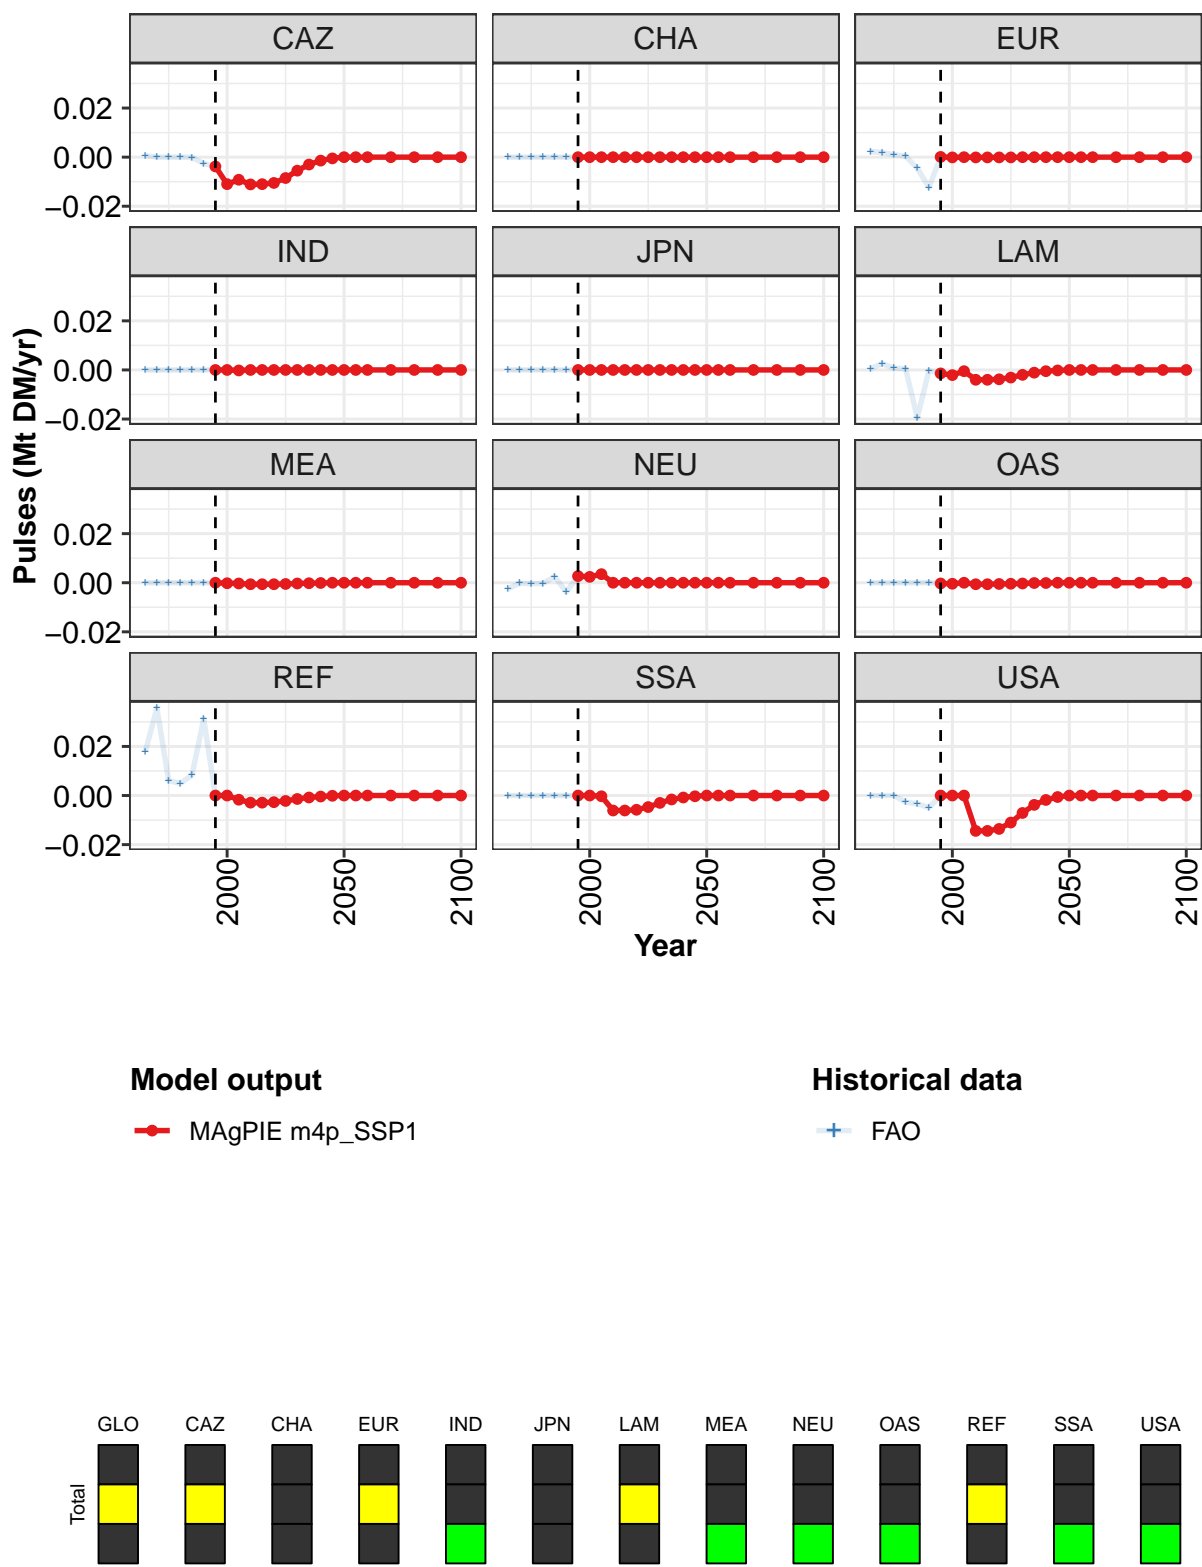

Figure 60: MAgPIE m4p\_SSP1 — Demand—Domestic Balanceflow—Crops—Other crops—Pulses (Mt DM/yr)

|     | 1995     | 2000     | 2005     | 2010     | 2015     | 2020     | 2025     | 2030     | 2035     | 2040     | 2045     |
|-----|----------|----------|----------|----------|----------|----------|----------|----------|----------|----------|----------|
| GLO | -0.00270 | -0.01140 | -0.00870 | -0.03980 | -0.03970 | -0.03760 | -0.03050 | -0.01960 | -0.01060 | -0.00510 | -0.00000 |
| CAZ | -0.00380 | -0.01100 | -0.00920 | -0.01110 | -0.01100 | -0.01050 | -0.00850 | -0.00550 | -0.00300 | -0.00140 | -0.00000 |
| CHA | 0.00000  | 0.00000  | 0.00000  | 0.00000  | 0.00000  | 0.00000  | 0.00000  | 0.00000  | 0.00000  | 0.00000  | 0.00000  |
| EUR | 0.00010  | -0.00010 | 0.00000  | -0.00010 | -0.00010 | -0.00010 | -0.00010 | 0.00000  | 0.00000  | 0.00000  | 0.00000  |
| IND | 0.00000  | 0.00000  | -0.00020 | 0.00000  | 0.00000  | 0.00000  | 0.00000  | 0.00000  | 0.00000  | 0.00000  | 0.00000  |
| JPN | 0.00000  | 0.00000  | 0.00000  | 0.00000  | 0.00000  | 0.00000  | 0.00000  | 0.00000  | 0.00000  | 0.00000  | 0.00000  |
| LAM | -0.00140 | -0.00210 | -0.00050 | -0.00400 | -0.00400 | -0.00380 | -0.00310 | -0.00200 | -0.00110 | -0.00050 | -0.00000 |
| MEA | 0.00000  | -0.00020 | -0.00030 | -0.00060 | -0.00060 | -0.00060 | -0.00050 | -0.00030 | -0.00020 | -0.00010 | 0.00000  |
| NEU | 0.00270  | 0.00240  | 0.00350  | 0.00000  | 0.00000  | 0.00000  | 0.00000  | 0.00000  | 0.00000  | 0.00000  | 0.00000  |
| OAS | -0.00030 | -0.00040 | 0.00000  | -0.00060 | -0.00060 | -0.00050 | -0.00040 | -0.00030 | -0.00010 | -0.00010 | 0.00000  |
| REF | 0.00000  | 0.00000  | -0.00170 | -0.00290 | -0.00290 | -0.00270 | -0.00220 | -0.00140 | -0.00080 | -0.00040 | -0.00000 |
| SSA | 0.00000  | 0.00000  | -0.00030 | -0.00610 | -0.00610 | -0.00580 | -0.00470 | -0.00300 | -0.00160 | -0.00080 | -0.00000 |
| USA | 0.00000  | 0.00000  | 0.00000  | -0.01440 | -0.01440 | -0.01360 | -0.01100 | -0.00710 | -0.00380 | -0.00180 | -0.00000 |

Table 179: MAgPIE m4p\_SSP1 — Demand—Domestic Balanceflow—Crops—Other crops—Pulses (Mt DM/yr)  
[PART 1/2]

|     | 2050    | 2055    | 2060    | 2070    | 2080    | 2090    | 2100    |
|-----|---------|---------|---------|---------|---------|---------|---------|
| GLO | 0.00000 | 0.00000 | 0.00000 | 0.00000 | 0.00000 | 0.00000 | 0.00000 |
| CAZ | 0.00000 | 0.00000 | 0.00000 | 0.00000 | 0.00000 | 0.00000 | 0.00000 |
| CHA | 0.00000 | 0.00000 | 0.00000 | 0.00000 | 0.00000 | 0.00000 | 0.00000 |
| EUR | 0.00000 | 0.00000 | 0.00000 | 0.00000 | 0.00000 | 0.00000 | 0.00000 |
| IND | 0.00000 | 0.00000 | 0.00000 | 0.00000 | 0.00000 | 0.00000 | 0.00000 |
| JPN | 0.00000 | 0.00000 | 0.00000 | 0.00000 | 0.00000 | 0.00000 | 0.00000 |
| LAM | 0.00000 | 0.00000 | 0.00000 | 0.00000 | 0.00000 | 0.00000 | 0.00000 |
| MEA | 0.00000 | 0.00000 | 0.00000 | 0.00000 | 0.00000 | 0.00000 | 0.00000 |
| NEU | 0.00000 | 0.00000 | 0.00000 | 0.00000 | 0.00000 | 0.00000 | 0.00000 |
| OAS | 0.00000 | 0.00000 | 0.00000 | 0.00000 | 0.00000 | 0.00000 | 0.00000 |
| REF | 0.00000 | 0.00000 | 0.00000 | 0.00000 | 0.00000 | 0.00000 | 0.00000 |
| SSA | 0.00000 | 0.00000 | 0.00000 | 0.00000 | 0.00000 | 0.00000 | 0.00000 |
| USA | 0.00000 | 0.00000 | 0.00000 | 0.00000 | 0.00000 | 0.00000 | 0.00000 |

Table 180: MAgPIE m4p\_SSP1 — Demand—Domestic Balanceflow—Crops—Other crops—Pulses (Mt DM/yr)  
[PART 2/2]

|     | 1965    | 1970    | 1975    | 1980    | 1985    | 1990    | 1995    | 2000    | 2005    | 2010    |
|-----|---------|---------|---------|---------|---------|---------|---------|---------|---------|---------|
| GLO | 0.0186  | 0.0400  | 0.0075  | 0.0028  | -0.0165 | 0.0073  | -0.0028 | -0.0113 | -0.0086 | -0.0398 |
| CAZ | 0.0006  | 0.0000  | 0.0000  | 0.0000  | -0.0001 | -0.0026 | -0.0038 | -0.0110 | -0.0092 | -0.0111 |
| CHA | 0.0000  | 0.0000  | 0.0000  | 0.0000  | 0.0000  | 0.0000  | 0.0000  | 0.0000  | 0.0000  | 0.0000  |
| EUR | 0.0023  | 0.0019  | 0.0010  | 0.0004  | -0.0045 | -0.0123 | 0.0001  | -0.0001 | 0.0000  | -0.0001 |
| IND | 0.0000  | 0.0000  | 0.0000  | 0.0000  | 0.0000  | 0.0000  | 0.0000  | 0.0000  | -0.0002 | 0.0000  |
| JPN | 0.0000  | 0.0000  | 0.0000  | 0.0000  | 0.0000  | 0.0000  | 0.0000  | 0.0000  | 0.0000  | 0.0000  |
| LAM | 0.0005  | 0.0026  | 0.0007  | 0.0005  | -0.0194 | -0.0003 | -0.0014 | -0.0021 | -0.0005 | -0.0040 |
| MEA | 0.0000  | 0.0000  | 0.0000  | 0.0000  | 0.0000  | 0.0000  | 0.0000  | -0.0002 | -0.0003 | -0.0006 |
| NEU | -0.0025 | -0.0002 | -0.0004 | -0.0003 | 0.0025  | -0.0038 | 0.0027  | 0.0024  | 0.0035  | 0.0000  |
| OAS | 0.0000  | 0.0000  | 0.0000  | 0.0000  | 0.0000  | 0.0000  | -0.0003 | -0.0004 | 0.0000  | -0.0006 |
| REF | 0.0178  | 0.0356  | 0.0061  | 0.0049  | 0.0084  | 0.0312  | 0.0000  | 0.0000  | -0.0017 | -0.0029 |
| SSA | 0.0000  | 0.0000  | 0.0000  | 0.0000  | 0.0000  | 0.0000  | 0.0000  | 0.0000  | -0.0003 | -0.0061 |
| USA | 0.0000  | 0.0000  | 0.0000  | -0.0027 | -0.0034 | -0.0049 | 0.0000  | 0.0000  | 0.0000  | -0.0144 |

Table 181: FAO — Demand—Domestic Balanceflow—Crops—Other crops—Pulses (Mt DM/yr)

5.1.16
Other crops—Tropical roots

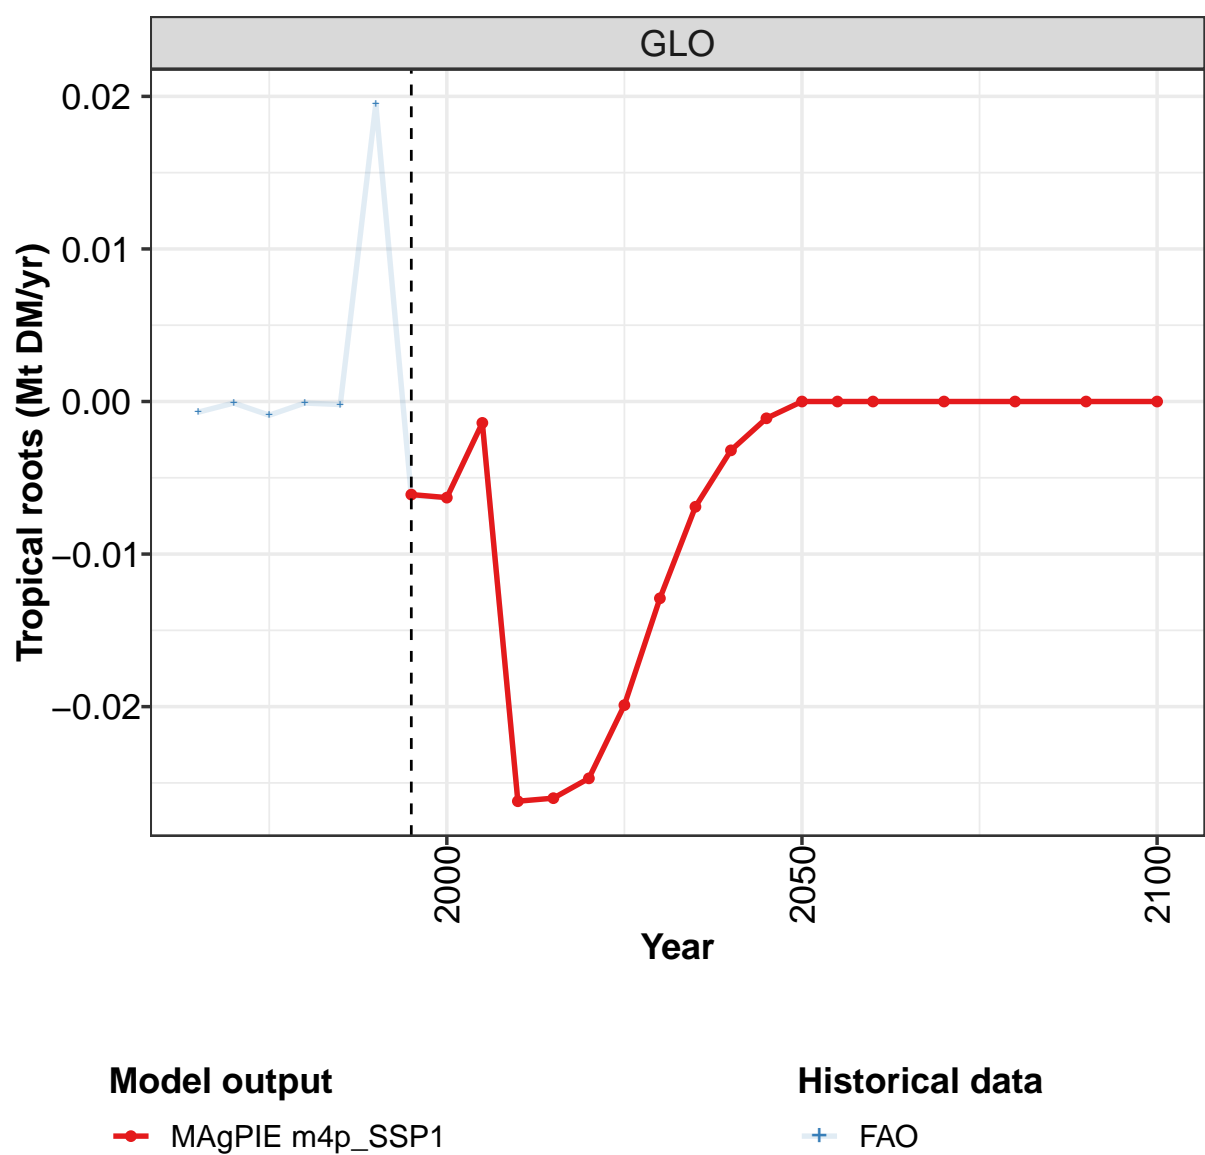

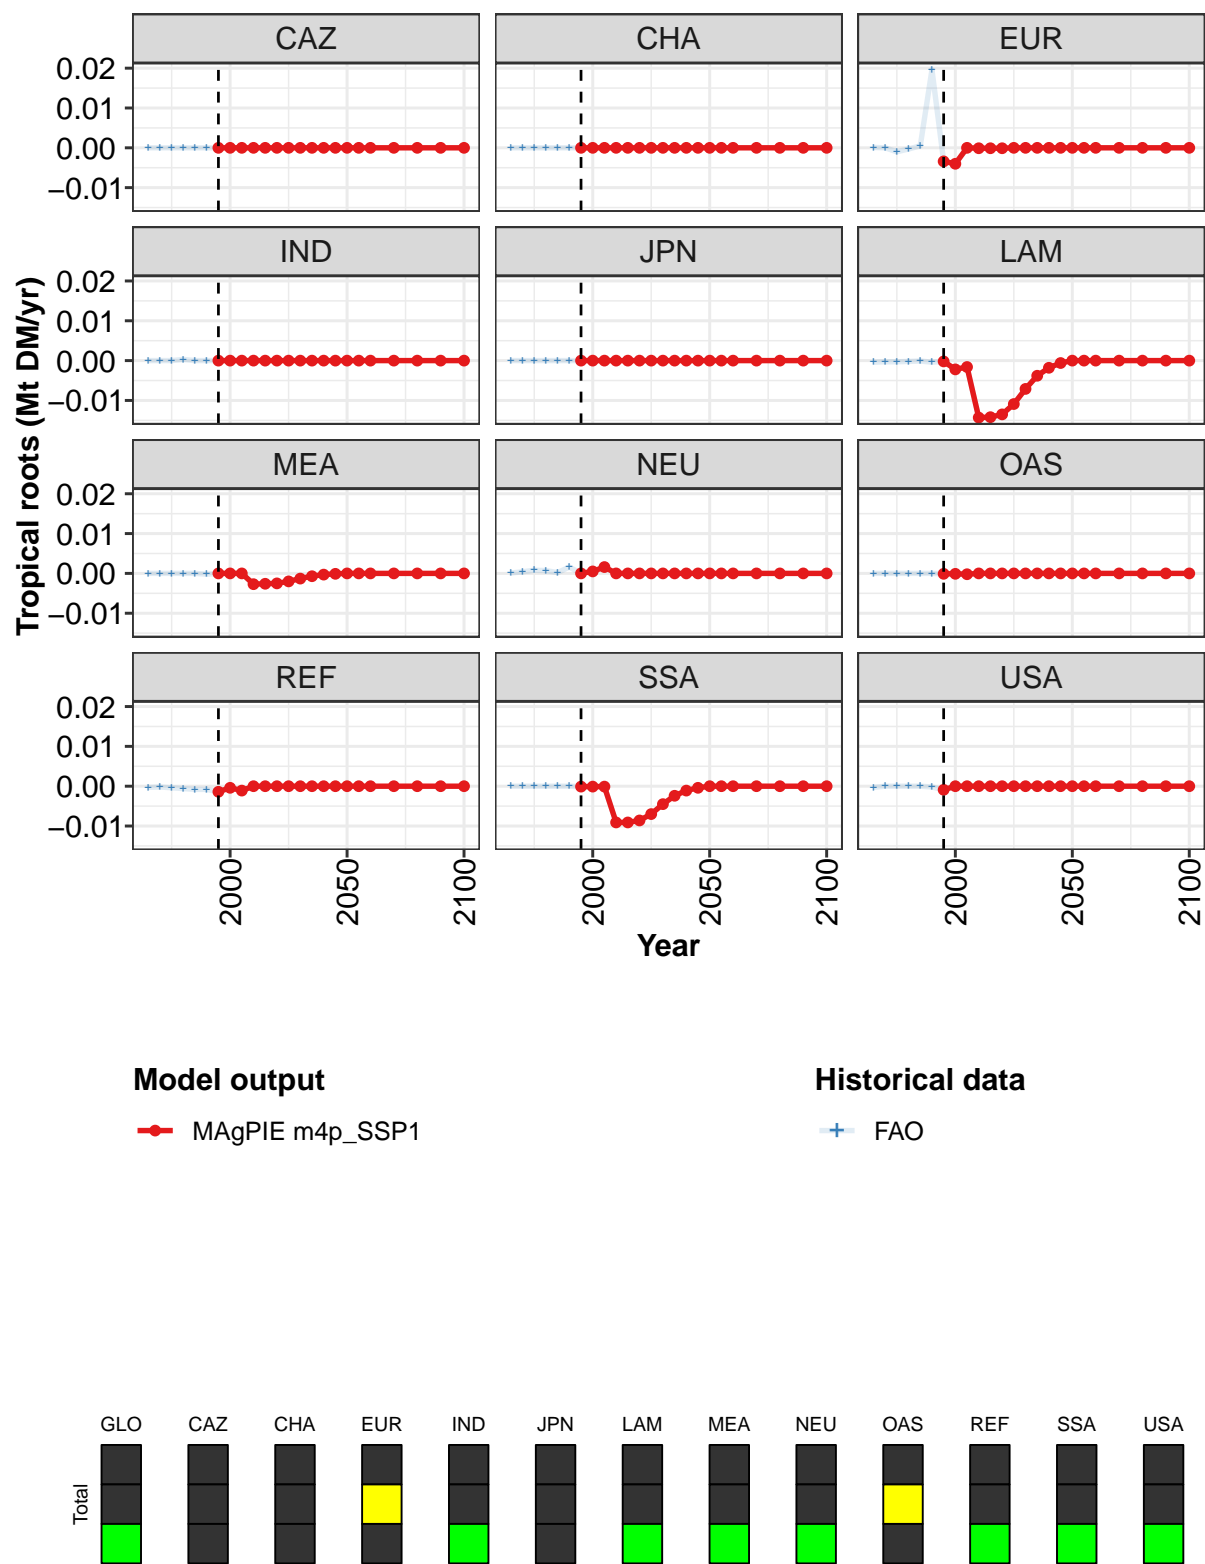

Figure 61: MAgPIE m4p\_SSP1 — Demand—Domestic Balanceflow—Crops—Other crops—Tropical roots (Mt DM/yr)

|     | 1995     | 2000     | 2005     | 2010     | 2015     | 2020     | 2025     | 2030     | 2035     | 2040     | 2045     |
|-----|----------|----------|----------|----------|----------|----------|----------|----------|----------|----------|----------|
| GLO | -0.00610 | -0.00630 | -0.00140 | -0.02620 | -0.02600 | -0.02470 | -0.01990 | -0.01290 | -0.00690 | -0.00320 | -0.00000 |
| CAZ | 0.00000  | 0.00000  | 0.00000  | 0.00000  | 0.00000  | 0.00000  | 0.00000  | 0.00000  | 0.00000  | 0.00000  | 0.00000  |
| CHA | 0.00000  | 0.00000  | 0.00000  | 0.00000  | 0.00000  | 0.00000  | 0.00000  | 0.00000  | 0.00000  | 0.00000  | 0.00000  |
| EUR | -0.00340 | -0.00400 | 0.00000  | -0.00010 | -0.00010 | -0.00010 | 0.00000  | 0.00000  | 0.00000  | 0.00000  | 0.00000  |
| IND | 0.00000  | 0.00000  | 0.00000  | 0.00000  | 0.00000  | 0.00000  | 0.00000  | 0.00000  | 0.00000  | 0.00000  | 0.00000  |
| JPN | 0.00000  | 0.00000  | 0.00000  | 0.00000  | 0.00000  | 0.00000  | 0.00000  | 0.00000  | 0.00000  | 0.00000  | 0.00000  |
| LAM | -0.00020 | -0.00220 | -0.00160 | -0.01430 | -0.01420 | -0.01350 | -0.01090 | -0.00710 | -0.00380 | -0.00180 | -0.00000 |
| MEA | 0.00000  | 0.00000  | 0.00000  | -0.00270 | -0.00260 | -0.00250 | -0.00200 | -0.00130 | -0.00070 | -0.00030 | -0.00000 |
| NEU | 0.00000  | 0.00050  | 0.00160  | 0.00000  | 0.00000  | 0.00000  | 0.00000  | 0.00000  | 0.00000  | 0.00000  | 0.00000  |
| OAS | -0.00010 | -0.00010 | -0.00020 | 0.00000  | 0.00000  | 0.00000  | 0.00000  | 0.00000  | 0.00000  | 0.00000  | 0.00000  |
| REF | -0.00140 | -0.00040 | -0.00110 | 0.00000  | 0.00000  | 0.00000  | 0.00000  | 0.00000  | 0.00000  | 0.00000  | 0.00000  |
| SSA | -0.00010 | -0.00010 | -0.00010 | -0.00910 | -0.00910 | -0.00860 | -0.00700 | -0.00450 | -0.00240 | -0.00110 | -0.00000 |
| USA | -0.00090 | 0.00000  | 0.00000  | 0.00000  | 0.00000  | 0.00000  | 0.00000  | 0.00000  | 0.00000  | 0.00000  | 0.00000  |

Table 182: MAgPIE m4p\_SSP1 — Demand—Domestic Balanceflow—Crops—Other crops—Tropical roots (Mt DM/yr) [PART 1/2]

|     | 2050    | 2055    | 2060    | 2070    | 2080    | 2090    | 2100    |
|-----|---------|---------|---------|---------|---------|---------|---------|
| GLO | 0.00000 | 0.00000 | 0.00000 | 0.00000 | 0.00000 | 0.00000 | 0.00000 |
| CAZ | 0.00000 | 0.00000 | 0.00000 | 0.00000 | 0.00000 | 0.00000 | 0.00000 |
| CHA | 0.00000 | 0.00000 | 0.00000 | 0.00000 | 0.00000 | 0.00000 | 0.00000 |
| EUR | 0.00000 | 0.00000 | 0.00000 | 0.00000 | 0.00000 | 0.00000 | 0.00000 |
| IND | 0.00000 | 0.00000 | 0.00000 | 0.00000 | 0.00000 | 0.00000 | 0.00000 |
| JPN | 0.00000 | 0.00000 | 0.00000 | 0.00000 | 0.00000 | 0.00000 | 0.00000 |
| LAM | 0.00000 | 0.00000 | 0.00000 | 0.00000 | 0.00000 | 0.00000 | 0.00000 |
| MEA | 0.00000 | 0.00000 | 0.00000 | 0.00000 | 0.00000 | 0.00000 | 0.00000 |
| NEU | 0.00000 | 0.00000 | 0.00000 | 0.00000 | 0.00000 | 0.00000 | 0.00000 |
| OAS | 0.00000 | 0.00000 | 0.00000 | 0.00000 | 0.00000 | 0.00000 | 0.00000 |
| REF | 0.00000 | 0.00000 | 0.00000 | 0.00000 | 0.00000 | 0.00000 | 0.00000 |
| SSA | 0.00000 | 0.00000 | 0.00000 | 0.00000 | 0.00000 | 0.00000 | 0.00000 |
| USA | 0.00000 | 0.00000 | 0.00000 | 0.00000 | 0.00000 | 0.00000 | 0.00000 |

Table 183: MAgPIE m4p\_SSP1 — Demand—Domestic Balanceflow—Crops—Other crops—Tropical roots (Mt DM/yr) [PART 2/2]

|     | 1965    | 1970    | 1975    | 1980    | 1985    | 1990    | 1995    | 2000    | 2005    | 2010    |
|-----|---------|---------|---------|---------|---------|---------|---------|---------|---------|---------|
| GLO | -0.0007 | -0.0001 | -0.0009 | -0.0001 | -0.0002 | 0.0195  | -0.0062 | -0.0063 | -0.0014 | -0.0261 |
| CAZ | 0.0000  | 0.0000  | 0.0000  | 0.0000  | 0.0000  | 0.0000  | 0.0000  | 0.0000  | 0.0000  | 0.0000  |
| CHA | 0.0000  | 0.0000  | 0.0000  | 0.0000  | 0.0000  | 0.0000  | 0.0000  | 0.0000  | 0.0000  | 0.0000  |
| EUR | 0.0001  | 0.0000  | -0.0010 | -0.0003 | 0.0005  | 0.0196  | -0.0034 | -0.0040 | 0.0000  | -0.0001 |
| IND | 0.0000  | 0.0000  | 0.0000  | 0.0003  | 0.0000  | 0.0000  | 0.0000  | 0.0000  | 0.0000  | 0.0000  |
| JPN | 0.0000  | 0.0000  | 0.0000  | 0.0000  | 0.0000  | 0.0000  | 0.0000  | 0.0000  | 0.0000  | 0.0000  |
| LAM | -0.0004 | -0.0003 | -0.0003 | -0.0002 | -0.0001 | -0.0004 | -0.0002 | -0.0022 | -0.0016 | -0.0143 |
| MEA | 0.0000  | 0.0000  | 0.0000  | 0.0000  | 0.0000  | -0.0002 | 0.0000  | 0.0000  | 0.0000  | -0.0027 |
| NEU | 0.0001  | 0.0004  | 0.0008  | 0.0007  | 0.0002  | 0.0016  | 0.0000  | 0.0005  | 0.0016  | 0.0000  |
| OAS | 0.0000  | 0.0000  | 0.0000  | 0.0000  | 0.0000  | 0.0000  | -0.0001 | -0.0001 | -0.0002 | 0.0000  |
| REF | -0.0003 | -0.0002 | -0.0004 | -0.0006 | -0.0008 | -0.0008 | -0.0014 | -0.0004 | -0.0011 | 0.0000  |
| SSA | 0.0000  | 0.0000  | 0.0000  | 0.0000  | 0.0000  | 0.0000  | -0.0001 | -0.0001 | -0.0001 | -0.0091 |
| USA | -0.0003 | 0.0000  | 0.0000  | 0.0000  | 0.0000  | -0.0002 | -0.0009 | 0.0000  | 0.0000  | 0.0000  |

Table 184: FAO — Demand—Domestic Balanceflow—Crops—Other crops—Tropical roots (Mt DM/yr)

5.1.17
Sugar crops

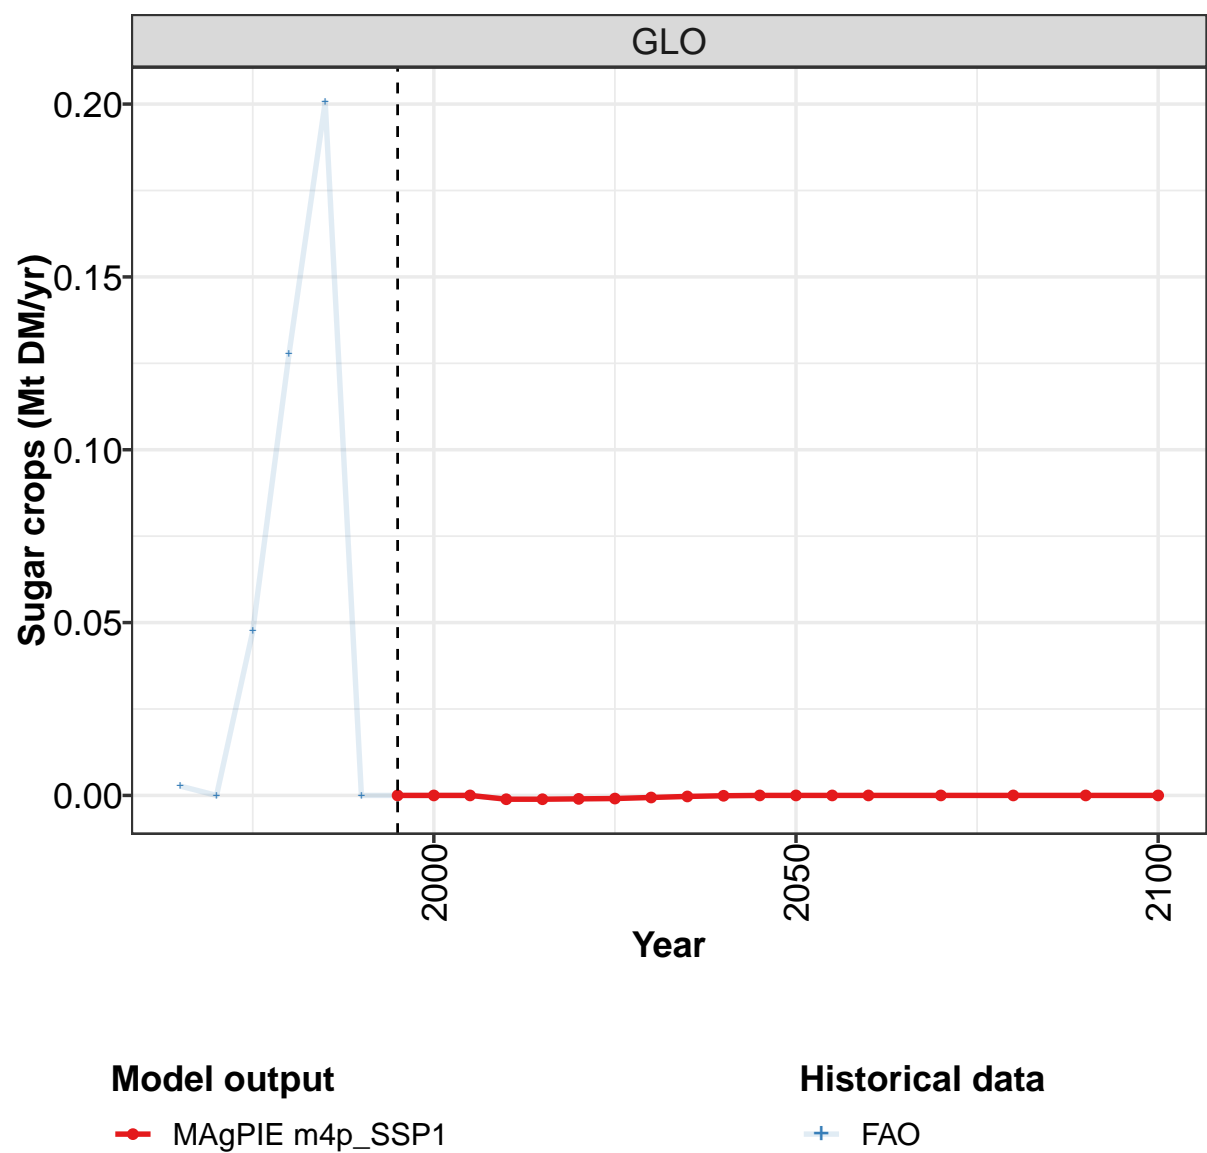



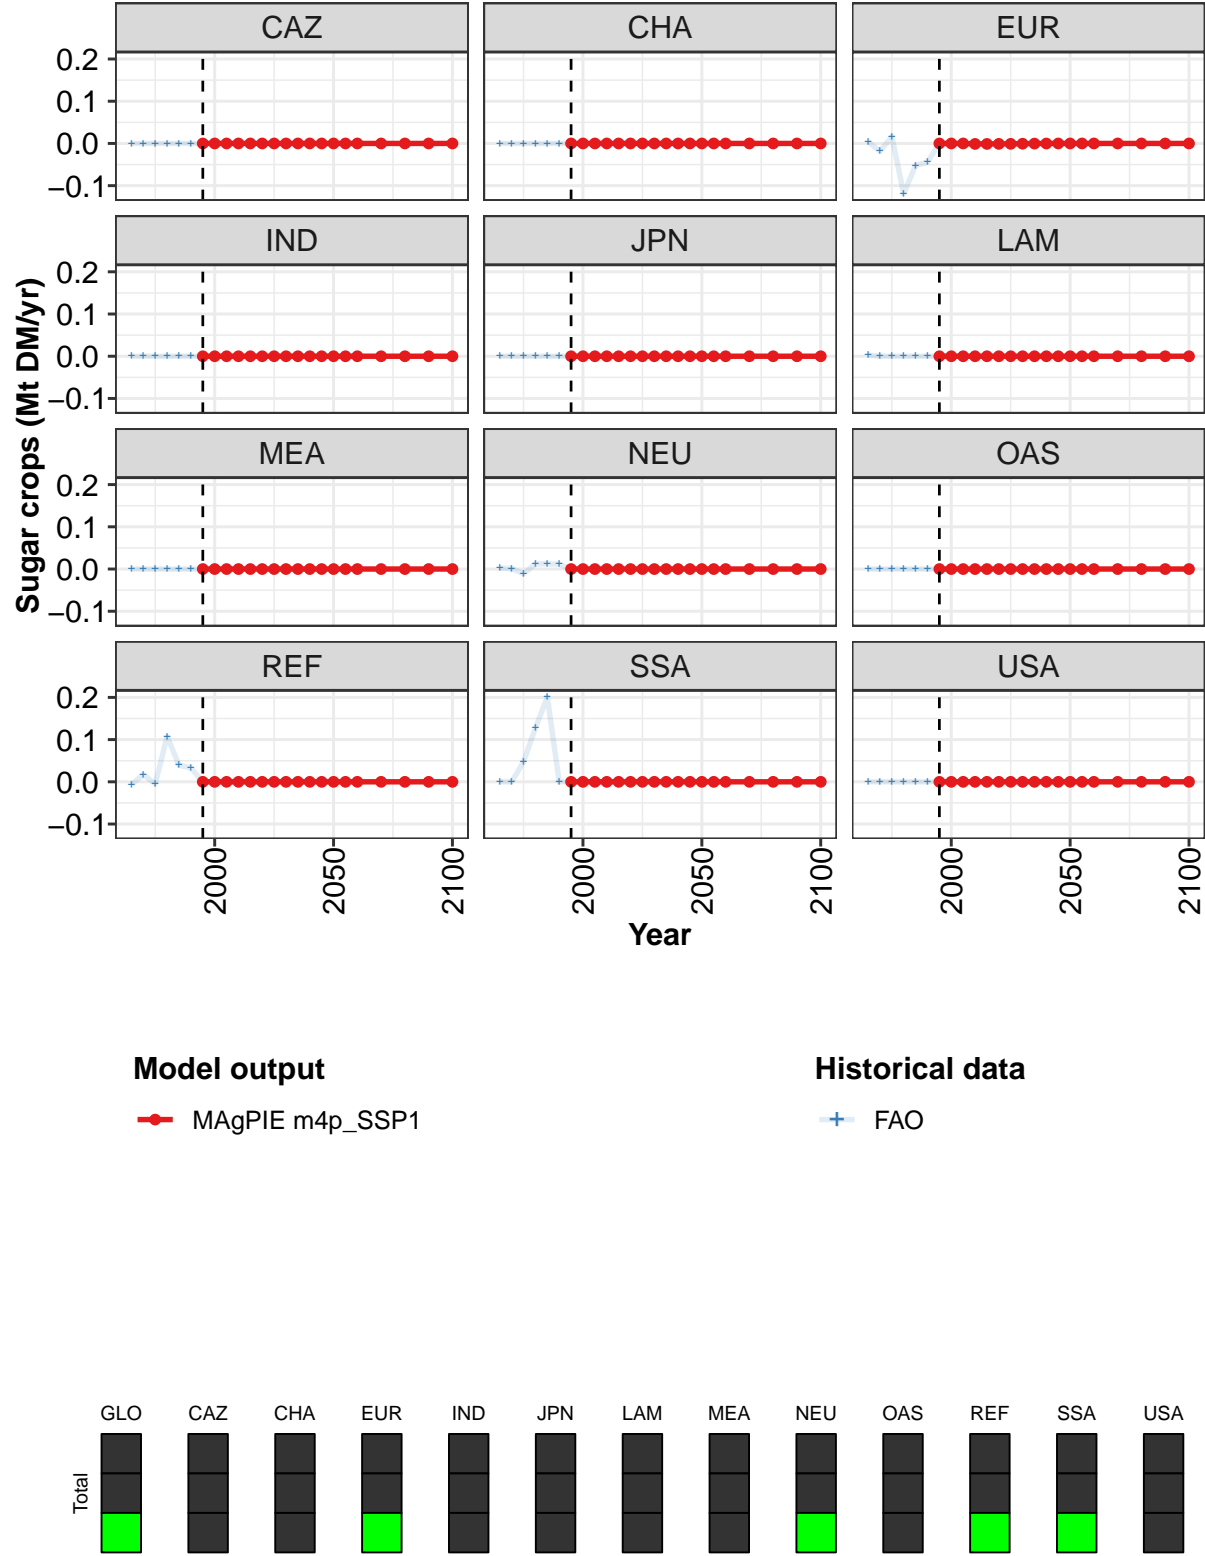

Figure 62: MAgPIE m4p\_SSP1 — Demand—Domestic Balanceflow—Crops—Sugar crops (Mt DM/yr)

|     | 1995 | 2000 | 2005 | 2010 | 2015 | 2020 | 2025 | 2030 | 2035 | 2040 | 2045 |
|-----|------|------|------|------|------|------|------|------|------|------|------|
| GLO | 0    | 0    | 0    | -0   | -0   | -0   | -0   | -0   | -0   | -0   | 0    |
| CAZ | 0    | 0    | 0    | 0    | 0    | 0    | 0    | 0    | 0    | 0    | 0    |
| CHA | 0    | 0    | 0    | 0    | 0    | 0    | 0    | 0    | 0    | 0    | 0    |
| EUR | 0    | 0    | 0    | -0   | -0   | -0   | -0   | -0   | -0   | -0   | 0    |
| IND | 0    | 0    | 0    | 0    | 0    | 0    | 0    | 0    | 0    | 0    | 0    |
| JPN | 0    | 0    | 0    | 0    | 0    | 0    | 0    | 0    | 0    | 0    | 0    |
| LAM | 0    | 0    | 0    | 0    | 0    | 0    | 0    | 0    | 0    | 0    | 0    |
| MEA | 0    | 0    | 0    | 0    | 0    | 0    | 0    | 0    | 0    | 0    | 0    |
| NEU | 0    | 0    | 0    | 0    | 0    | 0    | 0    | 0    | 0    | 0    | 0    |
| OAS | 0    | 0    | 0    | 0    | 0    | 0    | 0    | 0    | 0    | 0    | 0    |
| REF | 0    | 0    | 0    | 0    | 0    | 0    | 0    | 0    | 0    | 0    | 0    |
| SSA | 0    | 0    | 0    | 0    | 0    | 0    | 0    | 0    | 0    | 0    | 0    |
| USA | 0    | 0    | 0    | 0    | 0    | 0    | 0    | 0    | 0    | 0    | 0    |

Table 185: MAgPIE m4p\_SSP1 — Demand—Domestic Balanceflow—Crops—Sugar crops (Mt DM/yr) [PART 1/2]

|     | 2050 | 2055 | 2060 | 2070 | 2080 | 2090 | 2100 |
|-----|------|------|------|------|------|------|------|
| GLO | 0    | 0    | 0    | 0    | 0    | 0    | 0    |
| CAZ | 0    | 0    | 0    | 0    | 0    | 0    | 0    |
| CHA | 0    | 0    | 0    | 0    | 0    | 0    | 0    |
| EUR | 0    | 0    | 0    | 0    | 0    | 0    | 0    |
| IND | 0    | 0    | 0    | 0    | 0    | 0    | 0    |
| JPN | 0    | 0    | 0    | 0    | 0    | 0    | 0    |
| LAM | 0    | 0    | 0    | 0    | 0    | 0    | 0    |
| MEA | 0    | 0    | 0    | 0    | 0    | 0    | 0    |
| NEU | 0    | 0    | 0    | 0    | 0    | 0    | 0    |
| OAS | 0    | 0    | 0    | 0    | 0    | 0    | 0    |
| REF | 0    | 0    | 0    | 0    | 0    | 0    | 0    |
| SSA | 0    | 0    | 0    | 0    | 0    | 0    | 0    |
| USA | 0    | 0    | 0    | 0    | 0    | 0    | 0    |

Table 186: MAgPIE m4p\_SSP1 — Demand—Domestic Balanceflow—Crops—Sugar crops (Mt DM/yr) [PART 2/2]

|     | 1965   | 1970   | 1975   | 1980   | 1985   | 1990   | 1995  | 2000  | 2005  | 2010   |
|-----|--------|--------|--------|--------|--------|--------|-------|-------|-------|--------|
| GLO | 0.003  | 0.000  | 0.048  | 0.128  | 0.201  | 0.000  | 0.000 | 0.000 | 0.000 | -0.001 |
| CAZ | 0.000  | 0.000  | 0.000  | 0.000  | 0.000  | 0.000  | 0.000 | 0.000 | 0.000 | 0.000  |
| CHA | 0.000  | 0.000  | 0.000  | 0.000  | 0.000  | 0.000  | 0.000 | 0.000 | 0.000 | 0.000  |
| EUR | 0.004  | -0.018 | 0.016  | -0.119 | -0.052 | -0.044 | 0.000 | 0.000 | 0.000 | -0.001 |
| IND | 0.000  | 0.000  | 0.000  | 0.000  | 0.000  | 0.000  | 0.000 | 0.000 | 0.000 | 0.000  |
| JPN | 0.000  | 0.000  | 0.000  | 0.000  | 0.000  | 0.000  | 0.000 | 0.000 | 0.000 | 0.000  |
| LAM | 0.003  | 0.000  | 0.000  | 0.000  | 0.000  | 0.000  | 0.000 | 0.000 | 0.000 | 0.000  |
| MEA | 0.000  | 0.000  | 0.000  | 0.000  | 0.000  | 0.000  | 0.000 | 0.000 | 0.000 | 0.000  |
| NEU | 0.002  | 0.001  | -0.011 | 0.012  | 0.013  | 0.011  | 0.000 | 0.000 | 0.000 | 0.000  |
| OAS | 0.000  | 0.000  | 0.000  | 0.000  | 0.000  | 0.000  | 0.000 | 0.000 | 0.000 | 0.000  |
| REF | -0.006 | 0.017  | -0.005 | 0.107  | 0.039  | 0.033  | 0.000 | 0.000 | 0.000 | 0.000  |
| SSA | 0.000  | 0.000  | 0.048  | 0.128  | 0.201  | 0.000  | 0.000 | 0.000 | 0.000 | 0.000  |
| USA | 0.000  | 0.000  | 0.000  | 0.000  | 0.000  | 0.000  | 0.000 | 0.000 | 0.000 | 0.000  |

Table 187: FAO — Demand—Domestic Balanceflow—Crops—Sugar crops (Mt DM/yr)

5.1.18 Sugar crops—Sugar beet

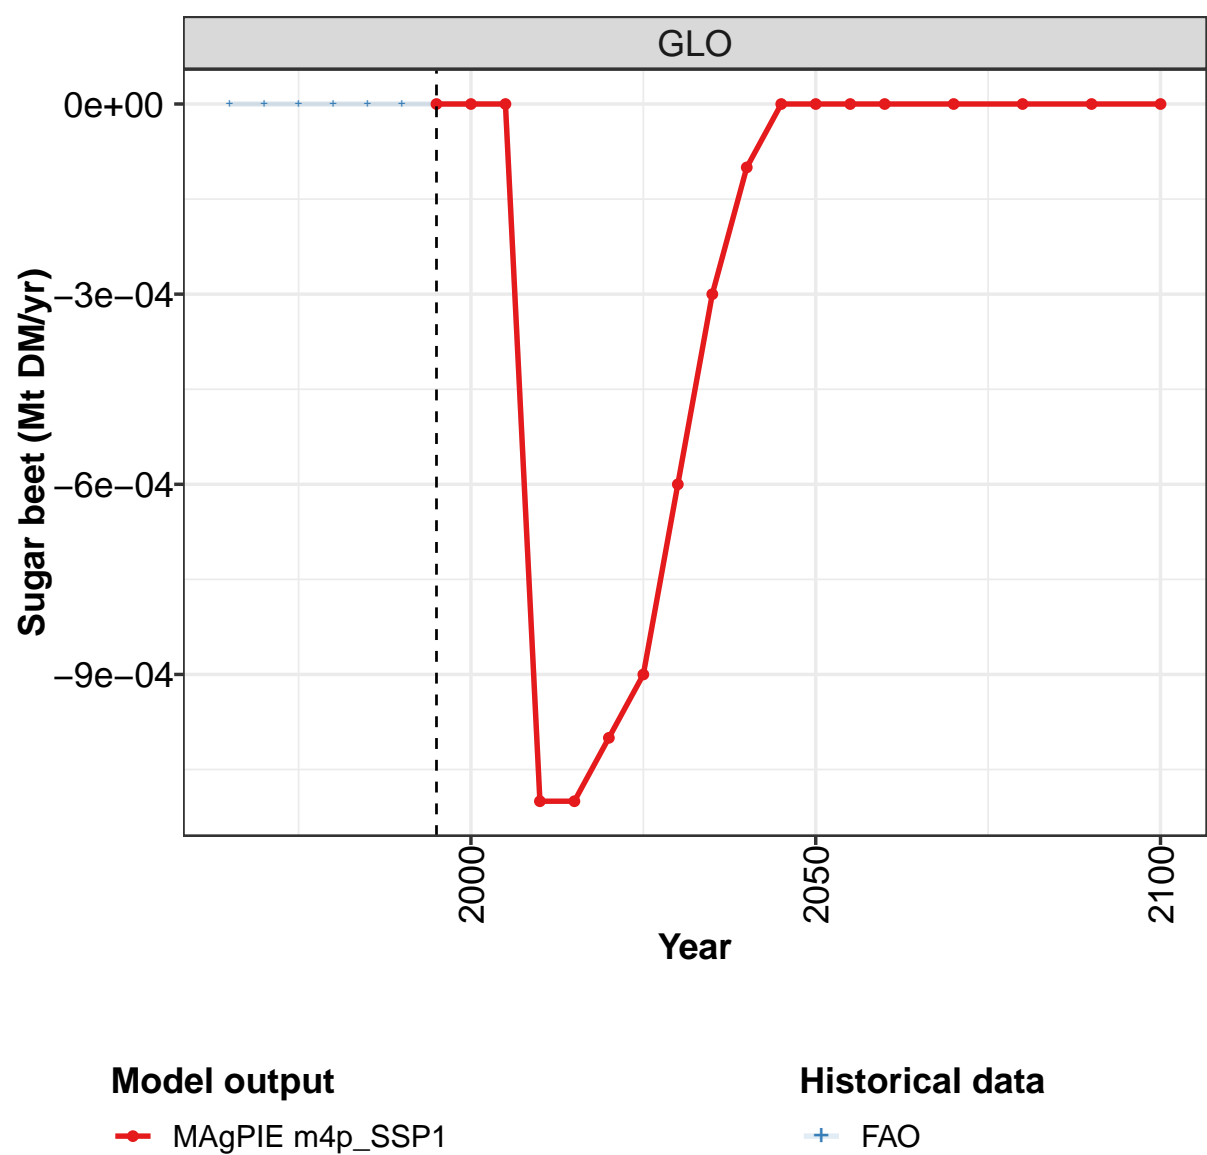

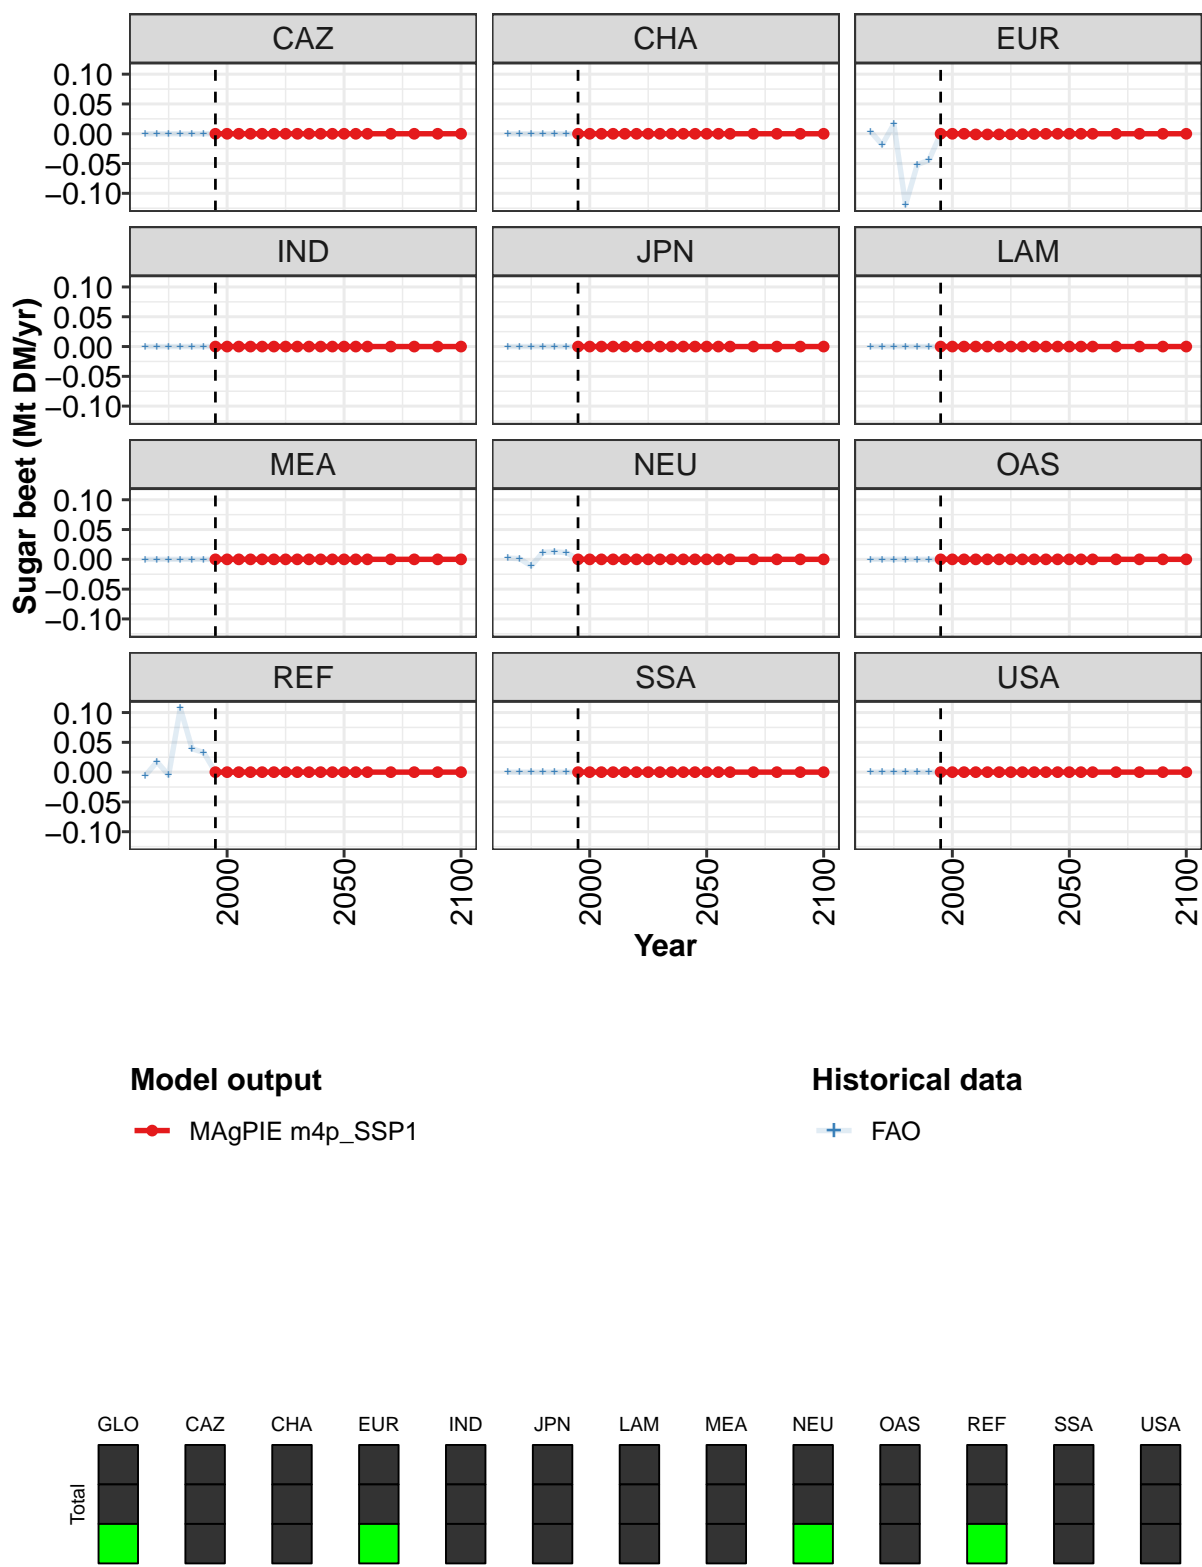

Figure 63: MAgPIE m4p\_SSP1 — Demand—Domestic Balanceflow—Crops—Sugar crops—Sugar beet (Mt DM/yr)

|     | 1995 | 2000 | 2005 | 2010 | 2015 | 2020 | 2025 | 2030 | 2035 | 2040 | 2045 |
|-----|------|------|------|------|------|------|------|------|------|------|------|
| GLO | 0    | 0    | 0    | -0   | -0   | -0   | -0   | -0   | -0   | -0   | 0    |
| CAZ | 0    | 0    | 0    | 0    | 0    | 0    | 0    | 0    | 0    | 0    | 0    |
| CHA | 0    | 0    | 0    | 0    | 0    | 0    | 0    | 0    | 0    | 0    | 0    |
| EUR | 0    | 0    | 0    | -0   | -0   | -0   | -0   | -0   | -0   | -0   | 0    |
| IND | 0    | 0    | 0    | 0    | 0    | 0    | 0    | 0    | 0    | 0    | 0    |
| JPN | 0    | 0    | 0    | 0    | 0    | 0    | 0    | 0    | 0    | 0    | 0    |
| LAM | 0    | 0    | 0    | 0    | 0    | 0    | 0    | 0    | 0    | 0    | 0    |
| MEA | 0    | 0    | 0    | 0    | 0    | 0    | 0    | 0    | 0    | 0    | 0    |
| NEU | 0    | 0    | 0    | 0    | 0    | 0    | 0    | 0    | 0    | 0    | 0    |
| OAS | 0    | 0    | 0    | 0    | 0    | 0    | 0    | 0    | 0    | 0    | 0    |
| REF | 0    | 0    | 0    | 0    | 0    | 0    | 0    | 0    | 0    | 0    | 0    |
| SSA | 0    | 0    | 0    | 0    | 0    | 0    | 0    | 0    | 0    | 0    | 0    |
| USA | 0    | 0    | 0    | 0    | 0    | 0    | 0    | 0    | 0    | 0    | 0    |

Table 188: MAgPIE m4p\_SSP1 — Demand—Domestic Balanceflow—Crops—Sugar crops—Sugar beet (Mt DM/yr) [PART 1/2]

|     | 2050 | 2055 | 2060 | 2070 | 2080 | 2090 | 2100 |
|-----|------|------|------|------|------|------|------|
| GLO | 0    | 0    | 0    | 0    | 0    | 0    | 0    |
| CAZ | 0    | 0    | 0    | 0    | 0    | 0    | 0    |
| CHA | 0    | 0    | 0    | 0    | 0    | 0    | 0    |
| EUR | 0    | 0    | 0    | 0    | 0    | 0    | 0    |
| IND | 0    | 0    | 0    | 0    | 0    | 0    | 0    |
| JPN | 0    | 0    | 0    | 0    | 0    | 0    | 0    |
| LAM | 0    | 0    | 0    | 0    | 0    | 0    | 0    |
| MEA | 0    | 0    | 0    | 0    | 0    | 0    | 0    |
| NEU | 0    | 0    | 0    | 0    | 0    | 0    | 0    |
| OAS | 0    | 0    | 0    | 0    | 0    | 0    | 0    |
| REF | 0    | 0    | 0    | 0    | 0    | 0    | 0    |
| SSA | 0    | 0    | 0    | 0    | 0    | 0    | 0    |
| USA | 0    | 0    | 0    | 0    | 0    | 0    | 0    |

Table 189: MAgPIE m4p\_SSP1 — Demand—Domestic Balanceflow—Crops—Sugar crops—Sugar beet (Mt DM/yr) [PART 2/2]

|     | 1965   | 1970   | 1975   | 1980   | 1985   | 1990   | 1995  | 2000  | 2005  | 2010   |
|-----|--------|--------|--------|--------|--------|--------|-------|-------|-------|--------|
| GLO | 0.000  | 0.000  | 0.000  | 0.000  | 0.000  | 0.000  | 0.000 | 0.000 | 0.000 | -0.001 |
| CAZ | 0.000  | 0.000  | 0.000  | 0.000  | 0.000  | 0.000  | 0.000 | 0.000 | 0.000 | 0.000  |
| CHA | 0.000  | 0.000  | 0.000  | 0.000  | 0.000  | 0.000  | 0.000 | 0.000 | 0.000 | 0.000  |
| EUR | 0.004  | -0.018 | 0.016  | -0.119 | -0.052 | -0.044 | 0.000 | 0.000 | 0.000 | -0.001 |
| IND | 0.000  | 0.000  | 0.000  | 0.000  | 0.000  | 0.000  | 0.000 | 0.000 | 0.000 | 0.000  |
| JPN | 0.000  | 0.000  | 0.000  | 0.000  | 0.000  | 0.000  | 0.000 | 0.000 | 0.000 | 0.000  |
| LAM | 0.000  | 0.000  | 0.000  | 0.000  | 0.000  | 0.000  | 0.000 | 0.000 | 0.000 | 0.000  |
| MEA | 0.000  | 0.000  | 0.000  | 0.000  | 0.000  | 0.000  | 0.000 | 0.000 | 0.000 | 0.000  |
| NEU | 0.002  | 0.001  | -0.011 | 0.012  | 0.013  | 0.011  | 0.000 | 0.000 | 0.000 | 0.000  |
| OAS | 0.000  | 0.000  | 0.000  | 0.000  | 0.000  | 0.000  | 0.000 | 0.000 | 0.000 | 0.000  |
| REF | -0.006 | 0.017  | -0.005 | 0.107  | 0.039  | 0.033  | 0.000 | 0.000 | 0.000 | 0.000  |
| SSA | 0.000  | 0.000  | 0.000  | 0.000  | 0.000  | 0.000  | 0.000 | 0.000 | 0.000 | 0.000  |
| USA | 0.000  | 0.000  | 0.000  | 0.000  | 0.000  | 0.000  | 0.000 | 0.000 | 0.000 | 0.000  |

Table 190: FAO — Demand—Domestic Balanceflow—Crops—Sugar crops—Sugar beet (Mt DM/yr)

5.2 Fish

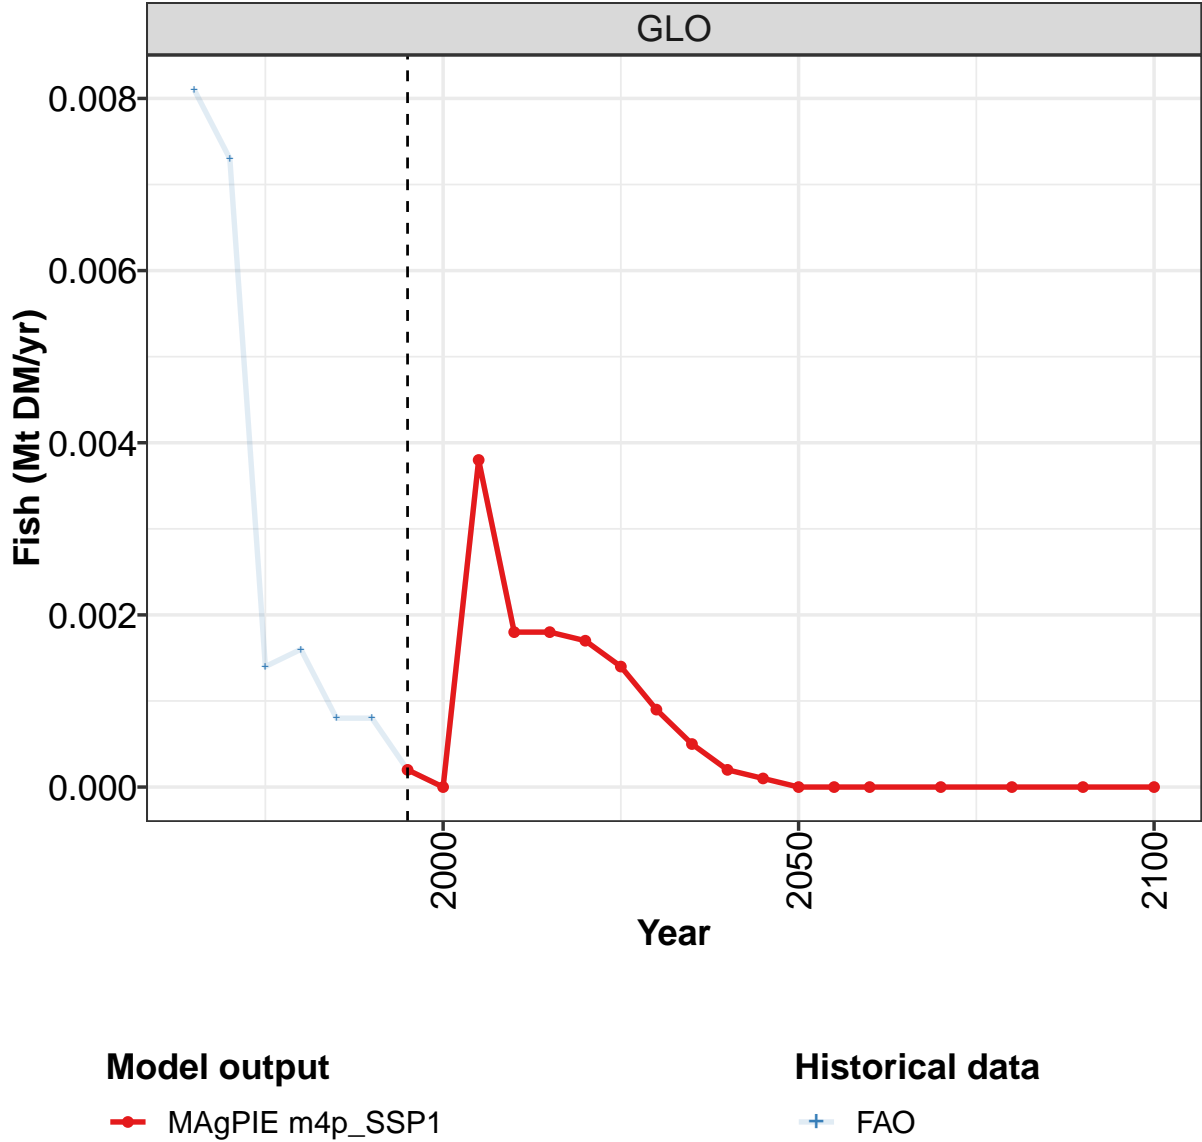

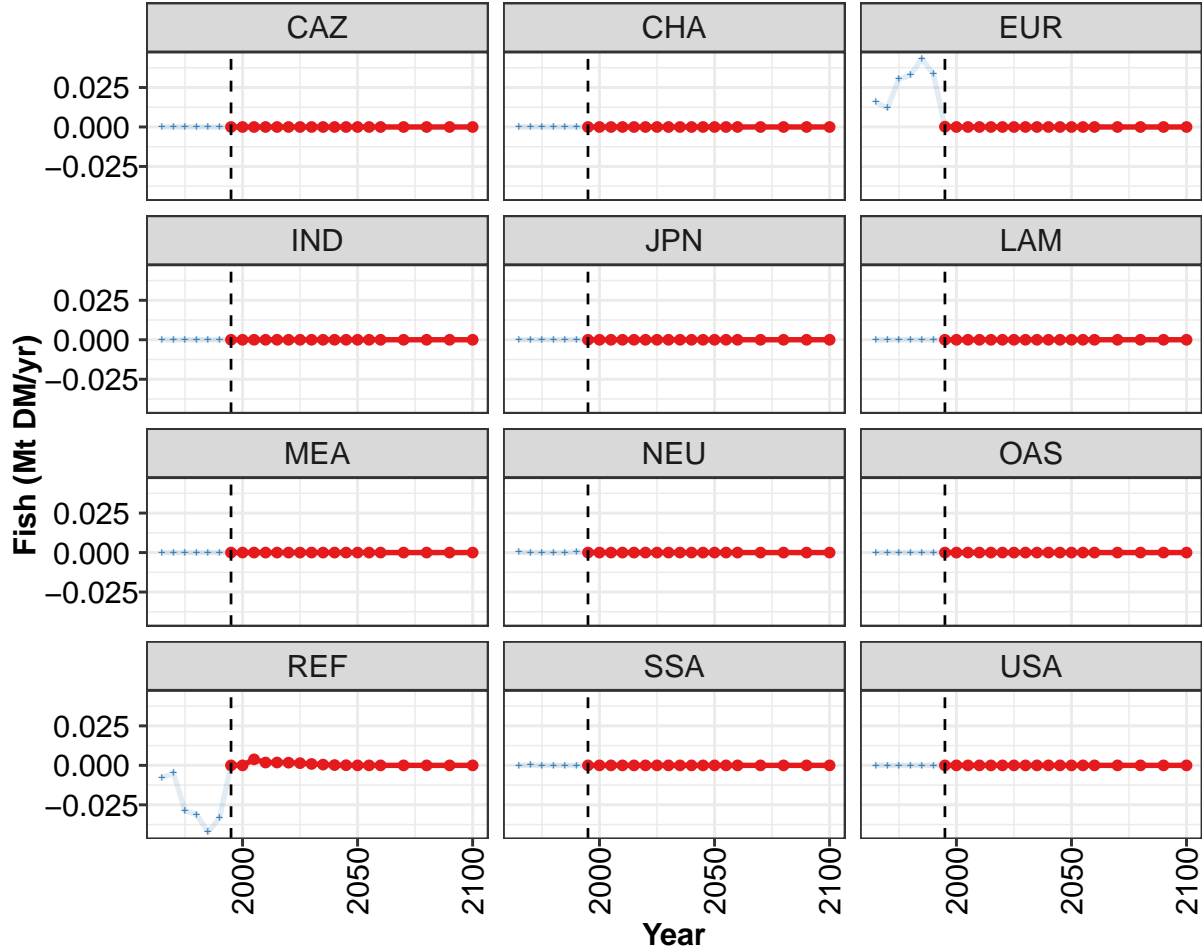

**Model output**  
—●— MAgPIE m4p\_SSP1

**Historical data**  
—+— FAO

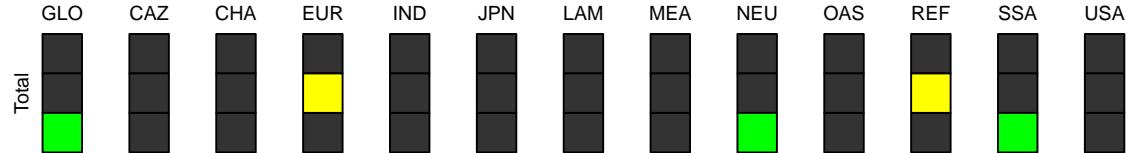

Figure 64: MAgPIE m4p\_SSP1 — Demand—Domestic Balanceflow—Fish (Mt DM/yr)

|     | 1995    | 2000    | 2005    | 2010    | 2015    | 2020    | 2025    | 2030    | 2035    | 2040    | 2045    |
|-----|---------|---------|---------|---------|---------|---------|---------|---------|---------|---------|---------|
| GLO | 0.00020 | 0.00000 | 0.00380 | 0.00180 | 0.00180 | 0.00170 | 0.00140 | 0.00090 | 0.00050 | 0.00020 | 0.00010 |
| CAZ | 0.00000 | 0.00000 | 0.00000 | 0.00000 | 0.00000 | 0.00000 | 0.00000 | 0.00000 | 0.00000 | 0.00000 | 0.00000 |
| CHA | 0.00000 | 0.00000 | 0.00000 | 0.00000 | 0.00000 | 0.00000 | 0.00000 | 0.00000 | 0.00000 | 0.00000 | 0.00000 |
| EUR | 0.00020 | 0.00000 | 0.00000 | 0.00000 | 0.00000 | 0.00000 | 0.00000 | 0.00000 | 0.00000 | 0.00000 | 0.00000 |
| IND | 0.00000 | 0.00000 | 0.00000 | 0.00000 | 0.00000 | 0.00000 | 0.00000 | 0.00000 | 0.00000 | 0.00000 | 0.00000 |
| JPN | 0.00000 | 0.00000 | 0.00000 | 0.00000 | 0.00000 | 0.00000 | 0.00000 | 0.00000 | 0.00000 | 0.00000 | 0.00000 |
| LAM | 0.00000 | 0.00000 | 0.00000 | 0.00000 | 0.00000 | 0.00000 | 0.00000 | 0.00000 | 0.00000 | 0.00000 | 0.00000 |
| MEA | 0.00000 | 0.00000 | 0.00000 | 0.00000 | 0.00000 | 0.00000 | 0.00000 | 0.00000 | 0.00000 | 0.00000 | 0.00000 |
| NEU | 0.00000 | 0.00000 | 0.00000 | 0.00000 | 0.00000 | 0.00000 | 0.00000 | 0.00000 | 0.00000 | 0.00000 | 0.00000 |
| OAS | 0.00000 | 0.00000 | 0.00000 | 0.00000 | 0.00000 | 0.00000 | 0.00000 | 0.00000 | 0.00000 | 0.00000 | 0.00000 |
| REF | 0.00000 | 0.00000 | 0.00380 | 0.00180 | 0.00180 | 0.00170 | 0.00140 | 0.00090 | 0.00050 | 0.00020 | 0.00010 |
| SSA | 0.00000 | 0.00000 | 0.00000 | 0.00000 | 0.00000 | 0.00000 | 0.00000 | 0.00000 | 0.00000 | 0.00000 | 0.00000 |
| USA | 0.00000 | 0.00000 | 0.00000 | 0.00000 | 0.00000 | 0.00000 | 0.00000 | 0.00000 | 0.00000 | 0.00000 | 0.00000 |

Table 191: MAgPIE m4p\_SSP1 — Demand—Domestic Balanceflow—Fish (Mt DM/yr) [PART 1/2]

|     | 2050    | 2055    | 2060    | 2070    | 2080    | 2090    | 2100    |
|-----|---------|---------|---------|---------|---------|---------|---------|
| GLO | 0.00000 | 0.00000 | 0.00000 | 0.00000 | 0.00000 | 0.00000 | 0.00000 |
| CAZ | 0.00000 | 0.00000 | 0.00000 | 0.00000 | 0.00000 | 0.00000 | 0.00000 |
| CHA | 0.00000 | 0.00000 | 0.00000 | 0.00000 | 0.00000 | 0.00000 | 0.00000 |
| EUR | 0.00000 | 0.00000 | 0.00000 | 0.00000 | 0.00000 | 0.00000 | 0.00000 |
| IND | 0.00000 | 0.00000 | 0.00000 | 0.00000 | 0.00000 | 0.00000 | 0.00000 |
| JPN | 0.00000 | 0.00000 | 0.00000 | 0.00000 | 0.00000 | 0.00000 | 0.00000 |
| LAM | 0.00000 | 0.00000 | 0.00000 | 0.00000 | 0.00000 | 0.00000 | 0.00000 |
| MEA | 0.00000 | 0.00000 | 0.00000 | 0.00000 | 0.00000 | 0.00000 | 0.00000 |
| NEU | 0.00000 | 0.00000 | 0.00000 | 0.00000 | 0.00000 | 0.00000 | 0.00000 |
| OAS | 0.00000 | 0.00000 | 0.00000 | 0.00000 | 0.00000 | 0.00000 | 0.00000 |
| REF | 0.00000 | 0.00000 | 0.00000 | 0.00000 | 0.00000 | 0.00000 | 0.00000 |
| SSA | 0.00000 | 0.00000 | 0.00000 | 0.00000 | 0.00000 | 0.00000 | 0.00000 |
| USA | 0.00000 | 0.00000 | 0.00000 | 0.00000 | 0.00000 | 0.00000 | 0.00000 |

Table 192: MAgPIE m4p\_SSP1 — Demand—Domestic Balanceflow—Fish (Mt DM/yr) [PART 2/2]

|     | 1965    | 1970    | 1975    | 1980    | 1985    | 1990    | 1995   | 2000   | 2005   | 2010   |
|-----|---------|---------|---------|---------|---------|---------|--------|--------|--------|--------|
| GLO | 0.0081  | 0.0073  | 0.0014  | 0.0016  | 0.0008  | 0.0008  | 0.0002 | 0.0000 | 0.0038 | 0.0018 |
| CAZ | 0.0000  | 0.0000  | 0.0000  | 0.0000  | 0.0000  | 0.0000  | 0.0000 | 0.0000 | 0.0000 | 0.0000 |
| CHA | 0.0000  | 0.0000  | 0.0000  | 0.0000  | 0.0000  | 0.0000  | 0.0000 | 0.0000 | 0.0000 | 0.0000 |
| EUR | 0.0157  | 0.0120  | 0.0303  | 0.0328  | 0.0432  | 0.0334  | 0.0002 | 0.0000 | 0.0000 | 0.0000 |
| IND | 0.0000  | 0.0000  | 0.0000  | 0.0000  | 0.0000  | 0.0000  | 0.0000 | 0.0000 | 0.0000 | 0.0000 |
| JPN | 0.0000  | 0.0000  | 0.0000  | 0.0000  | 0.0000  | 0.0000  | 0.0000 | 0.0000 | 0.0000 | 0.0000 |
| LAM | 0.0000  | 0.0000  | 0.0000  | 0.0000  | 0.0000  | 0.0000  | 0.0000 | 0.0000 | 0.0000 | 0.0000 |
| MEA | 0.0000  | 0.0000  | 0.0000  | 0.0000  | 0.0000  | 0.0000  | 0.0000 | 0.0000 | 0.0000 | 0.0000 |
| NEU | 0.0002  | 0.0001  | 0.0000  | -0.0001 | -0.0001 | 0.0005  | 0.0000 | 0.0000 | 0.0000 | 0.0000 |
| OAS | 0.0000  | 0.0000  | 0.0000  | 0.0000  | 0.0000  | 0.0000  | 0.0000 | 0.0000 | 0.0000 | 0.0000 |
| REF | -0.0078 | -0.0050 | -0.0288 | -0.0311 | -0.0423 | -0.0331 | 0.0000 | 0.0000 | 0.0038 | 0.0018 |
| SSA | 0.0000  | 0.0002  | 0.0000  | 0.0000  | 0.0000  | 0.0000  | 0.0000 | 0.0000 | 0.0000 | 0.0000 |
| USA | 0.0000  | 0.0000  | 0.0000  | 0.0000  | 0.0000  | 0.0000  | 0.0000 | 0.0000 | 0.0000 | 0.0000 |

Table 193: FAO — Demand—Domestic Balanceflow—Fish (Mt DM/yr)



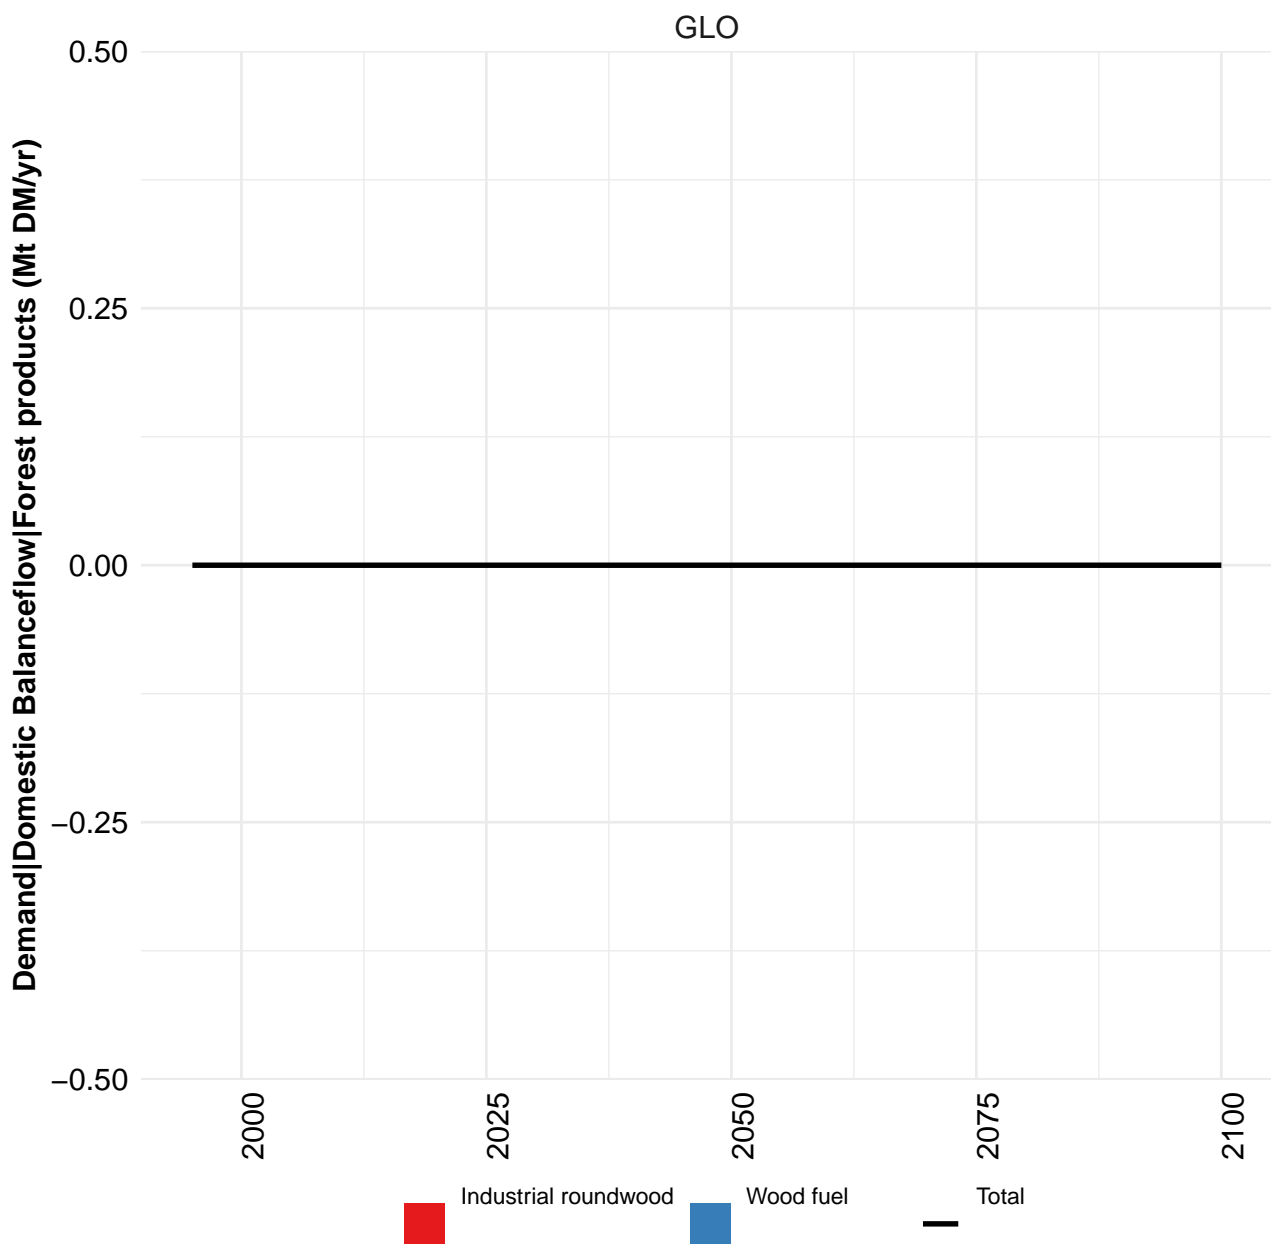

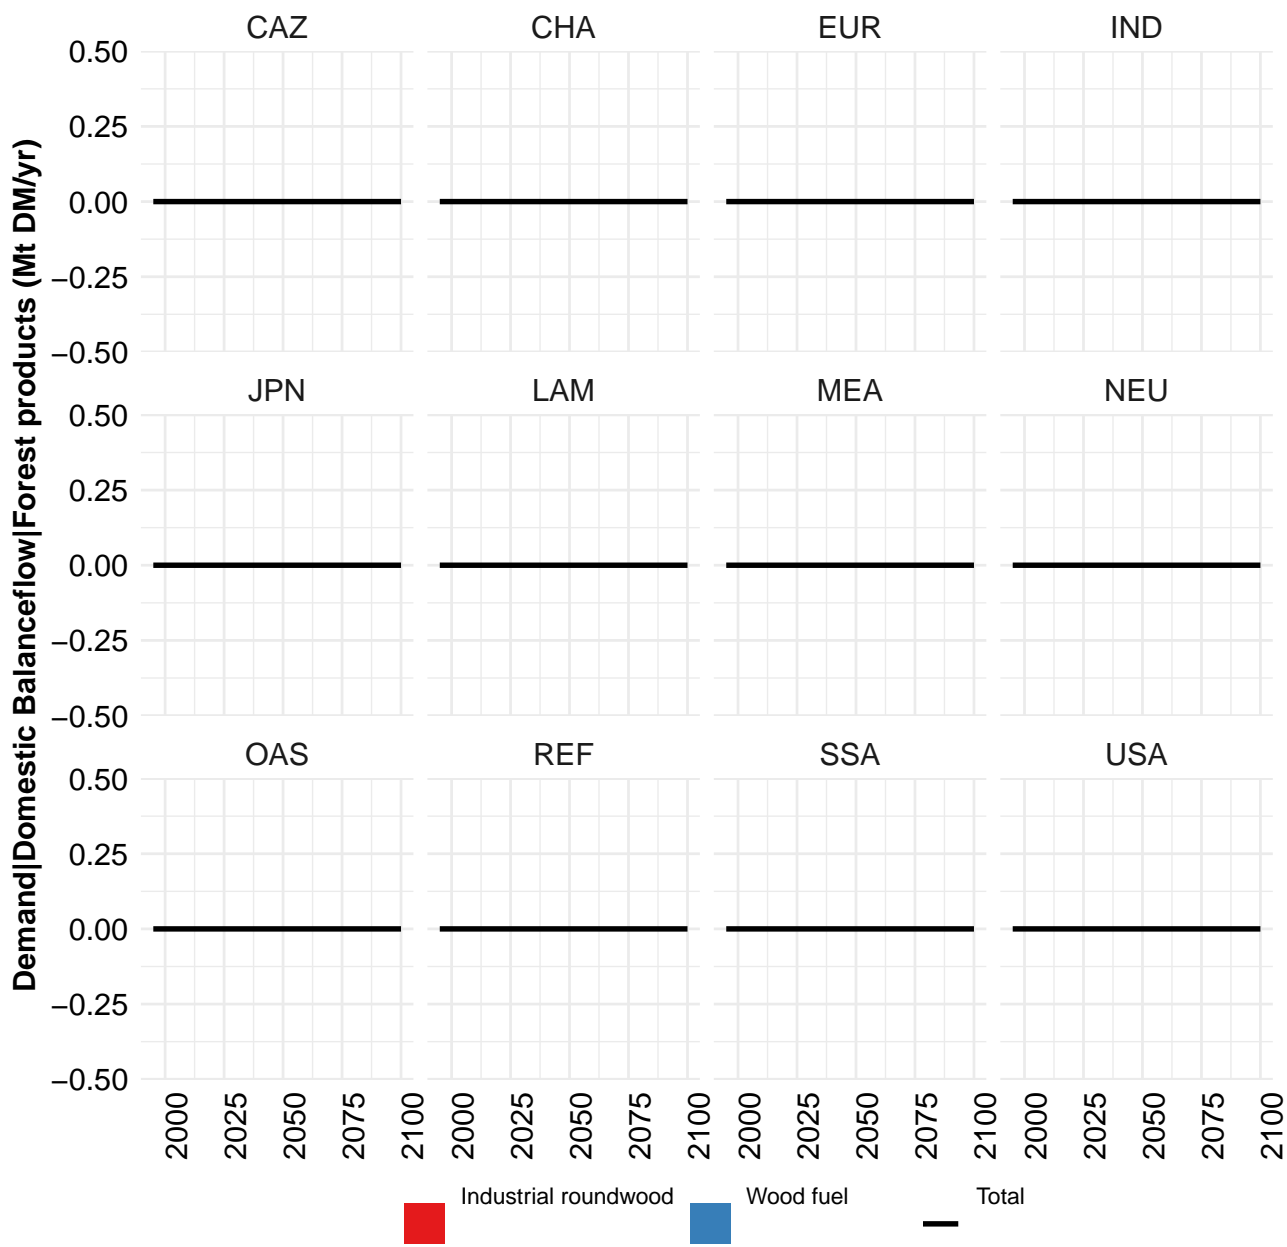

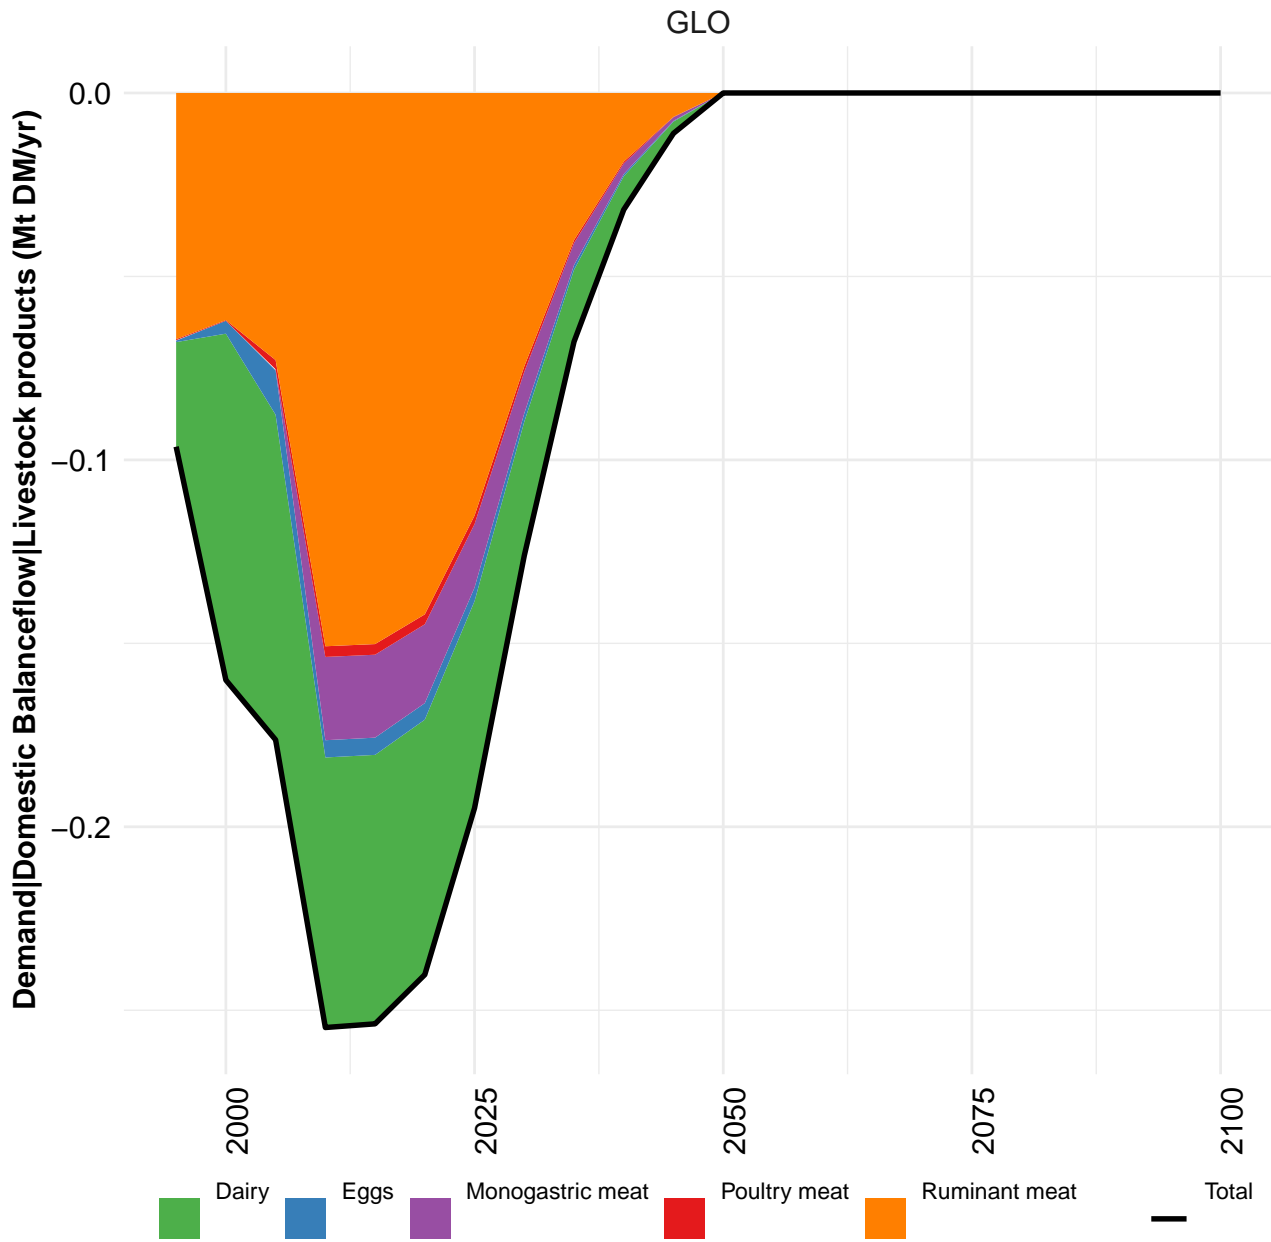

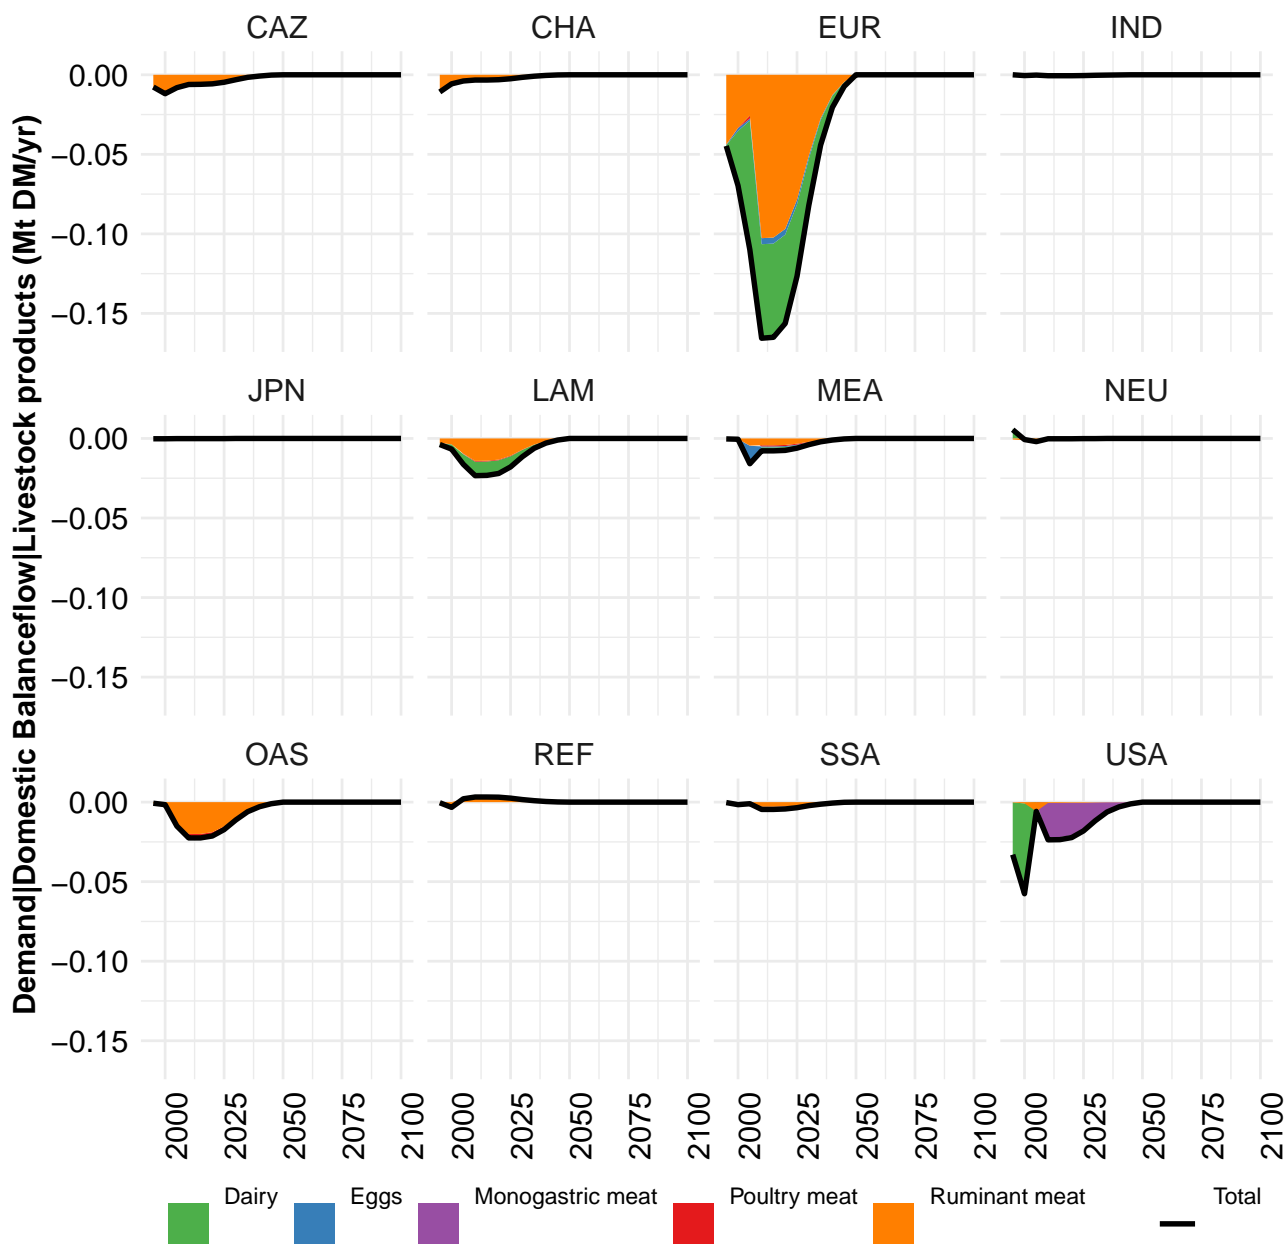

5.3 Livestock products

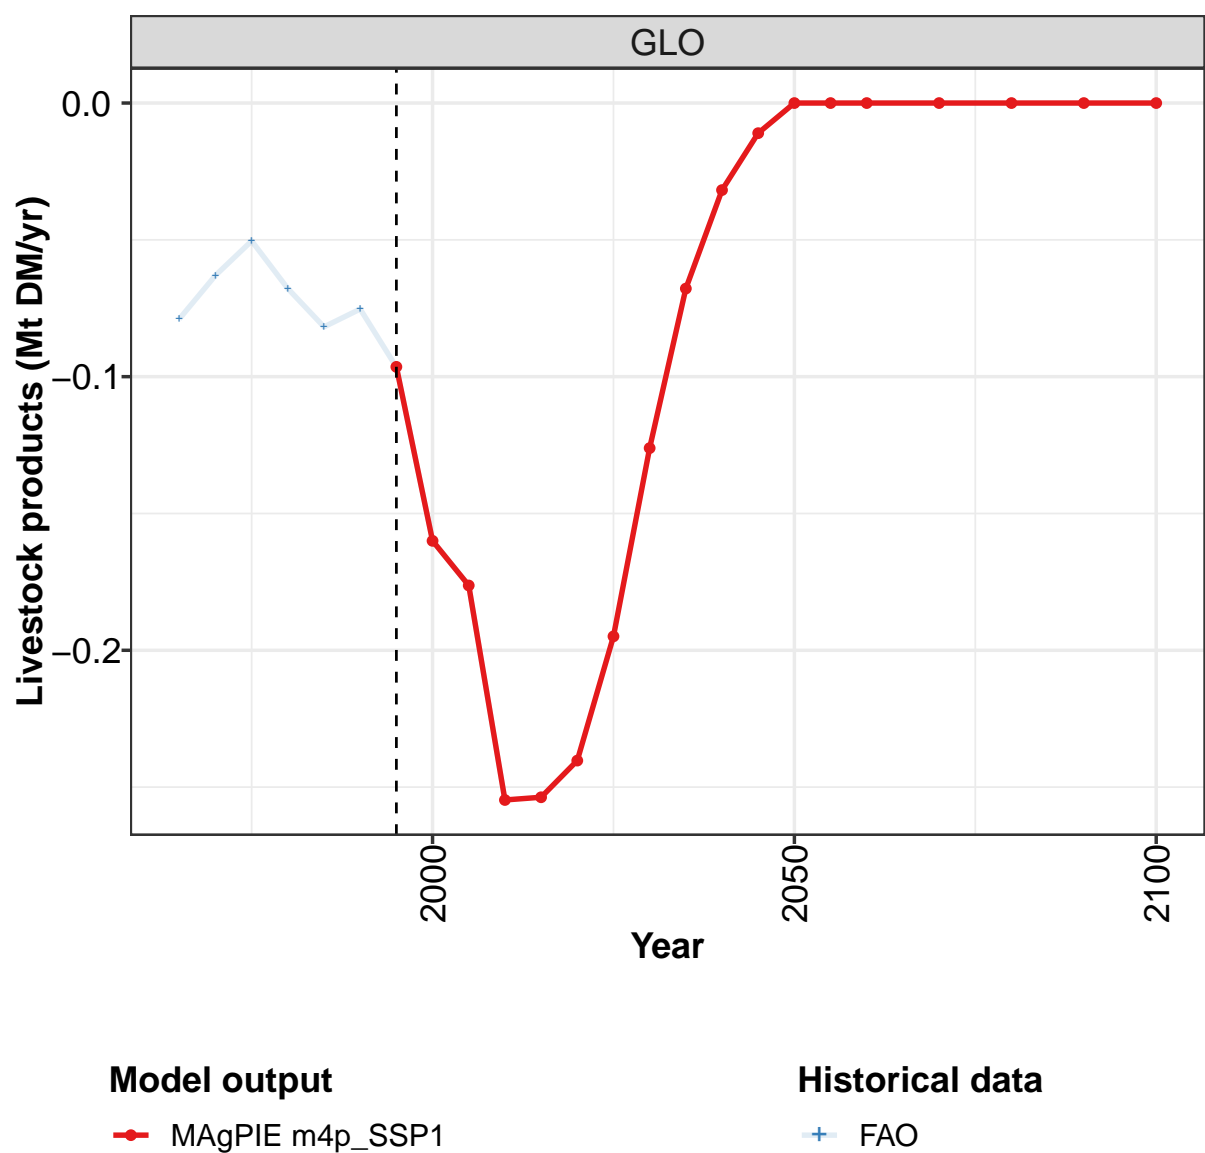

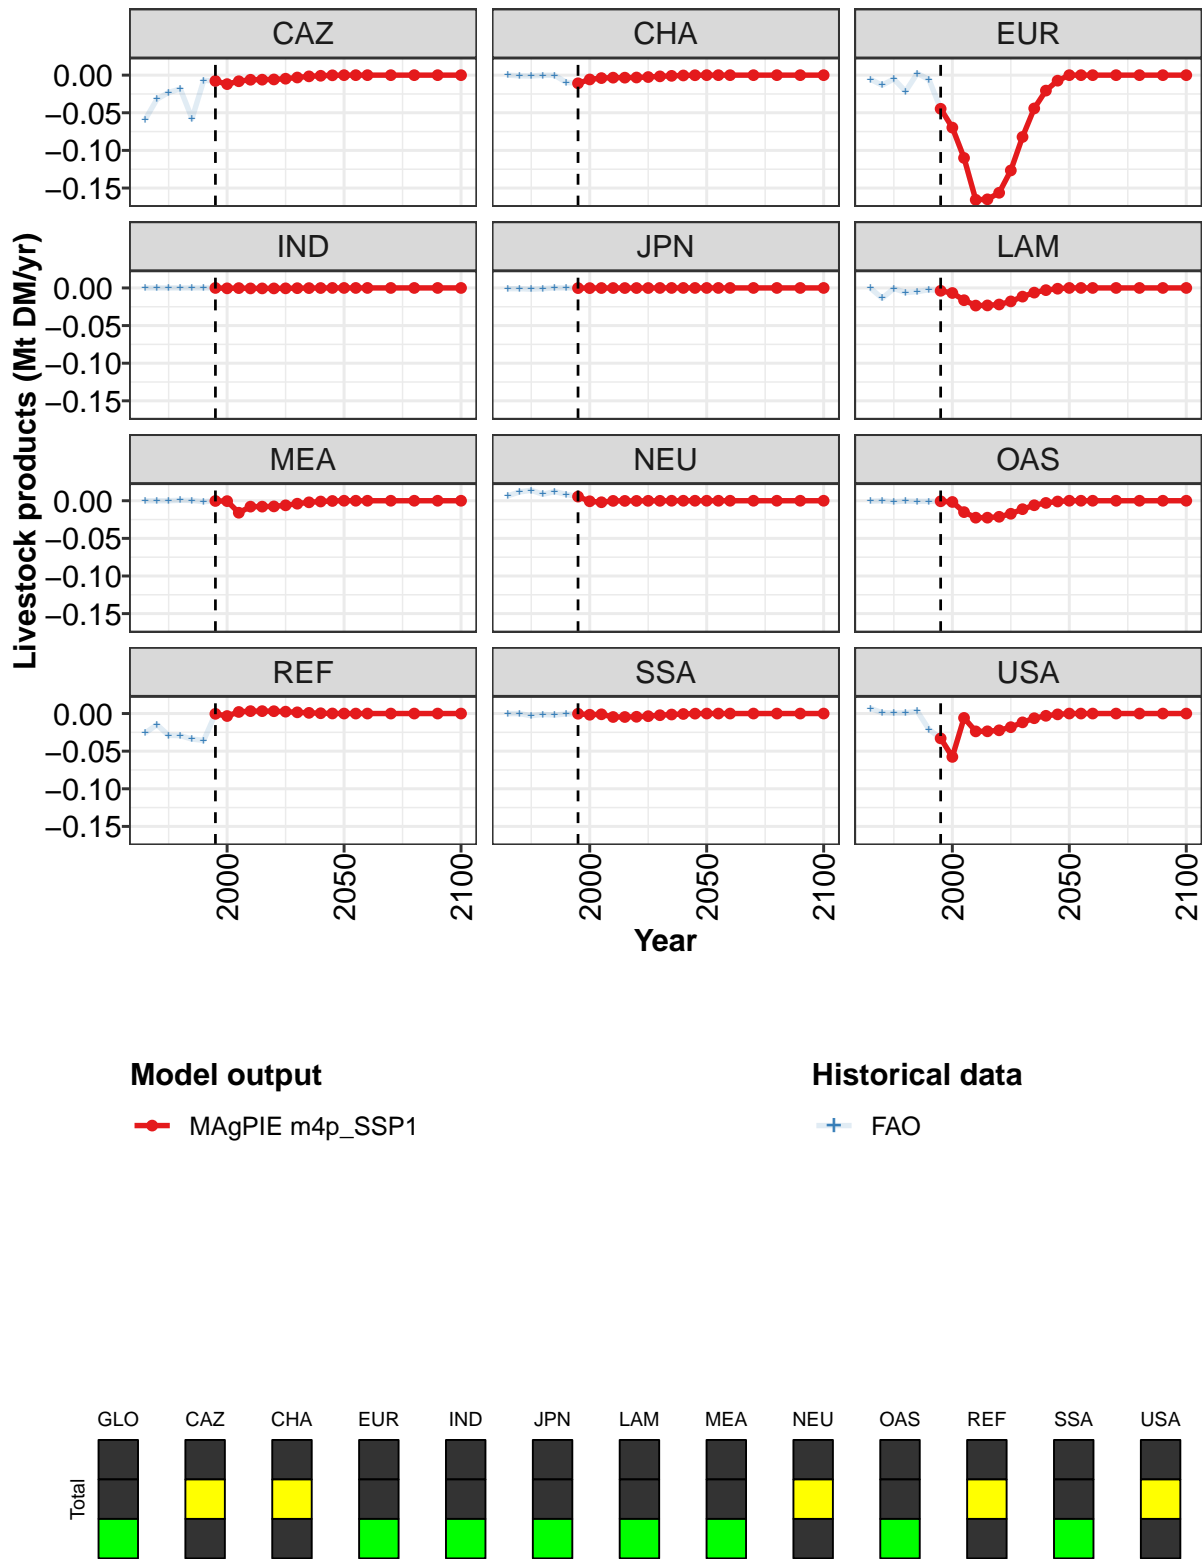

Figure 65: MAgPIE m4p\_SSP1 — Demand—Domestic Balanceflow—Livestock products (Mt DM/yr)

|     | 1995     | 2000     | 2005     | 2010     | 2015     | 2020     | 2025     | 2030     | 2035     | 2040     | 2045     |
|-----|----------|----------|----------|----------|----------|----------|----------|----------|----------|----------|----------|
| GLO | -0.09640 | -0.16000 | -0.17630 | -0.25470 | -0.25370 | -0.24030 | -0.19490 | -0.12610 | -0.06780 | -0.03180 | -0.00000 |
| CAZ | -0.00770 | -0.01190 | -0.00810 | -0.00610 | -0.00600 | -0.00570 | -0.00470 | -0.00310 | -0.00160 | -0.00080 | -0.00000 |
| CHA | -0.01080 | -0.00570 | -0.00390 | -0.00330 | -0.00330 | -0.00310 | -0.00250 | -0.00160 | -0.00090 | -0.00040 | -0.00000 |
| EUR | -0.04470 | -0.06970 | -0.11000 | -0.16560 | -0.16500 | -0.15630 | -0.12660 | -0.08210 | -0.04420 | -0.02050 | -0.00000 |
| IND | 0.00000  | -0.00050 | -0.00020 | -0.00060 | -0.00060 | -0.00060 | -0.00050 | -0.00030 | -0.00020 | -0.00010 | 0.00000  |
| JPN | -0.00020 | -0.00020 | -0.00010 | -0.00010 | -0.00010 | -0.00010 | -0.00010 | 0.00000  | 0.00000  | 0.00000  | 0.00000  |
| LAM | -0.00380 | -0.00670 | -0.01630 | -0.02340 | -0.02320 | -0.02200 | -0.01790 | -0.01150 | -0.00620 | -0.00290 | -0.00000 |
| MEA | -0.00030 | -0.00050 | -0.01590 | -0.00780 | -0.00780 | -0.00750 | -0.00610 | -0.00390 | -0.00210 | -0.00100 | -0.00000 |
| NEU | 0.00550  | -0.00070 | -0.00200 | -0.00020 | -0.00020 | -0.00020 | -0.00010 | -0.00010 | 0.00000  | 0.00000  | 0.00000  |
| OAS | -0.00070 | -0.00160 | -0.01510 | -0.02250 | -0.02250 | -0.02130 | -0.01730 | -0.01120 | -0.00600 | -0.00290 | -0.00000 |
| REF | -0.00040 | -0.00330 | 0.00210  | 0.00320  | 0.00320  | 0.00310  | 0.00250  | 0.00160  | 0.00090  | 0.00040  | 0.00000  |
| SSA | -0.00030 | -0.00160 | -0.00100 | -0.00460 | -0.00460 | -0.00430 | -0.00350 | -0.00220 | -0.00130 | -0.00060 | -0.00000 |
| USA | -0.03300 | -0.05760 | -0.00580 | -0.02370 | -0.02360 | -0.02230 | -0.01810 | -0.01170 | -0.00620 | -0.00300 | -0.00000 |

Table 194: MAgPIE m4p\_SSP1 — Demand—Domestic Balanceflow—Livestock products (Mt DM/yr) [PART 1/2]

|     | 2050    | 2055    | 2060    | 2070    | 2080    | 2090    | 2100    |
|-----|---------|---------|---------|---------|---------|---------|---------|
| GLO | 0.00000 | 0.00000 | 0.00000 | 0.00000 | 0.00000 | 0.00000 | 0.00000 |
| CAZ | 0.00000 | 0.00000 | 0.00000 | 0.00000 | 0.00000 | 0.00000 | 0.00000 |
| CHA | 0.00000 | 0.00000 | 0.00000 | 0.00000 | 0.00000 | 0.00000 | 0.00000 |
| EUR | 0.00000 | 0.00000 | 0.00000 | 0.00000 | 0.00000 | 0.00000 | 0.00000 |
| IND | 0.00000 | 0.00000 | 0.00000 | 0.00000 | 0.00000 | 0.00000 | 0.00000 |
| JPN | 0.00000 | 0.00000 | 0.00000 | 0.00000 | 0.00000 | 0.00000 | 0.00000 |
| LAM | 0.00000 | 0.00000 | 0.00000 | 0.00000 | 0.00000 | 0.00000 | 0.00000 |
| MEA | 0.00000 | 0.00000 | 0.00000 | 0.00000 | 0.00000 | 0.00000 | 0.00000 |
| NEU | 0.00000 | 0.00000 | 0.00000 | 0.00000 | 0.00000 | 0.00000 | 0.00000 |
| OAS | 0.00000 | 0.00000 | 0.00000 | 0.00000 | 0.00000 | 0.00000 | 0.00000 |
| REF | 0.00000 | 0.00000 | 0.00000 | 0.00000 | 0.00000 | 0.00000 | 0.00000 |
| SSA | 0.00000 | 0.00000 | 0.00000 | 0.00000 | 0.00000 | 0.00000 | 0.00000 |
| USA | 0.00000 | 0.00000 | 0.00000 | 0.00000 | 0.00000 | 0.00000 | 0.00000 |

Table 195: MAgPIE m4p\_SSP1 — Demand—Domestic Balanceflow—Livestock products (Mt DM/yr) [PART 2/2]

|     | 1965    | 1970    | 1975    | 1980    | 1985    | 1990    | 1995    | 2000    | 2005    | 2010    |
|-----|---------|---------|---------|---------|---------|---------|---------|---------|---------|---------|
| GLO | -0.0789 | -0.0630 | -0.0504 | -0.0678 | -0.0818 | -0.0753 | -0.0965 | -0.1599 | -0.1763 | -0.2548 |
| CAZ | -0.0588 | -0.0320 | -0.0230 | -0.0183 | -0.0577 | -0.0069 | -0.0077 | -0.0119 | -0.0080 | -0.0061 |
| CHA | 0.0000  | -0.0009 | -0.0011 | -0.0002 | -0.0002 | -0.0096 | -0.0108 | -0.0057 | -0.0038 | -0.0033 |
| EUR | -0.0055 | -0.0133 | -0.0051 | -0.0215 | 0.0023  | -0.0058 | -0.0448 | -0.0696 | -0.1100 | -0.1656 |
| IND | 0.0000  | 0.0000  | 0.0000  | 0.0000  | 0.0000  | 0.0000  | 0.0000  | -0.0005 | -0.0001 | -0.0006 |
| JPN | -0.0010 | -0.0010 | -0.0017 | -0.0009 | 0.0000  | 0.0001  | -0.0002 | -0.0002 | -0.0001 | -0.0001 |
| LAM | -0.0003 | -0.0137 | -0.0008 | -0.0060 | -0.0050 | -0.0023 | -0.0038 | -0.0067 | -0.0163 | -0.0234 |
| MEA | 0.0000  | 0.0000  | 0.0000  | 0.0006  | 0.0004  | -0.0012 | -0.0002 | -0.0005 | -0.0160 | -0.0079 |
| NEU | 0.0065  | 0.0117  | 0.0138  | 0.0086  | 0.0122  | 0.0084  | 0.0055  | -0.0007 | -0.0020 | -0.0002 |
| OAS | -0.0007 | 0.0000  | -0.0013 | -0.0004 | -0.0008 | -0.0008 | -0.0008 | -0.0015 | -0.0151 | -0.0226 |
| REF | -0.0258 | -0.0149 | -0.0290 | -0.0294 | -0.0340 | -0.0356 | -0.0005 | -0.0033 | 0.0021  | 0.0032  |
| SSA | -0.0001 | -0.0001 | -0.0029 | -0.0012 | -0.0020 | -0.0005 | -0.0003 | -0.0016 | -0.0009 | -0.0046 |
| USA | 0.0068  | 0.0011  | 0.0007  | 0.0008  | 0.0030  | -0.0211 | -0.0330 | -0.0575 | -0.0058 | -0.0236 |

Table 196: FAO — Demand—Domestic Balanceflow—Livestock products (Mt DM/yr)

5.3.1 Dairy

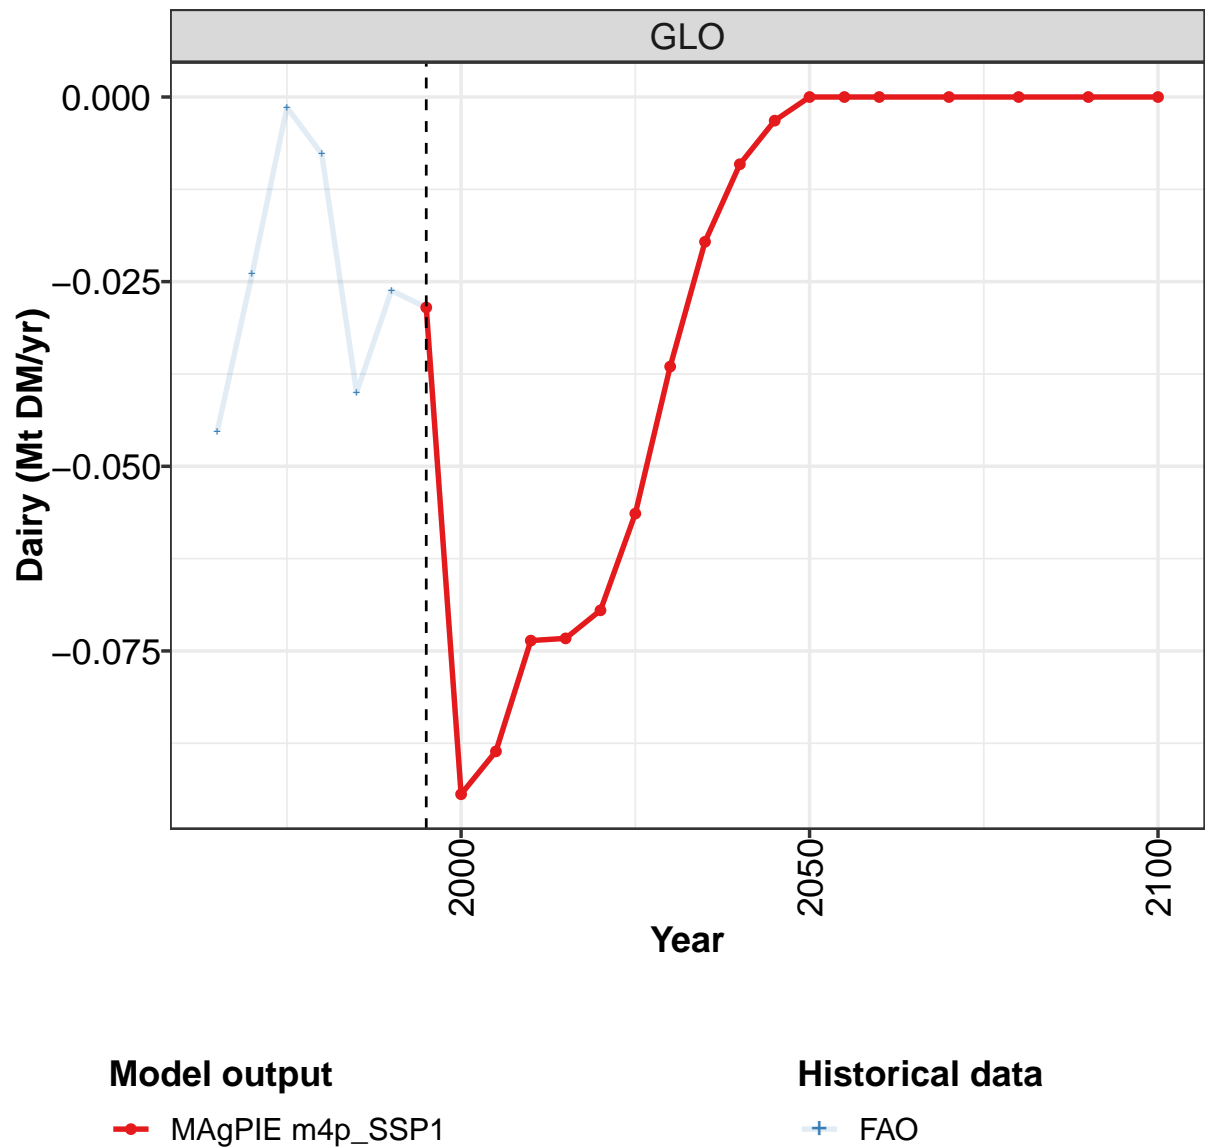



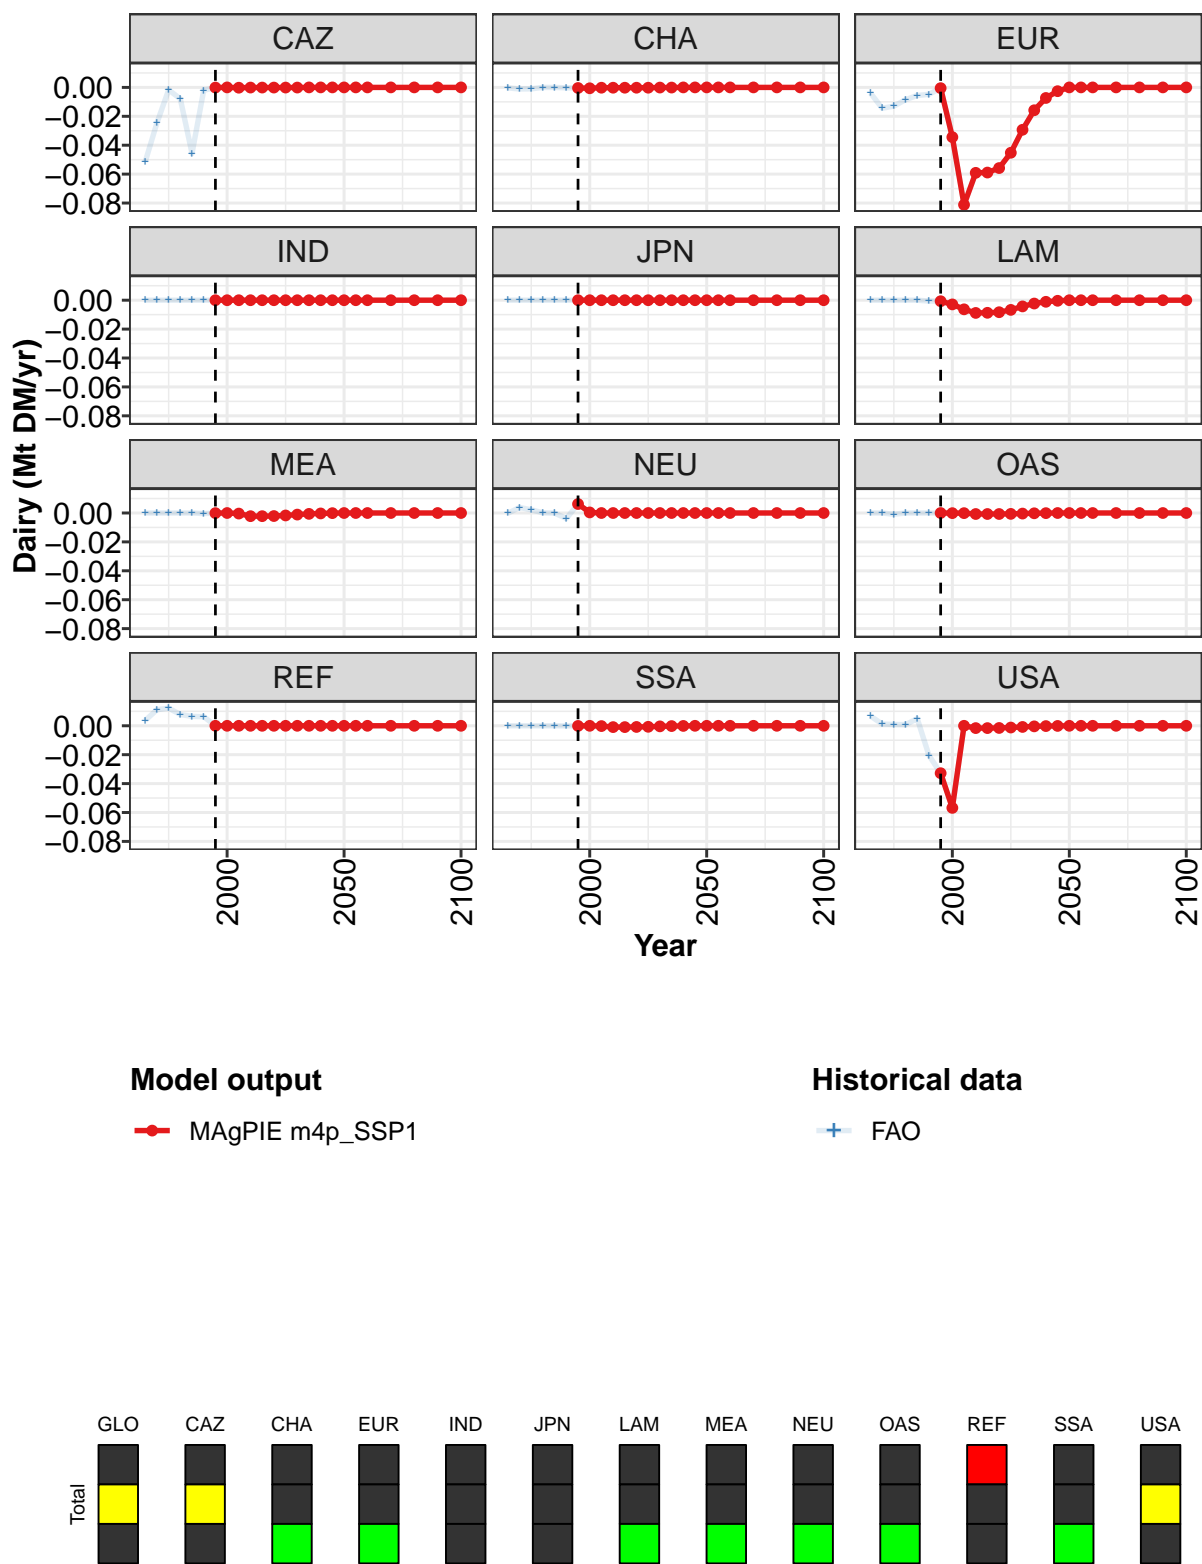

Figure 66: MAgPIE m4p\_SSP1 — Demand—Domestic Balanceflow—Livestock products—Dairy (Mt DM/yr)

|     | 1995     | 2000     | 2005     | 2010     | 2015     | 2020     | 2025     | 2030     | 2035     | 2040     | 2045     |
|-----|----------|----------|----------|----------|----------|----------|----------|----------|----------|----------|----------|
| GLO | -0.02850 | -0.09440 | -0.08860 | -0.07360 | -0.07330 | -0.06950 | -0.05640 | -0.03650 | -0.01960 | -0.00910 | -0.00000 |
| CAZ | -0.00010 | 0.00000  | -0.00020 | -0.00010 | -0.00010 | -0.00010 | -0.00010 | -0.00010 | 0.00000  | 0.00000  | 0.00000  |
| CHA | -0.00040 | -0.00060 | -0.00020 | -0.00020 | -0.00020 | -0.00020 | -0.00020 | -0.00010 | -0.00010 | 0.00000  | 0.00000  |
| EUR | -0.00050 | -0.03440 | -0.08120 | -0.05910 | -0.05890 | -0.05580 | -0.04520 | -0.02930 | -0.01580 | -0.00730 | -0.00000 |
| IND | 0.00000  | 0.00000  | 0.00000  | 0.00000  | 0.00000  | 0.00000  | 0.00000  | 0.00000  | 0.00000  | 0.00000  | 0.00000  |
| JPN | 0.00000  | 0.00000  | 0.00000  | 0.00000  | 0.00000  | 0.00000  | 0.00000  | 0.00000  | 0.00000  | 0.00000  | 0.00000  |
| LAM | -0.00070 | -0.00290 | -0.00630 | -0.00880 | -0.00870 | -0.00830 | -0.00670 | -0.00430 | -0.00230 | -0.00110 | -0.00000 |
| MEA | -0.00010 | 0.00000  | -0.00040 | -0.00220 | -0.00220 | -0.00210 | -0.00170 | -0.00110 | -0.00060 | -0.00030 | -0.00000 |
| NEU | 0.00620  | 0.00040  | 0.00000  | 0.00000  | 0.00000  | 0.00000  | 0.00000  | 0.00000  | 0.00000  | 0.00000  | 0.00000  |
| OAS | 0.00000  | -0.00010 | -0.00010 | -0.00070 | -0.00070 | -0.00070 | -0.00060 | -0.00040 | -0.00020 | -0.00010 | 0.00000  |
| REF | 0.00000  | 0.00000  | 0.00000  | 0.00000  | 0.00000  | 0.00000  | 0.00000  | 0.00000  | 0.00000  | 0.00000  | 0.00000  |
| SSA | -0.00010 | 0.00000  | -0.00020 | -0.00090 | -0.00090 | -0.00080 | -0.00070 | -0.00040 | -0.00020 | -0.00010 | 0.00000  |
| USA | -0.03280 | -0.05680 | 0.00000  | -0.00160 | -0.00160 | -0.00150 | -0.00120 | -0.00080 | -0.00040 | -0.00020 | -0.00000 |

Table 197: MAgPIE m4p\_SSP1 — Demand—Domestic Balanceflow—Livestock products—Dairy (Mt DM/yr)  
[PART 1/2]

|     | 2050    | 2055    | 2060    | 2070    | 2080    | 2090    | 2100    |
|-----|---------|---------|---------|---------|---------|---------|---------|
| GLO | 0.00000 | 0.00000 | 0.00000 | 0.00000 | 0.00000 | 0.00000 | 0.00000 |
| CAZ | 0.00000 | 0.00000 | 0.00000 | 0.00000 | 0.00000 | 0.00000 | 0.00000 |
| CHA | 0.00000 | 0.00000 | 0.00000 | 0.00000 | 0.00000 | 0.00000 | 0.00000 |
| EUR | 0.00000 | 0.00000 | 0.00000 | 0.00000 | 0.00000 | 0.00000 | 0.00000 |
| IND | 0.00000 | 0.00000 | 0.00000 | 0.00000 | 0.00000 | 0.00000 | 0.00000 |
| JPN | 0.00000 | 0.00000 | 0.00000 | 0.00000 | 0.00000 | 0.00000 | 0.00000 |
| LAM | 0.00000 | 0.00000 | 0.00000 | 0.00000 | 0.00000 | 0.00000 | 0.00000 |
| MEA | 0.00000 | 0.00000 | 0.00000 | 0.00000 | 0.00000 | 0.00000 | 0.00000 |
| NEU | 0.00000 | 0.00000 | 0.00000 | 0.00000 | 0.00000 | 0.00000 | 0.00000 |
| OAS | 0.00000 | 0.00000 | 0.00000 | 0.00000 | 0.00000 | 0.00000 | 0.00000 |
| REF | 0.00000 | 0.00000 | 0.00000 | 0.00000 | 0.00000 | 0.00000 | 0.00000 |
| SSA | 0.00000 | 0.00000 | 0.00000 | 0.00000 | 0.00000 | 0.00000 | 0.00000 |
| USA | 0.00000 | 0.00000 | 0.00000 | 0.00000 | 0.00000 | 0.00000 | 0.00000 |

Table 198: MAgPIE m4p\_SSP1 — Demand—Domestic Balanceflow—Livestock products—Dairy (Mt DM/yr)  
[PART 2/2]

|     | 1965    | 1970    | 1975    | 1980    | 1985    | 1990    | 1995    | 2000    | 2005    | 2010    |
|-----|---------|---------|---------|---------|---------|---------|---------|---------|---------|---------|
| GLO | -0.0453 | -0.0240 | -0.0014 | -0.0077 | -0.0400 | -0.0262 | -0.0285 | -0.0944 | -0.0885 | -0.0737 |
| CAZ | -0.0514 | -0.0246 | -0.0017 | -0.0079 | -0.0457 | -0.0020 | -0.0001 | 0.0000  | -0.0002 | -0.0001 |
| CHA | -0.0003 | -0.0011 | -0.0010 | 0.0000  | 0.0000  | -0.0003 | -0.0004 | -0.0006 | -0.0002 | -0.0002 |
| EUR | -0.0039 | -0.0144 | -0.0130 | -0.0085 | -0.0056 | -0.0048 | -0.0005 | -0.0344 | -0.0812 | -0.0591 |
| IND | 0.0000  | 0.0000  | 0.0000  | 0.0000  | 0.0000  | 0.0000  | 0.0000  | 0.0000  | 0.0000  | 0.0000  |
| JPN | 0.0000  | 0.0000  | 0.0000  | 0.0000  | 0.0000  | 0.0000  | 0.0000  | 0.0000  | 0.0000  | 0.0000  |
| LAM | 0.0000  | 0.0000  | 0.0000  | 0.0000  | 0.0000  | -0.0006 | -0.0007 | -0.0029 | -0.0063 | -0.0088 |
| MEA | 0.0000  | 0.0000  | 0.0000  | 0.0000  | 0.0000  | -0.0004 | -0.0001 | 0.0000  | -0.0004 | -0.0022 |
| NEU | -0.0002 | 0.0038  | 0.0022  | 0.0001  | -0.0001 | -0.0038 | 0.0062  | 0.0004  | 0.0000  | 0.0000  |
| OAS | 0.0000  | 0.0000  | -0.0009 | 0.0000  | 0.0000  | 0.0000  | 0.0000  | -0.0001 | -0.0001 | -0.0007 |
| REF | 0.0037  | 0.0111  | 0.0122  | 0.0078  | 0.0065  | 0.0063  | 0.0000  | 0.0000  | 0.0000  | 0.0000  |
| SSA | 0.0000  | 0.0000  | 0.0000  | 0.0000  | 0.0000  | -0.0001 | -0.0001 | 0.0000  | -0.0002 | -0.0009 |
| USA | 0.0068  | 0.0012  | 0.0009  | 0.0008  | 0.0049  | -0.0205 | -0.0328 | -0.0568 | 0.0000  | -0.0016 |

Table 199: FAO — Demand—Domestic Balanceflow—Livestock products—Dairy (Mt DM/yr)

5.3.2 Eggs

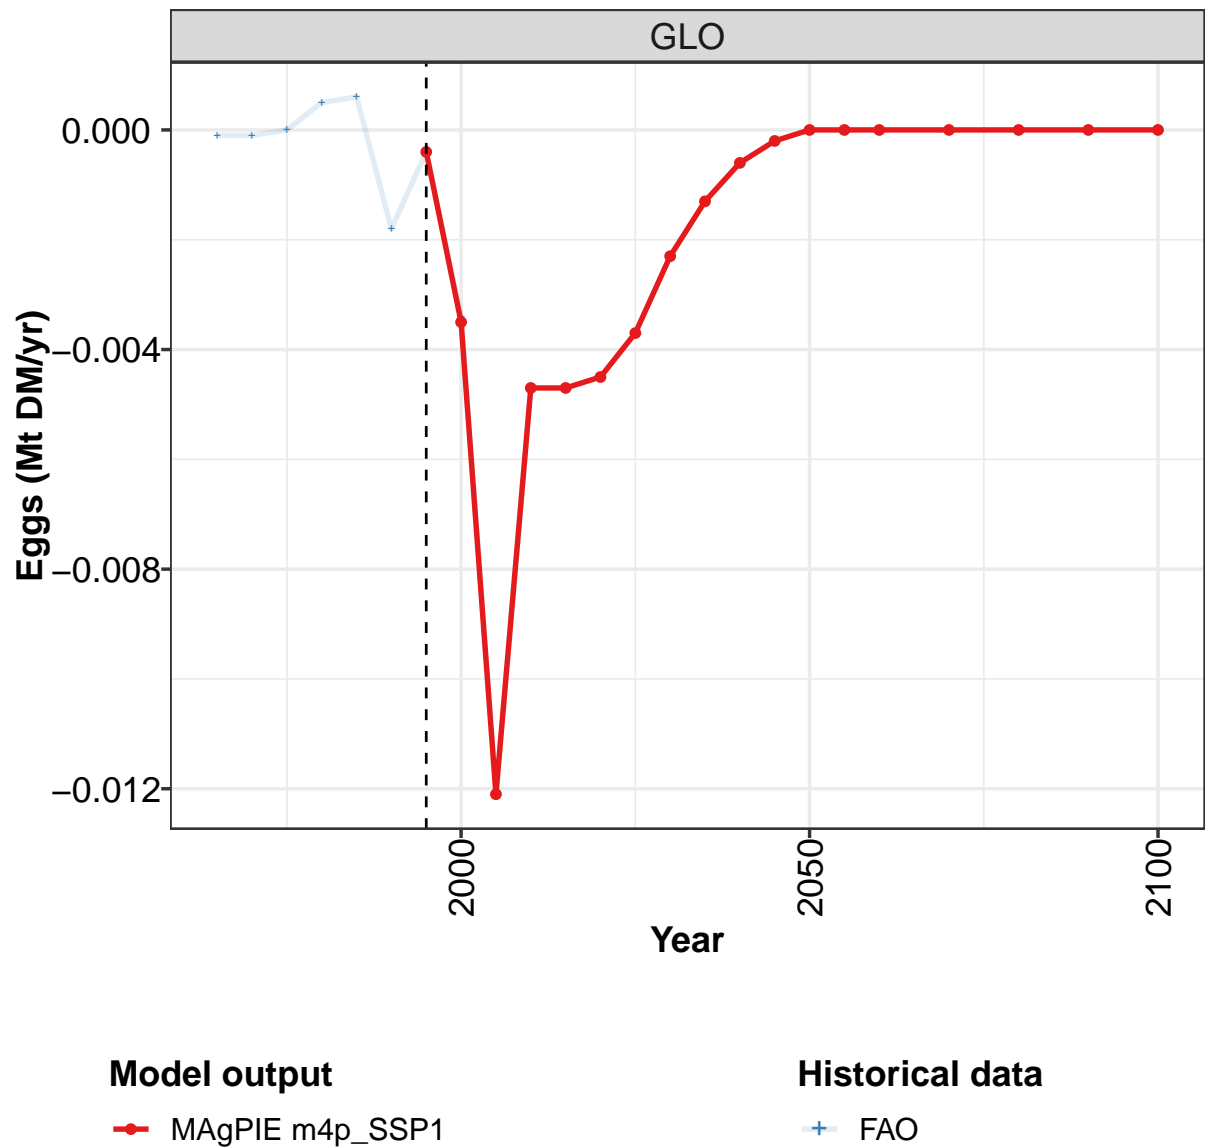

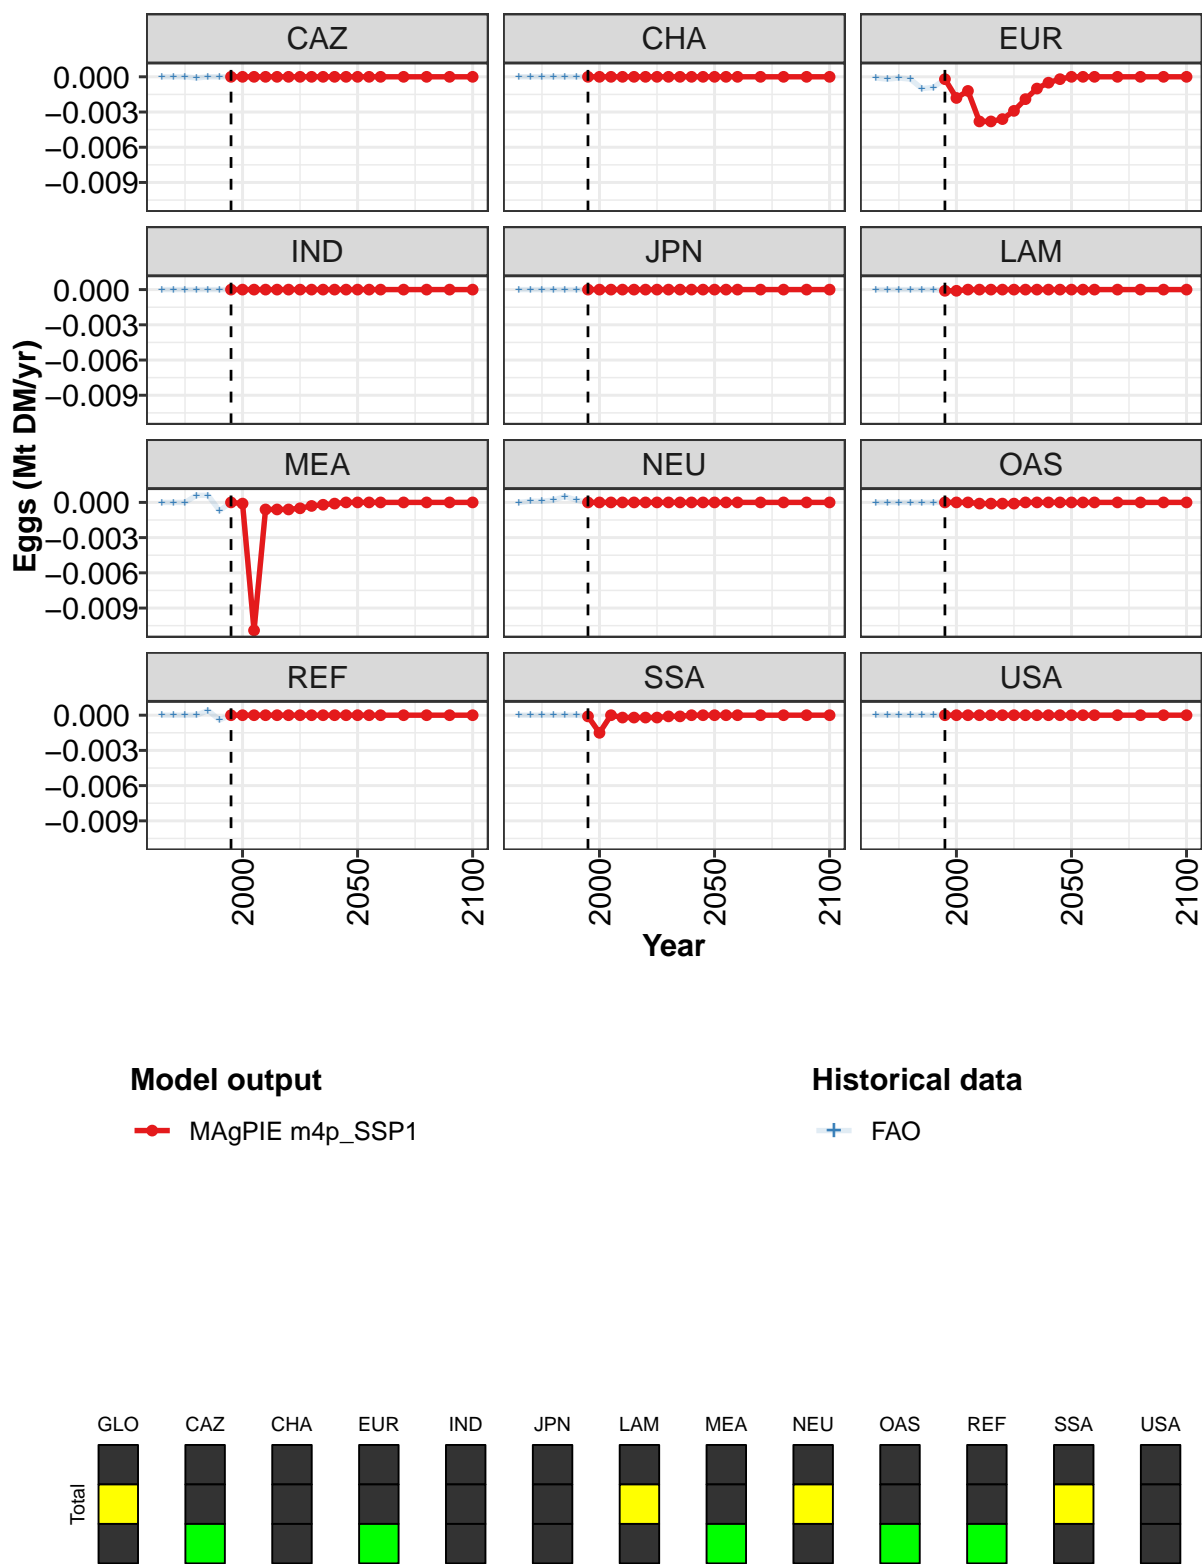

Figure 67: MAgPIE m4p\_SSP1 — Demand—Domestic Balanceflow—Livestock products—Eggs (Mt DM/yr)

|     | 1995 | 2000 | 2005 | 2010 | 2015 | 2020 | 2025 | 2030 | 2035 | 2040 | 2045 |
|-----|------|------|------|------|------|------|------|------|------|------|------|
| GLO | -0   | -0   | -0   | -0   | -0   | -0   | -0   | -0   | -0   | -0   | -0   |
| CAZ | 0    | 0    | 0    | 0    | 0    | 0    | 0    | 0    | 0    | 0    | 0    |
| CHA | 0    | 0    | 0    | 0    | 0    | 0    | 0    | 0    | 0    | 0    | 0    |
| EUR | -0   | -0   | -0   | -0   | -0   | -0   | -0   | -0   | -0   | -0   | -0   |
| IND | 0    | 0    | 0    | 0    | 0    | 0    | 0    | 0    | 0    | 0    | 0    |
| JPN | 0    | 0    | 0    | 0    | 0    | 0    | 0    | 0    | 0    | 0    | 0    |
| LAM | -0   | -0   | 0    | 0    | 0    | 0    | 0    | 0    | 0    | 0    | 0    |
| MEA | 0    | -0   | -0   | -0   | -0   | -0   | -0   | -0   | -0   | -0   | 0    |
| NEU | 0    | 0    | 0    | 0    | 0    | 0    | 0    | 0    | 0    | 0    | 0    |
| OAS | 0    | 0    | 0    | -0   | -0   | -0   | -0   | 0    | 0    | 0    | 0    |
| REF | 0    | 0    | 0    | 0    | 0    | 0    | 0    | 0    | 0    | 0    | 0    |
| SSA | -0   | -0   | 0    | -0   | -0   | -0   | -0   | -0   | -0   | 0    | 0    |
| USA | 0    | 0    | 0    | 0    | 0    | 0    | 0    | 0    | 0    | 0    | 0    |

Table 200: MAgPIE m4p\_SSP1 — Demand—Domestic Balanceflow—Livestock products—Eggs (Mt DM/yr)  
[PART 1/2]

|     | 2050 | 2055 | 2060 | 2070 | 2080 | 2090 | 2100 |
|-----|------|------|------|------|------|------|------|
| GLO | 0    | 0    | 0    | 0    | 0    | 0    | 0    |
| CAZ | 0    | 0    | 0    | 0    | 0    | 0    | 0    |
| CHA | 0    | 0    | 0    | 0    | 0    | 0    | 0    |
| EUR | 0    | 0    | 0    | 0    | 0    | 0    | 0    |
| IND | 0    | 0    | 0    | 0    | 0    | 0    | 0    |
| JPN | 0    | 0    | 0    | 0    | 0    | 0    | 0    |
| LAM | 0    | 0    | 0    | 0    | 0    | 0    | 0    |
| MEA | 0    | 0    | 0    | 0    | 0    | 0    | 0    |
| NEU | 0    | 0    | 0    | 0    | 0    | 0    | 0    |
| OAS | 0    | 0    | 0    | 0    | 0    | 0    | 0    |
| REF | 0    | 0    | 0    | 0    | 0    | 0    | 0    |
| SSA | 0    | 0    | 0    | 0    | 0    | 0    | 0    |
| USA | 0    | 0    | 0    | 0    | 0    | 0    | 0    |

Table 201: MAgPIE m4p\_SSP1 — Demand—Domestic Balanceflow—Livestock products—Eggs (Mt DM/yr)  
[PART 2/2]

|     | 1965      | 1970      | 1975      | 1980      | 1985      | 1990      | 1995      | 2000      | 2005      |       |
|-----|-----------|-----------|-----------|-----------|-----------|-----------|-----------|-----------|-----------|-------|
| GLO | -0.000100 | -0.000100 | 0.000000  | 0.000500  | 0.000600  | -0.001800 | -0.000400 | -0.003400 | -0.012100 | -0.00 |
| CAZ | 0.000000  | 0.000000  | 0.000000  | -0.000100 | 0.000000  | 0.000000  | 0.000000  | 0.000000  | 0.000000  | 0.00  |
| CHA | 0.000000  | 0.000000  | 0.000000  | 0.000000  | 0.000000  | 0.000000  | 0.000000  | 0.000000  | 0.000000  | 0.00  |
| EUR | -0.000100 | -0.000200 | -0.000100 | -0.000200 | -0.001000 | -0.000900 | -0.000200 | -0.001800 | -0.001200 | -0.00 |
| IND | 0.000000  | 0.000000  | 0.000000  | 0.000000  | 0.000000  | 0.000000  | 0.000000  | 0.000000  | 0.000000  | 0.00  |
| JPN | 0.000000  | 0.000000  | 0.000000  | 0.000000  | 0.000000  | 0.000000  | 0.000000  | 0.000000  | 0.000000  | 0.00  |
| LAM | 0.000000  | 0.000000  | 0.000000  | 0.000000  | 0.000000  | 0.000000  | -0.000100 | -0.000100 | 0.000000  | 0.00  |
| MEA | 0.000000  | 0.000000  | 0.000000  | 0.000600  | 0.000600  | -0.000700 | 0.000000  | -0.000100 | -0.010900 | -0.00 |
| NEU | 0.000000  | 0.000100  | 0.000100  | 0.000200  | 0.000500  | 0.000200  | 0.000000  | 0.000000  | 0.000000  | 0.00  |
| OAS | 0.000000  | 0.000000  | 0.000000  | 0.000000  | 0.000000  | 0.000000  | 0.000000  | 0.000000  | 0.000000  | -0.00 |
| REF | 0.000000  | 0.000000  | 0.000000  | 0.000000  | 0.000400  | -0.000400 | 0.000000  | 0.000000  | 0.000000  | 0.00  |
| SSA | 0.000000  | 0.000000  | 0.000000  | 0.000000  | 0.000000  | 0.000000  | -0.000100 | -0.001500 | 0.000000  | -0.00 |
| USA | 0.000000  | 0.000000  | 0.000000  | 0.000000  | 0.000000  | 0.000000  | 0.000000  | 0.000000  | 0.000000  | 0.00  |

Table 202: FAO — Demand—Domestic Balanceflow—Livestock products—Eggs (Mt DM/yr)

5.3.3 Monogastric meat

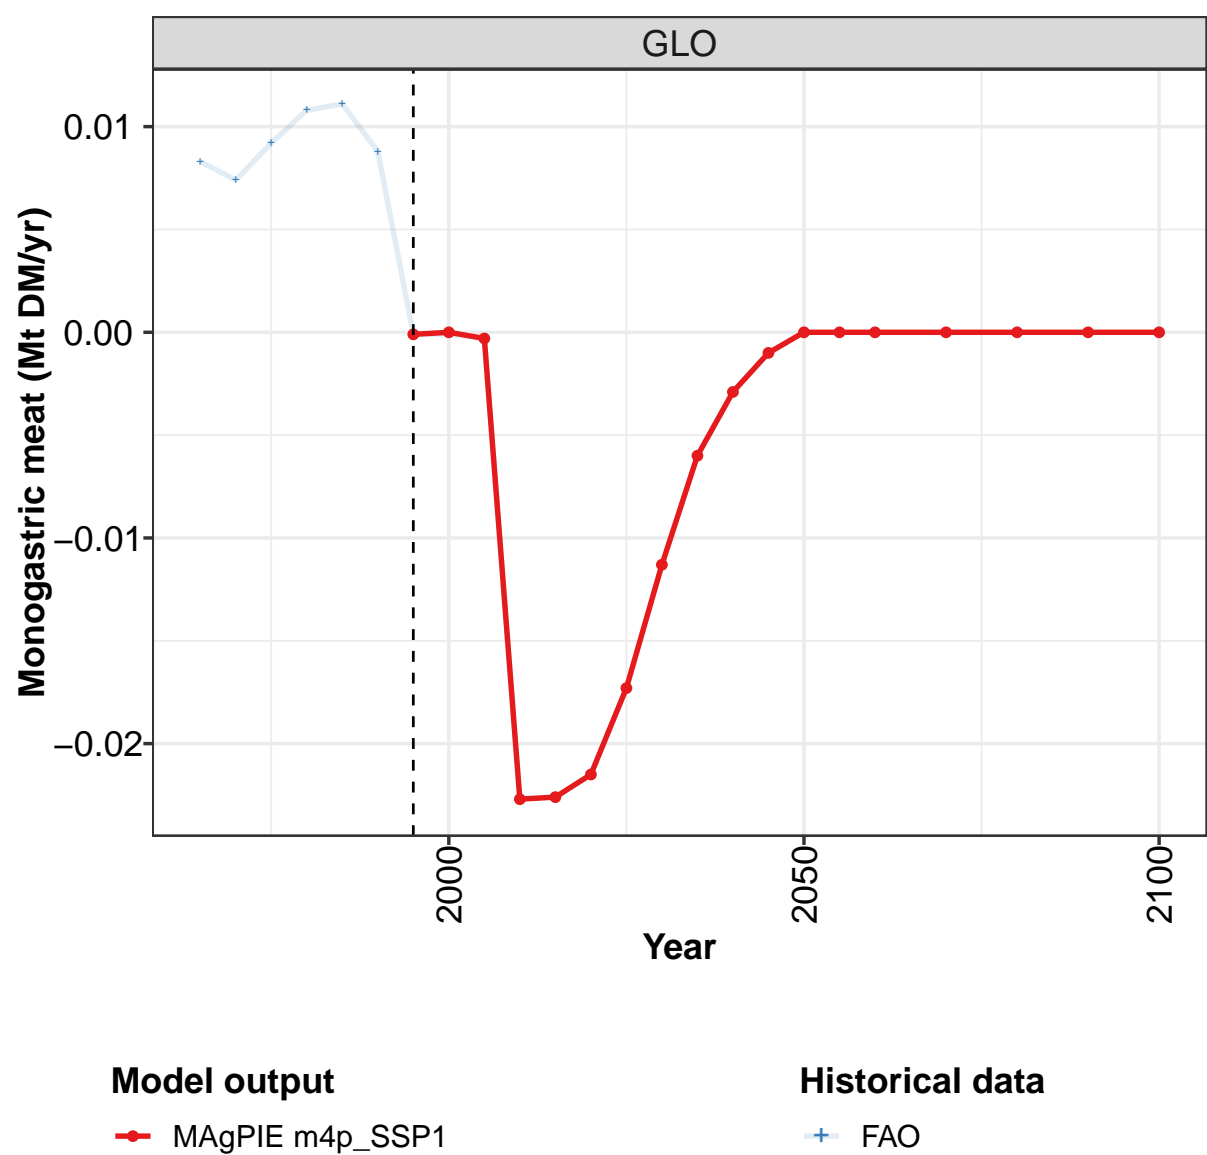

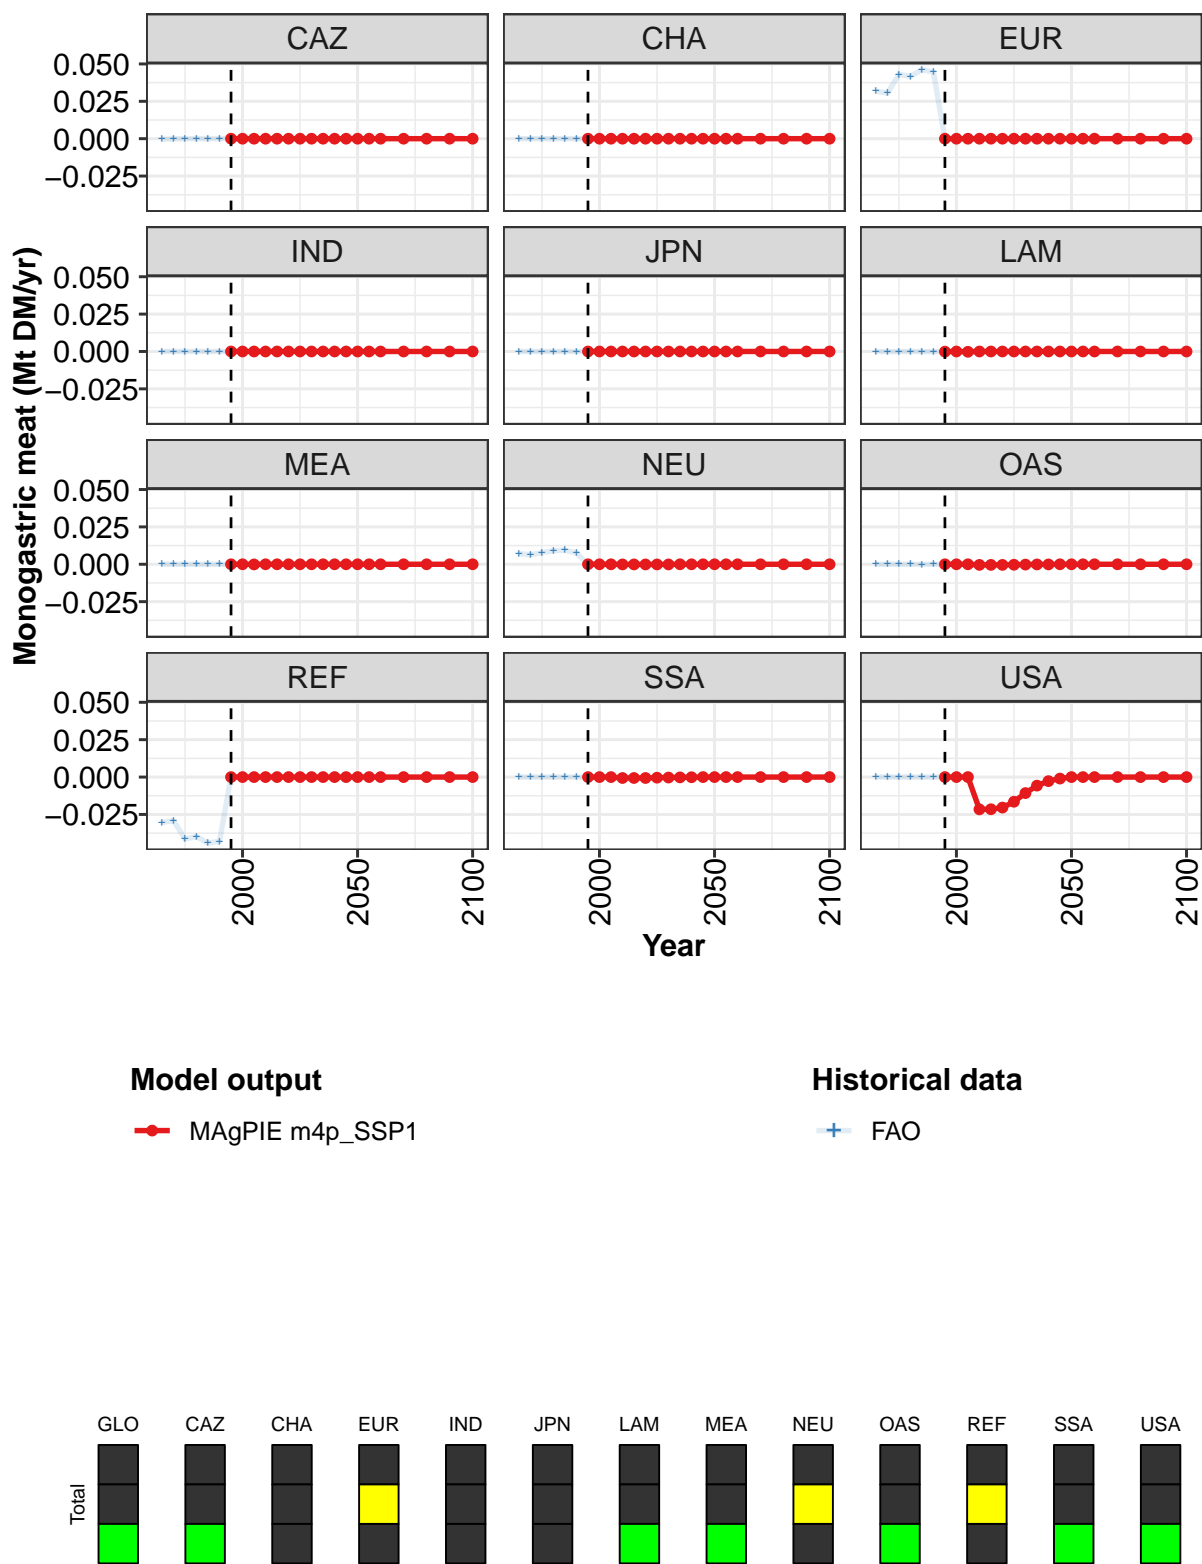

Figure 68: MAgPIE m4p\_SSP1 — Demand—Domestic Balanceflow—Livestock products—Monogastric meat (Mt DM/yr)

|     | 1995 | 2000 | 2005 | 2010 | 2015 | 2020 | 2025 | 2030 | 2035 | 2040 | 2045 |
|-----|------|------|------|------|------|------|------|------|------|------|------|
| GLO | -0   | 0    | -0   | -0   | -0   | -0   | -0   | -0   | -0   | -0   | -0   |
| CAZ | 0    | 0    | 0    | 0    | 0    | 0    | 0    | 0    | 0    | 0    | 0    |
| CHA | 0    | 0    | 0    | 0    | 0    | 0    | 0    | 0    | 0    | 0    | 0    |
| EUR | 0    | 0    | 0    | 0    | 0    | 0    | 0    | 0    | 0    | 0    | 0    |
| IND | 0    | 0    | 0    | 0    | 0    | 0    | 0    | 0    | 0    | 0    | 0    |
| JPN | 0    | 0    | 0    | 0    | 0    | 0    | 0    | 0    | 0    | 0    | 0    |
| LAM | -0   | 0    | -0   | 0    | 0    | 0    | 0    | 0    | 0    | 0    | 0    |
| MEA | 0    | 0    | -0   | 0    | 0    | 0    | 0    | 0    | 0    | 0    | 0    |
| NEU | 0    | 0    | 0    | -0   | -0   | -0   | -0   | -0   | 0    | 0    | 0    |
| OAS | 0    | 0    | 0    | -0   | -0   | -0   | -0   | -0   | -0   | -0   | 0    |
| REF | 0    | 0    | 0    | 0    | 0    | 0    | 0    | 0    | 0    | 0    | 0    |
| SSA | 0    | 0    | 0    | -0   | -0   | -0   | -0   | -0   | -0   | -0   | 0    |
| USA | 0    | 0    | 0    | -0   | -0   | -0   | -0   | -0   | -0   | -0   | -0   |

Table 203: MAgPIE m4p\_SSP1 — Demand—Domestic Balanceflow—Livestock products—Monogastric meat (Mt DM/yr) [PART 1/2]

|     | 2050 | 2055 | 2060 | 2070 | 2080 | 2090 | 2100 |
|-----|------|------|------|------|------|------|------|
| GLO | 0    | 0    | 0    | 0    | 0    | 0    | 0    |
| CAZ | 0    | 0    | 0    | 0    | 0    | 0    | 0    |
| CHA | 0    | 0    | 0    | 0    | 0    | 0    | 0    |
| EUR | 0    | 0    | 0    | 0    | 0    | 0    | 0    |
| IND | 0    | 0    | 0    | 0    | 0    | 0    | 0    |
| JPN | 0    | 0    | 0    | 0    | 0    | 0    | 0    |
| LAM | 0    | 0    | 0    | 0    | 0    | 0    | 0    |
| MEA | 0    | 0    | 0    | 0    | 0    | 0    | 0    |
| NEU | 0    | 0    | 0    | 0    | 0    | 0    | 0    |
| OAS | 0    | 0    | 0    | 0    | 0    | 0    | 0    |
| REF | 0    | 0    | 0    | 0    | 0    | 0    | 0    |
| SSA | 0    | 0    | 0    | 0    | 0    | 0    | 0    |
| USA | 0    | 0    | 0    | 0    | 0    | 0    | 0    |

Table 204: MAgPIE m4p\_SSP1 — Demand—Domestic Balanceflow—Livestock products—Monogastric meat (Mt DM/yr) [PART 2/2]

|     | 1965    | 1970    | 1975    | 1980    | 1985    | 1990    | 1995    | 2000    | 2005    | 2010    |
|-----|---------|---------|---------|---------|---------|---------|---------|---------|---------|---------|
| GLO | 0.0083  | 0.0074  | 0.0092  | 0.0108  | 0.0111  | 0.0088  | -0.0001 | -0.0001 | -0.0003 | -0.0228 |
| CAZ | -0.0003 | -0.0001 | 0.0000  | 0.0000  | 0.0000  | 0.0000  | 0.0000  | 0.0000  | 0.0000  | 0.0000  |
| CHA | 0.0000  | 0.0000  | 0.0000  | 0.0000  | 0.0000  | 0.0000  | 0.0000  | 0.0000  | 0.0000  | 0.0000  |
| EUR | 0.0318  | 0.0305  | 0.0430  | 0.0417  | 0.0461  | 0.0446  | 0.0000  | 0.0000  | 0.0000  | 0.0000  |
| IND | 0.0000  | 0.0000  | 0.0000  | 0.0000  | 0.0000  | 0.0000  | 0.0000  | 0.0000  | 0.0000  | 0.0000  |
| JPN | 0.0000  | 0.0000  | 0.0000  | 0.0000  | 0.0000  | 0.0000  | 0.0000  | 0.0000  | 0.0000  | 0.0000  |
| LAM | 0.0000  | -0.0001 | -0.0001 | 0.0000  | -0.0001 | -0.0002 | -0.0001 | 0.0000  | -0.0002 | 0.0000  |
| MEA | 0.0000  | 0.0000  | 0.0000  | 0.0000  | 0.0000  | 0.0000  | 0.0000  | 0.0000  | -0.0001 | 0.0000  |
| NEU | 0.0071  | 0.0063  | 0.0078  | 0.0090  | 0.0094  | 0.0075  | 0.0000  | 0.0000  | 0.0000  | -0.0001 |
| OAS | 0.0000  | 0.0000  | 0.0000  | 0.0000  | -0.0001 | 0.0000  | 0.0000  | 0.0000  | 0.0000  | -0.0004 |
| REF | -0.0303 | -0.0292 | -0.0414 | -0.0398 | -0.0442 | -0.0430 | 0.0000  | 0.0000  | 0.0000  | 0.0000  |
| SSA | 0.0000  | 0.0000  | 0.0000  | 0.0000  | 0.0000  | 0.0000  | 0.0000  | 0.0000  | 0.0000  | -0.0006 |
| USA | 0.0000  | 0.0000  | 0.0000  | 0.0000  | 0.0000  | 0.0000  | 0.0000  | 0.0000  | 0.0000  | -0.0216 |

Table 205: FAO — Demand—Domestic Balanceflow—Livestock products—Monogastric meat (Mt DM/yr)



5.3.4 Poultry meat

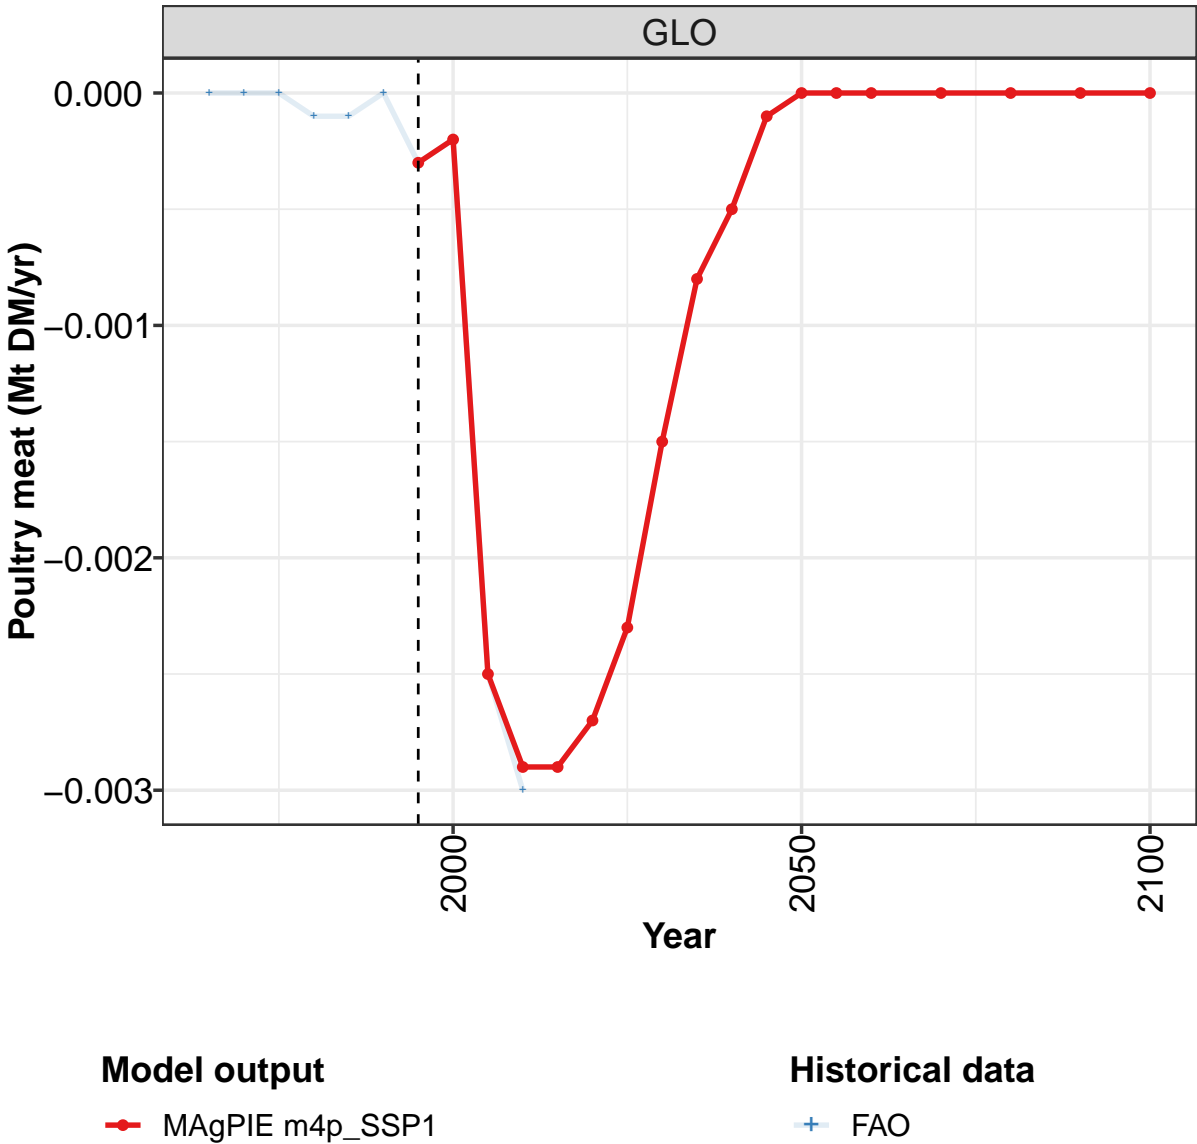

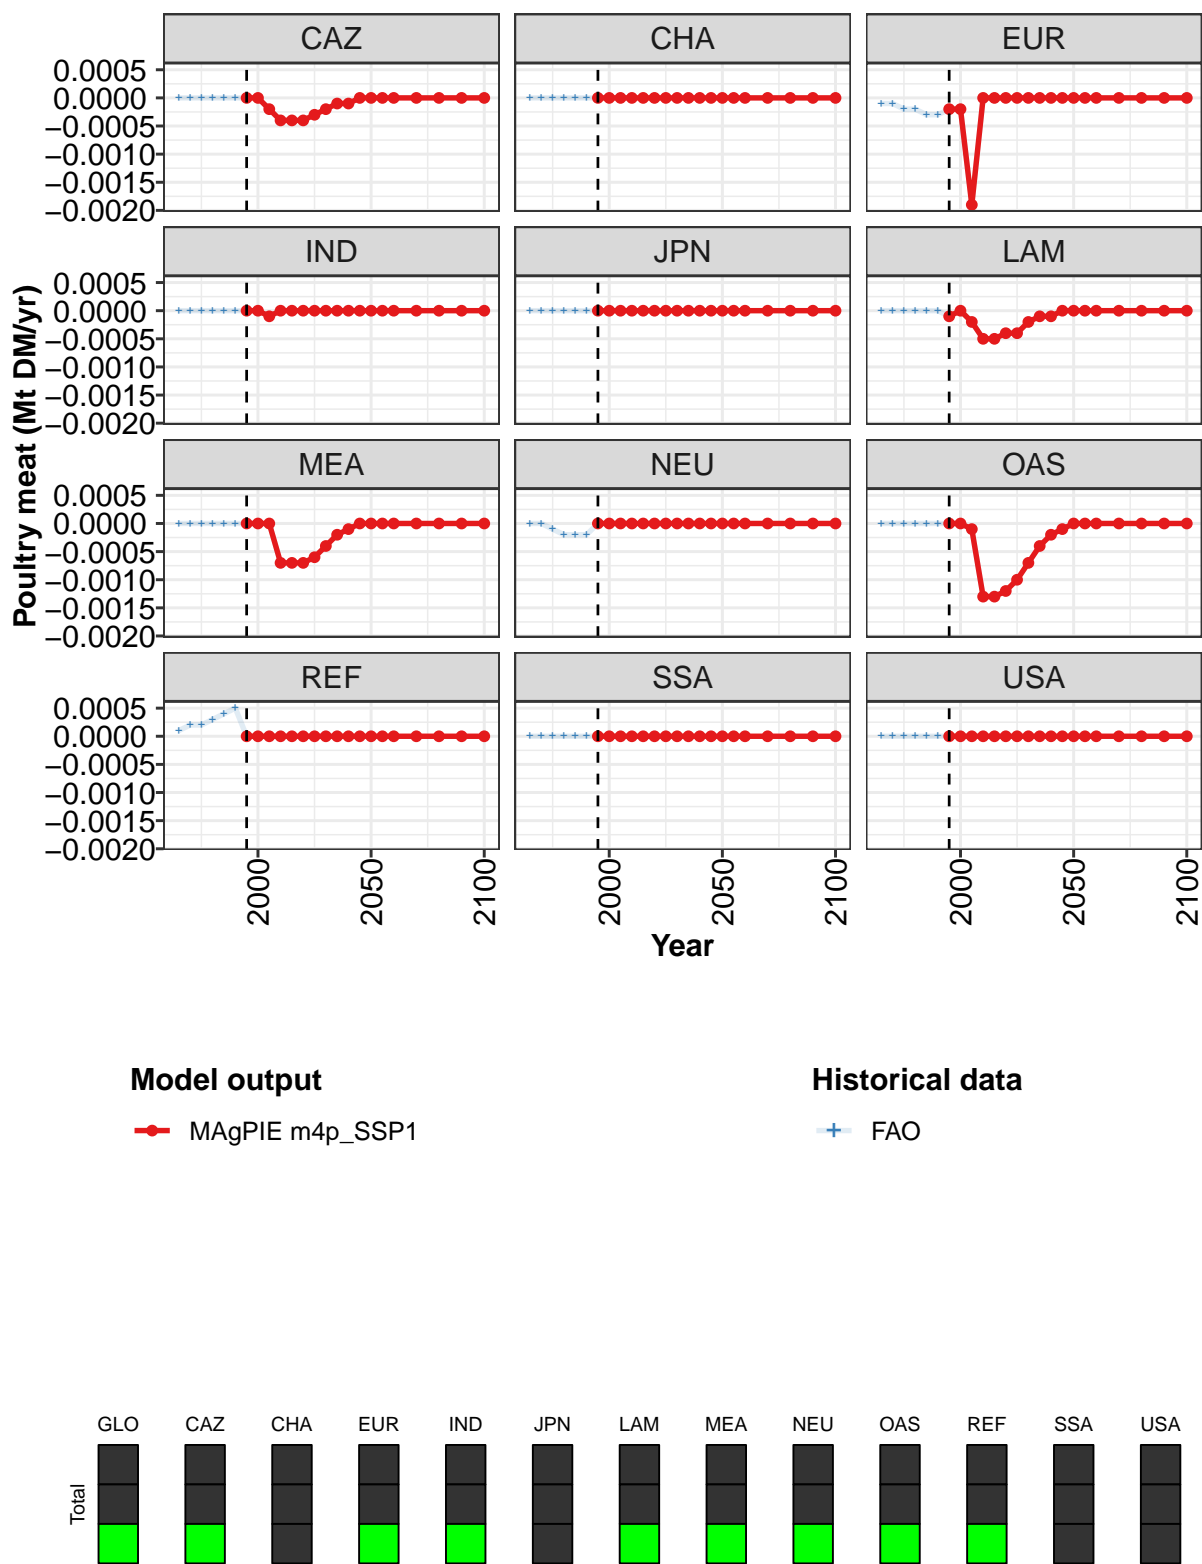

Figure 69: MAgPIE m4p\_SSP1 — Demand—Domestic Balanceflow—Livestock products—Poultry meat (Mt DM/yr)

|     | 1995 | 2000 | 2005 | 2010 | 2015 | 2020 | 2025 | 2030 | 2035 | 2040 | 2045 |
|-----|------|------|------|------|------|------|------|------|------|------|------|
| GLO | -0   | -0   | -0   | -0   | -0   | -0   | -0   | -0   | -0   | -0   | -0   |
| CAZ | 0    | 0    | -0   | -0   | -0   | -0   | -0   | -0   | -0   | -0   | 0    |
| CHA | 0    | 0    | 0    | 0    | 0    | 0    | 0    | 0    | 0    | 0    | 0    |
| EUR | -0   | -0   | -0   | 0    | 0    | 0    | 0    | 0    | 0    | 0    | 0    |
| IND | 0    | 0    | -0   | 0    | 0    | 0    | 0    | 0    | 0    | 0    | 0    |
| JPN | 0    | 0    | 0    | 0    | 0    | 0    | 0    | 0    | 0    | 0    | 0    |
| LAM | -0   | 0    | -0   | -0   | -0   | -0   | -0   | -0   | -0   | -0   | 0    |
| MEA | 0    | 0    | 0    | -0   | -0   | -0   | -0   | -0   | -0   | -0   | 0    |
| NEU | 0    | 0    | 0    | 0    | 0    | 0    | 0    | 0    | 0    | 0    | 0    |
| OAS | 0    | 0    | -0   | -0   | -0   | -0   | -0   | -0   | -0   | -0   | -0   |
| REF | 0    | 0    | 0    | 0    | 0    | 0    | 0    | 0    | 0    | 0    | 0    |
| SSA | 0    | 0    | 0    | 0    | 0    | 0    | 0    | 0    | 0    | 0    | 0    |
| USA | 0    | 0    | 0    | 0    | 0    | 0    | 0    | 0    | 0    | 0    | 0    |

Table 206: MAgPIE m4p\_SSP1 — Demand—Domestic Balanceflow—Livestock products—Poultry meat (Mt DM/yr) [PART 1/2]

|     | 2050 | 2055 | 2060 | 2070 | 2080 | 2090 | 2100 |
|-----|------|------|------|------|------|------|------|
| GLO | 0    | 0    | 0    | 0    | 0    | 0    | 0    |
| CAZ | 0    | 0    | 0    | 0    | 0    | 0    | 0    |
| CHA | 0    | 0    | 0    | 0    | 0    | 0    | 0    |
| EUR | 0    | 0    | 0    | 0    | 0    | 0    | 0    |
| IND | 0    | 0    | 0    | 0    | 0    | 0    | 0    |
| JPN | 0    | 0    | 0    | 0    | 0    | 0    | 0    |
| LAM | 0    | 0    | 0    | 0    | 0    | 0    | 0    |
| MEA | 0    | 0    | 0    | 0    | 0    | 0    | 0    |
| NEU | 0    | 0    | 0    | 0    | 0    | 0    | 0    |
| OAS | 0    | 0    | 0    | 0    | 0    | 0    | 0    |
| REF | 0    | 0    | 0    | 0    | 0    | 0    | 0    |
| SSA | 0    | 0    | 0    | 0    | 0    | 0    | 0    |
| USA | 0    | 0    | 0    | 0    | 0    | 0    | 0    |

Table 207: MAgPIE m4p\_SSP1 — Demand—Domestic Balanceflow—Livestock products—Poultry meat (Mt DM/yr) [PART 2/2]

|     | 1965      | 1970      | 1975      | 1980      | 1985      | 1990      | 1995      | 2000      | 2005      |       |
|-----|-----------|-----------|-----------|-----------|-----------|-----------|-----------|-----------|-----------|-------|
| GLO | 0.000000  | 0.000000  | 0.000000  | -0.000100 | -0.000100 | 0.000000  | -0.000300 | -0.000200 | -0.002500 | -0.00 |
| CAZ | 0.000000  | 0.000000  | 0.000000  | 0.000000  | 0.000000  | 0.000000  | 0.000000  | 0.000000  | -0.000200 | -0.00 |
| CHA | 0.000000  | 0.000000  | 0.000000  | 0.000000  | 0.000000  | 0.000000  | 0.000000  | 0.000000  | 0.000000  | 0.00  |
| EUR | -0.000100 | -0.000100 | -0.000200 | -0.000200 | -0.000300 | -0.000300 | -0.000200 | -0.000200 | -0.001900 | 0.00  |
| IND | 0.000000  | 0.000000  | 0.000000  | 0.000000  | 0.000000  | 0.000000  | 0.000000  | 0.000000  | -0.000100 | 0.00  |
| JPN | 0.000000  | 0.000000  | 0.000000  | 0.000000  | 0.000000  | 0.000000  | 0.000000  | 0.000000  | 0.000000  | 0.00  |
| LAM | 0.000000  | 0.000000  | 0.000000  | 0.000000  | 0.000000  | 0.000000  | -0.000100 | 0.000000  | -0.000200 | -0.00 |
| MEA | 0.000000  | 0.000000  | 0.000000  | 0.000000  | 0.000000  | 0.000000  | 0.000000  | 0.000000  | 0.000000  | -0.00 |
| NEU | 0.000000  | 0.000000  | -0.000100 | -0.000200 | -0.000200 | -0.000200 | 0.000000  | 0.000000  | 0.000000  | 0.00  |
| OAS | 0.000000  | 0.000000  | 0.000000  | 0.000000  | 0.000000  | 0.000000  | 0.000000  | 0.000000  | -0.000100 | -0.00 |
| REF | 0.000100  | 0.000200  | 0.000200  | 0.000300  | 0.000400  | 0.000500  | 0.000000  | 0.000000  | 0.000000  | 0.00  |
| SSA | 0.000000  | 0.000000  | 0.000000  | 0.000000  | 0.000000  | 0.000000  | 0.000000  | 0.000000  | 0.000000  | 0.00  |
| USA | 0.000000  | 0.000000  | 0.000000  | 0.000000  | 0.000000  | 0.000000  | 0.000000  | 0.000000  | 0.000000  | 0.00  |

Table 208: FAO — Demand—Domestic Balanceflow—Livestock products—Poultry meat (Mt DM/yr)

5.3.5 Ruminant meat

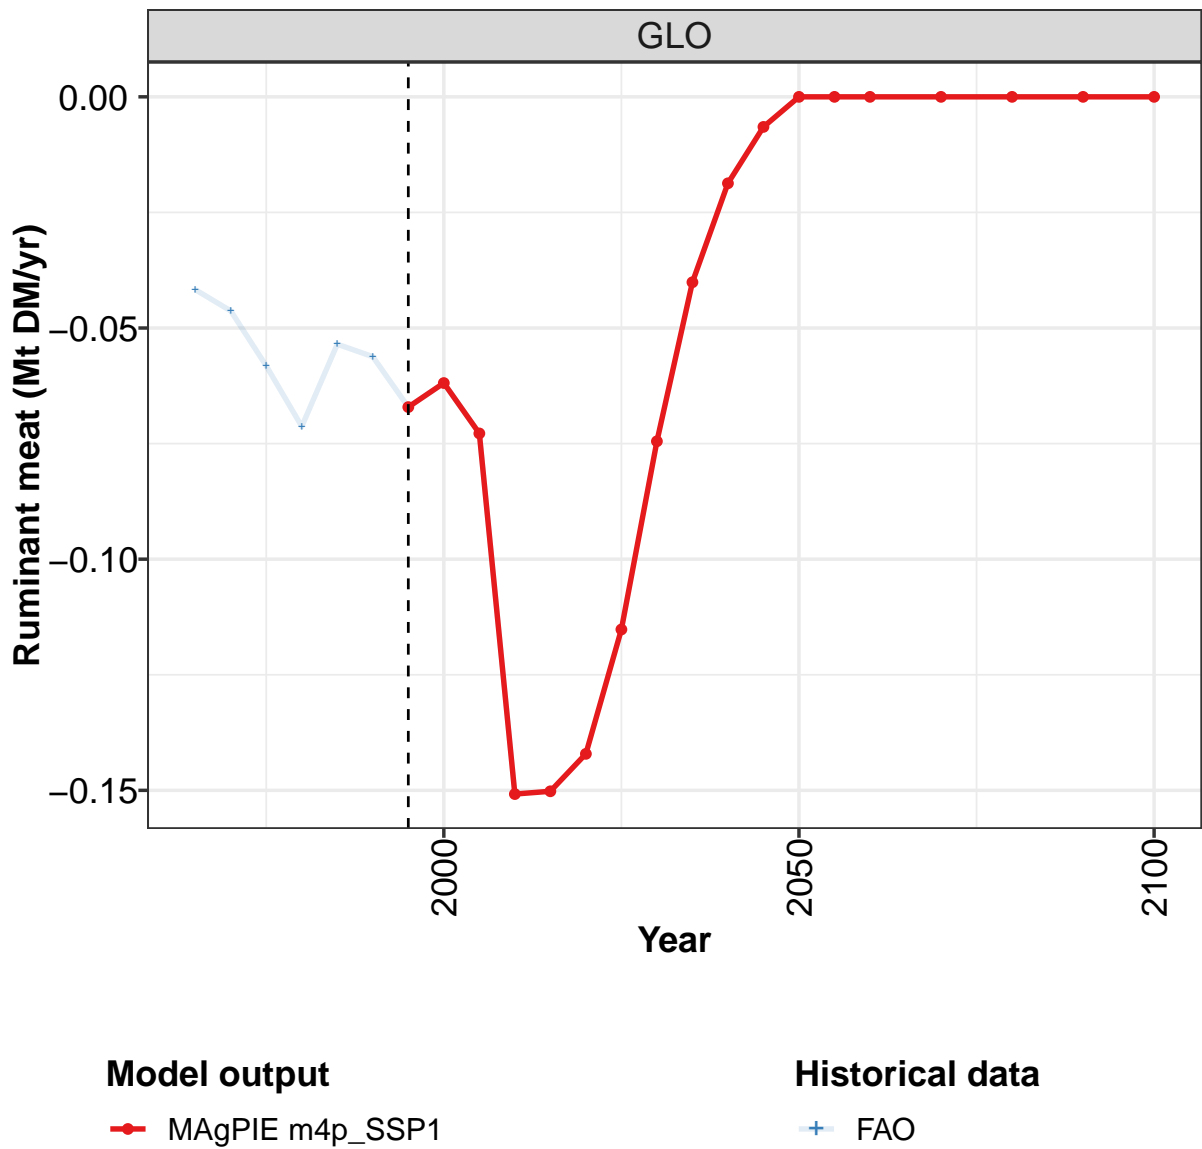

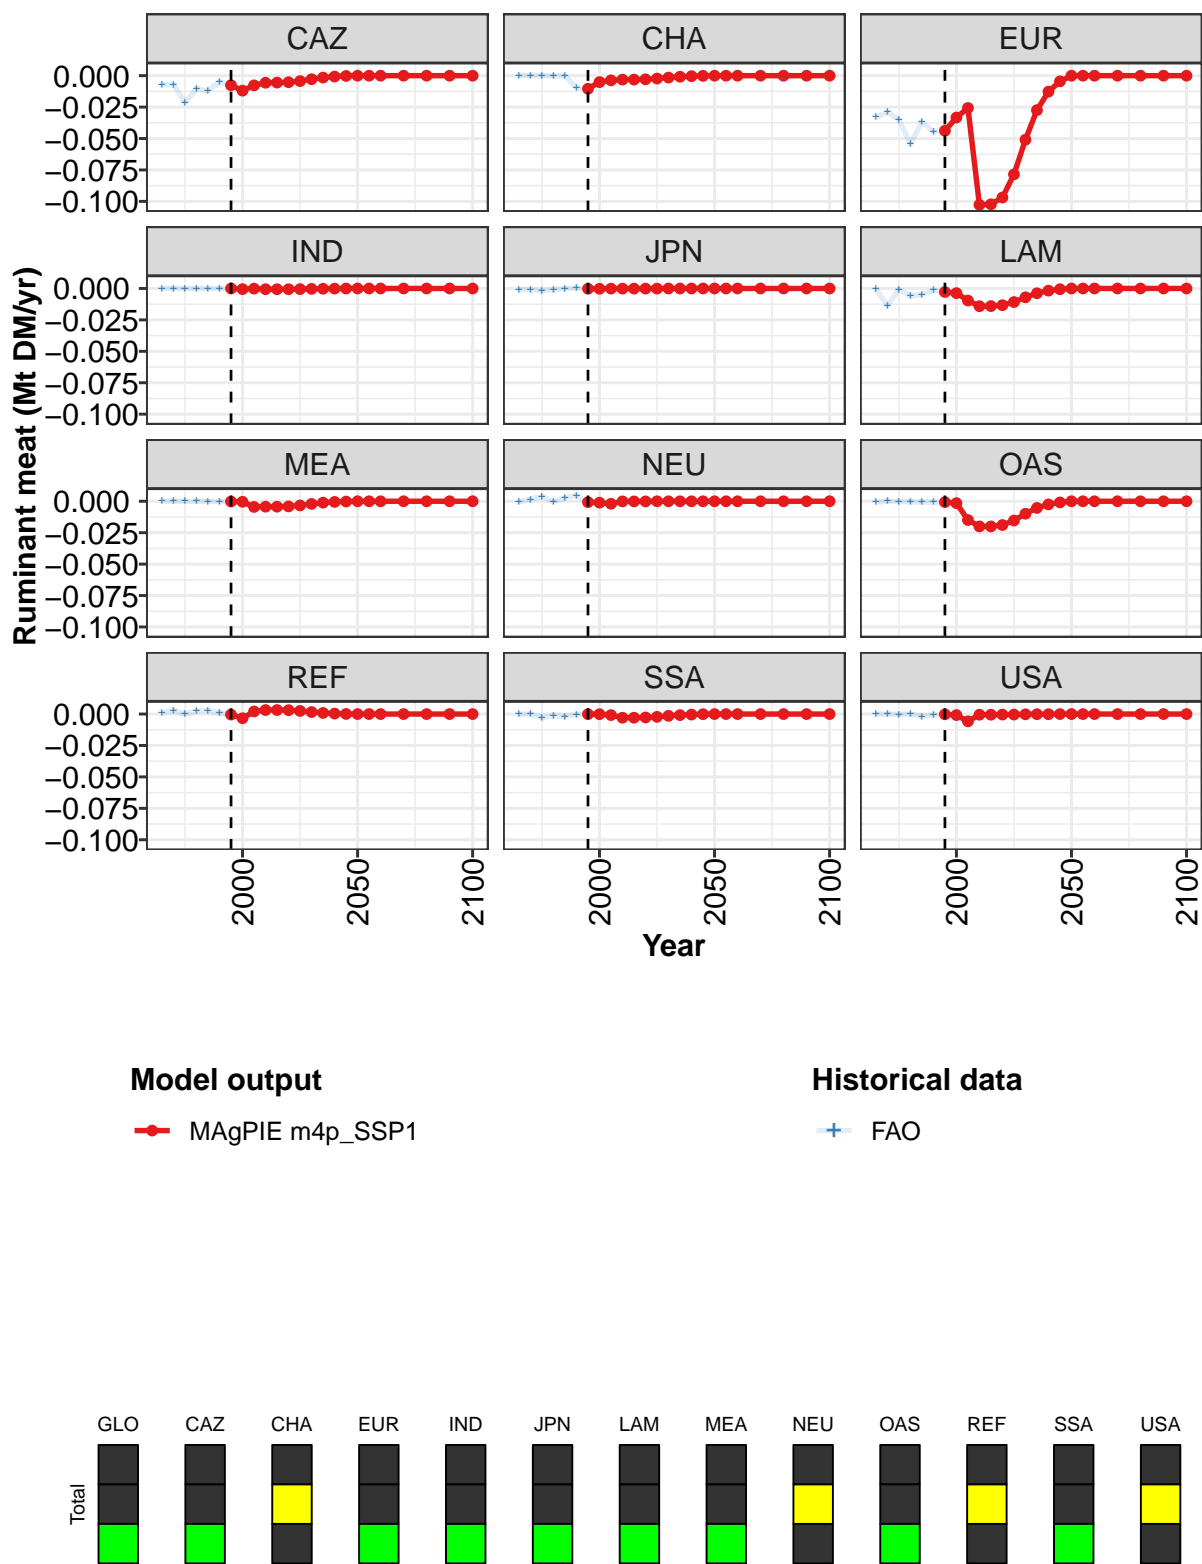

Figure 70: MAgPIE m4p\_SSP1 — Demand—Domestic Balanceflow—Livestock products—Ruminant meat (Mt DM/yr)

|     | 1995     | 2000     | 2005     | 2010     | 2015     | 2020     | 2025     | 2030     | 2035     | 2040     | 2045     |
|-----|----------|----------|----------|----------|----------|----------|----------|----------|----------|----------|----------|
| GLO | -0.06710 | -0.06190 | -0.07280 | -0.15080 | -0.15020 | -0.14210 | -0.11520 | -0.07450 | -0.04010 | -0.01870 | -0.00000 |
| CAZ | -0.00760 | -0.01190 | -0.00770 | -0.00560 | -0.00550 | -0.00520 | -0.00430 | -0.00280 | -0.00150 | -0.00070 | -0.00000 |
| CHA | -0.01040 | -0.00510 | -0.00370 | -0.00310 | -0.00310 | -0.00290 | -0.00230 | -0.00150 | -0.00080 | -0.00040 | -0.00000 |
| EUR | -0.04380 | -0.03330 | -0.02570 | -0.10270 | -0.10230 | -0.09690 | -0.07850 | -0.05090 | -0.02740 | -0.01270 | -0.00000 |
| IND | 0.00000  | -0.00050 | -0.00010 | -0.00060 | -0.00060 | -0.00060 | -0.00050 | -0.00030 | -0.00020 | -0.00010 | 0.00000  |
| JPN | -0.00020 | -0.00020 | -0.00010 | -0.00010 | -0.00010 | -0.00010 | -0.00010 | 0.00000  | 0.00000  | 0.00000  | 0.00000  |
| LAM | -0.00280 | -0.00370 | -0.00960 | -0.01410 | -0.01400 | -0.01330 | -0.01080 | -0.00700 | -0.00380 | -0.00170 | -0.00000 |
| MEA | -0.00020 | -0.00040 | -0.00450 | -0.00430 | -0.00430 | -0.00410 | -0.00330 | -0.00210 | -0.00110 | -0.00050 | -0.00000 |
| NEU | -0.00070 | -0.00110 | -0.00200 | -0.00010 | -0.00010 | -0.00010 | 0.00000  | 0.00000  | 0.00000  | 0.00000  | 0.00000  |
| OAS | -0.00070 | -0.00150 | -0.01490 | -0.02000 | -0.02000 | -0.01890 | -0.01530 | -0.00990 | -0.00530 | -0.00250 | -0.00000 |
| REF | -0.00040 | -0.00330 | 0.00210  | 0.00320  | 0.00320  | 0.00310  | 0.00250  | 0.00160  | 0.00090  | 0.00040  | 0.00000  |
| SSA | -0.00010 | -0.00010 | -0.00080 | -0.00290 | -0.00290 | -0.00270 | -0.00220 | -0.00140 | -0.00080 | -0.00040 | -0.00000 |
| USA | -0.00020 | -0.00080 | -0.00580 | -0.00050 | -0.00050 | -0.00040 | -0.00040 | -0.00020 | -0.00010 | -0.00010 | 0.00000  |

Table 209: MAgPIE m4p\_SSP1 — Demand—Domestic Balanceflow—Livestock products—Ruminant meat (Mt DM/yr) [PART 1/2]

|     | 2050    | 2055    | 2060    | 2070    | 2080    | 2090    | 2100    |
|-----|---------|---------|---------|---------|---------|---------|---------|
| GLO | 0.00000 | 0.00000 | 0.00000 | 0.00000 | 0.00000 | 0.00000 | 0.00000 |
| CAZ | 0.00000 | 0.00000 | 0.00000 | 0.00000 | 0.00000 | 0.00000 | 0.00000 |
| CHA | 0.00000 | 0.00000 | 0.00000 | 0.00000 | 0.00000 | 0.00000 | 0.00000 |
| EUR | 0.00000 | 0.00000 | 0.00000 | 0.00000 | 0.00000 | 0.00000 | 0.00000 |
| IND | 0.00000 | 0.00000 | 0.00000 | 0.00000 | 0.00000 | 0.00000 | 0.00000 |
| JPN | 0.00000 | 0.00000 | 0.00000 | 0.00000 | 0.00000 | 0.00000 | 0.00000 |
| LAM | 0.00000 | 0.00000 | 0.00000 | 0.00000 | 0.00000 | 0.00000 | 0.00000 |
| MEA | 0.00000 | 0.00000 | 0.00000 | 0.00000 | 0.00000 | 0.00000 | 0.00000 |
| NEU | 0.00000 | 0.00000 | 0.00000 | 0.00000 | 0.00000 | 0.00000 | 0.00000 |
| OAS | 0.00000 | 0.00000 | 0.00000 | 0.00000 | 0.00000 | 0.00000 | 0.00000 |
| REF | 0.00000 | 0.00000 | 0.00000 | 0.00000 | 0.00000 | 0.00000 | 0.00000 |
| SSA | 0.00000 | 0.00000 | 0.00000 | 0.00000 | 0.00000 | 0.00000 | 0.00000 |
| USA | 0.00000 | 0.00000 | 0.00000 | 0.00000 | 0.00000 | 0.00000 | 0.00000 |

Table 210: MAgPIE m4p\_SSP1 — Demand—Domestic Balanceflow—Livestock products—Ruminant meat (Mt DM/yr) [PART 2/2]

|     | 1965     | 1970     | 1975     | 1980     | 1985     | 1990     | 1995     | 2000     | 2005     | 2010     |
|-----|----------|----------|----------|----------|----------|----------|----------|----------|----------|----------|
| GLO | -0.04170 | -0.04630 | -0.05820 | -0.07130 | -0.05350 | -0.05620 | -0.06710 | -0.06190 | -0.07280 | -0.15060 |
| CAZ | -0.00720 | -0.00730 | -0.02130 | -0.01030 | -0.01210 | -0.00490 | -0.00760 | -0.01190 | -0.00770 | -0.00560 |
| CHA | 0.00030  | 0.00020  | 0.00000  | -0.00020 | -0.00020 | -0.00940 | -0.01040 | -0.00510 | -0.00370 | -0.00310 |
| EUR | -0.03310 | -0.02900 | -0.03490 | -0.05430 | -0.03700 | -0.04440 | -0.04380 | -0.03330 | -0.02570 | -0.10270 |
| IND | 0.00000  | 0.00000  | 0.00000  | 0.00000  | 0.00000  | 0.00000  | 0.00000  | -0.00050 | -0.00010 | -0.00060 |
| JPN | -0.00100 | -0.00100 | -0.00170 | -0.00090 | 0.00000  | 0.00020  | -0.00020 | -0.00020 | -0.00010 | -0.00010 |
| LAM | -0.00030 | -0.01360 | -0.00070 | -0.00600 | -0.00490 | -0.00140 | -0.00280 | -0.00370 | -0.00960 | -0.01410 |
| MEA | 0.00000  | 0.00000  | 0.00000  | 0.00000  | -0.00020 | -0.00010 | -0.00020 | -0.00040 | -0.00450 | -0.00430 |
| NEU | -0.00040 | 0.00150  | 0.00390  | -0.00050 | 0.00260  | 0.00470  | -0.00070 | -0.00110 | -0.00200 | -0.00010 |
| OAS | -0.00070 | 0.00000  | -0.00040 | -0.00040 | -0.00070 | -0.00080 | -0.00070 | -0.00150 | -0.01490 | -0.02000 |
| REF | 0.00080  | 0.00300  | 0.00000  | 0.00230  | 0.00290  | 0.00100  | -0.00040 | -0.00330 | 0.00210  | 0.00320  |
| SSA | -0.00010 | -0.00010 | -0.00290 | -0.00120 | -0.00200 | -0.00040 | -0.00010 | -0.00010 | -0.00080 | -0.00290 |
| USA | 0.00000  | -0.00010 | -0.00020 | 0.00000  | -0.00190 | -0.00070 | -0.00020 | -0.00080 | -0.00580 | -0.00050 |

Table 211: FAO — Demand—Domestic Balanceflow—Livestock products—Ruminant meat (Mt DM/yr)

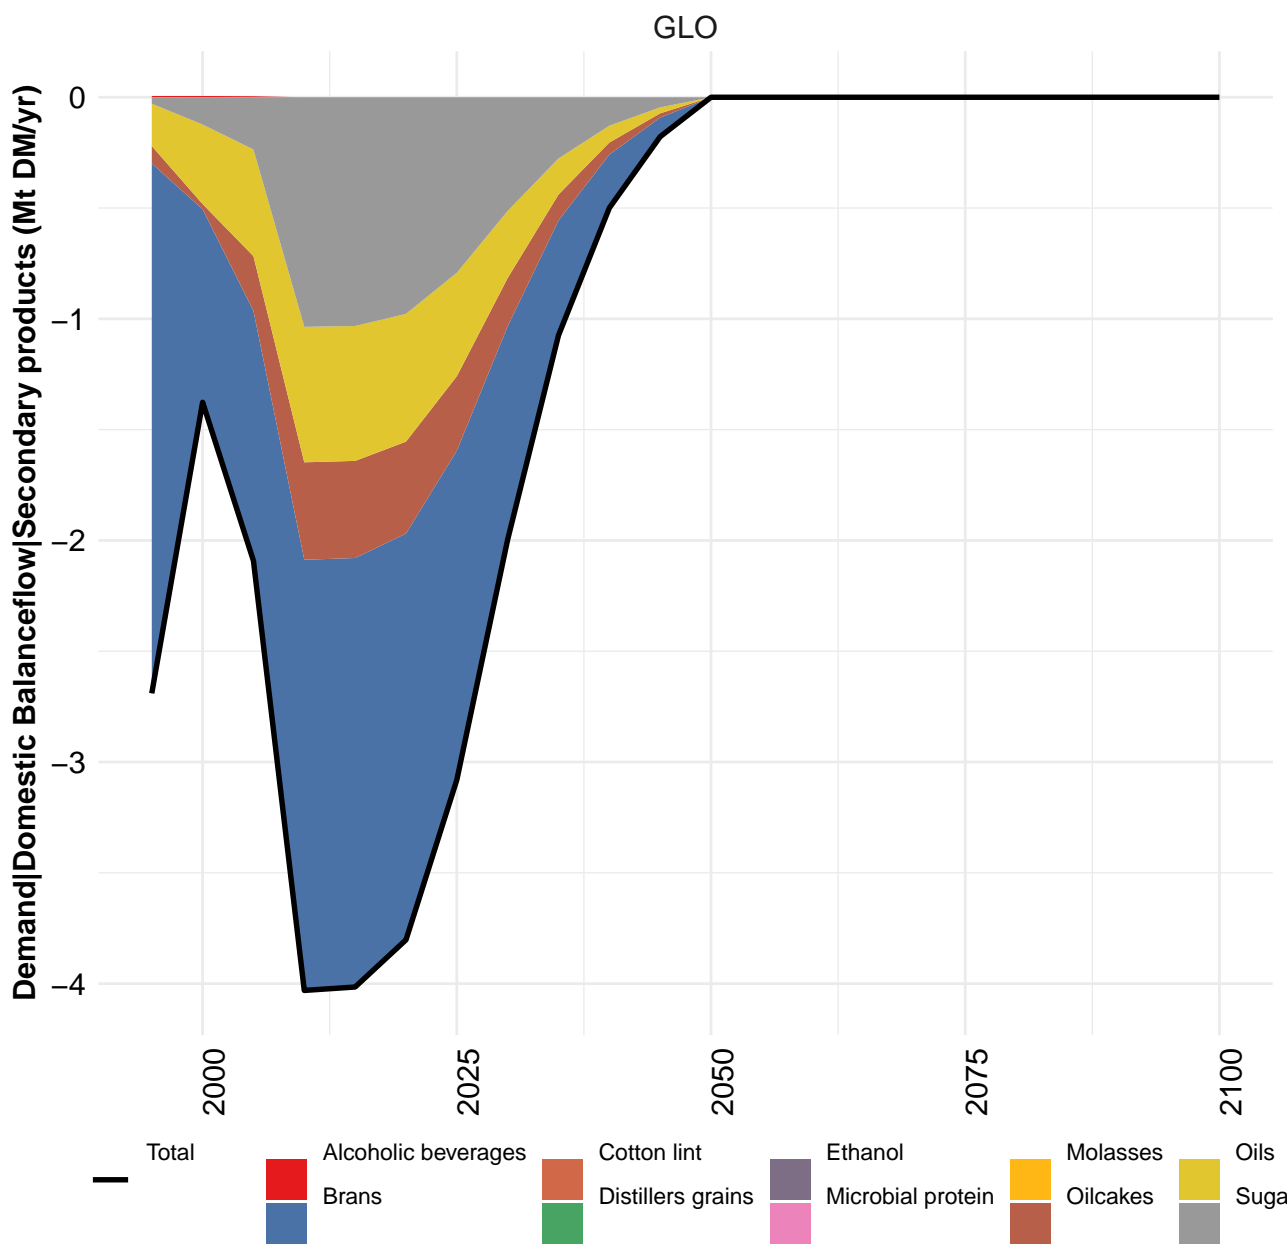

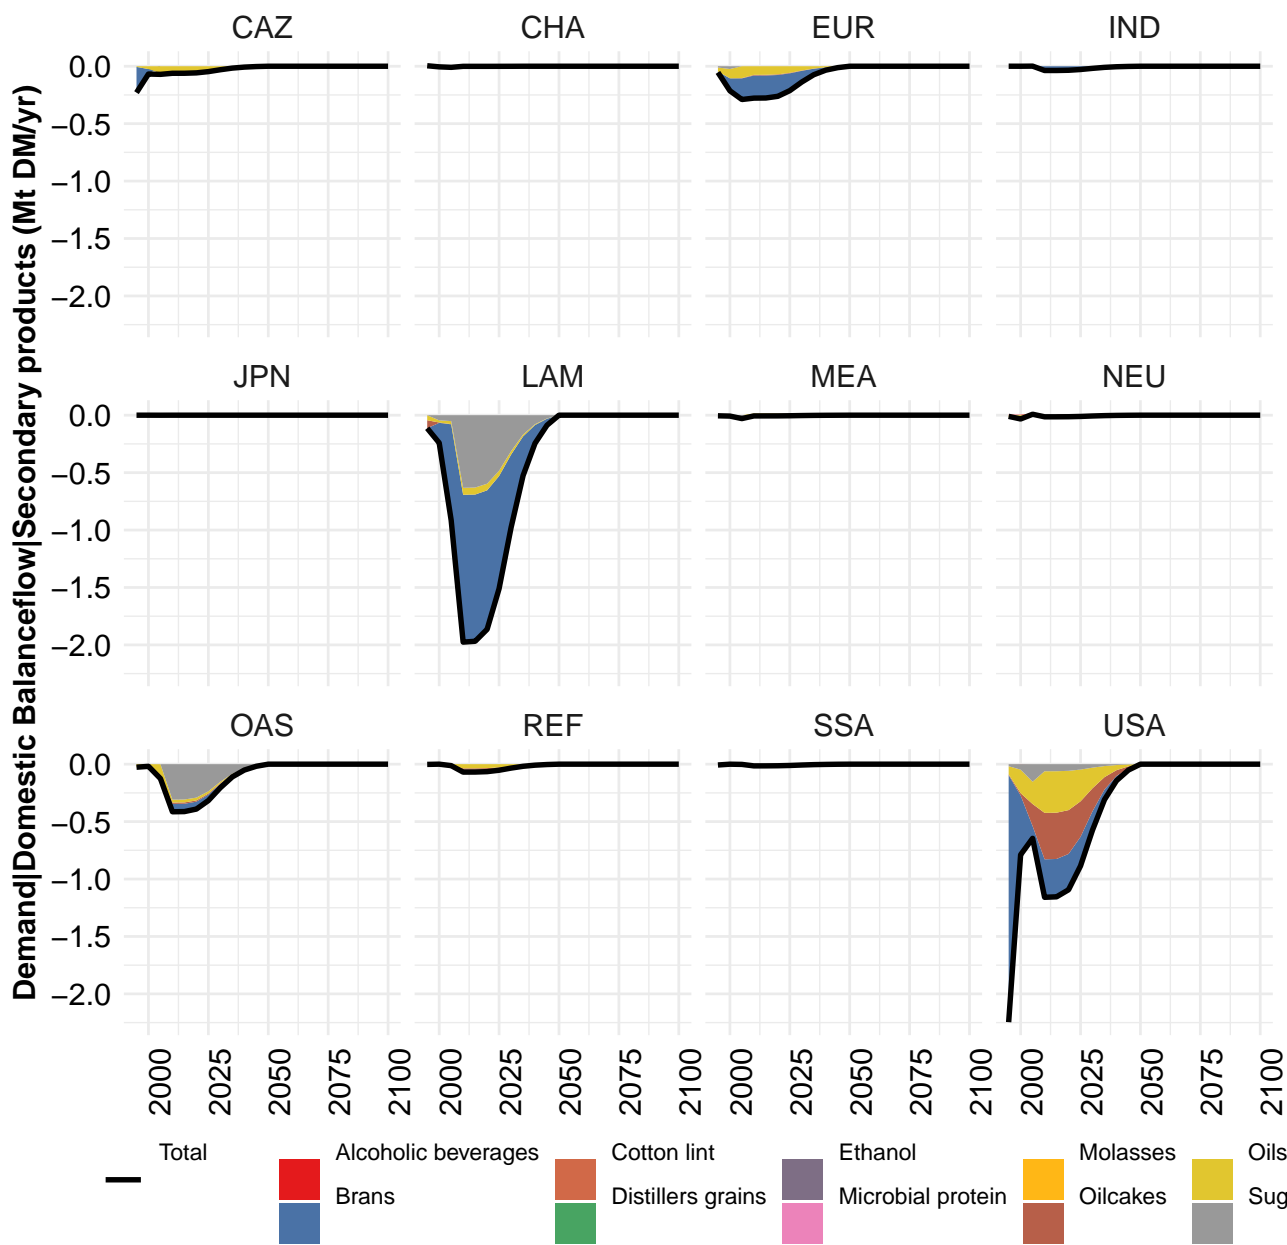



5.4 Secondary products

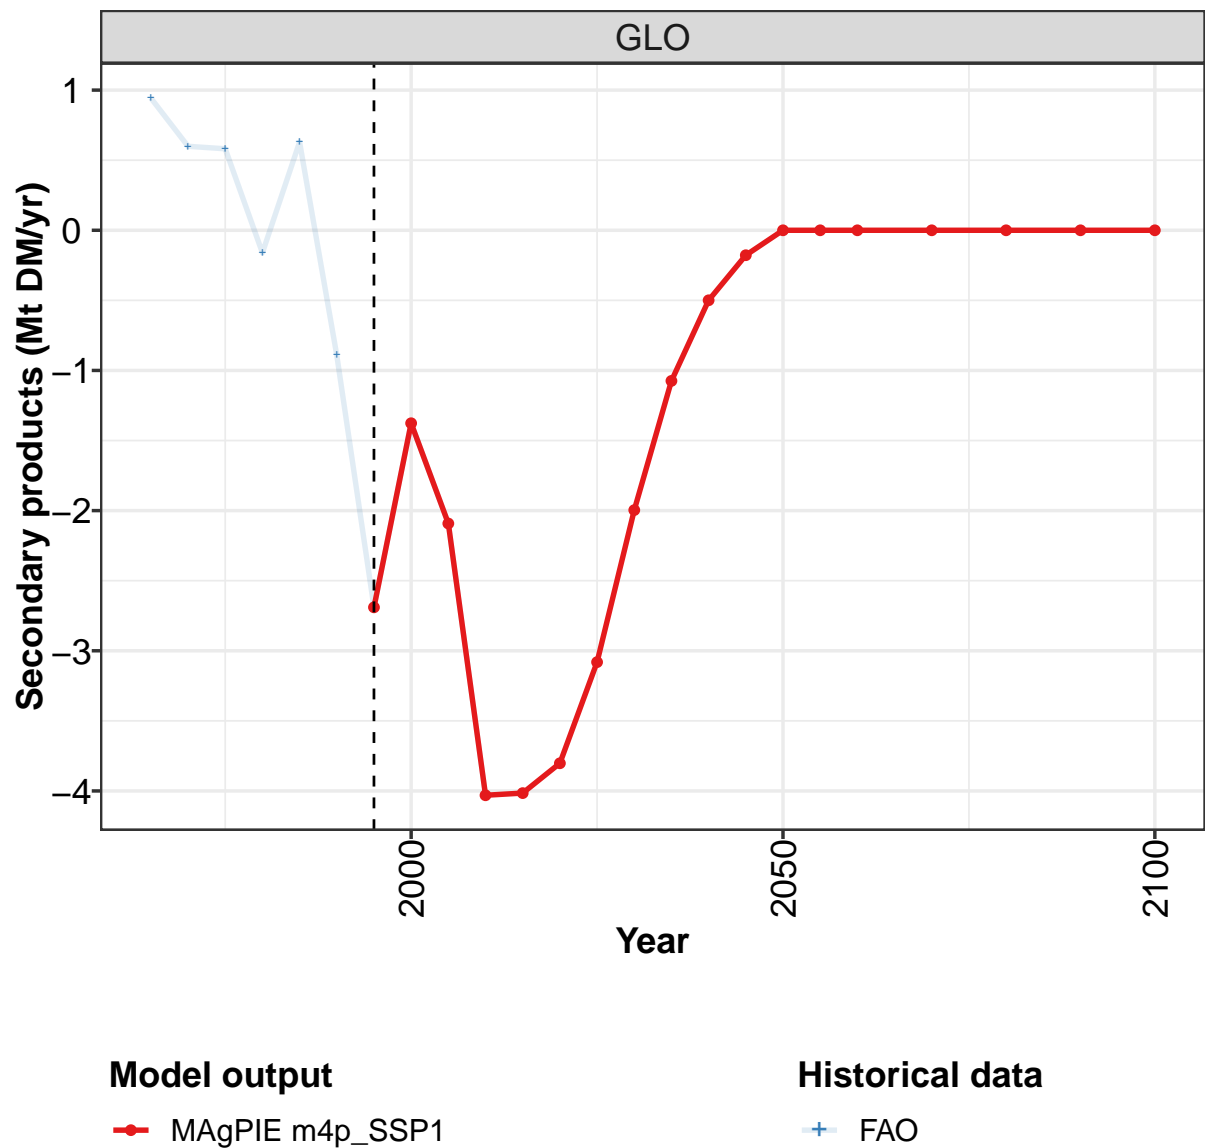

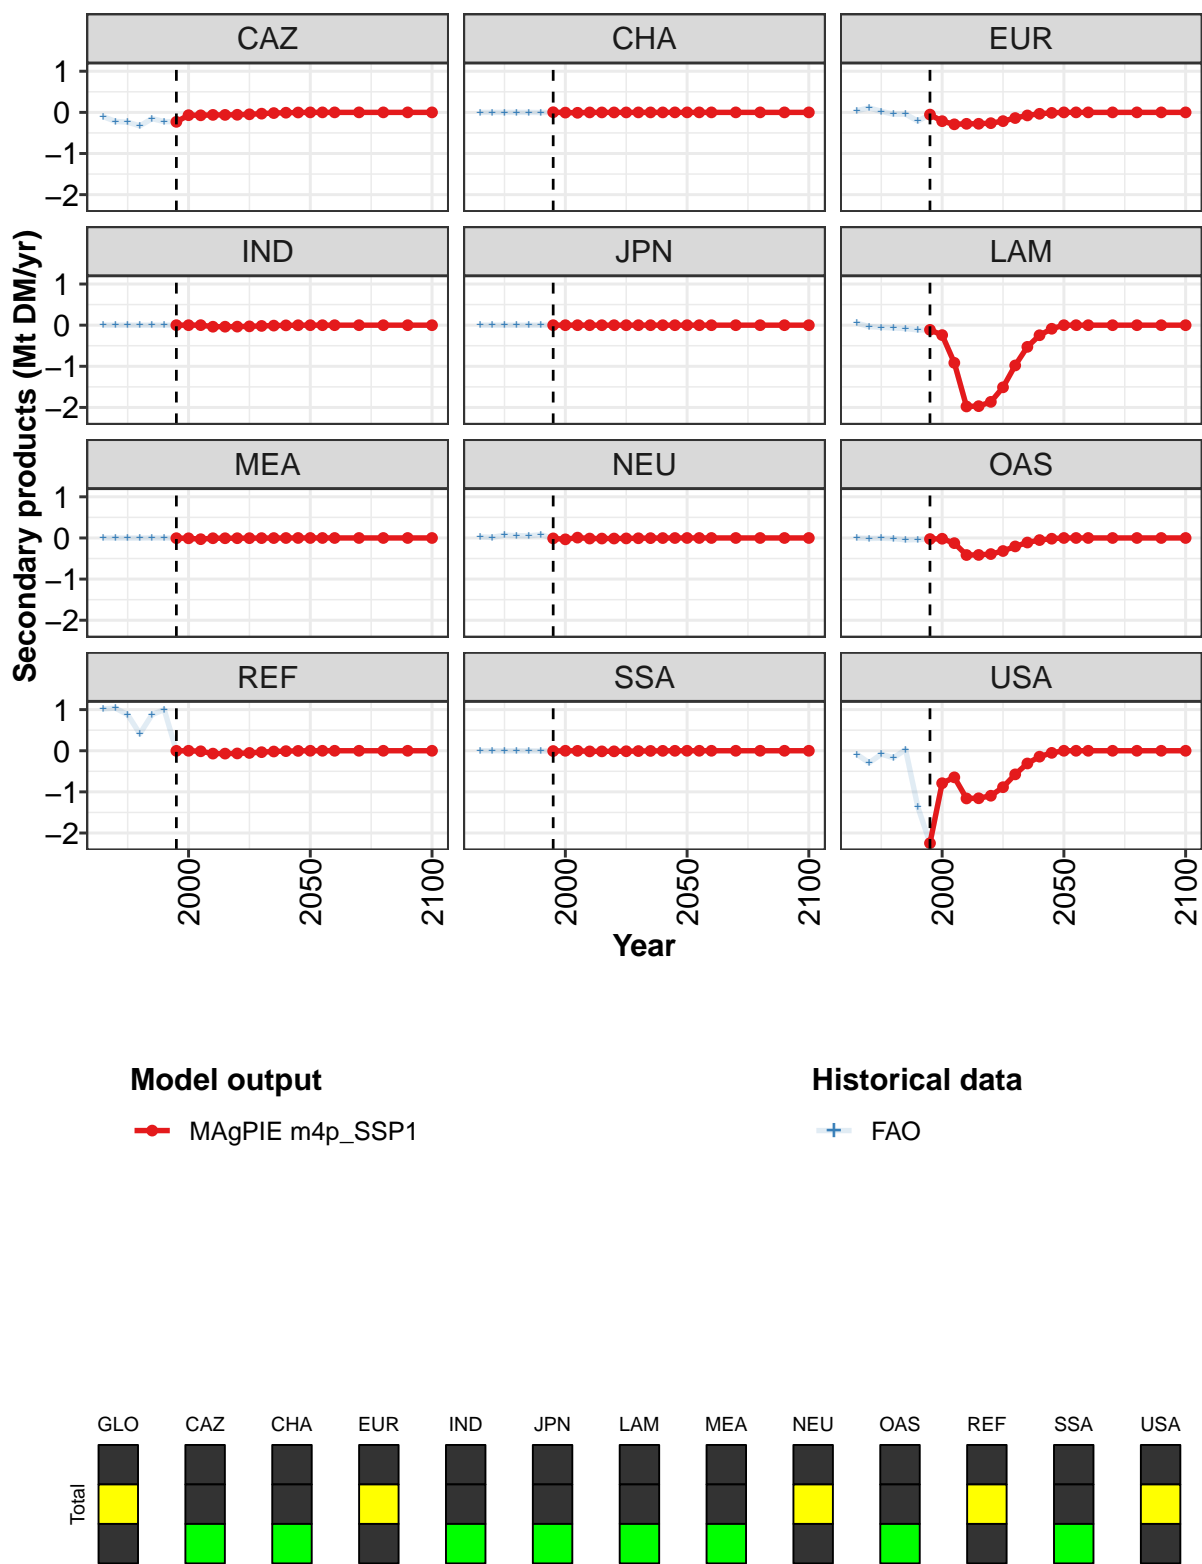

Figure 71: MAGPIE m4p\_SSP1 — Demand—Domestic Balanceflow—Secondary products (Mt DM/yr)

|     | 1995     | 2000     | 2005     | 2010     | 2015     | 2020     | 2025     | 2030     | 2035     | 2040     | 2045     |
|-----|----------|----------|----------|----------|----------|----------|----------|----------|----------|----------|----------|
| GLO | -2.69000 | -1.37650 | -2.09200 | -4.03080 | -4.01540 | -3.80250 | -3.08080 | -1.99630 | -1.07450 | -0.49940 | -0.17450 |
| CAZ | -0.23000 | -0.06780 | -0.07080 | -0.06140 | -0.06120 | -0.05790 | -0.04700 | -0.03050 | -0.01640 | -0.00760 | -0.00370 |
| CHA | 0.00420  | -0.00550 | -0.00960 | -0.00090 | -0.00090 | -0.00090 | -0.00070 | -0.00050 | -0.00020 | -0.00020 | 0.00000  |
| EUR | -0.05380 | -0.21390 | -0.28980 | -0.27780 | -0.27670 | -0.26200 | -0.21240 | -0.13760 | -0.07410 | -0.03440 | -0.01720 |
| IND | 0.00010  | -0.00020 | 0.00090  | -0.03720 | -0.03710 | -0.03510 | -0.02850 | -0.01850 | -0.00990 | -0.00460 | -0.00230 |
| JPN | 0.00000  | 0.00000  | -0.00010 | 0.00000  | 0.00000  | 0.00000  | 0.00000  | 0.00000  | 0.00000  | 0.00000  | 0.00000  |
| LAM | -0.11360 | -0.24080 | -0.91570 | -1.97580 | -1.96850 | -1.86410 | -1.51020 | -0.97860 | -0.52670 | -0.24460 | -0.08230 |
| MEA | -0.00520 | -0.00770 | -0.02940 | -0.00630 | -0.00620 | -0.00600 | -0.00480 | -0.00310 | -0.00180 | -0.00080 | -0.00040 |
| NEU | -0.01010 | -0.03280 | 0.00840  | -0.01400 | -0.01390 | -0.01320 | -0.01070 | -0.00690 | -0.00370 | -0.00180 | -0.00090 |
| OAS | -0.02640 | -0.01880 | -0.12560 | -0.41450 | -0.41280 | -0.39090 | -0.31680 | -0.20530 | -0.11060 | -0.05130 | -0.02560 |
| REF | -0.00200 | 0.00000  | -0.01260 | -0.06900 | -0.06870 | -0.06510 | -0.05280 | -0.03410 | -0.01830 | -0.00860 | -0.00430 |
| SSA | -0.00700 | -0.00010 | -0.00200 | -0.01480 | -0.01460 | -0.01380 | -0.01120 | -0.00720 | -0.00390 | -0.00190 | -0.00100 |
| USA | -2.24620 | -0.78890 | -0.64570 | -1.15910 | -1.15480 | -1.09350 | -0.88570 | -0.57400 | -0.30890 | -0.14360 | -0.07180 |

Table 212: MAgPIE m4p\_SSP1 — Demand—Domestic Balanceflow—Secondary products (Mt DM/yr) [PART 1/2]

|     | 2050    | 2055    | 2060    | 2070    | 2080    | 2090    | 2100    |
|-----|---------|---------|---------|---------|---------|---------|---------|
| GLO | 0.00000 | 0.00000 | 0.00000 | 0.00000 | 0.00000 | 0.00000 | 0.00000 |
| CAZ | 0.00000 | 0.00000 | 0.00000 | 0.00000 | 0.00000 | 0.00000 | 0.00000 |
| CHA | 0.00000 | 0.00000 | 0.00000 | 0.00000 | 0.00000 | 0.00000 | 0.00000 |
| EUR | 0.00000 | 0.00000 | 0.00000 | 0.00000 | 0.00000 | 0.00000 | 0.00000 |
| IND | 0.00000 | 0.00000 | 0.00000 | 0.00000 | 0.00000 | 0.00000 | 0.00000 |
| JPN | 0.00000 | 0.00000 | 0.00000 | 0.00000 | 0.00000 | 0.00000 | 0.00000 |
| LAM | 0.00000 | 0.00000 | 0.00000 | 0.00000 | 0.00000 | 0.00000 | 0.00000 |
| MEA | 0.00000 | 0.00000 | 0.00000 | 0.00000 | 0.00000 | 0.00000 | 0.00000 |
| NEU | 0.00000 | 0.00000 | 0.00000 | 0.00000 | 0.00000 | 0.00000 | 0.00000 |
| OAS | 0.00000 | 0.00000 | 0.00000 | 0.00000 | 0.00000 | 0.00000 | 0.00000 |
| REF | 0.00000 | 0.00000 | 0.00000 | 0.00000 | 0.00000 | 0.00000 | 0.00000 |
| SSA | 0.00000 | 0.00000 | 0.00000 | 0.00000 | 0.00000 | 0.00000 | 0.00000 |
| USA | 0.00000 | 0.00000 | 0.00000 | 0.00000 | 0.00000 | 0.00000 | 0.00000 |

Table 213: MAgPIE m4p\_SSP1 — Demand—Domestic Balanceflow—Secondary products (Mt DM/yr) [PART 2/2]

|     | 1965  | 1970  | 1975  | 1980  | 1985  | 1990  | 1995  | 2000  | 2005  | 2010  |
|-----|-------|-------|-------|-------|-------|-------|-------|-------|-------|-------|
| GLO | 0.94  | 0.60  | 0.58  | -0.16 | 0.63  | -0.89 | -2.69 | -1.38 | -2.09 | -4.03 |
| CAZ | -0.10 | -0.22 | -0.24 | -0.33 | -0.15 | -0.22 | -0.23 | -0.07 | -0.07 | -0.06 |
| CHA | 0.00  | 0.00  | 0.00  | 0.00  | 0.00  | -0.00 | 0.00  | -0.01 | -0.01 | -0.00 |
| EUR | 0.04  | 0.11  | 0.02  | -0.04 | -0.04 | -0.21 | -0.05 | -0.21 | -0.29 | -0.28 |
| IND | 0.00  | 0.00  | -0.00 | -0.00 | -0.00 | -0.00 | 0.00  | -0.00 | 0.00  | -0.04 |
| JPN | -0.00 | -0.00 | -0.00 | -0.00 | 0.00  | 0.00  | 0.00  | 0.00  | -0.00 | 0.00  |
| LAM | 0.05  | -0.04 | -0.05 | -0.07 | -0.08 | -0.12 | -0.11 | -0.24 | -0.92 | -1.98 |
| MEA | 0.00  | -0.00 | -0.00 | -0.00 | 0.00  | -0.00 | -0.01 | -0.01 | -0.03 | -0.01 |
| NEU | 0.03  | 0.01  | 0.07  | 0.06  | 0.05  | 0.08  | -0.01 | -0.03 | 0.01  | -0.01 |
| OAS | -0.00 | -0.01 | -0.01 | -0.01 | -0.05 | -0.04 | -0.03 | -0.02 | -0.13 | -0.41 |
| REF | 1.02  | 1.04  | 0.88  | 0.41  | 0.88  | 1.00  | -0.00 | -0.00 | -0.01 | -0.07 |
| SSA | 0.00  | 0.00  | -0.00 | -0.00 | -0.00 | -0.01 | -0.01 | -0.00 | -0.00 | -0.01 |
| USA | -0.09 | -0.29 | -0.08 | -0.17 | 0.03  | -1.37 | -2.25 | -0.79 | -0.65 | -1.16 |

Table 214: FAO — Demand—Domestic Balanceflow—Secondary products (Mt DM/yr)

5.4.1 Alcoholic beverages

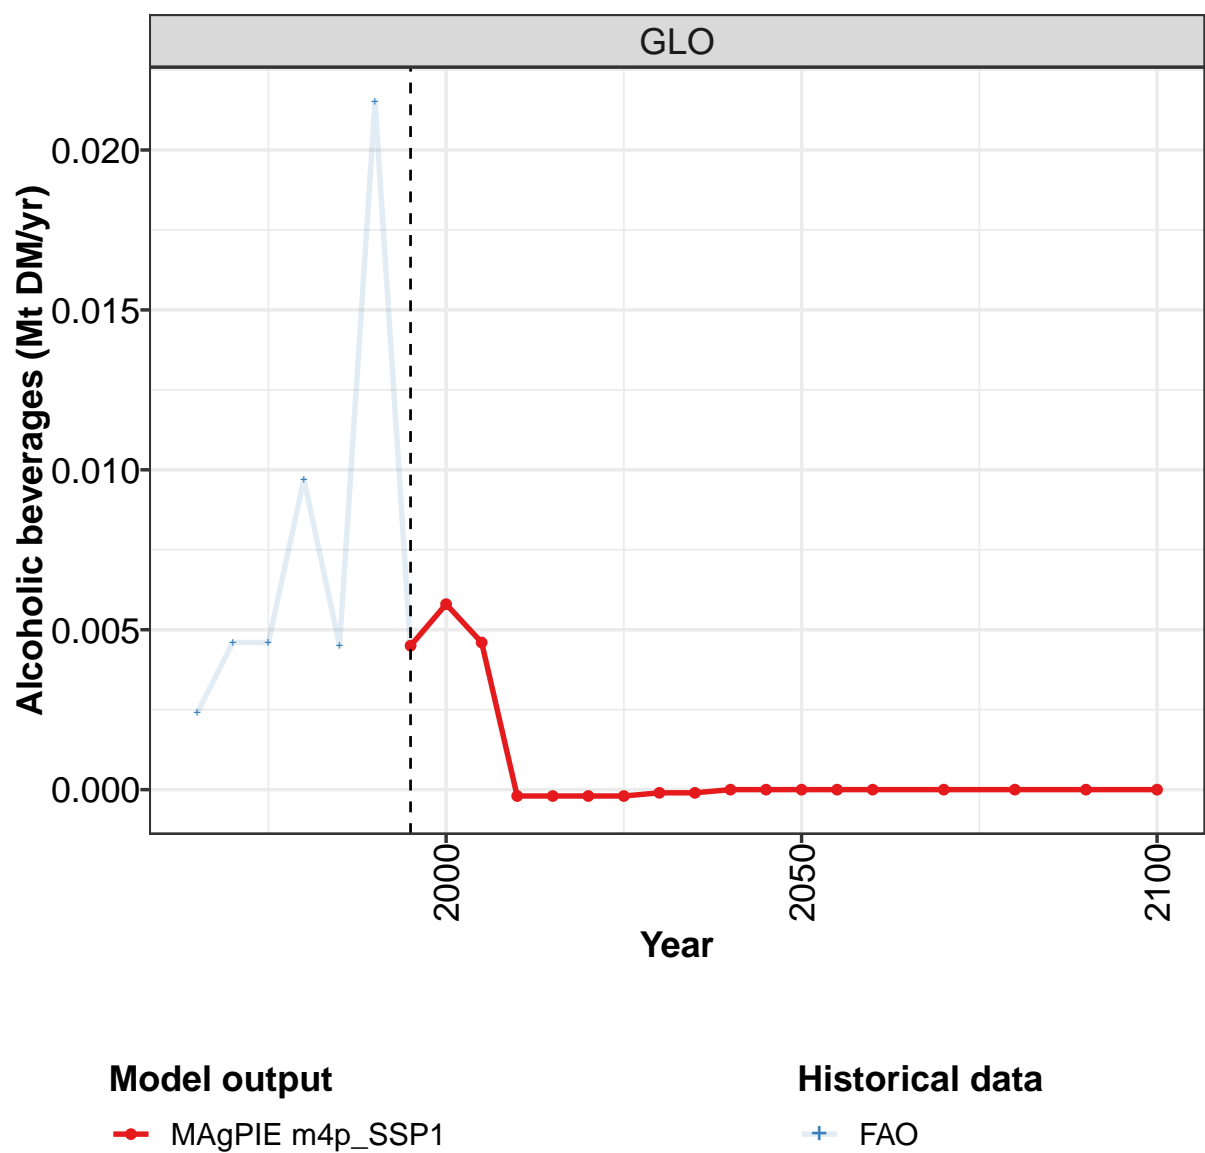

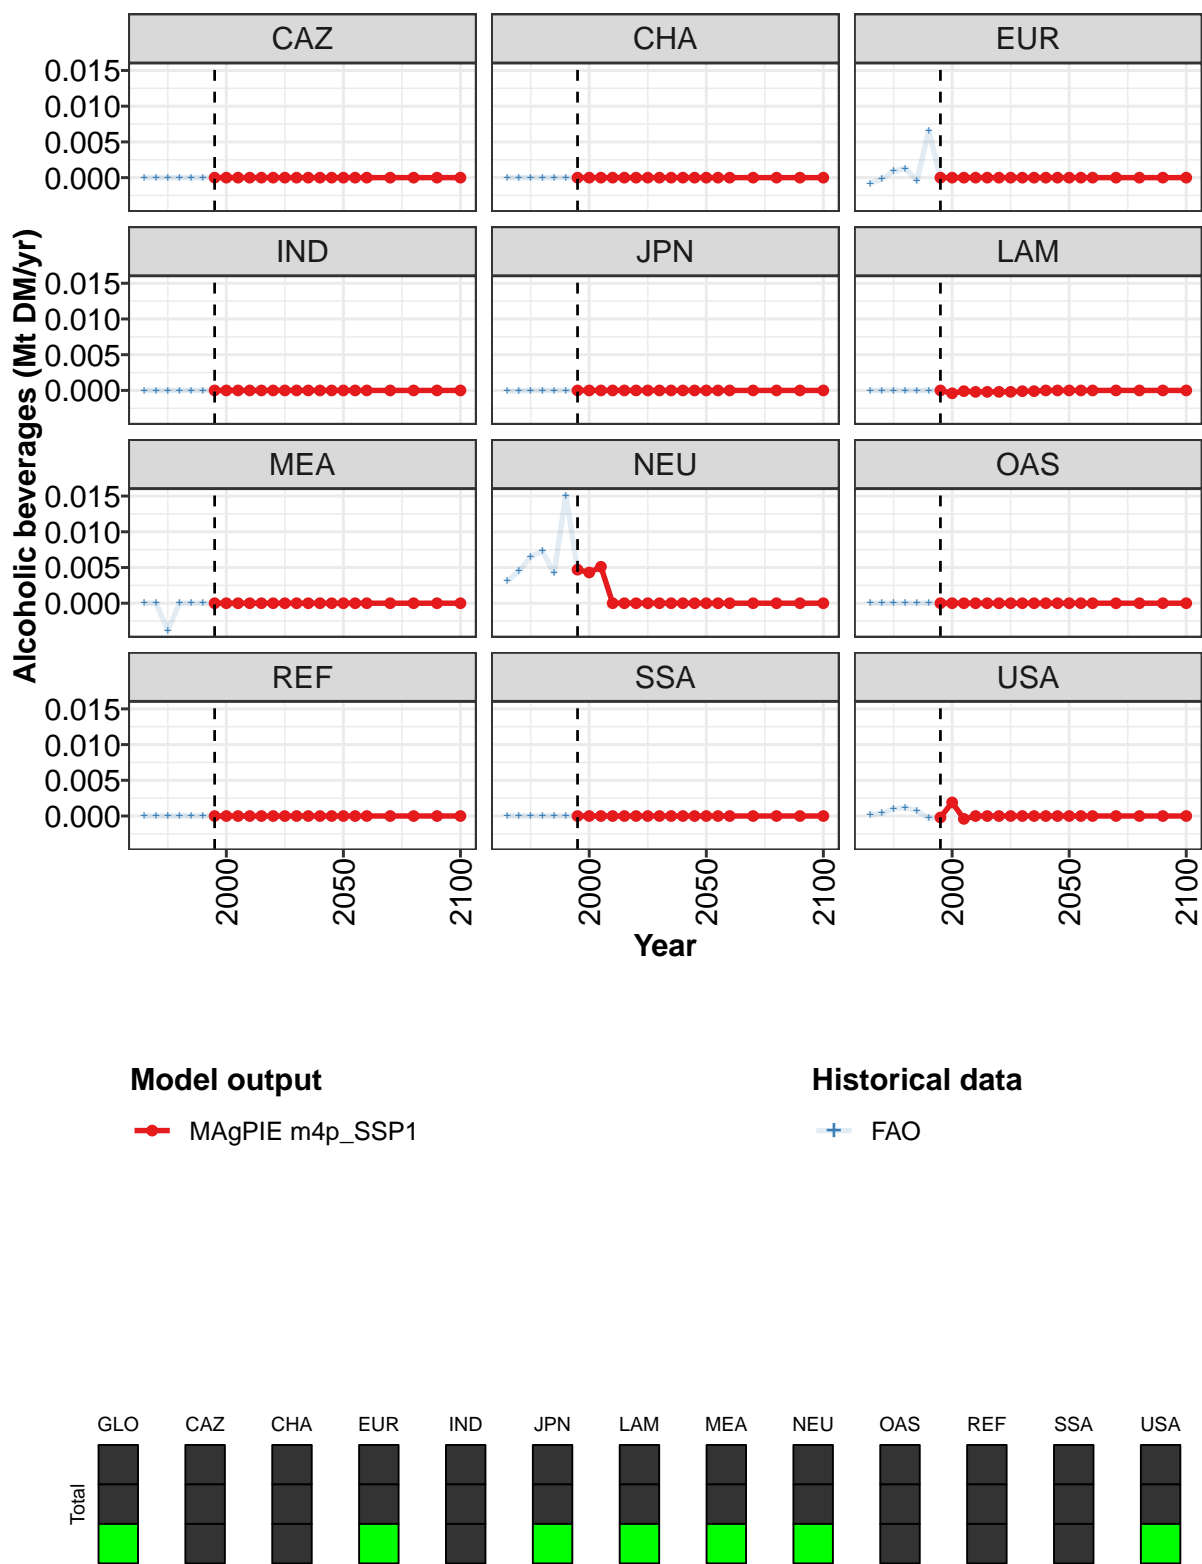

Figure 72: MAgPIE m4p\_SSP1 — Demand—Domestic Balanceflow—Secondary products—Alcoholic beverages (Mt DM/yr)

|     | 1995     | 2000     | 2005     | 2010     | 2015     | 2020     | 2025     | 2030     | 2035     | 2040    | 2045    |
|-----|----------|----------|----------|----------|----------|----------|----------|----------|----------|---------|---------|
| GLO | 0.00450  | 0.00580  | 0.00460  | -0.00020 | -0.00020 | -0.00020 | -0.00020 | -0.00010 | -0.00010 | 0.00000 | 0.00000 |
| CAZ | 0.00000  | 0.00000  | 0.00000  | 0.00000  | 0.00000  | 0.00000  | 0.00000  | 0.00000  | 0.00000  | 0.00000 | 0.00000 |
| CHA | 0.00000  | 0.00000  | 0.00000  | 0.00000  | 0.00000  | 0.00000  | 0.00000  | 0.00000  | 0.00000  | 0.00000 | 0.00000 |
| EUR | 0.00000  | 0.00000  | 0.00000  | 0.00000  | 0.00000  | 0.00000  | 0.00000  | 0.00000  | 0.00000  | 0.00000 | 0.00000 |
| IND | 0.00000  | 0.00000  | 0.00000  | 0.00000  | 0.00000  | 0.00000  | 0.00000  | 0.00000  | 0.00000  | 0.00000 | 0.00000 |
| JPN | 0.00000  | 0.00000  | 0.00000  | 0.00000  | 0.00000  | 0.00000  | 0.00000  | 0.00000  | 0.00000  | 0.00000 | 0.00000 |
| LAM | 0.00000  | -0.00040 | -0.00010 | -0.00020 | -0.00020 | -0.00020 | -0.00020 | -0.00010 | -0.00010 | 0.00000 | 0.00000 |
| MEA | 0.00000  | 0.00000  | 0.00000  | 0.00000  | 0.00000  | 0.00000  | 0.00000  | 0.00000  | 0.00000  | 0.00000 | 0.00000 |
| NEU | 0.00470  | 0.00430  | 0.00510  | 0.00000  | 0.00000  | 0.00000  | 0.00000  | 0.00000  | 0.00000  | 0.00000 | 0.00000 |
| OAS | 0.00000  | 0.00000  | 0.00000  | 0.00000  | 0.00000  | 0.00000  | 0.00000  | 0.00000  | 0.00000  | 0.00000 | 0.00000 |
| REF | 0.00000  | 0.00000  | 0.00000  | 0.00000  | 0.00000  | 0.00000  | 0.00000  | 0.00000  | 0.00000  | 0.00000 | 0.00000 |
| SSA | 0.00000  | 0.00000  | 0.00000  | 0.00000  | 0.00000  | 0.00000  | 0.00000  | 0.00000  | 0.00000  | 0.00000 | 0.00000 |
| USA | -0.00020 | 0.00190  | -0.00040 | 0.00000  | 0.00000  | 0.00000  | 0.00000  | 0.00000  | 0.00000  | 0.00000 | 0.00000 |

Table 215: MAgPIE m4p.SSP1 — Demand—Domestic Balanceflow—Secondary products—Alcoholic beverages (Mt DM/yr) [PART 1/2]

|     | 2050    | 2055    | 2060    | 2070    | 2080    | 2090    | 2100    |
|-----|---------|---------|---------|---------|---------|---------|---------|
| GLO | 0.00000 | 0.00000 | 0.00000 | 0.00000 | 0.00000 | 0.00000 | 0.00000 |
| CAZ | 0.00000 | 0.00000 | 0.00000 | 0.00000 | 0.00000 | 0.00000 | 0.00000 |
| CHA | 0.00000 | 0.00000 | 0.00000 | 0.00000 | 0.00000 | 0.00000 | 0.00000 |
| EUR | 0.00000 | 0.00000 | 0.00000 | 0.00000 | 0.00000 | 0.00000 | 0.00000 |
| IND | 0.00000 | 0.00000 | 0.00000 | 0.00000 | 0.00000 | 0.00000 | 0.00000 |
| JPN | 0.00000 | 0.00000 | 0.00000 | 0.00000 | 0.00000 | 0.00000 | 0.00000 |
| LAM | 0.00000 | 0.00000 | 0.00000 | 0.00000 | 0.00000 | 0.00000 | 0.00000 |
| MEA | 0.00000 | 0.00000 | 0.00000 | 0.00000 | 0.00000 | 0.00000 | 0.00000 |
| NEU | 0.00000 | 0.00000 | 0.00000 | 0.00000 | 0.00000 | 0.00000 | 0.00000 |
| OAS | 0.00000 | 0.00000 | 0.00000 | 0.00000 | 0.00000 | 0.00000 | 0.00000 |
| REF | 0.00000 | 0.00000 | 0.00000 | 0.00000 | 0.00000 | 0.00000 | 0.00000 |
| SSA | 0.00000 | 0.00000 | 0.00000 | 0.00000 | 0.00000 | 0.00000 | 0.00000 |
| USA | 0.00000 | 0.00000 | 0.00000 | 0.00000 | 0.00000 | 0.00000 | 0.00000 |

Table 216: MAgPIE m4p.SSP1 — Demand—Domestic Balanceflow—Secondary products—Alcoholic beverages (Mt DM/yr) [PART 2/2]

|     | 1965    | 1970    | 1975    | 1980   | 1985    | 1990    | 1995    | 2000    | 2005    | 2010    |
|-----|---------|---------|---------|--------|---------|---------|---------|---------|---------|---------|
| GLO | 0.0024  | 0.0046  | 0.0046  | 0.0097 | 0.0045  | 0.0215  | 0.0044  | 0.0058  | 0.0046  | -0.0003 |
| CAZ | 0.0000  | 0.0000  | 0.0000  | 0.0000 | 0.0000  | 0.0000  | 0.0000  | 0.0000  | 0.0000  | 0.0000  |
| CHA | 0.0000  | 0.0000  | 0.0000  | 0.0000 | 0.0000  | 0.0000  | 0.0000  | 0.0000  | 0.0000  | 0.0000  |
| EUR | -0.0008 | -0.0002 | 0.0009  | 0.0013 | -0.0004 | 0.0066  | 0.0000  | 0.0000  | 0.0000  | 0.0000  |
| IND | 0.0000  | 0.0000  | 0.0000  | 0.0000 | 0.0000  | 0.0000  | 0.0000  | 0.0000  | 0.0000  | 0.0000  |
| JPN | -0.0001 | -0.0001 | 0.0000  | 0.0000 | 0.0000  | 0.0000  | 0.0000  | 0.0000  | 0.0000  | 0.0000  |
| LAM | 0.0000  | 0.0000  | 0.0000  | 0.0000 | 0.0000  | 0.0000  | 0.0000  | -0.0004 | -0.0001 | -0.0002 |
| MEA | 0.0000  | 0.0000  | -0.0038 | 0.0000 | 0.0000  | 0.0000  | 0.0000  | 0.0000  | 0.0000  | 0.0000  |
| NEU | 0.0031  | 0.0045  | 0.0065  | 0.0073 | 0.0042  | 0.0151  | 0.0047  | 0.0043  | 0.0051  | 0.0000  |
| OAS | 0.0000  | 0.0000  | 0.0000  | 0.0000 | 0.0000  | 0.0000  | 0.0000  | 0.0000  | 0.0000  | 0.0000  |
| REF | 0.0000  | 0.0000  | 0.0000  | 0.0000 | 0.0000  | 0.0000  | 0.0000  | 0.0000  | 0.0000  | 0.0000  |
| SSA | 0.0000  | 0.0000  | 0.0000  | 0.0000 | 0.0000  | 0.0000  | 0.0000  | 0.0000  | 0.0000  | 0.0000  |
| USA | 0.0002  | 0.0004  | 0.0010  | 0.0012 | 0.0007  | -0.0003 | -0.0002 | 0.0019  | -0.0004 | 0.0000  |

Table 217: FAO — Demand—Domestic Balanceflow—Secondary products—Alcoholic beverages (Mt DM/yr)

5.4.2 Brans

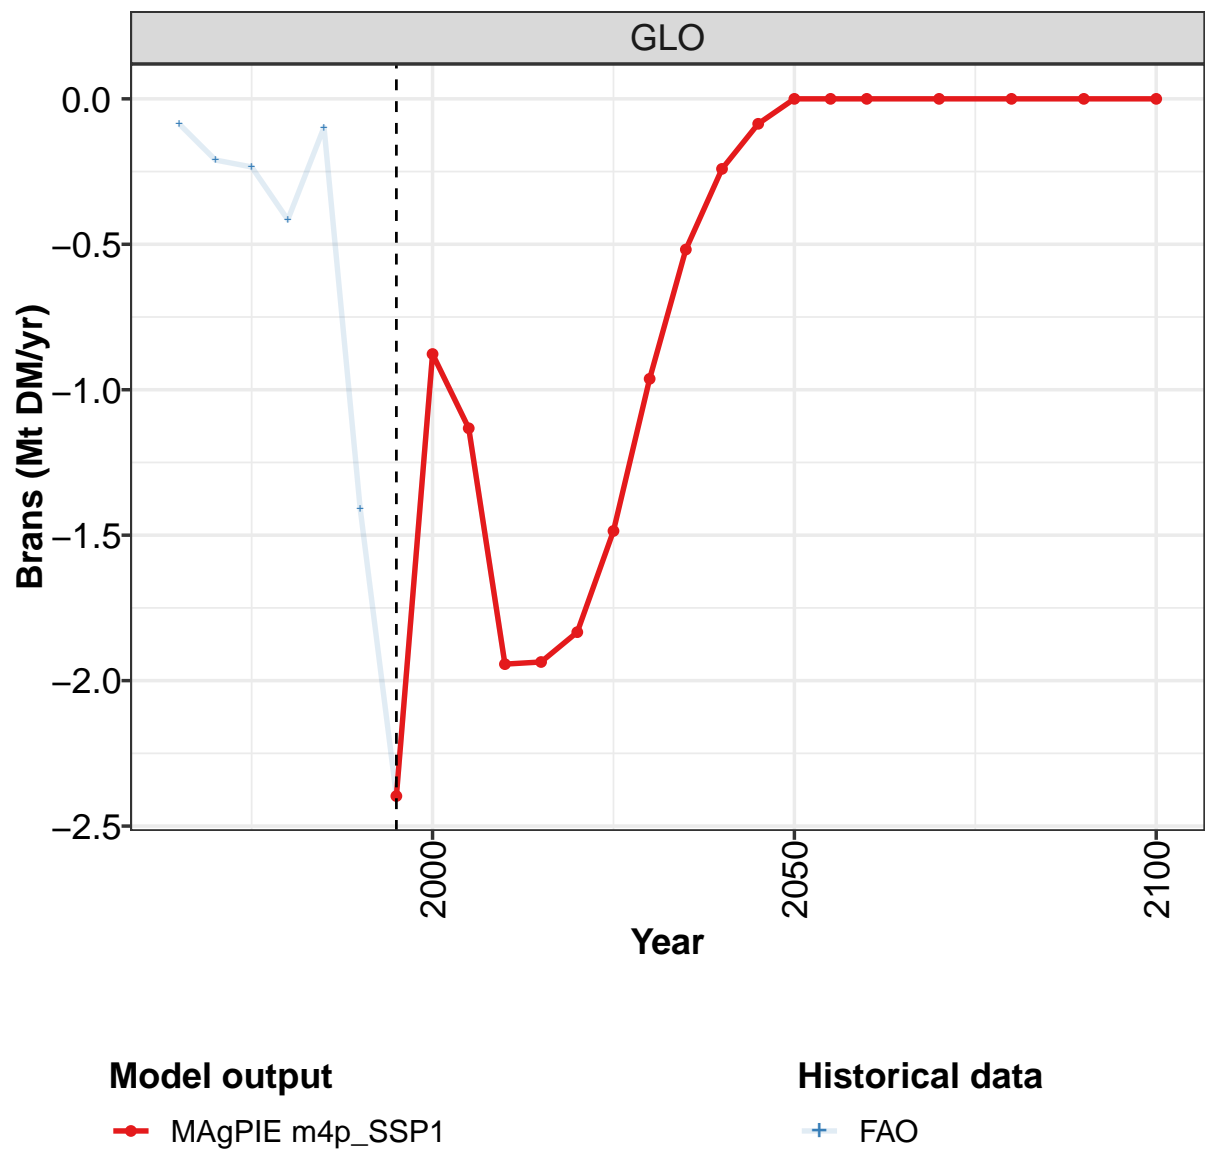

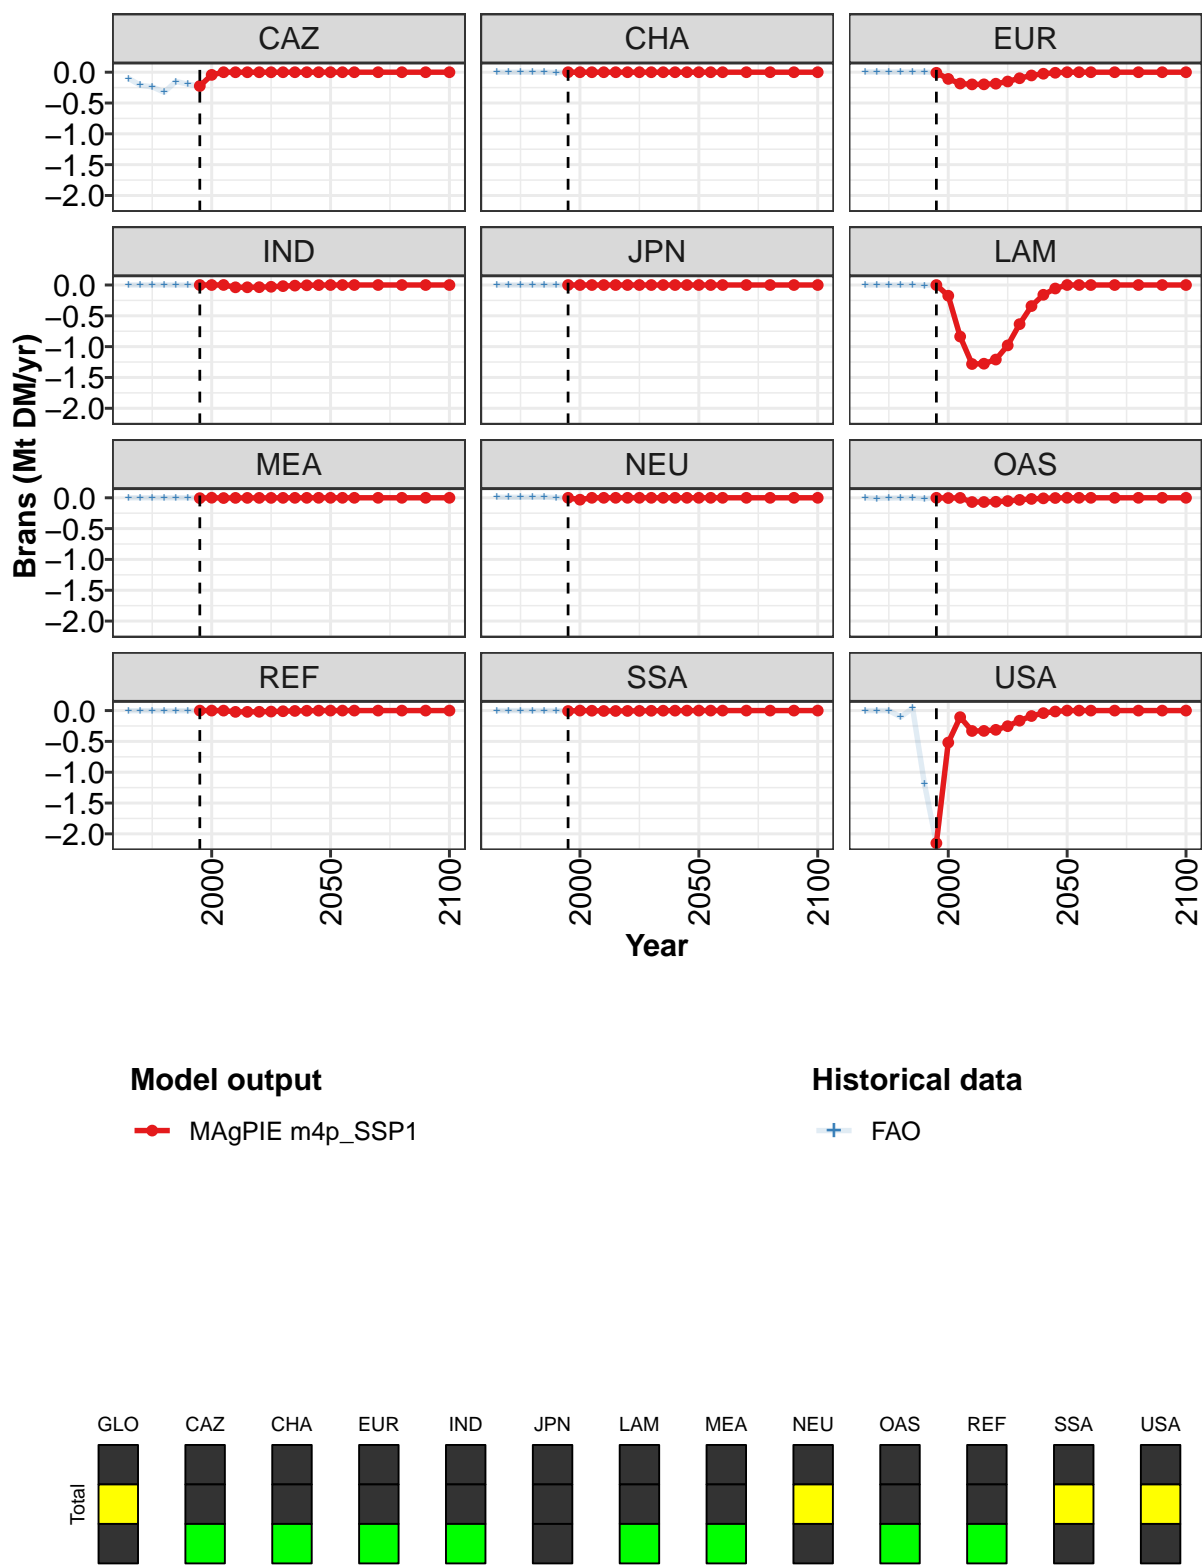

Figure 73: MAgPIE m4p\_SSP1 — Demand—Domestic Balanceflow—Secondary products—Brans (Mt DM/yr)



|     | 1995     | 2000     | 2005     | 2010     | 2015     | 2020     | 2025     | 2030     | 2035     | 2040     | 2045     |
|-----|----------|----------|----------|----------|----------|----------|----------|----------|----------|----------|----------|
| GLO | -2.39680 | -0.87720 | -1.13240 | -1.94330 | -1.93590 | -1.83330 | -1.48540 | -0.96250 | -0.51800 | -0.24070 | -0.03000 |
| CAZ | -0.22410 | -0.04330 | 0.00000  | -0.00030 | -0.00030 | -0.00030 | -0.00030 | -0.00020 | -0.00010 | 0.00000  | 0.00000  |
| CHA | 0.00000  | 0.00000  | 0.00000  | 0.00000  | 0.00000  | 0.00000  | 0.00000  | 0.00000  | 0.00000  | 0.00000  | 0.00000  |
| EUR | -0.00900 | -0.10850 | -0.18400 | -0.19730 | -0.19650 | -0.18610 | -0.15080 | -0.09770 | -0.05260 | -0.02440 | -0.00000 |
| IND | 0.00010  | 0.00010  | 0.00100  | -0.03710 | -0.03700 | -0.03500 | -0.02840 | -0.01840 | -0.00990 | -0.00460 | -0.00000 |
| JPN | 0.00000  | 0.00000  | 0.00000  | 0.00000  | 0.00000  | 0.00000  | 0.00000  | 0.00000  | 0.00000  | 0.00000  | 0.00000  |
| LAM | -0.00040 | -0.17390 | -0.83620 | -1.28170 | -1.27690 | -1.20920 | -0.97960 | -0.63480 | -0.34160 | -0.15870 | -0.03000 |
| MEA | -0.00580 | 0.00130  | -0.00360 | -0.00140 | -0.00140 | -0.00140 | -0.00110 | -0.00070 | -0.00040 | -0.00020 | -0.00000 |
| NEU | 0.00000  | -0.03080 | 0.00000  | 0.00000  | 0.00000  | 0.00000  | 0.00000  | 0.00000  | 0.00000  | 0.00000  | 0.00000  |
| OAS | 0.00000  | -0.00380 | -0.00120 | -0.06850 | -0.06820 | -0.06460 | -0.05240 | -0.03390 | -0.01830 | -0.00850 | -0.00000 |
| REF | 0.00000  | 0.00000  | -0.00020 | -0.02060 | -0.02050 | -0.01940 | -0.01580 | -0.01020 | -0.00550 | -0.00260 | -0.00000 |
| SSA | -0.00690 | 0.00000  | -0.00180 | -0.00570 | -0.00560 | -0.00530 | -0.00430 | -0.00280 | -0.00150 | -0.00070 | -0.00000 |
| USA | -2.15070 | -0.51830 | -0.10640 | -0.33070 | -0.32950 | -0.31200 | -0.25270 | -0.16380 | -0.08810 | -0.04100 | -0.00000 |

Table 218: MAgPIE m4p\_SSP1 — Demand—Domestic Balanceflow—Secondary products—Brans (Mt DM/yr)  
[PART 1/2]

|     | 2050    | 2055    | 2060    | 2070    | 2080    | 2090    | 2100    |
|-----|---------|---------|---------|---------|---------|---------|---------|
| GLO | 0.00000 | 0.00000 | 0.00000 | 0.00000 | 0.00000 | 0.00000 | 0.00000 |
| CAZ | 0.00000 | 0.00000 | 0.00000 | 0.00000 | 0.00000 | 0.00000 | 0.00000 |
| CHA | 0.00000 | 0.00000 | 0.00000 | 0.00000 | 0.00000 | 0.00000 | 0.00000 |
| EUR | 0.00000 | 0.00000 | 0.00000 | 0.00000 | 0.00000 | 0.00000 | 0.00000 |
| IND | 0.00000 | 0.00000 | 0.00000 | 0.00000 | 0.00000 | 0.00000 | 0.00000 |
| JPN | 0.00000 | 0.00000 | 0.00000 | 0.00000 | 0.00000 | 0.00000 | 0.00000 |
| LAM | 0.00000 | 0.00000 | 0.00000 | 0.00000 | 0.00000 | 0.00000 | 0.00000 |
| MEA | 0.00000 | 0.00000 | 0.00000 | 0.00000 | 0.00000 | 0.00000 | 0.00000 |
| NEU | 0.00000 | 0.00000 | 0.00000 | 0.00000 | 0.00000 | 0.00000 | 0.00000 |
| OAS | 0.00000 | 0.00000 | 0.00000 | 0.00000 | 0.00000 | 0.00000 | 0.00000 |
| REF | 0.00000 | 0.00000 | 0.00000 | 0.00000 | 0.00000 | 0.00000 | 0.00000 |
| SSA | 0.00000 | 0.00000 | 0.00000 | 0.00000 | 0.00000 | 0.00000 | 0.00000 |
| USA | 0.00000 | 0.00000 | 0.00000 | 0.00000 | 0.00000 | 0.00000 | 0.00000 |

Table 219: MAgPIE m4p\_SSP1 — Demand—Domestic Balanceflow—Secondary products—Brans (Mt DM/yr)  
[PART 2/2]

|     | 1965    | 1970    | 1975    | 1980    | 1985    | 1990    | 1995    | 2000    | 2005    | 2010    |
|-----|---------|---------|---------|---------|---------|---------|---------|---------|---------|---------|
| GLO | -0.0867 | -0.2104 | -0.2342 | -0.4157 | -0.0979 | -1.4087 | -2.3967 | -0.8771 | -1.1324 | -1.9433 |
| CAZ | -0.0994 | -0.2118 | -0.2376 | -0.3255 | -0.1498 | -0.1954 | -0.2241 | -0.0433 | 0.0000  | -0.0003 |
| CHA | 0.0000  | 0.0000  | 0.0000  | 0.0000  | 0.0000  | -0.0044 | 0.0000  | 0.0000  | 0.0000  | 0.0000  |
| EUR | 0.0050  | 0.0047  | 0.0022  | 0.0044  | 0.0042  | 0.0026  | -0.0090 | -0.1085 | -0.1840 | -0.1973 |
| IND | 0.0000  | 0.0000  | 0.0000  | 0.0008  | -0.0003 | -0.0011 | 0.0001  | 0.0001  | 0.0010  | -0.0371 |
| JPN | 0.0000  | 0.0000  | 0.0000  | 0.0000  | 0.0000  | 0.0000  | 0.0000  | 0.0000  | 0.0000  | 0.0000  |
| LAM | 0.0000  | 0.0000  | 0.0000  | 0.0000  | 0.0000  | -0.0050 | -0.0004 | -0.1739 | -0.8362 | -1.2817 |
| MEA | 0.0000  | 0.0000  | 0.0000  | 0.0000  | 0.0000  | 0.0000  | -0.0058 | 0.0013  | -0.0036 | -0.0014 |
| NEU | 0.0095  | 0.0085  | 0.0087  | 0.0106  | 0.0114  | 0.0036  | 0.0000  | -0.0308 | 0.0000  | 0.0000  |
| OAS | 0.0000  | -0.0098 | -0.0059 | -0.0018 | -0.0014 | -0.0136 | 0.0000  | -0.0038 | -0.0012 | -0.0685 |
| REF | -0.0019 | -0.0019 | -0.0016 | -0.0015 | -0.0016 | -0.0019 | 0.0000  | 0.0000  | -0.0002 | -0.0206 |
| SSA | 0.0000  | 0.0000  | 0.0000  | 0.0000  | 0.0000  | 0.0000  | -0.0069 | 0.0000  | -0.0018 | -0.0057 |
| USA | 0.0000  | 0.0000  | 0.0000  | -0.1026 | 0.0396  | -1.1936 | -2.1507 | -0.5183 | -0.1064 | -0.3307 |

Table 220: FAO — Demand—Domestic Balanceflow—Secondary products—Brans (Mt DM/yr)

5.4.3 Cotton lint

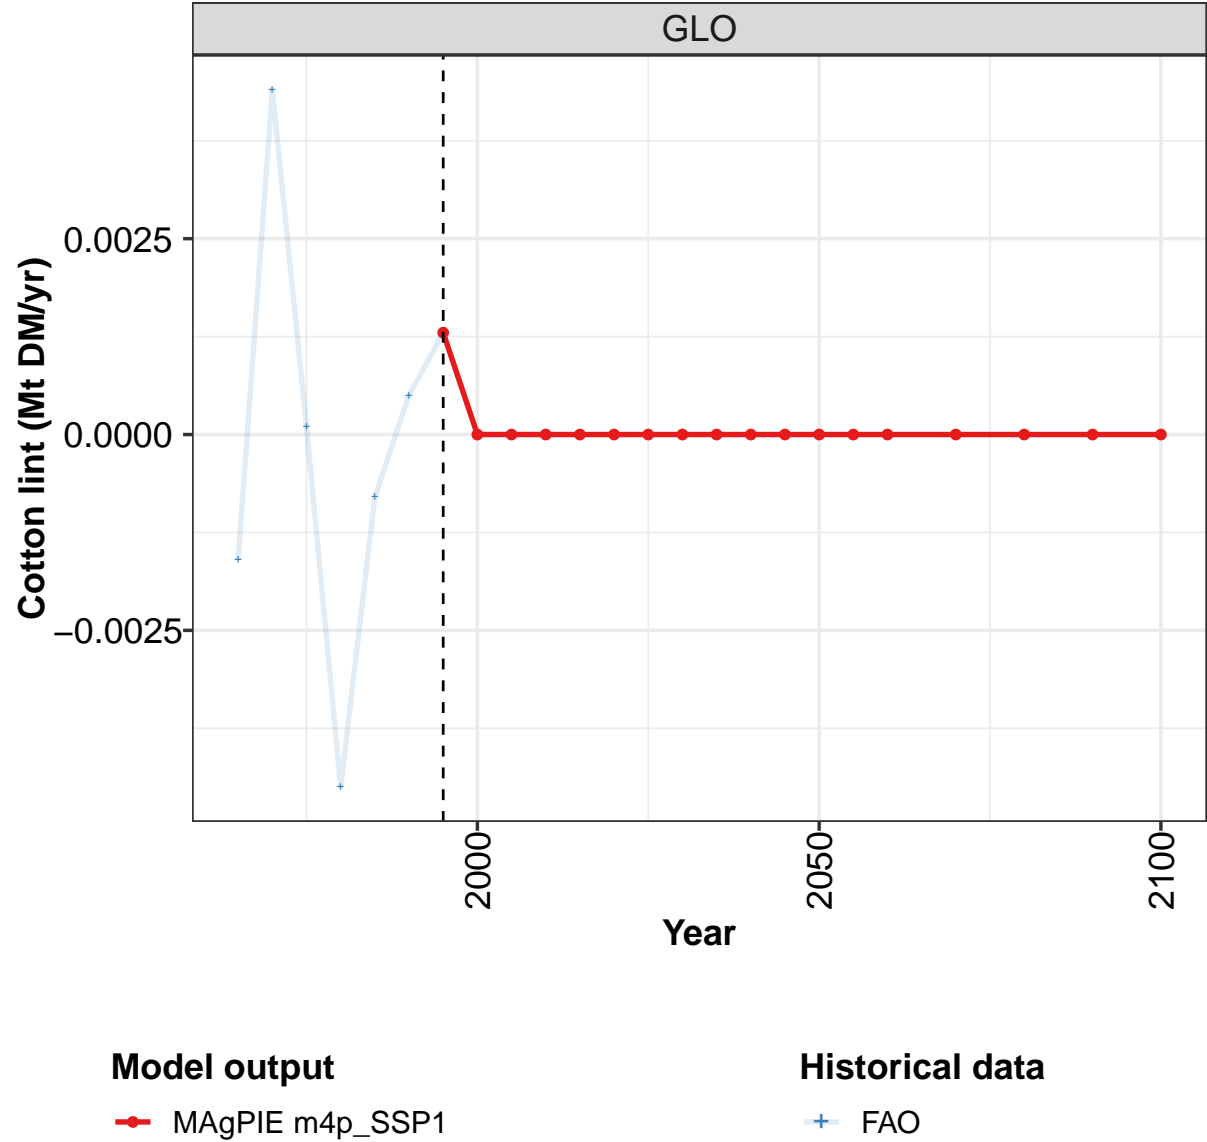

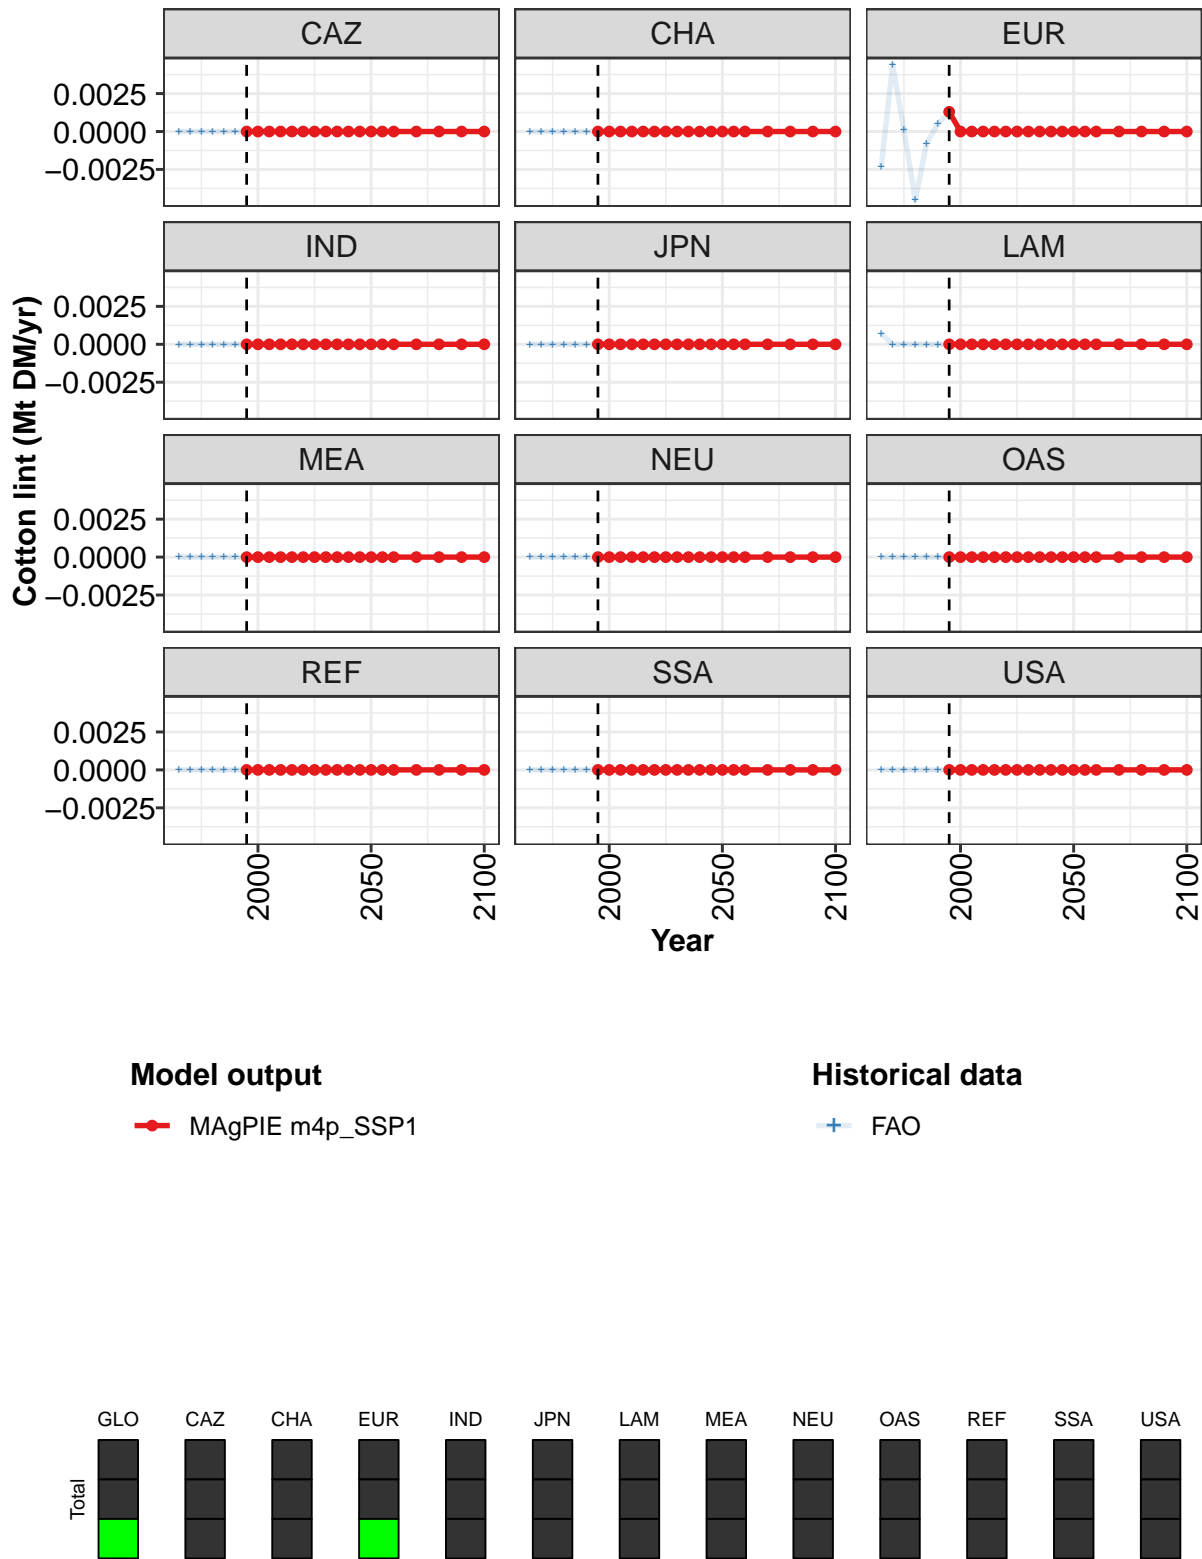

Figure 74: MAgPIE m4p\_SSP1 — Demand—Domestic Balanceflow—Secondary products—Cotton lint (Mt DM/yr)

|     | 1995    | 2000    | 2005    | 2010    | 2015    | 2020    | 2025    | 2030    | 2035    | 2040    | 2045    |
|-----|---------|---------|---------|---------|---------|---------|---------|---------|---------|---------|---------|
| GLO | 0.00130 | 0.00000 | 0.00000 | 0.00000 | 0.00000 | 0.00000 | 0.00000 | 0.00000 | 0.00000 | 0.00000 | 0.00000 |
| CAZ | 0.00000 | 0.00000 | 0.00000 | 0.00000 | 0.00000 | 0.00000 | 0.00000 | 0.00000 | 0.00000 | 0.00000 | 0.00000 |
| CHA | 0.00000 | 0.00000 | 0.00000 | 0.00000 | 0.00000 | 0.00000 | 0.00000 | 0.00000 | 0.00000 | 0.00000 | 0.00000 |
| EUR | 0.00130 | 0.00000 | 0.00000 | 0.00000 | 0.00000 | 0.00000 | 0.00000 | 0.00000 | 0.00000 | 0.00000 | 0.00000 |
| IND | 0.00000 | 0.00000 | 0.00000 | 0.00000 | 0.00000 | 0.00000 | 0.00000 | 0.00000 | 0.00000 | 0.00000 | 0.00000 |
| JPN | 0.00000 | 0.00000 | 0.00000 | 0.00000 | 0.00000 | 0.00000 | 0.00000 | 0.00000 | 0.00000 | 0.00000 | 0.00000 |
| LAM | 0.00000 | 0.00000 | 0.00000 | 0.00000 | 0.00000 | 0.00000 | 0.00000 | 0.00000 | 0.00000 | 0.00000 | 0.00000 |
| MEA | 0.00000 | 0.00000 | 0.00000 | 0.00000 | 0.00000 | 0.00000 | 0.00000 | 0.00000 | 0.00000 | 0.00000 | 0.00000 |
| NEU | 0.00000 | 0.00000 | 0.00000 | 0.00000 | 0.00000 | 0.00000 | 0.00000 | 0.00000 | 0.00000 | 0.00000 | 0.00000 |
| OAS | 0.00000 | 0.00000 | 0.00000 | 0.00000 | 0.00000 | 0.00000 | 0.00000 | 0.00000 | 0.00000 | 0.00000 | 0.00000 |
| REF | 0.00000 | 0.00000 | 0.00000 | 0.00000 | 0.00000 | 0.00000 | 0.00000 | 0.00000 | 0.00000 | 0.00000 | 0.00000 |
| SSA | 0.00000 | 0.00000 | 0.00000 | 0.00000 | 0.00000 | 0.00000 | 0.00000 | 0.00000 | 0.00000 | 0.00000 | 0.00000 |
| USA | 0.00000 | 0.00000 | 0.00000 | 0.00000 | 0.00000 | 0.00000 | 0.00000 | 0.00000 | 0.00000 | 0.00000 | 0.00000 |

Table 221: MAgPIE m4p\_SSP1 — Demand—Domestic Balanceflow—Secondary products—Cotton lint (Mt DM/yr) [PART 1/2]

|     | 2050    | 2055    | 2060    | 2070    | 2080    | 2090    | 2100    |
|-----|---------|---------|---------|---------|---------|---------|---------|
| GLO | 0.00000 | 0.00000 | 0.00000 | 0.00000 | 0.00000 | 0.00000 | 0.00000 |
| CAZ | 0.00000 | 0.00000 | 0.00000 | 0.00000 | 0.00000 | 0.00000 | 0.00000 |
| CHA | 0.00000 | 0.00000 | 0.00000 | 0.00000 | 0.00000 | 0.00000 | 0.00000 |
| EUR | 0.00000 | 0.00000 | 0.00000 | 0.00000 | 0.00000 | 0.00000 | 0.00000 |
| IND | 0.00000 | 0.00000 | 0.00000 | 0.00000 | 0.00000 | 0.00000 | 0.00000 |
| JPN | 0.00000 | 0.00000 | 0.00000 | 0.00000 | 0.00000 | 0.00000 | 0.00000 |
| LAM | 0.00000 | 0.00000 | 0.00000 | 0.00000 | 0.00000 | 0.00000 | 0.00000 |
| MEA | 0.00000 | 0.00000 | 0.00000 | 0.00000 | 0.00000 | 0.00000 | 0.00000 |
| NEU | 0.00000 | 0.00000 | 0.00000 | 0.00000 | 0.00000 | 0.00000 | 0.00000 |
| OAS | 0.00000 | 0.00000 | 0.00000 | 0.00000 | 0.00000 | 0.00000 | 0.00000 |
| REF | 0.00000 | 0.00000 | 0.00000 | 0.00000 | 0.00000 | 0.00000 | 0.00000 |
| SSA | 0.00000 | 0.00000 | 0.00000 | 0.00000 | 0.00000 | 0.00000 | 0.00000 |
| USA | 0.00000 | 0.00000 | 0.00000 | 0.00000 | 0.00000 | 0.00000 | 0.00000 |

Table 222: MAgPIE m4p\_SSP1 — Demand—Domestic Balanceflow—Secondary products—Cotton lint (Mt DM/yr) [PART 2/2]

|     | 1965     | 1970    | 1975    | 1980     | 1985     | 1990    | 1995    | 2000    | 2005    | 2010    |
|-----|----------|---------|---------|----------|----------|---------|---------|---------|---------|---------|
| GLO | -0.00160 | 0.00440 | 0.00010 | -0.00450 | -0.00080 | 0.00050 | 0.00130 | 0.00000 | 0.00000 | 0.00000 |
| CAZ | 0.00000  | 0.00000 | 0.00000 | 0.00000  | 0.00000  | 0.00000 | 0.00000 | 0.00000 | 0.00000 | 0.00000 |
| CHA | 0.00000  | 0.00000 | 0.00000 | 0.00000  | 0.00000  | 0.00000 | 0.00000 | 0.00000 | 0.00000 | 0.00000 |
| EUR | -0.00230 | 0.00440 | 0.00010 | -0.00450 | -0.00080 | 0.00050 | 0.00130 | 0.00000 | 0.00000 | 0.00000 |
| IND | 0.00000  | 0.00000 | 0.00000 | 0.00000  | 0.00000  | 0.00000 | 0.00000 | 0.00000 | 0.00000 | 0.00000 |
| JPN | 0.00000  | 0.00000 | 0.00000 | 0.00000  | 0.00000  | 0.00000 | 0.00000 | 0.00000 | 0.00000 | 0.00000 |
| LAM | 0.00070  | 0.00000 | 0.00000 | 0.00000  | 0.00000  | 0.00000 | 0.00000 | 0.00000 | 0.00000 | 0.00000 |
| MEA | 0.00000  | 0.00000 | 0.00000 | 0.00000  | 0.00000  | 0.00000 | 0.00000 | 0.00000 | 0.00000 | 0.00000 |
| NEU | 0.00000  | 0.00000 | 0.00000 | 0.00000  | 0.00000  | 0.00000 | 0.00000 | 0.00000 | 0.00000 | 0.00000 |
| OAS | 0.00000  | 0.00000 | 0.00000 | 0.00000  | 0.00000  | 0.00000 | 0.00000 | 0.00000 | 0.00000 | 0.00000 |
| REF | 0.00000  | 0.00000 | 0.00000 | 0.00000  | 0.00000  | 0.00000 | 0.00000 | 0.00000 | 0.00000 | 0.00000 |
| SSA | 0.00000  | 0.00000 | 0.00000 | 0.00000  | 0.00000  | 0.00000 | 0.00000 | 0.00000 | 0.00000 | 0.00000 |
| USA | 0.00000  | 0.00000 | 0.00000 | 0.00000  | 0.00000  | 0.00000 | 0.00000 | 0.00000 | 0.00000 | 0.00000 |

Table 223: FAO — Demand—Domestic Balanceflow—Secondary products—Cotton lint (Mt DM/yr)

5.4.4 Oilcakes

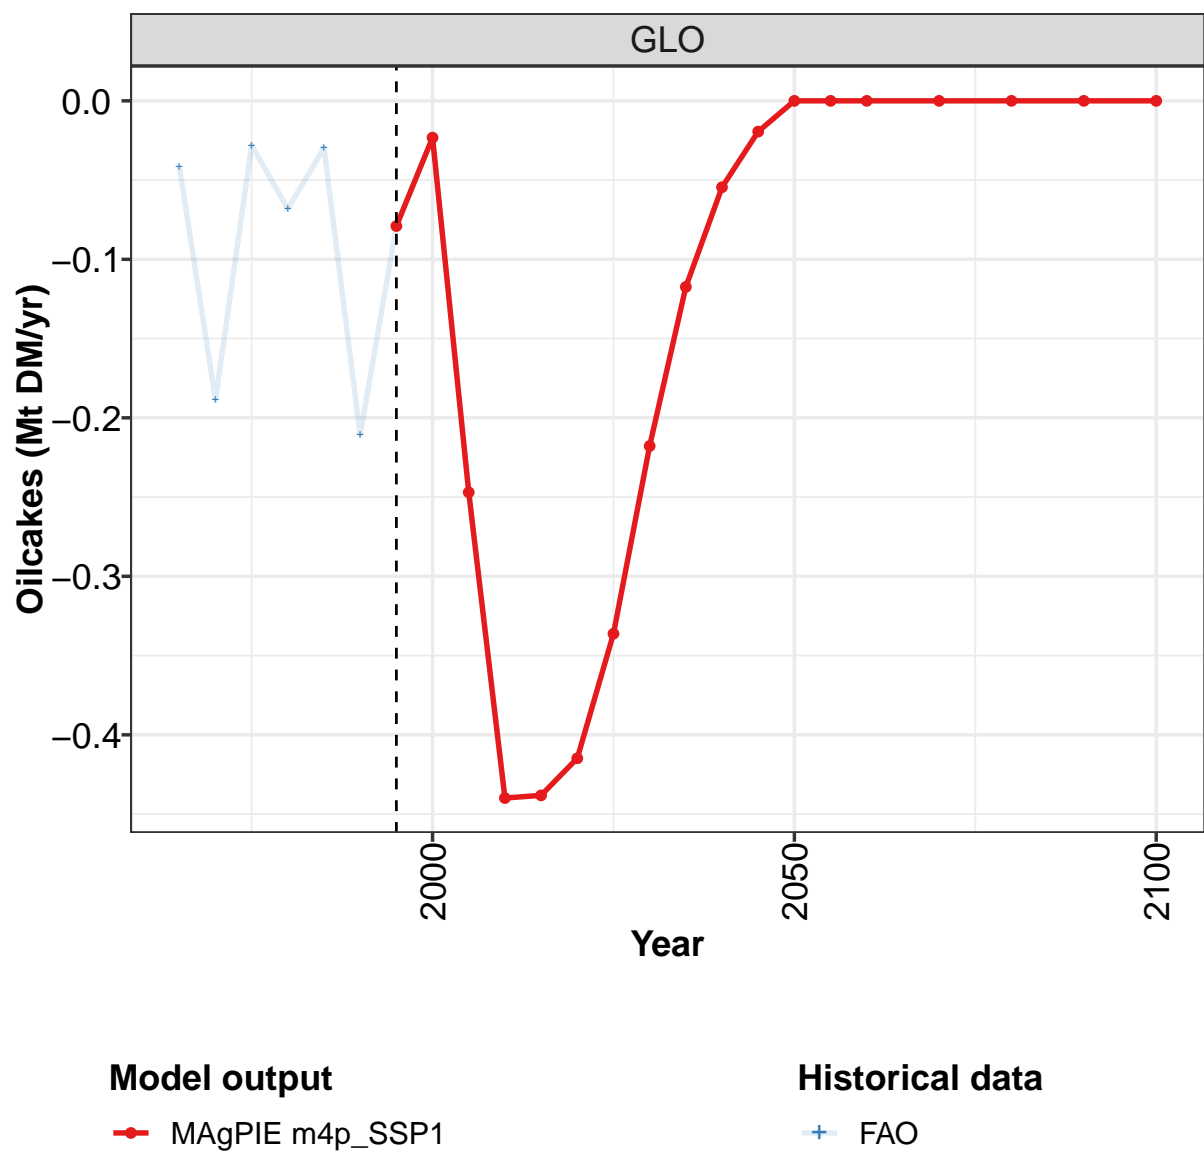

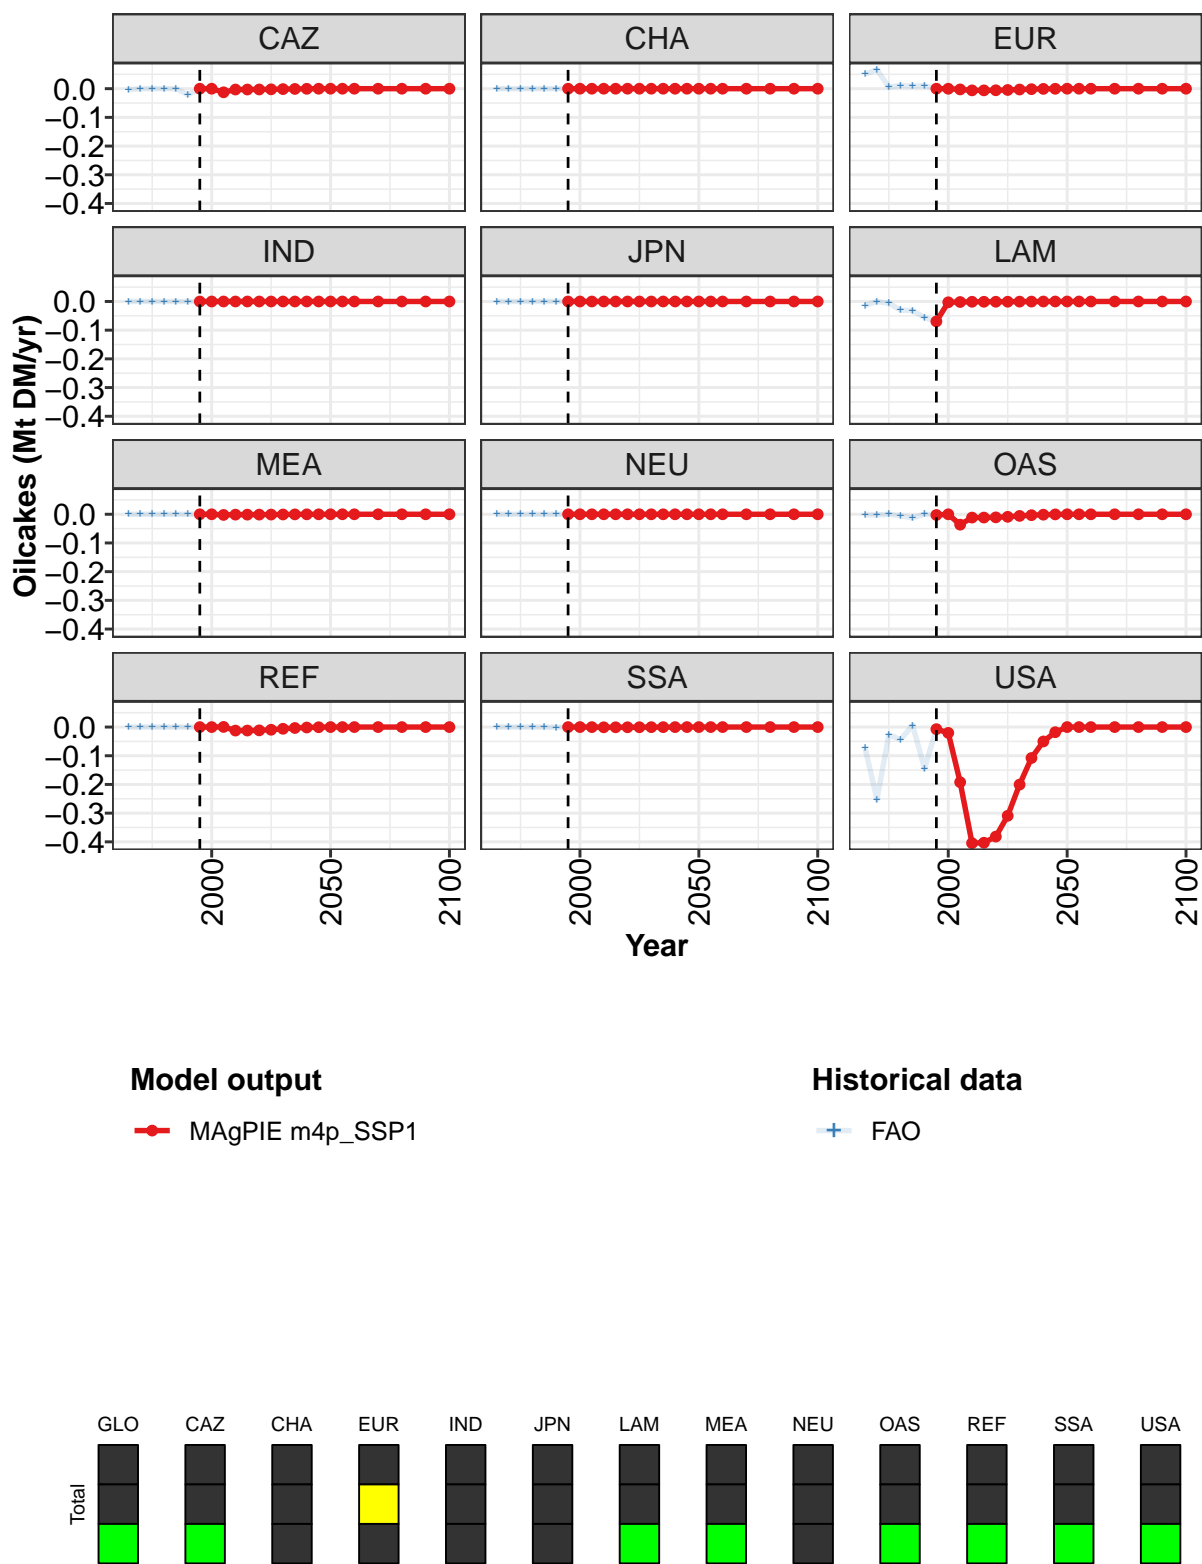

Figure 75: MAgPIE m4p\_SSP1 — Demand—Domestic Balanceflow—Secondary products—Oilcakes (Mt DM/yr)

|     | 1995      | 2000      | 2005      | 2010      | 2015      | 2020      | 2025      | 2030      | 2035      |       |
|-----|-----------|-----------|-----------|-----------|-----------|-----------|-----------|-----------|-----------|-------|
| GLO | -0.079000 | -0.023200 | -0.247000 | -0.439900 | -0.438200 | -0.414800 | -0.336200 | -0.217800 | -0.117400 | -0.05 |
| CAZ | 0.000000  | 0.000000  | -0.012600 | -0.002900 | -0.002900 | -0.002700 | -0.002200 | -0.001400 | -0.000800 | -0.00 |
| CHA | 0.000000  | 0.000000  | 0.000000  | 0.000000  | 0.000000  | 0.000000  | 0.000000  | 0.000000  | 0.000000  | 0.00  |
| EUR | 0.000000  | -0.000200 | -0.002500 | -0.005800 | -0.005800 | -0.005500 | -0.004500 | -0.002900 | -0.001600 | -0.00 |
| IND | 0.000000  | 0.000000  | 0.000000  | 0.000000  | 0.000000  | 0.000000  | 0.000000  | 0.000000  | 0.000000  | 0.00  |
| JPN | 0.000000  | 0.000000  | 0.000000  | 0.000000  | 0.000000  | 0.000000  | 0.000000  | 0.000000  | 0.000000  | 0.00  |
| LAM | -0.069400 | -0.002800 | -0.001800 | -0.001000 | -0.001000 | -0.000900 | -0.000800 | -0.000500 | -0.000300 | -0.00 |
| MEA | 0.000000  | 0.000000  | -0.002200 | -0.001300 | -0.001300 | -0.001200 | -0.001000 | -0.000700 | -0.000400 | -0.00 |
| NEU | 0.000000  | 0.000000  | 0.000000  | 0.000000  | 0.000000  | 0.000000  | 0.000000  | 0.000000  | 0.000000  | 0.00  |
| OAS | -0.002400 | 0.000000  | -0.036200 | -0.011500 | -0.011400 | -0.010800 | -0.008800 | -0.005700 | -0.003100 | -0.00 |
| REF | 0.000000  | 0.000000  | 0.000500  | -0.012200 | -0.012100 | -0.011500 | -0.009300 | -0.006000 | -0.003200 | -0.00 |
| SSA | 0.000000  | 0.000000  | -0.000100 | -0.000700 | -0.000700 | -0.000600 | -0.000500 | -0.000300 | -0.000200 | -0.00 |
| USA | -0.007200 | -0.020200 | -0.192100 | -0.404500 | -0.403000 | -0.381600 | -0.309100 | -0.200300 | -0.107800 | -0.05 |

Table 224: MAgPIE m4p\_SSP1 — Demand—Domestic Balanceflow—Secondary products—Oilcakes (Mt DM/yr) [PART 1/2]

|     | 2050     | 2055     | 2060     | 2070     | 2080     | 2090     | 2100     |
|-----|----------|----------|----------|----------|----------|----------|----------|
| GLO | 0.000000 | 0.000000 | 0.000000 | 0.000000 | 0.000000 | 0.000000 | 0.000000 |
| CAZ | 0.000000 | 0.000000 | 0.000000 | 0.000000 | 0.000000 | 0.000000 | 0.000000 |
| CHA | 0.000000 | 0.000000 | 0.000000 | 0.000000 | 0.000000 | 0.000000 | 0.000000 |
| EUR | 0.000000 | 0.000000 | 0.000000 | 0.000000 | 0.000000 | 0.000000 | 0.000000 |
| IND | 0.000000 | 0.000000 | 0.000000 | 0.000000 | 0.000000 | 0.000000 | 0.000000 |
| JPN | 0.000000 | 0.000000 | 0.000000 | 0.000000 | 0.000000 | 0.000000 | 0.000000 |
| LAM | 0.000000 | 0.000000 | 0.000000 | 0.000000 | 0.000000 | 0.000000 | 0.000000 |
| MEA | 0.000000 | 0.000000 | 0.000000 | 0.000000 | 0.000000 | 0.000000 | 0.000000 |
| NEU | 0.000000 | 0.000000 | 0.000000 | 0.000000 | 0.000000 | 0.000000 | 0.000000 |
| OAS | 0.000000 | 0.000000 | 0.000000 | 0.000000 | 0.000000 | 0.000000 | 0.000000 |
| REF | 0.000000 | 0.000000 | 0.000000 | 0.000000 | 0.000000 | 0.000000 | 0.000000 |
| SSA | 0.000000 | 0.000000 | 0.000000 | 0.000000 | 0.000000 | 0.000000 | 0.000000 |
| USA | 0.000000 | 0.000000 | 0.000000 | 0.000000 | 0.000000 | 0.000000 | 0.000000 |

Table 225: MAgPIE m4p\_SSP1 — Demand—Domestic Balanceflow—Secondary products—Oilcakes (Mt DM/yr) [PART 2/2]

|     | 1965    | 1970    | 1975    | 1980    | 1985    | 1990    | 1995    | 2000    | 2005    | 2010    |
|-----|---------|---------|---------|---------|---------|---------|---------|---------|---------|---------|
| GLO | -0.0413 | -0.1884 | -0.0281 | -0.0681 | -0.0298 | -0.2108 | -0.0790 | -0.0231 | -0.2469 | -0.4398 |
| CAZ | -0.0030 | 0.0000  | 0.0000  | 0.0000  | 0.0000  | -0.0211 | 0.0000  | 0.0000  | -0.0126 | -0.0029 |
| CHA | 0.0000  | 0.0000  | 0.0000  | 0.0000  | 0.0000  | 0.0000  | 0.0000  | 0.0000  | 0.0000  | 0.0000  |
| EUR | 0.0509  | 0.0659  | 0.0060  | 0.0112  | 0.0088  | 0.0110  | 0.0000  | -0.0002 | -0.0025 | -0.0058 |
| IND | 0.0000  | 0.0000  | 0.0000  | 0.0000  | 0.0000  | 0.0000  | 0.0000  | 0.0000  | 0.0000  | 0.0000  |
| JPN | 0.0000  | 0.0000  | 0.0000  | 0.0000  | 0.0000  | 0.0000  | 0.0000  | 0.0000  | 0.0000  | 0.0000  |
| LAM | -0.0138 | 0.0000  | -0.0062 | -0.0305 | -0.0318 | -0.0558 | -0.0694 | -0.0028 | -0.0018 | -0.0010 |
| MEA | 0.0000  | 0.0000  | 0.0000  | 0.0000  | 0.0000  | 0.0000  | 0.0000  | 0.0000  | -0.0022 | -0.0013 |
| NEU | 0.0000  | 0.0000  | 0.0000  | 0.0000  | 0.0000  | 0.0000  | 0.0000  | 0.0000  | 0.0000  | 0.0000  |
| OAS | -0.0026 | -0.0026 | 0.0000  | -0.0054 | -0.0127 | 0.0000  | -0.0024 | 0.0000  | -0.0362 | -0.0115 |
| REF | 0.0000  | 0.0000  | 0.0000  | 0.0000  | 0.0000  | 0.0000  | 0.0000  | 0.0000  | 0.0005  | -0.0122 |
| SSA | 0.0000  | 0.0000  | 0.0000  | 0.0000  | -0.0001 | -0.0011 | 0.0000  | 0.0000  | -0.0001 | -0.0007 |
| USA | -0.0729 | -0.2518 | -0.0279 | -0.0434 | 0.0061  | -0.1438 | -0.0072 | -0.0202 | -0.1921 | -0.4045 |

Table 226: FAO — Demand—Domestic Balanceflow—Secondary products—Oilcakes (Mt DM/yr)

5.4.5 Oils

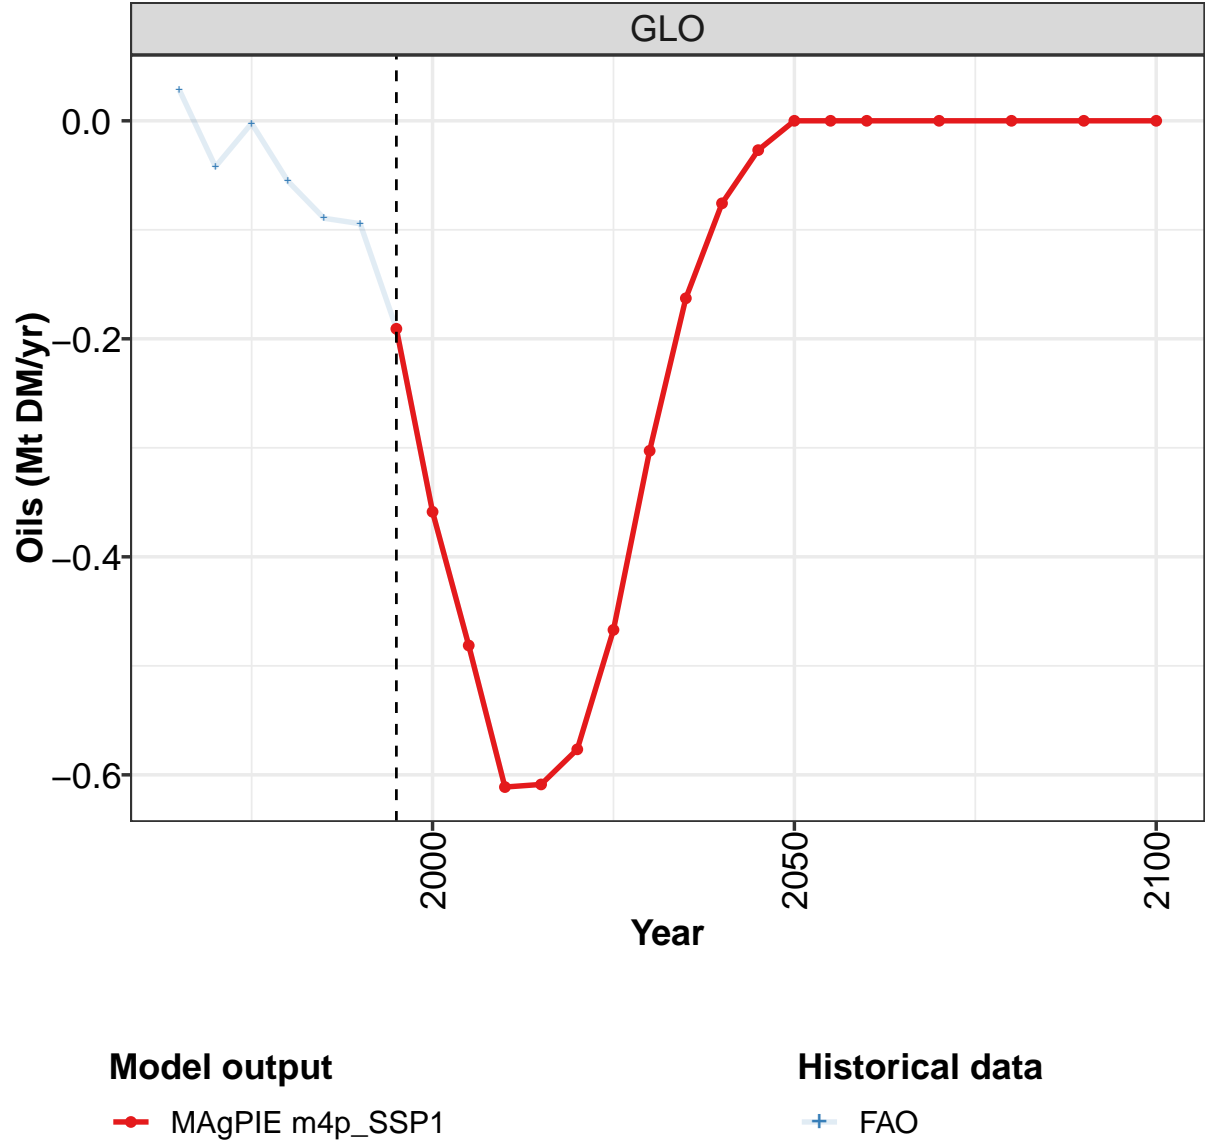



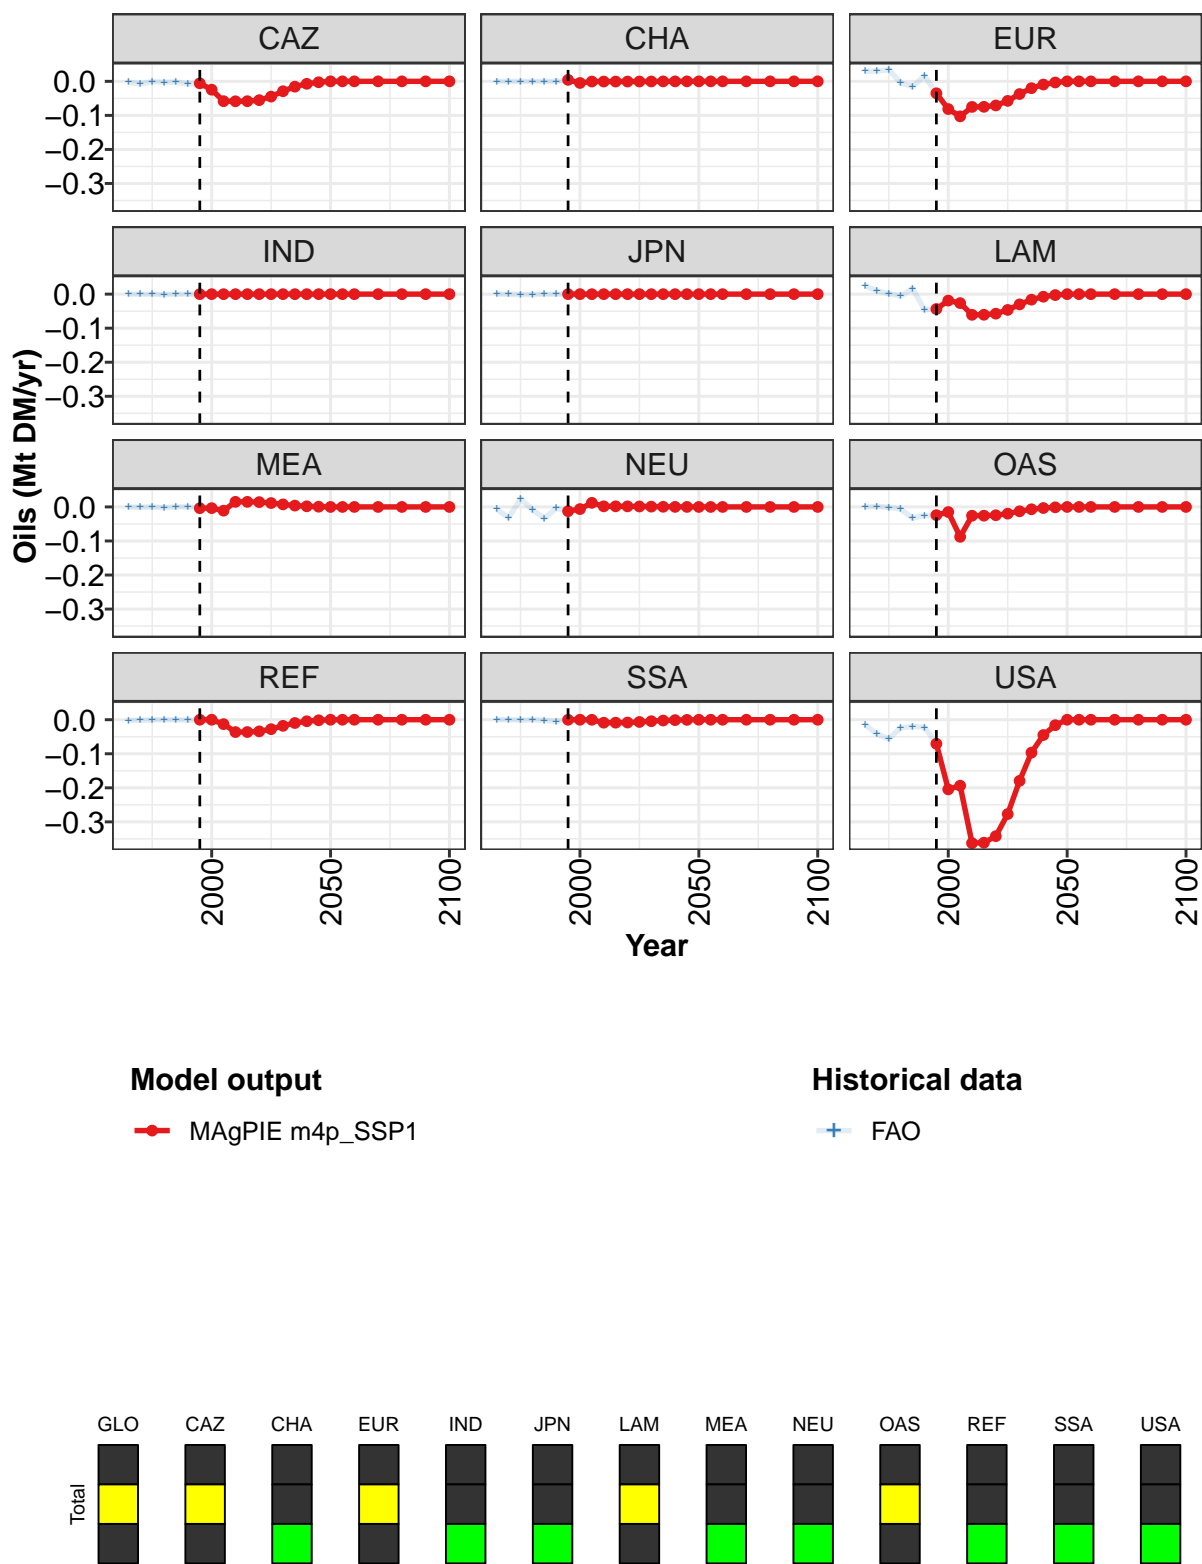

Figure 76: MAgPIE m4p\_SSP1 — Demand—Domestic Balanceflow—Secondary products—Oils (Mt DM/yr)

|     | 1995    | 2000    | 2005    | 2010    | 2015    | 2020    | 2025    | 2030    | 2035    | 2040    | 2045    |
|-----|---------|---------|---------|---------|---------|---------|---------|---------|---------|---------|---------|
| GLO | -0.1908 | -0.3587 | -0.4813 | -0.6112 | -0.6088 | -0.5766 | -0.4670 | -0.3027 | -0.1628 | -0.0757 | -0.0269 |
| CAZ | -0.0058 | -0.0245 | -0.0582 | -0.0585 | -0.0583 | -0.0552 | -0.0447 | -0.0290 | -0.0156 | -0.0072 | -0.0026 |
| CHA | 0.0044  | -0.0047 | -0.0005 | -0.0005 | -0.0005 | -0.0005 | -0.0004 | -0.0003 | -0.0001 | -0.0001 | 0.0000  |
| EUR | -0.0351 | -0.0814 | -0.1029 | -0.0751 | -0.0748 | -0.0708 | -0.0574 | -0.0372 | -0.0200 | -0.0093 | -0.0033 |
| IND | 0.0000  | 0.0000  | -0.0001 | 0.0000  | 0.0000  | 0.0000  | 0.0000  | 0.0000  | 0.0000  | 0.0000  | 0.0000  |
| JPN | 0.0000  | 0.0000  | -0.0001 | 0.0000  | 0.0000  | 0.0000  | 0.0000  | 0.0000  | 0.0000  | 0.0000  | 0.0000  |
| LAM | -0.0436 | -0.0188 | -0.0263 | -0.0607 | -0.0605 | -0.0573 | -0.0464 | -0.0301 | -0.0162 | -0.0075 | -0.0027 |
| MEA | -0.0037 | -0.0035 | -0.0109 | 0.0150  | 0.0150  | 0.0142  | 0.0115  | 0.0075  | 0.0040  | 0.0019  | 0.0007  |
| NEU | -0.0124 | -0.0063 | 0.0121  | 0.0018  | 0.0018  | 0.0017  | 0.0014  | 0.0009  | 0.0005  | 0.0002  | 0.0001  |
| OAS | -0.0240 | -0.0150 | -0.0877 | -0.0258 | -0.0257 | -0.0243 | -0.0197 | -0.0128 | -0.0069 | -0.0032 | -0.0011 |
| REF | 0.0000  | 0.0000  | -0.0129 | -0.0362 | -0.0361 | -0.0342 | -0.0277 | -0.0179 | -0.0096 | -0.0045 | -0.0016 |
| SSA | -0.0001 | 0.0000  | -0.0001 | -0.0087 | -0.0086 | -0.0082 | -0.0066 | -0.0043 | -0.0023 | -0.0011 | -0.0004 |
| USA | -0.0705 | -0.2045 | -0.1937 | -0.3625 | -0.3611 | -0.3420 | -0.2770 | -0.1795 | -0.0966 | -0.0449 | -0.0160 |

Table 227: MAgPIE m4p\_SSP1 — Demand—Domestic Balanceflow—Secondary products—Oils (Mt DM/yr)  
[PART 1/2]

|     | 2050   | 2055   | 2060   | 2070   | 2080   | 2090   | 2100   |
|-----|--------|--------|--------|--------|--------|--------|--------|
| GLO | 0.0000 | 0.0000 | 0.0000 | 0.0000 | 0.0000 | 0.0000 | 0.0000 |
| CAZ | 0.0000 | 0.0000 | 0.0000 | 0.0000 | 0.0000 | 0.0000 | 0.0000 |
| CHA | 0.0000 | 0.0000 | 0.0000 | 0.0000 | 0.0000 | 0.0000 | 0.0000 |
| EUR | 0.0000 | 0.0000 | 0.0000 | 0.0000 | 0.0000 | 0.0000 | 0.0000 |
| IND | 0.0000 | 0.0000 | 0.0000 | 0.0000 | 0.0000 | 0.0000 | 0.0000 |
| JPN | 0.0000 | 0.0000 | 0.0000 | 0.0000 | 0.0000 | 0.0000 | 0.0000 |
| LAM | 0.0000 | 0.0000 | 0.0000 | 0.0000 | 0.0000 | 0.0000 | 0.0000 |
| MEA | 0.0000 | 0.0000 | 0.0000 | 0.0000 | 0.0000 | 0.0000 | 0.0000 |
| NEU | 0.0000 | 0.0000 | 0.0000 | 0.0000 | 0.0000 | 0.0000 | 0.0000 |
| OAS | 0.0000 | 0.0000 | 0.0000 | 0.0000 | 0.0000 | 0.0000 | 0.0000 |
| REF | 0.0000 | 0.0000 | 0.0000 | 0.0000 | 0.0000 | 0.0000 | 0.0000 |
| SSA | 0.0000 | 0.0000 | 0.0000 | 0.0000 | 0.0000 | 0.0000 | 0.0000 |
| USA | 0.0000 | 0.0000 | 0.0000 | 0.0000 | 0.0000 | 0.0000 | 0.0000 |

Table 228: MAgPIE m4p\_SSP1 — Demand—Domestic Balanceflow—Secondary products—Oils (Mt DM/yr)  
[PART 2/2]

|     | 1965    | 1970    | 1975    | 1980    | 1985    | 1990    | 1995    | 2000    | 2005    | 2010    |
|-----|---------|---------|---------|---------|---------|---------|---------|---------|---------|---------|
| GLO | 0.0284  | -0.0421 | -0.0023 | -0.0553 | -0.0894 | -0.0944 | -0.1906 | -0.3589 | -0.4814 | -0.6111 |
| CAZ | -0.0023 | -0.0076 | -0.0009 | -0.0028 | -0.0020 | -0.0074 | -0.0058 | -0.0245 | -0.0582 | -0.0585 |
| CHA | 0.0000  | 0.0000  | 0.0000  | 0.0000  | 0.0000  | -0.0001 | 0.0044  | -0.0047 | -0.0005 | -0.0005 |
| EUR | 0.0296  | 0.0307  | 0.0340  | -0.0043 | -0.0156 | 0.0163  | -0.0351 | -0.0814 | -0.1029 | -0.0751 |
| IND | 0.0000  | 0.0000  | -0.0002 | -0.0015 | 0.0000  | 0.0000  | 0.0000  | 0.0000  | -0.0001 | 0.0000  |
| JPN | 0.0000  | 0.0000  | -0.0013 | -0.0012 | 0.0000  | 0.0000  | 0.0000  | 0.0000  | -0.0001 | 0.0000  |
| LAM | 0.0245  | 0.0095  | 0.0012  | -0.0055 | 0.0163  | -0.0459 | -0.0436 | -0.0188 | -0.0263 | -0.0607 |
| MEA | 0.0001  | -0.0010 | 0.0000  | -0.0021 | 0.0003  | 0.0004  | -0.0037 | -0.0035 | -0.0109 | 0.0150  |
| NEU | -0.0067 | -0.0316 | 0.0241  | -0.0081 | -0.0336 | -0.0039 | -0.0124 | -0.0063 | 0.0121  | 0.0018  |
| OAS | -0.0006 | 0.0018  | -0.0014 | -0.0063 | -0.0330 | -0.0253 | -0.0240 | -0.0150 | -0.0877 | -0.0258 |
| REF | -0.0018 | -0.0016 | -0.0006 | 0.0002  | -0.0001 | -0.0014 | 0.0000  | 0.0000  | -0.0129 | -0.0362 |
| SSA | 0.0000  | 0.0000  | -0.0013 | -0.0001 | -0.0017 | -0.0049 | -0.0001 | 0.0000  | -0.0001 | -0.0087 |
| USA | -0.0143 | -0.0423 | -0.0559 | -0.0236 | -0.0199 | -0.0223 | -0.0705 | -0.2045 | -0.1937 | -0.3625 |

Table 229: FAO — Demand—Domestic Balanceflow—Secondary products—Oils (Mt DM/yr)

5.4.6 Sugar

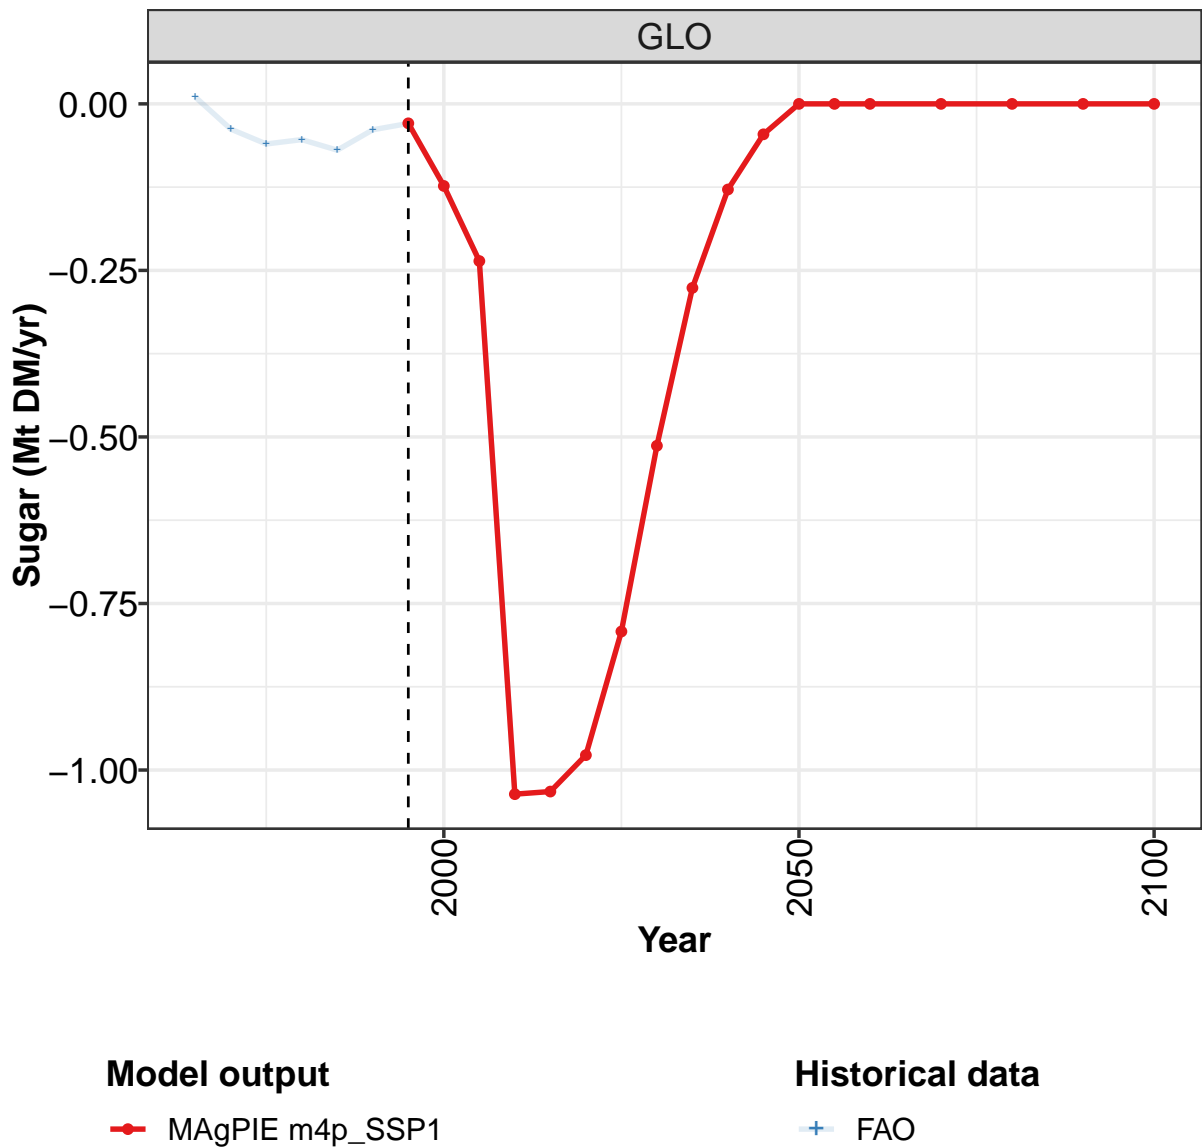

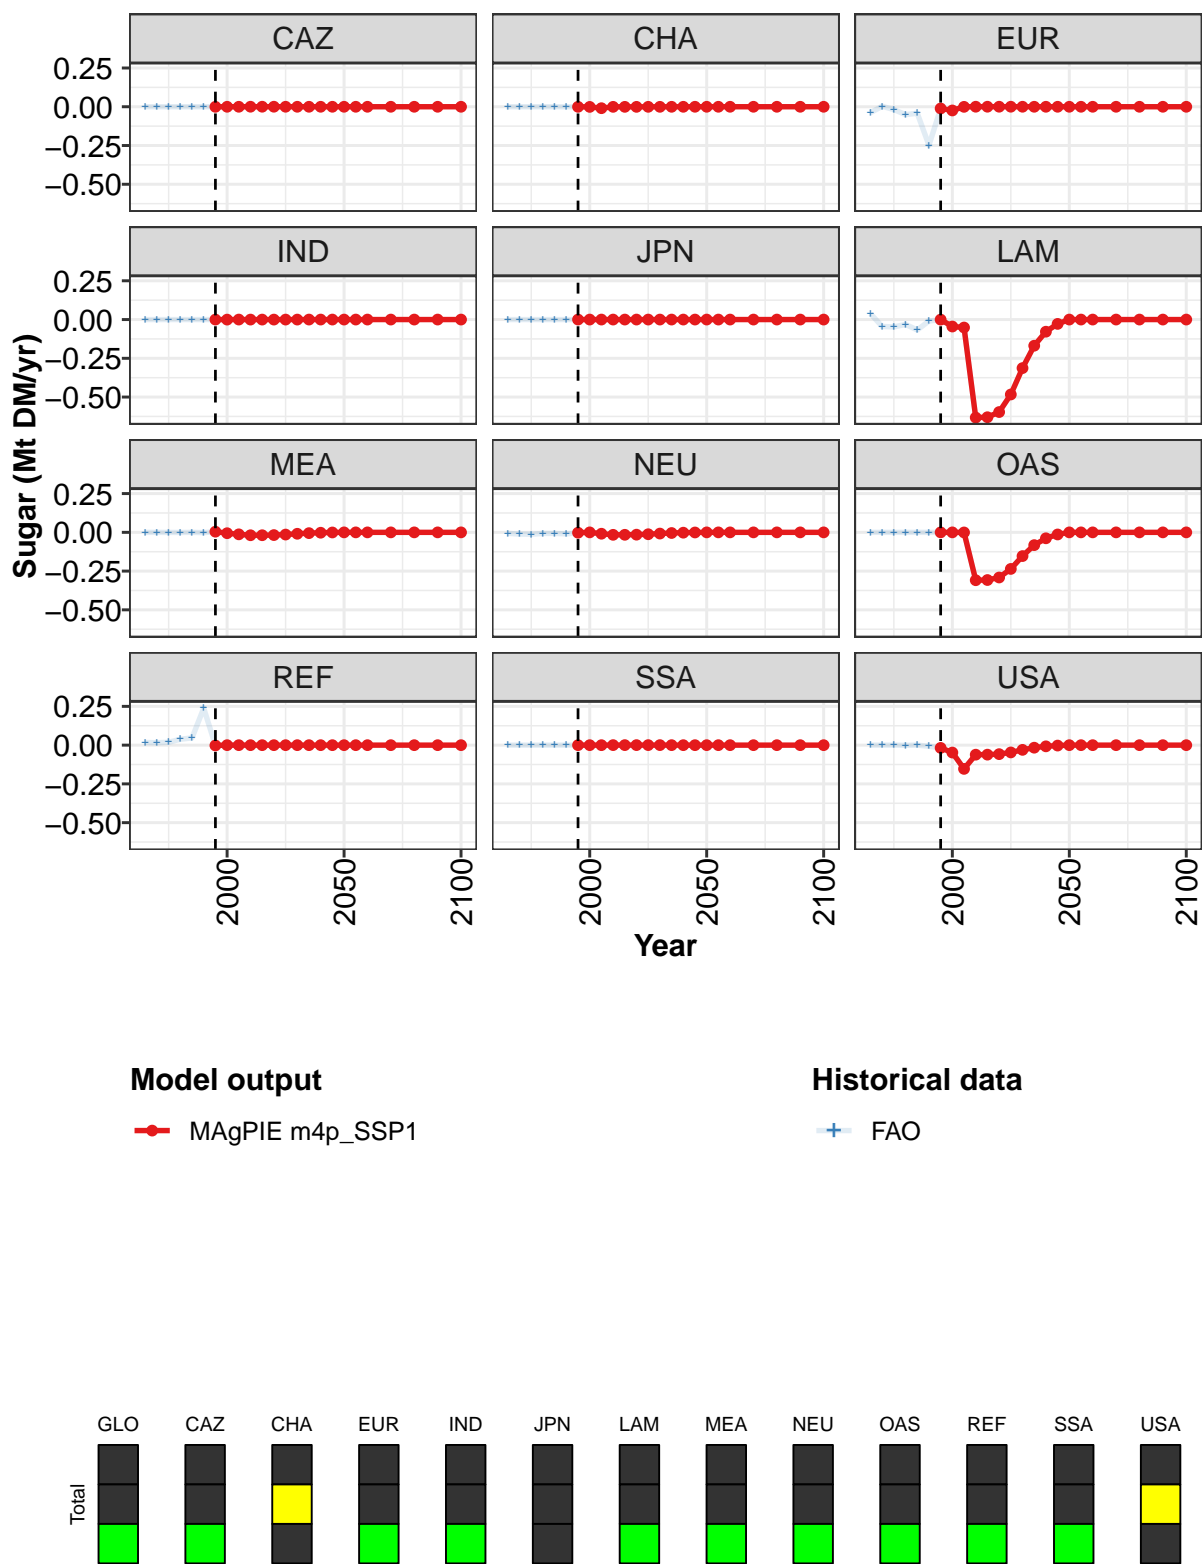

Figure 77: MAGPIE m4p\_SSP1 — Demand—Domestic Balanceflow—Secondary products—Sugar (Mt DM/yr)

|     | 1995     | 2000     | 2005     | 2010     | 2015     | 2020     | 2025     | 2030     | 2035     | 2040     | 2045     |
|-----|----------|----------|----------|----------|----------|----------|----------|----------|----------|----------|----------|
| GLO | -0.02920 | -0.12320 | -0.23590 | -1.03620 | -1.03230 | -0.97760 | -0.79200 | -0.51320 | -0.27620 | -0.12850 | -0.02850 |
| CAZ | -0.00010 | 0.00000  | 0.00000  | 0.00030  | 0.00030  | 0.00030  | 0.00020  | 0.00010  | 0.00010  | 0.00000  | 0.00000  |
| CHA | -0.00020 | -0.00080 | -0.00910 | -0.00040 | -0.00040 | -0.00040 | -0.00030 | -0.00020 | -0.00010 | -0.00010 | 0.00000  |
| EUR | -0.01100 | -0.02380 | -0.00040 | 0.00040  | 0.00040  | 0.00040  | 0.00030  | 0.00020  | 0.00010  | 0.00000  | 0.00000  |
| IND | 0.00000  | -0.00030 | 0.00000  | -0.00010 | -0.00010 | -0.00010 | -0.00010 | -0.00010 | 0.00000  | 0.00000  | 0.00000  |
| JPN | 0.00000  | 0.00000  | 0.00000  | 0.00000  | 0.00000  | 0.00000  | 0.00000  | 0.00000  | 0.00000  | 0.00000  | 0.00000  |
| LAM | -0.00020 | -0.04490 | -0.05130 | -0.63220 | -0.62990 | -0.59650 | -0.48320 | -0.31310 | -0.16850 | -0.07830 | -0.02850 |
| MEA | 0.00430  | -0.00550 | -0.01270 | -0.01860 | -0.01850 | -0.01760 | -0.01420 | -0.00920 | -0.00500 | -0.00230 | -0.00000 |
| NEU | -0.00240 | 0.00000  | -0.00880 | -0.01580 | -0.01570 | -0.01490 | -0.01210 | -0.00780 | -0.00420 | -0.00200 | -0.00000 |
| OAS | 0.00000  | 0.00000  | -0.00050 | -0.30870 | -0.30750 | -0.29120 | -0.23590 | -0.15290 | -0.08230 | -0.03820 | -0.01850 |
| REF | -0.00200 | 0.00000  | 0.00000  | 0.00000  | 0.00000  | 0.00000  | 0.00000  | 0.00000  | 0.00000  | 0.00000  | 0.00000  |
| SSA | 0.00000  | -0.00010 | 0.00000  | 0.00030  | 0.00030  | 0.00030  | 0.00020  | 0.00020  | 0.00010  | 0.00000  | 0.00000  |
| USA | -0.01760 | -0.04780 | -0.15310 | -0.06140 | -0.06120 | -0.05790 | -0.04690 | -0.03040 | -0.01640 | -0.00760 | -0.00000 |

Table 230: MAgPIE m4p\_SSP1 — Demand—Domestic Balanceflow—Secondary products—Sugar (Mt DM/yr)  
[PART 1/2]

|     | 2050    | 2055    | 2060    | 2070    | 2080    | 2090    | 2100    |
|-----|---------|---------|---------|---------|---------|---------|---------|
| GLO | 0.00000 | 0.00000 | 0.00000 | 0.00000 | 0.00000 | 0.00000 | 0.00000 |
| CAZ | 0.00000 | 0.00000 | 0.00000 | 0.00000 | 0.00000 | 0.00000 | 0.00000 |
| CHA | 0.00000 | 0.00000 | 0.00000 | 0.00000 | 0.00000 | 0.00000 | 0.00000 |
| EUR | 0.00000 | 0.00000 | 0.00000 | 0.00000 | 0.00000 | 0.00000 | 0.00000 |
| IND | 0.00000 | 0.00000 | 0.00000 | 0.00000 | 0.00000 | 0.00000 | 0.00000 |
| JPN | 0.00000 | 0.00000 | 0.00000 | 0.00000 | 0.00000 | 0.00000 | 0.00000 |
| LAM | 0.00000 | 0.00000 | 0.00000 | 0.00000 | 0.00000 | 0.00000 | 0.00000 |
| MEA | 0.00000 | 0.00000 | 0.00000 | 0.00000 | 0.00000 | 0.00000 | 0.00000 |
| NEU | 0.00000 | 0.00000 | 0.00000 | 0.00000 | 0.00000 | 0.00000 | 0.00000 |
| OAS | 0.00000 | 0.00000 | 0.00000 | 0.00000 | 0.00000 | 0.00000 | 0.00000 |
| REF | 0.00000 | 0.00000 | 0.00000 | 0.00000 | 0.00000 | 0.00000 | 0.00000 |
| SSA | 0.00000 | 0.00000 | 0.00000 | 0.00000 | 0.00000 | 0.00000 | 0.00000 |
| USA | 0.00000 | 0.00000 | 0.00000 | 0.00000 | 0.00000 | 0.00000 | 0.00000 |

Table 231: MAgPIE m4p\_SSP1 — Demand—Domestic Balanceflow—Secondary products—Sugar (Mt DM/yr)  
[PART 2/2]

|     | 1965   | 1970   | 1975   | 1980   | 1985   | 1990   | 1995   | 2000   | 2005   | 2010   |
|-----|--------|--------|--------|--------|--------|--------|--------|--------|--------|--------|
| GLO | 0.010  | -0.038 | -0.060 | -0.054 | -0.070 | -0.039 | -0.029 | -0.123 | -0.236 | -1.036 |
| CAZ | 0.000  | 0.000  | 0.000  | 0.000  | 0.000  | 0.000  | -0.000 | 0.000  | 0.000  | 0.000  |
| CHA | 0.000  | 0.000  | 0.000  | 0.000  | 0.000  | -0.000 | -0.000 | -0.001 | -0.009 | -0.000 |
| EUR | -0.038 | 0.003  | -0.018 | -0.051 | -0.042 | -0.249 | -0.011 | -0.024 | -0.000 | 0.000  |
| IND | 0.000  | 0.000  | 0.000  | 0.000  | 0.000  | 0.000  | 0.000  | -0.000 | 0.000  | -0.000 |
| JPN | 0.000  | 0.000  | 0.000  | 0.000  | 0.000  | 0.000  | 0.000  | 0.000  | 0.000  | 0.000  |
| LAM | 0.038  | -0.045 | -0.047 | -0.032 | -0.067 | -0.010 | -0.000 | -0.045 | -0.051 | -0.632 |
| MEA | 0.000  | -0.000 | -0.001 | -0.001 | 0.000  | -0.002 | 0.004  | -0.005 | -0.013 | -0.019 |
| NEU | -0.006 | -0.011 | -0.013 | -0.007 | -0.007 | -0.010 | -0.002 | 0.000  | -0.009 | -0.016 |
| OAS | 0.000  | 0.000  | 0.000  | 0.000  | 0.000  | 0.000  | 0.000  | 0.000  | -0.001 | -0.309 |
| REF | 0.017  | 0.016  | 0.018  | 0.038  | 0.046  | 0.239  | -0.002 | 0.000  | 0.000  | 0.000  |
| SSA | 0.000  | 0.000  | 0.000  | 0.000  | 0.000  | 0.000  | 0.000  | -0.000 | 0.000  | 0.000  |
| USA | 0.000  | 0.000  | 0.000  | -0.001 | 0.000  | -0.007 | -0.018 | -0.048 | -0.153 | -0.061 |

Table 232: FAO — Demand—Domestic Balanceflow—Secondary products—Sugar (Mt DM/yr)

## 6 Feed

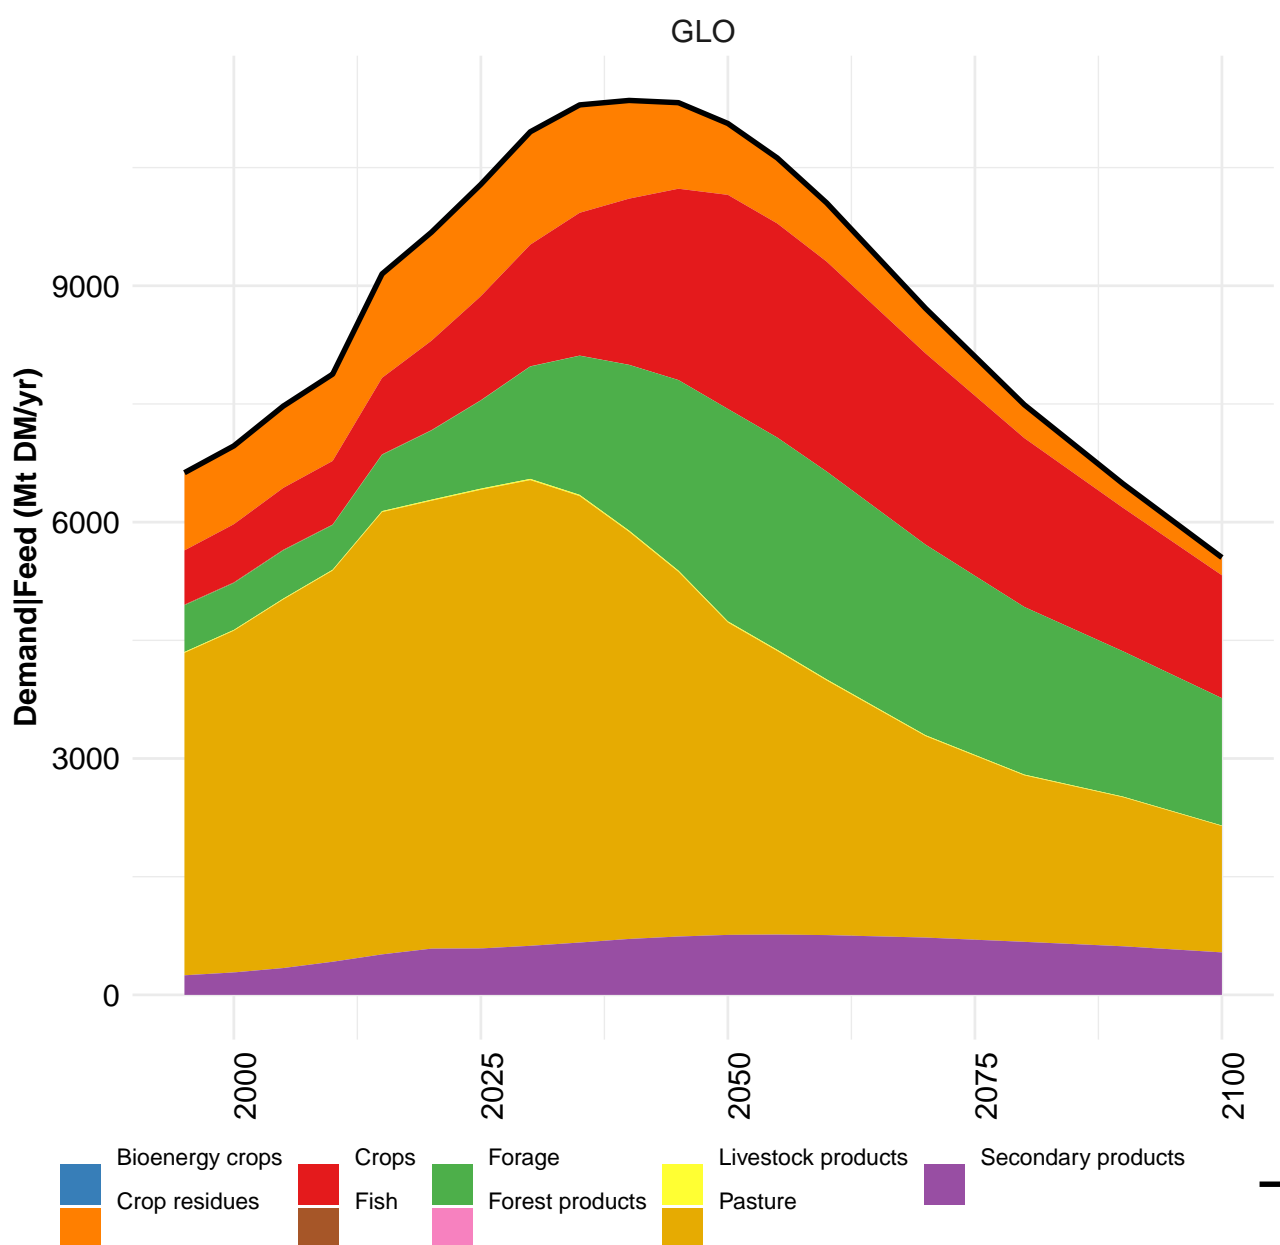

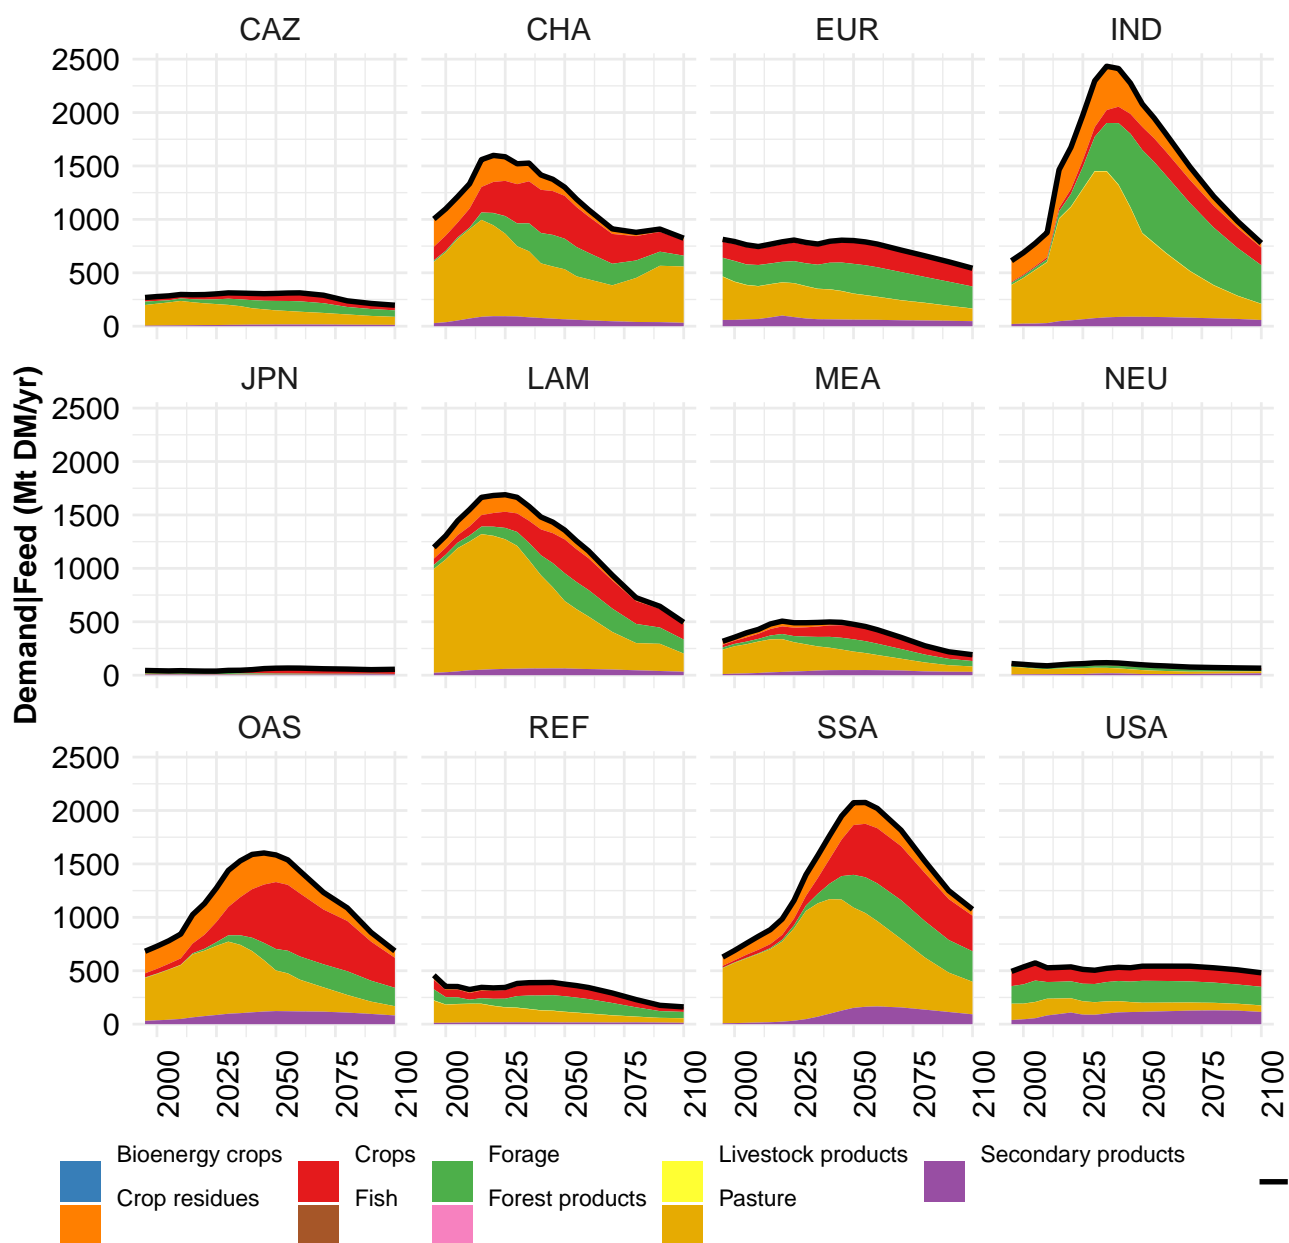

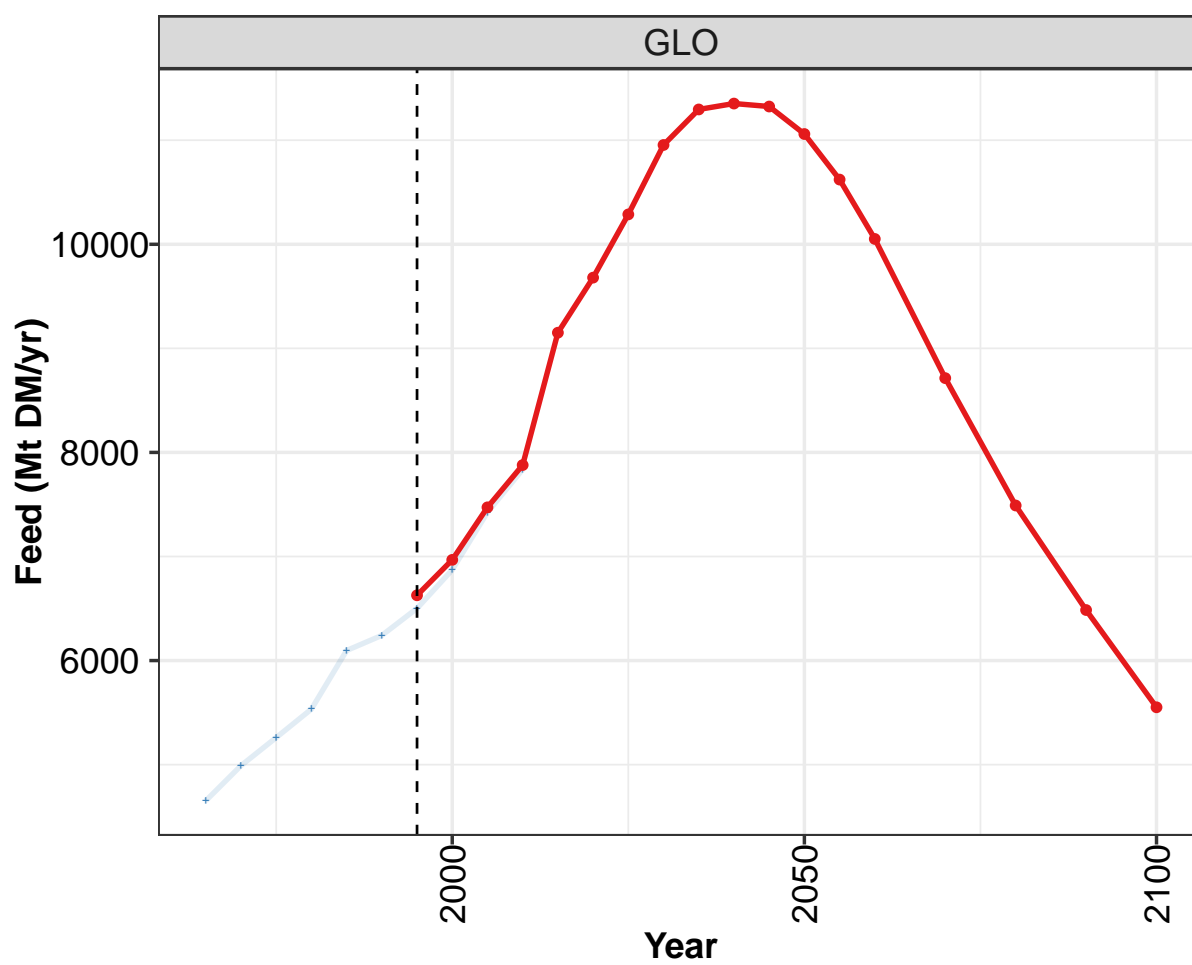**Model output**

—●— MAgPIE m4p\_SSP1

**Historical data**

—+— FAO



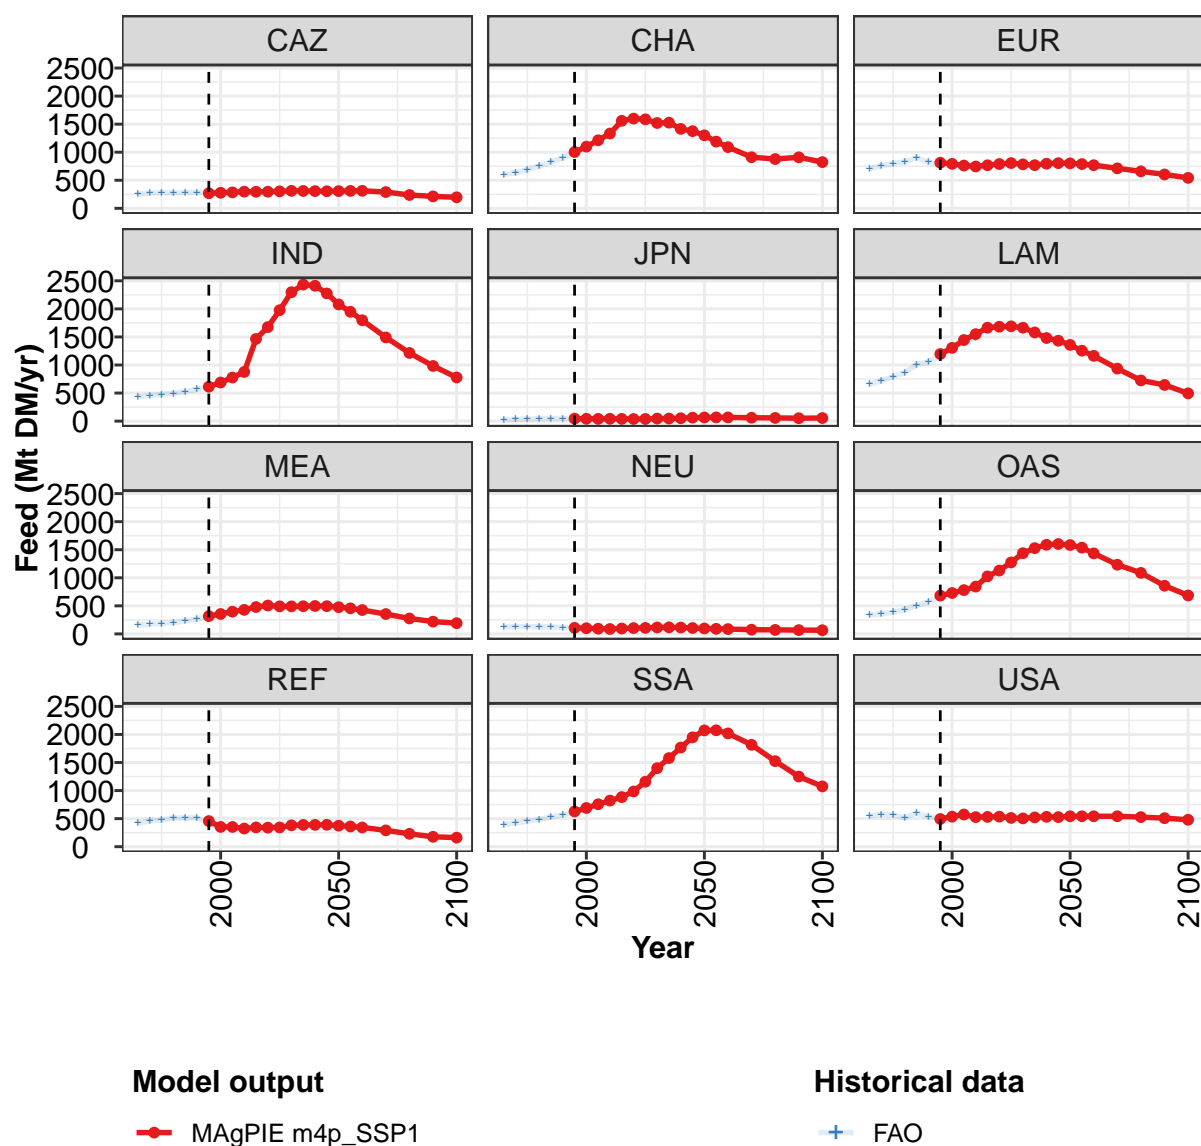

Figure 78: MAgPIE m4p\_SSP1 — Demand—Feed (Mt DM/yr)

|     | 1995 | 2000 | 2005 | 2010 | 2015 | 2020 | 2025  | 2030  | 2035  | 2040  | 2045  |
|-----|------|------|------|------|------|------|-------|-------|-------|-------|-------|
| GLO | 6627 | 6968 | 7473 | 7879 | 9151 | 9680 | 10287 | 10954 | 11296 | 11352 | 11324 |
| CAZ | 269  | 277  | 284  | 297  | 295  | 296  | 303   | 312   | 310   | 307   | 305   |
| CHA | 1004 | 1099 | 1213 | 1333 | 1559 | 1599 | 1586  | 1521  | 1527  | 1416  | 1375  |
| EUR | 813  | 793  | 762  | 746  | 767  | 790  | 806   | 784   | 769   | 795   | 805   |
| IND | 613  | 688  | 776  | 876  | 1464 | 1675 | 1977  | 2298  | 2433  | 2412  | 2275  |
| JPN | 44   | 42   | 40   | 42   | 40   | 38   | 38    | 45    | 46    | 52    | 62    |
| LAM | 1197 | 1305 | 1445 | 1550 | 1665 | 1682 | 1689  | 1665  | 1580  | 1481  | 1433  |
| MEA | 317  | 355  | 396  | 428  | 479  | 506  | 491   | 491   | 494   | 498   | 495   |
| NEU | 109  | 101  | 93   | 88   | 96   | 104  | 108   | 115   | 117   | 114   | 105   |
| OAS | 682  | 729  | 781  | 844  | 1025 | 1129 | 1275  | 1439  | 1529  | 1589  | 1602  |
| REF | 457  | 353  | 352  | 324  | 344  | 339  | 344   | 381   | 388   | 389   | 390   |
| SSA | 628  | 690  | 756  | 822  | 884  | 984  | 1158  | 1399  | 1580  | 1767  | 1949  |
| USA | 494  | 535  | 573  | 527  | 531  | 536  | 513   | 505   | 523   | 533   | 528   |

Table 233: MAgPIE m4p\_SSP1 — Demand—Feed (Mt DM/yr) [PART 1/2]

|     | 2050  | 2055  | 2060  | 2070 | 2080 | 2090 | 2100 |
|-----|-------|-------|-------|------|------|------|------|
| GLO | 11060 | 10622 | 10052 | 8714 | 7490 | 6486 | 5551 |
| CAZ | 307   | 311   | 312   | 290  | 237  | 213  | 197  |
| CHA | 1301  | 1189  | 1091  | 911  | 879  | 909  | 824  |
| EUR | 802   | 789   | 769   | 713  | 659  | 603  | 543  |
| IND | 2079  | 1948  | 1798  | 1492 | 1215 | 983  | 779  |
| JPN | 65    | 67    | 66    | 60   | 57   | 52   | 55   |
| LAM | 1358  | 1256  | 1163  | 936  | 725  | 645  | 495  |
| MEA | 476   | 456   | 426   | 354  | 275  | 219  | 191  |
| NEU | 97    | 91    | 86    | 76   | 72   | 68   | 66   |
| OAS | 1584  | 1538  | 1435  | 1233 | 1088 | 859  | 685  |
| REF | 375   | 361   | 343   | 291  | 230  | 176  | 162  |
| SSA | 2073  | 2075  | 2020  | 1816 | 1525 | 1250 | 1075 |
| USA | 542   | 543   | 543   | 542  | 528  | 509  | 481  |

Table 234: MAgPIE m4p\_SSP1 — Demand—Feed (Mt DM/yr) [PART 2/2]

|     | 1965 | 1970 | 1975 | 1980 | 1985 | 1990 | 1995 | 2000 | 2005 | 2010 |
|-----|------|------|------|------|------|------|------|------|------|------|
| GLO | 4653 | 4990 | 5260 | 5533 | 6096 | 6242 | 6502 | 6872 | 7424 | 7836 |
| CAZ | 254  | 270  | 279  | 273  | 283  | 285  | 292  | 304  | 313  | 312  |
| CHA | 600  | 638  | 690  | 751  | 824  | 899  | 997  | 1101 | 1210 | 1332 |
| EUR | 706  | 757  | 800  | 831  | 902  | 821  | 779  | 756  | 733  | 723  |
| IND | 432  | 457  | 473  | 493  | 526  | 567  | 615  | 691  | 802  | 903  |
| JPN | 28   | 34   | 37   | 44   | 47   | 47   | 45   | 42   | 40   | 42   |
| LAM | 657  | 717  | 793  | 865  | 1008 | 1057 | 1168 | 1288 | 1402 | 1490 |
| MEA | 156  | 175  | 185  | 201  | 233  | 265  | 312  | 357  | 404  | 428  |
| NEU | 124  | 128  | 131  | 126  | 125  | 112  | 103  | 94   | 92   | 87   |
| OAS | 333  | 355  | 385  | 432  | 508  | 574  | 648  | 698  | 773  | 845  |
| REF | 417  | 464  | 473  | 510  | 518  | 513  | 425  | 321  | 322  | 311  |
| SSA | 396  | 421  | 453  | 487  | 527  | 568  | 610  | 669  | 753  | 820  |
| USA | 550  | 576  | 561  | 519  | 597  | 535  | 509  | 549  | 579  | 544  |

Table 235: FAO — Demand—Feed (Mt DM/yr)

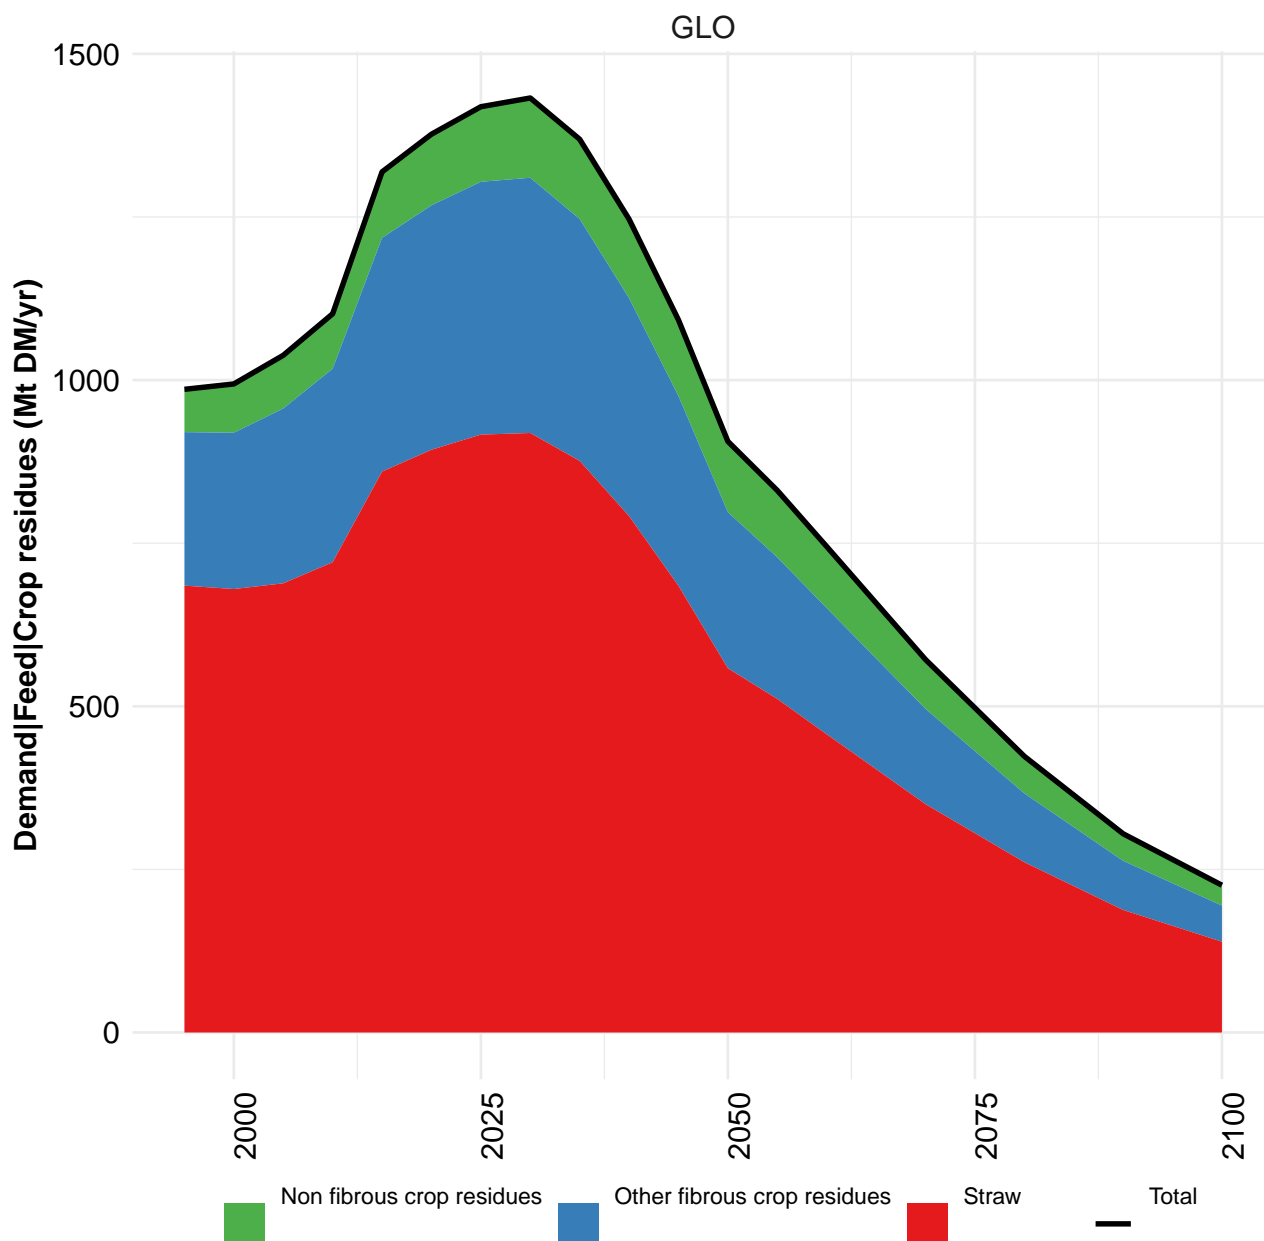

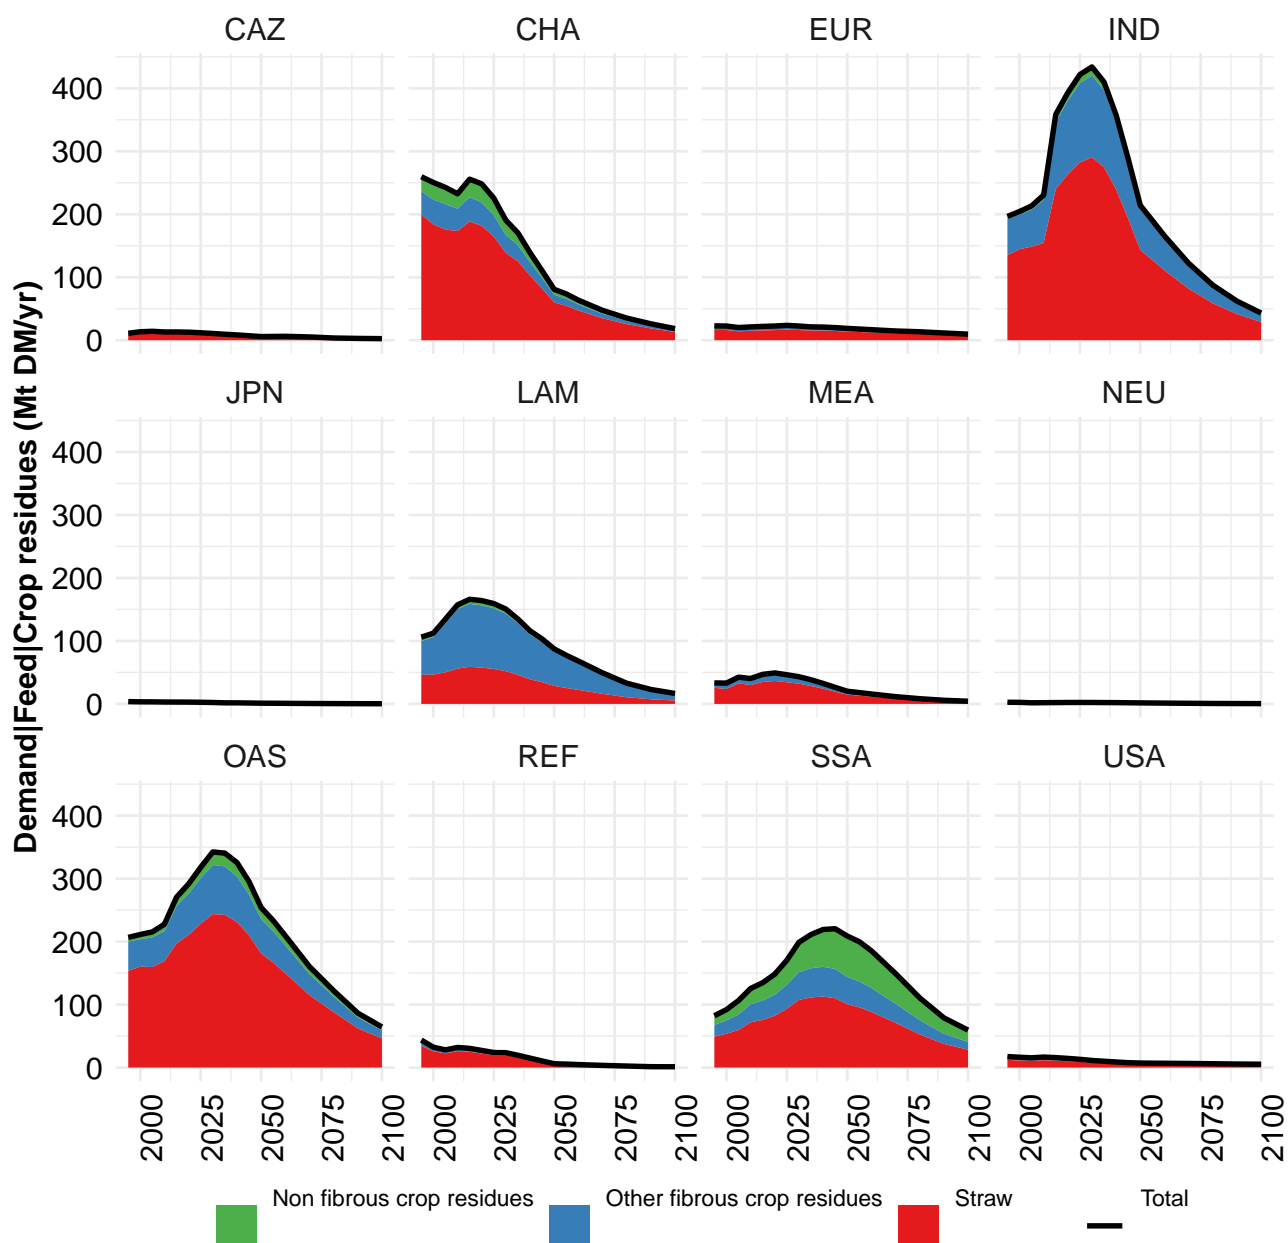

6.1 Crop residues

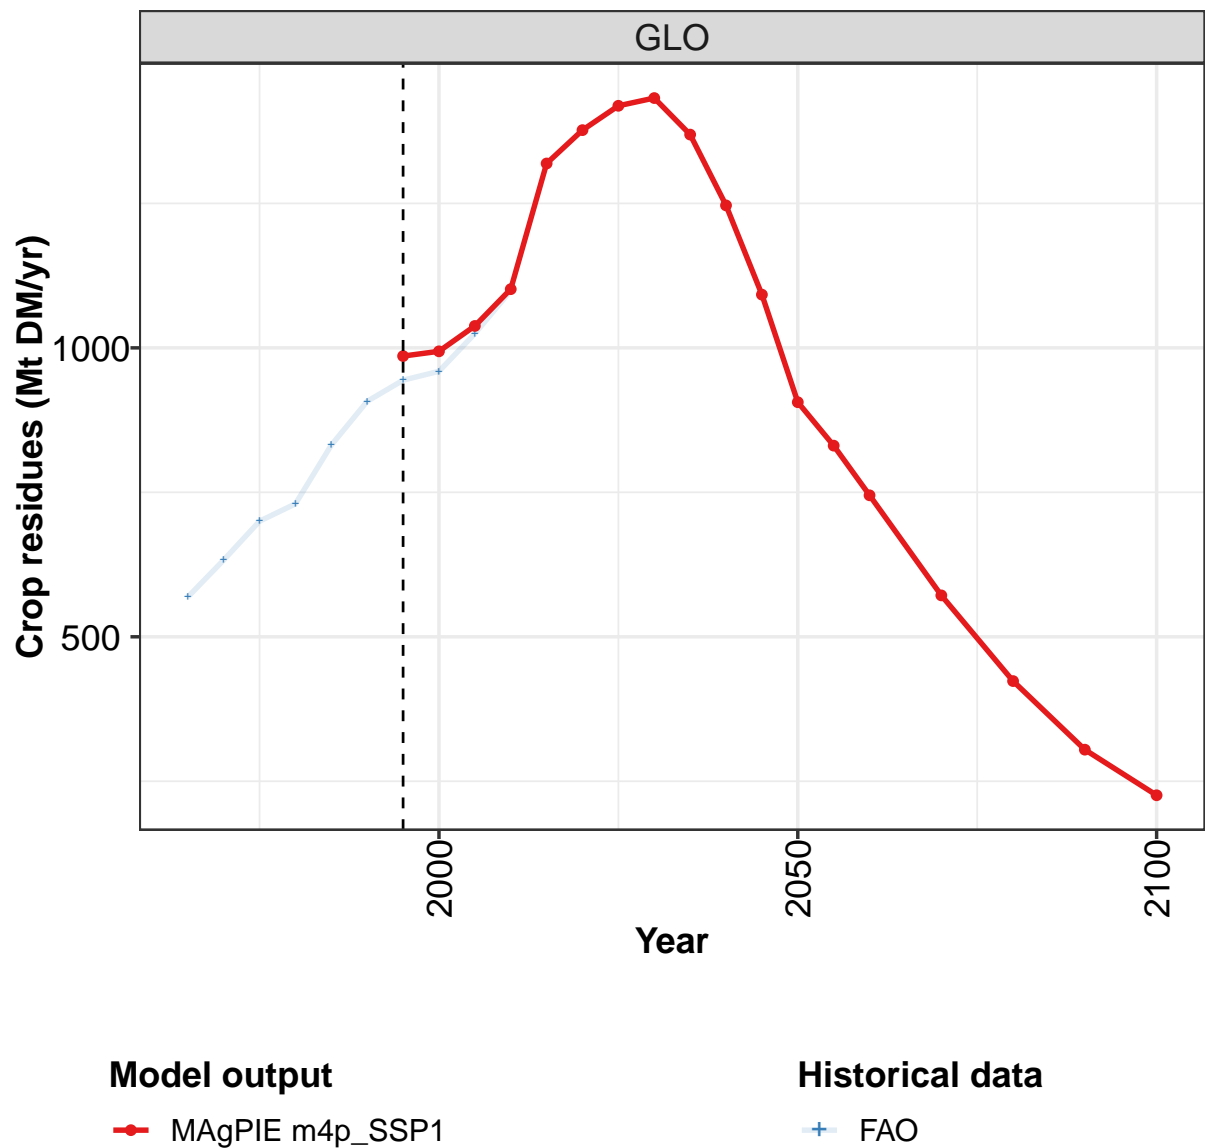

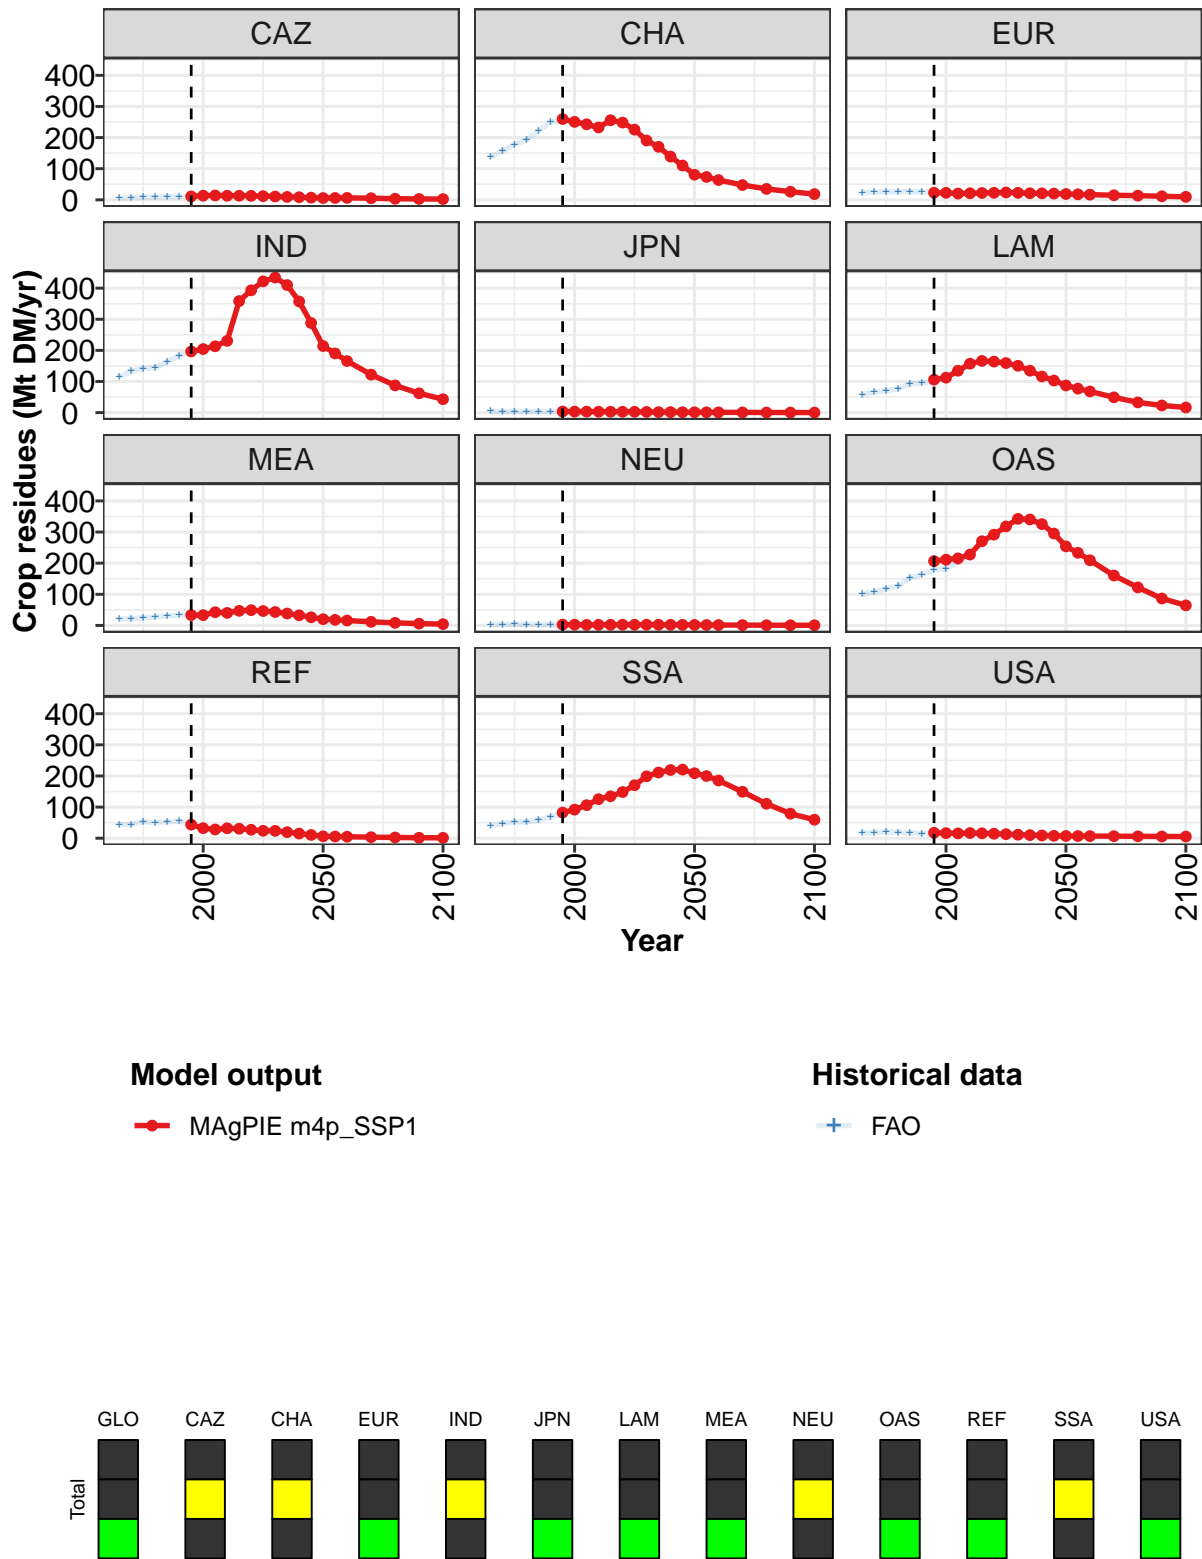

Figure 79: MAgPIE m4p\_SSP1 — Demand—Feed—Crop residues (Mt DM/yr)

|     | 1995 | 2000 | 2005 | 2010 | 2015 | 2020 | 2025 | 2030 | 2035 | 2040 | 2045 |
|-----|------|------|------|------|------|------|------|------|------|------|------|
| GLO | 986  | 994  | 1038 | 1102 | 1319 | 1377 | 1419 | 1432 | 1369 | 1247 | 1092 |
| CAZ | 11   | 13   | 14   | 13   | 13   | 13   | 12   | 11   | 10   | 8    | 7    |
| CHA | 260  | 251  | 243  | 233  | 256  | 248  | 226  | 191  | 170  | 139  | 110  |
| EUR | 23   | 23   | 20   | 21   | 22   | 23   | 24   | 23   | 21   | 21   | 20   |
| IND | 197  | 204  | 213  | 231  | 359  | 393  | 422  | 434  | 410  | 357  | 288  |
| JPN | 4    | 3    | 3    | 3    | 3    | 3    | 3    | 2    | 2    | 2    | 1    |
| LAM | 106  | 112  | 135  | 157  | 166  | 164  | 159  | 151  | 135  | 116  | 103  |
| MEA | 33   | 33   | 42   | 40   | 47   | 49   | 46   | 43   | 38   | 33   | 26   |
| NEU | 3    | 2    | 2    | 2    | 2    | 2    | 2    | 2    | 2    | 2    | 2    |
| OAS | 207  | 211  | 215  | 228  | 271  | 292  | 318  | 342  | 340  | 325  | 295  |
| REF | 44   | 32   | 28   | 32   | 30   | 27   | 24   | 24   | 19   | 15   | 11   |
| SSA | 82   | 92   | 106  | 126  | 135  | 148  | 170  | 199  | 211  | 219  | 220  |
| USA | 18   | 16   | 16   | 17   | 16   | 15   | 13   | 11   | 10   | 9    | 8    |

Table 236: MAgPIE m4p\_SSP1 — Demand—Feed—Crop residues (Mt DM/yr) [PART 1/2]

|     | 2050 | 2055 | 2060 | 2070 | 2080 | 2090 | 2100 |
|-----|------|------|------|------|------|------|------|
| GLO | 906  | 831  | 745  | 572  | 423  | 305  | 226  |
| CAZ | 6    | 6    | 6    | 5    | 4    | 3    | 3    |
| CHA | 81   | 74   | 64   | 47   | 35   | 26   | 18   |
| EUR | 19   | 18   | 17   | 15   | 13   | 11   | 10   |
| IND | 214  | 190  | 166  | 122  | 88   | 62   | 43   |
| JPN | 1    | 1    | 1    | 1    | 0    | 0    | 0    |
| LAM | 87   | 77   | 68   | 49   | 33   | 23   | 17   |
| MEA | 20   | 18   | 16   | 12   | 8    | 6    | 4    |
| NEU | 2    | 1    | 1    | 1    | 1    | 1    | 0    |
| OAS | 254  | 233  | 209  | 160  | 122  | 87   | 64   |
| REF | 6    | 6    | 5    | 3    | 2    | 1    | 1    |
| SSA | 209  | 200  | 185  | 149  | 111  | 79   | 59   |
| USA | 7    | 7    | 7    | 7    | 6    | 6    | 5    |

Table 237: MAgPIE m4p\_SSP1 — Demand—Feed—Crop residues (Mt DM/yr) [PART 2/2]

|     | 1965 | 1970 | 1975 | 1980 | 1985 | 1990 | 1995 | 2000 | 2005 | 2010 |
|-----|------|------|------|------|------|------|------|------|------|------|
| GLO | 569  | 633  | 700  | 730  | 832  | 907  | 944  | 959  | 1025 | 1099 |
| CAZ | 6    | 7    | 9    | 9    | 11   | 10   | 12   | 16   | 17   | 15   |
| CHA | 139  | 157  | 178  | 193  | 222  | 250  | 255  | 249  | 241  | 232  |
| EUR | 23   | 24   | 26   | 26   | 26   | 26   | 22   | 21   | 19   | 20   |
| IND | 115  | 133  | 141  | 145  | 163  | 183  | 197  | 205  | 216  | 233  |
| JPN | 4    | 4    | 4    | 4    | 4    | 4    | 4    | 3    | 3    | 3    |
| LAM | 58   | 66   | 70   | 76   | 93   | 95   | 102  | 110  | 131  | 152  |
| MEA | 21   | 21   | 25   | 26   | 30   | 33   | 35   | 33   | 43   | 40   |
| NEU | 3    | 3    | 4    | 3    | 3    | 3    | 3    | 2    | 2    | 2    |
| OAS | 100  | 108  | 117  | 128  | 152  | 164  | 179  | 182  | 203  | 227  |
| REF | 44   | 44   | 53   | 50   | 52   | 55   | 42   | 31   | 27   | 32   |
| SSA | 40   | 47   | 52   | 52   | 58   | 69   | 77   | 89   | 106  | 125  |
| USA | 16   | 18   | 20   | 19   | 17   | 15   | 18   | 17   | 16   | 17   |

Table 238: FAO — Demand—Feed—Crop residues (Mt DM/yr)

6.1.1 Non fibrous crop residues

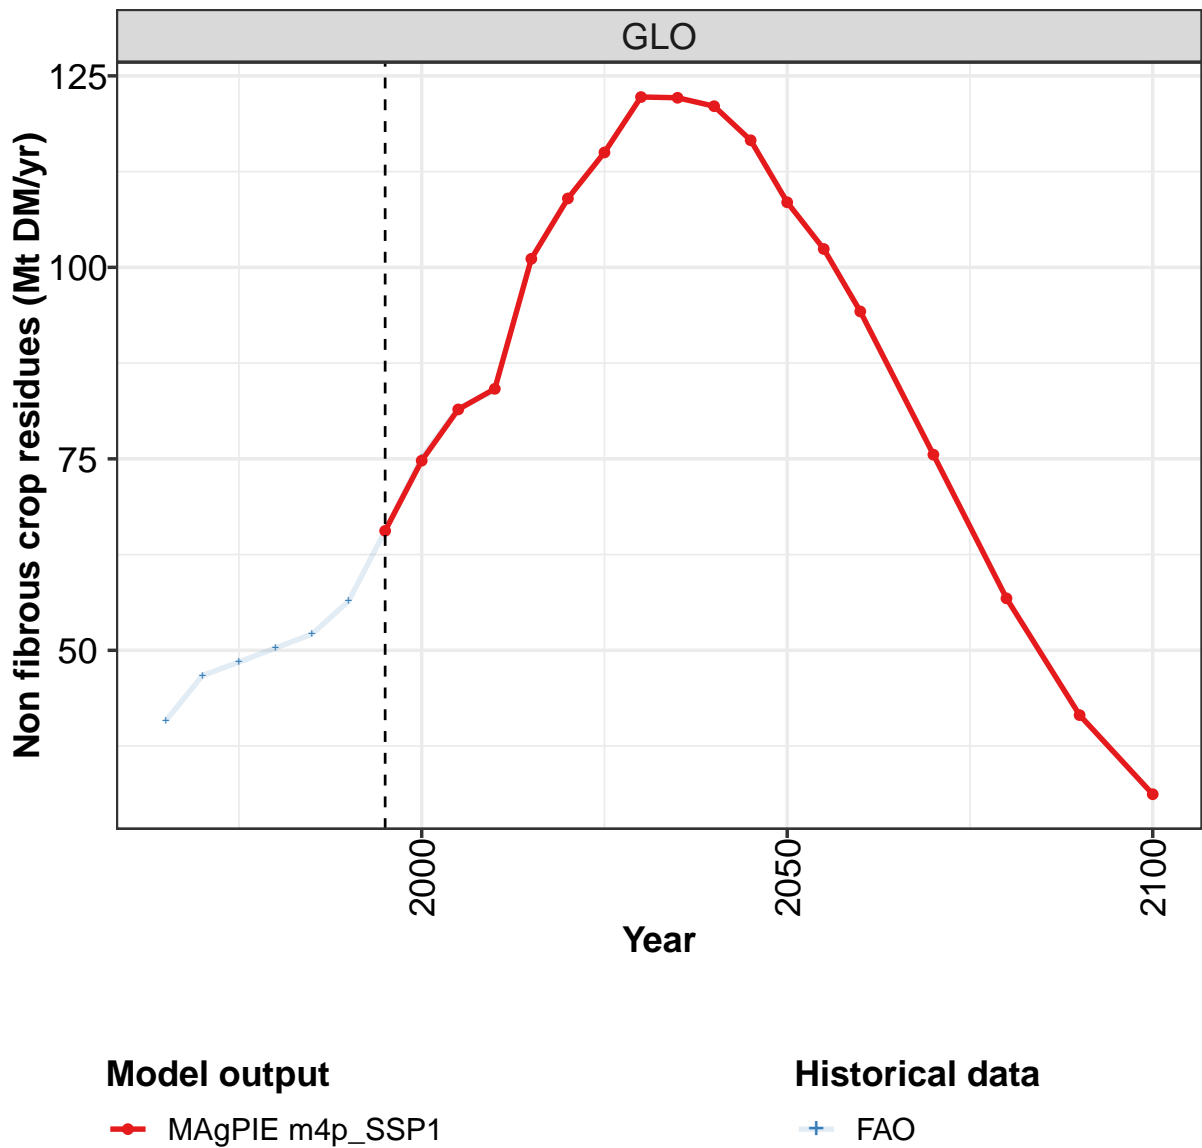



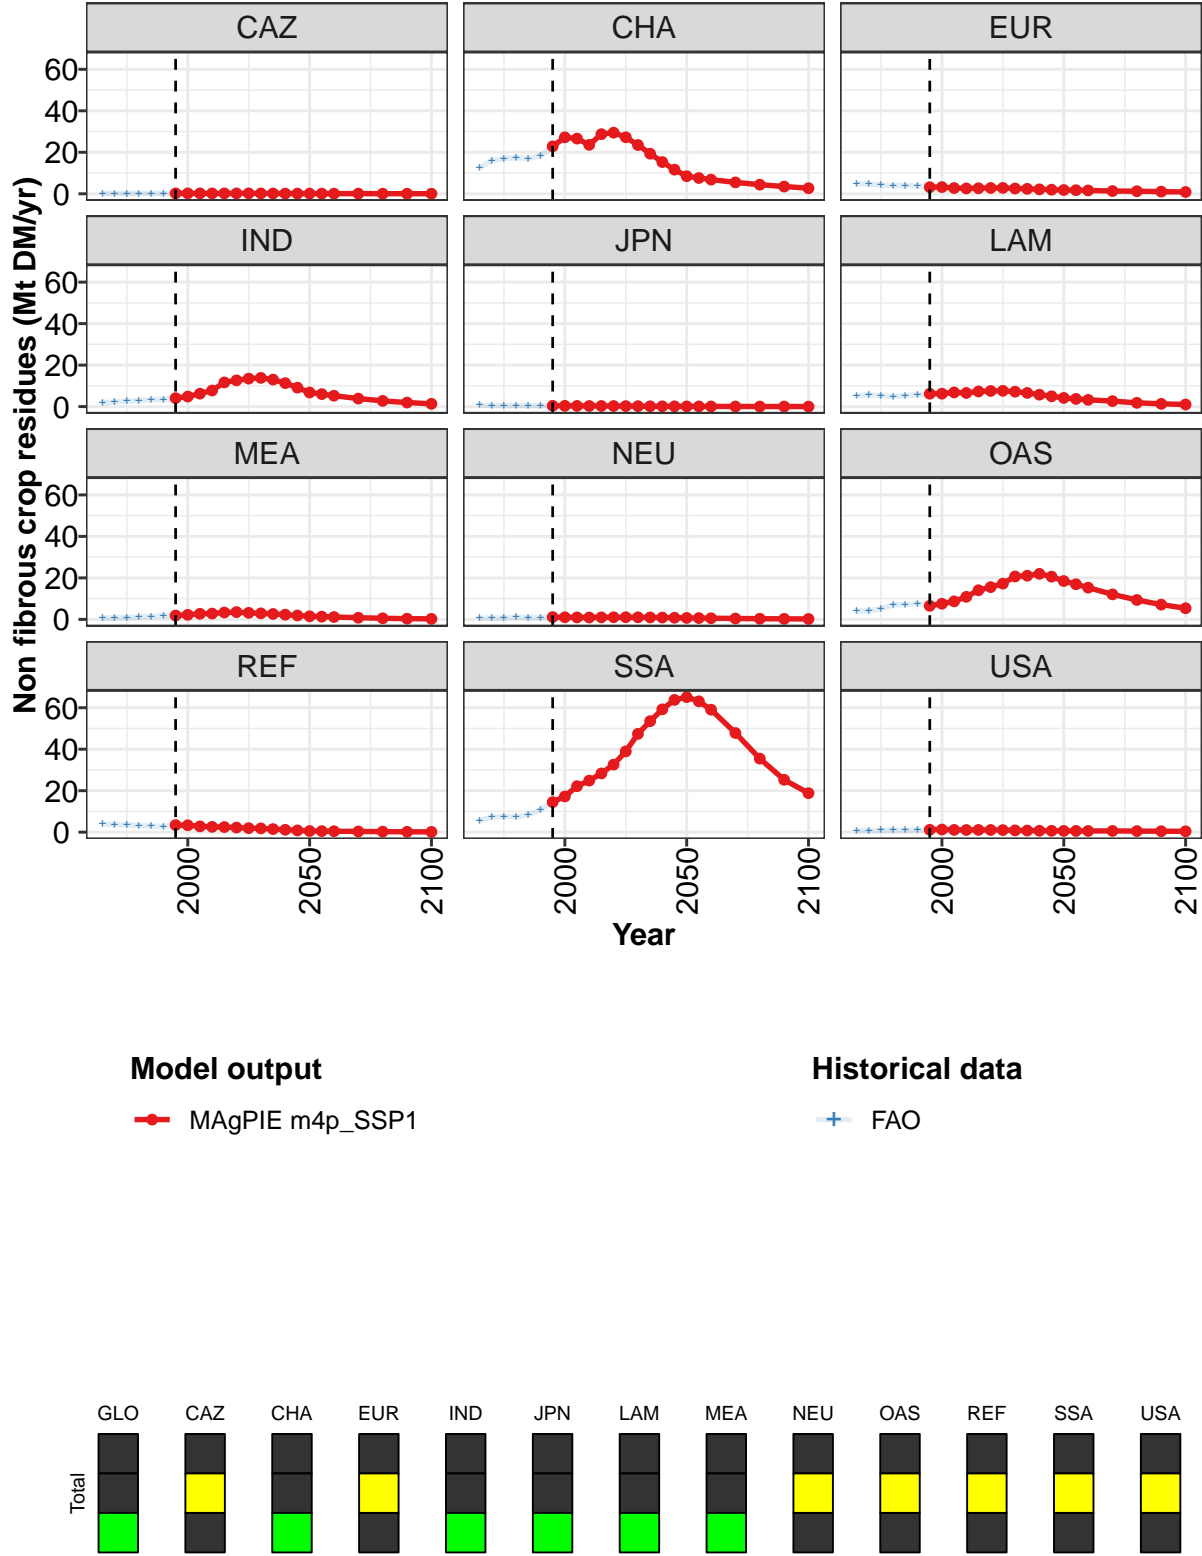

Figure 80: MAgPIE m4p\_SSP1 — Demand—Feed—Crop residues—Non fibrous crop residues (Mt DM/yr)

|     | 1995 | 2000 | 2005 | 2010 | 2015 | 2020 | 2025 | 2030 | 2035 | 2040 | 2045 |
|-----|------|------|------|------|------|------|------|------|------|------|------|
| GLO | 66   | 75   | 81   | 84   | 101  | 109  | 115  | 122  | 122  | 121  | 117  |
| CAZ | 0    | 0    | 0    | 0    | 0    | 0    | 0    | 0    | 0    | 0    | 0    |
| CHA | 23   | 27   | 27   | 24   | 29   | 29   | 27   | 24   | 19   | 15   | 12   |
| EUR | 3    | 3    | 3    | 3    | 3    | 3    | 3    | 3    | 2    | 2    | 2    |
| IND | 4    | 5    | 6    | 8    | 12   | 13   | 13   | 14   | 13   | 11   | 9    |
| JPN | 0    | 0    | 0    | 0    | 0    | 0    | 0    | 0    | 0    | 0    | 0    |
| LAM | 6    | 6    | 7    | 7    | 7    | 8    | 8    | 7    | 7    | 6    | 5    |
| MEA | 2    | 2    | 3    | 3    | 3    | 4    | 3    | 3    | 3    | 2    | 2    |
| NEU | 1    | 1    | 1    | 1    | 1    | 1    | 1    | 1    | 1    | 1    | 1    |
| OAS | 7    | 8    | 9    | 11   | 14   | 16   | 17   | 21   | 21   | 22   | 21   |
| REF | 3    | 3    | 3    | 3    | 2    | 2    | 2    | 2    | 2    | 1    | 1    |
| SSA | 15   | 17   | 22   | 25   | 28   | 33   | 39   | 47   | 54   | 59   | 64   |
| USA | 1    | 1    | 1    | 1    | 1    | 1    | 1    | 1    | 1    | 1    | 1    |

Table 239: MAgPIE m4p\_SSP1 — Demand—Feed—Crop residues—Non fibrous crop residues (Mt DM/yr)  
[PART 1/2]

|     | 2050 | 2055 | 2060 | 2070 | 2080 | 2090 | 2100 |
|-----|------|------|------|------|------|------|------|
| GLO | 108  | 102  | 94   | 76   | 57   | 42   | 31   |
| CAZ | 0    | 0    | 0    | 0    | 0    | 0    | 0    |
| CHA | 8    | 8    | 7    | 5    | 4    | 3    | 3    |
| EUR | 2    | 2    | 2    | 1    | 1    | 1    | 1    |
| IND | 7    | 6    | 5    | 4    | 3    | 2    | 1    |
| JPN | 0    | 0    | 0    | 0    | 0    | 0    | 0    |
| LAM | 4    | 4    | 3    | 3    | 2    | 1    | 1    |
| MEA | 1    | 1    | 1    | 1    | 1    | 0    | 0    |
| NEU | 1    | 1    | 1    | 0    | 0    | 0    | 0    |
| OAS | 18   | 17   | 15   | 12   | 9    | 7    | 5    |
| REF | 1    | 1    | 0    | 0    | 0    | 0    | 0    |
| SSA | 65   | 63   | 59   | 48   | 35   | 25   | 19   |
| USA | 1    | 1    | 1    | 1    | 1    | 0    | 0    |

Table 240: MAgPIE m4p\_SSP1 — Demand—Feed—Crop residues—Non fibrous crop residues (Mt DM/yr)  
[PART 2/2]

|     | 1965 | 1970 | 1975 | 1980 | 1985 | 1990 | 1995 | 2000 | 2005 | 2010 |
|-----|------|------|------|------|------|------|------|------|------|------|
| GLO | 40.8 | 46.7 | 48.5 | 50.3 | 52.1 | 56.4 | 65.6 | 75.2 | 81.6 | 83.9 |
| CAZ | 0.1  | 0.1  | 0.1  | 0.1  | 0.2  | 0.2  | 0.2  | 0.2  | 0.2  | 0.2  |
| CHA | 12.5 | 16.0 | 17.1 | 17.4 | 17.0 | 18.4 | 22.5 | 27.1 | 26.5 | 23.6 |
| EUR | 4.9  | 4.7  | 4.2  | 3.9  | 4.0  | 3.7  | 3.3  | 3.3  | 2.7  | 2.5  |
| IND | 1.8  | 2.3  | 2.6  | 2.9  | 3.3  | 3.5  | 4.1  | 4.9  | 6.3  | 7.9  |
| JPN | 0.8  | 0.5  | 0.5  | 0.5  | 0.5  | 0.4  | 0.4  | 0.4  | 0.3  | 0.3  |
| LAM | 5.1  | 5.7  | 5.2  | 4.9  | 5.3  | 5.7  | 6.0  | 6.1  | 6.6  | 6.2  |
| MEA | 0.7  | 0.7  | 0.9  | 1.2  | 1.5  | 1.7  | 1.9  | 2.3  | 2.7  | 2.8  |
| NEU | 0.6  | 0.7  | 0.7  | 1.0  | 0.9  | 0.9  | 0.9  | 0.9  | 0.9  | 0.9  |
| OAS | 4.1  | 4.1  | 5.1  | 7.0  | 7.2  | 7.5  | 7.2  | 7.9  | 9.0  | 10.9 |
| REF | 3.9  | 3.7  | 3.5  | 3.2  | 3.0  | 2.7  | 3.3  | 3.3  | 3.0  | 2.6  |
| SSA | 5.5  | 7.3  | 7.6  | 7.3  | 8.4  | 10.7 | 14.6 | 17.7 | 22.2 | 24.8 |
| USA | 0.8  | 0.8  | 0.9  | 1.0  | 1.0  | 1.0  | 1.2  | 1.3  | 1.1  | 1.1  |

Table 241: FAO — Demand—Feed—Crop residues—Non fibrous crop residues (Mt DM/yr)

6.1.2 Other fibrous crop residues

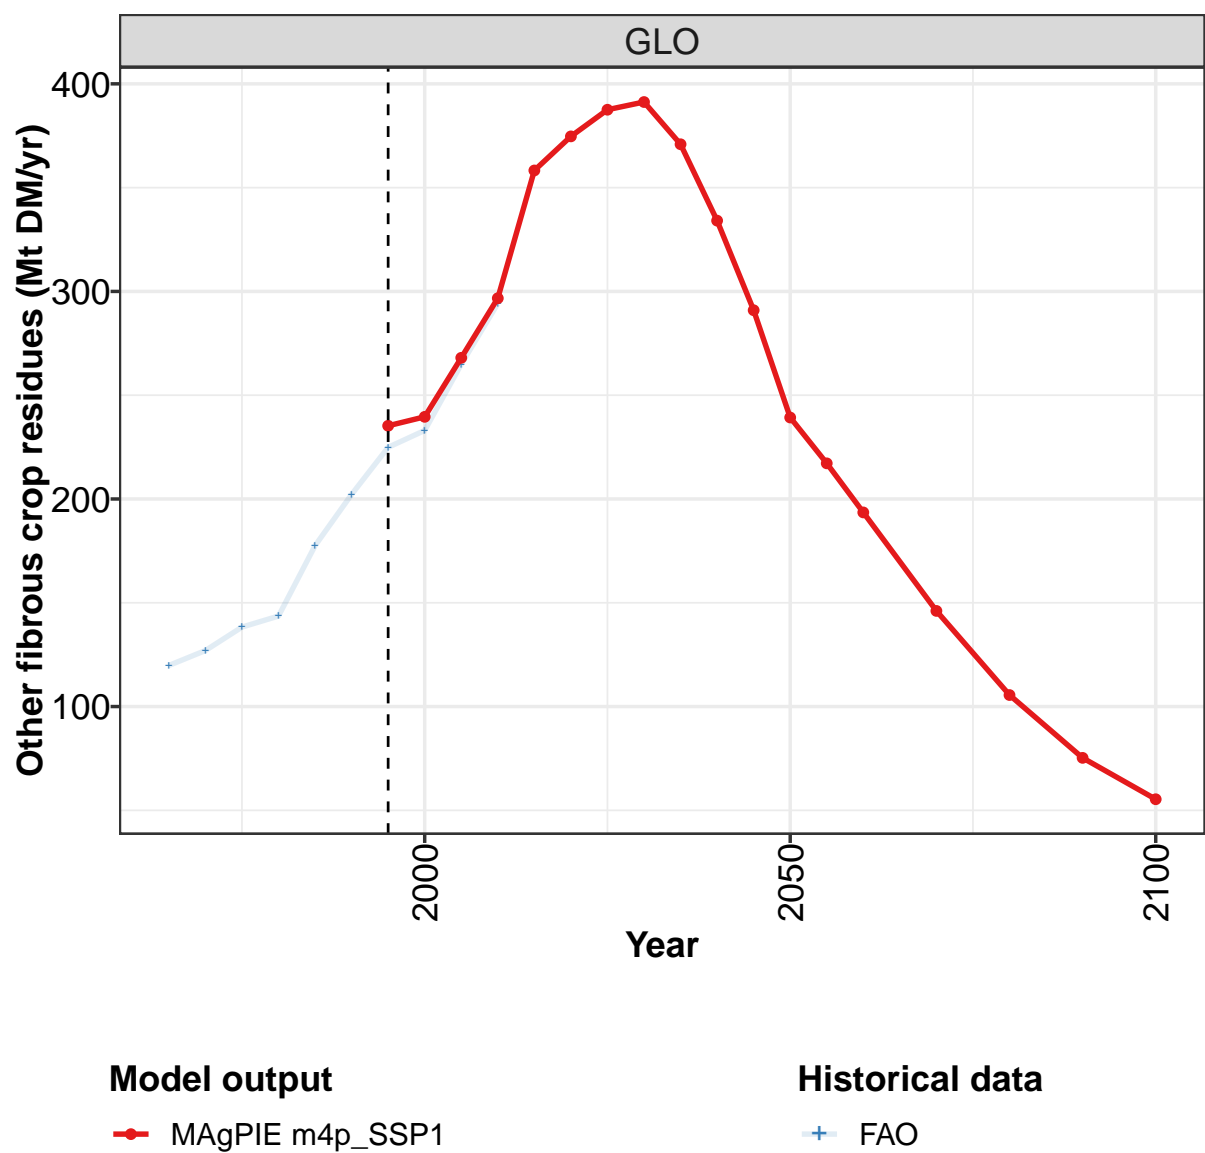

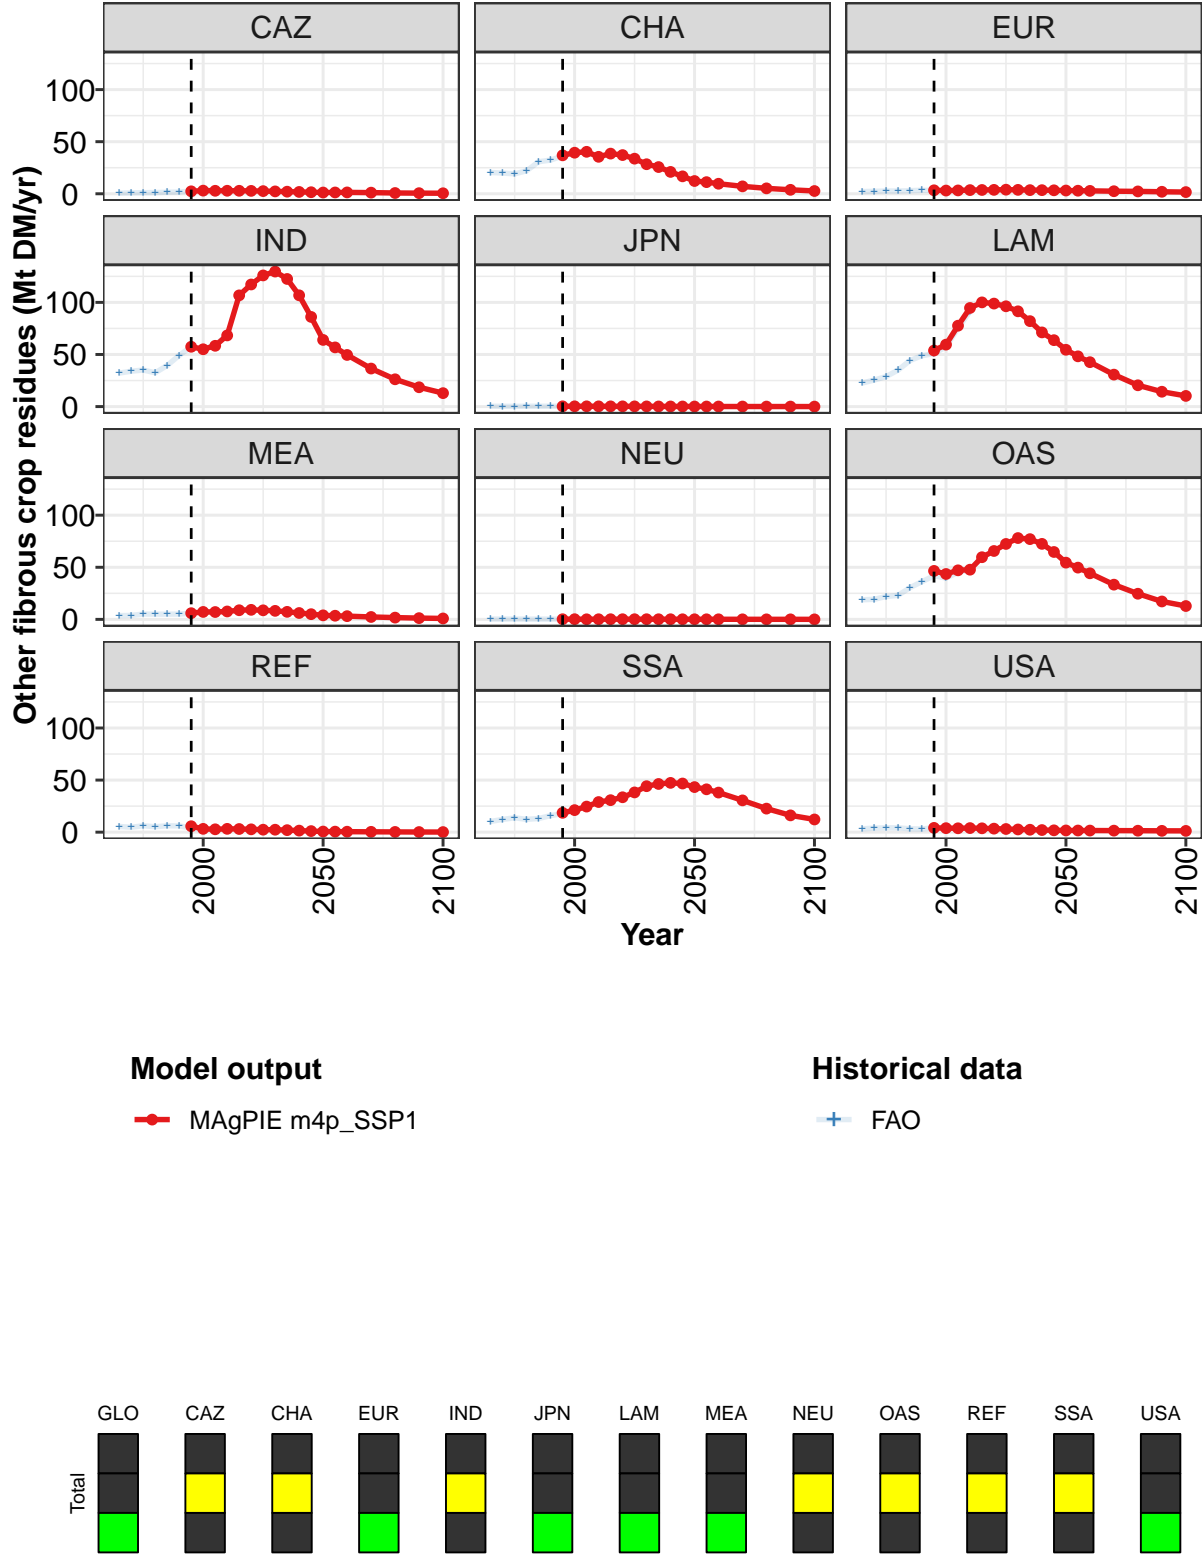

Figure 81: MAgPIE m4p\_SSP1 — Demand—Feed—Crop residues—Other fibrous crop residues (Mt DM/yr)

|     | 1995 | 2000 | 2005 | 2010 | 2015 | 2020 | 2025 | 2030 | 2035 | 2040 | 2045 |
|-----|------|------|------|------|------|------|------|------|------|------|------|
| GLO | 235  | 240  | 268  | 297  | 358  | 375  | 388  | 391  | 371  | 334  | 291  |
| CAZ | 2    | 3    | 3    | 3    | 3    | 3    | 3    | 2    | 2    | 2    | 2    |
| CHA | 37   | 39   | 40   | 35   | 39   | 37   | 34   | 28   | 26   | 21   | 17   |
| EUR | 3    | 3    | 3    | 4    | 4    | 4    | 4    | 4    | 4    | 4    | 3    |
| IND | 57   | 55   | 58   | 68   | 107  | 117  | 126  | 130  | 122  | 107  | 86   |
| JPN | 0    | 0    | 0    | 0    | 0    | 0    | 0    | 0    | 0    | 0    | 0    |
| LAM | 54   | 59   | 78   | 95   | 100  | 99   | 96   | 91   | 82   | 71   | 64   |
| MEA | 6    | 7    | 7    | 8    | 9    | 9    | 9    | 8    | 7    | 6    | 5    |
| NEU | 0    | 0    | 0    | 0    | 0    | 0    | 0    | 0    | 0    | 0    | 0    |
| OAS | 47   | 44   | 47   | 48   | 60   | 66   | 72   | 78   | 77   | 72   | 65   |
| REF | 6    | 3    | 3    | 3    | 3    | 3    | 2    | 2    | 2    | 2    | 1    |
| SSA | 19   | 21   | 25   | 29   | 31   | 34   | 38   | 44   | 46   | 47   | 47   |
| USA | 4    | 4    | 4    | 4    | 4    | 3    | 3    | 3    | 2    | 2    | 2    |

Table 242: MAgPIE m4p\_SSP1 — Demand—Feed—Crop residues—Other fibrous crop residues (Mt DM/yr)  
[PART 1/2]

|     | 2050 | 2055 | 2060 | 2070 | 2080 | 2090 | 2100 |
|-----|------|------|------|------|------|------|------|
| GLO | 239  | 217  | 194  | 146  | 106  | 75   | 55   |
| CAZ | 1    | 1    | 1    | 1    | 1    | 1    | 1    |
| CHA | 12   | 11   | 10   | 7    | 5    | 4    | 3    |
| EUR | 3    | 3    | 3    | 2    | 2    | 2    | 2    |
| IND | 64   | 57   | 50   | 37   | 26   | 19   | 13   |
| JPN | 0    | 0    | 0    | 0    | 0    | 0    | 0    |
| LAM | 55   | 48   | 43   | 31   | 20   | 14   | 10   |
| MEA | 4    | 4    | 3    | 2    | 2    | 1    | 1    |
| NEU | 0    | 0    | 0    | 0    | 0    | 0    | 0    |
| OAS | 54   | 50   | 44   | 33   | 25   | 17   | 13   |
| REF | 1    | 1    | 0    | 0    | 0    | 0    | 0    |
| SSA | 43   | 41   | 38   | 31   | 23   | 16   | 12   |
| USA | 2    | 2    | 2    | 1    | 1    | 1    | 1    |

Table 243: MAgPIE m4p\_SSP1 — Demand—Feed—Crop residues—Other fibrous crop residues (Mt DM/yr)  
[PART 2/2]

|     | 1965 | 1970 | 1975 | 1980 | 1985 | 1990 | 1995 | 2000 | 2005 | 2010 |
|-----|------|------|------|------|------|------|------|------|------|------|
| GLO | 120  | 127  | 138  | 144  | 177  | 202  | 225  | 233  | 265  | 294  |
| CAZ | 1    | 1    | 1    | 1    | 2    | 2    | 3    | 4    | 4    | 3    |
| CHA | 20   | 20   | 19   | 22   | 31   | 32   | 36   | 39   | 40   | 35   |
| EUR | 2    | 2    | 3    | 3    | 3    | 3    | 3    | 3    | 3    | 3    |
| IND | 32   | 34   | 35   | 32   | 39   | 49   | 57   | 55   | 59   | 69   |
| JPN | 0    | 0    | 0    | 0    | 0    | 0    | 0    | 0    | 0    | 0    |
| LAM | 23   | 25   | 29   | 35   | 44   | 49   | 51   | 57   | 75   | 91   |
| MEA | 4    | 4    | 5    | 5    | 5    | 5    | 6    | 7    | 7    | 8    |
| NEU | 0    | 0    | 0    | 0    | 0    | 0    | 0    | 0    | 0    | 0    |
| OAS | 19   | 19   | 22   | 23   | 30   | 36   | 42   | 40   | 45   | 48   |
| REF | 5    | 5    | 6    | 5    | 6    | 6    | 4    | 3    | 2    | 3    |
| SSA | 10   | 12   | 14   | 12   | 13   | 16   | 18   | 21   | 25   | 29   |
| USA | 3    | 4    | 4    | 4    | 3    | 3    | 4    | 4    | 4    | 4    |

Table 244: FAO — Demand—Feed—Crop residues—Other fibrous crop residues (Mt DM/yr)

6.1.3 Straw

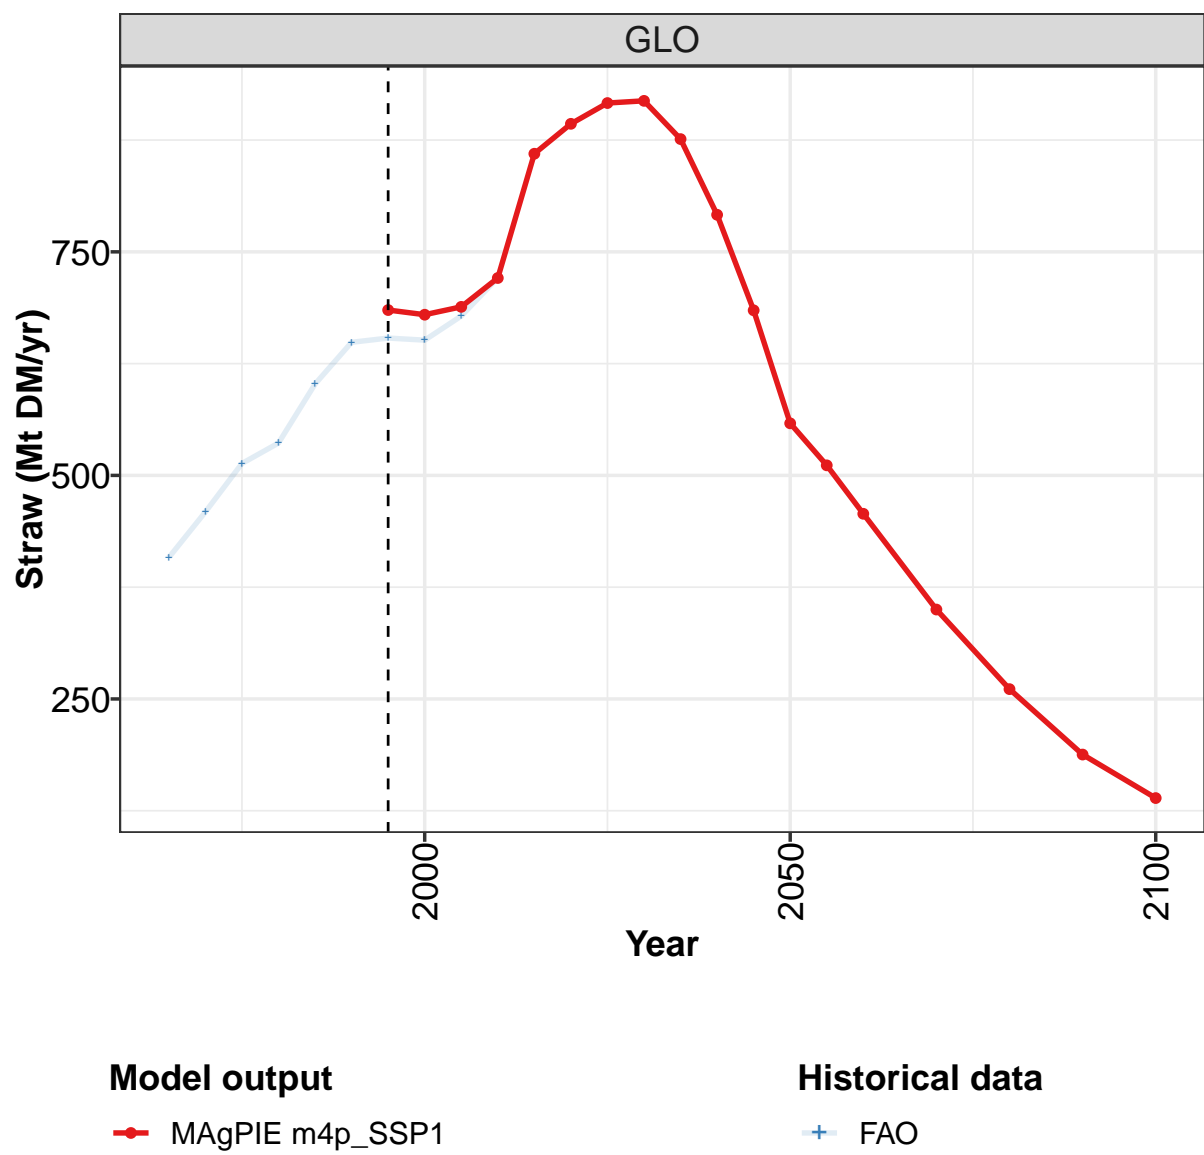

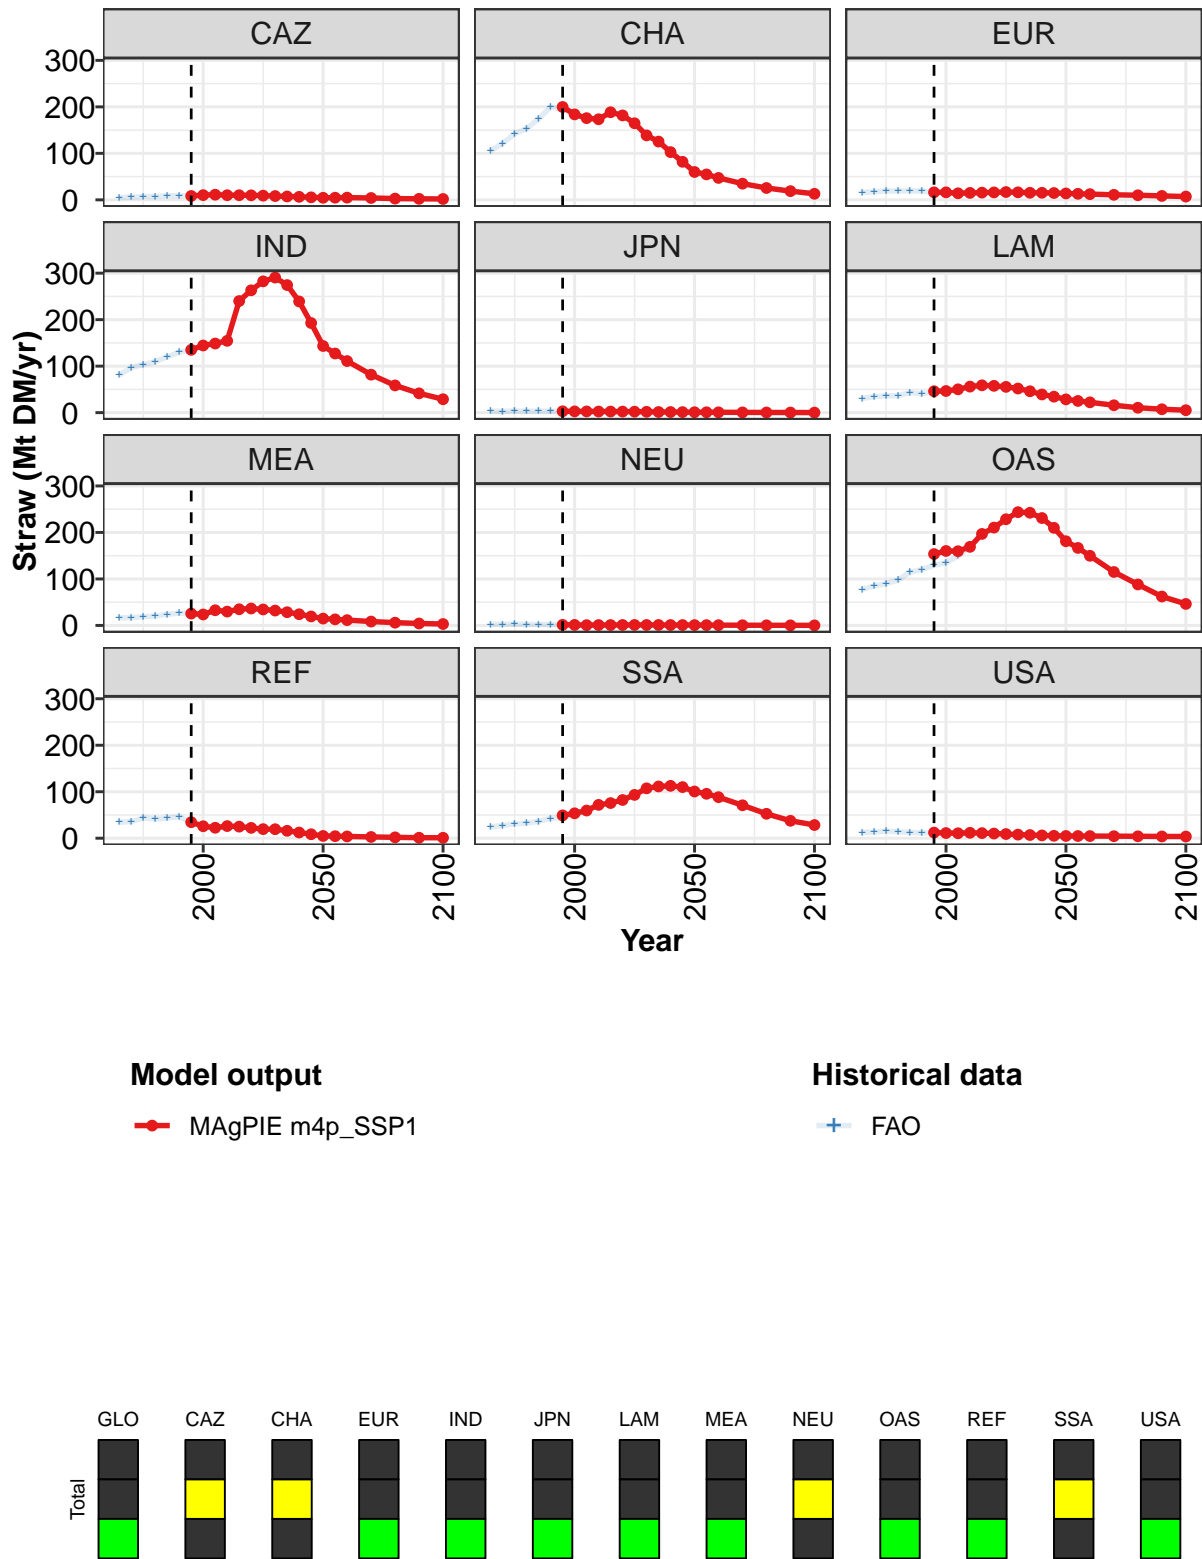

Figure 82: MAgPIE m4p\_SSP1 — Demand—Feed—Crop residues—Straw (Mt DM/yr)

|     | 1995 | 2000 | 2005 | 2010 | 2015 | 2020 | 2025 | 2030 | 2035 | 2040 | 2045 |
|-----|------|------|------|------|------|------|------|------|------|------|------|
| GLO | 685  | 680  | 688  | 721  | 860  | 893  | 916  | 919  | 876  | 791  | 685  |
| CAZ | 8    | 10   | 11   | 10   | 10   | 10   | 9    | 8    | 7    | 7    | 5    |
| CHA | 200  | 184  | 176  | 173  | 188  | 182  | 165  | 139  | 125  | 103  | 82   |
| EUR | 16   | 16   | 14   | 15   | 16   | 16   | 17   | 16   | 15   | 15   | 15   |
| IND | 135  | 144  | 149  | 154  | 240  | 263  | 282  | 291  | 274  | 239  | 193  |
| JPN | 3    | 3    | 3    | 2    | 2    | 2    | 2    | 2    | 1    | 1    | 1    |
| LAM | 46   | 47   | 50   | 56   | 59   | 58   | 55   | 52   | 46   | 39   | 34   |
| MEA | 26   | 24   | 33   | 30   | 35   | 36   | 34   | 32   | 28   | 24   | 19   |
| NEU | 1    | 1    | 1    | 1    | 1    | 1    | 1    | 1    | 1    | 1    | 1    |
| OAS | 154  | 160  | 160  | 169  | 197  | 210  | 228  | 244  | 242  | 231  | 210  |
| REF | 35   | 26   | 23   | 26   | 25   | 22   | 20   | 19   | 16   | 12   | 9    |
| SSA | 49   | 54   | 60   | 72   | 76   | 82   | 93   | 107  | 111  | 113  | 110  |
| USA | 12   | 11   | 11   | 12   | 11   | 10   | 9    | 8    | 7    | 6    | 5    |

Table 245: MAGPIE m4p\_SSP1 — Demand—Feed—Crop residues—Straw (Mt DM/yr) [PART 1/2]

|     | 2050 | 2055 | 2060 | 2070 | 2080 | 2090 | 2100 |
|-----|------|------|------|------|------|------|------|
| GLO | 558  | 511  | 457  | 350  | 261  | 188  | 139  |
| CAZ | 5    | 5    | 5    | 4    | 3    | 2    | 2    |
| CHA | 60   | 55   | 47   | 35   | 26   | 19   | 13   |
| EUR | 14   | 13   | 12   | 11   | 10   | 8    | 7    |
| IND | 143  | 127  | 111  | 82   | 59   | 42   | 29   |
| JPN | 1    | 1    | 1    | 1    | 0    | 0    | 0    |
| LAM | 29   | 25   | 22   | 16   | 11   | 7    | 5    |
| MEA | 15   | 13   | 11   | 8    | 6    | 4    | 3    |
| NEU | 1    | 1    | 1    | 0    | 0    | 0    | 0    |
| OAS | 181  | 167  | 150  | 115  | 88   | 62   | 46   |
| REF | 5    | 4    | 4    | 3    | 2    | 1    | 1    |
| SSA | 101  | 96   | 88   | 71   | 53   | 38   | 28   |
| USA | 5    | 5    | 5    | 4    | 4    | 4    | 4    |

Table 246: MAGPIE m4p\_SSP1 — Demand—Feed—Crop residues—Straw (Mt DM/yr) [PART 2/2]

|     | 1965 | 1970 | 1975 | 1980 | 1985 | 1990 | 1995 | 2000 | 2005 | 2010 |
|-----|------|------|------|------|------|------|------|------|------|------|
| GLO | 408  | 459  | 513  | 536  | 602  | 649  | 654  | 651  | 678  | 721  |
| CAZ | 5    | 6    | 7    | 7    | 9    | 8    | 9    | 12   | 14   | 12   |
| CHA | 106  | 121  | 142  | 153  | 174  | 199  | 196  | 183  | 175  | 173  |
| EUR | 16   | 17   | 19   | 19   | 19   | 19   | 15   | 15   | 14   | 15   |
| IND | 81   | 97   | 104  | 110  | 120  | 130  | 135  | 145  | 151  | 156  |
| JPN | 3    | 3    | 4    | 3    | 3    | 3    | 3    | 3    | 3    | 2    |
| LAM | 31   | 34   | 36   | 36   | 43   | 40   | 45   | 47   | 49   | 54   |
| MEA | 16   | 17   | 19   | 20   | 24   | 26   | 27   | 24   | 33   | 30   |
| NEU | 2    | 2    | 3    | 2    | 2    | 2    | 1    | 1    | 1    | 1    |
| OAS | 78   | 85   | 90   | 98   | 114  | 120  | 130  | 135  | 149  | 169  |
| REF | 34   | 36   | 44   | 41   | 43   | 46   | 34   | 25   | 22   | 26   |
| SSA | 24   | 27   | 31   | 32   | 36   | 43   | 45   | 51   | 59   | 72   |
| USA | 12   | 13   | 15   | 14   | 13   | 11   | 13   | 12   | 11   | 12   |

Table 247: FAO — Demand—Feed—Crop residues—Straw (Mt DM/yr)



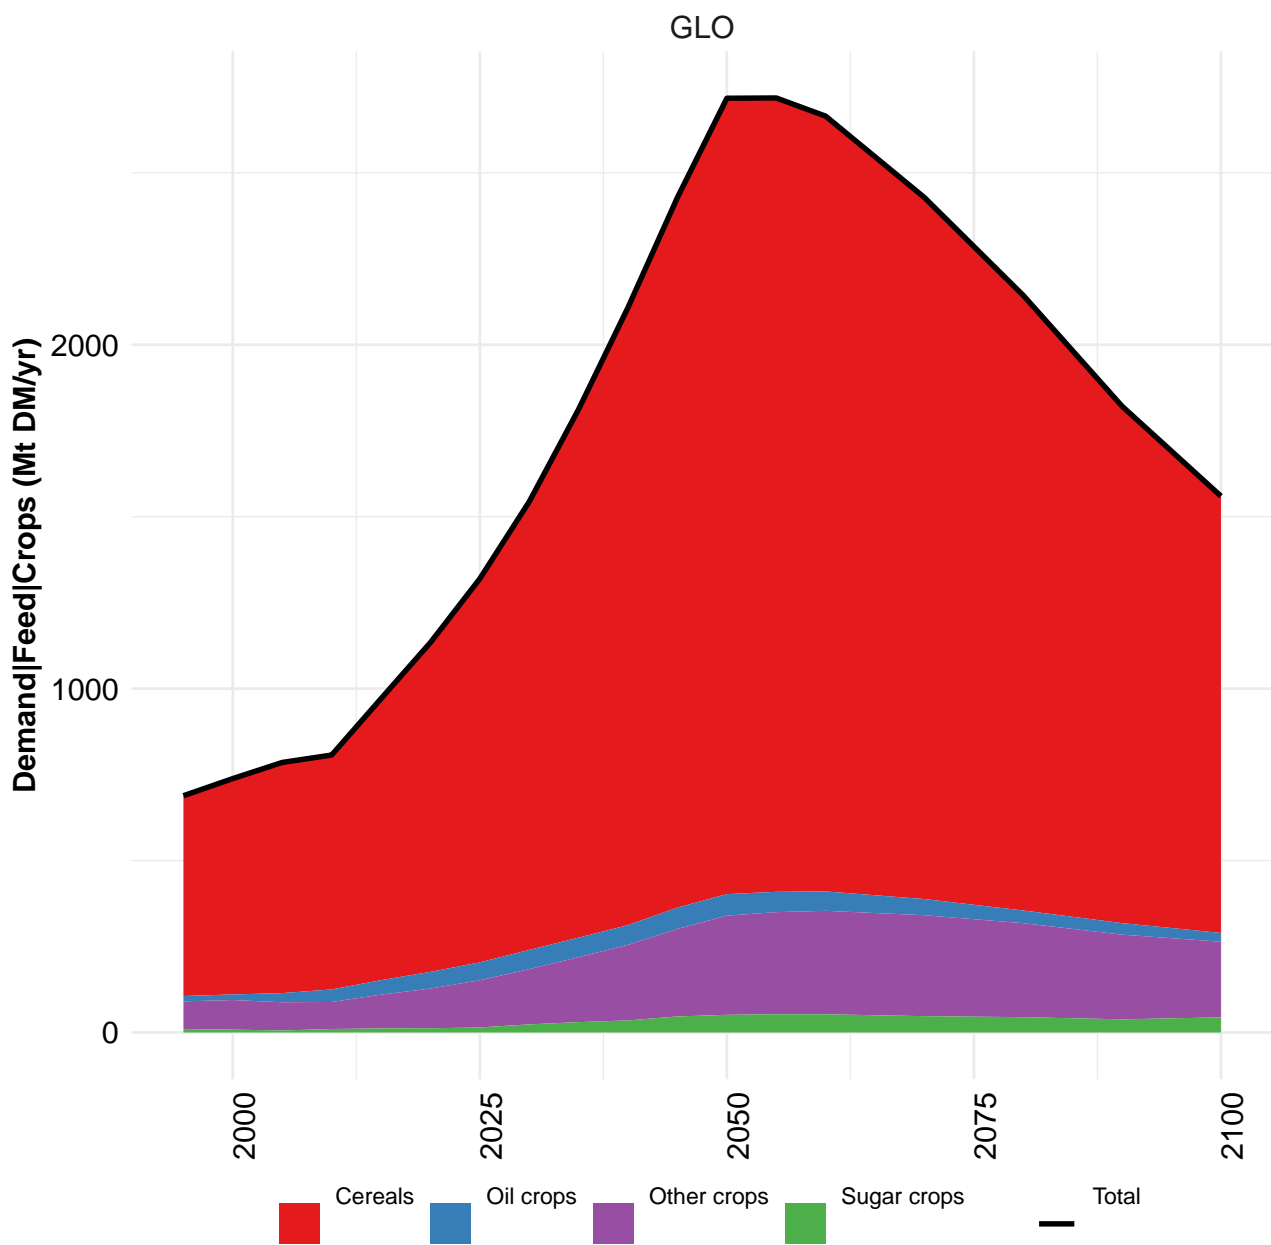

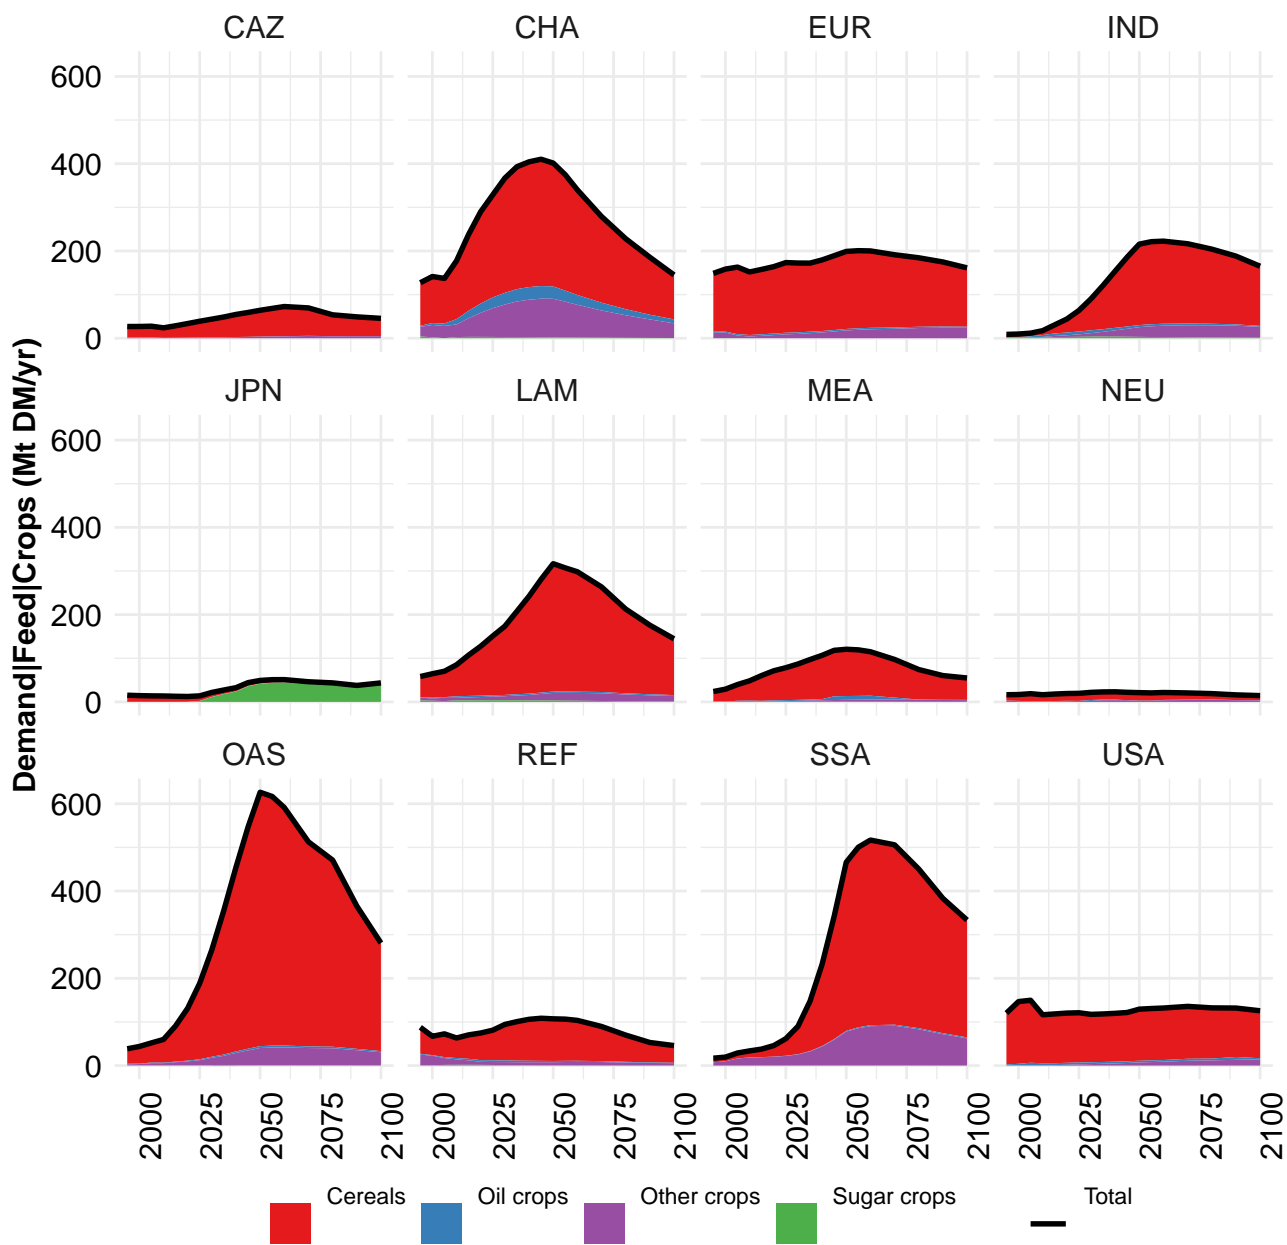

6.2
Crops

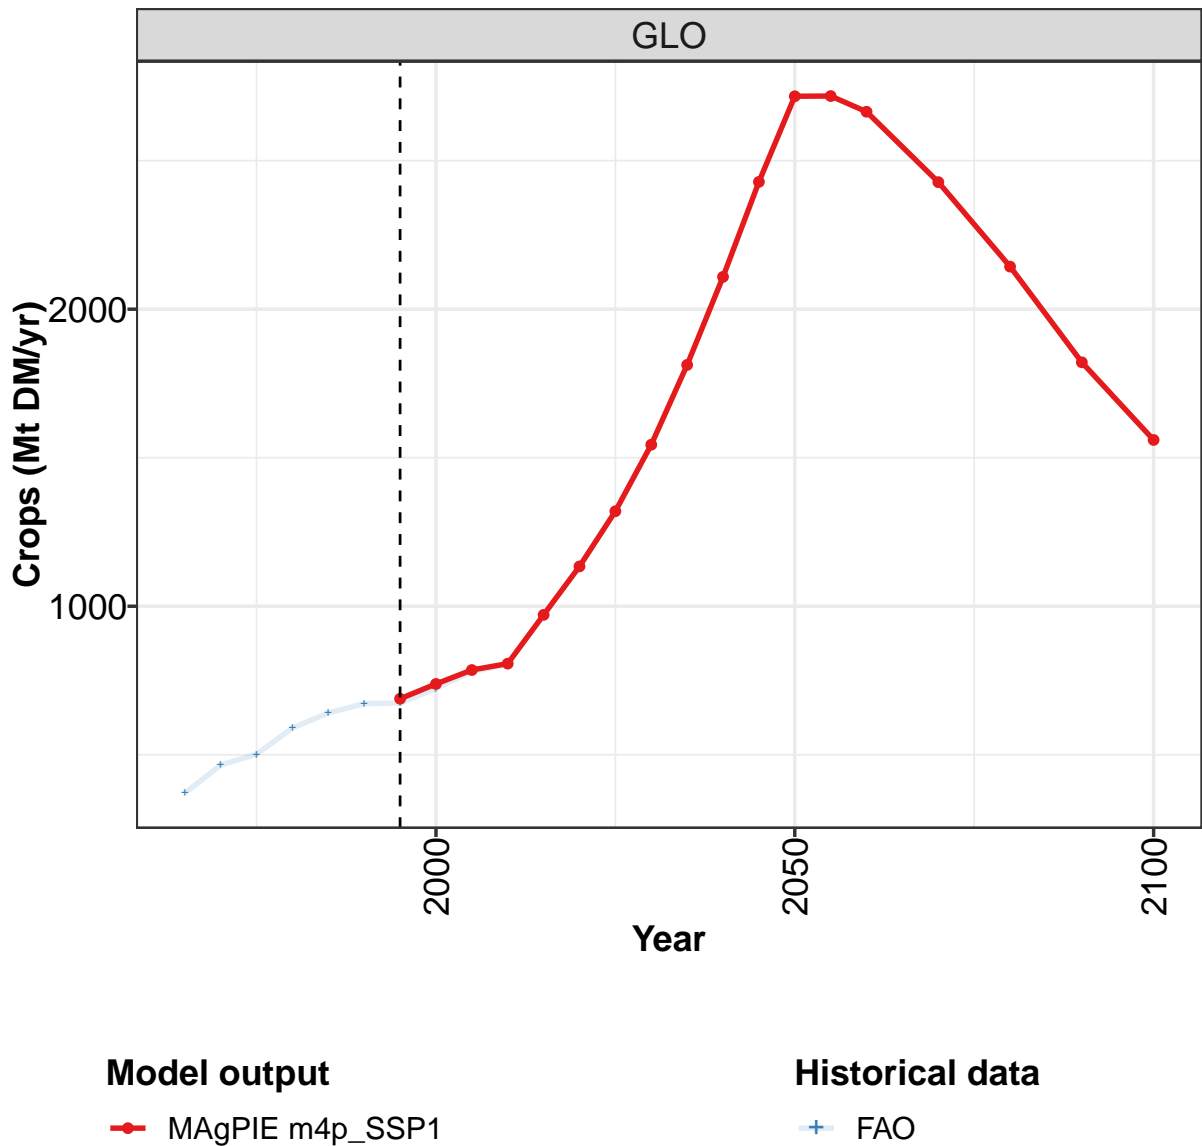

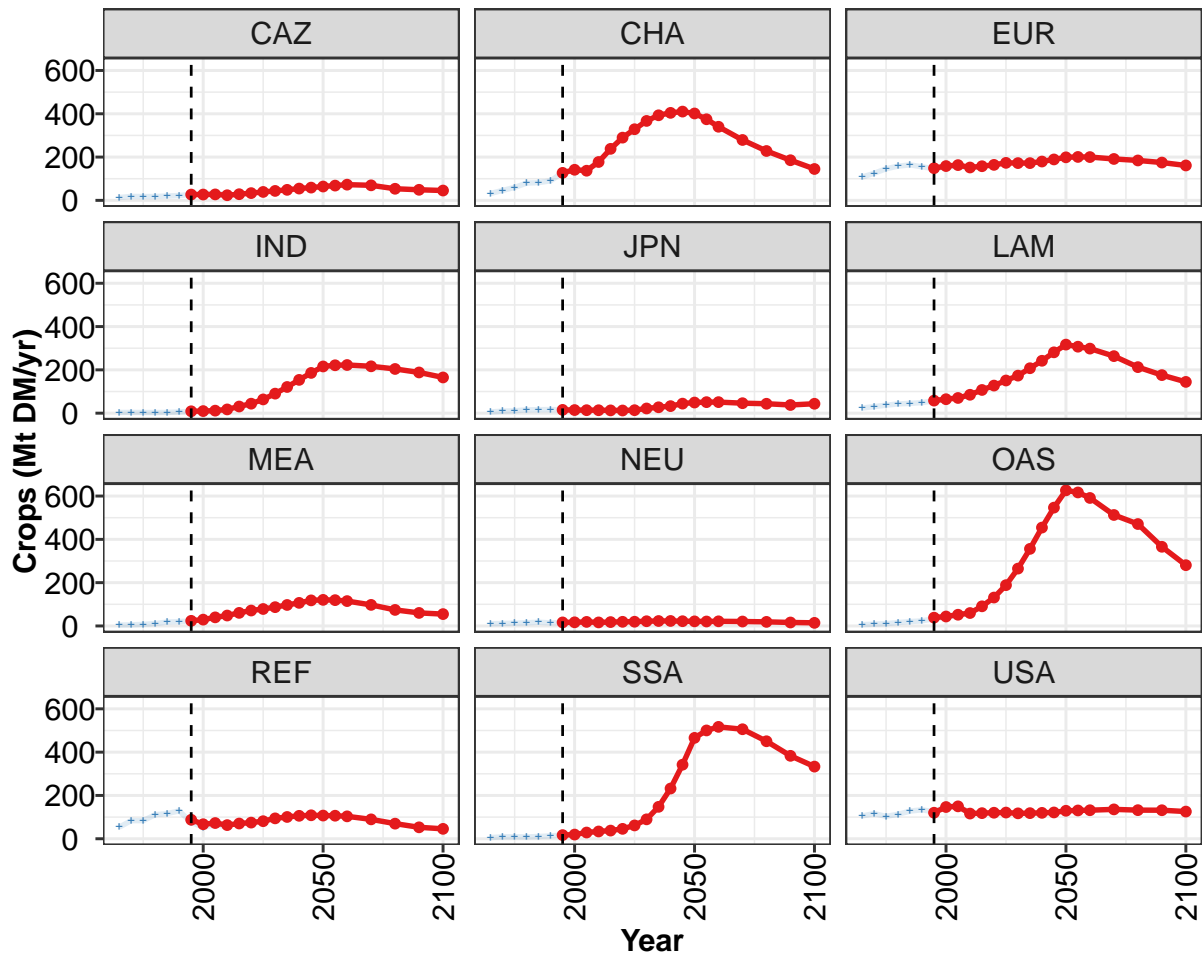

Model output

MAgPIE m4p\_SSP1

Historical data

FAO

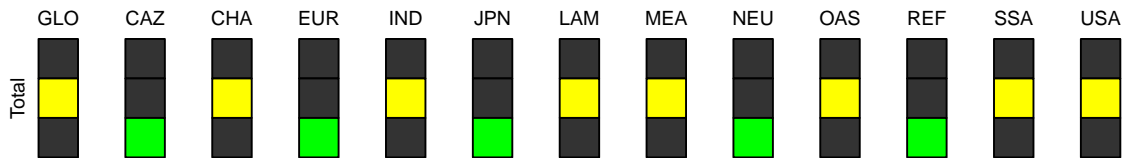

Figure 83: MAgPIE m4p\_SSP1 — Demand—Feed—Crops (Mt DM/yr)

|     | 1995 | 2000 | 2005 | 2010 | 2015 | 2020 | 2025 | 2030 | 2035 | 2040 | 2045 |
|-----|------|------|------|------|------|------|------|------|------|------|------|
| GLO | 689  | 738  | 785  | 807  | 971  | 1134 | 1320 | 1544 | 1813 | 2109 | 2429 |
| CAZ | 27   | 27   | 28   | 24   | 29   | 34   | 39   | 44   | 49   | 55   | 59   |
| CHA | 127  | 141  | 137  | 177  | 238  | 290  | 329  | 367  | 393  | 404  | 410  |
| EUR | 149  | 158  | 163  | 152  | 158  | 164  | 173  | 172  | 172  | 179  | 189  |
| IND | 9    | 10   | 12   | 17   | 31   | 44   | 64   | 90   | 121  | 154  | 186  |
| JPN | 15   | 14   | 14   | 14   | 13   | 12   | 14   | 22   | 27   | 33   | 44   |
| LAM | 58   | 65   | 70   | 85   | 107  | 128  | 151  | 173  | 208  | 242  | 281  |
| MEA | 24   | 29   | 40   | 48   | 60   | 71   | 78   | 87   | 97   | 107  | 118  |
| NEU | 16   | 17   | 19   | 16   | 18   | 19   | 20   | 22   | 23   | 23   | 22   |
| OAS | 38   | 44   | 52   | 60   | 91   | 131  | 189  | 265  | 356  | 454  | 547  |
| REF | 88   | 67   | 73   | 63   | 70   | 75   | 81   | 94   | 101  | 106  | 108  |
| SSA | 17   | 19   | 29   | 34   | 38   | 46   | 62   | 90   | 147  | 232  | 342  |
| USA | 120  | 147  | 150  | 116  | 118  | 120  | 121  | 117  | 118  | 120  | 122  |

Table 248: MAgPIE m4p\_SSP1 — Demand—Feed—Crops (Mt DM/yr) [PART 1/2]

|     | 2050 | 2055 | 2060 | 2070 | 2080 | 2090 | 2100 |
|-----|------|------|------|------|------|------|------|
| GLO | 2717 | 2718 | 2665 | 2428 | 2143 | 1821 | 1560 |
| CAZ | 64   | 68   | 73   | 70   | 54   | 49   | 46   |
| CHA | 401  | 375  | 340  | 279  | 228  | 186  | 145  |
| EUR | 199  | 201  | 200  | 191  | 184  | 175  | 161  |
| IND | 216  | 221  | 222  | 217  | 204  | 188  | 165  |
| JPN | 49   | 51   | 51   | 46   | 44   | 38   | 44   |
| LAM | 317  | 307  | 298  | 264  | 213  | 176  | 145  |
| MEA | 121  | 119  | 115  | 97   | 74   | 60   | 55   |
| NEU | 21   | 21   | 22   | 21   | 19   | 16   | 14   |
| OAS | 626  | 617  | 591  | 513  | 471  | 366  | 281  |
| REF | 107  | 106  | 104  | 90   | 70   | 53   | 46   |
| SSA | 466  | 500  | 517  | 506  | 450  | 383  | 333  |
| USA | 129  | 131  | 132  | 136  | 132  | 132  | 126  |

Table 249: MAgPIE m4p\_SSP1 — Demand—Feed—Crops (Mt DM/yr) [PART 2/2]

|     | 1965 | 1970 | 1975 | 1980 | 1985 | 1990 | 1995 | 2000 | 2005 | 2010 |
|-----|------|------|------|------|------|------|------|------|------|------|
| GLO | 370  | 466  | 502  | 590  | 641  | 672  | 674  | 723  | 780  | 804  |
| CAZ | 13   | 18   | 18   | 18   | 20   | 22   | 28   | 30   | 33   | 27   |
| CHA | 32   | 46   | 60   | 80   | 82   | 90   | 129  | 143  | 139  | 179  |
| EUR | 108  | 125  | 146  | 158  | 164  | 155  | 146  | 154  | 159  | 148  |
| IND | 3    | 3    | 3    | 3    | 3    | 6    | 9    | 10   | 12   | 18   |
| JPN | 6    | 9    | 11   | 15   | 16   | 17   | 15   | 14   | 14   | 14   |
| LAM | 23   | 30   | 37   | 43   | 45   | 49   | 58   | 65   | 71   | 84   |
| MEA | 4    | 5    | 7    | 11   | 18   | 20   | 24   | 29   | 37   | 47   |
| NEU | 10   | 12   | 13   | 15   | 17   | 14   | 15   | 16   | 19   | 16   |
| OAS | 6    | 8    | 11   | 16   | 20   | 24   | 34   | 40   | 50   | 61   |
| REF | 54   | 84   | 84   | 111  | 116  | 128  | 76   | 53   | 64   | 56   |
| SSA | 5    | 9    | 9    | 8    | 10   | 13   | 17   | 20   | 29   | 34   |
| USA | 105  | 116  | 103  | 113  | 128  | 134  | 124  | 151  | 153  | 120  |

Table 250: FAO — Demand—Feed—Crops (Mt DM/yr)

6.2.1
Cereals

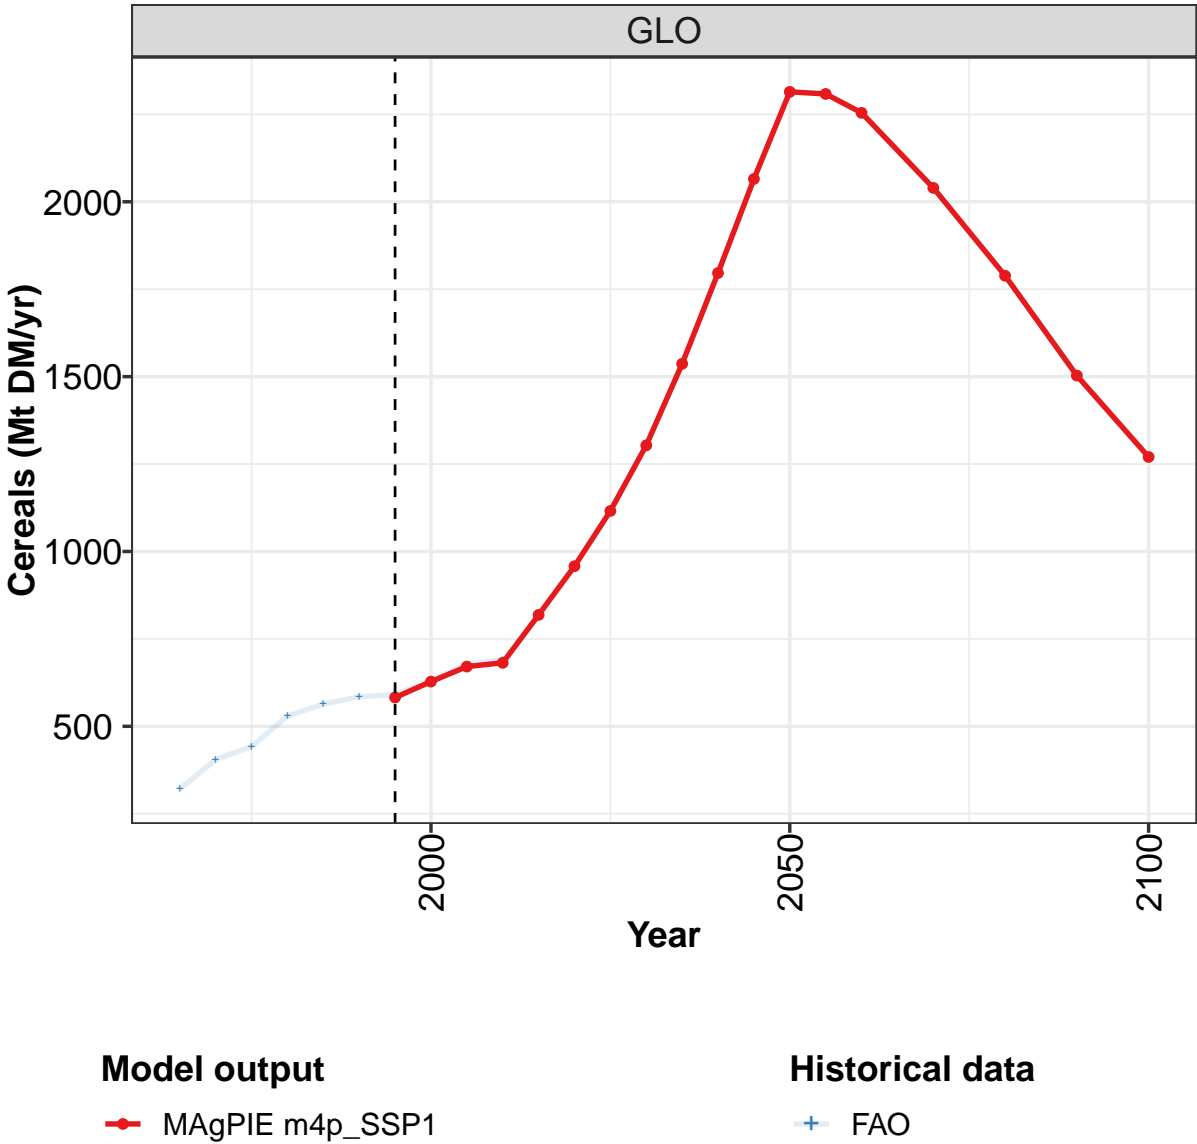

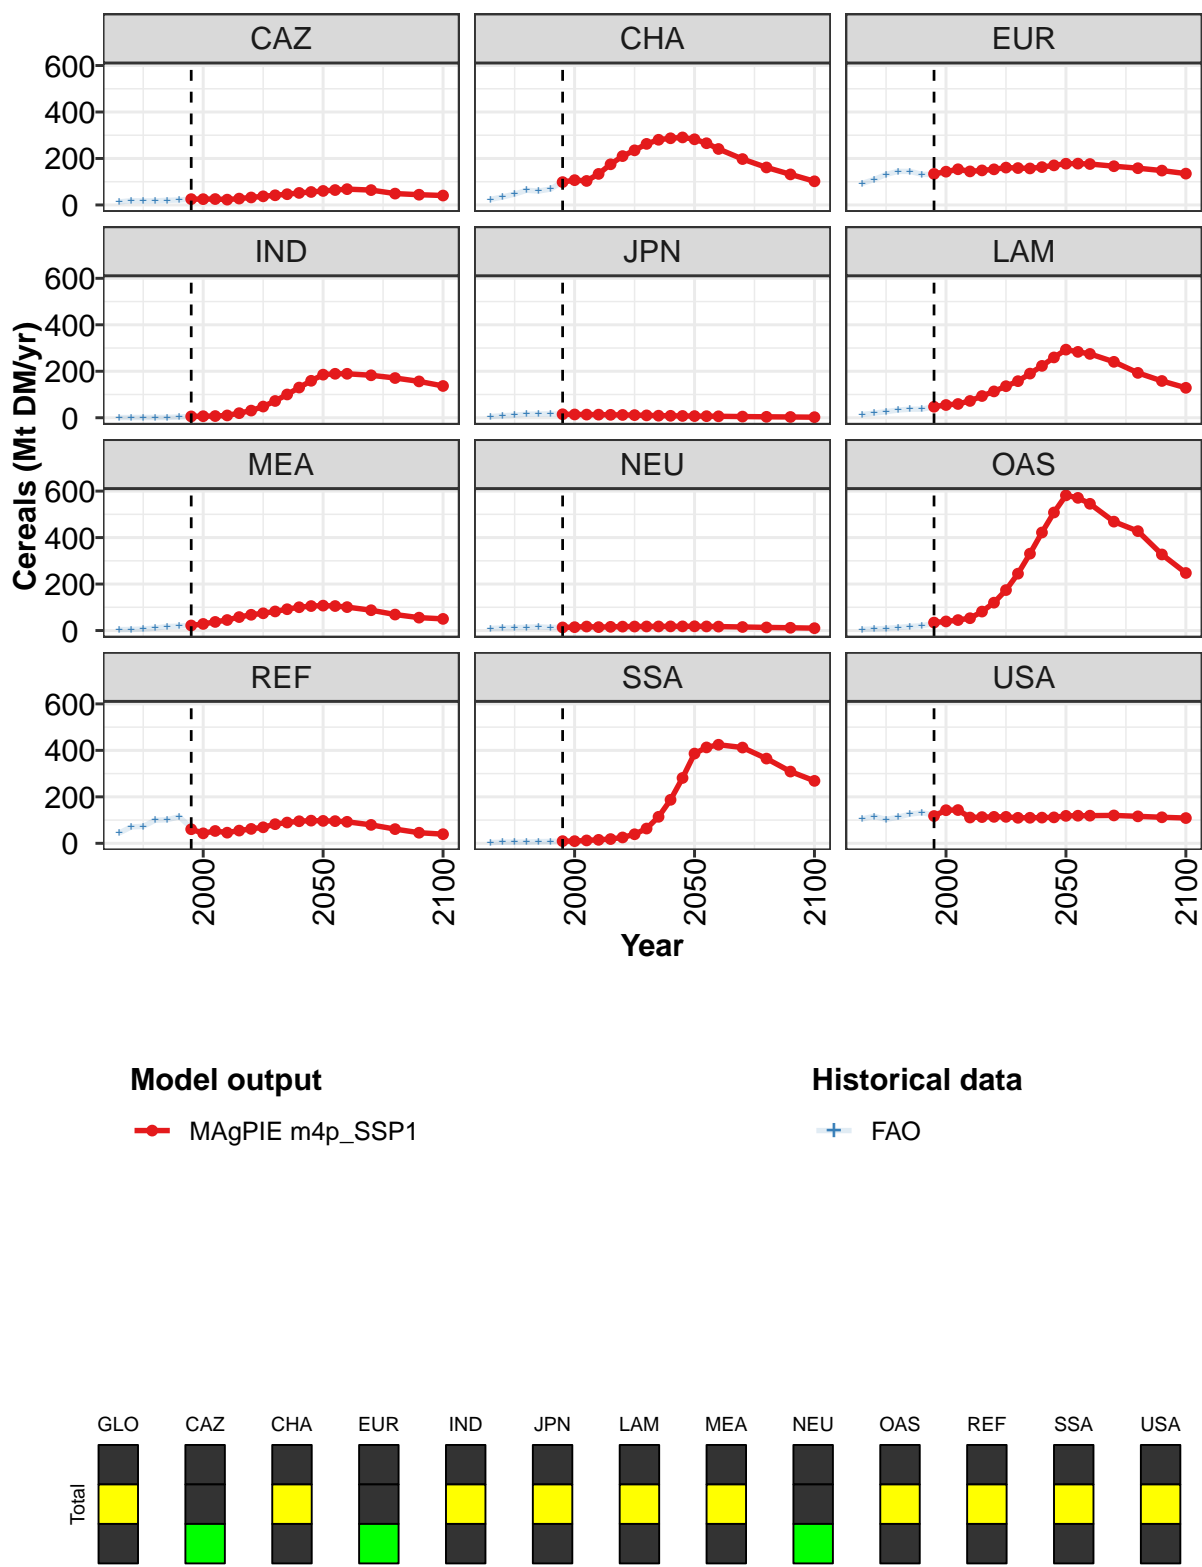

Figure 84: MAgPIE m4p\_SSP1 — Demand—Feed—Crops—Cereals (Mt DM/yr)

|     | 1995 | 2000 | 2005 | 2010 | 2015 | 2020 | 2025 | 2030 | 2035 | 2040 | 2045 |
|-----|------|------|------|------|------|------|------|------|------|------|------|
| GLO | 582  | 628  | 671  | 682  | 819  | 958  | 1116 | 1304 | 1537 | 1796 | 2065 |
| CAZ | 25   | 25   | 25   | 23   | 27   | 32   | 37   | 42   | 46   | 52   | 56   |
| CHA | 98   | 107  | 103  | 134  | 175  | 210  | 235  | 263  | 280  | 287  | 291  |
| EUR | 134  | 143  | 154  | 144  | 149  | 153  | 161  | 159  | 157  | 163  | 170  |
| IND | 6    | 7    | 7    | 10   | 20   | 31   | 48   | 72   | 100  | 130  | 159  |
| JPN | 15   | 14   | 14   | 13   | 13   | 12   | 11   | 10   | 9    | 8    | 8    |
| LAM | 47   | 55   | 59   | 72   | 93   | 113  | 136  | 157  | 190  | 223  | 260  |
| MEA | 22   | 28   | 37   | 45   | 58   | 68   | 74   | 82   | 92   | 100  | 105  |
| NEU | 13   | 15   | 17   | 15   | 16   | 17   | 17   | 18   | 18   | 18   | 18   |
| OAS | 34   | 39   | 45   | 53   | 82   | 120  | 174  | 245  | 331  | 422  | 508  |
| REF | 61   | 43   | 53   | 46   | 55   | 62   | 69   | 82   | 89   | 95   | 98   |
| SSA | 9    | 9    | 12   | 15   | 18   | 25   | 39   | 64   | 114  | 187  | 281  |
| USA | 118  | 143  | 143  | 111  | 113  | 114  | 114  | 110  | 110  | 111  | 112  |

Table 251: MAgPIE m4p\_SSP1 — Demand—Feed—Crops—Cereals (Mt DM/yr) [PART 1/2]

|     | 2050 | 2055 | 2060 | 2070 | 2080 | 2090 | 2100 |
|-----|------|------|------|------|------|------|------|
| GLO | 2314 | 2308 | 2254 | 2040 | 1789 | 1503 | 1270 |
| CAZ | 60   | 64   | 68   | 64   | 49   | 44   | 41   |
| CHA | 283  | 266  | 241  | 198  | 161  | 132  | 102  |
| EUR | 178  | 178  | 176  | 167  | 158  | 148  | 135  |
| IND | 186  | 189  | 189  | 183  | 171  | 156  | 137  |
| JPN | 7    | 7    | 6    | 5    | 4    | 3    | 2    |
| LAM | 293  | 283  | 275  | 241  | 193  | 158  | 129  |
| MEA | 107  | 105  | 101  | 87   | 69   | 55   | 50   |
| NEU | 18   | 18   | 17   | 15   | 13   | 12   | 10   |
| OAS | 582  | 571  | 546  | 469  | 428  | 327  | 248  |
| REF | 97   | 96   | 93   | 79   | 61   | 46   | 39   |
| SSA | 386  | 413  | 424  | 412  | 365  | 309  | 269  |
| USA | 118  | 119  | 119  | 120  | 116  | 112  | 109  |

Table 252: MAgPIE m4p\_SSP1 — Demand—Feed—Crops—Cereals (Mt DM/yr) [PART 2/2]

|     | 1965 | 1970 | 1975 | 1980 | 1985 | 1990 | 1995 | 2000 | 2005 | 2010 |
|-----|------|------|------|------|------|------|------|------|------|------|
| GLO | 321  | 405  | 442  | 529  | 563  | 585  | 591  | 631  | 677  | 690  |
| CAZ | 13   | 18   | 17   | 18   | 20   | 21   | 25   | 27   | 30   | 26   |
| CHA | 24   | 34   | 47   | 63   | 60   | 68   | 100  | 108  | 105  | 136  |
| EUR | 93   | 109  | 131  | 144  | 144  | 132  | 131  | 139  | 150  | 141  |
| IND | 1    | 1    | 1    | 1    | 1    | 3    | 6    | 7    | 7    | 10   |
| JPN | 5    | 9    | 11   | 15   | 16   | 16   | 15   | 14   | 14   | 13   |
| LAM | 14   | 20   | 26   | 33   | 37   | 37   | 48   | 56   | 61   | 72   |
| MEA | 4    | 5    | 7    | 11   | 17   | 19   | 23   | 28   | 37   | 46   |
| NEU | 9    | 11   | 12   | 14   | 16   | 13   | 14   | 14   | 17   | 15   |
| OAS | 5    | 7    | 9    | 13   | 18   | 21   | 31   | 36   | 44   | 54   |
| REF | 45   | 71   | 73   | 99   | 102  | 114  | 67   | 45   | 53   | 46   |
| SSA | 3    | 5    | 5    | 5    | 7    | 8    | 9    | 10   | 13   | 15   |
| USA | 105  | 116  | 103  | 112  | 126  | 132  | 121  | 147  | 147  | 116  |

Table 253: FAO — Demand—Feed—Crops—Cereals (Mt DM/yr)



6.2.2
Cereals—Maize

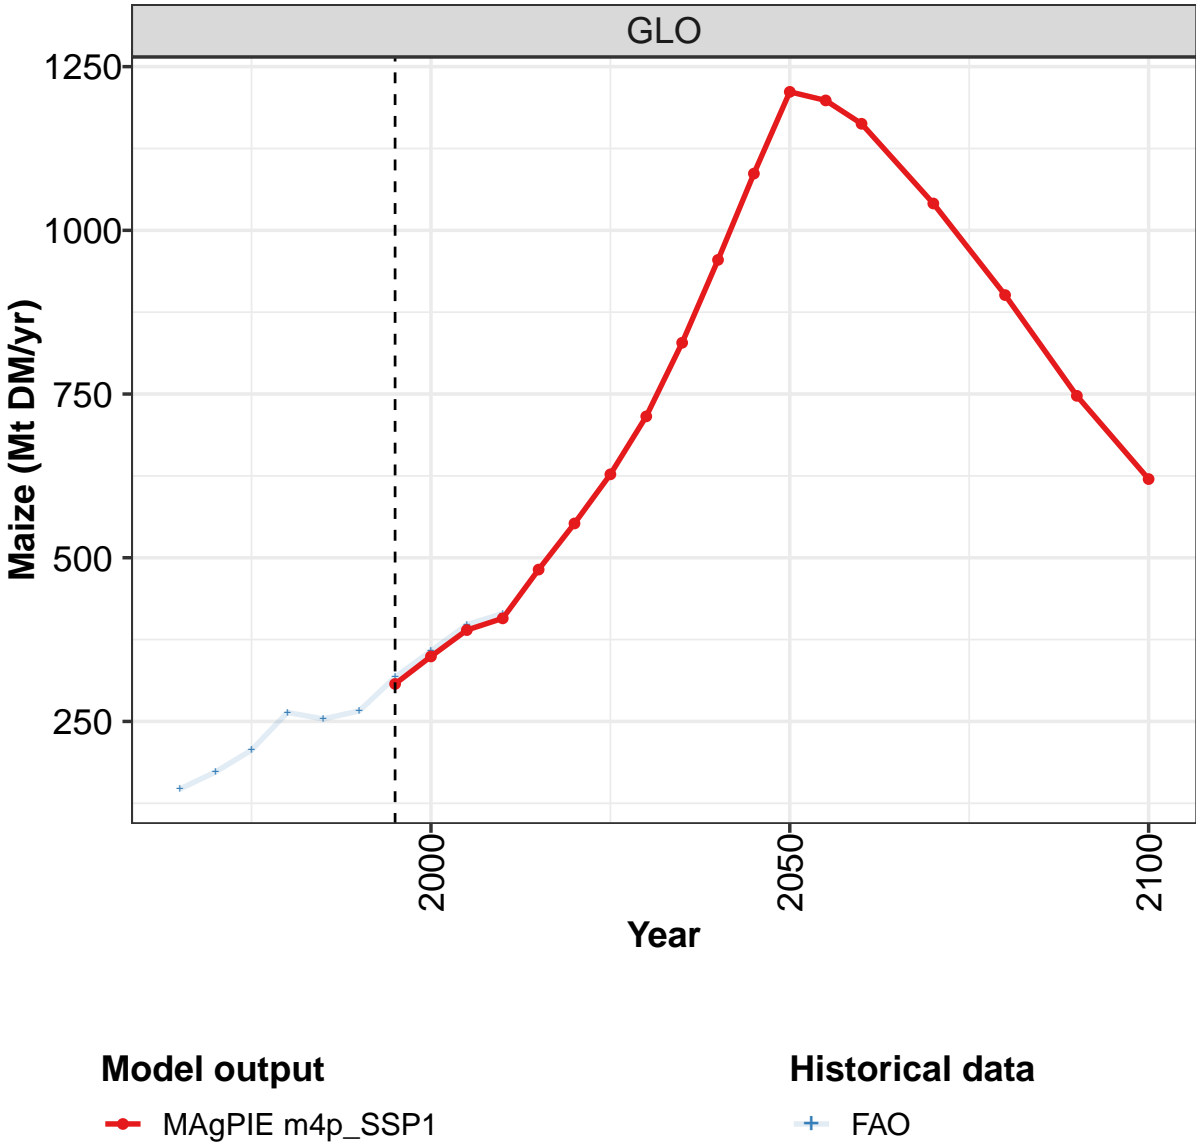

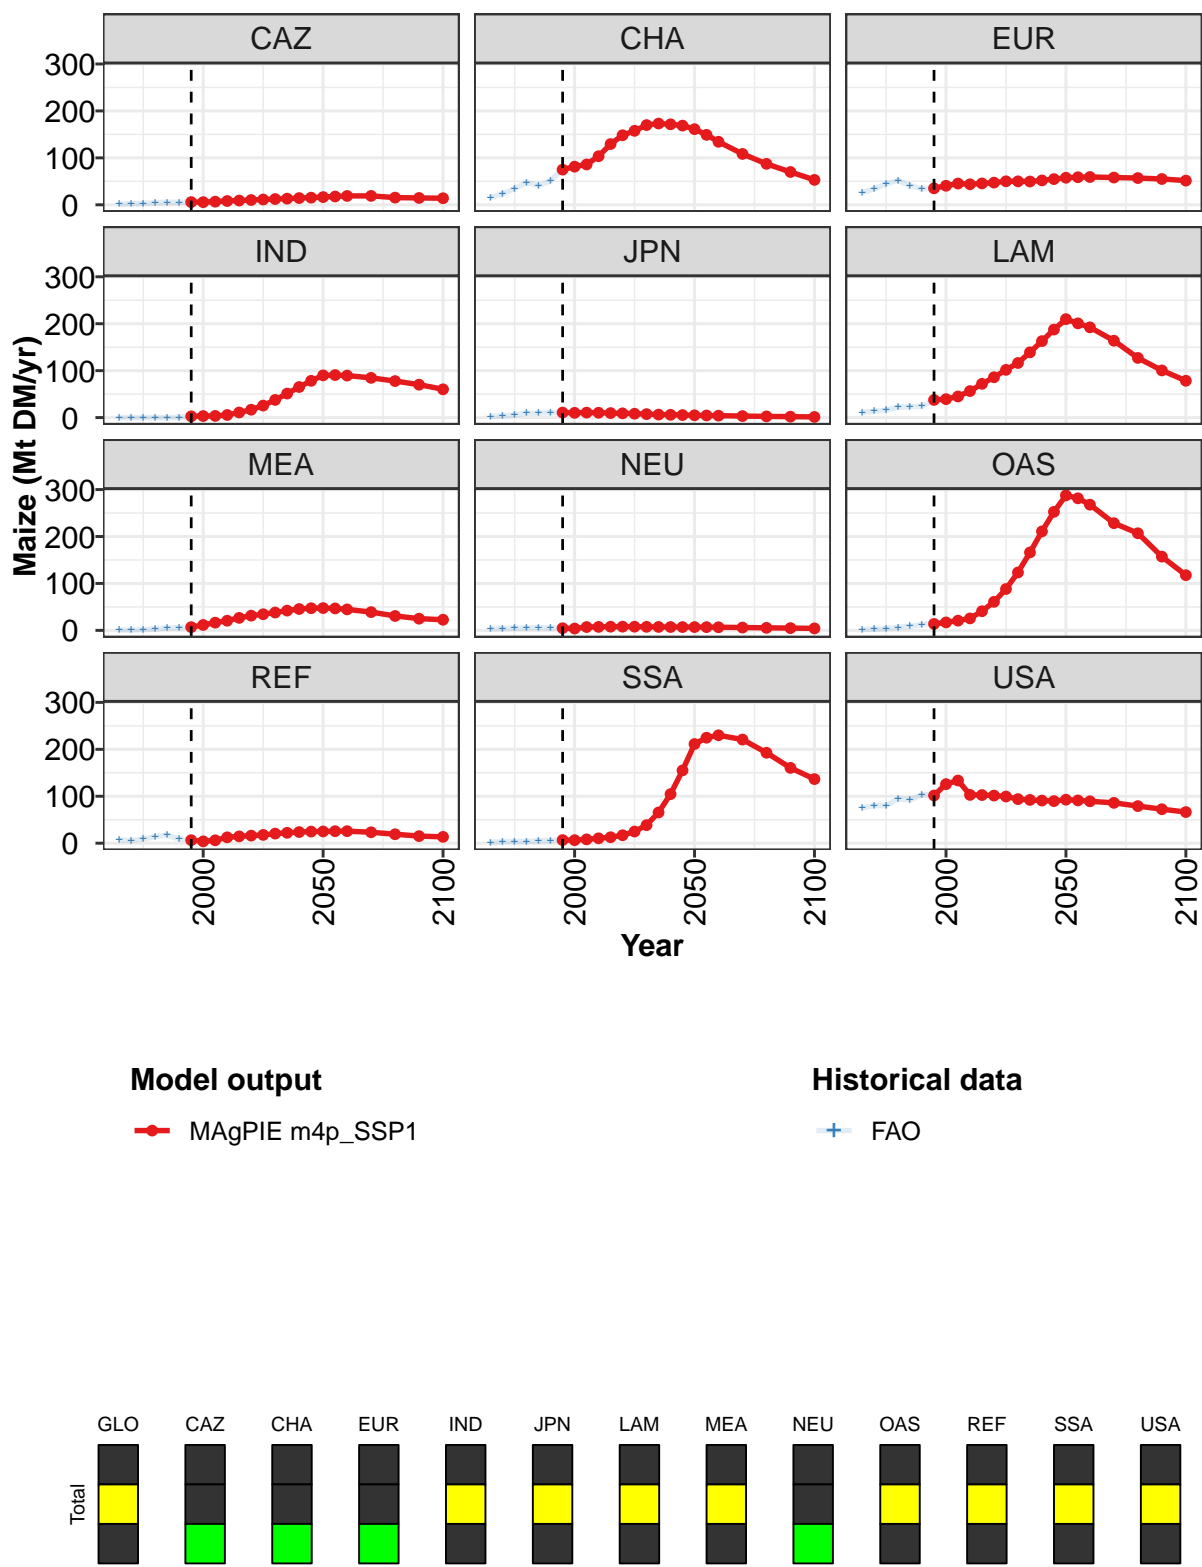

Figure 85: MAgPIE m4p\_SSP1 — Demand—Feed—Crops—Cereals—Maize (Mt DM/yr)

|     | 1995 | 2000 | 2005 | 2010 | 2015 | 2020 | 2025 | 2030 | 2035 | 2040 | 2045 |
|-----|------|------|------|------|------|------|------|------|------|------|------|
| GLO | 307  | 349  | 390  | 407  | 482  | 552  | 627  | 716  | 828  | 955  | 1087 |
| CAZ | 6    | 6    | 7    | 8    | 9    | 10   | 11   | 12   | 13   | 14   | 15   |
| CHA | 75   | 81   | 86   | 104  | 129  | 148  | 158  | 170  | 173  | 172  | 169  |
| EUR | 35   | 41   | 45   | 44   | 46   | 47   | 50   | 50   | 50   | 52   | 55   |
| IND | 3    | 3    | 4    | 6    | 11   | 17   | 26   | 38   | 51   | 65   | 78   |
| JPN | 11   | 10   | 11   | 10   | 10   | 9    | 8    | 7    | 6    | 6    | 5    |
| LAM | 38   | 39   | 45   | 57   | 72   | 86   | 102  | 116  | 139  | 163  | 188  |
| MEA | 7    | 12   | 17   | 21   | 27   | 31   | 34   | 38   | 42   | 46   | 47   |
| NEU | 5    | 4    | 7    | 7    | 8    | 8    | 8    | 8    | 7    | 7    | 7    |
| OAS | 14   | 17   | 21   | 26   | 41   | 61   | 88   | 124  | 166  | 211  | 253  |
| REF | 6    | 4    | 6    | 13   | 15   | 16   | 18   | 20   | 22   | 24   | 25   |
| SSA | 7    | 6    | 8    | 10   | 13   | 17   | 25   | 39   | 66   | 105  | 155  |
| USA | 102  | 126  | 134  | 103  | 103  | 101  | 99   | 94   | 92   | 91   | 90   |

Table 254: MAgPIE m4p\_SSP1 — Demand—Feed—Crops—Cereals—Maize (Mt DM/yr) [PART 1/2]

|     | 2050 | 2055 | 2060 | 2070 | 2080 | 2090 | 2100 |
|-----|------|------|------|------|------|------|------|
| GLO | 1212 | 1198 | 1163 | 1041 | 901  | 747  | 620  |
| CAZ | 16   | 18   | 19   | 19   | 15   | 15   | 14   |
| CHA | 161  | 149  | 134  | 108  | 87   | 70   | 53   |
| EUR | 58   | 59   | 59   | 58   | 57   | 55   | 52   |
| IND | 90   | 91   | 90   | 85   | 78   | 70   | 60   |
| JPN | 5    | 5    | 4    | 3    | 3    | 2    | 1    |
| LAM | 210  | 201  | 192  | 164  | 127  | 101  | 79   |
| MEA | 48   | 47   | 45   | 39   | 31   | 25   | 23   |
| NEU | 7    | 7    | 7    | 6    | 5    | 5    | 4    |
| OAS | 288  | 281  | 268  | 228  | 207  | 157  | 118  |
| REF | 25   | 26   | 26   | 23   | 19   | 15   | 14   |
| SSA | 211  | 225  | 230  | 221  | 193  | 161  | 137  |
| USA | 93   | 91   | 89   | 86   | 79   | 72   | 66   |

Table 255: MAgPIE m4p\_SSP1 — Demand—Feed—Crops—Cereals—Maize (Mt DM/yr) [PART 2/2]

|     | 1965 | 1970 | 1975 | 1980 | 1985 | 1990 | 1995 | 2000 | 2005 | 2010 |
|-----|------|------|------|------|------|------|------|------|------|------|
| GLO | 147  | 173  | 206  | 264  | 254  | 266  | 318  | 358  | 398  | 415  |
| CAZ | 1    | 2    | 3    | 5    | 5    | 5    | 6    | 6    | 8    | 9    |
| CHA | 16   | 23   | 34   | 48   | 41   | 51   | 77   | 83   | 88   | 105  |
| EUR | 26   | 34   | 45   | 52   | 41   | 34   | 36   | 40   | 45   | 43   |
| IND | 0    | 0    | 0    | 0    | 0    | 1    | 3    | 3    | 4    | 6    |
| JPN | 3    | 4    | 6    | 9    | 10   | 11   | 11   | 10   | 11   | 10   |
| LAM | 11   | 14   | 16   | 22   | 23   | 24   | 37   | 39   | 46   | 57   |
| MEA | 1    | 1    | 1    | 4    | 5    | 6    | 7    | 11   | 16   | 21   |
| NEU | 3    | 4    | 5    | 5    | 6    | 5    | 6    | 4    | 8    | 8    |
| OAS | 2    | 3    | 4    | 6    | 9    | 12   | 16   | 19   | 22   | 26   |
| REF | 7    | 5    | 9    | 14   | 17   | 9    | 7    | 4    | 6    | 13   |
| SSA | 2    | 3    | 4    | 4    | 5    | 6    | 7    | 6    | 8    | 11   |
| USA | 75   | 80   | 80   | 95   | 92   | 103  | 105  | 130  | 137  | 107  |

Table 256: FAO — Demand—Feed—Crops—Cereals—Maize (Mt DM/yr)

6.2.3
Cereals—Rice

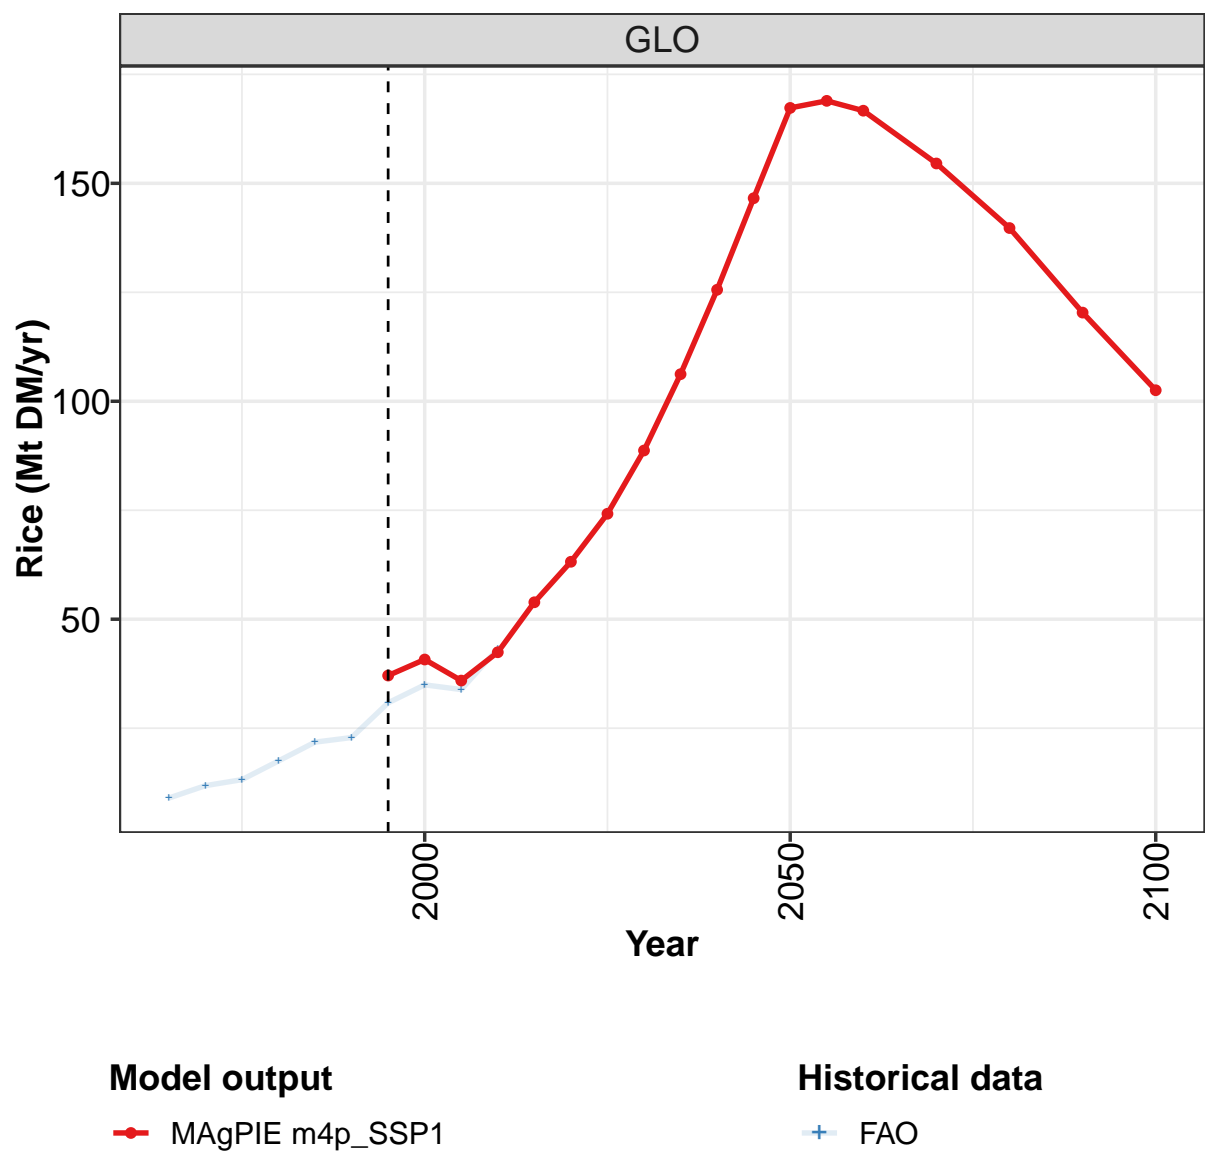

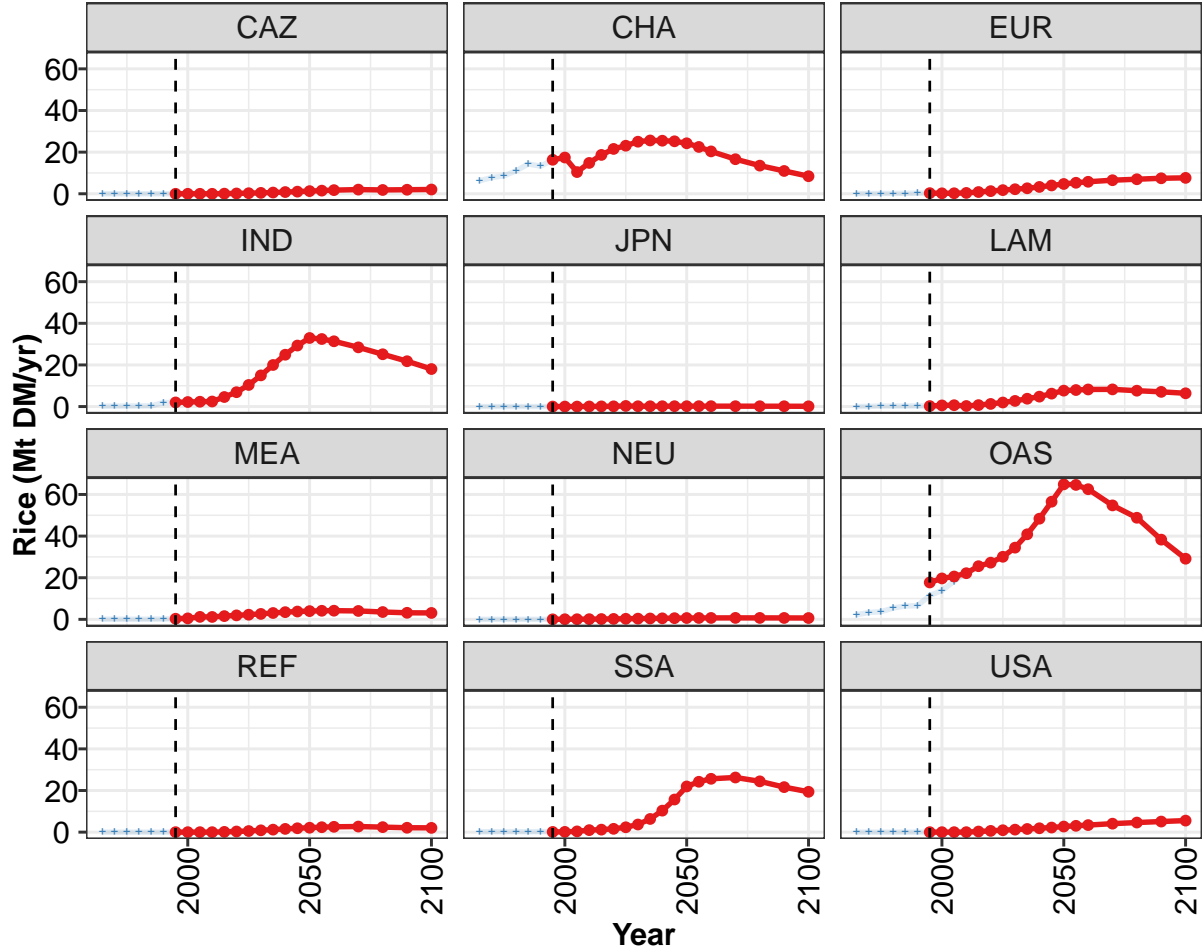

Model output

—●— MAGPIE m4p\_SSP1

Historical data

—+— FAO

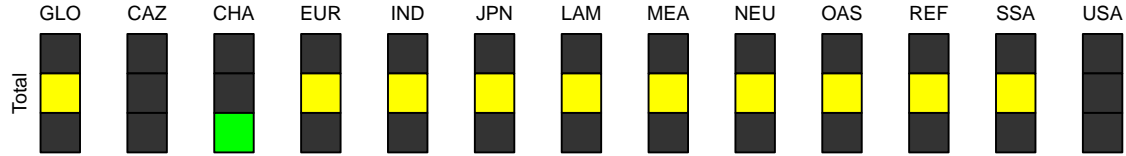

Figure 86: MAGPIE m4p\_SSP1 — Demand—Feed—Crops—Cereals—Rice (Mt DM/yr)

|     | 1995 | 2000 | 2005 | 2010 | 2015 | 2020 | 2025 | 2030 | 2035 | 2040 | 2045 |
|-----|------|------|------|------|------|------|------|------|------|------|------|
| GLO | 37   | 41   | 36   | 42   | 54   | 63   | 74   | 89   | 106  | 126  | 147  |
| CAZ | 0    | 0    | 0    | 0    | 0    | 0    | 0    | 0    | 1    | 1    | 1    |
| CHA | 16   | 17   | 10   | 15   | 19   | 22   | 23   | 25   | 26   | 26   | 25   |
| EUR | 0    | 0    | 0    | 0    | 1    | 1    | 2    | 2    | 3    | 3    | 4    |
| IND | 2    | 2    | 2    | 2    | 5    | 7    | 10   | 15   | 20   | 25   | 29   |
| JPN | 0    | 0    | 0    | 0    | 0    | 0    | 0    | 0    | 0    | 0    | 0    |
| LAM | 0    | 1    | 1    | 0    | 1    | 1    | 2    | 3    | 4    | 5    | 6    |
| MEA | 0    | 0    | 1    | 1    | 2    | 2    | 2    | 3    | 3    | 3    | 4    |
| NEU | 0    | 0    | 0    | 0    | 0    | 0    | 0    | 0    | 0    | 0    | 1    |
| OAS | 18   | 20   | 21   | 22   | 26   | 27   | 30   | 34   | 41   | 48   | 57   |
| REF | 0    | 0    | 0    | 0    | 0    | 0    | 1    | 1    | 1    | 2    | 2    |
| SSA | 0    | 0    | 0    | 1    | 1    | 2    | 2    | 4    | 6    | 10   | 16   |
| USA | 0    | 0    | 0    | 0    | 0    | 1    | 1    | 1    | 2    | 2    | 2    |

Table 257: MAgPIE m4p\_SSP1 — Demand—Feed—Crops—Cereals—Rice (Mt DM/yr) [PART 1/2]

|     | 2050 | 2055 | 2060 | 2070 | 2080 | 2090 | 2100 |
|-----|------|------|------|------|------|------|------|
| GLO | 167  | 169  | 167  | 155  | 140  | 120  | 103  |
| CAZ | 1    | 2    | 2    | 2    | 2    | 2    | 2    |
| CHA | 24   | 23   | 20   | 17   | 14   | 11   | 8    |
| EUR | 5    | 5    | 6    | 7    | 7    | 7    | 8    |
| IND | 33   | 32   | 31   | 28   | 25   | 22   | 18   |
| JPN | 0    | 0    | 0    | 0    | 0    | 0    | 0    |
| LAM | 8    | 8    | 8    | 8    | 8    | 7    | 6    |
| MEA | 4    | 4    | 4    | 4    | 4    | 3    | 3    |
| NEU | 1    | 1    | 1    | 1    | 1    | 1    | 1    |
| OAS | 65   | 65   | 63   | 55   | 49   | 38   | 29   |
| REF | 2    | 2    | 3    | 3    | 2    | 2    | 2    |
| SSA | 22   | 24   | 26   | 26   | 24   | 22   | 19   |
| USA | 3    | 3    | 3    | 4    | 5    | 5    | 6    |

Table 258: MAgPIE m4p\_SSP1 — Demand—Feed—Crops—Cereals—Rice (Mt DM/yr) [PART 2/2]

|     | 1965 | 1970 | 1975 | 1980 | 1985 | 1990 | 1995 | 2000 | 2005 | 2010 |
|-----|------|------|------|------|------|------|------|------|------|------|
| GLO | 9.0  | 11.8 | 13.2 | 17.5 | 21.8 | 22.9 | 30.8 | 34.9 | 33.9 | 43.2 |
| CAZ | 0.0  | 0.0  | 0.0  | 0.0  | 0.0  | 0.0  | 0.0  | 0.0  | 0.0  | 0.0  |
| CHA | 6.3  | 7.8  | 8.6  | 11.0 | 14.3 | 13.3 | 16.2 | 17.4 | 10.5 | 15.1 |
| EUR | 0.1  | 0.1  | 0.1  | 0.2  | 0.2  | 0.3  | 0.3  | 0.3  | 0.3  | 0.4  |
| IND | 0.2  | 0.2  | 0.3  | 0.3  | 0.3  | 1.9  | 2.0  | 2.2  | 2.4  | 2.5  |
| JPN | 0.0  | 0.0  | 0.0  | 0.0  | 0.0  | 0.0  | 0.0  | 0.0  | 0.0  | 0.1  |
| LAM | 0.0  | 0.1  | 0.3  | 0.2  | 0.3  | 0.3  | 0.3  | 0.5  | 0.6  | 0.3  |
| MEA | 0.0  | 0.1  | 0.1  | 0.1  | 0.1  | 0.2  | 0.3  | 0.5  | 1.2  | 1.2  |
| NEU | 0.0  | 0.0  | 0.0  | 0.0  | 0.0  | 0.0  | 0.0  | 0.0  | 0.1  | 0.1  |
| OAS | 2.2  | 3.3  | 3.7  | 5.5  | 6.4  | 6.6  | 11.5 | 13.8 | 18.3 | 22.7 |
| REF | 0.0  | 0.0  | 0.0  | 0.0  | 0.0  | 0.0  | 0.0  | 0.0  | 0.0  | 0.0  |
| SSA | 0.2  | 0.2  | 0.2  | 0.3  | 0.2  | 0.3  | 0.2  | 0.2  | 0.4  | 1.0  |
| USA | 0.0  | 0.0  | 0.0  | 0.0  | 0.0  | 0.0  | 0.0  | 0.0  | 0.0  | 0.0  |

Table 259: FAO — Demand—Feed—Crops—Cereals—Rice (Mt DM/yr)

6.2.4
Cereals—Temperate cereals

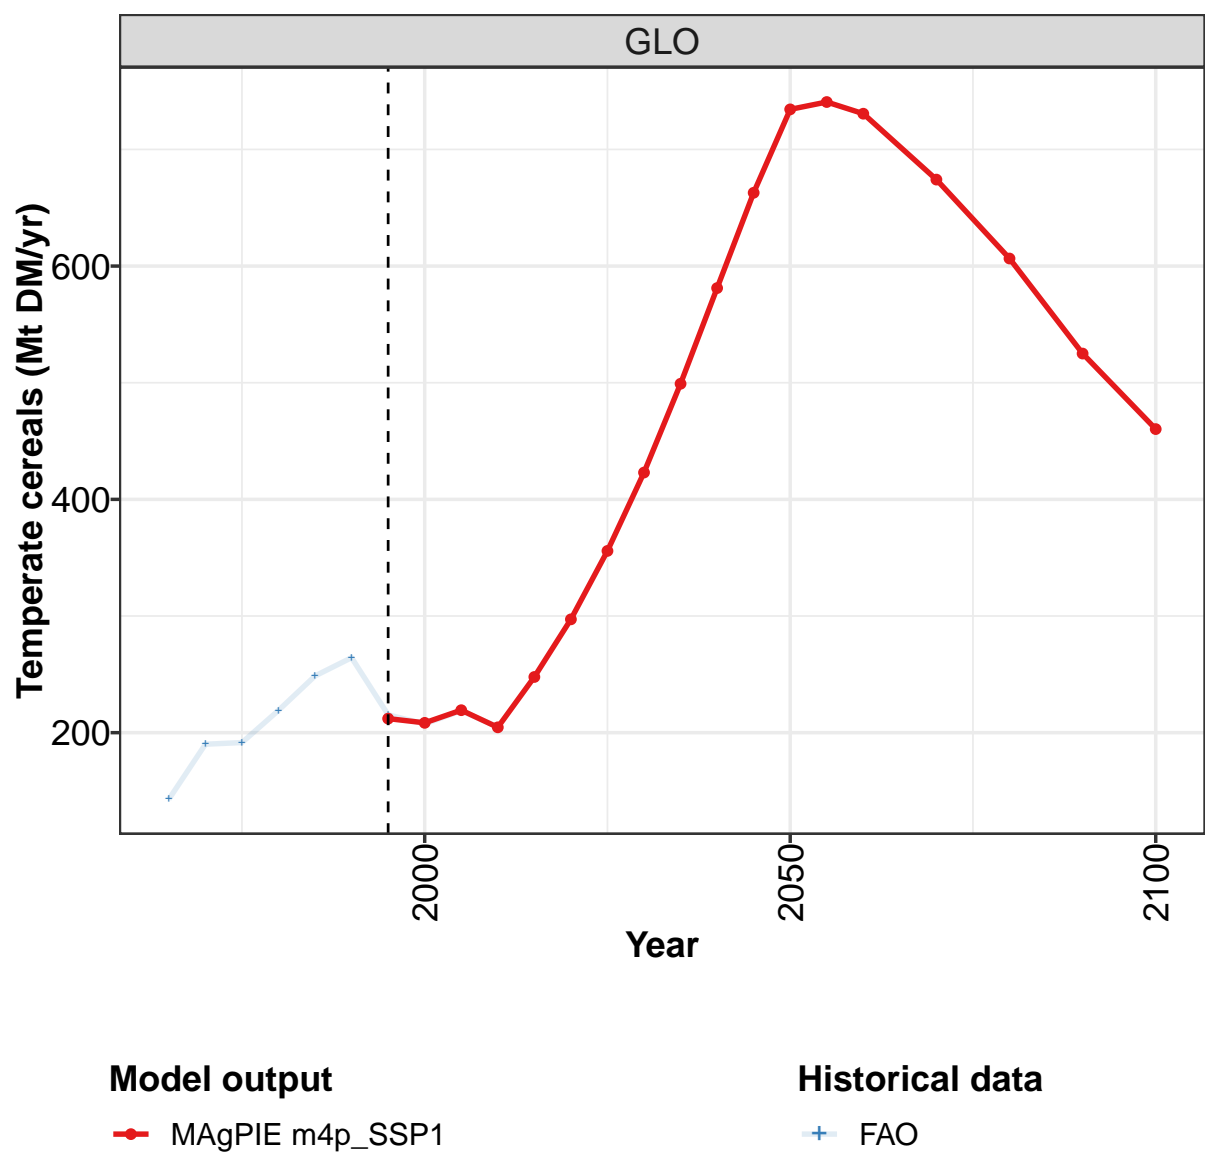

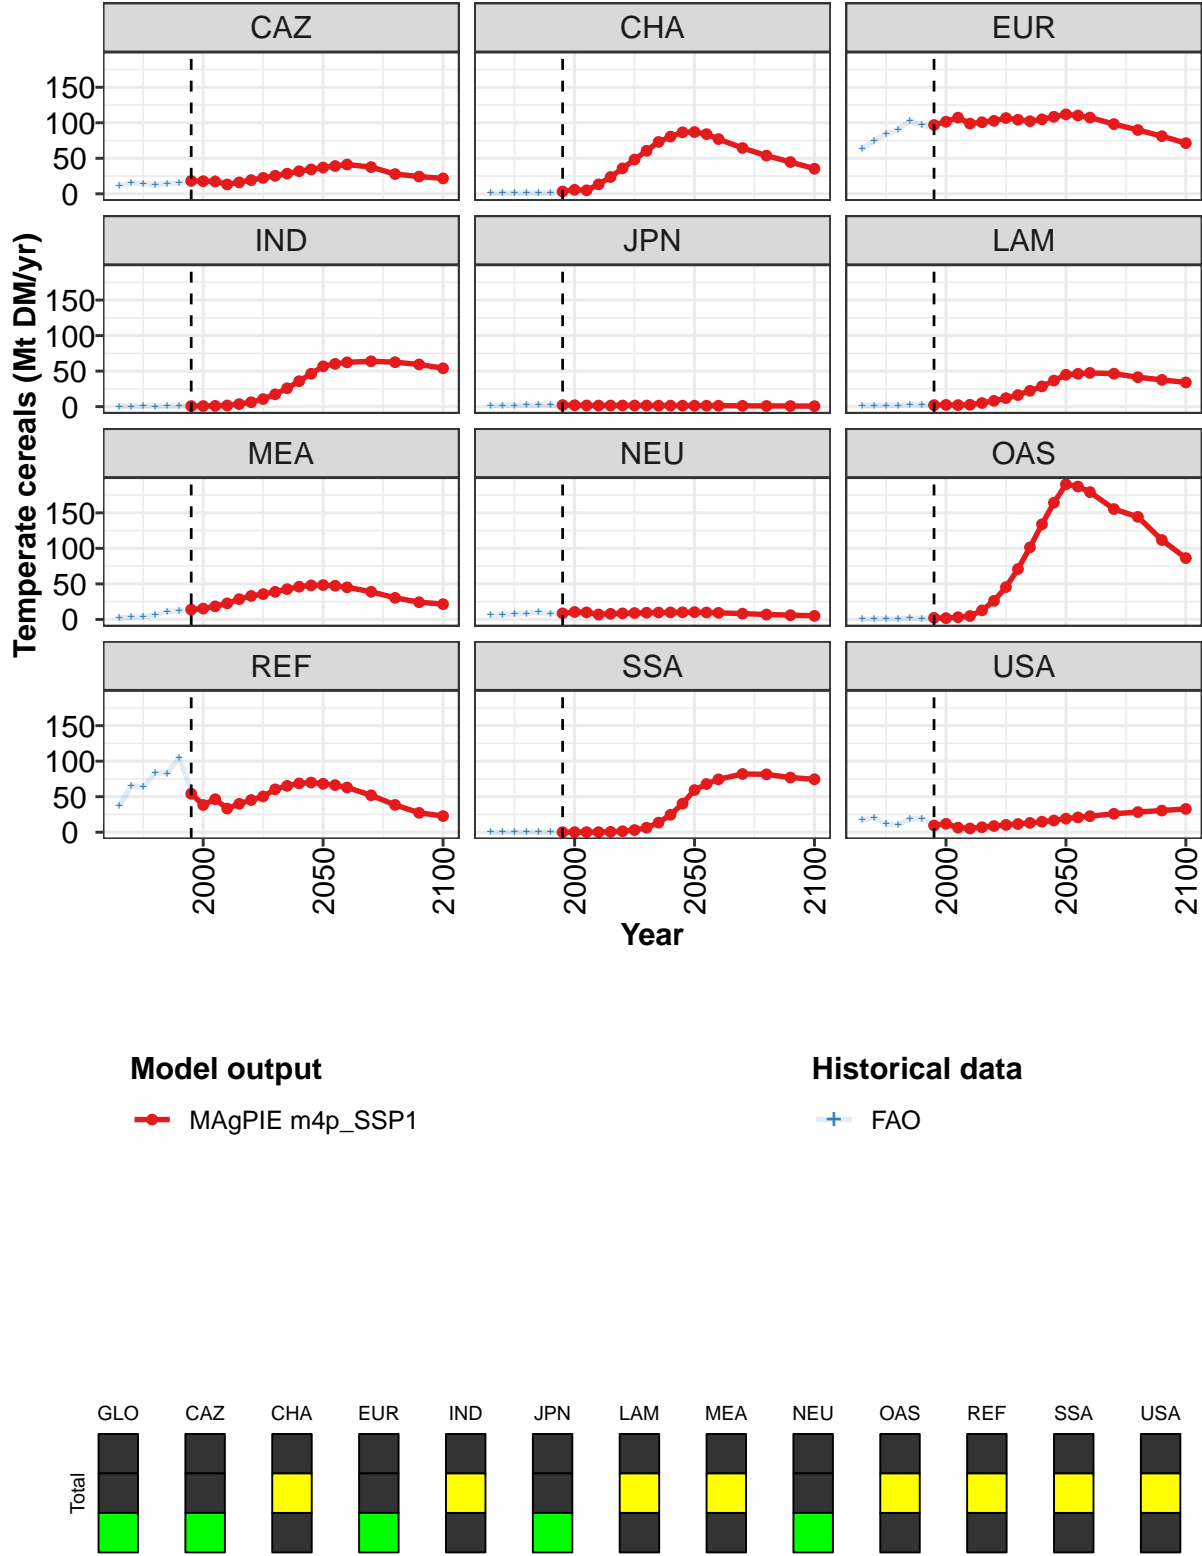

Figure 87: MAgPIE m4p\_SSP1 — Demand—Feed—Crops—Cereals—Temperate cereals (Mt DM/yr)



|     | 1995 | 2000 | 2005 | 2010 | 2015 | 2020 | 2025 | 2030 | 2035 | 2040 | 2045 |
|-----|------|------|------|------|------|------|------|------|------|------|------|
| GLO | 212  | 208  | 219  | 205  | 248  | 297  | 356  | 423  | 499  | 581  | 663  |
| CAZ | 18   | 18   | 17   | 13   | 16   | 19   | 22   | 25   | 28   | 32   | 34   |
| CHA | 3    | 6    | 5    | 13   | 24   | 36   | 48   | 61   | 73   | 81   | 87   |
| EUR | 97   | 102  | 107  | 99   | 101  | 103  | 107  | 104  | 102  | 105  | 108  |
| IND | 1    | 1    | 1    | 2    | 4    | 6    | 11   | 17   | 26   | 36   | 46   |
| JPN | 2    | 2    | 2    | 2    | 2    | 2    | 2    | 2    | 1    | 1    | 1    |
| LAM | 2    | 2    | 2    | 3    | 5    | 8    | 12   | 16   | 22   | 28   | 37   |
| MEA | 14   | 15   | 18   | 23   | 29   | 33   | 36   | 39   | 43   | 46   | 48   |
| NEU | 9    | 11   | 10   | 7    | 8    | 9    | 9    | 9    | 10   | 10   | 10   |
| OAS | 2    | 2    | 3    | 5    | 13   | 26   | 46   | 71   | 101  | 134  | 164  |
| REF | 54   | 38   | 46   | 33   | 40   | 45   | 50   | 60   | 65   | 69   | 70   |
| SSA | 0    | 0    | 0    | 0    | 1    | 1    | 3    | 6    | 13   | 25   | 40   |
| USA | 9    | 12   | 6    | 5    | 7    | 9    | 10   | 12   | 13   | 15   | 16   |

Table 260: MAgPIE m4p\_SSP1 — Demand—Feed—Crops—Cereals—Temperate cereals (Mt DM/yr) [PART 1/2]

|     | 2050 | 2055 | 2060 | 2070 | 2080 | 2090 | 2100 |
|-----|------|------|------|------|------|------|------|
| GLO | 734  | 741  | 731  | 674  | 606  | 525  | 460  |
| CAZ | 37   | 39   | 41   | 38   | 28   | 24   | 22   |
| CHA | 87   | 84   | 77   | 65   | 54   | 45   | 35   |
| EUR | 112  | 110  | 107  | 98   | 90   | 81   | 71   |
| IND | 57   | 60   | 62   | 64   | 63   | 59   | 54   |
| JPN | 1    | 1    | 1    | 1    | 1    | 1    | 1    |
| LAM | 45   | 46   | 47   | 46   | 41   | 38   | 34   |
| MEA | 48   | 47   | 45   | 39   | 30   | 24   | 22   |
| NEU | 10   | 10   | 9    | 8    | 7    | 6    | 5    |
| OAS | 190  | 187  | 179  | 155  | 144  | 112  | 86   |
| REF | 68   | 66   | 63   | 52   | 38   | 27   | 23   |
| SSA | 59   | 68   | 74   | 82   | 82   | 77   | 74   |
| USA | 19   | 21   | 23   | 26   | 28   | 30   | 33   |

Table 261: MAgPIE m4p\_SSP1 — Demand—Feed—Crops—Cereals—Temperate cereals (Mt DM/yr) [PART 2/2]

|     | 1965 | 1970 | 1975 | 1980 | 1985 | 1990 | 1995 | 2000 | 2005 | 2010 |
|-----|------|------|------|------|------|------|------|------|------|------|
| GLO | 143  | 190  | 191  | 219  | 249  | 264  | 215  | 207  | 219  | 205  |
| CAZ | 11   | 16   | 14   | 13   | 14   | 15   | 19   | 19   | 21   | 15   |
| CHA | 1    | 1    | 1    | 1    | 1    | 2    | 3    | 6    | 5    | 14   |
| EUR | 64   | 74   | 84   | 91   | 102  | 97   | 93   | 97   | 104  | 96   |
| IND | 0    | 0    | 1    | 0    | 1    | 1    | 1    | 1    | 1    | 2    |
| JPN | 1    | 2    | 2    | 2    | 2    | 2    | 2    | 2    | 2    | 2    |
| LAM | 1    | 1    | 2    | 2    | 3    | 2    | 2    | 3    | 2    | 3    |
| MEA | 2    | 3    | 4    | 6    | 11   | 12   | 15   | 15   | 18   | 23   |
| NEU | 6    | 6    | 7    | 9    | 10   | 8    | 8    | 10   | 9    | 7    |
| OAS | 1    | 1    | 1    | 1    | 2    | 1    | 3    | 2    | 3    | 5    |
| REF | 37   | 65   | 64   | 84   | 83   | 105  | 59   | 40   | 46   | 33   |
| SSA | 0    | 0    | 0    | 0    | 0    | 0    | 0    | 0    | 0    | 0    |
| USA | 17   | 20   | 12   | 10   | 19   | 19   | 10   | 12   | 7    | 6    |

Table 262: FAO — Demand—Feed—Crops—Cereals—Temperate cereals (Mt DM/yr)

6.2.5
Cereals—Tropical cereals

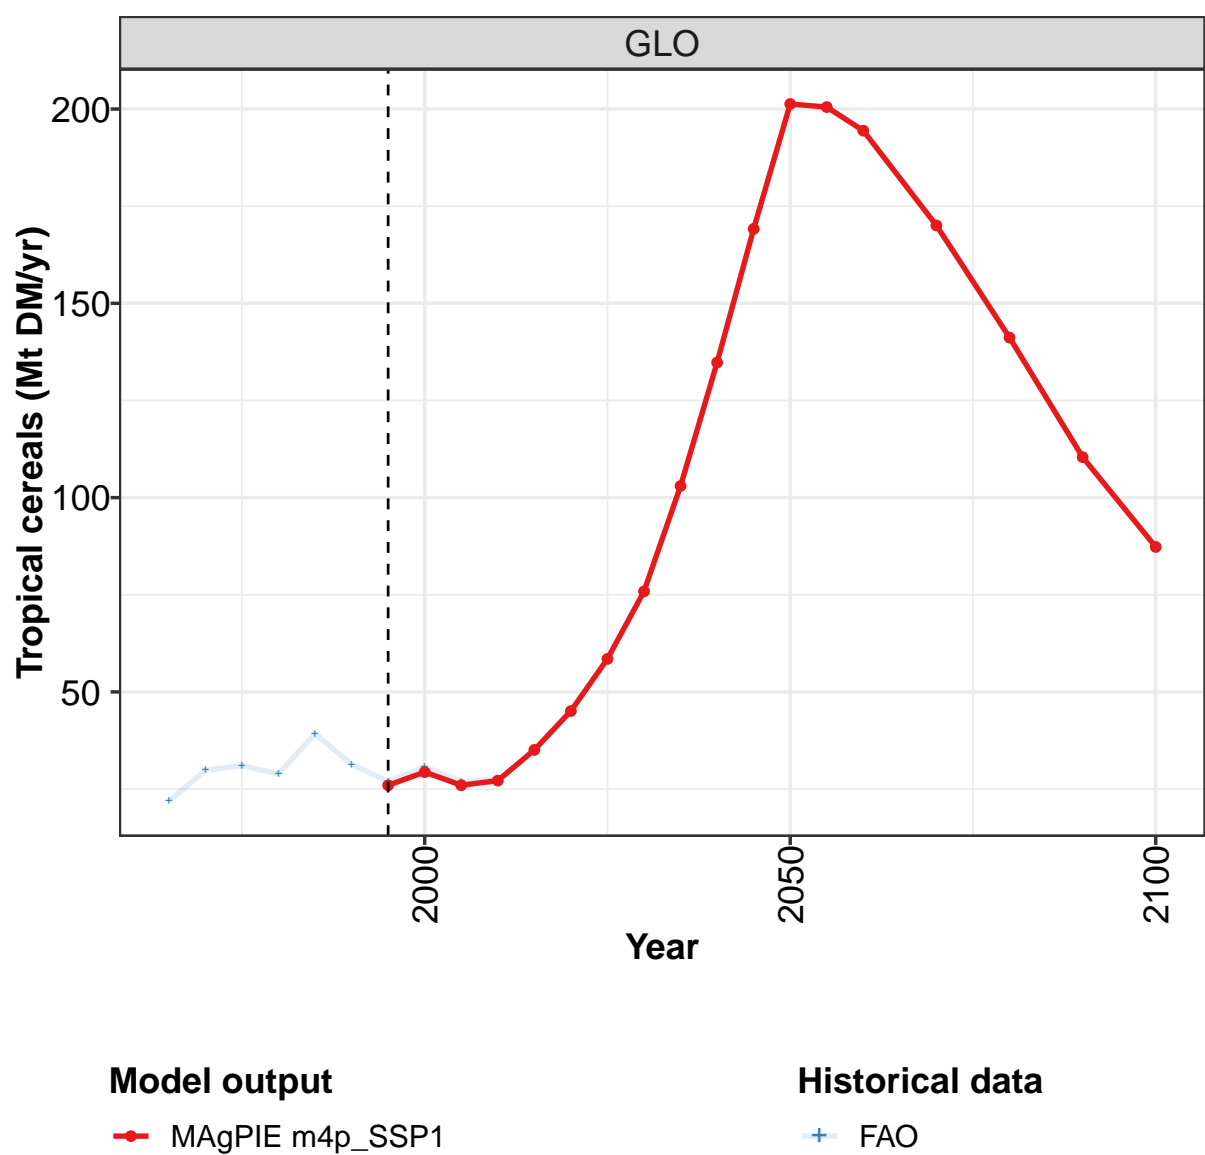

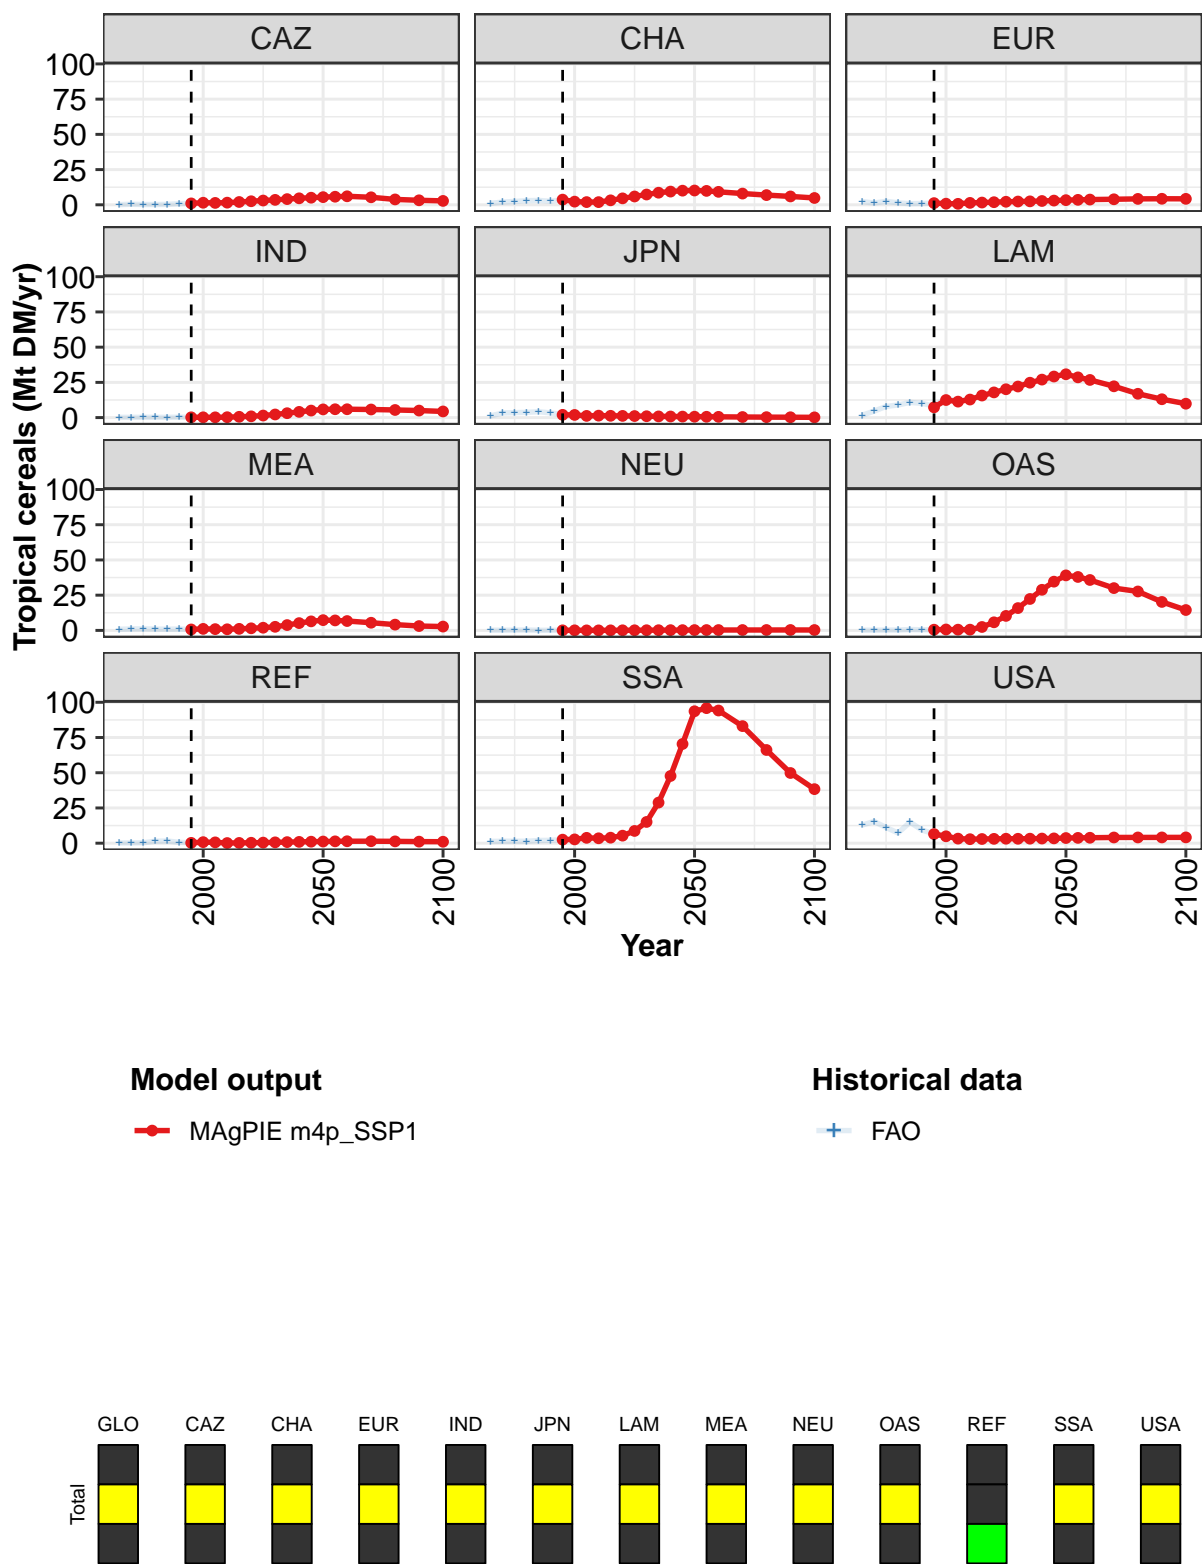

Figure 88: MAgPIE m4p\_SSP1 — Demand—Feed—Crops—Cereals—Tropical cereals (Mt DM/yr)

|     | 1995 | 2000 | 2005 | 2010 | 2015 | 2020 | 2025 | 2030 | 2035 | 2040 | 2045 |
|-----|------|------|------|------|------|------|------|------|------|------|------|
| GLO | 26   | 29   | 26   | 27   | 35   | 45   | 59   | 76   | 103  | 135  | 169  |
| CAZ | 1    | 1    | 1    | 2    | 2    | 3    | 3    | 4    | 4    | 5    | 5    |
| CHA | 4    | 2    | 2    | 2    | 3    | 5    | 6    | 7    | 9    | 9    | 10   |
| EUR | 1    | 1    | 1    | 1    | 2    | 2    | 2    | 2    | 2    | 3    | 3    |
| IND | 0    | 0    | 0    | 0    | 1    | 1    | 1    | 2    | 3    | 4    | 5    |
| JPN | 2    | 2    | 1    | 1    | 1    | 1    | 1    | 1    | 1    | 1    | 1    |
| LAM | 7    | 12   | 11   | 13   | 16   | 18   | 20   | 22   | 25   | 27   | 29   |
| MEA | 1    | 1    | 1    | 1    | 1    | 1    | 2    | 3    | 4    | 5    | 6    |
| NEU | 0    | 0    | 0    | 0    | 0    | 0    | 0    | 0    | 0    | 0    | 0    |
| OAS | 1    | 1    | 1    | 1    | 2    | 6    | 10   | 16   | 22   | 29   | 35   |
| REF | 0    | 1    | 1    | 0    | 0    | 0    | 0    | 1    | 1    | 1    | 1    |
| SSA | 3    | 3    | 4    | 3    | 4    | 5    | 9    | 15   | 29   | 48   | 70   |
| USA | 6    | 5    | 3    | 3    | 3    | 3    | 3    | 3    | 3    | 3    | 3    |

Table 263: MAgPIE m4p\_SSP1 — Demand—Feed—Crops—Cereals—Tropical cereals (Mt DM/yr) [PART 1/2]

|     | 2050 | 2055 | 2060 | 2070 | 2080 | 2090 | 2100 |
|-----|------|------|------|------|------|------|------|
| GLO | 201  | 201  | 194  | 170  | 141  | 110  | 87   |
| CAZ | 5    | 6    | 6    | 5    | 4    | 3    | 3    |
| CHA | 10   | 10   | 9    | 8    | 7    | 6    | 5    |
| EUR | 3    | 4    | 4    | 4    | 4    | 4    | 4    |
| IND | 6    | 6    | 6    | 6    | 5    | 5    | 4    |
| JPN | 1    | 1    | 1    | 0    | 0    | 0    | 0    |
| LAM | 31   | 29   | 27   | 22   | 17   | 13   | 10   |
| MEA | 7    | 7    | 7    | 5    | 4    | 3    | 3    |
| NEU | 0    | 0    | 0    | 0    | 0    | 0    | 0    |
| OAS | 39   | 38   | 36   | 30   | 28   | 20   | 14   |
| REF | 1    | 1    | 1    | 1    | 1    | 1    | 1    |
| SSA | 94   | 96   | 94   | 83   | 66   | 50   | 38   |
| USA | 4    | 4    | 4    | 4    | 4    | 4    | 4    |

Table 264: MAgPIE m4p\_SSP1 — Demand—Feed—Crops—Cereals—Tropical cereals (Mt DM/yr) [PART 2/2]

|     | 1965 | 1970 | 1975 | 1980 | 1985 | 1990 | 1995 | 2000 | 2005 | 2010 |
|-----|------|------|------|------|------|------|------|------|------|------|
| GLO | 21.9 | 29.9 | 31.0 | 28.9 | 39.2 | 31.4 | 27.0 | 30.7 | 26.9 | 27.6 |
| CAZ | 0.1  | 0.4  | 0.2  | 0.2  | 0.3  | 0.8  | 1.1  | 1.6  | 1.6  | 1.7  |
| CHA | 1.1  | 1.9  | 2.4  | 2.9  | 3.1  | 2.5  | 3.7  | 2.3  | 2.0  | 2.0  |
| EUR | 2.3  | 1.3  | 2.4  | 1.4  | 0.8  | 1.0  | 1.1  | 0.8  | 0.7  | 1.3  |
| IND | 0.2  | 0.2  | 0.2  | 0.2  | 0.2  | 0.3  | 0.2  | 0.2  | 0.2  | 0.3  |
| JPN | 1.3  | 3.3  | 3.5  | 3.7  | 4.2  | 3.3  | 2.0  | 1.9  | 1.2  | 1.4  |
| LAM | 1.7  | 4.6  | 7.9  | 9.0  | 10.8 | 10.1 | 8.2  | 13.6 | 11.9 | 12.8 |
| MEA | 0.8  | 1.0  | 1.1  | 0.9  | 0.8  | 1.0  | 0.7  | 1.1  | 0.9  | 0.8  |
| NEU | 0.1  | 0.1  | 0.2  | 0.3  | 0.1  | 0.1  | 0.0  | 0.1  | 0.0  | 0.0  |
| OAS | 0.1  | 0.1  | 0.2  | 0.2  | 0.6  | 0.4  | 0.4  | 0.5  | 0.5  | 0.5  |
| REF | 0.2  | 0.2  | 0.3  | 1.4  | 1.5  | 0.6  | 0.3  | 0.8  | 0.6  | 0.1  |
| SSA | 1.2  | 1.4  | 1.4  | 1.3  | 1.9  | 2.0  | 2.5  | 2.8  | 4.0  | 3.5  |
| USA | 12.8 | 15.4 | 11.1 | 7.3  | 14.9 | 9.3  | 6.7  | 5.1  | 3.3  | 3.0  |

Table 265: FAO — Demand—Feed—Crops—Cereals—Tropical cereals (Mt DM/yr)

6.2.6
Oil crops

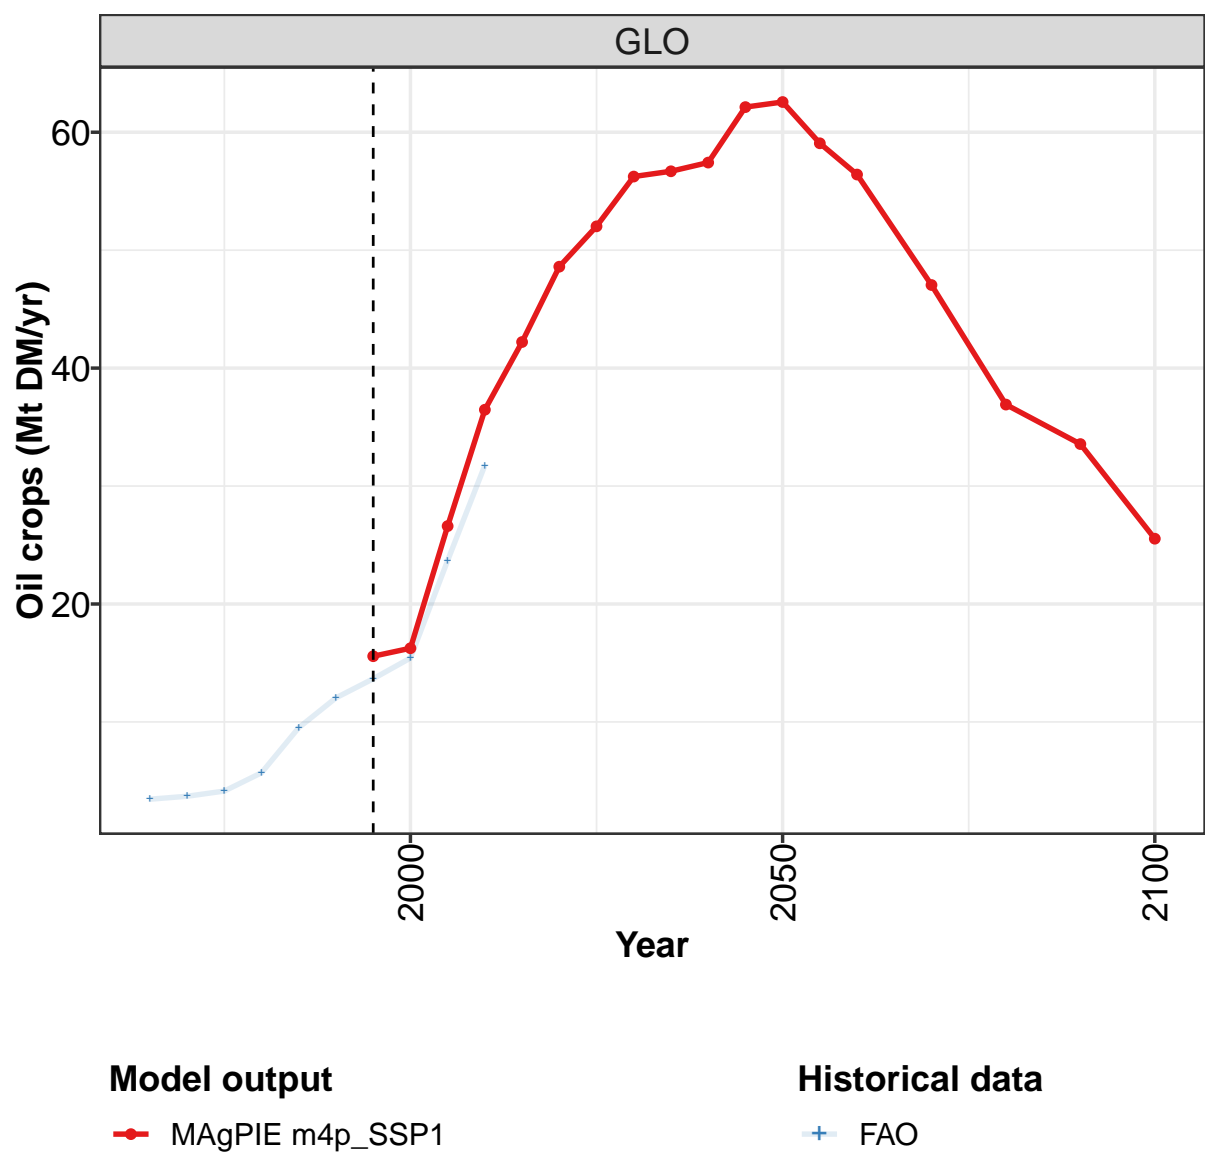

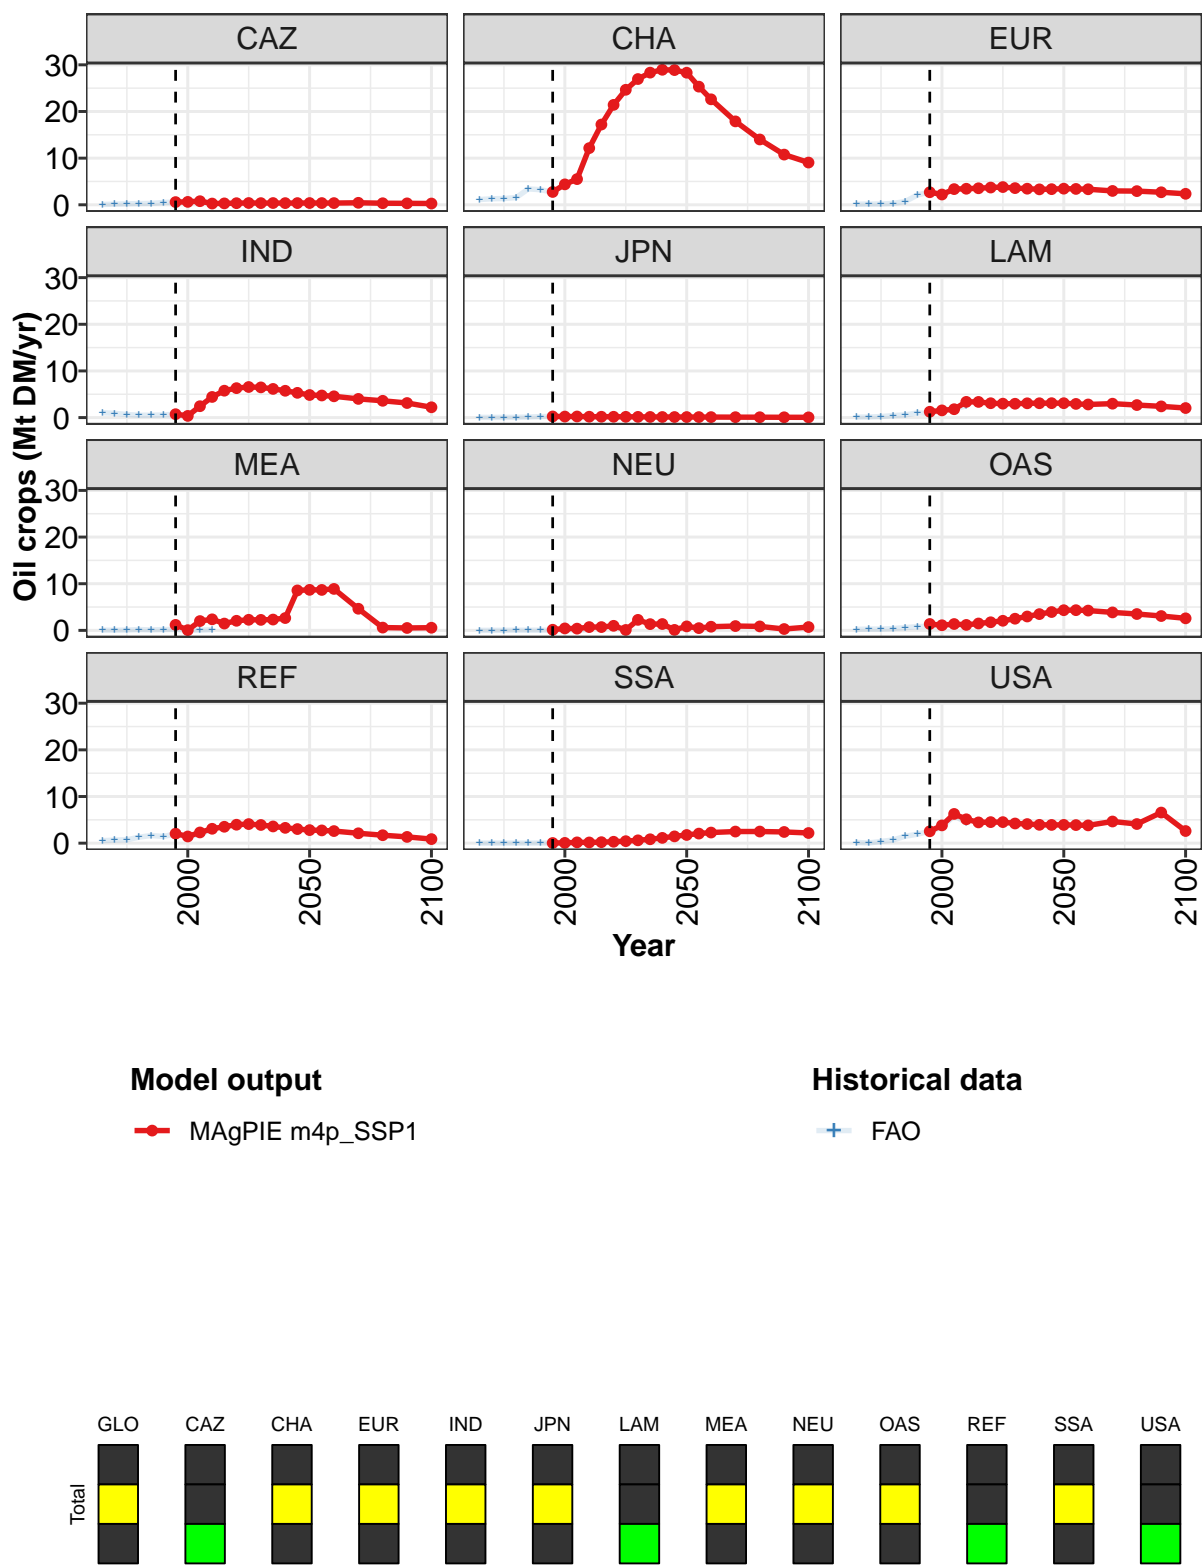

Figure 89: MAgPIE m4p\_SSP1 — Demand—Feed—Crops—Oil crops (Mt DM/yr)

|     | 1995 | 2000 | 2005 | 2010 | 2015 | 2020 | 2025 | 2030 | 2035 | 2040 | 2045 |
|-----|------|------|------|------|------|------|------|------|------|------|------|
| GLO | 15.6 | 16.2 | 26.6 | 36.5 | 42.2 | 48.6 | 52.0 | 56.2 | 56.7 | 57.4 | 62.1 |
| CAZ | 0.6  | 0.6  | 0.8  | 0.3  | 0.3  | 0.3  | 0.4  | 0.4  | 0.4  | 0.4  | 0.4  |
| CHA | 2.8  | 4.4  | 5.5  | 12.2 | 17.2 | 21.4 | 24.7 | 27.0 | 28.3 | 28.9 | 28.9 |
| EUR | 2.7  | 2.2  | 3.4  | 3.4  | 3.5  | 3.7  | 3.8  | 3.6  | 3.5  | 3.3  | 3.4  |
| IND | 0.7  | 0.4  | 2.4  | 4.4  | 5.8  | 6.3  | 6.6  | 6.5  | 6.1  | 5.7  | 5.3  |
| JPN | 0.2  | 0.2  | 0.2  | 0.2  | 0.2  | 0.2  | 0.2  | 0.2  | 0.1  | 0.1  | 0.1  |
| LAM | 1.2  | 1.5  | 1.8  | 3.4  | 3.4  | 3.1  | 3.0  | 3.0  | 3.1  | 3.1  | 3.1  |
| MEA | 1.2  | 0.1  | 2.0  | 2.4  | 1.5  | 2.1  | 2.3  | 2.3  | 2.3  | 2.6  | 8.6  |
| NEU | 0.1  | 0.4  | 0.4  | 0.7  | 0.7  | 1.0  | 0.1  | 2.3  | 1.3  | 1.4  | 0.1  |
| OAS | 1.4  | 1.1  | 1.4  | 1.2  | 1.5  | 1.7  | 2.1  | 2.5  | 3.0  | 3.5  | 3.9  |
| REF | 2.0  | 1.4  | 2.3  | 3.1  | 3.5  | 4.0  | 4.1  | 3.9  | 3.6  | 3.3  | 3.0  |
| SSA | 0.0  | 0.1  | 0.2  | 0.2  | 0.2  | 0.3  | 0.4  | 0.6  | 0.8  | 1.1  | 1.5  |
| USA | 2.5  | 3.8  | 6.3  | 5.1  | 4.5  | 4.5  | 4.5  | 4.2  | 4.1  | 3.9  | 3.9  |

Table 266: MAgPIE m4p\_SSP1 — Demand—Feed—Crops—Oil crops (Mt DM/yr) [PART 1/2]

|     | 2050 | 2055 | 2060 | 2070 | 2080 | 2090 | 2100 |
|-----|------|------|------|------|------|------|------|
| GLO | 62.6 | 59.1 | 56.4 | 47.0 | 36.9 | 33.6 | 25.5 |
| CAZ | 0.4  | 0.4  | 0.4  | 0.4  | 0.3  | 0.3  | 0.3  |
| CHA | 28.3 | 25.3 | 22.6 | 17.9 | 14.0 | 10.8 | 9.1  |
| EUR | 3.5  | 3.4  | 3.3  | 3.0  | 2.9  | 2.7  | 2.4  |
| IND | 4.8  | 4.7  | 4.6  | 4.0  | 3.6  | 3.1  | 2.2  |
| JPN | 0.1  | 0.1  | 0.1  | 0.1  | 0.1  | 0.1  | 0.1  |
| LAM | 3.1  | 2.9  | 2.8  | 3.0  | 2.7  | 2.4  | 2.0  |
| MEA | 8.7  | 8.7  | 8.9  | 4.6  | 0.6  | 0.5  | 0.6  |
| NEU | 0.9  | 0.5  | 0.8  | 0.9  | 0.9  | 0.3  | 0.7  |
| OAS | 4.3  | 4.3  | 4.2  | 3.9  | 3.5  | 3.1  | 2.6  |
| REF | 2.8  | 2.7  | 2.6  | 2.1  | 1.7  | 1.3  | 0.9  |
| SSA | 1.8  | 2.1  | 2.3  | 2.5  | 2.5  | 2.4  | 2.2  |
| USA | 3.9  | 3.9  | 3.8  | 4.6  | 4.1  | 6.6  | 2.6  |

Table 267: MAgPIE m4p\_SSP1 — Demand—Feed—Crops—Oil crops (Mt DM/yr) [PART 2/2]

|     | 1965 | 1970 | 1975 | 1980 | 1985 | 1990 | 1995 | 2000 | 2005 | 2010 |
|-----|------|------|------|------|------|------|------|------|------|------|
| GLO | 3.4  | 3.7  | 4.1  | 5.7  | 9.5  | 12.0 | 13.7 | 15.4 | 23.7 | 31.8 |
| CAZ | 0.1  | 0.1  | 0.2  | 0.3  | 0.3  | 0.5  | 0.6  | 0.6  | 0.9  | 0.3  |
| CHA | 1.1  | 1.3  | 1.3  | 1.5  | 3.4  | 3.2  | 2.7  | 4.4  | 5.5  | 12.2 |
| EUR | 0.1  | 0.2  | 0.2  | 0.3  | 0.7  | 2.1  | 2.7  | 2.2  | 3.3  | 3.4  |
| IND | 1.0  | 0.9  | 0.7  | 0.5  | 0.5  | 0.6  | 0.7  | 0.4  | 2.5  | 4.3  |
| JPN | 0.0  | 0.0  | 0.1  | 0.1  | 0.1  | 0.2  | 0.2  | 0.2  | 0.2  | 0.2  |
| LAM | 0.1  | 0.1  | 0.2  | 0.4  | 0.6  | 1.0  | 0.9  | 1.6  | 1.9  | 2.5  |
| MEA | 0.0  | 0.0  | 0.1  | 0.2  | 0.1  | 0.2  | 0.2  | 0.0  | 0.0  | 0.2  |
| NEU | 0.0  | 0.0  | 0.0  | 0.0  | 0.0  | 0.0  | 0.0  | 0.2  | 0.1  | 0.1  |
| OAS | 0.2  | 0.3  | 0.3  | 0.4  | 0.6  | 0.8  | 0.9  | 1.0  | 1.3  | 1.1  |
| REF | 0.5  | 0.7  | 0.7  | 1.3  | 1.6  | 1.4  | 2.0  | 1.3  | 1.9  | 2.9  |
| SSA | 0.0  | 0.0  | 0.0  | 0.0  | 0.0  | 0.0  | 0.0  | 0.1  | 0.2  | 0.2  |
| USA | 0.1  | 0.0  | 0.4  | 0.7  | 1.5  | 1.9  | 2.6  | 3.4  | 5.9  | 4.4  |

Table 268: FAO — Demand—Feed—Crops—Oil crops (Mt DM/yr)

6.2.7
Oil crops—Cotton seed

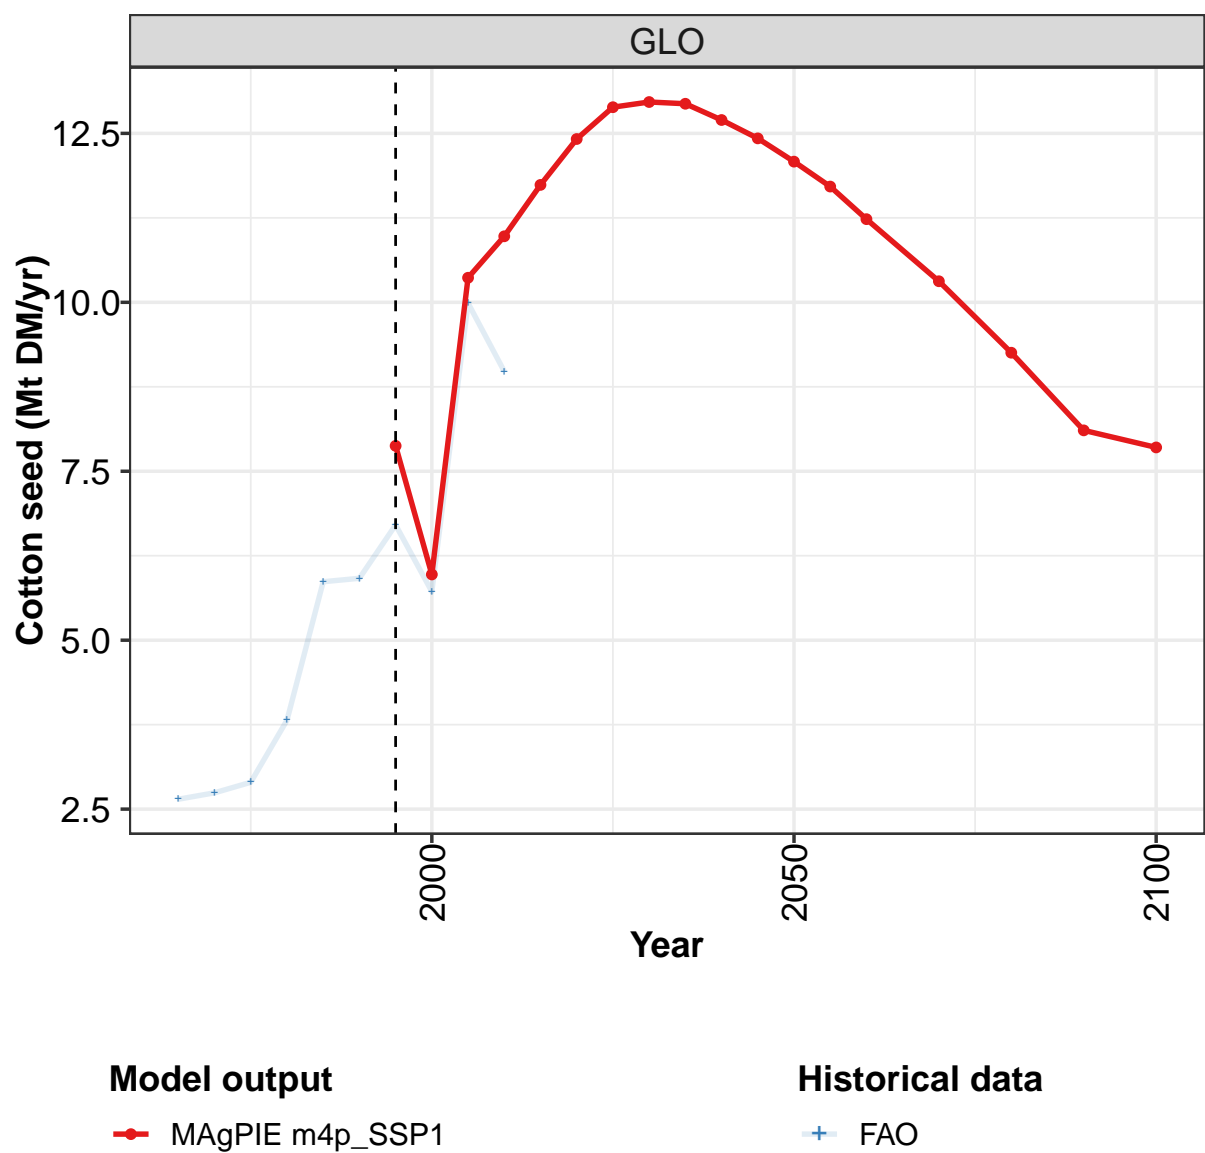



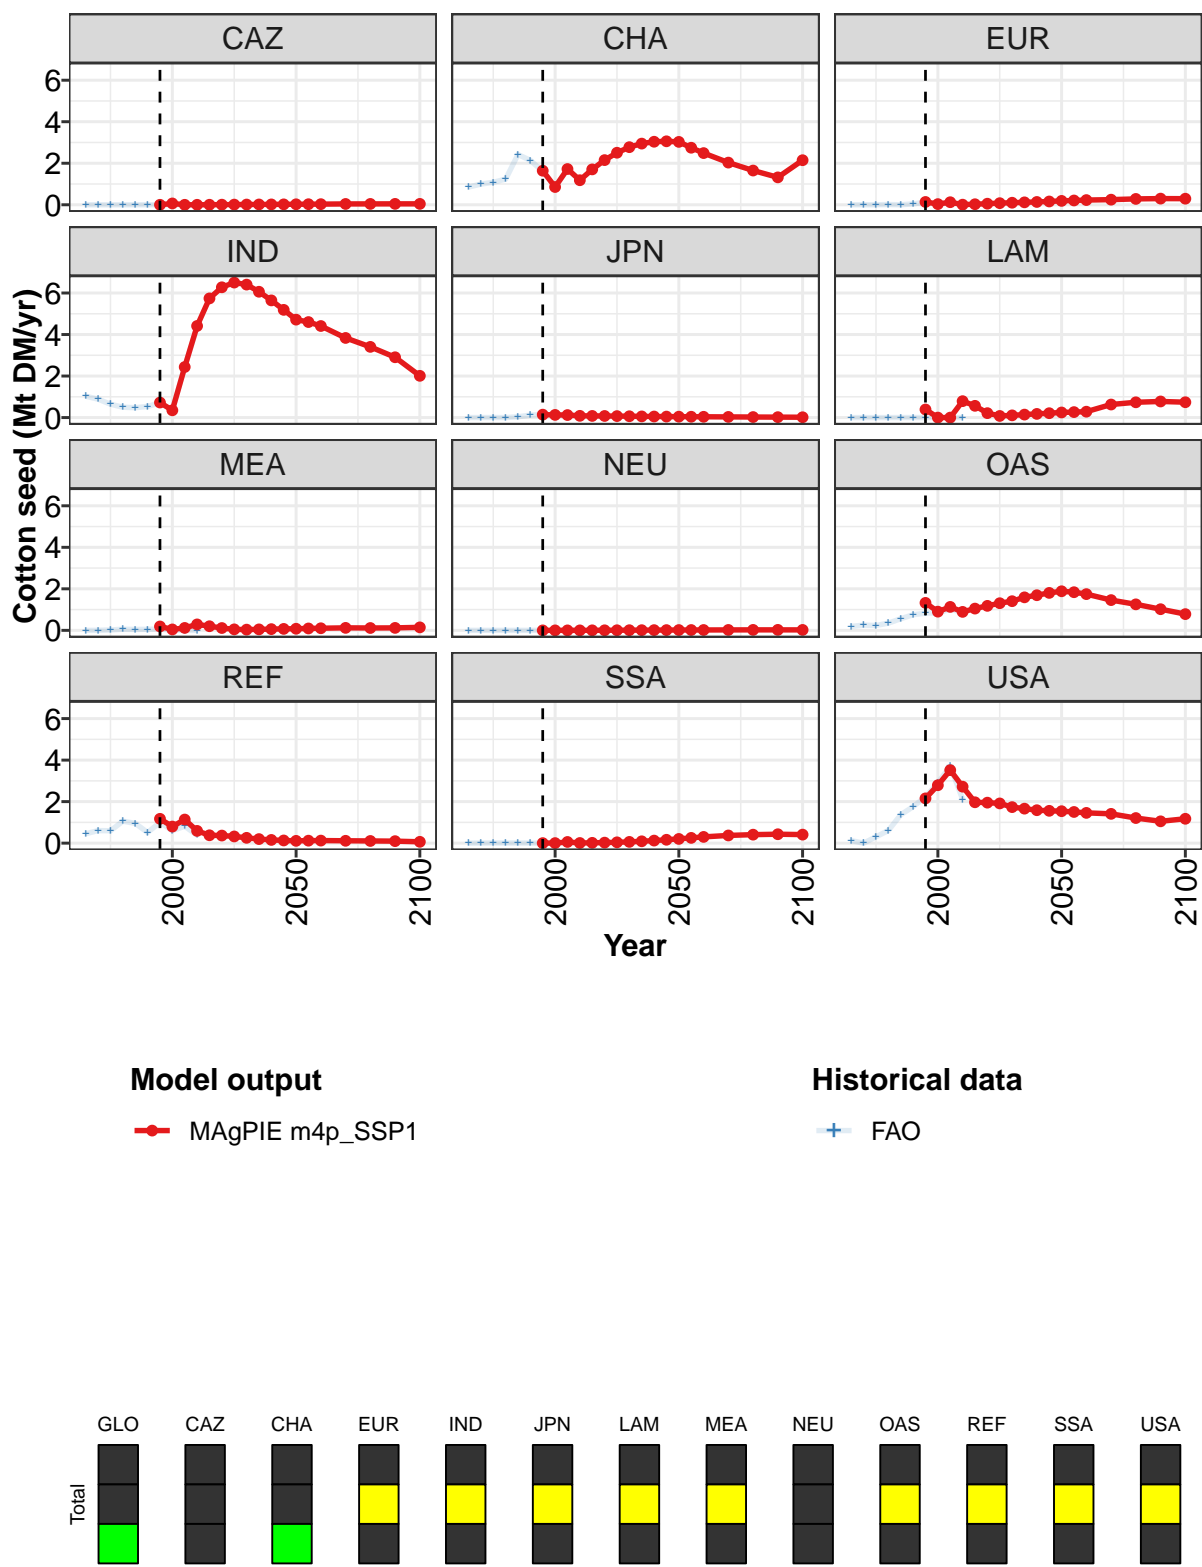

Figure 90: MAgPIE m4p\_SSP1 — Demand—Feed—Crops—Oil crops—Cotton seed (Mt DM/yr)

|     | 1995 | 2000 | 2005 | 2010 | 2015 | 2020 | 2025 | 2030 | 2035 | 2040 | 2045 |
|-----|------|------|------|------|------|------|------|------|------|------|------|
| GLO | 7.9  | 6.0  | 10.4 | 11.0 | 11.7 | 12.4 | 12.9 | 13.0 | 12.9 | 12.7 | 12.4 |
| CAZ | 0.0  | 0.1  | 0.0  | 0.0  | 0.0  | 0.0  | 0.0  | 0.0  | 0.0  | 0.0  | 0.0  |
| CHA | 1.6  | 0.9  | 1.7  | 1.2  | 1.7  | 2.2  | 2.5  | 2.8  | 2.9  | 3.0  | 3.1  |
| EUR | 0.1  | 0.0  | 0.1  | 0.0  | 0.0  | 0.1  | 0.1  | 0.1  | 0.1  | 0.1  | 0.2  |
| IND | 0.7  | 0.3  | 2.4  | 4.4  | 5.7  | 6.3  | 6.5  | 6.4  | 6.1  | 5.6  | 5.2  |
| JPN | 0.1  | 0.1  | 0.1  | 0.1  | 0.1  | 0.1  | 0.1  | 0.1  | 0.1  | 0.1  | 0.0  |
| LAM | 0.4  | 0.0  | 0.0  | 0.8  | 0.6  | 0.2  | 0.1  | 0.1  | 0.1  | 0.2  | 0.2  |
| MEA | 0.2  | 0.0  | 0.1  | 0.3  | 0.2  | 0.1  | 0.0  | 0.0  | 0.0  | 0.1  | 0.1  |
| NEU | 0.0  | 0.0  | 0.0  | 0.0  | 0.0  | 0.0  | 0.0  | 0.0  | 0.0  | 0.0  | 0.0  |
| OAS | 1.3  | 0.9  | 1.1  | 0.9  | 1.0  | 1.2  | 1.3  | 1.4  | 1.6  | 1.7  | 1.8  |
| REF | 1.2  | 0.8  | 1.1  | 0.6  | 0.4  | 0.4  | 0.3  | 0.3  | 0.2  | 0.2  | 0.1  |
| SSA | 0.0  | 0.0  | 0.1  | 0.0  | 0.0  | 0.0  | 0.0  | 0.1  | 0.1  | 0.1  | 0.2  |
| USA | 2.2  | 2.8  | 3.5  | 2.7  | 2.0  | 2.0  | 1.9  | 1.7  | 1.7  | 1.6  | 1.6  |

Table 269: MAgPIE m4p\_SSP1 — Demand—Feed—Crops—Oil crops—Cotton seed (Mt DM/yr) [PART 1/2]

|     | 2050 | 2055 | 2060 | 2070 | 2080 | 2090 | 2100 |
|-----|------|------|------|------|------|------|------|
| GLO | 12.1 | 11.7 | 11.2 | 10.3 | 9.3  | 8.1  | 7.9  |
| CAZ | 0.0  | 0.0  | 0.0  | 0.0  | 0.0  | 0.0  | 0.0  |
| CHA | 3.0  | 2.7  | 2.5  | 2.0  | 1.6  | 1.3  | 2.1  |
| EUR | 0.2  | 0.2  | 0.2  | 0.2  | 0.3  | 0.3  | 0.3  |
| IND | 4.7  | 4.6  | 4.4  | 3.8  | 3.4  | 2.9  | 2.0  |
| JPN | 0.0  | 0.0  | 0.0  | 0.0  | 0.0  | 0.0  | 0.0  |
| LAM | 0.2  | 0.3  | 0.3  | 0.6  | 0.7  | 0.8  | 0.7  |
| MEA | 0.1  | 0.1  | 0.1  | 0.1  | 0.1  | 0.1  | 0.1  |
| NEU | 0.0  | 0.0  | 0.0  | 0.0  | 0.0  | 0.0  | 0.0  |
| OAS | 1.9  | 1.8  | 1.7  | 1.5  | 1.3  | 1.0  | 0.8  |
| REF | 0.1  | 0.1  | 0.1  | 0.1  | 0.1  | 0.1  | 0.1  |
| SSA | 0.2  | 0.3  | 0.3  | 0.4  | 0.4  | 0.4  | 0.4  |
| USA | 1.5  | 1.5  | 1.5  | 1.4  | 1.2  | 1.1  | 1.2  |

Table 270: MAgPIE m4p\_SSP1 — Demand—Feed—Crops—Oil crops—Cotton seed (Mt DM/yr) [PART 2/2]

|     | 1965 | 1970 | 1975 | 1980 | 1985 | 1990 | 1995 | 2000 | 2005 | 2010 |
|-----|------|------|------|------|------|------|------|------|------|------|
| GLO | 2.65 | 2.74 | 2.90 | 3.82 | 5.87 | 5.92 | 6.71 | 5.72 | 9.99 | 8.98 |
| CAZ | 0.00 | 0.00 | 0.00 | 0.00 | 0.00 | 0.00 | 0.00 | 0.00 | 0.00 | 0.00 |
| CHA | 0.85 | 1.00 | 1.08 | 1.23 | 2.42 | 2.14 | 1.61 | 0.85 | 1.71 | 1.18 |
| EUR | 0.00 | 0.00 | 0.00 | 0.01 | 0.00 | 0.04 | 0.12 | 0.02 | 0.12 | 0.01 |
| IND | 1.03 | 0.89 | 0.64 | 0.50 | 0.47 | 0.53 | 0.71 | 0.35 | 2.47 | 4.33 |
| JPN | 0.00 | 0.00 | 0.00 | 0.00 | 0.04 | 0.12 | 0.14 | 0.13 | 0.12 | 0.09 |
| LAM | 0.00 | 0.00 | 0.00 | 0.00 | 0.00 | 0.00 | 0.00 | 0.00 | 0.00 | 0.00 |
| MEA | 0.00 | 0.00 | 0.02 | 0.05 | 0.04 | 0.05 | 0.06 | 0.01 | 0.00 | 0.00 |
| NEU | 0.00 | 0.00 | 0.00 | 0.00 | 0.00 | 0.00 | 0.00 | 0.00 | 0.00 | 0.00 |
| OAS | 0.19 | 0.25 | 0.24 | 0.35 | 0.56 | 0.75 | 0.83 | 0.84 | 1.02 | 0.86 |
| REF | 0.45 | 0.60 | 0.60 | 1.06 | 0.95 | 0.51 | 1.00 | 0.60 | 0.81 | 0.38 |
| SSA | 0.00 | 0.00 | 0.01 | 0.01 | 0.01 | 0.00 | 0.00 | 0.00 | 0.03 | 0.01 |
| USA | 0.12 | 0.00 | 0.31 | 0.61 | 1.37 | 1.76 | 2.23 | 2.91 | 3.71 | 2.11 |

Table 271: FAO — Demand—Feed—Crops—Oil crops—Cotton seed (Mt DM/yr)

6.2.8
Oil crops—Groundnuts

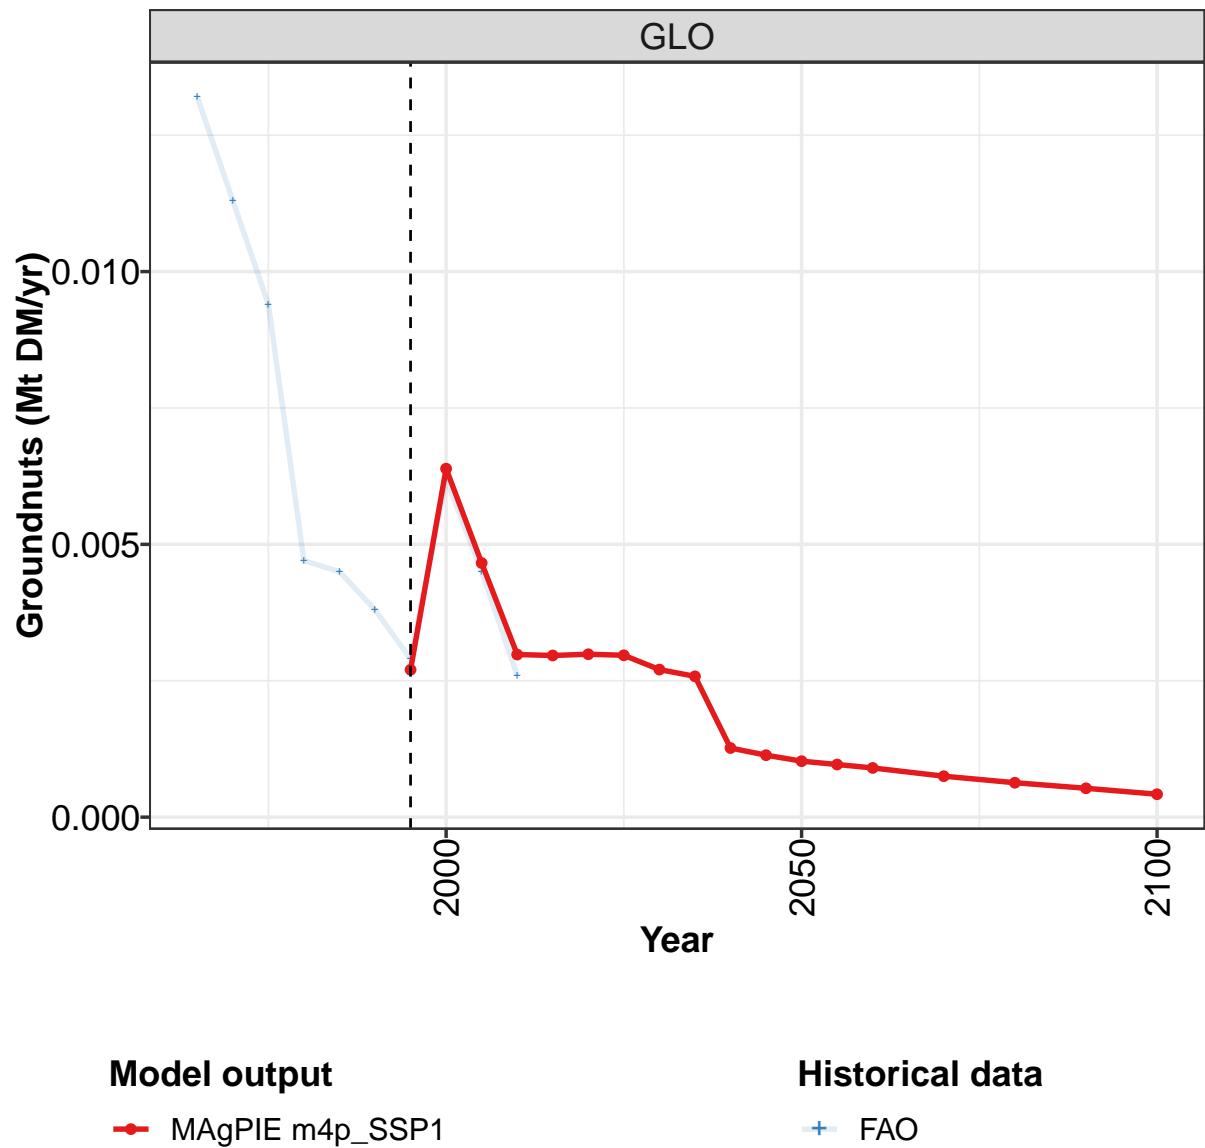

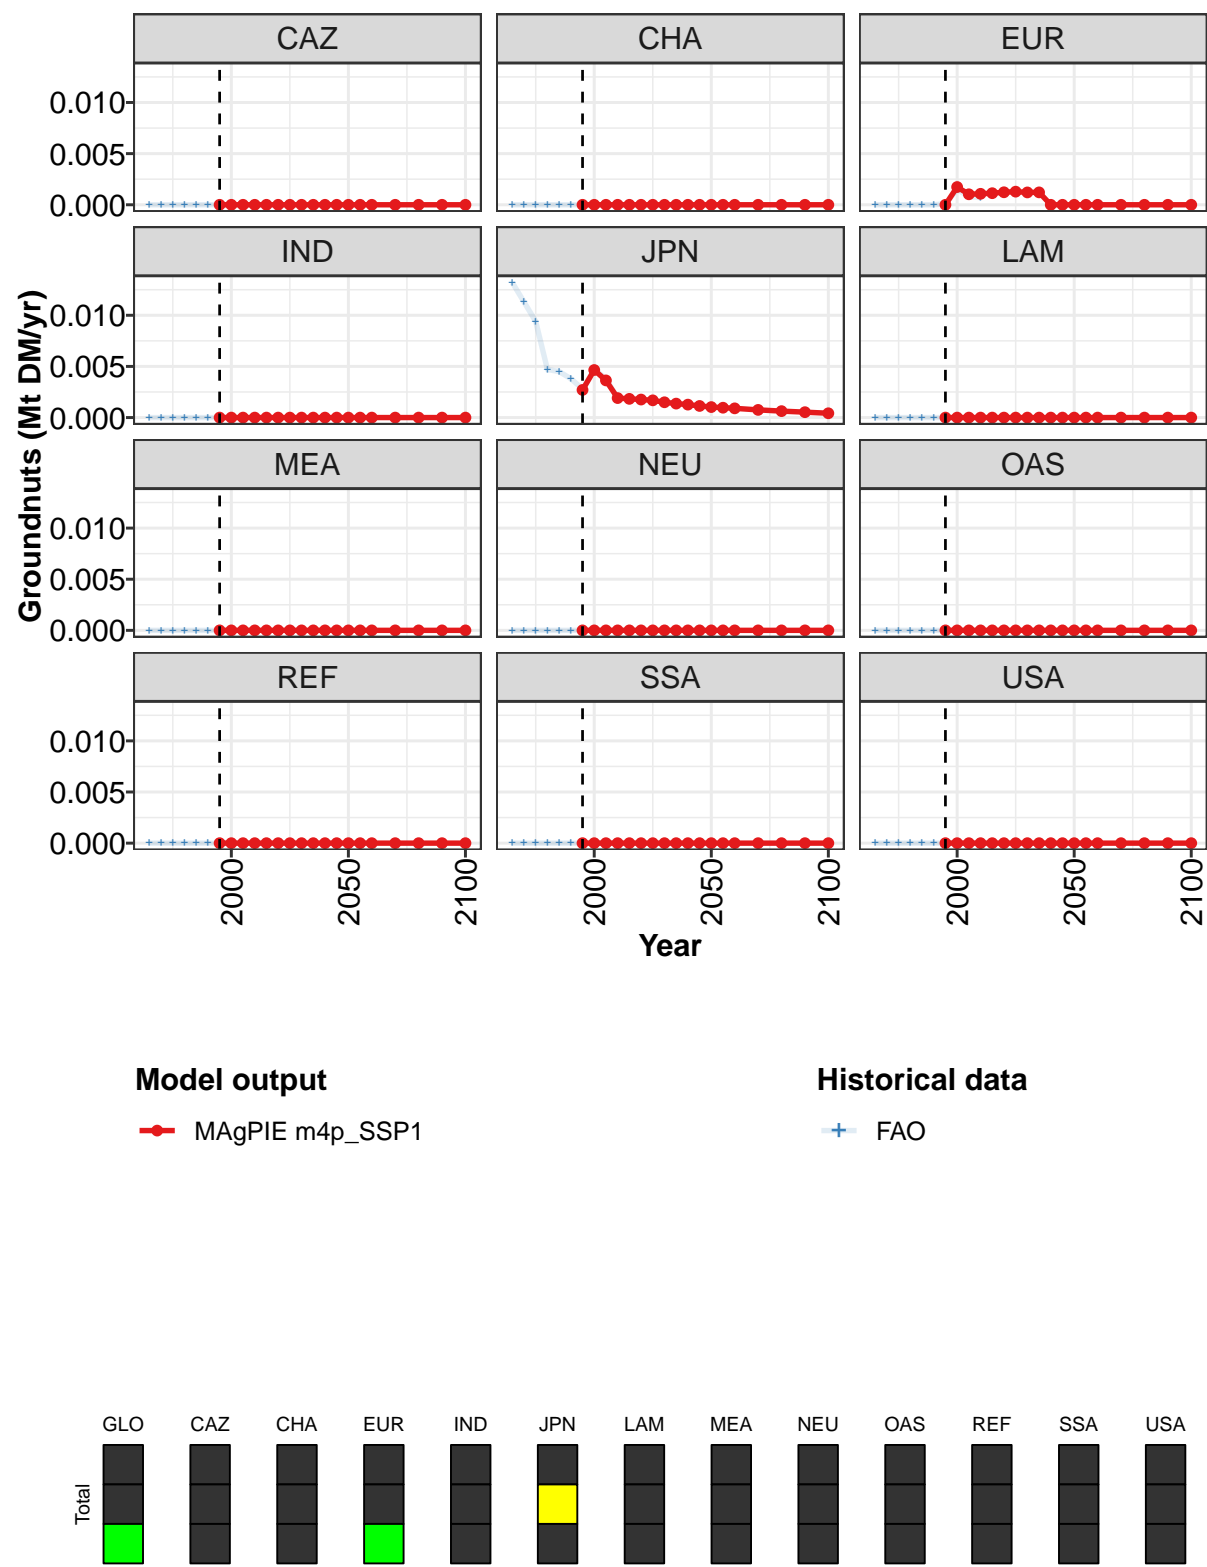

Figure 91: MAgPIE m4p\_SSP1 — Demand—Feed—Crops—Oil crops—Groundnuts (Mt DM/yr)

|     | 1995    | 2000    | 2005    | 2010    | 2015    | 2020    | 2025    | 2030    | 2035    | 2040    | 2045    |
|-----|---------|---------|---------|---------|---------|---------|---------|---------|---------|---------|---------|
| GLO | 0.00270 | 0.00639 | 0.00466 | 0.00298 | 0.00296 | 0.00299 | 0.00297 | 0.00270 | 0.00258 | 0.00127 | 0.00114 |
| CAZ | 0.00000 | 0.00000 | 0.00000 | 0.00000 | 0.00000 | 0.00000 | 0.00000 | 0.00000 | 0.00000 | 0.00000 | 0.00000 |
| CHA | 0.00000 | 0.00000 | 0.00000 | 0.00000 | 0.00000 | 0.00000 | 0.00000 | 0.00000 | 0.00000 | 0.00000 | 0.00000 |
| EUR | 0.00000 | 0.00174 | 0.00103 | 0.00107 | 0.00113 | 0.00122 | 0.00128 | 0.00121 | 0.00121 | 0.00000 | 0.00000 |
| IND | 0.00000 | 0.00000 | 0.00000 | 0.00000 | 0.00000 | 0.00000 | 0.00000 | 0.00000 | 0.00000 | 0.00000 | 0.00000 |
| JPN | 0.00270 | 0.00465 | 0.00363 | 0.00191 | 0.00183 | 0.00176 | 0.00168 | 0.00150 | 0.00137 | 0.00127 | 0.00114 |
| LAM | 0.00000 | 0.00000 | 0.00000 | 0.00000 | 0.00000 | 0.00000 | 0.00000 | 0.00000 | 0.00000 | 0.00000 | 0.00000 |
| MEA | 0.00000 | 0.00000 | 0.00000 | 0.00000 | 0.00000 | 0.00000 | 0.00000 | 0.00000 | 0.00000 | 0.00000 | 0.00000 |
| NEU | 0.00000 | 0.00000 | 0.00000 | 0.00000 | 0.00000 | 0.00000 | 0.00000 | 0.00000 | 0.00000 | 0.00000 | 0.00000 |
| OAS | 0.00000 | 0.00000 | 0.00000 | 0.00000 | 0.00000 | 0.00000 | 0.00000 | 0.00000 | 0.00000 | 0.00000 | 0.00000 |
| REF | 0.00000 | 0.00000 | 0.00000 | 0.00000 | 0.00000 | 0.00000 | 0.00000 | 0.00000 | 0.00000 | 0.00000 | 0.00000 |
| SSA | 0.00000 | 0.00000 | 0.00000 | 0.00000 | 0.00000 | 0.00000 | 0.00000 | 0.00000 | 0.00000 | 0.00000 | 0.00000 |
| USA | 0.00000 | 0.00000 | 0.00000 | 0.00000 | 0.00000 | 0.00000 | 0.00000 | 0.00000 | 0.00000 | 0.00000 | 0.00000 |

Table 272: MAgPIE m4p\_SSP1 — Demand—Feed—Crops—Oil crops—Groundnuts (Mt DM/yr) [PART 1/2]

|     | 2050    | 2055    | 2060    | 2070    | 2080    | 2090    | 2100    |
|-----|---------|---------|---------|---------|---------|---------|---------|
| GLO | 0.00103 | 0.00096 | 0.00090 | 0.00075 | 0.00063 | 0.00053 | 0.00042 |
| CAZ | 0.00000 | 0.00000 | 0.00000 | 0.00000 | 0.00000 | 0.00000 | 0.00000 |
| CHA | 0.00000 | 0.00000 | 0.00000 | 0.00000 | 0.00000 | 0.00000 | 0.00000 |
| EUR | 0.00000 | 0.00000 | 0.00000 | 0.00000 | 0.00000 | 0.00000 | 0.00000 |
| IND | 0.00000 | 0.00000 | 0.00000 | 0.00000 | 0.00000 | 0.00000 | 0.00000 |
| JPN | 0.00103 | 0.00096 | 0.00090 | 0.00075 | 0.00063 | 0.00053 | 0.00042 |
| LAM | 0.00000 | 0.00000 | 0.00000 | 0.00000 | 0.00000 | 0.00000 | 0.00000 |
| MEA | 0.00000 | 0.00000 | 0.00000 | 0.00000 | 0.00000 | 0.00000 | 0.00000 |
| NEU | 0.00000 | 0.00000 | 0.00000 | 0.00000 | 0.00000 | 0.00000 | 0.00000 |
| OAS | 0.00000 | 0.00000 | 0.00000 | 0.00000 | 0.00000 | 0.00000 | 0.00000 |
| REF | 0.00000 | 0.00000 | 0.00000 | 0.00000 | 0.00000 | 0.00000 | 0.00000 |
| SSA | 0.00000 | 0.00000 | 0.00000 | 0.00000 | 0.00000 | 0.00000 | 0.00000 |
| USA | 0.00000 | 0.00000 | 0.00000 | 0.00000 | 0.00000 | 0.00000 | 0.00000 |

Table 273: MAgPIE m4p\_SSP1 — Demand—Feed—Crops—Oil crops—Groundnuts (Mt DM/yr) [PART 2/2]

|     | 1965   | 1970   | 1975   | 1980   | 1985   | 1990   | 1995   | 2000   | 2005   | 2010   |
|-----|--------|--------|--------|--------|--------|--------|--------|--------|--------|--------|
| GLO | 0.0132 | 0.0113 | 0.0094 | 0.0047 | 0.0045 | 0.0038 | 0.0029 | 0.0062 | 0.0045 | 0.0026 |
| CAZ | 0.0000 | 0.0000 | 0.0000 | 0.0000 | 0.0000 | 0.0000 | 0.0000 | 0.0000 | 0.0000 | 0.0000 |
| CHA | 0.0000 | 0.0000 | 0.0000 | 0.0000 | 0.0000 | 0.0000 | 0.0000 | 0.0000 | 0.0000 | 0.0000 |
| EUR | 0.0000 | 0.0000 | 0.0000 | 0.0000 | 0.0000 | 0.0000 | 0.0001 | 0.0015 | 0.0008 | 0.0007 |
| IND | 0.0000 | 0.0000 | 0.0000 | 0.0000 | 0.0000 | 0.0000 | 0.0000 | 0.0000 | 0.0000 | 0.0000 |
| JPN | 0.0132 | 0.0113 | 0.0094 | 0.0047 | 0.0045 | 0.0038 | 0.0028 | 0.0047 | 0.0038 | 0.0019 |
| LAM | 0.0000 | 0.0000 | 0.0000 | 0.0000 | 0.0000 | 0.0000 | 0.0000 | 0.0000 | 0.0000 | 0.0000 |
| MEA | 0.0000 | 0.0000 | 0.0000 | 0.0000 | 0.0000 | 0.0000 | 0.0000 | 0.0000 | 0.0000 | 0.0000 |
| NEU | 0.0000 | 0.0000 | 0.0000 | 0.0000 | 0.0000 | 0.0000 | 0.0000 | 0.0000 | 0.0000 | 0.0000 |
| OAS | 0.0000 | 0.0000 | 0.0000 | 0.0000 | 0.0000 | 0.0000 | 0.0000 | 0.0000 | 0.0000 | 0.0000 |
| REF | 0.0000 | 0.0000 | 0.0000 | 0.0000 | 0.0000 | 0.0000 | 0.0000 | 0.0000 | 0.0000 | 0.0000 |
| SSA | 0.0000 | 0.0000 | 0.0000 | 0.0000 | 0.0000 | 0.0000 | 0.0000 | 0.0000 | 0.0000 | 0.0000 |
| USA | 0.0000 | 0.0000 | 0.0000 | 0.0000 | 0.0000 | 0.0000 | 0.0000 | 0.0000 | 0.0000 | 0.0000 |

Table 274: FAO — Demand—Feed—Crops—Oil crops—Groundnuts (Mt DM/yr)

6.2.9
Oil crops—Other oil crops (incl rapeseed)

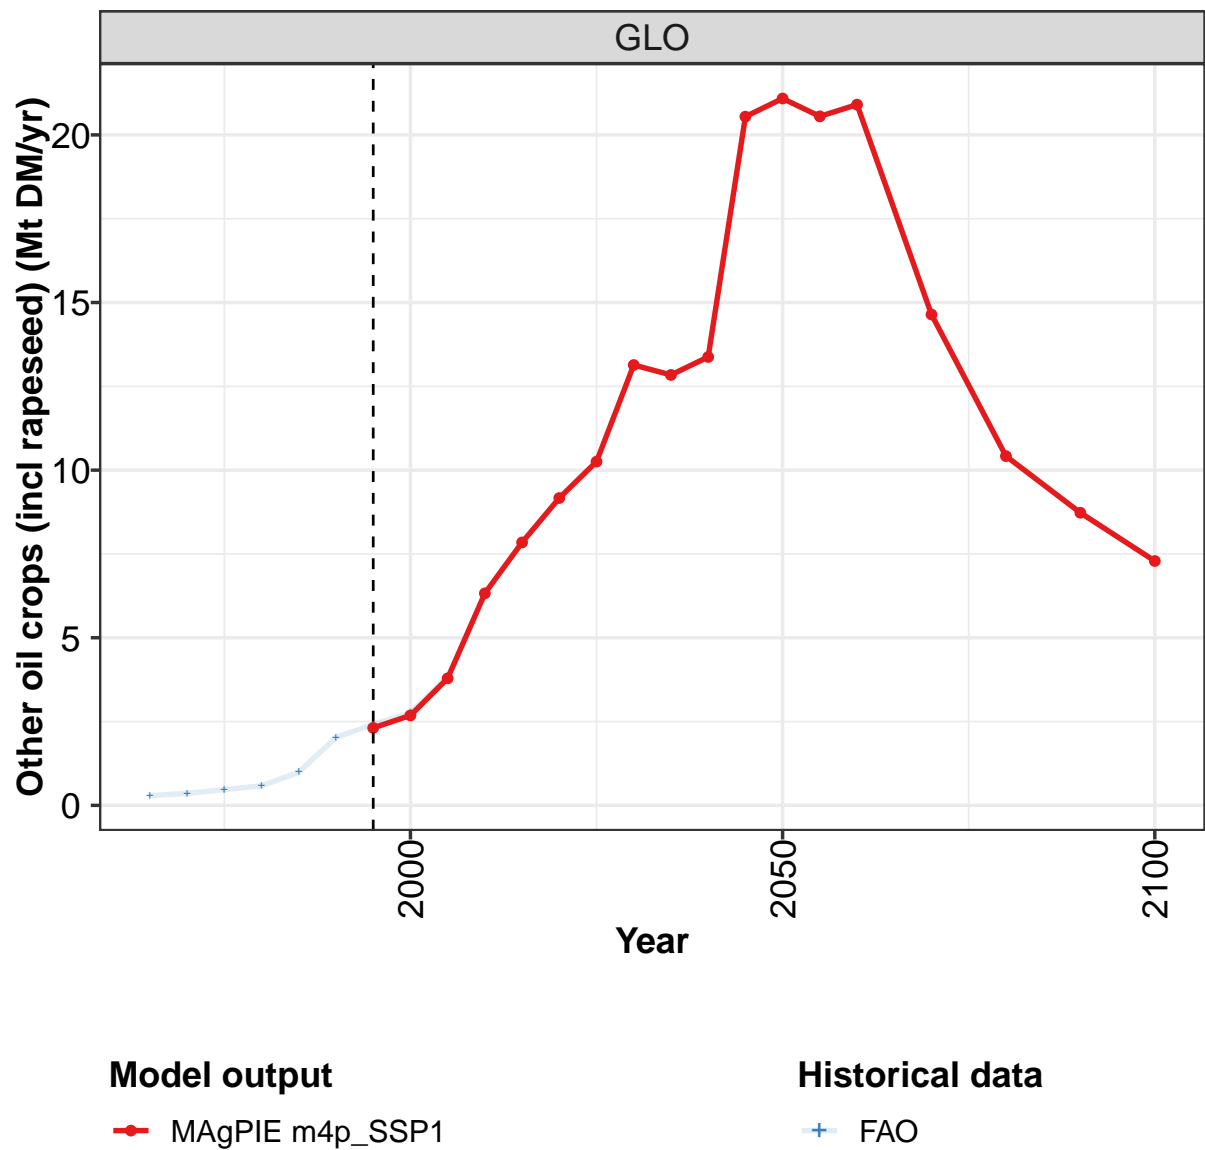

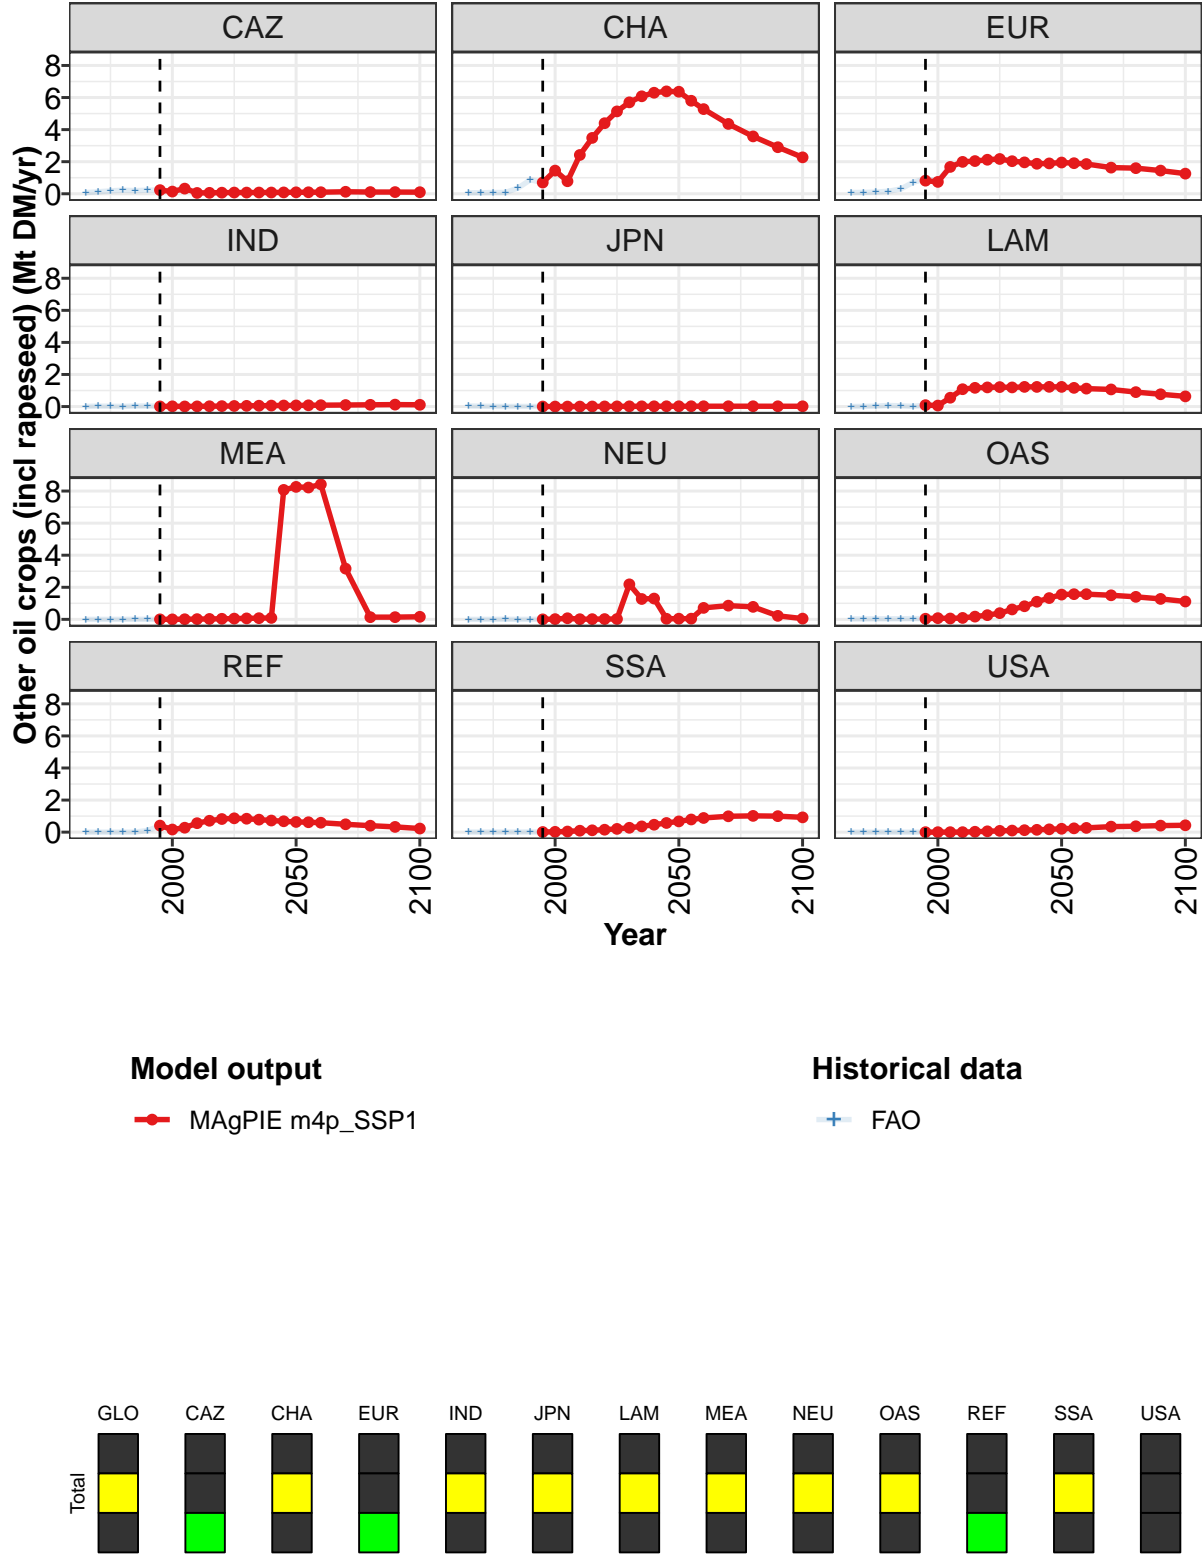

Figure 92: MAgPIE m4p\_SSP1 — Demand—Feed—Crops—Oil crops—Other oil crops (incl rapeseed) (Mt DM/yr)

|     | 1995 | 2000 | 2005 | 2010 | 2015 | 2020 | 2025 | 2030 | 2035 | 2040 | 2045 |
|-----|------|------|------|------|------|------|------|------|------|------|------|
| GLO | 2.3  | 2.7  | 3.8  | 6.3  | 7.8  | 9.2  | 10.3 | 13.1 | 12.8 | 13.4 | 20.5 |
| CAZ | 0.2  | 0.1  | 0.3  | 0.1  | 0.1  | 0.1  | 0.1  | 0.1  | 0.1  | 0.1  | 0.1  |
| CHA | 0.7  | 1.4  | 0.8  | 2.4  | 3.5  | 4.4  | 5.1  | 5.7  | 6.1  | 6.3  | 6.4  |
| EUR | 0.8  | 0.7  | 1.7  | 2.0  | 2.0  | 2.1  | 2.2  | 2.0  | 2.0  | 1.9  | 1.9  |
| IND | 0.0  | 0.0  | 0.0  | 0.0  | 0.0  | 0.0  | 0.0  | 0.0  | 0.1  | 0.1  | 0.1  |
| JPN | 0.0  | 0.0  | 0.0  | 0.0  | 0.0  | 0.0  | 0.0  | 0.0  | 0.0  | 0.0  | 0.0  |
| LAM | 0.1  | 0.1  | 0.6  | 1.1  | 1.2  | 1.2  | 1.2  | 1.2  | 1.2  | 1.2  | 1.2  |
| MEA | 0.0  | 0.0  | 0.0  | 0.0  | 0.0  | 0.0  | 0.0  | 0.1  | 0.1  | 0.1  | 8.1  |
| NEU | 0.0  | 0.0  | 0.1  | 0.0  | 0.0  | 0.0  | 0.0  | 2.2  | 1.3  | 1.3  | 0.0  |
| OAS | 0.0  | 0.1  | 0.1  | 0.1  | 0.2  | 0.3  | 0.4  | 0.6  | 0.8  | 1.1  | 1.3  |
| REF | 0.4  | 0.2  | 0.3  | 0.6  | 0.7  | 0.8  | 0.9  | 0.8  | 0.8  | 0.7  | 0.7  |
| SSA | 0.0  | 0.0  | 0.0  | 0.1  | 0.1  | 0.2  | 0.2  | 0.3  | 0.4  | 0.5  | 0.6  |
| USA | 0.0  | 0.0  | 0.0  | 0.0  | 0.0  | 0.1  | 0.1  | 0.1  | 0.1  | 0.1  | 0.2  |

Table 275: MAgPIE m4p\_SSP1 — Demand—Feed—Crops—Oil crops—Other oil crops (incl rapeseed) (Mt DM/yr) [PART 1/2]

|     | 2050 | 2055 | 2060 | 2070 | 2080 | 2090 | 2100 |
|-----|------|------|------|------|------|------|------|
| GLO | 21.1 | 20.6 | 20.9 | 14.6 | 10.4 | 8.7  | 7.3  |
| CAZ | 0.1  | 0.1  | 0.1  | 0.1  | 0.1  | 0.1  | 0.1  |
| CHA | 6.4  | 5.8  | 5.3  | 4.4  | 3.6  | 2.9  | 2.3  |
| EUR | 1.9  | 1.9  | 1.9  | 1.6  | 1.6  | 1.4  | 1.3  |
| IND | 0.1  | 0.1  | 0.1  | 0.1  | 0.1  | 0.1  | 0.1  |
| JPN | 0.0  | 0.0  | 0.0  | 0.0  | 0.0  | 0.0  | 0.0  |
| LAM | 1.2  | 1.2  | 1.1  | 1.1  | 0.9  | 0.8  | 0.6  |
| MEA | 8.3  | 8.2  | 8.4  | 3.2  | 0.1  | 0.1  | 0.2  |
| NEU | 0.0  | 0.0  | 0.7  | 0.9  | 0.8  | 0.2  | 0.0  |
| OAS | 1.5  | 1.6  | 1.6  | 1.5  | 1.4  | 1.3  | 1.1  |
| REF | 0.6  | 0.6  | 0.6  | 0.5  | 0.4  | 0.3  | 0.2  |
| SSA | 0.7  | 0.8  | 0.9  | 1.0  | 1.0  | 1.0  | 0.9  |
| USA | 0.2  | 0.2  | 0.3  | 0.3  | 0.4  | 0.4  | 0.4  |

Table 276: MAgPIE m4p\_SSP1 — Demand—Feed—Crops—Oil crops—Other oil crops (incl rapeseed) (Mt DM/yr) [PART 2/2]

|     | 1965 | 1970 | 1975 | 1980 | 1985 | 1990 | 1995 | 2000 | 2005 | 2010 |
|-----|------|------|------|------|------|------|------|------|------|------|
| GLO | 0.29 | 0.36 | 0.47 | 0.58 | 0.99 | 2.03 | 2.42 | 2.77 | 3.84 | 6.27 |
| CAZ | 0.08 | 0.12 | 0.18 | 0.22 | 0.20 | 0.22 | 0.24 | 0.16 | 0.38 | 0.06 |
| CHA | 0.06 | 0.06 | 0.08 | 0.08 | 0.36 | 0.87 | 0.70 | 1.44 | 0.78 | 2.42 |
| EUR | 0.08 | 0.09 | 0.11 | 0.15 | 0.30 | 0.71 | 0.93 | 0.81 | 1.69 | 1.95 |
| IND | 0.01 | 0.02 | 0.02 | 0.01 | 0.03 | 0.03 | 0.01 | 0.02 | 0.01 | 0.01 |
| JPN | 0.03 | 0.02 | 0.01 | 0.00 | 0.01 | 0.00 | 0.00 | 0.00 | 0.00 | 0.00 |
| LAM | 0.00 | 0.01 | 0.03 | 0.07 | 0.05 | 0.01 | 0.09 | 0.06 | 0.54 | 1.04 |
| MEA | 0.00 | 0.00 | 0.00 | 0.00 | 0.00 | 0.00 | 0.00 | 0.00 | 0.01 | 0.02 |
| NEU | 0.00 | 0.00 | 0.00 | 0.01 | 0.00 | 0.00 | 0.00 | 0.01 | 0.05 | 0.01 |
| OAS | 0.02 | 0.03 | 0.04 | 0.04 | 0.04 | 0.05 | 0.04 | 0.08 | 0.06 | 0.09 |
| REF | 0.00 | 0.00 | 0.00 | 0.00 | 0.00 | 0.11 | 0.39 | 0.16 | 0.28 | 0.57 |
| SSA | 0.00 | 0.00 | 0.01 | 0.00 | 0.01 | 0.01 | 0.01 | 0.02 | 0.05 | 0.09 |
| USA | 0.00 | 0.00 | 0.00 | 0.00 | 0.00 | 0.00 | 0.00 | 0.00 | 0.00 | 0.00 |

Table 277: FAO — Demand—Feed—Crops—Oil crops—Other oil crops (incl rapeseed) (Mt DM/yr)



6.2.10
Oil crops—Soybean

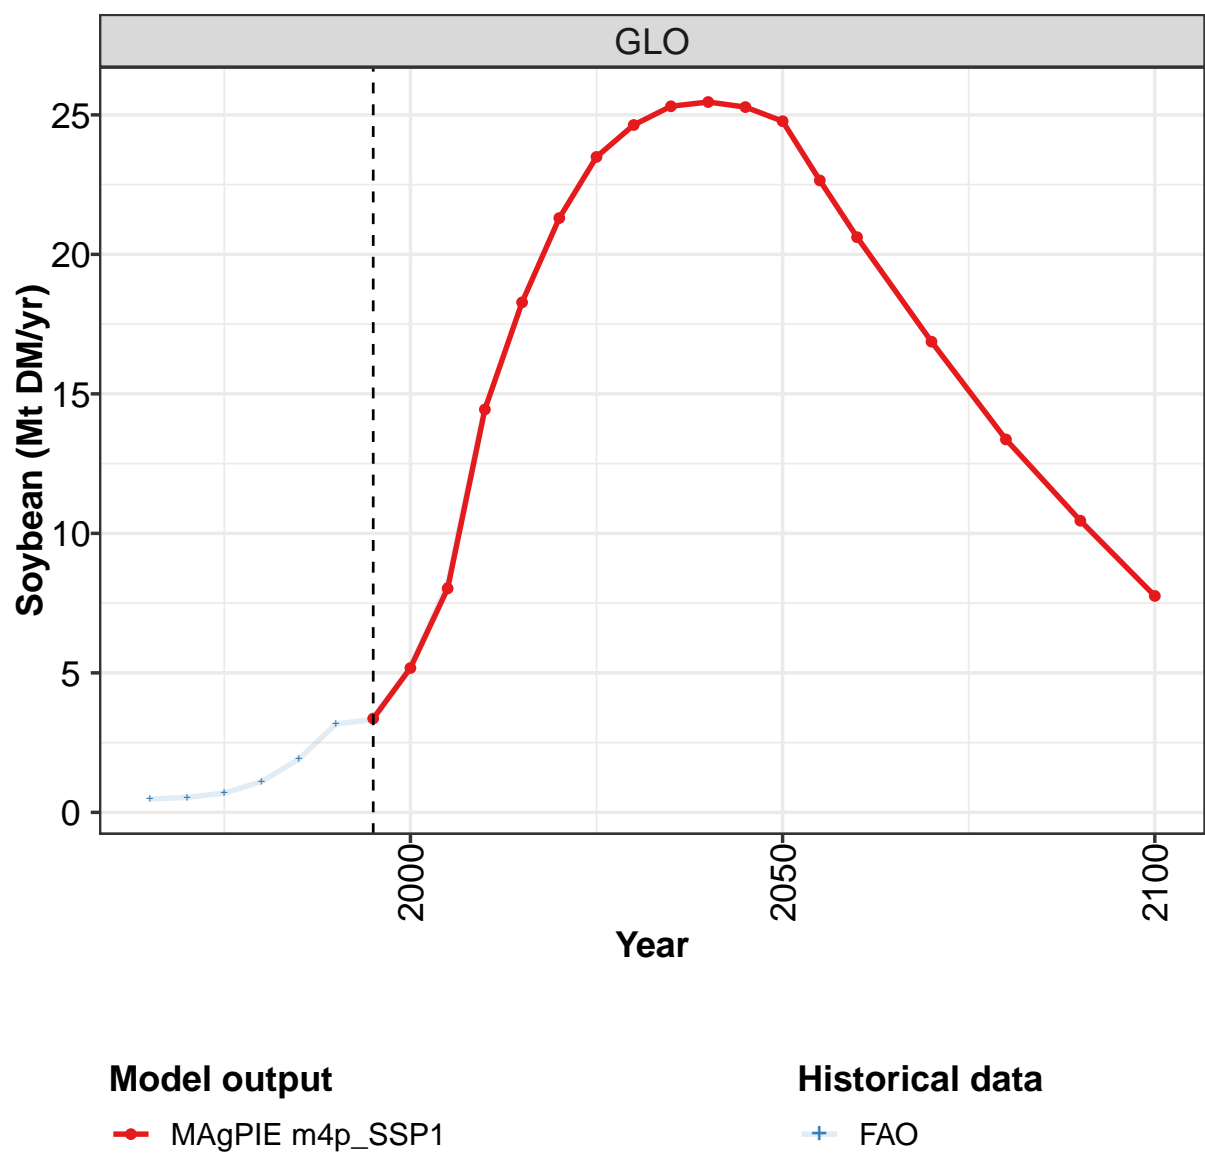

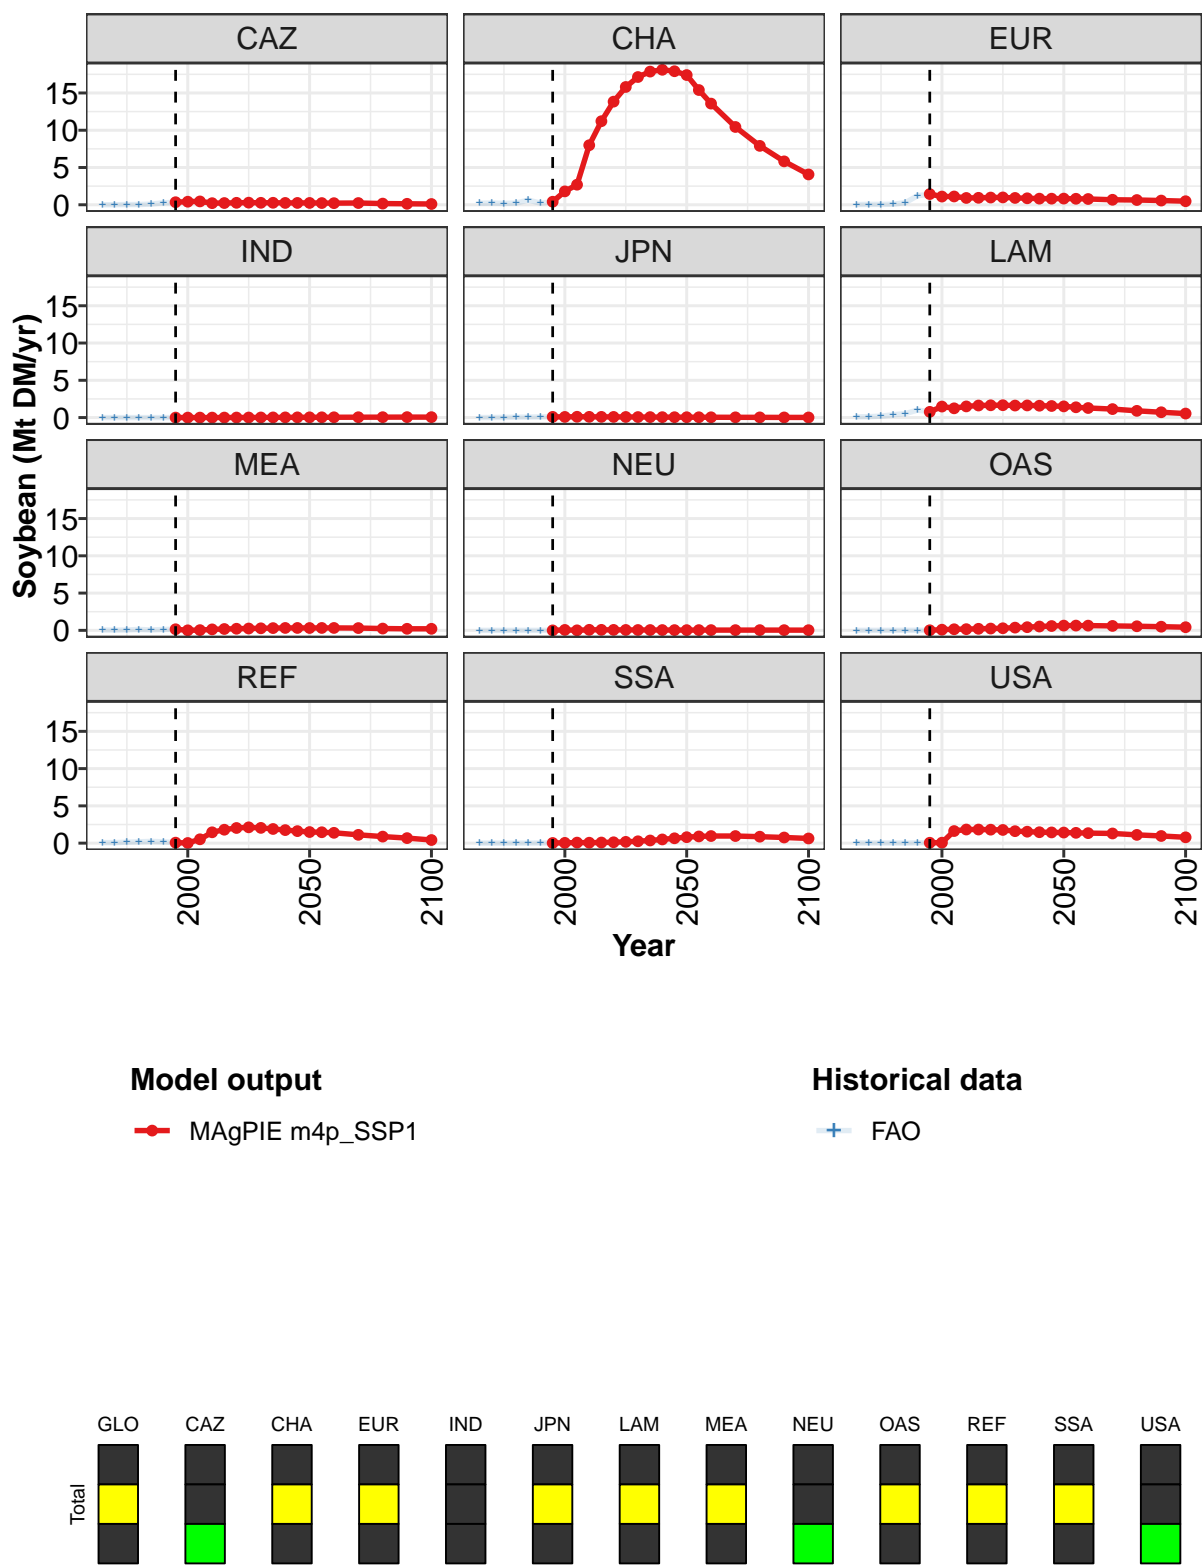

Figure 93: MAGPIE m4p\_SSP1 — Demand—Feed—Crops—Oil crops—Soybean (Mt DM/yr)

|     | 1995 | 2000 | 2005 | 2010 | 2015 | 2020 | 2025 | 2030 | 2035 | 2040 | 2045 |
|-----|------|------|------|------|------|------|------|------|------|------|------|
| GLO | 3.4  | 5.2  | 8.0  | 14.4 | 18.3 | 21.3 | 23.5 | 24.6 | 25.3 | 25.5 | 25.3 |
| CAZ | 0.3  | 0.4  | 0.5  | 0.2  | 0.2  | 0.3  | 0.3  | 0.3  | 0.3  | 0.3  | 0.2  |
| CHA | 0.4  | 1.8  | 2.7  | 8.0  | 11.2 | 13.8 | 15.8 | 17.1 | 17.9 | 18.1 | 17.9 |
| EUR | 1.4  | 1.1  | 1.1  | 0.9  | 0.9  | 1.0  | 1.0  | 0.9  | 0.9  | 0.8  | 0.8  |
| IND | 0.0  | 0.0  | 0.0  | 0.0  | 0.0  | 0.0  | 0.0  | 0.0  | 0.0  | 0.0  | 0.0  |
| JPN | 0.1  | 0.1  | 0.1  | 0.1  | 0.1  | 0.1  | 0.1  | 0.1  | 0.1  | 0.1  | 0.1  |
| LAM | 0.8  | 1.5  | 1.2  | 1.5  | 1.6  | 1.6  | 1.7  | 1.6  | 1.6  | 1.6  | 1.6  |
| MEA | 0.2  | 0.0  | 0.0  | 0.1  | 0.2  | 0.2  | 0.2  | 0.3  | 0.3  | 0.3  | 0.3  |
| NEU | 0.0  | 0.1  | 0.0  | 0.1  | 0.1  | 0.1  | 0.1  | 0.1  | 0.0  | 0.0  | 0.0  |
| OAS | 0.0  | 0.1  | 0.2  | 0.2  | 0.2  | 0.2  | 0.3  | 0.4  | 0.4  | 0.5  | 0.6  |
| REF | 0.1  | 0.0  | 0.5  | 1.5  | 1.8  | 2.0  | 2.1  | 2.1  | 1.9  | 1.8  | 1.6  |
| SSA | 0.0  | 0.0  | 0.1  | 0.1  | 0.1  | 0.1  | 0.2  | 0.3  | 0.4  | 0.5  | 0.7  |
| USA | 0.1  | 0.1  | 1.6  | 1.8  | 1.8  | 1.8  | 1.8  | 1.6  | 1.5  | 1.5  | 1.4  |

Table 278: MAgPIE m4p\_SSP1 — Demand—Feed—Crops—Oil crops—Soybean (Mt DM/yr) [PART 1/2]

|     | 2050 | 2055 | 2060 | 2070 | 2080 | 2090 | 2100 |
|-----|------|------|------|------|------|------|------|
| GLO | 24.8 | 22.7 | 20.6 | 16.9 | 13.4 | 10.5 | 7.8  |
| CAZ | 0.2  | 0.2  | 0.2  | 0.2  | 0.2  | 0.1  | 0.1  |
| CHA | 17.4 | 15.4 | 13.6 | 10.4 | 7.9  | 5.8  | 4.1  |
| EUR | 0.8  | 0.8  | 0.8  | 0.7  | 0.6  | 0.6  | 0.5  |
| IND | 0.0  | 0.0  | 0.0  | 0.0  | 0.1  | 0.1  | 0.1  |
| JPN | 0.0  | 0.0  | 0.0  | 0.0  | 0.0  | 0.0  | 0.0  |
| LAM | 1.5  | 1.4  | 1.3  | 1.1  | 0.9  | 0.7  | 0.5  |
| MEA | 0.3  | 0.3  | 0.3  | 0.3  | 0.2  | 0.2  | 0.2  |
| NEU | 0.0  | 0.0  | 0.0  | 0.0  | 0.0  | 0.0  | 0.0  |
| OAS | 0.6  | 0.6  | 0.6  | 0.6  | 0.6  | 0.5  | 0.4  |
| REF | 1.5  | 1.5  | 1.4  | 1.1  | 0.9  | 0.7  | 0.4  |
| SSA | 0.8  | 0.9  | 1.0  | 1.0  | 0.9  | 0.8  | 0.6  |
| USA | 1.4  | 1.4  | 1.3  | 1.3  | 1.1  | 1.0  | 0.8  |

Table 279: MAgPIE m4p\_SSP1 — Demand—Feed—Crops—Oil crops—Soybean (Mt DM/yr) [PART 2/2]

|     | 1965 | 1970 | 1975 | 1980 | 1985 | 1990 | 1995 | 2000 | 2005 | 2010 |
|-----|------|------|------|------|------|------|------|------|------|------|
| GLO | 0.5  | 0.5  | 0.7  | 1.1  | 1.9  | 3.2  | 3.3  | 5.2  | 8.2  | 14.6 |
| CAZ | 0.0  | 0.0  | 0.0  | 0.0  | 0.1  | 0.3  | 0.3  | 0.5  | 0.5  | 0.2  |
| CHA | 0.2  | 0.2  | 0.2  | 0.2  | 0.6  | 0.2  | 0.4  | 1.8  | 2.7  | 8.0  |
| EUR | 0.0  | 0.1  | 0.1  | 0.1  | 0.3  | 1.2  | 1.4  | 1.1  | 1.1  | 0.9  |
| IND | 0.0  | 0.0  | 0.0  | 0.0  | 0.0  | 0.0  | 0.0  | 0.0  | 0.0  | 0.0  |
| JPN | 0.0  | 0.0  | 0.0  | 0.0  | 0.1  | 0.1  | 0.1  | 0.1  | 0.1  | 0.1  |
| LAM | 0.1  | 0.1  | 0.2  | 0.4  | 0.5  | 1.0  | 0.8  | 1.5  | 1.4  | 1.5  |
| MEA | 0.0  | 0.0  | 0.1  | 0.1  | 0.1  | 0.1  | 0.2  | 0.0  | 0.0  | 0.1  |
| NEU | 0.0  | 0.0  | 0.0  | 0.0  | 0.0  | 0.0  | 0.0  | 0.0  | 0.0  | 0.1  |
| OAS | 0.0  | 0.0  | 0.0  | 0.0  | 0.0  | 0.0  | 0.0  | 0.1  | 0.1  | 0.2  |
| REF | 0.1  | 0.1  | 0.1  | 0.2  | 0.2  | 0.2  | 0.1  | 0.0  | 0.5  | 1.5  |
| SSA | 0.0  | 0.0  | 0.0  | 0.0  | 0.0  | 0.0  | 0.0  | 0.0  | 0.1  | 0.1  |
| USA | 0.0  | 0.0  | 0.0  | 0.0  | 0.0  | 0.0  | 0.1  | 0.1  | 1.7  | 2.0  |

Table 280: FAO — Demand—Feed—Crops—Oil crops—Soybean (Mt DM/yr)

6.2.11
Oil crops—Sunflower

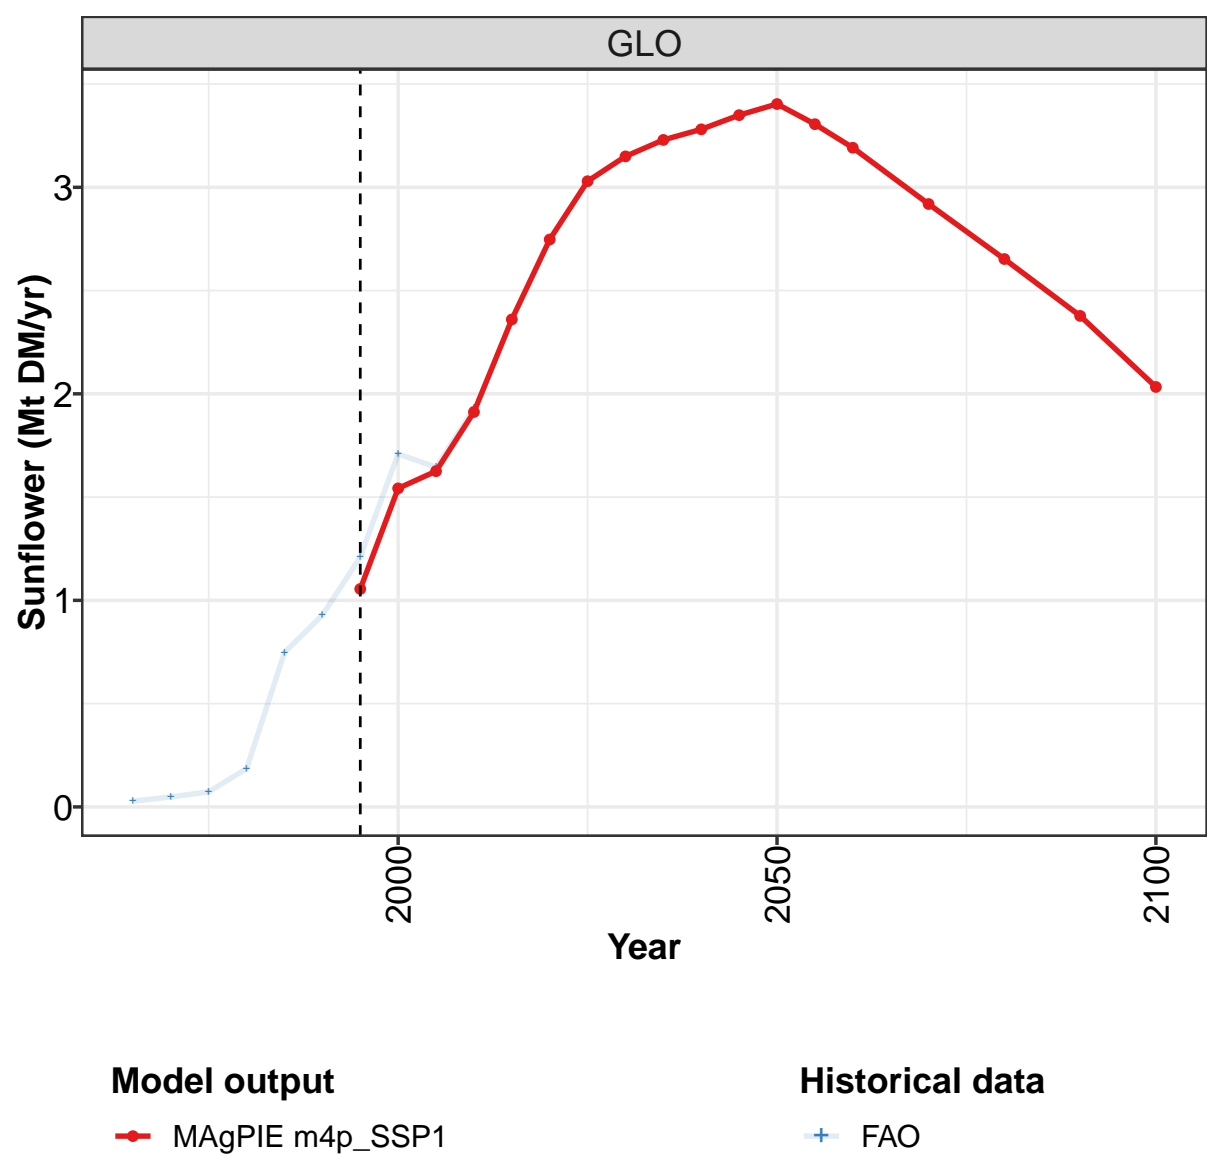

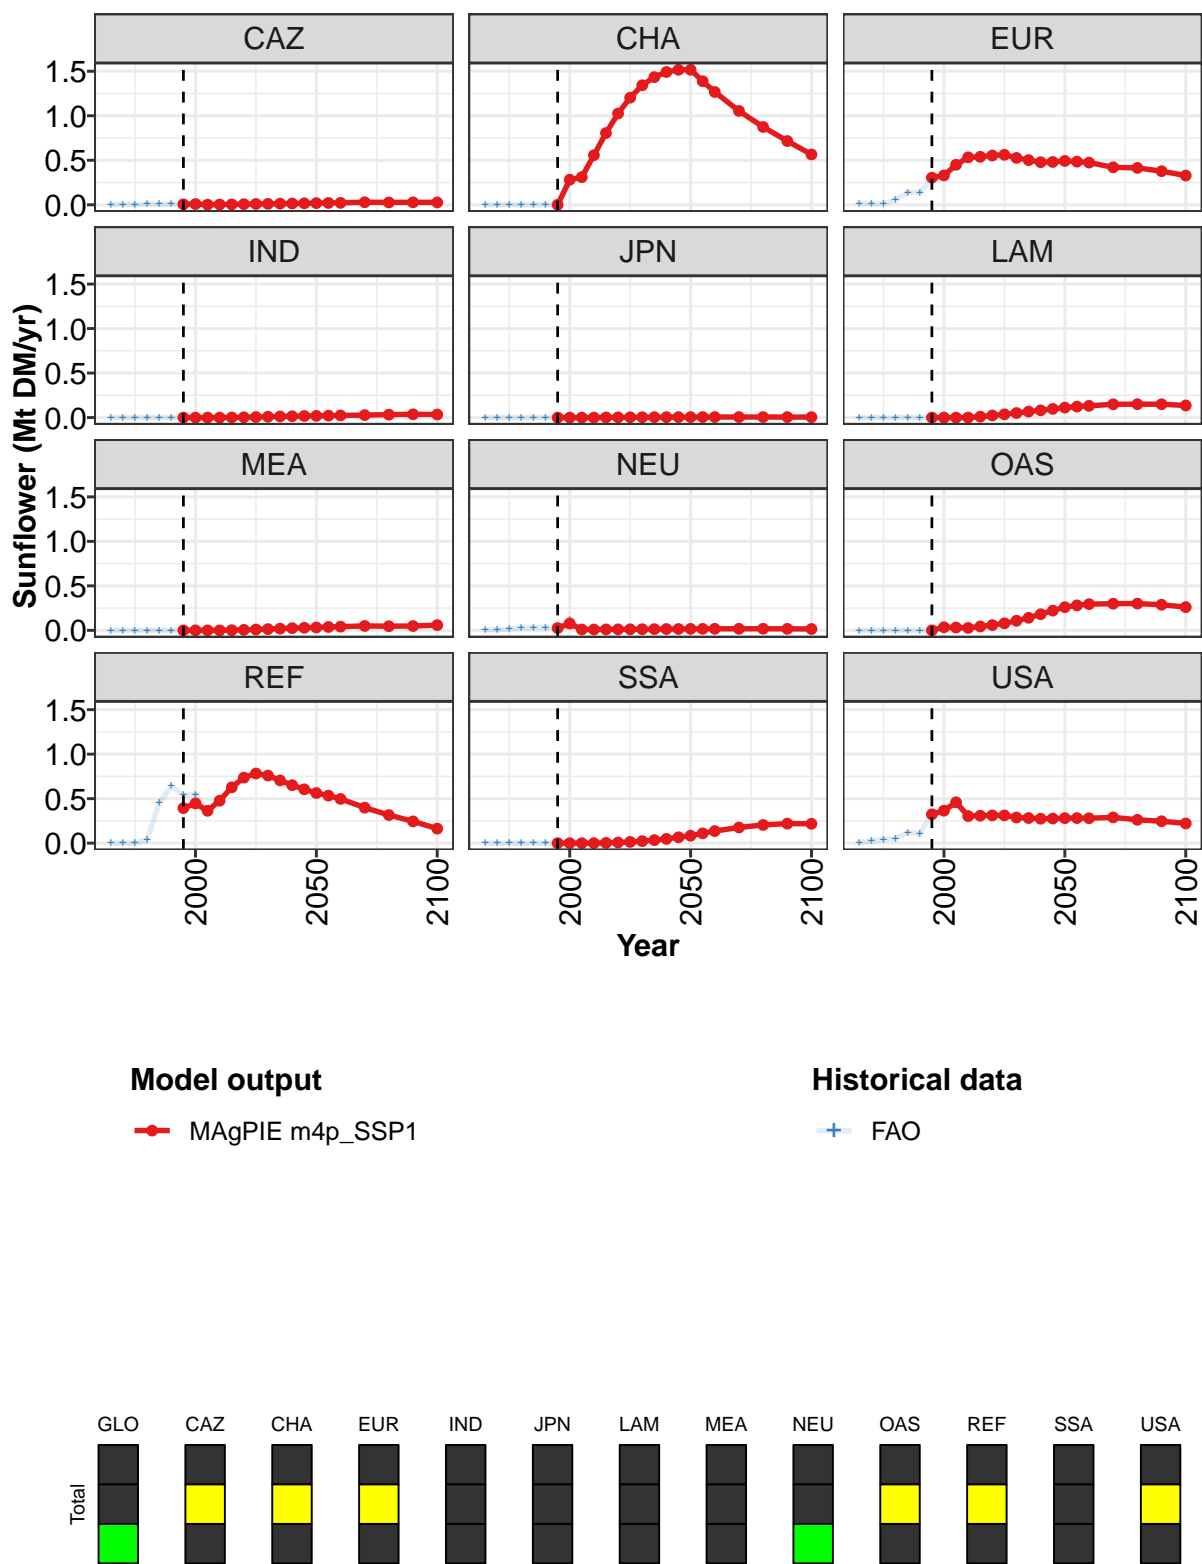

Figure 94: MAgPIE m4p\_SSP1 — Demand—Feed—Crops—Oil crops—Sunflower (Mt DM/yr)

|     | 1995 | 2000 | 2005 | 2010 | 2015 | 2020 | 2025 | 2030 | 2035 | 2040 | 2045 |
|-----|------|------|------|------|------|------|------|------|------|------|------|
| GLO | 1.06 | 1.54 | 1.63 | 1.91 | 2.36 | 2.75 | 3.03 | 3.15 | 3.23 | 3.28 | 3.35 |
| CAZ | 0.01 | 0.01 | 0.00 | 0.00 | 0.00 | 0.01 | 0.01 | 0.01 | 0.01 | 0.01 | 0.02 |
| CHA | 0.00 | 0.28 | 0.31 | 0.56 | 0.81 | 1.03 | 1.20 | 1.34 | 1.43 | 1.49 | 1.52 |
| EUR | 0.31 | 0.33 | 0.45 | 0.53 | 0.54 | 0.55 | 0.56 | 0.53 | 0.50 | 0.48 | 0.48 |
| IND | 0.00 | 0.00 | 0.00 | 0.00 | 0.00 | 0.00 | 0.01 | 0.01 | 0.01 | 0.01 | 0.02 |
| JPN | 0.00 | 0.00 | 0.00 | 0.00 | 0.00 | 0.00 | 0.00 | 0.00 | 0.00 | 0.00 | 0.01 |
| LAM | 0.00 | 0.00 | 0.00 | 0.00 | 0.01 | 0.02 | 0.04 | 0.05 | 0.07 | 0.08 | 0.10 |
| MEA | 0.00 | 0.00 | 0.00 | 0.00 | 0.00 | 0.01 | 0.01 | 0.01 | 0.02 | 0.02 | 0.03 |
| NEU | 0.03 | 0.08 | 0.01 | 0.01 | 0.01 | 0.01 | 0.01 | 0.01 | 0.01 | 0.01 | 0.02 |
| OAS | 0.00 | 0.03 | 0.03 | 0.03 | 0.04 | 0.06 | 0.08 | 0.11 | 0.14 | 0.18 | 0.22 |
| REF | 0.39 | 0.45 | 0.36 | 0.48 | 0.63 | 0.74 | 0.78 | 0.76 | 0.71 | 0.65 | 0.60 |
| SSA | 0.00 | 0.00 | 0.00 | 0.00 | 0.00 | 0.01 | 0.01 | 0.02 | 0.03 | 0.05 | 0.07 |
| USA | 0.32 | 0.36 | 0.46 | 0.30 | 0.31 | 0.31 | 0.31 | 0.29 | 0.28 | 0.27 | 0.28 |

Table 281: MAgPIE m4p\_SSP1 — Demand—Feed—Crops—Oil crops—Sunflower (Mt DM/yr) [PART 1/2]

|     | 2050 | 2055 | 2060 | 2070 | 2080 | 2090 | 2100 |
|-----|------|------|------|------|------|------|------|
| GLO | 3.40 | 3.31 | 3.19 | 2.92 | 2.65 | 2.38 | 2.03 |
| CAZ | 0.02 | 0.02 | 0.02 | 0.03 | 0.03 | 0.03 | 0.03 |
| CHA | 1.52 | 1.39 | 1.27 | 1.05 | 0.87 | 0.72 | 0.57 |
| EUR | 0.49 | 0.48 | 0.47 | 0.42 | 0.41 | 0.38 | 0.33 |
| IND | 0.02 | 0.02 | 0.02 | 0.03 | 0.03 | 0.04 | 0.03 |
| JPN | 0.01 | 0.01 | 0.01 | 0.01 | 0.01 | 0.01 | 0.00 |
| LAM | 0.11 | 0.12 | 0.13 | 0.15 | 0.15 | 0.15 | 0.14 |
| MEA | 0.03 | 0.04 | 0.04 | 0.05 | 0.05 | 0.05 | 0.06 |
| NEU | 0.02 | 0.02 | 0.02 | 0.02 | 0.02 | 0.02 | 0.02 |
| OAS | 0.26 | 0.28 | 0.29 | 0.30 | 0.30 | 0.29 | 0.26 |
| REF | 0.56 | 0.53 | 0.50 | 0.40 | 0.32 | 0.24 | 0.16 |
| SSA | 0.08 | 0.11 | 0.14 | 0.18 | 0.20 | 0.22 | 0.22 |
| USA | 0.28 | 0.28 | 0.28 | 0.29 | 0.26 | 0.25 | 0.22 |

Table 282: MAgPIE m4p\_SSP1 — Demand—Feed—Crops—Oil crops—Sunflower (Mt DM/yr) [PART 2/2]

|     | 1965 | 1970 | 1975 | 1980 | 1985 | 1990 | 1995 | 2000 | 2005 | 2010 |
|-----|------|------|------|------|------|------|------|------|------|------|
| GLO | 0.03 | 0.05 | 0.07 | 0.19 | 0.75 | 0.93 | 1.21 | 1.71 | 1.64 | 1.93 |
| CAZ | 0.00 | 0.00 | 0.01 | 0.01 | 0.01 | 0.01 | 0.01 | 0.01 | 0.00 | 0.00 |
| CHA | 0.00 | 0.00 | 0.00 | 0.00 | 0.00 | 0.00 | 0.00 | 0.28 | 0.31 | 0.56 |
| EUR | 0.02 | 0.01 | 0.01 | 0.06 | 0.14 | 0.14 | 0.29 | 0.32 | 0.43 | 0.52 |
| IND | 0.00 | 0.00 | 0.00 | 0.00 | 0.00 | 0.00 | 0.00 | 0.00 | 0.00 | 0.00 |
| JPN | 0.00 | 0.00 | 0.00 | 0.00 | 0.00 | 0.00 | 0.00 | 0.00 | 0.00 | 0.00 |
| LAM | 0.00 | 0.00 | 0.00 | 0.00 | 0.00 | 0.00 | 0.00 | 0.00 | 0.00 | 0.00 |
| MEA | 0.00 | 0.00 | 0.00 | 0.00 | 0.00 | 0.00 | 0.00 | 0.00 | 0.00 | 0.00 |
| NEU | 0.00 | 0.01 | 0.01 | 0.03 | 0.03 | 0.03 | 0.03 | 0.12 | 0.02 | 0.01 |
| OAS | 0.00 | 0.00 | 0.00 | 0.00 | 0.00 | 0.00 | 0.00 | 0.05 | 0.04 | 0.03 |
| REF | 0.00 | 0.00 | 0.00 | 0.04 | 0.45 | 0.64 | 0.54 | 0.54 | 0.37 | 0.48 |
| SSA | 0.00 | 0.00 | 0.00 | 0.00 | 0.00 | 0.00 | 0.00 | 0.00 | 0.00 | 0.00 |
| USA | 0.01 | 0.02 | 0.04 | 0.05 | 0.12 | 0.11 | 0.33 | 0.38 | 0.48 | 0.33 |

Table 283: FAO — Demand—Feed—Crops—Oil crops—Sunflower (Mt DM/yr)

6.2.12
Other crops

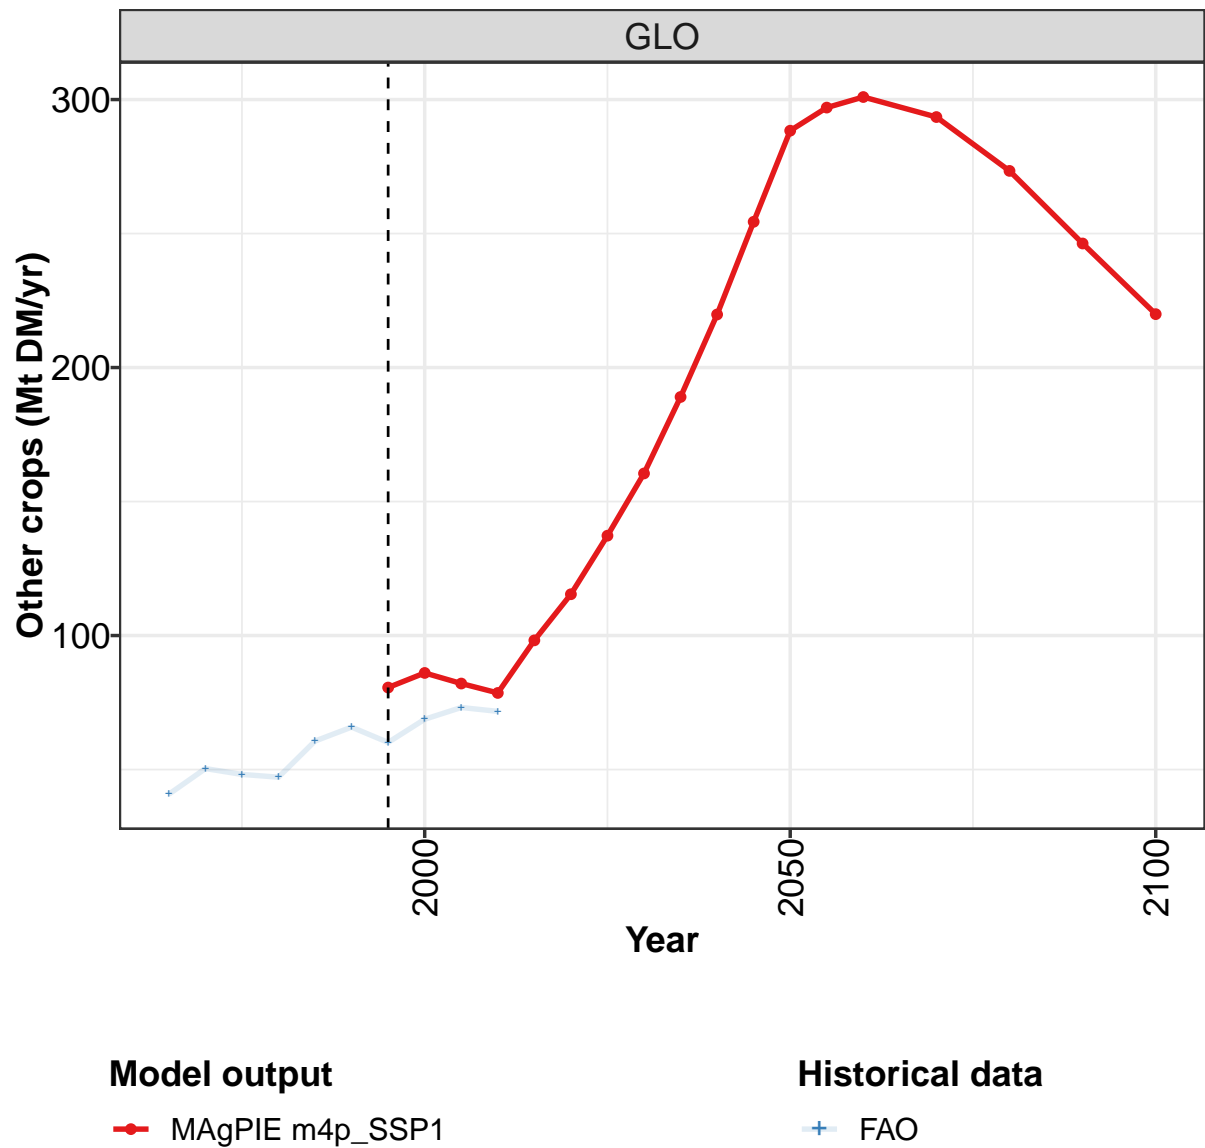

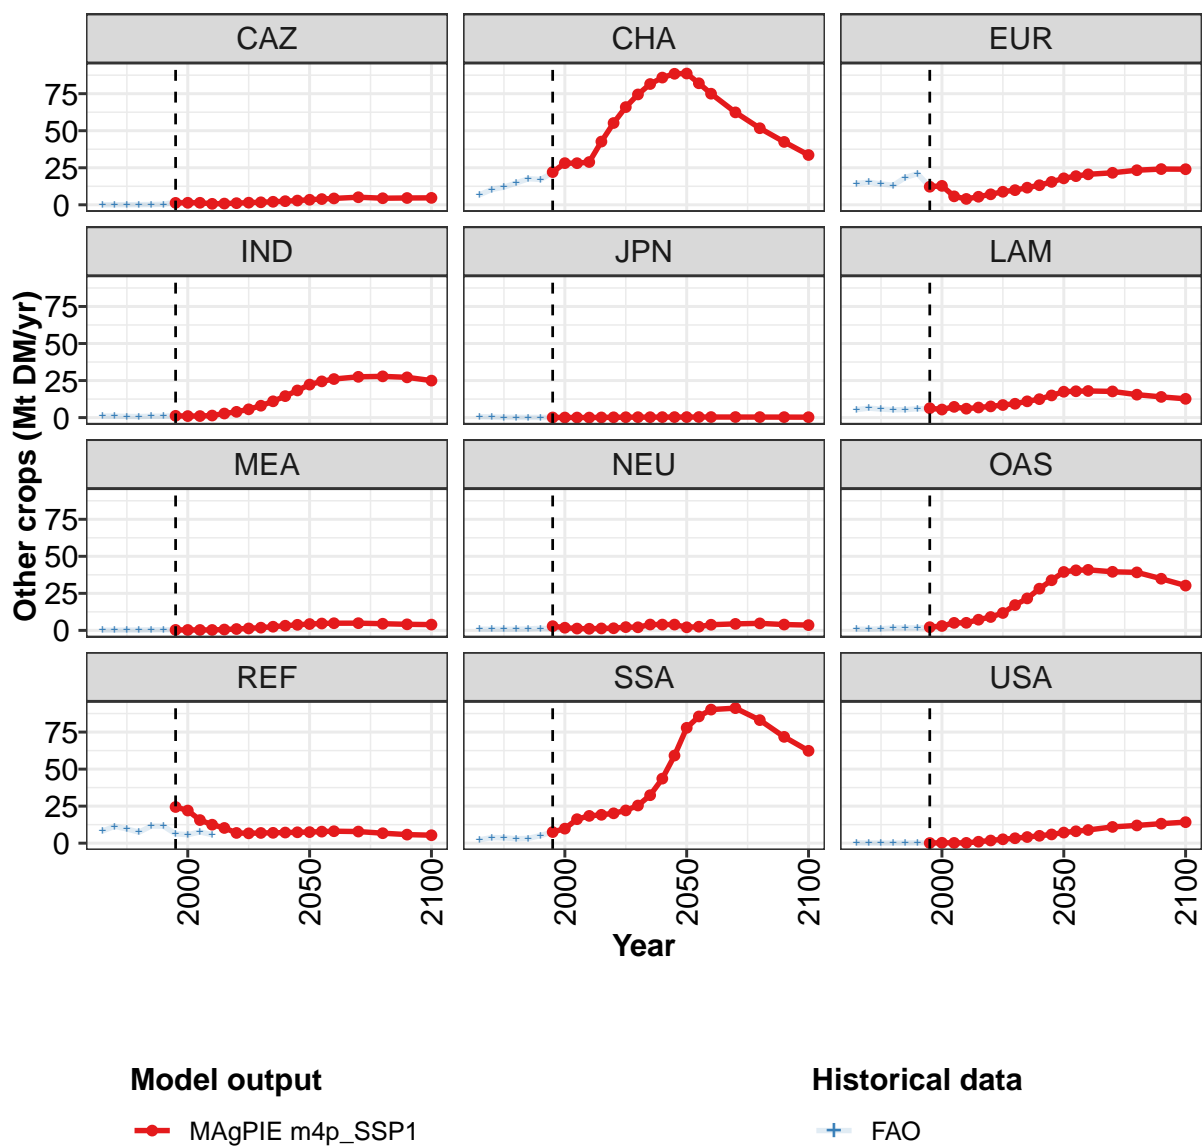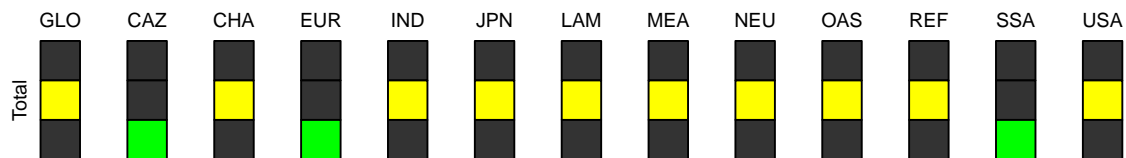

Figure 95: MAgPIE m4p\_SSP1 — Demand—Feed—Crops—Other crops (Mt DM/yr)



|     | 1995 | 2000 | 2005 | 2010 | 2015 | 2020 | 2025 | 2030 | 2035 | 2040 | 2045 |
|-----|------|------|------|------|------|------|------|------|------|------|------|
| GLO | 81   | 86   | 82   | 79   | 98   | 115  | 137  | 160  | 189  | 220  | 254  |
| CAZ | 1    | 1    | 1    | 1    | 1    | 1    | 1    | 2    | 2    | 2    | 3    |
| CHA | 22   | 28   | 28   | 29   | 43   | 55   | 66   | 75   | 82   | 86   | 88   |
| EUR | 12   | 13   | 6    | 4    | 5    | 7    | 9    | 10   | 12   | 13   | 15   |
| IND | 1    | 1    | 1    | 1    | 3    | 4    | 6    | 8    | 11   | 14   | 18   |
| JPN | 0    | 0    | 0    | 0    | 0    | 0    | 0    | 0    | 0    | 0    | 0    |
| LAM | 6    | 5    | 7    | 6    | 7    | 8    | 8    | 9    | 11   | 12   | 15   |
| MEA | 0    | 0    | 0    | 0    | 1    | 1    | 1    | 2    | 2    | 3    | 4    |
| NEU | 3    | 2    | 1    | 1    | 1    | 1    | 2    | 2    | 4    | 4    | 4    |
| OAS | 2    | 3    | 5    | 5    | 7    | 9    | 12   | 17   | 22   | 28   | 34   |
| REF | 24   | 22   | 16   | 12   | 10   | 7    | 7    | 7    | 7    | 7    | 7    |
| SSA | 8    | 10   | 16   | 18   | 19   | 20   | 22   | 25   | 32   | 44   | 59   |
| USA | 0    | 0    | 0    | 0    | 1    | 2    | 3    | 3    | 4    | 5    | 6    |

Table 284: MAgPIE m4p\_SSP1 — Demand—Feed—Crops—Other crops (Mt DM/yr) [PART 1/2]

|     | 2050 | 2055 | 2060 | 2070 | 2080 | 2090 | 2100 |
|-----|------|------|------|------|------|------|------|
| GLO | 288  | 297  | 301  | 293  | 273  | 246  | 220  |
| CAZ | 3    | 4    | 4    | 5    | 4    | 5    | 5    |
| CHA | 89   | 82   | 75   | 62   | 52   | 42   | 34   |
| EUR | 18   | 19   | 21   | 22   | 23   | 24   | 24   |
| IND | 22   | 24   | 26   | 28   | 28   | 27   | 25   |
| JPN | 0    | 0    | 0    | 0    | 0    | 0    | 0    |
| LAM | 17   | 18   | 18   | 18   | 15   | 14   | 13   |
| MEA | 4    | 5    | 5    | 5    | 5    | 4    | 4    |
| NEU | 2    | 2    | 4    | 4    | 5    | 4    | 4    |
| OAS | 39   | 41   | 41   | 40   | 39   | 35   | 30   |
| REF | 7    | 8    | 8    | 8    | 7    | 6    | 5    |
| SSA | 78   | 86   | 90   | 91   | 83   | 72   | 62   |
| USA | 7    | 8    | 9    | 11   | 12   | 13   | 14   |

Table 285: MAgPIE m4p\_SSP1 — Demand—Feed—Crops—Other crops (Mt DM/yr) [PART 2/2]

|     | 1965 | 1970 | 1975 | 1980 | 1985 | 1990 | 1995 | 2000 | 2005 | 2010 |
|-----|------|------|------|------|------|------|------|------|------|------|
| GLO | 40.8 | 50.4 | 48.2 | 47.2 | 60.6 | 65.8 | 60.1 | 68.8 | 73.2 | 71.7 |
| CAZ | 0.0  | 0.0  | 0.0  | 0.1  | 0.2  | 0.3  | 1.8  | 1.7  | 1.8  | 0.7  |
| CHA | 6.8  | 10.4 | 11.9 | 14.7 | 17.6 | 17.1 | 21.6 | 27.9 | 27.9 | 28.9 |
| EUR | 14.4 | 15.2 | 14.1 | 13.1 | 18.5 | 20.9 | 12.1 | 12.6 | 5.6  | 3.9  |
| IND | 1.0  | 1.0  | 0.8  | 0.7  | 0.9  | 1.0  | 1.2  | 1.1  | 1.1  | 1.4  |
| JPN | 0.6  | 0.4  | 0.2  | 0.1  | 0.1  | 0.1  | 0.1  | 0.1  | 0.1  | 0.0  |
| LAM | 5.4  | 6.4  | 5.7  | 5.3  | 5.4  | 6.0  | 6.0  | 5.5  | 6.9  | 5.7  |
| MEA | 0.1  | 0.1  | 0.3  | 0.2  | 0.4  | 0.5  | 0.3  | 0.3  | 0.3  | 0.3  |
| NEU | 0.8  | 0.8  | 0.7  | 0.8  | 1.0  | 1.4  | 1.1  | 1.2  | 1.2  | 1.1  |
| OAS | 0.8  | 0.7  | 1.1  | 1.7  | 1.6  | 1.7  | 1.9  | 2.4  | 4.4  | 5.2  |
| REF | 8.2  | 11.4 | 9.6  | 7.4  | 11.6 | 11.5 | 6.3  | 5.7  | 7.6  | 5.8  |
| SSA | 2.3  | 3.8  | 3.6  | 3.0  | 3.2  | 5.1  | 7.6  | 9.9  | 16.2 | 18.4 |
| USA | 0.3  | 0.1  | 0.1  | 0.1  | 0.1  | 0.3  | 0.1  | 0.3  | 0.2  | 0.2  |

Table 286: FAO — Demand—Feed—Crops—Other crops (Mt DM/yr)

6.2.13
Other crops—Fruits Vegetables Nuts

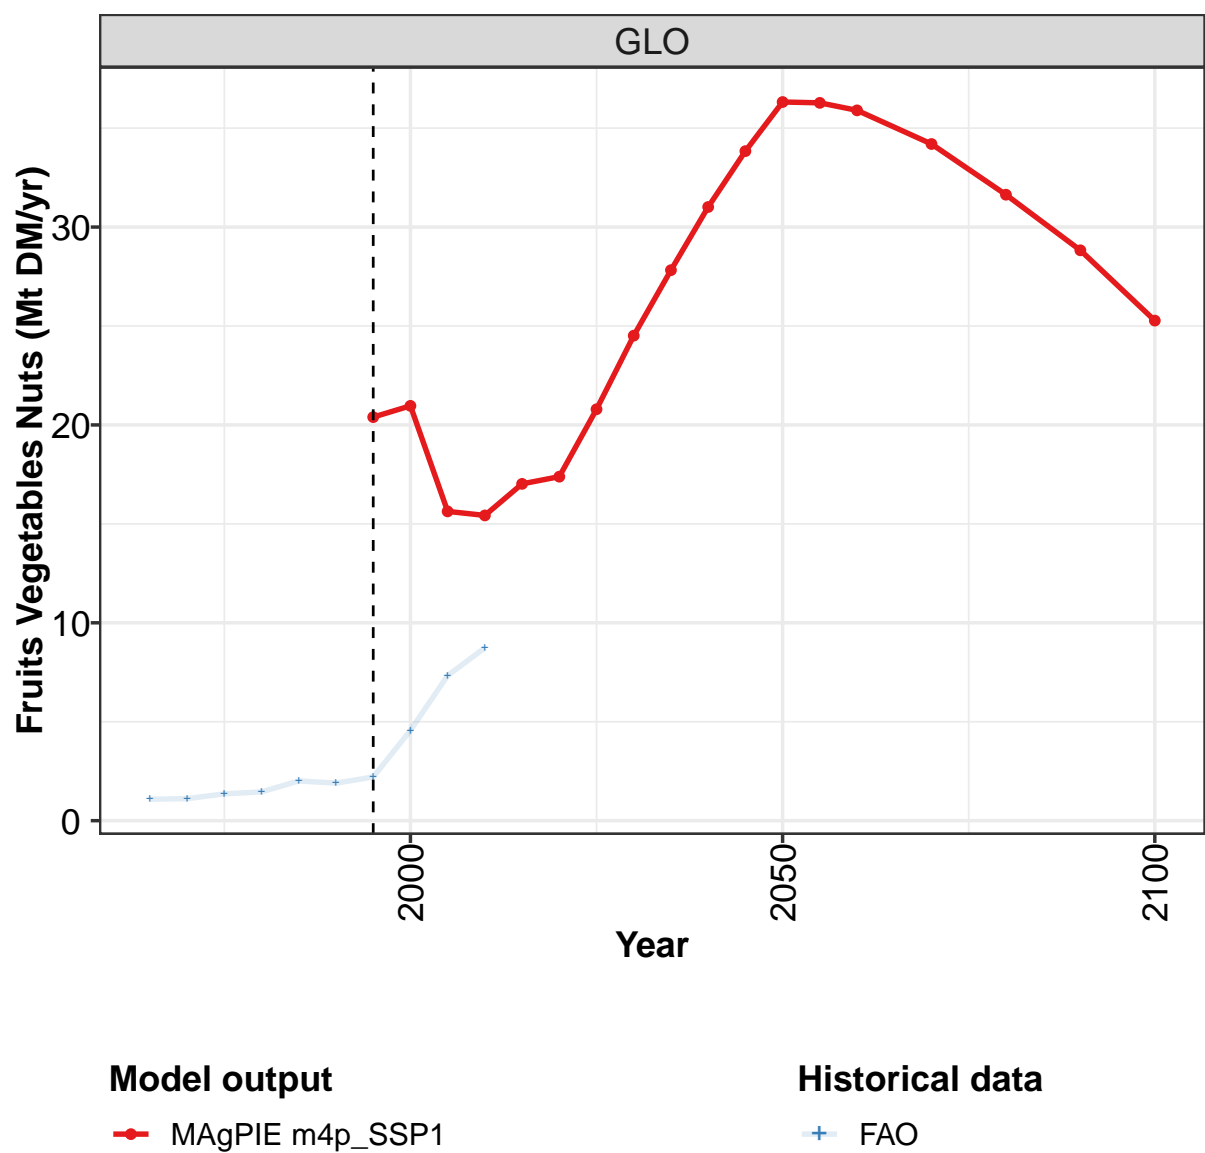

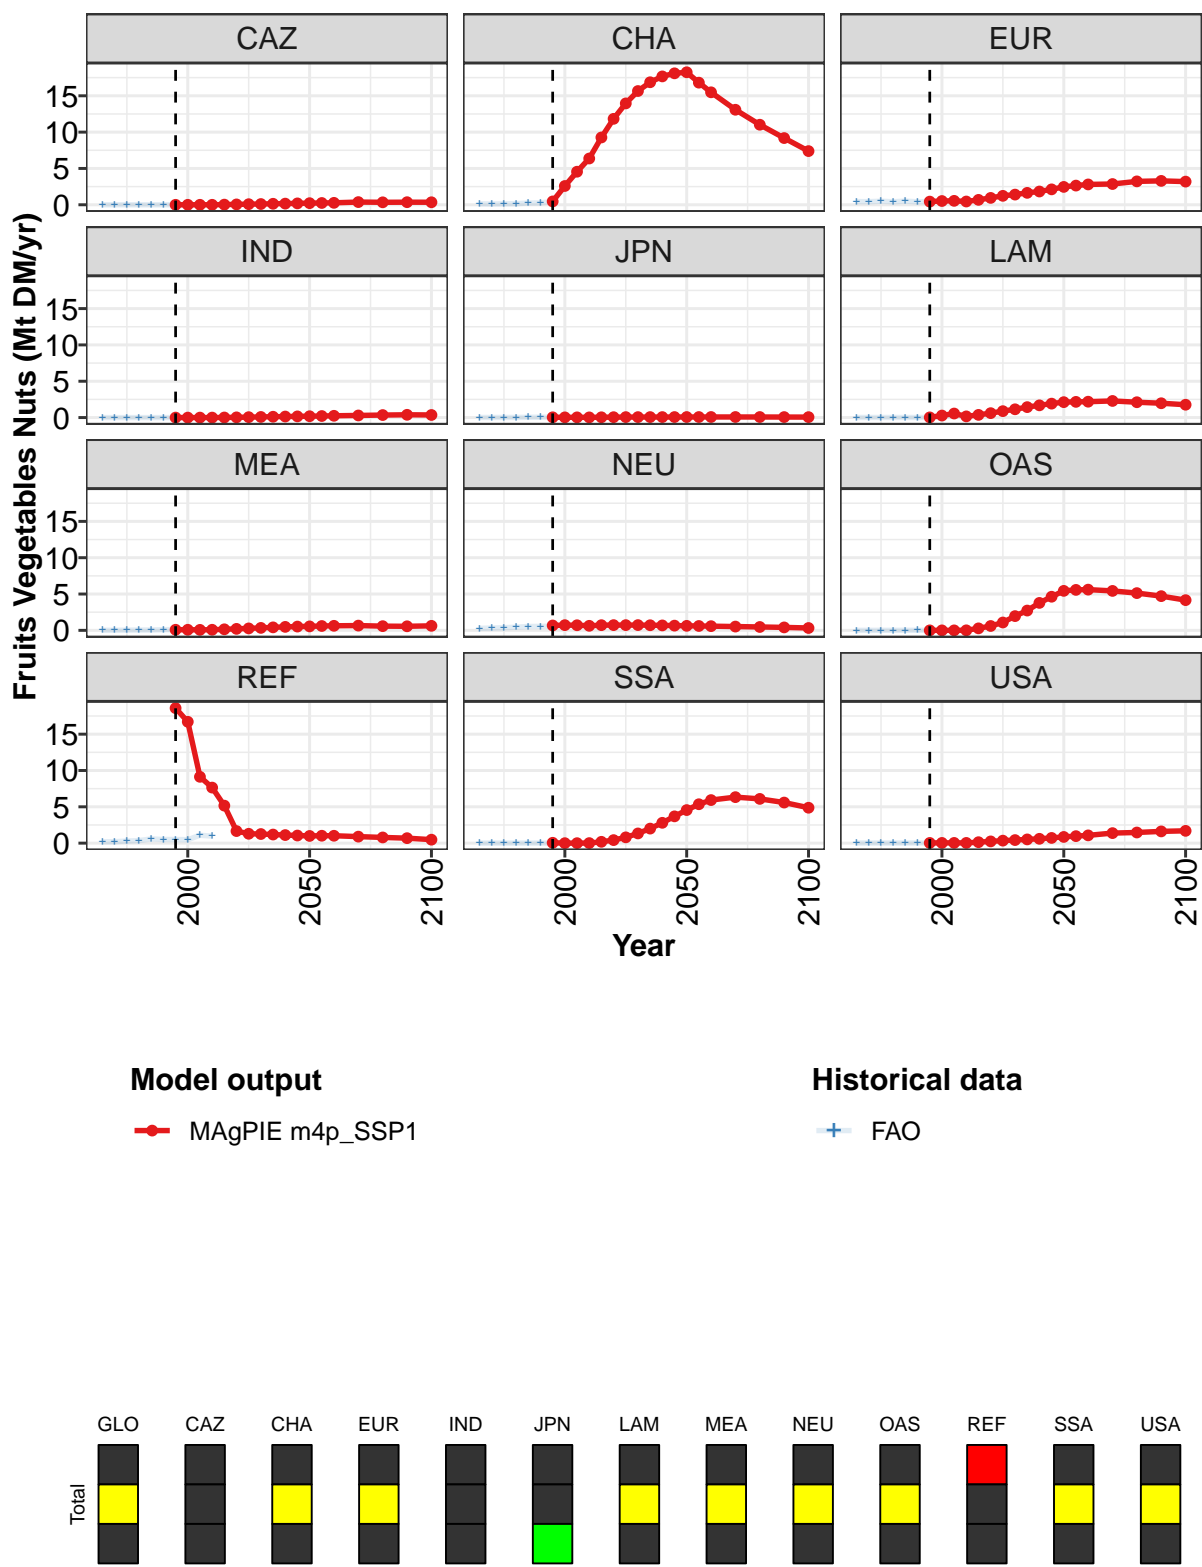

Figure 96: MAgPIE m4p\_SSP1 — Demand—Feed—Crops—Other crops—Fruits Vegetables Nuts (Mt DM/yr)

|     | 1995 | 2000 | 2005 | 2010 | 2015 | 2020 | 2025 | 2030 | 2035 | 2040 | 2045 |
|-----|------|------|------|------|------|------|------|------|------|------|------|
| GLO | 20.4 | 21.0 | 15.6 | 15.4 | 17.0 | 17.4 | 20.8 | 24.5 | 27.8 | 31.0 | 33.8 |
| CAZ | 0.0  | 0.0  | 0.0  | 0.0  | 0.0  | 0.1  | 0.1  | 0.1  | 0.1  | 0.2  | 0.2  |
| CHA | 0.5  | 2.6  | 4.6  | 6.4  | 9.3  | 11.8 | 14.0 | 15.7 | 16.9 | 17.7 | 18.1 |
| EUR | 0.4  | 0.5  | 0.5  | 0.5  | 0.7  | 0.9  | 1.2  | 1.4  | 1.6  | 1.8  | 2.1  |
| IND | 0.0  | 0.0  | 0.0  | 0.0  | 0.0  | 0.0  | 0.1  | 0.1  | 0.1  | 0.1  | 0.2  |
| JPN | 0.0  | 0.0  | 0.0  | 0.0  | 0.0  | 0.1  | 0.1  | 0.1  | 0.1  | 0.1  | 0.1  |
| LAM | 0.0  | 0.3  | 0.6  | 0.2  | 0.4  | 0.6  | 0.9  | 1.1  | 1.4  | 1.7  | 1.9  |
| MEA | 0.1  | 0.1  | 0.1  | 0.1  | 0.1  | 0.2  | 0.3  | 0.3  | 0.4  | 0.5  | 0.5  |
| NEU | 0.7  | 0.7  | 0.7  | 0.6  | 0.7  | 0.7  | 0.7  | 0.7  | 0.7  | 0.7  | 0.7  |
| OAS | 0.0  | 0.0  | 0.0  | 0.0  | 0.3  | 0.6  | 1.1  | 2.0  | 2.7  | 3.8  | 4.6  |
| REF | 18.6 | 16.7 | 9.1  | 7.7  | 5.2  | 1.7  | 1.3  | 1.3  | 1.2  | 1.1  | 1.0  |
| SSA | 0.1  | 0.0  | 0.0  | 0.0  | 0.2  | 0.4  | 0.8  | 1.3  | 2.0  | 2.8  | 3.7  |
| USA | 0.0  | 0.0  | 0.0  | 0.0  | 0.1  | 0.2  | 0.3  | 0.4  | 0.5  | 0.6  | 0.7  |

Table 287: MAgPIE m4p\_SSP1 — Demand—Feed—Crops—Other crops—Fruits Vegetables Nuts (Mt DM/yr)  
[PART 1/2]

|     | 2050 | 2055 | 2060 | 2070 | 2080 | 2090 | 2100 |
|-----|------|------|------|------|------|------|------|
| GLO | 36.3 | 36.3 | 35.9 | 34.2 | 31.6 | 28.8 | 25.3 |
| CAZ | 0.2  | 0.2  | 0.3  | 0.4  | 0.3  | 0.4  | 0.3  |
| CHA | 18.2 | 16.8 | 15.5 | 13.1 | 11.0 | 9.2  | 7.4  |
| EUR | 2.5  | 2.6  | 2.8  | 2.9  | 3.2  | 3.3  | 3.2  |
| IND | 0.2  | 0.2  | 0.2  | 0.3  | 0.3  | 0.4  | 0.4  |
| JPN | 0.1  | 0.1  | 0.1  | 0.1  | 0.1  | 0.1  | 0.1  |
| LAM | 2.1  | 2.2  | 2.2  | 2.3  | 2.1  | 2.0  | 1.8  |
| MEA | 0.5  | 0.6  | 0.6  | 0.7  | 0.6  | 0.6  | 0.6  |
| NEU | 0.6  | 0.6  | 0.6  | 0.5  | 0.5  | 0.4  | 0.3  |
| OAS | 5.4  | 5.6  | 5.6  | 5.4  | 5.1  | 4.7  | 4.2  |
| REF | 1.0  | 1.0  | 1.0  | 0.9  | 0.8  | 0.7  | 0.5  |
| SSA | 4.6  | 5.4  | 5.9  | 6.3  | 6.1  | 5.6  | 4.9  |
| USA | 0.9  | 1.0  | 1.1  | 1.4  | 1.5  | 1.6  | 1.7  |

Table 288: MAgPIE m4p\_SSP1 — Demand—Feed—Crops—Other crops—Fruits Vegetables Nuts (Mt DM/yr)  
[PART 2/2]

|     | 1965 | 1970 | 1975 | 1980 | 1985 | 1990 | 1995 | 2000 | 2005 | 2010 |
|-----|------|------|------|------|------|------|------|------|------|------|
| GLO | 1.08 | 1.11 | 1.36 | 1.46 | 2.01 | 1.90 | 2.21 | 4.57 | 7.33 | 8.74 |
| CAZ | 0.00 | 0.00 | 0.00 | 0.00 | 0.00 | 0.00 | 0.00 | 0.00 | 0.00 | 0.00 |
| CHA | 0.13 | 0.11 | 0.13 | 0.14 | 0.24 | 0.26 | 0.45 | 2.56 | 4.52 | 6.38 |
| EUR | 0.44 | 0.43 | 0.49 | 0.41 | 0.51 | 0.40 | 0.44 | 0.52 | 0.53 | 0.44 |
| IND | 0.00 | 0.00 | 0.00 | 0.00 | 0.00 | 0.00 | 0.00 | 0.00 | 0.00 | 0.00 |
| JPN | 0.01 | 0.01 | 0.02 | 0.02 | 0.04 | 0.05 | 0.04 | 0.03 | 0.03 | 0.03 |
| LAM | 0.01 | 0.01 | 0.01 | 0.01 | 0.01 | 0.01 | 0.02 | 0.16 | 0.35 | 0.14 |
| MEA | 0.01 | 0.01 | 0.03 | 0.04 | 0.05 | 0.09 | 0.11 | 0.10 | 0.08 | 0.09 |
| NEU | 0.28 | 0.32 | 0.36 | 0.44 | 0.54 | 0.55 | 0.59 | 0.66 | 0.69 | 0.64 |
| OAS | 0.00 | 0.00 | 0.01 | 0.01 | 0.01 | 0.01 | 0.01 | 0.01 | 0.01 | 0.01 |
| REF | 0.18 | 0.20 | 0.29 | 0.35 | 0.58 | 0.50 | 0.50 | 0.47 | 1.08 | 0.97 |
| SSA | 0.01 | 0.01 | 0.01 | 0.01 | 0.01 | 0.01 | 0.01 | 0.01 | 0.01 | 0.01 |
| USA | 0.02 | 0.02 | 0.02 | 0.02 | 0.02 | 0.02 | 0.03 | 0.03 | 0.03 | 0.04 |

Table 289: FAO — Demand—Feed—Crops—Other crops—Fruits Vegetables Nuts (Mt DM/yr)

6.2.14
Other crops—Potatoes

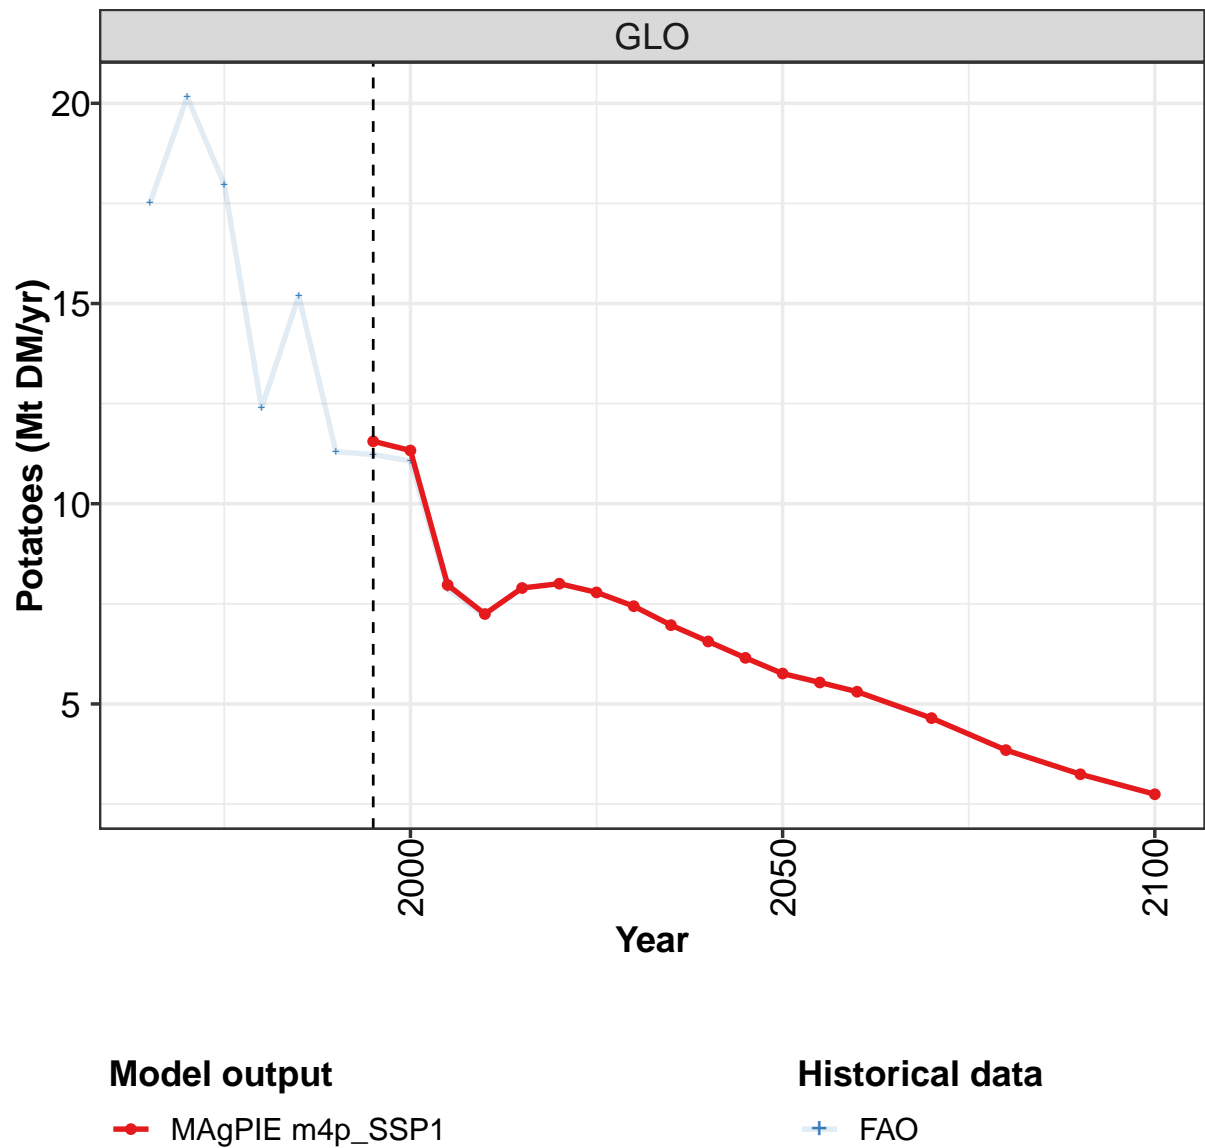

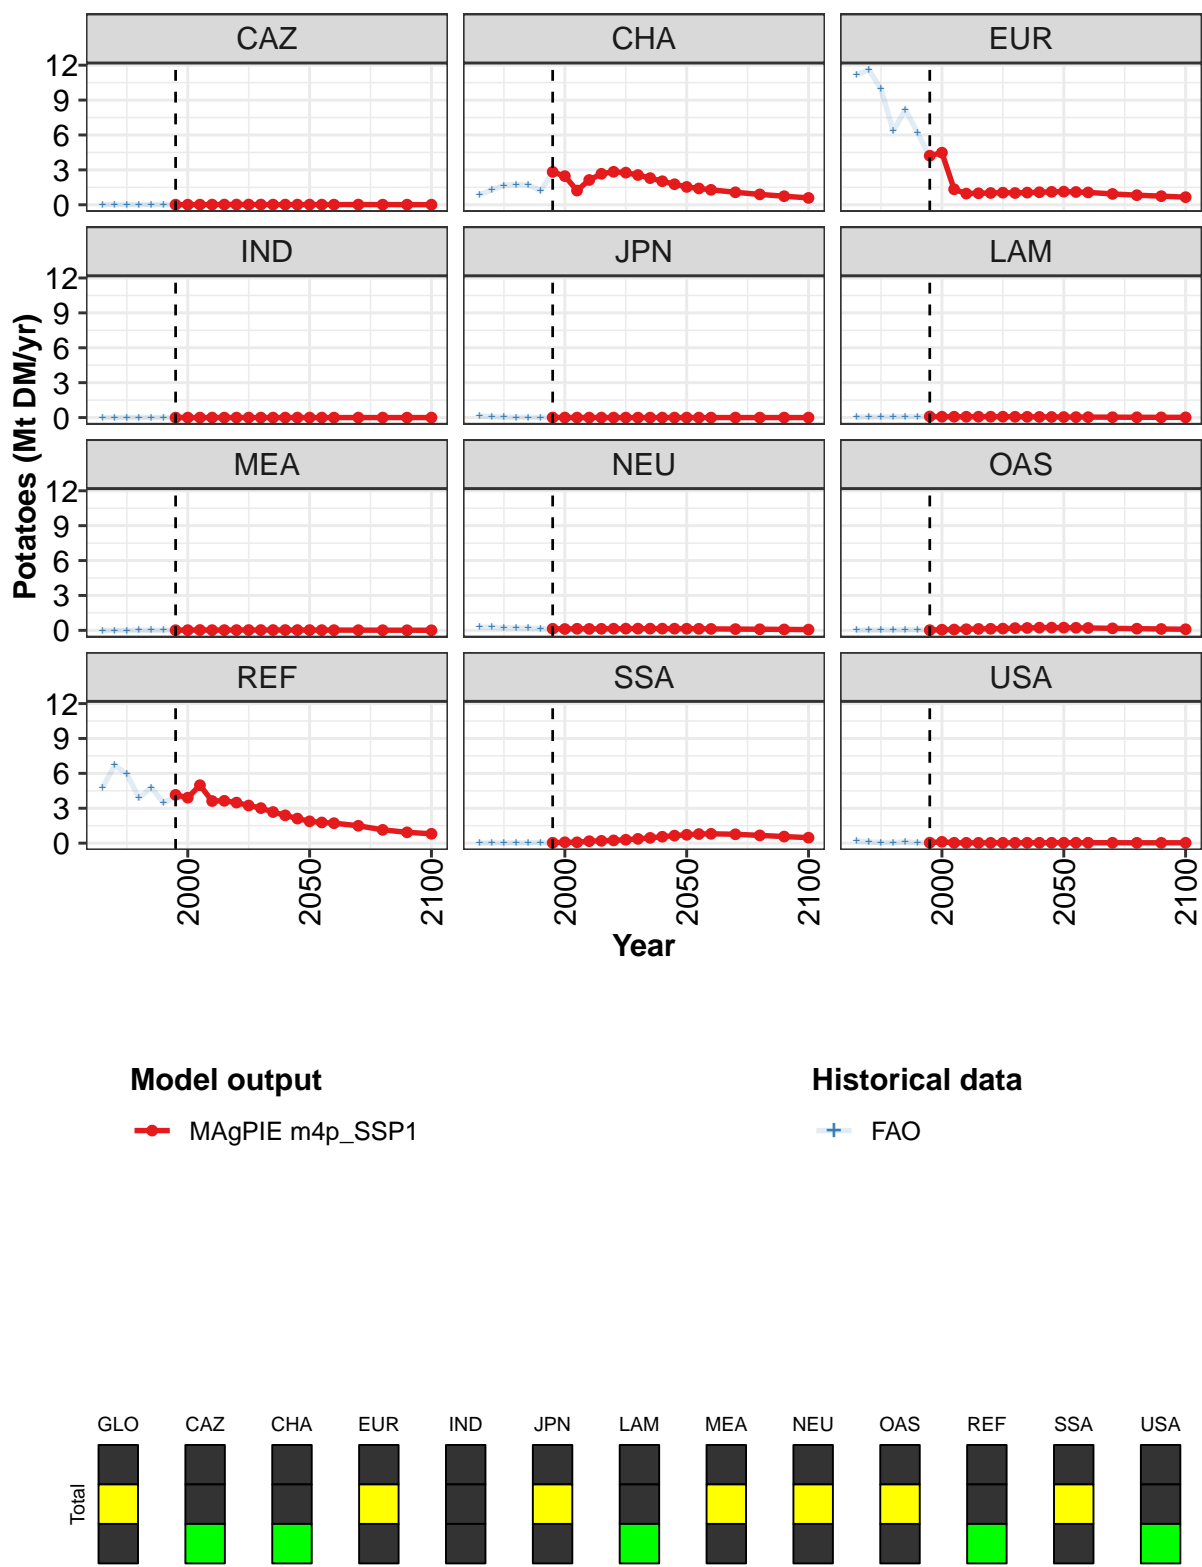

Figure 97: MAgPIE m4p\_SSP1 — Demand—Feed—Crops—Other crops—Potatoes (Mt DM/yr)

|     | 1995 | 2000 | 2005 | 2010 | 2015 | 2020 | 2025 | 2030 | 2035 | 2040 | 2045 |
|-----|------|------|------|------|------|------|------|------|------|------|------|
| GLO | 11.6 | 11.3 | 8.0  | 7.2  | 7.9  | 8.0  | 7.8  | 7.4  | 7.0  | 6.6  | 6.2  |
| CAZ | 0.0  | 0.0  | 0.0  | 0.0  | 0.0  | 0.0  | 0.0  | 0.0  | 0.0  | 0.0  | 0.0  |
| CHA | 2.8  | 2.5  | 1.2  | 2.1  | 2.7  | 2.8  | 2.8  | 2.6  | 2.3  | 2.0  | 1.8  |
| EUR | 4.2  | 4.5  | 1.3  | 1.0  | 1.0  | 1.0  | 1.0  | 1.0  | 1.0  | 1.1  | 1.1  |
| IND | 0.0  | 0.0  | 0.0  | 0.0  | 0.0  | 0.0  | 0.0  | 0.0  | 0.0  | 0.0  | 0.0  |
| JPN | 0.0  | 0.0  | 0.0  | 0.0  | 0.0  | 0.0  | 0.0  | 0.0  | 0.0  | 0.0  | 0.0  |
| LAM | 0.1  | 0.1  | 0.1  | 0.1  | 0.1  | 0.1  | 0.1  | 0.1  | 0.1  | 0.1  | 0.1  |
| MEA | 0.0  | 0.0  | 0.0  | 0.0  | 0.0  | 0.0  | 0.0  | 0.0  | 0.0  | 0.0  | 0.0  |
| NEU | 0.1  | 0.1  | 0.1  | 0.1  | 0.1  | 0.1  | 0.1  | 0.1  | 0.1  | 0.1  | 0.1  |
| OAS | 0.0  | 0.1  | 0.1  | 0.1  | 0.1  | 0.1  | 0.2  | 0.2  | 0.2  | 0.2  | 0.2  |
| REF | 4.2  | 3.9  | 5.0  | 3.6  | 3.6  | 3.5  | 3.2  | 3.0  | 2.7  | 2.4  | 2.1  |
| SSA | 0.0  | 0.1  | 0.1  | 0.2  | 0.2  | 0.2  | 0.3  | 0.4  | 0.5  | 0.6  | 0.6  |
| USA | 0.0  | 0.1  | 0.0  | 0.0  | 0.0  | 0.0  | 0.0  | 0.0  | 0.0  | 0.0  | 0.0  |

Table 290: MAgPIE m4p\_SSP1 — Demand—Feed—Crops—Other crops—Potatoes (Mt DM/yr) [PART 1/2]

|     | 2050 | 2055 | 2060 | 2070 | 2080 | 2090 | 2100 |
|-----|------|------|------|------|------|------|------|
| GLO | 5.8  | 5.5  | 5.3  | 4.6  | 3.8  | 3.2  | 2.7  |
| CAZ | 0.0  | 0.0  | 0.0  | 0.0  | 0.0  | 0.0  | 0.0  |
| CHA | 1.5  | 1.4  | 1.3  | 1.1  | 0.9  | 0.7  | 0.6  |
| EUR | 1.1  | 1.1  | 1.1  | 0.9  | 0.8  | 0.7  | 0.7  |
| IND | 0.0  | 0.0  | 0.0  | 0.0  | 0.0  | 0.0  | 0.0  |
| JPN | 0.0  | 0.0  | 0.0  | 0.0  | 0.0  | 0.0  | 0.0  |
| LAM | 0.0  | 0.0  | 0.0  | 0.0  | 0.0  | 0.0  | 0.0  |
| MEA | 0.0  | 0.0  | 0.0  | 0.0  | 0.0  | 0.0  | 0.0  |
| NEU | 0.1  | 0.1  | 0.1  | 0.1  | 0.1  | 0.1  | 0.1  |
| OAS | 0.2  | 0.2  | 0.2  | 0.2  | 0.1  | 0.1  | 0.1  |
| REF | 1.9  | 1.8  | 1.7  | 1.5  | 1.1  | 0.9  | 0.8  |
| SSA | 0.7  | 0.8  | 0.8  | 0.8  | 0.7  | 0.6  | 0.5  |
| USA | 0.0  | 0.0  | 0.0  | 0.0  | 0.0  | 0.0  | 0.0  |

Table 291: MAgPIE m4p\_SSP1 — Demand—Feed—Crops—Other crops—Potatoes (Mt DM/yr) [PART 2/2]

|     | 1965 | 1970 | 1975 | 1980 | 1985 | 1990 | 1995 | 2000 | 2005 | 2010 |
|-----|------|------|------|------|------|------|------|------|------|------|
| GLO | 17.5 | 20.2 | 18.0 | 12.4 | 15.2 | 11.3 | 11.2 | 11.1 | 7.9  | 7.2  |
| CAZ | 0.0  | 0.0  | 0.0  | 0.0  | 0.0  | 0.0  | 0.0  | 0.0  | 0.0  | 0.0  |
| CHA | 0.9  | 1.3  | 1.7  | 1.7  | 1.7  | 1.2  | 2.8  | 2.4  | 1.2  | 2.1  |
| EUR | 11.2 | 11.6 | 9.9  | 6.4  | 8.2  | 6.2  | 4.1  | 4.3  | 1.3  | 0.9  |
| IND | 0.0  | 0.0  | 0.0  | 0.0  | 0.0  | 0.0  | 0.0  | 0.0  | 0.0  | 0.0  |
| JPN | 0.1  | 0.1  | 0.0  | 0.0  | 0.0  | 0.0  | 0.0  | 0.0  | 0.0  | 0.0  |
| LAM | 0.0  | 0.1  | 0.1  | 0.1  | 0.1  | 0.1  | 0.1  | 0.1  | 0.1  | 0.1  |
| MEA | 0.0  | 0.0  | 0.0  | 0.0  | 0.0  | 0.0  | 0.0  | 0.0  | 0.0  | 0.0  |
| NEU | 0.3  | 0.3  | 0.2  | 0.2  | 0.2  | 0.2  | 0.1  | 0.1  | 0.1  | 0.1  |
| OAS | 0.0  | 0.0  | 0.0  | 0.0  | 0.0  | 0.0  | 0.0  | 0.1  | 0.1  | 0.1  |
| REF | 4.8  | 6.7  | 5.9  | 3.9  | 4.8  | 3.5  | 4.0  | 3.8  | 4.9  | 3.6  |
| SSA | 0.0  | 0.0  | 0.0  | 0.0  | 0.0  | 0.0  | 0.0  | 0.1  | 0.1  | 0.2  |
| USA | 0.2  | 0.1  | 0.1  | 0.1  | 0.1  | 0.0  | 0.0  | 0.1  | 0.0  | 0.0  |

Table 292: FAO — Demand—Feed—Crops—Other crops—Potatoes (Mt DM/yr)

6.2.15
Other crops—Pulses

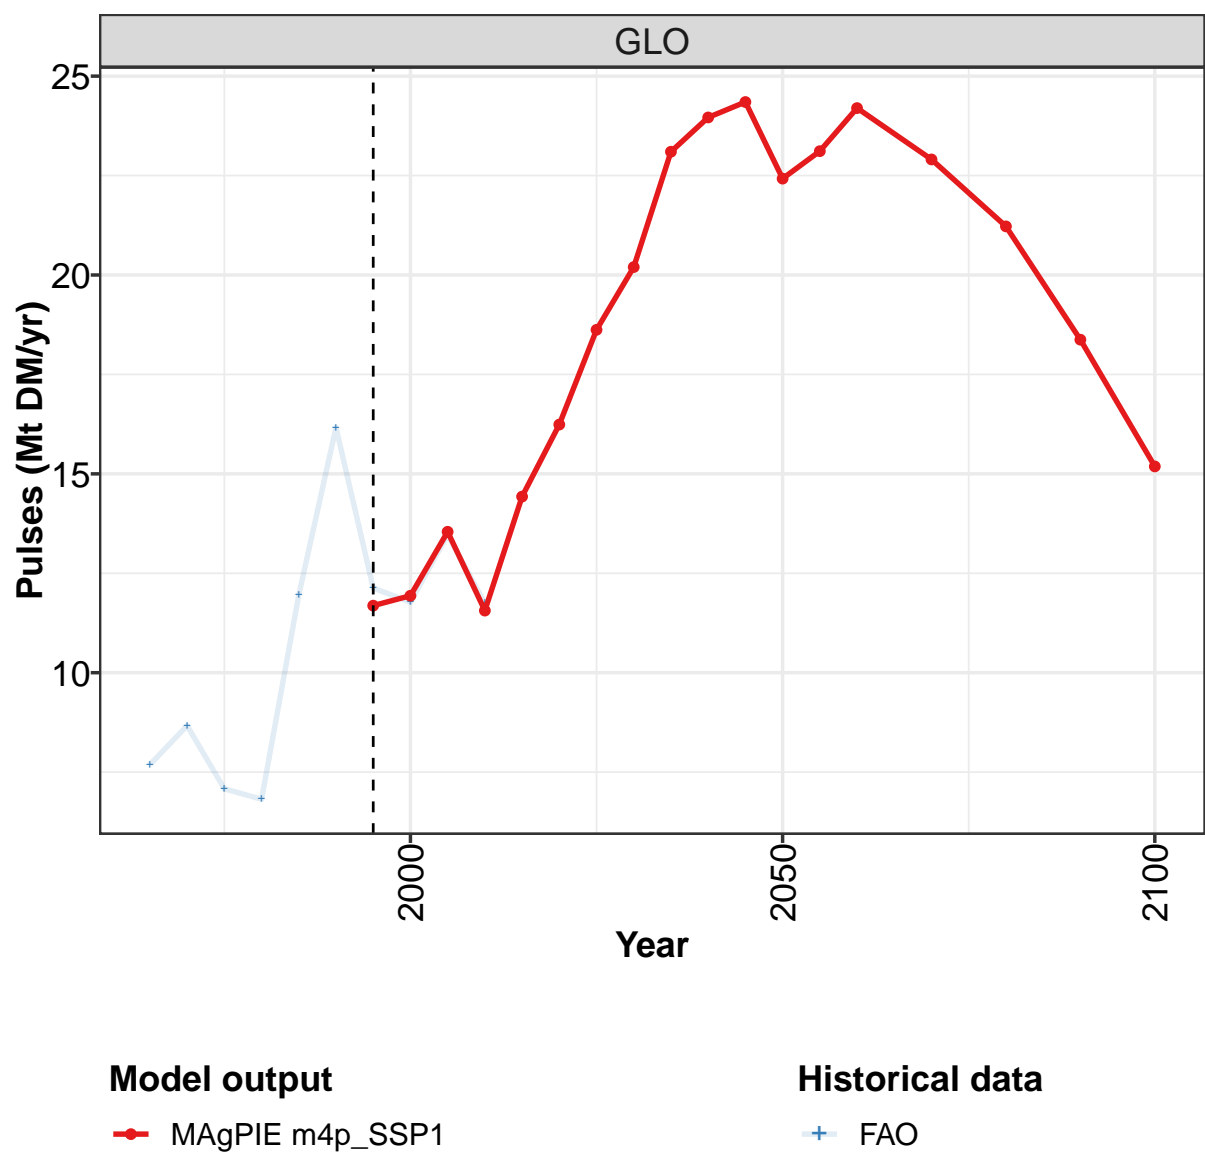



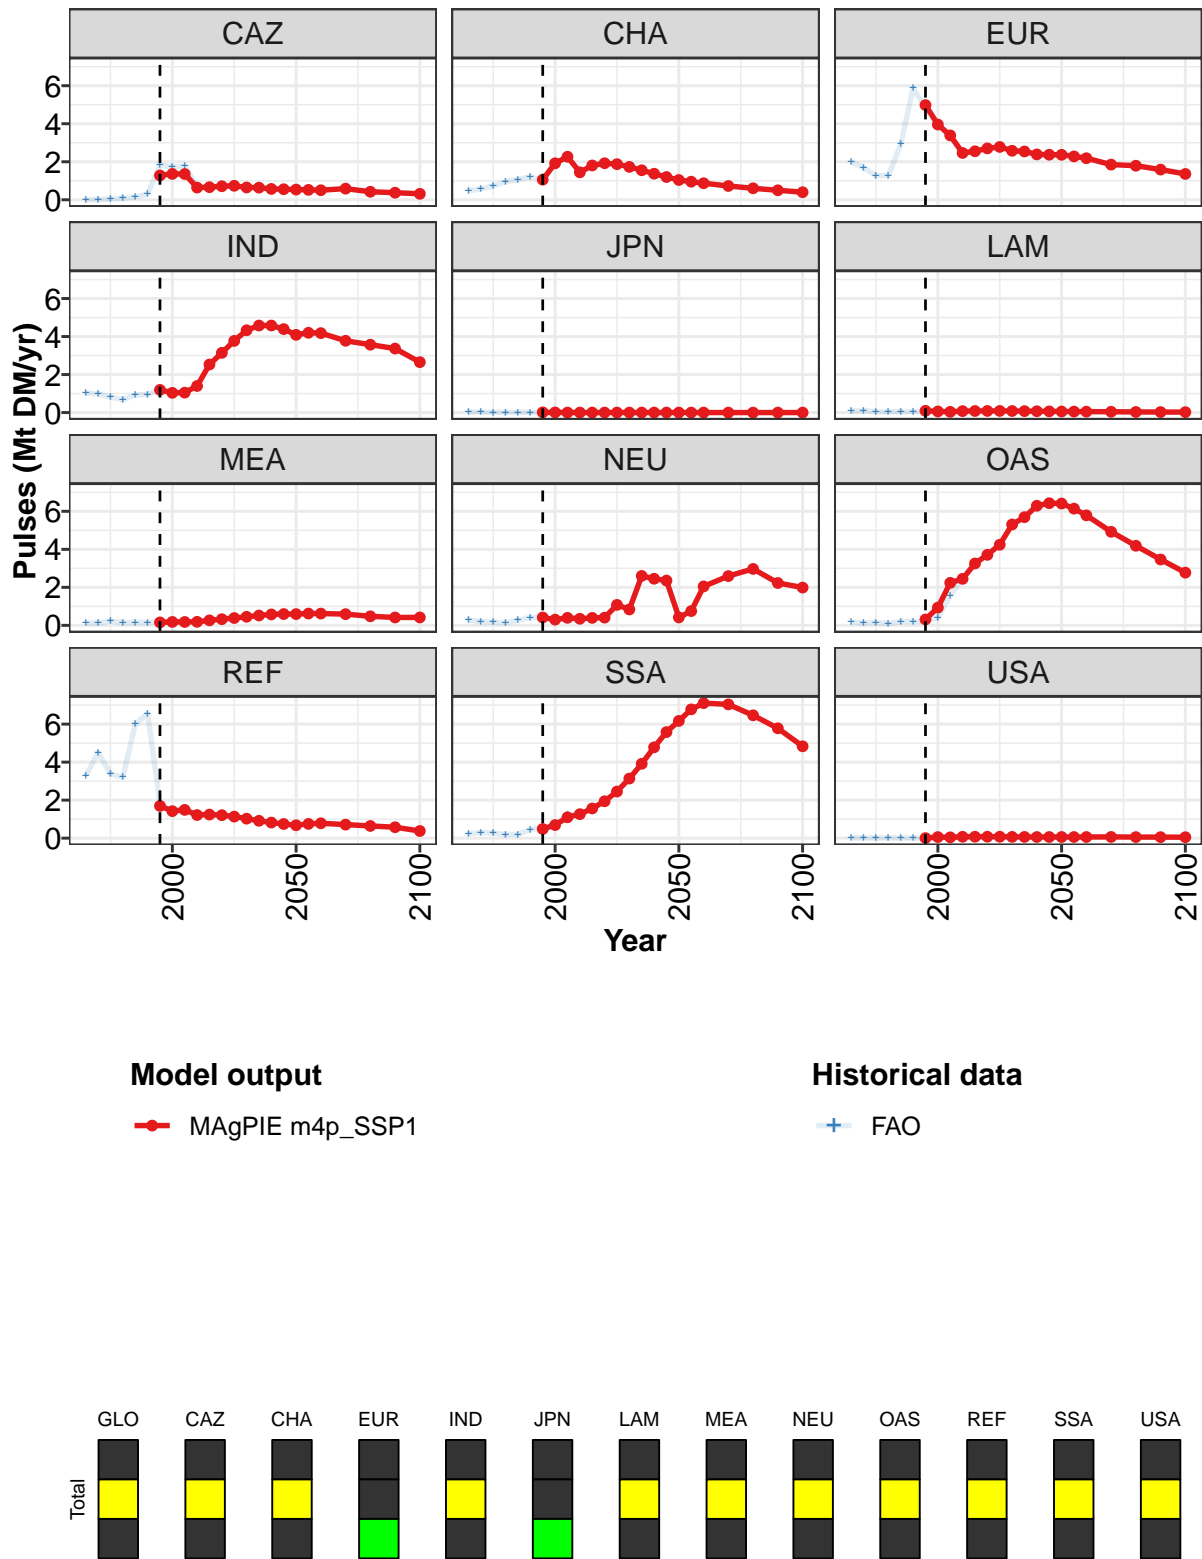

Figure 98: MAgPIE m4p\_SSP1 — Demand—Feed—Crops—Other crops—Pulses (Mt DM/yr)

|     | 1995 | 2000 | 2005 | 2010 | 2015 | 2020 | 2025 | 2030 | 2035 | 2040 | 2045 |
|-----|------|------|------|------|------|------|------|------|------|------|------|
| GLO | 11.7 | 11.9 | 13.5 | 11.6 | 14.4 | 16.2 | 18.6 | 20.2 | 23.1 | 24.0 | 24.3 |
| CAZ | 1.3  | 1.4  | 1.4  | 0.6  | 0.7  | 0.7  | 0.7  | 0.6  | 0.6  | 0.6  | 0.6  |
| CHA | 1.1  | 1.9  | 2.3  | 1.4  | 1.8  | 1.9  | 1.9  | 1.7  | 1.6  | 1.4  | 1.2  |
| EUR | 5.0  | 4.0  | 3.4  | 2.5  | 2.6  | 2.7  | 2.8  | 2.6  | 2.5  | 2.4  | 2.4  |
| IND | 1.2  | 1.0  | 1.0  | 1.4  | 2.5  | 3.1  | 3.8  | 4.3  | 4.6  | 4.6  | 4.4  |
| JPN | 0.0  | 0.0  | 0.0  | 0.0  | 0.0  | 0.0  | 0.0  | 0.0  | 0.0  | 0.0  | 0.0  |
| LAM | 0.1  | 0.1  | 0.0  | 0.1  | 0.1  | 0.1  | 0.1  | 0.1  | 0.1  | 0.1  | 0.1  |
| MEA | 0.2  | 0.2  | 0.2  | 0.2  | 0.3  | 0.3  | 0.4  | 0.5  | 0.5  | 0.6  | 0.6  |
| NEU | 0.4  | 0.3  | 0.4  | 0.3  | 0.4  | 0.4  | 1.1  | 0.8  | 2.6  | 2.5  | 2.4  |
| OAS | 0.3  | 0.9  | 2.2  | 2.4  | 3.3  | 3.7  | 4.2  | 5.3  | 5.7  | 6.3  | 6.4  |
| REF | 1.7  | 1.4  | 1.5  | 1.2  | 1.2  | 1.2  | 1.1  | 1.0  | 0.9  | 0.8  | 0.7  |
| SSA | 0.5  | 0.7  | 1.1  | 1.3  | 1.6  | 1.9  | 2.5  | 3.1  | 3.9  | 4.8  | 5.6  |
| USA | 0.0  | 0.1  | 0.0  | 0.1  | 0.1  | 0.1  | 0.1  | 0.1  | 0.1  | 0.1  | 0.1  |

Table 293: MAgPIE m4p\_SSP1 — Demand—Feed—Crops—Other crops—Pulses (Mt DM/yr) [PART 1/2]

|     | 2050 | 2055 | 2060 | 2070 | 2080 | 2090 | 2100 |
|-----|------|------|------|------|------|------|------|
| GLO | 22.4 | 23.1 | 24.2 | 22.9 | 21.2 | 18.4 | 15.2 |
| CAZ | 0.5  | 0.5  | 0.5  | 0.6  | 0.4  | 0.4  | 0.3  |
| CHA | 1.0  | 1.0  | 0.9  | 0.7  | 0.6  | 0.5  | 0.4  |
| EUR | 2.4  | 2.3  | 2.2  | 1.9  | 1.8  | 1.6  | 1.4  |
| IND | 4.1  | 4.2  | 4.2  | 3.8  | 3.6  | 3.4  | 2.7  |
| JPN | 0.0  | 0.0  | 0.0  | 0.0  | 0.0  | 0.0  | 0.0  |
| LAM | 0.1  | 0.1  | 0.0  | 0.0  | 0.0  | 0.0  | 0.0  |
| MEA | 0.6  | 0.6  | 0.6  | 0.6  | 0.5  | 0.4  | 0.4  |
| NEU | 0.4  | 0.8  | 2.0  | 2.6  | 3.0  | 2.2  | 2.0  |
| OAS | 6.4  | 6.1  | 5.8  | 4.9  | 4.2  | 3.5  | 2.8  |
| REF | 0.7  | 0.8  | 0.8  | 0.7  | 0.6  | 0.6  | 0.4  |
| SSA | 6.2  | 6.8  | 7.1  | 7.0  | 6.5  | 5.8  | 4.8  |
| USA | 0.1  | 0.1  | 0.1  | 0.1  | 0.1  | 0.1  | 0.0  |

Table 294: MAgPIE m4p\_SSP1 — Demand—Feed—Crops—Other crops—Pulses (Mt DM/yr) [PART 2/2]

|     | 1965 | 1970 | 1975 | 1980 | 1985 | 1990 | 1995 | 2000 | 2005 | 2010 |
|-----|------|------|------|------|------|------|------|------|------|------|
| GLO | 7.7  | 8.7  | 7.1  | 6.8  | 12.0 | 16.2 | 12.1 | 11.8 | 13.5 | 11.7 |
| CAZ | 0.0  | 0.0  | 0.0  | 0.1  | 0.1  | 0.3  | 1.8  | 1.7  | 1.8  | 0.7  |
| CHA | 0.5  | 0.6  | 0.7  | 1.0  | 1.1  | 1.2  | 1.0  | 1.9  | 2.3  | 1.4  |
| EUR | 2.0  | 1.7  | 1.3  | 1.3  | 2.9  | 5.9  | 4.8  | 3.9  | 3.3  | 2.4  |
| IND | 1.0  | 1.0  | 0.8  | 0.7  | 0.9  | 1.0  | 1.2  | 1.1  | 1.1  | 1.4  |
| JPN | 0.0  | 0.0  | 0.0  | 0.0  | 0.0  | 0.0  | 0.0  | 0.0  | 0.0  | 0.0  |
| LAM | 0.1  | 0.1  | 0.0  | 0.0  | 0.1  | 0.0  | 0.1  | 0.1  | 0.0  | 0.1  |
| MEA | 0.1  | 0.1  | 0.2  | 0.1  | 0.2  | 0.2  | 0.2  | 0.2  | 0.2  | 0.2  |
| NEU | 0.3  | 0.2  | 0.2  | 0.1  | 0.3  | 0.4  | 0.4  | 0.3  | 0.4  | 0.3  |
| OAS | 0.2  | 0.1  | 0.1  | 0.1  | 0.2  | 0.2  | 0.2  | 0.4  | 1.6  | 2.5  |
| REF | 3.3  | 4.5  | 3.4  | 3.2  | 6.0  | 6.6  | 1.8  | 1.4  | 1.6  | 1.2  |
| SSA | 0.2  | 0.3  | 0.3  | 0.2  | 0.2  | 0.4  | 0.6  | 0.7  | 1.2  | 1.3  |
| USA | 0.0  | 0.0  | 0.0  | 0.0  | 0.0  | 0.0  | 0.0  | 0.1  | 0.0  | 0.1  |

Table 295: FAO — Demand—Feed—Crops—Other crops—Pulses (Mt DM/yr)

6.2.16
Other crops—Tropical roots

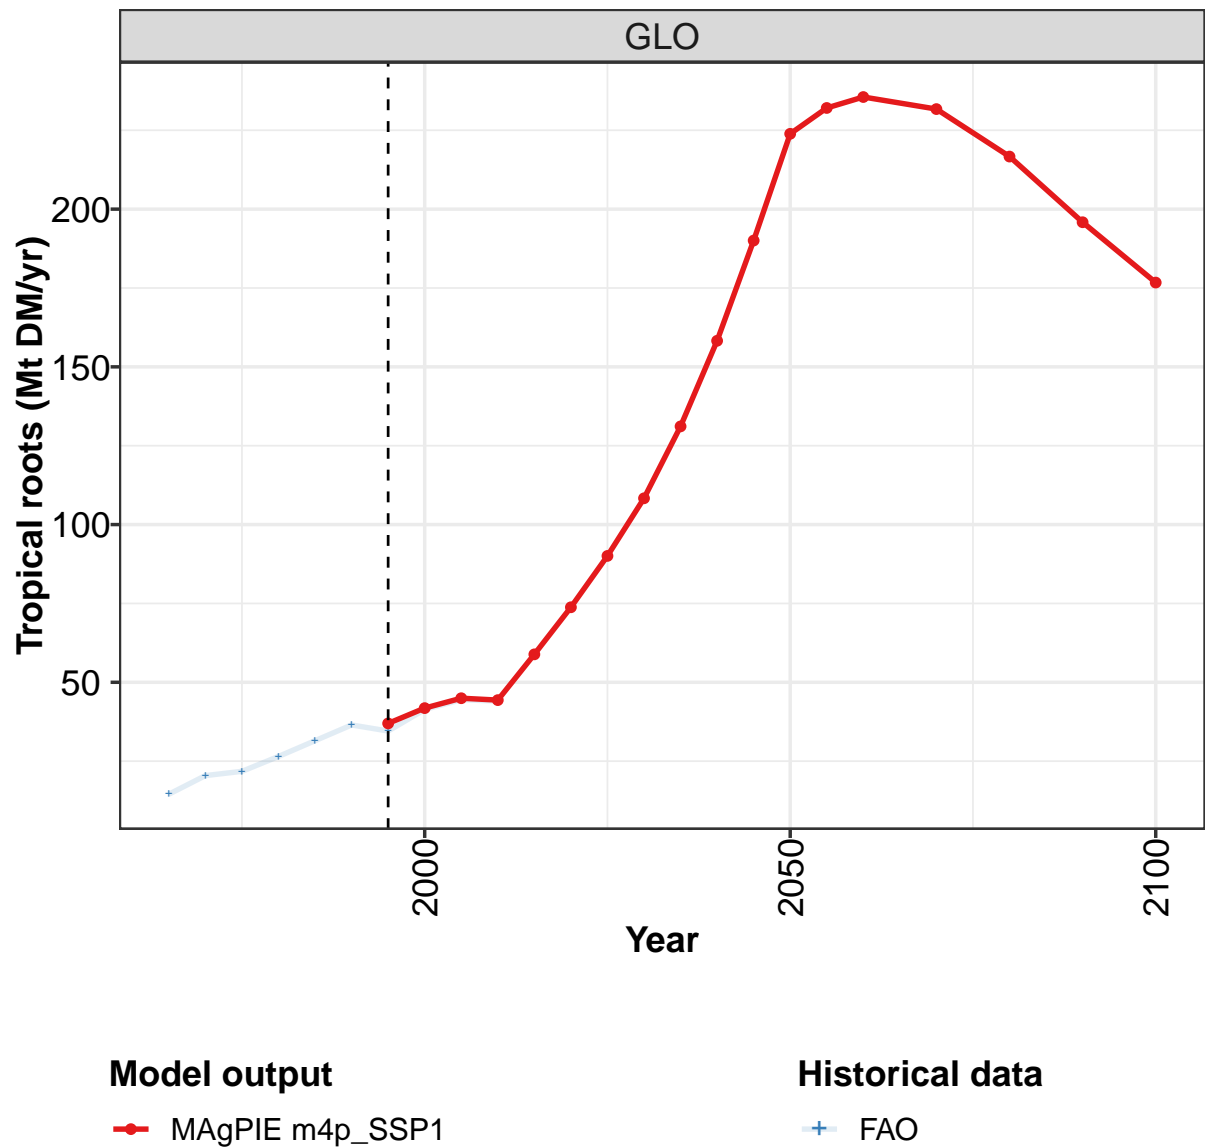

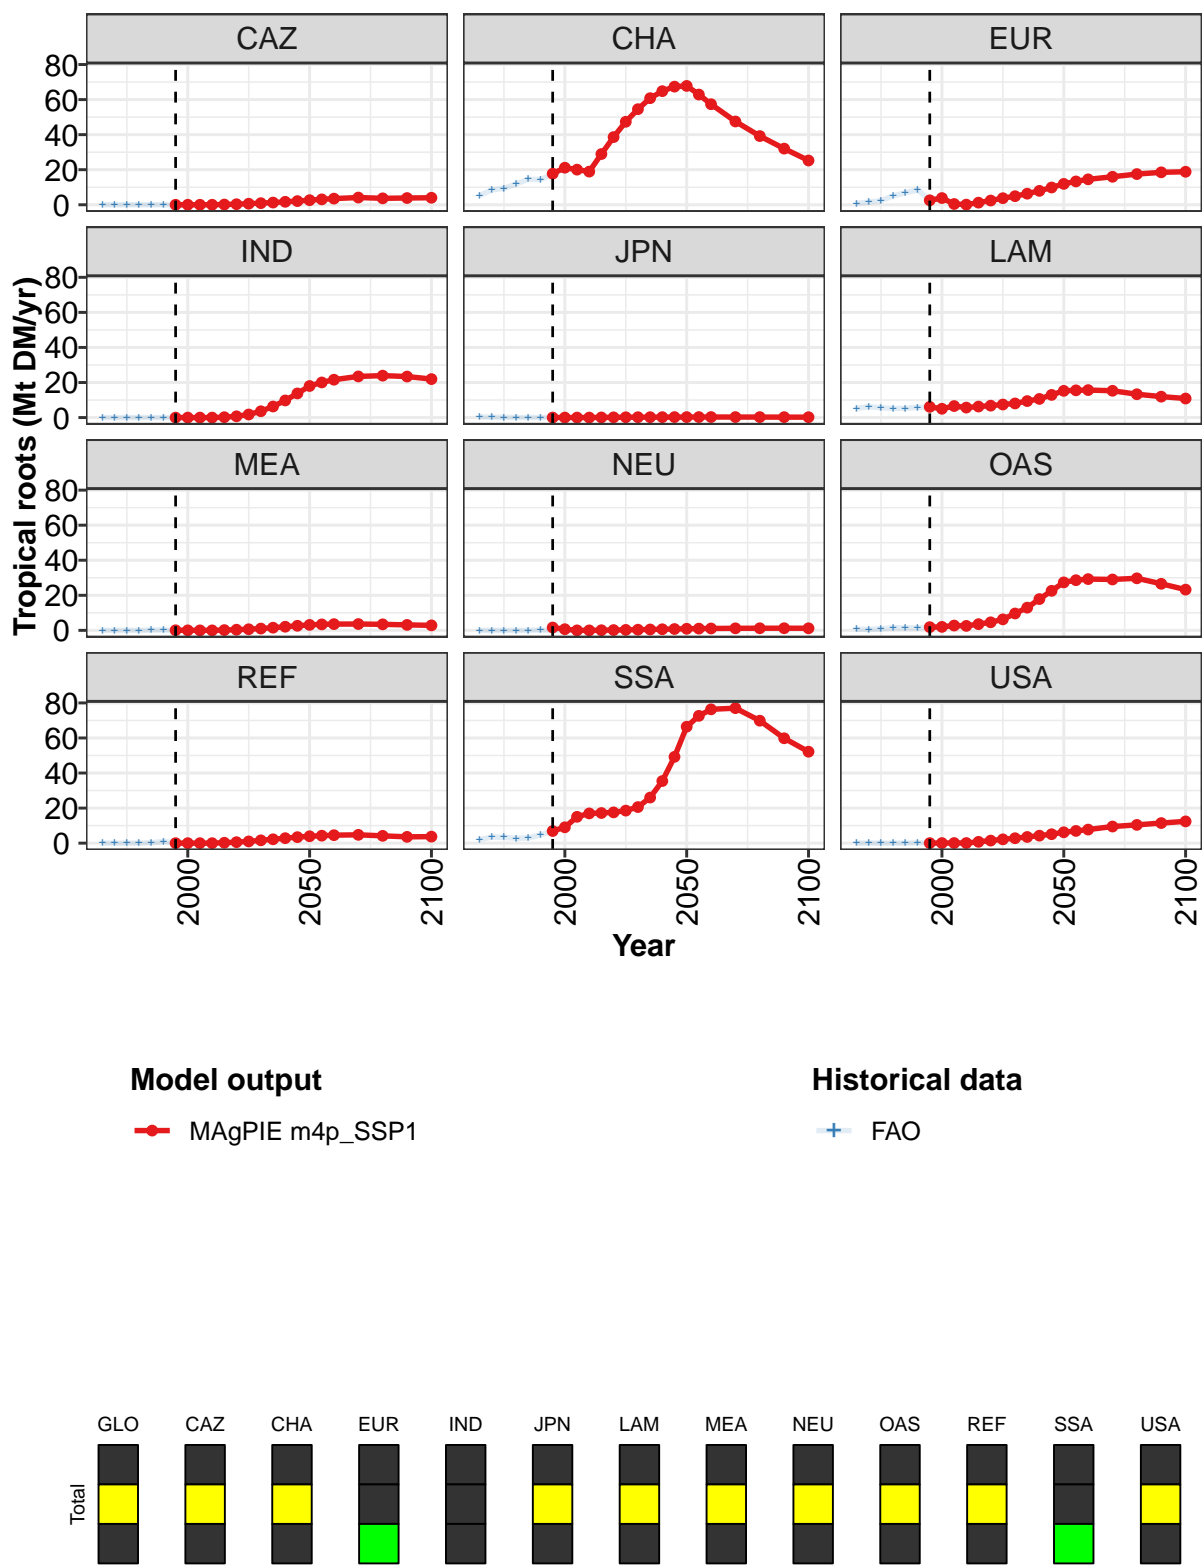

Figure 99: MAgPIE m4p\_SSP1 — Demand—Feed—Crops—Other crops—Tropical roots (Mt DM/yr)

|     | 1995 | 2000 | 2005 | 2010 | 2015 | 2020 | 2025 | 2030 | 2035 | 2040 | 2045 |
|-----|------|------|------|------|------|------|------|------|------|------|------|
| GLO | 37   | 42   | 45   | 44   | 59   | 74   | 90   | 108  | 131  | 158  | 190  |
| CAZ | 0    | 0    | 0    | 0    | 0    | 0    | 1    | 1    | 1    | 2    | 2    |
| CHA | 18   | 21   | 20   | 19   | 29   | 39   | 47   | 55   | 61   | 65   | 67   |
| EUR | 3    | 4    | 0    | 0    | 1    | 2    | 4    | 5    | 6    | 8    | 10   |
| IND | 0    | 0    | 0    | 0    | 0    | 1    | 2    | 4    | 6    | 10   | 14   |
| JPN | 0    | 0    | 0    | 0    | 0    | 0    | 0    | 0    | 0    | 0    | 0    |
| LAM | 6    | 5    | 7    | 6    | 6    | 7    | 7    | 8    | 9    | 11   | 13   |
| MEA | 0    | 0    | 0    | 0    | 0    | 0    | 1    | 1    | 2    | 2    | 3    |
| NEU | 2    | 1    | 0    | 0    | 0    | 0    | 0    | 0    | 1    | 1    | 1    |
| OAS | 2    | 2    | 3    | 3    | 4    | 5    | 6    | 10   | 13   | 18   | 23   |
| REF | 0    | 0    | 0    | 0    | 0    | 1    | 1    | 2    | 2    | 3    | 3    |
| SSA | 7    | 9    | 15   | 17   | 17   | 18   | 19   | 21   | 26   | 35   | 49   |
| USA | 0    | 0    | 0    | 0    | 1    | 1    | 2    | 3    | 4    | 4    | 5    |

Table 296: MAgPIE m4p\_SSP1 — Demand—Feed—Crops—Other crops—Tropical roots (Mt DM/yr) [PART 1/2]

|     | 2050 | 2055 | 2060 | 2070 | 2080 | 2090 | 2100 |
|-----|------|------|------|------|------|------|------|
| GLO | 224  | 232  | 236  | 232  | 217  | 196  | 177  |
| CAZ | 3    | 3    | 4    | 4    | 4    | 4    | 4    |
| CHA | 68   | 63   | 57   | 48   | 39   | 32   | 25   |
| EUR | 12   | 13   | 15   | 16   | 18   | 19   | 19   |
| IND | 18   | 20   | 22   | 23   | 24   | 23   | 22   |
| JPN | 0    | 0    | 0    | 0    | 0    | 0    | 0    |
| LAM | 15   | 16   | 16   | 15   | 13   | 12   | 11   |
| MEA | 3    | 3    | 4    | 4    | 3    | 3    | 3    |
| NEU | 1    | 1    | 1    | 1    | 1    | 1    | 1    |
| OAS | 27   | 29   | 29   | 29   | 30   | 27   | 23   |
| REF | 4    | 4    | 5    | 5    | 4    | 4    | 4    |
| SSA | 66   | 73   | 76   | 77   | 70   | 60   | 52   |
| USA | 6    | 7    | 8    | 9    | 10   | 11   | 12   |

Table 297: MAgPIE m4p\_SSP1 — Demand—Feed—Crops—Other crops—Tropical roots (Mt DM/yr) [PART 2/2]

|     | 1965 | 1970 | 1975 | 1980 | 1985 | 1990 | 1995 | 2000 | 2005 | 2010 |
|-----|------|------|------|------|------|------|------|------|------|------|
| GLO | 14.5 | 20.4 | 21.8 | 26.5 | 31.5 | 36.5 | 34.5 | 41.4 | 44.5 | 44.0 |
| CAZ | 0.0  | 0.0  | 0.0  | 0.0  | 0.0  | 0.0  | 0.0  | 0.0  | 0.0  | 0.0  |
| CHA | 5.3  | 8.4  | 9.4  | 11.8 | 14.6 | 14.4 | 17.4 | 21.0 | 19.9 | 19.0 |
| EUR | 0.8  | 1.5  | 2.4  | 5.1  | 6.9  | 8.5  | 2.7  | 3.9  | 0.4  | 0.1  |
| IND | 0.0  | 0.0  | 0.0  | 0.0  | 0.0  | 0.0  | 0.0  | 0.0  | 0.0  | 0.0  |
| JPN | 0.4  | 0.3  | 0.1  | 0.1  | 0.1  | 0.0  | 0.0  | 0.0  | 0.0  | 0.0  |
| LAM | 5.2  | 6.2  | 5.6  | 5.2  | 5.2  | 5.9  | 5.8  | 5.3  | 6.5  | 5.4  |
| MEA | 0.0  | 0.0  | 0.0  | 0.0  | 0.2  | 0.2  | 0.0  | 0.0  | 0.0  | 0.0  |
| NEU | 0.0  | 0.0  | 0.0  | 0.0  | 0.0  | 0.2  | 0.0  | 0.2  | 0.0  | 0.0  |
| OAS | 0.6  | 0.6  | 0.9  | 1.5  | 1.4  | 1.4  | 1.6  | 1.9  | 2.7  | 2.6  |
| REF | 0.0  | 0.0  | 0.0  | 0.0  | 0.2  | 1.0  | 0.0  | 0.0  | 0.0  | 0.0  |
| SSA | 2.0  | 3.4  | 3.3  | 2.8  | 3.0  | 4.6  | 7.0  | 9.1  | 14.9 | 16.9 |
| USA | 0.0  | 0.0  | 0.0  | 0.0  | 0.0  | 0.2  | 0.0  | 0.1  | 0.1  | 0.1  |

Table 298: FAO — Demand—Feed—Crops—Other crops—Tropical roots (Mt DM/yr)

6.2.17
Sugar crops

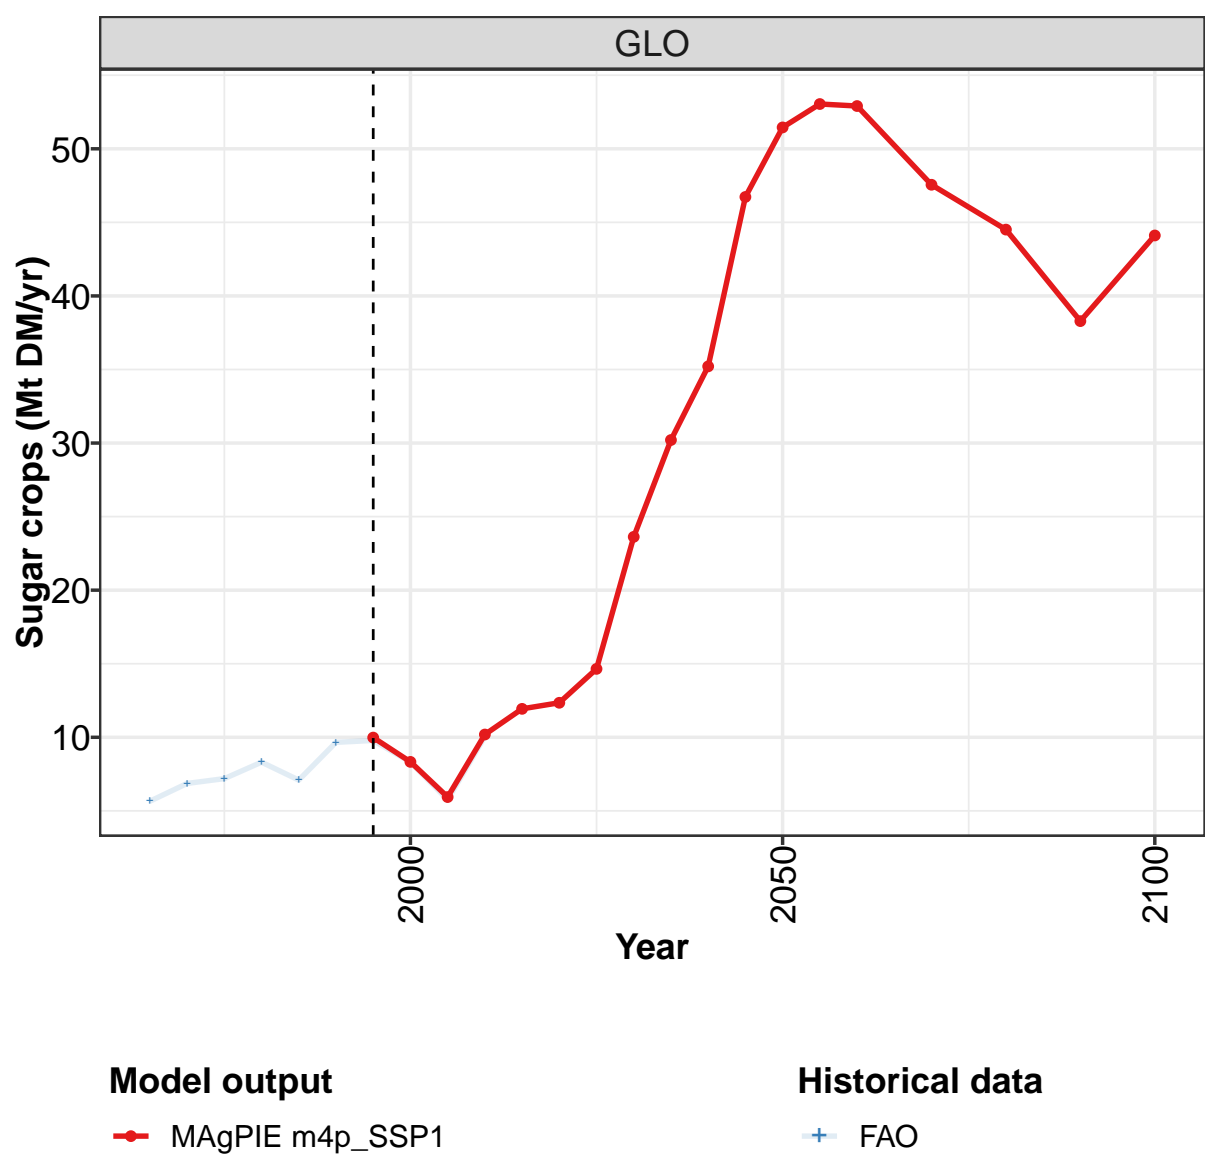

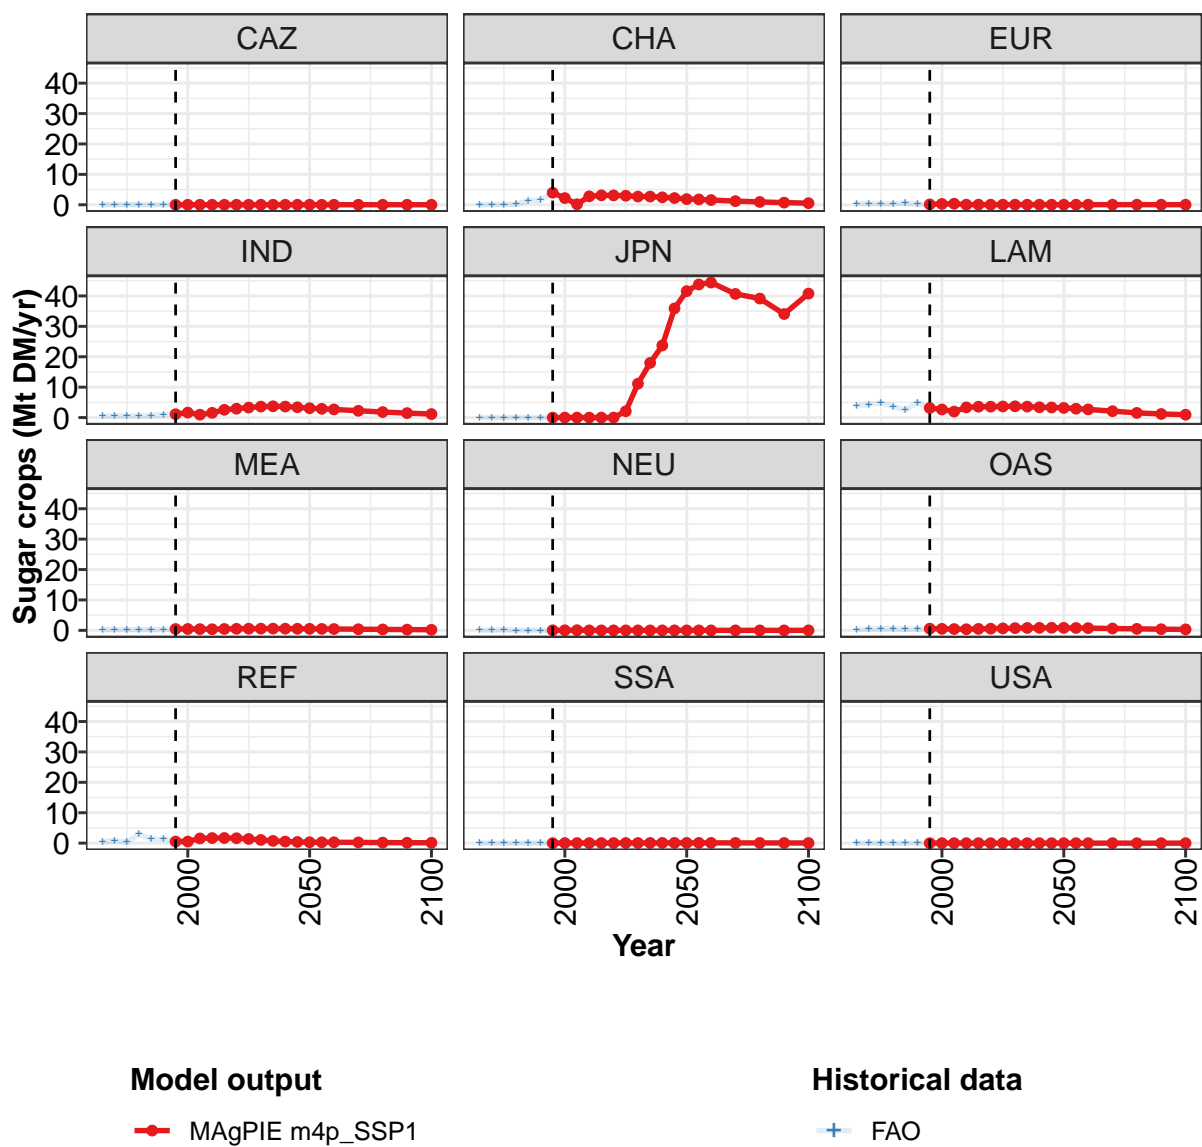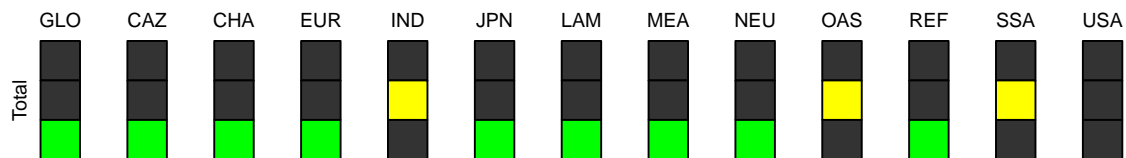

Figure 100: MAGPIE m4p\_SSP1 — Demand—Feed—Crops—Sugar crops (Mt DM/yr)

|     | 1995 | 2000 | 2005 | 2010 | 2015 | 2020 | 2025 | 2030 | 2035 | 2040 | 2045 |
|-----|------|------|------|------|------|------|------|------|------|------|------|
| GLO | 10.0 | 8.3  | 5.9  | 10.2 | 11.9 | 12.3 | 14.7 | 23.6 | 30.2 | 35.2 | 46.7 |
| CAZ | 0.0  | 0.0  | 0.0  | 0.0  | 0.0  | 0.0  | 0.0  | 0.0  | 0.0  | 0.0  | 0.0  |
| CHA | 4.0  | 2.2  | 0.2  | 2.8  | 3.1  | 3.1  | 3.0  | 2.7  | 2.7  | 2.5  | 2.2  |
| EUR | 0.1  | 0.3  | 0.3  | 0.0  | 0.0  | 0.0  | 0.0  | 0.0  | 0.0  | 0.0  | 0.0  |
| IND | 1.1  | 1.6  | 1.0  | 1.6  | 2.5  | 2.9  | 3.3  | 3.6  | 3.7  | 3.6  | 3.4  |
| JPN | 0.0  | 0.0  | 0.0  | 0.0  | 0.0  | 0.0  | 2.1  | 11.1 | 18.0 | 23.7 | 35.9 |
| LAM | 3.2  | 2.7  | 2.0  | 3.3  | 3.6  | 3.6  | 3.7  | 3.7  | 3.6  | 3.4  | 3.3  |
| MEA | 0.5  | 0.5  | 0.4  | 0.4  | 0.5  | 0.5  | 0.5  | 0.6  | 0.6  | 0.6  | 0.5  |
| NEU | 0.0  | 0.0  | 0.1  | 0.0  | 0.0  | 0.0  | 0.0  | 0.0  | 0.0  | 0.0  | 0.0  |
| OAS | 0.6  | 0.5  | 0.4  | 0.4  | 0.5  | 0.6  | 0.6  | 0.7  | 0.8  | 0.8  | 0.8  |
| REF | 0.5  | 0.5  | 1.6  | 1.7  | 1.7  | 1.6  | 1.4  | 1.1  | 0.7  | 0.5  | 0.4  |
| SSA | 0.0  | 0.0  | 0.0  | 0.0  | 0.0  | 0.0  | 0.0  | 0.1  | 0.1  | 0.1  | 0.1  |
| USA | 0.0  | 0.0  | 0.0  | 0.0  | 0.0  | 0.0  | 0.0  | 0.0  | 0.0  | 0.0  | 0.0  |

Table 299: MAgPIE m4p\_SSP1 — Demand—Feed—Crops—Sugar crops (Mt DM/yr) [PART 1/2]

|     | 2050 | 2055 | 2060 | 2070 | 2080 | 2090 | 2100 |
|-----|------|------|------|------|------|------|------|
| GLO | 51.5 | 53.0 | 52.9 | 47.6 | 44.5 | 38.3 | 44.1 |
| CAZ | 0.0  | 0.0  | 0.0  | 0.0  | 0.0  | 0.0  | 0.0  |
| CHA | 1.9  | 1.8  | 1.6  | 1.2  | 0.9  | 0.7  | 0.5  |
| EUR | 0.0  | 0.0  | 0.0  | 0.0  | 0.0  | 0.0  | 0.0  |
| IND | 3.1  | 2.9  | 2.7  | 2.2  | 1.8  | 1.5  | 1.2  |
| JPN | 41.6 | 43.8 | 44.4 | 40.7 | 39.1 | 34.1 | 40.8 |
| LAM | 3.2  | 2.9  | 2.7  | 2.1  | 1.5  | 1.2  | 0.9  |
| MEA | 0.5  | 0.5  | 0.4  | 0.4  | 0.3  | 0.3  | 0.2  |
| NEU | 0.0  | 0.0  | 0.0  | 0.0  | 0.0  | 0.0  | 0.0  |
| OAS | 0.8  | 0.8  | 0.7  | 0.6  | 0.5  | 0.4  | 0.3  |
| REF | 0.3  | 0.3  | 0.3  | 0.2  | 0.2  | 0.1  | 0.1  |
| SSA | 0.1  | 0.1  | 0.1  | 0.1  | 0.1  | 0.1  | 0.0  |
| USA | 0.0  | 0.0  | 0.0  | 0.0  | 0.0  | 0.0  | 0.0  |

Table 300: MAgPIE m4p\_SSP1 — Demand—Feed—Crops—Sugar crops (Mt DM/yr) [PART 2/2]

|     | 1965 | 1970 | 1975 | 1980 | 1985 | 1990 | 1995 | 2000 | 2005 | 2010 |
|-----|------|------|------|------|------|------|------|------|------|------|
| GLO | 5.7  | 6.9  | 7.2  | 8.3  | 7.1  | 9.7  | 9.8  | 8.3  | 5.7  | 10.0 |
| CAZ | 0.0  | 0.0  | 0.0  | 0.0  | 0.0  | 0.0  | 0.0  | 0.0  | 0.0  | 0.0  |
| CHA | 0.1  | 0.0  | 0.1  | 0.2  | 1.3  | 1.5  | 3.9  | 2.2  | 0.2  | 2.8  |
| EUR | 0.4  | 0.4  | 0.4  | 0.3  | 0.6  | 0.3  | 0.1  | 0.3  | 0.4  | 0.0  |
| IND | 0.5  | 0.5  | 0.6  | 0.5  | 0.7  | 0.9  | 1.1  | 1.6  | 1.0  | 1.6  |
| JPN | 0.0  | 0.0  | 0.0  | 0.0  | 0.0  | 0.0  | 0.0  | 0.0  | 0.0  | 0.0  |
| LAM | 3.8  | 4.2  | 4.8  | 3.6  | 2.5  | 4.9  | 3.1  | 2.6  | 1.8  | 3.2  |
| MEA | 0.2  | 0.2  | 0.2  | 0.2  | 0.2  | 0.3  | 0.4  | 0.4  | 0.4  | 0.4  |
| NEU | 0.0  | 0.0  | 0.2  | 0.0  | 0.0  | 0.0  | 0.0  | 0.0  | 0.1  | 0.0  |
| OAS | 0.3  | 0.4  | 0.6  | 0.5  | 0.4  | 0.4  | 0.5  | 0.5  | 0.5  | 0.4  |
| REF | 0.3  | 0.9  | 0.3  | 2.9  | 1.4  | 1.3  | 0.7  | 0.7  | 1.6  | 1.7  |
| SSA | 0.0  | 0.0  | 0.0  | 0.0  | 0.0  | 0.0  | 0.0  | 0.0  | 0.0  | 0.0  |
| USA | 0.0  | 0.0  | 0.0  | 0.0  | 0.0  | 0.0  | 0.0  | 0.0  | 0.0  | 0.0  |

Table 301: FAO — Demand—Feed—Crops—Sugar crops (Mt DM/yr)



6.2.18
Sugar crops—Sugar beet

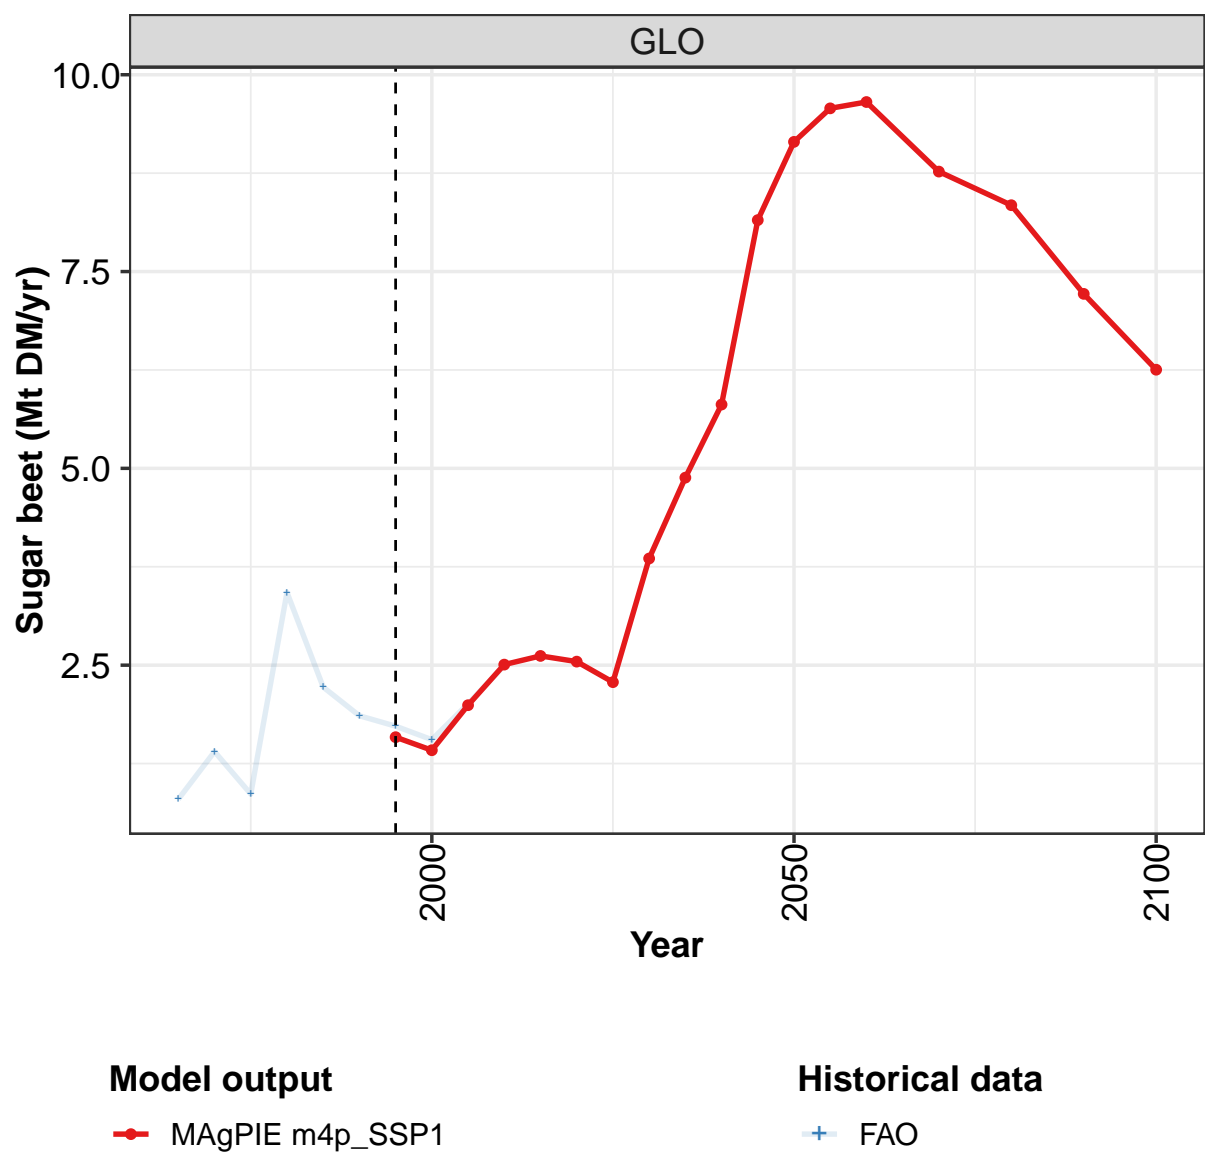

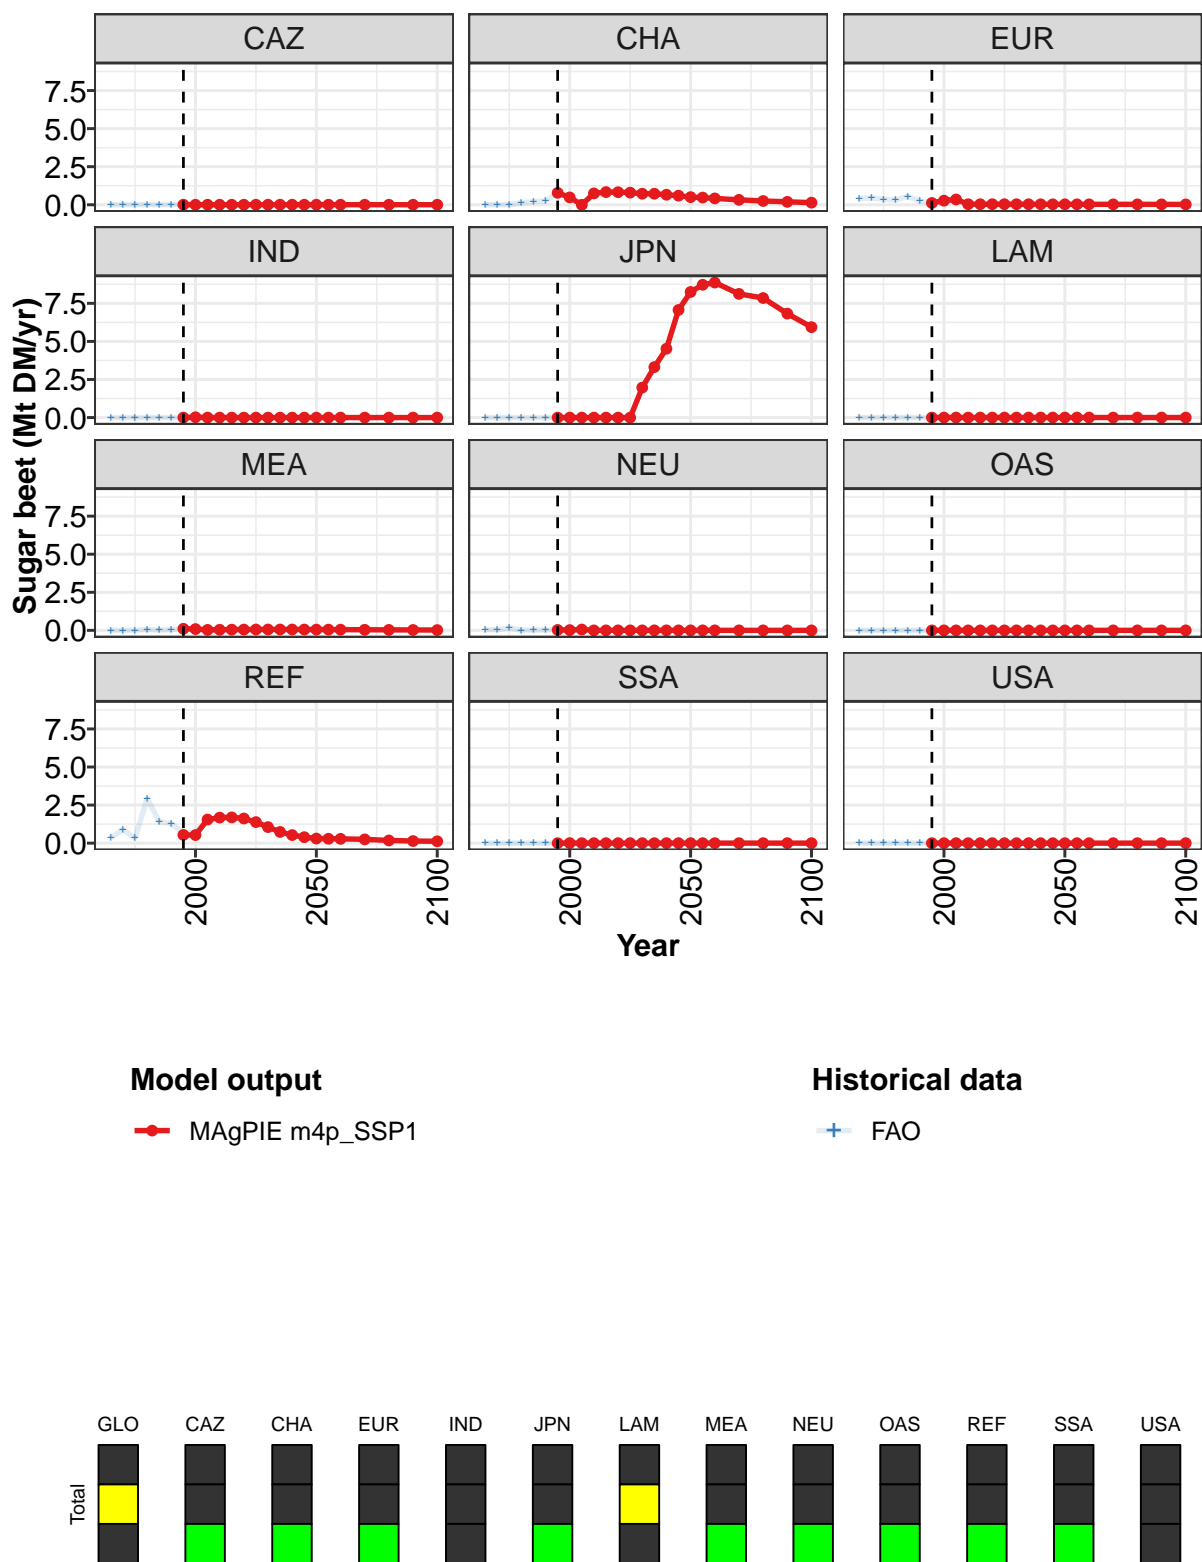

Figure 101: MAgPIE m4p\_SSP1 — Demand—Feed—Crops—Sugar crops—Sugar beet (Mt DM/yr)

|     | 1995 | 2000 | 2005 | 2010 | 2015 | 2020 | 2025 | 2030 | 2035 | 2040 | 2045 |
|-----|------|------|------|------|------|------|------|------|------|------|------|
| GLO | 1.59 | 1.42 | 1.99 | 2.51 | 2.62 | 2.55 | 2.28 | 3.86 | 4.88 | 5.81 | 8.15 |
| CAZ | 0.01 | 0.00 | 0.00 | 0.00 | 0.00 | 0.00 | 0.00 | 0.00 | 0.00 | 0.00 | 0.00 |
| CHA | 0.78 | 0.48 | 0.00 | 0.75 | 0.83 | 0.83 | 0.80 | 0.73 | 0.73 | 0.66 | 0.60 |
| EUR | 0.12 | 0.27 | 0.35 | 0.04 | 0.04 | 0.04 | 0.04 | 0.04 | 0.03 | 0.03 | 0.03 |
| IND | 0.00 | 0.02 | 0.00 | 0.00 | 0.00 | 0.00 | 0.00 | 0.00 | 0.00 | 0.00 | 0.00 |
| JPN | 0.00 | 0.00 | 0.00 | 0.00 | 0.00 | 0.00 | 0.00 | 1.97 | 3.32 | 4.52 | 7.07 |
| LAM | 0.00 | 0.00 | 0.00 | 0.00 | 0.00 | 0.00 | 0.00 | 0.00 | 0.00 | 0.00 | 0.00 |
| MEA | 0.10 | 0.09 | 0.03 | 0.04 | 0.05 | 0.05 | 0.06 | 0.06 | 0.06 | 0.06 | 0.06 |
| NEU | 0.03 | 0.02 | 0.06 | 0.00 | 0.00 | 0.00 | 0.00 | 0.00 | 0.00 | 0.00 | 0.00 |
| OAS | 0.00 | 0.00 | 0.00 | 0.00 | 0.00 | 0.00 | 0.00 | 0.00 | 0.00 | 0.00 | 0.00 |
| REF | 0.54 | 0.53 | 1.55 | 1.68 | 1.69 | 1.62 | 1.38 | 1.05 | 0.74 | 0.53 | 0.39 |
| SSA | 0.00 | 0.00 | 0.00 | 0.00 | 0.00 | 0.00 | 0.00 | 0.00 | 0.00 | 0.00 | 0.00 |
| USA | 0.00 | 0.00 | 0.00 | 0.00 | 0.00 | 0.00 | 0.00 | 0.00 | 0.00 | 0.00 | 0.00 |

Table 302: MAgPIE m4p\_SSP1 — Demand—Feed—Crops—Sugar crops—Sugar beet (Mt DM/yr) [PART 1/2]

|     | 2050 | 2055 | 2060 | 2070 | 2080 | 2090 | 2100 |
|-----|------|------|------|------|------|------|------|
| GLO | 9.15 | 9.57 | 9.65 | 8.77 | 8.34 | 7.22 | 6.25 |
| CAZ | 0.00 | 0.00 | 0.00 | 0.00 | 0.00 | 0.00 | 0.00 |
| CHA | 0.50 | 0.47 | 0.42 | 0.32 | 0.25 | 0.19 | 0.14 |
| EUR | 0.03 | 0.03 | 0.03 | 0.03 | 0.03 | 0.03 | 0.02 |
| IND | 0.00 | 0.00 | 0.00 | 0.00 | 0.00 | 0.00 | 0.00 |
| JPN | 8.25 | 8.72 | 8.87 | 8.12 | 7.85 | 6.83 | 5.94 |
| LAM | 0.00 | 0.00 | 0.00 | 0.00 | 0.00 | 0.00 | 0.00 |
| MEA | 0.05 | 0.05 | 0.05 | 0.04 | 0.03 | 0.03 | 0.02 |
| NEU | 0.00 | 0.00 | 0.00 | 0.00 | 0.00 | 0.00 | 0.00 |
| OAS | 0.00 | 0.00 | 0.00 | 0.00 | 0.00 | 0.00 | 0.00 |
| REF | 0.30 | 0.29 | 0.28 | 0.25 | 0.18 | 0.14 | 0.12 |
| SSA | 0.00 | 0.00 | 0.00 | 0.00 | 0.00 | 0.00 | 0.00 |
| USA | 0.00 | 0.00 | 0.00 | 0.00 | 0.00 | 0.00 | 0.00 |

Table 303: MAgPIE m4p\_SSP1 — Demand—Feed—Crops—Sugar crops—Sugar beet (Mt DM/yr) [PART 2/2]

|     | 1965 | 1970 | 1975 | 1980 | 1985 | 1990 | 1995 | 2000 | 2005 | 2010 |
|-----|------|------|------|------|------|------|------|------|------|------|
| GLO | 0.80 | 1.40 | 0.86 | 3.42 | 2.22 | 1.86 | 1.73 | 1.55 | 2.01 | 2.50 |
| CAZ | 0.01 | 0.00 | 0.00 | 0.00 | 0.00 | 0.00 | 0.00 | 0.00 | 0.00 | 0.00 |
| CHA | 0.00 | 0.00 | 0.00 | 0.12 | 0.22 | 0.24 | 0.76 | 0.48 | 0.00 | 0.74 |
| EUR | 0.41 | 0.44 | 0.36 | 0.31 | 0.56 | 0.25 | 0.12 | 0.28 | 0.35 | 0.04 |
| IND | 0.00 | 0.00 | 0.00 | 0.00 | 0.00 | 0.00 | 0.00 | 0.00 | 0.00 | 0.00 |
| JPN | 0.00 | 0.00 | 0.00 | 0.00 | 0.00 | 0.00 | 0.00 | 0.00 | 0.00 | 0.00 |
| LAM | 0.00 | 0.00 | 0.00 | 0.00 | 0.00 | 0.00 | 0.00 | 0.00 | 0.00 | 0.00 |
| MEA | 0.00 | 0.00 | 0.00 | 0.06 | 0.01 | 0.05 | 0.12 | 0.09 | 0.03 | 0.04 |
| NEU | 0.03 | 0.05 | 0.17 | 0.00 | 0.02 | 0.02 | 0.04 | 0.03 | 0.07 | 0.00 |
| OAS | 0.00 | 0.00 | 0.00 | 0.00 | 0.00 | 0.00 | 0.00 | 0.00 | 0.00 | 0.00 |
| REF | 0.34 | 0.90 | 0.33 | 2.92 | 1.42 | 1.28 | 0.67 | 0.67 | 1.55 | 1.67 |
| SSA | 0.00 | 0.00 | 0.00 | 0.00 | 0.00 | 0.00 | 0.00 | 0.00 | 0.00 | 0.00 |
| USA | 0.00 | 0.00 | 0.00 | 0.00 | 0.00 | 0.00 | 0.00 | 0.00 | 0.00 | 0.00 |

Table 304: FAO — Demand—Feed—Crops—Sugar crops—Sugar beet (Mt DM/yr)

6.2.19
Sugar crops—Sugar cane

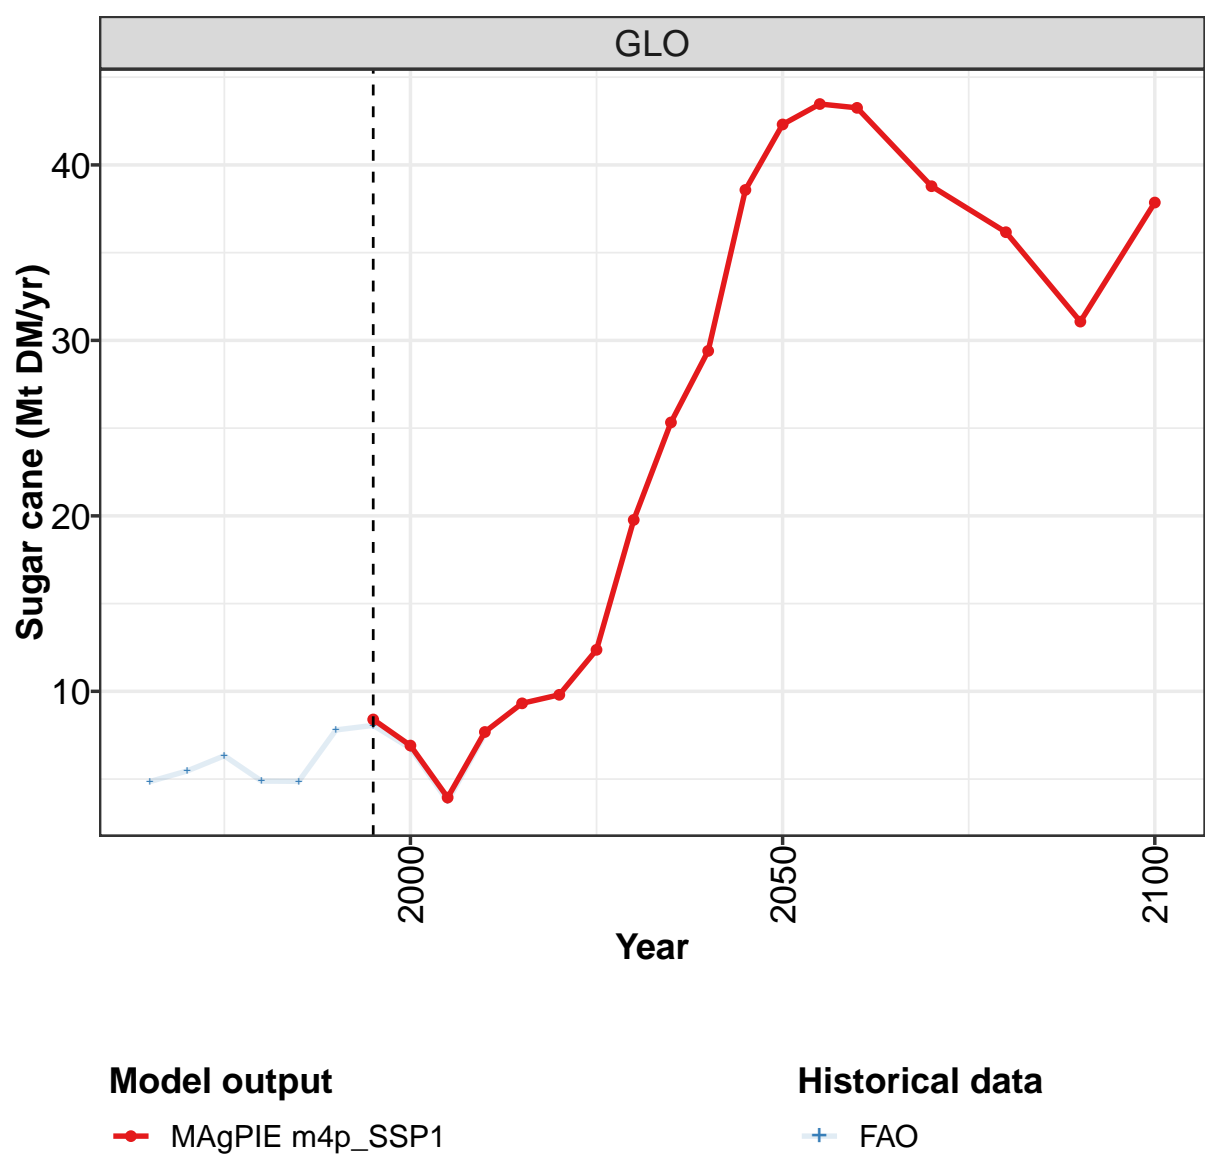

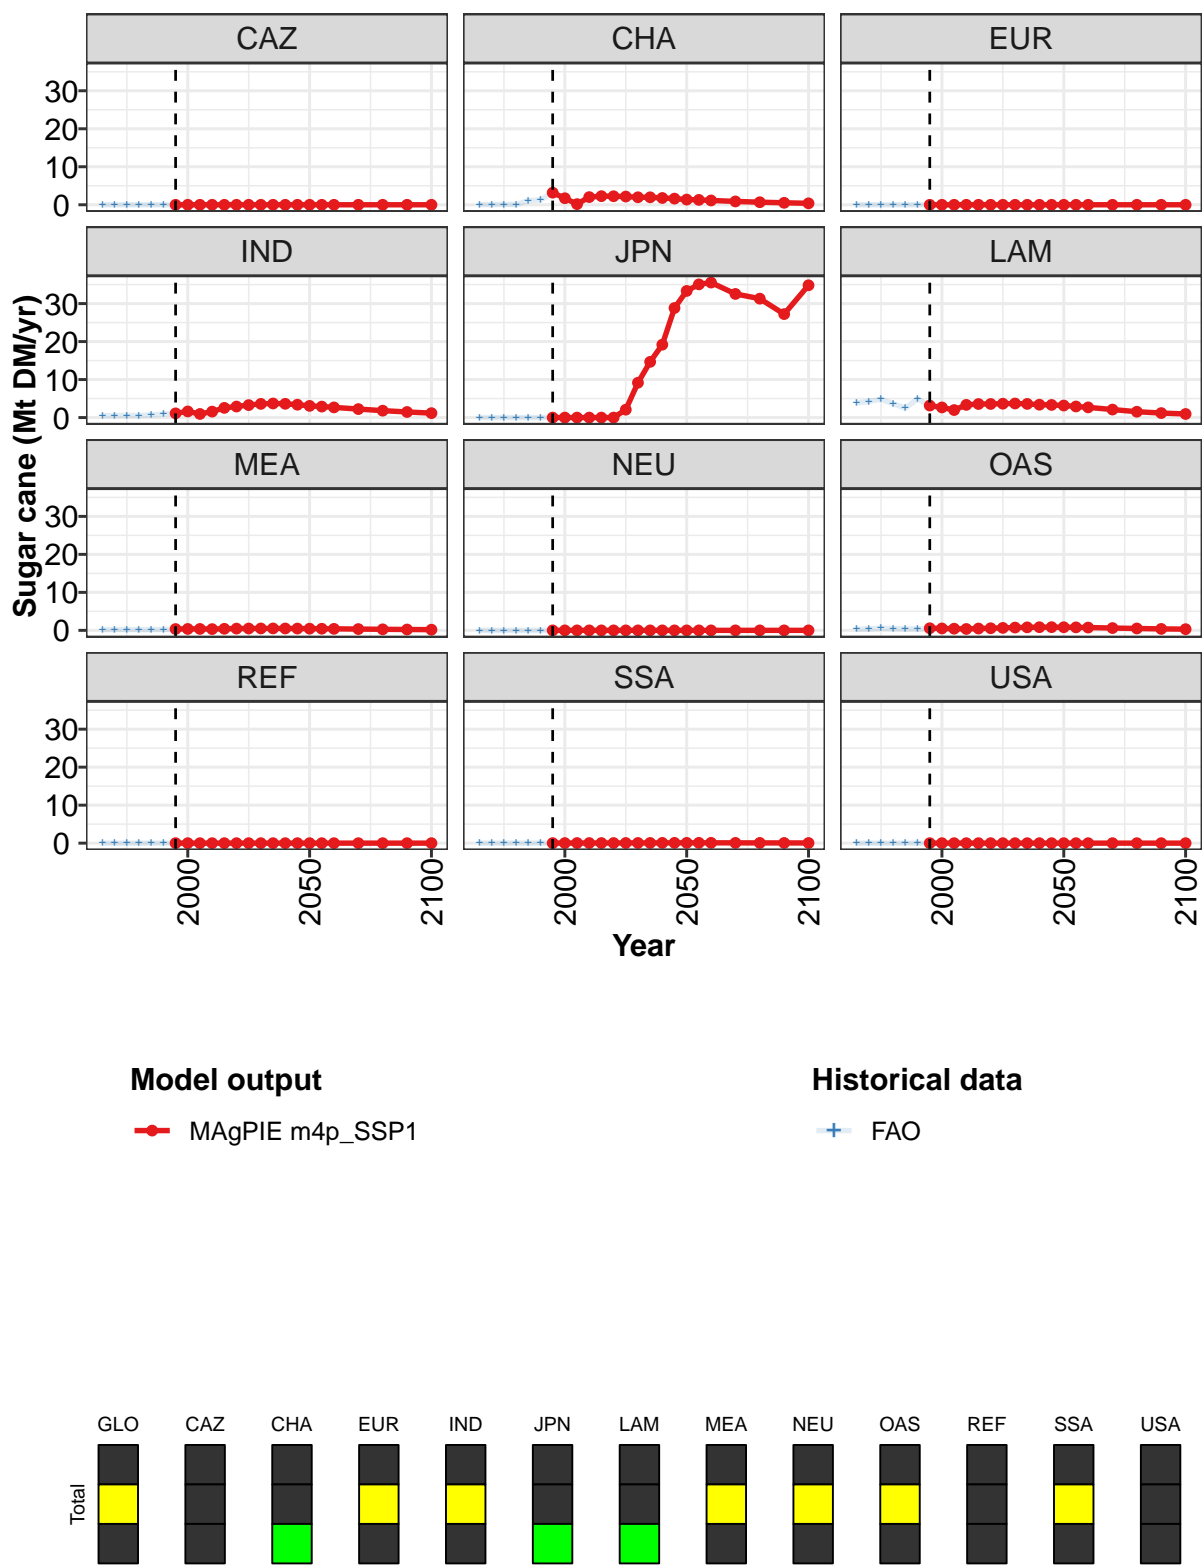

Figure 102: MAgPIE m4p\_SSP1 — Demand—Feed—Crops—Sugar crops—Sugar cane (Mt DM/yr)

|     | 1995 | 2000 | 2005 | 2010 | 2015 | 2020 | 2025 | 2030 | 2035 | 2040 | 2045 |
|-----|------|------|------|------|------|------|------|------|------|------|------|
| GLO | 8.4  | 6.9  | 3.9  | 7.7  | 9.3  | 9.8  | 12.4 | 19.8 | 25.3 | 29.4 | 38.6 |
| CAZ | 0.0  | 0.0  | 0.0  | 0.0  | 0.0  | 0.0  | 0.0  | 0.0  | 0.0  | 0.0  | 0.0  |
| CHA | 3.2  | 1.7  | 0.2  | 2.0  | 2.3  | 2.2  | 2.2  | 2.0  | 2.0  | 1.8  | 1.6  |
| EUR | 0.0  | 0.0  | 0.0  | 0.0  | 0.0  | 0.0  | 0.0  | 0.0  | 0.0  | 0.0  | 0.0  |
| IND | 1.1  | 1.6  | 1.0  | 1.6  | 2.5  | 2.9  | 3.3  | 3.6  | 3.7  | 3.6  | 3.4  |
| JPN | 0.0  | 0.0  | 0.0  | 0.0  | 0.0  | 0.0  | 2.1  | 9.2  | 14.7 | 19.2 | 28.8 |
| LAM | 3.2  | 2.7  | 2.0  | 3.3  | 3.6  | 3.6  | 3.6  | 3.7  | 3.6  | 3.4  | 3.3  |
| MEA | 0.4  | 0.4  | 0.4  | 0.3  | 0.4  | 0.5  | 0.5  | 0.5  | 0.5  | 0.5  | 0.5  |
| NEU | 0.0  | 0.0  | 0.0  | 0.0  | 0.0  | 0.0  | 0.0  | 0.0  | 0.0  | 0.0  | 0.0  |
| OAS | 0.6  | 0.5  | 0.4  | 0.4  | 0.5  | 0.6  | 0.6  | 0.7  | 0.8  | 0.8  | 0.8  |
| REF | 0.0  | 0.0  | 0.0  | 0.0  | 0.0  | 0.0  | 0.0  | 0.0  | 0.0  | 0.0  | 0.0  |
| SSA | 0.0  | 0.0  | 0.0  | 0.0  | 0.0  | 0.0  | 0.0  | 0.1  | 0.1  | 0.1  | 0.1  |
| USA | 0.0  | 0.0  | 0.0  | 0.0  | 0.0  | 0.0  | 0.0  | 0.0  | 0.0  | 0.0  | 0.0  |

Table 305: MAgPIE m4p\_SSP1 — Demand—Feed—Crops—Sugar crops—Sugar cane (Mt DM/yr) [PART 1/2]

|     | 2050 | 2055 | 2060 | 2070 | 2080 | 2090 | 2100 |
|-----|------|------|------|------|------|------|------|
| GLO | 42.3 | 43.5 | 43.3 | 38.8 | 36.2 | 31.1 | 37.9 |
| CAZ | 0.0  | 0.0  | 0.0  | 0.0  | 0.0  | 0.0  | 0.0  |
| CHA | 1.4  | 1.3  | 1.1  | 0.9  | 0.7  | 0.5  | 0.4  |
| EUR | 0.0  | 0.0  | 0.0  | 0.0  | 0.0  | 0.0  | 0.0  |
| IND | 3.1  | 2.9  | 2.7  | 2.2  | 1.8  | 1.5  | 1.2  |
| JPN | 33.3 | 35.1 | 35.5 | 32.5 | 31.3 | 27.2 | 34.8 |
| LAM | 3.2  | 2.9  | 2.7  | 2.1  | 1.5  | 1.2  | 0.9  |
| MEA | 0.4  | 0.4  | 0.4  | 0.3  | 0.3  | 0.2  | 0.2  |
| NEU | 0.0  | 0.0  | 0.0  | 0.0  | 0.0  | 0.0  | 0.0  |
| OAS | 0.8  | 0.8  | 0.7  | 0.6  | 0.5  | 0.4  | 0.3  |
| REF | 0.0  | 0.0  | 0.0  | 0.0  | 0.0  | 0.0  | 0.0  |
| SSA | 0.1  | 0.1  | 0.1  | 0.1  | 0.1  | 0.1  | 0.0  |
| USA | 0.0  | 0.0  | 0.0  | 0.0  | 0.0  | 0.0  | 0.0  |

Table 306: MAgPIE m4p\_SSP1 — Demand—Feed—Crops—Sugar crops—Sugar cane (Mt DM/yr) [PART 2/2]

|     | 1965 | 1970 | 1975 | 1980 | 1985 | 1990 | 1995 | 2000 | 2005 | 2010 |
|-----|------|------|------|------|------|------|------|------|------|------|
| GLO | 4.86 | 5.46 | 6.33 | 4.89 | 4.87 | 7.80 | 8.06 | 6.75 | 3.74 | 7.55 |
| CAZ | 0.00 | 0.00 | 0.00 | 0.00 | 0.00 | 0.00 | 0.00 | 0.00 | 0.00 | 0.00 |
| CHA | 0.05 | 0.04 | 0.10 | 0.06 | 1.09 | 1.28 | 3.11 | 1.71 | 0.17 | 2.02 |
| EUR | 0.00 | 0.00 | 0.00 | 0.00 | 0.00 | 0.00 | 0.00 | 0.00 | 0.00 | 0.00 |
| IND | 0.49 | 0.55 | 0.58 | 0.52 | 0.69 | 0.91 | 1.12 | 1.62 | 0.96 | 1.58 |
| JPN | 0.00 | 0.00 | 0.00 | 0.00 | 0.00 | 0.00 | 0.00 | 0.00 | 0.00 | 0.00 |
| LAM | 3.83 | 4.25 | 4.82 | 3.62 | 2.48 | 4.92 | 3.06 | 2.56 | 1.77 | 3.20 |
| MEA | 0.17 | 0.22 | 0.23 | 0.19 | 0.21 | 0.24 | 0.30 | 0.34 | 0.35 | 0.34 |
| NEU | 0.00 | 0.00 | 0.00 | 0.00 | 0.00 | 0.00 | 0.00 | 0.00 | 0.00 | 0.00 |
| OAS | 0.30 | 0.39 | 0.58 | 0.49 | 0.38 | 0.43 | 0.46 | 0.49 | 0.45 | 0.37 |
| REF | 0.00 | 0.00 | 0.00 | 0.00 | 0.00 | 0.00 | 0.00 | 0.00 | 0.00 | 0.00 |
| SSA | 0.01 | 0.01 | 0.01 | 0.01 | 0.02 | 0.02 | 0.02 | 0.03 | 0.03 | 0.03 |
| USA | 0.00 | 0.00 | 0.00 | 0.00 | 0.00 | 0.00 | 0.00 | 0.00 | 0.00 | 0.00 |

Table 307: FAO — Demand—Feed—Crops—Sugar crops—Sugar cane (Mt DM/yr)

6.3 Fish

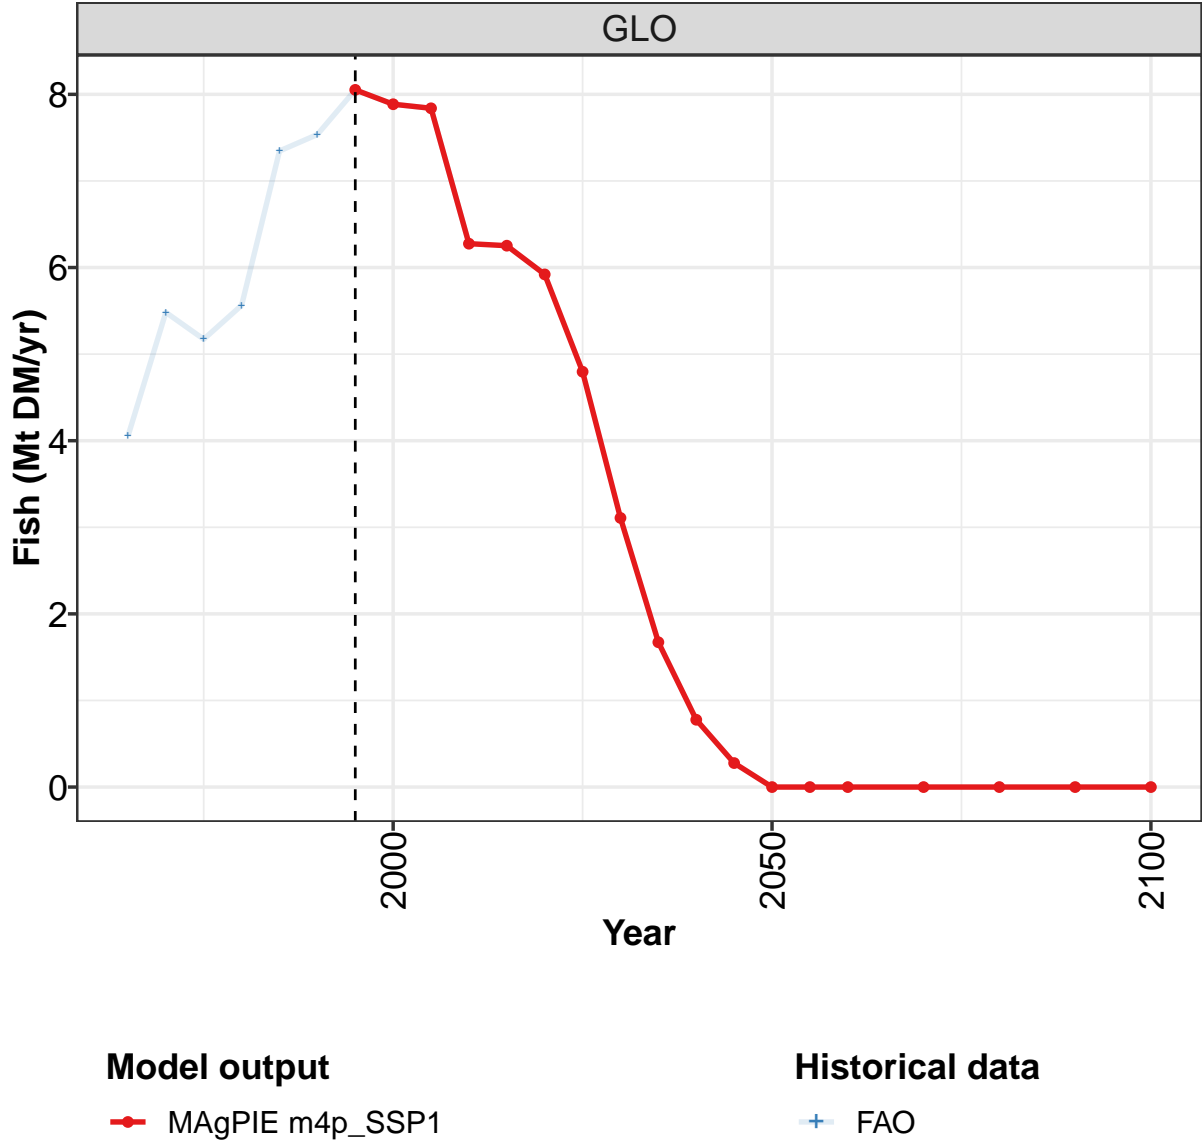

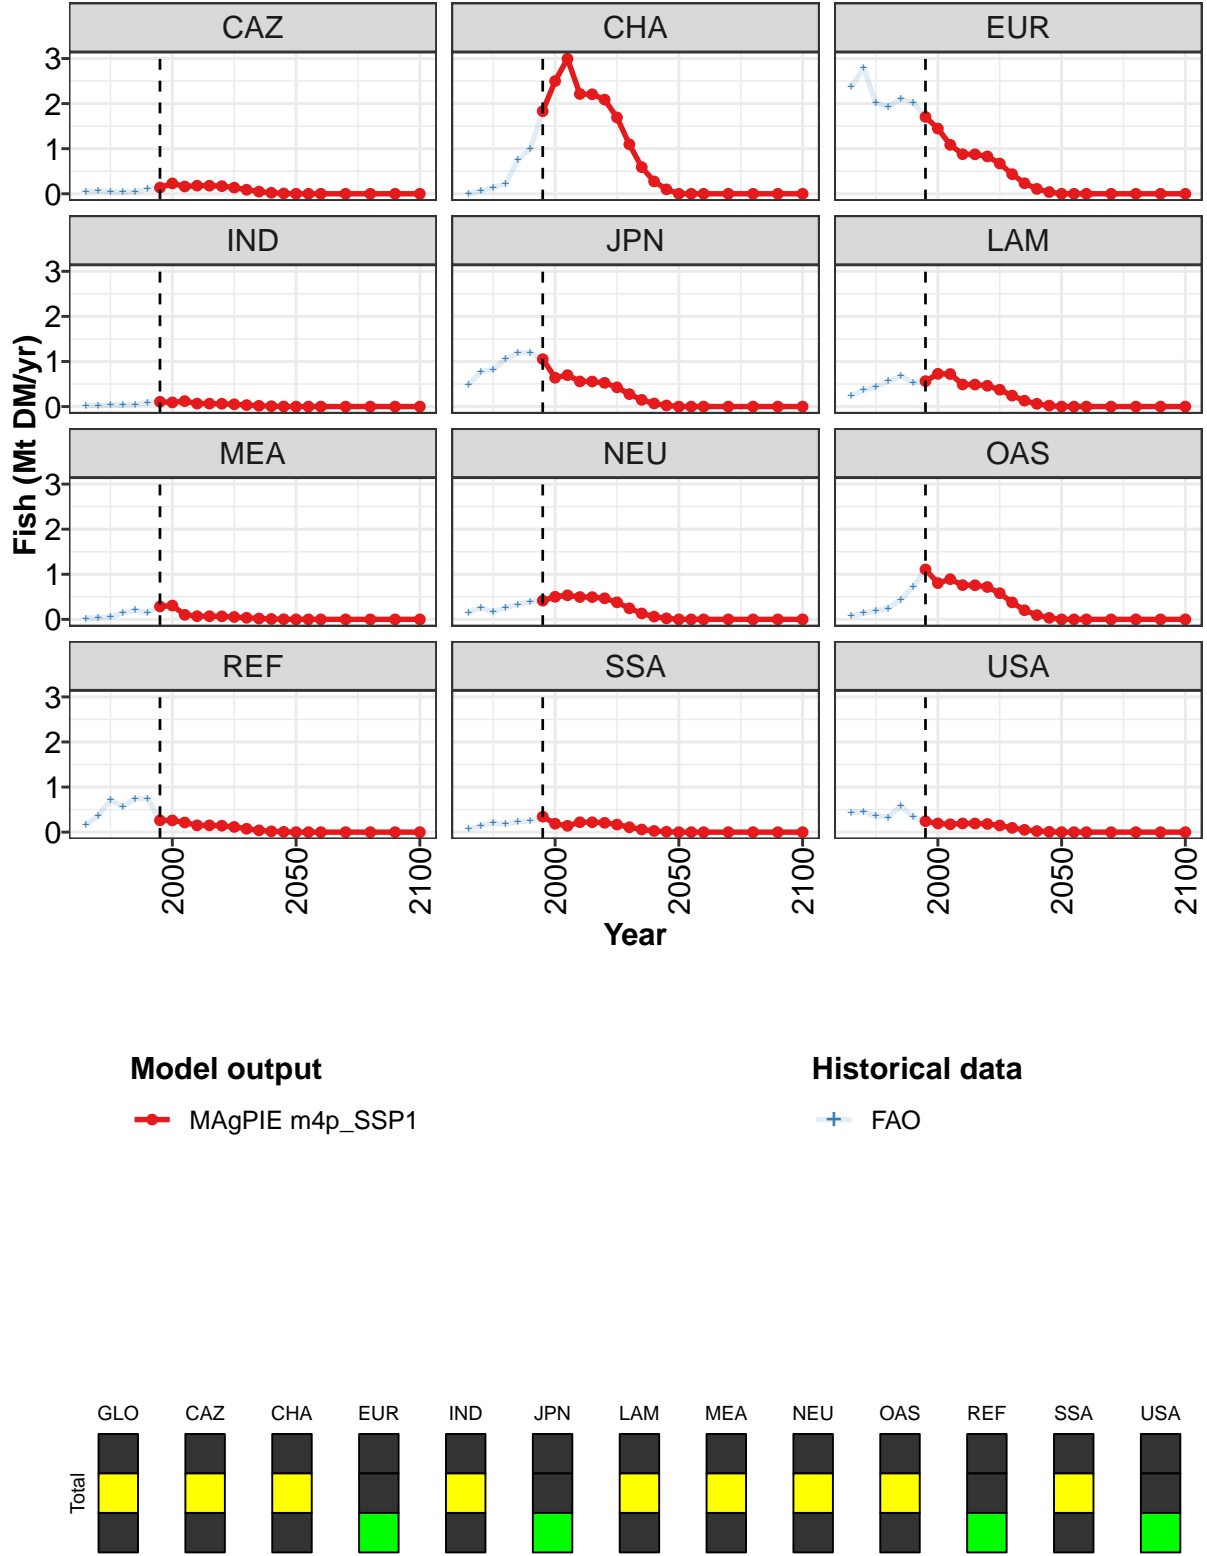

Figure 103: MAgPIE m4p\_SSP1 — Demand—Feed—Fish (Mt DM/yr)



|     | 1995 | 2000 | 2005 | 2010 | 2015 | 2020 | 2025 | 2030 | 2035 | 2040 | 2045 |
|-----|------|------|------|------|------|------|------|------|------|------|------|
| GLO | 8.05 | 7.89 | 7.84 | 6.28 | 6.25 | 5.92 | 4.80 | 3.11 | 1.67 | 0.78 | 0.28 |
| CAZ | 0.14 | 0.23 | 0.16 | 0.18 | 0.18 | 0.17 | 0.14 | 0.09 | 0.05 | 0.02 | 0.01 |
| CHA | 1.83 | 2.50 | 2.99 | 2.21 | 2.21 | 2.09 | 1.69 | 1.10 | 0.59 | 0.27 | 0.10 |
| EUR | 1.70 | 1.45 | 1.09 | 0.88 | 0.87 | 0.83 | 0.67 | 0.43 | 0.23 | 0.11 | 0.04 |
| IND | 0.11 | 0.09 | 0.12 | 0.07 | 0.07 | 0.06 | 0.05 | 0.03 | 0.02 | 0.01 | 0.00 |
| JPN | 1.05 | 0.64 | 0.70 | 0.56 | 0.56 | 0.53 | 0.43 | 0.28 | 0.15 | 0.07 | 0.02 |
| LAM | 0.56 | 0.73 | 0.72 | 0.49 | 0.49 | 0.46 | 0.37 | 0.24 | 0.13 | 0.06 | 0.02 |
| MEA | 0.29 | 0.31 | 0.10 | 0.07 | 0.07 | 0.07 | 0.05 | 0.03 | 0.02 | 0.01 | 0.00 |
| NEU | 0.41 | 0.50 | 0.53 | 0.50 | 0.49 | 0.47 | 0.38 | 0.25 | 0.13 | 0.06 | 0.02 |
| OAS | 1.11 | 0.80 | 0.89 | 0.76 | 0.76 | 0.72 | 0.58 | 0.38 | 0.20 | 0.09 | 0.03 |
| REF | 0.26 | 0.26 | 0.21 | 0.15 | 0.15 | 0.14 | 0.12 | 0.07 | 0.04 | 0.02 | 0.01 |
| SSA | 0.34 | 0.19 | 0.14 | 0.22 | 0.22 | 0.21 | 0.17 | 0.11 | 0.06 | 0.03 | 0.01 |
| USA | 0.24 | 0.19 | 0.18 | 0.19 | 0.19 | 0.18 | 0.15 | 0.10 | 0.05 | 0.02 | 0.01 |

Table 308: MAgPIE m4p\_SSP1 — Demand—Feed—Fish (Mt DM/yr) [PART 1/2]

|     | 2050 | 2055 | 2060 | 2070 | 2080 | 2090 | 2100 |
|-----|------|------|------|------|------|------|------|
| GLO | 0.00 | 0.00 | 0.00 | 0.00 | 0.00 | 0.00 | 0.00 |
| CAZ | 0.00 | 0.00 | 0.00 | 0.00 | 0.00 | 0.00 | 0.00 |
| CHA | 0.00 | 0.00 | 0.00 | 0.00 | 0.00 | 0.00 | 0.00 |
| EUR | 0.00 | 0.00 | 0.00 | 0.00 | 0.00 | 0.00 | 0.00 |
| IND | 0.00 | 0.00 | 0.00 | 0.00 | 0.00 | 0.00 | 0.00 |
| JPN | 0.00 | 0.00 | 0.00 | 0.00 | 0.00 | 0.00 | 0.00 |
| LAM | 0.00 | 0.00 | 0.00 | 0.00 | 0.00 | 0.00 | 0.00 |
| MEA | 0.00 | 0.00 | 0.00 | 0.00 | 0.00 | 0.00 | 0.00 |
| NEU | 0.00 | 0.00 | 0.00 | 0.00 | 0.00 | 0.00 | 0.00 |
| OAS | 0.00 | 0.00 | 0.00 | 0.00 | 0.00 | 0.00 | 0.00 |
| REF | 0.00 | 0.00 | 0.00 | 0.00 | 0.00 | 0.00 | 0.00 |
| SSA | 0.00 | 0.00 | 0.00 | 0.00 | 0.00 | 0.00 | 0.00 |
| USA | 0.00 | 0.00 | 0.00 | 0.00 | 0.00 | 0.00 | 0.00 |

Table 309: MAgPIE m4p\_SSP1 — Demand—Feed—Fish (Mt DM/yr) [PART 2/2]

|     | 1965 | 1970 | 1975 | 1980 | 1985 | 1990 | 1995 | 2000 | 2005 | 2010 |
|-----|------|------|------|------|------|------|------|------|------|------|
| GLO | 4.05 | 5.48 | 5.17 | 5.56 | 7.35 | 7.54 | 8.05 | 7.89 | 7.84 | 6.28 |
| CAZ | 0.05 | 0.07 | 0.05 | 0.03 | 0.04 | 0.10 | 0.14 | 0.23 | 0.16 | 0.18 |
| CHA | 0.01 | 0.07 | 0.14 | 0.22 | 0.75 | 1.00 | 1.83 | 2.50 | 2.99 | 2.21 |
| EUR | 2.37 | 2.79 | 2.01 | 1.93 | 2.10 | 2.03 | 1.70 | 1.45 | 1.09 | 0.88 |
| IND | 0.01 | 0.03 | 0.04 | 0.03 | 0.05 | 0.09 | 0.11 | 0.09 | 0.12 | 0.07 |
| JPN | 0.48 | 0.77 | 0.82 | 1.05 | 1.19 | 1.19 | 1.05 | 0.64 | 0.70 | 0.56 |
| LAM | 0.24 | 0.36 | 0.44 | 0.56 | 0.68 | 0.53 | 0.56 | 0.73 | 0.72 | 0.49 |
| MEA | 0.02 | 0.04 | 0.05 | 0.14 | 0.20 | 0.15 | 0.29 | 0.31 | 0.10 | 0.07 |
| NEU | 0.15 | 0.27 | 0.16 | 0.26 | 0.33 | 0.39 | 0.41 | 0.50 | 0.53 | 0.50 |
| OAS | 0.08 | 0.14 | 0.19 | 0.24 | 0.44 | 0.72 | 1.11 | 0.80 | 0.89 | 0.76 |
| REF | 0.16 | 0.36 | 0.71 | 0.57 | 0.74 | 0.75 | 0.26 | 0.26 | 0.21 | 0.15 |
| SSA | 0.06 | 0.14 | 0.20 | 0.18 | 0.23 | 0.25 | 0.34 | 0.19 | 0.14 | 0.22 |
| USA | 0.43 | 0.45 | 0.36 | 0.33 | 0.59 | 0.33 | 0.24 | 0.19 | 0.18 | 0.19 |

Table 310: FAO — Demand—Feed—Fish (Mt DM/yr)

6.4 Forage

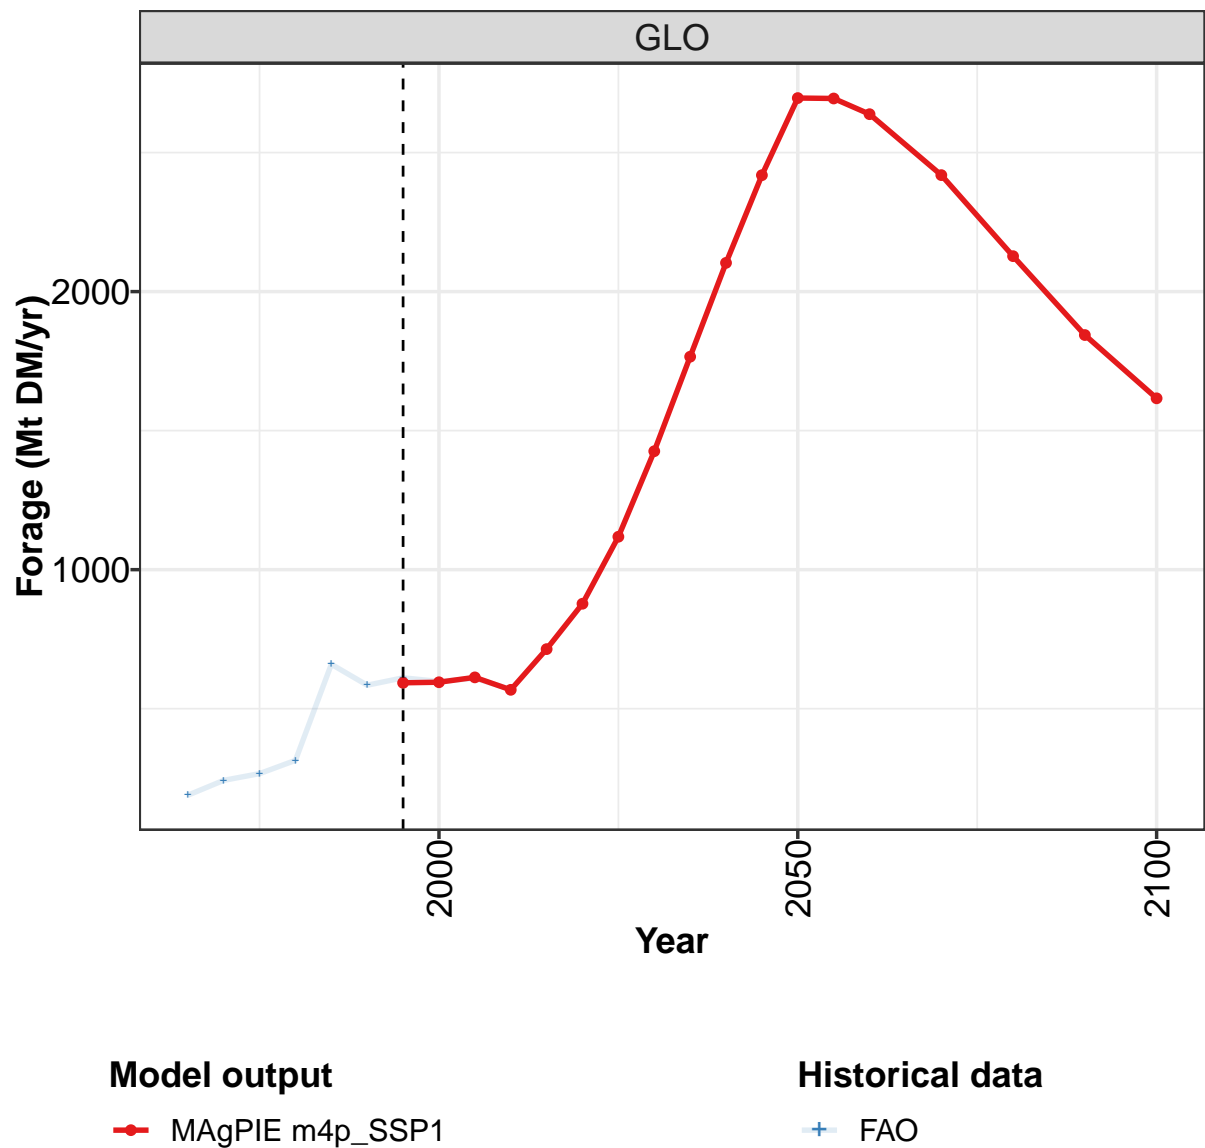

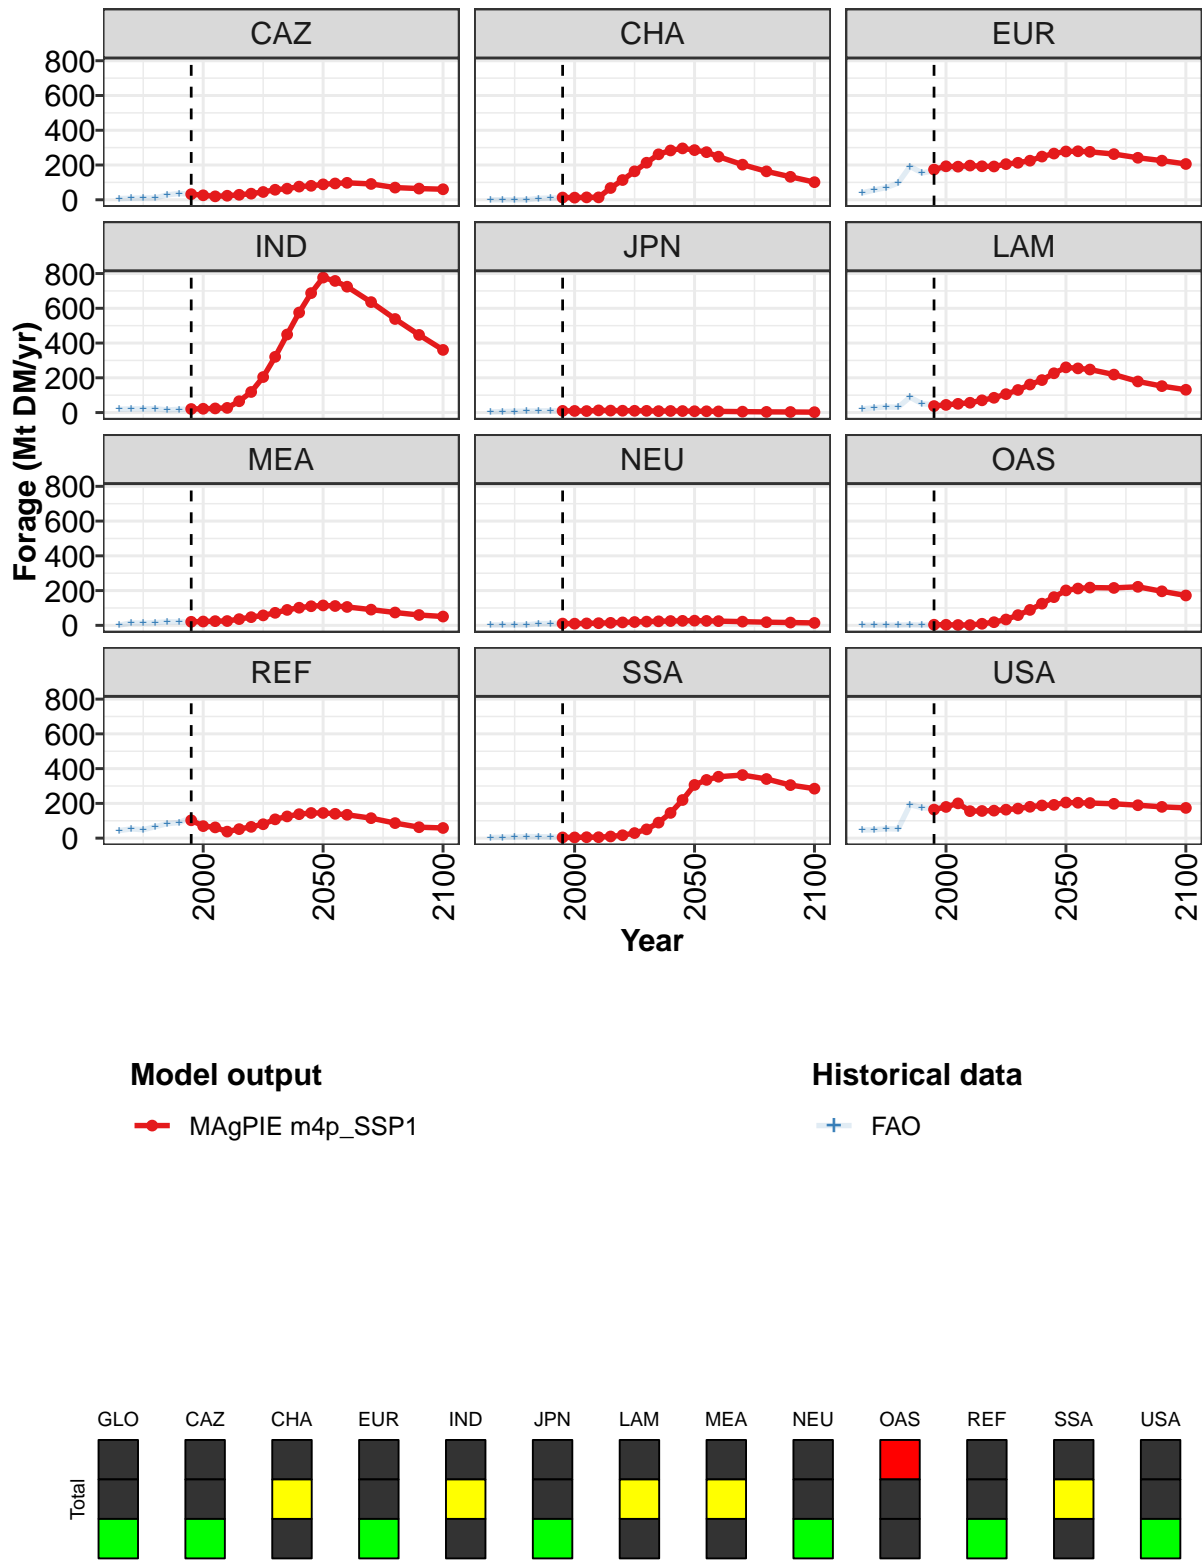

Figure 104: MAgPIE m4p\_SSP1 — Demand—Feed—Forage (Mt DM/yr)

|     | 1995 | 2000 | 2005 | 2010 | 2015 | 2020 | 2025 | 2030 | 2035 | 2040 | 2045 |
|-----|------|------|------|------|------|------|------|------|------|------|------|
| GLO | 593  | 595  | 613  | 568  | 714  | 878  | 1118 | 1426 | 1766 | 2103 | 2419 |
| CAZ | 32   | 26   | 20   | 23   | 29   | 35   | 45   | 58   | 64   | 76   | 80   |
| CHA | 13   | 12   | 14   | 14   | 68   | 114  | 164  | 213  | 262  | 284  | 296  |
| EUR | 174  | 193  | 191  | 197  | 193  | 192  | 205  | 213  | 225  | 249  | 266  |
| IND | 20   | 22   | 24   | 27   | 65   | 119  | 204  | 321  | 449  | 576  | 687  |
| JPN | 10   | 10   | 9    | 13   | 11   | 11   | 10   | 10   | 8    | 9    | 9    |
| LAM | 37   | 44   | 50   | 56   | 71   | 85   | 106  | 130  | 161  | 187  | 226  |
| MEA | 21   | 22   | 24   | 25   | 36   | 47   | 57   | 72   | 89   | 102  | 110  |
| NEU | 10   | 10   | 11   | 13   | 15   | 17   | 19   | 22   | 23   | 25   | 26   |
| OAS | 4    | 3    | 2    | 2    | 9    | 18   | 34   | 59   | 89   | 125  | 162  |
| REF | 103  | 69   | 62   | 38   | 52   | 65   | 80   | 108  | 125  | 138  | 145  |
| SSA | 4    | 4    | 5    | 5    | 10   | 17   | 29   | 51   | 89   | 145  | 220  |
| USA | 165  | 180  | 200  | 155  | 156  | 158  | 164  | 170  | 180  | 188  | 192  |

Table 311: MAgPIE m4p\_SSP1 — Demand—Feed—Forage (Mt DM/yr) [PART 1/2]

|     | 2050 | 2055 | 2060 | 2070 | 2080 | 2090 | 2100 |
|-----|------|------|------|------|------|------|------|
| GLO | 2696 | 2695 | 2638 | 2419 | 2127 | 1844 | 1616 |
| CAZ | 89   | 94   | 98   | 91   | 70   | 64   | 61   |
| CHA | 286  | 274  | 248  | 202  | 164  | 132  | 101  |
| EUR | 278  | 279  | 276  | 263  | 242  | 225  | 206  |
| IND | 777  | 758  | 724  | 636  | 538  | 447  | 361  |
| JPN | 8    | 7    | 7    | 5    | 4    | 3    | 2    |
| LAM | 260  | 254  | 248  | 219  | 179  | 152  | 131  |
| MEA | 115  | 111  | 106  | 91   | 74   | 60   | 51   |
| NEU | 27   | 26   | 24   | 21   | 18   | 16   | 14   |
| OAS | 201  | 212  | 217  | 216  | 222  | 196  | 172  |
| REF | 145  | 140  | 134  | 115  | 87   | 63   | 59   |
| SSA | 306  | 335  | 353  | 363  | 340  | 305  | 285  |
| USA | 205  | 204  | 202  | 198  | 190  | 180  | 174  |

Table 312: MAgPIE m4p\_SSP1 — Demand—Feed—Forage (Mt DM/yr) [PART 2/2]

|     | 1965 | 1970 | 1975 | 1980 | 1985 | 1990 | 1995 | 2000 | 2005 | 2010 |
|-----|------|------|------|------|------|------|------|------|------|------|
| GLO | 189  | 242  | 266  | 314  | 660  | 584  | 611  | 598  | 609  | 570  |
| CAZ | 7    | 9    | 10   | 10   | 28   | 36   | 32   | 30   | 26   | 29   |
| CHA | 0    | 0    | 0    | 0    | 8    | 10   | 11   | 12   | 13   | 14   |
| EUR | 39   | 56   | 70   | 96   | 192  | 155  | 167  | 178  | 179  | 189  |
| IND | 19   | 21   | 21   | 22   | 15   | 18   | 20   | 22   | 25   | 28   |
| JPN | 3    | 6    | 7    | 9    | 10   | 10   | 10   | 9    | 9    | 13   |
| LAM | 21   | 27   | 33   | 31   | 88   | 51   | 46   | 50   | 51   | 54   |
| MEA | 2    | 14   | 13   | 15   | 21   | 19   | 20   | 21   | 23   | 25   |
| NEU | 2    | 2    | 3    | 3    | 10   | 11   | 11   | 10   | 12   | 13   |
| OAS | 1    | 1    | 1    | 1    | 3    | 2    | 2    | 2    | 2    | 2    |
| REF | 44   | 53   | 49   | 66   | 83   | 90   | 119  | 75   | 63   | 37   |
| SSA | 4    | 5    | 6    | 9    | 9    | 7    | 5    | 5    | 5    | 5    |
| USA | 47   | 48   | 54   | 53   | 192  | 175  | 170  | 185  | 201  | 162  |

Table 313: FAO — Demand—Feed—Forage (Mt DM/yr)

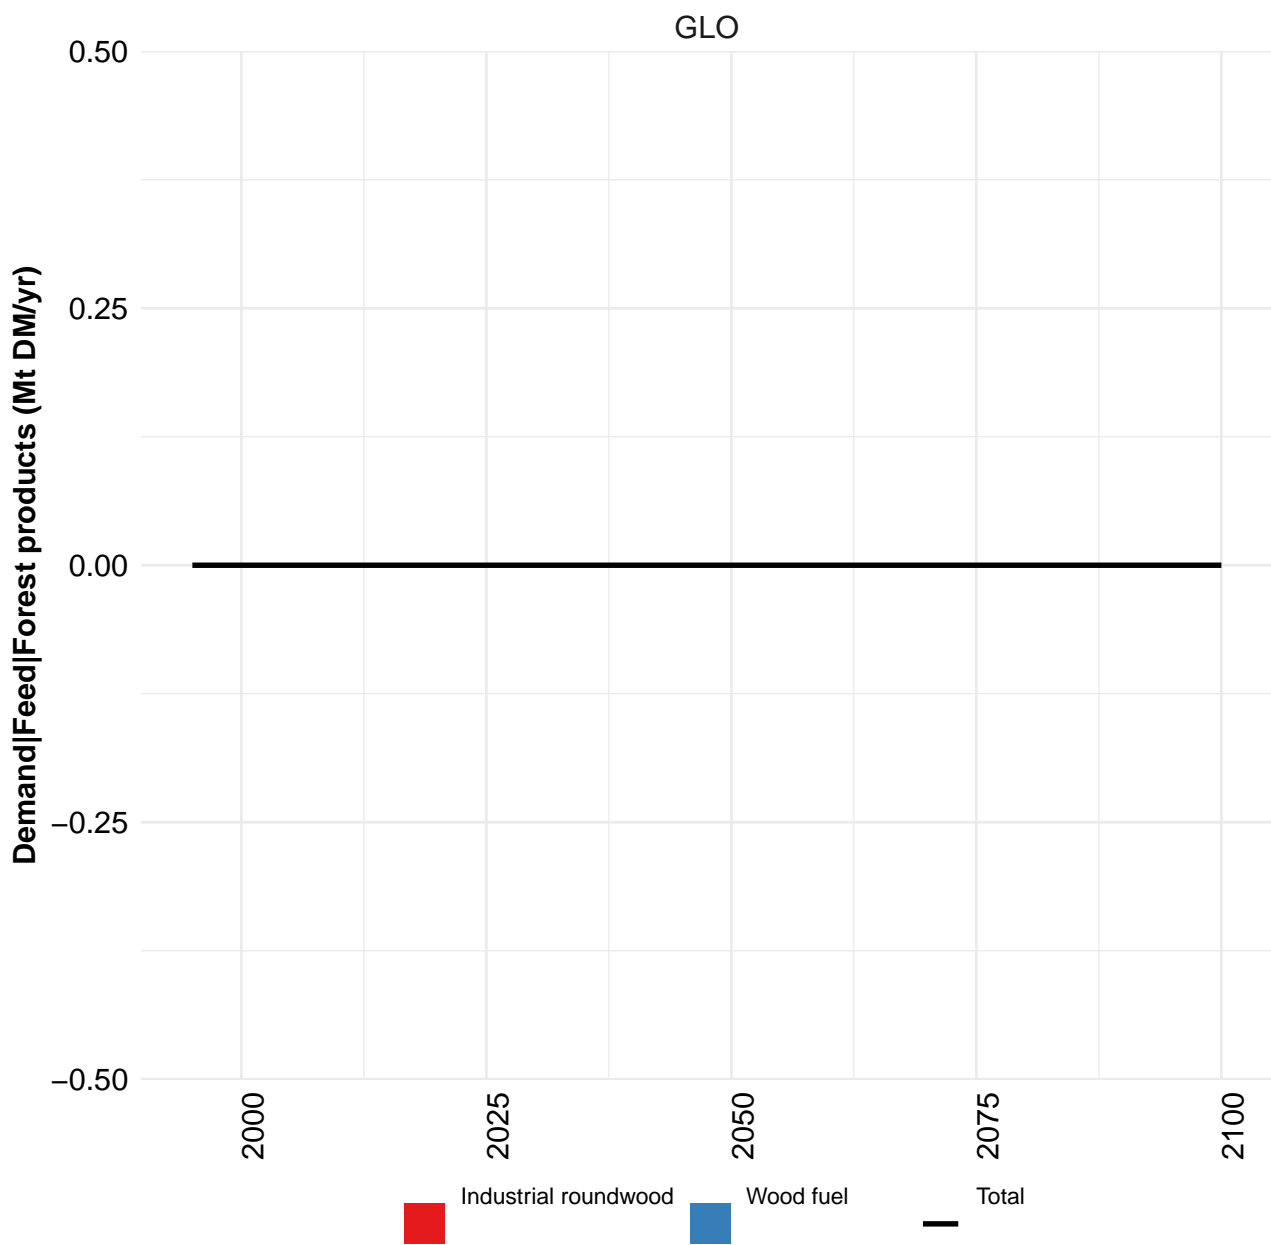

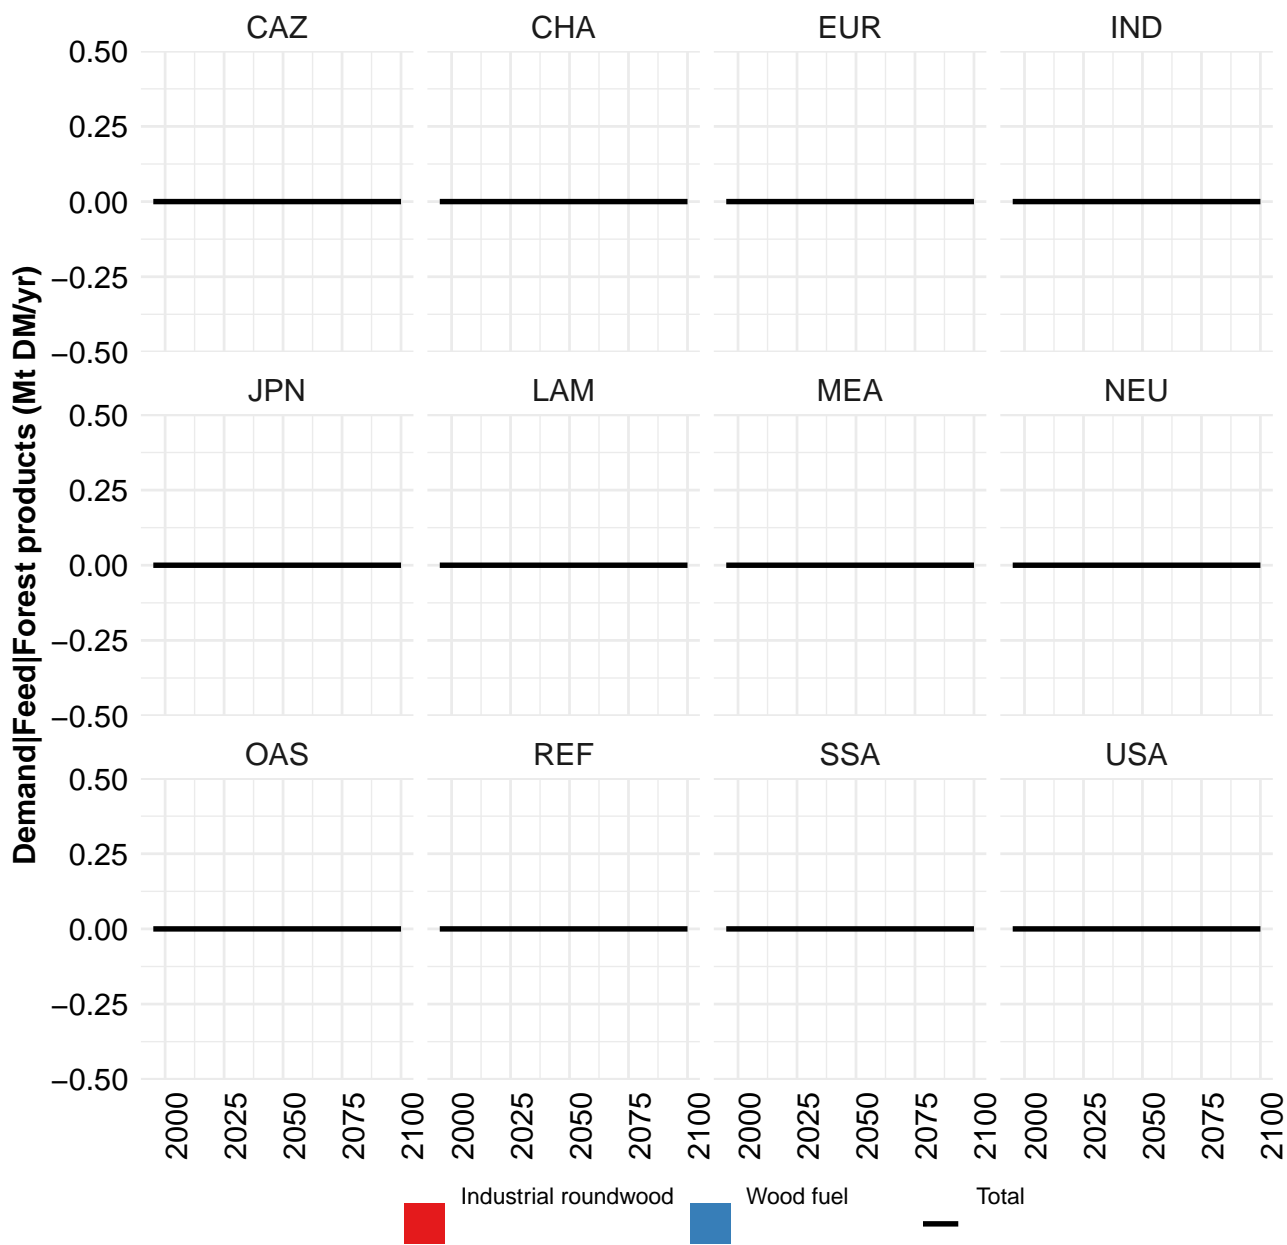

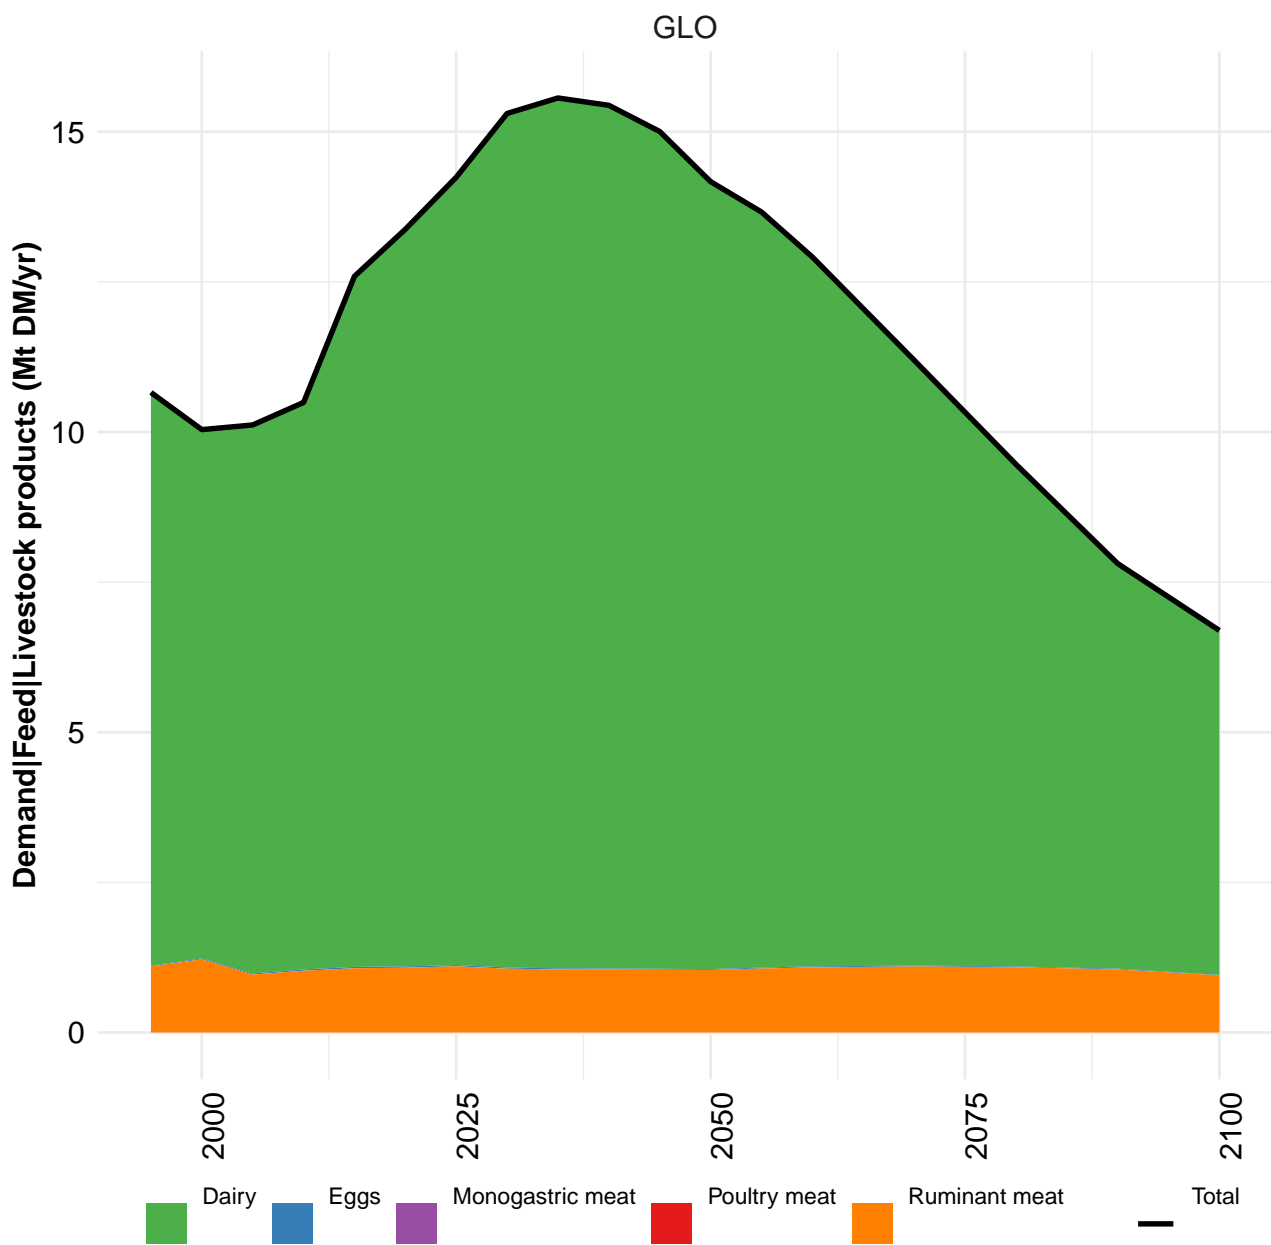

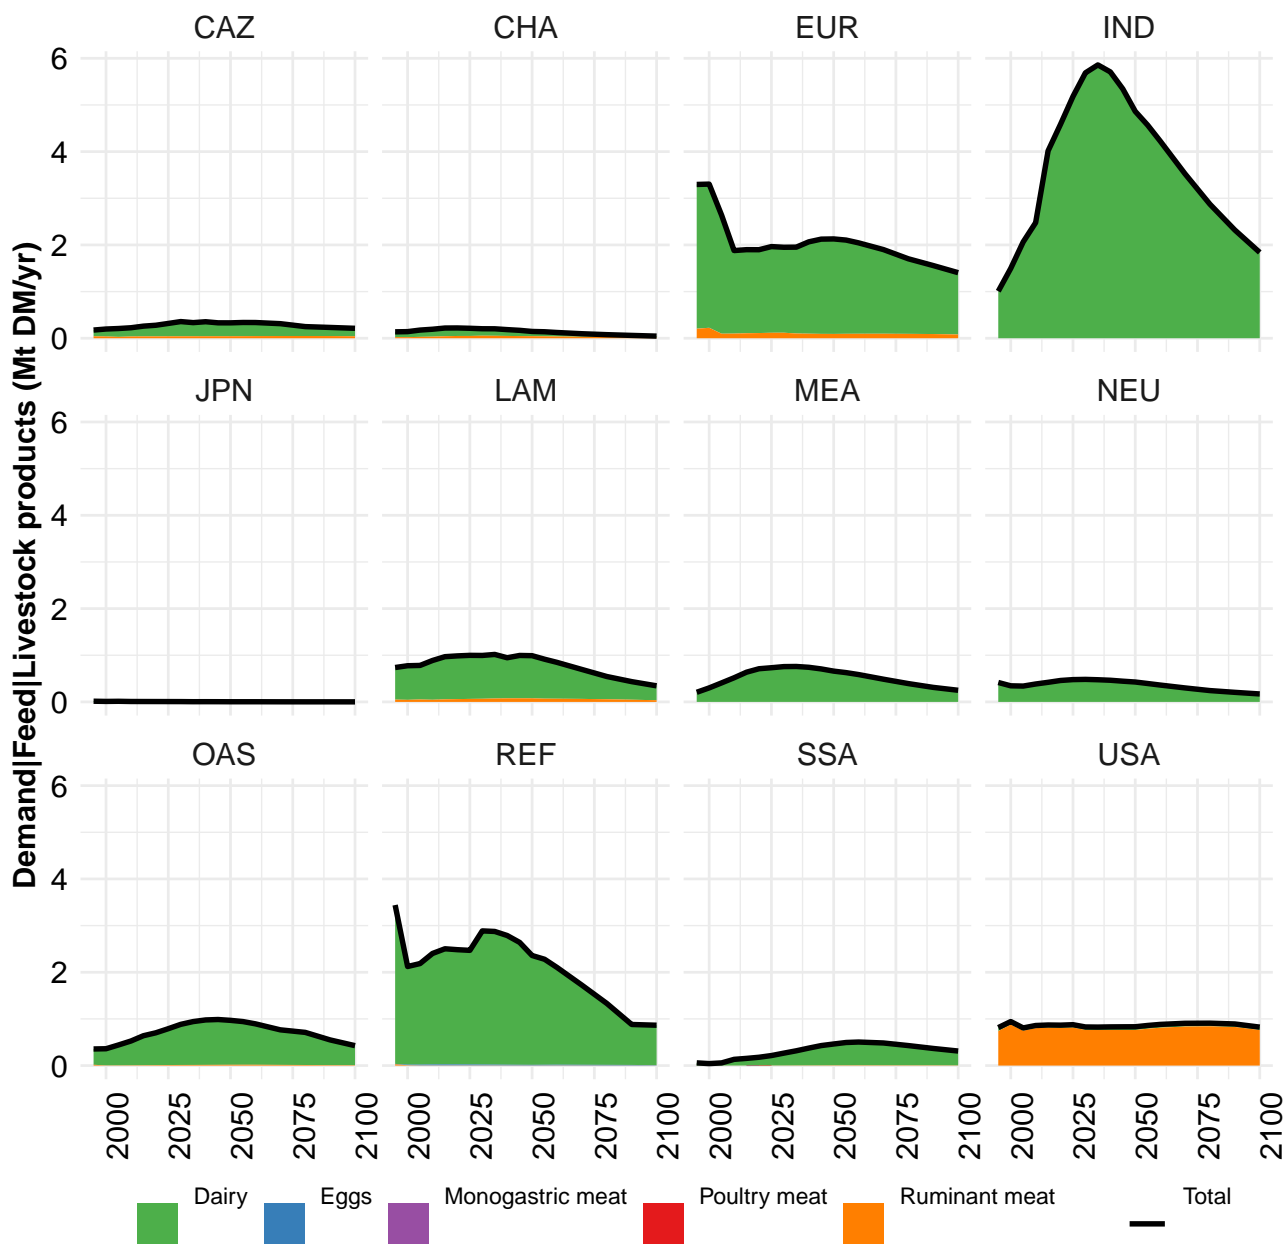



6.5 Livestock products

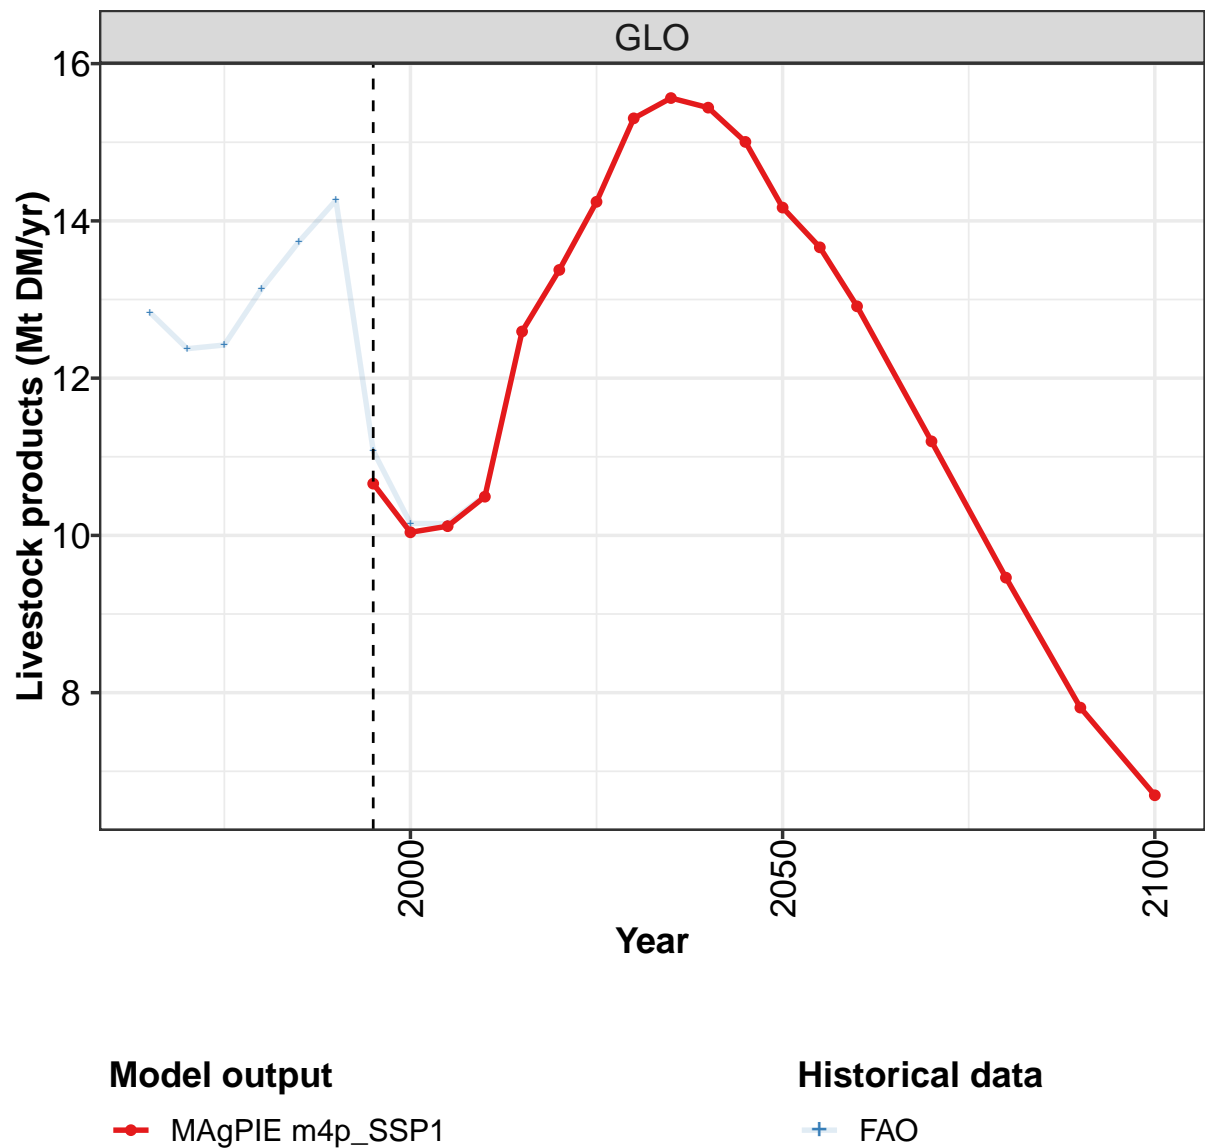

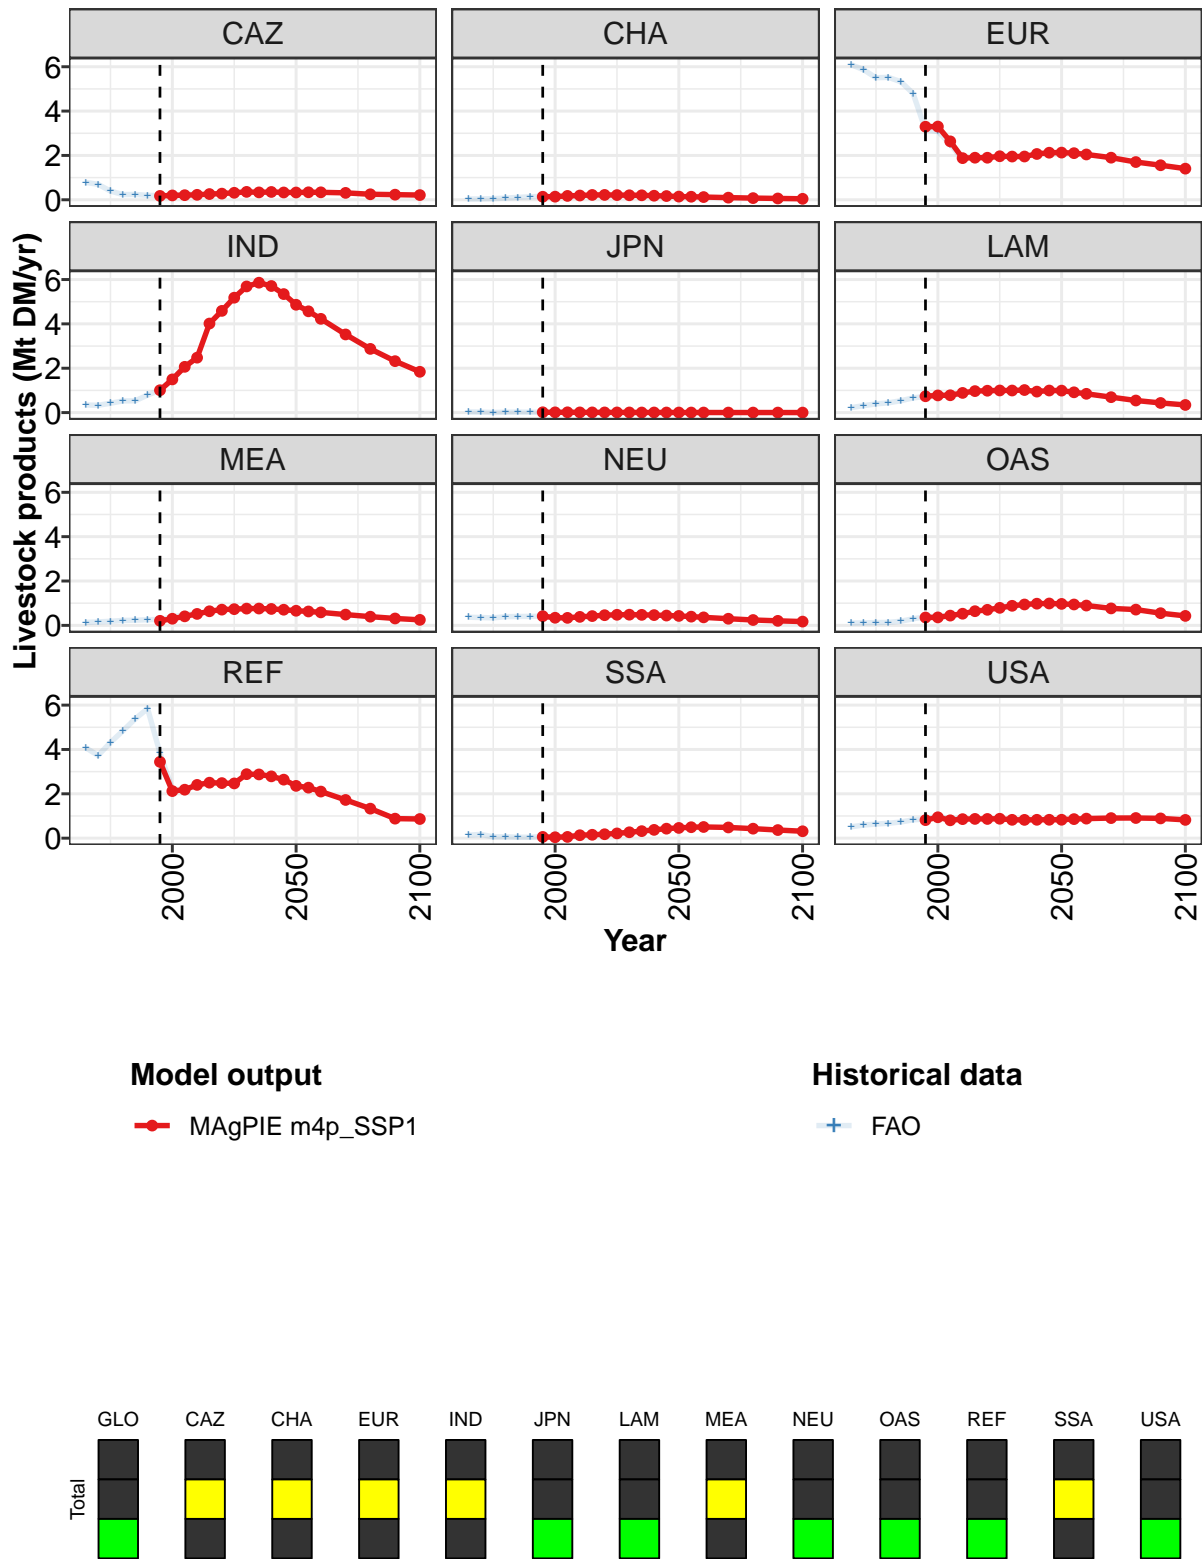

Figure 105: MAgPIE m4p\_SSP1 — Demand—Feed—Livestock products (Mt DM/yr)

|     | 1995 | 2000 | 2005 | 2010 | 2015 | 2020 | 2025 | 2030 | 2035 | 2040 | 2045 |
|-----|------|------|------|------|------|------|------|------|------|------|------|
| GLO | 10.7 | 10.0 | 10.1 | 10.5 | 12.6 | 13.4 | 14.2 | 15.3 | 15.6 | 15.4 | 15.0 |
| CAZ | 0.2  | 0.2  | 0.2  | 0.2  | 0.3  | 0.3  | 0.3  | 0.4  | 0.3  | 0.4  | 0.3  |
| CHA | 0.1  | 0.1  | 0.2  | 0.2  | 0.2  | 0.2  | 0.2  | 0.2  | 0.2  | 0.2  | 0.2  |
| EUR | 3.3  | 3.3  | 2.6  | 1.9  | 1.9  | 1.9  | 2.0  | 1.9  | 2.0  | 2.1  | 2.1  |
| IND | 1.0  | 1.5  | 2.1  | 2.5  | 4.0  | 4.6  | 5.2  | 5.7  | 5.9  | 5.7  | 5.3  |
| JPN | 0.0  | 0.0  | 0.0  | 0.0  | 0.0  | 0.0  | 0.0  | 0.0  | 0.0  | 0.0  | 0.0  |
| LAM | 0.7  | 0.8  | 0.8  | 0.9  | 1.0  | 1.0  | 1.0  | 1.0  | 1.0  | 0.9  | 1.0  |
| MEA | 0.2  | 0.3  | 0.4  | 0.5  | 0.6  | 0.7  | 0.7  | 0.8  | 0.8  | 0.7  | 0.7  |
| NEU | 0.4  | 0.3  | 0.3  | 0.4  | 0.4  | 0.5  | 0.5  | 0.5  | 0.5  | 0.5  | 0.4  |
| OAS | 0.4  | 0.4  | 0.4  | 0.5  | 0.6  | 0.7  | 0.8  | 0.9  | 0.9  | 1.0  | 1.0  |
| REF | 3.4  | 2.1  | 2.2  | 2.4  | 2.5  | 2.5  | 2.5  | 2.9  | 2.9  | 2.8  | 2.6  |
| SSA | 0.1  | 0.0  | 0.1  | 0.1  | 0.2  | 0.2  | 0.2  | 0.3  | 0.3  | 0.4  | 0.4  |
| USA | 0.8  | 0.9  | 0.8  | 0.9  | 0.9  | 0.9  | 0.9  | 0.8  | 0.8  | 0.8  | 0.8  |

Table 314: MAgPIE m4p-SSP1 — Demand—Feed—Livestock products (Mt DM/yr) [PART 1/2]

|     | 2050 | 2055 | 2060 | 2070 | 2080 | 2090 | 2100 |
|-----|------|------|------|------|------|------|------|
| GLO | 14.2 | 13.7 | 12.9 | 11.2 | 9.5  | 7.8  | 6.7  |
| CAZ | 0.3  | 0.3  | 0.3  | 0.3  | 0.2  | 0.2  | 0.2  |
| CHA | 0.1  | 0.1  | 0.1  | 0.1  | 0.1  | 0.1  | 0.0  |
| EUR | 2.1  | 2.1  | 2.0  | 1.9  | 1.7  | 1.6  | 1.4  |
| IND | 4.9  | 4.6  | 4.2  | 3.5  | 2.9  | 2.3  | 1.8  |
| JPN | 0.0  | 0.0  | 0.0  | 0.0  | 0.0  | 0.0  | 0.0  |
| LAM | 1.0  | 0.9  | 0.8  | 0.7  | 0.5  | 0.4  | 0.3  |
| MEA | 0.7  | 0.6  | 0.6  | 0.5  | 0.4  | 0.3  | 0.2  |
| NEU | 0.4  | 0.4  | 0.4  | 0.3  | 0.2  | 0.2  | 0.2  |
| OAS | 1.0  | 0.9  | 0.9  | 0.8  | 0.7  | 0.5  | 0.4  |
| REF | 2.4  | 2.3  | 2.1  | 1.7  | 1.3  | 0.9  | 0.9  |
| SSA | 0.5  | 0.5  | 0.5  | 0.5  | 0.4  | 0.4  | 0.3  |
| USA | 0.8  | 0.9  | 0.9  | 0.9  | 0.9  | 0.9  | 0.8  |

Table 315: MAgPIE m4p-SSP1 — Demand—Feed—Livestock products (Mt DM/yr) [PART 2/2]

|     | 1965 | 1970 | 1975 | 1980 | 1985 | 1990 | 1995 | 2000 | 2005 | 2010 |
|-----|------|------|------|------|------|------|------|------|------|------|
| GLO | 12.8 | 12.4 | 12.4 | 13.1 | 13.7 | 14.3 | 11.1 | 10.2 | 10.1 | 10.5 |
| CAZ | 0.8  | 0.7  | 0.4  | 0.2  | 0.2  | 0.2  | 0.2  | 0.2  | 0.2  | 0.3  |
| CHA | 0.0  | 0.0  | 0.1  | 0.1  | 0.1  | 0.1  | 0.2  | 0.2  | 0.2  | 0.2  |
| EUR | 6.1  | 5.9  | 5.5  | 5.5  | 5.3  | 4.8  | 3.1  | 3.1  | 2.5  | 1.8  |
| IND | 0.3  | 0.3  | 0.4  | 0.5  | 0.5  | 0.8  | 1.0  | 1.5  | 2.1  | 2.5  |
| JPN | 0.0  | 0.0  | 0.0  | 0.0  | 0.0  | 0.0  | 0.0  | 0.0  | 0.0  | 0.0  |
| LAM | 0.2  | 0.3  | 0.4  | 0.4  | 0.5  | 0.7  | 0.7  | 0.8  | 0.8  | 0.9  |
| MEA | 0.1  | 0.2  | 0.2  | 0.2  | 0.2  | 0.3  | 0.3  | 0.4  | 0.5  | 0.5  |
| NEU | 0.4  | 0.4  | 0.3  | 0.4  | 0.4  | 0.4  | 0.4  | 0.3  | 0.3  | 0.4  |
| OAS | 0.1  | 0.1  | 0.1  | 0.1  | 0.2  | 0.3  | 0.4  | 0.4  | 0.5  | 0.5  |
| REF | 4.1  | 3.7  | 4.3  | 4.8  | 5.4  | 5.8  | 3.8  | 2.2  | 2.2  | 2.4  |
| SSA | 0.1  | 0.2  | 0.1  | 0.1  | 0.0  | 0.0  | 0.1  | 0.1  | 0.1  | 0.1  |
| USA | 0.5  | 0.6  | 0.6  | 0.7  | 0.7  | 0.8  | 0.9  | 1.0  | 0.9  | 0.9  |

Table 316: FAO — Demand—Feed—Livestock products (Mt DM/yr)

6.5.1
Dairy

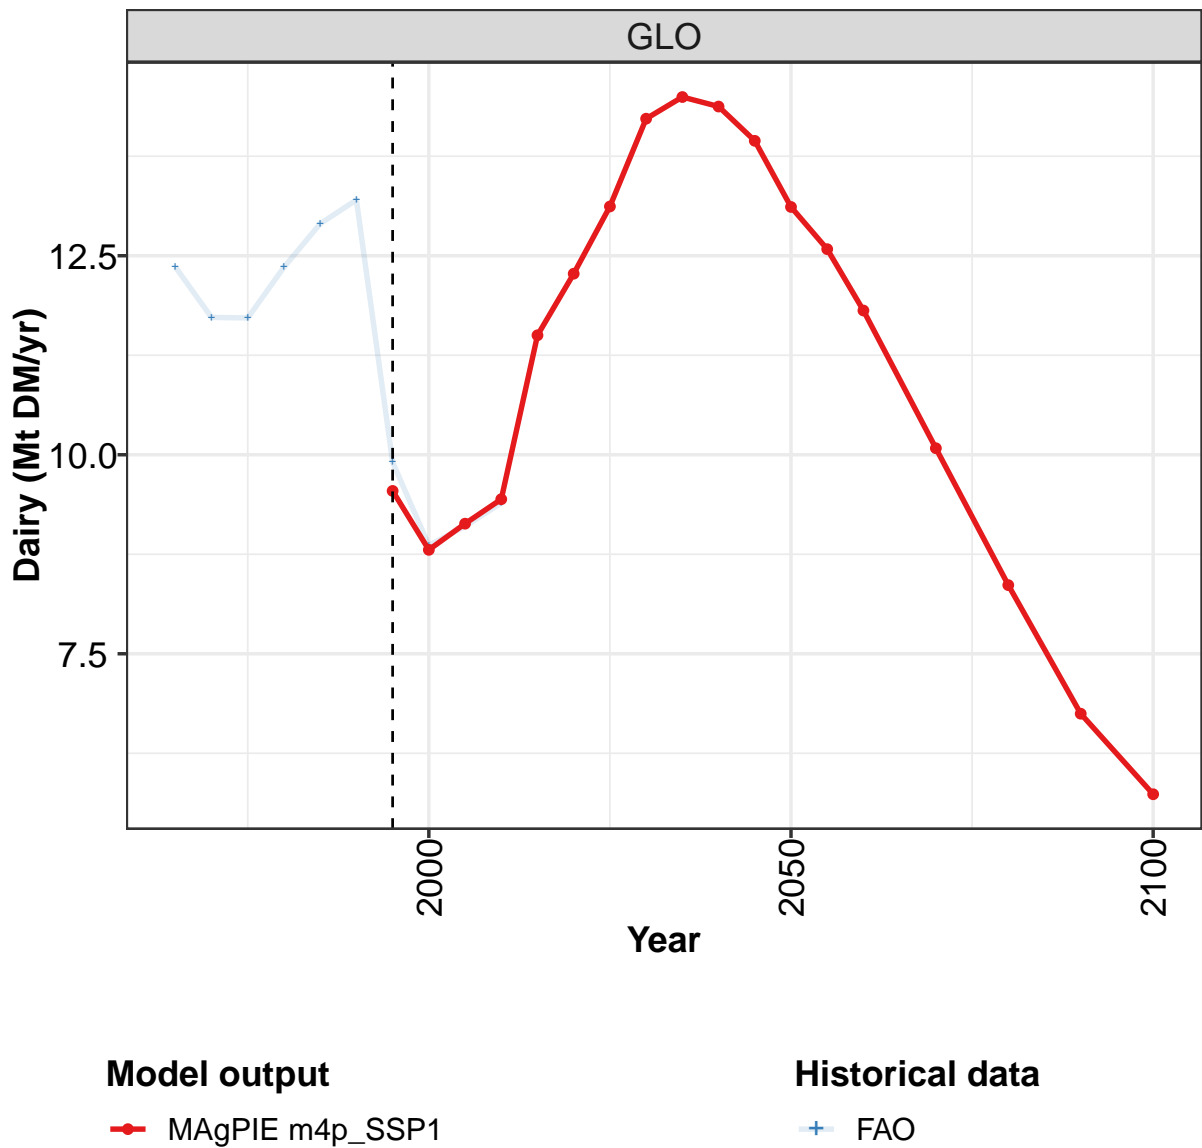

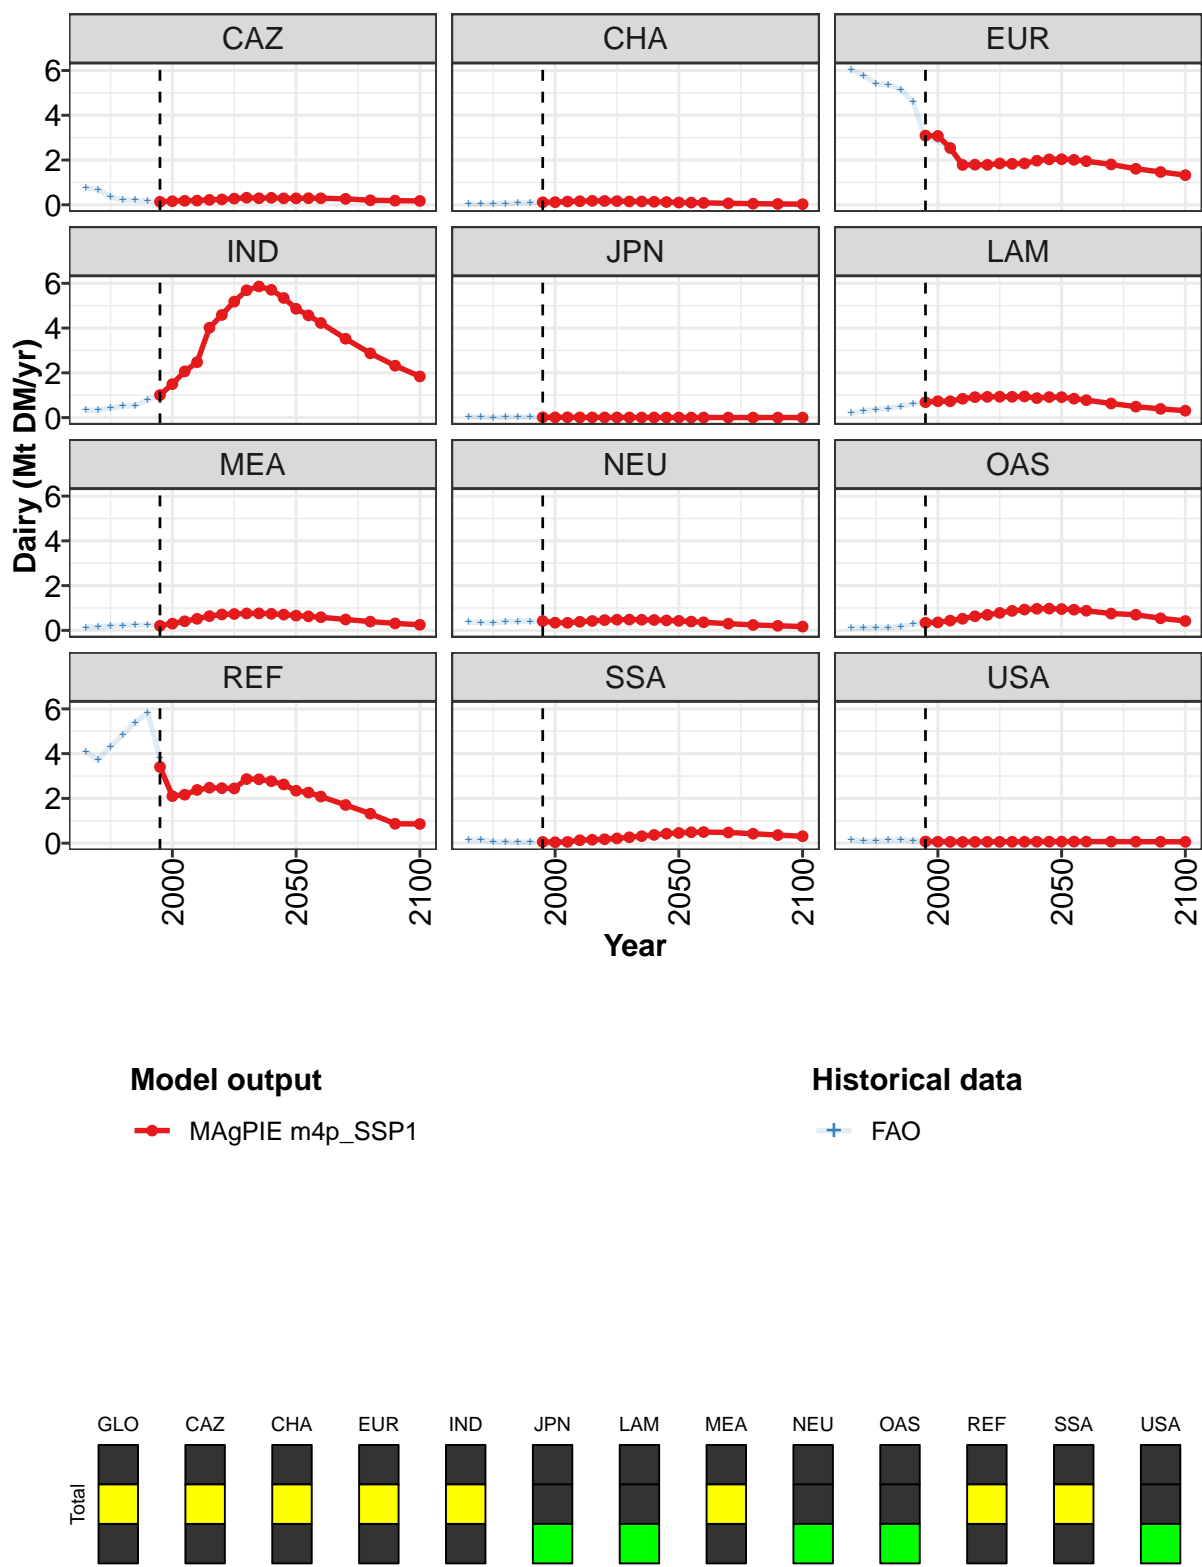

Figure 106: MAGPIE m4p\_SSP1 — Demand—Feed—Livestock products—Dairy (Mt DM/yr)

|     | 1995 | 2000 | 2005 | 2010 | 2015 | 2020 | 2025 | 2030 | 2035 | 2040 | 2045 |
|-----|------|------|------|------|------|------|------|------|------|------|------|
| GLO | 9.5  | 8.8  | 9.1  | 9.4  | 11.5 | 12.3 | 13.1 | 14.2 | 14.5 | 14.4 | 13.9 |
| CAZ | 0.1  | 0.2  | 0.2  | 0.2  | 0.2  | 0.2  | 0.3  | 0.3  | 0.3  | 0.3  | 0.3  |
| CHA | 0.1  | 0.1  | 0.1  | 0.2  | 0.2  | 0.2  | 0.2  | 0.1  | 0.2  | 0.1  | 0.1  |
| EUR | 3.1  | 3.1  | 2.5  | 1.8  | 1.8  | 1.8  | 1.8  | 1.8  | 1.9  | 2.0  | 2.0  |
| IND | 1.0  | 1.5  | 2.1  | 2.5  | 4.0  | 4.6  | 5.2  | 5.7  | 5.9  | 5.7  | 5.3  |
| JPN | 0.0  | 0.0  | 0.0  | 0.0  | 0.0  | 0.0  | 0.0  | 0.0  | 0.0  | 0.0  | 0.0  |
| LAM | 0.7  | 0.7  | 0.7  | 0.8  | 0.9  | 0.9  | 0.9  | 0.9  | 0.9  | 0.9  | 0.9  |
| MEA | 0.2  | 0.3  | 0.4  | 0.5  | 0.6  | 0.7  | 0.7  | 0.8  | 0.8  | 0.7  | 0.7  |
| NEU | 0.4  | 0.3  | 0.3  | 0.4  | 0.4  | 0.5  | 0.5  | 0.5  | 0.5  | 0.5  | 0.4  |
| OAS | 0.3  | 0.4  | 0.4  | 0.5  | 0.6  | 0.7  | 0.8  | 0.9  | 0.9  | 1.0  | 1.0  |
| REF | 3.4  | 2.1  | 2.2  | 2.4  | 2.5  | 2.5  | 2.4  | 2.9  | 2.9  | 2.8  | 2.6  |
| SSA | 0.1  | 0.0  | 0.1  | 0.1  | 0.2  | 0.2  | 0.2  | 0.3  | 0.3  | 0.4  | 0.4  |
| USA | 0.1  | 0.1  | 0.1  | 0.1  | 0.1  | 0.1  | 0.1  | 0.1  | 0.1  | 0.1  | 0.1  |

Table 317: MAgPIE m4p\_SSP1 — Demand—Feed—Livestock products—Dairy (Mt DM/yr) [PART 1/2]

|     | 2050 | 2055 | 2060 | 2070 | 2080 | 2090 | 2100 |
|-----|------|------|------|------|------|------|------|
| GLO | 13.1 | 12.6 | 11.8 | 10.1 | 8.4  | 6.7  | 5.7  |
| CAZ | 0.3  | 0.3  | 0.3  | 0.3  | 0.2  | 0.2  | 0.2  |
| CHA | 0.1  | 0.1  | 0.1  | 0.1  | 0.0  | 0.0  | 0.0  |
| EUR | 2.0  | 2.0  | 1.9  | 1.8  | 1.6  | 1.5  | 1.3  |
| IND | 4.9  | 4.6  | 4.2  | 3.5  | 2.9  | 2.3  | 1.8  |
| JPN | 0.0  | 0.0  | 0.0  | 0.0  | 0.0  | 0.0  | 0.0  |
| LAM | 0.9  | 0.8  | 0.8  | 0.6  | 0.5  | 0.4  | 0.3  |
| MEA | 0.7  | 0.6  | 0.6  | 0.5  | 0.4  | 0.3  | 0.2  |
| NEU | 0.4  | 0.4  | 0.4  | 0.3  | 0.2  | 0.2  | 0.2  |
| OAS | 1.0  | 0.9  | 0.9  | 0.8  | 0.7  | 0.5  | 0.4  |
| REF | 2.3  | 2.3  | 2.1  | 1.7  | 1.3  | 0.9  | 0.9  |
| SSA | 0.5  | 0.5  | 0.5  | 0.5  | 0.4  | 0.4  | 0.3  |
| USA | 0.1  | 0.1  | 0.1  | 0.1  | 0.1  | 0.1  | 0.1  |

Table 318: MAgPIE m4p\_SSP1 — Demand—Feed—Livestock products—Dairy (Mt DM/yr) [PART 2/2]

|     | 1965 | 1970 | 1975 | 1980 | 1985 | 1990 | 1995 | 2000 | 2005 | 2010 |
|-----|------|------|------|------|------|------|------|------|------|------|
| GLO | 12.4 | 11.7 | 11.7 | 12.4 | 12.9 | 13.2 | 9.9  | 8.9  | 9.1  | 9.4  |
| CAZ | 0.8  | 0.7  | 0.4  | 0.2  | 0.2  | 0.2  | 0.1  | 0.2  | 0.2  | 0.2  |
| CHA | 0.0  | 0.0  | 0.0  | 0.1  | 0.1  | 0.1  | 0.1  | 0.1  | 0.1  | 0.2  |
| EUR | 6.0  | 5.8  | 5.4  | 5.4  | 5.2  | 4.6  | 3.0  | 2.9  | 2.4  | 1.7  |
| IND | 0.3  | 0.3  | 0.4  | 0.5  | 0.5  | 0.8  | 1.0  | 1.5  | 2.1  | 2.5  |
| JPN | 0.0  | 0.0  | 0.0  | 0.0  | 0.0  | 0.0  | 0.0  | 0.0  | 0.0  | 0.0  |
| LAM | 0.2  | 0.3  | 0.4  | 0.4  | 0.5  | 0.6  | 0.7  | 0.7  | 0.7  | 0.8  |
| MEA | 0.1  | 0.2  | 0.2  | 0.2  | 0.2  | 0.3  | 0.3  | 0.4  | 0.5  | 0.5  |
| NEU | 0.4  | 0.4  | 0.3  | 0.4  | 0.4  | 0.4  | 0.4  | 0.3  | 0.3  | 0.4  |
| OAS | 0.1  | 0.1  | 0.1  | 0.1  | 0.2  | 0.3  | 0.4  | 0.4  | 0.4  | 0.5  |
| REF | 4.1  | 3.7  | 4.3  | 4.8  | 5.4  | 5.8  | 3.8  | 2.2  | 2.2  | 2.4  |
| SSA | 0.1  | 0.2  | 0.1  | 0.1  | 0.0  | 0.0  | 0.1  | 0.1  | 0.1  | 0.1  |
| USA | 0.1  | 0.1  | 0.1  | 0.1  | 0.2  | 0.1  | 0.1  | 0.1  | 0.1  | 0.1  |

Table 319: FAO — Demand—Feed—Livestock products—Dairy (Mt DM/yr)

6.5.2
Eggs

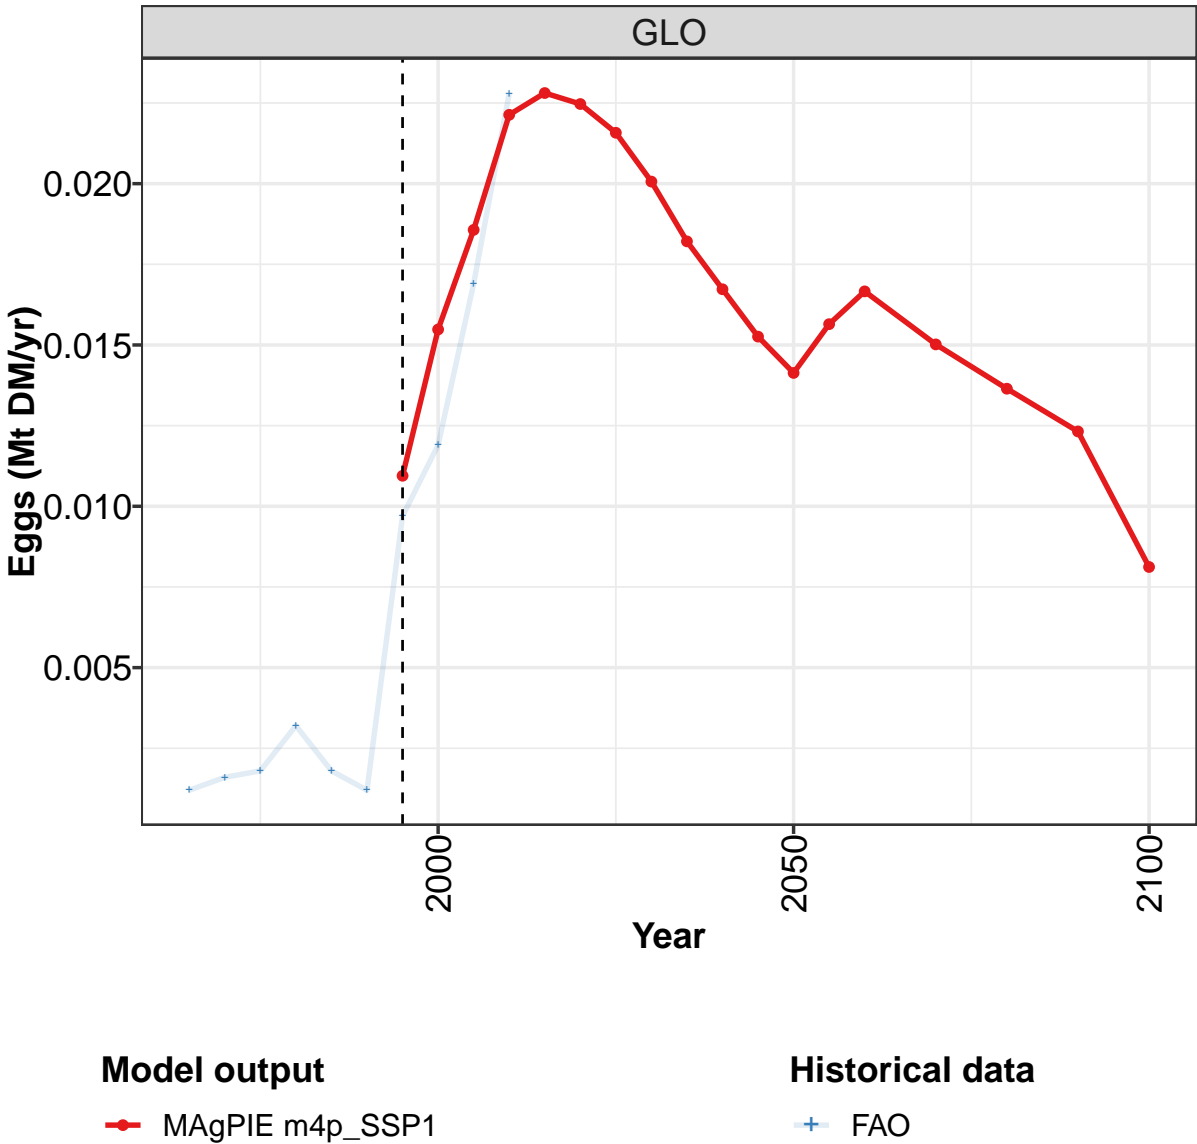

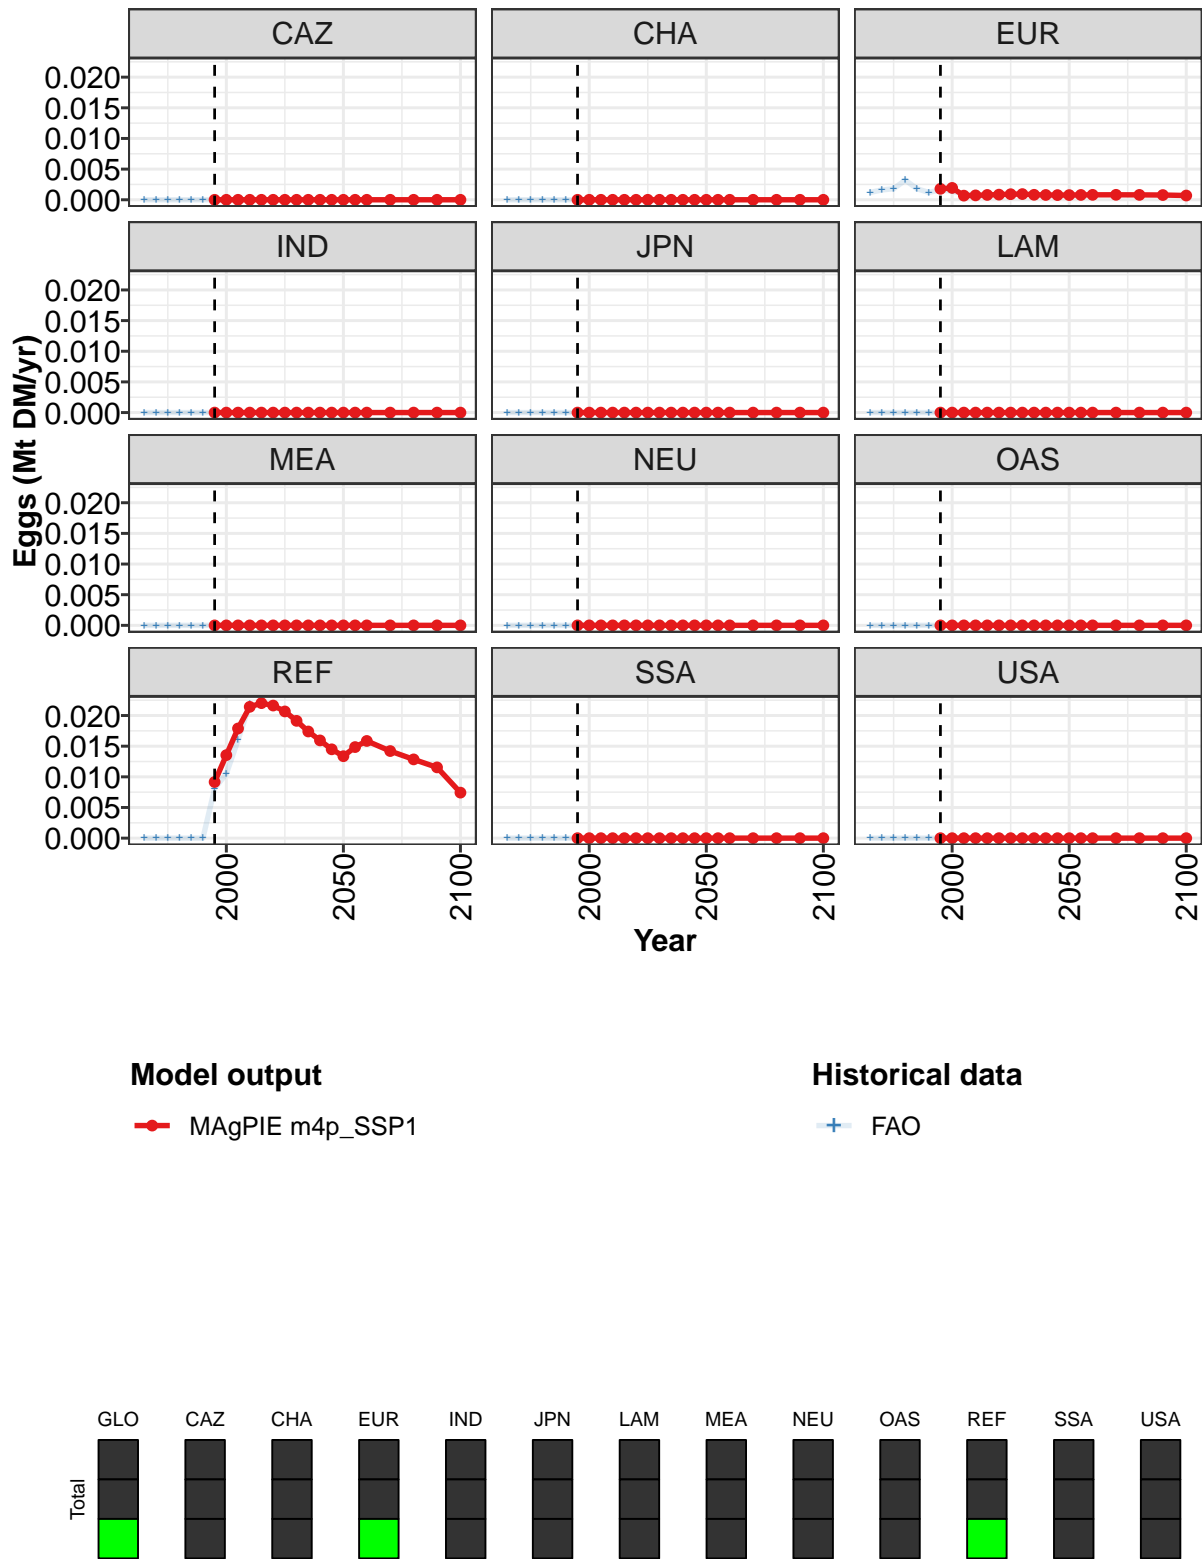

Figure 107: MAgPIE m4p\_SSP1 — Demand—Feed—Livestock products—Eggs (Mt DM/yr)



|     | 1995   | 2000   | 2005   | 2010   | 2015   | 2020   | 2025   | 2030   | 2035   | 2040   | 2045   |
|-----|--------|--------|--------|--------|--------|--------|--------|--------|--------|--------|--------|
| GLO | 0.0109 | 0.0155 | 0.0186 | 0.0221 | 0.0228 | 0.0225 | 0.0216 | 0.0201 | 0.0182 | 0.0167 | 0.0153 |
| CAZ | 0.0000 | 0.0000 | 0.0000 | 0.0000 | 0.0000 | 0.0000 | 0.0000 | 0.0000 | 0.0000 | 0.0000 | 0.0000 |
| CHA | 0.0000 | 0.0000 | 0.0000 | 0.0000 | 0.0000 | 0.0000 | 0.0000 | 0.0000 | 0.0000 | 0.0000 | 0.0000 |
| EUR | 0.0018 | 0.0019 | 0.0007 | 0.0007 | 0.0008 | 0.0008 | 0.0009 | 0.0009 | 0.0008 | 0.0008 | 0.0008 |
| IND | 0.0000 | 0.0000 | 0.0000 | 0.0000 | 0.0000 | 0.0000 | 0.0000 | 0.0000 | 0.0000 | 0.0000 | 0.0000 |
| JPN | 0.0000 | 0.0000 | 0.0000 | 0.0000 | 0.0000 | 0.0000 | 0.0000 | 0.0000 | 0.0000 | 0.0000 | 0.0000 |
| LAM | 0.0000 | 0.0000 | 0.0000 | 0.0000 | 0.0000 | 0.0000 | 0.0000 | 0.0000 | 0.0000 | 0.0000 | 0.0000 |
| MEA | 0.0000 | 0.0000 | 0.0000 | 0.0000 | 0.0000 | 0.0000 | 0.0000 | 0.0000 | 0.0000 | 0.0000 | 0.0000 |
| NEU | 0.0000 | 0.0000 | 0.0000 | 0.0000 | 0.0000 | 0.0000 | 0.0000 | 0.0000 | 0.0000 | 0.0000 | 0.0000 |
| OAS | 0.0000 | 0.0000 | 0.0000 | 0.0000 | 0.0000 | 0.0000 | 0.0000 | 0.0000 | 0.0000 | 0.0000 | 0.0000 |
| REF | 0.0092 | 0.0135 | 0.0179 | 0.0214 | 0.0220 | 0.0216 | 0.0207 | 0.0191 | 0.0174 | 0.0159 | 0.0145 |
| SSA | 0.0000 | 0.0000 | 0.0000 | 0.0000 | 0.0000 | 0.0000 | 0.0000 | 0.0000 | 0.0000 | 0.0000 | 0.0000 |
| USA | 0.0000 | 0.0000 | 0.0000 | 0.0000 | 0.0000 | 0.0000 | 0.0000 | 0.0000 | 0.0000 | 0.0000 | 0.0000 |

Table 320: MAgPIE m4p\_SSP1 — Demand—Feed—Livestock products—Eggs (Mt DM/yr) [PART 1/2]

|     | 2050   | 2055   | 2060   | 2070   | 2080   | 2090   | 2100   |
|-----|--------|--------|--------|--------|--------|--------|--------|
| GLO | 0.0141 | 0.0156 | 0.0167 | 0.0150 | 0.0136 | 0.0123 | 0.0081 |
| CAZ | 0.0000 | 0.0000 | 0.0000 | 0.0000 | 0.0000 | 0.0000 | 0.0000 |
| CHA | 0.0000 | 0.0000 | 0.0000 | 0.0000 | 0.0000 | 0.0000 | 0.0000 |
| EUR | 0.0008 | 0.0008 | 0.0008 | 0.0008 | 0.0008 | 0.0008 | 0.0007 |
| IND | 0.0000 | 0.0000 | 0.0000 | 0.0000 | 0.0000 | 0.0000 | 0.0000 |
| JPN | 0.0000 | 0.0000 | 0.0000 | 0.0000 | 0.0000 | 0.0000 | 0.0000 |
| LAM | 0.0000 | 0.0000 | 0.0000 | 0.0000 | 0.0000 | 0.0000 | 0.0000 |
| MEA | 0.0000 | 0.0000 | 0.0000 | 0.0000 | 0.0000 | 0.0000 | 0.0000 |
| NEU | 0.0000 | 0.0000 | 0.0000 | 0.0000 | 0.0000 | 0.0000 | 0.0000 |
| OAS | 0.0000 | 0.0000 | 0.0000 | 0.0000 | 0.0000 | 0.0000 | 0.0000 |
| REF | 0.0134 | 0.0149 | 0.0159 | 0.0142 | 0.0128 | 0.0115 | 0.0074 |
| SSA | 0.0000 | 0.0000 | 0.0000 | 0.0000 | 0.0000 | 0.0000 | 0.0000 |
| USA | 0.0000 | 0.0000 | 0.0000 | 0.0000 | 0.0000 | 0.0000 | 0.0000 |

Table 321: MAgPIE m4p\_SSP1 — Demand—Feed—Livestock products—Eggs (Mt DM/yr) [PART 2/2]

|     | 1965   | 1970   | 1975   | 1980   | 1985   | 1990   | 1995   | 2000   | 2005   | 2010   |
|-----|--------|--------|--------|--------|--------|--------|--------|--------|--------|--------|
| GLO | 0.0012 | 0.0016 | 0.0018 | 0.0032 | 0.0018 | 0.0012 | 0.0097 | 0.0119 | 0.0169 | 0.0228 |
| CAZ | 0.0000 | 0.0000 | 0.0000 | 0.0000 | 0.0000 | 0.0000 | 0.0000 | 0.0000 | 0.0000 | 0.0000 |
| CHA | 0.0000 | 0.0000 | 0.0000 | 0.0000 | 0.0000 | 0.0000 | 0.0000 | 0.0000 | 0.0000 | 0.0000 |
| EUR | 0.0012 | 0.0016 | 0.0018 | 0.0032 | 0.0018 | 0.0012 | 0.0016 | 0.0014 | 0.0009 | 0.0008 |
| IND | 0.0000 | 0.0000 | 0.0000 | 0.0000 | 0.0000 | 0.0000 | 0.0000 | 0.0000 | 0.0000 | 0.0000 |
| JPN | 0.0000 | 0.0000 | 0.0000 | 0.0000 | 0.0000 | 0.0000 | 0.0000 | 0.0000 | 0.0000 | 0.0000 |
| LAM | 0.0000 | 0.0000 | 0.0000 | 0.0000 | 0.0000 | 0.0000 | 0.0000 | 0.0000 | 0.0000 | 0.0000 |
| MEA | 0.0000 | 0.0000 | 0.0000 | 0.0000 | 0.0000 | 0.0000 | 0.0000 | 0.0000 | 0.0000 | 0.0000 |
| NEU | 0.0000 | 0.0000 | 0.0000 | 0.0000 | 0.0000 | 0.0000 | 0.0000 | 0.0000 | 0.0000 | 0.0000 |
| OAS | 0.0000 | 0.0000 | 0.0000 | 0.0000 | 0.0000 | 0.0000 | 0.0000 | 0.0000 | 0.0000 | 0.0000 |
| REF | 0.0000 | 0.0000 | 0.0000 | 0.0000 | 0.0000 | 0.0000 | 0.0081 | 0.0105 | 0.0160 | 0.0219 |
| SSA | 0.0000 | 0.0000 | 0.0000 | 0.0000 | 0.0000 | 0.0000 | 0.0000 | 0.0000 | 0.0000 | 0.0000 |
| USA | 0.0000 | 0.0000 | 0.0000 | 0.0000 | 0.0000 | 0.0000 | 0.0000 | 0.0000 | 0.0000 | 0.0000 |

Table 322: FAO — Demand—Feed—Livestock products—Eggs (Mt DM/yr)

6.5.3
Ruminant meat

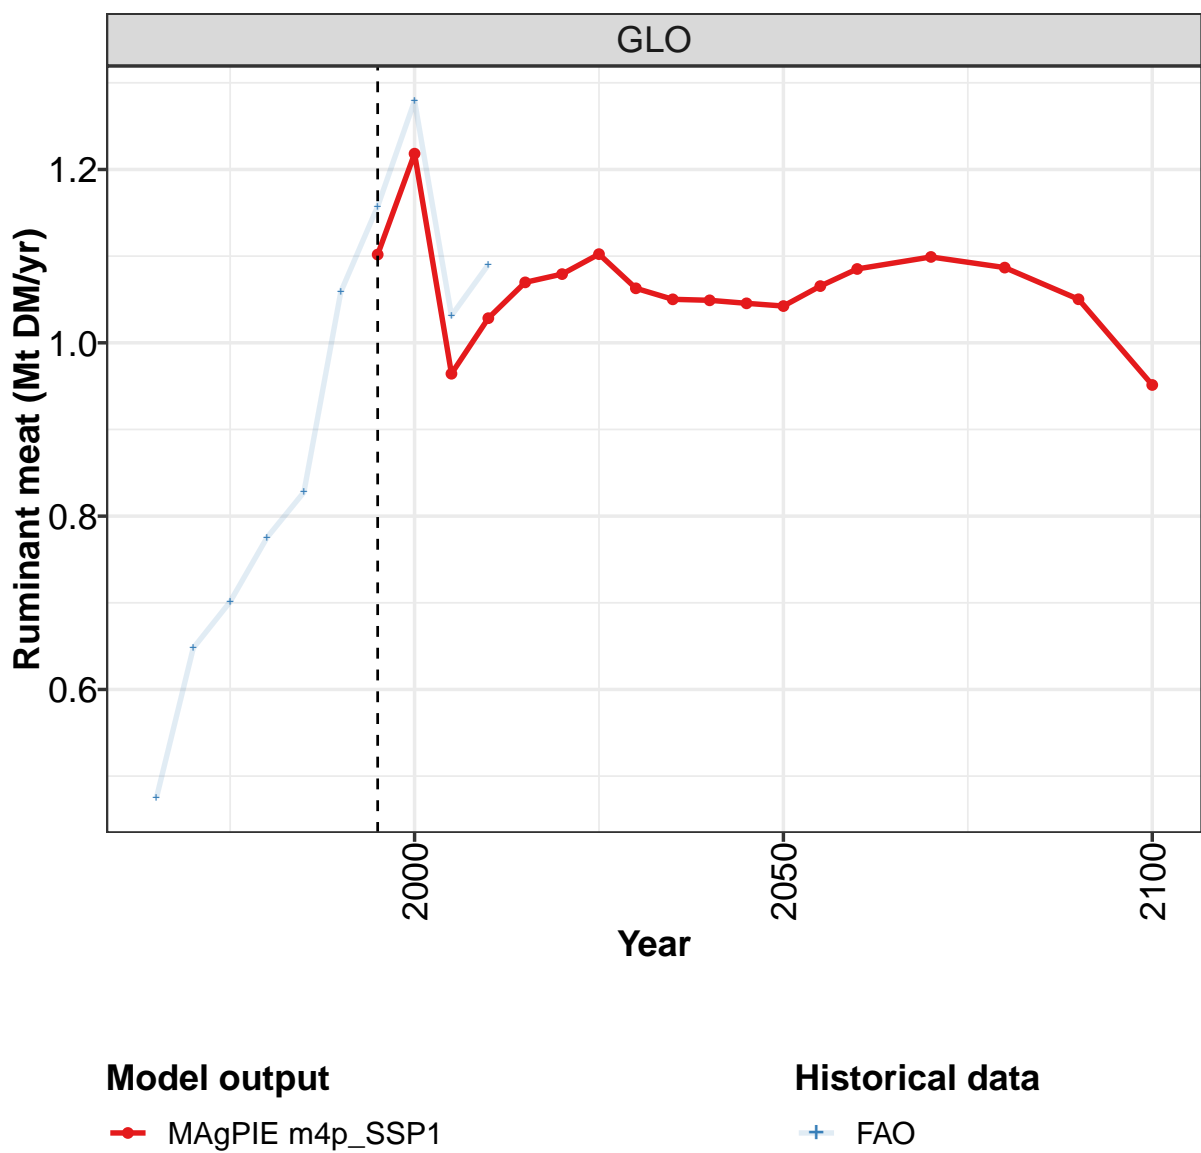

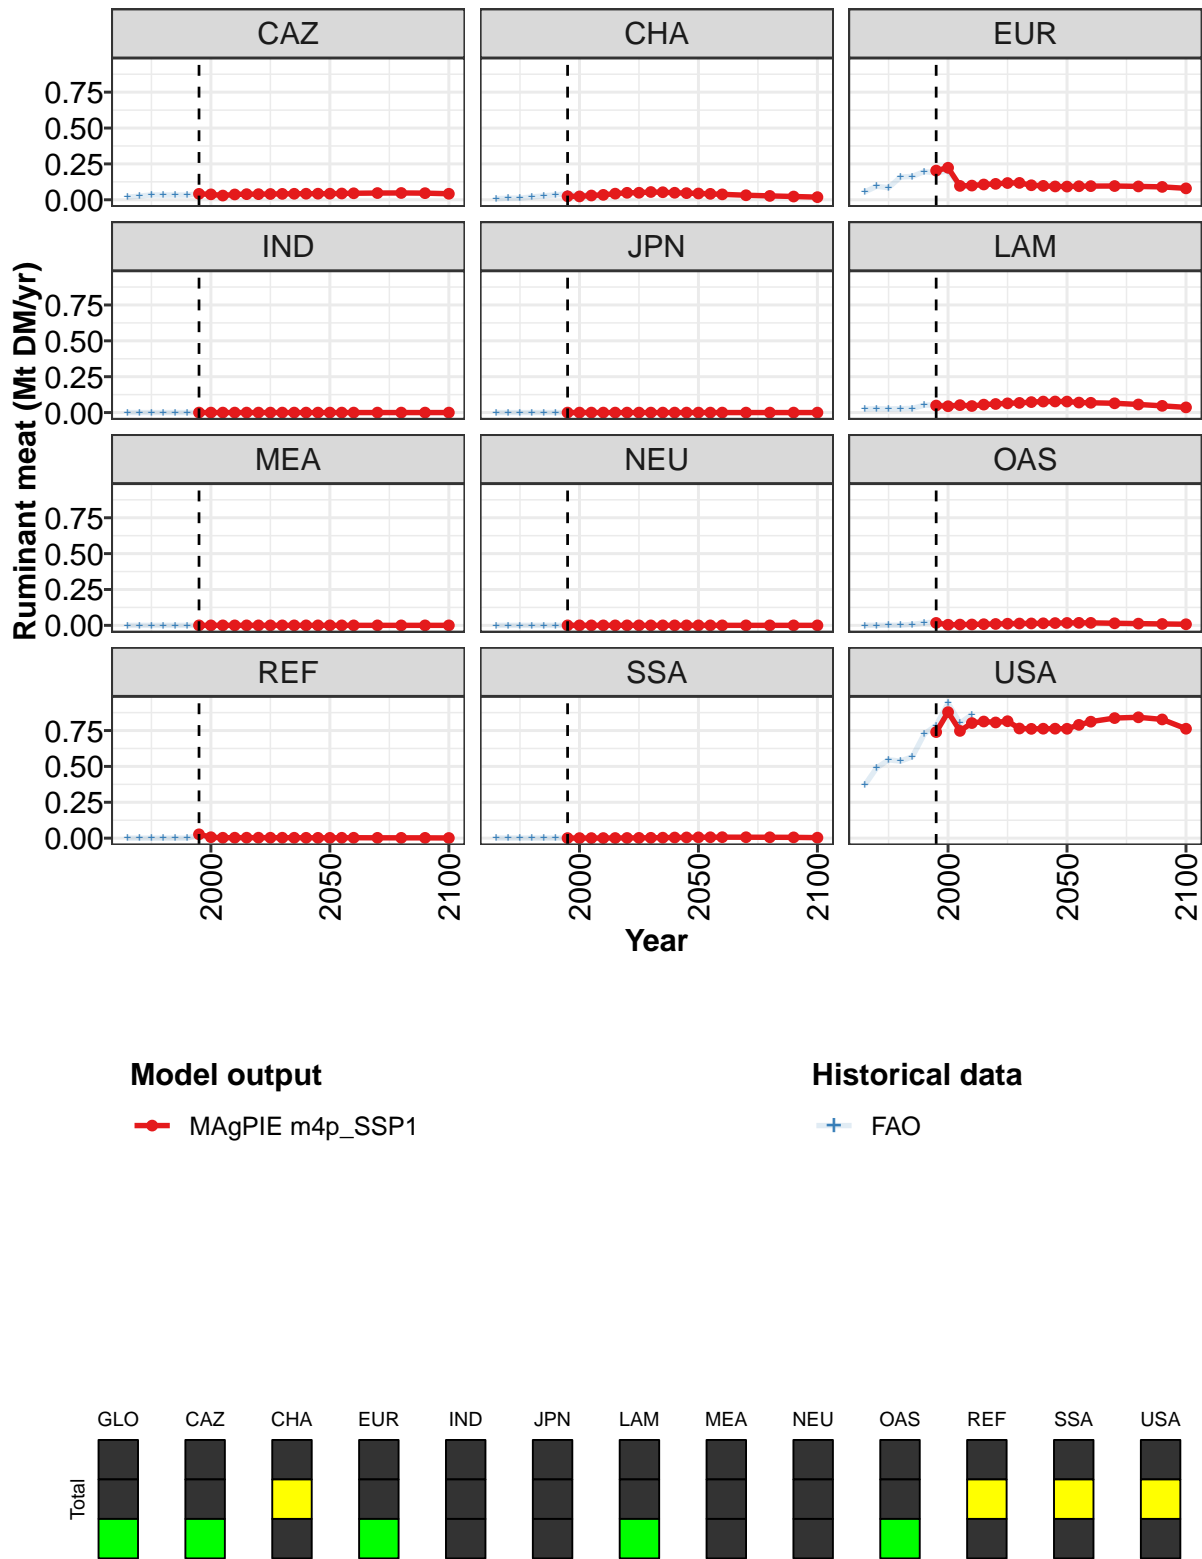

Figure 108: MAgPIE m4p\_SSP1 — Demand—Feed—Livestock products—Ruminant meat (Mt DM/yr)

|     | 1995 | 2000 | 2005 | 2010 | 2015 | 2020 | 2025 | 2030 | 2035 | 2040 | 2045 |
|-----|------|------|------|------|------|------|------|------|------|------|------|
| GLO | 1.10 | 1.22 | 0.96 | 1.03 | 1.07 | 1.08 | 1.10 | 1.06 | 1.05 | 1.05 | 1.05 |
| CAZ | 0.04 | 0.04 | 0.03 | 0.04 | 0.04 | 0.04 | 0.04 | 0.04 | 0.04 | 0.04 | 0.04 |
| CHA | 0.02 | 0.02 | 0.03 | 0.03 | 0.04 | 0.05 | 0.05 | 0.05 | 0.05 | 0.05 | 0.05 |
| EUR | 0.20 | 0.22 | 0.10 | 0.10 | 0.11 | 0.11 | 0.12 | 0.12 | 0.10 | 0.10 | 0.09 |
| IND | 0.00 | 0.00 | 0.00 | 0.00 | 0.00 | 0.00 | 0.00 | 0.00 | 0.00 | 0.00 | 0.00 |
| JPN | 0.00 | 0.00 | 0.00 | 0.00 | 0.00 | 0.00 | 0.00 | 0.00 | 0.00 | 0.00 | 0.00 |
| LAM | 0.05 | 0.04 | 0.05 | 0.05 | 0.06 | 0.06 | 0.06 | 0.07 | 0.07 | 0.08 | 0.08 |
| MEA | 0.00 | 0.00 | 0.00 | 0.00 | 0.00 | 0.00 | 0.00 | 0.00 | 0.00 | 0.00 | 0.00 |
| NEU | 0.00 | 0.00 | 0.00 | 0.00 | 0.00 | 0.00 | 0.00 | 0.00 | 0.00 | 0.00 | 0.00 |
| OAS | 0.02 | 0.00 | 0.01 | 0.01 | 0.01 | 0.01 | 0.01 | 0.01 | 0.01 | 0.01 | 0.02 |
| REF | 0.03 | 0.01 | 0.00 | 0.00 | 0.00 | 0.00 | 0.00 | 0.00 | 0.00 | 0.00 | 0.00 |
| SSA | 0.00 | 0.00 | 0.00 | 0.00 | 0.00 | 0.00 | 0.00 | 0.00 | 0.00 | 0.00 | 0.00 |
| USA | 0.74 | 0.88 | 0.75 | 0.80 | 0.81 | 0.81 | 0.82 | 0.76 | 0.76 | 0.76 | 0.76 |

Table 323: MAgPIE m4p\_SSP1 — Demand—Feed—Livestock products—Ruminant meat (Mt DM/yr) [PART 1/2]

|     | 2050 | 2055 | 2060 | 2070 | 2080 | 2090 | 2100 |
|-----|------|------|------|------|------|------|------|
| GLO | 1.04 | 1.07 | 1.09 | 1.10 | 1.09 | 1.05 | 0.95 |
| CAZ | 0.04 | 0.04 | 0.05 | 0.05 | 0.05 | 0.05 | 0.04 |
| CHA | 0.04 | 0.04 | 0.04 | 0.03 | 0.03 | 0.02 | 0.02 |
| EUR | 0.09 | 0.09 | 0.10 | 0.10 | 0.09 | 0.09 | 0.08 |
| IND | 0.00 | 0.00 | 0.00 | 0.00 | 0.00 | 0.00 | 0.00 |
| JPN | 0.00 | 0.00 | 0.00 | 0.00 | 0.00 | 0.00 | 0.00 |
| LAM | 0.08 | 0.07 | 0.07 | 0.06 | 0.06 | 0.05 | 0.04 |
| MEA | 0.00 | 0.00 | 0.00 | 0.00 | 0.00 | 0.00 | 0.00 |
| NEU | 0.00 | 0.00 | 0.00 | 0.00 | 0.00 | 0.00 | 0.00 |
| OAS | 0.02 | 0.02 | 0.02 | 0.01 | 0.01 | 0.01 | 0.01 |
| REF | 0.00 | 0.00 | 0.00 | 0.00 | 0.00 | 0.00 | 0.00 |
| SSA | 0.01 | 0.01 | 0.01 | 0.01 | 0.01 | 0.01 | 0.00 |
| USA | 0.76 | 0.79 | 0.81 | 0.84 | 0.84 | 0.83 | 0.76 |

Table 324: MAgPIE m4p\_SSP1 — Demand—Feed—Livestock products—Ruminant meat (Mt DM/yr) [PART 2/2]

|     | 1965 | 1970 | 1975 | 1980 | 1985 | 1990 | 1995 | 2000 | 2005 | 2010 |
|-----|------|------|------|------|------|------|------|------|------|------|
| GLO | 0.47 | 0.65 | 0.70 | 0.78 | 0.83 | 1.06 | 1.16 | 1.28 | 1.03 | 1.09 |
| CAZ | 0.02 | 0.03 | 0.03 | 0.03 | 0.03 | 0.03 | 0.04 | 0.04 | 0.04 | 0.04 |
| CHA | 0.01 | 0.01 | 0.01 | 0.02 | 0.03 | 0.03 | 0.04 | 0.03 | 0.04 | 0.03 |
| EUR | 0.05 | 0.09 | 0.08 | 0.16 | 0.16 | 0.20 | 0.19 | 0.20 | 0.10 | 0.10 |
| IND | 0.00 | 0.00 | 0.00 | 0.00 | 0.00 | 0.00 | 0.00 | 0.00 | 0.00 | 0.00 |
| JPN | 0.00 | 0.00 | 0.00 | 0.00 | 0.00 | 0.00 | 0.00 | 0.00 | 0.00 | 0.00 |
| LAM | 0.02 | 0.03 | 0.03 | 0.03 | 0.03 | 0.05 | 0.05 | 0.05 | 0.05 | 0.05 |
| MEA | 0.00 | 0.00 | 0.00 | 0.00 | 0.00 | 0.00 | 0.00 | 0.00 | 0.00 | 0.00 |
| NEU | 0.00 | 0.00 | 0.00 | 0.00 | 0.00 | 0.00 | 0.00 | 0.00 | 0.00 | 0.00 |
| OAS | 0.00 | 0.00 | 0.00 | 0.00 | 0.01 | 0.02 | 0.02 | 0.01 | 0.01 | 0.01 |
| REF | 0.00 | 0.00 | 0.00 | 0.00 | 0.00 | 0.00 | 0.02 | 0.01 | 0.00 | 0.00 |
| SSA | 0.00 | 0.00 | 0.00 | 0.00 | 0.00 | 0.00 | 0.00 | 0.00 | 0.00 | 0.00 |
| USA | 0.37 | 0.49 | 0.55 | 0.54 | 0.57 | 0.73 | 0.79 | 0.94 | 0.80 | 0.86 |

Table 325: FAO — Demand—Feed—Livestock products—Ruminant meat (Mt DM/yr)

6.6 Pasture

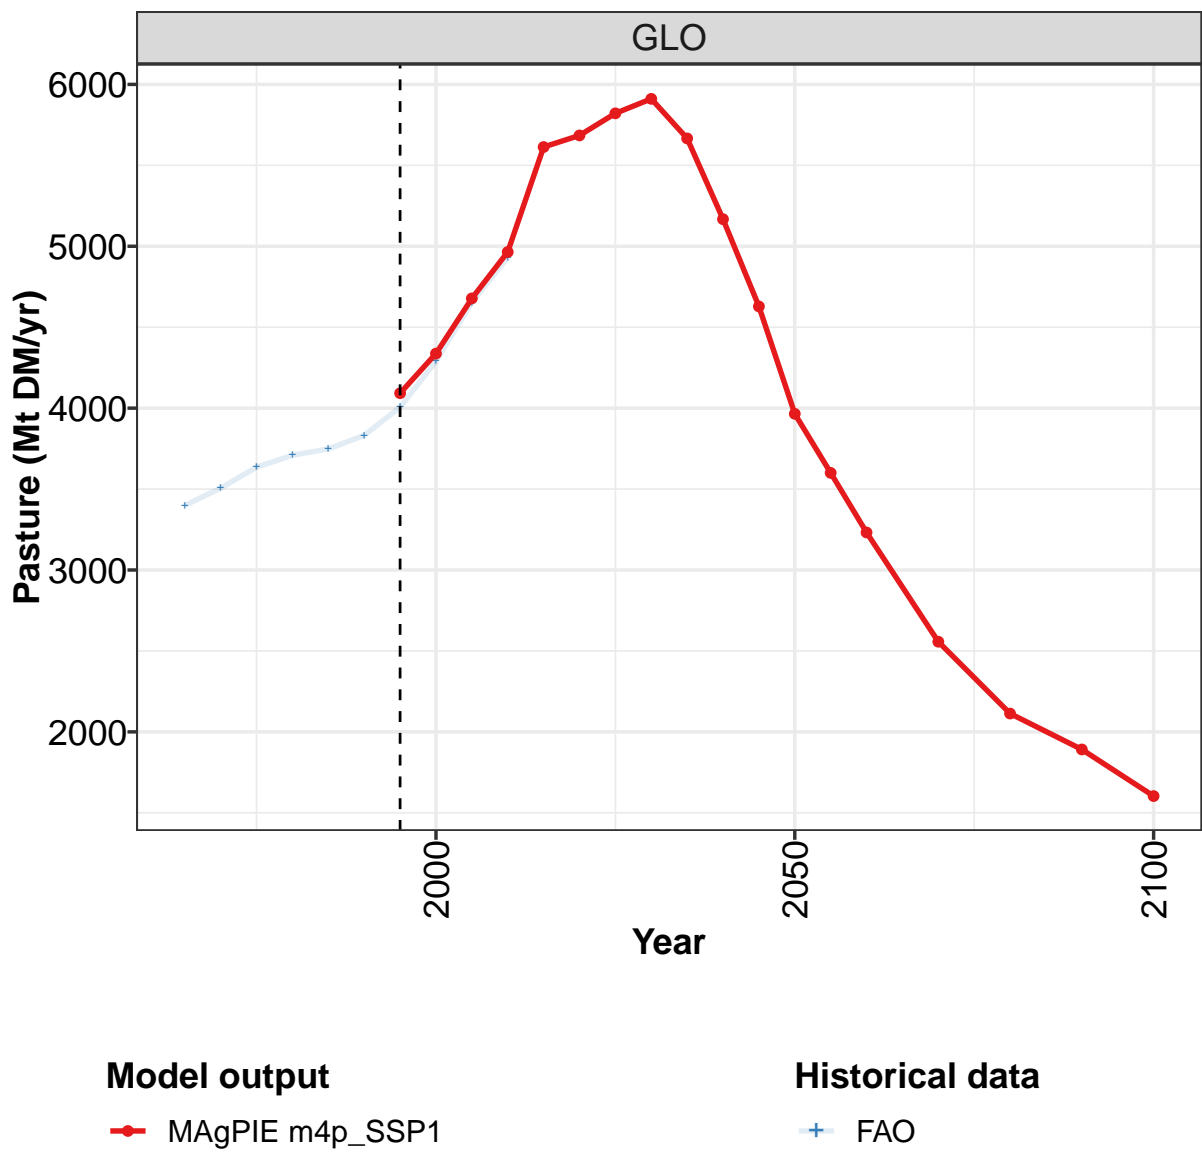

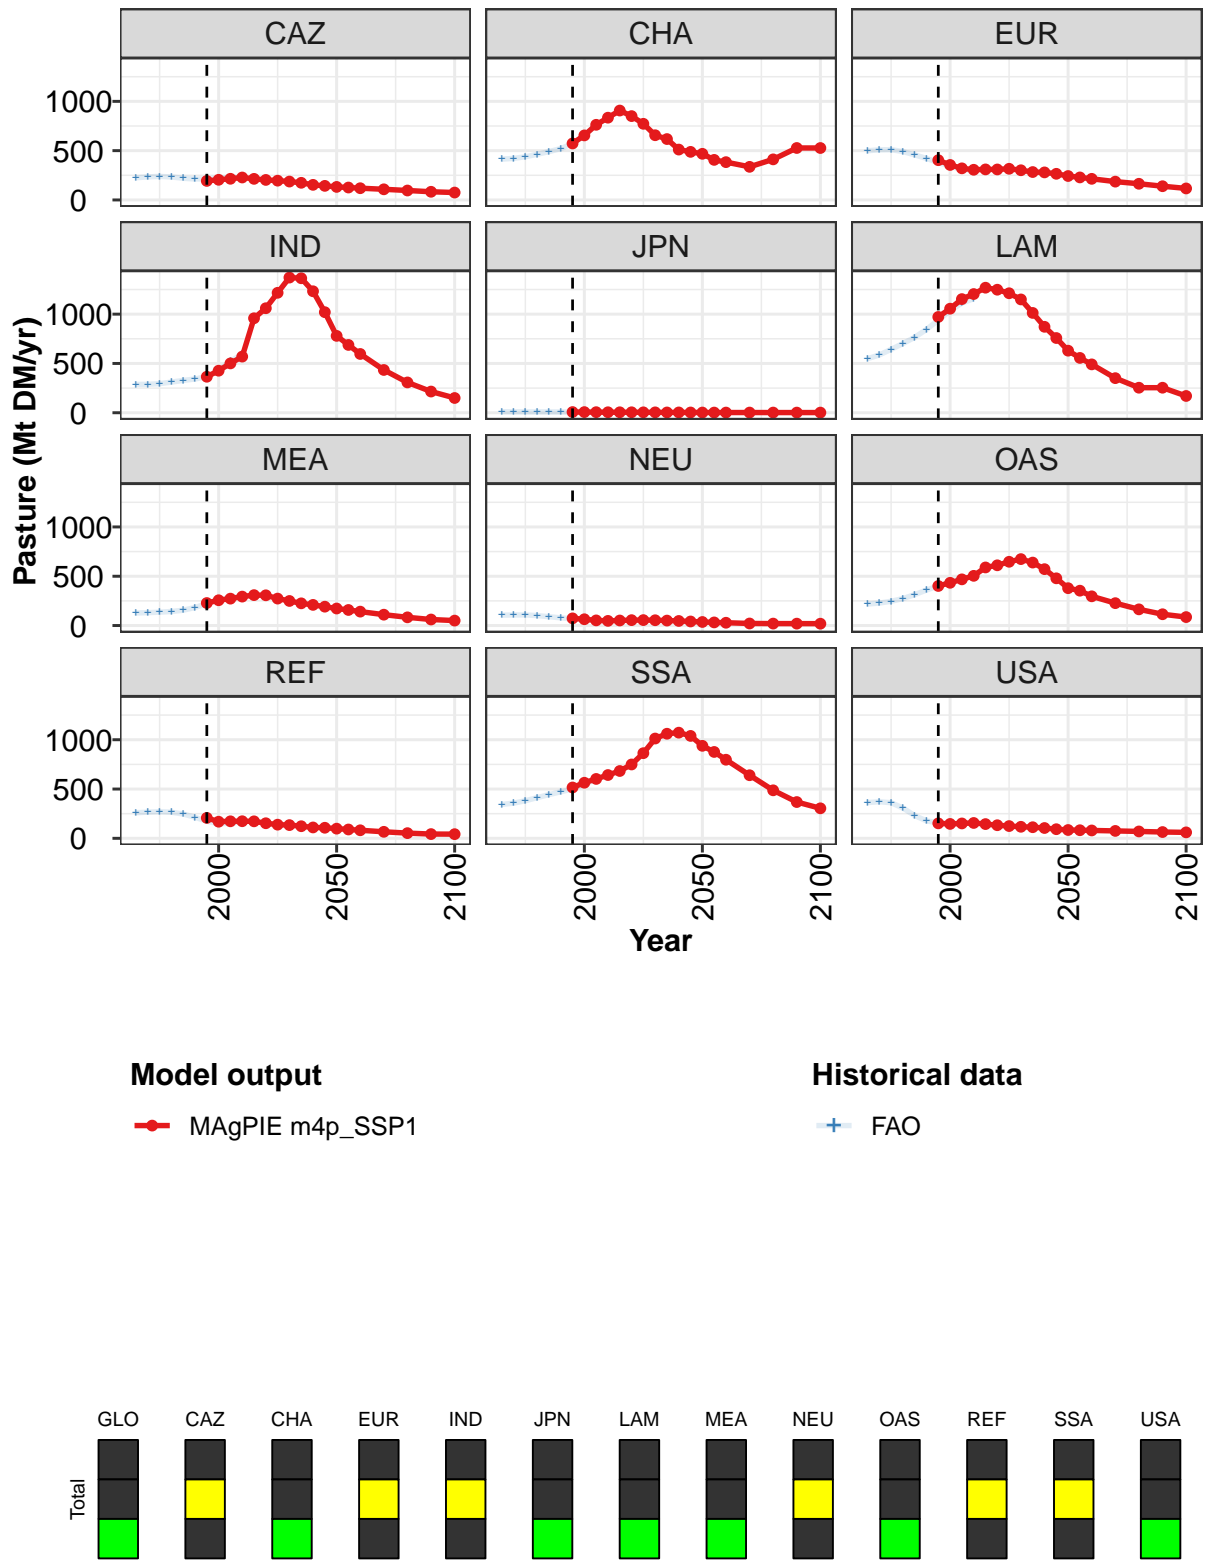

Figure 109: MAGPIE m4p\_SSP1 — Demand—Feed—Pasture (Mt DM/yr)

|     | 1995 | 2000 | 2005 | 2010 | 2015 | 2020 | 2025 | 2030 | 2035 | 2040 | 2045 |
|-----|------|------|------|------|------|------|------|------|------|------|------|
| GLO | 4092 | 4337 | 4678 | 4965 | 5613 | 5685 | 5821 | 5911 | 5666 | 5167 | 4628 |
| CAZ | 193  | 205  | 215  | 228  | 214  | 203  | 196  | 187  | 174  | 153  | 143  |
| CHA | 573  | 655  | 762  | 835  | 907  | 851  | 773  | 657  | 618  | 511  | 488  |
| EUR | 404  | 355  | 321  | 306  | 310  | 309  | 316  | 301  | 283  | 280  | 265  |
| IND | 365  | 427  | 501  | 570  | 959  | 1060 | 1217 | 1371 | 1364 | 1232 | 1020 |
| JPN | 7    | 7    | 6    | 5    | 5    | 5    | 4    | 4    | 3    | 3    | 3    |
| LAM | 972  | 1056 | 1153 | 1204 | 1269 | 1248 | 1212 | 1149 | 1013 | 872  | 758  |
| MEA | 228  | 257  | 273  | 294  | 309  | 307  | 273  | 250  | 225  | 209  | 191  |
| NEU | 73   | 64   | 52   | 47   | 51   | 55   | 55   | 54   | 50   | 46   | 41   |
| OAS | 401  | 434  | 468  | 504  | 589  | 611  | 647  | 674  | 639  | 572  | 479  |
| REF | 207  | 169  | 173  | 174  | 172  | 153  | 139  | 134  | 123  | 111  | 107  |
| SSA | 516  | 564  | 603  | 642  | 683  | 749  | 864  | 1012 | 1061 | 1072 | 1039 |
| USA | 152  | 146  | 151  | 156  | 145  | 133  | 124  | 117  | 113  | 105  | 93   |

Table 326: MAgPIE m4p\_SSP1 — Demand—Feed—Pasture (Mt DM/yr) [PART 1/2]

|     | 2050 | 2055 | 2060 | 2070 | 2080 | 2090 | 2100 |
|-----|------|------|------|------|------|------|------|
| GLO | 3965 | 3600 | 3232 | 2557 | 2113 | 1892 | 1604 |
| CAZ | 132  | 126  | 119  | 108  | 96   | 83   | 75   |
| CHA | 468  | 407  | 384  | 336  | 412  | 527  | 527  |
| EUR | 243  | 229  | 214  | 186  | 164  | 139  | 117  |
| IND | 780  | 688  | 596  | 434  | 308  | 215  | 150  |
| JPN | 2    | 2    | 2    | 2    | 2    | 2    | 2    |
| LAM | 630  | 556  | 491  | 351  | 254  | 254  | 170  |
| MEA | 173  | 158  | 141  | 110  | 83   | 61   | 50   |
| NEU | 36   | 32   | 28   | 21   | 20   | 19   | 19   |
| OAS | 379  | 354  | 297  | 227  | 164  | 115  | 86   |
| REF | 98   | 90   | 82   | 66   | 53   | 43   | 42   |
| SSA | 938  | 876  | 798  | 640  | 487  | 368  | 305  |
| USA | 85   | 82   | 80   | 75   | 70   | 64   | 60   |

Table 327: MAgPIE m4p\_SSP1 — Demand—Feed—Pasture (Mt DM/yr) [PART 2/2]

|     | 1965 | 1970 | 1975 | 1980 | 1985 | 1990 | 1995 | 2000 | 2005 | 2010 |
|-----|------|------|------|------|------|------|------|------|------|------|
| GLO | 3399 | 3506 | 3636 | 3709 | 3748 | 3832 | 4006 | 4290 | 4653 | 4931 |
| CAZ | 225  | 234  | 239  | 233  | 220  | 212  | 215  | 223  | 229  | 231  |
| CHA | 414  | 422  | 438  | 463  | 490  | 521  | 572  | 657  | 760  | 832  |
| EUR | 499  | 509  | 510  | 491  | 457  | 421  | 381  | 339  | 309  | 296  |
| IND | 287  | 288  | 295  | 311  | 328  | 342  | 367  | 429  | 522  | 594  |
| JPN | 10   | 10   | 9    | 9    | 8    | 8    | 7    | 7    | 6    | 5    |
| LAM | 548  | 586  | 643  | 702  | 765  | 845  | 939  | 1034 | 1113 | 1157 |
| MEA | 127  | 130  | 136  | 142  | 156  | 183  | 222  | 260  | 284  | 294  |
| NEU | 105  | 107  | 107  | 101  | 89   | 78   | 68   | 59   | 51   | 47   |
| OAS | 218  | 228  | 246  | 273  | 313  | 360  | 402  | 438  | 475  | 503  |
| REF | 260  | 266  | 270  | 265  | 246  | 213  | 173  | 148  | 152  | 168  |
| SSA | 344  | 357  | 381  | 412  | 443  | 471  | 502  | 546  | 600  | 640  |
| USA | 362  | 371  | 361  | 307  | 230  | 177  | 157  | 149  | 152  | 162  |

Table 328: FAO — Demand—Feed—Pasture (Mt DM/yr)

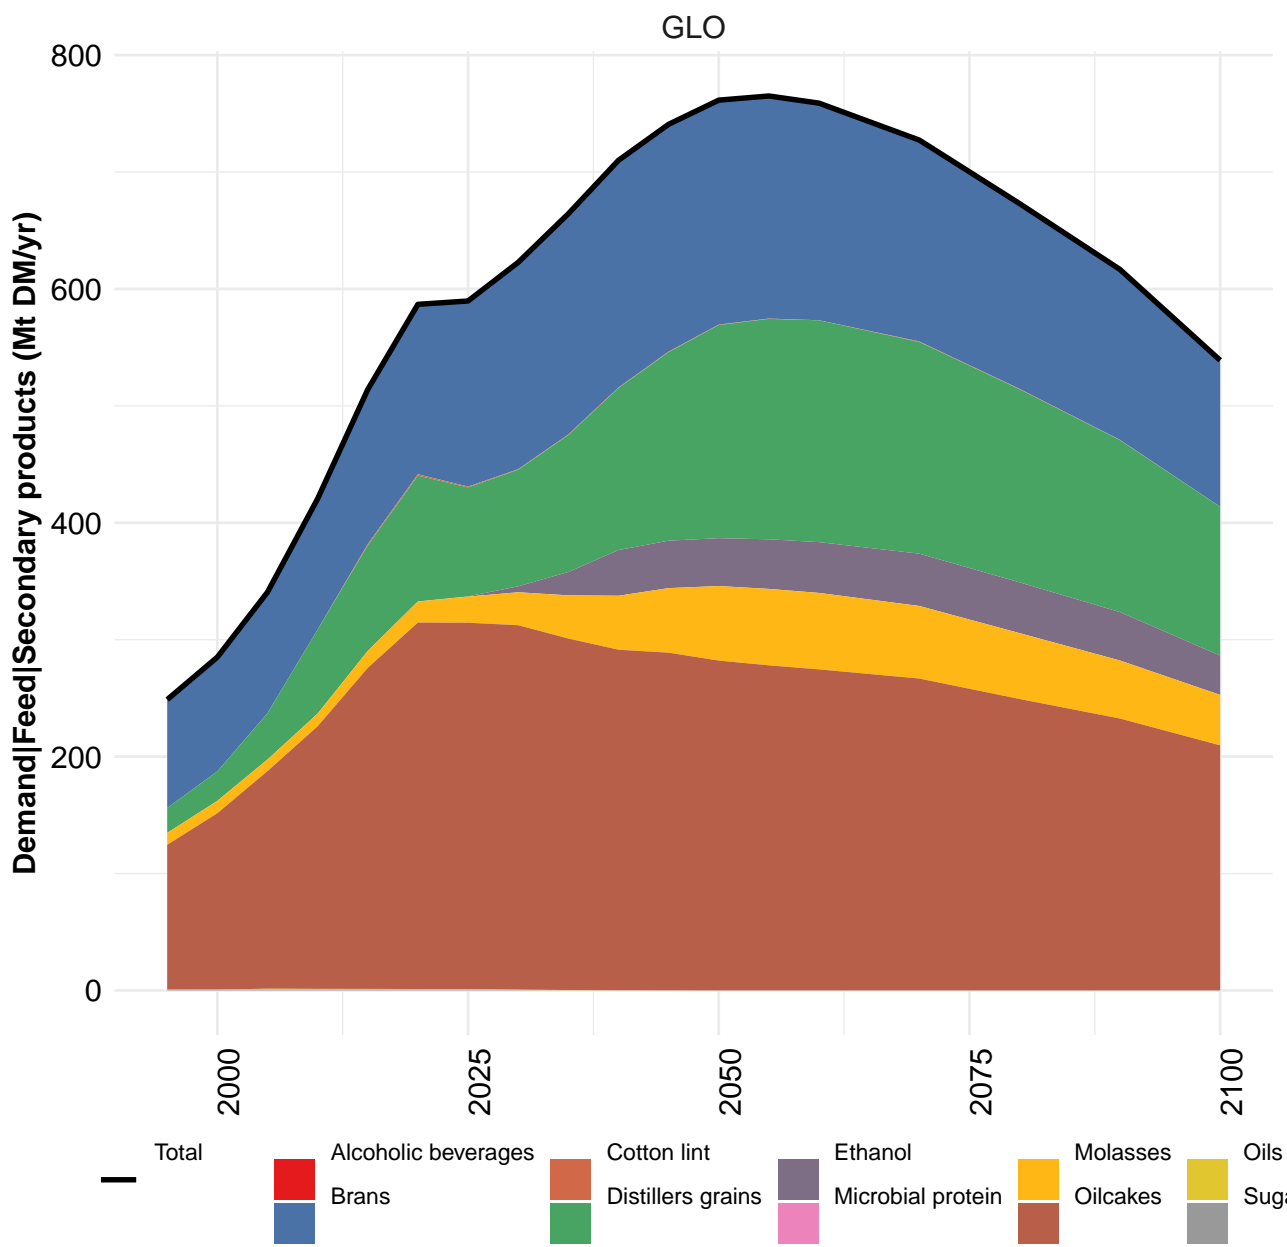



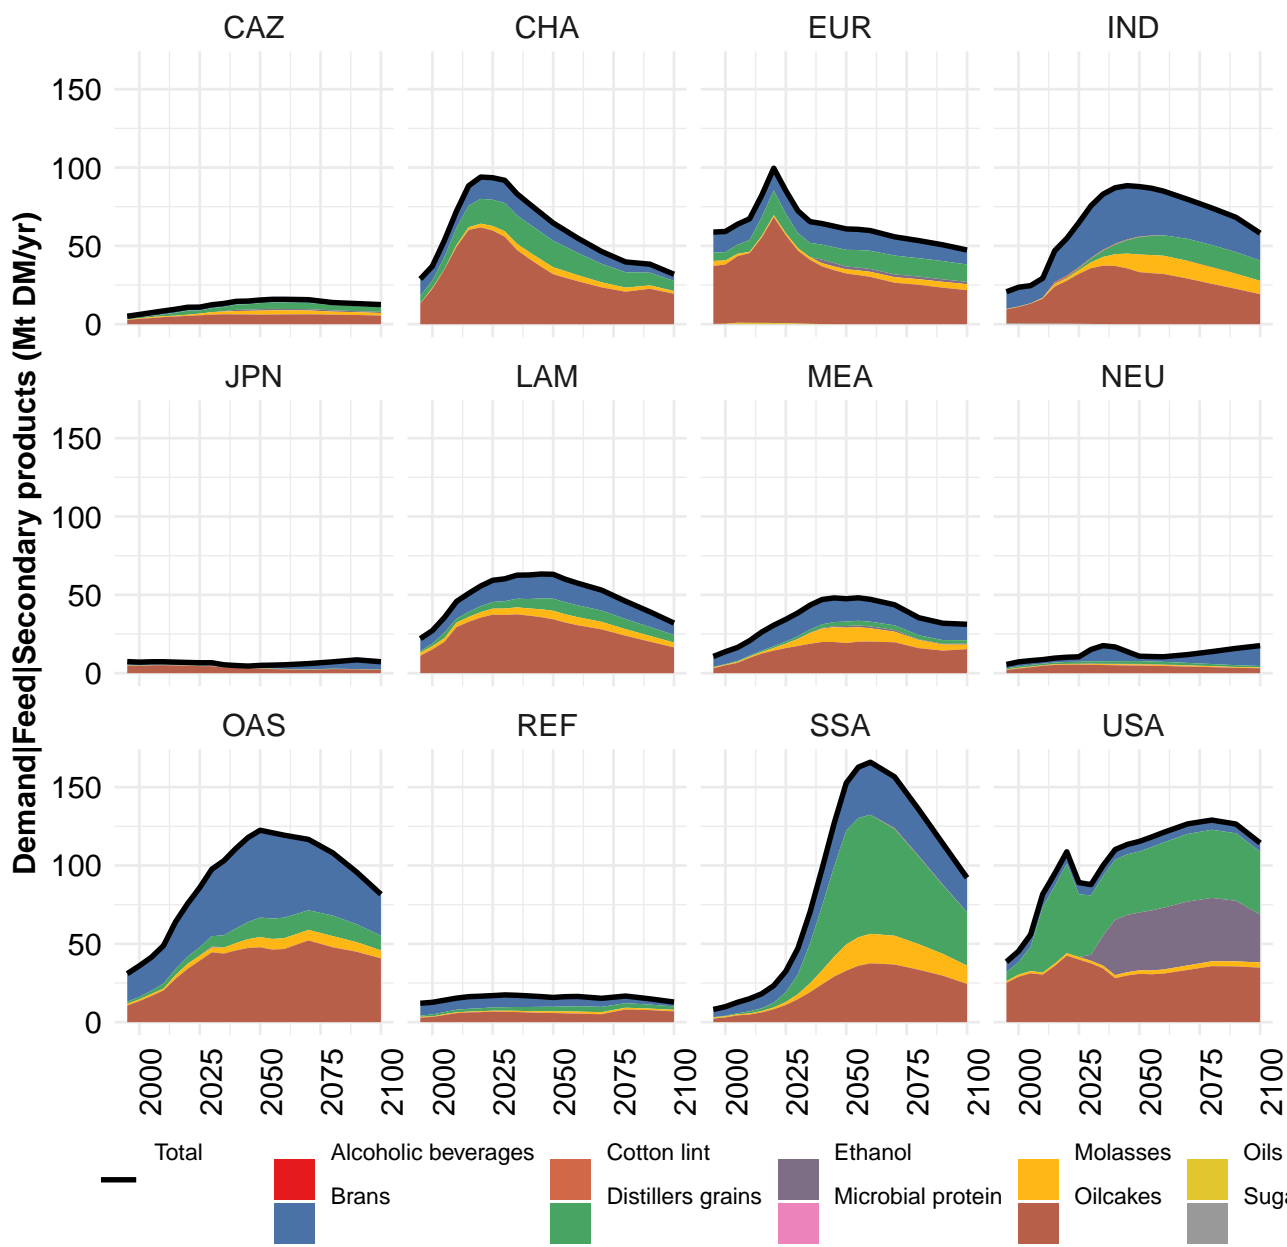

6.7 Secondary products

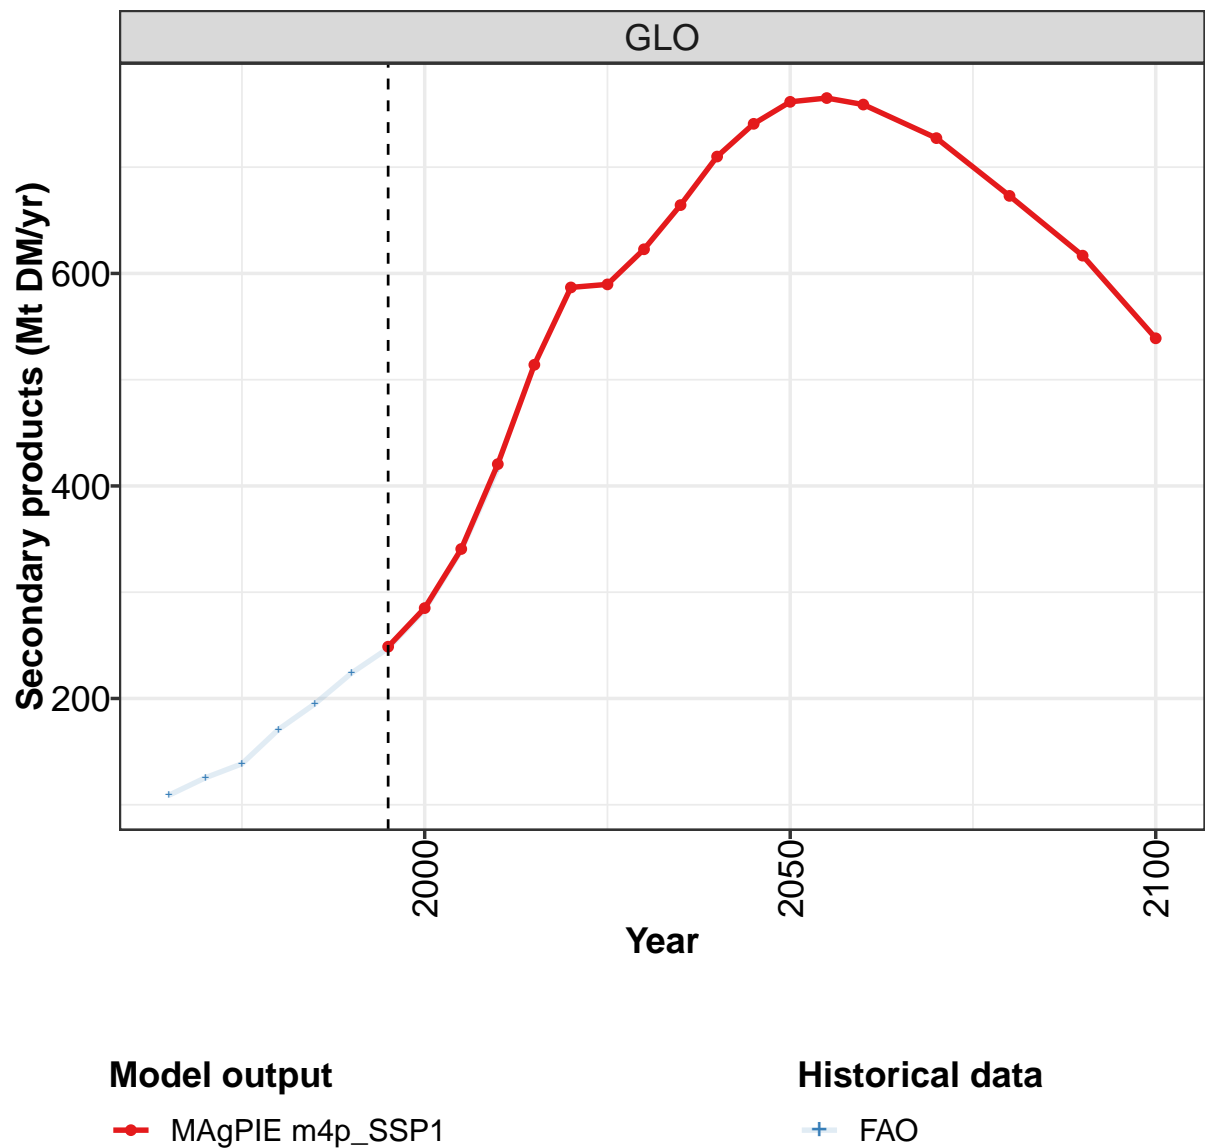

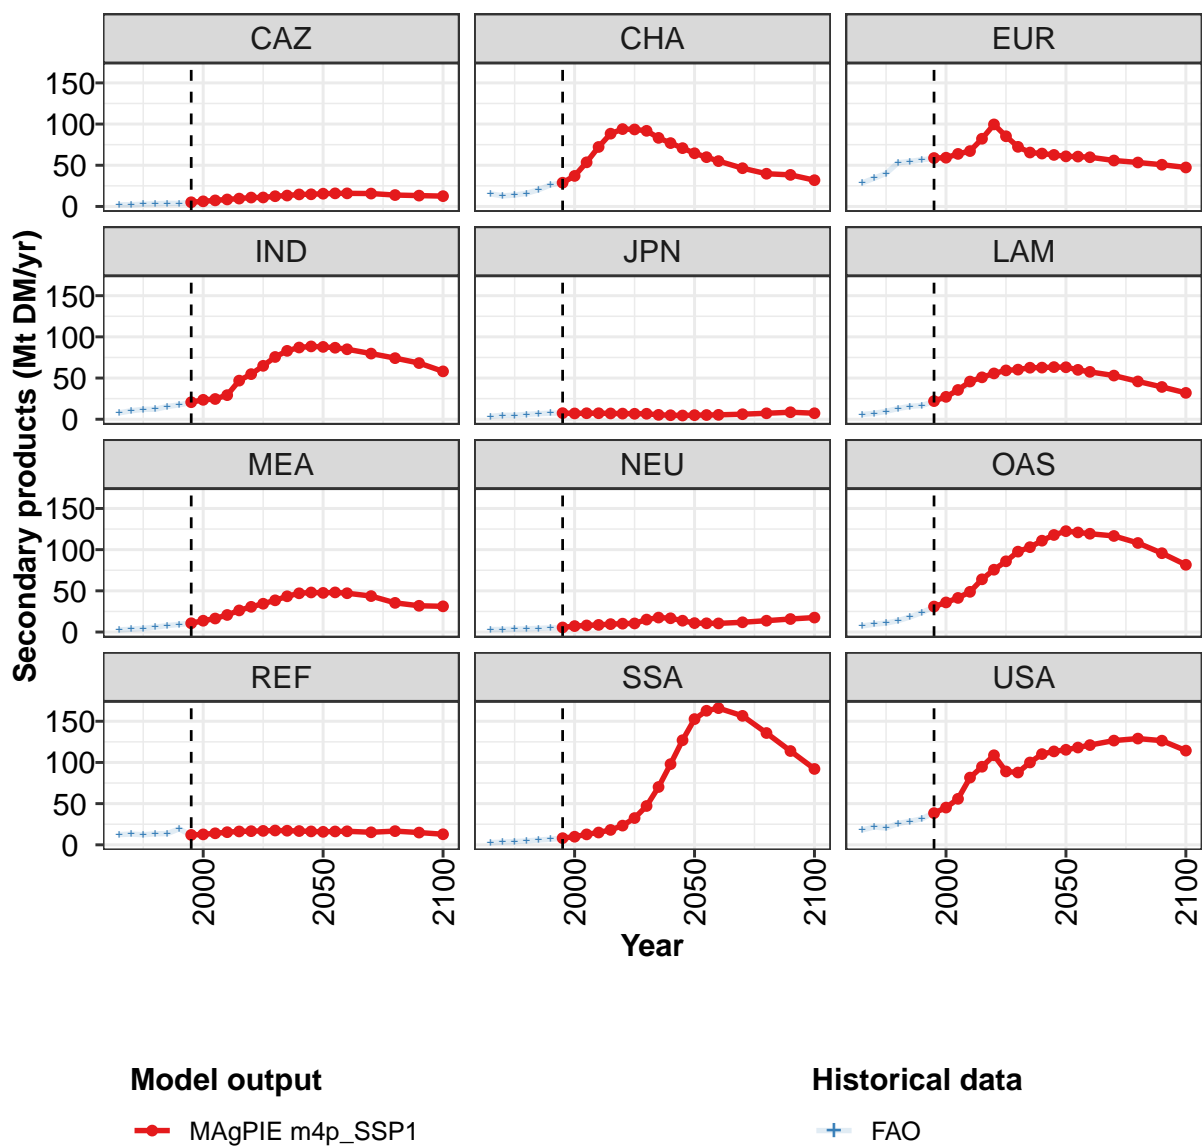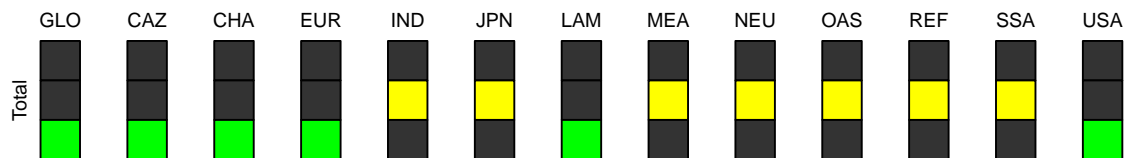

Figure 110: MAgPIE m4p\_SSP1 — Demand—Feed—Secondary products (Mt DM/yr)

|     | 1995 | 2000 | 2005 | 2010 | 2015 | 2020 | 2025 | 2030 | 2035 | 2040 | 2045 |
|-----|------|------|------|------|------|------|------|------|------|------|------|
| GLO | 249  | 285  | 341  | 421  | 514  | 587  | 590  | 623  | 664  | 710  | 741  |
| CAZ | 5    | 6    | 7    | 9    | 10   | 11   | 11   | 12   | 13   | 15   | 15   |
| CHA | 29   | 37   | 54   | 72   | 88   | 94   | 93   | 92   | 83   | 77   | 71   |
| EUR | 59   | 59   | 64   | 67   | 82   | 100  | 85   | 72   | 65   | 64   | 63   |
| IND | 21   | 24   | 25   | 29   | 47   | 55   | 65   | 76   | 83   | 87   | 88   |
| JPN | 7    | 7    | 7    | 7    | 7    | 7    | 7    | 7    | 5    | 5    | 5    |
| LAM | 22   | 27   | 36   | 46   | 51   | 56   | 59   | 60   | 63   | 63   | 63   |
| MEA | 11   | 14   | 16   | 21   | 26   | 31   | 34   | 39   | 43   | 47   | 48   |
| NEU | 6    | 7    | 8    | 9    | 10   | 10   | 10   | 15   | 18   | 17   | 14   |
| OAS | 31   | 36   | 41   | 49   | 64   | 76   | 86   | 98   | 103  | 111  | 118  |
| REF | 12   | 13   | 14   | 15   | 16   | 17   | 17   | 17   | 17   | 17   | 16   |
| SSA | 8    | 10   | 13   | 15   | 18   | 23   | 33   | 47   | 70   | 98   | 127  |
| USA | 39   | 45   | 56   | 82   | 95   | 109  | 89   | 88   | 100  | 110  | 113  |

Table 329: MAgPIE m4p\_SSP1 — Demand—Feed—Secondary products (Mt DM/yr) [PART 1/2]

|     | 2050 | 2055 | 2060 | 2070 | 2080 | 2090 | 2100 |
|-----|------|------|------|------|------|------|------|
| GLO | 762  | 765  | 759  | 727  | 673  | 617  | 539  |
| CAZ | 15   | 16   | 16   | 16   | 14   | 13   | 13   |
| CHA | 65   | 60   | 55   | 46   | 40   | 38   | 32   |
| EUR | 61   | 61   | 60   | 56   | 53   | 51   | 47   |
| IND | 88   | 87   | 85   | 80   | 74   | 68   | 58   |
| JPN | 5    | 5    | 5    | 6    | 7    | 9    | 7    |
| LAM | 63   | 60   | 58   | 53   | 46   | 39   | 32   |
| MEA | 48   | 48   | 47   | 44   | 35   | 32   | 31   |
| NEU | 11   | 11   | 10   | 12   | 14   | 16   | 18   |
| OAS | 122  | 121  | 119  | 117  | 108  | 96   | 82   |
| REF | 16   | 16   | 16   | 15   | 17   | 15   | 13   |
| SSA | 153  | 163  | 166  | 157  | 136  | 114  | 92   |
| USA | 115  | 118  | 121  | 127  | 129  | 126  | 114  |

Table 330: MAgPIE m4p\_SSP1 — Demand—Feed—Secondary products (Mt DM/yr) [PART 2/2]

|     | 1965 | 1970 | 1975 | 1980 | 1985 | 1990 | 1995 | 2000 | 2005 | 2010 |
|-----|------|------|------|------|------|------|------|------|------|------|
| GLO | 109  | 125  | 139  | 171  | 195  | 224  | 247  | 283  | 339  | 416  |
| CAZ | 2    | 2    | 3    | 3    | 4    | 4    | 5    | 6    | 7    | 9    |
| CHA | 15   | 13   | 14   | 16   | 20   | 26   | 29   | 38   | 54   | 72   |
| EUR | 28   | 34   | 40   | 53   | 55   | 57   | 58   | 59   | 62   | 66   |
| IND | 8    | 10   | 12   | 12   | 15   | 18   | 20   | 23   | 25   | 29   |
| JPN | 4    | 5    | 5    | 6    | 7    | 7    | 7    | 7    | 7    | 7    |
| LAM | 6    | 7    | 10   | 13   | 16   | 17   | 22   | 27   | 35   | 43   |
| MEA | 3    | 3    | 5    | 6    | 8    | 9    | 11   | 14   | 16   | 21   |
| NEU | 3    | 3    | 3    | 4    | 4    | 5    | 5    | 7    | 8    | 9    |
| OAS | 7    | 9    | 11   | 14   | 18   | 24   | 31   | 35   | 42   | 50   |
| REF | 12   | 13   | 12   | 13   | 14   | 19   | 11   | 12   | 14   | 15   |
| SSA | 3    | 3    | 4    | 5    | 6    | 7    | 8    | 10   | 13   | 15   |
| USA | 18   | 22   | 20   | 26   | 29   | 32   | 39   | 46   | 57   | 81   |

Table 331: FAO — Demand—Feed—Secondary products (Mt DM/yr)

6.7.1 Brans

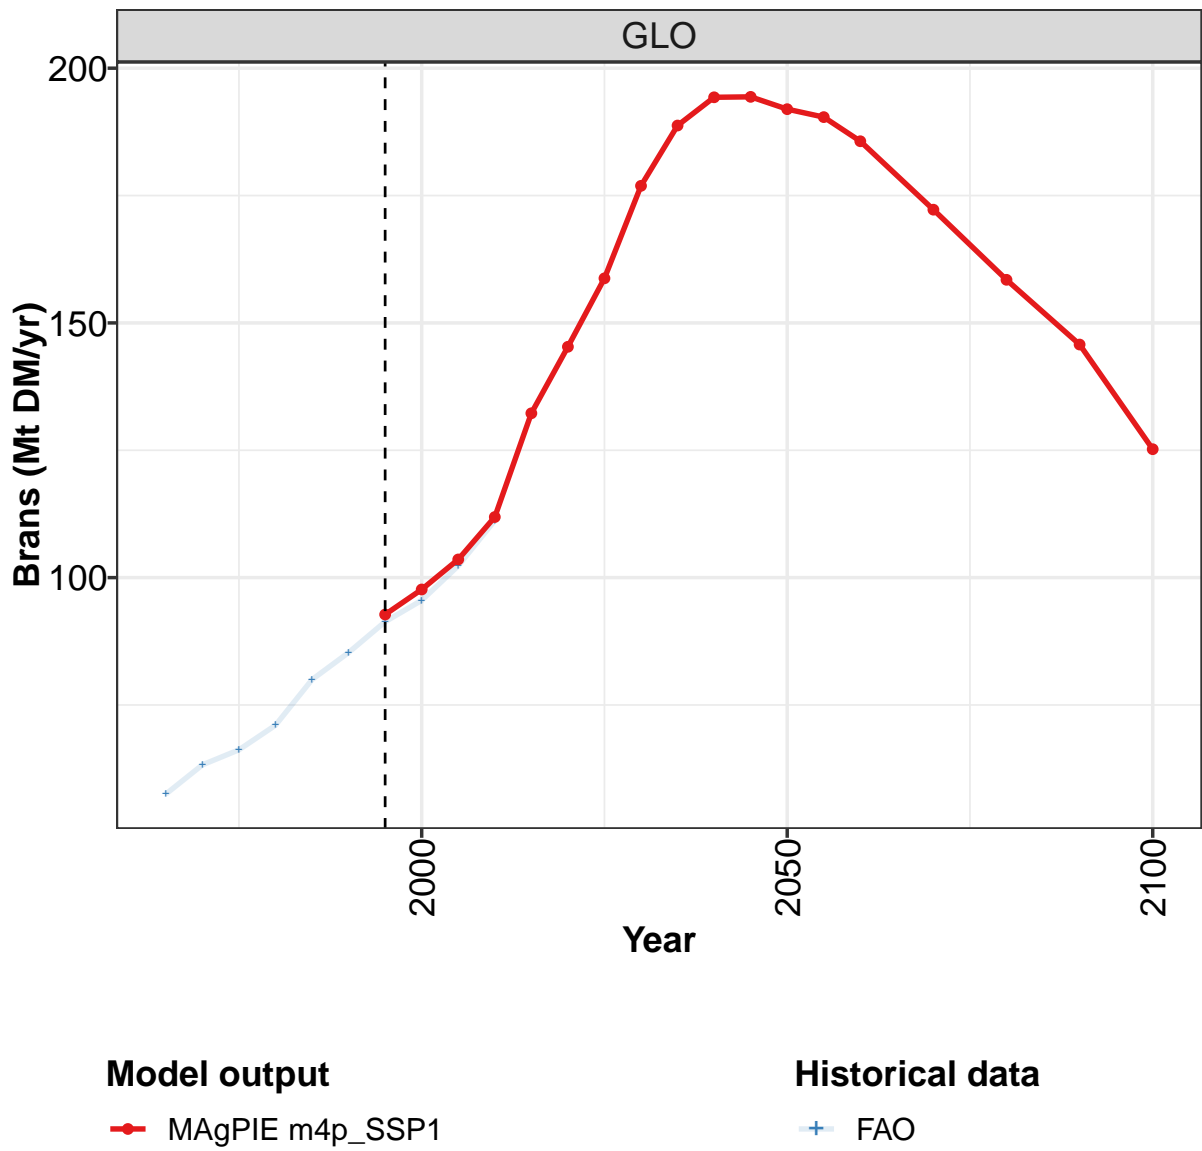

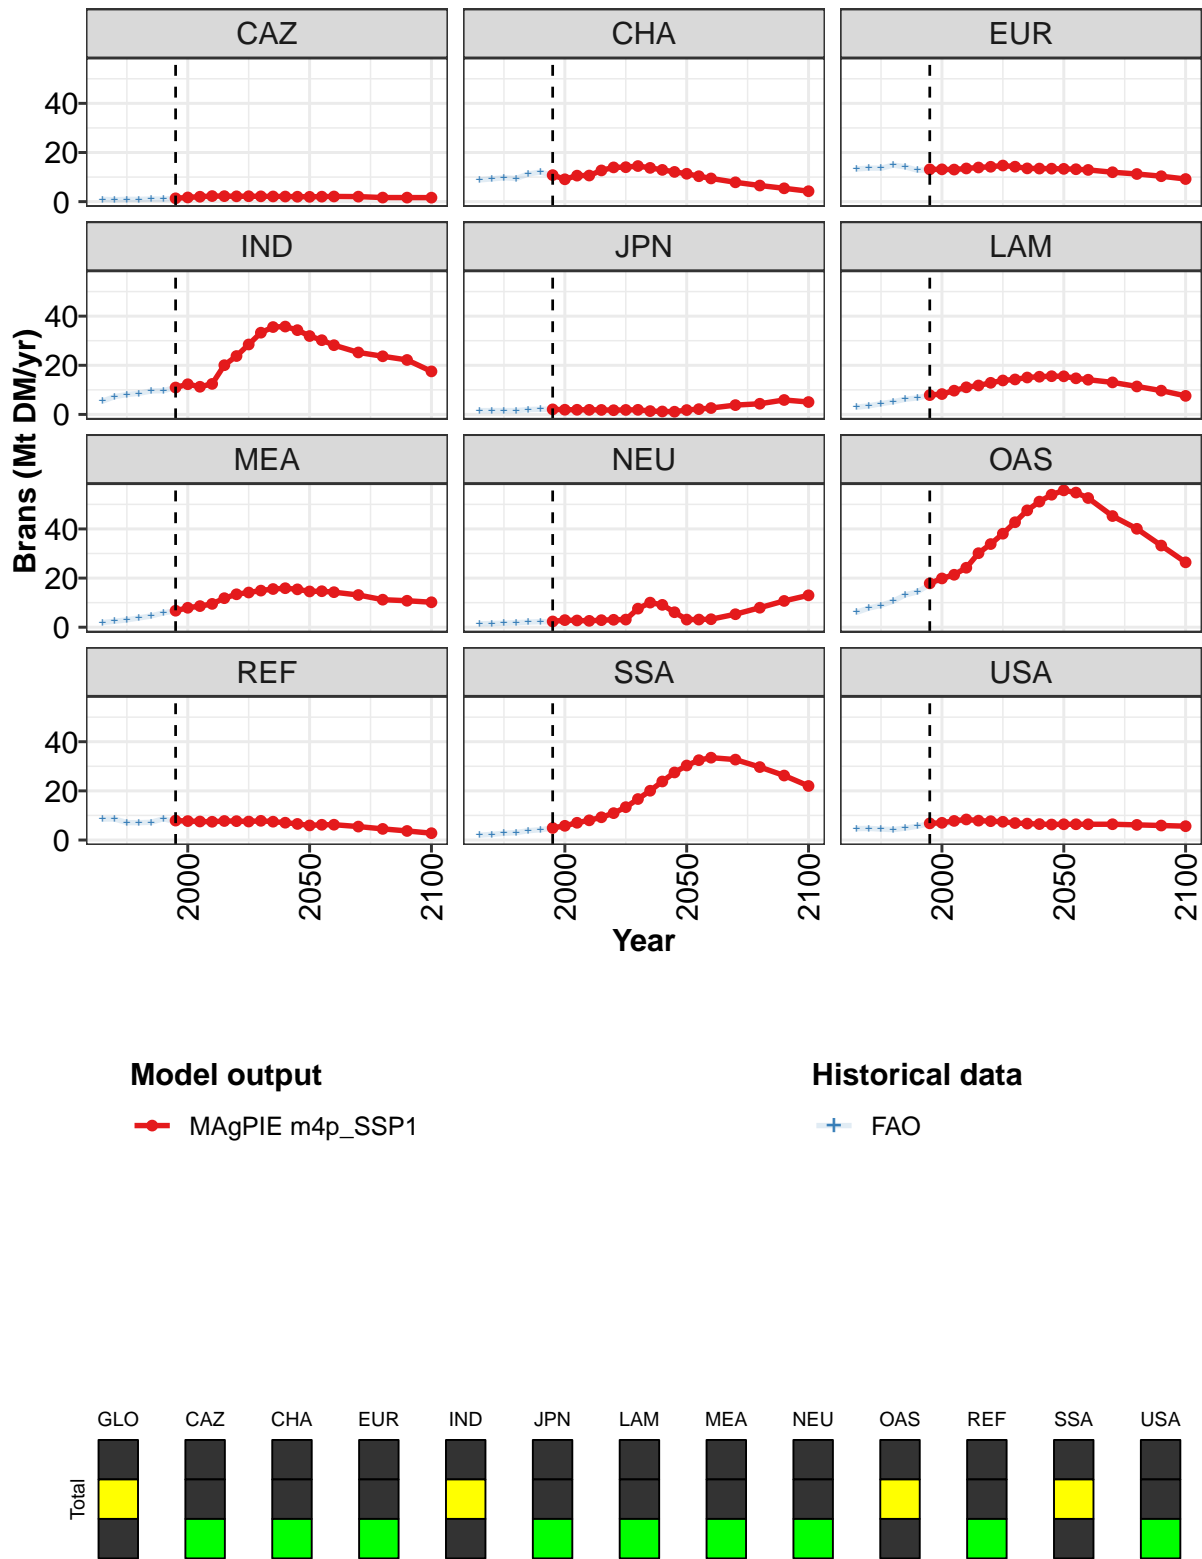

Figure 111: MAgPIE m4p\_SSP1 — Demand—Feed—Secondary products—Brans (Mt DM/yr)

|     | 1995 | 2000 | 2005 | 2010 | 2015 | 2020 | 2025 | 2030 | 2035 | 2040 | 2045 |
|-----|------|------|------|------|------|------|------|------|------|------|------|
| GLO | 93   | 98   | 104  | 112  | 132  | 145  | 159  | 177  | 189  | 194  | 194  |
| CAZ | 1    | 2    | 2    | 2    | 2    | 2    | 2    | 2    | 2    | 2    | 2    |
| CHA | 11   | 9    | 11   | 11   | 13   | 14   | 14   | 14   | 14   | 13   | 12   |
| EUR | 13   | 13   | 13   | 14   | 14   | 14   | 15   | 14   | 14   | 13   | 13   |
| IND | 11   | 12   | 11   | 12   | 20   | 24   | 28   | 33   | 36   | 36   | 34   |
| JPN | 2    | 2    | 2    | 2    | 2    | 2    | 2    | 2    | 1    | 1    | 1    |
| LAM | 8    | 8    | 10   | 11   | 12   | 13   | 14   | 14   | 15   | 15   | 16   |
| MEA | 7    | 8    | 9    | 10   | 12   | 13   | 14   | 15   | 16   | 16   | 15   |
| NEU | 2    | 3    | 3    | 3    | 3    | 3    | 3    | 8    | 10   | 9    | 6    |
| OAS | 18   | 20   | 21   | 24   | 30   | 34   | 38   | 43   | 48   | 51   | 54   |
| REF | 8    | 8    | 8    | 7    | 8    | 8    | 8    | 8    | 7    | 7    | 7    |
| SSA | 5    | 6    | 7    | 8    | 9    | 11   | 13   | 17   | 20   | 24   | 28   |
| USA | 7    | 7    | 8    | 8    | 8    | 8    | 7    | 7    | 7    | 6    | 6    |

Table 332: MAgPIE m4p\_SSP1 — Demand—Feed—Secondary products—Brans (Mt DM/yr) [PART 1/2]

|     | 2050 | 2055 | 2060 | 2070 | 2080 | 2090 | 2100 |
|-----|------|------|------|------|------|------|------|
| GLO | 192  | 190  | 186  | 172  | 158  | 146  | 125  |
| CAZ | 2    | 2    | 2    | 2    | 2    | 2    | 2    |
| CHA | 11   | 10   | 9    | 8    | 7    | 5    | 4    |
| EUR | 13   | 13   | 13   | 12   | 11   | 10   | 9    |
| IND | 32   | 30   | 28   | 25   | 24   | 22   | 18   |
| JPN | 2    | 2    | 3    | 4    | 4    | 6    | 5    |
| LAM | 16   | 15   | 14   | 13   | 11   | 10   | 8    |
| MEA | 15   | 15   | 14   | 13   | 11   | 11   | 10   |
| NEU | 3    | 3    | 3    | 5    | 8    | 11   | 13   |
| OAS | 56   | 55   | 53   | 45   | 40   | 33   | 26   |
| REF | 6    | 6    | 6    | 5    | 5    | 4    | 3    |
| SSA | 30   | 32   | 34   | 33   | 30   | 26   | 22   |
| USA | 6    | 6    | 6    | 6    | 6    | 6    | 6    |

Table 333: MAgPIE m4p\_SSP1 — Demand—Feed—Secondary products—Brans (Mt DM/yr) [PART 2/2]

|     | 1965 | 1970 | 1975 | 1980 | 1985 | 1990 | 1995 | 2000 | 2005 | 2010 |
|-----|------|------|------|------|------|------|------|------|------|------|
| GLO | 58   | 63   | 66   | 71   | 80   | 85   | 91   | 96   | 102  | 111  |
| CAZ | 1    | 1    | 1    | 1    | 1    | 1    | 1    | 2    | 2    | 2    |
| CHA | 9    | 9    | 10   | 9    | 11   | 12   | 11   | 9    | 11   | 11   |
| EUR | 13   | 14   | 14   | 15   | 14   | 13   | 13   | 13   | 13   | 13   |
| IND | 5    | 7    | 8    | 9    | 10   | 10   | 11   | 12   | 11   | 12   |
| JPN | 2    | 2    | 2    | 2    | 2    | 2    | 2    | 2    | 2    | 2    |
| LAM | 3    | 3    | 4    | 5    | 6    | 7    | 8    | 8    | 10   | 10   |
| MEA | 2    | 2    | 3    | 4    | 5    | 6    | 7    | 8    | 8    | 10   |
| NEU | 1    | 1    | 2    | 2    | 2    | 2    | 2    | 3    | 3    | 3    |
| OAS | 6    | 8    | 9    | 11   | 13   | 14   | 17   | 19   | 21   | 25   |
| REF | 9    | 9    | 7    | 7    | 7    | 9    | 7    | 7    | 7    | 7    |
| SSA | 2    | 2    | 3    | 3    | 4    | 4    | 5    | 6    | 7    | 8    |
| USA | 5    | 5    | 4    | 4    | 5    | 6    | 7    | 6    | 7    | 8    |

Table 334: FAO — Demand—Feed—Secondary products—Brans (Mt DM/yr)

6.7.2 Distillers grains

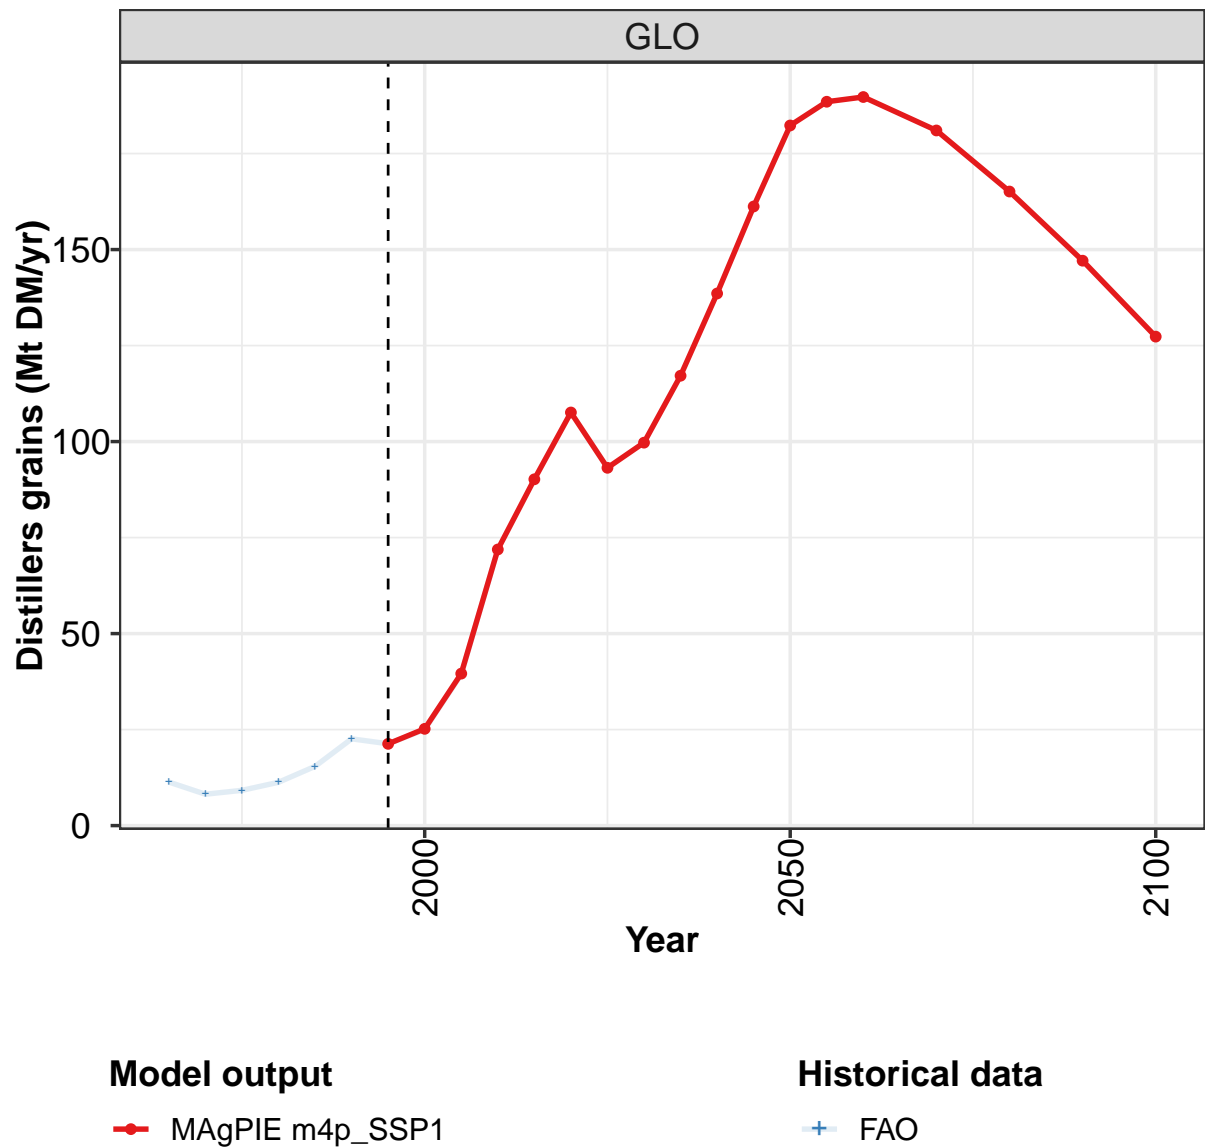



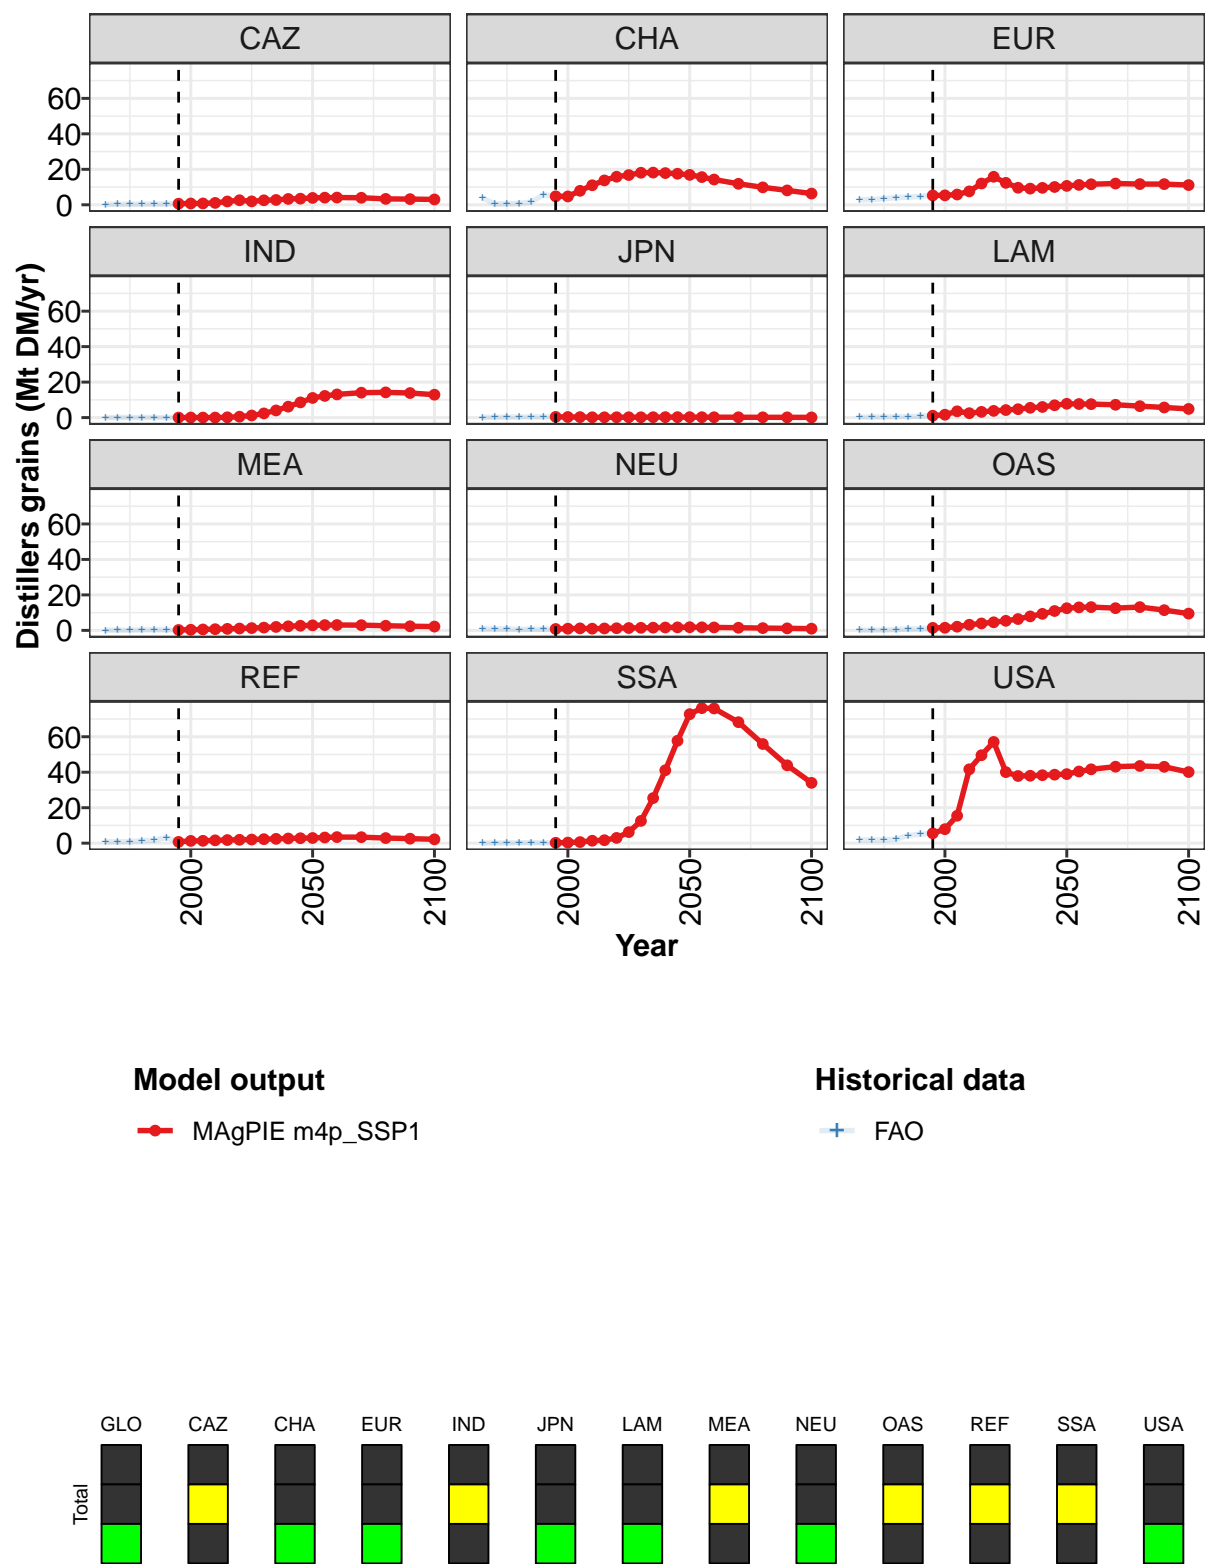

Figure 112: MAgPIE m4p\_SSP1 — Demand—Feed—Secondary products—Distillers grains (Mt DM/yr)

|     | 1995 | 2000 | 2005 | 2010 | 2015 | 2020 | 2025 | 2030 | 2035 | 2040 | 2045 |
|-----|------|------|------|------|------|------|------|------|------|------|------|
| GLO | 21   | 25   | 40   | 72   | 90   | 108  | 93   | 100  | 117  | 139  | 161  |
| CAZ | 1    | 1    | 1    | 1    | 2    | 3    | 2    | 3    | 3    | 3    | 3    |
| CHA | 5    | 5    | 8    | 11   | 14   | 16   | 17   | 18   | 18   | 18   | 18   |
| EUR | 5    | 5    | 6    | 8    | 12   | 16   | 12   | 10   | 9    | 10   | 10   |
| IND | 0    | 0    | 0    | 0    | 0    | 1    | 1    | 2    | 4    | 6    | 9    |
| JPN | 0    | 0    | 0    | 0    | 0    | 0    | 0    | 0    | 0    | 0    | 0    |
| LAM | 1    | 2    | 4    | 2    | 3    | 4    | 4    | 5    | 6    | 6    | 7    |
| MEA | 0    | 0    | 1    | 1    | 1    | 1    | 1    | 2    | 2    | 2    | 3    |
| NEU | 1    | 1    | 1    | 1    | 1    | 1    | 1    | 1    | 2    | 2    | 2    |
| OAS | 1    | 2    | 2    | 3    | 4    | 5    | 5    | 6    | 8    | 9    | 11   |
| REF | 1    | 1    | 1    | 2    | 2    | 2    | 2    | 2    | 2    | 3    | 3    |
| SSA | 0    | 0    | 1    | 1    | 2    | 3    | 6    | 13   | 25   | 41   | 58   |
| USA | 6    | 8    | 15   | 42   | 50   | 57   | 40   | 38   | 38   | 38   | 39   |

Table 335: MAgPIE m4p\_SSP1 — Demand—Feed—Secondary products—Distillers grains (Mt DM/yr) [PART 1/2]

|     | 2050 | 2055 | 2060 | 2070 | 2080 | 2090 | 2100 |
|-----|------|------|------|------|------|------|------|
| GLO | 182  | 188  | 190  | 181  | 165  | 147  | 127  |
| CAZ | 4    | 4    | 4    | 4    | 3    | 3    | 3    |
| CHA | 17   | 16   | 14   | 12   | 10   | 8    | 6    |
| EUR | 11   | 11   | 12   | 12   | 12   | 12   | 11   |
| IND | 11   | 12   | 13   | 14   | 14   | 14   | 13   |
| JPN | 0    | 0    | 0    | 0    | 0    | 0    | 0    |
| LAM | 8    | 8    | 8    | 7    | 6    | 6    | 5    |
| MEA | 3    | 3    | 3    | 3    | 3    | 2    | 2    |
| NEU | 2    | 2    | 2    | 1    | 1    | 1    | 1    |
| OAS | 12   | 13   | 13   | 13   | 13   | 11   | 9    |
| REF | 3    | 3    | 3    | 3    | 3    | 3    | 2    |
| SSA | 73   | 76   | 76   | 68   | 56   | 44   | 34   |
| USA | 39   | 40   | 42   | 43   | 44   | 43   | 40   |

Table 336: MAgPIE m4p\_SSP1 — Demand—Feed—Secondary products—Distillers grains (Mt DM/yr) [PART 2/2]

|     | 1965 | 1970 | 1975 | 1980 | 1985 | 1990 | 1995 | 2000 | 2005 | 2010 |
|-----|------|------|------|------|------|------|------|------|------|------|
| GLO | 11.3 | 8.2  | 9.2  | 11.3 | 15.4 | 22.6 | 21.3 | 25.0 | 39.3 | 71.8 |
| CAZ | 0.3  | 0.3  | 0.4  | 0.4  | 0.4  | 0.5  | 0.6  | 0.8  | 0.7  | 1.1  |
| CHA | 4.0  | 0.4  | 0.6  | 0.8  | 1.6  | 5.7  | 4.8  | 4.7  | 7.9  | 11.1 |
| EUR | 2.8  | 3.0  | 3.5  | 4.0  | 4.3  | 4.7  | 5.3  | 5.2  | 5.7  | 7.4  |
| IND | 0.0  | 0.0  | 0.0  | 0.0  | 0.0  | 0.0  | 0.0  | 0.0  | 0.0  | 0.0  |
| JPN | 0.2  | 0.2  | 0.2  | 0.4  | 0.4  | 0.4  | 0.4  | 0.3  | 0.3  | 0.2  |
| LAM | 0.3  | 0.3  | 0.4  | 0.5  | 0.6  | 0.9  | 1.1  | 1.7  | 3.6  | 2.5  |
| MEA | 0.0  | 0.1  | 0.1  | 0.2  | 0.3  | 0.2  | 0.3  | 0.4  | 0.5  | 0.7  |
| NEU | 0.9  | 0.8  | 0.9  | 0.6  | 0.6  | 0.7  | 0.8  | 0.9  | 1.1  | 1.0  |
| OAS | 0.1  | 0.2  | 0.2  | 0.4  | 0.8  | 1.0  | 1.4  | 1.5  | 2.1  | 3.2  |
| REF | 0.8  | 0.8  | 0.9  | 1.3  | 1.7  | 3.2  | 0.7  | 1.3  | 1.3  | 1.6  |
| SSA | 0.1  | 0.1  | 0.2  | 0.3  | 0.3  | 0.2  | 0.2  | 0.3  | 0.6  | 1.4  |
| USA | 1.8  | 1.8  | 1.9  | 2.3  | 4.3  | 5.0  | 5.6  | 7.9  | 15.5 | 41.7 |

Table 337: FAO — Demand—Feed—Secondary products—Distillers grains (Mt DM/yr)

6.7.3
Molasses

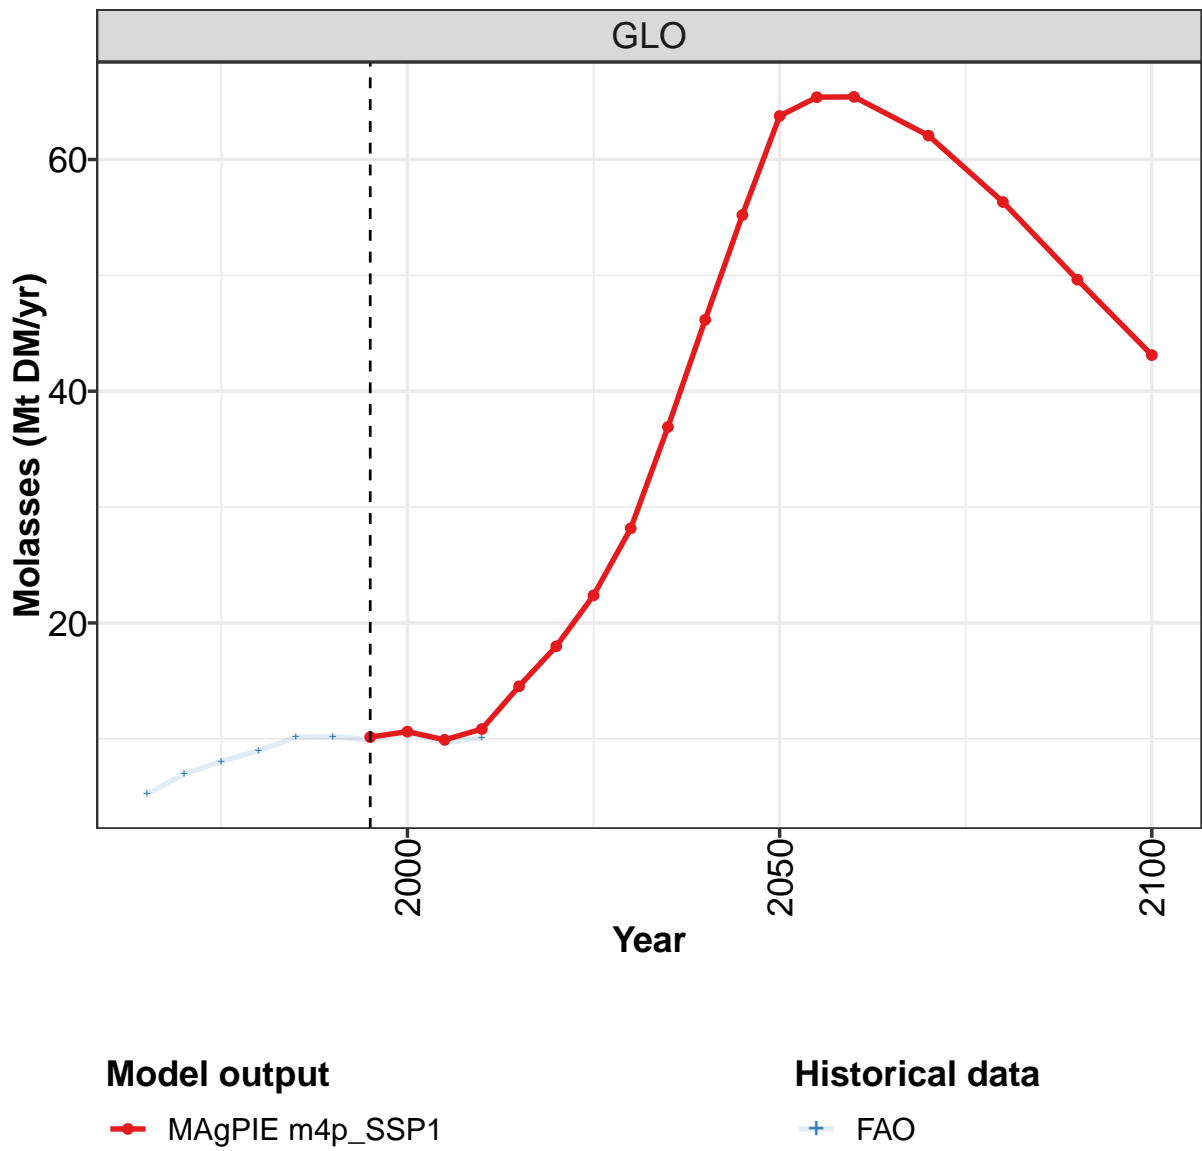

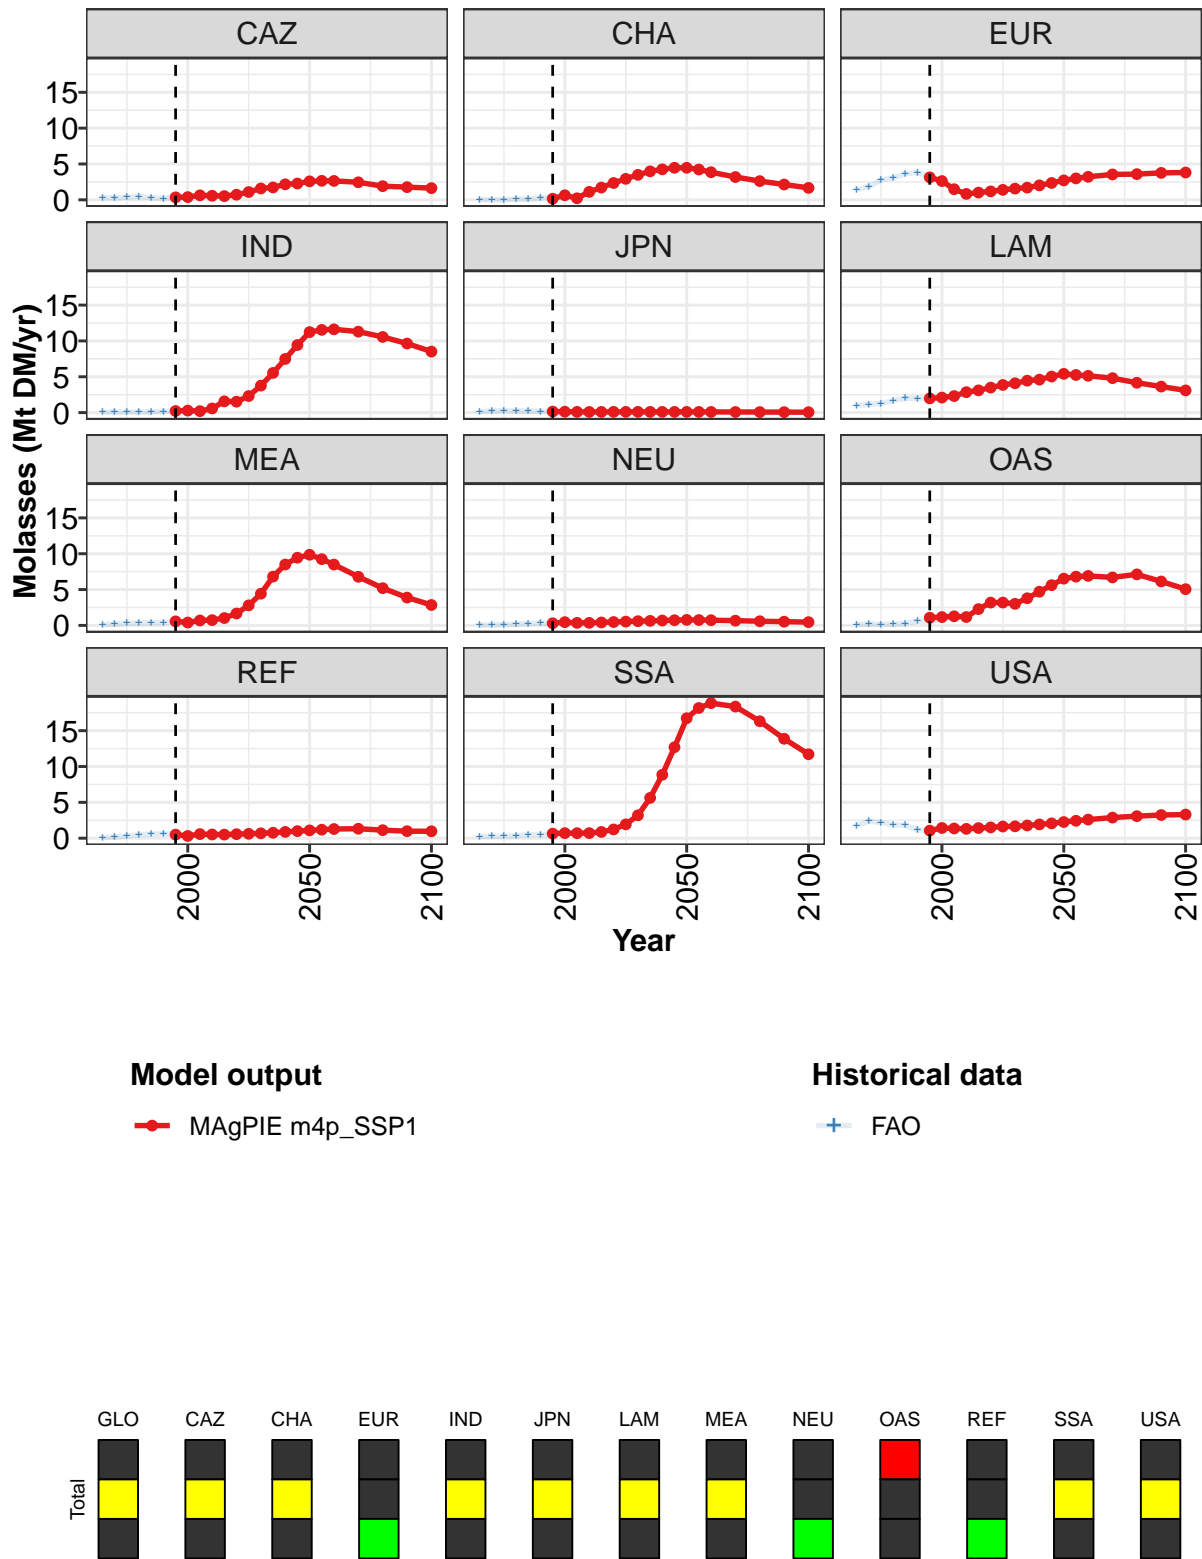

Figure 113: MAgPIE m4p\_SSP1 — Demand—Feed—Secondary products—Molasses (Mt DM/yr)

|     | 1995 | 2000 | 2005 | 2010 | 2015 | 2020 | 2025 | 2030 | 2035 | 2040 | 2045 |
|-----|------|------|------|------|------|------|------|------|------|------|------|
| GLO | 10.1 | 10.6 | 9.9  | 10.8 | 14.5 | 18.0 | 22.4 | 28.2 | 36.9 | 46.2 | 55.2 |
| CAZ | 0.3  | 0.4  | 0.6  | 0.6  | 0.5  | 0.7  | 1.1  | 1.6  | 1.7  | 2.2  | 2.3  |
| CHA | 0.2  | 0.6  | 0.2  | 1.1  | 1.7  | 2.4  | 2.9  | 3.5  | 4.0  | 4.3  | 4.5  |
| EUR | 3.1  | 2.6  | 1.5  | 0.8  | 1.0  | 1.2  | 1.4  | 1.6  | 1.7  | 2.0  | 2.4  |
| IND | 0.2  | 0.3  | 0.2  | 0.6  | 1.6  | 1.5  | 2.3  | 3.8  | 5.5  | 7.5  | 9.4  |
| JPN | 0.1  | 0.1  | 0.1  | 0.1  | 0.1  | 0.1  | 0.1  | 0.1  | 0.1  | 0.1  | 0.1  |
| LAM | 2.0  | 2.1  | 2.3  | 2.9  | 3.1  | 3.5  | 3.9  | 4.1  | 4.5  | 4.6  | 5.0  |
| MEA | 0.6  | 0.4  | 0.7  | 0.7  | 1.0  | 1.7  | 2.8  | 4.4  | 6.8  | 8.5  | 9.4  |
| NEU | 0.3  | 0.5  | 0.4  | 0.4  | 0.4  | 0.5  | 0.5  | 0.6  | 0.6  | 0.7  | 0.7  |
| OAS | 1.1  | 1.2  | 1.3  | 1.2  | 2.3  | 3.2  | 3.2  | 3.0  | 3.8  | 4.7  | 5.6  |
| REF | 0.5  | 0.3  | 0.6  | 0.5  | 0.5  | 0.6  | 0.6  | 0.7  | 0.8  | 0.9  | 1.0  |
| SSA | 0.6  | 0.7  | 0.7  | 0.7  | 0.9  | 1.2  | 1.9  | 3.2  | 5.6  | 8.9  | 12.7 |
| USA | 1.1  | 1.4  | 1.4  | 1.3  | 1.4  | 1.5  | 1.6  | 1.7  | 1.8  | 1.9  | 2.1  |

Table 338: MAgPIE m4p-SSP1 — Demand—Feed—Secondary products—Molasses (Mt DM/yr) [PART 1/2]

|     | 2050 | 2055 | 2060 | 2070 | 2080 | 2090 | 2100 |
|-----|------|------|------|------|------|------|------|
| GLO | 63.8 | 65.4 | 65.4 | 62.1 | 56.3 | 49.6 | 43.1 |
| CAZ | 2.6  | 2.7  | 2.6  | 2.4  | 1.9  | 1.8  | 1.6  |
| CHA | 4.5  | 4.2  | 3.9  | 3.2  | 2.6  | 2.1  | 1.7  |
| EUR | 2.7  | 3.0  | 3.2  | 3.5  | 3.6  | 3.8  | 3.8  |
| IND | 11.2 | 11.5 | 11.6 | 11.3 | 10.6 | 9.6  | 8.5  |
| JPN | 0.1  | 0.1  | 0.1  | 0.1  | 0.1  | 0.1  | 0.1  |
| LAM | 5.4  | 5.3  | 5.1  | 4.8  | 4.2  | 3.6  | 3.1  |
| MEA | 9.9  | 9.2  | 8.5  | 6.8  | 5.2  | 3.9  | 2.9  |
| NEU | 0.8  | 0.8  | 0.7  | 0.7  | 0.6  | 0.5  | 0.5  |
| OAS | 6.5  | 6.8  | 6.9  | 6.7  | 7.1  | 6.1  | 5.1  |
| REF | 1.1  | 1.2  | 1.3  | 1.3  | 1.1  | 1.0  | 1.0  |
| SSA | 16.7 | 18.2 | 18.8 | 18.4 | 16.3 | 13.9 | 11.7 |
| USA | 2.3  | 2.4  | 2.6  | 2.9  | 3.1  | 3.2  | 3.3  |

Table 339: MAgPIE m4p-SSP1 — Demand—Feed—Secondary products—Molasses (Mt DM/yr) [PART 2/2]

|     | 1965 | 1970 | 1975 | 1980 | 1985 | 1990 | 1995 | 2000 | 2005 | 2010 |
|-----|------|------|------|------|------|------|------|------|------|------|
| GLO | 5.2  | 7.0  | 8.1  | 9.0  | 10.1 | 10.2 | 9.9  | 10.6 | 9.6  | 10.1 |
| CAZ | 0.3  | 0.3  | 0.4  | 0.5  | 0.3  | 0.2  | 0.4  | 0.5  | 0.5  | 0.4  |
| CHA | 0.0  | 0.0  | 0.0  | 0.1  | 0.1  | 0.3  | 0.3  | 0.7  | 0.3  | 1.1  |
| EUR | 1.4  | 1.9  | 2.8  | 3.1  | 3.7  | 3.8  | 3.2  | 2.6  | 1.4  | 0.8  |
| IND | 0.0  | 0.1  | 0.1  | 0.1  | 0.1  | 0.2  | 0.2  | 0.3  | 0.2  | 0.3  |
| JPN | 0.1  | 0.2  | 0.3  | 0.2  | 0.2  | 0.2  | 0.1  | 0.1  | 0.1  | 0.1  |
| LAM | 1.0  | 1.2  | 1.3  | 1.6  | 2.0  | 2.0  | 2.1  | 2.2  | 2.4  | 2.5  |
| MEA | 0.1  | 0.2  | 0.3  | 0.3  | 0.4  | 0.4  | 0.5  | 0.4  | 0.5  | 0.7  |
| NEU | 0.0  | 0.1  | 0.1  | 0.2  | 0.3  | 0.3  | 0.3  | 0.4  | 0.3  | 0.4  |
| OAS | 0.1  | 0.2  | 0.1  | 0.2  | 0.3  | 0.6  | 0.6  | 0.9  | 1.3  | 1.2  |
| REF | 0.1  | 0.2  | 0.3  | 0.5  | 0.6  | 0.6  | 0.5  | 0.4  | 0.5  | 0.4  |
| SSA | 0.2  | 0.3  | 0.3  | 0.4  | 0.5  | 0.5  | 0.5  | 0.7  | 0.7  | 0.7  |
| USA | 1.8  | 2.4  | 2.2  | 1.9  | 1.8  | 1.1  | 1.1  | 1.4  | 1.4  | 1.4  |

Table 340: FAO — Demand—Feed—Secondary products—Molasses (Mt DM/yr)

6.7.4 Oilcakes

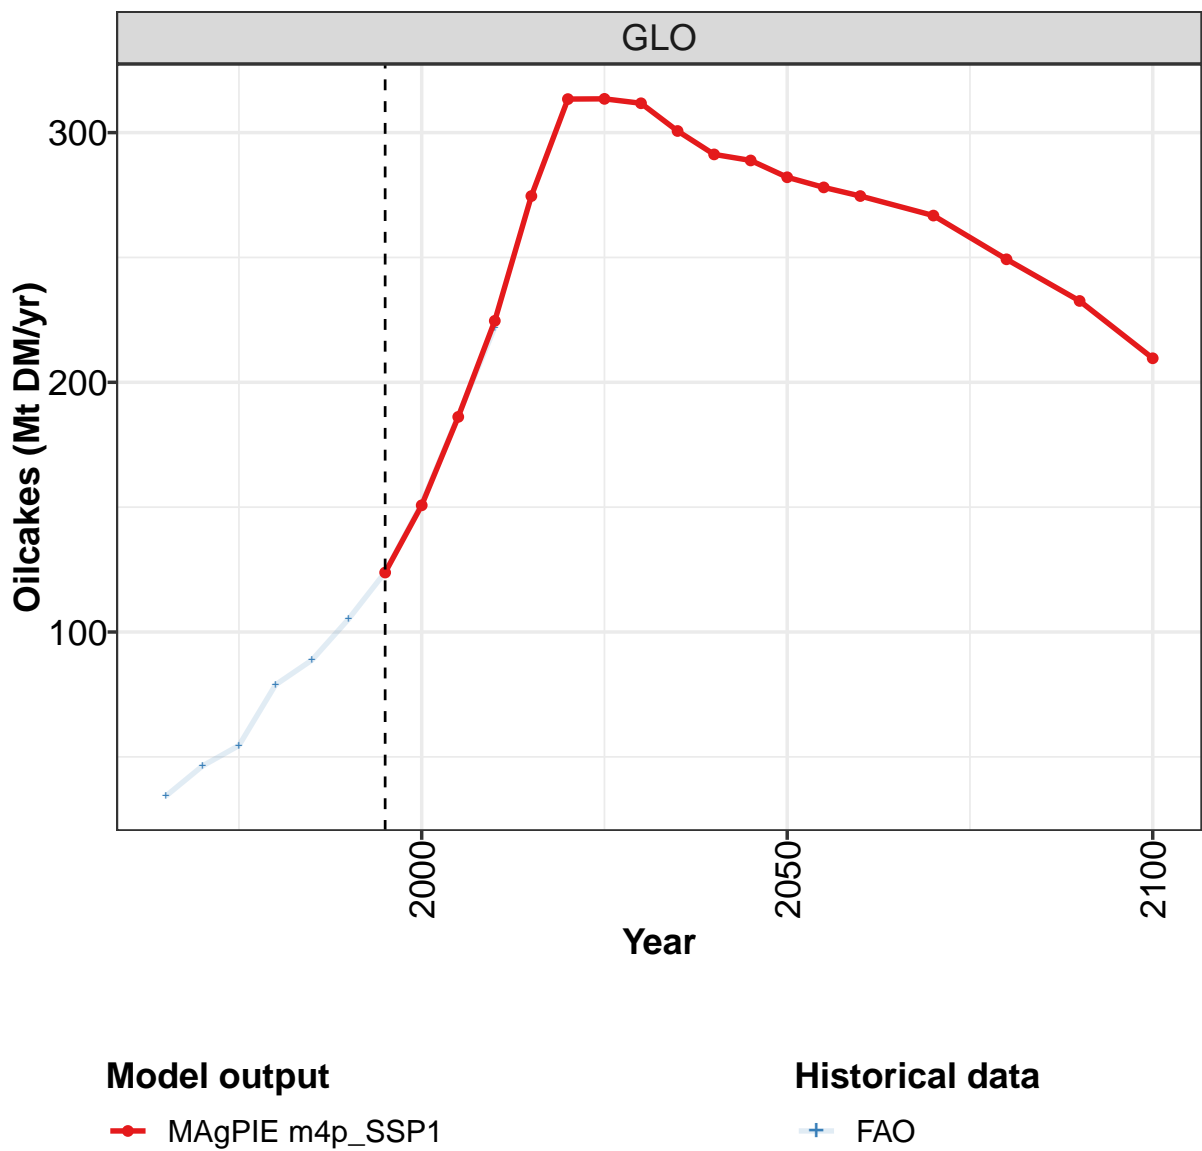

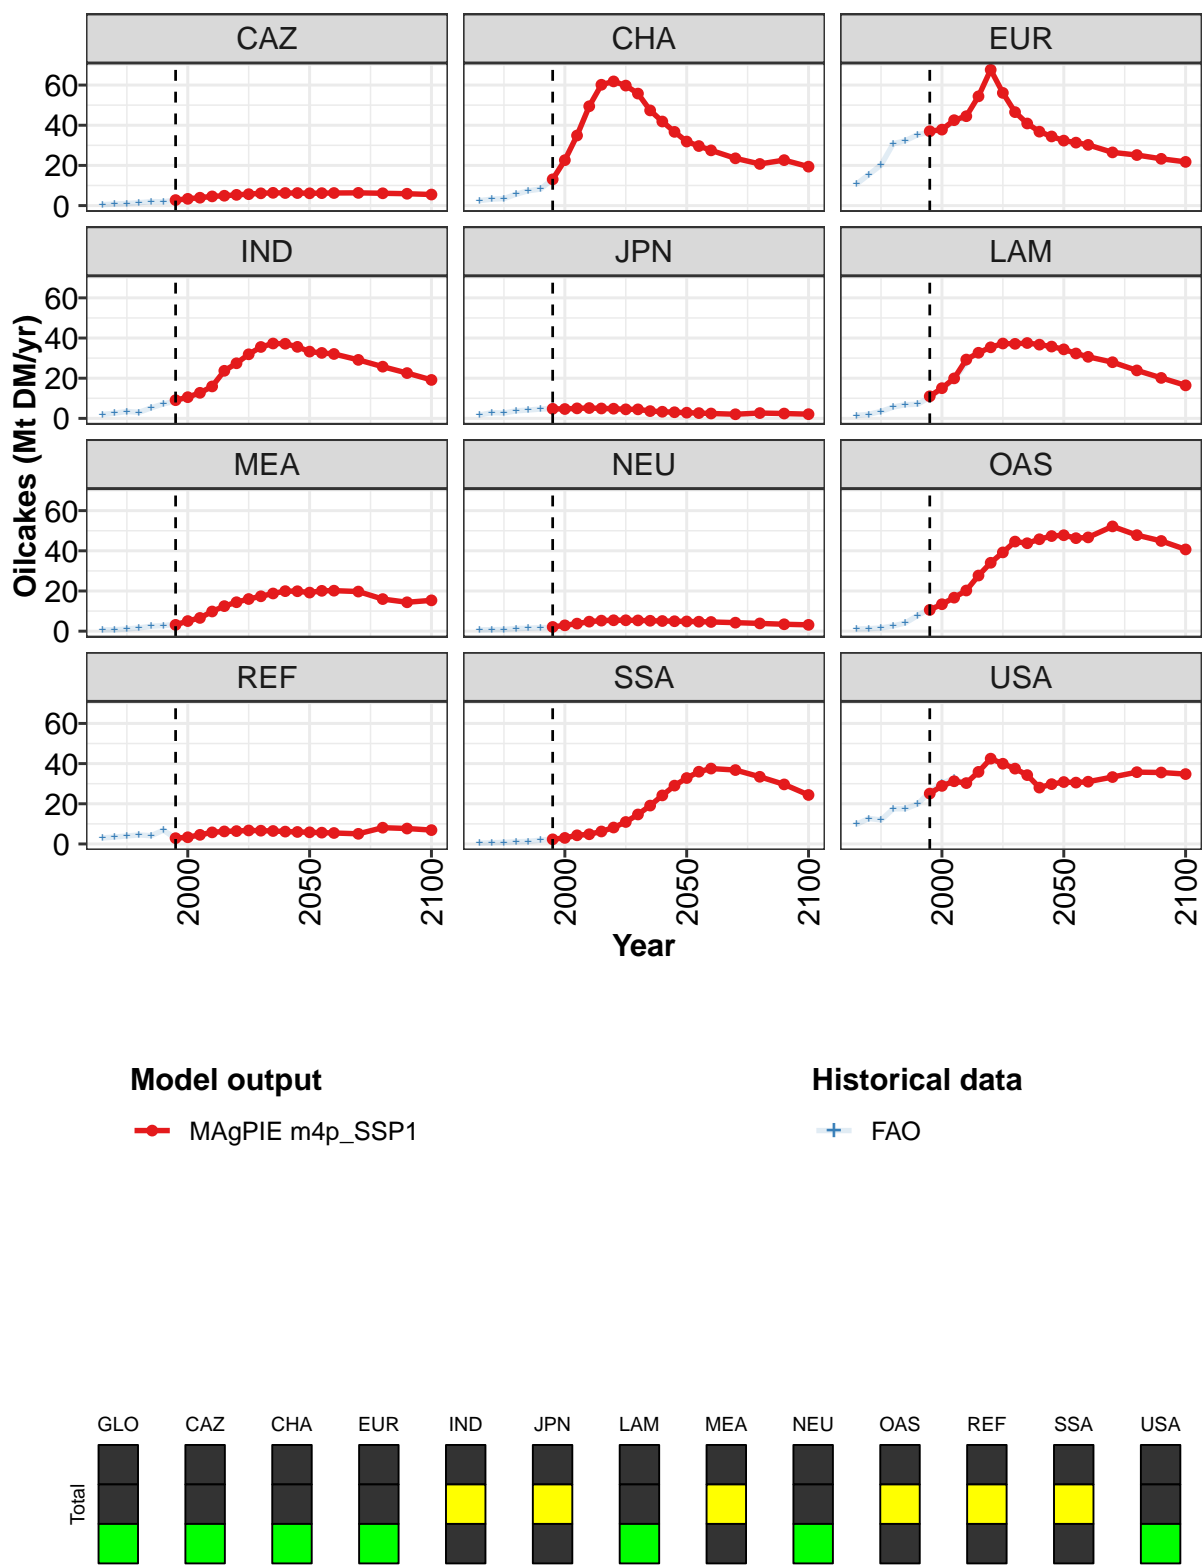

Figure 114: MAgPIE m4p\_SSP1 — Demand—Feed—Secondary products—Oilcakes (Mt DM/yr)

|     | 1995 | 2000 | 2005 | 2010 | 2015 | 2020 | 2025 | 2030 | 2035 | 2040 | 2045 |
|-----|------|------|------|------|------|------|------|------|------|------|------|
| GLO | 124  | 151  | 186  | 225  | 275  | 313  | 314  | 312  | 301  | 291  | 289  |
| CAZ | 3    | 3    | 4    | 5    | 5    | 5    | 6    | 6    | 6    | 6    | 6    |
| CHA | 13   | 23   | 35   | 49   | 60   | 62   | 60   | 56   | 47   | 42   | 37   |
| EUR | 37   | 38   | 43   | 45   | 54   | 68   | 56   | 47   | 41   | 37   | 34   |
| IND | 9    | 11   | 13   | 16   | 24   | 27   | 32   | 36   | 37   | 37   | 36   |
| JPN | 5    | 5    | 5    | 5    | 5    | 5    | 5    | 4    | 4    | 3    | 3    |
| LAM | 11   | 15   | 20   | 29   | 33   | 35   | 37   | 37   | 38   | 37   | 36   |
| MEA | 3    | 5    | 7    | 10   | 12   | 14   | 16   | 17   | 19   | 20   | 20   |
| NEU | 2    | 3    | 4    | 5    | 5    | 5    | 5    | 5    | 5    | 5    | 5    |
| OAS | 11   | 13   | 17   | 20   | 28   | 34   | 39   | 45   | 44   | 46   | 47   |
| REF | 3    | 3    | 5    | 6    | 6    | 6    | 7    | 7    | 6    | 6    | 6    |
| SSA | 2    | 3    | 4    | 5    | 6    | 8    | 11   | 15   | 19   | 24   | 29   |
| USA | 25   | 29   | 31   | 30   | 36   | 42   | 40   | 38   | 34   | 28   | 30   |

Table 341: MAgPIE m4p\_SSP1 — Demand—Feed—Secondary products—Oilcakes (Mt DM/yr) [PART 1/2]

|     | 2050 | 2055 | 2060 | 2070 | 2080 | 2090 | 2100 |
|-----|------|------|------|------|------|------|------|
| GLO | 282  | 278  | 275  | 267  | 249  | 233  | 210  |
| CAZ | 6    | 6    | 6    | 6    | 6    | 6    | 6    |
| CHA | 32   | 30   | 28   | 24   | 21   | 23   | 19   |
| EUR | 32   | 31   | 30   | 26   | 25   | 23   | 22   |
| IND | 33   | 33   | 32   | 29   | 26   | 23   | 19   |
| JPN | 3    | 3    | 2    | 2    | 3    | 2    | 2    |
| LAM | 34   | 32   | 31   | 28   | 24   | 20   | 16   |
| MEA | 19   | 20   | 20   | 20   | 16   | 14   | 15   |
| NEU | 5    | 5    | 5    | 4    | 4    | 3    | 3    |
| OAS | 48   | 46   | 47   | 52   | 48   | 45   | 41   |
| REF | 6    | 6    | 5    | 5    | 8    | 8    | 7    |
| SSA | 33   | 36   | 38   | 37   | 33   | 30   | 24   |
| USA | 31   | 31   | 31   | 33   | 36   | 36   | 35   |

Table 342: MAgPIE m4p\_SSP1 — Demand—Feed—Secondary products—Oilcakes (Mt DM/yr) [PART 2/2]

|     | 1965 | 1970 | 1975 | 1980 | 1985 | 1990 | 1995 | 2000 | 2005 | 2010 |
|-----|------|------|------|------|------|------|------|------|------|------|
| GLO | 34   | 46   | 55   | 79   | 89   | 105  | 124  | 151  | 187  | 222  |
| CAZ | 0    | 1    | 1    | 1    | 2    | 2    | 3    | 3    | 4    | 5    |
| CHA | 2    | 3    | 3    | 6    | 7    | 8    | 13   | 23   | 35   | 49   |
| EUR | 11   | 15   | 20   | 31   | 32   | 35   | 37   | 38   | 42   | 44   |
| IND | 2    | 3    | 3    | 3    | 5    | 7    | 9    | 10   | 13   | 16   |
| JPN | 2    | 3    | 3    | 4    | 4    | 5    | 5    | 5    | 5    | 5    |
| LAM | 1    | 2    | 3    | 6    | 7    | 7    | 10   | 15   | 19   | 27   |
| MEA | 1    | 1    | 1    | 2    | 2    | 3    | 3    | 5    | 7    | 10   |
| NEU | 1    | 1    | 1    | 1    | 1    | 2    | 2    | 3    | 4    | 5    |
| OAS | 1    | 1    | 2    | 3    | 4    | 8    | 11   | 13   | 17   | 21   |
| REF | 3    | 3    | 4    | 4    | 4    | 7    | 3    | 3    | 4    | 6    |
| SSA | 0    | 1    | 1    | 1    | 1    | 2    | 2    | 3    | 4    | 5    |
| USA | 10   | 13   | 12   | 17   | 18   | 20   | 26   | 30   | 33   | 30   |

Table 343: FAO — Demand—Feed—Secondary products—Oilcakes (Mt DM/yr)



6.7.5
Oils

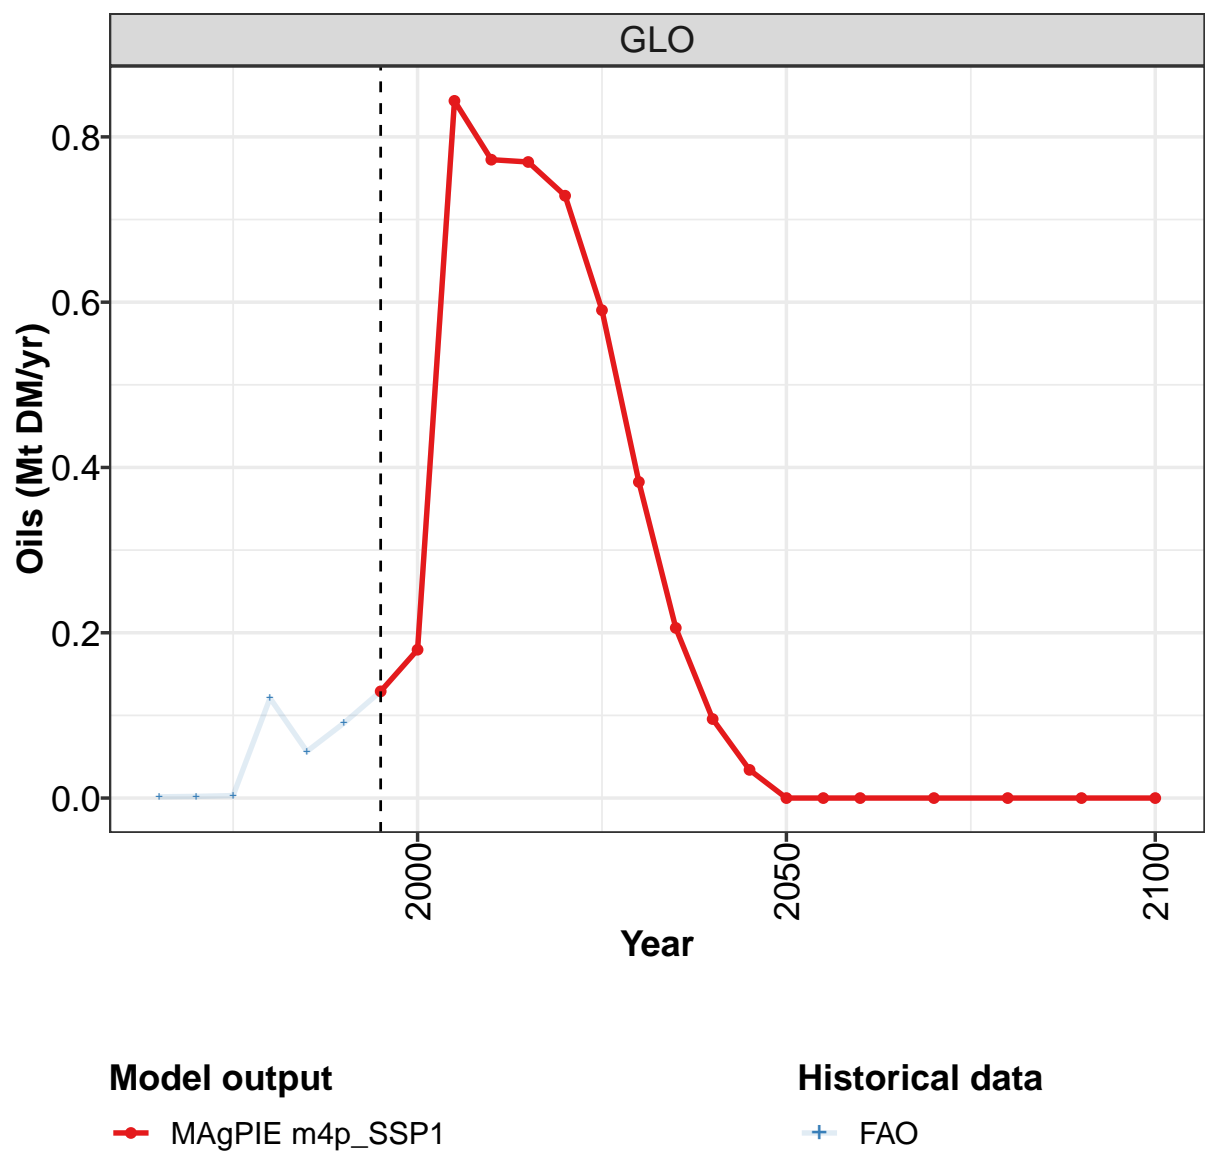

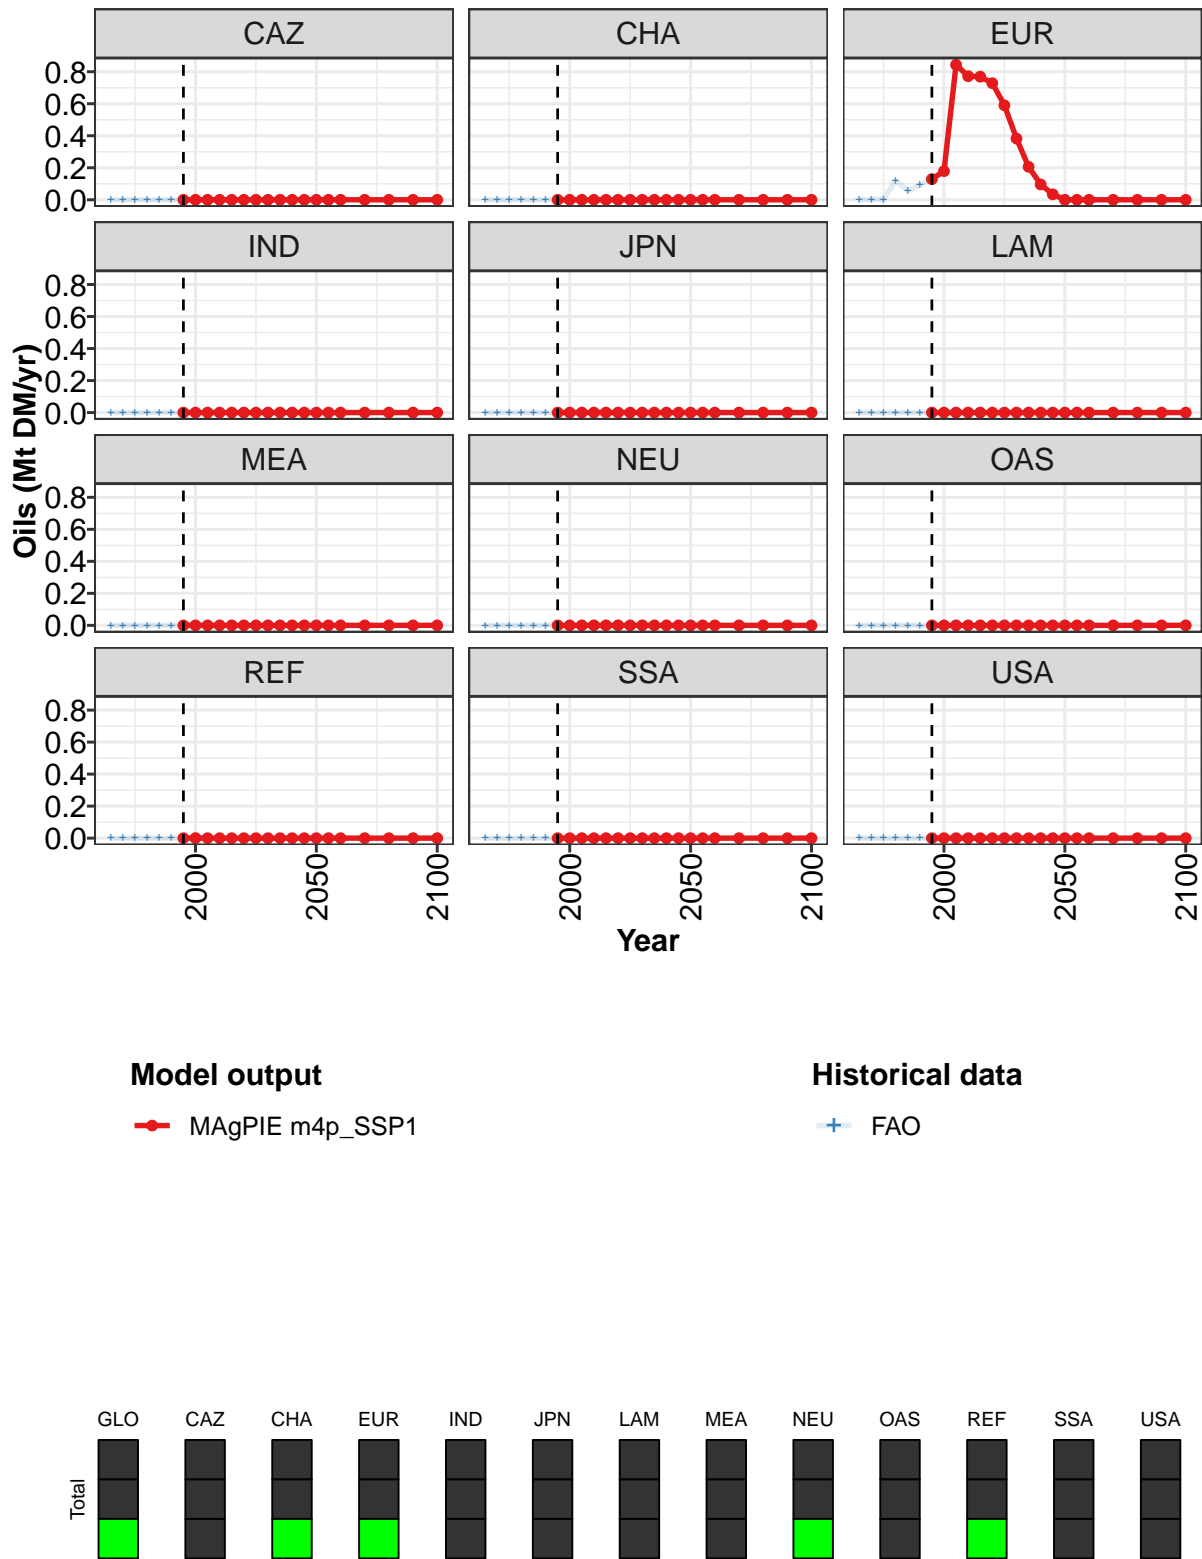

Figure 115: MAgPIE m4p\_SSP1 — Demand—Feed—Secondary products—Oils (Mt DM/yr)

|     | 1995  | 2000  | 2005  | 2010  | 2015  | 2020  | 2025  | 2030  | 2035  | 2040  | 2045  |
|-----|-------|-------|-------|-------|-------|-------|-------|-------|-------|-------|-------|
| GLO | 0.129 | 0.179 | 0.844 | 0.772 | 0.770 | 0.729 | 0.590 | 0.383 | 0.206 | 0.096 | 0.034 |
| CAZ | 0.000 | 0.000 | 0.000 | 0.000 | 0.000 | 0.000 | 0.000 | 0.000 | 0.000 | 0.000 | 0.000 |
| CHA | 0.000 | 0.000 | 0.000 | 0.000 | 0.000 | 0.000 | 0.000 | 0.000 | 0.000 | 0.000 | 0.000 |
| EUR | 0.129 | 0.179 | 0.844 | 0.772 | 0.769 | 0.729 | 0.590 | 0.382 | 0.206 | 0.096 | 0.034 |
| IND | 0.000 | 0.000 | 0.000 | 0.000 | 0.000 | 0.000 | 0.000 | 0.000 | 0.000 | 0.000 | 0.000 |
| JPN | 0.000 | 0.000 | 0.000 | 0.000 | 0.000 | 0.000 | 0.000 | 0.000 | 0.000 | 0.000 | 0.000 |
| LAM | 0.000 | 0.000 | 0.000 | 0.000 | 0.000 | 0.000 | 0.000 | 0.000 | 0.000 | 0.000 | 0.000 |
| MEA | 0.000 | 0.000 | 0.000 | 0.000 | 0.000 | 0.000 | 0.000 | 0.000 | 0.000 | 0.000 | 0.000 |
| NEU | 0.000 | 0.000 | 0.000 | 0.000 | 0.000 | 0.000 | 0.000 | 0.000 | 0.000 | 0.000 | 0.000 |
| OAS | 0.000 | 0.000 | 0.000 | 0.000 | 0.000 | 0.000 | 0.000 | 0.000 | 0.000 | 0.000 | 0.000 |
| REF | 0.000 | 0.000 | 0.000 | 0.000 | 0.000 | 0.000 | 0.000 | 0.000 | 0.000 | 0.000 | 0.000 |
| SSA | 0.000 | 0.000 | 0.000 | 0.000 | 0.000 | 0.000 | 0.000 | 0.000 | 0.000 | 0.000 | 0.000 |
| USA | 0.000 | 0.000 | 0.000 | 0.000 | 0.000 | 0.000 | 0.000 | 0.000 | 0.000 | 0.000 | 0.000 |

Table 344: MAgPIE m4p\_SSP1 — Demand—Feed—Secondary products—Oils (Mt DM/yr) [PART 1/2]

|     | 2050  | 2055  | 2060  | 2070  | 2080  | 2090  | 2100  |
|-----|-------|-------|-------|-------|-------|-------|-------|
| GLO | 0.000 | 0.000 | 0.000 | 0.000 | 0.000 | 0.000 | 0.000 |
| CAZ | 0.000 | 0.000 | 0.000 | 0.000 | 0.000 | 0.000 | 0.000 |
| CHA | 0.000 | 0.000 | 0.000 | 0.000 | 0.000 | 0.000 | 0.000 |
| EUR | 0.000 | 0.000 | 0.000 | 0.000 | 0.000 | 0.000 | 0.000 |
| IND | 0.000 | 0.000 | 0.000 | 0.000 | 0.000 | 0.000 | 0.000 |
| JPN | 0.000 | 0.000 | 0.000 | 0.000 | 0.000 | 0.000 | 0.000 |
| LAM | 0.000 | 0.000 | 0.000 | 0.000 | 0.000 | 0.000 | 0.000 |
| MEA | 0.000 | 0.000 | 0.000 | 0.000 | 0.000 | 0.000 | 0.000 |
| NEU | 0.000 | 0.000 | 0.000 | 0.000 | 0.000 | 0.000 | 0.000 |
| OAS | 0.000 | 0.000 | 0.000 | 0.000 | 0.000 | 0.000 | 0.000 |
| REF | 0.000 | 0.000 | 0.000 | 0.000 | 0.000 | 0.000 | 0.000 |
| SSA | 0.000 | 0.000 | 0.000 | 0.000 | 0.000 | 0.000 | 0.000 |
| USA | 0.000 | 0.000 | 0.000 | 0.000 | 0.000 | 0.000 | 0.000 |

Table 345: MAgPIE m4p\_SSP1 — Demand—Feed—Secondary products—Oils (Mt DM/yr) [PART 2/2]

|     | 1965  | 1970  | 1975  | 1980  | 1985  | 1990  | 1995  | 2000  | 2005  | 2010  |
|-----|-------|-------|-------|-------|-------|-------|-------|-------|-------|-------|
| GLO | 0.002 | 0.002 | 0.003 | 0.121 | 0.056 | 0.091 | 0.129 | 0.179 | 0.844 | 0.772 |
| CAZ | 0.000 | 0.000 | 0.000 | 0.000 | 0.000 | 0.000 | 0.000 | 0.000 | 0.000 | 0.000 |
| CHA | 0.000 | 0.000 | 0.000 | 0.001 | 0.000 | 0.000 | 0.000 | 0.000 | 0.000 | 0.000 |
| EUR | 0.002 | 0.002 | 0.003 | 0.120 | 0.056 | 0.091 | 0.129 | 0.179 | 0.844 | 0.772 |
| IND | 0.000 | 0.000 | 0.000 | 0.000 | 0.000 | 0.000 | 0.000 | 0.000 | 0.000 | 0.000 |
| JPN | 0.000 | 0.000 | 0.000 | 0.000 | 0.000 | 0.000 | 0.000 | 0.000 | 0.000 | 0.000 |
| LAM | 0.000 | 0.000 | 0.000 | 0.000 | 0.000 | 0.000 | 0.000 | 0.000 | 0.000 | 0.000 |
| MEA | 0.000 | 0.000 | 0.000 | 0.000 | 0.000 | 0.000 | 0.000 | 0.000 | 0.000 | 0.000 |
| NEU | 0.000 | 0.000 | 0.000 | 0.000 | 0.000 | 0.000 | 0.000 | 0.000 | 0.000 | 0.000 |
| OAS | 0.000 | 0.000 | 0.000 | 0.000 | 0.000 | 0.000 | 0.000 | 0.000 | 0.000 | 0.000 |
| REF | 0.000 | 0.000 | 0.000 | 0.000 | 0.000 | 0.000 | 0.000 | 0.000 | 0.000 | 0.000 |
| SSA | 0.000 | 0.000 | 0.000 | 0.000 | 0.000 | 0.000 | 0.000 | 0.000 | 0.000 | 0.000 |
| USA | 0.000 | 0.000 | 0.000 | 0.000 | 0.000 | 0.000 | 0.000 | 0.000 | 0.000 | 0.000 |

Table 346: FAO — Demand—Feed—Secondary products—Oils (Mt DM/yr)

6.7.6 Sugar

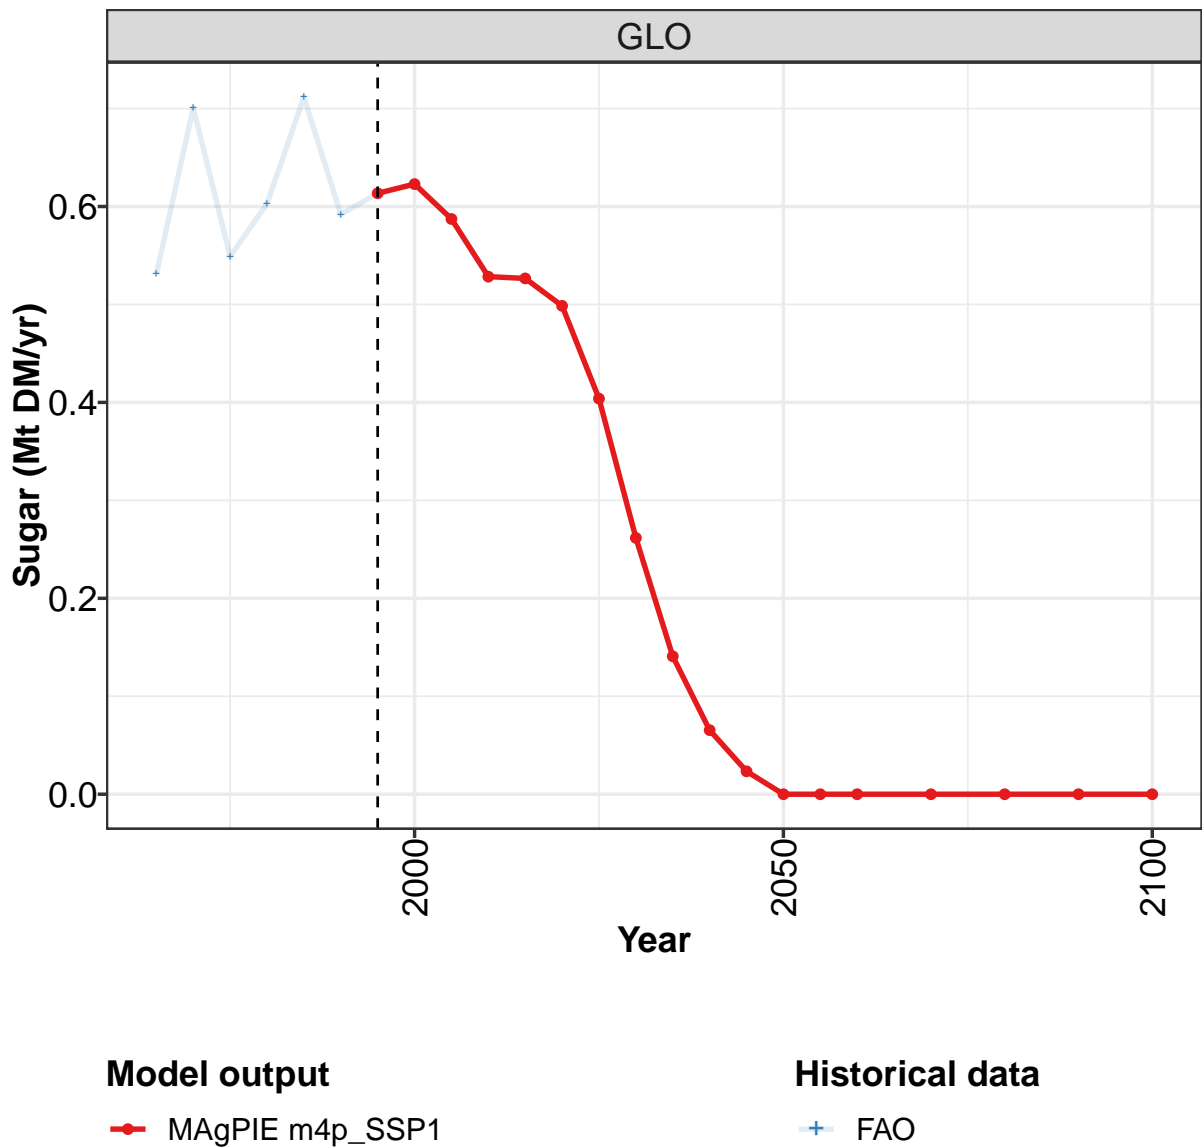

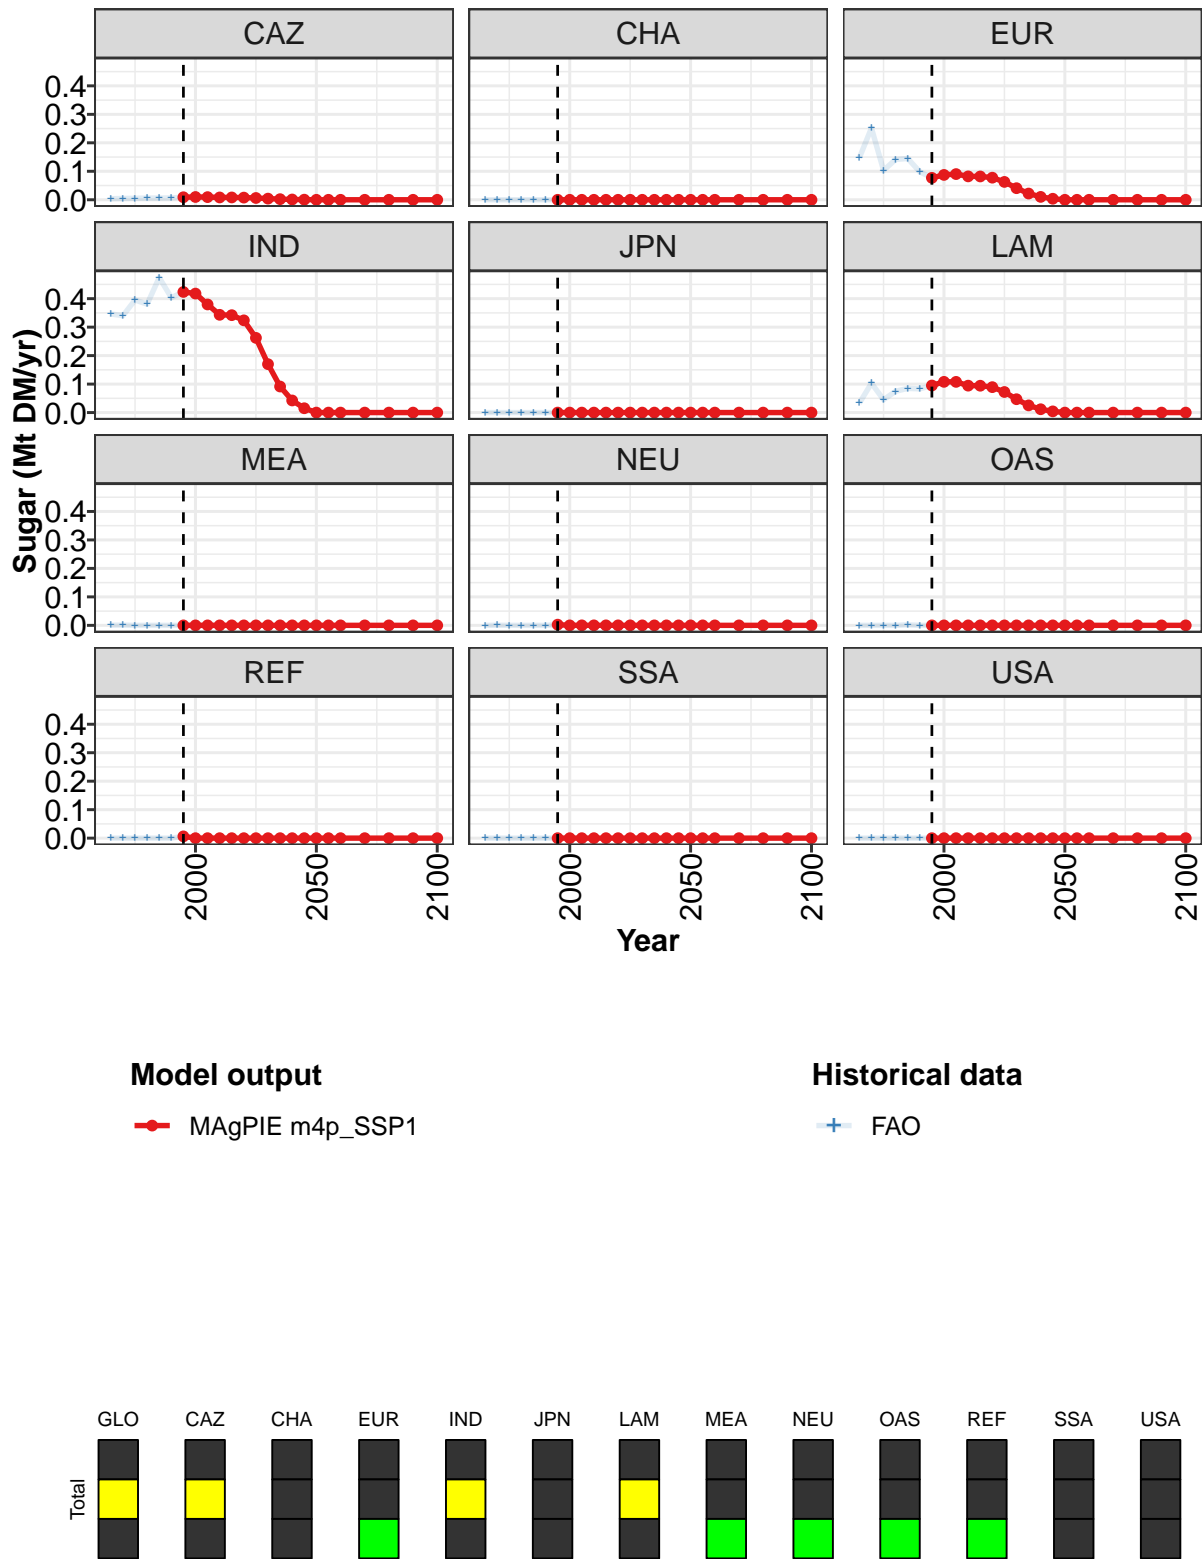

Figure 116: MAgPIE m4p\_SSP1 — Demand—Feed—Secondary products—Sugar (Mt DM/yr)

|     | 1995  | 2000  | 2005  | 2010  | 2015  | 2020  | 2025  | 2030  | 2035  | 2040  | 2045  |
|-----|-------|-------|-------|-------|-------|-------|-------|-------|-------|-------|-------|
| GLO | 0.613 | 0.623 | 0.587 | 0.528 | 0.527 | 0.499 | 0.404 | 0.262 | 0.141 | 0.065 | 0.023 |
| CAZ | 0.009 | 0.010 | 0.009 | 0.008 | 0.008 | 0.008 | 0.006 | 0.004 | 0.002 | 0.001 | 0.000 |
| CHA | 0.000 | 0.000 | 0.000 | 0.000 | 0.000 | 0.000 | 0.000 | 0.000 | 0.000 | 0.000 | 0.000 |
| EUR | 0.077 | 0.087 | 0.090 | 0.082 | 0.082 | 0.078 | 0.063 | 0.041 | 0.022 | 0.010 | 0.004 |
| IND | 0.424 | 0.418 | 0.380 | 0.343 | 0.342 | 0.324 | 0.262 | 0.170 | 0.091 | 0.043 | 0.015 |
| JPN | 0.000 | 0.000 | 0.000 | 0.000 | 0.000 | 0.000 | 0.000 | 0.000 | 0.000 | 0.000 | 0.000 |
| LAM | 0.095 | 0.108 | 0.108 | 0.095 | 0.094 | 0.089 | 0.072 | 0.047 | 0.025 | 0.012 | 0.004 |
| MEA | 0.000 | 0.000 | 0.000 | 0.000 | 0.000 | 0.000 | 0.000 | 0.000 | 0.000 | 0.000 | 0.000 |
| NEU | 0.003 | 0.000 | 0.000 | 0.000 | 0.000 | 0.000 | 0.000 | 0.000 | 0.000 | 0.000 | 0.000 |
| OAS | 0.000 | 0.000 | 0.000 | 0.000 | 0.000 | 0.000 | 0.000 | 0.000 | 0.000 | 0.000 | 0.000 |
| REF | 0.006 | 0.000 | 0.000 | 0.000 | 0.000 | 0.000 | 0.000 | 0.000 | 0.000 | 0.000 | 0.000 |
| SSA | 0.000 | 0.000 | 0.000 | 0.000 | 0.000 | 0.000 | 0.000 | 0.000 | 0.000 | 0.000 | 0.000 |
| USA | 0.000 | 0.000 | 0.000 | 0.000 | 0.000 | 0.000 | 0.000 | 0.000 | 0.000 | 0.000 | 0.000 |

Table 347: MAgPIE m4p\_SSP1 — Demand—Feed—Secondary products—Sugar (Mt DM/yr) [PART 1/2]

|     | 2050  | 2055  | 2060  | 2070  | 2080  | 2090  | 2100  |
|-----|-------|-------|-------|-------|-------|-------|-------|
| GLO | 0.000 | 0.000 | 0.000 | 0.000 | 0.000 | 0.000 | 0.000 |
| CAZ | 0.000 | 0.000 | 0.000 | 0.000 | 0.000 | 0.000 | 0.000 |
| CHA | 0.000 | 0.000 | 0.000 | 0.000 | 0.000 | 0.000 | 0.000 |
| EUR | 0.000 | 0.000 | 0.000 | 0.000 | 0.000 | 0.000 | 0.000 |
| IND | 0.000 | 0.000 | 0.000 | 0.000 | 0.000 | 0.000 | 0.000 |
| JPN | 0.000 | 0.000 | 0.000 | 0.000 | 0.000 | 0.000 | 0.000 |
| LAM | 0.000 | 0.000 | 0.000 | 0.000 | 0.000 | 0.000 | 0.000 |
| MEA | 0.000 | 0.000 | 0.000 | 0.000 | 0.000 | 0.000 | 0.000 |
| NEU | 0.000 | 0.000 | 0.000 | 0.000 | 0.000 | 0.000 | 0.000 |
| OAS | 0.000 | 0.000 | 0.000 | 0.000 | 0.000 | 0.000 | 0.000 |
| REF | 0.000 | 0.000 | 0.000 | 0.000 | 0.000 | 0.000 | 0.000 |
| SSA | 0.000 | 0.000 | 0.000 | 0.000 | 0.000 | 0.000 | 0.000 |
| USA | 0.000 | 0.000 | 0.000 | 0.000 | 0.000 | 0.000 | 0.000 |

Table 348: MAgPIE m4p\_SSP1 — Demand—Feed—Secondary products—Sugar (Mt DM/yr) [PART 2/2]

|     | 1965  | 1970  | 1975  | 1980  | 1985  | 1990  | 1995  | 2000  | 2005  | 2010  |
|-----|-------|-------|-------|-------|-------|-------|-------|-------|-------|-------|
| GLO | 0.531 | 0.701 | 0.549 | 0.603 | 0.712 | 0.592 | 0.614 | 0.623 | 0.587 | 0.528 |
| CAZ | 0.004 | 0.005 | 0.005 | 0.006 | 0.006 | 0.007 | 0.009 | 0.010 | 0.009 | 0.008 |
| CHA | 0.000 | 0.000 | 0.000 | 0.000 | 0.000 | 0.000 | 0.000 | 0.000 | 0.000 | 0.000 |
| EUR | 0.147 | 0.252 | 0.103 | 0.141 | 0.145 | 0.098 | 0.077 | 0.087 | 0.090 | 0.082 |
| IND | 0.346 | 0.340 | 0.395 | 0.381 | 0.474 | 0.404 | 0.424 | 0.418 | 0.380 | 0.343 |
| JPN | 0.000 | 0.000 | 0.000 | 0.000 | 0.000 | 0.000 | 0.000 | 0.000 | 0.000 | 0.000 |
| LAM | 0.033 | 0.103 | 0.045 | 0.075 | 0.085 | 0.083 | 0.095 | 0.108 | 0.108 | 0.095 |
| MEA | 0.001 | 0.001 | 0.000 | 0.000 | 0.000 | 0.000 | 0.000 | 0.000 | 0.000 | 0.000 |
| NEU | 0.000 | 0.000 | 0.000 | 0.000 | 0.000 | 0.000 | 0.003 | 0.000 | 0.000 | 0.000 |
| OAS | 0.000 | 0.000 | 0.000 | 0.000 | 0.002 | 0.000 | 0.000 | 0.000 | 0.000 | 0.000 |
| REF | 0.000 | 0.000 | 0.000 | 0.000 | 0.000 | 0.000 | 0.006 | 0.000 | 0.000 | 0.000 |
| SSA | 0.000 | 0.000 | 0.000 | 0.000 | 0.000 | 0.000 | 0.000 | 0.000 | 0.000 | 0.000 |
| USA | 0.000 | 0.000 | 0.000 | 0.000 | 0.000 | 0.000 | 0.000 | 0.000 | 0.000 | 0.000 |

Table 349: FAO — Demand—Feed—Secondary products—Sugar (Mt DM/yr)

## 7 Food

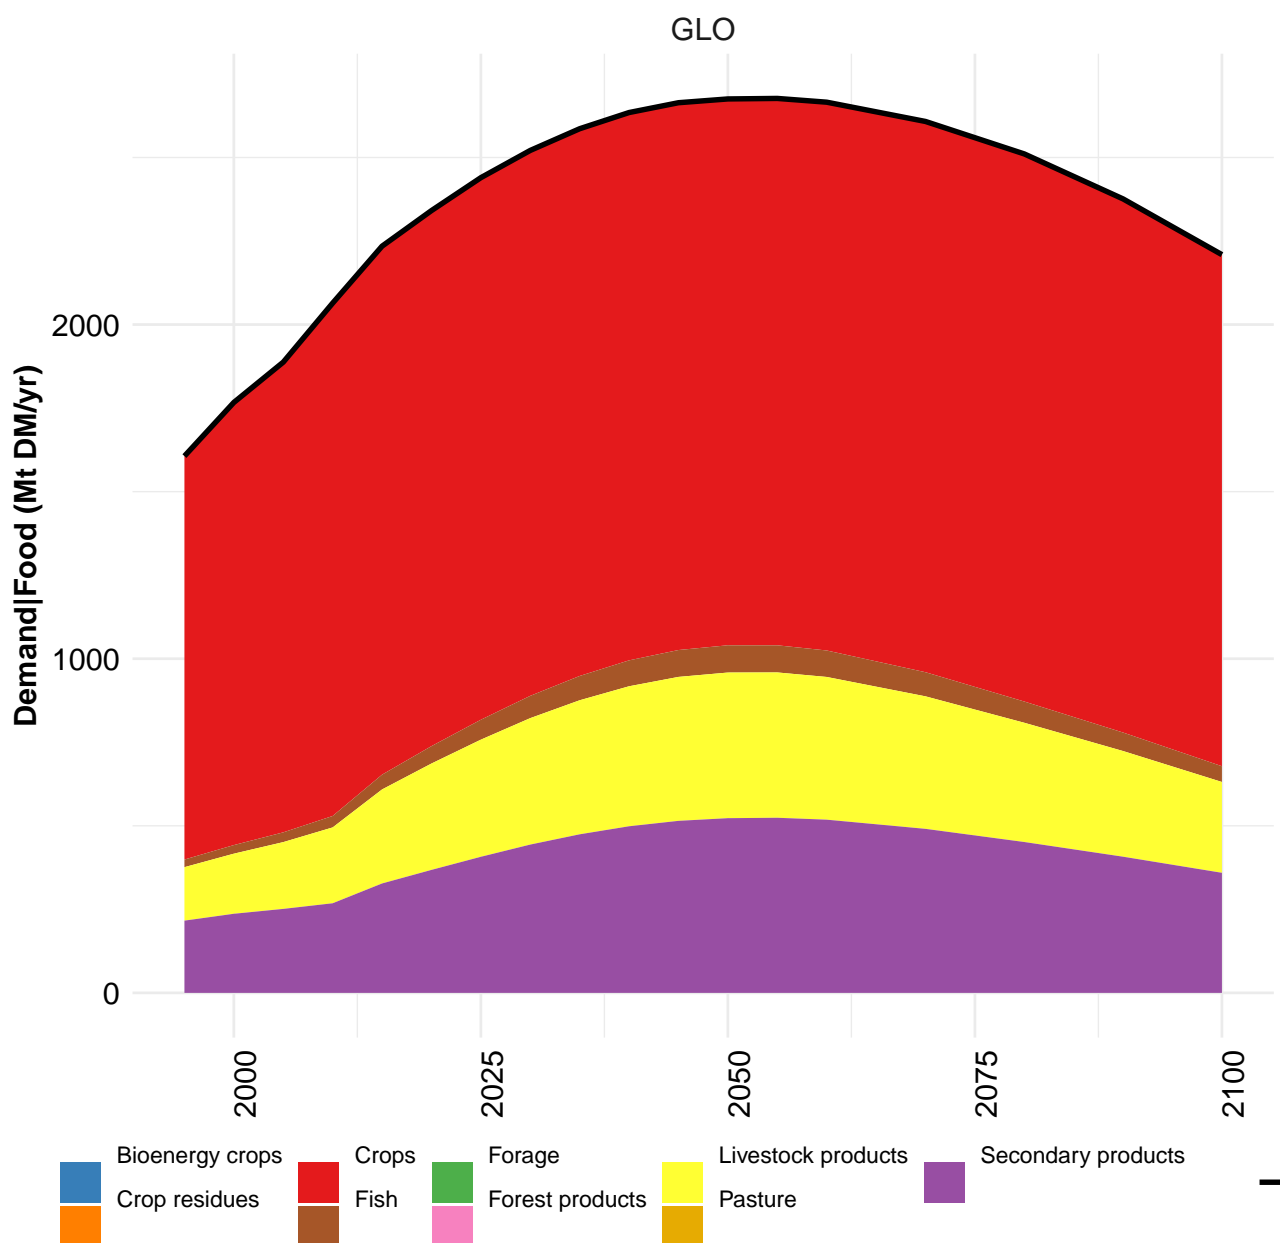

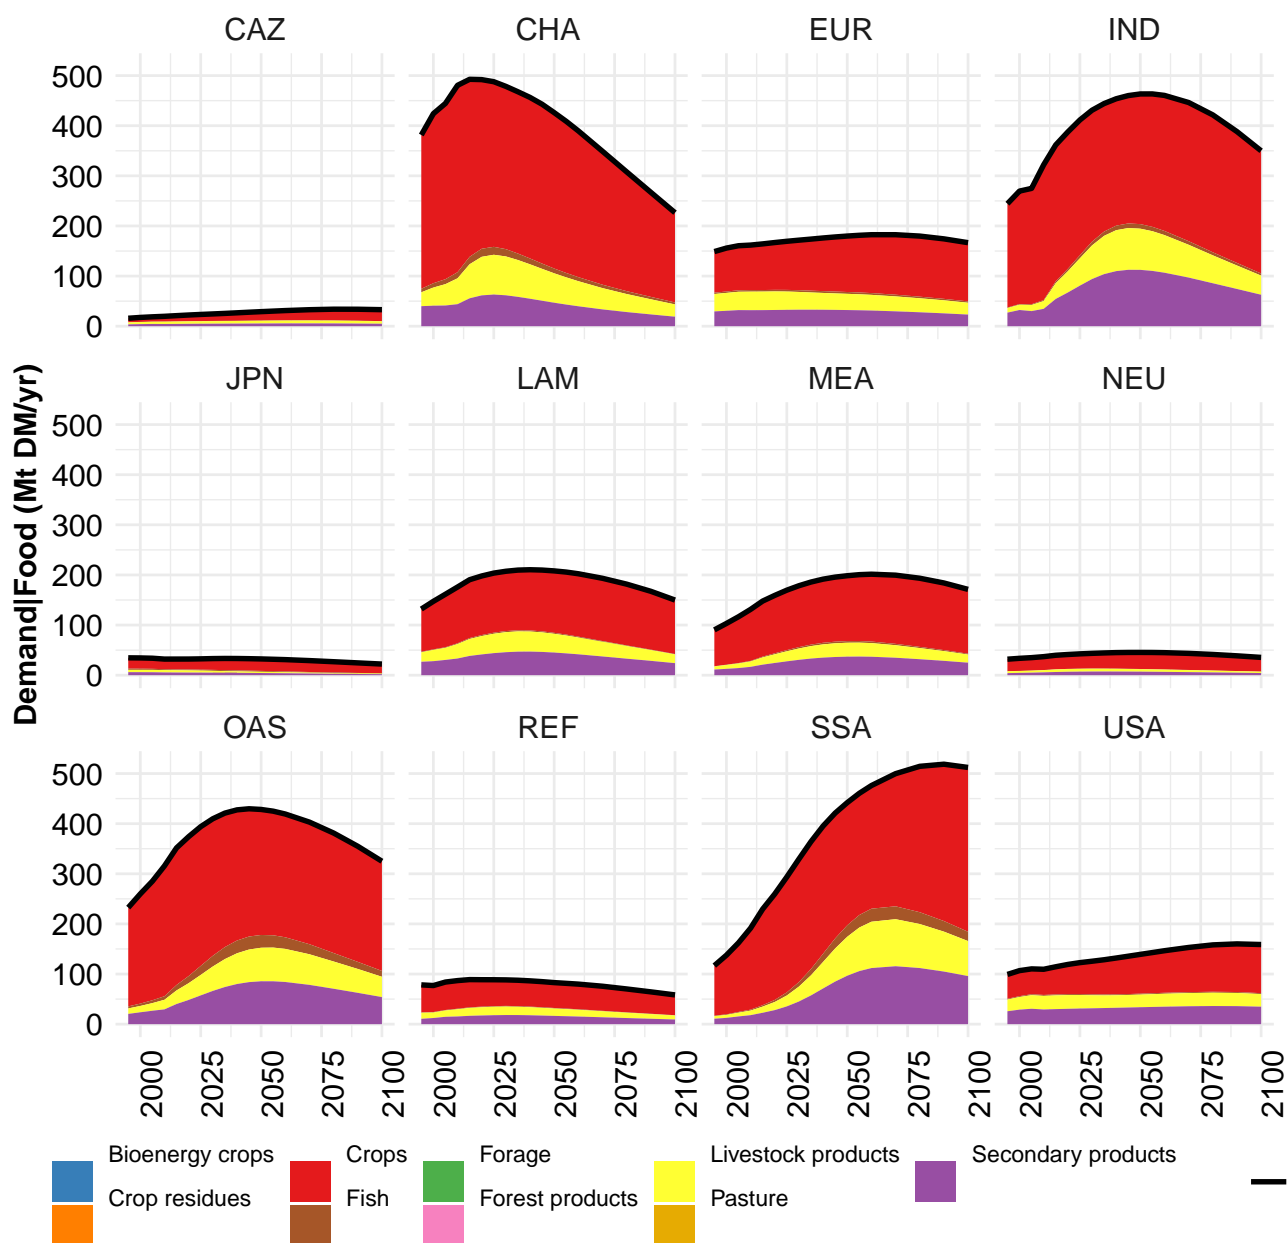



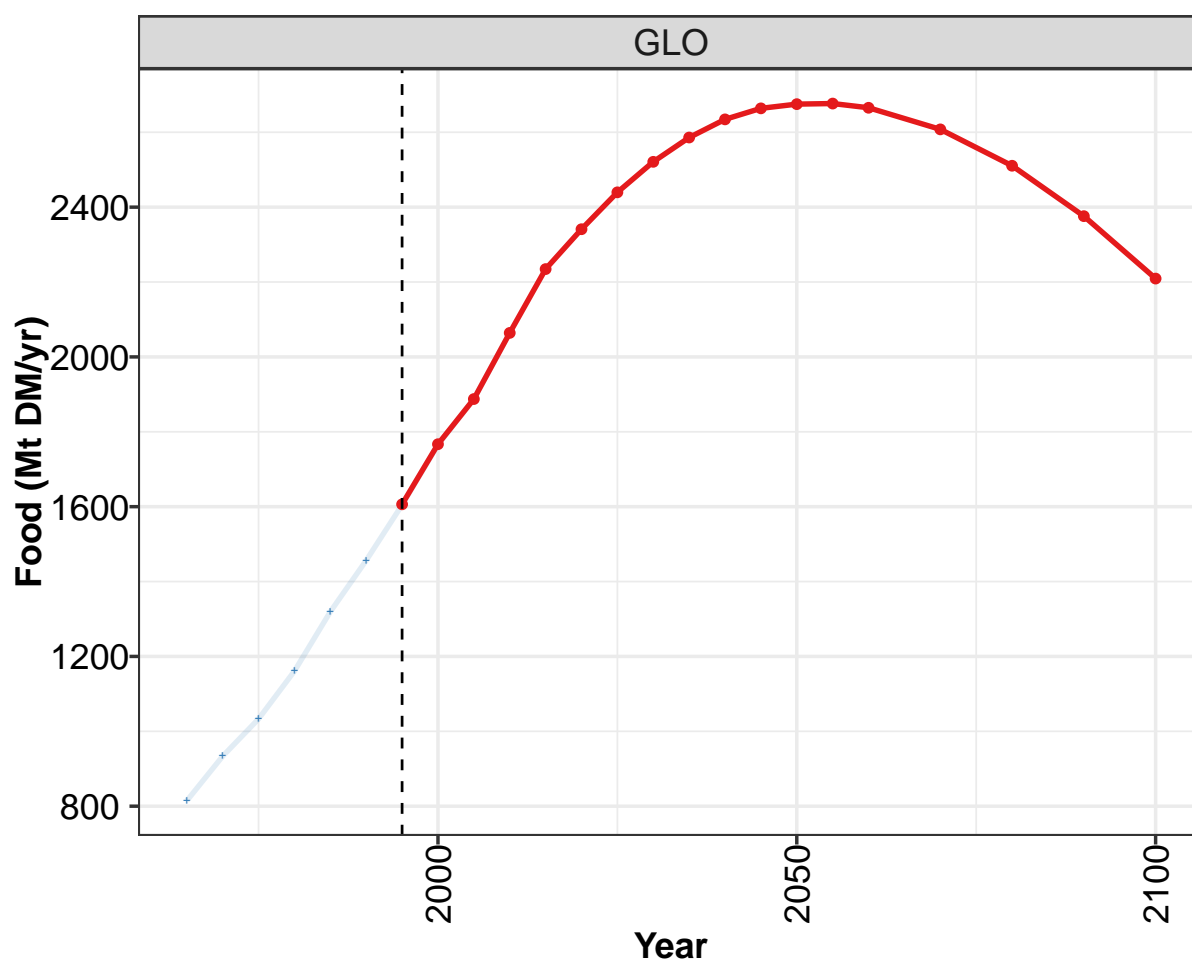**Model output**

—●— MAgPIE m4p\_SSP1

**Historical data**

—+— FAO

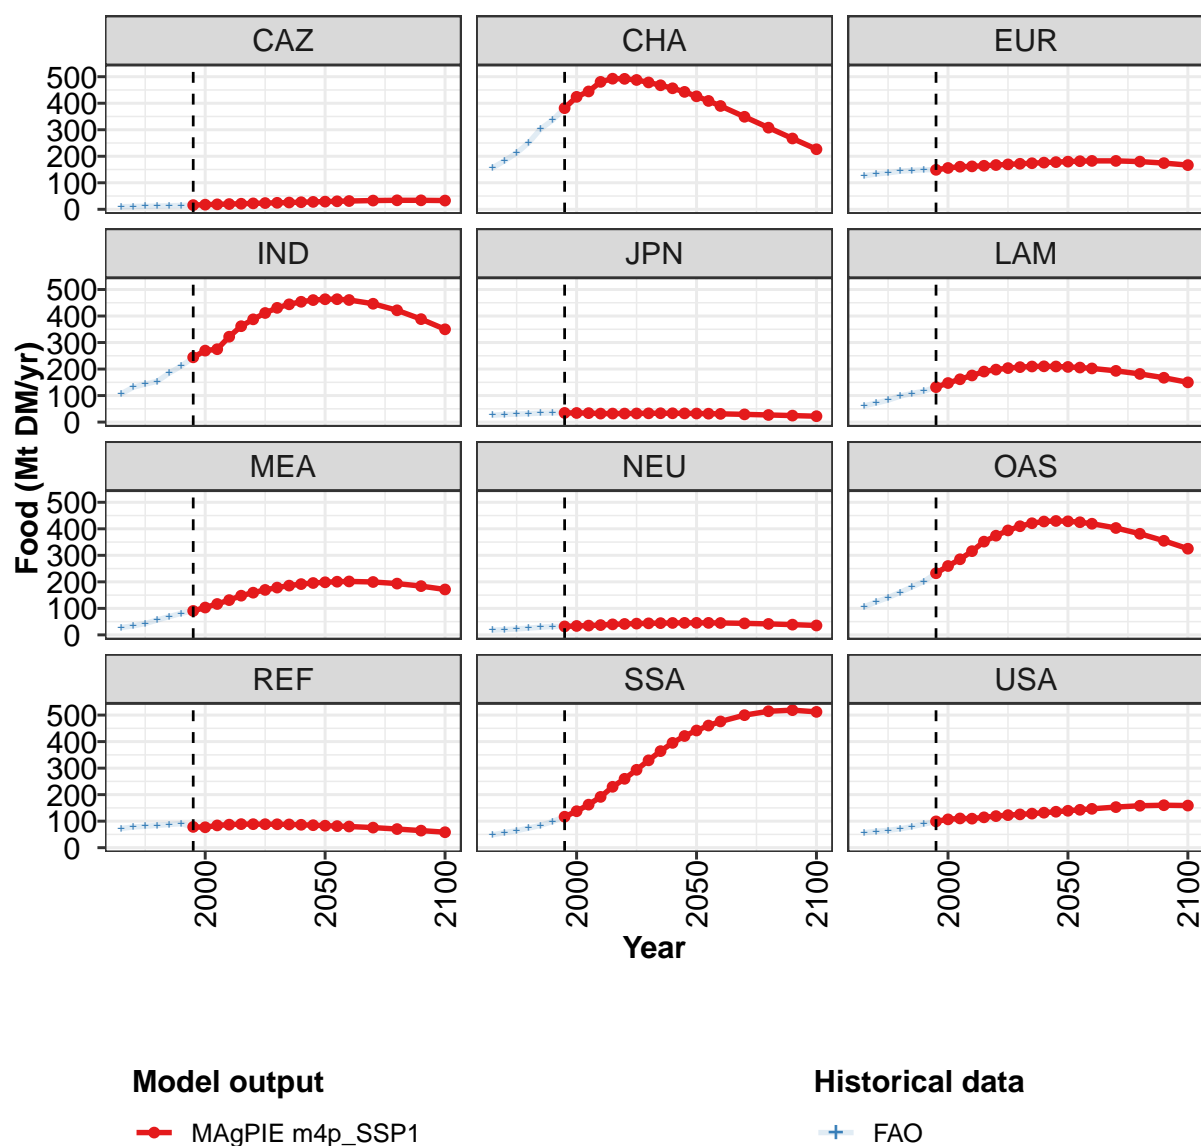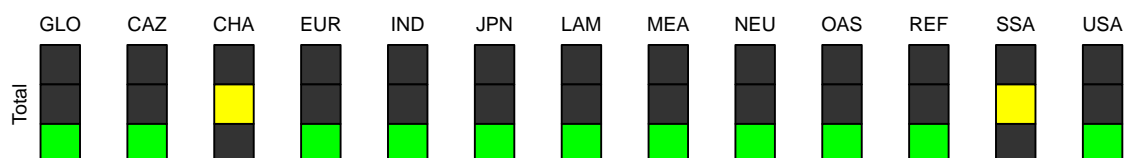

Figure 117: MAGPIE m4p\_SSP1 — Demand—Food (Mt DM/yr)

|     | 1995 | 2000 | 2005 | 2010 | 2015 | 2020 | 2025 | 2030 | 2035 | 2040 | 2045 |
|-----|------|------|------|------|------|------|------|------|------|------|------|
| GLO | 1606 | 1767 | 1888 | 2064 | 2235 | 2341 | 2440 | 2521 | 2586 | 2634 | 2664 |
| CAZ | 16   | 18   | 19   | 20   | 21   | 22   | 23   | 25   | 26   | 27   | 28   |
| CHA | 382  | 424  | 444  | 481  | 493  | 492  | 488  | 478  | 468  | 456  | 443  |
| EUR | 149  | 156  | 161  | 162  | 164  | 167  | 169  | 172  | 174  | 176  | 178  |
| IND | 244  | 270  | 275  | 322  | 362  | 388  | 411  | 431  | 444  | 454  | 460  |
| JPN | 35   | 34   | 34   | 32   | 32   | 32   | 33   | 33   | 33   | 33   | 33   |
| LAM | 132  | 147  | 162  | 176  | 191  | 198  | 204  | 207  | 210  | 210  | 210  |
| MEA | 90   | 103  | 117  | 131  | 148  | 159  | 170  | 178  | 186  | 192  | 196  |
| NEU | 32   | 34   | 35   | 37   | 40   | 41   | 43   | 44   | 44   | 45   | 45   |
| OAS | 233  | 260  | 285  | 316  | 352  | 374  | 394  | 410  | 421  | 428  | 430  |
| REF | 78   | 77   | 84   | 87   | 89   | 89   | 89   | 88   | 88   | 86   | 85   |
| SSA | 117  | 138  | 162  | 192  | 230  | 260  | 294  | 329  | 364  | 395  | 421  |
| USA | 99   | 107  | 110  | 109  | 115  | 119  | 123  | 126  | 129  | 132  | 136  |

Table 350: MAgPIE m4p-SSP1 — Demand—Food (Mt DM/yr) [PART 1/2]

|     | 2050 | 2055 | 2060 | 2070 | 2080 | 2090 | 2100 |
|-----|------|------|------|------|------|------|------|
| GLO | 2675 | 2677 | 2665 | 2608 | 2511 | 2376 | 2209 |
| CAZ | 29   | 30   | 31   | 33   | 34   | 34   | 33   |
| CHA | 426  | 409  | 390  | 349  | 308  | 267  | 227  |
| EUR | 180  | 181  | 183  | 183  | 180  | 174  | 167  |
| IND | 463  | 463  | 460  | 446  | 422  | 388  | 350  |
| JPN | 32   | 32   | 31   | 29   | 27   | 25   | 22   |
| LAM | 208  | 206  | 202  | 193  | 182  | 167  | 150  |
| MEA | 198  | 201  | 202  | 200  | 193  | 184  | 171  |
| NEU | 45   | 45   | 45   | 43   | 41   | 39   | 35   |
| OAS | 428  | 425  | 419  | 403  | 381  | 355  | 325  |
| REF | 83   | 81   | 80   | 76   | 70   | 64   | 58   |
| SSA | 442  | 461  | 476  | 500  | 514  | 519  | 512  |
| USA | 139  | 143  | 147  | 153  | 158  | 160  | 159  |

Table 351: MAgPIE m4p-SSP1 — Demand—Food (Mt DM/yr) [PART 2/2]

|     | 1965 | 1970 | 1975 | 1980 | 1985 | 1990 | 1995 | 2000 | 2005 | 2010 |
|-----|------|------|------|------|------|------|------|------|------|------|
| GLO | 815  | 934  | 1033 | 1161 | 1319 | 1456 | 1605 | 1765 | 1888 | 2064 |
| CAZ | 10   | 11   | 12   | 12   | 13   | 14   | 16   | 17   | 19   | 20   |
| CHA | 156  | 183  | 212  | 251  | 303  | 336  | 381  | 424  | 444  | 481  |
| EUR | 126  | 133  | 137  | 143  | 147  | 149  | 149  | 156  | 161  | 162  |
| IND | 107  | 131  | 143  | 154  | 185  | 211  | 243  | 268  | 275  | 322  |
| JPN | 26   | 29   | 30   | 32   | 34   | 35   | 35   | 34   | 34   | 32   |
| LAM | 61   | 72   | 83   | 98   | 108  | 117  | 132  | 147  | 162  | 176  |
| MEA | 28   | 34   | 43   | 56   | 69   | 81   | 90   | 103  | 117  | 131  |
| NEU | 18   | 20   | 22   | 26   | 29   | 32   | 32   | 34   | 35   | 37   |
| OAS | 105  | 124  | 141  | 160  | 181  | 202  | 232  | 260  | 285  | 316  |
| REF | 73   | 78   | 81   | 84   | 87   | 91   | 78   | 77   | 84   | 87   |
| SSA | 49   | 57   | 64   | 74   | 84   | 99   | 117  | 138  | 162  | 191  |
| USA | 56   | 62   | 65   | 71   | 80   | 89   | 99   | 107  | 110  | 110  |

Table 352: FAO — Demand—Food (Mt DM/yr)

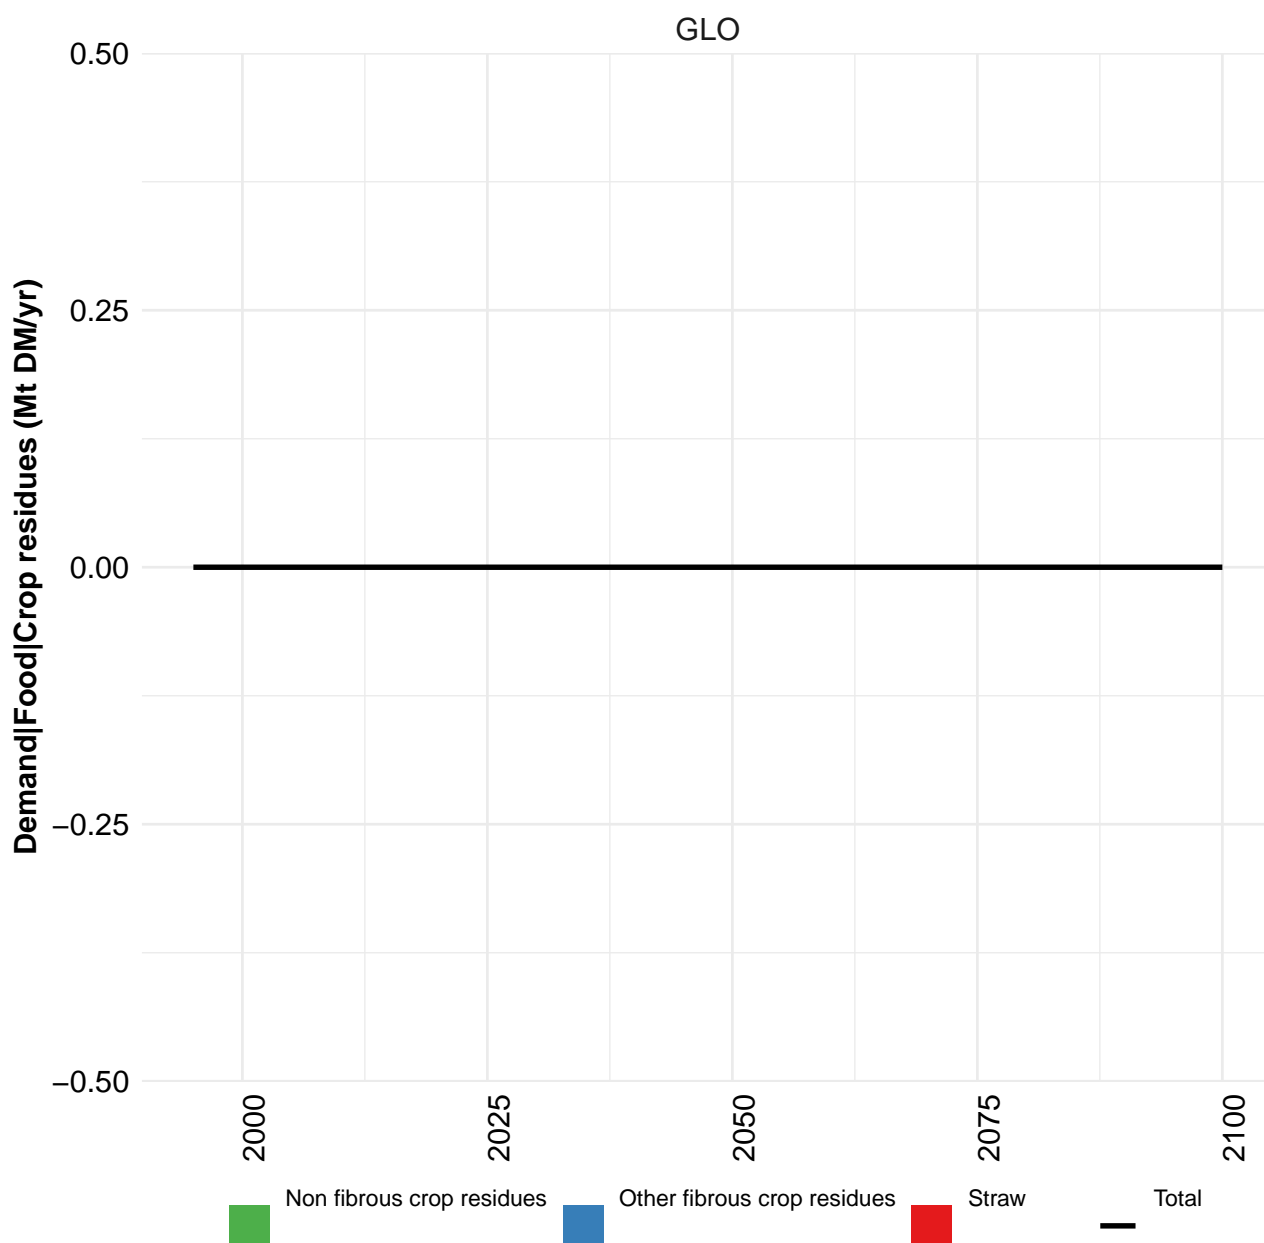

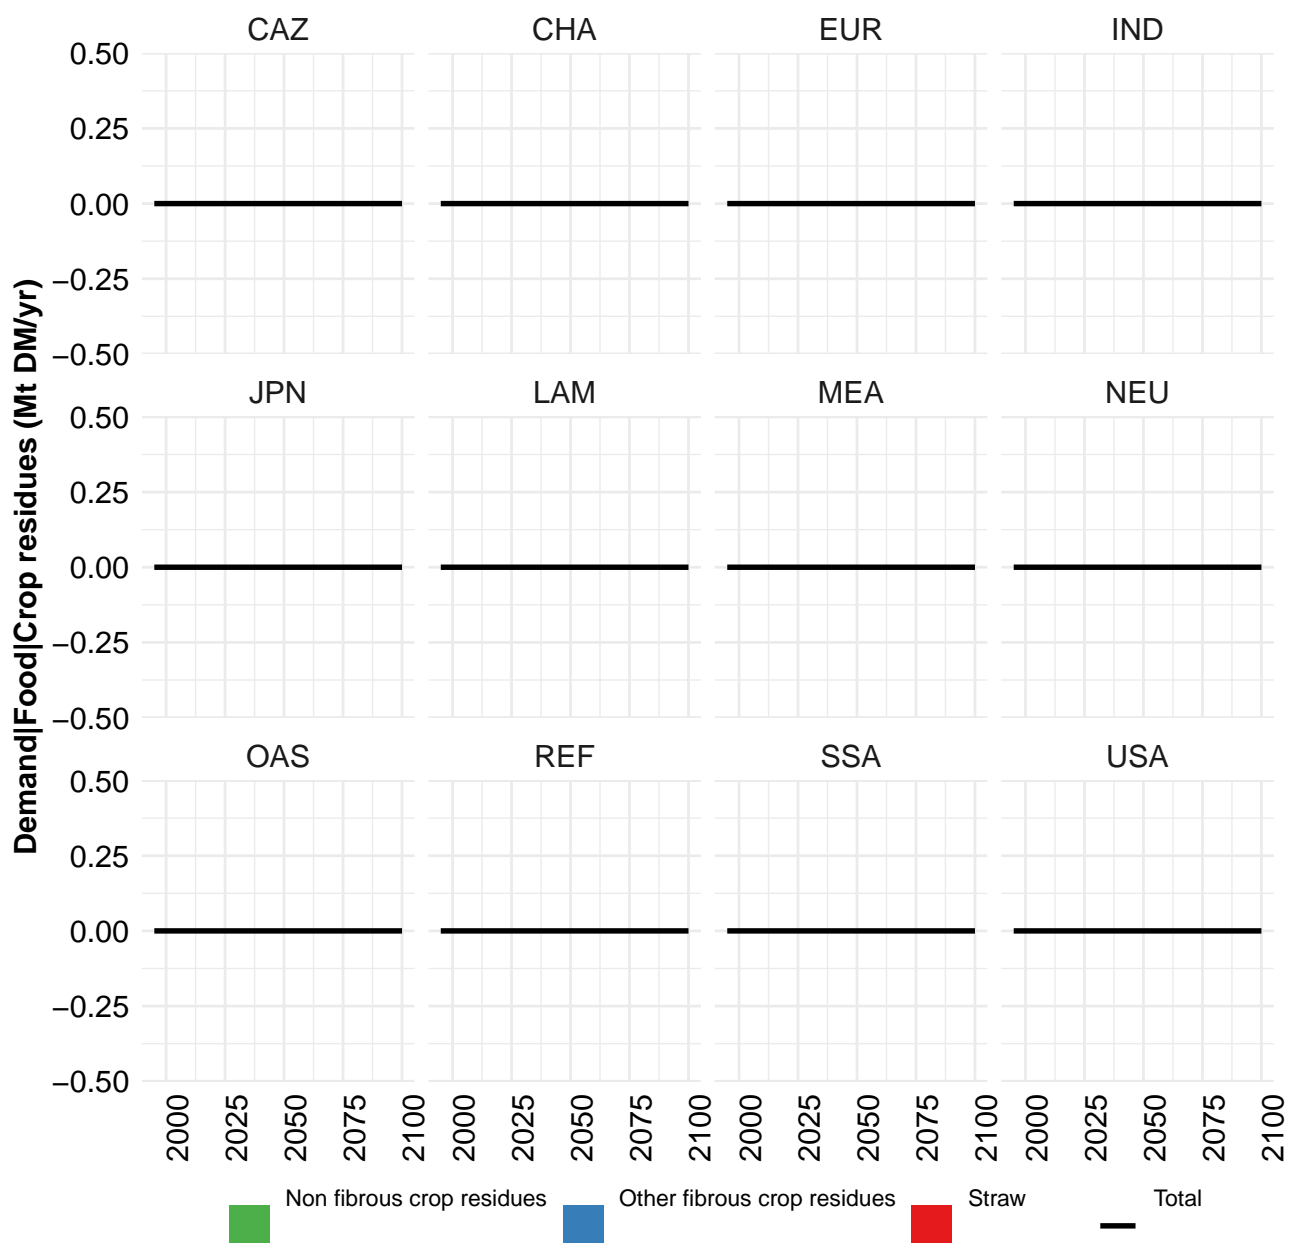

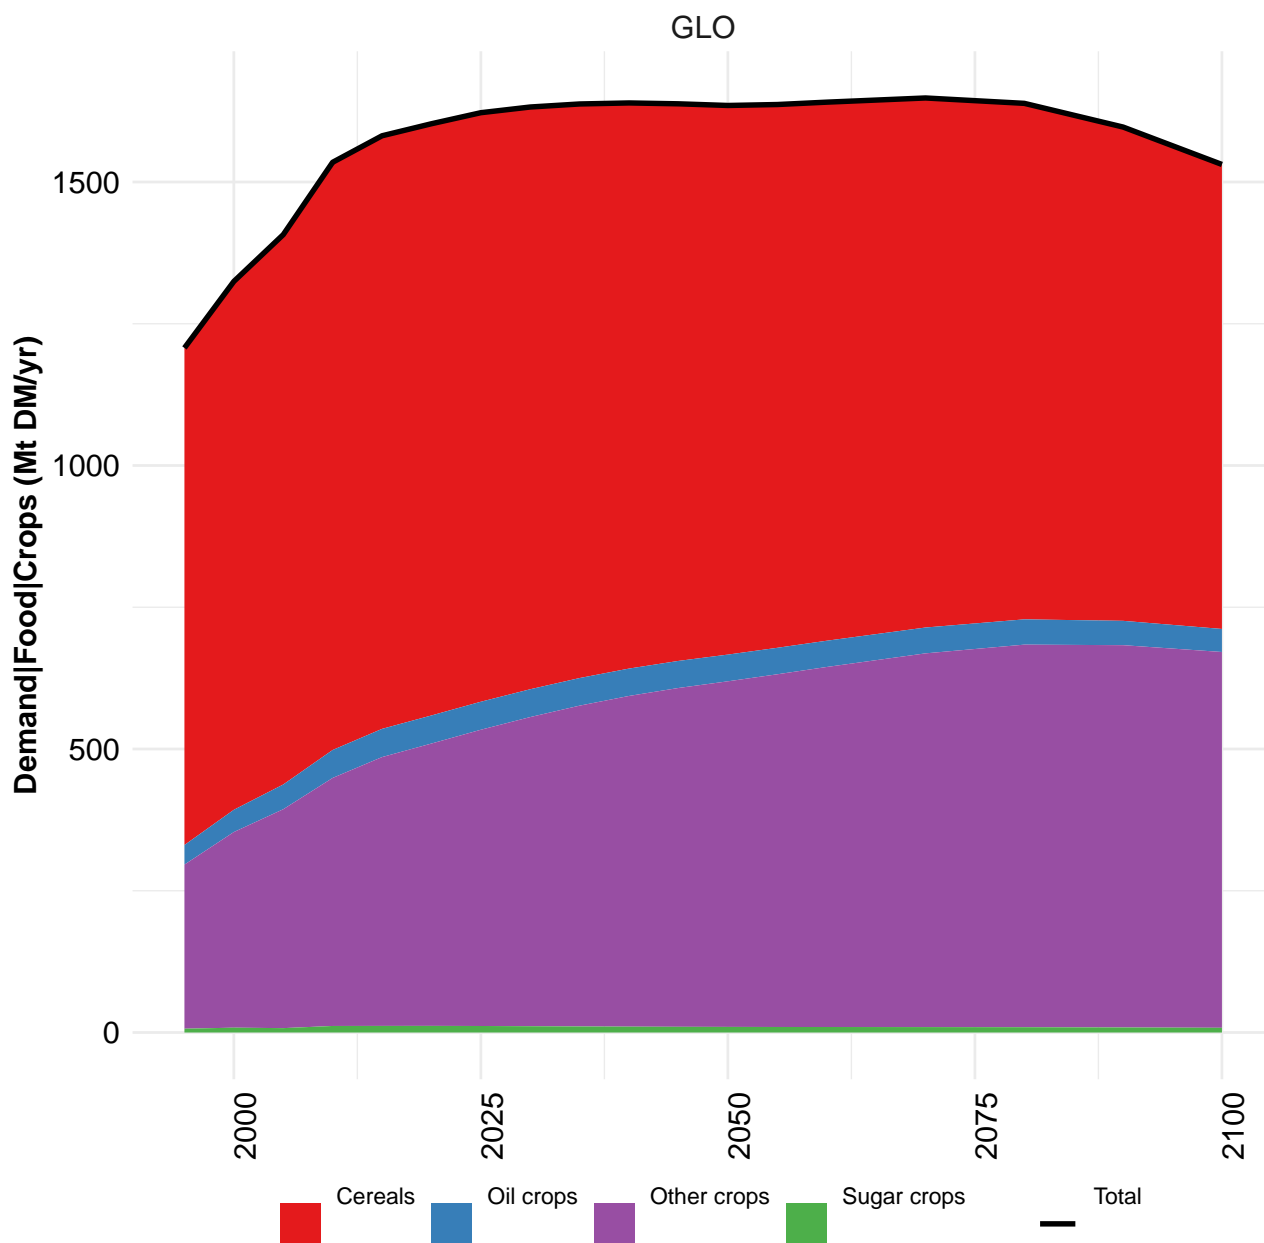

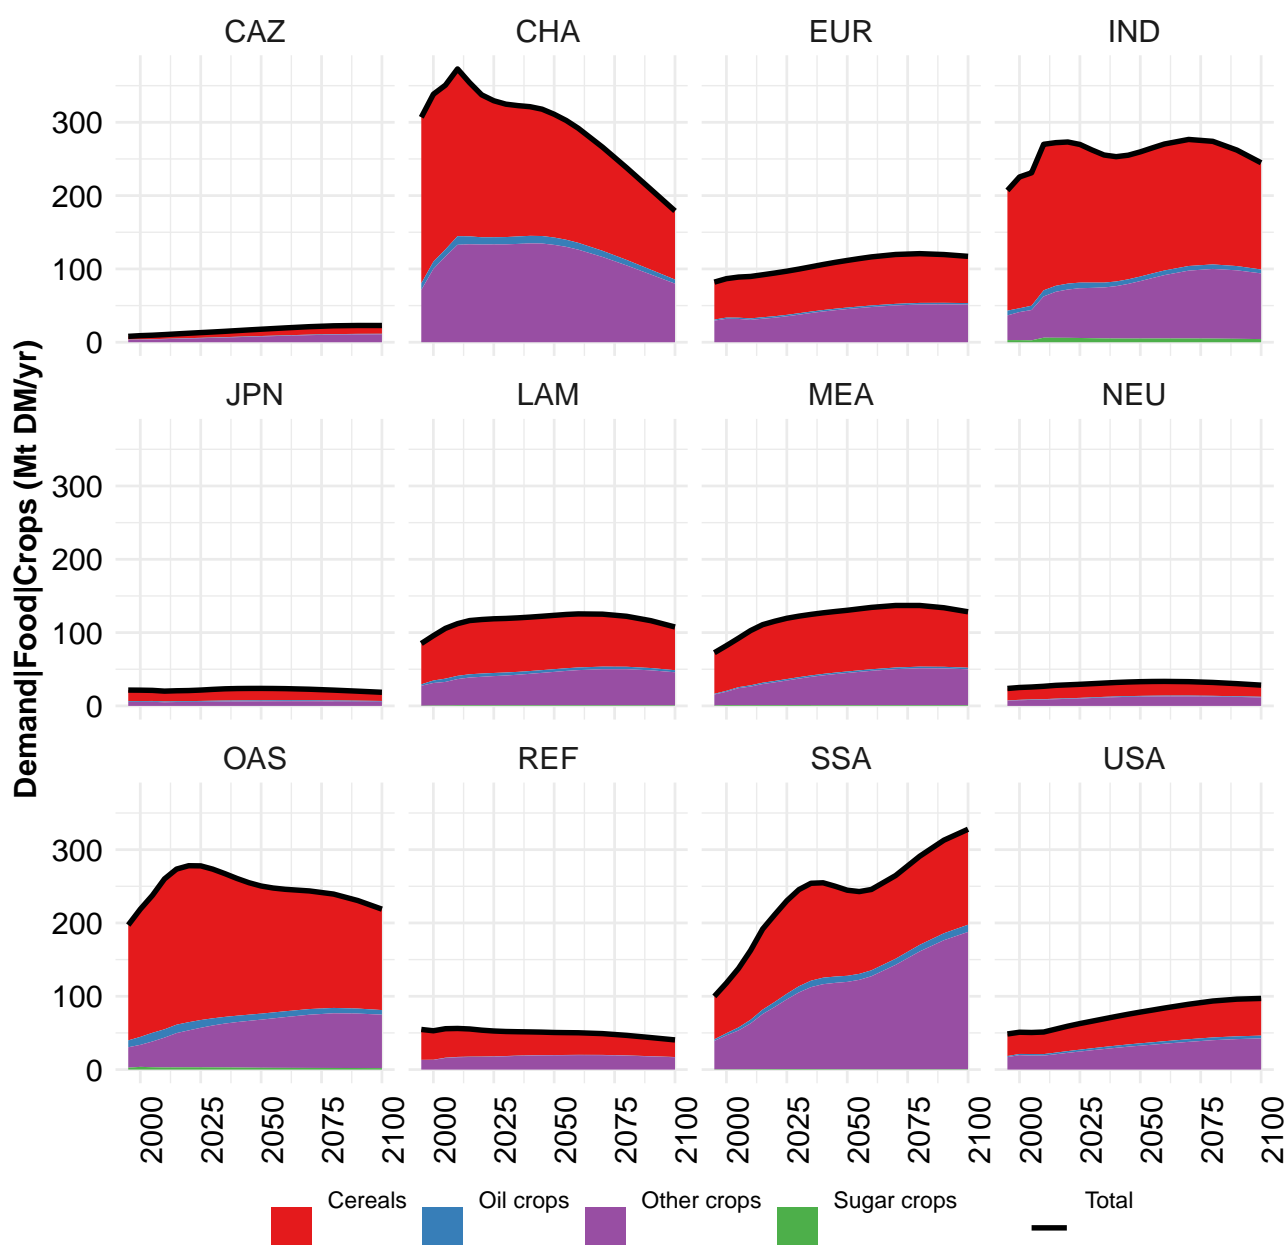

7.1
Crops

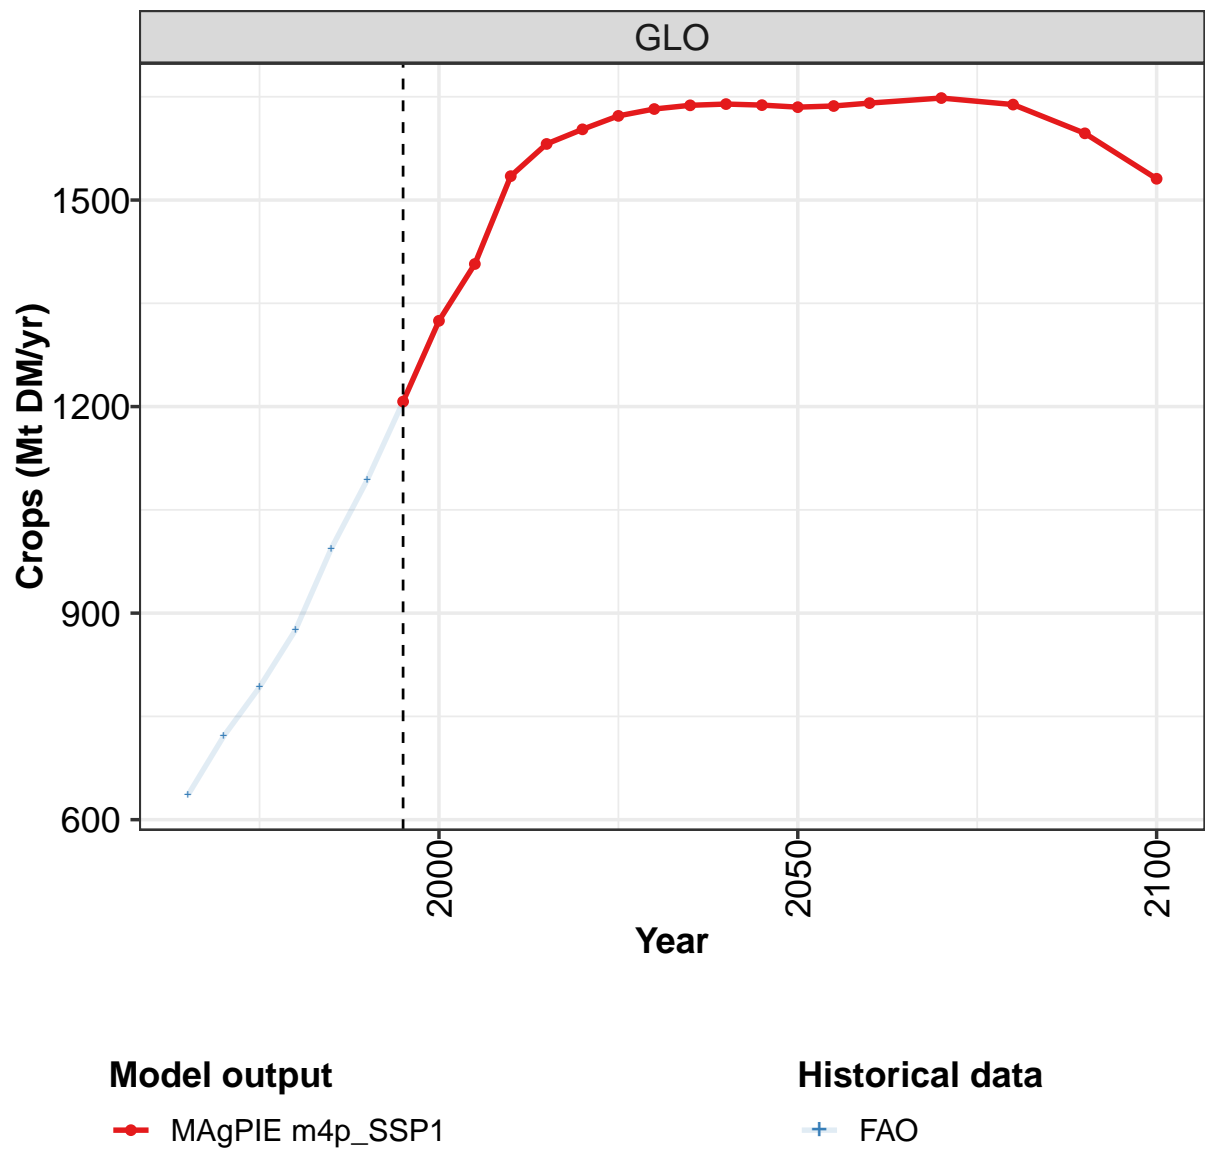



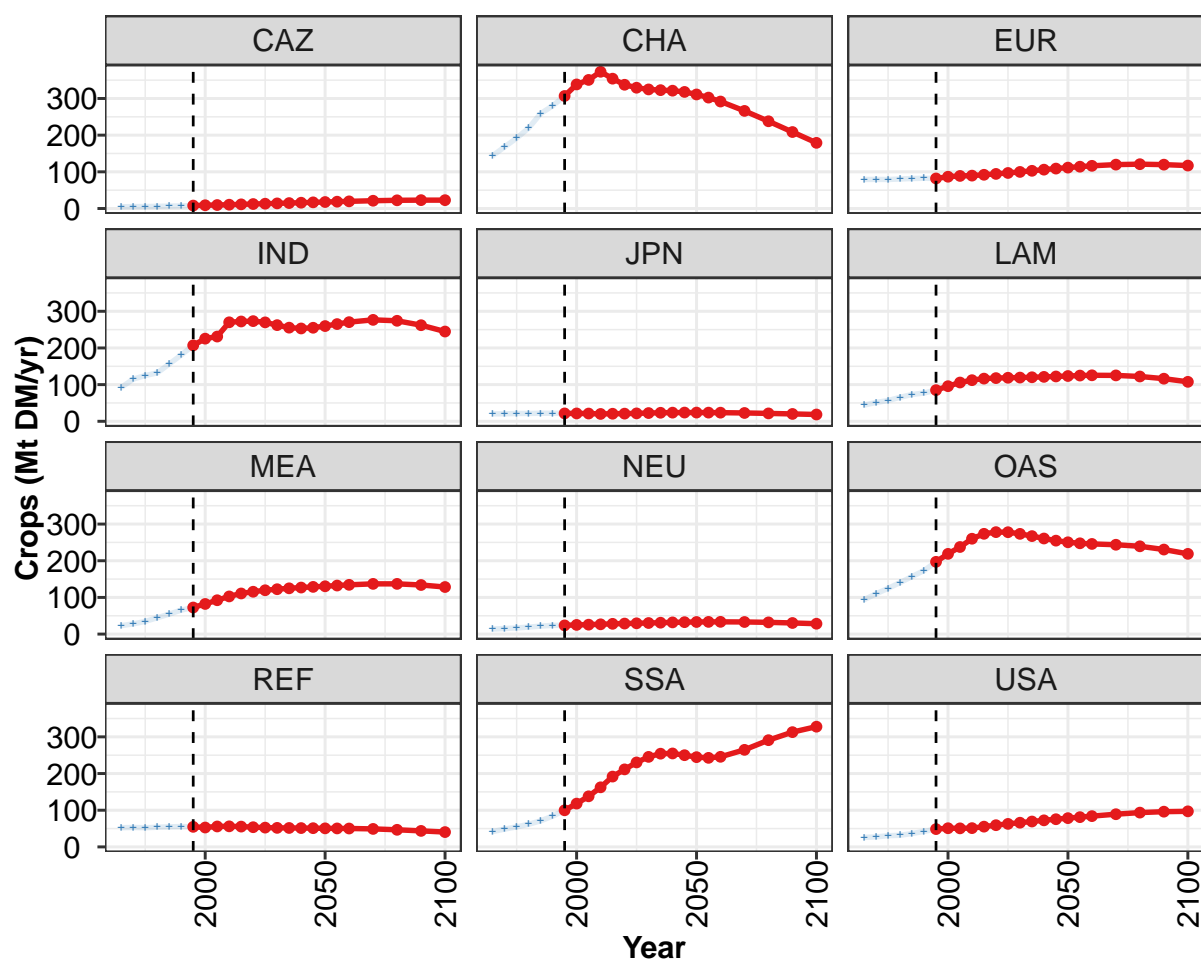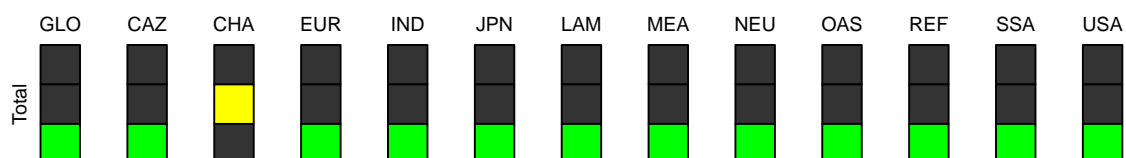

Figure 118: MAGPIE m4p\_SSP1 — Demand—Food—Crops (Mt DM/yr)

|     | 1995 | 2000 | 2005 | 2010 | 2015 | 2020 | 2025 | 2030 | 2035 | 2040 | 2045 |
|-----|------|------|------|------|------|------|------|------|------|------|------|
| GLO | 1207 | 1325 | 1407 | 1535 | 1582 | 1603 | 1622 | 1632 | 1638 | 1639 | 1638 |
| CAZ | 8    | 9    | 10   | 10   | 11   | 12   | 13   | 14   | 15   | 16   | 17   |
| CHA | 307  | 338  | 351  | 373  | 354  | 337  | 329  | 325  | 323  | 321  | 318  |
| EUR | 82   | 87   | 89   | 90   | 92   | 94   | 97   | 100  | 103  | 106  | 109  |
| IND | 207  | 225  | 231  | 270  | 272  | 273  | 270  | 262  | 255  | 253  | 255  |
| JPN | 22   | 21   | 21   | 20   | 21   | 21   | 22   | 23   | 23   | 24   | 24   |
| LAM | 85   | 96   | 106  | 112  | 116  | 118  | 119  | 119  | 120  | 121  | 122  |
| MEA | 73   | 82   | 92   | 103  | 111  | 116  | 120  | 122  | 125  | 127  | 129  |
| NEU | 24   | 25   | 26   | 27   | 28   | 29   | 29   | 30   | 31   | 32   | 33   |
| OAS | 197  | 219  | 238  | 260  | 273  | 278  | 278  | 273  | 267  | 261  | 255  |
| REF | 55   | 53   | 56   | 56   | 55   | 54   | 53   | 52   | 52   | 51   | 51   |
| SSA | 100  | 118  | 138  | 163  | 192  | 211  | 230  | 245  | 254  | 255  | 250  |
| USA | 49   | 51   | 51   | 51   | 55   | 59   | 63   | 66   | 69   | 72   | 76   |

Table 353: MAgPIE m4p-SSP1 — Demand—Food—Crops (Mt DM/yr) [PART 1/2]

|     | 2050 | 2055 | 2060 | 2070 | 2080 | 2090 | 2100 |
|-----|------|------|------|------|------|------|------|
| GLO | 1635 | 1637 | 1641 | 1648 | 1639 | 1597 | 1531 |
| CAZ | 18   | 19   | 20   | 21   | 22   | 23   | 23   |
| CHA | 311  | 302  | 292  | 266  | 238  | 209  | 179  |
| EUR | 112  | 114  | 116  | 120  | 121  | 120  | 117  |
| IND | 260  | 265  | 270  | 277  | 274  | 262  | 245  |
| JPN | 24   | 24   | 24   | 23   | 22   | 20   | 19   |
| LAM | 124  | 125  | 125  | 125  | 122  | 116  | 108  |
| MEA | 130  | 132  | 134  | 137  | 137  | 134  | 128  |
| NEU | 33   | 33   | 33   | 33   | 32   | 30   | 28   |
| OAS | 250  | 248  | 246  | 244  | 239  | 231  | 219  |
| REF | 51   | 50   | 50   | 49   | 47   | 44   | 40   |
| SSA | 245  | 243  | 246  | 265  | 291  | 313  | 328  |
| USA | 78   | 81   | 84   | 89   | 94   | 96   | 97   |

Table 354: MAgPIE m4p-SSP1 — Demand—Food—Crops (Mt DM/yr) [PART 2/2]

|     | 1965 | 1970 | 1975 | 1980 | 1985 | 1990 | 1995 | 2000 | 2005 | 2010 |
|-----|------|------|------|------|------|------|------|------|------|------|
| GLO | 635  | 721  | 793  | 875  | 994  | 1093 | 1207 | 1325 | 1407 | 1535 |
| CAZ | 5    | 5    | 5    | 6    | 7    | 7    | 8    | 9    | 10   | 10   |
| CHA | 144  | 168  | 192  | 219  | 259  | 280  | 307  | 338  | 351  | 373  |
| EUR | 79   | 79   | 79   | 80   | 82   | 82   | 82   | 87   | 89   | 90   |
| IND | 92   | 115  | 125  | 132  | 156  | 181  | 207  | 225  | 231  | 270  |
| JPN | 20   | 20   | 21   | 21   | 22   | 22   | 22   | 21   | 21   | 20   |
| LAM | 44   | 51   | 57   | 65   | 73   | 77   | 85   | 96   | 106  | 112  |
| MEA | 23   | 28   | 35   | 45   | 55   | 65   | 73   | 82   | 92   | 103  |
| NEU | 14   | 15   | 17   | 19   | 22   | 24   | 24   | 25   | 26   | 27   |
| OAS | 94   | 110  | 125  | 140  | 157  | 173  | 197  | 219  | 238  | 260  |
| REF | 52   | 53   | 52   | 54   | 55   | 55   | 55   | 53   | 56   | 56   |
| SSA | 42   | 49   | 54   | 62   | 71   | 84   | 100  | 118  | 138  | 162  |
| USA | 26   | 27   | 30   | 32   | 36   | 42   | 49   | 51   | 51   | 51   |

Table 355: FAO — Demand—Food—Crops (Mt DM/yr)

7.1.1
Cereals

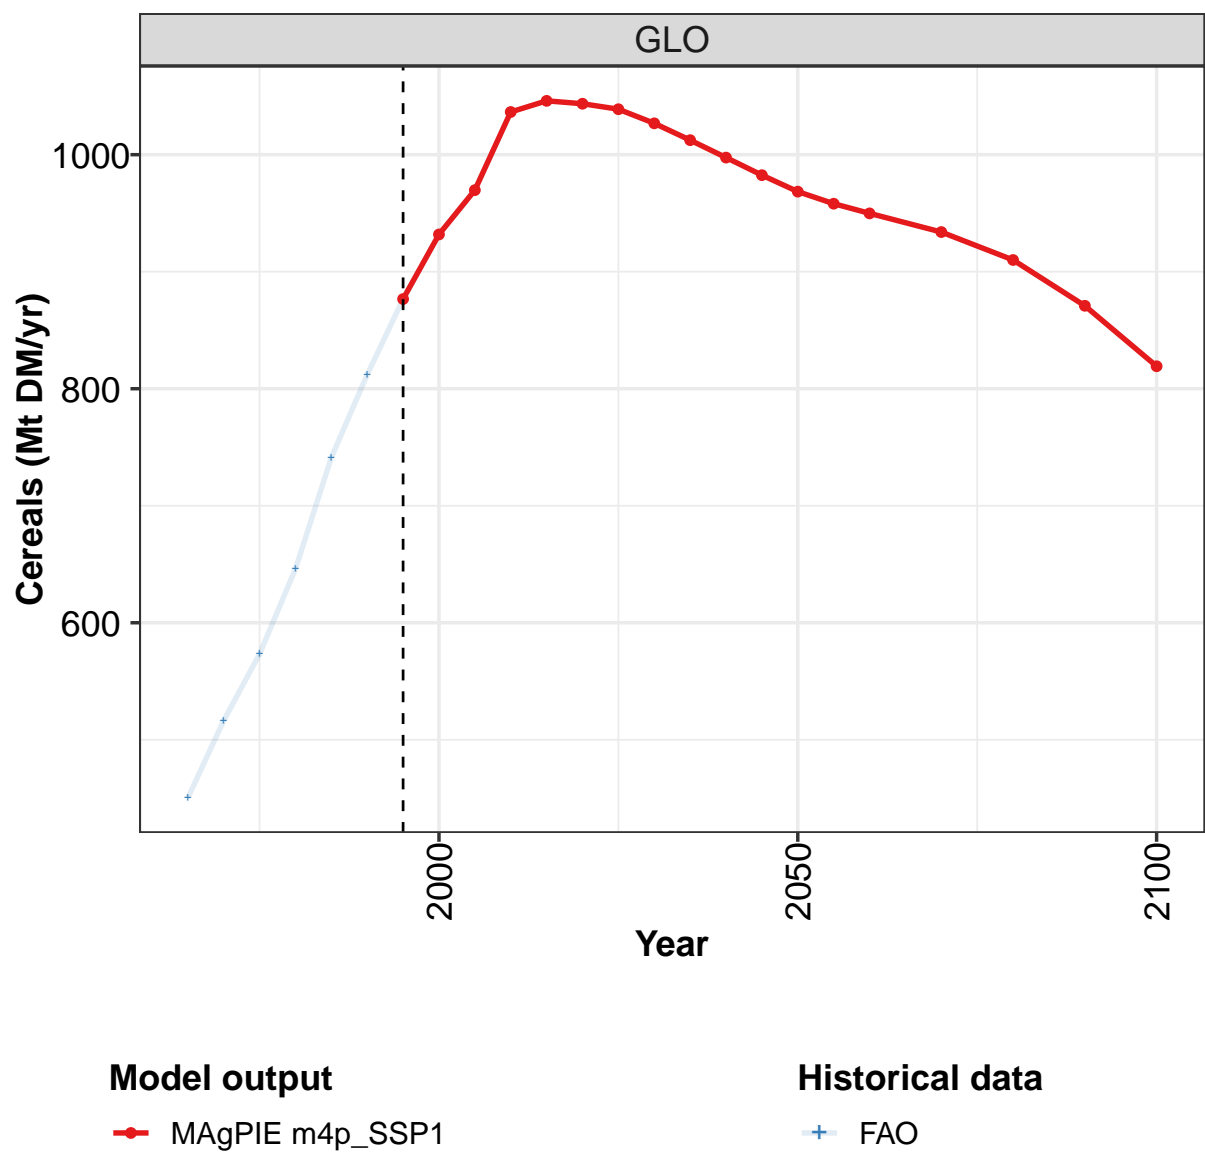

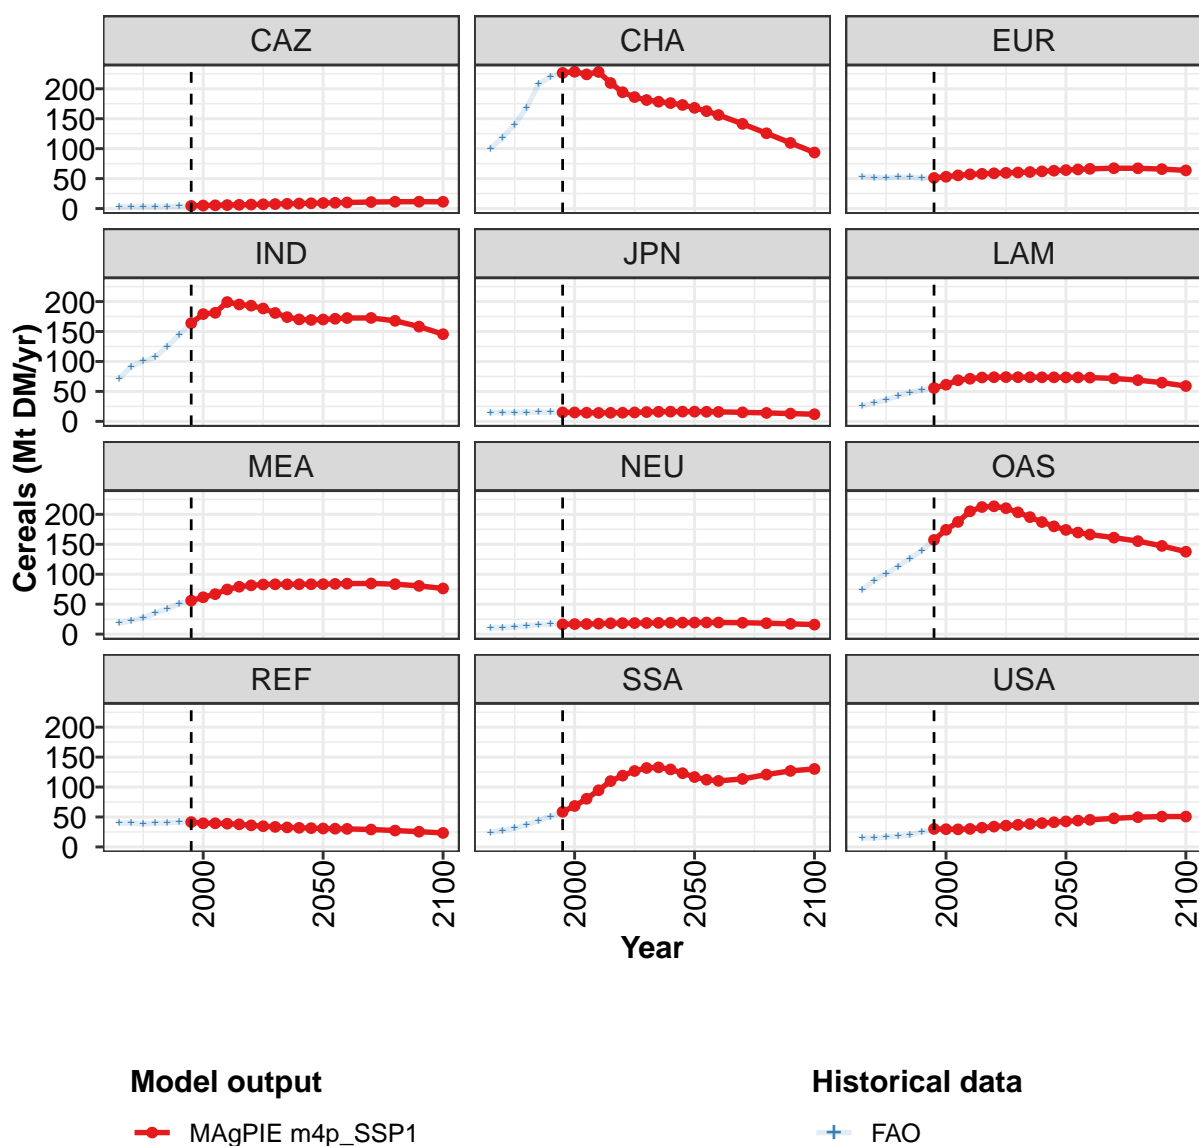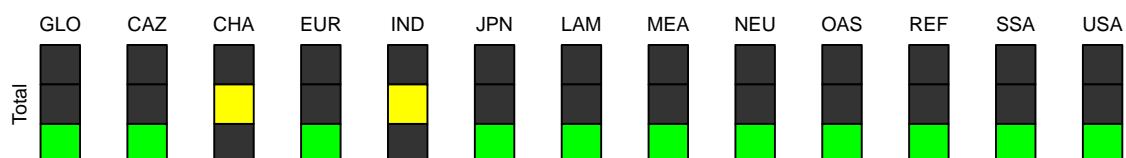

Figure 119: MAGPIE m4p\_SSP1 — Demand—Food—Crops—Cereals (Mt DM/yr)

|     | 1995 | 2000 | 2005 | 2010 | 2015 | 2020 | 2025 | 2030 | 2035 | 2040 | 2045 |
|-----|------|------|------|------|------|------|------|------|------|------|------|
| GLO | 877  | 932  | 970  | 1036 | 1046 | 1044 | 1039 | 1027 | 1012 | 998  | 983  |
| CAZ | 4    | 5    | 5    | 6    | 6    | 7    | 7    | 8    | 8    | 8    | 9    |
| CHA | 227  | 228  | 224  | 228  | 210  | 194  | 186  | 181  | 178  | 176  | 173  |
| EUR | 51   | 53   | 55   | 57   | 58   | 59   | 60   | 60   | 61   | 62   | 63   |
| IND | 164  | 179  | 181  | 199  | 195  | 193  | 188  | 181  | 174  | 170  | 169  |
| JPN | 15   | 15   | 14   | 14   | 14   | 14   | 15   | 16   | 16   | 16   | 16   |
| LAM | 56   | 61   | 69   | 71   | 73   | 74   | 74   | 74   | 74   | 74   | 73   |
| MEA | 56   | 62   | 67   | 75   | 79   | 81   | 83   | 83   | 83   | 83   | 83   |
| NEU | 16   | 17   | 17   | 18   | 18   | 18   | 19   | 19   | 19   | 19   | 19   |
| OAS | 157  | 174  | 187  | 205  | 212  | 213  | 210  | 203  | 195  | 187  | 180  |
| REF | 41   | 40   | 40   | 39   | 38   | 36   | 35   | 33   | 33   | 32   | 31   |
| SSA | 59   | 68   | 80   | 95   | 110  | 119  | 127  | 132  | 133  | 129  | 123  |
| USA | 30   | 30   | 29   | 30   | 32   | 34   | 36   | 37   | 38   | 40   | 41   |

Table 356: MAgPIE m4p\_SSP1 — Demand—Food—Crops—Cereals (Mt DM/yr) [PART 1/2]

|     | 2050 | 2055 | 2060 | 2070 | 2080 | 2090 | 2100 |
|-----|------|------|------|------|------|------|------|
| GLO | 968  | 958  | 950  | 934  | 910  | 871  | 819  |
| CAZ | 9    | 10   | 10   | 11   | 11   | 11   | 11   |
| CHA | 168  | 163  | 156  | 141  | 126  | 110  | 94   |
| EUR | 64   | 65   | 66   | 67   | 67   | 66   | 64   |
| IND | 170  | 171  | 173  | 173  | 168  | 158  | 146  |
| JPN | 16   | 16   | 16   | 15   | 14   | 13   | 12   |
| LAM | 73   | 73   | 73   | 72   | 69   | 65   | 59   |
| MEA | 83   | 84   | 84   | 85   | 83   | 81   | 76   |
| NEU | 19   | 19   | 19   | 19   | 18   | 17   | 16   |
| OAS | 174  | 170  | 166  | 161  | 155  | 147  | 138  |
| REF | 31   | 30   | 30   | 29   | 27   | 25   | 23   |
| SSA | 117  | 112  | 110  | 113  | 121  | 127  | 130  |
| USA | 43   | 44   | 45   | 48   | 50   | 51   | 51   |

Table 357: MAgPIE m4p\_SSP1 — Demand—Food—Crops—Cereals (Mt DM/yr) [PART 2/2]

|     | 1965 | 1970 | 1975 | 1980 | 1985 | 1990 | 1995 | 2000 | 2005 | 2010 |
|-----|------|------|------|------|------|------|------|------|------|------|
| GLO | 450  | 516  | 573  | 646  | 741  | 812  | 877  | 932  | 970  | 1037 |
| CAZ | 3    | 3    | 3    | 3    | 4    | 4    | 4    | 5    | 5    | 6    |
| CHA | 100  | 119  | 140  | 169  | 208  | 220  | 227  | 228  | 224  | 228  |
| EUR | 54   | 52   | 52   | 52   | 52   | 51   | 51   | 53   | 55   | 57   |
| IND | 71   | 91   | 100  | 107  | 125  | 144  | 164  | 179  | 181  | 199  |
| JPN | 15   | 14   | 15   | 15   | 15   | 15   | 15   | 15   | 14   | 14   |
| LAM | 26   | 31   | 36   | 42   | 48   | 52   | 56   | 61   | 69   | 71   |
| MEA | 18   | 22   | 27   | 35   | 42   | 51   | 56   | 62   | 67   | 75   |
| NEU | 10   | 11   | 12   | 14   | 16   | 17   | 16   | 17   | 17   | 18   |
| OAS | 74   | 90   | 101  | 113  | 127  | 140  | 157  | 174  | 187  | 205  |
| REF | 40   | 40   | 38   | 40   | 40   | 41   | 41   | 40   | 39   | 39   |
| SSA | 24   | 28   | 31   | 37   | 44   | 51   | 59   | 68   | 80   | 95   |
| USA | 15   | 15   | 17   | 18   | 20   | 25   | 30   | 30   | 29   | 30   |

Table 358: FAO — Demand—Food—Crops—Cereals (Mt DM/yr)

7.1.2
Cereals—Maize

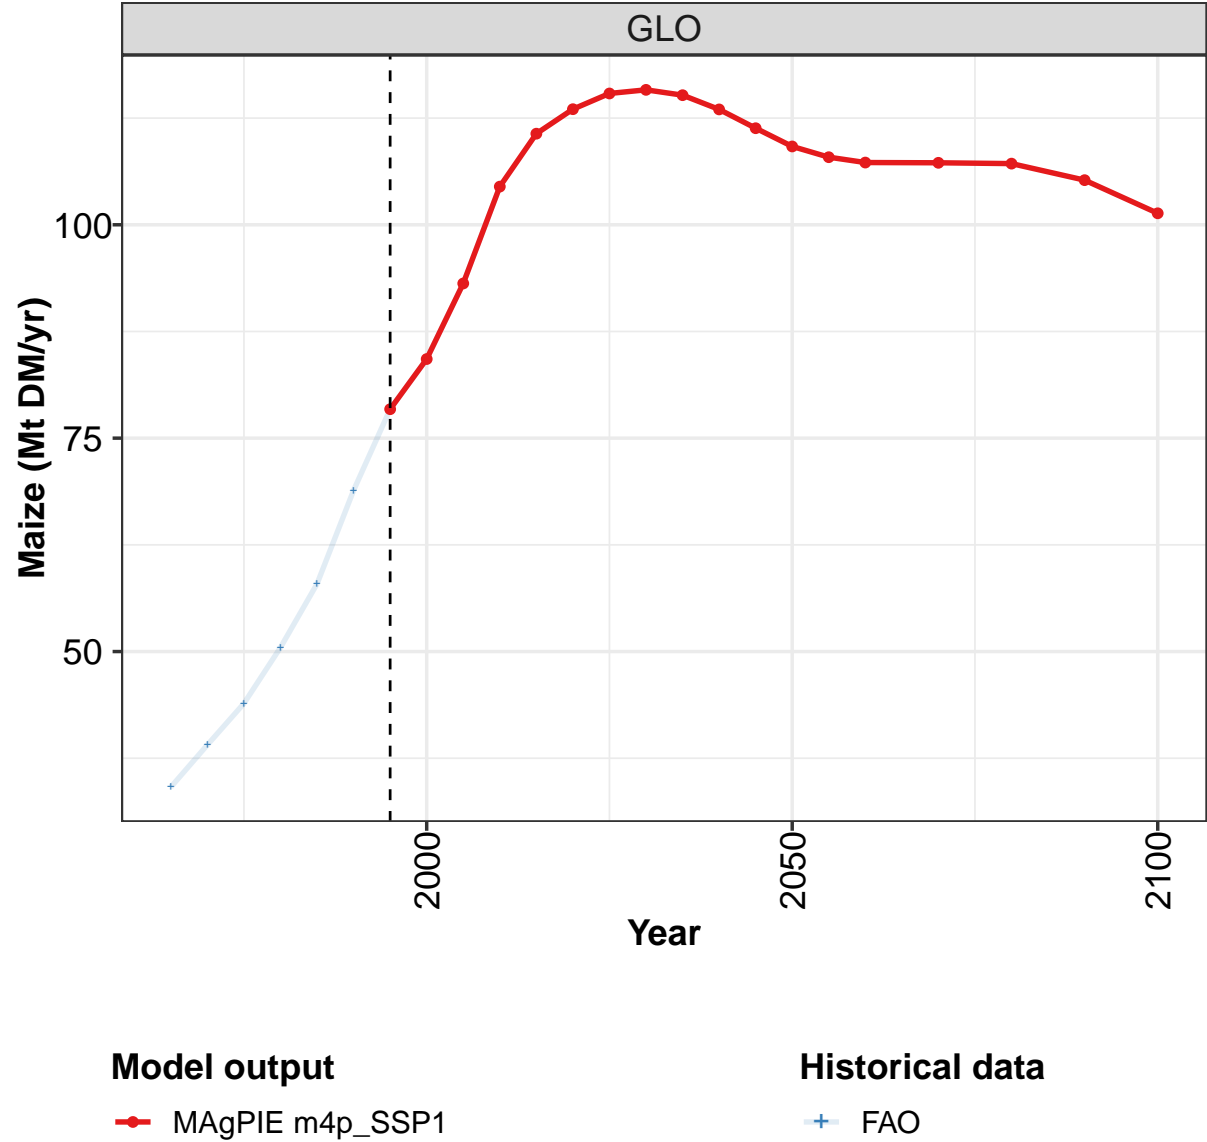

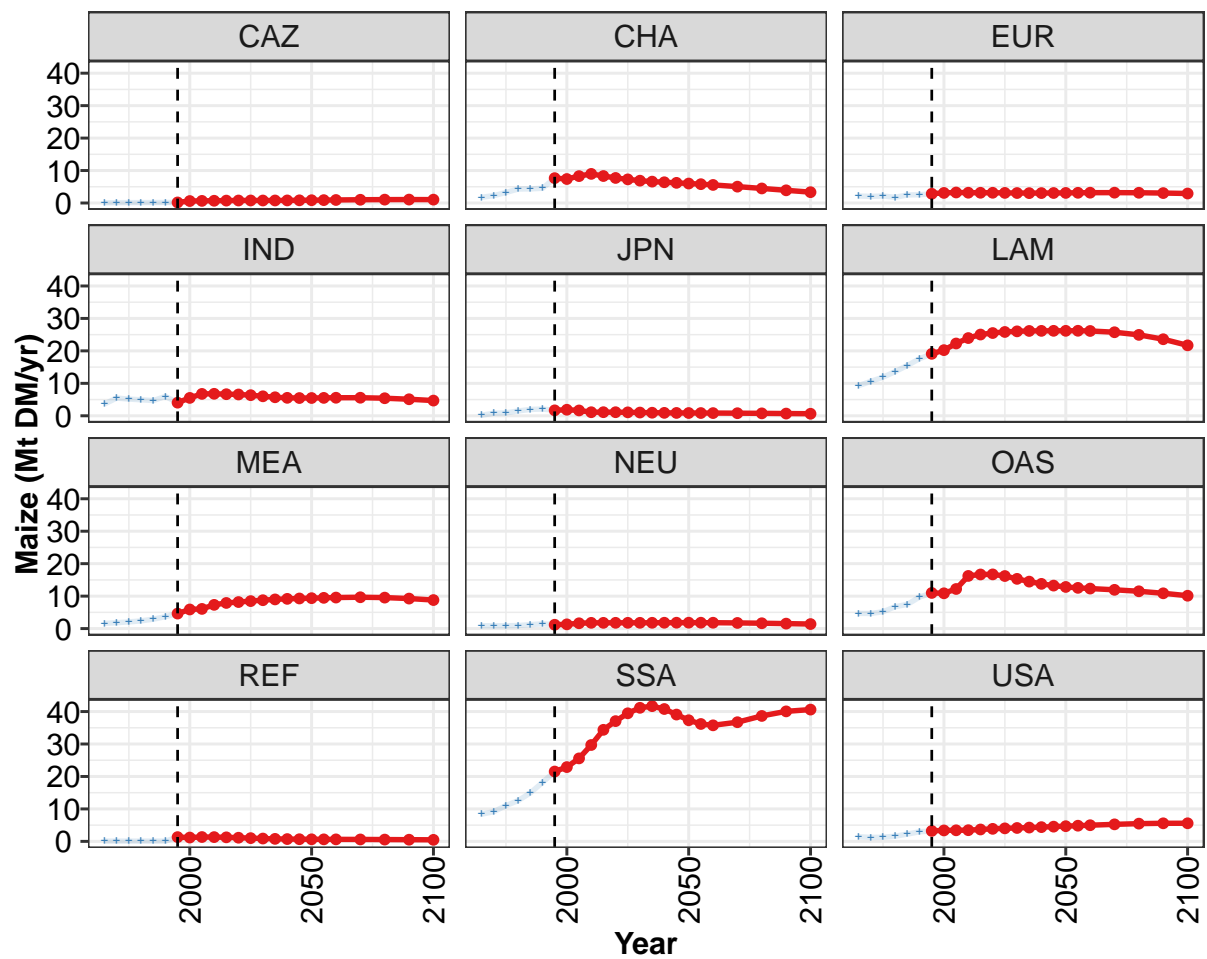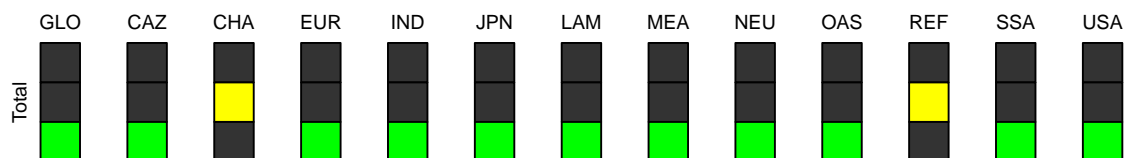

Figure 120: MAgPIE m4p\_SSP1 — Demand—Food—Crops—Cereals—Maize (Mt DM/yr)

|     | 1995 | 2000 | 2005 | 2010 | 2015 | 2020 | 2025 | 2030 | 2035 | 2040 | 2045 |
|-----|------|------|------|------|------|------|------|------|------|------|------|
| GLO | 78   | 84   | 93   | 104  | 111  | 114  | 115  | 116  | 115  | 114  | 111  |
| CAZ | 0    | 1    | 1    | 1    | 1    | 1    | 1    | 1    | 1    | 1    | 1    |
| CHA | 8    | 7    | 8    | 9    | 8    | 8    | 7    | 7    | 7    | 6    | 6    |
| EUR | 3    | 3    | 3    | 3    | 3    | 3    | 3    | 3    | 3    | 3    | 3    |
| IND | 4    | 6    | 7    | 7    | 7    | 7    | 6    | 6    | 6    | 6    | 5    |
| JPN | 2    | 2    | 2    | 1    | 1    | 1    | 1    | 1    | 1    | 1    | 1    |
| LAM | 19   | 20   | 22   | 24   | 25   | 26   | 26   | 26   | 26   | 26   | 26   |
| MEA | 5    | 6    | 6    | 7    | 8    | 8    | 8    | 9    | 9    | 9    | 9    |
| NEU | 1    | 1    | 2    | 2    | 2    | 2    | 2    | 2    | 2    | 2    | 2    |
| OAS | 11   | 11   | 12   | 16   | 17   | 17   | 16   | 15   | 14   | 14   | 13   |
| REF | 1    | 1    | 1    | 1    | 1    | 1    | 1    | 1    | 1    | 1    | 1    |
| SSA | 22   | 23   | 26   | 30   | 34   | 37   | 39   | 41   | 42   | 41   | 39   |
| USA | 3    | 3    | 3    | 3    | 4    | 4    | 4    | 4    | 4    | 4    | 5    |

Table 359: MAgPIE m4p\_SSP1 — Demand—Food—Crops—Cereals—Maize (Mt DM/yr) [PART 1/2]

|     | 2050 | 2055 | 2060 | 2070 | 2080 | 2090 | 2100 |
|-----|------|------|------|------|------|------|------|
| GLO | 109  | 108  | 107  | 107  | 107  | 105  | 101  |
| CAZ | 1    | 1    | 1    | 1    | 1    | 1    | 1    |
| CHA | 6    | 6    | 6    | 5    | 4    | 4    | 3    |
| EUR | 3    | 3    | 3    | 3    | 3    | 3    | 3    |
| IND | 5    | 6    | 6    | 6    | 5    | 5    | 5    |
| JPN | 1    | 1    | 1    | 1    | 1    | 1    | 1    |
| LAM | 26   | 26   | 26   | 26   | 25   | 24   | 22   |
| MEA | 9    | 9    | 10   | 10   | 10   | 9    | 9    |
| NEU | 2    | 2    | 2    | 2    | 2    | 2    | 1    |
| OAS | 13   | 13   | 12   | 12   | 11   | 11   | 10   |
| REF | 1    | 1    | 1    | 1    | 1    | 1    | 0    |
| SSA | 37   | 36   | 36   | 37   | 39   | 40   | 41   |
| USA | 5    | 5    | 5    | 5    | 5    | 6    | 6    |

Table 360: MAgPIE m4p\_SSP1 — Demand—Food—Crops—Cereals—Maize (Mt DM/yr) [PART 2/2]

|     | 1965 | 1970 | 1975 | 1980 | 1985 | 1990 | 1995 | 2000 | 2005 | 2010 |
|-----|------|------|------|------|------|------|------|------|------|------|
| GLO | 34   | 39   | 44   | 50   | 58   | 69   | 78   | 84   | 93   | 104  |
| CAZ | 0    | 0    | 0    | 0    | 0    | 0    | 0    | 1    | 1    | 1    |
| CHA | 2    | 2    | 3    | 4    | 4    | 5    | 8    | 7    | 8    | 9    |
| EUR | 2    | 2    | 2    | 2    | 2    | 3    | 3    | 3    | 3    | 3    |
| IND | 4    | 5    | 5    | 5    | 5    | 6    | 4    | 6    | 7    | 7    |
| JPN | 0    | 1    | 1    | 1    | 2    | 2    | 2    | 2    | 2    | 1    |
| LAM | 9    | 11   | 12   | 14   | 16   | 18   | 19   | 20   | 22   | 24   |
| MEA | 2    | 2    | 2    | 2    | 3    | 4    | 5    | 6    | 6    | 7    |
| NEU | 1    | 1    | 1    | 1    | 1    | 1    | 1    | 1    | 2    | 2    |
| OAS | 5    | 5    | 5    | 7    | 7    | 10   | 11   | 11   | 12   | 16   |
| REF | 0    | 0    | 0    | 0    | 0    | 0    | 1    | 1    | 1    | 1    |
| SSA | 8    | 9    | 11   | 13   | 15   | 18   | 22   | 23   | 26   | 30   |
| USA | 1    | 1    | 1    | 2    | 2    | 3    | 3    | 3    | 3    | 3    |

Table 361: FAO — Demand—Food—Crops—Cereals—Maize (Mt DM/yr)



7.1.3
Cereals—Rice

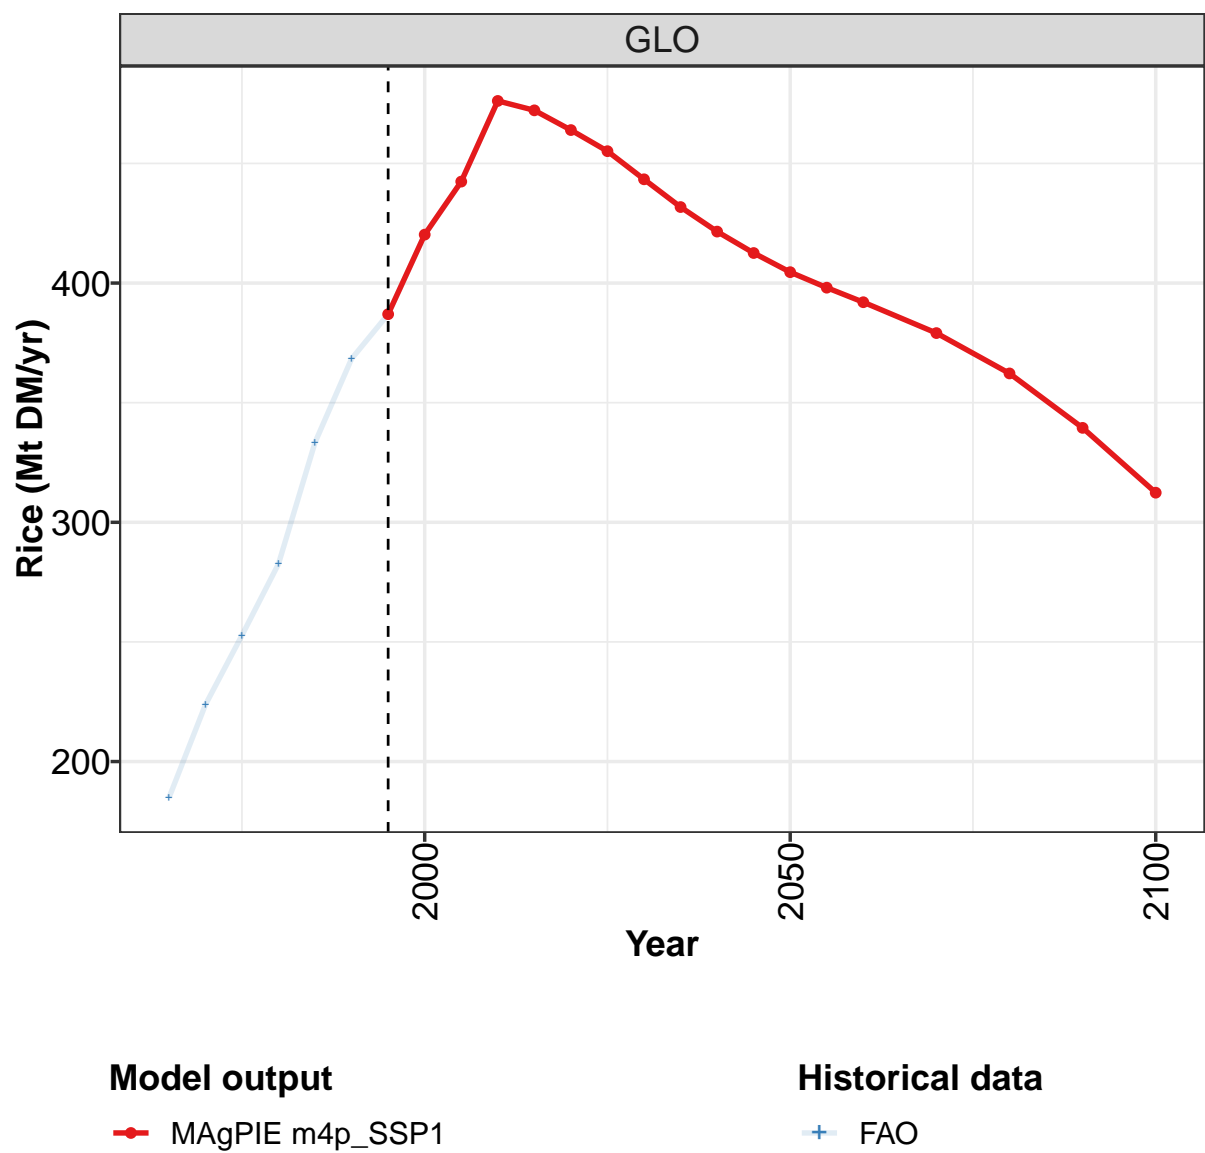

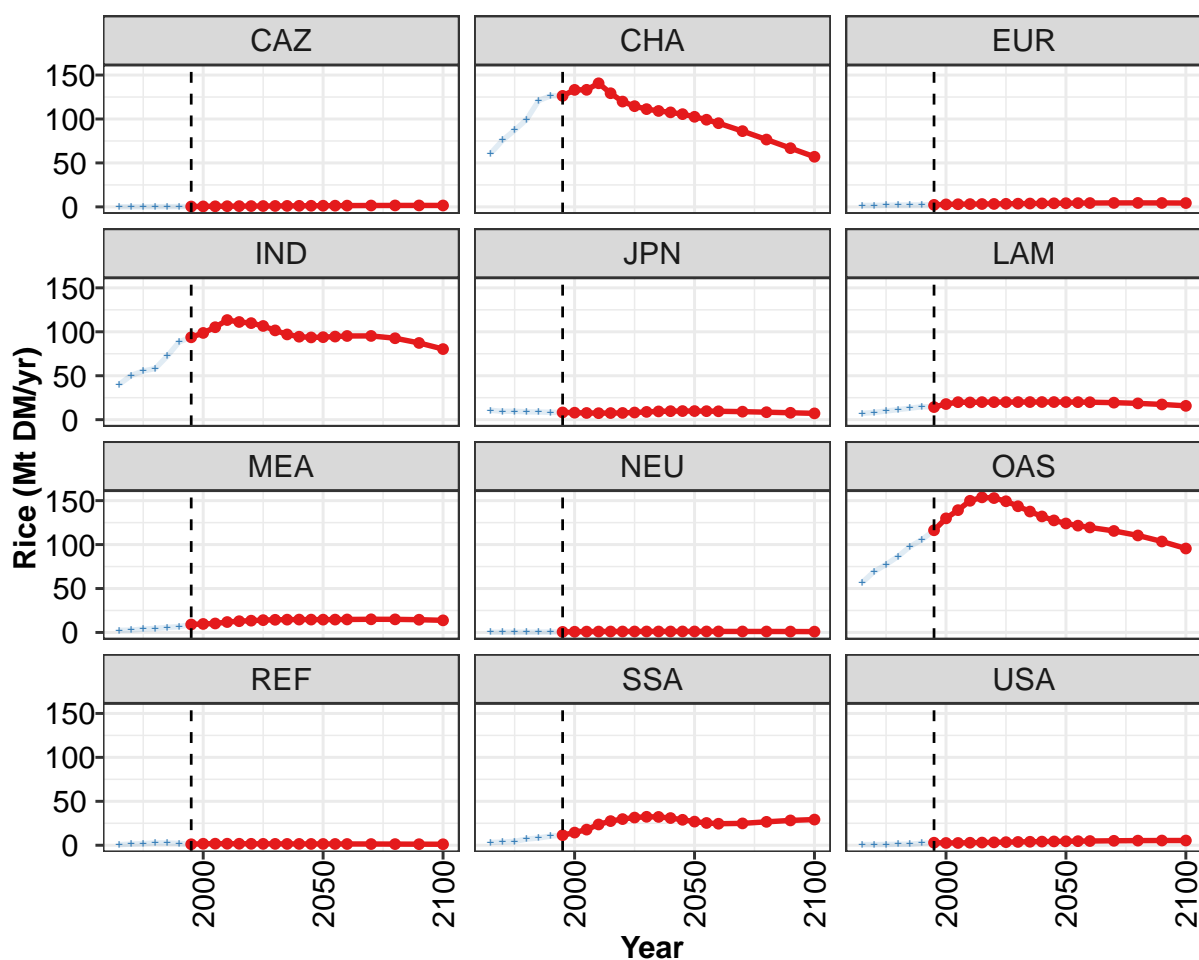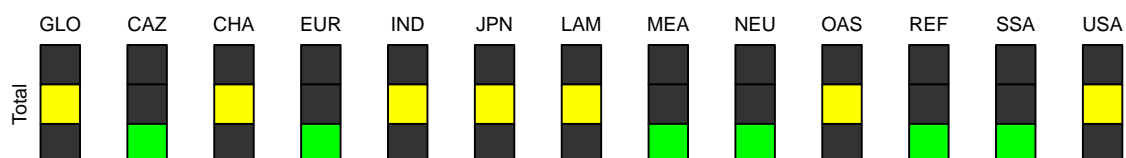

Figure 121: MAGPIE m4p\_SSP1 — Demand—Food—Crops—Cereals—Rice (Mt DM/yr)

|     | 1995 | 2000 | 2005 | 2010 | 2015 | 2020 | 2025 | 2030 | 2035 | 2040 | 2045 |
|-----|------|------|------|------|------|------|------|------|------|------|------|
| GLO | 387  | 420  | 442  | 476  | 472  | 464  | 455  | 443  | 432  | 422  | 413  |
| CAZ | 0    | 1    | 1    | 1    | 1    | 1    | 1    | 1    | 1    | 1    | 1    |
| CHA | 126  | 133  | 133  | 141  | 129  | 120  | 115  | 111  | 109  | 108  | 106  |
| EUR | 2    | 3    | 3    | 3    | 3    | 3    | 4    | 4    | 4    | 4    | 4    |
| IND | 94   | 99   | 105  | 113  | 111  | 110  | 107  | 102  | 97   | 94   | 94   |
| JPN | 8    | 8    | 8    | 7    | 8    | 8    | 8    | 9    | 9    | 10   | 10   |
| LAM | 14   | 18   | 20   | 20   | 20   | 20   | 20   | 20   | 20   | 20   | 20   |
| MEA | 9    | 10   | 10   | 12   | 13   | 13   | 14   | 14   | 15   | 15   | 15   |
| NEU | 1    | 1    | 1    | 1    | 1    | 1    | 1    | 1    | 1    | 1    | 1    |
| OAS | 116  | 130  | 139  | 150  | 154  | 153  | 149  | 144  | 138  | 132  | 128  |
| REF | 1    | 2    | 2    | 2    | 2    | 2    | 2    | 2    | 2    | 2    | 2    |
| SSA | 11   | 14   | 18   | 24   | 27   | 30   | 32   | 32   | 32   | 31   | 29   |
| USA | 3    | 3    | 3    | 3    | 3    | 3    | 4    | 4    | 4    | 4    | 4    |

Table 362: MAgPIE m4p\_SSP1 — Demand—Food—Crops—Cereals—Rice (Mt DM/yr) [PART 1/2]

|     | 2050 | 2055 | 2060 | 2070 | 2080 | 2090 | 2100 |
|-----|------|------|------|------|------|------|------|
| GLO | 405  | 398  | 392  | 379  | 362  | 339  | 312  |
| CAZ | 1    | 1    | 1    | 2    | 2    | 2    | 2    |
| CHA | 103  | 99   | 95   | 86   | 77   | 67   | 57   |
| EUR | 4    | 4    | 4    | 4    | 5    | 4    | 4    |
| IND | 94   | 95   | 95   | 95   | 93   | 87   | 80   |
| JPN | 10   | 10   | 10   | 9    | 9    | 8    | 7    |
| LAM | 20   | 20   | 20   | 19   | 19   | 17   | 16   |
| MEA | 15   | 15   | 15   | 15   | 15   | 15   | 14   |
| NEU | 1    | 1    | 1    | 1    | 1    | 1    | 1    |
| OAS | 124  | 122  | 120  | 116  | 110  | 104  | 96   |
| REF | 1    | 1    | 1    | 1    | 1    | 1    | 1    |
| SSA | 27   | 25   | 25   | 25   | 27   | 28   | 29   |
| USA | 5    | 5    | 5    | 5    | 5    | 5    | 5    |

Table 363: MAgPIE m4p\_SSP1 — Demand—Food—Crops—Cereals—Rice (Mt DM/yr) [PART 2/2]

|     | 1965 | 1970 | 1975 | 1980 | 1985 | 1990 | 1995 | 2000 | 2005 | 2010 |
|-----|------|------|------|------|------|------|------|------|------|------|
| GLO | 185  | 224  | 253  | 283  | 333  | 368  | 387  | 420  | 442  | 476  |
| CAZ | 0    | 0    | 0    | 0    | 0    | 0    | 0    | 1    | 1    | 1    |
| CHA | 61   | 76   | 87   | 99   | 121  | 126  | 126  | 133  | 133  | 141  |
| EUR | 2    | 2    | 2    | 2    | 2    | 2    | 2    | 3    | 3    | 3    |
| IND | 40   | 50   | 55   | 58   | 72   | 89   | 94   | 99   | 105  | 113  |
| JPN | 11   | 10   | 10   | 9    | 9    | 8    | 8    | 8    | 8    | 7    |
| LAM | 7    | 8    | 10   | 11   | 13   | 15   | 14   | 18   | 20   | 20   |
| MEA | 2    | 3    | 4    | 5    | 6    | 7    | 9    | 10   | 10   | 12   |
| NEU | 0    | 0    | 0    | 0    | 0    | 1    | 1    | 1    | 1    | 1    |
| OAS | 57   | 69   | 77   | 87   | 98   | 106  | 116  | 130  | 139  | 150  |
| REF | 1    | 1    | 2    | 3    | 3    | 2    | 1    | 2    | 2    | 2    |
| SSA | 3    | 4    | 4    | 7    | 8    | 10   | 11   | 14   | 18   | 24   |
| USA | 1    | 1    | 1    | 1    | 1    | 2    | 3    | 3    | 3    | 3    |

Table 364: FAO — Demand—Food—Crops—Cereals—Rice (Mt DM/yr)

7.1.4
Cereals—Temperate cereals

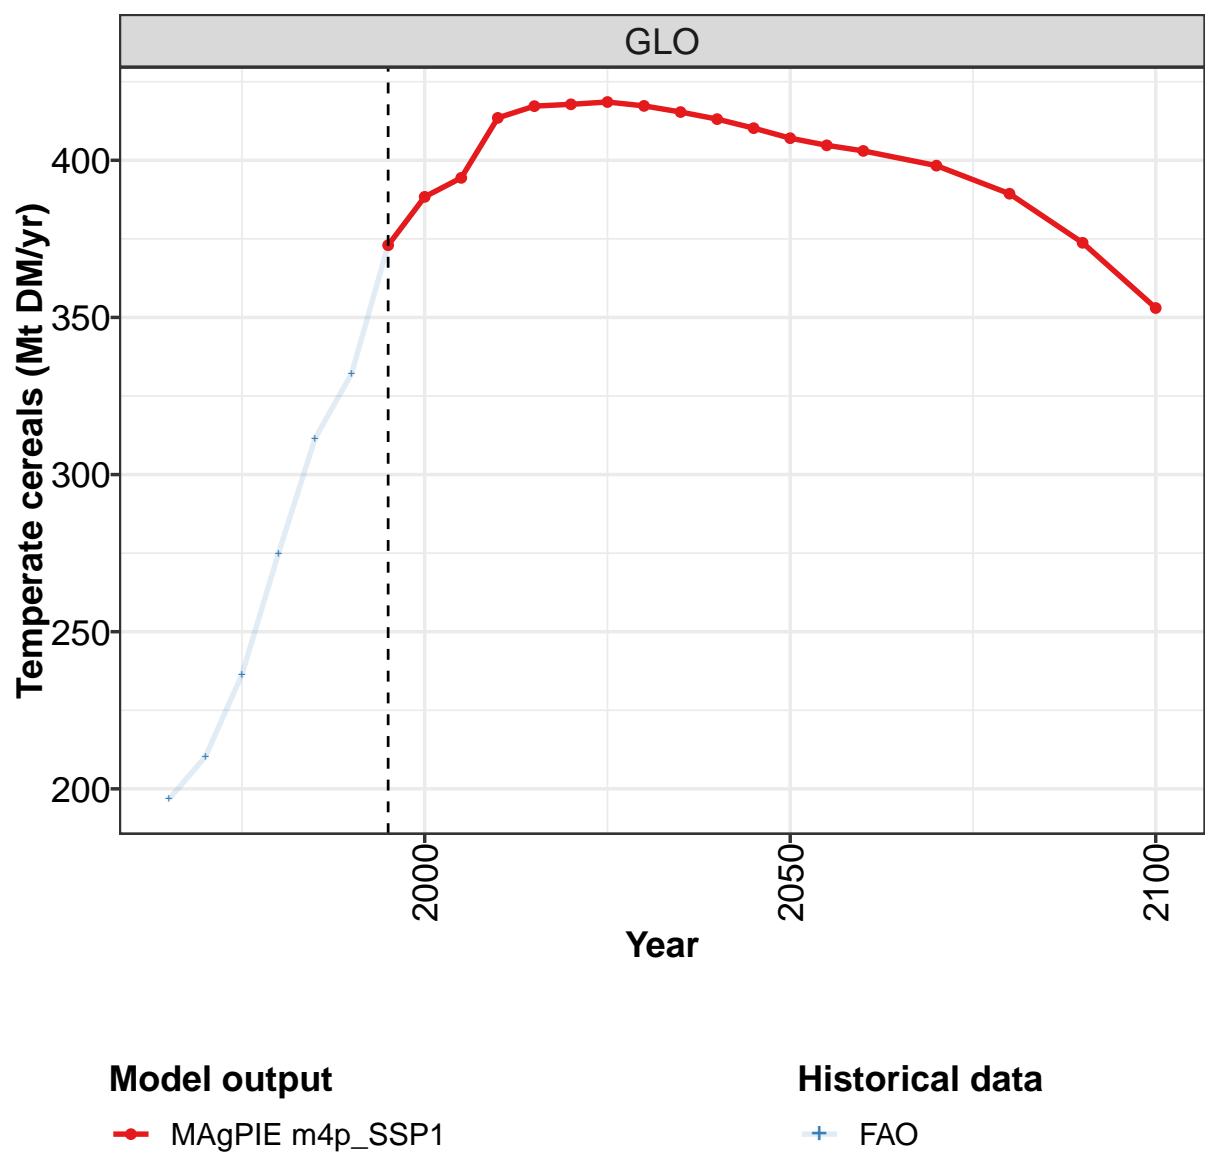

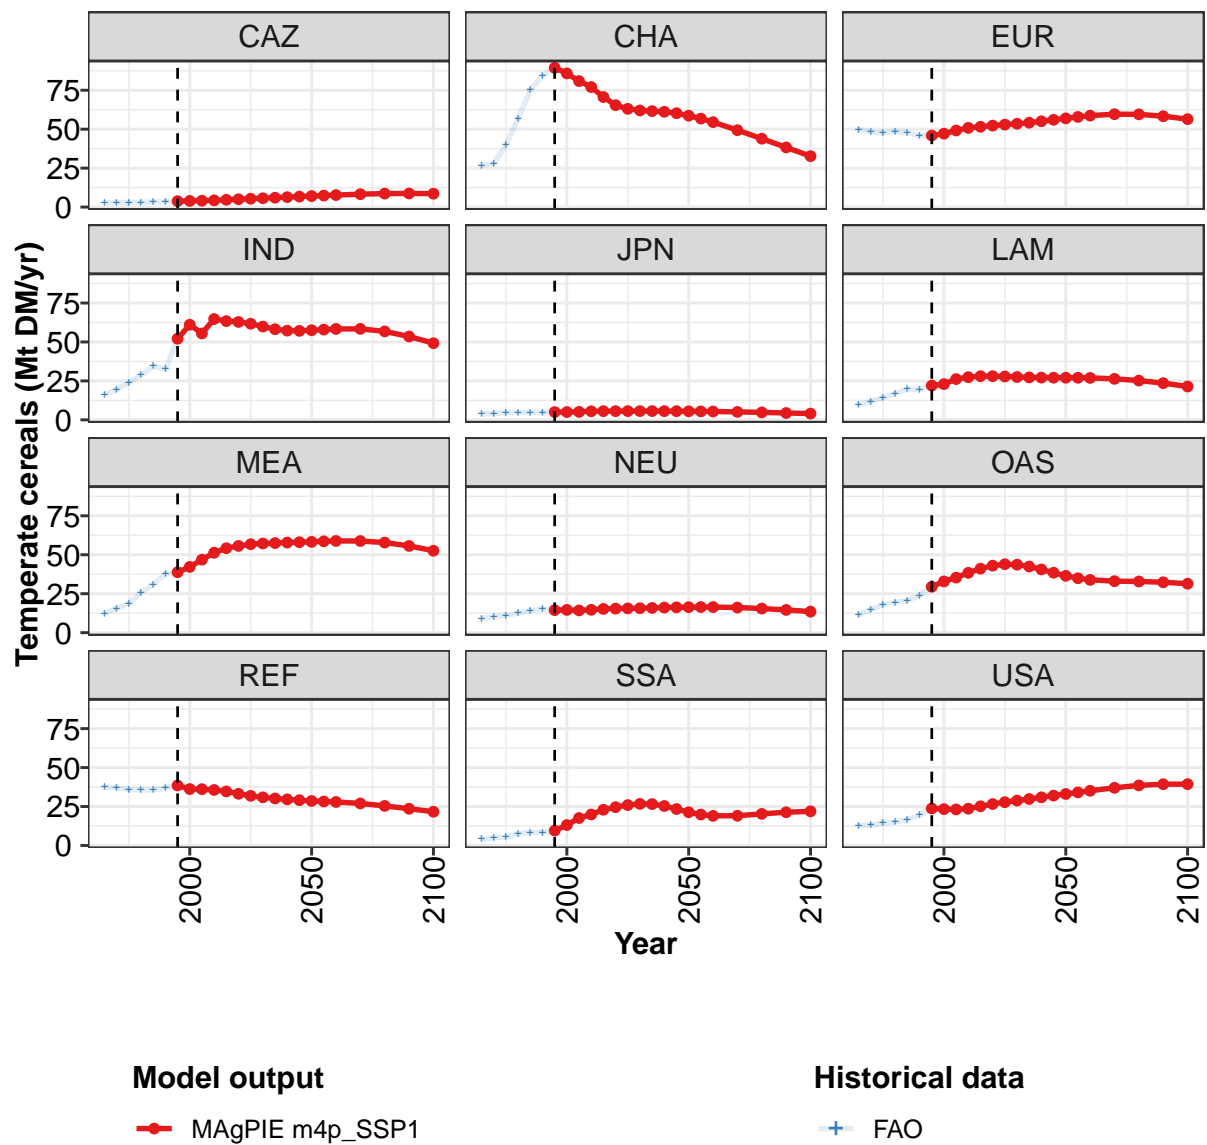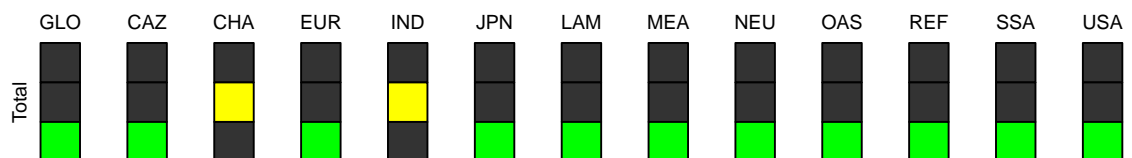

Figure 122: MAGPIE m4p\_SSP1 — Demand—Food—Crops—Cereals—Temperate cereals (Mt DM/yr)

|     | 1995 | 2000 | 2005 | 2010 | 2015 | 2020 | 2025 | 2030 | 2035 | 2040 | 2045 |
|-----|------|------|------|------|------|------|------|------|------|------|------|
| GLO | 373  | 388  | 394  | 413  | 417  | 418  | 419  | 417  | 415  | 413  | 410  |
| CAZ | 4    | 4    | 4    | 4    | 5    | 5    | 5    | 6    | 6    | 6    | 7    |
| CHA | 89   | 86   | 81   | 77   | 71   | 65   | 63   | 62   | 62   | 61   | 60   |
| EUR | 46   | 47   | 49   | 51   | 52   | 52   | 53   | 53   | 54   | 55   | 56   |
| IND | 52   | 61   | 55   | 65   | 63   | 63   | 62   | 60   | 58   | 57   | 57   |
| JPN | 5    | 5    | 5    | 6    | 6    | 6    | 6    | 6    | 6    | 6    | 6    |
| LAM | 22   | 23   | 26   | 27   | 28   | 28   | 28   | 28   | 27   | 27   | 27   |
| MEA | 39   | 42   | 47   | 51   | 54   | 56   | 57   | 57   | 58   | 58   | 58   |
| NEU | 14   | 15   | 14   | 15   | 15   | 15   | 16   | 16   | 16   | 16   | 16   |
| OAS | 29   | 33   | 35   | 38   | 41   | 43   | 44   | 44   | 42   | 41   | 38   |
| REF | 39   | 36   | 36   | 36   | 35   | 33   | 32   | 31   | 30   | 30   | 29   |
| SSA | 10   | 13   | 18   | 20   | 23   | 25   | 26   | 27   | 27   | 25   | 23   |
| USA | 24   | 23   | 23   | 24   | 25   | 27   | 28   | 29   | 30   | 31   | 32   |

Table 365: MAgPIE m4p\_SSP1 — Demand—Food—Crops—Cereals—Temperate cereals (Mt DM/yr) [PART 1/2]

|     | 2050 | 2055 | 2060 | 2070 | 2080 | 2090 | 2100 |
|-----|------|------|------|------|------|------|------|
| GLO | 407  | 405  | 403  | 398  | 389  | 374  | 353  |
| CAZ | 7    | 7    | 8    | 8    | 9    | 9    | 9    |
| CHA | 59   | 57   | 55   | 49   | 44   | 38   | 33   |
| EUR | 57   | 58   | 59   | 60   | 60   | 58   | 56   |
| IND | 58   | 58   | 58   | 58   | 57   | 54   | 49   |
| JPN | 6    | 5    | 5    | 5    | 5    | 4    | 4    |
| LAM | 27   | 27   | 27   | 26   | 25   | 24   | 21   |
| MEA | 58   | 59   | 59   | 59   | 58   | 56   | 53   |
| NEU | 16   | 16   | 16   | 16   | 16   | 15   | 14   |
| OAS | 37   | 35   | 34   | 33   | 33   | 32   | 31   |
| REF | 29   | 28   | 28   | 27   | 25   | 24   | 22   |
| SSA | 21   | 20   | 19   | 19   | 20   | 21   | 22   |
| USA | 33   | 34   | 35   | 37   | 39   | 39   | 39   |

Table 366: MAgPIE m4p\_SSP1 — Demand—Food—Crops—Cereals—Temperate cereals (Mt DM/yr) [PART 2/2]

|     | 1965 | 1970 | 1975 | 1980 | 1985 | 1990 | 1995 | 2000 | 2005 | 2010 |
|-----|------|------|------|------|------|------|------|------|------|------|
| GLO | 197  | 210  | 236  | 275  | 312  | 332  | 373  | 388  | 394  | 414  |
| CAZ | 3    | 3    | 3    | 3    | 3    | 3    | 4    | 4    | 4    | 4    |
| CHA | 27   | 28   | 40   | 57   | 75   | 84   | 89   | 86   | 81   | 77   |
| EUR | 50   | 48   | 48   | 49   | 48   | 46   | 46   | 47   | 49   | 51   |
| IND | 16   | 20   | 24   | 29   | 34   | 33   | 52   | 61   | 55   | 65   |
| JPN | 4    | 4    | 5    | 5    | 5    | 5    | 5    | 5    | 5    | 6    |
| LAM | 10   | 12   | 14   | 17   | 20   | 19   | 22   | 23   | 26   | 27   |
| MEA | 12   | 16   | 19   | 26   | 31   | 38   | 39   | 42   | 47   | 51   |
| NEU | 9    | 10   | 11   | 13   | 14   | 15   | 14   | 15   | 14   | 15   |
| OAS | 11   | 15   | 18   | 19   | 21   | 24   | 29   | 33   | 35   | 38   |
| REF | 37   | 37   | 36   | 36   | 36   | 37   | 39   | 36   | 36   | 36   |
| SSA | 4    | 5    | 5    | 8    | 8    | 8    | 10   | 13   | 18   | 20   |
| USA | 13   | 13   | 14   | 15   | 17   | 20   | 24   | 23   | 23   | 24   |

Table 367: FAO — Demand—Food—Crops—Cereals—Temperate cereals (Mt DM/yr)

7.1.5
Cereals—Tropical cereals

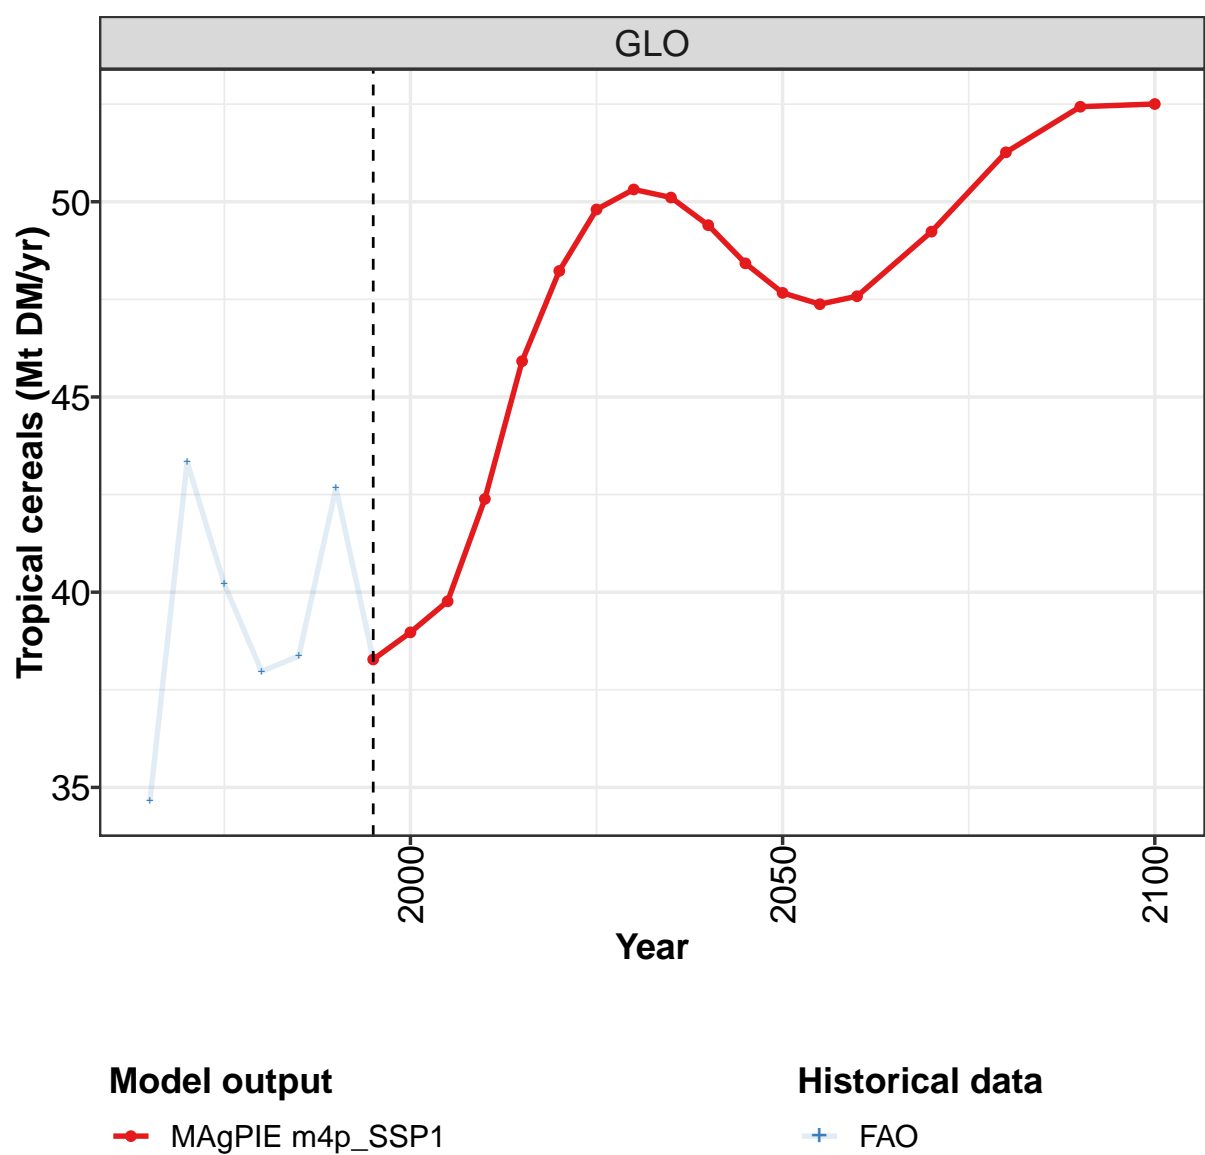

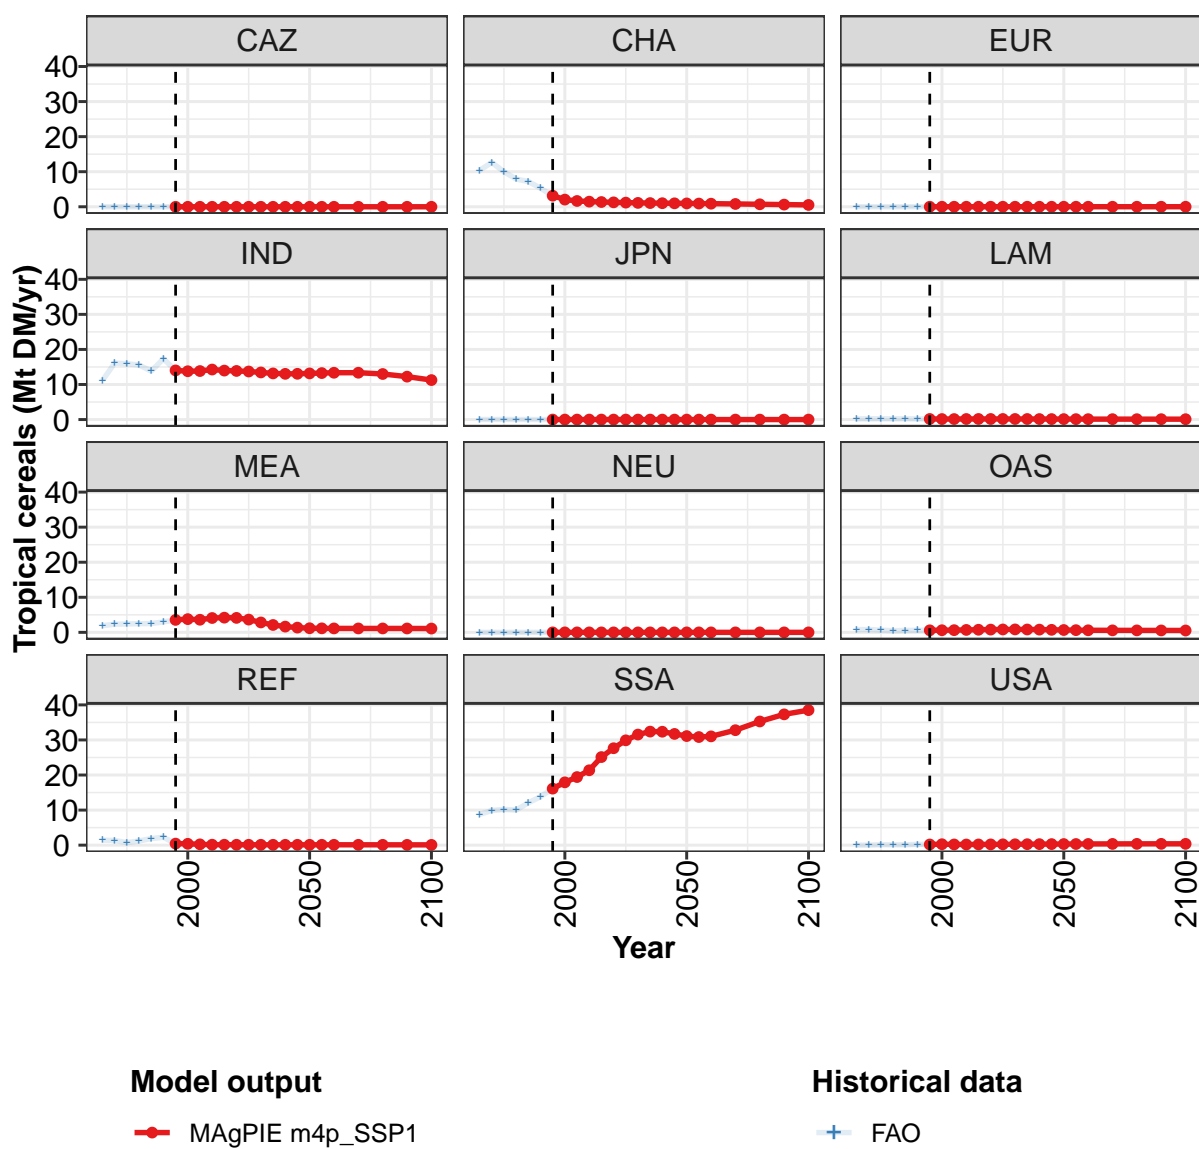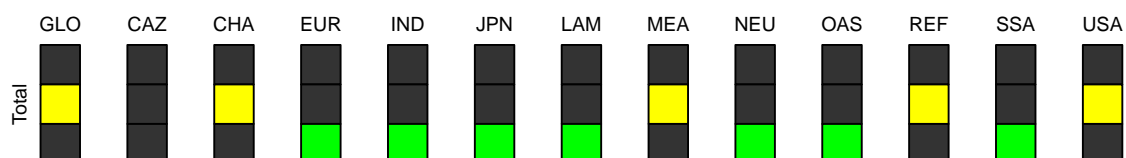

Figure 123: MAGPIE m4p\_SSP1 — Demand—Food—Crops—Cereals—Tropical cereals (Mt DM/yr)



|     | 1995 | 2000 | 2005 | 2010 | 2015 | 2020 | 2025 | 2030 | 2035 | 2040 | 2045 |
|-----|------|------|------|------|------|------|------|------|------|------|------|
| GLO | 38.3 | 39.0 | 39.8 | 42.4 | 45.9 | 48.2 | 49.8 | 50.3 | 50.1 | 49.4 | 48.4 |
| CAZ | 0.0  | 0.0  | 0.0  | 0.0  | 0.0  | 0.0  | 0.0  | 0.0  | 0.0  | 0.0  | 0.0  |
| CHA | 3.2  | 2.0  | 1.7  | 1.5  | 1.4  | 1.3  | 1.2  | 1.1  | 1.1  | 1.0  | 1.0  |
| EUR | 0.0  | 0.0  | 0.0  | 0.0  | 0.0  | 0.0  | 0.0  | 0.0  | 0.0  | 0.0  | 0.0  |
| IND | 14.0 | 13.8 | 13.8 | 14.3 | 14.0 | 13.9 | 13.7 | 13.4 | 13.2 | 13.0 | 13.1 |
| JPN | 0.0  | 0.0  | 0.0  | 0.0  | 0.0  | 0.0  | 0.0  | 0.0  | 0.0  | 0.0  | 0.0  |
| LAM | 0.2  | 0.2  | 0.2  | 0.2  | 0.2  | 0.2  | 0.2  | 0.2  | 0.2  | 0.2  | 0.1  |
| MEA | 3.6  | 3.8  | 3.6  | 4.1  | 4.2  | 4.1  | 3.6  | 2.8  | 2.1  | 1.6  | 1.4  |
| NEU | 0.0  | 0.0  | 0.0  | 0.0  | 0.0  | 0.0  | 0.0  | 0.0  | 0.0  | 0.0  | 0.0  |
| OAS | 0.6  | 0.6  | 0.6  | 0.7  | 0.7  | 0.8  | 0.8  | 0.8  | 0.8  | 0.8  | 0.7  |
| REF | 0.4  | 0.4  | 0.2  | 0.1  | 0.1  | 0.1  | 0.1  | 0.1  | 0.1  | 0.1  | 0.1  |
| SSA | 16.1 | 17.9 | 19.4 | 21.4 | 25.1 | 27.6 | 29.9 | 31.5 | 32.4 | 32.4 | 31.7 |
| USA | 0.2  | 0.3  | 0.2  | 0.2  | 0.2  | 0.2  | 0.2  | 0.3  | 0.3  | 0.3  | 0.3  |

Table 368: MAgPIE m4p\_SSP1 — Demand—Food—Crops—Cereals—Tropical cereals (Mt DM/yr) [PART 1/2]

|     | 2050 | 2055 | 2060 | 2070 | 2080 | 2090 | 2100 |
|-----|------|------|------|------|------|------|------|
| GLO | 47.7 | 47.4 | 47.6 | 49.2 | 51.3 | 52.4 | 52.5 |
| CAZ | 0.0  | 0.0  | 0.0  | 0.0  | 0.0  | 0.0  | 0.0  |
| CHA | 1.0  | 0.9  | 0.9  | 0.8  | 0.7  | 0.6  | 0.5  |
| EUR | 0.0  | 0.0  | 0.0  | 0.0  | 0.0  | 0.0  | 0.0  |
| IND | 13.2 | 13.3 | 13.4 | 13.4 | 13.0 | 12.2 | 11.3 |
| JPN | 0.0  | 0.0  | 0.0  | 0.0  | 0.0  | 0.0  | 0.0  |
| LAM | 0.1  | 0.1  | 0.1  | 0.1  | 0.1  | 0.1  | 0.1  |
| MEA | 1.2  | 1.1  | 1.1  | 1.1  | 1.1  | 1.1  | 1.1  |
| NEU | 0.0  | 0.0  | 0.0  | 0.0  | 0.0  | 0.0  | 0.0  |
| OAS | 0.7  | 0.6  | 0.6  | 0.6  | 0.6  | 0.6  | 0.5  |
| REF | 0.1  | 0.1  | 0.1  | 0.1  | 0.1  | 0.1  | 0.1  |
| SSA | 31.1 | 30.8 | 31.0 | 32.8 | 35.3 | 37.3 | 38.5 |
| USA | 0.3  | 0.3  | 0.3  | 0.4  | 0.4  | 0.4  | 0.4  |

Table 369: MAgPIE m4p\_SSP1 — Demand—Food—Crops—Cereals—Tropical cereals (Mt DM/yr) [PART 2/2]

|     | 1965 | 1970 | 1975 | 1980 | 1985 | 1990 | 1995 | 2000 | 2005 | 2010 |
|-----|------|------|------|------|------|------|------|------|------|------|
| GLO | 34.6 | 43.3 | 40.2 | 38.0 | 38.4 | 42.7 | 38.3 | 39.0 | 39.8 | 42.4 |
| CAZ | 0.0  | 0.0  | 0.0  | 0.0  | 0.0  | 0.0  | 0.0  | 0.0  | 0.0  | 0.0  |
| CHA | 10.4 | 12.6 | 10.0 | 7.9  | 7.2  | 5.3  | 3.2  | 2.0  | 1.7  | 1.5  |
| EUR | 0.0  | 0.0  | 0.0  | 0.0  | 0.0  | 0.0  | 0.0  | 0.0  | 0.0  | 0.0  |
| IND | 11.2 | 16.1 | 15.9 | 15.6 | 13.8 | 17.3 | 14.0 | 13.8 | 13.8 | 14.3 |
| JPN | 0.0  | 0.0  | 0.0  | 0.0  | 0.0  | 0.0  | 0.0  | 0.0  | 0.0  | 0.0  |
| LAM | 0.2  | 0.2  | 0.2  | 0.2  | 0.2  | 0.2  | 0.2  | 0.2  | 0.2  | 0.2  |
| MEA | 1.9  | 2.3  | 2.4  | 2.5  | 2.5  | 3.0  | 3.6  | 3.8  | 3.6  | 4.1  |
| NEU | 0.0  | 0.0  | 0.0  | 0.0  | 0.0  | 0.0  | 0.0  | 0.0  | 0.0  | 0.0  |
| OAS | 0.8  | 0.8  | 0.6  | 0.5  | 0.6  | 0.6  | 0.6  | 0.6  | 0.6  | 0.7  |
| REF | 1.4  | 1.3  | 0.7  | 1.2  | 1.9  | 2.2  | 0.4  | 0.4  | 0.2  | 0.1  |
| SSA | 8.7  | 9.9  | 10.2 | 10.0 | 12.1 | 13.8 | 16.1 | 17.9 | 19.4 | 21.4 |
| USA | 0.0  | 0.0  | 0.1  | 0.1  | 0.1  | 0.2  | 0.2  | 0.3  | 0.2  | 0.2  |

Table 370: FAO — Demand—Food—Crops—Cereals—Tropical cereals (Mt DM/yr)

7.1.6
Oil crops

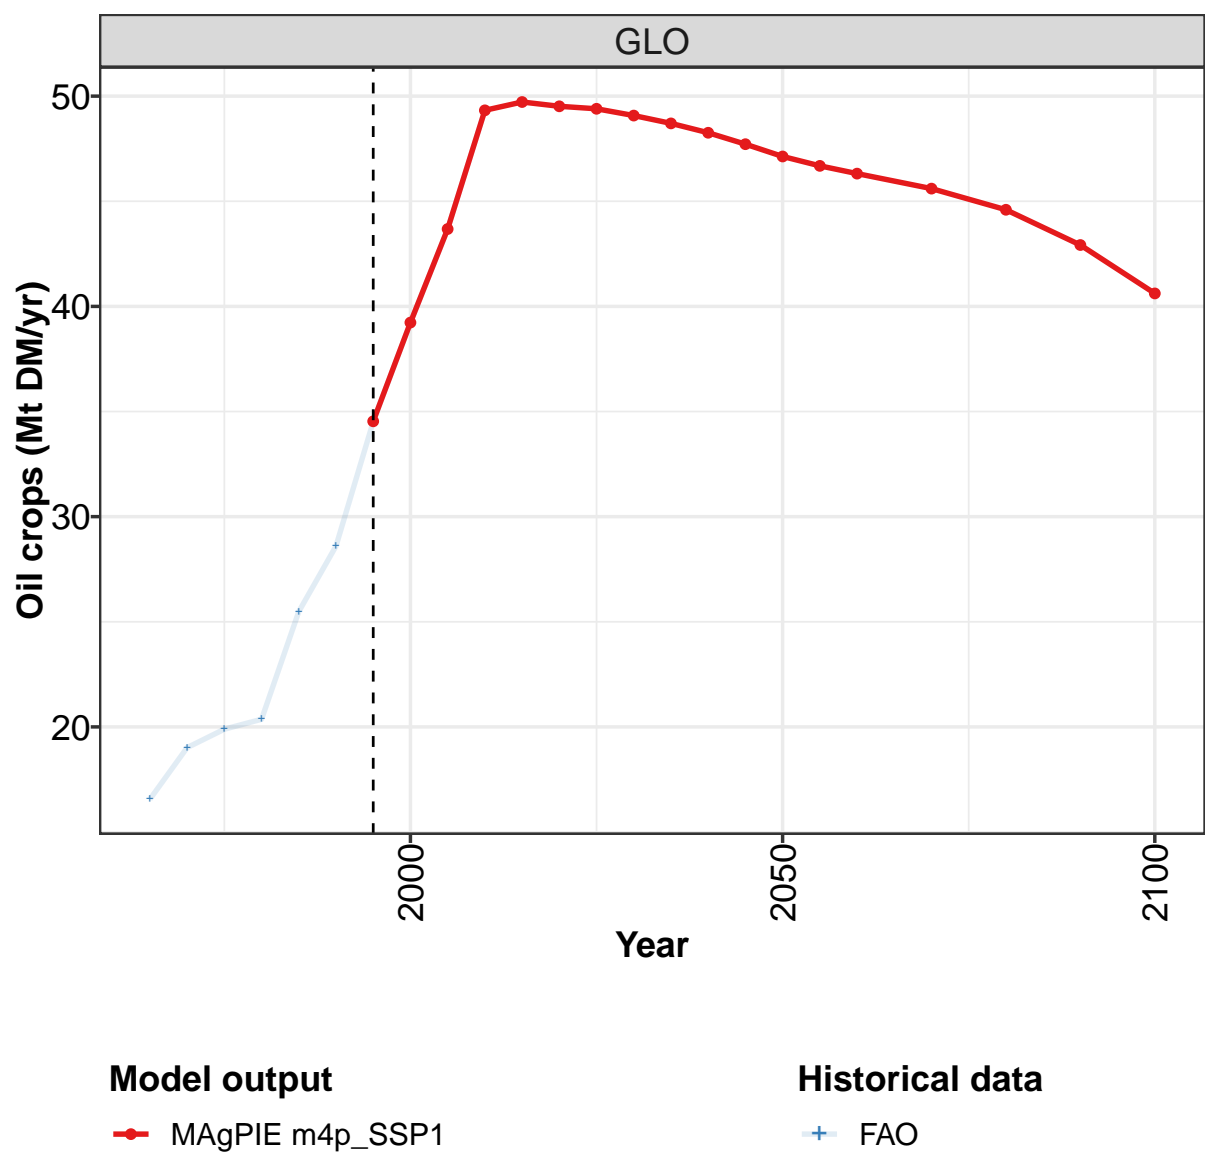

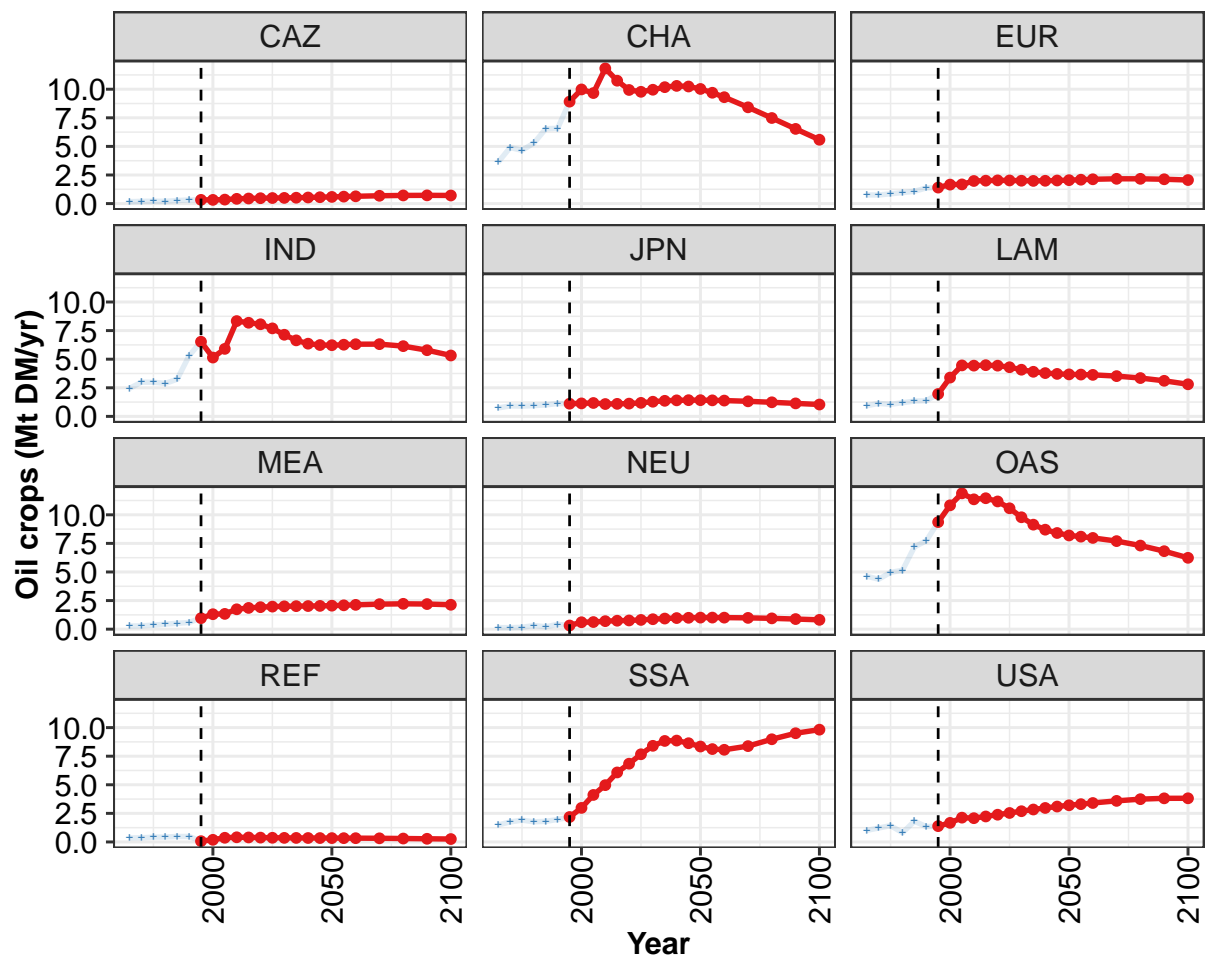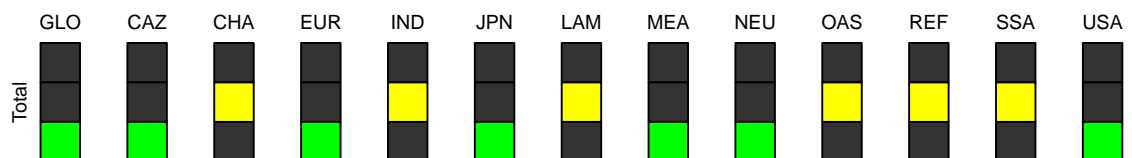

Figure 124: MAGPIE m4p\_SSP1 — Demand—Food—Crops—Oil crops (Mt DM/yr)

|     | 1995 | 2000 | 2005 | 2010 | 2015 | 2020 | 2025 | 2030 | 2035 | 2040 | 2045 |
|-----|------|------|------|------|------|------|------|------|------|------|------|
| GLO | 34.5 | 39.2 | 43.7 | 49.3 | 49.7 | 49.5 | 49.4 | 49.1 | 48.7 | 48.3 | 47.7 |
| CAZ | 0.3  | 0.3  | 0.3  | 0.4  | 0.4  | 0.5  | 0.5  | 0.5  | 0.5  | 0.5  | 0.6  |
| CHA | 8.9  | 10.0 | 9.7  | 11.8 | 10.7 | 9.9  | 9.8  | 10.0 | 10.2 | 10.3 | 10.2 |
| EUR | 1.4  | 1.7  | 1.7  | 2.0  | 2.0  | 2.0  | 2.0  | 2.0  | 2.0  | 2.0  | 2.0  |
| IND | 6.5  | 5.1  | 5.9  | 8.3  | 8.2  | 8.1  | 7.7  | 7.1  | 6.6  | 6.4  | 6.2  |
| JPN | 1.1  | 1.1  | 1.2  | 1.1  | 1.1  | 1.1  | 1.2  | 1.3  | 1.4  | 1.4  | 1.4  |
| LAM | 2.0  | 3.4  | 4.5  | 4.4  | 4.5  | 4.4  | 4.3  | 4.1  | 3.9  | 3.8  | 3.7  |
| MEA | 1.0  | 1.3  | 1.3  | 1.7  | 1.9  | 1.9  | 2.0  | 2.0  | 2.0  | 2.0  | 2.0  |
| NEU | 0.3  | 0.6  | 0.6  | 0.7  | 0.7  | 0.8  | 0.8  | 0.9  | 0.9  | 1.0  | 1.0  |
| OAS | 9.4  | 10.8 | 11.9 | 11.4 | 11.5 | 11.2 | 10.6 | 9.8  | 9.1  | 8.7  | 8.4  |
| REF | 0.1  | 0.2  | 0.4  | 0.4  | 0.4  | 0.4  | 0.4  | 0.4  | 0.4  | 0.3  | 0.3  |
| SSA | 2.2  | 3.0  | 4.1  | 5.0  | 6.1  | 6.8  | 7.7  | 8.4  | 8.8  | 8.9  | 8.6  |
| USA | 1.4  | 1.7  | 2.1  | 2.1  | 2.2  | 2.4  | 2.5  | 2.7  | 2.8  | 3.0  | 3.1  |

Table 371: MAgPIE m4p\_SSP1 — Demand—Food—Crops—Oil crops (Mt DM/yr) [PART 1/2]

|     | 2050 | 2055 | 2060 | 2070 | 2080 | 2090 | 2100 |
|-----|------|------|------|------|------|------|------|
| GLO | 47.1 | 46.7 | 46.3 | 45.6 | 44.6 | 42.9 | 40.6 |
| CAZ | 0.6  | 0.6  | 0.6  | 0.7  | 0.7  | 0.7  | 0.7  |
| CHA | 10.0 | 9.7  | 9.3  | 8.4  | 7.5  | 6.5  | 5.6  |
| EUR | 2.0  | 2.1  | 2.1  | 2.2  | 2.2  | 2.1  | 2.1  |
| IND | 6.2  | 6.3  | 6.3  | 6.3  | 6.1  | 5.8  | 5.3  |
| JPN | 1.4  | 1.4  | 1.4  | 1.3  | 1.2  | 1.1  | 1.0  |
| LAM | 3.7  | 3.7  | 3.6  | 3.5  | 3.4  | 3.1  | 2.8  |
| MEA | 2.1  | 2.1  | 2.1  | 2.2  | 2.2  | 2.2  | 2.1  |
| NEU | 1.0  | 1.0  | 1.0  | 1.0  | 0.9  | 0.9  | 0.8  |
| OAS | 8.2  | 8.1  | 8.0  | 7.7  | 7.3  | 6.8  | 6.2  |
| REF | 0.3  | 0.3  | 0.3  | 0.3  | 0.3  | 0.3  | 0.3  |
| SSA | 8.3  | 8.1  | 8.1  | 8.4  | 9.0  | 9.5  | 9.8  |
| USA | 3.2  | 3.3  | 3.4  | 3.6  | 3.7  | 3.8  | 3.8  |

Table 372: MAgPIE m4p\_SSP1 — Demand—Food—Crops—Oil crops (Mt DM/yr) [PART 2/2]

|     | 1965 | 1970 | 1975 | 1980 | 1985 | 1990 | 1995 | 2000 | 2005 | 2010 |
|-----|------|------|------|------|------|------|------|------|------|------|
| GLO | 16.6 | 19.0 | 19.9 | 20.4 | 25.5 | 28.6 | 34.5 | 39.2 | 43.7 | 49.3 |
| CAZ | 0.2  | 0.2  | 0.2  | 0.2  | 0.3  | 0.3  | 0.3  | 0.3  | 0.4  | 0.4  |
| CHA | 3.6  | 4.9  | 4.7  | 5.3  | 6.5  | 6.6  | 8.9  | 10.0 | 9.7  | 11.8 |
| EUR | 0.8  | 0.8  | 0.9  | 1.0  | 1.1  | 1.4  | 1.4  | 1.7  | 1.7  | 2.0  |
| IND | 2.5  | 3.0  | 3.0  | 2.9  | 3.2  | 5.3  | 6.5  | 5.1  | 5.9  | 8.3  |
| JPN | 0.7  | 0.9  | 0.9  | 0.9  | 1.0  | 1.1  | 1.1  | 1.1  | 1.2  | 1.1  |
| LAM | 0.9  | 1.1  | 1.1  | 1.2  | 1.3  | 1.4  | 2.0  | 3.4  | 4.5  | 4.4  |
| MEA | 0.3  | 0.3  | 0.4  | 0.4  | 0.5  | 0.6  | 1.0  | 1.3  | 1.3  | 1.7  |
| NEU | 0.1  | 0.1  | 0.2  | 0.3  | 0.2  | 0.4  | 0.3  | 0.6  | 0.6  | 0.7  |
| OAS | 4.6  | 4.4  | 5.0  | 5.1  | 7.2  | 7.7  | 9.3  | 10.8 | 11.9 | 11.4 |
| REF | 0.4  | 0.4  | 0.4  | 0.4  | 0.5  | 0.5  | 0.1  | 0.2  | 0.4  | 0.4  |
| SSA | 1.5  | 1.8  | 1.9  | 1.8  | 1.8  | 2.0  | 2.2  | 3.0  | 4.1  | 5.0  |
| USA | 1.0  | 1.2  | 1.4  | 0.8  | 1.8  | 1.3  | 1.4  | 1.7  | 2.1  | 2.1  |

Table 373: FAO — Demand—Food—Crops—Oil crops (Mt DM/yr)

7.1.7
Oil crops—Groundnuts

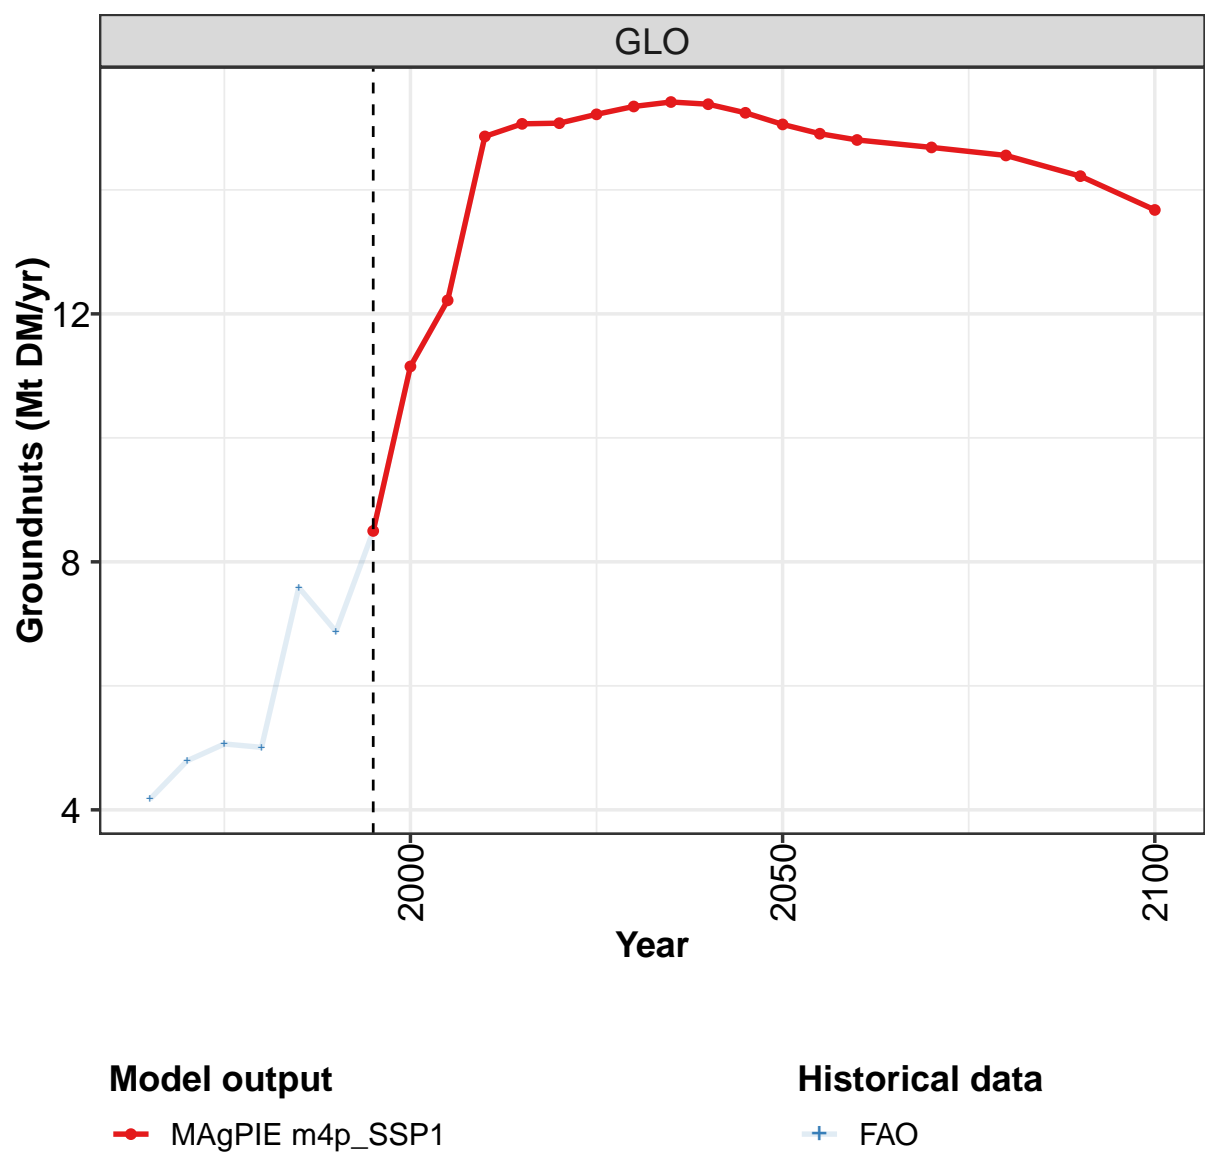

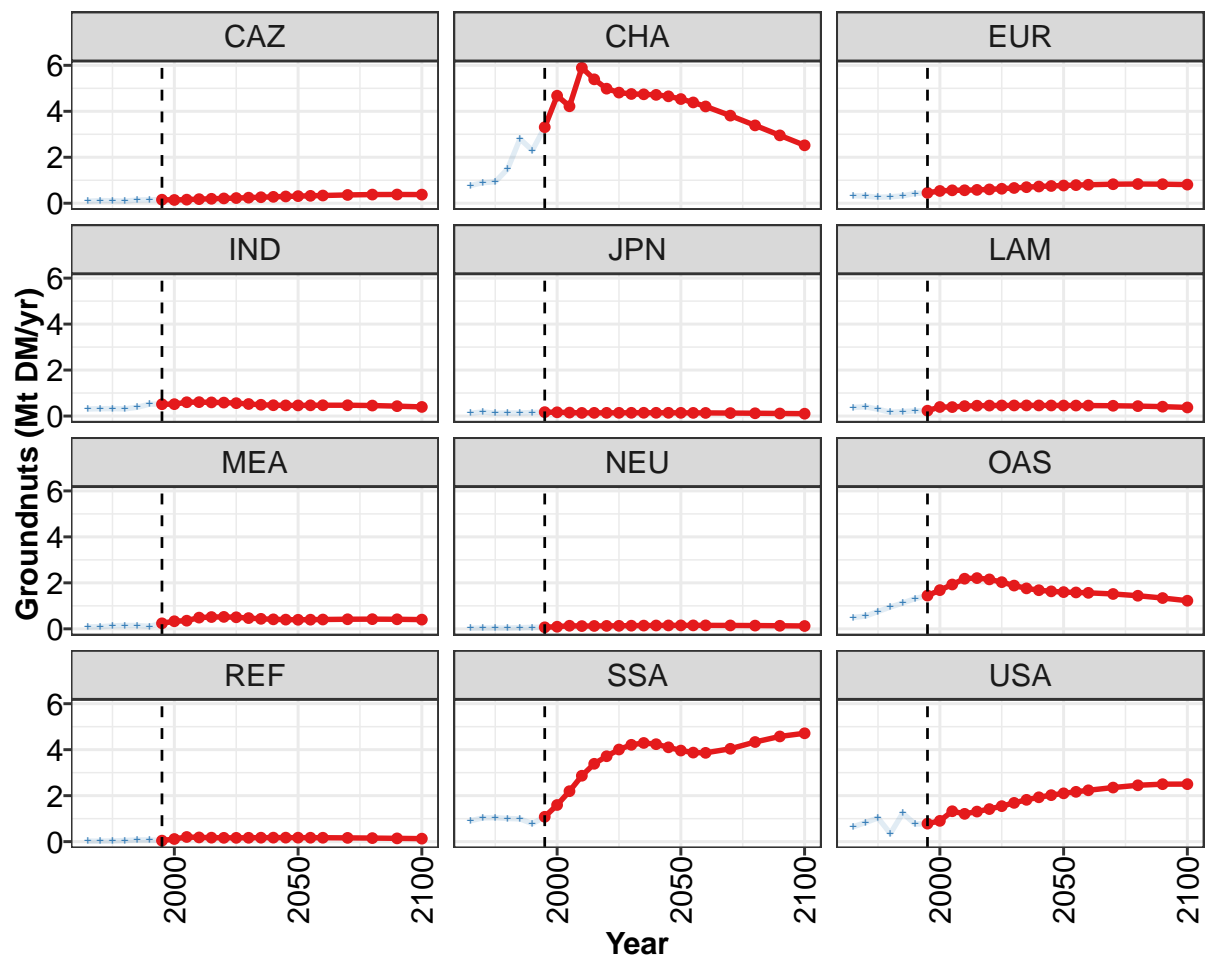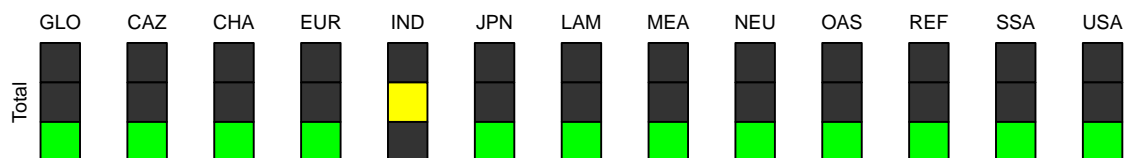

Figure 125: MAGPIE m4p\_SSP1 — Demand—Food—Crops—Oil crops—Groundnuts (Mt DM/yr)

|     | 1995 | 2000 | 2005 | 2010 | 2015 | 2020 | 2025 | 2030 | 2035 | 2040 | 2045 |
|-----|------|------|------|------|------|------|------|------|------|------|------|
| GLO | 8.5  | 11.2 | 12.2 | 14.9 | 15.1 | 15.1 | 15.2 | 15.3 | 15.4 | 15.4 | 15.2 |
| CAZ | 0.2  | 0.1  | 0.2  | 0.2  | 0.2  | 0.2  | 0.2  | 0.2  | 0.3  | 0.3  | 0.3  |
| CHA | 3.3  | 4.7  | 4.2  | 5.9  | 5.4  | 5.0  | 4.8  | 4.8  | 4.7  | 4.7  | 4.7  |
| EUR | 0.5  | 0.5  | 0.6  | 0.6  | 0.6  | 0.6  | 0.6  | 0.7  | 0.7  | 0.7  | 0.8  |
| IND | 0.5  | 0.5  | 0.6  | 0.6  | 0.6  | 0.6  | 0.6  | 0.5  | 0.5  | 0.5  | 0.5  |
| JPN | 0.2  | 0.2  | 0.1  | 0.1  | 0.1  | 0.1  | 0.1  | 0.1  | 0.1  | 0.1  | 0.1  |
| LAM | 0.2  | 0.4  | 0.4  | 0.4  | 0.4  | 0.5  | 0.5  | 0.5  | 0.5  | 0.5  | 0.5  |
| MEA | 0.2  | 0.3  | 0.4  | 0.5  | 0.5  | 0.5  | 0.5  | 0.5  | 0.4  | 0.4  | 0.4  |
| NEU | 0.1  | 0.1  | 0.1  | 0.1  | 0.1  | 0.1  | 0.1  | 0.1  | 0.1  | 0.1  | 0.1  |
| OAS | 1.4  | 1.7  | 1.9  | 2.2  | 2.2  | 2.2  | 2.0  | 1.9  | 1.8  | 1.7  | 1.6  |
| REF | 0.0  | 0.1  | 0.2  | 0.2  | 0.2  | 0.2  | 0.2  | 0.2  | 0.2  | 0.2  | 0.2  |
| SSA | 1.1  | 1.6  | 2.2  | 2.9  | 3.4  | 3.7  | 4.0  | 4.2  | 4.3  | 4.2  | 4.1  |
| USA | 0.8  | 0.9  | 1.3  | 1.2  | 1.3  | 1.4  | 1.5  | 1.7  | 1.8  | 1.9  | 2.0  |

Table 374: MAgPIE m4p\_SSP1 — Demand—Food—Crops—Oil crops—Groundnuts (Mt DM/yr) [PART 1/2]

|     | 2050 | 2055 | 2060 | 2070 | 2080 | 2090 | 2100 |
|-----|------|------|------|------|------|------|------|
| GLO | 15.1 | 14.9 | 14.8 | 14.7 | 14.6 | 14.2 | 13.7 |
| CAZ | 0.3  | 0.3  | 0.3  | 0.4  | 0.4  | 0.4  | 0.4  |
| CHA | 4.5  | 4.4  | 4.2  | 3.8  | 3.4  | 3.0  | 2.5  |
| EUR | 0.8  | 0.8  | 0.8  | 0.8  | 0.8  | 0.8  | 0.8  |
| IND | 0.5  | 0.5  | 0.5  | 0.5  | 0.5  | 0.4  | 0.4  |
| JPN | 0.1  | 0.1  | 0.1  | 0.1  | 0.1  | 0.1  | 0.1  |
| LAM | 0.5  | 0.5  | 0.5  | 0.4  | 0.4  | 0.4  | 0.4  |
| MEA | 0.4  | 0.4  | 0.4  | 0.4  | 0.4  | 0.4  | 0.4  |
| NEU | 0.2  | 0.2  | 0.2  | 0.1  | 0.1  | 0.1  | 0.1  |
| OAS | 1.6  | 1.6  | 1.6  | 1.5  | 1.4  | 1.3  | 1.2  |
| REF | 0.2  | 0.2  | 0.2  | 0.2  | 0.2  | 0.1  | 0.1  |
| SSA | 4.0  | 3.9  | 3.9  | 4.0  | 4.3  | 4.6  | 4.7  |
| USA | 2.1  | 2.2  | 2.2  | 2.4  | 2.5  | 2.5  | 2.5  |

Table 375: MAgPIE m4p\_SSP1 — Demand—Food—Crops—Oil crops—Groundnuts (Mt DM/yr) [PART 2/2]

|     | 1965 | 1970 | 1975 | 1980 | 1985 | 1990 | 1995 | 2000 | 2005 | 2010 |
|-----|------|------|------|------|------|------|------|------|------|------|
| GLO | 4.2  | 4.8  | 5.1  | 5.0  | 7.6  | 6.9  | 8.5  | 11.2 | 12.2 | 14.9 |
| CAZ | 0.1  | 0.1  | 0.1  | 0.1  | 0.1  | 0.2  | 0.2  | 0.1  | 0.2  | 0.2  |
| CHA | 0.8  | 0.9  | 0.9  | 1.5  | 2.8  | 2.3  | 3.3  | 4.7  | 4.2  | 5.9  |
| EUR | 0.3  | 0.3  | 0.3  | 0.3  | 0.3  | 0.4  | 0.5  | 0.5  | 0.6  | 0.6  |
| IND | 0.3  | 0.3  | 0.3  | 0.3  | 0.4  | 0.5  | 0.5  | 0.5  | 0.6  | 0.6  |
| JPN | 0.1  | 0.2  | 0.1  | 0.1  | 0.1  | 0.2  | 0.2  | 0.2  | 0.1  | 0.1  |
| LAM | 0.4  | 0.4  | 0.3  | 0.2  | 0.2  | 0.2  | 0.2  | 0.4  | 0.4  | 0.4  |
| MEA | 0.1  | 0.1  | 0.1  | 0.1  | 0.1  | 0.1  | 0.2  | 0.3  | 0.4  | 0.5  |
| NEU | 0.0  | 0.0  | 0.0  | 0.0  | 0.0  | 0.1  | 0.1  | 0.1  | 0.1  | 0.1  |
| OAS | 0.5  | 0.6  | 0.8  | 0.9  | 1.1  | 1.3  | 1.4  | 1.7  | 1.9  | 2.2  |
| REF | 0.0  | 0.0  | 0.0  | 0.0  | 0.1  | 0.1  | 0.0  | 0.1  | 0.2  | 0.2  |
| SSA | 0.9  | 1.0  | 1.0  | 1.0  | 1.0  | 0.8  | 1.1  | 1.6  | 2.2  | 2.9  |
| USA | 0.6  | 0.8  | 1.0  | 0.4  | 1.2  | 0.8  | 0.8  | 0.9  | 1.3  | 1.2  |

Table 376: FAO — Demand—Food—Crops—Oil crops—Groundnuts (Mt DM/yr)

7.1.8 Oil crops—Other oil crops (incl rapeseed)

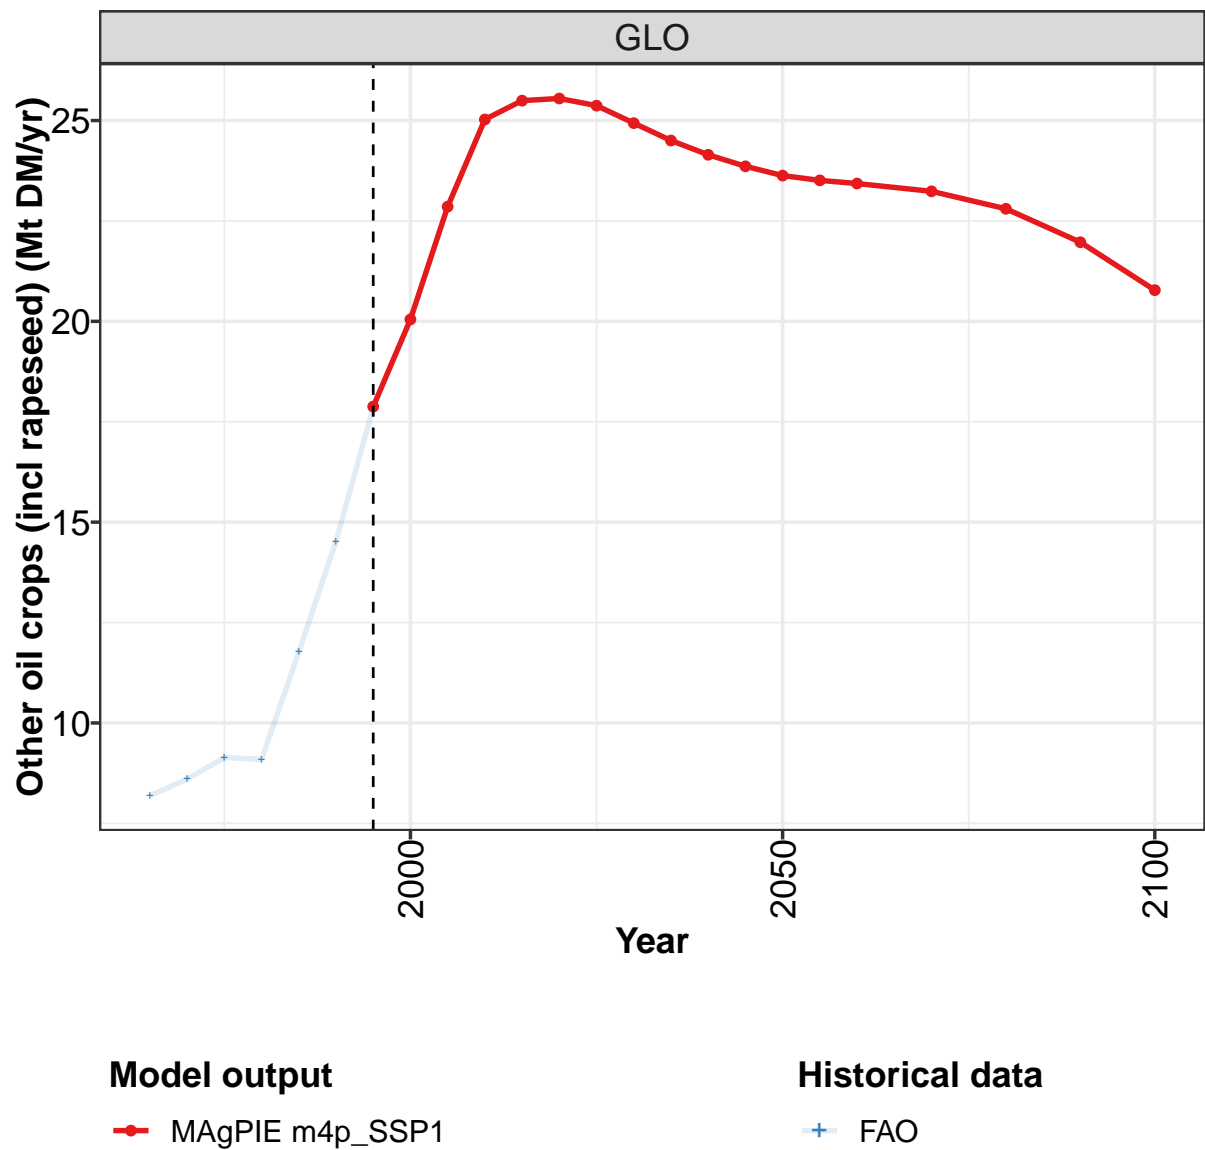



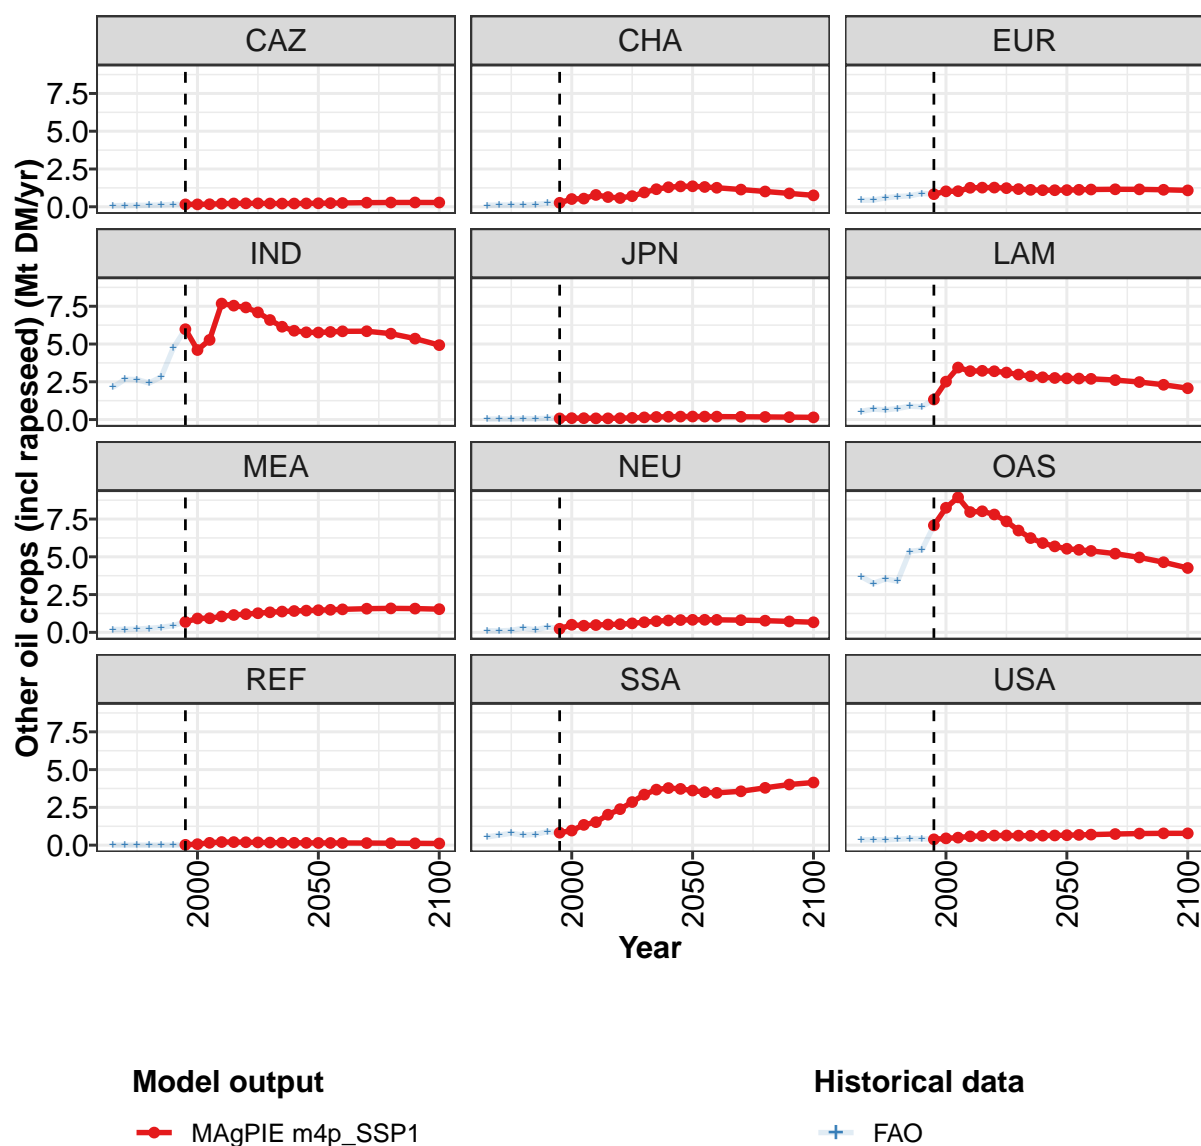

Figure 126: MAgPIE m4p\_SSP1 — Demand—Food—Crops—Oil crops—Other oil crops (incl rapeseed) (Mt DM/yr)

|     | 1995 | 2000 | 2005 | 2010 | 2015 | 2020 | 2025 | 2030 | 2035 | 2040 | 2045 |
|-----|------|------|------|------|------|------|------|------|------|------|------|
| GLO | 17.9 | 20.0 | 22.9 | 25.0 | 25.5 | 25.5 | 25.4 | 24.9 | 24.5 | 24.1 | 23.9 |
| CAZ | 0.2  | 0.2  | 0.2  | 0.2  | 0.2  | 0.2  | 0.2  | 0.2  | 0.2  | 0.2  | 0.2  |
| CHA | 0.3  | 0.5  | 0.5  | 0.8  | 0.6  | 0.6  | 0.7  | 0.9  | 1.2  | 1.3  | 1.3  |
| EUR | 0.8  | 1.0  | 1.0  | 1.3  | 1.3  | 1.3  | 1.2  | 1.2  | 1.1  | 1.1  | 1.1  |
| IND | 6.0  | 4.6  | 5.3  | 7.7  | 7.5  | 7.4  | 7.1  | 6.6  | 6.1  | 5.9  | 5.8  |
| JPN | 0.1  | 0.1  | 0.1  | 0.1  | 0.1  | 0.1  | 0.1  | 0.1  | 0.2  | 0.2  | 0.2  |
| LAM | 1.3  | 2.5  | 3.4  | 3.2  | 3.2  | 3.2  | 3.1  | 3.0  | 2.9  | 2.8  | 2.8  |
| MEA | 0.7  | 0.9  | 0.9  | 1.1  | 1.2  | 1.2  | 1.3  | 1.3  | 1.4  | 1.4  | 1.4  |
| NEU | 0.2  | 0.5  | 0.4  | 0.5  | 0.5  | 0.5  | 0.6  | 0.7  | 0.7  | 0.8  | 0.8  |
| OAS | 7.1  | 8.2  | 8.9  | 8.0  | 8.0  | 7.8  | 7.3  | 6.7  | 6.2  | 5.9  | 5.7  |
| REF | 0.0  | 0.1  | 0.2  | 0.2  | 0.2  | 0.2  | 0.2  | 0.2  | 0.2  | 0.2  | 0.2  |
| SSA | 0.8  | 1.0  | 1.3  | 1.5  | 2.0  | 2.4  | 2.9  | 3.3  | 3.7  | 3.8  | 3.7  |
| USA | 0.4  | 0.4  | 0.5  | 0.6  | 0.6  | 0.6  | 0.6  | 0.6  | 0.6  | 0.6  | 0.6  |

Table 377: MAgPIE m4p\_SSP1 — Demand—Food—Crops—Oil crops—Other oil crops (incl rapeseed) (Mt DM/yr) [PART 1/2]

|     | 2050 | 2055 | 2060 | 2070 | 2080 | 2090 | 2100 |
|-----|------|------|------|------|------|------|------|
| GLO | 23.6 | 23.5 | 23.4 | 23.2 | 22.8 | 22.0 | 20.8 |
| CAZ | 0.2  | 0.2  | 0.3  | 0.3  | 0.3  | 0.3  | 0.3  |
| CHA | 1.4  | 1.3  | 1.3  | 1.1  | 1.0  | 0.9  | 0.8  |
| EUR | 1.1  | 1.1  | 1.1  | 1.2  | 1.2  | 1.1  | 1.1  |
| IND | 5.8  | 5.8  | 5.8  | 5.8  | 5.7  | 5.4  | 4.9  |
| JPN | 0.2  | 0.2  | 0.2  | 0.2  | 0.2  | 0.2  | 0.1  |
| LAM | 2.7  | 2.7  | 2.7  | 2.6  | 2.5  | 2.3  | 2.1  |
| MEA | 1.5  | 1.5  | 1.5  | 1.6  | 1.6  | 1.6  | 1.5  |
| NEU | 0.8  | 0.8  | 0.8  | 0.8  | 0.8  | 0.7  | 0.7  |
| OAS | 5.5  | 5.5  | 5.4  | 5.2  | 5.0  | 4.6  | 4.3  |
| REF | 0.1  | 0.1  | 0.1  | 0.1  | 0.1  | 0.1  | 0.1  |
| SSA | 3.6  | 3.5  | 3.5  | 3.6  | 3.8  | 4.0  | 4.1  |
| USA | 0.7  | 0.7  | 0.7  | 0.7  | 0.8  | 0.8  | 0.8  |

Table 378: MAgPIE m4p\_SSP1 — Demand—Food—Crops—Oil crops—Other oil crops (incl rapeseed) (Mt DM/yr) [PART 2/2]

|     | 1965 | 1970 | 1975 | 1980 | 1985 | 1990 | 1995 | 2000 | 2005 | 2010 |
|-----|------|------|------|------|------|------|------|------|------|------|
| GLO | 8.2  | 8.6  | 9.1  | 9.1  | 11.8 | 14.5 | 17.9 | 20.0 | 22.9 | 25.0 |
| CAZ | 0.1  | 0.1  | 0.1  | 0.1  | 0.1  | 0.2  | 0.2  | 0.2  | 0.2  | 0.2  |
| CHA | 0.1  | 0.1  | 0.1  | 0.1  | 0.1  | 0.2  | 0.3  | 0.5  | 0.5  | 0.8  |
| EUR | 0.4  | 0.4  | 0.6  | 0.7  | 0.7  | 0.9  | 0.8  | 1.0  | 1.0  | 1.3  |
| IND | 2.1  | 2.7  | 2.6  | 2.4  | 2.8  | 4.7  | 6.0  | 4.6  | 5.3  | 7.7  |
| JPN | 0.0  | 0.0  | 0.0  | 0.1  | 0.1  | 0.1  | 0.1  | 0.1  | 0.1  | 0.1  |
| LAM | 0.5  | 0.7  | 0.6  | 0.7  | 0.9  | 0.8  | 1.3  | 2.5  | 3.4  | 3.2  |
| MEA | 0.2  | 0.2  | 0.2  | 0.3  | 0.3  | 0.4  | 0.7  | 0.9  | 0.9  | 1.1  |
| NEU | 0.1  | 0.1  | 0.1  | 0.3  | 0.2  | 0.3  | 0.2  | 0.5  | 0.4  | 0.5  |
| OAS | 3.7  | 3.2  | 3.5  | 3.4  | 5.4  | 5.5  | 7.1  | 8.2  | 8.9  | 8.0  |
| REF | 0.0  | 0.0  | 0.0  | 0.0  | 0.0  | 0.0  | 0.0  | 0.1  | 0.2  | 0.2  |
| SSA | 0.5  | 0.7  | 0.8  | 0.7  | 0.7  | 0.9  | 0.8  | 1.0  | 1.3  | 1.5  |
| USA | 0.4  | 0.4  | 0.3  | 0.4  | 0.4  | 0.4  | 0.4  | 0.4  | 0.5  | 0.6  |

Table 379: FAO — Demand—Food—Crops—Oil crops—Other oil crops (incl rapeseed) (Mt DM/yr)

7.1.9
Oil crops—Soybean

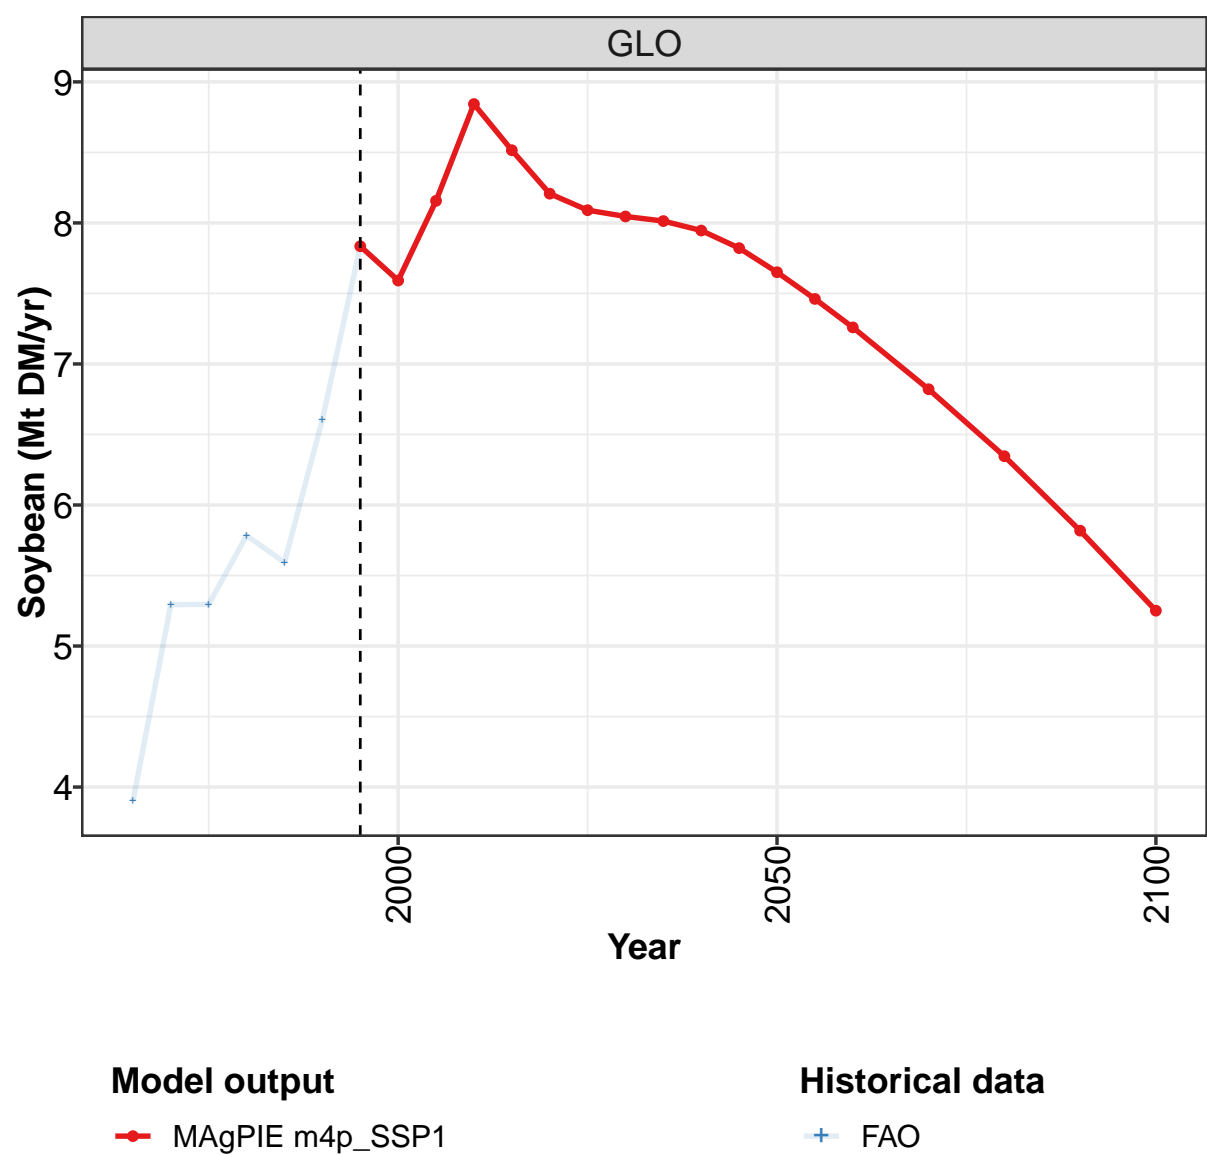

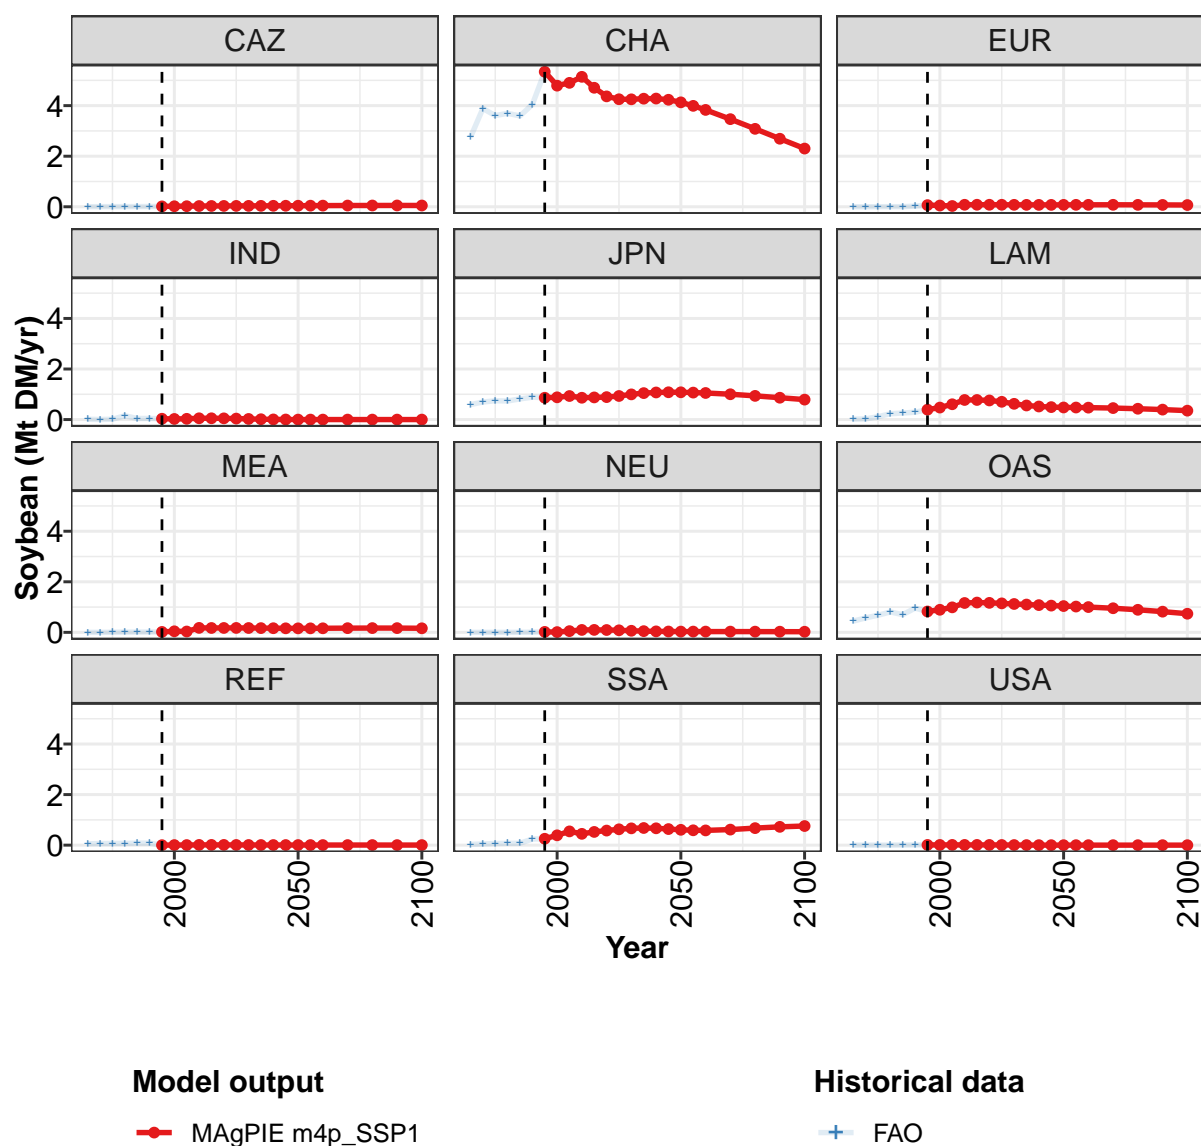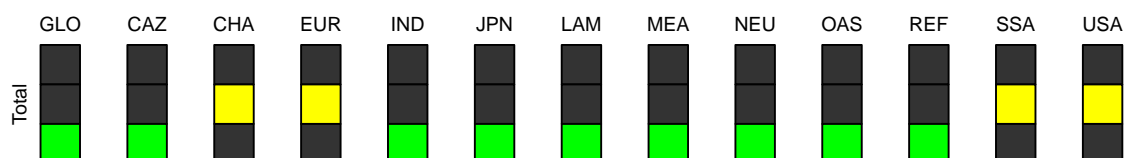

Figure 127: MAGPIE m4p\_SSP1 — Demand—Food—Crops—Oil crops—Soybean (Mt DM/yr)

|     | 1995 | 2000 | 2005 | 2010 | 2015 | 2020 | 2025 | 2030 | 2035 | 2040 | 2045 |
|-----|------|------|------|------|------|------|------|------|------|------|------|
| GLO | 7.83 | 7.59 | 8.16 | 8.84 | 8.52 | 8.21 | 8.09 | 8.05 | 8.01 | 7.95 | 7.82 |
| CAZ | 0.02 | 0.02 | 0.02 | 0.03 | 0.03 | 0.03 | 0.03 | 0.04 | 0.04 | 0.04 | 0.04 |
| CHA | 5.34 | 4.79 | 4.90 | 5.14 | 4.71 | 4.37 | 4.25 | 4.25 | 4.28 | 4.28 | 4.23 |
| EUR | 0.07 | 0.05 | 0.03 | 0.08 | 0.08 | 0.08 | 0.08 | 0.08 | 0.08 | 0.08 | 0.08 |
| IND | 0.03 | 0.02 | 0.03 | 0.05 | 0.05 | 0.05 | 0.04 | 0.03 | 0.01 | 0.01 | 0.00 |
| JPN | 0.86 | 0.88 | 0.93 | 0.86 | 0.88 | 0.89 | 0.93 | 1.00 | 1.05 | 1.07 | 1.08 |
| LAM | 0.39 | 0.47 | 0.61 | 0.78 | 0.78 | 0.76 | 0.70 | 0.62 | 0.56 | 0.52 | 0.49 |
| MEA | 0.02 | 0.04 | 0.03 | 0.18 | 0.17 | 0.17 | 0.18 | 0.17 | 0.17 | 0.16 | 0.16 |
| NEU | 0.02 | 0.01 | 0.05 | 0.10 | 0.10 | 0.09 | 0.08 | 0.06 | 0.05 | 0.04 | 0.03 |
| OAS | 0.83 | 0.89 | 0.99 | 1.16 | 1.18 | 1.17 | 1.15 | 1.12 | 1.10 | 1.08 | 1.06 |
| REF | 0.00 | 0.00 | 0.00 | 0.01 | 0.01 | 0.01 | 0.01 | 0.01 | 0.01 | 0.01 | 0.00 |
| SSA | 0.25 | 0.39 | 0.54 | 0.45 | 0.52 | 0.58 | 0.63 | 0.67 | 0.68 | 0.67 | 0.64 |
| USA | 0.01 | 0.01 | 0.01 | 0.01 | 0.01 | 0.01 | 0.01 | 0.00 | 0.00 | 0.00 | 0.00 |

Table 380: MAgPIE m4p\_SSP1 — Demand—Food—Crops—Oil crops—Soybean (Mt DM/yr) [PART 1/2]

|     | 2050 | 2055 | 2060 | 2070 | 2080 | 2090 | 2100 |
|-----|------|------|------|------|------|------|------|
| GLO | 7.65 | 7.46 | 7.26 | 6.82 | 6.35 | 5.82 | 5.25 |
| CAZ | 0.04 | 0.04 | 0.05 | 0.05 | 0.05 | 0.05 | 0.05 |
| CHA | 4.13 | 3.99 | 3.83 | 3.47 | 3.08 | 2.69 | 2.30 |
| EUR | 0.08 | 0.08 | 0.08 | 0.08 | 0.08 | 0.07 | 0.07 |
| IND | 0.00 | 0.00 | 0.00 | 0.00 | 0.00 | 0.00 | 0.00 |
| JPN | 1.08 | 1.07 | 1.05 | 1.00 | 0.94 | 0.86 | 0.79 |
| LAM | 0.48 | 0.48 | 0.47 | 0.45 | 0.43 | 0.39 | 0.35 |
| MEA | 0.16 | 0.16 | 0.16 | 0.17 | 0.17 | 0.17 | 0.16 |
| NEU | 0.03 | 0.03 | 0.03 | 0.03 | 0.03 | 0.03 | 0.02 |
| OAS | 1.04 | 1.02 | 1.00 | 0.95 | 0.89 | 0.82 | 0.74 |
| REF | 0.00 | 0.00 | 0.00 | 0.00 | 0.00 | 0.00 | 0.00 |
| SSA | 0.61 | 0.59 | 0.58 | 0.62 | 0.67 | 0.72 | 0.76 |
| USA | 0.00 | 0.00 | 0.00 | 0.00 | 0.00 | 0.00 | 0.00 |

Table 381: MAgPIE m4p\_SSP1 — Demand—Food—Crops—Oil crops—Soybean (Mt DM/yr) [PART 2/2]

|     | 1965 | 1970 | 1975 | 1980 | 1985 | 1990 | 1995 | 2000 | 2005 | 2010 |
|-----|------|------|------|------|------|------|------|------|------|------|
| GLO | 3.90 | 5.29 | 5.30 | 5.78 | 5.59 | 6.61 | 7.83 | 7.59 | 8.16 | 8.84 |
| CAZ | 0.00 | 0.00 | 0.00 | 0.01 | 0.01 | 0.01 | 0.02 | 0.02 | 0.02 | 0.03 |
| CHA | 2.75 | 3.89 | 3.61 | 3.70 | 3.59 | 4.05 | 5.34 | 4.79 | 4.90 | 5.14 |
| EUR | 0.00 | 0.00 | 0.00 | 0.00 | 0.00 | 0.03 | 0.07 | 0.05 | 0.03 | 0.08 |
| IND | 0.01 | 0.00 | 0.01 | 0.15 | 0.04 | 0.04 | 0.03 | 0.02 | 0.03 | 0.05 |
| JPN | 0.59 | 0.69 | 0.74 | 0.73 | 0.82 | 0.89 | 0.86 | 0.88 | 0.93 | 0.86 |
| LAM | 0.01 | 0.03 | 0.11 | 0.23 | 0.26 | 0.29 | 0.39 | 0.47 | 0.61 | 0.78 |
| MEA | 0.00 | 0.00 | 0.00 | 0.01 | 0.01 | 0.01 | 0.02 | 0.04 | 0.03 | 0.18 |
| NEU | 0.00 | 0.00 | 0.00 | 0.00 | 0.00 | 0.01 | 0.02 | 0.01 | 0.05 | 0.10 |
| OAS | 0.44 | 0.57 | 0.68 | 0.81 | 0.70 | 0.96 | 0.83 | 0.89 | 0.99 | 1.16 |
| REF | 0.05 | 0.06 | 0.07 | 0.07 | 0.08 | 0.08 | 0.00 | 0.00 | 0.00 | 0.01 |
| SSA | 0.03 | 0.05 | 0.07 | 0.07 | 0.07 | 0.24 | 0.25 | 0.39 | 0.54 | 0.45 |
| USA | 0.00 | 0.00 | 0.00 | 0.00 | 0.00 | 0.01 | 0.01 | 0.01 | 0.01 | 0.01 |

Table 382: FAO — Demand—Food—Crops—Oil crops—Soybean (Mt DM/yr)

## 7.1.10 Oil crops—Sunflower

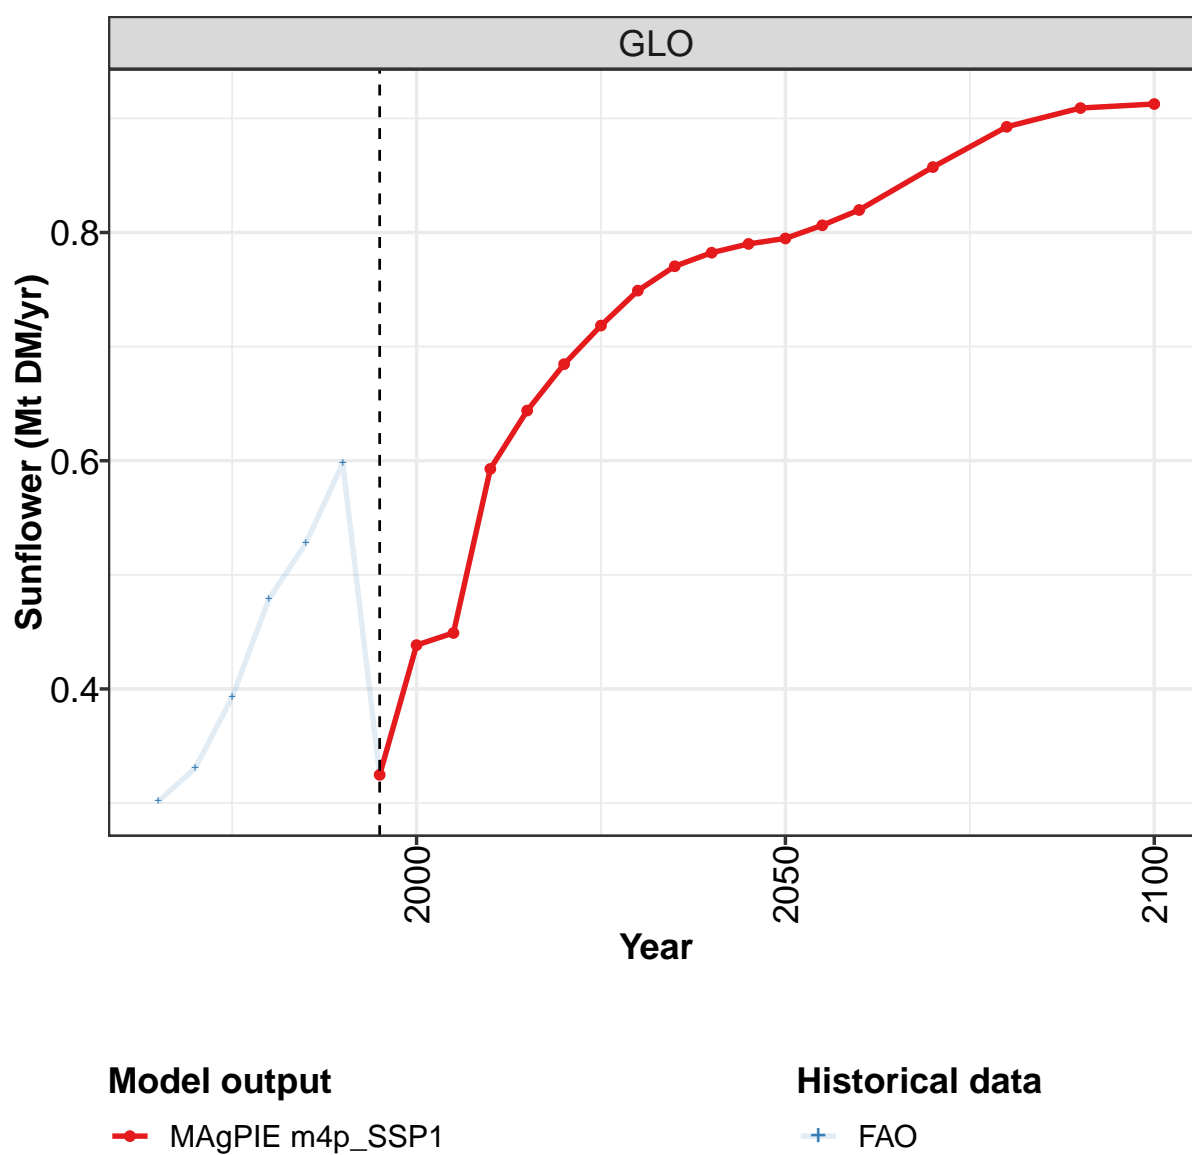

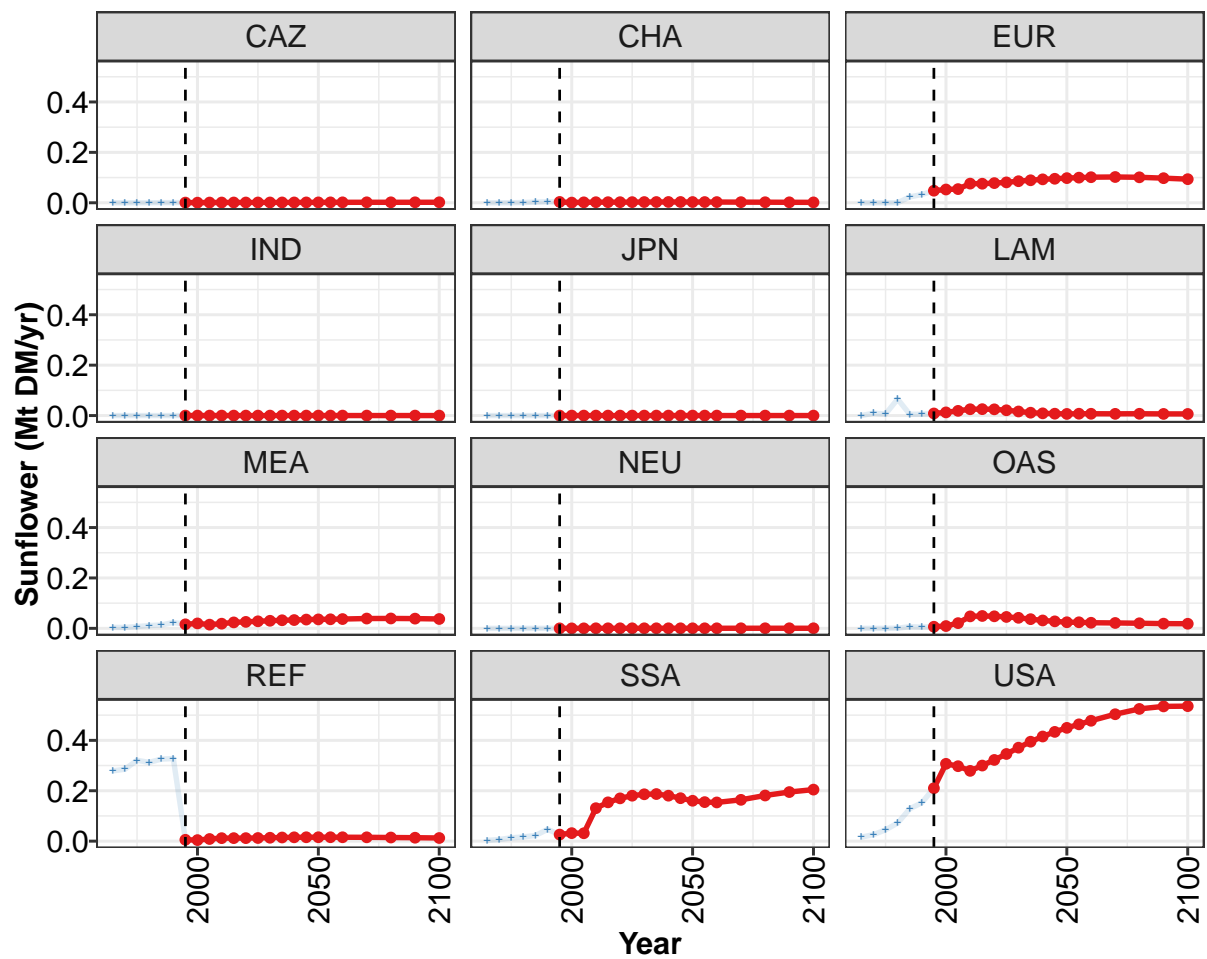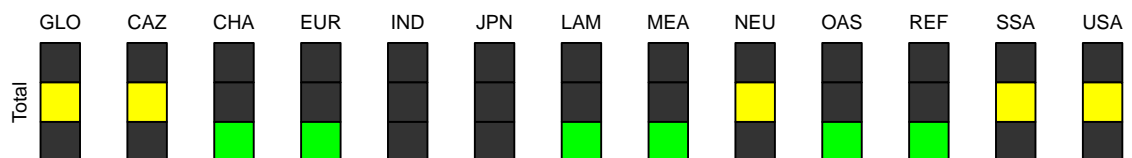

Figure 128: MAGPIE m4p\_SSP1 — Demand—Food—Crops—Oil crops—Sunflower (Mt DM/yr)

|     | 1995  | 2000  | 2005  | 2010  | 2015  | 2020  | 2025  | 2030  | 2035  | 2040  | 2045  |
|-----|-------|-------|-------|-------|-------|-------|-------|-------|-------|-------|-------|
| GLO | 0.325 | 0.438 | 0.449 | 0.593 | 0.644 | 0.685 | 0.718 | 0.749 | 0.770 | 0.782 | 0.790 |
| CAZ | 0.001 | 0.001 | 0.001 | 0.001 | 0.001 | 0.001 | 0.001 | 0.001 | 0.001 | 0.001 | 0.001 |
| CHA | 0.003 | 0.001 | 0.002 | 0.002 | 0.002 | 0.002 | 0.003 | 0.003 | 0.003 | 0.003 | 0.003 |
| EUR | 0.048 | 0.053 | 0.054 | 0.076 | 0.076 | 0.078 | 0.081 | 0.086 | 0.089 | 0.093 | 0.095 |
| IND | 0.000 | 0.000 | 0.000 | 0.000 | 0.000 | 0.000 | 0.000 | 0.000 | 0.000 | 0.000 | 0.000 |
| JPN | 0.000 | 0.000 | 0.000 | 0.000 | 0.000 | 0.000 | 0.000 | 0.000 | 0.000 | 0.000 | 0.000 |
| LAM | 0.008 | 0.013 | 0.019 | 0.025 | 0.025 | 0.025 | 0.021 | 0.016 | 0.011 | 0.009 | 0.007 |
| MEA | 0.016 | 0.020 | 0.015 | 0.019 | 0.024 | 0.026 | 0.028 | 0.030 | 0.032 | 0.033 | 0.035 |
| NEU | 0.000 | 0.000 | 0.000 | 0.000 | 0.000 | 0.000 | 0.000 | 0.000 | 0.000 | 0.000 | 0.000 |
| OAS | 0.007 | 0.009 | 0.021 | 0.048 | 0.049 | 0.048 | 0.045 | 0.042 | 0.037 | 0.031 | 0.028 |
| REF | 0.005 | 0.004 | 0.009 | 0.012 | 0.012 | 0.012 | 0.013 | 0.014 | 0.015 | 0.015 | 0.015 |
| SSA | 0.026 | 0.032 | 0.031 | 0.131 | 0.154 | 0.170 | 0.180 | 0.186 | 0.187 | 0.181 | 0.171 |
| USA | 0.210 | 0.307 | 0.298 | 0.279 | 0.300 | 0.322 | 0.346 | 0.371 | 0.395 | 0.415 | 0.434 |

Table 383: MAgPIE m4p\_SSP1 — Demand—Food—Crops—Oil crops—Sunflower (Mt DM/yr) [PART 1/2]

|     | 2050  | 2055  | 2060  | 2070  | 2080  | 2090  | 2100  |
|-----|-------|-------|-------|-------|-------|-------|-------|
| GLO | 0.795 | 0.806 | 0.820 | 0.857 | 0.893 | 0.909 | 0.913 |
| CAZ | 0.002 | 0.002 | 0.002 | 0.002 | 0.002 | 0.002 | 0.002 |
| CHA | 0.003 | 0.003 | 0.003 | 0.002 | 0.002 | 0.002 | 0.002 |
| EUR | 0.098 | 0.100 | 0.101 | 0.102 | 0.101 | 0.098 | 0.094 |
| IND | 0.000 | 0.000 | 0.000 | 0.000 | 0.000 | 0.000 | 0.000 |
| JPN | 0.000 | 0.000 | 0.000 | 0.000 | 0.000 | 0.000 | 0.000 |
| LAM | 0.007 | 0.007 | 0.007 | 0.007 | 0.007 | 0.007 | 0.006 |
| MEA | 0.036 | 0.036 | 0.037 | 0.039 | 0.039 | 0.039 | 0.037 |
| NEU | 0.000 | 0.000 | 0.000 | 0.000 | 0.000 | 0.000 | 0.000 |
| OAS | 0.024 | 0.024 | 0.022 | 0.021 | 0.020 | 0.019 | 0.018 |
| REF | 0.016 | 0.016 | 0.016 | 0.015 | 0.014 | 0.014 | 0.013 |
| SSA | 0.160 | 0.155 | 0.154 | 0.164 | 0.181 | 0.195 | 0.205 |
| USA | 0.450 | 0.464 | 0.478 | 0.504 | 0.525 | 0.535 | 0.536 |

Table 384: MAgPIE m4p\_SSP1 — Demand—Food—Crops—Oil crops—Sunflower (Mt DM/yr) [PART 2/2]

|     | 1965  | 1970  | 1975  | 1980  | 1985  | 1990  | 1995  | 2000  | 2005  | 2010  |
|-----|-------|-------|-------|-------|-------|-------|-------|-------|-------|-------|
| GLO | 0.302 | 0.331 | 0.393 | 0.479 | 0.528 | 0.598 | 0.325 | 0.438 | 0.450 | 0.592 |
| CAZ | 0.000 | 0.000 | 0.000 | 0.000 | 0.000 | 0.001 | 0.001 | 0.001 | 0.001 | 0.001 |
| CHA | 0.000 | 0.000 | 0.000 | 0.001 | 0.003 | 0.004 | 0.003 | 0.001 | 0.001 | 0.002 |
| EUR | 0.000 | 0.000 | 0.000 | 0.000 | 0.023 | 0.033 | 0.048 | 0.053 | 0.054 | 0.076 |
| IND | 0.000 | 0.000 | 0.000 | 0.000 | 0.000 | 0.000 | 0.000 | 0.000 | 0.000 | 0.000 |
| JPN | 0.000 | 0.000 | 0.000 | 0.000 | 0.000 | 0.000 | 0.000 | 0.000 | 0.000 | 0.000 |
| LAM | 0.000 | 0.009 | 0.006 | 0.065 | 0.005 | 0.005 | 0.008 | 0.013 | 0.019 | 0.025 |
| MEA | 0.004 | 0.004 | 0.007 | 0.011 | 0.013 | 0.023 | 0.016 | 0.020 | 0.015 | 0.019 |
| NEU | 0.000 | 0.000 | 0.000 | 0.000 | 0.000 | 0.000 | 0.000 | 0.000 | 0.000 | 0.000 |
| OAS | 0.000 | 0.000 | 0.000 | 0.001 | 0.007 | 0.005 | 0.007 | 0.009 | 0.021 | 0.047 |
| REF | 0.279 | 0.285 | 0.321 | 0.312 | 0.326 | 0.328 | 0.005 | 0.004 | 0.009 | 0.012 |
| SSA | 0.003 | 0.006 | 0.013 | 0.017 | 0.022 | 0.047 | 0.026 | 0.032 | 0.032 | 0.131 |
| USA | 0.016 | 0.026 | 0.045 | 0.072 | 0.128 | 0.152 | 0.210 | 0.307 | 0.298 | 0.279 |

Table 385: FAO — Demand—Food—Crops—Oil crops—Sunflower (Mt DM/yr)



7.1.11
Other crops

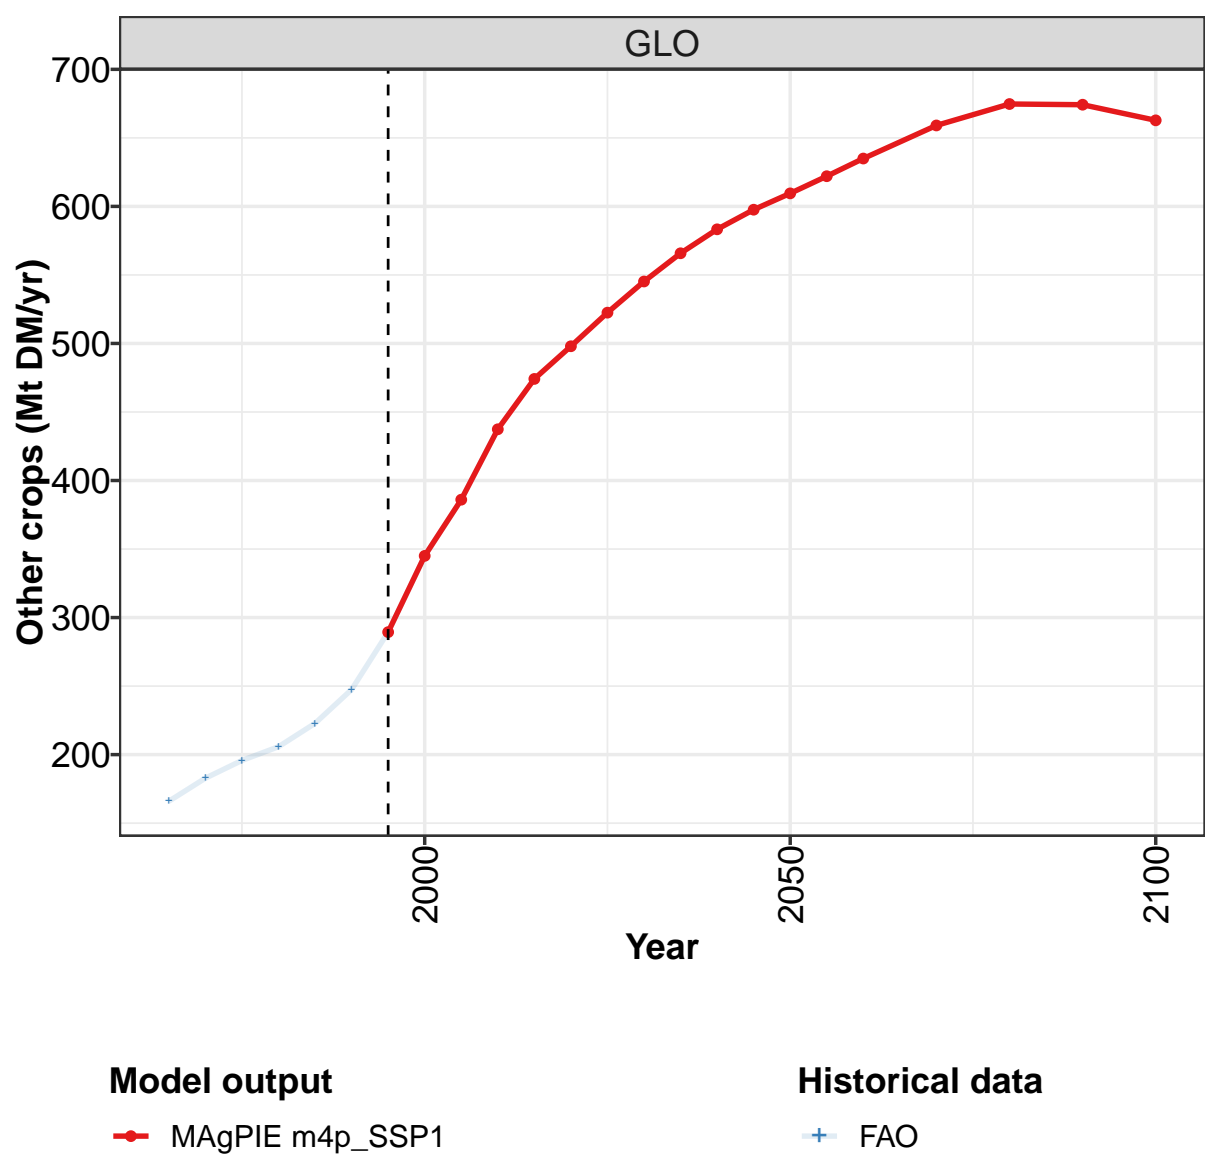

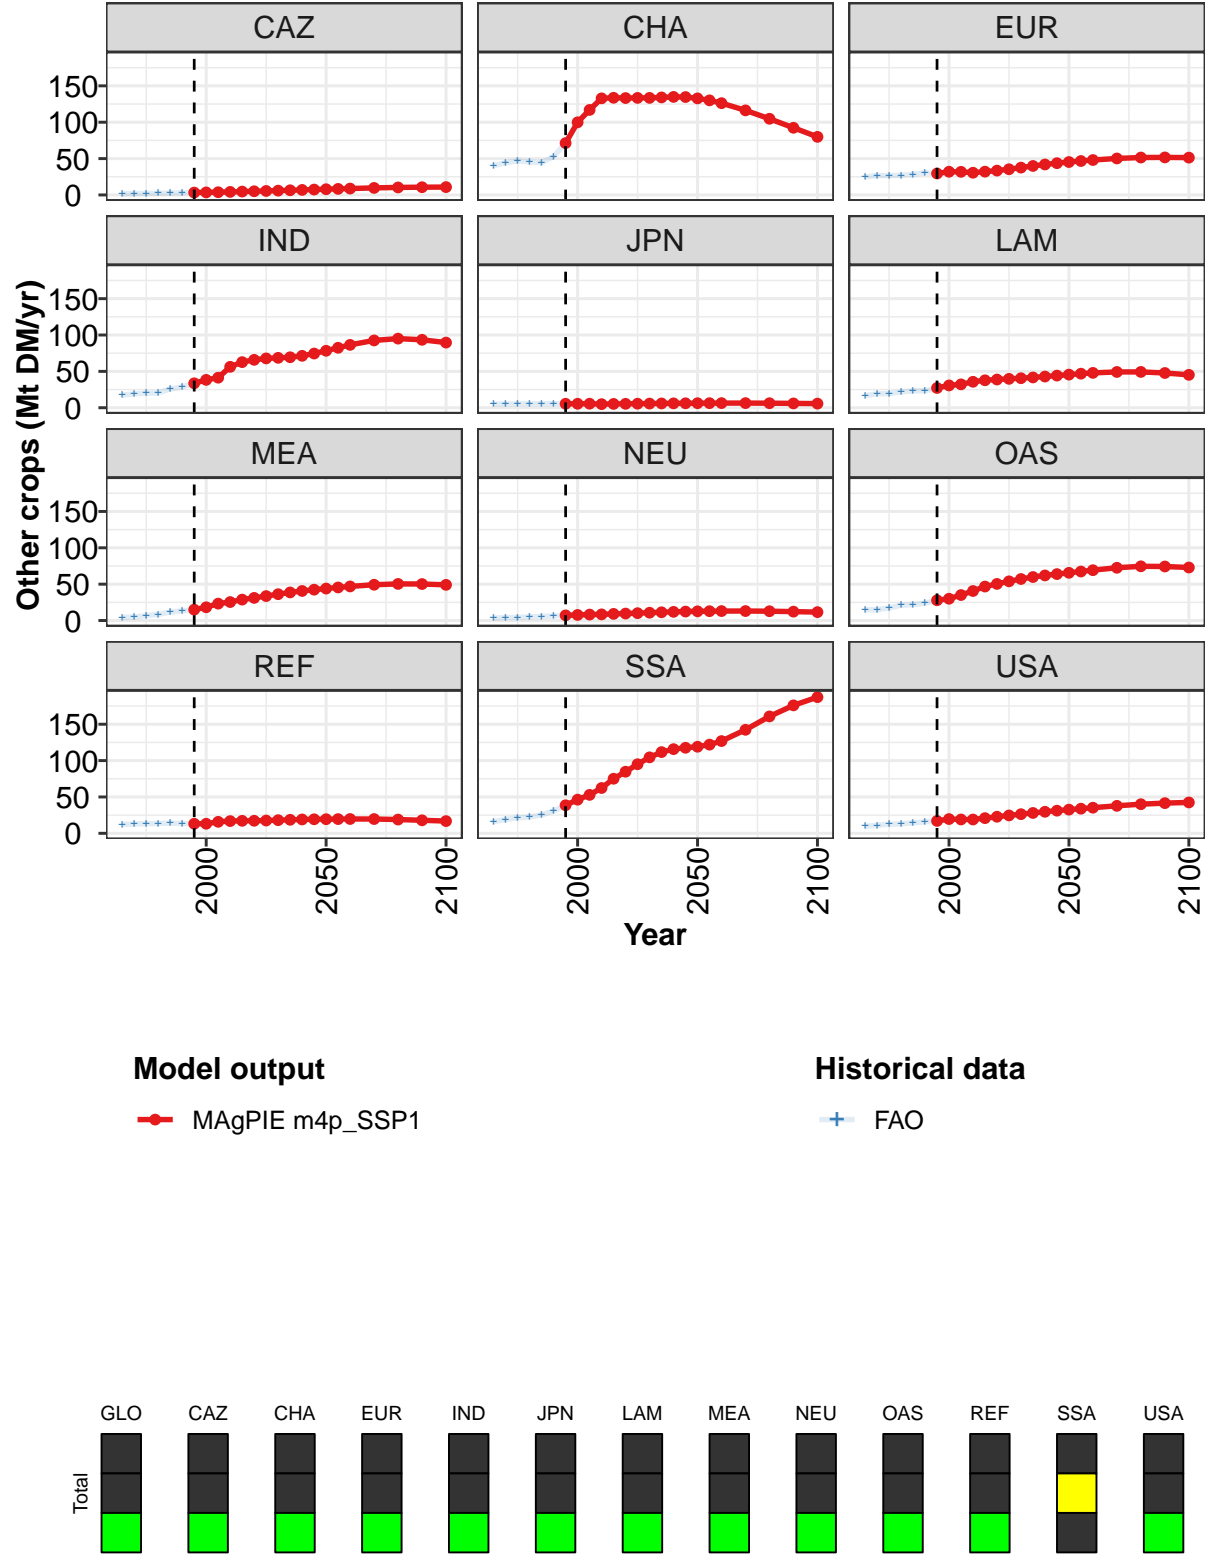

Figure 129: MAgPIE m4p\_SSP1 — Demand—Food—Crops—Other crops (Mt DM/yr)

|     | 1995 | 2000 | 2005 | 2010 | 2015 | 2020 | 2025 | 2030 | 2035 | 2040 | 2045 |
|-----|------|------|------|------|------|------|------|------|------|------|------|
| GLO | 289  | 345  | 386  | 437  | 474  | 498  | 522  | 545  | 566  | 583  | 598  |
| CAZ | 3    | 4    | 4    | 4    | 5    | 5    | 6    | 6    | 6    | 7    | 7    |
| CHA | 71   | 100  | 117  | 133  | 134  | 133  | 133  | 134  | 134  | 135  | 135  |
| EUR | 29   | 32   | 32   | 31   | 32   | 33   | 35   | 38   | 40   | 42   | 44   |
| IND | 34   | 38   | 41   | 56   | 63   | 66   | 68   | 69   | 69   | 71   | 75   |
| JPN | 6    | 5    | 6    | 5    | 5    | 5    | 6    | 6    | 6    | 6    | 6    |
| LAM | 27   | 31   | 32   | 36   | 38   | 39   | 40   | 41   | 42   | 43   | 44   |
| MEA | 15   | 18   | 23   | 25   | 29   | 31   | 34   | 36   | 39   | 41   | 42   |
| NEU | 7    | 8    | 8    | 9    | 9    | 10   | 10   | 11   | 11   | 12   | 12   |
| OAS | 28   | 30   | 35   | 41   | 47   | 50   | 54   | 57   | 60   | 62   | 64   |
| REF | 13   | 13   | 16   | 17   | 17   | 17   | 18   | 18   | 19   | 19   | 19   |
| SSA | 39   | 46   | 53   | 62   | 75   | 85   | 95   | 105  | 112  | 116  | 118  |
| USA | 17   | 20   | 19   | 19   | 21   | 23   | 25   | 26   | 28   | 30   | 31   |

Table 386: MAgPIE m4p\_SSP1 — Demand—Food—Crops—Other crops (Mt DM/yr) [PART 1/2]

|     | 2050 | 2055 | 2060 | 2070 | 2080 | 2090 | 2100 |
|-----|------|------|------|------|------|------|------|
| GLO | 610  | 622  | 635  | 659  | 675  | 674  | 663  |
| CAZ | 8    | 8    | 9    | 10   | 10   | 11   | 11   |
| CHA | 133  | 130  | 126  | 116  | 105  | 92   | 80   |
| EUR | 45   | 47   | 48   | 50   | 51   | 52   | 51   |
| IND | 78   | 82   | 86   | 93   | 95   | 93   | 90   |
| JPN | 6    | 6    | 6    | 6    | 6    | 6    | 6    |
| LAM | 46   | 47   | 48   | 49   | 49   | 48   | 45   |
| MEA | 44   | 45   | 47   | 49   | 50   | 50   | 49   |
| NEU | 13   | 13   | 13   | 13   | 13   | 12   | 12   |
| OAS | 66   | 67   | 69   | 73   | 75   | 74   | 73   |
| REF | 19   | 20   | 20   | 20   | 19   | 18   | 17   |
| SSA | 119  | 122  | 127  | 142  | 161  | 176  | 187  |
| USA | 33   | 34   | 35   | 38   | 40   | 42   | 42   |

Table 387: MAgPIE m4p\_SSP1 — Demand—Food—Crops—Other crops (Mt DM/yr) [PART 2/2]

|     | 1965 | 1970 | 1975 | 1980 | 1985 | 1990 | 1995 | 2000 | 2005 | 2010 |
|-----|------|------|------|------|------|------|------|------|------|------|
| GLO | 166  | 183  | 196  | 206  | 223  | 247  | 289  | 345  | 386  | 437  |
| CAZ | 2    | 2    | 2    | 2    | 3    | 3    | 3    | 4    | 4    | 4    |
| CHA | 40   | 44   | 47   | 45   | 45   | 53   | 71   | 100  | 117  | 133  |
| EUR | 25   | 27   | 27   | 27   | 28   | 30   | 30   | 32   | 32   | 31   |
| IND | 17   | 19   | 20   | 20   | 26   | 29   | 34   | 38   | 41   | 56   |
| JPN | 5    | 5    | 5    | 5    | 5    | 5    | 6    | 5    | 6    | 5    |
| LAM | 17   | 19   | 19   | 22   | 23   | 23   | 27   | 31   | 32   | 36   |
| MEA | 4    | 5    | 7    | 9    | 12   | 13   | 15   | 18   | 23   | 25   |
| NEU | 3    | 4    | 4    | 5    | 6    | 6    | 7    | 8    | 8    | 9    |
| OAS | 15   | 15   | 17   | 21   | 22   | 24   | 28   | 30   | 35   | 41   |
| REF | 12   | 13   | 13   | 14   | 14   | 13   | 13   | 13   | 16   | 17   |
| SSA | 16   | 19   | 21   | 23   | 25   | 31   | 39   | 46   | 53   | 62   |
| USA | 10   | 11   | 12   | 13   | 14   | 16   | 17   | 20   | 19   | 19   |

Table 388: FAO — Demand—Food—Crops—Other crops (Mt DM/yr)

7.1.12
Other crops—Fruits Vegetables Nuts

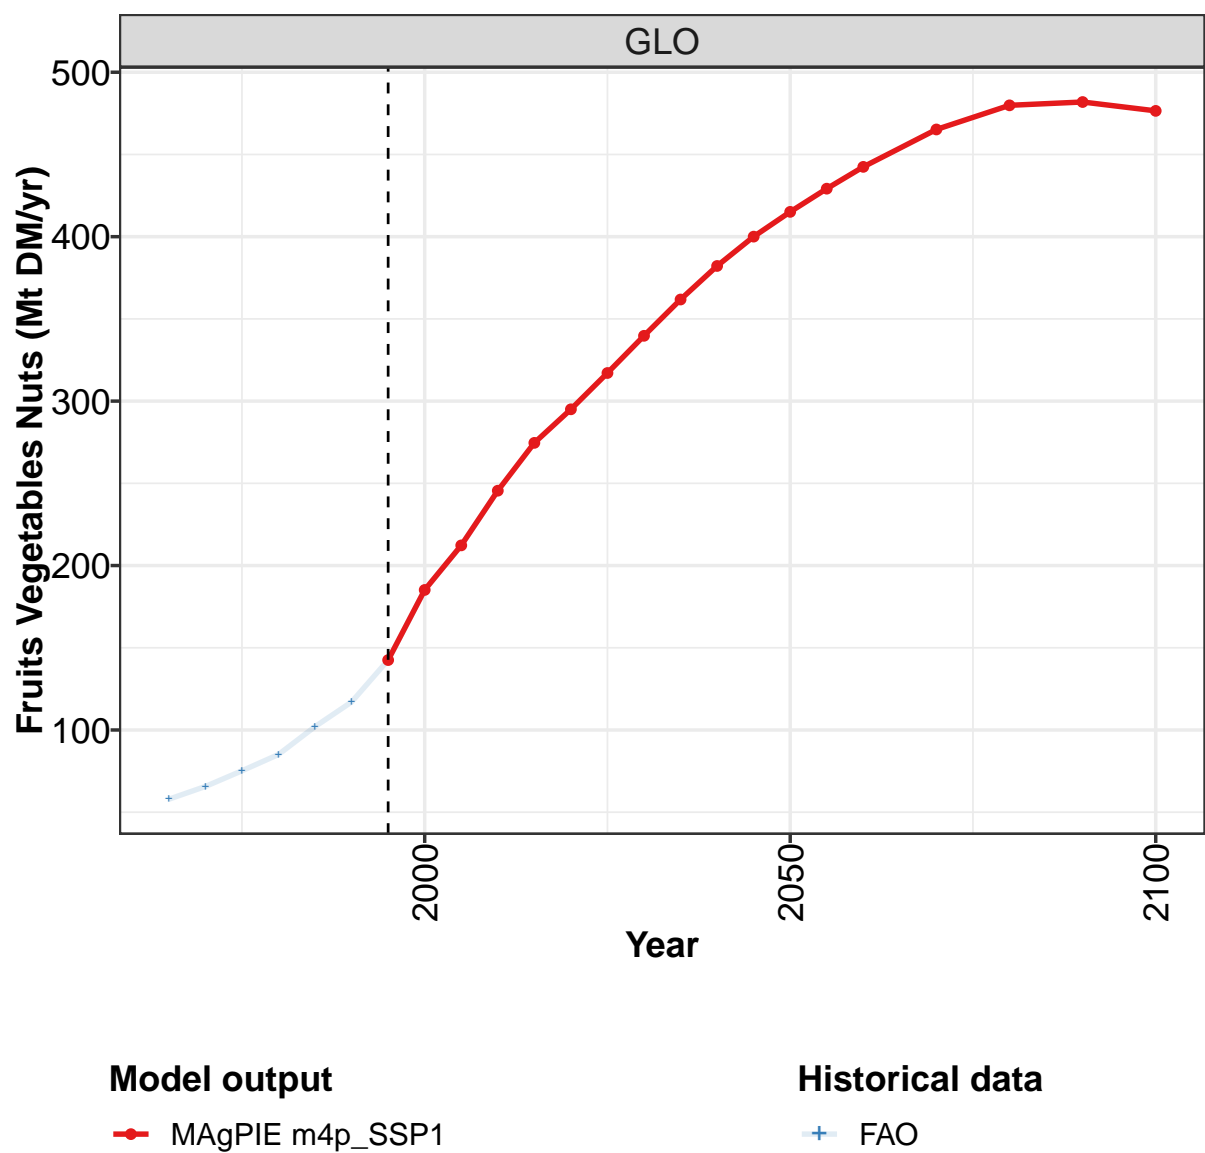

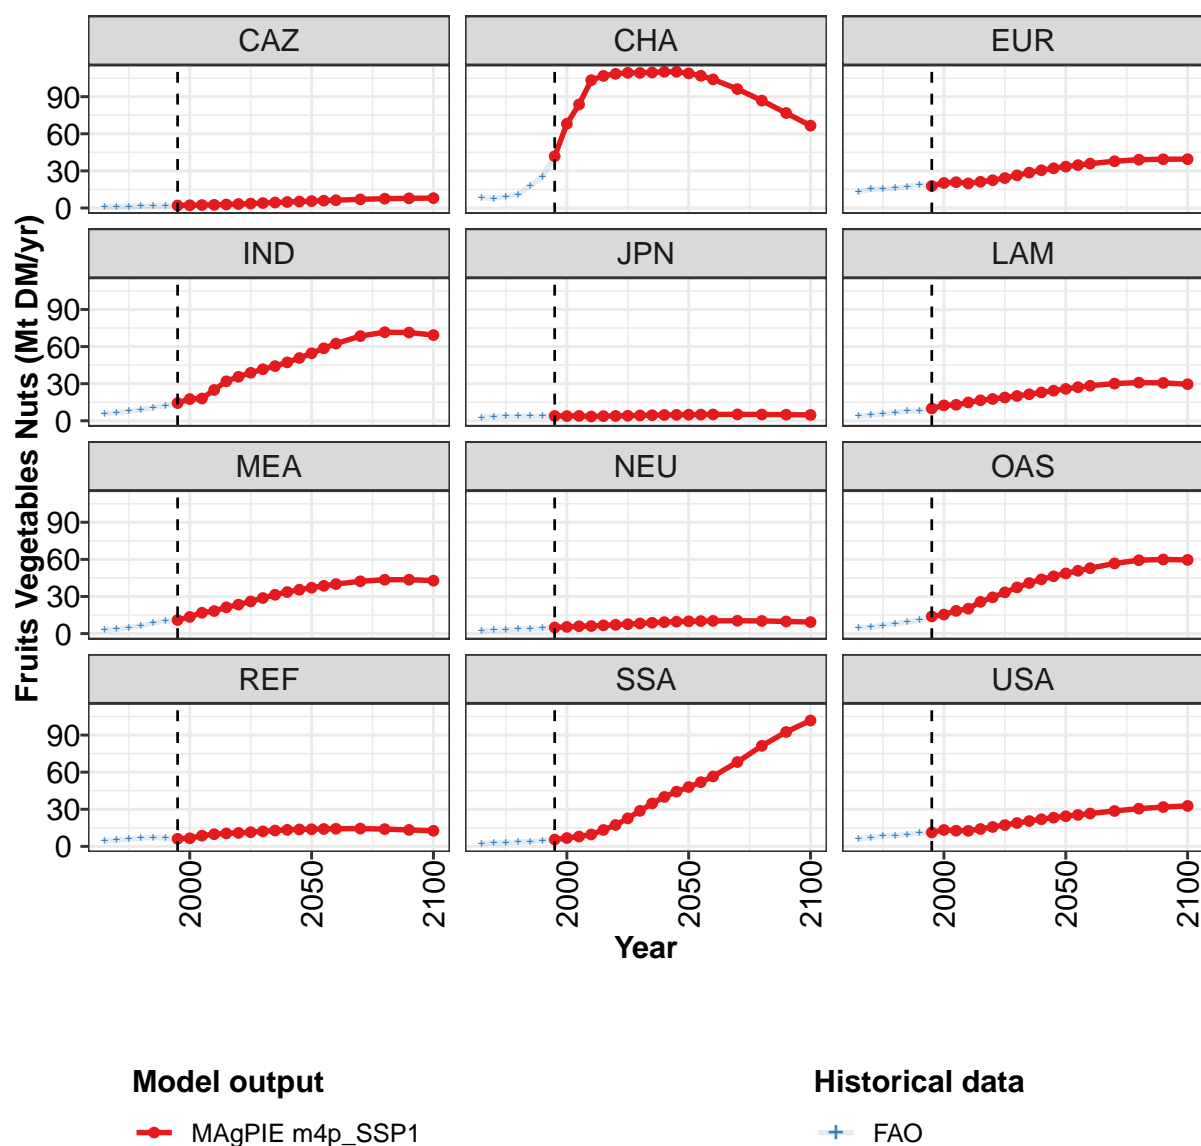

Figure 130: MAgPIE m4p\_SSP1 — Demand—Food—Crops—Other crops—Fruits Vegetables Nuts (Mt DM/yr)

|     | 1995 | 2000 | 2005 | 2010 | 2015 | 2020 | 2025 | 2030 | 2035 | 2040 | 2045 |
|-----|------|------|------|------|------|------|------|------|------|------|------|
| GLO | 143  | 185  | 212  | 246  | 275  | 295  | 317  | 340  | 362  | 382  | 400  |
| CAZ | 2    | 2    | 2    | 3    | 3    | 3    | 4    | 4    | 4    | 5    | 5    |
| CHA | 42   | 68   | 84   | 103  | 107  | 108  | 109  | 109  | 110  | 110  | 110  |
| EUR | 18   | 20   | 21   | 20   | 21   | 22   | 24   | 26   | 29   | 31   | 32   |
| IND | 14   | 18   | 18   | 25   | 32   | 36   | 39   | 42   | 44   | 47   | 51   |
| JPN | 4    | 4    | 4    | 3    | 4    | 4    | 4    | 4    | 5    | 5    | 5    |
| LAM | 10   | 12   | 13   | 15   | 17   | 18   | 19   | 20   | 21   | 23   | 24   |
| MEA | 11   | 13   | 17   | 18   | 21   | 23   | 26   | 29   | 31   | 34   | 35   |
| NEU | 5    | 5    | 6    | 6    | 7    | 7    | 8    | 8    | 9    | 9    | 10   |
| OAS | 14   | 15   | 18   | 20   | 26   | 29   | 33   | 37   | 41   | 44   | 46   |
| REF | 6    | 7    | 9    | 10   | 10   | 11   | 11   | 12   | 13   | 13   | 14   |
| SSA | 6    | 7    | 8    | 10   | 13   | 17   | 23   | 29   | 35   | 40   | 44   |
| USA | 11   | 13   | 13   | 13   | 14   | 16   | 17   | 19   | 20   | 22   | 23   |

Table 389: MAgPIE m4p\_SSP1 — Demand—Food—Crops—Other crops—Fruits Vegetables Nuts (Mt DM/yr)  
[PART 1/2]

|     | 2050 | 2055 | 2060 | 2070 | 2080 | 2090 | 2100 |
|-----|------|------|------|------|------|------|------|
| GLO | 415  | 429  | 442  | 465  | 480  | 482  | 477  |
| CAZ | 6    | 6    | 6    | 7    | 8    | 8    | 8    |
| CHA | 109  | 107  | 104  | 96   | 87   | 77   | 67   |
| EUR | 33   | 35   | 36   | 38   | 39   | 39   | 39   |
| IND | 55   | 59   | 62   | 68   | 72   | 71   | 69   |
| JPN | 5    | 5    | 5    | 5    | 5    | 5    | 5    |
| LAM | 26   | 27   | 28   | 30   | 31   | 31   | 30   |
| MEA | 37   | 39   | 40   | 42   | 44   | 44   | 43   |
| NEU | 10   | 10   | 10   | 10   | 10   | 10   | 9    |
| OAS | 49   | 51   | 53   | 57   | 59   | 60   | 60   |
| REF | 14   | 14   | 14   | 14   | 14   | 13   | 13   |
| SSA | 48   | 52   | 57   | 68   | 81   | 93   | 102  |
| USA | 24   | 25   | 27   | 29   | 31   | 32   | 33   |

Table 390: MAgPIE m4p\_SSP1 — Demand—Food—Crops—Other crops—Fruits Vegetables Nuts (Mt DM/yr)  
[PART 2/2]

|     | 1965 | 1970 | 1975 | 1980 | 1985 | 1990 | 1995 | 2000 | 2005 | 2010 |
|-----|------|------|------|------|------|------|------|------|------|------|
| GLO | 58   | 66   | 75   | 85   | 102  | 117  | 143  | 185  | 212  | 246  |
| CAZ | 1    | 1    | 1    | 1    | 2    | 2    | 2    | 2    | 2    | 3    |
| CHA | 8    | 8    | 9    | 11   | 18   | 25   | 42   | 68   | 84   | 103  |
| EUR | 13   | 15   | 15   | 16   | 17   | 19   | 18   | 20   | 21   | 20   |
| IND | 6    | 7    | 8    | 9    | 11   | 12   | 14   | 18   | 18   | 25   |
| JPN | 3    | 3    | 4    | 4    | 4    | 4    | 4    | 4    | 4    | 3    |
| LAM | 4    | 5    | 6    | 7    | 8    | 8    | 10   | 12   | 13   | 15   |
| MEA | 3    | 4    | 5    | 6    | 9    | 10   | 11   | 13   | 17   | 18   |
| NEU | 2    | 3    | 3    | 4    | 4    | 4    | 5    | 5    | 6    | 6    |
| OAS | 5    | 5    | 7    | 8    | 9    | 11   | 14   | 15   | 18   | 20   |
| REF | 4    | 5    | 6    | 7    | 7    | 7    | 6    | 7    | 9    | 10   |
| SSA | 2    | 3    | 3    | 3    | 4    | 5    | 6    | 7    | 8    | 10   |
| USA | 6    | 7    | 8    | 9    | 10   | 11   | 11   | 13   | 13   | 13   |

Table 391: FAO — Demand—Food—Crops—Other crops—Fruits Vegetables Nuts (Mt DM/yr)

7.1.13
Other crops—Potatoes

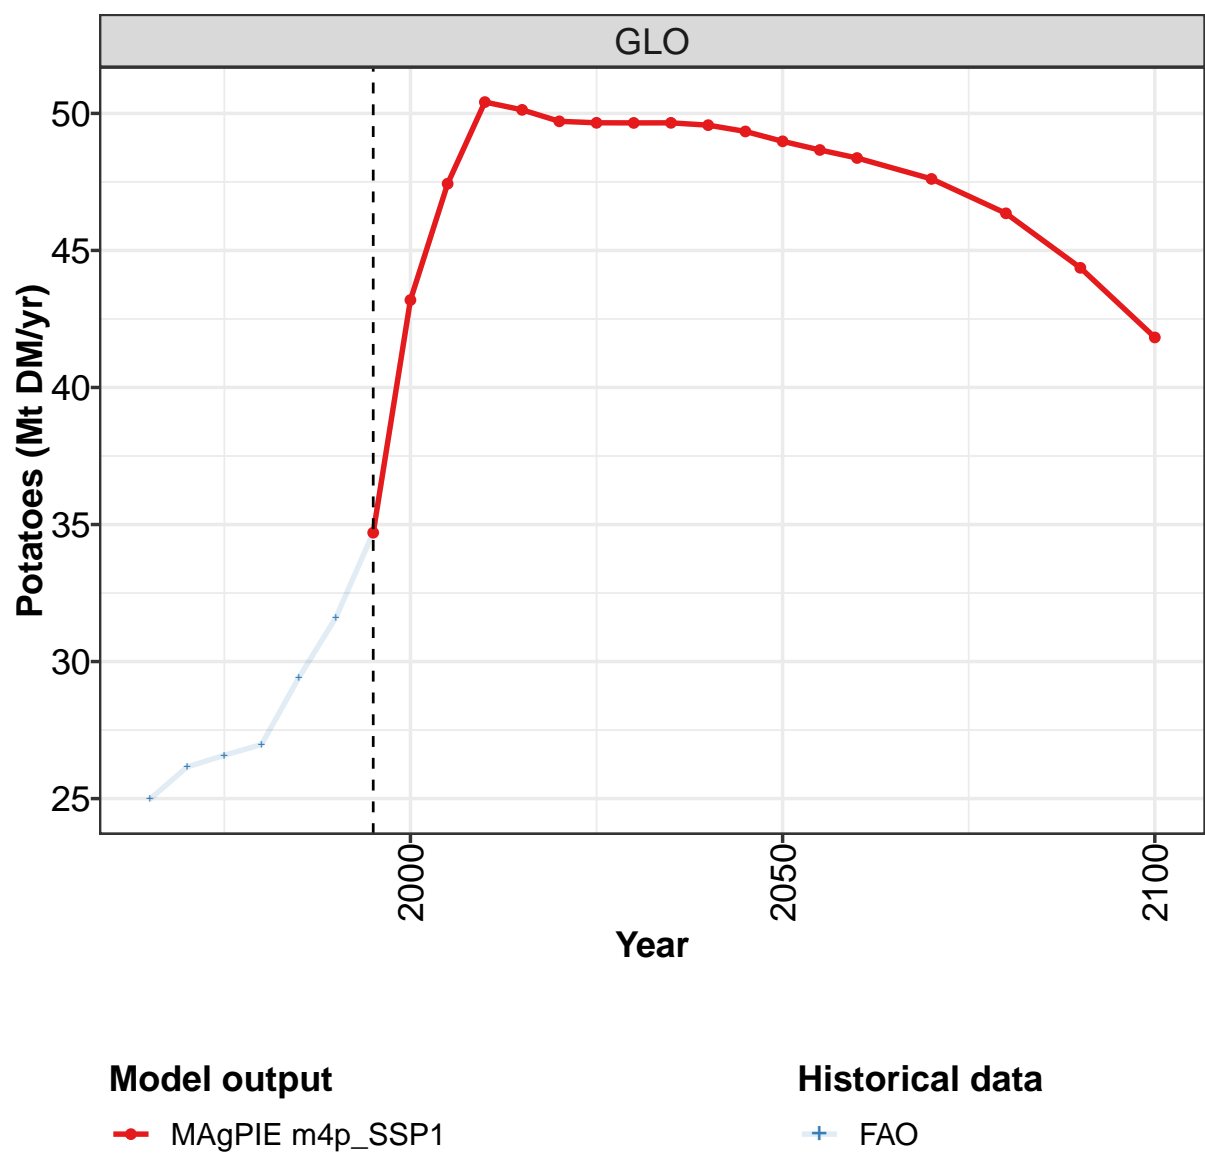

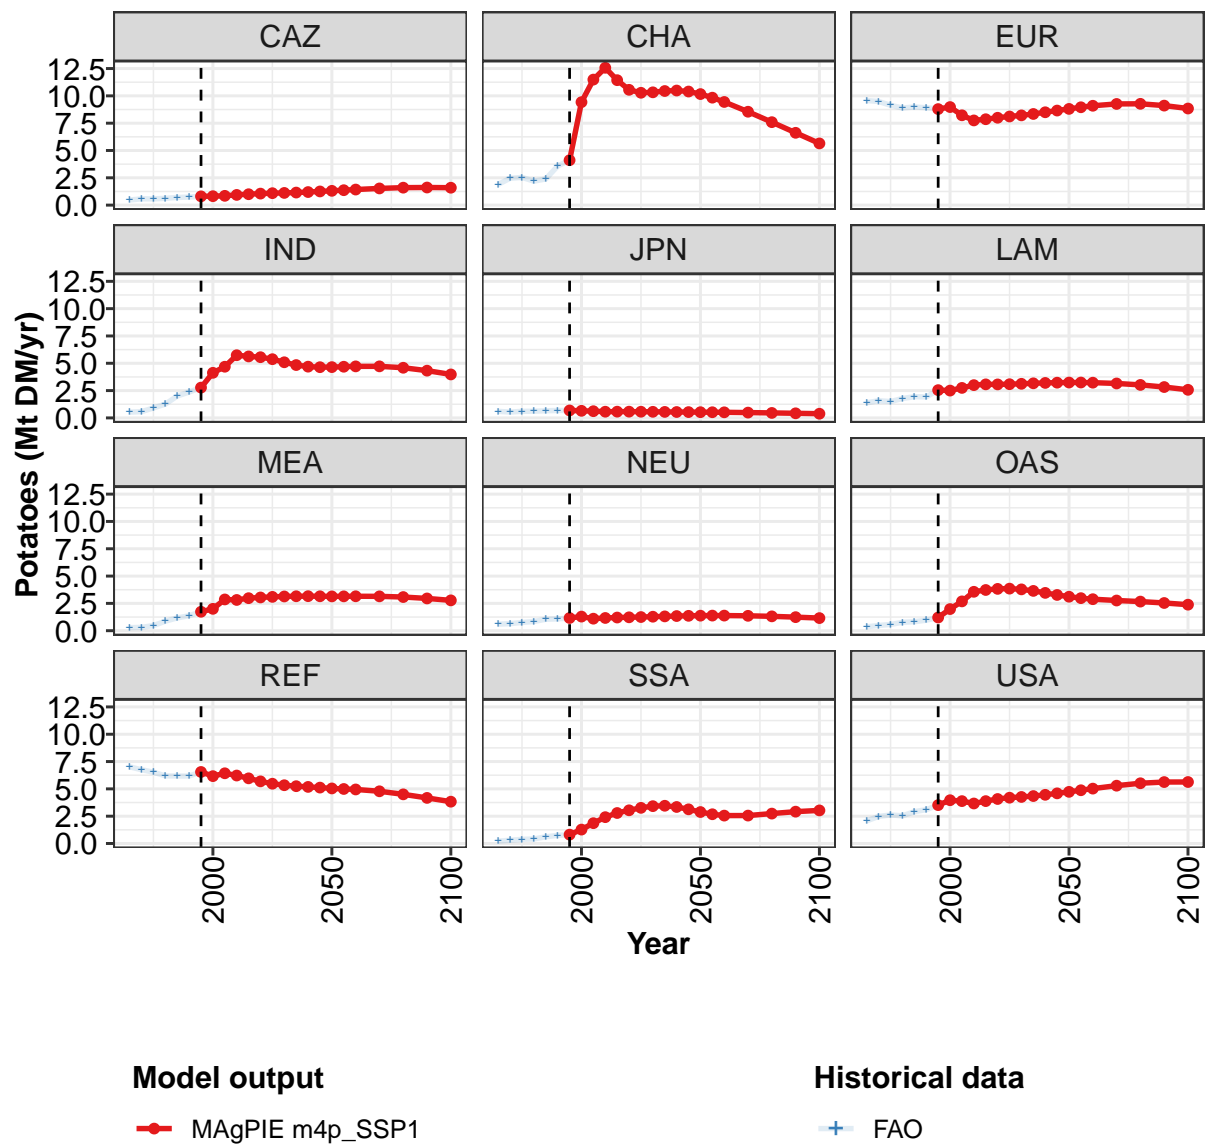

Figure 131: MAgPIE m4p\_SSP1 — Demand—Food—Crops—Other crops—Potatoes (Mt DM/yr)



|     | 1995 | 2000 | 2005 | 2010 | 2015 | 2020 | 2025 | 2030 | 2035 | 2040 | 2045 |
|-----|------|------|------|------|------|------|------|------|------|------|------|
| GLO | 34.7 | 43.2 | 47.4 | 50.4 | 50.1 | 49.7 | 49.7 | 49.7 | 49.7 | 49.6 | 49.3 |
| CAZ | 0.8  | 0.8  | 0.9  | 0.9  | 1.0  | 1.1  | 1.1  | 1.1  | 1.2  | 1.2  | 1.3  |
| CHA | 4.1  | 9.4  | 11.5 | 12.6 | 11.4 | 10.6 | 10.3 | 10.3 | 10.4 | 10.5 | 10.4 |
| EUR | 8.8  | 9.0  | 8.2  | 7.8  | 7.9  | 8.0  | 8.1  | 8.2  | 8.3  | 8.5  | 8.7  |
| IND | 2.8  | 4.1  | 4.7  | 5.7  | 5.6  | 5.6  | 5.4  | 5.1  | 4.8  | 4.7  | 4.6  |
| JPN | 0.7  | 0.7  | 0.6  | 0.6  | 0.6  | 0.6  | 0.6  | 0.6  | 0.6  | 0.5  | 0.5  |
| LAM | 2.5  | 2.5  | 2.7  | 3.0  | 3.1  | 3.1  | 3.1  | 3.1  | 3.2  | 3.2  | 3.2  |
| MEA | 1.7  | 2.0  | 2.9  | 2.8  | 3.0  | 3.0  | 3.1  | 3.1  | 3.2  | 3.2  | 3.2  |
| NEU | 1.2  | 1.3  | 1.1  | 1.2  | 1.2  | 1.2  | 1.3  | 1.3  | 1.3  | 1.3  | 1.4  |
| OAS | 1.2  | 2.0  | 2.7  | 3.6  | 3.7  | 3.8  | 3.9  | 3.8  | 3.6  | 3.5  | 3.3  |
| REF | 6.5  | 6.2  | 6.4  | 6.2  | 6.0  | 5.7  | 5.5  | 5.3  | 5.2  | 5.2  | 5.1  |
| SSA | 0.8  | 1.3  | 1.9  | 2.4  | 2.8  | 3.0  | 3.3  | 3.4  | 3.5  | 3.3  | 3.1  |
| USA | 3.5  | 4.0  | 3.9  | 3.7  | 3.9  | 4.1  | 4.2  | 4.3  | 4.3  | 4.5  | 4.6  |

Table 392: MAgPIE m4p\_SSP1 — Demand—Food—Crops—Other crops—Potatoes (Mt DM/yr) [PART 1/2]

|     | 2050 | 2055 | 2060 | 2070 | 2080 | 2090 | 2100 |
|-----|------|------|------|------|------|------|------|
| GLO | 49.0 | 48.7 | 48.4 | 47.6 | 46.4 | 44.4 | 41.8 |
| CAZ | 1.3  | 1.4  | 1.4  | 1.5  | 1.6  | 1.6  | 1.6  |
| CHA | 10.2 | 9.8  | 9.4  | 8.5  | 7.6  | 6.6  | 5.6  |
| EUR | 8.8  | 9.0  | 9.1  | 9.3  | 9.3  | 9.1  | 8.8  |
| IND | 4.7  | 4.7  | 4.7  | 4.7  | 4.6  | 4.3  | 4.0  |
| JPN | 0.5  | 0.5  | 0.5  | 0.5  | 0.5  | 0.4  | 0.4  |
| LAM | 3.2  | 3.2  | 3.2  | 3.2  | 3.0  | 2.8  | 2.6  |
| MEA | 3.1  | 3.1  | 3.2  | 3.1  | 3.1  | 3.0  | 2.8  |
| NEU | 1.4  | 1.4  | 1.4  | 1.4  | 1.3  | 1.2  | 1.2  |
| OAS | 3.1  | 3.0  | 2.9  | 2.8  | 2.7  | 2.5  | 2.4  |
| REF | 5.0  | 5.0  | 4.9  | 4.8  | 4.5  | 4.2  | 3.8  |
| SSA | 2.9  | 2.7  | 2.6  | 2.6  | 2.7  | 2.9  | 3.0  |
| USA | 4.7  | 4.9  | 5.0  | 5.3  | 5.5  | 5.6  | 5.6  |

Table 393: MAgPIE m4p\_SSP1 — Demand—Food—Crops—Other crops—Potatoes (Mt DM/yr) [PART 2/2]

|     | 1965 | 1970 | 1975 | 1980 | 1985 | 1990 | 1995 | 2000 | 2005 | 2010 |
|-----|------|------|------|------|------|------|------|------|------|------|
| GLO | 25.0 | 26.2 | 26.6 | 27.0 | 29.4 | 31.6 | 34.7 | 43.2 | 47.4 | 50.4 |
| CAZ | 0.5  | 0.6  | 0.6  | 0.6  | 0.7  | 0.7  | 0.8  | 0.8  | 0.9  | 0.9  |
| CHA | 1.9  | 2.5  | 2.5  | 2.2  | 2.4  | 3.6  | 4.1  | 9.4  | 11.5 | 12.6 |
| EUR | 9.6  | 9.5  | 9.1  | 8.9  | 9.0  | 8.9  | 8.8  | 9.0  | 8.2  | 7.8  |
| IND | 0.5  | 0.6  | 0.9  | 1.3  | 2.0  | 2.4  | 2.8  | 4.1  | 4.7  | 5.7  |
| JPN | 0.6  | 0.5  | 0.6  | 0.6  | 0.7  | 0.7  | 0.7  | 0.7  | 0.6  | 0.6  |
| LAM | 1.4  | 1.6  | 1.5  | 1.8  | 1.9  | 1.9  | 2.5  | 2.5  | 2.7  | 3.0  |
| MEA | 0.3  | 0.3  | 0.5  | 0.9  | 1.2  | 1.4  | 1.7  | 2.0  | 2.9  | 2.8  |
| NEU | 0.6  | 0.6  | 0.8  | 0.8  | 1.0  | 1.1  | 1.2  | 1.3  | 1.1  | 1.2  |
| OAS | 0.4  | 0.5  | 0.6  | 0.8  | 0.8  | 1.0  | 1.2  | 2.0  | 2.7  | 3.6  |
| REF | 7.0  | 6.7  | 6.5  | 6.2  | 6.2  | 6.2  | 6.5  | 6.2  | 6.4  | 6.2  |
| SSA | 0.2  | 0.3  | 0.4  | 0.4  | 0.6  | 0.7  | 0.8  | 1.3  | 1.9  | 2.4  |
| USA | 2.1  | 2.5  | 2.6  | 2.5  | 2.9  | 3.1  | 3.5  | 4.0  | 3.9  | 3.7  |

Table 394: FAO — Demand—Food—Crops—Other crops—Potatoes (Mt DM/yr)

7.1.14
Other crops—Pulses

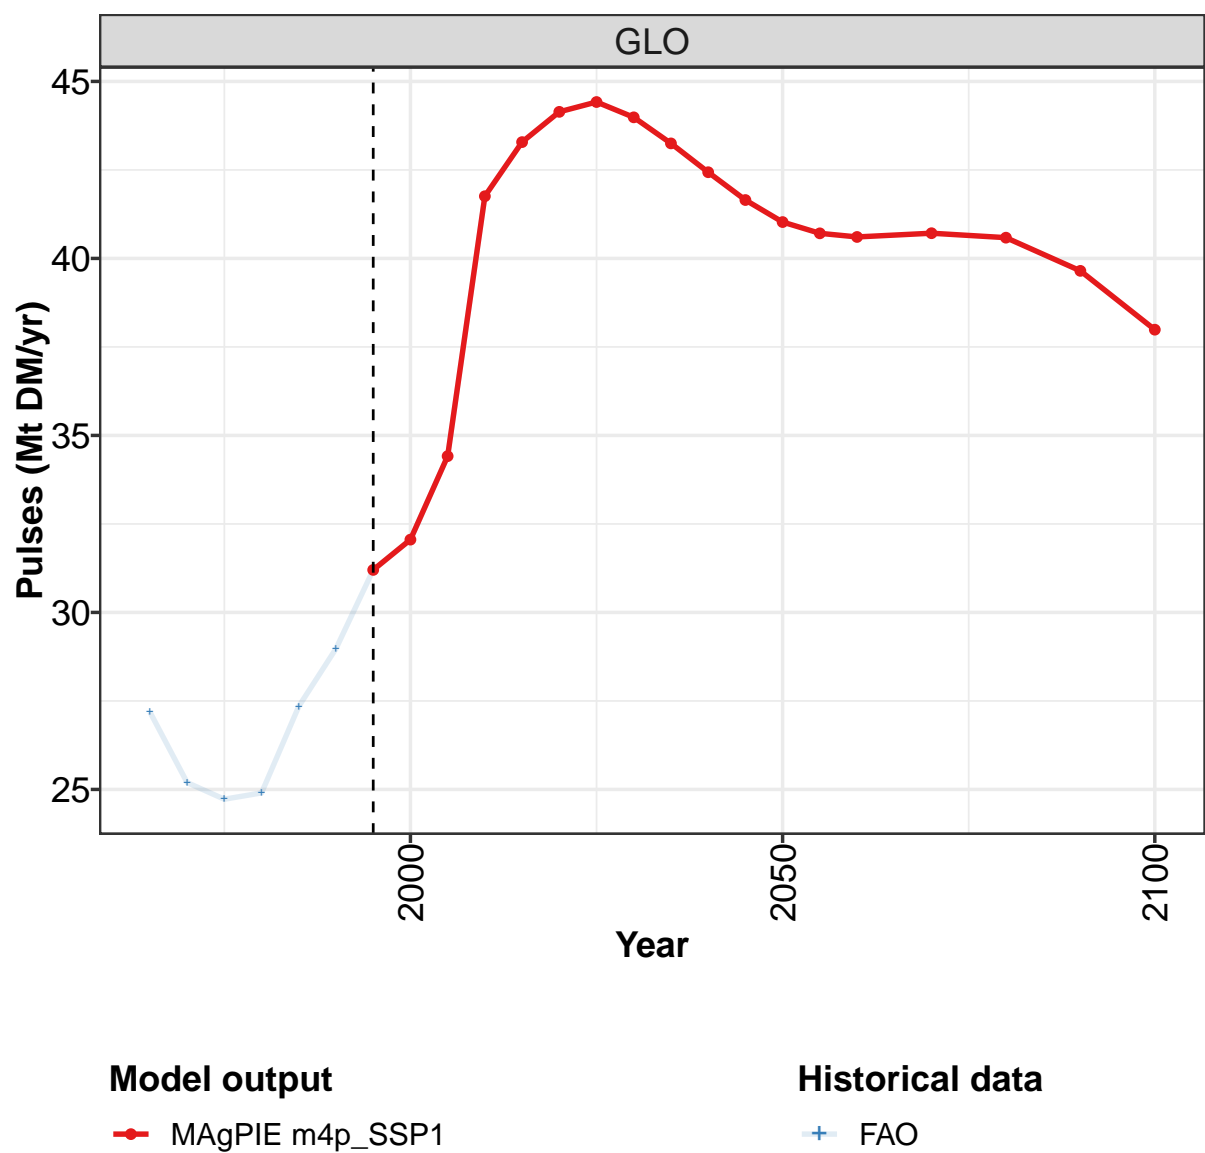

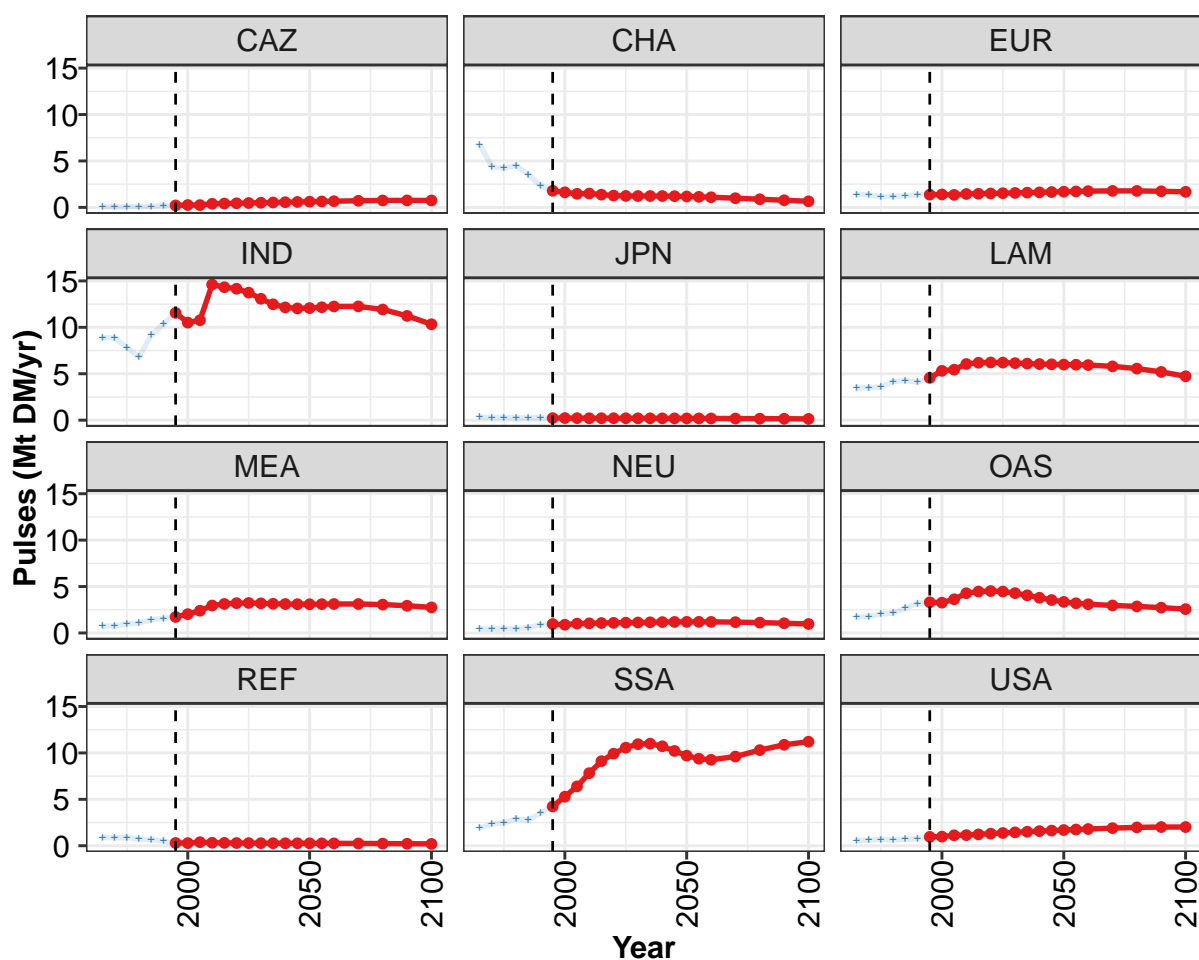

**Model output**

—●— MAgPIE m4p\_SSP1

**Historical data**

—+— FAO

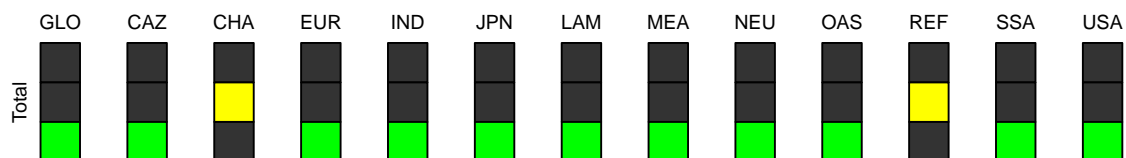

Figure 132: MAgPIE m4p\_SSP1 — Demand—Food—Crops—Other crops—Pulses (Mt DM/yr)

|     | 1995 | 2000 | 2005 | 2010 | 2015 | 2020 | 2025 | 2030 | 2035 | 2040 | 2045 |
|-----|------|------|------|------|------|------|------|------|------|------|------|
| GLO | 31.2 | 32.1 | 34.4 | 41.8 | 43.3 | 44.1 | 44.4 | 44.0 | 43.2 | 42.4 | 41.7 |
| CAZ | 0.2  | 0.3  | 0.2  | 0.4  | 0.4  | 0.4  | 0.5  | 0.5  | 0.5  | 0.6  | 0.6  |
| CHA | 1.8  | 1.6  | 1.5  | 1.5  | 1.4  | 1.3  | 1.2  | 1.2  | 1.2  | 1.2  | 1.2  |
| EUR | 1.4  | 1.4  | 1.3  | 1.4  | 1.5  | 1.5  | 1.5  | 1.6  | 1.6  | 1.6  | 1.7  |
| IND | 11.6 | 10.5 | 10.8 | 14.6 | 14.3 | 14.2 | 13.7 | 13.1 | 12.5 | 12.1 | 12.0 |
| JPN | 0.2  | 0.2  | 0.2  | 0.2  | 0.2  | 0.2  | 0.2  | 0.2  | 0.2  | 0.2  | 0.2  |
| LAM | 4.6  | 5.3  | 5.4  | 6.1  | 6.2  | 6.2  | 6.2  | 6.1  | 6.1  | 6.0  | 6.0  |
| MEA | 1.7  | 2.0  | 2.4  | 3.0  | 3.1  | 3.2  | 3.2  | 3.2  | 3.1  | 3.1  | 3.1  |
| NEU | 1.0  | 0.9  | 1.0  | 1.0  | 1.1  | 1.1  | 1.1  | 1.1  | 1.2  | 1.2  | 1.2  |
| OAS | 3.3  | 3.3  | 3.6  | 4.3  | 4.5  | 4.5  | 4.5  | 4.3  | 4.1  | 3.8  | 3.6  |
| REF | 0.3  | 0.3  | 0.4  | 0.3  | 0.3  | 0.3  | 0.3  | 0.3  | 0.3  | 0.3  | 0.3  |
| SSA | 4.2  | 5.3  | 6.4  | 7.8  | 9.1  | 9.9  | 10.6 | 10.9 | 11.0 | 10.7 | 10.2 |
| USA | 1.0  | 1.0  | 1.1  | 1.1  | 1.2  | 1.3  | 1.4  | 1.4  | 1.5  | 1.6  | 1.6  |

Table 395: MAgPIE m4p\_SSP1 — Demand—Food—Crops—Other crops—Pulses (Mt DM/yr) [PART 1/2]

|     | 2050 | 2055 | 2060 | 2070 | 2080 | 2090 | 2100 |
|-----|------|------|------|------|------|------|------|
| GLO | 41.0 | 40.7 | 40.6 | 40.7 | 40.6 | 39.6 | 38.0 |
| CAZ | 0.6  | 0.6  | 0.7  | 0.7  | 0.7  | 0.8  | 0.7  |
| CHA | 1.2  | 1.1  | 1.1  | 1.0  | 0.9  | 0.8  | 0.7  |
| EUR | 1.7  | 1.7  | 1.7  | 1.8  | 1.8  | 1.7  | 1.7  |
| IND | 12.1 | 12.2 | 12.2 | 12.3 | 11.9 | 11.2 | 10.3 |
| JPN | 0.2  | 0.2  | 0.2  | 0.2  | 0.2  | 0.2  | 0.1  |
| LAM | 6.0  | 6.0  | 5.9  | 5.8  | 5.6  | 5.2  | 4.7  |
| MEA | 3.1  | 3.1  | 3.1  | 3.1  | 3.1  | 2.9  | 2.8  |
| NEU | 1.2  | 1.2  | 1.2  | 1.2  | 1.1  | 1.0  | 1.0  |
| OAS | 3.3  | 3.2  | 3.1  | 3.0  | 2.9  | 2.7  | 2.6  |
| REF | 0.3  | 0.3  | 0.3  | 0.2  | 0.2  | 0.2  | 0.2  |
| SSA | 9.7  | 9.4  | 9.3  | 9.6  | 10.3 | 10.9 | 11.2 |
| USA | 1.7  | 1.7  | 1.8  | 1.9  | 2.0  | 2.0  | 2.0  |

Table 396: MAgPIE m4p\_SSP1 — Demand—Food—Crops—Other crops—Pulses (Mt DM/yr) [PART 2/2]

|     | 1965 | 1970 | 1975 | 1980 | 1985 | 1990 | 1995 | 2000 | 2005 | 2010 |
|-----|------|------|------|------|------|------|------|------|------|------|
| GLO | 27.2 | 25.2 | 24.7 | 24.9 | 27.3 | 29.0 | 31.2 | 32.1 | 34.4 | 41.8 |
| CAZ | 0.1  | 0.1  | 0.1  | 0.1  | 0.1  | 0.2  | 0.2  | 0.3  | 0.2  | 0.4  |
| CHA | 6.8  | 4.4  | 4.2  | 4.5  | 3.5  | 2.3  | 1.8  | 1.6  | 1.5  | 1.5  |
| EUR | 1.4  | 1.4  | 1.2  | 1.2  | 1.2  | 1.4  | 1.4  | 1.4  | 1.3  | 1.4  |
| IND | 8.9  | 8.9  | 7.8  | 6.8  | 9.1  | 10.3 | 11.6 | 10.5 | 10.8 | 14.6 |
| JPN | 0.3  | 0.3  | 0.3  | 0.3  | 0.2  | 0.3  | 0.2  | 0.2  | 0.2  | 0.2  |
| LAM | 3.4  | 3.5  | 3.6  | 4.2  | 4.3  | 4.1  | 4.6  | 5.3  | 5.4  | 6.1  |
| MEA | 0.7  | 0.8  | 1.0  | 1.1  | 1.4  | 1.6  | 1.7  | 2.0  | 2.4  | 3.0  |
| NEU | 0.4  | 0.4  | 0.5  | 0.5  | 0.6  | 0.9  | 1.0  | 0.9  | 1.0  | 1.0  |
| OAS | 1.7  | 1.8  | 2.0  | 2.1  | 2.7  | 3.2  | 3.3  | 3.3  | 3.6  | 4.3  |
| REF | 0.9  | 0.8  | 0.9  | 0.7  | 0.7  | 0.5  | 0.3  | 0.3  | 0.4  | 0.3  |
| SSA | 1.9  | 2.3  | 2.5  | 2.9  | 2.8  | 3.5  | 4.2  | 5.3  | 6.4  | 7.8  |
| USA | 0.6  | 0.6  | 0.7  | 0.6  | 0.7  | 0.8  | 1.0  | 1.0  | 1.1  | 1.1  |

Table 397: FAO — Demand—Food—Crops—Other crops—Pulses (Mt DM/yr)

7.1.15
Other crops—Tropical roots

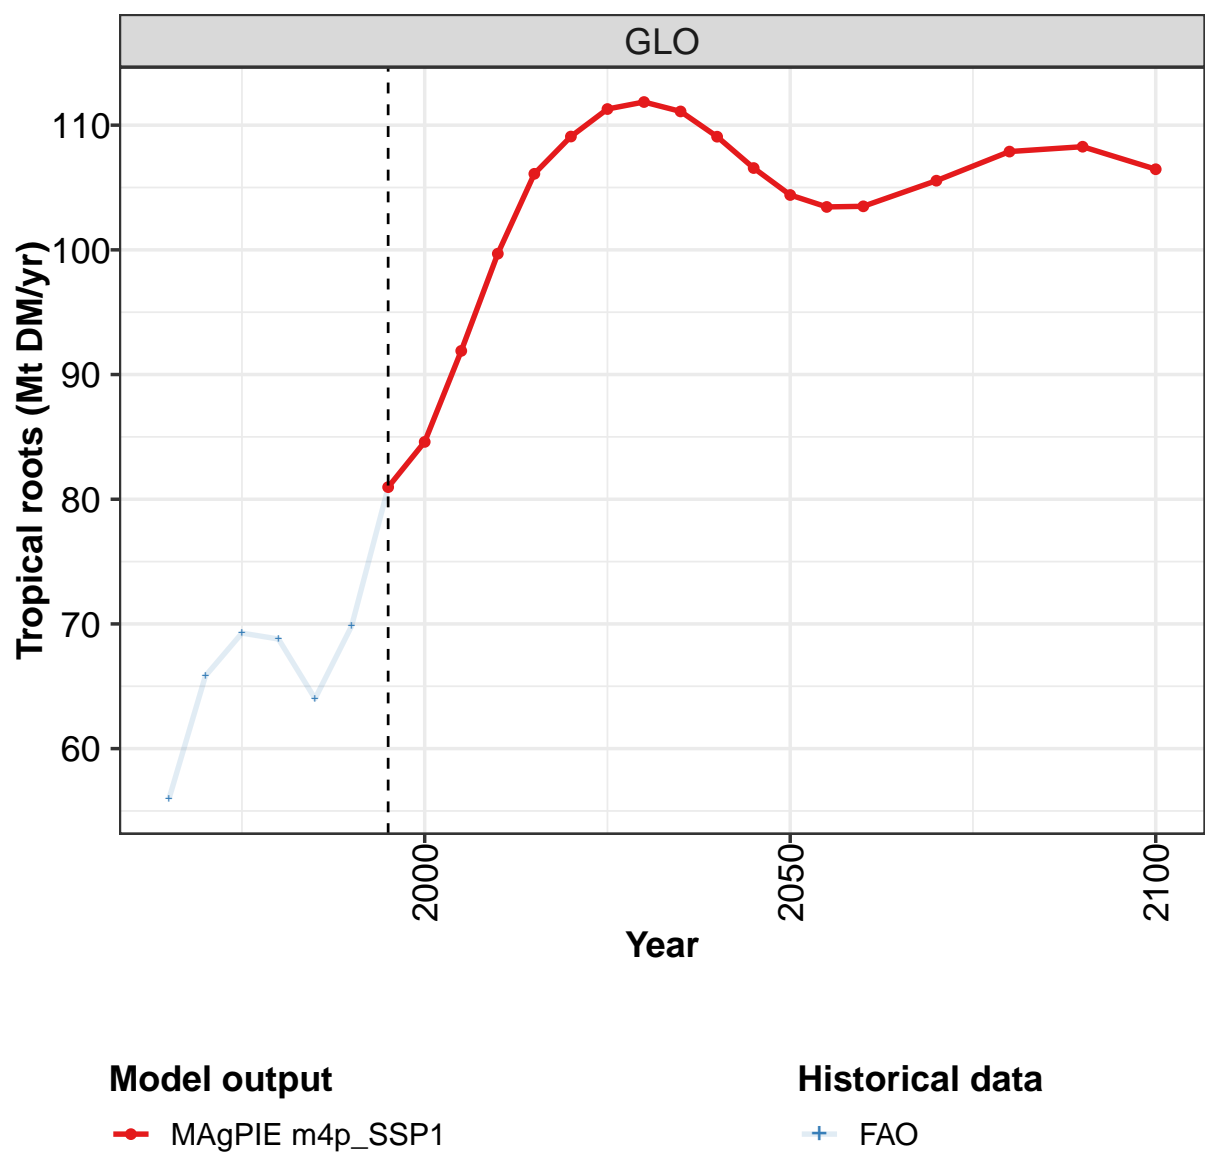

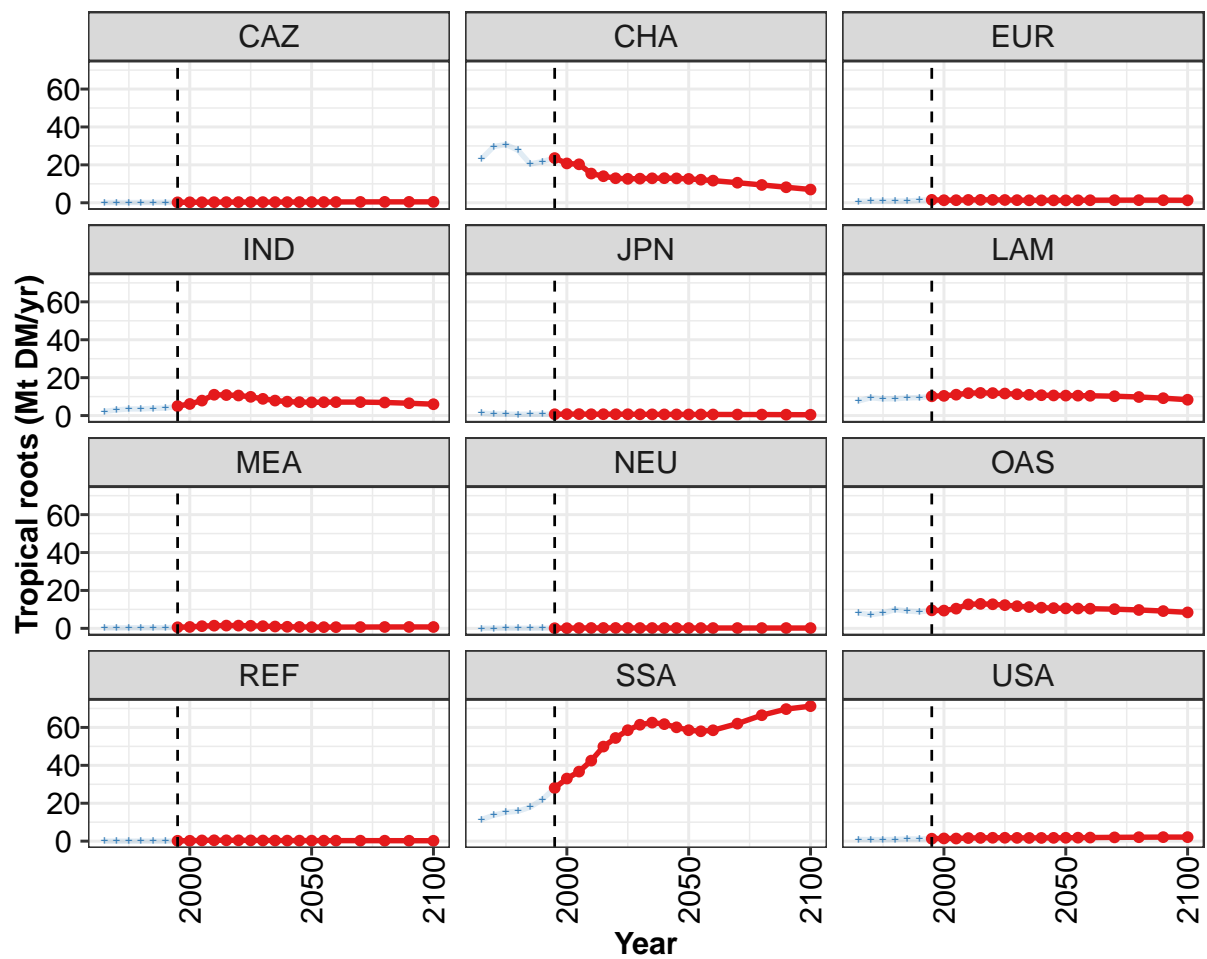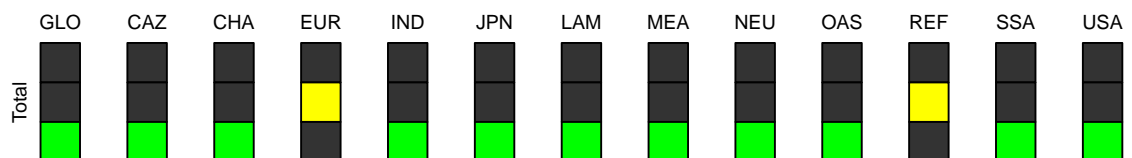

Figure 133: MAgPIE m4p\_SSP1 — Demand—Food—Crops—Other crops—Tropical roots (Mt DM/yr)

|     | 1995 | 2000 | 2005 | 2010 | 2015 | 2020 | 2025 | 2030 | 2035 | 2040 | 2045 |
|-----|------|------|------|------|------|------|------|------|------|------|------|
| GLO | 81   | 85   | 92   | 100  | 106  | 109  | 111  | 112  | 111  | 109  | 107  |
| CAZ | 0    | 0    | 0    | 0    | 0    | 0    | 0    | 0    | 0    | 0    | 0    |
| CHA | 24   | 21   | 20   | 15   | 14   | 13   | 13   | 13   | 13   | 13   | 13   |
| EUR | 2    | 1    | 1    | 2    | 2    | 2    | 1    | 1    | 1    | 1    | 1    |
| IND | 5    | 6    | 8    | 11   | 11   | 11   | 10   | 9    | 8    | 7    | 7    |
| JPN | 1    | 1    | 1    | 1    | 1    | 1    | 1    | 1    | 1    | 1    | 1    |
| LAM | 10   | 10   | 11   | 12   | 12   | 12   | 12   | 11   | 11   | 11   | 11   |
| MEA | 1    | 1    | 1    | 1    | 1    | 1    | 1    | 1    | 1    | 1    | 1    |
| NEU | 0    | 0    | 0    | 0    | 0    | 0    | 0    | 0    | 0    | 0    | 0    |
| OAS | 10   | 9    | 10   | 13   | 13   | 13   | 12   | 12   | 11   | 11   | 11   |
| REF | 0    | 0    | 0    | 0    | 0    | 0    | 0    | 0    | 0    | 0    | 0    |
| SSA | 28   | 33   | 37   | 42   | 50   | 54   | 59   | 61   | 63   | 62   | 60   |
| USA | 1    | 1    | 1    | 2    | 2    | 2    | 2    | 2    | 2    | 2    | 2    |

Table 398: MAgPIE m4p\_SSP1 — Demand—Food—Crops—Other crops—Tropical roots (Mt DM/yr) [PART 1/2]

|     | 2050 | 2055 | 2060 | 2070 | 2080 | 2090 | 2100 |
|-----|------|------|------|------|------|------|------|
| GLO | 104  | 103  | 103  | 106  | 108  | 108  | 106  |
| CAZ | 0    | 0    | 0    | 0    | 0    | 0    | 0    |
| CHA | 13   | 12   | 12   | 11   | 9    | 8    | 7    |
| EUR | 1    | 1    | 1    | 1    | 1    | 1    | 1    |
| IND | 7    | 7    | 7    | 7    | 7    | 7    | 6    |
| JPN | 1    | 1    | 1    | 1    | 1    | 0    | 0    |
| LAM | 11   | 11   | 10   | 10   | 10   | 9    | 8    |
| MEA | 1    | 1    | 1    | 1    | 1    | 1    | 1    |
| NEU | 0    | 0    | 0    | 0    | 0    | 0    | 0    |
| OAS | 11   | 10   | 10   | 10   | 10   | 9    | 8    |
| REF | 0    | 0    | 0    | 0    | 0    | 0    | 0    |
| SSA | 59   | 58   | 59   | 62   | 66   | 70   | 71   |
| USA | 2    | 2    | 2    | 2    | 2    | 2    | 2    |

Table 399: MAgPIE m4p\_SSP1 — Demand—Food—Crops—Other crops—Tropical roots (Mt DM/yr) [PART 2/2]

|     | 1965 | 1970 | 1975 | 1980 | 1985 | 1990 | 1995 | 2000 | 2005 | 2010 |
|-----|------|------|------|------|------|------|------|------|------|------|
| GLO | 55.9 | 65.8 | 69.3 | 68.8 | 64.0 | 69.8 | 80.9 | 84.6 | 91.9 | 99.7 |
| CAZ | 0.1  | 0.1  | 0.1  | 0.1  | 0.2  | 0.2  | 0.2  | 0.3  | 0.3  | 0.3  |
| CHA | 23.2 | 29.7 | 30.7 | 27.7 | 20.5 | 21.7 | 23.6 | 20.8 | 20.3 | 15.4 |
| EUR | 0.8  | 0.8  | 0.9  | 0.9  | 0.9  | 1.3  | 1.6  | 1.4  | 1.4  | 1.5  |
| IND | 2.2  | 3.0  | 3.5  | 3.5  | 3.8  | 3.9  | 5.0  | 6.1  | 7.9  | 11.0 |
| JPN | 1.3  | 0.9  | 0.7  | 0.7  | 0.7  | 0.7  | 0.7  | 0.8  | 0.8  | 0.7  |
| LAM | 7.7  | 9.4  | 8.8  | 8.9  | 9.3  | 9.5  | 10.2 | 10.4 | 11.0 | 11.8 |
| MEA | 0.2  | 0.2  | 0.3  | 0.3  | 0.3  | 0.4  | 0.6  | 0.8  | 1.2  | 1.4  |
| NEU | 0.0  | 0.0  | 0.1  | 0.0  | 0.0  | 0.1  | 0.1  | 0.1  | 0.2  | 0.2  |
| OAS | 8.1  | 7.3  | 8.0  | 9.9  | 9.1  | 8.8  | 9.5  | 9.4  | 10.4 | 12.7 |
| REF | 0.0  | 0.0  | 0.0  | 0.0  | 0.0  | 0.0  | 0.2  | 0.2  | 0.4  | 0.5  |
| SSA | 11.4 | 13.7 | 15.3 | 15.8 | 18.0 | 22.1 | 28.1 | 33.0 | 36.7 | 42.5 |
| USA | 0.9  | 0.8  | 0.8  | 0.9  | 1.2  | 1.1  | 1.3  | 1.4  | 1.4  | 1.6  |

Table 400: FAO — Demand—Food—Crops—Other crops—Tropical roots (Mt DM/yr)

## 7.1.16 Sugar crops

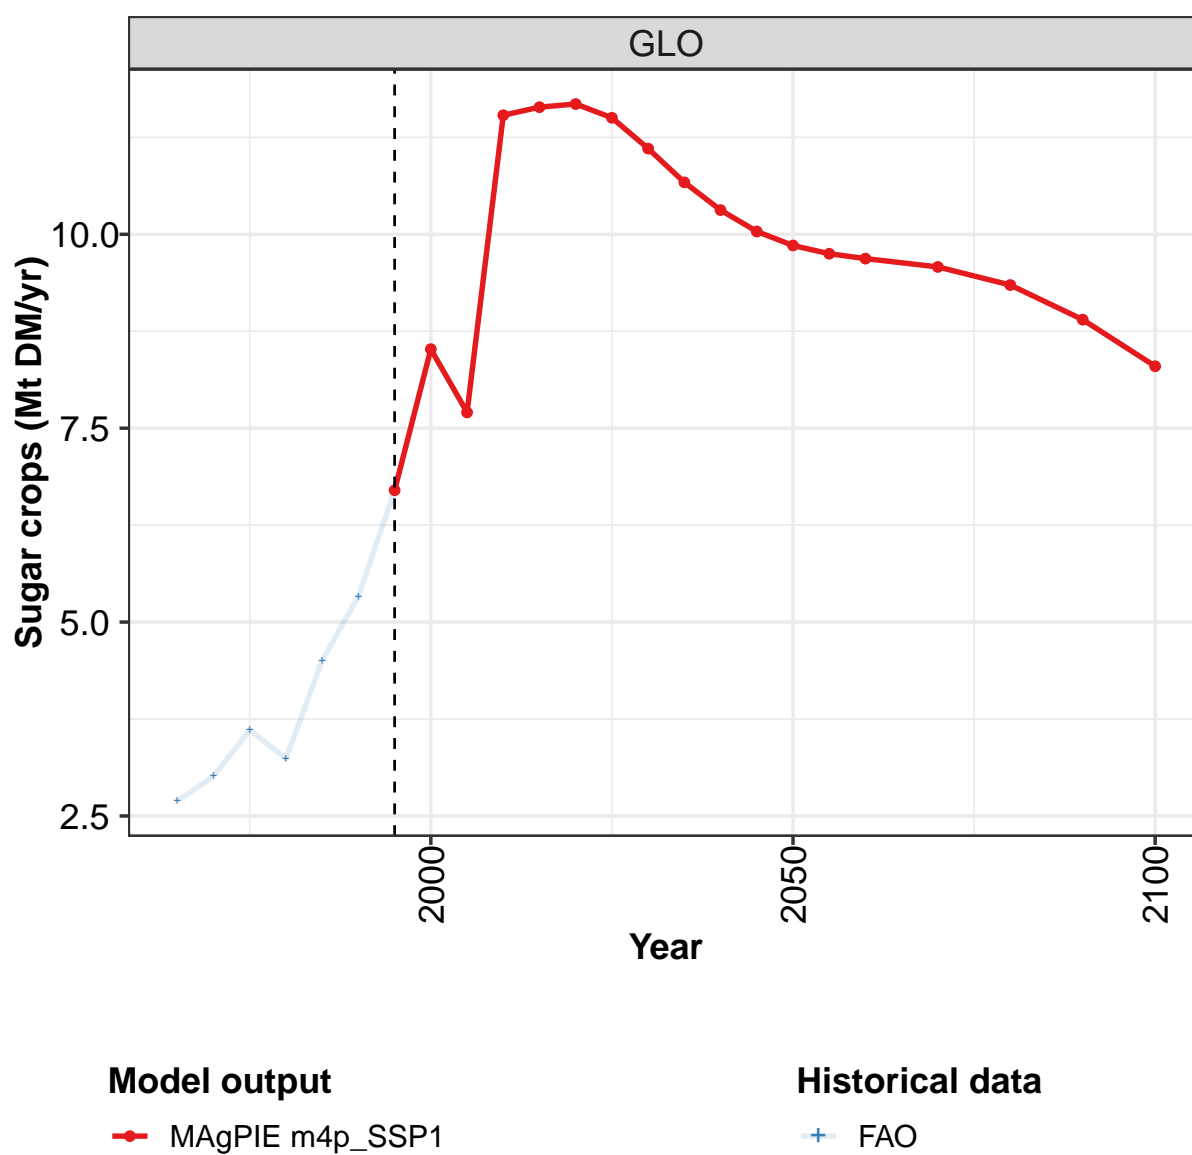



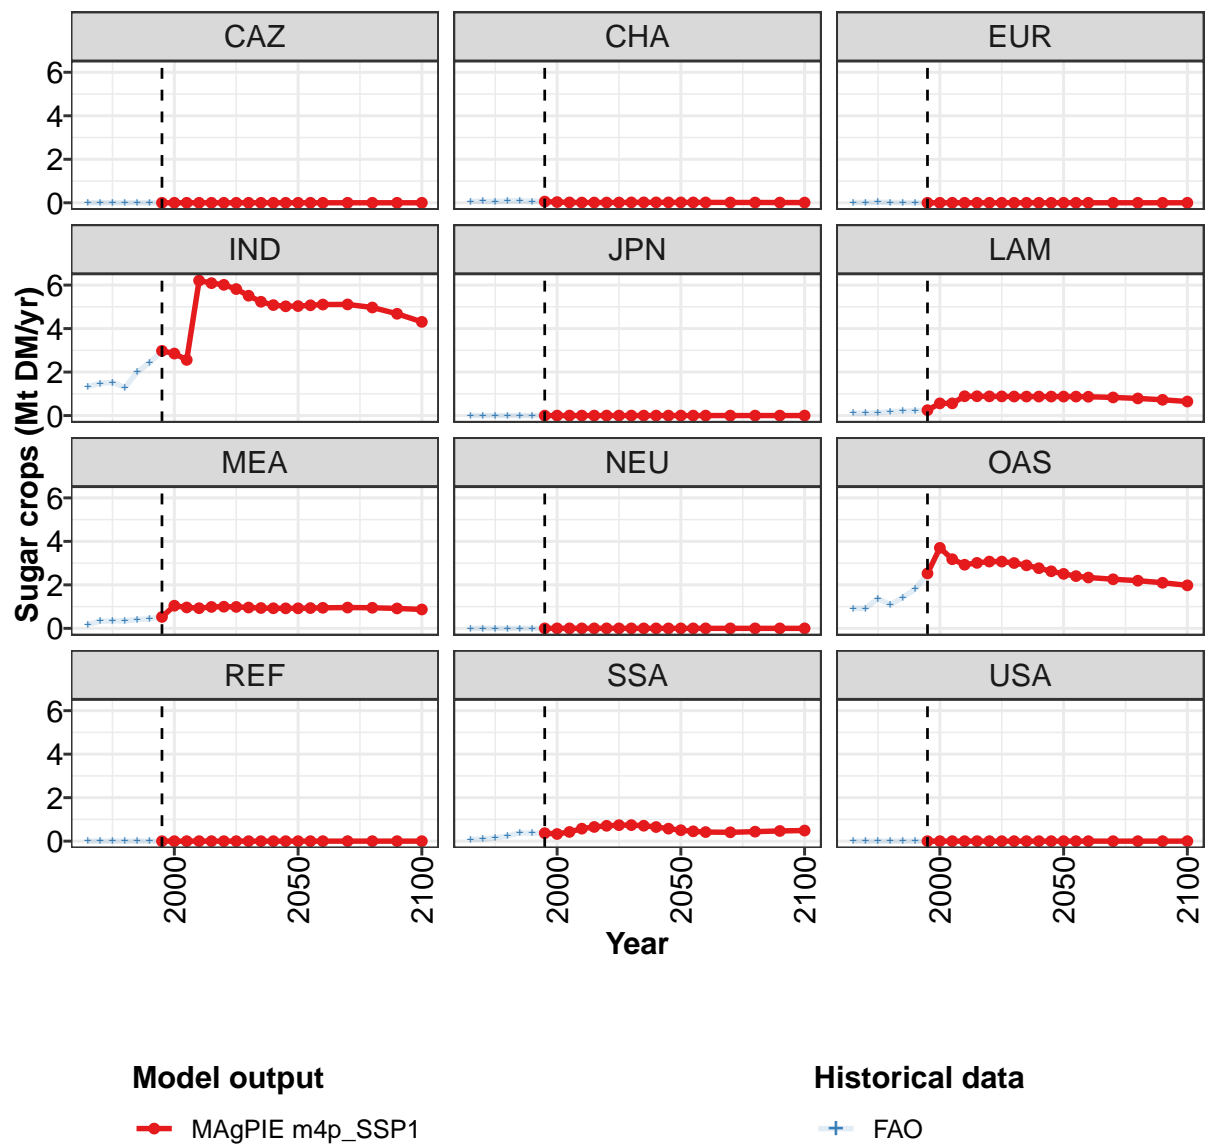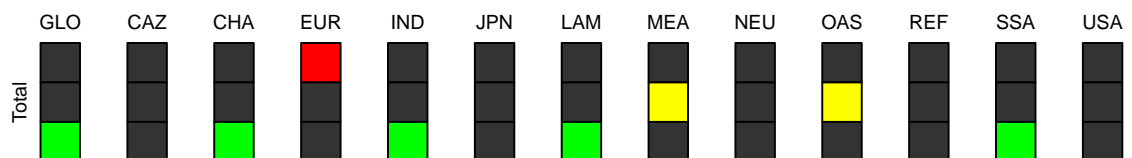

Figure 134: MAgPIE m4p\_SSP1 — Demand—Food—Crops—Sugar crops (Mt DM/yr)

|     | 1995 | 2000 | 2005 | 2010 | 2015 | 2020 | 2025 | 2030 | 2035 | 2040 | 2045 |
|-----|------|------|------|------|------|------|------|------|------|------|------|
| GLO | 6.7  | 8.5  | 7.7  | 11.5 | 11.6 | 11.7 | 11.5 | 11.1 | 10.7 | 10.3 | 10.0 |
| CAZ | 0.0  | 0.0  | 0.0  | 0.0  | 0.0  | 0.0  | 0.0  | 0.0  | 0.0  | 0.0  | 0.0  |
| CHA | 0.1  | 0.0  | 0.0  | 0.0  | 0.0  | 0.0  | 0.0  | 0.0  | 0.0  | 0.0  | 0.0  |
| EUR | 0.0  | 0.0  | 0.0  | 0.0  | 0.0  | 0.0  | 0.0  | 0.0  | 0.0  | 0.0  | 0.0  |
| IND | 3.0  | 2.9  | 2.6  | 6.2  | 6.1  | 6.0  | 5.8  | 5.5  | 5.2  | 5.1  | 5.0  |
| JPN | 0.0  | 0.0  | 0.0  | 0.0  | 0.0  | 0.0  | 0.0  | 0.0  | 0.0  | 0.0  | 0.0  |
| LAM | 0.2  | 0.6  | 0.6  | 0.9  | 0.9  | 0.9  | 0.9  | 0.9  | 0.9  | 0.9  | 0.9  |
| MEA | 0.5  | 1.0  | 1.0  | 0.9  | 1.0  | 1.0  | 1.0  | 1.0  | 0.9  | 0.9  | 0.9  |
| NEU | 0.0  | 0.0  | 0.0  | 0.0  | 0.0  | 0.0  | 0.0  | 0.0  | 0.0  | 0.0  | 0.0  |
| OAS | 2.5  | 3.7  | 3.2  | 2.9  | 3.0  | 3.1  | 3.1  | 3.0  | 2.9  | 2.8  | 2.6  |
| REF | 0.0  | 0.0  | 0.0  | 0.0  | 0.0  | 0.0  | 0.0  | 0.0  | 0.0  | 0.0  | 0.0  |
| SSA | 0.4  | 0.3  | 0.4  | 0.6  | 0.7  | 0.7  | 0.7  | 0.7  | 0.7  | 0.6  | 0.6  |
| USA | 0.0  | 0.0  | 0.0  | 0.0  | 0.0  | 0.0  | 0.0  | 0.0  | 0.0  | 0.0  | 0.0  |

Table 401: MAgPIE m4p\_SSP1 — Demand—Food—Crops—Sugar crops (Mt DM/yr) [PART 1/2]

|     | 2050 | 2055 | 2060 | 2070 | 2080 | 2090 | 2100 |
|-----|------|------|------|------|------|------|------|
| GLO | 9.9  | 9.7  | 9.7  | 9.6  | 9.3  | 8.9  | 8.3  |
| CAZ | 0.0  | 0.0  | 0.0  | 0.0  | 0.0  | 0.0  | 0.0  |
| CHA | 0.0  | 0.0  | 0.0  | 0.0  | 0.0  | 0.0  | 0.0  |
| EUR | 0.0  | 0.0  | 0.0  | 0.0  | 0.0  | 0.0  | 0.0  |
| IND | 5.0  | 5.1  | 5.1  | 5.1  | 5.0  | 4.7  | 4.3  |
| JPN | 0.0  | 0.0  | 0.0  | 0.0  | 0.0  | 0.0  | 0.0  |
| LAM | 0.9  | 0.9  | 0.9  | 0.8  | 0.8  | 0.7  | 0.6  |
| MEA | 0.9  | 0.9  | 0.9  | 1.0  | 0.9  | 0.9  | 0.9  |
| NEU | 0.0  | 0.0  | 0.0  | 0.0  | 0.0  | 0.0  | 0.0  |
| OAS | 2.5  | 2.4  | 2.3  | 2.3  | 2.2  | 2.1  | 2.0  |
| REF | 0.0  | 0.0  | 0.0  | 0.0  | 0.0  | 0.0  | 0.0  |
| SSA | 0.5  | 0.5  | 0.4  | 0.4  | 0.4  | 0.5  | 0.5  |
| USA | 0.0  | 0.0  | 0.0  | 0.0  | 0.0  | 0.0  | 0.0  |

Table 402: MAgPIE m4p\_SSP1 — Demand—Food—Crops—Sugar crops (Mt DM/yr) [PART 2/2]

|     | 1965 | 1970 | 1975 | 1980 | 1985 | 1990 | 1995 | 2000 | 2005 | 2010 |
|-----|------|------|------|------|------|------|------|------|------|------|
| GLO | 2.7  | 3.0  | 3.6  | 3.2  | 4.5  | 5.3  | 6.7  | 8.5  | 7.7  | 11.5 |
| CAZ | 0.0  | 0.0  | 0.0  | 0.0  | 0.0  | 0.0  | 0.0  | 0.0  | 0.0  | 0.0  |
| CHA | 0.1  | 0.1  | 0.1  | 0.1  | 0.1  | 0.1  | 0.1  | 0.0  | 0.0  | 0.0  |
| EUR | 0.0  | 0.0  | 0.0  | 0.0  | 0.0  | 0.0  | 0.0  | 0.0  | 0.0  | 0.0  |
| IND | 1.3  | 1.5  | 1.5  | 1.3  | 2.0  | 2.4  | 3.0  | 2.9  | 2.6  | 6.2  |
| JPN | 0.0  | 0.0  | 0.0  | 0.0  | 0.0  | 0.0  | 0.0  | 0.0  | 0.0  | 0.0  |
| LAM | 0.1  | 0.1  | 0.1  | 0.2  | 0.2  | 0.2  | 0.2  | 0.6  | 0.6  | 0.9  |
| MEA | 0.2  | 0.3  | 0.3  | 0.3  | 0.4  | 0.4  | 0.5  | 1.0  | 1.0  | 0.9  |
| NEU | 0.0  | 0.0  | 0.0  | 0.0  | 0.0  | 0.0  | 0.0  | 0.0  | 0.0  | 0.0  |
| OAS | 0.9  | 0.9  | 1.4  | 1.1  | 1.4  | 1.8  | 2.5  | 3.7  | 3.2  | 2.9  |
| REF | 0.0  | 0.0  | 0.0  | 0.0  | 0.0  | 0.0  | 0.0  | 0.0  | 0.0  | 0.0  |
| SSA | 0.1  | 0.1  | 0.2  | 0.2  | 0.4  | 0.4  | 0.4  | 0.3  | 0.4  | 0.6  |
| USA | 0.0  | 0.0  | 0.0  | 0.0  | 0.0  | 0.0  | 0.0  | 0.0  | 0.0  | 0.0  |

Table 403: FAO — Demand—Food—Crops—Sugar crops (Mt DM/yr)

7.1.17
Sugar crops—Sugar beet

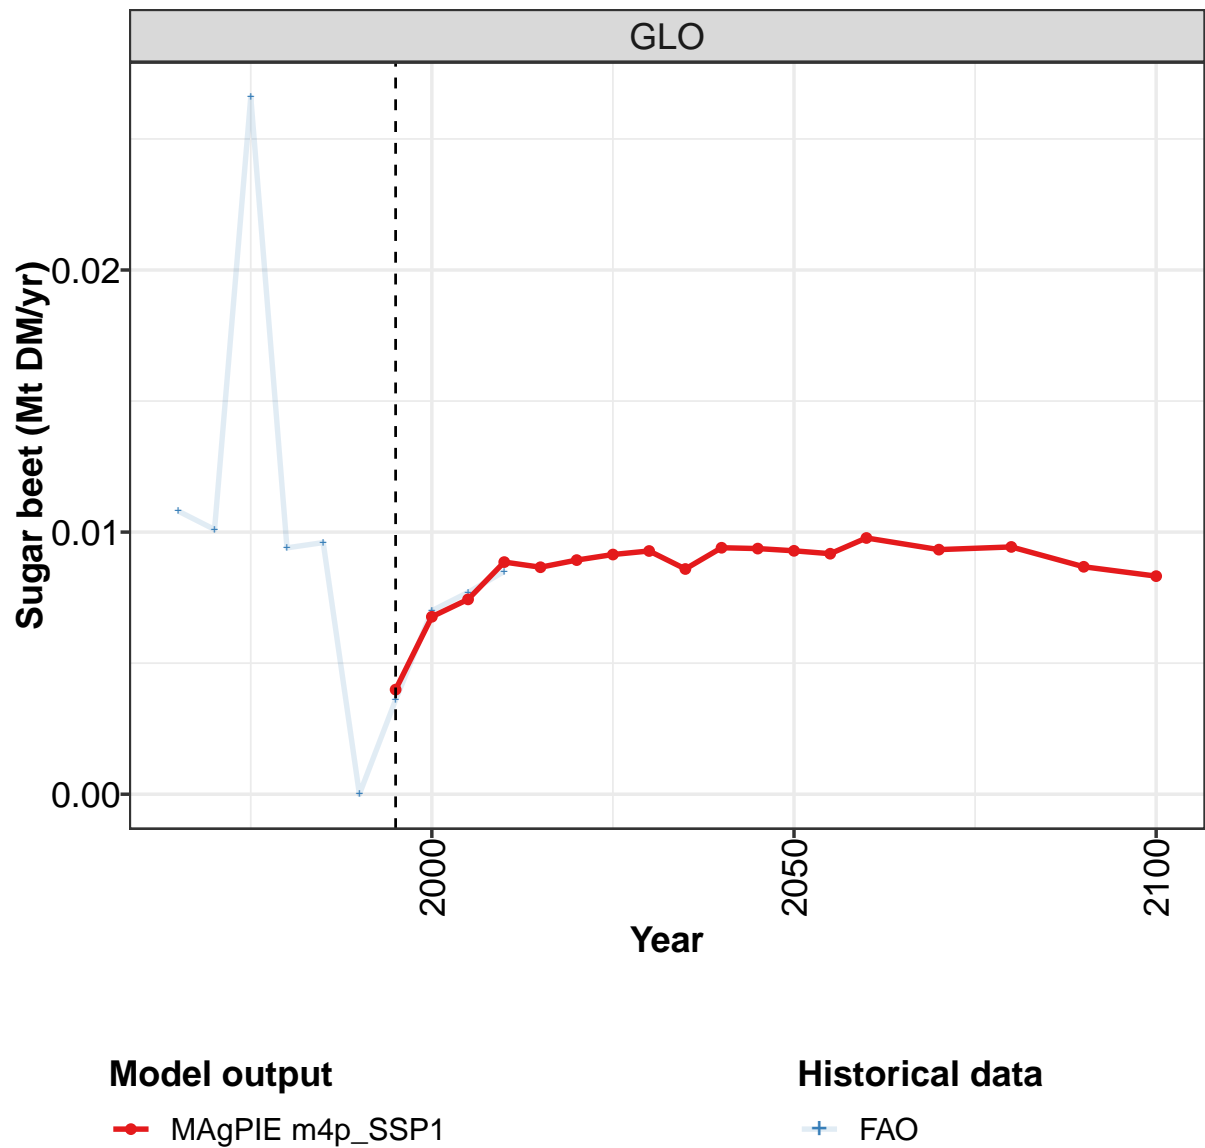

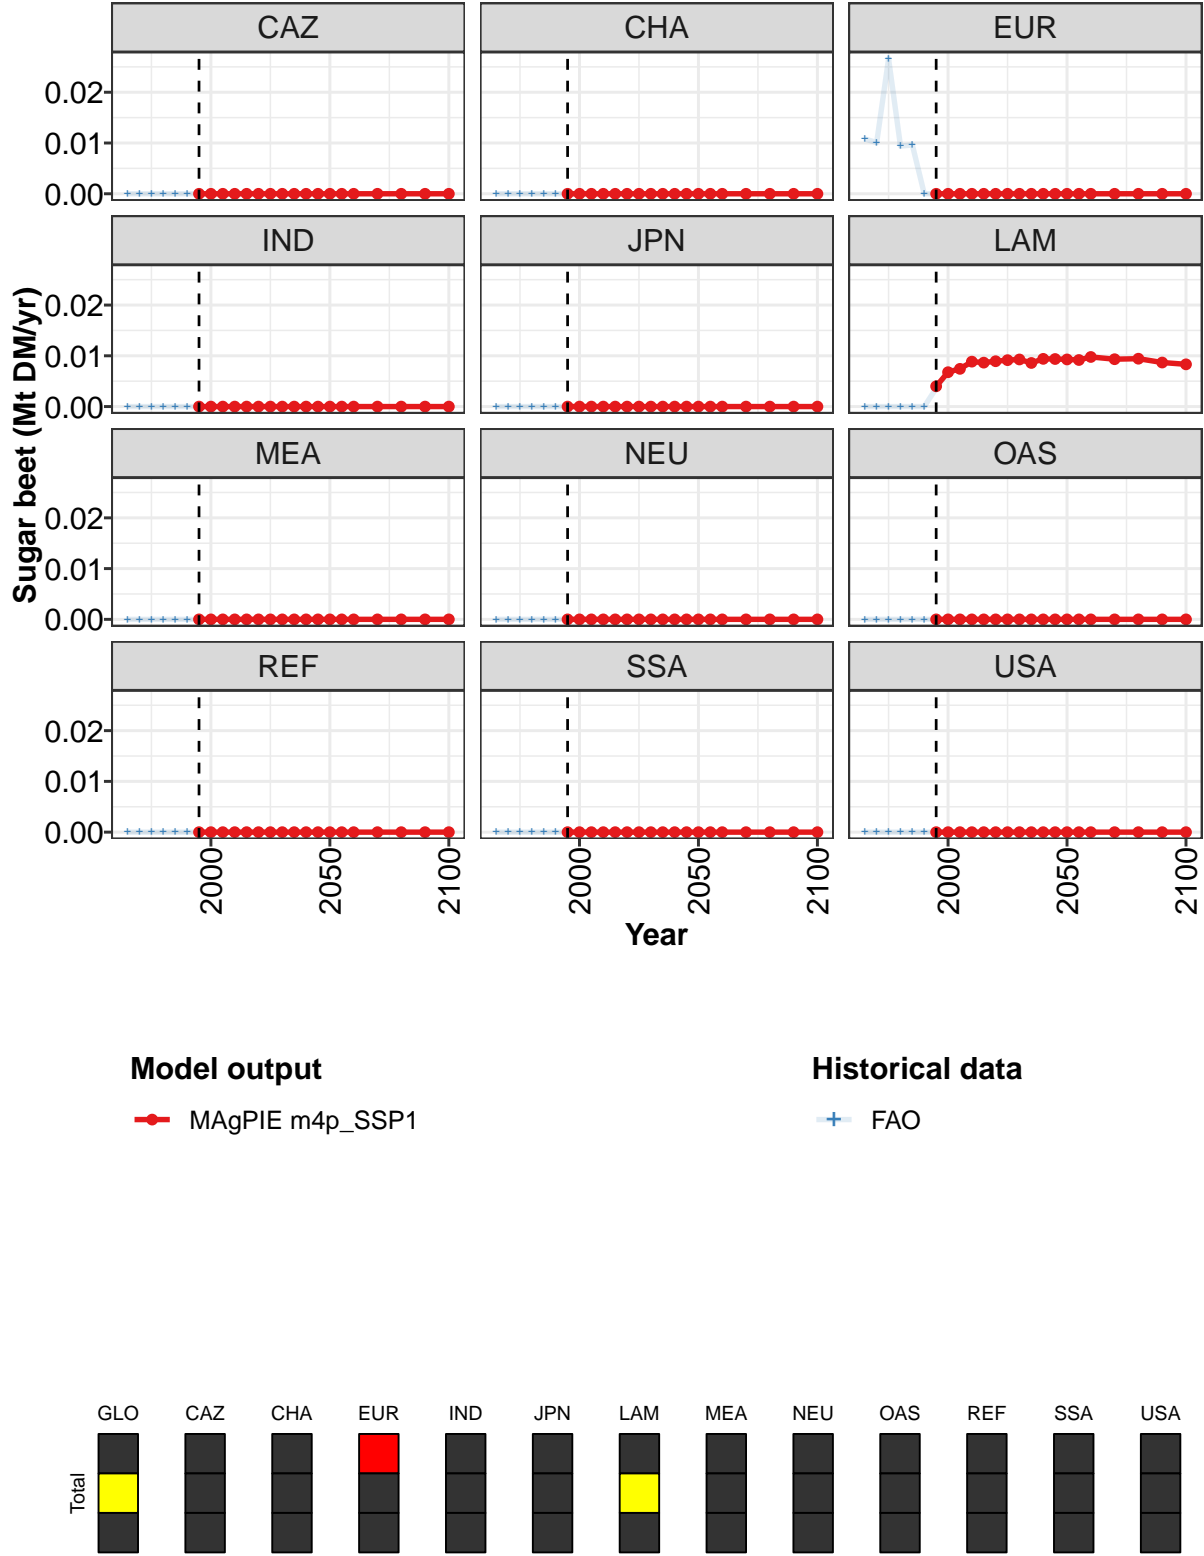

Figure 135: MAgPIE m4p\_SSP1 — Demand—Food—Crops—Sugar crops—Sugar beet (Mt DM/yr)

|     | 1995    | 2000    | 2005    | 2010    | 2015    | 2020    | 2025    | 2030    | 2035    | 2040    | 2045    |
|-----|---------|---------|---------|---------|---------|---------|---------|---------|---------|---------|---------|
| GLO | 0.00399 | 0.00677 | 0.00743 | 0.00886 | 0.00866 | 0.00893 | 0.00914 | 0.00928 | 0.00859 | 0.00940 | 0.00937 |
| CAZ | 0.00000 | 0.00000 | 0.00000 | 0.00000 | 0.00000 | 0.00000 | 0.00000 | 0.00000 | 0.00000 | 0.00000 | 0.00000 |
| CHA | 0.00000 | 0.00000 | 0.00000 | 0.00000 | 0.00000 | 0.00000 | 0.00000 | 0.00000 | 0.00000 | 0.00000 | 0.00000 |
| EUR | 0.00000 | 0.00000 | 0.00000 | 0.00000 | 0.00000 | 0.00000 | 0.00000 | 0.00000 | 0.00000 | 0.00000 | 0.00000 |
| IND | 0.00000 | 0.00000 | 0.00000 | 0.00000 | 0.00000 | 0.00000 | 0.00000 | 0.00000 | 0.00000 | 0.00000 | 0.00000 |
| JPN | 0.00000 | 0.00000 | 0.00000 | 0.00000 | 0.00000 | 0.00000 | 0.00000 | 0.00000 | 0.00000 | 0.00000 | 0.00000 |
| LAM | 0.00399 | 0.00677 | 0.00743 | 0.00886 | 0.00866 | 0.00893 | 0.00914 | 0.00928 | 0.00859 | 0.00940 | 0.00937 |
| MEA | 0.00000 | 0.00000 | 0.00000 | 0.00000 | 0.00000 | 0.00000 | 0.00000 | 0.00000 | 0.00000 | 0.00000 | 0.00000 |
| NEU | 0.00000 | 0.00000 | 0.00000 | 0.00000 | 0.00000 | 0.00000 | 0.00000 | 0.00000 | 0.00000 | 0.00000 | 0.00000 |
| OAS | 0.00000 | 0.00000 | 0.00000 | 0.00000 | 0.00000 | 0.00000 | 0.00000 | 0.00000 | 0.00000 | 0.00000 | 0.00000 |
| REF | 0.00000 | 0.00000 | 0.00000 | 0.00000 | 0.00000 | 0.00000 | 0.00000 | 0.00000 | 0.00000 | 0.00000 | 0.00000 |
| SSA | 0.00000 | 0.00000 | 0.00000 | 0.00000 | 0.00000 | 0.00000 | 0.00000 | 0.00000 | 0.00000 | 0.00000 | 0.00000 |
| USA | 0.00000 | 0.00000 | 0.00000 | 0.00000 | 0.00000 | 0.00000 | 0.00000 | 0.00000 | 0.00000 | 0.00000 | 0.00000 |

Table 404: MAgPIE m4p\_SSP1 — Demand—Food—Crops—Sugar crops—Sugar beet (Mt DM/yr) [PART 1/2]

|     | 2050    | 2055    | 2060    | 2070    | 2080    | 2090    | 2100    |
|-----|---------|---------|---------|---------|---------|---------|---------|
| GLO | 0.00929 | 0.00918 | 0.00978 | 0.00933 | 0.00943 | 0.00868 | 0.00832 |
| CAZ | 0.00000 | 0.00000 | 0.00000 | 0.00000 | 0.00000 | 0.00000 | 0.00000 |
| CHA | 0.00000 | 0.00000 | 0.00000 | 0.00000 | 0.00000 | 0.00000 | 0.00000 |
| EUR | 0.00000 | 0.00000 | 0.00000 | 0.00000 | 0.00000 | 0.00000 | 0.00000 |
| IND | 0.00000 | 0.00000 | 0.00000 | 0.00000 | 0.00000 | 0.00000 | 0.00000 |
| JPN | 0.00000 | 0.00000 | 0.00000 | 0.00000 | 0.00000 | 0.00000 | 0.00000 |
| LAM | 0.00929 | 0.00918 | 0.00978 | 0.00933 | 0.00943 | 0.00868 | 0.00832 |
| MEA | 0.00000 | 0.00000 | 0.00000 | 0.00000 | 0.00000 | 0.00000 | 0.00000 |
| NEU | 0.00000 | 0.00000 | 0.00000 | 0.00000 | 0.00000 | 0.00000 | 0.00000 |
| OAS | 0.00000 | 0.00000 | 0.00000 | 0.00000 | 0.00000 | 0.00000 | 0.00000 |
| REF | 0.00000 | 0.00000 | 0.00000 | 0.00000 | 0.00000 | 0.00000 | 0.00000 |
| SSA | 0.00000 | 0.00000 | 0.00000 | 0.00000 | 0.00000 | 0.00000 | 0.00000 |
| USA | 0.00000 | 0.00000 | 0.00000 | 0.00000 | 0.00000 | 0.00000 | 0.00000 |

Table 405: MAgPIE m4p\_SSP1 — Demand—Food—Crops—Sugar crops—Sugar beet (Mt DM/yr) [PART 2/2]

|     | 1965   | 1970   | 1975   | 1980   | 1985   | 1990   | 1995   | 2000   | 2005   | 2010   |
|-----|--------|--------|--------|--------|--------|--------|--------|--------|--------|--------|
| GLO | 0.0108 | 0.0101 | 0.0266 | 0.0094 | 0.0096 | 0.0000 | 0.0036 | 0.0070 | 0.0077 | 0.0085 |
| CAZ | 0.0000 | 0.0000 | 0.0000 | 0.0000 | 0.0000 | 0.0000 | 0.0000 | 0.0000 | 0.0000 | 0.0000 |
| CHA | 0.0000 | 0.0000 | 0.0000 | 0.0000 | 0.0000 | 0.0000 | 0.0000 | 0.0000 | 0.0000 | 0.0000 |
| EUR | 0.0108 | 0.0101 | 0.0266 | 0.0094 | 0.0096 | 0.0000 | 0.0000 | 0.0000 | 0.0000 | 0.0000 |
| IND | 0.0000 | 0.0000 | 0.0000 | 0.0000 | 0.0000 | 0.0000 | 0.0000 | 0.0000 | 0.0000 | 0.0000 |
| JPN | 0.0000 | 0.0000 | 0.0000 | 0.0000 | 0.0000 | 0.0000 | 0.0000 | 0.0000 | 0.0000 | 0.0000 |
| LAM | 0.0000 | 0.0000 | 0.0000 | 0.0000 | 0.0000 | 0.0000 | 0.0036 | 0.0069 | 0.0077 | 0.0085 |
| MEA | 0.0000 | 0.0000 | 0.0000 | 0.0000 | 0.0000 | 0.0000 | 0.0000 | 0.0000 | 0.0000 | 0.0000 |
| NEU | 0.0000 | 0.0000 | 0.0000 | 0.0000 | 0.0000 | 0.0000 | 0.0000 | 0.0000 | 0.0000 | 0.0000 |
| OAS | 0.0000 | 0.0000 | 0.0000 | 0.0000 | 0.0000 | 0.0000 | 0.0000 | 0.0000 | 0.0000 | 0.0000 |
| REF | 0.0000 | 0.0000 | 0.0000 | 0.0000 | 0.0000 | 0.0000 | 0.0000 | 0.0000 | 0.0000 | 0.0000 |
| SSA | 0.0000 | 0.0000 | 0.0000 | 0.0000 | 0.0000 | 0.0000 | 0.0000 | 0.0000 | 0.0000 | 0.0000 |
| USA | 0.0000 | 0.0000 | 0.0000 | 0.0000 | 0.0000 | 0.0000 | 0.0000 | 0.0000 | 0.0000 | 0.0000 |

Table 406: FAO — Demand—Food—Crops—Sugar crops—Sugar beet (Mt DM/yr)

7.1.18
Sugar crops—Sugar cane

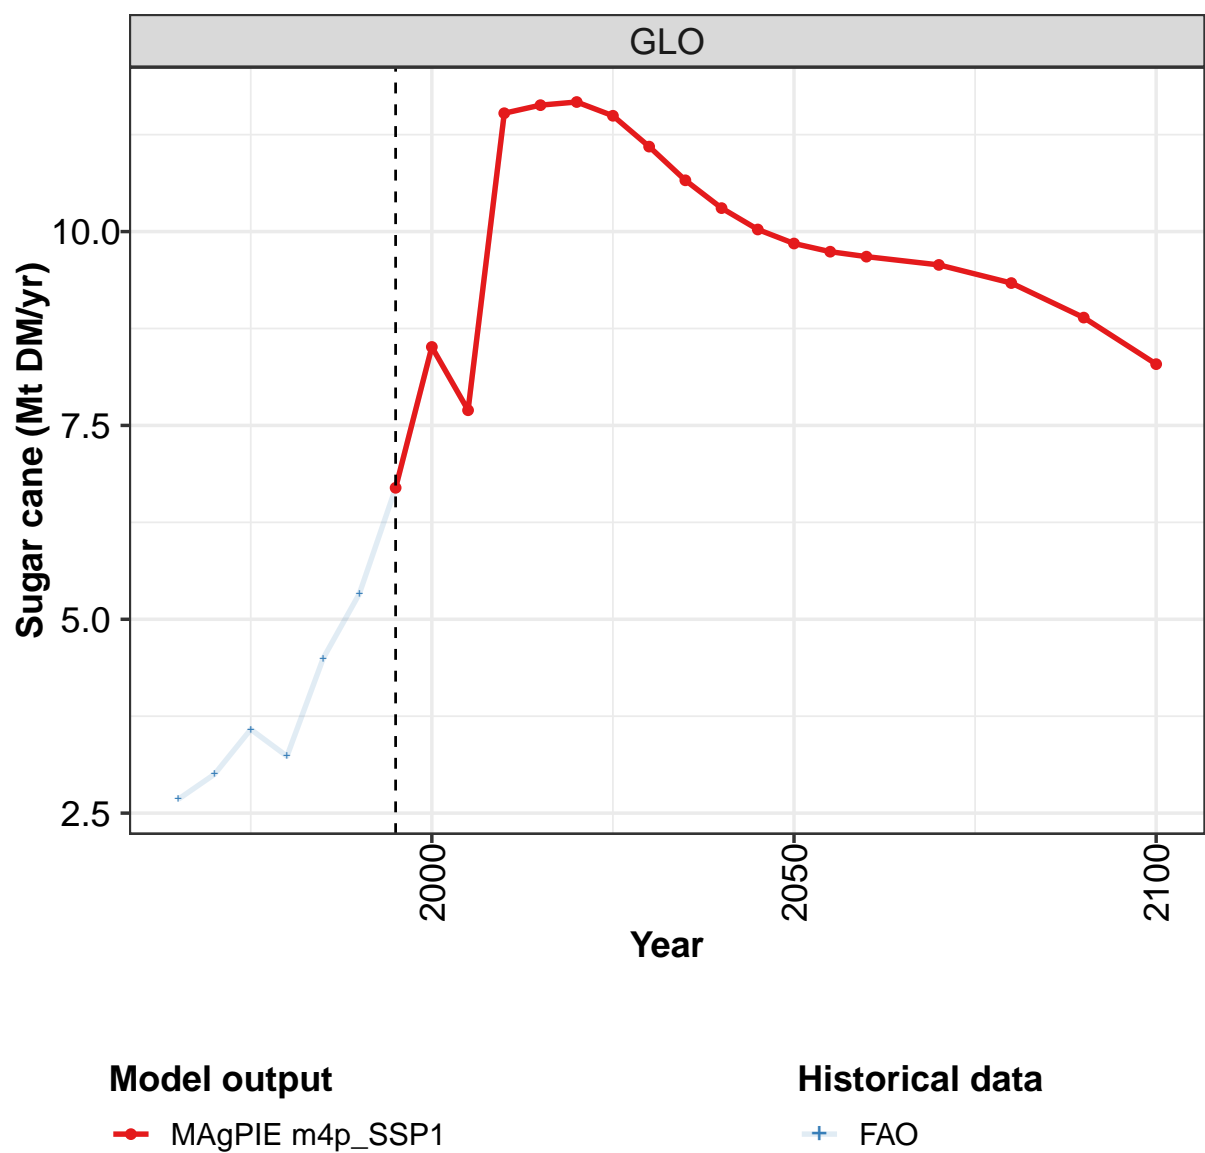

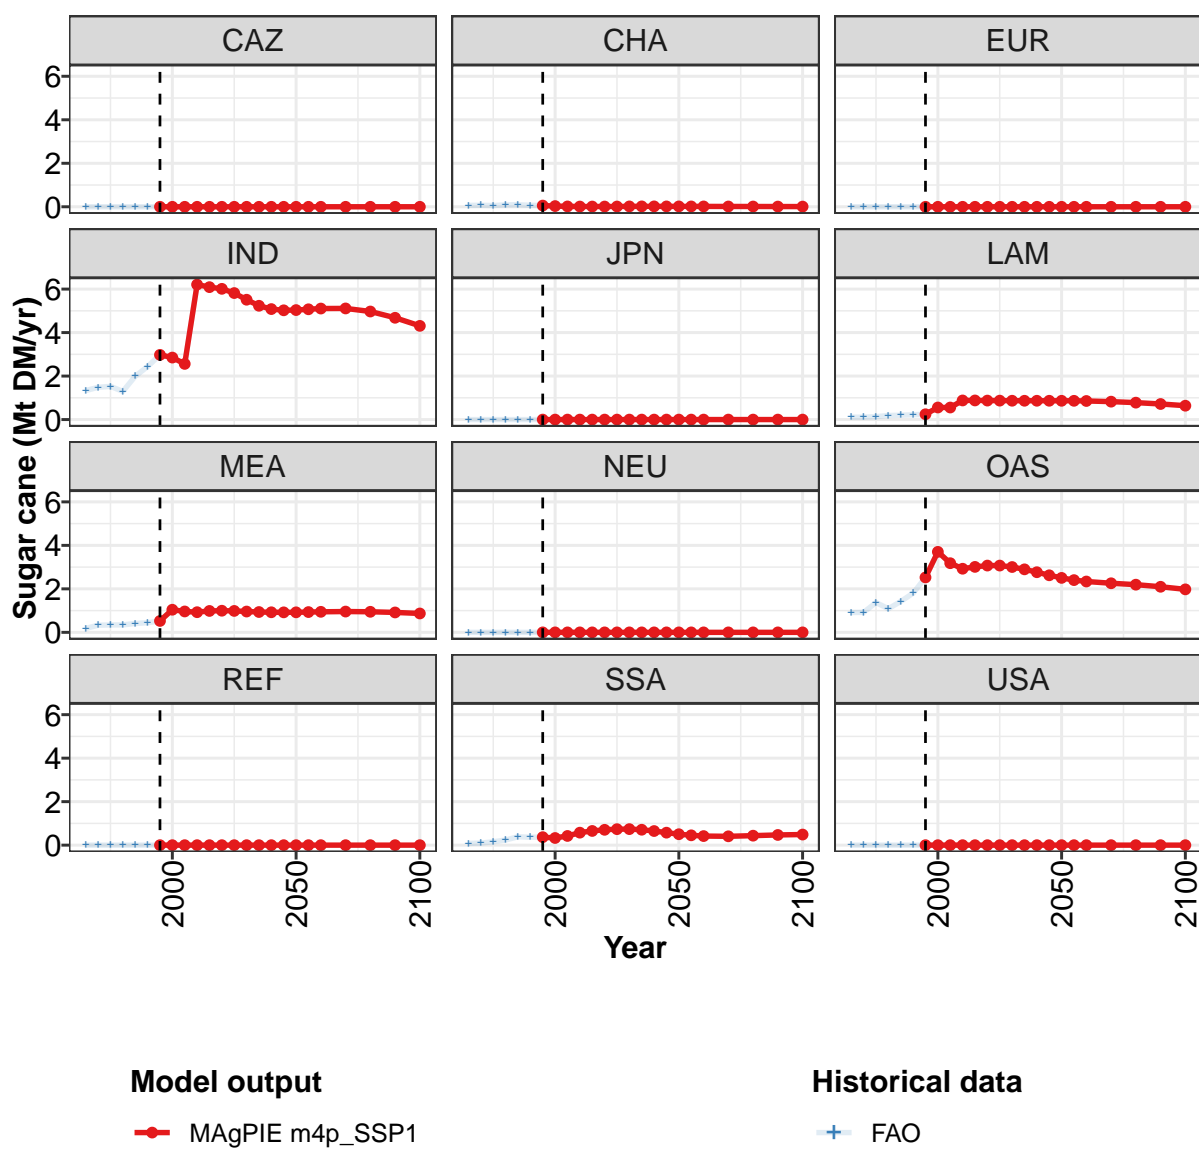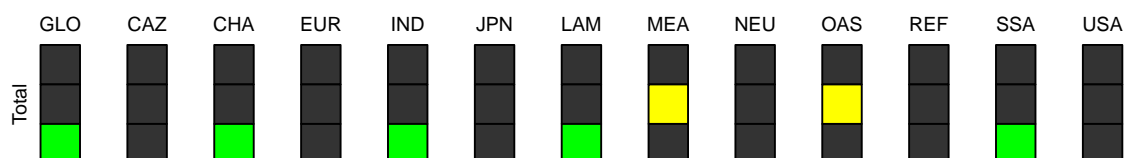

Figure 136: MAgPIE m4p\_SSP1 — Demand—Food—Crops—Sugar crops—Sugar cane (Mt DM/yr)

|     | 1995 | 2000 | 2005 | 2010 | 2015 | 2020 | 2025 | 2030 | 2035 | 2040 | 2045 |
|-----|------|------|------|------|------|------|------|------|------|------|------|
| GLO | 6.7  | 8.5  | 7.7  | 11.5 | 11.6 | 11.7 | 11.5 | 11.1 | 10.7 | 10.3 | 10.0 |
| CAZ | 0.0  | 0.0  | 0.0  | 0.0  | 0.0  | 0.0  | 0.0  | 0.0  | 0.0  | 0.0  | 0.0  |
| CHA | 0.1  | 0.0  | 0.0  | 0.0  | 0.0  | 0.0  | 0.0  | 0.0  | 0.0  | 0.0  | 0.0  |
| EUR | 0.0  | 0.0  | 0.0  | 0.0  | 0.0  | 0.0  | 0.0  | 0.0  | 0.0  | 0.0  | 0.0  |
| IND | 3.0  | 2.9  | 2.6  | 6.2  | 6.1  | 6.0  | 5.8  | 5.5  | 5.2  | 5.1  | 5.0  |
| JPN | 0.0  | 0.0  | 0.0  | 0.0  | 0.0  | 0.0  | 0.0  | 0.0  | 0.0  | 0.0  | 0.0  |
| LAM | 0.2  | 0.6  | 0.6  | 0.9  | 0.9  | 0.9  | 0.9  | 0.9  | 0.9  | 0.9  | 0.9  |
| MEA | 0.5  | 1.0  | 1.0  | 0.9  | 1.0  | 1.0  | 1.0  | 1.0  | 0.9  | 0.9  | 0.9  |
| NEU | 0.0  | 0.0  | 0.0  | 0.0  | 0.0  | 0.0  | 0.0  | 0.0  | 0.0  | 0.0  | 0.0  |
| OAS | 2.5  | 3.7  | 3.2  | 2.9  | 3.0  | 3.1  | 3.1  | 3.0  | 2.9  | 2.8  | 2.6  |
| REF | 0.0  | 0.0  | 0.0  | 0.0  | 0.0  | 0.0  | 0.0  | 0.0  | 0.0  | 0.0  | 0.0  |
| SSA | 0.4  | 0.3  | 0.4  | 0.6  | 0.7  | 0.7  | 0.7  | 0.7  | 0.7  | 0.6  | 0.6  |
| USA | 0.0  | 0.0  | 0.0  | 0.0  | 0.0  | 0.0  | 0.0  | 0.0  | 0.0  | 0.0  | 0.0  |

Table 407: MAgPIE m4p\_SSP1 — Demand—Food—Crops—Sugar crops—Sugar cane (Mt DM/yr) [PART 1/2]

|     | 2050 | 2055 | 2060 | 2070 | 2080 | 2090 | 2100 |
|-----|------|------|------|------|------|------|------|
| GLO | 9.8  | 9.7  | 9.7  | 9.6  | 9.3  | 8.9  | 8.3  |
| CAZ | 0.0  | 0.0  | 0.0  | 0.0  | 0.0  | 0.0  | 0.0  |
| CHA | 0.0  | 0.0  | 0.0  | 0.0  | 0.0  | 0.0  | 0.0  |
| EUR | 0.0  | 0.0  | 0.0  | 0.0  | 0.0  | 0.0  | 0.0  |
| IND | 5.0  | 5.1  | 5.1  | 5.1  | 5.0  | 4.7  | 4.3  |
| JPN | 0.0  | 0.0  | 0.0  | 0.0  | 0.0  | 0.0  | 0.0  |
| LAM | 0.9  | 0.9  | 0.9  | 0.8  | 0.8  | 0.7  | 0.6  |
| MEA | 0.9  | 0.9  | 0.9  | 1.0  | 0.9  | 0.9  | 0.9  |
| NEU | 0.0  | 0.0  | 0.0  | 0.0  | 0.0  | 0.0  | 0.0  |
| OAS | 2.5  | 2.4  | 2.3  | 2.3  | 2.2  | 2.1  | 2.0  |
| REF | 0.0  | 0.0  | 0.0  | 0.0  | 0.0  | 0.0  | 0.0  |
| SSA | 0.5  | 0.5  | 0.4  | 0.4  | 0.4  | 0.5  | 0.5  |
| USA | 0.0  | 0.0  | 0.0  | 0.0  | 0.0  | 0.0  | 0.0  |

Table 408: MAgPIE m4p\_SSP1 — Demand—Food—Crops—Sugar crops—Sugar cane (Mt DM/yr) [PART 2/2]

|     | 1965 | 1970 | 1975 | 1980 | 1985 | 1990 | 1995 | 2000 | 2005 | 2010 |
|-----|------|------|------|------|------|------|------|------|------|------|
| GLO | 2.7  | 3.0  | 3.6  | 3.2  | 4.5  | 5.3  | 6.7  | 8.5  | 7.7  | 11.5 |
| CAZ | 0.0  | 0.0  | 0.0  | 0.0  | 0.0  | 0.0  | 0.0  | 0.0  | 0.0  | 0.0  |
| CHA | 0.1  | 0.1  | 0.1  | 0.1  | 0.1  | 0.1  | 0.1  | 0.0  | 0.0  | 0.0  |
| EUR | 0.0  | 0.0  | 0.0  | 0.0  | 0.0  | 0.0  | 0.0  | 0.0  | 0.0  | 0.0  |
| IND | 1.3  | 1.5  | 1.5  | 1.3  | 2.0  | 2.4  | 3.0  | 2.9  | 2.6  | 6.2  |
| JPN | 0.0  | 0.0  | 0.0  | 0.0  | 0.0  | 0.0  | 0.0  | 0.0  | 0.0  | 0.0  |
| LAM | 0.1  | 0.1  | 0.1  | 0.2  | 0.2  | 0.2  | 0.2  | 0.6  | 0.6  | 0.9  |
| MEA | 0.2  | 0.3  | 0.3  | 0.3  | 0.4  | 0.4  | 0.5  | 1.0  | 1.0  | 0.9  |
| NEU | 0.0  | 0.0  | 0.0  | 0.0  | 0.0  | 0.0  | 0.0  | 0.0  | 0.0  | 0.0  |
| OAS | 0.9  | 0.9  | 1.4  | 1.1  | 1.4  | 1.8  | 2.5  | 3.7  | 3.2  | 2.9  |
| REF | 0.0  | 0.0  | 0.0  | 0.0  | 0.0  | 0.0  | 0.0  | 0.0  | 0.0  | 0.0  |
| SSA | 0.1  | 0.1  | 0.2  | 0.2  | 0.4  | 0.4  | 0.4  | 0.3  | 0.4  | 0.6  |
| USA | 0.0  | 0.0  | 0.0  | 0.0  | 0.0  | 0.0  | 0.0  | 0.0  | 0.0  | 0.0  |

Table 409: FAO — Demand—Food—Crops—Sugar crops—Sugar cane (Mt DM/yr)



7.2
Fish

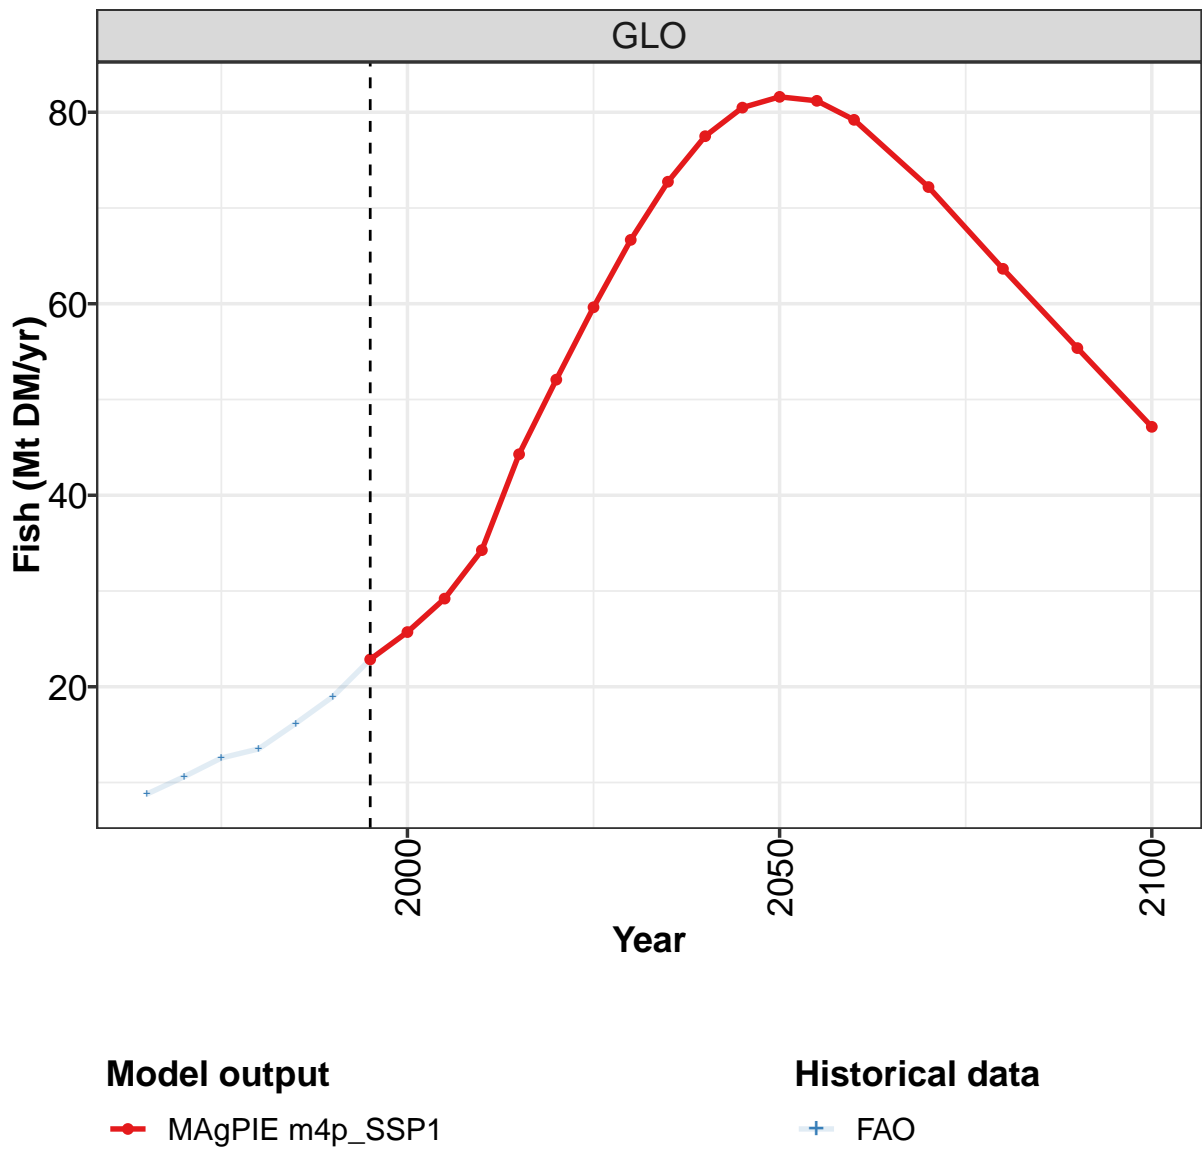

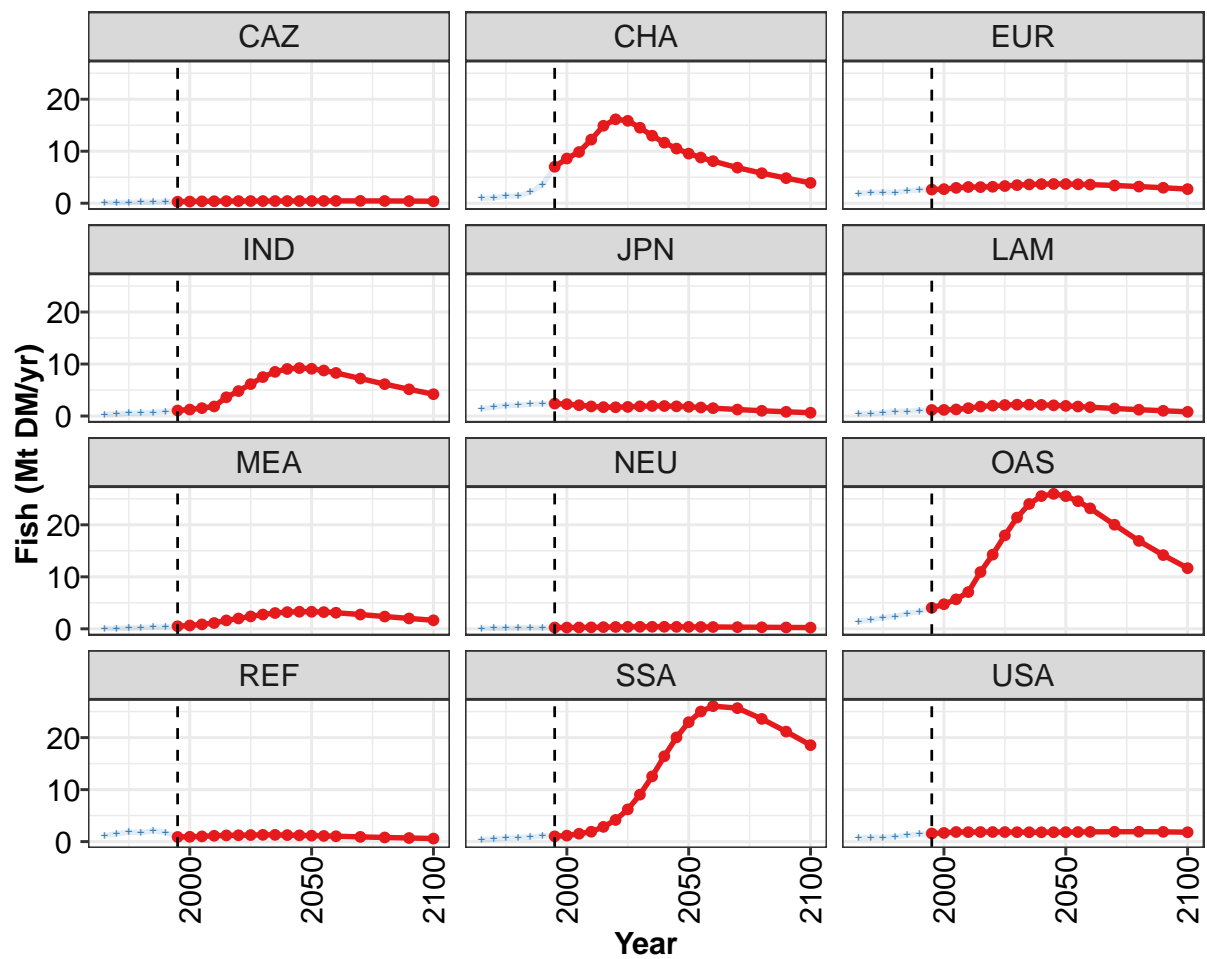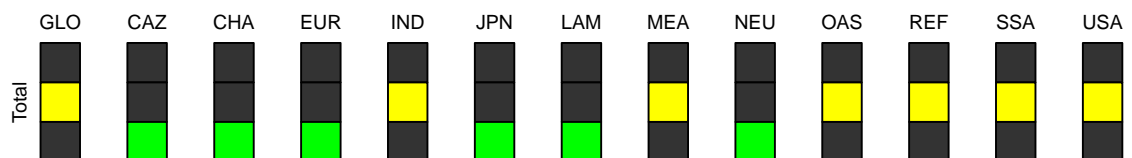

Figure 137: MAGPIE m4p\_SSP1 — Demand—Food—Fish (Mt DM/yr)

|     | 1995 | 2000 | 2005 | 2010 | 2015 | 2020 | 2025 | 2030 | 2035 | 2040 | 2045 |
|-----|------|------|------|------|------|------|------|------|------|------|------|
| GLO | 22.9 | 25.7 | 29.2 | 34.3 | 44.3 | 52.1 | 59.6 | 66.7 | 72.7 | 77.5 | 80.5 |
| CAZ | 0.3  | 0.3  | 0.4  | 0.4  | 0.4  | 0.4  | 0.4  | 0.4  | 0.4  | 0.4  | 0.4  |
| CHA | 7.0  | 8.6  | 9.9  | 12.2 | 14.9 | 16.1 | 15.9 | 14.5 | 13.0 | 11.7 | 10.5 |
| EUR | 2.6  | 2.7  | 3.0  | 3.1  | 3.1  | 3.2  | 3.3  | 3.5  | 3.6  | 3.7  | 3.7  |
| IND | 1.1  | 1.2  | 1.5  | 1.8  | 3.6  | 4.8  | 6.1  | 7.5  | 8.5  | 9.1  | 9.2  |
| JPN | 2.4  | 2.3  | 2.1  | 1.9  | 1.7  | 1.7  | 1.8  | 1.9  | 1.9  | 1.9  | 1.9  |
| LAM | 1.2  | 1.2  | 1.3  | 1.5  | 1.8  | 2.0  | 2.1  | 2.2  | 2.2  | 2.1  | 2.1  |
| MEA | 0.5  | 0.6  | 0.9  | 1.1  | 1.6  | 2.0  | 2.4  | 2.8  | 3.0  | 3.2  | 3.3  |
| NEU | 0.3  | 0.2  | 0.3  | 0.3  | 0.3  | 0.4  | 0.4  | 0.4  | 0.4  | 0.4  | 0.4  |
| OAS | 4.0  | 4.7  | 5.7  | 7.1  | 10.9 | 14.3 | 18.0 | 21.4 | 24.0 | 25.5 | 26.0 |
| REF | 0.9  | 0.9  | 1.0  | 1.1  | 1.2  | 1.2  | 1.3  | 1.3  | 1.3  | 1.3  | 1.2  |
| SSA | 1.0  | 1.2  | 1.5  | 1.9  | 2.8  | 4.2  | 6.2  | 9.0  | 12.5 | 16.4 | 20.0 |
| USA | 1.6  | 1.7  | 1.9  | 1.8  | 1.8  | 1.9  | 1.8  | 1.8  | 1.8  | 1.8  | 1.8  |

Table 410: MAgPIE m4p\_SSP1 — Demand—Food—Fish (Mt DM/yr) [PART 1/2]

|     | 2050 | 2055 | 2060 | 2070 | 2080 | 2090 | 2100 |
|-----|------|------|------|------|------|------|------|
| GLO | 81.6 | 81.2 | 79.2 | 72.2 | 63.6 | 55.4 | 47.1 |
| CAZ | 0.4  | 0.4  | 0.4  | 0.4  | 0.4  | 0.4  | 0.4  |
| CHA | 9.5  | 8.8  | 8.1  | 6.8  | 5.8  | 4.8  | 3.9  |
| EUR | 3.7  | 3.6  | 3.6  | 3.4  | 3.2  | 3.0  | 2.7  |
| IND | 9.1  | 8.8  | 8.3  | 7.2  | 6.1  | 5.1  | 4.2  |
| JPN | 1.8  | 1.6  | 1.5  | 1.2  | 1.0  | 0.8  | 0.6  |
| LAM | 2.0  | 1.8  | 1.7  | 1.5  | 1.2  | 1.0  | 0.8  |
| MEA | 3.3  | 3.2  | 3.1  | 2.7  | 2.4  | 2.0  | 1.6  |
| NEU | 0.4  | 0.4  | 0.3  | 0.3  | 0.3  | 0.3  | 0.2  |
| OAS | 25.5 | 24.5 | 23.2 | 20.0 | 16.9 | 14.2 | 11.7 |
| REF | 1.2  | 1.1  | 1.0  | 0.9  | 0.8  | 0.7  | 0.6  |
| SSA | 23.0 | 25.0 | 26.1 | 25.7 | 23.6 | 21.2 | 18.6 |
| USA | 1.8  | 1.8  | 1.9  | 1.9  | 1.9  | 1.9  | 1.8  |

Table 411: MAgPIE m4p\_SSP1 — Demand—Food—Fish (Mt DM/yr) [PART 2/2]

|     | 1965 | 1970 | 1975 | 1980 | 1985 | 1990 | 1995 | 2000 | 2005 | 2010 |
|-----|------|------|------|------|------|------|------|------|------|------|
| GLO | 8.8  | 10.6 | 12.6 | 13.5 | 16.2 | 19.0 | 22.9 | 25.7 | 29.2 | 34.3 |
| CAZ | 0.1  | 0.1  | 0.2  | 0.2  | 0.2  | 0.3  | 0.3  | 0.3  | 0.4  | 0.4  |
| CHA | 1.0  | 1.0  | 1.4  | 1.4  | 2.1  | 3.6  | 7.0  | 8.6  | 9.9  | 12.2 |
| EUR | 1.9  | 2.0  | 2.1  | 2.1  | 2.4  | 2.6  | 2.6  | 2.7  | 3.0  | 3.1  |
| IND | 0.3  | 0.4  | 0.5  | 0.6  | 0.7  | 0.9  | 1.1  | 1.2  | 1.5  | 1.8  |
| JPN | 1.4  | 1.7  | 2.0  | 2.1  | 2.3  | 2.4  | 2.4  | 2.3  | 2.1  | 1.8  |
| LAM | 0.4  | 0.5  | 0.6  | 0.9  | 0.9  | 1.1  | 1.2  | 1.2  | 1.3  | 1.5  |
| MEA | 0.1  | 0.1  | 0.2  | 0.2  | 0.3  | 0.4  | 0.5  | 0.6  | 0.9  | 1.1  |
| NEU | 0.1  | 0.1  | 0.1  | 0.2  | 0.2  | 0.2  | 0.3  | 0.2  | 0.3  | 0.3  |
| OAS | 1.4  | 1.7  | 2.1  | 2.4  | 3.0  | 3.3  | 4.0  | 4.7  | 5.7  | 7.1  |
| REF | 1.1  | 1.5  | 1.8  | 1.8  | 2.1  | 1.8  | 0.9  | 0.9  | 1.0  | 1.1  |
| SSA | 0.4  | 0.5  | 0.7  | 0.8  | 0.8  | 1.1  | 1.0  | 1.2  | 1.5  | 1.9  |
| USA | 0.7  | 0.8  | 0.8  | 0.9  | 1.2  | 1.4  | 1.6  | 1.7  | 1.9  | 1.8  |

Table 412: FAO — Demand—Food—Fish (Mt DM/yr)

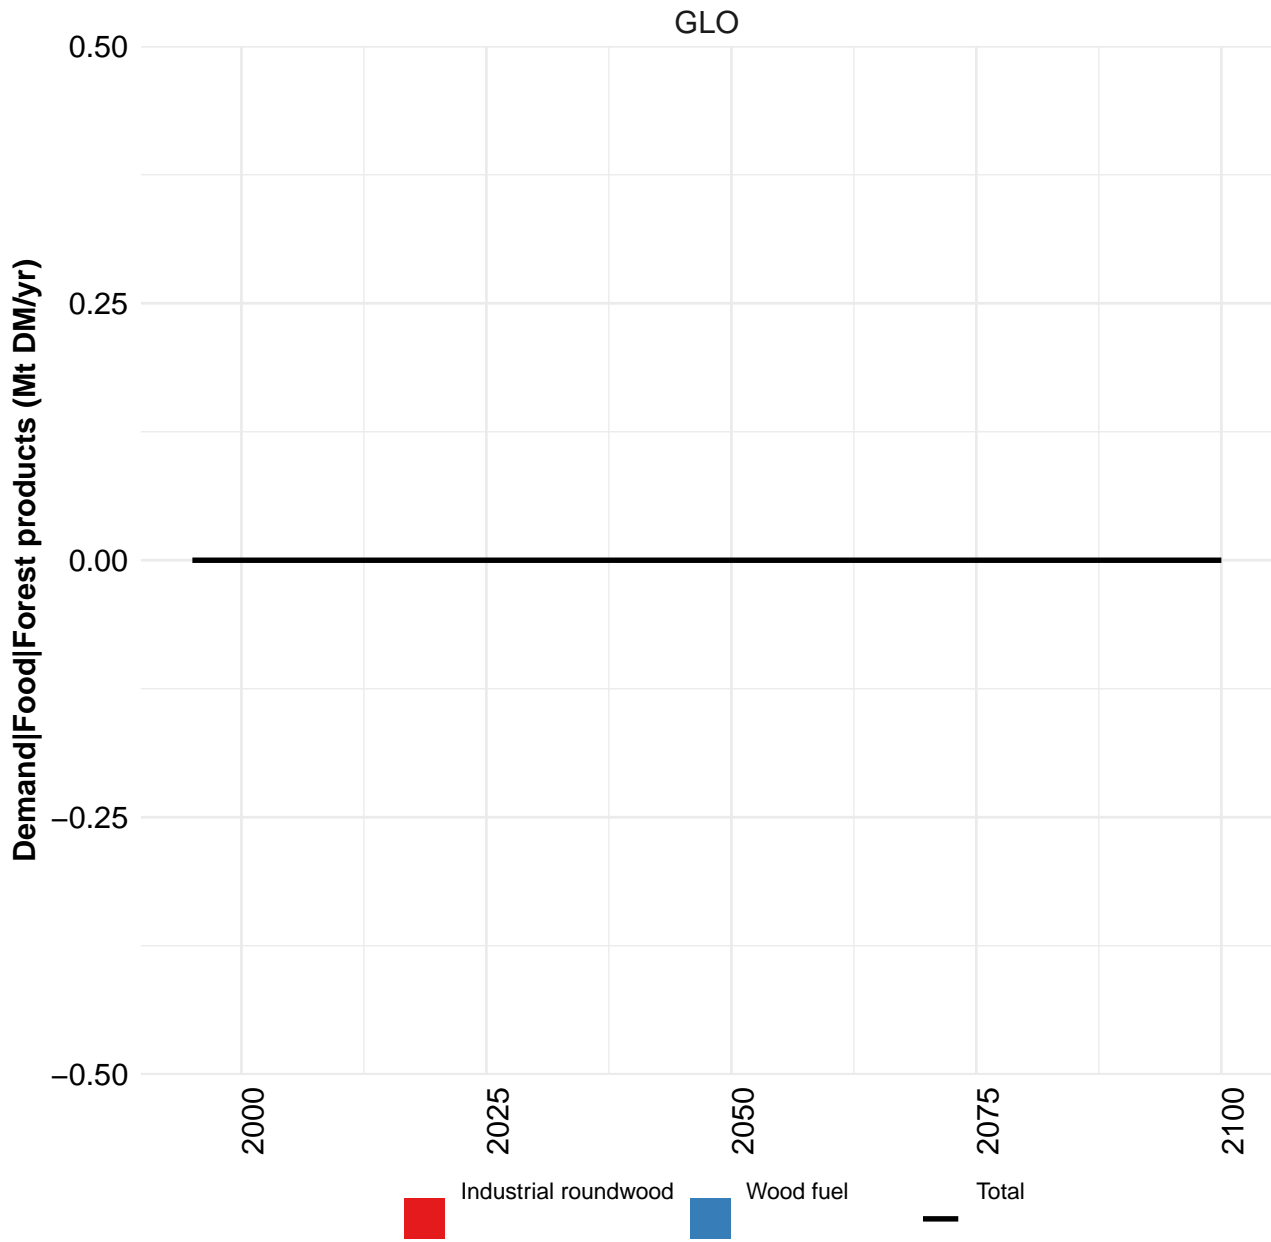

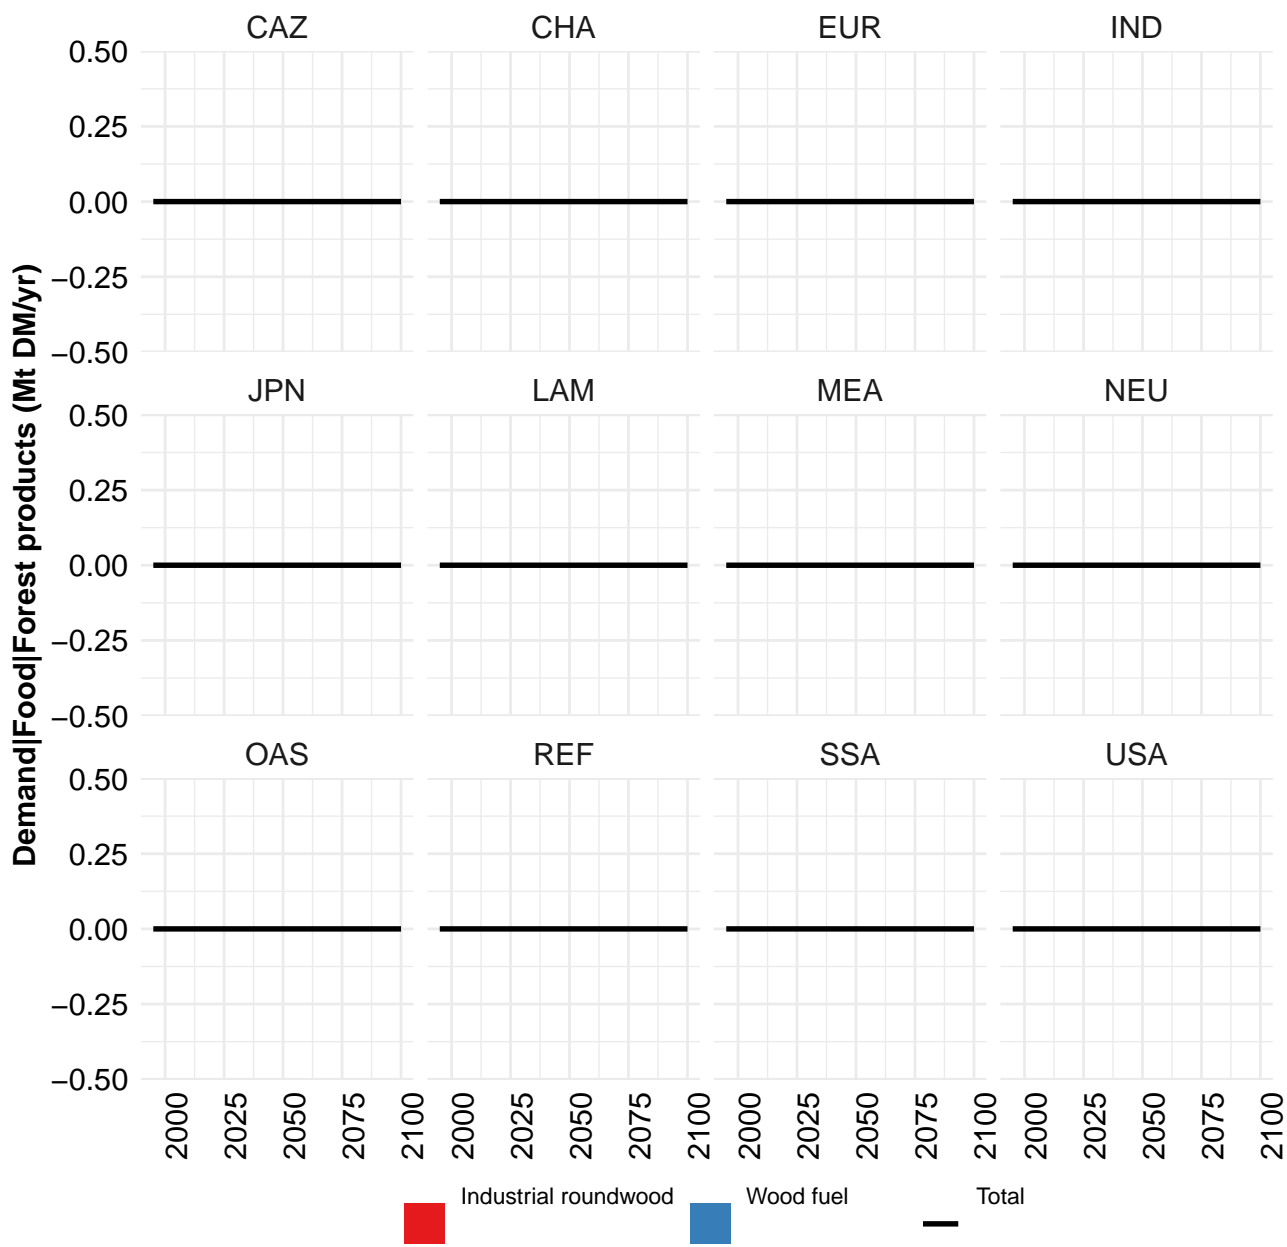

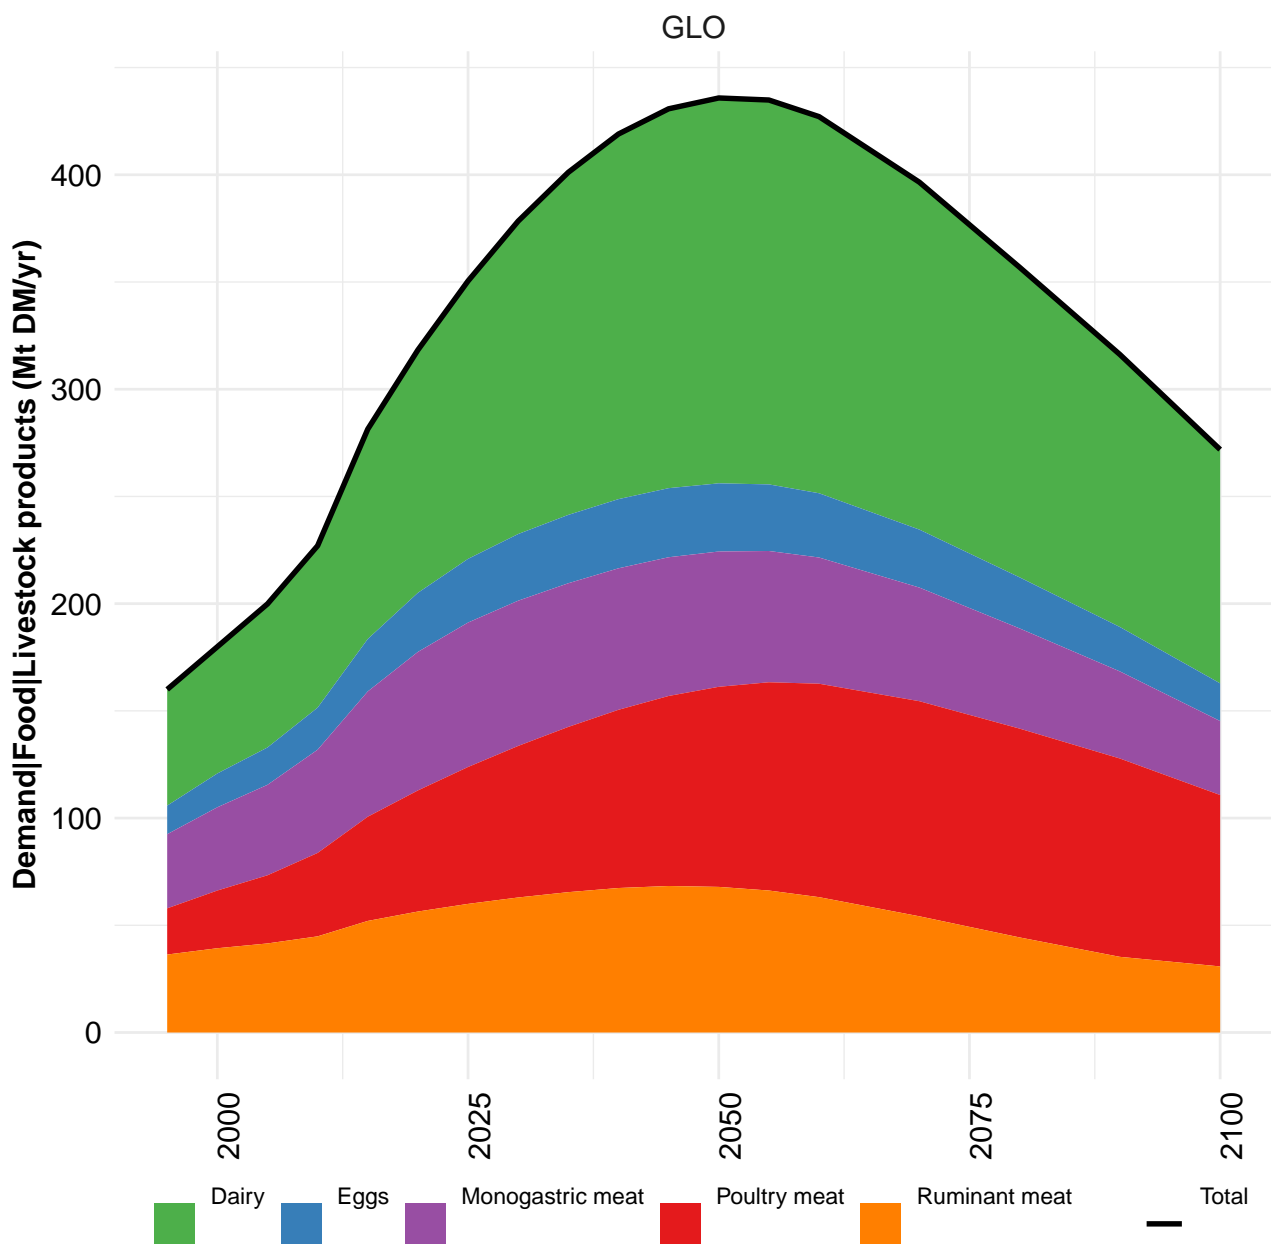

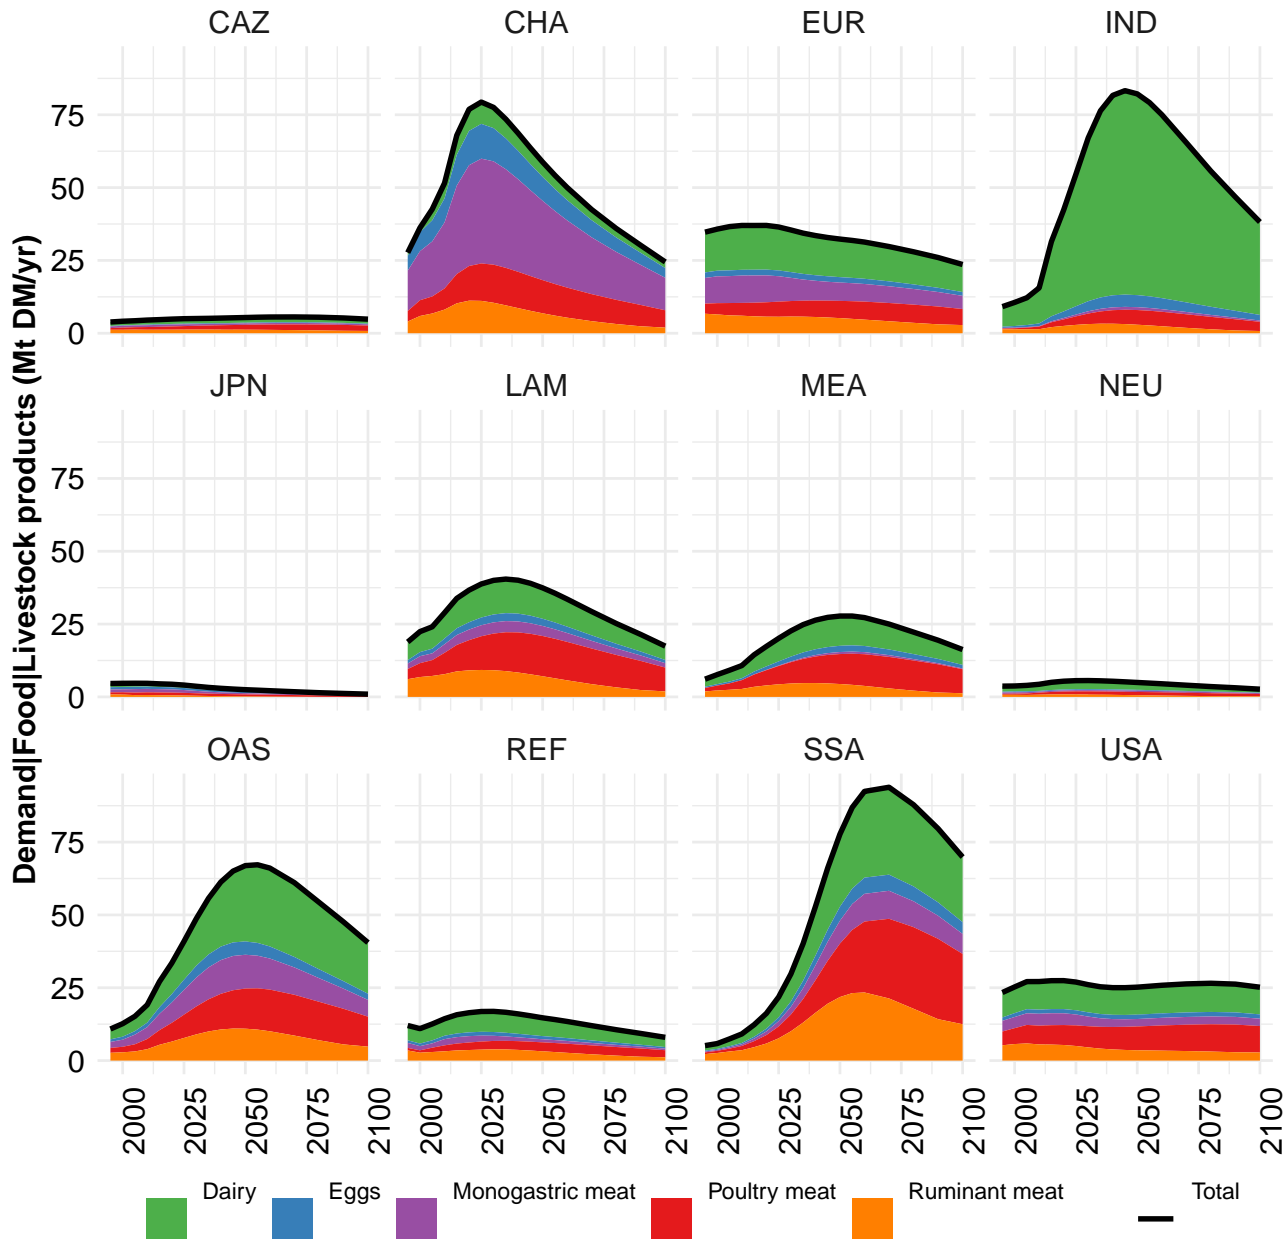

7.3 Livestock products

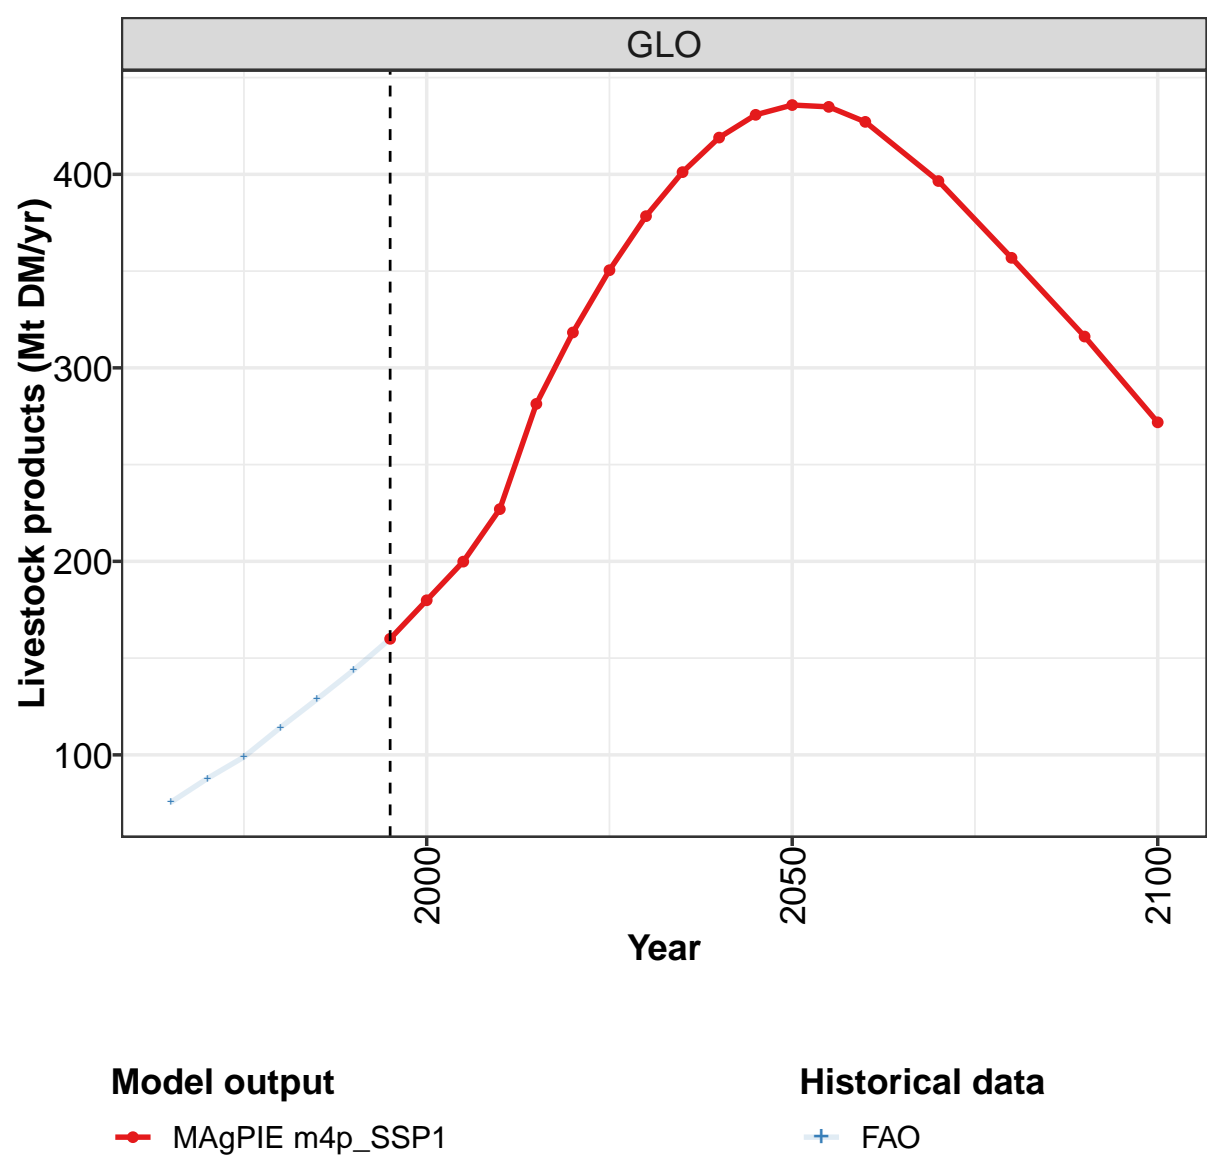



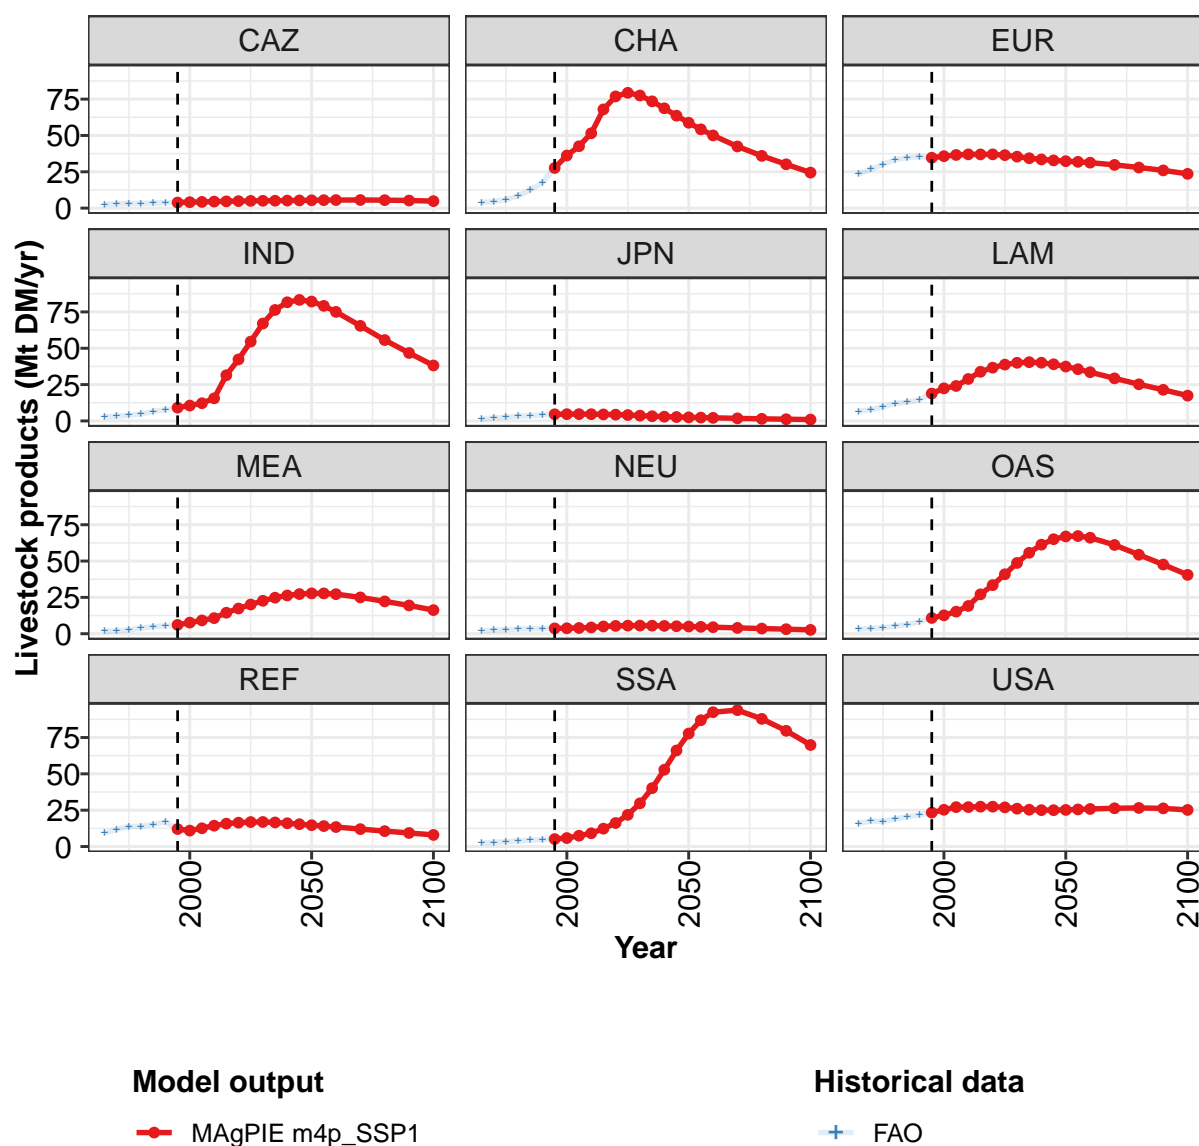

Figure 138: MAgPIE m4p\_SSP1 — Demand—Food—Livestock products (Mt DM/yr)

|     | 1995 | 2000 | 2005 | 2010 | 2015 | 2020 | 2025 | 2030 | 2035 | 2040 | 2045 |
|-----|------|------|------|------|------|------|------|------|------|------|------|
| GLO | 160  | 180  | 200  | 227  | 281  | 318  | 350  | 378  | 401  | 419  | 431  |
| CAZ | 4    | 4    | 4    | 5    | 5    | 5    | 5    | 5    | 5    | 5    | 5    |
| CHA | 28   | 36   | 43   | 52   | 68   | 77   | 79   | 78   | 73   | 69   | 64   |
| EUR | 35   | 36   | 37   | 37   | 37   | 37   | 36   | 35   | 34   | 34   | 33   |
| IND | 9    | 11   | 12   | 16   | 31   | 42   | 55   | 67   | 76   | 82   | 83   |
| JPN | 5    | 5    | 5    | 5    | 4    | 4    | 4    | 4    | 3    | 3    | 3    |
| LAM | 19   | 22   | 24   | 29   | 34   | 37   | 39   | 40   | 40   | 40   | 39   |
| MEA | 6    | 8    | 9    | 11   | 14   | 17   | 20   | 23   | 25   | 26   | 27   |
| NEU | 4    | 4    | 4    | 4    | 5    | 5    | 6    | 6    | 6    | 5    | 5    |
| OAS | 11   | 13   | 15   | 19   | 27   | 33   | 41   | 49   | 56   | 61   | 65   |
| REF | 12   | 11   | 13   | 14   | 16   | 16   | 17   | 17   | 17   | 16   | 15   |
| SSA | 5    | 6    | 7    | 9    | 12   | 16   | 22   | 30   | 40   | 53   | 66   |
| USA | 23   | 25   | 27   | 27   | 27   | 27   | 27   | 26   | 25   | 25   | 25   |

Table 413: MAgPIE m4p\_SSP1 — Demand—Food—Livestock products (Mt DM/yr) [PART 1/2]

|     | 2050 | 2055 | 2060 | 2070 | 2080 | 2090 | 2100 |
|-----|------|------|------|------|------|------|------|
| GLO | 436  | 435  | 427  | 397  | 357  | 316  | 272  |
| CAZ | 5    | 5    | 6    | 6    | 5    | 5    | 5    |
| CHA | 59   | 54   | 50   | 42   | 36   | 30   | 24   |
| EUR | 32   | 32   | 31   | 30   | 28   | 26   | 24   |
| IND | 82   | 79   | 75   | 65   | 56   | 47   | 38   |
| JPN | 2    | 2    | 2    | 2    | 1    | 1    | 1    |
| LAM | 37   | 36   | 34   | 29   | 25   | 21   | 17   |
| MEA | 28   | 28   | 27   | 25   | 22   | 19   | 16   |
| NEU | 5    | 5    | 5    | 4    | 4    | 3    | 3    |
| OAS | 67   | 67   | 66   | 61   | 54   | 48   | 40   |
| REF | 15   | 14   | 13   | 12   | 11   | 9    | 8    |
| SSA | 78   | 87   | 92   | 94   | 88   | 80   | 70   |
| USA | 25   | 26   | 26   | 26   | 27   | 26   | 25   |

Table 414: MAgPIE m4p\_SSP1 — Demand—Food—Livestock products (Mt DM/yr) [PART 2/2]

|     | 1965 | 1970 | 1975 | 1980 | 1985 | 1990 | 1995 | 2000 | 2005 | 2010 |
|-----|------|------|------|------|------|------|------|------|------|------|
| GLO | 76   | 88   | 99   | 114  | 129  | 144  | 160  | 180  | 200  | 227  |
| CAZ | 3    | 3    | 3    | 3    | 3    | 4    | 4    | 4    | 4    | 5    |
| CHA | 4    | 4    | 6    | 8    | 12   | 18   | 28   | 36   | 43   | 52   |
| EUR | 23   | 27   | 30   | 33   | 35   | 35   | 35   | 36   | 37   | 37   |
| IND | 3    | 3    | 4    | 5    | 7    | 8    | 9    | 11   | 12   | 16   |
| JPN | 1    | 2    | 3    | 3    | 4    | 4    | 5    | 5    | 5    | 5    |
| LAM | 6    | 8    | 10   | 12   | 13   | 15   | 19   | 22   | 24   | 29   |
| MEA | 2    | 2    | 3    | 4    | 5    | 5    | 6    | 8    | 9    | 11   |
| NEU | 2    | 2    | 3    | 3    | 3    | 4    | 4    | 4    | 4    | 4    |
| OAS | 3    | 4    | 4    | 5    | 6    | 8    | 11   | 13   | 15   | 19   |
| REF | 9    | 12   | 14   | 14   | 15   | 17   | 12   | 11   | 13   | 14   |
| SSA | 2    | 3    | 3    | 4    | 4    | 5    | 5    | 6    | 7    | 9    |
| USA | 16   | 17   | 17   | 19   | 21   | 22   | 23   | 25   | 27   | 27   |

Table 415: FAO — Demand—Food—Livestock products (Mt DM/yr)

7.3.1 Dairy

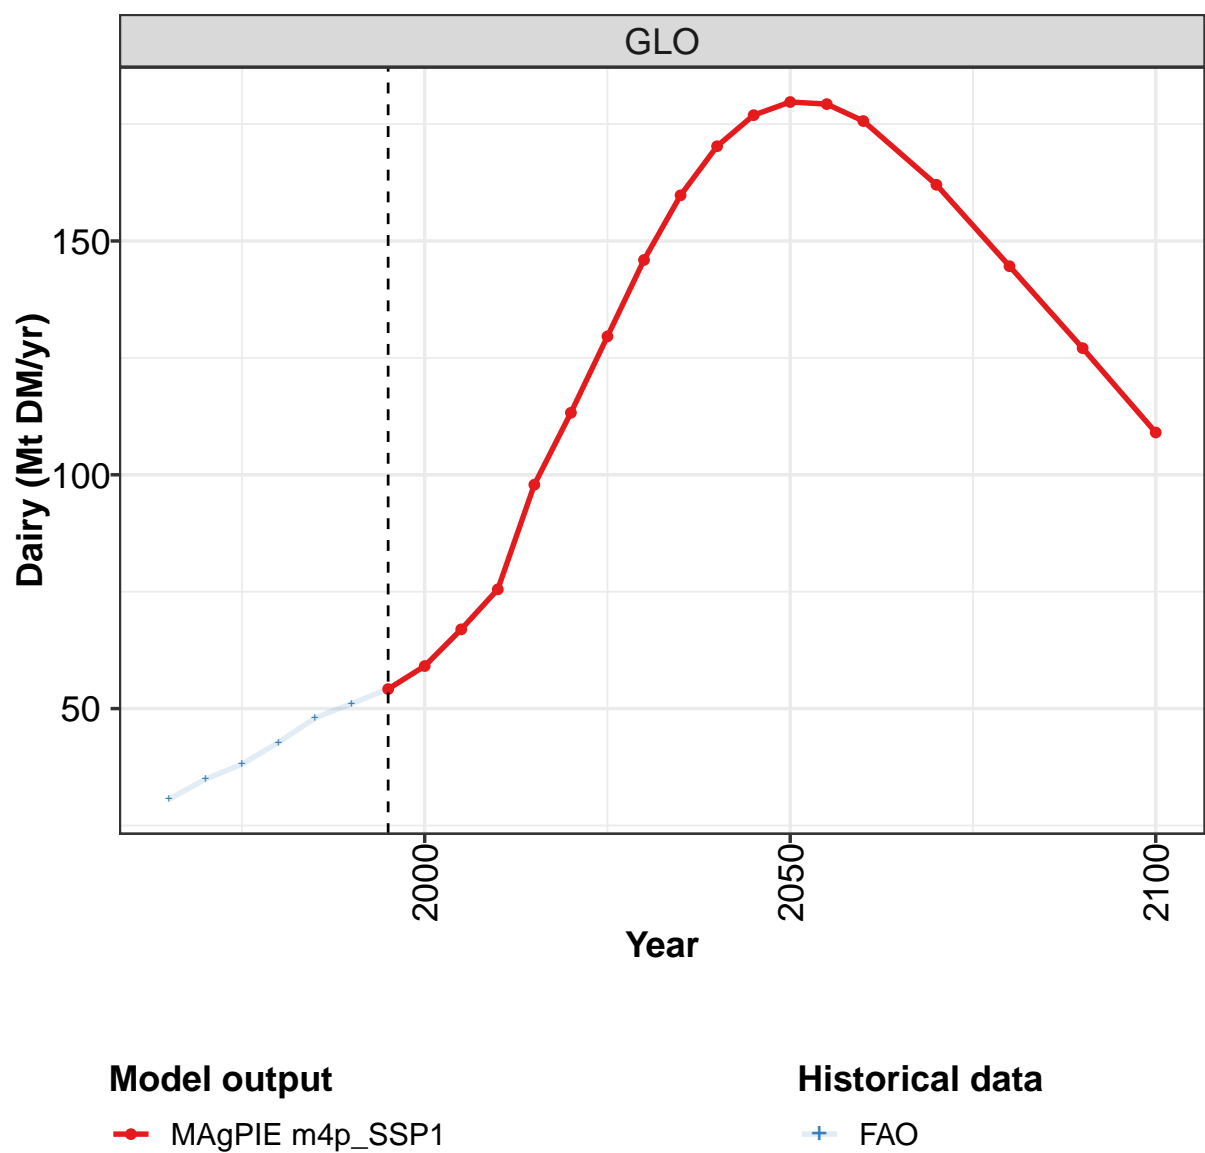

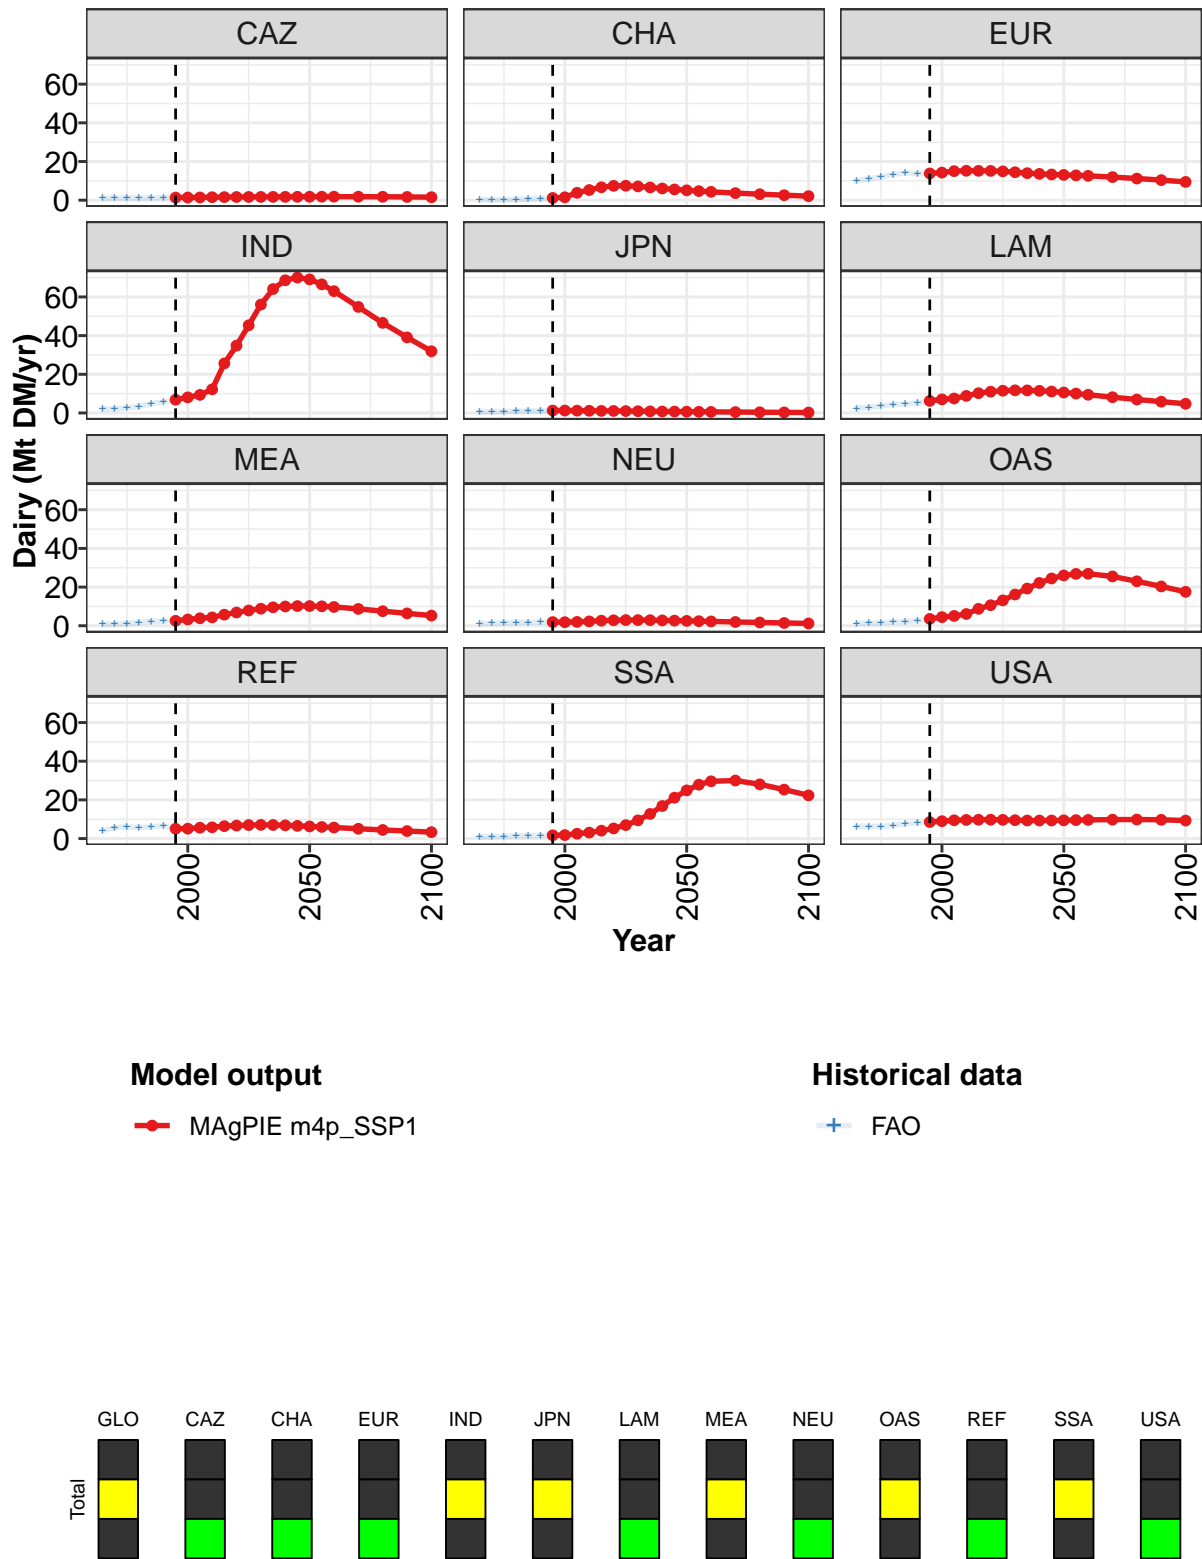

Figure 139: MAgPIE m4p\_SSP1 — Demand—Food—Livestock products—Dairy (Mt DM/yr)

|     | 1995 | 2000 | 2005 | 2010 | 2015 | 2020 | 2025 | 2030 | 2035 | 2040 | 2045 |
|-----|------|------|------|------|------|------|------|------|------|------|------|
| GLO | 54   | 59   | 67   | 75   | 98   | 113  | 130  | 146  | 160  | 170  | 177  |
| CAZ | 1    | 1    | 1    | 2    | 2    | 2    | 2    | 2    | 2    | 2    | 2    |
| CHA | 1    | 2    | 4    | 5    | 7    | 7    | 7    | 7    | 7    | 6    | 6    |
| EUR | 14   | 14   | 15   | 15   | 15   | 15   | 15   | 14   | 14   | 14   | 13   |
| IND | 7    | 8    | 9    | 12   | 26   | 35   | 45   | 56   | 64   | 69   | 70   |
| JPN | 1    | 1    | 1    | 1    | 1    | 1    | 1    | 1    | 1    | 1    | 1    |
| LAM | 6    | 7    | 8    | 9    | 10   | 11   | 12   | 12   | 12   | 11   | 11   |
| MEA | 3    | 3    | 4    | 4    | 6    | 7    | 8    | 9    | 10   | 10   | 10   |
| NEU | 2    | 2    | 2    | 2    | 3    | 3    | 3    | 3    | 3    | 3    | 3    |
| OAS | 4    | 4    | 5    | 6    | 9    | 11   | 13   | 16   | 19   | 22   | 24   |
| REF | 5    | 5    | 6    | 6    | 6    | 7    | 7    | 7    | 7    | 7    | 7    |
| SSA | 2    | 2    | 3    | 3    | 4    | 5    | 7    | 9    | 13   | 17   | 21   |
| USA | 9    | 9    | 9    | 10   | 10   | 10   | 10   | 10   | 9    | 9    | 9    |

Table 416: MAgPIE m4p\_SSP1 — Demand—Food—Livestock products—Dairy (Mt DM/yr) [PART 1/2]

|     | 2050 | 2055 | 2060 | 2070 | 2080 | 2090 | 2100 |
|-----|------|------|------|------|------|------|------|
| GLO | 180  | 179  | 176  | 162  | 145  | 127  | 109  |
| CAZ | 2    | 2    | 2    | 2    | 2    | 2    | 2    |
| CHA | 5    | 5    | 4    | 4    | 3    | 3    | 2    |
| EUR | 13   | 13   | 13   | 12   | 11   | 10   | 9    |
| IND | 69   | 67   | 63   | 55   | 47   | 39   | 32   |
| JPN | 1    | 1    | 1    | 0    | 0    | 0    | 0    |
| LAM | 11   | 10   | 9    | 8    | 7    | 6    | 5    |
| MEA | 10   | 10   | 10   | 9    | 8    | 6    | 5    |
| NEU | 3    | 2    | 2    | 2    | 2    | 1    | 1    |
| OAS | 26   | 27   | 27   | 26   | 23   | 20   | 18   |
| REF | 6    | 6    | 6    | 5    | 4    | 4    | 3    |
| SSA | 25   | 28   | 30   | 30   | 28   | 25   | 22   |
| USA | 9    | 10   | 10   | 10   | 10   | 10   | 9    |

Table 417: MAgPIE m4p\_SSP1 — Demand—Food—Livestock products—Dairy (Mt DM/yr) [PART 2/2]

|     | 1965 | 1970 | 1975 | 1980 | 1985 | 1990 | 1995 | 2000 | 2005 | 2010 |
|-----|------|------|------|------|------|------|------|------|------|------|
| GLO | 30.6 | 34.9 | 38.1 | 42.8 | 48.0 | 51.1 | 54.2 | 59.1 | 67.0 | 75.5 |
| CAZ | 1.0  | 1.1  | 1.1  | 1.1  | 1.2  | 1.4  | 1.4  | 1.4  | 1.4  | 1.6  |
| CHA | 0.2  | 0.2  | 0.3  | 0.4  | 0.6  | 0.9  | 1.2  | 1.5  | 3.8  | 5.3  |
| EUR | 10.0 | 11.1 | 12.0 | 13.2 | 14.3 | 13.7 | 13.8 | 14.3 | 15.0 | 15.2 |
| IND | 2.0  | 2.2  | 2.7  | 3.3  | 4.8  | 5.7  | 6.9  | 8.1  | 9.4  | 12.2 |
| JPN | 0.5  | 0.7  | 0.7  | 1.0  | 1.1  | 1.2  | 1.3  | 1.3  | 1.2  | 1.1  |
| LAM | 2.4  | 2.9  | 3.6  | 4.5  | 4.6  | 5.0  | 6.2  | 7.0  | 7.5  | 8.8  |
| MEA | 0.8  | 0.9  | 1.2  | 1.8  | 2.3  | 2.4  | 2.6  | 3.3  | 3.9  | 4.3  |
| NEU | 1.2  | 1.3  | 1.5  | 1.8  | 1.8  | 1.8  | 1.9  | 1.8  | 2.0  | 2.3  |
| OAS | 1.2  | 1.4  | 1.5  | 1.9  | 2.1  | 2.7  | 3.5  | 4.5  | 5.1  | 6.1  |
| REF | 4.1  | 5.7  | 6.1  | 5.7  | 6.0  | 6.7  | 5.1  | 5.1  | 5.6  | 5.8  |
| SSA | 0.9  | 1.0  | 1.2  | 1.4  | 1.5  | 1.6  | 1.7  | 1.8  | 2.5  | 3.1  |
| USA | 6.3  | 6.3  | 6.3  | 6.8  | 7.6  | 8.0  | 8.6  | 9.0  | 9.5  | 9.6  |

Table 418: FAO — Demand—Food—Livestock products—Dairy (Mt DM/yr)

7.3.2
Eggs

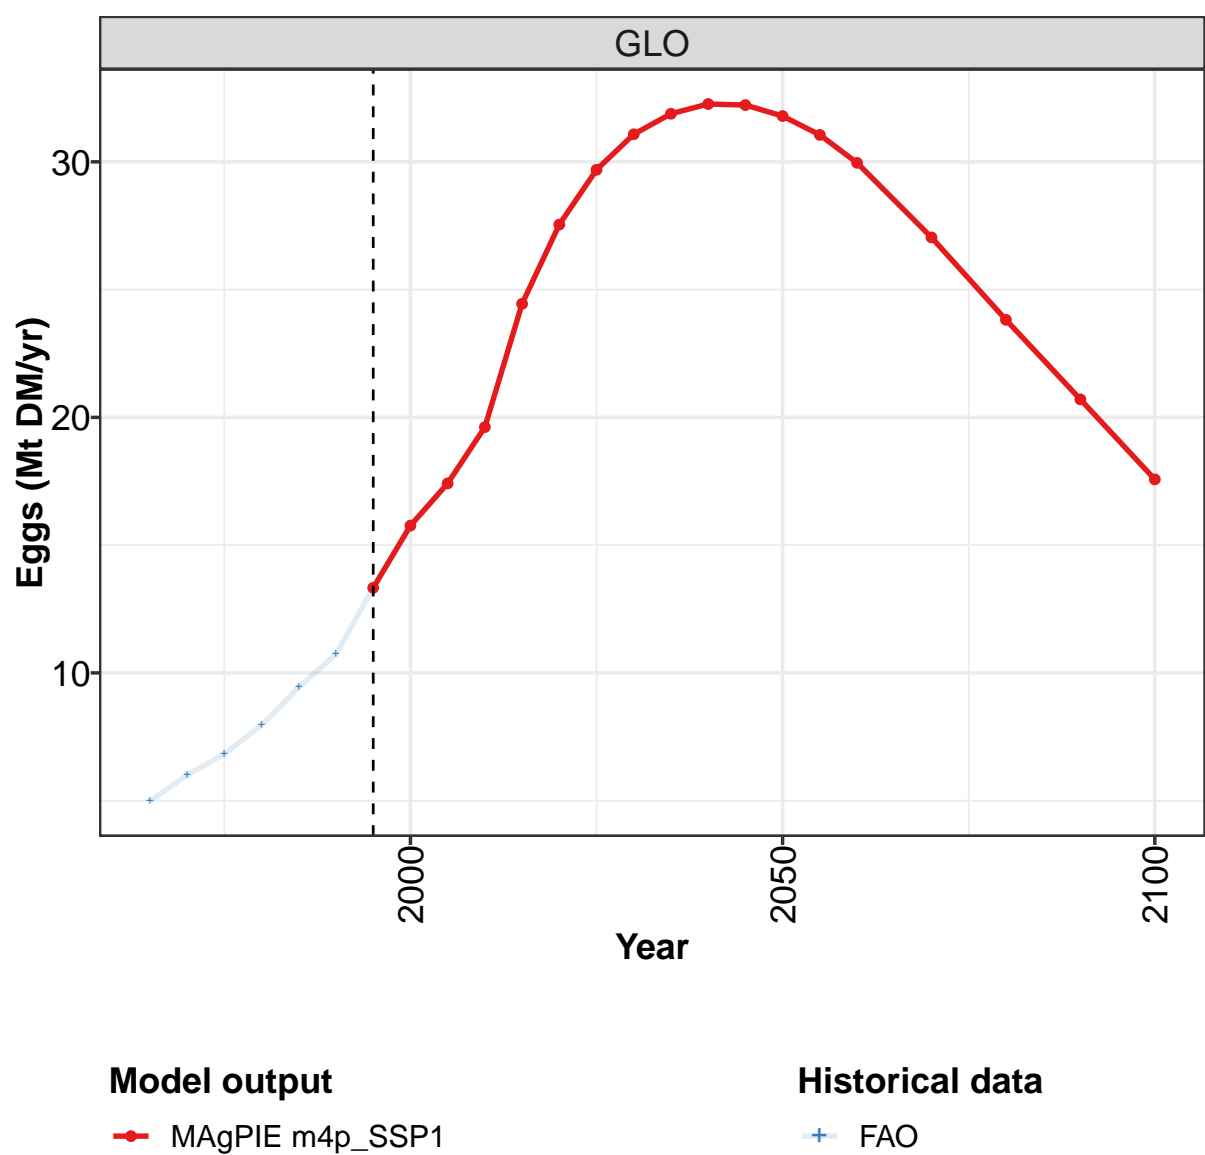

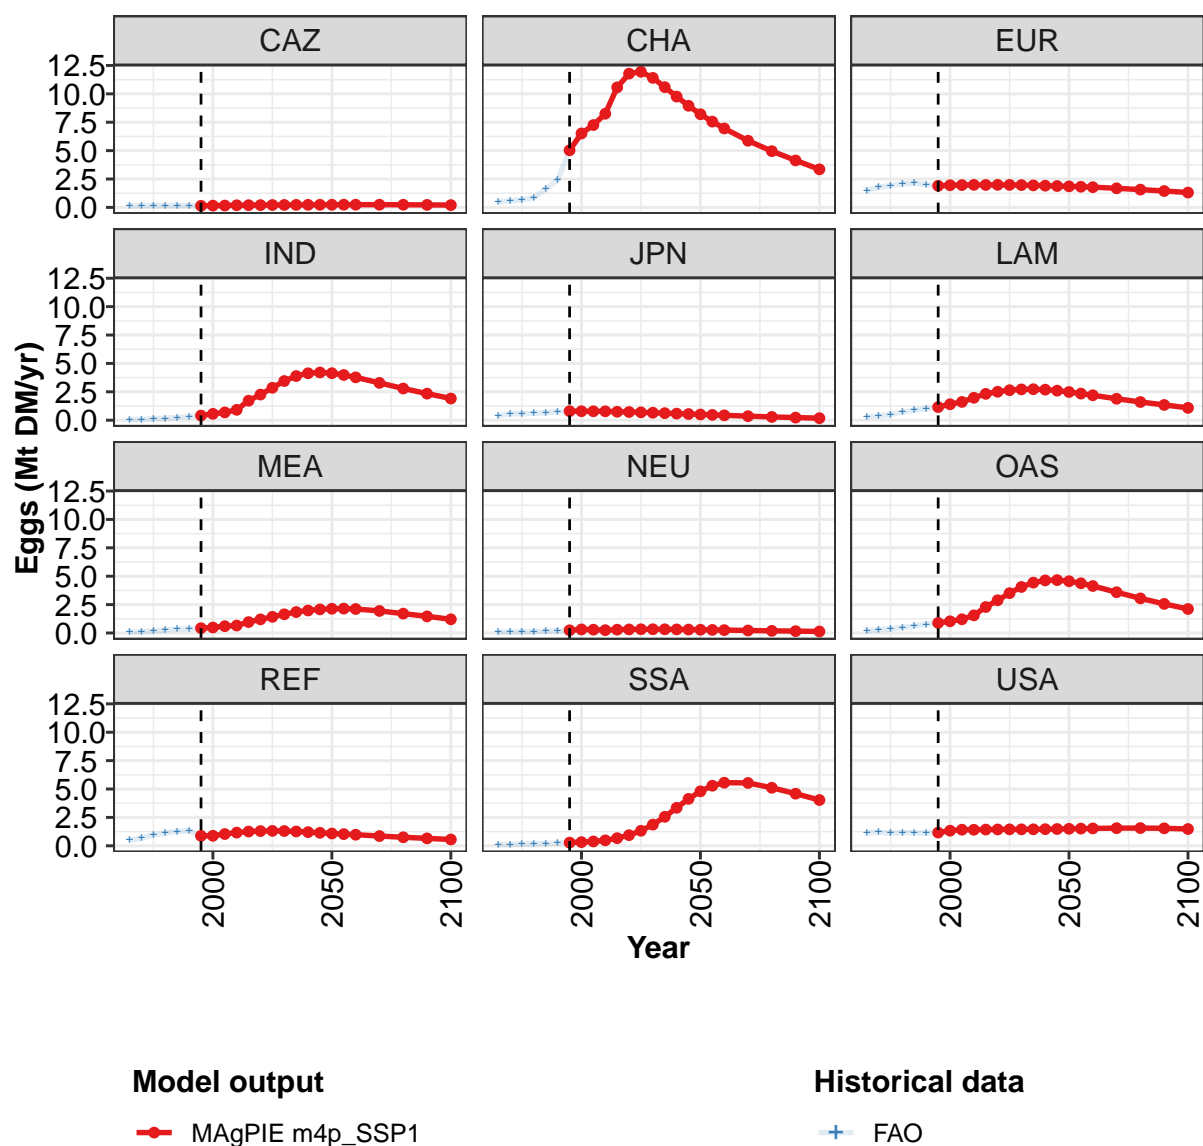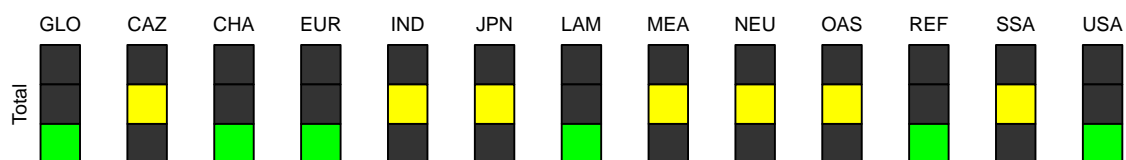

Figure 140: MAgPIE m4p\_SSP1 — Demand—Food—Livestock products—Eggs (Mt DM/yr)

|     | 1995 | 2000 | 2005 | 2010 | 2015 | 2020 | 2025 | 2030 | 2035 | 2040 | 2045 |
|-----|------|------|------|------|------|------|------|------|------|------|------|
| GLO | 13.3 | 15.8 | 17.4 | 19.6 | 24.4 | 27.5 | 29.7 | 31.1 | 31.9 | 32.3 | 32.2 |
| CAZ | 0.1  | 0.2  | 0.2  | 0.2  | 0.2  | 0.2  | 0.2  | 0.2  | 0.2  | 0.2  | 0.2  |
| CHA | 5.0  | 6.5  | 7.3  | 8.3  | 10.6 | 11.8 | 11.9 | 11.4 | 10.6 | 9.8  | 9.0  |
| EUR | 1.9  | 2.0  | 2.0  | 2.0  | 2.0  | 2.0  | 2.0  | 2.0  | 1.9  | 1.9  | 1.9  |
| IND | 0.4  | 0.6  | 0.7  | 0.9  | 1.7  | 2.3  | 2.9  | 3.5  | 3.9  | 4.1  | 4.2  |
| JPN | 0.8  | 0.8  | 0.8  | 0.8  | 0.7  | 0.7  | 0.7  | 0.7  | 0.6  | 0.6  | 0.5  |
| LAM | 1.2  | 1.4  | 1.6  | 2.0  | 2.3  | 2.5  | 2.6  | 2.7  | 2.7  | 2.7  | 2.6  |
| MEA | 0.4  | 0.5  | 0.6  | 0.7  | 1.0  | 1.2  | 1.4  | 1.6  | 1.8  | 2.0  | 2.1  |
| NEU | 0.2  | 0.3  | 0.3  | 0.2  | 0.3  | 0.3  | 0.3  | 0.3  | 0.3  | 0.3  | 0.3  |
| OAS | 0.9  | 1.0  | 1.2  | 1.6  | 2.3  | 2.9  | 3.5  | 4.1  | 4.4  | 4.6  | 4.7  |
| REF | 0.9  | 0.9  | 1.0  | 1.2  | 1.3  | 1.3  | 1.3  | 1.3  | 1.3  | 1.2  | 1.1  |
| SSA | 0.3  | 0.3  | 0.4  | 0.5  | 0.7  | 0.9  | 1.3  | 1.9  | 2.6  | 3.3  | 4.1  |
| USA | 1.2  | 1.3  | 1.4  | 1.4  | 1.4  | 1.4  | 1.4  | 1.4  | 1.5  | 1.5  | 1.5  |

Table 419: MAgPIE m4p\_SSP1 — Demand—Food—Livestock products—Eggs (Mt DM/yr) [PART 1/2]

|     | 2050 | 2055 | 2060 | 2070 | 2080 | 2090 | 2100 |
|-----|------|------|------|------|------|------|------|
| GLO | 31.8 | 31.1 | 30.0 | 27.0 | 23.8 | 20.7 | 17.6 |
| CAZ | 0.2  | 0.2  | 0.2  | 0.2  | 0.2  | 0.2  | 0.2  |
| CHA | 8.2  | 7.6  | 7.0  | 5.9  | 5.0  | 4.1  | 3.4  |
| EUR | 1.9  | 1.8  | 1.8  | 1.7  | 1.6  | 1.4  | 1.3  |
| IND | 4.1  | 4.0  | 3.8  | 3.3  | 2.8  | 2.3  | 1.9  |
| JPN | 0.5  | 0.5  | 0.4  | 0.4  | 0.3  | 0.2  | 0.2  |
| LAM | 2.5  | 2.3  | 2.2  | 1.9  | 1.6  | 1.3  | 1.1  |
| MEA | 2.1  | 2.1  | 2.1  | 1.9  | 1.7  | 1.5  | 1.2  |
| NEU | 0.3  | 0.3  | 0.3  | 0.2  | 0.2  | 0.2  | 0.1  |
| OAS | 4.6  | 4.4  | 4.1  | 3.6  | 3.0  | 2.6  | 2.1  |
| REF | 1.1  | 1.0  | 1.0  | 0.9  | 0.8  | 0.7  | 0.6  |
| SSA | 4.8  | 5.3  | 5.6  | 5.5  | 5.1  | 4.6  | 4.0  |
| USA | 1.5  | 1.5  | 1.5  | 1.6  | 1.6  | 1.5  | 1.5  |

Table 420: MAgPIE m4p\_SSP1 — Demand—Food—Livestock products—Eggs (Mt DM/yr) [PART 2/2]

|     | 1965 | 1970 | 1975 | 1980 | 1985 | 1990 | 1995 | 2000 | 2005 | 2010 |
|-----|------|------|------|------|------|------|------|------|------|------|
| GLO | 5.0  | 6.0  | 6.8  | 8.0  | 9.4  | 10.7 | 13.3 | 15.8 | 17.4 | 19.6 |
| CAZ | 0.1  | 0.2  | 0.2  | 0.2  | 0.2  | 0.2  | 0.1  | 0.2  | 0.2  | 0.2  |
| CHA | 0.5  | 0.6  | 0.7  | 0.9  | 1.6  | 2.4  | 5.0  | 6.5  | 7.3  | 8.3  |
| EUR | 1.5  | 1.8  | 1.9  | 2.1  | 2.1  | 2.0  | 1.9  | 2.0  | 2.0  | 2.0  |
| IND | 0.1  | 0.1  | 0.1  | 0.2  | 0.3  | 0.3  | 0.4  | 0.6  | 0.7  | 0.9  |
| JPN | 0.4  | 0.6  | 0.6  | 0.6  | 0.7  | 0.7  | 0.8  | 0.8  | 0.8  | 0.8  |
| LAM | 0.3  | 0.4  | 0.5  | 0.7  | 0.9  | 1.0  | 1.2  | 1.4  | 1.6  | 2.0  |
| MEA | 0.1  | 0.1  | 0.2  | 0.3  | 0.3  | 0.4  | 0.4  | 0.5  | 0.6  | 0.7  |
| NEU | 0.1  | 0.1  | 0.1  | 0.1  | 0.2  | 0.2  | 0.2  | 0.3  | 0.3  | 0.2  |
| OAS | 0.2  | 0.3  | 0.4  | 0.5  | 0.6  | 0.8  | 0.9  | 1.0  | 1.2  | 1.6  |
| REF | 0.5  | 0.7  | 0.9  | 1.1  | 1.3  | 1.3  | 0.9  | 0.9  | 1.0  | 1.2  |
| SSA | 0.1  | 0.1  | 0.2  | 0.2  | 0.2  | 0.3  | 0.3  | 0.3  | 0.4  | 0.5  |
| USA | 1.1  | 1.2  | 1.1  | 1.2  | 1.1  | 1.1  | 1.2  | 1.3  | 1.4  | 1.4  |

Table 421: FAO — Demand—Food—Livestock products—Eggs (Mt DM/yr)



7.3.3
Monogastric meat

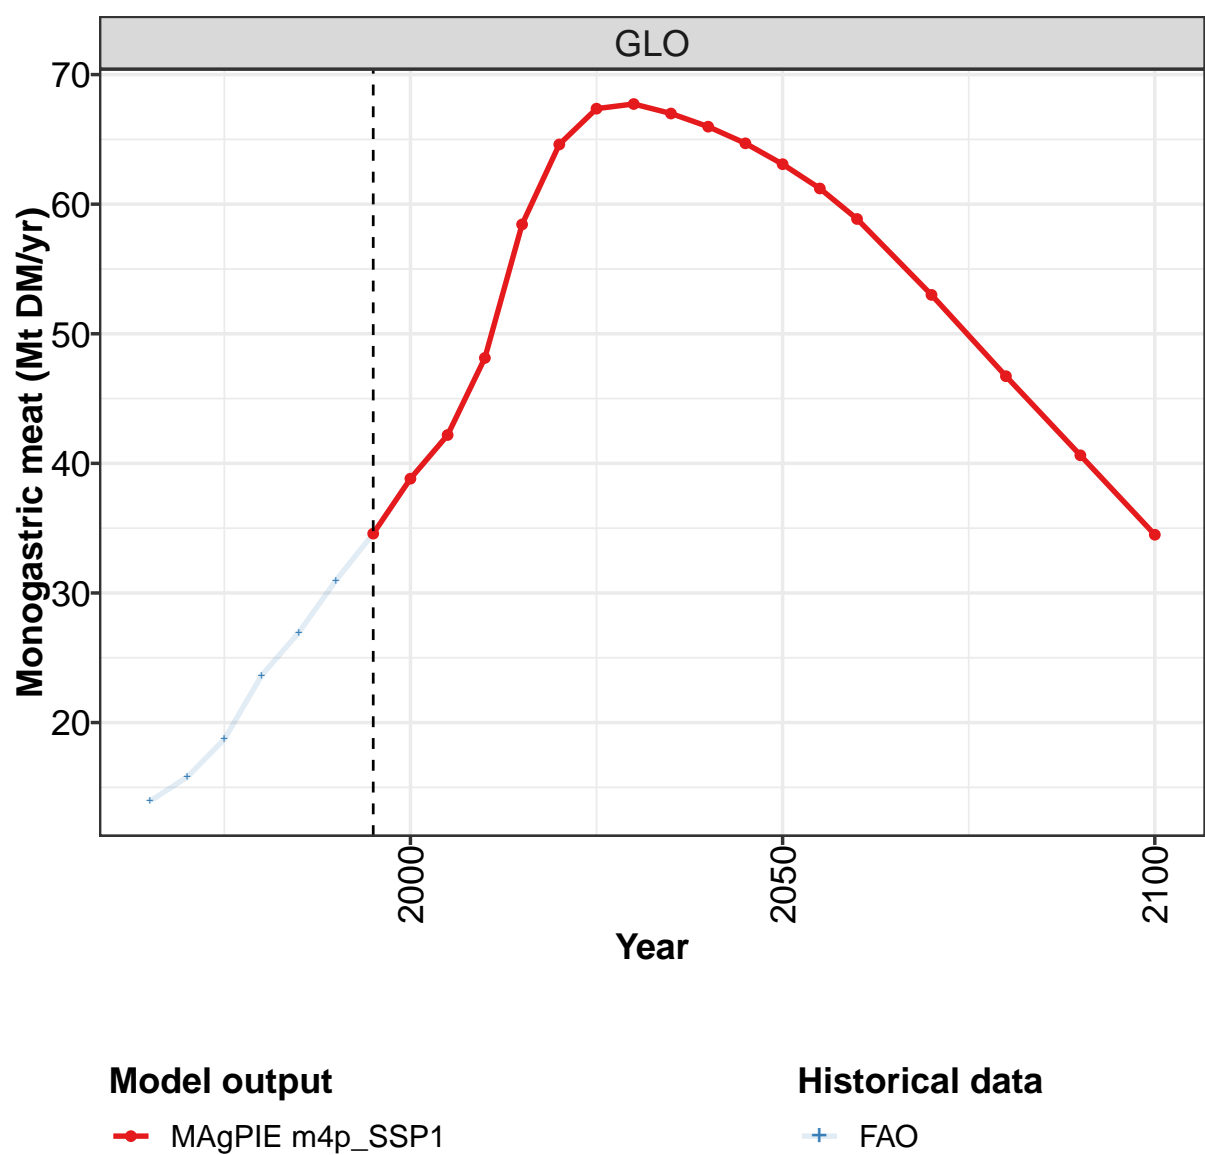

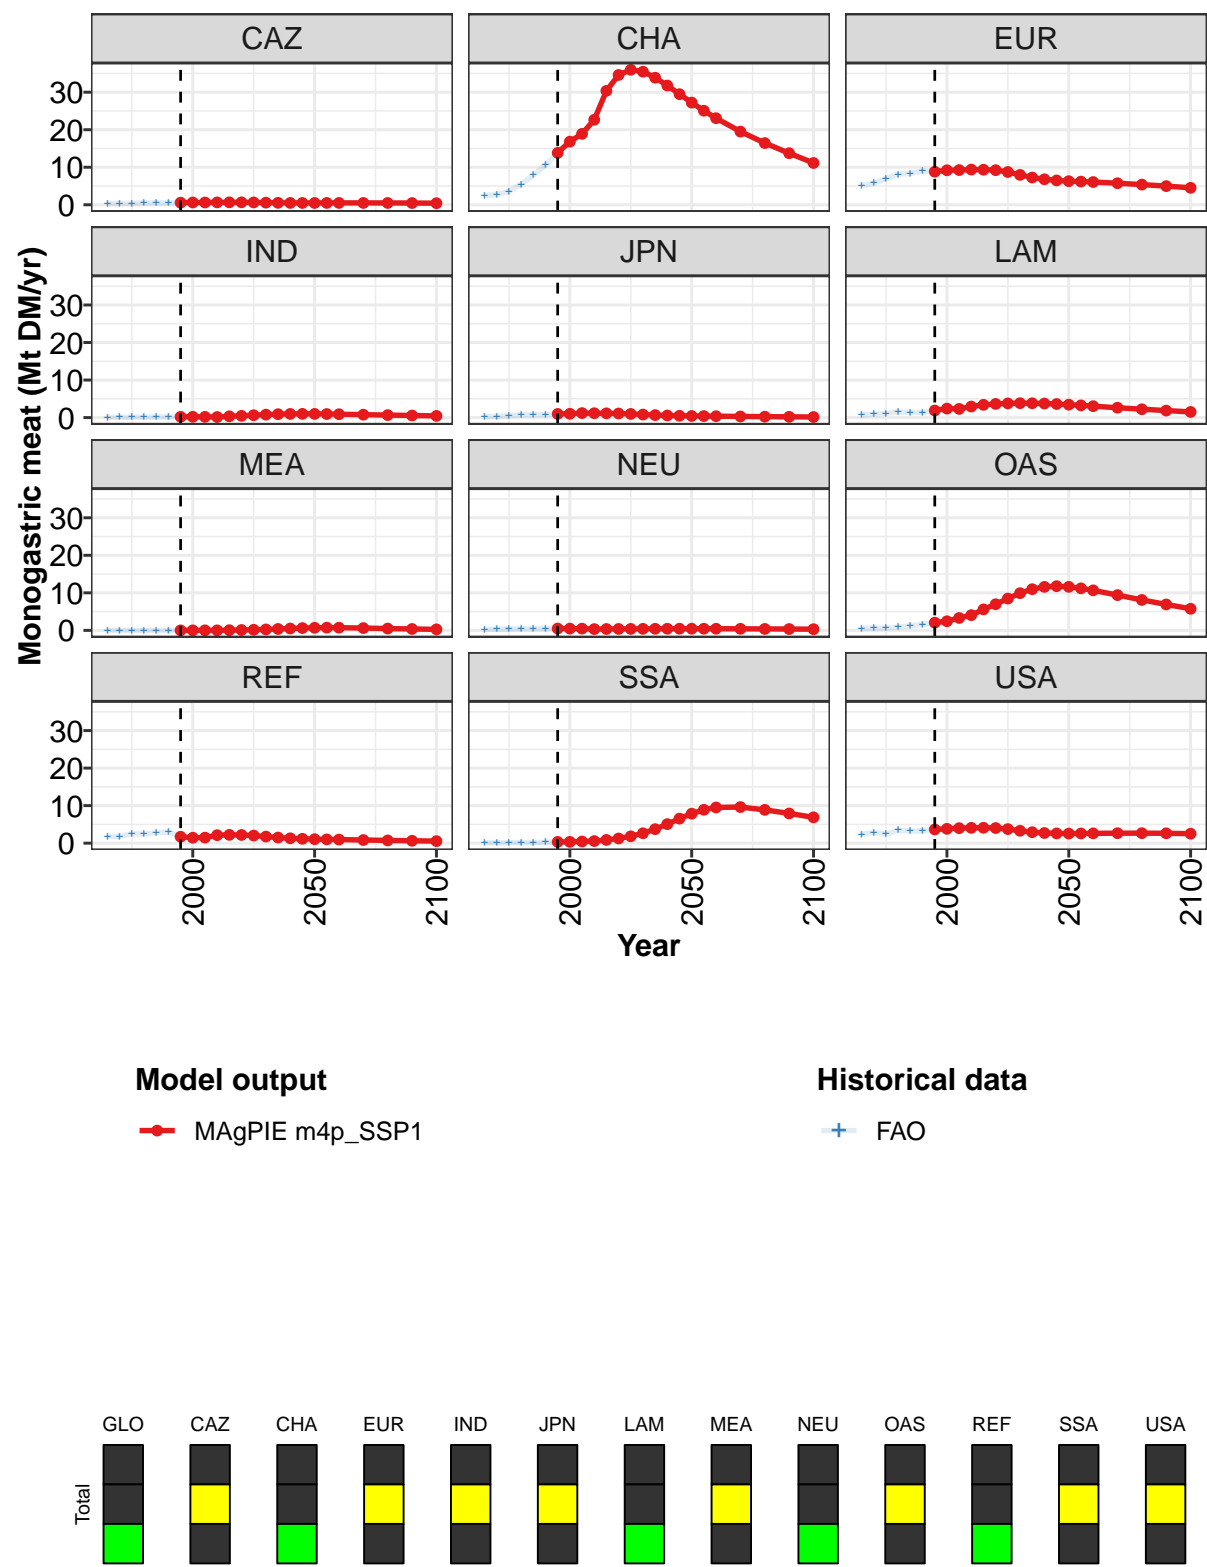

Figure 141: MAgPIE m4p\_SSP1 — Demand—Food—Livestock products—Monogastric meat (Mt DM/yr)

|     | 1995 | 2000 | 2005 | 2010 | 2015 | 2020 | 2025 | 2030 | 2035 | 2040 | 2045 |
|-----|------|------|------|------|------|------|------|------|------|------|------|
| GLO | 34.6 | 38.8 | 42.2 | 48.1 | 58.4 | 64.6 | 67.4 | 67.7 | 67.0 | 66.0 | 64.7 |
| CAZ | 0.6  | 0.6  | 0.6  | 0.6  | 0.7  | 0.7  | 0.6  | 0.6  | 0.5  | 0.5  | 0.5  |
| CHA | 13.8 | 16.8 | 18.9 | 22.7 | 30.4 | 34.6 | 36.0 | 35.5 | 33.9 | 31.8 | 29.5 |
| EUR | 8.8  | 9.2  | 9.3  | 9.4  | 9.4  | 9.2  | 8.7  | 8.0  | 7.3  | 6.8  | 6.5  |
| IND | 0.2  | 0.2  | 0.2  | 0.2  | 0.3  | 0.5  | 0.6  | 0.8  | 0.9  | 1.0  | 1.0  |
| JPN | 1.0  | 1.0  | 1.2  | 1.2  | 1.1  | 1.1  | 1.0  | 0.8  | 0.7  | 0.6  | 0.5  |
| LAM | 1.9  | 2.4  | 2.3  | 2.9  | 3.4  | 3.6  | 3.8  | 3.8  | 3.8  | 3.7  | 3.6  |
| MEA | 0.0  | 0.0  | 0.0  | 0.0  | 0.1  | 0.1  | 0.2  | 0.3  | 0.4  | 0.5  | 0.6  |
| NEU | 0.5  | 0.5  | 0.5  | 0.3  | 0.4  | 0.4  | 0.4  | 0.4  | 0.4  | 0.4  | 0.4  |
| OAS | 2.1  | 2.4  | 3.3  | 4.1  | 5.6  | 7.0  | 8.5  | 9.9  | 11.0 | 11.6 | 11.8 |
| REF | 1.7  | 1.5  | 1.5  | 2.1  | 2.2  | 2.2  | 2.0  | 1.8  | 1.5  | 1.3  | 1.2  |
| SSA | 0.3  | 0.3  | 0.4  | 0.6  | 0.9  | 1.3  | 1.8  | 2.6  | 3.7  | 5.1  | 6.5  |
| USA | 3.7  | 3.8  | 4.0  | 4.1  | 4.1  | 4.0  | 3.7  | 3.3  | 2.9  | 2.7  | 2.6  |

Table 422: MAgPIE m4p\_SSP1 — Demand—Food—Livestock products—Monogastric meat (Mt DM/yr)  
[PART 1/2]

|     | 2050 | 2055 | 2060 | 2070 | 2080 | 2090 | 2100 |
|-----|------|------|------|------|------|------|------|
| GLO | 63.1 | 61.2 | 58.9 | 53.0 | 46.7 | 40.6 | 34.5 |
| CAZ | 0.5  | 0.5  | 0.5  | 0.5  | 0.5  | 0.5  | 0.4  |
| CHA | 27.2 | 25.1 | 23.1 | 19.5 | 16.5 | 13.7 | 11.1 |
| EUR | 6.3  | 6.2  | 6.1  | 5.7  | 5.4  | 5.0  | 4.5  |
| IND | 1.0  | 0.9  | 0.9  | 0.8  | 0.7  | 0.6  | 0.5  |
| JPN | 0.4  | 0.4  | 0.4  | 0.3  | 0.2  | 0.2  | 0.2  |
| LAM | 3.4  | 3.3  | 3.0  | 2.6  | 2.2  | 1.9  | 1.5  |
| MEA | 0.7  | 0.7  | 0.7  | 0.6  | 0.5  | 0.4  | 0.3  |
| NEU | 0.4  | 0.4  | 0.4  | 0.4  | 0.4  | 0.4  | 0.3  |
| OAS | 11.6 | 11.2 | 10.7 | 9.4  | 8.1  | 6.9  | 5.8  |
| REF | 1.1  | 1.0  | 1.0  | 0.8  | 0.7  | 0.6  | 0.5  |
| SSA | 7.9  | 8.9  | 9.5  | 9.6  | 8.9  | 7.9  | 6.9  |
| USA | 2.6  | 2.6  | 2.6  | 2.7  | 2.7  | 2.6  | 2.5  |

Table 423: MAgPIE m4p\_SSP1 — Demand—Food—Livestock products—Monogastric meat (Mt DM/yr)  
[PART 2/2]

|     | 1965 | 1970 | 1975 | 1980 | 1985 | 1990 | 1995 | 2000 | 2005 | 2010 |
|-----|------|------|------|------|------|------|------|------|------|------|
| GLO | 13.9 | 15.8 | 18.7 | 23.6 | 26.9 | 31.0 | 34.6 | 38.8 | 42.2 | 48.1 |
| CAZ | 0.3  | 0.4  | 0.4  | 0.5  | 0.5  | 0.5  | 0.6  | 0.6  | 0.6  | 0.6  |
| CHA | 2.5  | 2.7  | 3.6  | 5.5  | 7.9  | 10.6 | 13.8 | 16.8 | 18.9 | 22.7 |
| EUR | 5.1  | 5.7  | 7.0  | 8.1  | 8.4  | 8.9  | 8.8  | 9.2  | 9.2  | 9.4  |
| IND | 0.1  | 0.1  | 0.1  | 0.1  | 0.2  | 0.2  | 0.2  | 0.2  | 0.2  | 0.2  |
| JPN | 0.2  | 0.3  | 0.5  | 0.7  | 0.8  | 0.9  | 1.0  | 1.0  | 1.2  | 1.2  |
| LAM | 0.7  | 0.9  | 1.1  | 1.4  | 1.4  | 1.3  | 1.9  | 2.4  | 2.3  | 2.9  |
| MEA | 0.0  | 0.0  | 0.0  | 0.0  | 0.0  | 0.0  | 0.0  | 0.0  | 0.0  | 0.0  |
| NEU | 0.3  | 0.3  | 0.4  | 0.4  | 0.5  | 0.5  | 0.5  | 0.5  | 0.5  | 0.3  |
| OAS | 0.5  | 0.6  | 0.6  | 0.8  | 1.2  | 1.6  | 2.1  | 2.4  | 3.3  | 4.1  |
| REF | 1.8  | 1.8  | 2.5  | 2.4  | 2.8  | 3.0  | 1.7  | 1.5  | 1.5  | 2.1  |
| SSA | 0.1  | 0.1  | 0.1  | 0.1  | 0.2  | 0.3  | 0.3  | 0.4  | 0.4  | 0.6  |
| USA | 2.4  | 2.8  | 2.4  | 3.4  | 3.2  | 3.3  | 3.7  | 3.8  | 4.0  | 4.1  |

Table 424: FAO — Demand—Food—Livestock products—Monogastric meat (Mt DM/yr)

7.3.4
Poultry meat

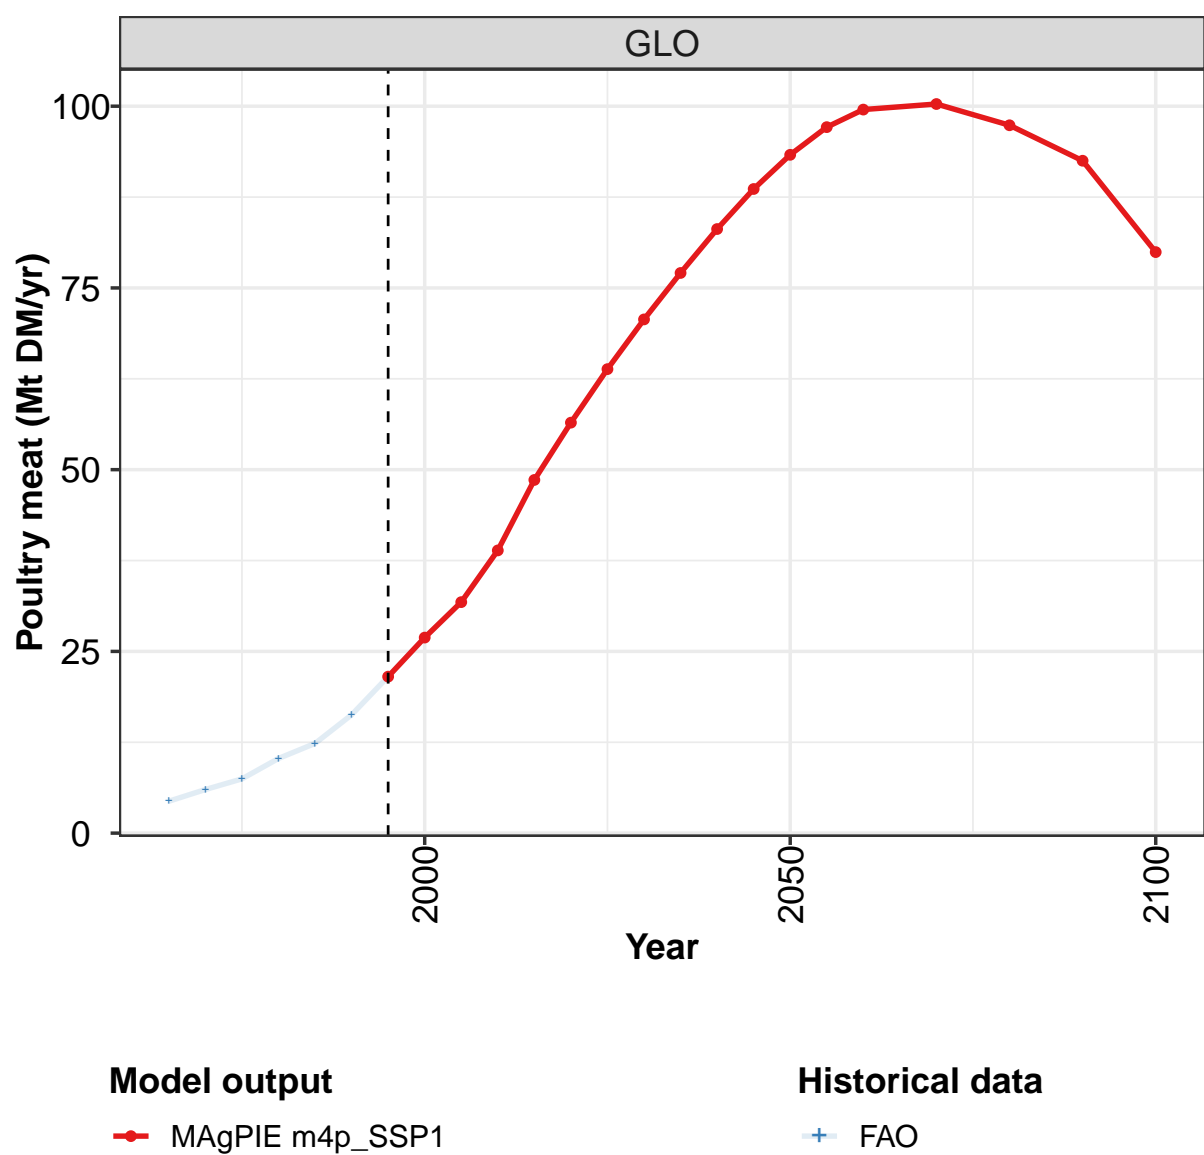

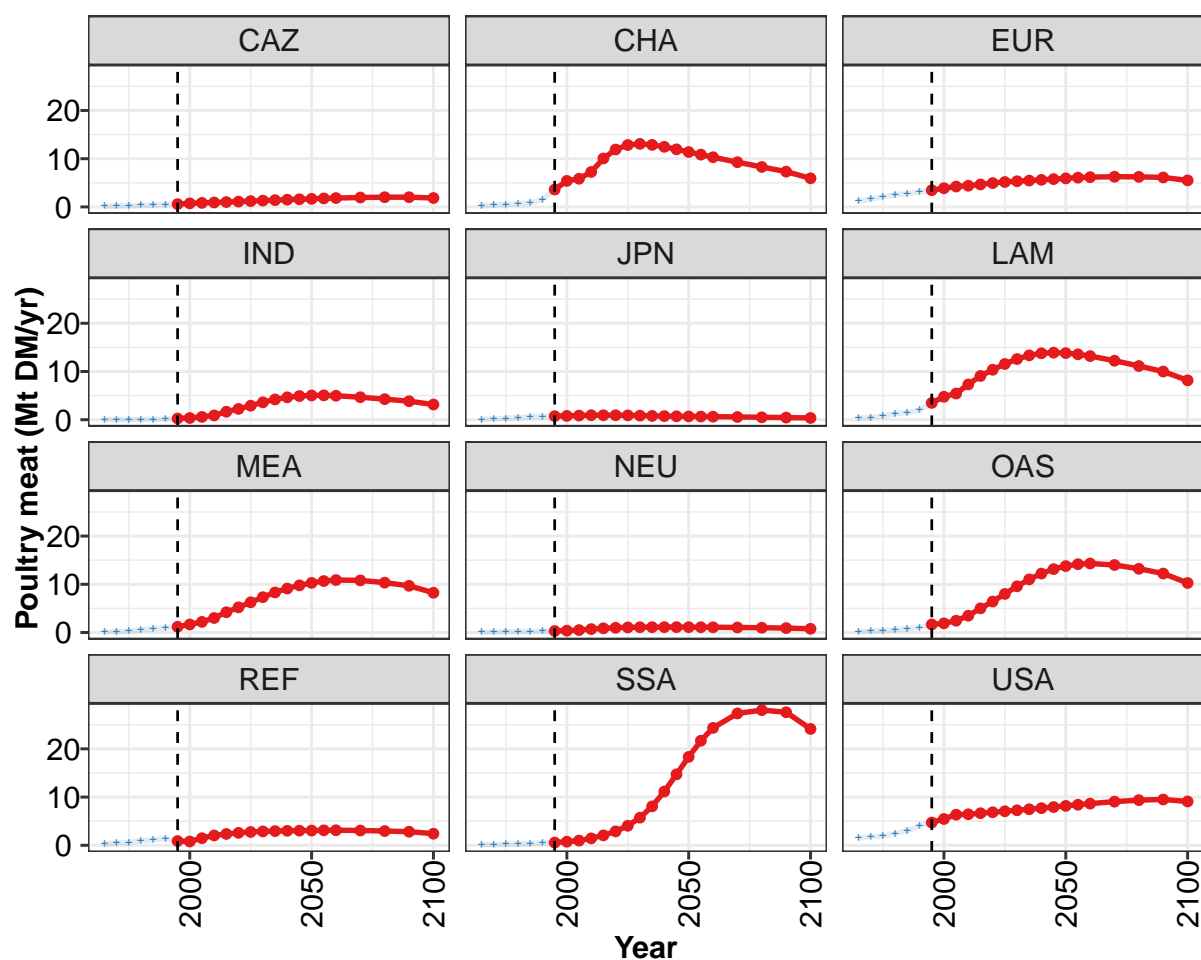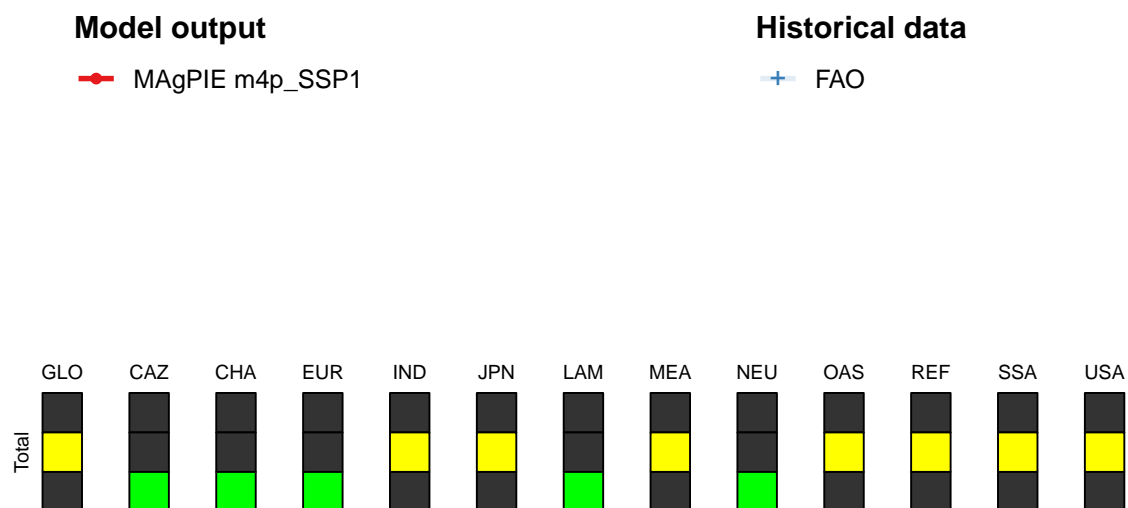

Figure 142: MAgPIE m4p\_SSP1 — Demand—Food—Livestock products—Poultry meat (Mt DM/yr)

|     | 1995 | 2000 | 2005 | 2010 | 2015 | 2020 | 2025 | 2030 | 2035 | 2040 | 2045 |
|-----|------|------|------|------|------|------|------|------|------|------|------|
| GLO | 22   | 27   | 32   | 39   | 49   | 56   | 64   | 71   | 77   | 83   | 89   |
| CAZ | 1    | 1    | 1    | 1    | 1    | 1    | 1    | 1    | 1    | 1    | 2    |
| CHA | 4    | 5    | 6    | 7    | 10   | 12   | 13   | 13   | 13   | 12   | 12   |
| EUR | 3    | 4    | 4    | 4    | 5    | 5    | 5    | 5    | 5    | 6    | 6    |
| IND | 0    | 0    | 1    | 1    | 2    | 2    | 3    | 4    | 4    | 5    | 5    |
| JPN | 1    | 1    | 1    | 1    | 1    | 1    | 1    | 1    | 1    | 1    | 1    |
| LAM | 3    | 5    | 5    | 7    | 9    | 10   | 12   | 13   | 13   | 14   | 14   |
| MEA | 1    | 2    | 2    | 3    | 4    | 5    | 6    | 7    | 8    | 9    | 10   |
| NEU | 0    | 0    | 1    | 1    | 1    | 1    | 1    | 1    | 1    | 1    | 1    |
| OAS | 2    | 2    | 2    | 3    | 5    | 6    | 8    | 10   | 11   | 12   | 13   |
| REF | 1    | 1    | 1    | 2    | 2    | 3    | 3    | 3    | 3    | 3    | 3    |
| SSA | 1    | 1    | 1    | 1    | 2    | 3    | 4    | 6    | 8    | 11   | 15   |
| USA | 5    | 5    | 6    | 6    | 7    | 7    | 7    | 7    | 7    | 8    | 8    |

Table 425: MAgPIE m4p\_SSP1 — Demand—Food—Livestock products—Poultry meat (Mt DM/yr) [PART 1/2]

|     | 2050 | 2055 | 2060 | 2070 | 2080 | 2090 | 2100 |
|-----|------|------|------|------|------|------|------|
| GLO | 93   | 97   | 100  | 100  | 97   | 93   | 80   |
| CAZ | 2    | 2    | 2    | 2    | 2    | 2    | 2    |
| CHA | 11   | 11   | 10   | 9    | 8    | 7    | 6    |
| EUR | 6    | 6    | 6    | 6    | 6    | 6    | 6    |
| IND | 5    | 5    | 5    | 5    | 4    | 4    | 3    |
| JPN | 1    | 1    | 1    | 1    | 1    | 0    | 0    |
| LAM | 14   | 14   | 13   | 12   | 11   | 10   | 8    |
| MEA | 10   | 11   | 11   | 11   | 10   | 10   | 8    |
| NEU | 1    | 1    | 1    | 1    | 1    | 1    | 1    |
| OAS | 14   | 14   | 14   | 14   | 13   | 12   | 10   |
| REF | 3    | 3    | 3    | 3    | 3    | 3    | 2    |
| SSA | 18   | 22   | 24   | 27   | 28   | 28   | 24   |
| USA | 8    | 8    | 9    | 9    | 9    | 10   | 9    |

Table 426: MAgPIE m4p\_SSP1 — Demand—Food—Livestock products—Poultry meat (Mt DM/yr) [PART 2/2]

|     | 1965 | 1970 | 1975 | 1980 | 1985 | 1990 | 1995 | 2000 | 2005 | 2010 |
|-----|------|------|------|------|------|------|------|------|------|------|
| GLO | 4.4  | 6.0  | 7.5  | 10.3 | 12.3 | 16.3 | 21.5 | 26.9 | 31.8 | 38.9 |
| CAZ | 0.2  | 0.2  | 0.3  | 0.4  | 0.4  | 0.5  | 0.6  | 0.7  | 0.8  | 0.9  |
| CHA | 0.3  | 0.4  | 0.5  | 0.7  | 0.8  | 1.6  | 3.6  | 5.4  | 5.8  | 7.3  |
| EUR | 1.2  | 1.6  | 2.1  | 2.5  | 2.7  | 3.1  | 3.5  | 3.9  | 4.2  | 4.4  |
| IND | 0.0  | 0.0  | 0.0  | 0.1  | 0.1  | 0.2  | 0.3  | 0.4  | 0.6  | 0.9  |
| JPN | 0.1  | 0.2  | 0.3  | 0.5  | 0.6  | 0.7  | 0.7  | 0.8  | 0.9  | 0.9  |
| LAM | 0.3  | 0.5  | 0.8  | 1.2  | 1.4  | 2.0  | 3.5  | 4.8  | 5.4  | 7.3  |
| MEA | 0.1  | 0.2  | 0.3  | 0.5  | 0.8  | 0.9  | 1.2  | 1.7  | 2.2  | 3.0  |
| NEU | 0.1  | 0.1  | 0.1  | 0.2  | 0.2  | 0.3  | 0.3  | 0.4  | 0.5  | 0.7  |
| OAS | 0.2  | 0.3  | 0.4  | 0.5  | 0.7  | 1.0  | 1.7  | 1.9  | 2.4  | 3.5  |
| REF | 0.3  | 0.4  | 0.6  | 0.9  | 1.2  | 1.4  | 0.9  | 0.8  | 1.5  | 2.0  |
| SSA | 0.1  | 0.2  | 0.2  | 0.3  | 0.4  | 0.5  | 0.6  | 0.7  | 1.0  | 1.4  |
| USA | 1.5  | 1.8  | 1.9  | 2.5  | 3.0  | 4.1  | 4.7  | 5.5  | 6.4  | 6.4  |

Table 427: FAO — Demand—Food—Livestock products—Poultry meat (Mt DM/yr)

7.3.5 Ruminant meat

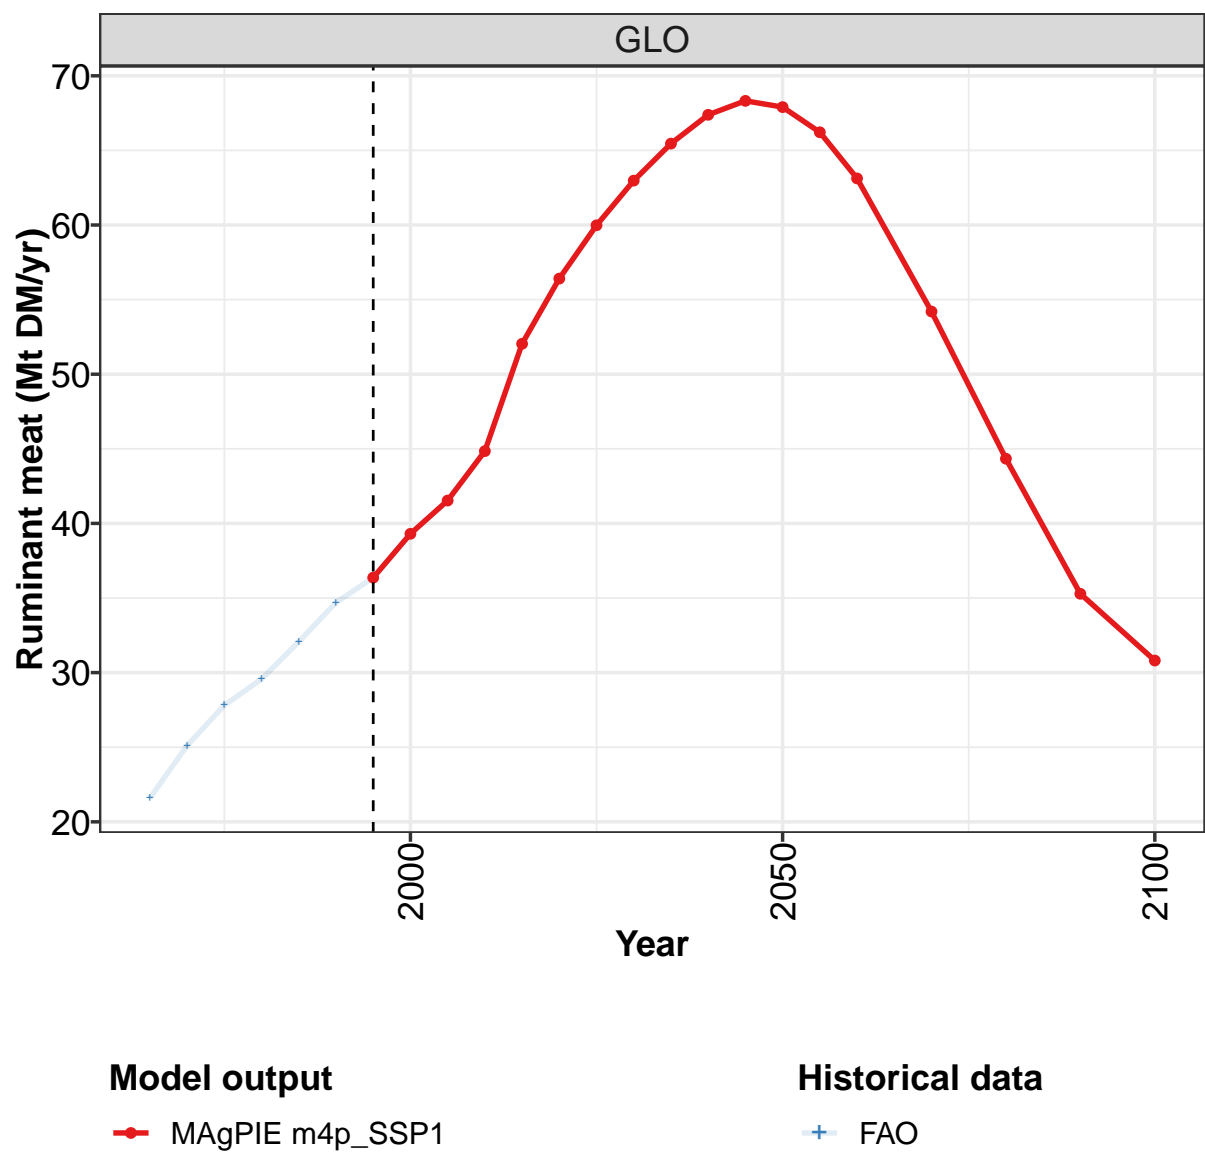

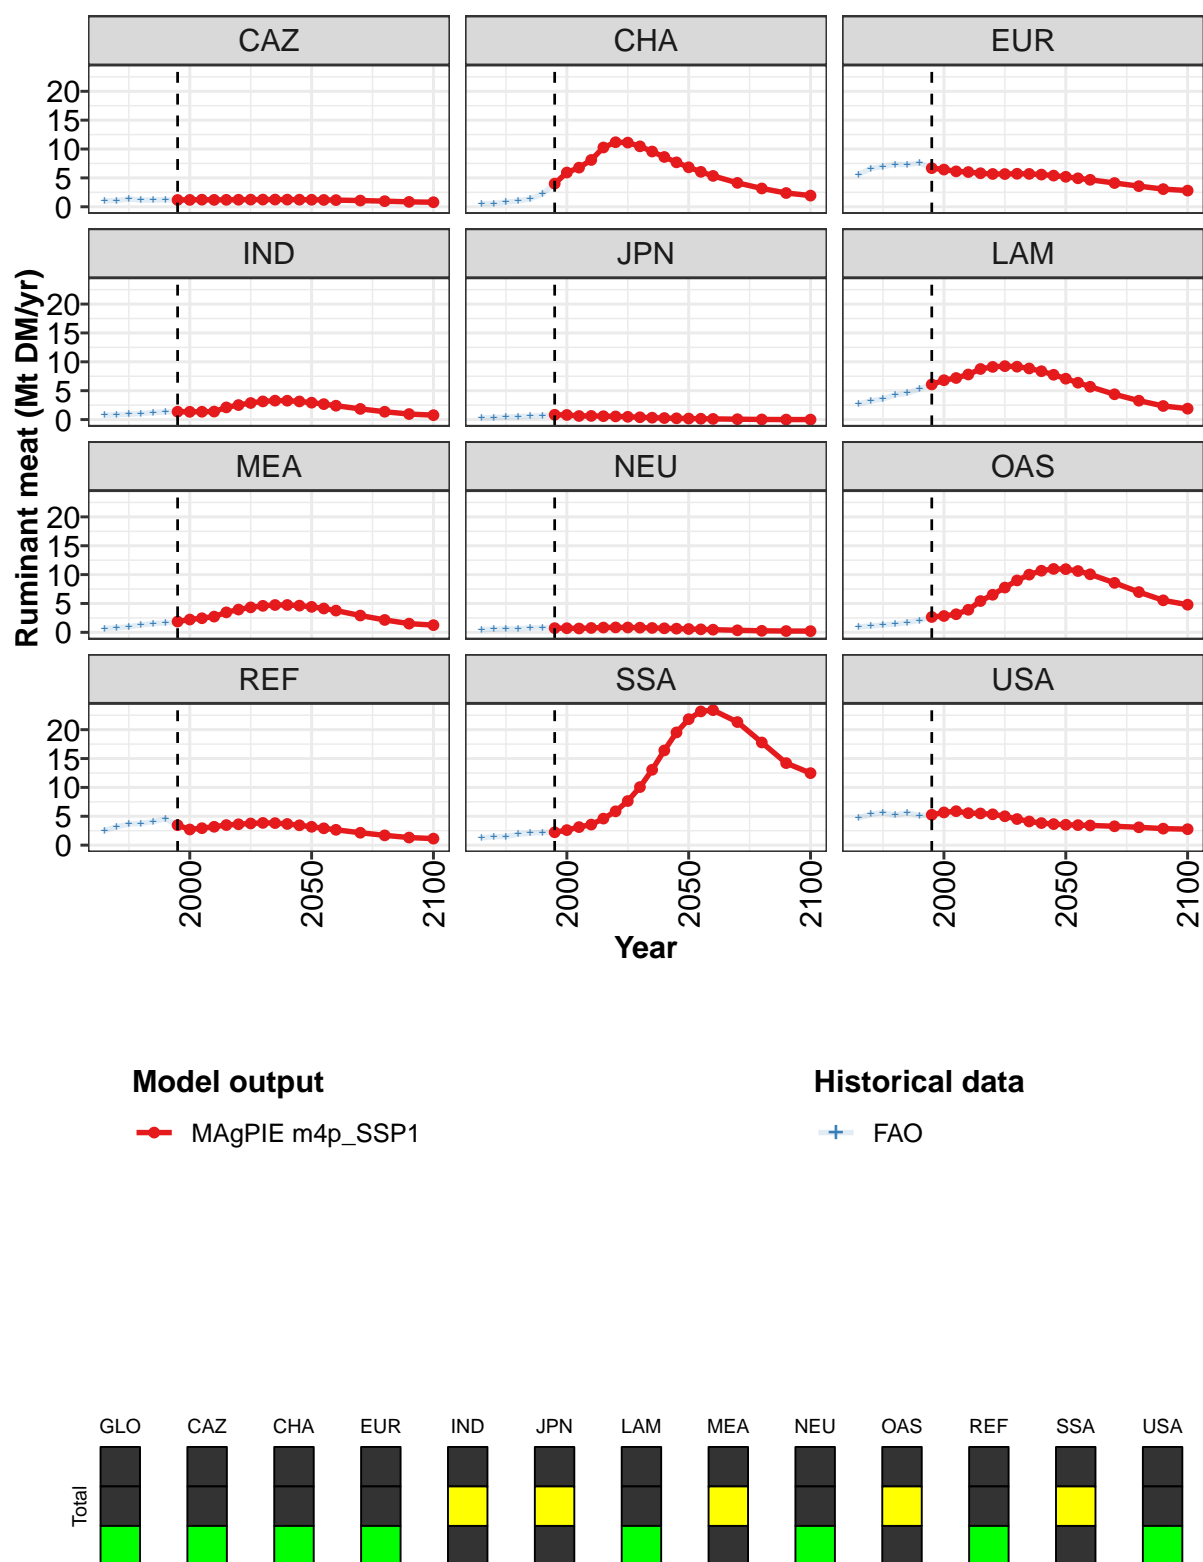

Figure 143: MAGPIE m4p\_SSP1 — Demand—Food—Livestock products—Ruminant meat (Mt DM/yr)



|     | 1995 | 2000 | 2005 | 2010 | 2015 | 2020 | 2025 | 2030 | 2035 | 2040 | 2045 |
|-----|------|------|------|------|------|------|------|------|------|------|------|
| GLO | 36.4 | 39.3 | 41.5 | 44.8 | 52.0 | 56.4 | 60.0 | 63.0 | 65.5 | 67.4 | 68.3 |
| CAZ | 1.2  | 1.2  | 1.2  | 1.2  | 1.2  | 1.2  | 1.2  | 1.2  | 1.2  | 1.2  | 1.2  |
| CHA | 4.0  | 5.9  | 6.8  | 8.1  | 10.3 | 11.2 | 11.1 | 10.5 | 9.6  | 8.6  | 7.7  |
| EUR | 6.7  | 6.5  | 6.1  | 6.0  | 5.8  | 5.7  | 5.7  | 5.7  | 5.7  | 5.6  | 5.4  |
| IND | 1.4  | 1.3  | 1.4  | 1.4  | 2.1  | 2.5  | 2.9  | 3.1  | 3.3  | 3.3  | 3.1  |
| JPN | 0.8  | 0.8  | 0.6  | 0.6  | 0.6  | 0.5  | 0.5  | 0.4  | 0.3  | 0.3  | 0.2  |
| LAM | 6.1  | 6.8  | 7.2  | 7.8  | 8.8  | 9.1  | 9.3  | 9.2  | 8.9  | 8.4  | 7.8  |
| MEA | 1.9  | 2.2  | 2.4  | 2.7  | 3.5  | 3.9  | 4.3  | 4.6  | 4.7  | 4.7  | 4.6  |
| NEU | 0.7  | 0.7  | 0.7  | 0.8  | 0.8  | 0.9  | 0.8  | 0.8  | 0.8  | 0.7  | 0.6  |
| OAS | 2.7  | 2.8  | 3.1  | 3.9  | 5.4  | 6.5  | 7.8  | 9.0  | 10.0 | 10.7 | 11.0 |
| REF | 3.5  | 2.7  | 2.9  | 3.2  | 3.5  | 3.6  | 3.8  | 3.9  | 3.8  | 3.7  | 3.4  |
| SSA | 2.2  | 2.6  | 3.1  | 3.6  | 4.6  | 5.9  | 7.6  | 10.1 | 13.1 | 16.4 | 19.5 |
| USA | 5.3  | 5.7  | 5.9  | 5.5  | 5.5  | 5.3  | 5.0  | 4.5  | 4.1  | 3.8  | 3.6  |

Table 428: MAgPIE m4p\_SSP1 — Demand—Food—Livestock products—Ruminant meat (Mt DM/yr) [PART 1/2]

|     | 2050 | 2055 | 2060 | 2070 | 2080 | 2090 | 2100 |
|-----|------|------|------|------|------|------|------|
| GLO | 67.9 | 66.2 | 63.1 | 54.2 | 44.3 | 35.3 | 30.8 |
| CAZ | 1.2  | 1.2  | 1.2  | 1.1  | 1.0  | 0.8  | 0.8  |
| CHA | 6.8  | 6.0  | 5.3  | 4.1  | 3.2  | 2.4  | 1.9  |
| EUR | 5.2  | 4.9  | 4.7  | 4.1  | 3.6  | 3.1  | 2.8  |
| IND | 2.9  | 2.7  | 2.4  | 1.8  | 1.4  | 1.0  | 0.8  |
| JPN | 0.2  | 0.1  | 0.1  | 0.1  | 0.0  | 0.0  | 0.0  |
| LAM | 7.1  | 6.4  | 5.7  | 4.4  | 3.3  | 2.4  | 1.9  |
| MEA | 4.4  | 4.1  | 3.8  | 2.9  | 2.2  | 1.5  | 1.3  |
| NEU | 0.6  | 0.5  | 0.5  | 0.4  | 0.3  | 0.2  | 0.2  |
| OAS | 10.9 | 10.6 | 10.1 | 8.6  | 7.0  | 5.5  | 4.8  |
| REF | 3.2  | 2.9  | 2.7  | 2.1  | 1.7  | 1.3  | 1.1  |
| SSA | 21.8 | 23.2 | 23.4 | 21.3 | 17.8 | 14.2 | 12.5 |
| USA | 3.5  | 3.5  | 3.4  | 3.3  | 3.1  | 2.9  | 2.8  |

Table 429: MAgPIE m4p\_SSP1 — Demand—Food—Livestock products—Ruminant meat (Mt DM/yr) [PART 2/2]

|     | 1965 | 1970 | 1975 | 1980 | 1985 | 1990 | 1995 | 2000 | 2005 | 2010 |
|-----|------|------|------|------|------|------|------|------|------|------|
| GLO | 21.6 | 25.1 | 27.8 | 29.6 | 32.1 | 34.7 | 36.4 | 39.3 | 41.5 | 44.8 |
| CAZ | 1.0  | 1.1  | 1.4  | 1.2  | 1.2  | 1.2  | 1.2  | 1.2  | 1.2  | 1.2  |
| CHA | 0.5  | 0.6  | 0.8  | 1.0  | 1.4  | 2.2  | 4.0  | 5.9  | 6.8  | 8.1  |
| EUR | 5.6  | 6.6  | 7.0  | 7.4  | 7.3  | 7.6  | 6.7  | 6.5  | 6.1  | 6.0  |
| IND | 0.8  | 0.8  | 0.9  | 1.0  | 1.2  | 1.3  | 1.4  | 1.3  | 1.4  | 1.4  |
| JPN | 0.3  | 0.3  | 0.4  | 0.5  | 0.6  | 0.7  | 0.8  | 0.8  | 0.6  | 0.6  |
| LAM | 2.7  | 3.2  | 3.6  | 4.2  | 4.6  | 5.3  | 6.1  | 6.8  | 7.2  | 7.8  |
| MEA | 0.7  | 0.8  | 1.0  | 1.3  | 1.5  | 1.6  | 1.9  | 2.2  | 2.4  | 2.7  |
| NEU | 0.5  | 0.5  | 0.6  | 0.6  | 0.8  | 0.8  | 0.7  | 0.7  | 0.7  | 0.8  |
| OAS | 1.0  | 1.1  | 1.3  | 1.4  | 1.7  | 2.1  | 2.7  | 2.8  | 3.1  | 3.9  |
| REF | 2.6  | 3.2  | 3.7  | 3.8  | 4.1  | 4.5  | 3.5  | 2.7  | 2.9  | 3.2  |
| SSA | 1.3  | 1.5  | 1.5  | 1.9  | 2.1  | 2.2  | 2.2  | 2.6  | 3.1  | 3.6  |
| USA | 4.7  | 5.3  | 5.6  | 5.2  | 5.6  | 5.1  | 5.3  | 5.7  | 5.9  | 5.5  |

Table 430: FAO — Demand—Food—Livestock products—Ruminant meat (Mt DM/yr)

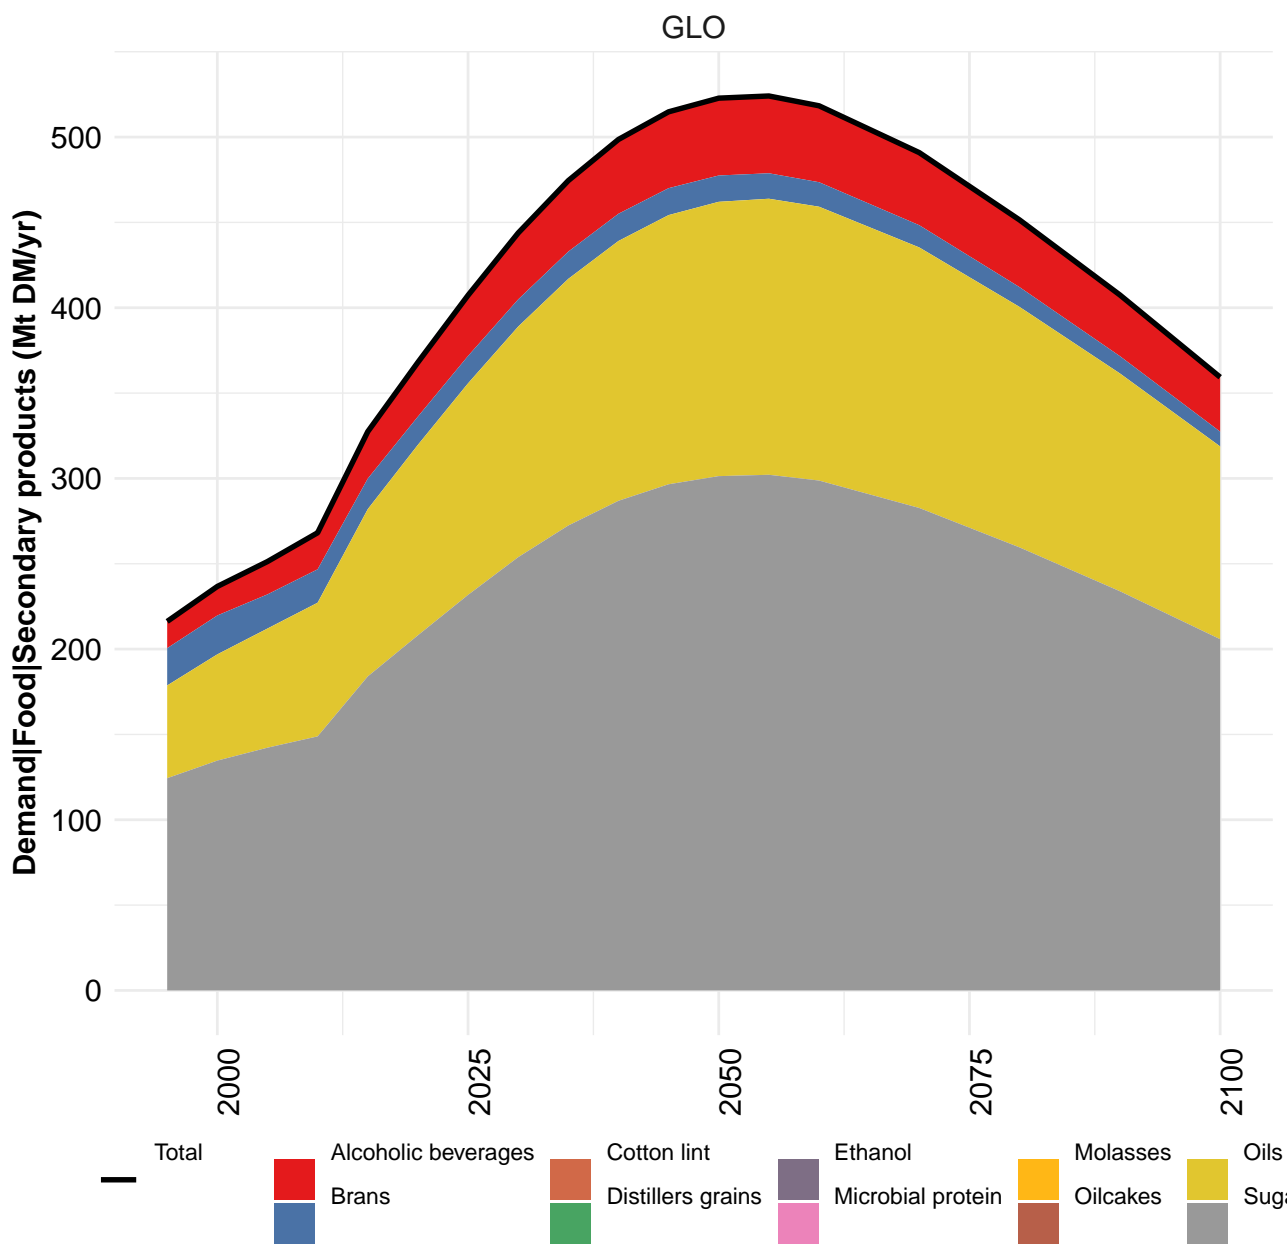

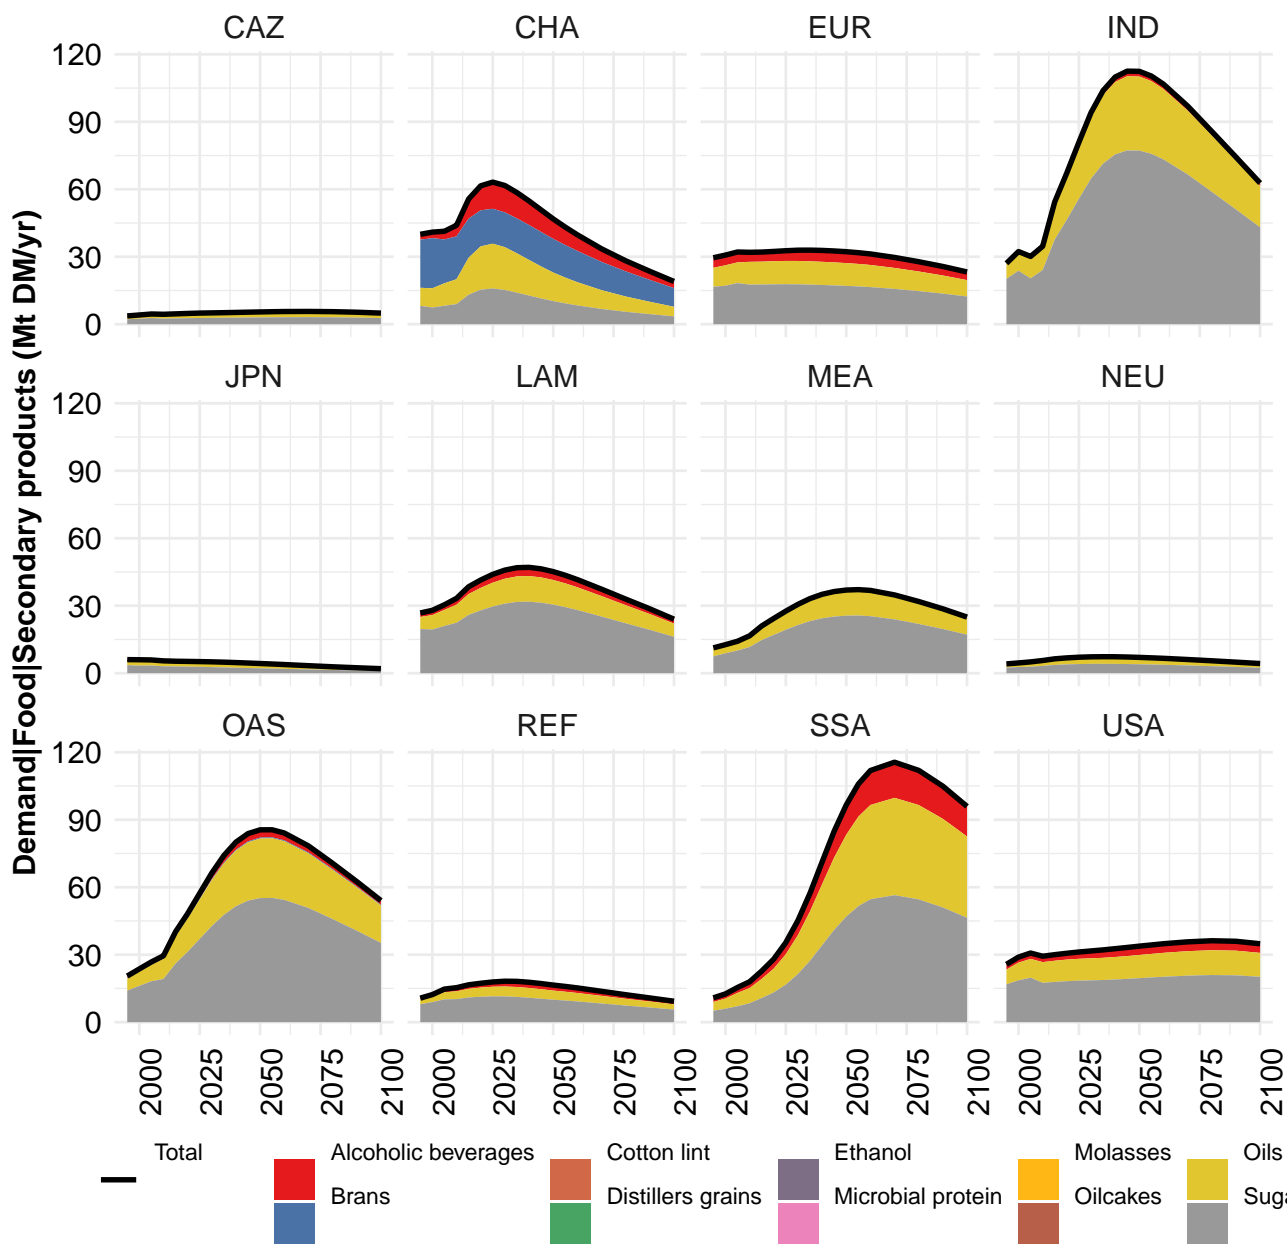

7.4 Secondary products

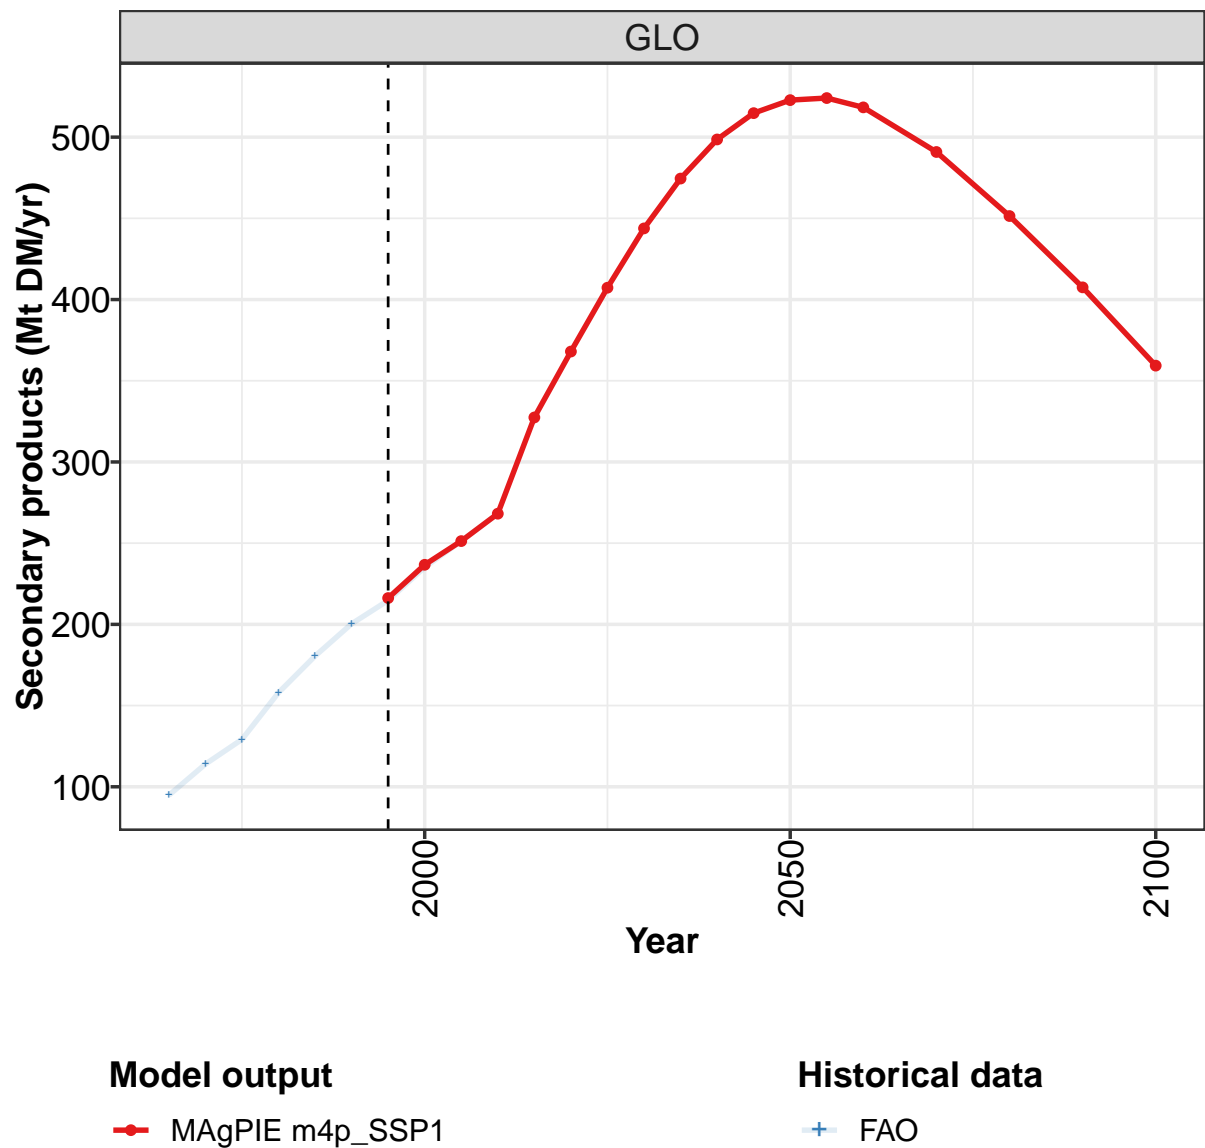

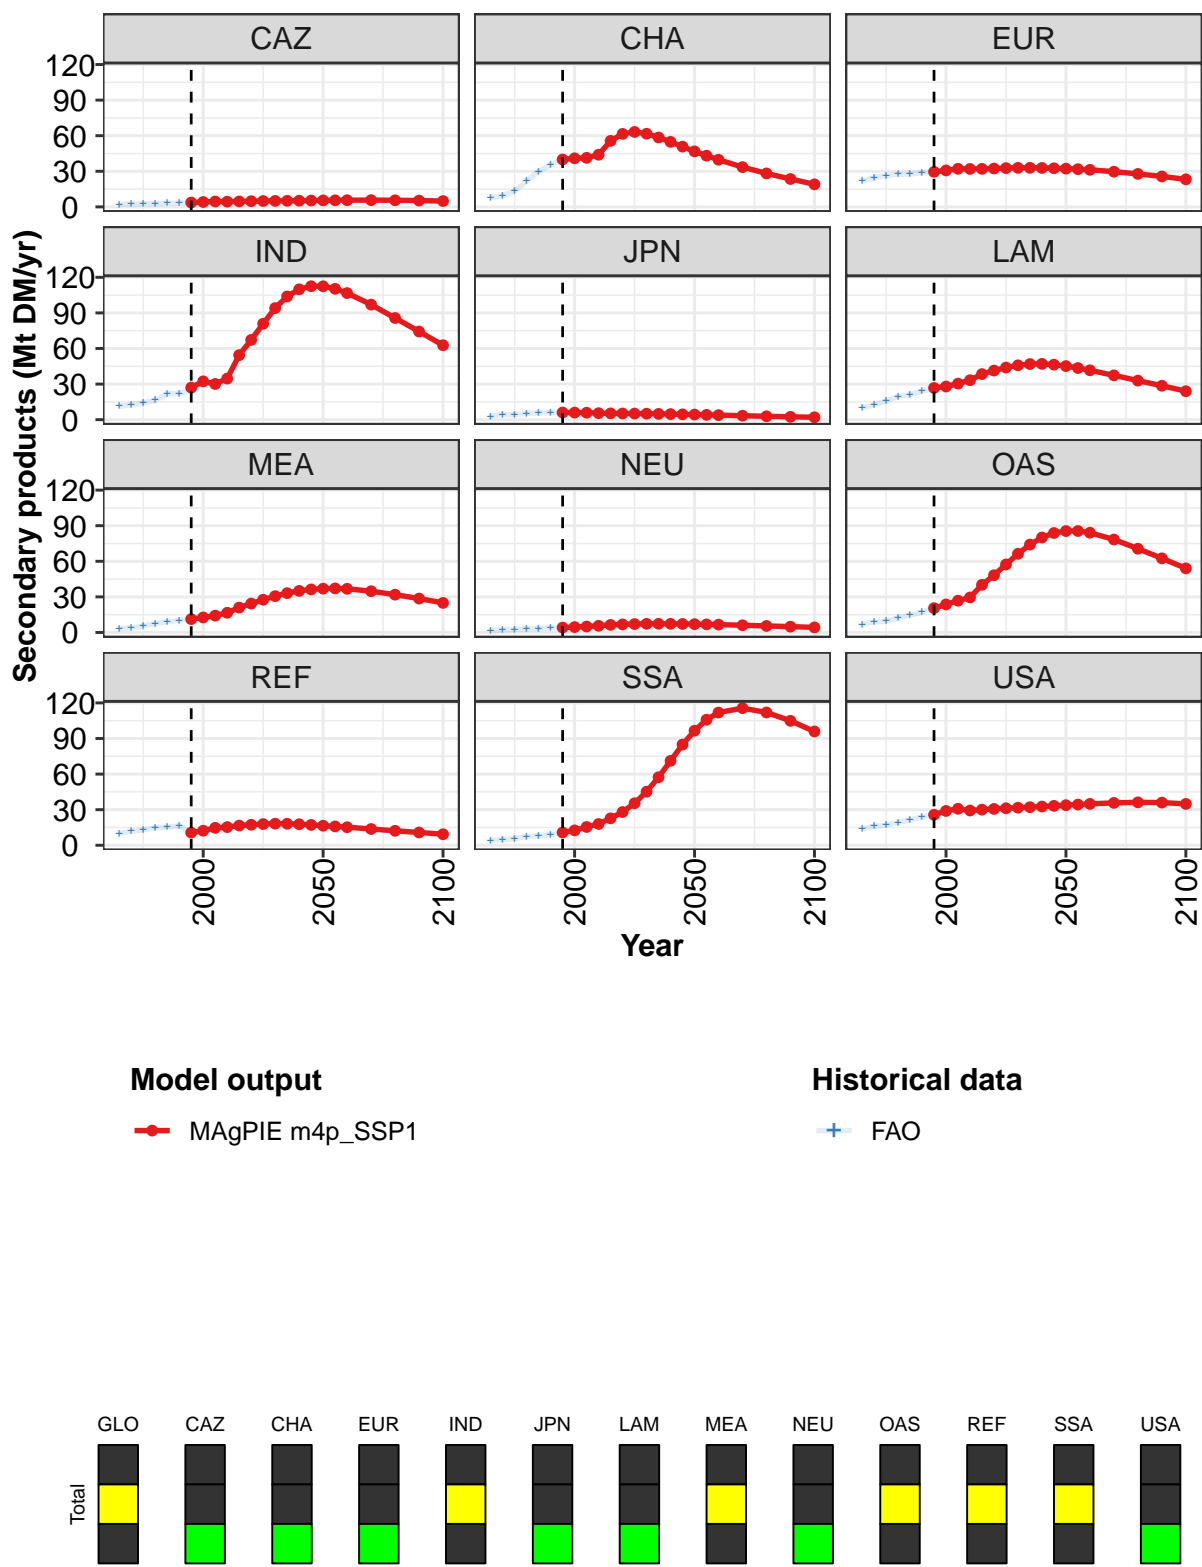

Figure 144: MAgPIE m4p\_SSP1 — Demand—Food—Secondary products (Mt DM/yr)

|     | 1995 | 2000 | 2005 | 2010 | 2015 | 2020 | 2025 | 2030 | 2035 | 2040 | 2045 |
|-----|------|------|------|------|------|------|------|------|------|------|------|
| GLO | 216  | 237  | 251  | 268  | 327  | 368  | 407  | 444  | 475  | 499  | 515  |
| CAZ | 4    | 4    | 5    | 4    | 5    | 5    | 5    | 5    | 5    | 5    | 5    |
| CHA | 40   | 41   | 41   | 44   | 56   | 62   | 63   | 62   | 59   | 55   | 51   |
| EUR | 30   | 31   | 32   | 32   | 32   | 32   | 33   | 33   | 33   | 33   | 33   |
| IND | 27   | 32   | 30   | 35   | 54   | 67   | 81   | 94   | 104  | 110  | 113  |
| JPN | 6    | 6    | 6    | 5    | 5    | 5    | 5    | 5    | 5    | 5    | 5    |
| LAM | 27   | 28   | 30   | 33   | 38   | 41   | 44   | 46   | 47   | 47   | 46   |
| MEA | 11   | 13   | 14   | 17   | 21   | 24   | 28   | 31   | 33   | 35   | 36   |
| NEU | 4    | 5    | 5    | 6    | 6    | 7    | 7    | 7    | 7    | 7    | 7    |
| OAS | 21   | 24   | 27   | 30   | 40   | 48   | 57   | 66   | 74   | 80   | 84   |
| REF | 11   | 12   | 15   | 15   | 17   | 17   | 18   | 18   | 18   | 18   | 17   |
| SSA | 11   | 13   | 15   | 18   | 23   | 28   | 35   | 45   | 57   | 71   | 85   |
| USA | 26   | 29   | 31   | 29   | 30   | 31   | 31   | 32   | 32   | 33   | 33   |

Table 431: MAgPIE m4p\_SSP1 — Demand—Food—Secondary products (Mt DM/yr) [PART 1/2]

|     | 2050 | 2055 | 2060 | 2070 | 2080 | 2090 | 2100 |
|-----|------|------|------|------|------|------|------|
| GLO | 523  | 524  | 518  | 491  | 451  | 408  | 359  |
| CAZ | 5    | 6    | 6    | 6    | 6    | 5    | 5    |
| CHA | 47   | 43   | 40   | 34   | 28   | 24   | 19   |
| EUR | 32   | 32   | 31   | 30   | 28   | 26   | 23   |
| IND | 112  | 110  | 107  | 97   | 86   | 74   | 63   |
| JPN | 4    | 4    | 4    | 3    | 3    | 2    | 2    |
| LAM | 45   | 44   | 42   | 37   | 33   | 29   | 24   |
| MEA | 37   | 37   | 37   | 35   | 32   | 29   | 25   |
| NEU | 7    | 7    | 7    | 6    | 6    | 5    | 4    |
| OAS | 86   | 86   | 84   | 78   | 71   | 62   | 54   |
| REF | 16   | 16   | 15   | 14   | 12   | 11   | 9    |
| SSA | 97   | 106  | 112  | 116  | 112  | 105  | 96   |
| USA | 34   | 34   | 35   | 36   | 36   | 36   | 35   |

Table 432: MAgPIE m4p\_SSP1 — Demand—Food—Secondary products (Mt DM/yr) [PART 2/2]

|     | 1965 | 1970 | 1975 | 1980 | 1985 | 1990 | 1995 | 2000 | 2005 | 2010 |
|-----|------|------|------|------|------|------|------|------|------|------|
| GLO | 95   | 114  | 129  | 158  | 180  | 200  | 215  | 235  | 251  | 268  |
| CAZ | 2    | 2    | 3    | 3    | 3    | 3    | 4    | 4    | 5    | 4    |
| CHA | 7    | 10   | 13   | 22   | 30   | 35   | 40   | 41   | 41   | 44   |
| EUR | 22   | 25   | 26   | 28   | 28   | 29   | 30   | 31   | 32   | 32   |
| IND | 11   | 13   | 14   | 16   | 22   | 22   | 26   | 31   | 30   | 35   |
| JPN | 3    | 4    | 4    | 5    | 6    | 6    | 6    | 6    | 6    | 5    |
| LAM | 10   | 12   | 16   | 20   | 21   | 24   | 27   | 28   | 30   | 33   |
| MEA | 3    | 4    | 5    | 8    | 9    | 10   | 11   | 13   | 14   | 17   |
| NEU | 2    | 2    | 3    | 3    | 3    | 4    | 4    | 5    | 5    | 6    |
| OAS | 7    | 9    | 9    | 12   | 15   | 17   | 21   | 24   | 27   | 30   |
| REF | 10   | 12   | 13   | 15   | 15   | 16   | 11   | 12   | 15   | 15   |
| SSA | 4    | 5    | 6    | 7    | 8    | 9    | 11   | 13   | 15   | 18   |
| USA | 14   | 16   | 17   | 19   | 21   | 24   | 26   | 29   | 31   | 29   |

Table 433: FAO — Demand—Food—Secondary products (Mt DM/yr)

7.4.1
Alcoholic beverages

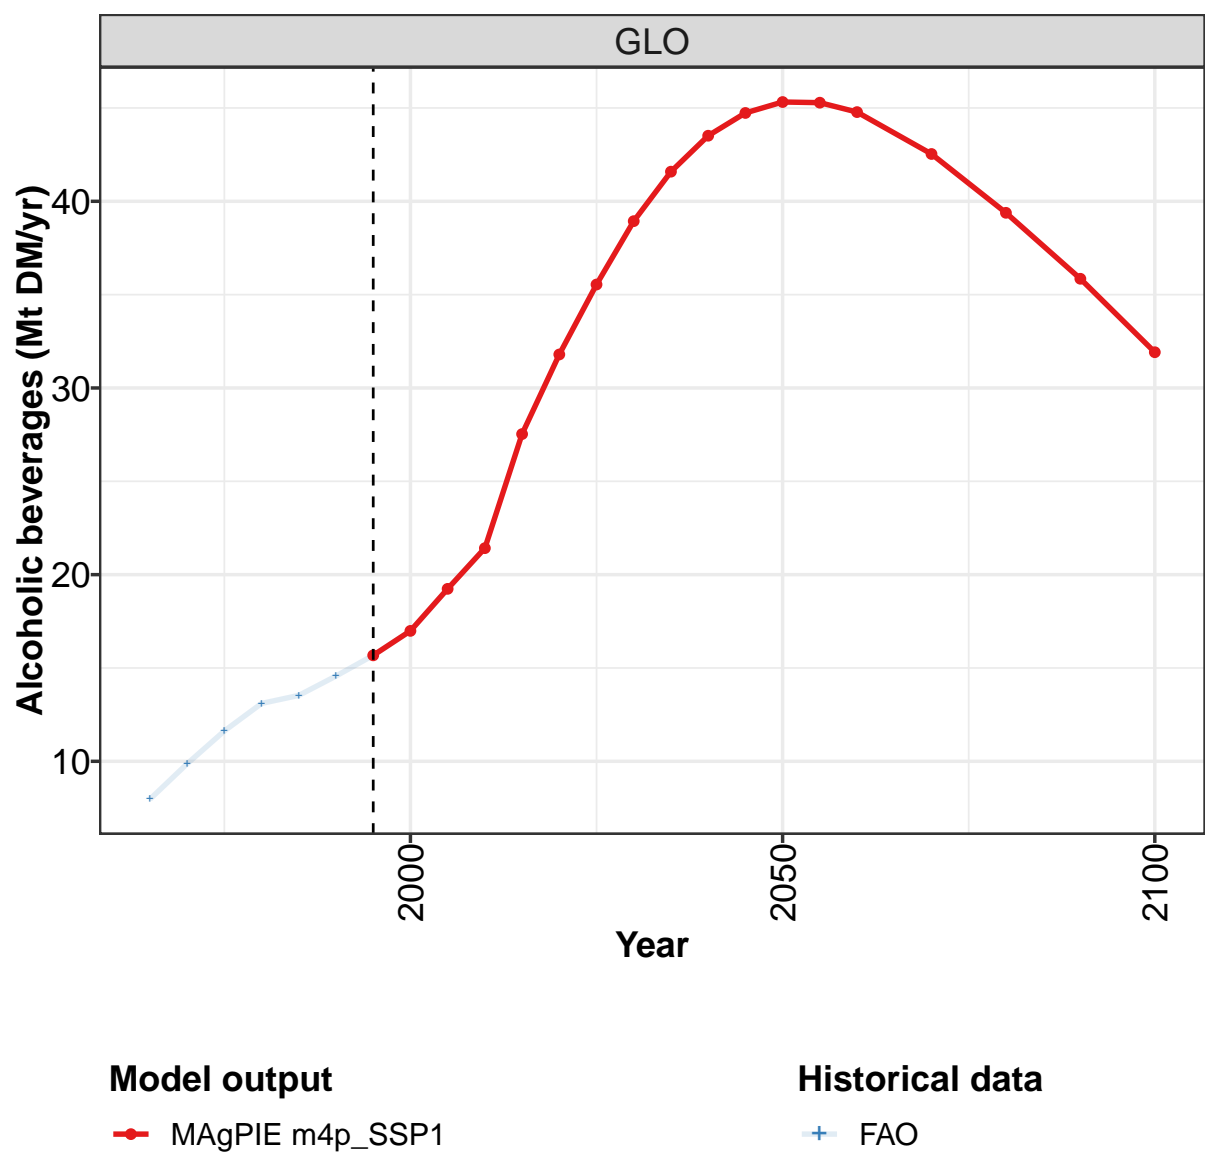

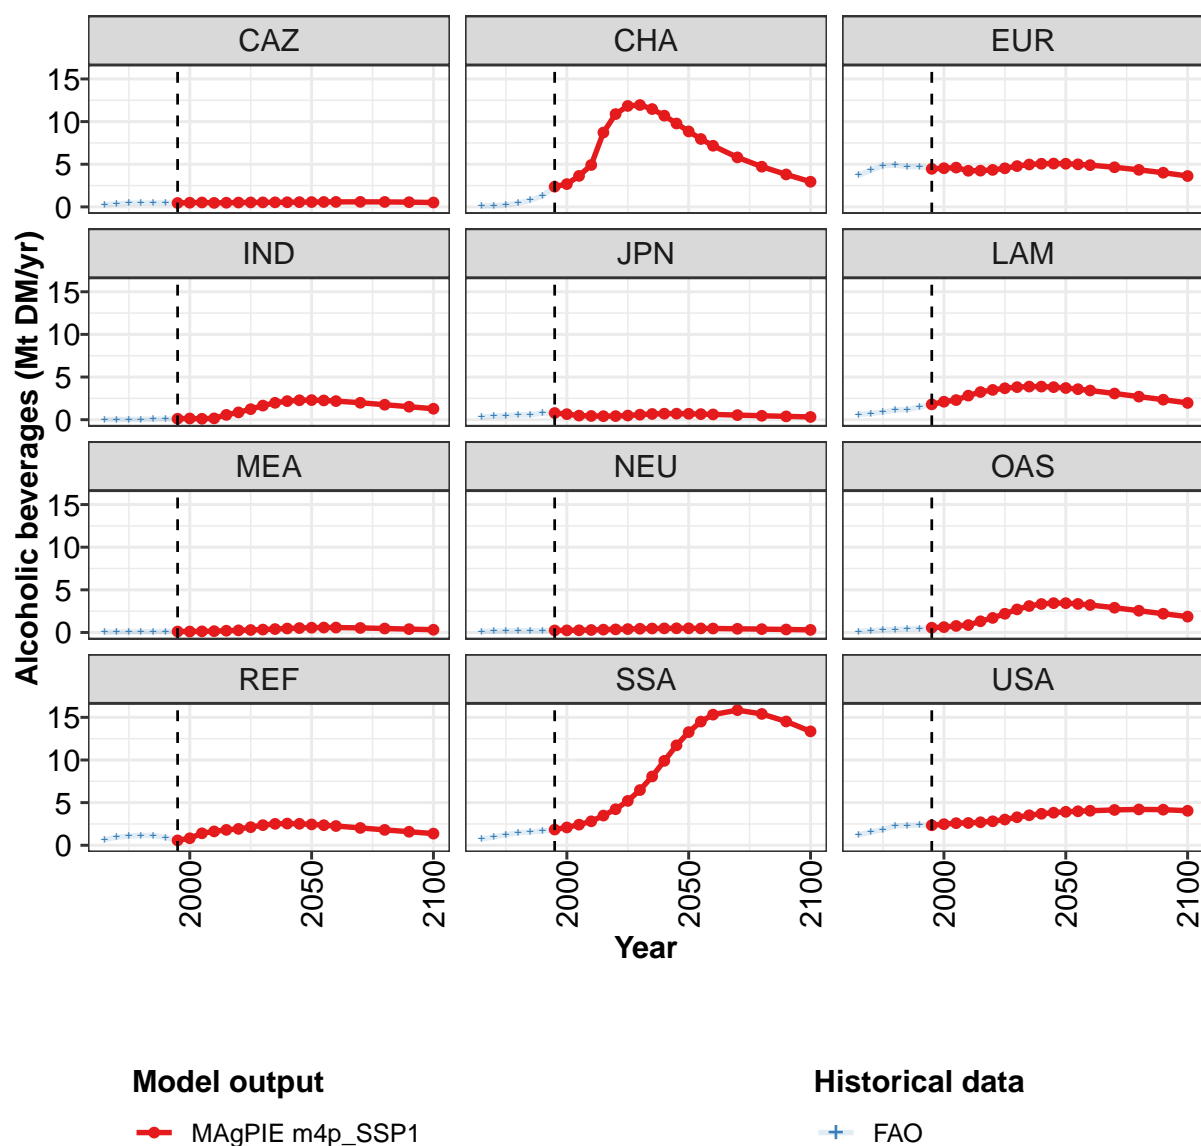

Figure 145: MAgPIE m4p\_SSP1 — Demand—Food—Secondary products—Alcoholic beverages (Mt DM/yr)



|     | 1995 | 2000 | 2005 | 2010 | 2015 | 2020 | 2025 | 2030 | 2035 | 2040 | 2045 |
|-----|------|------|------|------|------|------|------|------|------|------|------|
| GLO | 15.7 | 17.0 | 19.2 | 21.4 | 27.5 | 31.8 | 35.5 | 38.9 | 41.6 | 43.5 | 44.7 |
| CAZ | 0.5  | 0.5  | 0.5  | 0.5  | 0.5  | 0.5  | 0.5  | 0.5  | 0.5  | 0.5  | 0.6  |
| CHA | 2.4  | 2.7  | 3.6  | 4.9  | 8.7  | 10.9 | 11.8 | 11.9 | 11.5 | 10.7 | 9.8  |
| EUR | 4.5  | 4.5  | 4.6  | 4.2  | 4.3  | 4.3  | 4.5  | 4.8  | 5.0  | 5.1  | 5.1  |
| IND | 0.1  | 0.1  | 0.1  | 0.2  | 0.6  | 0.9  | 1.2  | 1.7  | 2.0  | 2.2  | 2.3  |
| JPN | 0.8  | 0.6  | 0.5  | 0.4  | 0.4  | 0.4  | 0.5  | 0.6  | 0.7  | 0.7  | 0.7  |
| LAM | 1.8  | 2.1  | 2.3  | 2.8  | 3.2  | 3.5  | 3.7  | 3.8  | 3.9  | 3.9  | 3.8  |
| MEA | 0.1  | 0.1  | 0.1  | 0.2  | 0.2  | 0.3  | 0.3  | 0.3  | 0.4  | 0.5  | 0.5  |
| NEU | 0.2  | 0.2  | 0.3  | 0.3  | 0.3  | 0.4  | 0.4  | 0.4  | 0.5  | 0.5  | 0.5  |
| OAS | 0.6  | 0.6  | 0.8  | 0.9  | 1.3  | 1.7  | 2.2  | 2.7  | 3.1  | 3.3  | 3.4  |
| REF | 0.6  | 0.8  | 1.4  | 1.6  | 1.8  | 1.9  | 2.1  | 2.4  | 2.5  | 2.5  | 2.5  |
| SSA | 1.8  | 2.1  | 2.4  | 2.8  | 3.5  | 4.2  | 5.2  | 6.5  | 8.1  | 9.9  | 11.7 |
| USA | 2.3  | 2.5  | 2.6  | 2.6  | 2.7  | 2.8  | 3.0  | 3.3  | 3.5  | 3.7  | 3.8  |

Table 434: MAgPIE m4p\_SSP1 — Demand—Food—Secondary products—Alcoholic beverages (Mt DM/yr)  
[PART 1/2]

|     | 2050 | 2055 | 2060 | 2070 | 2080 | 2090 | 2100 |
|-----|------|------|------|------|------|------|------|
| GLO | 45.3 | 45.3 | 44.8 | 42.5 | 39.4 | 35.9 | 31.9 |
| CAZ | 0.6  | 0.6  | 0.6  | 0.6  | 0.6  | 0.6  | 0.5  |
| CHA | 8.8  | 8.0  | 7.2  | 5.8  | 4.7  | 3.8  | 2.9  |
| EUR | 5.1  | 5.0  | 4.9  | 4.6  | 4.3  | 4.0  | 3.6  |
| IND | 2.3  | 2.3  | 2.2  | 2.0  | 1.8  | 1.5  | 1.3  |
| JPN | 0.7  | 0.7  | 0.6  | 0.5  | 0.5  | 0.4  | 0.3  |
| LAM | 3.7  | 3.6  | 3.4  | 3.1  | 2.7  | 2.3  | 2.0  |
| MEA | 0.6  | 0.6  | 0.6  | 0.5  | 0.5  | 0.4  | 0.3  |
| NEU | 0.5  | 0.5  | 0.5  | 0.4  | 0.4  | 0.4  | 0.3  |
| OAS | 3.4  | 3.4  | 3.2  | 2.9  | 2.6  | 2.2  | 1.9  |
| REF | 2.4  | 2.4  | 2.3  | 2.0  | 1.8  | 1.6  | 1.4  |
| SSA | 13.3 | 14.5 | 15.3 | 15.8 | 15.4 | 14.5 | 13.4 |
| USA | 3.9  | 4.0  | 4.0  | 4.1  | 4.2  | 4.2  | 4.0  |

Table 435: MAgPIE m4p\_SSP1 — Demand—Food—Secondary products—Alcoholic beverages (Mt DM/yr)  
[PART 2/2]

|     | 1965 | 1970 | 1975 | 1980 | 1985 | 1990 | 1995 | 2000 | 2005 | 2010 |
|-----|------|------|------|------|------|------|------|------|------|------|
| GLO | 8.0  | 9.9  | 11.6 | 13.1 | 13.5 | 14.6 | 15.7 | 17.0 | 19.2 | 21.4 |
| CAZ | 0.3  | 0.3  | 0.4  | 0.4  | 0.5  | 0.5  | 0.5  | 0.5  | 0.5  | 0.5  |
| CHA | 0.1  | 0.1  | 0.2  | 0.4  | 0.8  | 1.3  | 2.4  | 2.7  | 3.6  | 4.9  |
| EUR | 3.7  | 4.3  | 4.8  | 4.9  | 4.7  | 4.7  | 4.5  | 4.5  | 4.6  | 4.2  |
| IND | 0.0  | 0.0  | 0.0  | 0.0  | 0.1  | 0.1  | 0.1  | 0.1  | 0.1  | 0.2  |
| JPN | 0.3  | 0.4  | 0.5  | 0.6  | 0.6  | 0.8  | 0.8  | 0.7  | 0.5  | 0.4  |
| LAM | 0.6  | 0.7  | 0.9  | 1.1  | 1.2  | 1.5  | 1.8  | 2.1  | 2.3  | 2.8  |
| MEA | 0.0  | 0.1  | 0.1  | 0.1  | 0.1  | 0.1  | 0.1  | 0.1  | 0.1  | 0.2  |
| NEU | 0.1  | 0.2  | 0.2  | 0.2  | 0.2  | 0.2  | 0.2  | 0.2  | 0.3  | 0.3  |
| OAS | 0.1  | 0.2  | 0.3  | 0.4  | 0.4  | 0.5  | 0.6  | 0.6  | 0.8  | 0.9  |
| REF | 0.7  | 0.9  | 1.1  | 1.2  | 1.1  | 0.9  | 0.6  | 0.8  | 1.4  | 1.6  |
| SSA | 0.8  | 1.0  | 1.2  | 1.5  | 1.6  | 1.7  | 1.8  | 2.1  | 2.4  | 2.8  |
| USA | 1.2  | 1.6  | 1.8  | 2.3  | 2.3  | 2.4  | 2.3  | 2.5  | 2.6  | 2.6  |

Table 436: FAO — Demand—Food—Secondary products—Alcoholic beverages (Mt DM/yr)

7.4.2
Brans

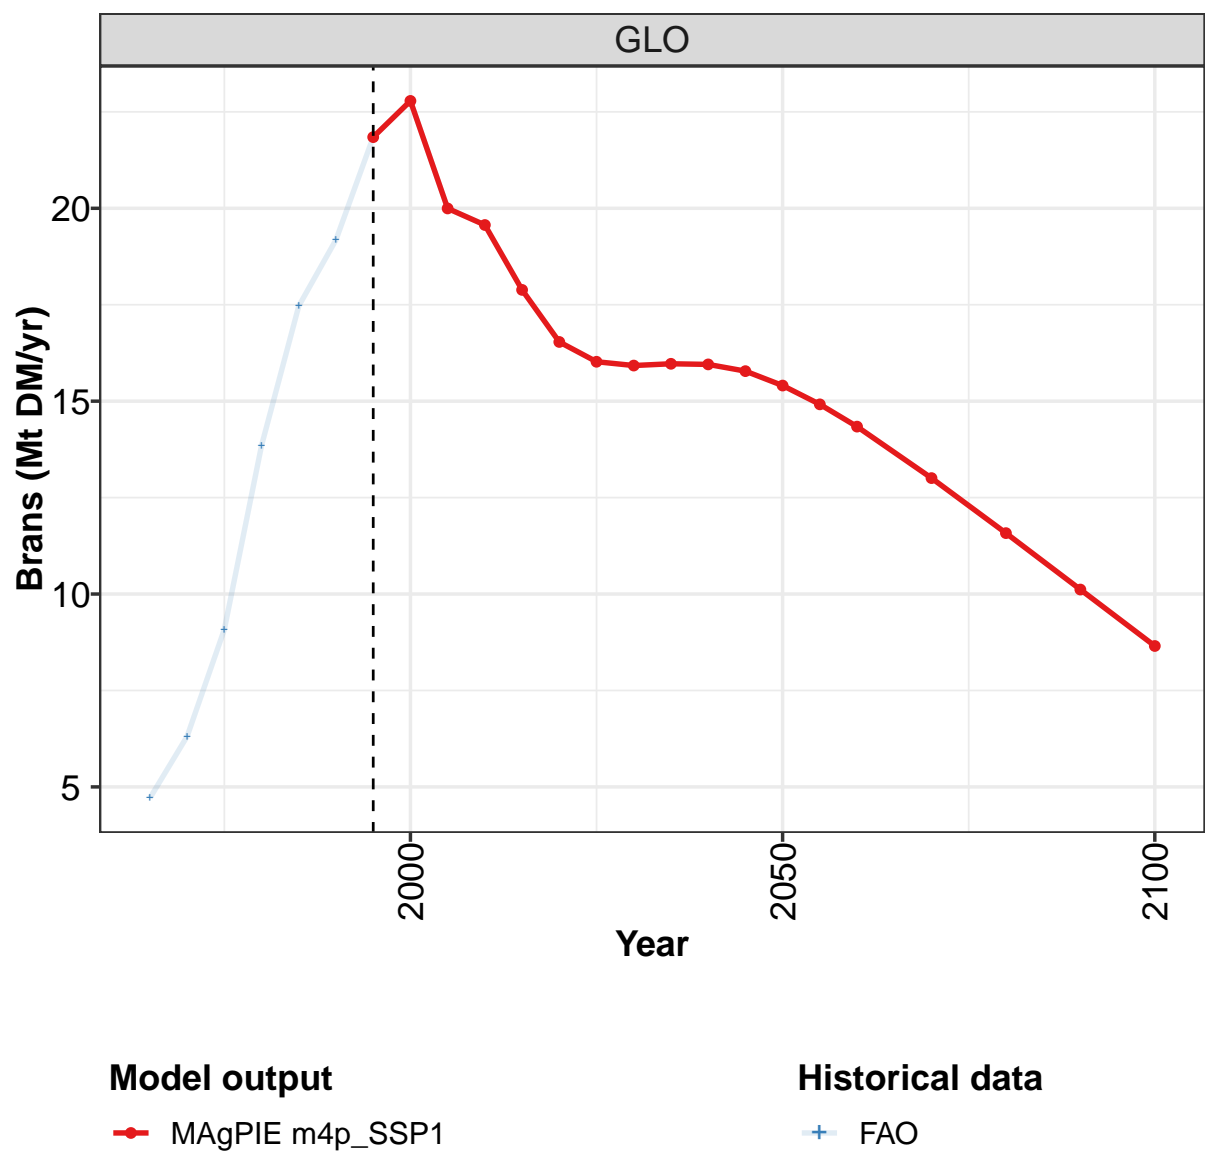

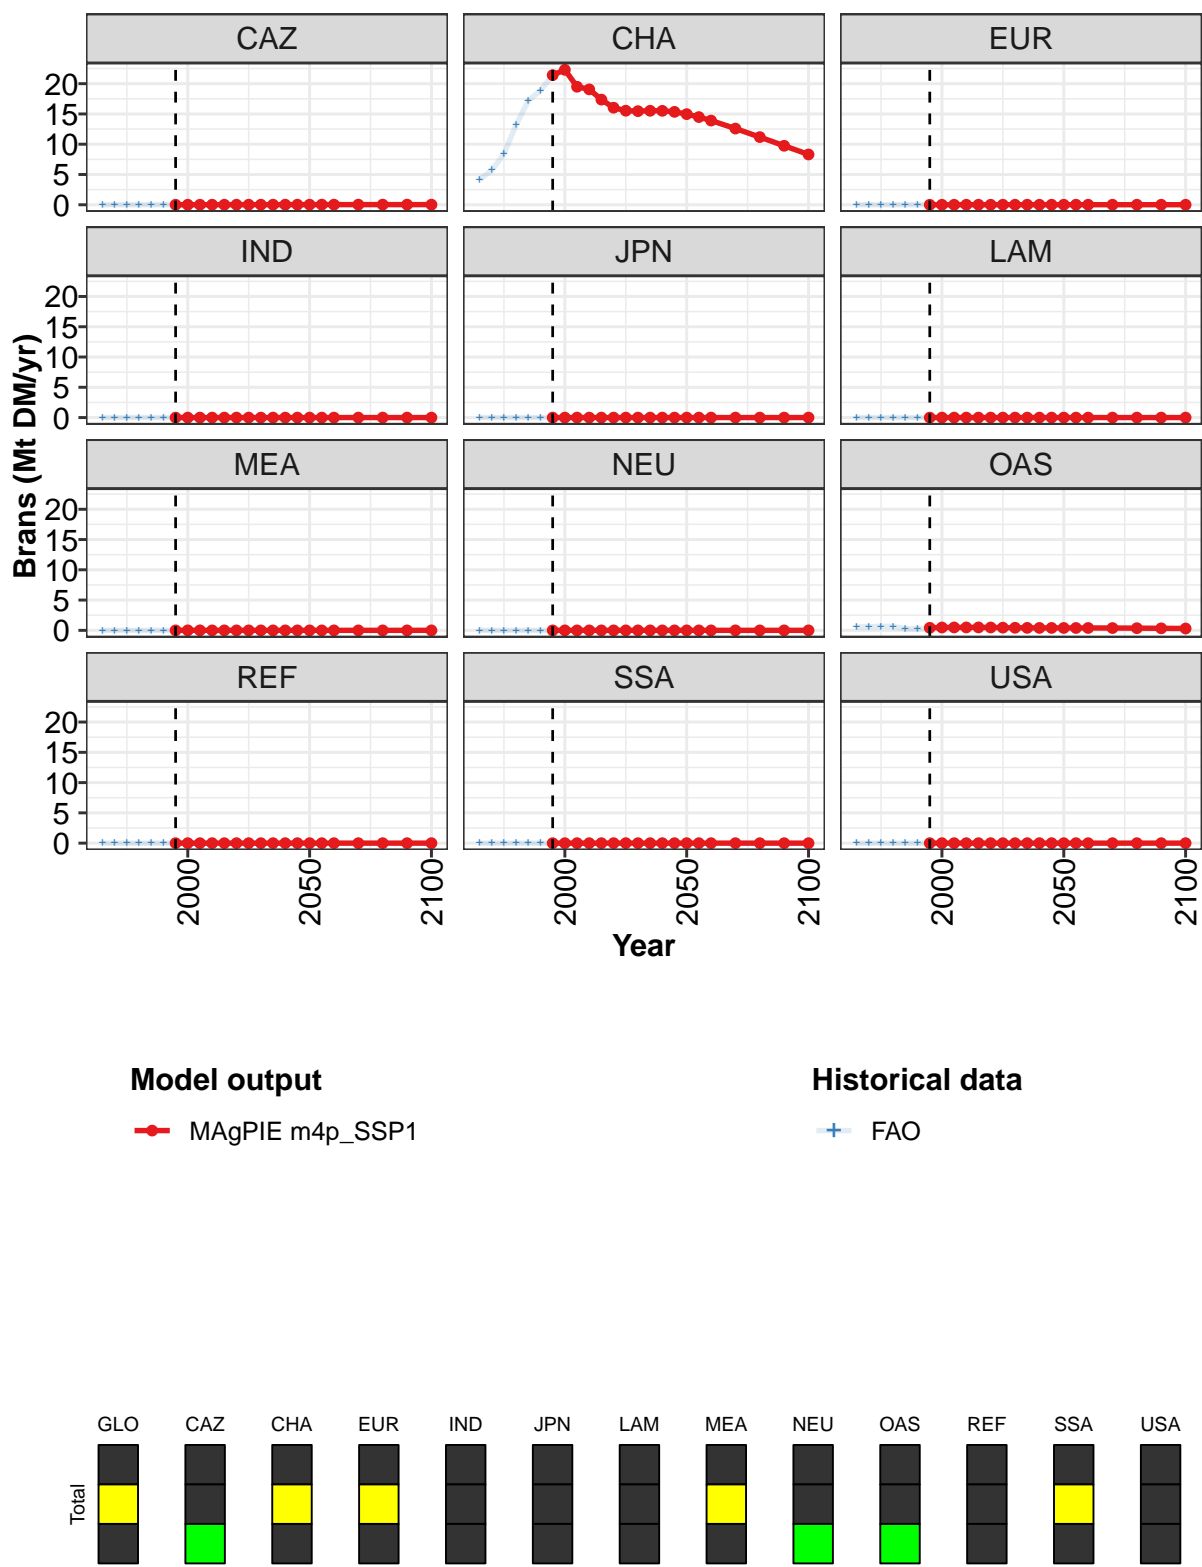

Figure 146: MAGPIE m4p\_SSP1 — Demand—Food—Secondary products—Brans (Mt DM/yr)

|     | 1995 | 2000 | 2005 | 2010 | 2015 | 2020 | 2025 | 2030 | 2035 | 2040 | 2045 |
|-----|------|------|------|------|------|------|------|------|------|------|------|
| GLO | 21.8 | 22.8 | 20.0 | 19.6 | 17.9 | 16.5 | 16.0 | 15.9 | 16.0 | 16.0 | 15.8 |
| CAZ | 0.0  | 0.0  | 0.0  | 0.0  | 0.0  | 0.0  | 0.0  | 0.0  | 0.0  | 0.0  | 0.0  |
| CHA | 21.4 | 22.3 | 19.5 | 19.1 | 17.4 | 16.0 | 15.5 | 15.5 | 15.5 | 15.5 | 15.3 |
| EUR | 0.0  | 0.0  | 0.0  | 0.0  | 0.0  | 0.0  | 0.0  | 0.0  | 0.0  | 0.0  | 0.0  |
| IND | 0.0  | 0.0  | 0.0  | 0.0  | 0.0  | 0.0  | 0.0  | 0.0  | 0.0  | 0.0  | 0.0  |
| JPN | 0.0  | 0.0  | 0.0  | 0.0  | 0.0  | 0.0  | 0.0  | 0.0  | 0.0  | 0.0  | 0.0  |
| LAM | 0.0  | 0.0  | 0.0  | 0.0  | 0.0  | 0.0  | 0.0  | 0.0  | 0.0  | 0.0  | 0.0  |
| MEA | 0.0  | 0.0  | 0.0  | 0.0  | 0.0  | 0.0  | 0.0  | 0.0  | 0.0  | 0.0  | 0.0  |
| NEU | 0.0  | 0.0  | 0.0  | 0.0  | 0.0  | 0.0  | 0.0  | 0.0  | 0.0  | 0.0  | 0.0  |
| OAS | 0.4  | 0.5  | 0.5  | 0.5  | 0.5  | 0.5  | 0.5  | 0.4  | 0.4  | 0.4  | 0.4  |
| REF | 0.0  | 0.0  | 0.0  | 0.0  | 0.0  | 0.0  | 0.0  | 0.0  | 0.0  | 0.0  | 0.0  |
| SSA | 0.0  | 0.0  | 0.0  | 0.0  | 0.0  | 0.0  | 0.0  | 0.0  | 0.0  | 0.0  | 0.0  |
| USA | 0.0  | 0.0  | 0.0  | 0.0  | 0.0  | 0.0  | 0.0  | 0.0  | 0.0  | 0.0  | 0.0  |

Table 437: MAgPIE m4p-SSP1 — Demand—Food—Secondary products—Brans (Mt DM/yr) [PART 1/2]

|     | 2050 | 2055 | 2060 | 2070 | 2080 | 2090 | 2100 |
|-----|------|------|------|------|------|------|------|
| GLO | 15.4 | 14.9 | 14.3 | 13.0 | 11.6 | 10.1 | 8.7  |
| CAZ | 0.0  | 0.0  | 0.0  | 0.0  | 0.0  | 0.0  | 0.0  |
| CHA | 15.0 | 14.5 | 13.9 | 12.6 | 11.2 | 9.7  | 8.3  |
| EUR | 0.0  | 0.0  | 0.0  | 0.0  | 0.0  | 0.0  | 0.0  |
| IND | 0.0  | 0.0  | 0.0  | 0.0  | 0.0  | 0.0  | 0.0  |
| JPN | 0.0  | 0.0  | 0.0  | 0.0  | 0.0  | 0.0  | 0.0  |
| LAM | 0.0  | 0.0  | 0.0  | 0.0  | 0.0  | 0.0  | 0.0  |
| MEA | 0.0  | 0.0  | 0.0  | 0.0  | 0.0  | 0.0  | 0.0  |
| NEU | 0.0  | 0.0  | 0.0  | 0.0  | 0.0  | 0.0  | 0.0  |
| OAS | 0.4  | 0.4  | 0.4  | 0.4  | 0.4  | 0.3  | 0.3  |
| REF | 0.0  | 0.0  | 0.0  | 0.0  | 0.0  | 0.0  | 0.0  |
| SSA | 0.0  | 0.0  | 0.0  | 0.0  | 0.0  | 0.0  | 0.0  |
| USA | 0.0  | 0.0  | 0.0  | 0.0  | 0.0  | 0.0  | 0.0  |

Table 438: MAgPIE m4p-SSP1 — Demand—Food—Secondary products—Brans (Mt DM/yr) [PART 2/2]

|     | 1965 | 1970 | 1975 | 1980 | 1985 | 1990 | 1995 | 2000 | 2005 | 2010 |
|-----|------|------|------|------|------|------|------|------|------|------|
| GLO | 4.7  | 6.3  | 9.1  | 13.9 | 17.5 | 19.2 | 21.8 | 22.8 | 20.0 | 19.6 |
| CAZ | 0.0  | 0.0  | 0.0  | 0.0  | 0.0  | 0.0  | 0.0  | 0.0  | 0.0  | 0.0  |
| CHA | 4.2  | 5.7  | 8.4  | 13.2 | 17.2 | 18.9 | 21.4 | 22.3 | 19.5 | 19.1 |
| EUR | 0.0  | 0.0  | 0.0  | 0.0  | 0.0  | 0.0  | 0.0  | 0.0  | 0.0  | 0.0  |
| IND | 0.0  | 0.0  | 0.0  | 0.0  | 0.0  | 0.0  | 0.0  | 0.0  | 0.0  | 0.0  |
| JPN | 0.0  | 0.0  | 0.0  | 0.0  | 0.0  | 0.0  | 0.0  | 0.0  | 0.0  | 0.0  |
| LAM | 0.0  | 0.0  | 0.0  | 0.0  | 0.0  | 0.0  | 0.0  | 0.0  | 0.0  | 0.0  |
| MEA | 0.0  | 0.0  | 0.0  | 0.0  | 0.0  | 0.0  | 0.0  | 0.0  | 0.0  | 0.0  |
| NEU | 0.0  | 0.0  | 0.0  | 0.0  | 0.0  | 0.0  | 0.0  | 0.0  | 0.0  | 0.0  |
| OAS | 0.5  | 0.6  | 0.7  | 0.6  | 0.3  | 0.3  | 0.4  | 0.5  | 0.5  | 0.5  |
| REF | 0.0  | 0.0  | 0.0  | 0.0  | 0.0  | 0.0  | 0.0  | 0.0  | 0.0  | 0.0  |
| SSA | 0.0  | 0.0  | 0.0  | 0.0  | 0.0  | 0.0  | 0.0  | 0.0  | 0.0  | 0.0  |
| USA | 0.0  | 0.0  | 0.0  | 0.0  | 0.0  | 0.0  | 0.0  | 0.0  | 0.0  | 0.0  |

Table 439: FAO — Demand—Food—Secondary products—Brans (Mt DM/yr)

7.4.3
Molasses

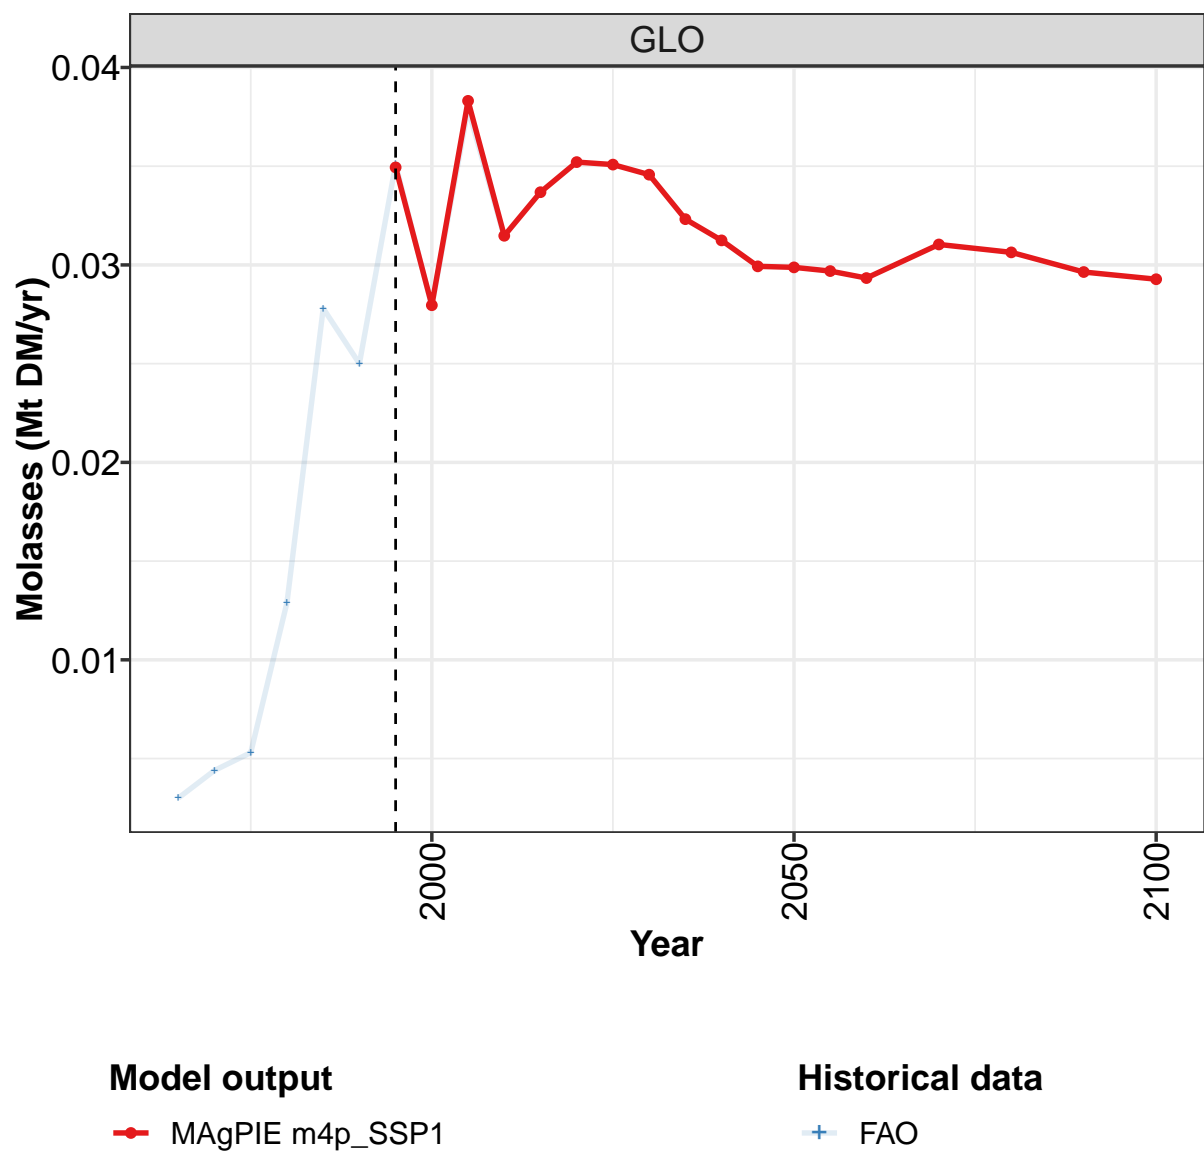

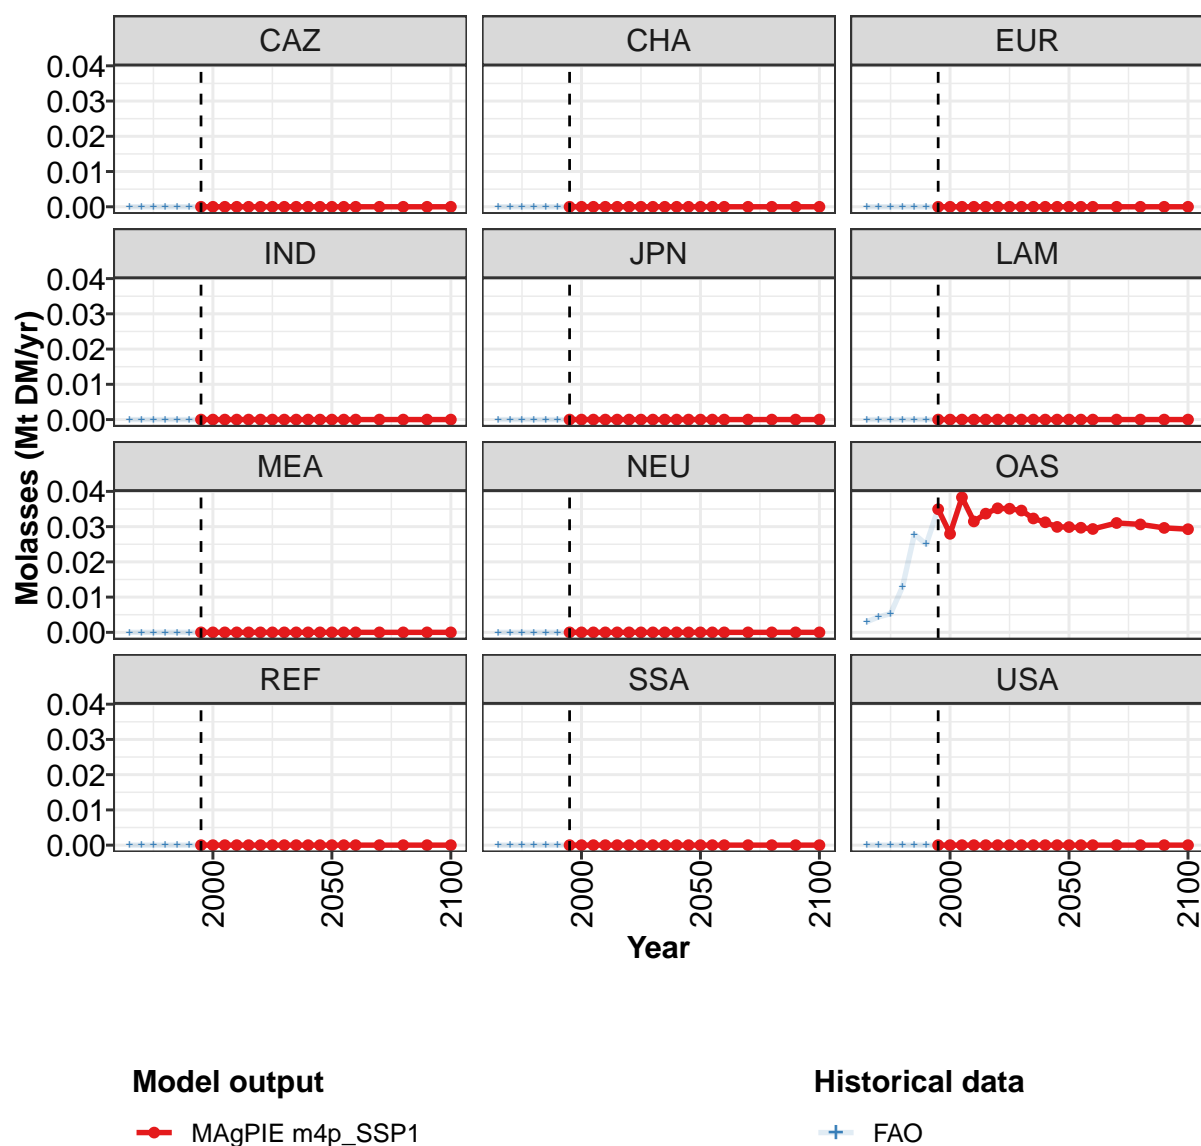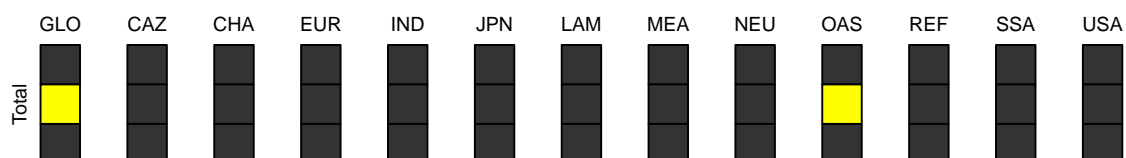

Figure 147: MAgPIE m4p\_SSP1 — Demand—Food—Secondary products—Molasses (Mt DM/yr)

|     | 1995   | 2000   | 2005   | 2010   | 2015   | 2020   | 2025   | 2030   | 2035   | 2040   | 2045   |
|-----|--------|--------|--------|--------|--------|--------|--------|--------|--------|--------|--------|
| GLO | 0.0349 | 0.0280 | 0.0383 | 0.0315 | 0.0337 | 0.0352 | 0.0351 | 0.0346 | 0.0323 | 0.0312 | 0.0299 |
| CAZ | 0.0000 | 0.0000 | 0.0000 | 0.0000 | 0.0000 | 0.0000 | 0.0000 | 0.0000 | 0.0000 | 0.0000 | 0.0000 |
| CHA | 0.0000 | 0.0000 | 0.0000 | 0.0000 | 0.0000 | 0.0000 | 0.0000 | 0.0000 | 0.0000 | 0.0000 | 0.0000 |
| EUR | 0.0000 | 0.0000 | 0.0000 | 0.0000 | 0.0000 | 0.0000 | 0.0000 | 0.0000 | 0.0000 | 0.0000 | 0.0000 |
| IND | 0.0000 | 0.0000 | 0.0000 | 0.0000 | 0.0000 | 0.0000 | 0.0000 | 0.0000 | 0.0000 | 0.0000 | 0.0000 |
| JPN | 0.0000 | 0.0000 | 0.0000 | 0.0000 | 0.0000 | 0.0000 | 0.0000 | 0.0000 | 0.0000 | 0.0000 | 0.0000 |
| LAM | 0.0000 | 0.0000 | 0.0000 | 0.0000 | 0.0000 | 0.0000 | 0.0000 | 0.0000 | 0.0000 | 0.0000 | 0.0000 |
| MEA | 0.0000 | 0.0000 | 0.0000 | 0.0000 | 0.0000 | 0.0000 | 0.0000 | 0.0000 | 0.0000 | 0.0000 | 0.0000 |
| NEU | 0.0000 | 0.0000 | 0.0000 | 0.0000 | 0.0000 | 0.0000 | 0.0000 | 0.0000 | 0.0000 | 0.0000 | 0.0000 |
| OAS | 0.0349 | 0.0280 | 0.0383 | 0.0315 | 0.0337 | 0.0352 | 0.0351 | 0.0346 | 0.0323 | 0.0312 | 0.0299 |
| REF | 0.0000 | 0.0000 | 0.0000 | 0.0000 | 0.0000 | 0.0000 | 0.0000 | 0.0000 | 0.0000 | 0.0000 | 0.0000 |
| SSA | 0.0000 | 0.0000 | 0.0000 | 0.0000 | 0.0000 | 0.0000 | 0.0000 | 0.0000 | 0.0000 | 0.0000 | 0.0000 |
| USA | 0.0000 | 0.0000 | 0.0000 | 0.0000 | 0.0000 | 0.0000 | 0.0000 | 0.0000 | 0.0000 | 0.0000 | 0.0000 |

Table 440: MAgPIE m4p\_SSP1 — Demand—Food—Secondary products—Molasses (Mt DM/yr) [PART 1/2]

|     | 2050   | 2055   | 2060   | 2070   | 2080   | 2090   | 2100   |
|-----|--------|--------|--------|--------|--------|--------|--------|
| GLO | 0.0299 | 0.0297 | 0.0293 | 0.0310 | 0.0306 | 0.0296 | 0.0293 |
| CAZ | 0.0000 | 0.0000 | 0.0000 | 0.0000 | 0.0000 | 0.0000 | 0.0000 |
| CHA | 0.0000 | 0.0000 | 0.0000 | 0.0000 | 0.0000 | 0.0000 | 0.0000 |
| EUR | 0.0000 | 0.0000 | 0.0000 | 0.0000 | 0.0000 | 0.0000 | 0.0000 |
| IND | 0.0000 | 0.0000 | 0.0000 | 0.0000 | 0.0000 | 0.0000 | 0.0000 |
| JPN | 0.0000 | 0.0000 | 0.0000 | 0.0000 | 0.0000 | 0.0000 | 0.0000 |
| LAM | 0.0000 | 0.0000 | 0.0000 | 0.0000 | 0.0000 | 0.0000 | 0.0000 |
| MEA | 0.0000 | 0.0000 | 0.0000 | 0.0000 | 0.0000 | 0.0000 | 0.0000 |
| NEU | 0.0000 | 0.0000 | 0.0000 | 0.0000 | 0.0000 | 0.0000 | 0.0000 |
| OAS | 0.0299 | 0.0297 | 0.0293 | 0.0310 | 0.0306 | 0.0296 | 0.0293 |
| REF | 0.0000 | 0.0000 | 0.0000 | 0.0000 | 0.0000 | 0.0000 | 0.0000 |
| SSA | 0.0000 | 0.0000 | 0.0000 | 0.0000 | 0.0000 | 0.0000 | 0.0000 |
| USA | 0.0000 | 0.0000 | 0.0000 | 0.0000 | 0.0000 | 0.0000 | 0.0000 |

Table 441: MAgPIE m4p\_SSP1 — Demand—Food—Secondary products—Molasses (Mt DM/yr) [PART 2/2]

|     | 1965   | 1970   | 1975   | 1980   | 1985   | 1990   | 1995   | 2000   | 2005   | 2010   |
|-----|--------|--------|--------|--------|--------|--------|--------|--------|--------|--------|
| GLO | 0.0030 | 0.0044 | 0.0053 | 0.0129 | 0.0278 | 0.0250 | 0.0351 | 0.0279 | 0.0379 | 0.0314 |
| CAZ | 0.0000 | 0.0000 | 0.0000 | 0.0000 | 0.0000 | 0.0000 | 0.0000 | 0.0000 | 0.0000 | 0.0000 |
| CHA | 0.0000 | 0.0000 | 0.0000 | 0.0000 | 0.0000 | 0.0000 | 0.0000 | 0.0000 | 0.0000 | 0.0000 |
| EUR | 0.0000 | 0.0000 | 0.0000 | 0.0000 | 0.0000 | 0.0000 | 0.0000 | 0.0000 | 0.0000 | 0.0000 |
| IND | 0.0000 | 0.0000 | 0.0000 | 0.0000 | 0.0000 | 0.0000 | 0.0000 | 0.0000 | 0.0000 | 0.0000 |
| JPN | 0.0000 | 0.0000 | 0.0000 | 0.0000 | 0.0000 | 0.0000 | 0.0000 | 0.0000 | 0.0000 | 0.0000 |
| LAM | 0.0000 | 0.0000 | 0.0000 | 0.0000 | 0.0000 | 0.0000 | 0.0000 | 0.0000 | 0.0000 | 0.0000 |
| MEA | 0.0000 | 0.0000 | 0.0000 | 0.0000 | 0.0000 | 0.0000 | 0.0000 | 0.0000 | 0.0000 | 0.0000 |
| NEU | 0.0000 | 0.0000 | 0.0000 | 0.0000 | 0.0000 | 0.0000 | 0.0000 | 0.0000 | 0.0000 | 0.0000 |
| OAS | 0.0030 | 0.0044 | 0.0053 | 0.0129 | 0.0278 | 0.0250 | 0.0351 | 0.0279 | 0.0379 | 0.0314 |
| REF | 0.0000 | 0.0000 | 0.0000 | 0.0000 | 0.0000 | 0.0000 | 0.0000 | 0.0000 | 0.0000 | 0.0000 |
| SSA | 0.0000 | 0.0000 | 0.0000 | 0.0000 | 0.0000 | 0.0000 | 0.0000 | 0.0000 | 0.0000 | 0.0000 |
| USA | 0.0000 | 0.0000 | 0.0000 | 0.0000 | 0.0000 | 0.0000 | 0.0000 | 0.0000 | 0.0000 | 0.0000 |

Table 442: FAO — Demand—Food—Secondary products—Molasses (Mt DM/yr)

7.4.4 Oils

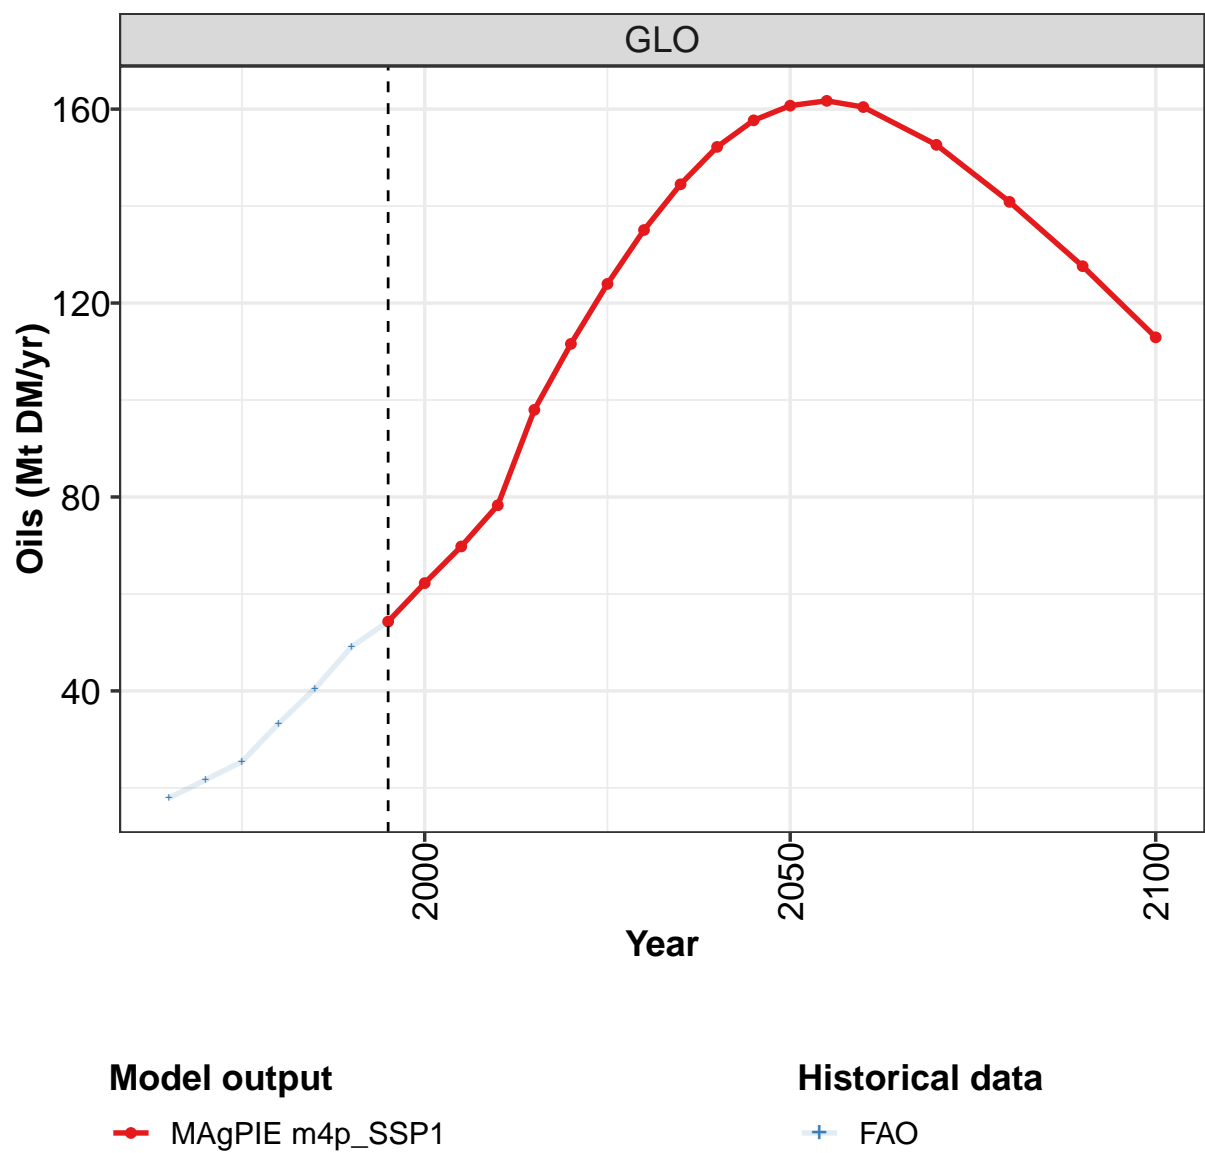



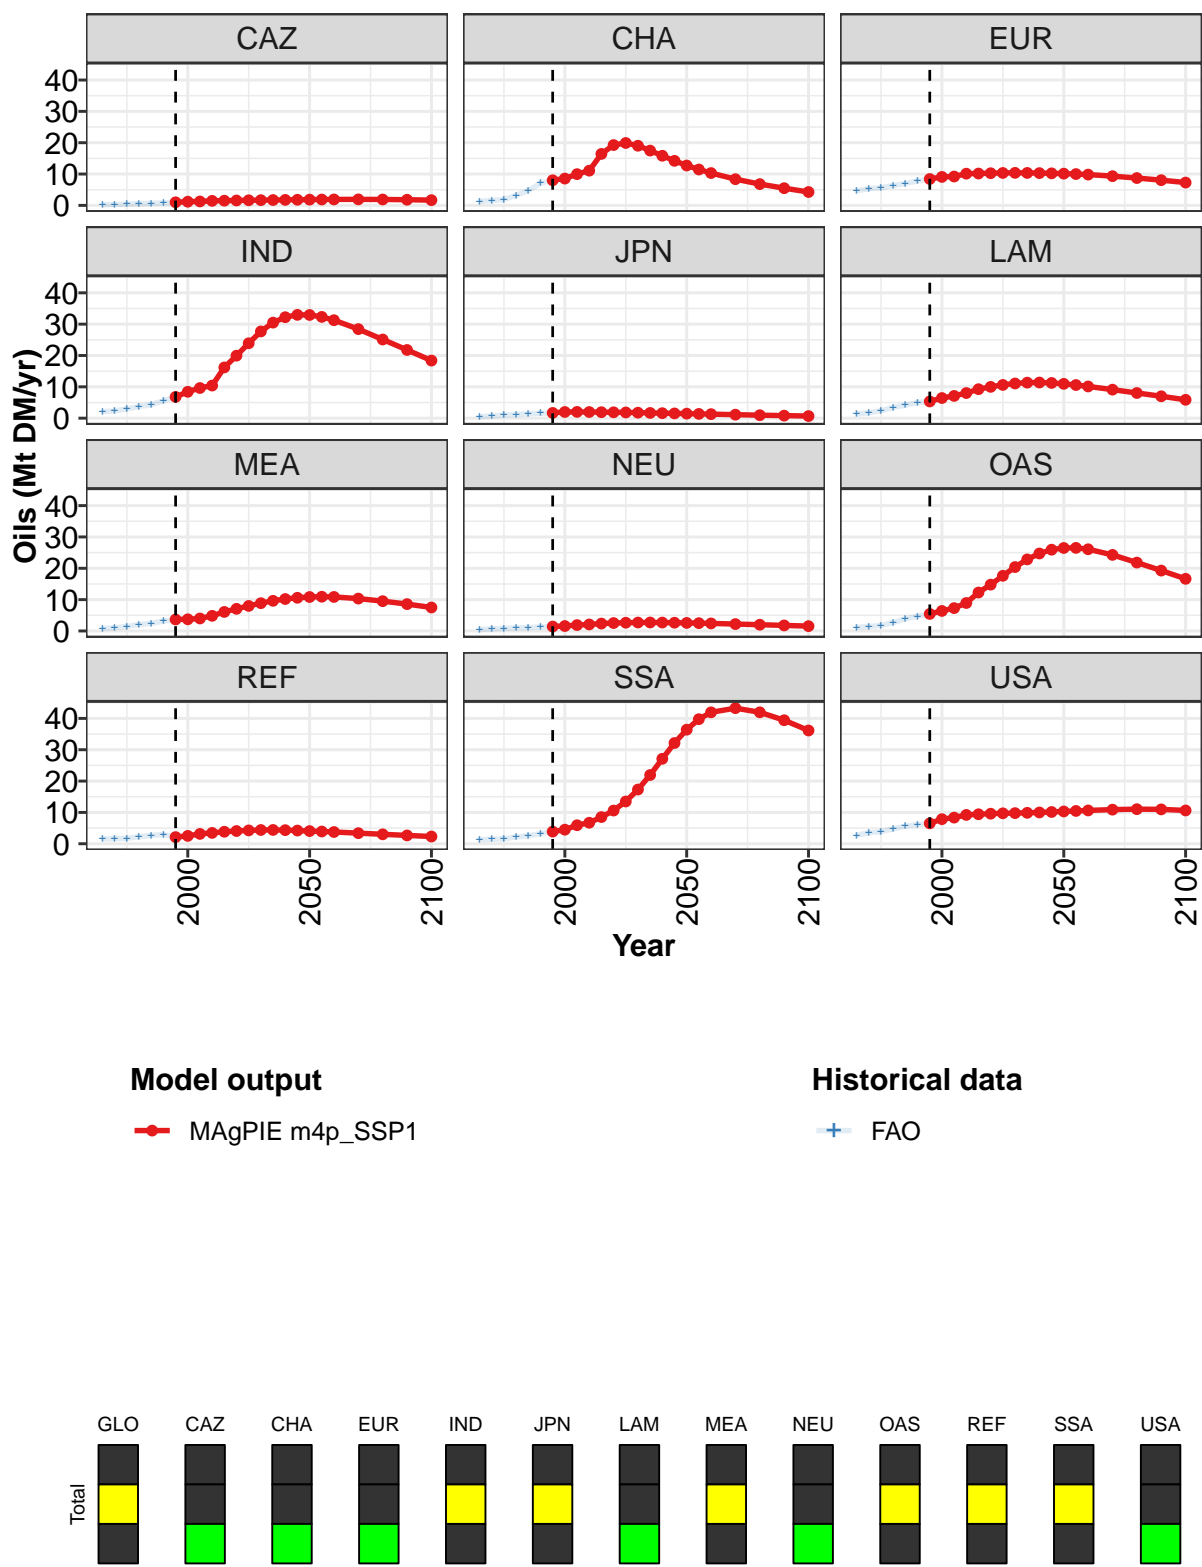

Figure 148: MAgPIE m4p\_SSP1 — Demand—Food—Secondary products—Oils (Mt DM/yr)

|     | 1995 | 2000 | 2005 | 2010 | 2015 | 2020 | 2025 | 2030 | 2035 | 2040 | 2045 |
|-----|------|------|------|------|------|------|------|------|------|------|------|
| GLO | 54   | 62   | 70   | 78   | 98   | 112  | 124  | 135  | 144  | 152  | 158  |
| CAZ | 1    | 1    | 1    | 1    | 2    | 2    | 2    | 2    | 2    | 2    | 2    |
| CHA | 8    | 9    | 10   | 11   | 16   | 19   | 20   | 19   | 17   | 16   | 14   |
| EUR | 8    | 9    | 9    | 10   | 10   | 10   | 10   | 10   | 10   | 10   | 10   |
| IND | 7    | 8    | 10   | 10   | 16   | 20   | 24   | 28   | 30   | 32   | 33   |
| JPN | 2    | 2    | 2    | 2    | 2    | 2    | 2    | 2    | 2    | 2    | 2    |
| LAM | 5    | 6    | 7    | 8    | 9    | 10   | 11   | 11   | 11   | 11   | 11   |
| MEA | 4    | 4    | 4    | 5    | 6    | 7    | 8    | 9    | 10   | 10   | 11   |
| NEU | 1    | 2    | 2    | 2    | 2    | 3    | 3    | 3    | 3    | 3    | 3    |
| OAS | 5    | 6    | 7    | 9    | 12   | 15   | 18   | 20   | 23   | 25   | 26   |
| REF | 2    | 3    | 3    | 3    | 4    | 4    | 4    | 4    | 4    | 4    | 4    |
| SSA | 4    | 5    | 6    | 7    | 9    | 11   | 13   | 17   | 22   | 27   | 32   |
| USA | 7    | 8    | 8    | 9    | 9    | 10   | 10   | 10   | 10   | 10   | 10   |

Table 443: MAgPIE m4p\_SSP1 — Demand—Food—Secondary products—Oils (Mt DM/yr) [PART 1/2]

|     | 2050 | 2055 | 2060 | 2070 | 2080 | 2090 | 2100 |
|-----|------|------|------|------|------|------|------|
| GLO | 161  | 162  | 160  | 153  | 141  | 128  | 113  |
| CAZ | 2    | 2    | 2    | 2    | 2    | 2    | 2    |
| CHA | 13   | 11   | 10   | 8    | 7    | 5    | 4    |
| EUR | 10   | 10   | 10   | 9    | 9    | 8    | 7    |
| IND | 33   | 32   | 31   | 28   | 25   | 22   | 18   |
| JPN | 1    | 1    | 1    | 1    | 1    | 1    | 1    |
| LAM | 11   | 11   | 10   | 9    | 8    | 7    | 6    |
| MEA | 11   | 11   | 11   | 10   | 10   | 9    | 7    |
| NEU | 3    | 2    | 2    | 2    | 2    | 2    | 2    |
| OAS | 26   | 27   | 26   | 24   | 22   | 19   | 17   |
| REF | 4    | 4    | 4    | 3    | 3    | 3    | 2    |
| SSA | 36   | 40   | 42   | 43   | 42   | 39   | 36   |
| USA | 10   | 10   | 11   | 11   | 11   | 11   | 11   |

Table 444: MAgPIE m4p\_SSP1 — Demand—Food—Secondary products—Oils (Mt DM/yr) [PART 2/2]

|     | 1965 | 1970 | 1975 | 1980 | 1985 | 1990 | 1995 | 2000 | 2005 | 2010 |
|-----|------|------|------|------|------|------|------|------|------|------|
| GLO | 17.9 | 21.6 | 25.4 | 33.2 | 40.5 | 49.1 | 54.3 | 62.2 | 69.8 | 78.3 |
| CAZ | 0.2  | 0.3  | 0.4  | 0.5  | 0.7  | 0.8  | 1.0  | 1.2  | 1.3  | 1.4  |
| CHA | 1.3  | 1.6  | 1.9  | 3.2  | 4.7  | 7.1  | 8.0  | 8.6  | 10.0 | 11.1 |
| EUR | 4.6  | 5.3  | 5.6  | 6.3  | 7.0  | 7.8  | 8.4  | 9.1  | 9.2  | 10.1 |
| IND | 2.1  | 2.3  | 3.0  | 3.8  | 4.3  | 5.6  | 6.8  | 8.4  | 9.6  | 10.4 |
| JPN | 0.5  | 0.7  | 1.0  | 1.2  | 1.4  | 1.6  | 1.7  | 2.0  | 2.0  | 2.0  |
| LAM | 1.3  | 1.7  | 2.4  | 3.4  | 4.2  | 5.0  | 5.3  | 6.4  | 7.1  | 8.0  |
| MEA | 0.8  | 1.0  | 1.4  | 2.1  | 2.4  | 3.1  | 3.7  | 3.7  | 4.0  | 4.8  |
| NEU | 0.5  | 0.7  | 0.8  | 1.0  | 1.1  | 1.3  | 1.4  | 1.6  | 1.9  | 2.1  |
| OAS | 1.2  | 1.4  | 1.8  | 2.6  | 3.9  | 4.7  | 5.4  | 6.3  | 7.3  | 8.9  |
| REF | 1.6  | 1.6  | 1.7  | 2.2  | 2.7  | 2.9  | 2.1  | 2.5  | 3.1  | 3.5  |
| SSA | 1.3  | 1.4  | 1.6  | 2.2  | 2.5  | 3.2  | 3.9  | 4.5  | 5.9  | 6.7  |
| USA | 2.7  | 3.5  | 3.9  | 4.7  | 5.7  | 6.1  | 6.5  | 7.9  | 8.4  | 9.2  |

Table 445: FAO — Demand—Food—Secondary products—Oils (Mt DM/yr)

7.4.5
Sugar

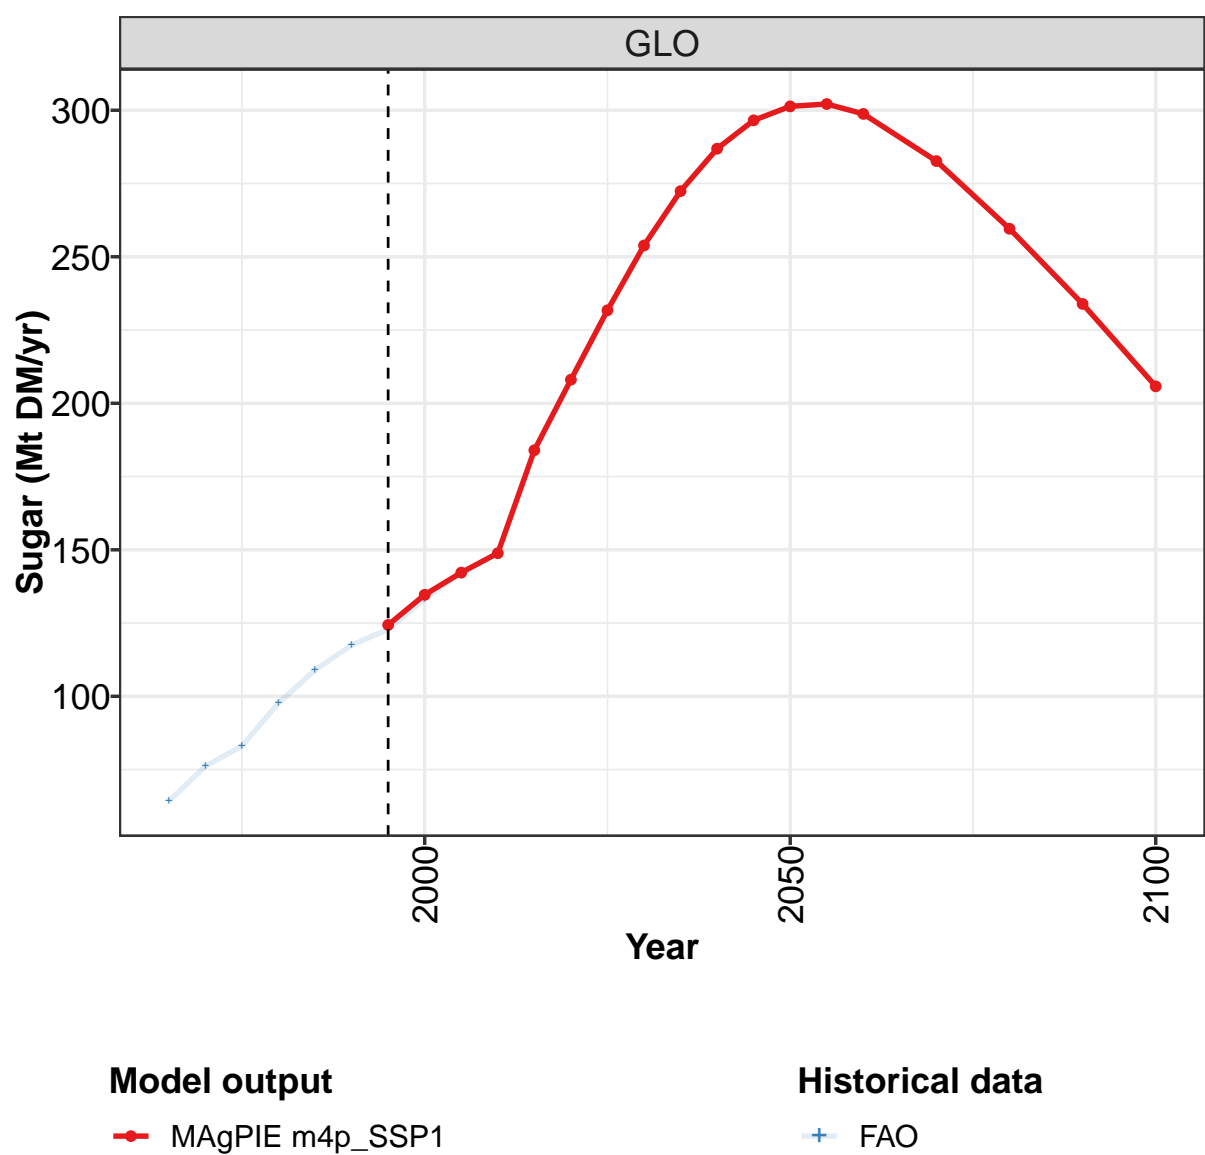

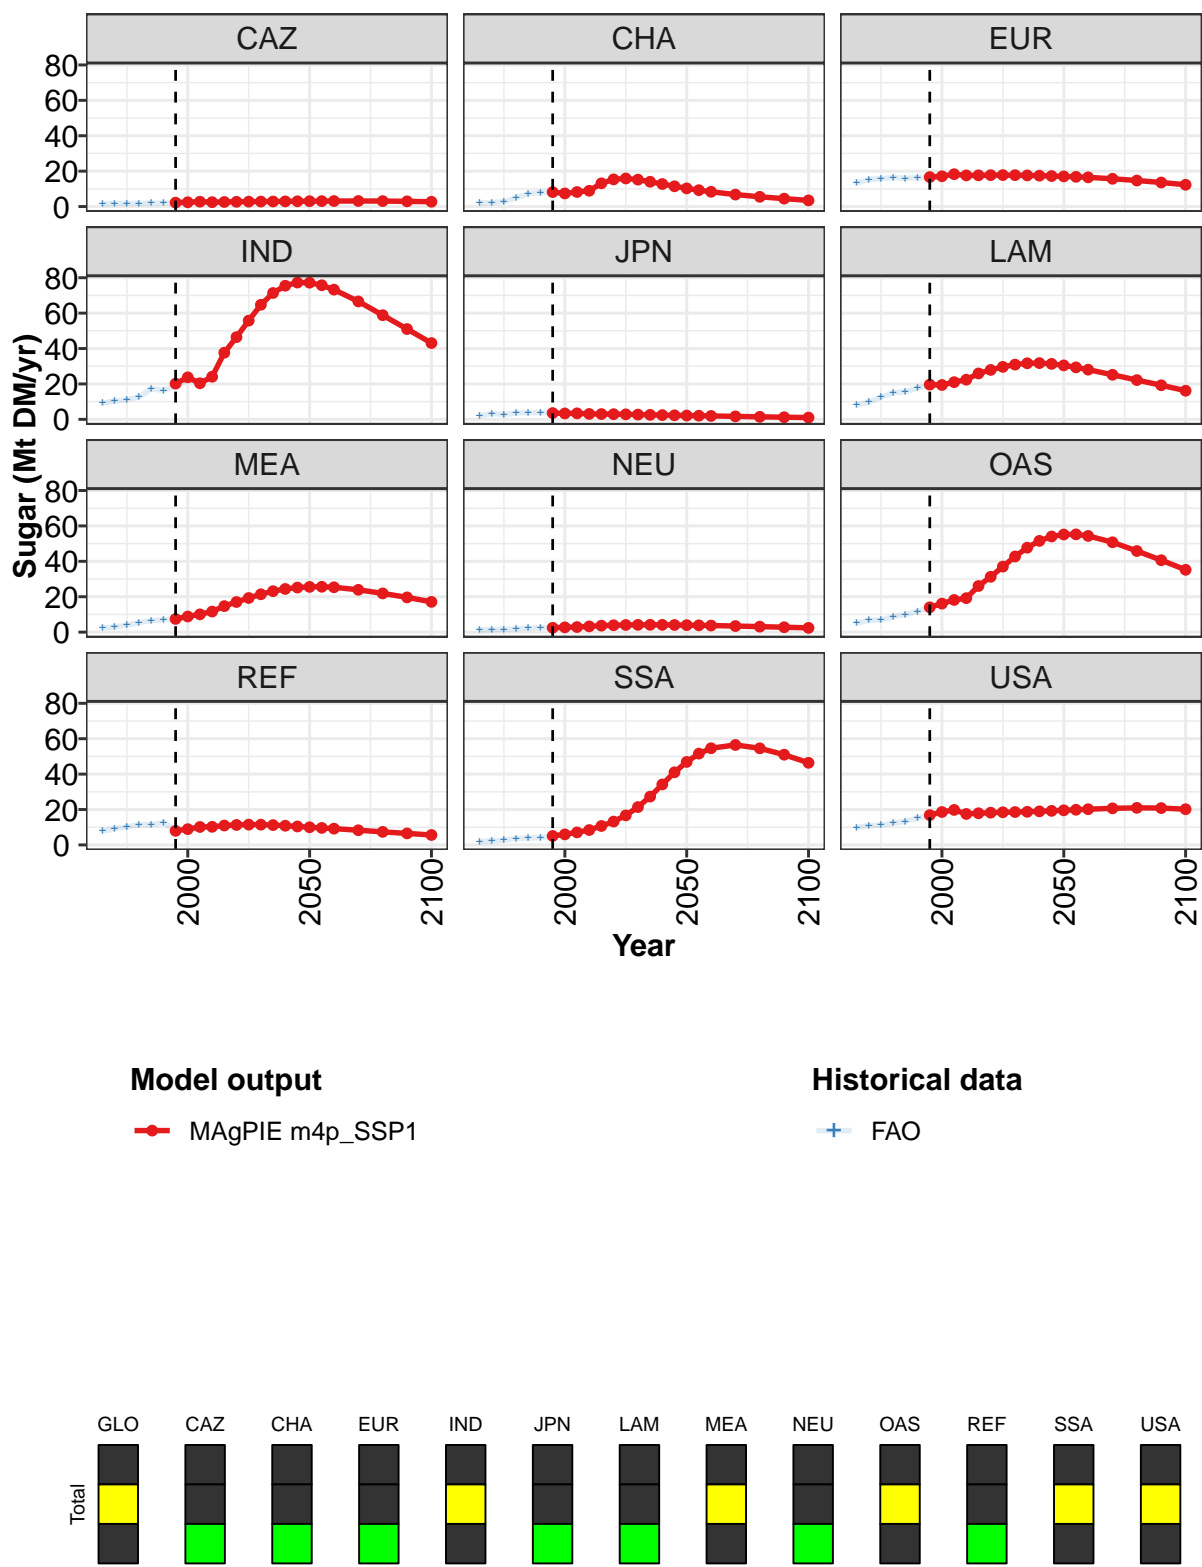

Figure 149: MAgPIE m4p\_SSP1 — Demand—Food—Secondary products—Sugar (Mt DM/yr)

|     | 1995 | 2000 | 2005 | 2010 | 2015 | 2020 | 2025 | 2030 | 2035 | 2040 | 2045 |
|-----|------|------|------|------|------|------|------|------|------|------|------|
| GLO | 124  | 135  | 142  | 149  | 184  | 208  | 232  | 254  | 272  | 287  | 297  |
| CAZ | 2    | 2    | 3    | 2    | 3    | 3    | 3    | 3    | 3    | 3    | 3    |
| CHA | 8    | 7    | 8    | 9    | 13   | 15   | 16   | 15   | 14   | 13   | 11   |
| EUR | 17   | 17   | 18   | 18   | 18   | 18   | 18   | 18   | 18   | 17   | 17   |
| IND | 20   | 24   | 20   | 24   | 38   | 46   | 56   | 65   | 71   | 75   | 77   |
| JPN | 4    | 3    | 3    | 3    | 3    | 3    | 3    | 3    | 3    | 2    | 2    |
| LAM | 20   | 19   | 21   | 22   | 26   | 28   | 30   | 31   | 32   | 32   | 31   |
| MEA | 7    | 9    | 10   | 12   | 15   | 17   | 19   | 21   | 23   | 24   | 25   |
| NEU | 2    | 3    | 3    | 3    | 4    | 4    | 4    | 4    | 4    | 4    | 4    |
| OAS | 14   | 16   | 18   | 19   | 26   | 31   | 37   | 43   | 48   | 52   | 54   |
| REF | 8    | 9    | 10   | 10   | 11   | 11   | 11   | 11   | 11   | 11   | 10   |
| SSA | 5    | 6    | 7    | 8    | 11   | 13   | 17   | 21   | 27   | 34   | 41   |
| USA | 17   | 19   | 20   | 17   | 18   | 18   | 18   | 19   | 19   | 19   | 19   |

Table 446: MAgPIE m4p-SSP1 — Demand—Food—Secondary products—Sugar (Mt DM/yr) [PART 1/2]

|     | 2050 | 2055 | 2060 | 2070 | 2080 | 2090 | 2100 |
|-----|------|------|------|------|------|------|------|
| GLO | 301  | 302  | 299  | 283  | 260  | 234  | 206  |
| CAZ | 3    | 3    | 3    | 3    | 3    | 3    | 3    |
| CHA | 10   | 9    | 8    | 7    | 6    | 4    | 3    |
| EUR | 17   | 17   | 17   | 16   | 15   | 14   | 12   |
| IND | 77   | 76   | 73   | 67   | 59   | 51   | 43   |
| JPN | 2    | 2    | 2    | 2    | 1    | 1    | 1    |
| LAM | 30   | 29   | 28   | 25   | 22   | 19   | 16   |
| MEA | 26   | 26   | 25   | 24   | 22   | 20   | 17   |
| NEU | 4    | 4    | 4    | 3    | 3    | 3    | 2    |
| OAS | 55   | 55   | 54   | 51   | 46   | 41   | 35   |
| REF | 10   | 10   | 9    | 8    | 7    | 7    | 6    |
| SSA | 47   | 52   | 55   | 56   | 55   | 51   | 46   |
| USA | 20   | 20   | 20   | 21   | 21   | 21   | 20   |

Table 447: MAgPIE m4p-SSP1 — Demand—Food—Secondary products—Sugar (Mt DM/yr) [PART 2/2]

|     | 1965 | 1970 | 1975 | 1980 | 1985 | 1990 | 1995 | 2000 | 2005 | 2010 |
|-----|------|------|------|------|------|------|------|------|------|------|
| GLO | 64   | 76   | 83   | 98   | 109  | 117  | 123  | 133  | 142  | 149  |
| CAZ | 2    | 2    | 2    | 2    | 2    | 2    | 2    | 2    | 3    | 2    |
| CHA | 2    | 2    | 3    | 5    | 7    | 8    | 8    | 7    | 8    | 9    |
| EUR | 13   | 15   | 16   | 16   | 16   | 16   | 17   | 17   | 18   | 18   |
| IND | 9    | 10   | 11   | 13   | 17   | 16   | 19   | 22   | 20   | 24   |
| JPN | 2    | 3    | 3    | 4    | 4    | 4    | 4    | 3    | 3    | 3    |
| LAM | 8    | 10   | 12   | 15   | 16   | 18   | 20   | 19   | 21   | 22   |
| MEA | 2    | 3    | 4    | 5    | 6    | 7    | 7    | 9    | 10   | 12   |
| NEU | 1    | 1    | 2    | 2    | 2    | 3    | 2    | 3    | 3    | 3    |
| OAS | 5    | 7    | 7    | 9    | 10   | 12   | 14   | 16   | 18   | 19   |
| REF | 8    | 9    | 10   | 11   | 11   | 13   | 8    | 9    | 10   | 10   |
| SSA | 2    | 2    | 3    | 4    | 4    | 4    | 5    | 6    | 7    | 8    |
| USA | 10   | 11   | 11   | 12   | 13   | 15   | 17   | 19   | 20   | 17   |

Table 448: FAO — Demand—Food—Secondary products—Sugar (Mt DM/yr)

## 8 Material

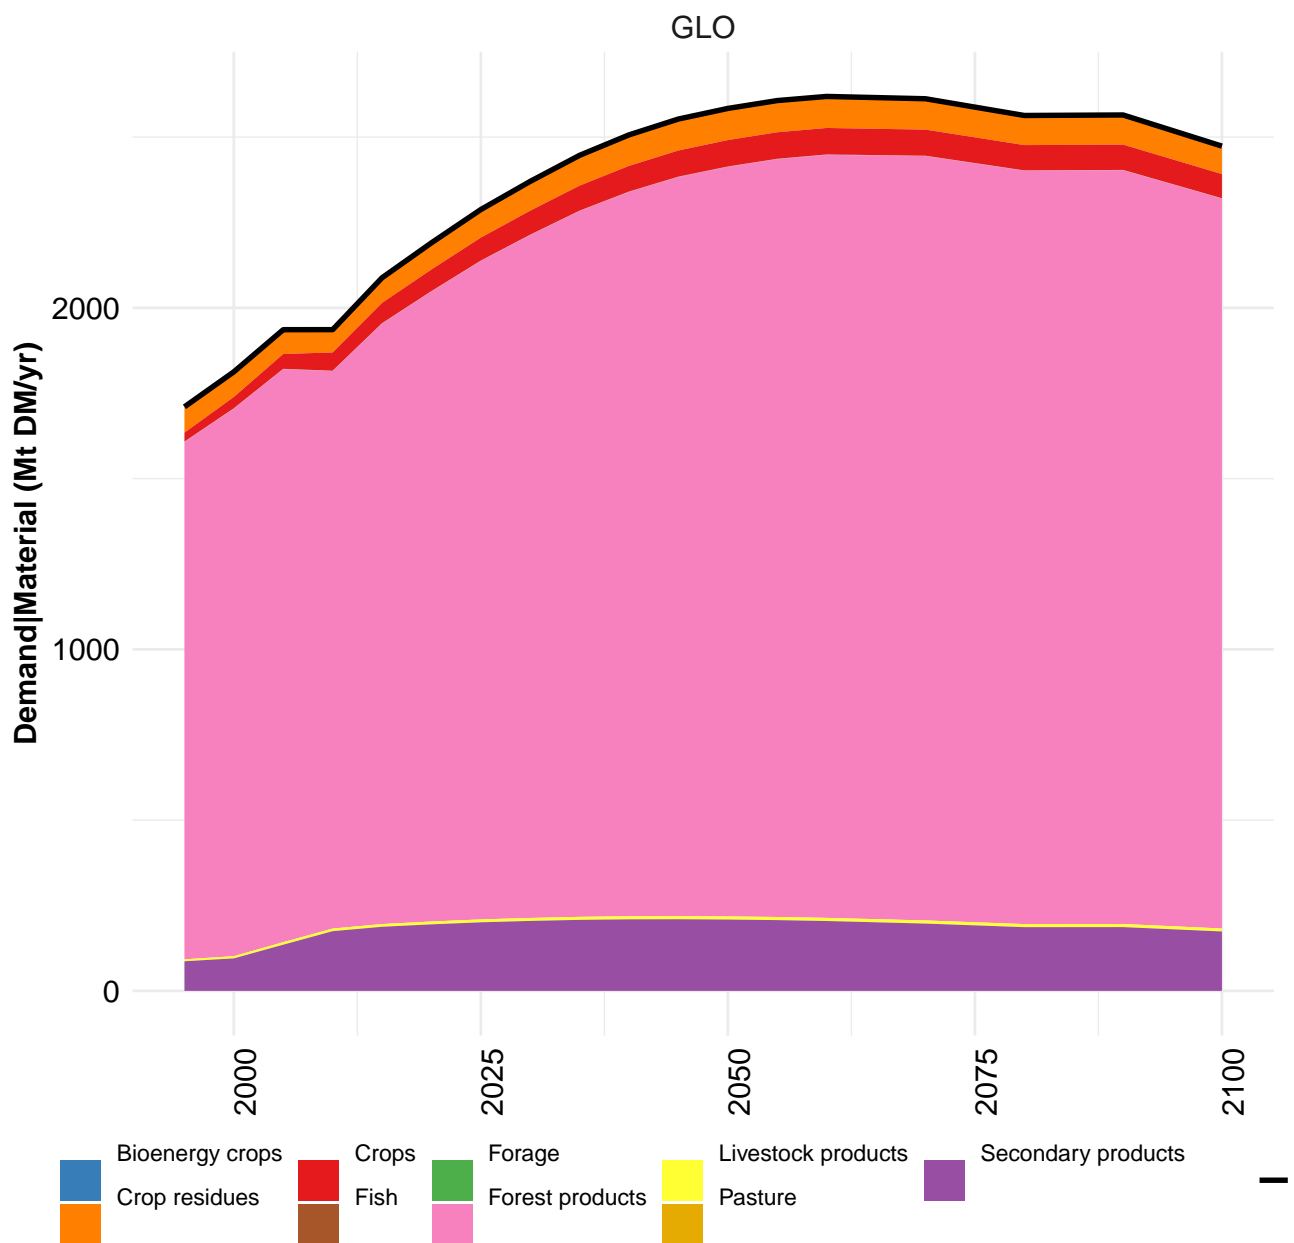

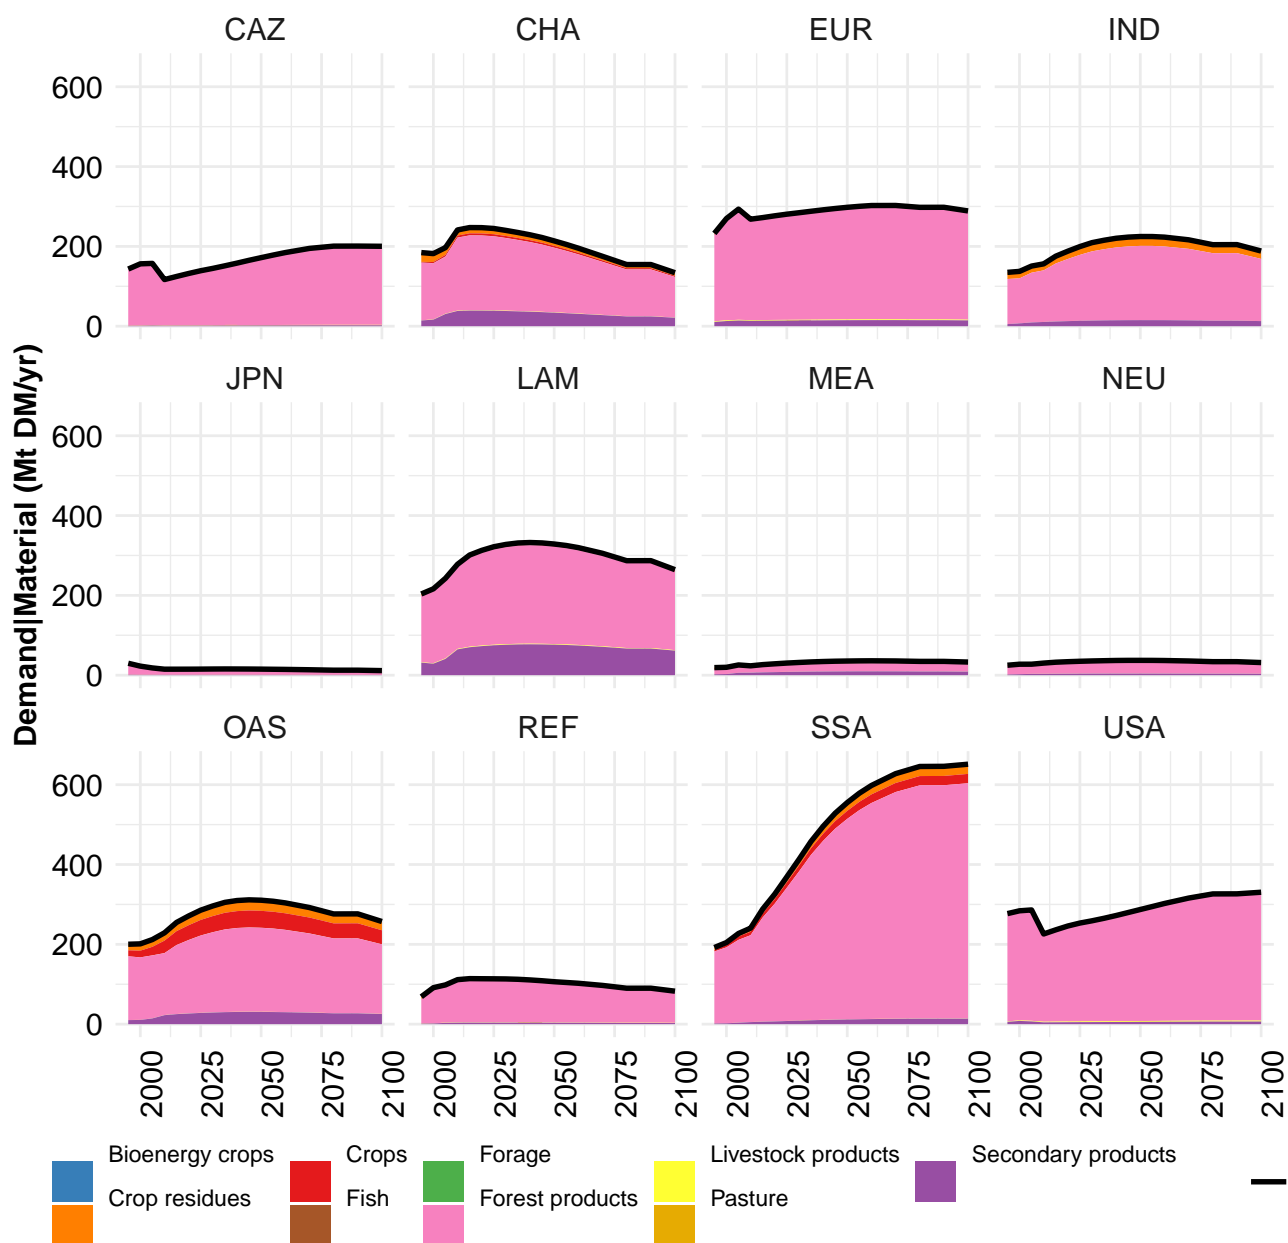

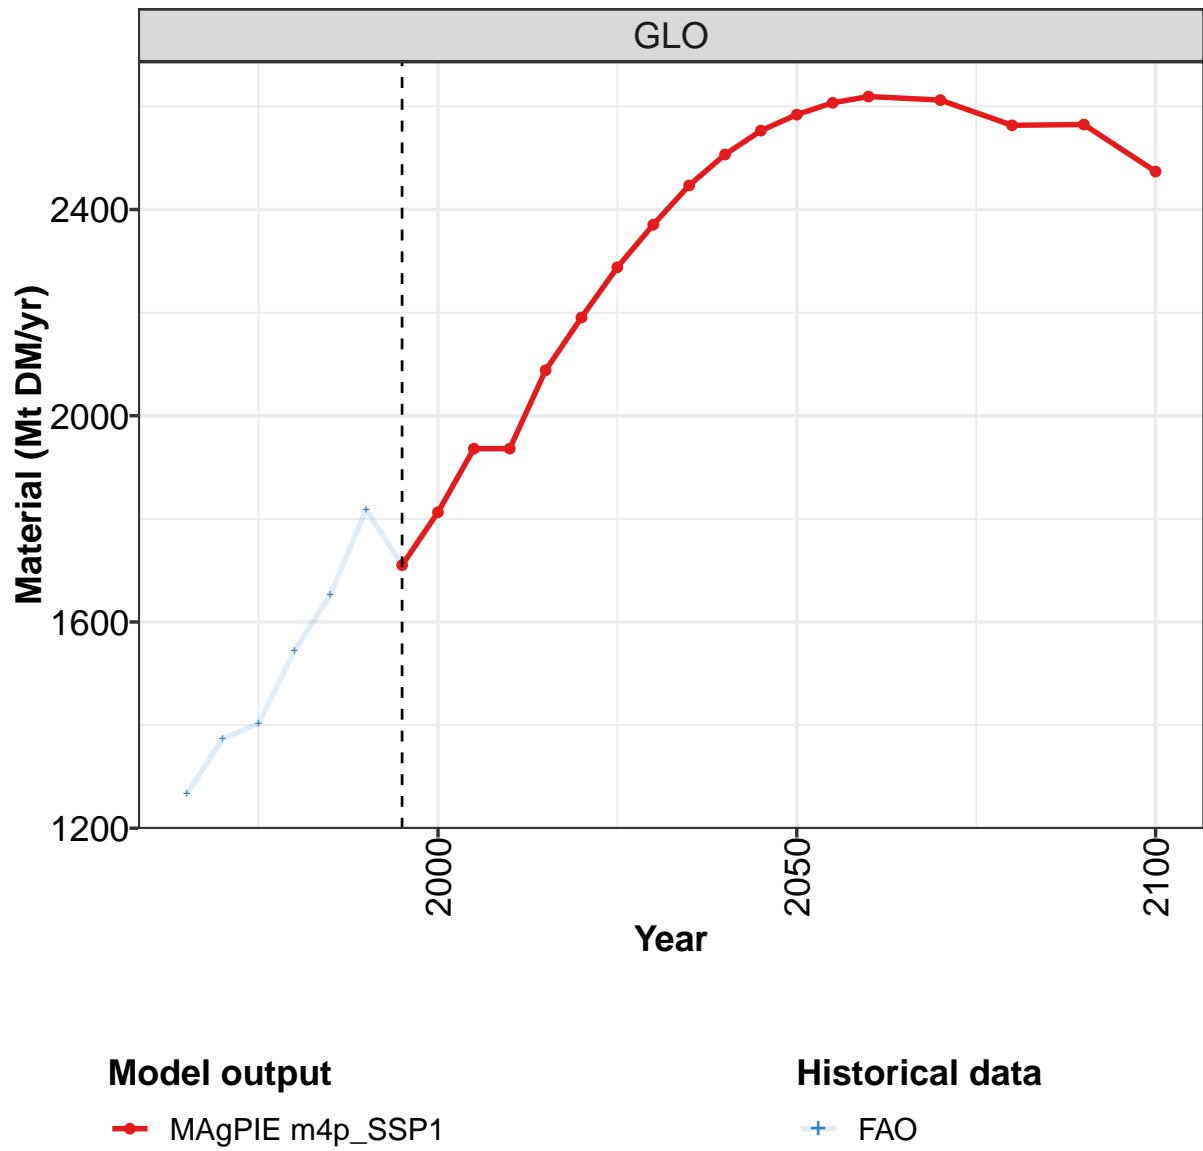



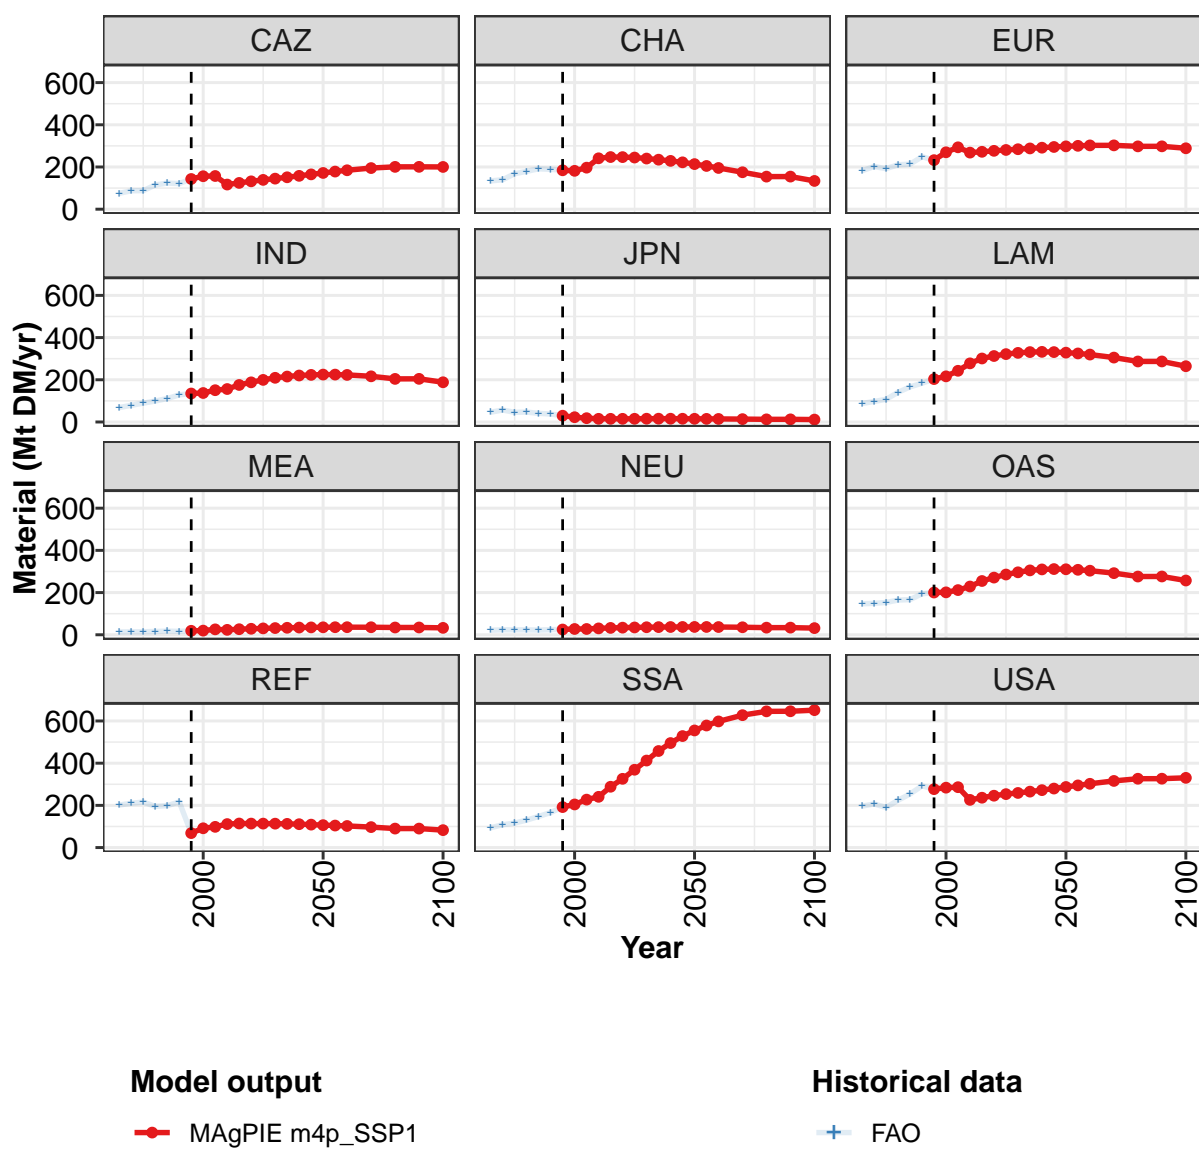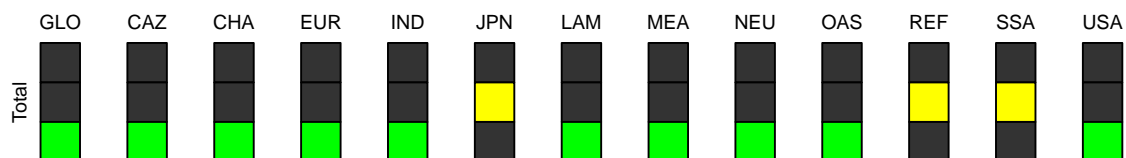

Figure 150: MAgPIE m4p\_SSP1 — Demand—Material (Mt DM/yr)

|     | 1995 | 2000 | 2005 | 2010 | 2015 | 2020 | 2025 | 2030 | 2035 | 2040 | 2045 |
|-----|------|------|------|------|------|------|------|------|------|------|------|
| GLO | 1710 | 1813 | 1936 | 1936 | 2088 | 2191 | 2288 | 2370 | 2447 | 2507 | 2553 |
| CAZ | 143  | 156  | 157  | 117  | 125  | 132  | 139  | 145  | 151  | 158  | 165  |
| CHA | 184  | 182  | 197  | 241  | 247  | 247  | 245  | 240  | 235  | 229  | 222  |
| EUR | 233  | 270  | 293  | 268  | 272  | 277  | 281  | 284  | 288  | 292  | 295  |
| IND | 135  | 137  | 151  | 156  | 175  | 188  | 200  | 209  | 215  | 220  | 223  |
| JPN | 30   | 23   | 18   | 15   | 15   | 15   | 15   | 15   | 16   | 16   | 15   |
| LAM | 203  | 216  | 243  | 278  | 301  | 313  | 322  | 328  | 331  | 332  | 331  |
| MEA | 19   | 20   | 26   | 23   | 26   | 28   | 30   | 32   | 33   | 34   | 35   |
| NEU | 25   | 27   | 28   | 30   | 33   | 34   | 35   | 36   | 36   | 37   | 37   |
| OAS | 200  | 201  | 212  | 229  | 255  | 271  | 286  | 296  | 305  | 310  | 312  |
| REF | 69   | 91   | 98   | 112  | 114  | 114  | 114  | 113  | 112  | 111  | 109  |
| SSA | 192  | 204  | 227  | 241  | 288  | 326  | 369  | 412  | 458  | 495  | 529  |
| USA | 277  | 284  | 286  | 226  | 236  | 246  | 253  | 259  | 265  | 272  | 280  |

Table 449: MAgPIE m4p\_SSP1 — Demand—Material (Mt DM/yr) [PART 1/2]

|     | 2050 | 2055 | 2060 | 2070 | 2080 | 2090 | 2100 |
|-----|------|------|------|------|------|------|------|
| GLO | 2584 | 2607 | 2619 | 2612 | 2563 | 2565 | 2474 |
| CAZ | 172  | 178  | 185  | 195  | 201  | 201  | 200  |
| CHA | 214  | 205  | 195  | 175  | 154  | 155  | 134  |
| EUR | 298  | 300  | 302  | 303  | 298  | 298  | 289  |
| IND | 225  | 225  | 223  | 216  | 204  | 204  | 188  |
| JPN | 15   | 15   | 15   | 14   | 13   | 13   | 11   |
| LAM | 329  | 325  | 320  | 305  | 287  | 287  | 264  |
| MEA | 35   | 36   | 36   | 36   | 35   | 35   | 33   |
| NEU | 37   | 37   | 37   | 36   | 34   | 34   | 32   |
| OAS | 311  | 308  | 304  | 292  | 276  | 276  | 257  |
| REF | 106  | 104  | 102  | 97   | 90   | 90   | 83   |
| SSA | 555  | 579  | 598  | 628  | 646  | 646  | 651  |
| USA | 287  | 295  | 302  | 316  | 326  | 327  | 331  |

Table 450: MAgPIE m4p\_SSP1 — Demand—Material (Mt DM/yr) [PART 2/2]

|     | 1965 | 1970 | 1975 | 1980 | 1985 | 1990 | 1995 | 2000 | 2005 | 2010 |
|-----|------|------|------|------|------|------|------|------|------|------|
| GLO | 1267 | 1373 | 1403 | 1544 | 1653 | 1818 | 1710 | 1813 | 1936 | 1936 |
| CAZ | 75   | 87   | 88   | 115  | 124  | 121  | 143  | 156  | 157  | 117  |
| CHA | 134  | 140  | 168  | 179  | 191  | 189  | 184  | 182  | 197  | 241  |
| EUR | 182  | 202  | 192  | 210  | 213  | 248  | 233  | 270  | 293  | 268  |
| IND | 68   | 79   | 89   | 99   | 111  | 128  | 135  | 137  | 151  | 156  |
| JPN | 46   | 57   | 46   | 47   | 41   | 38   | 30   | 23   | 18   | 15   |
| LAM | 88   | 97   | 107  | 141  | 166  | 184  | 203  | 216  | 243  | 278  |
| MEA | 13   | 14   | 14   | 16   | 17   | 16   | 19   | 20   | 26   | 23   |
| NEU | 21   | 24   | 23   | 23   | 22   | 24   | 25   | 27   | 28   | 30   |
| OAS | 147  | 149  | 153  | 164  | 167  | 194  | 200  | 201  | 212  | 229  |
| REF | 202  | 210  | 216  | 195  | 198  | 216  | 69   | 91   | 98   | 112  |
| SSA | 94   | 108  | 116  | 130  | 147  | 166  | 192  | 204  | 227  | 241  |
| USA | 196  | 207  | 190  | 224  | 254  | 292  | 277  | 284  | 286  | 226  |

Table 451: FAO — Demand—Material (Mt DM/yr)

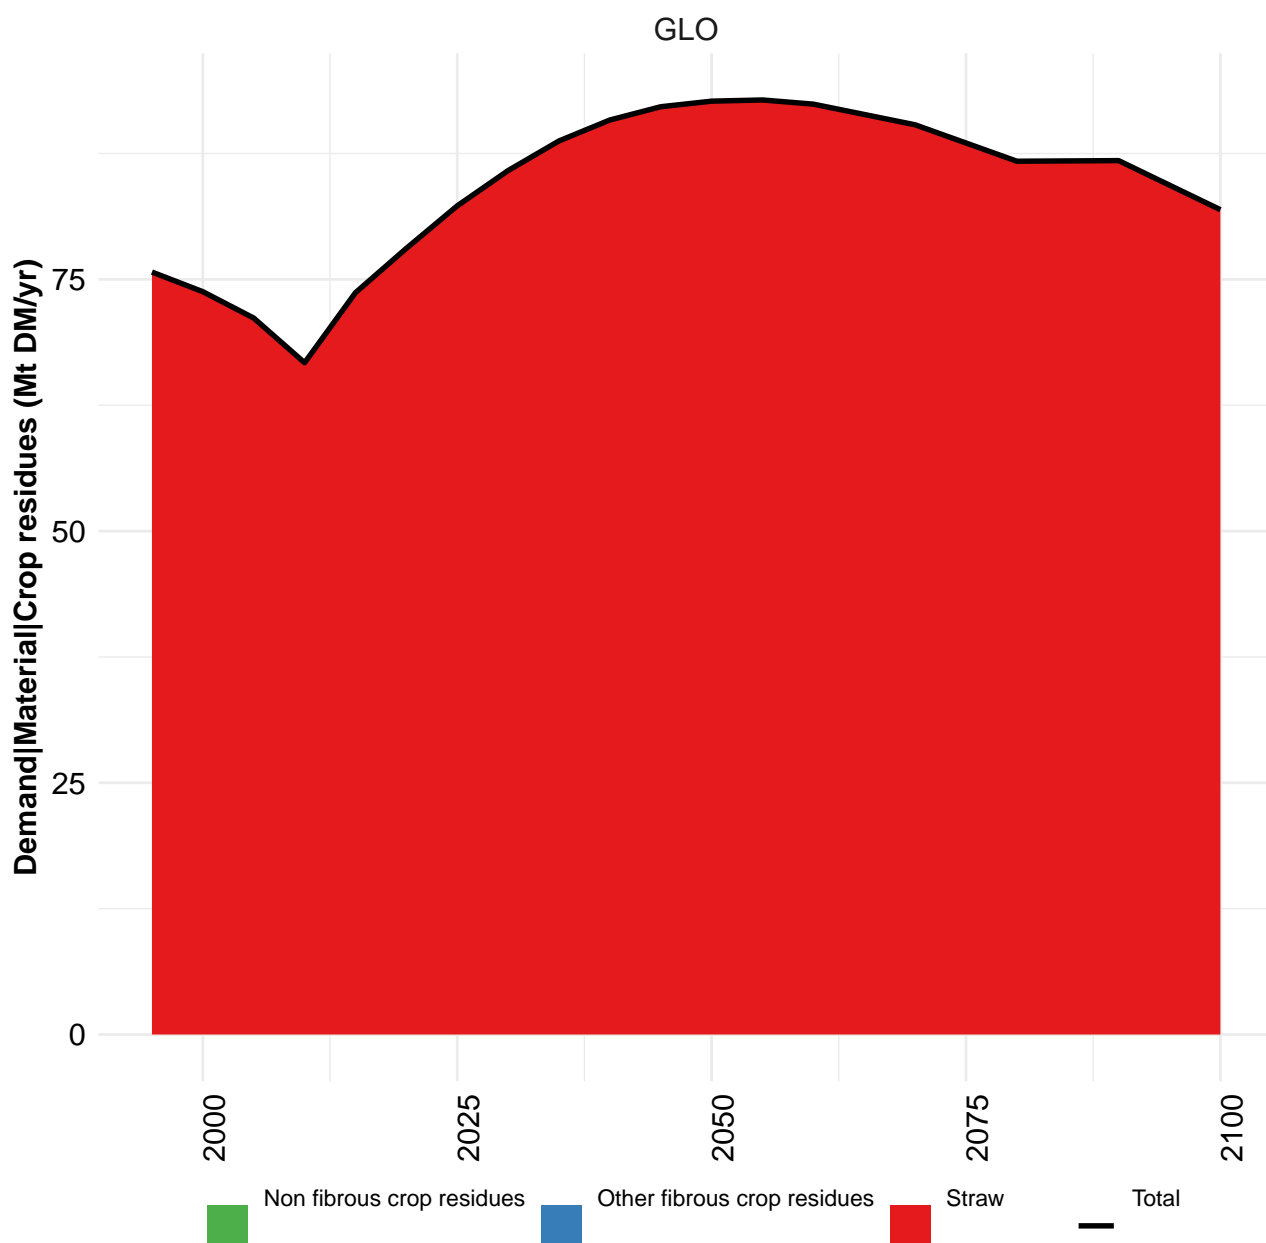

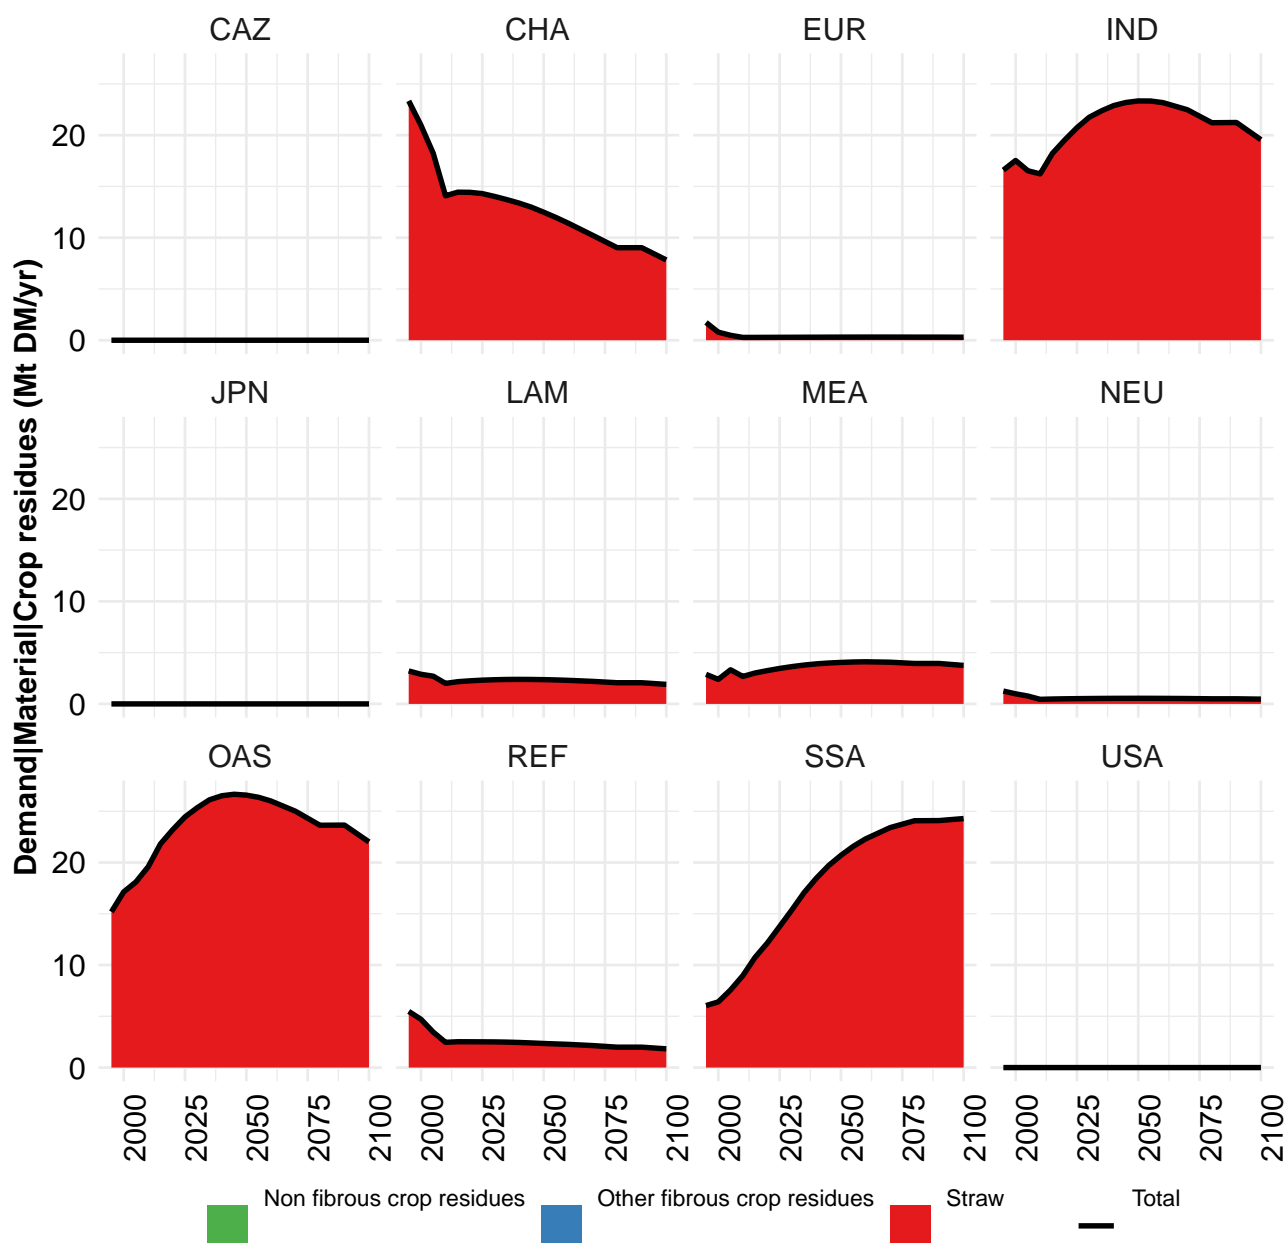

8.1 Crop residues

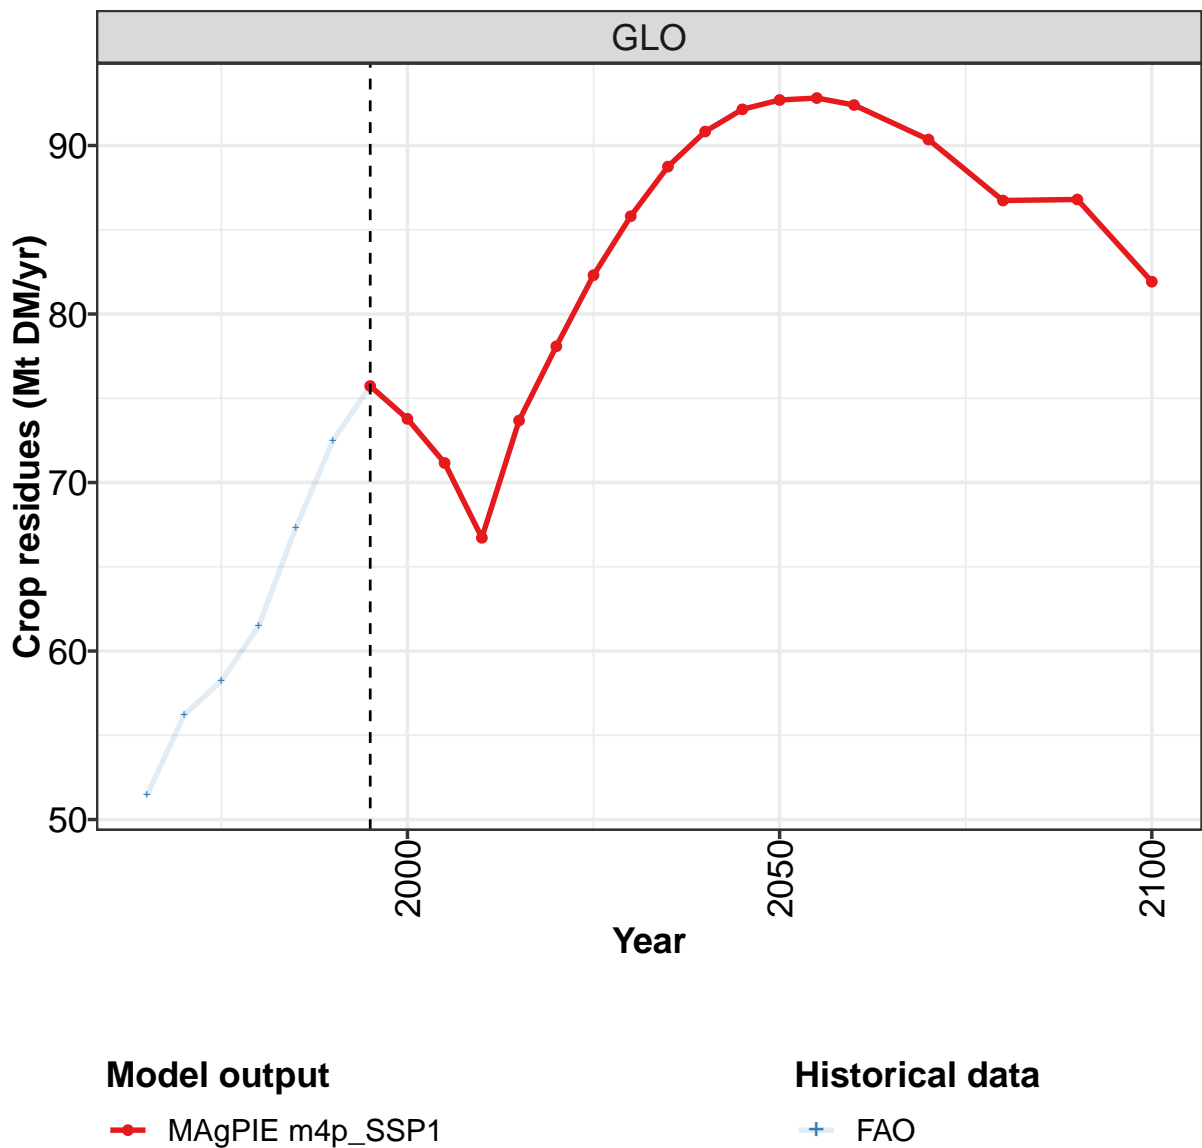

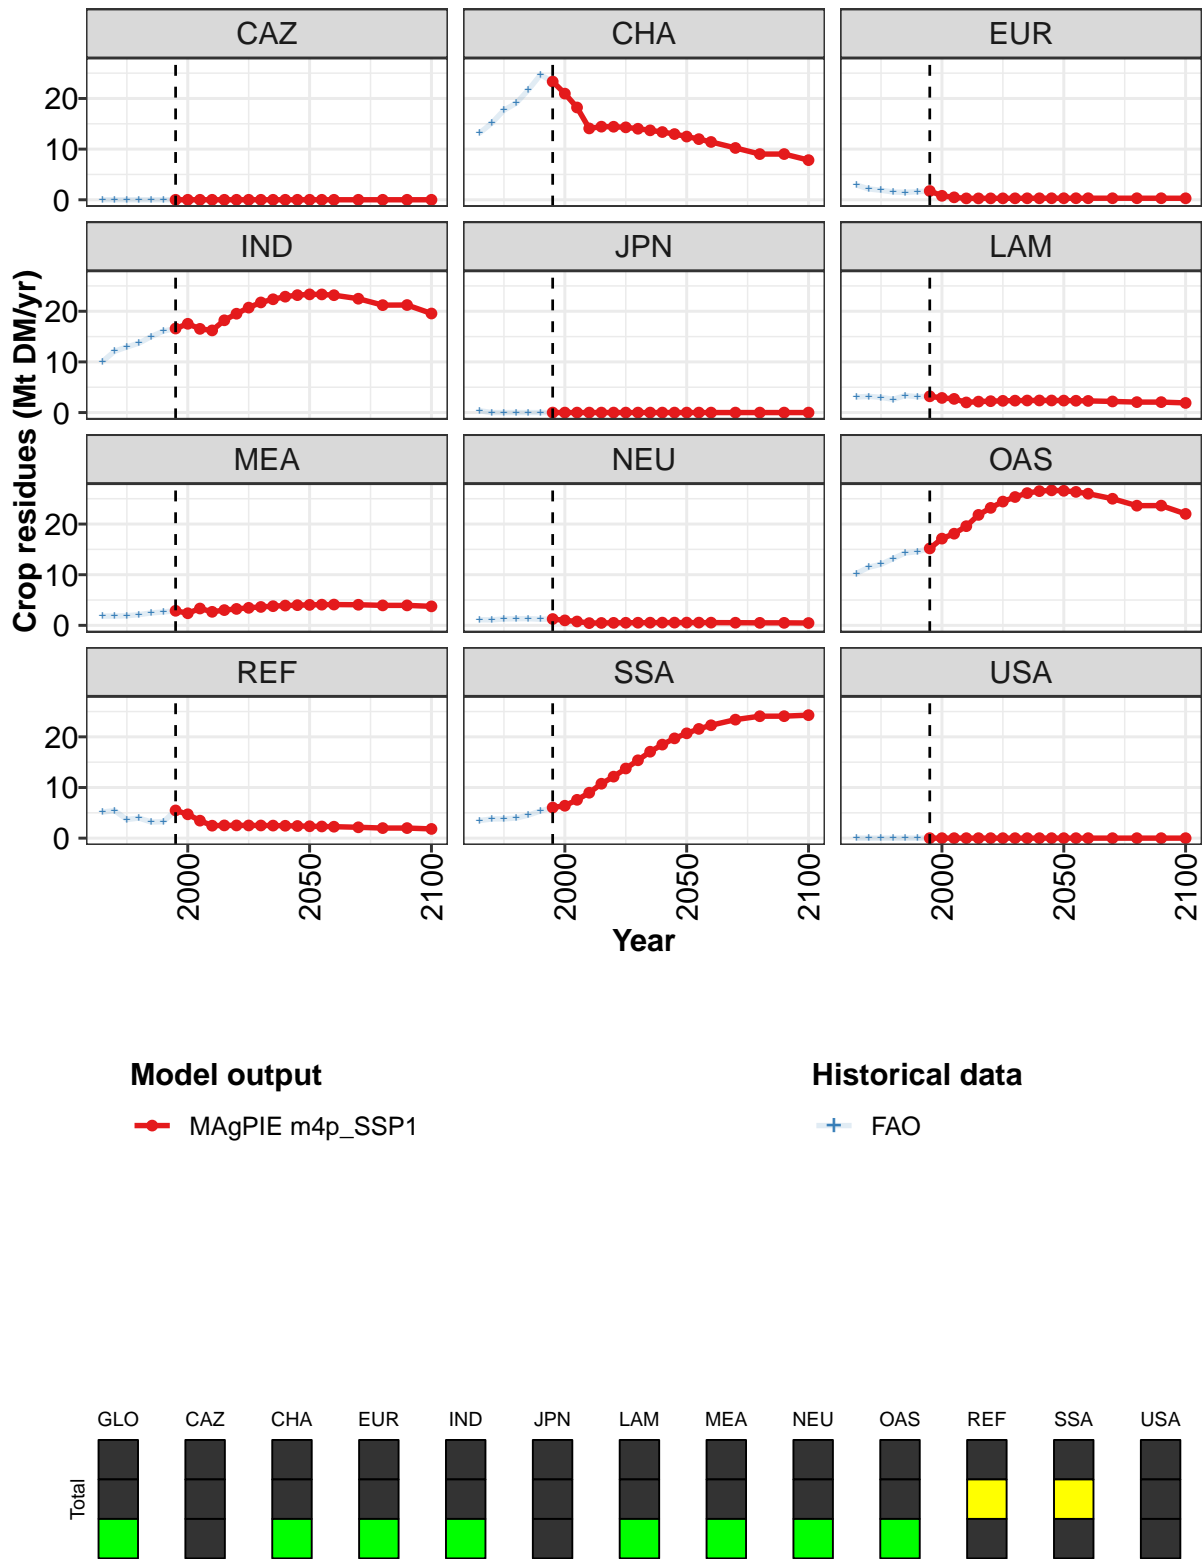

Figure 151: MAgPIE m4p\_SSP1 — Demand—Material—Crop residues (Mt DM/yr)

|     | 1995 | 2000 | 2005 | 2010 | 2015 | 2020 | 2025 | 2030 | 2035 | 2040 | 2045 |
|-----|------|------|------|------|------|------|------|------|------|------|------|
| GLO | 75.7 | 73.8 | 71.2 | 66.7 | 73.7 | 78.1 | 82.3 | 85.8 | 88.7 | 90.8 | 92.1 |
| CAZ | 0.0  | 0.0  | 0.0  | 0.0  | 0.0  | 0.0  | 0.0  | 0.0  | 0.0  | 0.0  | 0.0  |
| CHA | 23.3 | 21.0 | 18.2 | 14.1 | 14.4 | 14.4 | 14.3 | 14.0 | 13.7 | 13.4 | 13.0 |
| EUR | 1.7  | 0.8  | 0.5  | 0.3  | 0.3  | 0.3  | 0.3  | 0.3  | 0.3  | 0.3  | 0.3  |
| IND | 16.6 | 17.5 | 16.5 | 16.2 | 18.2 | 19.5 | 20.7 | 21.7 | 22.4 | 22.9 | 23.2 |
| JPN | 0.0  | 0.0  | 0.0  | 0.0  | 0.0  | 0.0  | 0.0  | 0.0  | 0.0  | 0.0  | 0.0  |
| LAM | 3.2  | 2.9  | 2.7  | 2.0  | 2.2  | 2.2  | 2.3  | 2.4  | 2.4  | 2.4  | 2.4  |
| MEA | 2.9  | 2.4  | 3.3  | 2.7  | 3.0  | 3.2  | 3.5  | 3.6  | 3.8  | 3.9  | 4.0  |
| NEU | 1.3  | 1.0  | 0.8  | 0.4  | 0.5  | 0.5  | 0.5  | 0.5  | 0.5  | 0.5  | 0.5  |
| OAS | 15.2 | 17.1 | 18.1 | 19.6 | 21.8 | 23.2 | 24.4 | 25.3 | 26.1 | 26.5 | 26.7 |
| REF | 5.5  | 4.7  | 3.5  | 2.5  | 2.5  | 2.5  | 2.5  | 2.5  | 2.5  | 2.4  | 2.4  |
| SSA | 6.0  | 6.4  | 7.6  | 9.0  | 10.8 | 12.2 | 13.8 | 15.4 | 17.1 | 18.5 | 19.7 |
| USA | 0.0  | 0.0  | 0.0  | 0.0  | 0.0  | 0.0  | 0.0  | 0.0  | 0.0  | 0.0  | 0.0  |

Table 452: MAgPIE m4p\_SSP1 — Demand—Material—Crop residues (Mt DM/yr) [PART 1/2]

|     | 2050 | 2055 | 2060 | 2070 | 2080 | 2090 | 2100 |
|-----|------|------|------|------|------|------|------|
| GLO | 92.7 | 92.8 | 92.4 | 90.4 | 86.7 | 86.8 | 81.9 |
| CAZ | 0.0  | 0.0  | 0.0  | 0.0  | 0.0  | 0.0  | 0.0  |
| CHA | 12.5 | 12.0 | 11.4 | 10.2 | 9.0  | 9.0  | 7.8  |
| EUR | 0.3  | 0.3  | 0.3  | 0.3  | 0.3  | 0.3  | 0.3  |
| IND | 23.3 | 23.3 | 23.2 | 22.5 | 21.2 | 21.2 | 19.6 |
| JPN | 0.0  | 0.0  | 0.0  | 0.0  | 0.0  | 0.0  | 0.0  |
| LAM | 2.4  | 2.3  | 2.3  | 2.2  | 2.1  | 2.1  | 1.9  |
| MEA | 4.0  | 4.1  | 4.1  | 4.1  | 3.9  | 3.9  | 3.8  |
| NEU | 0.5  | 0.5  | 0.5  | 0.5  | 0.5  | 0.5  | 0.5  |
| OAS | 26.6 | 26.4 | 26.0 | 25.0 | 23.6 | 23.6 | 22.0 |
| REF | 2.3  | 2.3  | 2.3  | 2.1  | 2.0  | 2.0  | 1.8  |
| SSA | 20.7 | 21.6 | 22.3 | 23.4 | 24.1 | 24.1 | 24.3 |
| USA | 0.0  | 0.0  | 0.0  | 0.0  | 0.0  | 0.0  | 0.0  |

Table 453: MAgPIE m4p\_SSP1 — Demand—Material—Crop residues (Mt DM/yr) [PART 2/2]

|     | 1965 | 1970 | 1975 | 1980 | 1985 | 1990 | 1995 | 2000 | 2005 | 2010 |
|-----|------|------|------|------|------|------|------|------|------|------|
| GLO | 51.4 | 56.2 | 58.2 | 61.5 | 67.3 | 72.5 | 75.7 | 73.8 | 71.2 | 66.7 |
| CAZ | 0.0  | 0.0  | 0.0  | 0.0  | 0.0  | 0.0  | 0.0  | 0.0  | 0.0  | 0.0  |
| CHA | 13.2 | 15.1 | 17.7 | 19.1 | 21.7 | 24.7 | 23.3 | 21.0 | 18.2 | 14.1 |
| EUR | 2.9  | 2.1  | 1.9  | 1.5  | 1.5  | 1.6  | 1.7  | 0.8  | 0.5  | 0.3  |
| IND | 10.1 | 12.1 | 12.9 | 13.7 | 15.0 | 16.1 | 16.6 | 17.5 | 16.5 | 16.2 |
| JPN | 0.4  | 0.0  | 0.0  | 0.0  | 0.0  | 0.0  | 0.0  | 0.0  | 0.0  | 0.0  |
| LAM | 3.1  | 3.2  | 3.0  | 2.6  | 3.4  | 3.1  | 3.2  | 2.9  | 2.7  | 2.0  |
| MEA | 1.8  | 1.8  | 1.9  | 2.1  | 2.5  | 2.6  | 2.9  | 2.4  | 3.3  | 2.7  |
| NEU | 1.1  | 1.1  | 1.3  | 1.3  | 1.3  | 1.2  | 1.3  | 1.0  | 0.8  | 0.4  |
| OAS | 10.3 | 11.5 | 12.1 | 13.2 | 14.3 | 14.6 | 15.2 | 17.1 | 18.1 | 19.6 |
| REF | 5.2  | 5.4  | 3.7  | 4.0  | 3.2  | 3.2  | 5.5  | 4.7  | 3.5  | 2.5  |
| SSA | 3.5  | 3.8  | 3.8  | 4.0  | 4.5  | 5.4  | 6.0  | 6.4  | 7.6  | 9.0  |
| USA | 0.0  | 0.0  | 0.0  | 0.0  | 0.0  | 0.0  | 0.0  | 0.0  | 0.0  | 0.0  |

Table 454: FAO — Demand—Material—Crop residues (Mt DM/yr)

8.1.1 Straw

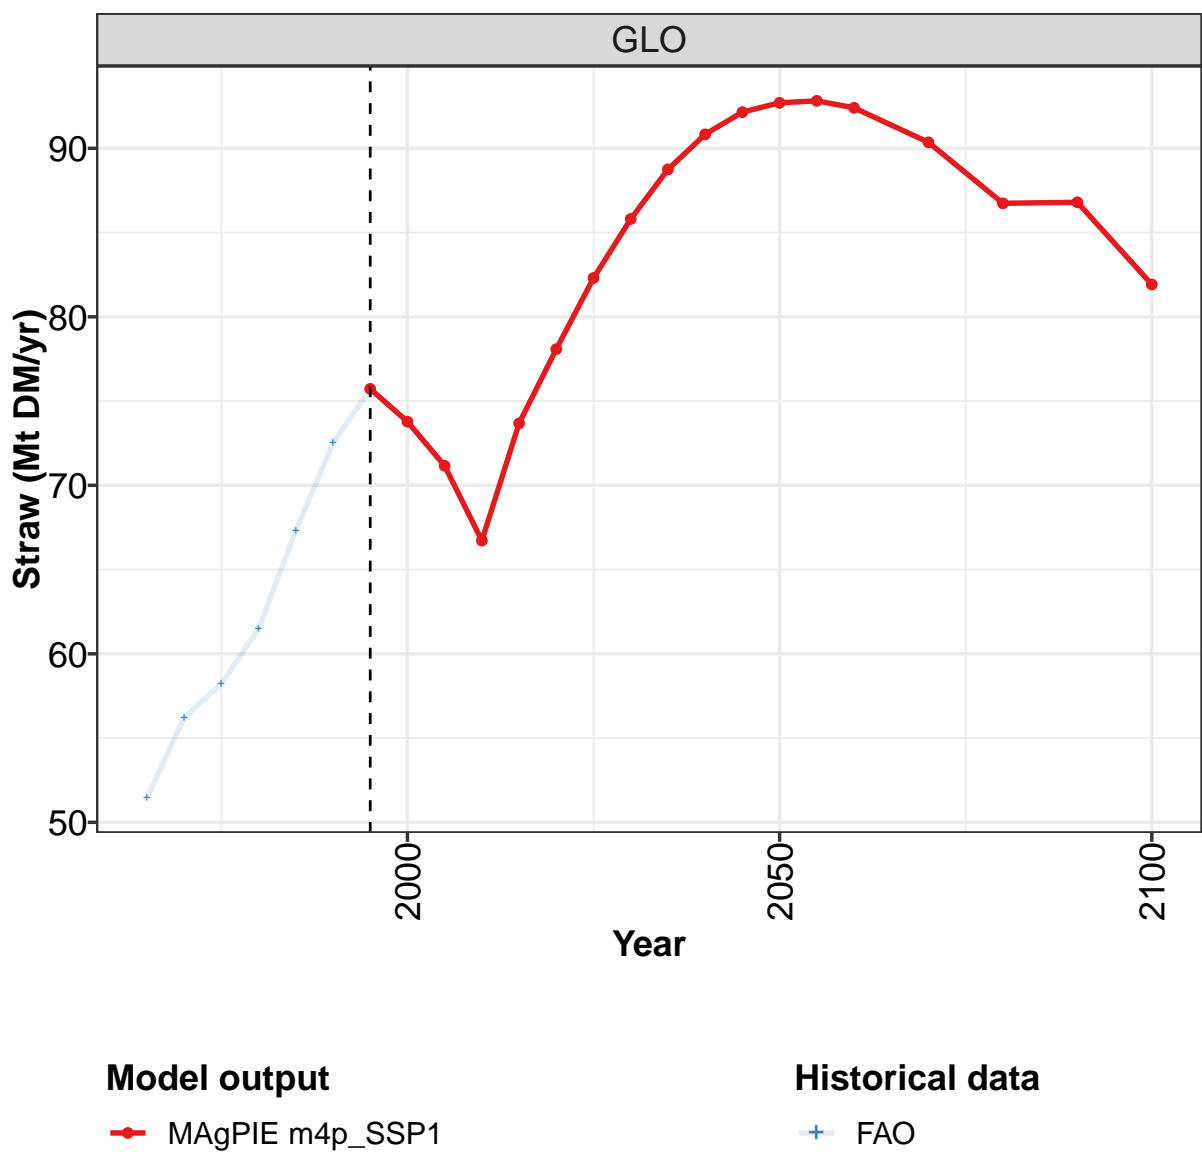



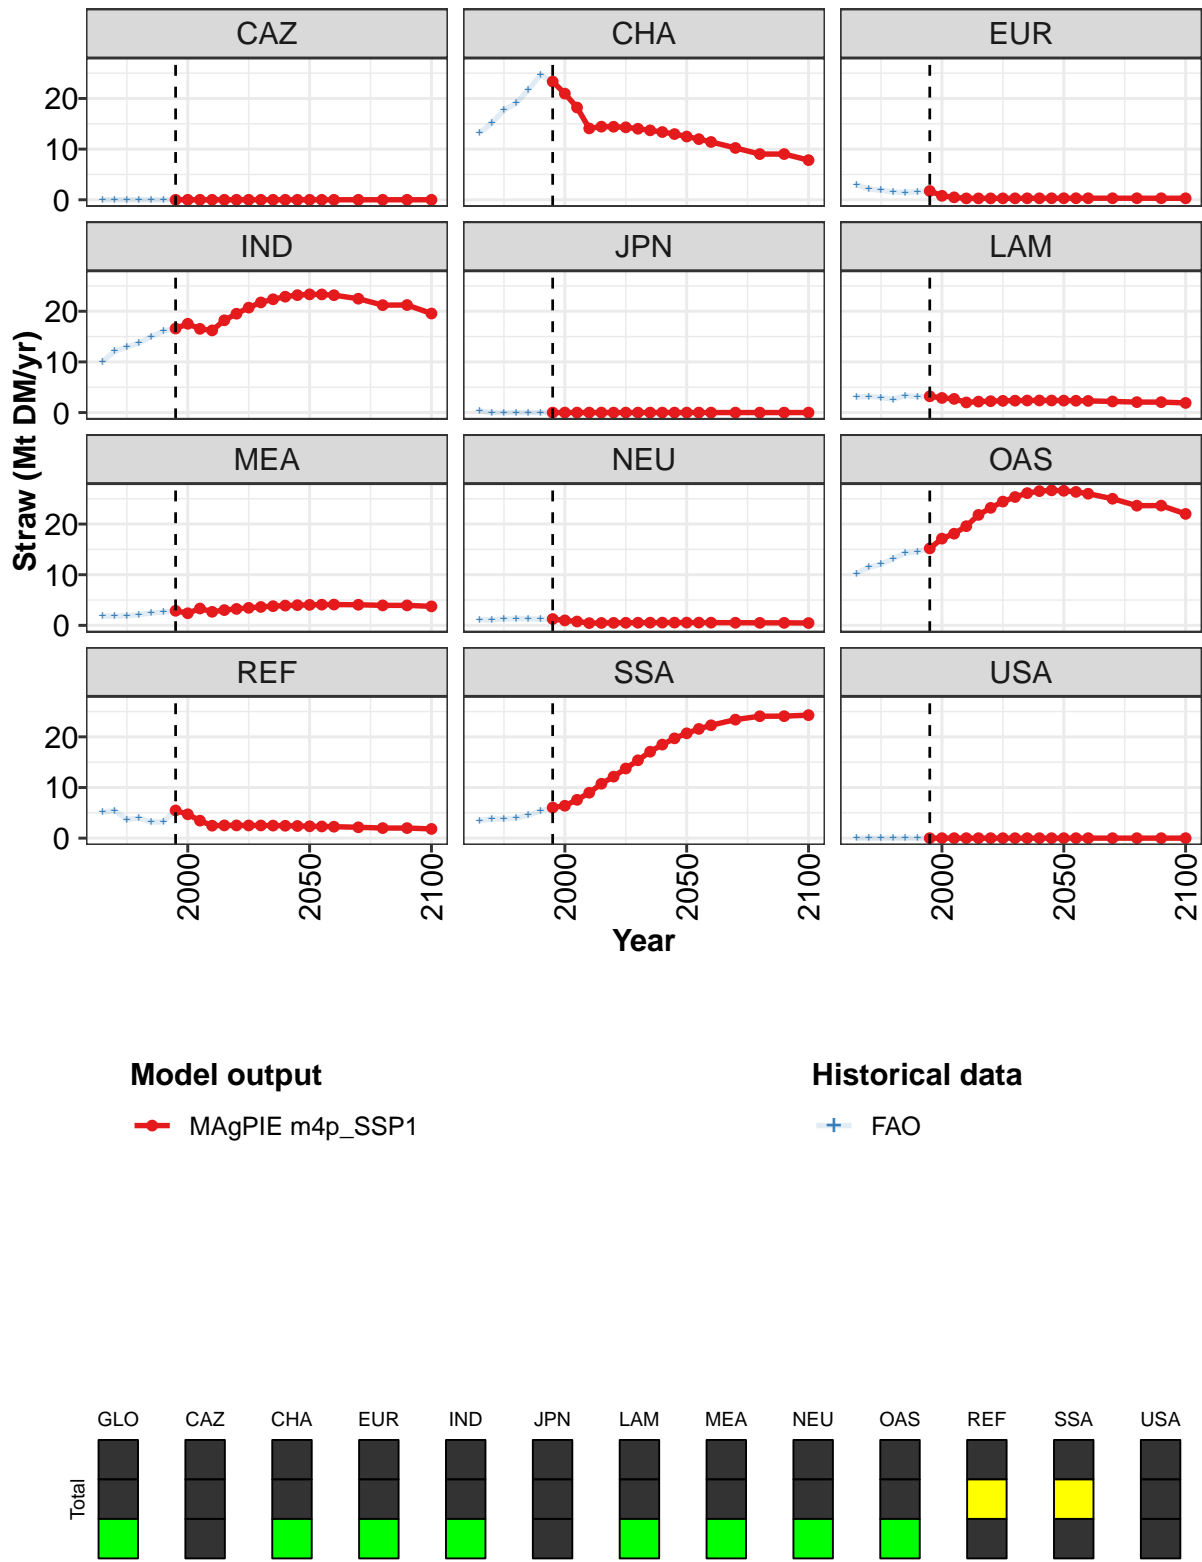

Figure 152: MAgPIE m4p\_SSP1 — Demand—Material—Crop residues—Straw (Mt DM/yr)

|     | 1995 | 2000 | 2005 | 2010 | 2015 | 2020 | 2025 | 2030 | 2035 | 2040 | 2045 |
|-----|------|------|------|------|------|------|------|------|------|------|------|
| GLO | 75.7 | 73.8 | 71.2 | 66.7 | 73.7 | 78.1 | 82.3 | 85.8 | 88.7 | 90.8 | 92.1 |
| CAZ | 0.0  | 0.0  | 0.0  | 0.0  | 0.0  | 0.0  | 0.0  | 0.0  | 0.0  | 0.0  | 0.0  |
| CHA | 23.3 | 21.0 | 18.2 | 14.1 | 14.4 | 14.4 | 14.3 | 14.0 | 13.7 | 13.4 | 13.0 |
| EUR | 1.7  | 0.8  | 0.5  | 0.3  | 0.3  | 0.3  | 0.3  | 0.3  | 0.3  | 0.3  | 0.3  |
| IND | 16.6 | 17.5 | 16.5 | 16.2 | 18.2 | 19.5 | 20.7 | 21.7 | 22.4 | 22.9 | 23.2 |
| JPN | 0.0  | 0.0  | 0.0  | 0.0  | 0.0  | 0.0  | 0.0  | 0.0  | 0.0  | 0.0  | 0.0  |
| LAM | 3.2  | 2.9  | 2.7  | 2.0  | 2.2  | 2.2  | 2.3  | 2.4  | 2.4  | 2.4  | 2.4  |
| MEA | 2.9  | 2.4  | 3.3  | 2.7  | 3.0  | 3.2  | 3.5  | 3.6  | 3.8  | 3.9  | 4.0  |
| NEU | 1.3  | 1.0  | 0.8  | 0.4  | 0.5  | 0.5  | 0.5  | 0.5  | 0.5  | 0.5  | 0.5  |
| OAS | 15.2 | 17.1 | 18.1 | 19.6 | 21.8 | 23.2 | 24.4 | 25.3 | 26.1 | 26.5 | 26.7 |
| REF | 5.5  | 4.7  | 3.5  | 2.5  | 2.5  | 2.5  | 2.5  | 2.5  | 2.5  | 2.4  | 2.4  |
| SSA | 6.0  | 6.4  | 7.6  | 9.0  | 10.8 | 12.2 | 13.8 | 15.4 | 17.1 | 18.5 | 19.7 |
| USA | 0.0  | 0.0  | 0.0  | 0.0  | 0.0  | 0.0  | 0.0  | 0.0  | 0.0  | 0.0  | 0.0  |

Table 455: MAgPIE m4p\_SSP1 — Demand—Material—Crop residues—Straw (Mt DM/yr) [PART 1/2]

|     | 2050 | 2055 | 2060 | 2070 | 2080 | 2090 | 2100 |
|-----|------|------|------|------|------|------|------|
| GLO | 92.7 | 92.8 | 92.4 | 90.4 | 86.7 | 86.8 | 81.9 |
| CAZ | 0.0  | 0.0  | 0.0  | 0.0  | 0.0  | 0.0  | 0.0  |
| CHA | 12.5 | 12.0 | 11.4 | 10.2 | 9.0  | 9.0  | 7.8  |
| EUR | 0.3  | 0.3  | 0.3  | 0.3  | 0.3  | 0.3  | 0.3  |
| IND | 23.3 | 23.3 | 23.2 | 22.5 | 21.2 | 21.2 | 19.6 |
| JPN | 0.0  | 0.0  | 0.0  | 0.0  | 0.0  | 0.0  | 0.0  |
| LAM | 2.4  | 2.3  | 2.3  | 2.2  | 2.1  | 2.1  | 1.9  |
| MEA | 4.0  | 4.1  | 4.1  | 4.1  | 3.9  | 3.9  | 3.8  |
| NEU | 0.5  | 0.5  | 0.5  | 0.5  | 0.5  | 0.5  | 0.5  |
| OAS | 26.6 | 26.4 | 26.0 | 25.0 | 23.6 | 23.6 | 22.0 |
| REF | 2.3  | 2.3  | 2.3  | 2.1  | 2.0  | 2.0  | 1.8  |
| SSA | 20.7 | 21.6 | 22.3 | 23.4 | 24.1 | 24.1 | 24.3 |
| USA | 0.0  | 0.0  | 0.0  | 0.0  | 0.0  | 0.0  | 0.0  |

Table 456: MAgPIE m4p\_SSP1 — Demand—Material—Crop residues—Straw (Mt DM/yr) [PART 2/2]

|     | 1965 | 1970 | 1975 | 1980 | 1985 | 1990 | 1995 | 2000 | 2005 | 2010 |
|-----|------|------|------|------|------|------|------|------|------|------|
| GLO | 51.4 | 56.2 | 58.2 | 61.5 | 67.3 | 72.5 | 75.7 | 73.8 | 71.2 | 66.7 |
| CAZ | 0.0  | 0.0  | 0.0  | 0.0  | 0.0  | 0.0  | 0.0  | 0.0  | 0.0  | 0.0  |
| CHA | 13.2 | 15.1 | 17.7 | 19.1 | 21.7 | 24.7 | 23.3 | 21.0 | 18.2 | 14.1 |
| EUR | 2.9  | 2.1  | 1.9  | 1.5  | 1.5  | 1.6  | 1.7  | 0.8  | 0.5  | 0.3  |
| IND | 10.1 | 12.1 | 12.9 | 13.7 | 15.0 | 16.1 | 16.6 | 17.5 | 16.5 | 16.2 |
| JPN | 0.4  | 0.0  | 0.0  | 0.0  | 0.0  | 0.0  | 0.0  | 0.0  | 0.0  | 0.0  |
| LAM | 3.1  | 3.2  | 3.0  | 2.6  | 3.4  | 3.1  | 3.2  | 2.9  | 2.7  | 2.0  |
| MEA | 1.8  | 1.8  | 1.9  | 2.1  | 2.5  | 2.6  | 2.9  | 2.4  | 3.3  | 2.7  |
| NEU | 1.1  | 1.1  | 1.3  | 1.3  | 1.3  | 1.2  | 1.3  | 1.0  | 0.8  | 0.4  |
| OAS | 10.3 | 11.5 | 12.1 | 13.2 | 14.3 | 14.6 | 15.2 | 17.1 | 18.1 | 19.6 |
| REF | 5.2  | 5.4  | 3.7  | 4.0  | 3.2  | 3.2  | 5.5  | 4.7  | 3.5  | 2.5  |
| SSA | 3.5  | 3.8  | 3.8  | 4.0  | 4.5  | 5.4  | 6.0  | 6.4  | 7.6  | 9.0  |
| USA | 0.0  | 0.0  | 0.0  | 0.0  | 0.0  | 0.0  | 0.0  | 0.0  | 0.0  | 0.0  |

Table 457: FAO — Demand—Material—Crop residues—Straw (Mt DM/yr)

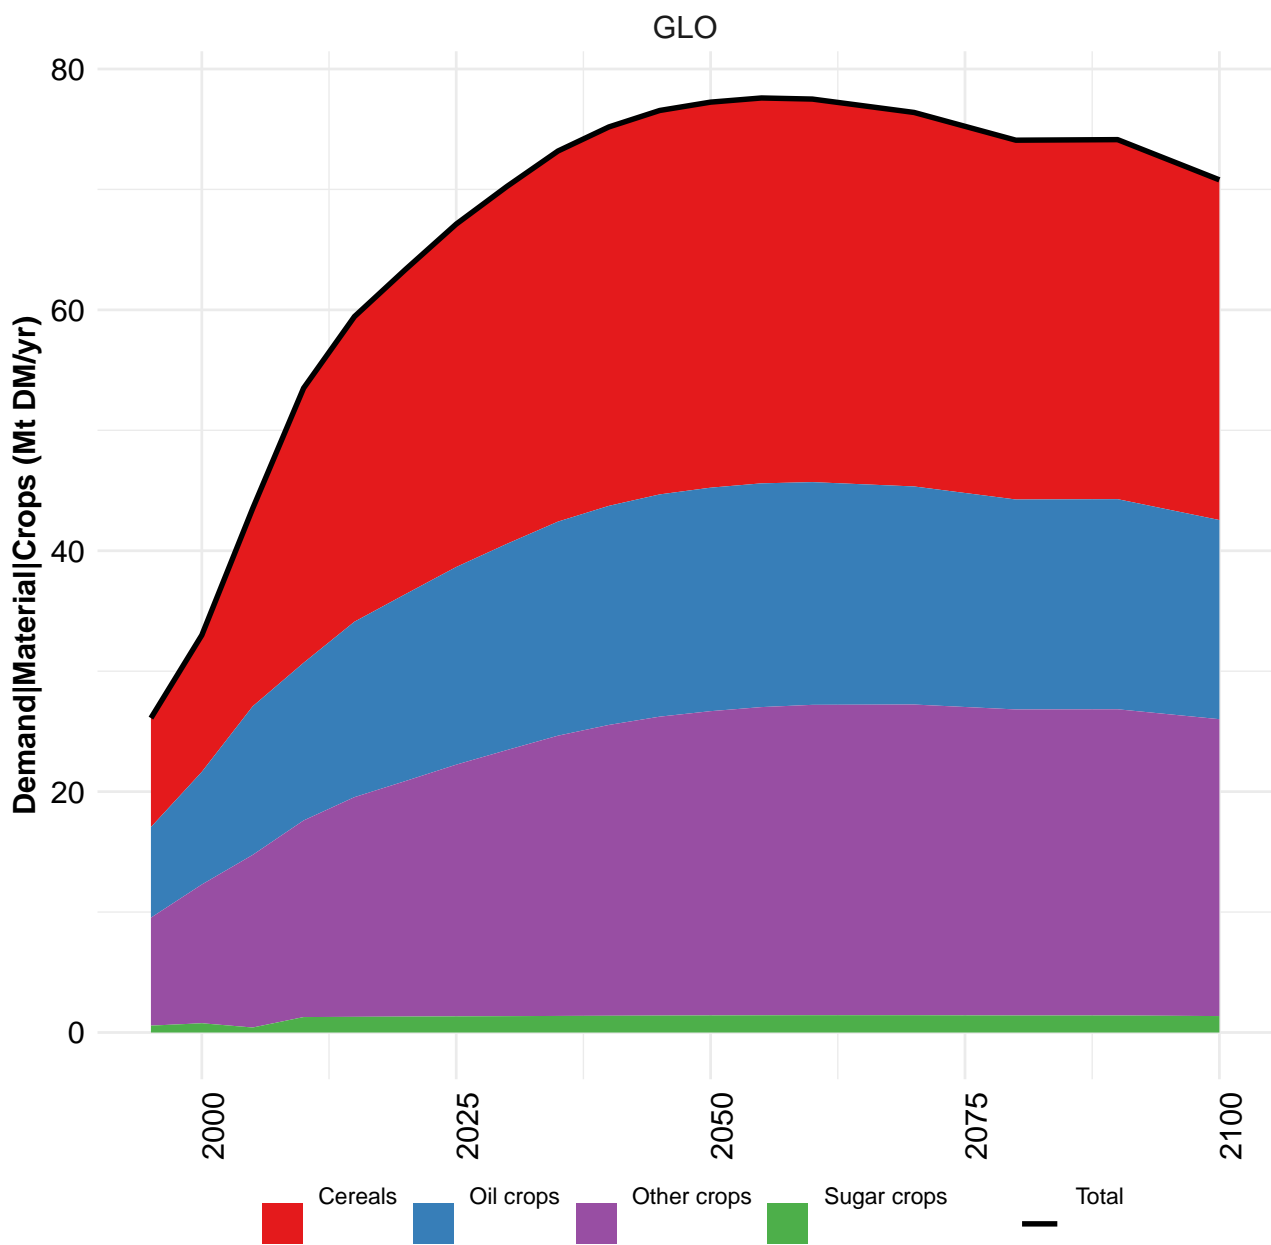

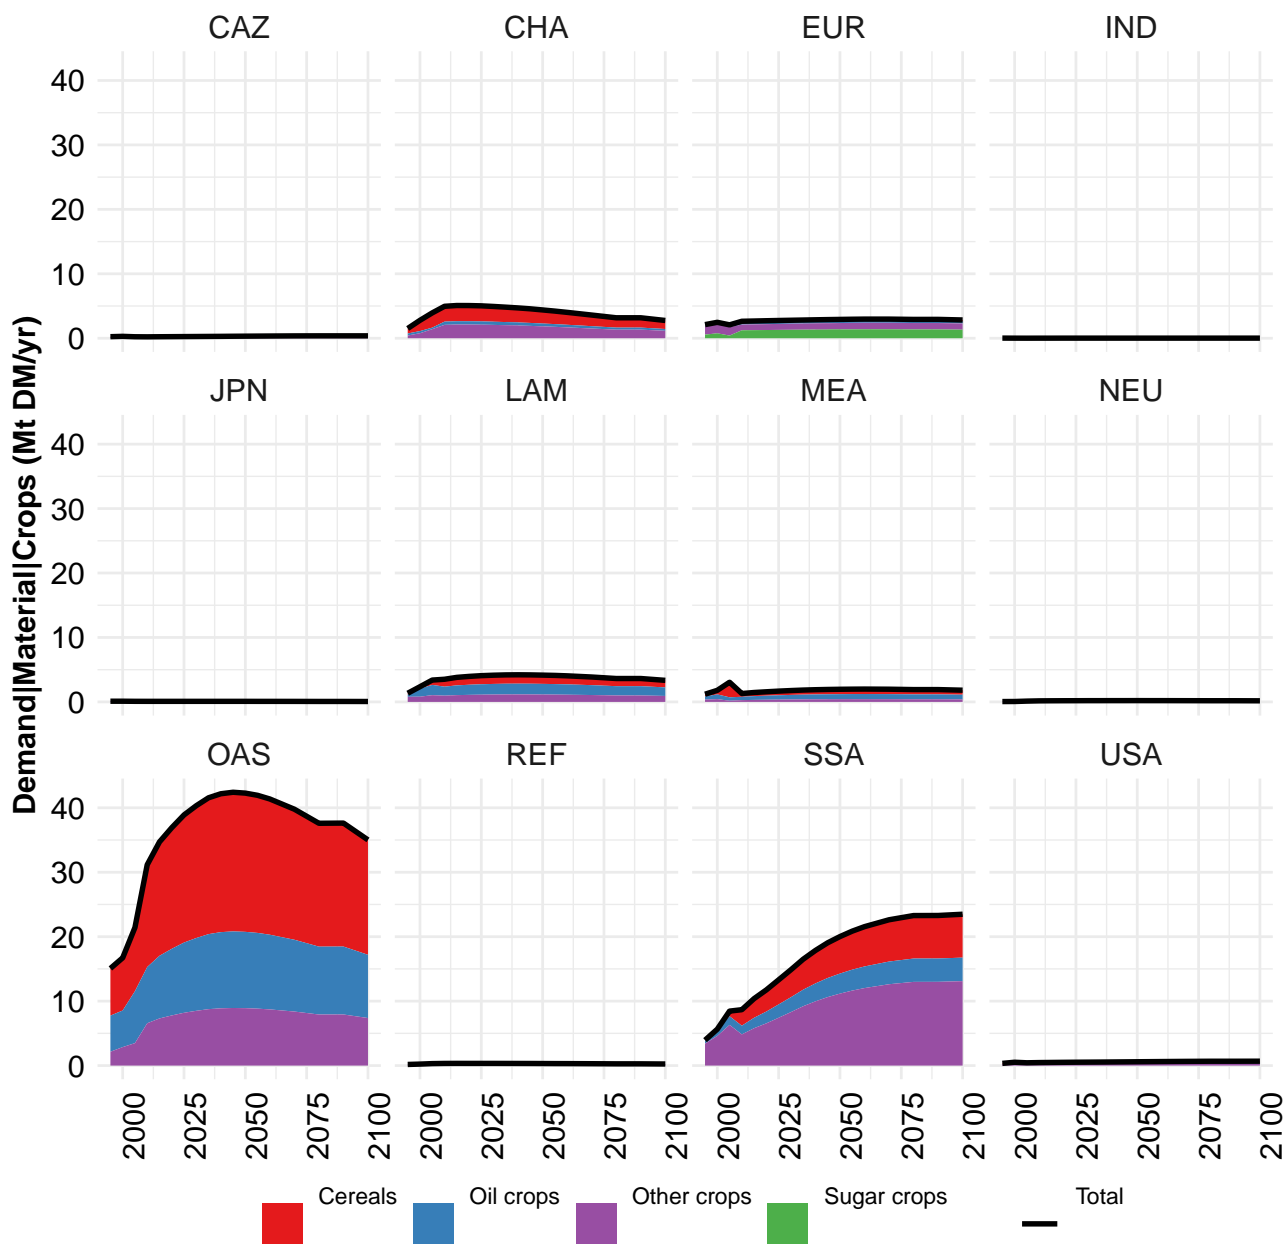

8.2 Crops

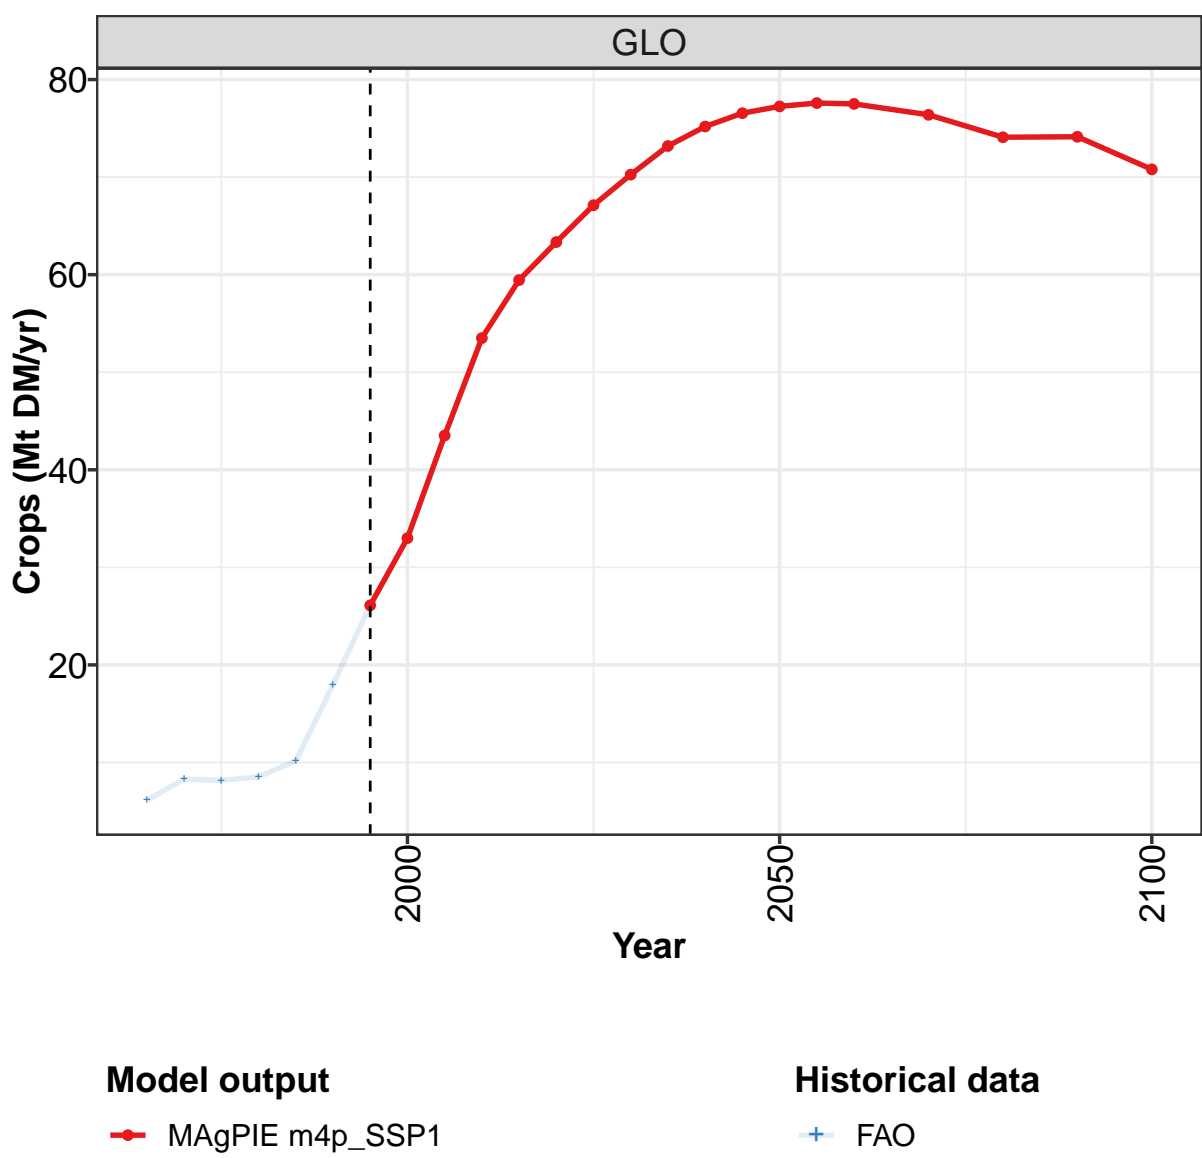

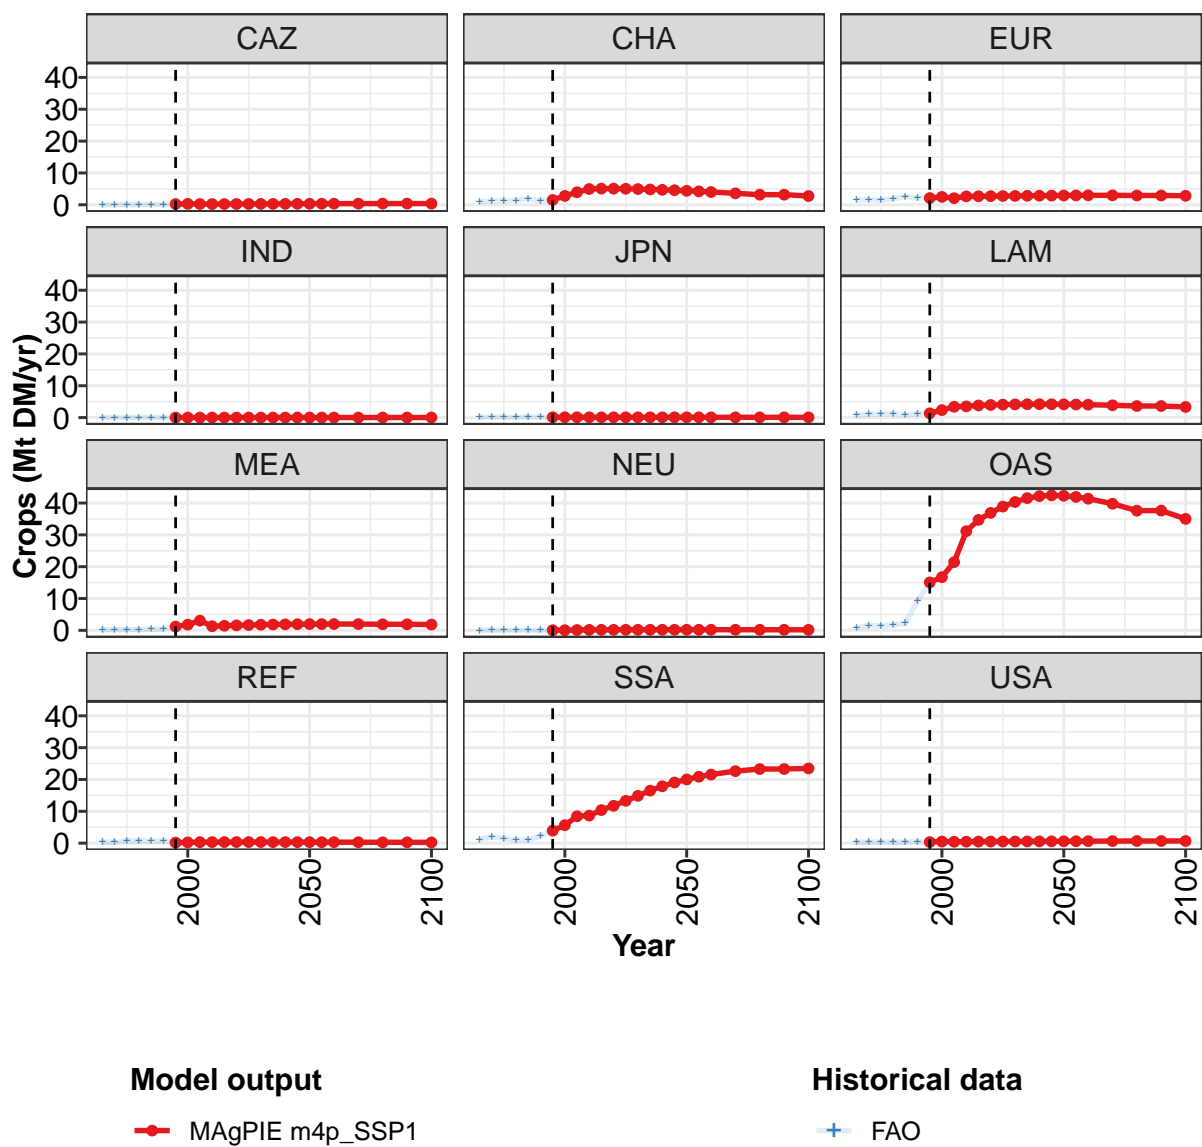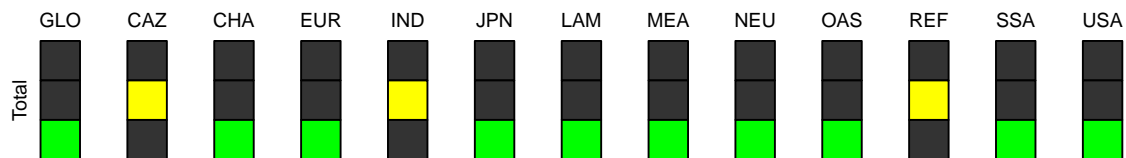

Figure 153: MAGPIE m4p\_SSP1 — Demand—Material—Crops (Mt DM/yr)

|     | 1995 | 2000 | 2005 | 2010 | 2015 | 2020 | 2025 | 2030 | 2035 | 2040 | 2045 |
|-----|------|------|------|------|------|------|------|------|------|------|------|
| GLO | 26.1 | 33.0 | 43.5 | 53.5 | 59.4 | 63.3 | 67.1 | 70.3 | 73.2 | 75.2 | 76.6 |
| CAZ | 0.2  | 0.3  | 0.2  | 0.2  | 0.2  | 0.2  | 0.3  | 0.3  | 0.3  | 0.3  | 0.3  |
| CHA | 1.5  | 2.8  | 3.9  | 5.0  | 5.1  | 5.1  | 5.0  | 4.9  | 4.8  | 4.7  | 4.6  |
| EUR | 2.1  | 2.5  | 2.1  | 2.6  | 2.7  | 2.7  | 2.8  | 2.8  | 2.8  | 2.9  | 2.9  |
| IND | 0.0  | 0.0  | 0.0  | 0.0  | 0.0  | 0.0  | 0.0  | 0.0  | 0.0  | 0.0  | 0.0  |
| JPN | 0.1  | 0.1  | 0.1  | 0.1  | 0.1  | 0.1  | 0.1  | 0.1  | 0.1  | 0.1  | 0.1  |
| LAM | 1.3  | 2.4  | 3.4  | 3.5  | 3.8  | 4.0  | 4.1  | 4.1  | 4.2  | 4.2  | 4.2  |
| MEA | 1.2  | 1.8  | 3.1  | 1.3  | 1.5  | 1.6  | 1.7  | 1.8  | 1.8  | 1.9  | 1.9  |
| NEU | 0.1  | 0.1  | 0.1  | 0.2  | 0.2  | 0.2  | 0.2  | 0.2  | 0.2  | 0.2  | 0.2  |
| OAS | 15.1 | 16.7 | 21.4 | 31.2 | 34.7 | 36.9 | 38.9 | 40.3 | 41.6 | 42.2 | 42.4 |
| REF | 0.2  | 0.2  | 0.3  | 0.3  | 0.3  | 0.3  | 0.3  | 0.3  | 0.3  | 0.3  | 0.3  |
| SSA | 3.9  | 5.6  | 8.5  | 8.7  | 10.4 | 11.7 | 13.3 | 14.9 | 16.5 | 17.9 | 19.1 |
| USA | 0.3  | 0.5  | 0.4  | 0.5  | 0.5  | 0.5  | 0.5  | 0.5  | 0.5  | 0.6  | 0.6  |

Table 458: MAgPIE m4p\_SSP1 — Demand—Material—Crops (Mt DM/yr) [PART 1/2]

|     | 2050 | 2055 | 2060 | 2070 | 2080 | 2090 | 2100 |
|-----|------|------|------|------|------|------|------|
| GLO | 77.2 | 77.6 | 77.5 | 76.4 | 74.1 | 74.1 | 70.8 |
| CAZ | 0.3  | 0.3  | 0.3  | 0.4  | 0.4  | 0.4  | 0.4  |
| CHA | 4.4  | 4.2  | 4.0  | 3.6  | 3.2  | 3.2  | 2.8  |
| EUR | 2.9  | 2.9  | 3.0  | 3.0  | 2.9  | 2.9  | 2.8  |
| IND | 0.0  | 0.0  | 0.0  | 0.0  | 0.0  | 0.0  | 0.0  |
| JPN | 0.1  | 0.1  | 0.1  | 0.1  | 0.1  | 0.1  | 0.1  |
| LAM | 4.2  | 4.1  | 4.0  | 3.9  | 3.6  | 3.6  | 3.3  |
| MEA | 2.0  | 2.0  | 2.0  | 2.0  | 1.9  | 1.9  | 1.8  |
| NEU | 0.2  | 0.2  | 0.2  | 0.2  | 0.2  | 0.2  | 0.2  |
| OAS | 42.3 | 41.9 | 41.4 | 39.8 | 37.6 | 37.6 | 35.0 |
| REF | 0.3  | 0.3  | 0.3  | 0.3  | 0.3  | 0.3  | 0.2  |
| SSA | 20.0 | 20.9 | 21.6 | 22.6 | 23.3 | 23.3 | 23.5 |
| USA | 0.6  | 0.6  | 0.6  | 0.6  | 0.7  | 0.7  | 0.7  |

Table 459: MAgPIE m4p\_SSP1 — Demand—Material—Crops (Mt DM/yr) [PART 2/2]

|     | 1965 | 1970 | 1975 | 1980 | 1985 | 1990 | 1995 | 2000 | 2005 | 2010 |
|-----|------|------|------|------|------|------|------|------|------|------|
| GLO | 6.1  | 8.3  | 8.2  | 8.5  | 10.2 | 18.0 | 26.1 | 33.0 | 43.5 | 53.5 |
| CAZ | 0.0  | 0.0  | 0.0  | 0.1  | 0.1  | 0.1  | 0.2  | 0.3  | 0.2  | 0.2  |
| CHA | 1.0  | 1.1  | 1.3  | 1.4  | 1.9  | 1.1  | 1.5  | 2.8  | 3.9  | 5.0  |
| EUR | 1.5  | 1.6  | 1.5  | 1.8  | 2.5  | 2.1  | 2.1  | 2.5  | 2.1  | 2.6  |
| IND | 0.0  | 0.0  | 0.0  | 0.0  | 0.0  | 0.0  | 0.0  | 0.0  | 0.0  | 0.0  |
| JPN | 0.1  | 0.1  | 0.1  | 0.1  | 0.1  | 0.1  | 0.1  | 0.1  | 0.1  | 0.1  |
| LAM | 0.7  | 1.1  | 1.0  | 1.2  | 0.8  | 1.2  | 1.3  | 2.4  | 3.4  | 3.5  |
| MEA | 0.1  | 0.1  | 0.3  | 0.3  | 0.4  | 0.5  | 1.2  | 1.8  | 3.1  | 1.3  |
| NEU | 0.0  | 0.0  | 0.0  | 0.1  | 0.0  | 0.0  | 0.1  | 0.1  | 0.1  | 0.2  |
| OAS | 0.8  | 1.6  | 1.3  | 1.7  | 2.2  | 9.3  | 15.1 | 16.7 | 21.4 | 31.2 |
| REF | 0.3  | 0.3  | 0.7  | 0.7  | 0.7  | 0.7  | 0.2  | 0.2  | 0.3  | 0.3  |
| SSA | 1.2  | 2.0  | 1.5  | 1.0  | 1.0  | 2.3  | 3.9  | 5.6  | 8.5  | 8.7  |
| USA | 0.3  | 0.3  | 0.4  | 0.3  | 0.3  | 0.6  | 0.3  | 0.5  | 0.4  | 0.5  |

Table 460: FAO — Demand—Material—Crops (Mt DM/yr)

8.2.1 Cereals

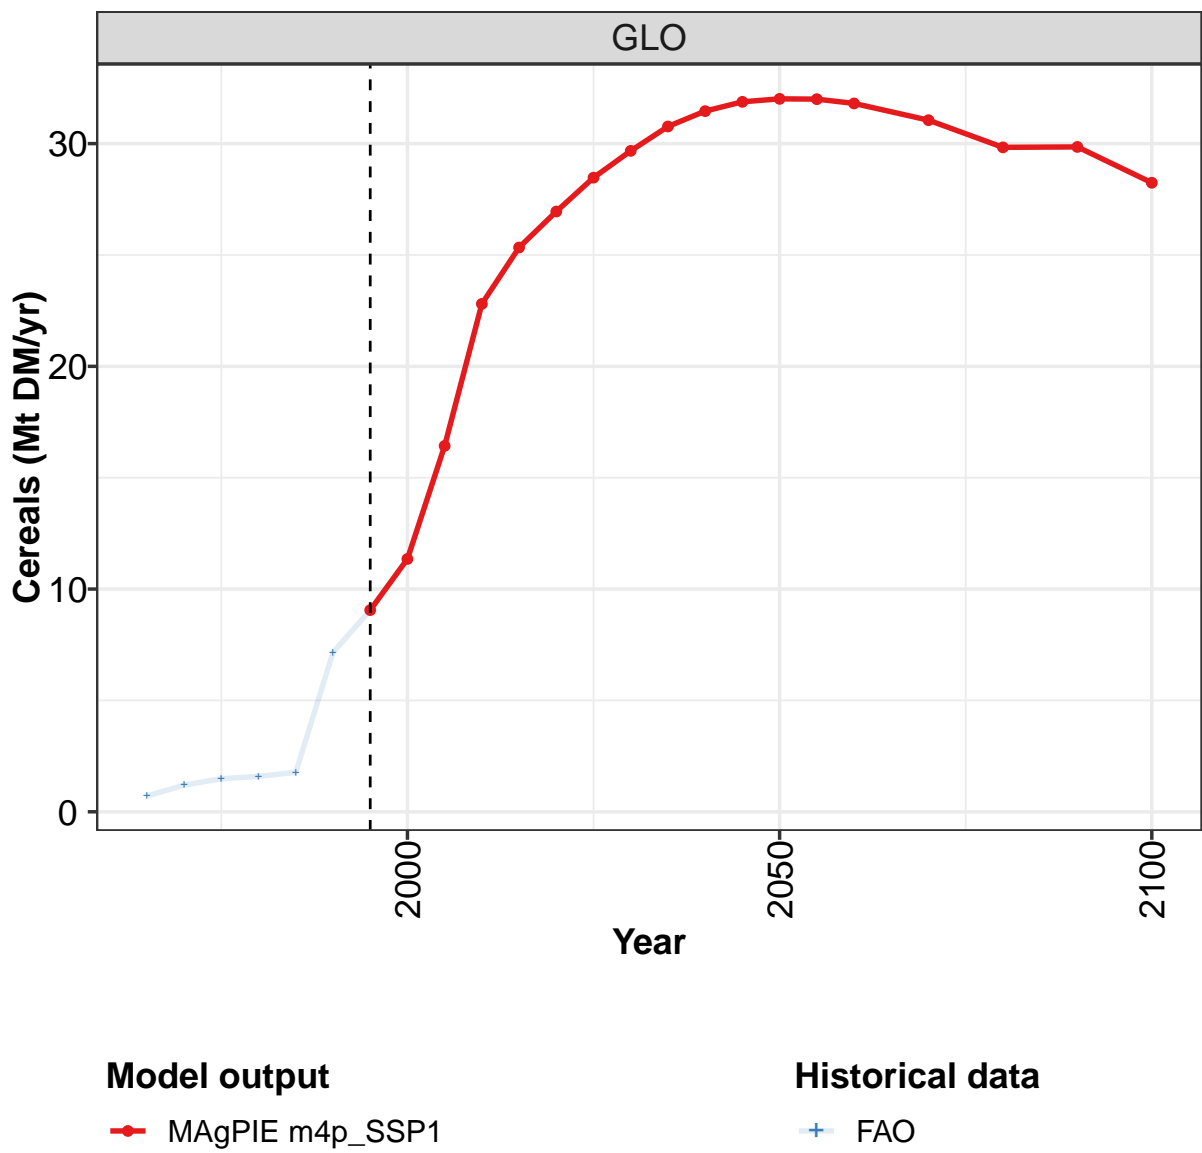



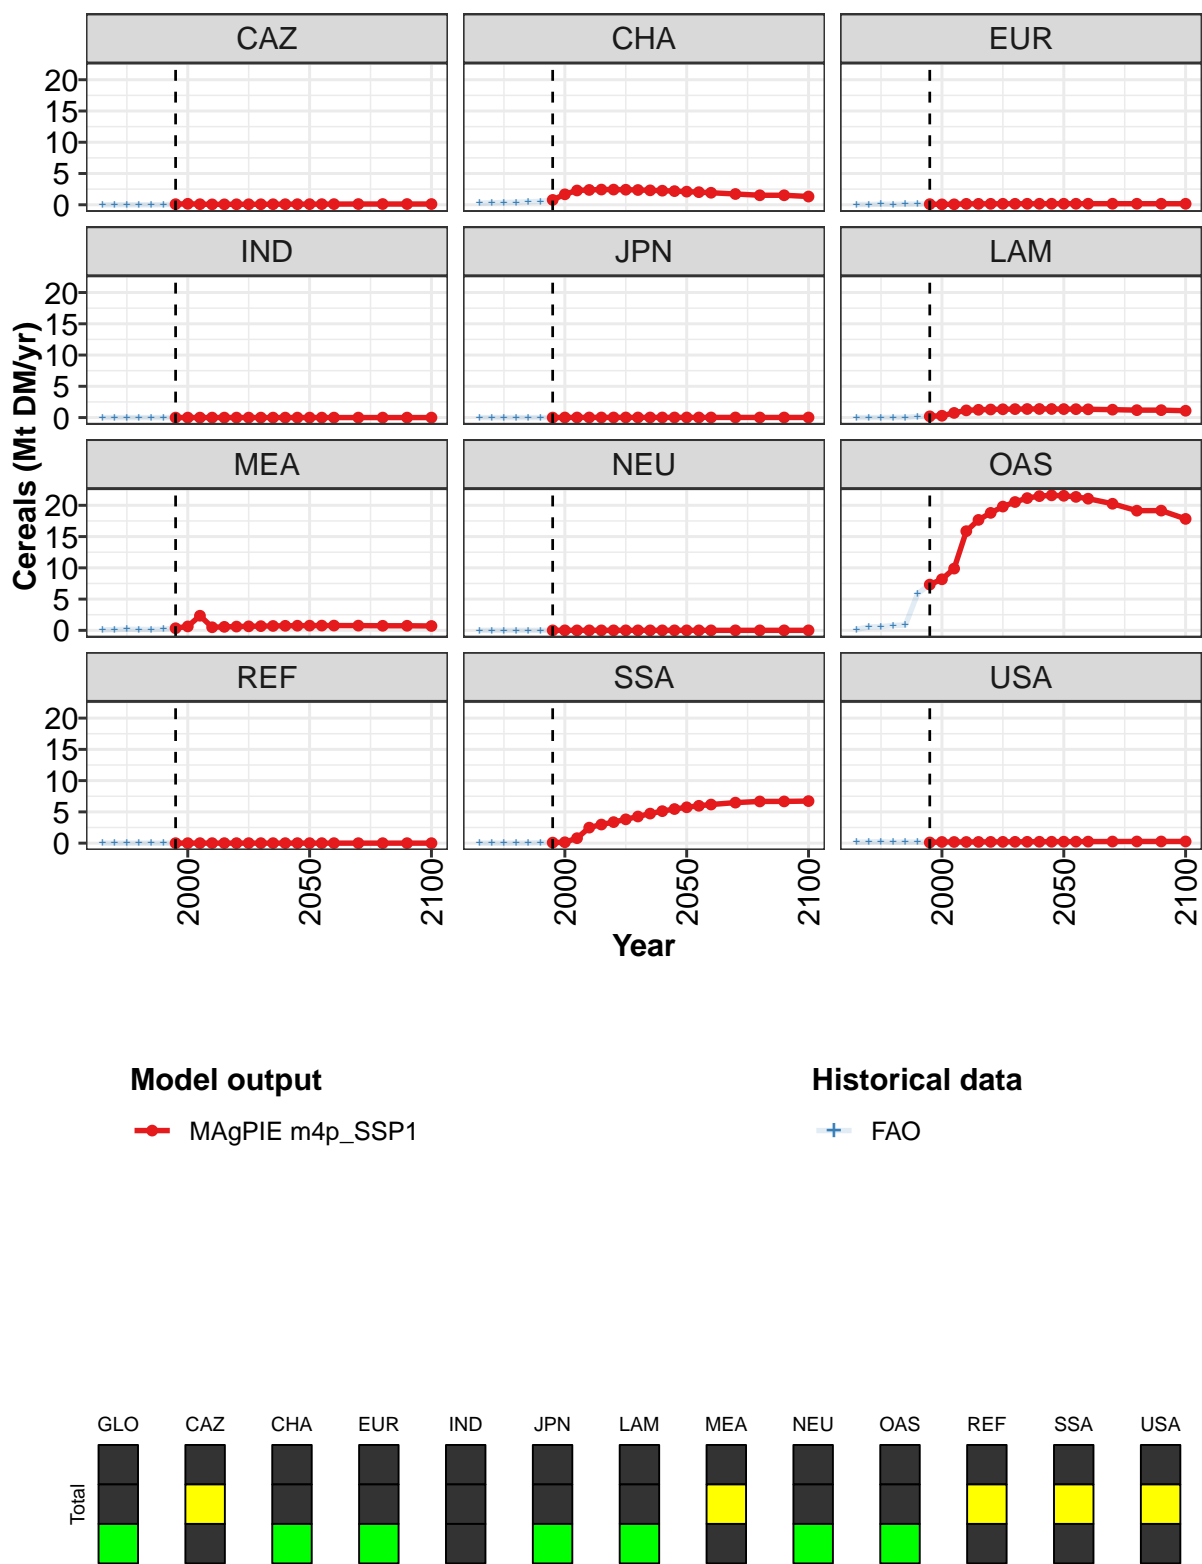

Figure 154: MAgPIE m4p\_SSP1 — Demand—Material—Crops—Cereals (Mt DM/yr)

|     | 1995 | 2000 | 2005 | 2010 | 2015 | 2020 | 2025 | 2030 | 2035 | 2040 | 2045 |
|-----|------|------|------|------|------|------|------|------|------|------|------|
| GLO | 9.1  | 11.4 | 16.4 | 22.8 | 25.3 | 27.0 | 28.5 | 29.7 | 30.8 | 31.5 | 31.9 |
| CAZ | 0.1  | 0.2  | 0.1  | 0.1  | 0.1  | 0.1  | 0.1  | 0.1  | 0.1  | 0.1  | 0.1  |
| CHA | 0.8  | 1.7  | 2.3  | 2.4  | 2.4  | 2.4  | 2.4  | 2.4  | 2.3  | 2.3  | 2.2  |
| EUR | 0.1  | 0.1  | 0.1  | 0.1  | 0.2  | 0.2  | 0.2  | 0.2  | 0.2  | 0.2  | 0.2  |
| IND | 0.0  | 0.0  | 0.0  | 0.0  | 0.0  | 0.0  | 0.0  | 0.0  | 0.0  | 0.0  | 0.0  |
| JPN | 0.0  | 0.0  | 0.0  | 0.0  | 0.0  | 0.0  | 0.0  | 0.0  | 0.0  | 0.0  | 0.0  |
| LAM | 0.2  | 0.3  | 0.7  | 1.1  | 1.2  | 1.3  | 1.3  | 1.4  | 1.4  | 1.4  | 1.4  |
| MEA | 0.3  | 0.6  | 2.3  | 0.5  | 0.6  | 0.6  | 0.6  | 0.7  | 0.7  | 0.7  | 0.7  |
| NEU | 0.0  | 0.0  | 0.0  | 0.0  | 0.0  | 0.0  | 0.0  | 0.0  | 0.0  | 0.0  | 0.0  |
| OAS | 7.3  | 8.2  | 9.9  | 15.9 | 17.7 | 18.8 | 19.8 | 20.5 | 21.2 | 21.5 | 21.6 |
| REF | 0.0  | 0.0  | 0.0  | 0.0  | 0.0  | 0.0  | 0.0  | 0.0  | 0.0  | 0.0  | 0.0  |
| SSA | 0.1  | 0.1  | 0.8  | 2.5  | 3.0  | 3.4  | 3.8  | 4.3  | 4.7  | 5.1  | 5.5  |
| USA | 0.1  | 0.2  | 0.2  | 0.2  | 0.2  | 0.2  | 0.2  | 0.2  | 0.2  | 0.2  | 0.2  |

Table 461: MAgPIE m4p\_SSP1 — Demand—Material—Crops—Cereals (Mt DM/yr) [PART 1/2]

|     | 2050 | 2055 | 2060 | 2070 | 2080 | 2090 | 2100 |
|-----|------|------|------|------|------|------|------|
| GLO | 32.0 | 32.0 | 31.8 | 31.1 | 29.8 | 29.9 | 28.2 |
| CAZ | 0.1  | 0.1  | 0.1  | 0.1  | 0.1  | 0.1  | 0.1  |
| CHA | 2.1  | 2.0  | 1.9  | 1.7  | 1.5  | 1.5  | 1.3  |
| EUR | 0.2  | 0.2  | 0.2  | 0.2  | 0.2  | 0.2  | 0.2  |
| IND | 0.0  | 0.0  | 0.0  | 0.0  | 0.0  | 0.0  | 0.0  |
| JPN | 0.0  | 0.0  | 0.0  | 0.0  | 0.0  | 0.0  | 0.0  |
| LAM | 1.4  | 1.3  | 1.3  | 1.3  | 1.2  | 1.2  | 1.1  |
| MEA | 0.8  | 0.8  | 0.8  | 0.8  | 0.7  | 0.7  | 0.7  |
| NEU | 0.0  | 0.0  | 0.0  | 0.0  | 0.0  | 0.0  | 0.0  |
| OAS | 21.5 | 21.4 | 21.1 | 20.3 | 19.1 | 19.2 | 17.8 |
| REF | 0.0  | 0.0  | 0.0  | 0.0  | 0.0  | 0.0  | 0.0  |
| SSA | 5.7  | 6.0  | 6.2  | 6.5  | 6.7  | 6.7  | 6.7  |
| USA | 0.2  | 0.2  | 0.2  | 0.3  | 0.3  | 0.3  | 0.3  |

Table 462: MAgPIE m4p\_SSP1 — Demand—Material—Crops—Cereals (Mt DM/yr) [PART 2/2]

|     | 1965 | 1970 | 1975 | 1980 | 1985 | 1990 | 1995 | 2000 | 2005 | 2010 |
|-----|------|------|------|------|------|------|------|------|------|------|
| GLO | 0.7  | 1.2  | 1.5  | 1.6  | 1.8  | 7.2  | 9.1  | 11.4 | 16.4 | 22.8 |
| CAZ | 0.0  | 0.0  | 0.0  | 0.0  | 0.0  | 0.0  | 0.1  | 0.2  | 0.1  | 0.1  |
| CHA | 0.3  | 0.3  | 0.4  | 0.4  | 0.5  | 0.5  | 0.8  | 1.7  | 2.3  | 2.4  |
| EUR | 0.1  | 0.0  | 0.1  | 0.1  | 0.1  | 0.1  | 0.1  | 0.1  | 0.1  | 0.1  |
| IND | 0.0  | 0.0  | 0.0  | 0.0  | 0.0  | 0.0  | 0.0  | 0.0  | 0.0  | 0.0  |
| JPN | 0.0  | 0.0  | 0.0  | 0.0  | 0.0  | 0.0  | 0.0  | 0.0  | 0.0  | 0.0  |
| LAM | 0.0  | 0.0  | 0.0  | 0.0  | 0.0  | 0.2  | 0.2  | 0.3  | 0.7  | 1.1  |
| MEA | 0.1  | 0.1  | 0.2  | 0.2  | 0.1  | 0.2  | 0.3  | 0.6  | 2.3  | 0.5  |
| NEU | 0.0  | 0.0  | 0.0  | 0.0  | 0.0  | 0.0  | 0.0  | 0.0  | 0.0  | 0.0  |
| OAS | 0.2  | 0.5  | 0.6  | 0.8  | 0.8  | 5.9  | 7.3  | 8.2  | 9.9  | 15.9 |
| REF | 0.0  | 0.0  | 0.0  | 0.0  | 0.0  | 0.0  | 0.0  | 0.0  | 0.0  | 0.0  |
| SSA | 0.0  | 0.0  | 0.0  | 0.0  | 0.0  | 0.1  | 0.1  | 0.1  | 0.8  | 2.5  |
| USA | 0.2  | 0.2  | 0.2  | 0.1  | 0.2  | 0.2  | 0.1  | 0.2  | 0.2  | 0.2  |

Table 463: FAO — Demand—Material—Crops—Cereals (Mt DM/yr)

8.2.2 Cereals—Rice

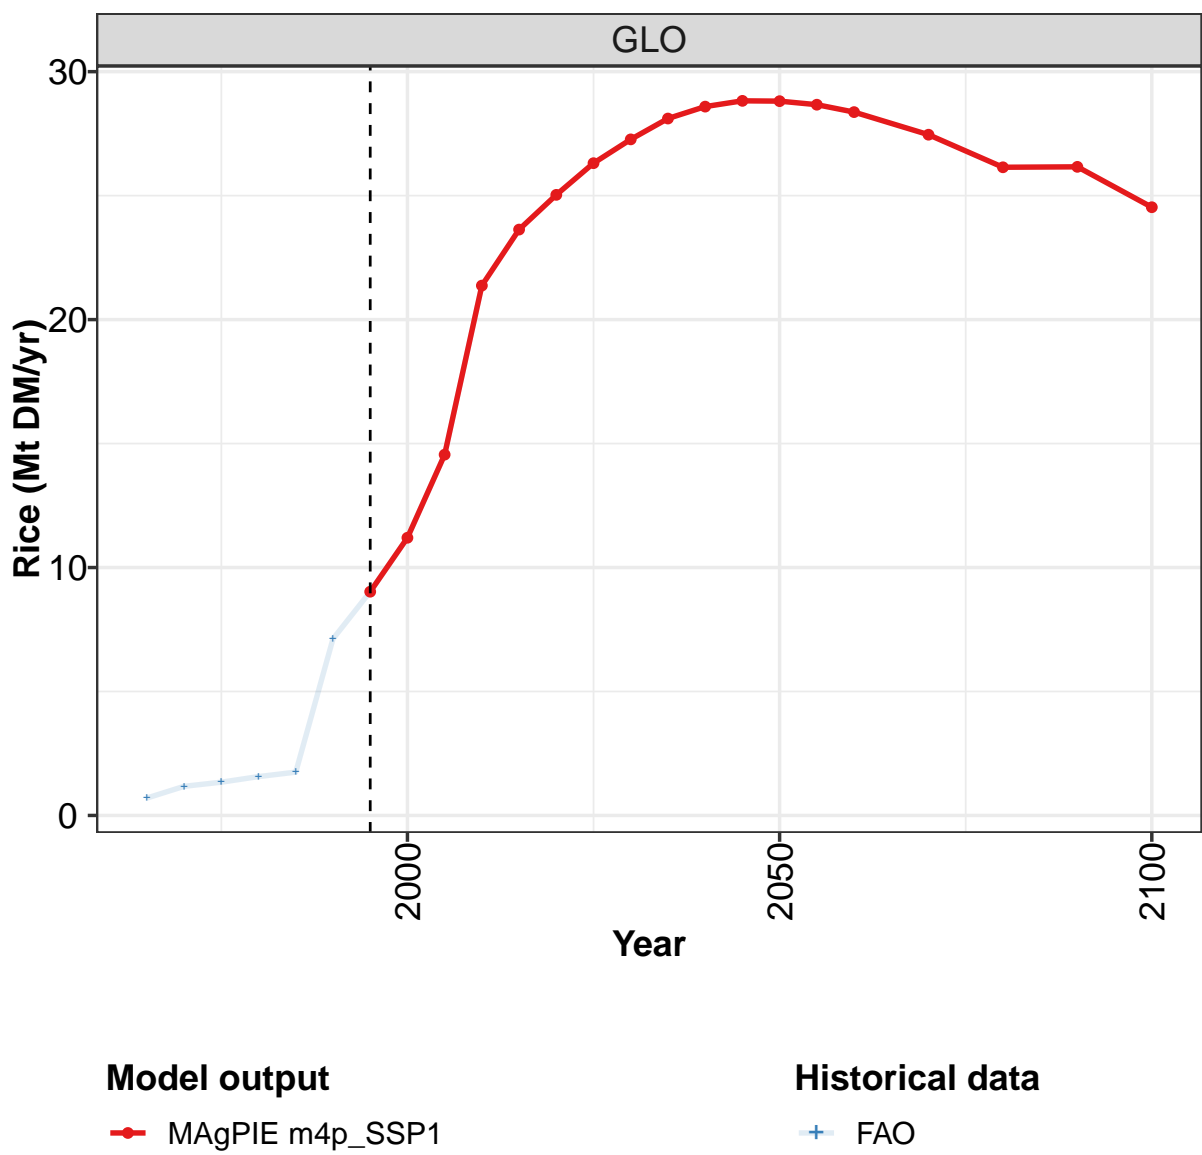

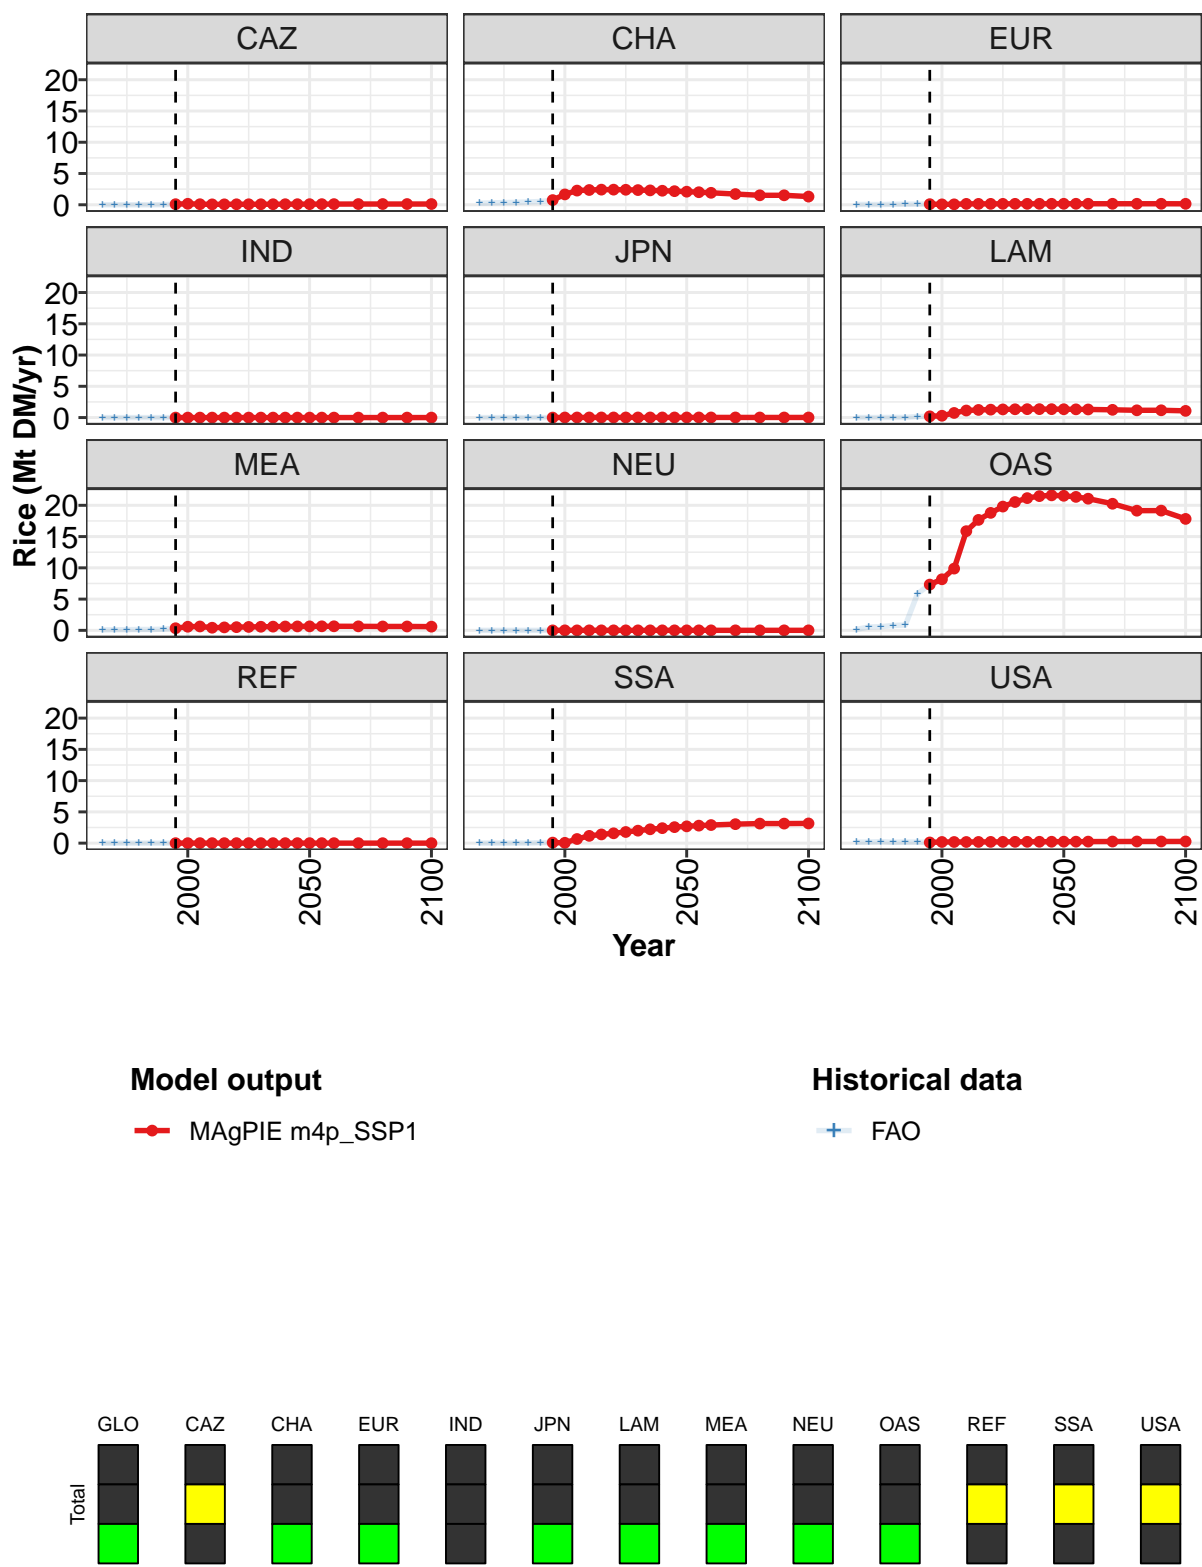

Figure 155: MAgPIE m4p\_SSP1 — Demand—Material—Crops—Cereals—Rice (Mt DM/yr)

|     | 1995 | 2000 | 2005 | 2010 | 2015 | 2020 | 2025 | 2030 | 2035 | 2040 | 2045 |
|-----|------|------|------|------|------|------|------|------|------|------|------|
| GLO | 9.0  | 11.2 | 14.6 | 21.4 | 23.6 | 25.0 | 26.3 | 27.3 | 28.1 | 28.6 | 28.8 |
| CAZ | 0.1  | 0.2  | 0.1  | 0.1  | 0.1  | 0.1  | 0.1  | 0.1  | 0.1  | 0.1  | 0.1  |
| CHA | 0.8  | 1.7  | 2.3  | 2.4  | 2.4  | 2.4  | 2.4  | 2.4  | 2.3  | 2.2  | 2.2  |
| EUR | 0.1  | 0.1  | 0.1  | 0.1  | 0.1  | 0.1  | 0.2  | 0.2  | 0.2  | 0.2  | 0.2  |
| IND | 0.0  | 0.0  | 0.0  | 0.0  | 0.0  | 0.0  | 0.0  | 0.0  | 0.0  | 0.0  | 0.0  |
| JPN | 0.0  | 0.0  | 0.0  | 0.0  | 0.0  | 0.0  | 0.0  | 0.0  | 0.0  | 0.0  | 0.0  |
| LAM | 0.2  | 0.3  | 0.7  | 1.1  | 1.2  | 1.3  | 1.3  | 1.3  | 1.3  | 1.3  | 1.3  |
| MEA | 0.3  | 0.6  | 0.6  | 0.4  | 0.5  | 0.5  | 0.5  | 0.6  | 0.6  | 0.6  | 0.6  |
| NEU | 0.0  | 0.0  | 0.0  | 0.0  | 0.0  | 0.0  | 0.0  | 0.0  | 0.0  | 0.0  | 0.0  |
| OAS | 7.3  | 8.2  | 9.9  | 15.9 | 17.7 | 18.8 | 19.8 | 20.5 | 21.2 | 21.5 | 21.6 |
| REF | 0.0  | 0.0  | 0.0  | 0.0  | 0.0  | 0.0  | 0.0  | 0.0  | 0.0  | 0.0  | 0.0  |
| SSA | 0.1  | 0.1  | 0.7  | 1.2  | 1.4  | 1.6  | 1.8  | 2.0  | 2.2  | 2.4  | 2.6  |
| USA | 0.1  | 0.2  | 0.2  | 0.2  | 0.2  | 0.2  | 0.2  | 0.2  | 0.2  | 0.2  | 0.2  |

Table 464: MAgPIE m4p\_SSP1 — Demand—Material—Crops—Cereals—Rice (Mt DM/yr) [PART 1/2]

|     | 2050 | 2055 | 2060 | 2070 | 2080 | 2090 | 2100 |
|-----|------|------|------|------|------|------|------|
| GLO | 28.8 | 28.7 | 28.4 | 27.5 | 26.1 | 26.2 | 24.5 |
| CAZ | 0.1  | 0.1  | 0.1  | 0.1  | 0.1  | 0.1  | 0.1  |
| CHA | 2.1  | 2.0  | 1.9  | 1.7  | 1.5  | 1.5  | 1.3  |
| EUR | 0.2  | 0.2  | 0.2  | 0.2  | 0.2  | 0.2  | 0.2  |
| IND | 0.0  | 0.0  | 0.0  | 0.0  | 0.0  | 0.0  | 0.0  |
| JPN | 0.0  | 0.0  | 0.0  | 0.0  | 0.0  | 0.0  | 0.0  |
| LAM | 1.3  | 1.3  | 1.3  | 1.2  | 1.2  | 1.2  | 1.1  |
| MEA | 0.6  | 0.6  | 0.7  | 0.6  | 0.6  | 0.6  | 0.6  |
| NEU | 0.0  | 0.0  | 0.0  | 0.0  | 0.0  | 0.0  | 0.0  |
| OAS | 21.5 | 21.4 | 21.1 | 20.3 | 19.1 | 19.2 | 17.8 |
| REF | 0.0  | 0.0  | 0.0  | 0.0  | 0.0  | 0.0  | 0.0  |
| SSA | 2.7  | 2.8  | 2.9  | 3.0  | 3.1  | 3.1  | 3.2  |
| USA | 0.2  | 0.2  | 0.2  | 0.3  | 0.3  | 0.3  | 0.3  |

Table 465: MAgPIE m4p\_SSP1 — Demand—Material—Crops—Cereals—Rice (Mt DM/yr) [PART 2/2]

|     | 1965 | 1970 | 1975 | 1980 | 1985 | 1990 | 1995 | 2000 | 2005 | 2010 |
|-----|------|------|------|------|------|------|------|------|------|------|
| GLO | 0.7  | 1.2  | 1.3  | 1.6  | 1.7  | 7.1  | 9.0  | 11.2 | 14.6 | 21.4 |
| CAZ | 0.0  | 0.0  | 0.0  | 0.0  | 0.0  | 0.0  | 0.1  | 0.2  | 0.1  | 0.1  |
| CHA | 0.3  | 0.3  | 0.3  | 0.4  | 0.5  | 0.5  | 0.8  | 1.7  | 2.3  | 2.4  |
| EUR | 0.1  | 0.0  | 0.0  | 0.1  | 0.1  | 0.1  | 0.1  | 0.1  | 0.1  | 0.1  |
| IND | 0.0  | 0.0  | 0.0  | 0.0  | 0.0  | 0.0  | 0.0  | 0.0  | 0.0  | 0.0  |
| JPN | 0.0  | 0.0  | 0.0  | 0.0  | 0.0  | 0.0  | 0.0  | 0.0  | 0.0  | 0.0  |
| LAM | 0.0  | 0.0  | 0.0  | 0.0  | 0.0  | 0.2  | 0.2  | 0.3  | 0.7  | 1.1  |
| MEA | 0.1  | 0.1  | 0.1  | 0.1  | 0.1  | 0.2  | 0.3  | 0.6  | 0.6  | 0.4  |
| NEU | 0.0  | 0.0  | 0.0  | 0.0  | 0.0  | 0.0  | 0.0  | 0.0  | 0.0  | 0.0  |
| OAS | 0.2  | 0.5  | 0.6  | 0.8  | 0.8  | 5.9  | 7.3  | 8.2  | 9.9  | 15.9 |
| REF | 0.0  | 0.0  | 0.0  | 0.0  | 0.0  | 0.0  | 0.0  | 0.0  | 0.0  | 0.0  |
| SSA | 0.0  | 0.0  | 0.0  | 0.0  | 0.0  | 0.1  | 0.1  | 0.1  | 0.7  | 1.2  |
| USA | 0.2  | 0.2  | 0.2  | 0.1  | 0.2  | 0.2  | 0.1  | 0.2  | 0.2  | 0.2  |

Table 466: FAO — Demand—Material—Crops—Cereals—Rice (Mt DM/yr)

8.2.3 Cereals—Tropical cereals

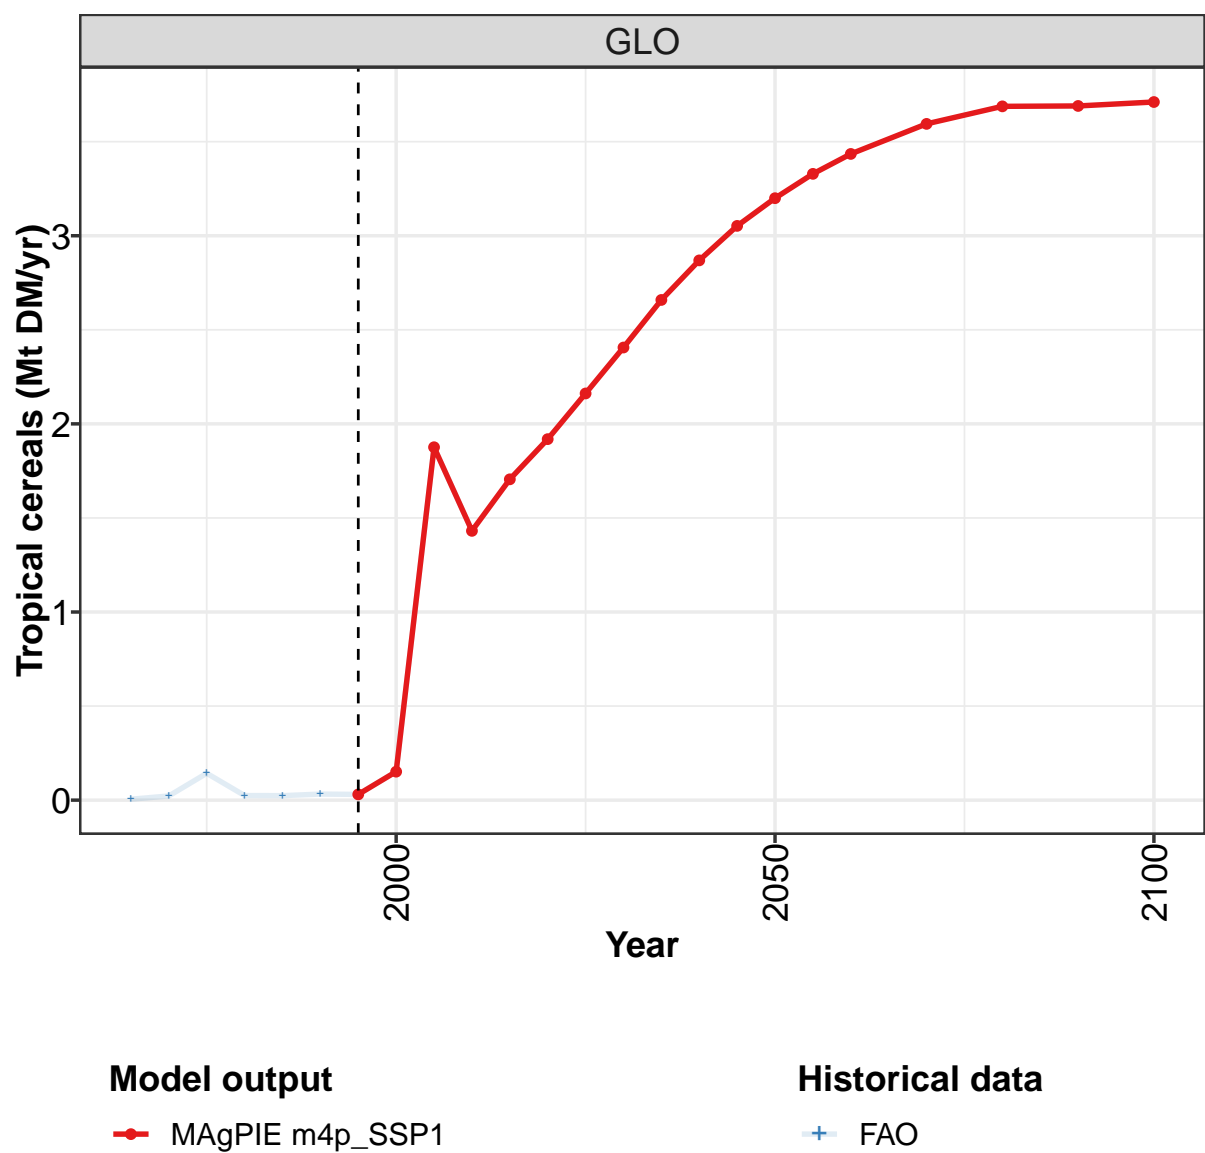

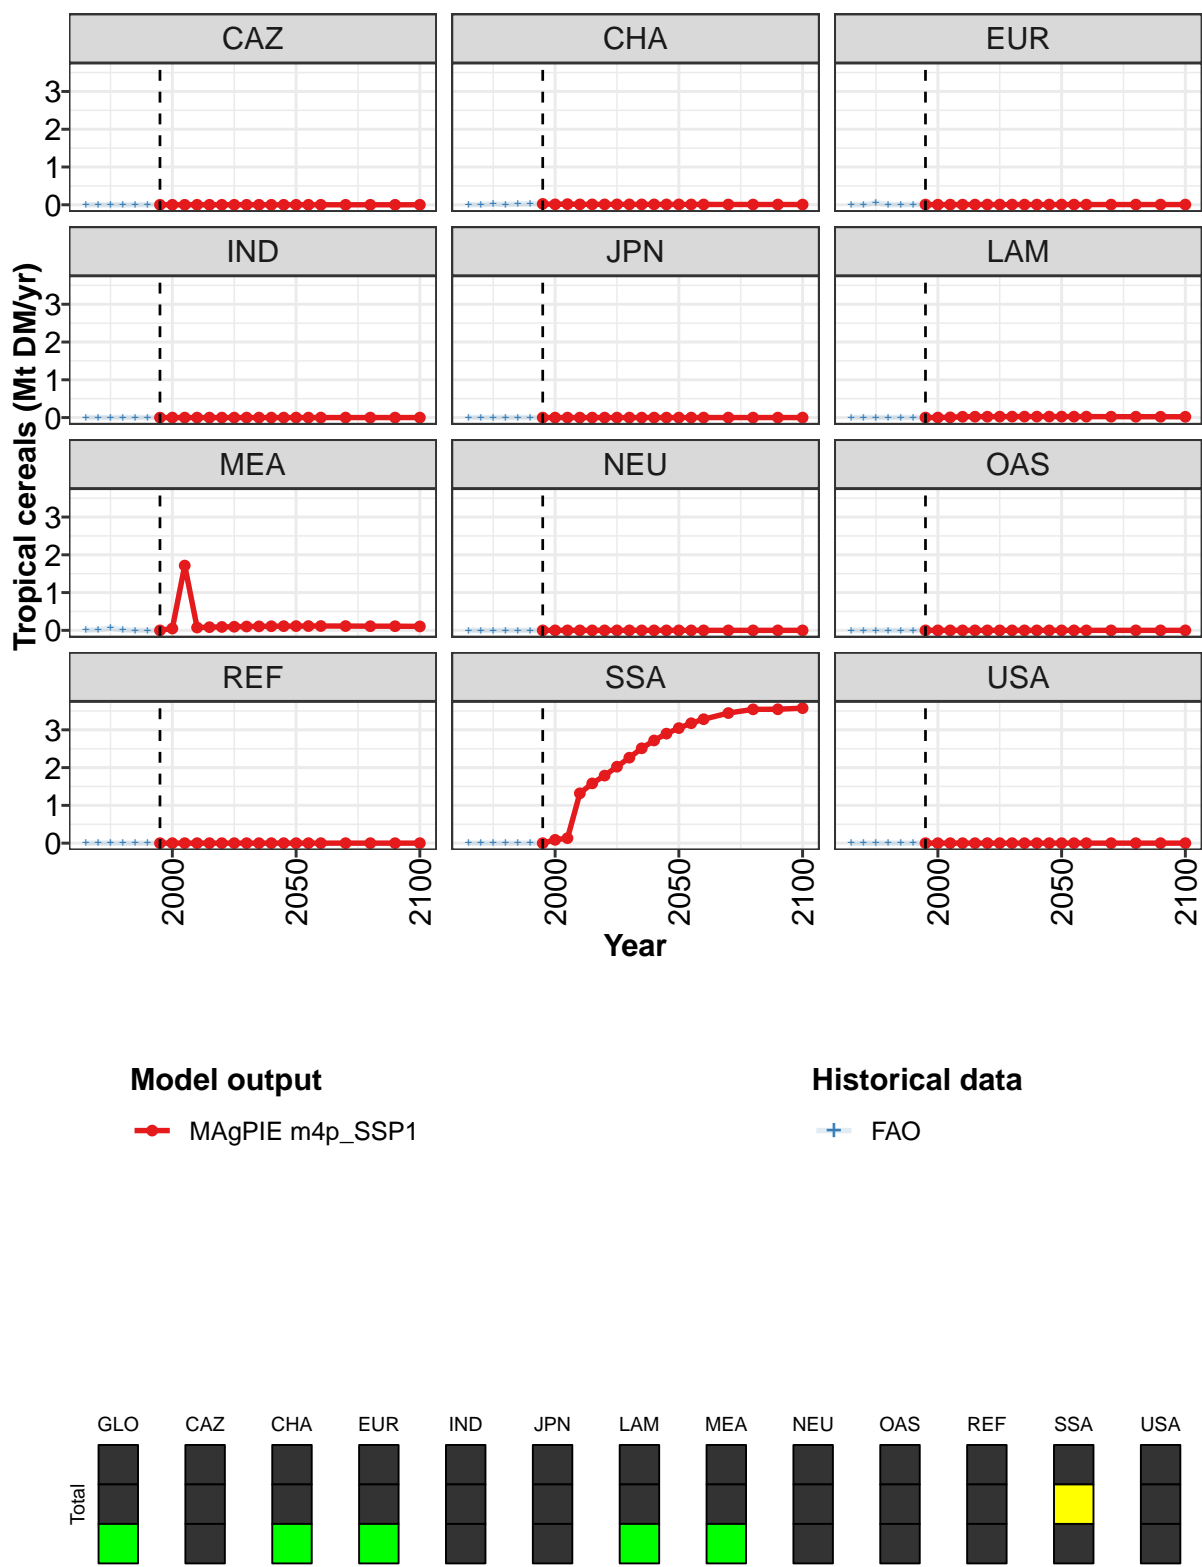

Figure 156: MAgPIE m4p\_SSP1 — Demand—Material—Crops—Cereals—Tropical cereals (Mt DM/yr)

|     | 1995 | 2000 | 2005 | 2010 | 2015 | 2020 | 2025 | 2030 | 2035 | 2040 | 2045 |
|-----|------|------|------|------|------|------|------|------|------|------|------|
| GLO | 0.03 | 0.15 | 1.88 | 1.43 | 1.71 | 1.92 | 2.16 | 2.41 | 2.66 | 2.87 | 3.05 |
| CAZ | 0.00 | 0.00 | 0.00 | 0.00 | 0.00 | 0.00 | 0.00 | 0.00 | 0.00 | 0.00 | 0.00 |
| CHA | 0.02 | 0.01 | 0.02 | 0.01 | 0.01 | 0.01 | 0.01 | 0.01 | 0.01 | 0.01 | 0.01 |
| EUR | 0.01 | 0.00 | 0.00 | 0.00 | 0.00 | 0.00 | 0.01 | 0.01 | 0.01 | 0.01 | 0.01 |
| IND | 0.00 | 0.00 | 0.00 | 0.00 | 0.00 | 0.00 | 0.00 | 0.00 | 0.00 | 0.00 | 0.00 |
| JPN | 0.00 | 0.00 | 0.00 | 0.00 | 0.00 | 0.00 | 0.00 | 0.00 | 0.00 | 0.00 | 0.00 |
| LAM | 0.00 | 0.00 | 0.01 | 0.02 | 0.02 | 0.02 | 0.03 | 0.03 | 0.03 | 0.03 | 0.03 |
| MEA | 0.00 | 0.05 | 1.72 | 0.07 | 0.08 | 0.09 | 0.10 | 0.10 | 0.11 | 0.11 | 0.11 |
| NEU | 0.00 | 0.00 | 0.00 | 0.00 | 0.00 | 0.00 | 0.00 | 0.00 | 0.00 | 0.00 | 0.00 |
| OAS | 0.00 | 0.00 | 0.00 | 0.00 | 0.00 | 0.00 | 0.00 | 0.00 | 0.00 | 0.00 | 0.00 |
| REF | 0.00 | 0.00 | 0.00 | 0.00 | 0.00 | 0.00 | 0.00 | 0.00 | 0.00 | 0.00 | 0.00 |
| SSA | 0.00 | 0.09 | 0.13 | 1.32 | 1.58 | 1.79 | 2.02 | 2.26 | 2.51 | 2.72 | 2.90 |
| USA | 0.00 | 0.00 | 0.00 | 0.00 | 0.00 | 0.00 | 0.00 | 0.00 | 0.00 | 0.00 | 0.00 |

Table 467: MAgPIE m4p\_SSP1 — Demand—Material—Crops—Cereals—Tropical cereals (Mt DM/yr) [PART 1/2]

|     | 2050 | 2055 | 2060 | 2070 | 2080 | 2090 | 2100 |
|-----|------|------|------|------|------|------|------|
| GLO | 3.20 | 3.33 | 3.43 | 3.59 | 3.69 | 3.69 | 3.71 |
| CAZ | 0.00 | 0.00 | 0.00 | 0.00 | 0.00 | 0.00 | 0.00 |
| CHA | 0.01 | 0.01 | 0.01 | 0.01 | 0.01 | 0.01 | 0.01 |
| EUR | 0.01 | 0.01 | 0.01 | 0.01 | 0.01 | 0.01 | 0.01 |
| IND | 0.00 | 0.00 | 0.00 | 0.00 | 0.00 | 0.00 | 0.00 |
| JPN | 0.00 | 0.00 | 0.00 | 0.00 | 0.00 | 0.00 | 0.00 |
| LAM | 0.03 | 0.03 | 0.02 | 0.02 | 0.02 | 0.02 | 0.02 |
| MEA | 0.11 | 0.11 | 0.11 | 0.11 | 0.11 | 0.11 | 0.10 |
| NEU | 0.00 | 0.00 | 0.00 | 0.00 | 0.00 | 0.00 | 0.00 |
| OAS | 0.00 | 0.00 | 0.00 | 0.00 | 0.00 | 0.00 | 0.00 |
| REF | 0.00 | 0.00 | 0.00 | 0.00 | 0.00 | 0.00 | 0.00 |
| SSA | 3.05 | 3.18 | 3.28 | 3.44 | 3.54 | 3.55 | 3.57 |
| USA | 0.00 | 0.00 | 0.00 | 0.00 | 0.00 | 0.00 | 0.00 |

Table 468: MAgPIE m4p\_SSP1 — Demand—Material—Crops—Cereals—Tropical cereals (Mt DM/yr) [PART 2/2]

|     | 1965 | 1970 | 1975 | 1980 | 1985 | 1990 | 1995 | 2000 | 2005 | 2010 |
|-----|------|------|------|------|------|------|------|------|------|------|
| GLO | 0.00 | 0.02 | 0.14 | 0.02 | 0.02 | 0.03 | 0.03 | 0.15 | 1.88 | 1.43 |
| CAZ | 0.00 | 0.00 | 0.00 | 0.00 | 0.00 | 0.00 | 0.00 | 0.00 | 0.00 | 0.00 |
| CHA | 0.00 | 0.00 | 0.02 | 0.01 | 0.02 | 0.03 | 0.02 | 0.01 | 0.02 | 0.01 |
| EUR | 0.00 | 0.00 | 0.06 | 0.00 | 0.00 | 0.01 | 0.01 | 0.00 | 0.00 | 0.00 |
| IND | 0.00 | 0.00 | 0.00 | 0.00 | 0.00 | 0.00 | 0.00 | 0.00 | 0.00 | 0.00 |
| JPN | 0.00 | 0.00 | 0.00 | 0.00 | 0.00 | 0.00 | 0.00 | 0.00 | 0.00 | 0.00 |
| LAM | 0.00 | 0.00 | 0.00 | 0.00 | 0.00 | 0.00 | 0.00 | 0.00 | 0.01 | 0.02 |
| MEA | 0.00 | 0.02 | 0.07 | 0.01 | 0.00 | 0.00 | 0.00 | 0.05 | 1.72 | 0.07 |
| NEU | 0.00 | 0.00 | 0.00 | 0.00 | 0.00 | 0.00 | 0.00 | 0.00 | 0.00 | 0.00 |
| OAS | 0.00 | 0.00 | 0.00 | 0.00 | 0.00 | 0.00 | 0.00 | 0.00 | 0.00 | 0.00 |
| REF | 0.00 | 0.00 | 0.00 | 0.00 | 0.00 | 0.00 | 0.00 | 0.00 | 0.00 | 0.00 |
| SSA | 0.00 | 0.00 | 0.00 | 0.00 | 0.00 | 0.00 | 0.00 | 0.09 | 0.13 | 1.32 |
| USA | 0.00 | 0.00 | 0.00 | 0.00 | 0.00 | 0.00 | 0.00 | 0.00 | 0.00 | 0.00 |

Table 469: FAO — Demand—Material—Crops—Cereals—Tropical cereals (Mt DM/yr)



8.2.4 Oil crops

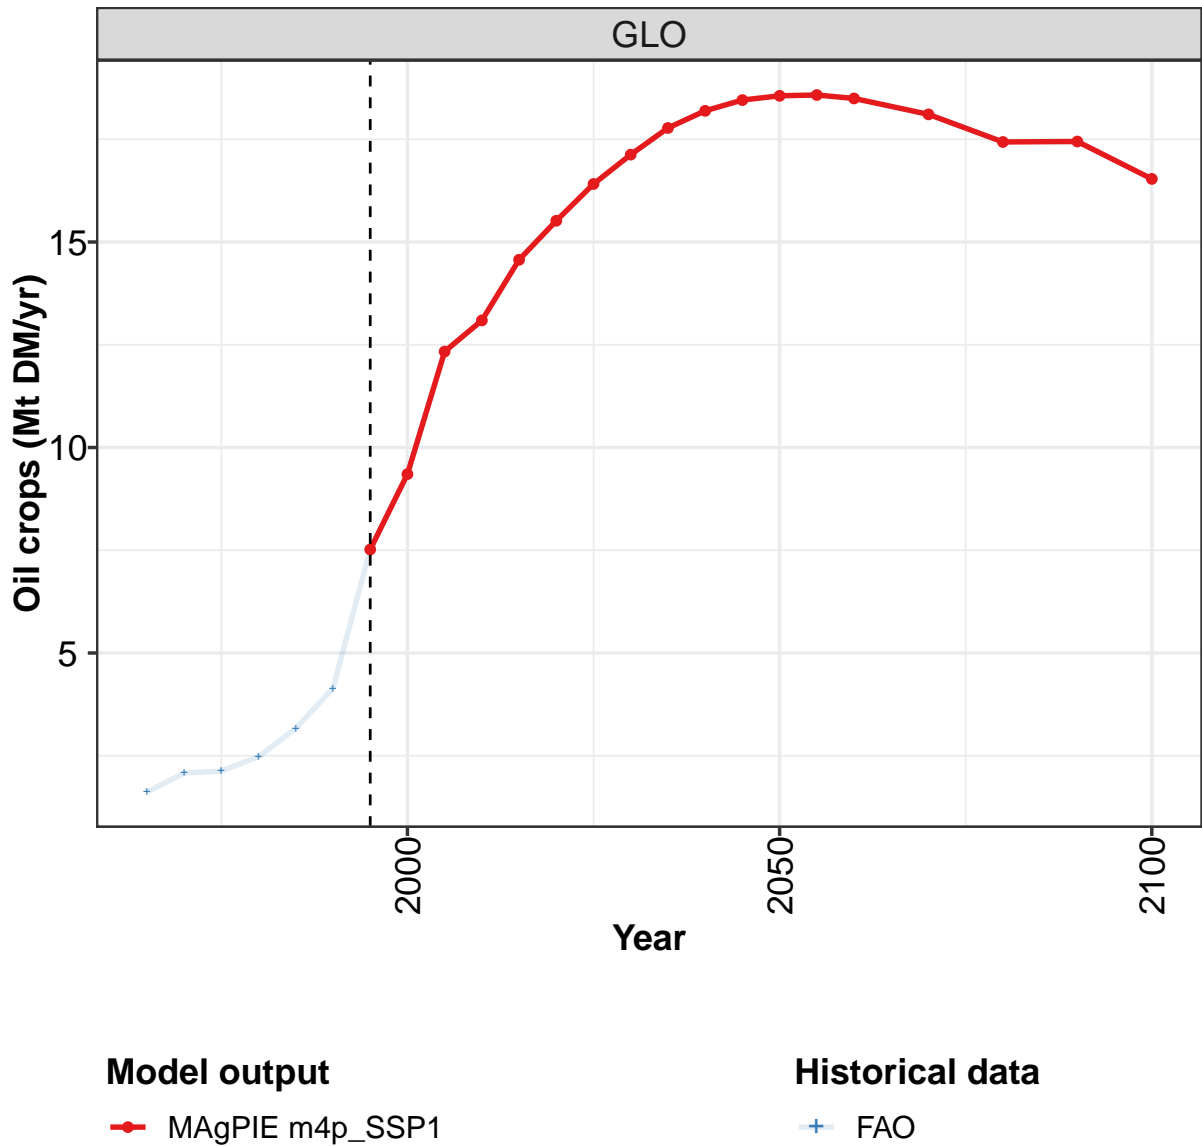

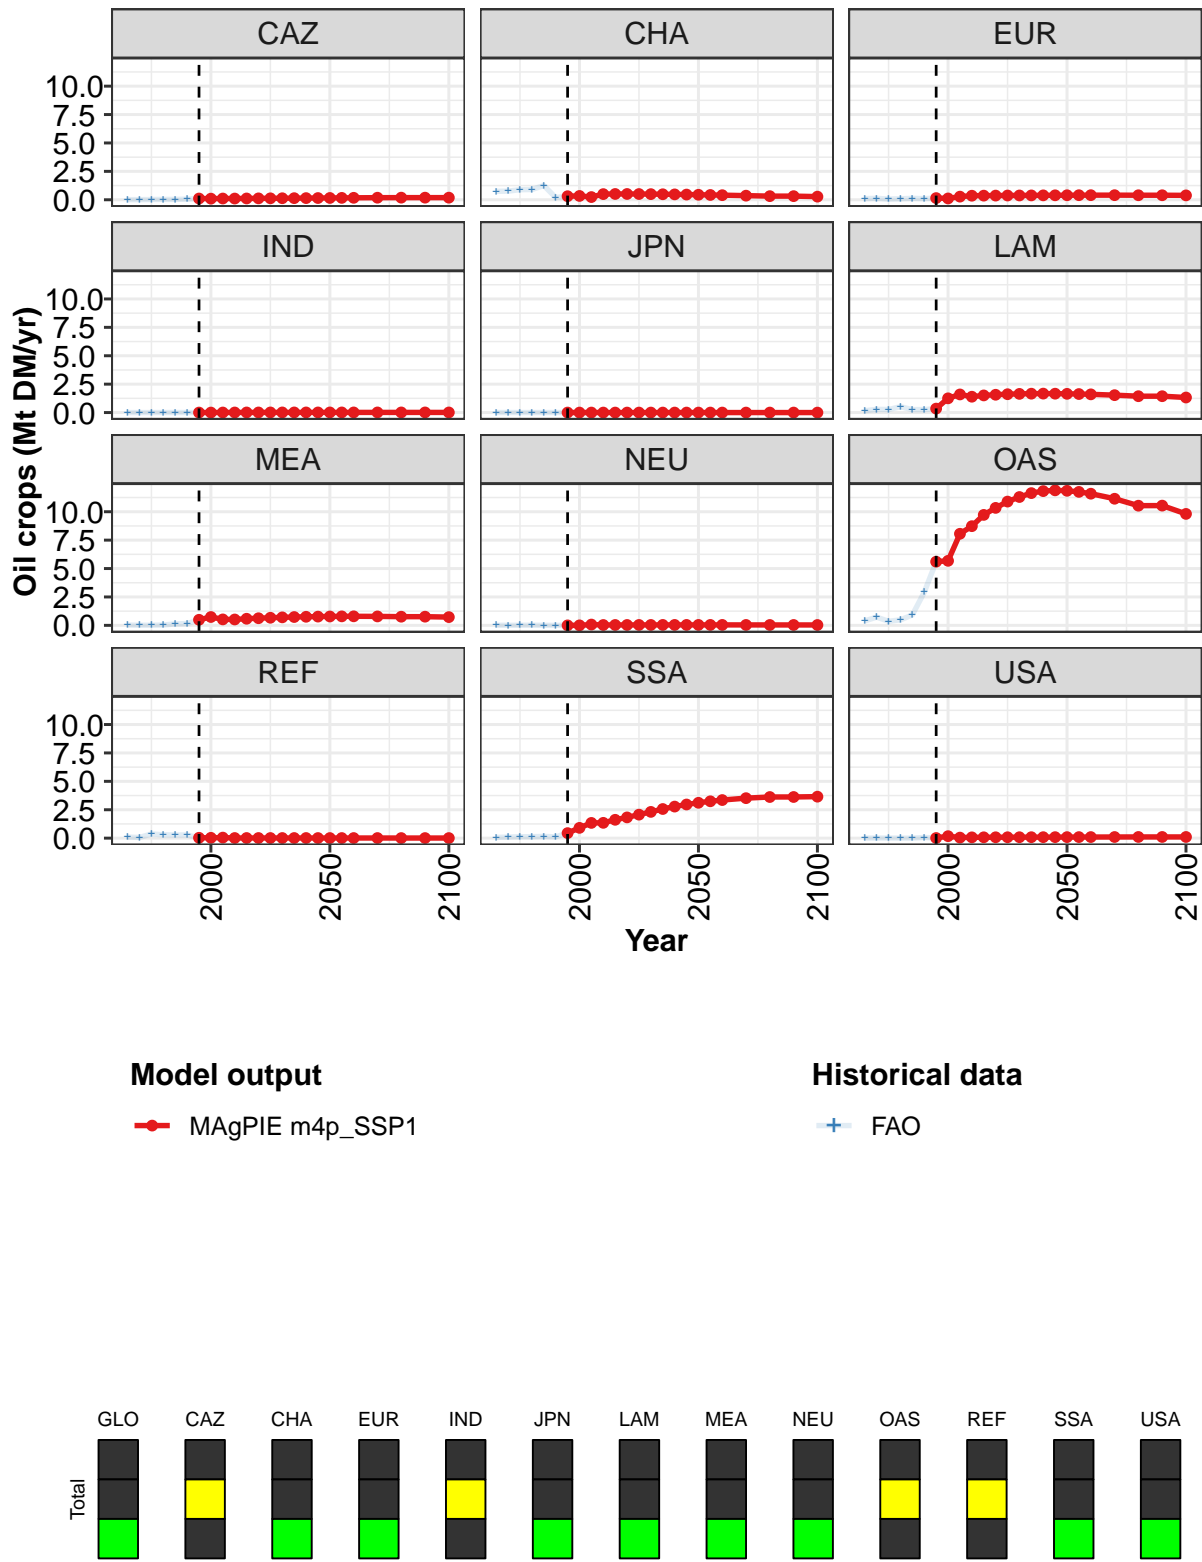

Figure 157: MAgPIE m4p\_SSP1 — Demand—Material—Crops—Oil crops (Mt DM/yr)

|     | 1995 | 2000 | 2005 | 2010 | 2015 | 2020 | 2025 | 2030 | 2035 | 2040 | 2045 |
|-----|------|------|------|------|------|------|------|------|------|------|------|
| GLO | 7.5  | 9.4  | 12.3 | 13.1 | 14.6 | 15.5 | 16.4 | 17.1 | 17.8 | 18.2 | 18.5 |
| CAZ | 0.1  | 0.1  | 0.1  | 0.1  | 0.1  | 0.1  | 0.1  | 0.1  | 0.1  | 0.1  | 0.2  |
| CHA | 0.3  | 0.3  | 0.2  | 0.5  | 0.5  | 0.5  | 0.5  | 0.5  | 0.5  | 0.5  | 0.5  |
| EUR | 0.2  | 0.1  | 0.3  | 0.4  | 0.4  | 0.4  | 0.4  | 0.4  | 0.4  | 0.4  | 0.4  |
| IND | 0.0  | 0.0  | 0.0  | 0.0  | 0.0  | 0.0  | 0.0  | 0.0  | 0.0  | 0.0  | 0.0  |
| JPN | 0.0  | 0.0  | 0.0  | 0.0  | 0.0  | 0.0  | 0.0  | 0.0  | 0.0  | 0.0  | 0.0  |
| LAM | 0.4  | 1.3  | 1.6  | 1.4  | 1.5  | 1.6  | 1.6  | 1.6  | 1.7  | 1.7  | 1.7  |
| MEA | 0.5  | 0.7  | 0.5  | 0.5  | 0.6  | 0.6  | 0.7  | 0.7  | 0.7  | 0.8  | 0.8  |
| NEU | 0.0  | 0.0  | 0.1  | 0.0  | 0.0  | 0.0  | 0.0  | 0.0  | 0.0  | 0.0  | 0.0  |
| OAS | 5.6  | 5.7  | 8.1  | 8.7  | 9.7  | 10.3 | 10.9 | 11.3 | 11.6 | 11.8 | 11.9 |
| REF | 0.0  | 0.0  | 0.1  | 0.0  | 0.0  | 0.0  | 0.0  | 0.0  | 0.0  | 0.0  | 0.0  |
| SSA | 0.4  | 0.9  | 1.3  | 1.3  | 1.6  | 1.8  | 2.1  | 2.3  | 2.6  | 2.8  | 3.0  |
| USA | 0.0  | 0.2  | 0.0  | 0.1  | 0.1  | 0.1  | 0.1  | 0.1  | 0.1  | 0.1  | 0.1  |

Table 470: MAgPIE m4p\_SSP1 — Demand—Material—Crops—Oil crops (Mt DM/yr) [PART 1/2]

|     | 2050 | 2055 | 2060 | 2070 | 2080 | 2090 | 2100 |
|-----|------|------|------|------|------|------|------|
| GLO | 18.6 | 18.6 | 18.5 | 18.1 | 17.4 | 17.4 | 16.5 |
| CAZ | 0.2  | 0.2  | 0.2  | 0.2  | 0.2  | 0.2  | 0.2  |
| CHA | 0.4  | 0.4  | 0.4  | 0.4  | 0.3  | 0.3  | 0.3  |
| EUR | 0.4  | 0.4  | 0.4  | 0.4  | 0.4  | 0.4  | 0.4  |
| IND | 0.0  | 0.0  | 0.0  | 0.0  | 0.0  | 0.0  | 0.0  |
| JPN | 0.0  | 0.0  | 0.0  | 0.0  | 0.0  | 0.0  | 0.0  |
| LAM | 1.7  | 1.6  | 1.6  | 1.5  | 1.4  | 1.4  | 1.3  |
| MEA | 0.8  | 0.8  | 0.8  | 0.8  | 0.8  | 0.8  | 0.7  |
| NEU | 0.0  | 0.0  | 0.0  | 0.0  | 0.0  | 0.0  | 0.0  |
| OAS | 11.8 | 11.7 | 11.6 | 11.1 | 10.5 | 10.5 | 9.8  |
| REF | 0.0  | 0.0  | 0.0  | 0.0  | 0.0  | 0.0  | 0.0  |
| SSA | 3.1  | 3.2  | 3.4  | 3.5  | 3.6  | 3.6  | 3.7  |
| USA | 0.1  | 0.1  | 0.1  | 0.1  | 0.1  | 0.1  | 0.1  |

Table 471: MAgPIE m4p\_SSP1 — Demand—Material—Crops—Oil crops (Mt DM/yr) [PART 2/2]

|     | 1965 | 1970 | 1975 | 1980 | 1985 | 1990 | 1995 | 2000 | 2005 | 2010 |
|-----|------|------|------|------|------|------|------|------|------|------|
| GLO | 1.6  | 2.1  | 2.1  | 2.5  | 3.2  | 4.1  | 7.5  | 9.4  | 12.3 | 13.1 |
| CAZ | 0.0  | 0.0  | 0.0  | 0.0  | 0.0  | 0.1  | 0.1  | 0.1  | 0.1  | 0.1  |
| CHA | 0.7  | 0.8  | 0.9  | 0.9  | 1.3  | 0.2  | 0.3  | 0.3  | 0.2  | 0.5  |
| EUR | 0.1  | 0.1  | 0.1  | 0.1  | 0.1  | 0.1  | 0.2  | 0.1  | 0.3  | 0.4  |
| IND | 0.0  | 0.0  | 0.0  | 0.0  | 0.0  | 0.0  | 0.0  | 0.0  | 0.0  | 0.0  |
| JPN | 0.0  | 0.0  | 0.0  | 0.0  | 0.0  | 0.0  | 0.0  | 0.0  | 0.0  | 0.0  |
| LAM | 0.2  | 0.3  | 0.3  | 0.5  | 0.3  | 0.3  | 0.4  | 1.3  | 1.6  | 1.4  |
| MEA | 0.0  | 0.0  | 0.0  | 0.0  | 0.1  | 0.2  | 0.5  | 0.7  | 0.5  | 0.5  |
| NEU | 0.0  | 0.0  | 0.0  | 0.0  | 0.0  | 0.0  | 0.0  | 0.0  | 0.1  | 0.0  |
| OAS | 0.4  | 0.7  | 0.4  | 0.5  | 0.9  | 2.9  | 5.6  | 5.7  | 8.1  | 8.7  |
| REF | 0.1  | 0.1  | 0.4  | 0.3  | 0.3  | 0.3  | 0.0  | 0.0  | 0.1  | 0.0  |
| SSA | 0.1  | 0.1  | 0.1  | 0.1  | 0.2  | 0.1  | 0.4  | 0.9  | 1.3  | 1.3  |
| USA | 0.0  | 0.0  | 0.0  | 0.0  | 0.0  | 0.1  | 0.0  | 0.2  | 0.0  | 0.1  |

Table 472: FAO — Demand—Material—Crops—Oil crops (Mt DM/yr)

8.2.5 Oil crops—Cotton seed

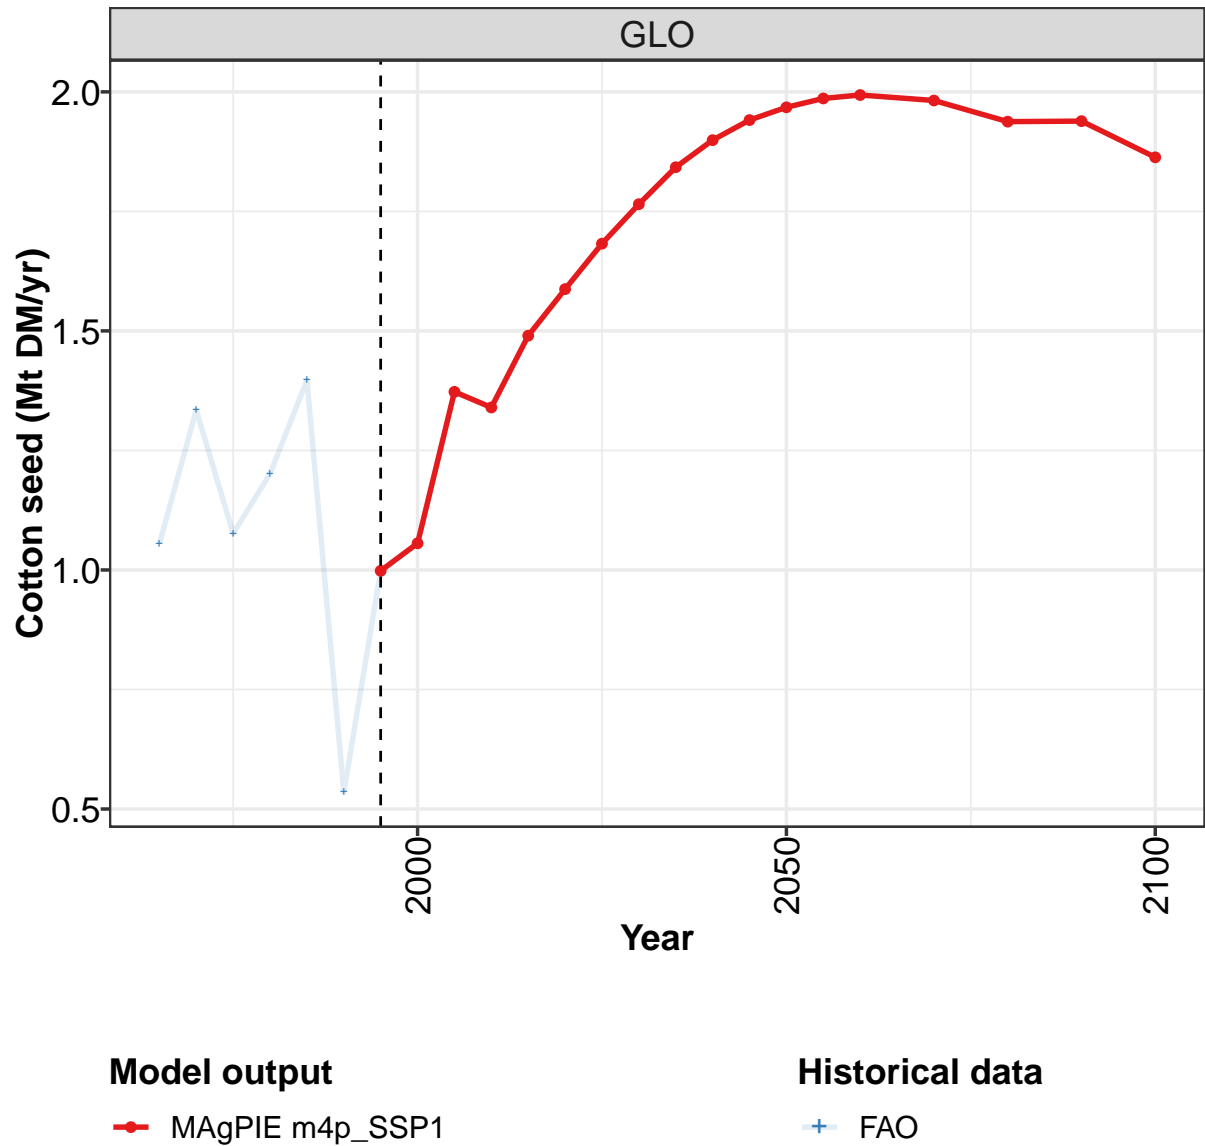

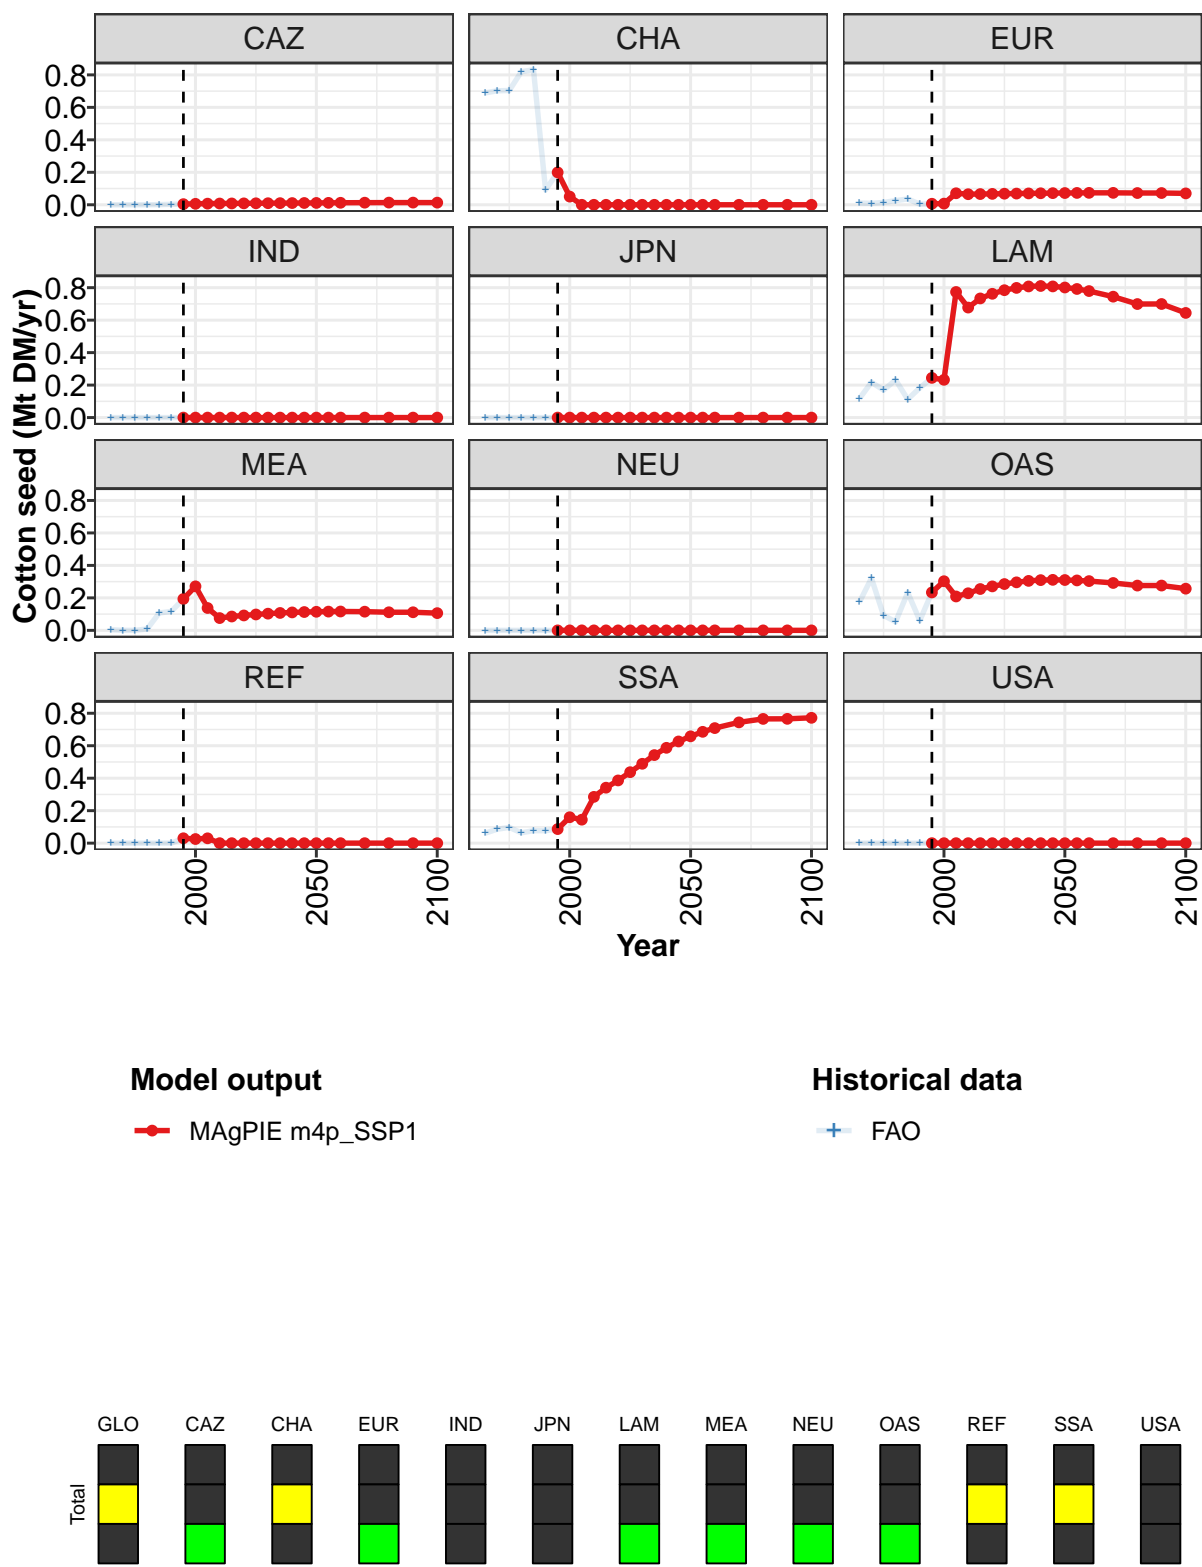

Figure 158: MAgPIE m4p\_SSP1 — Demand—Material—Crops—Oil crops—Cotton seed (Mt DM/yr)

|     | 1995 | 2000 | 2005 | 2010 | 2015 | 2020 | 2025 | 2030 | 2035 | 2040 | 2045 |
|-----|------|------|------|------|------|------|------|------|------|------|------|
| GLO | 1.00 | 1.06 | 1.37 | 1.34 | 1.49 | 1.59 | 1.68 | 1.77 | 1.84 | 1.90 | 1.94 |
| CAZ | 0.00 | 0.01 | 0.01 | 0.01 | 0.01 | 0.01 | 0.01 | 0.01 | 0.01 | 0.01 | 0.01 |
| CHA | 0.20 | 0.05 | 0.00 | 0.00 | 0.00 | 0.00 | 0.00 | 0.00 | 0.00 | 0.00 | 0.00 |
| EUR | 0.01 | 0.01 | 0.07 | 0.07 | 0.07 | 0.07 | 0.07 | 0.07 | 0.07 | 0.07 | 0.07 |
| IND | 0.00 | 0.00 | 0.00 | 0.00 | 0.00 | 0.00 | 0.00 | 0.00 | 0.00 | 0.00 | 0.00 |
| JPN | 0.00 | 0.00 | 0.00 | 0.00 | 0.00 | 0.00 | 0.00 | 0.00 | 0.00 | 0.00 | 0.00 |
| LAM | 0.24 | 0.23 | 0.77 | 0.68 | 0.73 | 0.76 | 0.78 | 0.80 | 0.81 | 0.81 | 0.81 |
| MEA | 0.19 | 0.27 | 0.14 | 0.08 | 0.09 | 0.09 | 0.10 | 0.10 | 0.11 | 0.11 | 0.11 |
| NEU | 0.00 | 0.00 | 0.00 | 0.00 | 0.00 | 0.00 | 0.00 | 0.00 | 0.00 | 0.00 | 0.00 |
| OAS | 0.23 | 0.30 | 0.21 | 0.23 | 0.25 | 0.27 | 0.29 | 0.30 | 0.30 | 0.31 | 0.31 |
| REF | 0.03 | 0.03 | 0.03 | 0.00 | 0.00 | 0.00 | 0.00 | 0.00 | 0.00 | 0.00 | 0.00 |
| SSA | 0.09 | 0.16 | 0.14 | 0.29 | 0.34 | 0.39 | 0.44 | 0.49 | 0.54 | 0.59 | 0.63 |
| USA | 0.00 | 0.00 | 0.00 | 0.00 | 0.00 | 0.00 | 0.00 | 0.00 | 0.00 | 0.00 | 0.00 |

Table 473: MAgPIE m4p\_SSP1 — Demand—Material—Crops—Oil crops—Cotton seed (Mt DM/yr) [PART 1/2]

|     | 2050 | 2055 | 2060 | 2070 | 2080 | 2090 | 2100 |
|-----|------|------|------|------|------|------|------|
| GLO | 1.97 | 1.99 | 1.99 | 1.98 | 1.94 | 1.94 | 1.86 |
| CAZ | 0.01 | 0.01 | 0.01 | 0.01 | 0.01 | 0.01 | 0.01 |
| CHA | 0.00 | 0.00 | 0.00 | 0.00 | 0.00 | 0.00 | 0.00 |
| EUR | 0.07 | 0.07 | 0.07 | 0.07 | 0.07 | 0.07 | 0.07 |
| IND | 0.00 | 0.00 | 0.00 | 0.00 | 0.00 | 0.00 | 0.00 |
| JPN | 0.00 | 0.00 | 0.00 | 0.00 | 0.00 | 0.00 | 0.00 |
| LAM | 0.80 | 0.79 | 0.78 | 0.74 | 0.70 | 0.70 | 0.64 |
| MEA | 0.11 | 0.12 | 0.12 | 0.12 | 0.11 | 0.11 | 0.11 |
| NEU | 0.00 | 0.00 | 0.00 | 0.00 | 0.00 | 0.00 | 0.00 |
| OAS | 0.31 | 0.31 | 0.30 | 0.29 | 0.28 | 0.28 | 0.26 |
| REF | 0.00 | 0.00 | 0.00 | 0.00 | 0.00 | 0.00 | 0.00 |
| SSA | 0.66 | 0.69 | 0.71 | 0.74 | 0.77 | 0.77 | 0.77 |
| USA | 0.00 | 0.00 | 0.00 | 0.00 | 0.00 | 0.00 | 0.00 |

Table 474: MAgPIE m4p\_SSP1 — Demand—Material—Crops—Oil crops—Cotton seed (Mt DM/yr) [PART 2/2]

|     | 1965 | 1970 | 1975 | 1980 | 1985 | 1990 | 1995 | 2000 | 2005 | 2010 |
|-----|------|------|------|------|------|------|------|------|------|------|
| GLO | 1.05 | 1.33 | 1.08 | 1.20 | 1.40 | 0.54 | 1.00 | 1.06 | 1.37 | 1.34 |
| CAZ | 0.00 | 0.00 | 0.00 | 0.00 | 0.00 | 0.00 | 0.00 | 0.01 | 0.01 | 0.01 |
| CHA | 0.69 | 0.70 | 0.70 | 0.82 | 0.83 | 0.09 | 0.20 | 0.05 | 0.00 | 0.00 |
| EUR | 0.01 | 0.01 | 0.01 | 0.03 | 0.04 | 0.00 | 0.01 | 0.01 | 0.07 | 0.07 |
| IND | 0.00 | 0.00 | 0.00 | 0.00 | 0.00 | 0.00 | 0.00 | 0.00 | 0.00 | 0.00 |
| JPN | 0.00 | 0.00 | 0.00 | 0.00 | 0.00 | 0.00 | 0.00 | 0.00 | 0.00 | 0.00 |
| LAM | 0.12 | 0.22 | 0.17 | 0.23 | 0.11 | 0.18 | 0.24 | 0.23 | 0.77 | 0.68 |
| MEA | 0.00 | 0.00 | 0.00 | 0.01 | 0.11 | 0.12 | 0.19 | 0.27 | 0.14 | 0.08 |
| NEU | 0.00 | 0.00 | 0.00 | 0.00 | 0.00 | 0.00 | 0.00 | 0.00 | 0.00 | 0.00 |
| OAS | 0.17 | 0.32 | 0.09 | 0.05 | 0.23 | 0.06 | 0.23 | 0.30 | 0.21 | 0.23 |
| REF | 0.00 | 0.00 | 0.00 | 0.00 | 0.00 | 0.00 | 0.03 | 0.03 | 0.03 | 0.00 |
| SSA | 0.06 | 0.09 | 0.10 | 0.06 | 0.08 | 0.08 | 0.09 | 0.16 | 0.14 | 0.29 |
| USA | 0.00 | 0.00 | 0.00 | 0.00 | 0.00 | 0.00 | 0.00 | 0.00 | 0.00 | 0.00 |

Table 475: FAO — Demand—Material—Crops—Oil crops—Cotton seed (Mt DM/yr)

8.2.6 Oil crops—Groundnuts

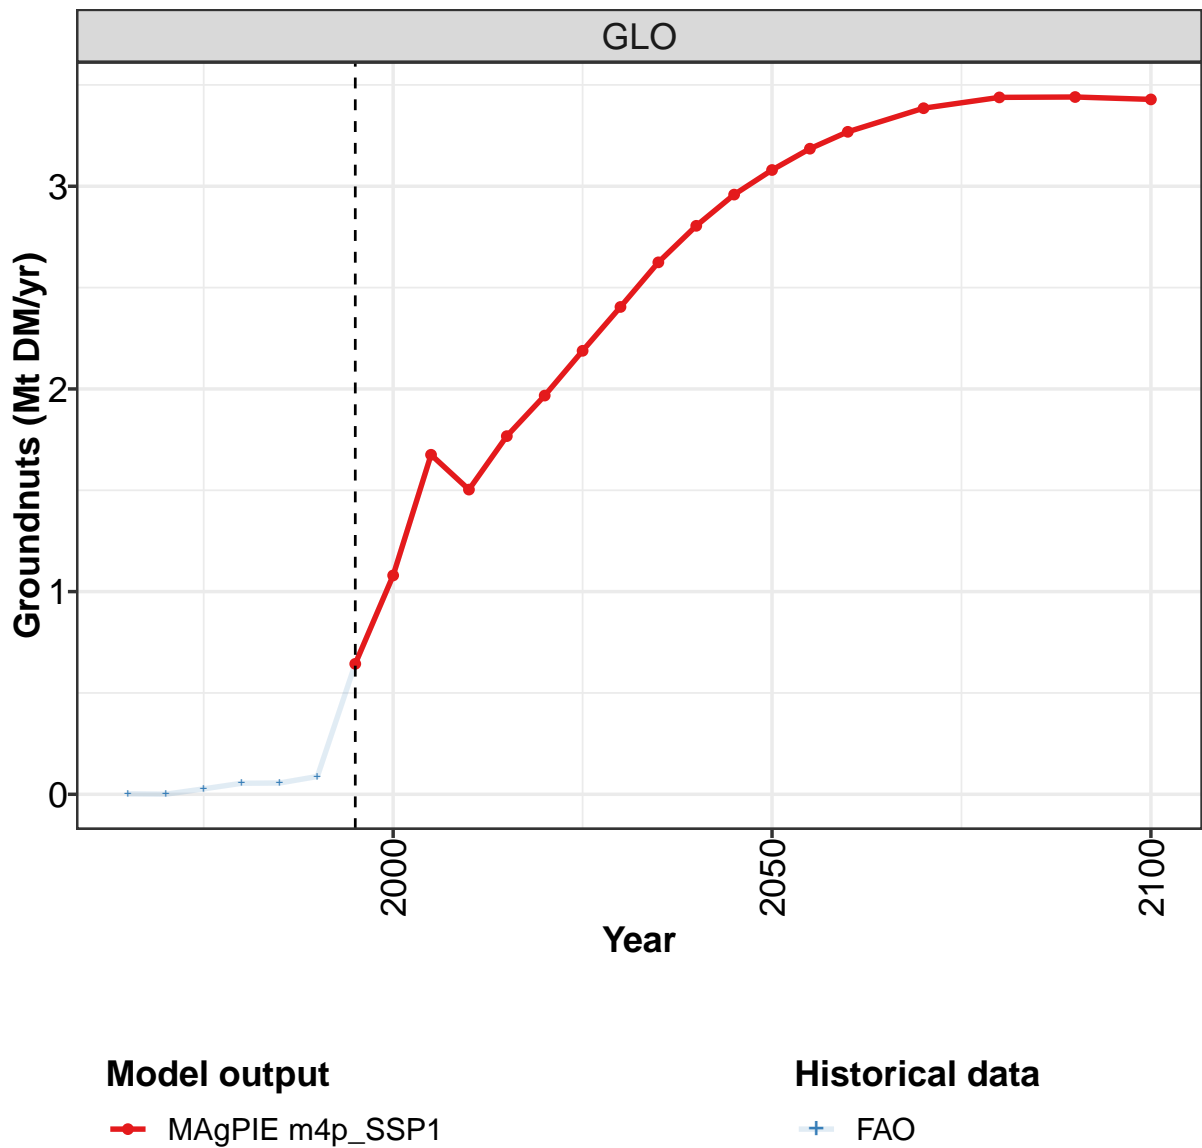

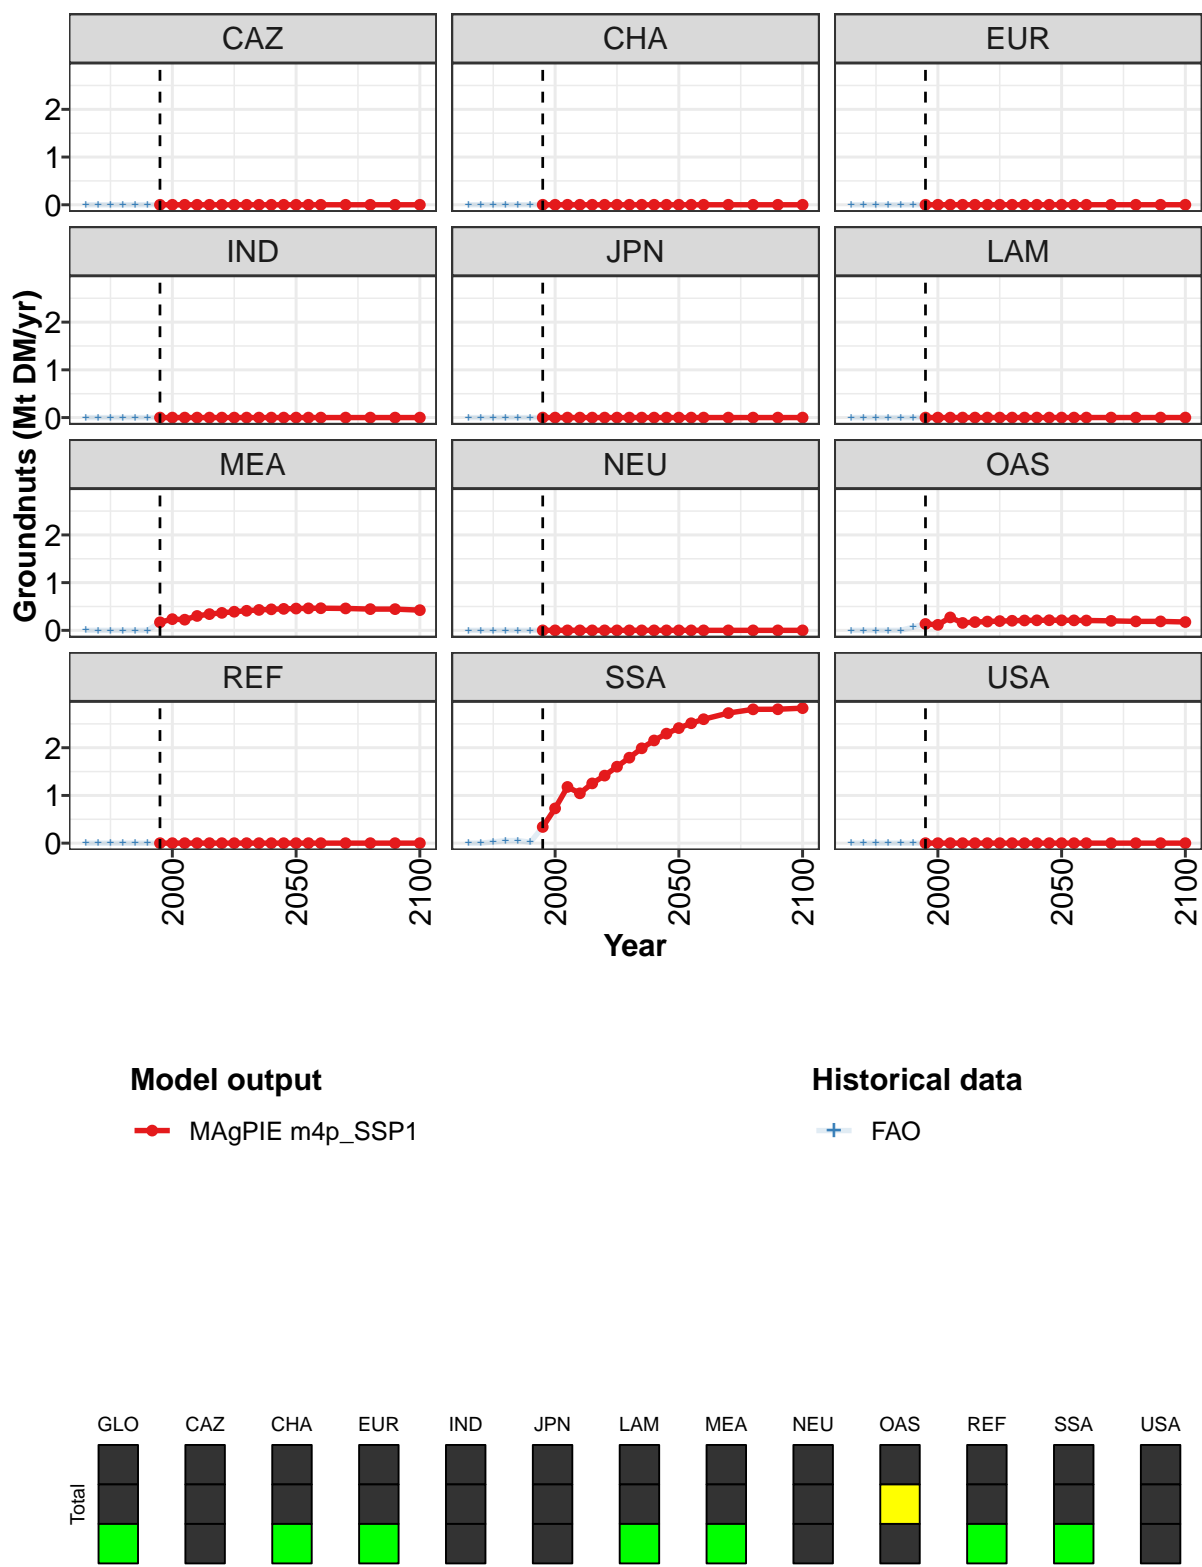

Figure 159: MAgPIE m4p\_SSP1 — Demand—Material—Crops—Oil crops—Groundnuts (Mt DM/yr)



|     | 1995 | 2000 | 2005 | 2010 | 2015 | 2020 | 2025 | 2030 | 2035 | 2040 | 2045 |
|-----|------|------|------|------|------|------|------|------|------|------|------|
| GLO | 0.64 | 1.08 | 1.68 | 1.50 | 1.77 | 1.97 | 2.19 | 2.40 | 2.62 | 2.80 | 2.96 |
| CAZ | 0.00 | 0.00 | 0.00 | 0.00 | 0.00 | 0.00 | 0.00 | 0.00 | 0.00 | 0.00 | 0.00 |
| CHA | 0.00 | 0.00 | 0.00 | 0.00 | 0.00 | 0.00 | 0.00 | 0.00 | 0.00 | 0.00 | 0.00 |
| EUR | 0.00 | 0.00 | 0.00 | 0.00 | 0.00 | 0.00 | 0.00 | 0.00 | 0.00 | 0.00 | 0.00 |
| IND | 0.00 | 0.00 | 0.00 | 0.00 | 0.00 | 0.00 | 0.00 | 0.00 | 0.00 | 0.00 | 0.00 |
| JPN | 0.00 | 0.00 | 0.00 | 0.00 | 0.00 | 0.00 | 0.00 | 0.00 | 0.00 | 0.00 | 0.00 |
| LAM | 0.00 | 0.00 | 0.00 | 0.00 | 0.00 | 0.00 | 0.00 | 0.00 | 0.00 | 0.00 | 0.00 |
| MEA | 0.17 | 0.24 | 0.22 | 0.30 | 0.34 | 0.37 | 0.39 | 0.41 | 0.43 | 0.44 | 0.45 |
| NEU | 0.00 | 0.00 | 0.00 | 0.00 | 0.00 | 0.00 | 0.00 | 0.00 | 0.00 | 0.00 | 0.00 |
| OAS | 0.13 | 0.12 | 0.27 | 0.16 | 0.17 | 0.18 | 0.19 | 0.20 | 0.21 | 0.21 | 0.21 |
| REF | 0.00 | 0.00 | 0.00 | 0.00 | 0.00 | 0.00 | 0.00 | 0.00 | 0.00 | 0.00 | 0.00 |
| SSA | 0.34 | 0.73 | 1.18 | 1.04 | 1.25 | 1.42 | 1.60 | 1.79 | 1.99 | 2.15 | 2.30 |
| USA | 0.00 | 0.00 | 0.00 | 0.00 | 0.00 | 0.00 | 0.00 | 0.00 | 0.00 | 0.00 | 0.00 |

Table 476: MAgPIE m4p\_SSP1 — Demand—Material—Crops—Oil crops—Groundnuts (Mt DM/yr) [PART 1/2]

|     | 2050 | 2055 | 2060 | 2070 | 2080 | 2090 | 2100 |
|-----|------|------|------|------|------|------|------|
| GLO | 3.08 | 3.19 | 3.27 | 3.39 | 3.44 | 3.44 | 3.43 |
| CAZ | 0.00 | 0.00 | 0.00 | 0.00 | 0.00 | 0.00 | 0.00 |
| CHA | 0.00 | 0.00 | 0.00 | 0.00 | 0.00 | 0.00 | 0.00 |
| EUR | 0.00 | 0.00 | 0.00 | 0.00 | 0.00 | 0.00 | 0.00 |
| IND | 0.00 | 0.00 | 0.00 | 0.00 | 0.00 | 0.00 | 0.00 |
| JPN | 0.00 | 0.00 | 0.00 | 0.00 | 0.00 | 0.00 | 0.00 |
| LAM | 0.00 | 0.00 | 0.00 | 0.00 | 0.00 | 0.00 | 0.00 |
| MEA | 0.46 | 0.46 | 0.46 | 0.46 | 0.45 | 0.45 | 0.42 |
| NEU | 0.00 | 0.00 | 0.00 | 0.00 | 0.00 | 0.00 | 0.00 |
| OAS | 0.21 | 0.21 | 0.21 | 0.20 | 0.19 | 0.19 | 0.17 |
| REF | 0.00 | 0.00 | 0.00 | 0.00 | 0.00 | 0.00 | 0.00 |
| SSA | 2.41 | 2.51 | 2.60 | 2.73 | 2.80 | 2.81 | 2.83 |
| USA | 0.00 | 0.00 | 0.00 | 0.00 | 0.00 | 0.00 | 0.00 |

Table 477: MAgPIE m4p\_SSP1 — Demand—Material—Crops—Oil crops—Groundnuts (Mt DM/yr) [PART 2/2]

|     | 1965 | 1970 | 1975 | 1980 | 1985 | 1990 | 1995 | 2000 | 2005 | 2010 |
|-----|------|------|------|------|------|------|------|------|------|------|
| GLO | 0.00 | 0.00 | 0.03 | 0.05 | 0.06 | 0.09 | 0.64 | 1.08 | 1.68 | 1.50 |
| CAZ | 0.00 | 0.00 | 0.00 | 0.00 | 0.00 | 0.00 | 0.00 | 0.00 | 0.00 | 0.00 |
| CHA | 0.00 | 0.00 | 0.00 | 0.00 | 0.00 | 0.00 | 0.00 | 0.00 | 0.00 | 0.00 |
| EUR | 0.00 | 0.00 | 0.00 | 0.00 | 0.00 | 0.00 | 0.00 | 0.00 | 0.00 | 0.00 |
| IND | 0.00 | 0.00 | 0.00 | 0.00 | 0.00 | 0.00 | 0.00 | 0.00 | 0.00 | 0.00 |
| JPN | 0.00 | 0.00 | 0.00 | 0.00 | 0.00 | 0.00 | 0.00 | 0.00 | 0.00 | 0.00 |
| LAM | 0.00 | 0.00 | 0.00 | 0.00 | 0.00 | 0.00 | 0.00 | 0.00 | 0.00 | 0.00 |
| MEA | 0.00 | 0.00 | 0.00 | 0.00 | 0.00 | 0.00 | 0.17 | 0.24 | 0.22 | 0.30 |
| NEU | 0.00 | 0.00 | 0.00 | 0.00 | 0.00 | 0.00 | 0.00 | 0.00 | 0.00 | 0.00 |
| OAS | 0.00 | 0.00 | 0.00 | 0.00 | 0.00 | 0.07 | 0.13 | 0.12 | 0.27 | 0.16 |
| REF | 0.00 | 0.00 | 0.00 | 0.00 | 0.00 | 0.00 | 0.00 | 0.00 | 0.00 | 0.00 |
| SSA | 0.00 | 0.00 | 0.03 | 0.05 | 0.05 | 0.02 | 0.34 | 0.73 | 1.18 | 1.04 |
| USA | 0.00 | 0.00 | 0.00 | 0.00 | 0.00 | 0.00 | 0.00 | 0.00 | 0.00 | 0.00 |

Table 478: FAO — Demand—Material—Crops—Oil crops—Groundnuts (Mt DM/yr)

8.2.7    Oil crops—Other oil crops (incl rapeseed)

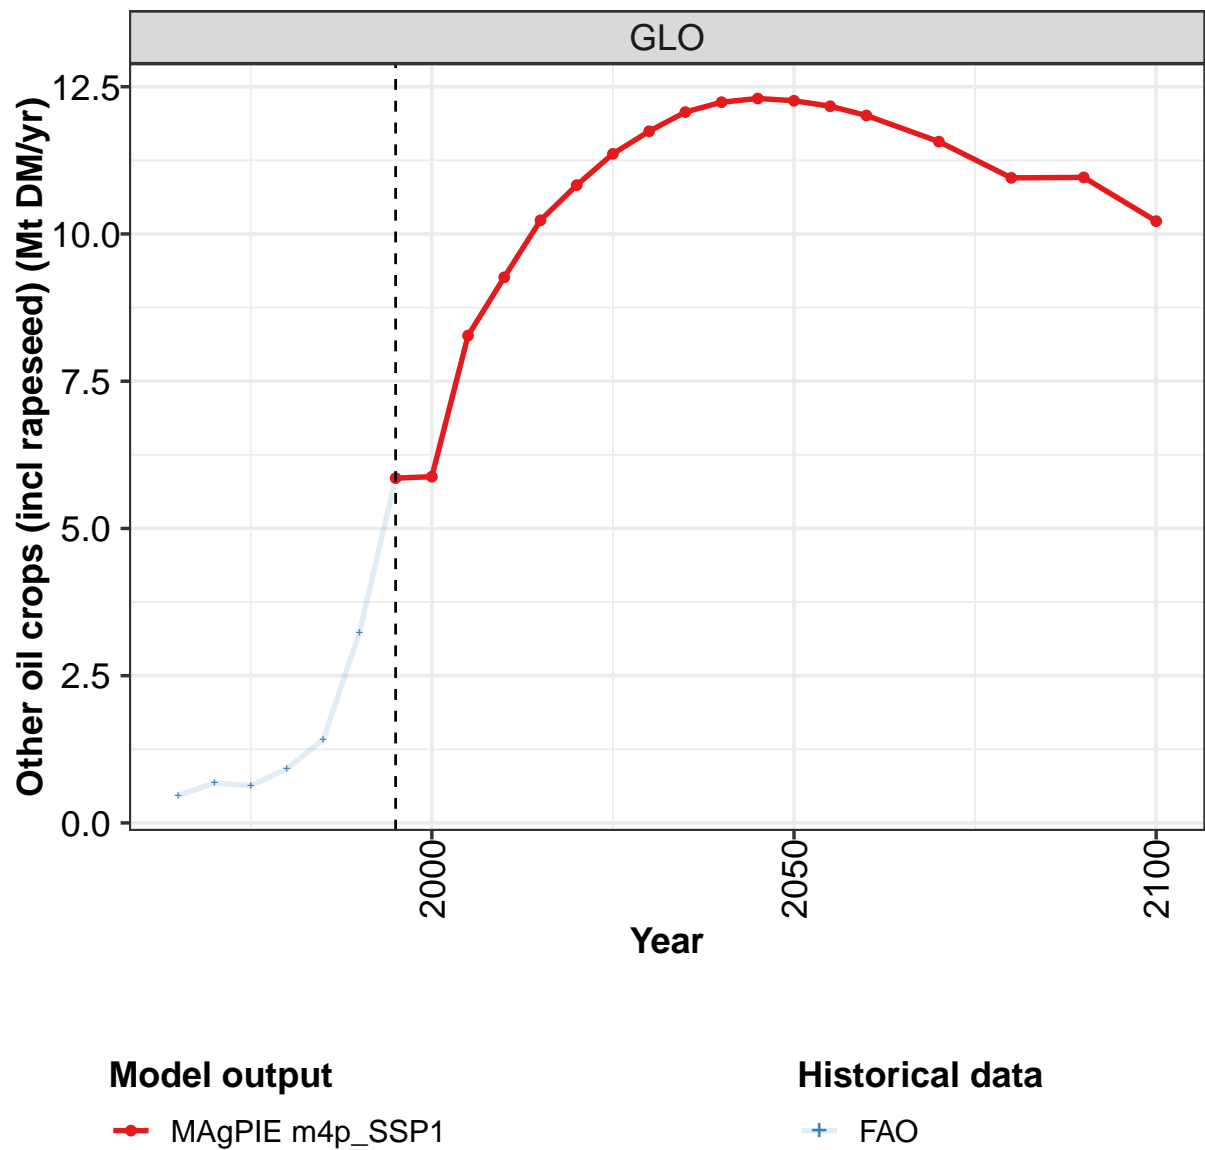

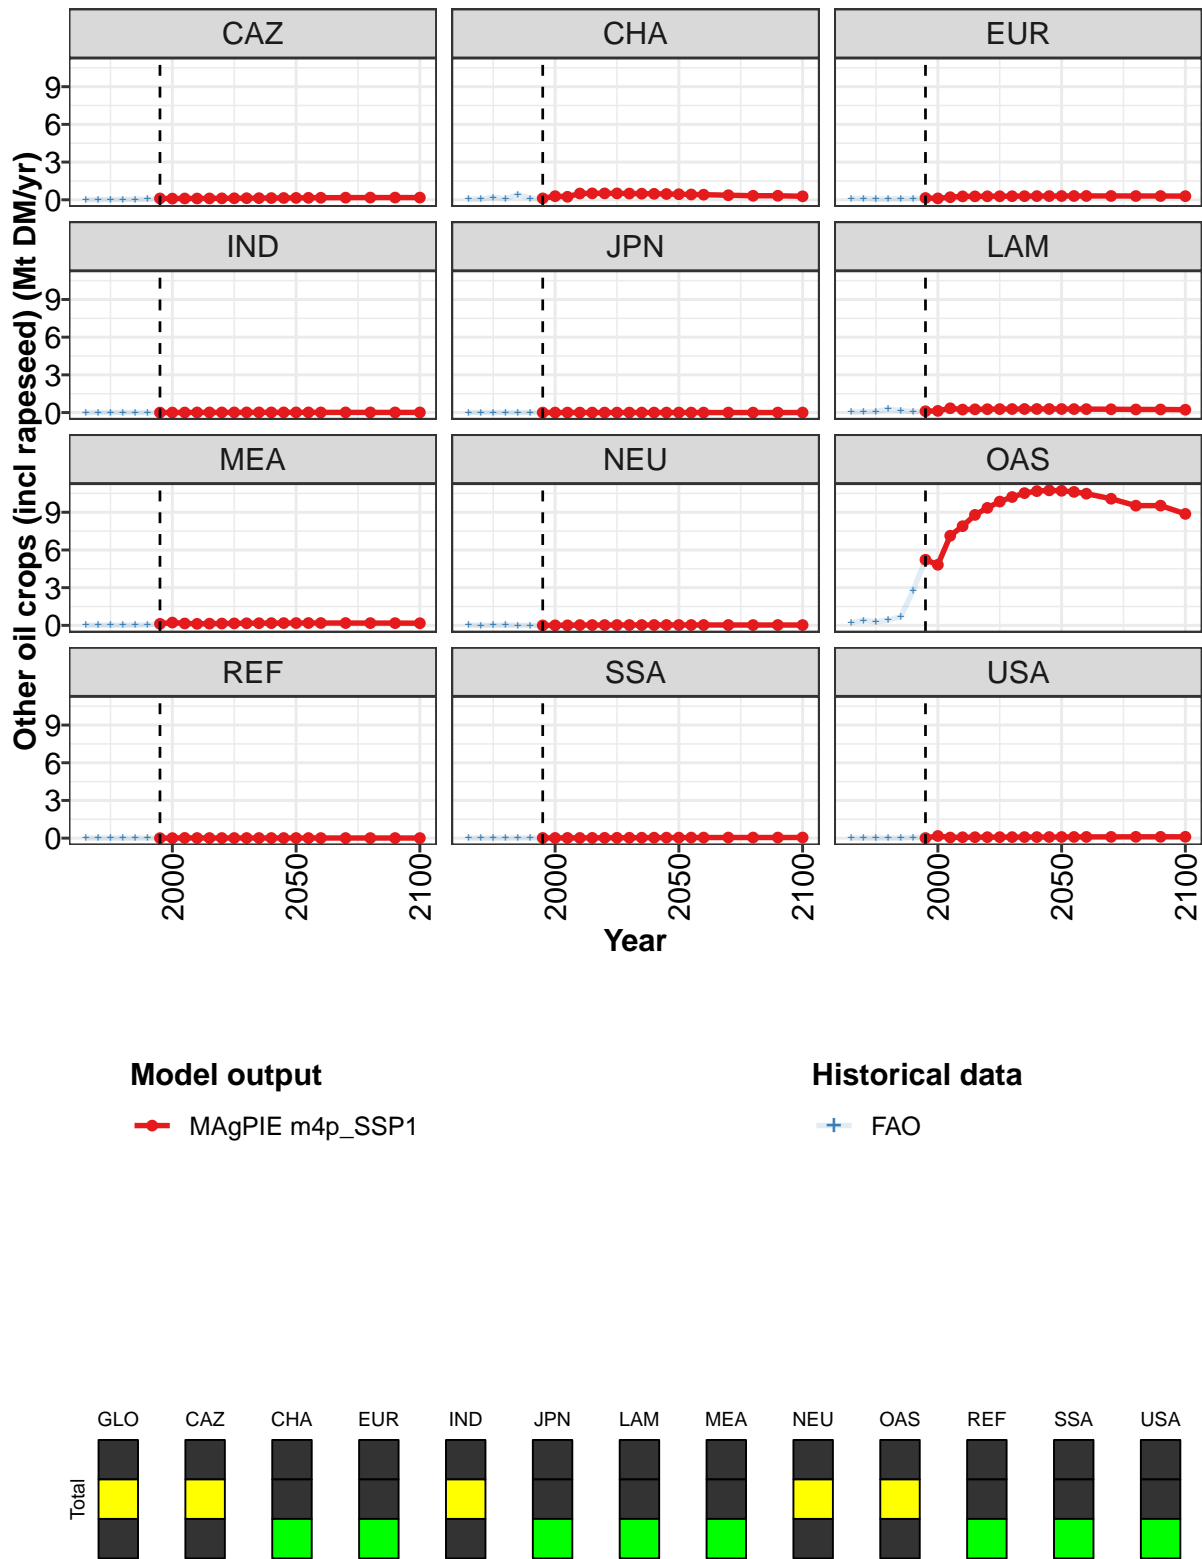

Figure 160: MAgPIE m4p\_SSP1 — Demand—Material—Crops—Oil crops—Other oil crops (incl rapeseed) (Mt DM/yr)

|     | 1995 | 2000 | 2005 | 2010 | 2015 | 2020 | 2025 | 2030 | 2035 | 2040 | 2045 |
|-----|------|------|------|------|------|------|------|------|------|------|------|
| GLO | 5.9  | 5.9  | 8.3  | 9.3  | 10.2 | 10.8 | 11.4 | 11.7 | 12.1 | 12.2 | 12.3 |
| CAZ | 0.1  | 0.1  | 0.1  | 0.1  | 0.1  | 0.1  | 0.1  | 0.1  | 0.1  | 0.1  | 0.1  |
| CHA | 0.1  | 0.3  | 0.2  | 0.5  | 0.5  | 0.5  | 0.5  | 0.5  | 0.5  | 0.5  | 0.5  |
| EUR | 0.1  | 0.1  | 0.2  | 0.3  | 0.3  | 0.3  | 0.3  | 0.3  | 0.3  | 0.3  | 0.3  |
| IND | 0.0  | 0.0  | 0.0  | 0.0  | 0.0  | 0.0  | 0.0  | 0.0  | 0.0  | 0.0  | 0.0  |
| JPN | 0.0  | 0.0  | 0.0  | 0.0  | 0.0  | 0.0  | 0.0  | 0.0  | 0.0  | 0.0  | 0.0  |
| LAM | 0.1  | 0.1  | 0.3  | 0.2  | 0.3  | 0.3  | 0.3  | 0.3  | 0.3  | 0.3  | 0.3  |
| MEA | 0.1  | 0.2  | 0.2  | 0.1  | 0.1  | 0.1  | 0.2  | 0.2  | 0.2  | 0.2  | 0.2  |
| NEU | 0.0  | 0.0  | 0.0  | 0.0  | 0.0  | 0.0  | 0.0  | 0.0  | 0.0  | 0.0  | 0.0  |
| OAS | 5.2  | 4.8  | 7.1  | 7.9  | 8.8  | 9.4  | 9.9  | 10.2 | 10.5 | 10.7 | 10.7 |
| REF | 0.0  | 0.0  | 0.0  | 0.0  | 0.0  | 0.0  | 0.0  | 0.0  | 0.0  | 0.0  | 0.0  |
| SSA | 0.0  | 0.0  | 0.0  | 0.0  | 0.0  | 0.0  | 0.0  | 0.0  | 0.0  | 0.0  | 0.0  |
| USA | 0.0  | 0.2  | 0.0  | 0.1  | 0.1  | 0.1  | 0.1  | 0.1  | 0.1  | 0.1  | 0.1  |

Table 479: MAgPIE m4p\_SSP1 — Demand—Material—Crops—Oil crops—Other oil crops (incl rapeseed) (Mt DM/yr) [PART 1/2]

|     | 2050 | 2055 | 2060 | 2070 | 2080 | 2090 | 2100 |
|-----|------|------|------|------|------|------|------|
| GLO | 12.3 | 12.2 | 12.0 | 11.6 | 11.0 | 11.0 | 10.2 |
| CAZ | 0.2  | 0.2  | 0.2  | 0.2  | 0.2  | 0.2  | 0.2  |
| CHA | 0.4  | 0.4  | 0.4  | 0.4  | 0.3  | 0.3  | 0.3  |
| EUR | 0.3  | 0.3  | 0.3  | 0.3  | 0.3  | 0.3  | 0.3  |
| IND | 0.0  | 0.0  | 0.0  | 0.0  | 0.0  | 0.0  | 0.0  |
| JPN | 0.0  | 0.0  | 0.0  | 0.0  | 0.0  | 0.0  | 0.0  |
| LAM | 0.3  | 0.3  | 0.3  | 0.3  | 0.2  | 0.2  | 0.2  |
| MEA | 0.2  | 0.2  | 0.2  | 0.2  | 0.2  | 0.2  | 0.2  |
| NEU | 0.0  | 0.0  | 0.0  | 0.0  | 0.0  | 0.0  | 0.0  |
| OAS | 10.7 | 10.6 | 10.5 | 10.1 | 9.5  | 9.5  | 8.9  |
| REF | 0.0  | 0.0  | 0.0  | 0.0  | 0.0  | 0.0  | 0.0  |
| SSA | 0.0  | 0.0  | 0.0  | 0.1  | 0.1  | 0.1  | 0.1  |
| USA | 0.1  | 0.1  | 0.1  | 0.1  | 0.1  | 0.1  | 0.1  |

Table 480: MAgPIE m4p\_SSP1 — Demand—Material—Crops—Oil crops—Other oil crops (incl rapeseed) (Mt DM/yr) [PART 2/2]

|     | 1965 | 1970 | 1975 | 1980 | 1985 | 1990 | 1995 | 2000 | 2005 | 2010 |
|-----|------|------|------|------|------|------|------|------|------|------|
| GLO | 0.46 | 0.68 | 0.63 | 0.92 | 1.42 | 3.23 | 5.85 | 5.88 | 8.28 | 9.26 |
| CAZ | 0.01 | 0.01 | 0.02 | 0.03 | 0.03 | 0.05 | 0.11 | 0.10 | 0.10 | 0.10 |
| CHA | 0.05 | 0.06 | 0.18 | 0.08 | 0.42 | 0.10 | 0.11 | 0.29 | 0.24 | 0.50 |
| EUR | 0.09 | 0.12 | 0.04 | 0.06 | 0.09 | 0.10 | 0.14 | 0.11 | 0.20 | 0.27 |
| IND | 0.00 | 0.00 | 0.00 | 0.00 | 0.00 | 0.00 | 0.00 | 0.00 | 0.01 | 0.01 |
| JPN | 0.00 | 0.00 | 0.00 | 0.00 | 0.00 | 0.00 | 0.00 | 0.00 | 0.00 | 0.00 |
| LAM | 0.04 | 0.06 | 0.09 | 0.28 | 0.15 | 0.08 | 0.11 | 0.13 | 0.34 | 0.24 |
| MEA | 0.02 | 0.01 | 0.01 | 0.02 | 0.02 | 0.03 | 0.12 | 0.22 | 0.15 | 0.12 |
| NEU | 0.01 | 0.01 | 0.01 | 0.01 | 0.00 | 0.00 | 0.00 | 0.00 | 0.00 | 0.02 |
| OAS | 0.22 | 0.40 | 0.26 | 0.43 | 0.68 | 2.78 | 5.22 | 4.82 | 7.13 | 7.89 |
| REF | 0.00 | 0.00 | 0.00 | 0.00 | 0.00 | 0.00 | 0.00 | 0.01 | 0.02 | 0.01 |
| SSA | 0.01 | 0.01 | 0.01 | 0.01 | 0.01 | 0.02 | 0.02 | 0.02 | 0.02 | 0.02 |
| USA | 0.00 | 0.00 | 0.00 | 0.00 | 0.00 | 0.06 | 0.01 | 0.18 | 0.05 | 0.07 |

Table 481: FAO — Demand—Material—Crops—Oil crops—Other oil crops (incl rapeseed) (Mt DM/yr)

8.2.8 Oil crops—Soybean

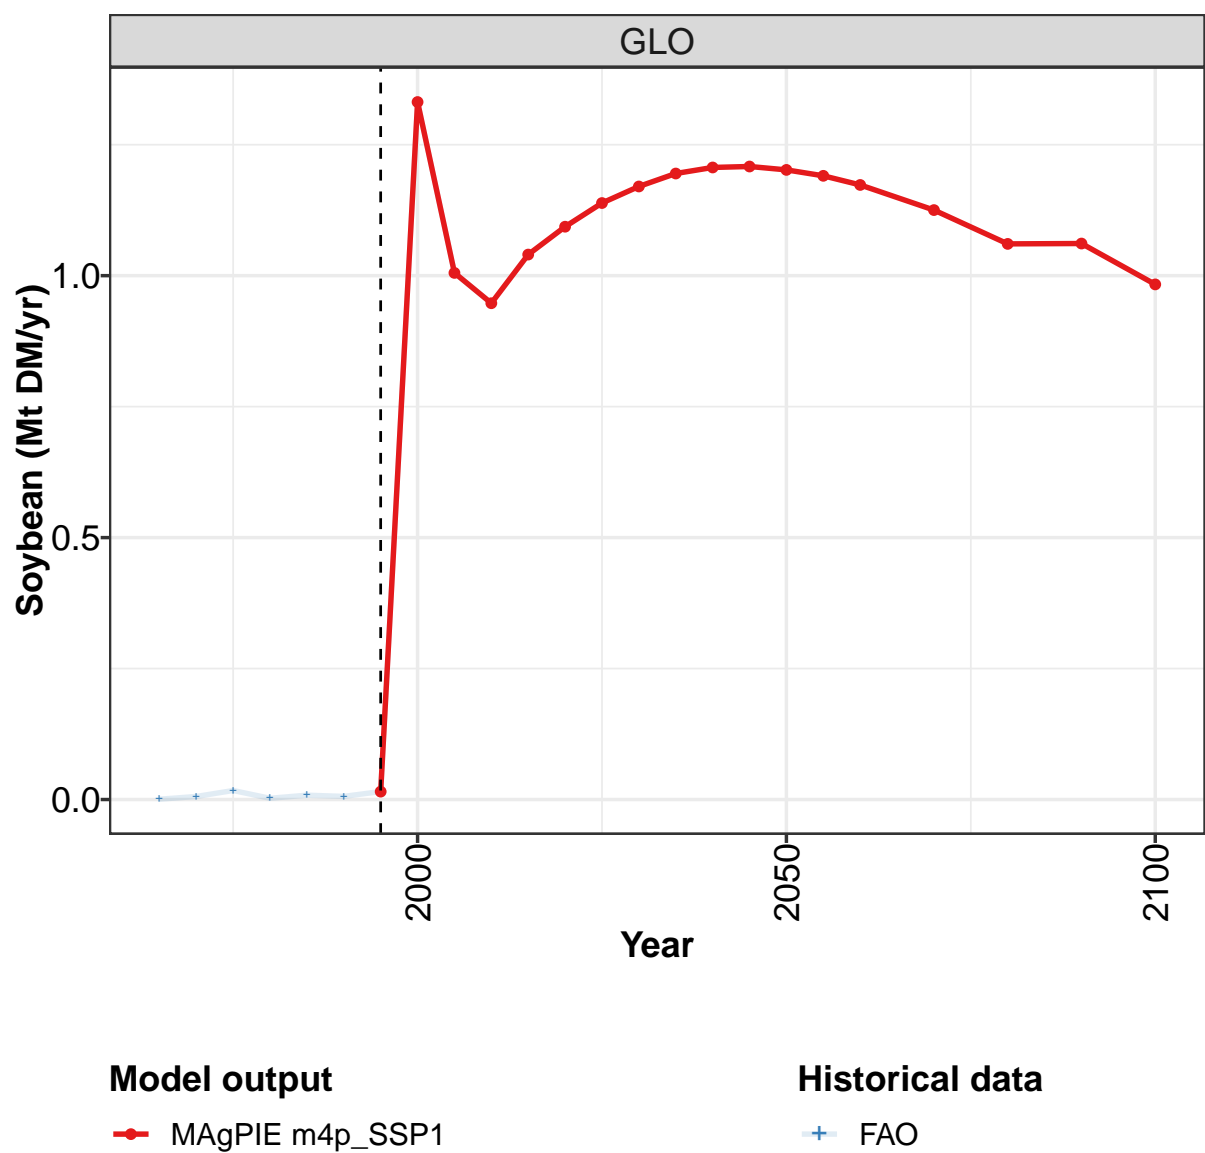

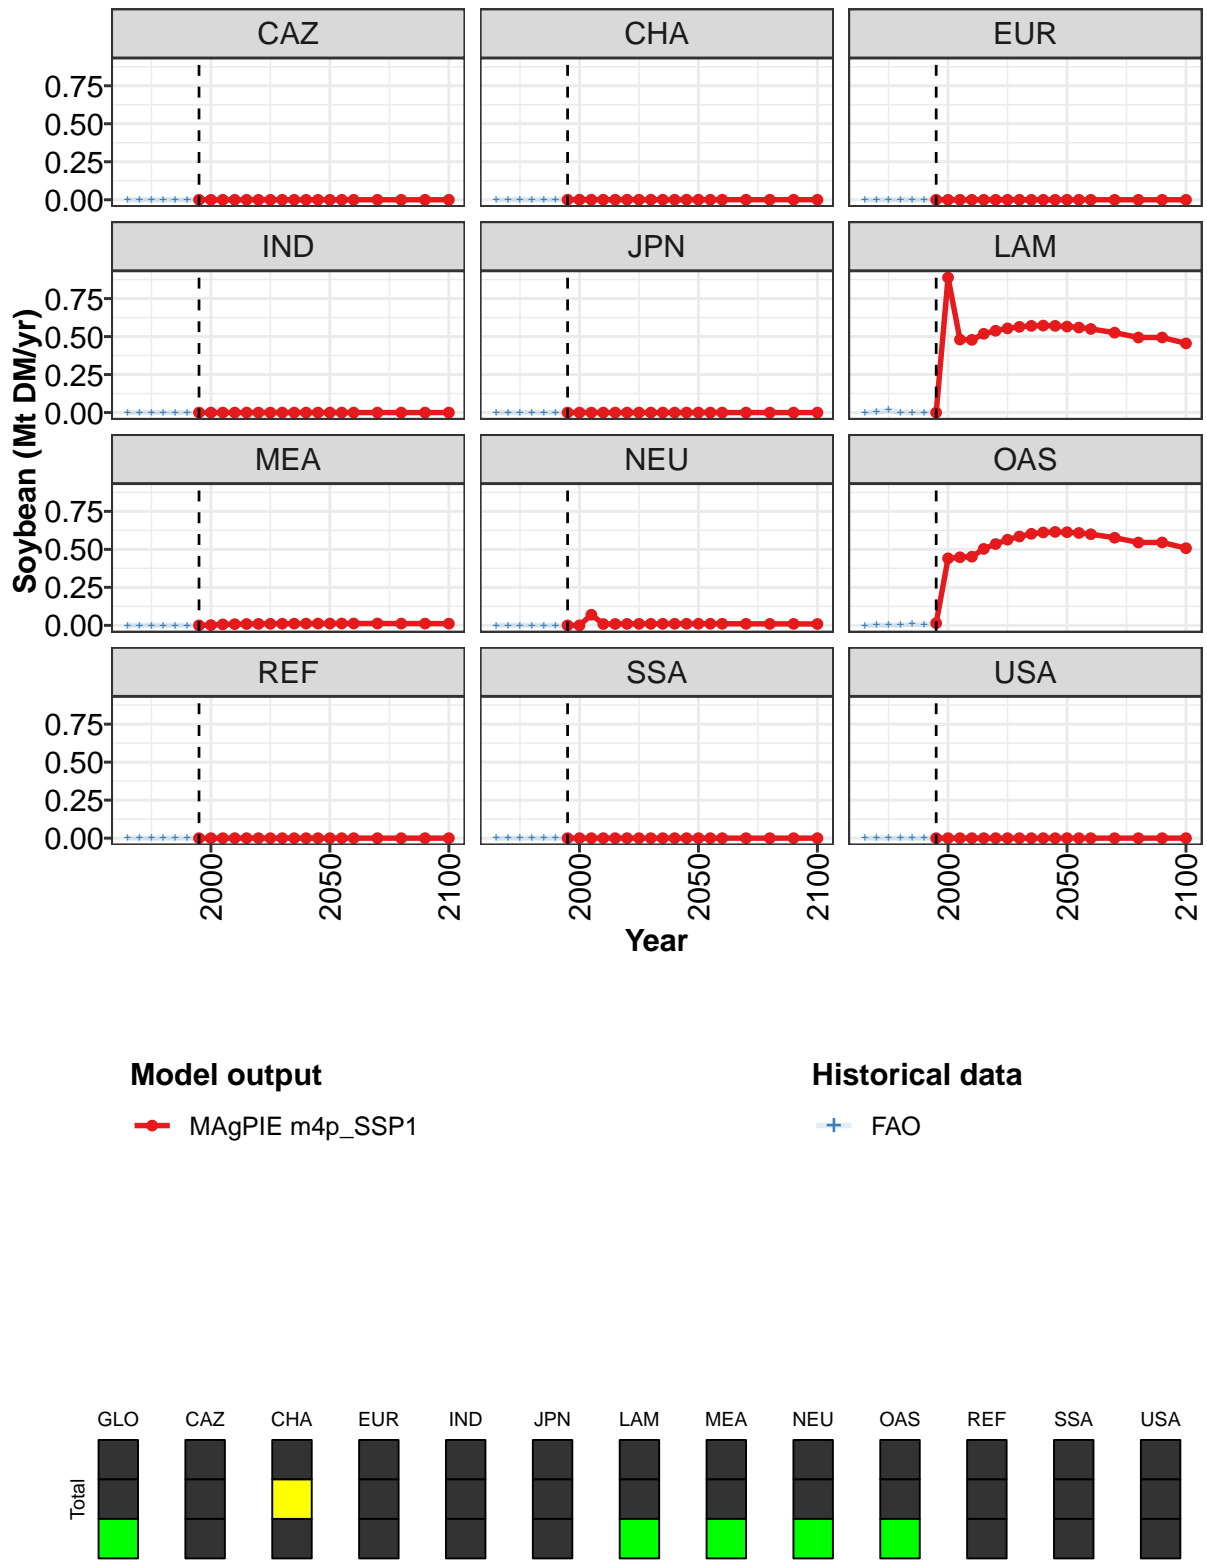

Figure 161: MAgPIE m4p\_SSP1 — Demand—Material—Crops—Oil crops—Soybean (Mt DM/yr)

|     | 1995 | 2000 | 2005 | 2010 | 2015 | 2020 | 2025 | 2030 | 2035 | 2040 | 2045 |
|-----|------|------|------|------|------|------|------|------|------|------|------|
| GLO | 0.02 | 1.33 | 1.01 | 0.95 | 1.04 | 1.09 | 1.14 | 1.17 | 1.19 | 1.21 | 1.21 |
| CAZ | 0.00 | 0.00 | 0.00 | 0.00 | 0.00 | 0.00 | 0.00 | 0.00 | 0.00 | 0.00 | 0.00 |
| CHA | 0.00 | 0.00 | 0.00 | 0.00 | 0.00 | 0.00 | 0.00 | 0.00 | 0.00 | 0.00 | 0.00 |
| EUR | 0.00 | 0.00 | 0.00 | 0.00 | 0.00 | 0.00 | 0.00 | 0.00 | 0.00 | 0.00 | 0.00 |
| IND | 0.00 | 0.00 | 0.00 | 0.00 | 0.00 | 0.00 | 0.00 | 0.00 | 0.00 | 0.00 | 0.00 |
| JPN | 0.00 | 0.00 | 0.00 | 0.00 | 0.00 | 0.00 | 0.00 | 0.00 | 0.00 | 0.00 | 0.00 |
| LAM | 0.00 | 0.89 | 0.48 | 0.48 | 0.52 | 0.54 | 0.55 | 0.56 | 0.57 | 0.57 | 0.57 |
| MEA | 0.00 | 0.00 | 0.01 | 0.01 | 0.01 | 0.01 | 0.01 | 0.01 | 0.01 | 0.01 | 0.01 |
| NEU | 0.00 | 0.00 | 0.07 | 0.01 | 0.01 | 0.01 | 0.01 | 0.01 | 0.01 | 0.01 | 0.01 |
| OAS | 0.01 | 0.44 | 0.45 | 0.45 | 0.50 | 0.54 | 0.56 | 0.58 | 0.60 | 0.61 | 0.61 |
| REF | 0.00 | 0.00 | 0.00 | 0.00 | 0.00 | 0.00 | 0.00 | 0.00 | 0.00 | 0.00 | 0.00 |
| SSA | 0.00 | 0.00 | 0.00 | 0.00 | 0.00 | 0.00 | 0.00 | 0.00 | 0.00 | 0.00 | 0.00 |
| USA | 0.00 | 0.00 | 0.00 | 0.00 | 0.00 | 0.00 | 0.00 | 0.00 | 0.00 | 0.00 | 0.00 |

Table 482: MAgPIE m4p\_SSP1 — Demand—Material—Crops—Oil crops—Soybean (Mt DM/yr) [PART 1/2]

|     | 2050 | 2055 | 2060 | 2070 | 2080 | 2090 | 2100 |
|-----|------|------|------|------|------|------|------|
| GLO | 1.20 | 1.19 | 1.17 | 1.13 | 1.06 | 1.06 | 0.98 |
| CAZ | 0.00 | 0.00 | 0.00 | 0.00 | 0.00 | 0.00 | 0.00 |
| CHA | 0.00 | 0.00 | 0.00 | 0.00 | 0.00 | 0.00 | 0.00 |
| EUR | 0.00 | 0.00 | 0.00 | 0.00 | 0.00 | 0.00 | 0.00 |
| IND | 0.00 | 0.00 | 0.00 | 0.00 | 0.00 | 0.00 | 0.00 |
| JPN | 0.00 | 0.00 | 0.00 | 0.00 | 0.00 | 0.00 | 0.00 |
| LAM | 0.57 | 0.56 | 0.55 | 0.53 | 0.49 | 0.49 | 0.46 |
| MEA | 0.01 | 0.01 | 0.01 | 0.01 | 0.01 | 0.01 | 0.01 |
| NEU | 0.01 | 0.01 | 0.01 | 0.01 | 0.01 | 0.01 | 0.01 |
| OAS | 0.61 | 0.61 | 0.60 | 0.58 | 0.55 | 0.55 | 0.51 |
| REF | 0.00 | 0.00 | 0.00 | 0.00 | 0.00 | 0.00 | 0.00 |
| SSA | 0.00 | 0.00 | 0.00 | 0.00 | 0.00 | 0.00 | 0.00 |
| USA | 0.00 | 0.00 | 0.00 | 0.00 | 0.00 | 0.00 | 0.00 |

Table 483: MAgPIE m4p\_SSP1 — Demand—Material—Crops—Oil crops—Soybean (Mt DM/yr) [PART 2/2]

|     | 1965 | 1970 | 1975 | 1980 | 1985 | 1990 | 1995 | 2000 | 2005 | 2010 |
|-----|------|------|------|------|------|------|------|------|------|------|
| GLO | 0.00 | 0.01 | 0.02 | 0.00 | 0.01 | 0.01 | 0.02 | 1.33 | 1.01 | 0.95 |
| CAZ | 0.00 | 0.00 | 0.00 | 0.00 | 0.00 | 0.00 | 0.00 | 0.00 | 0.00 | 0.00 |
| CHA | 0.00 | 0.00 | 0.00 | 0.00 | 0.00 | 0.00 | 0.00 | 0.00 | 0.00 | 0.00 |
| EUR | 0.00 | 0.00 | 0.00 | 0.00 | 0.00 | 0.00 | 0.00 | 0.00 | 0.00 | 0.00 |
| IND | 0.00 | 0.00 | 0.00 | 0.00 | 0.00 | 0.00 | 0.00 | 0.00 | 0.00 | 0.00 |
| JPN | 0.00 | 0.00 | 0.00 | 0.00 | 0.00 | 0.00 | 0.00 | 0.00 | 0.00 | 0.00 |
| LAM | 0.00 | 0.00 | 0.02 | 0.00 | 0.00 | 0.00 | 0.00 | 0.89 | 0.48 | 0.48 |
| MEA | 0.00 | 0.00 | 0.00 | 0.00 | 0.00 | 0.00 | 0.00 | 0.00 | 0.01 | 0.01 |
| NEU | 0.00 | 0.00 | 0.00 | 0.00 | 0.00 | 0.00 | 0.00 | 0.00 | 0.07 | 0.01 |
| OAS | 0.00 | 0.00 | 0.00 | 0.00 | 0.01 | 0.01 | 0.01 | 0.44 | 0.45 | 0.45 |
| REF | 0.00 | 0.00 | 0.00 | 0.00 | 0.00 | 0.00 | 0.00 | 0.00 | 0.00 | 0.00 |
| SSA | 0.00 | 0.00 | 0.00 | 0.00 | 0.00 | 0.00 | 0.00 | 0.00 | 0.00 | 0.00 |
| USA | 0.00 | 0.00 | 0.00 | 0.00 | 0.00 | 0.00 | 0.00 | 0.00 | 0.00 | 0.00 |

Table 484: FAO — Demand—Material—Crops—Oil crops—Soybean (Mt DM/yr)

8.2.9 Oil crops—Sunflower

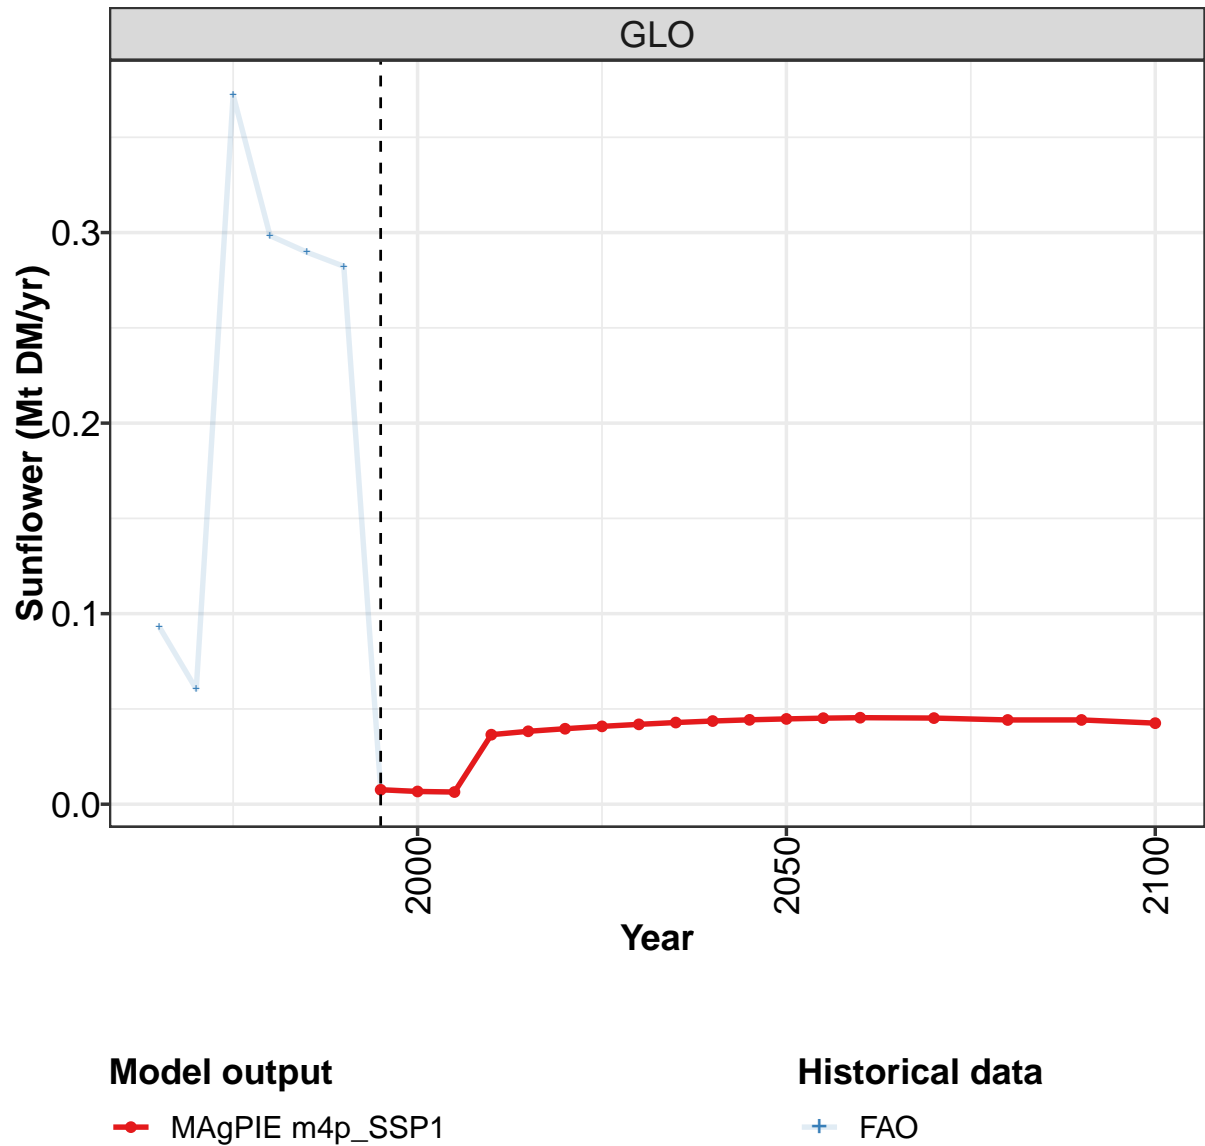



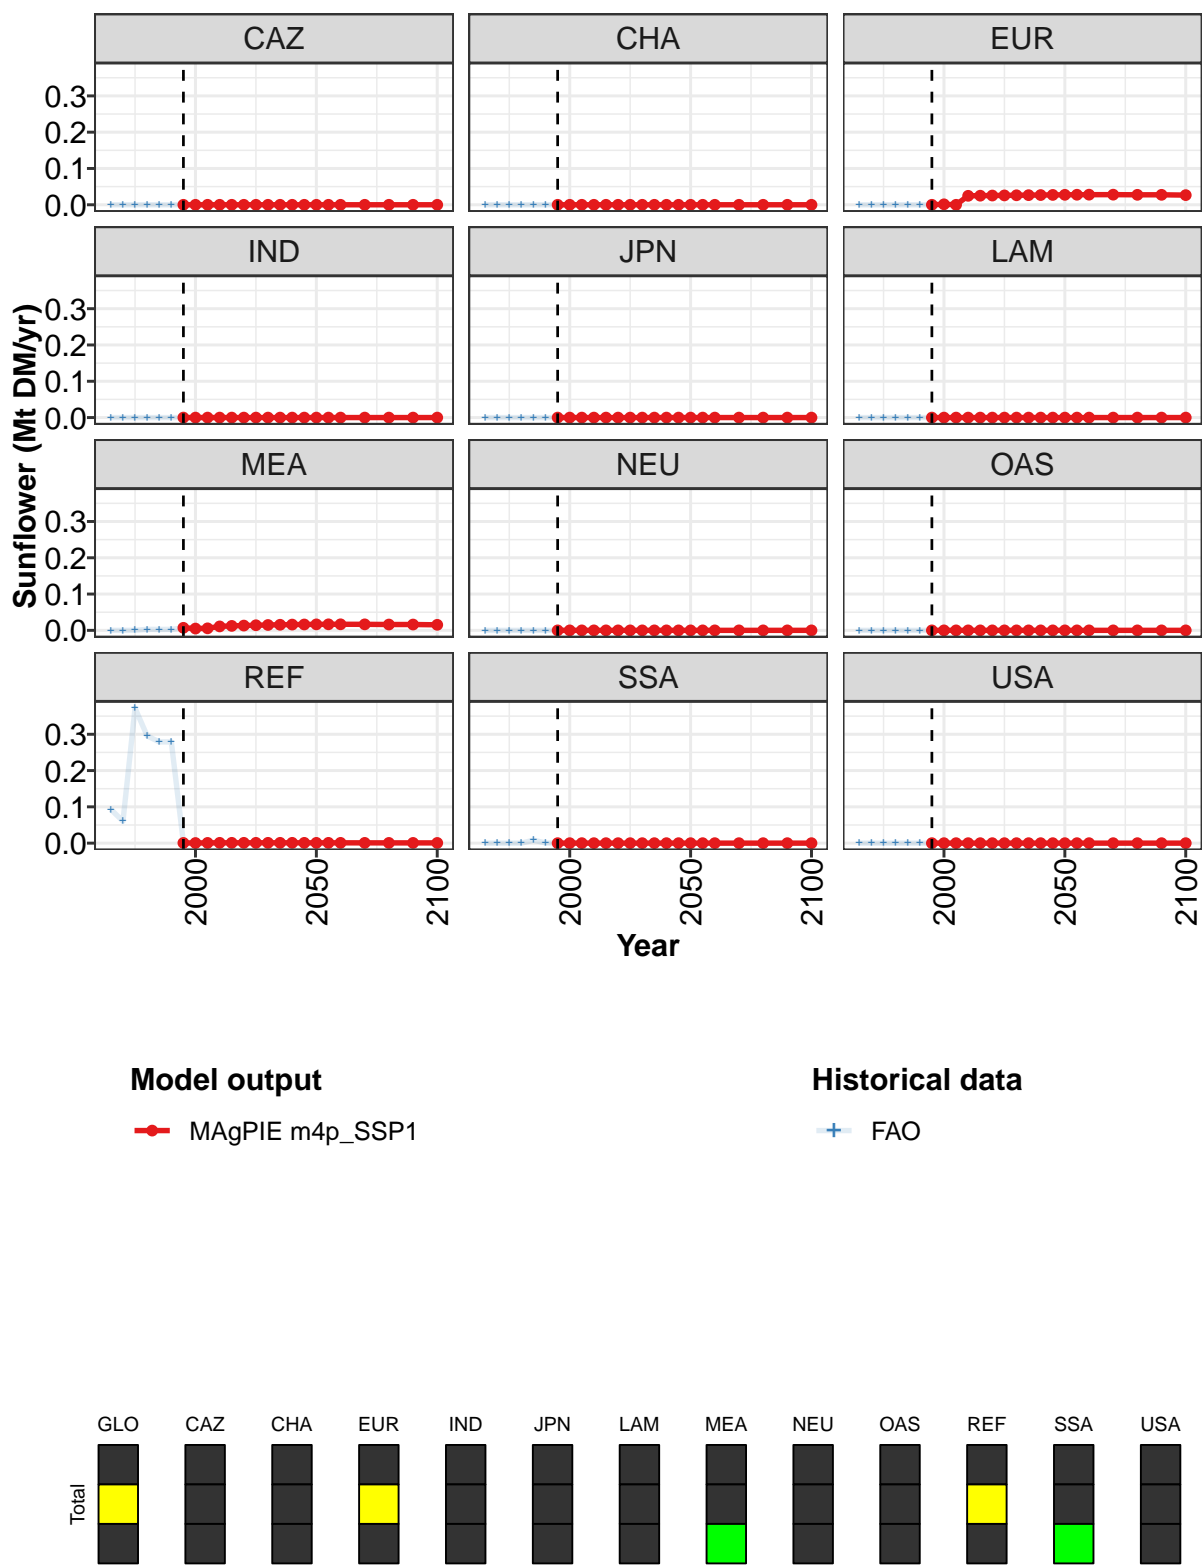

Figure 162: MAgPIE m4p\_SSP1 — Demand—Material—Crops—Oil crops—Sunflower (Mt DM/yr)

|     | 1995   | 2000   | 2005   | 2010   | 2015   | 2020   | 2025   | 2030   | 2035   | 2040   | 2045   |
|-----|--------|--------|--------|--------|--------|--------|--------|--------|--------|--------|--------|
| GLO | 0.0076 | 0.0067 | 0.0064 | 0.0365 | 0.0383 | 0.0396 | 0.0409 | 0.0419 | 0.0429 | 0.0437 | 0.0443 |
| CAZ | 0.0000 | 0.0000 | 0.0000 | 0.0000 | 0.0000 | 0.0000 | 0.0000 | 0.0000 | 0.0000 | 0.0000 | 0.0000 |
| CHA | 0.0000 | 0.0000 | 0.0000 | 0.0000 | 0.0000 | 0.0000 | 0.0000 | 0.0000 | 0.0000 | 0.0000 | 0.0000 |
| EUR | 0.0000 | 0.0013 | 0.0000 | 0.0247 | 0.0251 | 0.0255 | 0.0259 | 0.0262 | 0.0265 | 0.0269 | 0.0272 |
| IND | 0.0000 | 0.0000 | 0.0000 | 0.0000 | 0.0000 | 0.0000 | 0.0000 | 0.0000 | 0.0000 | 0.0000 | 0.0000 |
| JPN | 0.0000 | 0.0000 | 0.0000 | 0.0000 | 0.0000 | 0.0000 | 0.0000 | 0.0000 | 0.0000 | 0.0000 | 0.0000 |
| LAM | 0.0000 | 0.0000 | 0.0000 | 0.0000 | 0.0000 | 0.0000 | 0.0000 | 0.0000 | 0.0000 | 0.0000 | 0.0000 |
| MEA | 0.0070 | 0.0050 | 0.0056 | 0.0109 | 0.0123 | 0.0132 | 0.0141 | 0.0148 | 0.0154 | 0.0159 | 0.0163 |
| NEU | 0.0000 | 0.0000 | 0.0000 | 0.0000 | 0.0000 | 0.0000 | 0.0000 | 0.0000 | 0.0000 | 0.0000 | 0.0000 |
| OAS | 0.0000 | 0.0000 | 0.0000 | 0.0000 | 0.0000 | 0.0000 | 0.0000 | 0.0000 | 0.0000 | 0.0000 | 0.0000 |
| REF | 0.0006 | 0.0004 | 0.0007 | 0.0009 | 0.0009 | 0.0009 | 0.0009 | 0.0009 | 0.0009 | 0.0009 | 0.0009 |
| SSA | 0.0000 | 0.0000 | 0.0001 | 0.0000 | 0.0000 | 0.0000 | 0.0000 | 0.0000 | 0.0000 | 0.0000 | 0.0000 |
| USA | 0.0000 | 0.0000 | 0.0000 | 0.0000 | 0.0000 | 0.0000 | 0.0000 | 0.0000 | 0.0000 | 0.0000 | 0.0000 |

Table 485: MAgPIE m4p\_SSP1 — Demand—Material—Crops—Oil crops—Sunflower (Mt DM/yr) [PART 1/2]

|     | 2050   | 2055   | 2060   | 2070   | 2080   | 2090   | 2100   |
|-----|--------|--------|--------|--------|--------|--------|--------|
| GLO | 0.0448 | 0.0452 | 0.0454 | 0.0452 | 0.0442 | 0.0442 | 0.0425 |
| CAZ | 0.0000 | 0.0000 | 0.0000 | 0.0000 | 0.0000 | 0.0000 | 0.0000 |
| CHA | 0.0000 | 0.0000 | 0.0000 | 0.0000 | 0.0000 | 0.0000 | 0.0000 |
| EUR | 0.0274 | 0.0277 | 0.0278 | 0.0279 | 0.0274 | 0.0274 | 0.0266 |
| IND | 0.0000 | 0.0000 | 0.0000 | 0.0000 | 0.0000 | 0.0000 | 0.0000 |
| JPN | 0.0000 | 0.0000 | 0.0000 | 0.0000 | 0.0000 | 0.0000 | 0.0000 |
| LAM | 0.0000 | 0.0000 | 0.0000 | 0.0000 | 0.0000 | 0.0000 | 0.0000 |
| MEA | 0.0165 | 0.0167 | 0.0167 | 0.0166 | 0.0161 | 0.0161 | 0.0153 |
| NEU | 0.0000 | 0.0000 | 0.0000 | 0.0000 | 0.0000 | 0.0000 | 0.0000 |
| OAS | 0.0000 | 0.0000 | 0.0000 | 0.0000 | 0.0000 | 0.0000 | 0.0000 |
| REF | 0.0009 | 0.0008 | 0.0008 | 0.0008 | 0.0007 | 0.0007 | 0.0007 |
| SSA | 0.0000 | 0.0000 | 0.0000 | 0.0000 | 0.0000 | 0.0000 | 0.0000 |
| USA | 0.0000 | 0.0000 | 0.0000 | 0.0000 | 0.0000 | 0.0000 | 0.0000 |

Table 486: MAgPIE m4p\_SSP1 — Demand—Material—Crops—Oil crops—Sunflower (Mt DM/yr) [PART 2/2]

|     | 1965  | 1970  | 1975  | 1980  | 1985  | 1990  | 1995  | 2000  | 2005  | 2010  |
|-----|-------|-------|-------|-------|-------|-------|-------|-------|-------|-------|
| GLO | 0.093 | 0.060 | 0.372 | 0.298 | 0.290 | 0.282 | 0.008 | 0.007 | 0.006 | 0.037 |
| CAZ | 0.000 | 0.000 | 0.000 | 0.000 | 0.000 | 0.000 | 0.000 | 0.000 | 0.000 | 0.000 |
| CHA | 0.000 | 0.000 | 0.000 | 0.000 | 0.000 | 0.000 | 0.000 | 0.000 | 0.000 | 0.000 |
| EUR | 0.000 | 0.000 | 0.000 | 0.000 | 0.000 | 0.000 | 0.000 | 0.001 | 0.000 | 0.025 |
| IND | 0.000 | 0.000 | 0.000 | 0.000 | 0.000 | 0.000 | 0.000 | 0.000 | 0.000 | 0.000 |
| JPN | 0.000 | 0.000 | 0.000 | 0.000 | 0.000 | 0.000 | 0.000 | 0.000 | 0.000 | 0.000 |
| LAM | 0.000 | 0.000 | 0.000 | 0.000 | 0.000 | 0.000 | 0.000 | 0.000 | 0.000 | 0.000 |
| MEA | 0.000 | 0.000 | 0.000 | 0.003 | 0.003 | 0.003 | 0.007 | 0.005 | 0.006 | 0.011 |
| NEU | 0.000 | 0.000 | 0.000 | 0.000 | 0.000 | 0.000 | 0.000 | 0.000 | 0.000 | 0.000 |
| OAS | 0.000 | 0.000 | 0.000 | 0.000 | 0.000 | 0.000 | 0.000 | 0.000 | 0.000 | 0.000 |
| REF | 0.093 | 0.060 | 0.372 | 0.296 | 0.279 | 0.279 | 0.001 | 0.000 | 0.001 | 0.001 |
| SSA | 0.000 | 0.000 | 0.000 | 0.000 | 0.008 | 0.001 | 0.000 | 0.000 | 0.000 | 0.000 |
| USA | 0.000 | 0.000 | 0.000 | 0.000 | 0.000 | 0.000 | 0.000 | 0.000 | 0.000 | 0.000 |

Table 487: FAO — Demand—Material—Crops—Oil crops—Sunflower (Mt DM/yr)

8.2.10
Other crops

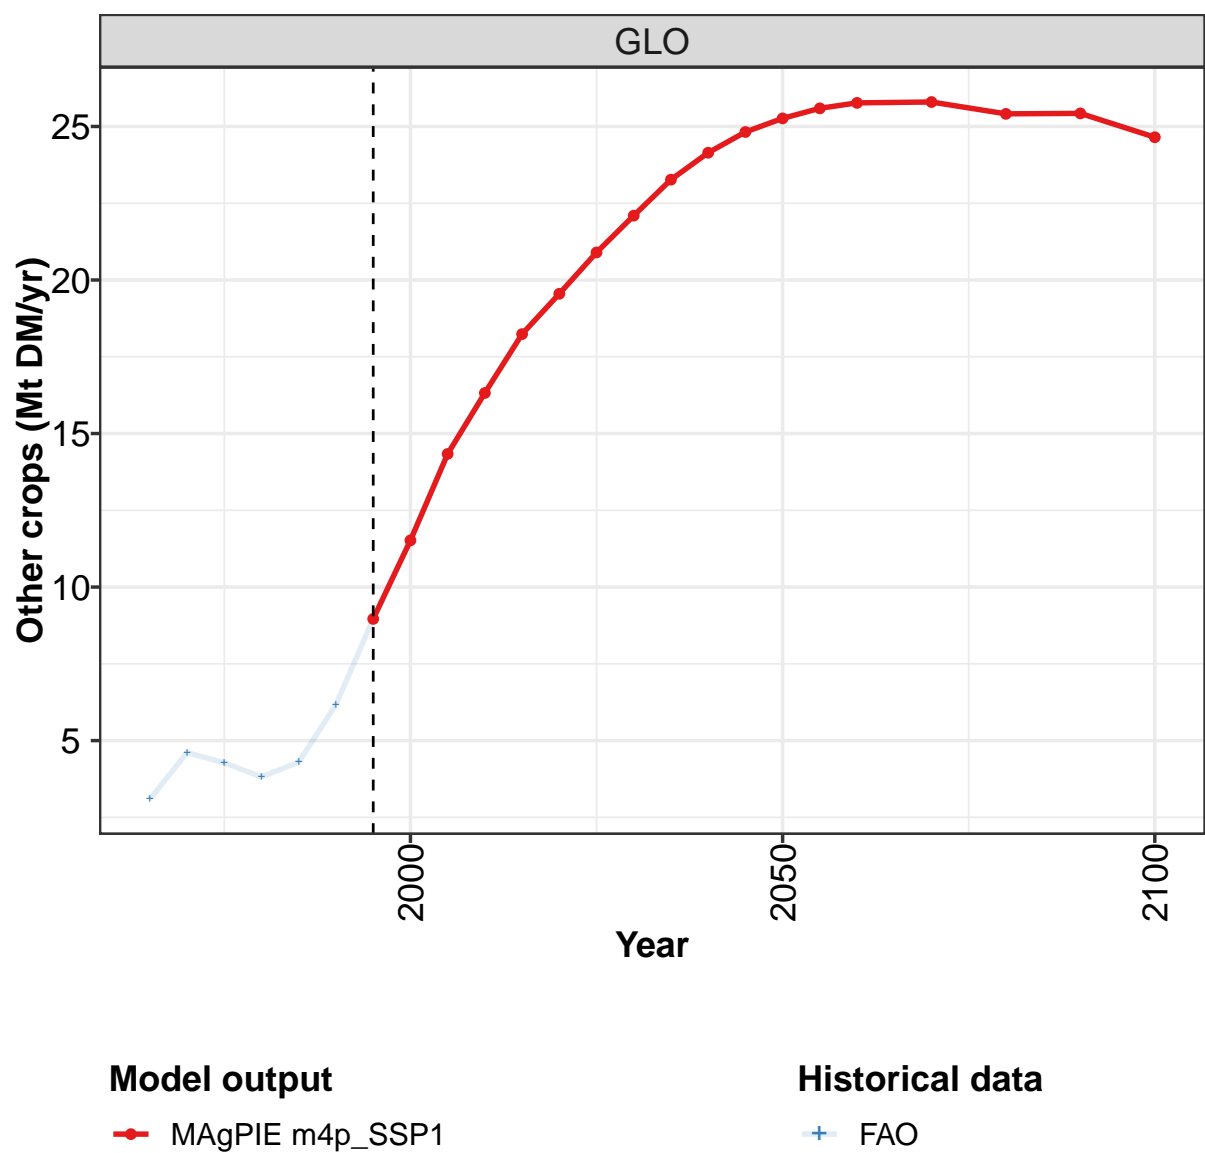

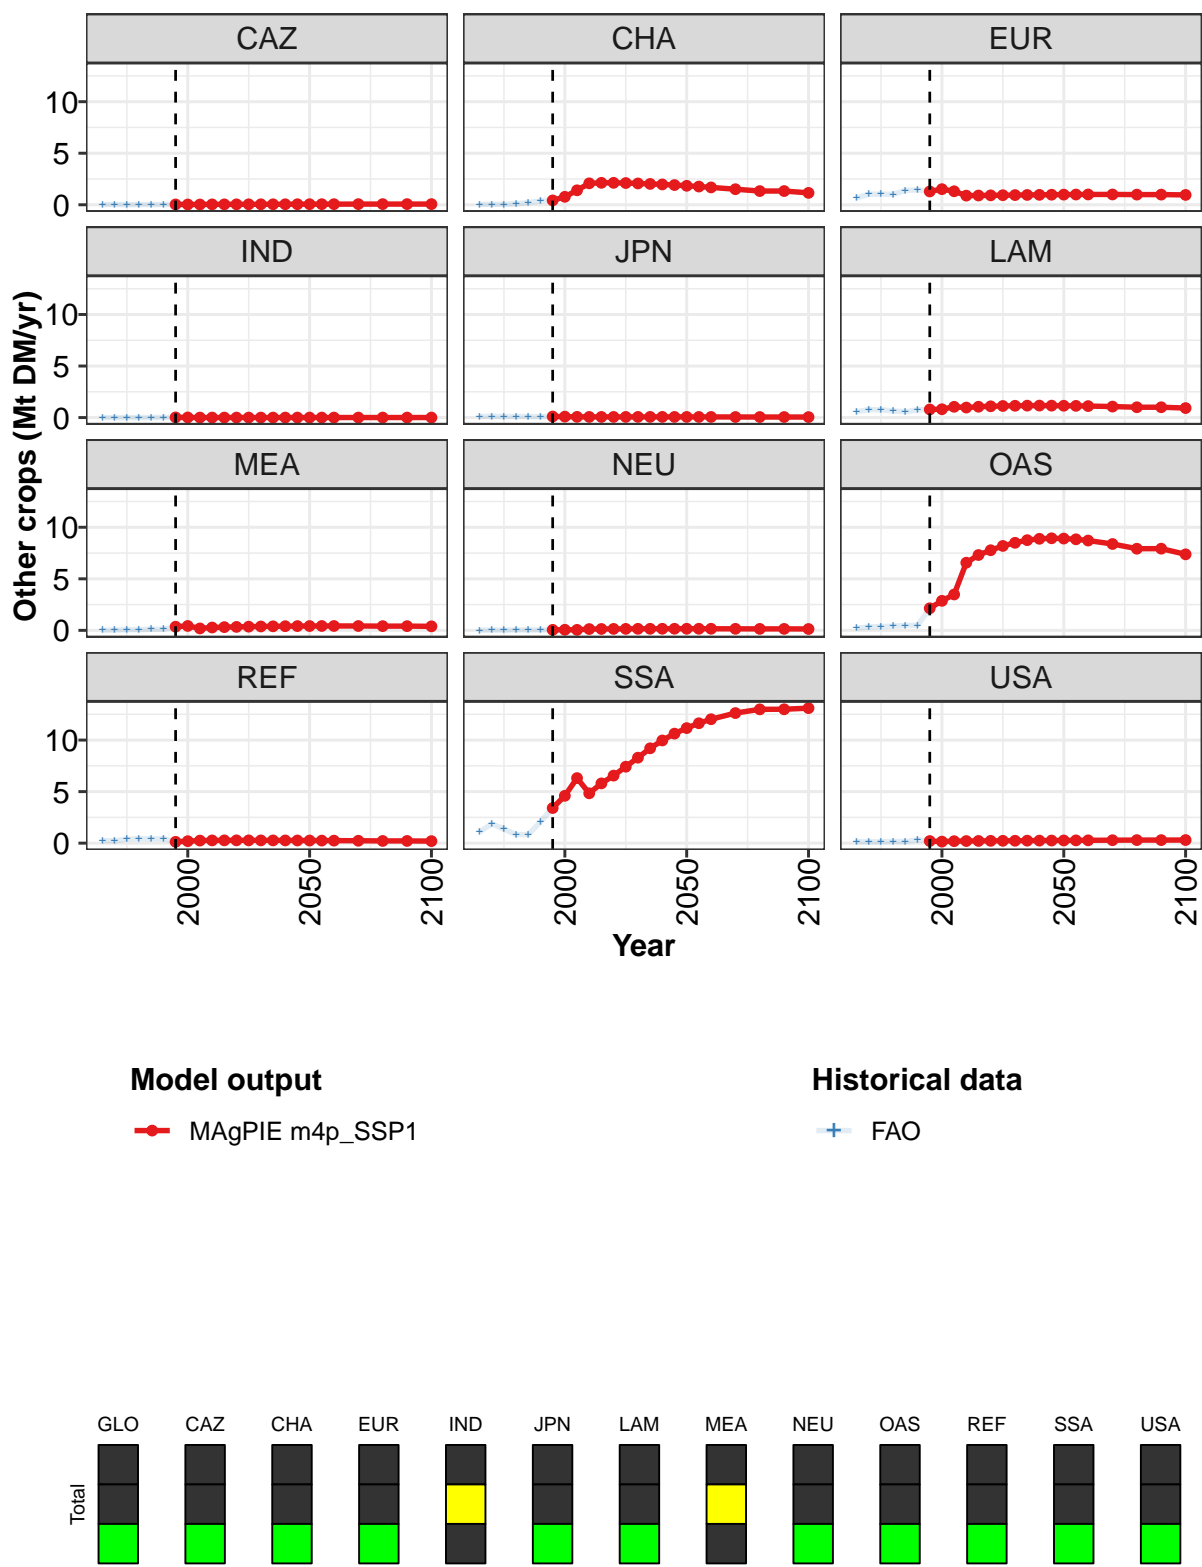

Figure 163: MAgPIE m4p\_SSP1 — Demand—Material—Crops—Other crops (Mt DM/yr)

|     | 1995 | 2000 | 2005 | 2010 | 2015 | 2020 | 2025 | 2030 | 2035 | 2040 | 2045 |
|-----|------|------|------|------|------|------|------|------|------|------|------|
| GLO | 9.0  | 11.5 | 14.3 | 16.3 | 18.2 | 19.6 | 20.9 | 22.1 | 23.3 | 24.1 | 24.8 |
| CAZ | 0.0  | 0.0  | 0.0  | 0.0  | 0.0  | 0.0  | 0.0  | 0.0  | 0.0  | 0.1  | 0.1  |
| CHA | 0.4  | 0.8  | 1.4  | 2.1  | 2.1  | 2.1  | 2.1  | 2.1  | 2.0  | 2.0  | 1.9  |
| EUR | 1.3  | 1.5  | 1.3  | 0.9  | 0.9  | 0.9  | 0.9  | 0.9  | 1.0  | 1.0  | 1.0  |
| IND | 0.0  | 0.0  | 0.0  | 0.0  | 0.0  | 0.0  | 0.0  | 0.0  | 0.0  | 0.0  | 0.0  |
| JPN | 0.1  | 0.1  | 0.1  | 0.1  | 0.1  | 0.1  | 0.1  | 0.1  | 0.1  | 0.1  | 0.1  |
| LAM | 0.8  | 0.8  | 1.0  | 1.0  | 1.1  | 1.1  | 1.1  | 1.1  | 1.2  | 1.2  | 1.2  |
| MEA | 0.4  | 0.4  | 0.2  | 0.3  | 0.3  | 0.3  | 0.4  | 0.4  | 0.4  | 0.4  | 0.4  |
| NEU | 0.1  | 0.1  | 0.1  | 0.1  | 0.1  | 0.1  | 0.1  | 0.1  | 0.2  | 0.2  | 0.2  |
| OAS | 2.1  | 2.9  | 3.5  | 6.6  | 7.3  | 7.8  | 8.2  | 8.5  | 8.8  | 8.9  | 8.9  |
| REF | 0.1  | 0.2  | 0.2  | 0.3  | 0.3  | 0.3  | 0.3  | 0.3  | 0.3  | 0.3  | 0.3  |
| SSA | 3.4  | 4.6  | 6.3  | 4.8  | 5.8  | 6.6  | 7.4  | 8.3  | 9.2  | 10.0 | 10.6 |
| USA | 0.2  | 0.1  | 0.2  | 0.2  | 0.2  | 0.2  | 0.2  | 0.2  | 0.2  | 0.2  | 0.3  |

Table 488: MAgPIE m4p\_SSP1 — Demand—Material—Crops—Other crops (Mt DM/yr) [PART 1/2]

|     | 2050 | 2055 | 2060 | 2070 | 2080 | 2090 | 2100 |
|-----|------|------|------|------|------|------|------|
| GLO | 25.3 | 25.6 | 25.8 | 25.8 | 25.4 | 25.4 | 24.6 |
| CAZ | 0.1  | 0.1  | 0.1  | 0.1  | 0.1  | 0.1  | 0.1  |
| CHA | 1.8  | 1.8  | 1.7  | 1.5  | 1.3  | 1.3  | 1.2  |
| EUR | 1.0  | 1.0  | 1.0  | 1.0  | 1.0  | 1.0  | 1.0  |
| IND | 0.0  | 0.0  | 0.0  | 0.0  | 0.0  | 0.0  | 0.0  |
| JPN | 0.1  | 0.1  | 0.1  | 0.1  | 0.1  | 0.1  | 0.0  |
| LAM | 1.1  | 1.1  | 1.1  | 1.1  | 1.0  | 1.0  | 0.9  |
| MEA | 0.4  | 0.4  | 0.4  | 0.4  | 0.4  | 0.4  | 0.4  |
| NEU | 0.2  | 0.2  | 0.2  | 0.1  | 0.1  | 0.1  | 0.1  |
| OAS | 8.9  | 8.8  | 8.7  | 8.4  | 7.9  | 7.9  | 7.4  |
| REF | 0.3  | 0.2  | 0.2  | 0.2  | 0.2  | 0.2  | 0.2  |
| SSA | 11.2 | 11.6 | 12.0 | 12.6 | 13.0 | 13.0 | 13.1 |
| USA | 0.3  | 0.3  | 0.3  | 0.3  | 0.3  | 0.3  | 0.3  |

Table 489: MAgPIE m4p\_SSP1 — Demand—Material—Crops—Other crops (Mt DM/yr) [PART 2/2]

|     | 1965 | 1970 | 1975 | 1980 | 1985 | 1990 | 1995 | 2000 | 2005 | 2010 |
|-----|------|------|------|------|------|------|------|------|------|------|
| GLO | 3.1  | 4.6  | 4.3  | 3.8  | 4.3  | 6.2  | 9.0  | 11.5 | 14.3 | 16.3 |
| CAZ | 0.0  | 0.0  | 0.0  | 0.0  | 0.0  | 0.0  | 0.0  | 0.0  | 0.0  | 0.0  |
| CHA | 0.0  | 0.0  | 0.0  | 0.1  | 0.2  | 0.4  | 0.4  | 0.8  | 1.4  | 2.1  |
| EUR | 0.7  | 1.0  | 1.0  | 1.0  | 1.4  | 1.4  | 1.3  | 1.5  | 1.3  | 0.9  |
| IND | 0.0  | 0.0  | 0.0  | 0.0  | 0.0  | 0.0  | 0.0  | 0.0  | 0.0  | 0.0  |
| JPN | 0.1  | 0.1  | 0.1  | 0.1  | 0.1  | 0.1  | 0.1  | 0.1  | 0.1  | 0.1  |
| LAM | 0.6  | 0.8  | 0.8  | 0.6  | 0.6  | 0.8  | 0.8  | 0.8  | 1.0  | 1.0  |
| MEA | 0.0  | 0.0  | 0.1  | 0.1  | 0.1  | 0.1  | 0.4  | 0.4  | 0.2  | 0.3  |
| NEU | 0.0  | 0.0  | 0.0  | 0.0  | 0.0  | 0.0  | 0.1  | 0.1  | 0.1  | 0.1  |
| OAS | 0.2  | 0.3  | 0.4  | 0.4  | 0.5  | 0.5  | 2.1  | 2.9  | 3.5  | 6.6  |
| REF | 0.2  | 0.2  | 0.4  | 0.4  | 0.4  | 0.4  | 0.1  | 0.2  | 0.2  | 0.3  |
| SSA | 1.1  | 1.9  | 1.4  | 0.8  | 0.8  | 2.1  | 3.4  | 4.6  | 6.3  | 4.8  |
| USA | 0.1  | 0.1  | 0.1  | 0.2  | 0.1  | 0.3  | 0.2  | 0.1  | 0.2  | 0.2  |

Table 490: FAO — Demand—Material—Crops—Other crops (Mt DM/yr)

8.2.11 Other crops—Fruits Vegetables Nuts

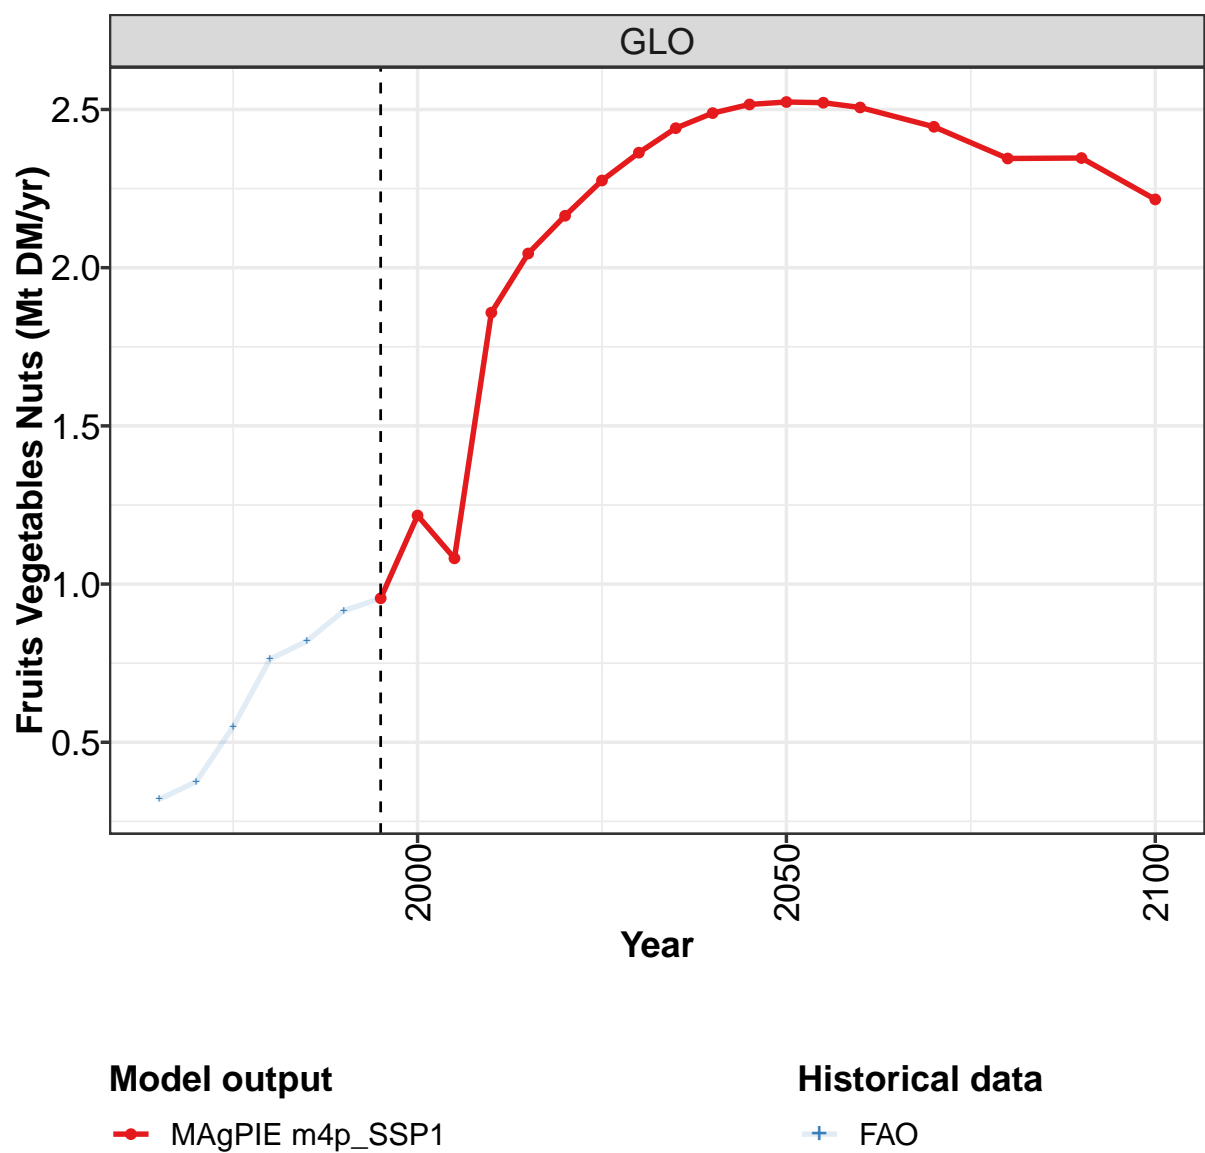

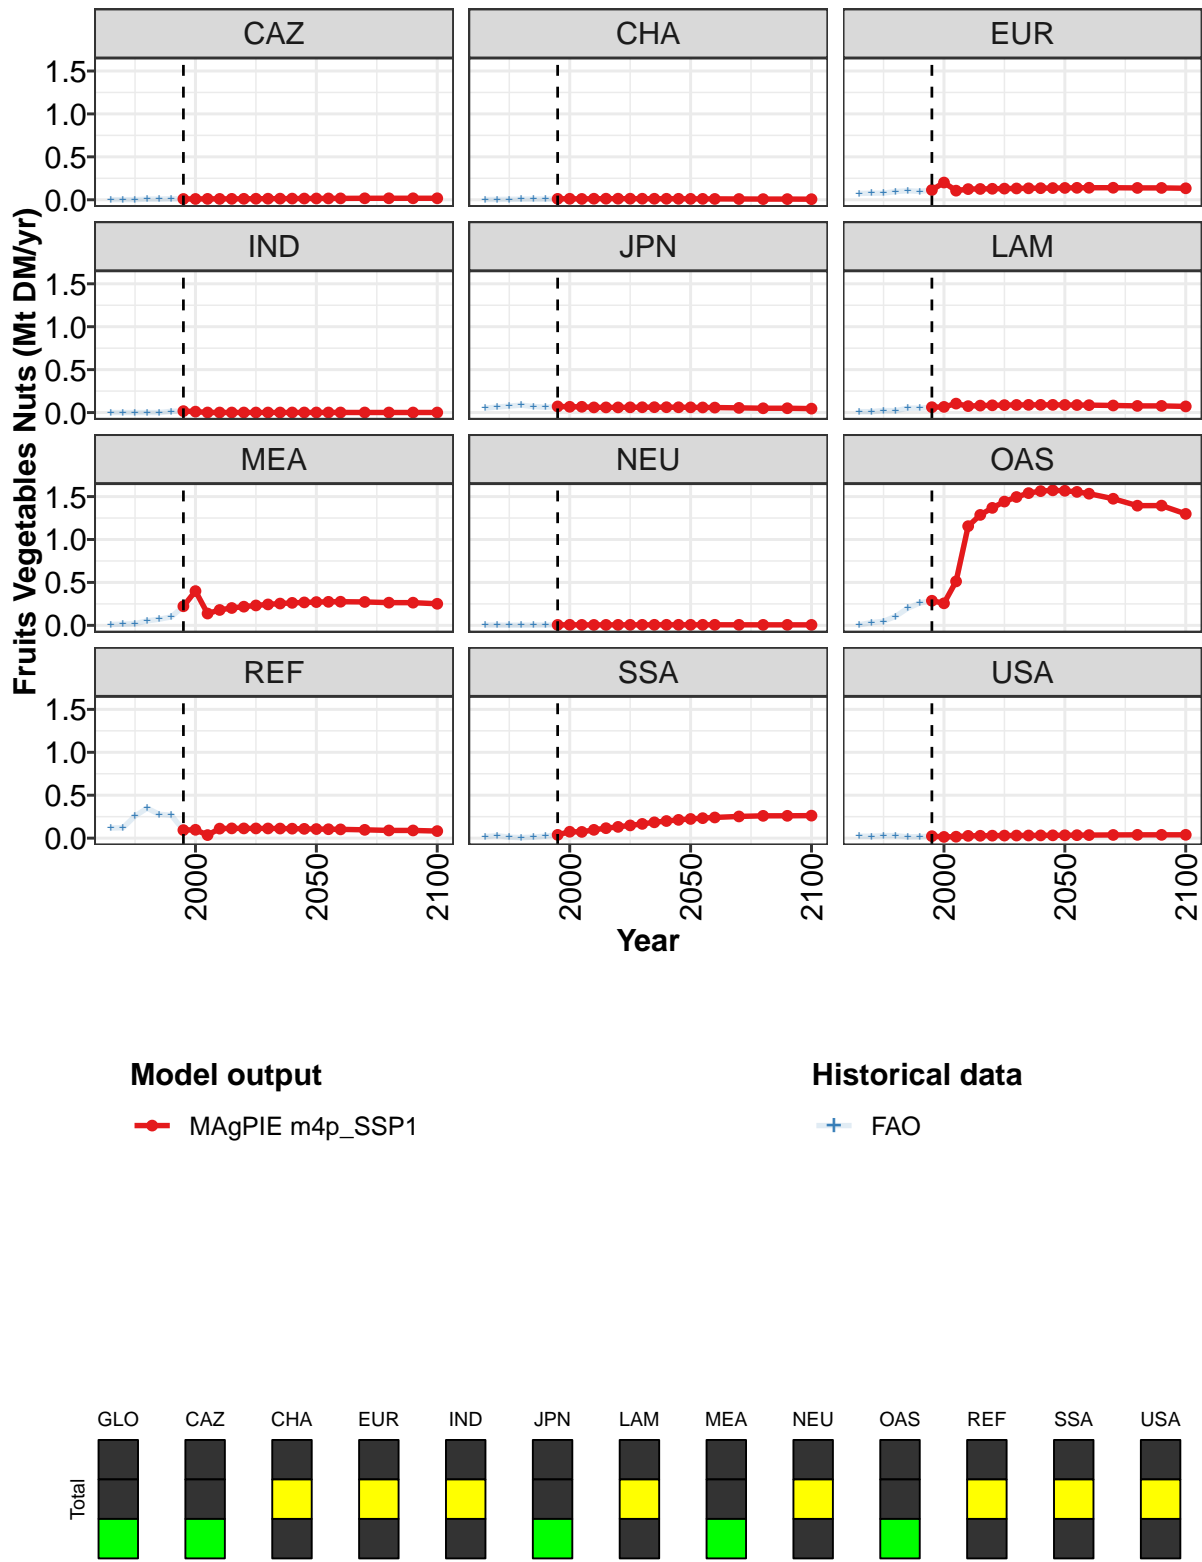

Figure 164: MAgPIE m4p\_SSP1 — Demand—Material—Crops—Other crops—Fruits Vegetables Nuts (Mt DM/yr)

|     | 1995 | 2000 | 2005 | 2010 | 2015 | 2020 | 2025 | 2030 | 2035 | 2040 | 2045 |
|-----|------|------|------|------|------|------|------|------|------|------|------|
| GLO | 0.95 | 1.22 | 1.08 | 1.86 | 2.04 | 2.16 | 2.28 | 2.36 | 2.44 | 2.49 | 2.52 |
| CAZ | 0.01 | 0.01 | 0.01 | 0.01 | 0.01 | 0.01 | 0.01 | 0.01 | 0.01 | 0.01 | 0.01 |
| CHA | 0.01 | 0.01 | 0.01 | 0.01 | 0.01 | 0.01 | 0.01 | 0.01 | 0.01 | 0.01 | 0.01 |
| EUR | 0.11 | 0.20 | 0.11 | 0.12 | 0.13 | 0.13 | 0.13 | 0.13 | 0.13 | 0.14 | 0.14 |
| IND | 0.02 | 0.01 | 0.00 | 0.00 | 0.00 | 0.00 | 0.00 | 0.00 | 0.00 | 0.00 | 0.00 |
| JPN | 0.07 | 0.07 | 0.07 | 0.06 | 0.06 | 0.06 | 0.06 | 0.06 | 0.06 | 0.06 | 0.06 |
| LAM | 0.06 | 0.07 | 0.10 | 0.08 | 0.08 | 0.08 | 0.09 | 0.09 | 0.09 | 0.09 | 0.09 |
| MEA | 0.22 | 0.40 | 0.14 | 0.18 | 0.20 | 0.22 | 0.23 | 0.24 | 0.25 | 0.26 | 0.27 |
| NEU | 0.01 | 0.01 | 0.01 | 0.01 | 0.01 | 0.01 | 0.01 | 0.01 | 0.01 | 0.01 | 0.01 |
| OAS | 0.29 | 0.26 | 0.51 | 1.16 | 1.29 | 1.37 | 1.44 | 1.50 | 1.54 | 1.56 | 1.57 |
| REF | 0.09 | 0.10 | 0.04 | 0.11 | 0.11 | 0.11 | 0.11 | 0.11 | 0.11 | 0.11 | 0.11 |
| SSA | 0.04 | 0.07 | 0.07 | 0.10 | 0.12 | 0.13 | 0.15 | 0.17 | 0.18 | 0.20 | 0.21 |
| USA | 0.02 | 0.01 | 0.02 | 0.03 | 0.03 | 0.03 | 0.03 | 0.03 | 0.03 | 0.03 | 0.03 |

Table 491: MAgPIE m4p\_SSP1 — Demand—Material—Crops—Other crops—Fruits Vegetables Nuts (Mt DM/yr) [PART 1/2]

|     | 2050 | 2055 | 2060 | 2070 | 2080 | 2090 | 2100 |
|-----|------|------|------|------|------|------|------|
| GLO | 2.52 | 2.52 | 2.51 | 2.45 | 2.35 | 2.35 | 2.22 |
| CAZ | 0.01 | 0.02 | 0.02 | 0.02 | 0.02 | 0.02 | 0.02 |
| CHA | 0.01 | 0.01 | 0.01 | 0.01 | 0.01 | 0.01 | 0.01 |
| EUR | 0.14 | 0.14 | 0.14 | 0.14 | 0.14 | 0.14 | 0.13 |
| IND | 0.00 | 0.00 | 0.00 | 0.00 | 0.00 | 0.00 | 0.00 |
| JPN | 0.06 | 0.06 | 0.06 | 0.05 | 0.05 | 0.05 | 0.05 |
| LAM | 0.09 | 0.09 | 0.09 | 0.08 | 0.08 | 0.08 | 0.07 |
| MEA | 0.27 | 0.27 | 0.28 | 0.27 | 0.26 | 0.26 | 0.25 |
| NEU | 0.01 | 0.01 | 0.01 | 0.01 | 0.01 | 0.01 | 0.01 |
| OAS | 1.57 | 1.55 | 1.53 | 1.47 | 1.39 | 1.40 | 1.30 |
| REF | 0.11 | 0.10 | 0.10 | 0.10 | 0.09 | 0.09 | 0.08 |
| SSA | 0.22 | 0.23 | 0.24 | 0.25 | 0.26 | 0.26 | 0.26 |
| USA | 0.03 | 0.03 | 0.04 | 0.04 | 0.04 | 0.04 | 0.04 |

Table 492: MAgPIE m4p\_SSP1 — Demand—Material—Crops—Other crops—Fruits Vegetables Nuts (Mt DM/yr) [PART 2/2]

|     | 1965 | 1970 | 1975 | 1980 | 1985 | 1990 | 1995 | 2000 | 2005 | 2010 |
|-----|------|------|------|------|------|------|------|------|------|------|
| GLO | 0.32 | 0.38 | 0.55 | 0.76 | 0.82 | 0.92 | 0.96 | 1.22 | 1.08 | 1.86 |
| CAZ | 0.00 | 0.00 | 0.00 | 0.01 | 0.01 | 0.01 | 0.01 | 0.01 | 0.01 | 0.01 |
| CHA | 0.00 | 0.00 | 0.01 | 0.01 | 0.01 | 0.01 | 0.01 | 0.01 | 0.01 | 0.01 |
| EUR | 0.07 | 0.08 | 0.08 | 0.10 | 0.11 | 0.10 | 0.11 | 0.20 | 0.11 | 0.12 |
| IND | 0.00 | 0.00 | 0.00 | 0.00 | 0.00 | 0.01 | 0.02 | 0.01 | 0.00 | 0.00 |
| JPN | 0.05 | 0.06 | 0.08 | 0.09 | 0.07 | 0.06 | 0.07 | 0.07 | 0.07 | 0.06 |
| LAM | 0.01 | 0.01 | 0.02 | 0.02 | 0.05 | 0.05 | 0.06 | 0.07 | 0.10 | 0.08 |
| MEA | 0.01 | 0.01 | 0.02 | 0.05 | 0.07 | 0.10 | 0.22 | 0.40 | 0.14 | 0.18 |
| NEU | 0.00 | 0.00 | 0.00 | 0.00 | 0.00 | 0.00 | 0.01 | 0.01 | 0.01 | 0.01 |
| OAS | 0.01 | 0.03 | 0.05 | 0.11 | 0.20 | 0.26 | 0.29 | 0.26 | 0.51 | 1.16 |
| REF | 0.12 | 0.12 | 0.26 | 0.35 | 0.28 | 0.27 | 0.09 | 0.10 | 0.04 | 0.11 |
| SSA | 0.02 | 0.03 | 0.01 | 0.01 | 0.01 | 0.02 | 0.04 | 0.07 | 0.07 | 0.10 |
| USA | 0.02 | 0.02 | 0.03 | 0.03 | 0.01 | 0.02 | 0.02 | 0.01 | 0.02 | 0.03 |

Table 493: FAO — Demand—Material—Crops—Other crops—Fruits Vegetables Nuts (Mt DM/yr)



8.2.12 Other crops—Potatoes

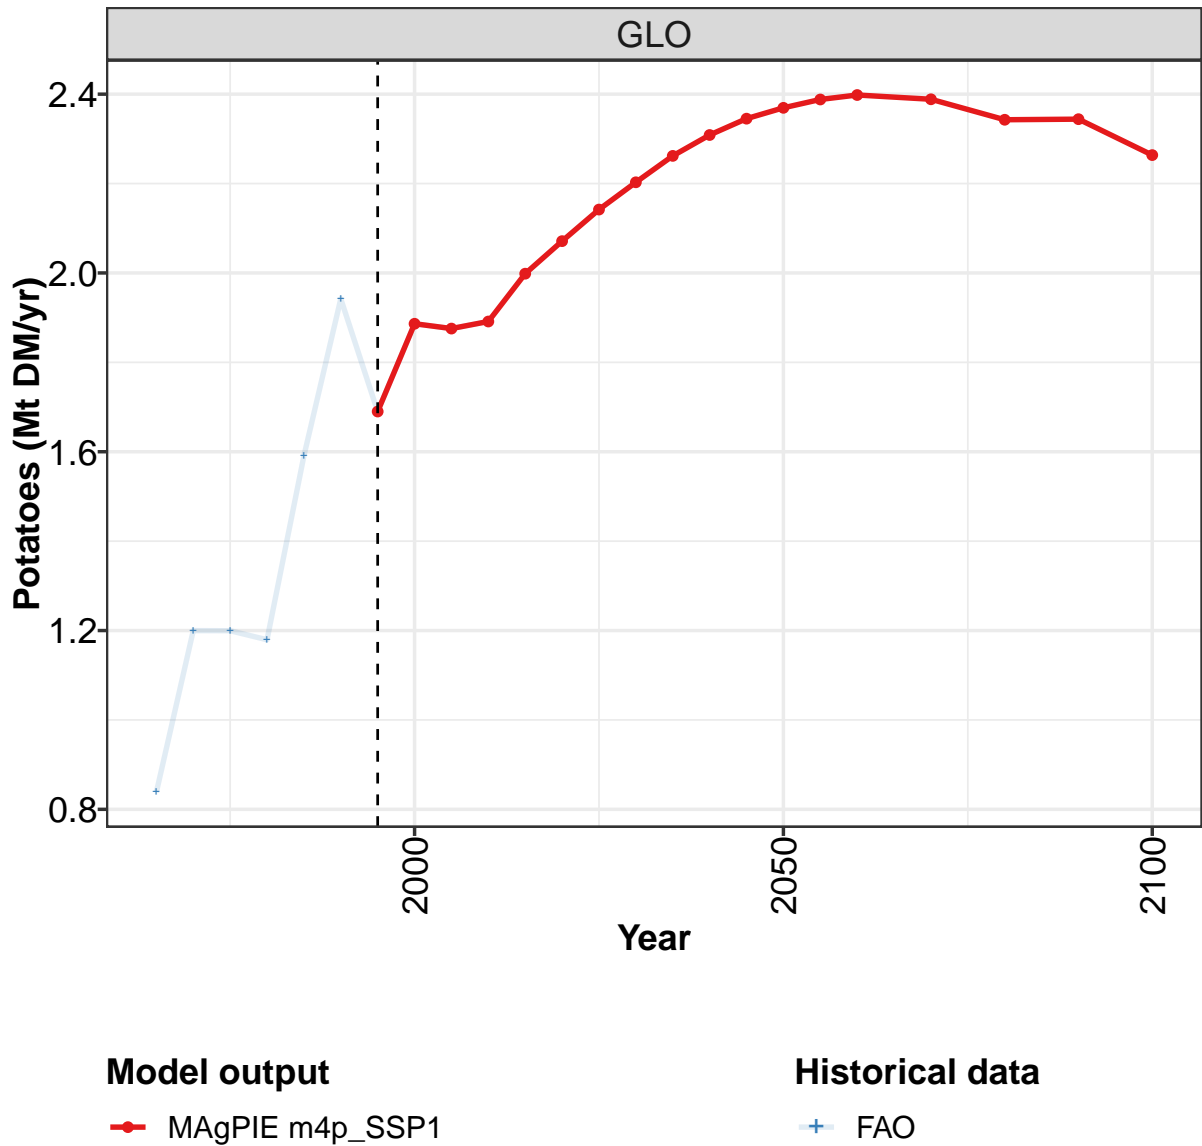

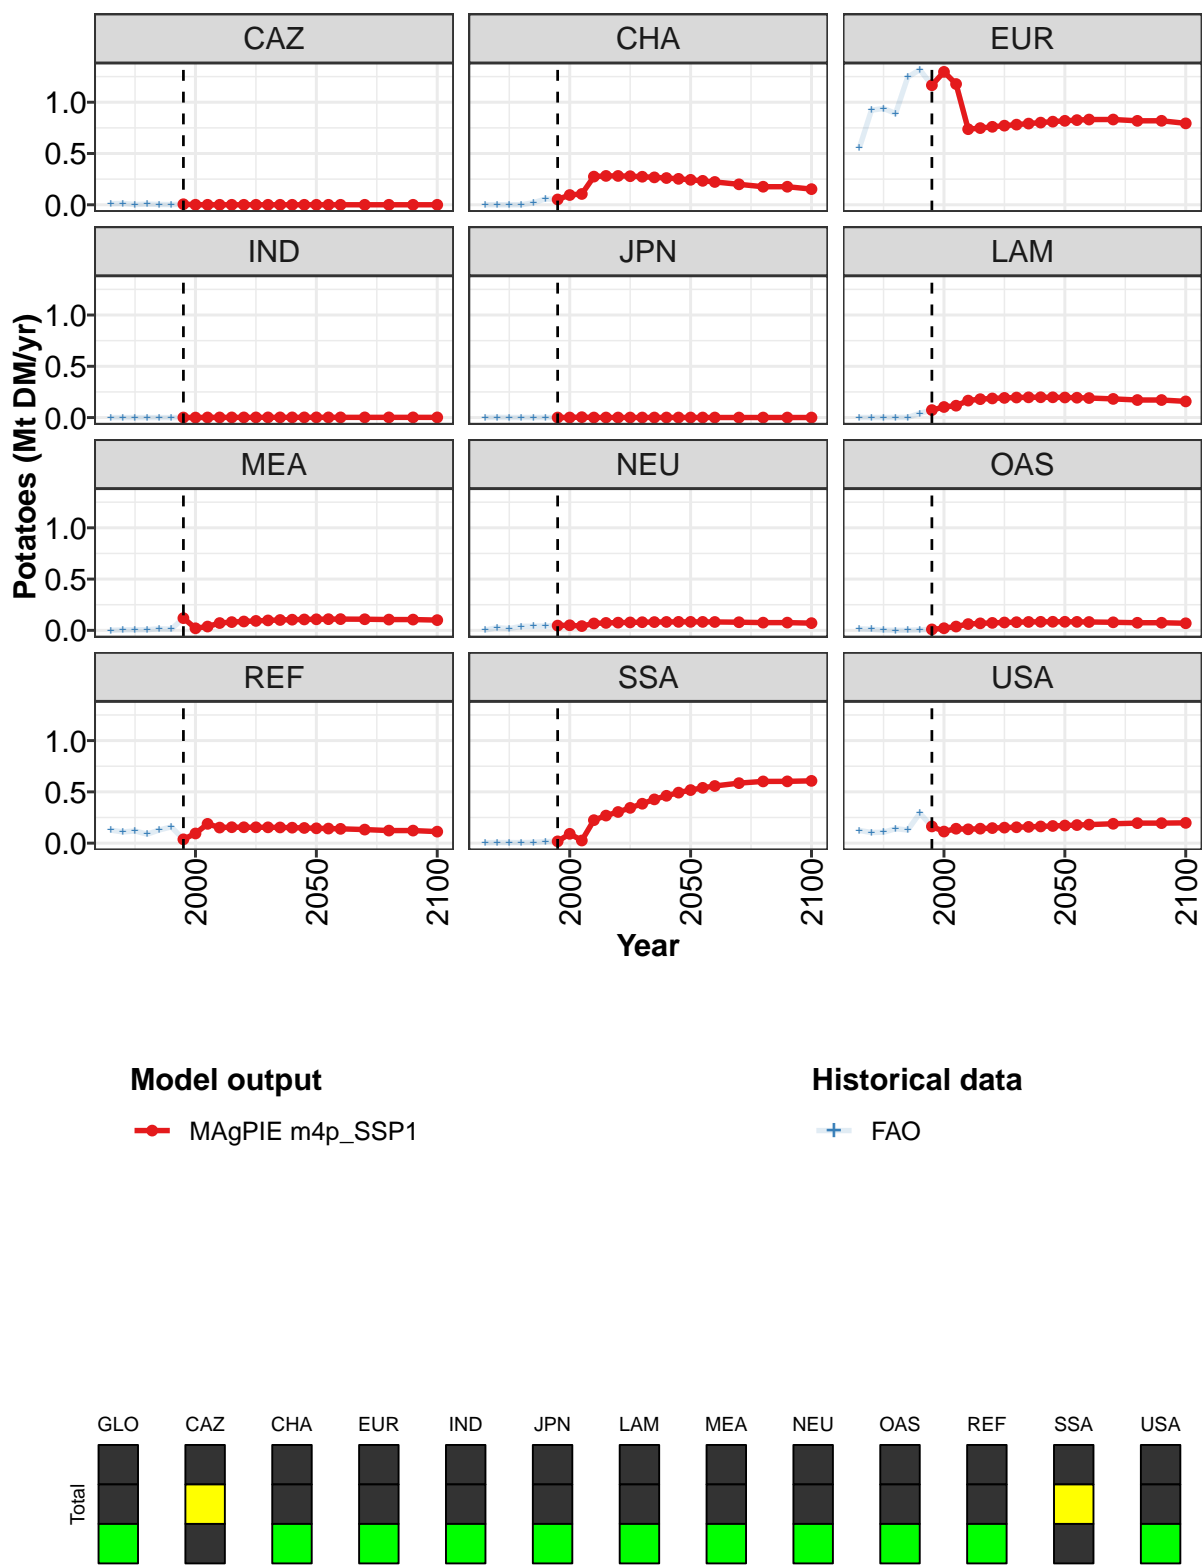

Figure 165: MAgPIE m4p\_SSP1 — Demand—Material—Crops—Other crops—Potatoes (Mt DM/yr)

|     | 1995 | 2000 | 2005 | 2010 | 2015 | 2020 | 2025 | 2030 | 2035 | 2040 | 2045 |
|-----|------|------|------|------|------|------|------|------|------|------|------|
| GLO | 1.69 | 1.89 | 1.88 | 1.89 | 2.00 | 2.07 | 2.14 | 2.20 | 2.26 | 2.31 | 2.35 |
| CAZ | 0.01 | 0.00 | 0.00 | 0.00 | 0.00 | 0.00 | 0.00 | 0.00 | 0.00 | 0.00 | 0.00 |
| CHA | 0.05 | 0.10 | 0.11 | 0.27 | 0.28 | 0.28 | 0.28 | 0.27 | 0.27 | 0.26 | 0.25 |
| EUR | 1.17 | 1.30 | 1.18 | 0.74 | 0.75 | 0.76 | 0.77 | 0.78 | 0.79 | 0.80 | 0.81 |
| IND | 0.00 | 0.00 | 0.00 | 0.00 | 0.00 | 0.00 | 0.00 | 0.00 | 0.00 | 0.00 | 0.00 |
| JPN | 0.00 | 0.00 | 0.00 | 0.00 | 0.00 | 0.00 | 0.00 | 0.00 | 0.00 | 0.00 | 0.00 |
| LAM | 0.07 | 0.10 | 0.12 | 0.17 | 0.18 | 0.19 | 0.19 | 0.20 | 0.20 | 0.20 | 0.20 |
| MEA | 0.12 | 0.02 | 0.04 | 0.07 | 0.08 | 0.09 | 0.09 | 0.10 | 0.10 | 0.10 | 0.11 |
| NEU | 0.05 | 0.05 | 0.04 | 0.07 | 0.07 | 0.08 | 0.08 | 0.08 | 0.08 | 0.08 | 0.08 |
| OAS | 0.01 | 0.02 | 0.04 | 0.06 | 0.07 | 0.07 | 0.08 | 0.08 | 0.08 | 0.08 | 0.08 |
| REF | 0.04 | 0.09 | 0.19 | 0.15 | 0.16 | 0.16 | 0.15 | 0.15 | 0.15 | 0.15 | 0.15 |
| SSA | 0.02 | 0.09 | 0.03 | 0.22 | 0.27 | 0.30 | 0.34 | 0.38 | 0.43 | 0.46 | 0.49 |
| USA | 0.16 | 0.11 | 0.14 | 0.14 | 0.14 | 0.15 | 0.15 | 0.15 | 0.16 | 0.16 | 0.17 |

Table 494: MAgPIE m4p\_SSP1 — Demand—Material—Crops—Other crops—Potatoes (Mt DM/yr) [PART 1/2]

|     | 2050 | 2055 | 2060 | 2070 | 2080 | 2090 | 2100 |
|-----|------|------|------|------|------|------|------|
| GLO | 2.37 | 2.39 | 2.40 | 2.39 | 2.34 | 2.34 | 2.26 |
| CAZ | 0.00 | 0.00 | 0.00 | 0.00 | 0.00 | 0.00 | 0.00 |
| CHA | 0.24 | 0.23 | 0.22 | 0.20 | 0.18 | 0.18 | 0.15 |
| EUR | 0.82 | 0.83 | 0.83 | 0.83 | 0.82 | 0.82 | 0.79 |
| IND | 0.00 | 0.00 | 0.00 | 0.00 | 0.00 | 0.00 | 0.00 |
| JPN | 0.00 | 0.00 | 0.00 | 0.00 | 0.00 | 0.00 | 0.00 |
| LAM | 0.20 | 0.19 | 0.19 | 0.18 | 0.17 | 0.17 | 0.16 |
| MEA | 0.11 | 0.11 | 0.11 | 0.11 | 0.11 | 0.11 | 0.10 |
| NEU | 0.08 | 0.08 | 0.08 | 0.08 | 0.08 | 0.08 | 0.07 |
| OAS | 0.08 | 0.08 | 0.08 | 0.08 | 0.07 | 0.07 | 0.07 |
| REF | 0.14 | 0.14 | 0.14 | 0.13 | 0.12 | 0.12 | 0.11 |
| SSA | 0.52 | 0.54 | 0.56 | 0.59 | 0.60 | 0.60 | 0.61 |
| USA | 0.17 | 0.18 | 0.18 | 0.19 | 0.20 | 0.20 | 0.20 |

Table 495: MAgPIE m4p\_SSP1 — Demand—Material—Crops—Other crops—Potatoes (Mt DM/yr) [PART 2/2]

|     | 1965 | 1970 | 1975 | 1980 | 1985 | 1990 | 1995 | 2000 | 2005 | 2010 |
|-----|------|------|------|------|------|------|------|------|------|------|
| GLO | 0.84 | 1.20 | 1.20 | 1.18 | 1.59 | 1.94 | 1.69 | 1.89 | 1.88 | 1.89 |
| CAZ | 0.01 | 0.01 | 0.00 | 0.01 | 0.00 | 0.00 | 0.01 | 0.00 | 0.00 | 0.00 |
| CHA | 0.00 | 0.00 | 0.00 | 0.00 | 0.02 | 0.06 | 0.05 | 0.10 | 0.11 | 0.27 |
| EUR | 0.55 | 0.92 | 0.94 | 0.89 | 1.25 | 1.32 | 1.17 | 1.30 | 1.18 | 0.74 |
| IND | 0.00 | 0.00 | 0.00 | 0.00 | 0.00 | 0.00 | 0.00 | 0.00 | 0.00 | 0.00 |
| JPN | 0.00 | 0.00 | 0.00 | 0.00 | 0.00 | 0.00 | 0.00 | 0.00 | 0.00 | 0.00 |
| LAM | 0.00 | 0.00 | 0.00 | 0.00 | 0.00 | 0.04 | 0.07 | 0.10 | 0.12 | 0.17 |
| MEA | 0.00 | 0.00 | 0.01 | 0.01 | 0.02 | 0.01 | 0.12 | 0.02 | 0.04 | 0.07 |
| NEU | 0.00 | 0.03 | 0.02 | 0.04 | 0.04 | 0.04 | 0.05 | 0.05 | 0.04 | 0.07 |
| OAS | 0.01 | 0.01 | 0.00 | 0.00 | 0.00 | 0.01 | 0.01 | 0.02 | 0.04 | 0.06 |
| REF | 0.13 | 0.11 | 0.12 | 0.09 | 0.13 | 0.16 | 0.04 | 0.09 | 0.19 | 0.15 |
| SSA | 0.00 | 0.01 | 0.01 | 0.01 | 0.01 | 0.01 | 0.02 | 0.09 | 0.03 | 0.22 |
| USA | 0.12 | 0.10 | 0.11 | 0.14 | 0.13 | 0.29 | 0.16 | 0.11 | 0.14 | 0.14 |

Table 496: FAO — Demand—Material—Crops—Other crops—Potatoes (Mt DM/yr)

8.2.13    Other crops—Pulses

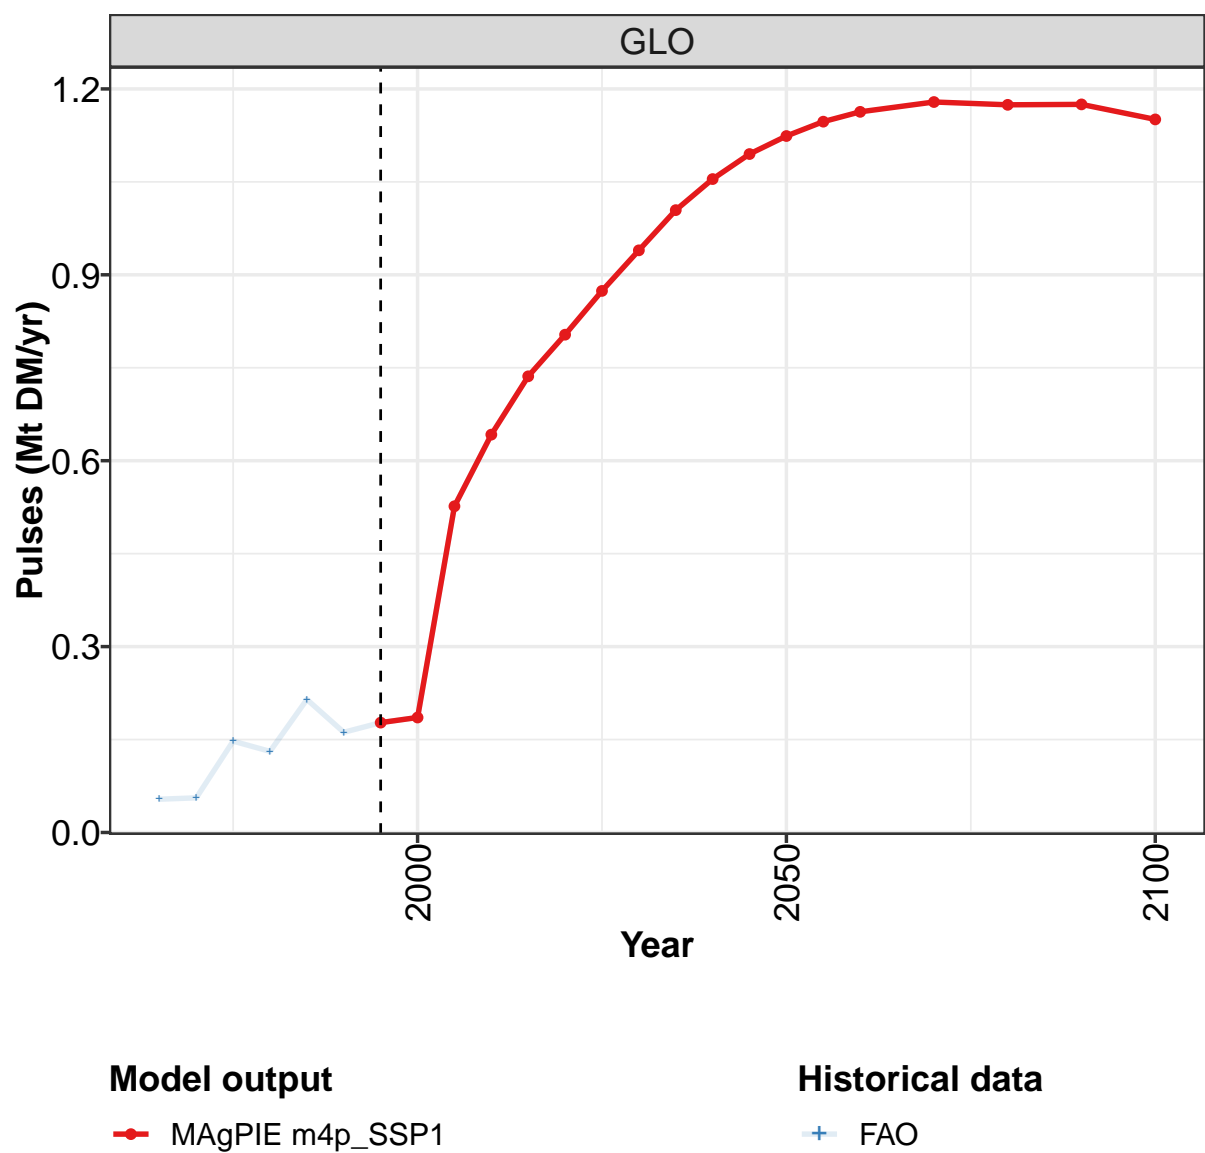

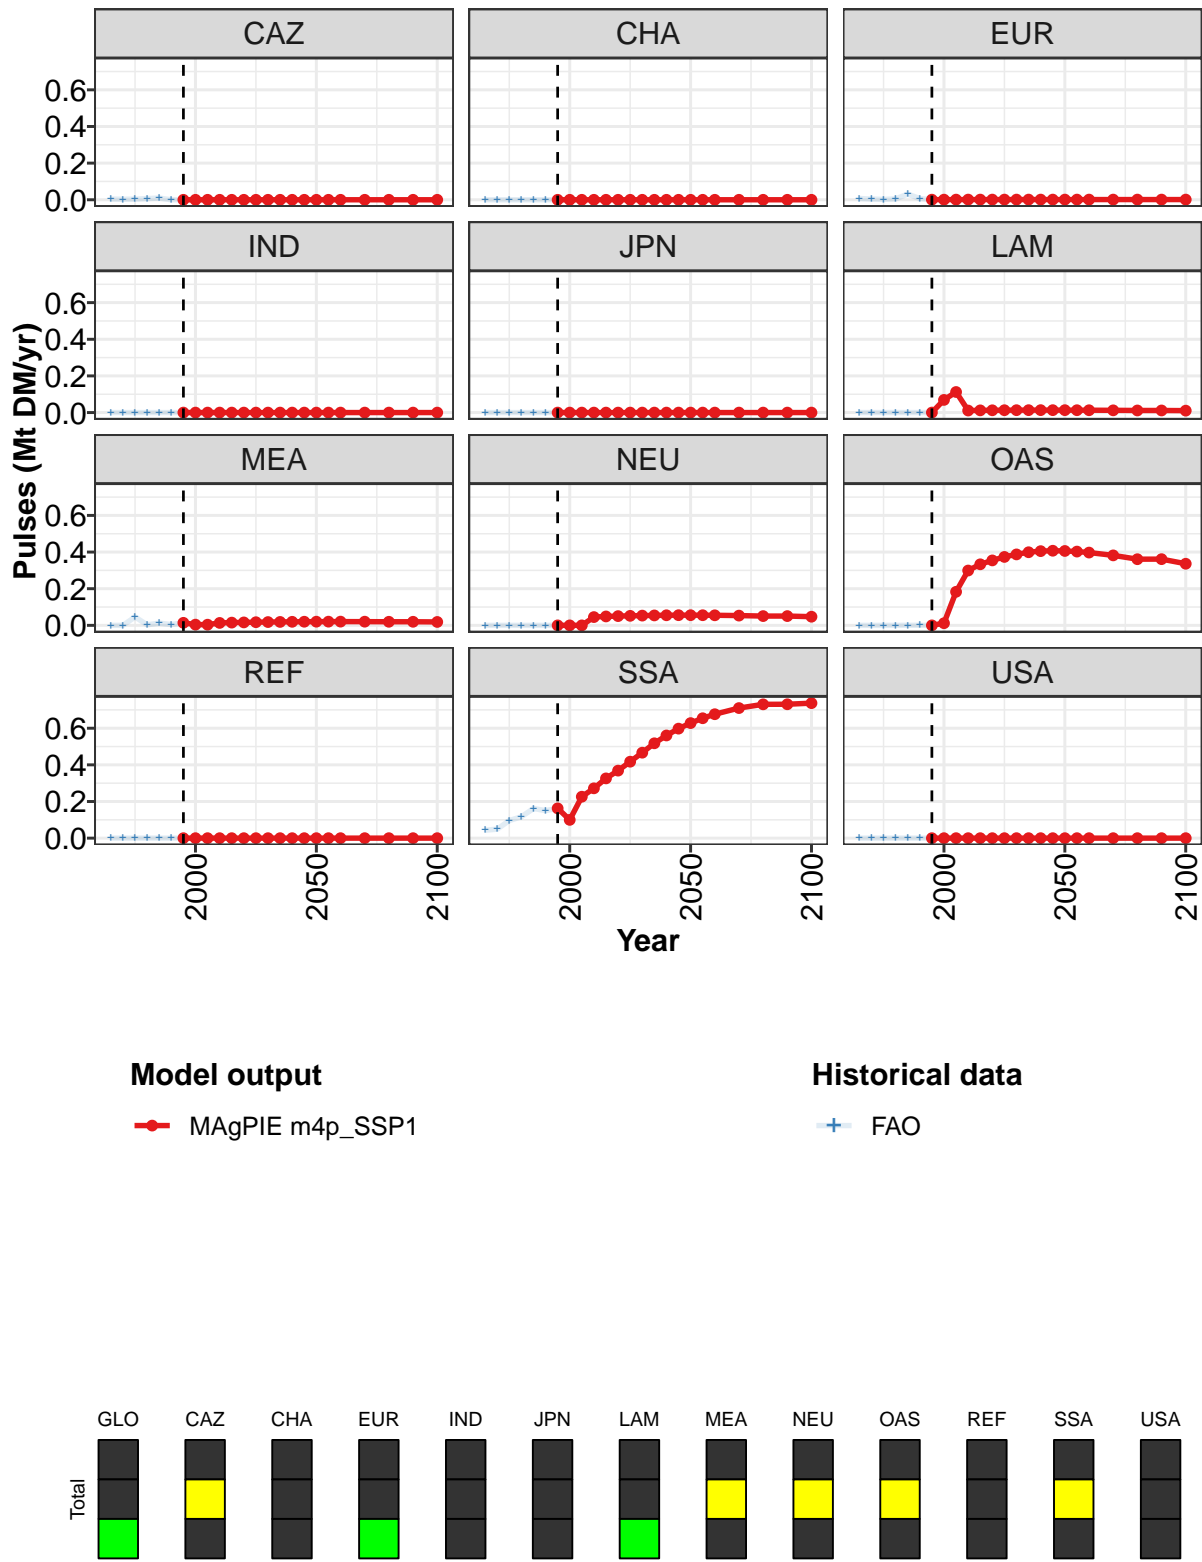

Figure 166: MAgPIE m4p\_SSP1 — Demand—Material—Crops—Other crops—Pulses (Mt DM/yr)

|     | 1995 | 2000 | 2005 | 2010 | 2015 | 2020 | 2025 | 2030 | 2035 | 2040 | 2045 |
|-----|------|------|------|------|------|------|------|------|------|------|------|
| GLO | 0.18 | 0.19 | 0.53 | 0.64 | 0.74 | 0.80 | 0.87 | 0.94 | 1.00 | 1.05 | 1.09 |
| CAZ | 0.00 | 0.00 | 0.00 | 0.00 | 0.00 | 0.00 | 0.00 | 0.00 | 0.00 | 0.00 | 0.00 |
| CHA | 0.00 | 0.00 | 0.00 | 0.00 | 0.00 | 0.00 | 0.00 | 0.00 | 0.00 | 0.00 | 0.00 |
| EUR | 0.00 | 0.00 | 0.00 | 0.00 | 0.00 | 0.00 | 0.00 | 0.00 | 0.00 | 0.00 | 0.00 |
| IND | 0.00 | 0.00 | 0.00 | 0.00 | 0.00 | 0.00 | 0.00 | 0.00 | 0.00 | 0.00 | 0.00 |
| JPN | 0.00 | 0.00 | 0.00 | 0.00 | 0.00 | 0.00 | 0.00 | 0.00 | 0.00 | 0.00 | 0.00 |
| LAM | 0.00 | 0.07 | 0.11 | 0.01 | 0.01 | 0.01 | 0.01 | 0.01 | 0.01 | 0.01 | 0.01 |
| MEA | 0.01 | 0.00 | 0.00 | 0.01 | 0.01 | 0.02 | 0.02 | 0.02 | 0.02 | 0.02 | 0.02 |
| NEU | 0.00 | 0.00 | 0.00 | 0.05 | 0.05 | 0.05 | 0.05 | 0.05 | 0.05 | 0.06 | 0.06 |
| OAS | 0.00 | 0.01 | 0.18 | 0.30 | 0.33 | 0.35 | 0.37 | 0.39 | 0.40 | 0.41 | 0.41 |
| REF | 0.00 | 0.00 | 0.00 | 0.00 | 0.00 | 0.00 | 0.00 | 0.00 | 0.00 | 0.00 | 0.00 |
| SSA | 0.16 | 0.10 | 0.23 | 0.27 | 0.33 | 0.37 | 0.42 | 0.47 | 0.52 | 0.56 | 0.60 |
| USA | 0.00 | 0.00 | 0.00 | 0.00 | 0.00 | 0.00 | 0.00 | 0.00 | 0.00 | 0.00 | 0.00 |

Table 497: MAgPIE m4p\_SSP1 — Demand—Material—Crops—Other crops—Pulses (Mt DM/yr) [PART 1/2]

|     | 2050 | 2055 | 2060 | 2070 | 2080 | 2090 | 2100 |
|-----|------|------|------|------|------|------|------|
| GLO | 1.12 | 1.15 | 1.16 | 1.18 | 1.17 | 1.18 | 1.15 |
| CAZ | 0.00 | 0.00 | 0.00 | 0.00 | 0.00 | 0.00 | 0.00 |
| CHA | 0.00 | 0.00 | 0.00 | 0.00 | 0.00 | 0.00 | 0.00 |
| EUR | 0.00 | 0.00 | 0.00 | 0.00 | 0.00 | 0.00 | 0.00 |
| IND | 0.00 | 0.00 | 0.00 | 0.00 | 0.00 | 0.00 | 0.00 |
| JPN | 0.00 | 0.00 | 0.00 | 0.00 | 0.00 | 0.00 | 0.00 |
| LAM | 0.01 | 0.01 | 0.01 | 0.01 | 0.01 | 0.01 | 0.01 |
| MEA | 0.02 | 0.02 | 0.02 | 0.02 | 0.02 | 0.02 | 0.02 |
| NEU | 0.06 | 0.06 | 0.05 | 0.05 | 0.05 | 0.05 | 0.05 |
| OAS | 0.41 | 0.40 | 0.40 | 0.38 | 0.36 | 0.36 | 0.34 |
| REF | 0.00 | 0.00 | 0.00 | 0.00 | 0.00 | 0.00 | 0.00 |
| SSA | 0.63 | 0.65 | 0.68 | 0.71 | 0.73 | 0.73 | 0.74 |
| USA | 0.00 | 0.00 | 0.00 | 0.00 | 0.00 | 0.00 | 0.00 |

Table 498: MAgPIE m4p\_SSP1 — Demand—Material—Crops—Other crops—Pulses (Mt DM/yr) [PART 2/2]

|     | 1965  | 1970  | 1975  | 1980  | 1985  | 1990  | 1995  | 2000  | 2005  | 2010  |
|-----|-------|-------|-------|-------|-------|-------|-------|-------|-------|-------|
| GLO | 0.054 | 0.056 | 0.147 | 0.131 | 0.215 | 0.162 | 0.177 | 0.186 | 0.526 | 0.642 |
| CAZ | 0.004 | 0.003 | 0.004 | 0.006 | 0.009 | 0.000 | 0.000 | 0.000 | 0.000 | 0.000 |
| CHA | 0.000 | 0.000 | 0.000 | 0.000 | 0.000 | 0.000 | 0.000 | 0.000 | 0.000 | 0.000 |
| EUR | 0.007 | 0.004 | 0.002 | 0.005 | 0.031 | 0.006 | 0.001 | 0.001 | 0.001 | 0.001 |
| IND | 0.000 | 0.000 | 0.000 | 0.000 | 0.000 | 0.000 | 0.000 | 0.000 | 0.000 | 0.000 |
| JPN | 0.000 | 0.000 | 0.000 | 0.000 | 0.000 | 0.000 | 0.000 | 0.000 | 0.000 | 0.000 |
| LAM | 0.000 | 0.000 | 0.000 | 0.000 | 0.000 | 0.000 | 0.000 | 0.069 | 0.112 | 0.011 |
| MEA | 0.000 | 0.000 | 0.046 | 0.003 | 0.012 | 0.004 | 0.014 | 0.004 | 0.004 | 0.013 |
| NEU | 0.000 | 0.000 | 0.000 | 0.000 | 0.000 | 0.000 | 0.000 | 0.000 | 0.000 | 0.045 |
| OAS | 0.000 | 0.000 | 0.000 | 0.000 | 0.000 | 0.000 | 0.000 | 0.012 | 0.183 | 0.299 |
| REF | 0.000 | 0.000 | 0.000 | 0.000 | 0.000 | 0.000 | 0.000 | 0.000 | 0.000 | 0.000 |
| SSA | 0.043 | 0.049 | 0.096 | 0.117 | 0.162 | 0.150 | 0.163 | 0.100 | 0.226 | 0.272 |
| USA | 0.000 | 0.000 | 0.000 | 0.000 | 0.000 | 0.000 | 0.000 | 0.000 | 0.000 | 0.000 |

Table 499: FAO — Demand—Material—Crops—Other crops—Pulses (Mt DM/yr)

8.2.14 Other crops—Tropical roots

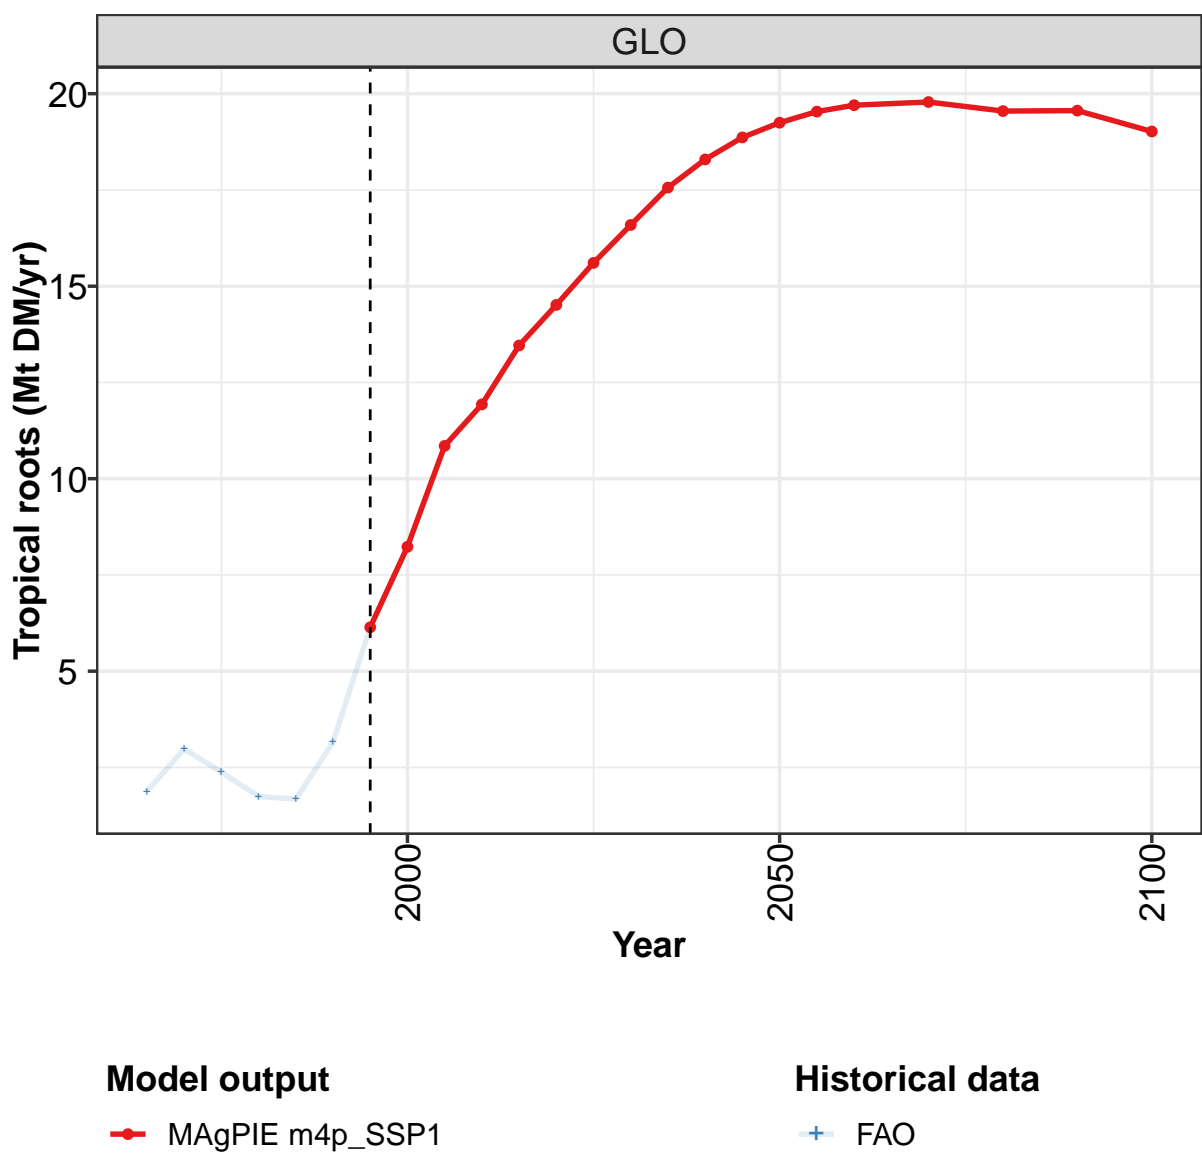

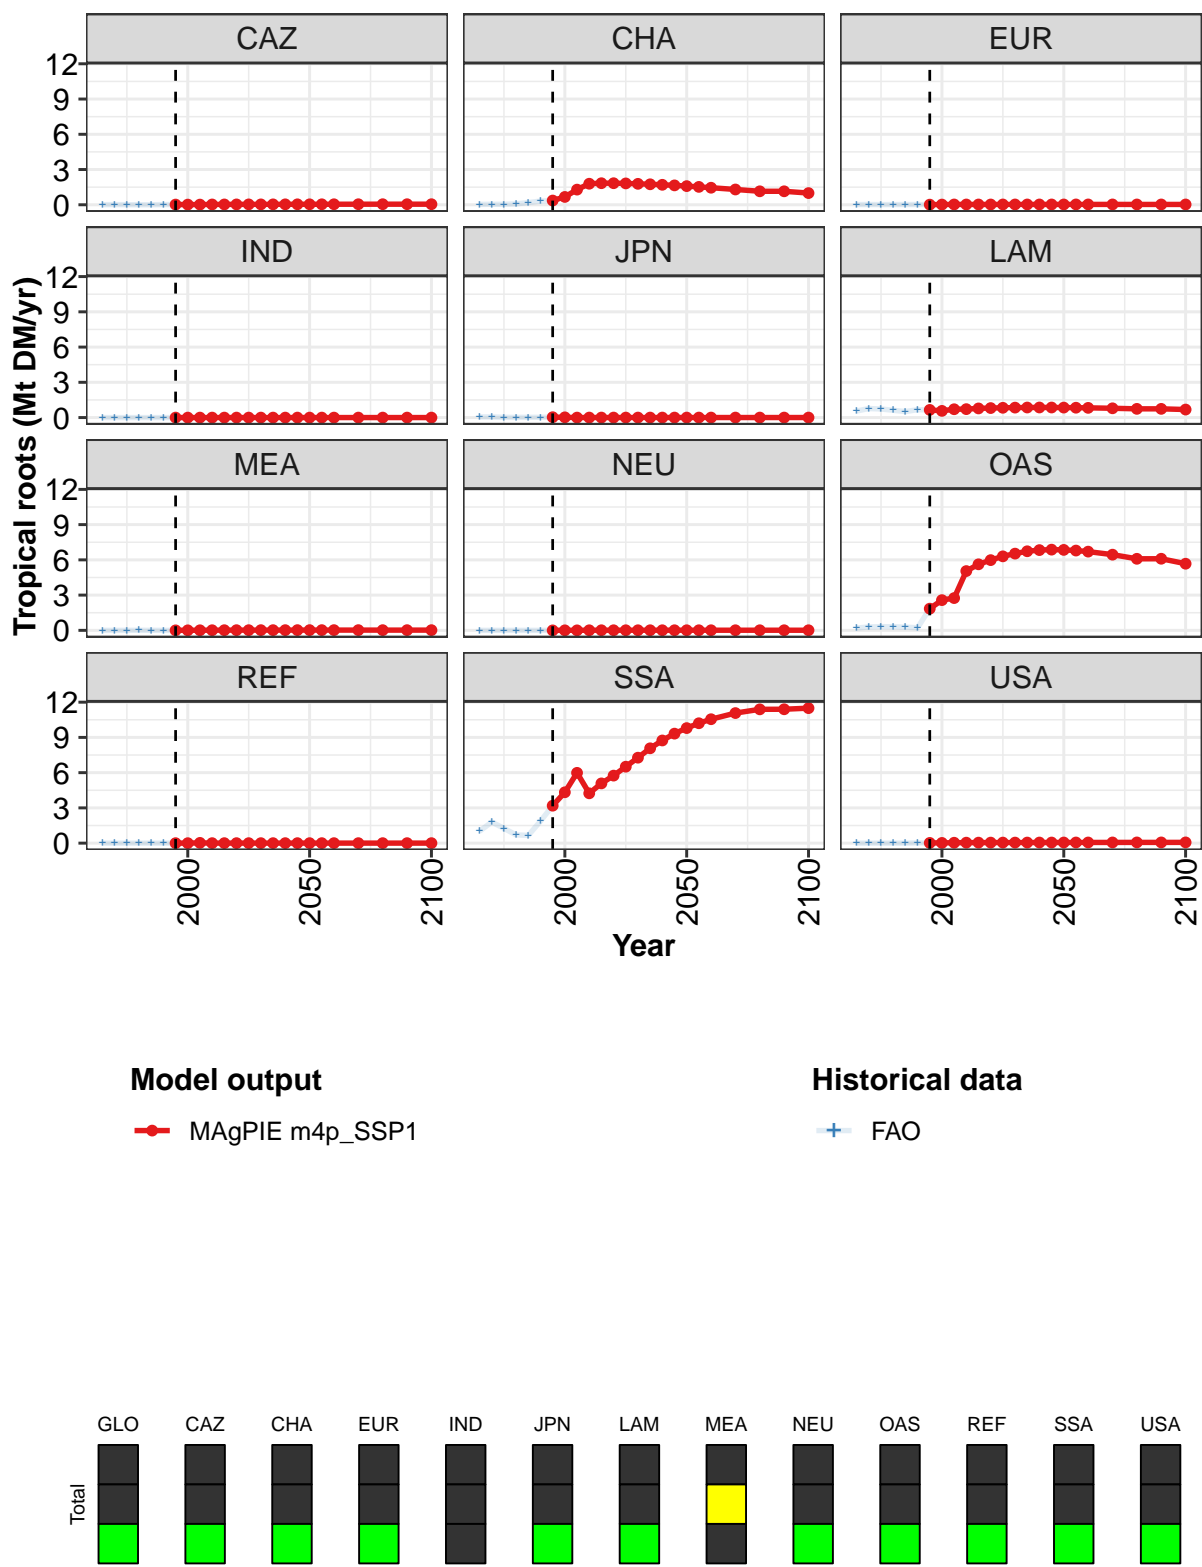

Figure 167: MAgPIE m4p\_SSP1 — Demand—Material—Crops—Other crops—Tropical roots (Mt DM/yr)



|     | 1995 | 2000 | 2005 | 2010 | 2015 | 2020 | 2025 | 2030 | 2035 | 2040 | 2045 |
|-----|------|------|------|------|------|------|------|------|------|------|------|
| GLO | 6.1  | 8.2  | 10.9 | 11.9 | 13.5 | 14.5 | 15.6 | 16.6 | 17.6 | 18.3 | 18.9 |
| CAZ | 0.0  | 0.0  | 0.0  | 0.0  | 0.0  | 0.0  | 0.0  | 0.0  | 0.0  | 0.0  | 0.0  |
| CHA | 0.4  | 0.7  | 1.3  | 1.8  | 1.8  | 1.8  | 1.8  | 1.8  | 1.7  | 1.7  | 1.7  |
| EUR | 0.0  | 0.0  | 0.0  | 0.0  | 0.0  | 0.0  | 0.0  | 0.0  | 0.0  | 0.0  | 0.0  |
| IND | 0.0  | 0.0  | 0.0  | 0.0  | 0.0  | 0.0  | 0.0  | 0.0  | 0.0  | 0.0  | 0.0  |
| JPN | 0.0  | 0.0  | 0.0  | 0.0  | 0.0  | 0.0  | 0.0  | 0.0  | 0.0  | 0.0  | 0.0  |
| LAM | 0.7  | 0.6  | 0.7  | 0.7  | 0.8  | 0.8  | 0.8  | 0.8  | 0.9  | 0.9  | 0.9  |
| MEA | 0.0  | 0.0  | 0.0  | 0.0  | 0.0  | 0.0  | 0.0  | 0.0  | 0.0  | 0.0  | 0.0  |
| NEU | 0.0  | 0.0  | 0.0  | 0.0  | 0.0  | 0.0  | 0.0  | 0.0  | 0.0  | 0.0  | 0.0  |
| OAS | 1.8  | 2.6  | 2.7  | 5.0  | 5.6  | 6.0  | 6.3  | 6.5  | 6.7  | 6.8  | 6.9  |
| REF | 0.0  | 0.0  | 0.0  | 0.0  | 0.0  | 0.0  | 0.0  | 0.0  | 0.0  | 0.0  | 0.0  |
| SSA | 3.2  | 4.3  | 6.0  | 4.2  | 5.1  | 5.7  | 6.5  | 7.3  | 8.1  | 8.7  | 9.3  |
| USA | 0.0  | 0.0  | 0.0  | 0.0  | 0.0  | 0.0  | 0.0  | 0.1  | 0.1  | 0.1  | 0.1  |

Table 500: MAgPIE m4p\_SSP1 — Demand—Material—Crops—Other crops—Tropical roots (Mt DM/yr)  
[PART 1/2]

|     | 2050 | 2055 | 2060 | 2070 | 2080 | 2090 | 2100 |
|-----|------|------|------|------|------|------|------|
| GLO | 19.2 | 19.5 | 19.7 | 19.8 | 19.5 | 19.6 | 19.0 |
| CAZ | 0.0  | 0.0  | 0.0  | 0.0  | 0.0  | 0.0  | 0.0  |
| CHA | 1.6  | 1.5  | 1.5  | 1.3  | 1.1  | 1.1  | 1.0  |
| EUR | 0.0  | 0.0  | 0.0  | 0.0  | 0.0  | 0.0  | 0.0  |
| IND | 0.0  | 0.0  | 0.0  | 0.0  | 0.0  | 0.0  | 0.0  |
| JPN | 0.0  | 0.0  | 0.0  | 0.0  | 0.0  | 0.0  | 0.0  |
| LAM | 0.9  | 0.8  | 0.8  | 0.8  | 0.7  | 0.7  | 0.7  |
| MEA | 0.0  | 0.0  | 0.0  | 0.0  | 0.0  | 0.0  | 0.0  |
| NEU | 0.0  | 0.0  | 0.0  | 0.0  | 0.0  | 0.0  | 0.0  |
| OAS | 6.8  | 6.8  | 6.7  | 6.4  | 6.1  | 6.1  | 5.7  |
| REF | 0.0  | 0.0  | 0.0  | 0.0  | 0.0  | 0.0  | 0.0  |
| SSA | 9.8  | 10.2 | 10.5 | 11.1 | 11.4 | 11.4 | 11.5 |
| USA | 0.1  | 0.1  | 0.1  | 0.1  | 0.1  | 0.1  | 0.1  |

Table 501: MAgPIE m4p\_SSP1 — Demand—Material—Crops—Other crops—Tropical roots (Mt DM/yr)  
[PART 2/2]

|     | 1965 | 1970 | 1975 | 1980 | 1985 | 1990 | 1995 | 2000 | 2005 | 2010 |
|-----|------|------|------|------|------|------|------|------|------|------|
| GLO | 1.9  | 3.0  | 2.4  | 1.7  | 1.7  | 3.2  | 6.1  | 8.2  | 10.9 | 11.9 |
| CAZ | 0.0  | 0.0  | 0.0  | 0.0  | 0.0  | 0.0  | 0.0  | 0.0  | 0.0  | 0.0  |
| CHA | 0.0  | 0.0  | 0.0  | 0.1  | 0.2  | 0.3  | 0.4  | 0.7  | 1.3  | 1.8  |
| EUR | 0.0  | 0.0  | 0.0  | 0.0  | 0.0  | 0.0  | 0.0  | 0.0  | 0.0  | 0.0  |
| IND | 0.0  | 0.0  | 0.0  | 0.0  | 0.0  | 0.0  | 0.0  | 0.0  | 0.0  | 0.0  |
| JPN | 0.1  | 0.1  | 0.0  | 0.0  | 0.0  | 0.0  | 0.0  | 0.0  | 0.0  | 0.0  |
| LAM | 0.6  | 0.8  | 0.7  | 0.6  | 0.5  | 0.7  | 0.7  | 0.6  | 0.7  | 0.7  |
| MEA | 0.0  | 0.0  | 0.0  | 0.0  | 0.0  | 0.0  | 0.0  | 0.0  | 0.0  | 0.0  |
| NEU | 0.0  | 0.0  | 0.0  | 0.0  | 0.0  | 0.0  | 0.0  | 0.0  | 0.0  | 0.0  |
| OAS | 0.2  | 0.3  | 0.3  | 0.3  | 0.3  | 0.2  | 1.8  | 2.6  | 2.7  | 5.0  |
| REF | 0.0  | 0.0  | 0.0  | 0.0  | 0.0  | 0.0  | 0.0  | 0.0  | 0.0  | 0.0  |
| SSA | 1.0  | 1.8  | 1.3  | 0.7  | 0.7  | 1.9  | 3.2  | 4.3  | 6.0  | 4.2  |
| USA | 0.0  | 0.0  | 0.0  | 0.0  | 0.0  | 0.0  | 0.0  | 0.0  | 0.0  | 0.0  |

Table 502: FAO — Demand—Material—Crops—Other crops—Tropical roots (Mt DM/yr)

8.2.15   Sugar crops

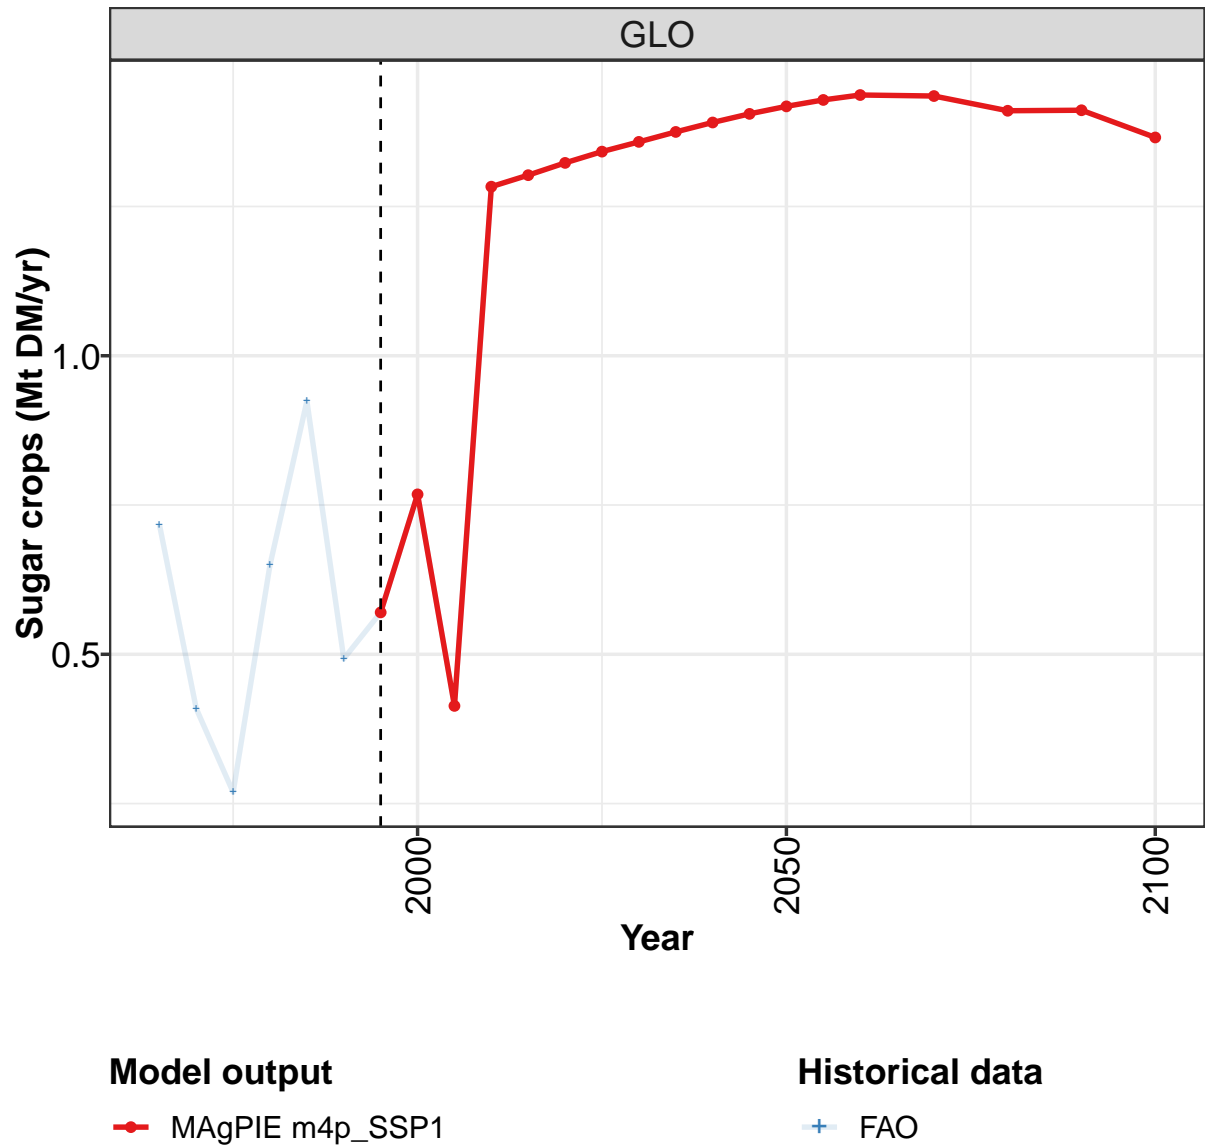

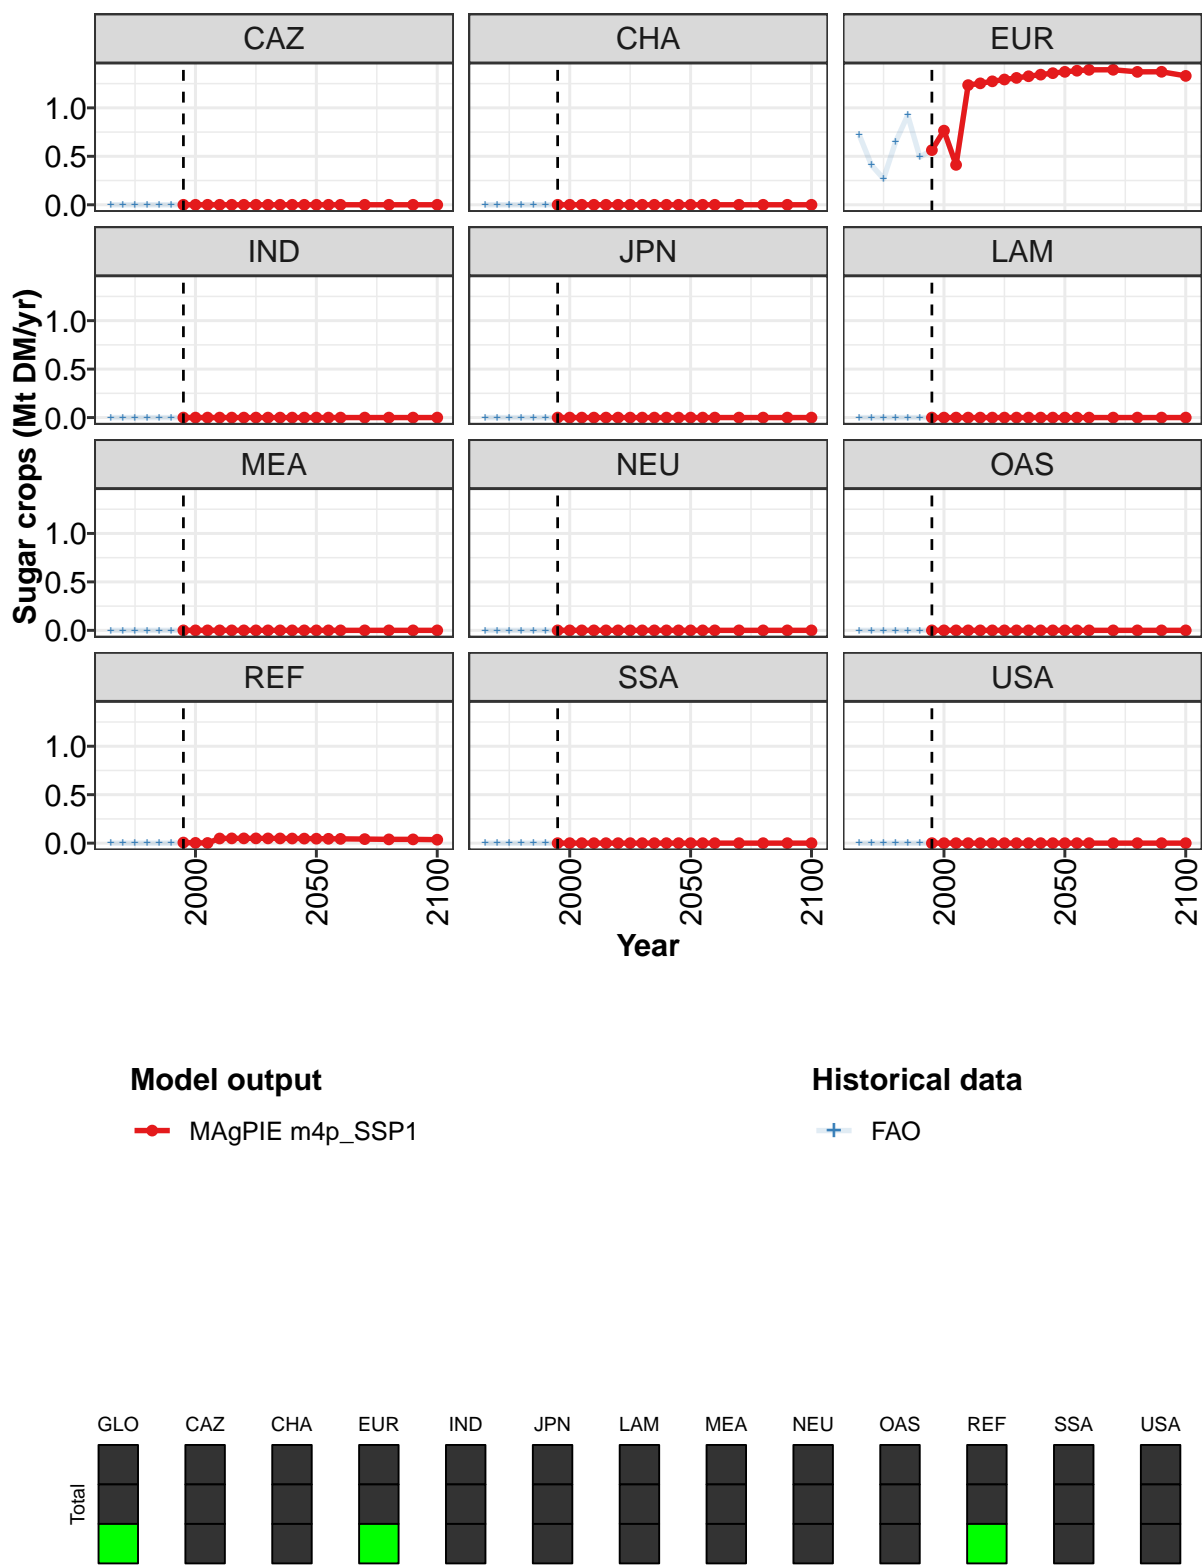

Figure 168: MAgPIE m4p\_SSP1 — Demand—Material—Crops—Sugar crops (Mt DM/yr)

|     | 1995 | 2000 | 2005 | 2010 | 2015 | 2020 | 2025 | 2030 | 2035 | 2040 | 2045 |
|-----|------|------|------|------|------|------|------|------|------|------|------|
| GLO | 0.57 | 0.77 | 0.41 | 1.28 | 1.30 | 1.32 | 1.34 | 1.36 | 1.37 | 1.39 | 1.41 |
| CAZ | 0.00 | 0.00 | 0.00 | 0.00 | 0.00 | 0.00 | 0.00 | 0.00 | 0.00 | 0.00 | 0.00 |
| CHA | 0.00 | 0.00 | 0.00 | 0.00 | 0.00 | 0.00 | 0.00 | 0.00 | 0.00 | 0.00 | 0.00 |
| EUR | 0.56 | 0.77 | 0.41 | 1.24 | 1.25 | 1.27 | 1.29 | 1.31 | 1.33 | 1.34 | 1.36 |
| IND | 0.00 | 0.00 | 0.00 | 0.00 | 0.00 | 0.00 | 0.00 | 0.00 | 0.00 | 0.00 | 0.00 |
| JPN | 0.00 | 0.00 | 0.00 | 0.00 | 0.00 | 0.00 | 0.00 | 0.00 | 0.00 | 0.00 | 0.00 |
| LAM | 0.00 | 0.00 | 0.00 | 0.00 | 0.00 | 0.00 | 0.00 | 0.00 | 0.00 | 0.00 | 0.00 |
| MEA | 0.00 | 0.00 | 0.00 | 0.00 | 0.00 | 0.00 | 0.00 | 0.00 | 0.00 | 0.00 | 0.00 |
| NEU | 0.00 | 0.00 | 0.00 | 0.00 | 0.00 | 0.00 | 0.00 | 0.00 | 0.00 | 0.00 | 0.00 |
| OAS | 0.00 | 0.00 | 0.00 | 0.00 | 0.00 | 0.00 | 0.00 | 0.00 | 0.00 | 0.00 | 0.00 |
| REF | 0.01 | 0.00 | 0.00 | 0.05 | 0.05 | 0.05 | 0.05 | 0.05 | 0.05 | 0.05 | 0.05 |
| SSA | 0.00 | 0.00 | 0.00 | 0.00 | 0.00 | 0.00 | 0.00 | 0.00 | 0.00 | 0.00 | 0.00 |
| USA | 0.00 | 0.00 | 0.00 | 0.00 | 0.00 | 0.00 | 0.00 | 0.00 | 0.00 | 0.00 | 0.00 |

Table 503: MAgPIE m4p\_SSP1 — Demand—Material—Crops—Sugar crops (Mt DM/yr) [PART 1/2]

|     | 2050 | 2055 | 2060 | 2070 | 2080 | 2090 | 2100 |
|-----|------|------|------|------|------|------|------|
| GLO | 1.42 | 1.43 | 1.44 | 1.44 | 1.41 | 1.41 | 1.37 |
| CAZ | 0.00 | 0.00 | 0.00 | 0.00 | 0.00 | 0.00 | 0.00 |
| CHA | 0.00 | 0.00 | 0.00 | 0.00 | 0.00 | 0.00 | 0.00 |
| EUR | 1.37 | 1.38 | 1.39 | 1.39 | 1.37 | 1.37 | 1.33 |
| IND | 0.00 | 0.00 | 0.00 | 0.00 | 0.00 | 0.00 | 0.00 |
| JPN | 0.00 | 0.00 | 0.00 | 0.00 | 0.00 | 0.00 | 0.00 |
| LAM | 0.00 | 0.00 | 0.00 | 0.00 | 0.00 | 0.00 | 0.00 |
| MEA | 0.00 | 0.00 | 0.00 | 0.00 | 0.00 | 0.00 | 0.00 |
| NEU | 0.00 | 0.00 | 0.00 | 0.00 | 0.00 | 0.00 | 0.00 |
| OAS | 0.00 | 0.00 | 0.00 | 0.00 | 0.00 | 0.00 | 0.00 |
| REF | 0.05 | 0.05 | 0.04 | 0.04 | 0.04 | 0.04 | 0.04 |
| SSA | 0.00 | 0.00 | 0.00 | 0.00 | 0.00 | 0.00 | 0.00 |
| USA | 0.00 | 0.00 | 0.00 | 0.00 | 0.00 | 0.00 | 0.00 |

Table 504: MAgPIE m4p\_SSP1 — Demand—Material—Crops—Sugar crops (Mt DM/yr) [PART 2/2]

|     | 1965 | 1970 | 1975 | 1980 | 1985 | 1990 | 1995 | 2000 | 2005 | 2010 |
|-----|------|------|------|------|------|------|------|------|------|------|
| GLO | 0.72 | 0.41 | 0.27 | 0.65 | 0.92 | 0.49 | 0.57 | 0.77 | 0.41 | 1.28 |
| CAZ | 0.00 | 0.00 | 0.00 | 0.00 | 0.00 | 0.00 | 0.00 | 0.00 | 0.00 | 0.00 |
| CHA | 0.00 | 0.00 | 0.00 | 0.00 | 0.00 | 0.00 | 0.00 | 0.00 | 0.00 | 0.00 |
| EUR | 0.72 | 0.41 | 0.27 | 0.65 | 0.92 | 0.49 | 0.56 | 0.77 | 0.41 | 1.24 |
| IND | 0.00 | 0.00 | 0.00 | 0.00 | 0.00 | 0.00 | 0.00 | 0.00 | 0.00 | 0.00 |
| JPN | 0.00 | 0.00 | 0.00 | 0.00 | 0.00 | 0.00 | 0.00 | 0.00 | 0.00 | 0.00 |
| LAM | 0.00 | 0.00 | 0.00 | 0.00 | 0.00 | 0.00 | 0.00 | 0.00 | 0.00 | 0.00 |
| MEA | 0.00 | 0.00 | 0.00 | 0.00 | 0.00 | 0.00 | 0.00 | 0.00 | 0.00 | 0.00 |
| NEU | 0.00 | 0.00 | 0.00 | 0.00 | 0.00 | 0.00 | 0.00 | 0.00 | 0.00 | 0.00 |
| OAS | 0.00 | 0.00 | 0.00 | 0.00 | 0.00 | 0.00 | 0.00 | 0.00 | 0.00 | 0.00 |
| REF | 0.00 | 0.00 | 0.00 | 0.00 | 0.00 | 0.00 | 0.01 | 0.00 | 0.00 | 0.05 |
| SSA | 0.00 | 0.00 | 0.00 | 0.00 | 0.00 | 0.00 | 0.00 | 0.00 | 0.00 | 0.00 |
| USA | 0.00 | 0.00 | 0.00 | 0.00 | 0.00 | 0.00 | 0.00 | 0.00 | 0.00 | 0.00 |

Table 505: FAO — Demand—Material—Crops—Sugar crops (Mt DM/yr)

8.2.16 Sugar crops—Sugar beet

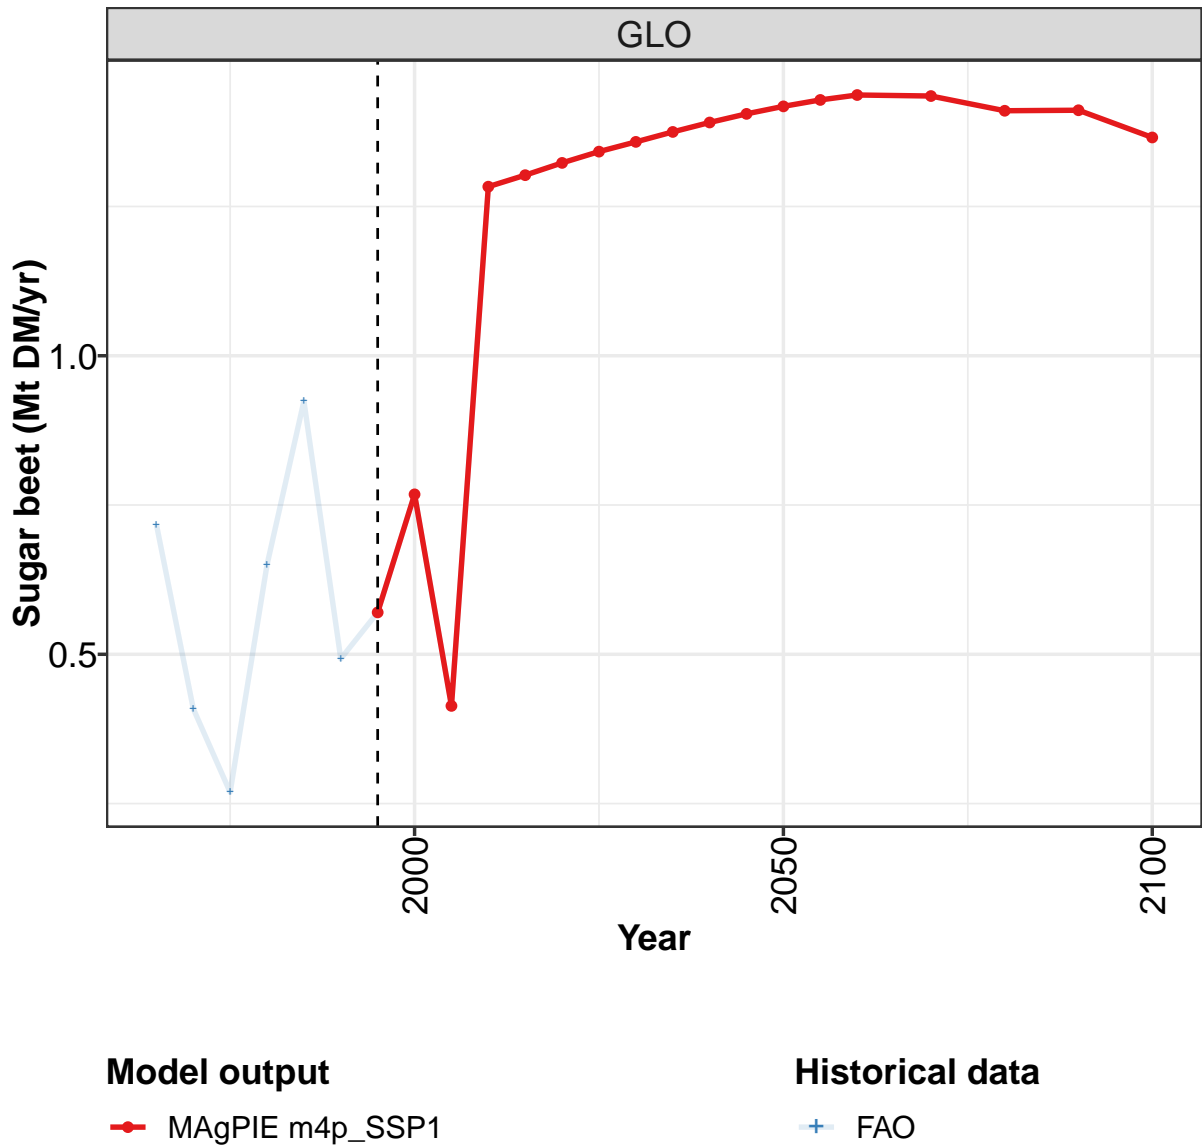

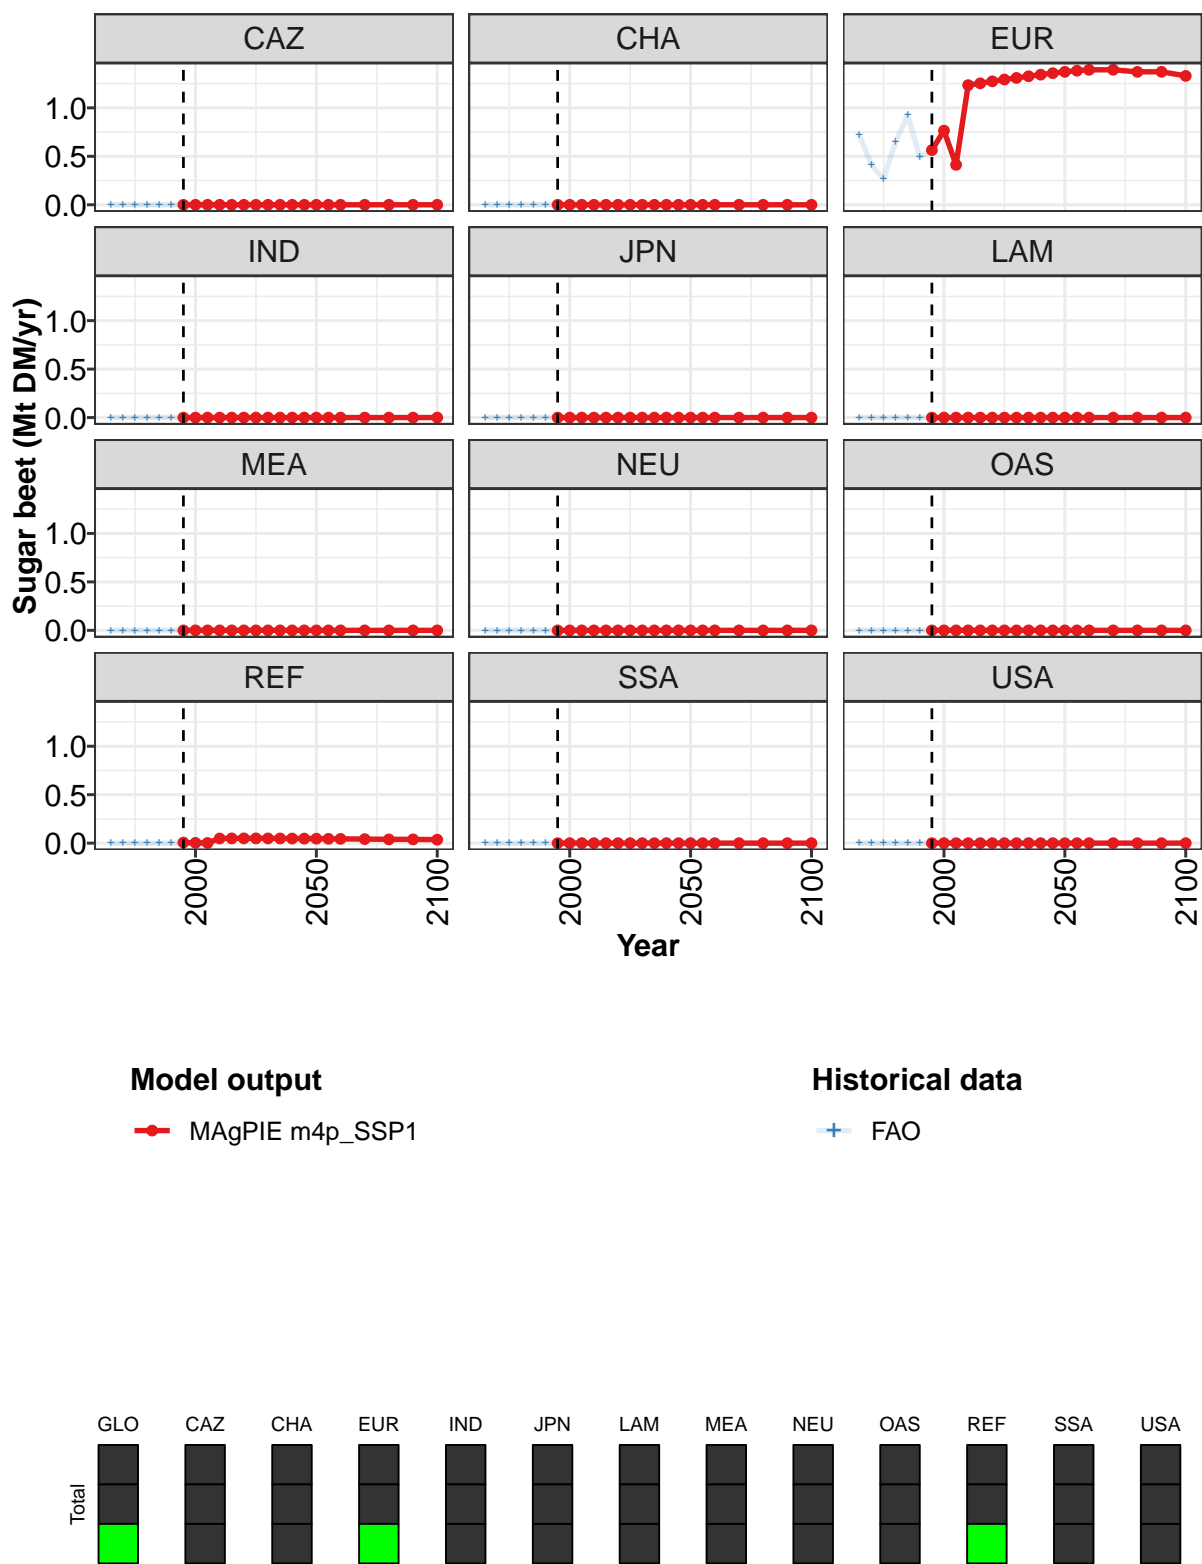

Figure 169: MAgPIE m4p\_SSP1 — Demand—Material—Crops—Sugar crops—Sugar beet (Mt DM/yr)

|     | 1995 | 2000 | 2005 | 2010 | 2015 | 2020 | 2025 | 2030 | 2035 | 2040 | 2045 |
|-----|------|------|------|------|------|------|------|------|------|------|------|
| GLO | 0.57 | 0.77 | 0.41 | 1.28 | 1.30 | 1.32 | 1.34 | 1.36 | 1.37 | 1.39 | 1.41 |
| CAZ | 0.00 | 0.00 | 0.00 | 0.00 | 0.00 | 0.00 | 0.00 | 0.00 | 0.00 | 0.00 | 0.00 |
| CHA | 0.00 | 0.00 | 0.00 | 0.00 | 0.00 | 0.00 | 0.00 | 0.00 | 0.00 | 0.00 | 0.00 |
| EUR | 0.56 | 0.77 | 0.41 | 1.24 | 1.25 | 1.27 | 1.29 | 1.31 | 1.33 | 1.34 | 1.36 |
| IND | 0.00 | 0.00 | 0.00 | 0.00 | 0.00 | 0.00 | 0.00 | 0.00 | 0.00 | 0.00 | 0.00 |
| JPN | 0.00 | 0.00 | 0.00 | 0.00 | 0.00 | 0.00 | 0.00 | 0.00 | 0.00 | 0.00 | 0.00 |
| LAM | 0.00 | 0.00 | 0.00 | 0.00 | 0.00 | 0.00 | 0.00 | 0.00 | 0.00 | 0.00 | 0.00 |
| MEA | 0.00 | 0.00 | 0.00 | 0.00 | 0.00 | 0.00 | 0.00 | 0.00 | 0.00 | 0.00 | 0.00 |
| NEU | 0.00 | 0.00 | 0.00 | 0.00 | 0.00 | 0.00 | 0.00 | 0.00 | 0.00 | 0.00 | 0.00 |
| OAS | 0.00 | 0.00 | 0.00 | 0.00 | 0.00 | 0.00 | 0.00 | 0.00 | 0.00 | 0.00 | 0.00 |
| REF | 0.01 | 0.00 | 0.00 | 0.05 | 0.05 | 0.05 | 0.05 | 0.05 | 0.05 | 0.05 | 0.05 |
| SSA | 0.00 | 0.00 | 0.00 | 0.00 | 0.00 | 0.00 | 0.00 | 0.00 | 0.00 | 0.00 | 0.00 |
| USA | 0.00 | 0.00 | 0.00 | 0.00 | 0.00 | 0.00 | 0.00 | 0.00 | 0.00 | 0.00 | 0.00 |

Table 506: MAgPIE m4p\_SSP1 — Demand—Material—Crops—Sugar crops—Sugar beet (Mt DM/yr) [PART 1/2]

|     | 2050 | 2055 | 2060 | 2070 | 2080 | 2090 | 2100 |
|-----|------|------|------|------|------|------|------|
| GLO | 1.42 | 1.43 | 1.44 | 1.44 | 1.41 | 1.41 | 1.37 |
| CAZ | 0.00 | 0.00 | 0.00 | 0.00 | 0.00 | 0.00 | 0.00 |
| CHA | 0.00 | 0.00 | 0.00 | 0.00 | 0.00 | 0.00 | 0.00 |
| EUR | 1.37 | 1.38 | 1.39 | 1.39 | 1.37 | 1.37 | 1.33 |
| IND | 0.00 | 0.00 | 0.00 | 0.00 | 0.00 | 0.00 | 0.00 |
| JPN | 0.00 | 0.00 | 0.00 | 0.00 | 0.00 | 0.00 | 0.00 |
| LAM | 0.00 | 0.00 | 0.00 | 0.00 | 0.00 | 0.00 | 0.00 |
| MEA | 0.00 | 0.00 | 0.00 | 0.00 | 0.00 | 0.00 | 0.00 |
| NEU | 0.00 | 0.00 | 0.00 | 0.00 | 0.00 | 0.00 | 0.00 |
| OAS | 0.00 | 0.00 | 0.00 | 0.00 | 0.00 | 0.00 | 0.00 |
| REF | 0.05 | 0.05 | 0.04 | 0.04 | 0.04 | 0.04 | 0.04 |
| SSA | 0.00 | 0.00 | 0.00 | 0.00 | 0.00 | 0.00 | 0.00 |
| USA | 0.00 | 0.00 | 0.00 | 0.00 | 0.00 | 0.00 | 0.00 |

Table 507: MAgPIE m4p\_SSP1 — Demand—Material—Crops—Sugar crops—Sugar beet (Mt DM/yr) [PART 2/2]

|     | 1965 | 1970 | 1975 | 1980 | 1985 | 1990 | 1995 | 2000 | 2005 | 2010 |
|-----|------|------|------|------|------|------|------|------|------|------|
| GLO | 0.72 | 0.41 | 0.27 | 0.65 | 0.92 | 0.49 | 0.57 | 0.77 | 0.41 | 1.28 |
| CAZ | 0.00 | 0.00 | 0.00 | 0.00 | 0.00 | 0.00 | 0.00 | 0.00 | 0.00 | 0.00 |
| CHA | 0.00 | 0.00 | 0.00 | 0.00 | 0.00 | 0.00 | 0.00 | 0.00 | 0.00 | 0.00 |
| EUR | 0.72 | 0.41 | 0.27 | 0.65 | 0.92 | 0.49 | 0.56 | 0.77 | 0.41 | 1.24 |
| IND | 0.00 | 0.00 | 0.00 | 0.00 | 0.00 | 0.00 | 0.00 | 0.00 | 0.00 | 0.00 |
| JPN | 0.00 | 0.00 | 0.00 | 0.00 | 0.00 | 0.00 | 0.00 | 0.00 | 0.00 | 0.00 |
| LAM | 0.00 | 0.00 | 0.00 | 0.00 | 0.00 | 0.00 | 0.00 | 0.00 | 0.00 | 0.00 |
| MEA | 0.00 | 0.00 | 0.00 | 0.00 | 0.00 | 0.00 | 0.00 | 0.00 | 0.00 | 0.00 |
| NEU | 0.00 | 0.00 | 0.00 | 0.00 | 0.00 | 0.00 | 0.00 | 0.00 | 0.00 | 0.00 |
| OAS | 0.00 | 0.00 | 0.00 | 0.00 | 0.00 | 0.00 | 0.00 | 0.00 | 0.00 | 0.00 |
| REF | 0.00 | 0.00 | 0.00 | 0.00 | 0.00 | 0.00 | 0.01 | 0.00 | 0.00 | 0.05 |
| SSA | 0.00 | 0.00 | 0.00 | 0.00 | 0.00 | 0.00 | 0.00 | 0.00 | 0.00 | 0.00 |
| USA | 0.00 | 0.00 | 0.00 | 0.00 | 0.00 | 0.00 | 0.00 | 0.00 | 0.00 | 0.00 |

Table 508: FAO — Demand—Material—Crops—Sugar crops—Sugar beet (Mt DM/yr)

8.3 Fish

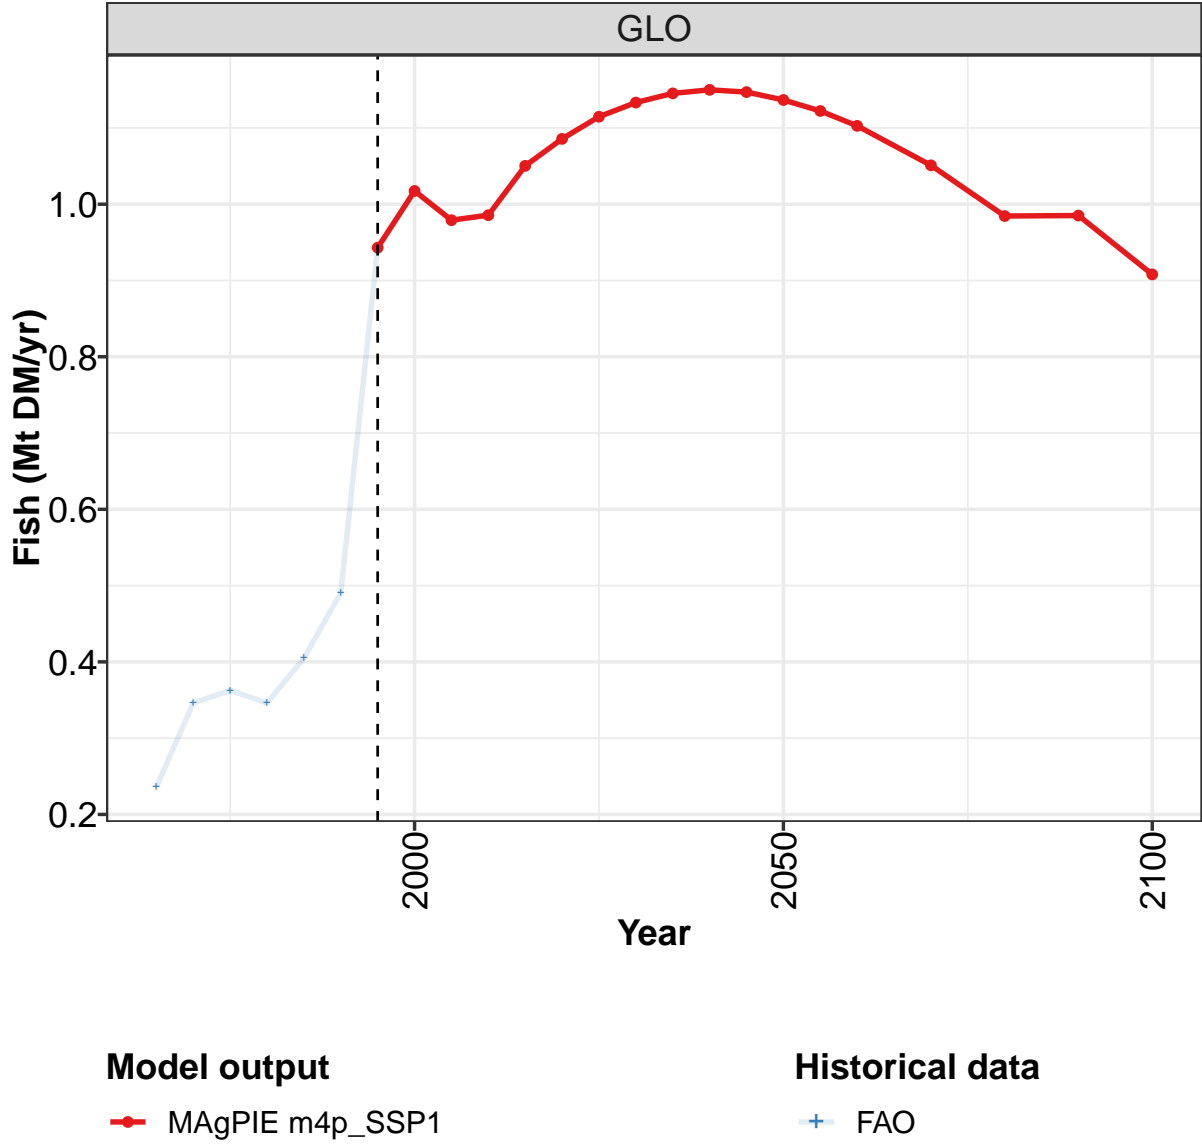



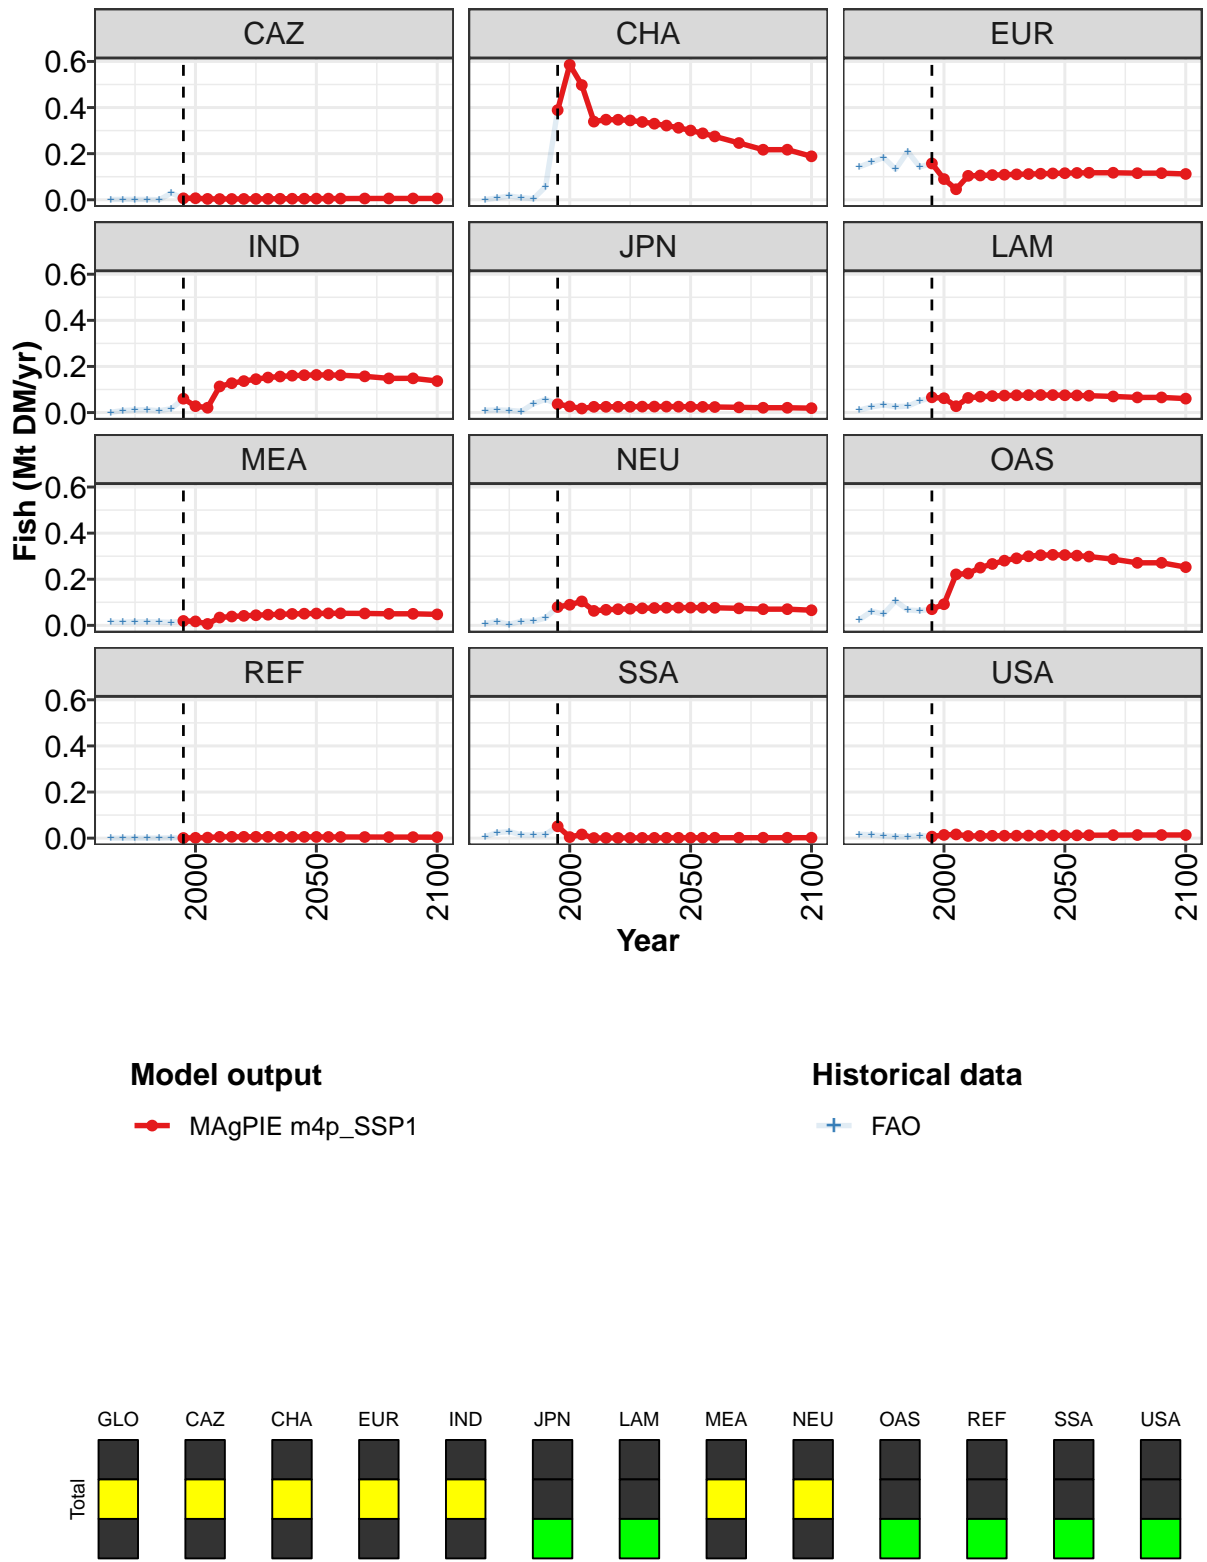

Figure 170: MAgPIE m4p\_SSP1 — Demand—Material—Fish (Mt DM/yr)

|     | 1995 | 2000 | 2005 | 2010 | 2015 | 2020 | 2025 | 2030 | 2035 | 2040 | 2045 |
|-----|------|------|------|------|------|------|------|------|------|------|------|
| GLO | 0.94 | 1.02 | 0.98 | 0.99 | 1.05 | 1.09 | 1.11 | 1.13 | 1.15 | 1.15 | 1.15 |
| CAZ | 0.01 | 0.01 | 0.00 | 0.00 | 0.00 | 0.00 | 0.00 | 0.00 | 0.00 | 0.00 | 0.00 |
| CHA | 0.39 | 0.59 | 0.50 | 0.34 | 0.35 | 0.35 | 0.34 | 0.34 | 0.33 | 0.32 | 0.31 |
| EUR | 0.16 | 0.09 | 0.05 | 0.10 | 0.11 | 0.11 | 0.11 | 0.11 | 0.11 | 0.11 | 0.11 |
| IND | 0.06 | 0.03 | 0.02 | 0.11 | 0.13 | 0.14 | 0.14 | 0.15 | 0.16 | 0.16 | 0.16 |
| JPN | 0.04 | 0.03 | 0.02 | 0.03 | 0.03 | 0.03 | 0.03 | 0.03 | 0.03 | 0.03 | 0.03 |
| LAM | 0.07 | 0.06 | 0.03 | 0.06 | 0.07 | 0.07 | 0.07 | 0.07 | 0.08 | 0.08 | 0.08 |
| MEA | 0.02 | 0.02 | 0.01 | 0.03 | 0.04 | 0.04 | 0.04 | 0.05 | 0.05 | 0.05 | 0.05 |
| NEU | 0.08 | 0.09 | 0.10 | 0.06 | 0.07 | 0.07 | 0.07 | 0.07 | 0.08 | 0.08 | 0.08 |
| OAS | 0.07 | 0.09 | 0.22 | 0.22 | 0.25 | 0.27 | 0.28 | 0.29 | 0.30 | 0.30 | 0.31 |
| REF | 0.00 | 0.00 | 0.00 | 0.01 | 0.01 | 0.01 | 0.01 | 0.01 | 0.01 | 0.01 | 0.01 |
| SSA | 0.05 | 0.00 | 0.02 | 0.00 | 0.00 | 0.00 | 0.00 | 0.00 | 0.00 | 0.00 | 0.00 |
| USA | 0.01 | 0.01 | 0.02 | 0.01 | 0.01 | 0.01 | 0.01 | 0.01 | 0.01 | 0.01 | 0.01 |

Table 509: MAgPIE m4p\_SSP1 — Demand—Material—Fish (Mt DM/yr) [PART 1/2]

|     | 2050 | 2055 | 2060 | 2070 | 2080 | 2090 | 2100 |
|-----|------|------|------|------|------|------|------|
| GLO | 1.14 | 1.12 | 1.10 | 1.05 | 0.98 | 0.99 | 0.91 |
| CAZ | 0.00 | 0.01 | 0.01 | 0.01 | 0.01 | 0.01 | 0.01 |
| CHA | 0.30 | 0.29 | 0.27 | 0.25 | 0.22 | 0.22 | 0.19 |
| EUR | 0.12 | 0.12 | 0.12 | 0.12 | 0.12 | 0.12 | 0.11 |
| IND | 0.16 | 0.16 | 0.16 | 0.16 | 0.15 | 0.15 | 0.14 |
| JPN | 0.03 | 0.02 | 0.02 | 0.02 | 0.02 | 0.02 | 0.02 |
| LAM | 0.08 | 0.07 | 0.07 | 0.07 | 0.07 | 0.07 | 0.06 |
| MEA | 0.05 | 0.05 | 0.05 | 0.05 | 0.05 | 0.05 | 0.05 |
| NEU | 0.08 | 0.08 | 0.08 | 0.07 | 0.07 | 0.07 | 0.07 |
| OAS | 0.30 | 0.30 | 0.30 | 0.29 | 0.27 | 0.27 | 0.25 |
| REF | 0.01 | 0.01 | 0.01 | 0.00 | 0.00 | 0.00 | 0.00 |
| SSA | 0.00 | 0.00 | 0.00 | 0.00 | 0.00 | 0.00 | 0.00 |
| USA | 0.01 | 0.01 | 0.01 | 0.01 | 0.01 | 0.01 | 0.01 |

Table 510: MAgPIE m4p\_SSP1 — Demand—Material—Fish (Mt DM/yr) [PART 2/2]

|     | 1965 | 1970 | 1975 | 1980 | 1985 | 1990 | 1995 | 2000 | 2005 | 2010 |
|-----|------|------|------|------|------|------|------|------|------|------|
| GLO | 0.24 | 0.35 | 0.36 | 0.35 | 0.40 | 0.49 | 0.94 | 1.02 | 0.98 | 0.99 |
| CAZ | 0.00 | 0.00 | 0.00 | 0.00 | 0.00 | 0.03 | 0.01 | 0.01 | 0.00 | 0.00 |
| CHA | 0.00 | 0.01 | 0.02 | 0.01 | 0.00 | 0.06 | 0.39 | 0.59 | 0.50 | 0.34 |
| EUR | 0.14 | 0.16 | 0.18 | 0.13 | 0.21 | 0.14 | 0.16 | 0.09 | 0.05 | 0.10 |
| IND | 0.00 | 0.01 | 0.01 | 0.01 | 0.01 | 0.02 | 0.06 | 0.03 | 0.02 | 0.11 |
| JPN | 0.01 | 0.01 | 0.01 | 0.01 | 0.04 | 0.06 | 0.04 | 0.03 | 0.02 | 0.03 |
| LAM | 0.01 | 0.02 | 0.03 | 0.03 | 0.03 | 0.05 | 0.07 | 0.06 | 0.03 | 0.06 |
| MEA | 0.01 | 0.01 | 0.02 | 0.02 | 0.01 | 0.01 | 0.02 | 0.02 | 0.01 | 0.03 |
| NEU | 0.01 | 0.02 | 0.00 | 0.02 | 0.02 | 0.03 | 0.08 | 0.09 | 0.10 | 0.06 |
| OAS | 0.02 | 0.06 | 0.05 | 0.11 | 0.07 | 0.06 | 0.07 | 0.09 | 0.22 | 0.22 |
| REF | 0.00 | 0.00 | 0.00 | 0.00 | 0.00 | 0.00 | 0.00 | 0.00 | 0.00 | 0.01 |
| SSA | 0.01 | 0.02 | 0.03 | 0.01 | 0.01 | 0.02 | 0.05 | 0.00 | 0.02 | 0.00 |
| USA | 0.02 | 0.01 | 0.01 | 0.01 | 0.01 | 0.01 | 0.01 | 0.01 | 0.02 | 0.01 |

Table 511: FAO — Demand—Material—Fish (Mt DM/yr)

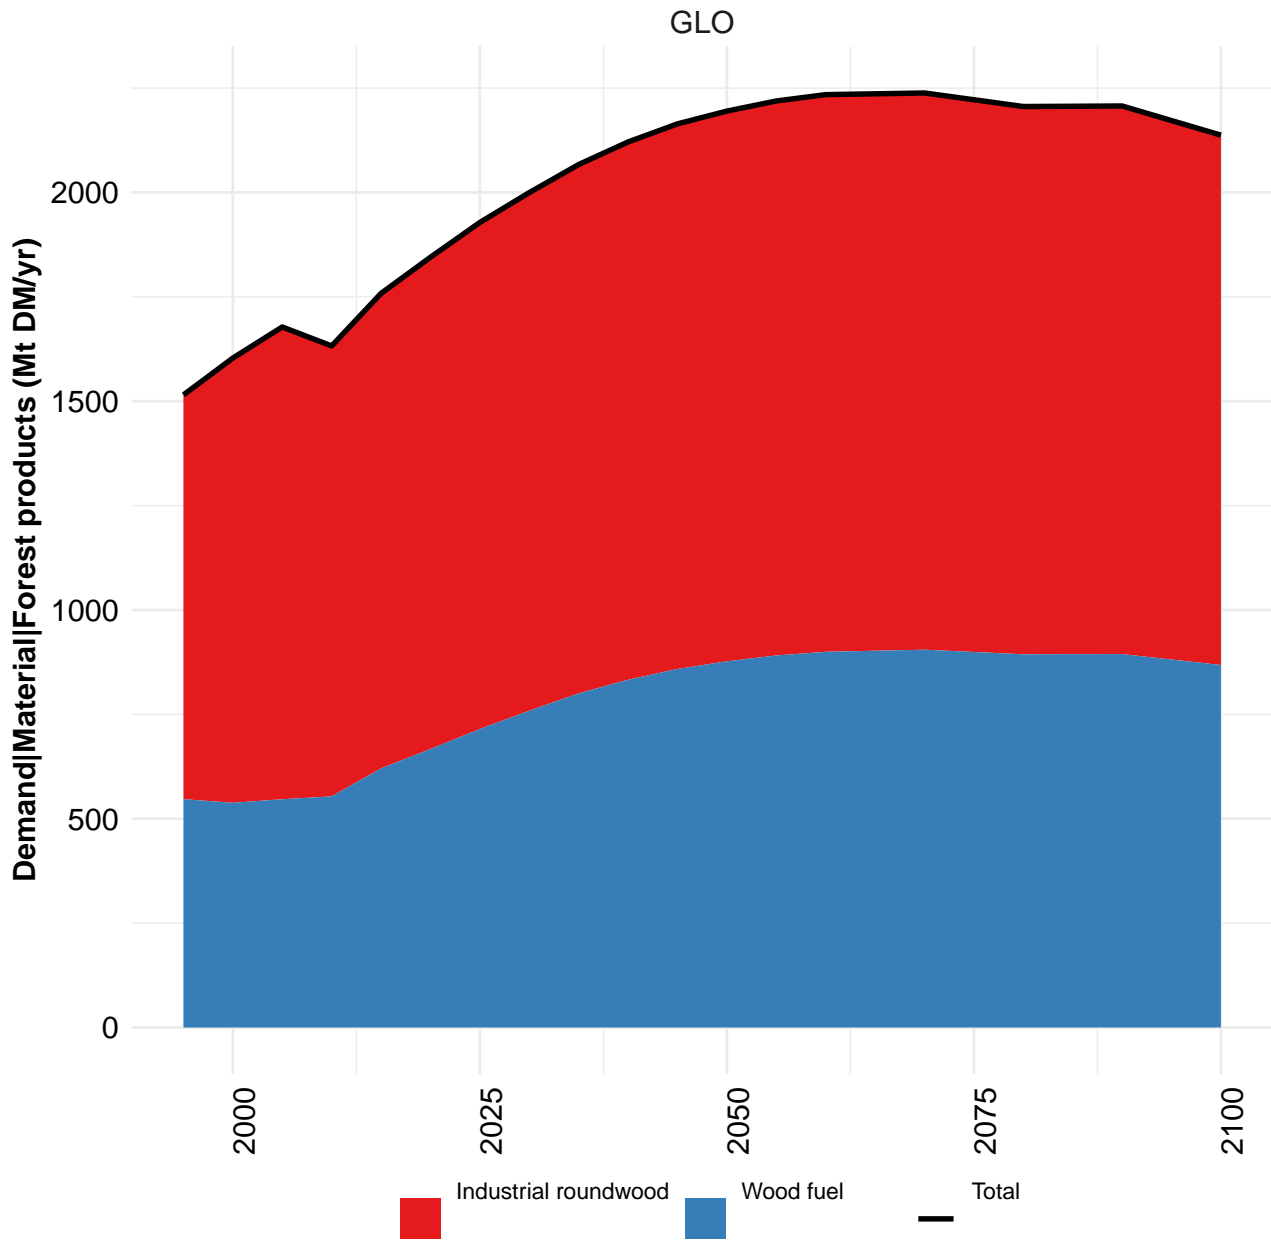

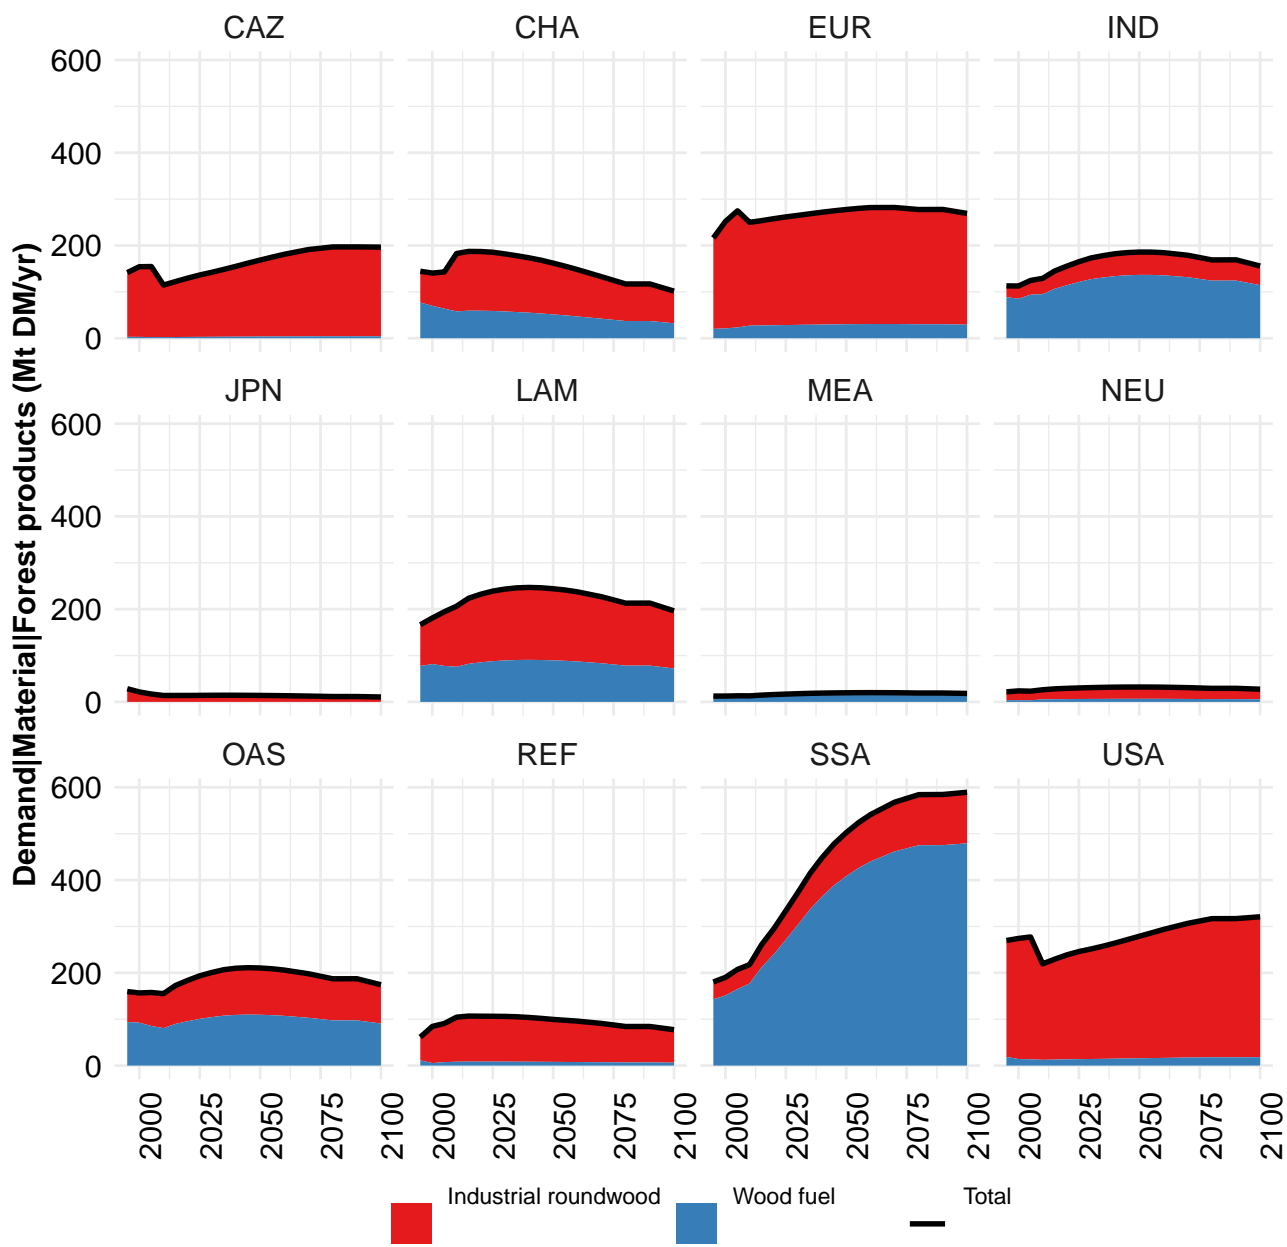

8.4 Forest products

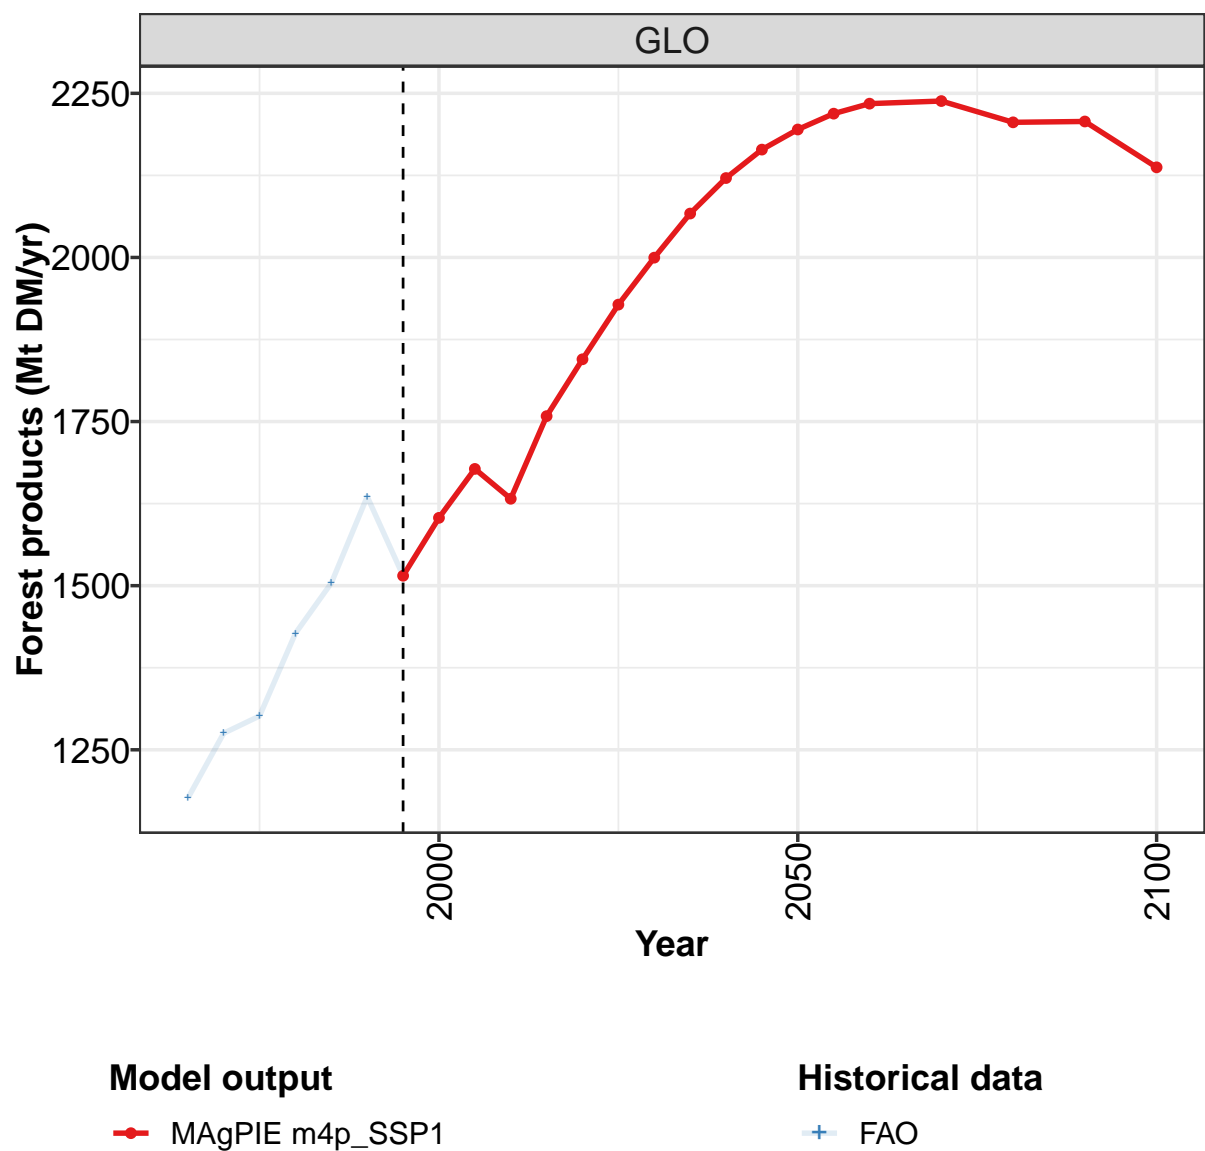

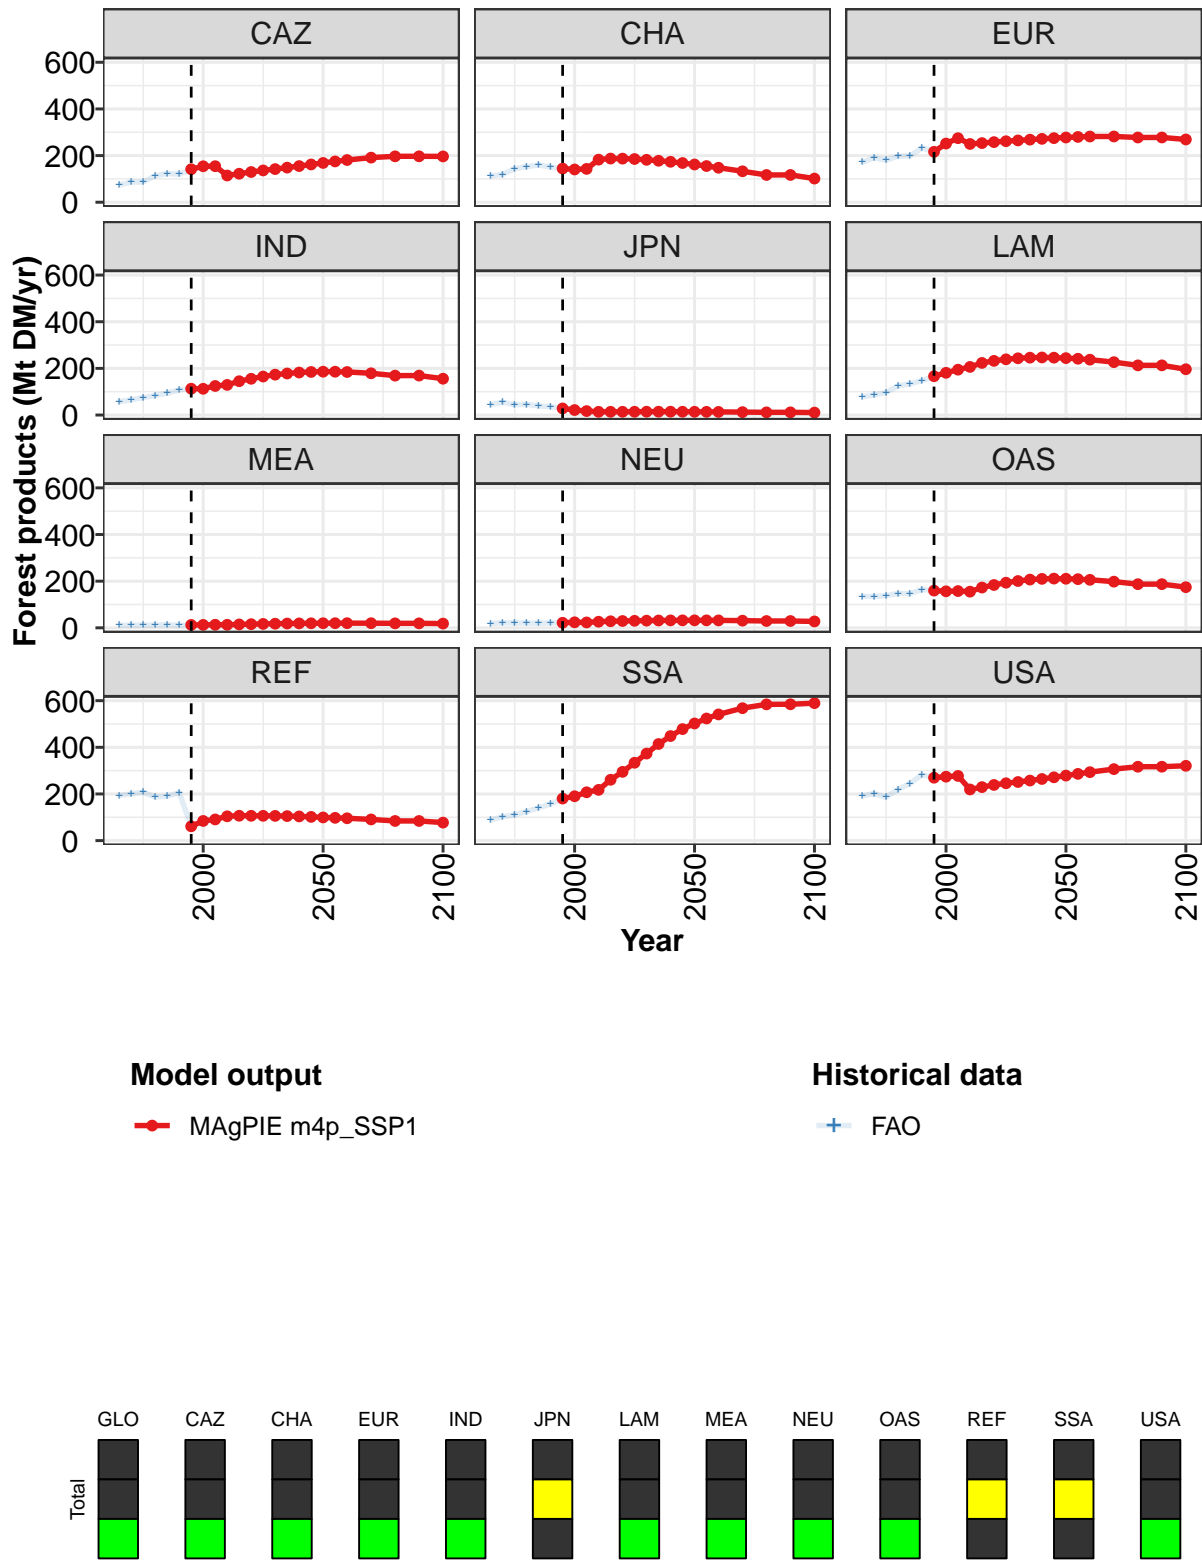

Figure 171: MAGPIE m4p\_SSP1 — Demand—Material—Forest products (Mt DM/yr)

|     | 1995 | 2000 | 2005 | 2010 | 2015 | 2020 | 2025 | 2030 | 2035 | 2040 | 2045 |
|-----|------|------|------|------|------|------|------|------|------|------|------|
| GLO | 1515 | 1603 | 1678 | 1632 | 1758 | 1845 | 1928 | 2000 | 2067 | 2121 | 2164 |
| CAZ | 142  | 154  | 155  | 115  | 122  | 130  | 136  | 142  | 148  | 155  | 162  |
| CHA | 144  | 141  | 143  | 183  | 187  | 187  | 185  | 182  | 178  | 173  | 168  |
| EUR | 216  | 252  | 275  | 250  | 254  | 258  | 262  | 265  | 268  | 272  | 275  |
| IND | 113  | 113  | 125  | 129  | 145  | 155  | 165  | 173  | 178  | 182  | 185  |
| JPN | 28   | 22   | 17   | 14   | 14   | 14   | 14   | 14   | 14   | 14   | 14   |
| LAM | 166  | 181  | 194  | 206  | 224  | 232  | 239  | 243  | 246  | 247  | 246  |
| MEA | 13   | 13   | 13   | 13   | 15   | 16   | 17   | 18   | 18   | 19   | 19   |
| NEU | 22   | 24   | 23   | 26   | 28   | 29   | 30   | 31   | 31   | 32   | 32   |
| OAS | 160  | 157  | 158  | 155  | 173  | 184  | 194  | 201  | 207  | 210  | 211  |
| REF | 61   | 84   | 91   | 104  | 107  | 106  | 106  | 106  | 105  | 104  | 102  |
| SSA | 180  | 190  | 207  | 218  | 261  | 295  | 334  | 373  | 414  | 448  | 478  |
| USA | 270  | 274  | 277  | 219  | 229  | 239  | 246  | 251  | 257  | 264  | 272  |

Table 512: MAgPIE m4p\_SSP1 — Demand—Material—Forest products (Mt DM/yr) [PART 1/2]

|     | 2050 | 2055 | 2060 | 2070 | 2080 | 2090 | 2100 |
|-----|------|------|------|------|------|------|------|
| GLO | 2195 | 2219 | 2234 | 2238 | 2206 | 2207 | 2137 |
| CAZ | 169  | 175  | 181  | 191  | 197  | 197  | 196  |
| CHA | 162  | 155  | 148  | 133  | 117  | 117  | 102  |
| EUR | 278  | 280  | 282  | 282  | 278  | 278  | 269  |
| IND | 186  | 186  | 185  | 179  | 169  | 169  | 156  |
| JPN | 14   | 14   | 13   | 13   | 12   | 12   | 11   |
| LAM | 244  | 241  | 237  | 227  | 213  | 213  | 196  |
| MEA | 20   | 20   | 20   | 20   | 19   | 19   | 18   |
| NEU | 32   | 32   | 32   | 31   | 29   | 29   | 27   |
| OAS | 210  | 209  | 206  | 198  | 187  | 187  | 174  |
| REF | 100  | 98   | 96   | 91   | 84   | 84   | 77   |
| SSA | 502  | 524  | 541  | 568  | 584  | 585  | 589  |
| USA | 279  | 286  | 293  | 307  | 317  | 317  | 321  |

Table 513: MAgPIE m4p\_SSP1 — Demand—Material—Forest products (Mt DM/yr) [PART 2/2]

|     | 1965 | 1970 | 1975 | 1980 | 1985 | 1990 | 1995 | 2000 | 2005 | 2010 |
|-----|------|------|------|------|------|------|------|------|------|------|
| GLO | 1176 | 1275 | 1301 | 1427 | 1504 | 1636 | 1515 | 1603 | 1678 | 1632 |
| CAZ | 74   | 86   | 87   | 114  | 123  | 120  | 142  | 154  | 155  | 115  |
| CHA | 113  | 119  | 144  | 152  | 160  | 150  | 144  | 141  | 143  | 183  |
| EUR | 171  | 191  | 180  | 197  | 199  | 233  | 216  | 252  | 275  | 250  |
| IND | 57   | 66   | 75   | 84   | 94   | 108  | 113  | 113  | 125  | 129  |
| JPN | 44   | 55   | 44   | 45   | 39   | 36   | 28   | 22   | 17   | 14   |
| LAM | 78   | 86   | 97   | 124  | 134  | 148  | 166  | 181  | 194  | 206  |
| MEA | 11   | 11   | 11   | 12   | 13   | 11   | 13   | 13   | 13   | 13   |
| NEU | 19   | 22   | 21   | 21   | 20   | 21   | 22   | 24   | 23   | 26   |
| OAS | 135  | 135  | 138  | 147  | 146  | 164  | 160  | 157  | 158  | 155  |
| REF | 193  | 201  | 208  | 187  | 190  | 206  | 61   | 84   | 91   | 104  |
| SSA | 89   | 102  | 110  | 124  | 141  | 157  | 180  | 190  | 207  | 218  |
| USA | 191  | 202  | 186  | 220  | 245  | 282  | 270  | 274  | 277  | 219  |

Table 514: FAO — Demand—Material—Forest products (Mt DM/yr)

8.4.1 Industrial roundwood

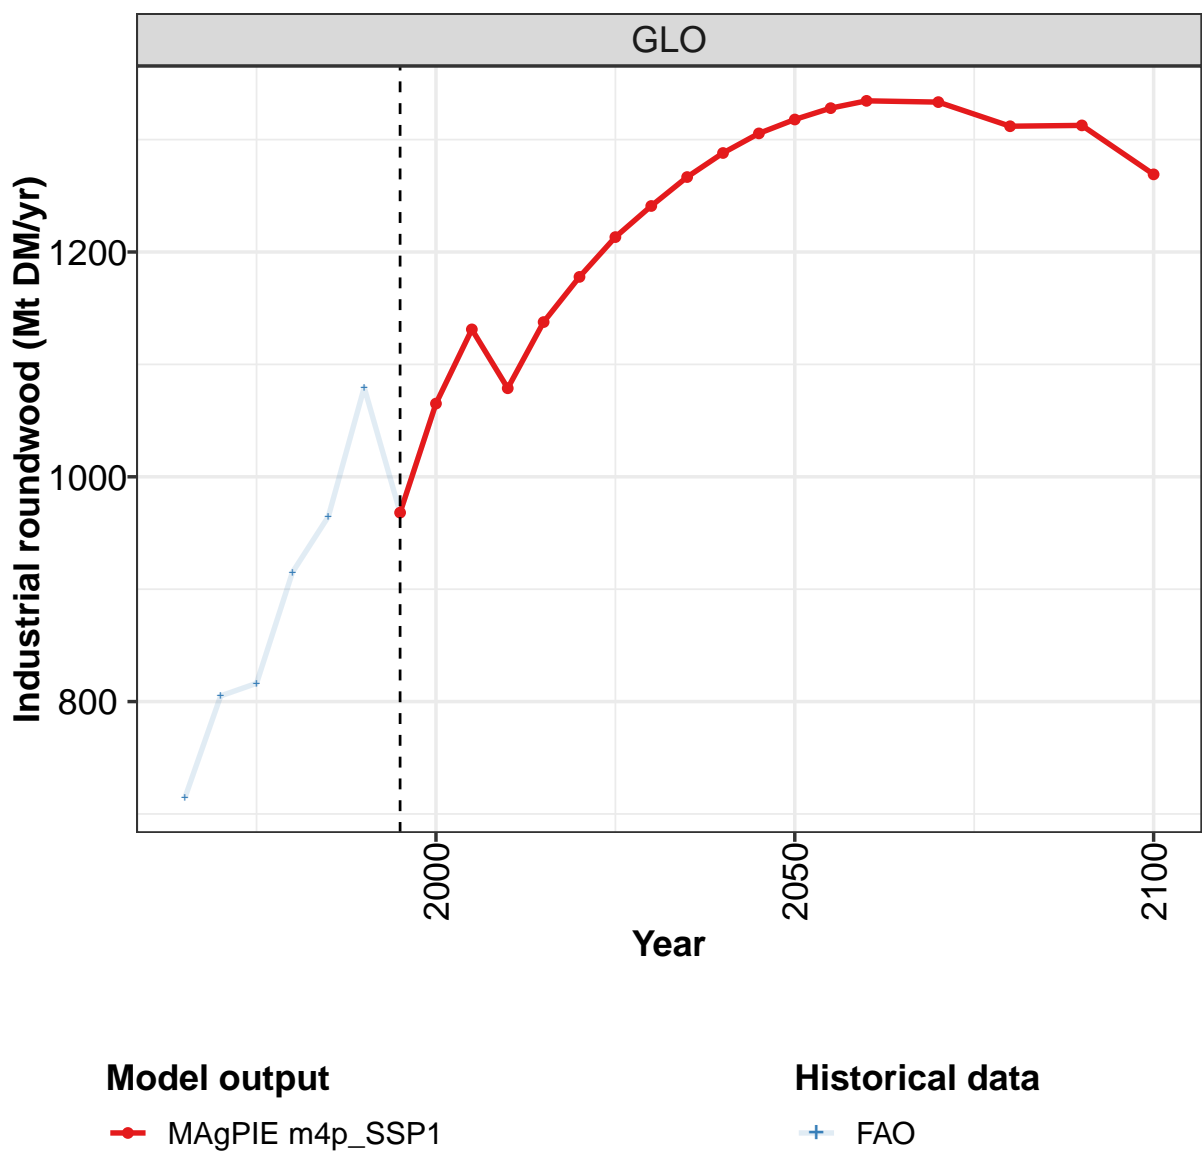



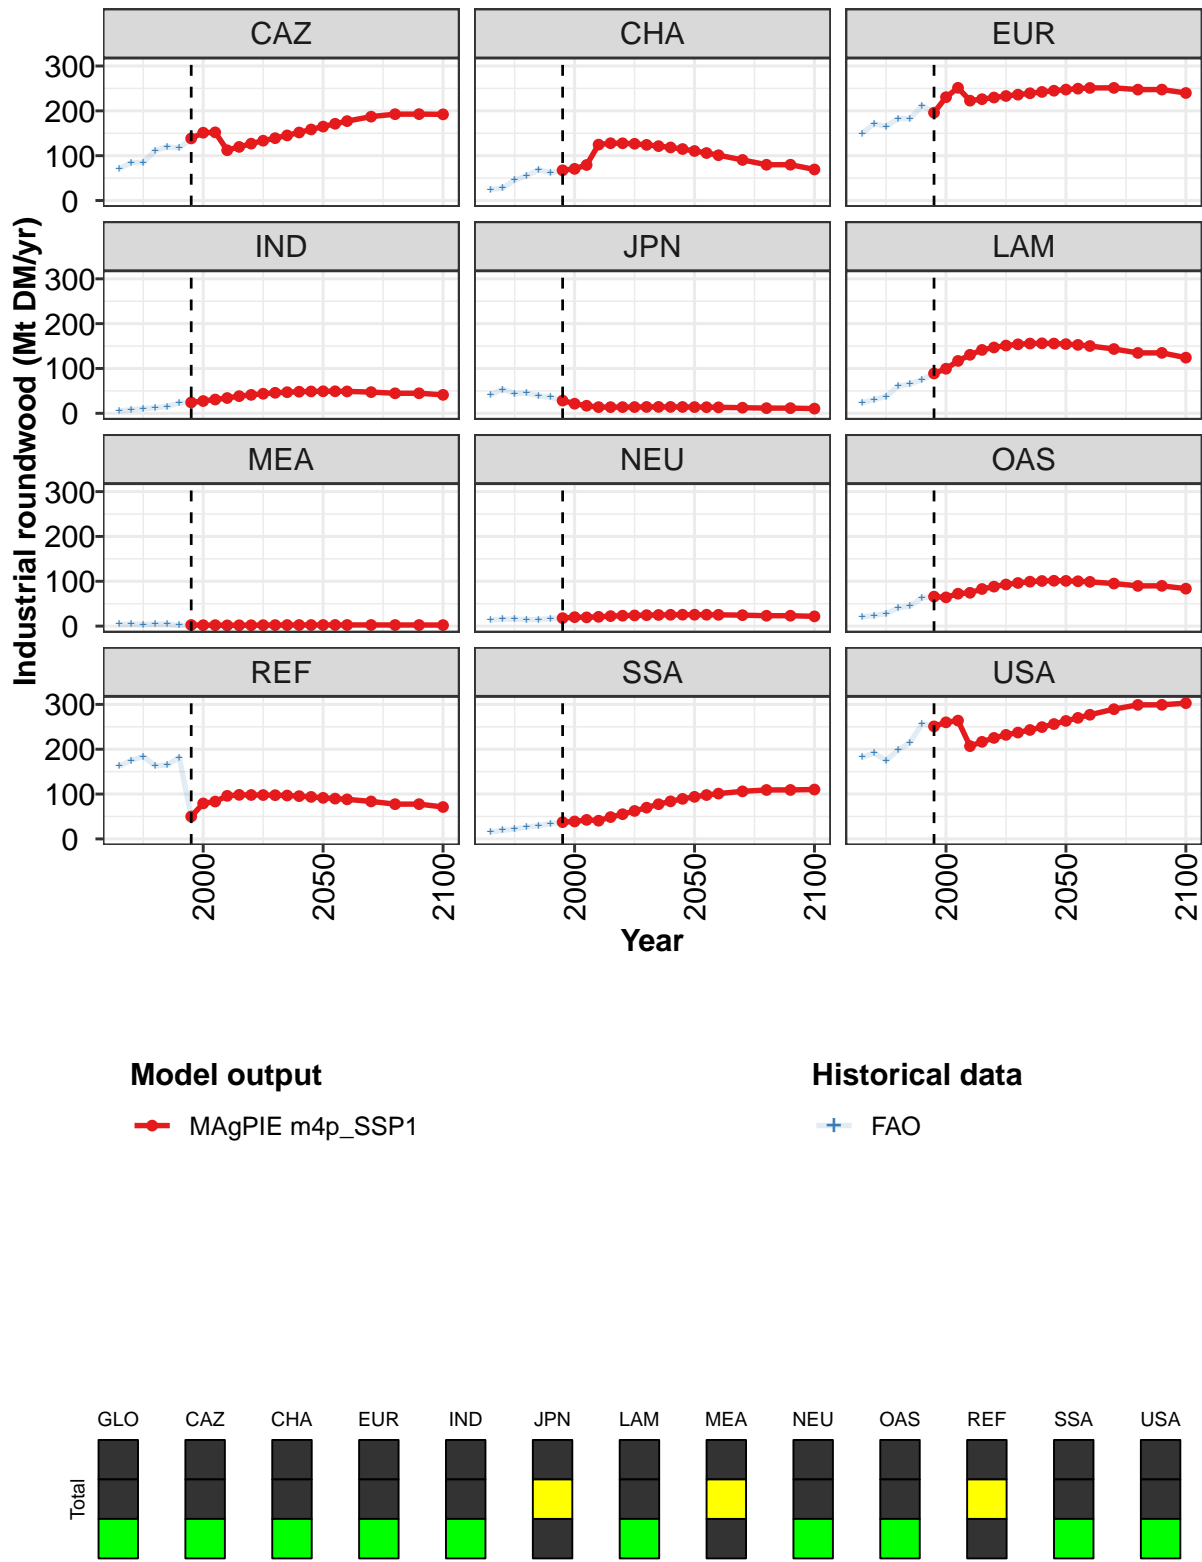

Figure 172: MAgPIE m4p\_SSP1 — Demand—Material—Forest products—Industrial roundwood (Mt DM/yr)

|     | 1995 | 2000 | 2005 | 2010 | 2015 | 2020 | 2025 | 2030 | 2035 | 2040 | 2045 |
|-----|------|------|------|------|------|------|------|------|------|------|------|
| GLO | 968  | 1065 | 1131 | 1079 | 1138 | 1178 | 1213 | 1241 | 1267 | 1288 | 1306 |
| CAZ | 138  | 151  | 152  | 112  | 120  | 127  | 133  | 139  | 145  | 152  | 159  |
| CHA | 67   | 71   | 79   | 125  | 128  | 128  | 127  | 124  | 121  | 118  | 115  |
| EUR | 196  | 230  | 251  | 223  | 226  | 230  | 233  | 236  | 239  | 242  | 245  |
| IND | 24   | 27   | 31   | 34   | 38   | 41   | 44   | 46   | 47   | 48   | 49   |
| JPN | 28   | 21   | 17   | 14   | 14   | 14   | 14   | 14   | 14   | 14   | 14   |
| LAM | 89   | 99   | 117  | 131  | 141  | 147  | 151  | 154  | 156  | 156  | 156  |
| MEA | 3    | 2    | 2    | 2    | 2    | 2    | 2    | 2    | 2    | 2    | 3    |
| NEU | 18   | 20   | 20   | 21   | 22   | 23   | 24   | 24   | 25   | 25   | 25   |
| OAS | 66   | 64   | 72   | 74   | 83   | 88   | 93   | 96   | 99   | 101  | 101  |
| REF | 50   | 79   | 83   | 96   | 98   | 98   | 98   | 98   | 97   | 95   | 94   |
| SSA | 37   | 39   | 42   | 41   | 49   | 55   | 62   | 70   | 77   | 84   | 89   |
| USA | 251  | 260  | 264  | 207  | 217  | 225  | 232  | 237  | 243  | 249  | 256  |

Table 515: MAgPIE m4p\_SSP1 — Demand—Material—Forest products—Industrial roundwood (Mt DM/yr)  
[PART 1/2]

|     | 2050 | 2055 | 2060 | 2070 | 2080 | 2090 | 2100 |
|-----|------|------|------|------|------|------|------|
| GLO | 1318 | 1328 | 1335 | 1333 | 1312 | 1313 | 1269 |
| CAZ | 165  | 171  | 177  | 187  | 193  | 193  | 192  |
| CHA | 111  | 106  | 101  | 91   | 80   | 80   | 69   |
| EUR | 247  | 250  | 251  | 251  | 247  | 248  | 240  |
| IND | 49   | 49   | 49   | 47   | 45   | 45   | 41   |
| JPN | 14   | 14   | 13   | 13   | 12   | 12   | 11   |
| LAM | 154  | 153  | 150  | 143  | 135  | 135  | 124  |
| MEA | 3    | 3    | 3    | 3    | 2    | 2    | 2    |
| NEU | 25   | 25   | 25   | 24   | 23   | 23   | 22   |
| OAS | 101  | 100  | 99   | 95   | 90   | 90   | 84   |
| REF | 92   | 90   | 88   | 84   | 78   | 78   | 71   |
| SSA | 94   | 98   | 101  | 106  | 109  | 109  | 110  |
| USA | 263  | 270  | 277  | 289  | 299  | 299  | 303  |

Table 516: MAgPIE m4p\_SSP1 — Demand—Material—Forest products—Industrial roundwood (Mt DM/yr)  
[PART 2/2]

|     | 1965 | 1970 | 1975 | 1980 | 1985 | 1990 | 1995 | 2000 | 2005 | 2010 |
|-----|------|------|------|------|------|------|------|------|------|------|
| GLO | 714  | 805  | 816  | 915  | 965  | 1079 | 968  | 1065 | 1131 | 1079 |
| CAZ | 72   | 84   | 85   | 111  | 120  | 117  | 138  | 151  | 152  | 112  |
| CHA | 25   | 28   | 46   | 55   | 69   | 62   | 67   | 71   | 79   | 125  |
| EUR | 150  | 171  | 166  | 183  | 183  | 212  | 196  | 230  | 251  | 223  |
| IND | 5    | 8    | 10   | 12   | 15   | 23   | 24   | 27   | 31   | 34   |
| JPN | 41   | 54   | 44   | 45   | 39   | 36   | 28   | 21   | 17   | 14   |
| LAM | 24   | 31   | 38   | 60   | 66   | 75   | 89   | 99   | 117  | 131  |
| MEA | 4    | 4    | 4    | 4    | 5    | 2    | 3    | 2    | 2    | 2    |
| NEU | 13   | 15   | 16   | 14   | 15   | 17   | 18   | 20   | 20   | 21   |
| OAS | 21   | 24   | 28   | 41   | 45   | 63   | 66   | 64   | 72   | 74   |
| REF | 162  | 175  | 184  | 163  | 165  | 182  | 50   | 79   | 83   | 96   |
| SSA | 15   | 19   | 22   | 26   | 30   | 34   | 37   | 39   | 42   | 41   |
| USA | 182  | 191  | 175  | 198  | 215  | 257  | 251  | 260  | 264  | 207  |

Table 517: FAO — Demand—Material—Forest products—Industrial roundwood (Mt DM/yr)

8.4.2 Wood fuel

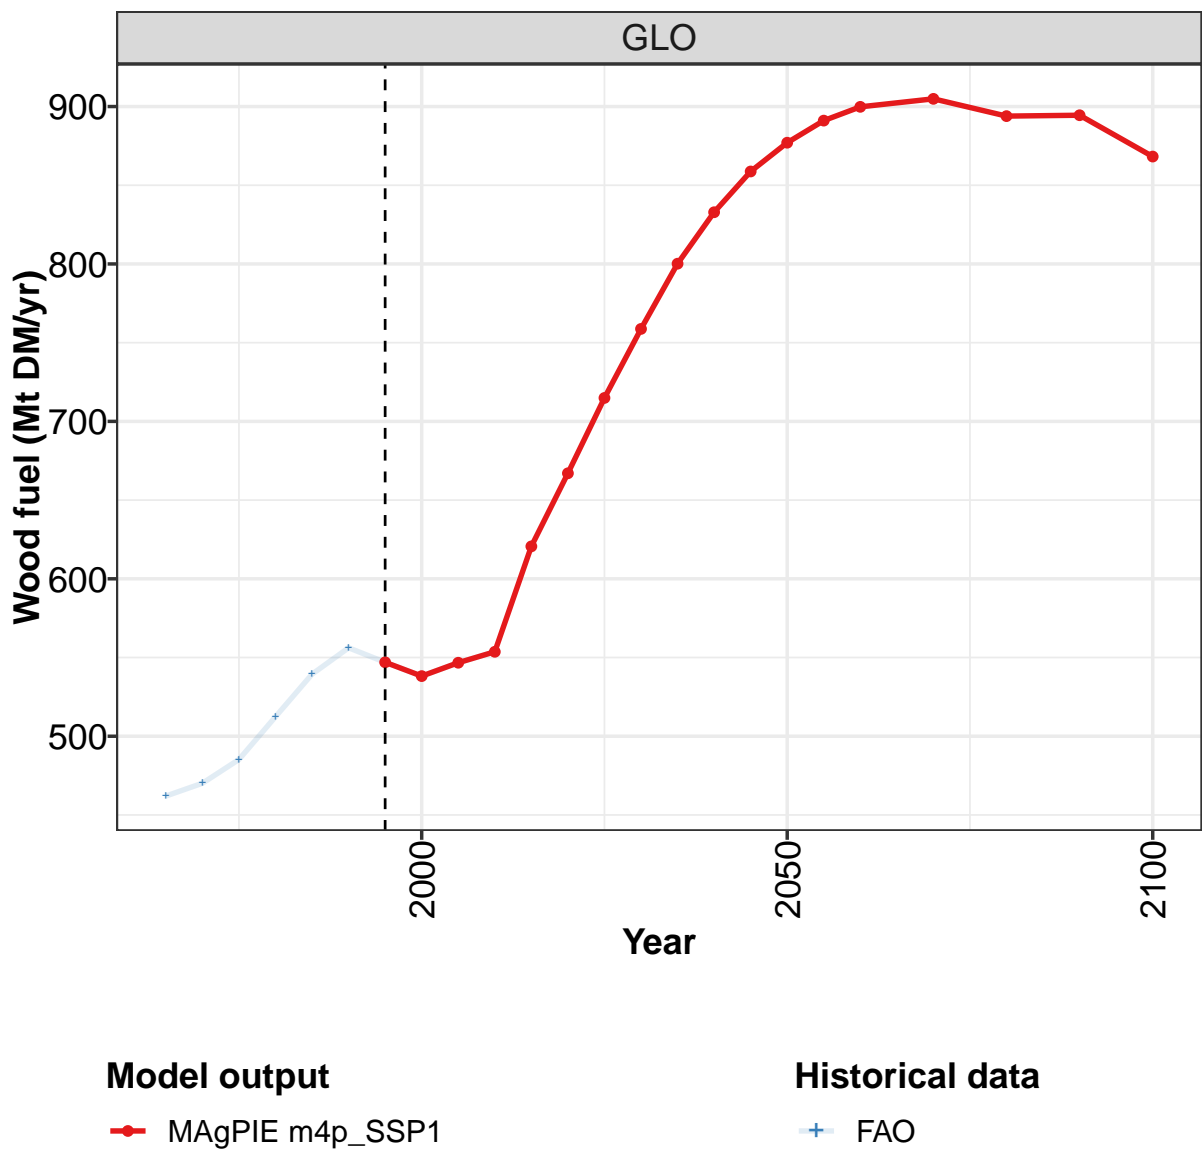

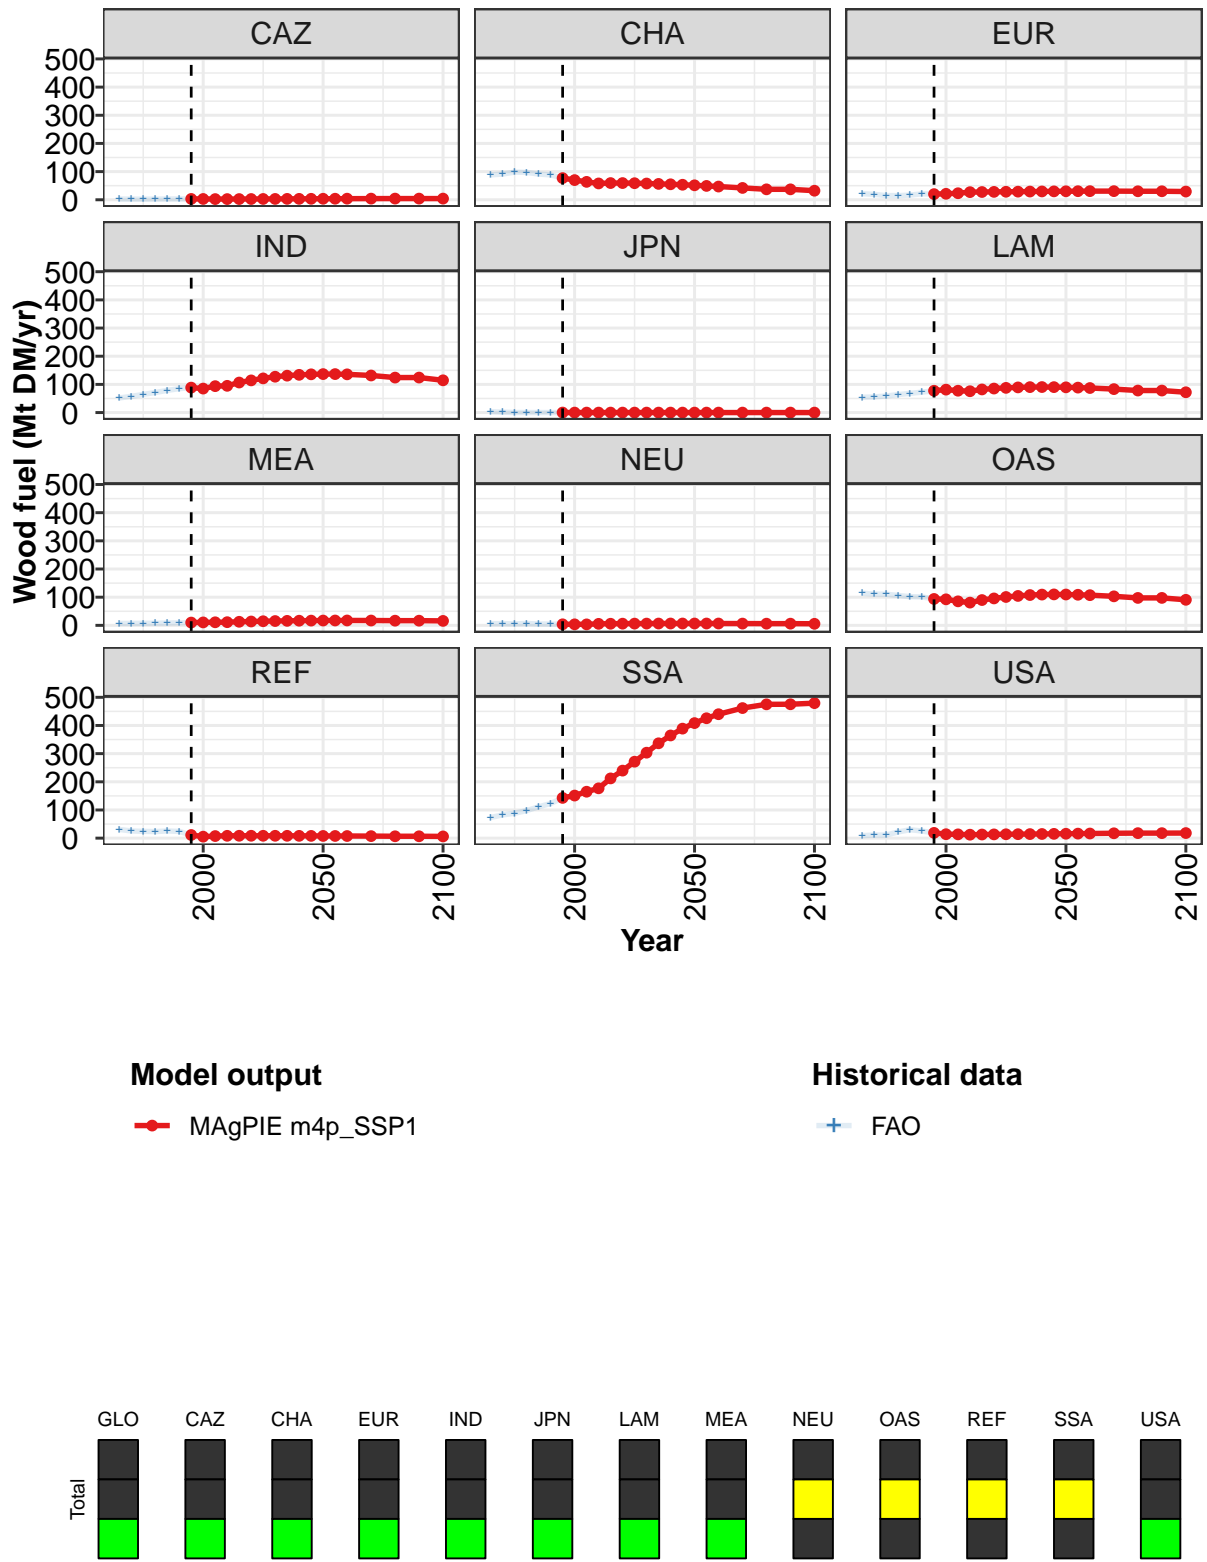

Figure 173: MAGPIE m4p\_SSP1 — Demand—Material—Forest products—Wood fuel (Mt DM/yr)

|     | 1995 | 2000 | 2005 | 2010 | 2015 | 2020 | 2025 | 2030 | 2035 | 2040 | 2045 |
|-----|------|------|------|------|------|------|------|------|------|------|------|
| GLO | 547  | 538  | 547  | 554  | 621  | 667  | 715  | 759  | 800  | 833  | 859  |
| CAZ | 3    | 3    | 3    | 2    | 3    | 3    | 3    | 3    | 3    | 3    | 4    |
| CHA | 77   | 70   | 64   | 58   | 59   | 59   | 59   | 58   | 56   | 55   | 53   |
| EUR | 20   | 21   | 23   | 27   | 28   | 28   | 28   | 29   | 29   | 30   | 30   |
| IND | 89   | 85   | 94   | 95   | 107  | 114  | 121  | 127  | 131  | 134  | 136  |
| JPN | 0    | 0    | 0    | 0    | 0    | 0    | 0    | 0    | 0    | 0    | 0    |
| LAM | 77   | 82   | 78   | 76   | 82   | 85   | 88   | 89   | 90   | 91   | 90   |
| MEA | 10   | 10   | 11   | 11   | 13   | 14   | 15   | 15   | 16   | 17   | 17   |
| NEU | 4    | 4    | 4    | 5    | 6    | 6    | 6    | 6    | 7    | 7    | 7    |
| OAS | 94   | 92   | 85   | 81   | 90   | 96   | 101  | 104  | 108  | 109  | 110  |
| REF | 11   | 5    | 7    | 8    | 9    | 8    | 8    | 8    | 8    | 8    | 8    |
| SSA | 143  | 151  | 165  | 177  | 212  | 240  | 271  | 303  | 337  | 365  | 389  |
| USA | 19   | 14   | 13   | 12   | 13   | 13   | 14   | 14   | 15   | 15   | 15   |

Table 518: MAgPIE m4p\_SSP1 — Demand—Material—Forest products—Wood fuel (Mt DM/yr) [PART 1/2]

|     | 2050 | 2055 | 2060 | 2070 | 2080 | 2090 | 2100 |
|-----|------|------|------|------|------|------|------|
| GLO | 877  | 891  | 900  | 905  | 894  | 894  | 868  |
| CAZ | 4    | 4    | 4    | 4    | 4    | 4    | 4    |
| CHA | 51   | 49   | 47   | 42   | 37   | 37   | 32   |
| EUR | 30   | 30   | 31   | 31   | 30   | 30   | 29   |
| IND | 137  | 137  | 136  | 132  | 124  | 124  | 115  |
| JPN | 0    | 0    | 0    | 0    | 0    | 0    | 0    |
| LAM | 90   | 89   | 87   | 83   | 78   | 78   | 72   |
| MEA | 17   | 17   | 17   | 17   | 17   | 17   | 16   |
| NEU | 7    | 7    | 7    | 6    | 6    | 6    | 6    |
| OAS | 110  | 109  | 107  | 103  | 97   | 97   | 91   |
| REF | 8    | 8    | 8    | 7    | 7    | 7    | 6    |
| SSA | 408  | 426  | 440  | 462  | 475  | 475  | 479  |
| USA | 16   | 16   | 17   | 17   | 18   | 18   | 18   |

Table 519: MAgPIE m4p\_SSP1 — Demand—Material—Forest products—Wood fuel (Mt DM/yr) [PART 2/2]

|     | 1965 | 1970 | 1975 | 1980 | 1985 | 1990 | 1995 | 2000 | 2005 | 2010 |
|-----|------|------|------|------|------|------|------|------|------|------|
| GLO | 462  | 470  | 485  | 512  | 539  | 556  | 547  | 538  | 547  | 554  |
| CAZ | 3    | 2    | 2    | 2    | 3    | 3    | 3    | 3    | 3    | 2    |
| CHA | 88   | 91   | 98   | 97   | 91   | 88   | 77   | 70   | 64   | 58   |
| EUR | 22   | 19   | 15   | 15   | 17   | 21   | 20   | 21   | 23   | 27   |
| IND | 52   | 58   | 64   | 71   | 79   | 85   | 89   | 85   | 94   | 95   |
| JPN | 3    | 1    | 0    | 0    | 0    | 0    | 0    | 0    | 0    | 0    |
| LAM | 54   | 55   | 59   | 64   | 68   | 72   | 77   | 82   | 78   | 76   |
| MEA | 7    | 7    | 7    | 8    | 8    | 9    | 10   | 10   | 11   | 11   |
| NEU | 6    | 6    | 5    | 7    | 5    | 5    | 4    | 4    | 4    | 5    |
| OAS | 114  | 111  | 111  | 106  | 102  | 101  | 94   | 92   | 85   | 81   |
| REF | 31   | 25   | 24   | 23   | 26   | 24   | 11   | 5    | 7    | 8    |
| SSA | 73   | 82   | 88   | 98   | 111  | 123  | 143  | 151  | 165  | 177  |
| USA | 9    | 11   | 11   | 22   | 30   | 25   | 19   | 14   | 13   | 12   |

Table 520: FAO — Demand—Material—Forest products—Wood fuel (Mt DM/yr)

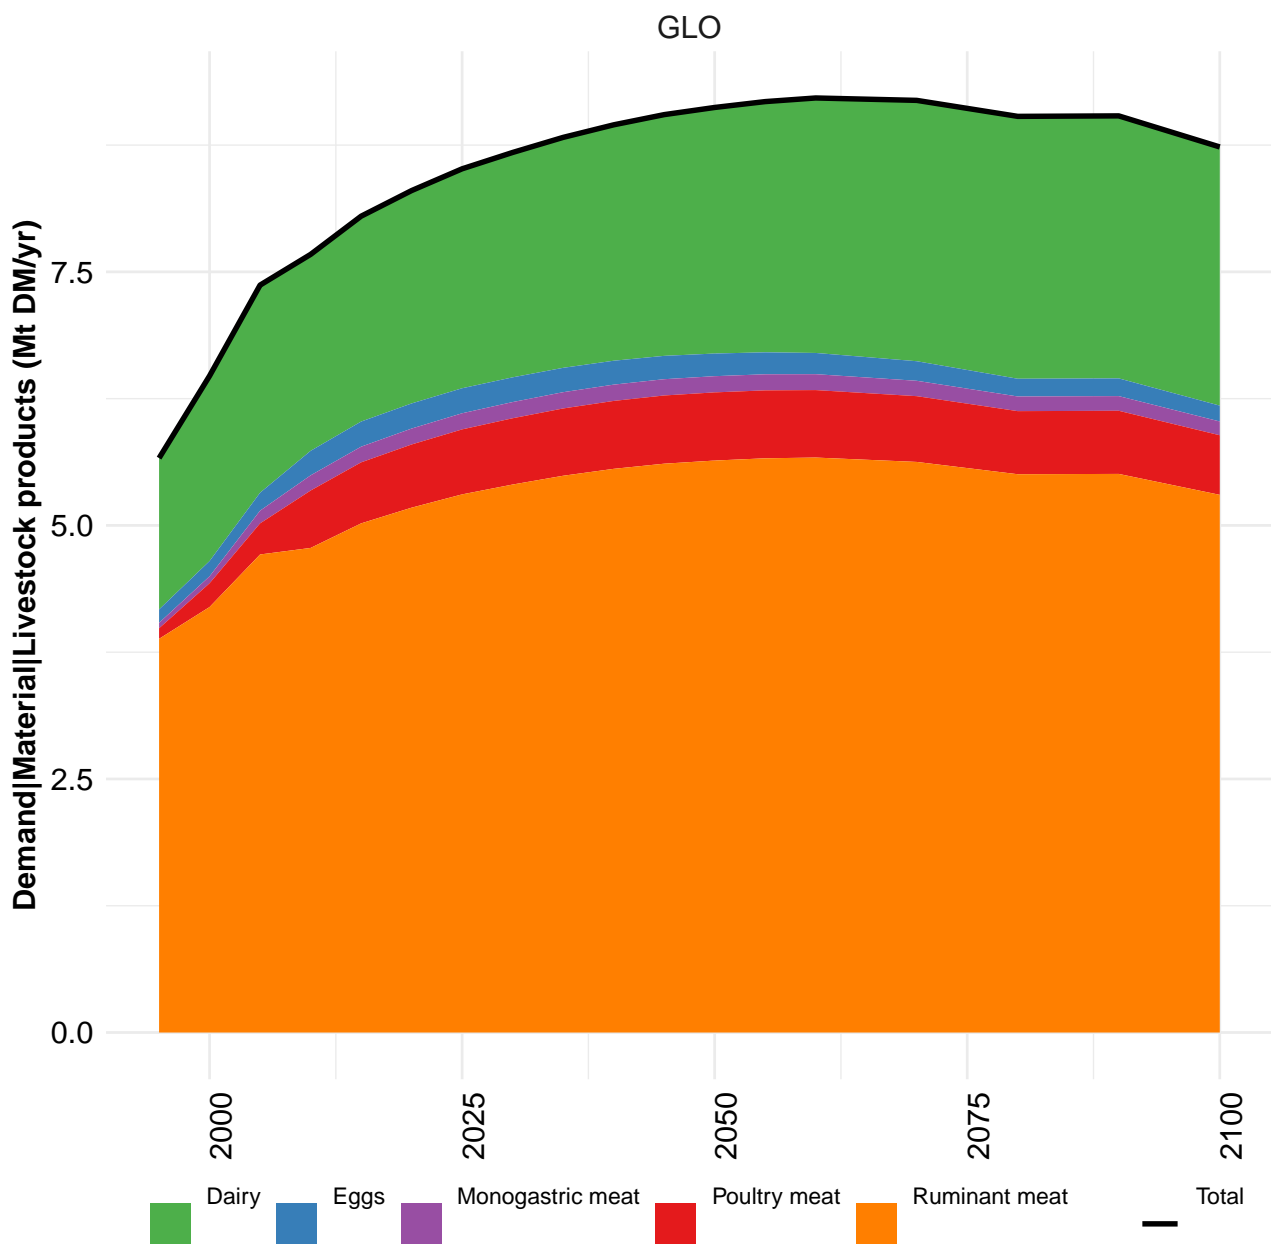

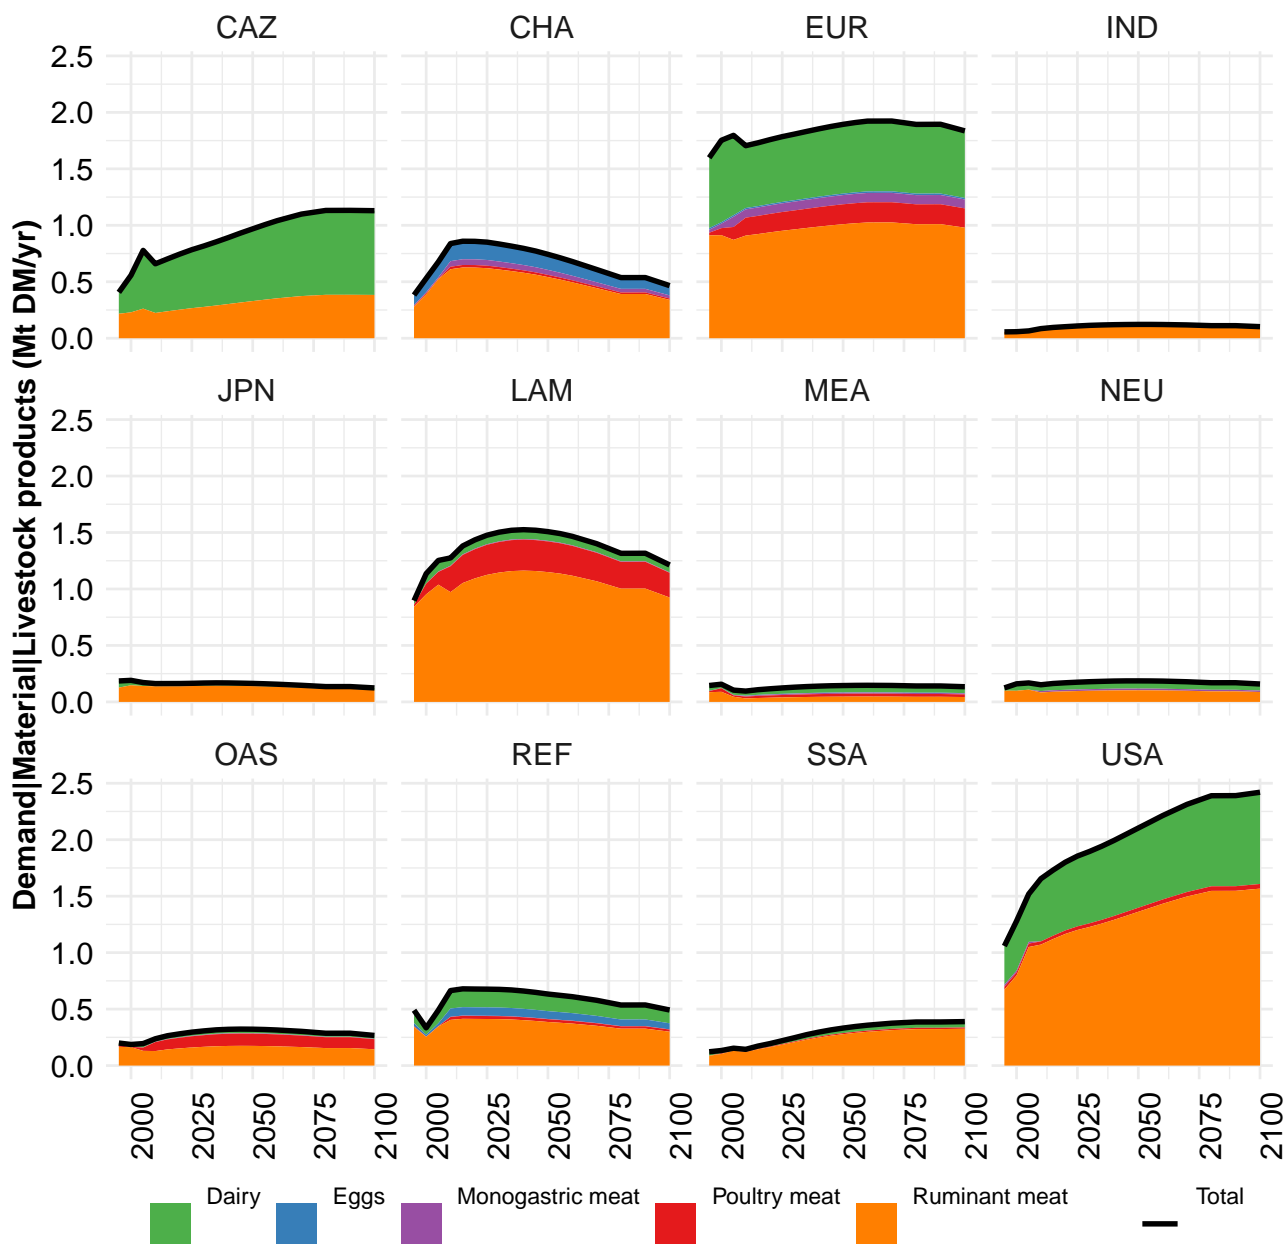

8.5 Livestock products

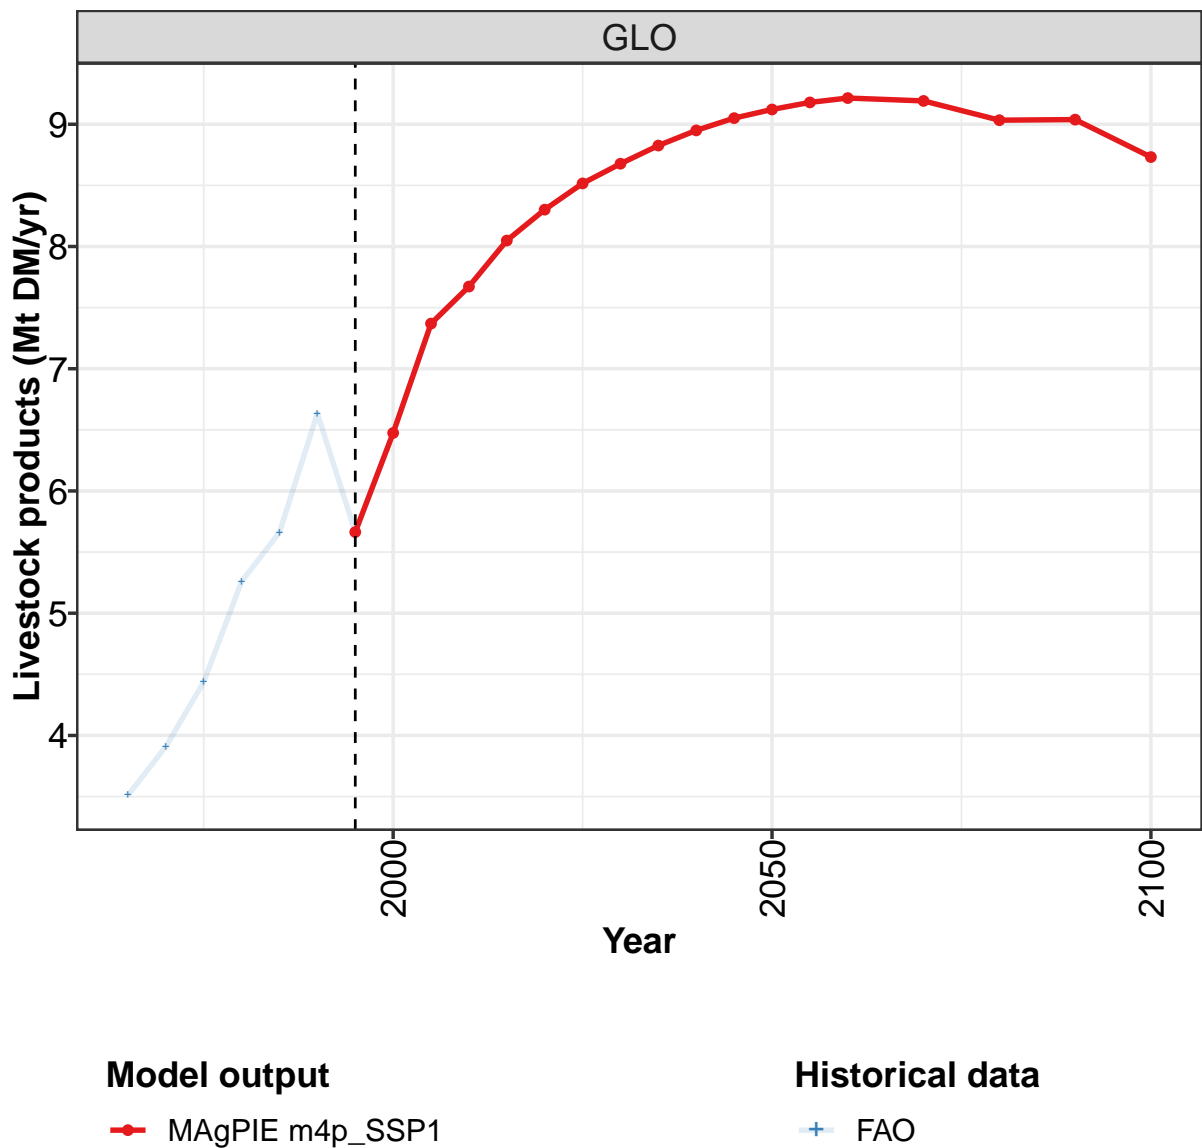



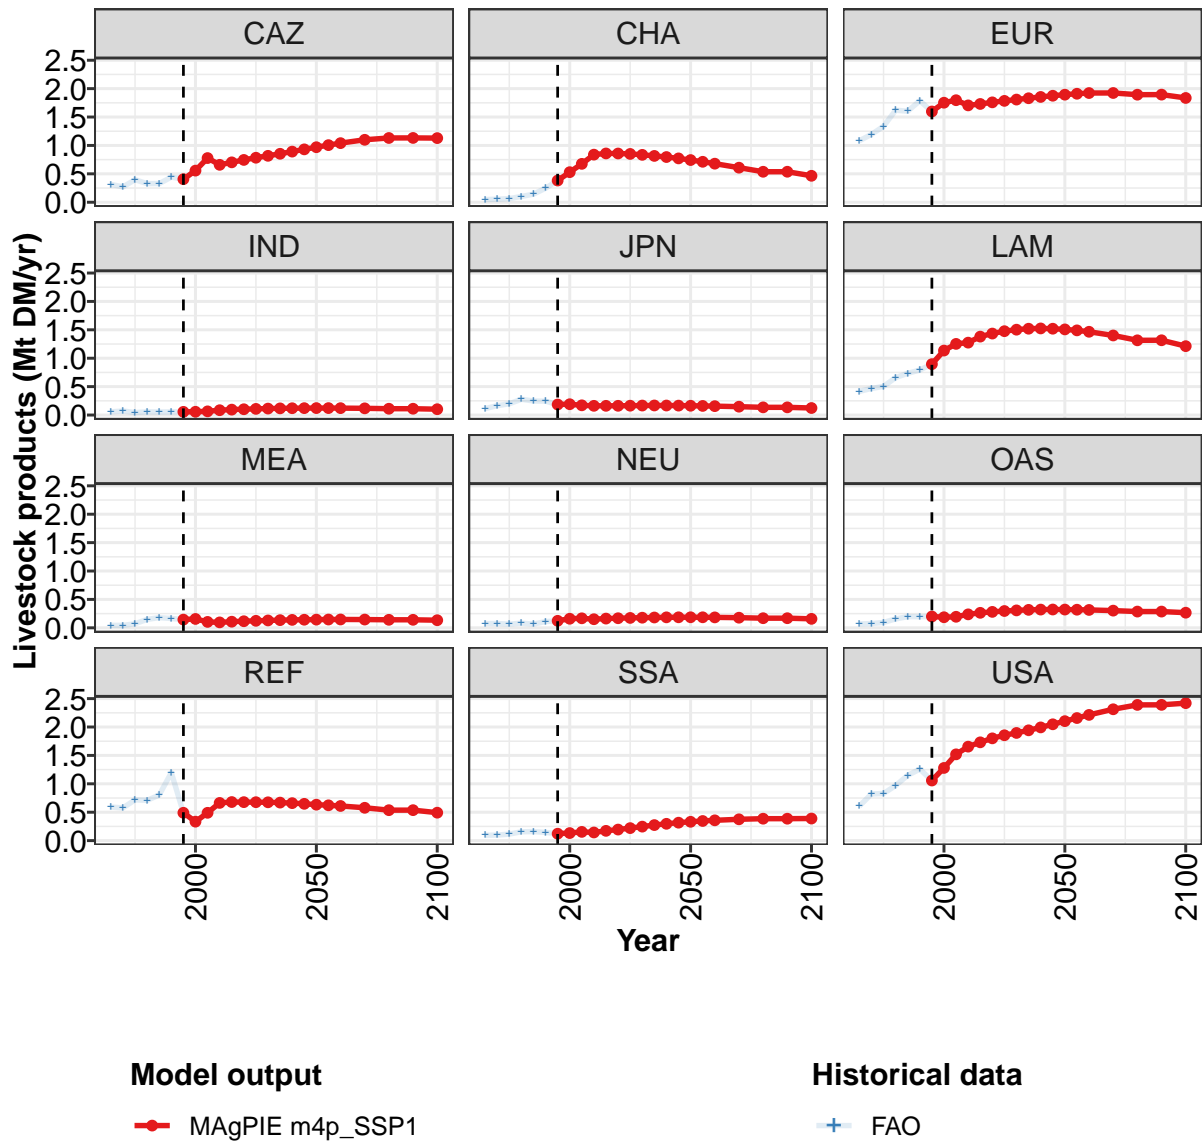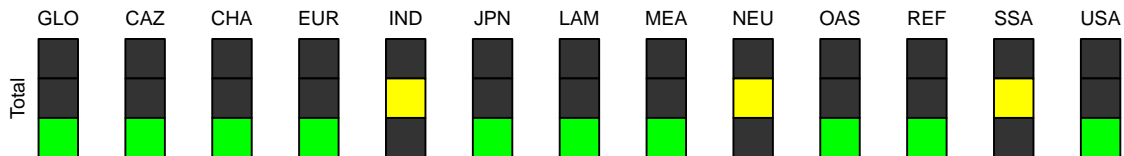

Figure 174: MAGPIE m4p\_SSP1 — Demand—Material—Livestock products (Mt DM/yr)

|     | 1995 | 2000 | 2005 | 2010 | 2015 | 2020 | 2025 | 2030 | 2035 | 2040 | 2045 |
|-----|------|------|------|------|------|------|------|------|------|------|------|
| GLO | 5.66 | 6.47 | 7.37 | 7.67 | 8.05 | 8.30 | 8.52 | 8.68 | 8.83 | 8.95 | 9.05 |
| CAZ | 0.41 | 0.56 | 0.78 | 0.66 | 0.70 | 0.75 | 0.78 | 0.82 | 0.85 | 0.89 | 0.93 |
| CHA | 0.38 | 0.53 | 0.68 | 0.84 | 0.86 | 0.86 | 0.85 | 0.83 | 0.82 | 0.80 | 0.77 |
| EUR | 1.60 | 1.75 | 1.80 | 1.71 | 1.73 | 1.76 | 1.79 | 1.81 | 1.83 | 1.85 | 1.88 |
| IND | 0.06 | 0.06 | 0.07 | 0.09 | 0.10 | 0.10 | 0.11 | 0.11 | 0.12 | 0.12 | 0.12 |
| JPN | 0.19 | 0.19 | 0.17 | 0.16 | 0.16 | 0.16 | 0.16 | 0.17 | 0.17 | 0.17 | 0.17 |
| LAM | 0.90 | 1.14 | 1.25 | 1.27 | 1.38 | 1.43 | 1.48 | 1.50 | 1.52 | 1.53 | 1.52 |
| MEA | 0.15 | 0.16 | 0.10 | 0.10 | 0.11 | 0.12 | 0.12 | 0.13 | 0.14 | 0.14 | 0.14 |
| NEU | 0.12 | 0.16 | 0.17 | 0.15 | 0.16 | 0.17 | 0.17 | 0.18 | 0.18 | 0.18 | 0.19 |
| OAS | 0.20 | 0.19 | 0.19 | 0.24 | 0.26 | 0.28 | 0.30 | 0.31 | 0.32 | 0.32 | 0.32 |
| REF | 0.49 | 0.33 | 0.49 | 0.66 | 0.68 | 0.68 | 0.68 | 0.67 | 0.67 | 0.66 | 0.65 |
| SSA | 0.12 | 0.13 | 0.15 | 0.14 | 0.17 | 0.19 | 0.22 | 0.25 | 0.27 | 0.30 | 0.32 |
| USA | 1.06 | 1.28 | 1.52 | 1.65 | 1.73 | 1.80 | 1.85 | 1.90 | 1.94 | 1.99 | 2.05 |

Table 521: MAgPIE m4p\_SSP1 — Demand—Material—Livestock products (Mt DM/yr) [PART 1/2]

|     | 2050 | 2055 | 2060 | 2070 | 2080 | 2090 | 2100 |
|-----|------|------|------|------|------|------|------|
| GLO | 9.12 | 9.18 | 9.21 | 9.19 | 9.03 | 9.04 | 8.73 |
| CAZ | 0.97 | 1.01 | 1.04 | 1.10 | 1.13 | 1.13 | 1.13 |
| CHA | 0.74 | 0.71 | 0.68 | 0.61 | 0.54 | 0.54 | 0.47 |
| EUR | 1.89 | 1.91 | 1.92 | 1.92 | 1.89 | 1.89 | 1.84 |
| IND | 0.12 | 0.12 | 0.12 | 0.12 | 0.11 | 0.11 | 0.10 |
| JPN | 0.16 | 0.16 | 0.16 | 0.15 | 0.14 | 0.14 | 0.12 |
| LAM | 1.51 | 1.49 | 1.47 | 1.40 | 1.32 | 1.32 | 1.21 |
| MEA | 0.14 | 0.15 | 0.15 | 0.15 | 0.14 | 0.14 | 0.13 |
| NEU | 0.19 | 0.19 | 0.18 | 0.18 | 0.17 | 0.17 | 0.16 |
| OAS | 0.32 | 0.32 | 0.32 | 0.30 | 0.29 | 0.29 | 0.27 |
| REF | 0.63 | 0.62 | 0.61 | 0.58 | 0.54 | 0.54 | 0.49 |
| SSA | 0.33 | 0.35 | 0.36 | 0.38 | 0.39 | 0.39 | 0.39 |
| USA | 2.10 | 2.16 | 2.21 | 2.31 | 2.39 | 2.39 | 2.42 |

Table 522: MAgPIE m4p\_SSP1 — Demand—Material—Livestock products (Mt DM/yr) [PART 2/2]

|     | 1965 | 1970 | 1975 | 1980 | 1985 | 1990 | 1995 | 2000 | 2005 | 2010 |
|-----|------|------|------|------|------|------|------|------|------|------|
| GLO | 3.51 | 3.91 | 4.44 | 5.26 | 5.66 | 6.63 | 5.66 | 6.47 | 7.37 | 7.67 |
| CAZ | 0.31 | 0.27 | 0.40 | 0.33 | 0.33 | 0.44 | 0.41 | 0.56 | 0.78 | 0.66 |
| CHA | 0.05 | 0.05 | 0.06 | 0.10 | 0.14 | 0.25 | 0.38 | 0.53 | 0.68 | 0.84 |
| EUR | 1.08 | 1.19 | 1.34 | 1.62 | 1.60 | 1.79 | 1.60 | 1.75 | 1.80 | 1.71 |
| IND | 0.06 | 0.07 | 0.04 | 0.06 | 0.05 | 0.06 | 0.06 | 0.06 | 0.07 | 0.09 |
| JPN | 0.11 | 0.16 | 0.20 | 0.28 | 0.25 | 0.24 | 0.19 | 0.19 | 0.17 | 0.16 |
| LAM | 0.42 | 0.47 | 0.50 | 0.66 | 0.73 | 0.79 | 0.90 | 1.14 | 1.25 | 1.27 |
| MEA | 0.04 | 0.04 | 0.07 | 0.15 | 0.18 | 0.16 | 0.15 | 0.16 | 0.10 | 0.10 |
| NEU | 0.08 | 0.07 | 0.07 | 0.08 | 0.07 | 0.11 | 0.12 | 0.16 | 0.17 | 0.15 |
| OAS | 0.07 | 0.07 | 0.10 | 0.16 | 0.20 | 0.20 | 0.20 | 0.19 | 0.19 | 0.24 |
| REF | 0.59 | 0.58 | 0.72 | 0.71 | 0.80 | 1.20 | 0.49 | 0.33 | 0.49 | 0.66 |
| SSA | 0.09 | 0.10 | 0.11 | 0.16 | 0.16 | 0.14 | 0.12 | 0.13 | 0.15 | 0.14 |
| USA | 0.61 | 0.82 | 0.83 | 0.97 | 1.15 | 1.26 | 1.06 | 1.28 | 1.52 | 1.65 |

Table 523: FAO — Demand—Material—Livestock products (Mt DM/yr)

8.5.1 Dairy

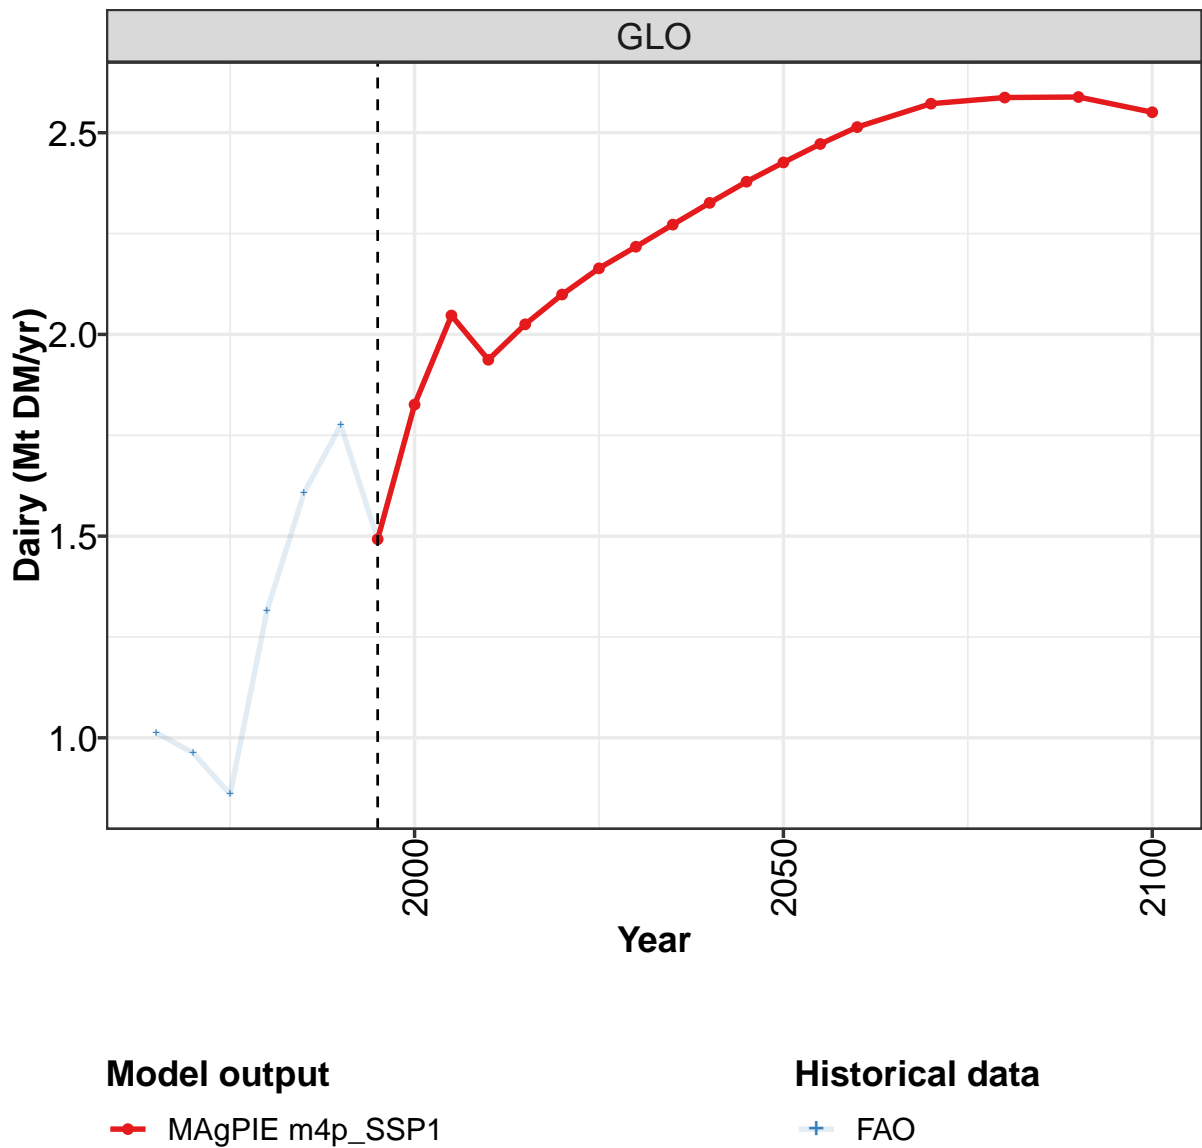

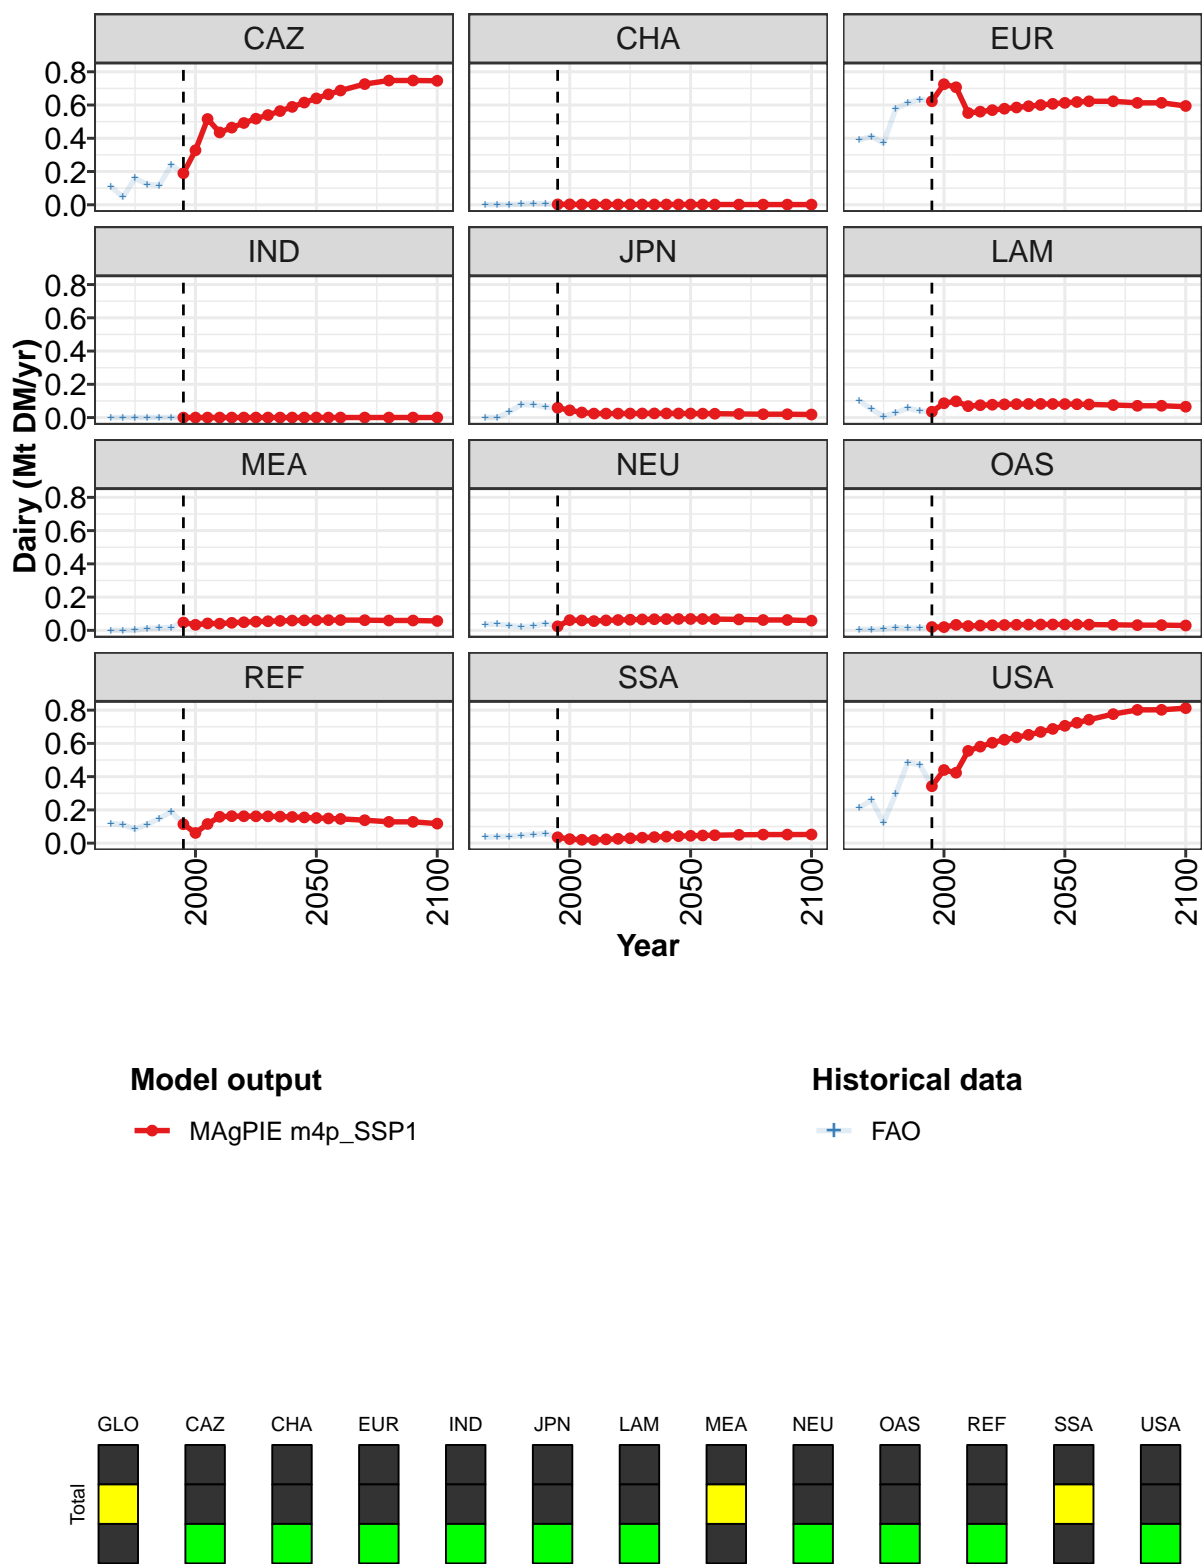

Figure 175: MAgPIE m4p\_SSP1 — Demand—Material—Livestock products—Dairy (Mt DM/yr)

|     | 1995 | 2000 | 2005 | 2010 | 2015 | 2020 | 2025 | 2030 | 2035 | 2040 | 2045 |
|-----|------|------|------|------|------|------|------|------|------|------|------|
| GLO | 1.49 | 1.83 | 2.05 | 1.94 | 2.03 | 2.10 | 2.16 | 2.22 | 2.27 | 2.33 | 2.38 |
| CAZ | 0.19 | 0.33 | 0.52 | 0.44 | 0.46 | 0.49 | 0.52 | 0.54 | 0.56 | 0.59 | 0.61 |
| CHA | 0.00 | 0.00 | 0.00 | 0.00 | 0.00 | 0.00 | 0.00 | 0.00 | 0.00 | 0.00 | 0.00 |
| EUR | 0.62 | 0.73 | 0.71 | 0.55 | 0.56 | 0.57 | 0.58 | 0.59 | 0.59 | 0.60 | 0.61 |
| IND | 0.00 | 0.00 | 0.00 | 0.00 | 0.00 | 0.00 | 0.00 | 0.00 | 0.00 | 0.00 | 0.00 |
| JPN | 0.06 | 0.04 | 0.03 | 0.02 | 0.02 | 0.02 | 0.02 | 0.02 | 0.02 | 0.02 | 0.02 |
| LAM | 0.04 | 0.09 | 0.10 | 0.07 | 0.07 | 0.08 | 0.08 | 0.08 | 0.08 | 0.08 | 0.08 |
| MEA | 0.05 | 0.03 | 0.04 | 0.04 | 0.05 | 0.05 | 0.05 | 0.05 | 0.06 | 0.06 | 0.06 |
| NEU | 0.02 | 0.06 | 0.06 | 0.06 | 0.06 | 0.06 | 0.06 | 0.07 | 0.07 | 0.07 | 0.07 |
| OAS | 0.02 | 0.02 | 0.03 | 0.03 | 0.03 | 0.03 | 0.03 | 0.03 | 0.03 | 0.04 | 0.04 |
| REF | 0.11 | 0.06 | 0.12 | 0.16 | 0.16 | 0.16 | 0.16 | 0.16 | 0.16 | 0.16 | 0.15 |
| SSA | 0.04 | 0.02 | 0.02 | 0.02 | 0.02 | 0.03 | 0.03 | 0.03 | 0.04 | 0.04 | 0.04 |
| USA | 0.34 | 0.44 | 0.42 | 0.56 | 0.58 | 0.60 | 0.62 | 0.64 | 0.65 | 0.67 | 0.69 |

Table 524: MAgPIE m4p\_SSP1 — Demand—Material—Livestock products—Dairy (Mt DM/yr) [PART 1/2]

|     | 2050 | 2055 | 2060 | 2070 | 2080 | 2090 | 2100 |
|-----|------|------|------|------|------|------|------|
| GLO | 2.43 | 2.47 | 2.51 | 2.57 | 2.59 | 2.59 | 2.55 |
| CAZ | 0.64 | 0.66 | 0.69 | 0.73 | 0.75 | 0.75 | 0.75 |
| CHA | 0.00 | 0.00 | 0.00 | 0.00 | 0.00 | 0.00 | 0.00 |
| EUR | 0.61 | 0.62 | 0.62 | 0.62 | 0.61 | 0.61 | 0.59 |
| IND | 0.00 | 0.00 | 0.00 | 0.00 | 0.00 | 0.00 | 0.00 |
| JPN | 0.02 | 0.02 | 0.02 | 0.02 | 0.02 | 0.02 | 0.02 |
| LAM | 0.08 | 0.08 | 0.08 | 0.08 | 0.07 | 0.07 | 0.07 |
| MEA | 0.06 | 0.06 | 0.06 | 0.06 | 0.06 | 0.06 | 0.06 |
| NEU | 0.07 | 0.07 | 0.07 | 0.07 | 0.06 | 0.06 | 0.06 |
| OAS | 0.04 | 0.04 | 0.03 | 0.03 | 0.03 | 0.03 | 0.03 |
| REF | 0.15 | 0.15 | 0.15 | 0.14 | 0.13 | 0.13 | 0.12 |
| SSA | 0.04 | 0.05 | 0.05 | 0.05 | 0.05 | 0.05 | 0.05 |
| USA | 0.71 | 0.72 | 0.74 | 0.78 | 0.80 | 0.80 | 0.81 |

Table 525: MAgPIE m4p\_SSP1 — Demand—Material—Livestock products—Dairy (Mt DM/yr) [PART 2/2]

|     | 1965 | 1970 | 1975 | 1980 | 1985 | 1990 | 1995 | 2000 | 2005 | 2010 |
|-----|------|------|------|------|------|------|------|------|------|------|
| GLO | 1.01 | 0.96 | 0.86 | 1.32 | 1.61 | 1.77 | 1.49 | 1.83 | 2.05 | 1.94 |
| CAZ | 0.11 | 0.05 | 0.16 | 0.12 | 0.12 | 0.24 | 0.19 | 0.33 | 0.52 | 0.44 |
| CHA | 0.00 | 0.00 | 0.00 | 0.00 | 0.01 | 0.01 | 0.00 | 0.00 | 0.00 | 0.00 |
| EUR | 0.39 | 0.41 | 0.37 | 0.58 | 0.61 | 0.63 | 0.62 | 0.73 | 0.71 | 0.55 |
| IND | 0.00 | 0.00 | 0.00 | 0.00 | 0.00 | 0.00 | 0.00 | 0.00 | 0.00 | 0.00 |
| JPN | 0.00 | 0.00 | 0.03 | 0.08 | 0.08 | 0.06 | 0.06 | 0.04 | 0.03 | 0.02 |
| LAM | 0.10 | 0.05 | 0.01 | 0.03 | 0.06 | 0.04 | 0.04 | 0.09 | 0.10 | 0.07 |
| MEA | 0.00 | 0.00 | 0.00 | 0.01 | 0.01 | 0.02 | 0.05 | 0.03 | 0.04 | 0.04 |
| NEU | 0.04 | 0.04 | 0.03 | 0.02 | 0.03 | 0.04 | 0.02 | 0.06 | 0.06 | 0.06 |
| OAS | 0.01 | 0.01 | 0.01 | 0.02 | 0.01 | 0.01 | 0.02 | 0.02 | 0.03 | 0.03 |
| REF | 0.12 | 0.11 | 0.08 | 0.11 | 0.15 | 0.19 | 0.11 | 0.06 | 0.12 | 0.16 |
| SSA | 0.04 | 0.04 | 0.04 | 0.05 | 0.05 | 0.06 | 0.04 | 0.02 | 0.02 | 0.02 |
| USA | 0.21 | 0.26 | 0.12 | 0.30 | 0.49 | 0.47 | 0.34 | 0.44 | 0.42 | 0.56 |

Table 526: FAO — Demand—Material—Livestock products—Dairy (Mt DM/yr)

8.5.2 Eggs

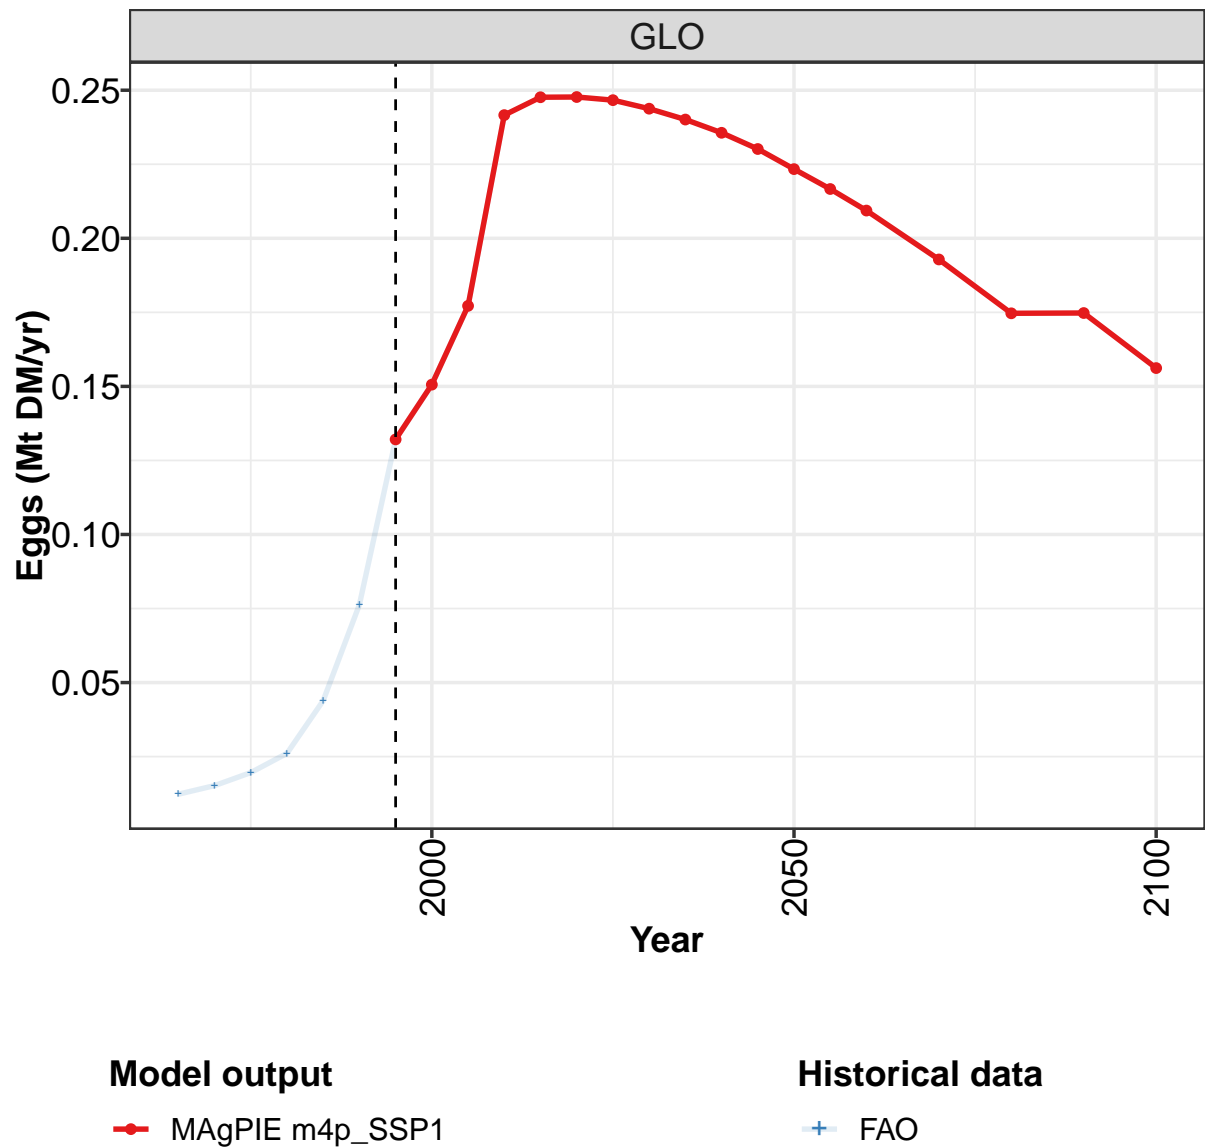

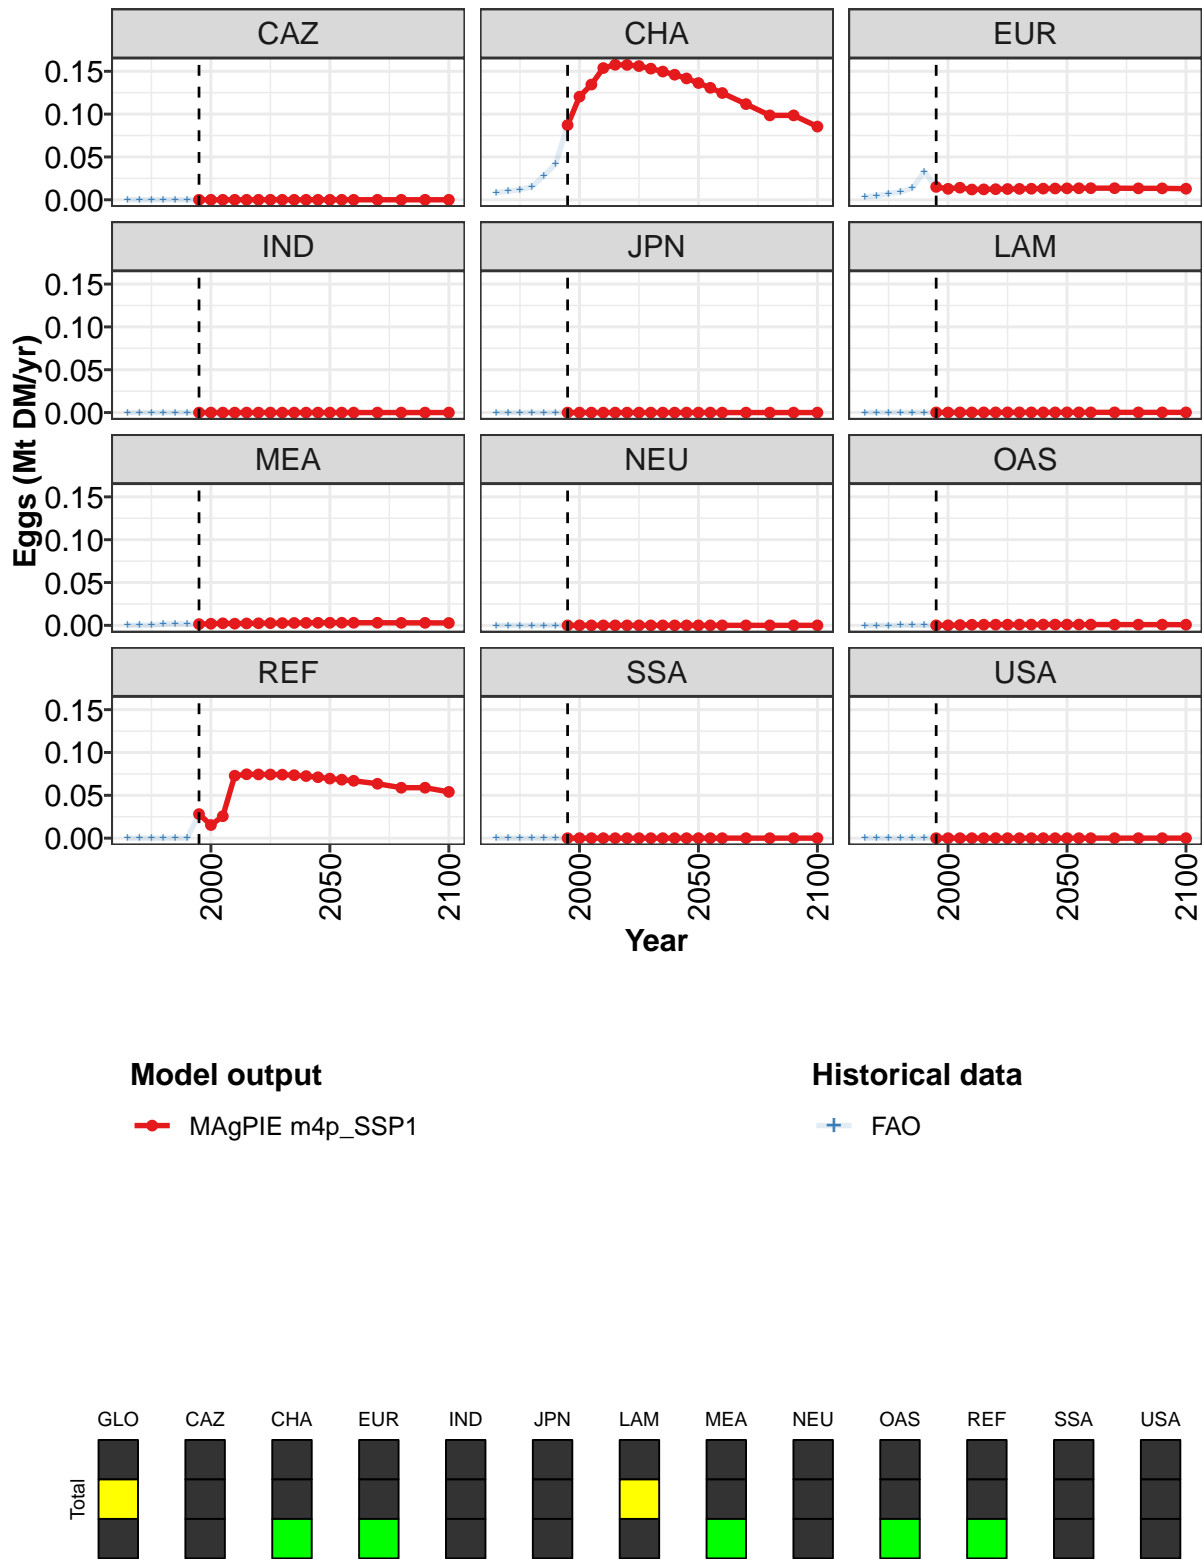

Figure 176: MAgPIE m4p\_SSP1 — Demand—Material—Livestock products—Eggs (Mt DM/yr)

|     | 1995  | 2000  | 2005  | 2010  | 2015  | 2020  | 2025  | 2030  | 2035  | 2040  | 2045  |
|-----|-------|-------|-------|-------|-------|-------|-------|-------|-------|-------|-------|
| GLO | 0.132 | 0.151 | 0.177 | 0.242 | 0.248 | 0.248 | 0.247 | 0.244 | 0.240 | 0.236 | 0.230 |
| CAZ | 0.000 | 0.000 | 0.000 | 0.000 | 0.000 | 0.000 | 0.000 | 0.000 | 0.000 | 0.000 | 0.000 |
| CHA | 0.087 | 0.120 | 0.135 | 0.154 | 0.158 | 0.157 | 0.156 | 0.153 | 0.150 | 0.146 | 0.142 |
| EUR | 0.015 | 0.013 | 0.014 | 0.012 | 0.012 | 0.012 | 0.013 | 0.013 | 0.013 | 0.013 | 0.013 |
| IND | 0.000 | 0.000 | 0.000 | 0.000 | 0.000 | 0.000 | 0.000 | 0.000 | 0.000 | 0.000 | 0.000 |
| JPN | 0.000 | 0.000 | 0.000 | 0.000 | 0.000 | 0.000 | 0.000 | 0.000 | 0.000 | 0.000 | 0.000 |
| LAM | 0.000 | 0.000 | 0.000 | 0.000 | 0.000 | 0.000 | 0.000 | 0.000 | 0.000 | 0.000 | 0.000 |
| MEA | 0.002 | 0.002 | 0.002 | 0.002 | 0.002 | 0.002 | 0.003 | 0.003 | 0.003 | 0.003 | 0.003 |
| NEU | 0.000 | 0.000 | 0.000 | 0.000 | 0.000 | 0.000 | 0.000 | 0.000 | 0.000 | 0.000 | 0.000 |
| OAS | 0.000 | 0.000 | 0.000 | 0.001 | 0.001 | 0.001 | 0.001 | 0.001 | 0.001 | 0.001 | 0.001 |
| REF | 0.028 | 0.015 | 0.026 | 0.073 | 0.075 | 0.074 | 0.074 | 0.074 | 0.074 | 0.072 | 0.071 |
| SSA | 0.000 | 0.000 | 0.000 | 0.000 | 0.000 | 0.000 | 0.000 | 0.000 | 0.000 | 0.000 | 0.000 |
| USA | 0.000 | 0.000 | 0.000 | 0.000 | 0.000 | 0.000 | 0.000 | 0.000 | 0.000 | 0.000 | 0.000 |

Table 527: MAgPIE m4p\_SSP1 — Demand—Material—Livestock products—Eggs (Mt DM/yr) [PART 1/2]

|     | 2050  | 2055  | 2060  | 2070  | 2080  | 2090  | 2100  |
|-----|-------|-------|-------|-------|-------|-------|-------|
| GLO | 0.223 | 0.217 | 0.209 | 0.193 | 0.175 | 0.175 | 0.156 |
| CAZ | 0.000 | 0.000 | 0.000 | 0.000 | 0.000 | 0.000 | 0.000 |
| CHA | 0.136 | 0.131 | 0.125 | 0.112 | 0.098 | 0.099 | 0.085 |
| EUR | 0.013 | 0.013 | 0.014 | 0.014 | 0.013 | 0.013 | 0.013 |
| IND | 0.000 | 0.000 | 0.000 | 0.000 | 0.000 | 0.000 | 0.000 |
| JPN | 0.000 | 0.000 | 0.000 | 0.000 | 0.000 | 0.000 | 0.000 |
| LAM | 0.000 | 0.000 | 0.000 | 0.000 | 0.000 | 0.000 | 0.000 |
| MEA | 0.003 | 0.003 | 0.003 | 0.003 | 0.003 | 0.003 | 0.003 |
| NEU | 0.000 | 0.000 | 0.000 | 0.000 | 0.000 | 0.000 | 0.000 |
| OAS | 0.001 | 0.001 | 0.001 | 0.001 | 0.001 | 0.001 | 0.001 |
| REF | 0.070 | 0.068 | 0.067 | 0.063 | 0.059 | 0.059 | 0.054 |
| SSA | 0.000 | 0.000 | 0.000 | 0.000 | 0.000 | 0.000 | 0.000 |
| USA | 0.000 | 0.000 | 0.000 | 0.000 | 0.000 | 0.000 | 0.000 |

Table 528: MAgPIE m4p\_SSP1 — Demand—Material—Livestock products—Eggs (Mt DM/yr) [PART 2/2]

|     | 1965  | 1970  | 1975  | 1980  | 1985  | 1990  | 1995  | 2000  | 2005  | 2010  |
|-----|-------|-------|-------|-------|-------|-------|-------|-------|-------|-------|
| GLO | 0.012 | 0.015 | 0.020 | 0.026 | 0.044 | 0.076 | 0.132 | 0.151 | 0.177 | 0.242 |
| CAZ | 0.000 | 0.000 | 0.000 | 0.000 | 0.000 | 0.000 | 0.000 | 0.000 | 0.000 | 0.000 |
| CHA | 0.009 | 0.010 | 0.012 | 0.015 | 0.028 | 0.042 | 0.087 | 0.120 | 0.135 | 0.154 |
| EUR | 0.003 | 0.005 | 0.007 | 0.009 | 0.014 | 0.033 | 0.015 | 0.013 | 0.014 | 0.012 |
| IND | 0.000 | 0.000 | 0.000 | 0.000 | 0.000 | 0.000 | 0.000 | 0.000 | 0.000 | 0.000 |
| JPN | 0.000 | 0.000 | 0.000 | 0.000 | 0.000 | 0.000 | 0.000 | 0.000 | 0.000 | 0.000 |
| LAM | 0.000 | 0.000 | 0.000 | 0.000 | 0.000 | 0.000 | 0.000 | 0.000 | 0.000 | 0.000 |
| MEA | 0.000 | 0.000 | 0.000 | 0.002 | 0.002 | 0.002 | 0.002 | 0.002 | 0.002 | 0.002 |
| NEU | 0.000 | 0.000 | 0.000 | 0.000 | 0.000 | 0.000 | 0.000 | 0.000 | 0.000 | 0.000 |
| OAS | 0.000 | 0.000 | 0.000 | 0.000 | 0.000 | 0.000 | 0.000 | 0.000 | 0.000 | 0.001 |
| REF | 0.000 | 0.000 | 0.000 | 0.000 | 0.000 | 0.000 | 0.028 | 0.015 | 0.026 | 0.073 |
| SSA | 0.000 | 0.000 | 0.000 | 0.000 | 0.000 | 0.000 | 0.000 | 0.000 | 0.000 | 0.000 |
| USA | 0.000 | 0.000 | 0.000 | 0.000 | 0.000 | 0.000 | 0.000 | 0.000 | 0.000 | 0.000 |

Table 529: FAO — Demand—Material—Livestock products—Eggs (Mt DM/yr)



8.5.3 Monogastric meat

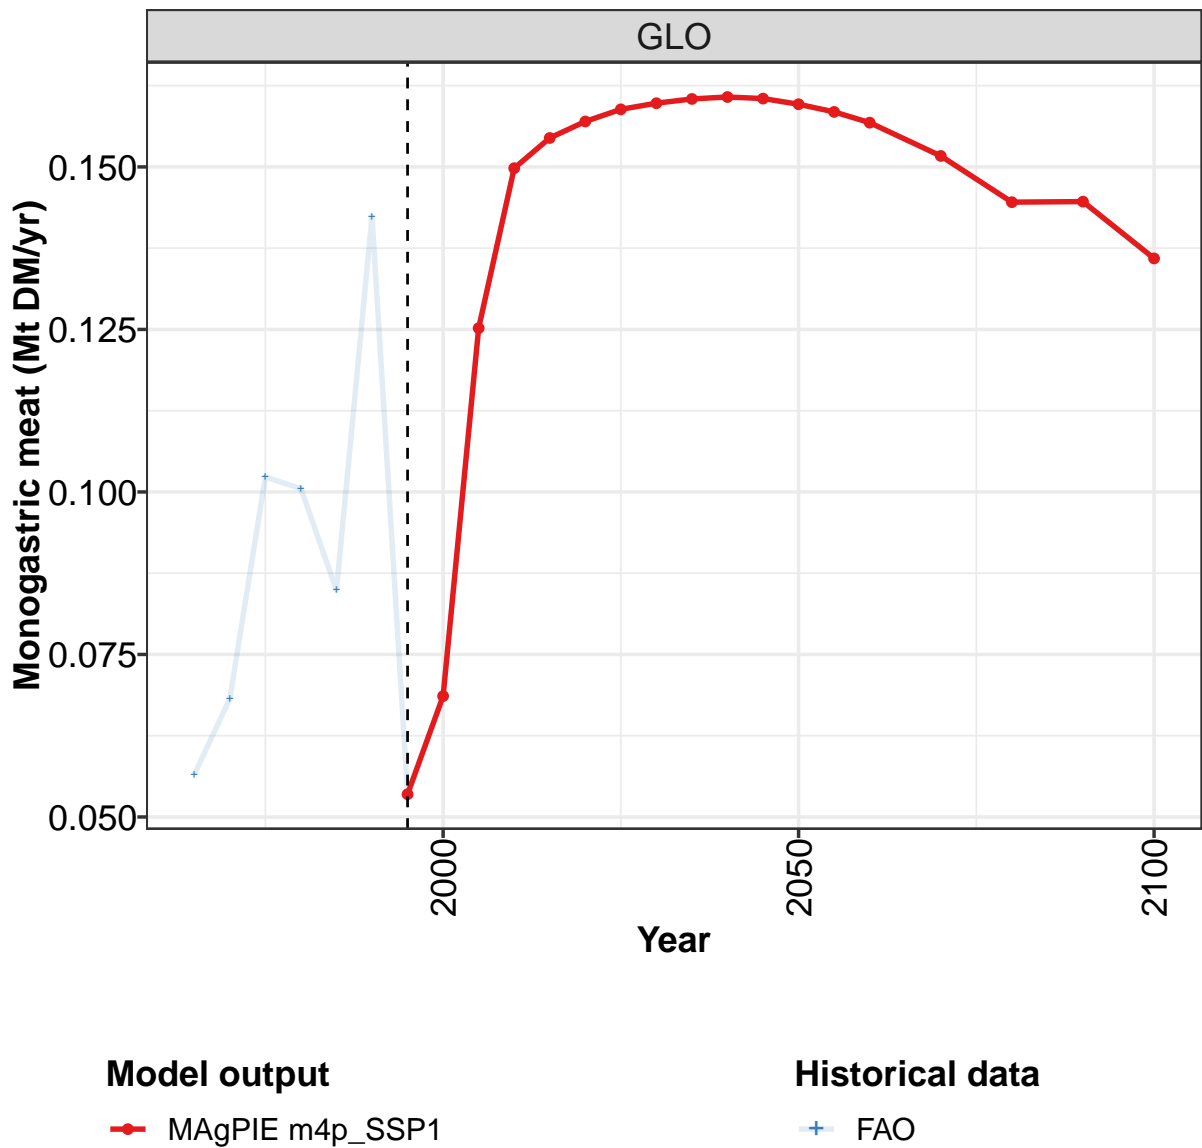

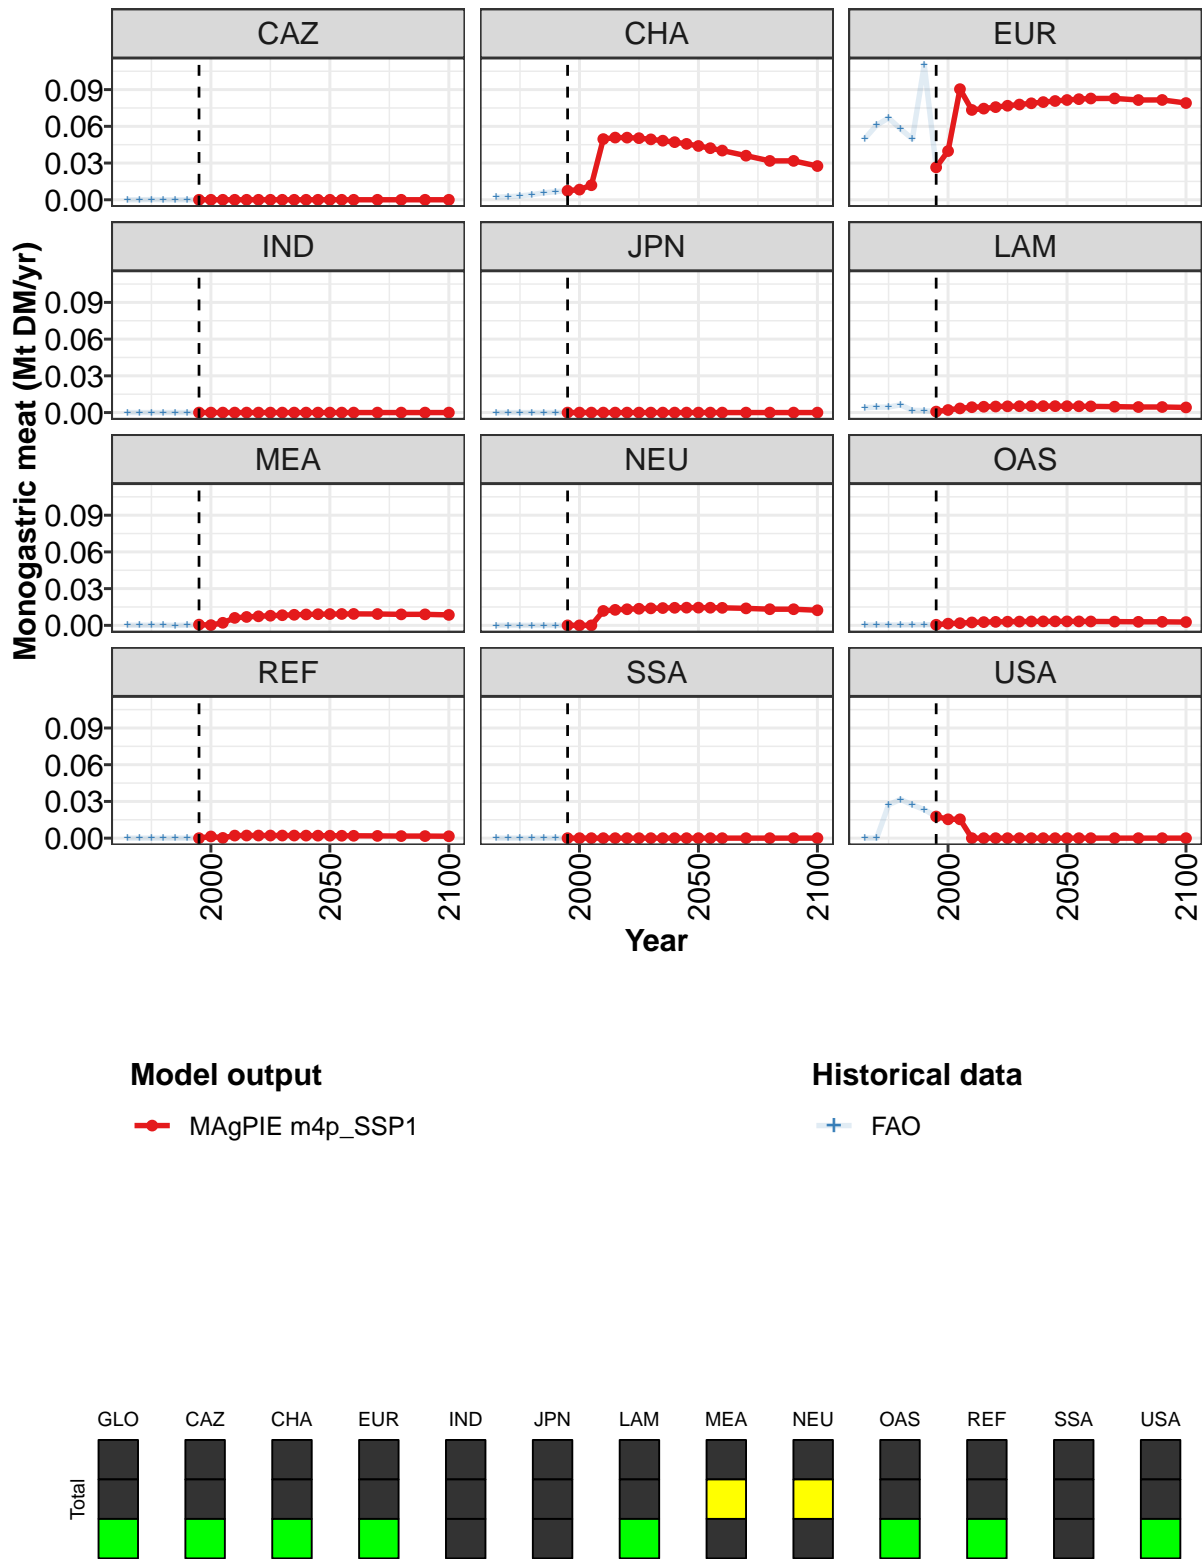

Figure 177: MAgPIE m4p\_SSP1 — Demand—Material—Livestock products—Monogastric meat (Mt DM/yr)

|     | 1995  | 2000  | 2005  | 2010  | 2015  | 2020  | 2025  | 2030  | 2035  | 2040  | 2045  |
|-----|-------|-------|-------|-------|-------|-------|-------|-------|-------|-------|-------|
| GLO | 0.053 | 0.069 | 0.125 | 0.150 | 0.154 | 0.157 | 0.159 | 0.160 | 0.160 | 0.161 | 0.161 |
| CAZ | 0.000 | 0.000 | 0.000 | 0.000 | 0.000 | 0.000 | 0.000 | 0.000 | 0.000 | 0.000 | 0.000 |
| CHA | 0.007 | 0.008 | 0.012 | 0.050 | 0.051 | 0.051 | 0.050 | 0.049 | 0.048 | 0.047 | 0.046 |
| EUR | 0.026 | 0.040 | 0.090 | 0.073 | 0.074 | 0.076 | 0.077 | 0.078 | 0.079 | 0.080 | 0.081 |
| IND | 0.000 | 0.000 | 0.000 | 0.000 | 0.000 | 0.000 | 0.000 | 0.000 | 0.000 | 0.000 | 0.000 |
| JPN | 0.000 | 0.000 | 0.000 | 0.000 | 0.000 | 0.000 | 0.000 | 0.000 | 0.000 | 0.000 | 0.000 |
| LAM | 0.001 | 0.002 | 0.003 | 0.004 | 0.005 | 0.005 | 0.005 | 0.005 | 0.005 | 0.005 | 0.005 |
| MEA | 0.001 | 0.000 | 0.002 | 0.006 | 0.007 | 0.007 | 0.008 | 0.008 | 0.009 | 0.009 | 0.009 |
| NEU | 0.000 | 0.000 | 0.000 | 0.012 | 0.013 | 0.013 | 0.014 | 0.014 | 0.014 | 0.014 | 0.014 |
| OAS | 0.001 | 0.001 | 0.002 | 0.002 | 0.003 | 0.003 | 0.003 | 0.003 | 0.003 | 0.003 | 0.003 |
| REF | 0.000 | 0.001 | 0.000 | 0.002 | 0.002 | 0.002 | 0.002 | 0.002 | 0.002 | 0.002 | 0.002 |
| SSA | 0.000 | 0.000 | 0.000 | 0.000 | 0.000 | 0.000 | 0.000 | 0.000 | 0.000 | 0.000 | 0.000 |
| USA | 0.018 | 0.015 | 0.015 | 0.000 | 0.000 | 0.000 | 0.000 | 0.000 | 0.000 | 0.000 | 0.000 |

Table 530: MAgPIE m4p\_SSP1 — Demand—Material—Livestock products—Monogastric meat (Mt DM/yr)  
[PART 1/2]

|     | 2050  | 2055  | 2060  | 2070  | 2080  | 2090  | 2100  |
|-----|-------|-------|-------|-------|-------|-------|-------|
| GLO | 0.160 | 0.158 | 0.157 | 0.152 | 0.145 | 0.145 | 0.136 |
| CAZ | 0.000 | 0.000 | 0.000 | 0.000 | 0.000 | 0.000 | 0.000 |
| CHA | 0.044 | 0.042 | 0.040 | 0.036 | 0.032 | 0.032 | 0.028 |
| EUR | 0.082 | 0.082 | 0.083 | 0.083 | 0.082 | 0.082 | 0.079 |
| IND | 0.000 | 0.000 | 0.000 | 0.000 | 0.000 | 0.000 | 0.000 |
| JPN | 0.000 | 0.000 | 0.000 | 0.000 | 0.000 | 0.000 | 0.000 |
| LAM | 0.005 | 0.005 | 0.005 | 0.005 | 0.005 | 0.005 | 0.004 |
| MEA | 0.009 | 0.009 | 0.009 | 0.009 | 0.009 | 0.009 | 0.009 |
| NEU | 0.014 | 0.014 | 0.014 | 0.014 | 0.013 | 0.013 | 0.012 |
| OAS | 0.003 | 0.003 | 0.003 | 0.003 | 0.003 | 0.003 | 0.003 |
| REF | 0.002 | 0.002 | 0.002 | 0.002 | 0.002 | 0.002 | 0.002 |
| SSA | 0.000 | 0.000 | 0.000 | 0.000 | 0.000 | 0.000 | 0.000 |
| USA | 0.000 | 0.000 | 0.000 | 0.000 | 0.000 | 0.000 | 0.000 |

Table 531: MAgPIE m4p\_SSP1 — Demand—Material—Livestock products—Monogastric meat (Mt DM/yr)  
[PART 2/2]

|     | 1965  | 1970  | 1975  | 1980  | 1985  | 1990  | 1995  | 2000  | 2005  | 2010  |
|-----|-------|-------|-------|-------|-------|-------|-------|-------|-------|-------|
| GLO | 0.057 | 0.068 | 0.102 | 0.101 | 0.085 | 0.142 | 0.053 | 0.069 | 0.125 | 0.150 |
| CAZ | 0.000 | 0.000 | 0.000 | 0.000 | 0.000 | 0.000 | 0.000 | 0.000 | 0.000 | 0.000 |
| CHA | 0.002 | 0.003 | 0.003 | 0.004 | 0.006 | 0.007 | 0.007 | 0.008 | 0.012 | 0.050 |
| EUR | 0.050 | 0.061 | 0.067 | 0.058 | 0.050 | 0.110 | 0.026 | 0.040 | 0.090 | 0.073 |
| IND | 0.000 | 0.000 | 0.000 | 0.000 | 0.000 | 0.000 | 0.000 | 0.000 | 0.000 | 0.000 |
| JPN | 0.000 | 0.000 | 0.000 | 0.000 | 0.000 | 0.000 | 0.000 | 0.000 | 0.000 | 0.000 |
| LAM | 0.004 | 0.004 | 0.004 | 0.006 | 0.002 | 0.002 | 0.001 | 0.002 | 0.003 | 0.004 |
| MEA | 0.000 | 0.000 | 0.000 | 0.000 | 0.000 | 0.000 | 0.001 | 0.000 | 0.002 | 0.006 |
| NEU | 0.000 | 0.000 | 0.000 | 0.000 | 0.000 | 0.000 | 0.000 | 0.000 | 0.000 | 0.012 |
| OAS | 0.000 | 0.000 | 0.000 | 0.000 | 0.000 | 0.001 | 0.001 | 0.001 | 0.002 | 0.002 |
| REF | 0.000 | 0.000 | 0.000 | 0.000 | 0.000 | 0.000 | 0.000 | 0.001 | 0.000 | 0.002 |
| SSA | 0.000 | 0.000 | 0.000 | 0.000 | 0.000 | 0.000 | 0.000 | 0.000 | 0.000 | 0.000 |
| USA | 0.000 | 0.000 | 0.027 | 0.032 | 0.027 | 0.023 | 0.018 | 0.015 | 0.015 | 0.000 |

Table 532: FAO — Demand—Material—Livestock products—Monogastric meat (Mt DM/yr)

8.5.4 Poultry meat

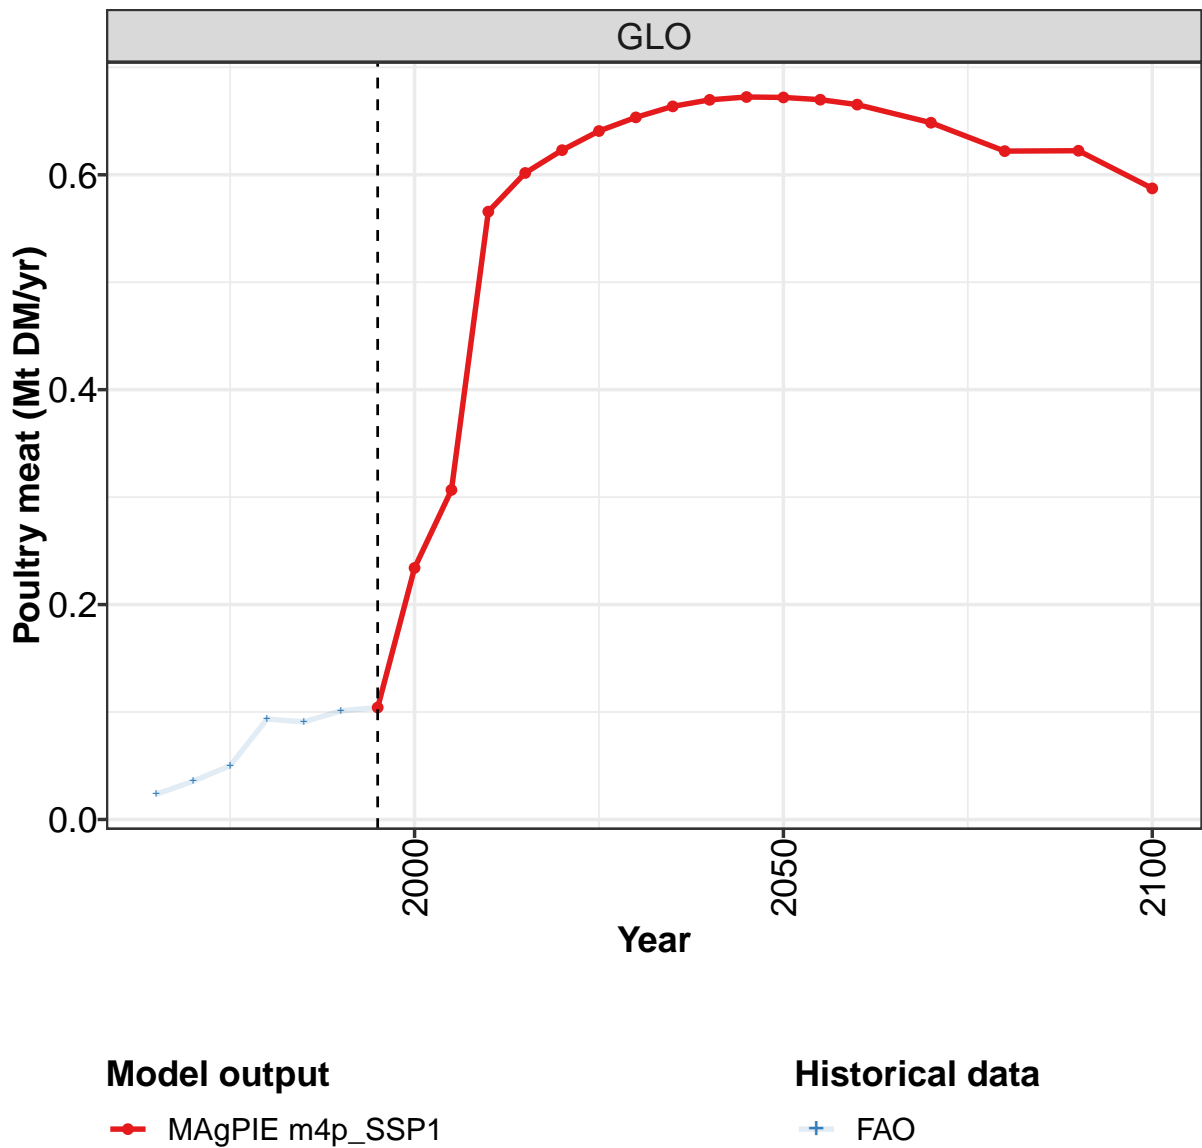

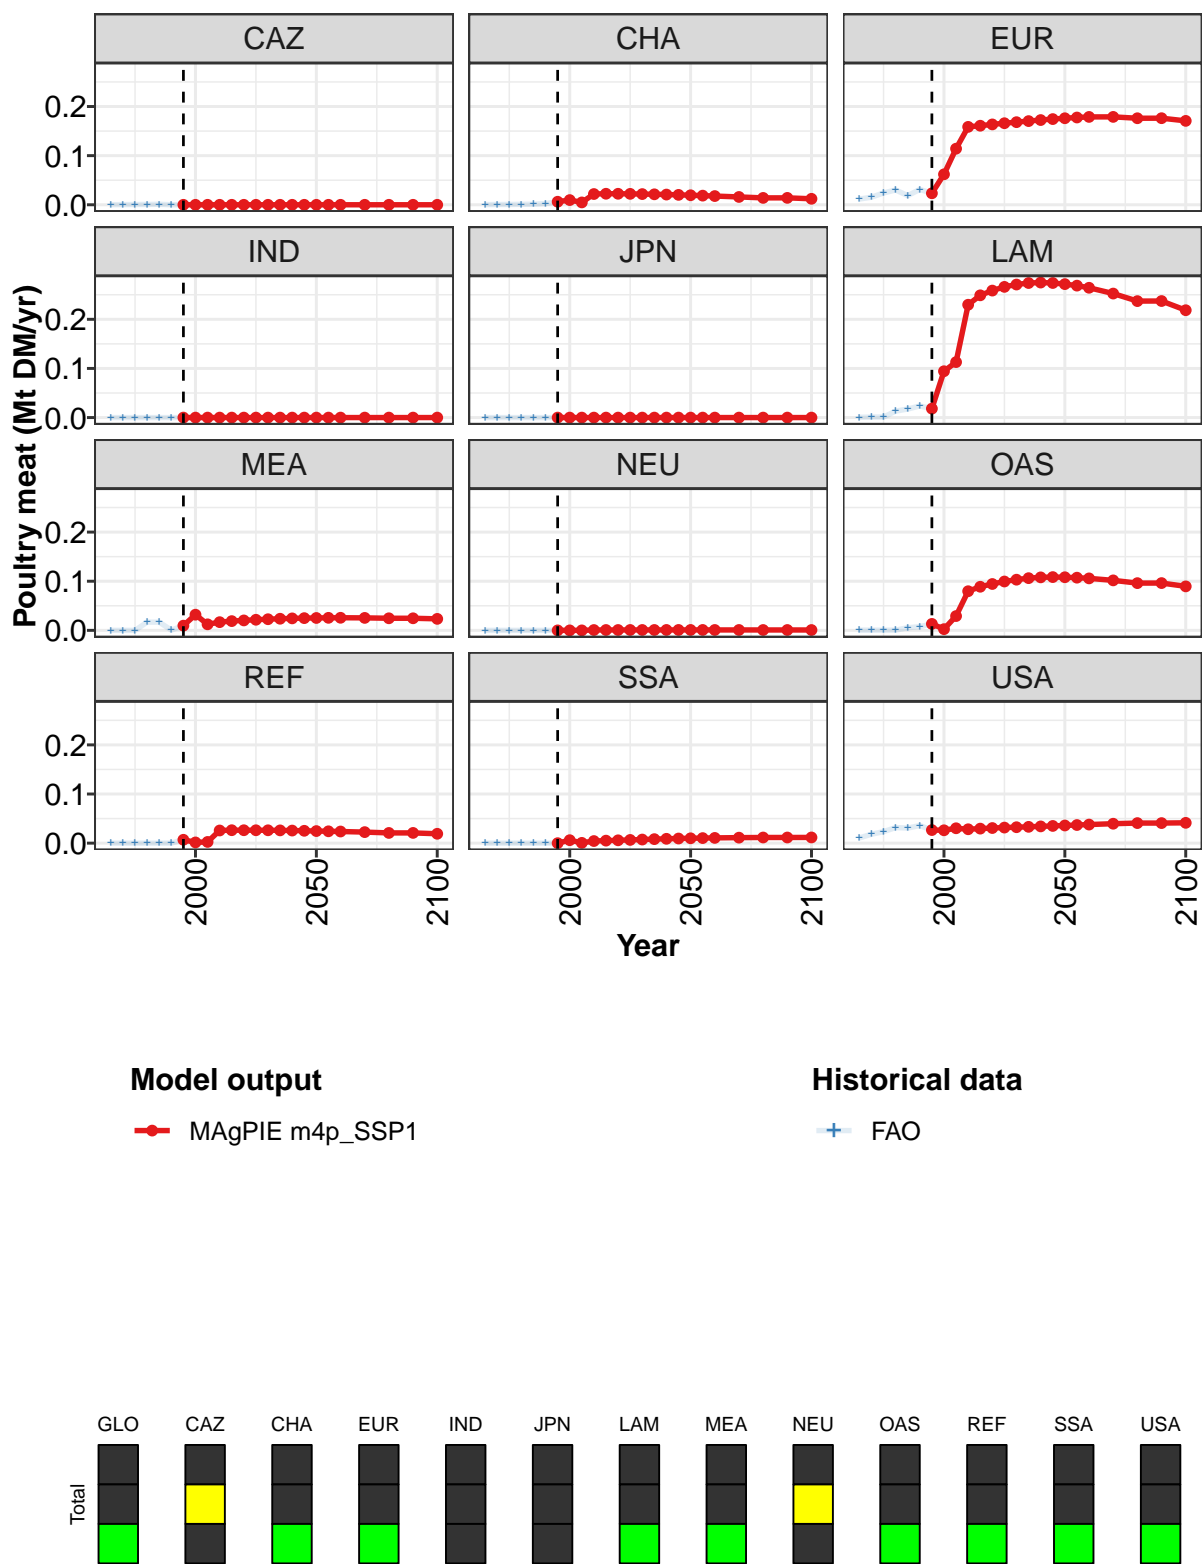

Figure 178: MAgPIE m4p\_SSP1 — Demand—Material—Livestock products—Poultry meat (Mt DM/yr)

|     | 1995  | 2000  | 2005  | 2010  | 2015  | 2020  | 2025  | 2030  | 2035  | 2040  | 2045  |
|-----|-------|-------|-------|-------|-------|-------|-------|-------|-------|-------|-------|
| GLO | 0.104 | 0.234 | 0.307 | 0.566 | 0.602 | 0.623 | 0.641 | 0.653 | 0.664 | 0.670 | 0.672 |
| CAZ | 0.000 | 0.000 | 0.000 | 0.000 | 0.000 | 0.000 | 0.000 | 0.000 | 0.000 | 0.000 | 0.000 |
| CHA | 0.006 | 0.010 | 0.005 | 0.022 | 0.022 | 0.022 | 0.022 | 0.022 | 0.021 | 0.021 | 0.020 |
| EUR | 0.023 | 0.062 | 0.114 | 0.159 | 0.161 | 0.164 | 0.166 | 0.168 | 0.170 | 0.172 | 0.174 |
| IND | 0.000 | 0.000 | 0.000 | 0.000 | 0.000 | 0.000 | 0.000 | 0.000 | 0.000 | 0.000 | 0.000 |
| JPN | 0.000 | 0.000 | 0.000 | 0.000 | 0.000 | 0.000 | 0.000 | 0.000 | 0.000 | 0.000 | 0.000 |
| LAM | 0.018 | 0.094 | 0.113 | 0.230 | 0.249 | 0.259 | 0.266 | 0.271 | 0.274 | 0.275 | 0.274 |
| MEA | 0.010 | 0.032 | 0.012 | 0.017 | 0.019 | 0.020 | 0.022 | 0.023 | 0.024 | 0.024 | 0.025 |
| NEU | 0.000 | 0.000 | 0.000 | 0.001 | 0.001 | 0.001 | 0.001 | 0.001 | 0.001 | 0.001 | 0.001 |
| OAS | 0.013 | 0.003 | 0.029 | 0.080 | 0.089 | 0.094 | 0.099 | 0.103 | 0.106 | 0.108 | 0.108 |
| REF | 0.007 | 0.001 | 0.003 | 0.026 | 0.026 | 0.026 | 0.026 | 0.026 | 0.026 | 0.026 | 0.025 |
| SSA | 0.000 | 0.006 | 0.001 | 0.004 | 0.005 | 0.006 | 0.007 | 0.007 | 0.008 | 0.009 | 0.009 |
| USA | 0.027 | 0.026 | 0.030 | 0.028 | 0.030 | 0.031 | 0.032 | 0.032 | 0.033 | 0.034 | 0.035 |

Table 533: MAgPIE m4p\_SSP1 — Demand—Material—Livestock products—Poultry meat (Mt DM/yr) [PART 1/2]

|     | 2050  | 2055  | 2060  | 2070  | 2080  | 2090  | 2100  |
|-----|-------|-------|-------|-------|-------|-------|-------|
| GLO | 0.672 | 0.670 | 0.665 | 0.648 | 0.622 | 0.622 | 0.587 |
| CAZ | 0.000 | 0.000 | 0.000 | 0.000 | 0.000 | 0.000 | 0.000 |
| CHA | 0.019 | 0.019 | 0.018 | 0.016 | 0.014 | 0.014 | 0.012 |
| EUR | 0.176 | 0.178 | 0.179 | 0.179 | 0.176 | 0.176 | 0.171 |
| IND | 0.000 | 0.000 | 0.000 | 0.000 | 0.000 | 0.000 | 0.000 |
| JPN | 0.000 | 0.000 | 0.000 | 0.000 | 0.000 | 0.000 | 0.000 |
| LAM | 0.272 | 0.269 | 0.264 | 0.252 | 0.237 | 0.237 | 0.219 |
| MEA | 0.025 | 0.026 | 0.026 | 0.025 | 0.025 | 0.025 | 0.023 |
| NEU | 0.001 | 0.001 | 0.001 | 0.001 | 0.001 | 0.001 | 0.001 |
| OAS | 0.108 | 0.107 | 0.106 | 0.102 | 0.096 | 0.096 | 0.090 |
| REF | 0.025 | 0.024 | 0.024 | 0.022 | 0.021 | 0.021 | 0.019 |
| SSA | 0.010 | 0.010 | 0.011 | 0.011 | 0.012 | 0.012 | 0.012 |
| USA | 0.036 | 0.037 | 0.038 | 0.040 | 0.041 | 0.041 | 0.041 |

Table 534: MAgPIE m4p\_SSP1 — Demand—Material—Livestock products—Poultry meat (Mt DM/yr) [PART 2/2]

|     | 1965  | 1970  | 1975  | 1980  | 1985  | 1990  | 1995  | 2000  | 2005  | 2010  |
|-----|-------|-------|-------|-------|-------|-------|-------|-------|-------|-------|
| GLO | 0.024 | 0.036 | 0.050 | 0.093 | 0.091 | 0.101 | 0.104 | 0.234 | 0.307 | 0.566 |
| CAZ | 0.000 | 0.000 | 0.001 | 0.001 | 0.001 | 0.000 | 0.000 | 0.000 | 0.000 | 0.000 |
| CHA | 0.000 | 0.001 | 0.001 | 0.001 | 0.001 | 0.002 | 0.006 | 0.010 | 0.005 | 0.022 |
| EUR | 0.012 | 0.015 | 0.024 | 0.030 | 0.019 | 0.031 | 0.023 | 0.062 | 0.114 | 0.159 |
| IND | 0.000 | 0.000 | 0.000 | 0.000 | 0.000 | 0.000 | 0.000 | 0.000 | 0.000 | 0.000 |
| JPN | 0.000 | 0.000 | 0.000 | 0.000 | 0.000 | 0.000 | 0.000 | 0.000 | 0.000 | 0.000 |
| LAM | 0.001 | 0.001 | 0.001 | 0.013 | 0.017 | 0.024 | 0.018 | 0.094 | 0.113 | 0.230 |
| MEA | 0.000 | 0.000 | 0.000 | 0.017 | 0.017 | 0.001 | 0.010 | 0.032 | 0.012 | 0.017 |
| NEU | 0.000 | 0.000 | 0.000 | 0.000 | 0.000 | 0.000 | 0.000 | 0.000 | 0.000 | 0.001 |
| OAS | 0.000 | 0.000 | 0.000 | 0.000 | 0.005 | 0.007 | 0.013 | 0.003 | 0.029 | 0.080 |
| REF | 0.000 | 0.000 | 0.000 | 0.000 | 0.000 | 0.000 | 0.007 | 0.002 | 0.003 | 0.026 |
| SSA | 0.000 | 0.000 | 0.000 | 0.000 | 0.000 | 0.000 | 0.000 | 0.006 | 0.001 | 0.004 |
| USA | 0.011 | 0.018 | 0.023 | 0.032 | 0.031 | 0.036 | 0.027 | 0.026 | 0.030 | 0.028 |

Table 535: FAO — Demand—Material—Livestock products—Poultry meat (Mt DM/yr)

8.5.5 Ruminant meat

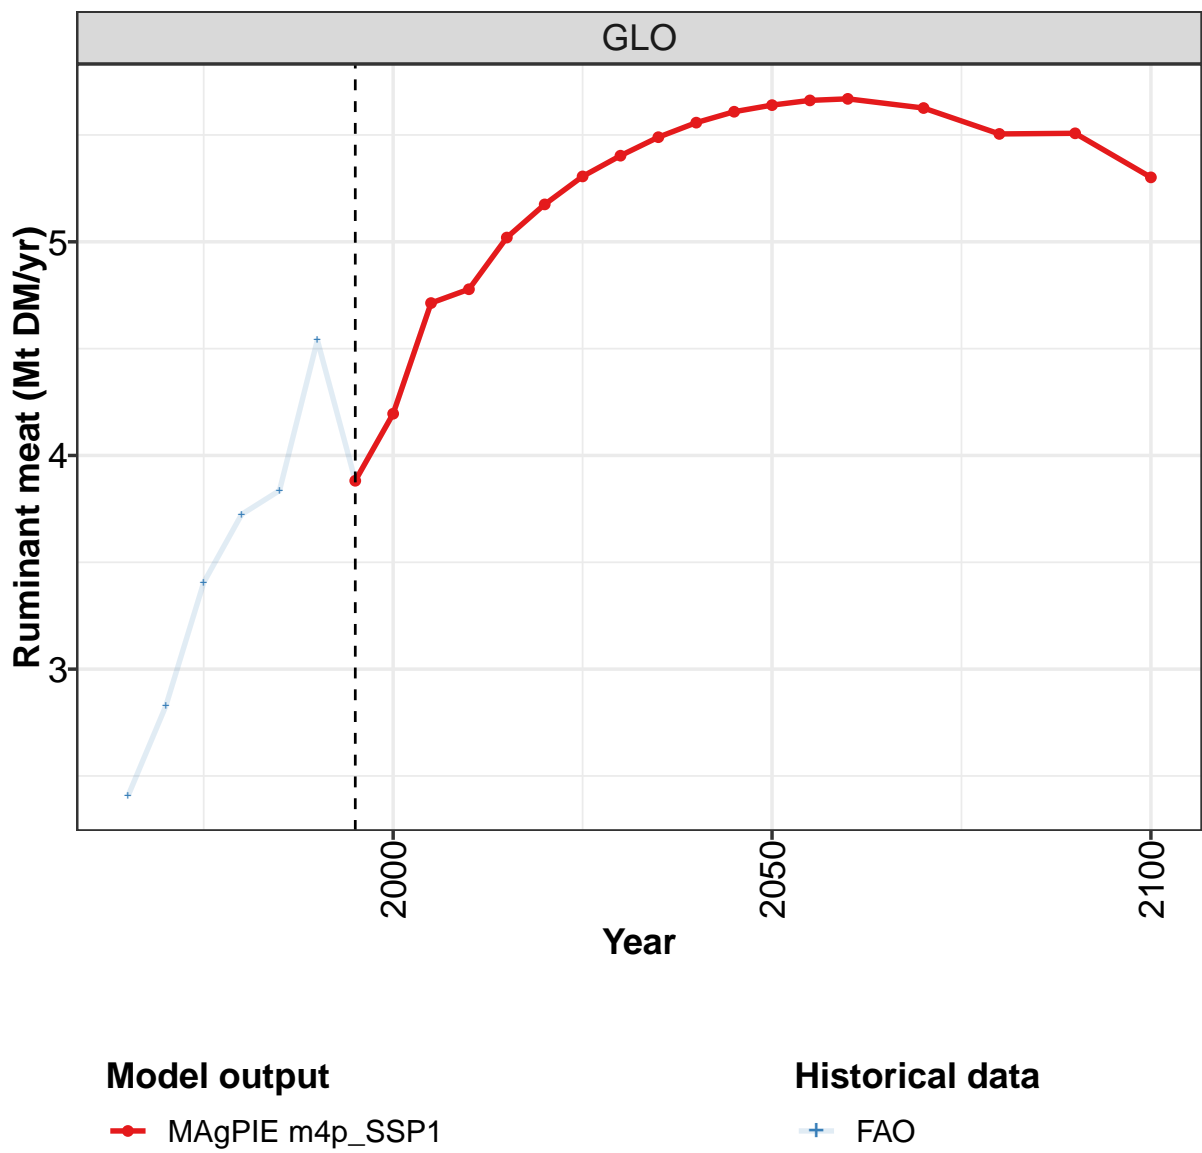

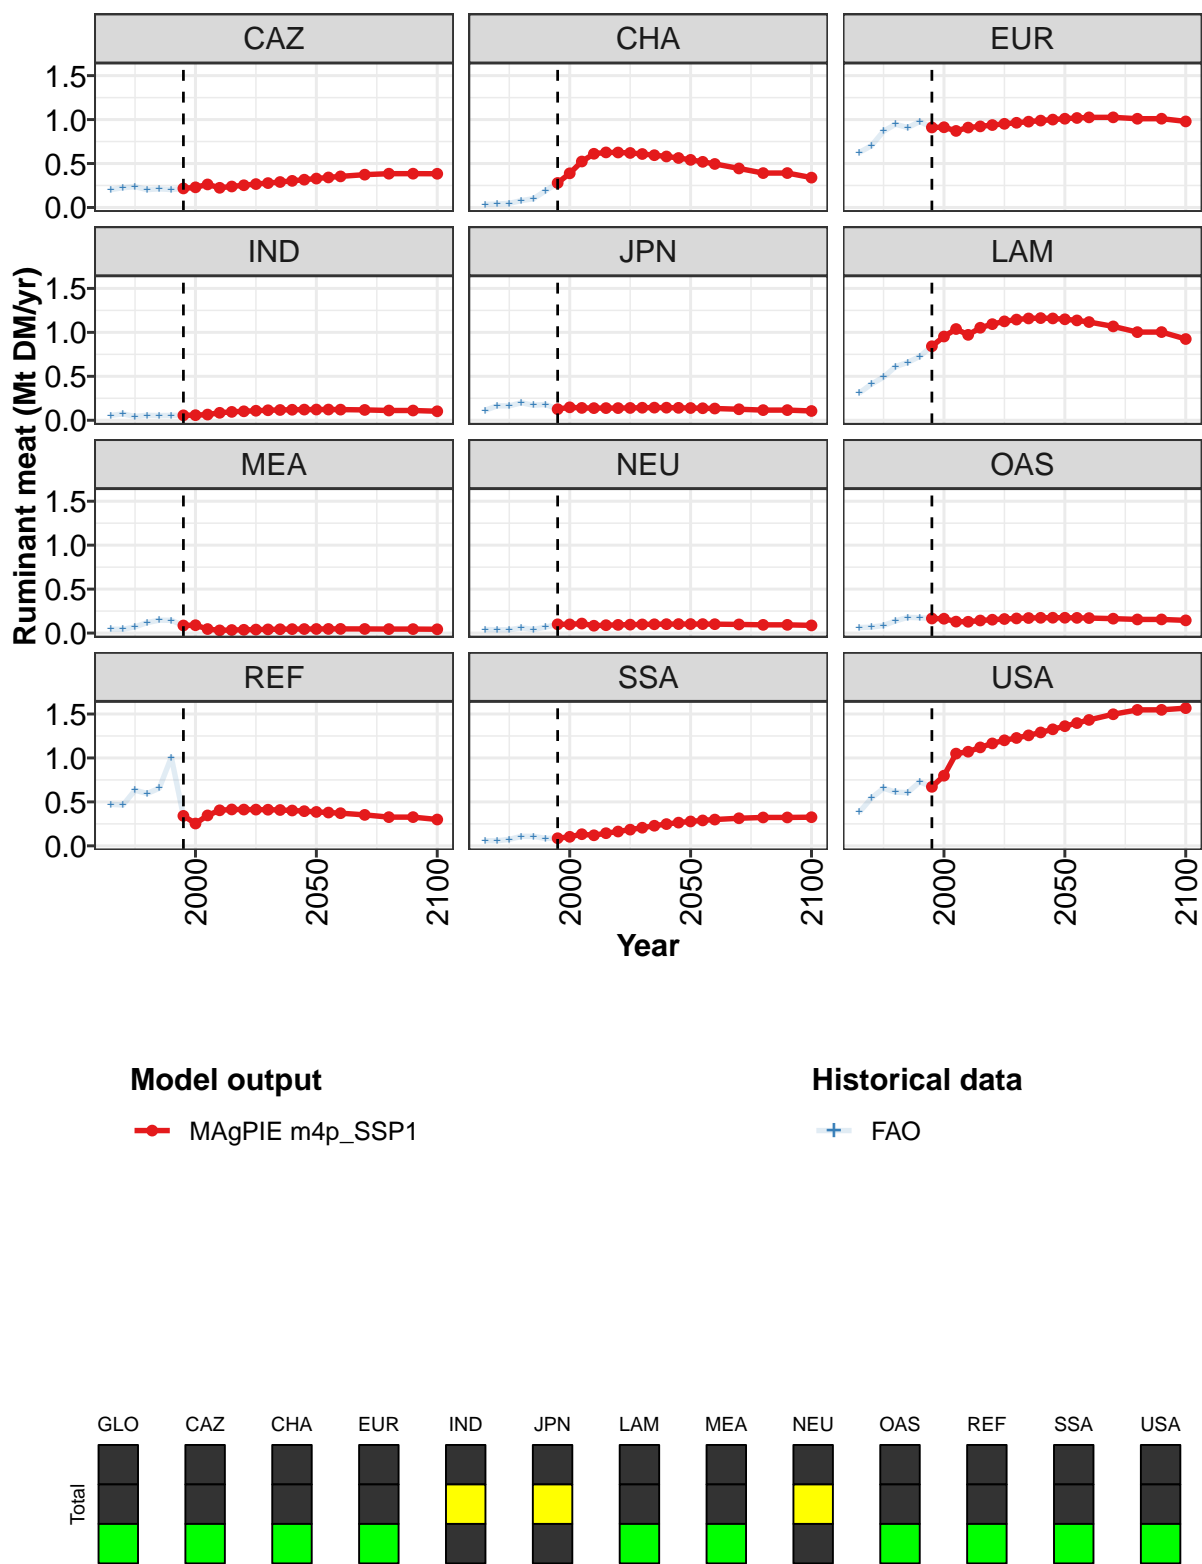

Figure 179: MAgPIE m4p\_SSP1 — Demand—Material—Livestock products—Ruminant meat (Mt DM/yr)



|     | 1995 | 2000 | 2005 | 2010 | 2015 | 2020 | 2025 | 2030 | 2035 | 2040 | 2045 |
|-----|------|------|------|------|------|------|------|------|------|------|------|
| GLO | 3.88 | 4.20 | 4.71 | 4.78 | 5.02 | 5.18 | 5.31 | 5.40 | 5.49 | 5.56 | 5.61 |
| CAZ | 0.22 | 0.23 | 0.26 | 0.22 | 0.24 | 0.25 | 0.27 | 0.28 | 0.29 | 0.30 | 0.32 |
| CHA | 0.28 | 0.39 | 0.52 | 0.61 | 0.63 | 0.63 | 0.62 | 0.61 | 0.59 | 0.58 | 0.56 |
| EUR | 0.91 | 0.91 | 0.87 | 0.91 | 0.92 | 0.94 | 0.95 | 0.96 | 0.98 | 0.99 | 1.00 |
| IND | 0.06 | 0.06 | 0.07 | 0.08 | 0.10 | 0.10 | 0.11 | 0.11 | 0.12 | 0.12 | 0.12 |
| JPN | 0.13 | 0.15 | 0.14 | 0.14 | 0.14 | 0.14 | 0.14 | 0.14 | 0.14 | 0.14 | 0.14 |
| LAM | 0.84 | 0.95 | 1.04 | 0.97 | 1.05 | 1.09 | 1.13 | 1.15 | 1.16 | 1.16 | 1.16 |
| MEA | 0.09 | 0.09 | 0.05 | 0.03 | 0.03 | 0.04 | 0.04 | 0.04 | 0.04 | 0.04 | 0.05 |
| NEU | 0.10 | 0.10 | 0.11 | 0.08 | 0.09 | 0.09 | 0.10 | 0.10 | 0.10 | 0.10 | 0.10 |
| OAS | 0.17 | 0.16 | 0.13 | 0.13 | 0.14 | 0.15 | 0.16 | 0.17 | 0.17 | 0.17 | 0.17 |
| REF | 0.34 | 0.25 | 0.35 | 0.40 | 0.41 | 0.41 | 0.41 | 0.41 | 0.41 | 0.40 | 0.39 |
| SSA | 0.09 | 0.10 | 0.13 | 0.12 | 0.14 | 0.16 | 0.18 | 0.21 | 0.23 | 0.25 | 0.26 |
| USA | 0.67 | 0.80 | 1.05 | 1.07 | 1.12 | 1.17 | 1.20 | 1.23 | 1.26 | 1.29 | 1.33 |

Table 536: MAgPIE m4p\_SSP1 — Demand—Material—Livestock products—Ruminant meat (Mt DM/yr)  
[PART 1/2]

|     | 2050 | 2055 | 2060 | 2070 | 2080 | 2090 | 2100 |
|-----|------|------|------|------|------|------|------|
| GLO | 5.64 | 5.66 | 5.67 | 5.63 | 5.50 | 5.51 | 5.30 |
| CAZ | 0.33 | 0.34 | 0.35 | 0.37 | 0.38 | 0.38 | 0.38 |
| CHA | 0.54 | 0.52 | 0.50 | 0.44 | 0.39 | 0.39 | 0.34 |
| EUR | 1.01 | 1.02 | 1.03 | 1.03 | 1.01 | 1.01 | 0.98 |
| IND | 0.12 | 0.12 | 0.12 | 0.12 | 0.11 | 0.11 | 0.10 |
| JPN | 0.14 | 0.14 | 0.13 | 0.13 | 0.12 | 0.12 | 0.11 |
| LAM | 1.15 | 1.14 | 1.12 | 1.07 | 1.00 | 1.00 | 0.92 |
| MEA | 0.05 | 0.05 | 0.05 | 0.05 | 0.05 | 0.05 | 0.04 |
| NEU | 0.10 | 0.10 | 0.10 | 0.10 | 0.09 | 0.09 | 0.09 |
| OAS | 0.17 | 0.17 | 0.17 | 0.16 | 0.15 | 0.16 | 0.14 |
| REF | 0.39 | 0.38 | 0.37 | 0.35 | 0.33 | 0.33 | 0.30 |
| SSA | 0.28 | 0.29 | 0.30 | 0.31 | 0.32 | 0.32 | 0.33 |
| USA | 1.36 | 1.40 | 1.43 | 1.50 | 1.55 | 1.55 | 1.57 |

Table 537: MAgPIE m4p\_SSP1 — Demand—Material—Livestock products—Ruminant meat (Mt DM/yr)  
[PART 2/2]

|     | 1965 | 1970 | 1975 | 1980 | 1985 | 1990 | 1995 | 2000 | 2005 | 2010 |
|-----|------|------|------|------|------|------|------|------|------|------|
| GLO | 2.41 | 2.83 | 3.41 | 3.72 | 3.84 | 4.54 | 3.88 | 4.20 | 4.71 | 4.78 |
| CAZ | 0.20 | 0.23 | 0.24 | 0.20 | 0.21 | 0.20 | 0.22 | 0.23 | 0.26 | 0.22 |
| CHA | 0.04 | 0.04 | 0.05 | 0.08 | 0.10 | 0.19 | 0.28 | 0.39 | 0.52 | 0.61 |
| EUR | 0.63 | 0.70 | 0.87 | 0.95 | 0.91 | 0.98 | 0.91 | 0.91 | 0.87 | 0.91 |
| IND | 0.06 | 0.07 | 0.04 | 0.06 | 0.05 | 0.06 | 0.06 | 0.06 | 0.07 | 0.08 |
| JPN | 0.11 | 0.16 | 0.16 | 0.20 | 0.17 | 0.18 | 0.13 | 0.15 | 0.14 | 0.14 |
| LAM | 0.31 | 0.41 | 0.49 | 0.61 | 0.66 | 0.73 | 0.84 | 0.95 | 1.04 | 0.97 |
| MEA | 0.04 | 0.04 | 0.07 | 0.12 | 0.15 | 0.14 | 0.09 | 0.09 | 0.05 | 0.03 |
| NEU | 0.04 | 0.04 | 0.04 | 0.06 | 0.04 | 0.07 | 0.10 | 0.10 | 0.11 | 0.08 |
| OAS | 0.06 | 0.07 | 0.09 | 0.14 | 0.18 | 0.17 | 0.17 | 0.16 | 0.13 | 0.13 |
| REF | 0.47 | 0.46 | 0.63 | 0.60 | 0.66 | 1.01 | 0.34 | 0.25 | 0.35 | 0.40 |
| SSA | 0.06 | 0.06 | 0.07 | 0.11 | 0.11 | 0.09 | 0.09 | 0.10 | 0.13 | 0.12 |
| USA | 0.38 | 0.54 | 0.66 | 0.61 | 0.61 | 0.73 | 0.67 | 0.80 | 1.05 | 1.07 |

Table 538: FAO — Demand—Material—Livestock products—Ruminant meat (Mt DM/yr)

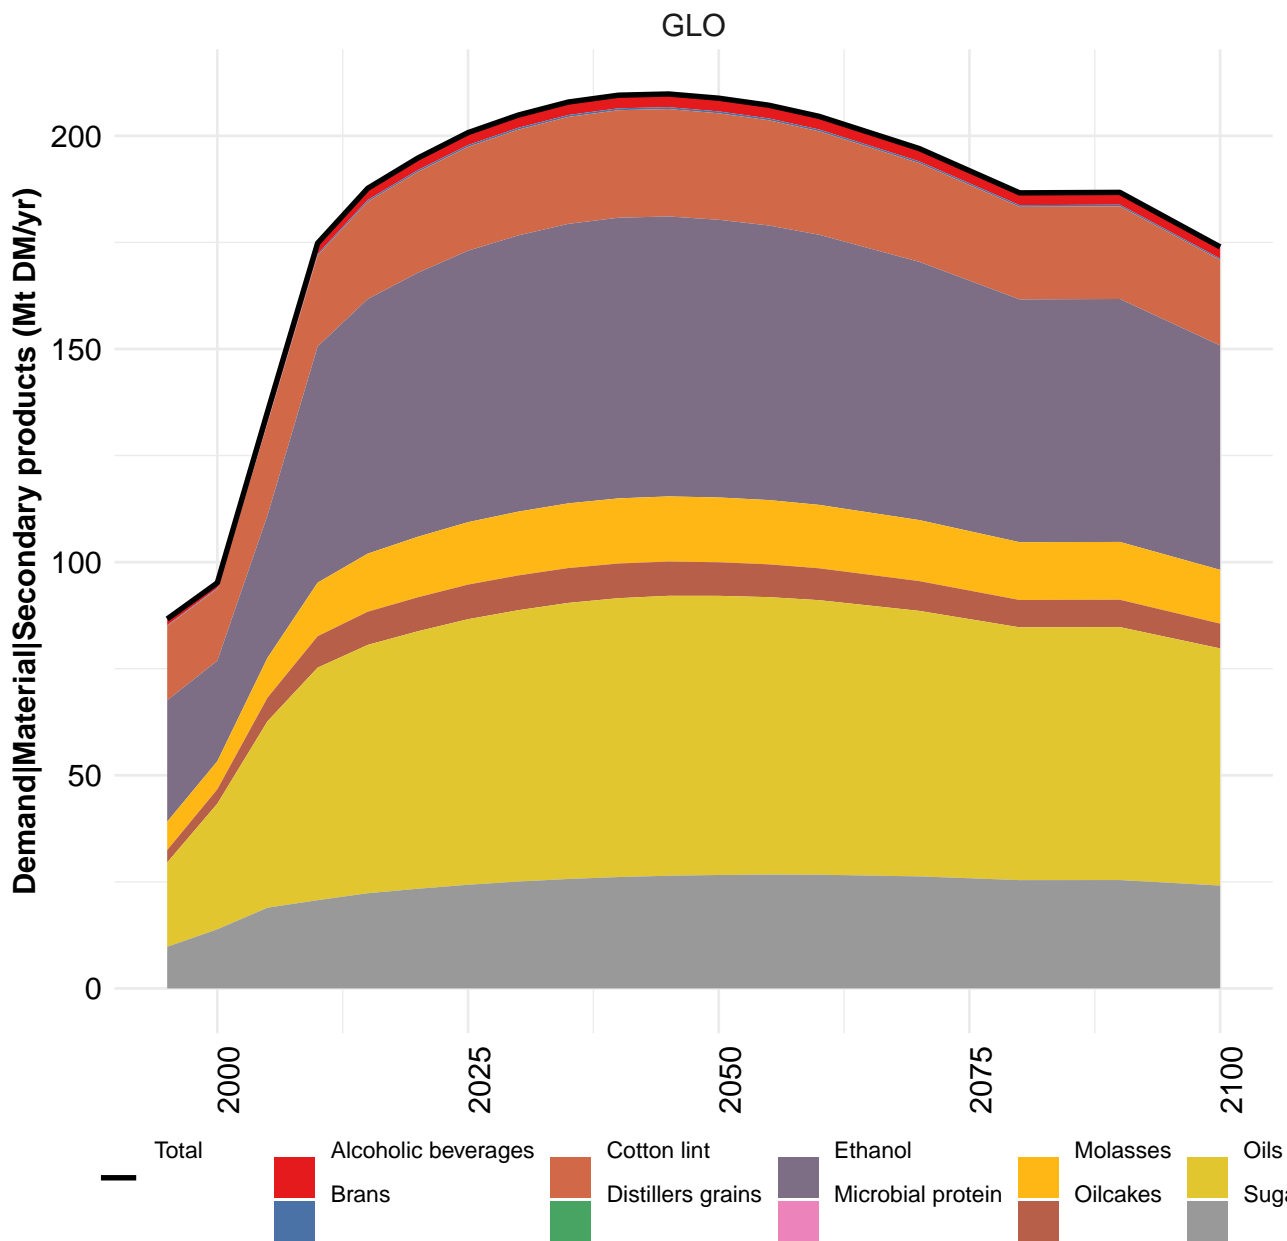

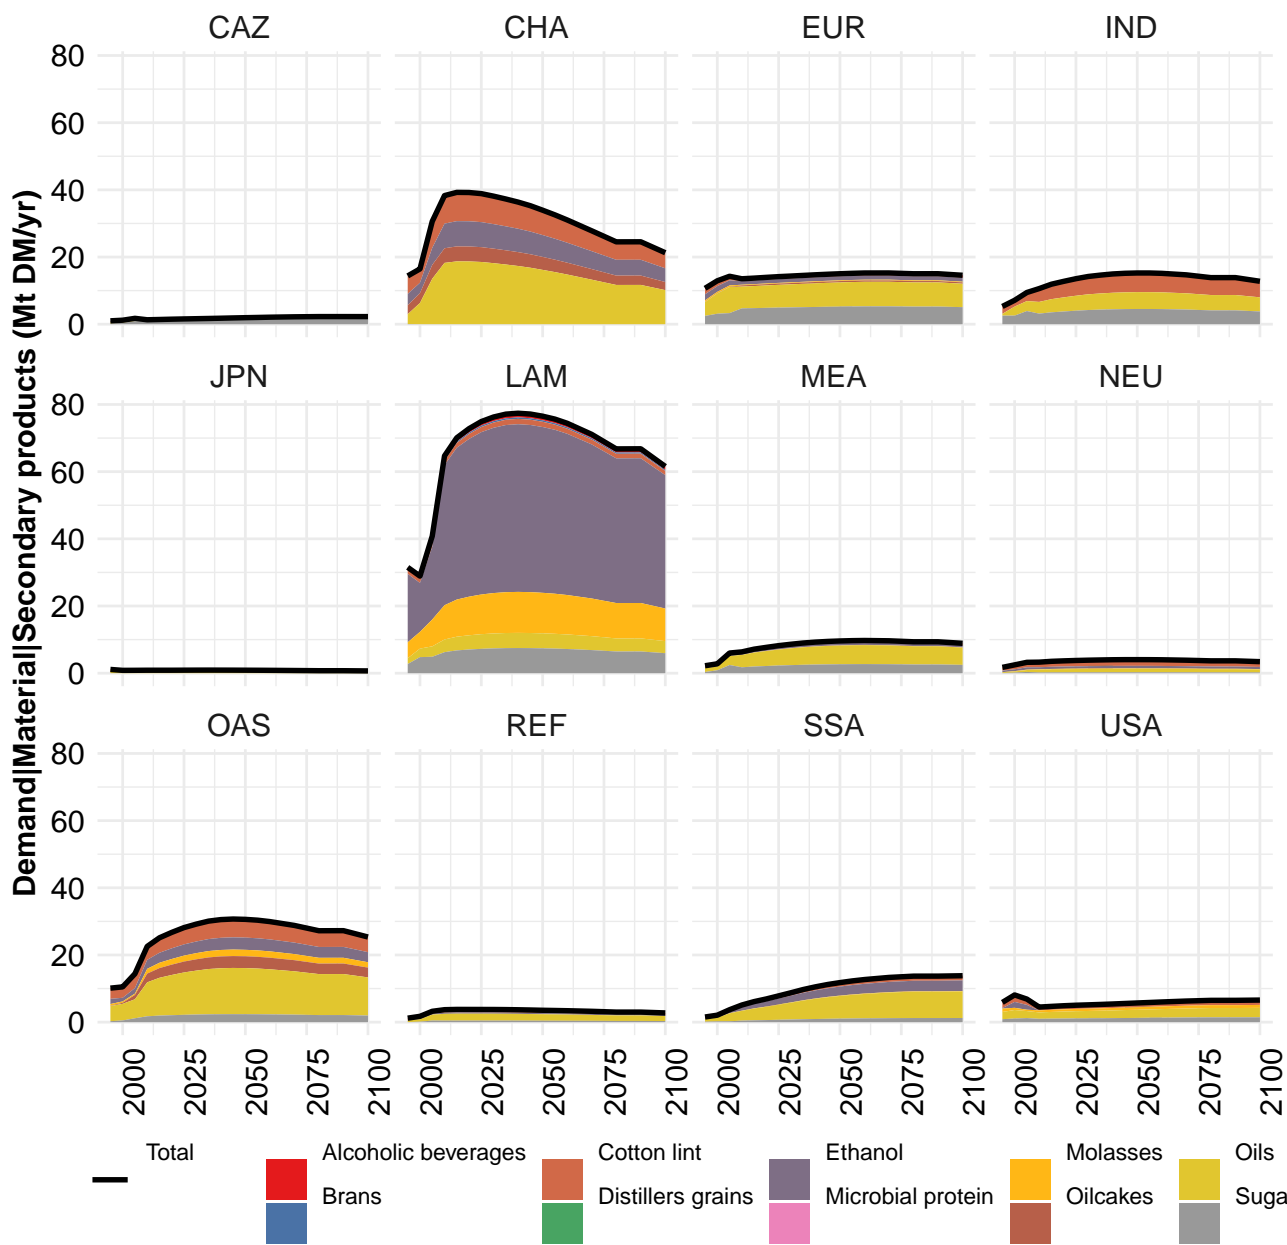

8.6 Secondary products

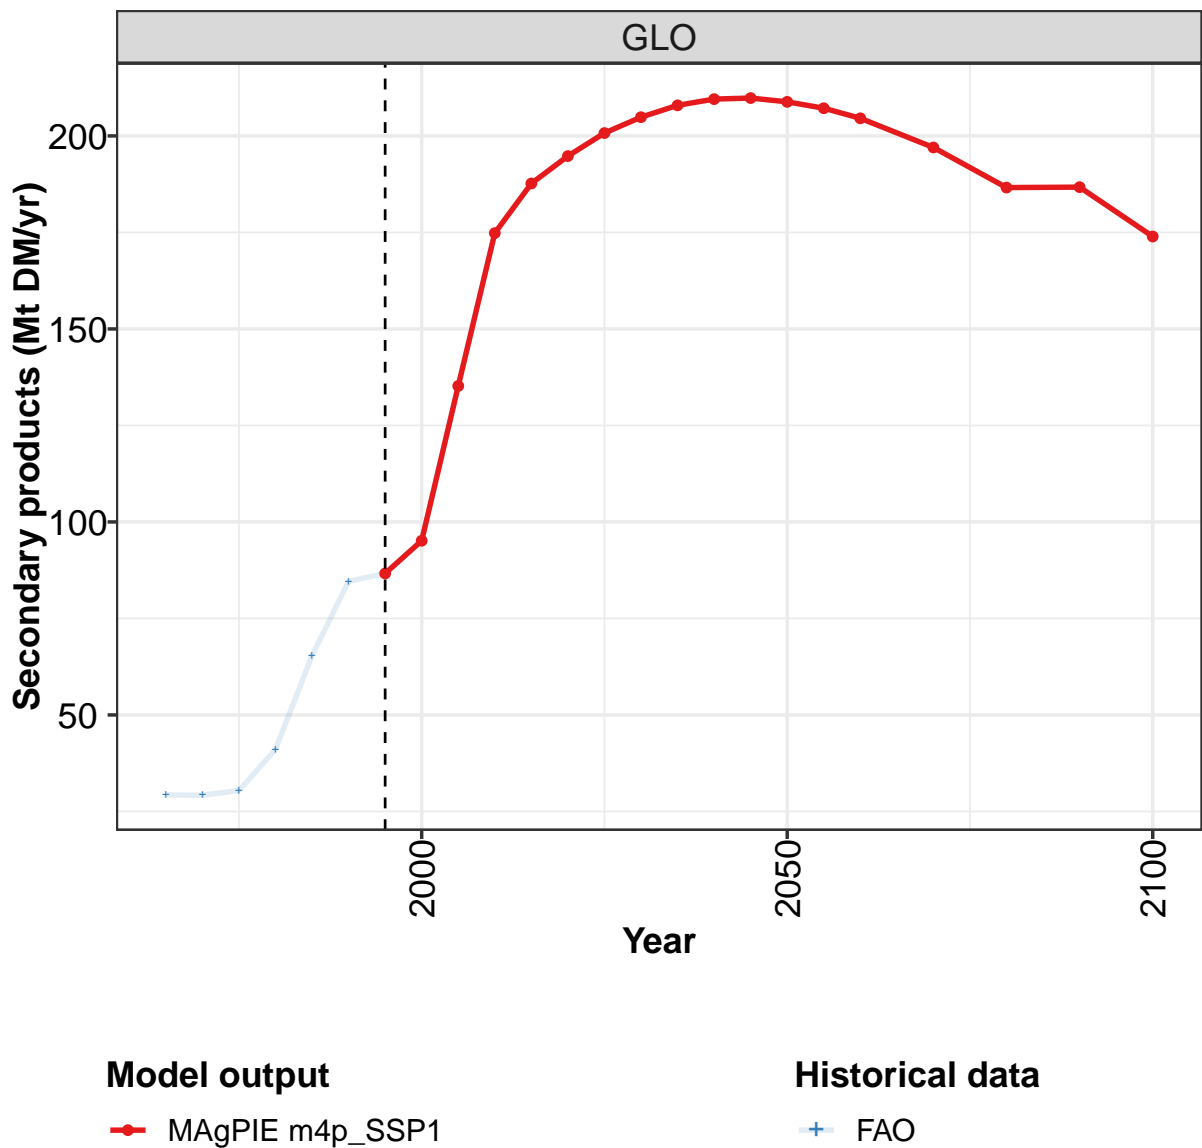

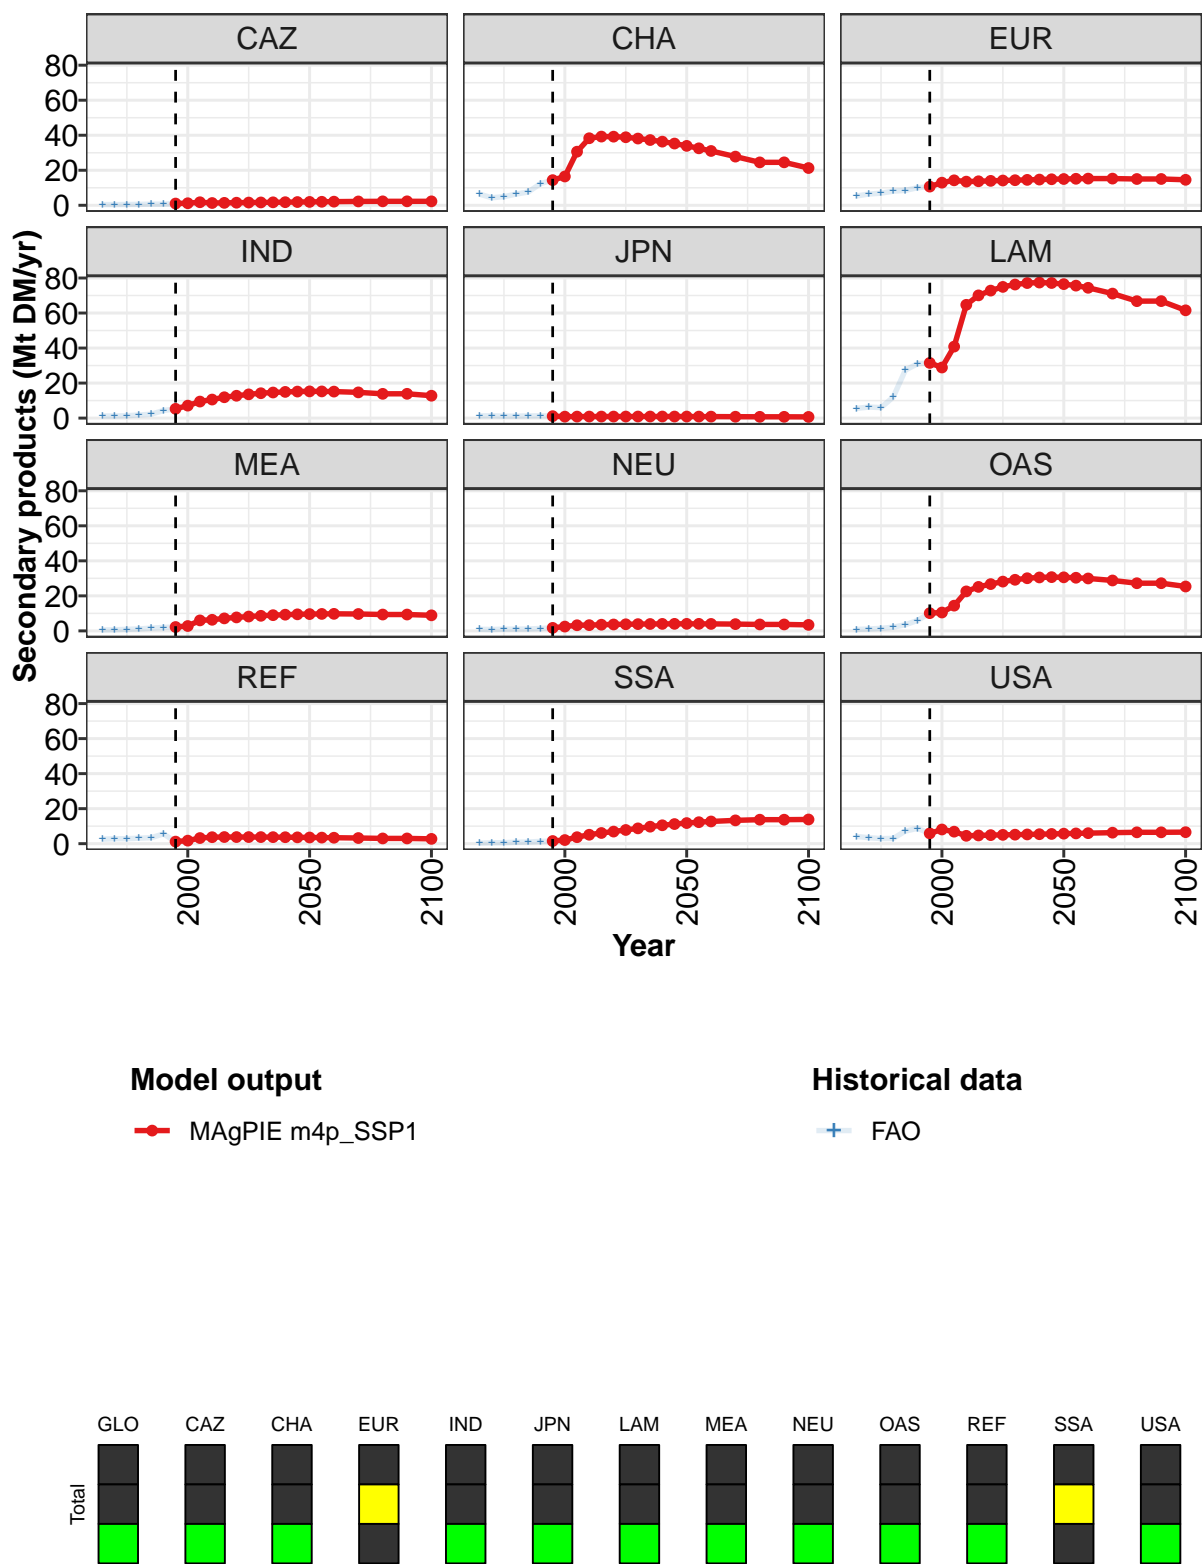

Figure 180: MAgPIE m4p\_SSP1 — Demand—Material—Secondary products (Mt DM/yr)

|     | 1995 | 2000 | 2005 | 2010 | 2015 | 2020 | 2025 | 2030 | 2035 | 2040 | 2045 |
|-----|------|------|------|------|------|------|------|------|------|------|------|
| GLO | 87   | 95   | 135  | 175  | 188  | 195  | 201  | 205  | 208  | 210  | 210  |
| CAZ | 1    | 1    | 2    | 1    | 1    | 1    | 2    | 2    | 2    | 2    | 2    |
| CHA | 14   | 16   | 31   | 38   | 39   | 39   | 39   | 38   | 37   | 36   | 35   |
| EUR | 11   | 13   | 14   | 14   | 14   | 14   | 14   | 14   | 15   | 15   | 15   |
| IND | 5    | 7    | 9    | 11   | 12   | 13   | 14   | 14   | 15   | 15   | 15   |
| JPN | 1    | 1    | 1    | 1    | 1    | 1    | 1    | 1    | 1    | 1    | 1    |
| LAM | 32   | 29   | 41   | 65   | 70   | 73   | 75   | 76   | 77   | 77   | 77   |
| MEA | 2    | 3    | 6    | 6    | 7    | 8    | 8    | 9    | 9    | 9    | 9    |
| NEU | 2    | 2    | 3    | 3    | 4    | 4    | 4    | 4    | 4    | 4    | 4    |
| OAS | 10   | 11   | 14   | 23   | 25   | 27   | 28   | 29   | 30   | 31   | 31   |
| REF | 1    | 2    | 3    | 4    | 4    | 4    | 4    | 4    | 4    | 4    | 4    |
| SSA | 2    | 2    | 4    | 5    | 6    | 7    | 8    | 9    | 10   | 11   | 11   |
| USA | 6    | 8    | 7    | 4    | 5    | 5    | 5    | 5    | 5    | 5    | 6    |

Table 539: MAgPIE m4p\_SSP1 — Demand—Material—Secondary products (Mt DM/yr) [PART 1/2]

|     | 2050 | 2055 | 2060 | 2070 | 2080 | 2090 | 2100 |
|-----|------|------|------|------|------|------|------|
| GLO | 209  | 207  | 205  | 197  | 187  | 187  | 174  |
| CAZ | 2    | 2    | 2    | 2    | 2    | 2    | 2    |
| CHA | 34   | 33   | 31   | 28   | 25   | 25   | 21   |
| EUR | 15   | 15   | 15   | 15   | 15   | 15   | 15   |
| IND | 15   | 15   | 15   | 15   | 14   | 14   | 13   |
| JPN | 1    | 1    | 1    | 1    | 1    | 1    | 1    |
| LAM | 77   | 76   | 74   | 71   | 67   | 67   | 62   |
| MEA | 10   | 10   | 10   | 10   | 9    | 9    | 9    |
| NEU | 4    | 4    | 4    | 4    | 4    | 4    | 3    |
| OAS | 31   | 30   | 30   | 29   | 27   | 27   | 25   |
| REF | 4    | 3    | 3    | 3    | 3    | 3    | 3    |
| SSA | 12   | 12   | 13   | 13   | 14   | 14   | 14   |
| USA | 6    | 6    | 6    | 6    | 6    | 6    | 7    |

Table 540: MAgPIE m4p\_SSP1 — Demand—Material—Secondary products (Mt DM/yr) [PART 2/2]

|     | 1965 | 1970 | 1975 | 1980 | 1985 | 1990 | 1995 | 2000 | 2005 | 2010 |
|-----|------|------|------|------|------|------|------|------|------|------|
| GLO | 29   | 29   | 30   | 41   | 65   | 85   | 87   | 95   | 135  | 175  |
| CAZ | 0    | 0    | 0    | 1    | 1    | 1    | 1    | 1    | 2    | 1    |
| CHA | 6    | 4    | 5    | 6    | 8    | 12   | 14   | 16   | 31   | 38   |
| EUR | 5    | 6    | 7    | 8    | 9    | 10   | 11   | 13   | 14   | 14   |
| IND | 1    | 1    | 1    | 2    | 2    | 4    | 5    | 7    | 9    | 11   |
| JPN | 1    | 1    | 1    | 1    | 1    | 1    | 1    | 1    | 1    | 1    |
| LAM | 6    | 6    | 6    | 12   | 27   | 31   | 32   | 29   | 41   | 65   |
| MEA | 1    | 1    | 1    | 1    | 2    | 2    | 2    | 3    | 6    | 6    |
| NEU | 1    | 1    | 1    | 1    | 1    | 1    | 2    | 2    | 3    | 3    |
| OAS | 1    | 1    | 1    | 2    | 4    | 6    | 10   | 11   | 14   | 23   |
| REF | 3    | 3    | 3    | 3    | 3    | 6    | 1    | 2    | 3    | 4    |
| SSA | 0    | 1    | 1    | 1    | 1    | 1    | 2    | 2    | 4    | 5    |
| USA | 4    | 3    | 3    | 3    | 7    | 9    | 6    | 8    | 7    | 4    |

Table 541: FAO — Demand—Material—Secondary products (Mt DM/yr)

8.6.1 Alcoholic beverages

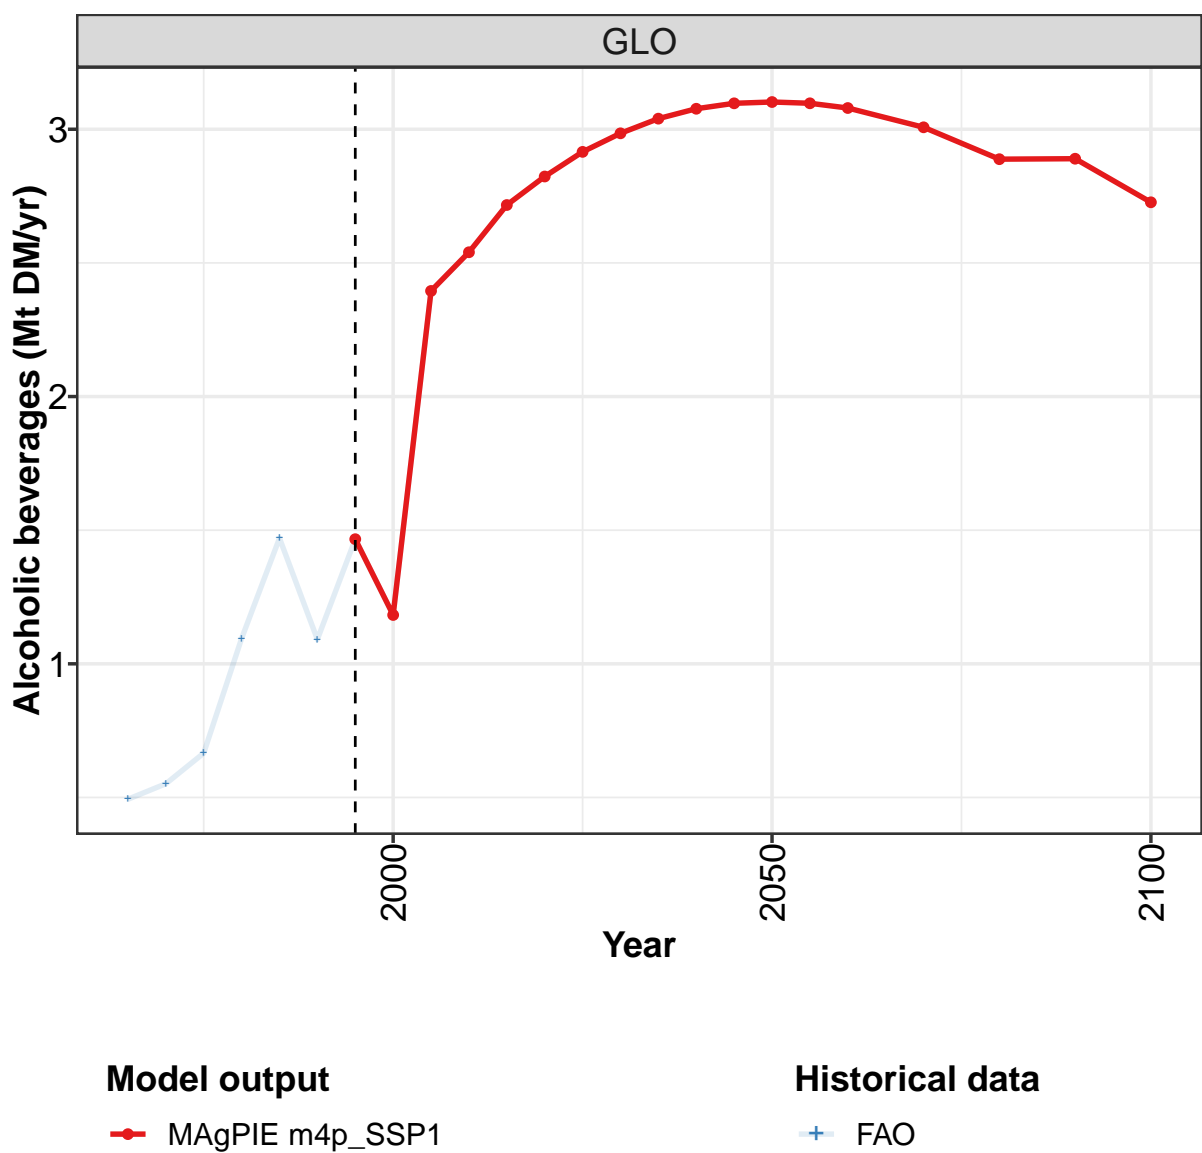

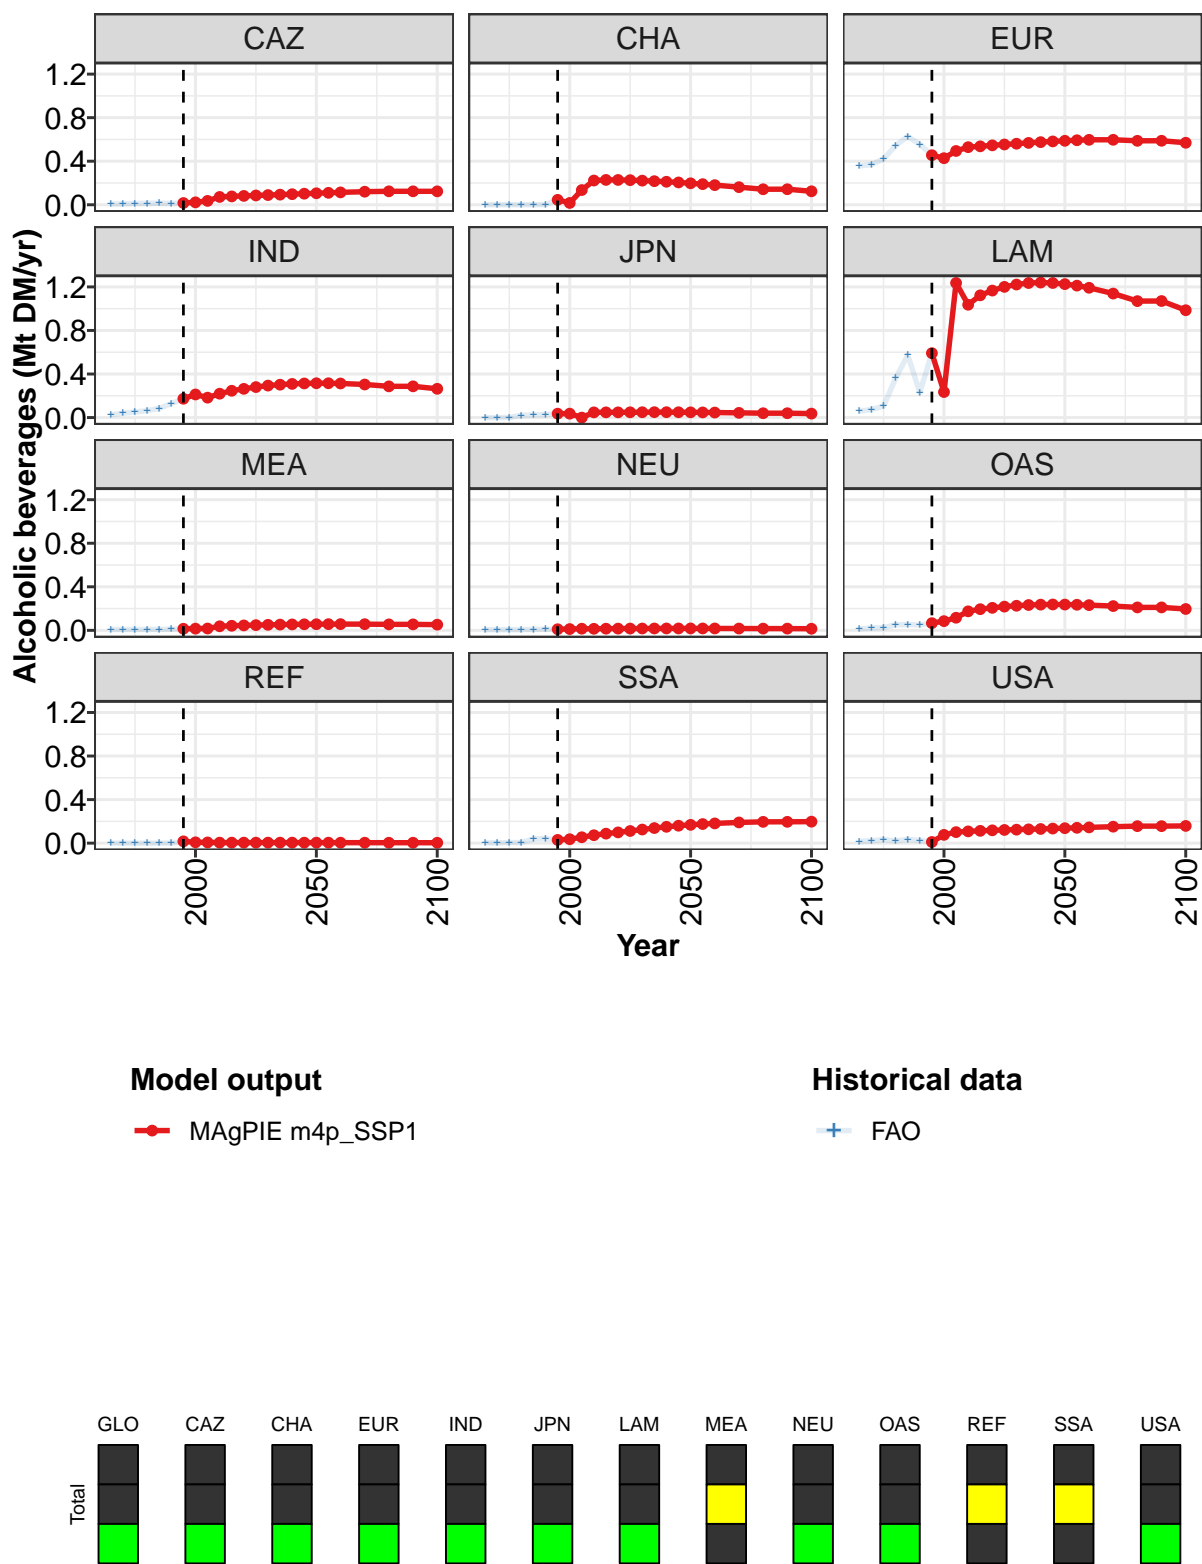

Figure 181: MAgPIE m4p\_SSP1 — Demand—Material—Secondary products—Alcoholic beverages (Mt DM/yr)



|     | 1995 | 2000 | 2005 | 2010 | 2015 | 2020 | 2025 | 2030 | 2035 | 2040 | 2045 |
|-----|------|------|------|------|------|------|------|------|------|------|------|
| GLO | 1.47 | 1.18 | 2.40 | 2.54 | 2.72 | 2.82 | 2.92 | 2.98 | 3.04 | 3.08 | 3.10 |
| CAZ | 0.02 | 0.02 | 0.04 | 0.07 | 0.08 | 0.08 | 0.09 | 0.09 | 0.09 | 0.10 | 0.10 |
| CHA | 0.05 | 0.02 | 0.14 | 0.22 | 0.23 | 0.23 | 0.23 | 0.22 | 0.22 | 0.21 | 0.21 |
| EUR | 0.46 | 0.43 | 0.49 | 0.53 | 0.54 | 0.55 | 0.55 | 0.56 | 0.57 | 0.58 | 0.58 |
| IND | 0.17 | 0.21 | 0.18 | 0.22 | 0.25 | 0.26 | 0.28 | 0.29 | 0.30 | 0.31 | 0.31 |
| JPN | 0.04 | 0.04 | 0.00 | 0.05 | 0.05 | 0.05 | 0.05 | 0.05 | 0.05 | 0.05 | 0.05 |
| LAM | 0.59 | 0.23 | 1.24 | 1.04 | 1.12 | 1.17 | 1.20 | 1.22 | 1.24 | 1.24 | 1.24 |
| MEA | 0.01 | 0.02 | 0.02 | 0.04 | 0.04 | 0.05 | 0.05 | 0.05 | 0.05 | 0.05 | 0.06 |
| NEU | 0.01 | 0.01 | 0.02 | 0.01 | 0.02 | 0.02 | 0.02 | 0.02 | 0.02 | 0.02 | 0.02 |
| OAS | 0.07 | 0.08 | 0.12 | 0.17 | 0.19 | 0.21 | 0.22 | 0.23 | 0.23 | 0.24 | 0.24 |
| REF | 0.02 | 0.01 | 0.01 | 0.00 | 0.01 | 0.01 | 0.00 | 0.00 | 0.00 | 0.00 | 0.00 |
| SSA | 0.03 | 0.04 | 0.05 | 0.07 | 0.09 | 0.10 | 0.11 | 0.13 | 0.14 | 0.15 | 0.16 |
| USA | 0.01 | 0.08 | 0.10 | 0.11 | 0.11 | 0.12 | 0.12 | 0.12 | 0.13 | 0.13 | 0.13 |

Table 542: MAgPIE m4p\_SSP1 — Demand—Material—Secondary products—Alcoholic beverages (Mt DM/yr)  
[PART 1/2]

|     | 2050 | 2055 | 2060 | 2070 | 2080 | 2090 | 2100 |
|-----|------|------|------|------|------|------|------|
| GLO | 3.10 | 3.10 | 3.08 | 3.01 | 2.89 | 2.89 | 2.73 |
| CAZ | 0.11 | 0.11 | 0.11 | 0.12 | 0.12 | 0.12 | 0.12 |
| CHA | 0.20 | 0.19 | 0.18 | 0.16 | 0.14 | 0.14 | 0.12 |
| EUR | 0.59 | 0.59 | 0.60 | 0.60 | 0.59 | 0.59 | 0.57 |
| IND | 0.32 | 0.32 | 0.31 | 0.30 | 0.29 | 0.29 | 0.26 |
| JPN | 0.05 | 0.05 | 0.05 | 0.04 | 0.04 | 0.04 | 0.04 |
| LAM | 1.23 | 1.21 | 1.19 | 1.14 | 1.07 | 1.07 | 0.99 |
| MEA | 0.06 | 0.06 | 0.06 | 0.06 | 0.06 | 0.06 | 0.05 |
| NEU | 0.02 | 0.02 | 0.02 | 0.02 | 0.02 | 0.02 | 0.02 |
| OAS | 0.24 | 0.24 | 0.23 | 0.22 | 0.21 | 0.21 | 0.20 |
| REF | 0.00 | 0.00 | 0.00 | 0.00 | 0.00 | 0.00 | 0.00 |
| SSA | 0.17 | 0.18 | 0.18 | 0.19 | 0.20 | 0.20 | 0.20 |
| USA | 0.14 | 0.14 | 0.14 | 0.15 | 0.16 | 0.16 | 0.16 |

Table 543: MAgPIE m4p\_SSP1 — Demand—Material—Secondary products—Alcoholic beverages (Mt DM/yr)  
[PART 2/2]

|     | 1965 | 1970 | 1975 | 1980 | 1985 | 1990 | 1995 | 2000 | 2005 | 2010 |
|-----|------|------|------|------|------|------|------|------|------|------|
| GLO | 0.49 | 0.55 | 0.67 | 1.09 | 1.47 | 1.09 | 1.47 | 1.18 | 2.40 | 2.54 |
| CAZ | 0.01 | 0.01 | 0.01 | 0.01 | 0.01 | 0.01 | 0.02 | 0.02 | 0.04 | 0.07 |
| CHA | 0.00 | 0.00 | 0.00 | 0.00 | 0.00 | 0.00 | 0.05 | 0.02 | 0.14 | 0.22 |
| EUR | 0.36 | 0.37 | 0.42 | 0.54 | 0.63 | 0.56 | 0.46 | 0.43 | 0.49 | 0.53 |
| IND | 0.03 | 0.04 | 0.05 | 0.06 | 0.08 | 0.13 | 0.17 | 0.21 | 0.18 | 0.22 |
| JPN | 0.00 | 0.00 | 0.00 | 0.02 | 0.02 | 0.03 | 0.04 | 0.04 | 0.00 | 0.05 |
| LAM | 0.06 | 0.07 | 0.10 | 0.36 | 0.57 | 0.23 | 0.59 | 0.23 | 1.24 | 1.04 |
| MEA | 0.01 | 0.01 | 0.01 | 0.01 | 0.01 | 0.01 | 0.01 | 0.02 | 0.02 | 0.04 |
| NEU | 0.01 | 0.01 | 0.01 | 0.01 | 0.01 | 0.01 | 0.01 | 0.01 | 0.02 | 0.01 |
| OAS | 0.01 | 0.02 | 0.03 | 0.05 | 0.05 | 0.05 | 0.07 | 0.08 | 0.12 | 0.17 |
| REF | 0.00 | 0.00 | 0.00 | 0.00 | 0.00 | 0.00 | 0.02 | 0.01 | 0.01 | 0.00 |
| SSA | 0.00 | 0.00 | 0.00 | 0.01 | 0.04 | 0.04 | 0.03 | 0.04 | 0.05 | 0.07 |
| USA | 0.02 | 0.02 | 0.03 | 0.02 | 0.03 | 0.02 | 0.01 | 0.08 | 0.10 | 0.11 |

Table 544: FAO — Demand—Material—Secondary products—Alcoholic beverages (Mt DM/yr)

8.6.2 Brans

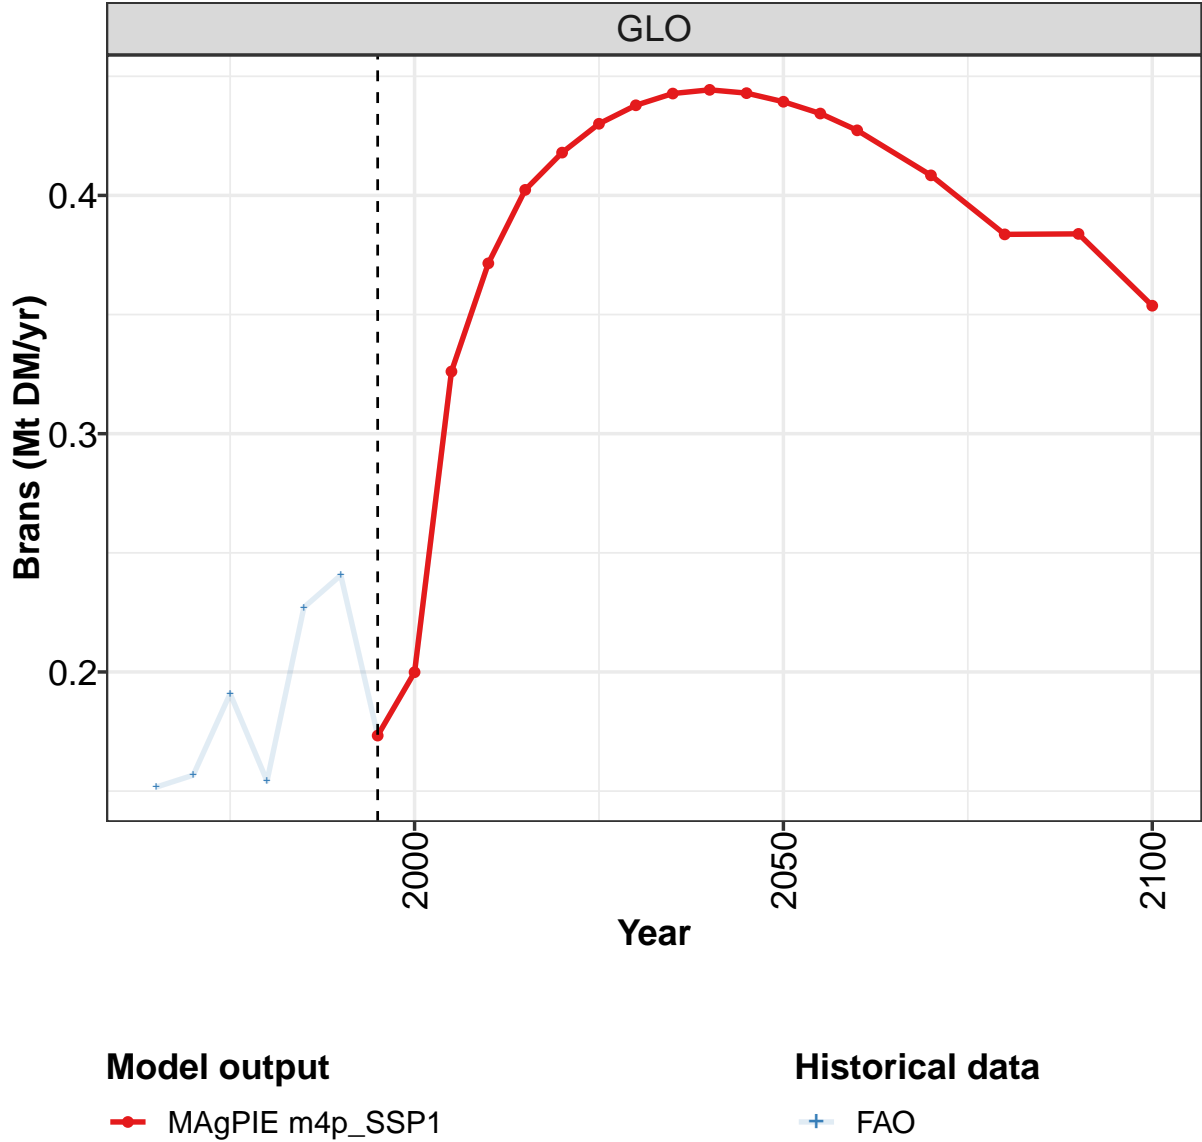

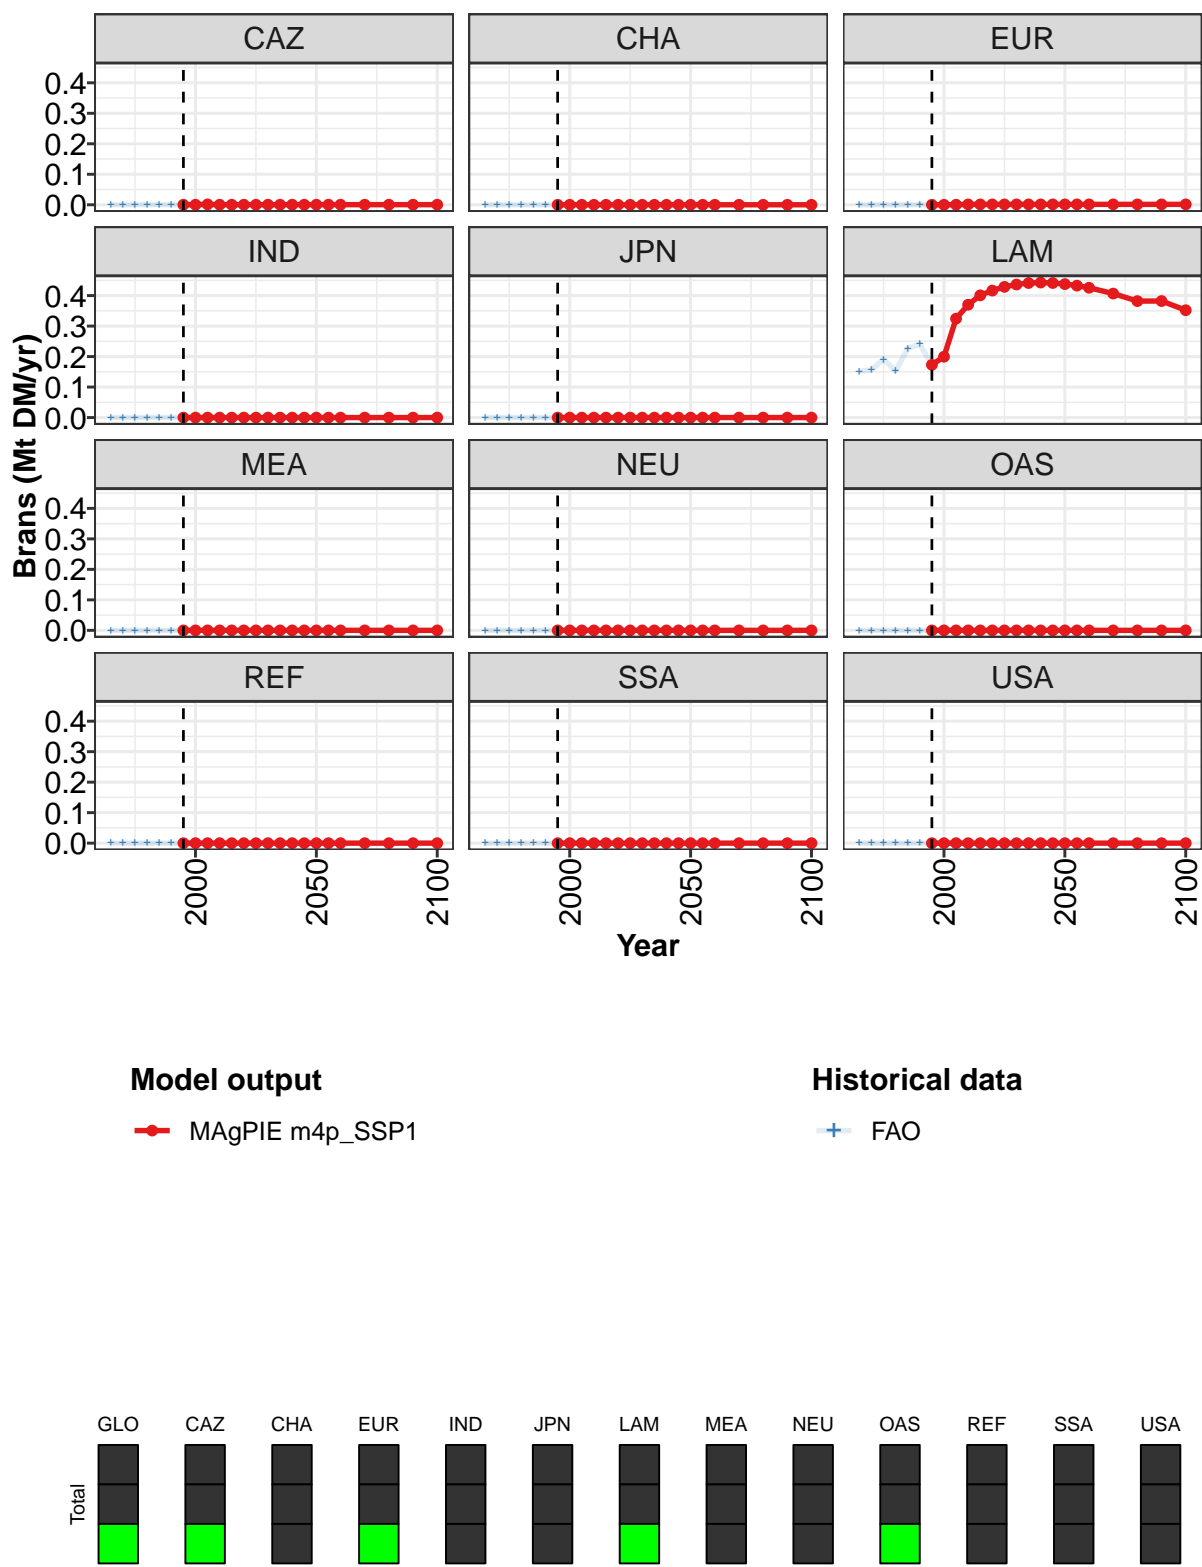

Figure 182: MAgPIE m4p\_SSP1 — Demand—Material—Secondary products—Brans (Mt DM/yr)

|     | 1995  | 2000  | 2005  | 2010  | 2015  | 2020  | 2025  | 2030  | 2035  | 2040  | 2045  |
|-----|-------|-------|-------|-------|-------|-------|-------|-------|-------|-------|-------|
| GLO | 0.173 | 0.200 | 0.326 | 0.371 | 0.402 | 0.418 | 0.430 | 0.438 | 0.443 | 0.444 | 0.443 |
| CAZ | 0.000 | 0.000 | 0.001 | 0.000 | 0.000 | 0.000 | 0.000 | 0.000 | 0.000 | 0.000 | 0.000 |
| CHA | 0.000 | 0.000 | 0.000 | 0.000 | 0.000 | 0.000 | 0.000 | 0.000 | 0.000 | 0.000 | 0.000 |
| EUR | 0.000 | 0.000 | 0.000 | 0.001 | 0.001 | 0.001 | 0.001 | 0.001 | 0.001 | 0.001 | 0.001 |
| IND | 0.000 | 0.000 | 0.000 | 0.000 | 0.000 | 0.000 | 0.000 | 0.000 | 0.000 | 0.000 | 0.000 |
| JPN | 0.000 | 0.000 | 0.000 | 0.000 | 0.000 | 0.000 | 0.000 | 0.000 | 0.000 | 0.000 | 0.000 |
| LAM | 0.173 | 0.200 | 0.325 | 0.370 | 0.401 | 0.417 | 0.429 | 0.436 | 0.441 | 0.443 | 0.441 |
| MEA | 0.000 | 0.000 | 0.000 | 0.000 | 0.000 | 0.000 | 0.000 | 0.000 | 0.000 | 0.000 | 0.000 |
| NEU | 0.000 | 0.000 | 0.000 | 0.000 | 0.000 | 0.000 | 0.000 | 0.000 | 0.000 | 0.000 | 0.000 |
| OAS | 0.000 | 0.000 | 0.000 | 0.000 | 0.000 | 0.000 | 0.000 | 0.000 | 0.000 | 0.000 | 0.000 |
| REF | 0.000 | 0.000 | 0.000 | 0.000 | 0.000 | 0.000 | 0.000 | 0.000 | 0.000 | 0.000 | 0.000 |
| SSA | 0.000 | 0.000 | 0.000 | 0.000 | 0.000 | 0.000 | 0.000 | 0.000 | 0.000 | 0.000 | 0.000 |
| USA | 0.000 | 0.000 | 0.000 | 0.000 | 0.000 | 0.000 | 0.000 | 0.000 | 0.000 | 0.000 | 0.000 |

Table 545: MAgPIE m4p\_SSP1 — Demand—Material—Secondary products—Brans (Mt DM/yr) [PART 1/2]

|     | 2050  | 2055  | 2060  | 2070  | 2080  | 2090  | 2100  |
|-----|-------|-------|-------|-------|-------|-------|-------|
| GLO | 0.439 | 0.434 | 0.427 | 0.408 | 0.384 | 0.384 | 0.354 |
| CAZ | 0.000 | 0.000 | 0.000 | 0.000 | 0.000 | 0.000 | 0.000 |
| CHA | 0.000 | 0.000 | 0.000 | 0.000 | 0.000 | 0.000 | 0.000 |
| EUR | 0.001 | 0.001 | 0.001 | 0.001 | 0.001 | 0.001 | 0.001 |
| IND | 0.000 | 0.000 | 0.000 | 0.000 | 0.000 | 0.000 | 0.000 |
| JPN | 0.000 | 0.000 | 0.000 | 0.000 | 0.000 | 0.000 | 0.000 |
| LAM | 0.438 | 0.433 | 0.426 | 0.407 | 0.382 | 0.382 | 0.352 |
| MEA | 0.000 | 0.000 | 0.000 | 0.000 | 0.000 | 0.000 | 0.000 |
| NEU | 0.000 | 0.000 | 0.000 | 0.000 | 0.000 | 0.000 | 0.000 |
| OAS | 0.000 | 0.000 | 0.000 | 0.000 | 0.000 | 0.000 | 0.000 |
| REF | 0.000 | 0.000 | 0.000 | 0.000 | 0.000 | 0.000 | 0.000 |
| SSA | 0.000 | 0.000 | 0.000 | 0.000 | 0.000 | 0.000 | 0.000 |
| USA | 0.000 | 0.000 | 0.000 | 0.000 | 0.000 | 0.000 | 0.000 |

Table 546: MAgPIE m4p\_SSP1 — Demand—Material—Secondary products—Brans (Mt DM/yr) [PART 2/2]

|     | 1965  | 1970  | 1975  | 1980  | 1985  | 1990  | 1995  | 2000  | 2005  | 2010  |
|-----|-------|-------|-------|-------|-------|-------|-------|-------|-------|-------|
| GLO | 0.152 | 0.157 | 0.191 | 0.154 | 0.227 | 0.241 | 0.173 | 0.200 | 0.326 | 0.371 |
| CAZ | 0.000 | 0.000 | 0.000 | 0.000 | 0.000 | 0.000 | 0.000 | 0.000 | 0.001 | 0.000 |
| CHA | 0.000 | 0.000 | 0.000 | 0.000 | 0.000 | 0.000 | 0.000 | 0.000 | 0.000 | 0.000 |
| EUR | 0.000 | 0.000 | 0.000 | 0.000 | 0.000 | 0.000 | 0.000 | 0.000 | 0.000 | 0.001 |
| IND | 0.000 | 0.000 | 0.000 | 0.000 | 0.000 | 0.000 | 0.000 | 0.000 | 0.000 | 0.000 |
| JPN | 0.000 | 0.000 | 0.000 | 0.000 | 0.000 | 0.000 | 0.000 | 0.000 | 0.000 | 0.000 |
| LAM | 0.152 | 0.157 | 0.191 | 0.154 | 0.227 | 0.240 | 0.173 | 0.200 | 0.325 | 0.370 |
| MEA | 0.000 | 0.000 | 0.000 | 0.000 | 0.000 | 0.000 | 0.000 | 0.000 | 0.000 | 0.000 |
| NEU | 0.000 | 0.000 | 0.000 | 0.000 | 0.000 | 0.000 | 0.000 | 0.000 | 0.000 | 0.000 |
| OAS | 0.000 | 0.000 | 0.000 | 0.000 | 0.000 | 0.000 | 0.000 | 0.000 | 0.000 | 0.000 |
| REF | 0.000 | 0.000 | 0.000 | 0.000 | 0.000 | 0.000 | 0.000 | 0.000 | 0.000 | 0.000 |
| SSA | 0.000 | 0.000 | 0.000 | 0.000 | 0.000 | 0.000 | 0.000 | 0.000 | 0.000 | 0.000 |
| USA | 0.000 | 0.000 | 0.000 | 0.000 | 0.000 | 0.000 | 0.000 | 0.000 | 0.000 | 0.000 |

Table 547: FAO — Demand—Material—Secondary products—Brans (Mt DM/yr)

8.6.3 Cotton lint

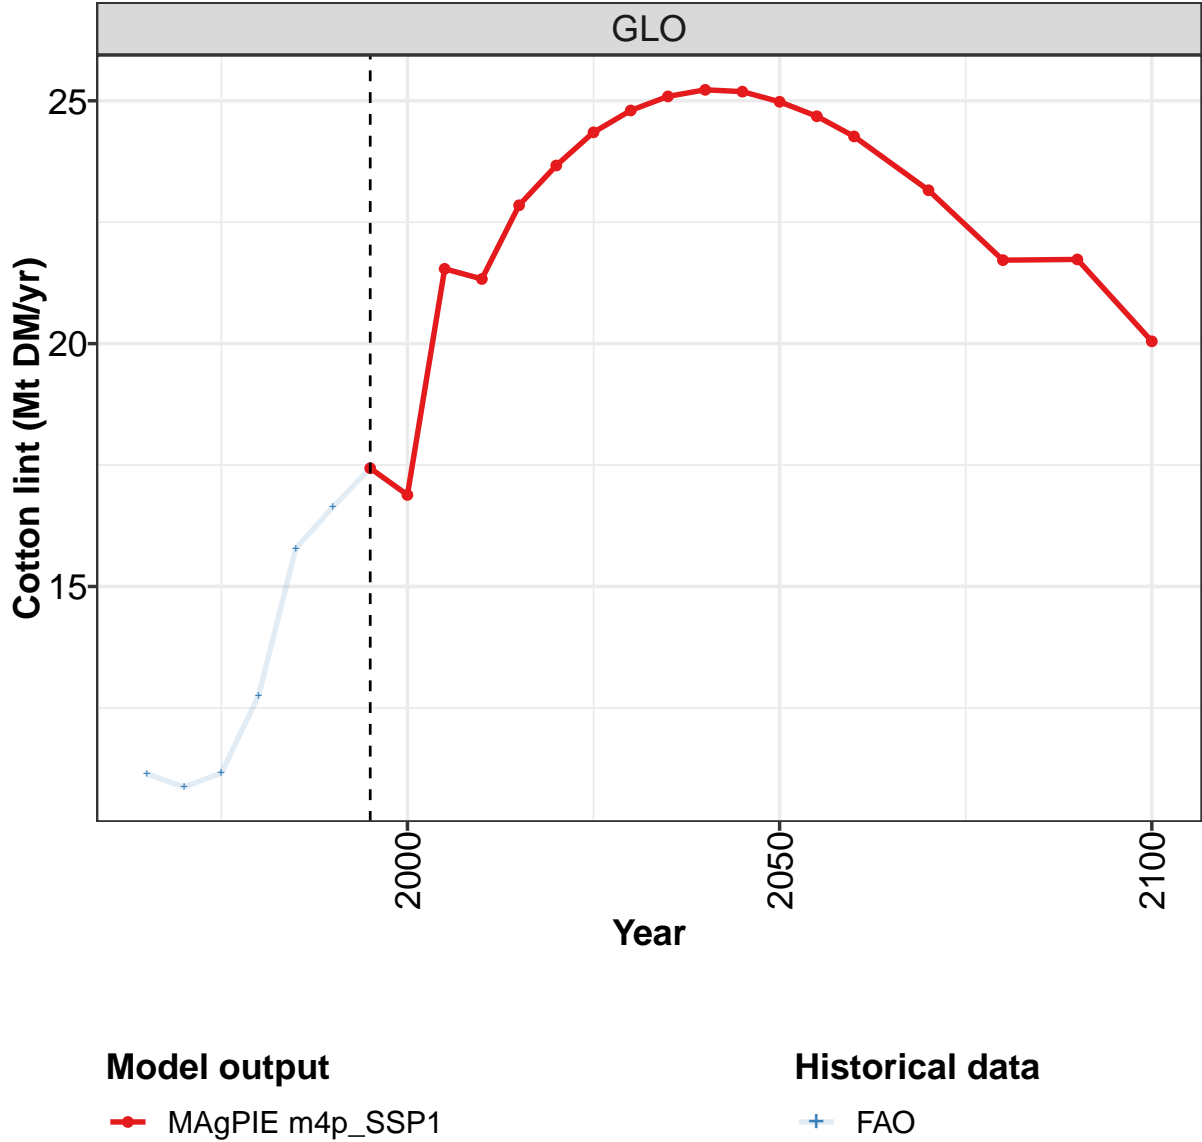

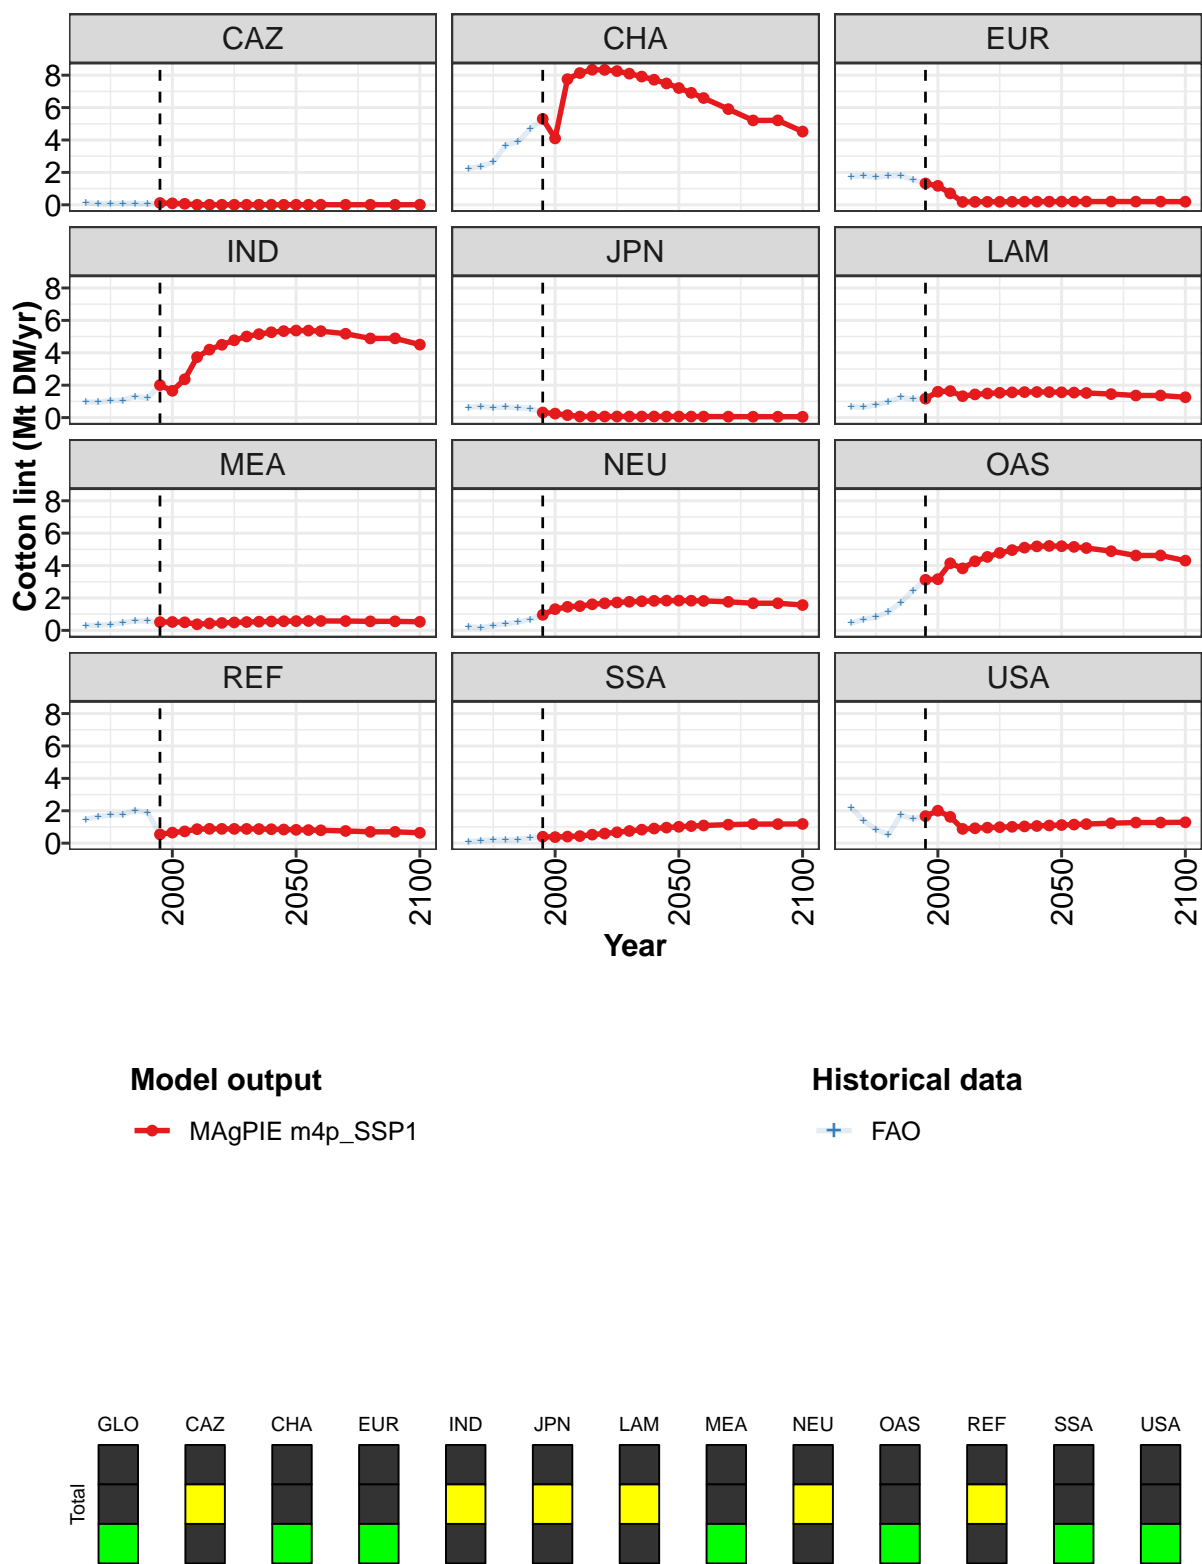

Figure 183: MAGPIE m4p\_SSP1 — Demand—Material—Secondary products—Cotton lint (Mt DM/yr)

|     | 1995 | 2000 | 2005 | 2010 | 2015 | 2020 | 2025 | 2030 | 2035 | 2040 | 2045 |
|-----|------|------|------|------|------|------|------|------|------|------|------|
| GLO | 17.4 | 16.9 | 21.5 | 21.3 | 22.8 | 23.7 | 24.4 | 24.8 | 25.1 | 25.2 | 25.2 |
| CAZ | 0.1  | 0.1  | 0.1  | 0.0  | 0.0  | 0.0  | 0.0  | 0.0  | 0.0  | 0.0  | 0.0  |
| CHA | 5.3  | 4.1  | 7.8  | 8.1  | 8.3  | 8.3  | 8.3  | 8.1  | 7.9  | 7.7  | 7.5  |
| EUR | 1.3  | 1.2  | 0.7  | 0.2  | 0.2  | 0.2  | 0.2  | 0.2  | 0.2  | 0.2  | 0.2  |
| IND | 2.0  | 1.7  | 2.4  | 3.7  | 4.2  | 4.5  | 4.8  | 5.0  | 5.2  | 5.3  | 5.3  |
| JPN | 0.3  | 0.2  | 0.2  | 0.1  | 0.1  | 0.1  | 0.1  | 0.1  | 0.1  | 0.1  | 0.1  |
| LAM | 1.2  | 1.6  | 1.6  | 1.3  | 1.4  | 1.5  | 1.5  | 1.6  | 1.6  | 1.6  | 1.6  |
| MEA | 0.5  | 0.5  | 0.5  | 0.4  | 0.4  | 0.5  | 0.5  | 0.5  | 0.5  | 0.6  | 0.6  |
| NEU | 1.0  | 1.3  | 1.5  | 1.5  | 1.6  | 1.7  | 1.7  | 1.8  | 1.8  | 1.8  | 1.8  |
| OAS | 3.1  | 3.2  | 4.1  | 3.8  | 4.3  | 4.5  | 4.8  | 5.0  | 5.1  | 5.2  | 5.2  |
| REF | 0.5  | 0.7  | 0.7  | 0.9  | 0.9  | 0.9  | 0.9  | 0.9  | 0.9  | 0.9  | 0.8  |
| SSA | 0.4  | 0.4  | 0.4  | 0.4  | 0.5  | 0.6  | 0.7  | 0.8  | 0.8  | 0.9  | 1.0  |
| USA | 1.7  | 2.0  | 1.6  | 0.9  | 0.9  | 1.0  | 1.0  | 1.0  | 1.0  | 1.1  | 1.1  |

Table 548: MAgPIE m4p\_SSP1 — Demand—Material—Secondary products—Cotton lint (Mt DM/yr) [PART 1/2]

|     | 2050 | 2055 | 2060 | 2070 | 2080 | 2090 | 2100 |
|-----|------|------|------|------|------|------|------|
| GLO | 25.0 | 24.7 | 24.3 | 23.2 | 21.7 | 21.7 | 20.0 |
| CAZ | 0.0  | 0.0  | 0.0  | 0.0  | 0.0  | 0.0  | 0.0  |
| CHA | 7.2  | 6.9  | 6.6  | 5.9  | 5.2  | 5.2  | 4.5  |
| EUR | 0.2  | 0.2  | 0.2  | 0.2  | 0.2  | 0.2  | 0.2  |
| IND | 5.4  | 5.4  | 5.3  | 5.2  | 4.9  | 4.9  | 4.5  |
| JPN | 0.1  | 0.1  | 0.1  | 0.1  | 0.1  | 0.1  | 0.1  |
| LAM | 1.6  | 1.5  | 1.5  | 1.5  | 1.4  | 1.4  | 1.3  |
| MEA | 0.6  | 0.6  | 0.6  | 0.6  | 0.6  | 0.6  | 0.5  |
| NEU | 1.8  | 1.8  | 1.8  | 1.8  | 1.7  | 1.7  | 1.6  |
| OAS | 5.2  | 5.2  | 5.1  | 4.9  | 4.6  | 4.6  | 4.3  |
| REF | 0.8  | 0.8  | 0.8  | 0.8  | 0.7  | 0.7  | 0.6  |
| SSA | 1.0  | 1.1  | 1.1  | 1.1  | 1.2  | 1.2  | 1.2  |
| USA | 1.1  | 1.2  | 1.2  | 1.2  | 1.3  | 1.3  | 1.3  |

Table 549: MAgPIE m4p\_SSP1 — Demand—Material—Secondary products—Cotton lint (Mt DM/yr) [PART 2/2]

|     | 1965 | 1970 | 1975 | 1980 | 1985 | 1990 | 1995 | 2000 | 2005 | 2010 |
|-----|------|------|------|------|------|------|------|------|------|------|
| GLO | 11.1 | 10.9 | 11.2 | 12.8 | 15.8 | 16.6 | 17.4 | 16.9 | 21.5 | 21.3 |
| CAZ | 0.1  | 0.1  | 0.1  | 0.1  | 0.1  | 0.0  | 0.1  | 0.1  | 0.1  | 0.0  |
| CHA | 2.2  | 2.4  | 2.6  | 3.7  | 3.9  | 4.7  | 5.3  | 4.1  | 7.8  | 8.1  |
| EUR | 1.8  | 1.8  | 1.7  | 1.8  | 1.8  | 1.5  | 1.3  | 1.2  | 0.7  | 0.2  |
| IND | 1.0  | 0.9  | 1.1  | 1.1  | 1.3  | 1.2  | 2.0  | 1.7  | 2.4  | 3.7  |
| JPN | 0.6  | 0.7  | 0.6  | 0.6  | 0.6  | 0.6  | 0.3  | 0.2  | 0.2  | 0.1  |
| LAM | 0.7  | 0.6  | 0.8  | 1.0  | 1.3  | 1.1  | 1.2  | 1.6  | 1.6  | 1.3  |
| MEA | 0.3  | 0.3  | 0.4  | 0.5  | 0.6  | 0.6  | 0.5  | 0.5  | 0.5  | 0.4  |
| NEU | 0.2  | 0.2  | 0.3  | 0.4  | 0.5  | 0.7  | 1.0  | 1.3  | 1.5  | 1.5  |
| OAS | 0.5  | 0.7  | 0.8  | 1.1  | 1.7  | 2.5  | 3.1  | 3.2  | 4.1  | 3.8  |
| REF | 1.5  | 1.6  | 1.7  | 1.8  | 2.0  | 1.9  | 0.5  | 0.7  | 0.7  | 0.9  |
| SSA | 0.1  | 0.2  | 0.2  | 0.2  | 0.2  | 0.3  | 0.4  | 0.4  | 0.4  | 0.4  |
| USA | 2.2  | 1.4  | 0.9  | 0.5  | 1.7  | 1.5  | 1.7  | 2.0  | 1.6  | 0.9  |

Table 550: FAO — Demand—Material—Secondary products—Cotton lint (Mt DM/yr)

8.6.4 Ethanol

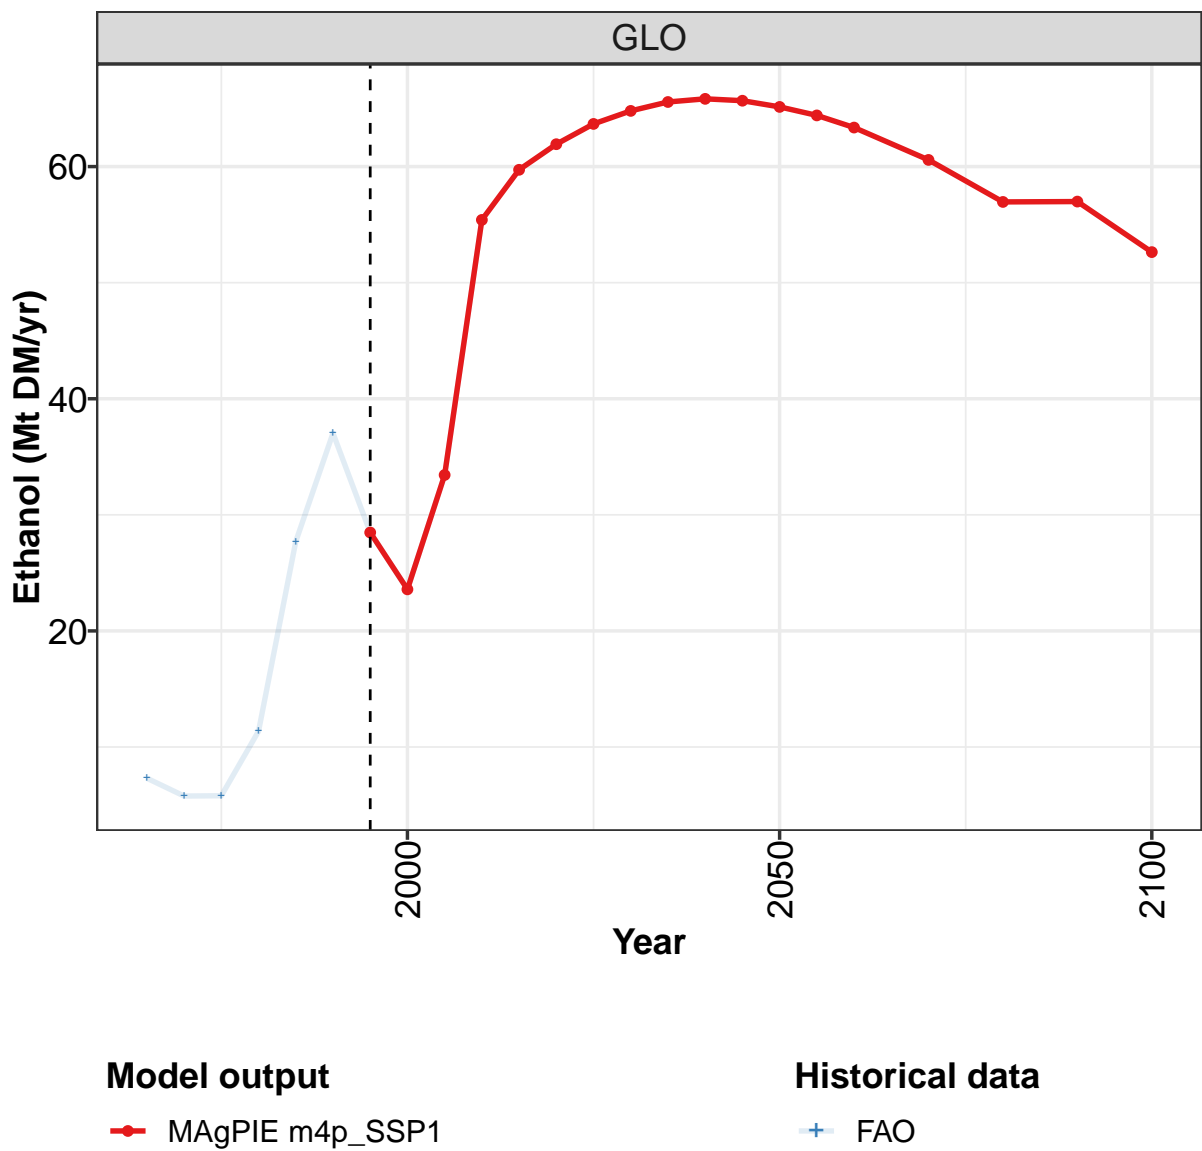



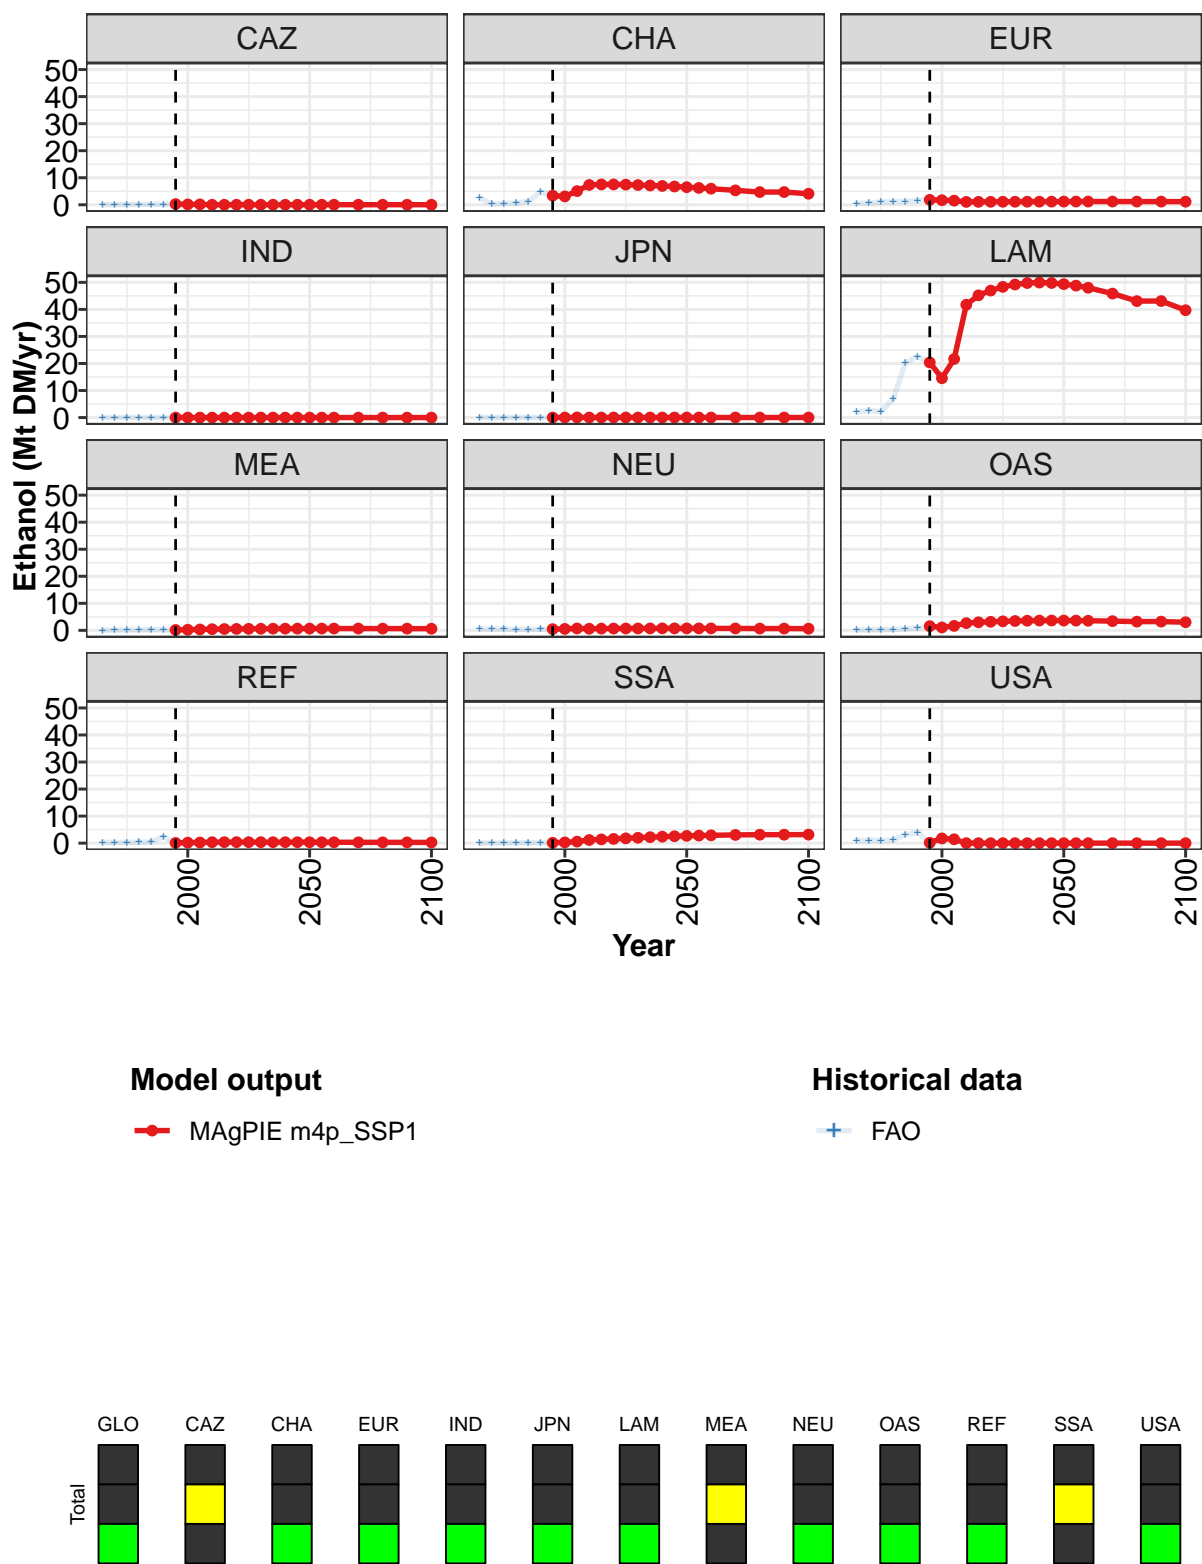

Figure 184: MAgPIE m4p\_SSP1 — Demand—Material—Secondary products—Ethanol (Mt DM/yr)

|     | 1995 | 2000 | 2005 | 2010 | 2015 | 2020 | 2025 | 2030 | 2035 | 2040 | 2045 |
|-----|------|------|------|------|------|------|------|------|------|------|------|
| GLO | 28.5 | 23.6 | 33.4 | 55.4 | 59.7 | 61.9 | 63.7 | 64.8 | 65.6 | 65.8 | 65.7 |
| CAZ | 0.3  | 0.1  | 0.2  | 0.0  | 0.0  | 0.0  | 0.0  | 0.0  | 0.0  | 0.0  | 0.0  |
| CHA | 3.4  | 3.1  | 5.1  | 7.3  | 7.5  | 7.5  | 7.4  | 7.3  | 7.1  | 7.0  | 6.8  |
| EUR | 1.8  | 1.7  | 1.5  | 1.1  | 1.1  | 1.1  | 1.1  | 1.1  | 1.1  | 1.2  | 1.2  |
| IND | 0.0  | 0.0  | 0.0  | 0.0  | 0.0  | 0.0  | 0.0  | 0.0  | 0.0  | 0.0  | 0.0  |
| JPN | 0.0  | 0.0  | 0.1  | 0.0  | 0.0  | 0.0  | 0.0  | 0.0  | 0.0  | 0.0  | 0.0  |
| LAM | 20.4 | 14.6 | 21.7 | 41.7 | 45.2 | 47.0 | 48.3 | 49.2 | 49.8 | 49.9 | 49.8 |
| MEA | 0.2  | 0.2  | 0.3  | 0.4  | 0.5  | 0.5  | 0.6  | 0.6  | 0.6  | 0.6  | 0.7  |
| NEU | 0.5  | 0.5  | 0.7  | 0.6  | 0.6  | 0.7  | 0.7  | 0.7  | 0.7  | 0.7  | 0.7  |
| OAS | 1.6  | 1.1  | 1.7  | 2.7  | 3.0  | 3.2  | 3.3  | 3.5  | 3.6  | 3.6  | 3.6  |
| REF | 0.1  | 0.2  | 0.2  | 0.4  | 0.4  | 0.4  | 0.4  | 0.4  | 0.4  | 0.4  | 0.4  |
| SSA | 0.1  | 0.3  | 0.6  | 1.2  | 1.4  | 1.6  | 1.8  | 2.0  | 2.2  | 2.4  | 2.6  |
| USA | 0.2  | 1.8  | 1.4  | 0.0  | 0.0  | 0.0  | 0.0  | 0.0  | 0.0  | 0.0  | 0.0  |

Table 551: MAgPIE m4p\_SSP1 — Demand—Material—Secondary products—Ethanol (Mt DM/yr) [PART 1/2]

|     | 2050 | 2055 | 2060 | 2070 | 2080 | 2090 | 2100 |
|-----|------|------|------|------|------|------|------|
| GLO | 65.1 | 64.4 | 63.4 | 60.6 | 57.0 | 57.0 | 52.6 |
| CAZ | 0.0  | 0.0  | 0.0  | 0.0  | 0.0  | 0.0  | 0.0  |
| CHA | 6.5  | 6.2  | 5.9  | 5.3  | 4.7  | 4.7  | 4.1  |
| EUR | 1.2  | 1.2  | 1.2  | 1.2  | 1.2  | 1.2  | 1.1  |
| IND | 0.0  | 0.0  | 0.0  | 0.0  | 0.0  | 0.0  | 0.0  |
| JPN | 0.0  | 0.0  | 0.0  | 0.0  | 0.0  | 0.0  | 0.0  |
| LAM | 49.4 | 48.8 | 48.0 | 45.9 | 43.1 | 43.1 | 39.7 |
| MEA | 0.7  | 0.7  | 0.7  | 0.7  | 0.6  | 0.6  | 0.6  |
| NEU | 0.7  | 0.7  | 0.7  | 0.7  | 0.7  | 0.7  | 0.6  |
| OAS | 3.6  | 3.6  | 3.6  | 3.4  | 3.2  | 3.2  | 3.0  |
| REF | 0.3  | 0.3  | 0.3  | 0.3  | 0.3  | 0.3  | 0.3  |
| SSA | 2.7  | 2.8  | 2.9  | 3.0  | 3.1  | 3.1  | 3.2  |
| USA | 0.0  | 0.0  | 0.0  | 0.0  | 0.0  | 0.0  | 0.0  |

Table 552: MAgPIE m4p\_SSP1 — Demand—Material—Secondary products—Ethanol (Mt DM/yr) [PART 2/2]

|     | 1965 | 1970 | 1975 | 1980 | 1985 | 1990 | 1995 | 2000 | 2005 | 2010 |
|-----|------|------|------|------|------|------|------|------|------|------|
| GLO | 7.3  | 5.8  | 5.8  | 11.4 | 27.7 | 37.0 | 28.5 | 23.6 | 33.4 | 55.4 |
| CAZ | 0.0  | 0.0  | 0.1  | 0.1  | 0.1  | 0.2  | 0.3  | 0.1  | 0.2  | 0.0  |
| CHA | 2.6  | 0.3  | 0.5  | 0.7  | 1.2  | 4.8  | 3.4  | 3.1  | 5.1  | 7.3  |
| EUR | 0.5  | 0.7  | 1.0  | 1.2  | 1.2  | 1.5  | 1.8  | 1.7  | 1.5  | 1.1  |
| IND | 0.0  | 0.0  | 0.0  | 0.0  | 0.0  | 0.0  | 0.0  | 0.0  | 0.0  | 0.0  |
| JPN | 0.0  | 0.0  | 0.0  | 0.0  | 0.0  | 0.0  | 0.0  | 0.0  | 0.1  | 0.0  |
| LAM | 2.1  | 2.6  | 2.2  | 6.8  | 20.2 | 22.6 | 20.4 | 14.6 | 21.7 | 41.7 |
| MEA | 0.0  | 0.0  | 0.1  | 0.1  | 0.2  | 0.1  | 0.2  | 0.2  | 0.3  | 0.4  |
| NEU | 0.6  | 0.5  | 0.5  | 0.3  | 0.4  | 0.4  | 0.5  | 0.5  | 0.7  | 0.6  |
| OAS | 0.1  | 0.2  | 0.2  | 0.3  | 0.6  | 0.9  | 1.6  | 1.1  | 1.7  | 2.7  |
| REF | 0.3  | 0.3  | 0.3  | 0.4  | 0.5  | 2.4  | 0.1  | 0.2  | 0.2  | 0.4  |
| SSA | 0.0  | 0.1  | 0.1  | 0.1  | 0.1  | 0.2  | 0.1  | 0.3  | 0.6  | 1.2  |
| USA | 1.0  | 1.0  | 1.0  | 1.2  | 3.2  | 4.0  | 0.2  | 1.8  | 1.4  | 0.0  |

Table 553: FAO — Demand—Material—Secondary products—Ethanol (Mt DM/yr)

8.6.5 Molasses

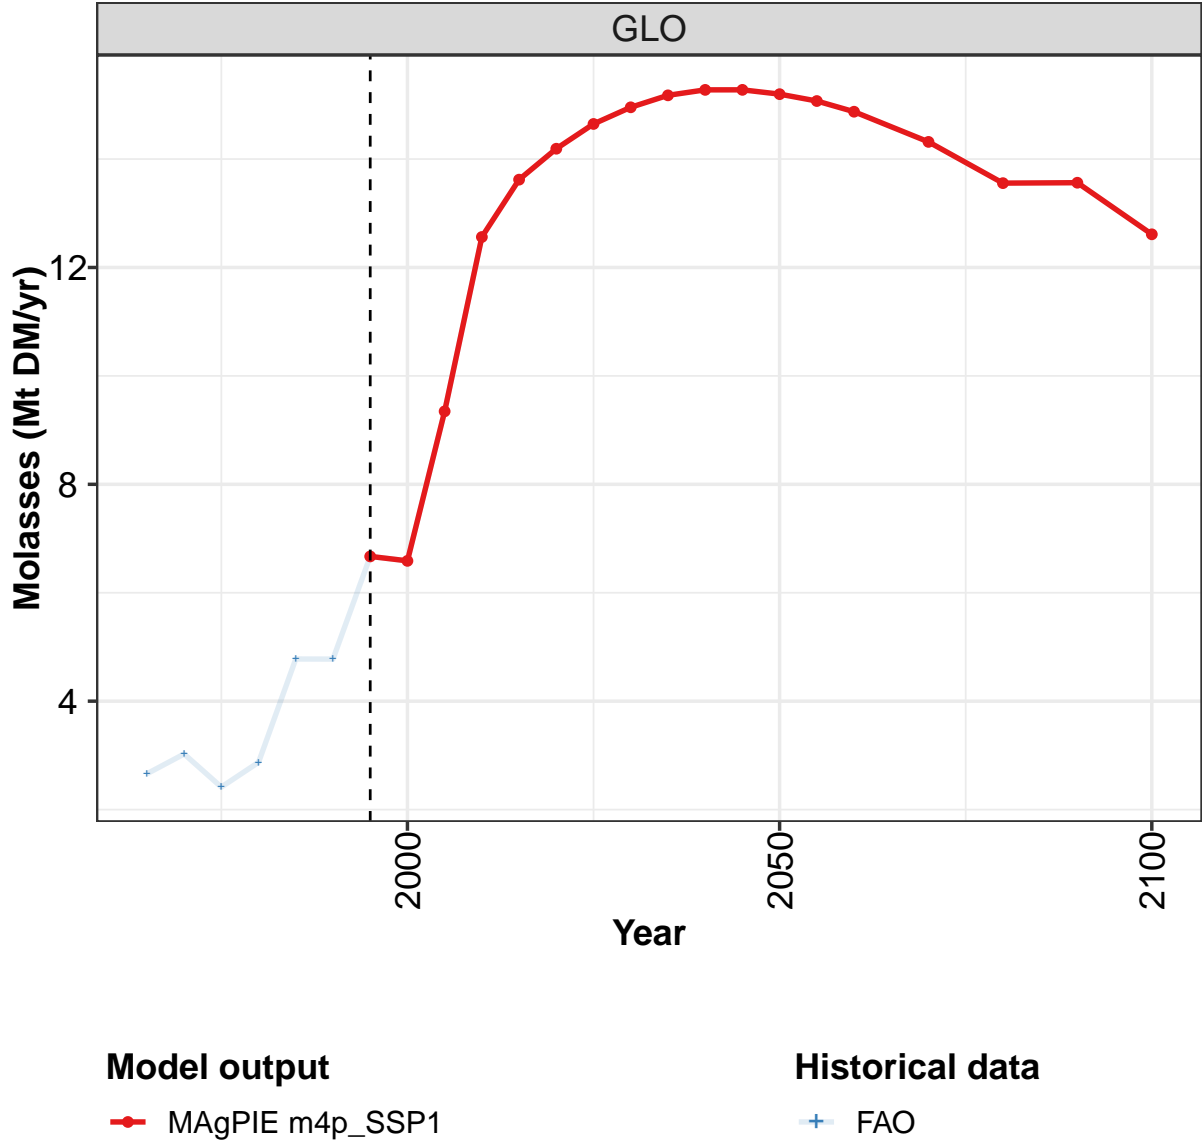

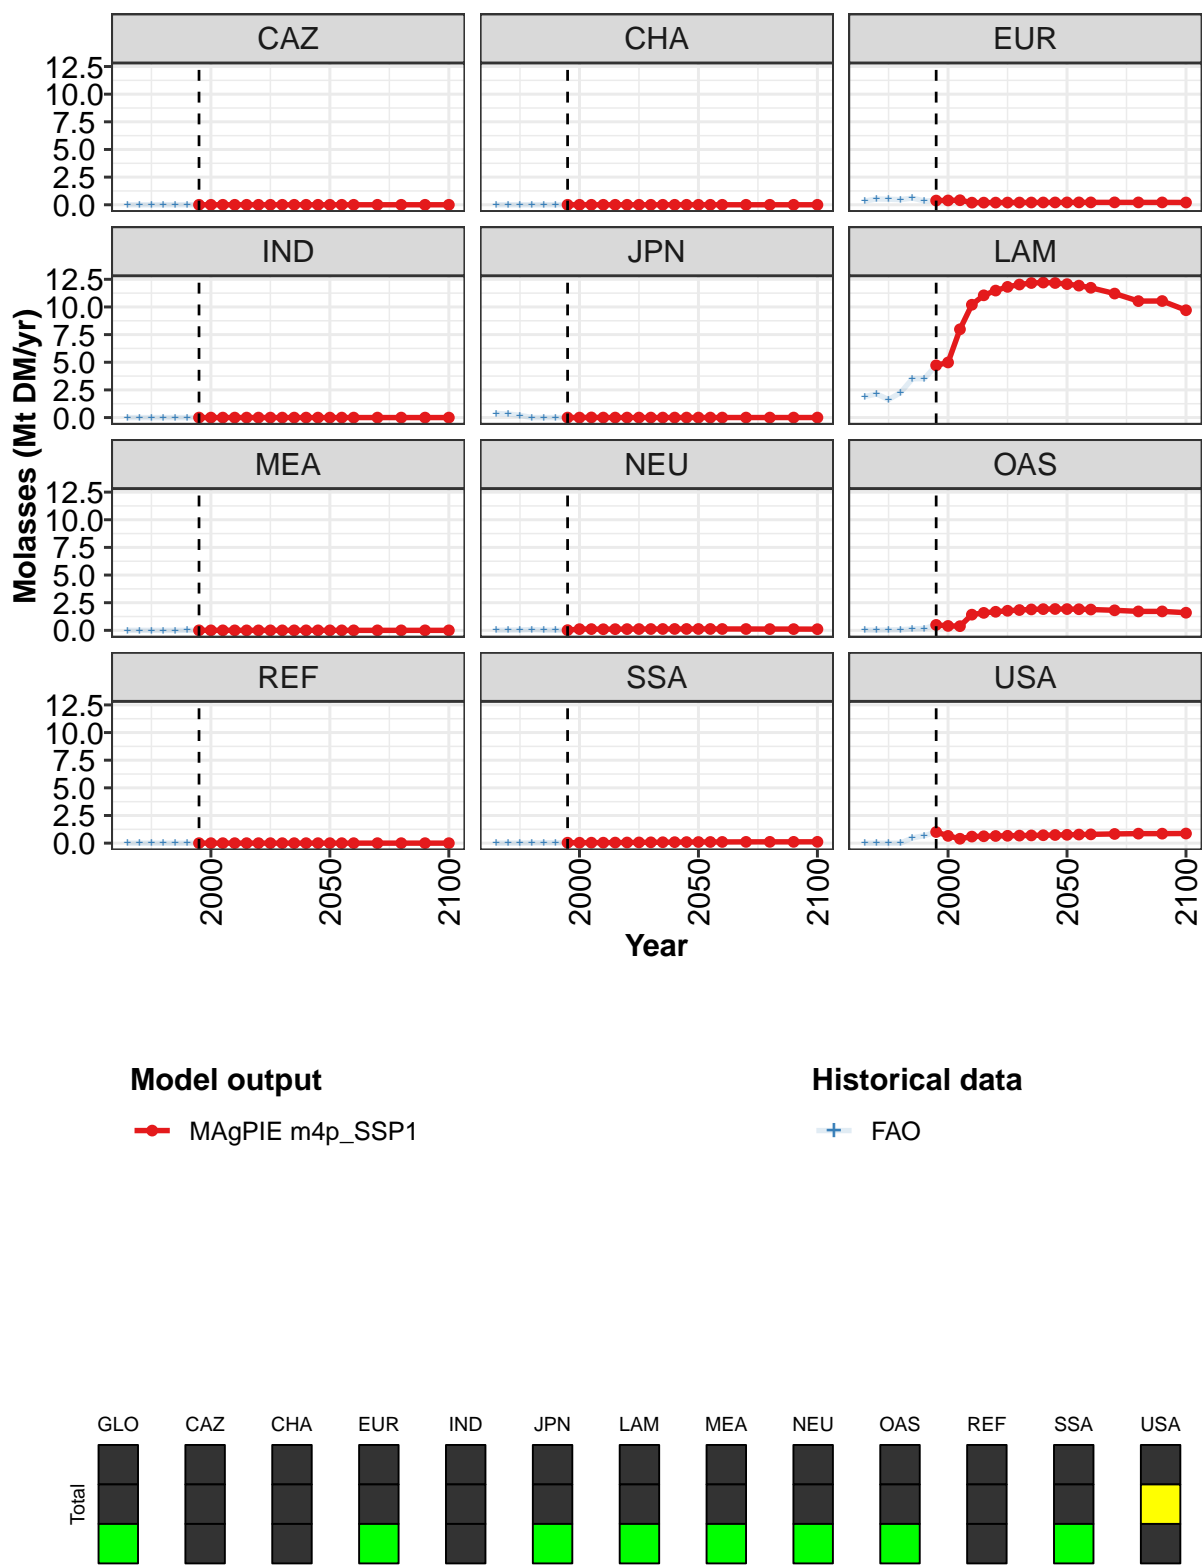

Figure 185: MAgPIE m4p\_SSP1 — Demand—Material—Secondary products—Molasses (Mt DM/yr)

|     | 1995 | 2000 | 2005 | 2010 | 2015 | 2020 | 2025 | 2030 | 2035 | 2040 | 2045 |
|-----|------|------|------|------|------|------|------|------|------|------|------|
| GLO | 6.7  | 6.6  | 9.3  | 12.6 | 13.6 | 14.2 | 14.6 | 15.0 | 15.2 | 15.3 | 15.3 |
| CAZ | 0.0  | 0.0  | 0.0  | 0.0  | 0.0  | 0.0  | 0.0  | 0.0  | 0.0  | 0.0  | 0.0  |
| CHA | 0.0  | 0.0  | 0.0  | 0.0  | 0.0  | 0.0  | 0.0  | 0.0  | 0.0  | 0.0  | 0.0  |
| EUR | 0.4  | 0.4  | 0.4  | 0.2  | 0.2  | 0.2  | 0.2  | 0.2  | 0.2  | 0.2  | 0.2  |
| IND | 0.0  | 0.0  | 0.0  | 0.0  | 0.0  | 0.0  | 0.0  | 0.0  | 0.0  | 0.0  | 0.0  |
| JPN | 0.0  | 0.0  | 0.0  | 0.0  | 0.0  | 0.0  | 0.0  | 0.0  | 0.0  | 0.0  | 0.0  |
| LAM | 4.7  | 5.0  | 8.0  | 10.2 | 11.1 | 11.5 | 11.8 | 12.0 | 12.2 | 12.2 | 12.2 |
| MEA | 0.0  | 0.0  | 0.0  | 0.0  | 0.0  | 0.0  | 0.0  | 0.0  | 0.0  | 0.0  | 0.0  |
| NEU | 0.0  | 0.1  | 0.1  | 0.1  | 0.1  | 0.1  | 0.1  | 0.1  | 0.1  | 0.1  | 0.1  |
| OAS | 0.5  | 0.4  | 0.4  | 1.4  | 1.6  | 1.7  | 1.8  | 1.8  | 1.9  | 1.9  | 1.9  |
| REF | 0.0  | 0.0  | 0.0  | 0.0  | 0.0  | 0.0  | 0.0  | 0.0  | 0.0  | 0.0  | 0.0  |
| SSA | 0.0  | 0.0  | 0.0  | 0.0  | 0.1  | 0.1  | 0.1  | 0.1  | 0.1  | 0.1  | 0.1  |
| USA | 1.0  | 0.7  | 0.4  | 0.6  | 0.6  | 0.6  | 0.7  | 0.7  | 0.7  | 0.7  | 0.7  |

Table 554: MAgPIE m4p\_SSP1 — Demand—Material—Secondary products—Molasses (Mt DM/yr) [PART 1/2]

|     | 2050 | 2055 | 2060 | 2070 | 2080 | 2090 | 2100 |
|-----|------|------|------|------|------|------|------|
| GLO | 15.2 | 15.1 | 14.9 | 14.3 | 13.6 | 13.6 | 12.6 |
| CAZ | 0.0  | 0.0  | 0.0  | 0.0  | 0.0  | 0.0  | 0.0  |
| CHA | 0.0  | 0.0  | 0.0  | 0.0  | 0.0  | 0.0  | 0.0  |
| EUR | 0.2  | 0.2  | 0.2  | 0.2  | 0.2  | 0.2  | 0.2  |
| IND | 0.0  | 0.0  | 0.0  | 0.0  | 0.0  | 0.0  | 0.0  |
| JPN | 0.0  | 0.0  | 0.0  | 0.0  | 0.0  | 0.0  | 0.0  |
| LAM | 12.1 | 11.9 | 11.7 | 11.2 | 10.5 | 10.5 | 9.7  |
| MEA | 0.0  | 0.0  | 0.0  | 0.0  | 0.0  | 0.0  | 0.0  |
| NEU | 0.1  | 0.1  | 0.1  | 0.1  | 0.1  | 0.1  | 0.1  |
| OAS | 1.9  | 1.9  | 1.9  | 1.8  | 1.7  | 1.7  | 1.6  |
| REF | 0.0  | 0.0  | 0.0  | 0.0  | 0.0  | 0.0  | 0.0  |
| SSA | 0.1  | 0.1  | 0.1  | 0.1  | 0.1  | 0.1  | 0.1  |
| USA | 0.8  | 0.8  | 0.8  | 0.8  | 0.9  | 0.9  | 0.9  |

Table 555: MAgPIE m4p\_SSP1 — Demand—Material—Secondary products—Molasses (Mt DM/yr) [PART 2/2]

|     | 1965 | 1970 | 1975 | 1980 | 1985 | 1990 | 1995 | 2000 | 2005 | 2010 |
|-----|------|------|------|------|------|------|------|------|------|------|
| GLO | 2.7  | 3.0  | 2.4  | 2.9  | 4.8  | 4.8  | 6.7  | 6.6  | 9.3  | 12.6 |
| CAZ | 0.0  | 0.0  | 0.0  | 0.0  | 0.0  | 0.0  | 0.0  | 0.0  | 0.0  | 0.0  |
| CHA | 0.0  | 0.0  | 0.0  | 0.0  | 0.0  | 0.0  | 0.0  | 0.0  | 0.0  | 0.0  |
| EUR | 0.3  | 0.5  | 0.5  | 0.5  | 0.6  | 0.4  | 0.4  | 0.4  | 0.4  | 0.2  |
| IND | 0.0  | 0.0  | 0.0  | 0.0  | 0.0  | 0.0  | 0.0  | 0.0  | 0.0  | 0.0  |
| JPN | 0.4  | 0.3  | 0.2  | 0.0  | 0.0  | 0.0  | 0.0  | 0.0  | 0.0  | 0.0  |
| LAM | 1.9  | 2.1  | 1.6  | 2.3  | 3.5  | 3.5  | 4.7  | 5.0  | 8.0  | 10.2 |
| MEA | 0.0  | 0.0  | 0.0  | 0.0  | 0.0  | 0.0  | 0.0  | 0.0  | 0.0  | 0.0  |
| NEU | 0.0  | 0.0  | 0.0  | 0.1  | 0.0  | 0.0  | 0.0  | 0.1  | 0.1  | 0.1  |
| OAS | 0.0  | 0.0  | 0.0  | 0.1  | 0.1  | 0.2  | 0.5  | 0.4  | 0.4  | 1.4  |
| REF | 0.0  | 0.0  | 0.0  | 0.0  | 0.0  | 0.0  | 0.0  | 0.0  | 0.0  | 0.0  |
| SSA | 0.0  | 0.0  | 0.0  | 0.0  | 0.0  | 0.0  | 0.0  | 0.0  | 0.0  | 0.0  |
| USA | 0.0  | 0.0  | 0.0  | 0.0  | 0.5  | 0.7  | 1.0  | 0.7  | 0.4  | 0.6  |

Table 556: FAO — Demand—Material—Secondary products—Molasses (Mt DM/yr)

8.6.6 Oilcakes

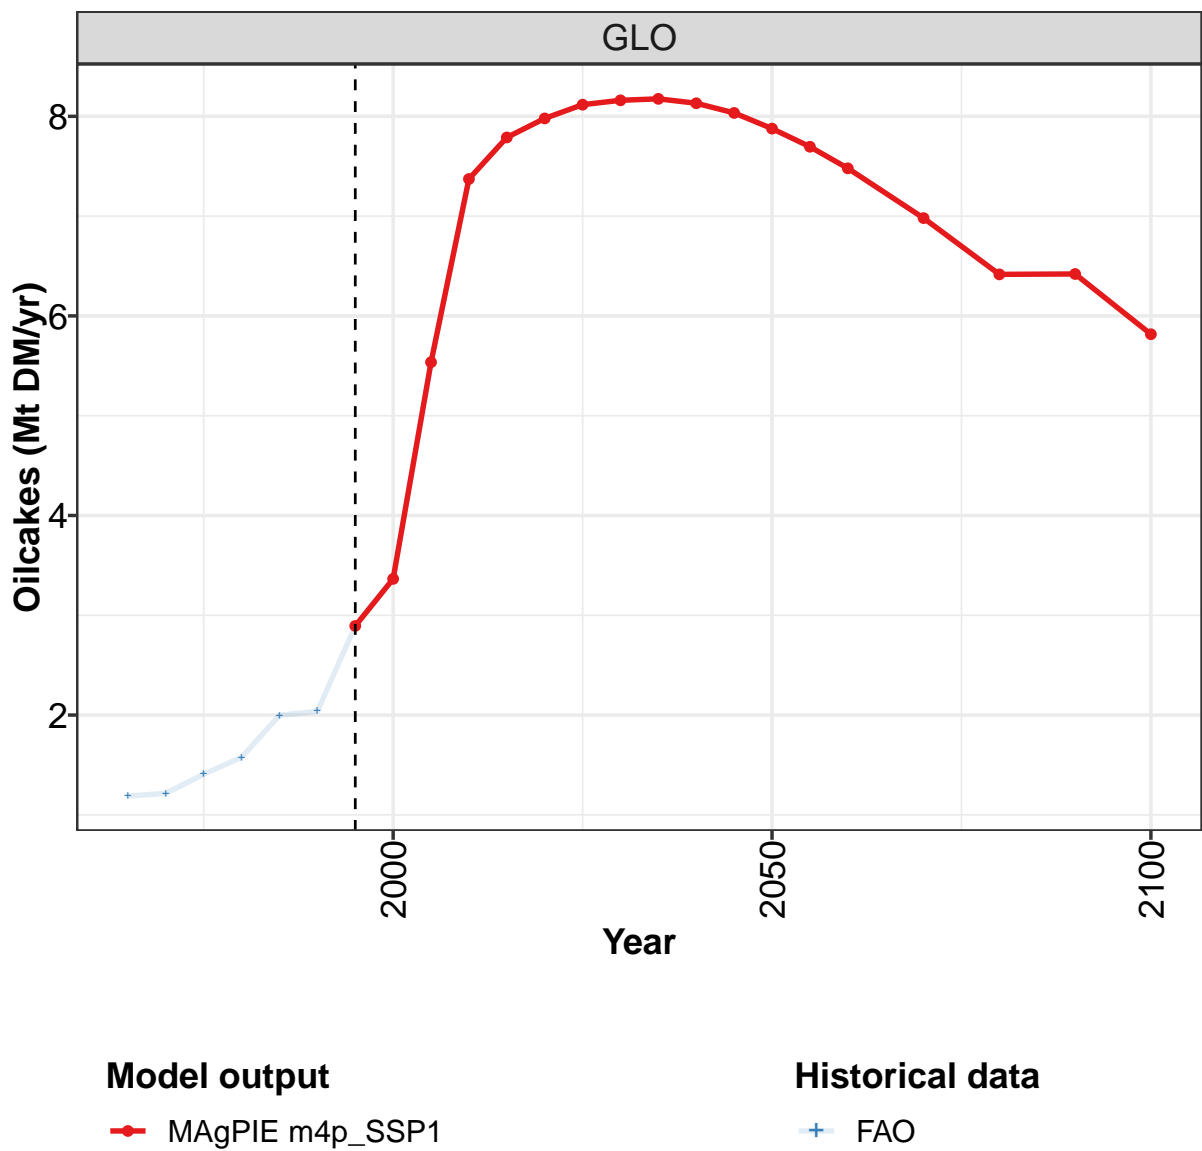

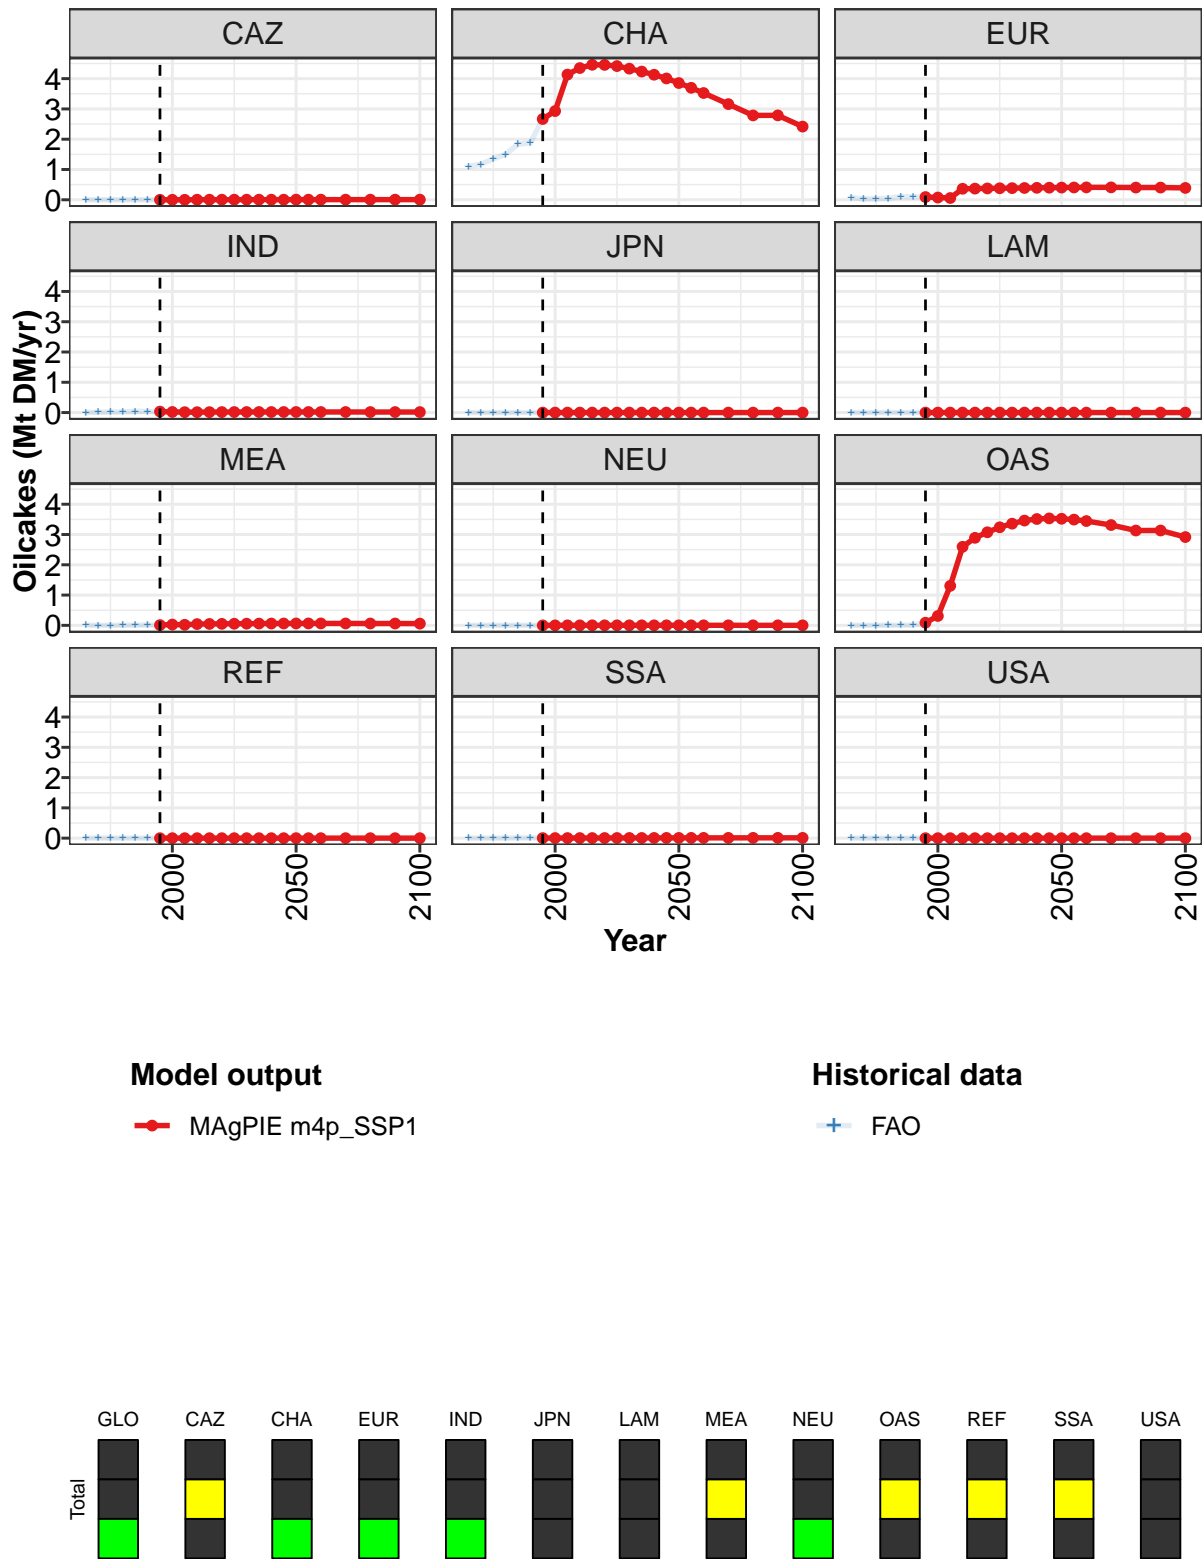

Figure 186: MAgPIE m4p\_SSP1 — Demand—Material—Secondary products—Oilcakes (Mt DM/yr)

|     | 1995 | 2000 | 2005 | 2010 | 2015 | 2020 | 2025 | 2030 | 2035 | 2040 | 2045 |
|-----|------|------|------|------|------|------|------|------|------|------|------|
| GLO | 2.89 | 3.36 | 5.54 | 7.37 | 7.79 | 7.98 | 8.12 | 8.16 | 8.18 | 8.13 | 8.03 |
| CAZ | 0.00 | 0.00 | 0.00 | 0.00 | 0.00 | 0.00 | 0.00 | 0.00 | 0.00 | 0.00 | 0.00 |
| CHA | 2.67 | 2.93 | 4.14 | 4.35 | 4.46 | 4.45 | 4.42 | 4.33 | 4.23 | 4.13 | 4.01 |
| EUR | 0.09 | 0.07 | 0.06 | 0.36 | 0.37 | 0.37 | 0.38 | 0.39 | 0.39 | 0.39 | 0.40 |
| IND | 0.03 | 0.02 | 0.01 | 0.01 | 0.02 | 0.02 | 0.02 | 0.02 | 0.02 | 0.02 | 0.02 |
| JPN | 0.00 | 0.00 | 0.00 | 0.00 | 0.00 | 0.00 | 0.00 | 0.00 | 0.00 | 0.00 | 0.00 |
| LAM | 0.00 | 0.00 | 0.00 | 0.00 | 0.00 | 0.00 | 0.00 | 0.00 | 0.00 | 0.00 | 0.00 |
| MEA | 0.01 | 0.03 | 0.02 | 0.04 | 0.05 | 0.05 | 0.05 | 0.06 | 0.06 | 0.06 | 0.06 |
| NEU | 0.00 | 0.00 | 0.00 | 0.00 | 0.00 | 0.00 | 0.00 | 0.00 | 0.00 | 0.00 | 0.00 |
| OAS | 0.09 | 0.31 | 1.30 | 2.60 | 2.89 | 3.07 | 3.24 | 3.36 | 3.46 | 3.51 | 3.53 |
| REF | 0.00 | 0.00 | 0.00 | 0.00 | 0.00 | 0.00 | 0.00 | 0.00 | 0.00 | 0.00 | 0.00 |
| SSA | 0.00 | 0.00 | 0.00 | 0.00 | 0.00 | 0.01 | 0.01 | 0.01 | 0.01 | 0.01 | 0.01 |
| USA | 0.00 | 0.00 | 0.00 | 0.00 | 0.00 | 0.00 | 0.00 | 0.00 | 0.00 | 0.00 | 0.00 |

Table 557: MAgPIE m4p\_SSP1 — Demand—Material—Secondary products—Oilcakes (Mt DM/yr) [PART 1/2]

|     | 2050 | 2055 | 2060 | 2070 | 2080 | 2090 | 2100 |
|-----|------|------|------|------|------|------|------|
| GLO | 7.88 | 7.70 | 7.48 | 6.98 | 6.42 | 6.42 | 5.82 |
| CAZ | 0.00 | 0.00 | 0.00 | 0.01 | 0.01 | 0.01 | 0.01 |
| CHA | 3.86 | 3.70 | 3.53 | 3.16 | 2.79 | 2.79 | 2.42 |
| EUR | 0.40 | 0.41 | 0.41 | 0.41 | 0.40 | 0.40 | 0.39 |
| IND | 0.02 | 0.02 | 0.02 | 0.02 | 0.02 | 0.02 | 0.02 |
| JPN | 0.00 | 0.00 | 0.00 | 0.00 | 0.00 | 0.00 | 0.00 |
| LAM | 0.00 | 0.00 | 0.00 | 0.00 | 0.00 | 0.00 | 0.00 |
| MEA | 0.06 | 0.06 | 0.06 | 0.06 | 0.06 | 0.06 | 0.06 |
| NEU | 0.00 | 0.00 | 0.00 | 0.00 | 0.00 | 0.00 | 0.00 |
| OAS | 3.52 | 3.49 | 3.45 | 3.31 | 3.13 | 3.13 | 2.92 |
| REF | 0.00 | 0.00 | 0.00 | 0.00 | 0.00 | 0.00 | 0.00 |
| SSA | 0.01 | 0.01 | 0.01 | 0.01 | 0.01 | 0.01 | 0.01 |
| USA | 0.00 | 0.00 | 0.00 | 0.00 | 0.00 | 0.00 | 0.00 |

Table 558: MAgPIE m4p\_SSP1 — Demand—Material—Secondary products—Oilcakes (Mt DM/yr) [PART 2/2]

|     | 1965 | 1970 | 1975 | 1980 | 1985 | 1990 | 1995 | 2000 | 2005 | 2010 |
|-----|------|------|------|------|------|------|------|------|------|------|
| GLO | 1.19 | 1.22 | 1.41 | 1.58 | 2.00 | 2.04 | 2.89 | 3.36 | 5.54 | 7.37 |
| CAZ | 0.00 | 0.00 | 0.00 | 0.00 | 0.00 | 0.00 | 0.00 | 0.00 | 0.00 | 0.00 |
| CHA | 1.11 | 1.17 | 1.35 | 1.50 | 1.83 | 1.88 | 2.67 | 2.93 | 4.14 | 4.35 |
| EUR | 0.07 | 0.03 | 0.04 | 0.05 | 0.10 | 0.10 | 0.09 | 0.07 | 0.06 | 0.36 |
| IND | 0.00 | 0.01 | 0.02 | 0.02 | 0.04 | 0.04 | 0.03 | 0.02 | 0.01 | 0.01 |
| JPN | 0.00 | 0.00 | 0.00 | 0.00 | 0.00 | 0.00 | 0.00 | 0.00 | 0.00 | 0.00 |
| LAM | 0.00 | 0.00 | 0.00 | 0.00 | 0.00 | 0.00 | 0.00 | 0.00 | 0.00 | 0.00 |
| MEA | 0.00 | 0.00 | 0.00 | 0.00 | 0.01 | 0.01 | 0.01 | 0.03 | 0.02 | 0.04 |
| NEU | 0.00 | 0.00 | 0.00 | 0.00 | 0.00 | 0.00 | 0.00 | 0.00 | 0.00 | 0.00 |
| OAS | 0.00 | 0.00 | 0.00 | 0.00 | 0.01 | 0.01 | 0.09 | 0.31 | 1.30 | 2.60 |
| REF | 0.00 | 0.00 | 0.00 | 0.00 | 0.00 | 0.00 | 0.00 | 0.00 | 0.00 | 0.00 |
| SSA | 0.00 | 0.00 | 0.00 | 0.00 | 0.01 | 0.01 | 0.00 | 0.00 | 0.00 | 0.00 |
| USA | 0.00 | 0.00 | 0.00 | 0.00 | 0.00 | 0.00 | 0.00 | 0.00 | 0.00 | 0.00 |

Table 559: FAO — Demand—Material—Secondary products—Oilcakes (Mt DM/yr)



8.6.7 Oils

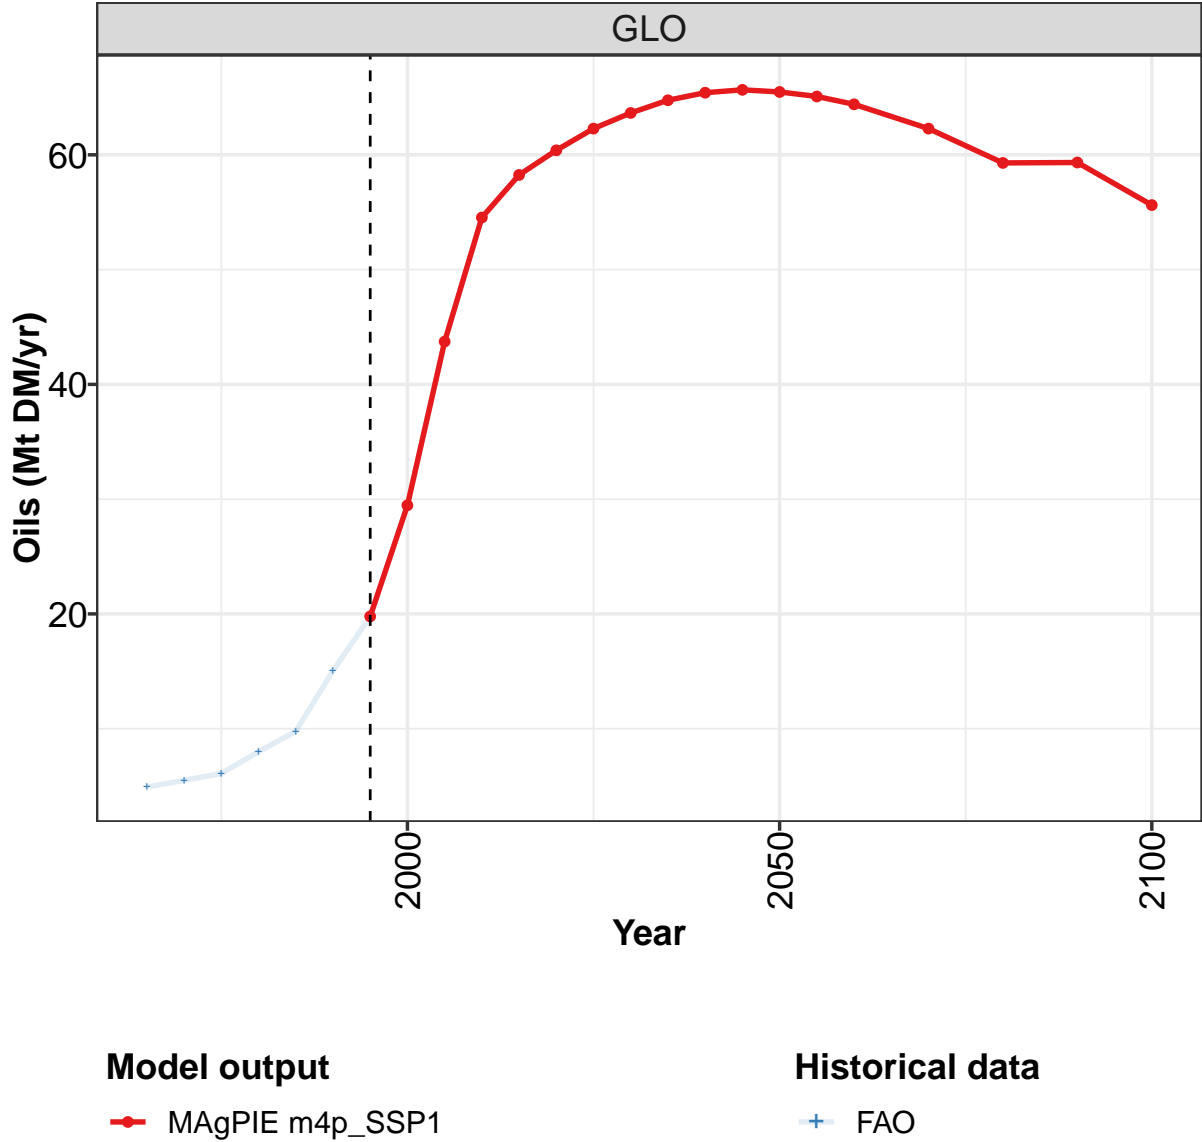

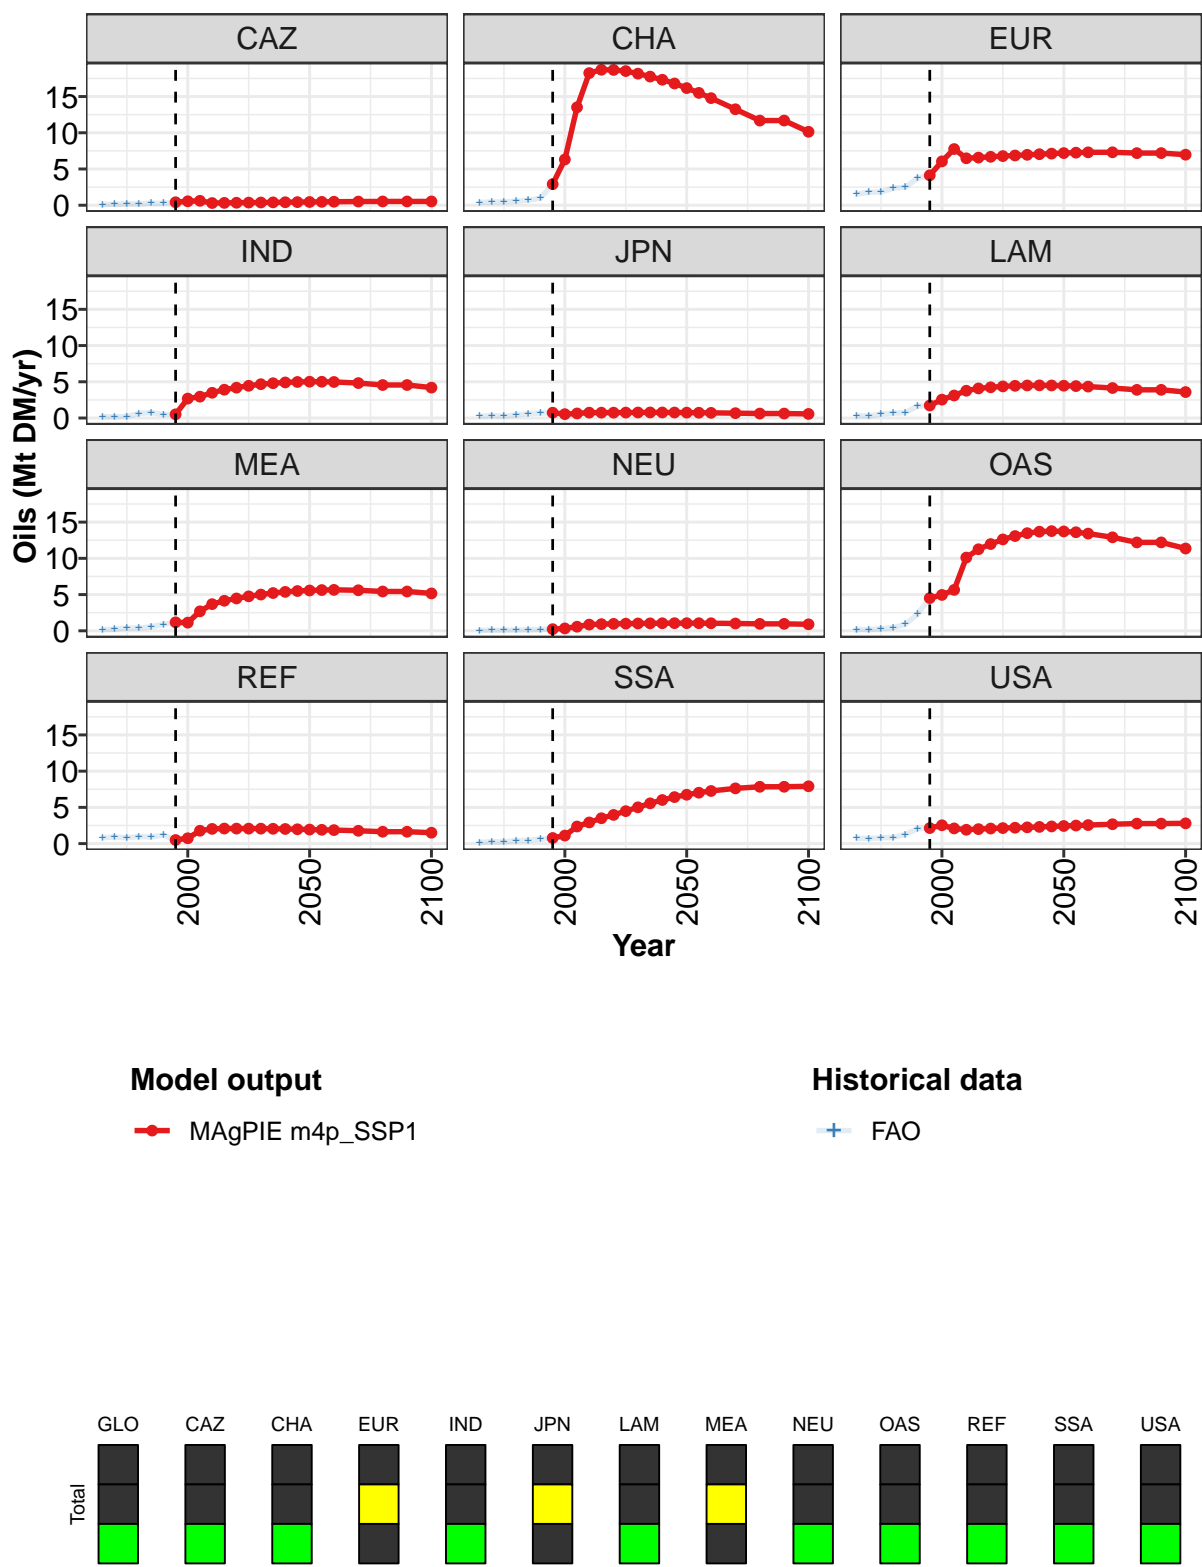

Figure 187: MAgPIE m4p\_SSP1 — Demand—Material—Secondary products—Oils (Mt DM/yr)

|     | 1995 | 2000 | 2005 | 2010 | 2015 | 2020 | 2025 | 2030 | 2035 | 2040 | 2045 |
|-----|------|------|------|------|------|------|------|------|------|------|------|
| GLO | 19.8 | 29.5 | 43.7 | 54.5 | 58.2 | 60.4 | 62.3 | 63.6 | 64.8 | 65.4 | 65.7 |
| CAZ | 0.4  | 0.5  | 0.6  | 0.3  | 0.3  | 0.3  | 0.4  | 0.4  | 0.4  | 0.4  | 0.4  |
| CHA | 2.9  | 6.3  | 13.5 | 18.2 | 18.7 | 18.7 | 18.5 | 18.2 | 17.8 | 17.3 | 16.8 |
| EUR | 4.1  | 6.1  | 7.8  | 6.5  | 6.6  | 6.7  | 6.8  | 6.9  | 7.0  | 7.0  | 7.1  |
| IND | 0.5  | 2.7  | 3.0  | 3.5  | 3.9  | 4.2  | 4.4  | 4.7  | 4.8  | 4.9  | 5.0  |
| JPN | 0.7  | 0.5  | 0.6  | 0.7  | 0.7  | 0.7  | 0.8  | 0.8  | 0.8  | 0.8  | 0.8  |
| LAM | 1.7  | 2.5  | 3.1  | 3.8  | 4.1  | 4.2  | 4.4  | 4.4  | 4.5  | 4.5  | 4.5  |
| MEA | 1.2  | 1.1  | 2.7  | 3.7  | 4.2  | 4.5  | 4.8  | 5.0  | 5.2  | 5.4  | 5.5  |
| NEU | 0.2  | 0.3  | 0.6  | 0.9  | 0.9  | 1.0  | 1.0  | 1.0  | 1.0  | 1.0  | 1.1  |
| OAS | 4.5  | 5.0  | 5.6  | 10.1 | 11.3 | 12.0 | 12.6 | 13.1 | 13.5 | 13.7 | 13.8 |
| REF | 0.5  | 0.7  | 1.8  | 2.0  | 2.1  | 2.1  | 2.1  | 2.1  | 2.0  | 2.0  | 2.0  |
| SSA | 0.8  | 1.1  | 2.4  | 2.9  | 3.5  | 4.0  | 4.5  | 5.0  | 5.6  | 6.0  | 6.4  |
| USA | 2.1  | 2.5  | 2.1  | 1.9  | 2.0  | 2.1  | 2.1  | 2.2  | 2.2  | 2.3  | 2.4  |

Table 560: MAgPIE m4p-SSP1 — Demand—Material—Secondary products—Oils (Mt DM/yr) [PART 1/2]

|     | 2050 | 2055 | 2060 | 2070 | 2080 | 2090 | 2100 |
|-----|------|------|------|------|------|------|------|
| GLO | 65.5 | 65.1 | 64.4 | 62.3 | 59.3 | 59.3 | 55.6 |
| CAZ | 0.4  | 0.5  | 0.5  | 0.5  | 0.5  | 0.5  | 0.5  |
| CHA | 16.2 | 15.5 | 14.8 | 13.2 | 11.7 | 11.7 | 10.1 |
| EUR | 7.2  | 7.3  | 7.3  | 7.3  | 7.2  | 7.2  | 7.0  |
| IND | 5.0  | 5.0  | 5.0  | 4.8  | 4.6  | 4.6  | 4.2  |
| JPN | 0.7  | 0.7  | 0.7  | 0.7  | 0.6  | 0.6  | 0.6  |
| LAM | 4.5  | 4.4  | 4.3  | 4.1  | 3.9  | 3.9  | 3.6  |
| MEA | 5.6  | 5.6  | 5.7  | 5.6  | 5.4  | 5.4  | 5.2  |
| NEU | 1.1  | 1.1  | 1.0  | 1.0  | 1.0  | 1.0  | 0.9  |
| OAS | 13.7 | 13.6 | 13.4 | 12.9 | 12.2 | 12.2 | 11.4 |
| REF | 1.9  | 1.9  | 1.9  | 1.8  | 1.6  | 1.6  | 1.5  |
| SSA | 6.7  | 7.0  | 7.3  | 7.6  | 7.8  | 7.8  | 7.9  |
| USA | 2.4  | 2.5  | 2.6  | 2.7  | 2.8  | 2.8  | 2.8  |

Table 561: MAgPIE m4p-SSP1 — Demand—Material—Secondary products—Oils (Mt DM/yr) [PART 2/2]

|     | 1965 | 1970 | 1975 | 1980 | 1985 | 1990 | 1995 | 2000 | 2005 | 2010 |
|-----|------|------|------|------|------|------|------|------|------|------|
| GLO | 4.9  | 5.5  | 6.1  | 8.0  | 9.8  | 15.0 | 19.8 | 29.5 | 43.7 | 54.5 |
| CAZ | 0.1  | 0.1  | 0.2  | 0.2  | 0.3  | 0.3  | 0.4  | 0.5  | 0.6  | 0.3  |
| CHA | 0.4  | 0.4  | 0.5  | 0.6  | 0.7  | 1.0  | 2.9  | 6.3  | 13.5 | 18.2 |
| EUR | 1.5  | 1.8  | 1.8  | 2.3  | 2.5  | 3.7  | 4.1  | 6.1  | 7.8  | 6.5  |
| IND | 0.2  | 0.2  | 0.2  | 0.6  | 0.8  | 0.5  | 0.5  | 2.7  | 3.0  | 3.5  |
| JPN | 0.2  | 0.3  | 0.3  | 0.4  | 0.6  | 0.7  | 0.7  | 0.5  | 0.6  | 0.7  |
| LAM | 0.3  | 0.3  | 0.5  | 0.7  | 0.7  | 1.6  | 1.7  | 2.5  | 3.1  | 3.8  |
| MEA | 0.2  | 0.2  | 0.4  | 0.4  | 0.6  | 0.9  | 1.2  | 1.1  | 2.7  | 3.7  |
| NEU | 0.1  | 0.1  | 0.1  | 0.1  | 0.1  | 0.2  | 0.2  | 0.3  | 0.6  | 0.9  |
| OAS | 0.2  | 0.2  | 0.3  | 0.4  | 0.9  | 2.3  | 4.5  | 5.0  | 5.6  | 10.1 |
| REF | 0.8  | 0.9  | 0.8  | 1.0  | 0.9  | 1.2  | 0.5  | 0.7  | 1.8  | 2.0  |
| SSA | 0.2  | 0.3  | 0.2  | 0.4  | 0.4  | 0.6  | 0.8  | 1.1  | 2.4  | 2.9  |
| USA | 0.7  | 0.7  | 0.8  | 0.8  | 1.3  | 2.1  | 2.1  | 2.5  | 2.1  | 1.9  |

Table 562: FAO — Demand—Material—Secondary products—Oils (Mt DM/yr)

8.6.8 Sugar

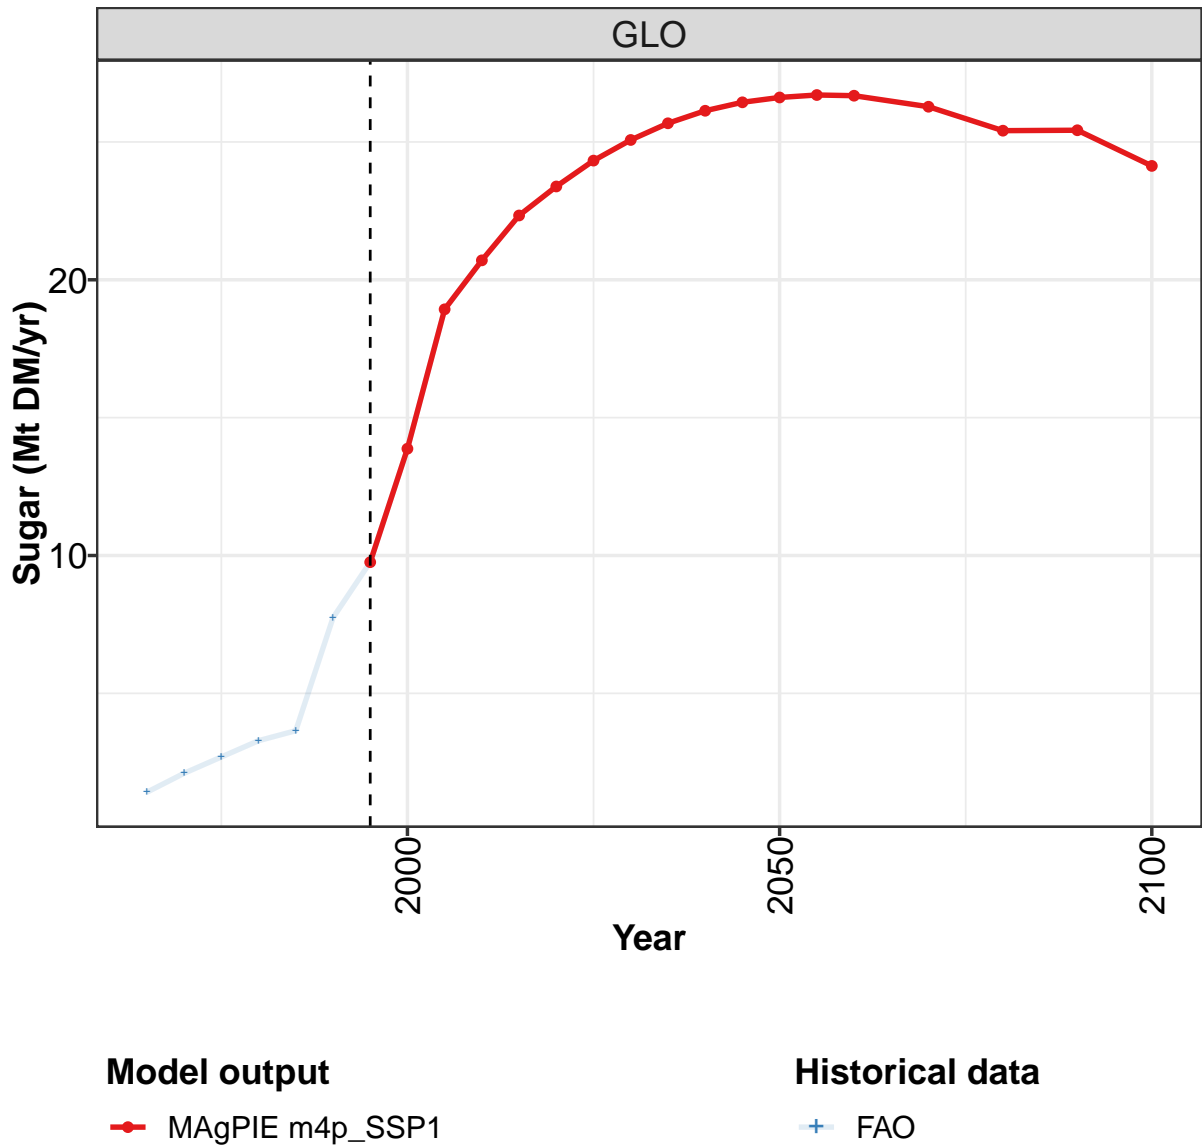

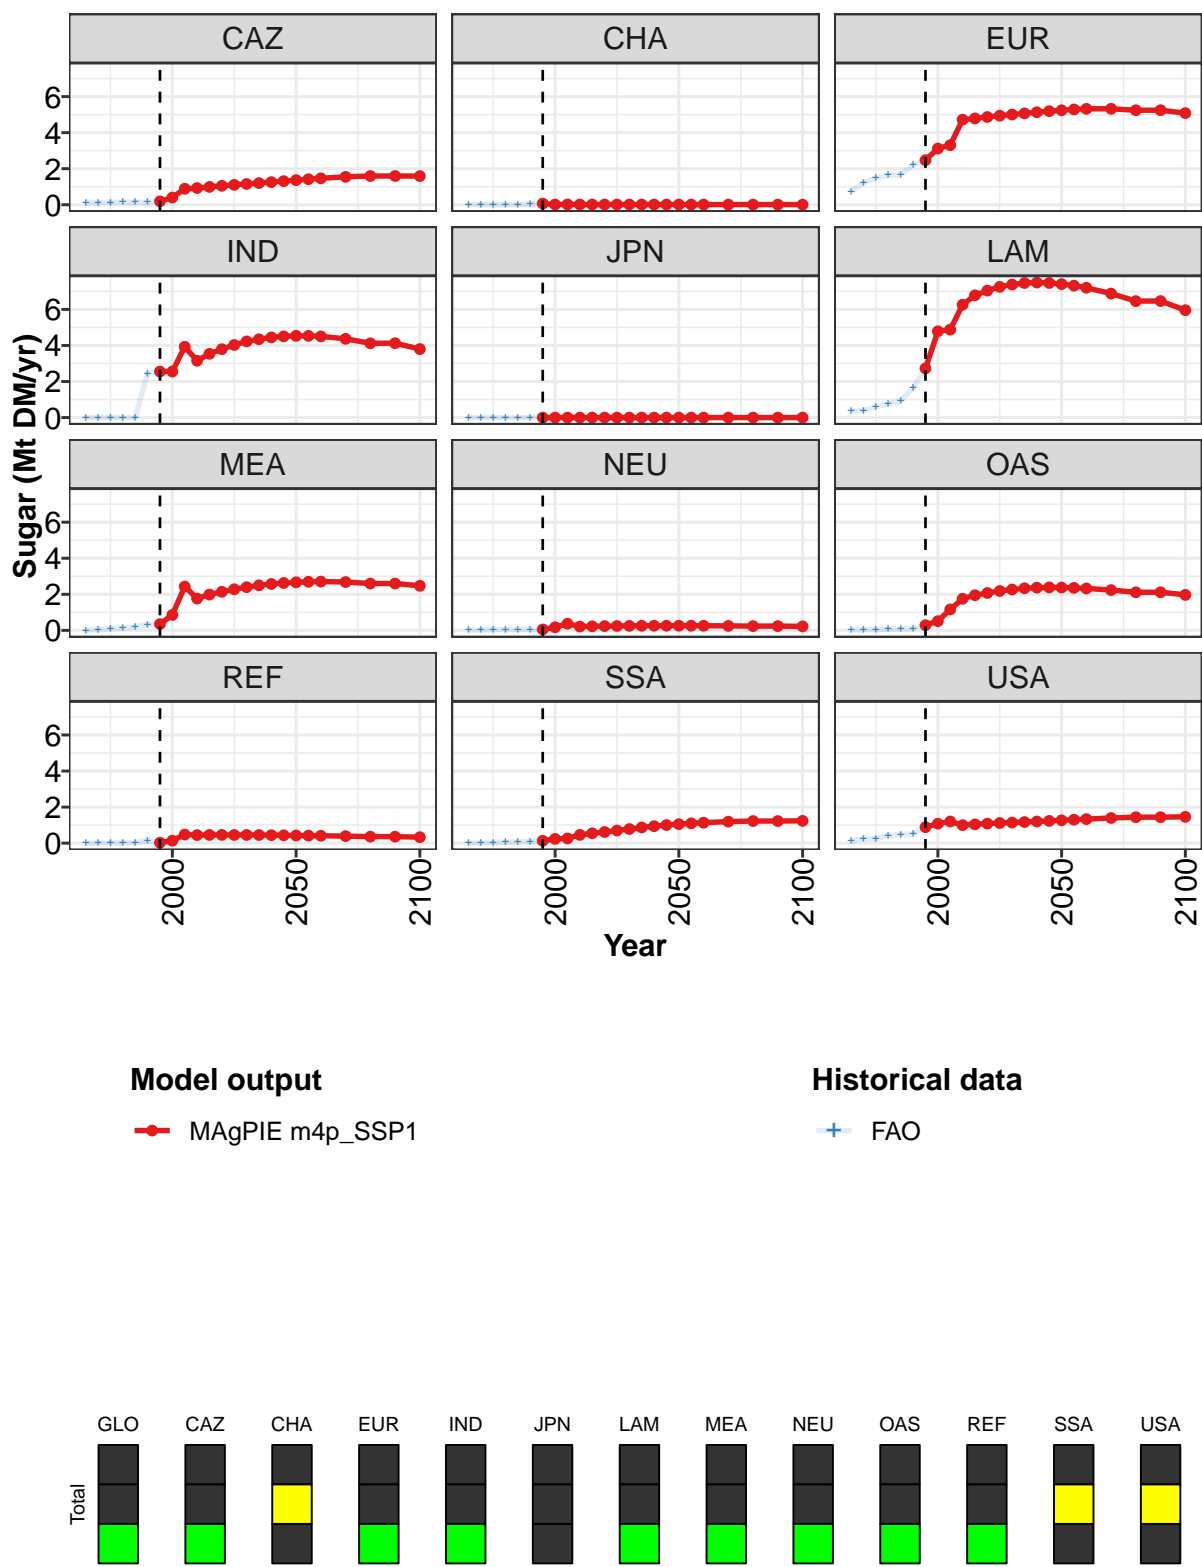

Figure 188: MAgPIE m4p\_SSP1 — Demand—Material—Secondary products—Sugar (Mt DM/yr)

|     | 1995 | 2000 | 2005 | 2010 | 2015 | 2020 | 2025 | 2030 | 2035 | 2040 | 2045 |
|-----|------|------|------|------|------|------|------|------|------|------|------|
| GLO | 9.8  | 13.9 | 18.9 | 20.7 | 22.3 | 23.4 | 24.3 | 25.1 | 25.7 | 26.1 | 26.4 |
| CAZ | 0.2  | 0.4  | 0.9  | 0.9  | 1.0  | 1.1  | 1.1  | 1.2  | 1.2  | 1.3  | 1.3  |
| CHA | 0.1  | 0.0  | 0.0  | 0.0  | 0.0  | 0.0  | 0.0  | 0.0  | 0.0  | 0.0  | 0.0  |
| EUR | 2.5  | 3.1  | 3.3  | 4.7  | 4.8  | 4.9  | 4.9  | 5.0  | 5.1  | 5.1  | 5.2  |
| IND | 2.6  | 2.6  | 3.9  | 3.2  | 3.5  | 3.8  | 4.0  | 4.2  | 4.3  | 4.4  | 4.5  |
| JPN | 0.0  | 0.0  | 0.0  | 0.0  | 0.0  | 0.0  | 0.0  | 0.0  | 0.0  | 0.0  | 0.0  |
| LAM | 2.7  | 4.8  | 4.9  | 6.3  | 6.8  | 7.0  | 7.3  | 7.4  | 7.5  | 7.5  | 7.5  |
| MEA | 0.3  | 0.9  | 2.4  | 1.8  | 2.0  | 2.1  | 2.3  | 2.4  | 2.5  | 2.6  | 2.6  |
| NEU | 0.1  | 0.2  | 0.4  | 0.2  | 0.2  | 0.2  | 0.2  | 0.2  | 0.3  | 0.3  | 0.3  |
| OAS | 0.3  | 0.5  | 1.2  | 1.8  | 2.0  | 2.1  | 2.2  | 2.3  | 2.3  | 2.4  | 2.4  |
| REF | 0.0  | 0.1  | 0.5  | 0.4  | 0.5  | 0.5  | 0.5  | 0.5  | 0.5  | 0.4  | 0.4  |
| SSA | 0.1  | 0.2  | 0.3  | 0.5  | 0.5  | 0.6  | 0.7  | 0.8  | 0.9  | 0.9  | 1.0  |
| USA | 0.9  | 1.1  | 1.2  | 1.0  | 1.0  | 1.1  | 1.1  | 1.1  | 1.2  | 1.2  | 1.2  |

Table 563: MAgPIE m4p\_SSP1 — Demand—Material—Secondary products—Sugar (Mt DM/yr) [PART 1/2]

|     | 2050 | 2055 | 2060 | 2070 | 2080 | 2090 | 2100 |
|-----|------|------|------|------|------|------|------|
| GLO | 26.6 | 26.7 | 26.7 | 26.3 | 25.4 | 25.4 | 24.1 |
| CAZ | 1.4  | 1.4  | 1.5  | 1.6  | 1.6  | 1.6  | 1.6  |
| CHA | 0.0  | 0.0  | 0.0  | 0.0  | 0.0  | 0.0  | 0.0  |
| EUR | 5.2  | 5.3  | 5.3  | 5.3  | 5.2  | 5.2  | 5.1  |
| IND | 4.5  | 4.5  | 4.5  | 4.4  | 4.1  | 4.1  | 3.8  |
| JPN | 0.0  | 0.0  | 0.0  | 0.0  | 0.0  | 0.0  | 0.0  |
| LAM | 7.4  | 7.3  | 7.2  | 6.9  | 6.5  | 6.5  | 6.0  |
| MEA | 2.7  | 2.7  | 2.7  | 2.7  | 2.6  | 2.6  | 2.5  |
| NEU | 0.3  | 0.3  | 0.3  | 0.2  | 0.2  | 0.2  | 0.2  |
| OAS | 2.4  | 2.4  | 2.3  | 2.2  | 2.1  | 2.1  | 2.0  |
| REF | 0.4  | 0.4  | 0.4  | 0.4  | 0.4  | 0.4  | 0.3  |
| SSA | 1.1  | 1.1  | 1.1  | 1.2  | 1.2  | 1.2  | 1.2  |
| USA | 1.3  | 1.3  | 1.3  | 1.4  | 1.4  | 1.4  | 1.5  |

Table 564: MAgPIE m4p\_SSP1 — Demand—Material—Secondary products—Sugar (Mt DM/yr) [PART 2/2]

|     | 1965 | 1970 | 1975 | 1980 | 1985 | 1990 | 1995 | 2000 | 2005 | 2010 |
|-----|------|------|------|------|------|------|------|------|------|------|
| GLO | 1.4  | 2.1  | 2.7  | 3.3  | 3.6  | 7.7  | 9.8  | 13.9 | 18.9 | 20.7 |
| CAZ | 0.1  | 0.1  | 0.1  | 0.1  | 0.1  | 0.1  | 0.2  | 0.4  | 0.9  | 0.9  |
| CHA | 0.0  | 0.0  | 0.0  | 0.0  | 0.0  | 0.0  | 0.1  | 0.0  | 0.0  | 0.0  |
| EUR | 0.7  | 1.2  | 1.5  | 1.6  | 1.7  | 2.2  | 2.5  | 3.1  | 3.3  | 4.7  |
| IND | 0.0  | 0.0  | 0.0  | 0.0  | 0.0  | 2.5  | 2.6  | 2.6  | 3.9  | 3.2  |
| JPN | 0.0  | 0.0  | 0.0  | 0.0  | 0.0  | 0.0  | 0.0  | 0.0  | 0.0  | 0.0  |
| LAM | 0.4  | 0.4  | 0.6  | 0.8  | 0.9  | 1.7  | 2.7  | 4.8  | 4.9  | 6.3  |
| MEA | 0.0  | 0.1  | 0.1  | 0.1  | 0.2  | 0.3  | 0.3  | 0.9  | 2.4  | 1.8  |
| NEU | 0.0  | 0.0  | 0.0  | 0.0  | 0.0  | 0.0  | 0.1  | 0.2  | 0.4  | 0.2  |
| OAS | 0.0  | 0.0  | 0.0  | 0.1  | 0.1  | 0.1  | 0.3  | 0.5  | 1.2  | 1.8  |
| REF | 0.0  | 0.0  | 0.0  | 0.0  | 0.0  | 0.2  | 0.0  | 0.1  | 0.5  | 0.4  |
| SSA | 0.0  | 0.0  | 0.0  | 0.1  | 0.1  | 0.1  | 0.1  | 0.2  | 0.3  | 0.5  |
| USA | 0.1  | 0.2  | 0.2  | 0.4  | 0.5  | 0.5  | 0.9  | 1.1  | 1.2  | 1.0  |

Table 565: FAO — Demand—Material—Secondary products—Sugar (Mt DM/yr)

## 9 Processing

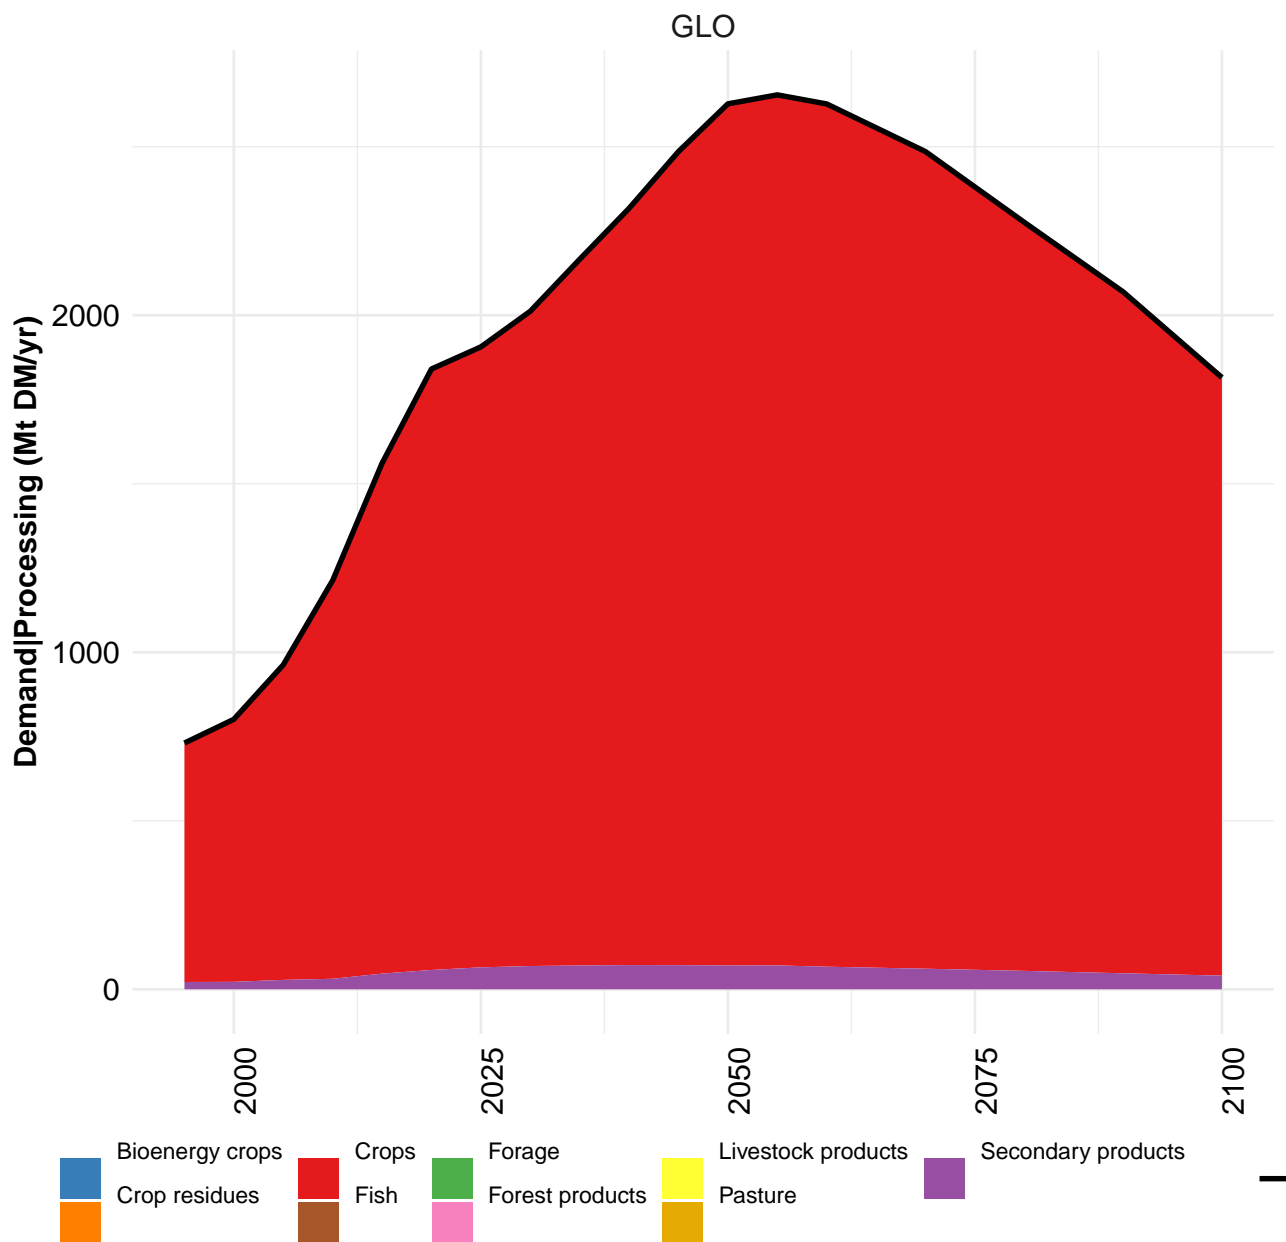

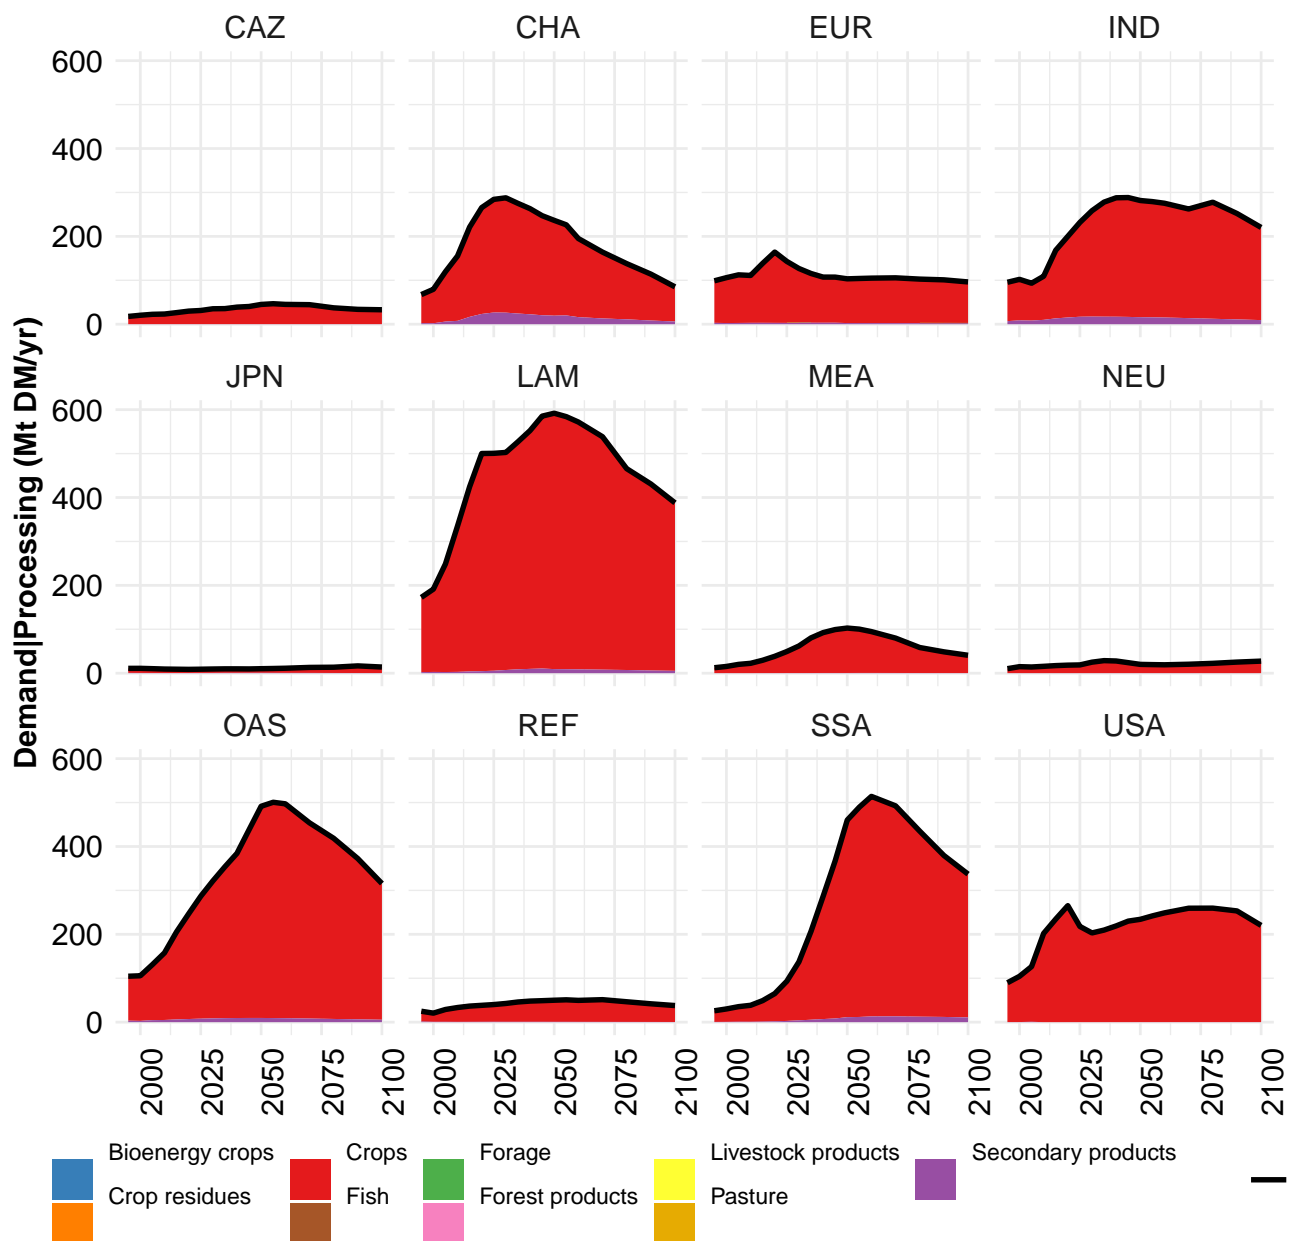



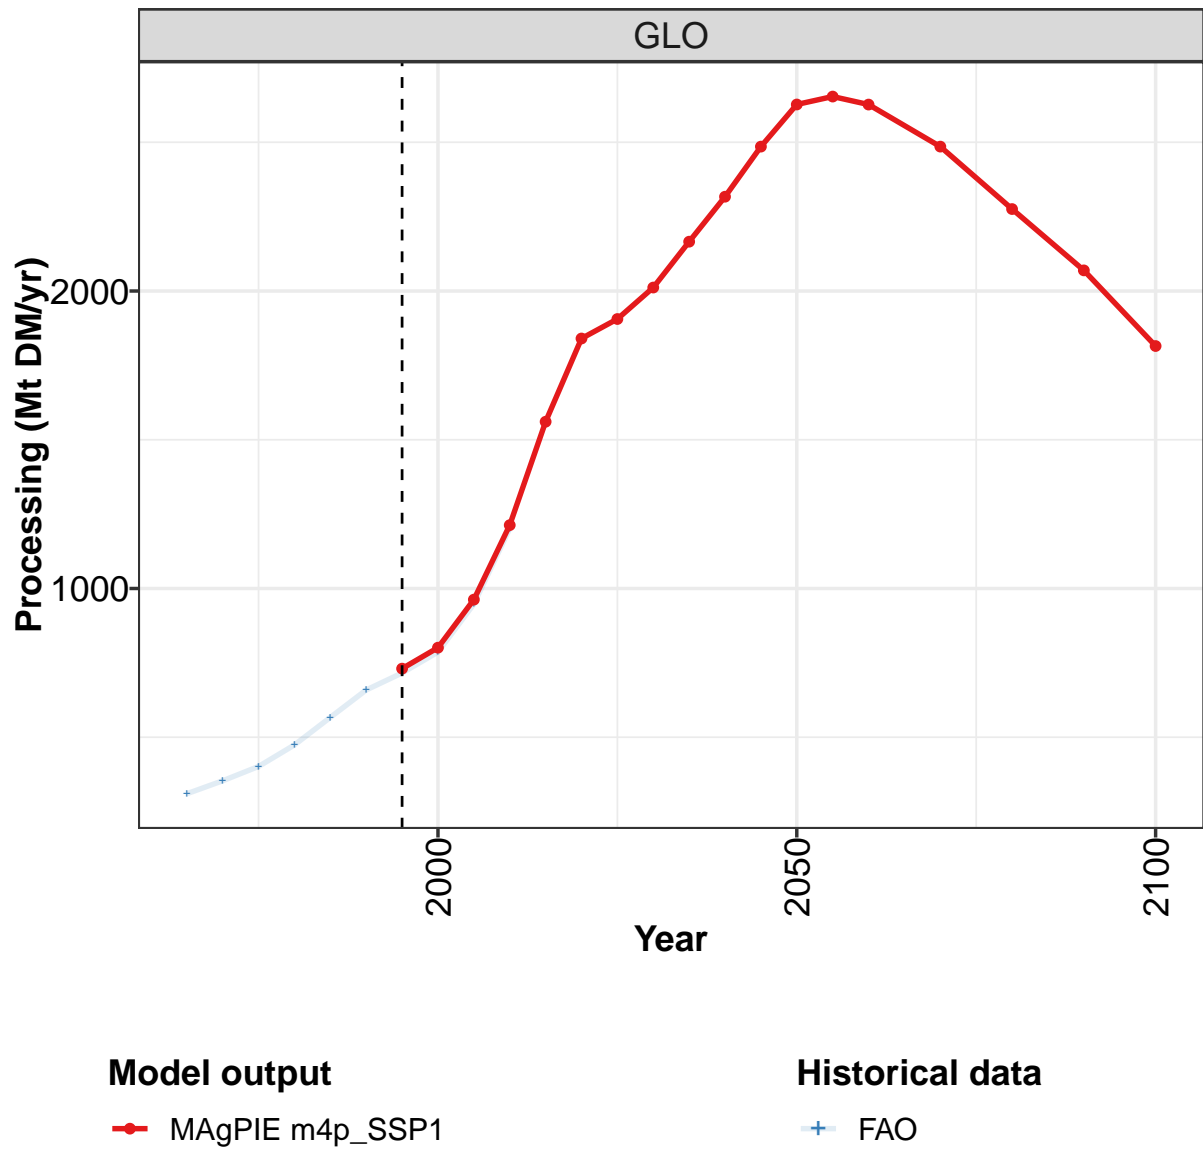

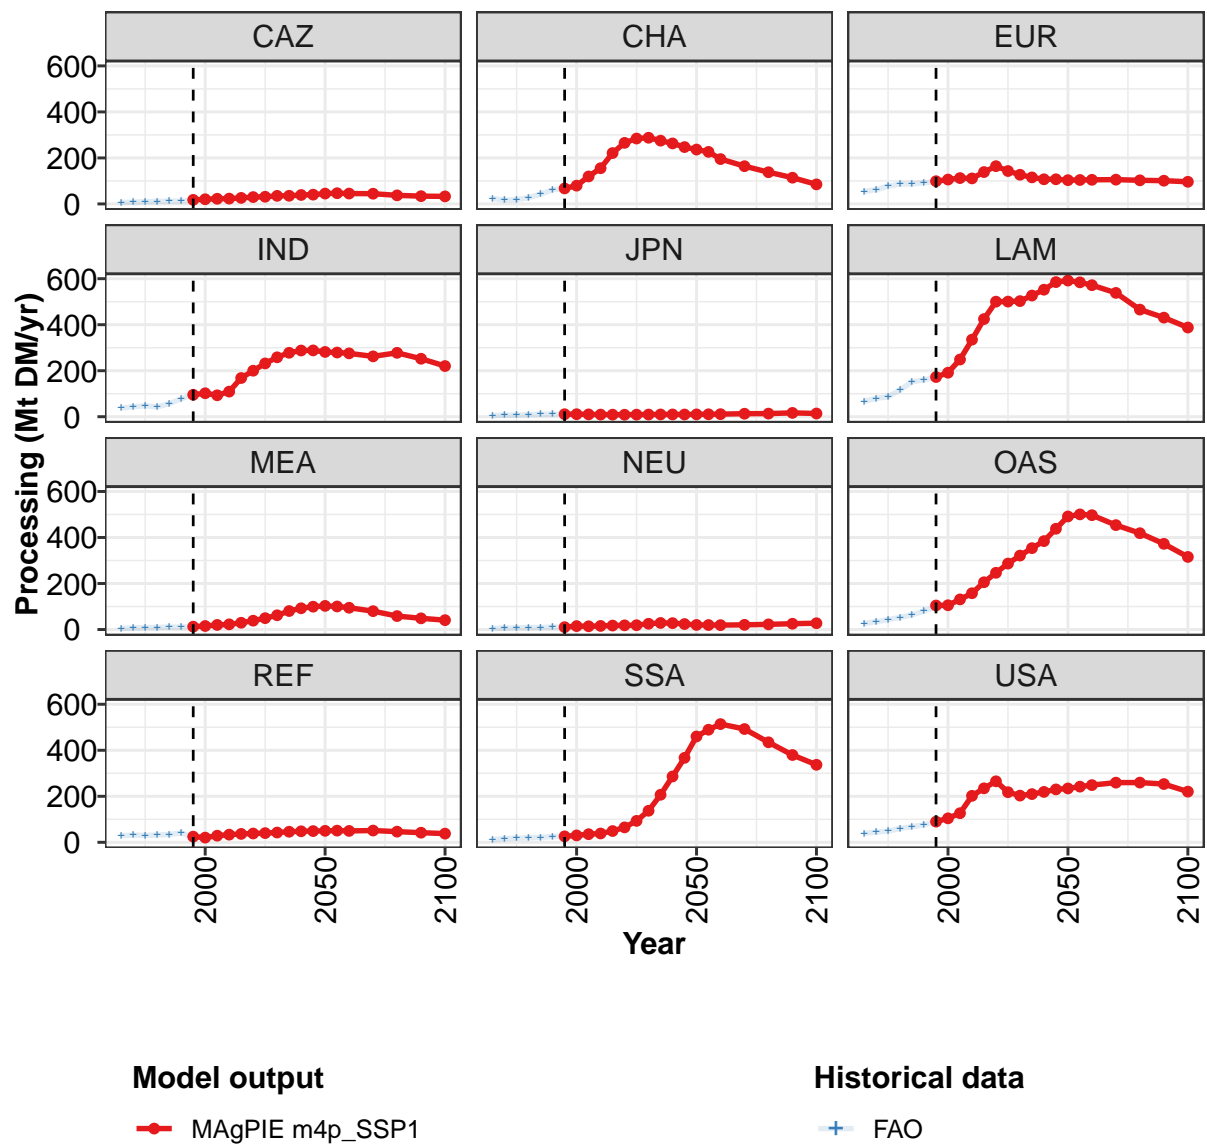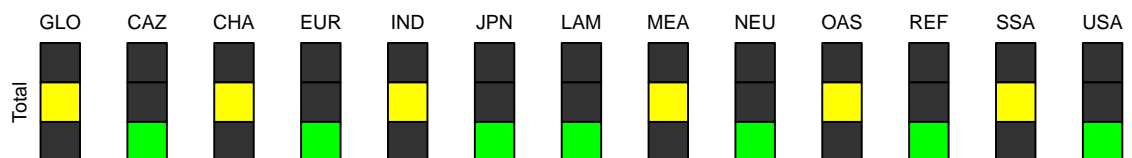

Figure 189: MAgPIE m4p\_SSP1 — Demand—Processing (Mt DM/yr)

|     | 1995 | 2000 | 2005 | 2010 | 2015 | 2020 | 2025 | 2030 | 2035 | 2040 | 2045 |
|-----|------|------|------|------|------|------|------|------|------|------|------|
| GLO | 731  | 801  | 963  | 1213 | 1561 | 1840 | 1906 | 2012 | 2166 | 2317 | 2485 |
| CAZ | 18   | 20   | 23   | 23   | 26   | 30   | 31   | 35   | 36   | 39   | 40   |
| CHA | 67   | 79   | 120  | 155  | 221  | 265  | 284  | 288  | 275  | 263  | 247  |
| EUR | 99   | 106  | 112  | 111  | 139  | 164  | 143  | 127  | 115  | 107  | 107  |
| IND | 95   | 102  | 93   | 109  | 168  | 200  | 232  | 258  | 278  | 288  | 288  |
| JPN | 11   | 11   | 10   | 9    | 9    | 9    | 9    | 10   | 10   | 10   | 10   |
| LAM | 173  | 191  | 249  | 335  | 425  | 500  | 501  | 503  | 527  | 552  | 585  |
| MEA | 12   | 15   | 20   | 23   | 29   | 38   | 49   | 62   | 80   | 92   | 99   |
| NEU | 10   | 15   | 14   | 16   | 17   | 18   | 19   | 25   | 29   | 28   | 24   |
| OAS | 105  | 106  | 131  | 158  | 206  | 247  | 287  | 321  | 354  | 384  | 438  |
| REF | 25   | 21   | 29   | 33   | 37   | 38   | 40   | 43   | 46   | 48   | 49   |
| SSA | 26   | 30   | 35   | 38   | 49   | 65   | 93   | 137  | 207  | 286  | 367  |
| USA | 90   | 104  | 127  | 202  | 235  | 265  | 218  | 203  | 210  | 219  | 230  |

Table 566: MAgPIE m4p\_SSP1 — Demand—Processing (Mt DM/yr) [PART 1/2]

|     | 2050 | 2055 | 2060 | 2070 | 2080 | 2090 | 2100 |
|-----|------|------|------|------|------|------|------|
| GLO | 2627 | 2654 | 2627 | 2485 | 2276 | 2069 | 1815 |
| CAZ | 45   | 47   | 45   | 45   | 37   | 34   | 33   |
| CHA | 236  | 226  | 195  | 164  | 138  | 114  | 85   |
| EUR | 103  | 104  | 105  | 106  | 103  | 101  | 96   |
| IND | 282  | 279  | 275  | 262  | 278  | 252  | 220  |
| JPN | 10   | 11   | 11   | 13   | 14   | 17   | 14   |
| LAM | 592  | 584  | 572  | 538  | 466  | 431  | 388  |
| MEA | 103  | 100  | 95   | 80   | 58   | 49   | 41   |
| NEU | 20   | 20   | 19   | 20   | 22   | 25   | 27   |
| OAS | 491  | 501  | 497  | 454  | 419  | 372  | 316  |
| REF | 50   | 51   | 50   | 51   | 46   | 42   | 38   |
| SSA | 460  | 489  | 514  | 493  | 435  | 380  | 337  |
| USA | 234  | 242  | 249  | 259  | 260  | 253  | 220  |

Table 567: MAgPIE m4p\_SSP1 — Demand—Processing (Mt DM/yr) [PART 2/2]

|     | 1965 | 1970 | 1975 | 1980 | 1985 | 1990 | 1995 | 2000 | 2005 | 2010 |
|-----|------|------|------|------|------|------|------|------|------|------|
| GLO | 310  | 354  | 402  | 474  | 567  | 659  | 716  | 786  | 948  | 1201 |
| CAZ | 6    | 8    | 10   | 11   | 12   | 12   | 17   | 20   | 20   | 21   |
| CHA | 23   | 16   | 19   | 27   | 42   | 62   | 67   | 79   | 119  | 156  |
| EUR | 54   | 62   | 77   | 86   | 87   | 93   | 95   | 99   | 103  | 108  |
| IND | 38   | 43   | 47   | 43   | 57   | 78   | 96   | 102  | 93   | 109  |
| JPN | 5    | 7    | 7    | 9    | 11   | 11   | 11   | 11   | 10   | 9    |
| LAM | 67   | 80   | 86   | 116  | 152  | 160  | 173  | 186  | 253  | 331  |
| MEA | 5    | 7    | 9    | 9    | 11   | 11   | 12   | 15   | 19   | 22   |
| NEU | 5    | 6    | 7    | 8    | 9    | 11   | 9    | 13   | 13   | 16   |
| OAS | 27   | 34   | 43   | 52   | 64   | 80   | 98   | 105  | 126  | 156  |
| REF | 29   | 31   | 30   | 31   | 34   | 41   | 22   | 19   | 28   | 33   |
| SSA | 12   | 16   | 18   | 20   | 22   | 25   | 25   | 30   | 35   | 38   |
| USA | 38   | 45   | 48   | 60   | 68   | 76   | 89   | 107  | 129  | 204  |

Table 568: FAO — Demand—Processing (Mt DM/yr)

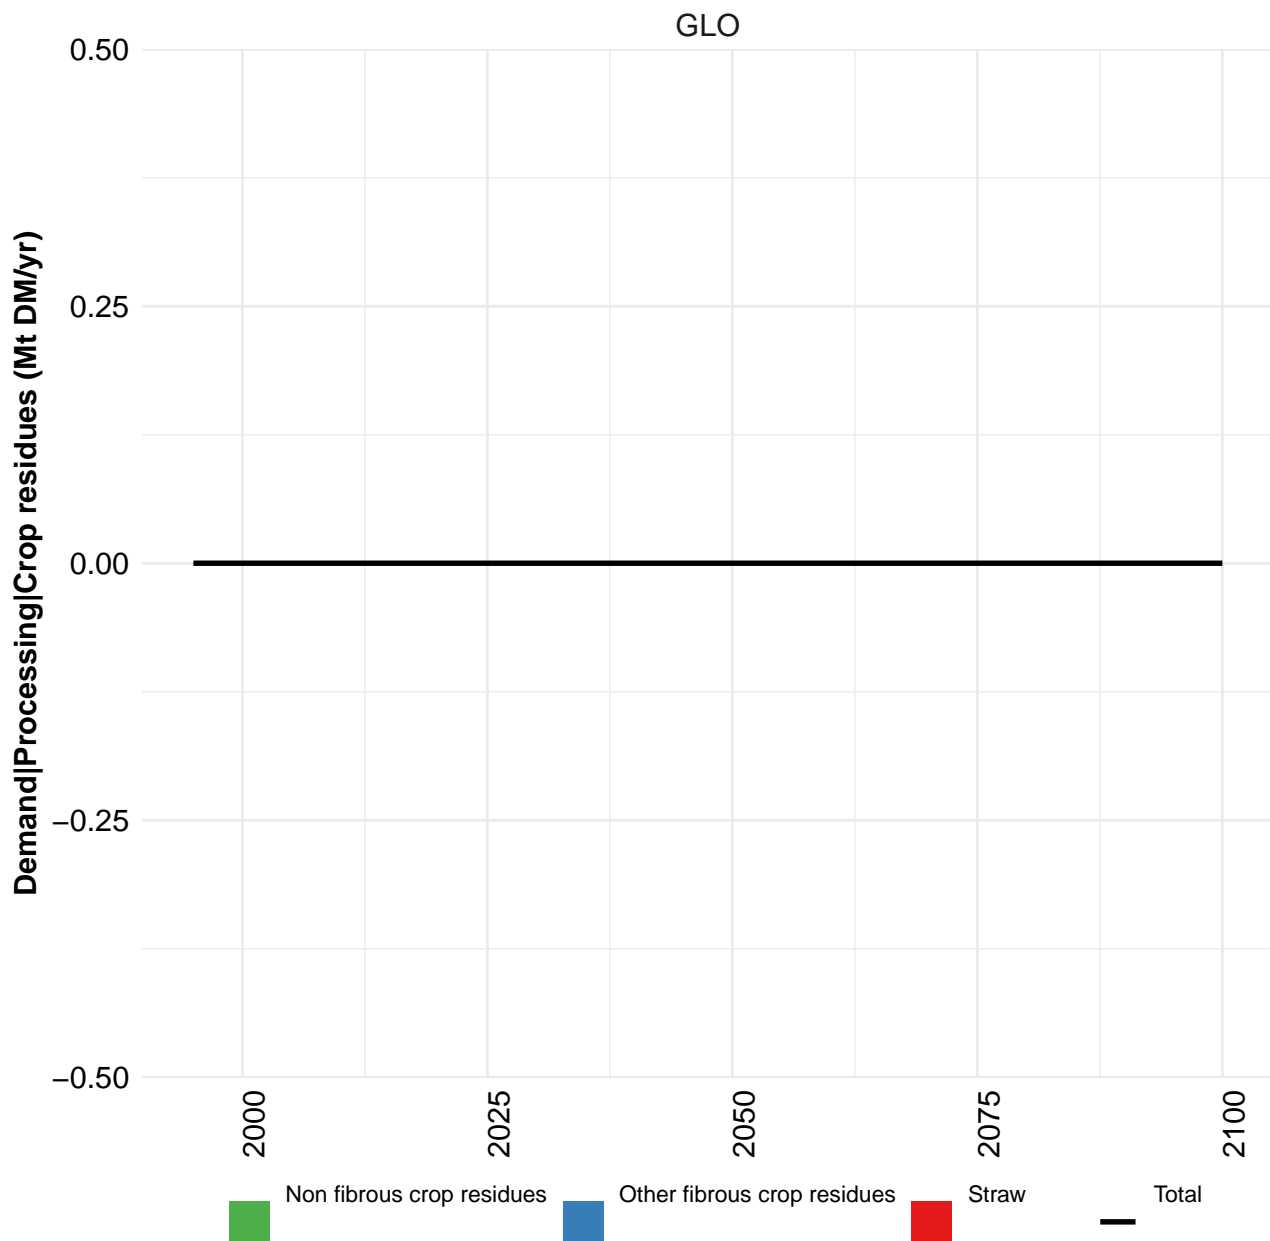

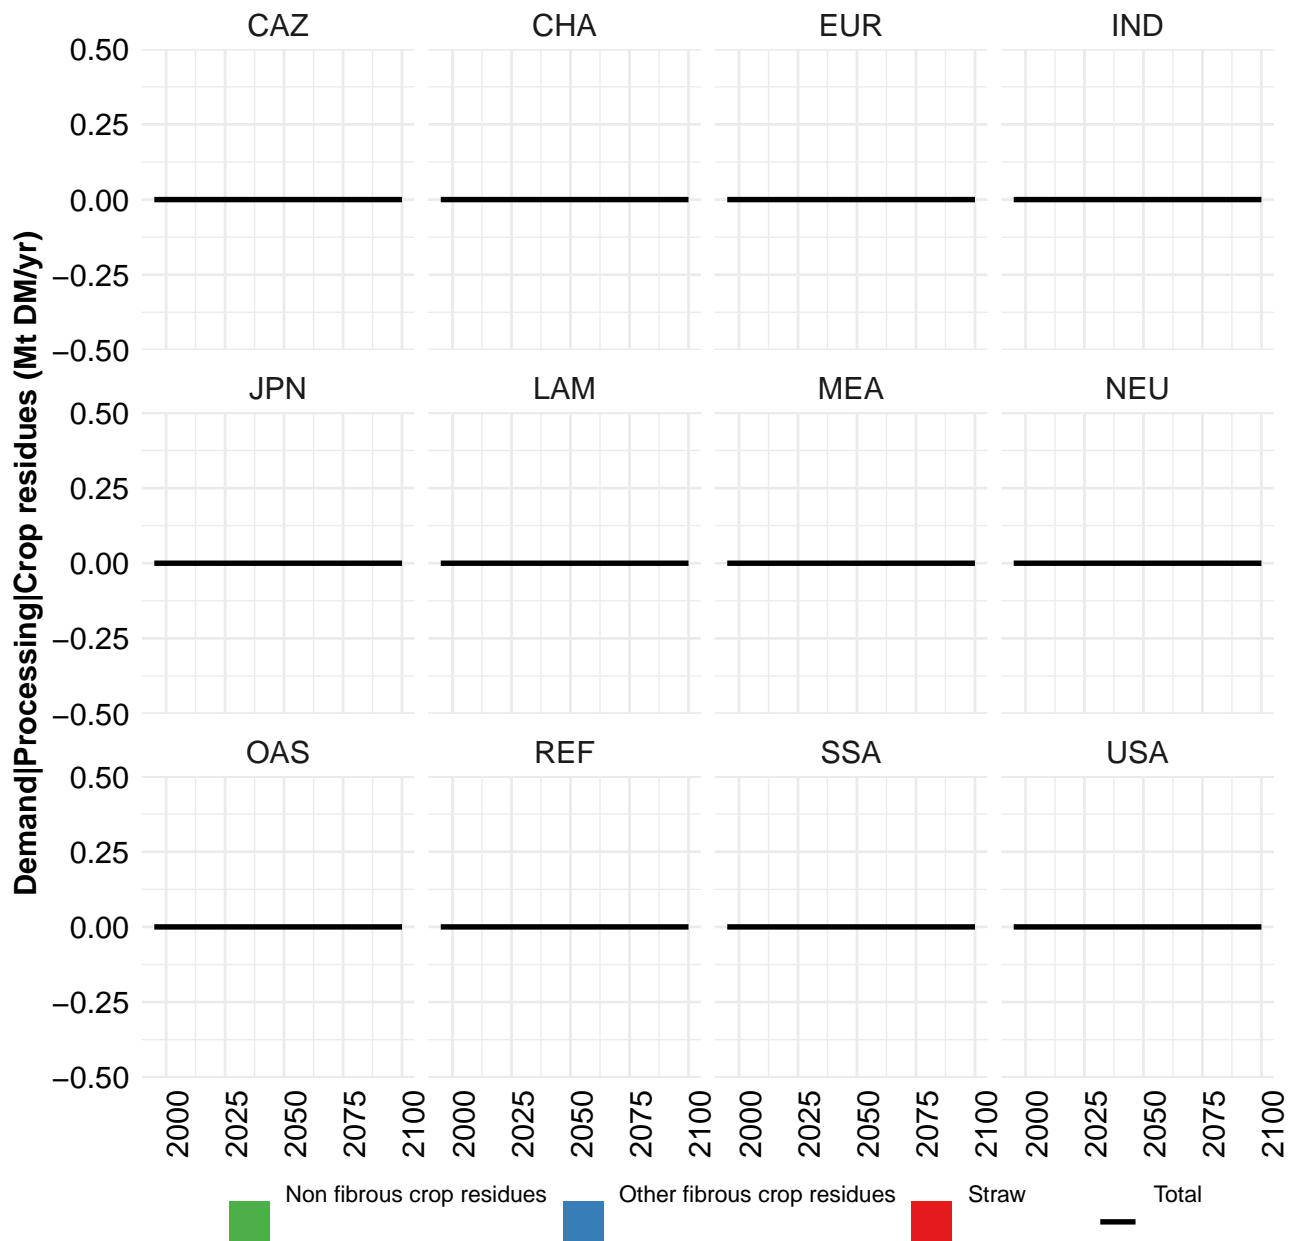

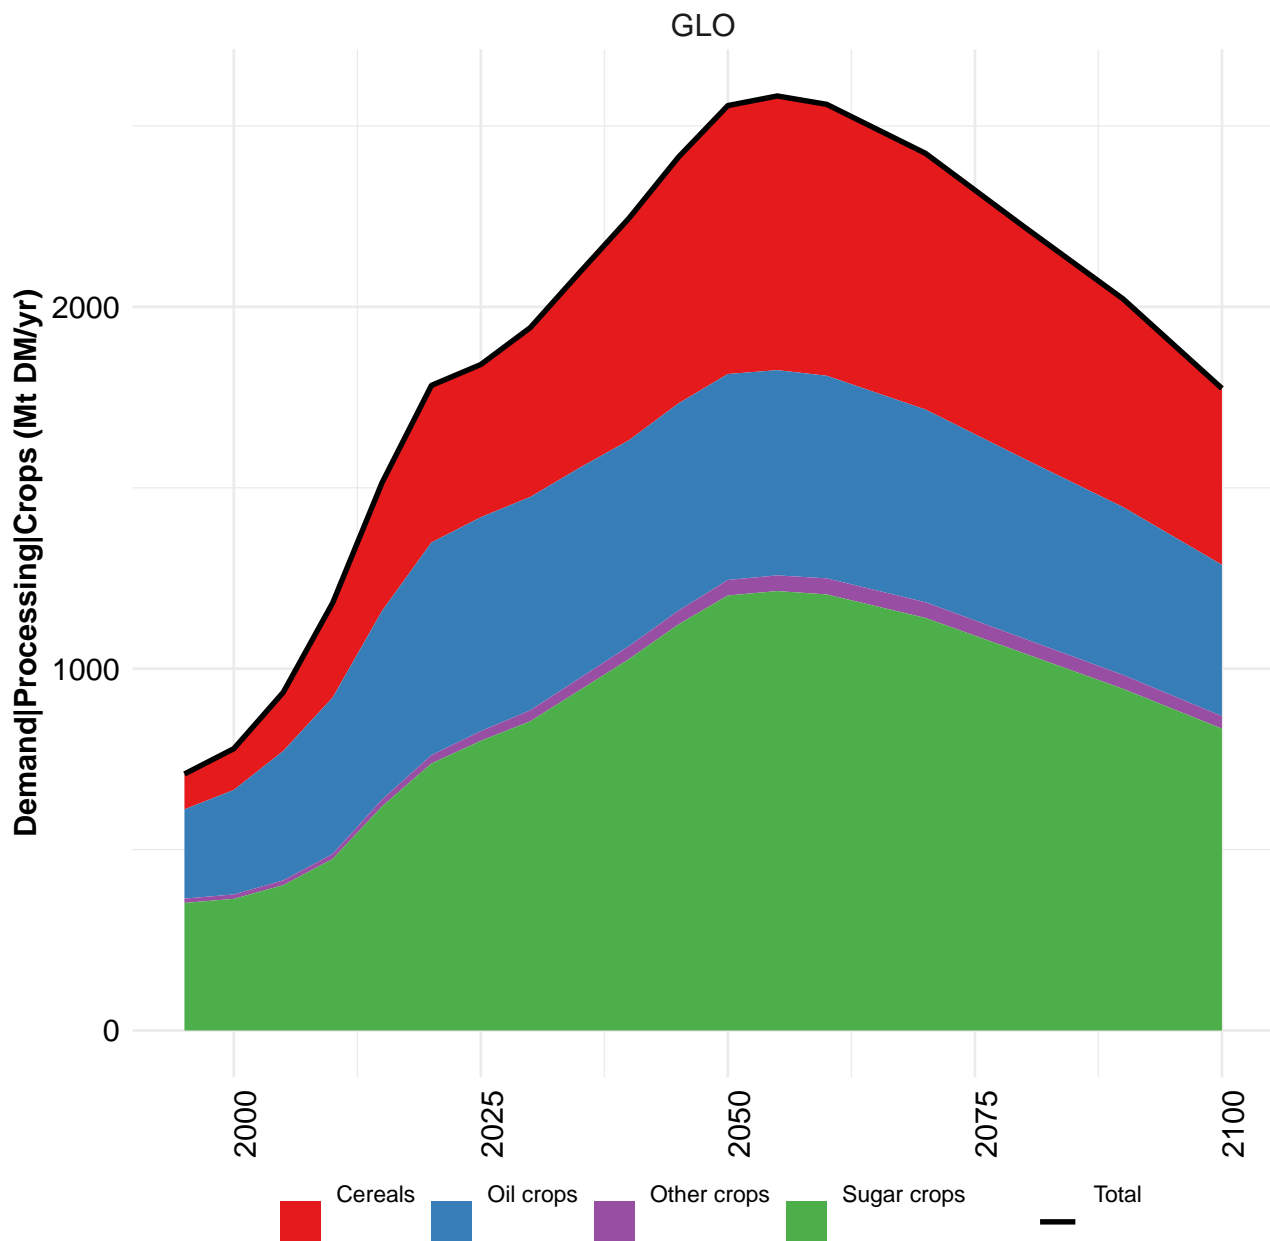

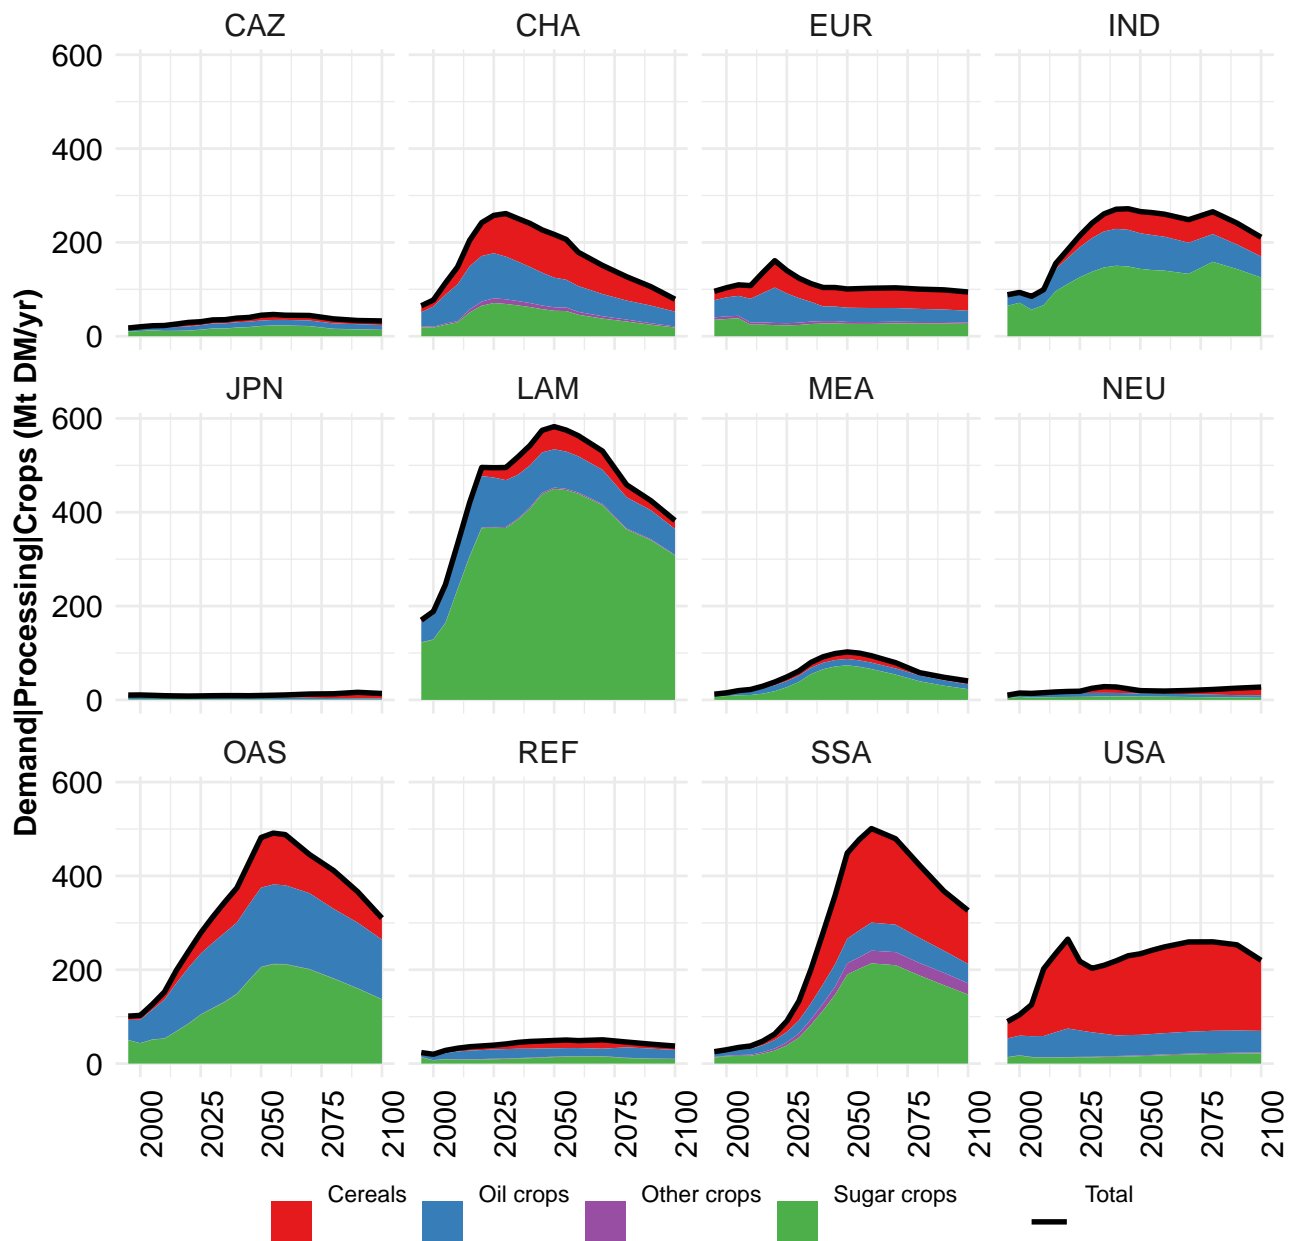

9.1
Crops

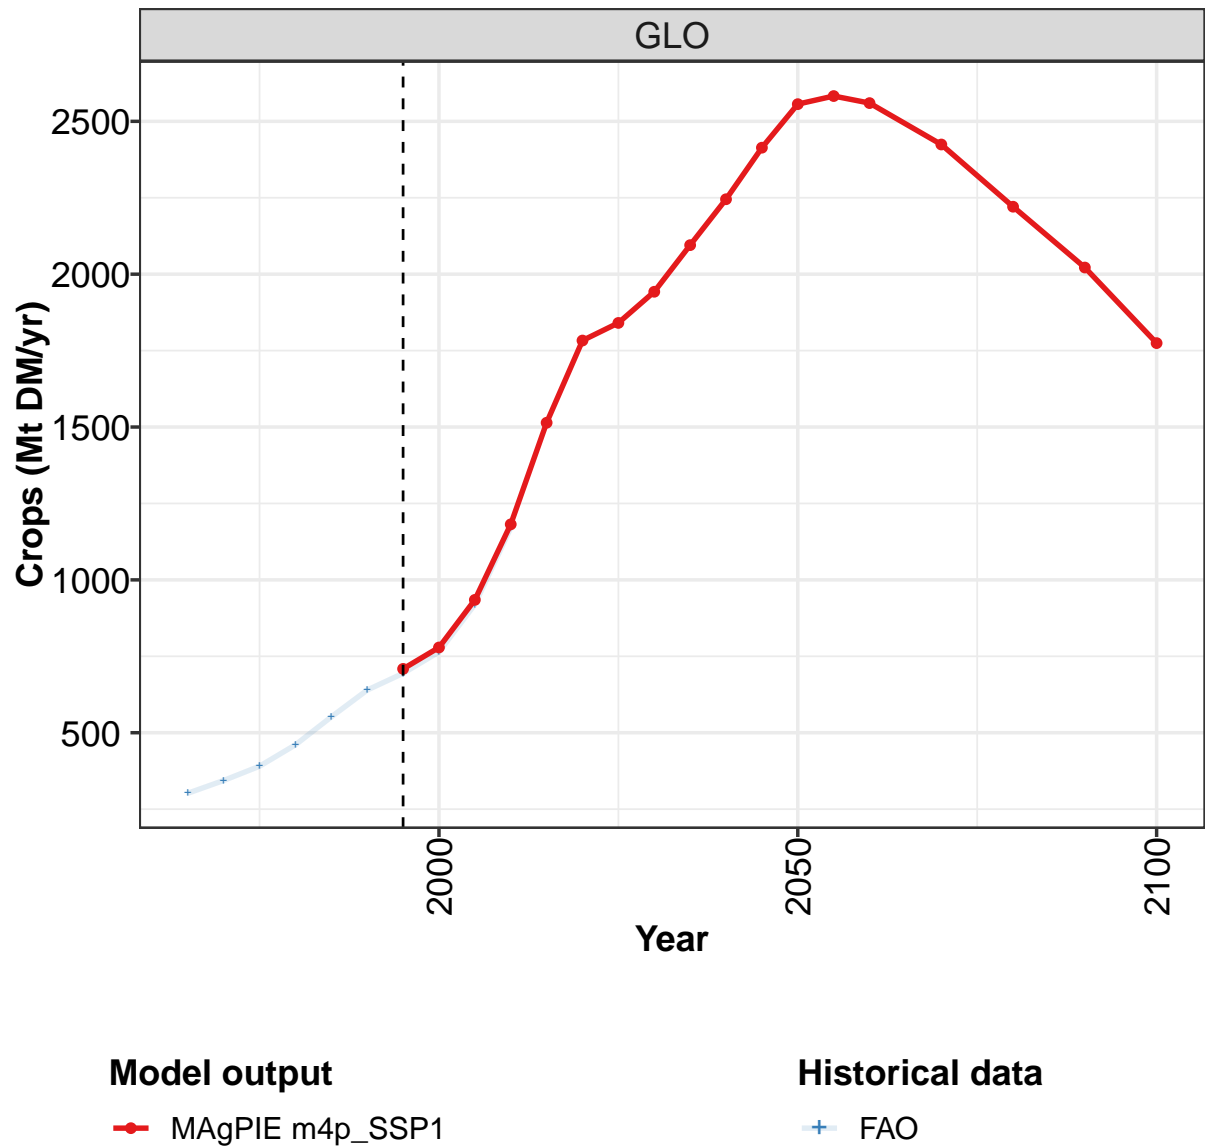



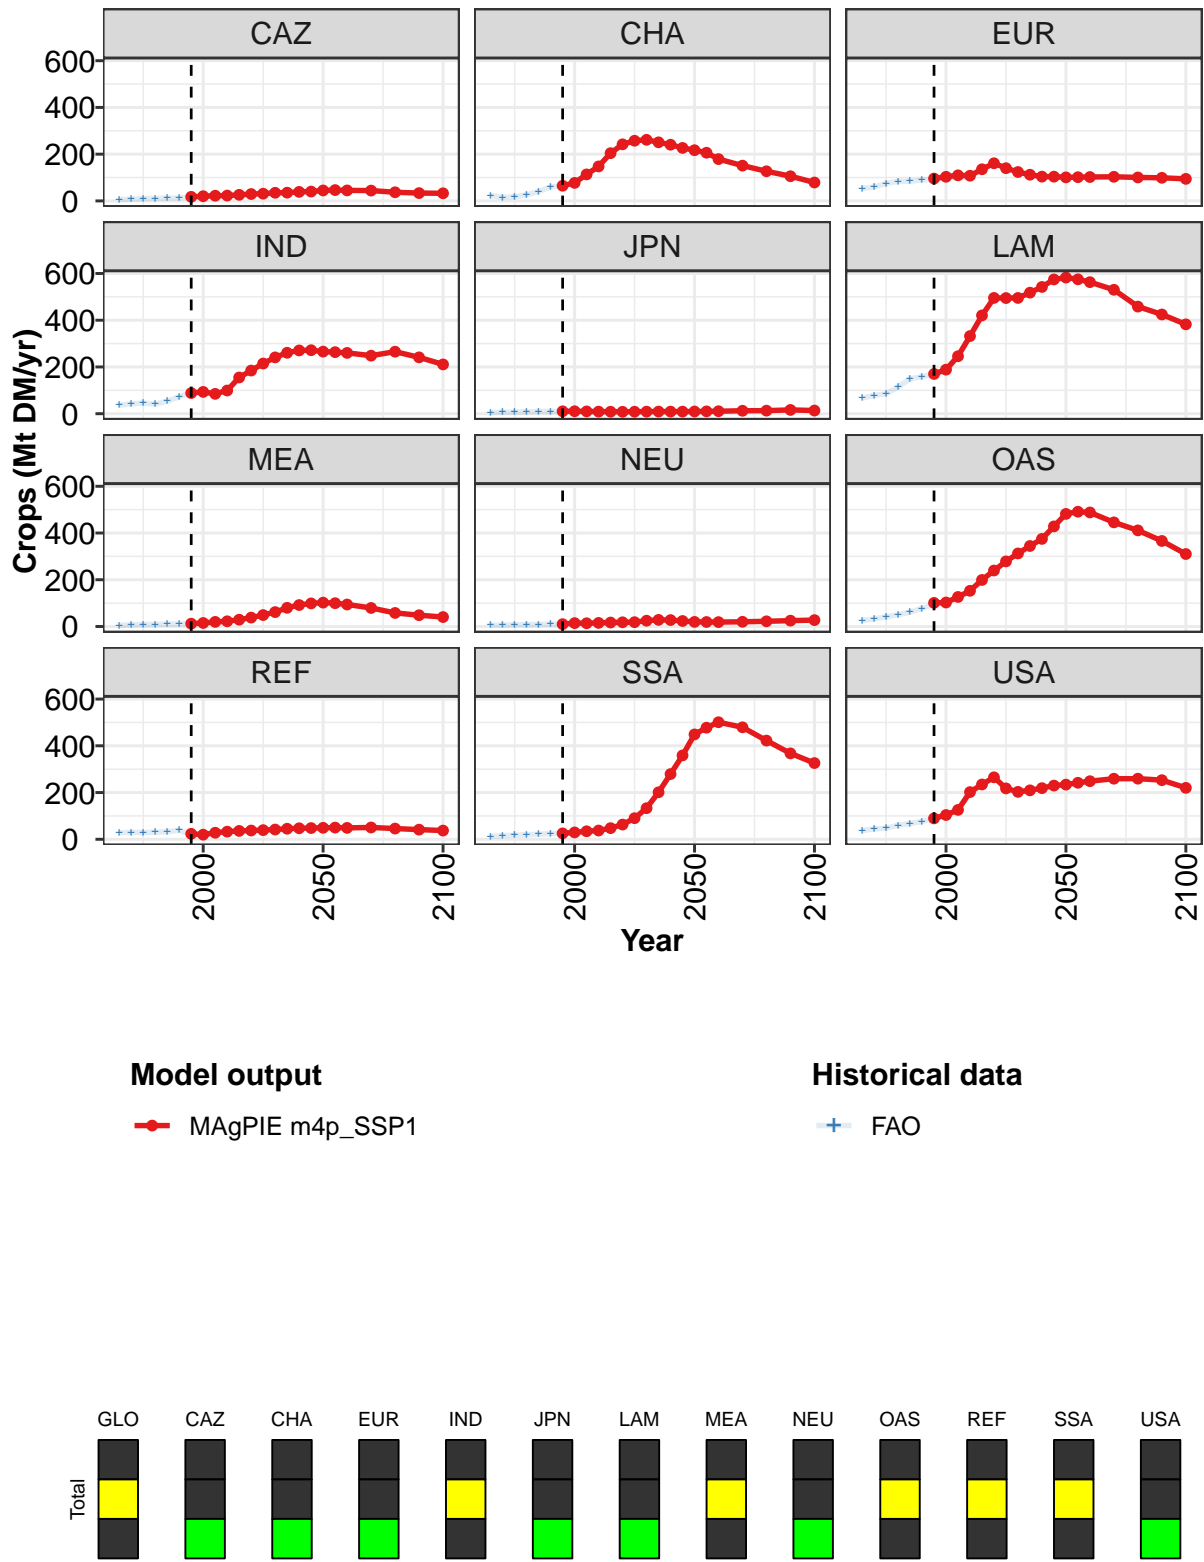

Figure 190: MAgPIE m4p\_SSP1 — Demand—Processing—Crops (Mt DM/yr)

|     | 1995 | 2000 | 2005 | 2010 | 2015 | 2020 | 2025 | 2030 | 2035 | 2040 | 2045 |
|-----|------|------|------|------|------|------|------|------|------|------|------|
| GLO | 709  | 779  | 935  | 1182 | 1514 | 1783 | 1841 | 1943 | 2095 | 2245 | 2414 |
| CAZ | 18   | 20   | 22   | 23   | 26   | 30   | 31   | 35   | 35   | 39   | 40   |
| CHA | 65   | 77   | 113  | 148  | 204  | 242  | 258  | 262  | 251  | 240  | 227  |
| EUR | 96   | 103  | 110  | 108  | 135  | 161  | 140  | 124  | 112  | 104  | 104  |
| IND | 88   | 93   | 85   | 99   | 155  | 185  | 215  | 241  | 261  | 271  | 272  |
| JPN | 10   | 11   | 10   | 9    | 9    | 8    | 9    | 9    | 9    | 9    | 9    |
| LAM | 170  | 189  | 246  | 332  | 421  | 496  | 495  | 495  | 518  | 542  | 575  |
| MEA | 12   | 15   | 20   | 22   | 29   | 38   | 49   | 62   | 80   | 92   | 99   |
| NEU | 10   | 15   | 14   | 15   | 17   | 18   | 19   | 25   | 28   | 28   | 24   |
| OAS | 101  | 103  | 126  | 153  | 199  | 240  | 279  | 313  | 345  | 375  | 428  |
| REF | 23   | 20   | 28   | 33   | 36   | 38   | 39   | 42   | 45   | 47   | 48   |
| SSA | 25   | 29   | 34   | 38   | 48   | 63   | 90   | 133  | 201  | 279  | 359  |
| USA | 90   | 104  | 126  | 202  | 235  | 265  | 218  | 203  | 210  | 219  | 230  |

Table 569: MAgPIE m4p-SSP1 — Demand—Processing—Crops (Mt DM/yr) [PART 1/2]

|     | 2050 | 2055 | 2060 | 2070 | 2080 | 2090 | 2100 |
|-----|------|------|------|------|------|------|------|
| GLO | 2556 | 2583 | 2560 | 2424 | 2221 | 2022 | 1775 |
| CAZ | 45   | 46   | 45   | 44   | 37   | 34   | 33   |
| CHA | 217  | 206  | 179  | 151  | 127  | 106  | 79   |
| EUR | 101  | 102  | 102  | 103  | 100  | 99   | 94   |
| IND | 266  | 263  | 260  | 248  | 265  | 241  | 211  |
| JPN | 9    | 10   | 11   | 13   | 13   | 16   | 14   |
| LAM | 583  | 575  | 563  | 530  | 458  | 425  | 382  |
| MEA | 102  | 100  | 94   | 79   | 58   | 48   | 40   |
| NEU | 20   | 19   | 19   | 20   | 22   | 25   | 27   |
| OAS | 482  | 491  | 488  | 446  | 411  | 366  | 310  |
| REF | 49   | 50   | 49   | 51   | 46   | 41   | 37   |
| SSA | 449  | 478  | 501  | 479  | 422  | 368  | 326  |
| USA | 234  | 242  | 249  | 259  | 259  | 253  | 220  |

Table 570: MAgPIE m4p-SSP1 — Demand—Processing—Crops (Mt DM/yr) [PART 2/2]

|     | 1965 | 1970 | 1975 | 1980 | 1985 | 1990 | 1995 | 2000 | 2005 | 2010 |
|-----|------|------|------|------|------|------|------|------|------|------|
| GLO | 302  | 344  | 390  | 460  | 552  | 640  | 694  | 764  | 920  | 1170 |
| CAZ | 6    | 8    | 9    | 11   | 12   | 12   | 17   | 19   | 20   | 21   |
| CHA | 23   | 15   | 18   | 26   | 40   | 59   | 65   | 77   | 113  | 148  |
| EUR | 52   | 60   | 75   | 84   | 84   | 90   | 92   | 97   | 100  | 105  |
| IND | 37   | 42   | 46   | 41   | 53   | 72   | 89   | 93   | 85   | 99   |
| JPN | 5    | 6    | 6    | 8    | 10   | 10   | 10   | 11   | 10   | 9    |
| LAM | 66   | 79   | 85   | 114  | 150  | 158  | 170  | 184  | 250  | 328  |
| MEA | 5    | 7    | 9    | 9    | 10   | 11   | 12   | 14   | 19   | 22   |
| NEU | 5    | 6    | 7    | 8    | 9    | 11   | 9    | 13   | 13   | 15   |
| OAS | 25   | 32   | 41   | 50   | 62   | 78   | 95   | 102  | 121  | 151  |
| REF | 28   | 30   | 29   | 30   | 32   | 39   | 21   | 19   | 27   | 32   |
| SSA | 12   | 16   | 18   | 19   | 21   | 24   | 25   | 29   | 34   | 37   |
| USA | 38   | 44   | 47   | 60   | 68   | 76   | 89   | 106  | 128  | 204  |

Table 571: FAO — Demand—Processing—Crops (Mt DM/yr)

9.1.1 Cereals

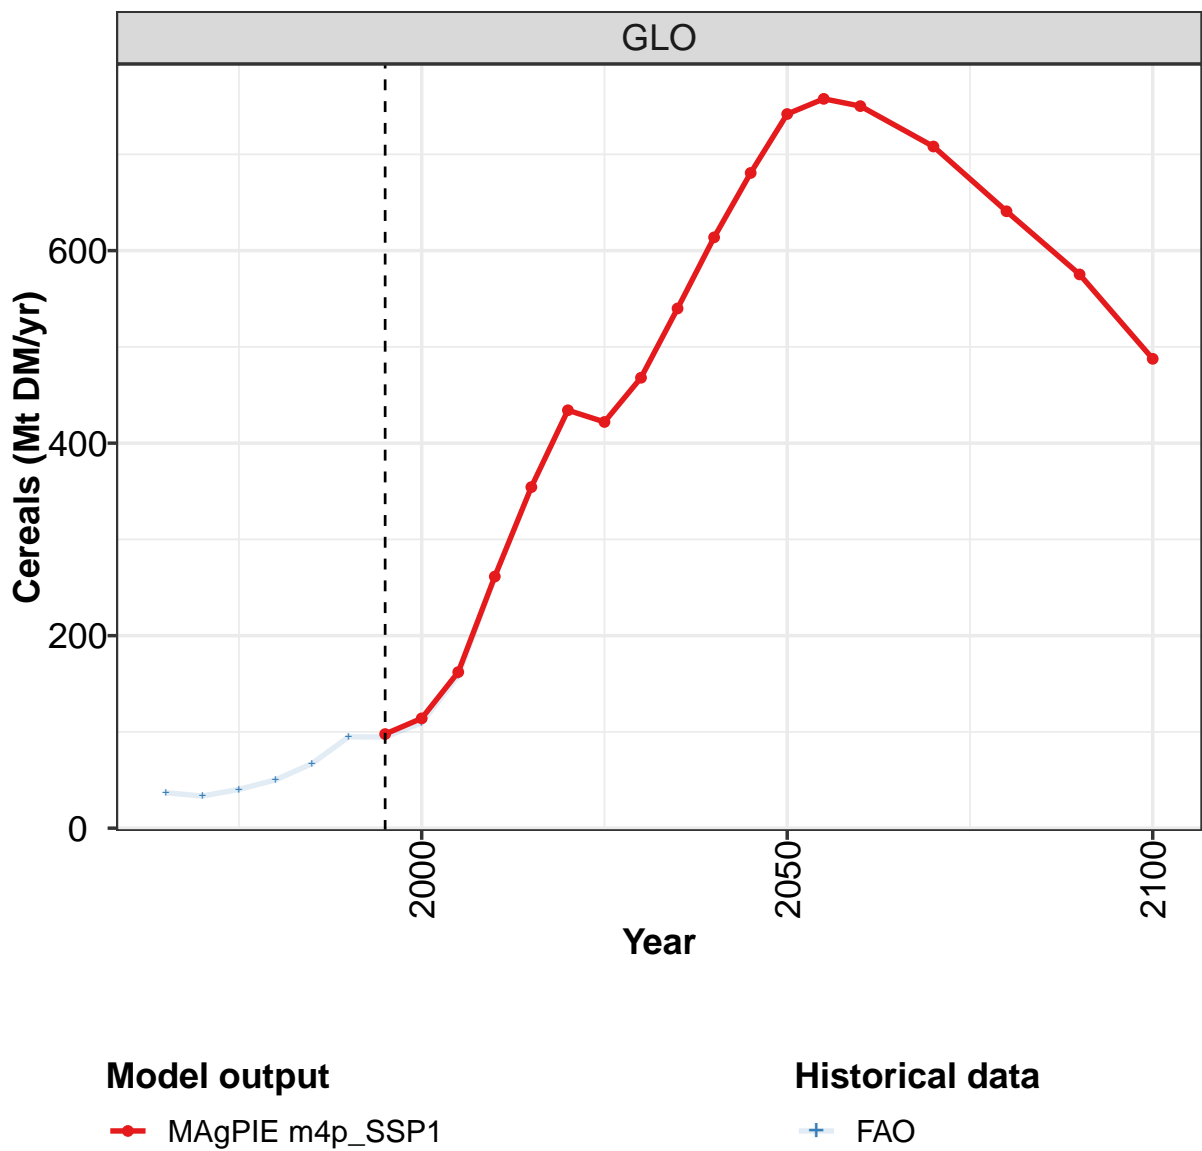

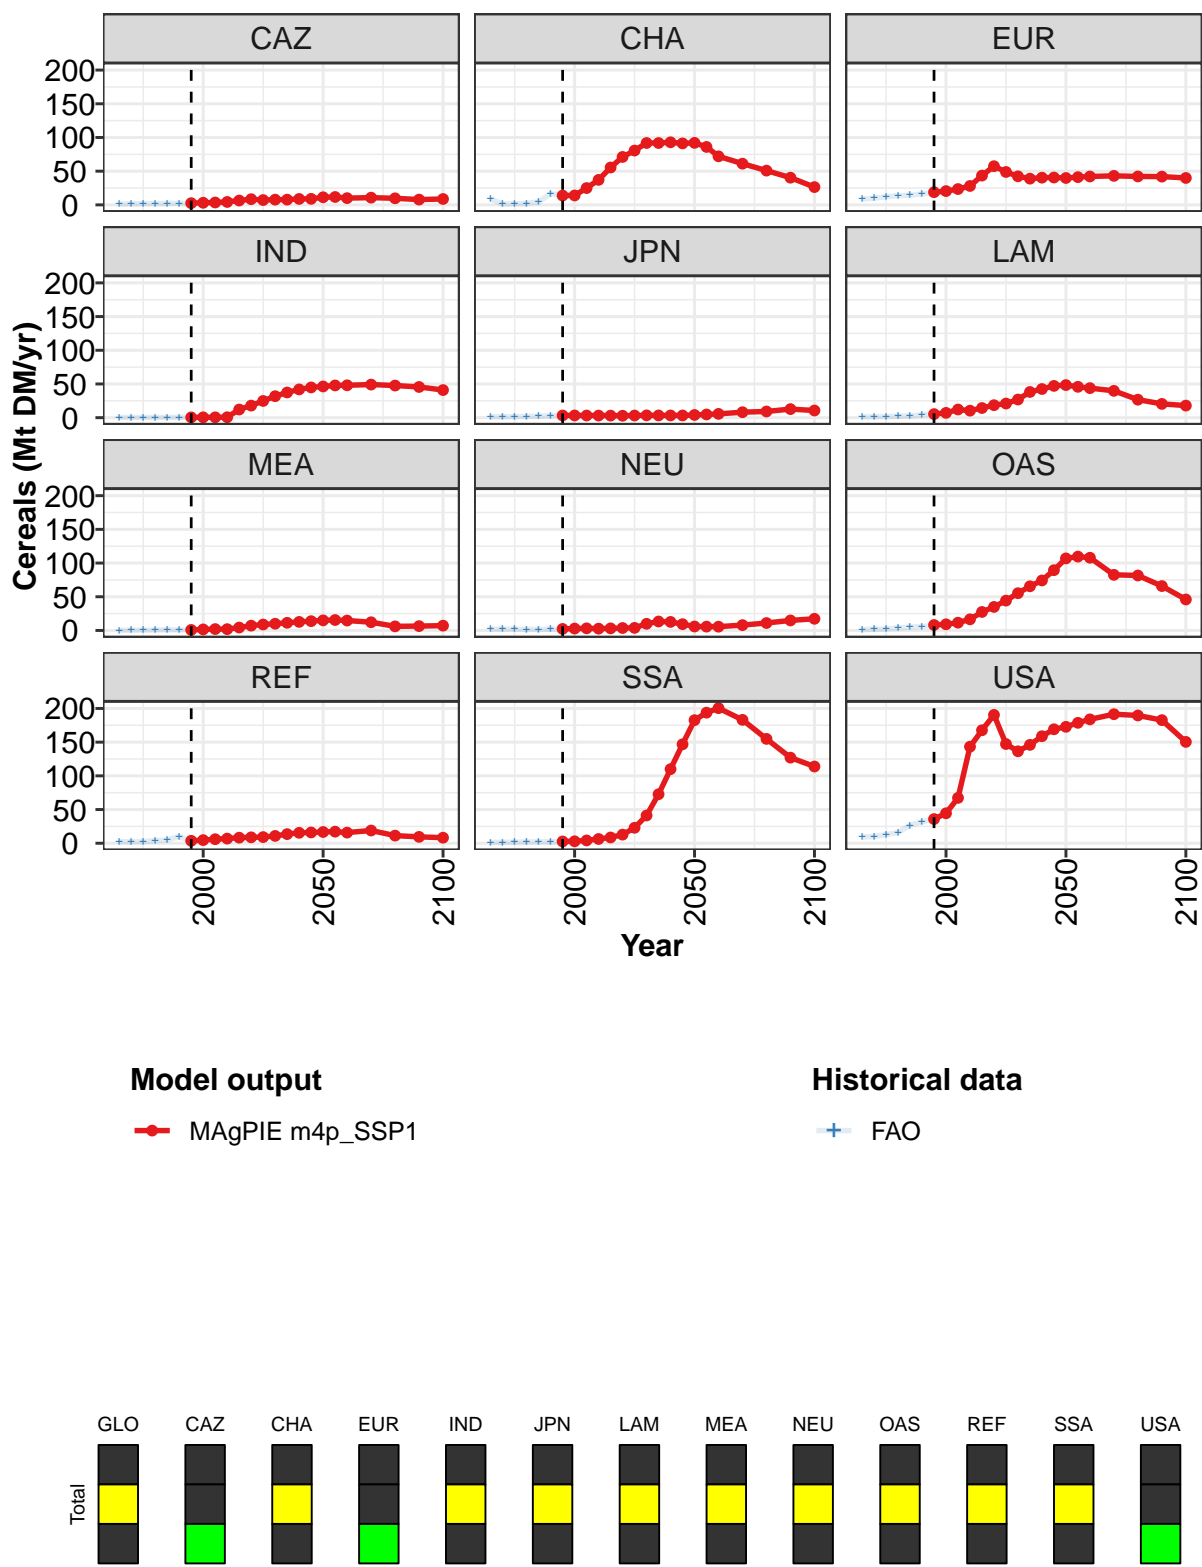

Figure 191: MAgPIE m4p\_SSP1 — Demand—Processing—Crops—Cereals (Mt DM/yr)

|     | 1995 | 2000 | 2005 | 2010 | 2015 | 2020 | 2025 | 2030 | 2035 | 2040 | 2045 |
|-----|------|------|------|------|------|------|------|------|------|------|------|
| GLO | 98   | 114  | 162  | 261  | 354  | 434  | 422  | 468  | 540  | 614  | 681  |
| CAZ | 3    | 3    | 4    | 4    | 6    | 8    | 7    | 8    | 8    | 9    | 9    |
| CHA | 14   | 14   | 25   | 37   | 55   | 71   | 81   | 92   | 92   | 93   | 91   |
| EUR | 19   | 20   | 23   | 28   | 43   | 57   | 49   | 42   | 39   | 40   | 41   |
| IND | 0    | 1    | 1    | 1    | 12   | 18   | 25   | 32   | 37   | 42   | 45   |
| JPN | 3    | 3    | 3    | 3    | 3    | 3    | 3    | 3    | 3    | 3    | 3    |
| LAM | 5    | 7    | 12   | 10   | 14   | 19   | 21   | 27   | 38   | 43   | 47   |
| MEA | 1    | 2    | 2    | 2    | 4    | 7    | 9    | 10   | 11   | 13   | 14   |
| NEU | 2    | 3    | 3    | 3    | 3    | 4    | 4    | 10   | 13   | 13   | 9    |
| OAS | 8    | 9    | 12   | 17   | 27   | 35   | 44   | 55   | 66   | 74   | 89   |
| REF | 4    | 5    | 6    | 7    | 8    | 9    | 9    | 11   | 14   | 16   | 16   |
| SSA | 3    | 3    | 4    | 6    | 9    | 13   | 23   | 41   | 73   | 110  | 147  |
| USA | 36   | 44   | 67   | 143  | 168  | 190  | 147  | 136  | 146  | 159  | 169  |

Table 572: MAgPIE m4p\_SSP1 — Demand—Processing—Crops—Cereals (Mt DM/yr) [PART 1/2]

|     | 2050 | 2055 | 2060 | 2070 | 2080 | 2090 | 2100 |
|-----|------|------|------|------|------|------|------|
| GLO | 742  | 758  | 750  | 708  | 641  | 575  | 488  |
| CAZ | 11   | 12   | 10   | 11   | 10   | 8    | 9    |
| CHA | 92   | 86   | 72   | 61   | 51   | 40   | 26   |
| EUR | 40   | 41   | 42   | 43   | 42   | 42   | 40   |
| IND | 46   | 48   | 48   | 49   | 48   | 46   | 41   |
| JPN | 4    | 5    | 6    | 8    | 9    | 13   | 11   |
| LAM | 48   | 46   | 44   | 40   | 27   | 20   | 18   |
| MEA | 15   | 15   | 15   | 12   | 6    | 6    | 7    |
| NEU | 6    | 6    | 6    | 8    | 11   | 15   | 17   |
| OAS | 107  | 110  | 108  | 83   | 82   | 66   | 46   |
| REF | 17   | 17   | 16   | 19   | 11   | 9    | 8    |
| SSA | 183  | 194  | 200  | 183  | 155  | 127  | 114  |
| USA | 173  | 179  | 184  | 191  | 190  | 183  | 150  |

Table 573: MAgPIE m4p\_SSP1 — Demand—Processing—Crops—Cereals (Mt DM/yr) [PART 2/2]

|     | 1965 | 1970 | 1975 | 1980 | 1985 | 1990 | 1995 | 2000 | 2005 | 2010 |
|-----|------|------|------|------|------|------|------|------|------|------|
| GLO | 37   | 33   | 40   | 50   | 67   | 95   | 95   | 109  | 158  | 260  |
| CAZ | 1    | 2    | 2    | 2    | 2    | 2    | 3    | 3    | 3    | 4    |
| CHA | 9    | 1    | 2    | 2    | 4    | 17   | 14   | 14   | 25   | 37   |
| EUR | 8    | 10   | 12   | 13   | 14   | 16   | 18   | 18   | 21   | 26   |
| IND | 0    | 0    | 0    | 0    | 0    | 0    | 0    | 1    | 1    | 1    |
| JPN | 1    | 1    | 1    | 2    | 2    | 3    | 3    | 3    | 3    | 3    |
| LAM | 1    | 1    | 2    | 2    | 3    | 4    | 5    | 7    | 12   | 11   |
| MEA | 0    | 0    | 0    | 1    | 1    | 1    | 1    | 1    | 2    | 2    |
| NEU | 2    | 2    | 2    | 1    | 2    | 2    | 2    | 2    | 3    | 3    |
| OAS | 1    | 2    | 2    | 4    | 5    | 6    | 7    | 8    | 11   | 16   |
| REF | 2    | 2    | 2    | 4    | 5    | 10   | 2    | 4    | 6    | 7    |
| SSA | 1    | 1    | 2    | 2    | 2    | 2    | 3    | 3    | 4    | 6    |
| USA | 9    | 10   | 13   | 16   | 27   | 32   | 36   | 44   | 67   | 144  |

Table 574: FAO — Demand—Processing—Crops—Cereals (Mt DM/yr)

9.1.2
Cereals—Maize

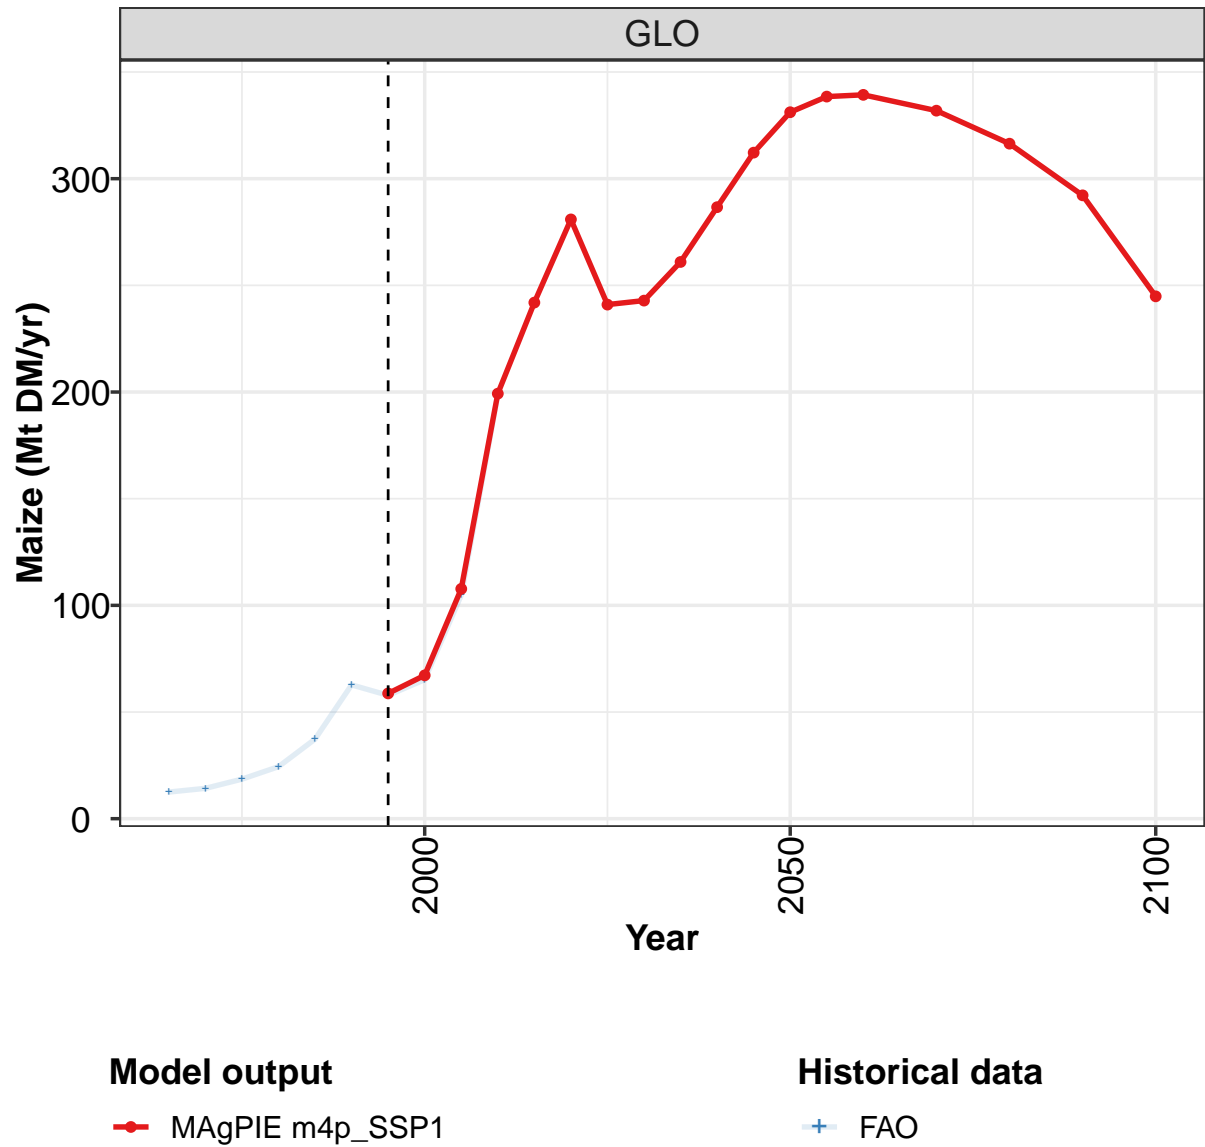

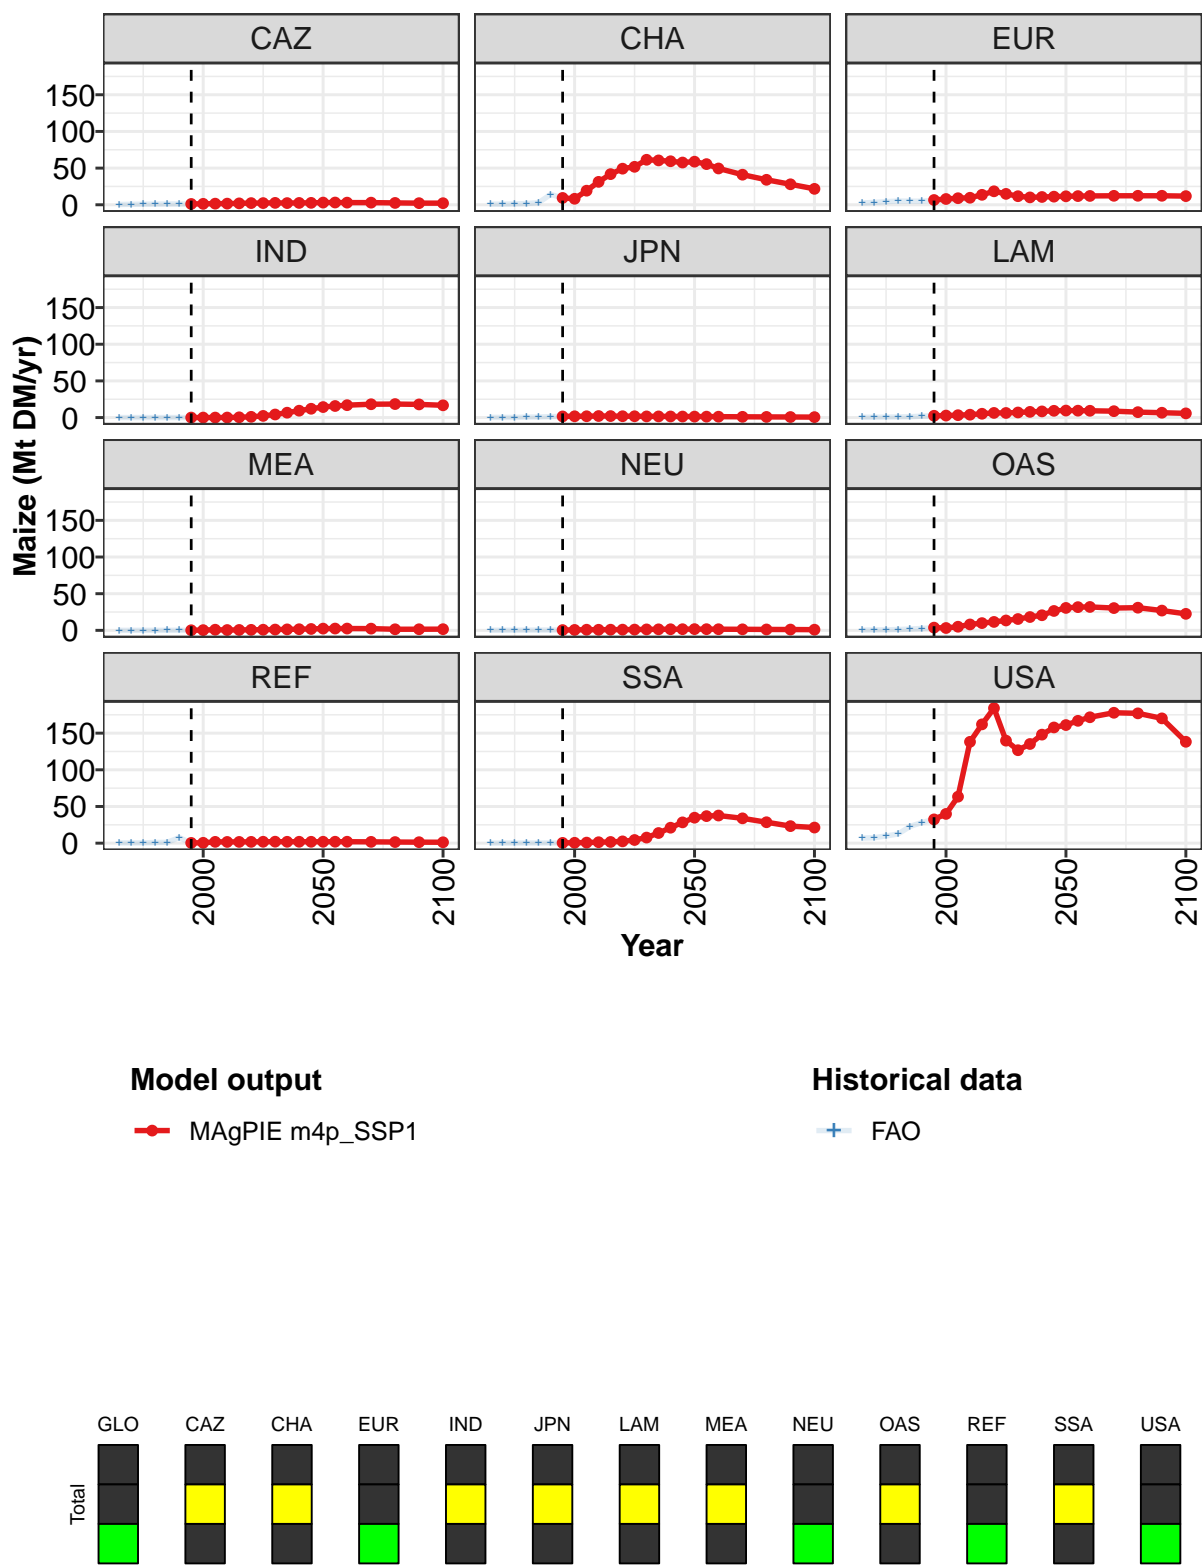

Figure 192: MAgPIE m4p\_SSP1 — Demand—Processing—Crops—Cereals—Maize (Mt DM/yr)

|     | 1995 | 2000 | 2005 | 2010 | 2015 | 2020 | 2025 | 2030 | 2035 | 2040 | 2045 |
|-----|------|------|------|------|------|------|------|------|------|------|------|
| GLO | 59   | 67   | 108  | 199  | 242  | 281  | 241  | 243  | 261  | 287  | 312  |
| CAZ | 1    | 1    | 2    | 2    | 2    | 2    | 2    | 3    | 2    | 3    | 3    |
| CHA | 9    | 8    | 19   | 31   | 42   | 49   | 52   | 61   | 61   | 59   | 58   |
| EUR | 7    | 8    | 9    | 10   | 14   | 18   | 15   | 12   | 10   | 11   | 11   |
| IND | 0    | 0    | 0    | 0    | 0    | 1    | 2    | 4    | 7    | 9    | 12   |
| JPN | 2    | 2    | 2    | 2    | 2    | 2    | 2    | 2    | 2    | 2    | 1    |
| LAM | 2    | 3    | 3    | 4    | 5    | 6    | 6    | 7    | 8    | 8    | 9    |
| MEA | 0    | 0    | 1    | 0    | 1    | 1    | 1    | 1    | 1    | 2    | 2    |
| NEU | 0    | 1    | 1    | 1    | 1    | 1    | 1    | 1    | 1    | 2    | 2    |
| OAS | 4    | 3    | 5    | 8    | 10   | 12   | 14   | 15   | 18   | 21   | 26   |
| REF | 0    | 0    | 2    | 2    | 2    | 2    | 2    | 2    | 2    | 2    | 2    |
| SSA | 0    | 1    | 1    | 1    | 2    | 2    | 4    | 8    | 14   | 21   | 28   |
| USA | 32   | 40   | 63   | 138  | 162  | 184  | 140  | 127  | 135  | 148  | 158  |

Table 575: MAgPIE m4p\_SSP1 — Demand—Processing—Crops—Cereals—Maize (Mt DM/yr) [PART 1/2]

|     | 2050 | 2055 | 2060 | 2070 | 2080 | 2090 | 2100 |
|-----|------|------|------|------|------|------|------|
| GLO | 331  | 338  | 339  | 332  | 316  | 292  | 245  |
| CAZ | 3    | 3    | 3    | 3    | 3    | 2    | 2    |
| CHA | 59   | 55   | 50   | 41   | 34   | 28   | 22   |
| EUR | 12   | 12   | 12   | 12   | 12   | 12   | 12   |
| IND | 14   | 16   | 17   | 18   | 18   | 18   | 17   |
| JPN | 1    | 1    | 1    | 1    | 1    | 1    | 1    |
| LAM | 10   | 9    | 9    | 9    | 7    | 7    | 6    |
| MEA | 2    | 2    | 2    | 2    | 2    | 2    | 2    |
| NEU | 2    | 2    | 2    | 1    | 1    | 1    | 1    |
| OAS | 31   | 32   | 32   | 30   | 31   | 27   | 23   |
| REF | 2    | 2    | 2    | 2    | 2    | 1    | 1    |
| SSA | 35   | 37   | 38   | 34   | 29   | 23   | 21   |
| USA | 161  | 167  | 172  | 178  | 177  | 170  | 138  |

Table 576: MAgPIE m4p\_SSP1 — Demand—Processing—Crops—Cereals—Maize (Mt DM/yr) [PART 2/2]

|     | 1965 | 1970 | 1975 | 1980 | 1985 | 1990 | 1995 | 2000 | 2005 | 2010 |
|-----|------|------|------|------|------|------|------|------|------|------|
| GLO | 12   | 14   | 19   | 24   | 37   | 63   | 58   | 65   | 105  | 198  |
| CAZ | 0    | 1    | 1    | 1    | 1    | 1    | 1    | 1    | 1    | 1    |
| CHA | 1    | 1    | 1    | 2    | 3    | 14   | 9    | 8    | 19   | 31   |
| EUR | 2    | 3    | 4    | 5    | 5    | 5    | 6    | 6    | 7    | 8    |
| IND | 0    | 0    | 0    | 0    | 0    | 0    | 0    | 0    | 0    | 0    |
| JPN | 0    | 0    | 0    | 1    | 1    | 1    | 2    | 2    | 2    | 2    |
| LAM | 0    | 0    | 1    | 1    | 1    | 2    | 3    | 3    | 3    | 4    |
| MEA | 0    | 0    | 0    | 0    | 0    | 0    | 0    | 0    | 0    | 0    |
| NEU | 0    | 0    | 0    | 0    | 0    | 0    | 0    | 1    | 1    | 1    |
| OAS | 0    | 1    | 1    | 1    | 2    | 3    | 4    | 3    | 5    | 8    |
| REF | 0    | 0    | 0    | 1    | 1    | 8    | 0    | 0    | 2    | 2    |
| SSA | 0    | 0    | 0    | 0    | 0    | 0    | 0    | 1    | 1    | 1    |
| USA | 7    | 7    | 10   | 12   | 23   | 28   | 32   | 40   | 63   | 139  |

Table 577: FAO — Demand—Processing—Crops—Cereals—Maize (Mt DM/yr)



9.1.3
Cereals—Rice

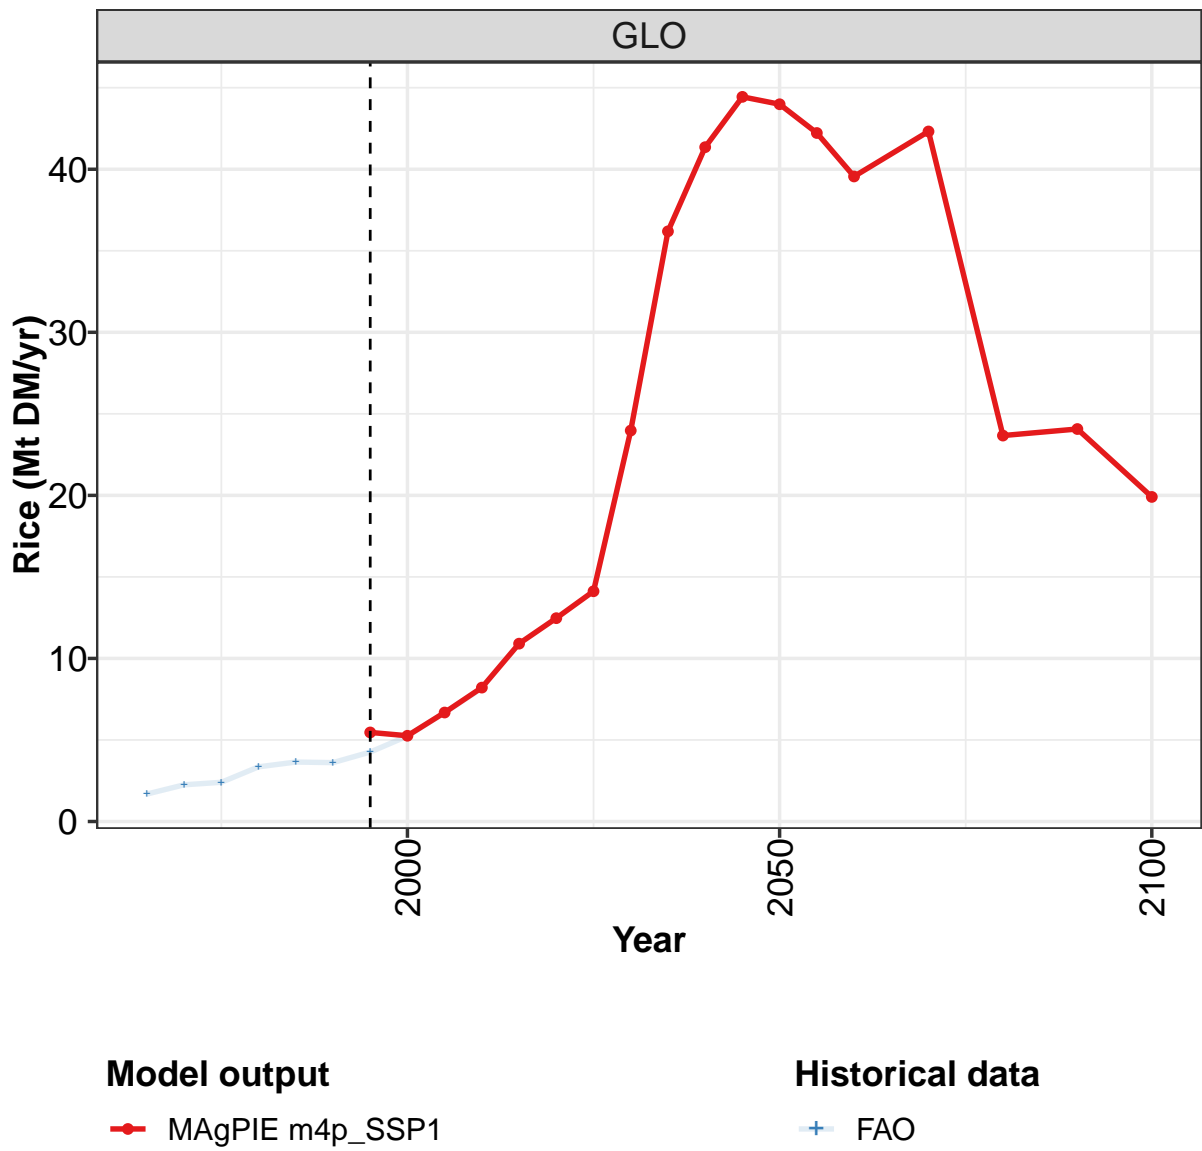

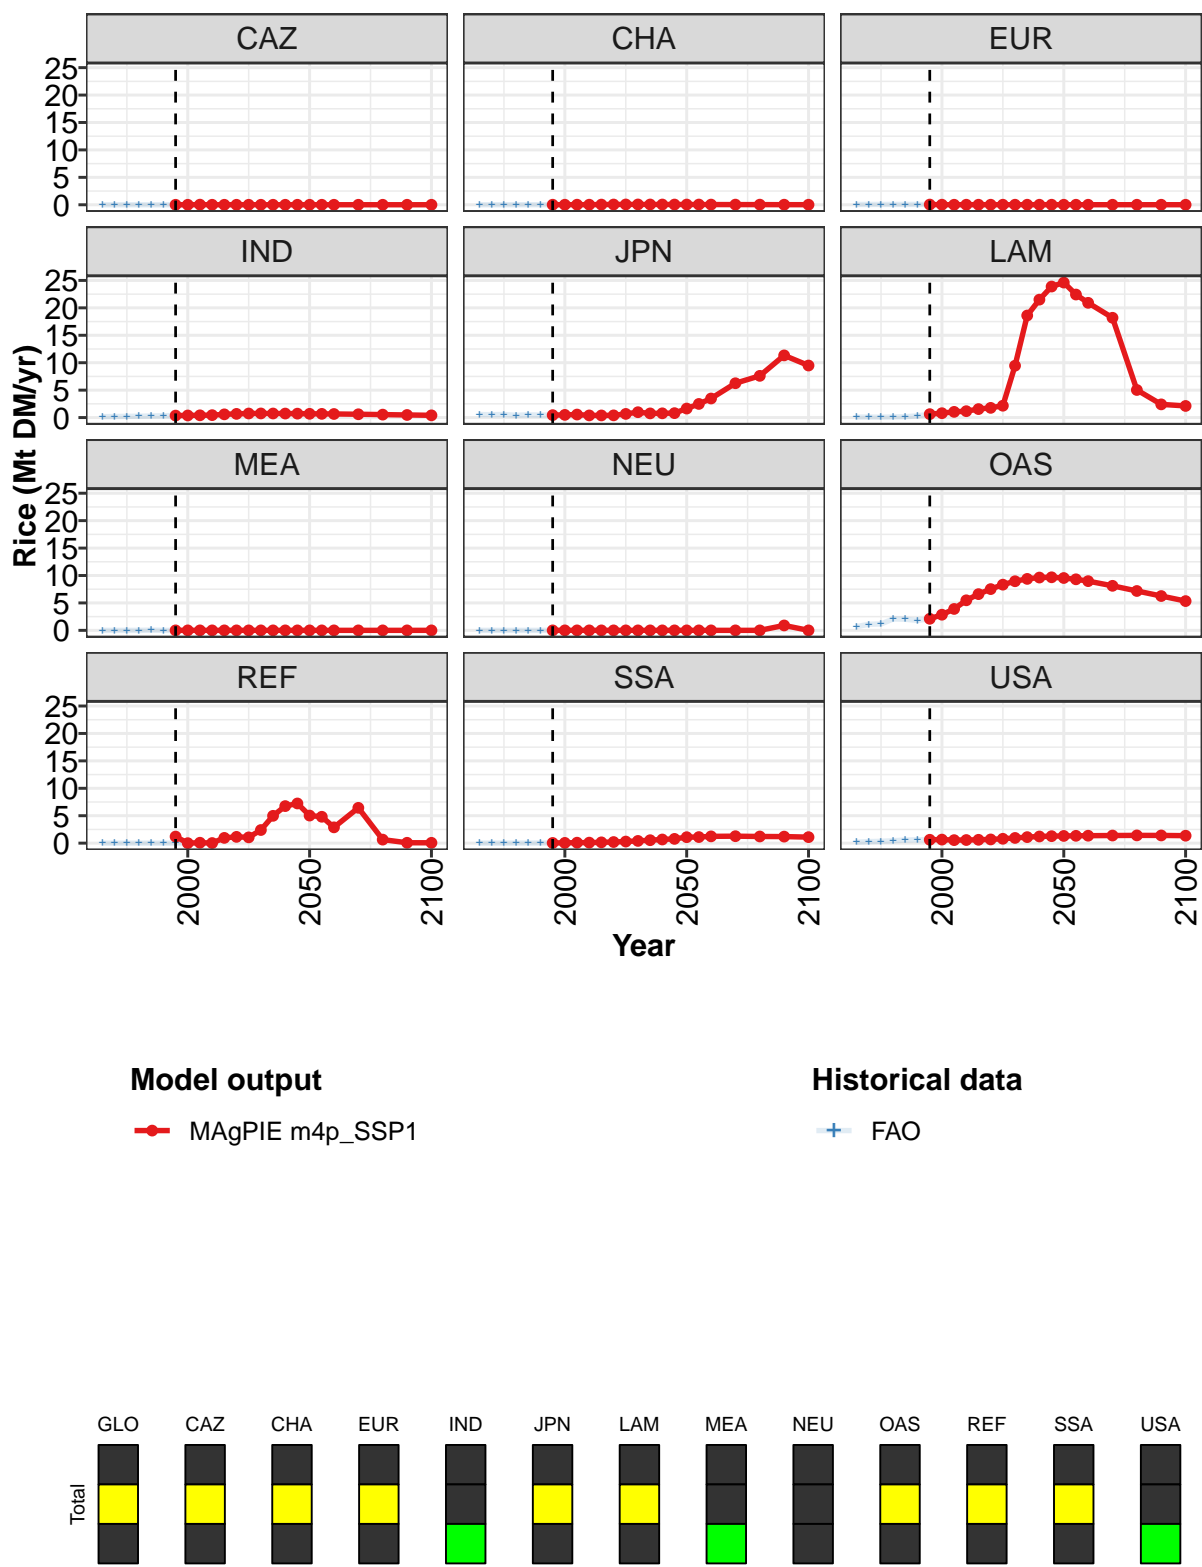

Figure 193: MAGPIE m4p\_SSP1 — Demand—Processing—Crops—Cereals—Rice (Mt DM/yr)

|     | 1995 | 2000 | 2005 | 2010 | 2015 | 2020 | 2025 | 2030 | 2035 | 2040 | 2045 |
|-----|------|------|------|------|------|------|------|------|------|------|------|
| GLO | 5.5  | 5.3  | 6.7  | 8.2  | 10.9 | 12.5 | 14.1 | 24.0 | 36.2 | 41.4 | 44.4 |
| CAZ | 0.0  | 0.0  | 0.0  | 0.0  | 0.0  | 0.0  | 0.0  | 0.0  | 0.0  | 0.0  | 0.0  |
| CHA | 0.0  | 0.0  | 0.0  | 0.0  | 0.0  | 0.1  | 0.1  | 0.1  | 0.1  | 0.0  | 0.0  |
| EUR | 0.0  | 0.0  | 0.0  | 0.0  | 0.0  | 0.0  | 0.0  | 0.0  | 0.0  | 0.0  | 0.0  |
| IND | 0.4  | 0.4  | 0.4  | 0.4  | 0.6  | 0.7  | 0.7  | 0.8  | 0.7  | 0.7  | 0.7  |
| JPN | 0.4  | 0.5  | 0.6  | 0.4  | 0.4  | 0.4  | 0.7  | 1.0  | 0.8  | 0.8  | 0.8  |
| LAM | 0.6  | 0.8  | 1.0  | 1.2  | 1.5  | 1.8  | 2.2  | 9.5  | 18.6 | 21.5 | 23.9 |
| MEA | 0.0  | 0.0  | 0.0  | 0.0  | 0.0  | 0.0  | 0.0  | 0.0  | 0.0  | 0.0  | 0.0  |
| NEU | 0.0  | 0.0  | 0.0  | 0.0  | 0.0  | 0.0  | 0.0  | 0.0  | 0.0  | 0.0  | 0.0  |
| OAS | 2.1  | 2.9  | 3.9  | 5.5  | 6.6  | 7.5  | 8.3  | 9.0  | 9.4  | 9.6  | 9.7  |
| REF | 1.2  | 0.0  | 0.1  | 0.0  | 1.0  | 1.1  | 1.1  | 2.4  | 5.0  | 6.8  | 7.2  |
| SSA | 0.0  | 0.1  | 0.1  | 0.1  | 0.1  | 0.2  | 0.3  | 0.4  | 0.5  | 0.7  | 0.8  |
| USA | 0.6  | 0.6  | 0.6  | 0.6  | 0.6  | 0.7  | 0.8  | 1.0  | 1.1  | 1.2  | 1.3  |

Table 578: MAgPIE m4p-SSP1 — Demand—Processing—Crops—Cereals—Rice (Mt DM/yr) [PART 1/2]

|     | 2050 | 2055 | 2060 | 2070 | 2080 | 2090 | 2100 |
|-----|------|------|------|------|------|------|------|
| GLO | 44.0 | 42.2 | 39.6 | 42.3 | 23.7 | 24.1 | 19.9 |
| CAZ | 0.0  | 0.0  | 0.0  | 0.0  | 0.0  | 0.0  | 0.0  |
| CHA | 0.0  | 0.0  | 0.0  | 0.0  | 0.0  | 0.0  | 0.0  |
| EUR | 0.0  | 0.0  | 0.0  | 0.0  | 0.0  | 0.0  | 0.0  |
| IND | 0.7  | 0.7  | 0.7  | 0.6  | 0.5  | 0.5  | 0.4  |
| JPN | 1.6  | 2.5  | 3.5  | 6.3  | 7.6  | 11.3 | 9.5  |
| LAM | 24.6 | 22.4 | 20.9 | 18.2 | 5.0  | 2.4  | 2.1  |
| MEA | 0.0  | 0.0  | 0.0  | 0.0  | 0.0  | 0.0  | 0.0  |
| NEU | 0.0  | 0.0  | 0.0  | 0.0  | 0.0  | 0.9  | 0.0  |
| OAS | 9.5  | 9.3  | 9.0  | 8.1  | 7.2  | 6.3  | 5.3  |
| REF | 5.0  | 4.8  | 2.9  | 6.4  | 0.6  | 0.1  | 0.1  |
| SSA | 1.1  | 1.1  | 1.2  | 1.3  | 1.2  | 1.2  | 1.1  |
| USA | 1.3  | 1.3  | 1.4  | 1.4  | 1.4  | 1.4  | 1.4  |

Table 579: MAgPIE m4p-SSP1 — Demand—Processing—Crops—Cereals—Rice (Mt DM/yr) [PART 2/2]

|     | 1965 | 1970 | 1975 | 1980 | 1985 | 1990 | 1995 | 2000 | 2005 | 2010 |
|-----|------|------|------|------|------|------|------|------|------|------|
| GLO | 1.68 | 2.25 | 2.40 | 3.35 | 3.64 | 3.61 | 4.26 | 5.24 | 6.68 | 8.17 |
| CAZ | 0.00 | 0.00 | 0.00 | 0.00 | 0.00 | 0.00 | 0.00 | 0.00 | 0.03 | 0.00 |
| CHA | 0.00 | 0.01 | 0.00 | 0.01 | 0.01 | 0.01 | 0.01 | 0.01 | 0.02 | 0.02 |
| EUR | 0.05 | 0.06 | 0.06 | 0.06 | 0.07 | 0.05 | 0.04 | 0.02 | 0.01 | 0.01 |
| IND | 0.15 | 0.19 | 0.23 | 0.24 | 0.29 | 0.34 | 0.36 | 0.38 | 0.41 | 0.45 |
| JPN | 0.54 | 0.52 | 0.55 | 0.41 | 0.49 | 0.44 | 0.44 | 0.49 | 0.55 | 0.39 |
| LAM | 0.08 | 0.09 | 0.06 | 0.10 | 0.16 | 0.31 | 0.63 | 0.78 | 1.09 | 1.22 |
| MEA | 0.00 | 0.00 | 0.00 | 0.00 | 0.04 | 0.00 | 0.00 | 0.00 | 0.00 | 0.00 |
| NEU | 0.00 | 0.00 | 0.00 | 0.00 | 0.00 | 0.00 | 0.00 | 0.00 | 0.00 | 0.00 |
| OAS | 0.68 | 1.11 | 1.16 | 2.08 | 2.02 | 1.82 | 2.11 | 2.85 | 3.93 | 5.40 |
| REF | 0.00 | 0.00 | 0.00 | 0.00 | 0.00 | 0.00 | 0.00 | 0.00 | 0.00 | 0.00 |
| SSA | 0.00 | 0.00 | 0.00 | 0.02 | 0.01 | 0.03 | 0.04 | 0.05 | 0.08 | 0.10 |
| USA | 0.17 | 0.28 | 0.33 | 0.44 | 0.56 | 0.62 | 0.62 | 0.65 | 0.55 | 0.57 |

Table 580: FAO — Demand—Processing—Crops—Cereals—Rice (Mt DM/yr)

9.1.4
Cereals—Temperate cereals

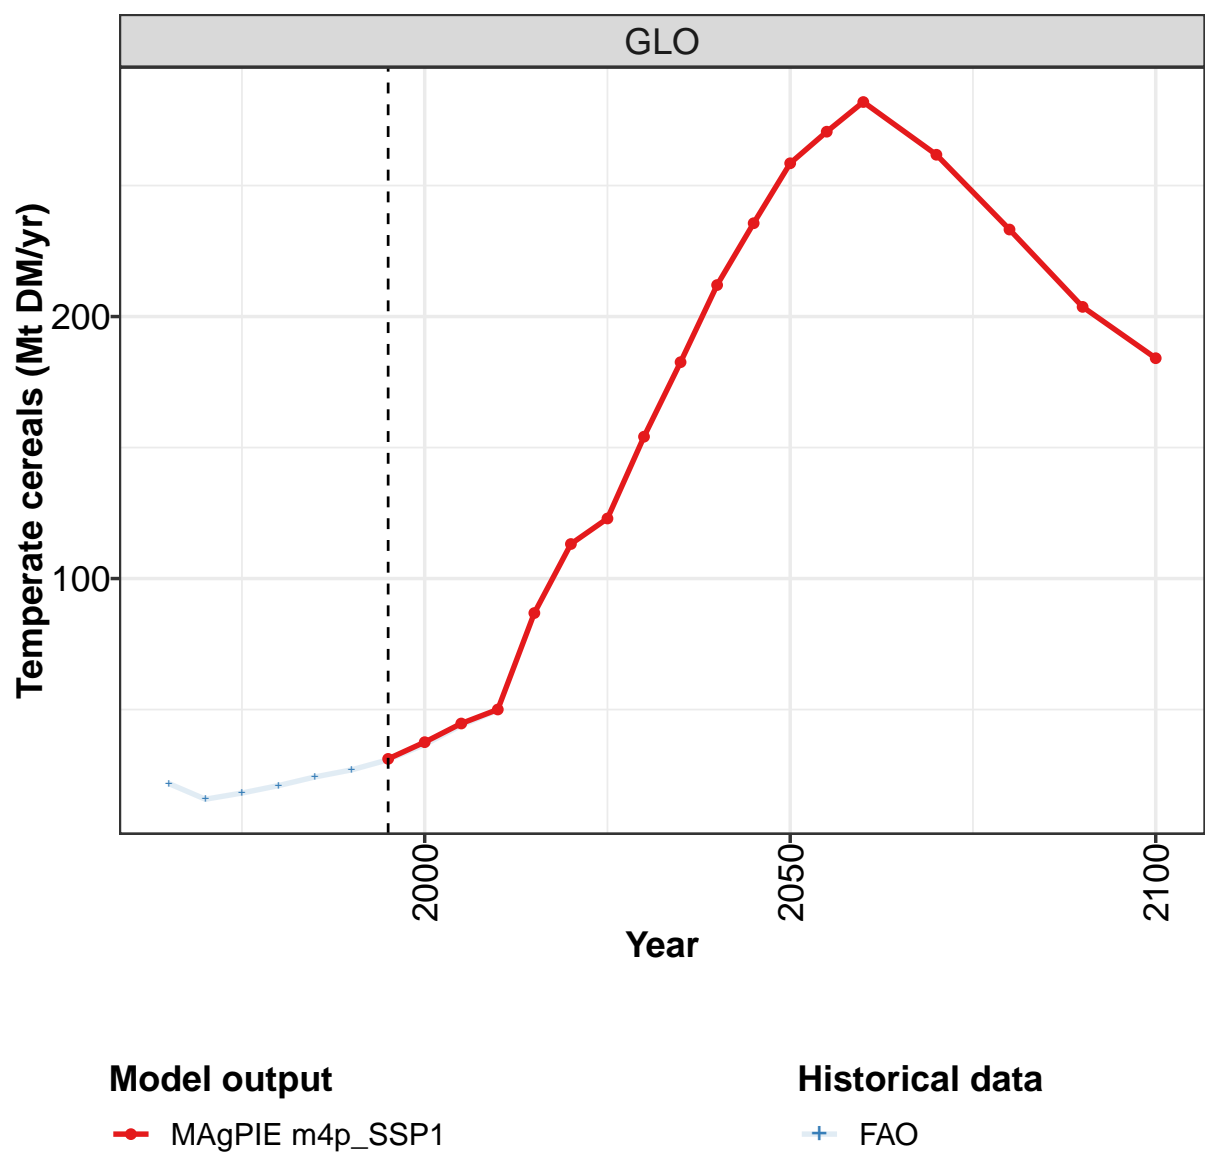

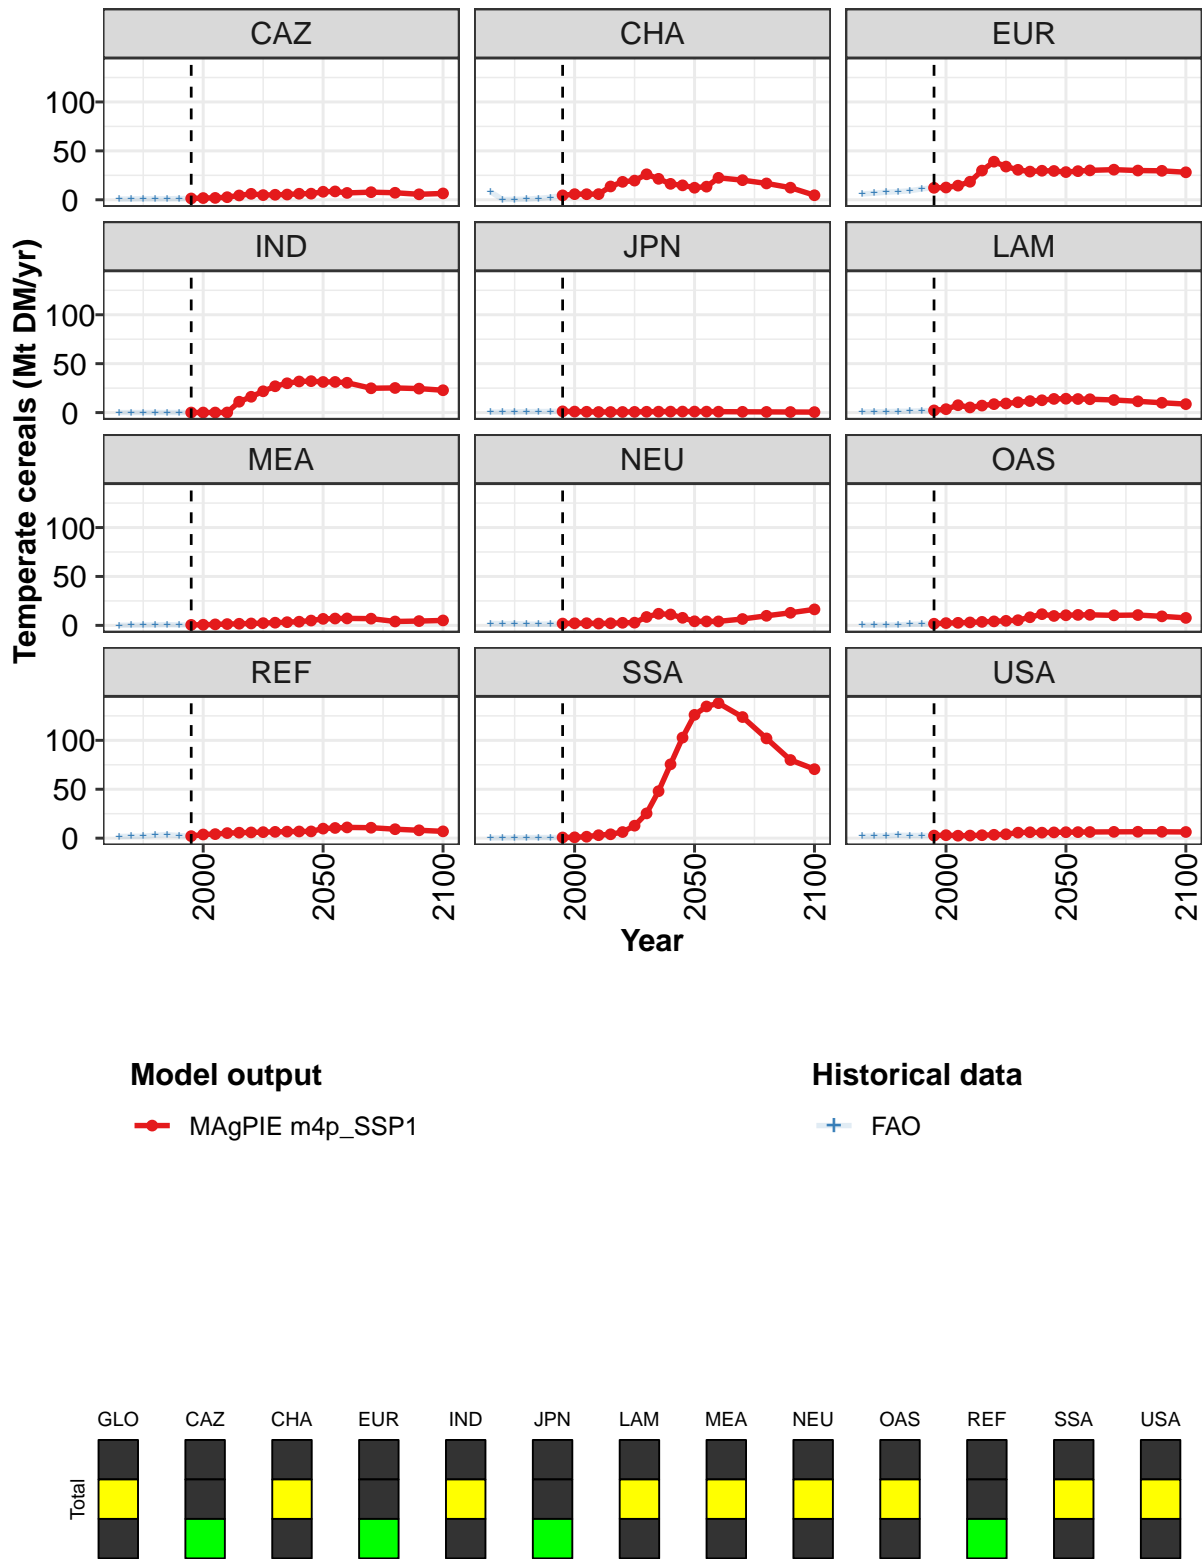

Figure 194: MAgPIE m4p\_SSP1 — Demand—Processing—Crops—Cereals—Temperate cereals (Mt DM/yr)

|     | 1995 | 2000 | 2005 | 2010 | 2015 | 2020 | 2025 | 2030 | 2035 | 2040 | 2045 |
|-----|------|------|------|------|------|------|------|------|------|------|------|
| GLO | 31   | 38   | 45   | 50   | 87   | 113  | 123  | 154  | 183  | 212  | 236  |
| CAZ | 1    | 2    | 2    | 3    | 4    | 6    | 5    | 5    | 5    | 6    | 6    |
| CHA | 5    | 6    | 6    | 6    | 14   | 18   | 20   | 26   | 21   | 16   | 15   |
| EUR | 12   | 13   | 14   | 18   | 30   | 39   | 34   | 31   | 29   | 30   | 29   |
| IND | 0    | 0    | 0    | 0    | 11   | 16   | 22   | 27   | 30   | 32   | 32   |
| JPN | 1    | 1    | 1    | 1    | 1    | 1    | 1    | 1    | 1    | 1    | 1    |
| LAM | 2    | 4    | 8    | 5    | 7    | 9    | 9    | 11   | 12   | 13   | 14   |
| MEA | 1    | 1    | 1    | 1    | 2    | 2    | 2    | 3    | 3    | 4    | 5    |
| NEU | 2    | 2    | 2    | 2    | 2    | 3    | 3    | 9    | 12   | 11   | 8    |
| OAS | 2    | 2    | 3    | 3    | 4    | 4    | 5    | 5    | 8    | 11   | 10   |
| REF | 2    | 4    | 4    | 5    | 6    | 6    | 6    | 6    | 7    | 7    | 7    |
| SSA | 1    | 1    | 1    | 3    | 4    | 6    | 13   | 25   | 48   | 75   | 103  |
| USA | 3    | 3    | 3    | 3    | 3    | 3    | 4    | 6    | 6    | 6    | 6    |

Table 581: MAgPIE m4p\_SSP1 — Demand—Processing—Crops—Cereals—Temperate cereals (Mt DM/yr)  
[PART 1/2]

|     | 2050 | 2055 | 2060 | 2070 | 2080 | 2090 | 2100 |
|-----|------|------|------|------|------|------|------|
| GLO | 259  | 271  | 282  | 262  | 233  | 204  | 184  |
| CAZ | 8    | 9    | 7    | 8    | 7    | 6    | 6    |
| CHA | 12   | 13   | 22   | 20   | 17   | 12   | 5    |
| EUR | 28   | 29   | 30   | 31   | 30   | 30   | 28   |
| IND | 31   | 31   | 30   | 25   | 25   | 24   | 23   |
| JPN | 1    | 1    | 1    | 1    | 1    | 1    | 0    |
| LAM | 14   | 14   | 14   | 13   | 12   | 10   | 9    |
| MEA | 7    | 7    | 7    | 7    | 4    | 4    | 5    |
| NEU | 4    | 4    | 4    | 7    | 10   | 13   | 16   |
| OAS | 10   | 11   | 11   | 10   | 11   | 9    | 8    |
| REF | 10   | 10   | 11   | 11   | 9    | 8    | 7    |
| SSA | 126  | 135  | 138  | 124  | 102  | 80   | 71   |
| USA | 6    | 6    | 6    | 6    | 7    | 7    | 6    |

Table 582: MAgPIE m4p\_SSP1 — Demand—Processing—Crops—Cereals—Temperate cereals (Mt DM/yr)  
[PART 2/2]

|     | 1965 | 1970 | 1975 | 1980 | 1985 | 1990 | 1995 | 2000 | 2005 | 2010 |
|-----|------|------|------|------|------|------|------|------|------|------|
| GLO | 21.8 | 15.8 | 18.1 | 21.0 | 24.3 | 27.0 | 30.8 | 36.6 | 44.0 | 49.8 |
| CAZ | 0.7  | 0.9  | 1.1  | 1.0  | 1.0  | 1.2  | 1.4  | 1.8  | 1.8  | 2.7  |
| CHA | 8.0  | 0.3  | 0.4  | 0.7  | 1.5  | 2.5  | 4.5  | 5.7  | 5.7  | 5.8  |
| EUR | 6.0  | 6.7  | 7.8  | 8.3  | 9.2  | 11.2 | 12.3 | 12.3 | 14.2 | 18.1 |
| IND | 0.0  | 0.0  | 0.0  | 0.0  | 0.0  | 0.0  | 0.1  | 0.1  | 0.1  | 0.1  |
| JPN | 0.4  | 0.5  | 0.7  | 1.0  | 1.0  | 1.1  | 1.2  | 1.0  | 0.9  | 0.6  |
| LAM | 0.7  | 0.9  | 0.9  | 1.3  | 1.4  | 1.9  | 2.2  | 3.5  | 7.7  | 5.3  |
| MEA | 0.1  | 0.2  | 0.3  | 0.5  | 0.7  | 0.4  | 0.5  | 0.6  | 1.0  | 1.3  |
| NEU | 2.0  | 1.8  | 1.8  | 1.2  | 1.2  | 1.4  | 1.6  | 1.7  | 2.0  | 1.9  |
| OAS | 0.1  | 0.2  | 0.2  | 0.5  | 1.1  | 1.3  | 1.7  | 2.3  | 2.6  | 3.0  |
| REF | 1.7  | 1.9  | 2.0  | 2.9  | 3.6  | 2.6  | 2.1  | 3.8  | 4.1  | 5.2  |
| SSA | 0.2  | 0.3  | 0.4  | 0.6  | 0.7  | 0.6  | 0.6  | 0.8  | 1.4  | 3.0  |
| USA | 1.9  | 2.2  | 2.5  | 3.1  | 2.7  | 2.7  | 2.7  | 3.1  | 2.5  | 2.7  |

Table 583: FAO — Demand—Processing—Crops—Cereals—Temperate cereals (Mt DM/yr)

9.1.5
Cereals—Tropical cereals

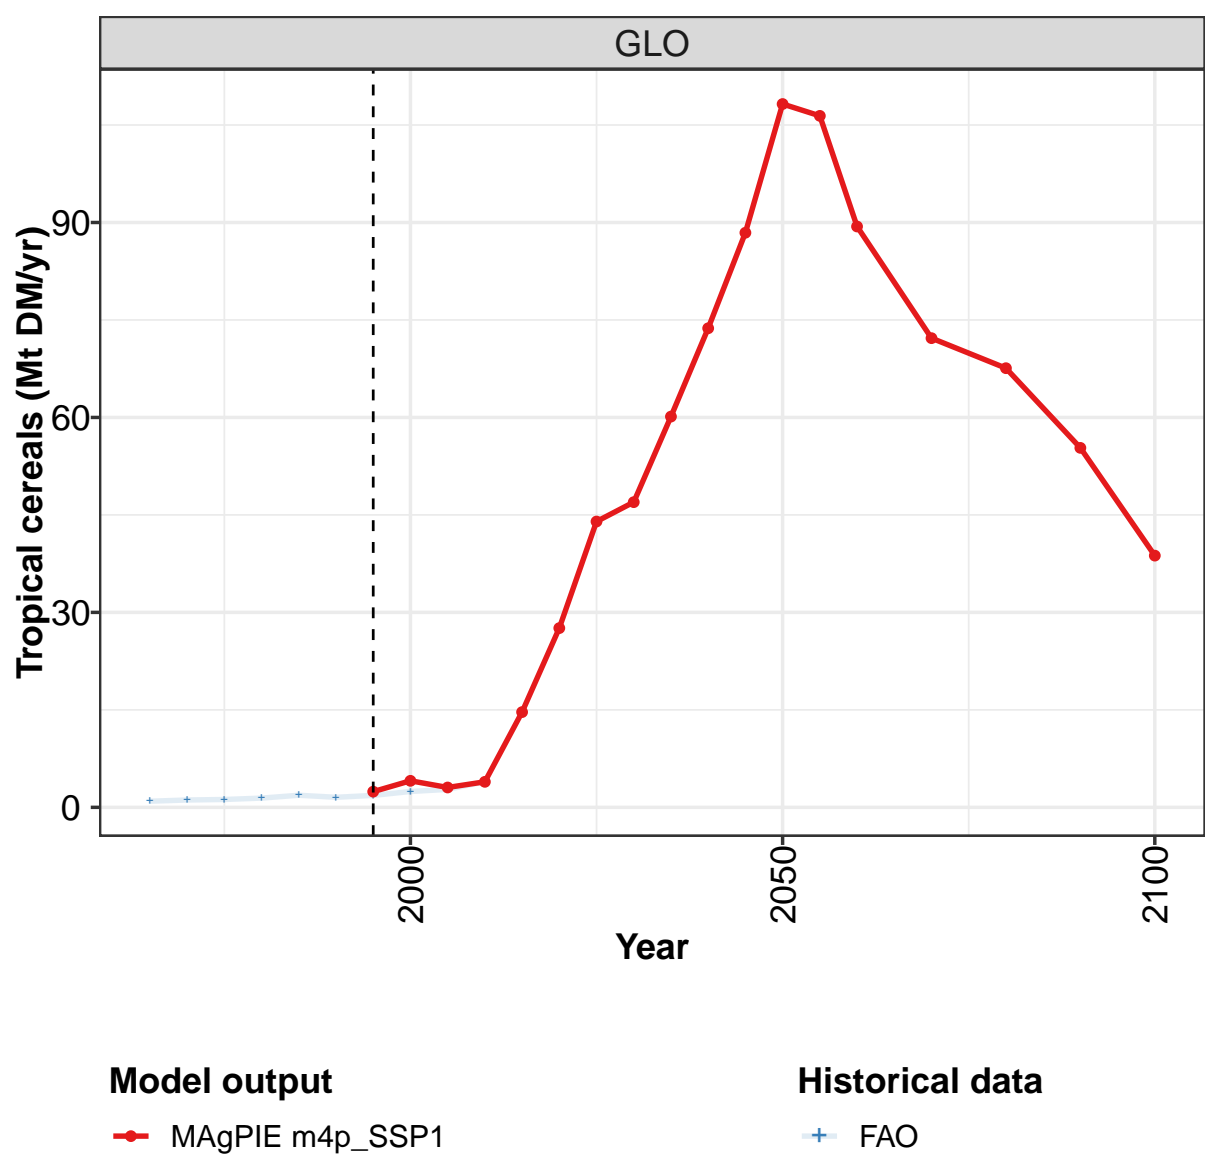

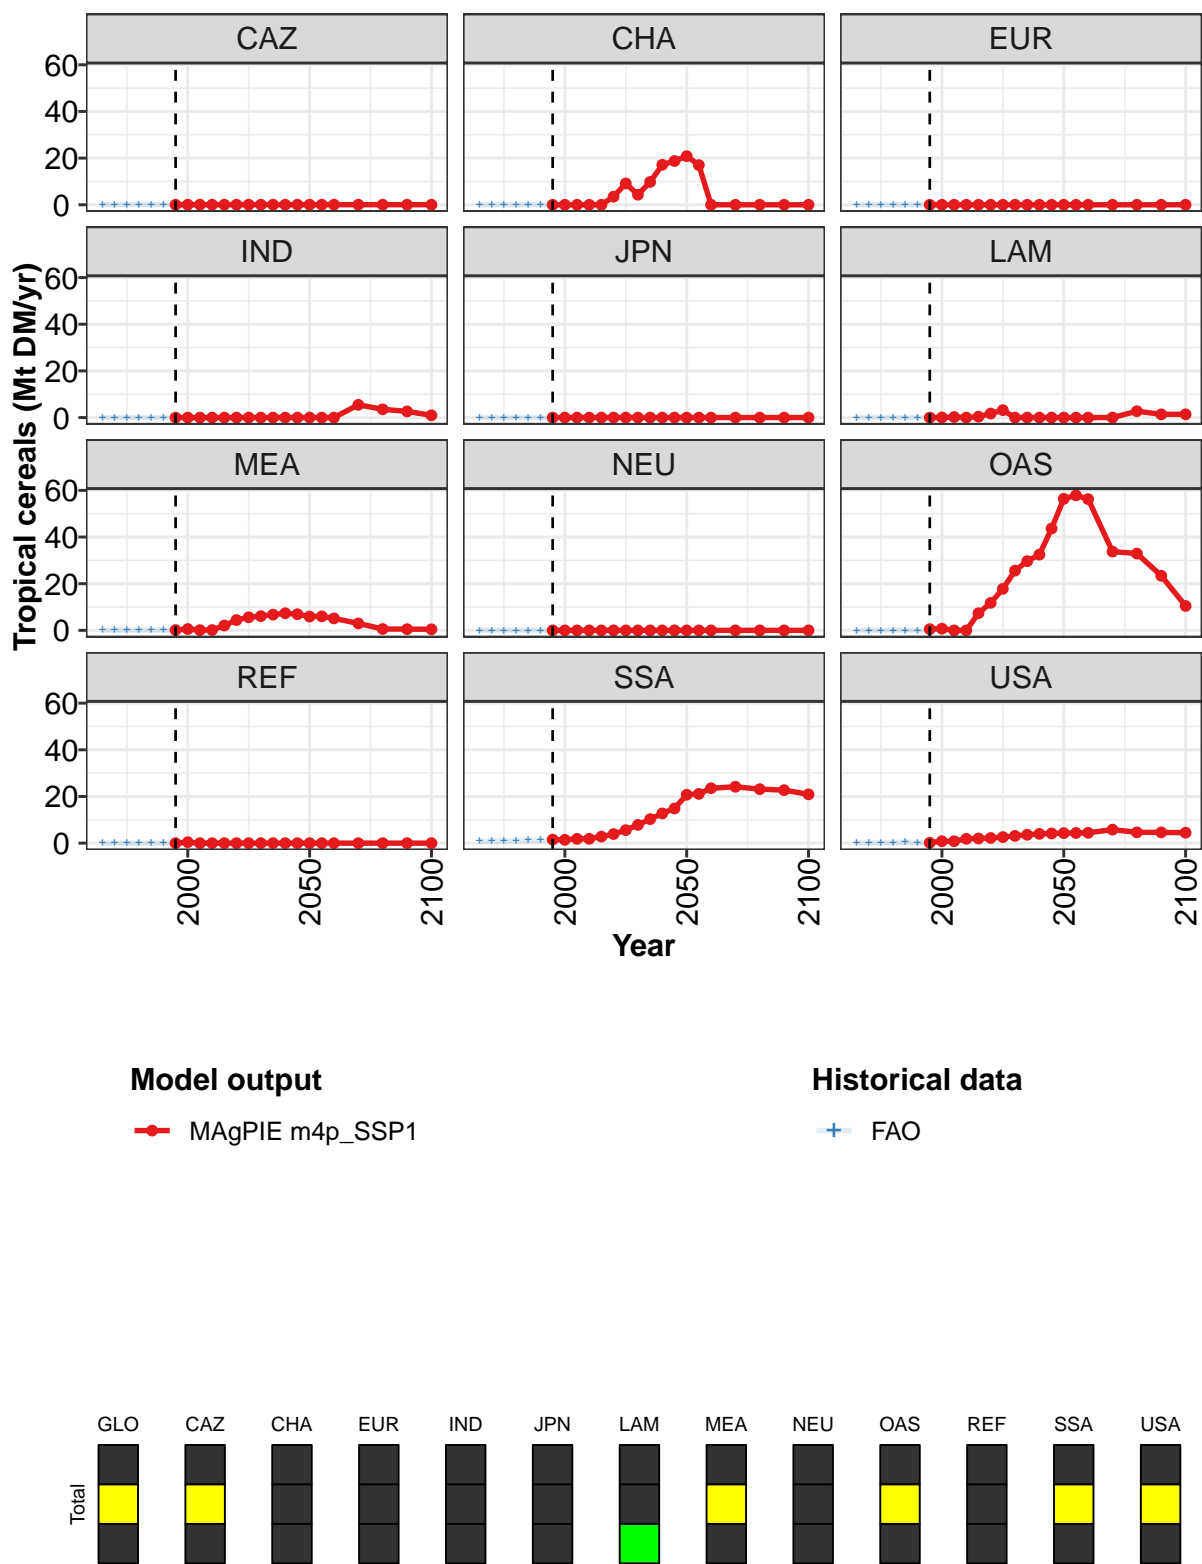

Figure 195: MAgPIE m4p\_SSP1 — Demand—Processing—Crops—Cereals—Tropical cereals (Mt DM/yr)



|     | 1995 | 2000 | 2005 | 2010 | 2015 | 2020 | 2025 | 2030 | 2035 | 2040 | 2045 |
|-----|------|------|------|------|------|------|------|------|------|------|------|
| GLO | 2    | 4    | 3    | 4    | 15   | 28   | 44   | 47   | 60   | 74   | 88   |
| CAZ | 0    | 0    | 0    | 0    | 0    | 0    | 0    | 0    | 0    | 0    | 0    |
| CHA | 0    | 0    | 0    | 0    | 0    | 3    | 9    | 4    | 10   | 17   | 19   |
| EUR | 0    | 0    | 0    | 0    | 0    | 0    | 0    | 0    | 0    | 0    | 0    |
| IND | 0    | 0    | 0    | 0    | 0    | 0    | 0    | 0    | 0    | 0    | 0    |
| JPN | 0    | 0    | 0    | 0    | 0    | 0    | 0    | 0    | 0    | 0    | 0    |
| LAM | 0    | 0    | 0    | 0    | 0    | 2    | 3    | 0    | 0    | 0    | 0    |
| MEA | 0    | 1    | 0    | 0    | 2    | 4    | 6    | 6    | 7    | 7    | 7    |
| NEU | 0    | 0    | 0    | 0    | 0    | 0    | 0    | 0    | 0    | 0    | 0    |
| OAS | 1    | 1    | 0    | 0    | 7    | 12   | 18   | 26   | 30   | 32   | 44   |
| REF | 0    | 0    | 0    | 0    | 0    | 0    | 0    | 0    | 0    | 0    | 0    |
| SSA | 2    | 1    | 2    | 2    | 3    | 4    | 6    | 8    | 10   | 13   | 15   |
| USA | 0    | 1    | 1    | 2    | 2    | 2    | 3    | 3    | 4    | 4    | 4    |

Table 584: MAgPIE m4p\_SSP1 — Demand—Processing—Crops—Cereals—Tropical cereals (Mt DM/yr)  
[PART 1/2]

|     | 2050 | 2055 | 2060 | 2070 | 2080 | 2090 | 2100 |
|-----|------|------|------|------|------|------|------|
| GLO | 108  | 106  | 89   | 72   | 68   | 55   | 39   |
| CAZ | 0    | 0    | 0    | 0    | 0    | 0    | 0    |
| CHA | 21   | 17   | 0    | 0    | 0    | 0    | 0    |
| EUR | 0    | 0    | 0    | 0    | 0    | 0    | 0    |
| IND | 0    | 0    | 0    | 5    | 4    | 3    | 1    |
| JPN | 0    | 0    | 0    | 0    | 0    | 0    | 0    |
| LAM | 0    | 0    | 0    | 0    | 3    | 1    | 1    |
| MEA | 6    | 6    | 5    | 3    | 1    | 1    | 0    |
| NEU | 0    | 0    | 0    | 0    | 0    | 0    | 0    |
| OAS | 56   | 58   | 56   | 34   | 33   | 23   | 10   |
| REF | 0    | 0    | 0    | 0    | 0    | 0    | 0    |
| SSA | 21   | 21   | 24   | 24   | 23   | 23   | 21   |
| USA | 4    | 4    | 4    | 6    | 5    | 5    | 4    |

Table 585: MAgPIE m4p\_SSP1 — Demand—Processing—Crops—Cereals—Tropical cereals (Mt DM/yr)  
[PART 2/2]

|     | 1965 | 1970 | 1975 | 1980 | 1985 | 1990 | 1995 | 2000 | 2005 | 2010 |
|-----|------|------|------|------|------|------|------|------|------|------|
| GLO | 0.94 | 1.13 | 1.21 | 1.42 | 1.86 | 1.55 | 1.84 | 2.44 | 2.76 | 3.94 |
| CAZ | 0.03 | 0.05 | 0.06 | 0.11 | 0.05 | 0.07 | 0.03 | 0.04 | 0.04 | 0.04 |
| CHA | 0.00 | 0.00 | 0.00 | 0.00 | 0.00 | 0.00 | 0.00 | 0.00 | 0.00 | 0.00 |
| EUR | 0.00 | 0.00 | 0.00 | 0.00 | 0.00 | 0.00 | 0.00 | 0.00 | 0.00 | 0.00 |
| IND | 0.00 | 0.00 | 0.00 | 0.00 | 0.00 | 0.00 | 0.00 | 0.00 | 0.00 | 0.00 |
| JPN | 0.00 | 0.00 | 0.00 | 0.00 | 0.00 | 0.00 | 0.00 | 0.00 | 0.00 | 0.00 |
| LAM | 0.00 | 0.00 | 0.00 | 0.00 | 0.00 | 0.00 | 0.00 | 0.00 | 0.00 | 0.00 |
| MEA | 0.03 | 0.05 | 0.06 | 0.07 | 0.09 | 0.10 | 0.13 | 0.13 | 0.12 | 0.15 |
| NEU | 0.00 | 0.00 | 0.00 | 0.00 | 0.00 | 0.00 | 0.00 | 0.00 | 0.00 | 0.00 |
| OAS | 0.00 | 0.00 | 0.00 | 0.00 | 0.00 | 0.00 | 0.00 | 0.00 | 0.00 | 0.00 |
| REF | 0.00 | 0.00 | 0.00 | 0.00 | 0.00 | 0.00 | 0.00 | 0.00 | 0.00 | 0.00 |
| SSA | 0.81 | 0.94 | 1.02 | 1.14 | 1.23 | 1.25 | 1.49 | 1.44 | 1.77 | 1.88 |
| USA | 0.07 | 0.08 | 0.06 | 0.09 | 0.48 | 0.12 | 0.19 | 0.83 | 0.83 | 1.88 |

Table 586: FAO — Demand—Processing—Crops—Cereals—Tropical cereals (Mt DM/yr)

9.1.6 Oil crops

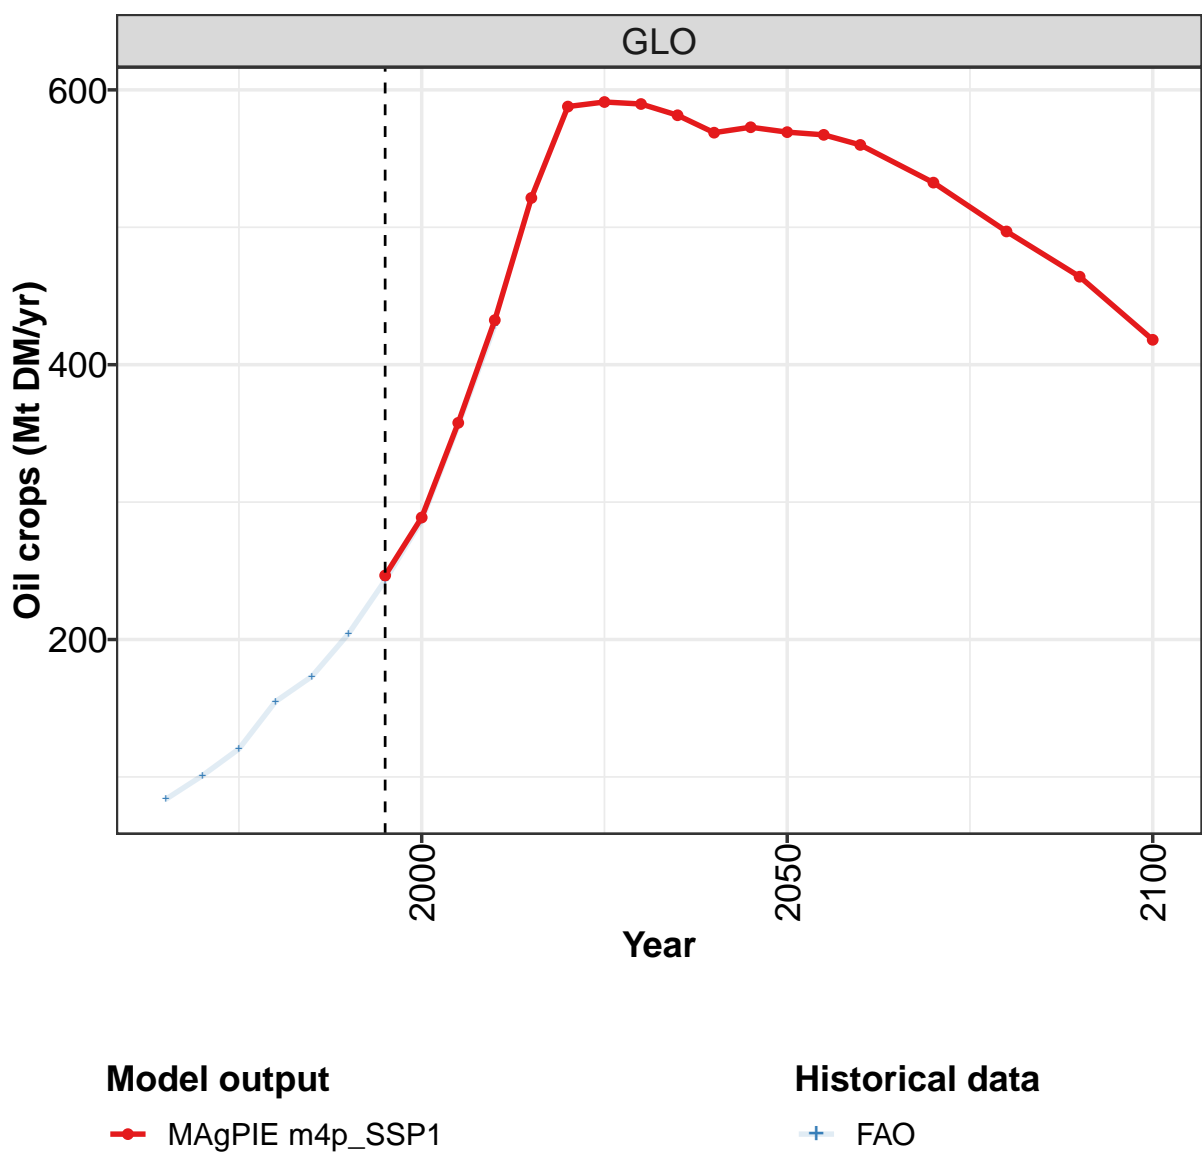

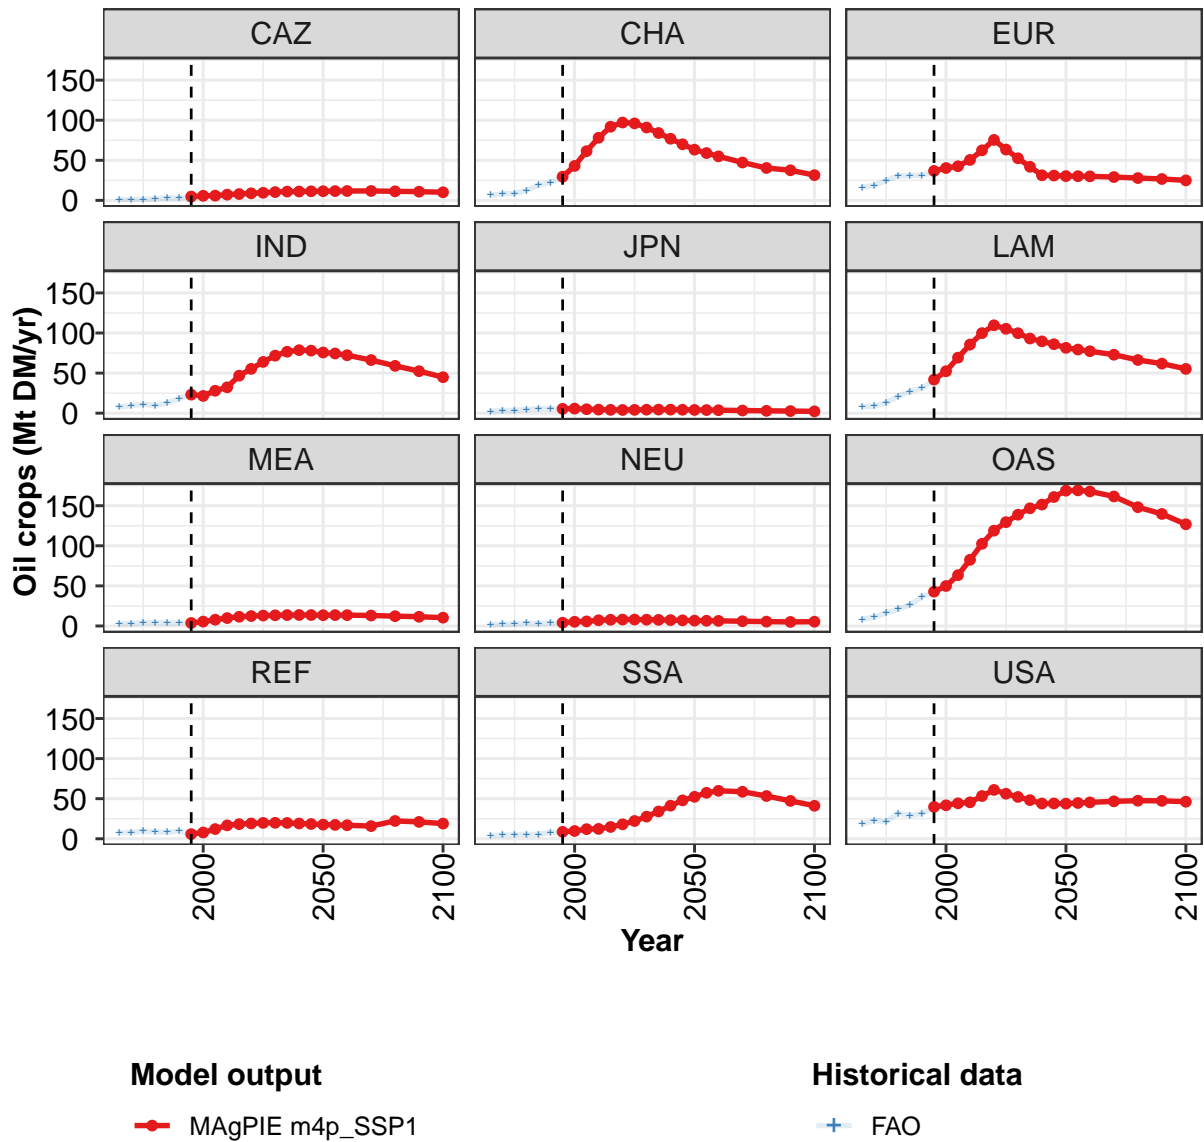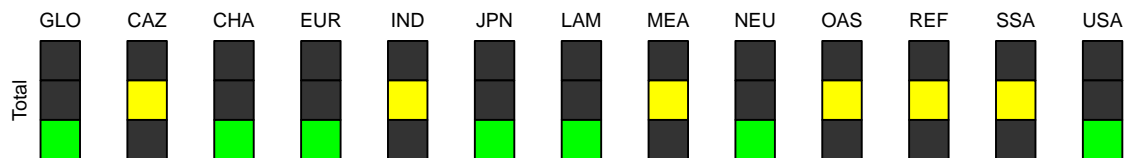

Figure 196: MAGPIE m4p\_SSP1 — Demand—Processing—Crops—Oil crops (Mt DM/yr)

|     | 1995 | 2000 | 2005 | 2010 | 2015 | 2020 | 2025 | 2030 | 2035 | 2040 | 2045 |
|-----|------|------|------|------|------|------|------|------|------|------|------|
| GLO | 247  | 289  | 358  | 432  | 521  | 588  | 591  | 590  | 582  | 569  | 573  |
| CAZ | 5    | 6    | 6    | 7    | 8    | 9    | 10   | 10   | 11   | 11   | 11   |
| CHA | 30   | 43   | 61   | 78   | 92   | 97   | 96   | 91   | 84   | 77   | 70   |
| EUR | 37   | 40   | 43   | 51   | 62   | 75   | 63   | 53   | 42   | 31   | 31   |
| IND | 23   | 22   | 28   | 32   | 47   | 55   | 64   | 72   | 77   | 79   | 78   |
| JPN | 5    | 6    | 5    | 4    | 4    | 4    | 4    | 4    | 4    | 4    | 4    |
| LAM | 42   | 52   | 69   | 86   | 100  | 110  | 105  | 100  | 93   | 90   | 86   |
| MEA | 4    | 5    | 8    | 10   | 11   | 12   | 13   | 13   | 14   | 14   | 14   |
| NEU | 4    | 5    | 6    | 7    | 8    | 8    | 8    | 8    | 8    | 7    | 7    |
| OAS | 43   | 50   | 63   | 83   | 103  | 119  | 130  | 139  | 147  | 151  | 161  |
| REF | 6    | 8    | 12   | 17   | 18   | 19   | 20   | 20   | 20   | 19   | 18   |
| SSA | 9    | 10   | 12   | 12   | 15   | 18   | 22   | 28   | 34   | 41   | 48   |
| USA | 40   | 42   | 44   | 45   | 53   | 61   | 56   | 52   | 48   | 44   | 44   |

Table 587: MAgPIE m4p\_SSP1 — Demand—Processing—Crops—Oil crops (Mt DM/yr) [PART 1/2]

|     | 2050 | 2055 | 2060 | 2070 | 2080 | 2090 | 2100 |
|-----|------|------|------|------|------|------|------|
| GLO | 569  | 567  | 560  | 532  | 497  | 464  | 418  |
| CAZ | 11   | 12   | 12   | 12   | 11   | 11   | 10   |
| CHA | 63   | 59   | 55   | 47   | 40   | 38   | 32   |
| EUR | 30   | 30   | 30   | 29   | 28   | 27   | 25   |
| IND | 76   | 74   | 72   | 66   | 59   | 52   | 45   |
| JPN | 4    | 4    | 4    | 3    | 3    | 3    | 2    |
| LAM | 82   | 79   | 77   | 73   | 66   | 62   | 55   |
| MEA | 13   | 14   | 14   | 13   | 12   | 11   | 10   |
| NEU | 7    | 7    | 6    | 6    | 5    | 5    | 5    |
| OAS | 169  | 169  | 168  | 162  | 148  | 140  | 127  |
| REF | 18   | 17   | 17   | 16   | 22   | 21   | 19   |
| SSA | 52   | 57   | 60   | 59   | 53   | 47   | 41   |
| USA | 44   | 45   | 45   | 47   | 48   | 47   | 46   |

Table 588: MAgPIE m4p\_SSP1 — Demand—Processing—Crops—Oil crops (Mt DM/yr) [PART 2/2]

|     | 1965 | 1970 | 1975 | 1980 | 1985 | 1990 | 1995 | 2000 | 2005 | 2010 |
|-----|------|------|------|------|------|------|------|------|------|------|
| GLO | 84   | 101  | 120  | 155  | 173  | 204  | 243  | 287  | 356  | 428  |
| CAZ | 1    | 1    | 1    | 2    | 3    | 3    | 4    | 5    | 6    | 8    |
| CHA | 7    | 8    | 9    | 12   | 19   | 22   | 29   | 43   | 61   | 78   |
| EUR | 16   | 19   | 25   | 31   | 31   | 31   | 36   | 41   | 42   | 50   |
| IND | 8    | 9    | 11   | 10   | 13   | 18   | 23   | 22   | 28   | 32   |
| JPN | 2    | 4    | 4    | 5    | 5    | 5    | 5    | 6    | 5    | 4    |
| LAM | 8    | 9    | 13   | 21   | 27   | 32   | 41   | 49   | 68   | 81   |
| MEA | 3    | 3    | 4    | 4    | 3    | 4    | 4    | 5    | 8    | 10   |
| NEU | 2    | 2    | 2    | 3    | 3    | 4    | 4    | 5    | 6    | 7    |
| OAS | 8    | 11   | 16   | 21   | 26   | 36   | 43   | 50   | 63   | 84   |
| REF | 7    | 8    | 9    | 9    | 8    | 10   | 6    | 7    | 11   | 16   |
| SSA | 4    | 5    | 5    | 5    | 6    | 8    | 8    | 10   | 12   | 12   |
| USA | 18   | 23   | 21   | 32   | 29   | 31   | 40   | 44   | 47   | 46   |

Table 589: FAO — Demand—Processing—Crops—Oil crops (Mt DM/yr)

9.1.7
Oil crops—Cotton seed

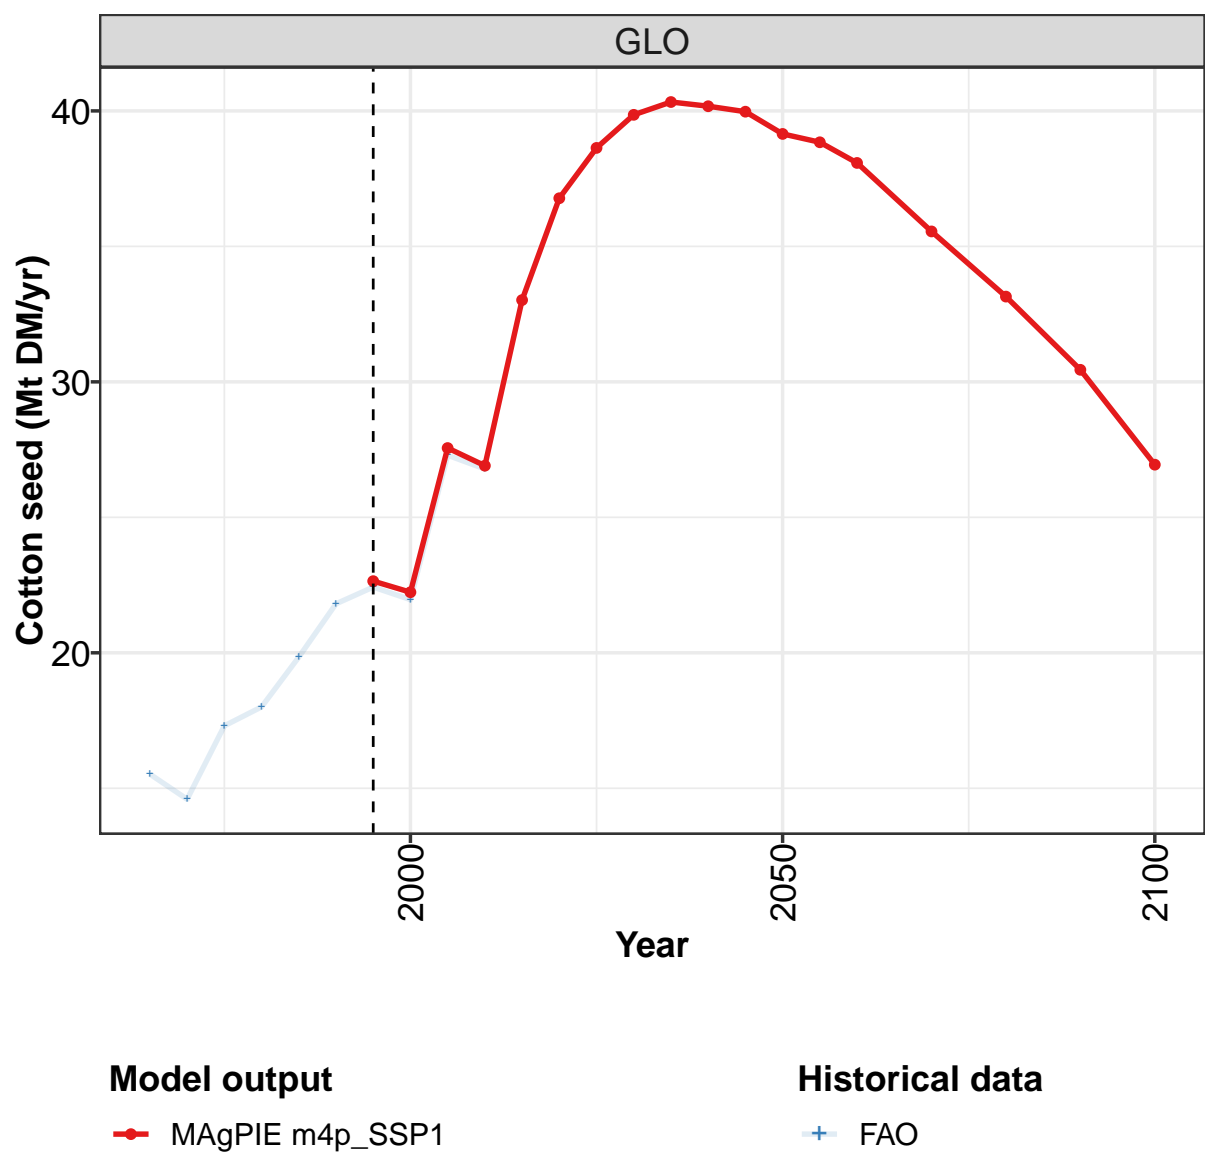

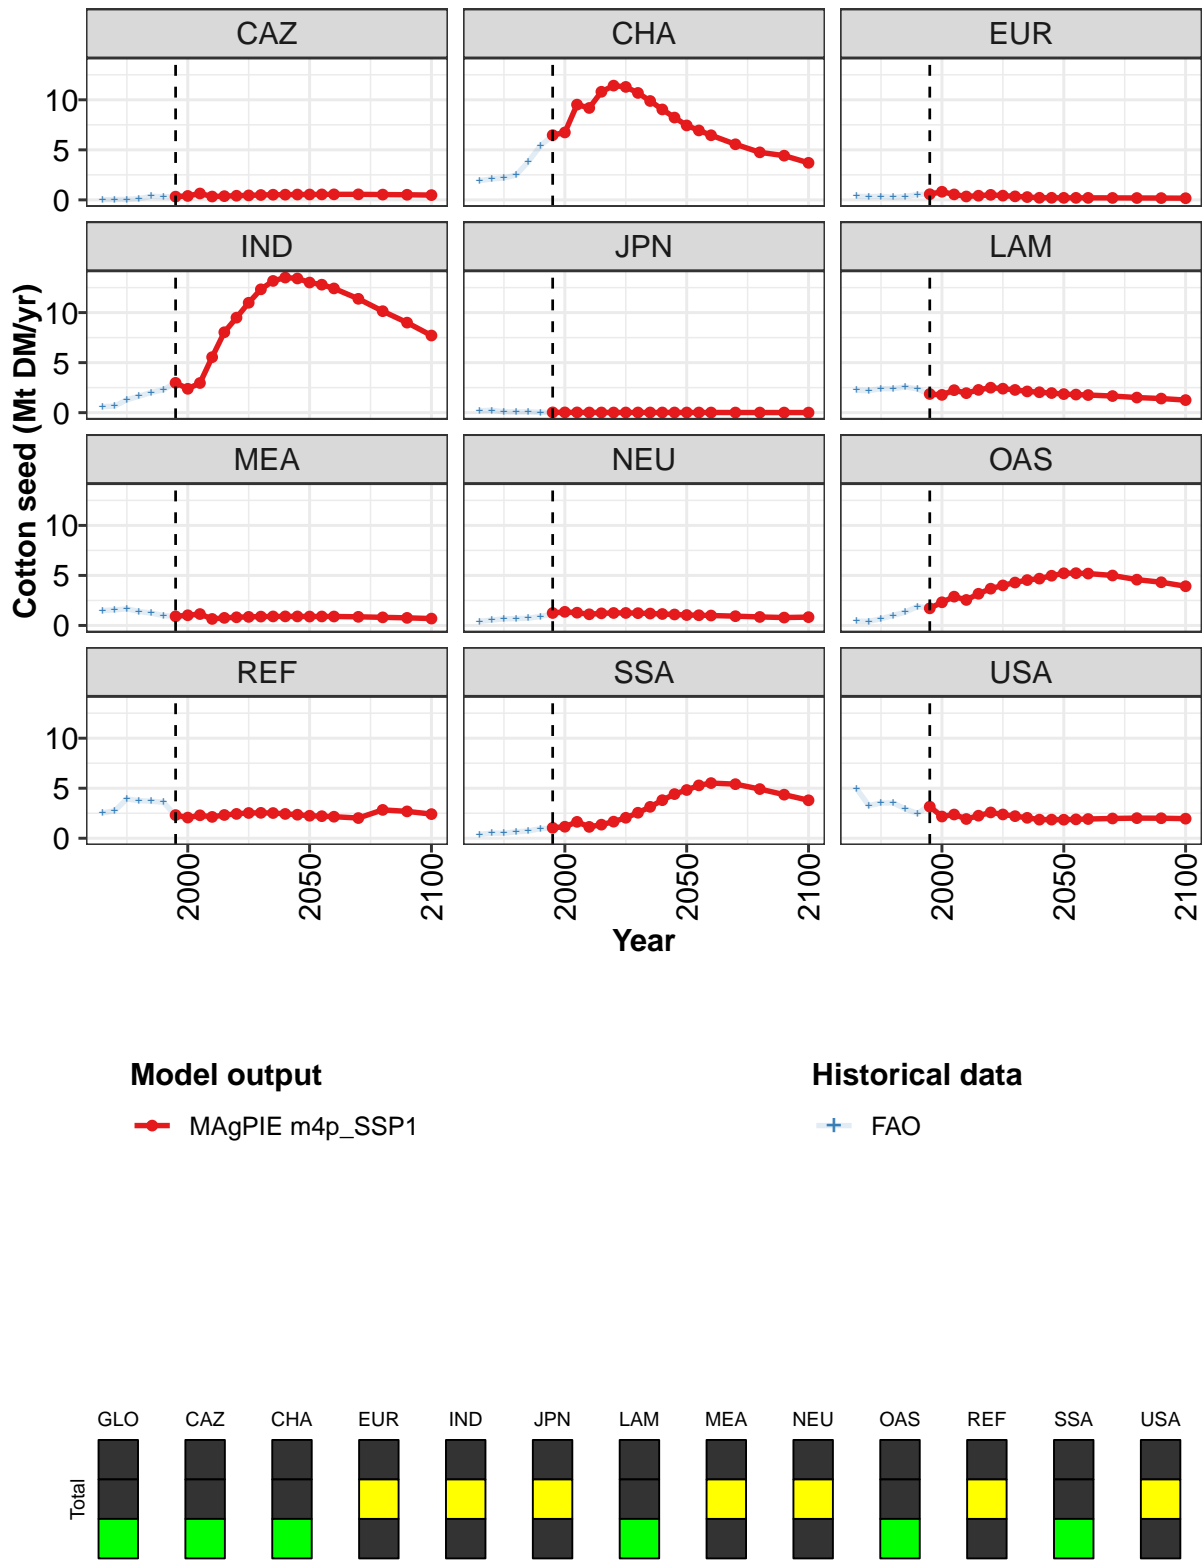

Figure 197: MAGPIE m4p\_SSP1 — Demand—Processing—Crops—Oil crops—Cotton seed (Mt DM/yr)

|     | 1995 | 2000 | 2005 | 2010 | 2015 | 2020 | 2025 | 2030 | 2035 | 2040 | 2045 |
|-----|------|------|------|------|------|------|------|------|------|------|------|
| GLO | 22.6 | 22.2 | 27.6 | 26.9 | 33.0 | 36.8 | 38.6 | 39.9 | 40.3 | 40.2 | 40.0 |
| CAZ | 0.3  | 0.4  | 0.6  | 0.3  | 0.4  | 0.4  | 0.4  | 0.5  | 0.5  | 0.5  | 0.5  |
| CHA | 6.5  | 6.7  | 9.5  | 9.2  | 10.8 | 11.4 | 11.3 | 10.7 | 9.9  | 9.0  | 8.2  |
| EUR | 0.6  | 0.8  | 0.5  | 0.3  | 0.4  | 0.5  | 0.4  | 0.4  | 0.3  | 0.2  | 0.2  |
| IND | 3.0  | 2.4  | 3.0  | 5.5  | 8.0  | 9.5  | 11.0 | 12.3 | 13.2 | 13.5 | 13.4 |
| JPN | 0.0  | 0.0  | 0.0  | 0.0  | 0.0  | 0.0  | 0.0  | 0.0  | 0.0  | 0.0  | 0.0  |
| LAM | 1.9  | 1.8  | 2.3  | 2.0  | 2.3  | 2.5  | 2.4  | 2.3  | 2.1  | 2.0  | 2.0  |
| MEA | 0.9  | 1.0  | 1.1  | 0.7  | 0.8  | 0.8  | 0.9  | 0.9  | 0.9  | 0.9  | 0.9  |
| NEU | 1.2  | 1.4  | 1.3  | 1.1  | 1.2  | 1.3  | 1.3  | 1.2  | 1.2  | 1.1  | 1.1  |
| OAS | 1.7  | 2.3  | 2.9  | 2.6  | 3.2  | 3.7  | 4.0  | 4.3  | 4.5  | 4.7  | 5.0  |
| REF | 2.3  | 2.1  | 2.3  | 2.1  | 2.3  | 2.4  | 2.5  | 2.5  | 2.5  | 2.4  | 2.4  |
| SSA | 1.0  | 1.2  | 1.6  | 1.1  | 1.4  | 1.7  | 2.0  | 2.6  | 3.1  | 3.8  | 4.4  |
| USA | 3.2  | 2.2  | 2.4  | 1.9  | 2.3  | 2.6  | 2.4  | 2.2  | 2.0  | 1.9  | 1.9  |

Table 590: MAgPIE m4p\_SSP1 — Demand—Processing—Crops—Oil crops—Cotton seed (Mt DM/yr) [PART 1/2]

|     | 2050 | 2055 | 2060 | 2070 | 2080 | 2090 | 2100 |
|-----|------|------|------|------|------|------|------|
| GLO | 39.2 | 38.8 | 38.1 | 35.6 | 33.1 | 30.4 | 26.9 |
| CAZ | 0.5  | 0.5  | 0.6  | 0.6  | 0.5  | 0.5  | 0.5  |
| CHA | 7.4  | 6.9  | 6.5  | 5.6  | 4.8  | 4.4  | 3.7  |
| EUR | 0.2  | 0.2  | 0.2  | 0.2  | 0.2  | 0.2  | 0.2  |
| IND | 13.0 | 12.8 | 12.4 | 11.4 | 10.1 | 9.0  | 7.7  |
| JPN | 0.0  | 0.0  | 0.0  | 0.0  | 0.0  | 0.0  | 0.0  |
| LAM | 1.9  | 1.8  | 1.8  | 1.7  | 1.5  | 1.4  | 1.3  |
| MEA | 0.9  | 0.9  | 0.9  | 0.9  | 0.8  | 0.8  | 0.7  |
| NEU | 1.0  | 1.0  | 1.0  | 0.9  | 0.9  | 0.8  | 0.8  |
| OAS | 5.2  | 5.2  | 5.2  | 5.0  | 4.6  | 4.3  | 3.9  |
| REF | 2.3  | 2.2  | 2.2  | 2.0  | 2.8  | 2.7  | 2.4  |
| SSA | 4.8  | 5.3  | 5.5  | 5.4  | 4.9  | 4.4  | 3.8  |
| USA | 1.9  | 1.9  | 1.9  | 2.0  | 2.0  | 2.0  | 2.0  |

Table 591: MAgPIE m4p\_SSP1 — Demand—Processing—Crops—Oil crops—Cotton seed (Mt DM/yr) [PART 2/2]

|     | 1965 | 1970 | 1975 | 1980 | 1985 | 1990 | 1995 | 2000 | 2005 | 2010 |
|-----|------|------|------|------|------|------|------|------|------|------|
| GLO | 15.5 | 14.6 | 17.3 | 18.0 | 19.8 | 21.8 | 22.4 | 22.0 | 27.3 | 26.8 |
| CAZ | 0.0  | 0.0  | 0.0  | 0.1  | 0.4  | 0.3  | 0.3  | 0.4  | 0.6  | 0.4  |
| CHA | 1.9  | 2.1  | 2.2  | 2.5  | 3.8  | 5.4  | 6.4  | 6.7  | 9.5  | 9.2  |
| EUR | 0.4  | 0.3  | 0.4  | 0.3  | 0.3  | 0.5  | 0.6  | 0.8  | 0.5  | 0.3  |
| IND | 0.6  | 0.7  | 1.3  | 1.6  | 2.0  | 2.3  | 3.0  | 2.4  | 2.9  | 5.5  |
| JPN | 0.2  | 0.2  | 0.1  | 0.1  | 0.1  | 0.0  | 0.0  | 0.0  | 0.0  | 0.0  |
| LAM | 2.2  | 2.2  | 2.4  | 2.4  | 2.6  | 2.4  | 1.8  | 1.7  | 2.2  | 1.8  |
| MEA | 1.5  | 1.6  | 1.7  | 1.4  | 1.2  | 1.0  | 0.9  | 1.0  | 1.1  | 0.7  |
| NEU | 0.4  | 0.5  | 0.7  | 0.7  | 0.7  | 0.9  | 1.1  | 1.3  | 1.2  | 1.1  |
| OAS | 0.4  | 0.4  | 0.7  | 1.0  | 1.3  | 1.9  | 1.7  | 2.3  | 2.9  | 2.6  |
| REF | 2.5  | 2.7  | 3.9  | 3.8  | 3.7  | 3.6  | 2.2  | 1.9  | 2.1  | 2.1  |
| SSA | 0.4  | 0.5  | 0.5  | 0.6  | 0.7  | 1.0  | 1.0  | 1.1  | 1.6  | 1.1  |
| USA | 4.9  | 3.3  | 3.5  | 3.5  | 2.9  | 2.5  | 3.3  | 2.3  | 2.5  | 1.9  |

Table 592: FAO — Demand—Processing—Crops—Oil crops—Cotton seed (Mt DM/yr)

9.1.8 Oil crops—Groundnuts

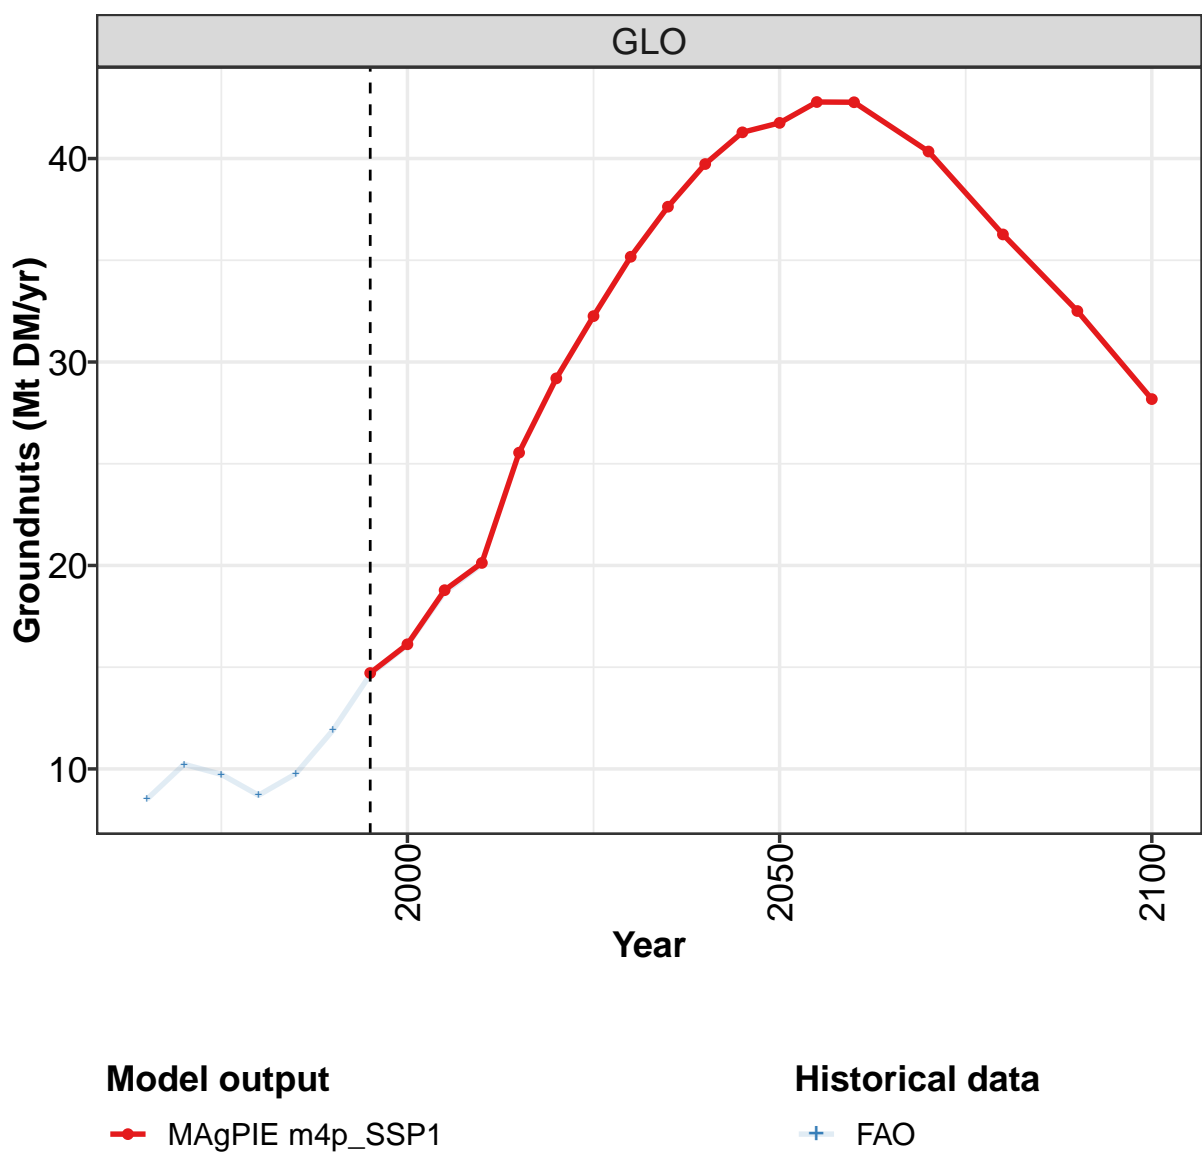



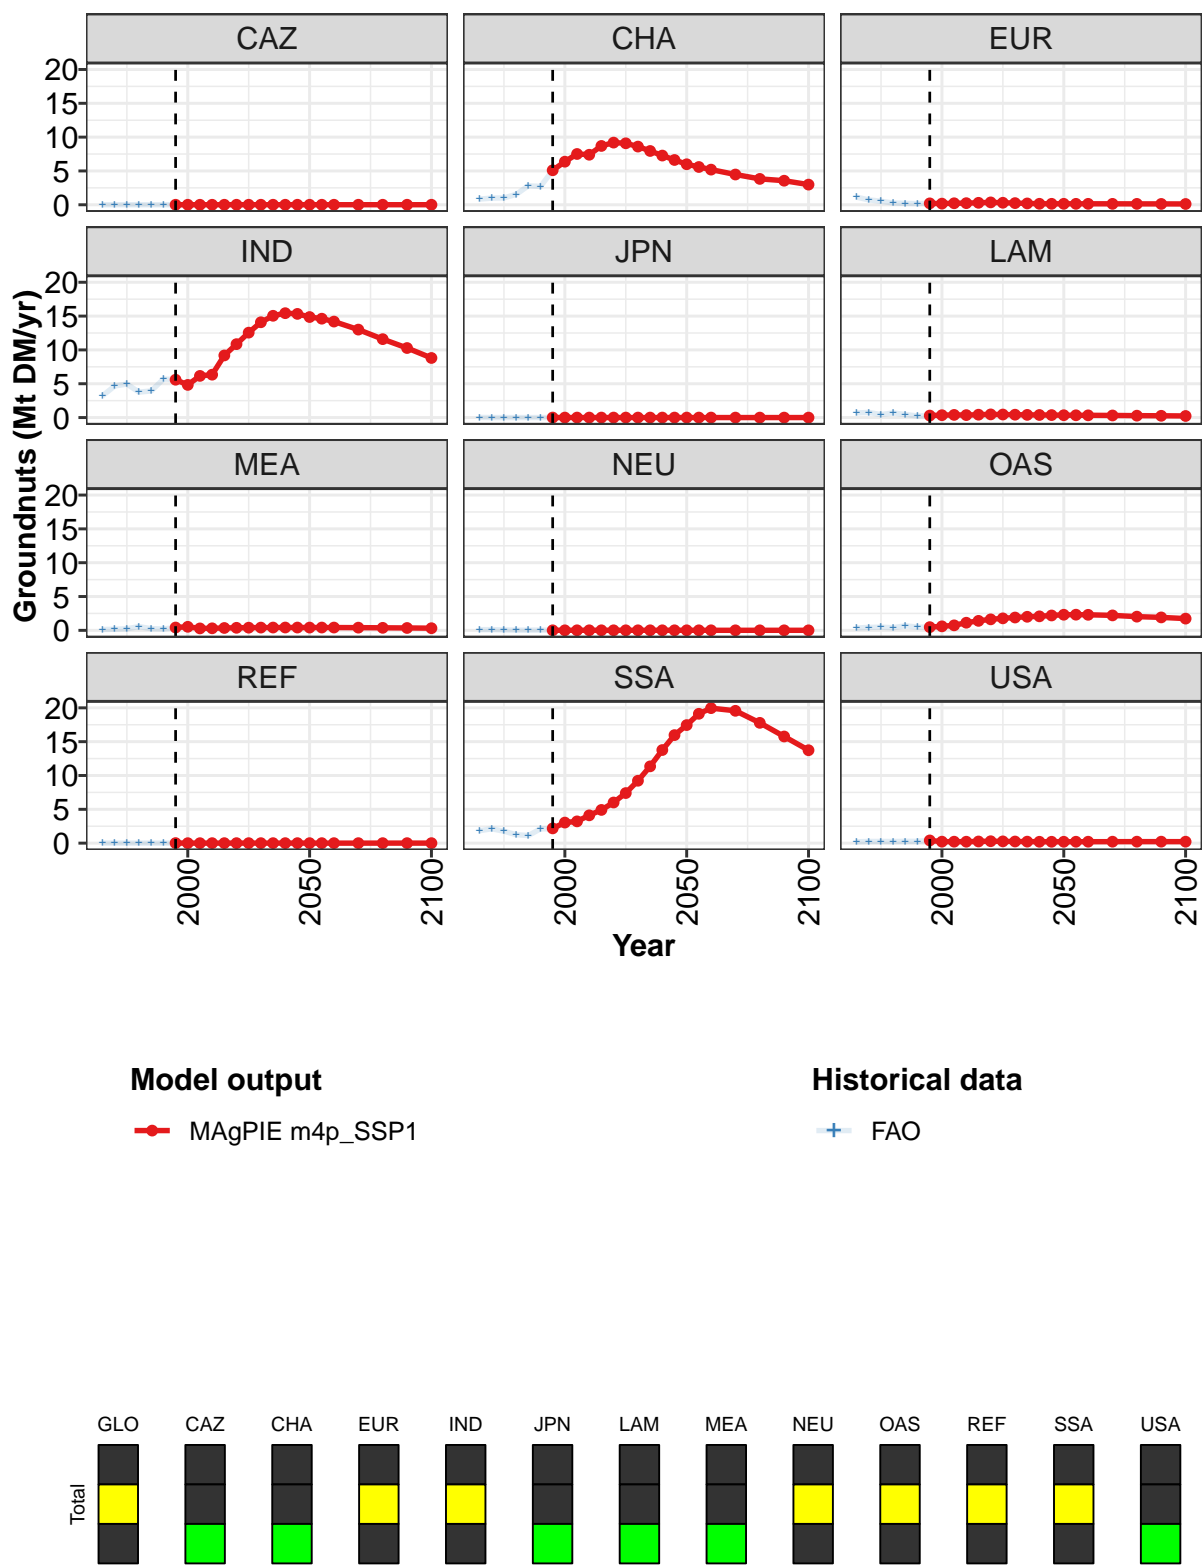

Figure 198: MAgPIE m4p\_SSP1 — Demand—Processing—Crops—Oil crops—Groundnuts (Mt DM/yr)

|     | 1995 | 2000 | 2005 | 2010 | 2015 | 2020 | 2025 | 2030 | 2035 | 2040 | 2045 |
|-----|------|------|------|------|------|------|------|------|------|------|------|
| GLO | 14.7 | 16.1 | 18.8 | 20.1 | 25.5 | 29.2 | 32.3 | 35.2 | 37.6 | 39.7 | 41.3 |
| CAZ | 0.0  | 0.0  | 0.0  | 0.0  | 0.0  | 0.0  | 0.0  | 0.0  | 0.0  | 0.0  | 0.0  |
| CHA | 5.1  | 6.4  | 7.5  | 7.4  | 8.7  | 9.2  | 9.1  | 8.6  | 8.0  | 7.3  | 6.6  |
| EUR | 0.2  | 0.2  | 0.2  | 0.2  | 0.3  | 0.4  | 0.3  | 0.2  | 0.2  | 0.1  | 0.1  |
| IND | 5.6  | 4.8  | 6.2  | 6.3  | 9.2  | 10.9 | 12.6 | 14.1 | 15.0 | 15.4 | 15.3 |
| JPN | 0.0  | 0.0  | 0.0  | 0.0  | 0.0  | 0.0  | 0.0  | 0.0  | 0.0  | 0.0  | 0.0  |
| LAM | 0.3  | 0.4  | 0.4  | 0.4  | 0.4  | 0.5  | 0.4  | 0.4  | 0.4  | 0.4  | 0.4  |
| MEA | 0.4  | 0.5  | 0.3  | 0.3  | 0.4  | 0.4  | 0.4  | 0.4  | 0.4  | 0.4  | 0.4  |
| NEU | 0.0  | 0.0  | 0.0  | 0.0  | 0.0  | 0.0  | 0.0  | 0.0  | 0.0  | 0.0  | 0.0  |
| OAS | 0.5  | 0.6  | 0.7  | 1.1  | 1.4  | 1.6  | 1.8  | 1.9  | 2.0  | 2.1  | 2.2  |
| REF | 0.0  | 0.0  | 0.0  | 0.0  | 0.0  | 0.0  | 0.0  | 0.0  | 0.0  | 0.0  | 0.0  |
| SSA | 2.2  | 3.0  | 3.2  | 4.1  | 4.9  | 6.0  | 7.4  | 9.2  | 11.4 | 13.8 | 16.0 |
| USA | 0.4  | 0.2  | 0.2  | 0.2  | 0.3  | 0.3  | 0.3  | 0.2  | 0.2  | 0.2  | 0.2  |

Table 593: MAgPIE m4p\_SSP1 — Demand—Processing—Crops—Oil crops—Groundnuts (Mt DM/yr) [PART 1/2]

|     | 2050 | 2055 | 2060 | 2070 | 2080 | 2090 | 2100 |
|-----|------|------|------|------|------|------|------|
| GLO | 41.8 | 42.8 | 42.8 | 40.3 | 36.3 | 32.5 | 28.2 |
| CAZ | 0.0  | 0.0  | 0.0  | 0.0  | 0.0  | 0.0  | 0.0  |
| CHA | 6.0  | 5.6  | 5.2  | 4.5  | 3.8  | 3.6  | 3.0  |
| EUR | 0.1  | 0.1  | 0.1  | 0.1  | 0.1  | 0.1  | 0.1  |
| IND | 14.9 | 14.6 | 14.2 | 13.0 | 11.6 | 10.3 | 8.8  |
| JPN | 0.0  | 0.0  | 0.0  | 0.0  | 0.0  | 0.0  | 0.0  |
| LAM | 0.3  | 0.3  | 0.3  | 0.3  | 0.3  | 0.3  | 0.2  |
| MEA | 0.4  | 0.4  | 0.4  | 0.4  | 0.4  | 0.4  | 0.3  |
| NEU | 0.0  | 0.0  | 0.0  | 0.0  | 0.0  | 0.0  | 0.0  |
| OAS | 2.3  | 2.3  | 2.3  | 2.2  | 2.0  | 1.9  | 1.7  |
| REF | 0.0  | 0.0  | 0.0  | 0.0  | 0.0  | 0.0  | 0.0  |
| SSA | 17.5 | 19.1 | 20.0 | 19.6 | 17.8 | 15.8 | 13.7 |
| USA | 0.2  | 0.2  | 0.2  | 0.2  | 0.2  | 0.2  | 0.2  |

Table 594: MAgPIE m4p\_SSP1 — Demand—Processing—Crops—Oil crops—Groundnuts (Mt DM/yr) [PART 2/2]

|     | 1965 | 1970 | 1975 | 1980 | 1985 | 1990 | 1995 | 2000 | 2005 | 2010 |
|-----|------|------|------|------|------|------|------|------|------|------|
| GLO | 8.5  | 10.2 | 9.7  | 8.7  | 9.8  | 11.9 | 14.6 | 16.1 | 18.7 | 20.1 |
| CAZ | 0.0  | 0.0  | 0.0  | 0.0  | 0.0  | 0.0  | 0.0  | 0.0  | 0.0  | 0.0  |
| CHA | 0.8  | 1.0  | 1.0  | 1.5  | 2.8  | 2.7  | 5.1  | 6.3  | 7.5  | 7.4  |
| EUR | 1.1  | 0.7  | 0.5  | 0.3  | 0.2  | 0.2  | 0.2  | 0.2  | 0.2  | 0.2  |
| IND | 3.2  | 4.7  | 4.9  | 3.8  | 3.9  | 5.7  | 5.6  | 4.8  | 6.1  | 6.3  |
| JPN | 0.0  | 0.0  | 0.0  | 0.0  | 0.0  | 0.0  | 0.0  | 0.0  | 0.0  | 0.0  |
| LAM | 0.7  | 0.8  | 0.4  | 0.7  | 0.5  | 0.2  | 0.3  | 0.3  | 0.4  | 0.3  |
| MEA | 0.1  | 0.2  | 0.2  | 0.5  | 0.2  | 0.2  | 0.4  | 0.5  | 0.3  | 0.3  |
| NEU | 0.1  | 0.1  | 0.1  | 0.0  | 0.0  | 0.0  | 0.0  | 0.0  | 0.0  | 0.0  |
| OAS | 0.3  | 0.4  | 0.5  | 0.4  | 0.7  | 0.5  | 0.5  | 0.6  | 0.7  | 1.1  |
| REF | 0.0  | 0.0  | 0.0  | 0.0  | 0.0  | 0.0  | 0.0  | 0.0  | 0.0  | 0.0  |
| SSA | 1.8  | 2.1  | 1.8  | 1.3  | 1.1  | 2.1  | 2.1  | 3.0  | 3.2  | 4.1  |
| USA | 0.2  | 0.2  | 0.3  | 0.2  | 0.3  | 0.3  | 0.4  | 0.2  | 0.2  | 0.2  |

Table 595: FAO — Demand—Processing—Crops—Oil crops—Groundnuts (Mt DM/yr)

9.1.9
Oil crops—Oilpalms

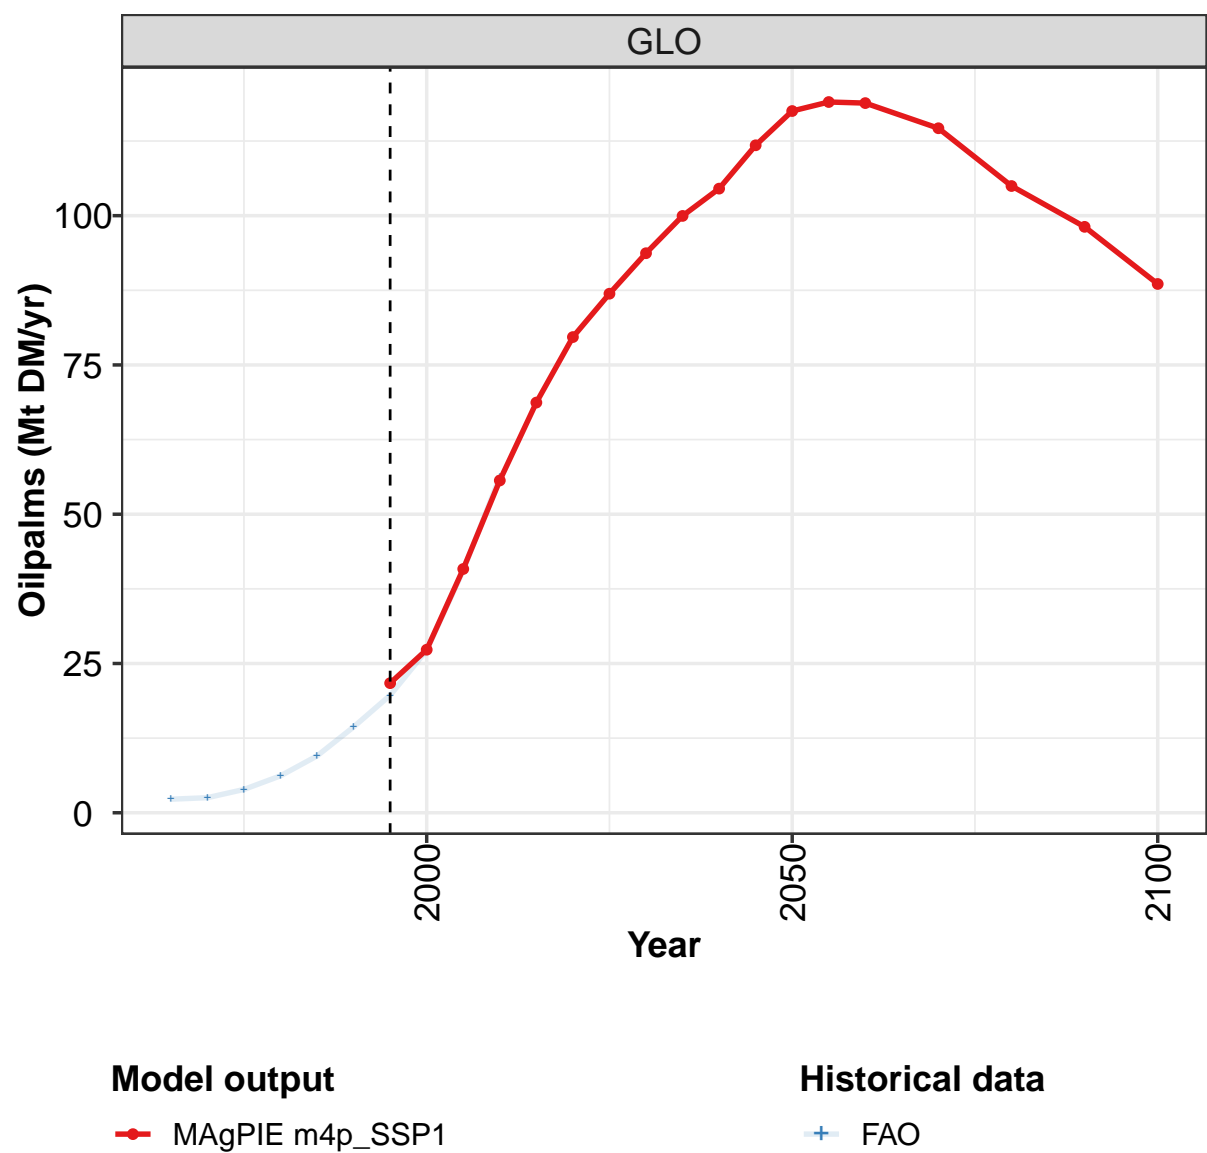

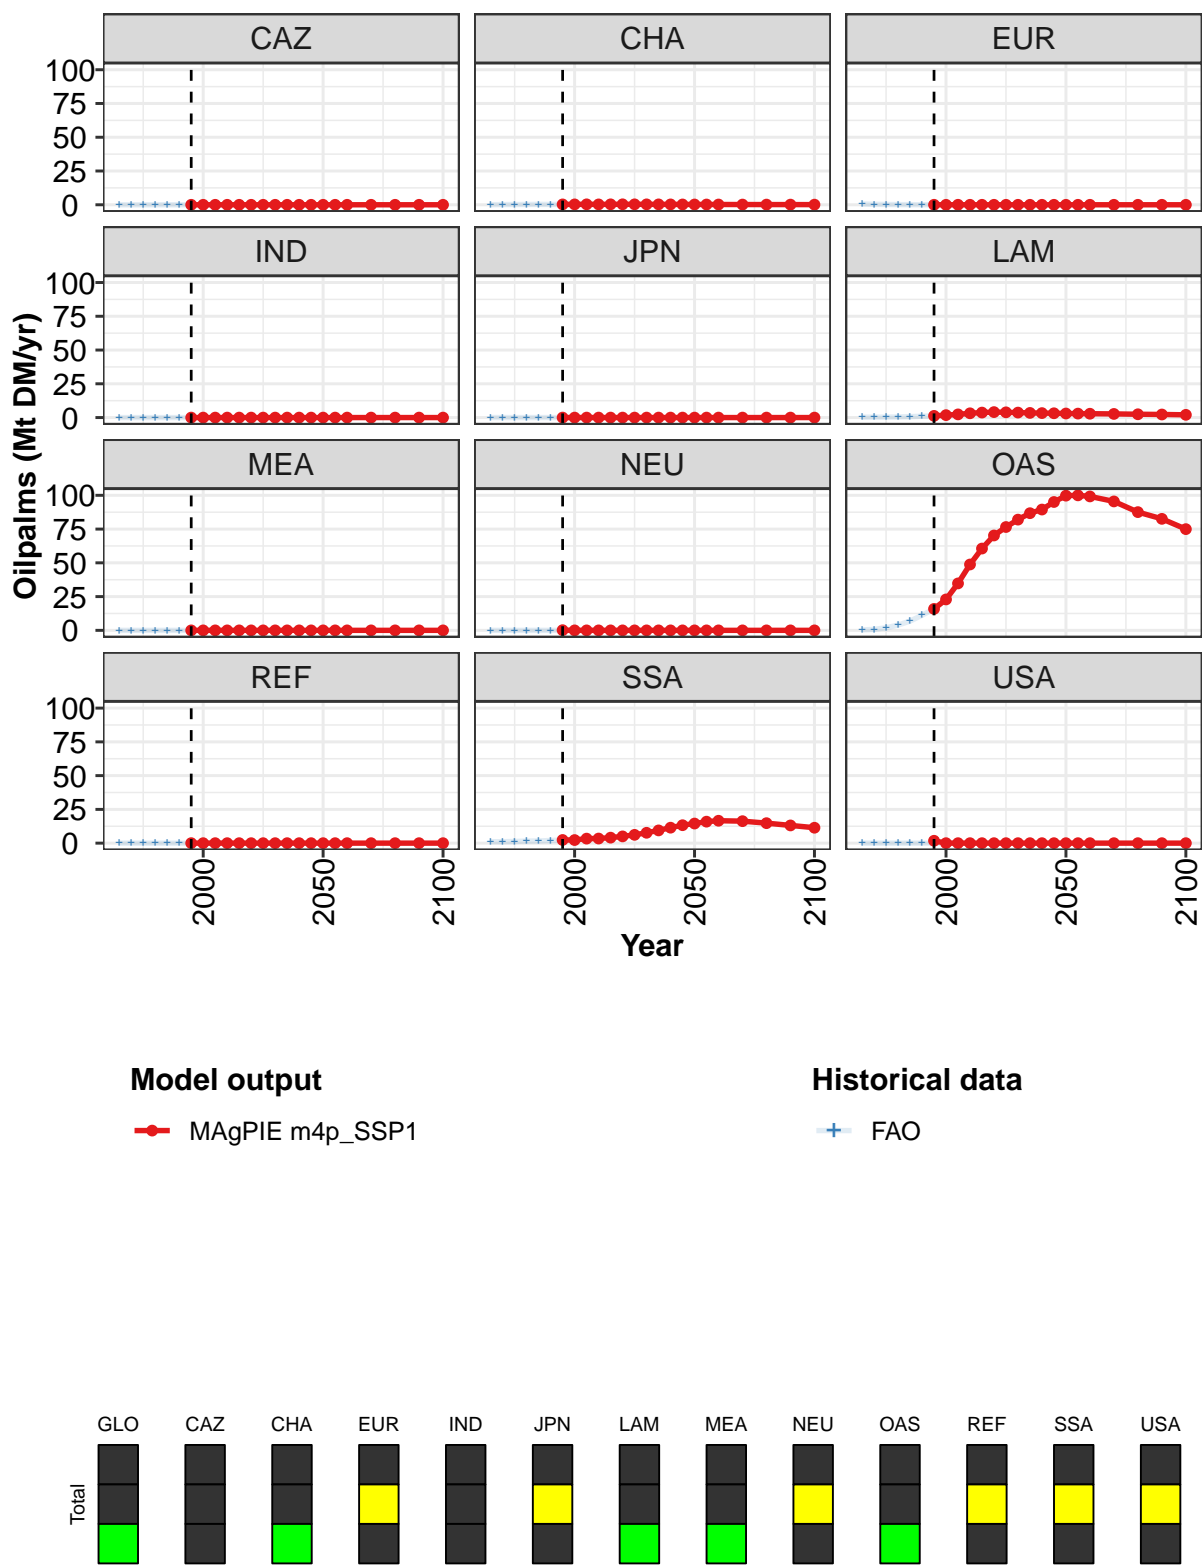

Figure 199: MAgPIE m4p\_SSP1 — Demand—Processing—Crops—Oil crops—Oilpalms (Mt DM/yr)

|     | 1995 | 2000 | 2005 | 2010 | 2015 | 2020 | 2025 | 2030 | 2035 | 2040 | 2045 |
|-----|------|------|------|------|------|------|------|------|------|------|------|
| GLO | 22   | 27   | 41   | 56   | 69   | 80   | 87   | 94   | 100  | 105  | 112  |
| CAZ | 0    | 0    | 0    | 0    | 0    | 0    | 0    | 0    | 0    | 0    | 0    |
| CHA | 0    | 0    | 0    | 0    | 0    | 0    | 0    | 0    | 0    | 0    | 0    |
| EUR | 0    | 0    | 0    | 0    | 0    | 0    | 0    | 0    | 0    | 0    | 0    |
| IND | 0    | 0    | 0    | 0    | 0    | 0    | 0    | 0    | 0    | 0    | 0    |
| JPN | 0    | 0    | 0    | 0    | 0    | 0    | 0    | 0    | 0    | 0    | 0    |
| LAM | 1    | 2    | 2    | 3    | 4    | 4    | 4    | 4    | 3    | 3    | 3    |
| MEA | 0    | 0    | 0    | 0    | 0    | 0    | 0    | 0    | 0    | 0    | 0    |
| NEU | 0    | 0    | 0    | 0    | 0    | 0    | 0    | 0    | 0    | 0    | 0    |
| OAS | 16   | 23   | 35   | 49   | 61   | 70   | 77   | 82   | 87   | 89   | 95   |
| REF | 0    | 0    | 0    | 0    | 0    | 0    | 0    | 0    | 0    | 0    | 0    |
| SSA | 2    | 2    | 3    | 3    | 4    | 5    | 6    | 8    | 9    | 11   | 13   |
| USA | 2    | 0    | 0    | 0    | 0    | 0    | 0    | 0    | 0    | 0    | 0    |

Table 596: MAgPIE m4p\_SSP1 — Demand—Processing—Crops—Oil crops—Oilpalms (Mt DM/yr) [PART 1/2]

|     | 2050 | 2055 | 2060 | 2070 | 2080 | 2090 | 2100 |
|-----|------|------|------|------|------|------|------|
| GLO | 118  | 119  | 119  | 115  | 105  | 98   | 89   |
| CAZ | 0    | 0    | 0    | 0    | 0    | 0    | 0    |
| CHA | 0    | 0    | 0    | 0    | 0    | 0    | 0    |
| EUR | 0    | 0    | 0    | 0    | 0    | 0    | 0    |
| IND | 0    | 0    | 0    | 0    | 0    | 0    | 0    |
| JPN | 0    | 0    | 0    | 0    | 0    | 0    | 0    |
| LAM | 3    | 3    | 3    | 3    | 2    | 2    | 2    |
| MEA | 0    | 0    | 0    | 0    | 0    | 0    | 0    |
| NEU | 0    | 0    | 0    | 0    | 0    | 0    | 0    |
| OAS | 100  | 100  | 99   | 95   | 88   | 83   | 75   |
| REF | 0    | 0    | 0    | 0    | 0    | 0    | 0    |
| SSA | 15   | 16   | 17   | 16   | 15   | 13   | 11   |
| USA | 0    | 0    | 0    | 0    | 0    | 0    | 0    |

Table 597: MAgPIE m4p\_SSP1 — Demand—Processing—Crops—Oil crops—Oilpalms (Mt DM/yr) [PART 2/2]

|     | 1965 | 1970 | 1975 | 1980 | 1985 | 1990 | 1995 | 2000 | 2005 | 2010 |
|-----|------|------|------|------|------|------|------|------|------|------|
| GLO | 2.3  | 2.5  | 3.9  | 6.2  | 9.5  | 14.4 | 19.7 | 27.2 | 40.6 | 56.3 |
| CAZ | 0.0  | 0.0  | 0.0  | 0.0  | 0.0  | 0.0  | 0.0  | 0.0  | 0.0  | 0.0  |
| CHA | 0.1  | 0.1  | 0.2  | 0.2  | 0.3  | 0.2  | 0.3  | 0.3  | 0.3  | 0.3  |
| EUR | 0.6  | 0.3  | 0.2  | 0.1  | 0.1  | 0.0  | 0.0  | 0.0  | 0.0  | 0.0  |
| IND | 0.0  | 0.0  | 0.0  | 0.0  | 0.0  | 0.0  | 0.0  | 0.0  | 0.0  | 0.0  |
| JPN | 0.0  | 0.0  | 0.0  | 0.0  | 0.0  | 0.0  | 0.0  | 0.0  | 0.0  | 0.0  |
| LAM | 0.2  | 0.3  | 0.3  | 0.4  | 0.7  | 1.0  | 1.2  | 1.7  | 2.3  | 3.0  |
| MEA | 0.0  | 0.0  | 0.0  | 0.0  | 0.0  | 0.0  | 0.0  | 0.0  | 0.0  | 0.0  |
| NEU | 0.0  | 0.0  | 0.0  | 0.0  | 0.0  | 0.0  | 0.0  | 0.0  | 0.0  | 0.0  |
| OAS | 0.3  | 0.7  | 1.9  | 3.9  | 6.9  | 11.2 | 15.9 | 23.0 | 34.6 | 49.6 |
| REF | 0.0  | 0.0  | 0.0  | 0.0  | 0.0  | 0.0  | 0.0  | 0.0  | 0.0  | 0.0  |
| SSA | 1.1  | 1.0  | 1.2  | 1.5  | 1.6  | 1.9  | 2.3  | 2.3  | 3.4  | 3.4  |
| USA | 0.0  | 0.0  | 0.0  | 0.0  | 0.0  | 0.0  | 0.0  | 0.0  | 0.0  | 0.0  |

Table 598: FAO — Demand—Processing—Crops—Oil crops—Oilpalms (Mt DM/yr)

9.1.10
Oil crops—Other oil crops (incl rapeseed)

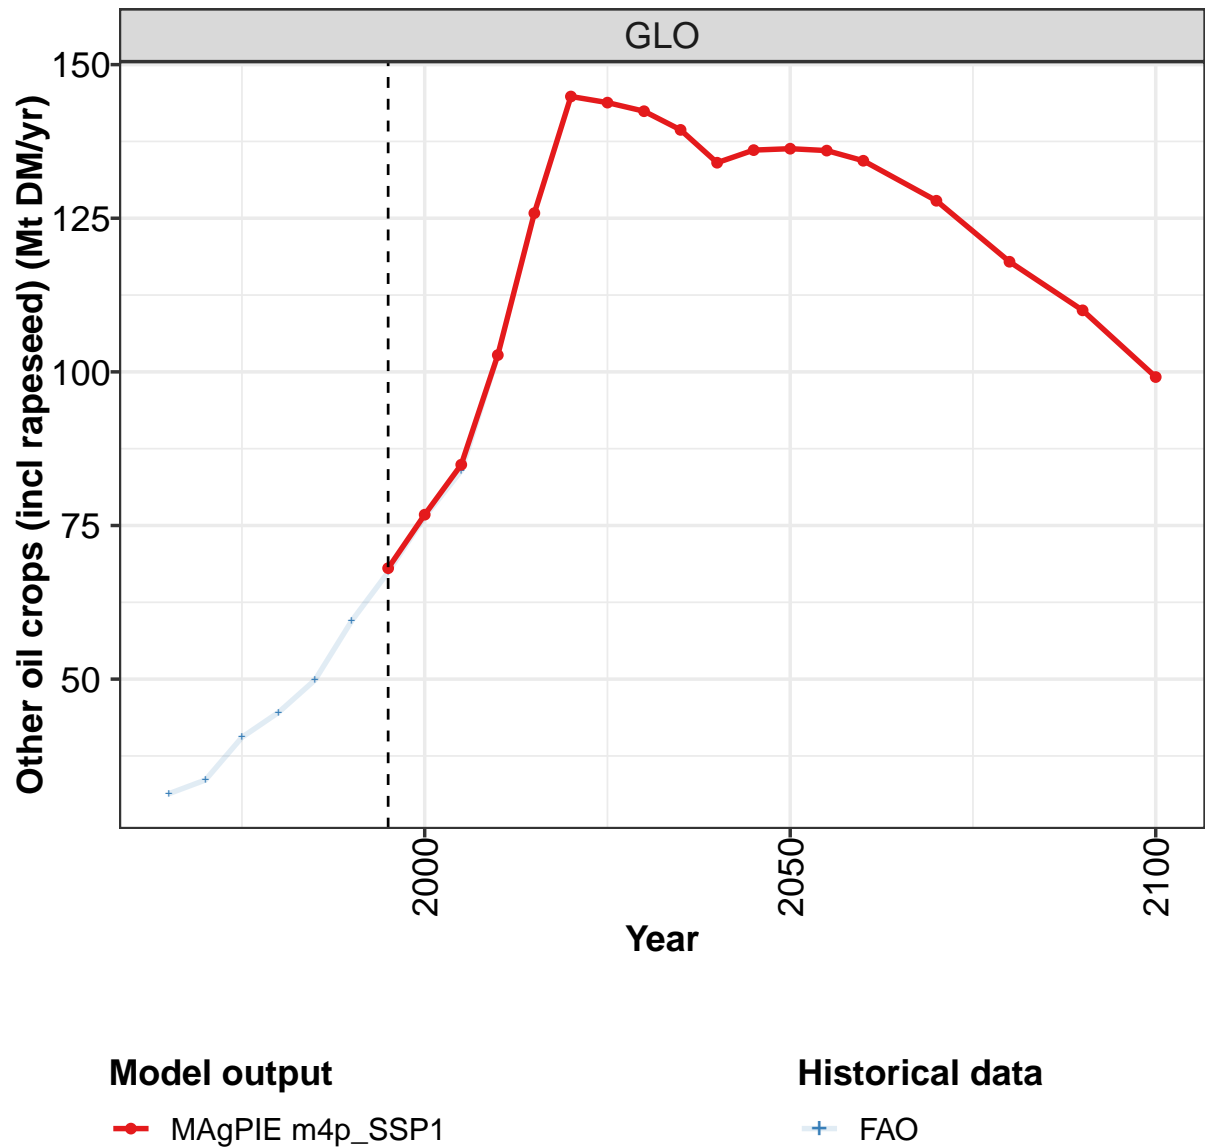

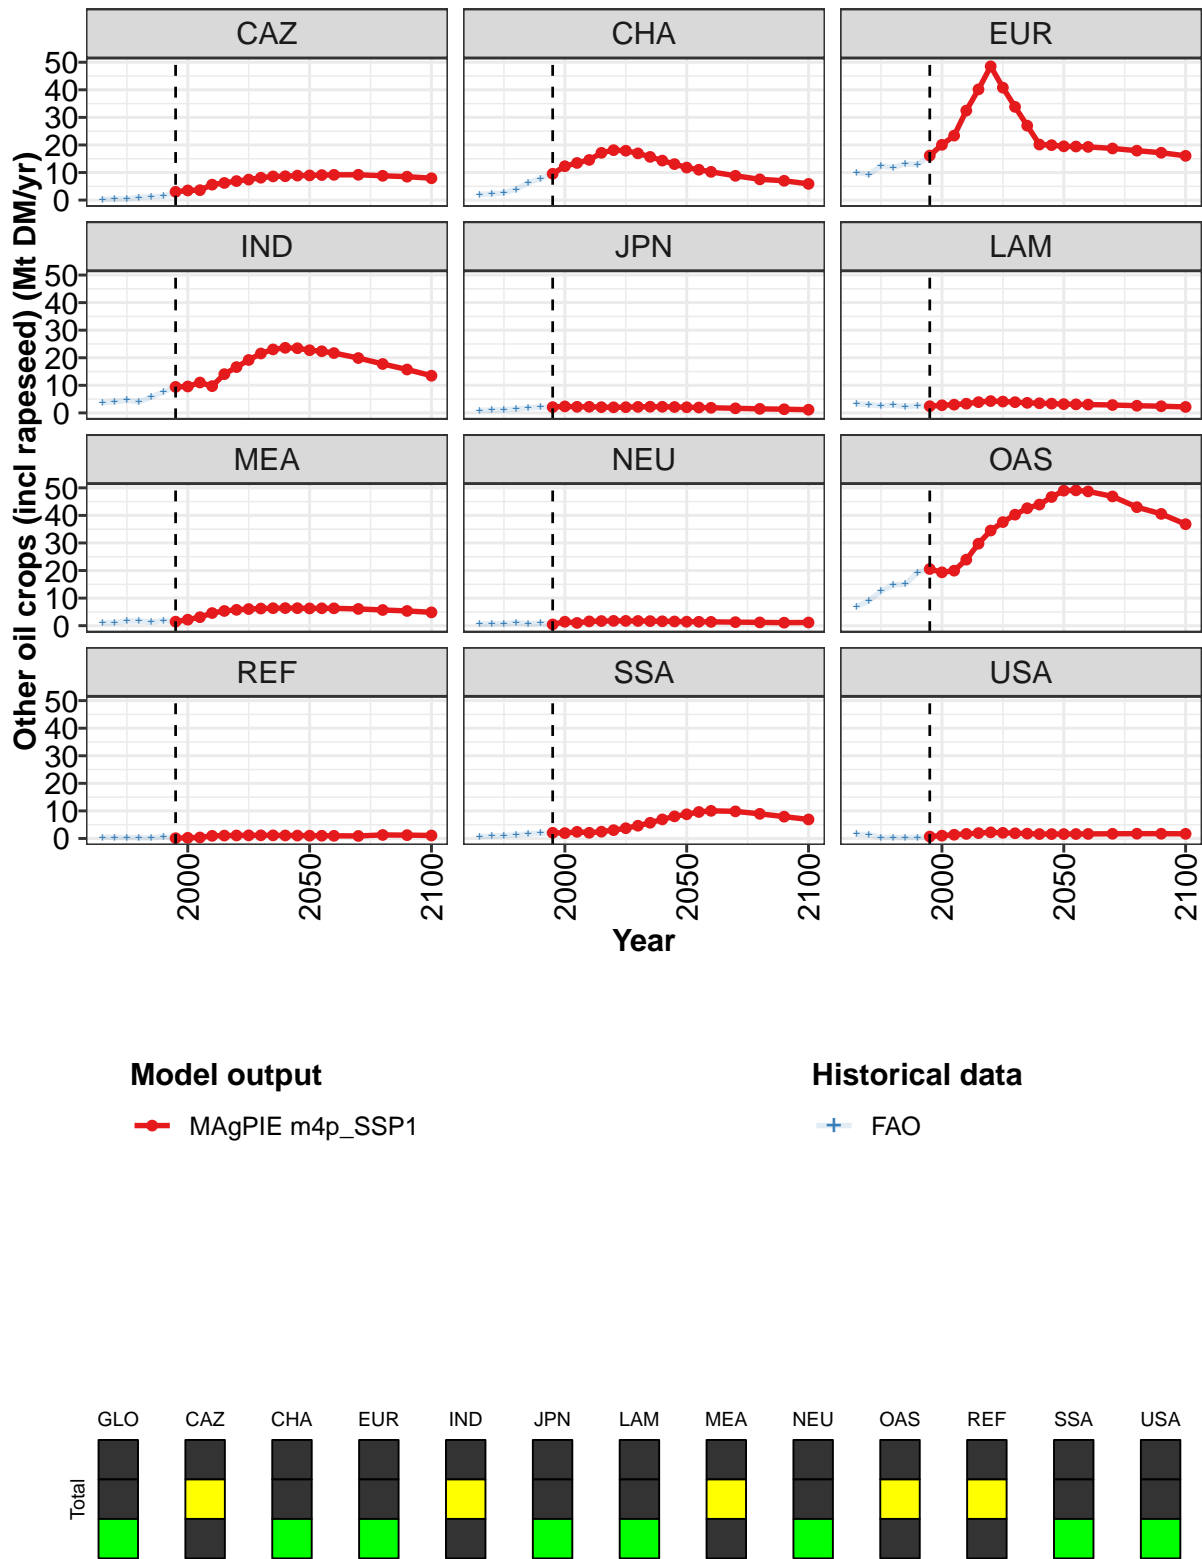

Figure 200: MAgPIE m4p\_SSP1 — Demand—Processing—Crops—Oil crops—Other oil crops (incl rapeseed) (Mt DM/yr)

|     | 1995 | 2000 | 2005 | 2010 | 2015 | 2020 | 2025 | 2030 | 2035 | 2040 | 2045 |
|-----|------|------|------|------|------|------|------|------|------|------|------|
| GLO | 68   | 77   | 85   | 103  | 126  | 145  | 144  | 142  | 139  | 134  | 136  |
| CAZ | 3    | 4    | 4    | 6    | 6    | 7    | 7    | 8    | 9    | 9    | 9    |
| CHA | 10   | 12   | 13   | 15   | 17   | 18   | 18   | 17   | 16   | 14   | 13   |
| EUR | 16   | 20   | 23   | 32   | 40   | 49   | 41   | 34   | 27   | 20   | 20   |
| IND | 9    | 10   | 11   | 10   | 14   | 17   | 19   | 22   | 23   | 24   | 23   |
| JPN | 2    | 2    | 2    | 2    | 2    | 2    | 2    | 2    | 2    | 2    | 2    |
| LAM | 2    | 3    | 3    | 3    | 4    | 4    | 4    | 4    | 4    | 4    | 3    |
| MEA | 1    | 2    | 3    | 5    | 5    | 6    | 6    | 6    | 6    | 6    | 6    |
| NEU | 0    | 1    | 1    | 2    | 2    | 2    | 2    | 2    | 2    | 2    | 2    |
| OAS | 21   | 19   | 20   | 24   | 30   | 35   | 38   | 40   | 43   | 44   | 47   |
| REF | 0    | 0    | 0    | 1    | 1    | 1    | 1    | 1    | 1    | 1    | 1    |
| SSA | 2    | 2    | 2    | 2    | 2    | 3    | 4    | 5    | 6    | 7    | 8    |
| USA | 1    | 1    | 1    | 2    | 2    | 2    | 2    | 2    | 2    | 2    | 2    |

Table 599: MAgPIE m4p\_SSP1 — Demand—Processing—Crops—Oil crops—Other oil crops (incl rapeseed) (Mt DM/yr) [PART 1/2]

|     | 2050 | 2055 | 2060 | 2070 | 2080 | 2090 | 2100 |
|-----|------|------|------|------|------|------|------|
| GLO | 136  | 136  | 134  | 128  | 118  | 110  | 99   |
| CAZ | 9    | 9    | 9    | 9    | 9    | 8    | 8    |
| CHA | 12   | 11   | 10   | 9    | 8    | 7    | 6    |
| EUR | 20   | 19   | 19   | 19   | 18   | 17   | 16   |
| IND | 23   | 22   | 22   | 20   | 18   | 16   | 13   |
| JPN | 2    | 2    | 2    | 2    | 1    | 1    | 1    |
| LAM | 3    | 3    | 3    | 3    | 3    | 2    | 2    |
| MEA | 6    | 6    | 6    | 6    | 6    | 5    | 5    |
| NEU | 1    | 1    | 1    | 1    | 1    | 1    | 1    |
| OAS | 49   | 49   | 49   | 47   | 43   | 41   | 37   |
| REF | 1    | 1    | 1    | 1    | 1    | 1    | 1    |
| SSA | 9    | 10   | 10   | 10   | 9    | 8    | 7    |
| USA | 2    | 2    | 2    | 2    | 2    | 2    | 2    |

Table 600: MAgPIE m4p\_SSP1 — Demand—Processing—Crops—Oil crops—Other oil crops (incl rapeseed) (Mt DM/yr) [PART 2/2]

|     | 1965 | 1970 | 1975 | 1980 | 1985 | 1990 | 1995 | 2000 | 2005 | 2010 |
|-----|------|------|------|------|------|------|------|------|------|------|
| GLO | 31   | 34   | 41   | 45   | 50   | 59   | 67   | 76   | 84   | 103  |
| CAZ | 0    | 0    | 0    | 1    | 1    | 1    | 3    | 3    | 3    | 6    |
| CHA | 2    | 2    | 3    | 4    | 6    | 8    | 9    | 12   | 13   | 15   |
| EUR | 10   | 9    | 12   | 12   | 13   | 13   | 16   | 20   | 23   | 32   |
| IND | 4    | 4    | 5    | 4    | 6    | 8    | 9    | 10   | 11   | 10   |
| JPN | 1    | 1    | 1    | 1    | 2    | 2    | 2    | 2    | 2    | 2    |
| LAM | 3    | 3    | 3    | 3    | 2    | 3    | 2    | 3    | 3    | 3    |
| MEA | 1    | 1    | 2    | 2    | 1    | 2    | 1    | 2    | 3    | 5    |
| NEU | 1    | 1    | 1    | 1    | 1    | 1    | 0    | 1    | 1    | 2    |
| OAS | 7    | 9    | 12   | 15   | 15   | 19   | 21   | 19   | 20   | 24   |
| REF | 0    | 0    | 0    | 0    | 0    | 1    | 0    | 0    | 0    | 1    |
| SSA | 1    | 1    | 1    | 1    | 2    | 2    | 2    | 2    | 2    | 2    |
| USA | 2    | 1    | 0    | 0    | 0    | 0    | 1    | 1    | 1    | 2    |

Table 601: FAO — Demand—Processing—Crops—Oil crops—Other oil crops (incl rapeseed) (Mt DM/yr)



9.1.11 Oil crops—Soybean

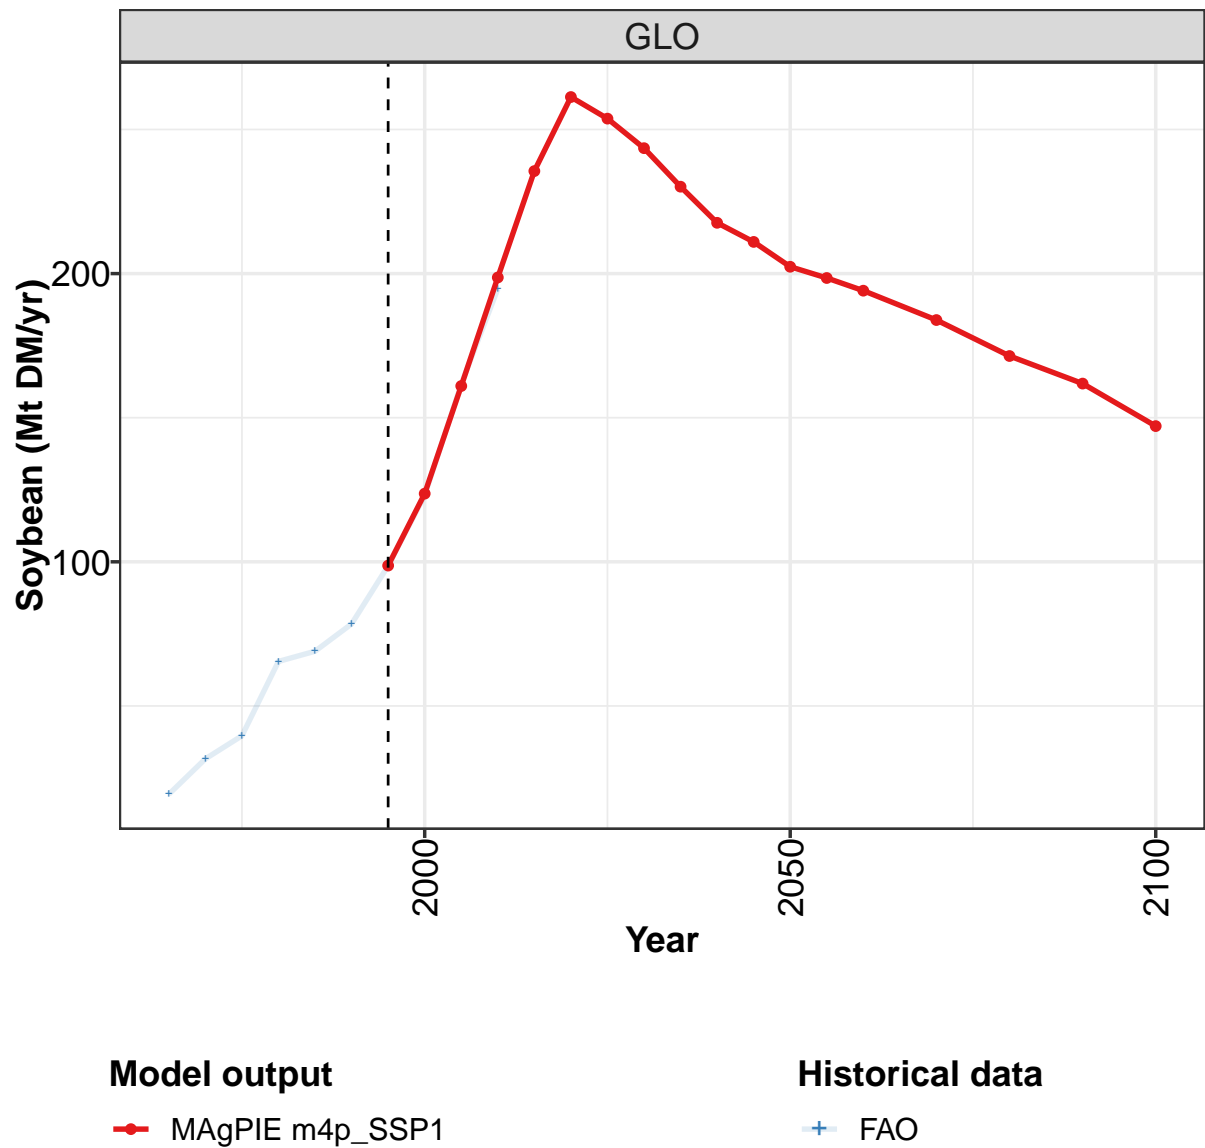

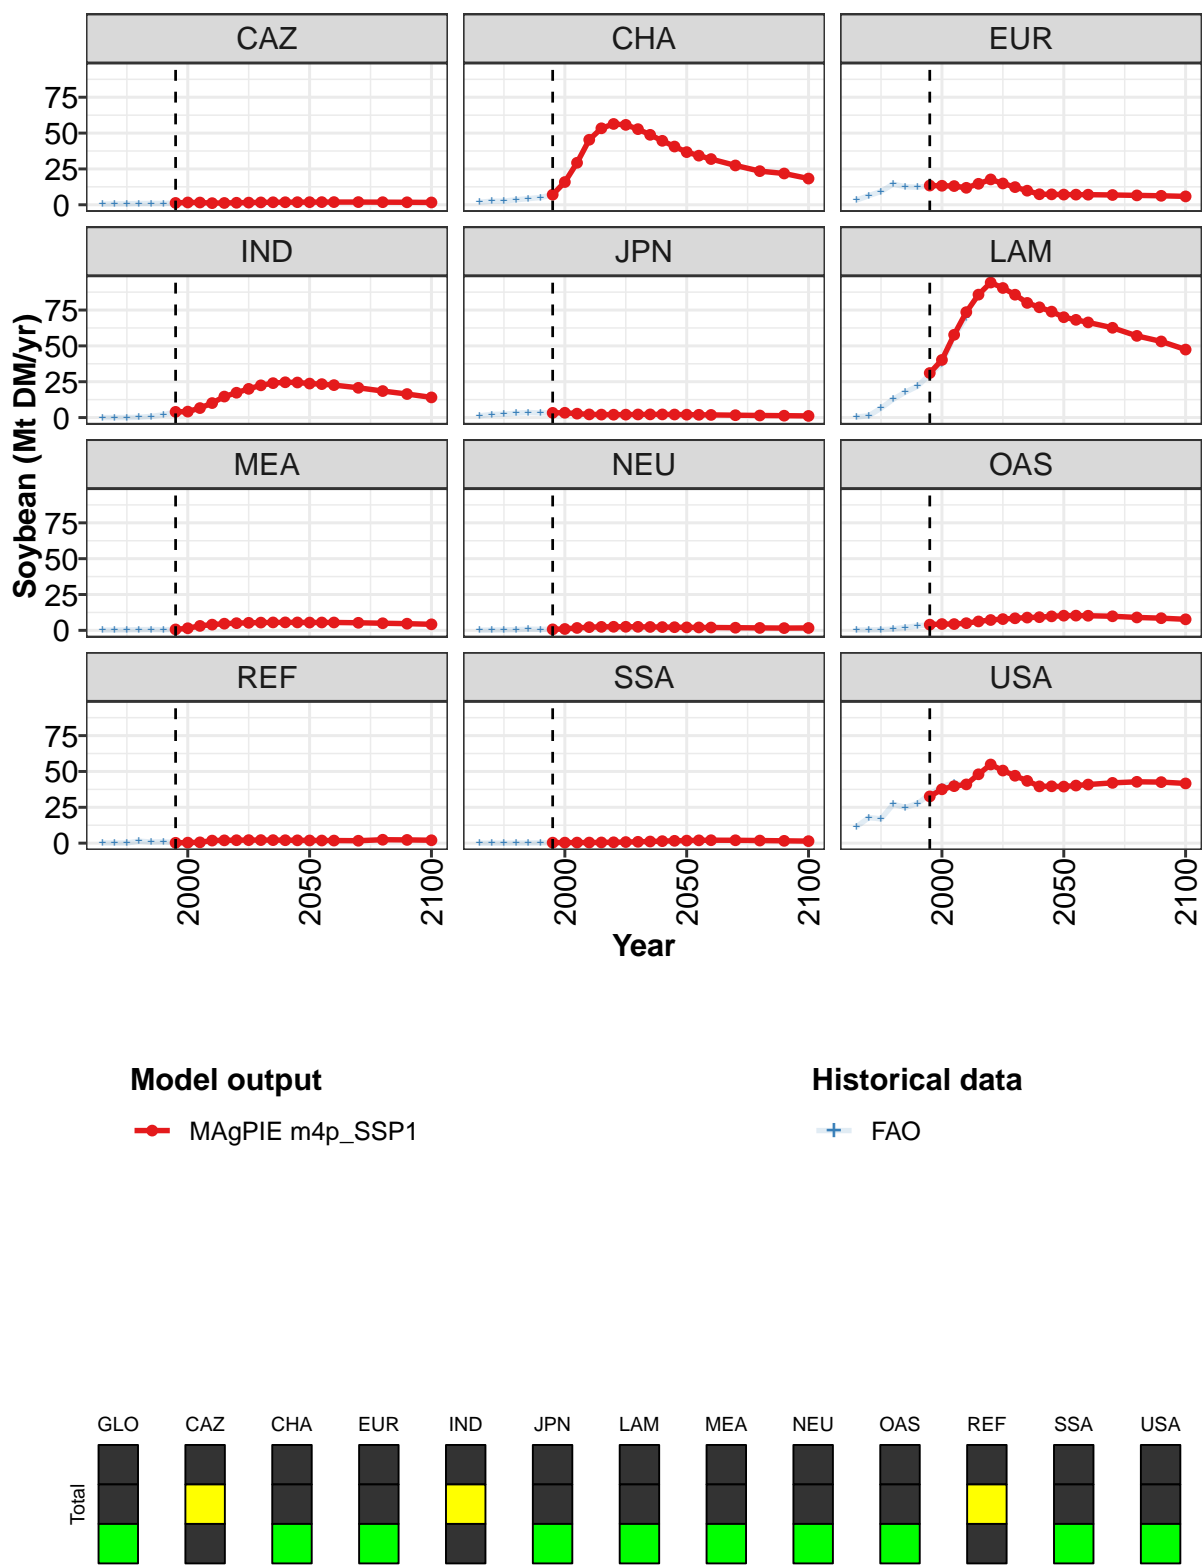

Figure 201: MAgPIE m4p\_SSP1 — Demand—Processing—Crops—Oil crops—Soybean (Mt DM/yr)

|     | 1995 | 2000 | 2005 | 2010 | 2015 | 2020 | 2025 | 2030 | 2035 | 2040 | 2045 |
|-----|------|------|------|------|------|------|------|------|------|------|------|
| GLO | 99   | 124  | 161  | 199  | 236  | 261  | 254  | 244  | 230  | 218  | 211  |
| CAZ | 1    | 2    | 2    | 1    | 1    | 1    | 2    | 2    | 2    | 2    | 2    |
| CHA | 7    | 16   | 29   | 45   | 53   | 56   | 56   | 53   | 49   | 45   | 41   |
| EUR | 13   | 13   | 13   | 12   | 15   | 18   | 15   | 12   | 10   | 7    | 7    |
| IND | 4    | 4    | 7    | 10   | 15   | 17   | 20   | 22   | 24   | 25   | 24   |
| JPN | 3    | 3    | 3    | 2    | 2    | 2    | 2    | 2    | 2    | 2    | 2    |
| LAM | 31   | 40   | 58   | 74   | 86   | 94   | 90   | 86   | 80   | 77   | 74   |
| MEA | 1    | 1    | 3    | 4    | 5    | 5    | 5    | 5    | 6    | 6    | 6    |
| NEU | 1    | 1    | 2    | 2    | 2    | 3    | 3    | 2    | 2    | 2    | 2    |
| OAS | 4    | 4    | 4    | 5    | 6    | 7    | 8    | 8    | 9    | 9    | 10   |
| REF | 0    | 0    | 1    | 2    | 2    | 2    | 2    | 2    | 2    | 2    | 2    |
| SSA | 0    | 0    | 0    | 0    | 1    | 1    | 1    | 1    | 1    | 1    | 2    |
| USA | 33   | 38   | 40   | 41   | 48   | 55   | 51   | 47   | 43   | 40   | 40   |

Table 602: MAgPIE m4p\_SSP1 — Demand—Processing—Crops—Oil crops—Soybean (Mt DM/yr) [PART 1/2]

|     | 2050 | 2055 | 2060 | 2070 | 2080 | 2090 | 2100 |
|-----|------|------|------|------|------|------|------|
| GLO | 202  | 198  | 194  | 184  | 171  | 162  | 147  |
| CAZ | 2    | 2    | 2    | 2    | 2    | 2    | 2    |
| CHA | 37   | 34   | 32   | 27   | 23   | 22   | 18   |
| EUR | 7    | 7    | 7    | 7    | 7    | 6    | 6    |
| IND | 24   | 23   | 23   | 21   | 19   | 16   | 14   |
| JPN | 2    | 2    | 2    | 2    | 1    | 1    | 1    |
| LAM | 70   | 68   | 66   | 63   | 57   | 53   | 47   |
| MEA | 5    | 6    | 5    | 5    | 5    | 5    | 4    |
| NEU | 2    | 2    | 2    | 2    | 2    | 2    | 2    |
| OAS | 10   | 10   | 10   | 10   | 9    | 8    | 8    |
| REF | 2    | 2    | 2    | 2    | 2    | 2    | 2    |
| SSA | 2    | 2    | 2    | 2    | 2    | 2    | 1    |
| USA | 39   | 40   | 41   | 42   | 43   | 43   | 42   |

Table 603: MAgPIE m4p\_SSP1 — Demand—Processing—Crops—Oil crops—Soybean (Mt DM/yr) [PART 2/2]

|     | 1965 | 1970 | 1975 | 1980 | 1985 | 1990 | 1995 | 2000 | 2005 | 2010 |
|-----|------|------|------|------|------|------|------|------|------|------|
| GLO | 19   | 32   | 40   | 65   | 69   | 78   | 99   | 123  | 162  | 195  |
| CAZ | 0    | 1    | 1    | 1    | 1    | 1    | 1    | 2    | 2    | 1    |
| CHA | 2    | 2    | 3    | 3    | 4    | 5    | 7    | 16   | 29   | 45   |
| EUR | 3    | 6    | 9    | 14   | 13   | 12   | 13   | 13   | 13   | 12   |
| IND | 0    | 0    | 0    | 0    | 1    | 2    | 4    | 4    | 7    | 10   |
| JPN | 1    | 2    | 2    | 3    | 3    | 3    | 3    | 3    | 3    | 2    |
| LAM | 0    | 1    | 7    | 13   | 18   | 22   | 30   | 38   | 57   | 70   |
| MEA | 0    | 0    | 0    | 0    | 1    | 0    | 1    | 1    | 3    | 4    |
| NEU | 0    | 0    | 0    | 1    | 1    | 1    | 1    | 1    | 2    | 2    |
| OAS | 0    | 0    | 0    | 1    | 2    | 3    | 4    | 4    | 4    | 5    |
| REF | 0    | 0    | 0    | 1    | 1    | 1    | 0    | 0    | 1    | 2    |
| SSA | 0    | 0    | 0    | 0    | 0    | 0    | 0    | 0    | 0    | 0    |
| USA | 12   | 18   | 17   | 27   | 25   | 28   | 34   | 40   | 42   | 41   |

Table 604: FAO — Demand—Processing—Crops—Oil crops—Soybean (Mt DM/yr)

9.1.12
Oil crops—Sunflower

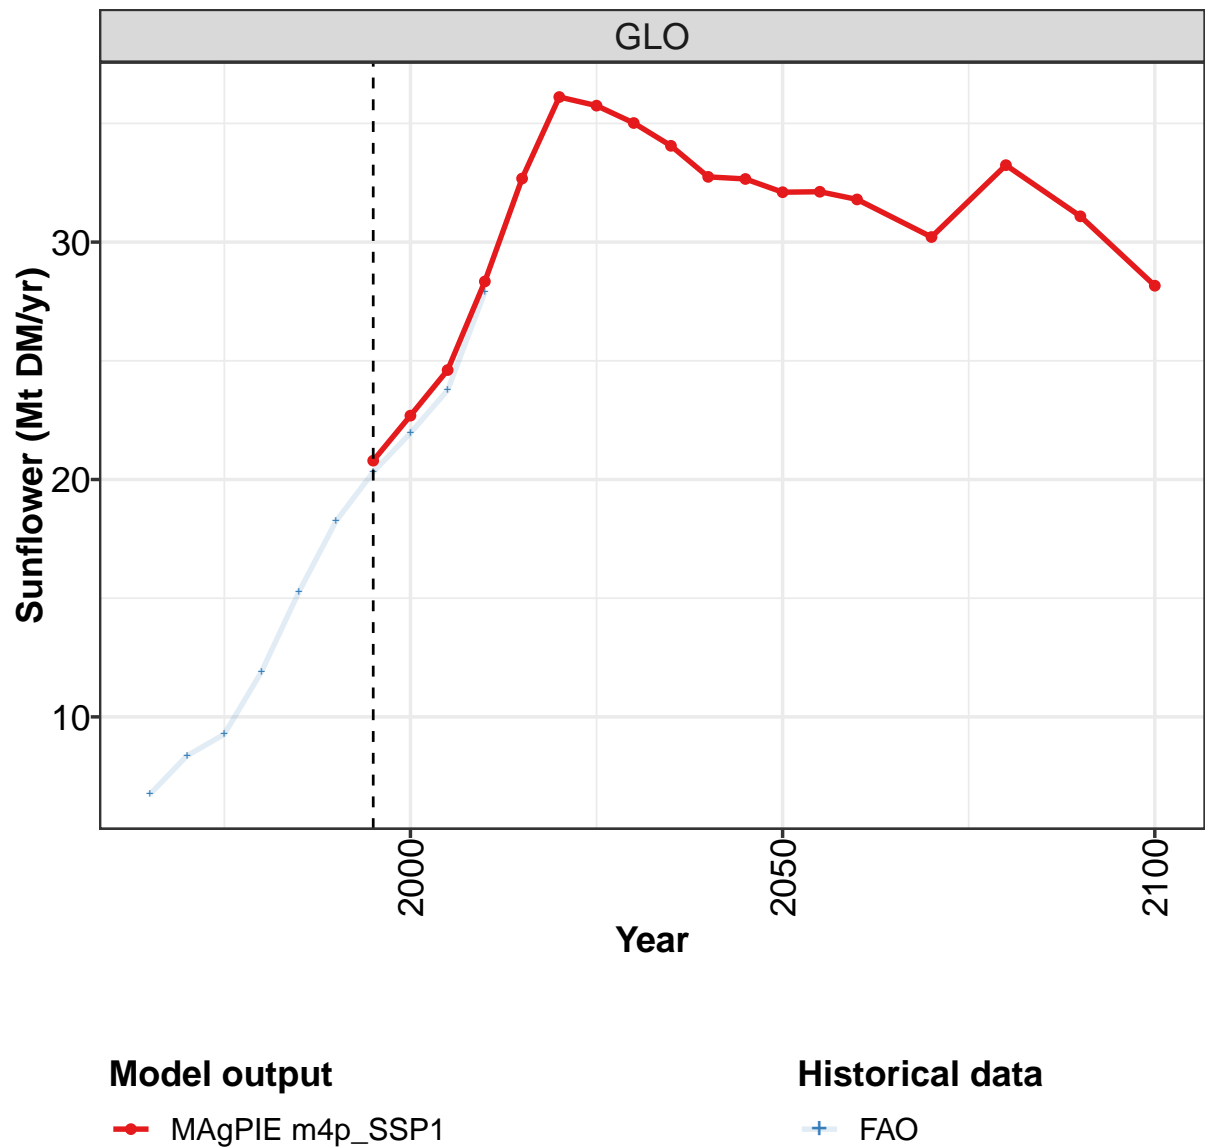

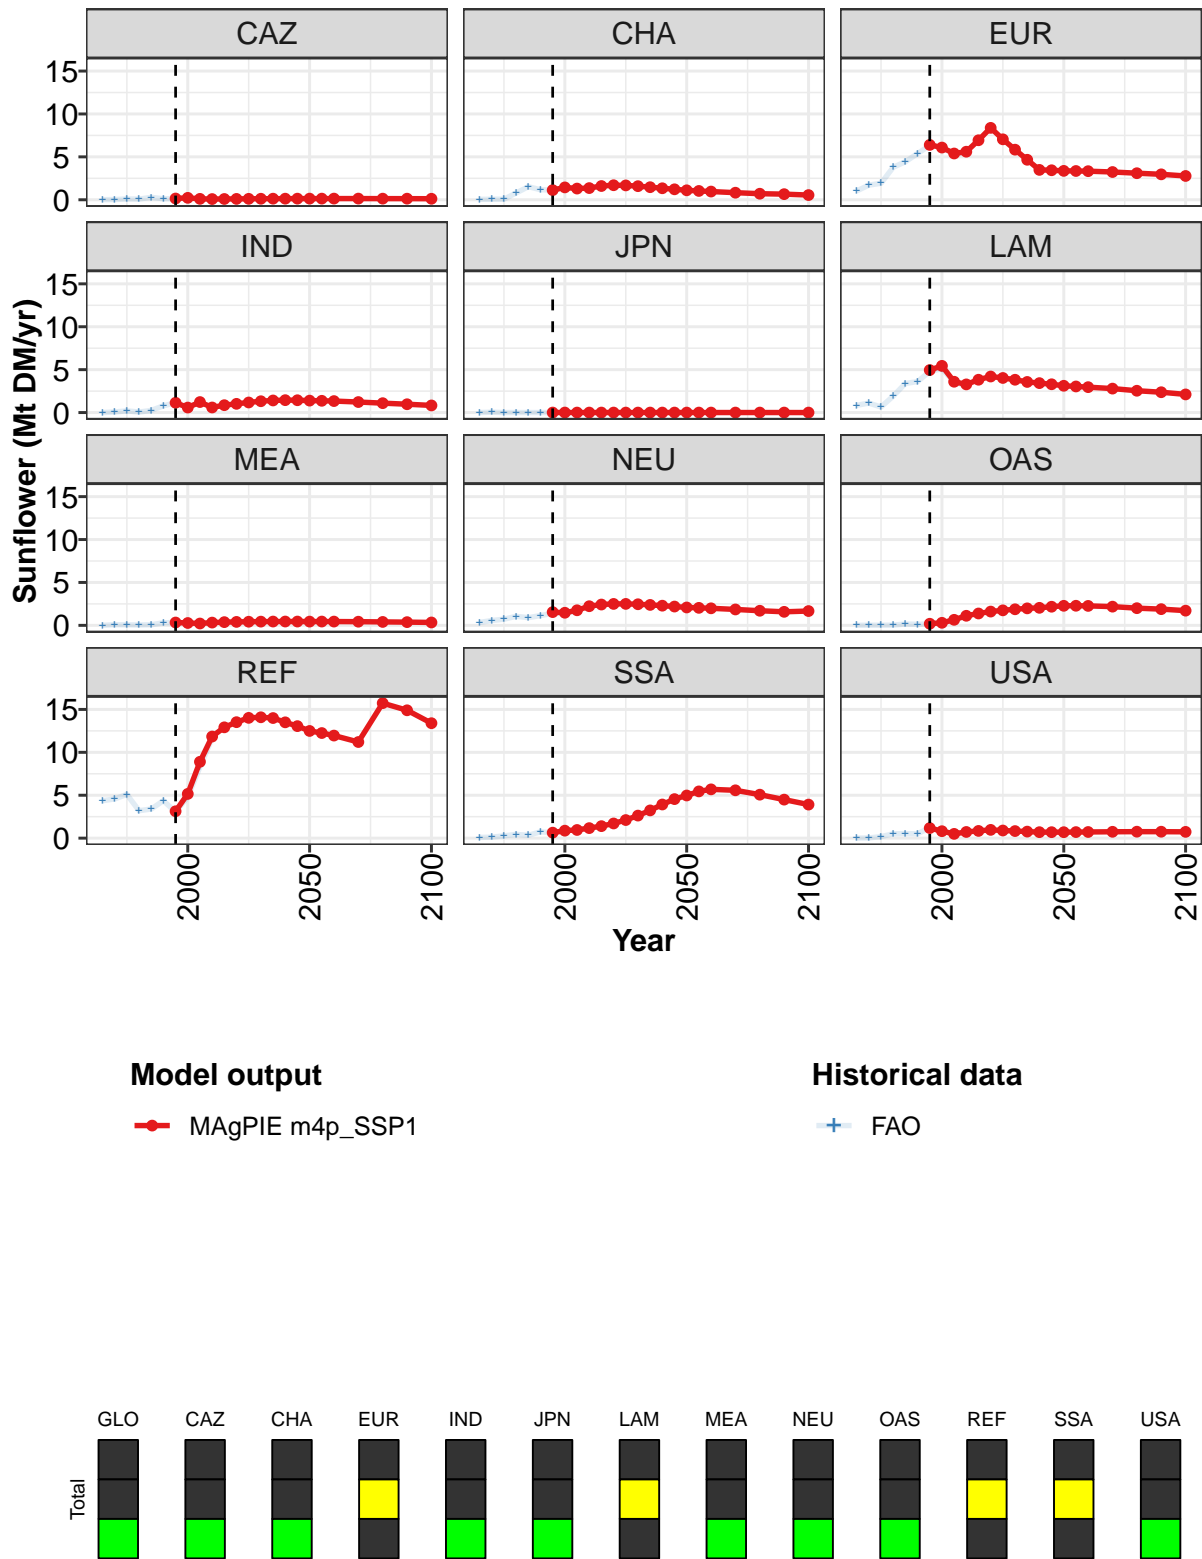

Figure 202: MAgPIE m4p\_SSP1 — Demand—Processing—Crops—Oil crops—Sunflower (Mt DM/yr)

|     | 1995 | 2000 | 2005 | 2010 | 2015 | 2020 | 2025 | 2030 | 2035 | 2040 | 2045 |
|-----|------|------|------|------|------|------|------|------|------|------|------|
| GLO | 20.8 | 22.7 | 24.6 | 28.3 | 32.7 | 36.1 | 35.7 | 35.0 | 34.1 | 32.7 | 32.7 |
| CAZ | 0.1  | 0.2  | 0.1  | 0.1  | 0.1  | 0.1  | 0.1  | 0.1  | 0.1  | 0.1  | 0.1  |
| CHA | 1.1  | 1.4  | 1.3  | 1.4  | 1.6  | 1.7  | 1.7  | 1.6  | 1.5  | 1.3  | 1.2  |
| EUR | 6.4  | 6.1  | 5.4  | 5.6  | 6.9  | 8.4  | 7.0  | 5.8  | 4.7  | 3.5  | 3.4  |
| IND | 1.1  | 0.6  | 1.2  | 0.6  | 0.9  | 1.0  | 1.2  | 1.3  | 1.4  | 1.4  | 1.4  |
| JPN | 0.0  | 0.0  | 0.0  | 0.0  | 0.0  | 0.0  | 0.0  | 0.0  | 0.0  | 0.0  | 0.0  |
| LAM | 5.0  | 5.4  | 3.6  | 3.3  | 3.8  | 4.2  | 4.0  | 3.8  | 3.6  | 3.4  | 3.3  |
| MEA | 0.3  | 0.3  | 0.2  | 0.3  | 0.4  | 0.4  | 0.4  | 0.4  | 0.4  | 0.4  | 0.4  |
| NEU | 1.5  | 1.5  | 1.8  | 2.2  | 2.4  | 2.5  | 2.5  | 2.5  | 2.4  | 2.3  | 2.2  |
| OAS | 0.2  | 0.3  | 0.6  | 1.1  | 1.4  | 1.6  | 1.7  | 1.9  | 2.0  | 2.0  | 2.2  |
| REF | 3.1  | 5.2  | 8.9  | 11.8 | 12.9 | 13.5 | 14.0 | 14.1 | 14.0 | 13.5 | 13.1 |
| SSA | 0.6  | 0.9  | 1.0  | 1.2  | 1.4  | 1.7  | 2.1  | 2.6  | 3.2  | 3.9  | 4.6  |
| USA | 1.2  | 0.8  | 0.5  | 0.7  | 0.8  | 1.0  | 0.9  | 0.8  | 0.8  | 0.7  | 0.7  |

Table 605: MAgPIE m4p\_SSP1 — Demand—Processing—Crops—Oil crops—Sunflower (Mt DM/yr) [PART 1/2]

|     | 2050 | 2055 | 2060 | 2070 | 2080 | 2090 | 2100 |
|-----|------|------|------|------|------|------|------|
| GLO | 32.1 | 32.1 | 31.8 | 30.2 | 33.2 | 31.1 | 28.2 |
| CAZ | 0.1  | 0.1  | 0.1  | 0.1  | 0.1  | 0.1  | 0.1  |
| CHA | 1.1  | 1.0  | 1.0  | 0.8  | 0.7  | 0.7  | 0.5  |
| EUR | 3.4  | 3.4  | 3.3  | 3.2  | 3.1  | 3.0  | 2.8  |
| IND | 1.4  | 1.4  | 1.3  | 1.2  | 1.1  | 1.0  | 0.8  |
| JPN | 0.0  | 0.0  | 0.0  | 0.0  | 0.0  | 0.0  | 0.0  |
| LAM | 3.1  | 3.0  | 3.0  | 2.8  | 2.5  | 2.4  | 2.1  |
| MEA | 0.4  | 0.4  | 0.4  | 0.4  | 0.4  | 0.4  | 0.3  |
| NEU | 2.1  | 2.0  | 2.0  | 1.9  | 1.7  | 1.6  | 1.7  |
| OAS | 2.3  | 2.3  | 2.3  | 2.2  | 2.0  | 1.9  | 1.7  |
| REF | 12.5 | 12.3 | 12.0 | 11.2 | 15.7 | 14.9 | 13.4 |
| SSA | 5.0  | 5.5  | 5.7  | 5.6  | 5.1  | 4.5  | 3.9  |
| USA | 0.7  | 0.7  | 0.7  | 0.7  | 0.8  | 0.8  | 0.7  |

Table 606: MAgPIE m4p\_SSP1 — Demand—Processing—Crops—Oil crops—Sunflower (Mt DM/yr) [PART 2/2]

|     | 1965 | 1970 | 1975 | 1980 | 1985 | 1990 | 1995 | 2000 | 2005 | 2010 |
|-----|------|------|------|------|------|------|------|------|------|------|
| GLO | 6.7  | 8.4  | 9.3  | 11.9 | 15.3 | 18.2 | 20.3 | 22.0 | 23.8 | 27.9 |
| CAZ | 0.0  | 0.0  | 0.1  | 0.1  | 0.3  | 0.1  | 0.1  | 0.2  | 0.1  | 0.1  |
| CHA | 0.1  | 0.1  | 0.1  | 0.8  | 1.5  | 1.2  | 1.1  | 1.4  | 1.3  | 1.4  |
| EUR | 1.0  | 1.7  | 1.9  | 3.8  | 4.4  | 5.4  | 6.3  | 6.1  | 5.3  | 5.5  |
| IND | 0.0  | 0.1  | 0.2  | 0.1  | 0.2  | 0.8  | 1.1  | 0.6  | 1.2  | 0.6  |
| JPN | 0.0  | 0.0  | 0.0  | 0.0  | 0.0  | 0.0  | 0.0  | 0.0  | 0.0  | 0.0  |
| LAM | 0.8  | 1.1  | 0.7  | 1.9  | 3.4  | 3.6  | 4.8  | 5.1  | 3.5  | 3.1  |
| MEA | 0.0  | 0.1  | 0.1  | 0.0  | 0.1  | 0.3  | 0.3  | 0.3  | 0.2  | 0.3  |
| NEU | 0.3  | 0.6  | 0.7  | 1.1  | 0.9  | 1.1  | 1.4  | 1.4  | 1.7  | 2.2  |
| OAS | 0.0  | 0.0  | 0.0  | 0.0  | 0.2  | 0.1  | 0.2  | 0.3  | 0.6  | 1.1  |
| REF | 4.4  | 4.6  | 5.1  | 3.2  | 3.4  | 4.4  | 3.0  | 4.8  | 8.3  | 11.7 |
| SSA | 0.1  | 0.1  | 0.3  | 0.4  | 0.3  | 0.7  | 0.6  | 0.9  | 1.0  | 1.2  |
| USA | 0.0  | 0.0  | 0.2  | 0.5  | 0.5  | 0.5  | 1.2  | 0.9  | 0.5  | 0.7  |

Table 607: FAO — Demand—Processing—Crops—Oil crops—Sunflower (Mt DM/yr)

9.1.13
Other crops

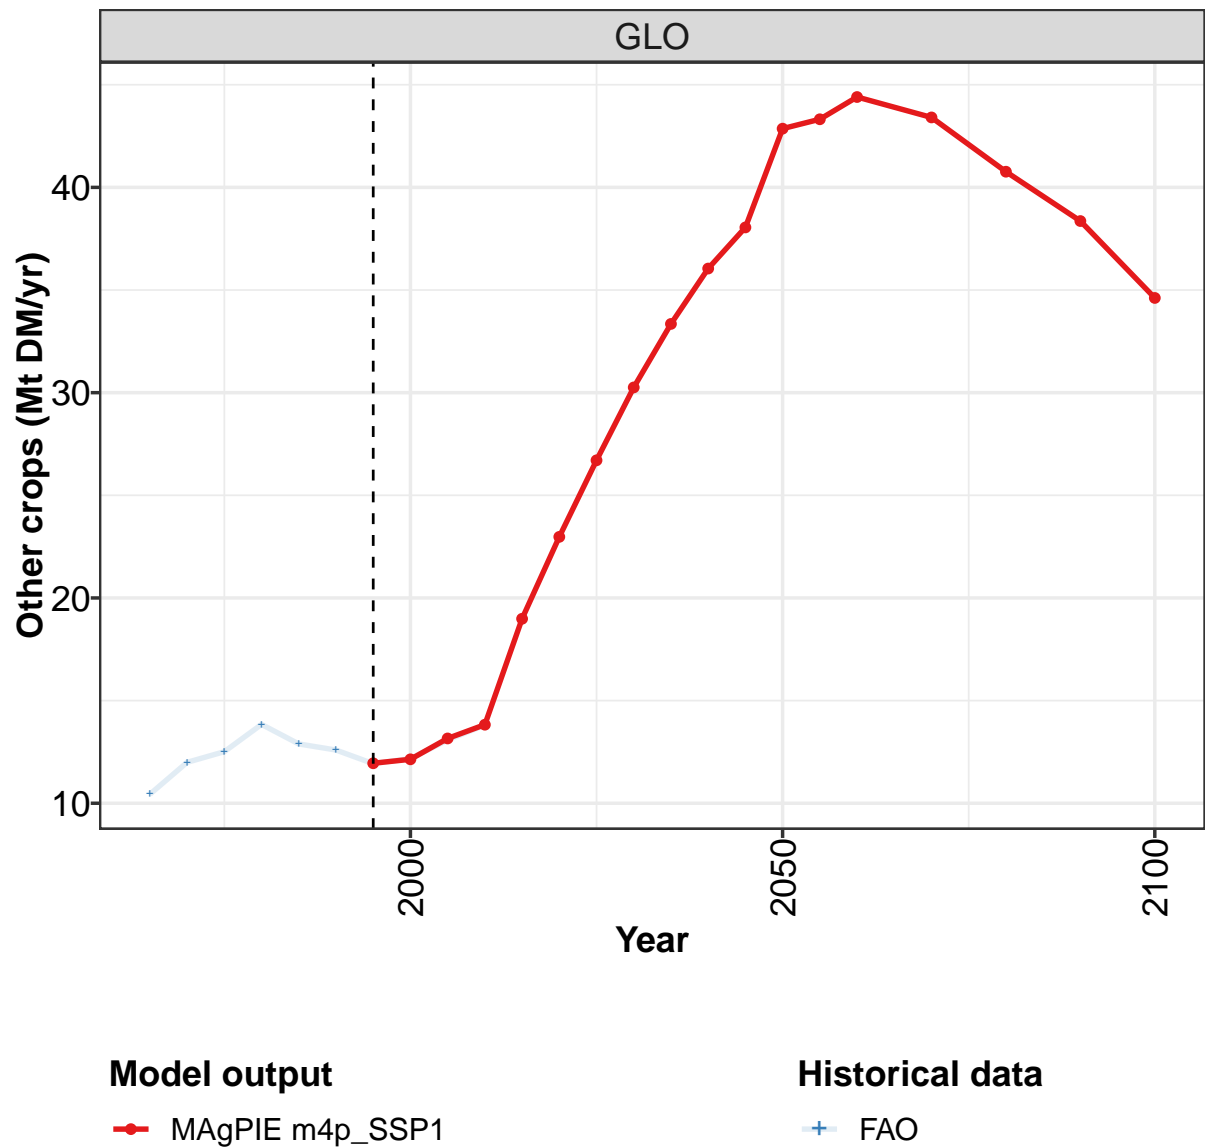

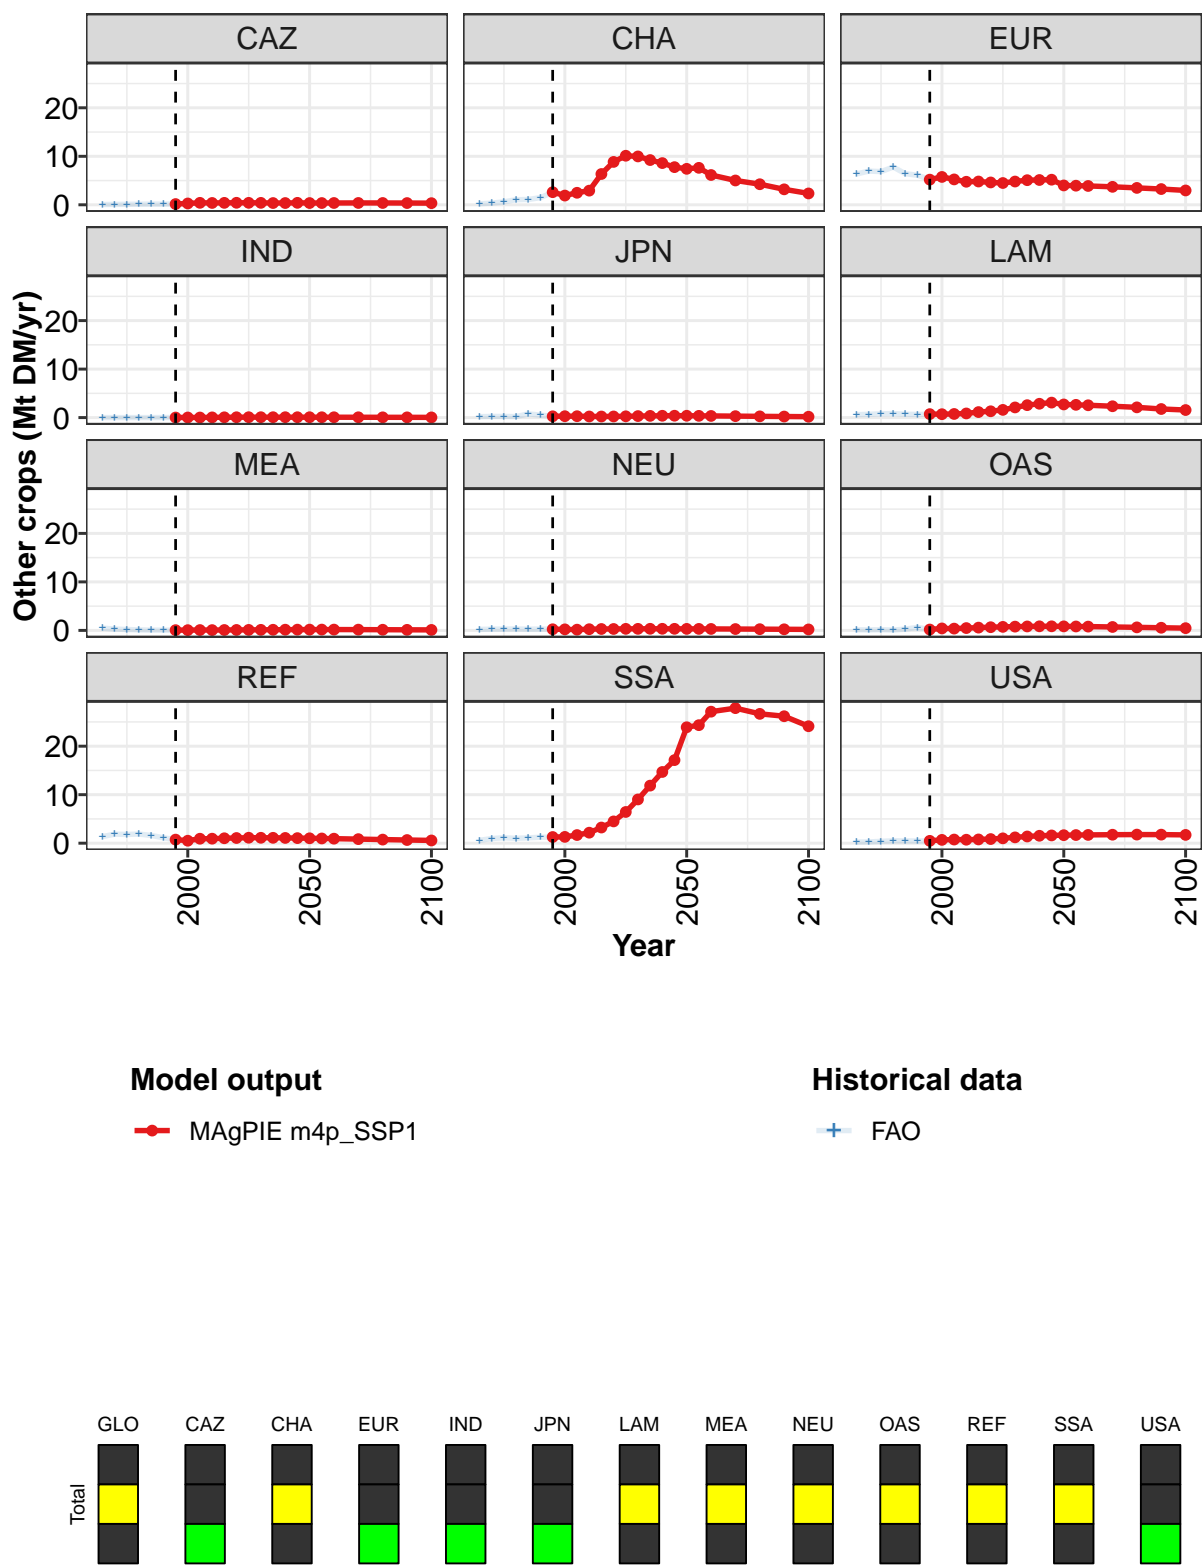

Figure 203: MAgPIE m4p\_SSP1 — Demand—Processing—Crops—Other crops (Mt DM/yr)



|     | 1995 | 2000 | 2005 | 2010 | 2015 | 2020 | 2025 | 2030 | 2035 | 2040 | 2045 |
|-----|------|------|------|------|------|------|------|------|------|------|------|
| GLO | 11.9 | 12.1 | 13.2 | 13.8 | 19.0 | 23.0 | 26.7 | 30.3 | 33.3 | 36.0 | 38.0 |
| CAZ | 0.2  | 0.3  | 0.4  | 0.4  | 0.4  | 0.4  | 0.4  | 0.4  | 0.4  | 0.4  | 0.4  |
| CHA | 2.6  | 1.9  | 2.5  | 2.9  | 6.4  | 8.8  | 10.1 | 10.0 | 9.2  | 8.6  | 7.8  |
| EUR | 5.2  | 5.7  | 5.2  | 4.8  | 4.8  | 4.6  | 4.5  | 4.8  | 5.1  | 5.1  | 5.2  |
| IND | 0.0  | 0.0  | 0.0  | 0.1  | 0.1  | 0.1  | 0.1  | 0.1  | 0.1  | 0.1  | 0.1  |
| JPN | 0.3  | 0.3  | 0.3  | 0.2  | 0.2  | 0.2  | 0.3  | 0.3  | 0.4  | 0.4  | 0.4  |
| LAM | 0.7  | 0.7  | 0.8  | 0.9  | 1.1  | 1.3  | 1.6  | 2.1  | 2.6  | 2.9  | 3.1  |
| MEA | 0.1  | 0.1  | 0.1  | 0.1  | 0.1  | 0.1  | 0.1  | 0.1  | 0.1  | 0.1  | 0.2  |
| NEU | 0.2  | 0.2  | 0.2  | 0.2  | 0.3  | 0.3  | 0.3  | 0.3  | 0.3  | 0.3  | 0.3  |
| OAS | 0.2  | 0.4  | 0.4  | 0.5  | 0.6  | 0.7  | 0.7  | 0.8  | 0.8  | 0.8  | 0.8  |
| REF | 0.7  | 0.5  | 0.9  | 0.9  | 1.0  | 1.1  | 1.1  | 1.1  | 1.1  | 1.1  | 1.1  |
| SSA | 1.3  | 1.3  | 1.7  | 2.2  | 3.2  | 4.5  | 6.4  | 9.0  | 11.9 | 14.7 | 17.1 |
| USA | 0.5  | 0.7  | 0.8  | 0.7  | 0.8  | 0.9  | 1.0  | 1.2  | 1.4  | 1.5  | 1.6  |

Table 608: MAgPIE m4p\_SSP1 — Demand—Processing—Crops—Other crops (Mt DM/yr) [PART 1/2]

|     | 2050 | 2055 | 2060 | 2070 | 2080 | 2090 | 2100 |
|-----|------|------|------|------|------|------|------|
| GLO | 42.9 | 43.3 | 44.4 | 43.4 | 40.8 | 38.4 | 34.6 |
| CAZ | 0.4  | 0.4  | 0.4  | 0.4  | 0.4  | 0.4  | 0.3  |
| CHA | 7.4  | 7.6  | 6.1  | 5.0  | 4.2  | 3.2  | 2.3  |
| EUR | 4.0  | 3.9  | 3.9  | 3.7  | 3.5  | 3.3  | 3.0  |
| IND | 0.1  | 0.1  | 0.1  | 0.1  | 0.1  | 0.1  | 0.0  |
| JPN | 0.4  | 0.4  | 0.3  | 0.3  | 0.3  | 0.2  | 0.2  |
| LAM | 2.7  | 2.6  | 2.5  | 2.3  | 2.1  | 1.8  | 1.6  |
| MEA | 0.2  | 0.2  | 0.2  | 0.2  | 0.1  | 0.1  | 0.1  |
| NEU | 0.3  | 0.3  | 0.3  | 0.3  | 0.3  | 0.2  | 0.2  |
| OAS | 0.8  | 0.8  | 0.8  | 0.7  | 0.6  | 0.5  | 0.5  |
| REF | 1.0  | 1.0  | 0.9  | 0.8  | 0.7  | 0.7  | 0.6  |
| SSA | 23.9 | 24.3 | 27.1 | 27.8 | 26.7 | 26.2 | 24.1 |
| USA | 1.7  | 1.7  | 1.7  | 1.8  | 1.8  | 1.8  | 1.7  |

Table 609: MAgPIE m4p\_SSP1 — Demand—Processing—Crops—Other crops (Mt DM/yr) [PART 2/2]

|     | 1965 | 1970 | 1975 | 1980 | 1985 | 1990 | 1995 | 2000 | 2005 | 2010 |
|-----|------|------|------|------|------|------|------|------|------|------|
| GLO | 10.4 | 12.0 | 12.5 | 13.8 | 12.9 | 12.6 | 11.9 | 12.2 | 13.1 | 13.8 |
| CAZ | 0.1  | 0.1  | 0.1  | 0.1  | 0.1  | 0.1  | 0.2  | 0.3  | 0.4  | 0.4  |
| CHA | 0.2  | 0.3  | 0.6  | 1.0  | 1.1  | 1.5  | 2.6  | 1.9  | 2.5  | 3.0  |
| EUR | 6.4  | 6.9  | 6.8  | 7.8  | 6.4  | 6.1  | 5.2  | 5.8  | 5.2  | 4.7  |
| IND | 0.0  | 0.0  | 0.0  | 0.0  | 0.0  | 0.0  | 0.0  | 0.0  | 0.0  | 0.1  |
| JPN | 0.2  | 0.2  | 0.2  | 0.2  | 0.8  | 0.5  | 0.3  | 0.3  | 0.3  | 0.2  |
| LAM | 0.6  | 0.7  | 0.8  | 0.8  | 0.7  | 0.6  | 0.7  | 0.7  | 0.8  | 0.9  |
| MEA | 0.5  | 0.3  | 0.2  | 0.1  | 0.1  | 0.0  | 0.1  | 0.1  | 0.1  | 0.1  |
| NEU | 0.2  | 0.2  | 0.3  | 0.3  | 0.2  | 0.3  | 0.2  | 0.2  | 0.2  | 0.3  |
| OAS | 0.1  | 0.1  | 0.1  | 0.1  | 0.3  | 0.6  | 0.2  | 0.4  | 0.4  | 0.5  |
| REF | 1.4  | 1.9  | 1.8  | 1.9  | 1.6  | 1.1  | 0.7  | 0.5  | 0.9  | 0.9  |
| SSA | 0.6  | 1.0  | 1.1  | 1.0  | 1.1  | 1.2  | 1.2  | 1.3  | 1.6  | 2.2  |
| USA | 0.2  | 0.3  | 0.4  | 0.5  | 0.5  | 0.4  | 0.5  | 0.7  | 0.8  | 0.7  |

Table 610: FAO — Demand—Processing—Crops—Other crops (Mt DM/yr)

9.1.14
Other crops—Fruits Vegetables Nuts

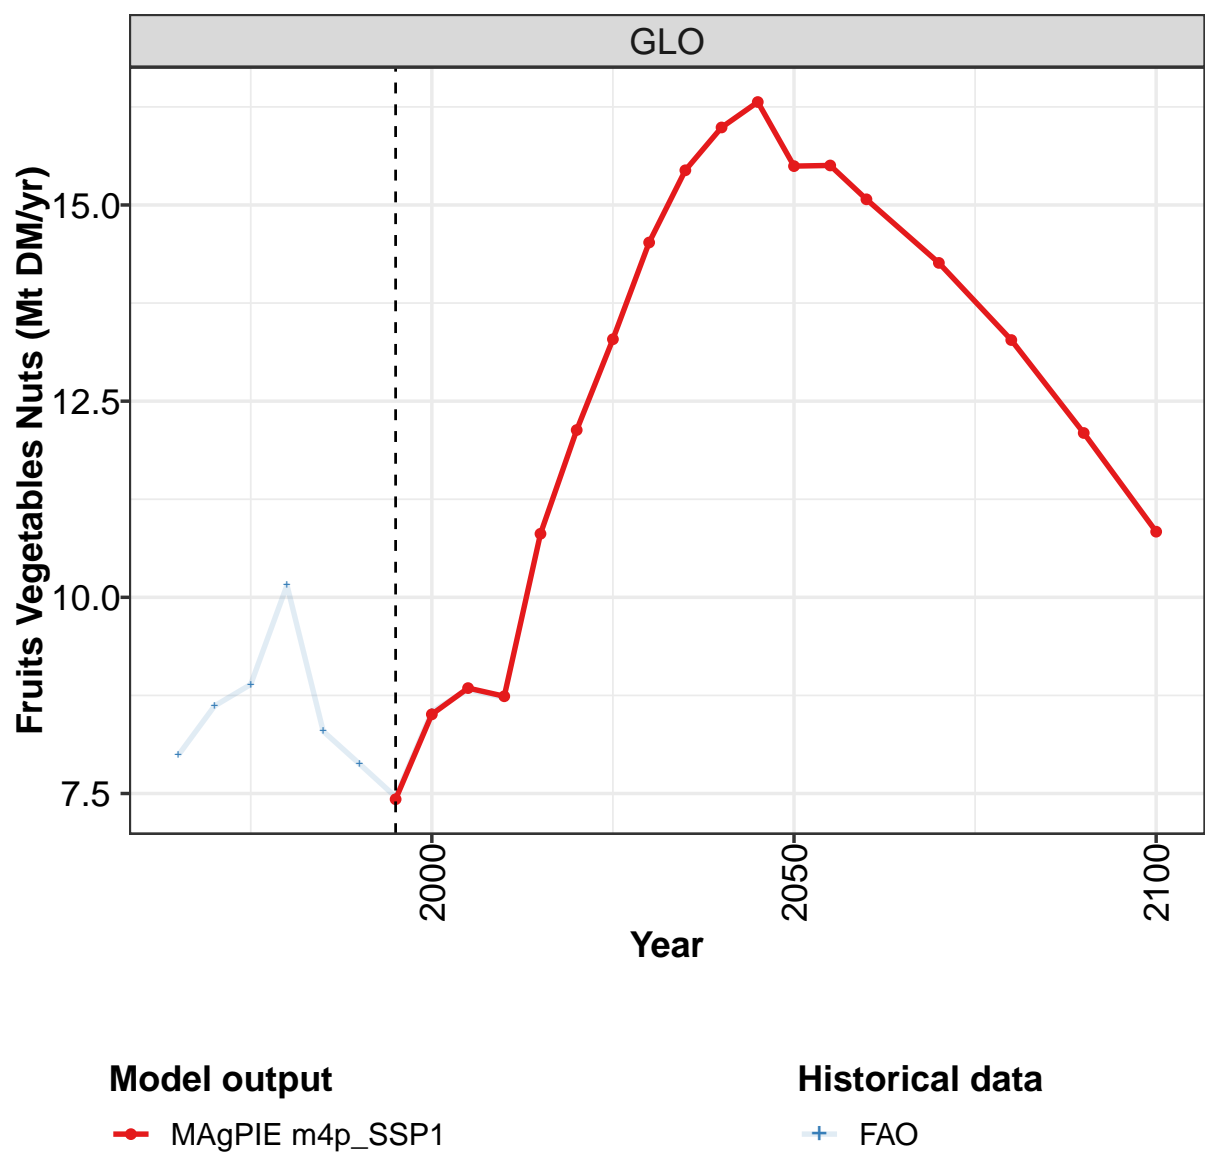

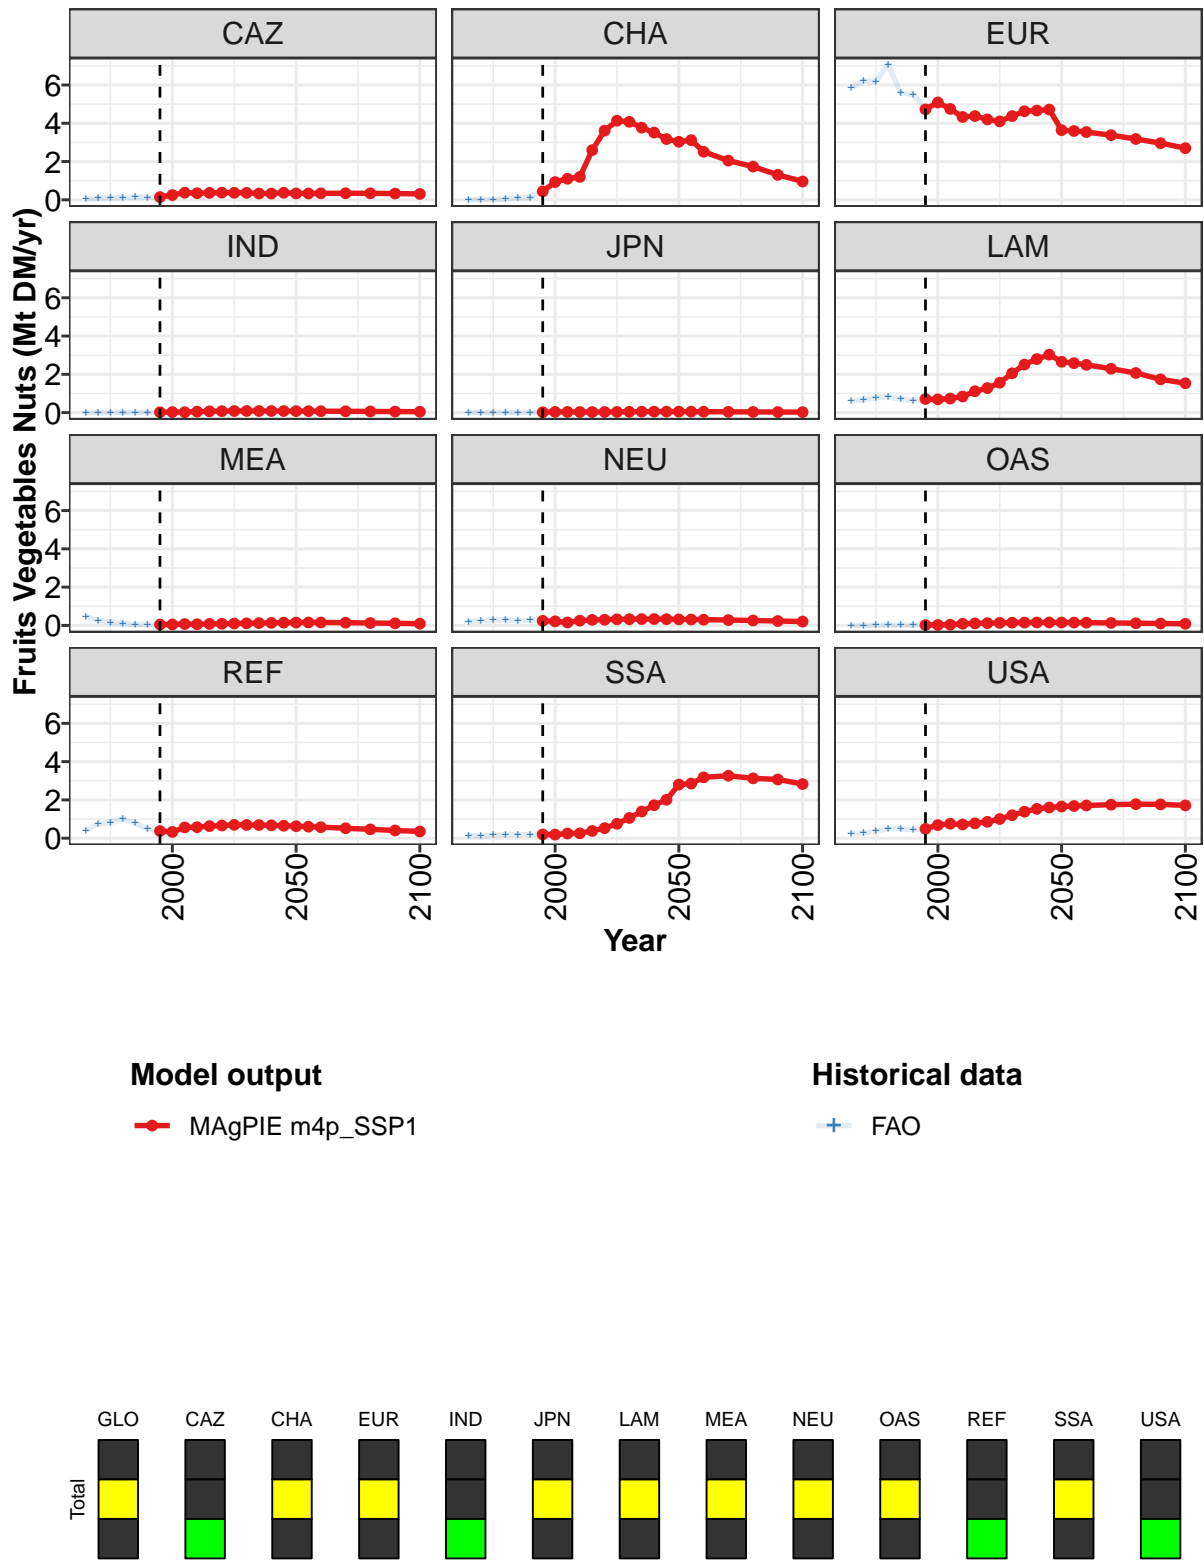

Figure 204: MAgPIE m4p\_SSP1 — Demand—Processing—Crops—Other crops—Fruits Vegetables Nuts (Mt DM/yr)

|     | 1995 | 2000 | 2005 | 2010 | 2015 | 2020 | 2025 | 2030 | 2035 | 2040 | 2045 |
|-----|------|------|------|------|------|------|------|------|------|------|------|
| GLO | 7.4  | 8.5  | 8.8  | 8.7  | 10.8 | 12.1 | 13.3 | 14.5 | 15.4 | 16.0 | 16.3 |
| CAZ | 0.1  | 0.2  | 0.4  | 0.3  | 0.4  | 0.4  | 0.4  | 0.4  | 0.3  | 0.3  | 0.4  |
| CHA | 0.4  | 0.9  | 1.1  | 1.2  | 2.6  | 3.6  | 4.1  | 4.1  | 3.8  | 3.5  | 3.2  |
| EUR | 4.7  | 5.1  | 4.7  | 4.3  | 4.4  | 4.2  | 4.1  | 4.4  | 4.6  | 4.7  | 4.7  |
| IND | 0.0  | 0.0  | 0.0  | 0.1  | 0.1  | 0.1  | 0.1  | 0.1  | 0.1  | 0.1  | 0.1  |
| JPN | 0.0  | 0.0  | 0.0  | 0.0  | 0.0  | 0.0  | 0.0  | 0.0  | 0.0  | 0.1  | 0.1  |
| LAM | 0.7  | 0.7  | 0.7  | 0.8  | 1.1  | 1.3  | 1.6  | 2.1  | 2.5  | 2.8  | 3.0  |
| MEA | 0.0  | 0.0  | 0.1  | 0.1  | 0.1  | 0.1  | 0.1  | 0.1  | 0.1  | 0.1  | 0.1  |
| NEU | 0.2  | 0.2  | 0.2  | 0.2  | 0.3  | 0.3  | 0.3  | 0.3  | 0.3  | 0.3  | 0.3  |
| OAS | 0.0  | 0.0  | 0.0  | 0.1  | 0.1  | 0.1  | 0.1  | 0.1  | 0.1  | 0.2  | 0.2  |
| REF | 0.4  | 0.3  | 0.6  | 0.6  | 0.6  | 0.7  | 0.7  | 0.7  | 0.7  | 0.7  | 0.6  |
| SSA | 0.2  | 0.2  | 0.2  | 0.3  | 0.4  | 0.5  | 0.8  | 1.1  | 1.4  | 1.7  | 2.0  |
| USA | 0.5  | 0.7  | 0.8  | 0.7  | 0.8  | 0.9  | 1.0  | 1.2  | 1.4  | 1.5  | 1.6  |

Table 611: MAgPIE m4p\_SSP1 — Demand—Processing—Crops—Other crops—Fruits Vegetables Nuts (Mt DM/yr) [PART 1/2]

|     | 2050 | 2055 | 2060 | 2070 | 2080 | 2090 | 2100 |
|-----|------|------|------|------|------|------|------|
| GLO | 15.5 | 15.5 | 15.1 | 14.3 | 13.3 | 12.1 | 10.8 |
| CAZ | 0.3  | 0.3  | 0.3  | 0.3  | 0.3  | 0.3  | 0.3  |
| CHA | 3.0  | 3.1  | 2.5  | 2.1  | 1.7  | 1.3  | 1.0  |
| EUR | 3.6  | 3.6  | 3.5  | 3.4  | 3.2  | 3.0  | 2.7  |
| IND | 0.1  | 0.1  | 0.1  | 0.1  | 0.1  | 0.1  | 0.0  |
| JPN | 0.1  | 0.0  | 0.0  | 0.0  | 0.0  | 0.0  | 0.0  |
| LAM | 2.7  | 2.6  | 2.5  | 2.3  | 2.1  | 1.7  | 1.5  |
| MEA | 0.1  | 0.2  | 0.2  | 0.1  | 0.1  | 0.1  | 0.1  |
| NEU | 0.3  | 0.3  | 0.3  | 0.3  | 0.3  | 0.2  | 0.2  |
| OAS | 0.2  | 0.1  | 0.1  | 0.1  | 0.1  | 0.1  | 0.1  |
| REF | 0.6  | 0.6  | 0.6  | 0.5  | 0.5  | 0.4  | 0.3  |
| SSA | 2.8  | 2.9  | 3.2  | 3.3  | 3.1  | 3.1  | 2.8  |
| USA | 1.7  | 1.7  | 1.7  | 1.8  | 1.8  | 1.8  | 1.7  |

Table 612: MAgPIE m4p\_SSP1 — Demand—Processing—Crops—Other crops—Fruits Vegetables Nuts (Mt DM/yr) [PART 2/2]

|     | 1965 | 1970 | 1975 | 1980 | 1985 | 1990 | 1995 | 2000 | 2005 | 2010 |
|-----|------|------|------|------|------|------|------|------|------|------|
| GLO | 8.0  | 8.6  | 8.9  | 10.2 | 8.3  | 7.9  | 7.5  | 8.5  | 8.8  | 8.7  |
| CAZ | 0.1  | 0.1  | 0.1  | 0.1  | 0.1  | 0.1  | 0.1  | 0.2  | 0.4  | 0.3  |
| CHA | 0.0  | 0.0  | 0.0  | 0.1  | 0.1  | 0.1  | 0.4  | 0.9  | 1.1  | 1.2  |
| EUR | 5.9  | 6.2  | 6.2  | 7.1  | 5.6  | 5.5  | 4.8  | 5.2  | 4.7  | 4.3  |
| IND | 0.0  | 0.0  | 0.0  | 0.0  | 0.0  | 0.0  | 0.0  | 0.0  | 0.0  | 0.1  |
| JPN | 0.0  | 0.0  | 0.0  | 0.0  | 0.0  | 0.0  | 0.0  | 0.0  | 0.0  | 0.0  |
| LAM | 0.6  | 0.7  | 0.8  | 0.8  | 0.7  | 0.6  | 0.7  | 0.7  | 0.8  | 0.9  |
| MEA | 0.5  | 0.3  | 0.2  | 0.1  | 0.1  | 0.0  | 0.0  | 0.0  | 0.1  | 0.1  |
| NEU | 0.2  | 0.2  | 0.3  | 0.3  | 0.2  | 0.3  | 0.2  | 0.2  | 0.2  | 0.2  |
| OAS | 0.0  | 0.0  | 0.0  | 0.0  | 0.0  | 0.0  | 0.0  | 0.0  | 0.0  | 0.1  |
| REF | 0.4  | 0.7  | 0.8  | 1.0  | 0.8  | 0.5  | 0.4  | 0.3  | 0.6  | 0.6  |
| SSA | 0.1  | 0.1  | 0.2  | 0.2  | 0.2  | 0.2  | 0.2  | 0.2  | 0.2  | 0.3  |
| USA | 0.2  | 0.3  | 0.4  | 0.5  | 0.5  | 0.4  | 0.5  | 0.7  | 0.8  | 0.7  |

Table 613: FAO — Demand—Processing—Crops—Other crops—Fruits Vegetables Nuts (Mt DM/yr)

9.1.15
Other crops—Potatoes

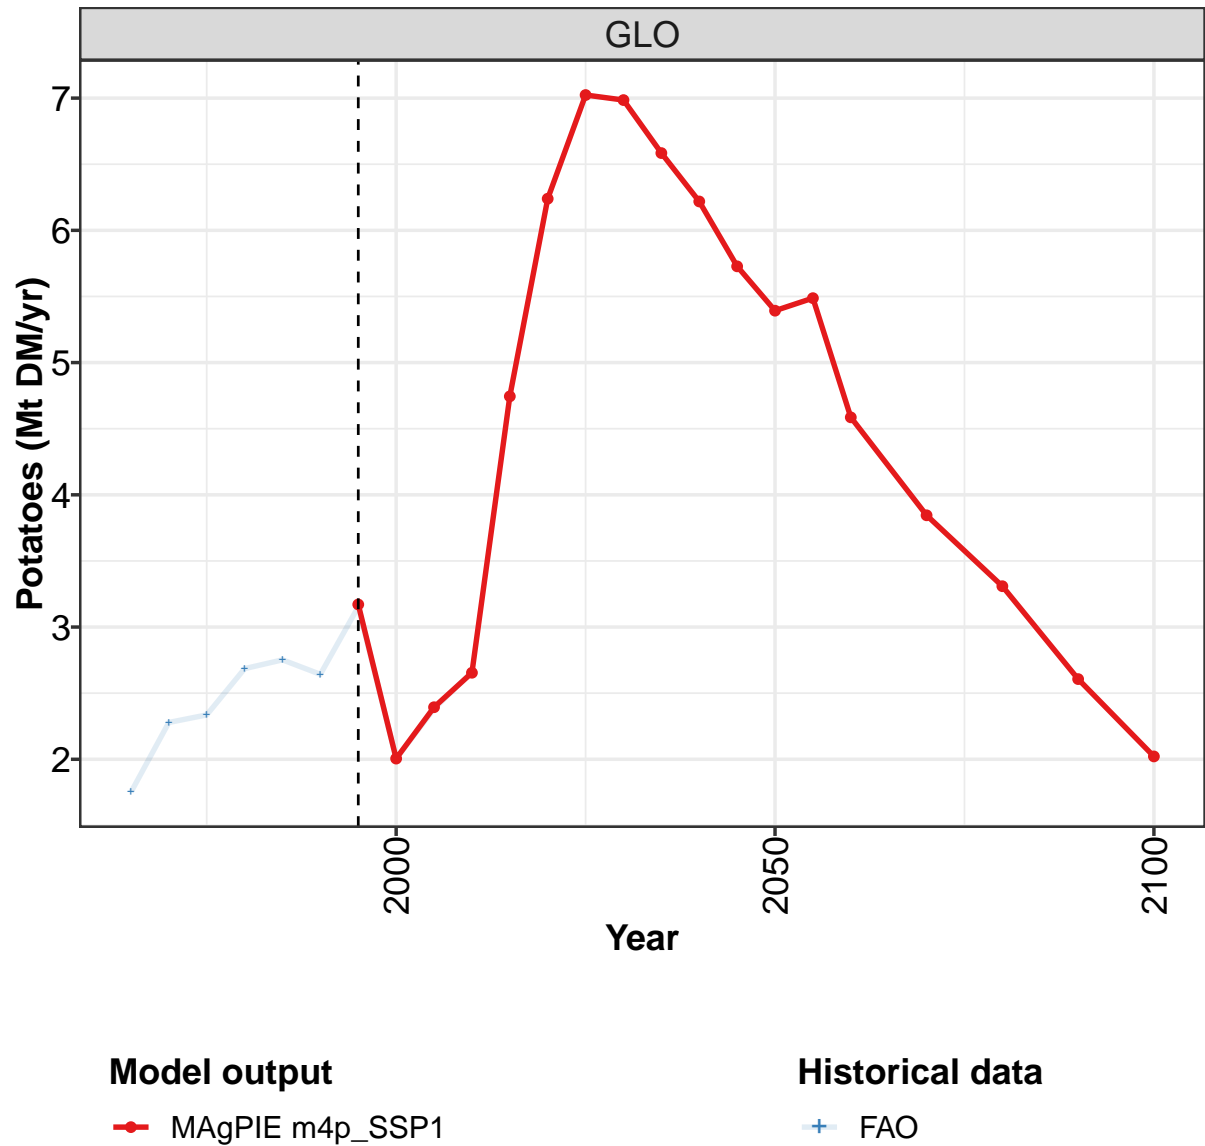

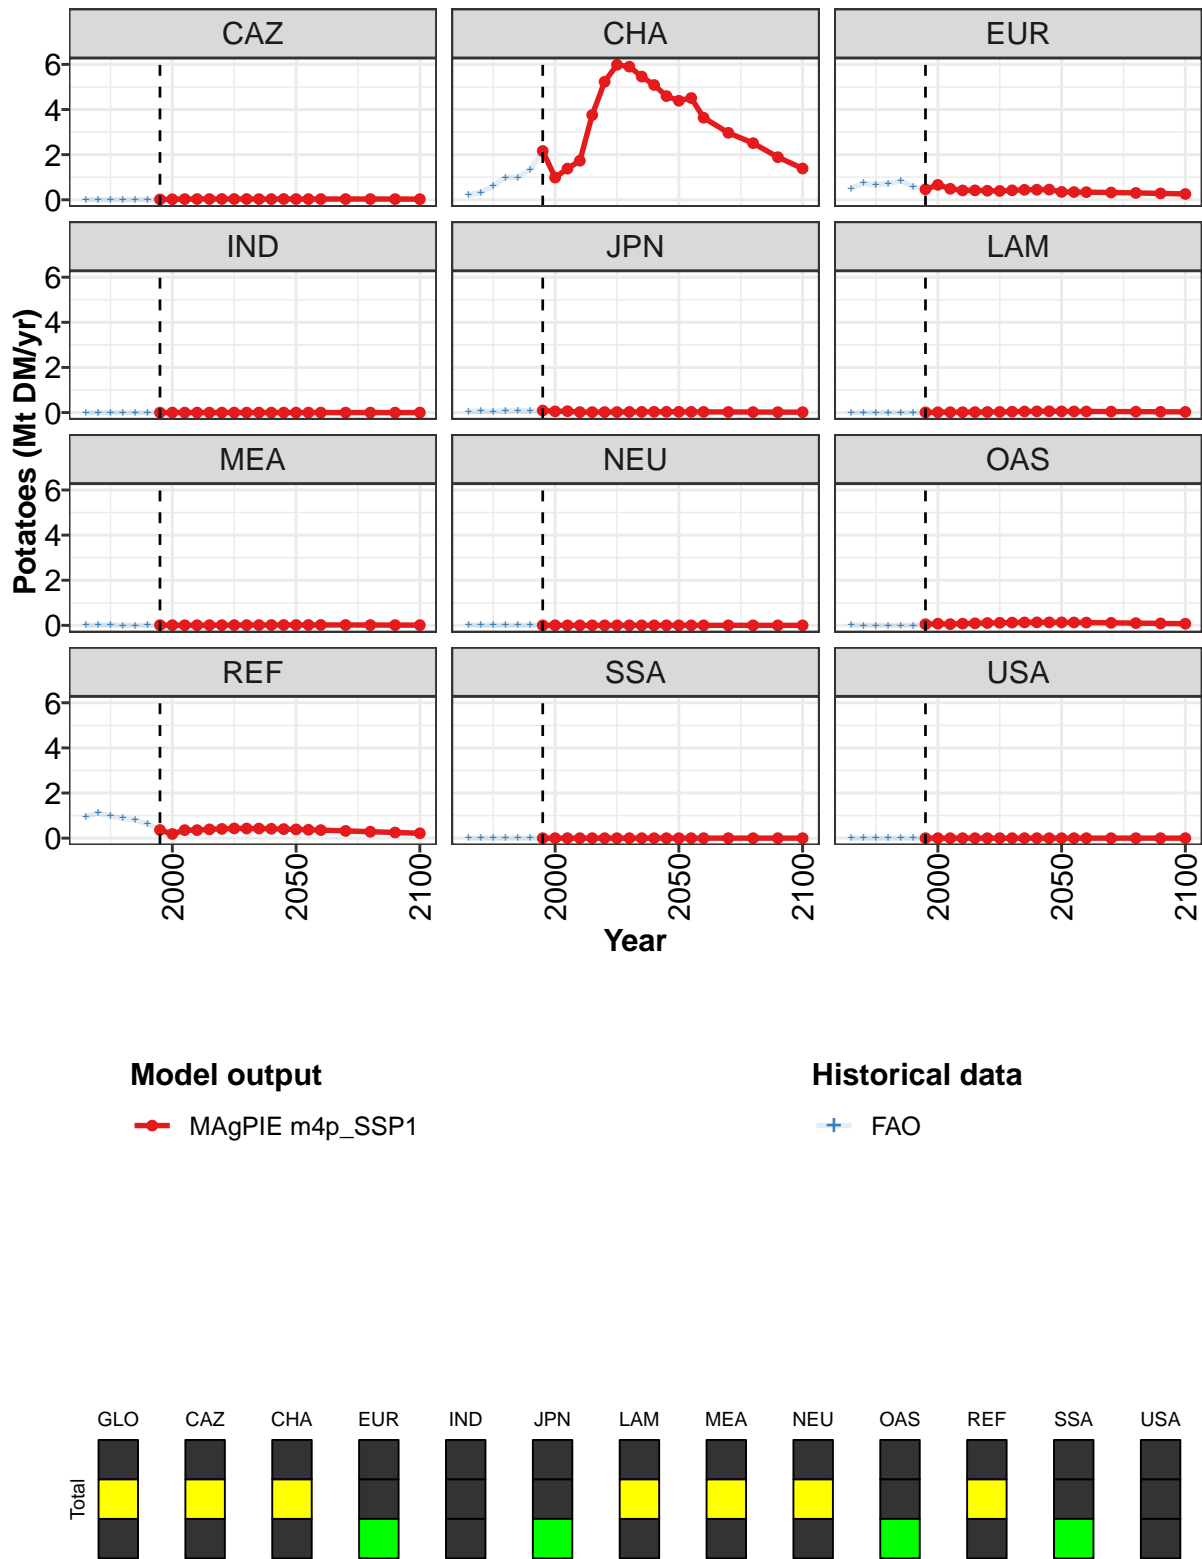

Figure 205: MAgPIE m4p\_SSP1 — Demand—Processing—Crops—Other crops—Potatoes (Mt DM/yr)

|     | 1995 | 2000 | 2005 | 2010 | 2015 | 2020 | 2025 | 2030 | 2035 | 2040 | 2045 |
|-----|------|------|------|------|------|------|------|------|------|------|------|
| GLO | 3.17 | 2.01 | 2.39 | 2.65 | 4.74 | 6.24 | 7.02 | 6.99 | 6.58 | 6.22 | 5.73 |
| CAZ | 0.02 | 0.02 | 0.03 | 0.03 | 0.03 | 0.04 | 0.04 | 0.03 | 0.03 | 0.03 | 0.04 |
| CHA | 2.16 | 0.98 | 1.38 | 1.73 | 3.76 | 5.23 | 5.98 | 5.90 | 5.46 | 5.09 | 4.60 |
| EUR | 0.46 | 0.66 | 0.49 | 0.41 | 0.42 | 0.40 | 0.39 | 0.42 | 0.44 | 0.44 | 0.45 |
| IND | 0.00 | 0.00 | 0.00 | 0.00 | 0.00 | 0.00 | 0.00 | 0.00 | 0.00 | 0.00 | 0.00 |
| JPN | 0.09 | 0.05 | 0.06 | 0.02 | 0.02 | 0.02 | 0.02 | 0.03 | 0.03 | 0.03 | 0.03 |
| LAM | 0.01 | 0.01 | 0.02 | 0.02 | 0.02 | 0.02 | 0.03 | 0.04 | 0.05 | 0.05 | 0.06 |
| MEA | 0.01 | 0.01 | 0.01 | 0.01 | 0.01 | 0.01 | 0.01 | 0.01 | 0.01 | 0.02 | 0.02 |
| NEU | 0.00 | 0.00 | 0.00 | 0.00 | 0.00 | 0.00 | 0.00 | 0.00 | 0.00 | 0.00 | 0.00 |
| OAS | 0.05 | 0.07 | 0.05 | 0.08 | 0.09 | 0.10 | 0.11 | 0.12 | 0.13 | 0.13 | 0.13 |
| REF | 0.36 | 0.19 | 0.36 | 0.36 | 0.39 | 0.41 | 0.43 | 0.43 | 0.43 | 0.42 | 0.40 |
| SSA | 0.00 | 0.00 | 0.00 | 0.00 | 0.00 | 0.00 | 0.00 | 0.00 | 0.00 | 0.00 | 0.00 |
| USA | 0.00 | 0.00 | 0.00 | 0.00 | 0.00 | 0.00 | 0.00 | 0.00 | 0.00 | 0.00 | 0.00 |

Table 614: MAgPIE m4p\_SSP1 — Demand—Processing—Crops—Other crops—Potatoes (Mt DM/yr) [PART 1/2]

|     | 2050 | 2055 | 2060 | 2070 | 2080 | 2090 | 2100 |
|-----|------|------|------|------|------|------|------|
| GLO | 5.39 | 5.49 | 4.59 | 3.85 | 3.31 | 2.61 | 2.02 |
| CAZ | 0.03 | 0.03 | 0.03 | 0.03 | 0.03 | 0.03 | 0.03 |
| CHA | 4.39 | 4.51 | 3.64 | 2.97 | 2.51 | 1.89 | 1.39 |
| EUR | 0.35 | 0.34 | 0.34 | 0.32 | 0.30 | 0.28 | 0.26 |
| IND | 0.00 | 0.00 | 0.00 | 0.00 | 0.00 | 0.00 | 0.00 |
| JPN | 0.03 | 0.03 | 0.03 | 0.03 | 0.02 | 0.02 | 0.02 |
| LAM | 0.05 | 0.05 | 0.05 | 0.04 | 0.04 | 0.03 | 0.03 |
| MEA | 0.02 | 0.02 | 0.02 | 0.02 | 0.01 | 0.01 | 0.01 |
| NEU | 0.00 | 0.00 | 0.00 | 0.00 | 0.00 | 0.00 | 0.00 |
| OAS | 0.13 | 0.13 | 0.12 | 0.11 | 0.10 | 0.09 | 0.07 |
| REF | 0.39 | 0.37 | 0.36 | 0.32 | 0.29 | 0.25 | 0.22 |
| SSA | 0.00 | 0.00 | 0.00 | 0.00 | 0.00 | 0.00 | 0.00 |
| USA | 0.00 | 0.00 | 0.00 | 0.00 | 0.00 | 0.00 | 0.00 |

Table 615: MAgPIE m4p\_SSP1 — Demand—Processing—Crops—Other crops—Potatoes (Mt DM/yr) [PART 2/2]

|     | 1965 | 1970 | 1975 | 1980 | 1985 | 1990 | 1995 | 2000 | 2005 | 2010 |
|-----|------|------|------|------|------|------|------|------|------|------|
| GLO | 1.75 | 2.28 | 2.34 | 2.69 | 2.75 | 2.64 | 3.15 | 2.00 | 2.38 | 2.66 |
| CAZ | 0.01 | 0.01 | 0.00 | 0.00 | 0.01 | 0.00 | 0.02 | 0.02 | 0.03 | 0.03 |
| CHA | 0.20 | 0.33 | 0.60 | 0.99 | 0.99 | 1.34 | 2.14 | 0.97 | 1.37 | 1.74 |
| EUR | 0.51 | 0.73 | 0.66 | 0.72 | 0.85 | 0.58 | 0.47 | 0.67 | 0.48 | 0.41 |
| IND | 0.00 | 0.00 | 0.00 | 0.00 | 0.00 | 0.00 | 0.00 | 0.00 | 0.00 | 0.00 |
| JPN | 0.04 | 0.07 | 0.05 | 0.07 | 0.09 | 0.07 | 0.09 | 0.05 | 0.06 | 0.02 |
| LAM | 0.00 | 0.00 | 0.00 | 0.00 | 0.00 | 0.00 | 0.01 | 0.01 | 0.02 | 0.02 |
| MEA | 0.01 | 0.01 | 0.02 | 0.00 | 0.00 | 0.00 | 0.01 | 0.01 | 0.01 | 0.01 |
| NEU | 0.01 | 0.01 | 0.00 | 0.01 | 0.01 | 0.00 | 0.00 | 0.00 | 0.00 | 0.00 |
| OAS | 0.02 | 0.00 | 0.00 | 0.00 | 0.00 | 0.00 | 0.05 | 0.07 | 0.05 | 0.07 |
| REF | 0.95 | 1.12 | 0.99 | 0.88 | 0.81 | 0.63 | 0.36 | 0.19 | 0.36 | 0.36 |
| SSA | 0.00 | 0.00 | 0.00 | 0.00 | 0.00 | 0.00 | 0.00 | 0.00 | 0.00 | 0.00 |
| USA | 0.00 | 0.00 | 0.00 | 0.00 | 0.00 | 0.00 | 0.00 | 0.00 | 0.00 | 0.00 |

Table 616: FAO — Demand—Processing—Crops—Other crops—Potatoes (Mt DM/yr)

9.1.16 Other crops—Tropical roots

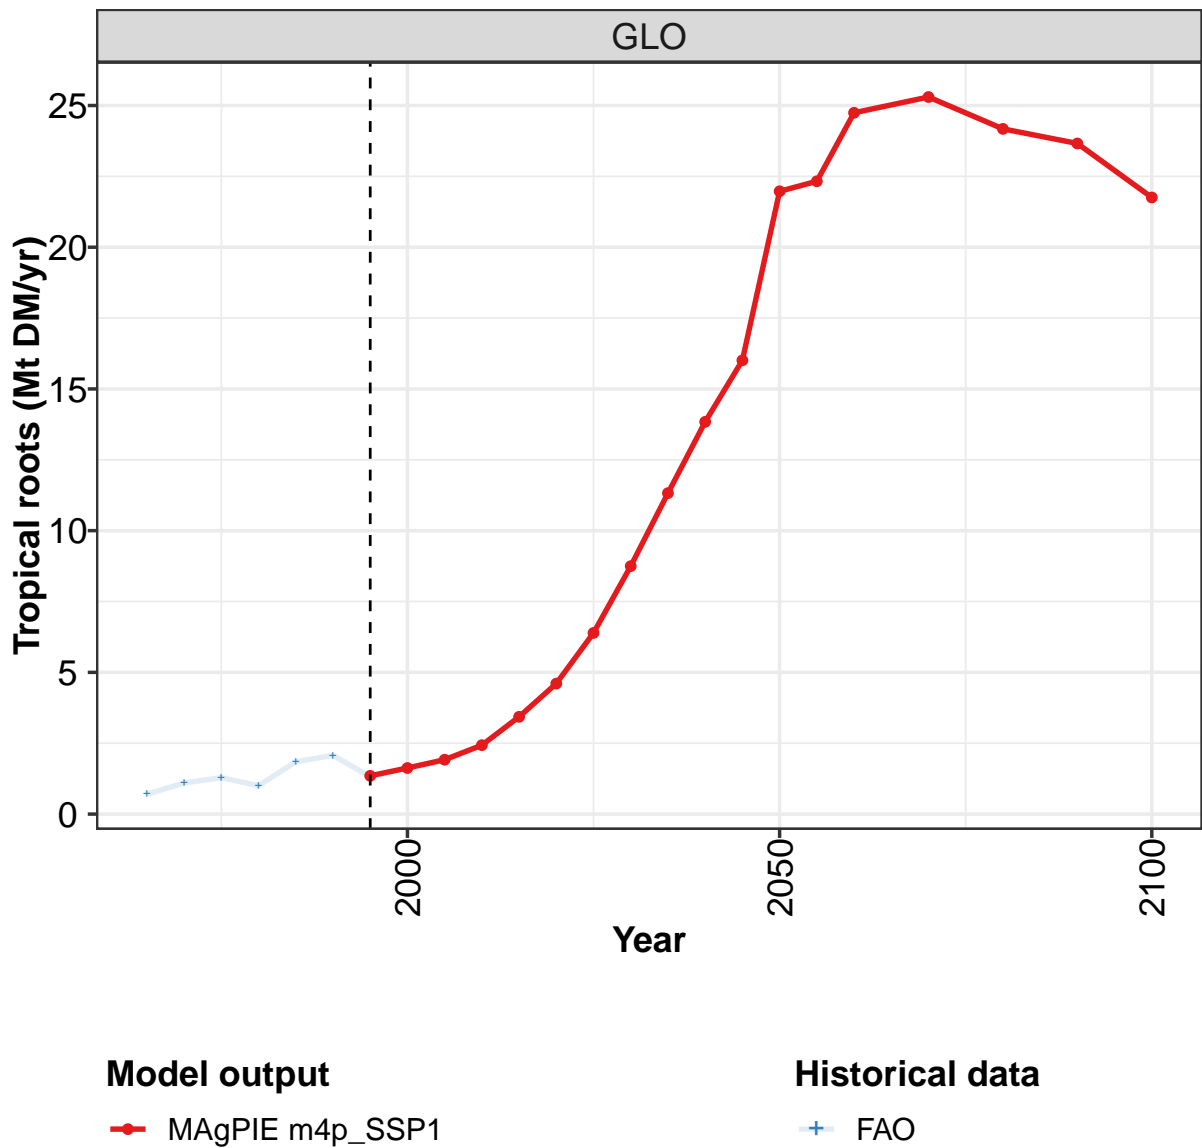



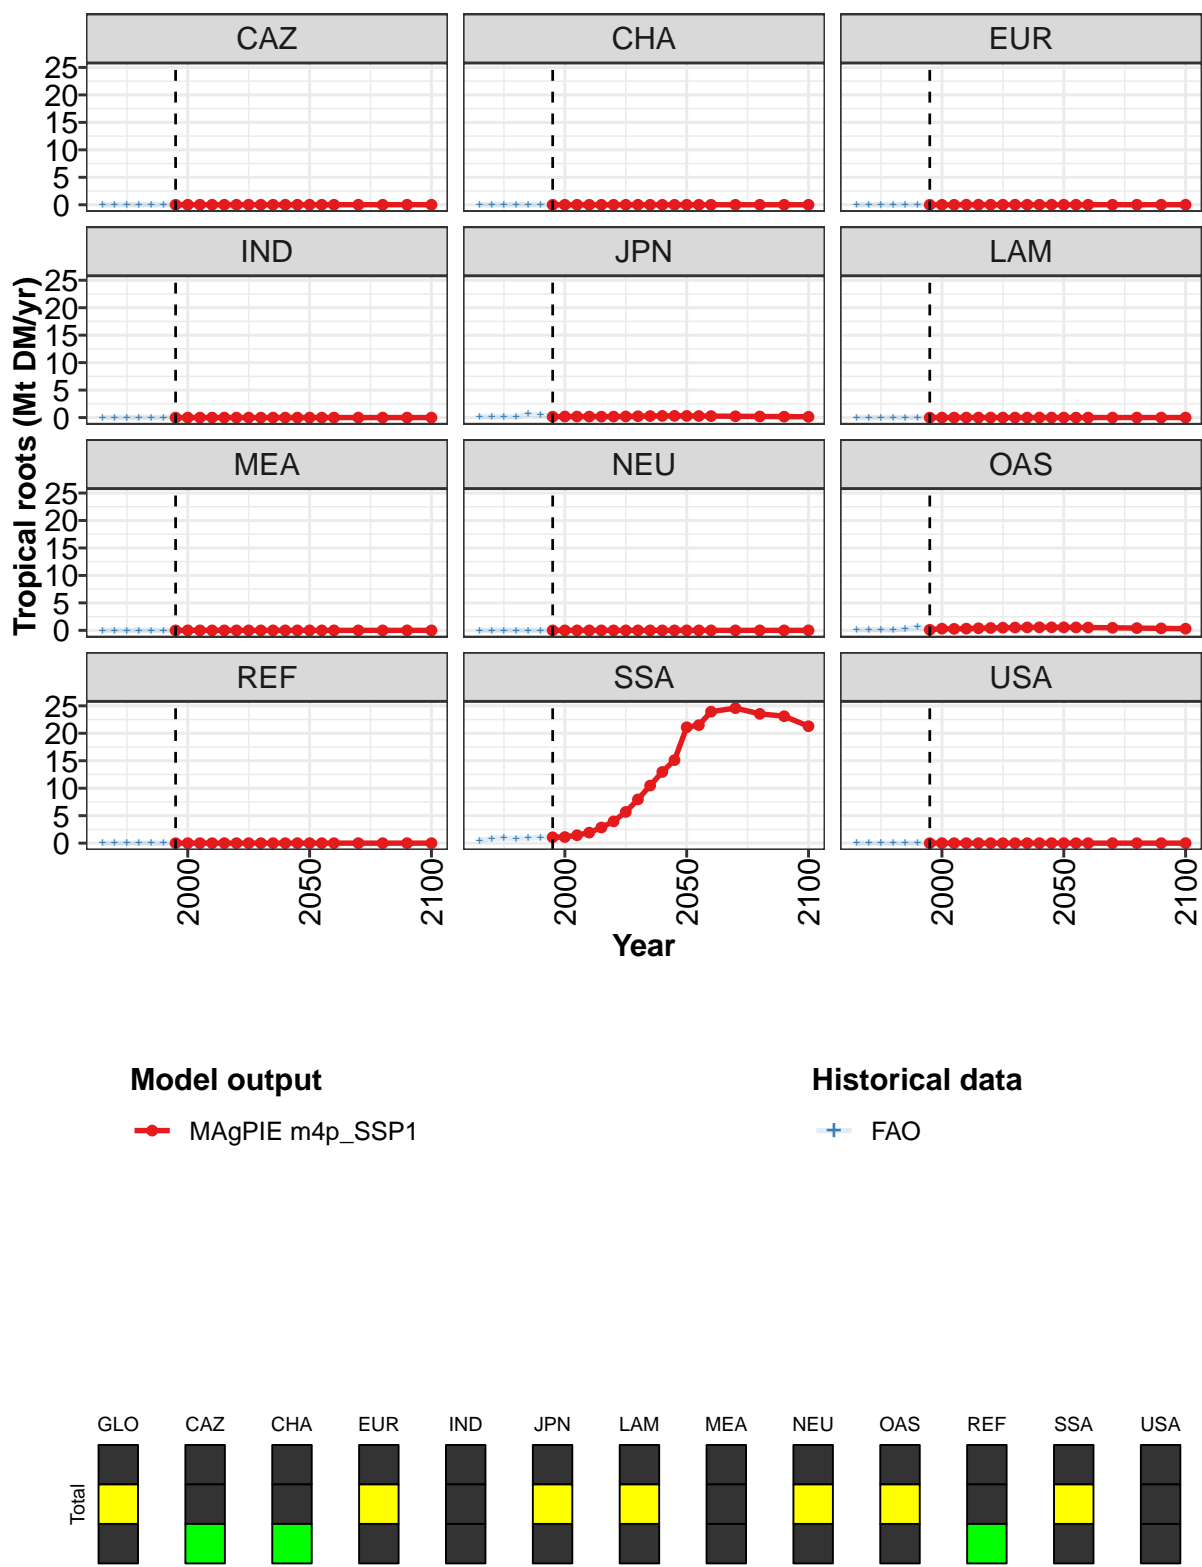

Figure 206: MAgPIE m4p\_SSP1 — Demand—Processing—Crops—Other crops—Tropical roots (Mt DM/yr)

|     | 1995 | 2000 | 2005 | 2010 | 2015 | 2020 | 2025 | 2030 | 2035 | 2040 | 2045 |
|-----|------|------|------|------|------|------|------|------|------|------|------|
| GLO | 1.4  | 1.6  | 1.9  | 2.4  | 3.4  | 4.6  | 6.4  | 8.7  | 11.3 | 13.8 | 16.0 |
| CAZ | 0.0  | 0.0  | 0.0  | 0.0  | 0.0  | 0.0  | 0.0  | 0.0  | 0.0  | 0.0  | 0.0  |
| CHA | 0.0  | 0.0  | 0.0  | 0.0  | 0.0  | 0.0  | 0.0  | 0.0  | 0.0  | 0.0  | 0.0  |
| EUR | 0.0  | 0.0  | 0.0  | 0.0  | 0.0  | 0.0  | 0.0  | 0.0  | 0.0  | 0.0  | 0.0  |
| IND | 0.0  | 0.0  | 0.0  | 0.0  | 0.0  | 0.0  | 0.0  | 0.0  | 0.0  | 0.0  | 0.0  |
| JPN | 0.2  | 0.2  | 0.2  | 0.2  | 0.2  | 0.2  | 0.2  | 0.2  | 0.3  | 0.3  | 0.3  |
| LAM | 0.0  | 0.0  | 0.0  | 0.0  | 0.0  | 0.0  | 0.0  | 0.0  | 0.0  | 0.0  | 0.0  |
| MEA | 0.0  | 0.0  | 0.0  | 0.0  | 0.0  | 0.0  | 0.0  | 0.0  | 0.0  | 0.0  | 0.0  |
| NEU | 0.0  | 0.0  | 0.0  | 0.0  | 0.0  | 0.0  | 0.0  | 0.0  | 0.0  | 0.0  | 0.0  |
| OAS | 0.1  | 0.3  | 0.3  | 0.3  | 0.4  | 0.4  | 0.5  | 0.5  | 0.5  | 0.6  | 0.6  |
| REF | 0.0  | 0.0  | 0.0  | 0.0  | 0.0  | 0.0  | 0.0  | 0.0  | 0.0  | 0.0  | 0.0  |
| SSA | 1.1  | 1.1  | 1.4  | 1.9  | 2.9  | 4.0  | 5.7  | 8.0  | 10.5 | 13.0 | 15.1 |
| USA | 0.0  | 0.0  | 0.0  | 0.0  | 0.0  | 0.0  | 0.0  | 0.0  | 0.0  | 0.0  | 0.0  |

Table 617: MAgPIE m4p\_SSP1 — Demand—Processing—Crops—Other crops—Tropical roots (Mt DM/yr)  
[PART 1/2]

|     | 2050 | 2055 | 2060 | 2070 | 2080 | 2090 | 2100 |
|-----|------|------|------|------|------|------|------|
| GLO | 22.0 | 22.3 | 24.7 | 25.3 | 24.2 | 23.7 | 21.8 |
| CAZ | 0.0  | 0.0  | 0.0  | 0.0  | 0.0  | 0.0  | 0.0  |
| CHA | 0.0  | 0.0  | 0.0  | 0.0  | 0.0  | 0.0  | 0.0  |
| EUR | 0.0  | 0.0  | 0.0  | 0.0  | 0.0  | 0.0  | 0.0  |
| IND | 0.0  | 0.0  | 0.0  | 0.0  | 0.0  | 0.0  | 0.0  |
| JPN | 0.3  | 0.3  | 0.3  | 0.2  | 0.2  | 0.2  | 0.1  |
| LAM | 0.0  | 0.0  | 0.0  | 0.0  | 0.0  | 0.0  | 0.0  |
| MEA | 0.0  | 0.0  | 0.0  | 0.0  | 0.0  | 0.0  | 0.0  |
| NEU | 0.0  | 0.0  | 0.0  | 0.0  | 0.0  | 0.0  | 0.0  |
| OAS | 0.6  | 0.5  | 0.5  | 0.5  | 0.4  | 0.4  | 0.3  |
| REF | 0.0  | 0.0  | 0.0  | 0.0  | 0.0  | 0.0  | 0.0  |
| SSA | 21.1 | 21.5 | 23.9 | 24.6 | 23.5 | 23.1 | 21.3 |
| USA | 0.0  | 0.0  | 0.0  | 0.0  | 0.0  | 0.0  | 0.0  |

Table 618: MAgPIE m4p\_SSP1 — Demand—Processing—Crops—Other crops—Tropical roots (Mt DM/yr)  
[PART 2/2]

|     | 1965 | 1970 | 1975 | 1980 | 1985 | 1990 | 1995 | 2000 | 2005 | 2010 |
|-----|------|------|------|------|------|------|------|------|------|------|
| GLO | 0.70 | 1.10 | 1.29 | 1.00 | 1.84 | 2.07 | 1.32 | 1.63 | 1.87 | 2.43 |
| CAZ | 0.00 | 0.00 | 0.00 | 0.00 | 0.00 | 0.00 | 0.00 | 0.01 | 0.01 | 0.01 |
| CHA | 0.00 | 0.00 | 0.00 | 0.00 | 0.00 | 0.00 | 0.00 | 0.00 | 0.00 | 0.00 |
| EUR | 0.00 | 0.00 | 0.00 | 0.00 | 0.00 | 0.00 | 0.00 | 0.00 | 0.00 | 0.01 |
| IND | 0.00 | 0.00 | 0.00 | 0.00 | 0.00 | 0.00 | 0.00 | 0.00 | 0.00 | 0.00 |
| JPN | 0.15 | 0.16 | 0.18 | 0.13 | 0.66 | 0.43 | 0.16 | 0.20 | 0.19 | 0.18 |
| LAM | 0.00 | 0.00 | 0.00 | 0.00 | 0.00 | 0.00 | 0.00 | 0.00 | 0.00 | 0.00 |
| MEA | 0.00 | 0.00 | 0.00 | 0.00 | 0.00 | 0.00 | 0.00 | 0.00 | 0.00 | 0.00 |
| NEU | 0.00 | 0.00 | 0.00 | 0.00 | 0.00 | 0.00 | 0.00 | 0.00 | 0.00 | 0.00 |
| OAS | 0.10 | 0.09 | 0.14 | 0.06 | 0.25 | 0.60 | 0.11 | 0.31 | 0.28 | 0.31 |
| REF | 0.00 | 0.00 | 0.00 | 0.00 | 0.00 | 0.00 | 0.00 | 0.00 | 0.00 | 0.00 |
| SSA | 0.46 | 0.85 | 0.97 | 0.81 | 0.93 | 1.04 | 1.04 | 1.12 | 1.39 | 1.91 |
| USA | 0.00 | 0.00 | 0.00 | 0.00 | 0.00 | 0.00 | 0.00 | 0.00 | 0.00 | 0.00 |

Table 619: FAO — Demand—Processing—Crops—Other crops—Tropical roots (Mt DM/yr)

9.1.17 Sugar crops

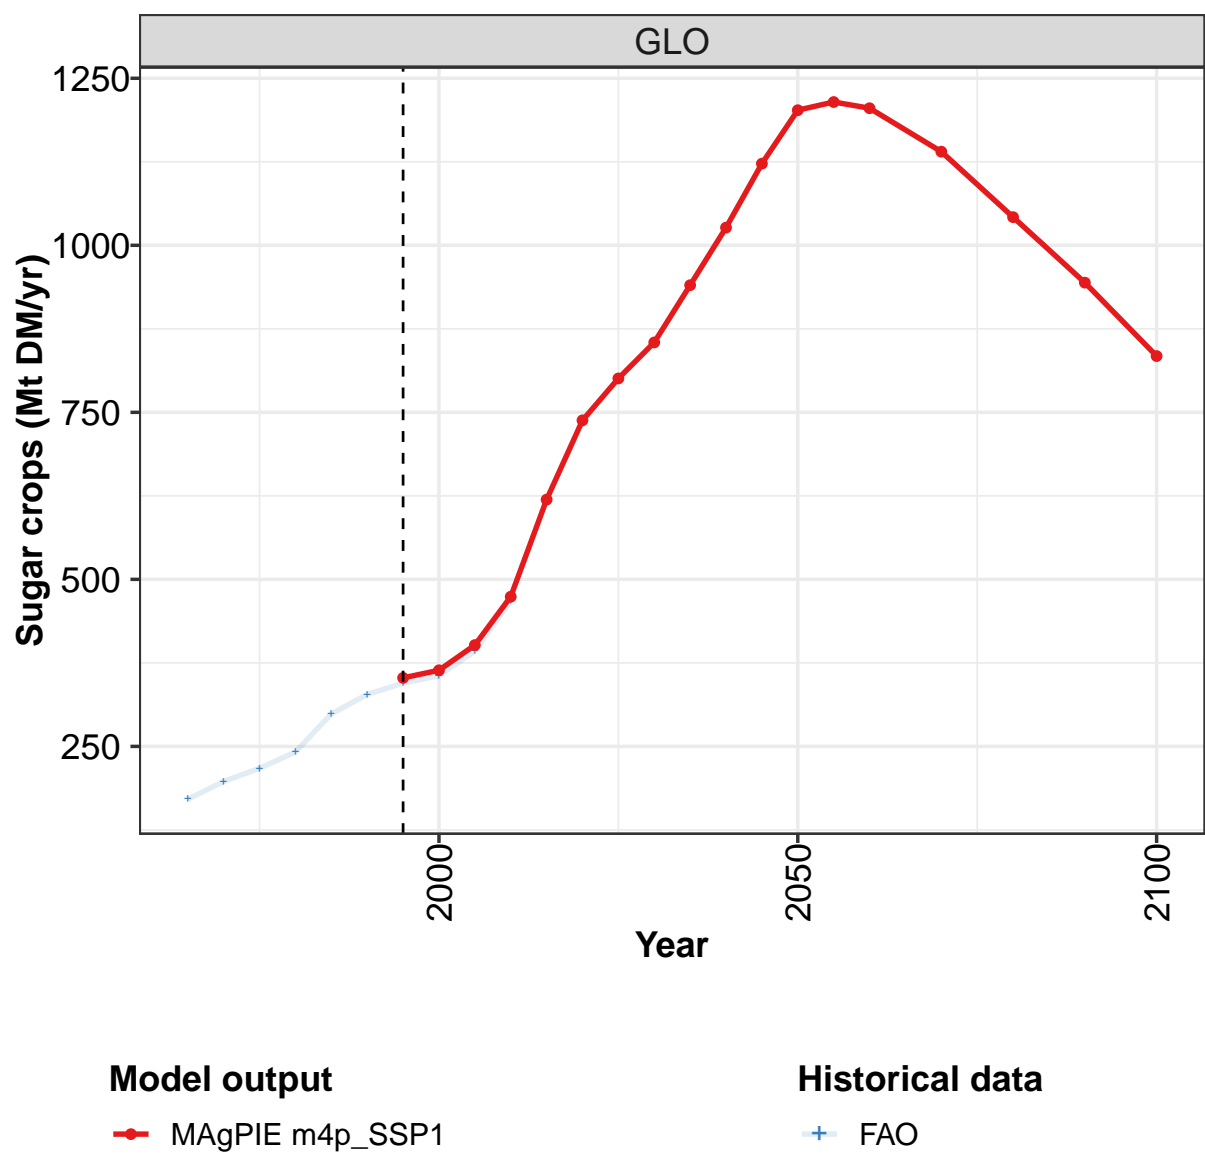

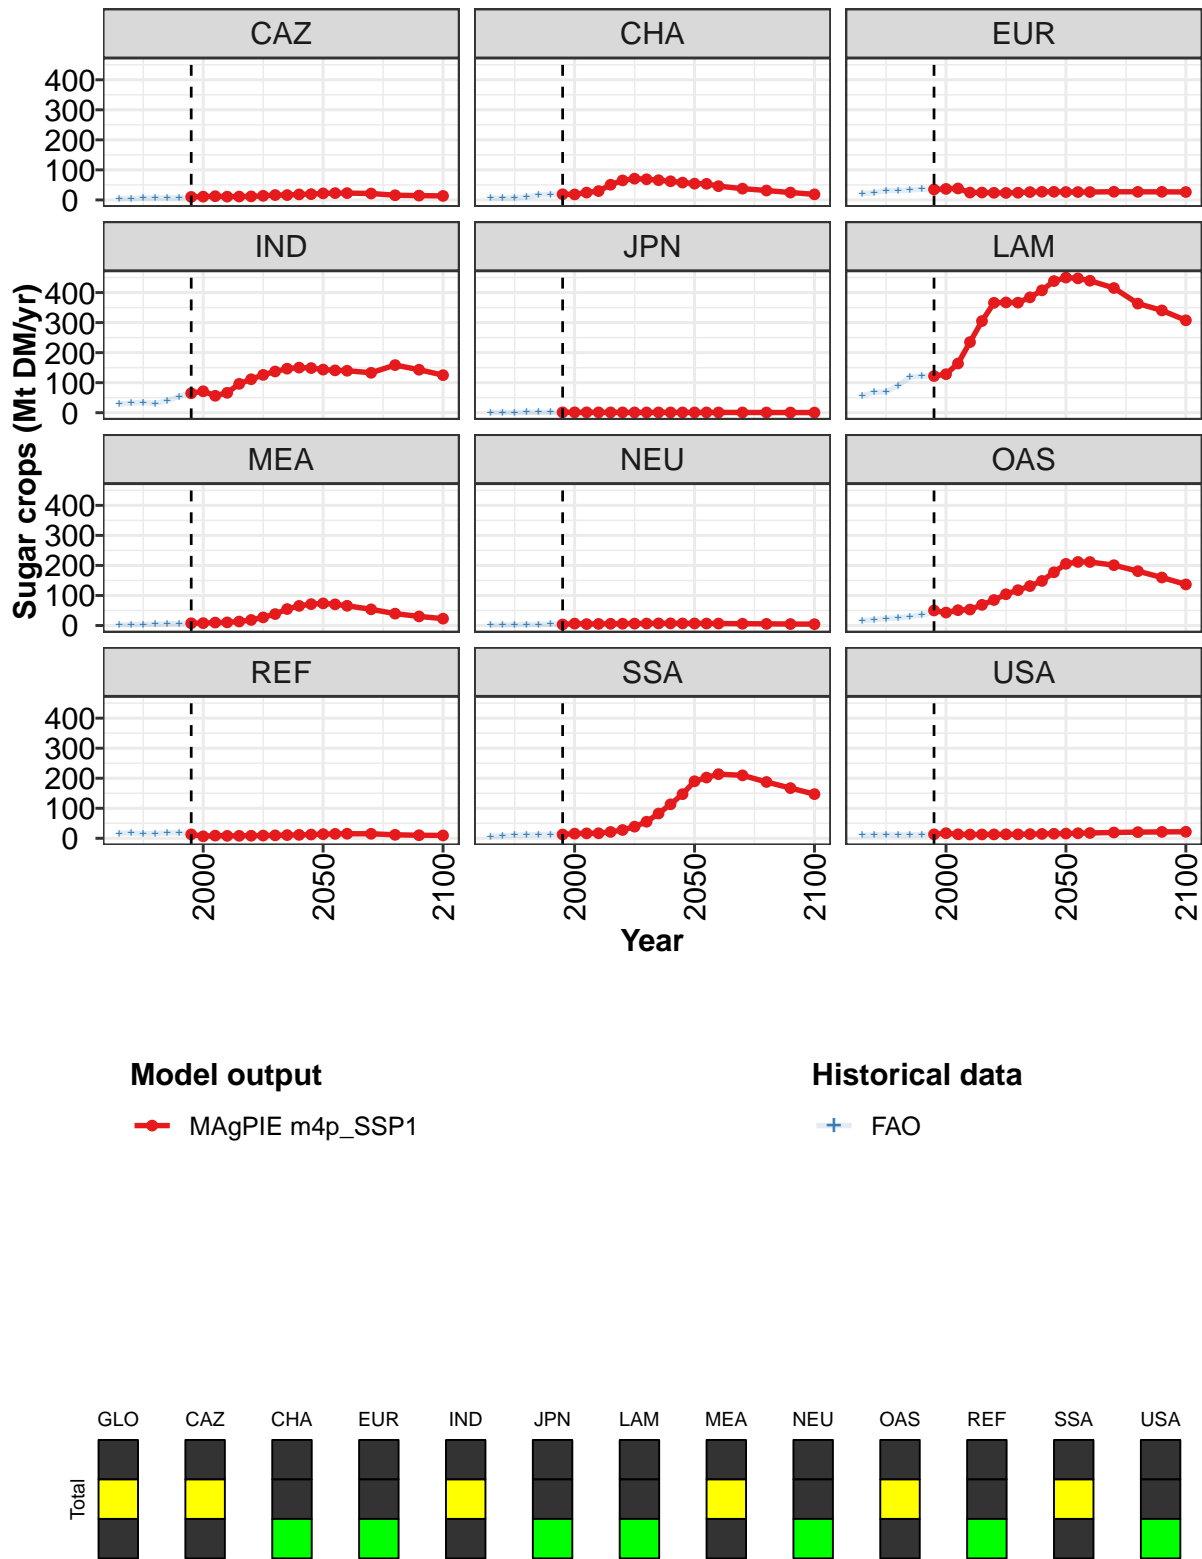

Figure 207: MAgPIE m4p\_SSP1 — Demand—Processing—Crops—Sugar crops (Mt DM/yr)

|     | 1995 | 2000 | 2005 | 2010 | 2015 | 2020 | 2025 | 2030 | 2035 | 2040 | 2045 |
|-----|------|------|------|------|------|------|------|------|------|------|------|
| GLO | 353  | 364  | 402  | 474  | 619  | 738  | 801  | 855  | 940  | 1027 | 1122 |
| CAZ | 10   | 11   | 12   | 11   | 11   | 12   | 14   | 16   | 16   | 18   | 19   |
| CHA | 19   | 18   | 25   | 29   | 51   | 65   | 71   | 69   | 66   | 62   | 58   |
| EUR | 35   | 37   | 38   | 25   | 25   | 24   | 23   | 24   | 26   | 27   | 27   |
| IND | 65   | 71   | 56   | 66   | 96   | 111  | 126  | 137  | 147  | 150  | 149  |
| JPN | 1    | 1    | 1    | 1    | 1    | 1    | 1    | 1    | 1    | 1    | 1    |
| LAM | 122  | 128  | 164  | 235  | 305  | 366  | 367  | 366  | 384  | 407  | 438  |
| MEA | 8    | 8    | 10   | 10   | 13   | 19   | 27   | 38   | 55   | 65   | 71   |
| NEU | 3    | 6    | 5    | 5    | 6    | 6    | 6    | 7    | 7    | 7    | 7    |
| OAS | 50   | 43   | 51   | 53   | 69   | 85   | 104  | 118  | 131  | 148  | 177  |
| REF | 13   | 7    | 9    | 8    | 8    | 9    | 9    | 10   | 11   | 12   | 13   |
| SSA | 13   | 16   | 17   | 17   | 21   | 28   | 39   | 55   | 83   | 113  | 147  |
| USA | 13   | 17   | 13   | 13   | 13   | 13   | 13   | 13   | 14   | 15   | 15   |

Table 620: MAgPIE m4p\_SSP1 — Demand—Processing—Crops—Sugar crops (Mt DM/yr) [PART 1/2]

|     | 2050 | 2055 | 2060 | 2070 | 2080 | 2090 | 2100 |
|-----|------|------|------|------|------|------|------|
| GLO | 1202 | 1214 | 1205 | 1140 | 1042 | 944  | 834  |
| CAZ | 22   | 23   | 23   | 21   | 16   | 14   | 13   |
| CHA | 54   | 54   | 46   | 38   | 31   | 25   | 19   |
| EUR | 26   | 26   | 26   | 27   | 27   | 27   | 26   |
| IND | 144  | 141  | 140  | 133  | 159  | 143  | 125  |
| JPN | 1    | 1    | 1    | 1    | 1    | 1    | 1    |
| LAM | 450  | 447  | 439  | 415  | 363  | 341  | 308  |
| MEA | 74   | 71   | 66   | 54   | 40   | 30   | 23   |
| NEU | 7    | 7    | 7    | 6    | 5    | 5    | 4    |
| OAS | 205  | 212  | 211  | 201  | 181  | 160  | 137  |
| REF | 14   | 15   | 15   | 15   | 12   | 10   | 10   |
| SSA | 190  | 202  | 214  | 210  | 188  | 167  | 147  |
| USA | 16   | 17   | 18   | 19   | 21   | 21   | 22   |

Table 621: MAgPIE m4p\_SSP1 — Demand—Processing—Crops—Sugar crops (Mt DM/yr) [PART 2/2]

|     | 1965 | 1970 | 1975 | 1980 | 1985 | 1990 | 1995 | 2000 | 2005 | 2010 |
|-----|------|------|------|------|------|------|------|------|------|------|
| GLO | 171  | 197  | 217  | 242  | 299  | 328  | 345  | 356  | 393  | 467  |
| CAZ | 4    | 5    | 6    | 7    | 7    | 7    | 10   | 10   | 10   | 9    |
| CHA | 7    | 6    | 7    | 10   | 16   | 19   | 19   | 18   | 25   | 30   |
| EUR | 21   | 24   | 31   | 32   | 33   | 36   | 32   | 32   | 32   | 24   |
| IND | 29   | 32   | 34   | 31   | 40   | 54   | 65   | 71   | 56   | 66   |
| JPN | 1    | 1    | 1    | 1    | 2    | 1    | 1    | 1    | 1    | 1    |
| LAM | 57   | 68   | 70   | 90   | 119  | 121  | 124  | 127  | 169  | 235  |
| MEA | 2    | 3    | 4    | 4    | 6    | 6    | 8    | 8    | 10   | 10   |
| NEU | 1    | 2    | 2    | 3    | 4    | 5    | 3    | 5    | 5    | 5    |
| OAS | 16   | 19   | 23   | 25   | 30   | 35   | 44   | 43   | 46   | 50   |
| REF | 17   | 18   | 15   | 16   | 18   | 18   | 12   | 7    | 9    | 8    |
| SSA | 6    | 9    | 10   | 11   | 13   | 13   | 13   | 16   | 17   | 16   |
| USA | 10   | 11   | 13   | 11   | 11   | 12   | 13   | 17   | 13   | 13   |

Table 622: FAO — Demand—Processing—Crops—Sugar crops (Mt DM/yr)

9.1.18
Sugar crops—Sugar beet

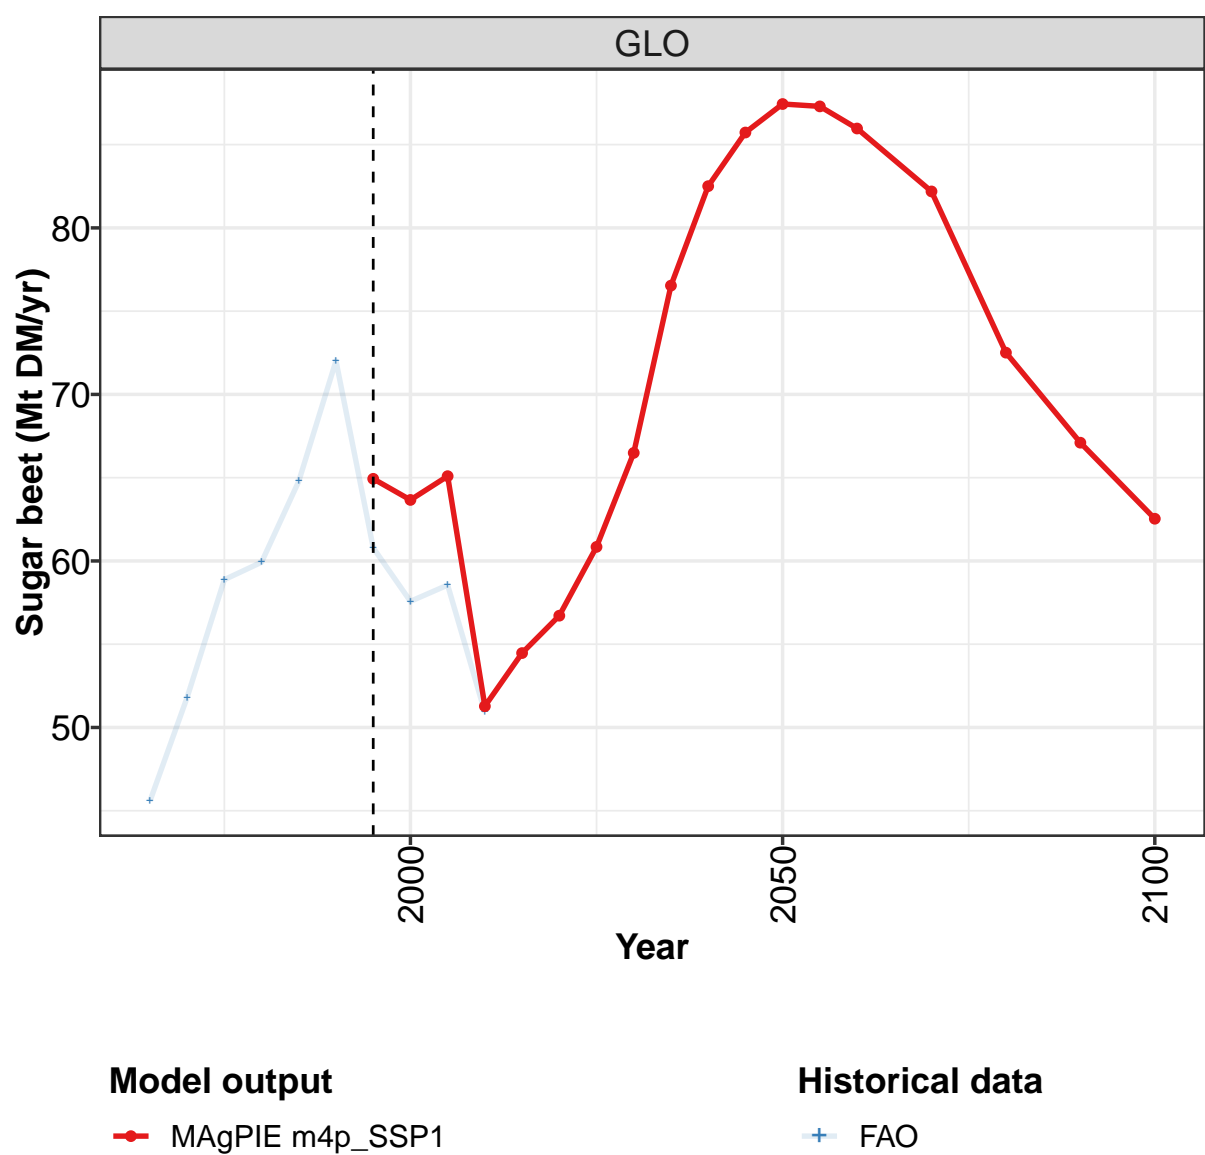

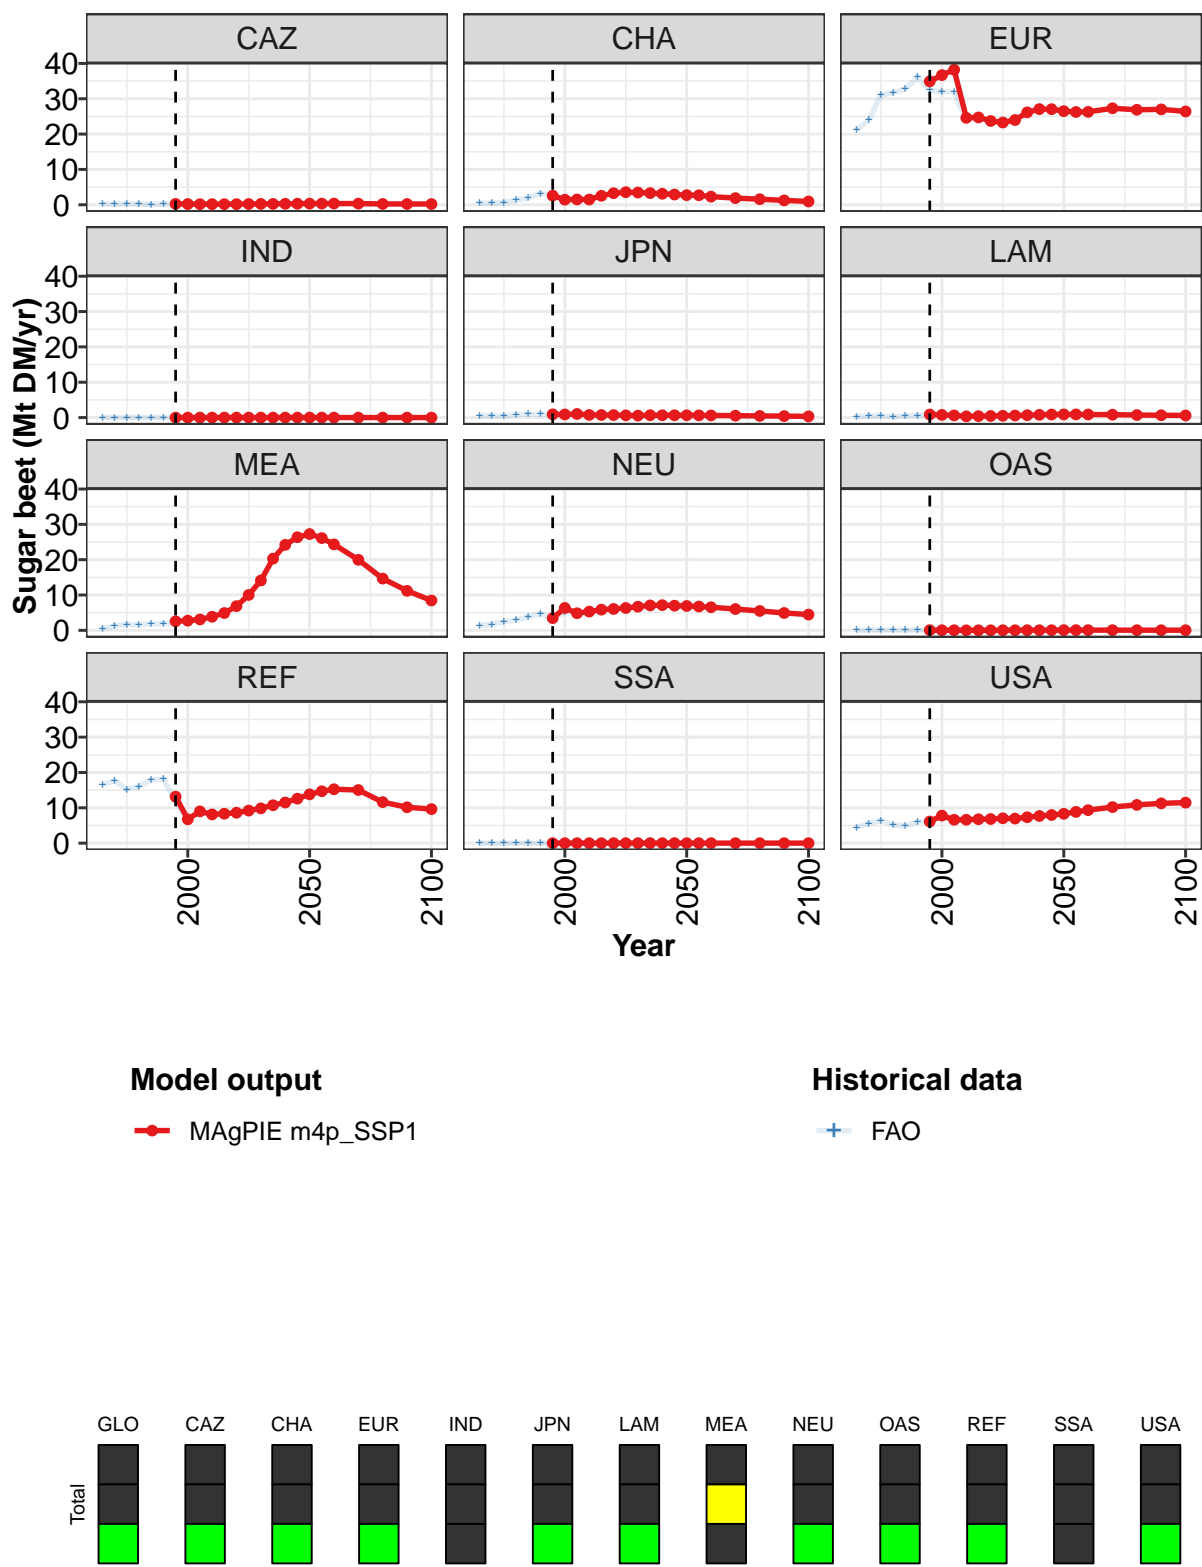

Figure 208: MAgPIE m4p\_SSP1 — Demand—Processing—Crops—Sugar crops—Sugar beet (Mt DM/yr)

|     | 1995 | 2000 | 2005 | 2010 | 2015 | 2020 | 2025 | 2030 | 2035 | 2040 | 2045 |
|-----|------|------|------|------|------|------|------|------|------|------|------|
| GLO | 64.9 | 63.7 | 65.1 | 51.3 | 54.5 | 56.7 | 60.8 | 66.5 | 76.5 | 82.5 | 85.7 |
| CAZ | 0.3  | 0.2  | 0.2  | 0.2  | 0.2  | 0.2  | 0.2  | 0.2  | 0.2  | 0.3  | 0.3  |
| CHA | 2.6  | 1.5  | 1.5  | 1.5  | 2.5  | 3.3  | 3.6  | 3.5  | 3.3  | 3.1  | 2.9  |
| EUR | 34.9 | 36.7 | 38.2 | 24.6 | 24.7 | 23.7 | 23.3 | 24.0 | 26.2 | 27.1 | 27.1 |
| IND | 0.0  | 0.0  | 0.0  | 0.0  | 0.0  | 0.0  | 0.0  | 0.0  | 0.0  | 0.0  | 0.0  |
| JPN | 0.9  | 0.9  | 1.0  | 0.7  | 0.7  | 0.7  | 0.6  | 0.6  | 0.7  | 0.7  | 0.7  |
| LAM | 0.9  | 0.8  | 0.6  | 0.3  | 0.4  | 0.5  | 0.5  | 0.6  | 0.7  | 0.8  | 0.9  |
| MEA | 2.6  | 2.7  | 3.1  | 3.9  | 4.9  | 6.9  | 10.0 | 14.1 | 20.3 | 24.2 | 26.4 |
| NEU | 3.5  | 6.3  | 4.9  | 5.3  | 5.9  | 6.1  | 6.3  | 6.7  | 7.1  | 7.1  | 7.0  |
| OAS | 0.1  | 0.0  | 0.0  | 0.0  | 0.0  | 0.0  | 0.0  | 0.0  | 0.0  | 0.0  | 0.1  |
| REF | 13.2 | 6.7  | 9.0  | 8.1  | 8.3  | 8.6  | 9.2  | 9.8  | 10.7 | 11.5 | 12.6 |
| SSA | 0.0  | 0.0  | 0.0  | 0.0  | 0.0  | 0.0  | 0.0  | 0.0  | 0.0  | 0.0  | 0.0  |
| USA | 6.1  | 7.8  | 6.6  | 6.6  | 6.8  | 6.8  | 7.0  | 7.0  | 7.3  | 7.7  | 8.0  |

Table 623: MAgPIE m4p\_SSP1 — Demand—Processing—Crops—Sugar crops—Sugar beet (Mt DM/yr) [PART 1/2]

|     | 2050 | 2055 | 2060 | 2070 | 2080 | 2090 | 2100 |
|-----|------|------|------|------|------|------|------|
| GLO | 87.4 | 87.3 | 86.0 | 82.2 | 72.5 | 67.1 | 62.5 |
| CAZ | 0.3  | 0.3  | 0.3  | 0.3  | 0.2  | 0.2  | 0.2  |
| CHA | 2.7  | 2.7  | 2.3  | 1.9  | 1.6  | 1.2  | 0.9  |
| EUR | 26.5 | 26.3 | 26.3 | 27.3 | 26.9 | 27.0 | 26.4 |
| IND | 0.0  | 0.0  | 0.0  | 0.0  | 0.0  | 0.0  | 0.0  |
| JPN | 0.6  | 0.6  | 0.6  | 0.5  | 0.5  | 0.4  | 0.3  |
| LAM | 0.9  | 0.9  | 0.9  | 0.8  | 0.7  | 0.7  | 0.6  |
| MEA | 27.3 | 26.1 | 24.3 | 20.0 | 14.7 | 11.2 | 8.5  |
| NEU | 6.9  | 6.7  | 6.5  | 6.0  | 5.5  | 4.9  | 4.5  |
| OAS | 0.1  | 0.1  | 0.1  | 0.1  | 0.1  | 0.0  | 0.0  |
| REF | 13.8 | 14.7 | 15.3 | 15.0 | 11.6 | 10.2 | 9.6  |
| SSA | 0.0  | 0.0  | 0.0  | 0.0  | 0.0  | 0.0  | 0.0  |
| USA | 8.3  | 8.8  | 9.3  | 10.2 | 10.8 | 11.3 | 11.5 |

Table 624: MAgPIE m4p\_SSP1 — Demand—Processing—Crops—Sugar crops—Sugar beet (Mt DM/yr) [PART 2/2]

|     | 1965 | 1970 | 1975 | 1980 | 1985 | 1990 | 1995 | 2000 | 2005 | 2010 |
|-----|------|------|------|------|------|------|------|------|------|------|
| GLO | 45.6 | 51.8 | 58.9 | 59.9 | 64.8 | 72.0 | 60.8 | 57.6 | 58.5 | 50.9 |
| CAZ | 0.2  | 0.2  | 0.2  | 0.2  | 0.1  | 0.2  | 0.2  | 0.2  | 0.1  | 0.1  |
| CHA | 0.5  | 0.5  | 0.6  | 1.4  | 1.9  | 3.2  | 2.6  | 1.5  | 1.5  | 1.5  |
| EUR | 21.1 | 24.0 | 31.1 | 31.7 | 32.8 | 36.1 | 32.4 | 32.0 | 31.9 | 24.0 |
| IND | 0.0  | 0.0  | 0.0  | 0.0  | 0.0  | 0.0  | 0.0  | 0.0  | 0.0  | 0.0  |
| JPN | 0.4  | 0.6  | 0.4  | 0.9  | 0.9  | 1.0  | 0.9  | 0.9  | 1.0  | 0.7  |
| LAM | 0.3  | 0.5  | 0.5  | 0.2  | 0.6  | 0.6  | 0.9  | 0.7  | 0.6  | 0.3  |
| MEA | 0.5  | 1.3  | 1.7  | 1.5  | 1.8  | 1.9  | 2.5  | 2.7  | 3.0  | 3.8  |
| NEU | 1.4  | 1.7  | 2.5  | 2.9  | 3.8  | 4.8  | 3.3  | 5.1  | 4.7  | 5.4  |
| OAS | 0.0  | 0.1  | 0.1  | 0.1  | 0.0  | 0.1  | 0.0  | 0.0  | 0.0  | 0.0  |
| REF | 16.6 | 17.6 | 15.2 | 16.0 | 17.9 | 18.2 | 11.7 | 6.6  | 9.1  | 8.1  |
| SSA | 0.0  | 0.0  | 0.0  | 0.0  | 0.0  | 0.0  | 0.0  | 0.0  | 0.0  | 0.0  |
| USA | 4.5  | 5.5  | 6.5  | 5.1  | 4.9  | 6.0  | 6.1  | 7.8  | 6.6  | 7.0  |

Table 625: FAO — Demand—Processing—Crops—Sugar crops—Sugar beet (Mt DM/yr)



9.1.19
Sugar crops—Sugar cane

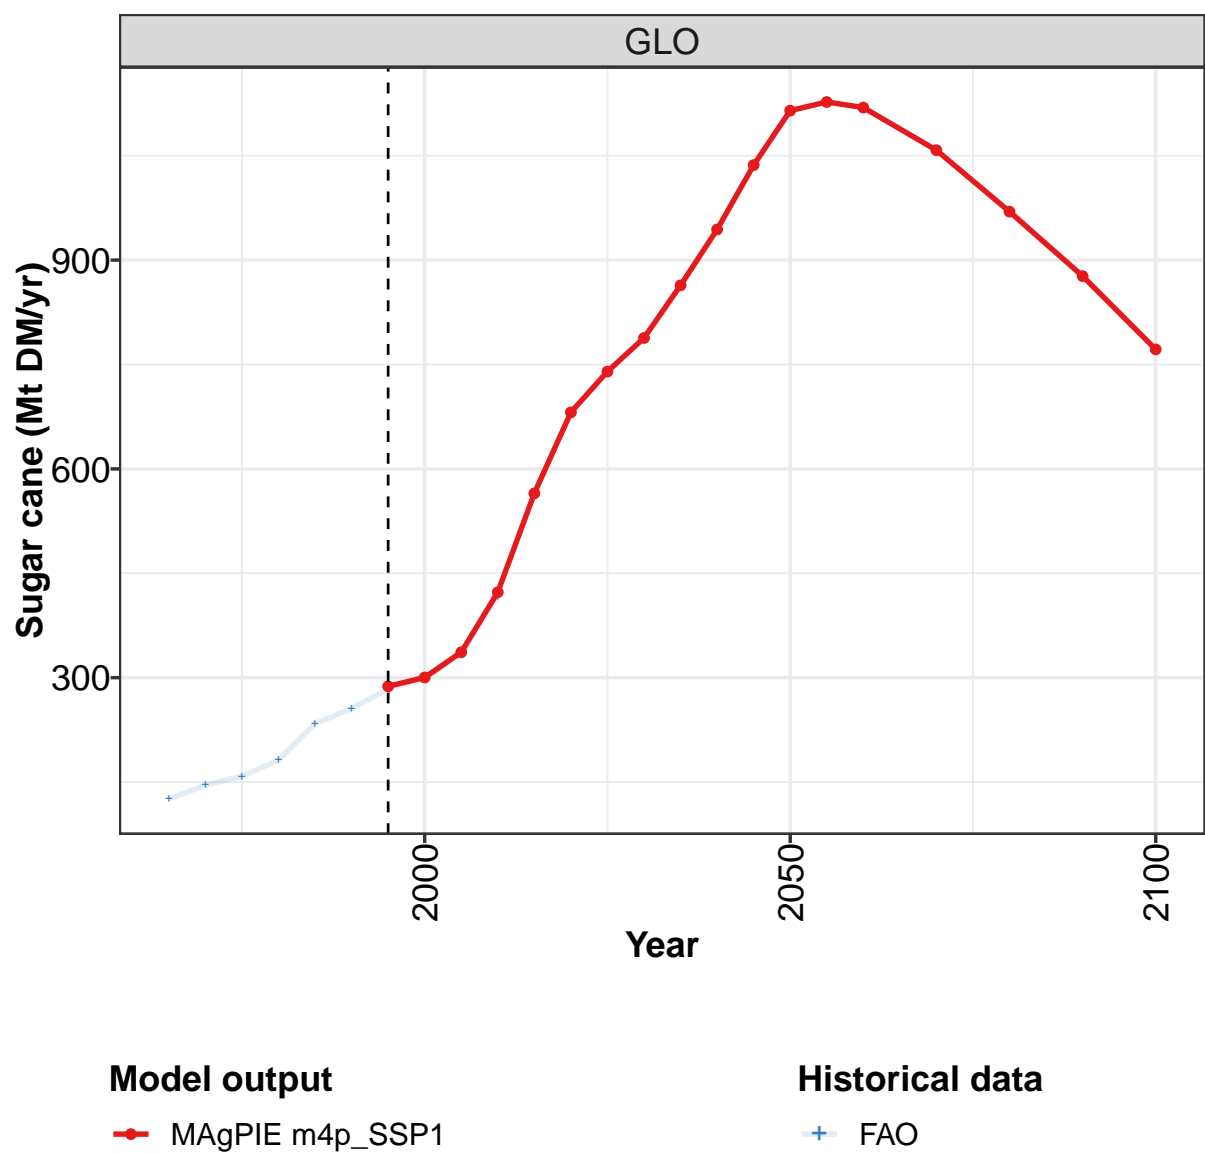

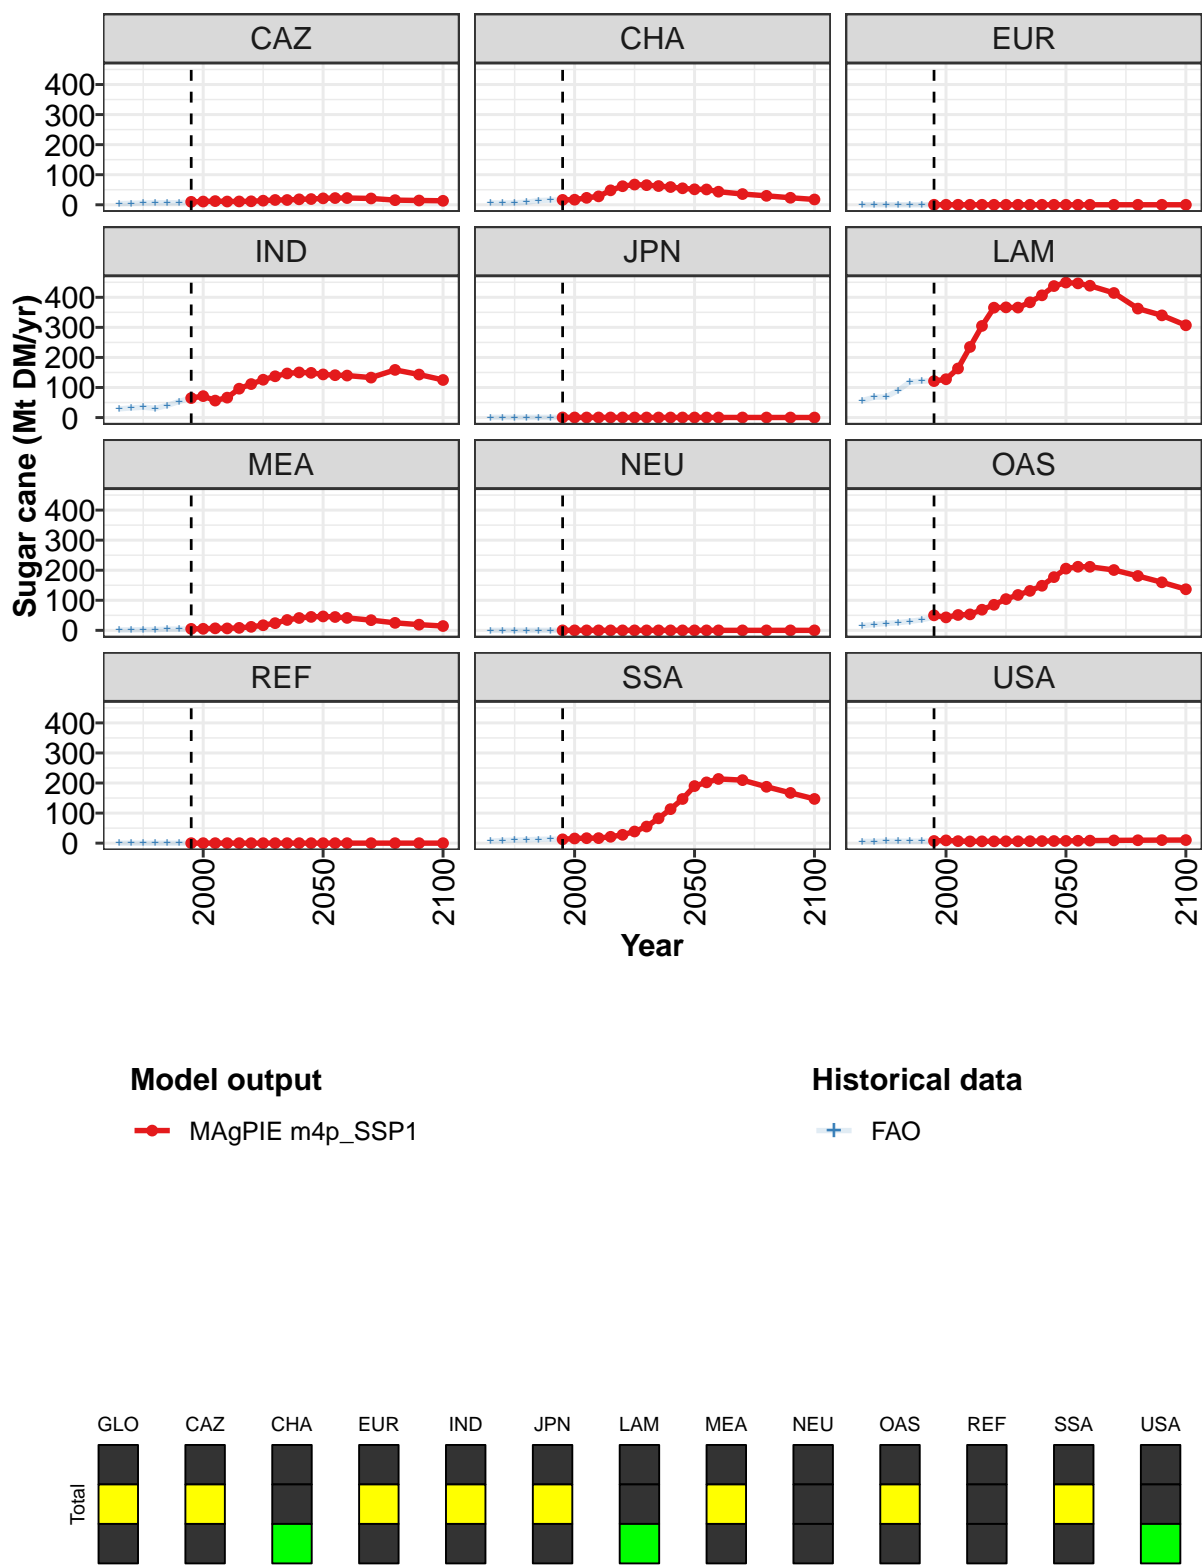

Figure 209: MAgPIE m4p\_SSP1 — Demand—Processing—Crops—Sugar crops—Sugar cane (Mt DM/yr)

|     | 1995 | 2000 | 2005 | 2010 | 2015 | 2020 | 2025 | 2030 | 2035 | 2040 | 2045 |
|-----|------|------|------|------|------|------|------|------|------|------|------|
| GLO | 288  | 300  | 337  | 423  | 565  | 681  | 740  | 788  | 864  | 944  | 1037 |
| CAZ | 10   | 11   | 12   | 11   | 11   | 12   | 14   | 16   | 16   | 18   | 19   |
| CHA | 16   | 17   | 23   | 28   | 48   | 62   | 67   | 65   | 62   | 59   | 55   |
| EUR | 0    | 0    | 0    | 0    | 0    | 0    | 0    | 0    | 0    | 0    | 0    |
| IND | 65   | 71   | 56   | 66   | 96   | 111  | 126  | 137  | 147  | 150  | 149  |
| JPN | 0    | 0    | 0    | 0    | 0    | 0    | 0    | 0    | 0    | 0    | 0    |
| LAM | 121  | 128  | 163  | 235  | 305  | 366  | 367  | 366  | 383  | 407  | 437  |
| MEA | 5    | 5    | 7    | 7    | 8    | 12   | 17   | 24   | 35   | 41   | 45   |
| NEU | 0    | 0    | 0    | 0    | 0    | 0    | 0    | 0    | 0    | 0    | 0    |
| OAS | 50   | 43   | 51   | 53   | 69   | 85   | 104  | 118  | 131  | 148  | 177  |
| REF | 0    | 0    | 0    | 0    | 0    | 0    | 0    | 0    | 0    | 0    | 0    |
| SSA | 13   | 16   | 17   | 17   | 21   | 28   | 39   | 55   | 83   | 113  | 147  |
| USA | 7    | 9    | 7    | 6    | 6    | 6    | 6    | 6    | 7    | 7    | 7    |

Table 626: MAgPIE m4p\_SSP1 — Demand—Processing—Crops—Sugar crops—Sugar cane (Mt DM/yr) [PART 1/2]

|     | 2050 | 2055 | 2060 | 2070 | 2080 | 2090 | 2100 |
|-----|------|------|------|------|------|------|------|
| GLO | 1115 | 1127 | 1119 | 1058 | 970  | 877  | 772  |
| CAZ | 21   | 22   | 22   | 21   | 15   | 14   | 13   |
| CHA | 52   | 51   | 43   | 36   | 30   | 23   | 18   |
| EUR | 0    | 0    | 0    | 0    | 0    | 0    | 0    |
| IND | 144  | 141  | 140  | 133  | 159  | 143  | 125  |
| JPN | 0    | 0    | 0    | 0    | 0    | 0    | 0    |
| LAM | 449  | 446  | 439  | 414  | 363  | 340  | 307  |
| MEA | 46   | 44   | 41   | 34   | 25   | 19   | 14   |
| NEU | 0    | 0    | 0    | 0    | 0    | 0    | 0    |
| OAS | 205  | 212  | 211  | 201  | 181  | 160  | 137  |
| REF | 0    | 0    | 0    | 0    | 0    | 0    | 0    |
| SSA | 190  | 202  | 214  | 210  | 188  | 167  | 147  |
| USA | 7    | 8    | 8    | 9    | 10   | 10   | 10   |

Table 627: MAgPIE m4p\_SSP1 — Demand—Processing—Crops—Sugar crops—Sugar cane (Mt DM/yr) [PART 2/2]

|     | 1965 | 1970 | 1975 | 1980 | 1985 | 1990 | 1995 | 2000 | 2005 | 2010 |
|-----|------|------|------|------|------|------|------|------|------|------|
| GLO | 125  | 146  | 158  | 182  | 234  | 256  | 284  | 298  | 334  | 417  |
| CAZ | 4    | 5    | 6    | 6    | 7    | 7    | 9    | 10   | 10   | 8    |
| CHA | 6    | 5    | 6    | 8    | 14   | 15   | 16   | 17   | 23   | 28   |
| EUR | 0    | 0    | 0    | 0    | 0    | 0    | 0    | 0    | 0    | 0    |
| IND | 29   | 32   | 34   | 31   | 40   | 54   | 65   | 71   | 56   | 66   |
| JPN | 1    | 1    | 1    | 1    | 1    | 1    | 0    | 0    | 0    | 0    |
| LAM | 56   | 68   | 69   | 90   | 119  | 121  | 123  | 126  | 168  | 235  |
| MEA | 1    | 2    | 2    | 3    | 4    | 4    | 5    | 5    | 7    | 6    |
| NEU | 0    | 0    | 0    | 0    | 0    | 0    | 0    | 0    | 0    | 0    |
| OAS | 16   | 19   | 23   | 25   | 30   | 35   | 44   | 43   | 46   | 50   |
| REF | 0    | 0    | 0    | 0    | 0    | 0    | 0    | 0    | 0    | 0    |
| SSA | 6    | 9    | 10   | 11   | 13   | 13   | 13   | 16   | 17   | 16   |
| USA | 6    | 6    | 7    | 6    | 7    | 6    | 7    | 9    | 7    | 6    |

Table 628: FAO — Demand—Processing—Crops—Sugar crops—Sugar cane (Mt DM/yr)

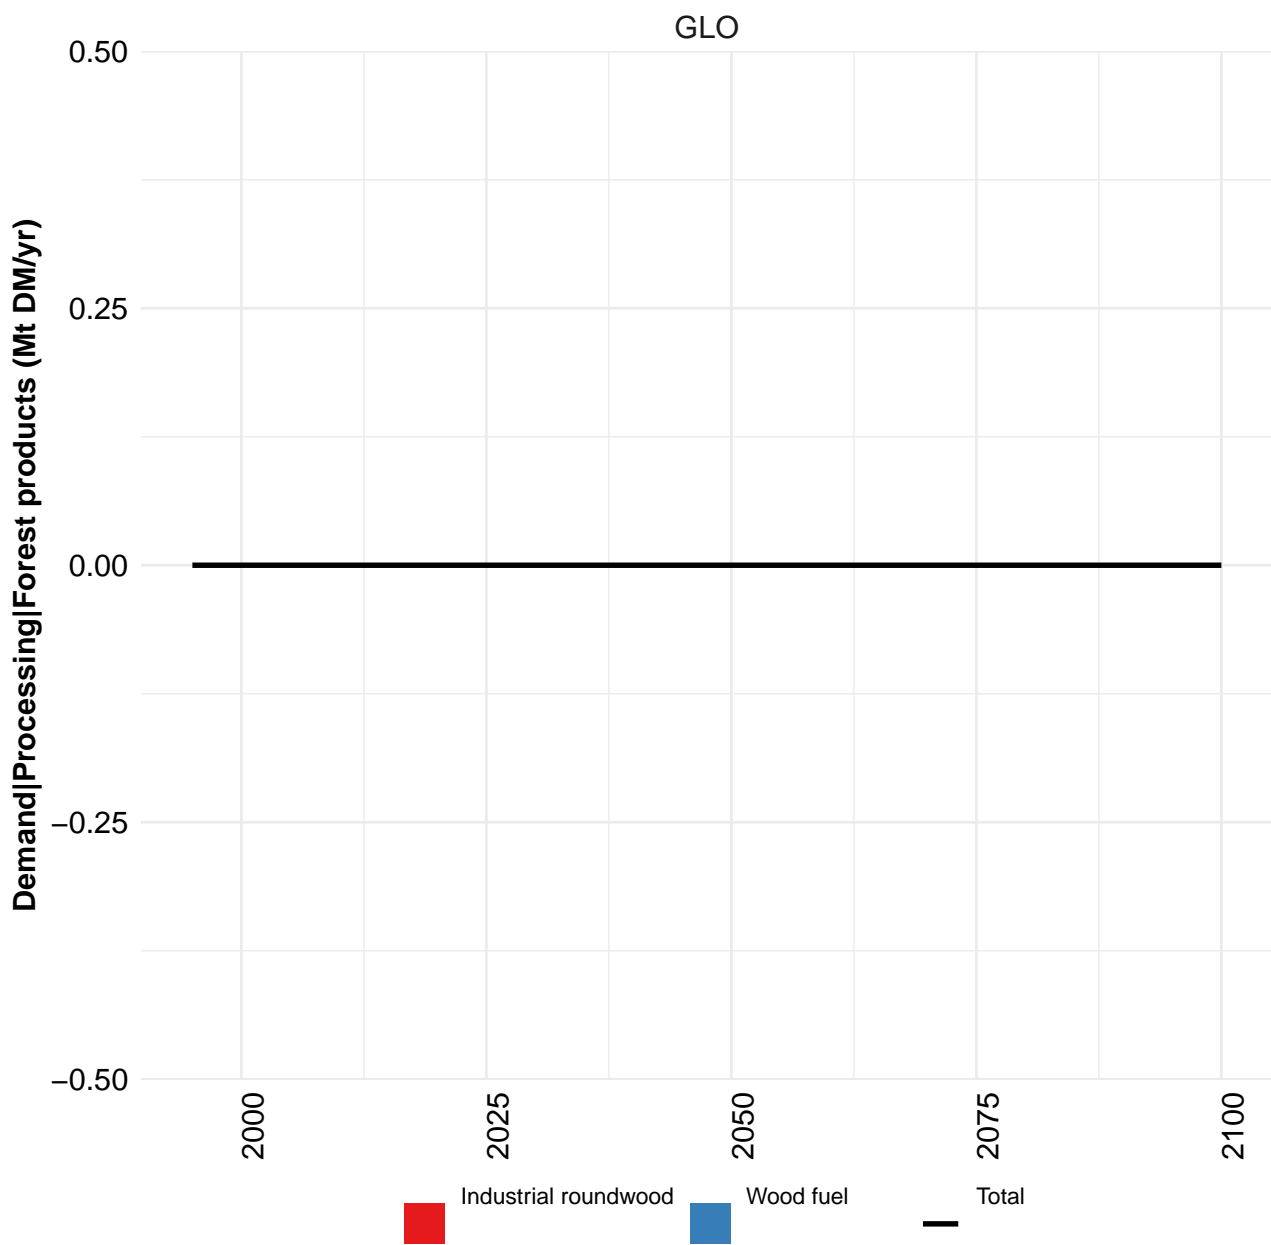

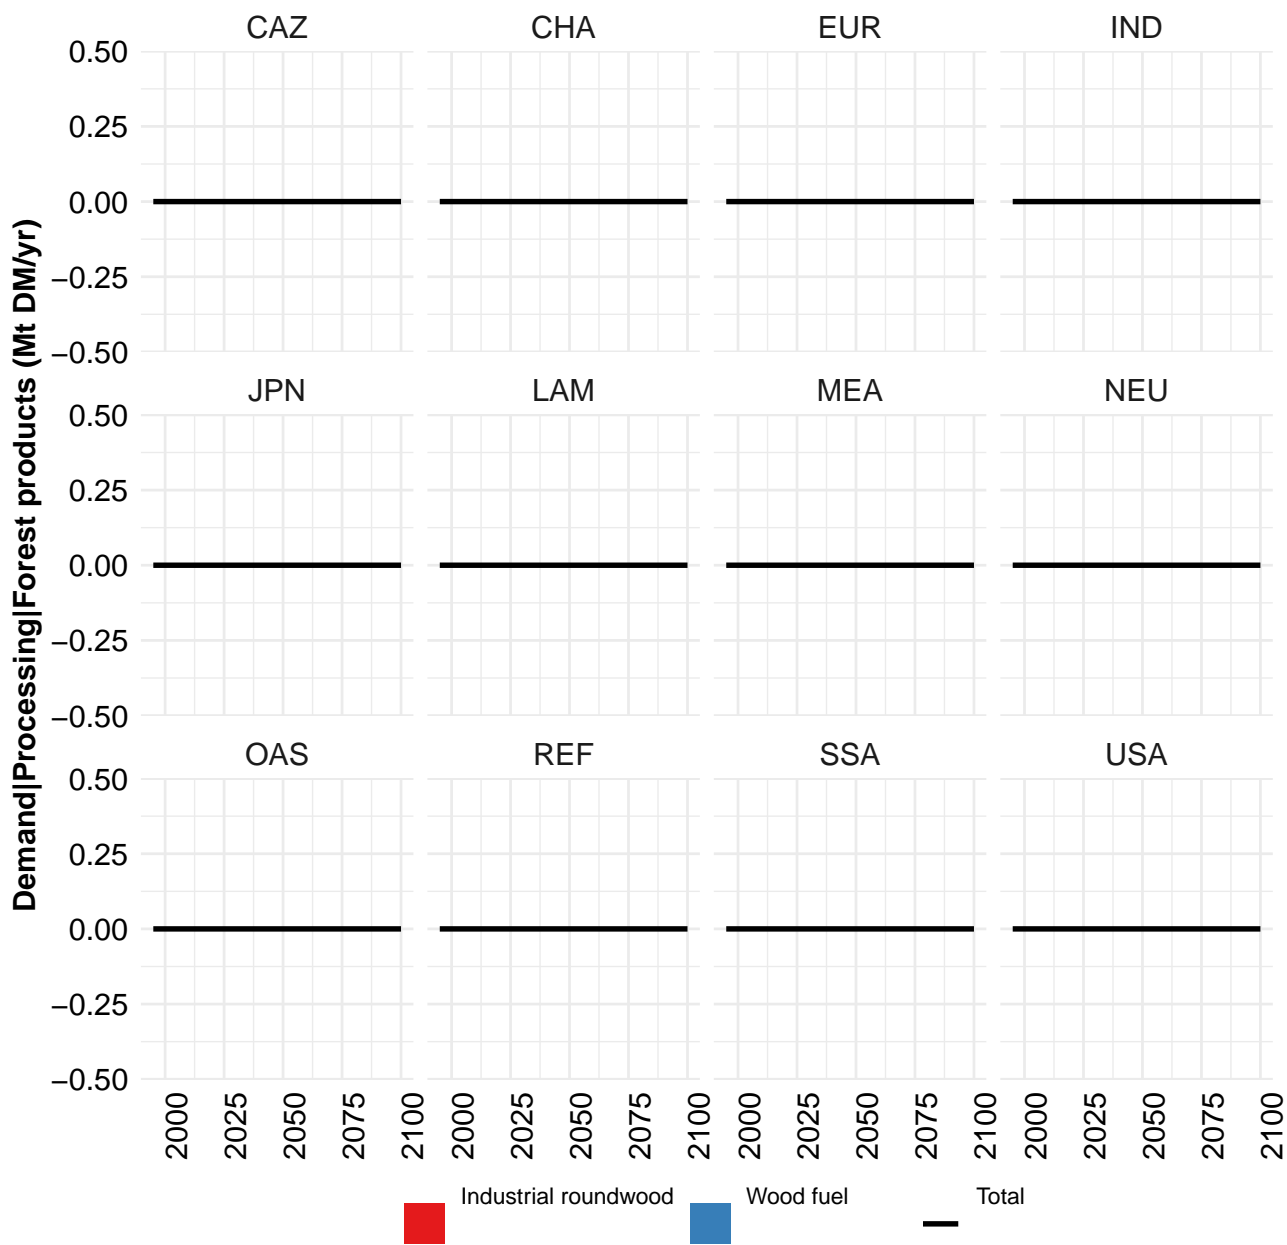

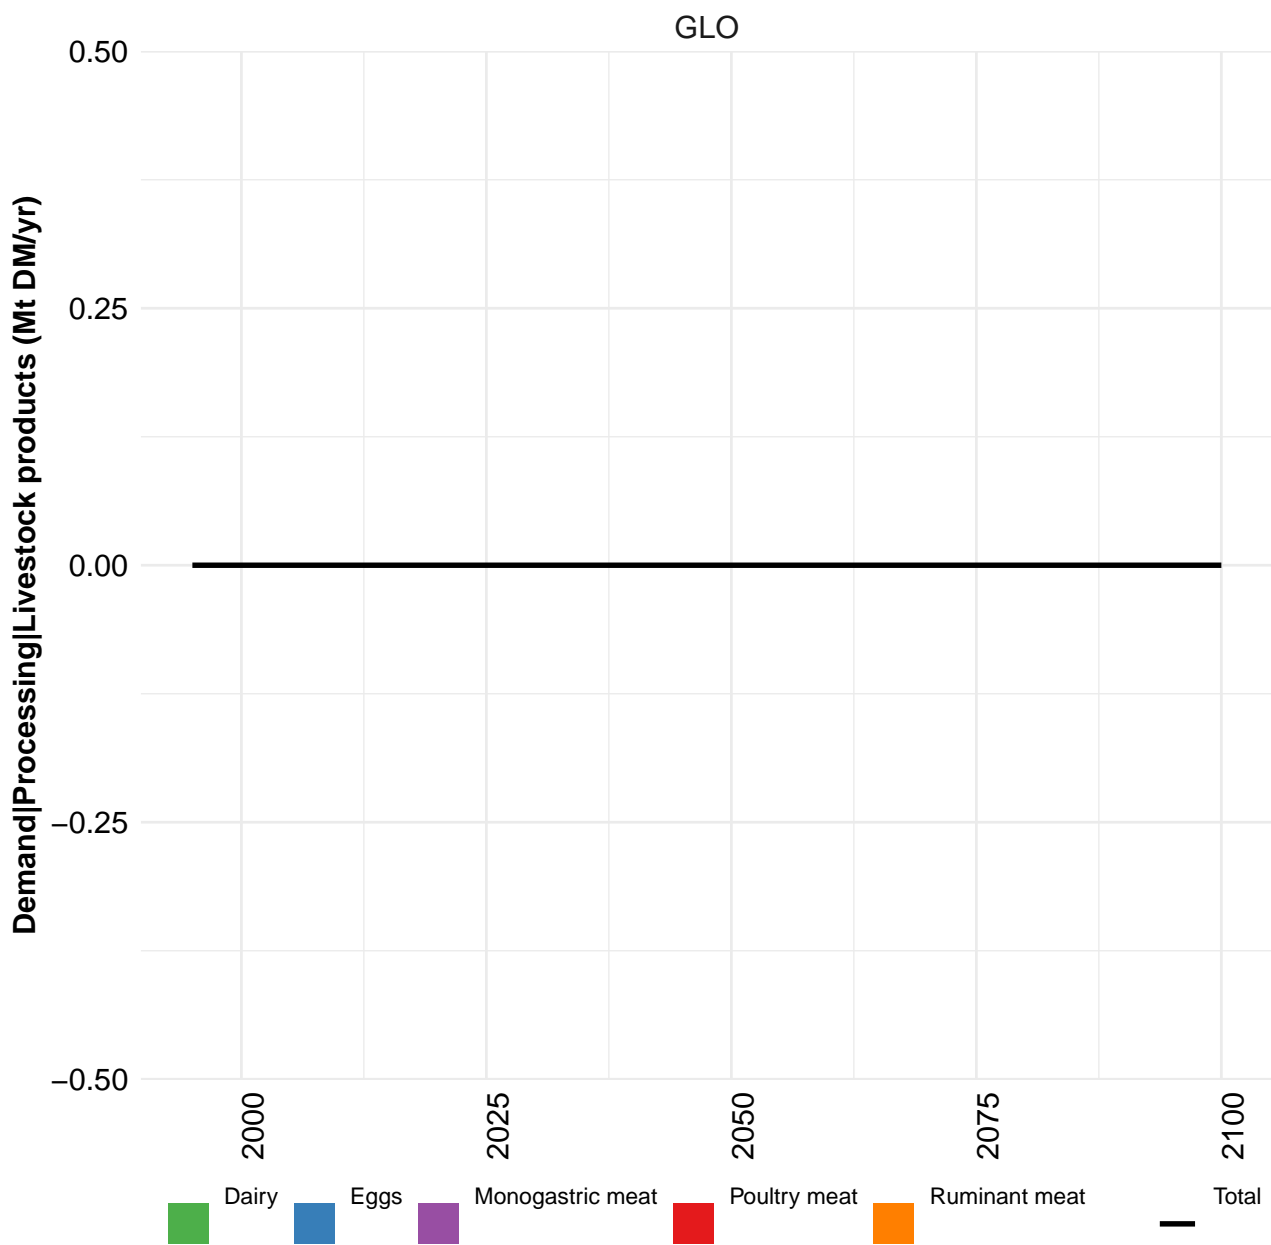

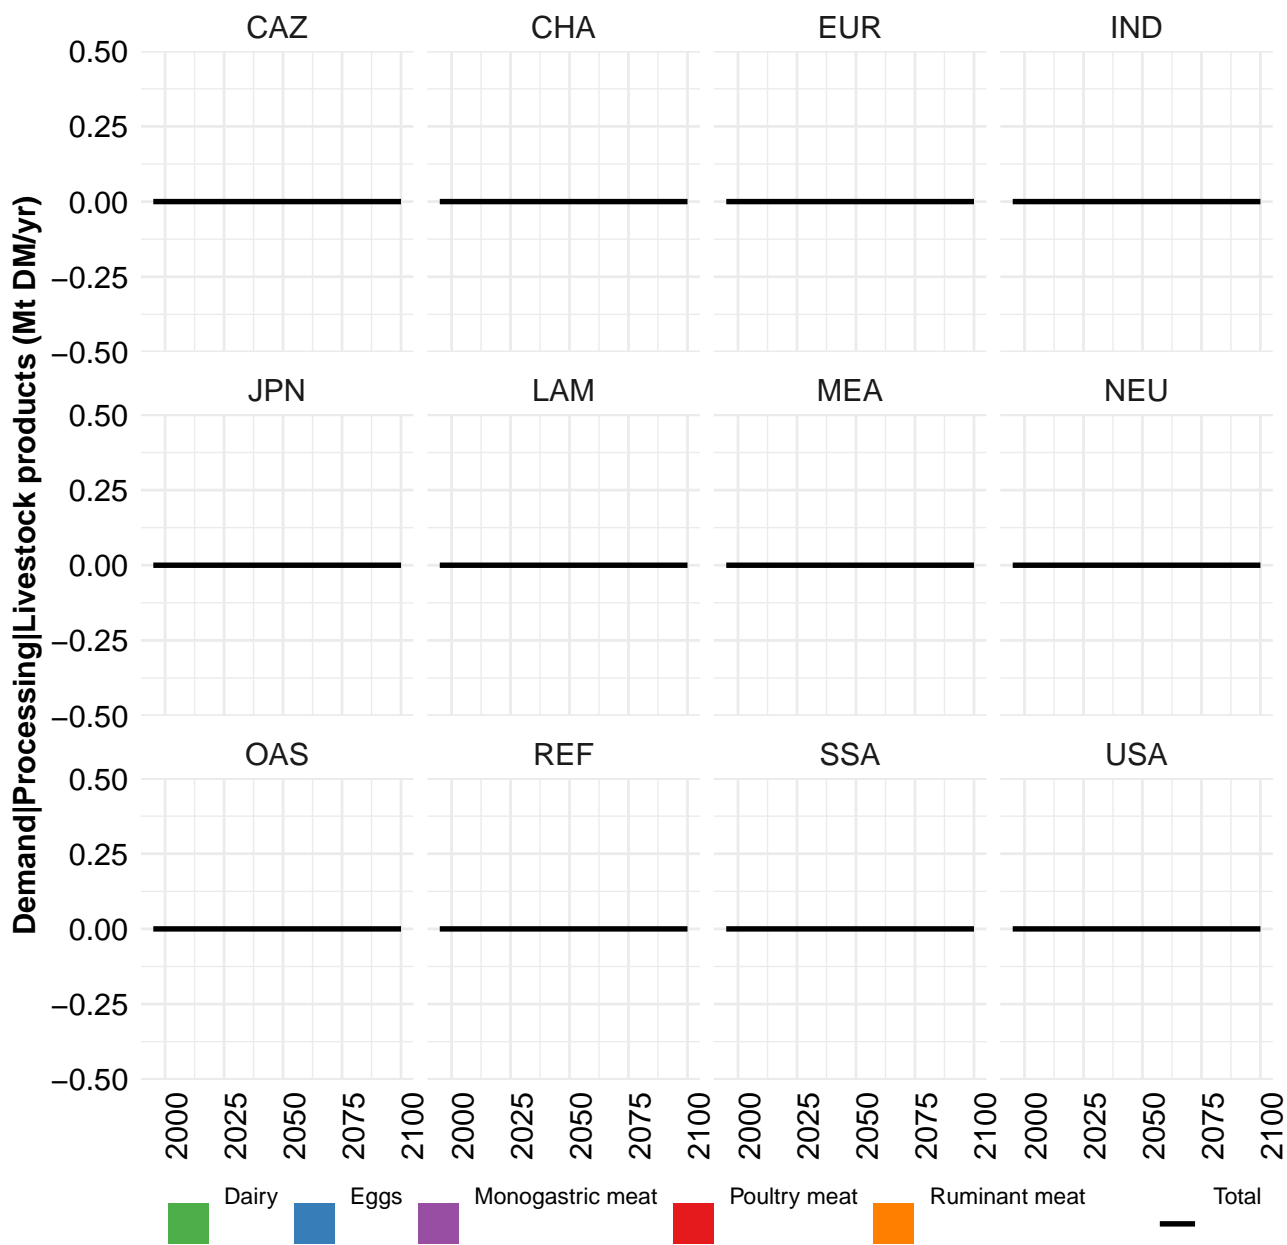

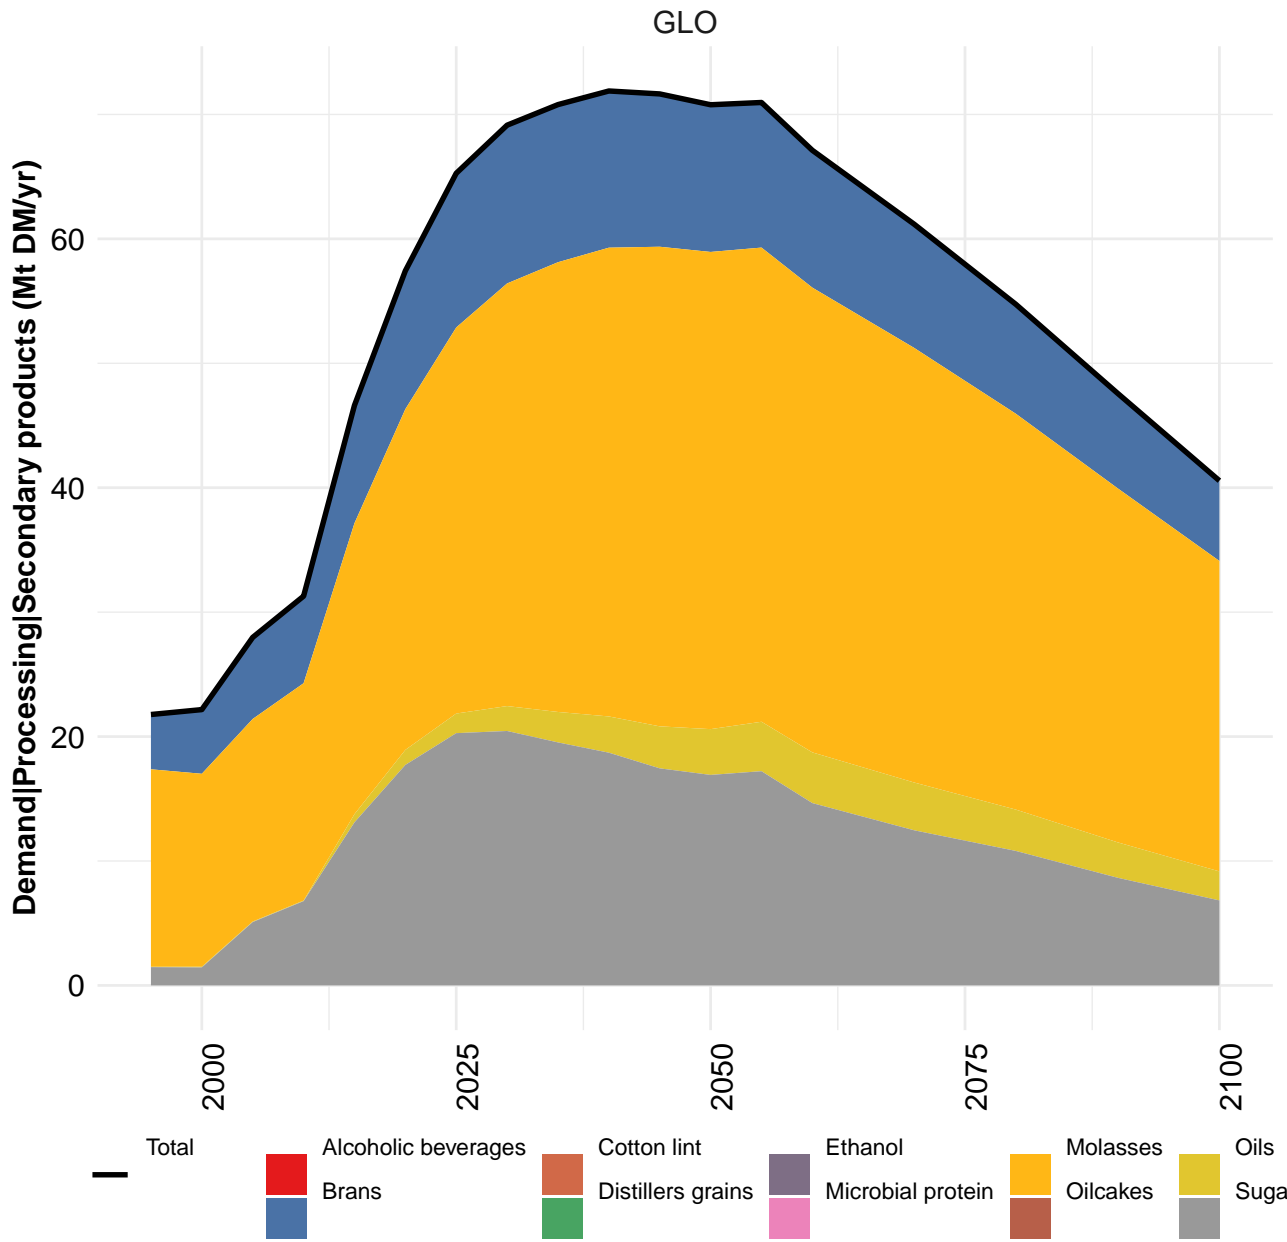



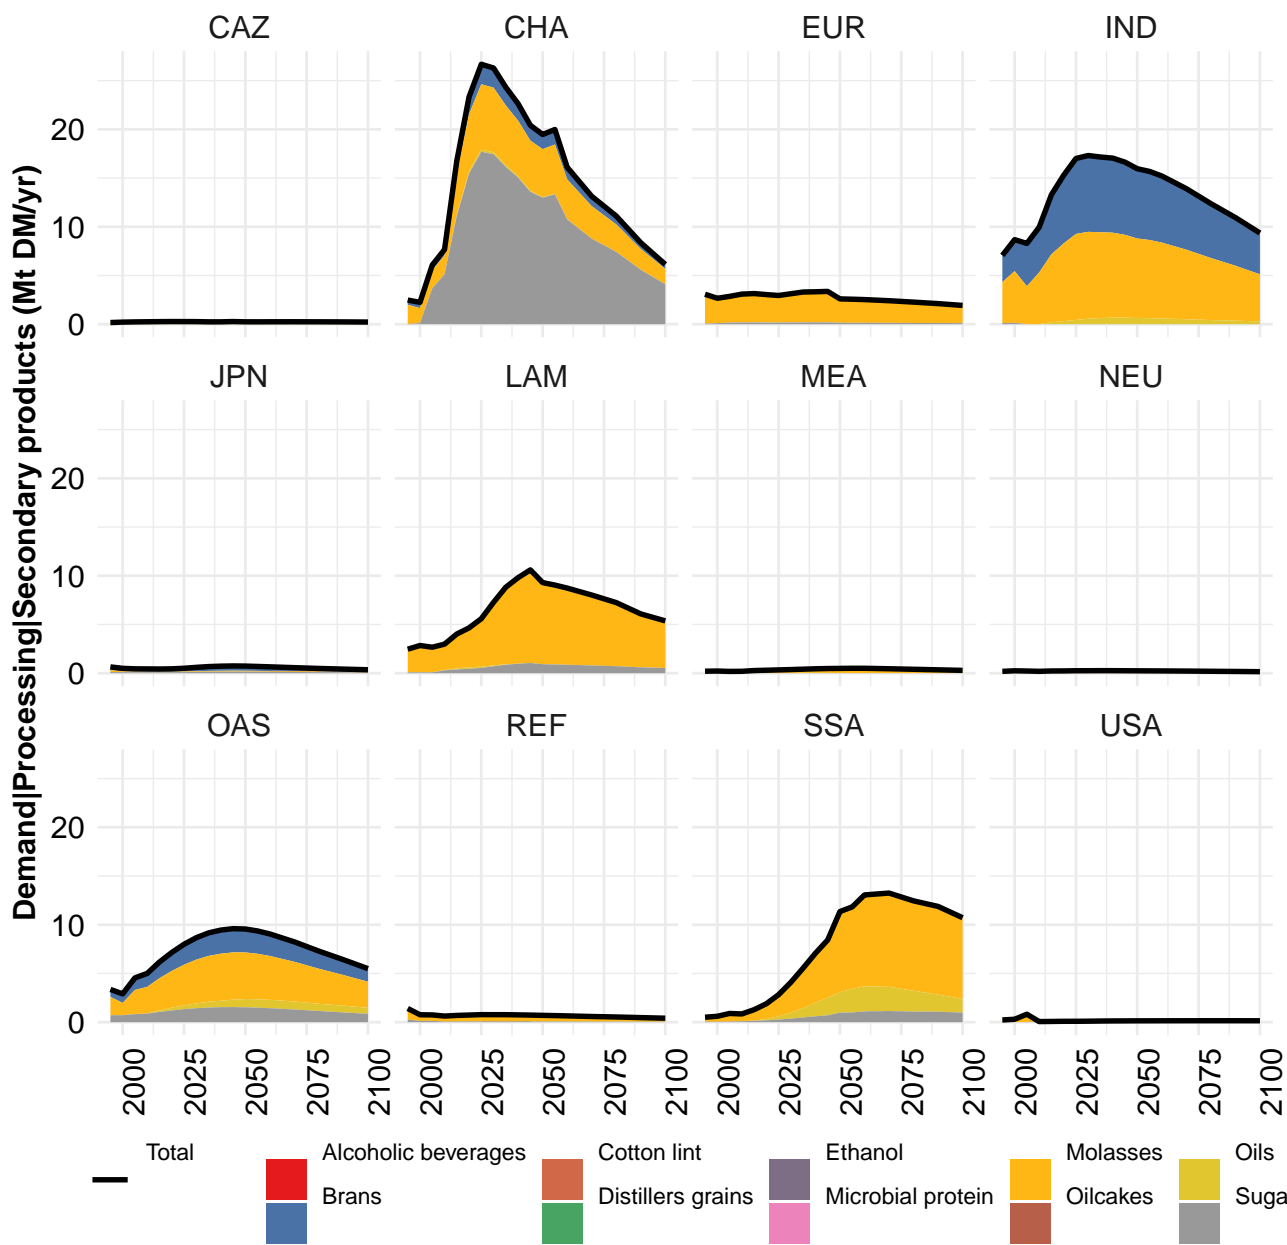

9.2 Secondary products

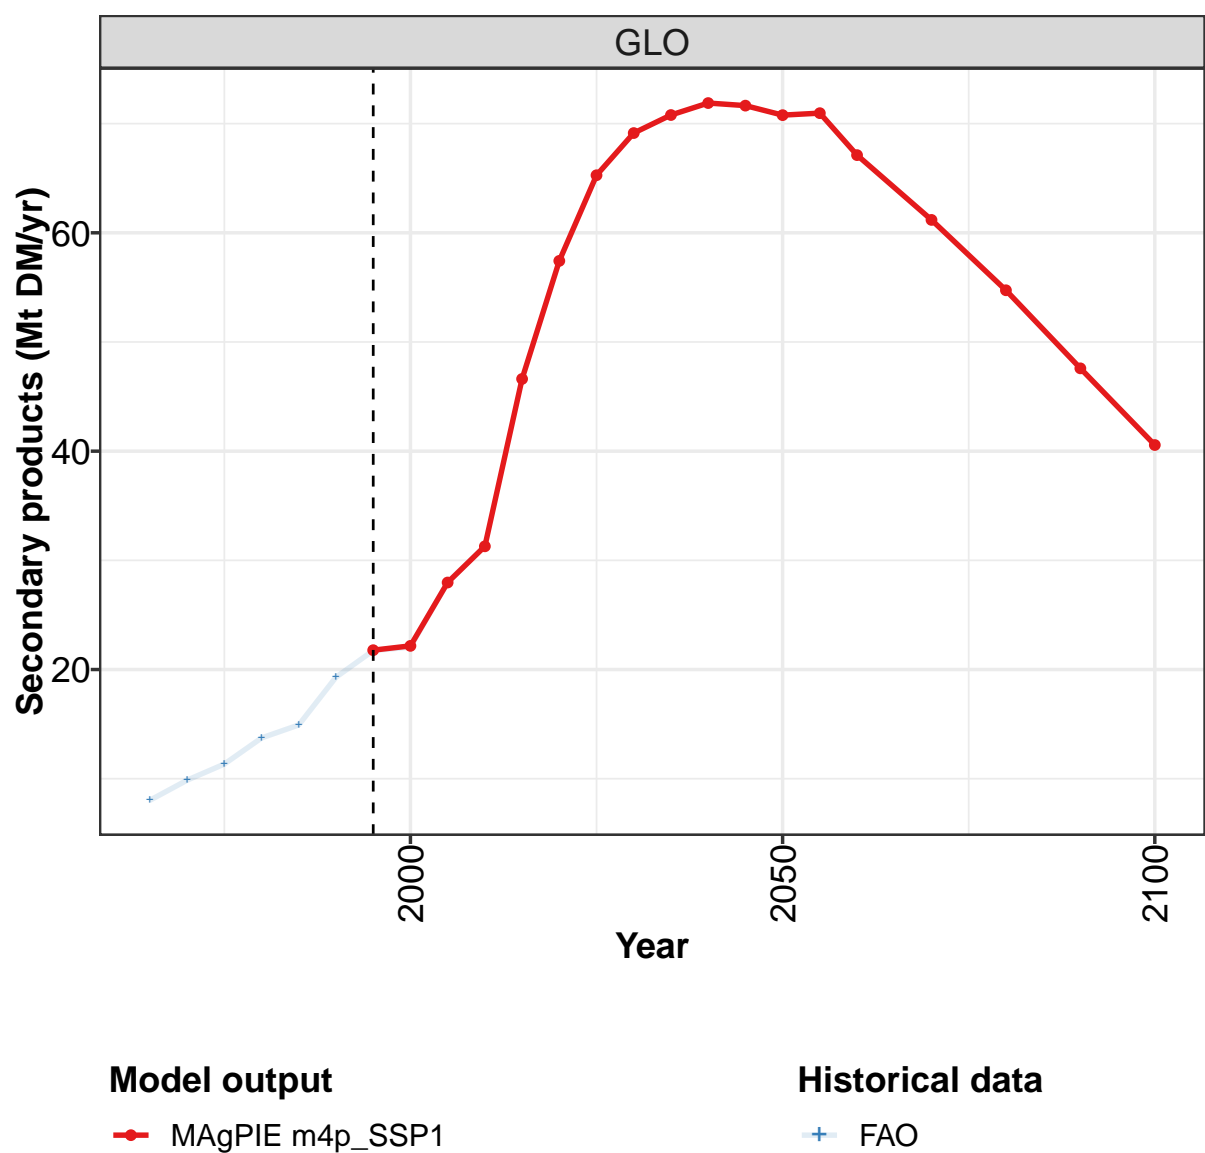

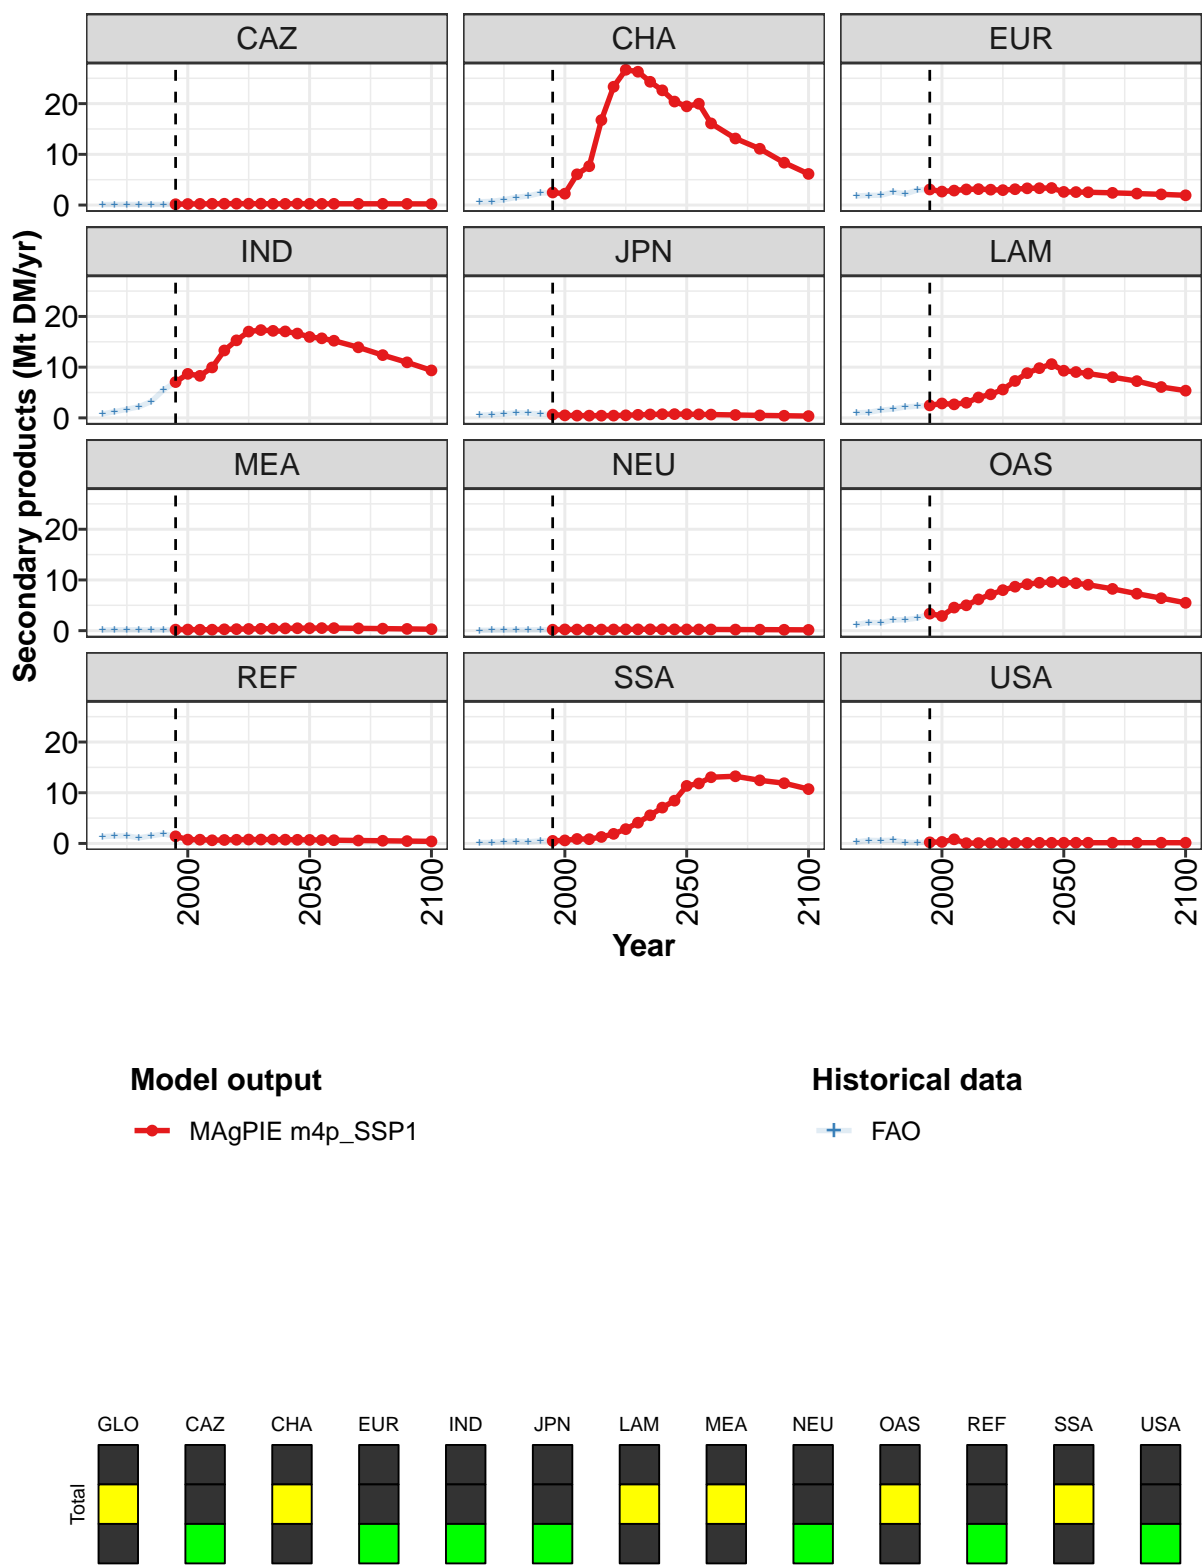

Figure 210: MAgPIE m4p\_SSP1 — Demand—Processing—Secondary products (Mt DM/yr)

|     | 1995 | 2000 | 2005 | 2010 | 2015 | 2020 | 2025 | 2030 | 2035 | 2040 | 2045 |
|-----|------|------|------|------|------|------|------|------|------|------|------|
| GLO | 21.8 | 22.2 | 28.0 | 31.3 | 46.6 | 57.4 | 65.3 | 69.1 | 70.8 | 71.9 | 71.6 |
| CAZ | 0.2  | 0.2  | 0.2  | 0.3  | 0.3  | 0.3  | 0.3  | 0.3  | 0.2  | 0.2  | 0.3  |
| CHA | 2.5  | 2.2  | 6.1  | 7.7  | 16.8 | 23.3 | 26.7 | 26.3 | 24.3 | 22.6 | 20.4 |
| EUR | 3.1  | 2.7  | 2.9  | 3.1  | 3.1  | 3.0  | 2.9  | 3.1  | 3.3  | 3.3  | 3.4  |
| IND | 7.1  | 8.7  | 8.3  | 9.9  | 13.3 | 15.3 | 17.0 | 17.3 | 17.2 | 17.1 | 16.6 |
| JPN | 0.6  | 0.5  | 0.4  | 0.4  | 0.4  | 0.4  | 0.5  | 0.6  | 0.7  | 0.7  | 0.7  |
| LAM | 2.5  | 2.8  | 2.7  | 3.0  | 4.0  | 4.6  | 5.6  | 7.3  | 8.8  | 9.8  | 10.6 |
| MEA | 0.2  | 0.2  | 0.2  | 0.2  | 0.3  | 0.3  | 0.3  | 0.4  | 0.4  | 0.5  | 0.5  |
| NEU | 0.2  | 0.2  | 0.2  | 0.2  | 0.2  | 0.2  | 0.3  | 0.3  | 0.3  | 0.3  | 0.3  |
| OAS | 3.4  | 2.9  | 4.5  | 5.0  | 6.2  | 7.1  | 8.0  | 8.7  | 9.2  | 9.5  | 9.6  |
| REF | 1.4  | 0.8  | 0.7  | 0.6  | 0.7  | 0.7  | 0.8  | 0.8  | 0.8  | 0.7  | 0.7  |
| SSA | 0.5  | 0.6  | 0.9  | 0.8  | 1.3  | 1.9  | 2.8  | 4.1  | 5.6  | 7.1  | 8.4  |
| USA | 0.2  | 0.3  | 0.8  | 0.1  | 0.1  | 0.1  | 0.1  | 0.1  | 0.1  | 0.1  | 0.1  |

Table 629: MAgPIE m4p\_SSP1 — Demand—Processing—Secondary products (Mt DM/yr) [PART 1/2]

|     | 2050 | 2055 | 2060 | 2070 | 2080 | 2090 | 2100 |
|-----|------|------|------|------|------|------|------|
| GLO | 70.8 | 71.0 | 67.1 | 61.2 | 54.7 | 47.6 | 40.6 |
| CAZ | 0.2  | 0.2  | 0.2  | 0.3  | 0.2  | 0.2  | 0.2  |
| CHA | 19.5 | 20.0 | 16.1 | 13.1 | 11.1 | 8.4  | 6.1  |
| EUR | 2.6  | 2.6  | 2.5  | 2.4  | 2.3  | 2.1  | 1.9  |
| IND | 16.0 | 15.7 | 15.2 | 13.9 | 12.4 | 10.9 | 9.4  |
| JPN | 0.7  | 0.7  | 0.7  | 0.6  | 0.5  | 0.4  | 0.4  |
| LAM | 9.3  | 9.0  | 8.7  | 8.0  | 7.2  | 6.1  | 5.4  |
| MEA | 0.5  | 0.5  | 0.5  | 0.5  | 0.4  | 0.3  | 0.3  |
| NEU | 0.2  | 0.2  | 0.2  | 0.2  | 0.2  | 0.2  | 0.2  |
| OAS | 9.6  | 9.4  | 9.1  | 8.2  | 7.3  | 6.4  | 5.5  |
| REF | 0.7  | 0.7  | 0.6  | 0.6  | 0.5  | 0.5  | 0.4  |
| SSA | 11.4 | 11.8 | 13.1 | 13.3 | 12.4 | 11.9 | 10.7 |
| USA | 0.1  | 0.1  | 0.1  | 0.1  | 0.1  | 0.1  | 0.1  |

Table 630: MAgPIE m4p\_SSP1 — Demand—Processing—Secondary products (Mt DM/yr) [PART 2/2]

|     | 1965 | 1970 | 1975 | 1980 | 1985 | 1990 | 1995 | 2000 | 2005 | 2010 |
|-----|------|------|------|------|------|------|------|------|------|------|
| GLO | 8.0  | 9.9  | 11.3 | 13.7 | 14.9 | 19.3 | 21.7 | 22.1 | 28.0 | 31.3 |
| CAZ | 0.1  | 0.1  | 0.1  | 0.1  | 0.1  | 0.1  | 0.2  | 0.2  | 0.2  | 0.3  |
| CHA | 0.6  | 0.7  | 1.0  | 1.5  | 1.8  | 2.3  | 2.4  | 2.2  | 6.0  | 7.7  |
| EUR | 1.8  | 1.9  | 1.9  | 2.6  | 2.2  | 3.0  | 3.1  | 2.7  | 2.8  | 3.0  |
| IND | 0.8  | 1.2  | 1.7  | 2.2  | 3.2  | 5.5  | 7.1  | 8.7  | 8.3  | 9.9  |
| JPN | 0.5  | 0.6  | 0.8  | 1.0  | 0.9  | 0.8  | 0.6  | 0.5  | 0.4  | 0.4  |
| LAM | 1.0  | 1.1  | 1.5  | 1.7  | 2.2  | 2.3  | 2.4  | 2.7  | 2.8  | 3.1  |
| MEA | 0.1  | 0.2  | 0.2  | 0.2  | 0.1  | 0.1  | 0.2  | 0.2  | 0.2  | 0.2  |
| NEU | 0.1  | 0.1  | 0.1  | 0.1  | 0.1  | 0.2  | 0.2  | 0.2  | 0.2  | 0.2  |
| OAS | 1.2  | 1.6  | 1.6  | 2.1  | 2.2  | 2.5  | 3.4  | 2.9  | 4.6  | 4.9  |
| REF | 1.3  | 1.5  | 1.5  | 1.1  | 1.5  | 1.9  | 1.4  | 0.8  | 0.7  | 0.6  |
| SSA | 0.2  | 0.2  | 0.4  | 0.4  | 0.3  | 0.5  | 0.5  | 0.6  | 0.9  | 0.8  |
| USA | 0.3  | 0.6  | 0.6  | 0.7  | 0.2  | 0.2  | 0.2  | 0.3  | 0.8  | 0.1  |

Table 631: FAO — Demand—Processing—Secondary products (Mt DM/yr)

9.2.1
Brans

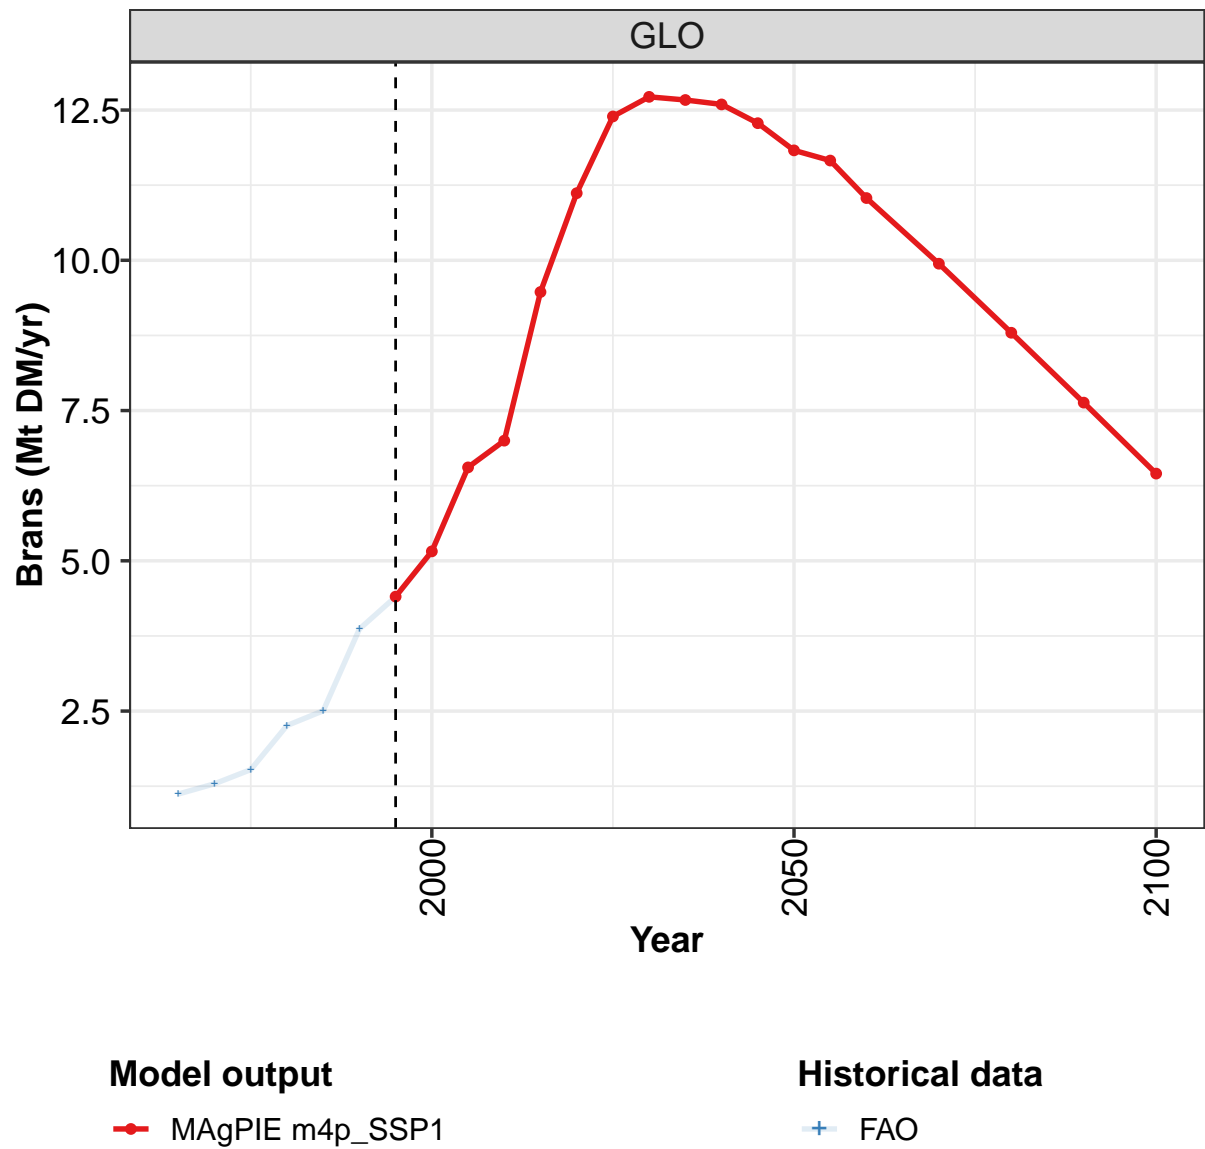

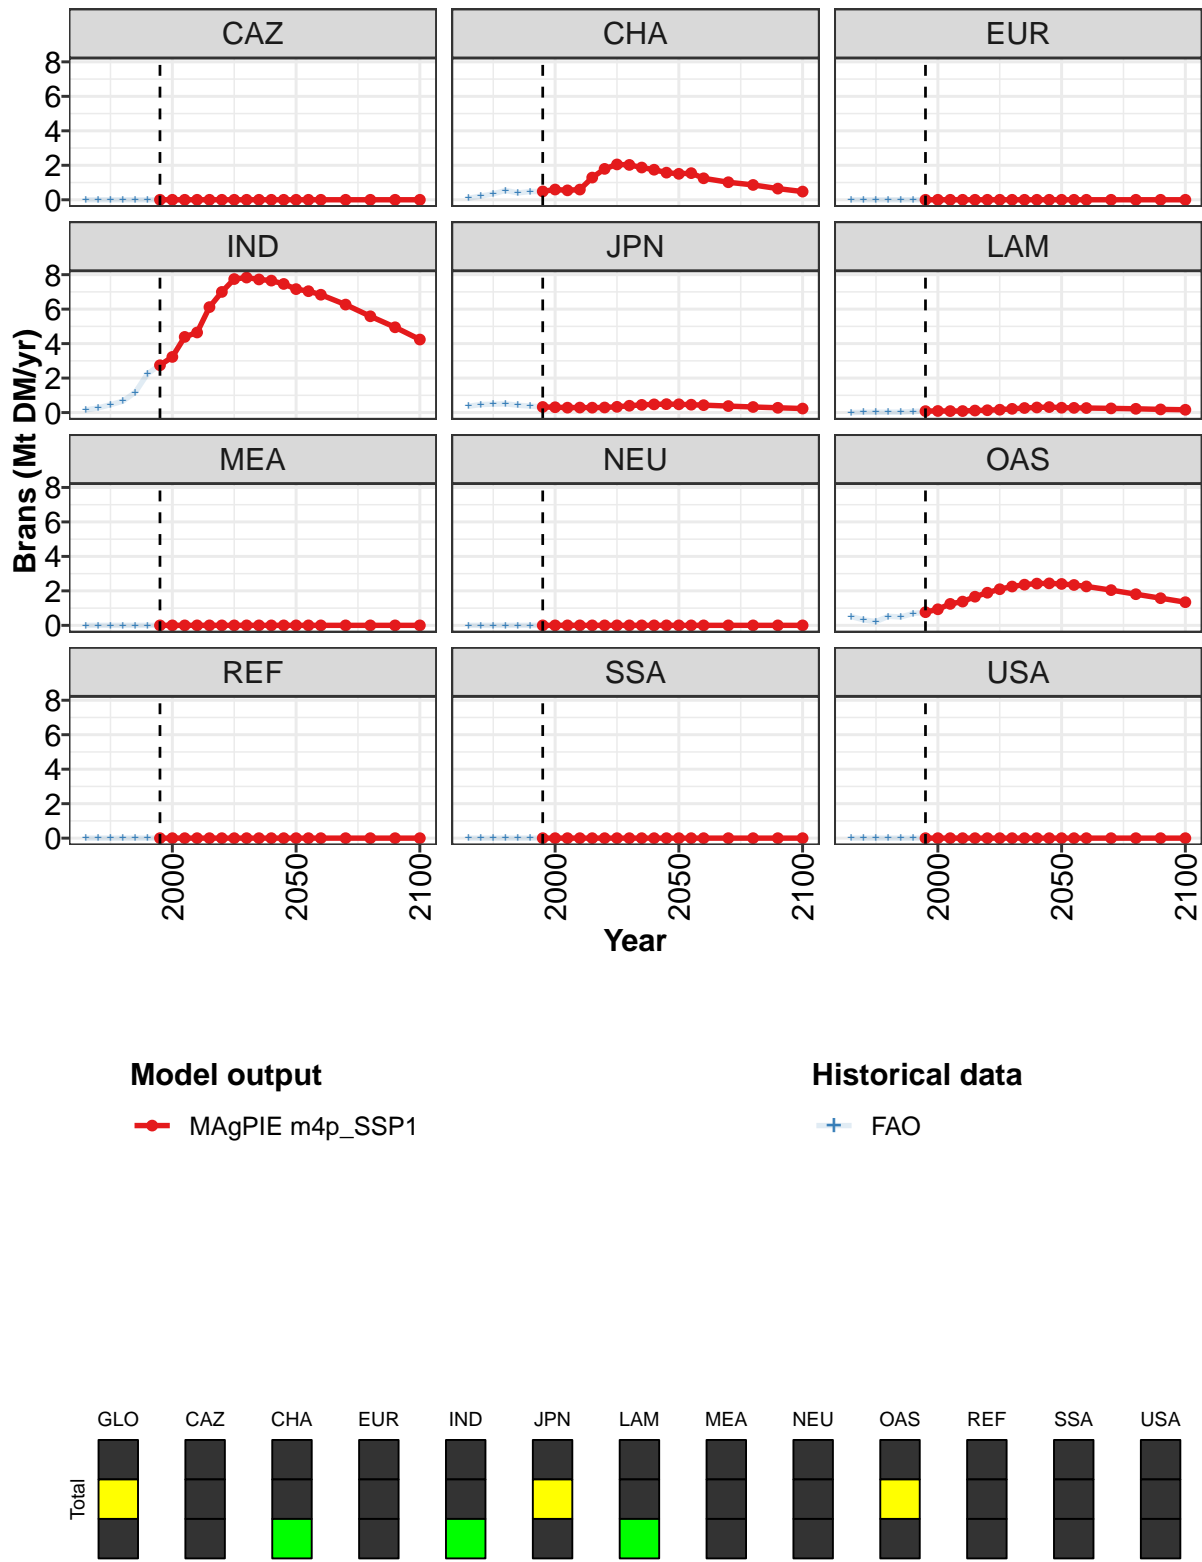

Figure 211: MAgPIE m4p\_SSP1 — Demand—Processing—Secondary products—Brans (Mt DM/yr)

|     | 1995 | 2000 | 2005 | 2010 | 2015 | 2020 | 2025 | 2030 | 2035 | 2040 | 2045 |
|-----|------|------|------|------|------|------|------|------|------|------|------|
| GLO | 4.4  | 5.2  | 6.6  | 7.0  | 9.5  | 11.1 | 12.4 | 12.7 | 12.7 | 12.6 | 12.3 |
| CAZ | 0.0  | 0.0  | 0.0  | 0.0  | 0.0  | 0.0  | 0.0  | 0.0  | 0.0  | 0.0  | 0.0  |
| CHA | 0.5  | 0.6  | 0.5  | 0.6  | 1.3  | 1.8  | 2.1  | 2.0  | 1.9  | 1.7  | 1.6  |
| EUR | 0.0  | 0.0  | 0.0  | 0.0  | 0.0  | 0.0  | 0.0  | 0.0  | 0.0  | 0.0  | 0.0  |
| IND | 2.7  | 3.2  | 4.4  | 4.6  | 6.1  | 7.0  | 7.7  | 7.8  | 7.7  | 7.7  | 7.5  |
| JPN | 0.3  | 0.3  | 0.3  | 0.3  | 0.3  | 0.3  | 0.3  | 0.4  | 0.4  | 0.5  | 0.5  |
| LAM | 0.1  | 0.1  | 0.1  | 0.1  | 0.1  | 0.1  | 0.2  | 0.2  | 0.3  | 0.3  | 0.3  |
| MEA | 0.0  | 0.0  | 0.0  | 0.0  | 0.0  | 0.0  | 0.0  | 0.0  | 0.0  | 0.0  | 0.0  |
| NEU | 0.0  | 0.0  | 0.0  | 0.0  | 0.0  | 0.0  | 0.0  | 0.0  | 0.0  | 0.0  | 0.0  |
| OAS | 0.8  | 0.9  | 1.2  | 1.4  | 1.7  | 1.9  | 2.1  | 2.3  | 2.4  | 2.4  | 2.4  |
| REF | 0.0  | 0.0  | 0.0  | 0.0  | 0.0  | 0.0  | 0.0  | 0.0  | 0.0  | 0.0  | 0.0  |
| SSA | 0.0  | 0.0  | 0.0  | 0.0  | 0.0  | 0.0  | 0.0  | 0.0  | 0.0  | 0.0  | 0.0  |
| USA | 0.0  | 0.0  | 0.0  | 0.0  | 0.0  | 0.0  | 0.0  | 0.0  | 0.0  | 0.0  | 0.0  |

Table 632: MAgPIE m4p\_SSP1 — Demand—Processing—Secondary products—Brans (Mt DM/yr) [PART 1/2]

|     | 2050 | 2055 | 2060 | 2070 | 2080 | 2090 | 2100 |
|-----|------|------|------|------|------|------|------|
| GLO | 11.8 | 11.7 | 11.0 | 9.9  | 8.8  | 7.6  | 6.5  |
| CAZ | 0.0  | 0.0  | 0.0  | 0.0  | 0.0  | 0.0  | 0.0  |
| CHA | 1.5  | 1.5  | 1.2  | 1.0  | 0.9  | 0.6  | 0.5  |
| EUR | 0.0  | 0.0  | 0.0  | 0.0  | 0.0  | 0.0  | 0.0  |
| IND | 7.2  | 7.0  | 6.8  | 6.3  | 5.6  | 4.9  | 4.2  |
| JPN | 0.5  | 0.5  | 0.4  | 0.4  | 0.3  | 0.3  | 0.2  |
| LAM | 0.3  | 0.3  | 0.3  | 0.2  | 0.2  | 0.2  | 0.2  |
| MEA | 0.0  | 0.0  | 0.0  | 0.0  | 0.0  | 0.0  | 0.0  |
| NEU | 0.0  | 0.0  | 0.0  | 0.0  | 0.0  | 0.0  | 0.0  |
| OAS | 2.4  | 2.3  | 2.3  | 2.0  | 1.8  | 1.6  | 1.3  |
| REF | 0.0  | 0.0  | 0.0  | 0.0  | 0.0  | 0.0  | 0.0  |
| SSA | 0.0  | 0.0  | 0.0  | 0.0  | 0.0  | 0.0  | 0.0  |
| USA | 0.0  | 0.0  | 0.0  | 0.0  | 0.0  | 0.0  | 0.0  |

Table 633: MAgPIE m4p\_SSP1 — Demand—Processing—Secondary products—Brans (Mt DM/yr) [PART 2/2]

|     | 1965 | 1970 | 1975 | 1980 | 1985 | 1990 | 1995 | 2000 | 2005 | 2010 |
|-----|------|------|------|------|------|------|------|------|------|------|
| GLO | 1.12 | 1.29 | 1.53 | 2.26 | 2.50 | 3.87 | 4.40 | 5.15 | 6.57 | 6.99 |
| CAZ | 0.00 | 0.00 | 0.00 | 0.00 | 0.00 | 0.00 | 0.00 | 0.00 | 0.00 | 0.00 |
| CHA | 0.09 | 0.21 | 0.34 | 0.54 | 0.40 | 0.48 | 0.48 | 0.59 | 0.54 | 0.60 |
| EUR | 0.00 | 0.00 | 0.00 | 0.00 | 0.00 | 0.00 | 0.00 | 0.00 | 0.00 | 0.00 |
| IND | 0.16 | 0.27 | 0.46 | 0.66 | 1.17 | 2.26 | 2.75 | 3.23 | 4.39 | 4.65 |
| JPN | 0.37 | 0.47 | 0.48 | 0.51 | 0.42 | 0.38 | 0.32 | 0.31 | 0.29 | 0.29 |
| LAM | 0.00 | 0.02 | 0.02 | 0.02 | 0.03 | 0.06 | 0.08 | 0.09 | 0.09 | 0.09 |
| MEA | 0.00 | 0.00 | 0.00 | 0.00 | 0.00 | 0.00 | 0.00 | 0.00 | 0.00 | 0.00 |
| NEU | 0.00 | 0.00 | 0.00 | 0.00 | 0.00 | 0.00 | 0.00 | 0.00 | 0.00 | 0.00 |
| OAS | 0.51 | 0.32 | 0.22 | 0.53 | 0.49 | 0.69 | 0.77 | 0.93 | 1.25 | 1.36 |
| REF | 0.00 | 0.00 | 0.00 | 0.00 | 0.00 | 0.00 | 0.00 | 0.00 | 0.00 | 0.00 |
| SSA | 0.00 | 0.00 | 0.00 | 0.00 | 0.00 | 0.00 | 0.00 | 0.00 | 0.00 | 0.00 |
| USA | 0.00 | 0.00 | 0.00 | 0.00 | 0.00 | 0.00 | 0.00 | 0.00 | 0.00 | 0.00 |

Table 634: FAO — Demand—Processing—Secondary products—Brans (Mt DM/yr)

9.2.2 Molasses

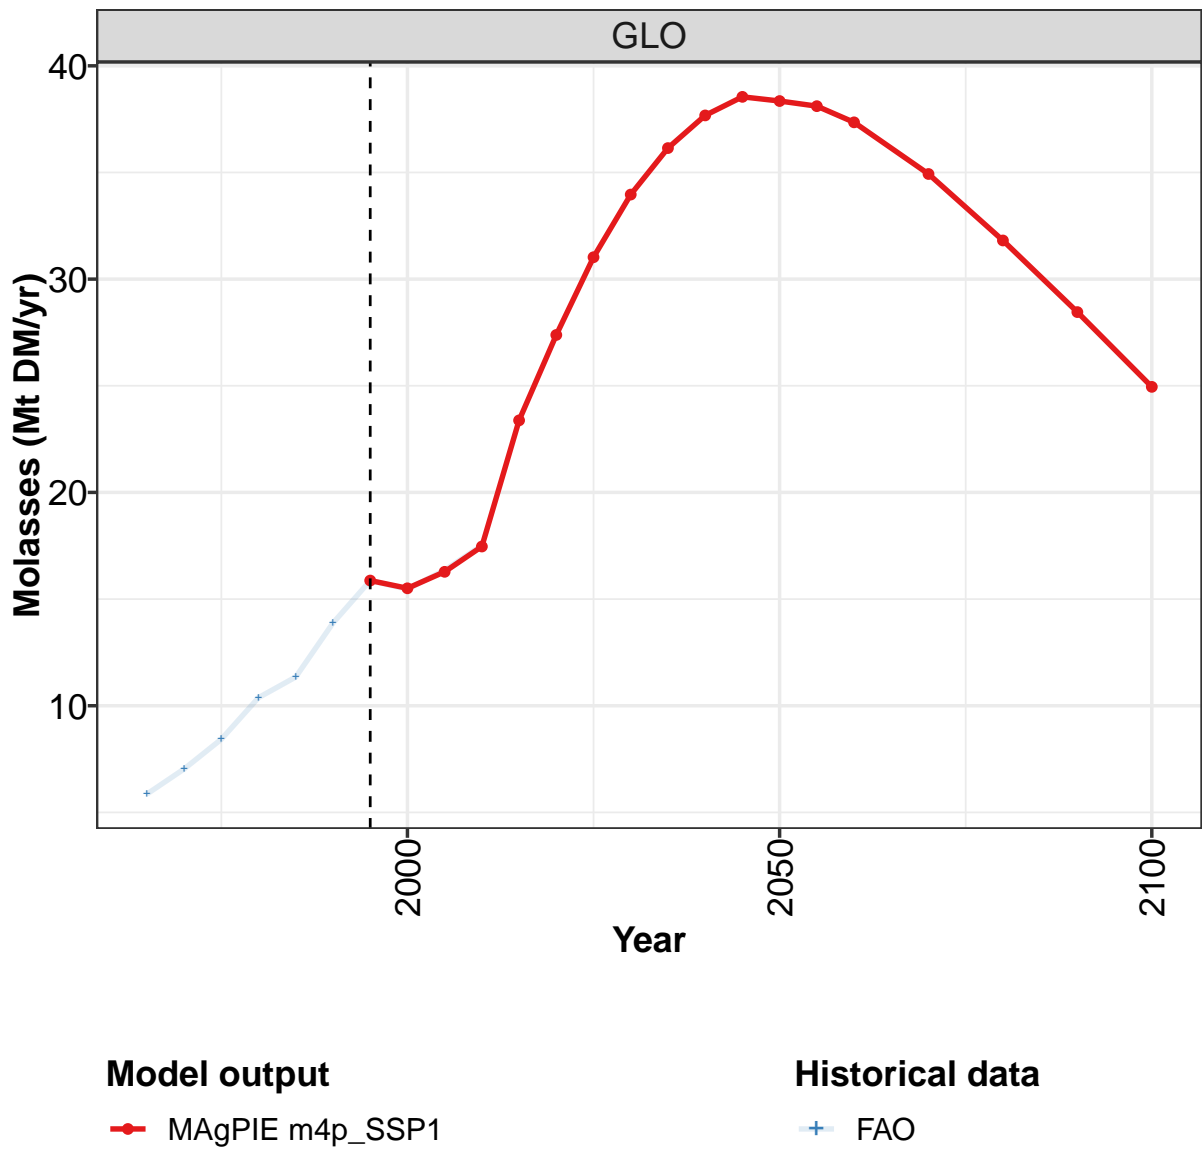



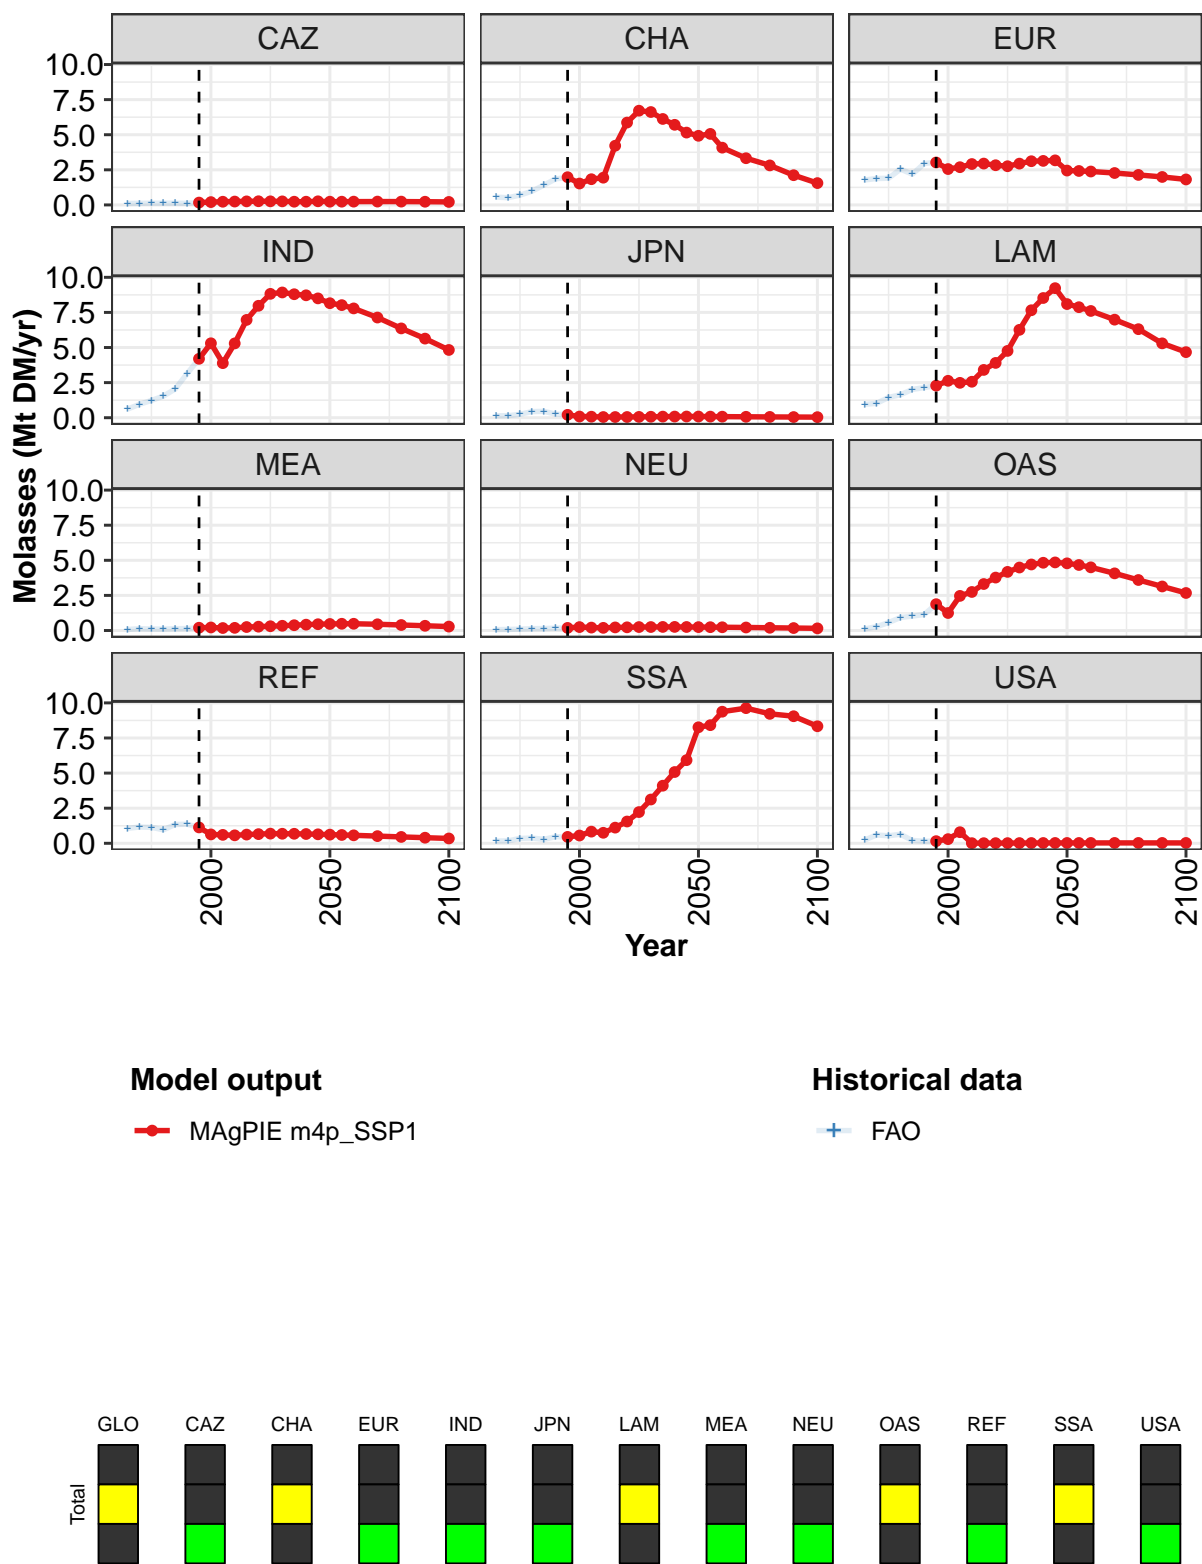

Figure 212: MAgPIE m4p\_SSP1 — Demand—Processing—Secondary products—Molasses (Mt DM/yr)

|     | 1995 | 2000 | 2005 | 2010 | 2015 | 2020 | 2025 | 2030 | 2035 | 2040 | 2045 |
|-----|------|------|------|------|------|------|------|------|------|------|------|
| GLO | 15.9 | 15.5 | 16.3 | 17.5 | 23.4 | 27.4 | 31.0 | 34.0 | 36.1 | 37.7 | 38.5 |
| CAZ | 0.2  | 0.2  | 0.2  | 0.2  | 0.3  | 0.3  | 0.3  | 0.3  | 0.2  | 0.2  | 0.3  |
| CHA | 2.0  | 1.5  | 1.8  | 1.9  | 4.2  | 5.9  | 6.7  | 6.6  | 6.1  | 5.7  | 5.2  |
| EUR | 3.0  | 2.6  | 2.7  | 2.9  | 2.9  | 2.8  | 2.8  | 2.9  | 3.1  | 3.1  | 3.2  |
| IND | 4.2  | 5.3  | 3.9  | 5.3  | 7.0  | 8.0  | 8.8  | 8.9  | 8.8  | 8.7  | 8.5  |
| JPN | 0.2  | 0.1  | 0.1  | 0.1  | 0.1  | 0.1  | 0.1  | 0.1  | 0.1  | 0.1  | 0.1  |
| LAM | 2.3  | 2.6  | 2.5  | 2.6  | 3.4  | 3.9  | 4.8  | 6.3  | 7.7  | 8.5  | 9.2  |
| MEA | 0.2  | 0.2  | 0.2  | 0.2  | 0.2  | 0.3  | 0.3  | 0.3  | 0.4  | 0.4  | 0.4  |
| NEU | 0.2  | 0.2  | 0.2  | 0.2  | 0.2  | 0.2  | 0.2  | 0.2  | 0.3  | 0.3  | 0.3  |
| OAS | 1.9  | 1.2  | 2.5  | 2.7  | 3.3  | 3.8  | 4.2  | 4.5  | 4.7  | 4.8  | 4.9  |
| REF | 1.1  | 0.6  | 0.6  | 0.6  | 0.6  | 0.7  | 0.7  | 0.7  | 0.7  | 0.7  | 0.6  |
| SSA | 0.5  | 0.6  | 0.8  | 0.8  | 1.1  | 1.6  | 2.2  | 3.1  | 4.1  | 5.1  | 5.9  |
| USA | 0.2  | 0.3  | 0.8  | 0.0  | 0.0  | 0.0  | 0.0  | 0.0  | 0.0  | 0.0  | 0.0  |

Table 635: MAgPIE m4p\_SSP1 — Demand—Processing—Secondary products—Molasses (Mt DM/yr) [PART 1/2]

|     | 2050 | 2055 | 2060 | 2070 | 2080 | 2090 | 2100 |
|-----|------|------|------|------|------|------|------|
| GLO | 38.3 | 38.1 | 37.4 | 34.9 | 31.8 | 28.5 | 24.9 |
| CAZ | 0.2  | 0.2  | 0.2  | 0.2  | 0.2  | 0.2  | 0.2  |
| CHA | 4.9  | 5.1  | 4.1  | 3.3  | 2.8  | 2.1  | 1.6  |
| EUR | 2.4  | 2.4  | 2.4  | 2.3  | 2.1  | 2.0  | 1.8  |
| IND | 8.2  | 8.0  | 7.8  | 7.1  | 6.4  | 5.6  | 4.8  |
| JPN | 0.1  | 0.1  | 0.1  | 0.1  | 0.1  | 0.0  | 0.0  |
| LAM | 8.1  | 7.9  | 7.6  | 7.0  | 6.3  | 5.3  | 4.7  |
| MEA | 0.5  | 0.5  | 0.5  | 0.4  | 0.4  | 0.3  | 0.3  |
| NEU | 0.2  | 0.2  | 0.2  | 0.2  | 0.2  | 0.2  | 0.2  |
| OAS | 4.8  | 4.7  | 4.5  | 4.1  | 3.6  | 3.1  | 2.7  |
| REF | 0.6  | 0.6  | 0.6  | 0.5  | 0.5  | 0.4  | 0.3  |
| SSA | 8.3  | 8.4  | 9.4  | 9.6  | 9.2  | 9.1  | 8.3  |
| USA | 0.0  | 0.0  | 0.0  | 0.0  | 0.0  | 0.0  | 0.0  |

Table 636: MAgPIE m4p\_SSP1 — Demand—Processing—Secondary products—Molasses (Mt DM/yr) [PART 2/2]

|     | 1965 | 1970 | 1975 | 1980 | 1985 | 1990 | 1995 | 2000 | 2005 | 2010 |
|-----|------|------|------|------|------|------|------|------|------|------|
| GLO | 5.9  | 7.0  | 8.4  | 10.4 | 11.3 | 13.9 | 15.9 | 15.5 | 16.4 | 17.5 |
| CAZ | 0.1  | 0.1  | 0.1  | 0.1  | 0.1  | 0.1  | 0.2  | 0.2  | 0.2  | 0.2  |
| CHA | 0.6  | 0.5  | 0.7  | 1.0  | 1.4  | 1.9  | 2.0  | 1.5  | 1.8  | 2.0  |
| EUR | 1.8  | 1.9  | 1.9  | 2.5  | 2.2  | 2.9  | 3.0  | 2.6  | 2.7  | 2.9  |
| IND | 0.6  | 1.0  | 1.2  | 1.5  | 2.0  | 3.1  | 4.2  | 5.3  | 3.9  | 5.3  |
| JPN | 0.1  | 0.1  | 0.2  | 0.4  | 0.5  | 0.3  | 0.2  | 0.1  | 0.1  | 0.1  |
| LAM | 0.9  | 1.0  | 1.4  | 1.6  | 2.0  | 2.1  | 2.3  | 2.6  | 2.6  | 2.7  |
| MEA | 0.1  | 0.1  | 0.1  | 0.1  | 0.1  | 0.1  | 0.2  | 0.2  | 0.2  | 0.2  |
| NEU | 0.1  | 0.1  | 0.1  | 0.1  | 0.1  | 0.2  | 0.2  | 0.2  | 0.2  | 0.2  |
| OAS | 0.1  | 0.3  | 0.6  | 0.9  | 1.0  | 1.1  | 1.9  | 1.2  | 2.5  | 2.7  |
| REF | 1.1  | 1.2  | 1.1  | 1.0  | 1.3  | 1.4  | 1.1  | 0.6  | 0.6  | 0.6  |
| SSA | 0.2  | 0.2  | 0.3  | 0.4  | 0.3  | 0.5  | 0.4  | 0.6  | 0.8  | 0.7  |
| USA | 0.2  | 0.6  | 0.5  | 0.6  | 0.2  | 0.1  | 0.2  | 0.3  | 0.8  | 0.0  |

Table 637: FAO — Demand—Processing—Secondary products—Molasses (Mt DM/yr)

9.2.3 Sugar

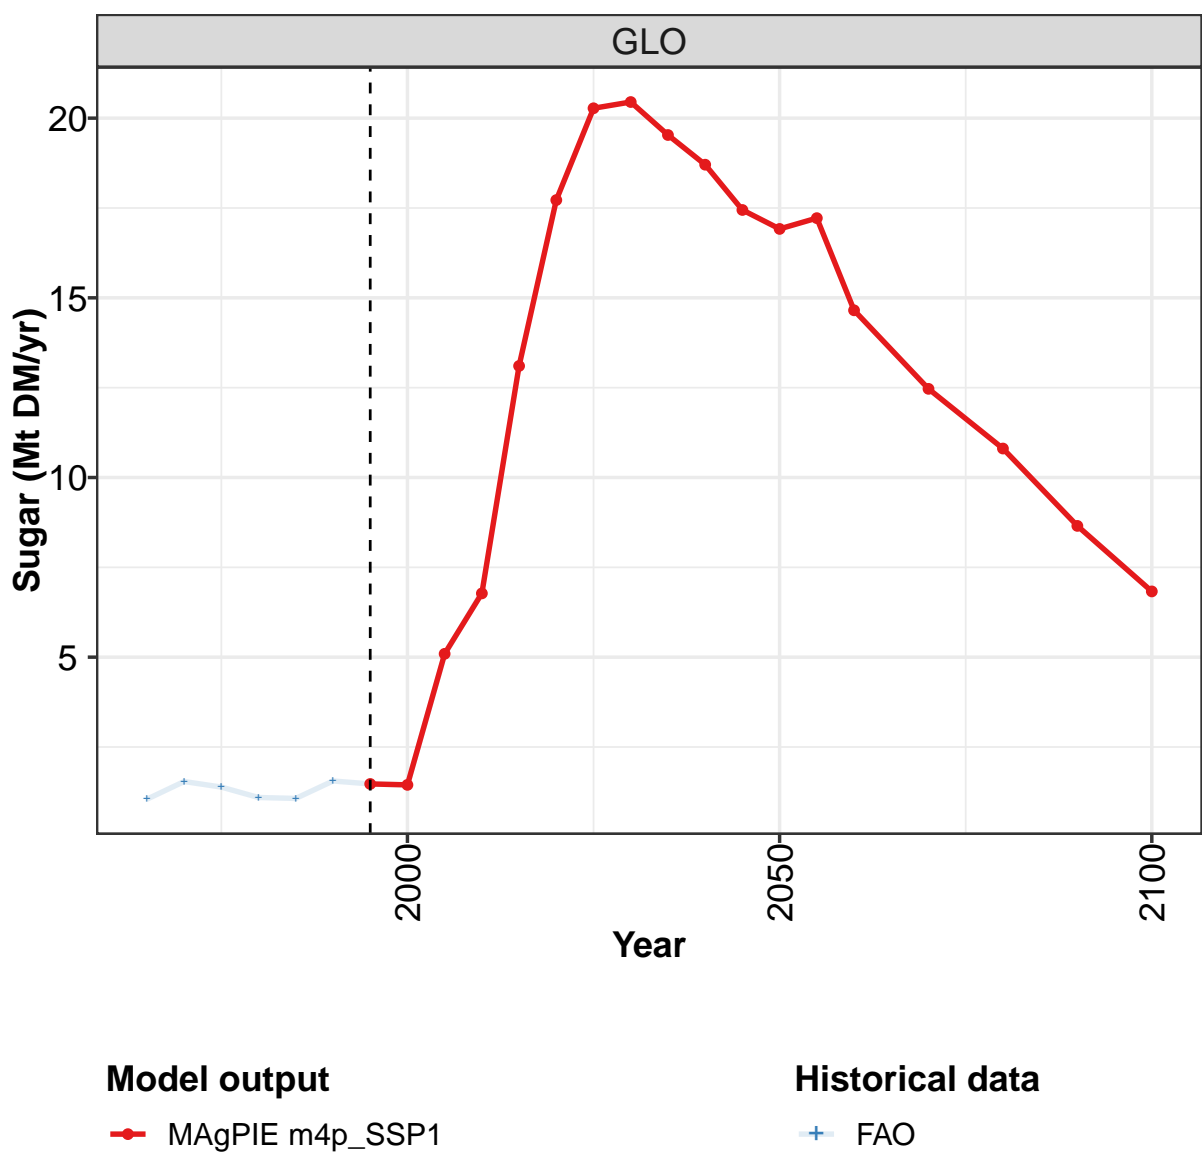

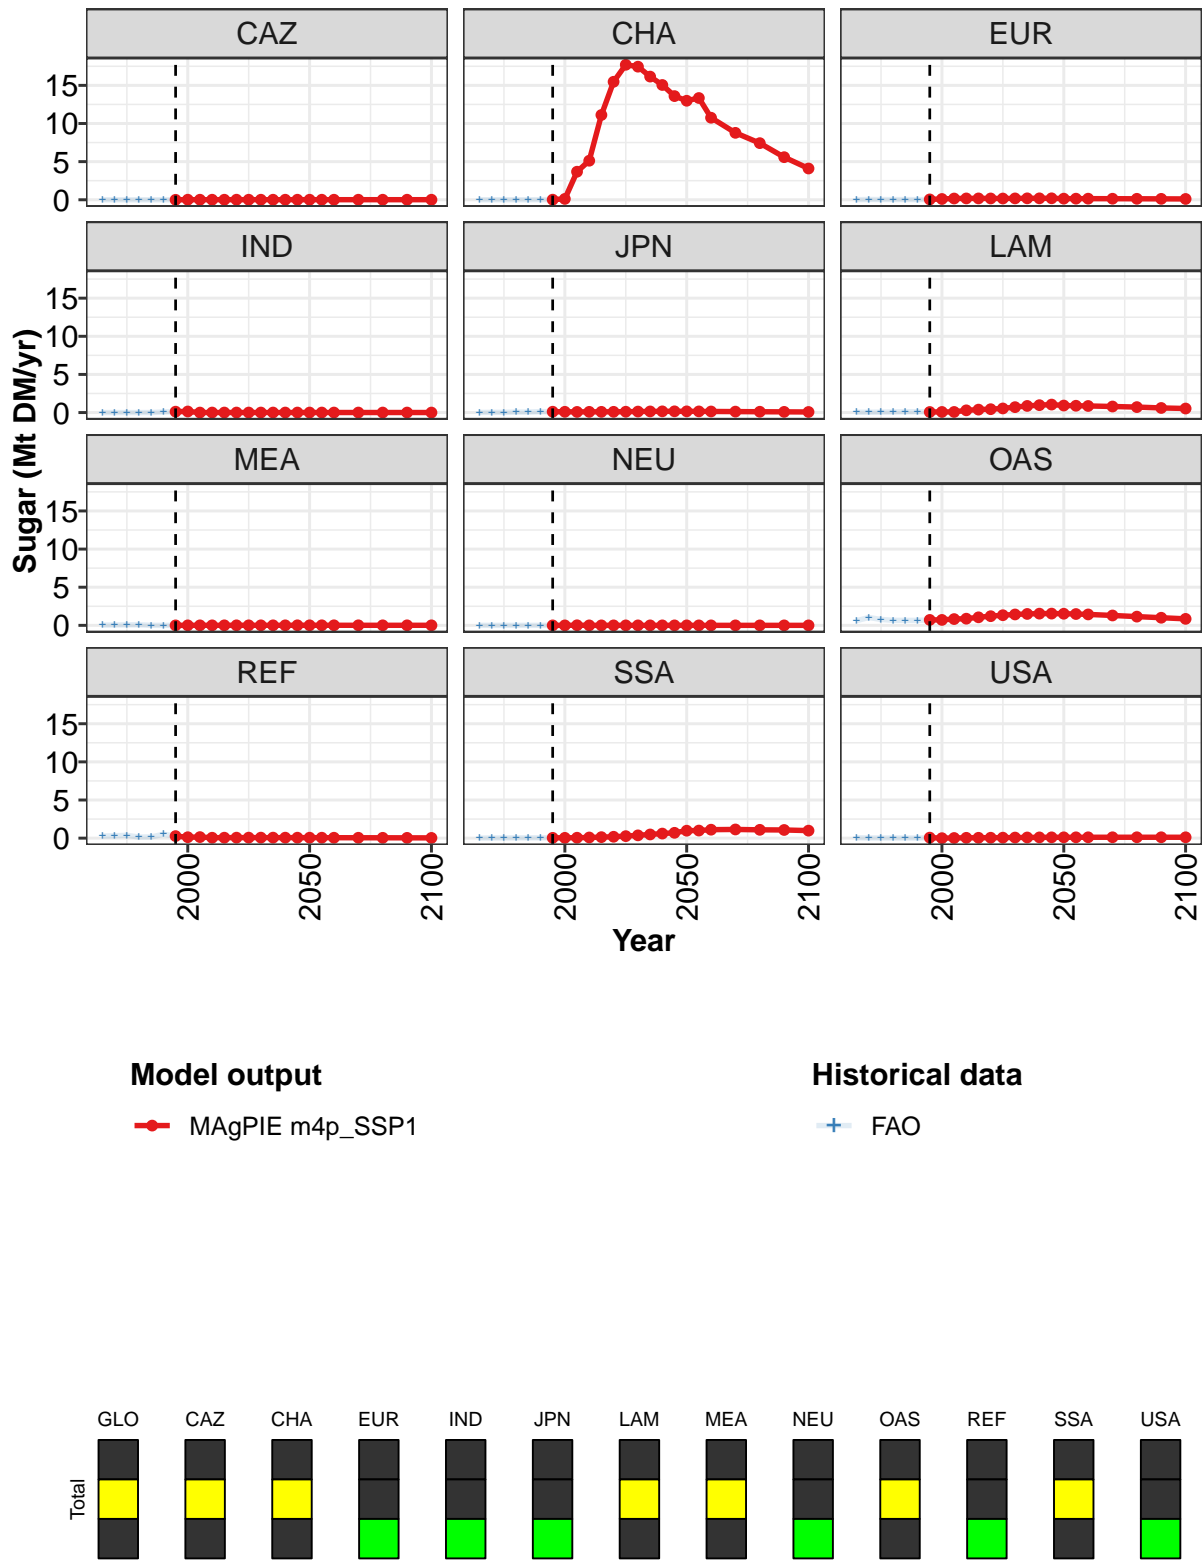

Figure 213: MAgPIE m4p\_SSP1 — Demand—Processing—Secondary products—Sugar (Mt DM/yr)

|     | 1995 | 2000 | 2005 | 2010 | 2015 | 2020 | 2025 | 2030 | 2035 | 2040 | 2045 |
|-----|------|------|------|------|------|------|------|------|------|------|------|
| GLO | 1.5  | 1.4  | 5.1  | 6.8  | 13.1 | 17.7 | 20.3 | 20.4 | 19.5 | 18.7 | 17.4 |
| CAZ | 0.0  | 0.0  | 0.0  | 0.0  | 0.0  | 0.0  | 0.0  | 0.0  | 0.0  | 0.0  | 0.0  |
| CHA | 0.0  | 0.1  | 3.7  | 5.1  | 11.1 | 15.5 | 17.7 | 17.5 | 16.2 | 15.1 | 13.6 |
| EUR | 0.0  | 0.1  | 0.2  | 0.2  | 0.2  | 0.2  | 0.2  | 0.2  | 0.2  | 0.2  | 0.2  |
| IND | 0.1  | 0.1  | 0.0  | 0.0  | 0.0  | 0.0  | 0.0  | 0.0  | 0.0  | 0.0  | 0.0  |
| JPN | 0.1  | 0.1  | 0.1  | 0.1  | 0.1  | 0.1  | 0.1  | 0.1  | 0.1  | 0.2  | 0.2  |
| LAM | 0.1  | 0.1  | 0.1  | 0.3  | 0.4  | 0.4  | 0.5  | 0.7  | 0.9  | 1.0  | 1.1  |
| MEA | 0.0  | 0.0  | 0.0  | 0.0  | 0.0  | 0.0  | 0.0  | 0.0  | 0.0  | 0.0  | 0.0  |
| NEU | 0.0  | 0.0  | 0.0  | 0.0  | 0.0  | 0.0  | 0.0  | 0.0  | 0.0  | 0.0  | 0.0  |
| OAS | 0.7  | 0.7  | 0.8  | 0.9  | 1.1  | 1.2  | 1.3  | 1.4  | 1.5  | 1.5  | 1.5  |
| REF | 0.3  | 0.1  | 0.1  | 0.1  | 0.1  | 0.1  | 0.1  | 0.1  | 0.1  | 0.1  | 0.1  |
| SSA | 0.0  | 0.0  | 0.1  | 0.1  | 0.1  | 0.2  | 0.3  | 0.4  | 0.5  | 0.6  | 0.7  |
| USA | 0.1  | 0.0  | 0.0  | 0.0  | 0.1  | 0.1  | 0.1  | 0.1  | 0.1  | 0.1  | 0.1  |

Table 638: MAgPIE m4p\_SSP1 — Demand—Processing—Secondary products—Sugar (Mt DM/yr) [PART 1/2]

|     | 2050 | 2055 | 2060 | 2070 | 2080 | 2090 | 2100 |
|-----|------|------|------|------|------|------|------|
| GLO | 16.9 | 17.2 | 14.7 | 12.5 | 10.8 | 8.7  | 6.8  |
| CAZ | 0.0  | 0.0  | 0.0  | 0.0  | 0.0  | 0.0  | 0.0  |
| CHA | 13.0 | 13.3 | 10.8 | 8.8  | 7.4  | 5.6  | 4.1  |
| EUR | 0.1  | 0.1  | 0.1  | 0.1  | 0.1  | 0.1  | 0.1  |
| IND | 0.0  | 0.0  | 0.0  | 0.0  | 0.0  | 0.0  | 0.0  |
| JPN | 0.2  | 0.2  | 0.1  | 0.1  | 0.1  | 0.1  | 0.1  |
| LAM | 0.9  | 0.9  | 0.9  | 0.8  | 0.7  | 0.6  | 0.5  |
| MEA | 0.0  | 0.0  | 0.0  | 0.0  | 0.0  | 0.0  | 0.0  |
| NEU | 0.0  | 0.0  | 0.0  | 0.0  | 0.0  | 0.0  | 0.0  |
| OAS | 1.5  | 1.5  | 1.4  | 1.3  | 1.1  | 1.0  | 0.9  |
| REF | 0.1  | 0.1  | 0.1  | 0.1  | 0.0  | 0.0  | 0.0  |
| SSA | 1.0  | 1.0  | 1.1  | 1.1  | 1.1  | 1.1  | 1.0  |
| USA | 0.1  | 0.1  | 0.1  | 0.1  | 0.1  | 0.1  | 0.1  |

Table 639: MAgPIE m4p\_SSP1 — Demand—Processing—Secondary products—Sugar (Mt DM/yr) [PART 2/2]

|     | 1965 | 1970 | 1975 | 1980 | 1985 | 1990 | 1995 | 2000 | 2005 | 2010 |
|-----|------|------|------|------|------|------|------|------|------|------|
| GLO | 1.05 | 1.54 | 1.39 | 1.09 | 1.07 | 1.55 | 1.47 | 1.44 | 5.07 | 6.81 |
| CAZ | 0.00 | 0.00 | 0.00 | 0.00 | 0.00 | 0.00 | 0.00 | 0.01 | 0.01 | 0.01 |
| CHA | 0.00 | 0.00 | 0.00 | 0.00 | 0.00 | 0.01 | 0.01 | 0.12 | 3.65 | 5.16 |
| EUR | 0.01 | 0.04 | 0.03 | 0.02 | 0.03 | 0.02 | 0.05 | 0.11 | 0.16 | 0.17 |
| IND | 0.00 | 0.00 | 0.00 | 0.00 | 0.00 | 0.08 | 0.12 | 0.14 | 0.00 | 0.00 |
| JPN | 0.02 | 0.03 | 0.03 | 0.06 | 0.06 | 0.12 | 0.11 | 0.10 | 0.09 | 0.10 |
| LAM | 0.04 | 0.04 | 0.06 | 0.08 | 0.11 | 0.11 | 0.08 | 0.08 | 0.09 | 0.31 |
| MEA | 0.03 | 0.05 | 0.06 | 0.07 | 0.01 | 0.00 | 0.00 | 0.00 | 0.00 | 0.00 |
| NEU | 0.00 | 0.00 | 0.00 | 0.00 | 0.00 | 0.00 | 0.00 | 0.00 | 0.01 | 0.00 |
| OAS | 0.62 | 1.03 | 0.78 | 0.66 | 0.65 | 0.65 | 0.72 | 0.71 | 0.83 | 0.86 |
| REF | 0.27 | 0.32 | 0.37 | 0.14 | 0.16 | 0.51 | 0.27 | 0.12 | 0.14 | 0.06 |
| SSA | 0.01 | 0.02 | 0.03 | 0.03 | 0.04 | 0.04 | 0.04 | 0.04 | 0.06 | 0.09 |
| USA | 0.05 | 0.02 | 0.02 | 0.02 | 0.01 | 0.01 | 0.07 | 0.00 | 0.02 | 0.05 |

Table 640: FAO — Demand—Processing—Secondary products—Sugar (Mt DM/yr)

## 10 Seed

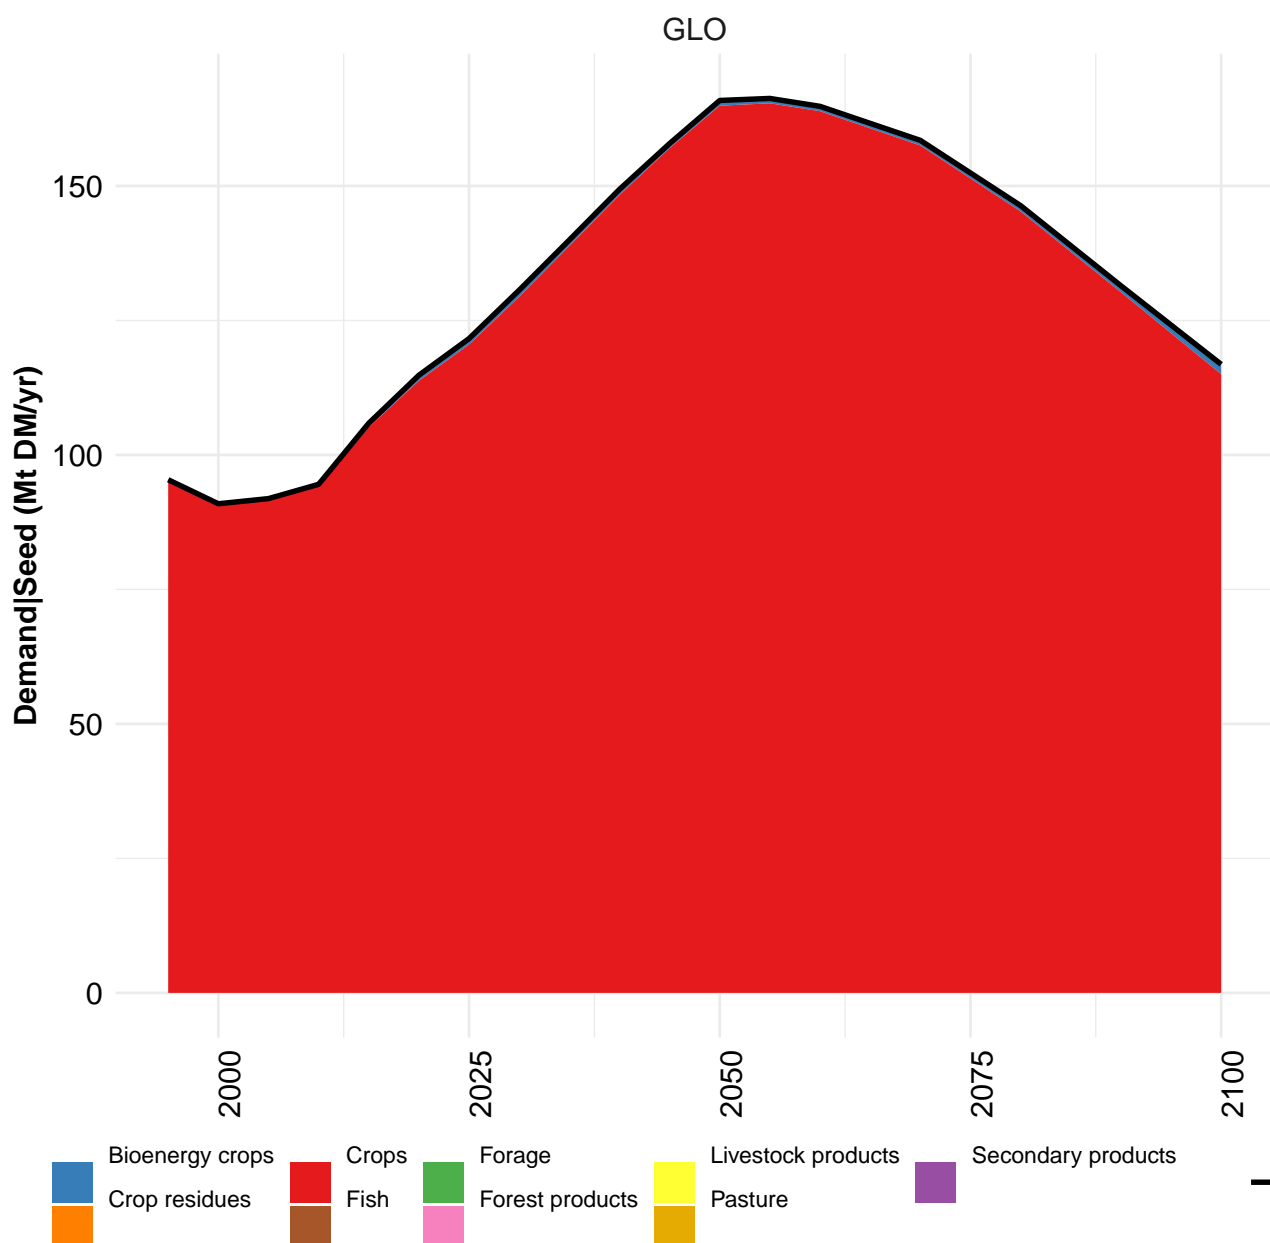

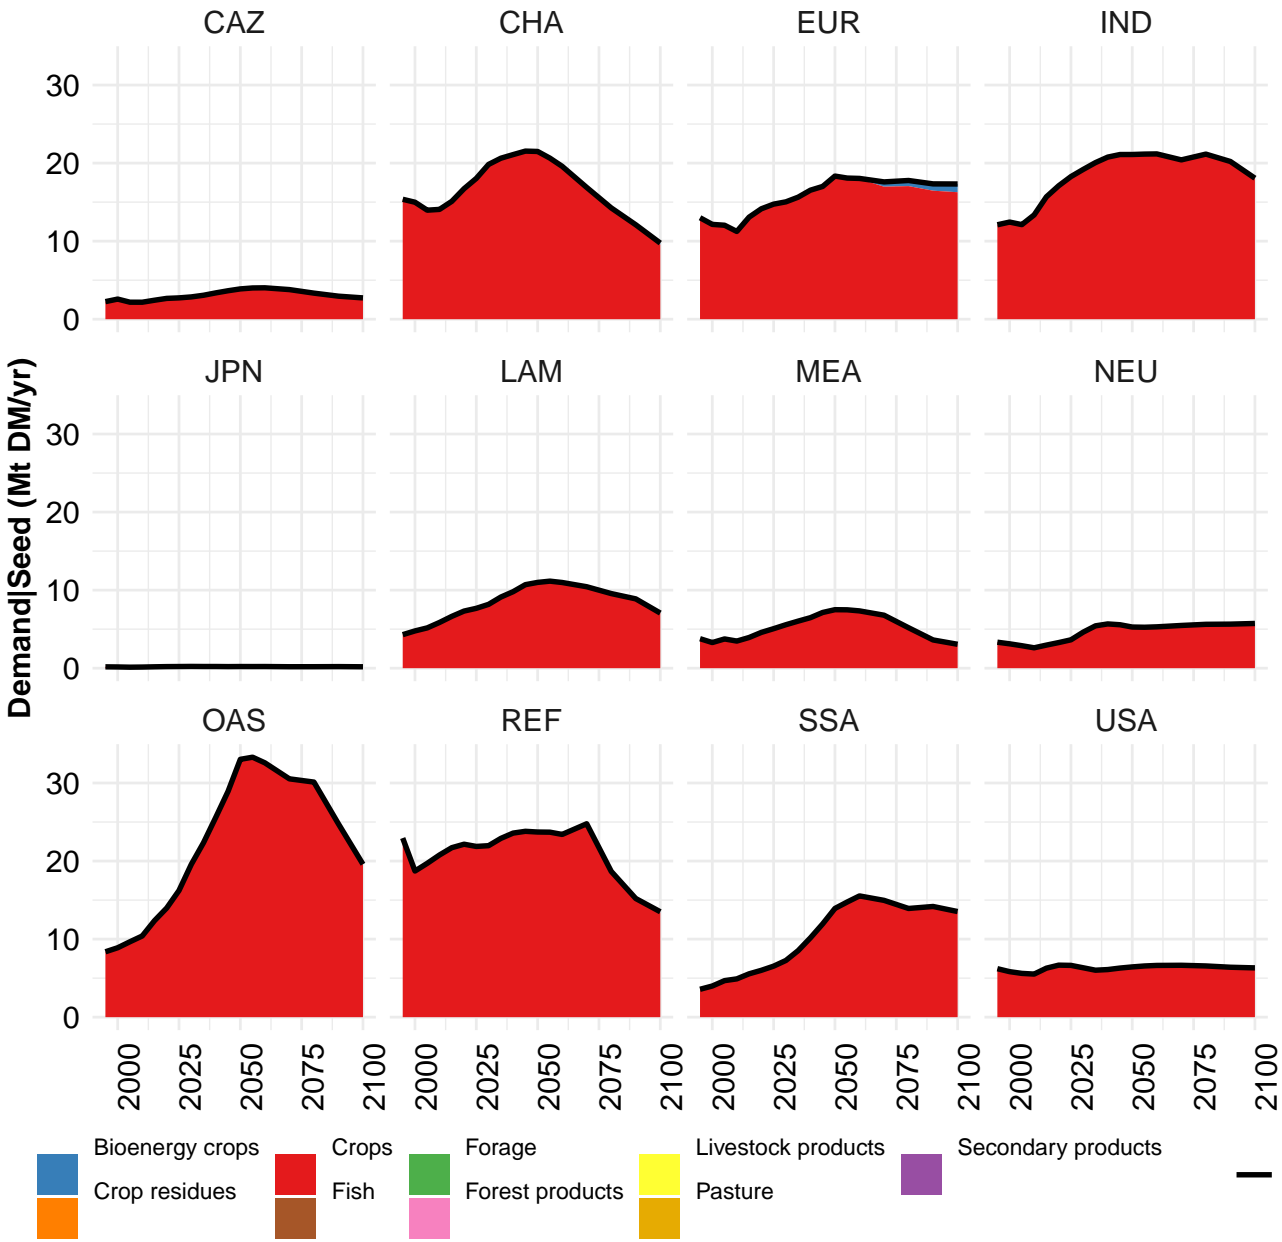

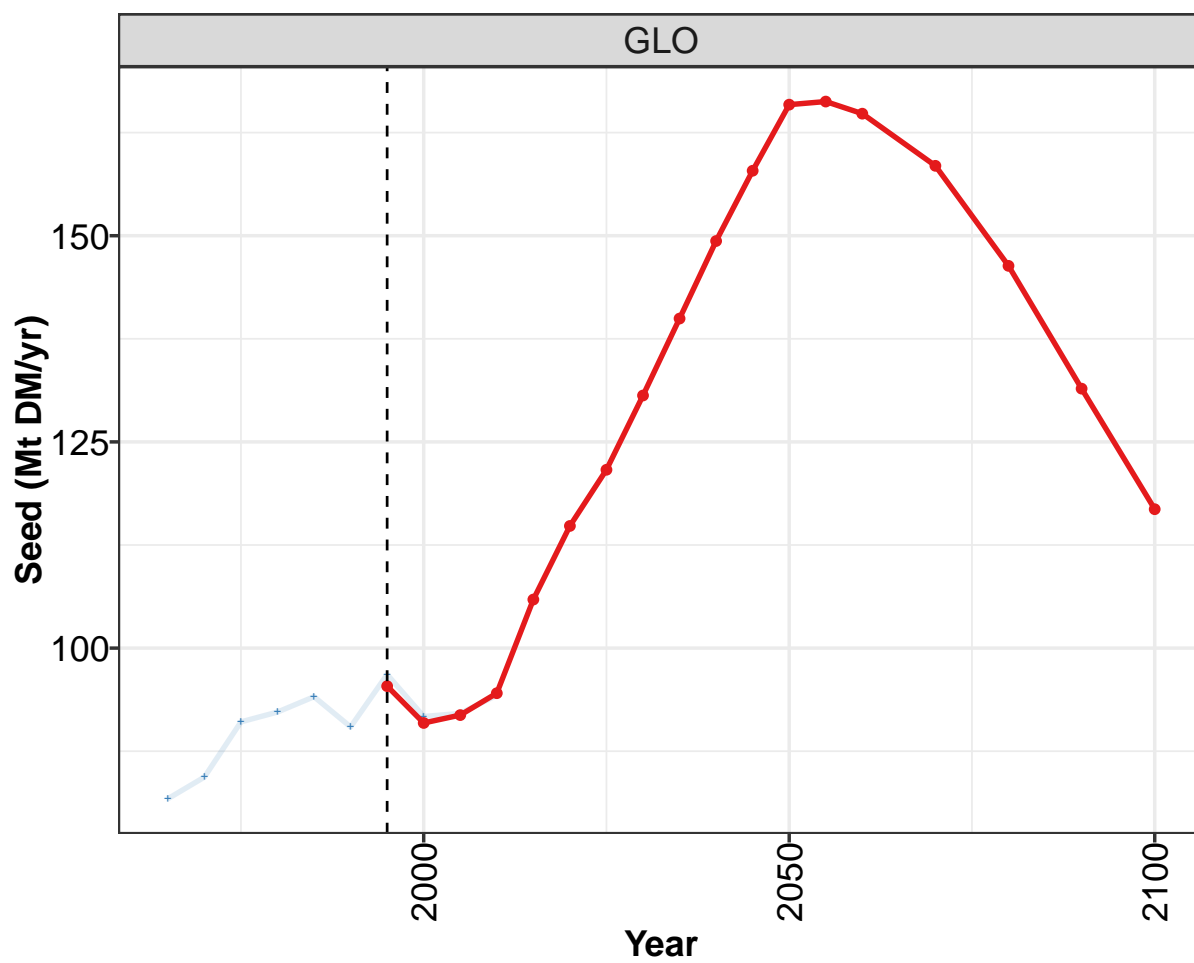**Model output**

—●— MAgPIE m4p\_SSP1

**Historical data**

—+— FAO



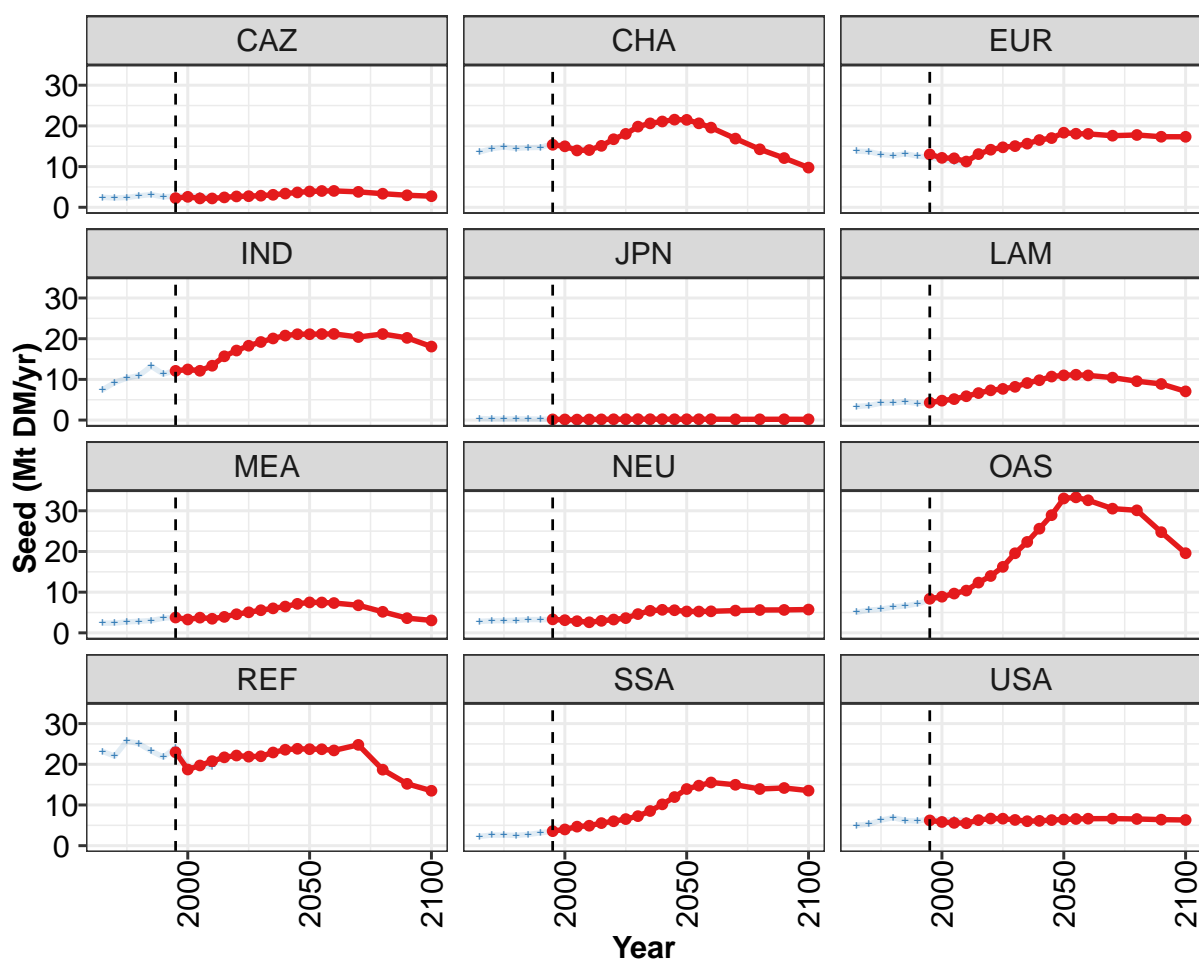

**Model output**

—●— MAgPIE m4p\_SSP1

**Historical data**

+— FAO

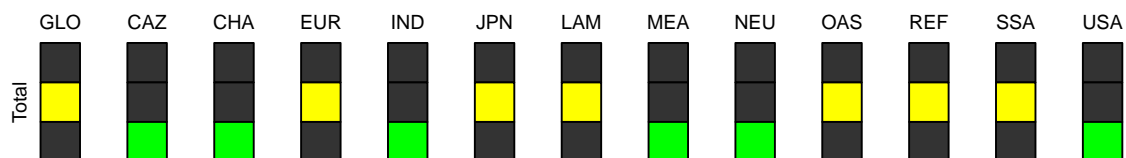

Figure 214: MAgPIE m4p\_SSP1 — Demand—Seed (Mt DM/yr)

|     | 1995 | 2000 | 2005 | 2010 | 2015 | 2020 | 2025 | 2030 | 2035 | 2040 | 2045 |
|-----|------|------|------|------|------|------|------|------|------|------|------|
| GLO | 95   | 91   | 92   | 95   | 106  | 115  | 122  | 131  | 140  | 149  | 158  |
| CAZ | 2    | 3    | 2    | 2    | 2    | 3    | 3    | 3    | 3    | 3    | 4    |
| CHA | 15   | 15   | 14   | 14   | 15   | 17   | 18   | 20   | 21   | 21   | 22   |
| EUR | 13   | 12   | 12   | 11   | 13   | 14   | 15   | 15   | 16   | 17   | 17   |
| IND | 12   | 12   | 12   | 13   | 16   | 17   | 18   | 19   | 20   | 21   | 21   |
| JPN | 0    | 0    | 0    | 0    | 0    | 0    | 0    | 0    | 0    | 0    | 0    |
| LAM | 4    | 5    | 5    | 6    | 7    | 7    | 8    | 8    | 9    | 10   | 11   |
| MEA | 4    | 3    | 4    | 3    | 4    | 5    | 5    | 6    | 6    | 6    | 7    |
| NEU | 3    | 3    | 3    | 3    | 3    | 3    | 4    | 5    | 5    | 6    | 6    |
| OAS | 8    | 9    | 10   | 10   | 12   | 14   | 16   | 20   | 22   | 26   | 29   |
| REF | 23   | 19   | 20   | 21   | 22   | 22   | 22   | 22   | 23   | 24   | 24   |
| SSA | 4    | 4    | 5    | 5    | 6    | 6    | 7    | 7    | 9    | 10   | 12   |
| USA | 6    | 6    | 6    | 6    | 6    | 7    | 7    | 6    | 6    | 6    | 6    |

Table 641: MAgPIE m4p\_SSP1 — Demand—Seed (Mt DM/yr) [PART 1/2]

|     | 2050 | 2055 | 2060 | 2070 | 2080 | 2090 | 2100 |
|-----|------|------|------|------|------|------|------|
| GLO | 166  | 166  | 165  | 158  | 146  | 131  | 117  |
| CAZ | 4    | 4    | 4    | 4    | 3    | 3    | 3    |
| CHA | 21   | 21   | 20   | 17   | 14   | 12   | 10   |
| EUR | 18   | 18   | 18   | 18   | 18   | 17   | 17   |
| IND | 21   | 21   | 21   | 20   | 21   | 20   | 18   |
| JPN | 0    | 0    | 0    | 0    | 0    | 0    | 0    |
| LAM | 11   | 11   | 11   | 10   | 10   | 9    | 7    |
| MEA | 7    | 7    | 7    | 7    | 5    | 4    | 3    |
| NEU | 5    | 5    | 5    | 5    | 6    | 6    | 6    |
| OAS | 33   | 33   | 33   | 31   | 30   | 25   | 20   |
| REF | 24   | 24   | 23   | 25   | 19   | 15   | 14   |
| SSA | 14   | 15   | 16   | 15   | 14   | 14   | 14   |
| USA | 6    | 7    | 7    | 7    | 7    | 6    | 6    |

Table 642: MAgPIE m4p\_SSP1 — Demand—Seed (Mt DM/yr) [PART 2/2]

|     | 1965 | 1970 | 1975 | 1980 | 1985 | 1990 | 1995 | 2000 | 2005 | 2010 |
|-----|------|------|------|------|------|------|------|------|------|------|
| GLO | 81.7 | 84.4 | 91.1 | 92.2 | 94.1 | 90.4 | 96.8 | 91.7 | 92.1 | 94.3 |
| CAZ | 2.5  | 2.3  | 2.4  | 2.8  | 3.1  | 2.6  | 2.8  | 2.9  | 2.8  | 2.6  |
| CHA | 13.6 | 14.4 | 14.8 | 14.5 | 14.7 | 14.7 | 15.6 | 15.3 | 14.1 | 14.4 |
| EUR | 13.8 | 13.7 | 13.0 | 12.7 | 13.1 | 12.6 | 12.2 | 11.6 | 11.2 | 10.6 |
| IND | 7.4  | 9.2  | 10.3 | 11.0 | 13.2 | 11.3 | 12.2 | 12.5 | 12.1 | 13.5 |
| JPN | 0.4  | 0.3  | 0.3  | 0.3  | 0.3  | 0.2  | 0.2  | 0.2  | 0.2  | 0.1  |
| LAM | 3.3  | 3.6  | 4.2  | 4.2  | 4.5  | 4.1  | 4.3  | 4.8  | 5.3  | 5.9  |
| MEA | 2.4  | 2.4  | 2.7  | 2.8  | 3.0  | 3.6  | 3.9  | 3.4  | 3.8  | 3.6  |
| NEU | 2.8  | 3.0  | 3.0  | 3.1  | 3.3  | 3.3  | 3.2  | 3.0  | 2.8  | 2.5  |
| OAS | 5.1  | 5.6  | 5.8  | 6.4  | 6.6  | 7.2  | 8.1  | 8.8  | 9.5  | 10.5 |
| REF | 23.2 | 22.0 | 25.7 | 25.1 | 23.3 | 21.8 | 24.1 | 19.1 | 19.5 | 19.3 |
| SSA | 2.3  | 2.6  | 2.6  | 2.5  | 2.8  | 3.2  | 3.6  | 3.9  | 4.5  | 5.0  |
| USA | 5.0  | 5.3  | 6.3  | 6.9  | 6.2  | 6.0  | 6.6  | 6.4  | 6.3  | 6.2  |

Table 643: FAO — Demand—Seed (Mt DM/yr)

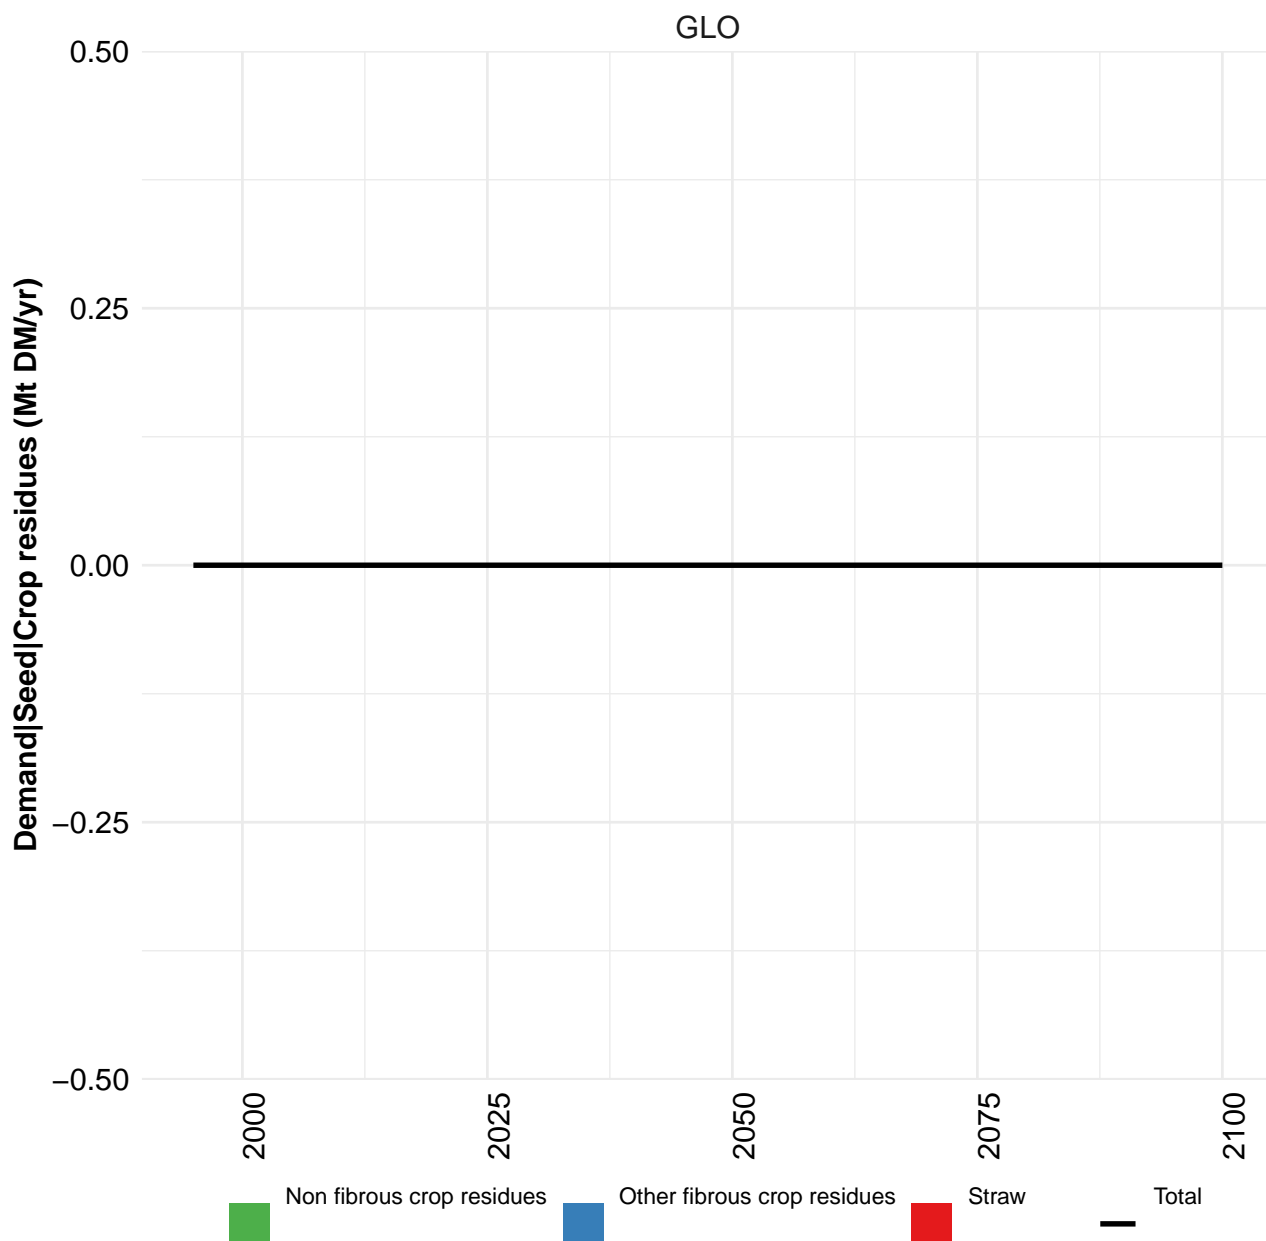

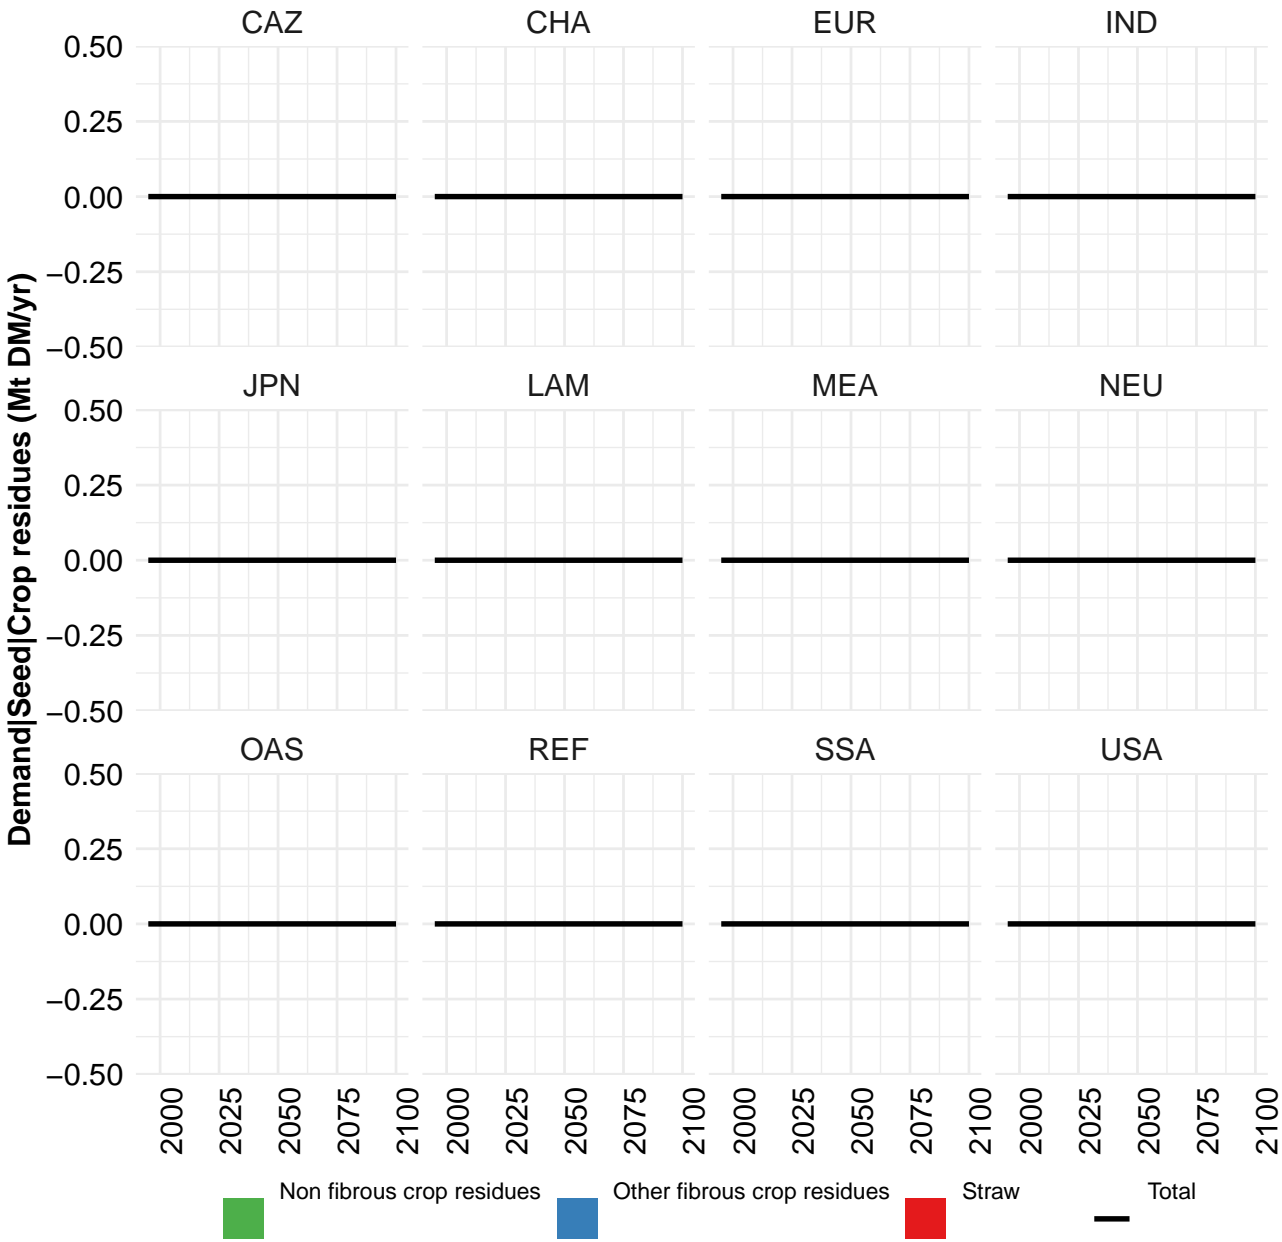

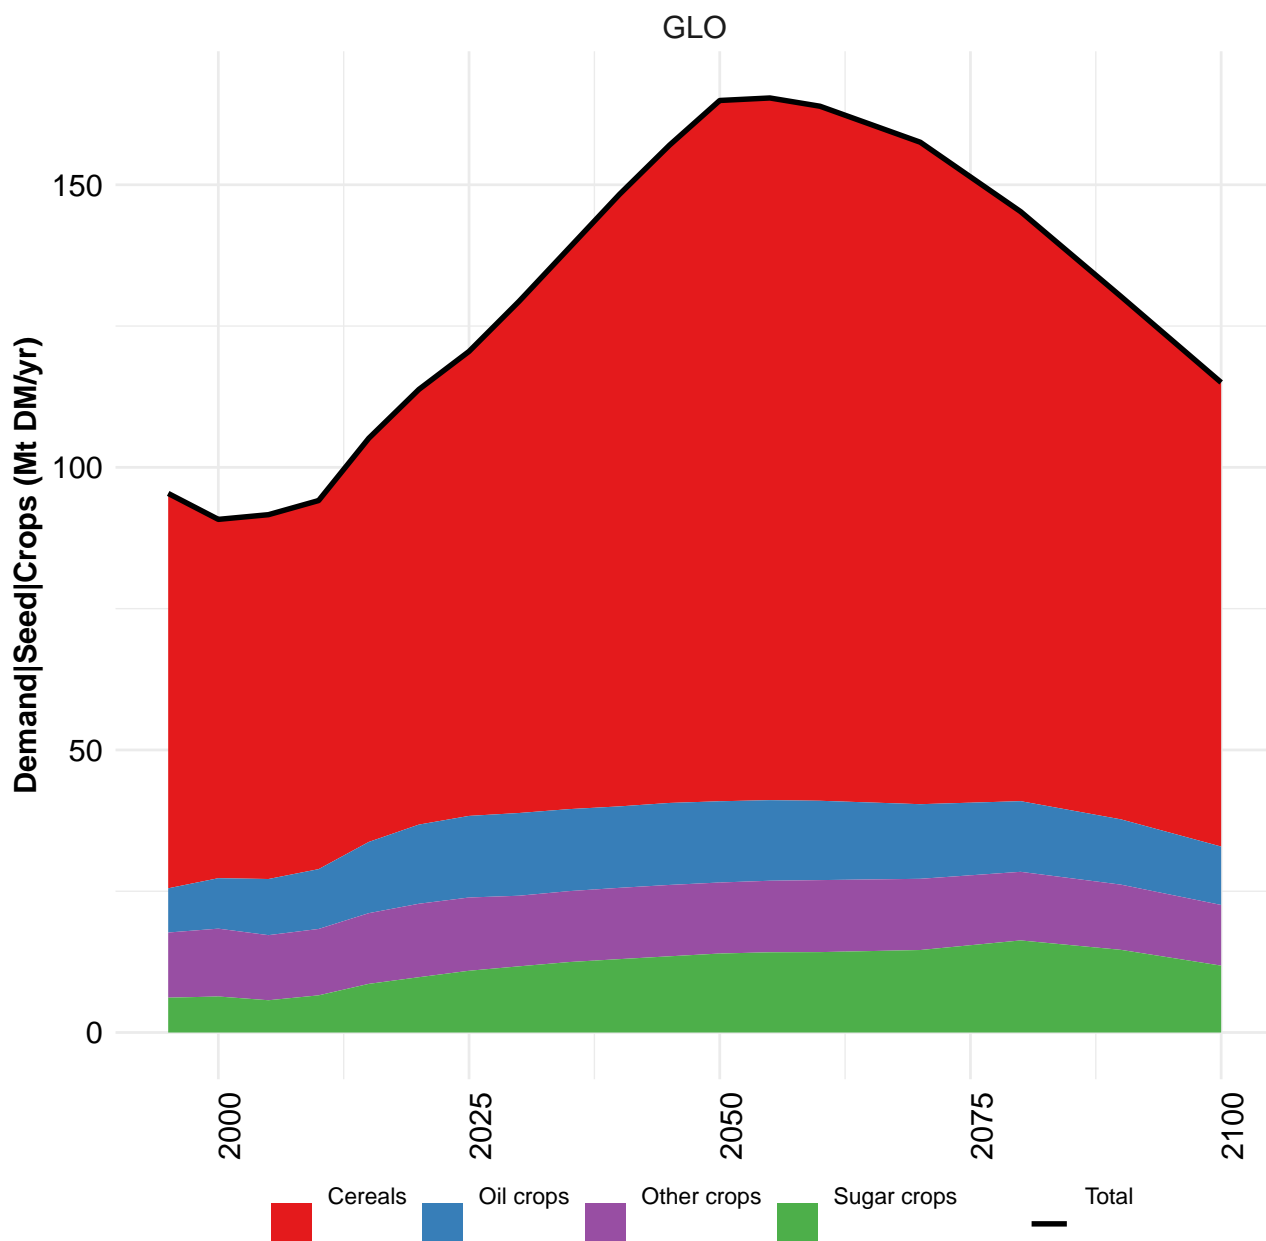

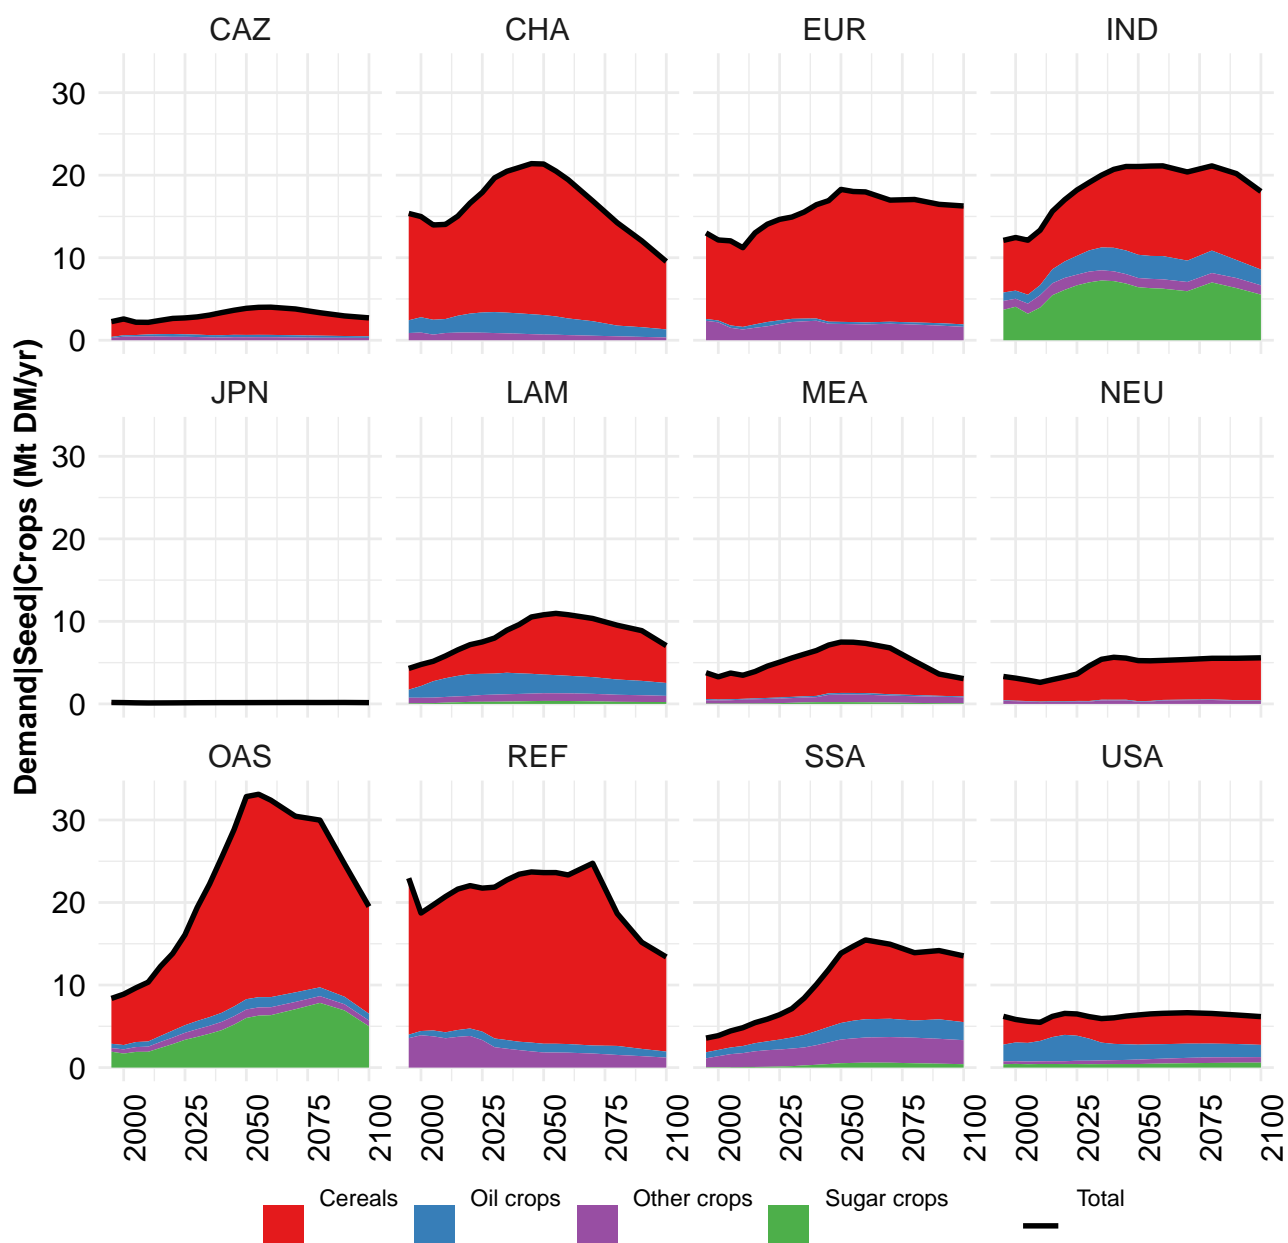

## 10.1 Crops

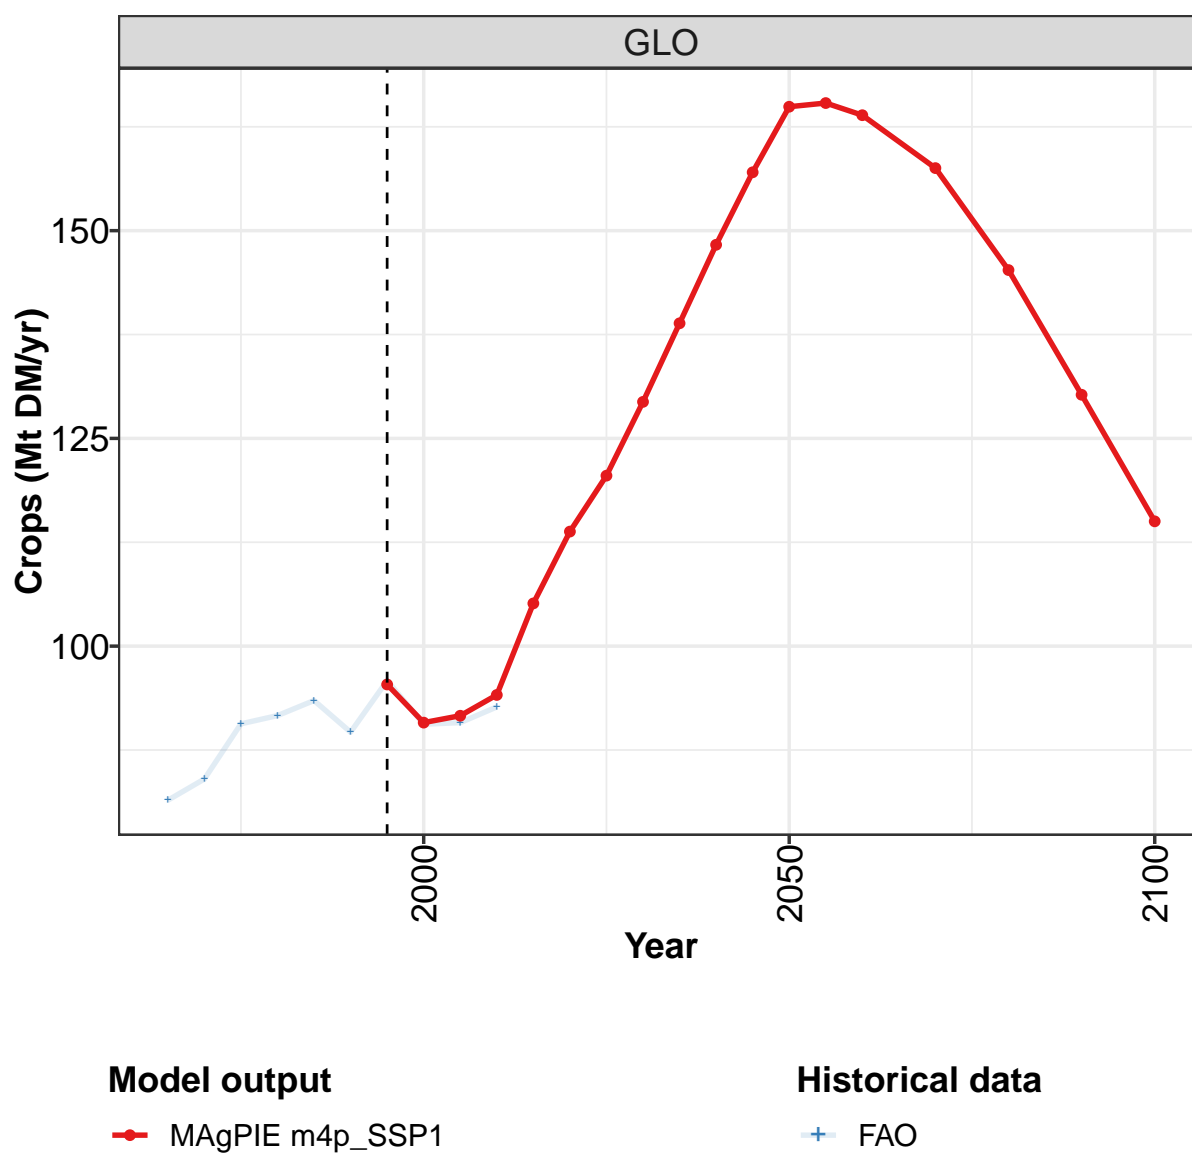

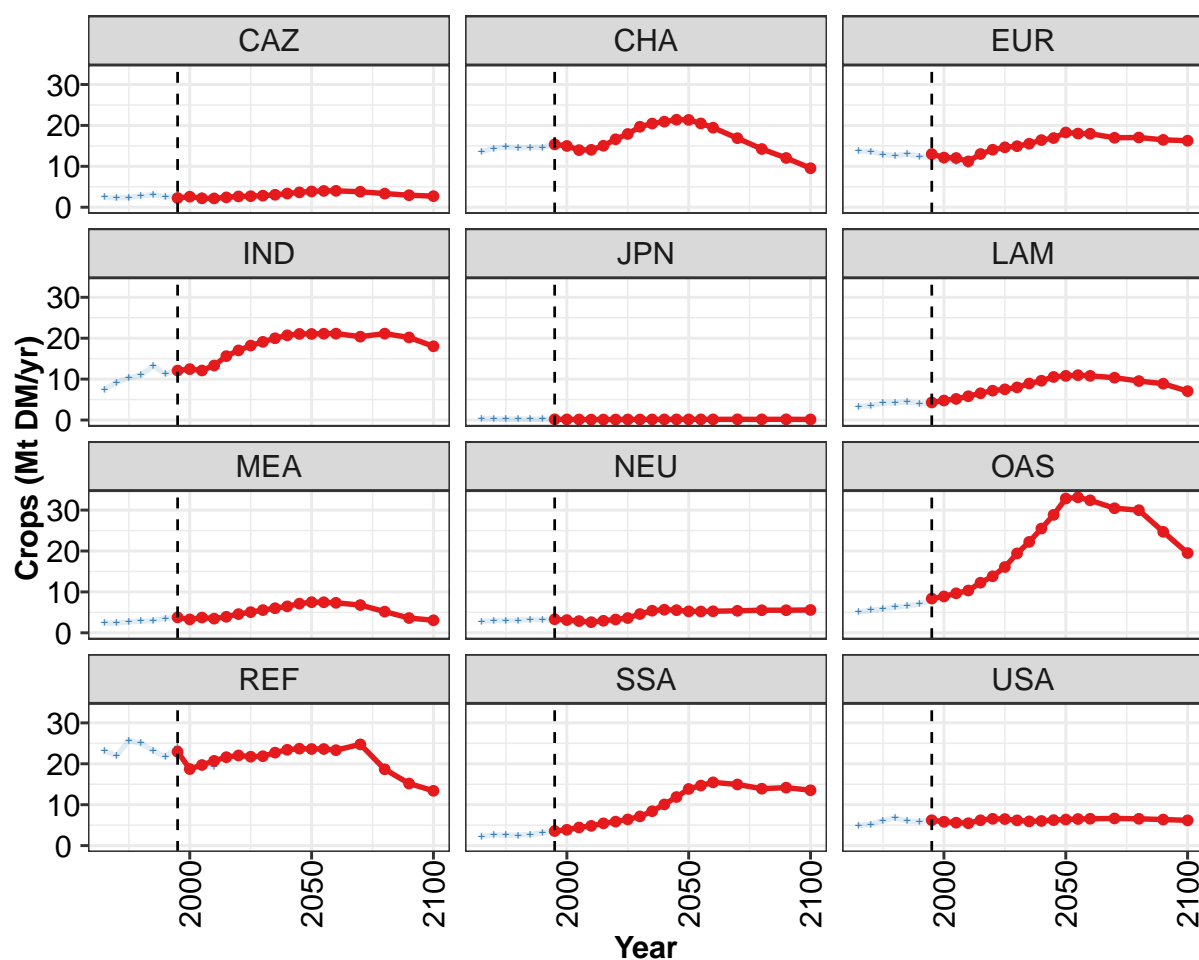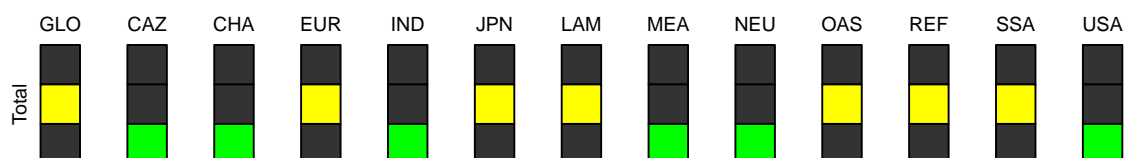

Figure 215: MAgPIE m4p\_SSP1 — Demand—Seed—Crops (Mt DM/yr)



|     | 1995 | 2000 | 2005 | 2010 | 2015 | 2020 | 2025 | 2030 | 2035 | 2040 | 2045 |
|-----|------|------|------|------|------|------|------|------|------|------|------|
| GLO | 95   | 91   | 92   | 94   | 105  | 114  | 121  | 129  | 139  | 148  | 157  |
| CAZ | 2    | 3    | 2    | 2    | 2    | 3    | 3    | 3    | 3    | 3    | 4    |
| CHA | 15   | 15   | 14   | 14   | 15   | 17   | 18   | 20   | 20   | 21   | 21   |
| EUR | 13   | 12   | 12   | 11   | 13   | 14   | 15   | 15   | 16   | 16   | 17   |
| IND | 12   | 12   | 12   | 13   | 16   | 17   | 18   | 19   | 20   | 21   | 21   |
| JPN | 0    | 0    | 0    | 0    | 0    | 0    | 0    | 0    | 0    | 0    | 0    |
| LAM | 4    | 5    | 5    | 6    | 7    | 7    | 8    | 8    | 9    | 10   | 11   |
| MEA | 4    | 3    | 4    | 3    | 4    | 5    | 5    | 6    | 6    | 6    | 7    |
| NEU | 3    | 3    | 3    | 3    | 3    | 3    | 4    | 5    | 5    | 6    | 6    |
| OAS | 8    | 9    | 10   | 10   | 12   | 14   | 16   | 19   | 22   | 25   | 29   |
| REF | 23   | 19   | 20   | 21   | 22   | 22   | 22   | 22   | 23   | 23   | 24   |
| SSA | 4    | 4    | 4    | 5    | 5    | 6    | 6    | 7    | 8    | 10   | 12   |
| USA | 6    | 6    | 6    | 5    | 6    | 7    | 6    | 6    | 6    | 6    | 6    |

Table 644: MAgPIE m4p.SSP1 — Demand—Seed—Crops (Mt DM/yr) [PART 1/2]

|     | 2050 | 2055 | 2060 | 2070 | 2080 | 2090 | 2100 |
|-----|------|------|------|------|------|------|------|
| GLO | 165  | 165  | 164  | 158  | 145  | 130  | 115  |
| CAZ | 4    | 4    | 4    | 4    | 3    | 3    | 3    |
| CHA | 21   | 20   | 19   | 17   | 14   | 12   | 10   |
| EUR | 18   | 18   | 18   | 17   | 17   | 16   | 16   |
| IND | 21   | 21   | 21   | 20   | 21   | 20   | 18   |
| JPN | 0    | 0    | 0    | 0    | 0    | 0    | 0    |
| LAM | 11   | 11   | 11   | 10   | 10   | 9    | 7    |
| MEA | 7    | 7    | 7    | 7    | 5    | 4    | 3    |
| NEU | 5    | 5    | 5    | 5    | 6    | 6    | 6    |
| OAS | 33   | 33   | 32   | 30   | 30   | 25   | 20   |
| REF | 24   | 24   | 23   | 25   | 19   | 15   | 13   |
| SSA | 14   | 15   | 15   | 15   | 14   | 14   | 14   |
| USA | 6    | 7    | 7    | 7    | 7    | 6    | 6    |

Table 645: MAgPIE m4p.SSP1 — Demand—Seed—Crops (Mt DM/yr) [PART 2/2]

|     | 1965 | 1970 | 1975 | 1980 | 1985 | 1990 | 1995 | 2000 | 2005 | 2010 |
|-----|------|------|------|------|------|------|------|------|------|------|
| GLO | 81.5 | 84.0 | 90.6 | 91.6 | 93.5 | 89.6 | 95.8 | 90.6 | 90.8 | 92.7 |
| CAZ | 2.4  | 2.3  | 2.4  | 2.8  | 3.1  | 2.5  | 2.8  | 2.8  | 2.8  | 2.5  |
| CHA | 13.6 | 14.4 | 14.8 | 14.4 | 14.6 | 14.7 | 15.5 | 15.1 | 13.9 | 14.1 |
| EUR | 13.7 | 13.6 | 12.9 | 12.6 | 13.0 | 12.4 | 12.1 | 11.4 | 11.1 | 10.4 |
| IND | 7.4  | 9.2  | 10.3 | 11.0 | 13.2 | 11.3 | 12.2 | 12.5 | 12.1 | 13.5 |
| JPN | 0.4  | 0.3  | 0.2  | 0.2  | 0.2  | 0.2  | 0.2  | 0.2  | 0.1  | 0.1  |
| LAM | 3.3  | 3.5  | 4.1  | 4.2  | 4.4  | 4.0  | 4.2  | 4.6  | 5.0  | 5.7  |
| MEA | 2.4  | 2.4  | 2.7  | 2.8  | 3.0  | 3.5  | 3.8  | 3.3  | 3.7  | 3.5  |
| NEU | 2.8  | 3.0  | 3.0  | 3.0  | 3.3  | 3.2  | 3.2  | 3.0  | 2.7  | 2.5  |
| OAS | 5.1  | 5.6  | 5.8  | 6.3  | 6.6  | 7.1  | 7.9  | 8.7  | 9.4  | 10.3 |
| REF | 23.2 | 22.0 | 25.7 | 25.0 | 23.2 | 21.7 | 24.1 | 19.0 | 19.5 | 19.2 |
| SSA | 2.3  | 2.6  | 2.6  | 2.5  | 2.7  | 3.1  | 3.5  | 3.9  | 4.5  | 5.0  |
| USA | 4.9  | 5.2  | 6.2  | 6.8  | 6.0  | 5.9  | 6.3  | 6.1  | 6.0  | 5.9  |

Table 646: FAO — Demand—Seed—Crops (Mt DM/yr)

## 10.1.1 Cereals

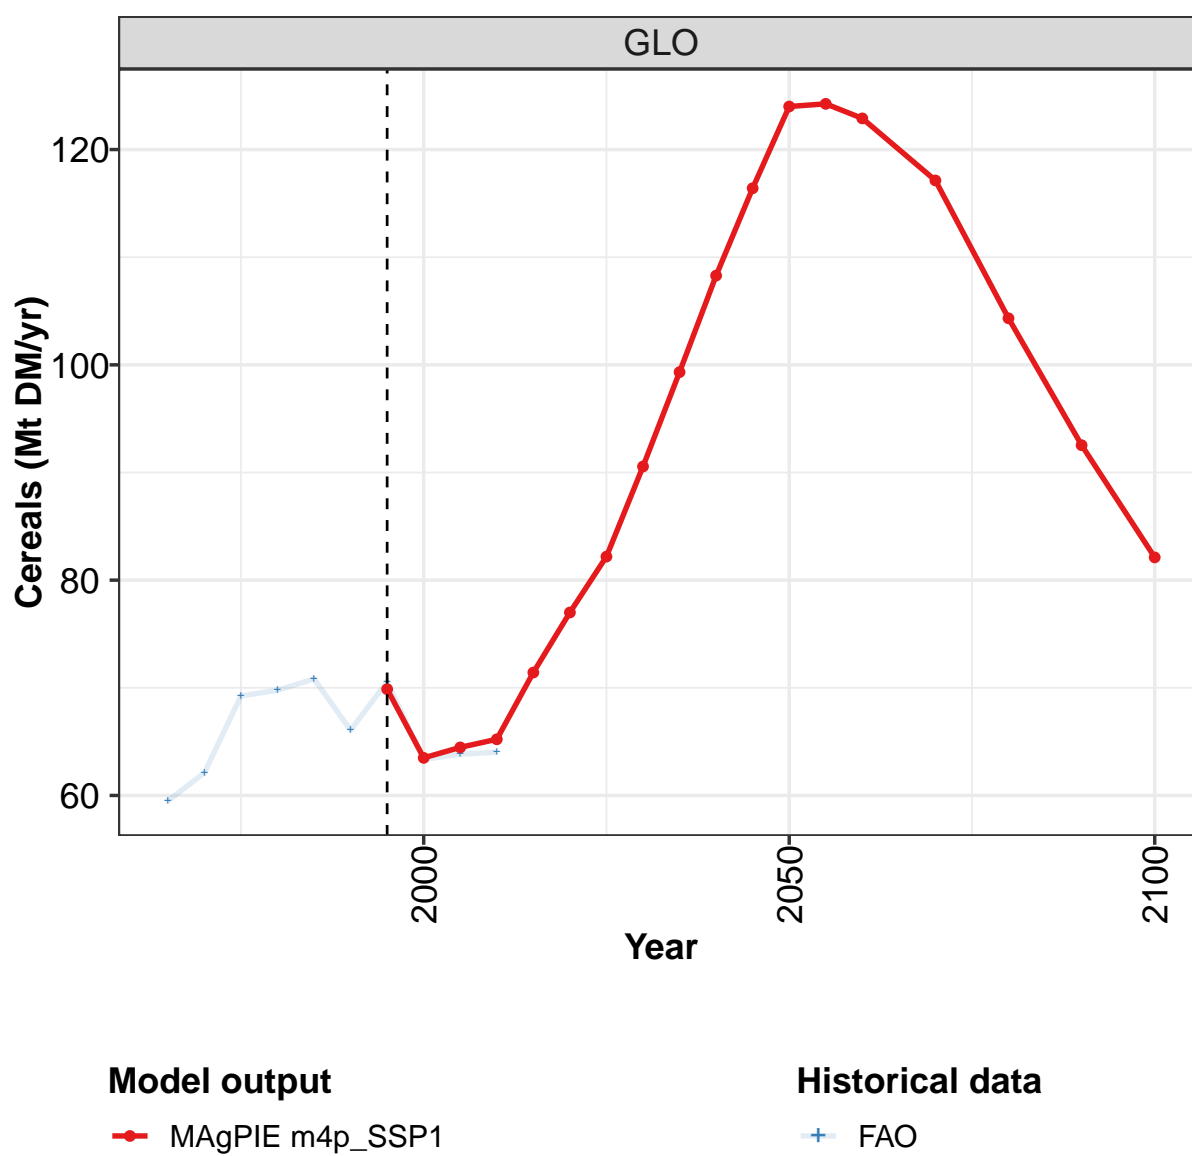

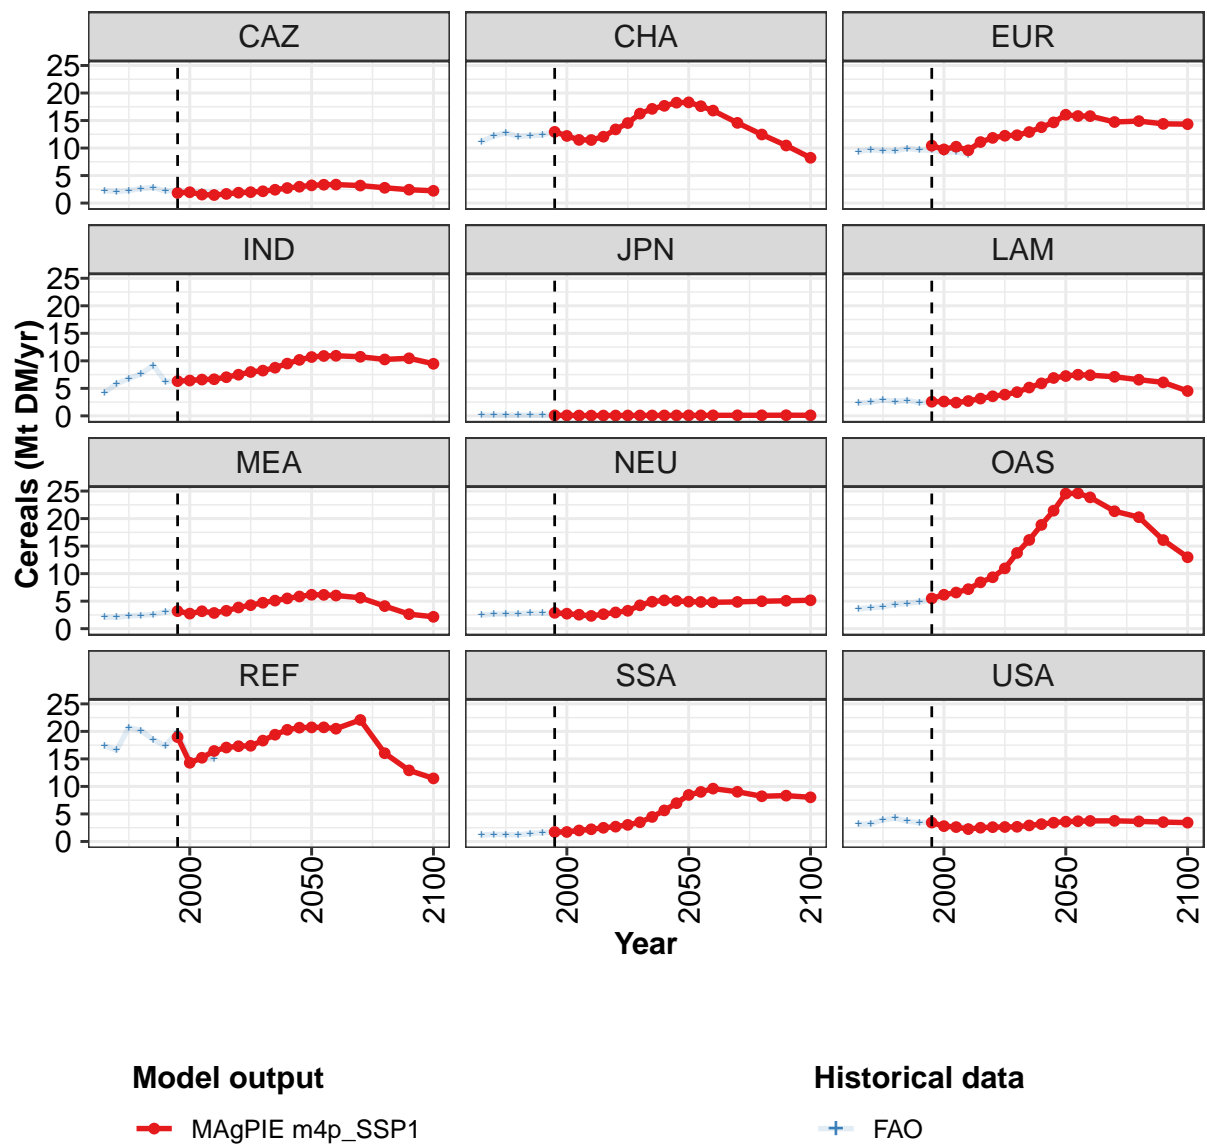

Figure 216: MAGPIE m4p\_SSP1 — Demand—Seed—Crops—Cereals (Mt DM/yr)

|     | 1995 | 2000 | 2005 | 2010 | 2015 | 2020 | 2025 | 2030 | 2035 | 2040 | 2045 |
|-----|------|------|------|------|------|------|------|------|------|------|------|
| GLO | 70   | 63   | 64   | 65   | 71   | 77   | 82   | 91   | 99   | 108  | 116  |
| CAZ | 2    | 2    | 2    | 1    | 2    | 2    | 2    | 2    | 2    | 3    | 3    |
| CHA | 13   | 12   | 11   | 11   | 12   | 13   | 15   | 16   | 17   | 18   | 18   |
| EUR | 10   | 10   | 10   | 10   | 11   | 12   | 12   | 12   | 13   | 14   | 15   |
| IND | 6    | 6    | 7    | 7    | 7    | 7    | 8    | 8    | 9    | 10   | 10   |
| JPN | 0    | 0    | 0    | 0    | 0    | 0    | 0    | 0    | 0    | 0    | 0    |
| LAM | 3    | 3    | 2    | 3    | 3    | 4    | 4    | 4    | 5    | 6    | 7    |
| MEA | 3    | 3    | 3    | 3    | 3    | 4    | 4    | 5    | 5    | 5    | 6    |
| NEU | 3    | 3    | 3    | 2    | 3    | 3    | 3    | 4    | 5    | 5    | 5    |
| OAS | 5    | 6    | 7    | 7    | 8    | 9    | 11   | 14   | 16   | 19   | 21   |
| REF | 19   | 14   | 15   | 16   | 17   | 17   | 17   | 18   | 19   | 20   | 21   |
| SSA | 2    | 2    | 2    | 2    | 2    | 3    | 3    | 3    | 4    | 6    | 7    |
| USA | 3    | 3    | 3    | 2    | 3    | 3    | 3    | 3    | 3    | 3    | 3    |

Table 647: MAgPIE m4p\_SSP1 — Demand—Seed—Crops—Cereals (Mt DM/yr) [PART 1/2]

|     | 2050 | 2055 | 2060 | 2070 | 2080 | 2090 | 2100 |
|-----|------|------|------|------|------|------|------|
| GLO | 124  | 124  | 123  | 117  | 104  | 93   | 82   |
| CAZ | 3    | 3    | 3    | 3    | 3    | 2    | 2    |
| CHA | 18   | 18   | 17   | 15   | 12   | 10   | 8    |
| EUR | 16   | 16   | 16   | 15   | 15   | 14   | 14   |
| IND | 11   | 11   | 11   | 11   | 10   | 10   | 9    |
| JPN | 0    | 0    | 0    | 0    | 0    | 0    | 0    |
| LAM | 7    | 7    | 7    | 7    | 7    | 6    | 5    |
| MEA | 6    | 6    | 6    | 6    | 4    | 3    | 2    |
| NEU | 5    | 5    | 5    | 5    | 5    | 5    | 5    |
| OAS | 25   | 25   | 24   | 21   | 20   | 16   | 13   |
| REF | 21   | 21   | 20   | 22   | 16   | 13   | 11   |
| SSA | 8    | 9    | 10   | 9    | 8    | 8    | 8    |
| USA | 4    | 4    | 4    | 4    | 4    | 4    | 3    |

Table 648: MAgPIE m4p\_SSP1 — Demand—Seed—Crops—Cereals (Mt DM/yr) [PART 2/2]

|     | 1965 | 1970 | 1975 | 1980 | 1985 | 1990 | 1995 | 2000 | 2005 | 2010 |
|-----|------|------|------|------|------|------|------|------|------|------|
| GLO | 59.5 | 62.1 | 69.2 | 69.8 | 70.8 | 66.1 | 70.6 | 63.4 | 63.8 | 64.0 |
| CAZ | 2.3  | 2.1  | 2.3  | 2.6  | 2.8  | 2.2  | 2.3  | 2.2  | 2.1  | 1.9  |
| CHA | 11.2 | 12.2 | 12.7 | 12.1 | 12.2 | 12.4 | 13.0 | 12.3 | 11.5 | 11.6 |
| EUR | 9.4  | 9.7  | 9.5  | 9.5  | 9.9  | 9.7  | 9.6  | 9.2  | 9.3  | 8.8  |
| IND | 4.2  | 5.8  | 6.8  | 7.6  | 9.2  | 6.2  | 6.4  | 6.5  | 6.6  | 6.8  |
| JPN | 0.2  | 0.1  | 0.1  | 0.1  | 0.1  | 0.1  | 0.1  | 0.1  | 0.1  | 0.1  |
| LAM | 2.3  | 2.5  | 2.9  | 2.6  | 2.8  | 2.4  | 2.6  | 2.6  | 2.4  | 2.6  |
| MEA | 2.1  | 2.1  | 2.3  | 2.4  | 2.6  | 3.1  | 3.2  | 2.8  | 3.2  | 2.9  |
| NEU | 2.5  | 2.6  | 2.7  | 2.7  | 2.8  | 2.8  | 2.8  | 2.6  | 2.4  | 2.2  |
| OAS | 3.6  | 3.8  | 4.0  | 4.4  | 4.6  | 4.9  | 5.3  | 6.0  | 6.5  | 7.2  |
| REF | 17.4 | 16.6 | 20.7 | 20.2 | 18.5 | 17.4 | 20.0 | 14.6 | 15.0 | 15.0 |
| SSA | 1.1  | 1.3  | 1.2  | 1.2  | 1.4  | 1.6  | 1.7  | 1.7  | 2.0  | 2.3  |
| USA | 3.1  | 3.2  | 3.9  | 4.2  | 3.7  | 3.4  | 3.5  | 2.9  | 2.8  | 2.7  |

Table 649: FAO — Demand—Seed—Crops—Cereals (Mt DM/yr)

## 10.1.2 Cereals—Maize

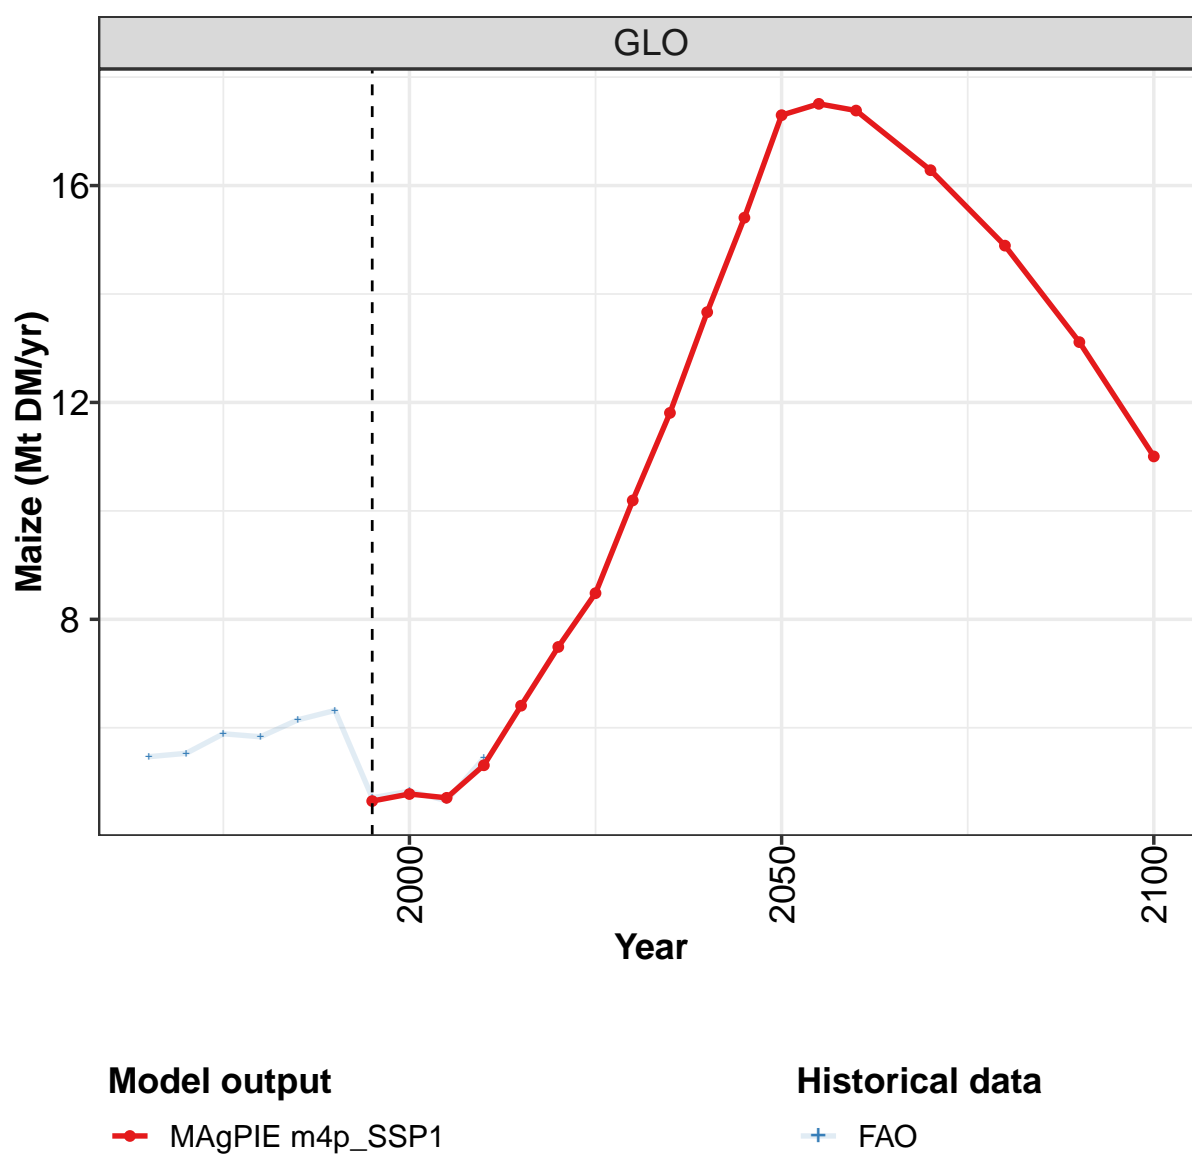

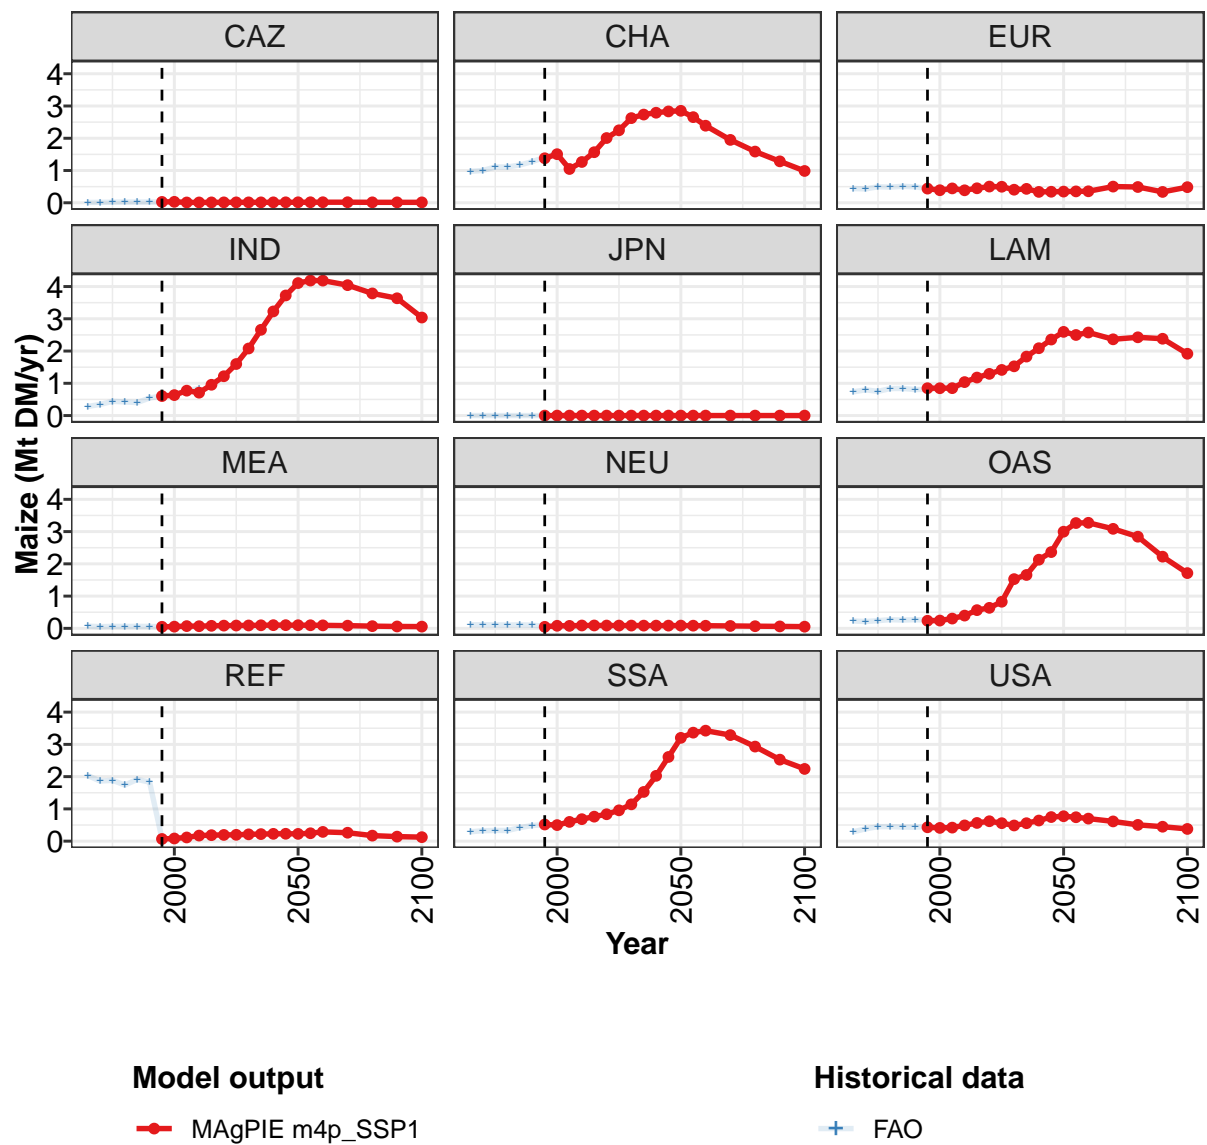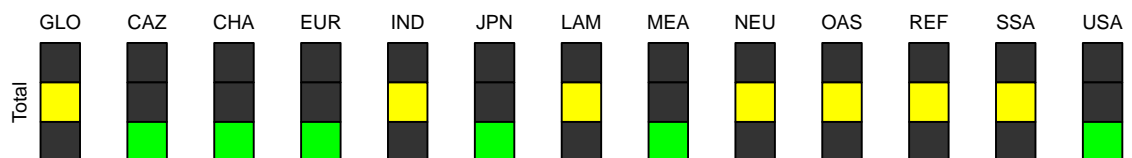

Figure 217: MAGPIE m4p\_SSP1 — Demand—Seed—Crops—Cereals—Maize (Mt DM/yr)

|     | 1995 | 2000 | 2005 | 2010 | 2015 | 2020 | 2025 | 2030 | 2035 | 2040 | 2045 |
|-----|------|------|------|------|------|------|------|------|------|------|------|
| GLO | 4.6  | 4.8  | 4.7  | 5.3  | 6.4  | 7.5  | 8.5  | 10.2 | 11.8 | 13.7 | 15.4 |
| CAZ | 0.0  | 0.0  | 0.0  | 0.0  | 0.0  | 0.0  | 0.0  | 0.0  | 0.0  | 0.0  | 0.0  |
| CHA | 1.4  | 1.5  | 1.0  | 1.3  | 1.6  | 2.0  | 2.2  | 2.6  | 2.7  | 2.8  | 2.8  |
| EUR | 0.4  | 0.4  | 0.4  | 0.4  | 0.4  | 0.5  | 0.5  | 0.4  | 0.4  | 0.3  | 0.3  |
| IND | 0.6  | 0.6  | 0.8  | 0.7  | 1.0  | 1.2  | 1.6  | 2.1  | 2.7  | 3.2  | 3.7  |
| JPN | 0.0  | 0.0  | 0.0  | 0.0  | 0.0  | 0.0  | 0.0  | 0.0  | 0.0  | 0.0  | 0.0  |
| LAM | 0.8  | 0.8  | 0.8  | 1.0  | 1.2  | 1.3  | 1.4  | 1.5  | 1.8  | 2.1  | 2.4  |
| MEA | 0.0  | 0.1  | 0.1  | 0.1  | 0.1  | 0.1  | 0.1  | 0.1  | 0.1  | 0.1  | 0.1  |
| NEU | 0.0  | 0.1  | 0.1  | 0.1  | 0.1  | 0.1  | 0.1  | 0.1  | 0.1  | 0.1  | 0.1  |
| OAS | 0.2  | 0.2  | 0.3  | 0.4  | 0.6  | 0.6  | 0.8  | 1.5  | 1.7  | 2.1  | 2.4  |
| REF | 0.1  | 0.1  | 0.1  | 0.2  | 0.2  | 0.2  | 0.2  | 0.2  | 0.2  | 0.2  | 0.2  |
| SSA | 0.5  | 0.5  | 0.6  | 0.7  | 0.8  | 0.8  | 1.0  | 1.1  | 1.5  | 2.0  | 2.6  |
| USA | 0.4  | 0.4  | 0.4  | 0.5  | 0.6  | 0.6  | 0.6  | 0.5  | 0.6  | 0.6  | 0.7  |

Table 650: MAgPIE m4p\_SSP1 — Demand—Seed—Crops—Cereals—Maize (Mt DM/yr) [PART 1/2]

|     | 2050 | 2055 | 2060 | 2070 | 2080 | 2090 | 2100 |
|-----|------|------|------|------|------|------|------|
| GLO | 17.3 | 17.5 | 17.4 | 16.3 | 14.9 | 13.1 | 11.0 |
| CAZ | 0.0  | 0.0  | 0.0  | 0.0  | 0.0  | 0.0  | 0.0  |
| CHA | 2.9  | 2.7  | 2.4  | 1.9  | 1.6  | 1.3  | 1.0  |
| EUR | 0.3  | 0.4  | 0.4  | 0.5  | 0.5  | 0.3  | 0.5  |
| IND | 4.1  | 4.2  | 4.2  | 4.0  | 3.8  | 3.6  | 3.0  |
| JPN | 0.0  | 0.0  | 0.0  | 0.0  | 0.0  | 0.0  | 0.0  |
| LAM | 2.6  | 2.5  | 2.6  | 2.4  | 2.4  | 2.4  | 1.9  |
| MEA | 0.1  | 0.1  | 0.1  | 0.1  | 0.1  | 0.1  | 0.1  |
| NEU | 0.1  | 0.1  | 0.1  | 0.1  | 0.1  | 0.1  | 0.1  |
| OAS | 3.0  | 3.3  | 3.3  | 3.1  | 2.8  | 2.2  | 1.7  |
| REF | 0.2  | 0.2  | 0.3  | 0.3  | 0.2  | 0.1  | 0.1  |
| SSA | 3.2  | 3.4  | 3.4  | 3.3  | 2.9  | 2.5  | 2.2  |
| USA | 0.8  | 0.7  | 0.7  | 0.6  | 0.5  | 0.4  | 0.4  |

Table 651: MAgPIE m4p\_SSP1 — Demand—Seed—Crops—Cereals—Maize (Mt DM/yr) [PART 2/2]

|     | 1965 | 1970 | 1975 | 1980 | 1985 | 1990 | 1995 | 2000 | 2005 | 2010 |
|-----|------|------|------|------|------|------|------|------|------|------|
| GLO | 5.47 | 5.53 | 5.89 | 5.83 | 6.15 | 6.32 | 4.71 | 4.83 | 4.65 | 5.44 |
| CAZ | 0.01 | 0.01 | 0.02 | 0.03 | 0.02 | 0.02 | 0.03 | 0.03 | 0.01 | 0.01 |
| CHA | 0.97 | 1.00 | 1.11 | 1.11 | 1.17 | 1.28 | 1.41 | 1.53 | 1.01 | 1.29 |
| EUR | 0.44 | 0.43 | 0.50 | 0.48 | 0.51 | 0.49 | 0.44 | 0.38 | 0.39 | 0.37 |
| IND | 0.28 | 0.34 | 0.44 | 0.42 | 0.40 | 0.54 | 0.61 | 0.64 | 0.76 | 0.84 |
| JPN | 0.00 | 0.00 | 0.00 | 0.00 | 0.00 | 0.00 | 0.00 | 0.00 | 0.00 | 0.00 |
| LAM | 0.74 | 0.80 | 0.75 | 0.84 | 0.84 | 0.81 | 0.82 | 0.84 | 0.87 | 0.97 |
| MEA | 0.07 | 0.05 | 0.06 | 0.06 | 0.06 | 0.06 | 0.05 | 0.05 | 0.07 | 0.07 |
| NEU | 0.11 | 0.11 | 0.11 | 0.10 | 0.11 | 0.10 | 0.06 | 0.08 | 0.08 | 0.09 |
| OAS | 0.23 | 0.21 | 0.24 | 0.27 | 0.26 | 0.27 | 0.25 | 0.26 | 0.31 | 0.40 |
| REF | 2.03 | 1.86 | 1.88 | 1.74 | 1.91 | 1.83 | 0.07 | 0.09 | 0.12 | 0.16 |
| SSA | 0.29 | 0.32 | 0.33 | 0.33 | 0.42 | 0.48 | 0.51 | 0.49 | 0.60 | 0.73 |
| USA | 0.29 | 0.38 | 0.45 | 0.45 | 0.44 | 0.43 | 0.45 | 0.43 | 0.44 | 0.51 |

Table 652: FAO — Demand—Seed—Crops—Cereals—Maize (Mt DM/yr)

## 10.1.3 Cereals—Rice

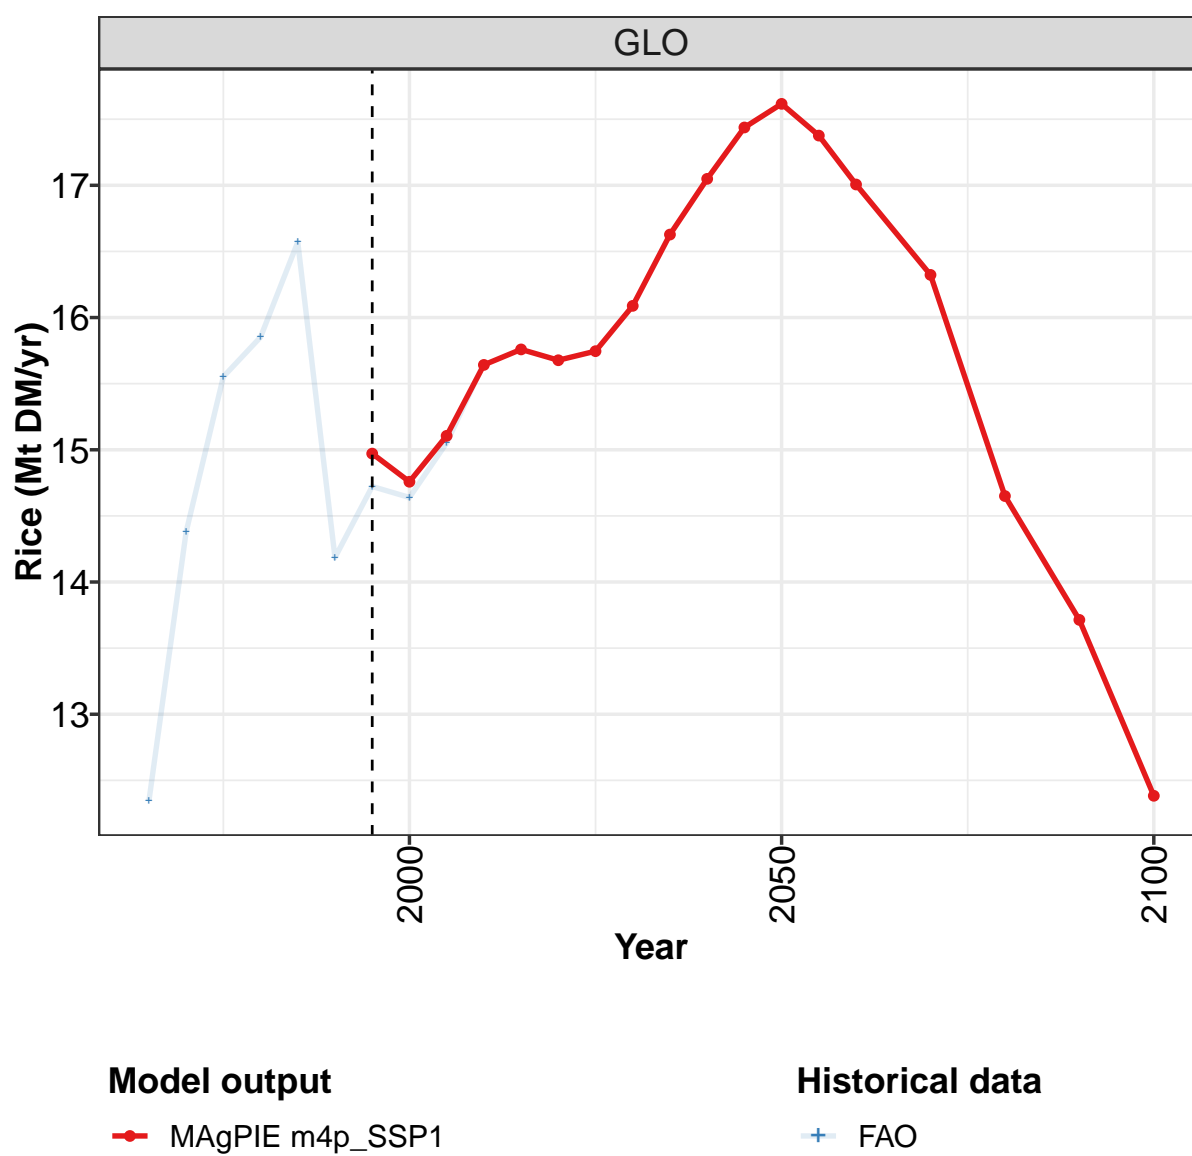



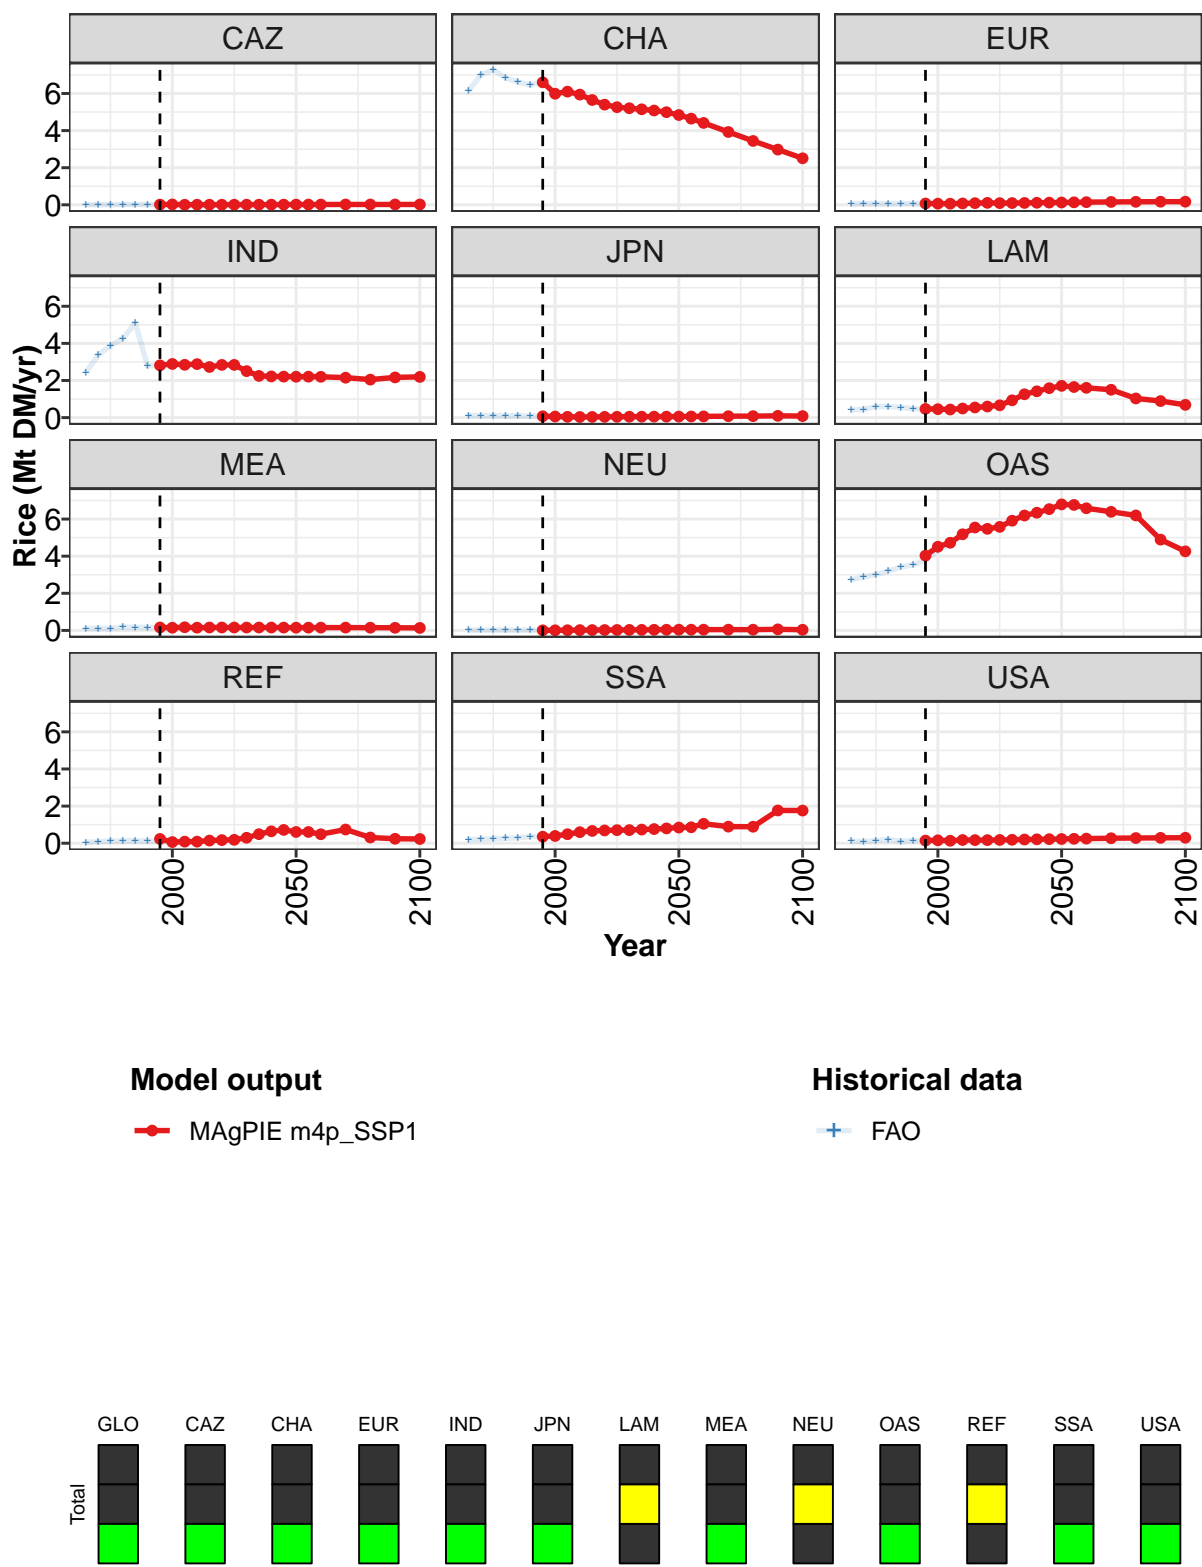

Figure 218: MAgPIE m4p\_SSP1 — Demand—Seed—Crops—Cereals—Rice (Mt DM/yr)

|     | 1995 | 2000 | 2005 | 2010 | 2015 | 2020 | 2025 | 2030 | 2035 | 2040 | 2045 |
|-----|------|------|------|------|------|------|------|------|------|------|------|
| GLO | 15.0 | 14.8 | 15.1 | 15.6 | 15.8 | 15.7 | 15.7 | 16.1 | 16.6 | 17.0 | 17.4 |
| CAZ | 0.0  | 0.0  | 0.0  | 0.0  | 0.0  | 0.0  | 0.0  | 0.0  | 0.0  | 0.0  | 0.0  |
| CHA | 6.6  | 6.0  | 6.1  | 5.9  | 5.6  | 5.4  | 5.3  | 5.2  | 5.1  | 5.1  | 5.0  |
| EUR | 0.1  | 0.1  | 0.1  | 0.1  | 0.1  | 0.1  | 0.1  | 0.1  | 0.1  | 0.1  | 0.1  |
| IND | 2.8  | 2.9  | 2.8  | 2.9  | 2.7  | 2.8  | 2.8  | 2.5  | 2.2  | 2.2  | 2.2  |
| JPN | 0.1  | 0.1  | 0.0  | 0.0  | 0.0  | 0.0  | 0.0  | 0.1  | 0.1  | 0.1  | 0.1  |
| LAM | 0.5  | 0.5  | 0.4  | 0.5  | 0.5  | 0.6  | 0.7  | 0.9  | 1.3  | 1.4  | 1.6  |
| MEA | 0.2  | 0.1  | 0.2  | 0.1  | 0.2  | 0.2  | 0.2  | 0.2  | 0.2  | 0.2  | 0.2  |
| NEU | 0.0  | 0.0  | 0.0  | 0.0  | 0.0  | 0.0  | 0.0  | 0.0  | 0.0  | 0.0  | 0.0  |
| OAS | 4.0  | 4.5  | 4.7  | 5.2  | 5.5  | 5.5  | 5.6  | 5.9  | 6.2  | 6.3  | 6.5  |
| REF | 0.2  | 0.1  | 0.1  | 0.1  | 0.1  | 0.2  | 0.2  | 0.3  | 0.5  | 0.6  | 0.7  |
| SSA | 0.4  | 0.4  | 0.5  | 0.6  | 0.7  | 0.7  | 0.7  | 0.7  | 0.7  | 0.8  | 0.8  |
| USA | 0.1  | 0.2  | 0.1  | 0.2  | 0.2  | 0.2  | 0.2  | 0.2  | 0.2  | 0.2  | 0.2  |

Table 653: MAgPIE m4p\_SSP1 — Demand—Seed—Crops—Cereals—Rice (Mt DM/yr) [PART 1/2]

|     | 2050 | 2055 | 2060 | 2070 | 2080 | 2090 | 2100 |
|-----|------|------|------|------|------|------|------|
| GLO | 17.6 | 17.4 | 17.0 | 16.3 | 14.7 | 13.7 | 12.4 |
| CAZ | 0.0  | 0.0  | 0.0  | 0.0  | 0.0  | 0.0  | 0.0  |
| CHA | 4.8  | 4.6  | 4.4  | 3.9  | 3.4  | 3.0  | 2.5  |
| EUR | 0.1  | 0.1  | 0.1  | 0.2  | 0.2  | 0.2  | 0.2  |
| IND | 2.2  | 2.2  | 2.2  | 2.2  | 2.0  | 2.2  | 2.2  |
| JPN | 0.1  | 0.1  | 0.1  | 0.1  | 0.1  | 0.1  | 0.1  |
| LAM | 1.7  | 1.7  | 1.6  | 1.5  | 1.0  | 0.9  | 0.7  |
| MEA | 0.1  | 0.2  | 0.2  | 0.2  | 0.1  | 0.1  | 0.1  |
| NEU | 0.0  | 0.0  | 0.0  | 0.0  | 0.0  | 0.1  | 0.0  |
| OAS | 6.8  | 6.8  | 6.6  | 6.4  | 6.2  | 4.9  | 4.3  |
| REF | 0.6  | 0.6  | 0.5  | 0.7  | 0.3  | 0.2  | 0.2  |
| SSA | 0.8  | 0.9  | 1.0  | 0.9  | 0.9  | 1.8  | 1.8  |
| USA | 0.2  | 0.2  | 0.2  | 0.3  | 0.3  | 0.3  | 0.3  |

Table 654: MAgPIE m4p\_SSP1 — Demand—Seed—Crops—Cereals—Rice (Mt DM/yr) [PART 2/2]

|     | 1965 | 1970 | 1975 | 1980 | 1985 | 1990 | 1995 | 2000 | 2005 | 2010 |
|-----|------|------|------|------|------|------|------|------|------|------|
| GLO | 12.3 | 14.4 | 15.6 | 15.9 | 16.6 | 14.2 | 14.7 | 14.6 | 15.1 | 15.7 |
| CAZ | 0.0  | 0.0  | 0.0  | 0.0  | 0.0  | 0.0  | 0.0  | 0.0  | 0.0  | 0.0  |
| CHA | 6.1  | 7.0  | 7.3  | 6.8  | 6.6  | 6.4  | 6.7  | 6.0  | 6.1  | 5.9  |
| EUR | 0.1  | 0.1  | 0.1  | 0.1  | 0.1  | 0.1  | 0.1  | 0.1  | 0.1  | 0.1  |
| IND | 2.4  | 3.4  | 3.9  | 4.3  | 5.1  | 2.8  | 2.8  | 2.9  | 2.9  | 2.9  |
| JPN | 0.1  | 0.1  | 0.1  | 0.1  | 0.1  | 0.1  | 0.1  | 0.1  | 0.0  | 0.0  |
| LAM | 0.4  | 0.4  | 0.6  | 0.6  | 0.6  | 0.5  | 0.5  | 0.5  | 0.4  | 0.5  |
| MEA | 0.1  | 0.1  | 0.1  | 0.2  | 0.2  | 0.2  | 0.2  | 0.1  | 0.2  | 0.2  |
| NEU | 0.0  | 0.0  | 0.0  | 0.0  | 0.0  | 0.0  | 0.0  | 0.0  | 0.0  | 0.0  |
| OAS | 2.7  | 2.9  | 3.0  | 3.2  | 3.4  | 3.5  | 3.8  | 4.3  | 4.7  | 5.2  |
| REF | 0.0  | 0.1  | 0.1  | 0.1  | 0.1  | 0.1  | 0.1  | 0.1  | 0.1  | 0.1  |
| SSA | 0.2  | 0.2  | 0.2  | 0.3  | 0.3  | 0.4  | 0.4  | 0.4  | 0.5  | 0.6  |
| USA | 0.1  | 0.1  | 0.1  | 0.2  | 0.1  | 0.1  | 0.1  | 0.2  | 0.1  | 0.2  |

Table 655: FAO — Demand—Seed—Crops—Cereals—Rice (Mt DM/yr)

10.1.4 Cereals—Temperate cereals

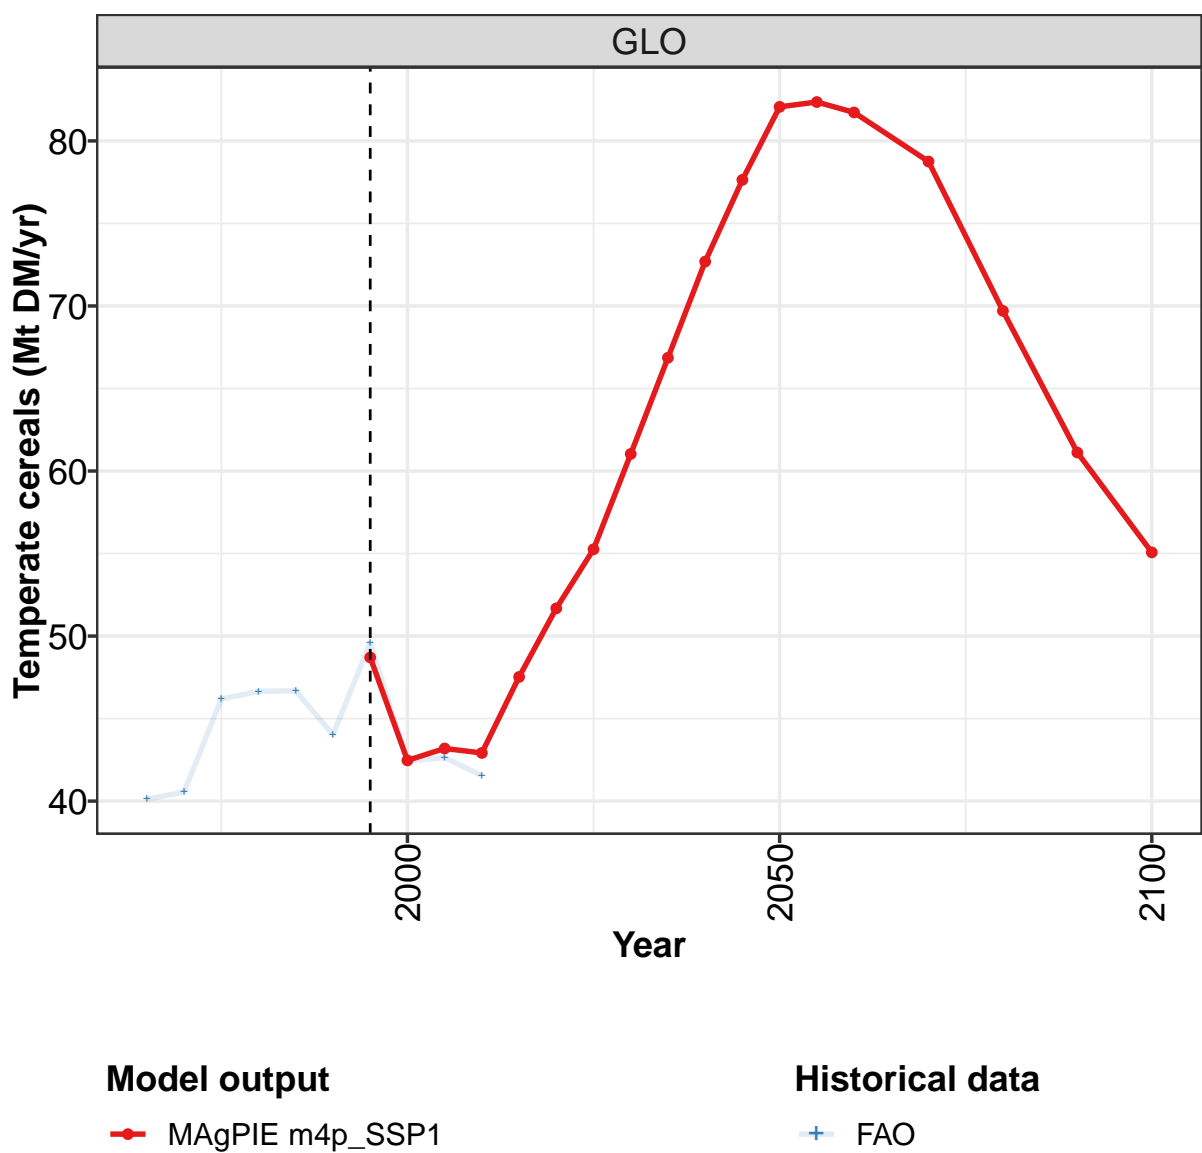

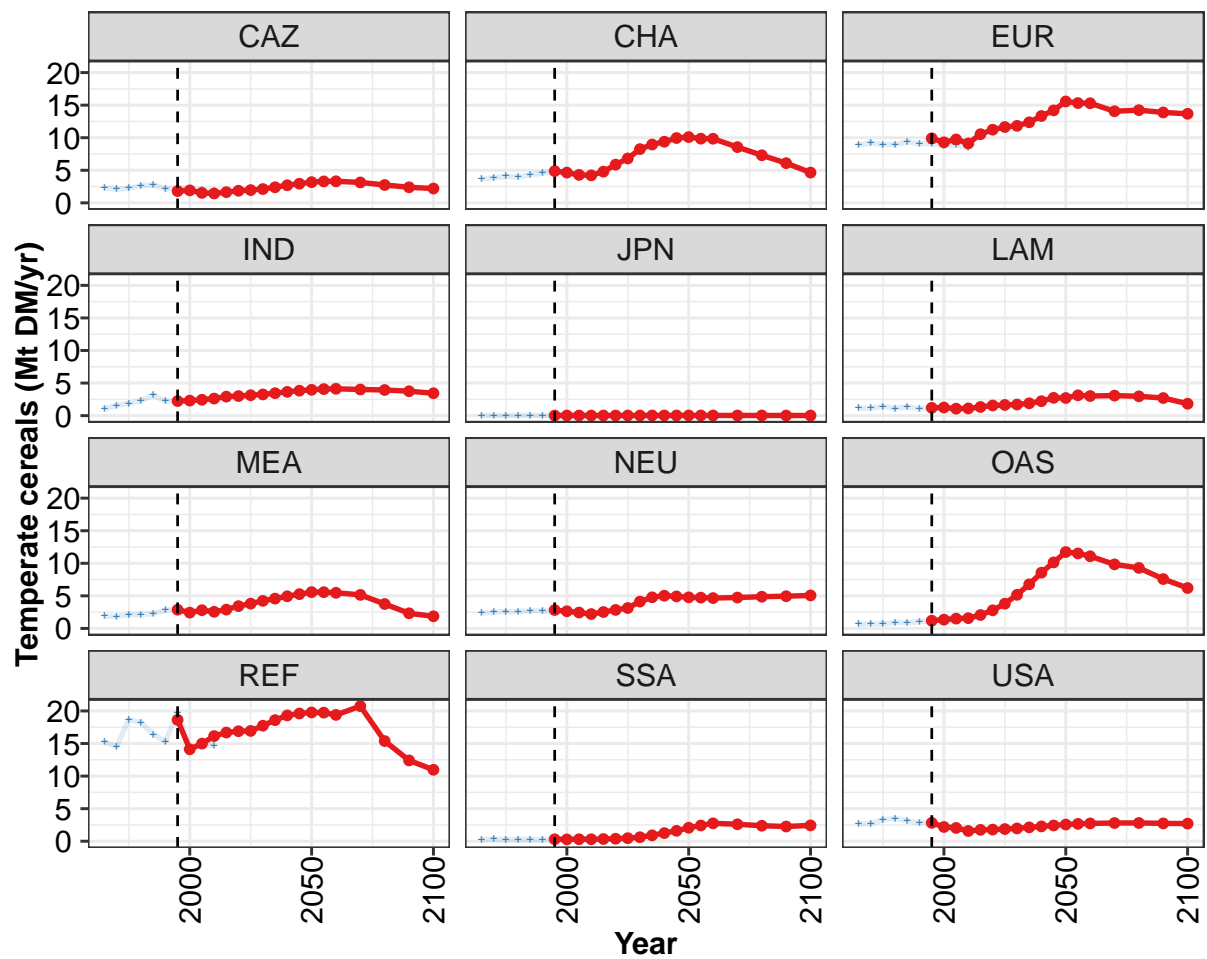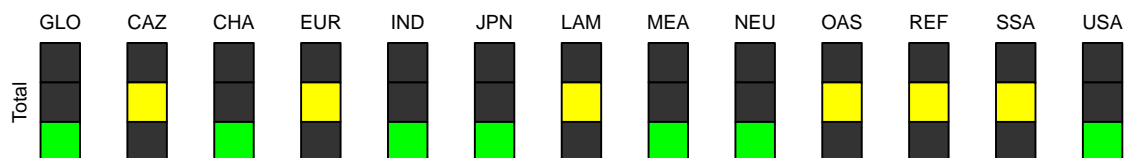

Figure 219: MAgPIE m4p\_SSP1 — Demand—Seed—Crops—Cereals—Temperate cereals (Mt DM/yr)

|     | 1995 | 2000 | 2005 | 2010 | 2015 | 2020 | 2025 | 2030 | 2035 | 2040 | 2045 |
|-----|------|------|------|------|------|------|------|------|------|------|------|
| GLO | 48.7 | 42.5 | 43.2 | 42.9 | 47.5 | 51.7 | 55.3 | 61.0 | 66.9 | 72.7 | 77.6 |
| CAZ | 1.8  | 1.9  | 1.5  | 1.4  | 1.6  | 1.9  | 2.0  | 2.1  | 2.4  | 2.7  | 2.9  |
| CHA | 4.9  | 4.6  | 4.3  | 4.2  | 4.8  | 5.9  | 6.8  | 8.2  | 9.0  | 9.4  | 10.0 |
| EUR | 9.9  | 9.3  | 9.7  | 9.1  | 10.5 | 11.2 | 11.6 | 11.8 | 12.4 | 13.3 | 14.2 |
| IND | 2.2  | 2.3  | 2.4  | 2.6  | 2.9  | 3.0  | 3.1  | 3.3  | 3.5  | 3.7  | 3.8  |
| JPN | 0.0  | 0.0  | 0.0  | 0.0  | 0.0  | 0.0  | 0.0  | 0.0  | 0.0  | 0.0  | 0.0  |
| LAM | 1.2  | 1.2  | 1.1  | 1.1  | 1.3  | 1.6  | 1.6  | 1.7  | 1.9  | 2.2  | 2.7  |
| MEA | 2.9  | 2.4  | 2.8  | 2.6  | 2.9  | 3.4  | 3.8  | 4.2  | 4.6  | 4.9  | 5.3  |
| NEU | 2.8  | 2.6  | 2.4  | 2.2  | 2.5  | 2.8  | 3.1  | 4.1  | 4.8  | 5.0  | 4.9  |
| OAS | 1.2  | 1.4  | 1.5  | 1.6  | 2.1  | 2.8  | 3.8  | 5.2  | 6.8  | 8.6  | 10.1 |
| REF | 18.6 | 14.1 | 15.0 | 16.1 | 16.7 | 16.9 | 16.9 | 17.7 | 18.6 | 19.3 | 19.6 |
| SSA | 0.3  | 0.3  | 0.3  | 0.3  | 0.3  | 0.4  | 0.5  | 0.6  | 0.9  | 1.2  | 1.6  |
| USA | 2.8  | 2.2  | 2.0  | 1.6  | 1.7  | 1.8  | 1.9  | 2.0  | 2.1  | 2.3  | 2.4  |

Table 656: MAgPIE m4p\_SSP1 — Demand—Seed—Crops—Cereals—Temperate cereals (Mt DM/yr) [PART 1/2]

|     | 2050 | 2055 | 2060 | 2070 | 2080 | 2090 | 2100 |
|-----|------|------|------|------|------|------|------|
| GLO | 82.1 | 82.4 | 81.7 | 78.8 | 69.7 | 61.1 | 55.1 |
| CAZ | 3.2  | 3.3  | 3.3  | 3.1  | 2.7  | 2.4  | 2.2  |
| CHA | 10.1 | 9.9  | 9.8  | 8.6  | 7.3  | 6.1  | 4.6  |
| EUR | 15.6 | 15.3 | 15.3 | 14.1 | 14.2 | 13.9 | 13.7 |
| IND | 4.0  | 4.1  | 4.1  | 4.0  | 3.9  | 3.7  | 3.4  |
| JPN | 0.0  | 0.0  | 0.0  | 0.0  | 0.0  | 0.0  | 0.0  |
| LAM | 2.7  | 3.1  | 3.0  | 3.1  | 3.0  | 2.7  | 1.8  |
| MEA | 5.6  | 5.6  | 5.5  | 5.2  | 3.8  | 2.3  | 1.9  |
| NEU | 4.8  | 4.7  | 4.7  | 4.7  | 4.9  | 4.9  | 5.1  |
| OAS | 11.7 | 11.5 | 11.1 | 9.8  | 9.3  | 7.6  | 6.2  |
| REF | 19.8 | 19.7 | 19.4 | 20.7 | 15.4 | 12.4 | 11.0 |
| SSA | 2.1  | 2.4  | 2.8  | 2.6  | 2.4  | 2.3  | 2.4  |
| USA | 2.6  | 2.7  | 2.7  | 2.8  | 2.8  | 2.7  | 2.7  |

Table 657: MAgPIE m4p\_SSP1 — Demand—Seed—Crops—Cereals—Temperate cereals (Mt DM/yr) [PART 2/2]

|     | 1965 | 1970 | 1975 | 1980 | 1985 | 1990 | 1995 | 2000 | 2005 | 2010 |
|-----|------|------|------|------|------|------|------|------|------|------|
| GLO | 40.1 | 40.6 | 46.2 | 46.7 | 46.7 | 44.0 | 49.6 | 42.4 | 42.6 | 41.5 |
| CAZ | 2.3  | 2.1  | 2.2  | 2.6  | 2.8  | 2.1  | 2.3  | 2.1  | 2.1  | 1.8  |
| CHA | 3.6  | 3.8  | 4.1  | 4.0  | 4.3  | 4.5  | 4.9  | 4.7  | 4.3  | 4.3  |
| EUR | 8.9  | 9.2  | 9.0  | 8.9  | 9.3  | 9.1  | 9.1  | 8.7  | 8.9  | 8.4  |
| IND | 1.0  | 1.6  | 1.9  | 2.3  | 3.1  | 2.2  | 2.3  | 2.3  | 2.4  | 2.6  |
| JPN | 0.0  | 0.0  | 0.0  | 0.0  | 0.0  | 0.0  | 0.0  | 0.0  | 0.0  | 0.0  |
| LAM | 1.2  | 1.1  | 1.4  | 1.1  | 1.4  | 1.1  | 1.2  | 1.2  | 1.1  | 1.1  |
| MEA | 1.9  | 1.9  | 2.1  | 2.1  | 2.3  | 2.8  | 2.9  | 2.4  | 2.8  | 2.6  |
| NEU | 2.4  | 2.5  | 2.6  | 2.6  | 2.7  | 2.7  | 2.7  | 2.5  | 2.3  | 2.1  |
| OAS | 0.6  | 0.7  | 0.7  | 0.9  | 0.9  | 1.1  | 1.2  | 1.4  | 1.5  | 1.6  |
| REF | 15.2 | 14.6 | 18.6 | 18.2 | 16.4 | 15.3 | 19.8 | 14.4 | 14.8 | 14.7 |
| SSA | 0.3  | 0.3  | 0.3  | 0.3  | 0.3  | 0.2  | 0.3  | 0.3  | 0.3  | 0.3  |
| USA | 2.7  | 2.7  | 3.3  | 3.5  | 3.1  | 2.8  | 2.9  | 2.3  | 2.2  | 2.0  |

Table 658: FAO — Demand—Seed—Crops—Cereals—Temperate cereals (Mt DM/yr)

10.1.5 Cereals—Tropical cereals

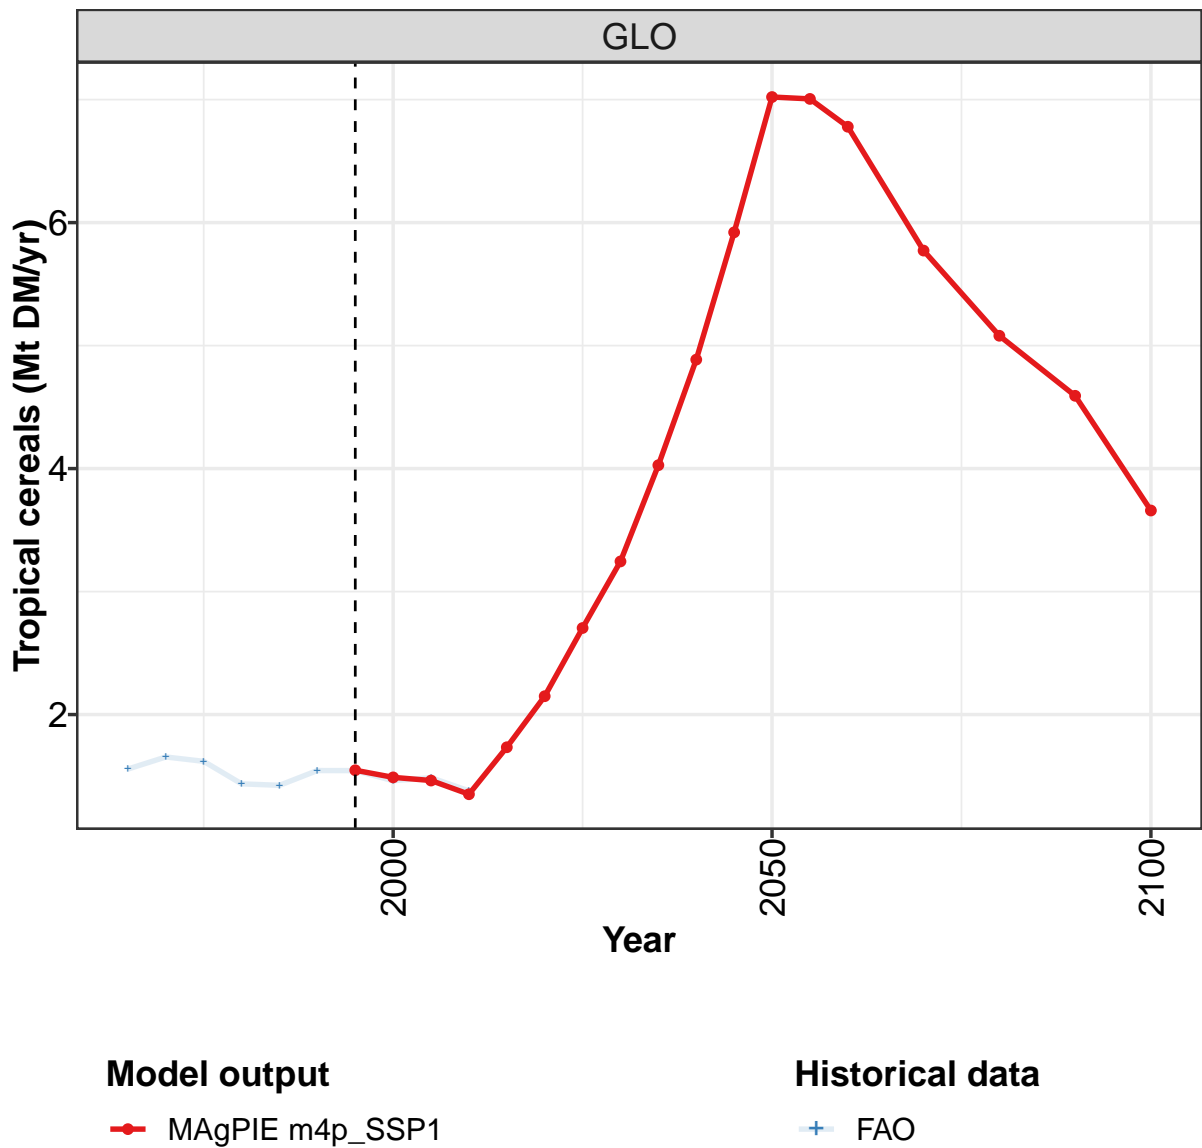

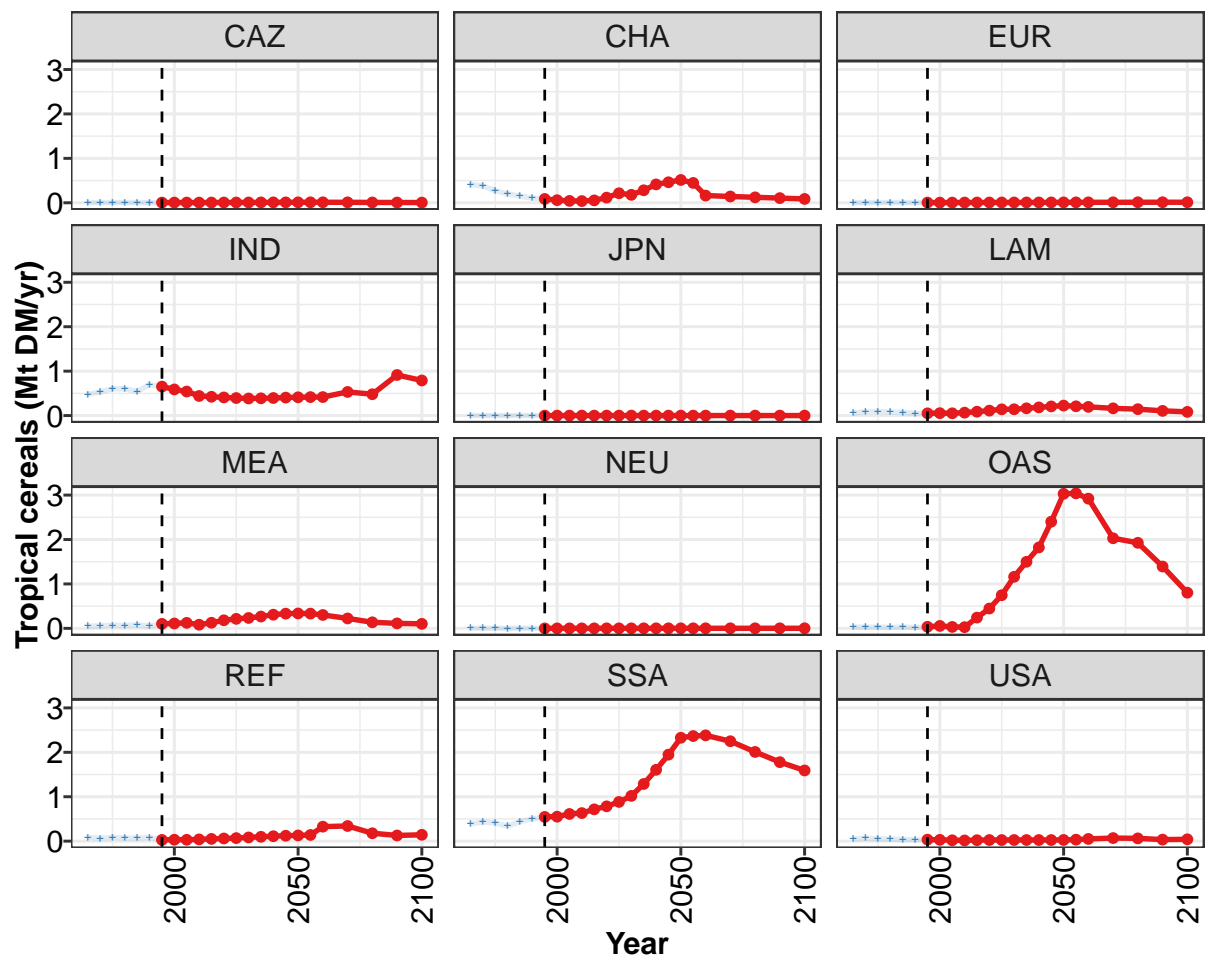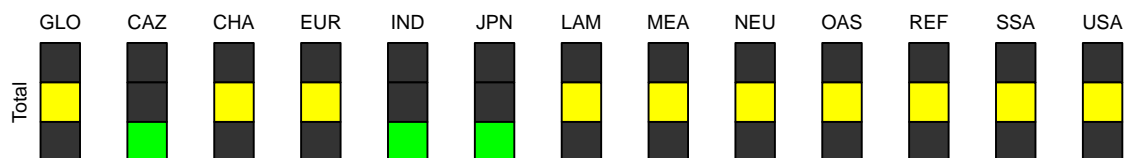

Figure 220: MAgPIE m4p\_SSP1 — Demand—Seed—Crops—Cereals—Tropical cereals (Mt DM/yr)

|     | 1995 | 2000 | 2005 | 2010 | 2015 | 2020 | 2025 | 2030 | 2035 | 2040 | 2045 |
|-----|------|------|------|------|------|------|------|------|------|------|------|
| GLO | 1.55 | 1.49 | 1.46 | 1.35 | 1.73 | 2.15 | 2.70 | 3.25 | 4.03 | 4.89 | 5.92 |
| CAZ | 0.01 | 0.00 | 0.00 | 0.00 | 0.01 | 0.01 | 0.01 | 0.01 | 0.01 | 0.01 | 0.01 |
| CHA | 0.09 | 0.06 | 0.04 | 0.04 | 0.05 | 0.12 | 0.21 | 0.18 | 0.28 | 0.41 | 0.46 |
| EUR | 0.00 | 0.00 | 0.00 | 0.01 | 0.01 | 0.01 | 0.01 | 0.01 | 0.01 | 0.01 | 0.01 |
| IND | 0.65 | 0.59 | 0.54 | 0.44 | 0.42 | 0.41 | 0.39 | 0.38 | 0.39 | 0.40 | 0.40 |
| JPN | 0.00 | 0.00 | 0.00 | 0.00 | 0.00 | 0.00 | 0.00 | 0.00 | 0.00 | 0.00 | 0.00 |
| LAM | 0.05 | 0.05 | 0.05 | 0.07 | 0.09 | 0.11 | 0.14 | 0.14 | 0.16 | 0.18 | 0.21 |
| MEA | 0.10 | 0.11 | 0.12 | 0.08 | 0.13 | 0.18 | 0.21 | 0.23 | 0.27 | 0.31 | 0.33 |
| NEU | 0.00 | 0.00 | 0.00 | 0.00 | 0.00 | 0.00 | 0.00 | 0.00 | 0.00 | 0.00 | 0.00 |
| OAS | 0.04 | 0.05 | 0.03 | 0.03 | 0.24 | 0.45 | 0.75 | 1.16 | 1.50 | 1.82 | 2.40 |
| REF | 0.03 | 0.03 | 0.03 | 0.04 | 0.05 | 0.06 | 0.07 | 0.08 | 0.10 | 0.11 | 0.12 |
| SSA | 0.55 | 0.55 | 0.61 | 0.63 | 0.72 | 0.78 | 0.88 | 1.02 | 1.29 | 1.61 | 1.95 |
| USA | 0.04 | 0.03 | 0.02 | 0.02 | 0.02 | 0.03 | 0.03 | 0.03 | 0.03 | 0.03 | 0.03 |

Table 659: MAgPIE m4p\_SSP1 — Demand—Seed—Crops—Cereals—Tropical cereals (Mt DM/yr) [PART 1/2]

|     | 2050 | 2055 | 2060 | 2070 | 2080 | 2090 | 2100 |
|-----|------|------|------|------|------|------|------|
| GLO | 7.02 | 7.01 | 6.78 | 5.77 | 5.08 | 4.59 | 3.66 |
| CAZ | 0.01 | 0.01 | 0.01 | 0.01 | 0.01 | 0.01 | 0.01 |
| CHA | 0.51 | 0.45 | 0.16 | 0.14 | 0.12 | 0.11 | 0.09 |
| EUR | 0.01 | 0.01 | 0.01 | 0.01 | 0.01 | 0.01 | 0.01 |
| IND | 0.41 | 0.42 | 0.42 | 0.53 | 0.48 | 0.91 | 0.79 |
| JPN | 0.00 | 0.00 | 0.00 | 0.00 | 0.00 | 0.00 | 0.00 |
| LAM | 0.22 | 0.21 | 0.20 | 0.16 | 0.14 | 0.11 | 0.08 |
| MEA | 0.34 | 0.33 | 0.30 | 0.22 | 0.14 | 0.11 | 0.10 |
| NEU | 0.00 | 0.00 | 0.00 | 0.00 | 0.00 | 0.00 | 0.00 |
| OAS | 3.03 | 3.04 | 2.92 | 2.03 | 1.93 | 1.39 | 0.80 |
| REF | 0.13 | 0.14 | 0.33 | 0.34 | 0.18 | 0.13 | 0.14 |
| SSA | 2.33 | 2.37 | 2.38 | 2.25 | 2.01 | 1.78 | 1.59 |
| USA | 0.03 | 0.03 | 0.05 | 0.07 | 0.06 | 0.03 | 0.04 |

Table 660: MAgPIE m4p\_SSP1 — Demand—Seed—Crops—Cereals—Tropical cereals (Mt DM/yr) [PART 2/2]

|     | 1965 | 1970 | 1975 | 1980 | 1985 | 1990 | 1995 | 2000 | 2005 | 2010 |
|-----|------|------|------|------|------|------|------|------|------|------|
| GLO | 1.56 | 1.66 | 1.62 | 1.44 | 1.42 | 1.54 | 1.54 | 1.46 | 1.49 | 1.38 |
| CAZ | 0.00 | 0.01 | 0.00 | 0.01 | 0.01 | 0.00 | 0.01 | 0.01 | 0.01 | 0.00 |
| CHA | 0.42 | 0.38 | 0.27 | 0.20 | 0.15 | 0.11 | 0.09 | 0.06 | 0.04 | 0.04 |
| EUR | 0.01 | 0.00 | 0.01 | 0.00 | 0.00 | 0.00 | 0.00 | 0.00 | 0.00 | 0.01 |
| IND | 0.48 | 0.53 | 0.60 | 0.60 | 0.54 | 0.69 | 0.65 | 0.59 | 0.54 | 0.48 |
| JPN | 0.00 | 0.00 | 0.00 | 0.00 | 0.00 | 0.00 | 0.00 | 0.00 | 0.00 | 0.00 |
| LAM | 0.05 | 0.09 | 0.09 | 0.08 | 0.07 | 0.05 | 0.06 | 0.06 | 0.05 | 0.07 |
| MEA | 0.05 | 0.06 | 0.07 | 0.07 | 0.08 | 0.05 | 0.10 | 0.10 | 0.12 | 0.08 |
| NEU | 0.00 | 0.00 | 0.00 | 0.00 | 0.00 | 0.00 | 0.00 | 0.00 | 0.00 | 0.00 |
| OAS | 0.03 | 0.03 | 0.03 | 0.02 | 0.03 | 0.02 | 0.02 | 0.03 | 0.03 | 0.03 |
| REF | 0.09 | 0.06 | 0.08 | 0.07 | 0.07 | 0.08 | 0.03 | 0.03 | 0.03 | 0.04 |
| SSA | 0.39 | 0.43 | 0.41 | 0.34 | 0.44 | 0.50 | 0.55 | 0.56 | 0.64 | 0.63 |
| USA | 0.04 | 0.07 | 0.05 | 0.04 | 0.04 | 0.03 | 0.04 | 0.03 | 0.02 | 0.01 |

Table 661: FAO — Demand—Seed—Crops—Cereals—Tropical cereals (Mt DM/yr)



## 10.1.6 Oil crops

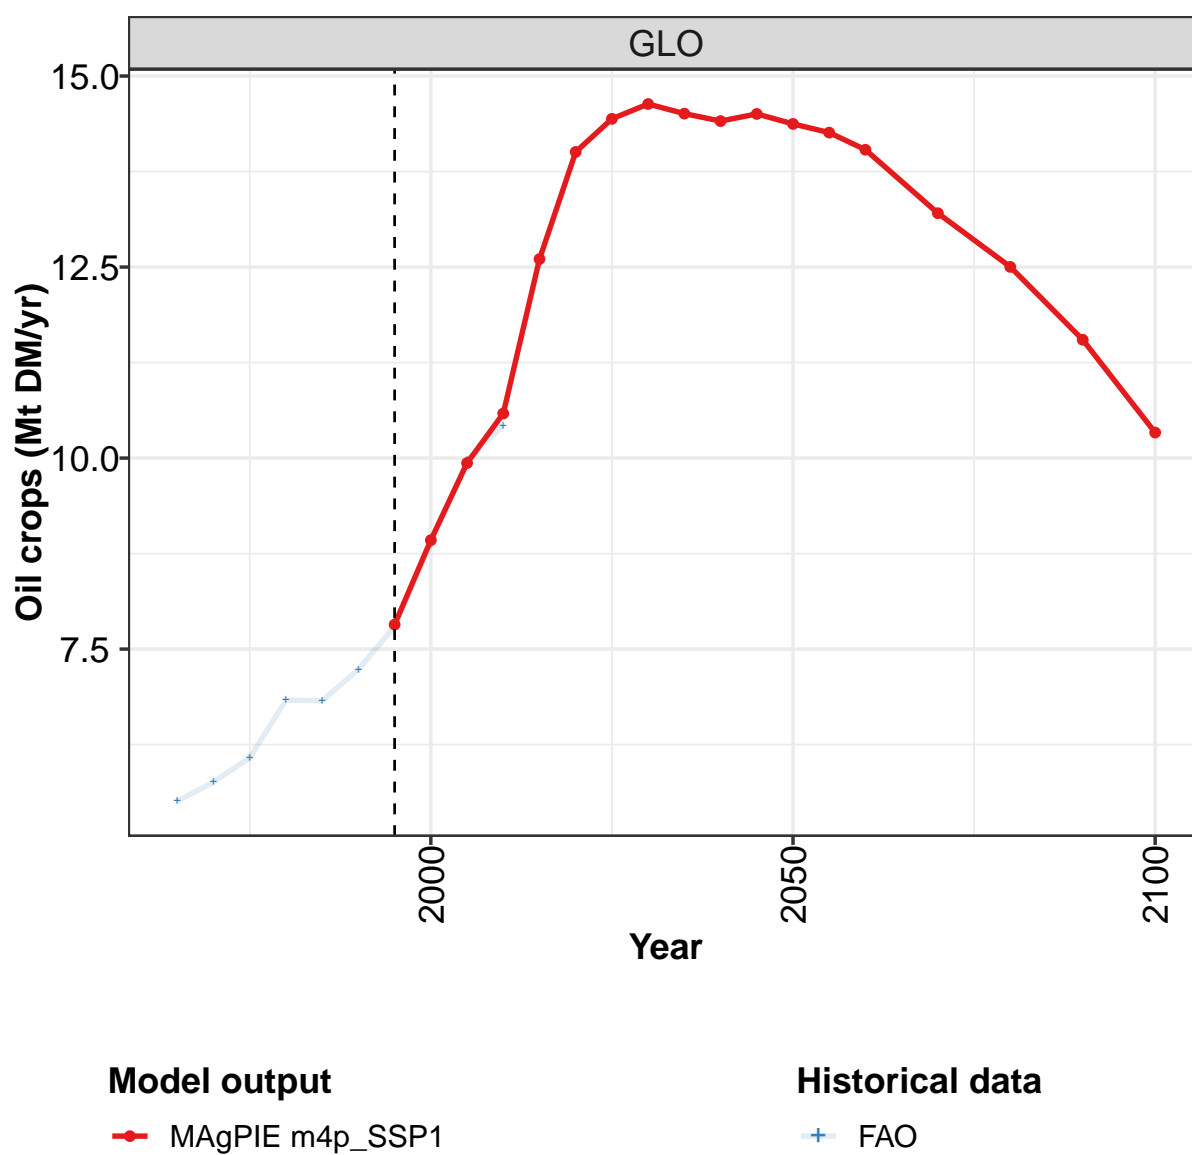

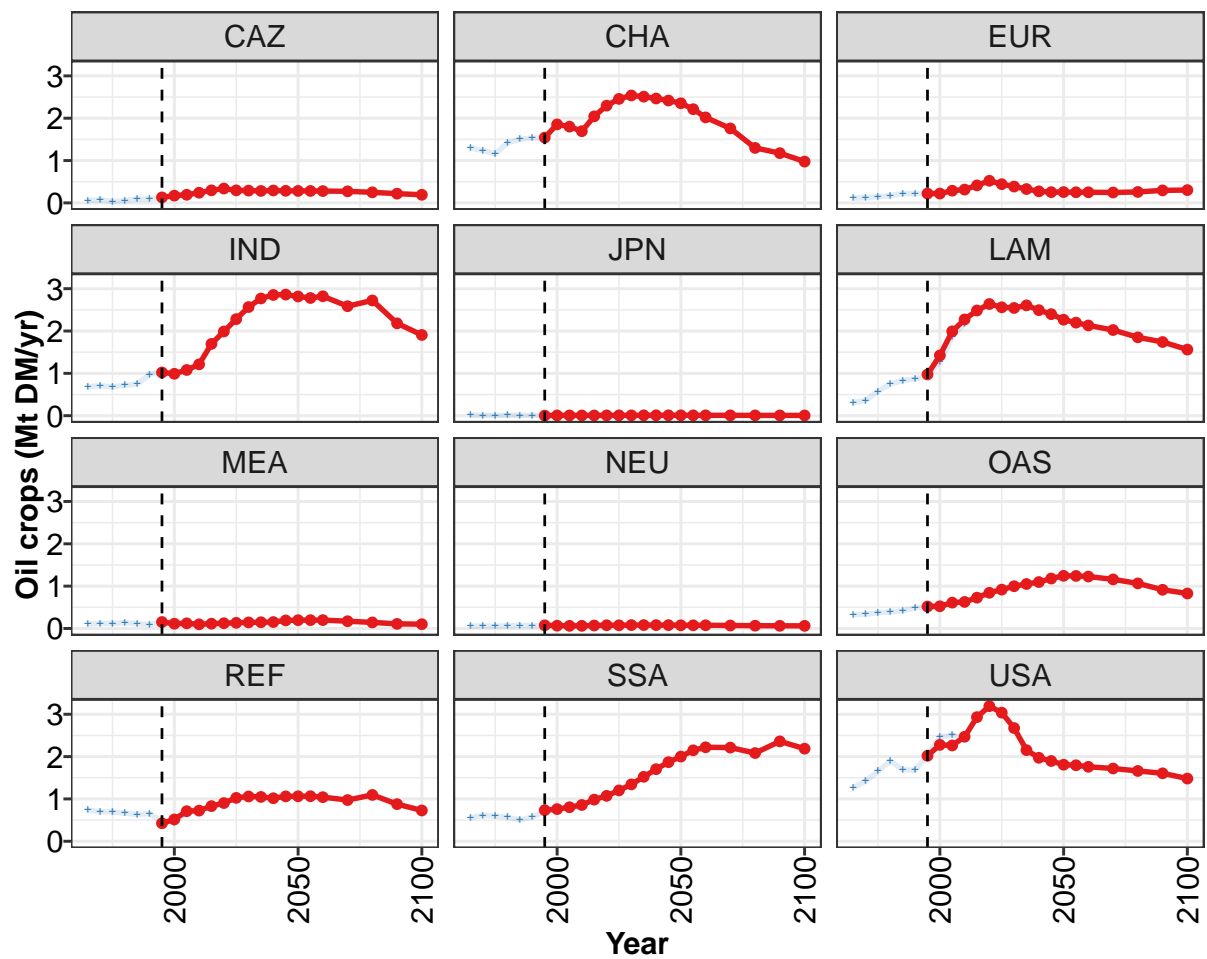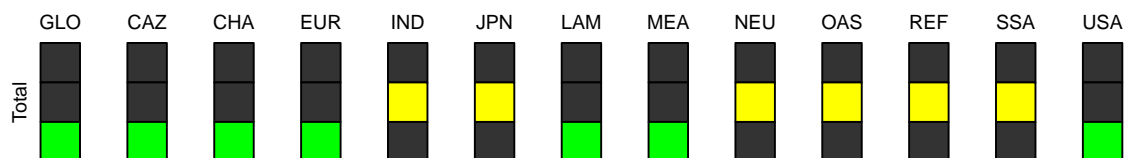

Figure 221: MAgPIE m4p\_SSP1 — Demand—Seed—Crops—Oil crops (Mt DM/yr)

|     | 1995 | 2000 | 2005 | 2010 | 2015 | 2020 | 2025 | 2030 | 2035 | 2040 | 2045 |
|-----|------|------|------|------|------|------|------|------|------|------|------|
| GLO | 7.8  | 8.9  | 9.9  | 10.6 | 12.6 | 14.0 | 14.4 | 14.6 | 14.5 | 14.4 | 14.5 |
| CAZ | 0.1  | 0.2  | 0.2  | 0.2  | 0.3  | 0.3  | 0.3  | 0.3  | 0.3  | 0.3  | 0.3  |
| CHA | 1.5  | 1.9  | 1.8  | 1.7  | 2.0  | 2.3  | 2.5  | 2.5  | 2.5  | 2.5  | 2.4  |
| EUR | 0.2  | 0.2  | 0.3  | 0.3  | 0.4  | 0.5  | 0.4  | 0.4  | 0.3  | 0.3  | 0.3  |
| IND | 1.0  | 1.0  | 1.1  | 1.2  | 1.7  | 2.0  | 2.3  | 2.6  | 2.8  | 2.9  | 2.9  |
| JPN | 0.0  | 0.0  | 0.0  | 0.0  | 0.0  | 0.0  | 0.0  | 0.0  | 0.0  | 0.0  | 0.0  |
| LAM | 1.0  | 1.4  | 2.0  | 2.3  | 2.5  | 2.6  | 2.6  | 2.5  | 2.6  | 2.5  | 2.4  |
| MEA | 0.2  | 0.1  | 0.1  | 0.1  | 0.1  | 0.1  | 0.1  | 0.1  | 0.1  | 0.2  | 0.2  |
| NEU | 0.1  | 0.1  | 0.1  | 0.1  | 0.1  | 0.1  | 0.1  | 0.1  | 0.1  | 0.1  | 0.1  |
| OAS | 0.5  | 0.5  | 0.6  | 0.6  | 0.7  | 0.8  | 0.9  | 1.0  | 1.1  | 1.1  | 1.2  |
| REF | 0.4  | 0.5  | 0.7  | 0.7  | 0.8  | 0.9  | 1.0  | 1.1  | 1.0  | 1.0  | 1.1  |
| SSA | 0.7  | 0.8  | 0.8  | 0.9  | 1.0  | 1.1  | 1.2  | 1.3  | 1.5  | 1.7  | 1.9  |
| USA | 2.0  | 2.3  | 2.3  | 2.5  | 2.9  | 3.2  | 3.0  | 2.7  | 2.2  | 2.0  | 1.9  |

Table 662: MAgPIE m4p\_SSP1 — Demand—Seed—Crops—Oil crops (Mt DM/yr) [PART 1/2]

|     | 2050 | 2055 | 2060 | 2070 | 2080 | 2090 | 2100 |
|-----|------|------|------|------|------|------|------|
| GLO | 14.4 | 14.3 | 14.0 | 13.2 | 12.5 | 11.5 | 10.3 |
| CAZ | 0.3  | 0.3  | 0.3  | 0.3  | 0.2  | 0.2  | 0.2  |
| CHA | 2.4  | 2.2  | 2.0  | 1.8  | 1.3  | 1.2  | 1.0  |
| EUR | 0.3  | 0.3  | 0.3  | 0.2  | 0.3  | 0.3  | 0.3  |
| IND | 2.8  | 2.8  | 2.8  | 2.6  | 2.7  | 2.2  | 1.9  |
| JPN | 0.0  | 0.0  | 0.0  | 0.0  | 0.0  | 0.0  | 0.0  |
| LAM | 2.3  | 2.2  | 2.1  | 2.0  | 1.9  | 1.7  | 1.6  |
| MEA | 0.2  | 0.2  | 0.2  | 0.2  | 0.1  | 0.1  | 0.1  |
| NEU | 0.1  | 0.1  | 0.1  | 0.1  | 0.1  | 0.1  | 0.1  |
| OAS | 1.2  | 1.2  | 1.2  | 1.2  | 1.1  | 0.9  | 0.8  |
| REF | 1.1  | 1.1  | 1.0  | 1.0  | 1.1  | 0.9  | 0.7  |
| SSA | 2.0  | 2.1  | 2.2  | 2.2  | 2.1  | 2.4  | 2.2  |
| USA | 1.8  | 1.8  | 1.8  | 1.7  | 1.7  | 1.6  | 1.5  |

Table 663: MAgPIE m4p\_SSP1 — Demand—Seed—Crops—Oil crops (Mt DM/yr) [PART 2/2]

|     | 1965 | 1970 | 1975 | 1980 | 1985 | 1990 | 1995 | 2000 | 2005 | 2010 |
|-----|------|------|------|------|------|------|------|------|------|------|
| GLO | 5.5  | 5.8  | 6.1  | 6.8  | 6.8  | 7.2  | 7.8  | 8.9  | 10.0 | 10.4 |
| CAZ | 0.1  | 0.1  | 0.0  | 0.1  | 0.1  | 0.1  | 0.1  | 0.2  | 0.2  | 0.2  |
| CHA | 1.3  | 1.2  | 1.2  | 1.4  | 1.5  | 1.5  | 1.6  | 1.9  | 1.8  | 1.7  |
| EUR | 0.1  | 0.1  | 0.1  | 0.2  | 0.2  | 0.2  | 0.2  | 0.2  | 0.3  | 0.3  |
| IND | 0.7  | 0.7  | 0.7  | 0.7  | 0.7  | 1.0  | 1.0  | 1.0  | 1.1  | 1.2  |
| JPN | 0.0  | 0.0  | 0.0  | 0.0  | 0.0  | 0.0  | 0.0  | 0.0  | 0.0  | 0.0  |
| LAM | 0.3  | 0.4  | 0.6  | 0.7  | 0.8  | 0.9  | 0.9  | 1.3  | 1.9  | 2.2  |
| MEA | 0.1  | 0.1  | 0.1  | 0.1  | 0.1  | 0.1  | 0.1  | 0.1  | 0.1  | 0.1  |
| NEU | 0.1  | 0.1  | 0.1  | 0.1  | 0.1  | 0.1  | 0.1  | 0.1  | 0.1  | 0.1  |
| OAS | 0.3  | 0.3  | 0.4  | 0.4  | 0.4  | 0.5  | 0.5  | 0.5  | 0.6  | 0.6  |
| REF | 0.7  | 0.7  | 0.7  | 0.7  | 0.6  | 0.7  | 0.5  | 0.4  | 0.7  | 0.7  |
| SSA | 0.6  | 0.6  | 0.6  | 0.6  | 0.5  | 0.6  | 0.7  | 0.8  | 0.8  | 0.9  |
| USA | 1.3  | 1.4  | 1.7  | 1.9  | 1.7  | 1.7  | 2.0  | 2.5  | 2.5  | 2.4  |

Table 664: FAO — Demand—Seed—Crops—Oil crops (Mt DM/yr)

## 10.1.7 Oil crops—Cotton seed

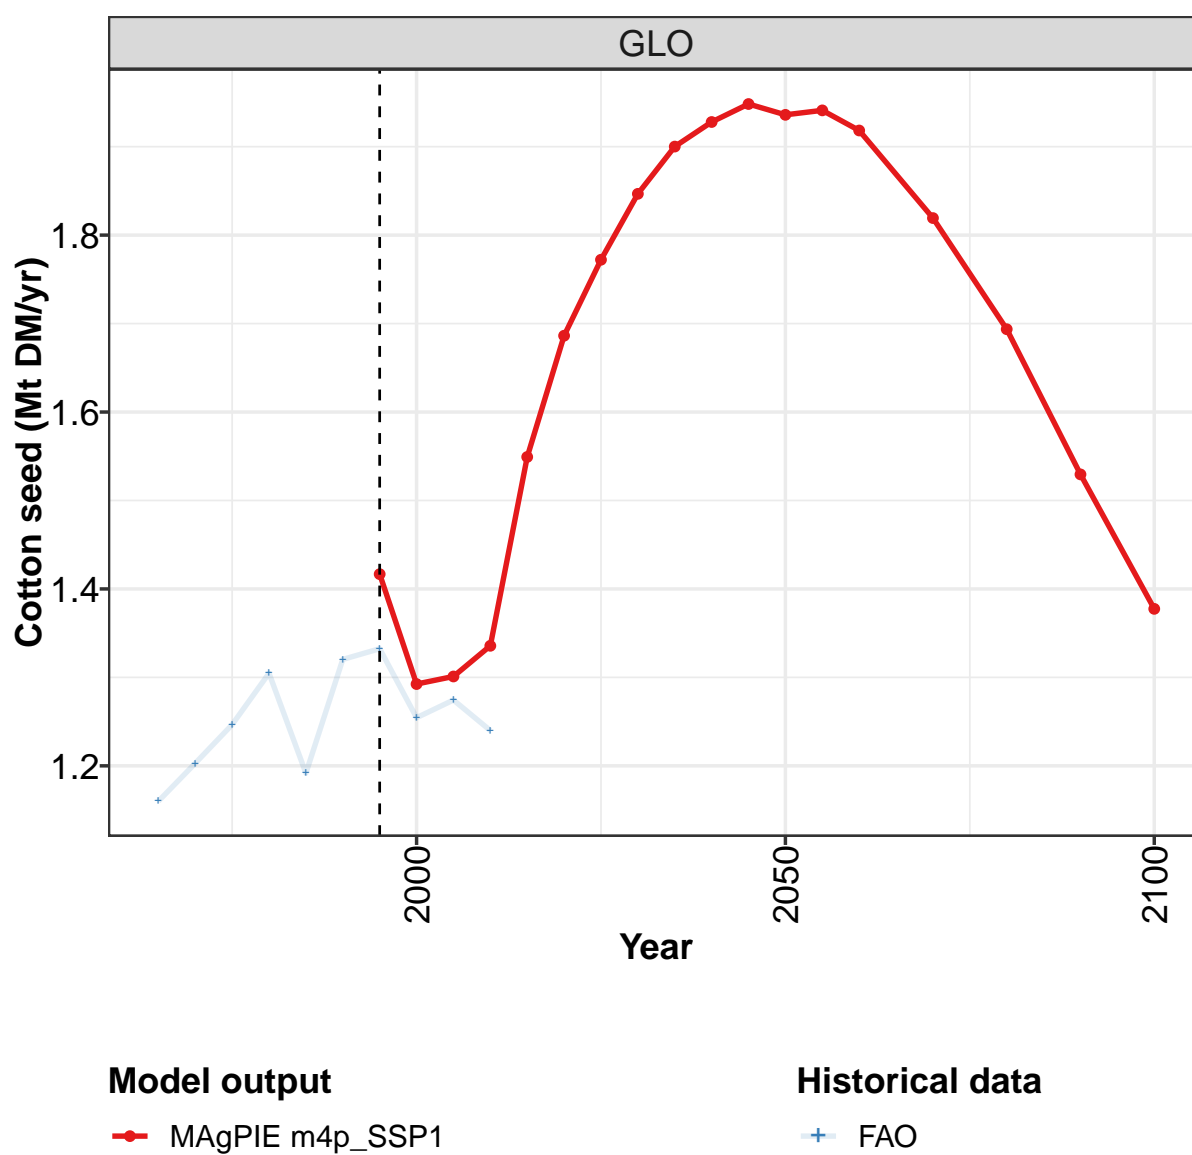

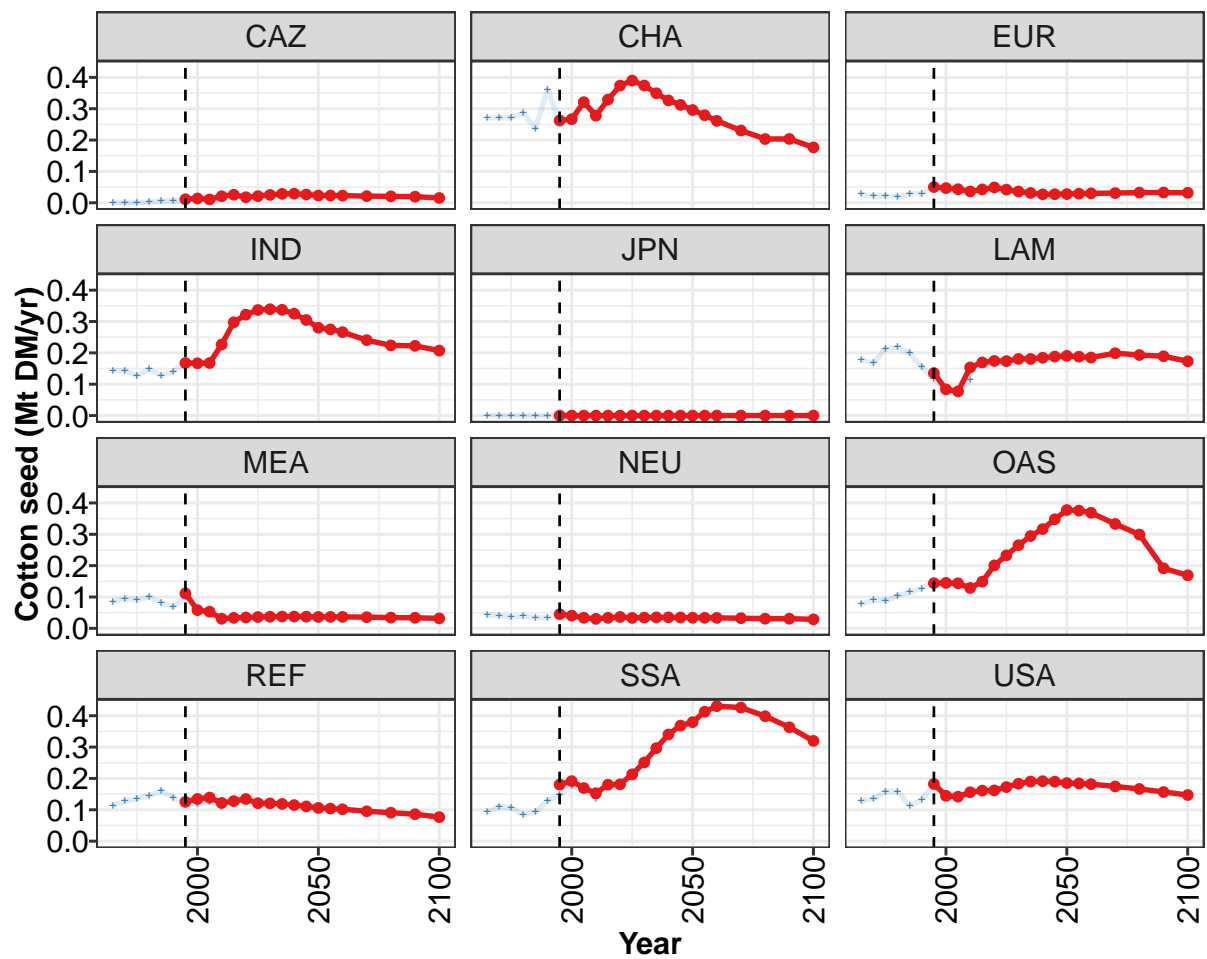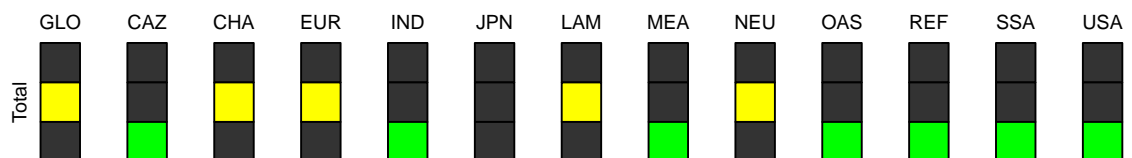

Figure 222: MAGPIE m4p\_SSP1 — Demand—Seed—Crops—Oil crops—Cotton seed (Mt DM/yr)

|     | 1995 | 2000 | 2005 | 2010 | 2015 | 2020 | 2025 | 2030 | 2035 | 2040 | 2045 |
|-----|------|------|------|------|------|------|------|------|------|------|------|
| GLO | 1.42 | 1.29 | 1.30 | 1.34 | 1.55 | 1.69 | 1.77 | 1.85 | 1.90 | 1.93 | 1.95 |
| CAZ | 0.01 | 0.01 | 0.01 | 0.02 | 0.03 | 0.02 | 0.02 | 0.03 | 0.03 | 0.03 | 0.03 |
| CHA | 0.26 | 0.27 | 0.32 | 0.28 | 0.33 | 0.37 | 0.39 | 0.37 | 0.35 | 0.33 | 0.31 |
| EUR | 0.05 | 0.05 | 0.04 | 0.04 | 0.04 | 0.05 | 0.04 | 0.04 | 0.03 | 0.03 | 0.03 |
| IND | 0.17 | 0.17 | 0.17 | 0.23 | 0.30 | 0.32 | 0.34 | 0.34 | 0.34 | 0.32 | 0.30 |
| JPN | 0.00 | 0.00 | 0.00 | 0.00 | 0.00 | 0.00 | 0.00 | 0.00 | 0.00 | 0.00 | 0.00 |
| LAM | 0.14 | 0.08 | 0.08 | 0.15 | 0.17 | 0.17 | 0.17 | 0.18 | 0.18 | 0.18 | 0.19 |
| MEA | 0.11 | 0.06 | 0.05 | 0.03 | 0.03 | 0.03 | 0.04 | 0.04 | 0.04 | 0.04 | 0.04 |
| NEU | 0.05 | 0.04 | 0.03 | 0.03 | 0.03 | 0.04 | 0.03 | 0.03 | 0.04 | 0.04 | 0.03 |
| OAS | 0.14 | 0.15 | 0.14 | 0.13 | 0.15 | 0.20 | 0.23 | 0.27 | 0.29 | 0.32 | 0.35 |
| REF | 0.13 | 0.13 | 0.14 | 0.12 | 0.13 | 0.13 | 0.12 | 0.12 | 0.12 | 0.12 | 0.11 |
| SSA | 0.18 | 0.19 | 0.17 | 0.15 | 0.18 | 0.18 | 0.21 | 0.25 | 0.30 | 0.34 | 0.37 |
| USA | 0.18 | 0.14 | 0.14 | 0.16 | 0.16 | 0.16 | 0.17 | 0.18 | 0.19 | 0.19 | 0.19 |

Table 665: MAgPIE m4p\_SSP1 — Demand—Seed—Crops—Oil crops—Cotton seed (Mt DM/yr) [PART 1/2]

|     | 2050 | 2055 | 2060 | 2070 | 2080 | 2090 | 2100 |
|-----|------|------|------|------|------|------|------|
| GLO | 1.94 | 1.94 | 1.92 | 1.82 | 1.69 | 1.53 | 1.38 |
| CAZ | 0.02 | 0.02 | 0.02 | 0.02 | 0.02 | 0.02 | 0.02 |
| CHA | 0.30 | 0.28 | 0.26 | 0.23 | 0.20 | 0.20 | 0.18 |
| EUR | 0.03 | 0.03 | 0.03 | 0.03 | 0.03 | 0.03 | 0.03 |
| IND | 0.28 | 0.28 | 0.27 | 0.24 | 0.22 | 0.22 | 0.21 |
| JPN | 0.00 | 0.00 | 0.00 | 0.00 | 0.00 | 0.00 | 0.00 |
| LAM | 0.19 | 0.19 | 0.19 | 0.20 | 0.19 | 0.19 | 0.17 |
| MEA | 0.04 | 0.04 | 0.04 | 0.04 | 0.03 | 0.03 | 0.03 |
| NEU | 0.03 | 0.03 | 0.03 | 0.03 | 0.03 | 0.03 | 0.03 |
| OAS | 0.38 | 0.38 | 0.37 | 0.33 | 0.30 | 0.19 | 0.17 |
| REF | 0.11 | 0.10 | 0.10 | 0.10 | 0.09 | 0.09 | 0.08 |
| SSA | 0.38 | 0.41 | 0.43 | 0.43 | 0.40 | 0.36 | 0.32 |
| USA | 0.19 | 0.18 | 0.18 | 0.17 | 0.17 | 0.16 | 0.15 |

Table 666: MAgPIE m4p\_SSP1 — Demand—Seed—Crops—Oil crops—Cotton seed (Mt DM/yr) [PART 2/2]

|     | 1965 | 1970 | 1975 | 1980 | 1985 | 1990 | 1995 | 2000 | 2005 | 2010 |
|-----|------|------|------|------|------|------|------|------|------|------|
| GLO | 1.16 | 1.20 | 1.25 | 1.30 | 1.19 | 1.32 | 1.33 | 1.25 | 1.27 | 1.24 |
| CAZ | 0.00 | 0.00 | 0.00 | 0.00 | 0.00 | 0.01 | 0.01 | 0.01 | 0.01 | 0.02 |
| CHA | 0.27 | 0.27 | 0.27 | 0.29 | 0.24 | 0.36 | 0.26 | 0.27 | 0.32 | 0.28 |
| EUR | 0.03 | 0.02 | 0.02 | 0.02 | 0.03 | 0.03 | 0.05 | 0.05 | 0.04 | 0.04 |
| IND | 0.14 | 0.14 | 0.13 | 0.15 | 0.13 | 0.14 | 0.17 | 0.17 | 0.17 | 0.22 |
| JPN | 0.00 | 0.00 | 0.00 | 0.00 | 0.00 | 0.00 | 0.00 | 0.00 | 0.00 | 0.00 |
| LAM | 0.18 | 0.17 | 0.21 | 0.22 | 0.20 | 0.15 | 0.12 | 0.08 | 0.08 | 0.11 |
| MEA | 0.09 | 0.09 | 0.09 | 0.10 | 0.08 | 0.07 | 0.10 | 0.06 | 0.05 | 0.02 |
| NEU | 0.04 | 0.04 | 0.04 | 0.04 | 0.03 | 0.03 | 0.04 | 0.04 | 0.03 | 0.03 |
| OAS | 0.08 | 0.09 | 0.09 | 0.10 | 0.12 | 0.13 | 0.15 | 0.14 | 0.14 | 0.13 |
| REF | 0.11 | 0.13 | 0.14 | 0.15 | 0.16 | 0.14 | 0.12 | 0.12 | 0.13 | 0.11 |
| SSA | 0.09 | 0.11 | 0.11 | 0.08 | 0.09 | 0.13 | 0.15 | 0.18 | 0.16 | 0.13 |
| USA | 0.13 | 0.14 | 0.16 | 0.16 | 0.11 | 0.13 | 0.18 | 0.15 | 0.15 | 0.15 |

Table 667: FAO — Demand—Seed—Crops—Oil crops—Cotton seed (Mt DM/yr)

10.1.8 Oil crops—Groundnuts

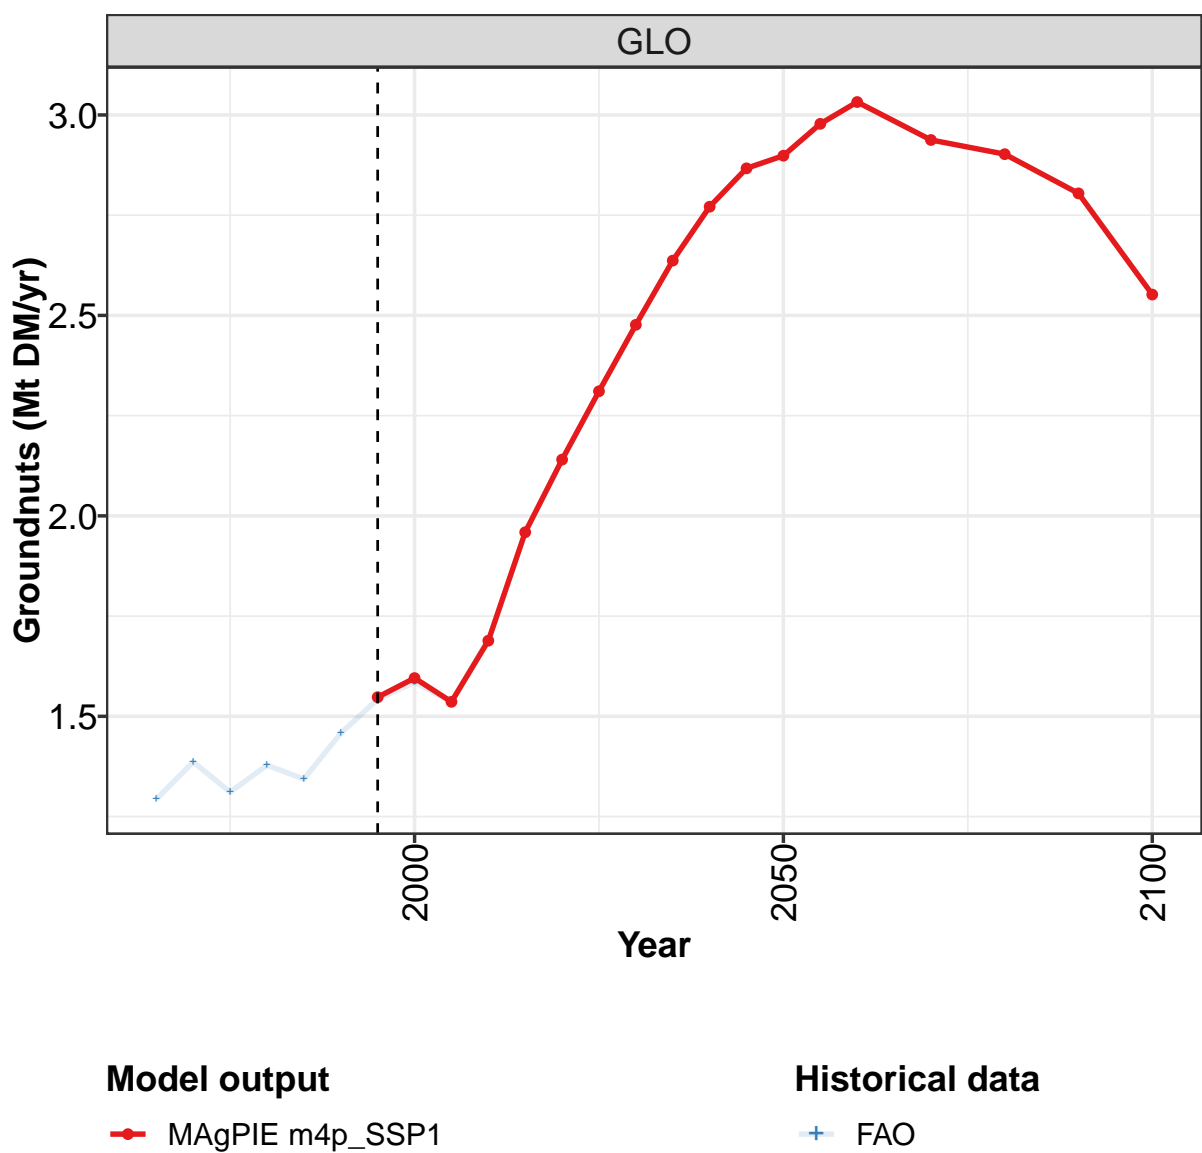

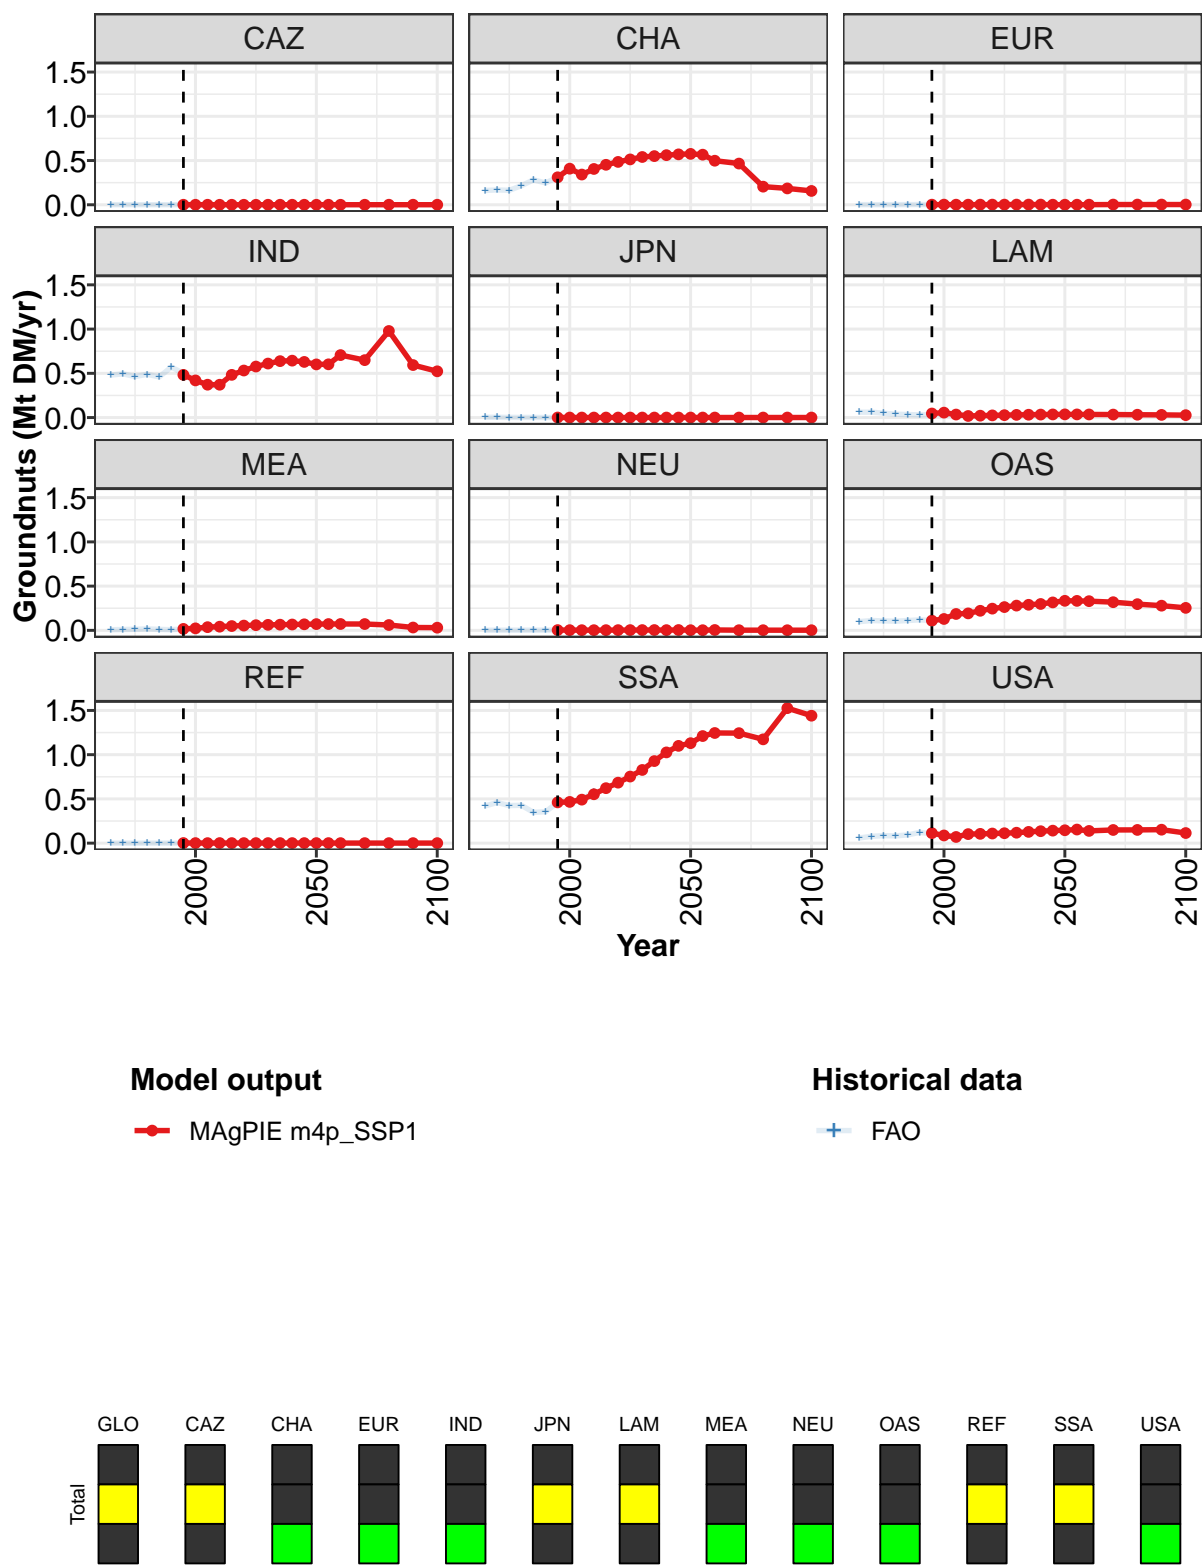

Figure 223: MAGPIE m4p\_SSP1 — Demand—Seed—Crops—Oil crops—Groundnuts (Mt DM/yr)



|     | 1995 | 2000 | 2005 | 2010 | 2015 | 2020 | 2025 | 2030 | 2035 | 2040 | 2045 |
|-----|------|------|------|------|------|------|------|------|------|------|------|
| GLO | 1.55 | 1.60 | 1.54 | 1.69 | 1.96 | 2.14 | 2.31 | 2.48 | 2.64 | 2.77 | 2.87 |
| CAZ | 0.00 | 0.00 | 0.00 | 0.00 | 0.00 | 0.00 | 0.00 | 0.00 | 0.00 | 0.00 | 0.00 |
| CHA | 0.31 | 0.41 | 0.34 | 0.40 | 0.45 | 0.48 | 0.51 | 0.54 | 0.55 | 0.56 | 0.57 |
| EUR | 0.00 | 0.00 | 0.00 | 0.00 | 0.00 | 0.00 | 0.00 | 0.00 | 0.00 | 0.00 | 0.00 |
| IND | 0.48 | 0.42 | 0.37 | 0.37 | 0.48 | 0.53 | 0.58 | 0.61 | 0.64 | 0.64 | 0.63 |
| JPN | 0.00 | 0.00 | 0.00 | 0.00 | 0.00 | 0.00 | 0.00 | 0.00 | 0.00 | 0.00 | 0.00 |
| LAM | 0.05 | 0.06 | 0.03 | 0.02 | 0.02 | 0.02 | 0.03 | 0.03 | 0.03 | 0.03 | 0.04 |
| MEA | 0.02 | 0.02 | 0.04 | 0.04 | 0.05 | 0.05 | 0.06 | 0.06 | 0.06 | 0.07 | 0.07 |
| NEU | 0.00 | 0.00 | 0.00 | 0.00 | 0.00 | 0.00 | 0.00 | 0.00 | 0.00 | 0.00 | 0.00 |
| OAS | 0.11 | 0.13 | 0.19 | 0.19 | 0.22 | 0.25 | 0.26 | 0.28 | 0.29 | 0.30 | 0.32 |
| REF | 0.00 | 0.00 | 0.00 | 0.00 | 0.00 | 0.00 | 0.00 | 0.00 | 0.00 | 0.00 | 0.00 |
| SSA | 0.46 | 0.47 | 0.49 | 0.55 | 0.62 | 0.68 | 0.75 | 0.83 | 0.93 | 1.03 | 1.10 |
| USA | 0.11 | 0.09 | 0.07 | 0.10 | 0.11 | 0.11 | 0.11 | 0.12 | 0.13 | 0.14 | 0.14 |

Table 668: MAgPIE m4p\_SSP1 — Demand—Seed—Crops—Oil crops—Groundnuts (Mt DM/yr) [PART 1/2]

|     | 2050 | 2055 | 2060 | 2070 | 2080 | 2090 | 2100 |
|-----|------|------|------|------|------|------|------|
| GLO | 2.90 | 2.98 | 3.03 | 2.94 | 2.90 | 2.80 | 2.55 |
| CAZ | 0.00 | 0.00 | 0.00 | 0.00 | 0.00 | 0.00 | 0.00 |
| CHA | 0.58 | 0.57 | 0.50 | 0.47 | 0.21 | 0.19 | 0.16 |
| EUR | 0.00 | 0.00 | 0.00 | 0.00 | 0.00 | 0.00 | 0.00 |
| IND | 0.60 | 0.60 | 0.71 | 0.65 | 0.98 | 0.59 | 0.52 |
| JPN | 0.00 | 0.00 | 0.00 | 0.00 | 0.00 | 0.00 | 0.00 |
| LAM | 0.04 | 0.04 | 0.04 | 0.03 | 0.03 | 0.03 | 0.03 |
| MEA | 0.07 | 0.07 | 0.07 | 0.07 | 0.06 | 0.03 | 0.03 |
| NEU | 0.00 | 0.00 | 0.00 | 0.00 | 0.00 | 0.00 | 0.00 |
| OAS | 0.33 | 0.33 | 0.33 | 0.32 | 0.30 | 0.28 | 0.25 |
| REF | 0.00 | 0.00 | 0.00 | 0.00 | 0.00 | 0.00 | 0.00 |
| SSA | 1.13 | 1.21 | 1.25 | 1.24 | 1.17 | 1.53 | 1.44 |
| USA | 0.15 | 0.15 | 0.14 | 0.15 | 0.15 | 0.15 | 0.11 |

Table 669: MAgPIE m4p\_SSP1 — Demand—Seed—Crops—Oil crops—Groundnuts (Mt DM/yr) [PART 2/2]

|     | 1965 | 1970 | 1975 | 1980 | 1985 | 1990 | 1995 | 2000 | 2005 | 2010 |
|-----|------|------|------|------|------|------|------|------|------|------|
| GLO | 1.29 | 1.39 | 1.31 | 1.38 | 1.34 | 1.46 | 1.54 | 1.59 | 1.53 | 1.69 |
| CAZ | 0.00 | 0.00 | 0.00 | 0.00 | 0.00 | 0.00 | 0.00 | 0.00 | 0.00 | 0.00 |
| CHA | 0.16 | 0.17 | 0.16 | 0.22 | 0.28 | 0.25 | 0.31 | 0.43 | 0.34 | 0.39 |
| EUR | 0.00 | 0.00 | 0.00 | 0.00 | 0.00 | 0.00 | 0.00 | 0.00 | 0.00 | 0.00 |
| IND | 0.48 | 0.49 | 0.46 | 0.49 | 0.46 | 0.57 | 0.50 | 0.41 | 0.37 | 0.35 |
| JPN | 0.00 | 0.00 | 0.00 | 0.00 | 0.00 | 0.00 | 0.00 | 0.00 | 0.00 | 0.00 |
| LAM | 0.06 | 0.06 | 0.05 | 0.04 | 0.03 | 0.03 | 0.03 | 0.04 | 0.03 | 0.04 |
| MEA | 0.01 | 0.01 | 0.01 | 0.02 | 0.01 | 0.01 | 0.02 | 0.02 | 0.04 | 0.04 |
| NEU | 0.00 | 0.00 | 0.00 | 0.00 | 0.00 | 0.00 | 0.00 | 0.00 | 0.00 | 0.00 |
| OAS | 0.10 | 0.11 | 0.11 | 0.10 | 0.11 | 0.12 | 0.11 | 0.13 | 0.19 | 0.19 |
| REF | 0.00 | 0.00 | 0.00 | 0.00 | 0.00 | 0.00 | 0.00 | 0.00 | 0.00 | 0.00 |
| SSA | 0.42 | 0.46 | 0.42 | 0.43 | 0.35 | 0.35 | 0.46 | 0.47 | 0.49 | 0.58 |
| USA | 0.06 | 0.08 | 0.08 | 0.08 | 0.09 | 0.12 | 0.10 | 0.08 | 0.08 | 0.09 |

Table 670: FAO — Demand—Seed—Crops—Oil crops—Groundnuts (Mt DM/yr)

## 10.1.9 Oil crops—Other oil crops (incl rapeseed)

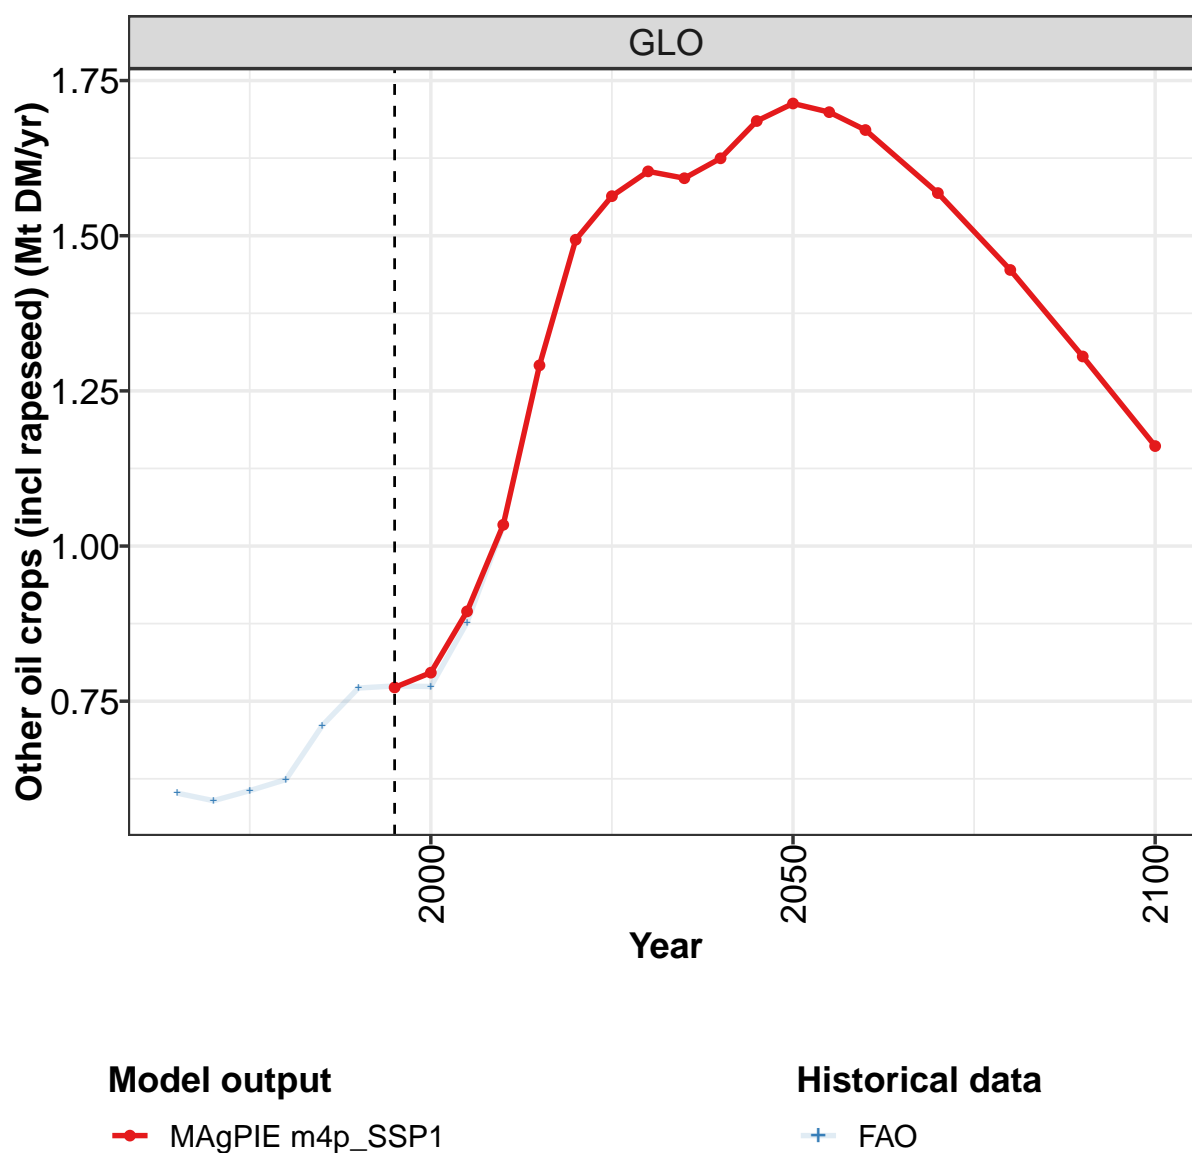

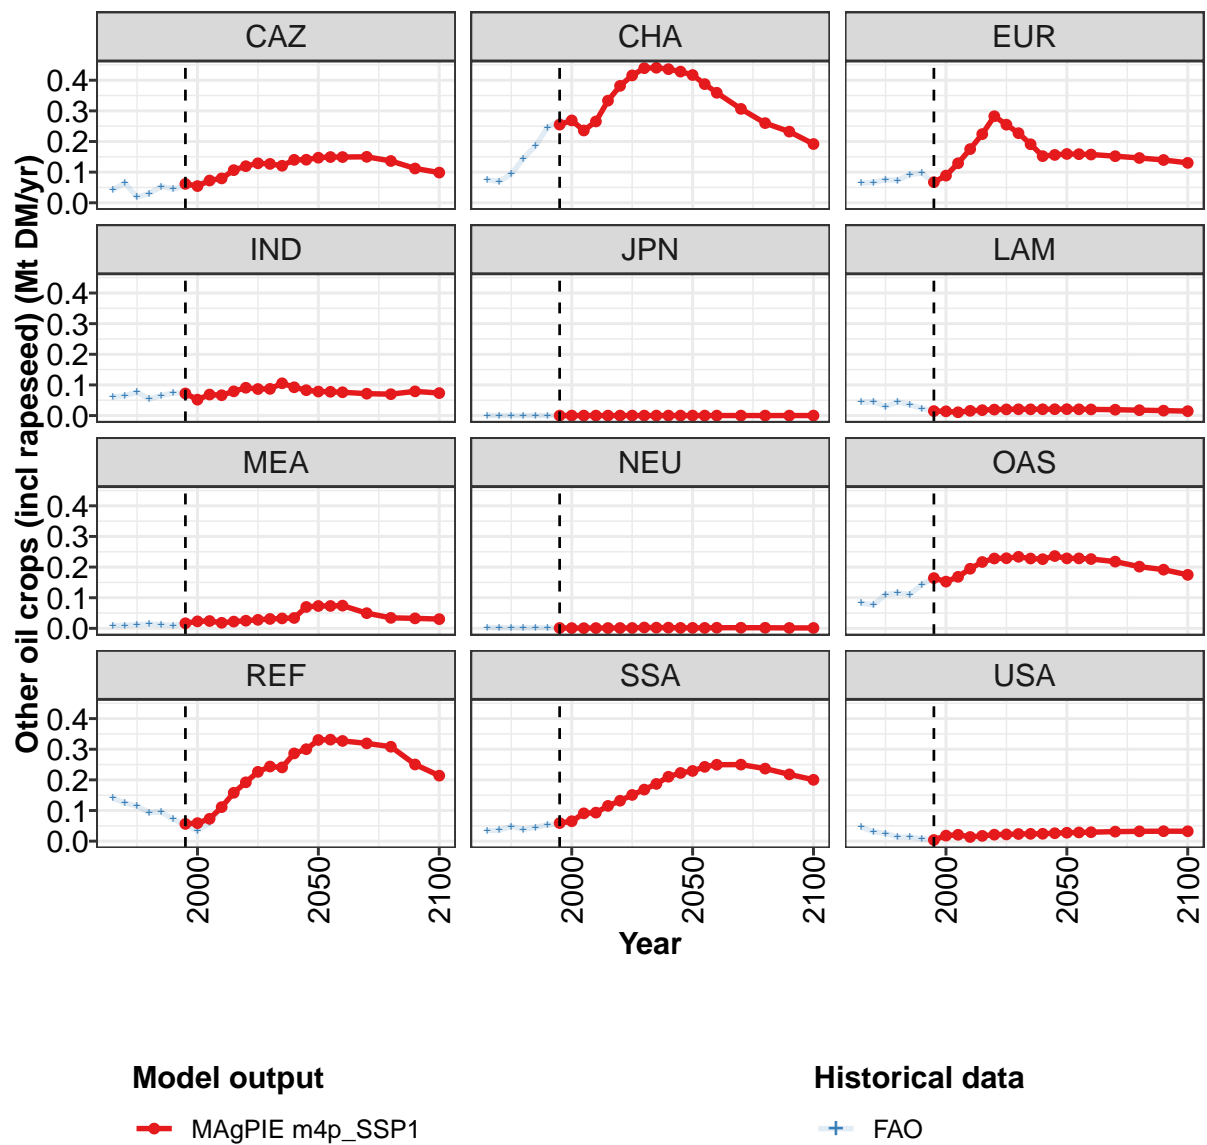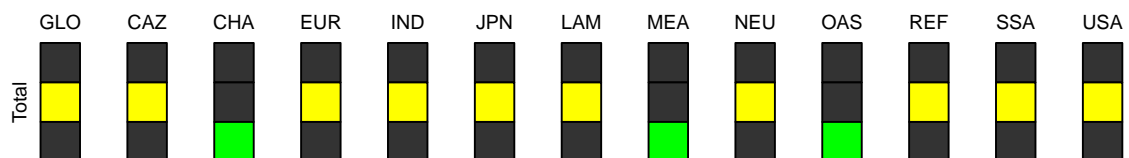

Figure 224: MAgPIE m4p\_SSP1 — Demand—Seed—Crops—Oil crops—Other oil crops (incl rapeseed) (Mt DM/yr)

|     | 1995 | 2000 | 2005 | 2010 | 2015 | 2020 | 2025 | 2030 | 2035 | 2040 | 2045 |
|-----|------|------|------|------|------|------|------|------|------|------|------|
| GLO | 0.77 | 0.80 | 0.89 | 1.03 | 1.29 | 1.49 | 1.56 | 1.60 | 1.59 | 1.62 | 1.68 |
| CAZ | 0.06 | 0.05 | 0.07 | 0.08 | 0.11 | 0.12 | 0.13 | 0.13 | 0.12 | 0.14 | 0.14 |
| CHA | 0.26 | 0.27 | 0.24 | 0.27 | 0.33 | 0.38 | 0.42 | 0.44 | 0.44 | 0.44 | 0.43 |
| EUR | 0.07 | 0.09 | 0.13 | 0.18 | 0.22 | 0.28 | 0.25 | 0.23 | 0.19 | 0.15 | 0.16 |
| IND | 0.07 | 0.05 | 0.07 | 0.07 | 0.08 | 0.09 | 0.09 | 0.09 | 0.11 | 0.09 | 0.08 |
| JPN | 0.00 | 0.00 | 0.00 | 0.00 | 0.00 | 0.00 | 0.00 | 0.00 | 0.00 | 0.00 | 0.00 |
| LAM | 0.01 | 0.01 | 0.01 | 0.02 | 0.02 | 0.02 | 0.02 | 0.02 | 0.02 | 0.02 | 0.02 |
| MEA | 0.02 | 0.02 | 0.02 | 0.02 | 0.02 | 0.03 | 0.03 | 0.03 | 0.03 | 0.03 | 0.07 |
| NEU | 0.00 | 0.00 | 0.00 | 0.00 | 0.00 | 0.00 | 0.00 | 0.00 | 0.00 | 0.00 | 0.00 |
| OAS | 0.16 | 0.15 | 0.17 | 0.19 | 0.22 | 0.23 | 0.23 | 0.23 | 0.23 | 0.23 | 0.24 |
| REF | 0.06 | 0.06 | 0.07 | 0.11 | 0.16 | 0.19 | 0.23 | 0.24 | 0.24 | 0.29 | 0.30 |
| SSA | 0.06 | 0.07 | 0.09 | 0.09 | 0.12 | 0.13 | 0.15 | 0.17 | 0.19 | 0.21 | 0.22 |
| USA | 0.00 | 0.02 | 0.02 | 0.01 | 0.02 | 0.02 | 0.02 | 0.02 | 0.02 | 0.02 | 0.03 |

Table 671: MAgPIE m4p\_SSP1 — Demand—Seed—Crops—Oil crops—Other oil crops (incl rapeseed) (Mt DM/yr) [PART 1/2]

|     | 2050 | 2055 | 2060 | 2070 | 2080 | 2090 | 2100 |
|-----|------|------|------|------|------|------|------|
| GLO | 1.71 | 1.70 | 1.67 | 1.57 | 1.44 | 1.31 | 1.16 |
| CAZ | 0.15 | 0.15 | 0.15 | 0.15 | 0.14 | 0.11 | 0.10 |
| CHA | 0.42 | 0.39 | 0.36 | 0.31 | 0.26 | 0.23 | 0.19 |
| EUR | 0.16 | 0.16 | 0.16 | 0.15 | 0.15 | 0.14 | 0.13 |
| IND | 0.08 | 0.08 | 0.08 | 0.07 | 0.07 | 0.08 | 0.07 |
| JPN | 0.00 | 0.00 | 0.00 | 0.00 | 0.00 | 0.00 | 0.00 |
| LAM | 0.02 | 0.02 | 0.02 | 0.02 | 0.02 | 0.02 | 0.01 |
| MEA | 0.07 | 0.07 | 0.07 | 0.05 | 0.03 | 0.03 | 0.03 |
| NEU | 0.00 | 0.00 | 0.00 | 0.00 | 0.00 | 0.00 | 0.00 |
| OAS | 0.23 | 0.23 | 0.23 | 0.22 | 0.20 | 0.19 | 0.17 |
| REF | 0.33 | 0.33 | 0.33 | 0.32 | 0.31 | 0.25 | 0.21 |
| SSA | 0.23 | 0.24 | 0.25 | 0.25 | 0.24 | 0.22 | 0.20 |
| USA | 0.03 | 0.03 | 0.03 | 0.03 | 0.03 | 0.03 | 0.03 |

Table 672: MAgPIE m4p\_SSP1 — Demand—Seed—Crops—Oil crops—Other oil crops (incl rapeseed) (Mt DM/yr) [PART 2/2]

|     | 1965 | 1970 | 1975 | 1980 | 1985 | 1990 | 1995 | 2000 | 2005 | 2010 |
|-----|------|------|------|------|------|------|------|------|------|------|
| GLO | 0.60 | 0.59 | 0.61 | 0.62 | 0.71 | 0.77 | 0.77 | 0.77 | 0.88 | 1.03 |
| CAZ | 0.04 | 0.06 | 0.02 | 0.03 | 0.05 | 0.05 | 0.05 | 0.06 | 0.08 | 0.08 |
| CHA | 0.08 | 0.07 | 0.09 | 0.14 | 0.19 | 0.25 | 0.27 | 0.27 | 0.23 | 0.27 |
| EUR | 0.06 | 0.07 | 0.08 | 0.07 | 0.09 | 0.10 | 0.07 | 0.09 | 0.13 | 0.17 |
| IND | 0.06 | 0.07 | 0.08 | 0.05 | 0.07 | 0.07 | 0.07 | 0.05 | 0.07 | 0.07 |
| JPN | 0.00 | 0.00 | 0.00 | 0.00 | 0.00 | 0.00 | 0.00 | 0.00 | 0.00 | 0.00 |
| LAM | 0.04 | 0.04 | 0.03 | 0.04 | 0.04 | 0.02 | 0.01 | 0.01 | 0.01 | 0.02 |
| MEA | 0.01 | 0.01 | 0.01 | 0.01 | 0.01 | 0.01 | 0.02 | 0.02 | 0.02 | 0.02 |
| NEU | 0.00 | 0.00 | 0.00 | 0.00 | 0.00 | 0.00 | 0.00 | 0.00 | 0.00 | 0.00 |
| OAS | 0.08 | 0.08 | 0.11 | 0.12 | 0.11 | 0.14 | 0.17 | 0.15 | 0.17 | 0.20 |
| REF | 0.14 | 0.12 | 0.11 | 0.09 | 0.10 | 0.07 | 0.05 | 0.03 | 0.06 | 0.11 |
| SSA | 0.03 | 0.04 | 0.05 | 0.04 | 0.04 | 0.05 | 0.06 | 0.07 | 0.09 | 0.09 |
| USA | 0.05 | 0.03 | 0.03 | 0.01 | 0.01 | 0.01 | 0.00 | 0.02 | 0.02 | 0.01 |

Table 673: FAO — Demand—Seed—Crops—Oil crops—Other oil crops (incl rapeseed) (Mt DM/yr)

## 10.1.10 Oil crops—Soybean

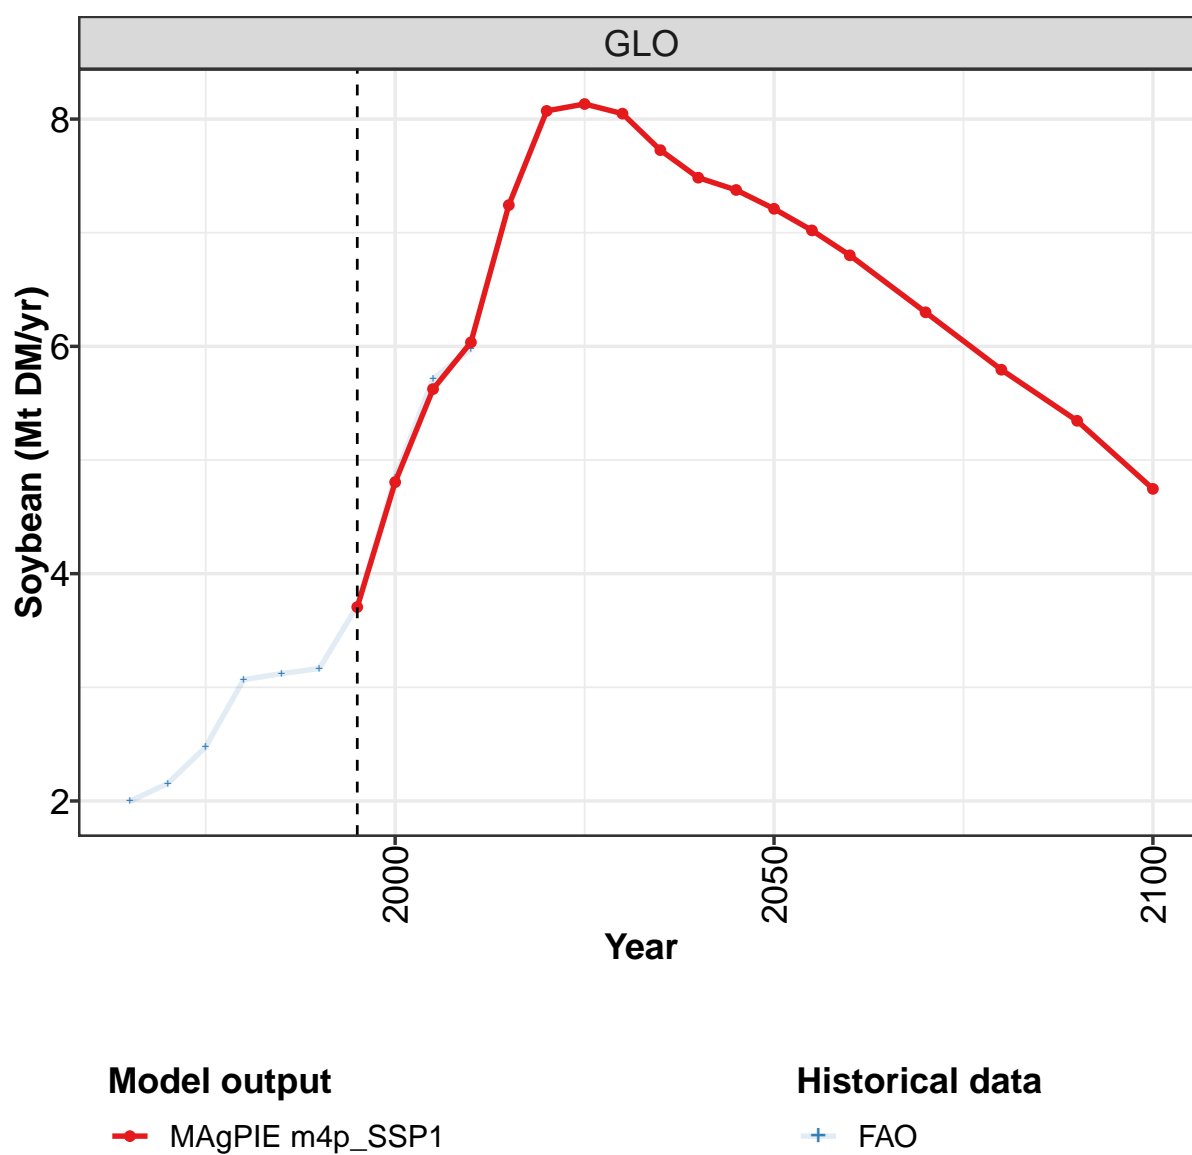

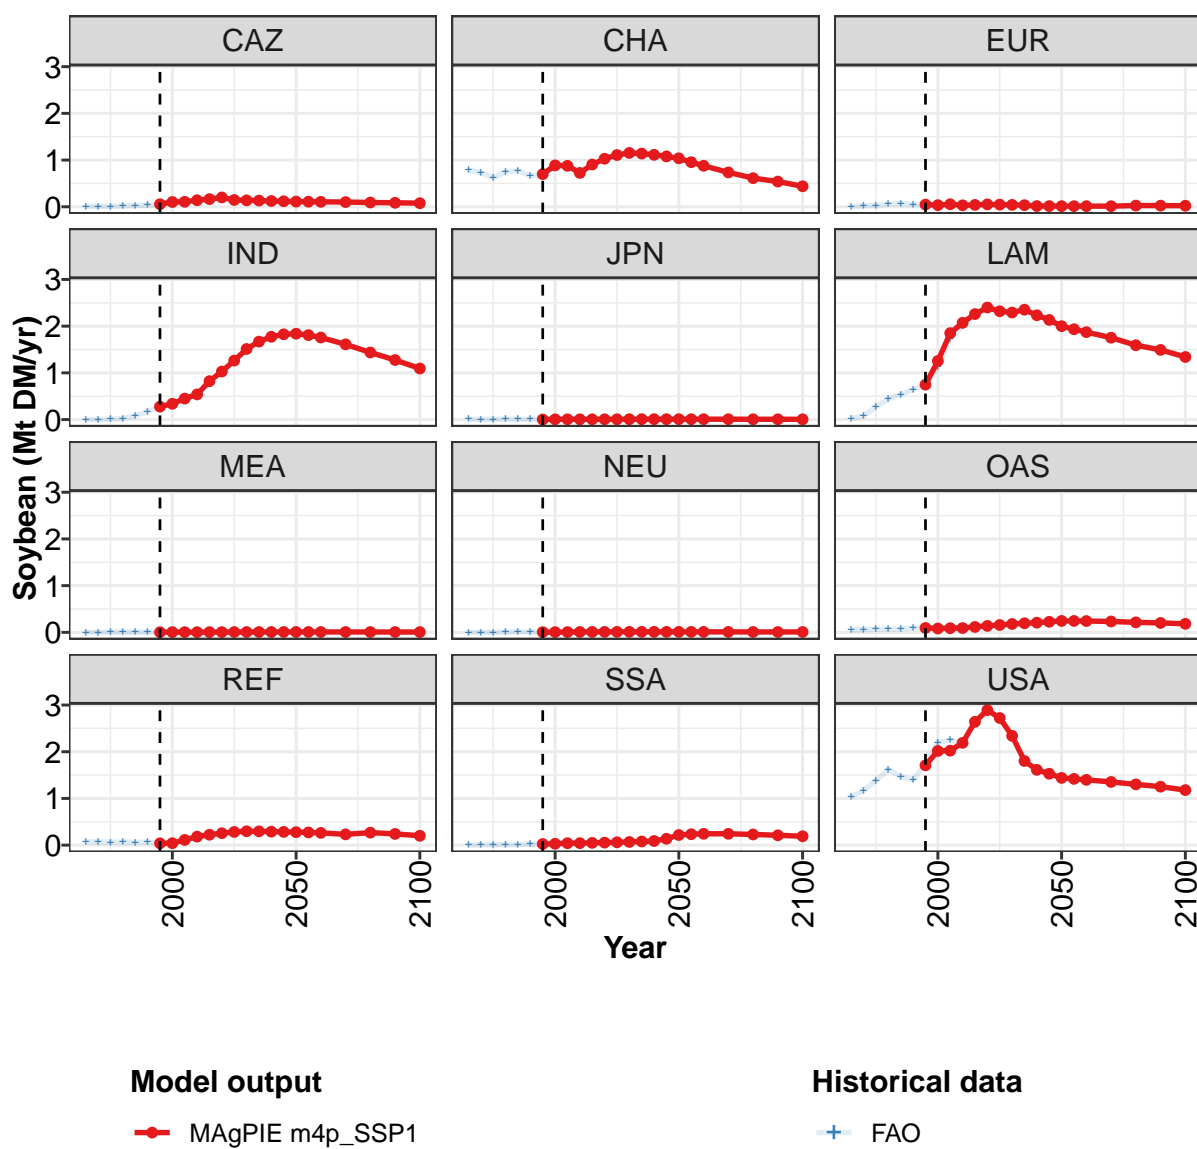

Figure 225: MAgPIE m4p\_SSP1 — Demand—Seed—Crops—Oil crops—Soybean (Mt DM/yr)

|     | 1995 | 2000 | 2005 | 2010 | 2015 | 2020 | 2025 | 2030 | 2035 | 2040 | 2045 |
|-----|------|------|------|------|------|------|------|------|------|------|------|
| GLO | 3.71 | 4.81 | 5.62 | 6.04 | 7.24 | 8.07 | 8.13 | 8.05 | 7.73 | 7.48 | 7.38 |
| CAZ | 0.05 | 0.10 | 0.11 | 0.14 | 0.16 | 0.20 | 0.15 | 0.14 | 0.13 | 0.12 | 0.12 |
| CHA | 0.70 | 0.89 | 0.88 | 0.73 | 0.90 | 1.03 | 1.11 | 1.15 | 1.14 | 1.11 | 1.08 |
| EUR | 0.05 | 0.04 | 0.05 | 0.03 | 0.04 | 0.05 | 0.05 | 0.04 | 0.03 | 0.02 | 0.01 |
| IND | 0.28 | 0.34 | 0.45 | 0.54 | 0.82 | 1.03 | 1.26 | 1.51 | 1.67 | 1.77 | 1.83 |
| JPN | 0.00 | 0.01 | 0.01 | 0.01 | 0.01 | 0.01 | 0.01 | 0.01 | 0.01 | 0.01 | 0.01 |
| LAM | 0.75 | 1.25 | 1.85 | 2.07 | 2.26 | 2.40 | 2.32 | 2.29 | 2.35 | 2.23 | 2.13 |
| MEA | 0.00 | 0.01 | 0.01 | 0.00 | 0.01 | 0.01 | 0.01 | 0.01 | 0.01 | 0.01 | 0.01 |
| NEU | 0.01 | 0.01 | 0.01 | 0.01 | 0.01 | 0.01 | 0.01 | 0.01 | 0.01 | 0.01 | 0.01 |
| OAS | 0.09 | 0.08 | 0.09 | 0.09 | 0.12 | 0.14 | 0.16 | 0.18 | 0.19 | 0.21 | 0.23 |
| REF | 0.04 | 0.04 | 0.11 | 0.18 | 0.22 | 0.26 | 0.28 | 0.30 | 0.30 | 0.29 | 0.28 |
| SSA | 0.03 | 0.03 | 0.04 | 0.04 | 0.05 | 0.05 | 0.06 | 0.07 | 0.08 | 0.09 | 0.14 |
| USA | 1.71 | 2.02 | 2.02 | 2.19 | 2.64 | 2.89 | 2.72 | 2.34 | 1.80 | 1.61 | 1.53 |

Table 674: MAgPIE m4p\_SSP1 — Demand—Seed—Crops—Oil crops—Soybean (Mt DM/yr) [PART 1/2]

|     | 2050 | 2055 | 2060 | 2070 | 2080 | 2090 | 2100 |
|-----|------|------|------|------|------|------|------|
| GLO | 7.21 | 7.02 | 6.80 | 6.30 | 5.79 | 5.35 | 4.75 |
| CAZ | 0.11 | 0.11 | 0.11 | 0.10 | 0.09 | 0.09 | 0.08 |
| CHA | 1.04 | 0.96 | 0.88 | 0.74 | 0.61 | 0.54 | 0.44 |
| EUR | 0.01 | 0.01 | 0.01 | 0.01 | 0.03 | 0.02 | 0.02 |
| IND | 1.84 | 1.81 | 1.76 | 1.61 | 1.44 | 1.28 | 1.09 |
| JPN | 0.01 | 0.01 | 0.01 | 0.01 | 0.01 | 0.01 | 0.01 |
| LAM | 2.00 | 1.93 | 1.87 | 1.75 | 1.59 | 1.49 | 1.34 |
| MEA | 0.01 | 0.01 | 0.01 | 0.01 | 0.01 | 0.01 | 0.01 |
| NEU | 0.01 | 0.01 | 0.01 | 0.01 | 0.01 | 0.01 | 0.01 |
| OAS | 0.24 | 0.24 | 0.24 | 0.23 | 0.21 | 0.20 | 0.18 |
| REF | 0.28 | 0.27 | 0.26 | 0.23 | 0.27 | 0.24 | 0.20 |
| SSA | 0.22 | 0.23 | 0.24 | 0.24 | 0.23 | 0.21 | 0.19 |
| USA | 1.44 | 1.42 | 1.40 | 1.35 | 1.30 | 1.25 | 1.18 |

Table 675: MAgPIE m4p\_SSP1 — Demand—Seed—Crops—Oil crops—Soybean (Mt DM/yr) [PART 2/2]

|     | 1965 | 1970 | 1975 | 1980 | 1985 | 1990 | 1995 | 2000 | 2005 | 2010 |
|-----|------|------|------|------|------|------|------|------|------|------|
| GLO | 2.00 | 2.15 | 2.48 | 3.07 | 3.12 | 3.17 | 3.72 | 4.85 | 5.72 | 5.98 |
| CAZ | 0.01 | 0.01 | 0.01 | 0.02 | 0.03 | 0.04 | 0.05 | 0.10 | 0.11 | 0.14 |
| CHA | 0.79 | 0.73 | 0.63 | 0.75 | 0.77 | 0.66 | 0.70 | 0.88 | 0.87 | 0.74 |
| EUR | 0.00 | 0.02 | 0.03 | 0.06 | 0.07 | 0.05 | 0.05 | 0.04 | 0.06 | 0.03 |
| IND | 0.00 | 0.00 | 0.01 | 0.03 | 0.08 | 0.17 | 0.28 | 0.34 | 0.44 | 0.54 |
| JPN | 0.01 | 0.01 | 0.01 | 0.01 | 0.01 | 0.01 | 0.00 | 0.01 | 0.01 | 0.01 |
| LAM | 0.02 | 0.08 | 0.27 | 0.44 | 0.54 | 0.65 | 0.73 | 1.12 | 1.72 | 2.00 |
| MEA | 0.00 | 0.00 | 0.00 | 0.00 | 0.01 | 0.01 | 0.00 | 0.01 | 0.01 | 0.00 |
| NEU | 0.00 | 0.00 | 0.00 | 0.00 | 0.01 | 0.01 | 0.00 | 0.00 | 0.01 | 0.01 |
| OAS | 0.06 | 0.06 | 0.07 | 0.07 | 0.07 | 0.09 | 0.09 | 0.08 | 0.09 | 0.09 |
| REF | 0.07 | 0.07 | 0.06 | 0.07 | 0.06 | 0.06 | 0.04 | 0.04 | 0.12 | 0.18 |
| SSA | 0.01 | 0.01 | 0.01 | 0.01 | 0.01 | 0.03 | 0.03 | 0.03 | 0.04 | 0.05 |
| USA | 1.04 | 1.17 | 1.38 | 1.62 | 1.46 | 1.40 | 1.74 | 2.20 | 2.25 | 2.18 |

Table 676: FAO — Demand—Seed—Crops—Oil crops—Soybean (Mt DM/yr)

## 10.1.11 Oil crops—Sunflower

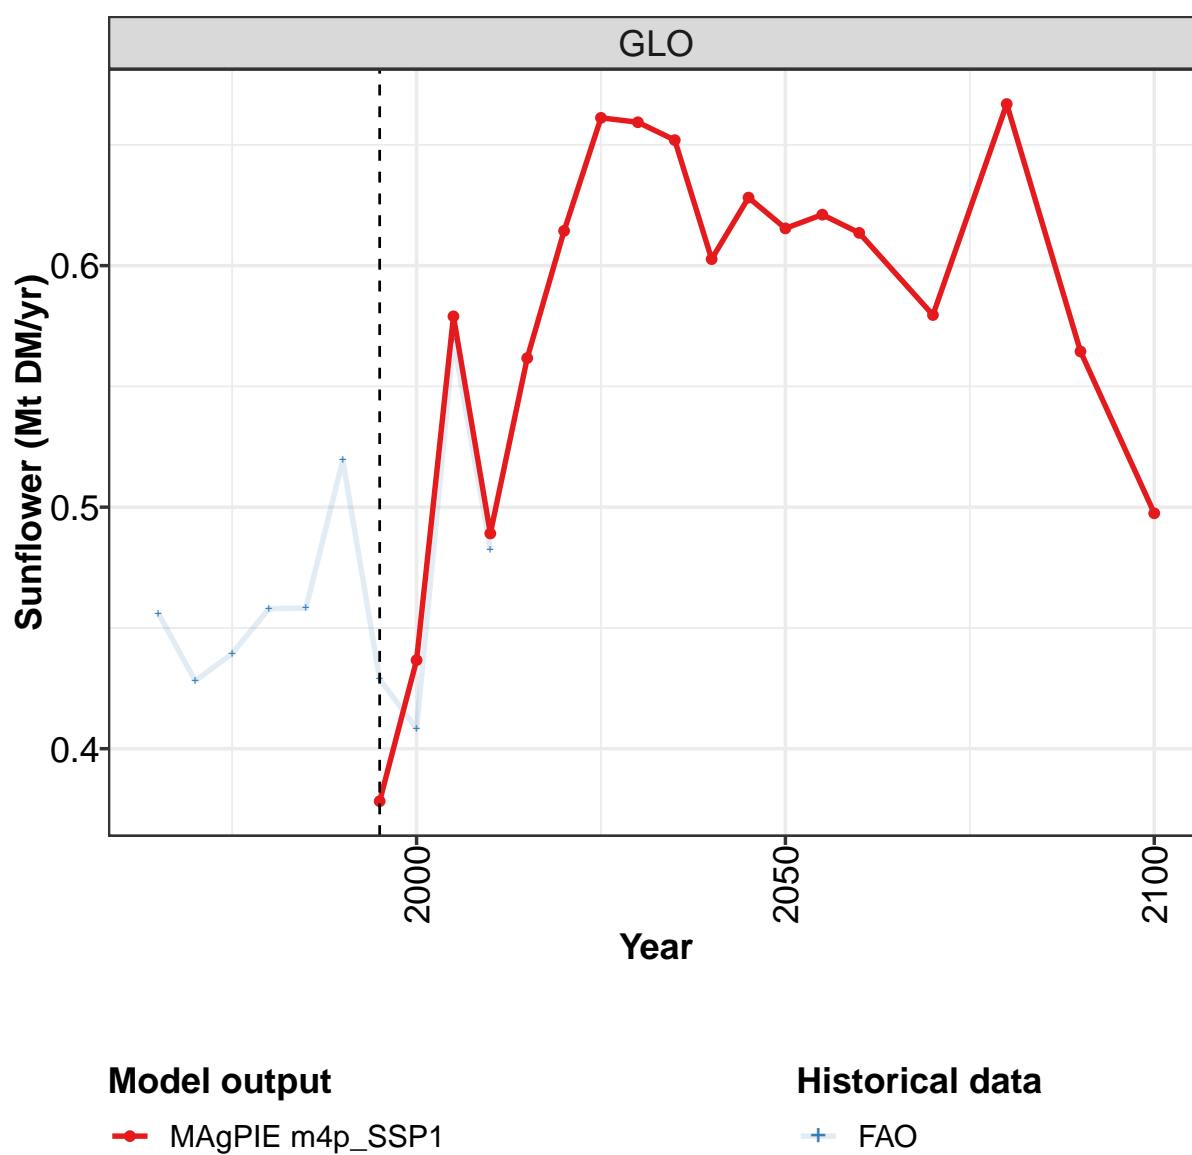



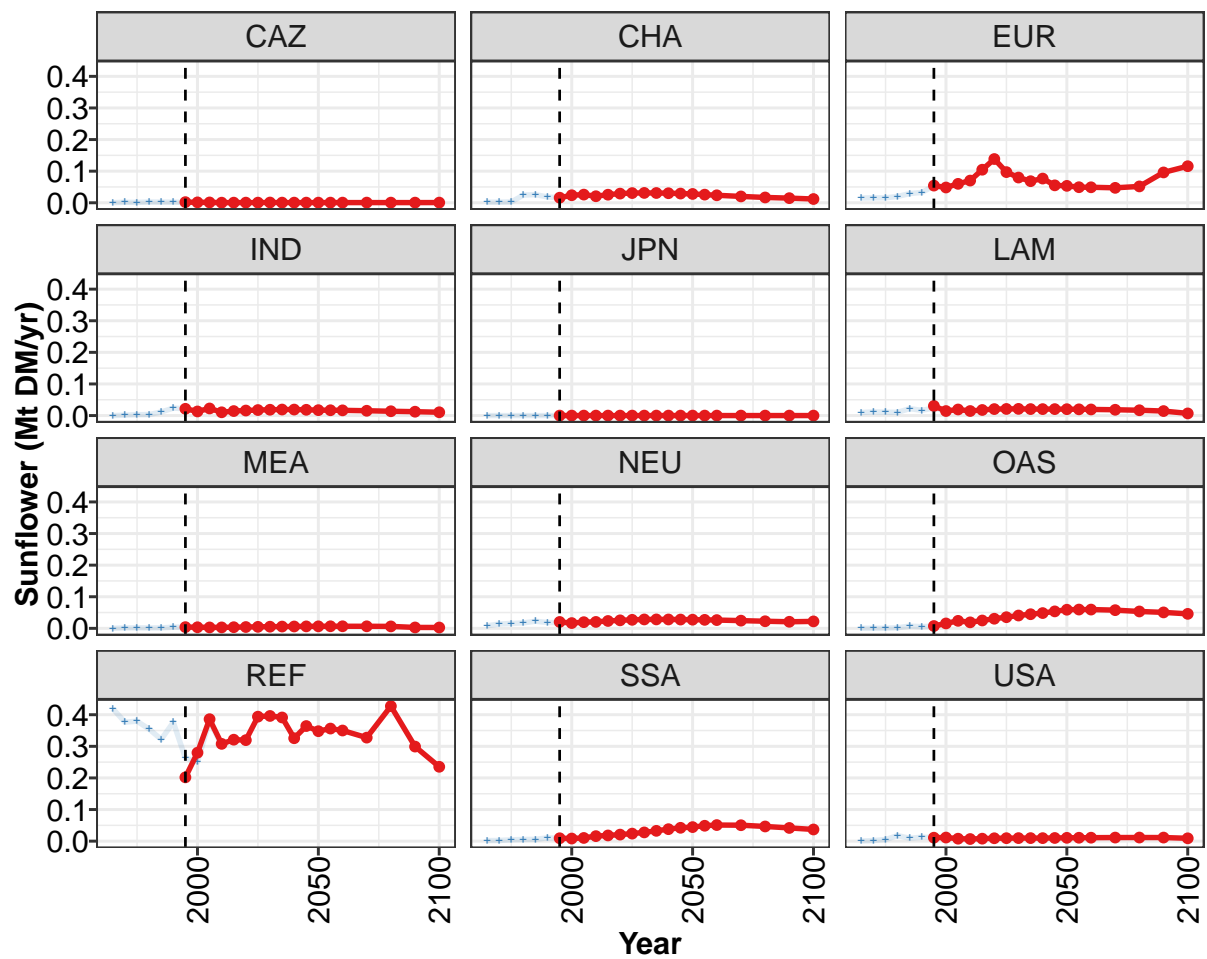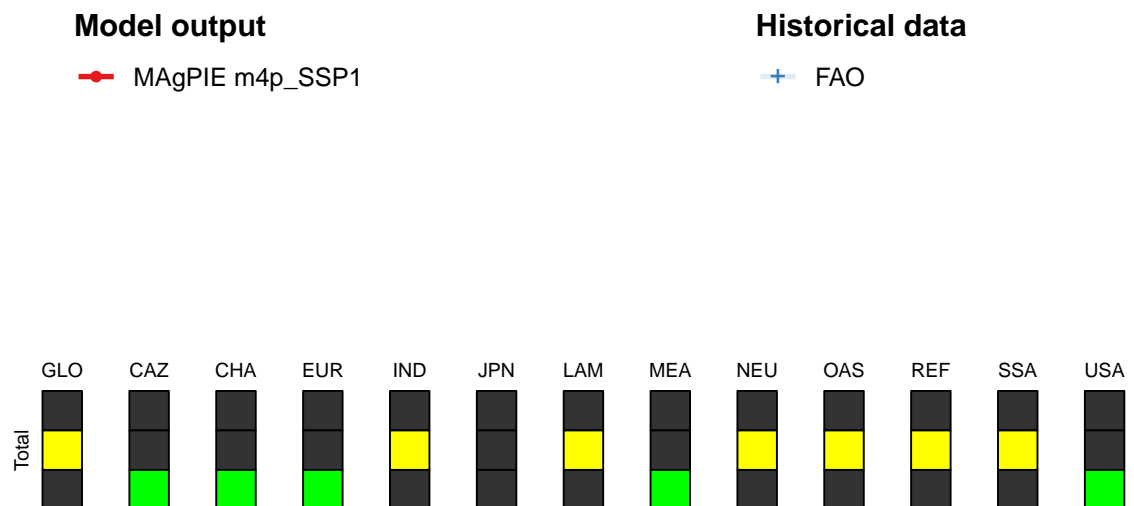

Figure 226: MAGPIE m4p\_SSP1 — Demand—Seed—Crops—Oil crops—Sunflower (Mt DM/yr)

|     | 1995  | 2000  | 2005  | 2010  | 2015  | 2020  | 2025  | 2030  | 2035  | 2040  | 2045  |
|-----|-------|-------|-------|-------|-------|-------|-------|-------|-------|-------|-------|
| GLO | 0.378 | 0.437 | 0.579 | 0.489 | 0.562 | 0.614 | 0.661 | 0.659 | 0.652 | 0.603 | 0.628 |
| CAZ | 0.002 | 0.001 | 0.001 | 0.000 | 0.000 | 0.001 | 0.001 | 0.001 | 0.001 | 0.001 | 0.001 |
| CHA | 0.016 | 0.024 | 0.026 | 0.021 | 0.026 | 0.029 | 0.031 | 0.031 | 0.031 | 0.030 | 0.029 |
| EUR | 0.054 | 0.048 | 0.060 | 0.070 | 0.105 | 0.138 | 0.097 | 0.080 | 0.068 | 0.077 | 0.055 |
| IND | 0.021 | 0.013 | 0.023 | 0.010 | 0.014 | 0.016 | 0.017 | 0.018 | 0.019 | 0.019 | 0.018 |
| JPN | 0.000 | 0.000 | 0.000 | 0.000 | 0.000 | 0.000 | 0.000 | 0.000 | 0.000 | 0.000 | 0.000 |
| LAM | 0.031 | 0.014 | 0.019 | 0.014 | 0.018 | 0.021 | 0.021 | 0.021 | 0.021 | 0.020 | 0.020 |
| MEA | 0.004 | 0.004 | 0.003 | 0.003 | 0.004 | 0.004 | 0.005 | 0.005 | 0.006 | 0.006 | 0.006 |
| NEU | 0.020 | 0.017 | 0.020 | 0.020 | 0.023 | 0.025 | 0.027 | 0.028 | 0.028 | 0.028 | 0.028 |
| OAS | 0.007 | 0.016 | 0.024 | 0.019 | 0.025 | 0.030 | 0.035 | 0.041 | 0.045 | 0.048 | 0.054 |
| REF | 0.202 | 0.280 | 0.386 | 0.308 | 0.321 | 0.320 | 0.394 | 0.396 | 0.391 | 0.326 | 0.364 |
| SSA | 0.009 | 0.008 | 0.010 | 0.016 | 0.018 | 0.021 | 0.024 | 0.028 | 0.033 | 0.038 | 0.042 |
| USA | 0.011 | 0.011 | 0.008 | 0.007 | 0.008 | 0.009 | 0.009 | 0.010 | 0.010 | 0.010 | 0.010 |

Table 677: MAgPIE m4p\_SSP1 — Demand—Seed—Crops—Oil crops—Sunflower (Mt DM/yr) [PART 1/2]

|     | 2050  | 2055  | 2060  | 2070  | 2080  | 2090  | 2100  |
|-----|-------|-------|-------|-------|-------|-------|-------|
| GLO | 0.615 | 0.621 | 0.614 | 0.580 | 0.667 | 0.564 | 0.497 |
| CAZ | 0.001 | 0.001 | 0.001 | 0.001 | 0.001 | 0.001 | 0.001 |
| CHA | 0.028 | 0.026 | 0.024 | 0.020 | 0.017 | 0.015 | 0.012 |
| EUR | 0.054 | 0.049 | 0.049 | 0.047 | 0.052 | 0.096 | 0.116 |
| IND | 0.017 | 0.017 | 0.017 | 0.015 | 0.014 | 0.012 | 0.010 |
| JPN | 0.000 | 0.000 | 0.000 | 0.000 | 0.000 | 0.000 | 0.000 |
| LAM | 0.020 | 0.020 | 0.019 | 0.018 | 0.017 | 0.014 | 0.007 |
| MEA | 0.006 | 0.007 | 0.007 | 0.007 | 0.006 | 0.003 | 0.003 |
| NEU | 0.027 | 0.027 | 0.026 | 0.024 | 0.022 | 0.021 | 0.022 |
| OAS | 0.059 | 0.060 | 0.059 | 0.058 | 0.053 | 0.051 | 0.046 |
| REF | 0.348 | 0.356 | 0.350 | 0.328 | 0.427 | 0.299 | 0.235 |
| SSA | 0.044 | 0.049 | 0.051 | 0.050 | 0.047 | 0.042 | 0.037 |
| USA | 0.011 | 0.011 | 0.011 | 0.011 | 0.011 | 0.011 | 0.009 |

Table 678: MAgPIE m4p\_SSP1 — Demand—Seed—Crops—Oil crops—Sunflower (Mt DM/yr) [PART 2/2]

|     | 1965  | 1970  | 1975  | 1980  | 1985  | 1990  | 1995  | 2000  | 2005  | 2010  |
|-----|-------|-------|-------|-------|-------|-------|-------|-------|-------|-------|
| GLO | 0.456 | 0.428 | 0.439 | 0.458 | 0.458 | 0.519 | 0.429 | 0.408 | 0.569 | 0.482 |
| CAZ | 0.000 | 0.002 | 0.001 | 0.003 | 0.002 | 0.002 | 0.001 | 0.001 | 0.001 | 0.000 |
| CHA | 0.002 | 0.002 | 0.003 | 0.024 | 0.026 | 0.018 | 0.016 | 0.024 | 0.023 | 0.022 |
| EUR | 0.015 | 0.016 | 0.016 | 0.020 | 0.029 | 0.033 | 0.053 | 0.048 | 0.059 | 0.068 |
| IND | 0.000 | 0.001 | 0.003 | 0.003 | 0.011 | 0.024 | 0.021 | 0.013 | 0.024 | 0.010 |
| JPN | 0.000 | 0.000 | 0.000 | 0.000 | 0.000 | 0.000 | 0.000 | 0.000 | 0.000 | 0.000 |
| LAM | 0.010 | 0.012 | 0.011 | 0.010 | 0.022 | 0.017 | 0.024 | 0.015 | 0.017 | 0.014 |
| MEA | 0.000 | 0.001 | 0.002 | 0.001 | 0.002 | 0.004 | 0.004 | 0.004 | 0.003 | 0.003 |
| NEU | 0.008 | 0.014 | 0.015 | 0.017 | 0.022 | 0.018 | 0.018 | 0.016 | 0.019 | 0.020 |
| OAS | 0.000 | 0.000 | 0.000 | 0.002 | 0.007 | 0.005 | 0.007 | 0.016 | 0.024 | 0.019 |
| REF | 0.419 | 0.377 | 0.380 | 0.354 | 0.322 | 0.376 | 0.263 | 0.251 | 0.381 | 0.302 |
| SSA | 0.002 | 0.002 | 0.004 | 0.005 | 0.006 | 0.010 | 0.009 | 0.008 | 0.010 | 0.016 |
| USA | 0.000 | 0.002 | 0.005 | 0.018 | 0.009 | 0.012 | 0.011 | 0.012 | 0.009 | 0.007 |

Table 679: FAO — Demand—Seed—Crops—Oil crops—Sunflower (Mt DM/yr)

10.1.12 Other crops

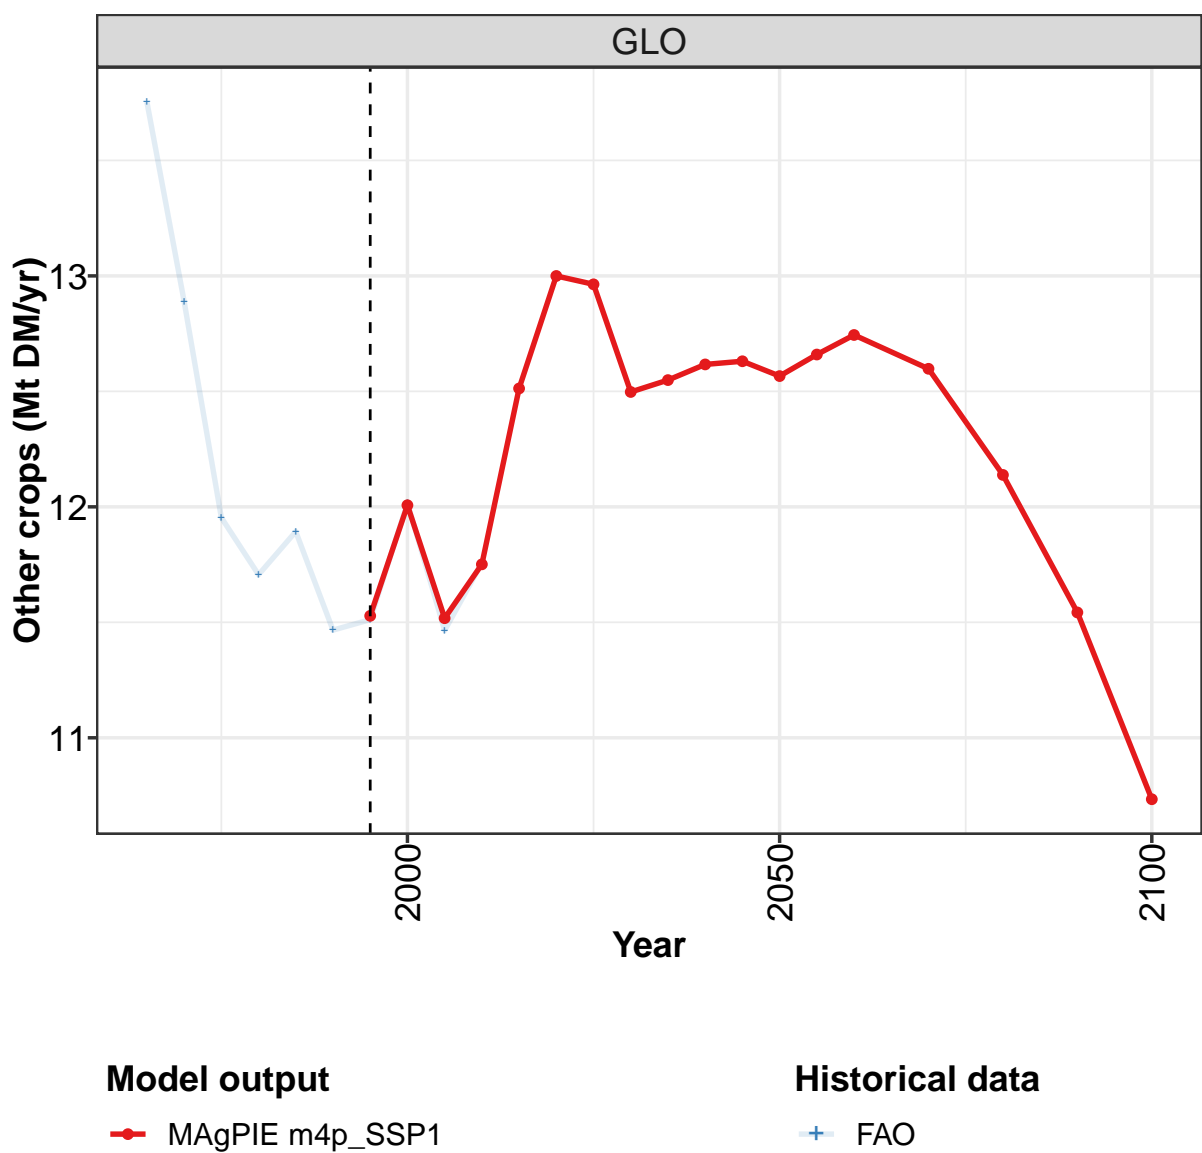

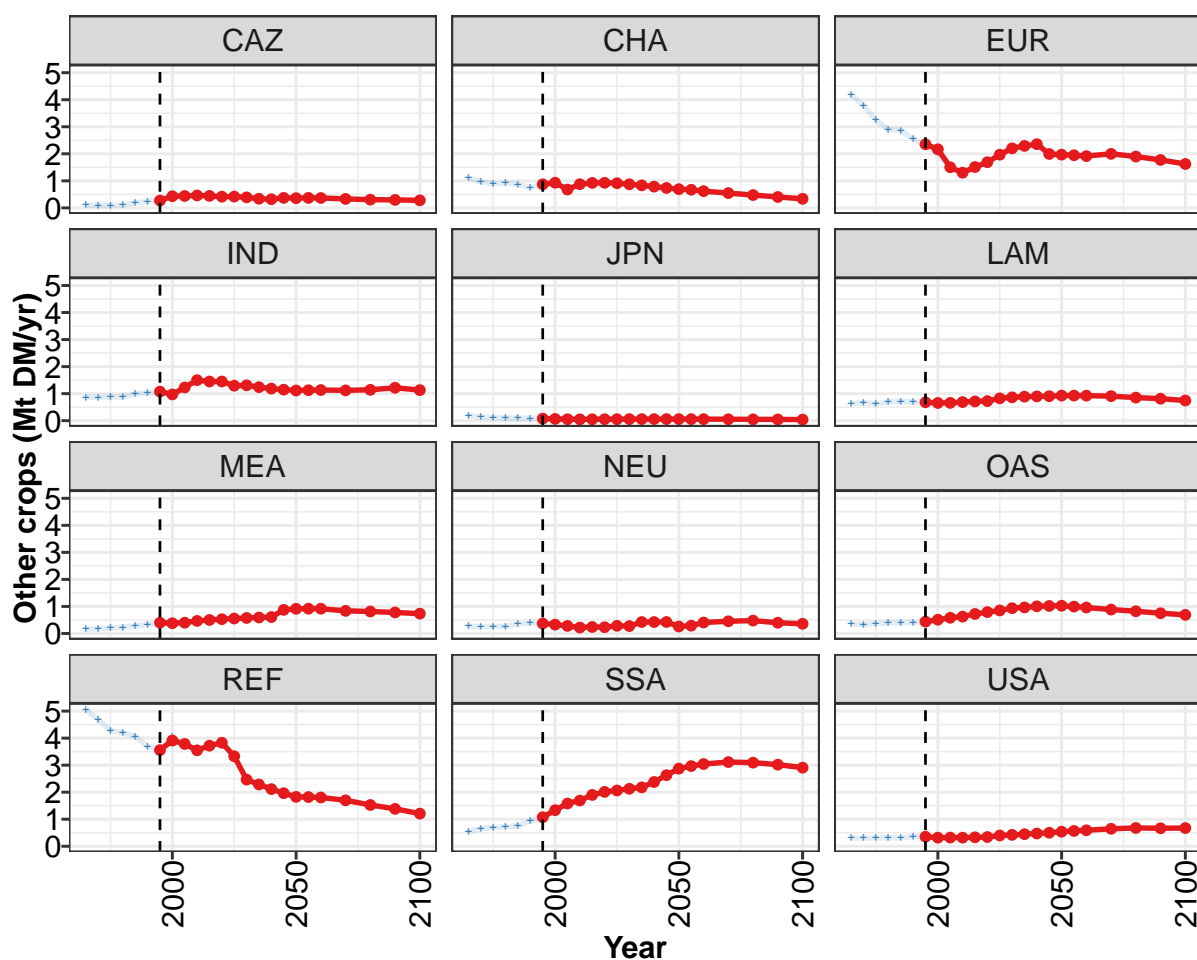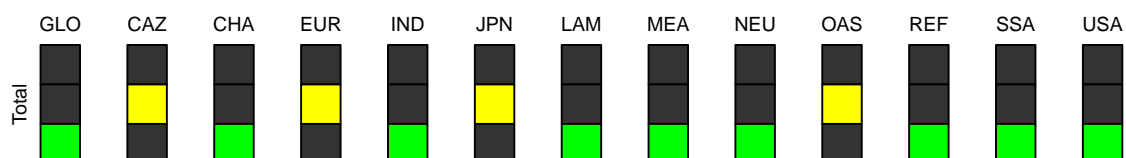

Figure 227: MAgPIE m4p\_SSP1 — Demand—Seed—Crops—Other crops (Mt DM/yr)

|     | 1995 | 2000 | 2005 | 2010 | 2015 | 2020 | 2025 | 2030 | 2035 | 2040 | 2045 |
|-----|------|------|------|------|------|------|------|------|------|------|------|
| GLO | 11.5 | 12.0 | 11.5 | 11.8 | 12.5 | 13.0 | 13.0 | 12.5 | 12.5 | 12.6 | 12.6 |
| CAZ | 0.3  | 0.4  | 0.4  | 0.5  | 0.4  | 0.4  | 0.4  | 0.4  | 0.3  | 0.3  | 0.4  |
| CHA | 0.9  | 0.9  | 0.7  | 0.9  | 0.9  | 0.9  | 0.9  | 0.9  | 0.8  | 0.8  | 0.7  |
| EUR | 2.4  | 2.2  | 1.5  | 1.3  | 1.5  | 1.7  | 2.0  | 2.2  | 2.3  | 2.4  | 2.0  |
| IND | 1.1  | 1.0  | 1.2  | 1.5  | 1.5  | 1.5  | 1.3  | 1.3  | 1.2  | 1.2  | 1.1  |
| JPN | 0.1  | 0.1  | 0.1  | 0.0  | 0.1  | 0.1  | 0.1  | 0.1  | 0.1  | 0.1  | 0.1  |
| LAM | 0.7  | 0.7  | 0.7  | 0.7  | 0.7  | 0.7  | 0.8  | 0.9  | 0.9  | 0.9  | 0.9  |
| MEA | 0.4  | 0.4  | 0.4  | 0.5  | 0.5  | 0.5  | 0.6  | 0.6  | 0.6  | 0.6  | 0.9  |
| NEU | 0.4  | 0.3  | 0.3  | 0.2  | 0.2  | 0.2  | 0.3  | 0.3  | 0.4  | 0.4  | 0.4  |
| OAS | 0.4  | 0.5  | 0.6  | 0.6  | 0.7  | 0.8  | 0.9  | 0.9  | 1.0  | 1.0  | 1.0  |
| REF | 3.6  | 3.9  | 3.8  | 3.5  | 3.7  | 3.8  | 3.3  | 2.5  | 2.3  | 2.1  | 2.0  |
| SSA | 1.1  | 1.3  | 1.6  | 1.7  | 1.9  | 2.0  | 2.1  | 2.1  | 2.2  | 2.4  | 2.6  |
| USA | 0.4  | 0.3  | 0.3  | 0.3  | 0.3  | 0.3  | 0.4  | 0.4  | 0.4  | 0.5  | 0.5  |

Table 680: MAgPIE m4p-SSP1 — Demand—Seed—Crops—Other crops (Mt DM/yr) [PART 1/2]

|     | 2050 | 2055 | 2060 | 2070 | 2080 | 2090 | 2100 |
|-----|------|------|------|------|------|------|------|
| GLO | 12.6 | 12.7 | 12.7 | 12.6 | 12.1 | 11.5 | 10.7 |
| CAZ | 0.4  | 0.4  | 0.4  | 0.3  | 0.3  | 0.3  | 0.3  |
| CHA | 0.7  | 0.7  | 0.6  | 0.5  | 0.5  | 0.4  | 0.3  |
| EUR | 2.0  | 1.9  | 1.9  | 2.0  | 1.9  | 1.8  | 1.6  |
| IND | 1.1  | 1.1  | 1.1  | 1.1  | 1.1  | 1.2  | 1.1  |
| JPN | 0.1  | 0.1  | 0.1  | 0.1  | 0.1  | 0.0  | 0.0  |
| LAM | 0.9  | 0.9  | 0.9  | 0.9  | 0.9  | 0.8  | 0.7  |
| MEA | 0.9  | 0.9  | 0.9  | 0.8  | 0.8  | 0.8  | 0.7  |
| NEU | 0.3  | 0.3  | 0.4  | 0.5  | 0.5  | 0.4  | 0.4  |
| OAS | 1.0  | 1.0  | 1.0  | 0.9  | 0.8  | 0.7  | 0.7  |
| REF | 1.8  | 1.8  | 1.8  | 1.7  | 1.5  | 1.4  | 1.2  |
| SSA | 2.9  | 3.0  | 3.0  | 3.1  | 3.1  | 3.0  | 2.9  |
| USA | 0.5  | 0.6  | 0.6  | 0.6  | 0.7  | 0.7  | 0.7  |

Table 681: MAgPIE m4p-SSP1 — Demand—Seed—Crops—Other crops (Mt DM/yr) [PART 2/2]

|     | 1965 | 1970 | 1975 | 1980 | 1985 | 1990 | 1995 | 2000 | 2005 | 2010 |
|-----|------|------|------|------|------|------|------|------|------|------|
| GLO | 13.8 | 12.9 | 12.0 | 11.7 | 11.9 | 11.5 | 11.5 | 12.0 | 11.5 | 11.8 |
| CAZ | 0.1  | 0.1  | 0.1  | 0.1  | 0.2  | 0.2  | 0.3  | 0.5  | 0.5  | 0.4  |
| CHA | 1.1  | 1.0  | 0.9  | 0.9  | 0.9  | 0.8  | 0.9  | 0.9  | 0.7  | 0.9  |
| EUR | 4.2  | 3.8  | 3.2  | 2.9  | 2.9  | 2.6  | 2.3  | 2.0  | 1.5  | 1.3  |
| IND | 0.9  | 0.9  | 0.9  | 0.9  | 1.0  | 1.0  | 1.1  | 1.0  | 1.2  | 1.5  |
| JPN | 0.2  | 0.1  | 0.1  | 0.1  | 0.1  | 0.1  | 0.1  | 0.1  | 0.1  | 0.0  |
| LAM | 0.6  | 0.7  | 0.6  | 0.7  | 0.7  | 0.7  | 0.7  | 0.7  | 0.7  | 0.7  |
| MEA | 0.2  | 0.2  | 0.2  | 0.2  | 0.3  | 0.3  | 0.4  | 0.4  | 0.4  | 0.5  |
| NEU | 0.3  | 0.3  | 0.3  | 0.3  | 0.4  | 0.4  | 0.4  | 0.3  | 0.3  | 0.2  |
| OAS | 0.3  | 0.3  | 0.4  | 0.4  | 0.4  | 0.4  | 0.4  | 0.5  | 0.6  | 0.6  |
| REF | 5.0  | 4.7  | 4.3  | 4.2  | 4.1  | 3.7  | 3.6  | 4.0  | 3.8  | 3.5  |
| SSA | 0.5  | 0.6  | 0.7  | 0.7  | 0.8  | 0.9  | 1.1  | 1.3  | 1.6  | 1.8  |
| USA | 0.3  | 0.3  | 0.3  | 0.3  | 0.3  | 0.4  | 0.4  | 0.3  | 0.3  | 0.3  |

Table 682: FAO — Demand—Seed—Crops—Other crops (Mt DM/yr)

10.1.13 Other crops—Fruits Vegetables Nuts

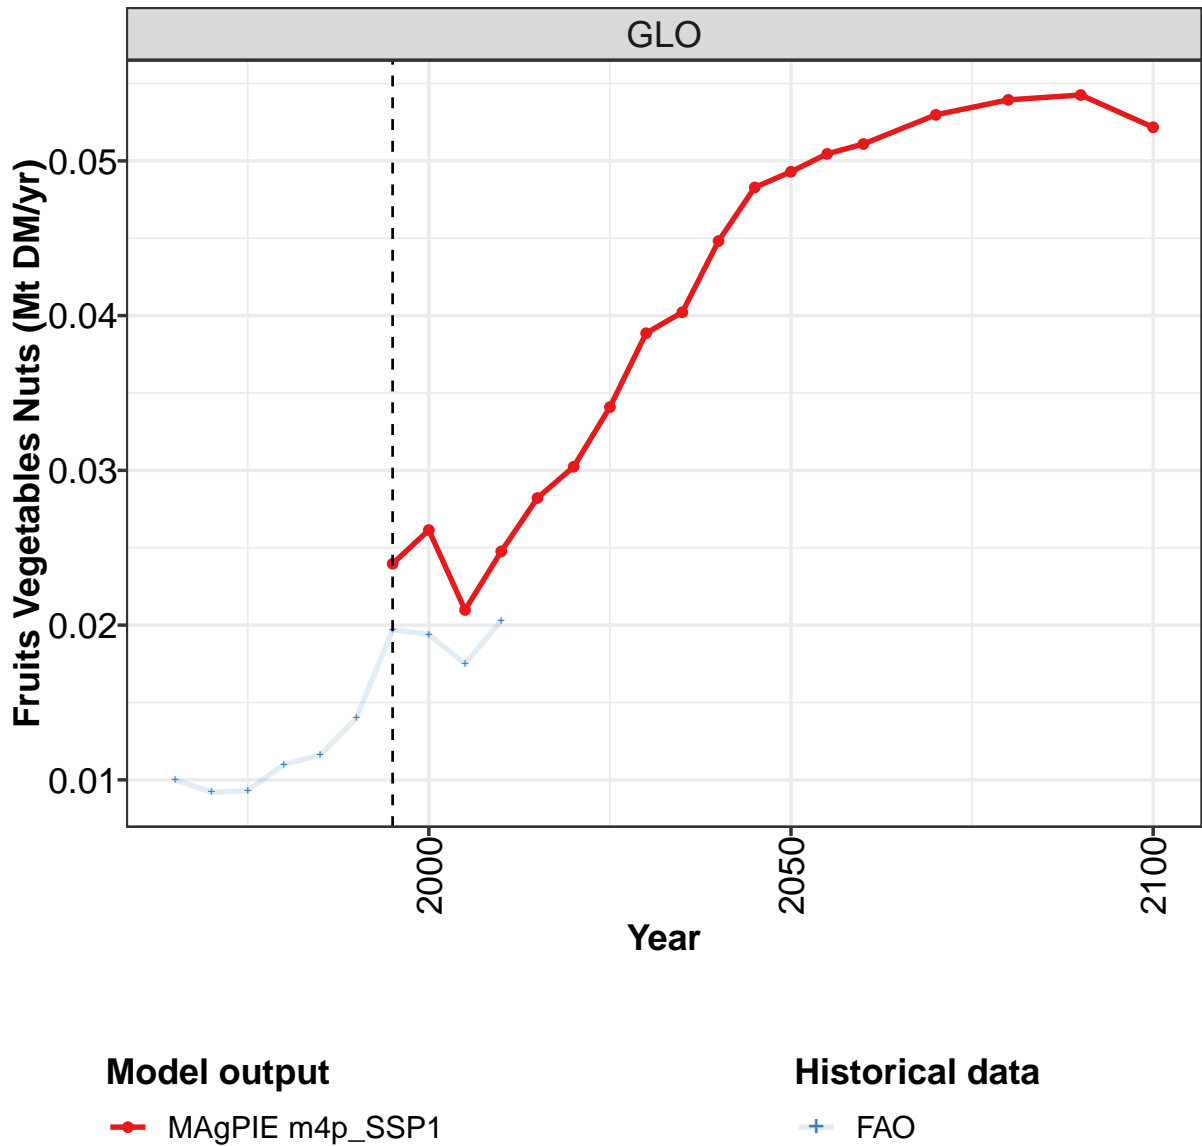

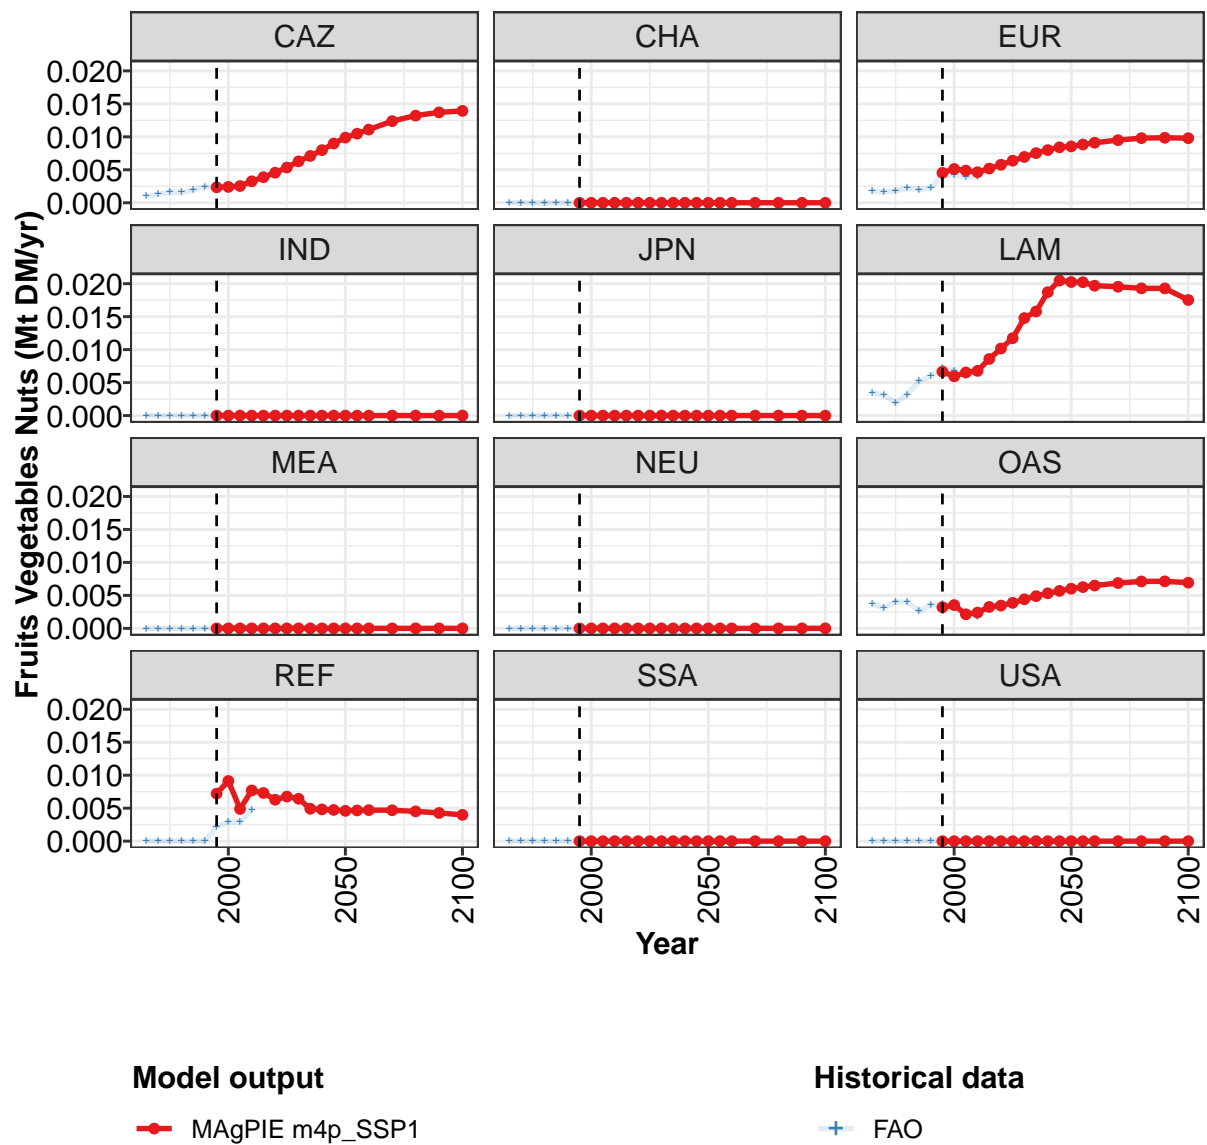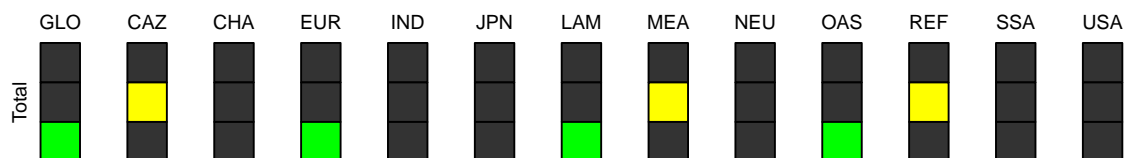

Figure 228: MAgPIE m4p\_SSP1 — Demand—Seed—Crops—Other crops—Fruits Vegetables Nuts (Mt DM/yr)

|     | 1995   | 2000   | 2005   | 2010   | 2015   | 2020   | 2025   | 2030   | 2035   | 2040   | 2045   |
|-----|--------|--------|--------|--------|--------|--------|--------|--------|--------|--------|--------|
| GLO | 0.0240 | 0.0261 | 0.0210 | 0.0248 | 0.0282 | 0.0302 | 0.0341 | 0.0389 | 0.0402 | 0.0448 | 0.0483 |
| CAZ | 0.0023 | 0.0024 | 0.0025 | 0.0033 | 0.0039 | 0.0046 | 0.0053 | 0.0063 | 0.0071 | 0.0080 | 0.0090 |
| CHA | 0.0000 | 0.0000 | 0.0000 | 0.0000 | 0.0000 | 0.0000 | 0.0000 | 0.0000 | 0.0000 | 0.0000 | 0.0000 |
| EUR | 0.0045 | 0.0051 | 0.0049 | 0.0046 | 0.0052 | 0.0058 | 0.0064 | 0.0070 | 0.0075 | 0.0080 | 0.0084 |
| IND | 0.0000 | 0.0000 | 0.0000 | 0.0000 | 0.0000 | 0.0000 | 0.0000 | 0.0000 | 0.0000 | 0.0000 | 0.0000 |
| JPN | 0.0000 | 0.0000 | 0.0000 | 0.0000 | 0.0000 | 0.0000 | 0.0000 | 0.0000 | 0.0000 | 0.0000 | 0.0000 |
| LAM | 0.0067 | 0.0059 | 0.0065 | 0.0068 | 0.0086 | 0.0102 | 0.0117 | 0.0148 | 0.0158 | 0.0187 | 0.0205 |
| MEA | 0.0000 | 0.0000 | 0.0000 | 0.0000 | 0.0000 | 0.0000 | 0.0000 | 0.0000 | 0.0000 | 0.0000 | 0.0000 |
| NEU | 0.0000 | 0.0000 | 0.0000 | 0.0000 | 0.0000 | 0.0000 | 0.0000 | 0.0000 | 0.0000 | 0.0000 | 0.0000 |
| OAS | 0.0032 | 0.0035 | 0.0021 | 0.0024 | 0.0033 | 0.0035 | 0.0039 | 0.0044 | 0.0049 | 0.0053 | 0.0057 |
| REF | 0.0072 | 0.0091 | 0.0049 | 0.0077 | 0.0073 | 0.0063 | 0.0068 | 0.0064 | 0.0049 | 0.0048 | 0.0047 |
| SSA | 0.0000 | 0.0000 | 0.0000 | 0.0000 | 0.0000 | 0.0000 | 0.0000 | 0.0000 | 0.0000 | 0.0000 | 0.0000 |
| USA | 0.0000 | 0.0000 | 0.0000 | 0.0000 | 0.0000 | 0.0000 | 0.0000 | 0.0000 | 0.0000 | 0.0000 | 0.0000 |

Table 683: MAgPIE m4p\_SSP1 — Demand—Seed—Crops—Other crops—Fruits Vegetables Nuts (Mt DM/yr)  
[PART 1/2]

|     | 2050   | 2055   | 2060   | 2070   | 2080   | 2090   | 2100   |
|-----|--------|--------|--------|--------|--------|--------|--------|
| GLO | 0.0493 | 0.0505 | 0.0511 | 0.0530 | 0.0539 | 0.0543 | 0.0522 |
| CAZ | 0.0099 | 0.0105 | 0.0111 | 0.0124 | 0.0132 | 0.0137 | 0.0139 |
| CHA | 0.0000 | 0.0000 | 0.0000 | 0.0000 | 0.0000 | 0.0000 | 0.0000 |
| EUR | 0.0085 | 0.0088 | 0.0091 | 0.0095 | 0.0098 | 0.0099 | 0.0098 |
| IND | 0.0000 | 0.0000 | 0.0000 | 0.0000 | 0.0000 | 0.0000 | 0.0000 |
| JPN | 0.0000 | 0.0000 | 0.0000 | 0.0000 | 0.0000 | 0.0000 | 0.0000 |
| LAM | 0.0203 | 0.0202 | 0.0197 | 0.0195 | 0.0193 | 0.0193 | 0.0175 |
| MEA | 0.0000 | 0.0000 | 0.0000 | 0.0000 | 0.0000 | 0.0000 | 0.0000 |
| NEU | 0.0000 | 0.0000 | 0.0000 | 0.0000 | 0.0000 | 0.0000 | 0.0000 |
| OAS | 0.0060 | 0.0063 | 0.0065 | 0.0069 | 0.0071 | 0.0071 | 0.0069 |
| REF | 0.0046 | 0.0047 | 0.0047 | 0.0047 | 0.0045 | 0.0043 | 0.0040 |
| SSA | 0.0000 | 0.0000 | 0.0000 | 0.0000 | 0.0000 | 0.0000 | 0.0000 |
| USA | 0.0000 | 0.0000 | 0.0000 | 0.0000 | 0.0000 | 0.0000 | 0.0000 |

Table 684: MAgPIE m4p\_SSP1 — Demand—Seed—Crops—Other crops—Fruits Vegetables Nuts (Mt DM/yr)  
[PART 2/2]

|     | 1965   | 1970   | 1975   | 1980   | 1985   | 1990   | 1995   | 2000   | 2005   | 2010   |
|-----|--------|--------|--------|--------|--------|--------|--------|--------|--------|--------|
| GLO | 0.0100 | 0.0092 | 0.0093 | 0.0110 | 0.0116 | 0.0140 | 0.0197 | 0.0194 | 0.0175 | 0.0203 |
| CAZ | 0.0010 | 0.0013 | 0.0016 | 0.0016 | 0.0019 | 0.0024 | 0.0023 | 0.0024 | 0.0025 | 0.0033 |
| CHA | 0.0000 | 0.0000 | 0.0000 | 0.0000 | 0.0000 | 0.0000 | 0.0000 | 0.0000 | 0.0000 | 0.0000 |
| EUR | 0.0018 | 0.0016 | 0.0018 | 0.0022 | 0.0020 | 0.0022 | 0.0043 | 0.0042 | 0.0039 | 0.0039 |
| IND | 0.0000 | 0.0000 | 0.0000 | 0.0000 | 0.0000 | 0.0000 | 0.0000 | 0.0000 | 0.0000 | 0.0000 |
| JPN | 0.0000 | 0.0000 | 0.0000 | 0.0000 | 0.0000 | 0.0000 | 0.0000 | 0.0000 | 0.0000 | 0.0000 |
| LAM | 0.0034 | 0.0031 | 0.0019 | 0.0032 | 0.0052 | 0.0060 | 0.0072 | 0.0068 | 0.0060 | 0.0066 |
| MEA | 0.0000 | 0.0000 | 0.0000 | 0.0000 | 0.0000 | 0.0000 | 0.0000 | 0.0001 | 0.0001 | 0.0001 |
| NEU | 0.0000 | 0.0000 | 0.0000 | 0.0000 | 0.0000 | 0.0000 | 0.0000 | 0.0000 | 0.0000 | 0.0000 |
| OAS | 0.0037 | 0.0031 | 0.0040 | 0.0040 | 0.0026 | 0.0035 | 0.0037 | 0.0031 | 0.0020 | 0.0017 |
| REF | 0.0000 | 0.0000 | 0.0000 | 0.0000 | 0.0000 | 0.0000 | 0.0022 | 0.0029 | 0.0029 | 0.0047 |
| SSA | 0.0000 | 0.0000 | 0.0000 | 0.0000 | 0.0000 | 0.0000 | 0.0000 | 0.0000 | 0.0000 | 0.0000 |
| USA | 0.0000 | 0.0000 | 0.0000 | 0.0000 | 0.0000 | 0.0000 | 0.0000 | 0.0000 | 0.0000 | 0.0000 |

Table 685: FAO — Demand—Seed—Crops—Other crops—Fruits Vegetables Nuts (Mt DM/yr)



10.1.14 Other crops—Potatoes

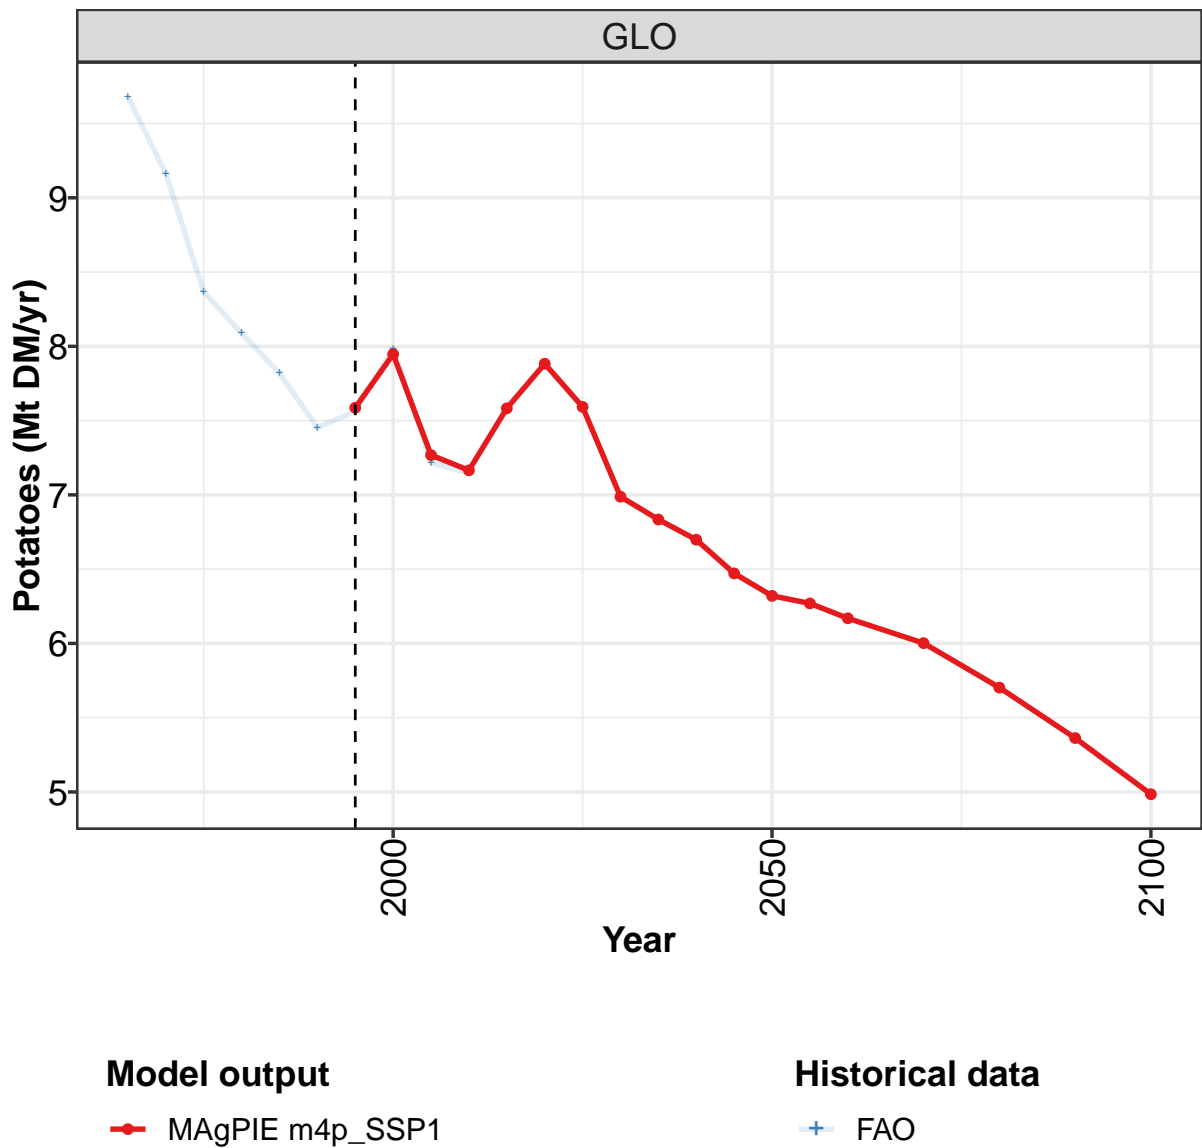

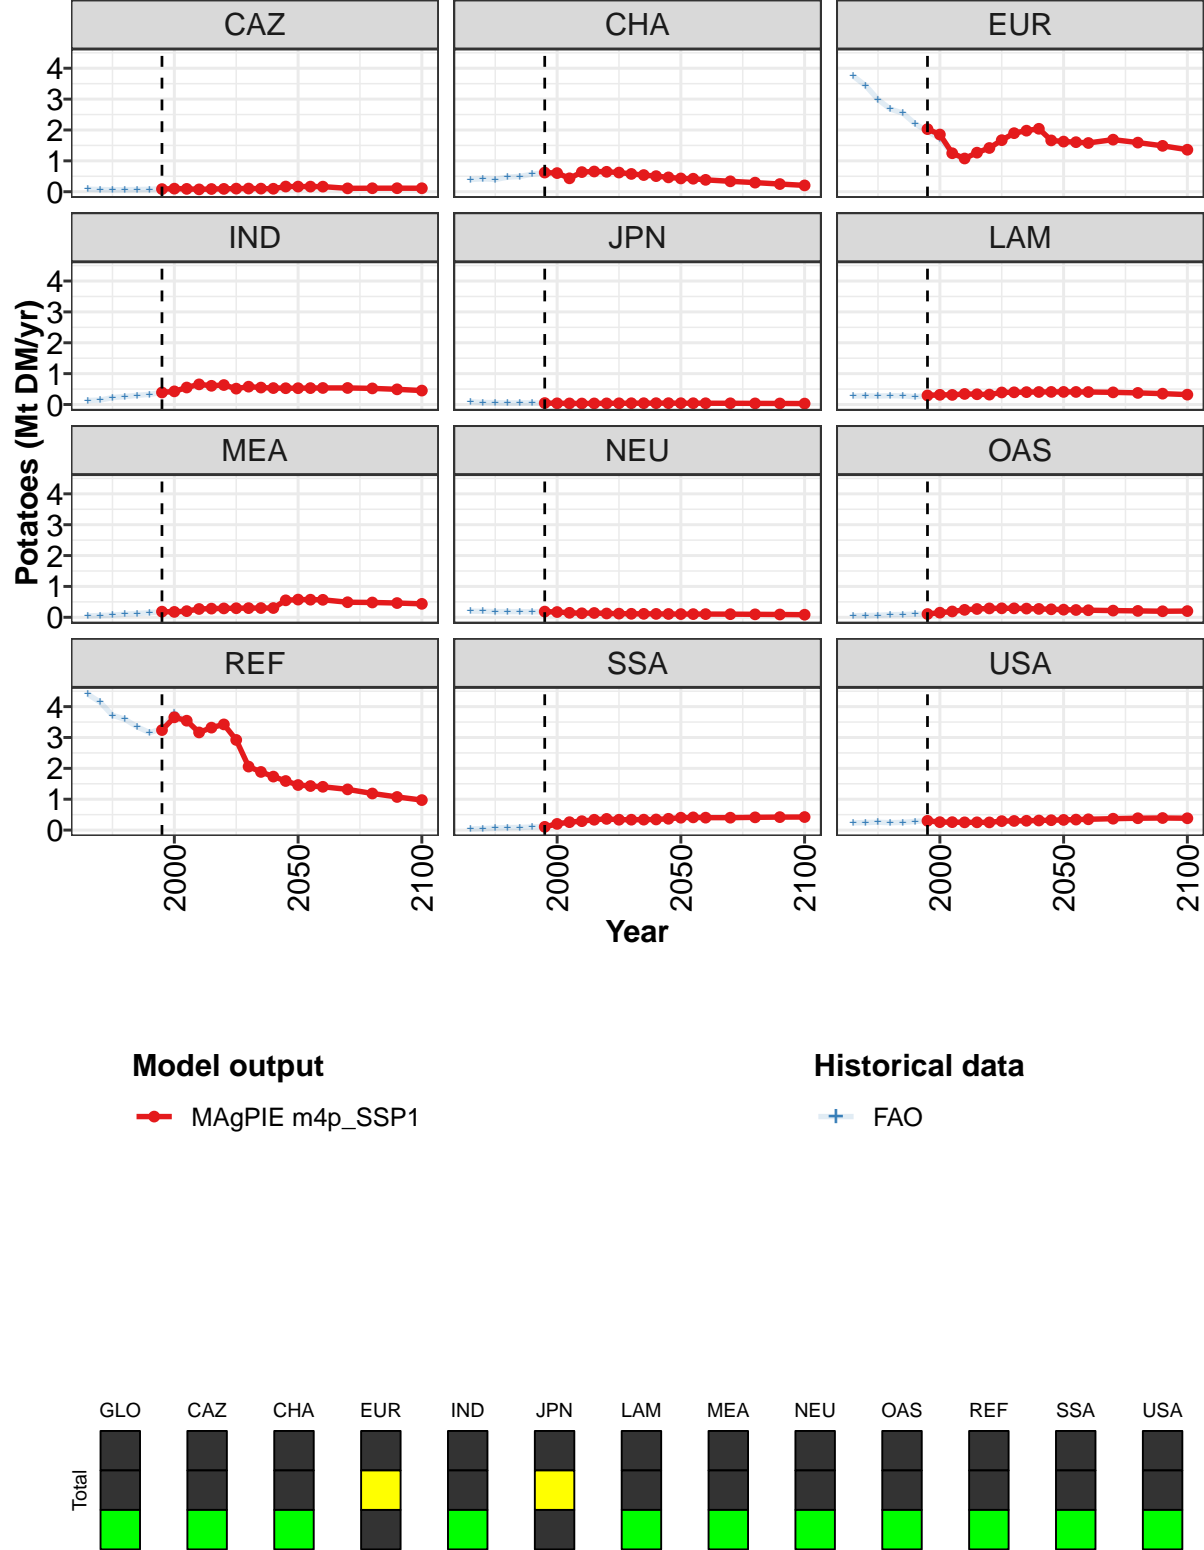

Figure 229: MAgPIE m4p\_SSP1 — Demand—Seed—Crops—Other crops—Potatoes (Mt DM/yr)

|     | 1995 | 2000 | 2005 | 2010 | 2015 | 2020 | 2025 | 2030 | 2035 | 2040 | 2045 |
|-----|------|------|------|------|------|------|------|------|------|------|------|
| GLO | 7.59 | 7.95 | 7.27 | 7.17 | 7.58 | 7.88 | 7.59 | 6.99 | 6.83 | 6.70 | 6.47 |
| CAZ | 0.09 | 0.10 | 0.09 | 0.08 | 0.09 | 0.09 | 0.10 | 0.10 | 0.10 | 0.10 | 0.17 |
| CHA | 0.62 | 0.60 | 0.43 | 0.64 | 0.66 | 0.65 | 0.62 | 0.58 | 0.54 | 0.51 | 0.47 |
| EUR | 2.03 | 1.85 | 1.25 | 1.08 | 1.27 | 1.42 | 1.67 | 1.90 | 1.98 | 2.04 | 1.66 |
| IND | 0.39 | 0.43 | 0.55 | 0.65 | 0.61 | 0.63 | 0.51 | 0.58 | 0.55 | 0.53 | 0.53 |
| JPN | 0.05 | 0.04 | 0.04 | 0.03 | 0.04 | 0.04 | 0.04 | 0.04 | 0.04 | 0.04 | 0.04 |
| LAM | 0.29 | 0.31 | 0.31 | 0.34 | 0.33 | 0.32 | 0.39 | 0.40 | 0.40 | 0.41 | 0.41 |
| MEA | 0.18 | 0.18 | 0.20 | 0.27 | 0.28 | 0.29 | 0.29 | 0.30 | 0.30 | 0.30 | 0.55 |
| NEU | 0.18 | 0.17 | 0.15 | 0.13 | 0.14 | 0.12 | 0.12 | 0.11 | 0.11 | 0.11 | 0.11 |
| OAS | 0.11 | 0.15 | 0.19 | 0.24 | 0.27 | 0.29 | 0.29 | 0.29 | 0.28 | 0.27 | 0.26 |
| REF | 3.24 | 3.65 | 3.54 | 3.16 | 3.32 | 3.42 | 2.92 | 2.06 | 1.88 | 1.73 | 1.59 |
| SSA | 0.11 | 0.20 | 0.26 | 0.29 | 0.34 | 0.36 | 0.34 | 0.34 | 0.34 | 0.34 | 0.37 |
| USA | 0.30 | 0.26 | 0.26 | 0.25 | 0.25 | 0.25 | 0.29 | 0.30 | 0.30 | 0.31 | 0.32 |

Table 686: MAgPIE m4p\_SSP1 — Demand—Seed—Crops—Other crops—Potatoes (Mt DM/yr) [PART 1/2]

|     | 2050 | 2055 | 2060 | 2070 | 2080 | 2090 | 2100 |
|-----|------|------|------|------|------|------|------|
| GLO | 6.32 | 6.27 | 6.17 | 6.00 | 5.70 | 5.36 | 4.98 |
| CAZ | 0.17 | 0.17 | 0.17 | 0.11 | 0.11 | 0.11 | 0.11 |
| CHA | 0.43 | 0.42 | 0.38 | 0.34 | 0.29 | 0.25 | 0.21 |
| EUR | 1.62 | 1.61 | 1.58 | 1.69 | 1.59 | 1.49 | 1.36 |
| IND | 0.53 | 0.53 | 0.54 | 0.54 | 0.52 | 0.49 | 0.45 |
| JPN | 0.04 | 0.04 | 0.04 | 0.04 | 0.04 | 0.03 | 0.03 |
| LAM | 0.41 | 0.41 | 0.40 | 0.39 | 0.38 | 0.35 | 0.32 |
| MEA | 0.57 | 0.57 | 0.57 | 0.49 | 0.48 | 0.46 | 0.44 |
| NEU | 0.10 | 0.10 | 0.10 | 0.10 | 0.10 | 0.09 | 0.08 |
| OAS | 0.25 | 0.24 | 0.23 | 0.22 | 0.21 | 0.20 | 0.20 |
| REF | 1.46 | 1.43 | 1.40 | 1.32 | 1.19 | 1.07 | 0.97 |
| SSA | 0.40 | 0.41 | 0.40 | 0.40 | 0.41 | 0.42 | 0.42 |
| USA | 0.33 | 0.34 | 0.35 | 0.37 | 0.38 | 0.39 | 0.38 |

Table 687: MAgPIE m4p\_SSP1 — Demand—Seed—Crops—Other crops—Potatoes (Mt DM/yr) [PART 2/2]

|     | 1965 | 1970 | 1975 | 1980 | 1985 | 1990 | 1995 | 2000 | 2005 | 2010 |
|-----|------|------|------|------|------|------|------|------|------|------|
| GLO | 9.68 | 9.16 | 8.37 | 8.09 | 7.82 | 7.45 | 7.56 | 7.99 | 7.22 | 7.15 |
| CAZ | 0.08 | 0.07 | 0.06 | 0.07 | 0.07 | 0.08 | 0.10 | 0.11 | 0.10 | 0.08 |
| CHA | 0.40 | 0.42 | 0.40 | 0.47 | 0.50 | 0.57 | 0.62 | 0.62 | 0.44 | 0.64 |
| EUR | 3.74 | 3.44 | 2.99 | 2.68 | 2.55 | 2.20 | 1.96 | 1.72 | 1.22 | 1.07 |
| IND | 0.13 | 0.14 | 0.22 | 0.26 | 0.30 | 0.33 | 0.39 | 0.43 | 0.55 | 0.66 |
| JPN | 0.09 | 0.07 | 0.06 | 0.05 | 0.05 | 0.05 | 0.05 | 0.04 | 0.04 | 0.03 |
| LAM | 0.27 | 0.28 | 0.27 | 0.29 | 0.28 | 0.25 | 0.29 | 0.31 | 0.31 | 0.34 |
| MEA | 0.04 | 0.06 | 0.07 | 0.10 | 0.12 | 0.15 | 0.18 | 0.17 | 0.20 | 0.26 |
| NEU | 0.20 | 0.20 | 0.18 | 0.18 | 0.18 | 0.18 | 0.18 | 0.17 | 0.15 | 0.13 |
| OAS | 0.05 | 0.06 | 0.06 | 0.09 | 0.09 | 0.10 | 0.11 | 0.15 | 0.19 | 0.24 |
| REF | 4.40 | 4.14 | 3.72 | 3.59 | 3.34 | 3.16 | 3.28 | 3.80 | 3.50 | 3.15 |
| SSA | 0.04 | 0.05 | 0.07 | 0.08 | 0.08 | 0.10 | 0.11 | 0.20 | 0.26 | 0.29 |
| USA | 0.23 | 0.24 | 0.26 | 0.24 | 0.25 | 0.28 | 0.31 | 0.27 | 0.26 | 0.25 |

Table 688: FAO — Demand—Seed—Crops—Other crops—Potatoes (Mt DM/yr)

10.1.15 Other crops—Pulses

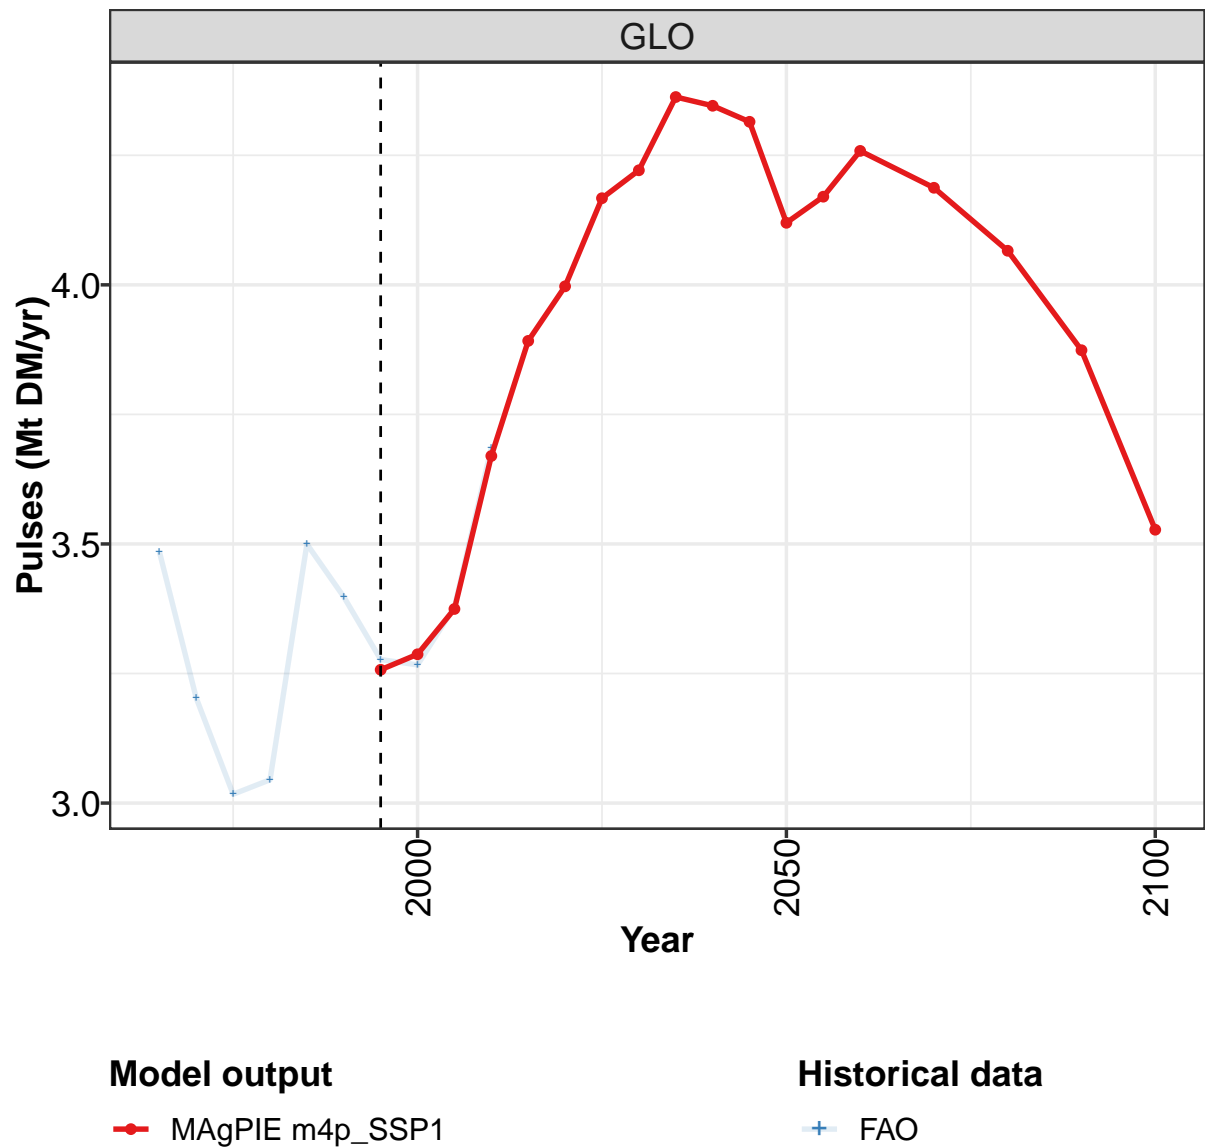

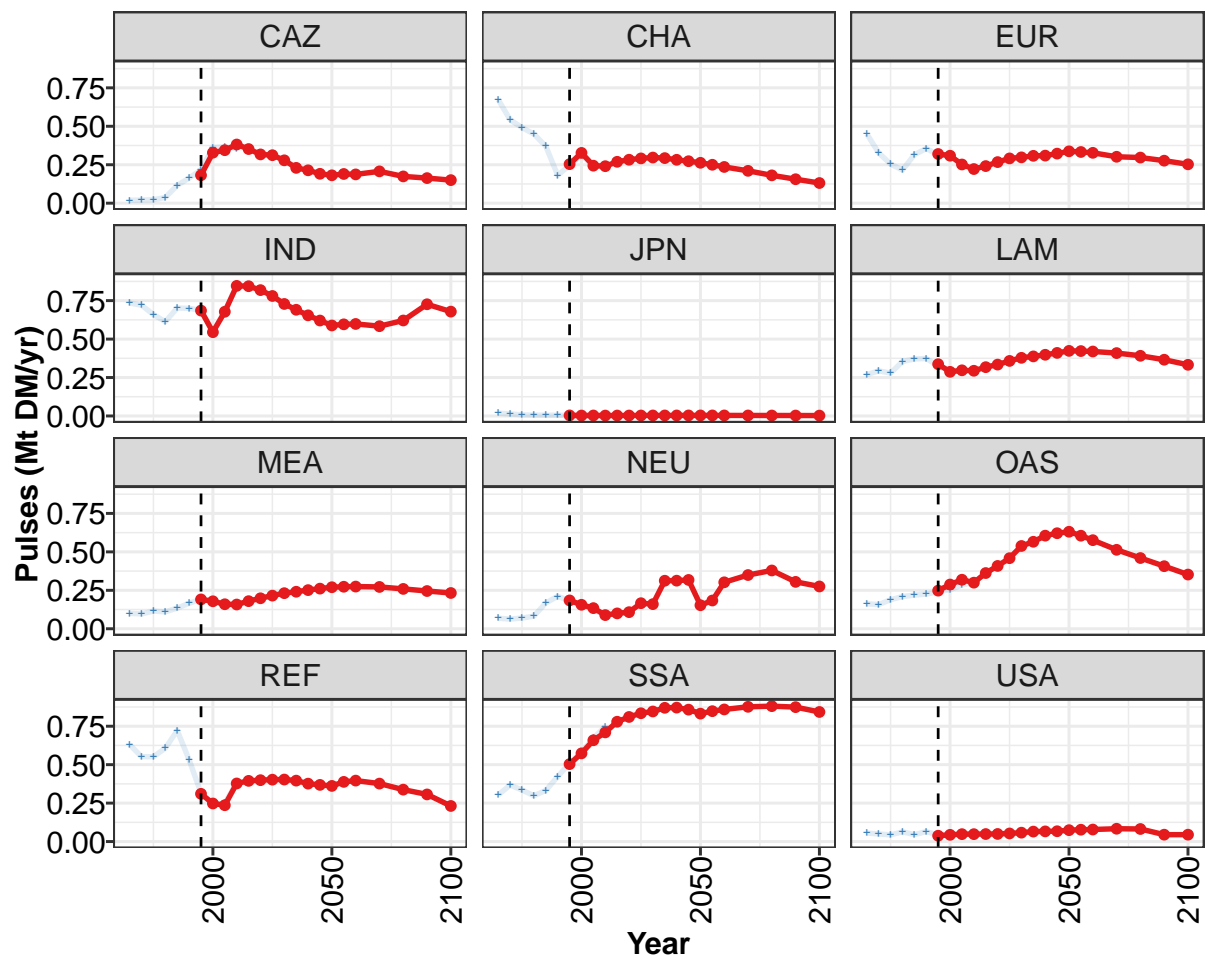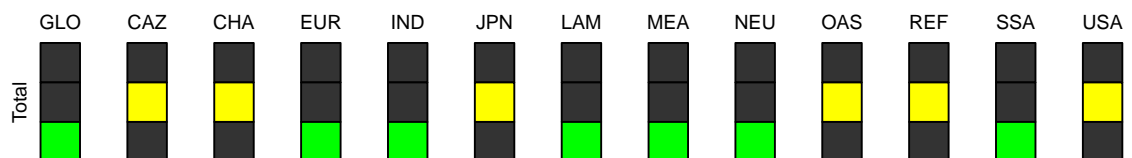

Figure 230: MAGPIE m4p\_SSP1 — Demand—Seed—Crops—Other crops—Pulses (Mt DM/yr)

|     | 1995 | 2000 | 2005 | 2010 | 2015 | 2020 | 2025 | 2030 | 2035 | 2040 | 2045 |
|-----|------|------|------|------|------|------|------|------|------|------|------|
| GLO | 3.26 | 3.29 | 3.37 | 3.67 | 3.89 | 4.00 | 4.17 | 4.22 | 4.36 | 4.35 | 4.31 |
| CAZ | 0.18 | 0.33 | 0.34 | 0.38 | 0.35 | 0.32 | 0.31 | 0.28 | 0.23 | 0.21 | 0.19 |
| CHA | 0.25 | 0.33 | 0.24 | 0.24 | 0.27 | 0.28 | 0.29 | 0.30 | 0.29 | 0.28 | 0.27 |
| EUR | 0.32 | 0.31 | 0.25 | 0.22 | 0.24 | 0.27 | 0.29 | 0.30 | 0.31 | 0.31 | 0.32 |
| IND | 0.69 | 0.54 | 0.68 | 0.85 | 0.84 | 0.82 | 0.78 | 0.73 | 0.69 | 0.65 | 0.62 |
| JPN | 0.00 | 0.00 | 0.00 | 0.00 | 0.00 | 0.00 | 0.00 | 0.00 | 0.00 | 0.00 | 0.00 |
| LAM | 0.34 | 0.29 | 0.30 | 0.29 | 0.32 | 0.33 | 0.36 | 0.38 | 0.39 | 0.40 | 0.41 |
| MEA | 0.19 | 0.18 | 0.16 | 0.16 | 0.18 | 0.20 | 0.22 | 0.23 | 0.24 | 0.25 | 0.26 |
| NEU | 0.18 | 0.16 | 0.13 | 0.09 | 0.10 | 0.11 | 0.17 | 0.16 | 0.31 | 0.31 | 0.32 |
| OAS | 0.25 | 0.29 | 0.32 | 0.30 | 0.36 | 0.41 | 0.46 | 0.54 | 0.57 | 0.61 | 0.62 |
| REF | 0.31 | 0.25 | 0.24 | 0.38 | 0.39 | 0.40 | 0.40 | 0.40 | 0.40 | 0.38 | 0.37 |
| SSA | 0.50 | 0.57 | 0.66 | 0.71 | 0.78 | 0.81 | 0.83 | 0.85 | 0.87 | 0.87 | 0.86 |
| USA | 0.04 | 0.04 | 0.05 | 0.05 | 0.05 | 0.05 | 0.05 | 0.06 | 0.06 | 0.07 | 0.07 |

Table 689: MAgPIE m4p\_SSP1 — Demand—Seed—Crops—Other crops—Pulses (Mt DM/yr) [PART 1/2]

|     | 2050 | 2055 | 2060 | 2070 | 2080 | 2090 | 2100 |
|-----|------|------|------|------|------|------|------|
| GLO | 4.12 | 4.17 | 4.26 | 4.19 | 4.07 | 3.87 | 3.53 |
| CAZ | 0.18 | 0.19 | 0.19 | 0.21 | 0.17 | 0.16 | 0.15 |
| CHA | 0.26 | 0.25 | 0.24 | 0.21 | 0.18 | 0.16 | 0.13 |
| EUR | 0.34 | 0.33 | 0.33 | 0.30 | 0.30 | 0.28 | 0.25 |
| IND | 0.59 | 0.60 | 0.60 | 0.58 | 0.62 | 0.73 | 0.68 |
| JPN | 0.00 | 0.00 | 0.00 | 0.00 | 0.00 | 0.00 | 0.00 |
| LAM | 0.42 | 0.42 | 0.42 | 0.41 | 0.39 | 0.37 | 0.33 |
| MEA | 0.27 | 0.27 | 0.27 | 0.27 | 0.26 | 0.25 | 0.23 |
| NEU | 0.15 | 0.18 | 0.30 | 0.35 | 0.38 | 0.31 | 0.28 |
| OAS | 0.63 | 0.61 | 0.58 | 0.51 | 0.46 | 0.41 | 0.35 |
| REF | 0.36 | 0.39 | 0.40 | 0.38 | 0.34 | 0.31 | 0.23 |
| SSA | 0.83 | 0.85 | 0.86 | 0.88 | 0.88 | 0.87 | 0.84 |
| USA | 0.07 | 0.08 | 0.08 | 0.08 | 0.08 | 0.04 | 0.04 |

Table 690: MAgPIE m4p\_SSP1 — Demand—Seed—Crops—Other crops—Pulses (Mt DM/yr) [PART 2/2]

|     | 1965 | 1970 | 1975 | 1980 | 1985 | 1990 | 1995 | 2000 | 2005 | 2010 |
|-----|------|------|------|------|------|------|------|------|------|------|
| GLO | 3.49 | 3.20 | 3.02 | 3.04 | 3.50 | 3.40 | 3.28 | 3.27 | 3.38 | 3.69 |
| CAZ | 0.02 | 0.02 | 0.02 | 0.04 | 0.12 | 0.16 | 0.22 | 0.36 | 0.37 | 0.35 |
| CHA | 0.67 | 0.54 | 0.49 | 0.45 | 0.37 | 0.18 | 0.25 | 0.31 | 0.24 | 0.24 |
| EUR | 0.45 | 0.33 | 0.25 | 0.22 | 0.32 | 0.36 | 0.31 | 0.30 | 0.25 | 0.22 |
| IND | 0.73 | 0.72 | 0.66 | 0.61 | 0.70 | 0.70 | 0.69 | 0.55 | 0.68 | 0.85 |
| JPN | 0.02 | 0.01 | 0.01 | 0.01 | 0.01 | 0.00 | 0.00 | 0.00 | 0.00 | 0.00 |
| LAM | 0.27 | 0.29 | 0.28 | 0.35 | 0.37 | 0.37 | 0.33 | 0.29 | 0.30 | 0.29 |
| MEA | 0.10 | 0.10 | 0.12 | 0.11 | 0.13 | 0.17 | 0.19 | 0.18 | 0.16 | 0.16 |
| NEU | 0.07 | 0.06 | 0.07 | 0.08 | 0.17 | 0.21 | 0.18 | 0.15 | 0.12 | 0.09 |
| OAS | 0.16 | 0.16 | 0.19 | 0.21 | 0.22 | 0.23 | 0.24 | 0.25 | 0.28 | 0.30 |
| REF | 0.63 | 0.55 | 0.55 | 0.61 | 0.72 | 0.53 | 0.32 | 0.24 | 0.25 | 0.38 |
| SSA | 0.30 | 0.37 | 0.33 | 0.30 | 0.33 | 0.42 | 0.51 | 0.58 | 0.67 | 0.75 |
| USA | 0.06 | 0.05 | 0.04 | 0.06 | 0.04 | 0.06 | 0.04 | 0.04 | 0.05 | 0.05 |

Table 691: FAO — Demand—Seed—Crops—Other crops—Pulses (Mt DM/yr)

10.1.16 Other crops—Tropical roots

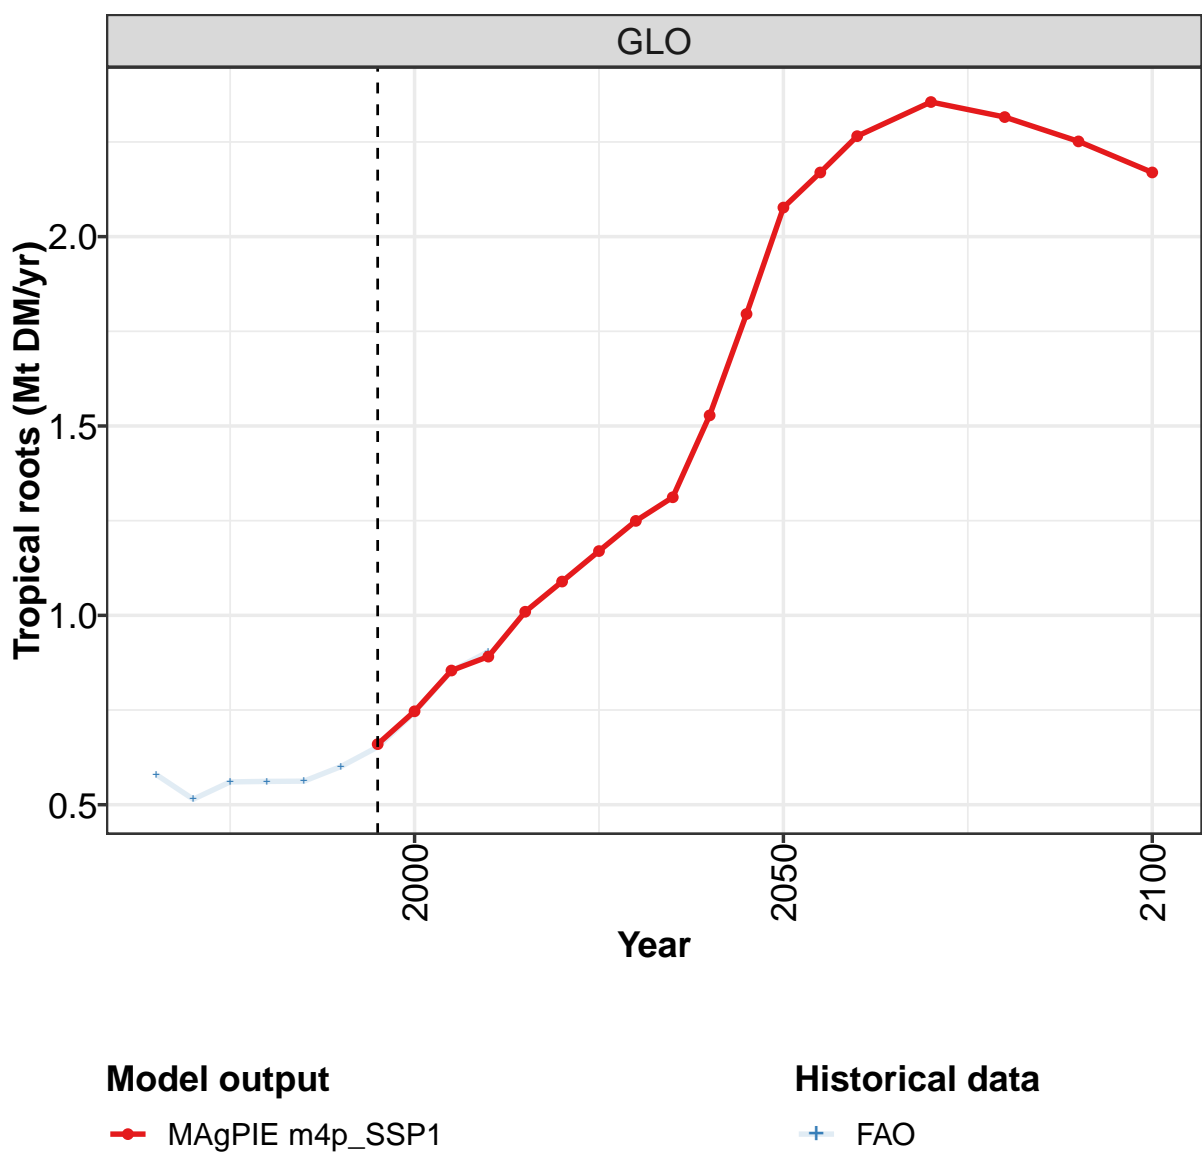

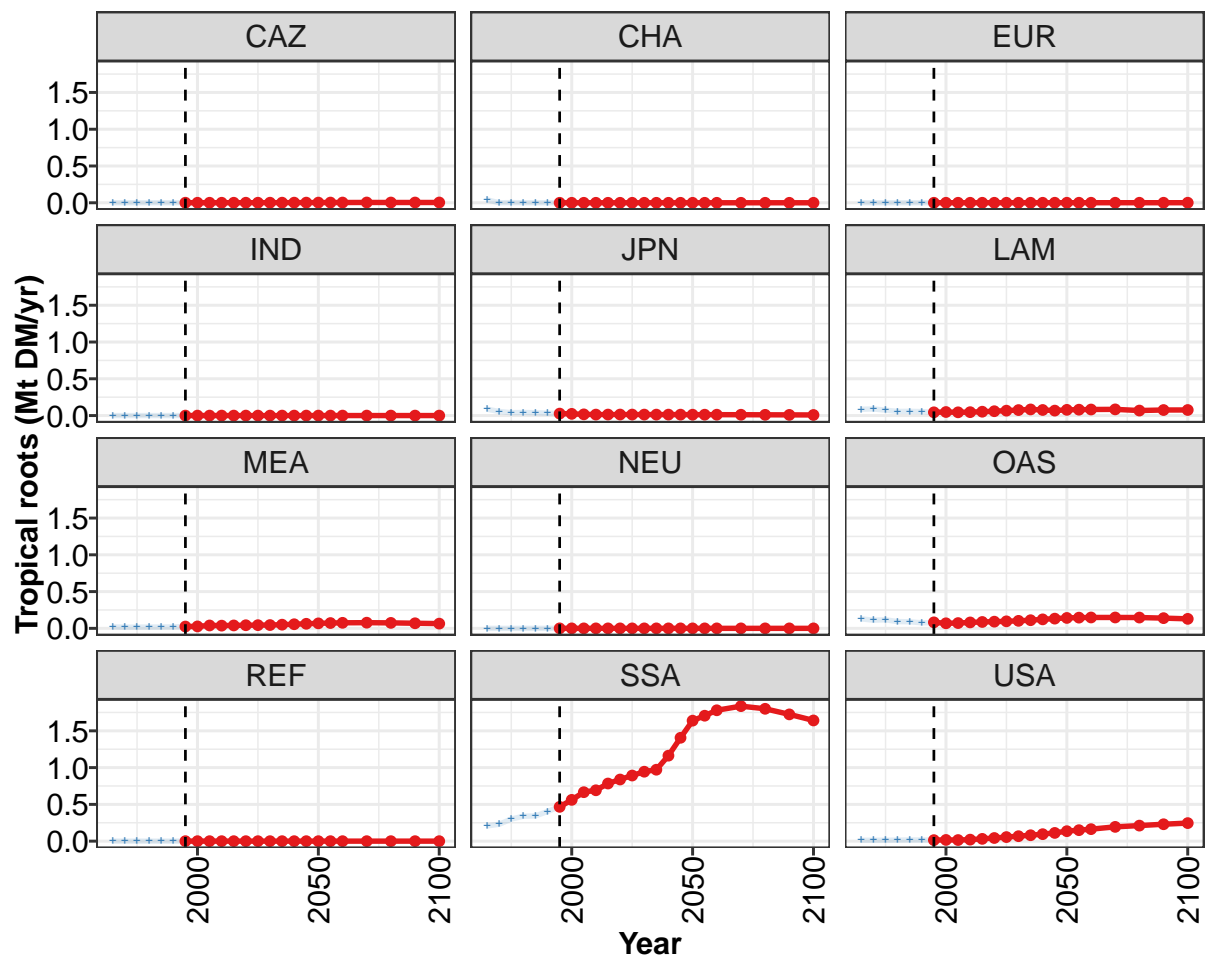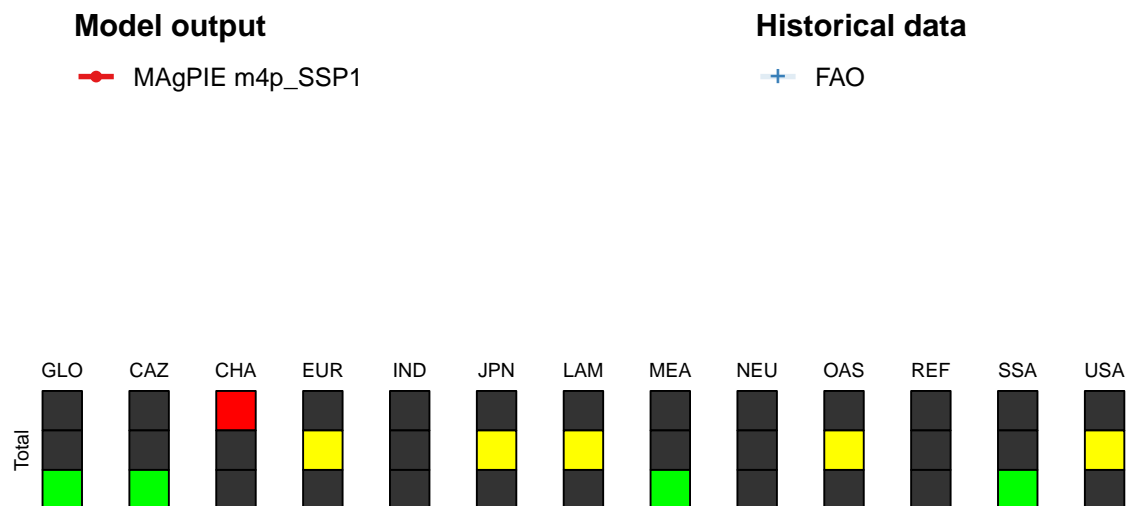

Figure 231: MAgPIE m4p\_SSP1 — Demand—Seed—Crops—Other crops—Tropical roots (Mt DM/yr)



|     | 1995 | 2000 | 2005 | 2010 | 2015 | 2020 | 2025 | 2030 | 2035 | 2040 | 2045 |
|-----|------|------|------|------|------|------|------|------|------|------|------|
| GLO | 0.66 | 0.75 | 0.85 | 0.89 | 1.01 | 1.09 | 1.17 | 1.25 | 1.31 | 1.53 | 1.80 |
| CAZ | 0.00 | 0.00 | 0.00 | 0.00 | 0.00 | 0.00 | 0.00 | 0.00 | 0.00 | 0.00 | 0.00 |
| CHA | 0.00 | 0.00 | 0.00 | 0.00 | 0.00 | 0.00 | 0.00 | 0.00 | 0.00 | 0.00 | 0.00 |
| EUR | 0.00 | 0.00 | 0.00 | 0.00 | 0.00 | 0.00 | 0.00 | 0.00 | 0.00 | 0.00 | 0.00 |
| IND | 0.00 | 0.00 | 0.00 | 0.00 | 0.00 | 0.00 | 0.00 | 0.00 | 0.00 | 0.00 | 0.00 |
| JPN | 0.03 | 0.02 | 0.02 | 0.01 | 0.01 | 0.01 | 0.01 | 0.01 | 0.01 | 0.01 | 0.01 |
| LAM | 0.04 | 0.05 | 0.04 | 0.05 | 0.05 | 0.06 | 0.07 | 0.07 | 0.08 | 0.08 | 0.07 |
| MEA | 0.02 | 0.03 | 0.04 | 0.04 | 0.04 | 0.04 | 0.04 | 0.05 | 0.05 | 0.06 | 0.06 |
| NEU | 0.00 | 0.00 | 0.00 | 0.00 | 0.00 | 0.00 | 0.00 | 0.00 | 0.00 | 0.00 | 0.00 |
| OAS | 0.08 | 0.07 | 0.07 | 0.08 | 0.09 | 0.09 | 0.10 | 0.10 | 0.11 | 0.12 | 0.13 |
| REF | 0.00 | 0.00 | 0.00 | 0.00 | 0.00 | 0.00 | 0.00 | 0.00 | 0.00 | 0.00 | 0.00 |
| SSA | 0.47 | 0.56 | 0.67 | 0.69 | 0.78 | 0.84 | 0.89 | 0.94 | 0.97 | 1.16 | 1.41 |
| USA | 0.01 | 0.02 | 0.02 | 0.02 | 0.03 | 0.04 | 0.06 | 0.07 | 0.08 | 0.09 | 0.11 |

Table 692: MAgPIE m4p\_SSP1 — Demand—Seed—Crops—Other crops—Tropical roots (Mt DM/yr) [PART 1/2]

|     | 2050 | 2055 | 2060 | 2070 | 2080 | 2090 | 2100 |
|-----|------|------|------|------|------|------|------|
| GLO | 2.08 | 2.17 | 2.27 | 2.36 | 2.32 | 2.25 | 2.17 |
| CAZ | 0.00 | 0.00 | 0.00 | 0.00 | 0.00 | 0.00 | 0.00 |
| CHA | 0.00 | 0.00 | 0.00 | 0.00 | 0.00 | 0.00 | 0.00 |
| EUR | 0.00 | 0.00 | 0.00 | 0.00 | 0.00 | 0.00 | 0.00 |
| IND | 0.00 | 0.00 | 0.00 | 0.00 | 0.00 | 0.00 | 0.00 |
| JPN | 0.01 | 0.01 | 0.01 | 0.01 | 0.01 | 0.01 | 0.01 |
| LAM | 0.08 | 0.08 | 0.08 | 0.08 | 0.07 | 0.08 | 0.08 |
| MEA | 0.07 | 0.07 | 0.08 | 0.08 | 0.07 | 0.07 | 0.06 |
| NEU | 0.00 | 0.00 | 0.00 | 0.00 | 0.00 | 0.00 | 0.00 |
| OAS | 0.14 | 0.15 | 0.15 | 0.15 | 0.15 | 0.14 | 0.13 |
| REF | 0.00 | 0.00 | 0.00 | 0.00 | 0.00 | 0.00 | 0.00 |
| SSA | 1.64 | 1.71 | 1.78 | 1.84 | 1.80 | 1.72 | 1.64 |
| USA | 0.14 | 0.15 | 0.16 | 0.19 | 0.21 | 0.23 | 0.25 |

Table 693: MAgPIE m4p\_SSP1 — Demand—Seed—Crops—Other crops—Tropical roots (Mt DM/yr) [PART 2/2]

|     | 1965  | 1970  | 1975  | 1980  | 1985  | 1990  | 1995  | 2000  | 2005  | 2010  |
|-----|-------|-------|-------|-------|-------|-------|-------|-------|-------|-------|
| GLO | 0.579 | 0.514 | 0.560 | 0.562 | 0.562 | 0.601 | 0.652 | 0.744 | 0.853 | 0.904 |
| CAZ | 0.000 | 0.000 | 0.000 | 0.001 | 0.000 | 0.000 | 0.001 | 0.001 | 0.001 | 0.001 |
| CHA | 0.040 | 0.000 | 0.002 | 0.001 | 0.000 | 0.000 | 0.000 | 0.000 | 0.000 | 0.000 |
| EUR | 0.001 | 0.000 | 0.000 | 0.000 | 0.000 | 0.000 | 0.000 | 0.000 | 0.000 | 0.000 |
| IND | 0.000 | 0.000 | 0.000 | 0.000 | 0.000 | 0.000 | 0.000 | 0.000 | 0.000 | 0.000 |
| JPN | 0.087 | 0.055 | 0.039 | 0.042 | 0.038 | 0.032 | 0.027 | 0.024 | 0.017 | 0.013 |
| LAM | 0.085 | 0.090 | 0.073 | 0.056 | 0.057 | 0.054 | 0.042 | 0.049 | 0.044 | 0.045 |
| MEA | 0.019 | 0.016 | 0.017 | 0.018 | 0.018 | 0.020 | 0.023 | 0.026 | 0.039 | 0.037 |
| NEU | 0.000 | 0.000 | 0.000 | 0.000 | 0.000 | 0.000 | 0.000 | 0.000 | 0.000 | 0.000 |
| OAS | 0.128 | 0.111 | 0.116 | 0.092 | 0.089 | 0.076 | 0.077 | 0.068 | 0.071 | 0.077 |
| REF | 0.000 | 0.000 | 0.000 | 0.000 | 0.000 | 0.000 | 0.000 | 0.000 | 0.000 | 0.000 |
| SSA | 0.207 | 0.230 | 0.300 | 0.339 | 0.343 | 0.403 | 0.468 | 0.561 | 0.666 | 0.711 |
| USA | 0.012 | 0.012 | 0.012 | 0.014 | 0.016 | 0.016 | 0.014 | 0.016 | 0.016 | 0.021 |

Table 694: FAO — Demand—Seed—Crops—Other crops—Tropical roots (Mt DM/yr)

## 10.1.17 Sugar crops

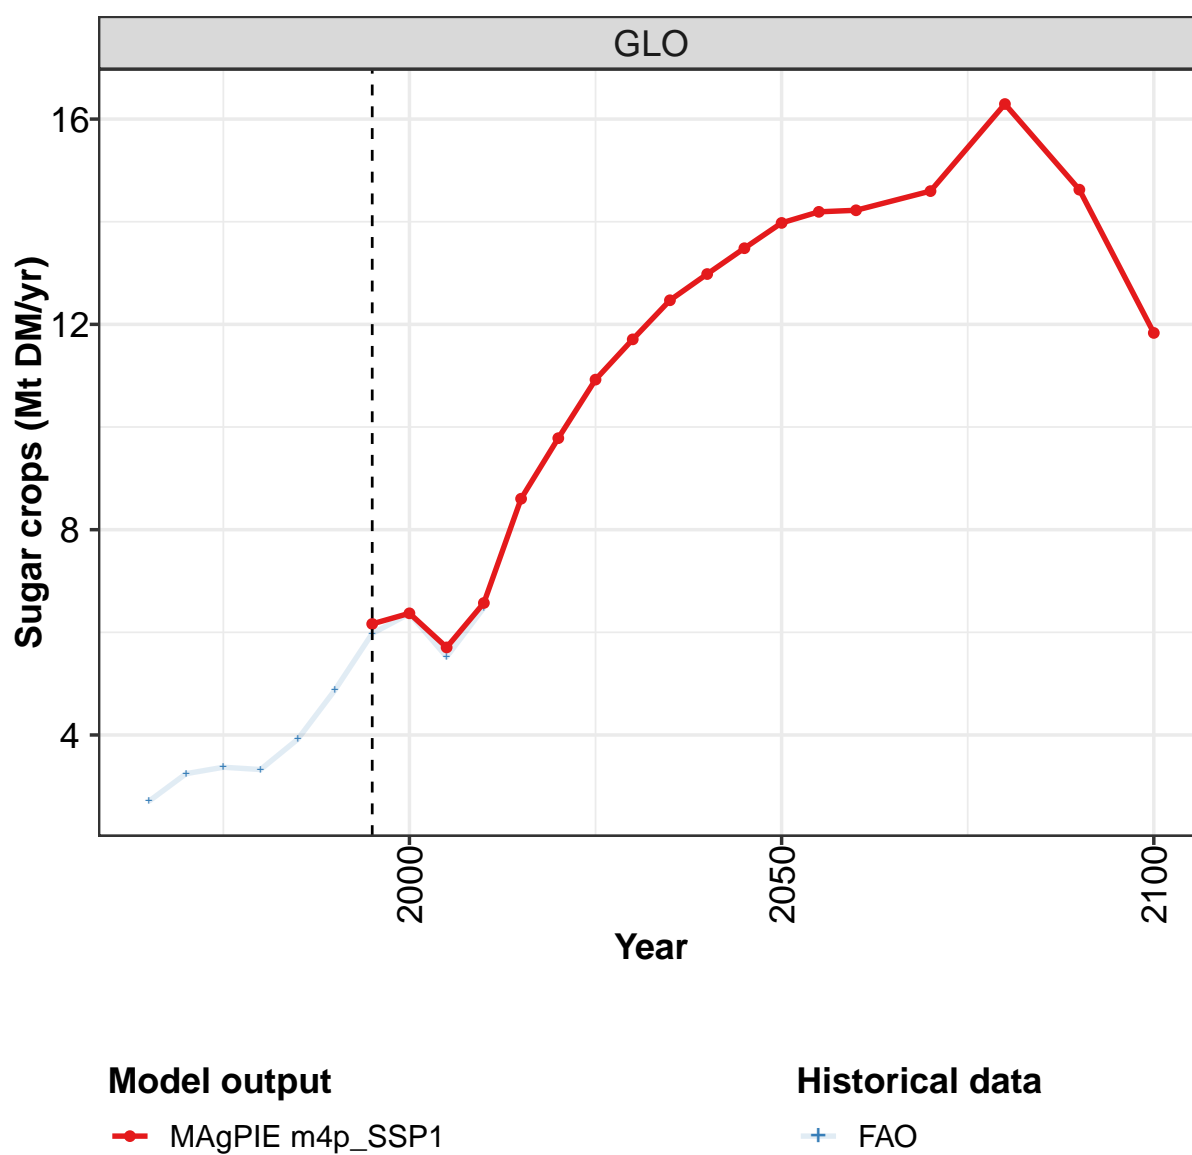

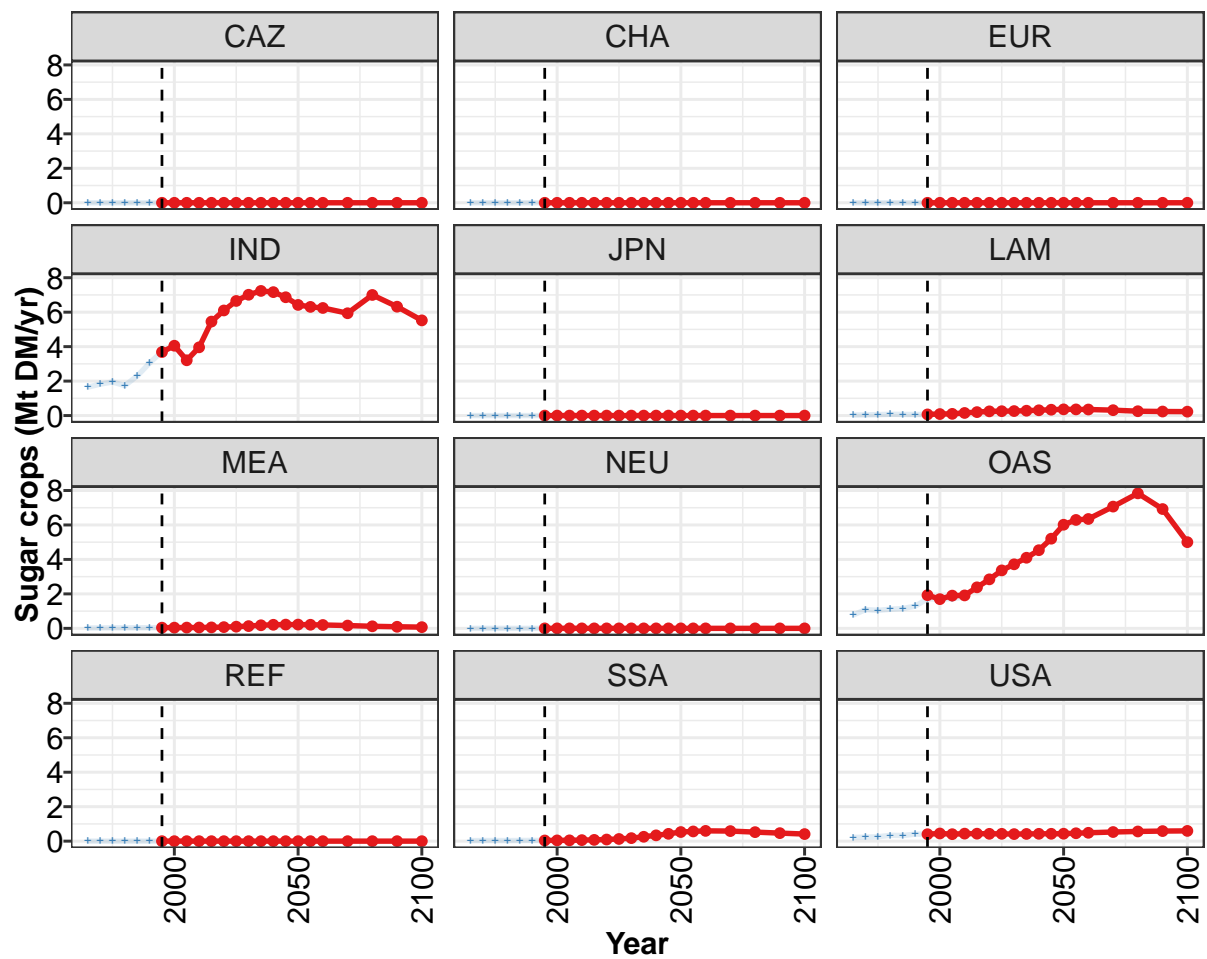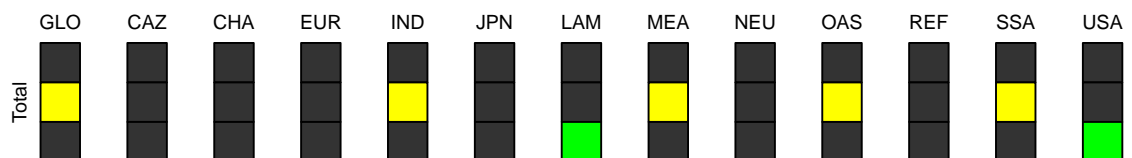

Figure 232: MAGPIE m4p\_SSP1 — Demand—Seed—Crops—Sugar crops (Mt DM/yr)

|     | 1995 | 2000 | 2005 | 2010 | 2015 | 2020 | 2025 | 2030 | 2035 | 2040 | 2045 |
|-----|------|------|------|------|------|------|------|------|------|------|------|
| GLO | 6.2  | 6.4  | 5.7  | 6.6  | 8.6  | 9.8  | 10.9 | 11.7 | 12.5 | 13.0 | 13.5 |
| CAZ | 0.0  | 0.0  | 0.0  | 0.0  | 0.0  | 0.0  | 0.0  | 0.0  | 0.0  | 0.0  | 0.0  |
| CHA | 0.0  | 0.0  | 0.0  | 0.0  | 0.0  | 0.0  | 0.0  | 0.0  | 0.0  | 0.0  | 0.0  |
| EUR | 0.0  | 0.0  | 0.0  | 0.0  | 0.0  | 0.0  | 0.0  | 0.0  | 0.0  | 0.0  | 0.0  |
| IND | 3.7  | 4.1  | 3.2  | 4.0  | 5.5  | 6.1  | 6.7  | 7.0  | 7.2  | 7.2  | 6.9  |
| JPN | 0.0  | 0.0  | 0.0  | 0.0  | 0.0  | 0.0  | 0.0  | 0.0  | 0.0  | 0.0  | 0.0  |
| LAM | 0.1  | 0.1  | 0.1  | 0.2  | 0.2  | 0.2  | 0.3  | 0.3  | 0.3  | 0.3  | 0.3  |
| MEA | 0.0  | 0.0  | 0.0  | 0.0  | 0.1  | 0.1  | 0.1  | 0.1  | 0.2  | 0.2  | 0.2  |
| NEU | 0.0  | 0.0  | 0.0  | 0.0  | 0.0  | 0.0  | 0.0  | 0.0  | 0.0  | 0.0  | 0.0  |
| OAS | 1.9  | 1.7  | 1.9  | 1.9  | 2.4  | 2.8  | 3.4  | 3.7  | 4.1  | 4.5  | 5.2  |
| REF | 0.0  | 0.0  | 0.0  | 0.0  | 0.0  | 0.0  | 0.0  | 0.0  | 0.0  | 0.0  | 0.0  |
| SSA | 0.0  | 0.0  | 0.0  | 0.1  | 0.1  | 0.1  | 0.1  | 0.2  | 0.3  | 0.3  | 0.4  |
| USA | 0.4  | 0.4  | 0.4  | 0.4  | 0.4  | 0.4  | 0.4  | 0.4  | 0.4  | 0.4  | 0.4  |

Table 695: MAgPIE m4p\_SSP1 — Demand—Seed—Crops—Sugar crops (Mt DM/yr) [PART 1/2]

|     | 2050 | 2055 | 2060 | 2070 | 2080 | 2090 | 2100 |
|-----|------|------|------|------|------|------|------|
| GLO | 14.0 | 14.2 | 14.2 | 14.6 | 16.3 | 14.6 | 11.8 |
| CAZ | 0.0  | 0.0  | 0.0  | 0.0  | 0.0  | 0.0  | 0.0  |
| CHA | 0.0  | 0.0  | 0.0  | 0.0  | 0.0  | 0.0  | 0.0  |
| EUR | 0.0  | 0.0  | 0.0  | 0.0  | 0.0  | 0.0  | 0.0  |
| IND | 6.4  | 6.3  | 6.2  | 5.9  | 7.0  | 6.3  | 5.5  |
| JPN | 0.0  | 0.0  | 0.0  | 0.0  | 0.0  | 0.0  | 0.0  |
| LAM | 0.4  | 0.4  | 0.4  | 0.3  | 0.3  | 0.2  | 0.2  |
| MEA | 0.2  | 0.2  | 0.2  | 0.2  | 0.1  | 0.1  | 0.1  |
| NEU | 0.0  | 0.0  | 0.0  | 0.0  | 0.0  | 0.0  | 0.0  |
| OAS | 6.0  | 6.3  | 6.3  | 7.1  | 7.8  | 6.9  | 5.0  |
| REF | 0.0  | 0.0  | 0.0  | 0.0  | 0.0  | 0.0  | 0.0  |
| SSA | 0.5  | 0.6  | 0.6  | 0.6  | 0.5  | 0.5  | 0.4  |
| USA | 0.4  | 0.5  | 0.5  | 0.5  | 0.6  | 0.6  | 0.6  |

Table 696: MAgPIE m4p\_SSP1 — Demand—Seed—Crops—Sugar crops (Mt DM/yr) [PART 2/2]

|     | 1965 | 1970 | 1975 | 1980 | 1985 | 1990 | 1995 | 2000 | 2005 | 2010 |
|-----|------|------|------|------|------|------|------|------|------|------|
| GLO | 2.71 | 3.25 | 3.37 | 3.33 | 3.92 | 4.88 | 5.98 | 6.36 | 5.52 | 6.48 |
| CAZ | 0.00 | 0.00 | 0.00 | 0.00 | 0.00 | 0.00 | 0.00 | 0.00 | 0.00 | 0.00 |
| CHA | 0.00 | 0.00 | 0.00 | 0.00 | 0.00 | 0.00 | 0.00 | 0.00 | 0.00 | 0.00 |
| EUR | 0.00 | 0.00 | 0.00 | 0.00 | 0.00 | 0.00 | 0.00 | 0.00 | 0.00 | 0.00 |
| IND | 1.65 | 1.82 | 1.95 | 1.74 | 2.30 | 3.05 | 3.72 | 4.04 | 3.20 | 3.95 |
| JPN | 0.00 | 0.00 | 0.00 | 0.00 | 0.00 | 0.00 | 0.00 | 0.00 | 0.00 | 0.00 |
| LAM | 0.03 | 0.04 | 0.05 | 0.08 | 0.07 | 0.06 | 0.06 | 0.09 | 0.10 | 0.15 |
| MEA | 0.02 | 0.03 | 0.03 | 0.03 | 0.04 | 0.04 | 0.04 | 0.04 | 0.04 | 0.04 |
| NEU | 0.00 | 0.00 | 0.00 | 0.00 | 0.00 | 0.00 | 0.00 | 0.00 | 0.00 | 0.00 |
| OAS | 0.77 | 1.09 | 1.05 | 1.11 | 1.15 | 1.29 | 1.71 | 1.70 | 1.72 | 1.83 |
| REF | 0.00 | 0.00 | 0.00 | 0.00 | 0.00 | 0.00 | 0.00 | 0.00 | 0.00 | 0.00 |
| SSA | 0.03 | 0.04 | 0.04 | 0.03 | 0.04 | 0.04 | 0.04 | 0.04 | 0.05 | 0.06 |
| USA | 0.22 | 0.23 | 0.25 | 0.34 | 0.33 | 0.41 | 0.40 | 0.45 | 0.40 | 0.46 |

Table 697: FAO — Demand—Seed—Crops—Sugar crops (Mt DM/yr)

## 10.1.18 Sugar crops—Sugar cane

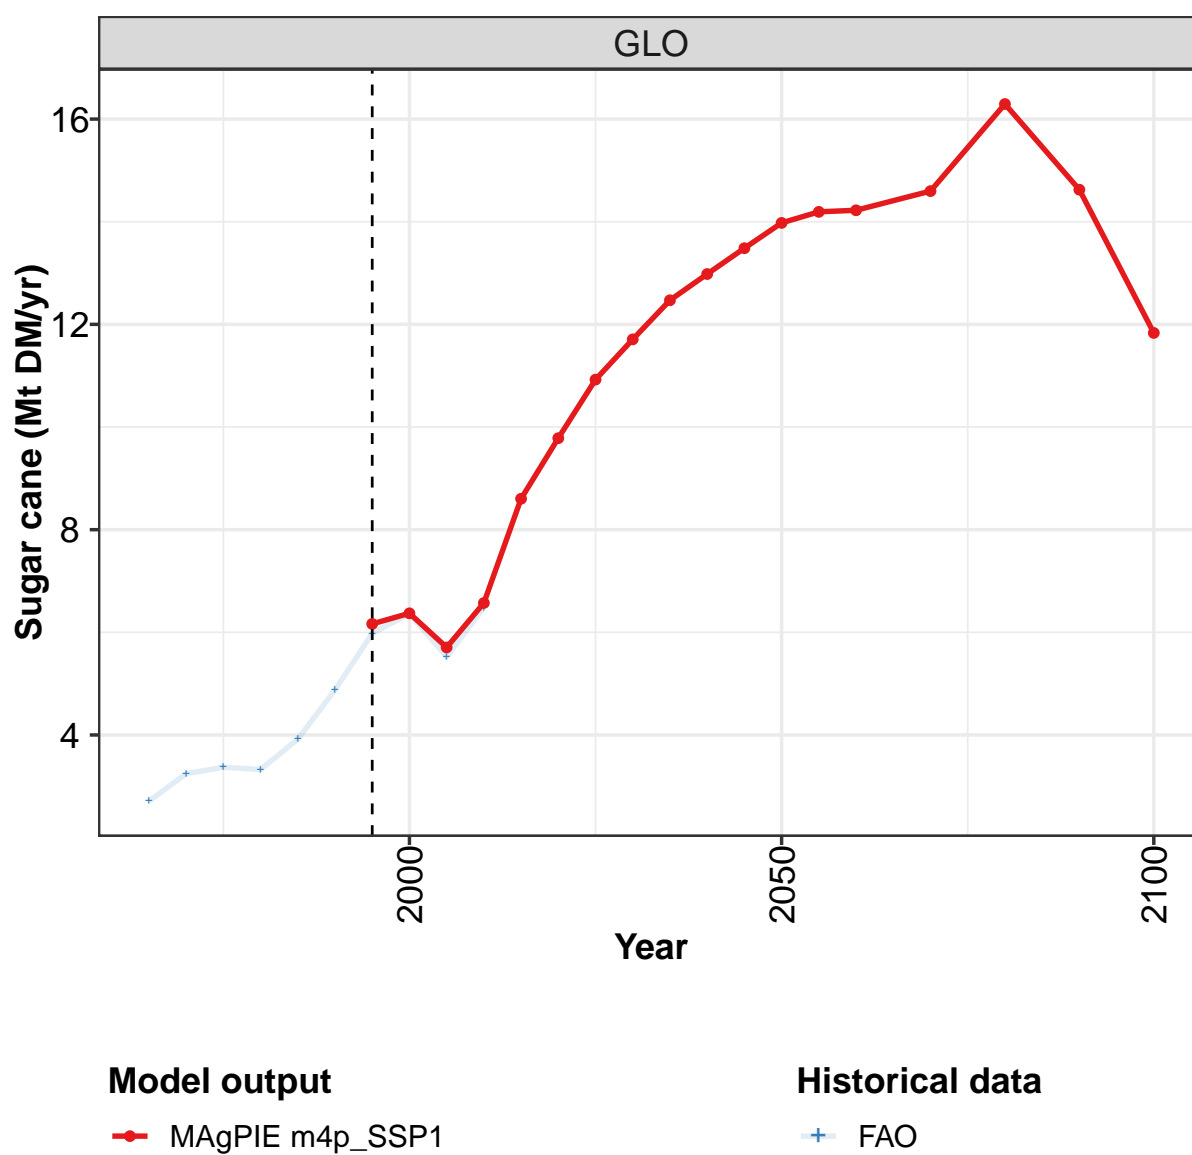

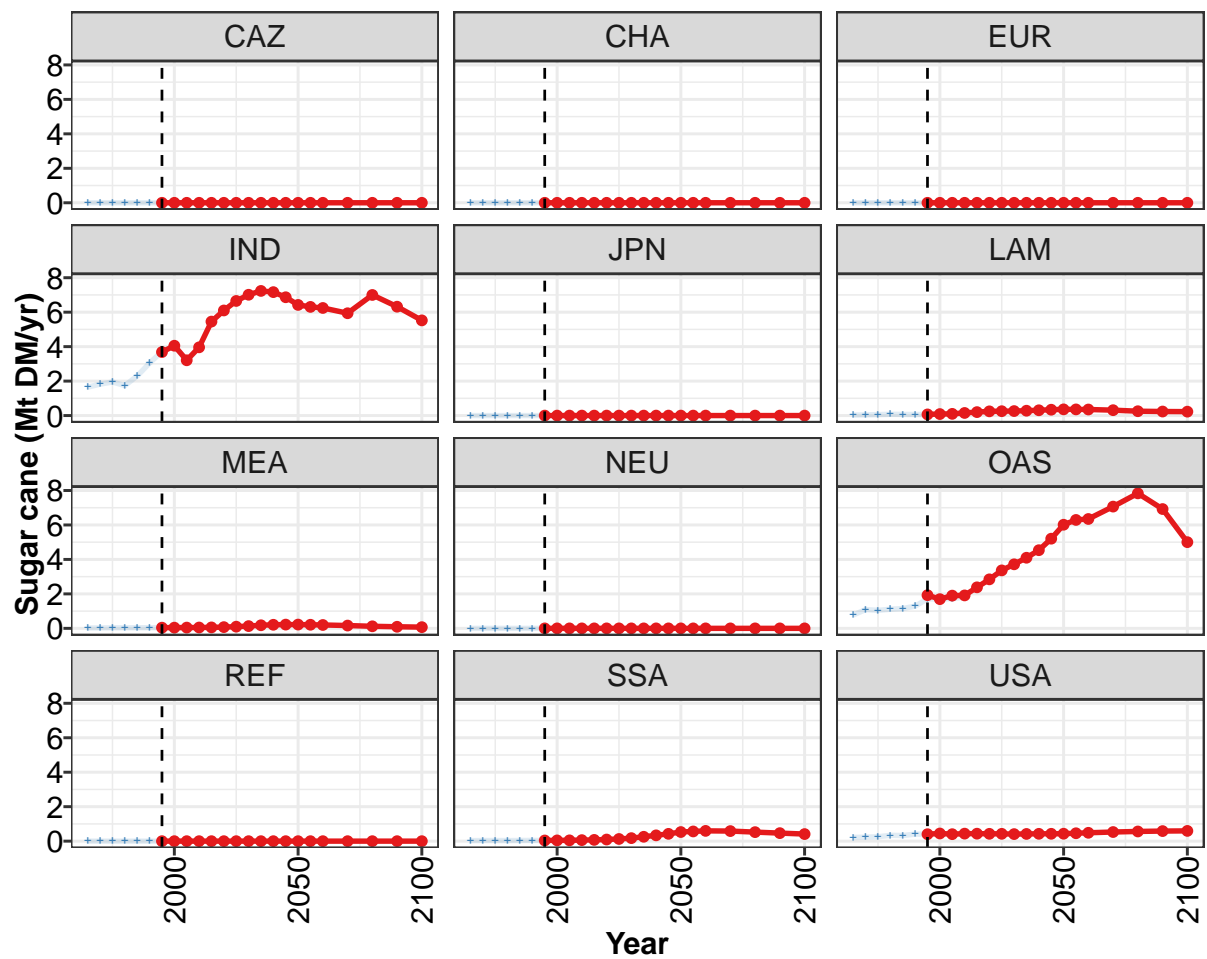

Figure 233: MAGPIE m4p\_SSP1 — Demand—Seed—Crops—Sugar crops—Sugar cane (Mt DM/yr)

|     | 1995 | 2000 | 2005 | 2010 | 2015 | 2020 | 2025 | 2030 | 2035 | 2040 | 2045 |
|-----|------|------|------|------|------|------|------|------|------|------|------|
| GLO | 6.2  | 6.4  | 5.7  | 6.6  | 8.6  | 9.8  | 10.9 | 11.7 | 12.5 | 13.0 | 13.5 |
| CAZ | 0.0  | 0.0  | 0.0  | 0.0  | 0.0  | 0.0  | 0.0  | 0.0  | 0.0  | 0.0  | 0.0  |
| CHA | 0.0  | 0.0  | 0.0  | 0.0  | 0.0  | 0.0  | 0.0  | 0.0  | 0.0  | 0.0  | 0.0  |
| EUR | 0.0  | 0.0  | 0.0  | 0.0  | 0.0  | 0.0  | 0.0  | 0.0  | 0.0  | 0.0  | 0.0  |
| IND | 3.7  | 4.1  | 3.2  | 4.0  | 5.5  | 6.1  | 6.7  | 7.0  | 7.2  | 7.2  | 6.9  |
| JPN | 0.0  | 0.0  | 0.0  | 0.0  | 0.0  | 0.0  | 0.0  | 0.0  | 0.0  | 0.0  | 0.0  |
| LAM | 0.1  | 0.1  | 0.1  | 0.2  | 0.2  | 0.2  | 0.3  | 0.3  | 0.3  | 0.3  | 0.3  |
| MEA | 0.0  | 0.0  | 0.0  | 0.0  | 0.1  | 0.1  | 0.1  | 0.1  | 0.2  | 0.2  | 0.2  |
| NEU | 0.0  | 0.0  | 0.0  | 0.0  | 0.0  | 0.0  | 0.0  | 0.0  | 0.0  | 0.0  | 0.0  |
| OAS | 1.9  | 1.7  | 1.9  | 1.9  | 2.4  | 2.8  | 3.4  | 3.7  | 4.1  | 4.5  | 5.2  |
| REF | 0.0  | 0.0  | 0.0  | 0.0  | 0.0  | 0.0  | 0.0  | 0.0  | 0.0  | 0.0  | 0.0  |
| SSA | 0.0  | 0.0  | 0.0  | 0.1  | 0.1  | 0.1  | 0.1  | 0.2  | 0.3  | 0.3  | 0.4  |
| USA | 0.4  | 0.4  | 0.4  | 0.4  | 0.4  | 0.4  | 0.4  | 0.4  | 0.4  | 0.4  | 0.4  |

Table 698: MAgPIE m4p\_SSP1 — Demand—Seed—Crops—Sugar crops—Sugar cane (Mt DM/yr) [PART 1/2]

|     | 2050 | 2055 | 2060 | 2070 | 2080 | 2090 | 2100 |
|-----|------|------|------|------|------|------|------|
| GLO | 14.0 | 14.2 | 14.2 | 14.6 | 16.3 | 14.6 | 11.8 |
| CAZ | 0.0  | 0.0  | 0.0  | 0.0  | 0.0  | 0.0  | 0.0  |
| CHA | 0.0  | 0.0  | 0.0  | 0.0  | 0.0  | 0.0  | 0.0  |
| EUR | 0.0  | 0.0  | 0.0  | 0.0  | 0.0  | 0.0  | 0.0  |
| IND | 6.4  | 6.3  | 6.2  | 5.9  | 7.0  | 6.3  | 5.5  |
| JPN | 0.0  | 0.0  | 0.0  | 0.0  | 0.0  | 0.0  | 0.0  |
| LAM | 0.4  | 0.4  | 0.4  | 0.3  | 0.3  | 0.2  | 0.2  |
| MEA | 0.2  | 0.2  | 0.2  | 0.2  | 0.1  | 0.1  | 0.1  |
| NEU | 0.0  | 0.0  | 0.0  | 0.0  | 0.0  | 0.0  | 0.0  |
| OAS | 6.0  | 6.3  | 6.3  | 7.1  | 7.8  | 6.9  | 5.0  |
| REF | 0.0  | 0.0  | 0.0  | 0.0  | 0.0  | 0.0  | 0.0  |
| SSA | 0.5  | 0.6  | 0.6  | 0.6  | 0.5  | 0.5  | 0.4  |
| USA | 0.4  | 0.5  | 0.5  | 0.5  | 0.6  | 0.6  | 0.6  |

Table 699: MAgPIE m4p\_SSP1 — Demand—Seed—Crops—Sugar crops—Sugar cane (Mt DM/yr) [PART 2/2]

|     | 1965 | 1970 | 1975 | 1980 | 1985 | 1990 | 1995 | 2000 | 2005 | 2010 |
|-----|------|------|------|------|------|------|------|------|------|------|
| GLO | 2.71 | 3.25 | 3.37 | 3.33 | 3.92 | 4.88 | 5.98 | 6.36 | 5.52 | 6.48 |
| CAZ | 0.00 | 0.00 | 0.00 | 0.00 | 0.00 | 0.00 | 0.00 | 0.00 | 0.00 | 0.00 |
| CHA | 0.00 | 0.00 | 0.00 | 0.00 | 0.00 | 0.00 | 0.00 | 0.00 | 0.00 | 0.00 |
| EUR | 0.00 | 0.00 | 0.00 | 0.00 | 0.00 | 0.00 | 0.00 | 0.00 | 0.00 | 0.00 |
| IND | 1.65 | 1.82 | 1.95 | 1.74 | 2.30 | 3.05 | 3.72 | 4.04 | 3.20 | 3.95 |
| JPN | 0.00 | 0.00 | 0.00 | 0.00 | 0.00 | 0.00 | 0.00 | 0.00 | 0.00 | 0.00 |
| LAM | 0.03 | 0.04 | 0.05 | 0.08 | 0.07 | 0.06 | 0.06 | 0.09 | 0.10 | 0.15 |
| MEA | 0.02 | 0.03 | 0.03 | 0.03 | 0.04 | 0.04 | 0.04 | 0.04 | 0.04 | 0.04 |
| NEU | 0.00 | 0.00 | 0.00 | 0.00 | 0.00 | 0.00 | 0.00 | 0.00 | 0.00 | 0.00 |
| OAS | 0.77 | 1.09 | 1.05 | 1.11 | 1.15 | 1.29 | 1.71 | 1.70 | 1.72 | 1.83 |
| REF | 0.00 | 0.00 | 0.00 | 0.00 | 0.00 | 0.00 | 0.00 | 0.00 | 0.00 | 0.00 |
| SSA | 0.03 | 0.04 | 0.04 | 0.03 | 0.04 | 0.04 | 0.04 | 0.04 | 0.05 | 0.06 |
| USA | 0.22 | 0.23 | 0.25 | 0.34 | 0.33 | 0.41 | 0.40 | 0.45 | 0.40 | 0.46 |

Table 700: FAO — Demand—Seed—Crops—Sugar crops—Sugar cane (Mt DM/yr)

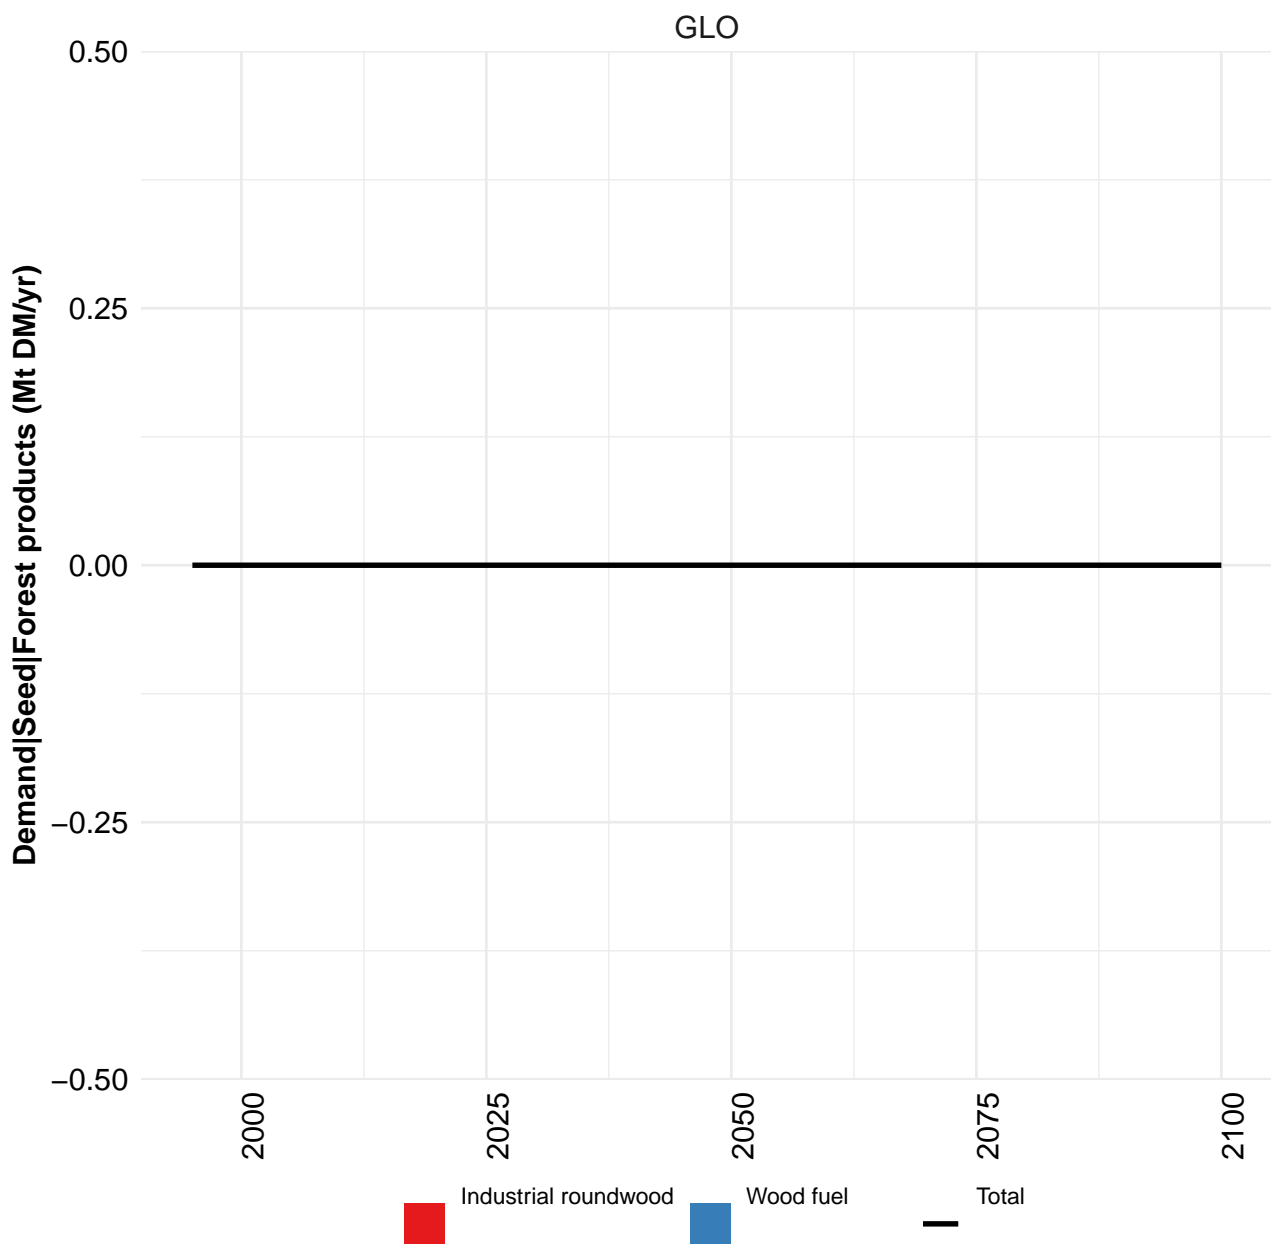



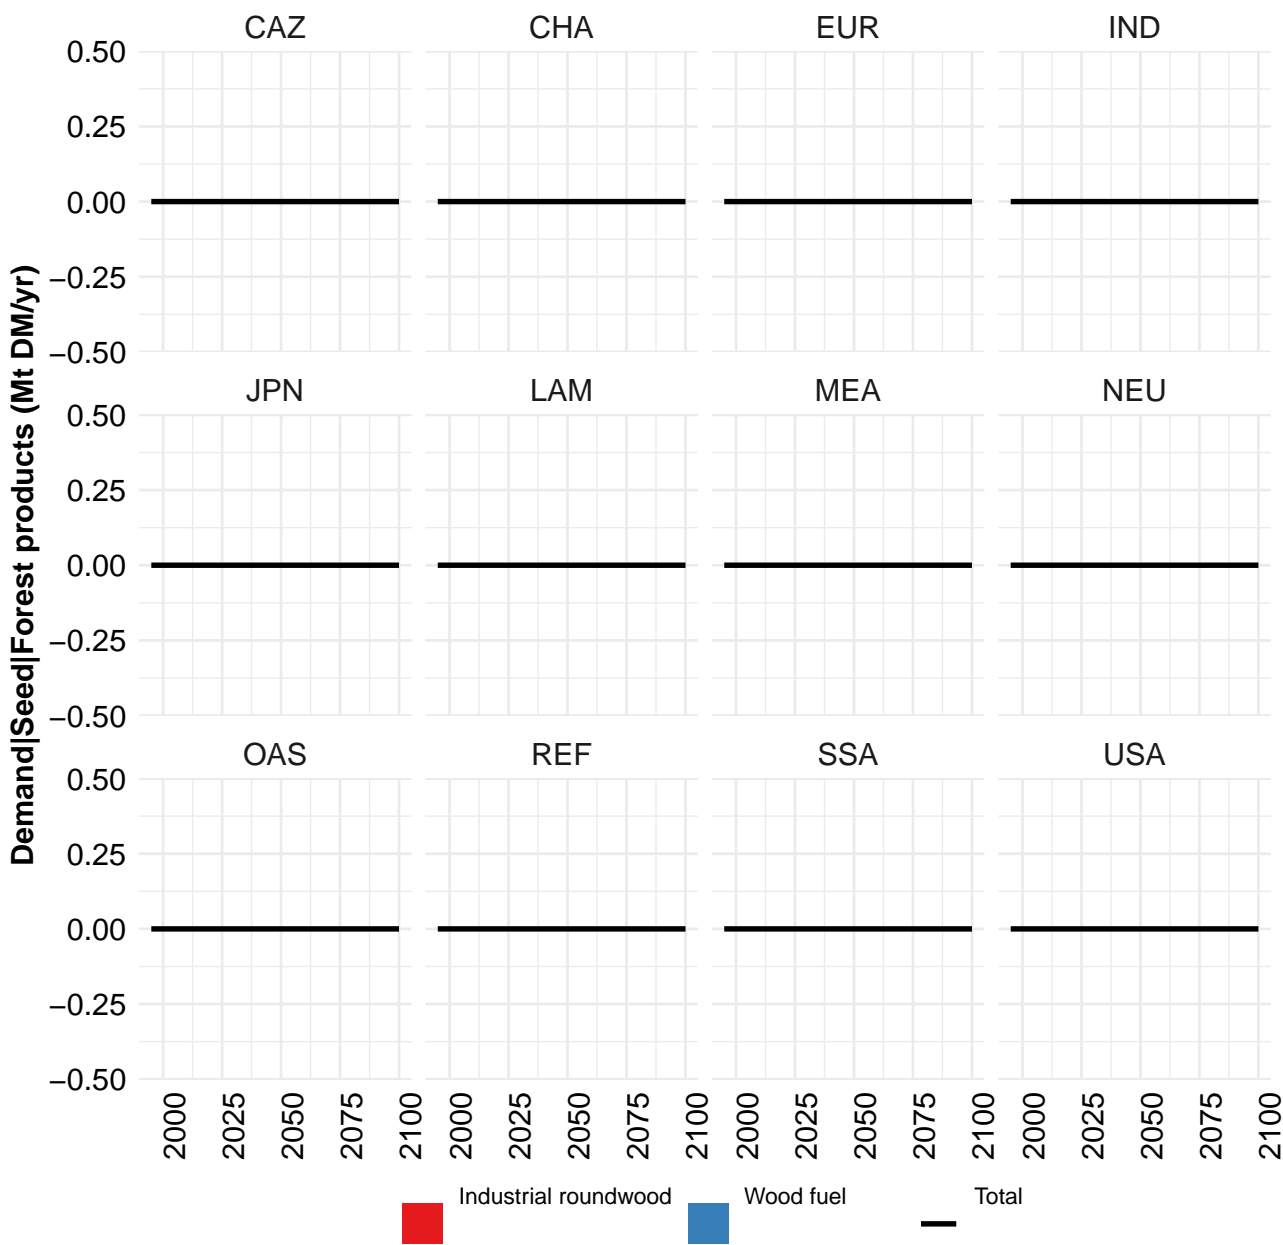

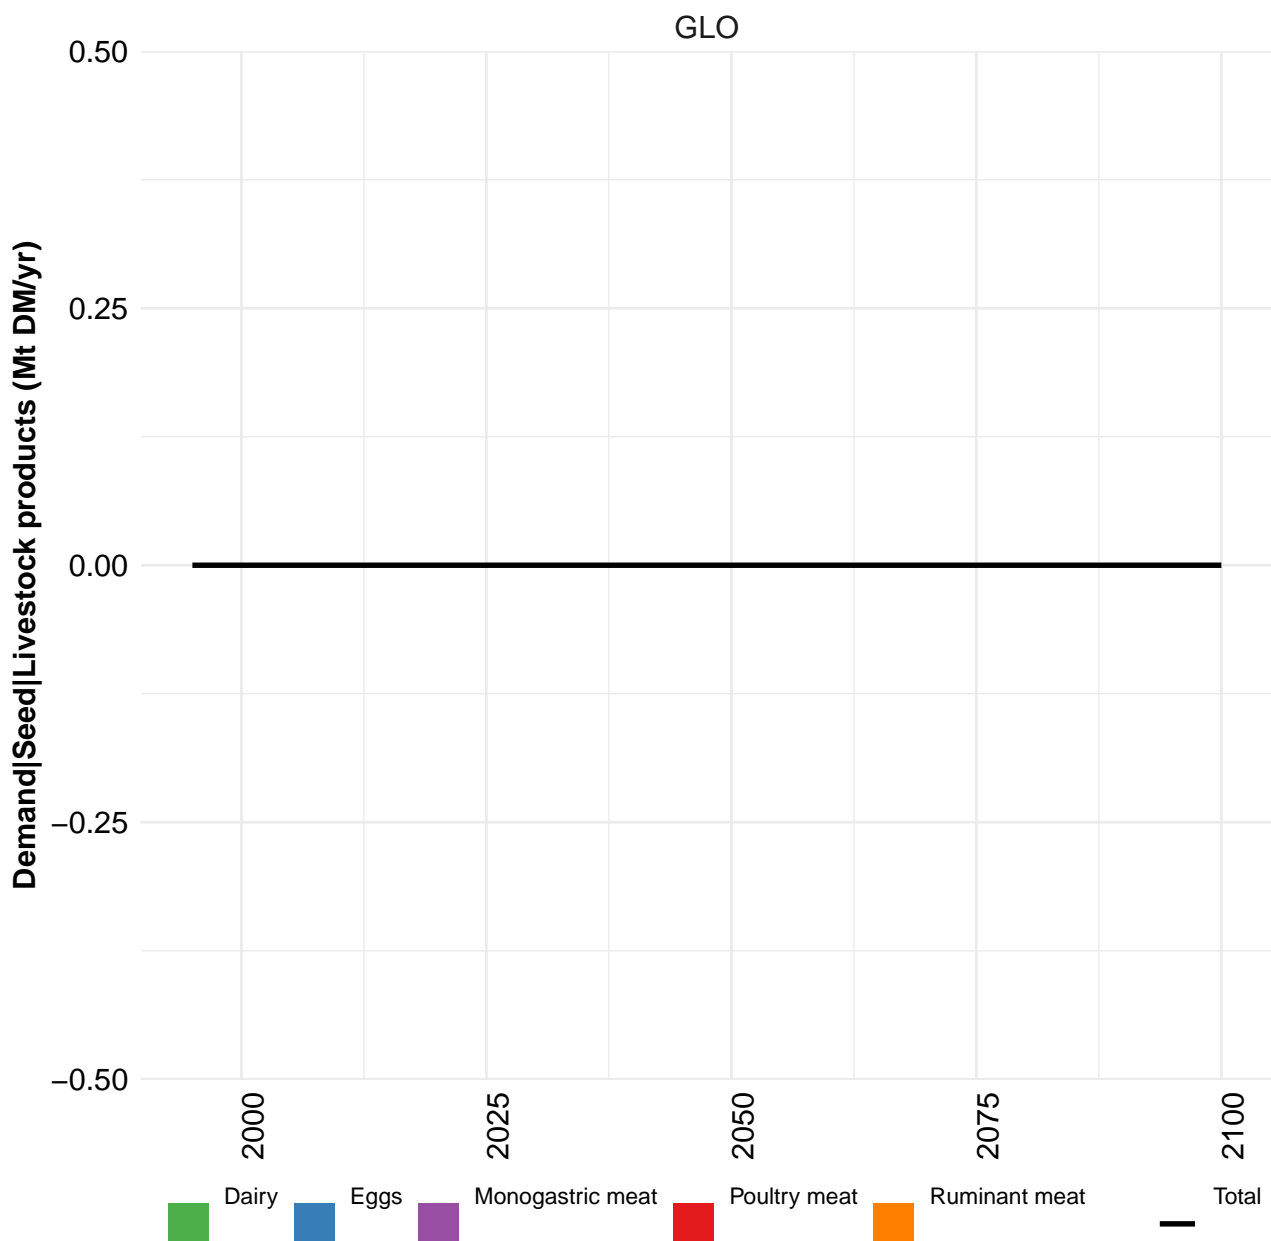

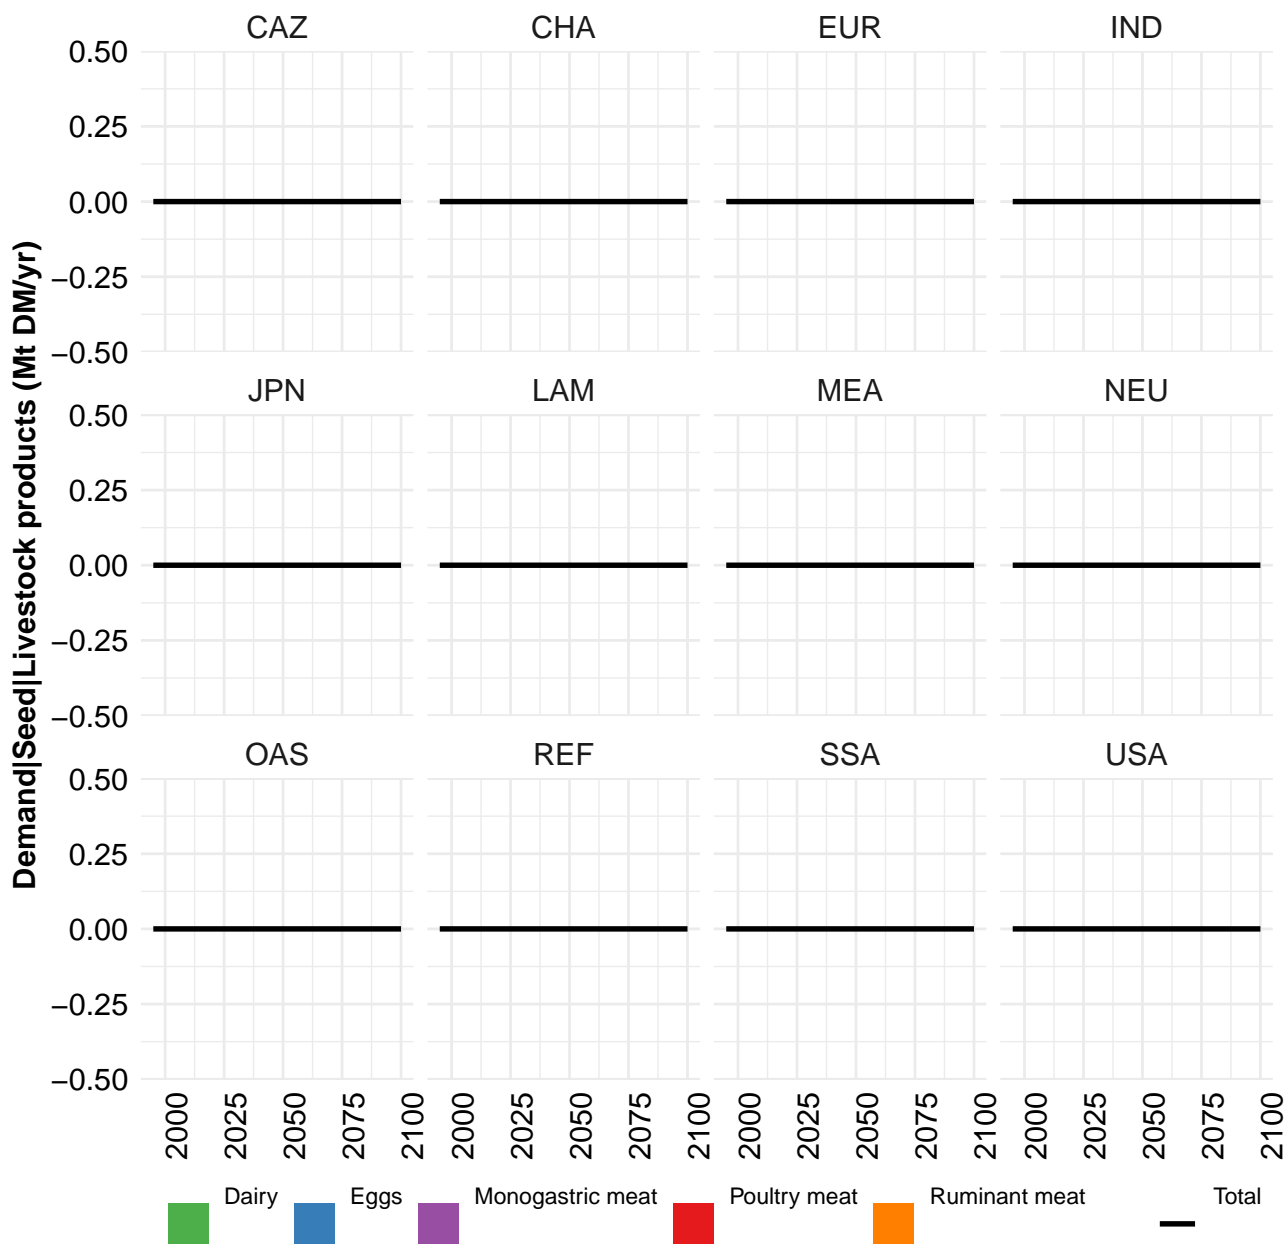

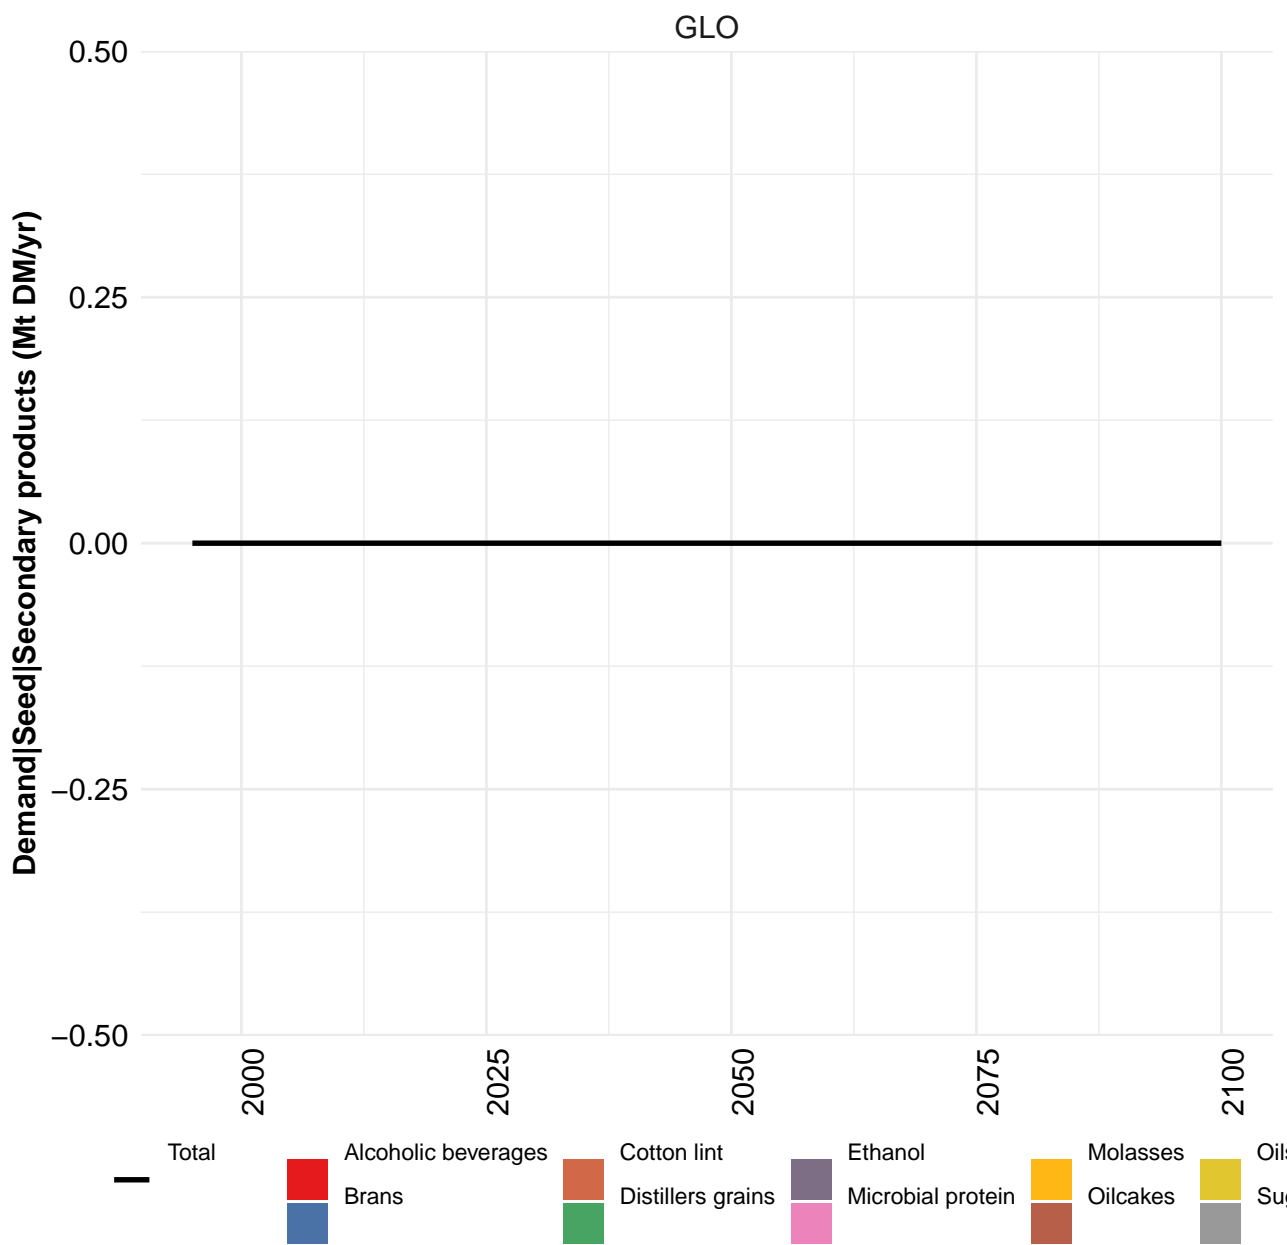

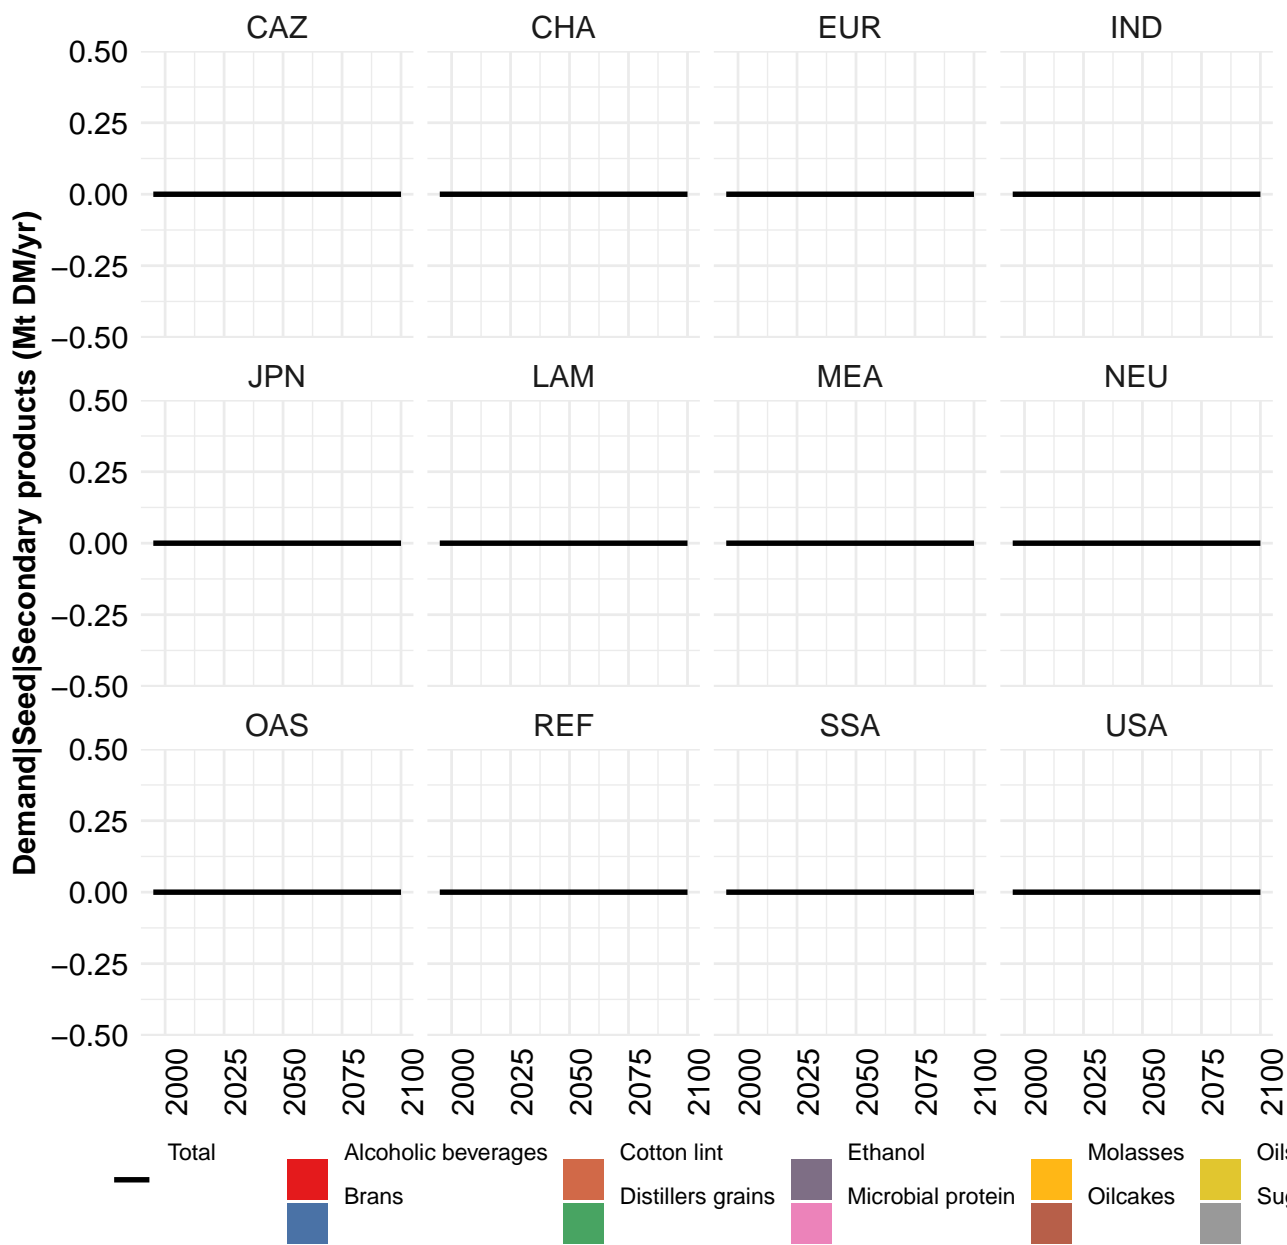

## Part IV

## Emissions

11 CH<sub>4</sub>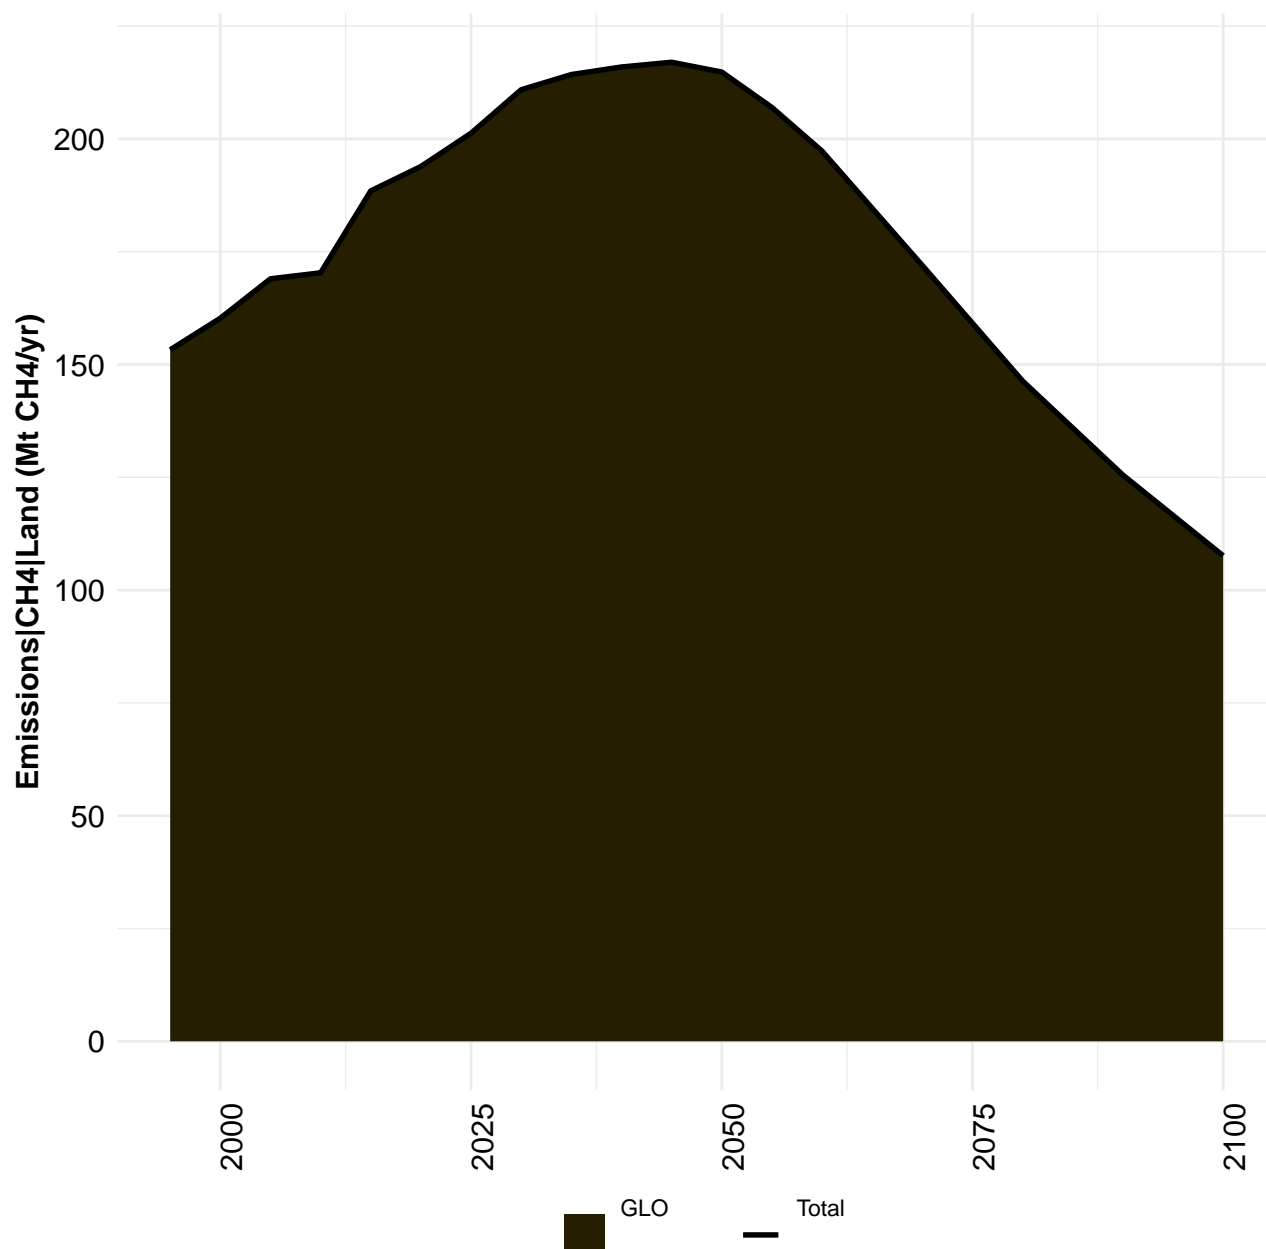

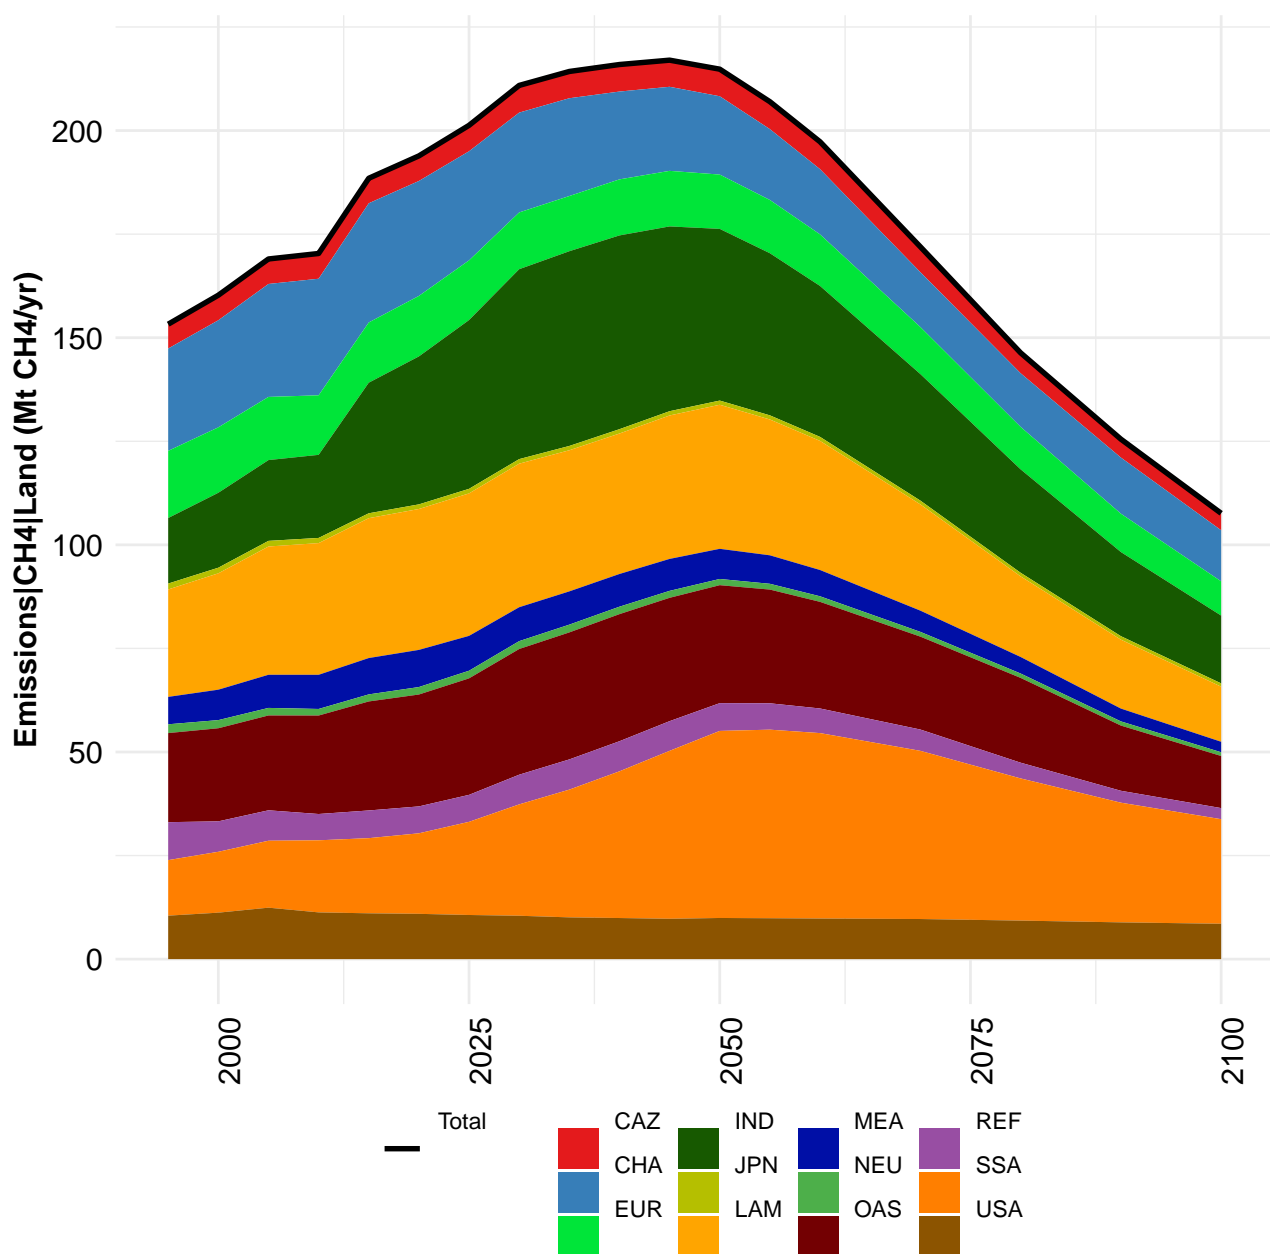

11.1 Land

11.1.1 Agriculture

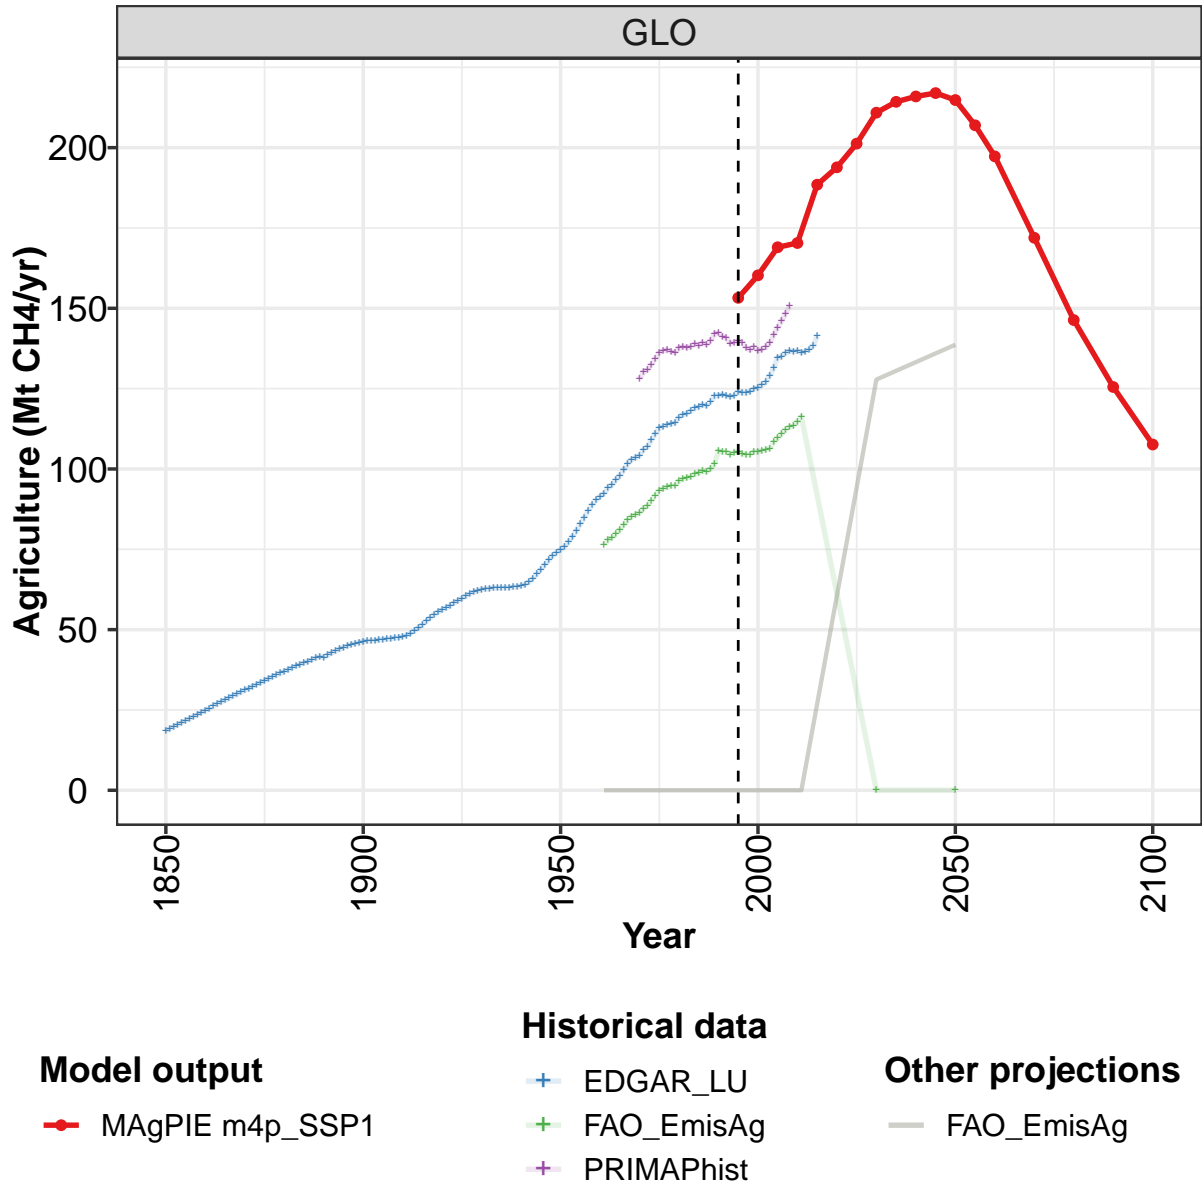



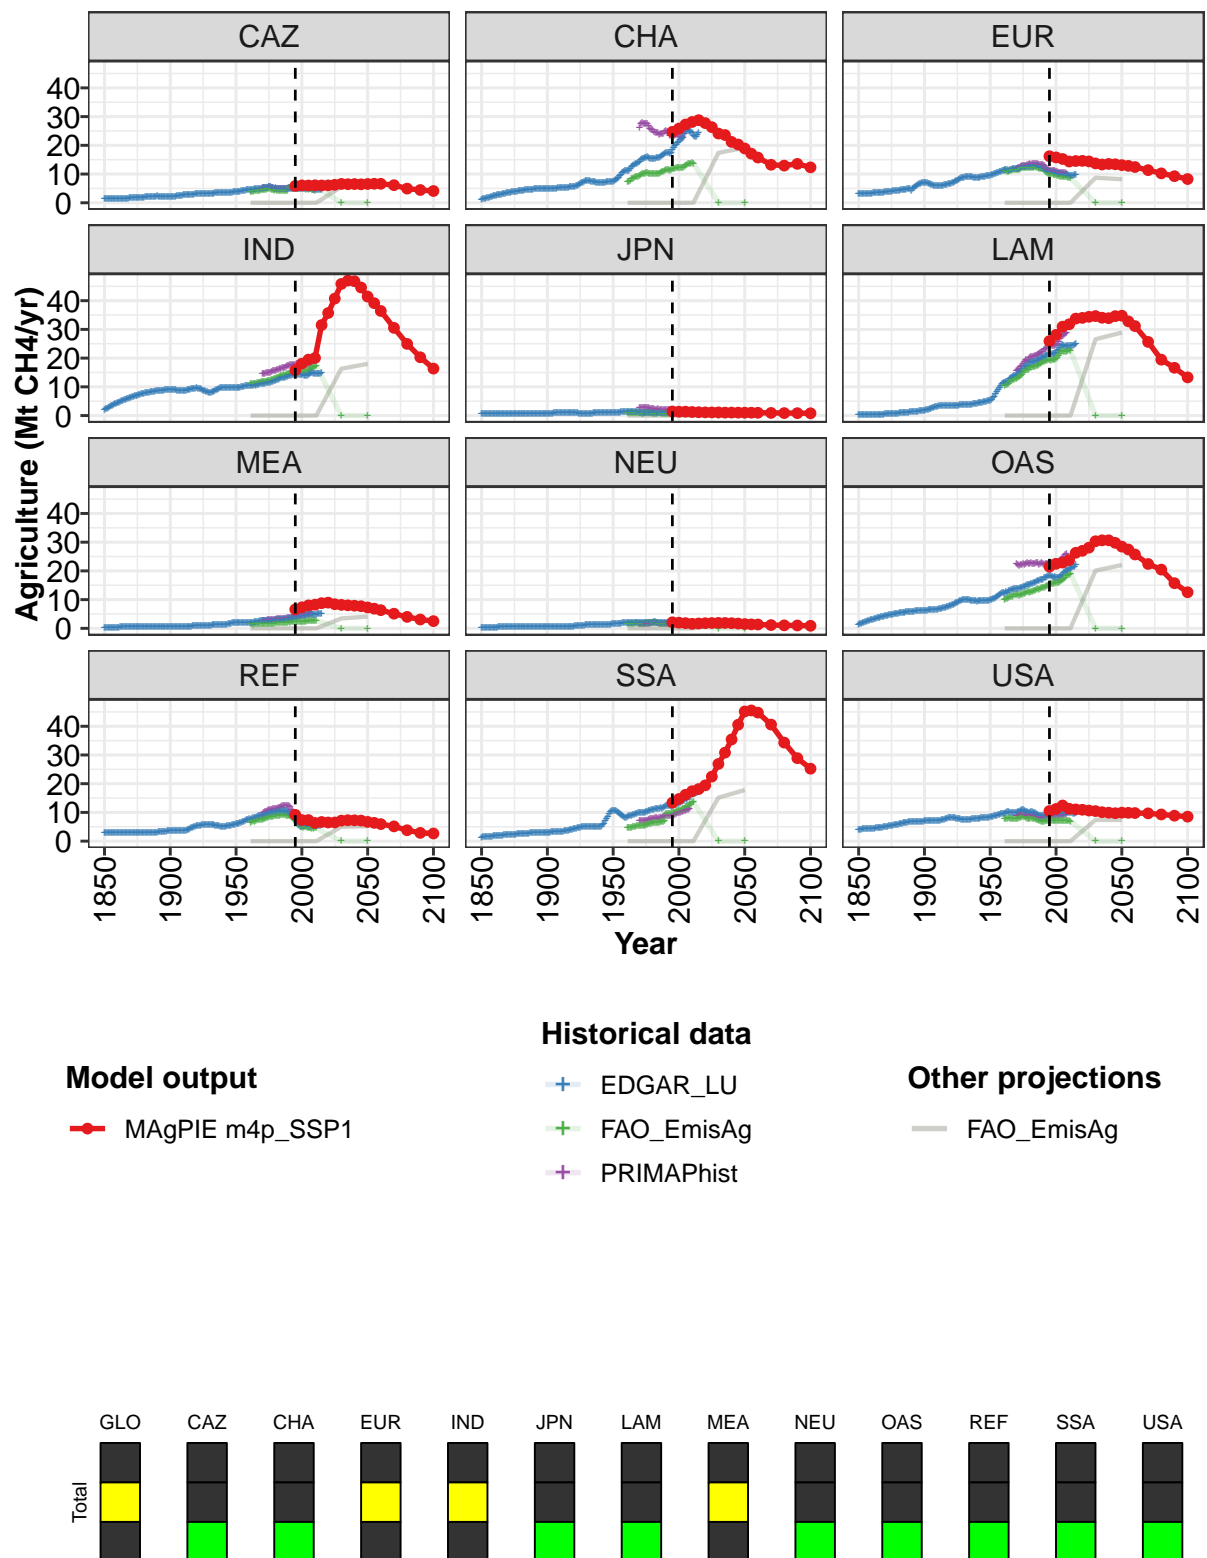Figure 234: MAgPIE m4p\_SSP1 — Emissions—CH<sub>4</sub>—Land—Agriculture (Mt CH<sub>4</sub>/yr)

|     | 1995 | 2000 | 2005 | 2010 | 2015 | 2020 | 2025 | 2030 | 2035 | 2040 | 2045 |
|-----|------|------|------|------|------|------|------|------|------|------|------|
| GLO | 153  | 160  | 169  | 170  | 188  | 194  | 201  | 211  | 214  | 216  | 217  |
| CAZ | 6    | 6    | 6    | 6    | 6    | 6    | 6    | 7    | 6    | 7    | 6    |
| CHA | 25   | 26   | 27   | 28   | 29   | 28   | 26   | 24   | 24   | 21   | 20   |
| EUR | 16   | 16   | 15   | 14   | 15   | 15   | 14   | 14   | 13   | 14   | 13   |
| IND | 16   | 18   | 19   | 20   | 32   | 36   | 41   | 46   | 47   | 47   | 45   |
| JPN | 1    | 1    | 1    | 1    | 1    | 1    | 1    | 1    | 1    | 1    | 1    |
| LAM | 26   | 28   | 31   | 32   | 34   | 34   | 34   | 35   | 34   | 34   | 35   |
| MEA | 7    | 7    | 8    | 8    | 9    | 9    | 8    | 8    | 8    | 8    | 8    |
| NEU | 2    | 2    | 2    | 2    | 2    | 2    | 2    | 2    | 2    | 2    | 2    |
| OAS | 22   | 22   | 23   | 24   | 26   | 27   | 28   | 30   | 31   | 31   | 30   |
| REF | 9    | 7    | 7    | 6    | 7    | 6    | 7    | 7    | 7    | 7    | 7    |
| SSA | 13   | 15   | 16   | 17   | 18   | 19   | 22   | 27   | 31   | 35   | 41   |
| USA | 10   | 11   | 12   | 11   | 11   | 11   | 11   | 10   | 10   | 10   | 10   |

Table 701: MAgPIE m4p\_SSP1 — Emissions—CH4—Land—Agriculture (Mt CH4/yr) [PART 1/2]

|     | 2050 | 2055 | 2060 | 2070 | 2080 | 2090 | 2100 |
|-----|------|------|------|------|------|------|------|
| GLO | 215  | 207  | 197  | 172  | 146  | 126  | 108  |
| CAZ | 7    | 7    | 7    | 6    | 5    | 4    | 4    |
| CHA | 19   | 17   | 16   | 13   | 13   | 14   | 12   |
| EUR | 13   | 13   | 12   | 11   | 10   | 9    | 8    |
| IND | 41   | 39   | 36   | 31   | 25   | 20   | 16   |
| JPN | 1    | 1    | 1    | 1    | 1    | 1    | 1    |
| LAM | 35   | 33   | 31   | 26   | 19   | 17   | 13   |
| MEA | 7    | 7    | 6    | 5    | 4    | 3    | 3    |
| NEU | 2    | 1    | 1    | 1    | 1    | 1    | 1    |
| OAS | 28   | 27   | 26   | 22   | 20   | 16   | 13   |
| REF | 7    | 6    | 6    | 5    | 4    | 3    | 3    |
| SSA | 45   | 46   | 45   | 41   | 34   | 29   | 25   |
| USA | 10   | 10   | 10   | 10   | 9    | 9    | 9    |

Table 702: MAgPIE m4p\_SSP1 — Emissions—CH4—Land—Agriculture (Mt CH4/yr) [PART 2/2]

|     | 1850 | 1851 | 1852 | 1853 | 1854 | 1855 | 1856 | 1857 | 1858 | 1859 | 1860 |
|-----|------|------|------|------|------|------|------|------|------|------|------|
| GLO | 18   | 19   | 20   | 20   | 21   | 22   | 22   | 23   | 24   | 24   | 25   |
| CAZ | 1    | 1    | 1    | 1    | 1    | 1    | 1    | 1    | 1    | 1    | 1    |
| CHA | 1    | 1    | 1    | 2    | 2    | 2    | 2    | 2    | 2    | 2    | 2    |
| EUR | 3    | 3    | 3    | 3    | 3    | 3    | 3    | 3    | 3    | 3    | 3    |
| IND | 2    | 2    | 3    | 3    | 3    | 3    | 3    | 4    | 4    | 4    | 4    |
| JPN | 0    | 0    | 0    | 0    | 0    | 0    | 0    | 0    | 0    | 0    | 0    |
| LAM | 0    | 0    | 0    | 0    | 0    | 0    | 0    | 0    | 0    | 0    | 0    |
| MEA | 0    | 0    | 0    | 0    | 0    | 0    | 0    | 0    | 0    | 0    | 0    |
| NEU | 0    | 0    | 0    | 0    | 0    | 0    | 0    | 0    | 0    | 0    | 0    |
| OAS | 1    | 2    | 2    | 2    | 2    | 2    | 2    | 3    | 3    | 3    | 3    |
| REF | 3    | 3    | 3    | 3    | 3    | 3    | 3    | 3    | 3    | 3    | 3    |
| SSA | 1    | 1    | 1    | 1    | 2    | 2    | 2    | 2    | 2    | 2    | 2    |
| USA | 4    | 4    | 4    | 4    | 4    | 4    | 4    | 4    | 4    | 4    | 4    |

Table 703: PRIMAPHist — Emissions—CH4—Land—Agriculture (Mt CH4/yr) [PART 1/16]

|     | 1861 | 1862 | 1863 | 1864 | 1865 | 1866 | 1867 | 1868 | 1869 | 1870 | 1871 |
|-----|------|------|------|------|------|------|------|------|------|------|------|
| GLO | 26   | 26   | 27   | 27   | 28   | 29   | 29   | 30   | 31   | 31   | 32   |
| CAZ | 1    | 1    | 1    | 1    | 1    | 2    | 2    | 2    | 2    | 2    | 2    |
| CHA | 3    | 3    | 3    | 3    | 3    | 3    | 3    | 3    | 3    | 3    | 4    |
| EUR | 3    | 3    | 3    | 3    | 3    | 3    | 4    | 4    | 4    | 4    | 4    |
| IND | 5    | 5    | 5    | 5    | 5    | 6    | 6    | 6    | 6    | 6    | 6    |
| JPN | 0    | 0    | 0    | 1    | 1    | 1    | 1    | 1    | 1    | 1    | 1    |
| LAM | 0    | 0    | 0    | 0    | 0    | 0    | 0    | 0    | 0    | 0    | 0    |
| MEA | 0    | 0    | 0    | 0    | 0    | 0    | 0    | 0    | 0    | 0    | 0    |
| NEU | 0    | 0    | 0    | 0    | 0    | 0    | 0    | 0    | 0    | 0    | 0    |
| OAS | 3    | 3    | 3    | 4    | 4    | 4    | 4    | 4    | 4    | 4    | 4    |
| REF | 3    | 3    | 3    | 3    | 3    | 3    | 3    | 3    | 3    | 3    | 3    |
| SSA | 2    | 2    | 2    | 2    | 2    | 2    | 2    | 2    | 2    | 2    | 2    |
| USA | 4    | 4    | 4    | 5    | 5    | 5    | 5    | 5    | 5    | 5    | 5    |

Table 704: PRIMAPHist — Emissions—CH4—Land—Agriculture (Mt CH4/yr) [PART 2/16]

|     | 1872 | 1873 | 1874 | 1875 | 1876 | 1877 | 1878 | 1879 | 1880 | 1881 | 1882 |
|-----|------|------|------|------|------|------|------|------|------|------|------|
| GLO | 32   | 33   | 34   | 34   | 35   | 35   | 36   | 36   | 37   | 38   | 38   |
| CAZ | 2    | 2    | 2    | 2    | 2    | 2    | 2    | 2    | 2    | 2    | 2    |
| CHA | 4    | 4    | 4    | 4    | 4    | 4    | 4    | 4    | 4    | 4    | 4    |
| EUR | 4    | 4    | 4    | 4    | 4    | 4    | 4    | 4    | 4    | 4    | 4    |
| IND | 7    | 7    | 7    | 7    | 7    | 7    | 7    | 8    | 8    | 8    | 8    |
| JPN | 1    | 1    | 1    | 1    | 1    | 1    | 1    | 1    | 1    | 1    | 1    |
| LAM | 1    | 1    | 1    | 1    | 1    | 1    | 1    | 1    | 1    | 1    | 1    |
| MEA | 0    | 0    | 0    | 0    | 0    | 0    | 0    | 1    | 1    | 1    | 1    |
| NEU | 0    | 0    | 0    | 0    | 0    | 0    | 0    | 0    | 0    | 0    | 0    |
| OAS | 4    | 5    | 5    | 5    | 5    | 5    | 5    | 5    | 5    | 5    | 5    |
| REF | 3    | 3    | 3    | 3    | 3    | 3    | 3    | 3    | 3    | 3    | 3    |
| SSA | 2    | 2    | 2    | 2    | 2    | 2    | 2    | 2    | 3    | 3    | 3    |
| USA | 5    | 5    | 5    | 5    | 5    | 6    | 6    | 6    | 6    | 6    | 6    |

Table 705: PRIMAPHist — Emissions—CH4—Land—Agriculture (Mt CH4/yr) [PART 3/16]

|     | 1883 | 1884 | 1885 | 1886 | 1887 | 1888 | 1889 | 1890 | 1891 | 1892 | 1893 |
|-----|------|------|------|------|------|------|------|------|------|------|------|
| GLO | 39   | 39   | 40   | 40   | 41   | 41   | 42   | 41   | 42   | 43   | 43   |
| CAZ | 2    | 2    | 2    | 2    | 2    | 2    | 2    | 2    | 2    | 2    | 2    |
| CHA | 4    | 4    | 4    | 5    | 5    | 5    | 5    | 5    | 5    | 5    | 5    |
| EUR | 4    | 5    | 5    | 5    | 5    | 5    | 5    | 4    | 5    | 5    | 6    |
| IND | 8    | 8    | 8    | 8    | 8    | 8    | 8    | 8    | 9    | 9    | 9    |
| JPN | 1    | 1    | 1    | 1    | 1    | 1    | 1    | 1    | 1    | 1    | 1    |
| LAM | 1    | 1    | 1    | 1    | 1    | 1    | 1    | 1    | 1    | 1    | 1    |
| MEA | 1    | 1    | 1    | 1    | 1    | 1    | 1    | 1    | 1    | 1    | 1    |
| NEU | 0    | 0    | 0    | 0    | 1    | 1    | 1    | 1    | 1    | 1    | 1    |
| OAS | 5    | 5    | 6    | 6    | 6    | 6    | 6    | 6    | 6    | 6    | 6    |
| REF | 3    | 3    | 3    | 3    | 3    | 3    | 3    | 3    | 3    | 3    | 3    |
| SSA | 3    | 3    | 3    | 3    | 3    | 3    | 3    | 3    | 3    | 3    | 3    |
| USA | 6    | 6    | 6    | 6    | 7    | 7    | 7    | 7    | 7    | 7    | 7    |

Table 706: PRIMAPHist — Emissions—CH4—Land—Agriculture (Mt CH4/yr) [PART 4/16]

|     | 1894 | 1895 | 1896 | 1897 | 1898 | 1899 | 1900 | 1901 | 1902 | 1903 | 1904 |
|-----|------|------|------|------|------|------|------|------|------|------|------|
| GLO | 44   | 44   | 45   | 45   | 46   | 46   | 46   | 46   | 47   | 47   | 47   |
| CAZ | 2    | 2    | 2    | 2    | 2    | 2    | 2    | 2    | 2    | 2    | 2    |
| CHA | 5    | 5    | 5    | 5    | 5    | 5    | 5    | 5    | 5    | 5    | 5    |
| EUR | 6    | 6    | 7    | 7    | 7    | 7    | 7    | 7    | 7    | 7    | 7    |
| IND | 9    | 9    | 9    | 9    | 9    | 9    | 9    | 9    | 9    | 9    | 9    |
| JPN | 1    | 1    | 1    | 1    | 1    | 1    | 1    | 1    | 1    | 1    | 1    |
| LAM | 1    | 1    | 2    | 2    | 2    | 2    | 2    | 2    | 2    | 2    | 2    |
| MEA | 1    | 1    | 1    | 1    | 1    | 1    | 1    | 1    | 1    | 1    | 1    |
| NEU | 1    | 1    | 1    | 1    | 1    | 1    | 1    | 1    | 1    | 1    | 1    |
| OAS | 6    | 6    | 6    | 6    | 6    | 6    | 6    | 6    | 6    | 6    | 6    |
| REF | 3    | 3    | 3    | 3    | 3    | 3    | 3    | 3    | 4    | 4    | 4    |
| SSA | 3    | 3    | 3    | 3    | 3    | 3    | 3    | 3    | 3    | 3    | 3    |
| USA | 7    | 7    | 7    | 7    | 7    | 7    | 7    | 7    | 7    | 7    | 7    |

Table 707: PRIMAPhist — Emissions—CH4—Land—Agriculture (Mt CH4/yr) [PART 5/16]

|     | 1905 | 1906 | 1907 | 1908 | 1909 | 1910 | 1911 | 1912 | 1913 | 1914 | 1915 |
|-----|------|------|------|------|------|------|------|------|------|------|------|
| GLO | 47   | 47   | 47   | 47   | 48   | 48   | 48   | 49   | 50   | 51   | 52   |
| CAZ | 2    | 2    | 2    | 3    | 3    | 3    | 3    | 3    | 3    | 3    | 3    |
| CHA | 5    | 5    | 5    | 5    | 5    | 5    | 5    | 5    | 5    | 5    | 5    |
| EUR | 6    | 6    | 6    | 6    | 6    | 6    | 6    | 6    | 6    | 6    | 6    |
| IND | 9    | 9    | 9    | 9    | 9    | 9    | 9    | 9    | 9    | 9    | 9    |
| JPN | 1    | 1    | 1    | 1    | 1    | 1    | 1    | 1    | 1    | 1    | 1    |
| LAM | 3    | 3    | 3    | 3    | 3    | 3    | 3    | 3    | 3    | 3    | 3    |
| MEA | 1    | 1    | 1    | 1    | 1    | 1    | 1    | 1    | 1    | 1    | 1    |
| NEU | 1    | 1    | 1    | 1    | 1    | 1    | 1    | 1    | 1    | 1    | 1    |
| OAS | 6    | 6    | 6    | 7    | 7    | 7    | 7    | 7    | 7    | 7    | 7    |
| REF | 4    | 4    | 4    | 4    | 4    | 4    | 4    | 4    | 4    | 4    | 4    |
| SSA | 3    | 3    | 3    | 3    | 3    | 3    | 3    | 3    | 3    | 4    | 4    |
| USA | 7    | 7    | 7    | 7    | 7    | 7    | 7    | 7    | 7    | 7    | 8    |

Table 708: PRIMAPhist — Emissions—CH4—Land—Agriculture (Mt CH4/yr) [PART 6/16]

|     | 1916 | 1917 | 1918 | 1919 | 1920 | 1921 | 1922 | 1923 | 1924 | 1925 | 1926 |
|-----|------|------|------|------|------|------|------|------|------|------|------|
| GLO | 53   | 54   | 55   | 55   | 56   | 57   | 57   | 58   | 59   | 60   | 60   |
| CAZ | 3    | 3    | 3    | 3    | 3    | 3    | 3    | 3    | 3    | 3    | 3    |
| CHA | 5    | 5    | 5    | 6    | 6    | 6    | 6    | 6    | 6    | 7    | 7    |
| EUR | 6    | 6    | 6    | 7    | 7    | 7    | 7    | 7    | 8    | 8    | 8    |
| IND | 9    | 9    | 9    | 9    | 10   | 9    | 9    | 9    | 9    | 9    | 9    |
| JPN | 1    | 1    | 1    | 1    | 1    | 1    | 1    | 1    | 1    | 1    | 1    |
| LAM | 3    | 3    | 3    | 3    | 3    | 4    | 4    | 4    | 4    | 4    | 4    |
| MEA | 1    | 1    | 1    | 1    | 1    | 1    | 1    | 1    | 1    | 1    | 1    |
| NEU | 1    | 1    | 1    | 1    | 1    | 1    | 1    | 1    | 1    | 1    | 1    |
| OAS | 7    | 7    | 8    | 8    | 8    | 8    | 8    | 9    | 9    | 9    | 9    |
| REF | 5    | 5    | 5    | 5    | 5    | 5    | 5    | 5    | 6    | 6    | 6    |
| SSA | 4    | 4    | 4    | 4    | 4    | 4    | 4    | 5    | 5    | 5    | 5    |
| USA | 8    | 8    | 8    | 8    | 8    | 8    | 8    | 8    | 8    | 8    | 8    |

Table 709: PRIMAPhist — Emissions—CH4—Land—Agriculture (Mt CH4/yr) [PART 7/16]

|     | 1927 | 1928 | 1929 | 1930 | 1931 | 1932 | 1933 | 1934 | 1935 | 1936 | 1937 |
|-----|------|------|------|------|------|------|------|------|------|------|------|
| GLO | 61   | 62   | 62   | 62   | 63   | 63   | 63   | 63   | 63   | 63   | 63   |
| CAZ | 3    | 3    | 3    | 3    | 3    | 3    | 3    | 3    | 3    | 3    | 3    |
| CHA | 7    | 7    | 8    | 8    | 8    | 8    | 7    | 7    | 7    | 7    | 7    |
| EUR | 8    | 9    | 9    | 9    | 9    | 9    | 9    | 9    | 9    | 9    | 9    |
| IND | 8    | 8    | 8    | 8    | 8    | 8    | 8    | 9    | 9    | 9    | 9    |
| JPN | 1    | 1    | 1    | 1    | 1    | 1    | 1    | 1    | 1    | 1    | 1    |
| LAM | 4    | 4    | 4    | 4    | 4    | 4    | 4    | 4    | 4    | 4    | 4    |
| MEA | 1    | 1    | 1    | 1    | 1    | 1    | 1    | 1    | 1    | 1    | 1    |
| NEU | 1    | 1    | 1    | 1    | 1    | 1    | 1    | 1    | 1    | 1    | 1    |
| OAS | 10   | 10   | 10   | 10   | 10   | 10   | 10   | 10   | 10   | 10   | 10   |
| REF | 6    | 6    | 6    | 6    | 6    | 6    | 6    | 6    | 5    | 5    | 5    |
| SSA | 5    | 5    | 5    | 5    | 5    | 5    | 5    | 5    | 5    | 5    | 5    |
| USA | 8    | 8    | 7    | 7    | 7    | 8    | 8    | 8    | 8    | 8    | 8    |

Table 710: PRIMAPhist — Emissions—CH4—Land—Agriculture (Mt CH4/yr) [PART 8/16]

|     | 1938 | 1939 | 1940 | 1941 | 1942 | 1943 | 1944 | 1945 | 1946 | 1947 | 1948 |
|-----|------|------|------|------|------|------|------|------|------|------|------|
| GLO | 63   | 63   | 64   | 64   | 65   | 66   | 67   | 69   | 70   | 72   | 73   |
| CAZ | 3    | 3    | 3    | 3    | 3    | 3    | 4    | 4    | 4    | 4    | 4    |
| CHA | 7    | 7    | 7    | 7    | 7    | 7    | 7    | 7    | 7    | 7    | 7    |
| EUR | 9    | 9    | 9    | 9    | 9    | 9    | 9    | 9    | 9    | 9    | 9    |
| IND | 10   | 10   | 10   | 10   | 10   | 10   | 10   | 10   | 10   | 10   | 10   |
| JPN | 1    | 1    | 1    | 1    | 1    | 1    | 1    | 1    | 1    | 1    | 1    |
| LAM | 4    | 4    | 4    | 4    | 4    | 4    | 5    | 5    | 5    | 5    | 5    |
| MEA | 1    | 1    | 1    | 1    | 1    | 1    | 1    | 2    | 2    | 2    | 2    |
| NEU | 1    | 1    | 1    | 1    | 1    | 1    | 1    | 1    | 1    | 1    | 1    |
| OAS | 9    | 9    | 9    | 9    | 9    | 9    | 10   | 10   | 10   | 10   | 10   |
| REF | 5    | 5    | 5    | 5    | 5    | 5    | 5    | 5    | 5    | 6    | 6    |
| SSA | 5    | 5    | 5    | 5    | 6    | 6    | 7    | 8    | 9    | 9    | 10   |
| USA | 8    | 8    | 8    | 8    | 8    | 8    | 8    | 8    | 8    | 8    | 8    |

Table 711: PRIMAPhist — Emissions—CH4—Land—Agriculture (Mt CH4/yr) [PART 9/16]

|     | 1949 | 1950 | 1951 | 1952 | 1953 | 1954 | 1955 | 1956 | 1957 | 1958 | 1959 |
|-----|------|------|------|------|------|------|------|------|------|------|------|
| GLO | 74   | 75   | 76   | 77   | 79   | 81   | 83   | 85   | 87   | 89   | 90   |
| CAZ | 4    | 4    | 4    | 4    | 4    | 4    | 4    | 4    | 4    | 4    | 4    |
| CHA | 7    | 7    | 8    | 8    | 8    | 9    | 9    | 10   | 10   | 11   | 11   |
| EUR | 9    | 10   | 10   | 10   | 10   | 10   | 10   | 11   | 11   | 11   | 11   |
| IND | 10   | 10   | 10   | 10   | 10   | 10   | 10   | 10   | 10   | 10   | 10   |
| JPN | 1    | 1    | 1    | 1    | 1    | 1    | 1    | 1    | 1    | 1    | 1    |
| LAM | 5    | 5    | 6    | 6    | 7    | 7    | 8    | 9    | 10   | 10   | 11   |
| MEA | 2    | 2    | 2    | 2    | 2    | 2    | 2    | 2    | 2    | 2    | 2    |
| NEU | 1    | 1    | 1    | 2    | 2    | 2    | 2    | 2    | 2    | 2    | 2    |
| OAS | 10   | 10   | 10   | 10   | 10   | 11   | 11   | 11   | 12   | 12   | 12   |
| REF | 6    | 6    | 6    | 6    | 6    | 7    | 7    | 7    | 7    | 7    | 8    |
| SSA | 11   | 11   | 11   | 10   | 10   | 10   | 9    | 9    | 9    | 8    | 8    |
| USA | 8    | 8    | 8    | 9    | 9    | 9    | 9    | 9    | 9    | 9    | 10   |

Table 712: PRIMAPhist — Emissions—CH4—Land—Agriculture (Mt CH4/yr) [PART 10/16]

|     | 1960 | 1961 | 1962 | 1963 | 1964 | 1965 | 1966 | 1967 | 1968 | 1969 | 1970 |
|-----|------|------|------|------|------|------|------|------|------|------|------|
| GLO | 91   | 92   | 94   | 95   | 97   | 98   | 100  | 102  | 103  | 103  | 104  |
| CAZ | 5    | 5    | 5    | 5    | 5    | 5    | 5    | 5    | 5    | 5    | 5    |
| CHA | 11   | 11   | 11   | 12   | 12   | 13   | 13   | 14   | 14   | 14   | 14   |
| EUR | 11   | 11   | 12   | 11   | 11   | 11   | 12   | 12   | 12   | 12   | 12   |
| IND | 10   | 10   | 10   | 10   | 11   | 10   | 11   | 11   | 11   | 11   | 11   |
| JPN | 1    | 1    | 1    | 1    | 1    | 1    | 1    | 1    | 1    | 1    | 1    |
| LAM | 11   | 11   | 12   | 12   | 12   | 13   | 13   | 13   | 14   | 14   | 14   |
| MEA | 2    | 2    | 2    | 2    | 2    | 2    | 2    | 2    | 2    | 3    | 3    |
| NEU | 2    | 2    | 2    | 2    | 2    | 2    | 2    | 2    | 2    | 2    | 2    |
| OAS | 12   | 12   | 13   | 13   | 13   | 13   | 13   | 13   | 14   | 14   | 14   |
| REF | 8    | 7    | 8    | 8    | 8    | 8    | 9    | 9    | 9    | 9    | 9    |
| SSA | 8    | 9    | 9    | 9    | 9    | 9    | 9    | 9    | 10   | 10   | 10   |
| USA | 10   | 10   | 10   | 10   | 10   | 10   | 10   | 10   | 10   | 10   | 10   |

Table 713: PRIMAPhist — Emissions—CH4—Land—Agriculture (Mt CH4/yr) [PART 11/16]

|     | 1971 | 1972 | 1973 | 1974 | 1975 | 1976 | 1977 | 1978 | 1979 | 1980 | 1981 |
|-----|------|------|------|------|------|------|------|------|------|------|------|
| GLO | 106  | 107  | 109  | 111  | 113  | 113  | 114  | 114  | 114  | 116  | 117  |
| CAZ | 5    | 5    | 5    | 5    | 6    | 5    | 5    | 5    | 5    | 5    | 5    |
| CHA | 15   | 15   | 15   | 16   | 16   | 16   | 16   | 15   | 15   | 15   | 15   |
| EUR | 12   | 12   | 12   | 13   | 13   | 13   | 13   | 13   | 13   | 13   | 13   |
| IND | 11   | 11   | 11   | 11   | 12   | 12   | 12   | 12   | 12   | 12   | 12   |
| JPN | 1    | 1    | 1    | 1    | 1    | 1    | 1    | 1    | 1    | 1    | 1    |
| LAM | 14   | 15   | 15   | 16   | 16   | 17   | 17   | 17   | 18   | 18   | 19   |
| MEA | 3    | 3    | 3    | 3    | 3    | 3    | 3    | 3    | 3    | 3    | 3    |
| NEU | 2    | 2    | 2    | 2    | 2    | 2    | 2    | 2    | 2    | 2    | 2    |
| OAS | 14   | 14   | 14   | 14   | 14   | 14   | 15   | 15   | 15   | 15   | 15   |
| REF | 9    | 9    | 9    | 10   | 10   | 10   | 10   | 10   | 10   | 10   | 10   |
| SSA | 10   | 10   | 10   | 10   | 10   | 10   | 10   | 11   | 11   | 11   | 11   |
| USA | 10   | 10   | 10   | 11   | 11   | 11   | 10   | 10   | 10   | 10   | 10   |

Table 714: PRIMAPhist — Emissions—CH4—Land—Agriculture (Mt CH4/yr) [PART 12/16]

|     | 1982 | 1983 | 1984 | 1985 | 1986 | 1987 | 1988 | 1989 | 1990 | 1991 | 1992 |
|-----|------|------|------|------|------|------|------|------|------|------|------|
| GLO | 117  | 118  | 119  | 119  | 120  | 120  | 121  | 123  | 123  | 123  | 123  |
| CAZ | 5    | 5    | 5    | 5    | 5    | 5    | 5    | 5    | 5    | 5    | 5    |
| CHA | 15   | 16   | 16   | 16   | 16   | 16   | 17   | 17   | 17   | 17   | 17   |
| EUR | 13   | 13   | 13   | 13   | 13   | 12   | 12   | 12   | 12   | 12   | 11   |
| IND | 12   | 13   | 13   | 13   | 13   | 13   | 14   | 14   | 14   | 14   | 14   |
| JPN | 1    | 1    | 1    | 1    | 1    | 1    | 1    | 1    | 1    | 1    | 1    |
| LAM | 19   | 19   | 19   | 19   | 19   | 19   | 20   | 20   | 20   | 21   | 21   |
| MEA | 3    | 3    | 3    | 3    | 3    | 3    | 3    | 3    | 3    | 3    | 4    |
| NEU | 2    | 2    | 2    | 2    | 2    | 2    | 2    | 2    | 2    | 2    | 2    |
| OAS | 15   | 16   | 16   | 16   | 17   | 16   | 17   | 17   | 17   | 17   | 18   |
| REF | 10   | 10   | 11   | 11   | 11   | 11   | 10   | 10   | 10   | 10   | 9    |
| SSA | 11   | 11   | 11   | 11   | 11   | 11   | 12   | 12   | 12   | 12   | 12   |
| USA | 10   | 10   | 10   | 10   | 9    | 9    | 9    | 9    | 9    | 9    | 9    |

Table 715: PRIMAPhist — Emissions—CH4—Land—Agriculture (Mt CH4/yr) [PART 13/16]

|     | 1993 | 1994 | 1995 | 1996 | 1997 | 1998 | 1999 | 2000 | 2001 | 2002 | 2003 |
|-----|------|------|------|------|------|------|------|------|------|------|------|
| GLO | 122  | 123  | 124  | 124  | 124  | 124  | 125  | 125  | 126  | 127  | 129  |
| CAZ | 5    | 5    | 5    | 5    | 5    | 5    | 5    | 5    | 5    | 5    | 5    |
| CHA | 17   | 17   | 18   | 19   | 20   | 20   | 21   | 21   | 22   | 22   | 23   |
| EUR | 11   | 11   | 11   | 11   | 11   | 11   | 11   | 10   | 10   | 10   | 10   |
| IND | 14   | 14   | 14   | 14   | 14   | 14   | 14   | 14   | 14   | 14   | 14   |
| JPN | 1    | 1    | 1    | 1    | 1    | 1    | 1    | 1    | 1    | 1    | 1    |
| LAM | 21   | 21   | 22   | 21   | 21   | 21   | 22   | 22   | 22   | 23   | 24   |
| MEA | 4    | 4    | 4    | 4    | 4    | 4    | 4    | 4    | 4    | 4    | 5    |
| NEU | 2    | 2    | 2    | 2    | 2    | 2    | 2    | 2    | 1    | 1    | 1    |
| OAS | 18   | 18   | 18   | 18   | 18   | 18   | 18   | 18   | 18   | 18   | 18   |
| REF | 9    | 8    | 7    | 7    | 6    | 6    | 5    | 5    | 5    | 5    | 5    |
| SSA | 12   | 12   | 12   | 12   | 13   | 13   | 13   | 13   | 13   | 14   | 14   |
| USA | 9    | 9    | 10   | 9    | 9    | 9    | 10   | 10   | 10   | 10   | 10   |

Table 716: PRIMAPhist — Emissions—CH4—Land—Agriculture (Mt CH4/yr) [PART 14/16]

|     | 2004 | 2005 | 2006 | 2007 | 2008 | 2009 | 2010 | 2011 | 2012 | 2013 | 2014 |
|-----|------|------|------|------|------|------|------|------|------|------|------|
| GLO | 131  | 135  | 135  | 136  | 137  | 137  | 137  | 136  | 137  | 137  | 138  |
| CAZ | 5    | 5    | 5    | 5    | 5    | 5    | 4    | 5    | 5    | 5    | 5    |
| CHA | 24   | 25   | 25   | 25   | 25   | 25   | 24   | 23   | 23   | 23   | 23   |
| EUR | 10   | 10   | 10   | 10   | 10   | 10   | 10   | 10   | 9    | 9    | 10   |
| IND | 14   | 14   | 14   | 15   | 15   | 15   | 15   | 15   | 15   | 15   | 15   |
| JPN | 1    | 1    | 1    | 1    | 1    | 1    | 1    | 1    | 1    | 1    | 1    |
| LAM | 24   | 25   | 24   | 24   | 24   | 24   | 24   | 24   | 24   | 24   | 25   |
| MEA | 5    | 5    | 5    | 5    | 5    | 5    | 5    | 5    | 5    | 5    | 5    |
| NEU | 1    | 1    | 2    | 2    | 1    | 1    | 2    | 2    | 2    | 2    | 2    |
| OAS | 18   | 19   | 19   | 20   | 20   | 20   | 21   | 21   | 21   | 21   | 21   |
| REF | 5    | 5    | 5    | 5    | 5    | 5    | 5    | 5    | 5    | 5    | 5    |
| SSA | 14   | 15   | 15   | 15   | 16   | 16   | 16   | 17   | 17   | 17   | 17   |
| USA | 9    | 10   | 10   | 10   | 10   | 10   | 10   | 10   | 10   | 10   | 10   |

Table 717: PRIMAPhist — Emissions—CH4—Land—Agriculture (Mt CH4/yr) [PART 15/16]

|     | 2015 |
|-----|------|
| GLO | 141  |
| CAZ | 4    |
| CHA | 24   |
| EUR | 10   |
| IND | 15   |
| JPN | 1    |
| LAM | 25   |
| MEA | 5    |
| NEU | 2    |
| OAS | 22   |
| REF | 6    |
| SSA | 17   |
| USA | 10   |

Table 718: PRIMAPhist — Emissions—CH4—Land—Agriculture (Mt CH4/yr) [PART 16/16]

|     | 1961 | 1962 | 1963 | 1964 | 1965 | 1966 | 1967 | 1968 | 1969 | 1970 | 1971 |
|-----|------|------|------|------|------|------|------|------|------|------|------|
| GLO | 76   | 78   | 78   | 80   | 81   | 83   | 84   | 85   | 86   | 86   | 88   |
| CAZ | 4    | 4    | 4    | 4    | 4    | 4    | 4    | 4    | 4    | 4    | 5    |
| CHA | 7    | 7    | 8    | 8    | 8    | 9    | 9    | 9    | 9    | 9    | 10   |
| EUR | 11   | 11   | 11   | 11   | 11   | 11   | 11   | 11   | 11   | 11   | 11   |
| IND | 11   | 11   | 11   | 11   | 11   | 11   | 11   | 12   | 12   | 12   | 12   |
| JPN | 1    | 1    | 1    | 1    | 1    | 1    | 1    | 1    | 1    | 1    | 1    |
| LAM | 10   | 11   | 11   | 11   | 12   | 12   | 12   | 13   | 13   | 13   | 13   |
| MEA | 1    | 1    | 1    | 1    | 1    | 2    | 2    | 2    | 2    | 2    | 2    |
| NEU | 2    | 2    | 2    | 2    | 2    | 2    | 2    | 2    | 2    | 2    | 2    |
| OAS | 10   | 10   | 10   | 11   | 11   | 11   | 11   | 12   | 12   | 12   | 12   |
| REF | 6    | 7    | 7    | 7    | 7    | 7    | 8    | 8    | 8    | 7    | 8    |
| SSA | 5    | 5    | 5    | 5    | 5    | 5    | 5    | 5    | 5    | 5    | 6    |
| USA | 8    | 8    | 8    | 8    | 8    | 8    | 8    | 8    | 8    | 8    | 8    |

Table 719: FAO\_EmisAg — Emissions—CH4—Land—Agriculture (Mt CH4/yr) [PART 1/5]

|     | 1972 | 1973 | 1974 | 1975 | 1976 | 1977 | 1978 | 1979 | 1980 | 1981 | 1982 |
|-----|------|------|------|------|------|------|------|------|------|------|------|
| GLO | 89   | 90   | 92   | 93   | 94   | 94   | 95   | 95   | 96   | 97   | 97   |
| CAZ | 5    | 5    | 5    | 5    | 5    | 5    | 4    | 4    | 4    | 4    | 4    |
| CHA | 10   | 10   | 10   | 10   | 10   | 10   | 10   | 10   | 10   | 10   | 10   |
| EUR | 12   | 12   | 12   | 12   | 12   | 12   | 12   | 12   | 12   | 12   | 12   |
| IND | 12   | 12   | 12   | 12   | 12   | 12   | 13   | 13   | 13   | 13   | 13   |
| JPN | 1    | 1    | 1    | 1    | 1    | 1    | 1    | 1    | 1    | 1    | 1    |
| LAM | 13   | 14   | 14   | 15   | 15   | 16   | 16   | 16   | 17   | 17   | 17   |
| MEA | 2    | 2    | 2    | 2    | 2    | 2    | 2    | 2    | 2    | 2    | 2    |
| NEU | 2    | 2    | 2    | 2    | 2    | 2    | 2    | 2    | 2    | 2    | 2    |
| OAS | 11   | 12   | 12   | 12   | 12   | 12   | 13   | 13   | 13   | 13   | 13   |
| REF | 8    | 8    | 8    | 8    | 8    | 8    | 9    | 9    | 9    | 9    | 9    |
| SSA | 6    | 6    | 6    | 6    | 6    | 6    | 6    | 6    | 6    | 6    | 6    |
| USA | 8    | 8    | 8    | 9    | 8    | 8    | 8    | 8    | 8    | 8    | 8    |

Table 720: FAO\_EmisAg — Emissions—CH4—Land—Agriculture (Mt CH4/yr) [PART 2/5]

|     | 1983 | 1984 | 1985 | 1986 | 1987 | 1988 | 1989 | 1990 | 1991 | 1992 | 1993 |
|-----|------|------|------|------|------|------|------|------|------|------|------|
| GLO | 98   | 98   | 99   | 99   | 99   | 100  | 102  | 106  | 105  | 105  | 105  |
| CAZ | 4    | 4    | 4    | 4    | 4    | 4    | 4    | 5    | 5    | 5    | 5    |
| CHA | 10   | 10   | 10   | 11   | 11   | 11   | 11   | 11   | 11   | 11   | 11   |
| EUR | 12   | 12   | 12   | 12   | 12   | 12   | 12   | 12   | 11   | 11   | 10   |
| IND | 14   | 14   | 14   | 14   | 14   | 14   | 14   | 15   | 15   | 15   | 15   |
| JPN | 1    | 1    | 1    | 1    | 1    | 1    | 1    | 1    | 1    | 1    | 1    |
| LAM | 17   | 17   | 17   | 17   | 18   | 18   | 18   | 19   | 19   | 19   | 19   |
| MEA | 2    | 2    | 2    | 2    | 2    | 2    | 2    | 2    | 2    | 2    | 2    |
| NEU | 2    | 2    | 2    | 2    | 2    | 2    | 2    | 2    | 2    | 2    | 2    |
| OAS | 13   | 13   | 13   | 14   | 14   | 14   | 14   | 14   | 14   | 14   | 15   |
| REF | 9    | 9    | 9    | 9    | 9    | 9    | 9    | 9    | 9    | 9    | 8    |
| SSA | 7    | 6    | 6    | 7    | 7    | 7    | 7    | 10   | 10   | 10   | 9    |
| USA | 8    | 8    | 8    | 7    | 7    | 7    | 7    | 7    | 7    | 7    | 7    |

Table 721: FAO\_EmisAg — Emissions—CH4—Land—Agriculture (Mt CH4/yr) [PART 3/5]



|     | 1994 | 1995 | 1996 | 1997 | 1998 | 1999 | 2000 | 2001 | 2002 | 2003 | 2004 |
|-----|------|------|------|------|------|------|------|------|------|------|------|
| GLO | 105  | 105  | 105  | 104  | 105  | 105  | 105  | 106  | 106  | 106  | 108  |
| CAZ | 5    | 5    | 5    | 5    | 5    | 5    | 6    | 6    | 6    | 5    | 5    |
| CHA | 11   | 12   | 12   | 12   | 12   | 12   | 12   | 12   | 12   | 12   | 13   |
| EUR | 10   | 10   | 10   | 10   | 10   | 10   | 10   | 9    | 9    | 9    | 9    |
| IND | 15   | 15   | 15   | 15   | 15   | 15   | 15   | 15   | 15   | 15   | 15   |
| JPN | 1    | 1    | 1    | 1    | 1    | 1    | 1    | 1    | 1    | 1    | 1    |
| LAM | 19   | 20   | 19   | 19   | 19   | 20   | 20   | 20   | 21   | 22   | 22   |
| MEA | 2    | 2    | 2    | 2    | 2    | 2    | 2    | 2    | 2    | 2    | 3    |
| NEU | 2    | 2    | 2    | 1    | 1    | 1    | 1    | 1    | 1    | 1    | 1    |
| OAS | 15   | 15   | 15   | 16   | 15   | 16   | 16   | 16   | 16   | 16   | 16   |
| REF | 8    | 7    | 7    | 6    | 5    | 5    | 5    | 5    | 5    | 5    | 5    |
| SSA | 10   | 10   | 10   | 10   | 10   | 10   | 10   | 11   | 11   | 11   | 11   |
| USA | 7    | 7    | 7    | 7    | 7    | 7    | 7    | 7    | 7    | 7    | 7    |

Table 722: FAO.EmisAg — Emissions—CH4—Land—Agriculture (Mt CH4/yr) [PART 4/5]

|     | 2005 | 2006 | 2007 | 2008 | 2009 | 2010 | 2011 | 2030 | 2050 |
|-----|------|------|------|------|------|------|------|------|------|
| GLO | 110  | 111  | 112  | 113  | 113  | 115  | 116  | 0    | 0    |
| CAZ | 5    | 5    | 5    | 4    | 4    | 4    | 6    | 0    | 0    |
| CHA | 13   | 13   | 13   | 14   | 14   | 14   | 14   | 0    | 0    |
| EUR | 9    | 9    | 9    | 9    | 9    | 9    | 9    | 0    | 0    |
| IND | 16   | 16   | 16   | 17   | 17   | 17   | 17   | 0    | 0    |
| JPN | 1    | 1    | 1    | 1    | 1    | 1    | 1    | 0    | 0    |
| LAM | 22   | 22   | 22   | 22   | 22   | 23   | 23   | 0    | 0    |
| MEA | 3    | 3    | 3    | 3    | 3    | 3    | 3    | 0    | 0    |
| NEU | 1    | 1    | 1    | 1    | 1    | 1    | 1    | 0    | 0    |
| OAS | 17   | 17   | 18   | 18   | 19   | 19   | 19   | 0    | 0    |
| REF | 5    | 5    | 4    | 5    | 4    | 5    | 4    | 0    | 0    |
| SSA | 12   | 12   | 12   | 13   | 13   | 13   | 14   | 0    | 0    |
| USA | 7    | 7    | 7    | 7    | 7    | 7    | 7    | 0    | 0    |

Table 723: FAO.EmisAg — Emissions—CH4—Land—Agriculture (Mt CH4/yr) [PART 5/5]

|     | 1970 | 1971 | 1972 | 1973 | 1974 | 1975 | 1976 | 1977 | 1978 | 1979 | 1980 |
|-----|------|------|------|------|------|------|------|------|------|------|------|
| GLO | 128  | 130  | 131  | 132  | 134  | 136  | 137  | 137  | 137  | 136  | 138  |
| CAZ | 5    | 5    | 5    | 5    | 5    | 6    | 6    | 5    | 5    | 5    | 5    |
| CHA | 26   | 28   | 28   | 27   | 28   | 28   | 28   | 27   | 26   | 25   | 25   |
| EUR | 12   | 12   | 12   | 13   | 13   | 13   | 13   | 13   | 13   | 13   | 13   |
| IND | 15   | 15   | 15   | 15   | 15   | 15   | 15   | 15   | 15   | 15   | 16   |
| JPN | 3    | 3    | 3    | 3    | 3    | 3    | 3    | 3    | 2    | 2    | 2    |
| LAM | 16   | 16   | 16   | 17   | 17   | 18   | 19   | 19   | 19   | 19   | 20   |
| MEA | 3    | 3    | 3    | 3    | 3    | 3    | 3    | 3    | 3    | 3    | 3    |
| NEU | 2    | 2    | 2    | 2    | 2    | 2    | 2    | 2    | 2    | 2    | 2    |
| OAS | 23   | 22   | 22   | 22   | 22   | 22   | 22   | 22   | 23   | 23   | 23   |
| REF | 9    | 10   | 10   | 10   | 11   | 11   | 11   | 11   | 11   | 11   | 11   |
| SSA | 7    | 7    | 7    | 7    | 7    | 7    | 7    | 7    | 8    | 8    | 8    |
| USA | 9    | 9    | 9    | 9    | 9    | 9    | 9    | 9    | 9    | 9    | 9    |

Table 724: EDGAR.LU — Emissions—CH4—Land—Agriculture (Mt CH4/yr) [PART 1/4]

|     | 1981 | 1982 | 1983 | 1984 | 1985 | 1986 | 1987 | 1988 | 1989 | 1990 | 1991 |
|-----|------|------|------|------|------|------|------|------|------|------|------|
| GLO | 138  | 138  | 138  | 139  | 138  | 139  | 139  | 140  | 142  | 142  | 141  |
| CAZ | 5    | 5    | 5    | 5    | 5    | 5    | 5    | 5    | 5    | 5    | 5    |
| CHA | 25   | 24   | 24   | 24   | 24   | 24   | 24   | 24   | 25   | 25   | 25   |
| EUR | 13   | 13   | 13   | 14   | 14   | 14   | 13   | 13   | 13   | 13   | 13   |
| IND | 16   | 16   | 16   | 16   | 17   | 17   | 17   | 17   | 17   | 17   | 18   |
| JPN | 2    | 2    | 2    | 2    | 2    | 2    | 2    | 2    | 2    | 2    | 2    |
| LAM | 20   | 20   | 20   | 21   | 21   | 21   | 21   | 22   | 22   | 22   | 23   |
| MEA | 3    | 3    | 3    | 3    | 3    | 3    | 3    | 3    | 4    | 4    | 4    |
| NEU | 2    | 2    | 2    | 2    | 2    | 2    | 2    | 2    | 2    | 2    | 2    |
| OAS | 23   | 22   | 22   | 23   | 23   | 23   | 22   | 23   | 23   | 22   | 22   |
| REF | 11   | 12   | 12   | 12   | 12   | 12   | 12   | 12   | 12   | 12   | 12   |
| SSA | 8    | 8    | 8    | 8    | 8    | 8    | 8    | 8    | 9    | 9    | 9    |
| USA | 9    | 9    | 9    | 9    | 9    | 8    | 8    | 8    | 8    | 8    | 8    |

Table 725: EDGAR.LU — Emissions—CH4—Land—Agriculture (Mt CH4/yr) [PART 2/4]

|     | 1992 | 1993 | 1994 | 1995 | 1996 | 1997 | 1998 | 1999 | 2000 | 2001 | 2002 |
|-----|------|------|------|------|------|------|------|------|------|------|------|
| GLO | 141  | 139  | 139  | 140  | 139  | 138  | 137  | 138  | 137  | 137  | 138  |
| CAZ | 5    | 5    | 5    | 5    | 5    | 5    | 5    | 5    | 5    | 5    | 5    |
| CHA | 24   | 23   | 23   | 24   | 24   | 23   | 24   | 24   | 23   | 23   | 23   |
| EUR | 12   | 12   | 11   | 11   | 11   | 11   | 11   | 11   | 11   | 11   | 11   |
| IND | 18   | 18   | 18   | 18   | 18   | 18   | 18   | 18   | 18   | 18   | 18   |
| JPN | 2    | 2    | 2    | 2    | 2    | 2    | 2    | 2    | 2    | 1    | 1    |
| LAM | 23   | 24   | 24   | 25   | 24   | 24   | 24   | 24   | 25   | 25   | 26   |
| MEA | 4    | 4    | 4    | 4    | 4    | 4    | 4    | 5    | 5    | 5    | 5    |
| NEU | 2    | 2    | 2    | 2    | 2    | 2    | 1    | 2    | 2    | 1    | 1    |
| OAS | 22   | 22   | 22   | 23   | 23   | 23   | 23   | 23   | 23   | 23   | 23   |
| REF | 11   | 10   | 10   | 9    | 8    | 7    | 6    | 6    | 6    | 6    | 6    |
| SSA | 9    | 9    | 9    | 9    | 9    | 9    | 10   | 10   | 10   | 10   | 10   |
| USA | 8    | 9    | 9    | 9    | 9    | 9    | 9    | 9    | 9    | 9    | 9    |

Table 726: EDGAR.LU — Emissions—CH4—Land—Agriculture (Mt CH4/yr) [PART 3/4]

|     | 2003 | 2004 | 2005 | 2006 | 2007 | 2008 |
|-----|------|------|------|------|------|------|
| GLO | 139  | 142  | 144  | 146  | 148  | 151  |
| CAZ | 5    | 5    | 5    | 6    | 6    | 6    |
| CHA | 23   | 24   | 25   | 26   | 27   | 28   |
| EUR | 11   | 10   | 10   | 10   | 10   | 10   |
| IND | 18   | 18   | 18   | 18   | 18   | 18   |
| JPN | 1    | 1    | 1    | 1    | 1    | 1    |
| LAM | 27   | 27   | 28   | 28   | 29   | 29   |
| MEA | 5    | 5    | 5    | 5    | 5    | 5    |
| NEU | 1    | 1    | 1    | 1    | 2    | 2    |
| OAS | 23   | 24   | 24   | 25   | 26   | 26   |
| REF | 6    | 6    | 6    | 6    | 5    | 5    |
| SSA | 10   | 10   | 11   | 11   | 11   | 11   |
| USA | 9    | 9    | 9    | 9    | 9    | 9    |

Table 727: EDGAR.LU — Emissions—CH4—Land—Agriculture (Mt CH4/yr) [PART 4/4]

11.1.2 Agriculture—Animal waste management

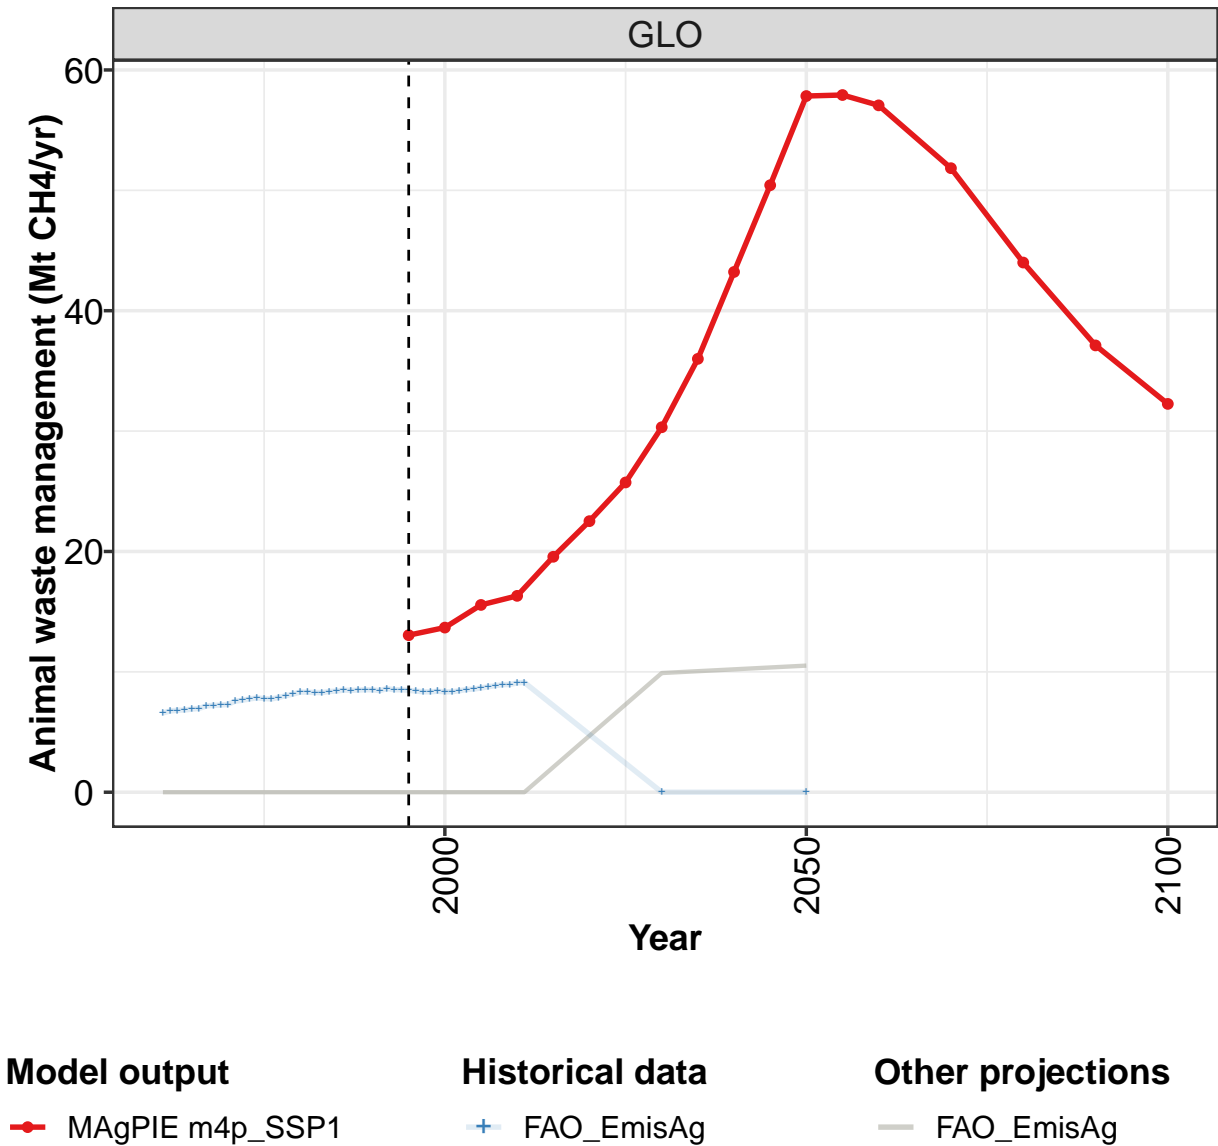

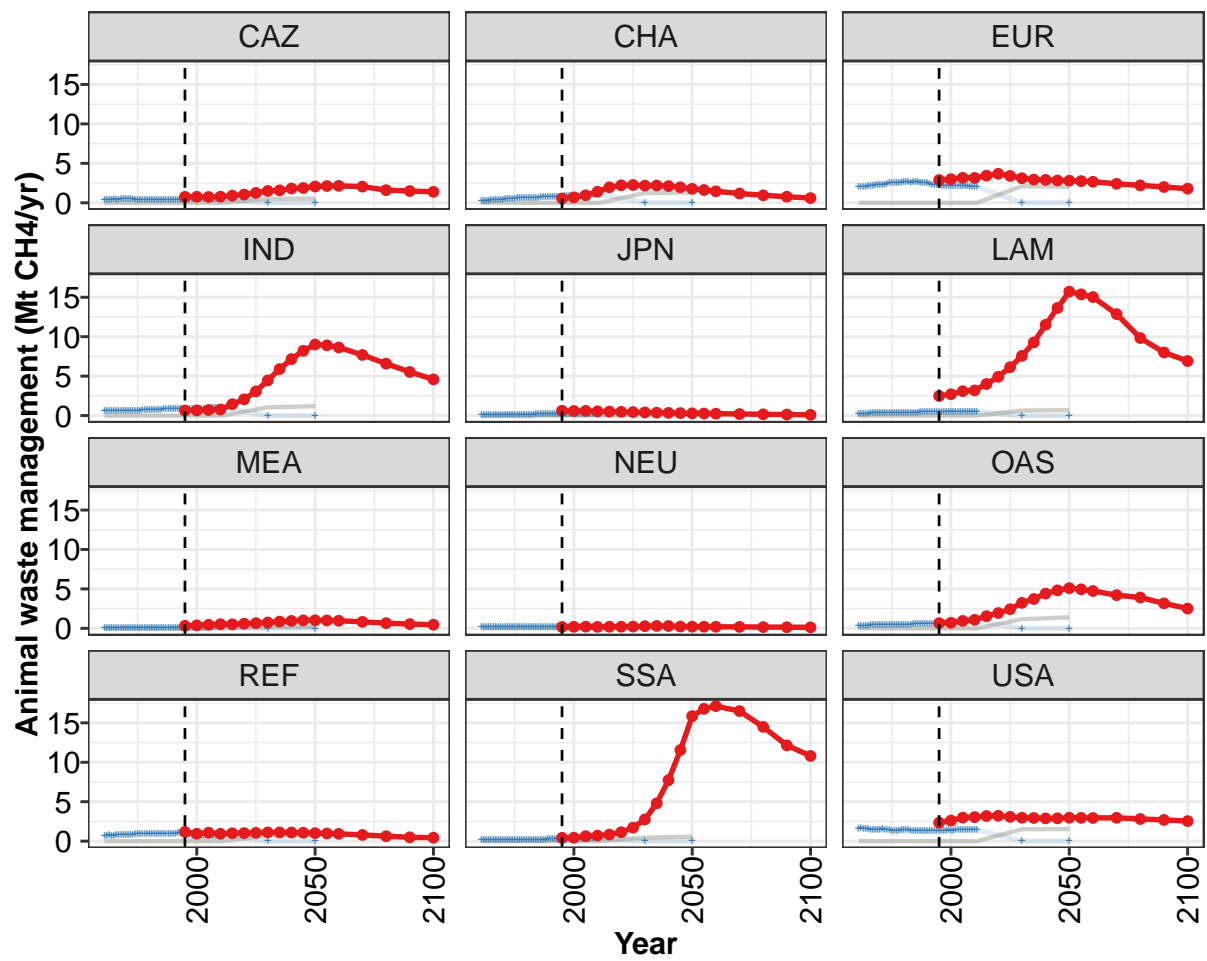**Model output**

—●— MAgPIE m4p\_SSP1

**Historical data**

—+— FAO\_EmisAg

**Other projections**

— FAO\_EmisAg

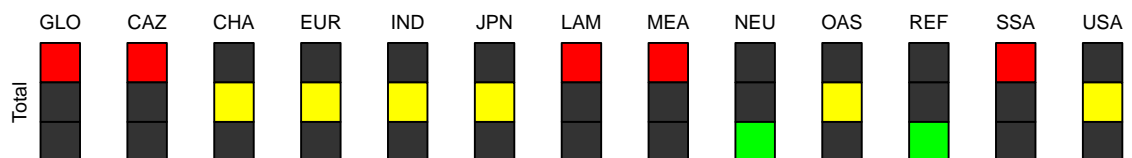

Figure 235: MAgPIE m4p\_SSP1 — Emissions—CH<sub>4</sub>—Land—Agriculture—Animal waste management (Mt CH<sub>4</sub>/yr)

|     | 1995 | 2000 | 2005 | 2010 | 2015 | 2020 | 2025 | 2030 | 2035 | 2040 | 2045 |
|-----|------|------|------|------|------|------|------|------|------|------|------|
| GLO | 13.0 | 13.7 | 15.6 | 16.3 | 19.6 | 22.5 | 25.7 | 30.3 | 36.0 | 43.2 | 50.4 |
| CAZ | 0.8  | 0.8  | 0.7  | 0.8  | 0.9  | 1.1  | 1.3  | 1.5  | 1.6  | 1.8  | 1.9  |
| CHA | 0.6  | 0.7  | 0.9  | 1.4  | 2.0  | 2.2  | 2.3  | 2.2  | 2.2  | 2.1  | 2.0  |
| EUR | 2.9  | 3.0  | 3.2  | 3.2  | 3.4  | 3.7  | 3.4  | 3.1  | 2.9  | 2.9  | 2.8  |
| IND | 0.6  | 0.7  | 0.7  | 0.8  | 1.4  | 2.1  | 3.1  | 4.5  | 5.9  | 7.2  | 8.2  |
| JPN | 0.6  | 0.6  | 0.6  | 0.5  | 0.5  | 0.5  | 0.4  | 0.4  | 0.4  | 0.3  | 0.3  |
| LAM | 2.5  | 2.7  | 3.1  | 3.2  | 4.0  | 4.9  | 6.1  | 7.6  | 9.3  | 11.5 | 13.6 |
| MEA | 0.3  | 0.4  | 0.5  | 0.5  | 0.5  | 0.6  | 0.7  | 0.7  | 0.9  | 0.9  | 1.0  |
| NEU | 0.2  | 0.2  | 0.2  | 0.2  | 0.2  | 0.2  | 0.2  | 0.3  | 0.3  | 0.3  | 0.2  |
| OAS | 0.7  | 0.7  | 0.9  | 1.1  | 1.5  | 1.9  | 2.4  | 3.2  | 3.7  | 4.4  | 4.8  |
| REF | 1.2  | 0.9  | 1.1  | 0.9  | 1.0  | 1.0  | 1.1  | 1.1  | 1.1  | 1.1  | 1.1  |
| SSA | 0.4  | 0.4  | 0.6  | 0.7  | 0.8  | 1.1  | 1.7  | 2.8  | 4.8  | 7.7  | 11.6 |
| USA | 2.3  | 2.6  | 3.0  | 3.0  | 3.2  | 3.2  | 3.1  | 3.0  | 2.9  | 2.9  | 2.9  |

Table 728: MAgPIE m4p\_SSP1 — Emissions—CH4—Land—Agriculture—Animal waste management (Mt CH4/yr) [PART 1/2]

|     | 2050 | 2055 | 2060 | 2070 | 2080 | 2090 | 2100 |
|-----|------|------|------|------|------|------|------|
| GLO | 57.8 | 57.9 | 57.1 | 51.8 | 44.0 | 37.1 | 32.3 |
| CAZ | 2.1  | 2.1  | 2.1  | 2.0  | 1.6  | 1.5  | 1.4  |
| CHA | 1.8  | 1.6  | 1.5  | 1.2  | 0.9  | 0.8  | 0.6  |
| EUR | 2.8  | 2.7  | 2.7  | 2.4  | 2.2  | 2.0  | 1.8  |
| IND | 9.0  | 8.9  | 8.6  | 7.7  | 6.6  | 5.5  | 4.6  |
| JPN | 0.3  | 0.3  | 0.2  | 0.2  | 0.2  | 0.1  | 0.1  |
| LAM | 15.7 | 15.4 | 15.0 | 12.9 | 9.8  | 8.0  | 6.9  |
| MEA | 1.0  | 1.0  | 1.0  | 0.8  | 0.7  | 0.5  | 0.5  |
| NEU | 0.2  | 0.2  | 0.2  | 0.2  | 0.2  | 0.1  | 0.1  |
| OAS | 5.1  | 5.0  | 4.7  | 4.2  | 3.9  | 3.2  | 2.5  |
| REF | 1.0  | 1.0  | 0.9  | 0.8  | 0.6  | 0.5  | 0.4  |
| SSA | 15.9 | 16.8 | 17.1 | 16.5 | 14.5 | 12.1 | 10.8 |
| USA | 3.0  | 3.0  | 2.9  | 3.0  | 2.8  | 2.7  | 2.5  |

Table 729: MAgPIE m4p\_SSP1 — Emissions—CH4—Land—Agriculture—Animal waste management (Mt CH4/yr) [PART 2/2]

|     | 1961 | 1962 | 1963 | 1964 | 1965 | 1966 | 1967 | 1968 | 1969 | 1970 | 1971 |
|-----|------|------|------|------|------|------|------|------|------|------|------|
| GLO | 6.59 | 6.75 | 6.81 | 6.83 | 6.90 | 6.96 | 7.16 | 7.22 | 7.23 | 7.30 | 7.56 |
| CAZ | 0.43 | 0.44 | 0.44 | 0.44 | 0.44 | 0.43 | 0.44 | 0.45 | 0.45 | 0.46 | 0.47 |
| CHA | 0.22 | 0.21 | 0.25 | 0.31 | 0.35 | 0.38 | 0.42 | 0.42 | 0.40 | 0.39 | 0.45 |
| EUR | 2.02 | 2.05 | 2.04 | 2.06 | 2.09 | 2.14 | 2.19 | 2.22 | 2.24 | 2.29 | 2.32 |
| IND | 0.60 | 0.60 | 0.59 | 0.60 | 0.60 | 0.61 | 0.61 | 0.62 | 0.63 | 0.63 | 0.64 |
| JPN | 0.07 | 0.09 | 0.09 | 0.10 | 0.11 | 0.10 | 0.11 | 0.12 | 0.13 | 0.14 | 0.15 |
| LAM | 0.26 | 0.26 | 0.27 | 0.28 | 0.29 | 0.29 | 0.30 | 0.31 | 0.31 | 0.32 | 0.32 |
| MEA | 0.06 | 0.06 | 0.06 | 0.06 | 0.06 | 0.06 | 0.07 | 0.07 | 0.07 | 0.07 | 0.07 |
| NEU | 0.16 | 0.16 | 0.16 | 0.16 | 0.16 | 0.16 | 0.17 | 0.17 | 0.17 | 0.17 | 0.17 |
| OAS | 0.33 | 0.35 | 0.36 | 0.37 | 0.38 | 0.39 | 0.39 | 0.41 | 0.41 | 0.42 | 0.42 |
| REF | 0.68 | 0.74 | 0.77 | 0.69 | 0.73 | 0.78 | 0.80 | 0.78 | 0.77 | 0.78 | 0.83 |
| SSA | 0.15 | 0.15 | 0.16 | 0.16 | 0.16 | 0.17 | 0.17 | 0.17 | 0.18 | 0.18 | 0.18 |
| USA | 1.60 | 1.64 | 1.63 | 1.60 | 1.52 | 1.44 | 1.49 | 1.48 | 1.47 | 1.43 | 1.52 |

Table 730: FAO\_EmisAg — Emissions—CH4—Land—Agriculture—Animal waste management (Mt CH4/yr) [PART 1/5]

|     | 1972 | 1973 | 1974 | 1975 | 1976 | 1977 | 1978 | 1979 | 1980 | 1981 | 1982 |
|-----|------|------|------|------|------|------|------|------|------|------|------|
| GLO | 7.64 | 7.75 | 7.84 | 7.79 | 7.74 | 7.87 | 8.02 | 8.15 | 8.32 | 8.30 | 8.29 |
| CAZ | 0.46 | 0.45 | 0.44 | 0.43 | 0.42 | 0.42 | 0.41 | 0.42 | 0.44 | 0.43 | 0.43 |
| CHA | 0.53 | 0.55 | 0.54 | 0.55 | 0.58 | 0.59 | 0.60 | 0.62 | 0.65 | 0.63 | 0.61 |
| EUR | 2.34 | 2.46 | 2.51 | 2.50 | 2.50 | 2.53 | 2.57 | 2.59 | 2.62 | 2.60 | 2.60 |
| IND | 0.65 | 0.65 | 0.65 | 0.66 | 0.67 | 0.68 | 0.69 | 0.71 | 0.72 | 0.73 | 0.75 |
| JPN | 0.15 | 0.15 | 0.15 | 0.14 | 0.15 | 0.15 | 0.16 | 0.16 | 0.16 | 0.16 | 0.16 |
| LAM | 0.33 | 0.34 | 0.35 | 0.36 | 0.37 | 0.38 | 0.38 | 0.38 | 0.40 | 0.40 | 0.40 |
| MEA | 0.08 | 0.08 | 0.08 | 0.08 | 0.08 | 0.08 | 0.08 | 0.08 | 0.08 | 0.09 | 0.08 |
| NEU | 0.17 | 0.18 | 0.18 | 0.18 | 0.19 | 0.19 | 0.19 | 0.19 | 0.20 | 0.20 | 0.20 |
| OAS | 0.43 | 0.44 | 0.44 | 0.43 | 0.42 | 0.43 | 0.46 | 0.47 | 0.46 | 0.48 | 0.49 |
| REF | 0.86 | 0.86 | 0.88 | 0.90 | 0.87 | 0.88 | 0.92 | 0.93 | 0.94 | 0.94 | 0.95 |
| SSA | 0.18 | 0.18 | 0.18 | 0.19 | 0.19 | 0.20 | 0.20 | 0.21 | 0.21 | 0.21 | 0.22 |
| USA | 1.47 | 1.42 | 1.42 | 1.36 | 1.30 | 1.35 | 1.36 | 1.39 | 1.46 | 1.44 | 1.39 |

Table 731: FAO\_EmisAg — Emissions—CH4—Land—Agriculture—Animal waste management (Mt CH4/yr)  
[PART 2/5]

|     | 1983 | 1984 | 1985 | 1986 | 1987 | 1988 | 1989 | 1990 | 1991 | 1992 | 1993 |
|-----|------|------|------|------|------|------|------|------|------|------|------|
| GLO | 8.27 | 8.37 | 8.40 | 8.49 | 8.46 | 8.47 | 8.51 | 8.51 | 8.44 | 8.61 | 8.51 |
| CAZ | 0.42 | 0.43 | 0.43 | 0.42 | 0.41 | 0.42 | 0.42 | 0.42 | 0.41 | 0.41 | 0.41 |
| CHA | 0.63 | 0.63 | 0.65 | 0.70 | 0.72 | 0.70 | 0.74 | 0.75 | 0.77 | 0.78 | 0.79 |
| EUR | 2.57 | 2.60 | 2.60 | 2.62 | 2.57 | 2.57 | 2.53 | 2.50 | 2.42 | 2.34 | 2.26 |
| IND | 0.76 | 0.78 | 0.79 | 0.80 | 0.80 | 0.81 | 0.82 | 0.84 | 0.85 | 0.86 | 0.87 |
| JPN | 0.16 | 0.16 | 0.17 | 0.17 | 0.17 | 0.18 | 0.18 | 0.18 | 0.18 | 0.18 | 0.19 |
| LAM | 0.40 | 0.41 | 0.41 | 0.41 | 0.42 | 0.42 | 0.43 | 0.43 | 0.44 | 0.45 | 0.45 |
| MEA | 0.09 | 0.09 | 0.09 | 0.10 | 0.10 | 0.10 | 0.10 | 0.11 | 0.10 | 0.11 | 0.11 |
| NEU | 0.19 | 0.20 | 0.19 | 0.19 | 0.20 | 0.19 | 0.19 | 0.19 | 0.19 | 0.18 | 0.17 |
| OAS | 0.51 | 0.52 | 0.53 | 0.55 | 0.56 | 0.57 | 0.59 | 0.59 | 0.61 | 0.63 | 0.64 |
| REF | 0.96 | 0.98 | 0.98 | 0.98 | 0.99 | 0.96 | 0.97 | 0.96 | 0.94 | 1.11 | 1.05 |
| SSA | 0.22 | 0.21 | 0.22 | 0.22 | 0.22 | 0.23 | 0.24 | 0.24 | 0.24 | 0.24 | 0.24 |
| USA | 1.35 | 1.36 | 1.34 | 1.31 | 1.29 | 1.31 | 1.30 | 1.29 | 1.29 | 1.32 | 1.33 |

Table 732: FAO\_EmisAg — Emissions—CH4—Land—Agriculture—Animal waste management (Mt CH4/yr)  
[PART 3/5]

|     | 1994 | 1995 | 1996 | 1997 | 1998 | 1999 | 2000 | 2001 | 2002 | 2003 | 2004 |
|-----|------|------|------|------|------|------|------|------|------|------|------|
| GLO | 8.51 | 8.47 | 8.40 | 8.34 | 8.34 | 8.39 | 8.34 | 8.35 | 8.43 | 8.53 | 8.57 |
| CAZ | 0.42 | 0.43 | 0.44 | 0.44 | 0.45 | 0.45 | 0.45 | 0.47 | 0.48 | 0.48 | 0.48 |
| CHA | 0.80 | 0.81 | 0.83 | 0.83 | 0.83 | 0.85 | 0.87 | 0.88 | 0.89 | 0.90 | 0.93 |
| EUR | 2.25 | 2.22 | 2.19 | 2.19 | 2.17 | 2.19 | 2.17 | 2.14 | 2.13 | 2.12 | 2.11 |
| IND | 0.87 | 0.88 | 0.88 | 0.89 | 0.89 | 0.89 | 0.89 | 0.90 | 0.90 | 0.91 | 0.92 |
| JPN | 0.18 | 0.18 | 0.18 | 0.18 | 0.18 | 0.18 | 0.17 | 0.17 | 0.17 | 0.17 | 0.17 |
| LAM | 0.46 | 0.46 | 0.45 | 0.45 | 0.45 | 0.45 | 0.46 | 0.47 | 0.48 | 0.50 | 0.51 |
| MEA | 0.11 | 0.11 | 0.12 | 0.12 | 0.13 | 0.13 | 0.12 | 0.12 | 0.12 | 0.13 | 0.13 |
| NEU | 0.17 | 0.18 | 0.17 | 0.17 | 0.17 | 0.17 | 0.16 | 0.16 | 0.15 | 0.15 | 0.14 |
| OAS | 0.66 | 0.68 | 0.70 | 0.72 | 0.71 | 0.72 | 0.72 | 0.74 | 0.77 | 0.80 | 0.82 |
| REF | 1.00 | 0.92 | 0.85 | 0.76 | 0.72 | 0.69 | 0.67 | 0.64 | 0.65 | 0.70 | 0.66 |
| SSA | 0.24 | 0.25 | 0.25 | 0.26 | 0.27 | 0.28 | 0.28 | 0.28 | 0.29 | 0.30 | 0.30 |
| USA | 1.34 | 1.36 | 1.35 | 1.33 | 1.37 | 1.39 | 1.37 | 1.38 | 1.39 | 1.38 | 1.39 |

Table 733: FAO\_EmisAg — Emissions—CH4—Land—Agriculture—Animal waste management (Mt CH4/yr)  
[PART 4/5]

|     | 2005 | 2006 | 2007 | 2008 | 2009 | 2010 | 2011 | 2030 | 2050 |
|-----|------|------|------|------|------|------|------|------|------|
| GLO | 8.66 | 8.76 | 8.86 | 8.93 | 8.96 | 9.08 | 9.12 | 0.00 | 0.00 |
| CAZ | 0.48 | 0.48 | 0.47 | 0.45 | 0.45 | 0.44 | 0.45 | 0.00 | 0.00 |
| CHA | 0.96 | 0.99 | 1.01 | 1.02 | 1.05 | 1.10 | 1.09 | 0.00 | 0.00 |
| EUR | 2.11 | 2.09 | 2.10 | 2.08 | 2.06 | 2.07 | 2.05 | 0.00 | 0.00 |
| IND | 0.93 | 0.94 | 0.97 | 0.98 | 1.00 | 1.02 | 1.03 | 0.00 | 0.00 |
| JPN | 0.17 | 0.17 | 0.17 | 0.17 | 0.17 | 0.17 | 0.17 | 0.00 | 0.00 |
| LAM | 0.52 | 0.53 | 0.53 | 0.53 | 0.54 | 0.54 | 0.54 | 0.00 | 0.00 |
| MEA | 0.14 | 0.14 | 0.14 | 0.14 | 0.15 | 0.15 | 0.15 | 0.00 | 0.00 |
| NEU | 0.14 | 0.14 | 0.15 | 0.14 | 0.14 | 0.14 | 0.14 | 0.00 | 0.00 |
| OAS | 0.84 | 0.87 | 0.90 | 0.91 | 0.95 | 0.96 | 0.98 | 0.00 | 0.00 |
| REF | 0.66 | 0.67 | 0.66 | 0.67 | 0.65 | 0.67 | 0.69 | 0.00 | 0.00 |
| SSA | 0.31 | 0.32 | 0.34 | 0.36 | 0.36 | 0.37 | 0.38 | 0.00 | 0.00 |
| USA | 1.40 | 1.41 | 1.42 | 1.47 | 1.44 | 1.44 | 1.45 | 0.00 | 0.00 |

Table 734: FAO\_EmisAg — Emissions—CH4—Land—Agriculture—Animal waste management (Mt CH4/yr)  
[PART 5/5]

11.1.3 Agriculture—Rice

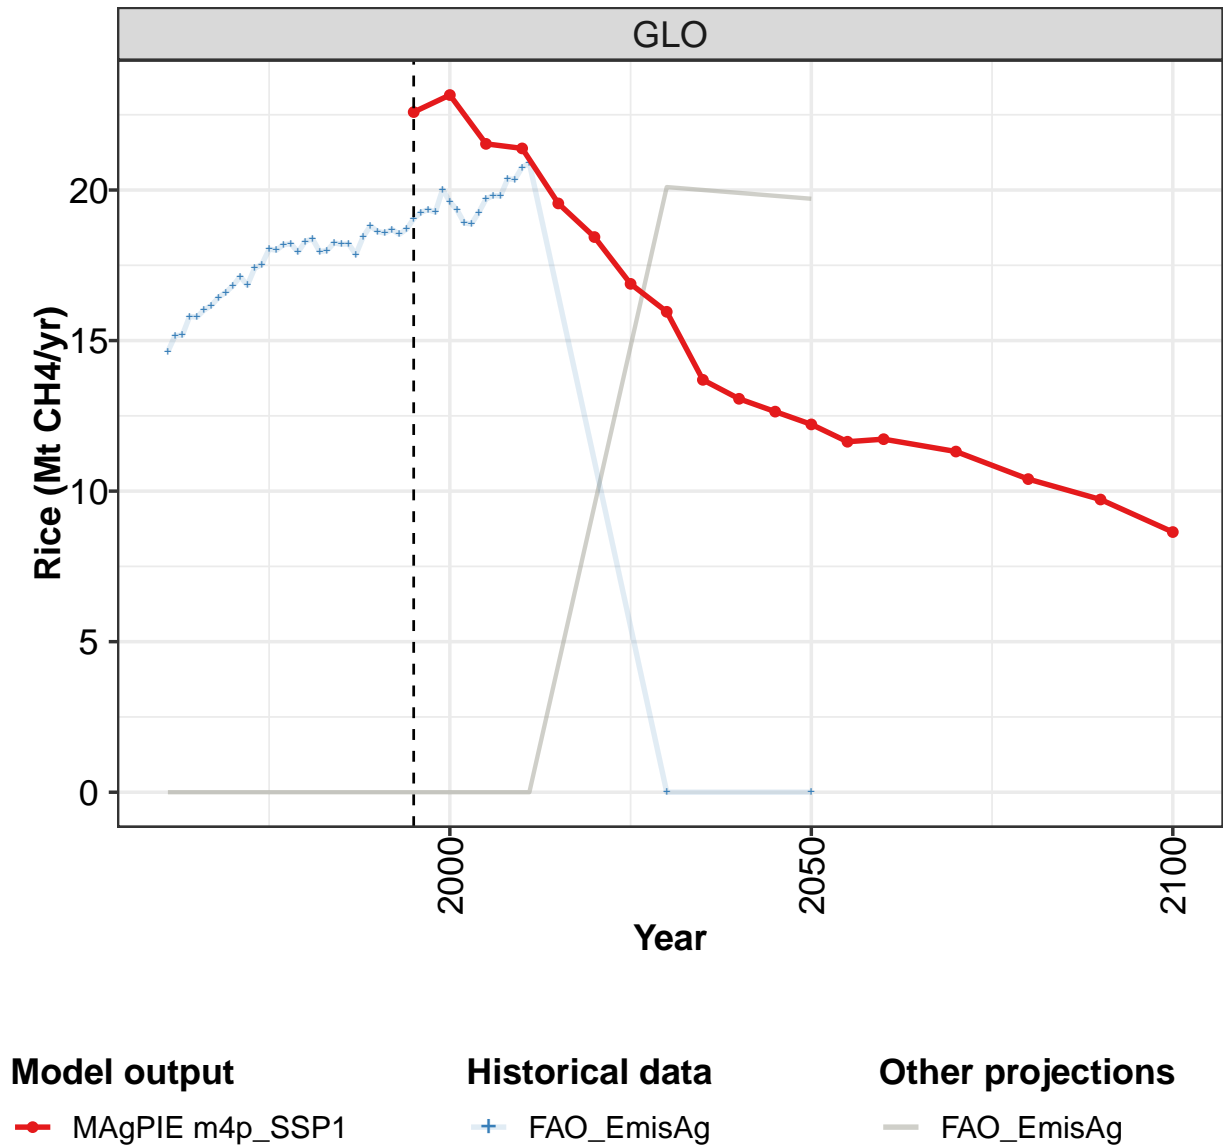



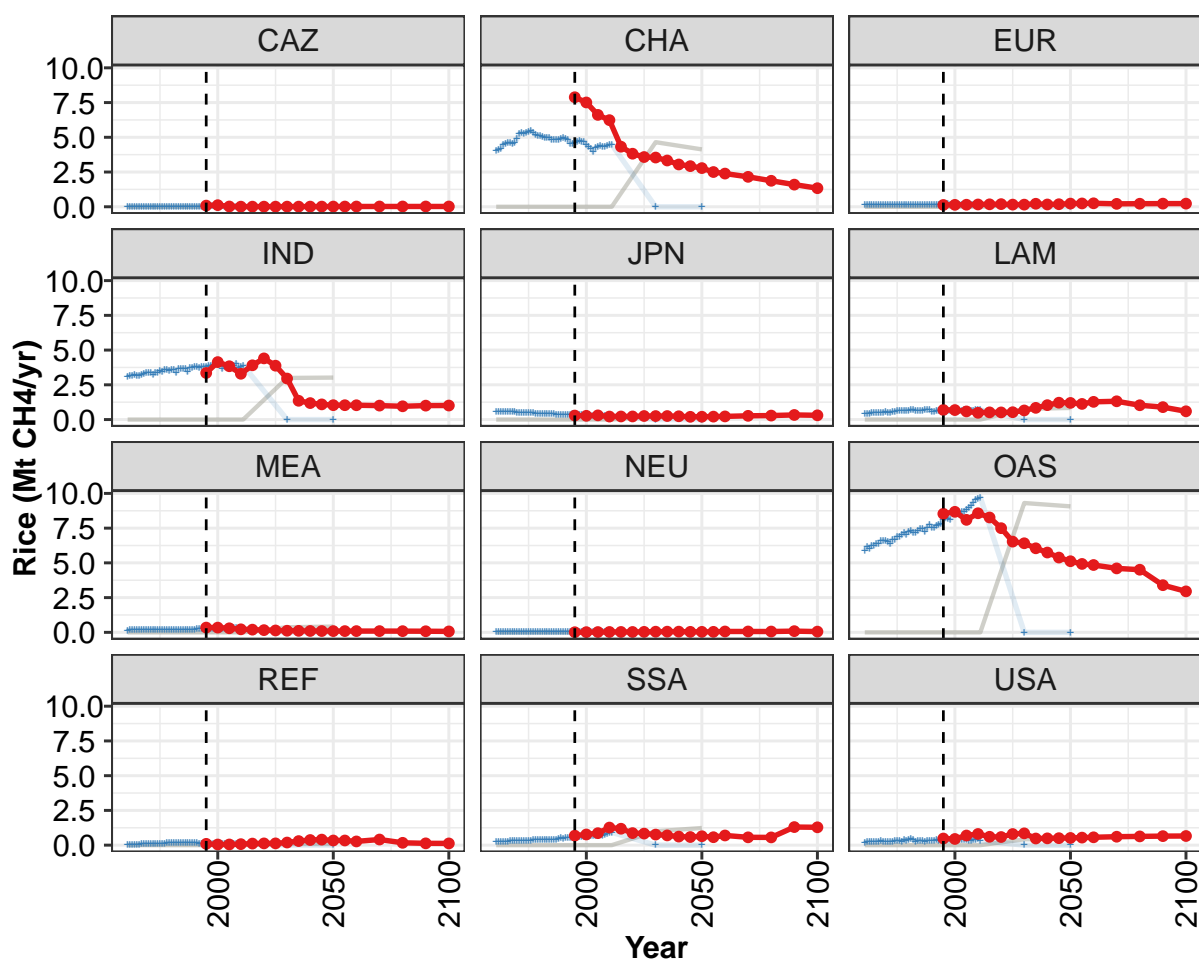**Model output**

—●— MAgPIE m4p\_SSP1

**Historical data**

—+— FAO\_EmisAg

**Other projections**

— FAO\_EmisAg

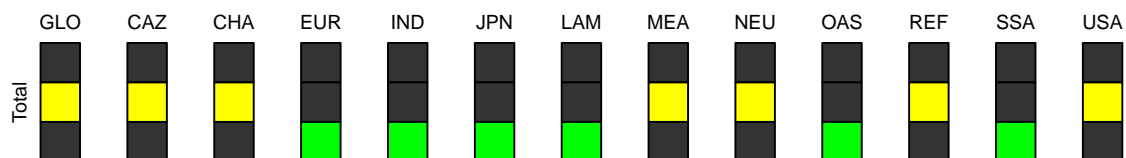

Figure 236: MAgPIE m4p\_SSP1 — Emissions—CH4—Land—Agriculture—Rice (Mt CH4/yr)

|     | 1995 | 2000 | 2005 | 2010 | 2015 | 2020 | 2025 | 2030 | 2035 | 2040 | 2045 |
|-----|------|------|------|------|------|------|------|------|------|------|------|
| GLO | 22.6 | 23.2 | 21.5 | 21.4 | 19.6 | 18.4 | 16.9 | 16.0 | 13.7 | 13.1 | 12.6 |
| CAZ | 0.1  | 0.1  | 0.0  | 0.0  | 0.0  | 0.0  | 0.0  | 0.0  | 0.0  | 0.0  | 0.0  |
| CHA | 7.9  | 7.5  | 6.6  | 6.2  | 4.3  | 3.8  | 3.6  | 3.5  | 3.3  | 3.0  | 2.9  |
| EUR | 0.1  | 0.1  | 0.1  | 0.2  | 0.2  | 0.2  | 0.2  | 0.2  | 0.2  | 0.2  | 0.2  |
| IND | 3.4  | 4.1  | 3.8  | 3.3  | 3.9  | 4.4  | 3.9  | 3.0  | 1.4  | 1.2  | 1.1  |
| JPN | 0.3  | 0.3  | 0.3  | 0.2  | 0.2  | 0.2  | 0.3  | 0.3  | 0.3  | 0.2  | 0.2  |
| LAM | 0.7  | 0.7  | 0.6  | 0.5  | 0.5  | 0.5  | 0.5  | 0.7  | 0.8  | 1.0  | 1.2  |
| MEA | 0.3  | 0.3  | 0.3  | 0.2  | 0.2  | 0.2  | 0.1  | 0.1  | 0.1  | 0.1  | 0.1  |
| NEU | 0.0  | 0.0  | 0.0  | 0.0  | 0.0  | 0.0  | 0.0  | 0.0  | 0.1  | 0.1  | 0.0  |
| OAS | 8.5  | 8.7  | 8.1  | 8.6  | 8.3  | 7.5  | 6.5  | 6.4  | 6.1  | 5.7  | 5.4  |
| REF | 0.1  | 0.0  | 0.0  | 0.1  | 0.1  | 0.1  | 0.1  | 0.2  | 0.3  | 0.4  | 0.4  |
| SSA | 0.7  | 0.8  | 0.9  | 1.3  | 1.2  | 0.9  | 0.8  | 0.8  | 0.7  | 0.6  | 0.6  |
| USA | 0.5  | 0.4  | 0.7  | 0.8  | 0.6  | 0.6  | 0.8  | 0.9  | 0.5  | 0.5  | 0.5  |

Table 735: MAgPIE m4p\_SSP1 — Emissions—CH4—Land—Agriculture—Rice (Mt CH4/yr) [PART 1/2]

|     | 2050 | 2055 | 2060 | 2070 | 2080 | 2090 | 2100 |
|-----|------|------|------|------|------|------|------|
| GLO | 12.2 | 11.6 | 11.7 | 11.3 | 10.4 | 9.7  | 8.6  |
| CAZ | 0.0  | 0.0  | 0.0  | 0.0  | 0.0  | 0.0  | 0.0  |
| CHA | 2.8  | 2.5  | 2.4  | 2.2  | 1.9  | 1.6  | 1.3  |
| EUR | 0.2  | 0.2  | 0.3  | 0.2  | 0.2  | 0.2  | 0.2  |
| IND | 1.0  | 1.0  | 1.0  | 1.0  | 1.0  | 1.0  | 1.0  |
| JPN | 0.2  | 0.2  | 0.2  | 0.3  | 0.3  | 0.3  | 0.3  |
| LAM | 1.2  | 1.1  | 1.3  | 1.3  | 1.0  | 0.9  | 0.6  |
| MEA | 0.1  | 0.1  | 0.1  | 0.1  | 0.1  | 0.1  | 0.1  |
| NEU | 0.0  | 0.0  | 0.1  | 0.1  | 0.1  | 0.1  | 0.1  |
| OAS | 5.1  | 4.9  | 4.8  | 4.6  | 4.5  | 3.4  | 3.0  |
| REF | 0.3  | 0.3  | 0.3  | 0.4  | 0.2  | 0.1  | 0.1  |
| SSA | 0.6  | 0.6  | 0.7  | 0.6  | 0.6  | 1.3  | 1.3  |
| USA | 0.5  | 0.5  | 0.6  | 0.6  | 0.6  | 0.6  | 0.7  |

Table 736: MAgPIE m4p\_SSP1 — Emissions—CH4—Land—Agriculture—Rice (Mt CH4/yr) [PART 2/2]

|     | 1961 | 1962 | 1963 | 1964 | 1965 | 1966 | 1967 | 1968 | 1969 | 1970 | 1971 |
|-----|------|------|------|------|------|------|------|------|------|------|------|
| GLO | 14.6 | 15.2 | 15.2 | 15.8 | 15.8 | 16.0 | 16.2 | 16.4 | 16.6 | 16.8 | 17.1 |
| CAZ | 0.0  | 0.0  | 0.0  | 0.0  | 0.0  | 0.0  | 0.0  | 0.0  | 0.0  | 0.0  | 0.0  |
| CHA | 4.0  | 4.1  | 4.2  | 4.5  | 4.5  | 4.6  | 4.6  | 4.5  | 4.6  | 4.9  | 5.3  |
| EUR | 0.1  | 0.1  | 0.1  | 0.1  | 0.1  | 0.1  | 0.1  | 0.1  | 0.1  | 0.1  | 0.1  |
| IND | 3.1  | 3.2  | 3.2  | 3.2  | 3.1  | 3.1  | 3.2  | 3.3  | 3.3  | 3.3  | 3.3  |
| JPN | 0.6  | 0.6  | 0.6  | 0.6  | 0.6  | 0.6  | 0.6  | 0.6  | 0.6  | 0.5  | 0.5  |
| LAM | 0.4  | 0.4  | 0.4  | 0.5  | 0.5  | 0.5  | 0.5  | 0.5  | 0.5  | 0.5  | 0.5  |
| MEA | 0.1  | 0.1  | 0.2  | 0.2  | 0.2  | 0.2  | 0.2  | 0.2  | 0.2  | 0.2  | 0.2  |
| NEU | 0.0  | 0.0  | 0.0  | 0.0  | 0.0  | 0.0  | 0.0  | 0.0  | 0.0  | 0.0  | 0.0  |
| OAS | 5.9  | 6.1  | 6.0  | 6.2  | 6.2  | 6.4  | 6.4  | 6.6  | 6.6  | 6.6  | 6.5  |
| REF | 0.0  | 0.0  | 0.0  | 0.0  | 0.1  | 0.1  | 0.1  | 0.1  | 0.1  | 0.1  | 0.1  |
| SSA | 0.2  | 0.3  | 0.2  | 0.2  | 0.2  | 0.3  | 0.3  | 0.3  | 0.3  | 0.3  | 0.3  |
| USA | 0.2  | 0.2  | 0.2  | 0.2  | 0.2  | 0.2  | 0.2  | 0.3  | 0.3  | 0.2  | 0.2  |

Table 737: FAO\_EmisAg — Emissions—CH4—Land—Agriculture—Rice (Mt CH4/yr) [PART 1/5]

|     | 1972 | 1973 | 1974 | 1975 | 1976 | 1977 | 1978 | 1979 | 1980 | 1981 | 1982 |
|-----|------|------|------|------|------|------|------|------|------|------|------|
| GLO | 16.8 | 17.4 | 17.5 | 18.0 | 18.0 | 18.2 | 18.2 | 17.9 | 18.3 | 18.4 | 18.0 |
| CAZ | 0.0  | 0.0  | 0.0  | 0.0  | 0.0  | 0.0  | 0.0  | 0.0  | 0.0  | 0.0  | 0.0  |
| CHA | 5.3  | 5.3  | 5.4  | 5.4  | 5.5  | 5.4  | 5.2  | 5.1  | 5.1  | 5.0  | 5.0  |
| EUR | 0.2  | 0.2  | 0.2  | 0.1  | 0.1  | 0.1  | 0.2  | 0.1  | 0.1  | 0.1  | 0.1  |
| IND | 3.3  | 3.4  | 3.4  | 3.5  | 3.4  | 3.6  | 3.6  | 3.5  | 3.6  | 3.6  | 3.4  |
| JPN | 0.5  | 0.5  | 0.5  | 0.5  | 0.5  | 0.5  | 0.4  | 0.4  | 0.4  | 0.4  | 0.4  |
| LAM | 0.5  | 0.5  | 0.5  | 0.6  | 0.7  | 0.6  | 0.6  | 0.6  | 0.7  | 0.7  | 0.7  |
| MEA | 0.2  | 0.2  | 0.2  | 0.2  | 0.2  | 0.2  | 0.2  | 0.2  | 0.2  | 0.2  | 0.2  |
| NEU | 0.0  | 0.0  | 0.0  | 0.0  | 0.0  | 0.0  | 0.0  | 0.0  | 0.0  | 0.0  | 0.0  |
| OAS | 6.3  | 6.7  | 6.7  | 6.9  | 6.9  | 7.0  | 7.1  | 7.0  | 7.2  | 7.3  | 7.2  |
| REF | 0.1  | 0.1  | 0.1  | 0.1  | 0.1  | 0.1  | 0.1  | 0.1  | 0.2  | 0.1  | 0.2  |
| SSA | 0.3  | 0.3  | 0.3  | 0.3  | 0.3  | 0.4  | 0.4  | 0.4  | 0.4  | 0.4  | 0.4  |
| USA | 0.2  | 0.3  | 0.3  | 0.3  | 0.3  | 0.3  | 0.4  | 0.3  | 0.4  | 0.5  | 0.4  |

Table 738: FAO\_EmisAg — Emissions—CH4—Land—Agriculture—Rice (Mt CH4/yr) [PART 2/5]

|     | 1983 | 1984 | 1985 | 1986 | 1987 | 1988 | 1989 | 1990 | 1991 | 1992 | 1993 |
|-----|------|------|------|------|------|------|------|------|------|------|------|
| GLO | 18.0 | 18.2 | 18.2 | 18.2 | 17.9 | 18.4 | 18.8 | 18.6 | 18.6 | 18.7 | 18.5 |
| CAZ | 0.0  | 0.0  | 0.0  | 0.0  | 0.0  | 0.0  | 0.0  | 0.0  | 0.0  | 0.0  | 0.0  |
| CHA | 5.0  | 5.0  | 4.8  | 4.8  | 4.8  | 4.8  | 4.9  | 4.9  | 4.9  | 4.8  | 4.5  |
| EUR | 0.1  | 0.1  | 0.1  | 0.2  | 0.2  | 0.2  | 0.2  | 0.2  | 0.2  | 0.2  | 0.1  |
| IND | 3.7  | 3.6  | 3.6  | 3.7  | 3.4  | 3.7  | 3.7  | 3.8  | 3.8  | 3.7  | 3.8  |
| JPN | 0.4  | 0.4  | 0.4  | 0.4  | 0.4  | 0.4  | 0.4  | 0.4  | 0.4  | 0.4  | 0.4  |
| LAM | 0.6  | 0.7  | 0.6  | 0.6  | 0.7  | 0.7  | 0.7  | 0.6  | 0.6  | 0.7  | 0.6  |
| MEA | 0.2  | 0.2  | 0.2  | 0.2  | 0.2  | 0.2  | 0.2  | 0.2  | 0.2  | 0.3  | 0.3  |
| NEU | 0.0  | 0.0  | 0.0  | 0.0  | 0.0  | 0.0  | 0.0  | 0.0  | 0.0  | 0.0  | 0.0  |
| OAS | 7.2  | 7.3  | 7.5  | 7.4  | 7.3  | 7.6  | 7.7  | 7.6  | 7.5  | 7.7  | 7.8  |
| REF | 0.2  | 0.2  | 0.2  | 0.1  | 0.2  | 0.2  | 0.2  | 0.1  | 0.1  | 0.1  | 0.1  |
| SSA | 0.4  | 0.4  | 0.4  | 0.4  | 0.4  | 0.4  | 0.5  | 0.5  | 0.5  | 0.5  | 0.5  |
| USA | 0.3  | 0.3  | 0.3  | 0.3  | 0.3  | 0.3  | 0.3  | 0.3  | 0.3  | 0.4  | 0.3  |

Table 739: FAO\_EmisAg — Emissions—CH4—Land—Agriculture—Rice (Mt CH4/yr) [PART 3/5]

|     | 1994 | 1995 | 1996 | 1997 | 1998 | 1999 | 2000 | 2001 | 2002 | 2003 | 2004 |
|-----|------|------|------|------|------|------|------|------|------|------|------|
| GLO | 18.7 | 19.0 | 19.3 | 19.3 | 19.3 | 20.0 | 19.6 | 19.3 | 18.9 | 18.9 | 19.3 |
| CAZ | 0.0  | 0.0  | 0.0  | 0.0  | 0.0  | 0.0  | 0.0  | 0.0  | 0.0  | 0.0  | 0.0  |
| CHA | 4.5  | 4.6  | 4.7  | 4.7  | 4.7  | 4.7  | 4.5  | 4.3  | 4.2  | 4.0  | 4.2  |
| EUR | 0.2  | 0.2  | 0.2  | 0.2  | 0.2  | 0.2  | 0.2  | 0.2  | 0.2  | 0.2  | 0.2  |
| IND | 3.8  | 3.8  | 3.8  | 3.9  | 4.0  | 4.0  | 4.0  | 4.0  | 3.7  | 3.8  | 3.7  |
| JPN | 0.4  | 0.4  | 0.3  | 0.3  | 0.3  | 0.3  | 0.3  | 0.3  | 0.3  | 0.3  | 0.3  |
| LAM | 0.7  | 0.7  | 0.6  | 0.6  | 0.6  | 0.7  | 0.7  | 0.6  | 0.6  | 0.6  | 0.7  |
| MEA | 0.3  | 0.3  | 0.3  | 0.3  | 0.3  | 0.3  | 0.3  | 0.3  | 0.3  | 0.3  | 0.3  |
| NEU | 0.0  | 0.0  | 0.0  | 0.0  | 0.0  | 0.0  | 0.0  | 0.0  | 0.0  | 0.0  | 0.0  |
| OAS | 7.8  | 8.1  | 8.2  | 8.2  | 8.1  | 8.7  | 8.6  | 8.6  | 8.5  | 8.6  | 8.7  |
| REF | 0.1  | 0.1  | 0.1  | 0.1  | 0.1  | 0.1  | 0.1  | 0.1  | 0.1  | 0.1  | 0.1  |
| SSA | 0.5  | 0.6  | 0.6  | 0.6  | 0.6  | 0.6  | 0.6  | 0.6  | 0.6  | 0.7  | 0.7  |
| USA | 0.4  | 0.4  | 0.3  | 0.4  | 0.4  | 0.4  | 0.4  | 0.4  | 0.4  | 0.4  | 0.4  |

Table 740: FAO\_EmisAg — Emissions—CH4—Land—Agriculture—Rice (Mt CH4/yr) [PART 4/5]

|     | 2005 | 2006 | 2007 | 2008 | 2009 | 2010 | 2011 | 2030 | 2050 |
|-----|------|------|------|------|------|------|------|------|------|
| GLO | 19.7 | 19.8 | 19.8 | 20.4 | 20.4 | 20.8 | 20.9 | 0.0  | 0.0  |
| CAZ | 0.0  | 0.0  | 0.0  | 0.0  | 0.0  | 0.0  | 0.0  | 0.0  | 0.0  |
| CHA | 4.3  | 4.4  | 4.3  | 4.4  | 4.4  | 4.4  | 4.5  | 0.0  | 0.0  |
| EUR | 0.2  | 0.2  | 0.2  | 0.2  | 0.2  | 0.2  | 0.2  | 0.0  | 0.0  |
| IND | 3.9  | 3.9  | 3.9  | 4.0  | 3.7  | 3.8  | 3.9  | 0.0  | 0.0  |
| JPN | 0.3  | 0.3  | 0.3  | 0.3  | 0.3  | 0.3  | 0.3  | 0.0  | 0.0  |
| LAM | 0.7  | 0.6  | 0.6  | 0.7  | 0.7  | 0.7  | 0.7  | 0.0  | 0.0  |
| MEA | 0.3  | 0.3  | 0.3  | 0.3  | 0.2  | 0.2  | 0.3  | 0.0  | 0.0  |
| NEU | 0.0  | 0.0  | 0.0  | 0.0  | 0.0  | 0.0  | 0.0  | 0.0  | 0.0  |
| OAS | 8.8  | 9.0  | 9.1  | 9.3  | 9.5  | 9.6  | 9.7  | 0.0  | 0.0  |
| REF | 0.1  | 0.1  | 0.1  | 0.1  | 0.1  | 0.1  | 0.1  | 0.0  | 0.0  |
| SSA | 0.7  | 0.7  | 0.7  | 0.8  | 0.8  | 0.9  | 0.9  | 0.0  | 0.0  |
| USA | 0.4  | 0.3  | 0.3  | 0.4  | 0.4  | 0.4  | 0.3  | 0.0  | 0.0  |

Table 741: FAO\_EmisAg — Emissions—CH4—Land—Agriculture—Rice (Mt CH4/yr) [PART 5/5]

## 12 CO2

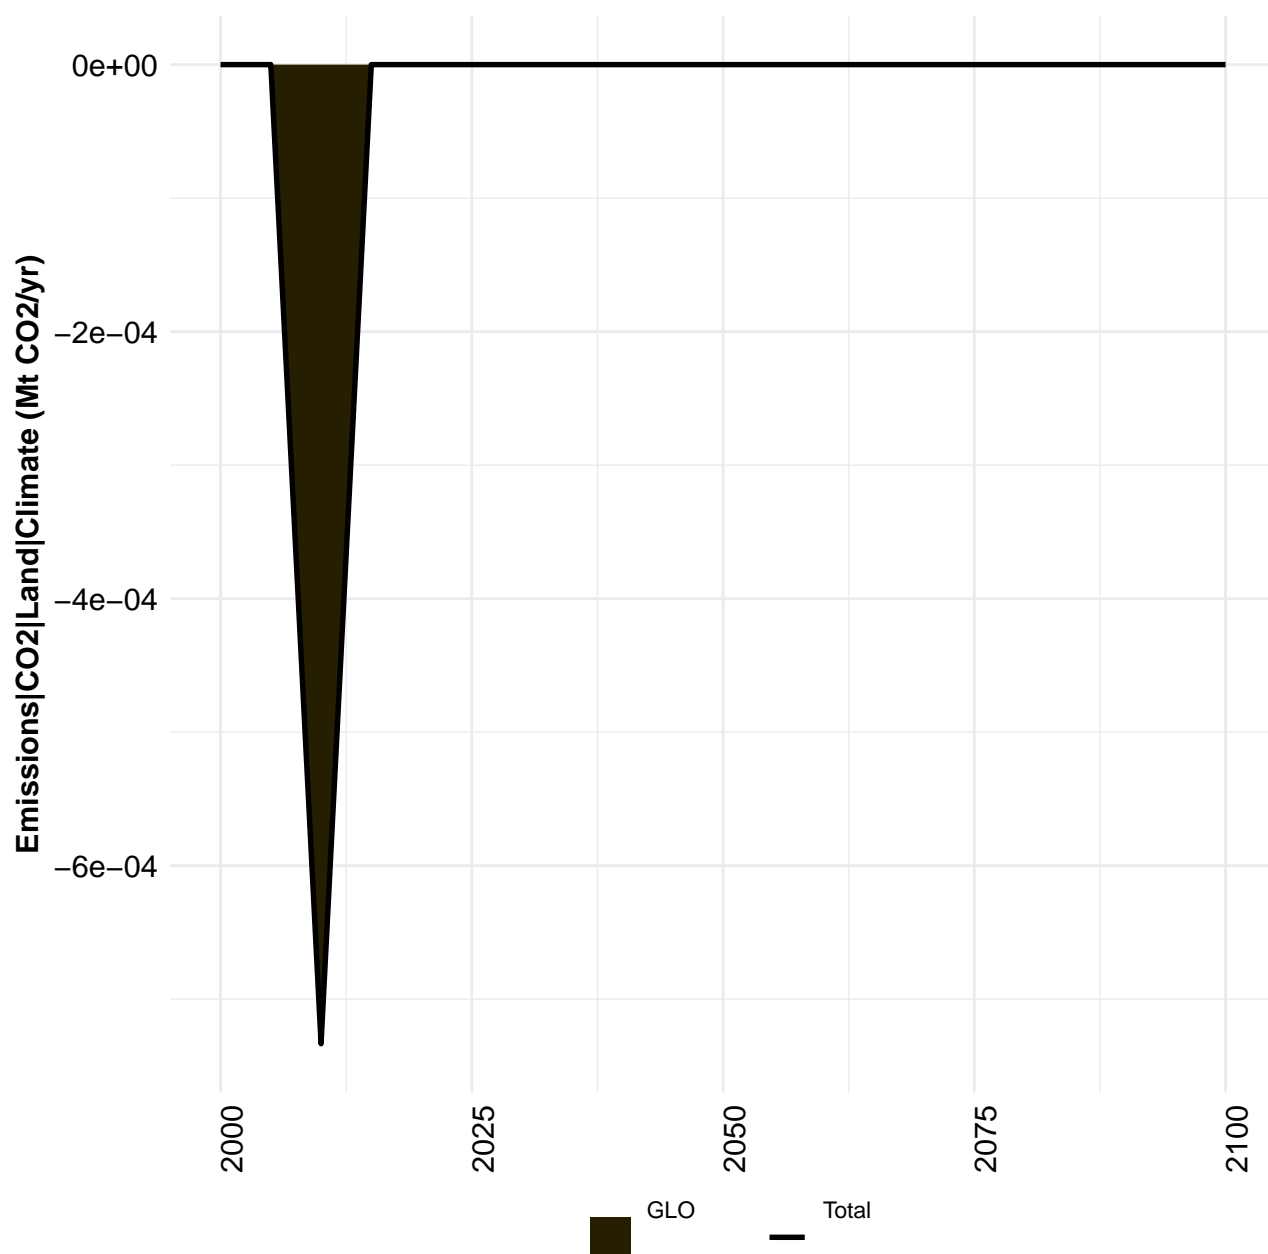

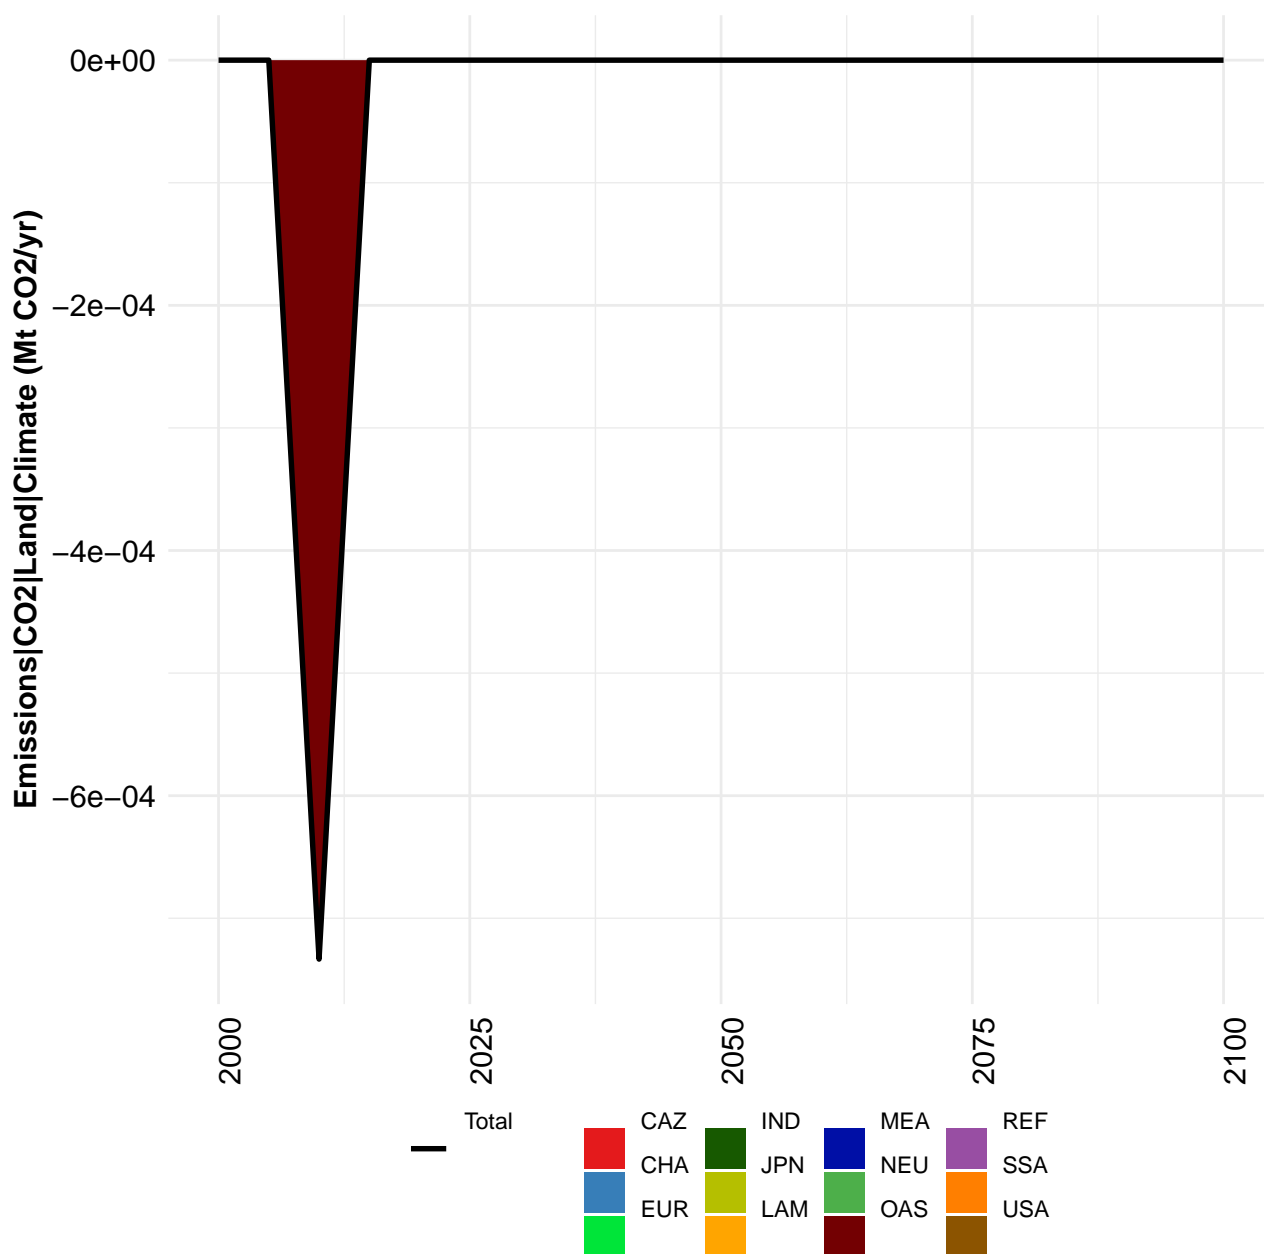

12.1 Land

12.1.1 Land-use Change

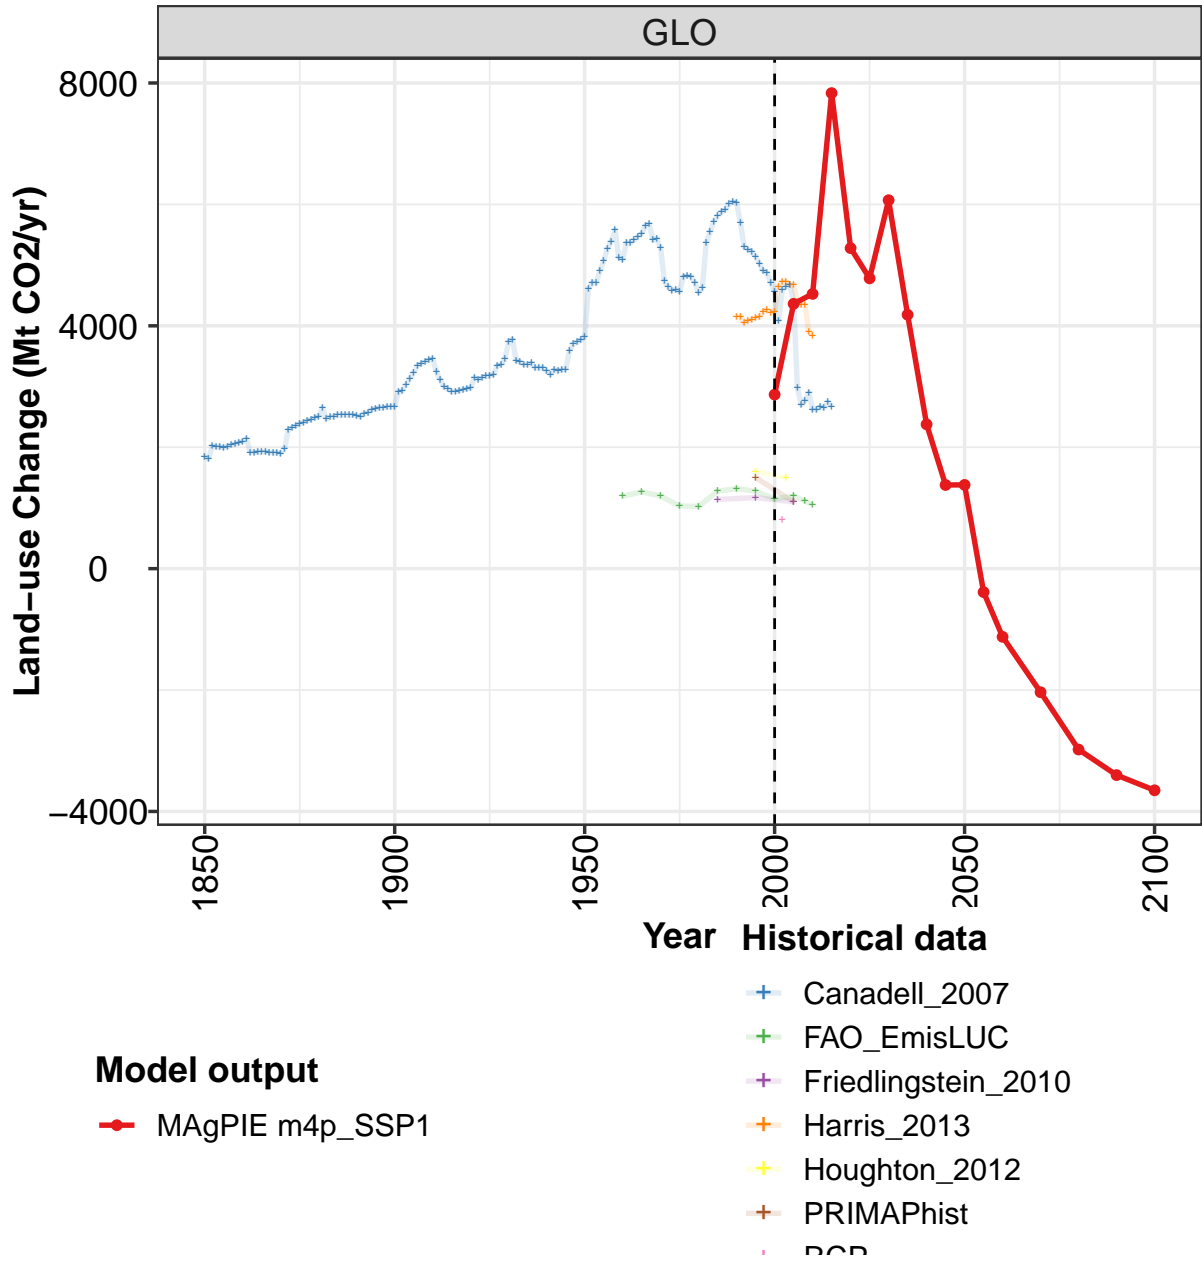

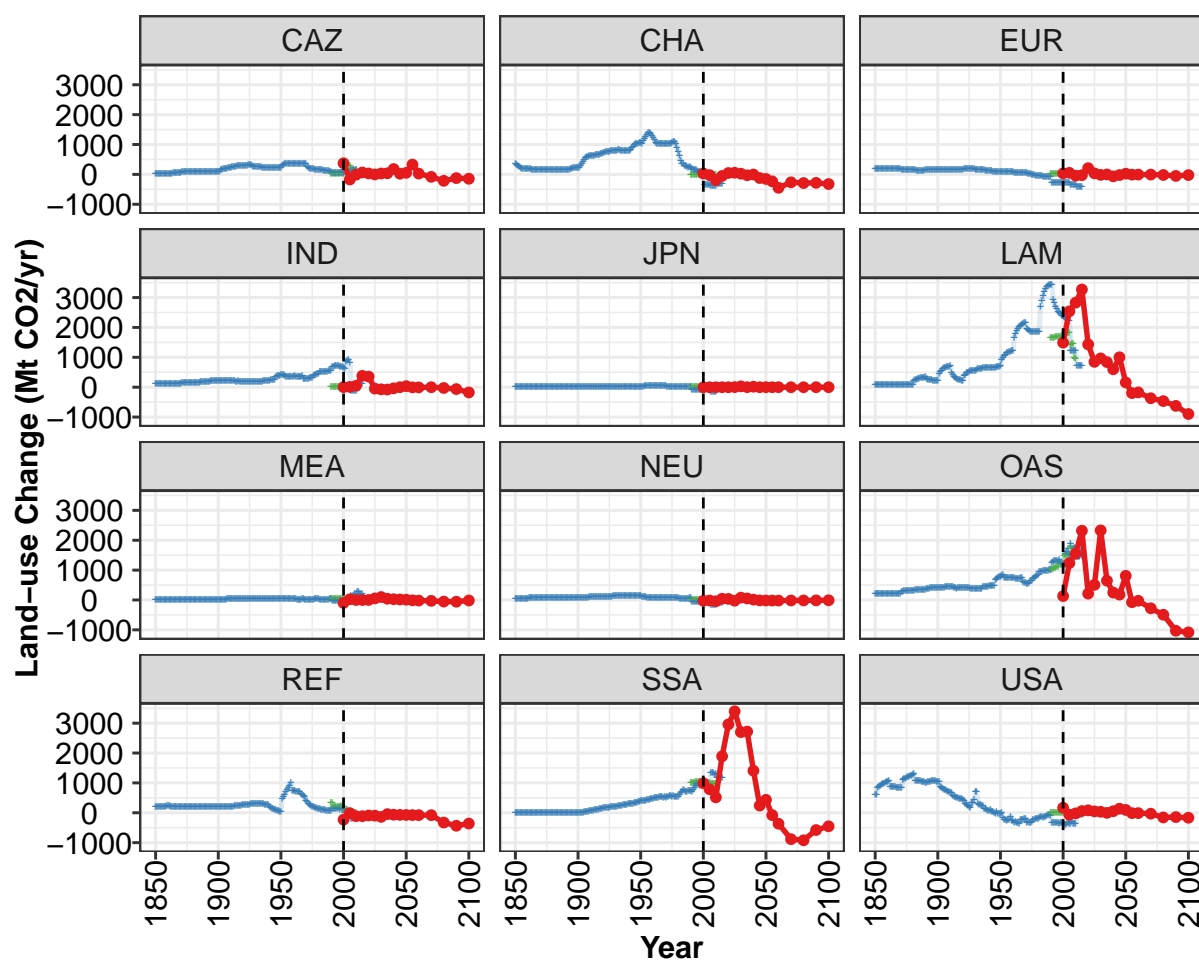

### Model output

—•— MAGPIE m4p\_SSP1

### Historical data

—+— FAO\_EmisLUC

—+— PRIMAPhist

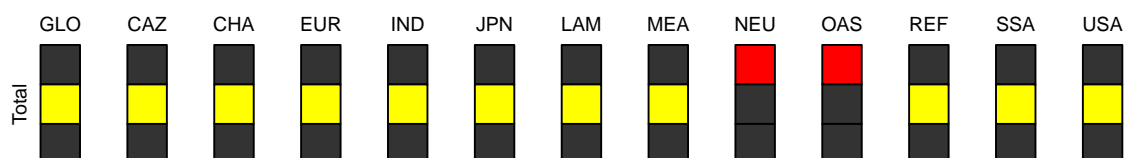

Figure 237: MAGPIE m4p\_SSP1 — Emissions—CO<sub>2</sub>—Land—Land-use Change (Mt CO<sub>2</sub>/yr)



|     | 2000 | 2005 | 2010 | 2015 | 2020 | 2025 | 2030 | 2035 | 2040 | 2045 | 2050 |
|-----|------|------|------|------|------|------|------|------|------|------|------|
| GLO | 2867 | 4363 | 4526 | 7834 | 5280 | 4782 | 6070 | 4183 | 2377 | 1378 | 1379 |
| CAZ | 374  | -171 | -8   | 64   | 33   | -0   | 31   | 39   | 180  | 24   | 53   |
| CHA | 31   | -24  | -192 | -52  | 48   | 56   | 24   | -28  | -3   | -121 | -152 |
| EUR | 34   | 54   | -42  | -26  | 209  | 36   | -15  | -1   | -65  | -21  | 25   |
| IND | 2    | 10   | 50   | 381  | 356  | -47  | -71  | -78  | -37  | 1    | 36   |
| JPN | -4   | -1   | -1   | -1   | -1   | 3    | 29   | 1    | 17   | 0    | 1    |
| LAM | 1492 | 2540 | 2830 | 3271 | 1433 | 849  | 966  | 841  | 601  | 1002 | 159  |
| MEA | -100 | 24   | -0   | -1   | 1    | 54   | 99   | 42   | 26   | 18   | 10   |
| NEU | -26  | -16  | -42  | 42   | 37   | -24  | 79   | 51   | 12   | -14  | -16  |
| OAS | 131  | 1234 | 1550 | 2319 | 213  | 507  | 2330 | 645  | 249  | 181  | 809  |
| REF | -229 | -10  | -114 | -114 | -89  | -96  | -138 | -45  | -65  | -70  | -73  |
| SSA | 991  | 787  | 516  | 1891 | 2958 | 3396 | 2701 | 2719 | 1409 | 243  | 433  |
| USA | 169  | -65  | -20  | 59   | 82   | 47   | 34   | -2   | 53   | 136  | 95   |

Table 742: MAgPIE m4p\_SSP1 — Emissions—CO2—Land—Land-use Change (Mt CO2/yr) [PART 1/2]

|     | 2055 | 2060  | 2070  | 2080  | 2090  | 2100  |
|-----|------|-------|-------|-------|-------|-------|
| GLO | -386 | -1123 | -2035 | -2980 | -3401 | -3651 |
| CAZ | 328  | 28    | -82   | -215  | -123  | -144  |
| CHA | -233 | -448  | -264  | -289  | -282  | -322  |
| EUR | -8   | -5    | -4    | -19   | -50   | -22   |
| IND | -6   | -5    | -0    | -26   | -63   | -177  |
| JPN | 0    | 0     | -1    | -1    | -1    | -0    |
| LAM | -197 | -174  | -369  | -465  | -626  | -897  |
| MEA | -10  | -19   | -29   | -53   | -58   | -17   |
| NEU | -18  | -19   | -16   | -15   | -13   | -10   |
| OAS | -75  | -26   | -278  | -494  | -1029 | -1084 |
| REF | -77  | -78   | -79   | -326  | -434  | -361  |
| SSA | -78  | -366  | -883  | -921  | -577  | -452  |
| USA | -12  | -12   | -30   | -157  | -144  | -166  |

Table 743: MAgPIE m4p\_SSP1 — Emissions—CO2—Land—Land-use Change (Mt CO2/yr) [PART 2/2]

|     | 1850 | 1851 | 1852 | 1853 | 1854 | 1855 | 1856 | 1857 | 1858 | 1859 | 1860 |
|-----|------|------|------|------|------|------|------|------|------|------|------|
| GLO | 1841 | 1812 | 2018 | 2010 | 2003 | 1992 | 2014 | 2034 | 2051 | 2079 | 2095 |
| CAZ | 29   | 28   | 28   | 28   | 28   | 28   | 28   | 28   | 28   | 28   | 27   |
| CHA | 368  | 336  | 303  | 268  | 233  | 196  | 191  | 186  | 182  | 179  | 177  |
| EUR | 176  | 176  | 176  | 176  | 176  | 176  | 176  | 176  | 176  | 176  | 176  |
| IND | 106  | 106  | 106  | 106  | 106  | 106  | 106  | 106  | 106  | 107  | 107  |
| JPN | -3   | -3   | -3   | -3   | -3   | -3   | -3   | -3   | -3   | -3   | -3   |
| LAM | 87   | 85   | 85   | 84   | 83   | 82   | 81   | 81   | 80   | 80   | 78   |
| MEA | 4    | 4    | 4    | 4    | 4    | 4    | 4    | 4    | 4    | 4    | 4    |
| NEU | 48   | 48   | 48   | 48   | 48   | 48   | 48   | 48   | 48   | 48   | 48   |
| OAS | 222  | 220  | 219  | 219  | 218  | 218  | 218  | 218  | 218  | 218  | 218  |
| REF | 208  | 208  | 209  | 210  | 211  | 212  | 214  | 215  | 216  | 218  | 219  |
| SSA | -5   | -4   | -4   | -4   | -4   | -4   | -4   | -4   | -5   | -6   | -7   |
| USA | 601  | 607  | 845  | 874  | 902  | 929  | 955  | 979  | 1000 | 1030 | 1050 |

Table 744: PRIMAPHist — Emissions—CO2—Land—Land-use Change (Mt CO2/yr) [PART 1/16]

|     | 1861 | 1862 | 1863 | 1864 | 1865 | 1866 | 1867 | 1868 | 1869 | 1870 | 1871 |
|-----|------|------|------|------|------|------|------|------|------|------|------|
| GLO | 2136 | 1916 | 1916 | 1918 | 1920 | 1921 | 1915 | 1910 | 1904 | 1900 | 1973 |
| CAZ | 28   | 34   | 36   | 38   | 41   | 43   | 45   | 47   | 49   | 52   | 71   |
| CHA | 175  | 173  | 169  | 167  | 166  | 165  | 164  | 163  | 162  | 162  | 161  |
| EUR | 176  | 176  | 176  | 176  | 177  | 177  | 178  | 178  | 179  | 179  | 161  |
| IND | 107  | 107  | 107  | 107  | 107  | 107  | 107  | 108  | 108  | 108  | 137  |
| JPN | -2   | -2   | -2   | -2   | -2   | -2   | -2   | -2   | -2   | -2   | 1    |
| LAM | 81   | 82   | 82   | 82   | 83   | 81   | 79   | 78   | 77   | 77   | 76   |
| MEA | 10   | 11   | 12   | 12   | 12   | 13   | 13   | 14   | 14   | 14   | 14   |
| NEU | 61   | 63   | 65   | 66   | 67   | 68   | 69   | 70   | 71   | 71   | 69   |
| OAS | 219  | 219  | 219  | 220  | 220  | 220  | 220  | 220  | 221  | 221  | 275  |
| REF | 221  | 191  | 191  | 191  | 191  | 191  | 190  | 189  | 189  | 189  | 189  |
| SSA | -8   | -7   | -6   | -5   | -2   | -2   | -1   | -1   | -2   | -2   | -3   |
| USA | 1070 | 871  | 868  | 865  | 862  | 860  | 852  | 845  | 838  | 831  | 821  |

Table 745: PRIMAPHist — Emissions—CO2—Land—Land-use Change (Mt CO2/yr) [PART 2/16]

|     | 1872 | 1873 | 1874 | 1875 | 1876 | 1877 | 1878 | 1879 | 1880 | 1881 | 1882 |
|-----|------|------|------|------|------|------|------|------|------|------|------|
| GLO | 2286 | 2326 | 2353 | 2382 | 2410 | 2434 | 2459 | 2485 | 2507 | 2646 | 2469 |
| CAZ | 79   | 85   | 88   | 92   | 95   | 94   | 95   | 96   | 96   | 97   | 97   |
| CHA | 160  | 160  | 152  | 150  | 148  | 147  | 146  | 147  | 147  | 147  | 146  |
| EUR | 158  | 156  | 153  | 150  | 148  | 146  | 145  | 143  | 142  | 140  | 139  |
| IND | 144  | 148  | 152  | 155  | 157  | 158  | 160  | 161  | 162  | 163  | 163  |
| JPN | 2    | 3    | 3    | 3    | 3    | 3    | 4    | 4    | 4    | 4    | 4    |
| LAM | 76   | 75   | 75   | 75   | 75   | 77   | 79   | 80   | 82   | 198  | 232  |
| MEA | 15   | 15   | 15   | 15   | 16   | 16   | 16   | 16   | 16   | 16   | 17   |
| NEU | 70   | 70   | 70   | 70   | 70   | 70   | 70   | 71   | 71   | 71   | 71   |
| OAS | 288  | 297  | 304  | 310  | 313  | 316  | 319  | 321  | 323  | 324  | 325  |
| REF | 189  | 191  | 192  | 192  | 195  | 196  | 196  | 196  | 196  | 196  | 197  |
| SSA | -4   | -3   | -2   | -1   | -0   | -0   | -0   | 0    | -1   | -1   | -2   |
| USA | 1110 | 1130 | 1150 | 1170 | 1190 | 1210 | 1230 | 1250 | 1270 | 1290 | 1080 |

Table 746: PRIMAPHist — Emissions—CO2—Land—Land-use Change (Mt CO2/yr) [PART 3/16]

|     | 1883 | 1884 | 1885 | 1886 | 1887 | 1888 | 1889 | 1890 | 1891 | 1892 | 1893 |
|-----|------|------|------|------|------|------|------|------|------|------|------|
| GLO | 2495 | 2506 | 2529 | 2533 | 2532 | 2531 | 2529 | 2517 | 2504 | 2557 | 2560 |
| CAZ | 98   | 98   | 99   | 99   | 100  | 100  | 100  | 100  | 101  | 101  | 101  |
| CHA | 145  | 144  | 144  | 143  | 143  | 142  | 142  | 142  | 142  | 142  | 142  |
| EUR | 137  | 136  | 135  | 136  | 136  | 137  | 138  | 138  | 139  | 140  | 140  |
| IND | 164  | 164  | 164  | 165  | 165  | 165  | 166  | 166  | 188  | 193  | 197  |
| JPN | 4    | 4    | 4    | 5    | 5    | 5    | 5    | 5    | 5    | 5    | 5    |
| LAM | 258  | 280  | 298  | 309  | 316  | 323  | 329  | 333  | 269  | 257  | 247  |
| MEA | 17   | 17   | 17   | 17   | 17   | 17   | 18   | 18   | 18   | 18   | 18   |
| NEU | 71   | 71   | 71   | 72   | 72   | 73   | 73   | 73   | 74   | 74   | 75   |
| OAS | 326  | 326  | 328  | 328  | 329  | 329  | 330  | 330  | 370  | 379  | 386  |
| REF | 197  | 197  | 199  | 199  | 199  | 200  | 200  | 201  | 201  | 201  | 203  |
| SSA | -3   | -2   | -1   | 0    | 0    | -0   | -1   | -1   | -2   | -2   | -4   |
| USA | 1080 | 1070 | 1070 | 1060 | 1050 | 1040 | 1030 | 1010 | 999  | 1050 | 1050 |

Table 747: PRIMAPHist — Emissions—CO2—Land—Land-use Change (Mt CO2/yr) [PART 4/16]

|     | 1894 | 1895 | 1896 | 1897 | 1898 | 1899 | 1900 | 1901 | 1902 | 1903 | 1904 |
|-----|------|------|------|------|------|------|------|------|------|------|------|
| GLO | 2618 | 2638 | 2647 | 2655 | 2664 | 2664 | 2671 | 2914 | 2926 | 3033 | 3130 |
| CAZ | 102  | 102  | 102  | 102  | 103  | 103  | 103  | 104  | 151  | 163  | 173  |
| CHA | 198  | 204  | 210  | 216  | 222  | 228  | 233  | 238  | 299  | 363  | 430  |
| EUR | 141  | 142  | 142  | 143  | 143  | 144  | 145  | 145  | 146  | 147  | 148  |
| IND | 200  | 202  | 204  | 205  | 206  | 207  | 208  | 208  | 209  | 209  | 209  |
| JPN | 5    | 6    | 6    | 6    | 6    | 6    | 6    | 6    | 6    | 6    | 7    |
| LAM | 239  | 234  | 230  | 226  | 224  | 223  | 221  | 447  | 512  | 564  | 608  |
| MEA | 18   | 18   | 18   | 19   | 19   | 19   | 19   | 22   | 22   | 23   | 23   |
| NEU | 75   | 75   | 76   | 76   | 77   | 77   | 77   | 84   | 85   | 86   | 87   |
| OAS | 392  | 396  | 399  | 402  | 403  | 405  | 406  | 408  | 410  | 412  | 414  |
| REF | 203  | 203  | 204  | 204  | 204  | 204  | 205  | 206  | 206  | 207  | 207  |
| SSA | -5   | -5   | -5   | -4   | -2   | -2   | -2   | -3   | -1   | 4    | 10   |
| USA | 1050 | 1060 | 1060 | 1060 | 1060 | 1050 | 1050 | 1050 | 881  | 850  | 815  |

Table 748: PRIMAPHist — Emissions—CO2—Land—Land-use Change (Mt CO2/yr) [PART 5/16]

|     | 1905 | 1906 | 1907 | 1908 | 1909 | 1910 | 1911 | 1912 | 1913 | 1914 | 1915 |
|-----|------|------|------|------|------|------|------|------|------|------|------|
| GLO | 3229 | 3342 | 3374 | 3409 | 3434 | 3456 | 3243 | 3109 | 2996 | 2956 | 2913 |
| CAZ | 184  | 194  | 204  | 214  | 222  | 232  | 241  | 250  | 258  | 267  | 276  |
| CHA | 498  | 567  | 583  | 597  | 607  | 616  | 624  | 626  | 627  | 641  | 643  |
| EUR | 149  | 151  | 152  | 153  | 154  | 155  | 156  | 158  | 159  | 161  | 162  |
| IND | 210  | 221  | 223  | 225  | 227  | 228  | 229  | 230  | 202  | 196  | 192  |
| JPN | 7    | 7    | 7    | 7    | 7    | 7    | 7    | 8    | 8    | 8    | 8    |
| LAM | 646  | 664  | 677  | 689  | 698  | 706  | 479  | 413  | 359  | 314  | 273  |
| MEA | 23   | 24   | 24   | 24   | 24   | 24   | 24   | 24   | 25   | 25   | 25   |
| NEU | 88   | 89   | 89   | 90   | 90   | 91   | 91   | 92   | 92   | 93   | 93   |
| OAS | 417  | 437  | 442  | 446  | 449  | 452  | 453  | 455  | 407  | 397  | 390  |
| REF | 208  | 208  | 208  | 208  | 208  | 208  | 208  | 208  | 226  | 231  | 237  |
| SSA | 18   | 27   | 37   | 47   | 57   | 66   | 74   | 83   | 92   | 100  | 108  |
| USA | 781  | 755  | 728  | 709  | 690  | 671  | 655  | 562  | 541  | 524  | 507  |

Table 749: PRIMAPHist — Emissions—CO2—Land—Land-use Change (Mt CO2/yr) [PART 6/16]

|     | 1916 | 1917 | 1918 | 1919 | 1920 | 1921 | 1922 | 1923 | 1924 | 1925 | 1926 |
|-----|------|------|------|------|------|------|------|------|------|------|------|
| GLO | 2921 | 2932 | 2944 | 2965 | 2972 | 3148 | 3119 | 3147 | 3170 | 3182 | 3198 |
| CAZ | 284  | 287  | 290  | 292  | 295  | 298  | 300  | 303  | 305  | 308  | 310  |
| CHA | 644  | 662  | 681  | 699  | 717  | 736  | 745  | 754  | 763  | 771  | 779  |
| EUR | 163  | 165  | 167  | 168  | 170  | 171  | 173  | 174  | 176  | 177  | 176  |
| IND | 198  | 197  | 197  | 197  | 197  | 196  | 196  | 196  | 196  | 196  | 190  |
| JPN | 8    | 8    | 8    | 8    | 8    | 9    | 9    | 9    | 9    | 9    | 9    |
| LAM | 259  | 247  | 237  | 228  | 221  | 384  | 430  | 467  | 498  | 526  | 533  |
| MEA | 25   | 25   | 25   | 25   | 25   | 25   | 25   | 25   | 25   | 25   | 34   |
| NEU | 94   | 94   | 94   | 94   | 95   | 95   | 95   | 95   | 95   | 96   | 117  |
| OAS | 401  | 399  | 400  | 400  | 400  | 400  | 399  | 399  | 401  | 401  | 391  |
| REF | 241  | 246  | 250  | 255  | 260  | 264  | 269  | 274  | 279  | 284  | 289  |
| SSA | 116  | 125  | 134  | 142  | 151  | 158  | 165  | 171  | 177  | 182  | 187  |
| USA | 489  | 476  | 462  | 456  | 434  | 412  | 313  | 280  | 246  | 207  | 182  |

Table 750: PRIMAPHist — Emissions—CO2—Land—Land-use Change (Mt CO2/yr) [PART 7/16]

|     | 1927 | 1928 | 1929 | 1930 | 1931 | 1932 | 1933 | 1934 | 1935 | 1936 | 1937 |
|-----|------|------|------|------|------|------|------|------|------|------|------|
| GLO | 3342 | 3354 | 3453 | 3738 | 3777 | 3418 | 3406 | 3362 | 3356 | 3386 | 3303 |
| CAZ | 274  | 269  | 263  | 258  | 253  | 249  | 245  | 241  | 236  | 232  | 227  |
| CHA | 782  | 785  | 791  | 799  | 806  | 809  | 812  | 793  | 792  | 792  | 792  |
| EUR | 175  | 173  | 171  | 169  | 166  | 163  | 159  | 155  | 151  | 146  | 141  |
| IND | 189  | 188  | 188  | 187  | 187  | 187  | 187  | 188  | 188  | 211  | 216  |
| JPN | 9    | 9    | 9    | 9    | 9    | 10   | 10   | 10   | 10   | 10   | 10   |
| LAM | 539  | 544  | 546  | 550  | 593  | 606  | 614  | 621  | 627  | 634  | 640  |
| MEA | 37   | 39   | 39   | 39   | 40   | 41   | 41   | 42   | 42   | 43   | 43   |
| NEU | 122  | 126  | 127  | 127  | 128  | 129  | 130  | 130  | 131  | 131  | 132  |
| OAS | 388  | 388  | 387  | 386  | 387  | 387  | 387  | 387  | 388  | 428  | 439  |
| REF | 294  | 295  | 298  | 299  | 302  | 305  | 306  | 301  | 294  | 287  | 280  |
| SSA | 192  | 198  | 205  | 211  | 217  | 223  | 231  | 237  | 248  | 254  | 261  |
| USA | 341  | 341  | 429  | 703  | 688  | 311  | 284  | 257  | 249  | 218  | 120  |

Table 751: PRIMAPHist — Emissions—CO2—Land—Land-use Change (Mt CO2/yr) [PART 8/16]

|     | 1938 | 1939 | 1940 | 1941 | 1942 | 1943 | 1944 | 1945 | 1946 | 1947 | 1948 |
|-----|------|------|------|------|------|------|------|------|------|------|------|
| GLO | 3313 | 3307 | 3260 | 3196 | 3274 | 3254 | 3277 | 3282 | 3589 | 3700 | 3729 |
| CAZ | 223  | 220  | 215  | 211  | 212  | 212  | 213  | 213  | 214  | 214  | 214  |
| CHA | 792  | 792  | 792  | 792  | 836  | 881  | 929  | 977  | 1030 | 1030 | 1040 |
| EUR | 137  | 132  | 127  | 121  | 115  | 110  | 104  | 99   | 94   | 89   | 84   |
| IND | 221  | 224  | 226  | 230  | 233  | 236  | 240  | 243  | 341  | 366  | 385  |
| JPN | 10   | 10   | 10   | 10   | 11   | 11   | 11   | 11   | 11   | 11   | 11   |
| LAM | 647  | 652  | 657  | 652  | 650  | 649  | 647  | 647  | 658  | 669  | 681  |
| MEA | 44   | 44   | 44   | 45   | 45   | 46   | 46   | 46   | 46   | 46   | 47   |
| NEU | 132  | 132  | 132  | 133  | 133  | 132  | 133  | 132  | 132  | 133  | 132  |
| OAS | 445  | 451  | 457  | 462  | 469  | 476  | 483  | 490  | 662  | 706  | 738  |
| REF | 272  | 265  | 253  | 193  | 169  | 145  | 121  | 99   | 85   | 72   | 60   |
| SSA | 268  | 277  | 285  | 292  | 300  | 308  | 317  | 325  | 335  | 343  | 357  |
| USA | 122  | 108  | 60   | 55   | 101  | 48   | 33   | 0    | -18  | 22   | -19  |

Table 752: PRIMAPHist — Emissions—CO2—Land—Land-use Change (Mt CO2/yr) [PART 9/16]

|     | 1949 | 1950 | 1951 | 1952 | 1953 | 1954 | 1955 | 1956 | 1957 | 1958 | 1959 |
|-----|------|------|------|------|------|------|------|------|------|------|------|
| GLO | 3768 | 3815 | 4613 | 4714 | 4703 | 4901 | 5064 | 5277 | 5390 | 5576 | 5123 |
| CAZ | 213  | 214  | 303  | 330  | 352  | 355  | 359  | 360  | 360  | 359  | 359  |
| CHA | 1050 | 1050 | 1040 | 1110 | 1180 | 1250 | 1320 | 1390 | 1400 | 1370 | 1300 |
| EUR | 79   | 74   | 81   | 80   | 79   | 79   | 79   | 80   | 81   | 82   | 75   |
| IND | 398  | 409  | 417  | 428  | 370  | 365  | 365  | 364  | 365  | 358  | 360  |
| JPN | 11   | 11   | 26   | 30   | 33   | 34   | 35   | 35   | 35   | 35   | 35   |
| LAM | 694  | 707  | 922  | 991  | 1048 | 1095 | 1136 | 1159 | 1180 | 1197 | 1211 |
| MEA | 47   | 47   | 37   | 36   | 34   | 31   | 29   | 28   | 27   | 27   | 26   |
| NEU | 132  | 131  | 109  | 104  | 99   | 93   | 87   | 85   | 84   | 82   | 80   |
| OAS | 761  | 781  | 813  | 838  | 741  | 736  | 738  | 738  | 739  | 729  | 728  |
| REF | 50   | 45   | 452  | 533  | 611  | 686  | 762  | 842  | 920  | 998  | 742  |
| SSA | 371  | 386  | 401  | 389  | 400  | 411  | 423  | 435  | 448  | 458  | 469  |
| USA | -39  | -42  | 12   | -154 | -243 | -236 | -269 | -240 | -249 | -120 | -263 |

Table 753: PRIMAPHist — Emissions—CO2—Land—Land-use Change (Mt CO2/yr) [PART 10/16]

|     | 1960 | 1961 | 1962 | 1963 | 1964 | 1965 | 1966 | 1967 | 1968 | 1969 | 1970 |
|-----|------|------|------|------|------|------|------|------|------|------|------|
| GLO | 5089 | 5367 | 5360 | 5412 | 5460 | 5517 | 5648 | 5675 | 5415 | 5435 | 5278 |
| CAZ | 358  | 356  | 357  | 356  | 356  | 356  | 355  | 355  | 354  | 352  | 350  |
| CHA | 1240 | 1160 | 1070 | 1030 | 1030 | 1020 | 1020 | 1020 | 1010 | 1010 | 1010 |
| EUR | 75   | 66   | 64   | 63   | 62   | 61   | 60   | 58   | 57   | 56   | 47   |
| IND | 362  | 367  | 353  | 356  | 350  | 357  | 364  | 371  | 290  | 280  | 273  |
| JPN | 35   | 35   | 35   | 35   | 35   | 35   | 35   | 35   | 34   | 34   | 34   |
| LAM | 1224 | 1647 | 1774 | 1877 | 1958 | 2029 | 2066 | 2097 | 2125 | 2148 | 2169 |
| MEA | 25   | 25   | 24   | 23   | 23   | 22   | 23   | 24   | 24   | 24   | 23   |
| NEU | 79   | 76   | 74   | 73   | 72   | 70   | 73   | 73   | 74   | 73   | 72   |
| OAS | 732  | 740  | 712  | 717  | 707  | 719  | 731  | 743  | 602  | 582  | 571  |
| REF | 752  | 732  | 720  | 708  | 699  | 687  | 646  | 604  | 563  | 526  | 408  |
| SSA | 479  | 487  | 491  | 510  | 517  | 526  | 523  | 527  | 512  | 538  | 513  |
| USA | -274 | -324 | -315 | -337 | -348 | -365 | -247 | -232 | -229 | -188 | -193 |

Table 754: PRIMAPHist — Emissions—CO2—Land—Land-use Change (Mt CO2/yr) [PART 11/16]

|     | 1971 | 1972 | 1973 | 1974 | 1975 | 1976 | 1977 | 1978 | 1979 | 1980 | 1981 |
|-----|------|------|------|------|------|------|------|------|------|------|------|
| GLO | 4738 | 4639 | 4585 | 4596 | 4567 | 4810 | 4820 | 4815 | 4709 | 4548 | 4635 |
| CAZ | 253  | 219  | 194  | 185  | 177  | 171  | 166  | 161  | 157  | 153  | 159  |
| CHA | 1010 | 1020 | 1030 | 1030 | 1050 | 1090 | 1100 | 1030 | 894  | 755  | 609  |
| EUR | 38   | 28   | 18   | 8    | -2   | -12  | -22  | -33  | -44  | -51  | -56  |
| IND | 265  | 265  | 299  | 324  | 329  | 370  | 399  | 419  | 438  | 450  | 506  |
| JPN | 18   | 13   | 9    | 8    | 7    | 6    | 5    | 4    | 3    | 3    | 3    |
| LAM | 1967 | 1924 | 1889 | 1861 | 1842 | 1844 | 1847 | 1851 | 1856 | 1860 | 1869 |
| MEA | 23   | 23   | 23   | 24   | 24   | 24   | 24   | 24   | 24   | 24   | 18   |
| NEU | 70   | 69   | 68   | 67   | 66   | 64   | 63   | 61   | 60   | 59   | 46   |
| OAS | 538  | 530  | 586  | 628  | 635  | 707  | 757  | 789  | 818  | 835  | 932  |
| REF | 356  | 303  | 253  | 230  | 208  | 199  | 178  | 159  | 140  | 125  | 118  |
| SSA | 525  | 539  | 553  | 568  | 530  | 584  | 523  | 547  | 552  | 531  | 612  |
| USA | -326 | -295 | -339 | -336 | -298 | -236 | -219 | -198 | -188 | -196 | -183 |

Table 755: PRIMAPHist — Emissions—CO2—Land—Land-use Change (Mt CO2/yr) [PART 12/16]

|     | 1982 | 1983 | 1984 | 1985 | 1986 | 1987 | 1988 | 1989 | 1990 | 1991 | 1992 |
|-----|------|------|------|------|------|------|------|------|------|------|------|
| GLO | 5369 | 5543 | 5720 | 5807 | 5871 | 5914 | 6006 | 6038 | 6029 | 5690 | 5297 |
| CAZ | 145  | 140  | 134  | 127  | 120  | 114  | 108  | 103  | 97   | 57   | 55   |
| CHA | 443  | 366  | 339  | 299  | 278  | 257  | 235  | 241  | 221  | 185  | 145  |
| EUR | -59  | -62  | -64  | -66  | -67  | -67  | -67  | -67  | -65  | -276 | -276 |
| IND | 515  | 522  | 529  | 532  | 529  | 529  | 539  | 549  | 557  | 669  | 696  |
| JPN | 3    | 3    | 2    | 1    | 1    | 0    | -1   | -1   | -2   | -74  | -74  |
| LAM | 2676 | 2880 | 3052 | 3199 | 3304 | 3363 | 3391 | 3414 | 3433 | 3435 | 2942 |
| MEA | 18   | 18   | 19   | 21   | 22   | 23   | 24   | 24   | 25   | -13  | -13  |
| NEU | 44   | 44   | 47   | 52   | 53   | 55   | 56   | 58   | 60   | -52  | -52  |
| OAS | 945  | 953  | 965  | 970  | 961  | 962  | 976  | 995  | 1007 | 1232 | 1279 |
| REF | 109  | 102  | 96   | 91   | 82   | 79   | 77   | 74   | 71   | 146  | 146  |
| SSA | 667  | 717  | 754  | 724  | 710  | 710  | 744  | 724  | 739  | 718  | 786  |
| USA | -137 | -140 | -153 | -142 | -123 | -111 | -76  | -77  | -114 | -336 | -336 |

Table 756: PRIMAPHist — Emissions—CO2—Land—Land-use Change (Mt CO2/yr) [PART 13/16]

|     | 1993 | 1994 | 1995 | 1996 | 1997 | 1998 | 1999 | 2000 | 2001 | 2002 | 2003 |
|-----|------|------|------|------|------|------|------|------|------|------|------|
| GLO | 5259 | 5212 | 5142 | 5025 | 4904 | 4869 | 4710 | 4555 | 4082 | 4586 | 4645 |
| CAZ | 52   | 49   | 47   | 44   | 43   | 42   | 41   | 40   | 95   | 94   | 97   |
| CHA | 144  | 156  | 113  | 100  | 77   | 45   | 19   | -45  | -339 | -340 | -339 |
| EUR | -276 | -276 | -276 | -276 | -277 | -276 | -276 | -276 | -278 | -278 | -278 |
| IND | 717  | 711  | 709  | 705  | 696  | 689  | 670  | 655  | 629  | 834  | 885  |
| JPN | -74  | -74  | -74  | -74  | -74  | -74  | -74  | -74  | -39  | -39  | -39  |
| LAM | 2811 | 2702 | 2616 | 2533 | 2488 | 2445 | 2404 | 2380 | 2358 | 2293 | 2256 |
| MEA | -13  | -13  | -13  | -13  | -13  | -13  | -13  | -13  | -16  | -16  | -16  |
| NEU | -52  | -52  | -52  | -52  | -52  | -52  | -52  | -52  | -57  | -57  | -56  |
| OAS | 1316 | 1305 | 1299 | 1286 | 1347 | 1258 | 1224 | 1198 | 1171 | 1541 | 1619 |
| REF | 146  | 146  | 146  | 158  | 115  | 166  | 129  | 134  | -15  | -8   | 63   |
| SSA | 825  | 895  | 964  | 958  | 909  | 989  | 969  | 958  | 961  | 949  | 828  |
| USA | -336 | -336 | -336 | -343 | -354 | -349 | -331 | -349 | -389 | -388 | -375 |

Table 757: PRIMAPHist — Emissions—CO2—Land—Land-use Change (Mt CO2/yr) [PART 14/16]

|     | 2004 | 2005 | 2006 | 2007 | 2008 | 2009 | 2010 | 2011 | 2012 | 2013 | 2014 |
|-----|------|------|------|------|------|------|------|------|------|------|------|
| GLO | 4670 | 4397 | 2979 | 2697 | 2766 | 2899 | 2622 | 2622 | 2666 | 2649 | 2742 |
| CAZ | 93   | 94   | 147  | 135  | 141  | 110  | 159  | -36  | -17  | 27   | 5    |
| CHA | -340 | -340 | -396 | -396 | -395 | -395 | -396 | -312 | -312 | -312 | -312 |
| EUR | -278 | -278 | -340 | -339 | -340 | -340 | -340 | -427 | -427 | -428 | -428 |
| IND | 923  | 818  | -127 | -127 | -127 | -127 | -127 | 121  | 121  | 121  | 121  |
| JPN | -39  | -39  | -143 | -143 | -143 | -143 | -143 | 7    | 7    | 7    | 7    |
| LAM | 2232 | 2226 | 1222 | 1217 | 1219 | 1221 | 1213 | 723  | 731  | 732  | 730  |
| MEA | -16  | -16  | 138  | 120  | 146  | 210  | 146  | 266  | 263  | 200  | 164  |
| NEU | -57  | -57  | -163 | -163 | -163 | -163 | -163 | -90  | -90  | -90  | -90  |
| OAS | 1708 | 1500 | 1881 | 1543 | 1536 | 1757 | 1528 | 1433 | 1434 | 1439 | 1639 |
| REF | -48  | -30  | -196 | -200 | -63  | -163 | -189 | -180 | -127 | -181 | -179 |
| SSA | 829  | 878  | 1327 | 1348 | 1337 | 1286 | 1308 | 1186 | 1163 | 1218 | 1156 |
| USA | -338 | -359 | -372 | -298 | -383 | -354 | -373 | -70  | -80  | -83  | -72  |

Table 758: PRIMAPHist — Emissions—CO2—Land—Land-use Change (Mt CO2/yr) [PART 15/16]

|     | 2015 |
|-----|------|
| GLO | 2671 |
| CAZ | -5   |
| CHA | -312 |
| EUR | -427 |
| IND | 121  |
| JPN | 7    |
| LAM | 729  |
| MEA | 223  |
| NEU | -90  |
| OAS | 1488 |
| REF | -167 |
| SSA | 1180 |
| USA | -76  |

Table 759: PRIMAPHist — Emissions—CO2—Land—Land-use Change (Mt CO2/yr) [PART 16/16]

|     | 1960 | 1965 | 1970 | 1975 | 1980 | 1985 | 1990 | 1995 | 2000 | 2005 | 2008 |
|-----|------|------|------|------|------|------|------|------|------|------|------|
| GLO | 1192 | 1264 | 1197 | 1032 | 1025 | 1275 | 1319 | 1275 | 1149 | 1196 | 1112 |
| CAZ |      |      |      |      |      |      |      |      |      |      |      |
| CHA |      |      |      |      |      |      |      |      |      |      |      |
| EUR |      |      |      |      |      |      |      |      |      |      |      |
| IND |      |      |      |      |      |      |      |      |      |      |      |
| JPN |      |      |      |      |      |      |      |      |      |      |      |
| LAM |      |      |      |      |      |      |      |      |      |      |      |
| MEA |      |      |      |      |      |      |      |      |      |      |      |
| NEU |      |      |      |      |      |      |      |      |      |      |      |
| OAS |      |      |      |      |      |      |      |      |      |      |      |
| REF |      |      |      |      |      |      |      |      |      |      |      |
| SSA |      |      |      |      |      |      |      |      |      |      |      |
| USA |      |      |      |      |      |      |      |      |      |      |      |

Table 760: RCP — Emissions—CO2—Land—Land-use Change (Mt CO2/yr) [PART 1/2]

|     | 2010 |
|-----|------|
| GLO | 1057 |
| CAZ |      |
| CHA |      |
| EUR |      |
| IND |      |
| JPN |      |
| LAM |      |
| MEA |      |
| NEU |      |
| OAS |      |
| REF |      |
| SSA |      |
| USA |      |

Table 761: RCP — Emissions—CO2—Land—Land-use Change (Mt CO2/yr) [PART 2/2]

|     | 1985 | 1995 | 2005 |
|-----|------|------|------|
| GLO | 1140 | 1170 | 1100 |
| CAZ |      |      |      |
| CHA |      |      |      |
| EUR |      |      |      |
| IND |      |      |      |
| JPN |      |      |      |
| LAM |      |      |      |
| MEA |      |      |      |
| NEU |      |      |      |
| OAS |      |      |      |
| REF |      |      |      |
| SSA |      |      |      |
| USA |      |      |      |

Table 762: Houghton\_2012 — Emissions—CO2—Land—Land-use Change (Mt CO2/yr)

|     | 1990 | 1991 | 1992 | 1993 | 1994 | 1995 | 1996 | 1997 | 1998 | 1999 | 2000 |
|-----|------|------|------|------|------|------|------|------|------|------|------|
| GLO | 4151 | 4151 | 4054 | 4080 | 4106 | 4132 | 4149 | 4229 | 4258 | 4215 | 4227 |
| CAZ | 36   | 36   | 36   | 36   | 36   | 36   | 29   | 22   | 65   | 36   | 22   |
| CHA | 0    | 0    | 0    | 0    | 0    | 0    | 0    | 0    | 0    | 0    | 0    |
| EUR | 26   | 26   | 22   | 22   | 22   | 22   | 22   | 22   | 22   | 22   | 23   |
| IND | 0    | 0    | 0    | 0    | 0    | 0    | 0    | 0    | 0    | 0    | 0    |
| JPN | 0    | 0    | 0    | 0    | 0    | 0    | 0    | 0    | 0    | 0    | 0    |
| LAM | 1663 | 1663 | 1667 | 1670 | 1674 | 1678 | 1682 | 1685 | 1690 | 1693 | 1696 |
| MEA | 53   | 53   | 53   | 53   | 53   | 54   | 53   | 54   | 55   | 54   | 55   |
| NEU | 0    | 0    | 0    | 0    | 0    | 0    | 0    | 0    | 0    | 0    | 0    |
| OAS | 1025 | 1024 | 1046 | 1067 | 1089 | 1110 | 1119 | 1232 | 1175 | 1188 | 1205 |
| REF | 329  | 329  | 211  | 211  | 211  | 211  | 216  | 190  | 222  | 198  | 202  |
| SSA | 1019 | 1019 | 1020 | 1021 | 1022 | 1022 | 1027 | 1024 | 1028 | 1023 | 1025 |
| USA | 0    | 0    | 0    | 0    | 0    | 0    | 0    | 0    | 0    | 0    | 0    |

Table 763: FAO\_EmisLUC — Emissions—CO2—Land—Land-use Change (Mt CO2/yr) [PART 1/2]

|     | 2001 | 2002 | 2003 | 2004 | 2005 | 2006 | 2007 | 2008 | 2009 | 2010 |
|-----|------|------|------|------|------|------|------|------|------|------|
| GLO | 4644 | 4724 | 4733 | 4670 | 4675 | 4399 | 4347 | 4348 | 3903 | 3843 |
| CAZ | 284  | 317  | 317  | 299  | 302  | 149  | 144  | 149  | 131  | 163  |
| CHA | 0    | 0    | 0    | 0    | 0    | 0    | 0    | 0    | 0    | 0    |
| EUR | 15   | 16   | 16   | 16   | 16   | 30   | 30   | 30   | 30   | 30   |
| IND | 0    | 0    | 0    | 0    | 0    | 0    | 0    | 0    | 0    | 0    |
| JPN | 0    | 0    | 0    | 0    | 0    | 0    | 0    | 0    | 0    | 0    |
| LAM | 1816 | 1818 | 1823 | 1824 | 1827 | 1437 | 1438 | 1441 | 996  | 944  |
| MEA | 13   | 18   | 11   | 15   | 13   | 21   | 19   | 23   | 30   | 23   |
| NEU | 2    | 2    | 2    | 2    | 2    | 0    | 0    | 0    | 0    | 0    |
| OAS | 1492 | 1521 | 1491 | 1506 | 1487 | 1768 | 1719 | 1709 | 1724 | 1689 |
| REF | 37   | 41   | 85   | 17   | 28   | 14   | 14   | 14   | 14   | 14   |
| SSA | 983  | 991  | 990  | 992  | 1001 | 979  | 982  | 982  | 978  | 981  |
| USA | 0    | 0    | 0    | 0    | 0    | 0    | 0    | 0    | 0    | 0    |

Table 764: FAO\_EmisLUC — Emissions—CO2—Land—Land-use Change (Mt CO2/yr) [PART 2/2]

|     | 1995 | 2003 |
|-----|------|------|
| GLO | 1600 | 1500 |
| CAZ |      |      |
| CHA |      |      |
| EUR |      |      |
| IND |      |      |
| JPN |      |      |
| LAM |      |      |
| MEA |      |      |
| NEU |      |      |
| OAS |      |      |
| REF |      |      |
| SSA |      |      |
| USA |      |      |

Table 765: Canadell.2007 — Emissions—CO2—Land—Land-use Change (Mt CO2/yr)



|     | 1995 | 2005 |
|-----|------|------|
| GLO | 1500 | 1100 |
| CAZ |      |      |
| CHA |      |      |
| EUR |      |      |
| IND |      |      |
| JPN |      |      |
| LAM |      |      |
| MEA |      |      |
| NEU |      |      |
| OAS |      |      |
| REF |      |      |
| SSA |      |      |
| USA |      |      |

Table 766: Friedlingstein\_2010 — Emissions—CO2—Land—Land-use Change (Mt CO2/yr)

|     | 2002 |
|-----|------|
| GLO | 810  |
| CAZ |      |
| CHA |      |
| EUR |      |
| IND |      |
| JPN |      |
| LAM |      |
| MEA |      |
| NEU |      |
| OAS |      |
| REF |      |
| SSA |      |
| USA |      |

Table 767: Harris\_2013 — Emissions—CO2—Land—Land-use Change (Mt CO2/yr)

## 13 N2O

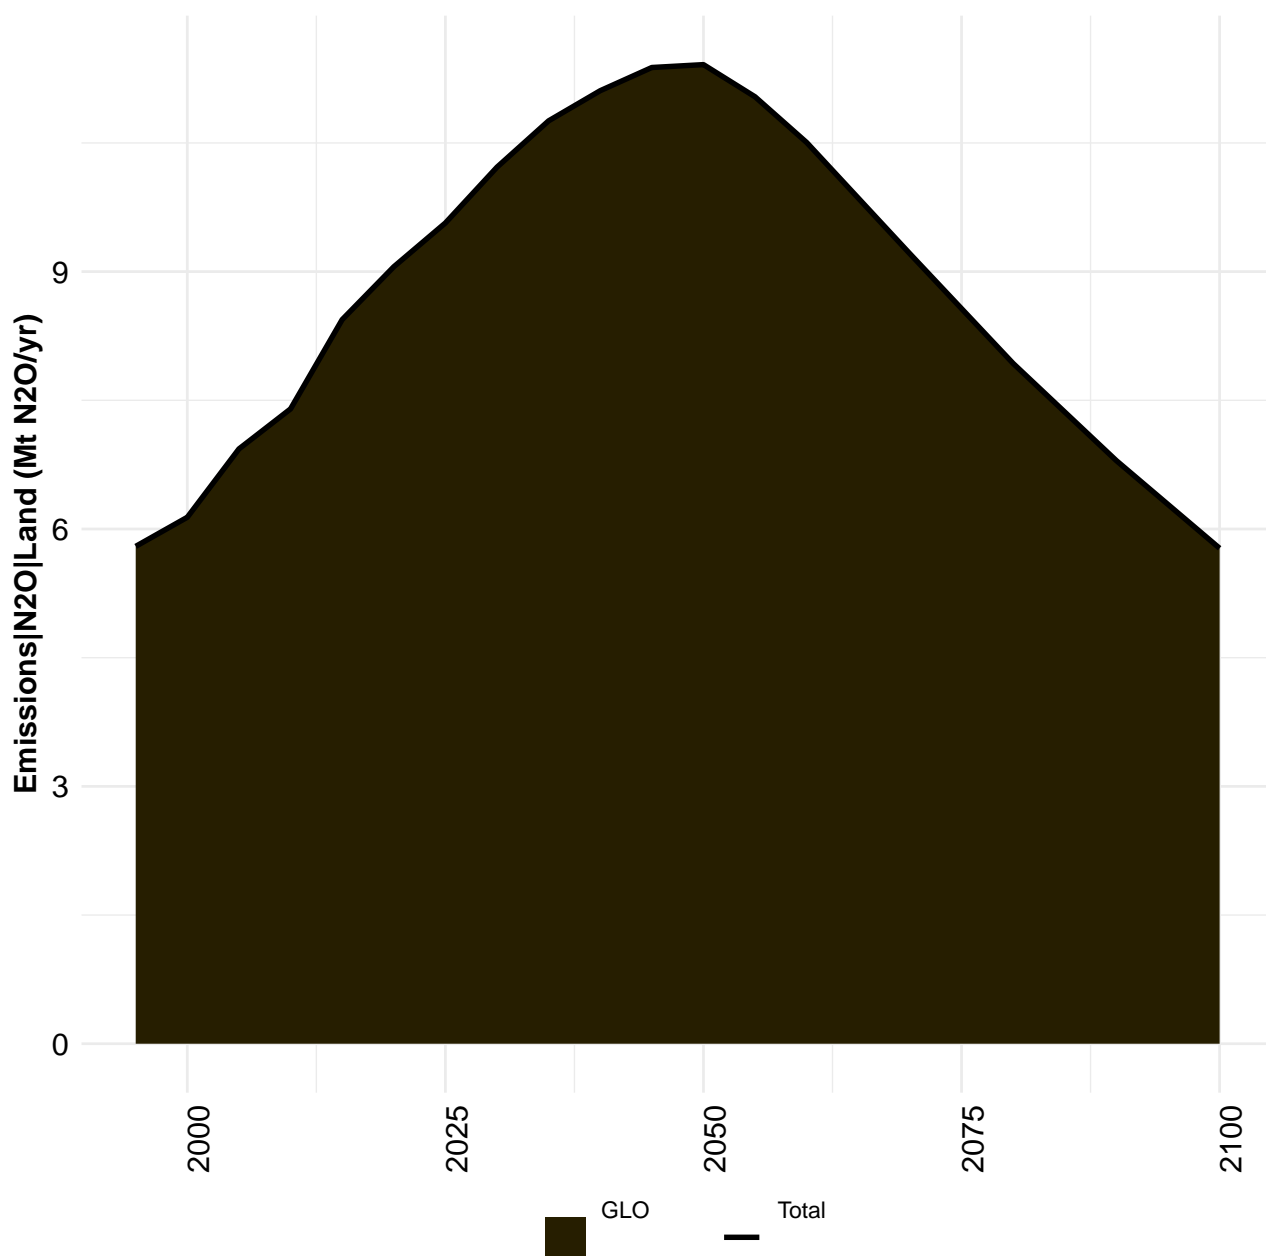

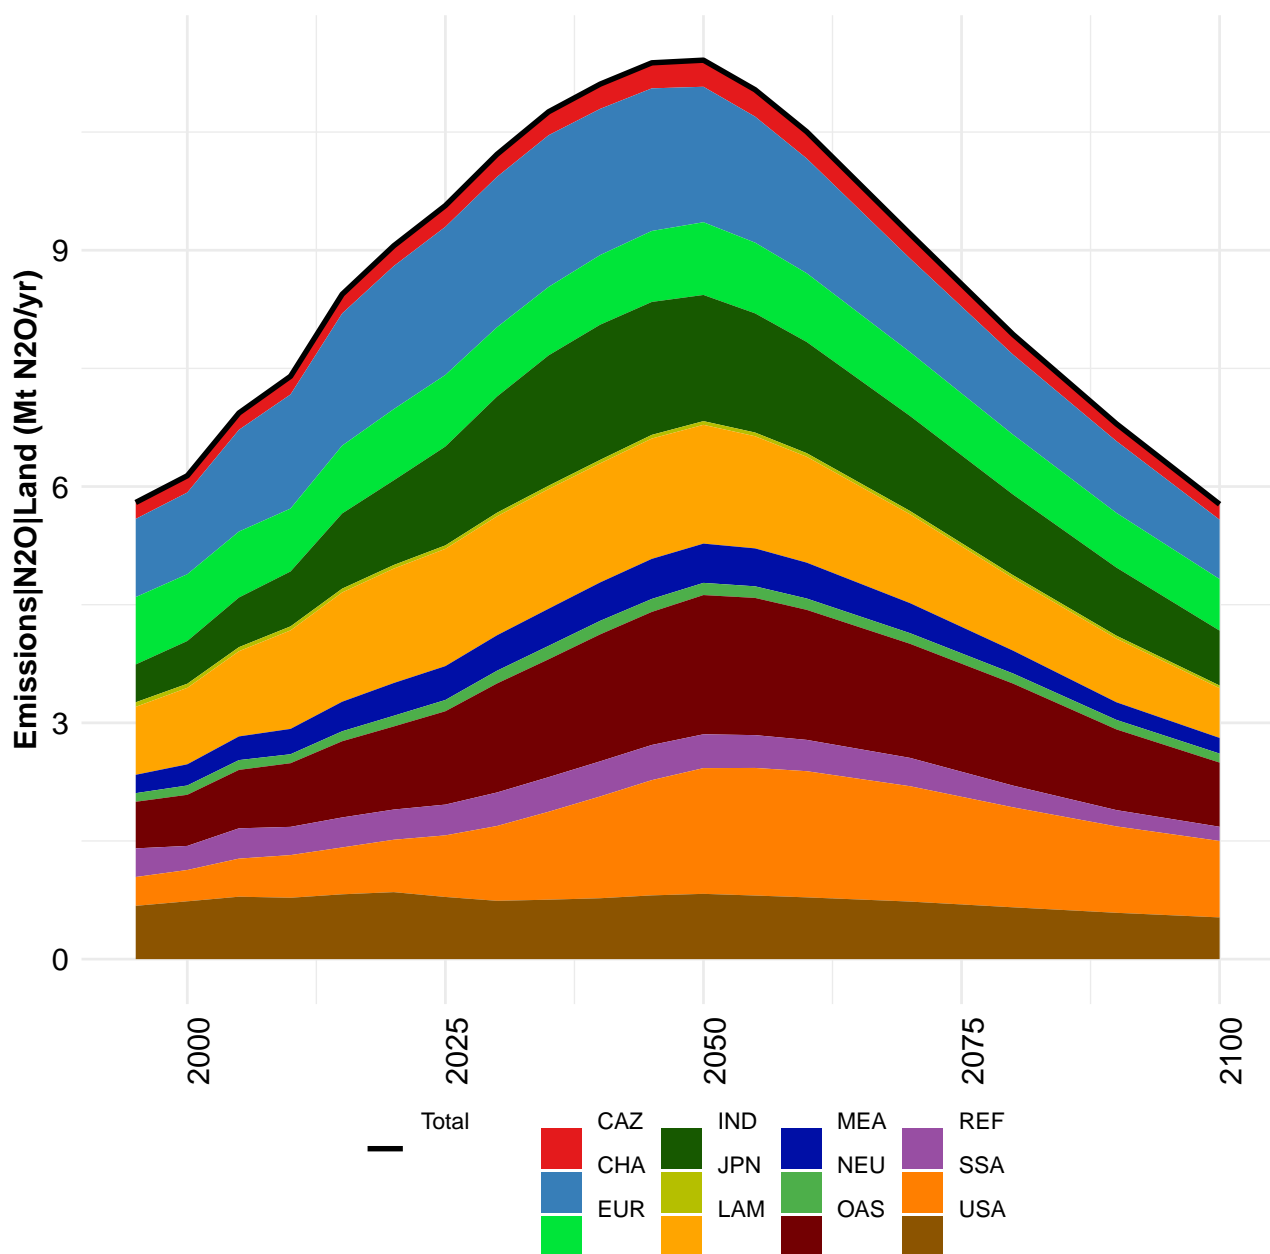

13.1 Land

13.1.1 Agriculture

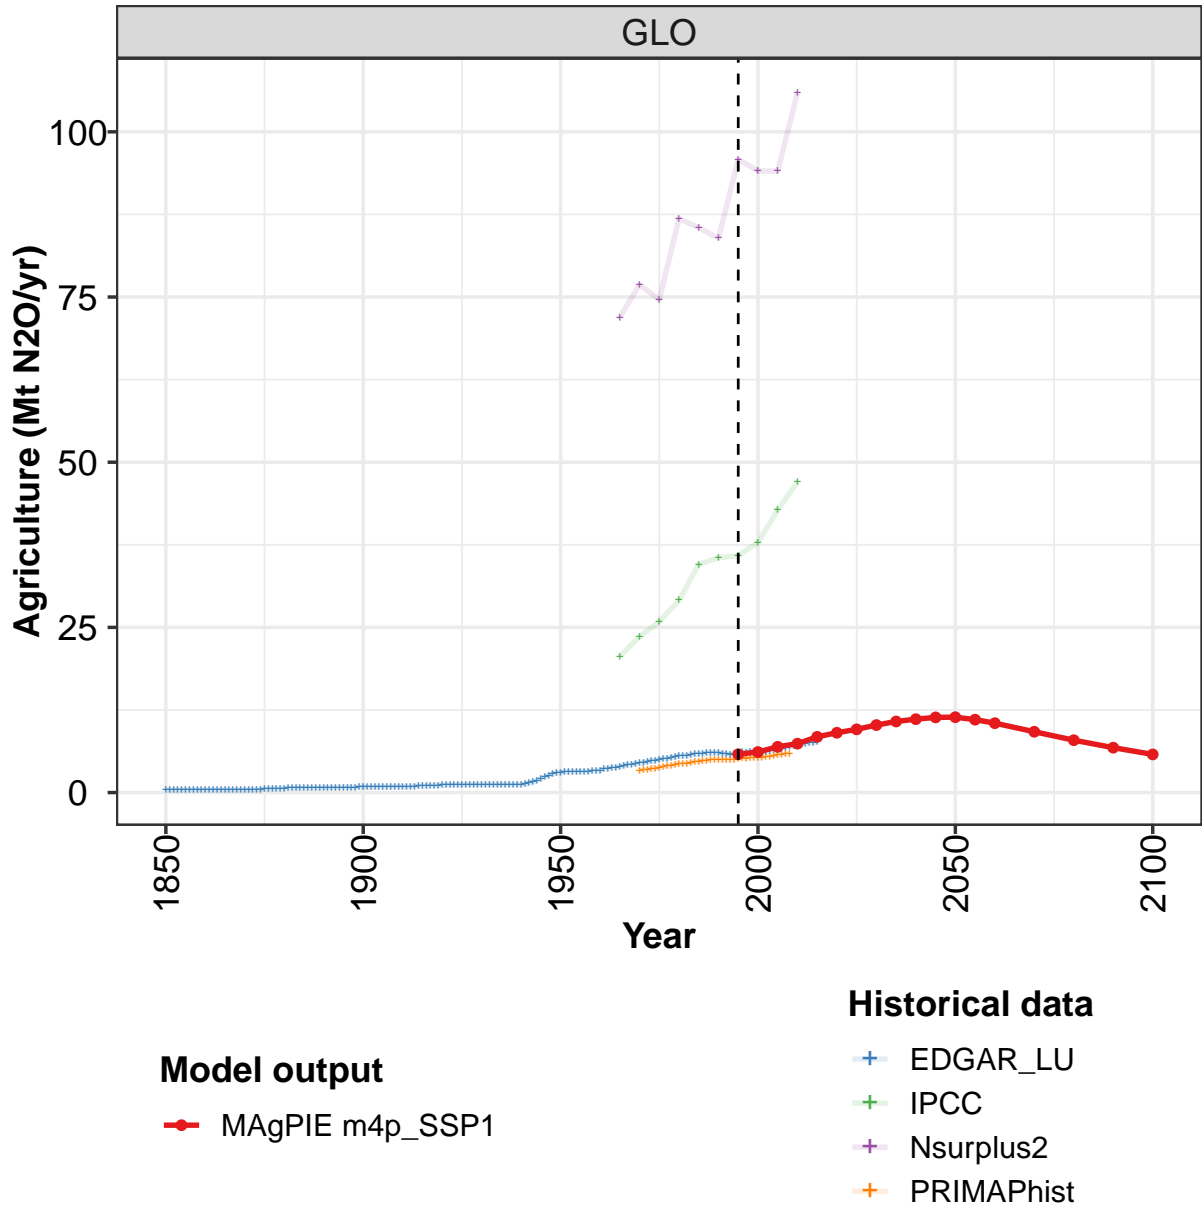

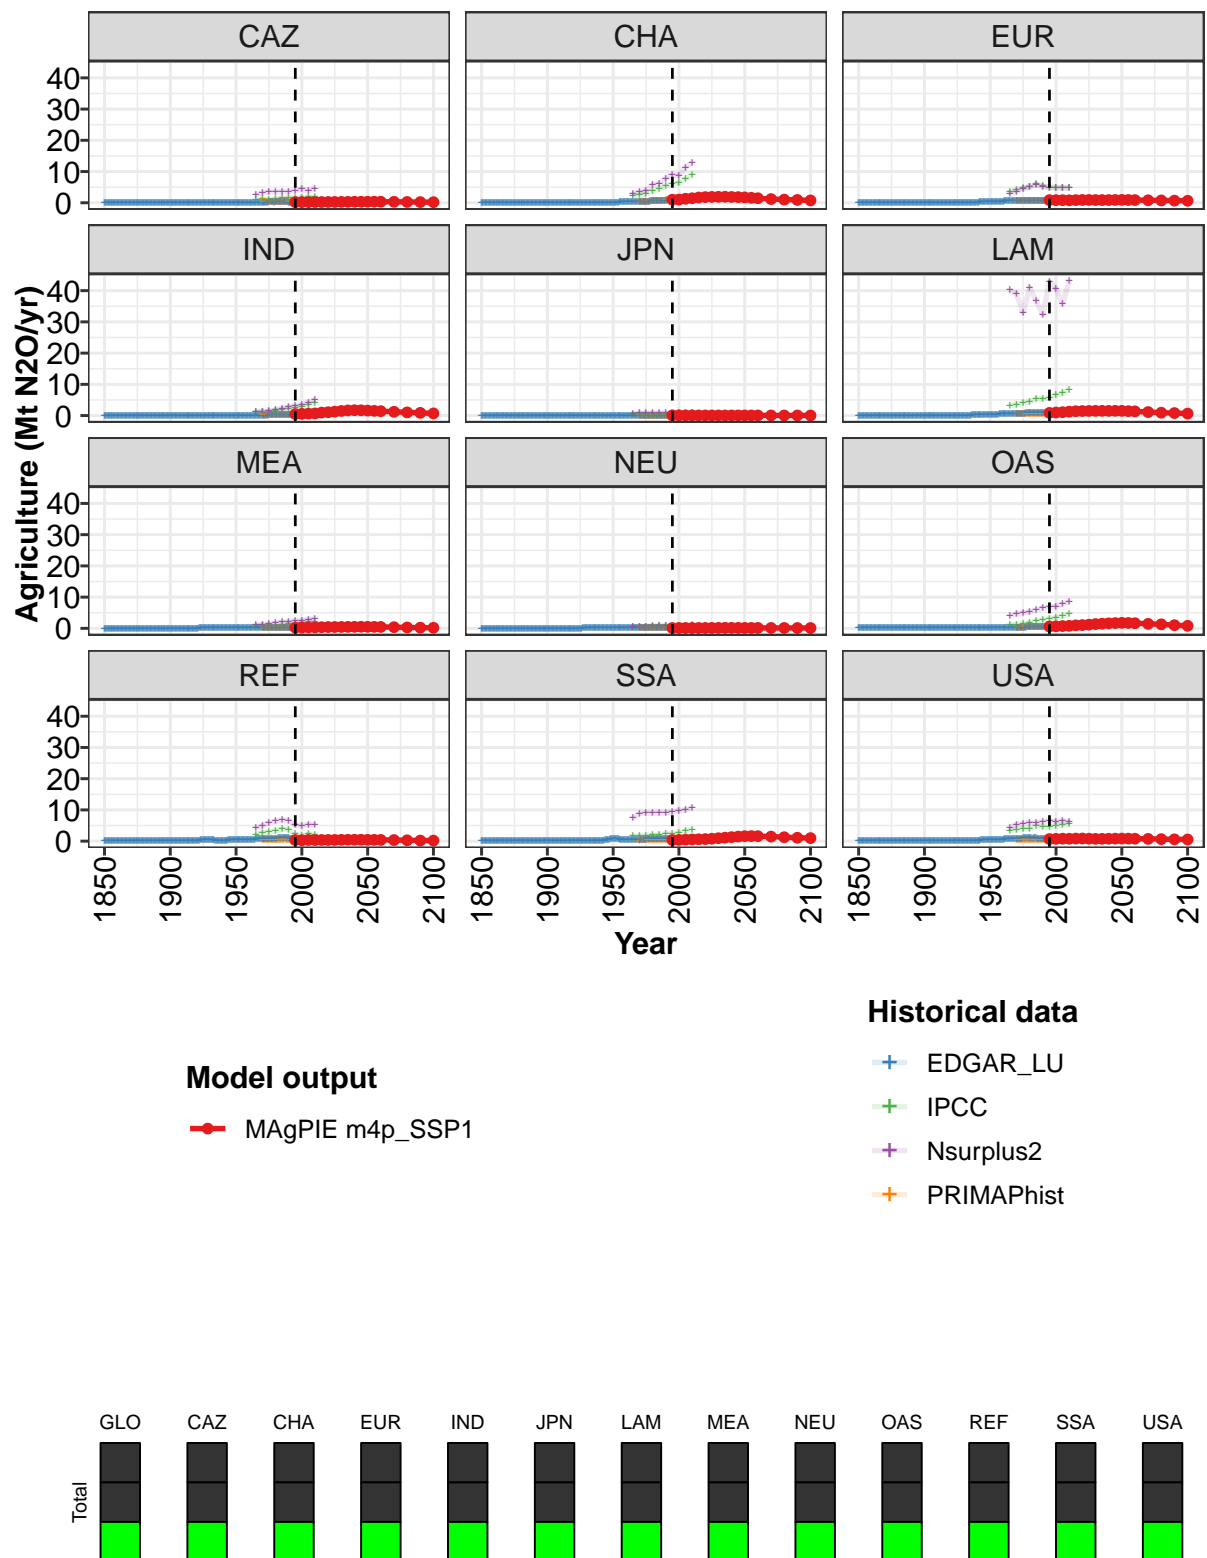Figure 238: MAgPIE m4p\_SSP1 — Emissions—N<sub>2</sub>O—Land—Agriculture (Mt N<sub>2</sub>O/yr)

|     | 1995 | 2000 | 2005 | 2010 | 2015 | 2020 | 2025 | 2030 | 2035 | 2040 | 2045 |
|-----|------|------|------|------|------|------|------|------|------|------|------|
| GLO | 5.8  | 6.1  | 6.9  | 7.4  | 8.4  | 9.1  | 9.6  | 10.2 | 10.8 | 11.1 | 11.4 |
| CAZ | 0.2  | 0.2  | 0.2  | 0.2  | 0.2  | 0.3  | 0.3  | 0.3  | 0.3  | 0.3  | 0.3  |
| CHA | 1.0  | 1.0  | 1.3  | 1.4  | 1.7  | 1.8  | 1.9  | 1.9  | 1.9  | 1.9  | 1.8  |
| EUR | 0.9  | 0.8  | 0.8  | 0.8  | 0.9  | 0.9  | 0.9  | 0.9  | 0.9  | 0.9  | 0.9  |
| IND | 0.5  | 0.5  | 0.6  | 0.7  | 1.0  | 1.1  | 1.3  | 1.5  | 1.7  | 1.7  | 1.7  |
| JPN | 0.1  | 0.1  | 0.1  | 0.1  | 0.0  | 0.0  | 0.0  | 0.0  | 0.0  | 0.0  | 0.0  |
| LAM | 0.9  | 1.0  | 1.1  | 1.3  | 1.4  | 1.5  | 1.5  | 1.5  | 1.5  | 1.5  | 1.5  |
| MEA | 0.2  | 0.3  | 0.3  | 0.3  | 0.4  | 0.4  | 0.4  | 0.4  | 0.5  | 0.5  | 0.5  |
| NEU | 0.1  | 0.1  | 0.1  | 0.1  | 0.1  | 0.1  | 0.1  | 0.2  | 0.2  | 0.2  | 0.2  |
| OAS | 0.6  | 0.6  | 0.7  | 0.8  | 1.0  | 1.1  | 1.2  | 1.4  | 1.5  | 1.6  | 1.7  |
| REF | 0.4  | 0.3  | 0.4  | 0.4  | 0.4  | 0.4  | 0.4  | 0.4  | 0.4  | 0.4  | 0.4  |
| SSA | 0.4  | 0.4  | 0.5  | 0.5  | 0.6  | 0.7  | 0.8  | 1.0  | 1.1  | 1.3  | 1.5  |
| USA | 0.7  | 0.7  | 0.8  | 0.8  | 0.8  | 0.9  | 0.8  | 0.7  | 0.8  | 0.8  | 0.8  |

Table 768: MAgPIE m4p\_SSP1 — Emissions—N2O—Land—Agriculture (Mt N2O/yr) [PART 1/2]

|     | 2050 | 2055 | 2060 | 2070 | 2080 | 2090 | 2100 |
|-----|------|------|------|------|------|------|------|
| GLO | 11.4 | 11.0 | 10.5 | 9.2  | 7.9  | 6.8  | 5.8  |
| CAZ | 0.3  | 0.3  | 0.3  | 0.3  | 0.3  | 0.2  | 0.2  |
| CHA | 1.7  | 1.6  | 1.5  | 1.2  | 1.0  | 0.9  | 0.8  |
| EUR | 0.9  | 0.9  | 0.9  | 0.8  | 0.8  | 0.7  | 0.7  |
| IND | 1.6  | 1.5  | 1.4  | 1.2  | 1.0  | 0.9  | 0.7  |
| JPN | 0.0  | 0.0  | 0.0  | 0.0  | 0.0  | 0.0  | 0.0  |
| LAM | 1.5  | 1.4  | 1.3  | 1.1  | 0.9  | 0.8  | 0.6  |
| MEA | 0.5  | 0.5  | 0.5  | 0.4  | 0.3  | 0.2  | 0.2  |
| NEU | 0.2  | 0.1  | 0.1  | 0.1  | 0.1  | 0.1  | 0.1  |
| OAS | 1.8  | 1.7  | 1.7  | 1.4  | 1.3  | 1.0  | 0.8  |
| REF | 0.4  | 0.4  | 0.4  | 0.4  | 0.3  | 0.2  | 0.2  |
| SSA | 1.6  | 1.6  | 1.6  | 1.5  | 1.3  | 1.1  | 1.0  |
| USA | 0.8  | 0.8  | 0.8  | 0.7  | 0.7  | 0.6  | 0.5  |

Table 769: MAgPIE m4p\_SSP1 — Emissions—N2O—Land—Agriculture (Mt N2O/yr) [PART 2/2]

|     | 1850 | 1851 | 1852 | 1853 | 1854 | 1855 | 1856 | 1857 | 1858 | 1859 | 1860 |
|-----|------|------|------|------|------|------|------|------|------|------|------|
| GLO | 0.35 | 0.36 | 0.36 | 0.37 | 0.38 | 0.38 | 0.39 | 0.39 | 0.39 | 0.40 | 0.40 |
| CAZ | 0.02 | 0.02 | 0.02 | 0.02 | 0.02 | 0.02 | 0.02 | 0.02 | 0.02 | 0.02 | 0.02 |
| CHA | 0.01 | 0.01 | 0.01 | 0.01 | 0.01 | 0.01 | 0.01 | 0.01 | 0.01 | 0.01 | 0.01 |
| EUR | 0.04 | 0.04 | 0.04 | 0.04 | 0.04 | 0.04 | 0.04 | 0.04 | 0.04 | 0.04 | 0.04 |
| IND | 0.02 | 0.02 | 0.02 | 0.02 | 0.02 | 0.03 | 0.03 | 0.03 | 0.03 | 0.03 | 0.03 |
| JPN | 0.00 | 0.00 | 0.00 | 0.00 | 0.00 | 0.00 | 0.00 | 0.00 | 0.00 | 0.00 | 0.00 |
| LAM | 0.01 | 0.01 | 0.01 | 0.01 | 0.01 | 0.01 | 0.01 | 0.01 | 0.01 | 0.01 | 0.01 |
| MEA | 0.01 | 0.01 | 0.01 | 0.01 | 0.01 | 0.01 | 0.01 | 0.01 | 0.01 | 0.01 | 0.01 |
| NEU | 0.01 | 0.01 | 0.01 | 0.01 | 0.01 | 0.01 | 0.01 | 0.01 | 0.01 | 0.01 | 0.01 |
| OAS | 0.03 | 0.03 | 0.03 | 0.03 | 0.03 | 0.03 | 0.03 | 0.03 | 0.03 | 0.03 | 0.03 |
| REF | 0.08 | 0.08 | 0.08 | 0.09 | 0.09 | 0.09 | 0.09 | 0.09 | 0.09 | 0.09 | 0.09 |
| SSA | 0.03 | 0.03 | 0.03 | 0.03 | 0.03 | 0.03 | 0.03 | 0.03 | 0.03 | 0.03 | 0.03 |
| USA | 0.10 | 0.10 | 0.10 | 0.11 | 0.11 | 0.11 | 0.11 | 0.11 | 0.11 | 0.11 | 0.11 |

Table 770: PRIMAPHist — Emissions—N2O—Land—Agriculture (Mt N2O/yr) [PART 1/16]

|     | 1861 | 1862 | 1863 | 1864 | 1865 | 1866 | 1867 | 1868 | 1869 | 1870 | 1871 |
|-----|------|------|------|------|------|------|------|------|------|------|------|
| GLO | 0.40 | 0.40 | 0.40 | 0.40 | 0.40 | 0.40 | 0.40 | 0.40 | 0.40 | 0.40 | 0.41 |
| CAZ | 0.02 | 0.02 | 0.02 | 0.02 | 0.02 | 0.02 | 0.02 | 0.02 | 0.02 | 0.02 | 0.02 |
| CHA | 0.01 | 0.01 | 0.01 | 0.01 | 0.01 | 0.01 | 0.01 | 0.01 | 0.01 | 0.01 | 0.01 |
| EUR | 0.04 | 0.04 | 0.04 | 0.04 | 0.04 | 0.04 | 0.04 | 0.04 | 0.04 | 0.04 | 0.05 |
| IND | 0.03 | 0.03 | 0.03 | 0.03 | 0.03 | 0.03 | 0.03 | 0.03 | 0.03 | 0.03 | 0.03 |
| JPN | 0.00 | 0.00 | 0.00 | 0.00 | 0.00 | 0.00 | 0.00 | 0.00 | 0.00 | 0.00 | 0.00 |
| LAM | 0.01 | 0.01 | 0.01 | 0.01 | 0.01 | 0.01 | 0.01 | 0.01 | 0.01 | 0.01 | 0.01 |
| MEA | 0.01 | 0.01 | 0.01 | 0.01 | 0.01 | 0.01 | 0.01 | 0.01 | 0.01 | 0.01 | 0.01 |
| NEU | 0.01 | 0.01 | 0.01 | 0.01 | 0.01 | 0.01 | 0.01 | 0.01 | 0.01 | 0.01 | 0.01 |
| OAS | 0.03 | 0.03 | 0.03 | 0.03 | 0.03 | 0.03 | 0.03 | 0.03 | 0.03 | 0.03 | 0.04 |
| REF | 0.09 | 0.09 | 0.09 | 0.09 | 0.09 | 0.09 | 0.09 | 0.09 | 0.09 | 0.09 | 0.09 |
| SSA | 0.03 | 0.03 | 0.03 | 0.03 | 0.03 | 0.03 | 0.03 | 0.03 | 0.03 | 0.03 | 0.04 |
| USA | 0.12 | 0.12 | 0.12 | 0.12 | 0.12 | 0.12 | 0.12 | 0.12 | 0.12 | 0.12 | 0.12 |

Table 771: PRIMAPhist — Emissions—N2O—Land—Agriculture (Mt N2O/yr) [PART 2/16]

|     | 1872 | 1873 | 1874 | 1875 | 1876 | 1877 | 1878 | 1879 | 1880 | 1881 | 1882 |
|-----|------|------|------|------|------|------|------|------|------|------|------|
| GLO | 0.43 | 0.45 | 0.48 | 0.52 | 0.55 | 0.58 | 0.61 | 0.63 | 0.65 | 0.66 | 0.66 |
| CAZ | 0.03 | 0.03 | 0.03 | 0.03 | 0.03 | 0.03 | 0.04 | 0.04 | 0.04 | 0.04 | 0.04 |
| CHA | 0.01 | 0.01 | 0.01 | 0.01 | 0.01 | 0.01 | 0.01 | 0.01 | 0.01 | 0.02 | 0.02 |
| EUR | 0.05 | 0.05 | 0.05 | 0.06 | 0.06 | 0.06 | 0.07 | 0.07 | 0.07 | 0.07 | 0.07 |
| IND | 0.03 | 0.03 | 0.03 | 0.03 | 0.04 | 0.04 | 0.04 | 0.04 | 0.04 | 0.04 | 0.04 |
| JPN | 0.00 | 0.00 | 0.00 | 0.00 | 0.00 | 0.00 | 0.00 | 0.00 | 0.00 | 0.00 | 0.00 |
| LAM | 0.01 | 0.01 | 0.01 | 0.01 | 0.01 | 0.01 | 0.01 | 0.01 | 0.01 | 0.01 | 0.01 |
| MEA | 0.01 | 0.01 | 0.01 | 0.01 | 0.01 | 0.01 | 0.01 | 0.01 | 0.01 | 0.01 | 0.01 |
| NEU | 0.01 | 0.01 | 0.01 | 0.01 | 0.01 | 0.01 | 0.01 | 0.01 | 0.01 | 0.01 | 0.01 |
| OAS | 0.04 | 0.04 | 0.04 | 0.04 | 0.05 | 0.05 | 0.05 | 0.05 | 0.06 | 0.06 | 0.06 |
| REF | 0.10 | 0.10 | 0.11 | 0.12 | 0.13 | 0.13 | 0.14 | 0.15 | 0.15 | 0.15 | 0.15 |
| SSA | 0.04 | 0.04 | 0.04 | 0.04 | 0.05 | 0.05 | 0.05 | 0.05 | 0.06 | 0.06 | 0.06 |
| USA | 0.12 | 0.13 | 0.14 | 0.15 | 0.16 | 0.17 | 0.18 | 0.18 | 0.19 | 0.19 | 0.19 |

Table 772: PRIMAPhist — Emissions—N2O—Land—Agriculture (Mt N2O/yr) [PART 3/16]

|     | 1883 | 1884 | 1885 | 1886 | 1887 | 1888 | 1889 | 1890 | 1891 | 1892 | 1893 |
|-----|------|------|------|------|------|------|------|------|------|------|------|
| GLO | 0.67 | 0.67 | 0.68 | 0.68 | 0.68 | 0.69 | 0.69 | 0.72 | 0.73 | 0.74 | 0.75 |
| CAZ | 0.04 | 0.04 | 0.04 | 0.04 | 0.04 | 0.04 | 0.04 | 0.04 | 0.04 | 0.04 | 0.04 |
| CHA | 0.02 | 0.02 | 0.02 | 0.02 | 0.02 | 0.02 | 0.02 | 0.02 | 0.02 | 0.02 | 0.02 |
| EUR | 0.07 | 0.07 | 0.07 | 0.07 | 0.08 | 0.08 | 0.08 | 0.07 | 0.08 | 0.08 | 0.09 |
| IND | 0.04 | 0.04 | 0.04 | 0.04 | 0.04 | 0.04 | 0.05 | 0.05 | 0.05 | 0.05 | 0.05 |
| JPN | 0.00 | 0.00 | 0.00 | 0.00 | 0.00 | 0.00 | 0.00 | 0.00 | 0.00 | 0.00 | 0.00 |
| LAM | 0.01 | 0.01 | 0.01 | 0.01 | 0.01 | 0.01 | 0.01 | 0.02 | 0.02 | 0.02 | 0.02 |
| MEA | 0.01 | 0.01 | 0.01 | 0.01 | 0.01 | 0.01 | 0.01 | 0.01 | 0.01 | 0.01 | 0.01 |
| NEU | 0.01 | 0.01 | 0.01 | 0.01 | 0.01 | 0.01 | 0.01 | 0.01 | 0.01 | 0.01 | 0.01 |
| OAS | 0.06 | 0.06 | 0.06 | 0.06 | 0.06 | 0.06 | 0.06 | 0.06 | 0.06 | 0.06 | 0.06 |
| REF | 0.15 | 0.15 | 0.16 | 0.16 | 0.16 | 0.16 | 0.16 | 0.16 | 0.17 | 0.17 | 0.17 |
| SSA | 0.06 | 0.06 | 0.06 | 0.06 | 0.06 | 0.06 | 0.06 | 0.06 | 0.06 | 0.06 | 0.06 |
| USA | 0.19 | 0.19 | 0.19 | 0.20 | 0.20 | 0.20 | 0.20 | 0.21 | 0.21 | 0.21 | 0.21 |

Table 773: PRIMAPhist — Emissions—N2O—Land—Agriculture (Mt N2O/yr) [PART 4/16]

|     | 1894 | 1895 | 1896 | 1897 | 1898 | 1899 | 1900 | 1901 | 1902 | 1903 | 1904 |
|-----|------|------|------|------|------|------|------|------|------|------|------|
| GLO | 0.76 | 0.77 | 0.78 | 0.79 | 0.80 | 0.80 | 0.81 | 0.81 | 0.82 | 0.83 | 0.83 |
| CAZ | 0.04 | 0.04 | 0.04 | 0.04 | 0.04 | 0.04 | 0.04 | 0.04 | 0.04 | 0.04 | 0.04 |
| CHA | 0.02 | 0.02 | 0.02 | 0.02 | 0.02 | 0.02 | 0.02 | 0.02 | 0.02 | 0.02 | 0.02 |
| EUR | 0.09 | 0.10 | 0.10 | 0.10 | 0.11 | 0.11 | 0.11 | 0.11 | 0.11 | 0.10 | 0.10 |
| IND | 0.05 | 0.05 | 0.05 | 0.05 | 0.05 | 0.05 | 0.05 | 0.05 | 0.05 | 0.05 | 0.05 |
| JPN | 0.00 | 0.00 | 0.00 | 0.00 | 0.00 | 0.00 | 0.00 | 0.00 | 0.00 | 0.00 | 0.00 |
| LAM | 0.02 | 0.02 | 0.03 | 0.03 | 0.03 | 0.03 | 0.03 | 0.04 | 0.04 | 0.05 | 0.05 |
| MEA | 0.01 | 0.01 | 0.01 | 0.01 | 0.01 | 0.01 | 0.01 | 0.01 | 0.01 | 0.01 | 0.01 |
| NEU | 0.01 | 0.01 | 0.01 | 0.01 | 0.01 | 0.01 | 0.01 | 0.01 | 0.01 | 0.01 | 0.01 |
| OAS | 0.06 | 0.06 | 0.06 | 0.07 | 0.07 | 0.07 | 0.07 | 0.07 | 0.07 | 0.07 | 0.07 |
| REF | 0.17 | 0.17 | 0.18 | 0.18 | 0.18 | 0.18 | 0.18 | 0.18 | 0.18 | 0.18 | 0.18 |
| SSA | 0.07 | 0.07 | 0.07 | 0.07 | 0.07 | 0.07 | 0.07 | 0.07 | 0.07 | 0.07 | 0.07 |
| USA | 0.21 | 0.21 | 0.21 | 0.21 | 0.21 | 0.21 | 0.21 | 0.21 | 0.21 | 0.21 | 0.21 |

Table 774: PRIMAPHist — Emissions—N2O—Land—Agriculture (Mt N2O/yr) [PART 5/16]

|     | 1905 | 1906 | 1907 | 1908 | 1909 | 1910 | 1911 | 1912 | 1913 | 1914 | 1915 |
|-----|------|------|------|------|------|------|------|------|------|------|------|
| GLO | 0.84 | 0.85 | 0.86 | 0.87 | 0.87 | 0.88 | 0.89 | 0.91 | 0.93 | 0.96 | 0.98 |
| CAZ | 0.04 | 0.05 | 0.05 | 0.05 | 0.05 | 0.05 | 0.05 | 0.05 | 0.05 | 0.05 | 0.05 |
| CHA | 0.02 | 0.03 | 0.03 | 0.03 | 0.03 | 0.03 | 0.03 | 0.03 | 0.03 | 0.03 | 0.03 |
| EUR | 0.10 | 0.10 | 0.09 | 0.09 | 0.09 | 0.09 | 0.09 | 0.09 | 0.09 | 0.10 | 0.10 |
| IND | 0.05 | 0.05 | 0.05 | 0.05 | 0.05 | 0.05 | 0.05 | 0.05 | 0.05 | 0.05 | 0.05 |
| JPN | 0.00 | 0.00 | 0.00 | 0.00 | 0.00 | 0.00 | 0.00 | 0.00 | 0.00 | 0.00 | 0.00 |
| LAM | 0.06 | 0.06 | 0.07 | 0.07 | 0.08 | 0.08 | 0.08 | 0.08 | 0.08 | 0.08 | 0.08 |
| MEA | 0.01 | 0.02 | 0.02 | 0.02 | 0.02 | 0.02 | 0.02 | 0.02 | 0.02 | 0.02 | 0.02 |
| NEU | 0.01 | 0.01 | 0.01 | 0.01 | 0.01 | 0.01 | 0.01 | 0.01 | 0.01 | 0.01 | 0.01 |
| OAS | 0.07 | 0.07 | 0.07 | 0.07 | 0.07 | 0.07 | 0.08 | 0.08 | 0.08 | 0.08 | 0.08 |
| REF | 0.18 | 0.18 | 0.18 | 0.18 | 0.18 | 0.18 | 0.19 | 0.19 | 0.20 | 0.21 | 0.22 |
| SSA | 0.07 | 0.07 | 0.08 | 0.08 | 0.08 | 0.08 | 0.08 | 0.09 | 0.09 | 0.09 | 0.10 |
| USA | 0.21 | 0.21 | 0.21 | 0.21 | 0.22 | 0.22 | 0.22 | 0.22 | 0.22 | 0.23 | 0.23 |

Table 775: PRIMAPHist — Emissions—N2O—Land—Agriculture (Mt N2O/yr) [PART 6/16]

|     | 1916 | 1917 | 1918 | 1919 | 1920 | 1921 | 1922 | 1923 | 1924 | 1925 | 1926 |
|-----|------|------|------|------|------|------|------|------|------|------|------|
| GLO | 1.01 | 1.04 | 1.07 | 1.09 | 1.11 | 1.12 | 1.14 | 1.16 | 1.17 | 1.19 | 1.20 |
| CAZ | 0.05 | 0.05 | 0.05 | 0.06 | 0.06 | 0.06 | 0.06 | 0.06 | 0.06 | 0.06 | 0.06 |
| CHA | 0.03 | 0.03 | 0.04 | 0.04 | 0.04 | 0.04 | 0.04 | 0.04 | 0.04 | 0.04 | 0.04 |
| EUR | 0.10 | 0.10 | 0.11 | 0.11 | 0.11 | 0.11 | 0.12 | 0.12 | 0.13 | 0.13 | 0.14 |
| IND | 0.05 | 0.05 | 0.05 | 0.05 | 0.05 | 0.05 | 0.05 | 0.05 | 0.05 | 0.05 | 0.05 |
| JPN | 0.00 | 0.00 | 0.00 | 0.00 | 0.00 | 0.00 | 0.00 | 0.00 | 0.00 | 0.00 | 0.00 |
| LAM | 0.08 | 0.08 | 0.08 | 0.08 | 0.09 | 0.09 | 0.08 | 0.08 | 0.08 | 0.08 | 0.08 |
| MEA | 0.02 | 0.02 | 0.02 | 0.02 | 0.02 | 0.02 | 0.02 | 0.02 | 0.03 | 0.03 | 0.03 |
| NEU | 0.01 | 0.01 | 0.01 | 0.01 | 0.02 | 0.02 | 0.02 | 0.02 | 0.02 | 0.02 | 0.02 |
| OAS | 0.08 | 0.09 | 0.09 | 0.09 | 0.09 | 0.09 | 0.09 | 0.09 | 0.10 | 0.10 | 0.10 |
| REF | 0.23 | 0.25 | 0.26 | 0.26 | 0.27 | 0.27 | 0.27 | 0.28 | 0.28 | 0.28 | 0.28 |
| SSA | 0.11 | 0.11 | 0.12 | 0.12 | 0.13 | 0.13 | 0.14 | 0.15 | 0.15 | 0.16 | 0.16 |
| USA | 0.23 | 0.24 | 0.24 | 0.24 | 0.24 | 0.24 | 0.24 | 0.24 | 0.23 | 0.23 | 0.23 |

Table 776: PRIMAPHist — Emissions—N2O—Land—Agriculture (Mt N2O/yr) [PART 7/16]



|     | 1927 | 1928 | 1929 | 1930 | 1931 | 1932 | 1933 | 1934 | 1935 | 1936 | 1937 |
|-----|------|------|------|------|------|------|------|------|------|------|------|
| GLO | 1.21 | 1.22 | 1.23 | 1.24 | 1.24 | 1.24 | 1.24 | 1.24 | 1.23 | 1.23 | 1.22 |
| CAZ | 0.06 | 0.06 | 0.06 | 0.06 | 0.06 | 0.06 | 0.06 | 0.06 | 0.06 | 0.06 | 0.06 |
| CHA | 0.05 | 0.05 | 0.05 | 0.05 | 0.05 | 0.05 | 0.05 | 0.06 | 0.06 | 0.06 | 0.06 |
| EUR | 0.14 | 0.15 | 0.15 | 0.15 | 0.15 | 0.15 | 0.15 | 0.15 | 0.15 | 0.15 | 0.14 |
| IND | 0.05 | 0.05 | 0.05 | 0.05 | 0.05 | 0.05 | 0.05 | 0.05 | 0.05 | 0.05 | 0.05 |
| JPN | 0.00 | 0.00 | 0.00 | 0.00 | 0.00 | 0.00 | 0.00 | 0.00 | 0.00 | 0.00 | 0.00 |
| LAM | 0.08 | 0.08 | 0.08 | 0.08 | 0.08 | 0.08 | 0.08 | 0.08 | 0.09 | 0.09 | 0.09 |
| MEA | 0.03 | 0.03 | 0.03 | 0.03 | 0.03 | 0.03 | 0.03 | 0.03 | 0.03 | 0.03 | 0.03 |
| NEU | 0.02 | 0.02 | 0.03 | 0.03 | 0.03 | 0.03 | 0.03 | 0.03 | 0.03 | 0.03 | 0.03 |
| OAS | 0.10 | 0.10 | 0.10 | 0.10 | 0.11 | 0.11 | 0.11 | 0.11 | 0.11 | 0.11 | 0.11 |
| REF | 0.29 | 0.29 | 0.29 | 0.29 | 0.29 | 0.28 | 0.28 | 0.27 | 0.27 | 0.26 | 0.25 |
| SSA | 0.17 | 0.17 | 0.18 | 0.18 | 0.18 | 0.17 | 0.17 | 0.17 | 0.16 | 0.16 | 0.16 |
| USA | 0.22 | 0.22 | 0.22 | 0.22 | 0.22 | 0.22 | 0.22 | 0.22 | 0.22 | 0.22 | 0.22 |

Table 777: PRIMAPHist — Emissions—N2O—Land—Agriculture (Mt N2O/yr) [PART 8/16]

|     | 1938 | 1939 | 1940 | 1941 | 1942 | 1943 | 1944 | 1945 | 1946 | 1947 | 1948 |
|-----|------|------|------|------|------|------|------|------|------|------|------|
| GLO | 1.22 | 1.22 | 1.23 | 1.28 | 1.41 | 1.61 | 1.84 | 2.10 | 2.36 | 2.60 | 2.81 |
| CAZ | 0.06 | 0.06 | 0.06 | 0.06 | 0.07 | 0.07 | 0.08 | 0.08 | 0.09 | 0.10 | 0.10 |
| CHA | 0.06 | 0.07 | 0.07 | 0.07 | 0.08 | 0.08 | 0.09 | 0.10 | 0.11 | 0.11 | 0.12 |
| EUR | 0.14 | 0.14 | 0.14 | 0.15 | 0.17 | 0.20 | 0.24 | 0.28 | 0.32 | 0.36 | 0.40 |
| IND | 0.05 | 0.05 | 0.05 | 0.05 | 0.05 | 0.05 | 0.05 | 0.06 | 0.06 | 0.06 | 0.06 |
| JPN | 0.00 | 0.00 | 0.00 | 0.00 | 0.01 | 0.01 | 0.01 | 0.02 | 0.02 | 0.03 | 0.03 |
| LAM | 0.10 | 0.10 | 0.10 | 0.11 | 0.12 | 0.14 | 0.16 | 0.19 | 0.21 | 0.23 | 0.25 |
| MEA | 0.03 | 0.03 | 0.03 | 0.04 | 0.04 | 0.05 | 0.06 | 0.07 | 0.08 | 0.09 | 0.10 |
| NEU | 0.03 | 0.03 | 0.03 | 0.03 | 0.03 | 0.03 | 0.04 | 0.04 | 0.05 | 0.05 | 0.06 |
| OAS | 0.11 | 0.11 | 0.12 | 0.12 | 0.12 | 0.13 | 0.15 | 0.16 | 0.17 | 0.18 | 0.19 |
| REF | 0.25 | 0.25 | 0.24 | 0.25 | 0.26 | 0.27 | 0.29 | 0.31 | 0.33 | 0.35 | 0.37 |
| SSA | 0.15 | 0.15 | 0.15 | 0.17 | 0.21 | 0.27 | 0.35 | 0.43 | 0.51 | 0.59 | 0.65 |
| USA | 0.23 | 0.23 | 0.23 | 0.23 | 0.26 | 0.29 | 0.32 | 0.37 | 0.41 | 0.45 | 0.48 |

Table 778: PRIMAPHist — Emissions—N2O—Land—Agriculture (Mt N2O/yr) [PART 9/16]

|     | 1949 | 1950 | 1951 | 1952 | 1953 | 1954 | 1955 | 1956 | 1957 | 1958 | 1959 |
|-----|------|------|------|------|------|------|------|------|------|------|------|
| GLO | 2.96 | 3.05 | 3.08 | 3.11 | 3.13 | 3.15 | 3.17 | 3.19 | 3.21 | 3.24 | 3.28 |
| CAZ | 0.10 | 0.11 | 0.11 | 0.11 | 0.11 | 0.12 | 0.12 | 0.12 | 0.12 | 0.12 | 0.13 |
| CHA | 0.13 | 0.13 | 0.14 | 0.15 | 0.15 | 0.16 | 0.16 | 0.17 | 0.17 | 0.18 | 0.19 |
| EUR | 0.42 | 0.43 | 0.44 | 0.44 | 0.44 | 0.45 | 0.45 | 0.46 | 0.46 | 0.46 | 0.47 |
| IND | 0.06 | 0.06 | 0.06 | 0.06 | 0.06 | 0.06 | 0.06 | 0.06 | 0.06 | 0.06 | 0.06 |
| JPN | 0.03 | 0.03 | 0.03 | 0.03 | 0.03 | 0.03 | 0.03 | 0.03 | 0.03 | 0.03 | 0.03 |
| LAM | 0.27 | 0.28 | 0.29 | 0.31 | 0.33 | 0.36 | 0.38 | 0.41 | 0.43 | 0.45 | 0.47 |
| MEA | 0.10 | 0.11 | 0.11 | 0.11 | 0.11 | 0.10 | 0.10 | 0.10 | 0.09 | 0.09 | 0.09 |
| NEU | 0.06 | 0.06 | 0.06 | 0.07 | 0.07 | 0.07 | 0.07 | 0.07 | 0.07 | 0.07 | 0.07 |
| OAS | 0.20 | 0.21 | 0.21 | 0.21 | 0.21 | 0.22 | 0.22 | 0.22 | 0.23 | 0.23 | 0.23 |
| REF | 0.38 | 0.40 | 0.41 | 0.42 | 0.43 | 0.44 | 0.45 | 0.47 | 0.48 | 0.49 | 0.51 |
| SSA | 0.69 | 0.71 | 0.71 | 0.69 | 0.66 | 0.62 | 0.59 | 0.55 | 0.51 | 0.48 | 0.47 |
| USA | 0.50 | 0.51 | 0.52 | 0.52 | 0.53 | 0.53 | 0.54 | 0.54 | 0.55 | 0.55 | 0.56 |

Table 779: PRIMAPHist — Emissions—N2O—Land—Agriculture (Mt N2O/yr) [PART 10/16]

|     | 1960 | 1961 | 1962 | 1963 | 1964 | 1965 | 1966 | 1967 | 1968 | 1969 | 1970 |
|-----|------|------|------|------|------|------|------|------|------|------|------|
| GLO | 3.33 | 3.55 | 3.64 | 3.71 | 3.79 | 3.91 | 4.06 | 4.18 | 4.27 | 4.33 | 4.44 |
| CAZ | 0.13 | 0.13 | 0.13 | 0.14 | 0.14 | 0.14 | 0.14 | 0.14 | 0.14 | 0.15 | 0.15 |
| CHA | 0.19 | 0.20 | 0.21 | 0.22 | 0.25 | 0.27 | 0.29 | 0.29 | 0.30 | 0.31 | 0.32 |
| EUR | 0.47 | 0.51 | 0.53 | 0.53 | 0.54 | 0.55 | 0.57 | 0.59 | 0.61 | 0.62 | 0.63 |
| IND | 0.06 | 0.07 | 0.07 | 0.07 | 0.07 | 0.07 | 0.07 | 0.07 | 0.08 | 0.08 | 0.08 |
| JPN | 0.03 | 0.03 | 0.04 | 0.04 | 0.04 | 0.04 | 0.04 | 0.04 | 0.04 | 0.04 | 0.04 |
| LAM | 0.48 | 0.50 | 0.51 | 0.52 | 0.53 | 0.55 | 0.57 | 0.58 | 0.59 | 0.60 | 0.61 |
| MEA | 0.09 | 0.10 | 0.10 | 0.10 | 0.11 | 0.11 | 0.11 | 0.12 | 0.13 | 0.13 | 0.13 |
| NEU | 0.08 | 0.08 | 0.08 | 0.08 | 0.08 | 0.08 | 0.08 | 0.09 | 0.09 | 0.09 | 0.09 |
| OAS | 0.24 | 0.25 | 0.25 | 0.25 | 0.26 | 0.26 | 0.27 | 0.28 | 0.28 | 0.29 | 0.30 |
| REF | 0.52 | 0.55 | 0.58 | 0.59 | 0.60 | 0.61 | 0.65 | 0.67 | 0.69 | 0.69 | 0.72 |
| SSA | 0.46 | 0.51 | 0.52 | 0.52 | 0.53 | 0.54 | 0.54 | 0.55 | 0.56 | 0.56 | 0.57 |
| USA | 0.57 | 0.60 | 0.62 | 0.65 | 0.67 | 0.70 | 0.72 | 0.76 | 0.76 | 0.78 | 0.80 |

Table 780: PRIMAPhist — Emissions—N2O—Land—Agriculture (Mt N2O/yr) [PART 11/16]

|     | 1971 | 1972 | 1973 | 1974 | 1975 | 1976 | 1977 | 1978 | 1979 | 1980 | 1981 |
|-----|------|------|------|------|------|------|------|------|------|------|------|
| GLO | 4.56 | 4.65 | 4.81 | 4.84 | 5.03 | 5.09 | 5.17 | 5.31 | 5.39 | 5.51 | 5.53 |
| CAZ | 0.15 | 0.15 | 0.15 | 0.16 | 0.16 | 0.16 | 0.16 | 0.16 | 0.16 | 0.16 | 0.16 |
| CHA | 0.34 | 0.35 | 0.37 | 0.36 | 0.39 | 0.39 | 0.43 | 0.47 | 0.51 | 0.54 | 0.53 |
| EUR | 0.65 | 0.66 | 0.68 | 0.69 | 0.71 | 0.71 | 0.72 | 0.75 | 0.76 | 0.76 | 0.76 |
| IND | 0.08 | 0.08 | 0.08 | 0.08 | 0.09 | 0.09 | 0.10 | 0.10 | 0.10 | 0.11 | 0.11 |
| JPN | 0.04 | 0.04 | 0.04 | 0.04 | 0.04 | 0.04 | 0.04 | 0.04 | 0.04 | 0.04 | 0.04 |
| LAM | 0.62 | 0.64 | 0.66 | 0.68 | 0.69 | 0.72 | 0.74 | 0.74 | 0.75 | 0.77 | 0.78 |
| MEA | 0.14 | 0.14 | 0.14 | 0.14 | 0.15 | 0.15 | 0.15 | 0.16 | 0.16 | 0.17 | 0.18 |
| NEU | 0.09 | 0.09 | 0.09 | 0.09 | 0.10 | 0.10 | 0.10 | 0.11 | 0.11 | 0.11 | 0.11 |
| OAS | 0.30 | 0.30 | 0.31 | 0.31 | 0.31 | 0.32 | 0.33 | 0.34 | 0.35 | 0.35 | 0.36 |
| REF | 0.76 | 0.78 | 0.81 | 0.83 | 0.85 | 0.86 | 0.86 | 0.89 | 0.87 | 0.90 | 0.90 |
| SSA | 0.58 | 0.58 | 0.58 | 0.58 | 0.59 | 0.60 | 0.61 | 0.62 | 0.63 | 0.64 | 0.65 |
| USA | 0.82 | 0.84 | 0.88 | 0.87 | 0.95 | 0.95 | 0.92 | 0.93 | 0.95 | 0.96 | 0.96 |

Table 781: PRIMAPhist — Emissions—N2O—Land—Agriculture (Mt N2O/yr) [PART 12/16]

|     | 1982 | 1983 | 1984 | 1985 | 1986 | 1987 | 1988 | 1989 | 1990 | 1991 | 1992 |
|-----|------|------|------|------|------|------|------|------|------|------|------|
| GLO | 5.57 | 5.70 | 5.82 | 5.82 | 5.88 | 5.96 | 6.00 | 6.06 | 5.98 | 5.92 | 5.86 |
| CAZ | 0.16 | 0.16 | 0.17 | 0.17 | 0.17 | 0.16 | 0.16 | 0.17 | 0.13 | 0.13 | 0.13 |
| CHA | 0.55 | 0.59 | 0.62 | 0.60 | 0.61 | 0.69 | 0.72 | 0.75 | 0.78 | 0.79 | 0.80 |
| EUR | 0.77 | 0.78 | 0.79 | 0.79 | 0.80 | 0.78 | 0.78 | 0.78 | 0.76 | 0.72 | 0.68 |
| IND | 0.11 | 0.12 | 0.12 | 0.13 | 0.14 | 0.13 | 0.14 | 0.14 | 0.15 | 0.15 | 0.16 |
| JPN | 0.04 | 0.04 | 0.04 | 0.04 | 0.04 | 0.04 | 0.04 | 0.04 | 0.04 | 0.04 | 0.04 |
| LAM | 0.78 | 0.78 | 0.80 | 0.80 | 0.82 | 0.83 | 0.84 | 0.85 | 0.85 | 0.85 | 0.87 |
| MEA | 0.18 | 0.19 | 0.20 | 0.21 | 0.21 | 0.22 | 0.22 | 0.23 | 0.23 | 0.24 | 0.26 |
| NEU | 0.11 | 0.11 | 0.11 | 0.10 | 0.11 | 0.11 | 0.11 | 0.11 | 0.11 | 0.11 | 0.10 |
| OAS | 0.36 | 0.38 | 0.38 | 0.39 | 0.41 | 0.41 | 0.42 | 0.43 | 0.42 | 0.43 | 0.44 |
| REF | 0.93 | 0.97 | 0.97 | 1.00 | 1.02 | 1.03 | 1.01 | 0.97 | 0.92 | 0.88 | 0.79 |
| SSA | 0.65 | 0.65 | 0.65 | 0.66 | 0.66 | 0.67 | 0.68 | 0.69 | 0.69 | 0.69 | 0.69 |
| USA | 0.91 | 0.92 | 0.96 | 0.93 | 0.90 | 0.89 | 0.87 | 0.90 | 0.91 | 0.90 | 0.91 |

Table 782: PRIMAPhist — Emissions—N2O—Land—Agriculture (Mt N2O/yr) [PART 13/16]

|     | 1993 | 1994 | 1995 | 1996 | 1997 | 1998 | 1999 | 2000 | 2001 | 2002 | 2003 |
|-----|------|------|------|------|------|------|------|------|------|------|------|
| GLO | 5.78 | 5.91 | 6.05 | 6.11 | 6.10 | 6.24 | 6.17 | 6.14 | 6.22 | 6.19 | 6.35 |
| CAZ | 0.13 | 0.13 | 0.14 | 0.14 | 0.14 | 0.14 | 0.15 | 0.15 | 0.15 | 0.14 | 0.15 |
| CHA | 0.76 | 0.80 | 0.90 | 0.94 | 0.90 | 0.90 | 0.93 | 0.89 | 0.90 | 0.89 | 0.89 |
| EUR | 0.67 | 0.66 | 0.66 | 0.66 | 0.67 | 0.66 | 0.66 | 0.65 | 0.65 | 0.64 | 0.62 |
| IND | 0.16 | 0.15 | 0.16 | 0.17 | 0.18 | 0.19 | 0.19 | 0.19 | 0.20 | 0.19 | 0.20 |
| JPN | 0.04 | 0.04 | 0.04 | 0.04 | 0.04 | 0.03 | 0.03 | 0.03 | 0.03 | 0.03 | 0.03 |
| LAM | 0.88 | 0.90 | 0.92 | 0.91 | 0.93 | 0.95 | 0.95 | 0.99 | 1.02 | 1.03 | 1.09 |
| MEA | 0.26 | 0.44 | 0.42 | 0.41 | 0.40 | 0.39 | 0.37 | 0.36 | 0.37 | 0.36 | 0.39 |
| NEU | 0.10 | 0.09 | 0.10 | 0.10 | 0.10 | 0.10 | 0.10 | 0.10 | 0.09 | 0.09 | 0.10 |
| OAS | 0.46 | 0.45 | 0.47 | 0.49 | 0.50 | 0.52 | 0.54 | 0.55 | 0.54 | 0.56 | 0.58 |
| REF | 0.70 | 0.62 | 0.59 | 0.56 | 0.54 | 0.55 | 0.52 | 0.51 | 0.50 | 0.50 | 0.48 |
| SSA | 0.69 | 0.73 | 0.74 | 0.76 | 0.78 | 0.84 | 0.82 | 0.82 | 0.84 | 0.83 | 0.86 |
| USA | 0.93 | 0.89 | 0.92 | 0.93 | 0.92 | 0.98 | 0.91 | 0.90 | 0.93 | 0.93 | 0.94 |

Table 783: PRIMAPhist — Emissions—N<sub>2</sub>O—Land—Agriculture (Mt N<sub>2</sub>O/yr) [PART 14/16]

|     | 2004 | 2005 | 2006 | 2007 | 2008 | 2009 | 2010 | 2011 | 2012 | 2013 | 2014 |
|-----|------|------|------|------|------|------|------|------|------|------|------|
| GLO | 6.55 | 6.51 | 6.66 | 6.85 | 7.00 | 7.09 | 7.28 | 7.34 | 7.42 | 7.47 | 7.53 |
| CAZ | 0.15 | 0.15 | 0.15 | 0.15 | 0.15 | 0.15 | 0.15 | 0.15 | 0.16 | 0.17 | 0.16 |
| CHA | 0.93 | 0.95 | 1.03 | 1.11 | 1.20 | 1.28 | 1.37 | 1.41 | 1.49 | 1.49 | 1.50 |
| EUR | 0.63 | 0.62 | 0.61 | 0.61 | 0.61 | 0.60 | 0.60 | 0.60 | 0.60 | 0.61 | 0.62 |
| IND | 0.21 | 0.22 | 0.23 | 0.25 | 0.25 | 0.26 | 0.27 | 0.28 | 0.27 | 0.27 | 0.27 |
| JPN | 0.03 | 0.03 | 0.03 | 0.04 | 0.03 | 0.03 | 0.03 | 0.03 | 0.03 | 0.03 | 0.03 |
| LAM | 1.09 | 1.11 | 1.14 | 1.18 | 1.17 | 1.15 | 1.19 | 1.20 | 1.21 | 1.20 | 1.23 |
| MEA | 0.40 | 0.40 | 0.40 | 0.40 | 0.40 | 0.39 | 0.38 | 0.39 | 0.41 | 0.41 | 0.42 |
| NEU | 0.10 | 0.10 | 0.11 | 0.10 | 0.10 | 0.11 | 0.10 | 0.11 | 0.12 | 0.12 | 0.12 |
| OAS | 0.61 | 0.62 | 0.63 | 0.66 | 0.68 | 0.73 | 0.73 | 0.73 | 0.74 | 0.76 | 0.77 |
| REF | 0.49 | 0.48 | 0.48 | 0.47 | 0.48 | 0.49 | 0.50 | 0.51 | 0.52 | 0.52 | 0.52 |
| SSA | 0.87 | 0.89 | 0.88 | 0.90 | 0.95 | 0.92 | 0.96 | 0.98 | 0.97 | 1.00 | 0.99 |
| USA | 1.02 | 0.93 | 0.96 | 0.99 | 0.97 | 0.98 | 1.00 | 0.96 | 0.91 | 0.90 | 0.90 |

Table 784: PRIMAPhist — Emissions—N<sub>2</sub>O—Land—Agriculture (Mt N<sub>2</sub>O/yr) [PART 15/16]

|     | 2015 |
|-----|------|
| GLO | 7.72 |
| CAZ | 0.16 |
| CHA | 1.58 |
| EUR | 0.62 |
| IND | 0.29 |
| JPN | 0.03 |
| LAM | 1.26 |
| MEA | 0.42 |
| NEU | 0.12 |
| OAS | 0.80 |
| REF | 0.51 |
| SSA | 1.02 |
| USA | 0.90 |

Table 785: PRIMAPhist — Emissions—N<sub>2</sub>O—Land—Agriculture (Mt N<sub>2</sub>O/yr) [PART 16/16]

|     | 1965 | 1970 | 1975 | 1980 | 1985 | 1990 | 1995 | 2000 | 2005 | 2010 |
|-----|------|------|------|------|------|------|------|------|------|------|
| GLO | 20.6 | 23.6 | 25.9 | 29.1 | 34.5 | 35.5 | 35.8 | 37.9 | 42.7 | 47.0 |
| CAZ | 1.1  | 1.1  | 1.1  | 1.2  | 1.5  | 1.6  | 1.6  | 1.7  | 1.8  | 1.9  |
| CHA | 2.2  | 2.5  | 2.9  | 3.8  | 4.4  | 5.3  | 6.0  | 6.4  | 7.8  | 8.8  |
| EUR | 3.6  | 4.2  | 4.7  | 5.2  | 5.9  | 5.3  | 5.0  | 4.9  | 4.9  | 5.0  |
| IND | 1.1  | 1.2  | 1.3  | 1.5  | 1.8  | 2.1  | 2.5  | 2.8  | 3.3  | 4.0  |
| JPN | 0.3  | 0.3  | 0.3  | 0.4  | 0.4  | 0.4  | 0.4  | 0.3  | 0.3  | 0.3  |
| LAM | 3.2  | 3.6  | 4.0  | 4.4  | 5.5  | 5.3  | 5.8  | 6.5  | 7.2  | 8.2  |
| MEA | 0.6  | 0.7  | 0.8  | 0.9  | 1.2  | 1.4  | 1.6  | 1.8  | 2.1  | 2.3  |
| NEU | 0.5  | 0.5  | 0.6  | 0.6  | 0.7  | 0.7  | 0.6  | 0.7  | 0.7  | 0.7  |
| OAS | 1.2  | 1.3  | 1.5  | 1.8  | 2.3  | 2.8  | 3.1  | 3.4  | 4.0  | 4.6  |
| REF | 2.2  | 2.6  | 2.9  | 3.2  | 3.8  | 3.7  | 2.3  | 1.8  | 2.2  | 2.1  |
| SSA | 1.6  | 1.7  | 1.8  | 1.9  | 2.1  | 2.3  | 2.4  | 2.6  | 3.2  | 3.6  |
| USA | 3.2  | 3.7  | 4.0  | 4.1  | 4.8  | 4.6  | 4.5  | 4.9  | 5.3  | 5.5  |

Table 786: IPCC — Emissions—N2O—Land—Agriculture (Mt N2O/yr)

|     | 1965 | 1970 | 1975 | 1980 | 1985 | 1990 | 1995 | 2000 | 2005 | 2010 |
|-----|------|------|------|------|------|------|------|------|------|------|
| GLO | 72   | 77   | 75   | 87   | 85   | 84   | 96   | 94   | 94   | 106  |
| CAZ | 3    | 3    | 4    | 3    | 4    | 4    | 4    | 4    | 4    | 5    |
| CHA | 3    | 3    | 4    | 6    | 6    | 8    | 9    | 9    | 11   | 13   |
| EUR | 3    | 4    | 4    | 5    | 6    | 5    | 5    | 5    | 5    | 5    |
| IND | 1    | 1    | 1    | 2    | 2    | 3    | 3    | 3    | 4    | 5    |
| JPN | 1    | 1    | 1    | 1    | 1    | 1    | 1    | 1    | 1    | 1    |
| LAM | 40   | 39   | 33   | 41   | 37   | 32   | 43   | 41   | 36   | 43   |
| MEA | 1    | 1    | 1    | 2    | 2    | 2    | 3    | 3    | 3    | 3    |
| NEU | 1    | 1    | 1    | 1    | 1    | 1    | 1    | 1    | 1    | 1    |
| OAS | 4    | 5    | 5    | 5    | 6    | 7    | 7    | 7    | 8    | 9    |
| REF | 4    | 5    | 6    | 6    | 7    | 7    | 5    | 5    | 5    | 5    |
| SSA | 7    | 9    | 9    | 9    | 9    | 9    | 9    | 10   | 10   | 11   |
| USA | 4    | 5    | 6    | 6    | 6    | 6    | 7    | 6    | 6    | 6    |

Table 787: Nsurplus2 — Emissions—N2O—Land—Agriculture (Mt N2O/yr)

|     | 1970 | 1971 | 1972 | 1973 | 1974 | 1975 | 1976 | 1977 | 1978 | 1979 | 1980 |
|-----|------|------|------|------|------|------|------|------|------|------|------|
| GLO | 3.34 | 3.42 | 3.52 | 3.62 | 3.66 | 3.82 | 3.89 | 4.00 | 4.11 | 4.23 | 4.32 |
| CAZ | 0.17 | 0.18 | 0.18 | 0.18 | 0.18 | 0.19 | 0.19 | 0.18 | 0.18 | 0.18 | 0.18 |
| CHA | 0.34 | 0.35 | 0.36 | 0.38 | 0.37 | 0.40 | 0.41 | 0.45 | 0.48 | 0.52 | 0.55 |
| EUR | 0.60 | 0.62 | 0.63 | 0.66 | 0.66 | 0.68 | 0.68 | 0.69 | 0.72 | 0.74 | 0.73 |
| IND | 0.19 | 0.20 | 0.20 | 0.20 | 0.20 | 0.21 | 0.22 | 0.23 | 0.24 | 0.25 | 0.26 |
| JPN | 0.03 | 0.03 | 0.03 | 0.03 | 0.03 | 0.03 | 0.03 | 0.03 | 0.03 | 0.03 | 0.03 |
| LAM | 0.45 | 0.46 | 0.48 | 0.49 | 0.51 | 0.53 | 0.55 | 0.58 | 0.57 | 0.58 | 0.61 |
| MEA | 0.11 | 0.11 | 0.11 | 0.11 | 0.12 | 0.12 | 0.12 | 0.12 | 0.13 | 0.13 | 0.14 |
| NEU | 0.06 | 0.07 | 0.07 | 0.07 | 0.07 | 0.07 | 0.08 | 0.08 | 0.08 | 0.09 | 0.09 |
| OAS | 0.32 | 0.32 | 0.32 | 0.33 | 0.33 | 0.34 | 0.34 | 0.36 | 0.37 | 0.38 | 0.38 |
| REF | 0.40 | 0.42 | 0.44 | 0.45 | 0.47 | 0.49 | 0.48 | 0.49 | 0.50 | 0.50 | 0.52 |
| SSA | 0.28 | 0.28 | 0.28 | 0.28 | 0.28 | 0.29 | 0.29 | 0.30 | 0.31 | 0.32 | 0.32 |
| USA | 0.40 | 0.41 | 0.42 | 0.45 | 0.44 | 0.49 | 0.48 | 0.48 | 0.49 | 0.51 | 0.51 |

Table 788: EDGAR.LU — Emissions—N2O—Land—Agriculture (Mt N2O/yr) [PART 1/4]

|     | 1981 | 1982 | 1983 | 1984 | 1985 | 1986 | 1987 | 1988 | 1989 | 1990 | 1991 |
|-----|------|------|------|------|------|------|------|------|------|------|------|
| GLO | 4.36 | 4.42 | 4.54 | 4.67 | 4.69 | 4.75 | 4.84 | 4.94 | 5.00 | 5.02 | 4.97 |
| CAZ | 0.19 | 0.19 | 0.19 | 0.19 | 0.19 | 0.20 | 0.19 | 0.19 | 0.20 | 0.21 | 0.21 |
| CHA | 0.55 | 0.57 | 0.61 | 0.64 | 0.62 | 0.64 | 0.72 | 0.77 | 0.79 | 0.82 | 0.83 |
| EUR | 0.73 | 0.75 | 0.75 | 0.77 | 0.77 | 0.78 | 0.77 | 0.78 | 0.77 | 0.73 | 0.69 |
| IND | 0.27 | 0.28 | 0.30 | 0.32 | 0.33 | 0.35 | 0.33 | 0.37 | 0.37 | 0.38 | 0.40 |
| JPN | 0.03 | 0.03 | 0.03 | 0.03 | 0.03 | 0.03 | 0.03 | 0.03 | 0.03 | 0.03 | 0.03 |
| LAM | 0.62 | 0.62 | 0.62 | 0.64 | 0.65 | 0.66 | 0.68 | 0.69 | 0.70 | 0.70 | 0.70 |
| MEA | 0.15 | 0.15 | 0.16 | 0.16 | 0.17 | 0.17 | 0.17 | 0.18 | 0.19 | 0.19 | 0.19 |
| NEU | 0.09 | 0.09 | 0.09 | 0.09 | 0.09 | 0.09 | 0.09 | 0.09 | 0.09 | 0.09 | 0.09 |
| OAS | 0.39 | 0.40 | 0.42 | 0.43 | 0.44 | 0.44 | 0.44 | 0.45 | 0.46 | 0.47 | 0.47 |
| REF | 0.52 | 0.53 | 0.56 | 0.57 | 0.58 | 0.59 | 0.60 | 0.59 | 0.56 | 0.54 | 0.51 |
| SSA | 0.32 | 0.33 | 0.33 | 0.32 | 0.33 | 0.33 | 0.33 | 0.34 | 0.35 | 0.36 | 0.36 |
| USA | 0.51 | 0.49 | 0.48 | 0.51 | 0.49 | 0.48 | 0.48 | 0.45 | 0.48 | 0.49 | 0.49 |

Table 789: EDGAR\_LU — Emissions—N2O—Land—Agriculture (Mt N2O/yr) [PART 2/4]

|     | 1992 | 1993 | 1994 | 1995 | 1996 | 1997 | 1998 | 1999 | 2000 | 2001 | 2002 |
|-----|------|------|------|------|------|------|------|------|------|------|------|
| GLO | 4.96 | 4.92 | 4.99 | 5.10 | 5.20 | 5.17 | 5.23 | 5.28 | 5.26 | 5.32 | 5.41 |
| CAZ | 0.21 | 0.21 | 0.22 | 0.22 | 0.23 | 0.23 | 0.23 | 0.24 | 0.24 | 0.24 | 0.24 |
| CHA | 0.85 | 0.82 | 0.86 | 0.98 | 1.02 | 0.94 | 0.96 | 1.00 | 0.98 | 0.99 | 1.07 |
| EUR | 0.65 | 0.63 | 0.64 | 0.63 | 0.64 | 0.65 | 0.64 | 0.64 | 0.62 | 0.62 | 0.61 |
| IND | 0.41 | 0.42 | 0.44 | 0.45 | 0.46 | 0.47 | 0.48 | 0.49 | 0.47 | 0.48 | 0.46 |
| JPN | 0.03 | 0.03 | 0.03 | 0.03 | 0.03 | 0.03 | 0.03 | 0.03 | 0.03 | 0.03 | 0.03 |
| LAM | 0.72 | 0.74 | 0.77 | 0.78 | 0.77 | 0.79 | 0.80 | 0.80 | 0.83 | 0.85 | 0.87 |
| MEA | 0.20 | 0.20 | 0.21 | 0.21 | 0.22 | 0.23 | 0.24 | 0.24 | 0.25 | 0.26 | 0.26 |
| NEU | 0.09 | 0.09 | 0.09 | 0.08 | 0.09 | 0.09 | 0.09 | 0.09 | 0.09 | 0.08 | 0.08 |
| OAS | 0.48 | 0.49 | 0.50 | 0.50 | 0.52 | 0.52 | 0.53 | 0.53 | 0.54 | 0.53 | 0.55 |
| REF | 0.45 | 0.41 | 0.36 | 0.33 | 0.30 | 0.30 | 0.27 | 0.26 | 0.26 | 0.27 | 0.27 |
| SSA | 0.36 | 0.36 | 0.36 | 0.37 | 0.37 | 0.38 | 0.40 | 0.41 | 0.41 | 0.42 | 0.43 |
| USA | 0.51 | 0.51 | 0.54 | 0.53 | 0.55 | 0.56 | 0.56 | 0.55 | 0.54 | 0.55 | 0.55 |

Table 790: EDGAR\_LU — Emissions—N2O—Land—Agriculture (Mt N2O/yr) [PART 3/4]

|     | 2003 | 2004 | 2005 | 2006 | 2007 | 2008 |
|-----|------|------|------|------|------|------|
| GLO | 5.49 | 5.64 | 5.68 | 5.75 | 5.82 | 5.88 |
| CAZ | 0.24 | 0.25 | 0.25 | 0.25 | 0.25 | 0.25 |
| CHA | 1.05 | 1.11 | 1.12 | 1.16 | 1.18 | 1.22 |
| EUR | 0.61 | 0.61 | 0.60 | 0.59 | 0.58 | 0.58 |
| IND | 0.48 | 0.50 | 0.50 | 0.50 | 0.51 | 0.52 |
| JPN | 0.03 | 0.03 | 0.03 | 0.03 | 0.03 | 0.03 |
| LAM | 0.93 | 0.95 | 0.96 | 0.98 | 1.01 | 1.03 |
| MEA | 0.26 | 0.27 | 0.27 | 0.28 | 0.28 | 0.28 |
| NEU | 0.08 | 0.09 | 0.09 | 0.09 | 0.09 | 0.09 |
| OAS | 0.56 | 0.57 | 0.58 | 0.59 | 0.60 | 0.61 |
| REF | 0.26 | 0.27 | 0.27 | 0.27 | 0.26 | 0.26 |
| SSA | 0.43 | 0.44 | 0.45 | 0.45 | 0.46 | 0.47 |
| USA | 0.56 | 0.58 | 0.58 | 0.57 | 0.56 | 0.56 |

Table 791: EDGAR\_LU — Emissions—N2O—Land—Agriculture (Mt N2O/yr) [PART 4/4]

13.1.2 Agriculture—Agricultural Soils

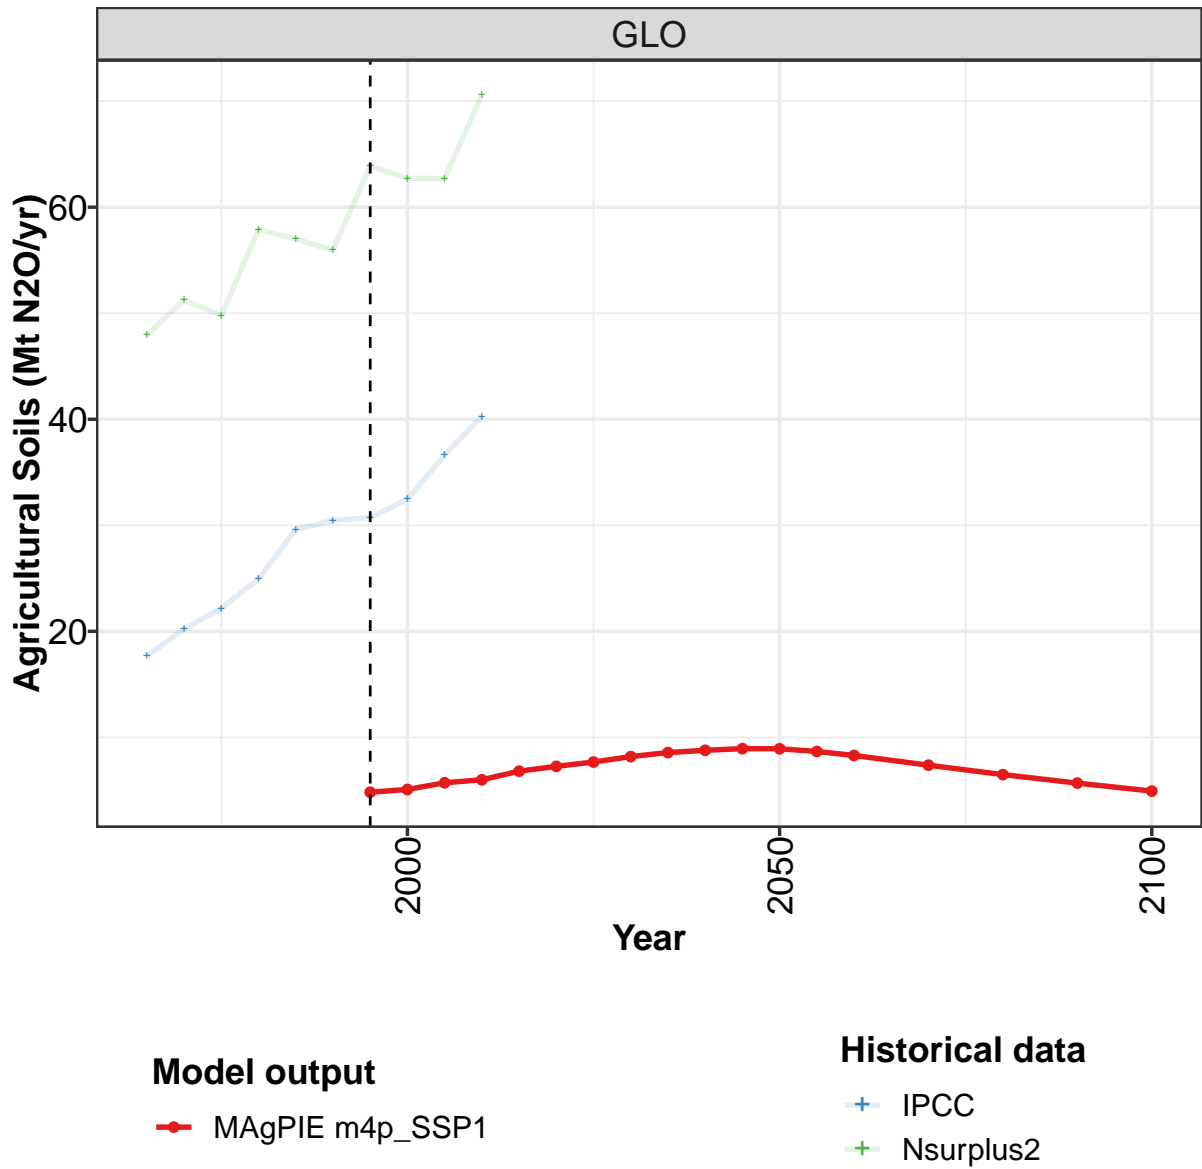

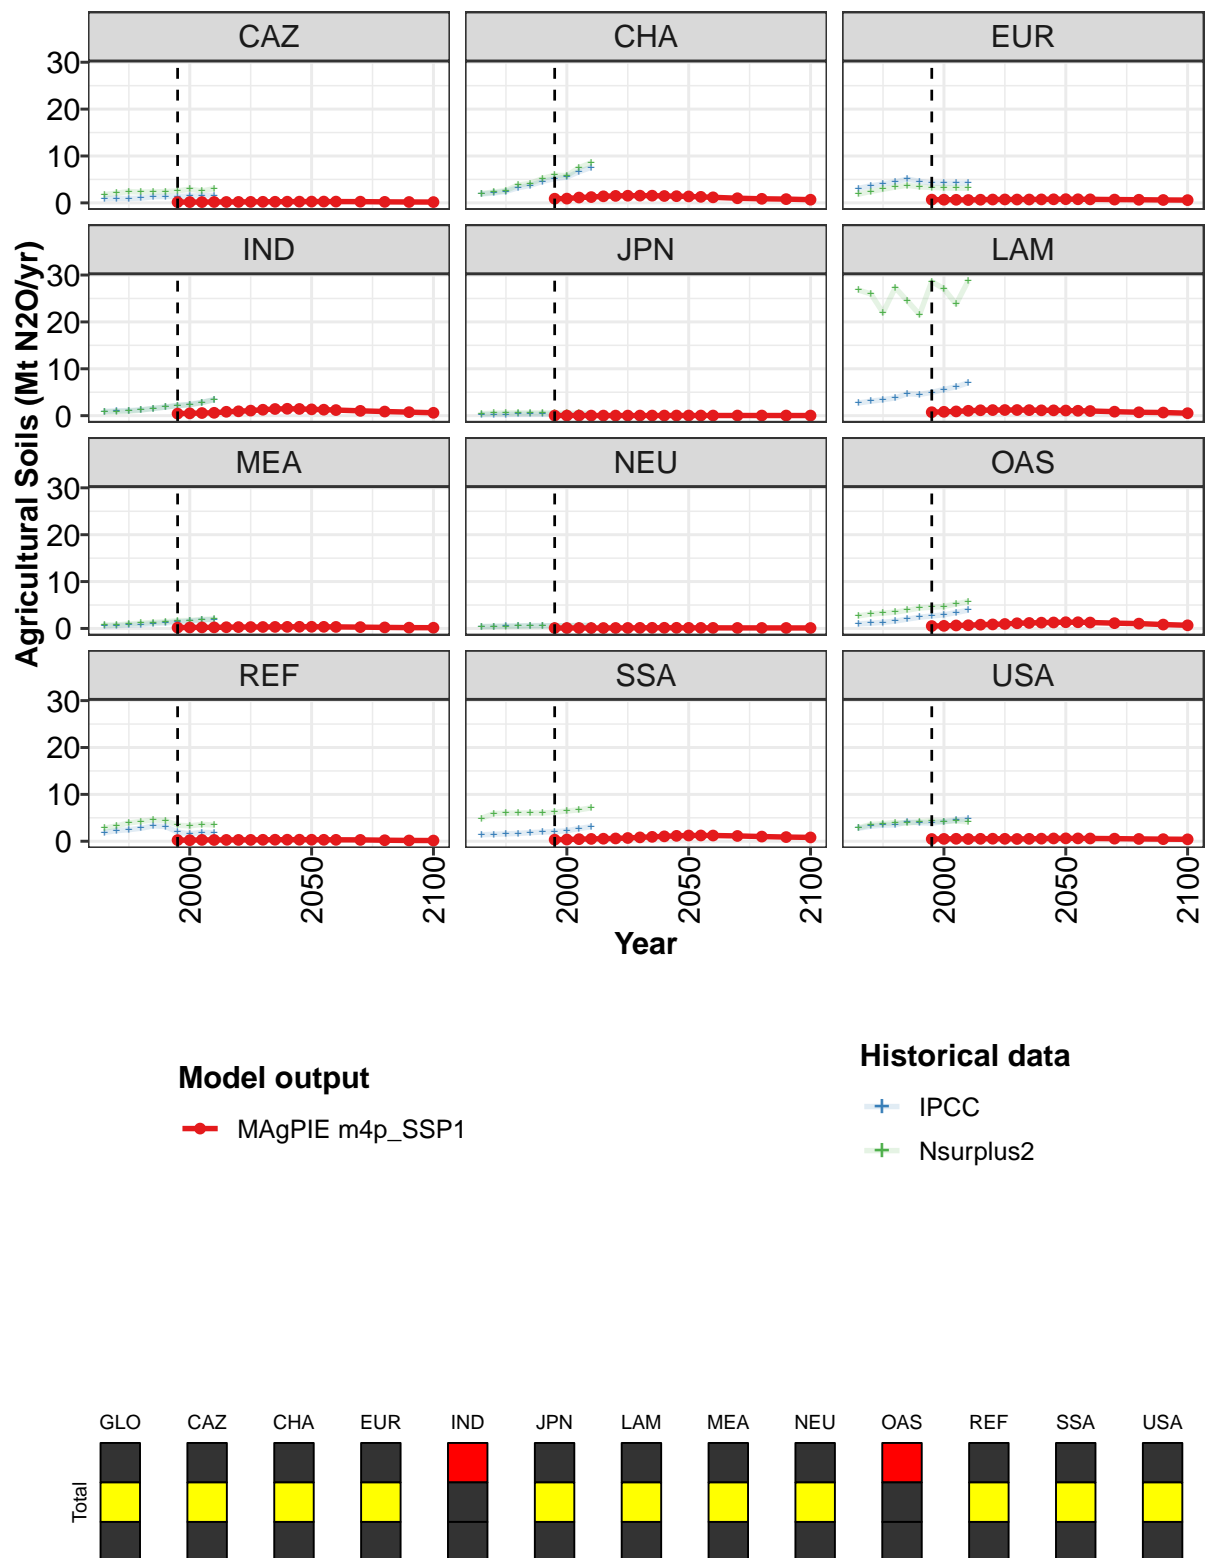Figure 239: MAgPIE m4p\_SSP1 — Emissions—N<sub>2</sub>O—Land—Agriculture—Agricultural Soils (Mt N<sub>2</sub>O/yr)

|     | 1995 | 2000 | 2005 | 2010 | 2015 | 2020 | 2025 | 2030 | 2035 | 2040 | 2045 |
|-----|------|------|------|------|------|------|------|------|------|------|------|
| GLO | 4.83 | 5.09 | 5.72 | 6.00 | 6.81 | 7.26 | 7.67 | 8.19 | 8.57 | 8.78 | 8.94 |
| CAZ | 0.17 | 0.17 | 0.18 | 0.19 | 0.20 | 0.21 | 0.22 | 0.23 | 0.24 | 0.25 | 0.26 |
| CHA | 0.89 | 0.92 | 1.14 | 1.24 | 1.40 | 1.49 | 1.53 | 1.54 | 1.54 | 1.47 | 1.43 |
| EUR | 0.69 | 0.68 | 0.66 | 0.62 | 0.68 | 0.72 | 0.73 | 0.72 | 0.72 | 0.74 | 0.76 |
| IND | 0.44 | 0.49 | 0.57 | 0.61 | 0.83 | 0.93 | 1.08 | 1.27 | 1.43 | 1.47 | 1.44 |
| JPN | 0.03 | 0.03 | 0.03 | 0.02 | 0.02 | 0.02 | 0.02 | 0.03 | 0.03 | 0.03 | 0.03 |
| LAM | 0.74 | 0.83 | 0.91 | 1.05 | 1.15 | 1.20 | 1.21 | 1.21 | 1.18 | 1.14 | 1.14 |
| MEA | 0.19 | 0.21 | 0.23 | 0.24 | 0.27 | 0.30 | 0.30 | 0.32 | 0.33 | 0.34 | 0.36 |
| NEU | 0.09 | 0.10 | 0.10 | 0.09 | 0.10 | 0.11 | 0.11 | 0.13 | 0.14 | 0.15 | 0.14 |
| OAS | 0.52 | 0.56 | 0.64 | 0.68 | 0.81 | 0.86 | 0.96 | 1.11 | 1.17 | 1.24 | 1.28 |
| REF | 0.25 | 0.23 | 0.29 | 0.28 | 0.29 | 0.29 | 0.29 | 0.31 | 0.33 | 0.33 | 0.33 |
| SSA | 0.34 | 0.37 | 0.45 | 0.50 | 0.54 | 0.60 | 0.70 | 0.83 | 0.94 | 1.05 | 1.15 |
| USA | 0.48 | 0.51 | 0.53 | 0.49 | 0.52 | 0.54 | 0.52 | 0.49 | 0.52 | 0.56 | 0.60 |

Table 792: MAgPIE m4p\_SSP1 — Emissions—N2O—Land—Agriculture—Agricultural Soils (Mt N2O/yr)  
[PART 1/2]

|     | 2050 | 2055 | 2060 | 2070 | 2080 | 2090 | 2100 |
|-----|------|------|------|------|------|------|------|
| GLO | 8.93 | 8.67 | 8.29 | 7.38 | 6.49 | 5.69 | 4.94 |
| CAZ | 0.28 | 0.28 | 0.28 | 0.26 | 0.22 | 0.19 | 0.17 |
| CHA | 1.37 | 1.29 | 1.19 | 0.99 | 0.87 | 0.80 | 0.68 |
| EUR | 0.79 | 0.77 | 0.75 | 0.71 | 0.67 | 0.62 | 0.59 |
| IND | 1.35 | 1.28 | 1.19 | 1.03 | 0.88 | 0.75 | 0.62 |
| JPN | 0.03 | 0.03 | 0.03 | 0.03 | 0.03 | 0.03 | 0.03 |
| LAM | 1.10 | 1.05 | 1.00 | 0.86 | 0.73 | 0.67 | 0.53 |
| MEA | 0.36 | 0.35 | 0.33 | 0.29 | 0.22 | 0.18 | 0.16 |
| NEU | 0.13 | 0.13 | 0.12 | 0.12 | 0.11 | 0.11 | 0.10 |
| OAS | 1.33 | 1.33 | 1.27 | 1.13 | 1.03 | 0.83 | 0.67 |
| REF | 0.33 | 0.32 | 0.31 | 0.29 | 0.22 | 0.17 | 0.15 |
| SSA | 1.23 | 1.24 | 1.22 | 1.13 | 1.00 | 0.89 | 0.82 |
| USA | 0.62 | 0.61 | 0.59 | 0.55 | 0.50 | 0.45 | 0.41 |

Table 793: MAgPIE m4p\_SSP1 — Emissions—N2O—Land—Agriculture—Agricultural Soils (Mt N2O/yr)  
[PART 2/2]

|     | 1965 | 1970 | 1975 | 1980 | 1985 | 1990 | 1995 | 2000 | 2005 | 2010 |
|-----|------|------|------|------|------|------|------|------|------|------|
| GLO | 17.7 | 20.2 | 22.2 | 24.9 | 29.6 | 30.5 | 30.7 | 32.5 | 36.6 | 40.3 |
| CAZ | 0.9  | 1.0  | 0.9  | 1.0  | 1.3  | 1.4  | 1.4  | 1.4  | 1.5  | 1.6  |
| CHA | 1.9  | 2.1  | 2.4  | 3.2  | 3.7  | 4.6  | 5.2  | 5.5  | 6.7  | 7.6  |
| EUR | 3.1  | 3.6  | 4.0  | 4.5  | 5.1  | 4.6  | 4.2  | 4.2  | 4.2  | 4.3  |
| IND | 0.9  | 1.0  | 1.1  | 1.2  | 1.5  | 1.8  | 2.2  | 2.4  | 2.8  | 3.4  |
| JPN | 0.2  | 0.3  | 0.3  | 0.3  | 0.3  | 0.3  | 0.3  | 0.3  | 0.3  | 0.3  |
| LAM | 2.7  | 3.1  | 3.4  | 3.8  | 4.7  | 4.5  | 5.0  | 5.6  | 6.2  | 7.0  |
| MEA | 0.5  | 0.6  | 0.7  | 0.8  | 1.0  | 1.2  | 1.4  | 1.6  | 1.8  | 1.9  |
| NEU | 0.4  | 0.5  | 0.5  | 0.5  | 0.6  | 0.6  | 0.5  | 0.6  | 0.6  | 0.6  |
| OAS | 1.0  | 1.1  | 1.3  | 1.6  | 2.0  | 2.4  | 2.7  | 2.9  | 3.4  | 3.9  |
| REF | 1.9  | 2.3  | 2.5  | 2.8  | 3.3  | 3.2  | 2.0  | 1.5  | 1.9  | 1.8  |
| SSA | 1.4  | 1.5  | 1.6  | 1.7  | 1.8  | 2.0  | 2.1  | 2.2  | 2.7  | 3.1  |
| USA | 2.8  | 3.2  | 3.4  | 3.5  | 4.1  | 4.0  | 3.9  | 4.2  | 4.6  | 4.7  |

Table 794: IPCC — Emissions—N2O—Land—Agriculture—Agricultural Soils (Mt N2O/yr)



|     | 1965 | 1970 | 1975 | 1980 | 1985 | 1990 | 1995 | 2000 | 2005 | 2010 |
|-----|------|------|------|------|------|------|------|------|------|------|
| GLO | 47.9 | 51.2 | 49.8 | 57.9 | 57.0 | 55.9 | 63.9 | 62.7 | 62.7 | 70.6 |
| CAZ | 1.8  | 2.1  | 2.4  | 2.3  | 2.4  | 2.4  | 2.6  | 2.9  | 2.5  | 3.0  |
| CHA | 2.0  | 2.3  | 2.6  | 3.8  | 4.2  | 5.2  | 5.9  | 5.8  | 7.5  | 8.6  |
| EUR | 1.9  | 2.5  | 2.9  | 3.4  | 3.7  | 3.4  | 3.3  | 3.2  | 3.1  | 3.1  |
| IND | 0.8  | 0.9  | 0.9  | 1.2  | 1.5  | 1.8  | 2.2  | 2.3  | 2.8  | 3.4  |
| JPN | 0.4  | 0.5  | 0.6  | 0.6  | 0.6  | 0.6  | 0.6  | 0.5  | 0.5  | 0.5  |
| LAM | 26.8 | 26.0 | 22.0 | 27.3 | 24.5 | 21.6 | 28.6 | 27.1 | 23.8 | 28.8 |
| MEA | 0.7  | 0.7  | 1.0  | 1.1  | 1.3  | 1.4  | 1.7  | 1.7  | 1.9  | 2.0  |
| NEU | 0.4  | 0.4  | 0.4  | 0.5  | 0.5  | 0.5  | 0.6  | 0.6  | 0.7  | 0.7  |
| OAS | 2.7  | 3.1  | 3.3  | 3.5  | 3.9  | 4.4  | 4.5  | 4.7  | 5.2  | 5.8  |
| REF | 2.8  | 3.3  | 3.9  | 4.2  | 4.5  | 4.4  | 3.4  | 3.3  | 3.6  | 3.5  |
| SSA | 4.9  | 5.9  | 6.0  | 6.0  | 6.0  | 6.0  | 6.2  | 6.5  | 6.7  | 7.1  |
| USA | 2.9  | 3.6  | 3.7  | 4.0  | 3.9  | 4.2  | 4.4  | 4.2  | 4.3  | 4.1  |

Table 795: Nsurplus2 — Emissions—N2O—Land—Agriculture—Agricultural Soils (Mt N2O/yr)

## 13.1.3 Agriculture—Agricultural Soils—Decay of Crop Residues

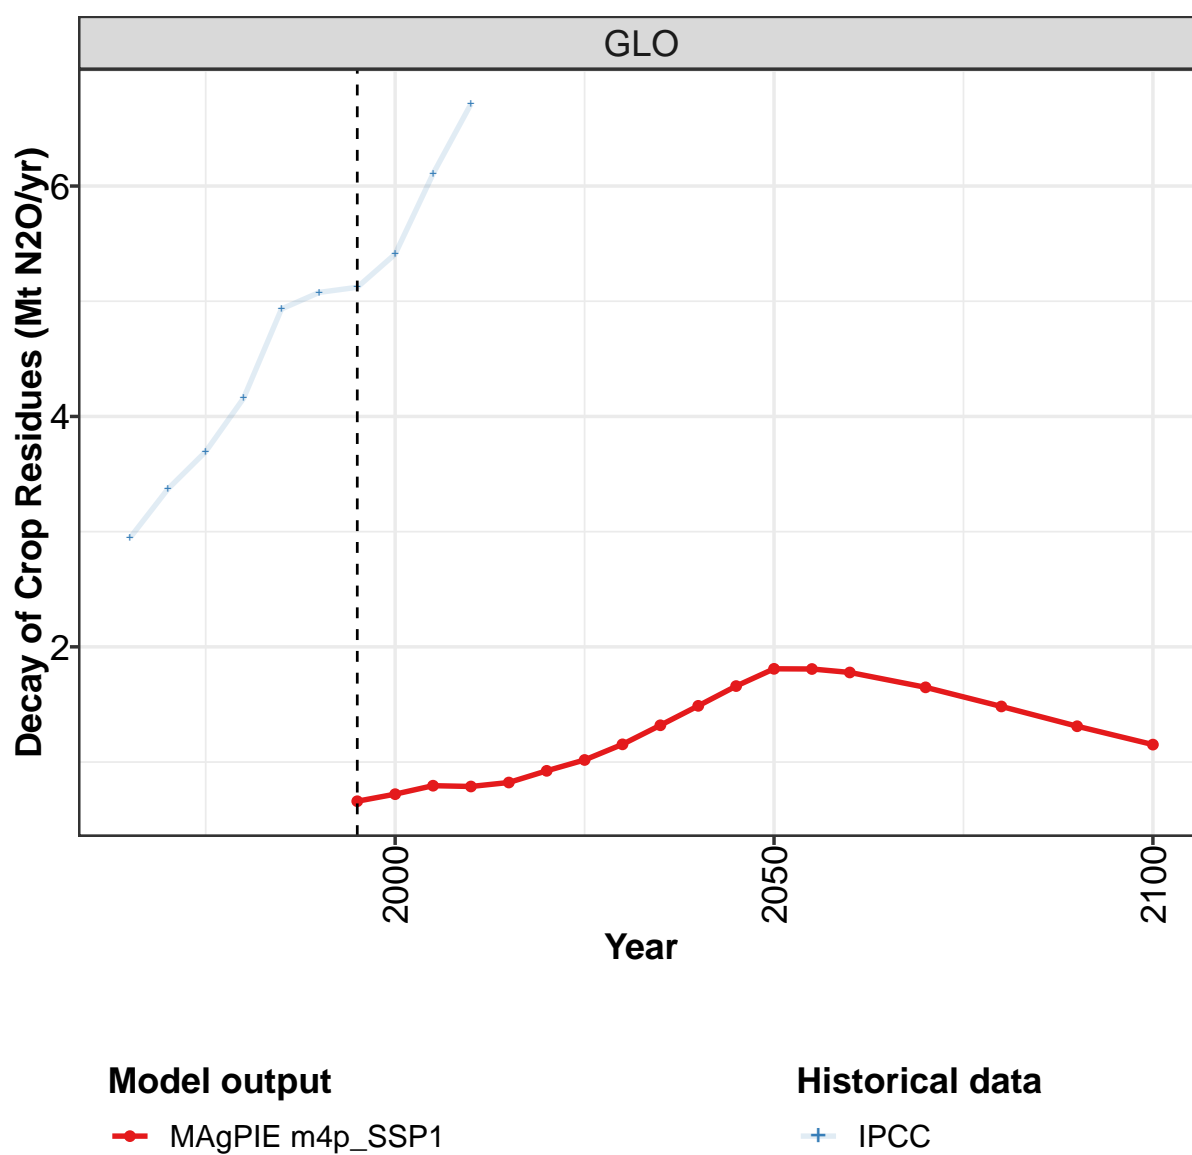

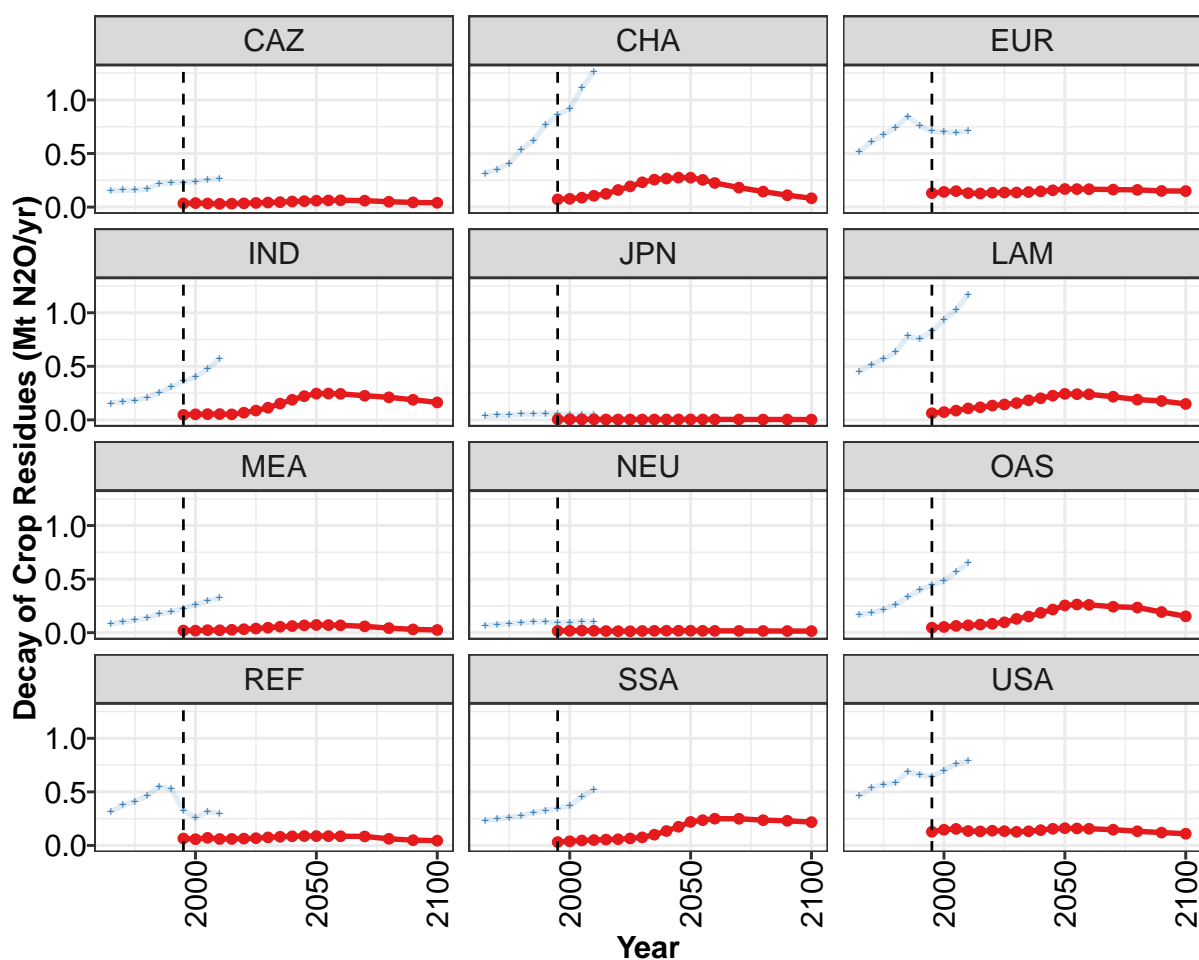

**Model output**

—●— MAGPIE m4p\_SSP1

**Historical data**

—+— IPCC

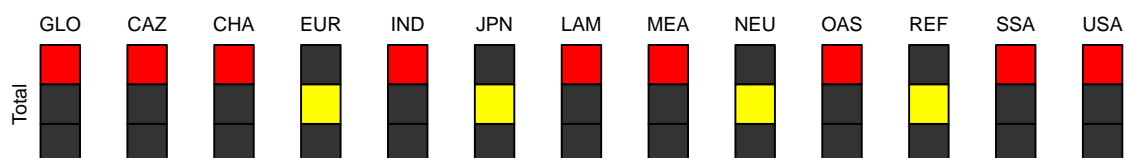

Figure 240: MAGPIE m4p\_SSP1 — Emissions—N<sub>2</sub>O—Land—Agriculture—Agricultural Soils—Decay of Crop Residues (Mt N<sub>2</sub>O/yr)

|     | 1995 | 2000 | 2005 | 2010 | 2015 | 2020 | 2025 | 2030 | 2035 | 2040 | 2045 |
|-----|------|------|------|------|------|------|------|------|------|------|------|
| GLO | 0.66 | 0.72 | 0.79 | 0.79 | 0.82 | 0.92 | 1.02 | 1.15 | 1.32 | 1.49 | 1.66 |
| CAZ | 0.03 | 0.04 | 0.03 | 0.03 | 0.03 | 0.04 | 0.04 | 0.04 | 0.05 | 0.05 | 0.06 |
| CHA | 0.07 | 0.08 | 0.09 | 0.11 | 0.12 | 0.16 | 0.19 | 0.23 | 0.26 | 0.27 | 0.28 |
| EUR | 0.13 | 0.14 | 0.15 | 0.13 | 0.13 | 0.13 | 0.14 | 0.14 | 0.14 | 0.15 | 0.16 |
| IND | 0.05 | 0.05 | 0.05 | 0.05 | 0.05 | 0.07 | 0.09 | 0.11 | 0.15 | 0.19 | 0.22 |
| JPN | 0.00 | 0.00 | 0.00 | 0.00 | 0.00 | 0.00 | 0.00 | 0.00 | 0.00 | 0.00 | 0.00 |
| LAM | 0.06 | 0.07 | 0.09 | 0.11 | 0.12 | 0.13 | 0.14 | 0.16 | 0.18 | 0.20 | 0.23 |
| MEA | 0.02 | 0.02 | 0.02 | 0.02 | 0.03 | 0.03 | 0.04 | 0.05 | 0.06 | 0.06 | 0.07 |
| NEU | 0.02 | 0.02 | 0.02 | 0.02 | 0.02 | 0.01 | 0.01 | 0.02 | 0.02 | 0.02 | 0.02 |
| OAS | 0.05 | 0.05 | 0.06 | 0.07 | 0.08 | 0.08 | 0.10 | 0.13 | 0.15 | 0.19 | 0.22 |
| REF | 0.07 | 0.06 | 0.07 | 0.06 | 0.06 | 0.06 | 0.07 | 0.08 | 0.08 | 0.09 | 0.09 |
| SSA | 0.03 | 0.04 | 0.05 | 0.05 | 0.06 | 0.06 | 0.07 | 0.08 | 0.10 | 0.13 | 0.17 |
| USA | 0.13 | 0.15 | 0.15 | 0.14 | 0.13 | 0.14 | 0.13 | 0.13 | 0.13 | 0.14 | 0.16 |

Table 796: MAgPIE m4p\_SSP1 — Emissions—N2O—Land—Agriculture—Agricultural Soils—Decay of Crop Residues (Mt N2O/yr) [PART 1/2]

|     | 2050 | 2055 | 2060 | 2070 | 2080 | 2090 | 2100 |
|-----|------|------|------|------|------|------|------|
| GLO | 1.81 | 1.81 | 1.78 | 1.65 | 1.48 | 1.31 | 1.15 |
| CAZ | 0.06 | 0.06 | 0.06 | 0.06 | 0.05 | 0.04 | 0.04 |
| CHA | 0.27 | 0.25 | 0.23 | 0.18 | 0.14 | 0.11 | 0.08 |
| EUR | 0.17 | 0.17 | 0.17 | 0.16 | 0.16 | 0.15 | 0.15 |
| IND | 0.25 | 0.25 | 0.24 | 0.23 | 0.21 | 0.19 | 0.16 |
| JPN | 0.00 | 0.00 | 0.00 | 0.00 | 0.00 | 0.00 | 0.00 |
| LAM | 0.24 | 0.24 | 0.24 | 0.22 | 0.19 | 0.18 | 0.15 |
| MEA | 0.07 | 0.07 | 0.07 | 0.06 | 0.04 | 0.03 | 0.03 |
| NEU | 0.02 | 0.02 | 0.02 | 0.02 | 0.02 | 0.02 | 0.01 |
| OAS | 0.25 | 0.26 | 0.26 | 0.24 | 0.23 | 0.19 | 0.15 |
| REF | 0.09 | 0.09 | 0.09 | 0.08 | 0.06 | 0.05 | 0.04 |
| SSA | 0.22 | 0.24 | 0.25 | 0.25 | 0.24 | 0.23 | 0.22 |
| USA | 0.16 | 0.16 | 0.16 | 0.15 | 0.13 | 0.12 | 0.11 |

Table 797: MAgPIE m4p\_SSP1 — Emissions—N2O—Land—Agriculture—Agricultural Soils—Decay of Crop Residues (Mt N2O/yr) [PART 2/2]

|     | 1965 | 1970 | 1975 | 1980 | 1985 | 1990 | 1995 | 2000 | 2005 | 2010 |
|-----|------|------|------|------|------|------|------|------|------|------|
| GLO | 2.95 | 3.37 | 3.69 | 4.16 | 4.93 | 5.08 | 5.12 | 5.41 | 6.11 | 6.71 |
| CAZ | 0.15 | 0.16 | 0.16 | 0.17 | 0.22 | 0.23 | 0.23 | 0.24 | 0.25 | 0.27 |
| CHA | 0.32 | 0.35 | 0.41 | 0.54 | 0.62 | 0.76 | 0.86 | 0.92 | 1.11 | 1.26 |
| EUR | 0.52 | 0.61 | 0.67 | 0.74 | 0.85 | 0.76 | 0.71 | 0.70 | 0.70 | 0.71 |
| IND | 0.15 | 0.17 | 0.18 | 0.21 | 0.26 | 0.31 | 0.36 | 0.40 | 0.47 | 0.57 |
| JPN | 0.04 | 0.04 | 0.04 | 0.05 | 0.06 | 0.06 | 0.05 | 0.05 | 0.05 | 0.05 |
| LAM | 0.45 | 0.51 | 0.57 | 0.63 | 0.78 | 0.76 | 0.83 | 0.93 | 1.03 | 1.17 |
| MEA | 0.08 | 0.10 | 0.12 | 0.14 | 0.17 | 0.20 | 0.23 | 0.26 | 0.30 | 0.32 |
| NEU | 0.07 | 0.08 | 0.09 | 0.09 | 0.10 | 0.10 | 0.09 | 0.10 | 0.10 | 0.10 |
| OAS | 0.17 | 0.19 | 0.22 | 0.26 | 0.33 | 0.40 | 0.44 | 0.48 | 0.57 | 0.65 |
| REF | 0.31 | 0.38 | 0.41 | 0.46 | 0.55 | 0.53 | 0.33 | 0.26 | 0.32 | 0.30 |
| SSA | 0.23 | 0.25 | 0.26 | 0.28 | 0.31 | 0.33 | 0.34 | 0.37 | 0.45 | 0.52 |
| USA | 0.46 | 0.54 | 0.57 | 0.58 | 0.69 | 0.66 | 0.64 | 0.70 | 0.76 | 0.79 |

Table 798: IPCC — Emissions—N2O—Land—Agriculture—Agricultural Soils—Decay of Crop Residues (Mt N2O/yr)

13.1.4 Agriculture—Agricultural Soils—Inorganic Fertilizers

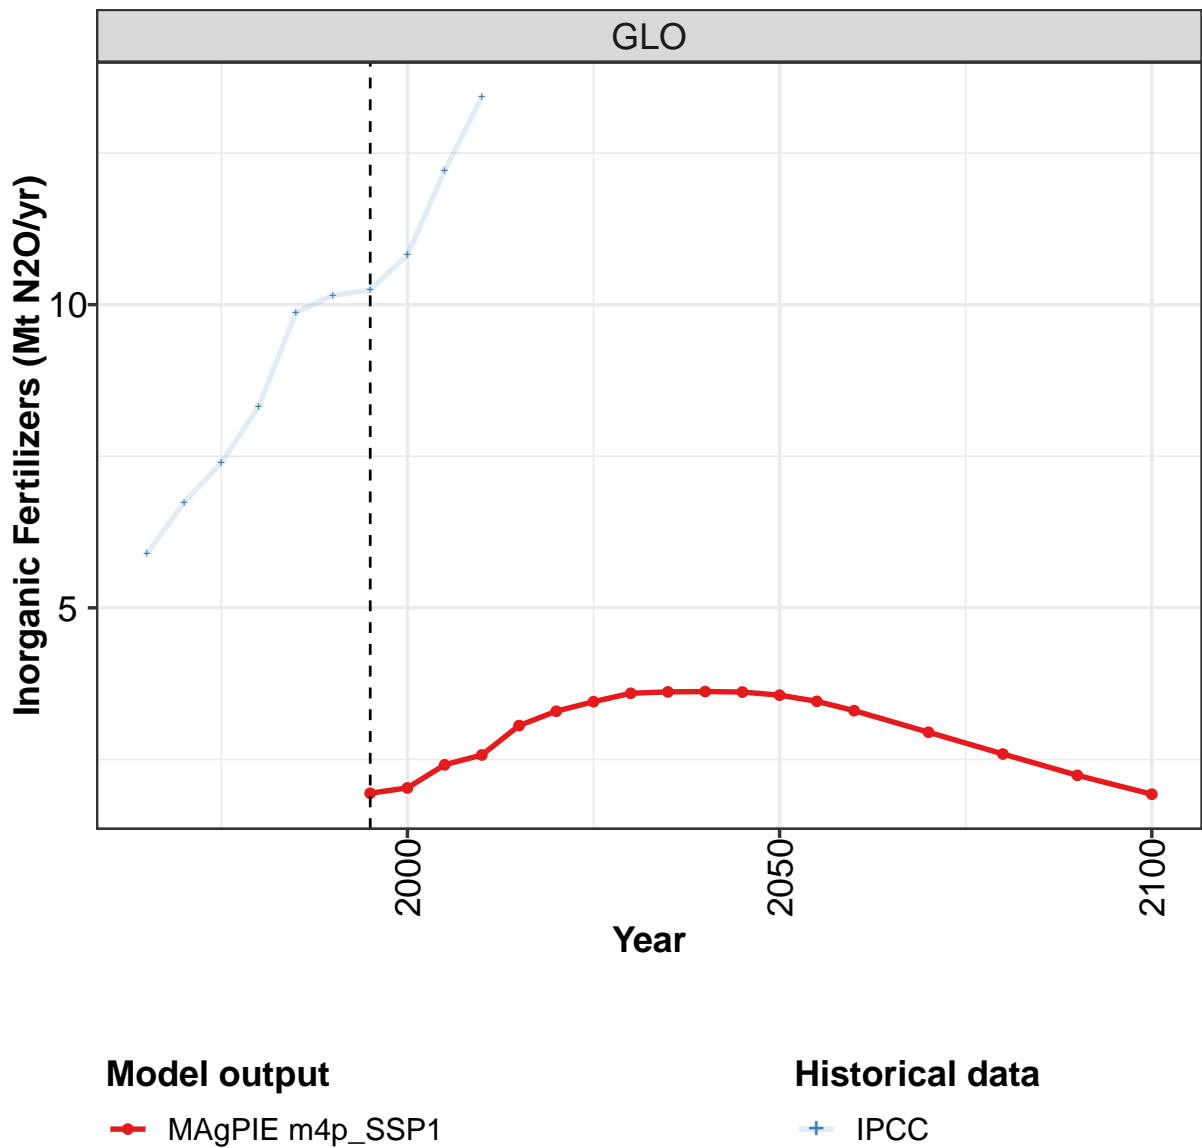

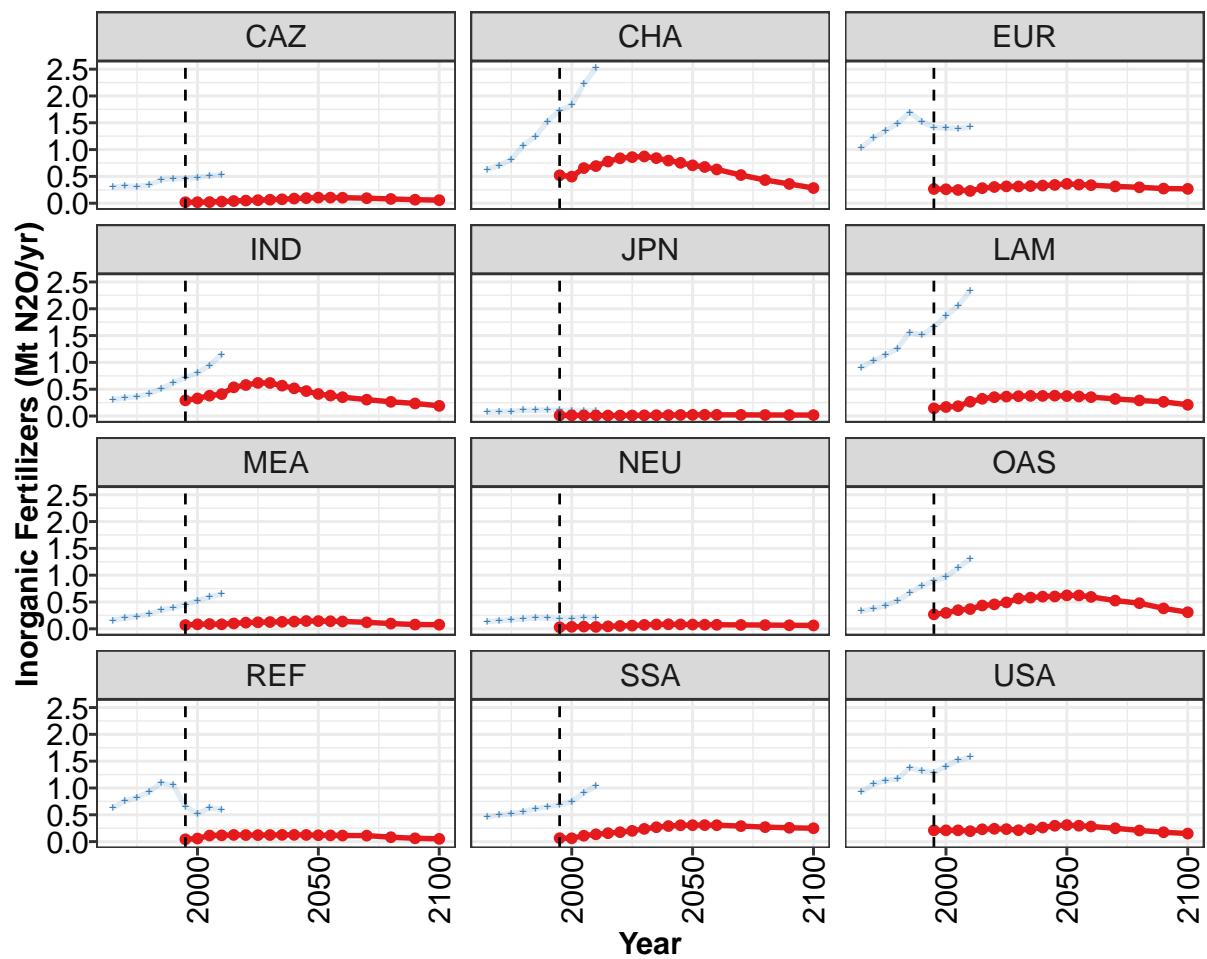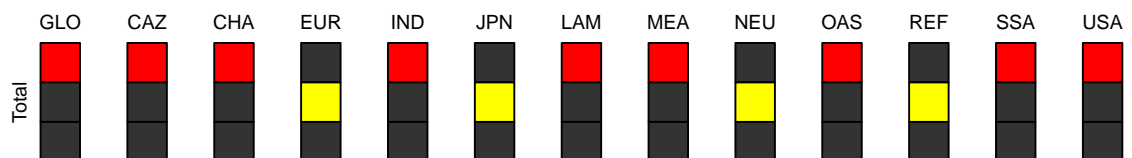

Figure 241: MAGPIE m4p\_SSP1 — Emissions—N<sub>2</sub>O—Land—Agriculture—Agricultural Soils—Inorganic Fertilizers (Mt N<sub>2</sub>O/yr)

|     | 1995 | 2000 | 2005 | 2010 | 2015 | 2020 | 2025 | 2030 | 2035 | 2040 | 2045 |
|-----|------|------|------|------|------|------|------|------|------|------|------|
| GLO | 1.94 | 2.03 | 2.41 | 2.57 | 3.06 | 3.29 | 3.45 | 3.59 | 3.61 | 3.62 | 3.61 |
| CAZ | 0.02 | 0.02 | 0.02 | 0.03 | 0.04 | 0.05 | 0.06 | 0.07 | 0.07 | 0.09 | 0.10 |
| CHA | 0.52 | 0.50 | 0.66 | 0.69 | 0.78 | 0.84 | 0.86 | 0.87 | 0.84 | 0.80 | 0.75 |
| EUR | 0.27 | 0.26 | 0.25 | 0.23 | 0.28 | 0.30 | 0.31 | 0.31 | 0.32 | 0.33 | 0.34 |
| IND | 0.29 | 0.33 | 0.38 | 0.41 | 0.53 | 0.58 | 0.62 | 0.62 | 0.57 | 0.52 | 0.47 |
| JPN | 0.01 | 0.01 | 0.01 | 0.01 | 0.01 | 0.01 | 0.01 | 0.01 | 0.01 | 0.02 | 0.02 |
| LAM | 0.14 | 0.17 | 0.18 | 0.27 | 0.32 | 0.35 | 0.36 | 0.37 | 0.38 | 0.37 | 0.38 |
| MEA | 0.07 | 0.08 | 0.09 | 0.08 | 0.10 | 0.12 | 0.12 | 0.13 | 0.13 | 0.13 | 0.15 |
| NEU | 0.03 | 0.04 | 0.04 | 0.04 | 0.05 | 0.05 | 0.06 | 0.07 | 0.08 | 0.08 | 0.08 |
| OAS | 0.27 | 0.30 | 0.35 | 0.37 | 0.43 | 0.46 | 0.49 | 0.57 | 0.58 | 0.60 | 0.60 |
| REF | 0.04 | 0.06 | 0.11 | 0.12 | 0.12 | 0.12 | 0.12 | 0.12 | 0.13 | 0.13 | 0.12 |
| SSA | 0.06 | 0.06 | 0.11 | 0.14 | 0.16 | 0.18 | 0.20 | 0.24 | 0.27 | 0.29 | 0.30 |
| USA | 0.21 | 0.21 | 0.21 | 0.19 | 0.23 | 0.24 | 0.23 | 0.21 | 0.23 | 0.26 | 0.30 |

Table 799: MAgPIE m4p\_SSP1 — Emissions—N2O—Land—Agriculture—Agricultural Soils—Inorganic Fertilizers (Mt N2O/yr) [PART 1/2]

|     | 2050 | 2055 | 2060 | 2070 | 2080 | 2090 | 2100 |
|-----|------|------|------|------|------|------|------|
| GLO | 3.56 | 3.46 | 3.30 | 2.95 | 2.59 | 2.24 | 1.93 |
| CAZ | 0.11 | 0.11 | 0.10 | 0.09 | 0.08 | 0.07 | 0.06 |
| CHA | 0.71 | 0.68 | 0.63 | 0.53 | 0.43 | 0.36 | 0.28 |
| EUR | 0.36 | 0.35 | 0.34 | 0.31 | 0.30 | 0.27 | 0.27 |
| IND | 0.41 | 0.38 | 0.35 | 0.31 | 0.26 | 0.23 | 0.19 |
| JPN | 0.02 | 0.02 | 0.02 | 0.02 | 0.02 | 0.02 | 0.02 |
| LAM | 0.37 | 0.36 | 0.35 | 0.32 | 0.29 | 0.26 | 0.21 |
| MEA | 0.14 | 0.14 | 0.14 | 0.12 | 0.10 | 0.08 | 0.08 |
| NEU | 0.08 | 0.08 | 0.08 | 0.07 | 0.07 | 0.07 | 0.06 |
| OAS | 0.62 | 0.62 | 0.60 | 0.53 | 0.48 | 0.38 | 0.31 |
| REF | 0.12 | 0.12 | 0.11 | 0.11 | 0.08 | 0.06 | 0.05 |
| SSA | 0.31 | 0.31 | 0.31 | 0.29 | 0.27 | 0.26 | 0.25 |
| USA | 0.31 | 0.30 | 0.28 | 0.25 | 0.21 | 0.17 | 0.15 |

Table 800: MAgPIE m4p\_SSP1 — Emissions—N2O—Land—Agriculture—Agricultural Soils—Inorganic Fertilizers (Mt N2O/yr) [PART 2/2]

|     | 1965 | 1970 | 1975 | 1980 | 1985 | 1990 | 1995 | 2000 | 2005 | 2010 |
|-----|------|------|------|------|------|------|------|------|------|------|
| GLO | 5.9  | 6.7  | 7.4  | 8.3  | 9.9  | 10.2 | 10.2 | 10.8 | 12.2 | 13.4 |
| CAZ | 0.3  | 0.3  | 0.3  | 0.3  | 0.4  | 0.5  | 0.5  | 0.5  | 0.5  | 0.5  |
| CHA | 0.6  | 0.7  | 0.8  | 1.1  | 1.2  | 1.5  | 1.7  | 1.8  | 2.2  | 2.5  |
| EUR | 1.0  | 1.2  | 1.3  | 1.5  | 1.7  | 1.5  | 1.4  | 1.4  | 1.4  | 1.4  |
| IND | 0.3  | 0.3  | 0.4  | 0.4  | 0.5  | 0.6  | 0.7  | 0.8  | 0.9  | 1.1  |
| JPN | 0.1  | 0.1  | 0.1  | 0.1  | 0.1  | 0.1  | 0.1  | 0.1  | 0.1  | 0.1  |
| LAM | 0.9  | 1.0  | 1.1  | 1.3  | 1.6  | 1.5  | 1.7  | 1.9  | 2.1  | 2.3  |
| MEA | 0.2  | 0.2  | 0.2  | 0.3  | 0.3  | 0.4  | 0.5  | 0.5  | 0.6  | 0.6  |
| NEU | 0.1  | 0.2  | 0.2  | 0.2  | 0.2  | 0.2  | 0.2  | 0.2  | 0.2  | 0.2  |
| OAS | 0.3  | 0.4  | 0.4  | 0.5  | 0.7  | 0.8  | 0.9  | 1.0  | 1.1  | 1.3  |
| REF | 0.6  | 0.8  | 0.8  | 0.9  | 1.1  | 1.1  | 0.7  | 0.5  | 0.6  | 0.6  |
| SSA | 0.5  | 0.5  | 0.5  | 0.6  | 0.6  | 0.7  | 0.7  | 0.7  | 0.9  | 1.0  |
| USA | 0.9  | 1.1  | 1.1  | 1.2  | 1.4  | 1.3  | 1.3  | 1.4  | 1.5  | 1.6  |

Table 801: IPCC — Emissions—N2O—Land—Agriculture—Agricultural Soils—Inorganic Fertilizers (Mt N2O/yr)

## 13.1.5 Agriculture—Agricultural Soils—Manure applied to Croplands

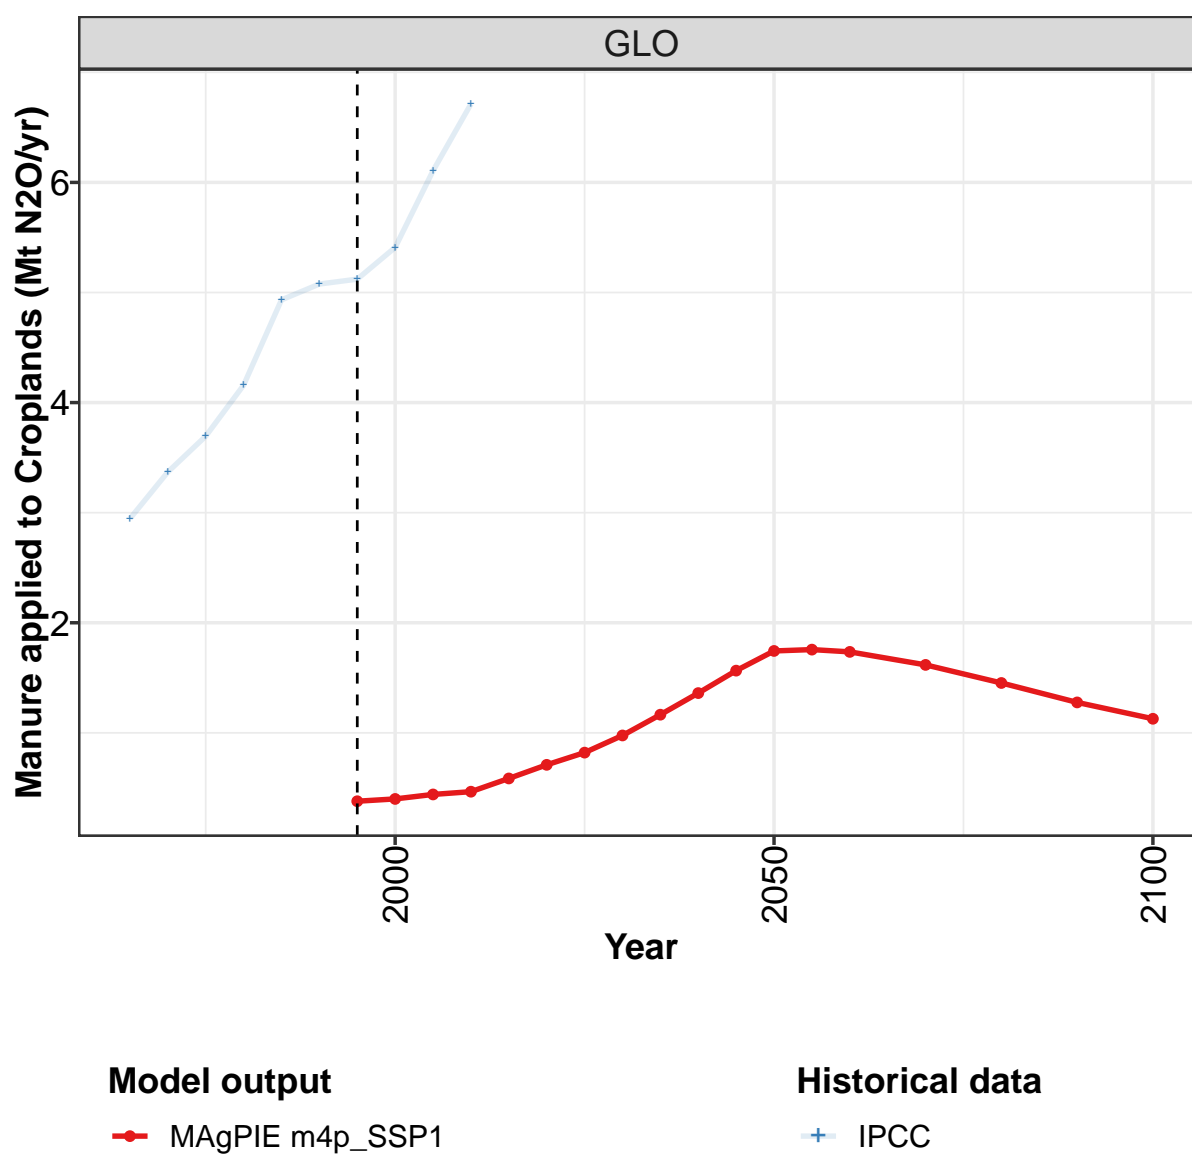



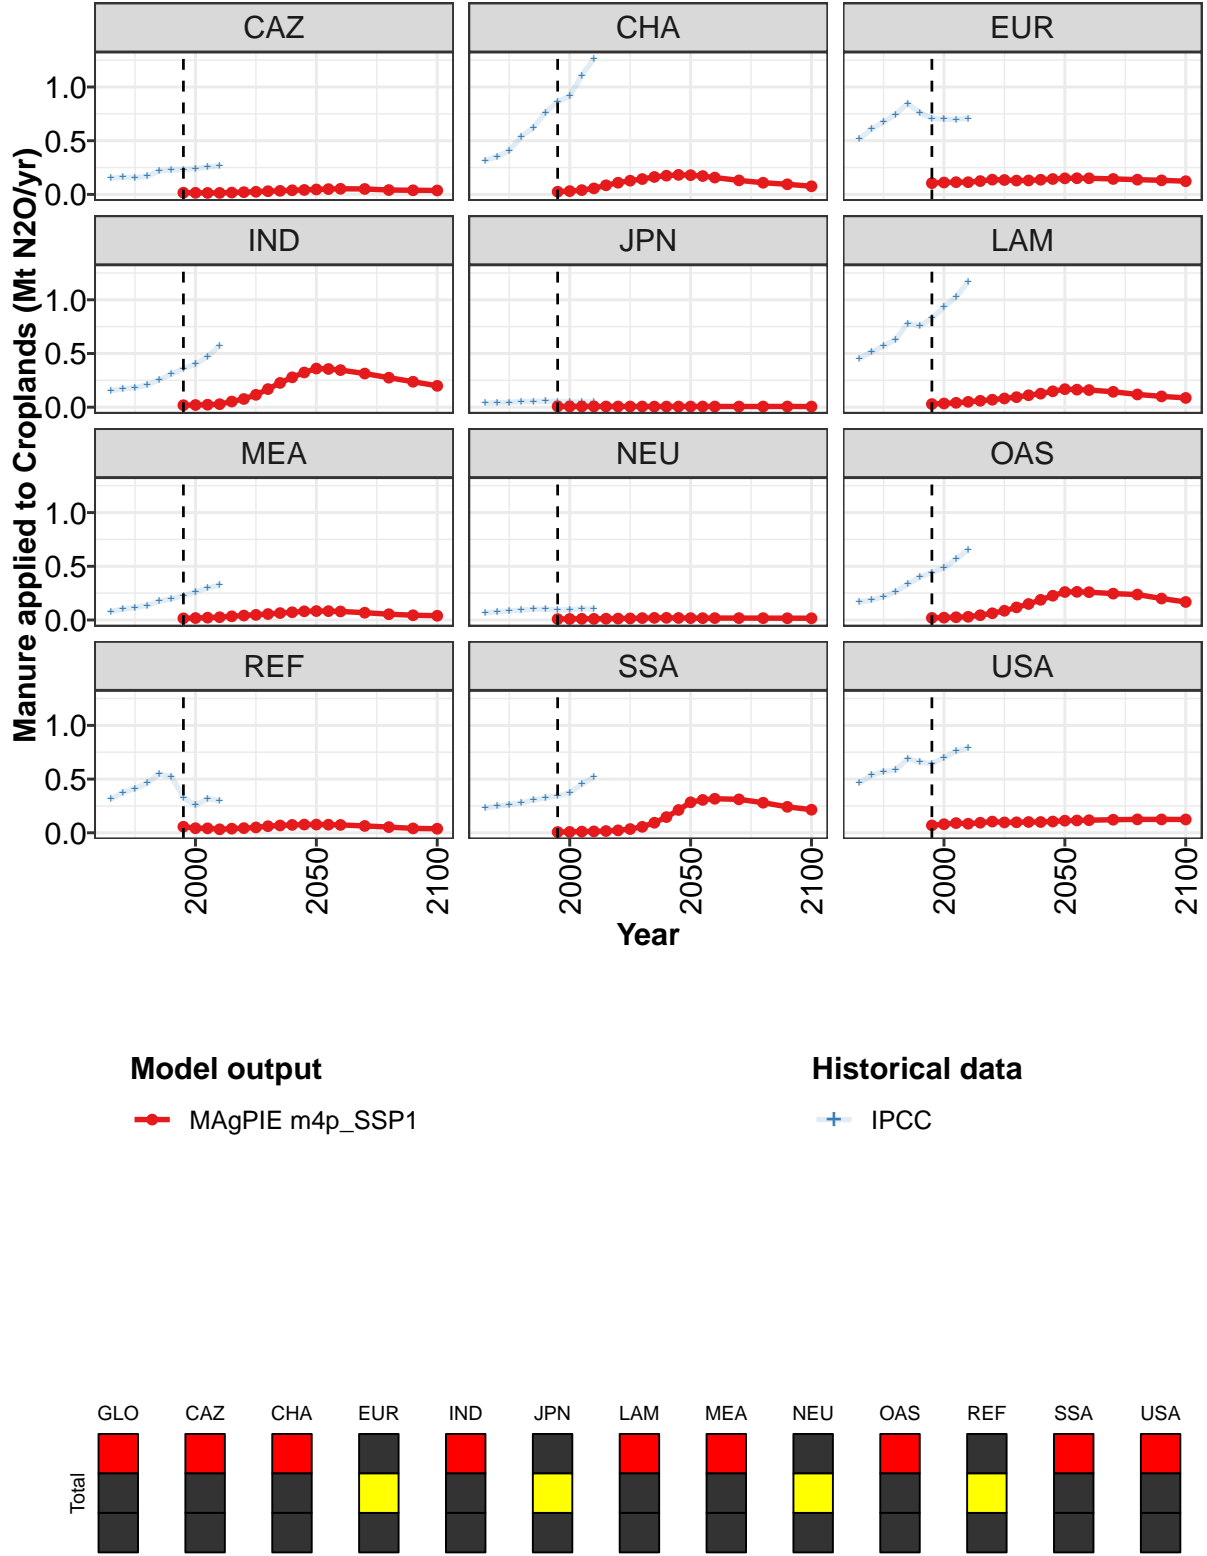

Figure 242: MAGPIE m4p\_SSP1 — Emissions—N2O—Land—Agriculture—Agricultural Soils—Manure applied to Croplands (Mt N2O/yr)

|     | 1995 | 2000 | 2005 | 2010 | 2015 | 2020 | 2025 | 2030 | 2035 | 2040 | 2045 |
|-----|------|------|------|------|------|------|------|------|------|------|------|
| GLO | 0.38 | 0.40 | 0.44 | 0.47 | 0.59 | 0.71 | 0.82 | 0.98 | 1.17 | 1.36 | 1.57 |
| CAZ | 0.02 | 0.02 | 0.01 | 0.01 | 0.02 | 0.02 | 0.02 | 0.03 | 0.03 | 0.04 | 0.04 |
| CHA | 0.03 | 0.03 | 0.04 | 0.06 | 0.08 | 0.11 | 0.13 | 0.14 | 0.16 | 0.17 | 0.18 |
| EUR | 0.11 | 0.11 | 0.11 | 0.11 | 0.12 | 0.14 | 0.13 | 0.13 | 0.13 | 0.14 | 0.14 |
| IND | 0.02 | 0.02 | 0.02 | 0.03 | 0.05 | 0.08 | 0.12 | 0.17 | 0.23 | 0.28 | 0.32 |
| JPN | 0.01 | 0.01 | 0.01 | 0.01 | 0.01 | 0.01 | 0.01 | 0.01 | 0.01 | 0.01 | 0.01 |
| LAM | 0.03 | 0.03 | 0.04 | 0.05 | 0.06 | 0.07 | 0.08 | 0.09 | 0.11 | 0.13 | 0.15 |
| MEA | 0.02 | 0.02 | 0.02 | 0.03 | 0.03 | 0.04 | 0.05 | 0.06 | 0.06 | 0.07 | 0.08 |
| NEU | 0.01 | 0.01 | 0.01 | 0.01 | 0.01 | 0.01 | 0.01 | 0.02 | 0.02 | 0.02 | 0.02 |
| OAS | 0.02 | 0.02 | 0.03 | 0.03 | 0.04 | 0.06 | 0.09 | 0.12 | 0.15 | 0.19 | 0.23 |
| REF | 0.06 | 0.04 | 0.04 | 0.03 | 0.04 | 0.04 | 0.05 | 0.06 | 0.07 | 0.07 | 0.08 |
| SSA | 0.01 | 0.01 | 0.01 | 0.01 | 0.02 | 0.02 | 0.03 | 0.06 | 0.09 | 0.15 | 0.21 |
| USA | 0.07 | 0.08 | 0.09 | 0.08 | 0.09 | 0.10 | 0.10 | 0.10 | 0.10 | 0.10 | 0.11 |

Table 802: MAgPIE m4p\_SSP1 — Emissions—N2O—Land—Agriculture—Agricultural Soils—Manure applied to Croplands (Mt N2O/yr) [PART 1/2]

|     | 2050 | 2055 | 2060 | 2070 | 2080 | 2090 | 2100 |
|-----|------|------|------|------|------|------|------|
| GLO | 1.74 | 1.76 | 1.74 | 1.62 | 1.45 | 1.28 | 1.13 |
| CAZ | 0.05 | 0.05 | 0.05 | 0.05 | 0.04 | 0.04 | 0.04 |
| CHA | 0.18 | 0.17 | 0.16 | 0.13 | 0.11 | 0.09 | 0.08 |
| EUR | 0.15 | 0.15 | 0.15 | 0.14 | 0.14 | 0.13 | 0.12 |
| IND | 0.36 | 0.36 | 0.35 | 0.31 | 0.27 | 0.24 | 0.20 |
| JPN | 0.01 | 0.01 | 0.01 | 0.01 | 0.01 | 0.01 | 0.01 |
| LAM | 0.17 | 0.16 | 0.16 | 0.14 | 0.12 | 0.10 | 0.09 |
| MEA | 0.08 | 0.08 | 0.08 | 0.07 | 0.05 | 0.04 | 0.04 |
| NEU | 0.02 | 0.02 | 0.02 | 0.02 | 0.02 | 0.02 | 0.02 |
| OAS | 0.26 | 0.26 | 0.26 | 0.25 | 0.24 | 0.20 | 0.17 |
| REF | 0.08 | 0.08 | 0.07 | 0.06 | 0.05 | 0.04 | 0.04 |
| SSA | 0.28 | 0.31 | 0.32 | 0.31 | 0.28 | 0.24 | 0.21 |
| USA | 0.11 | 0.11 | 0.12 | 0.12 | 0.12 | 0.12 | 0.12 |

Table 803: MAgPIE m4p\_SSP1 — Emissions—N2O—Land—Agriculture—Agricultural Soils—Manure applied to Croplands (Mt N2O/yr) [PART 2/2]

|     | 1965 | 1970 | 1975 | 1980 | 1985 | 1990 | 1995 | 2000 | 2005 | 2010 |
|-----|------|------|------|------|------|------|------|------|------|------|
| GLO | 2.95 | 3.37 | 3.69 | 4.16 | 4.93 | 5.08 | 5.12 | 5.41 | 6.11 | 6.71 |
| CAZ | 0.15 | 0.16 | 0.16 | 0.17 | 0.22 | 0.23 | 0.23 | 0.24 | 0.25 | 0.27 |
| CHA | 0.32 | 0.35 | 0.41 | 0.54 | 0.62 | 0.76 | 0.86 | 0.92 | 1.11 | 1.26 |
| EUR | 0.52 | 0.61 | 0.67 | 0.74 | 0.85 | 0.76 | 0.71 | 0.70 | 0.70 | 0.71 |
| IND | 0.15 | 0.17 | 0.18 | 0.21 | 0.26 | 0.31 | 0.36 | 0.40 | 0.47 | 0.57 |
| JPN | 0.04 | 0.04 | 0.04 | 0.05 | 0.06 | 0.06 | 0.05 | 0.05 | 0.05 | 0.05 |
| LAM | 0.45 | 0.51 | 0.57 | 0.63 | 0.78 | 0.76 | 0.83 | 0.93 | 1.03 | 1.17 |
| MEA | 0.08 | 0.10 | 0.12 | 0.14 | 0.17 | 0.20 | 0.23 | 0.26 | 0.30 | 0.32 |
| NEU | 0.07 | 0.08 | 0.09 | 0.09 | 0.10 | 0.10 | 0.09 | 0.10 | 0.10 | 0.10 |
| OAS | 0.17 | 0.19 | 0.22 | 0.26 | 0.33 | 0.40 | 0.44 | 0.48 | 0.57 | 0.65 |
| REF | 0.31 | 0.38 | 0.41 | 0.46 | 0.55 | 0.53 | 0.33 | 0.26 | 0.32 | 0.30 |
| SSA | 0.23 | 0.25 | 0.26 | 0.28 | 0.31 | 0.33 | 0.34 | 0.37 | 0.45 | 0.52 |
| USA | 0.46 | 0.54 | 0.57 | 0.58 | 0.69 | 0.66 | 0.64 | 0.70 | 0.76 | 0.79 |

Table 804: IPCC — Emissions—N2O—Land—Agriculture—Agricultural Soils—Manure applied to Croplands (Mt N2O/yr)

13.1.6 Agriculture—Agricultural Soils—Pasture

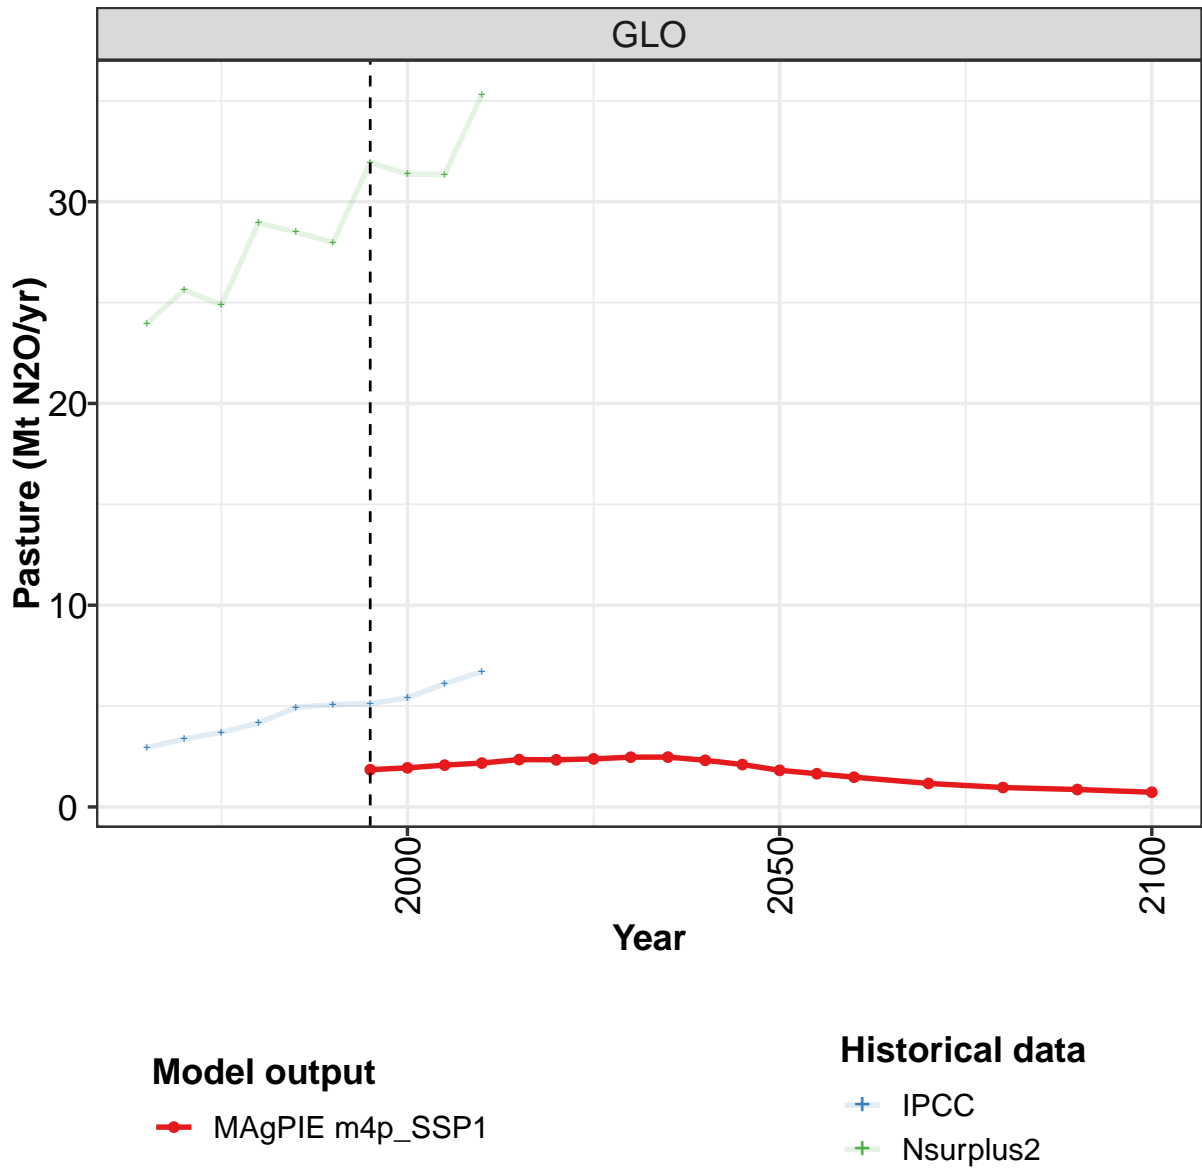

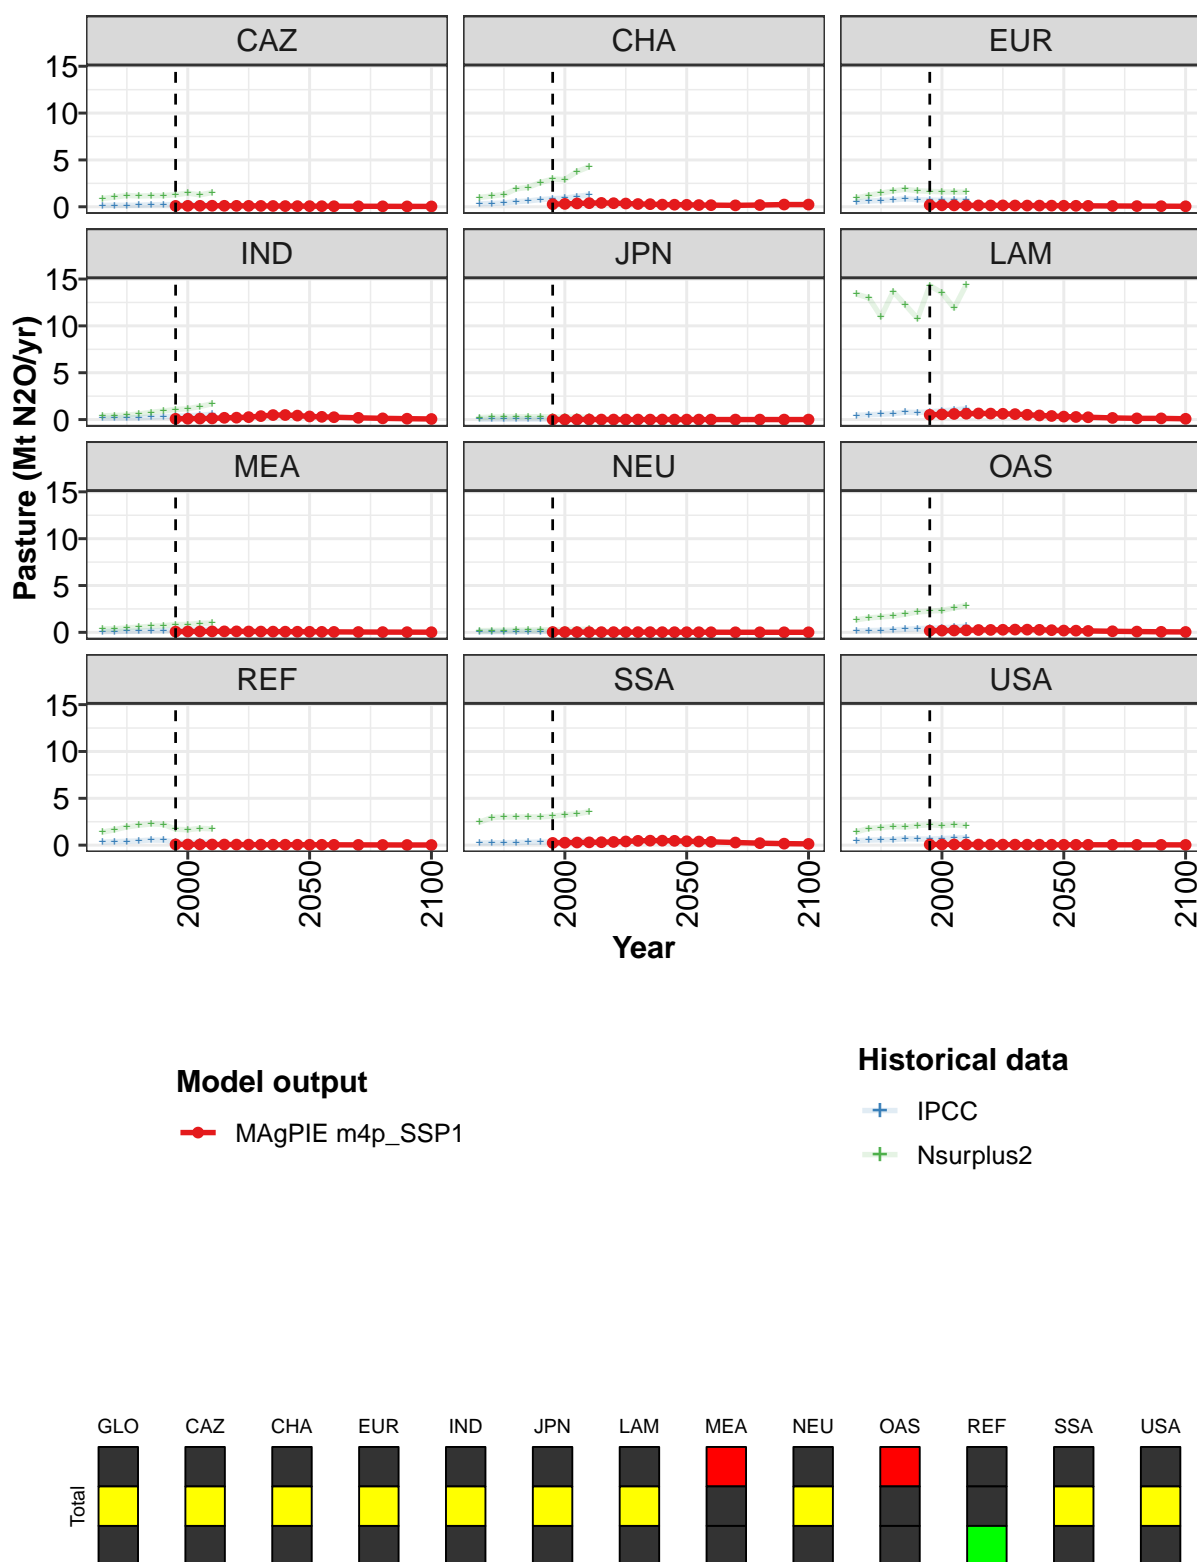

Figure 243: MAgPIE m4p\_SSP1 — Emissions—N<sub>2</sub>O—Land—Agriculture—Agricultural Soils—Pasture (Mt N<sub>2</sub>O/yr)

|     | 1995 | 2000 | 2005 | 2010 | 2015 | 2020 | 2025 | 2030 | 2035 | 2040 | 2045 |
|-----|------|------|------|------|------|------|------|------|------|------|------|
| GLO | 1.85 | 1.94 | 2.07 | 2.18 | 2.35 | 2.34 | 2.38 | 2.47 | 2.47 | 2.31 | 2.10 |
| CAZ | 0.10 | 0.10 | 0.11 | 0.11 | 0.11 | 0.10 | 0.10 | 0.09 | 0.09 | 0.08 | 0.07 |
| CHA | 0.28 | 0.31 | 0.36 | 0.39 | 0.41 | 0.38 | 0.35 | 0.30 | 0.28 | 0.23 | 0.22 |
| EUR | 0.19 | 0.17 | 0.15 | 0.14 | 0.14 | 0.14 | 0.15 | 0.14 | 0.13 | 0.13 | 0.12 |
| IND | 0.08 | 0.09 | 0.11 | 0.12 | 0.19 | 0.21 | 0.26 | 0.37 | 0.48 | 0.49 | 0.43 |
| JPN | 0.00 | 0.00 | 0.00 | 0.00 | 0.00 | 0.00 | 0.00 | 0.00 | 0.00 | 0.00 | 0.00 |
| LAM | 0.51 | 0.55 | 0.60 | 0.62 | 0.65 | 0.64 | 0.62 | 0.59 | 0.51 | 0.44 | 0.38 |
| MEA | 0.08 | 0.09 | 0.10 | 0.10 | 0.11 | 0.11 | 0.09 | 0.09 | 0.08 | 0.07 | 0.07 |
| NEU | 0.04 | 0.03 | 0.03 | 0.02 | 0.02 | 0.03 | 0.03 | 0.03 | 0.02 | 0.02 | 0.02 |
| OAS | 0.18 | 0.19 | 0.20 | 0.22 | 0.25 | 0.26 | 0.28 | 0.30 | 0.29 | 0.27 | 0.24 |
| REF | 0.08 | 0.07 | 0.07 | 0.07 | 0.07 | 0.06 | 0.05 | 0.05 | 0.05 | 0.05 | 0.05 |
| SSA | 0.24 | 0.26 | 0.28 | 0.30 | 0.32 | 0.34 | 0.39 | 0.46 | 0.48 | 0.48 | 0.46 |
| USA | 0.07 | 0.07 | 0.07 | 0.07 | 0.07 | 0.06 | 0.06 | 0.05 | 0.05 | 0.05 | 0.04 |

Table 805: MAgPIE m4p\_SSP1 — Emissions—N2O—Land—Agriculture—Agricultural Soils—Pasture (Mt N2O/yr) [PART 1/2]

|     | 2050 | 2055 | 2060 | 2070 | 2080 | 2090 | 2100 |
|-----|------|------|------|------|------|------|------|
| GLO | 1.82 | 1.65 | 1.48 | 1.17 | 0.96 | 0.86 | 0.73 |
| CAZ | 0.07 | 0.06 | 0.06 | 0.05 | 0.05 | 0.04 | 0.04 |
| CHA | 0.21 | 0.18 | 0.17 | 0.15 | 0.19 | 0.24 | 0.24 |
| EUR | 0.11 | 0.11 | 0.10 | 0.08 | 0.07 | 0.06 | 0.05 |
| IND | 0.33 | 0.29 | 0.25 | 0.19 | 0.13 | 0.09 | 0.06 |
| JPN | 0.00 | 0.00 | 0.00 | 0.00 | 0.00 | 0.00 | 0.00 |
| LAM | 0.32 | 0.28 | 0.25 | 0.18 | 0.13 | 0.13 | 0.09 |
| MEA | 0.06 | 0.06 | 0.05 | 0.04 | 0.03 | 0.02 | 0.02 |
| NEU | 0.02 | 0.02 | 0.01 | 0.01 | 0.01 | 0.01 | 0.01 |
| OAS | 0.19 | 0.18 | 0.15 | 0.12 | 0.08 | 0.06 | 0.04 |
| REF | 0.04 | 0.04 | 0.03 | 0.03 | 0.02 | 0.02 | 0.02 |
| SSA | 0.42 | 0.39 | 0.35 | 0.28 | 0.21 | 0.16 | 0.13 |
| USA | 0.04 | 0.04 | 0.04 | 0.04 | 0.03 | 0.03 | 0.03 |

Table 806: MAgPIE m4p\_SSP1 — Emissions—N2O—Land—Agriculture—Agricultural Soils—Pasture (Mt N2O/yr) [PART 2/2]

|     | 1965 | 1970 | 1975 | 1980 | 1985 | 1990 | 1995 | 2000 | 2005 | 2010 |
|-----|------|------|------|------|------|------|------|------|------|------|
| GLO | 2.95 | 3.37 | 3.69 | 4.16 | 4.93 | 5.08 | 5.12 | 5.41 | 6.11 | 6.71 |
| CAZ | 0.15 | 0.16 | 0.16 | 0.17 | 0.22 | 0.23 | 0.23 | 0.24 | 0.25 | 0.27 |
| CHA | 0.32 | 0.35 | 0.41 | 0.54 | 0.62 | 0.76 | 0.86 | 0.92 | 1.11 | 1.26 |
| EUR | 0.52 | 0.61 | 0.67 | 0.74 | 0.85 | 0.76 | 0.71 | 0.70 | 0.70 | 0.71 |
| IND | 0.15 | 0.17 | 0.18 | 0.21 | 0.26 | 0.31 | 0.36 | 0.40 | 0.47 | 0.57 |
| JPN | 0.04 | 0.04 | 0.04 | 0.05 | 0.06 | 0.06 | 0.05 | 0.05 | 0.05 | 0.05 |
| LAM | 0.45 | 0.51 | 0.57 | 0.63 | 0.78 | 0.76 | 0.83 | 0.93 | 1.03 | 1.17 |
| MEA | 0.08 | 0.10 | 0.12 | 0.14 | 0.17 | 0.20 | 0.23 | 0.26 | 0.30 | 0.32 |
| NEU | 0.07 | 0.08 | 0.09 | 0.09 | 0.10 | 0.10 | 0.09 | 0.10 | 0.10 | 0.10 |
| OAS | 0.17 | 0.19 | 0.22 | 0.26 | 0.33 | 0.40 | 0.44 | 0.48 | 0.57 | 0.65 |
| REF | 0.31 | 0.38 | 0.41 | 0.46 | 0.55 | 0.53 | 0.33 | 0.26 | 0.32 | 0.30 |
| SSA | 0.23 | 0.25 | 0.26 | 0.28 | 0.31 | 0.33 | 0.34 | 0.37 | 0.45 | 0.52 |
| USA | 0.46 | 0.54 | 0.57 | 0.58 | 0.69 | 0.66 | 0.64 | 0.70 | 0.76 | 0.79 |

Table 807: IPCC — Emissions—N2O—Land—Agriculture—Agricultural Soils—Pasture (Mt N2O/yr)

|     | 1965 | 1970 | 1975 | 1980 | 1985 | 1990 | 1995 | 2000 | 2005 | 2010 |
|-----|------|------|------|------|------|------|------|------|------|------|
| GLO | 24.0 | 25.6 | 24.9 | 29.0 | 28.5 | 28.0 | 31.9 | 31.4 | 31.4 | 35.3 |
| CAZ | 0.9  | 1.0  | 1.2  | 1.1  | 1.2  | 1.2  | 1.3  | 1.5  | 1.3  | 1.5  |
| CHA | 1.0  | 1.2  | 1.3  | 1.9  | 2.1  | 2.6  | 3.0  | 2.9  | 3.8  | 4.3  |
| EUR | 0.9  | 1.2  | 1.5  | 1.7  | 1.9  | 1.7  | 1.6  | 1.6  | 1.6  | 1.6  |
| IND | 0.4  | 0.4  | 0.5  | 0.6  | 0.8  | 0.9  | 1.1  | 1.2  | 1.4  | 1.7  |
| JPN | 0.2  | 0.3  | 0.3  | 0.3  | 0.3  | 0.3  | 0.3  | 0.3  | 0.3  | 0.2  |
| LAM | 13.4 | 13.0 | 11.0 | 13.6 | 12.2 | 10.8 | 14.3 | 13.5 | 11.9 | 14.4 |
| MEA | 0.4  | 0.4  | 0.5  | 0.6  | 0.7  | 0.7  | 0.8  | 0.8  | 1.0  | 1.0  |
| NEU | 0.2  | 0.2  | 0.2  | 0.2  | 0.3  | 0.3  | 0.3  | 0.3  | 0.3  | 0.3  |
| OAS | 1.3  | 1.5  | 1.6  | 1.7  | 1.9  | 2.2  | 2.3  | 2.3  | 2.6  | 2.9  |
| REF | 1.4  | 1.6  | 2.0  | 2.1  | 2.3  | 2.2  | 1.7  | 1.6  | 1.8  | 1.7  |
| SSA | 2.4  | 3.0  | 3.0  | 3.0  | 3.0  | 3.0  | 3.1  | 3.2  | 3.3  | 3.6  |
| USA | 1.4  | 1.8  | 1.9  | 2.0  | 1.9  | 2.1  | 2.2  | 2.1  | 2.2  | 2.1  |

Table 808: Nsurplus2 — Emissions—N2O—Land—Agriculture—Agricultural Soils—Pasture (Mt N2O/yr)

## 13.1.7 Agriculture—Animal Waste Management

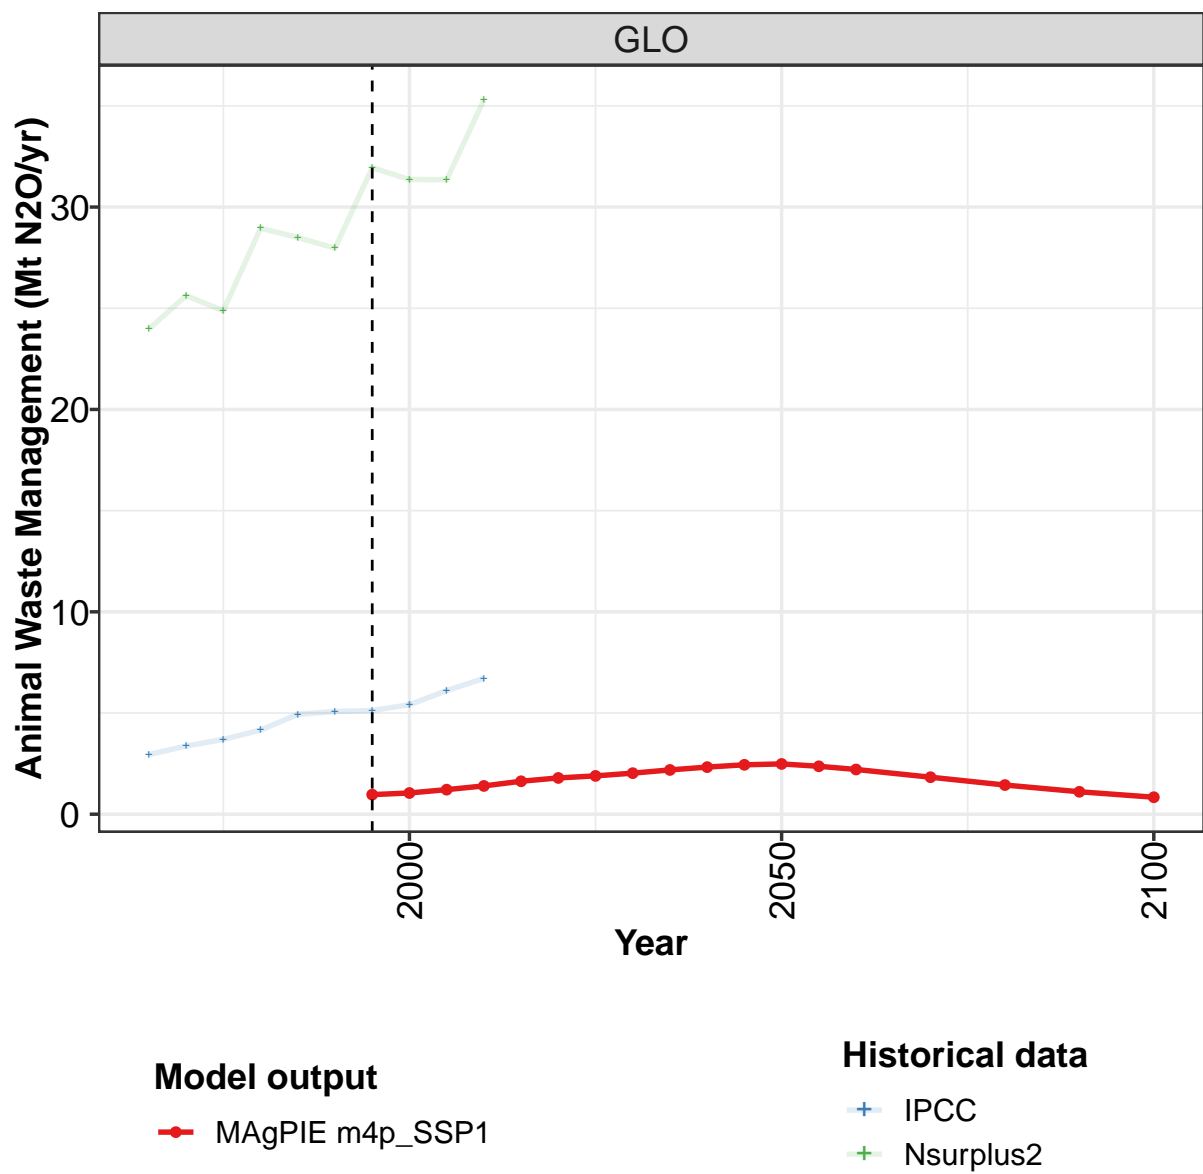

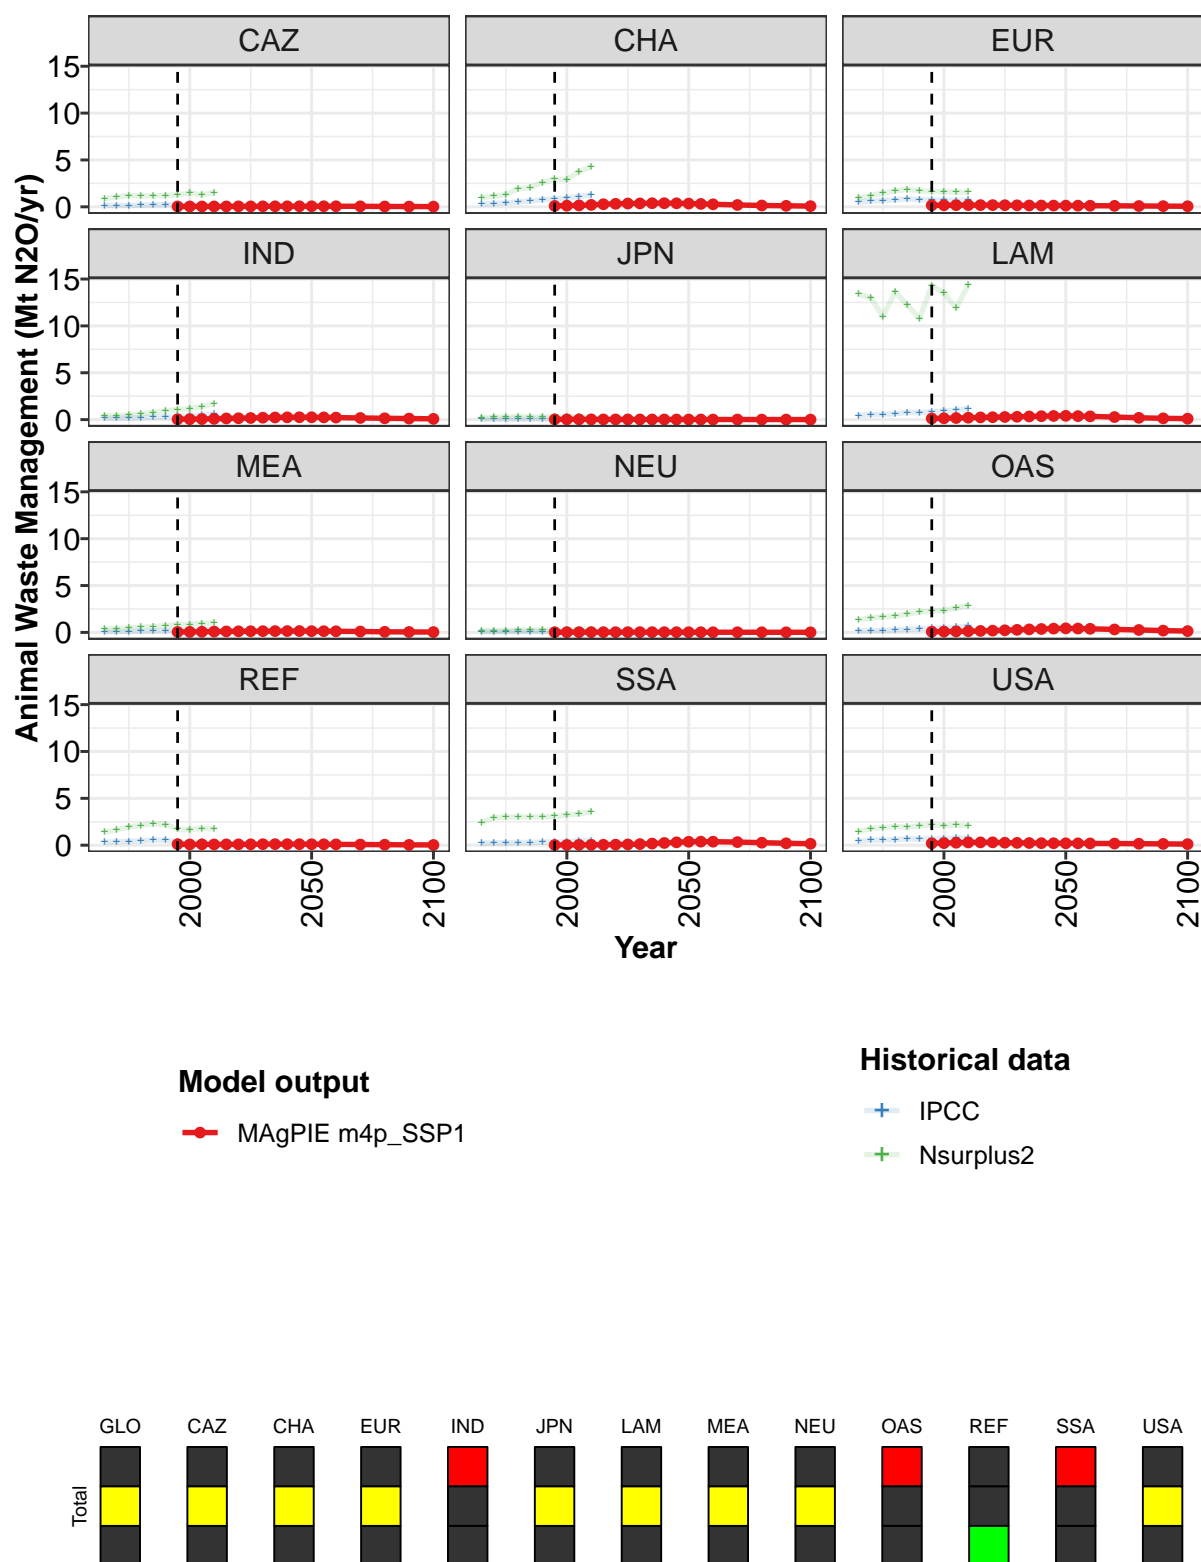

Figure 244: MAgPIE m4p\_SSP1 — Emissions—N<sub>2</sub>O—Land—Agriculture—Animal Waste Management (Mt N<sub>2</sub>O/yr)



|     | 1995 | 2000 | 2005 | 2010 | 2015 | 2020 | 2025 | 2030 | 2035 | 2040 | 2045 |
|-----|------|------|------|------|------|------|------|------|------|------|------|
| GLO | 0.97 | 1.05 | 1.21 | 1.40 | 1.63 | 1.79 | 1.89 | 2.03 | 2.19 | 2.33 | 2.44 |
| CAZ | 0.04 | 0.04 | 0.04 | 0.04 | 0.05 | 0.05 | 0.05 | 0.05 | 0.06 | 0.06 | 0.06 |
| CHA | 0.10 | 0.12 | 0.15 | 0.21 | 0.28 | 0.32 | 0.35 | 0.37 | 0.39 | 0.39 | 0.38 |
| EUR | 0.16 | 0.17 | 0.18 | 0.18 | 0.18 | 0.19 | 0.18 | 0.16 | 0.15 | 0.14 | 0.14 |
| IND | 0.04 | 0.05 | 0.06 | 0.08 | 0.12 | 0.15 | 0.17 | 0.21 | 0.23 | 0.24 | 0.25 |
| JPN | 0.03 | 0.03 | 0.03 | 0.03 | 0.03 | 0.02 | 0.02 | 0.02 | 0.02 | 0.02 | 0.01 |
| LAM | 0.12 | 0.15 | 0.17 | 0.20 | 0.24 | 0.26 | 0.28 | 0.30 | 0.34 | 0.37 | 0.39 |
| MEA | 0.05 | 0.06 | 0.07 | 0.09 | 0.11 | 0.12 | 0.13 | 0.13 | 0.14 | 0.15 | 0.15 |
| NEU | 0.02 | 0.02 | 0.03 | 0.03 | 0.03 | 0.03 | 0.03 | 0.03 | 0.03 | 0.03 | 0.03 |
| OAS | 0.08 | 0.09 | 0.10 | 0.12 | 0.16 | 0.19 | 0.23 | 0.27 | 0.32 | 0.37 | 0.41 |
| REF | 0.11 | 0.08 | 0.09 | 0.08 | 0.09 | 0.09 | 0.10 | 0.11 | 0.11 | 0.11 | 0.11 |
| SSA | 0.02 | 0.03 | 0.03 | 0.04 | 0.05 | 0.06 | 0.09 | 0.12 | 0.17 | 0.24 | 0.31 |
| USA | 0.20 | 0.23 | 0.26 | 0.29 | 0.30 | 0.31 | 0.27 | 0.25 | 0.24 | 0.22 | 0.21 |

Table 809: MAgPIE m4p\_SSP1 — Emissions—N2O—Land—Agriculture—Animal Waste Management (Mt N2O/yr) [PART 1/2]

|     | 2050 | 2055 | 2060 | 2070 | 2080 | 2090 | 2100 |
|-----|------|------|------|------|------|------|------|
| GLO | 2.48 | 2.37 | 2.21 | 1.83 | 1.44 | 1.11 | 0.84 |
| CAZ | 0.06 | 0.06 | 0.06 | 0.05 | 0.04 | 0.03 | 0.02 |
| CHA | 0.35 | 0.31 | 0.27 | 0.20 | 0.14 | 0.11 | 0.07 |
| EUR | 0.13 | 0.13 | 0.12 | 0.10 | 0.09 | 0.08 | 0.06 |
| IND | 0.25 | 0.24 | 0.22 | 0.18 | 0.14 | 0.11 | 0.08 |
| JPN | 0.01 | 0.01 | 0.01 | 0.01 | 0.01 | 0.01 | 0.01 |
| LAM | 0.41 | 0.38 | 0.35 | 0.27 | 0.19 | 0.14 | 0.10 |
| MEA | 0.14 | 0.13 | 0.12 | 0.10 | 0.07 | 0.05 | 0.04 |
| NEU | 0.02 | 0.02 | 0.02 | 0.02 | 0.02 | 0.01 | 0.01 |
| OAS | 0.44 | 0.41 | 0.38 | 0.32 | 0.26 | 0.19 | 0.14 |
| REF | 0.10 | 0.10 | 0.09 | 0.07 | 0.06 | 0.04 | 0.03 |
| SSA | 0.37 | 0.38 | 0.38 | 0.33 | 0.27 | 0.21 | 0.15 |
| USA | 0.21 | 0.20 | 0.19 | 0.18 | 0.16 | 0.14 | 0.12 |

Table 810: MAgPIE m4p\_SSP1 — Emissions—N2O—Land—Agriculture—Animal Waste Management (Mt N2O/yr) [PART 2/2]

|     | 1965 | 1970 | 1975 | 1980 | 1985 | 1990 | 1995 | 2000 | 2005 | 2010 |
|-----|------|------|------|------|------|------|------|------|------|------|
| GLO | 2.95 | 3.37 | 3.69 | 4.16 | 4.93 | 5.08 | 5.12 | 5.41 | 6.11 | 6.71 |
| CAZ | 0.15 | 0.16 | 0.16 | 0.17 | 0.22 | 0.23 | 0.23 | 0.24 | 0.25 | 0.27 |
| CHA | 0.32 | 0.35 | 0.41 | 0.54 | 0.62 | 0.76 | 0.86 | 0.92 | 1.11 | 1.26 |
| EUR | 0.52 | 0.61 | 0.67 | 0.74 | 0.85 | 0.76 | 0.71 | 0.70 | 0.70 | 0.71 |
| IND | 0.15 | 0.17 | 0.18 | 0.21 | 0.26 | 0.31 | 0.36 | 0.40 | 0.47 | 0.57 |
| JPN | 0.04 | 0.04 | 0.04 | 0.05 | 0.06 | 0.06 | 0.05 | 0.05 | 0.05 | 0.05 |
| LAM | 0.45 | 0.51 | 0.57 | 0.63 | 0.78 | 0.76 | 0.83 | 0.93 | 1.03 | 1.17 |
| MEA | 0.08 | 0.10 | 0.12 | 0.14 | 0.17 | 0.20 | 0.23 | 0.26 | 0.30 | 0.32 |
| NEU | 0.07 | 0.08 | 0.09 | 0.09 | 0.10 | 0.10 | 0.09 | 0.10 | 0.10 | 0.10 |
| OAS | 0.17 | 0.19 | 0.22 | 0.26 | 0.33 | 0.40 | 0.44 | 0.48 | 0.57 | 0.65 |
| REF | 0.31 | 0.38 | 0.41 | 0.46 | 0.55 | 0.53 | 0.33 | 0.26 | 0.32 | 0.30 |
| SSA | 0.23 | 0.25 | 0.26 | 0.28 | 0.31 | 0.33 | 0.34 | 0.37 | 0.45 | 0.52 |
| USA | 0.46 | 0.54 | 0.57 | 0.58 | 0.69 | 0.66 | 0.64 | 0.70 | 0.76 | 0.79 |

Table 811: IPCC — Emissions—N2O—Land—Agriculture—Animal Waste Management (Mt N2O/yr)

|     | 1965 | 1970 | 1975 | 1980 | 1985 | 1990 | 1995 | 2000 | 2005 | 2010 |
|-----|------|------|------|------|------|------|------|------|------|------|
| GLO | 24.0 | 25.6 | 24.9 | 29.0 | 28.5 | 28.0 | 31.9 | 31.4 | 31.4 | 35.3 |
| CAZ | 0.9  | 1.0  | 1.2  | 1.1  | 1.2  | 1.2  | 1.3  | 1.5  | 1.3  | 1.5  |
| CHA | 1.0  | 1.2  | 1.3  | 1.9  | 2.1  | 2.6  | 3.0  | 2.9  | 3.8  | 4.3  |
| EUR | 0.9  | 1.2  | 1.5  | 1.7  | 1.9  | 1.7  | 1.6  | 1.6  | 1.6  | 1.6  |
| IND | 0.4  | 0.4  | 0.5  | 0.6  | 0.8  | 0.9  | 1.1  | 1.2  | 1.4  | 1.7  |
| JPN | 0.2  | 0.3  | 0.3  | 0.3  | 0.3  | 0.3  | 0.3  | 0.3  | 0.3  | 0.2  |
| LAM | 13.4 | 13.0 | 11.0 | 13.6 | 12.2 | 10.8 | 14.3 | 13.5 | 11.9 | 14.4 |
| MEA | 0.4  | 0.4  | 0.5  | 0.6  | 0.7  | 0.7  | 0.8  | 0.8  | 1.0  | 1.0  |
| NEU | 0.2  | 0.2  | 0.2  | 0.2  | 0.3  | 0.3  | 0.3  | 0.3  | 0.3  | 0.3  |
| OAS | 1.3  | 1.5  | 1.6  | 1.7  | 1.9  | 2.2  | 2.3  | 2.3  | 2.6  | 2.9  |
| REF | 1.4  | 1.6  | 2.0  | 2.1  | 2.3  | 2.2  | 1.7  | 1.6  | 1.8  | 1.7  |
| SSA | 2.4  | 3.0  | 3.0  | 3.0  | 3.0  | 3.0  | 3.1  | 3.2  | 3.3  | 3.6  |
| USA | 1.4  | 1.8  | 1.9  | 2.0  | 1.9  | 2.1  | 2.2  | 2.1  | 2.2  | 2.1  |

Table 812: Nsurplus2 — Emissions—N2O—Land—Agriculture—Animal Waste Management (Mt N2O/yr)

## 14 NH3

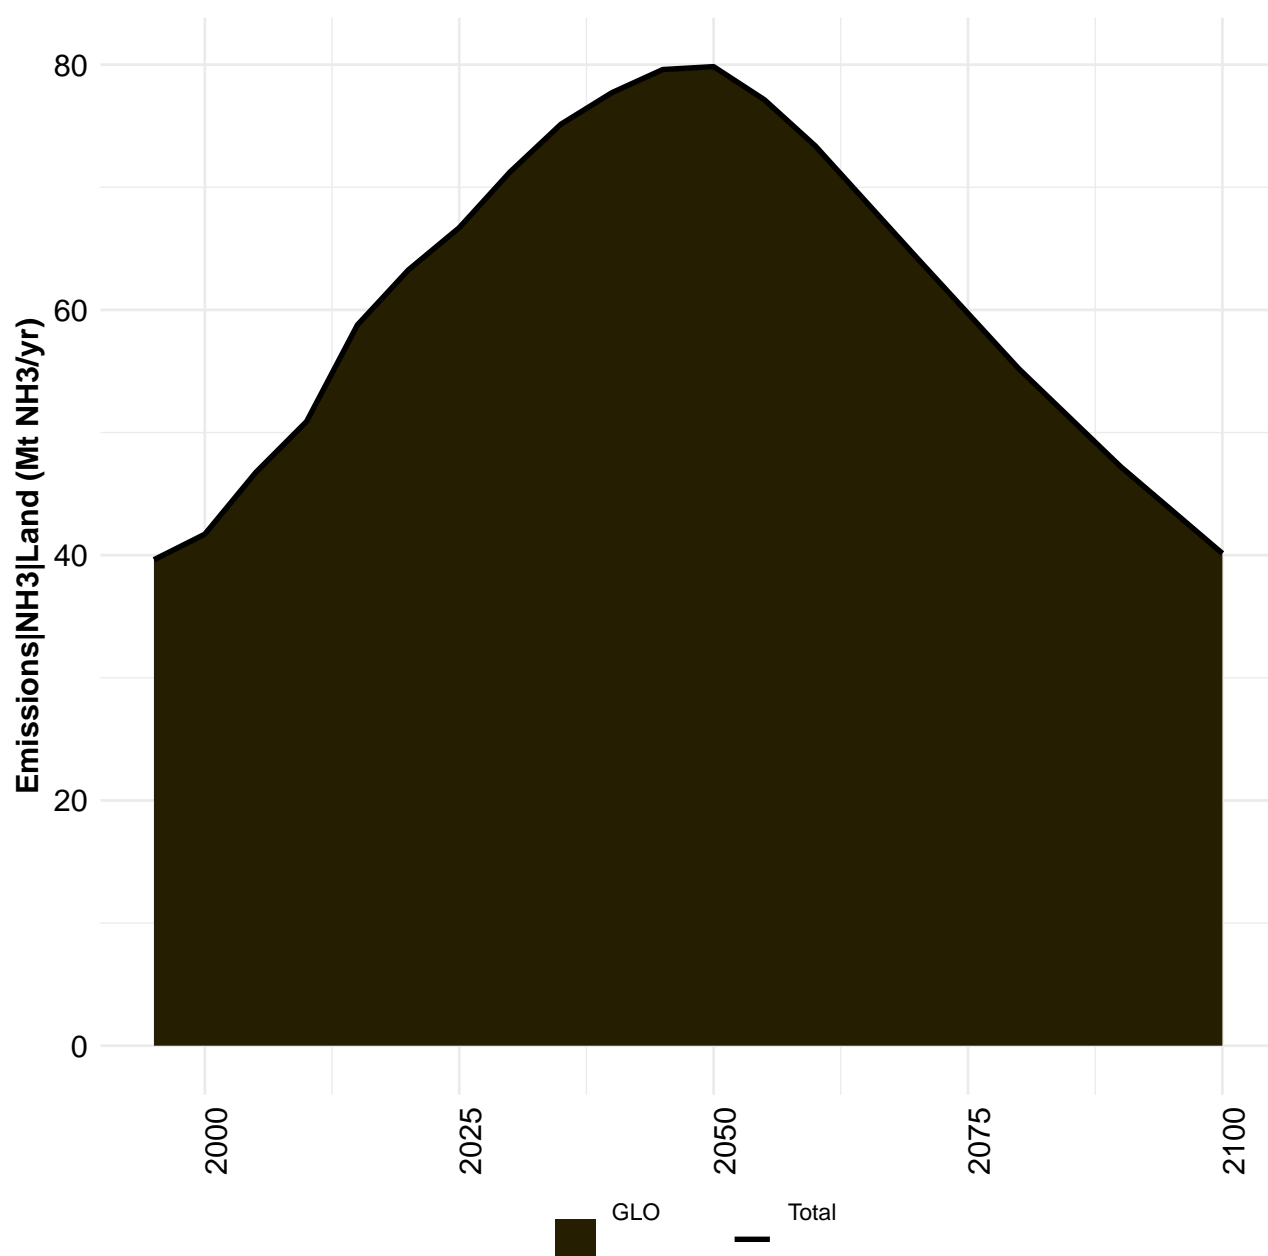

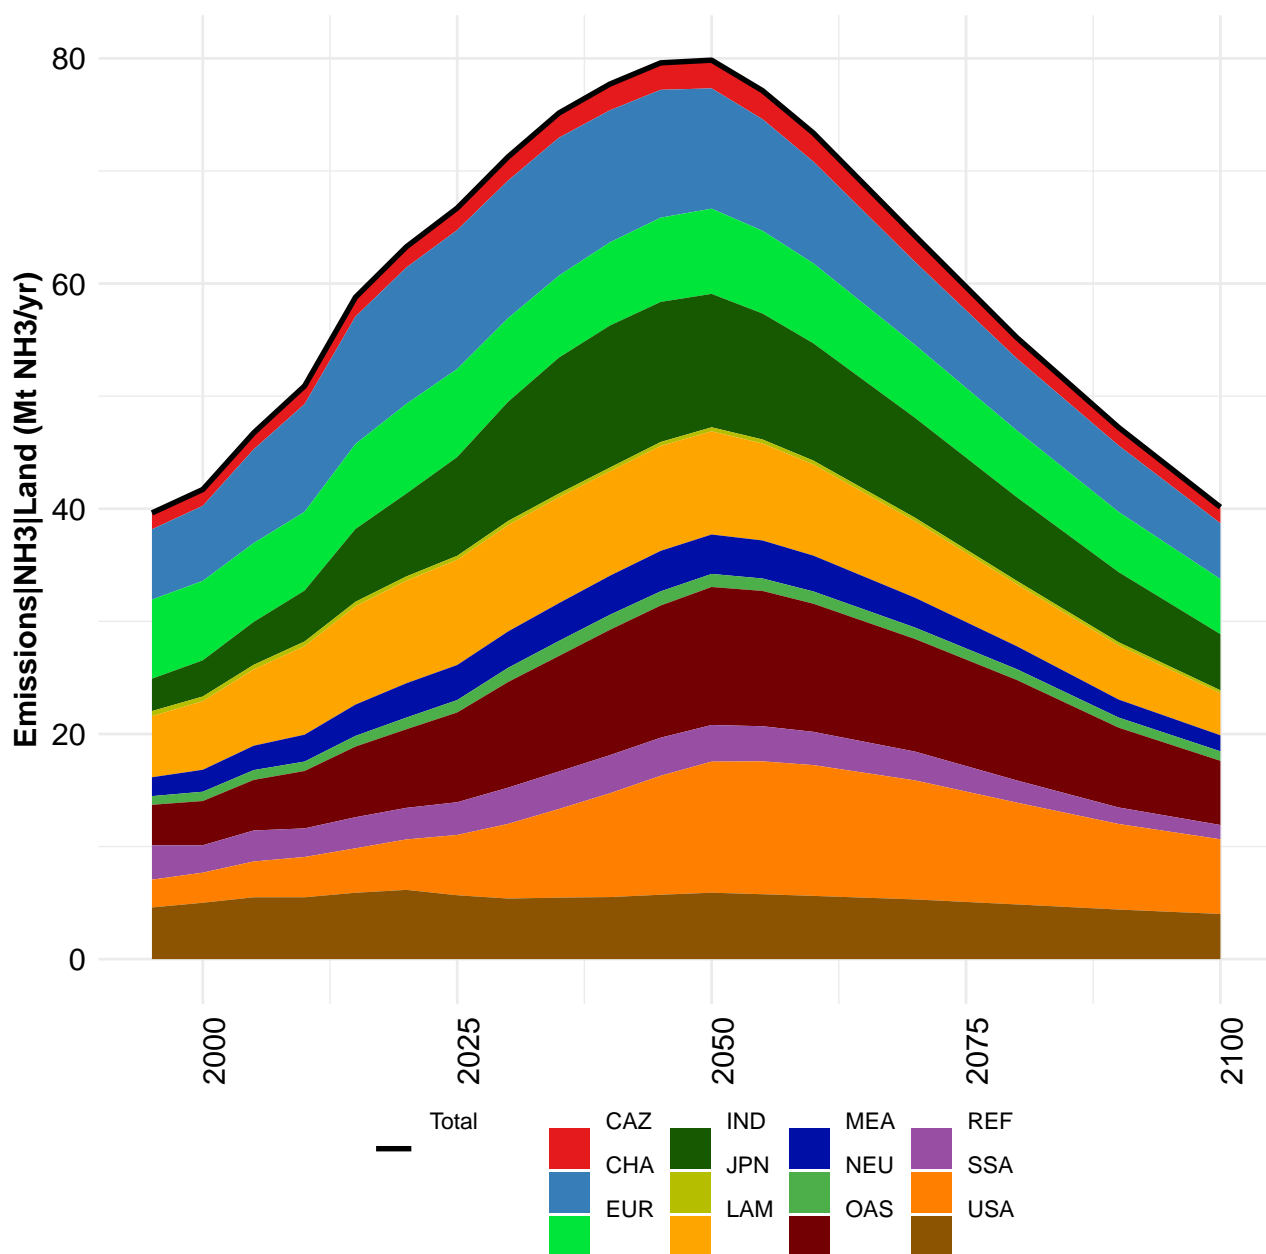

## 14.1 Land

## 14.1.1 Agriculture

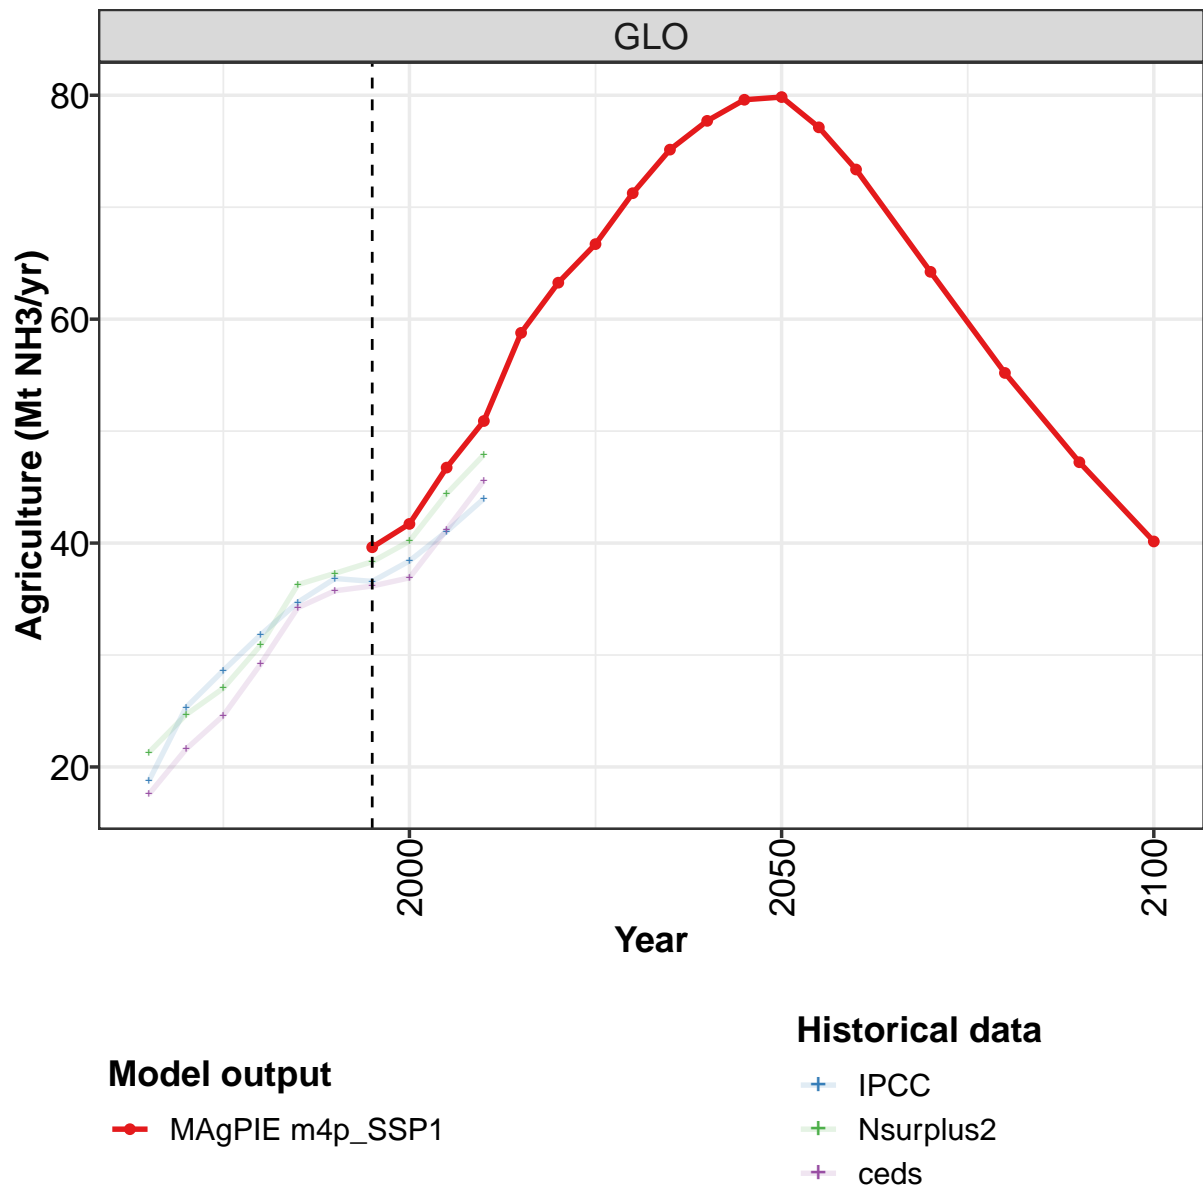

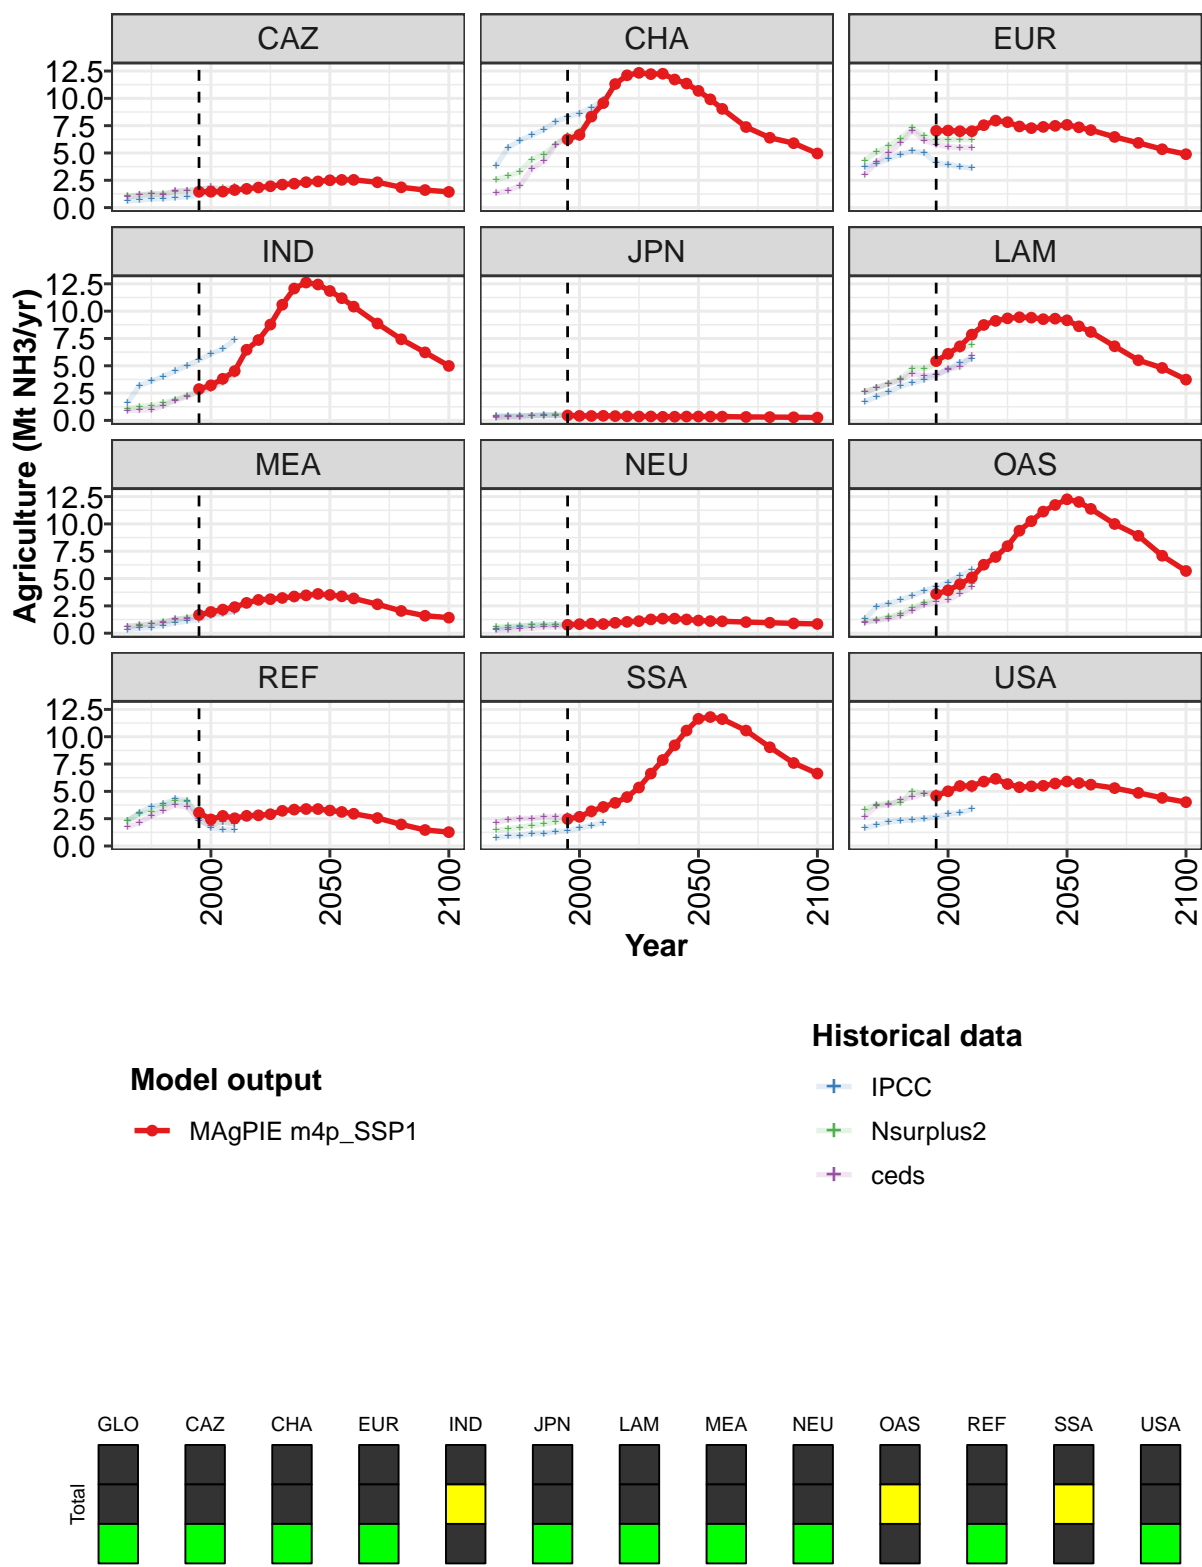

Figure 245: MAgPIE m4p\_SSP1 — Emissions—NH3—Land—Agriculture (Mt NH3/yr)

|     | 1995 | 2000 | 2005 | 2010 | 2015 | 2020 | 2025 | 2030 | 2035 | 2040 | 2045 |
|-----|------|------|------|------|------|------|------|------|------|------|------|
| GLO | 39.6 | 41.7 | 46.7 | 50.9 | 58.8 | 63.3 | 66.7 | 71.3 | 75.1 | 77.7 | 79.6 |
| CAZ | 1.5  | 1.5  | 1.5  | 1.6  | 1.7  | 1.8  | 2.0  | 2.1  | 2.2  | 2.3  | 2.4  |
| CHA | 6.2  | 6.7  | 8.3  | 9.6  | 11.3 | 12.1 | 12.3 | 12.2 | 12.3 | 11.7 | 11.4 |
| EUR | 7.0  | 7.1  | 7.0  | 7.0  | 7.5  | 8.0  | 7.8  | 7.4  | 7.3  | 7.4  | 7.5  |
| IND | 2.9  | 3.2  | 3.8  | 4.5  | 6.5  | 7.4  | 8.8  | 10.6 | 12.1 | 12.6 | 12.4 |
| JPN | 0.5  | 0.4  | 0.4  | 0.4  | 0.4  | 0.4  | 0.4  | 0.4  | 0.3  | 0.3  | 0.4  |
| LAM | 5.4  | 6.1  | 6.8  | 7.9  | 8.7  | 9.1  | 9.3  | 9.4  | 9.4  | 9.3  | 9.3  |
| MEA | 1.7  | 1.9  | 2.2  | 2.4  | 2.8  | 3.1  | 3.1  | 3.2  | 3.4  | 3.5  | 3.6  |
| NEU | 0.8  | 0.8  | 0.9  | 0.8  | 1.0  | 1.0  | 1.1  | 1.3  | 1.3  | 1.3  | 1.3  |
| OAS | 3.6  | 3.9  | 4.5  | 5.1  | 6.3  | 7.0  | 8.0  | 9.4  | 10.3 | 11.1 | 11.7 |
| REF | 3.1  | 2.4  | 2.8  | 2.5  | 2.8  | 2.8  | 2.9  | 3.2  | 3.3  | 3.4  | 3.4  |
| SSA | 2.5  | 2.7  | 3.2  | 3.6  | 3.9  | 4.5  | 5.4  | 6.6  | 7.9  | 9.2  | 10.6 |
| USA | 4.6  | 5.0  | 5.5  | 5.5  | 5.9  | 6.2  | 5.7  | 5.4  | 5.5  | 5.5  | 5.7  |

Table 813: MAgPIE m4p\_SSP1 — Emissions—NH3—Land—Agriculture (Mt NH3/yr) [PART 1/2]

|     | 2050 | 2055 | 2060 | 2070 | 2080 | 2090 | 2100 |
|-----|------|------|------|------|------|------|------|
| GLO | 79.8 | 77.1 | 73.4 | 64.2 | 55.2 | 47.2 | 40.1 |
| CAZ | 2.5  | 2.5  | 2.5  | 2.3  | 1.9  | 1.6  | 1.4  |
| CHA | 10.7 | 9.9  | 9.0  | 7.4  | 6.4  | 5.9  | 5.0  |
| EUR | 7.6  | 7.3  | 7.1  | 6.5  | 5.9  | 5.3  | 4.9  |
| IND | 11.8 | 11.2 | 10.4 | 8.9  | 7.4  | 6.2  | 5.0  |
| JPN | 0.4  | 0.4  | 0.3  | 0.3  | 0.3  | 0.3  | 0.3  |
| LAM | 9.2  | 8.6  | 8.1  | 6.8  | 5.5  | 4.8  | 3.7  |
| MEA | 3.5  | 3.4  | 3.2  | 2.6  | 2.0  | 1.6  | 1.4  |
| NEU | 1.2  | 1.1  | 1.1  | 1.0  | 1.0  | 0.9  | 0.8  |
| OAS | 12.3 | 12.0 | 11.4 | 10.0 | 8.9  | 7.1  | 5.7  |
| REF | 3.3  | 3.1  | 3.0  | 2.6  | 2.0  | 1.5  | 1.3  |
| SSA | 11.6 | 11.8 | 11.6 | 10.6 | 9.0  | 7.6  | 6.6  |
| USA | 5.9  | 5.8  | 5.6  | 5.3  | 4.9  | 4.4  | 4.0  |

Table 814: MAgPIE m4p\_SSP1 — Emissions—NH3—Land—Agriculture (Mt NH3/yr) [PART 2/2]

|     | 1965 | 1970 | 1975 | 1980 | 1985 | 1990 | 1995 | 2000 | 2005 | 2010 |
|-----|------|------|------|------|------|------|------|------|------|------|
| GLO | 18.8 | 25.3 | 28.6 | 31.8 | 34.7 | 36.8 | 36.6 | 38.4 | 41.0 | 44.0 |
| CAZ | 0.6  | 0.7  | 0.8  | 0.8  | 0.9  | 1.0  | 1.2  | 1.4  | 1.5  | 1.5  |
| CHA | 3.9  | 5.5  | 6.1  | 6.6  | 7.1  | 7.8  | 8.3  | 8.6  | 9.2  | 9.8  |
| EUR | 3.8  | 4.0  | 4.5  | 4.9  | 5.2  | 5.0  | 4.1  | 4.0  | 3.8  | 3.6  |
| IND | 1.6  | 3.2  | 3.6  | 4.0  | 4.5  | 5.0  | 5.5  | 6.1  | 6.6  | 7.4  |
| JPN | 0.4  | 0.4  | 0.4  | 0.5  | 0.5  | 0.5  | 0.5  | 0.4  | 0.4  | 0.4  |
| LAM | 1.7  | 2.2  | 2.6  | 3.1  | 3.4  | 3.7  | 4.1  | 4.6  | 5.3  | 5.6  |
| MEA | 0.4  | 0.5  | 0.5  | 0.7  | 1.0  | 1.1  | 1.2  | 1.6  | 1.8  | 2.0  |
| NEU | 0.4  | 0.5  | 0.6  | 0.8  | 0.7  | 0.8  | 0.8  | 0.8  | 0.9  | 0.9  |
| OAS | 1.3  | 2.4  | 2.7  | 3.1  | 3.4  | 3.9  | 4.3  | 4.7  | 5.3  | 5.8  |
| REF | 2.3  | 3.1  | 3.6  | 3.8  | 4.3  | 4.2  | 2.5  | 1.7  | 1.5  | 1.5  |
| SSA | 0.8  | 0.9  | 1.0  | 1.1  | 1.1  | 1.3  | 1.4  | 1.6  | 1.9  | 2.2  |
| USA | 1.6  | 1.9  | 2.2  | 2.3  | 2.4  | 2.5  | 2.7  | 2.9  | 3.0  | 3.4  |

Table 815: ceds — Emissions—NH3—Land—Agriculture (Mt NH3/yr)

|     | 1965 | 1970 | 1975 | 1980 | 1985 | 1990 | 1995 | 2000 | 2005 | 2010 |
|-----|------|------|------|------|------|------|------|------|------|------|
| GLO | 21.3 | 24.7 | 27.0 | 30.9 | 36.3 | 37.3 | 38.3 | 40.2 | 44.4 | 47.9 |
| CAZ | 1.1  | 1.2  | 1.2  | 1.3  | 1.5  | 1.5  | 1.7  | 1.8  | 1.8  | 1.8  |
| CHA | 2.6  | 2.9  | 3.3  | 4.4  | 4.9  | 5.8  | 6.6  | 7.0  | 8.4  | 9.7  |
| EUR | 4.3  | 5.1  | 5.6  | 6.3  | 7.3  | 6.5  | 6.2  | 6.2  | 6.2  | 6.2  |
| IND | 1.1  | 1.3  | 1.4  | 1.6  | 1.9  | 2.3  | 2.7  | 2.9  | 3.5  | 4.2  |
| JPN | 0.3  | 0.3  | 0.4  | 0.4  | 0.5  | 0.5  | 0.4  | 0.4  | 0.4  | 0.4  |
| LAM | 2.6  | 3.0  | 3.4  | 3.8  | 4.8  | 4.7  | 5.2  | 5.9  | 6.4  | 7.0  |
| MEA | 0.6  | 0.8  | 0.9  | 1.0  | 1.3  | 1.4  | 1.6  | 1.9  | 2.2  | 2.4  |
| NEU | 0.6  | 0.6  | 0.7  | 0.7  | 0.8  | 0.8  | 0.7  | 0.8  | 0.8  | 0.8  |
| OAS | 1.1  | 1.3  | 1.5  | 1.8  | 2.3  | 2.8  | 3.3  | 3.6  | 4.0  | 4.5  |
| REF | 2.3  | 3.0  | 3.1  | 3.7  | 4.1  | 4.0  | 2.9  | 2.1  | 2.2  | 2.1  |
| SSA | 1.4  | 1.6  | 1.7  | 1.9  | 2.0  | 2.2  | 2.3  | 2.6  | 2.9  | 3.2  |
| USA | 3.3  | 3.8  | 3.9  | 4.0  | 5.0  | 4.8  | 4.8  | 5.1  | 5.6  | 5.6  |

Table 816: IPCC — Emissions—NH3—Land—Agriculture (Mt NH3/yr)

|     | 1965 | 1970 | 1975 | 1980 | 1985 | 1990 | 1995 | 2000 | 2005 | 2010 |
|-----|------|------|------|------|------|------|------|------|------|------|
| GLO | 17.6 | 21.6 | 24.6 | 29.2 | 34.2 | 35.7 | 36.2 | 36.9 | 41.2 | 45.6 |
| CAZ | 1.0  | 1.1  | 1.3  | 1.2  | 1.5  | 1.6  | 1.7  | 1.9  | 1.6  | 1.9  |
| CHA | 1.3  | 1.6  | 2.0  | 3.6  | 4.3  | 5.7  | 6.5  | 6.4  | 8.5  | 9.8  |
| EUR | 3.0  | 4.2  | 5.0  | 5.9  | 7.1  | 6.1  | 5.8  | 5.6  | 5.5  | 5.5  |
| IND | 0.9  | 0.9  | 1.0  | 1.3  | 1.8  | 2.2  | 2.6  | 2.9  | 3.6  | 4.4  |
| JPN | 0.3  | 0.4  | 0.4  | 0.4  | 0.5  | 0.5  | 0.4  | 0.4  | 0.4  | 0.4  |
| LAM | 2.6  | 3.0  | 3.4  | 3.7  | 4.3  | 4.1  | 4.2  | 4.7  | 4.9  | 5.9  |
| MEA | 0.6  | 0.7  | 0.8  | 1.0  | 1.3  | 1.4  | 1.6  | 1.8  | 1.8  | 2.1  |
| NEU | 0.3  | 0.3  | 0.4  | 0.5  | 0.6  | 0.6  | 0.5  | 0.6  | 0.7  | 0.7  |
| OAS | 1.0  | 1.1  | 1.4  | 1.6  | 2.1  | 2.6  | 2.8  | 3.0  | 3.6  | 4.2  |
| REF | 1.7  | 2.2  | 2.7  | 3.3  | 3.8  | 3.5  | 2.3  | 1.9  | 2.2  | 2.0  |
| SSA | 2.1  | 2.4  | 2.5  | 2.5  | 2.7  | 2.7  | 2.7  | 2.8  | 3.1  | 3.6  |
| USA | 2.7  | 3.7  | 3.8  | 4.2  | 4.5  | 4.8  | 4.9  | 5.0  | 5.3  | 5.2  |

Table 817: Nsurplus2 — Emissions—NH3—Land—Agriculture (Mt NH3/yr)



## 14.1.2 Agriculture—Agricultural Soils

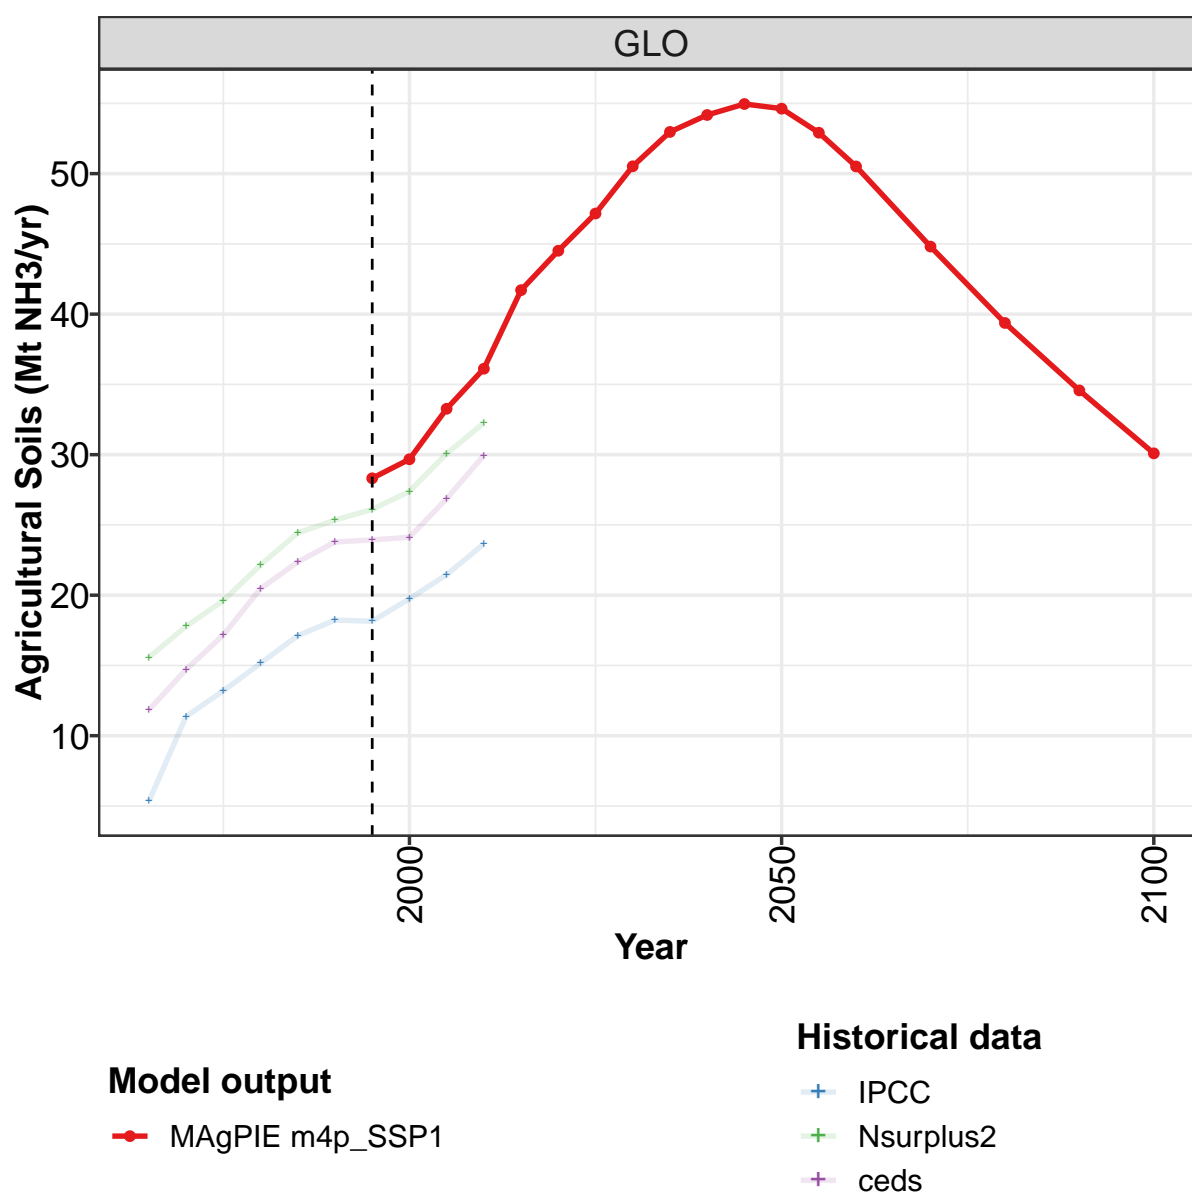

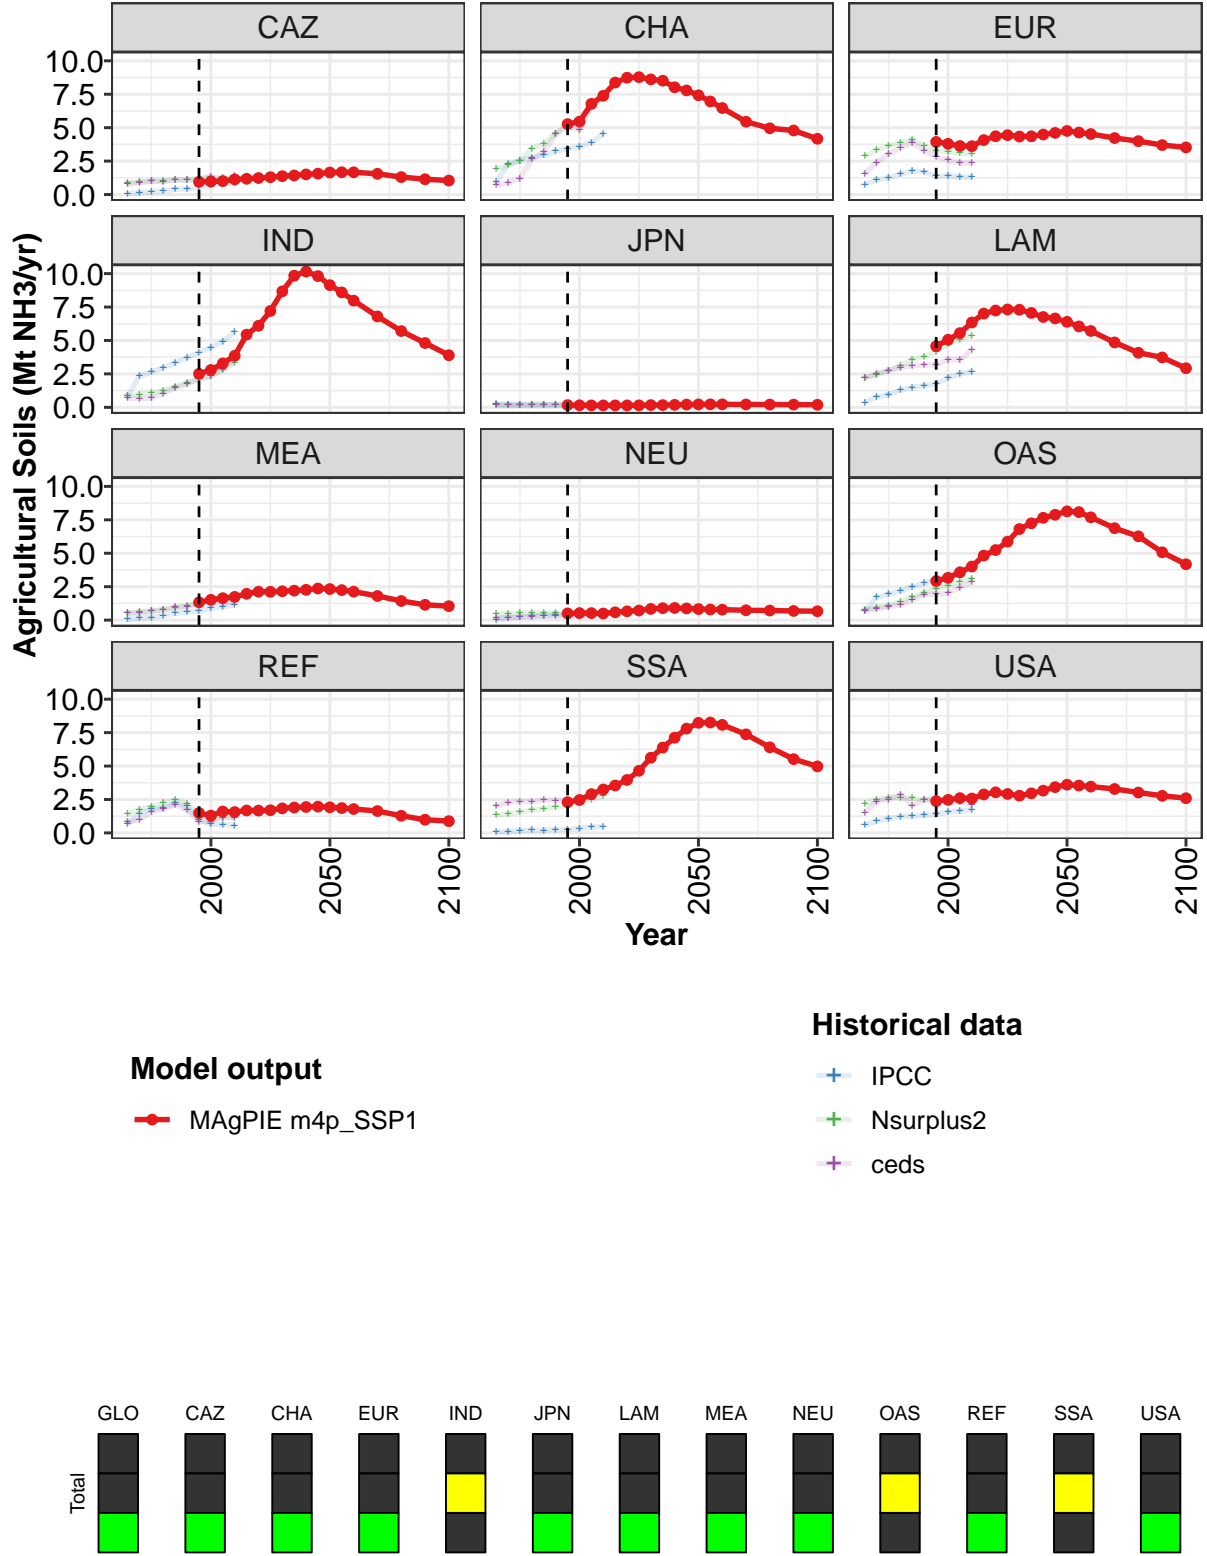

Figure 246: MAGPIE m4p\_SSP1 — Emissions—NH3—Land—Agriculture—Agricultural Soils (Mt NH3/yr)

|     | 1995 | 2000 | 2005 | 2010 | 2015 | 2020 | 2025 | 2030 | 2035 | 2040 | 2045 |
|-----|------|------|------|------|------|------|------|------|------|------|------|
| GLO | 28.3 | 29.7 | 33.3 | 36.1 | 41.7 | 44.5 | 47.2 | 50.5 | 53.0 | 54.2 | 55.0 |
| CAZ | 0.9  | 1.0  | 1.0  | 1.1  | 1.2  | 1.2  | 1.3  | 1.4  | 1.4  | 1.5  | 1.6  |
| CHA | 5.3  | 5.5  | 6.8  | 7.4  | 8.4  | 8.7  | 8.8  | 8.6  | 8.5  | 8.0  | 7.8  |
| EUR | 3.9  | 3.8  | 3.6  | 3.6  | 4.1  | 4.4  | 4.4  | 4.3  | 4.4  | 4.5  | 4.6  |
| IND | 2.5  | 2.8  | 3.3  | 3.9  | 5.4  | 6.1  | 7.2  | 8.7  | 9.8  | 10.2 | 9.8  |
| JPN | 0.2  | 0.2  | 0.1  | 0.1  | 0.1  | 0.1  | 0.2  | 0.2  | 0.2  | 0.2  | 0.2  |
| LAM | 4.6  | 5.1  | 5.6  | 6.3  | 7.0  | 7.2  | 7.3  | 7.3  | 7.1  | 6.8  | 6.6  |
| MEA | 1.3  | 1.5  | 1.6  | 1.7  | 2.0  | 2.1  | 2.1  | 2.2  | 2.2  | 2.3  | 2.4  |
| NEU | 0.5  | 0.5  | 0.5  | 0.5  | 0.6  | 0.7  | 0.7  | 0.8  | 0.9  | 0.9  | 0.9  |
| OAS | 2.9  | 3.2  | 3.6  | 4.0  | 4.8  | 5.2  | 5.9  | 6.8  | 7.2  | 7.7  | 7.9  |
| REF | 1.5  | 1.3  | 1.6  | 1.6  | 1.7  | 1.7  | 1.7  | 1.8  | 1.9  | 1.9  | 2.0  |
| SSA | 2.3  | 2.5  | 2.9  | 3.2  | 3.5  | 4.0  | 4.6  | 5.6  | 6.4  | 7.1  | 7.8  |
| USA | 2.4  | 2.5  | 2.6  | 2.6  | 2.9  | 3.0  | 2.9  | 2.8  | 3.0  | 3.2  | 3.4  |

Table 818: MAgPIE m4p\_SSP1 — Emissions—NH3—Land—Agriculture—Agricultural Soils (Mt NH3/yr)  
[PART 1/2]

|     | 2050 | 2055 | 2060 | 2070 | 2080 | 2090 | 2100 |
|-----|------|------|------|------|------|------|------|
| GLO | 54.6 | 52.9 | 50.5 | 44.8 | 39.4 | 34.6 | 30.1 |
| CAZ | 1.6  | 1.7  | 1.7  | 1.6  | 1.3  | 1.1  | 1.0  |
| CHA | 7.4  | 7.0  | 6.5  | 5.4  | 5.0  | 4.8  | 4.2  |
| EUR | 4.8  | 4.6  | 4.5  | 4.2  | 4.0  | 3.7  | 3.5  |
| IND | 9.1  | 8.6  | 8.0  | 6.8  | 5.7  | 4.8  | 3.9  |
| JPN | 0.2  | 0.2  | 0.2  | 0.2  | 0.2  | 0.2  | 0.2  |
| LAM | 6.4  | 6.1  | 5.7  | 4.9  | 4.1  | 3.7  | 2.9  |
| MEA | 2.3  | 2.2  | 2.1  | 1.8  | 1.4  | 1.1  | 1.0  |
| NEU | 0.8  | 0.8  | 0.8  | 0.7  | 0.7  | 0.7  | 0.7  |
| OAS | 8.1  | 8.1  | 7.7  | 6.9  | 6.3  | 5.1  | 4.2  |
| REF | 1.9  | 1.9  | 1.8  | 1.6  | 1.3  | 1.0  | 0.9  |
| SSA | 8.2  | 8.3  | 8.1  | 7.4  | 6.4  | 5.5  | 5.0  |
| USA | 3.6  | 3.5  | 3.5  | 3.3  | 3.0  | 2.8  | 2.6  |

Table 819: MAgPIE m4p\_SSP1 — Emissions—NH3—Land—Agriculture—Agricultural Soils (Mt NH3/yr)  
[PART 2/2]

|     | 1965 | 1970 | 1975 | 1980 | 1985 | 1990 | 1995 | 2000 | 2005 | 2010 |
|-----|------|------|------|------|------|------|------|------|------|------|
| GLO | 5.3  | 11.4 | 13.2 | 15.2 | 17.1 | 18.2 | 18.1 | 19.7 | 21.5 | 23.6 |
| CAZ | 0.1  | 0.1  | 0.2  | 0.3  | 0.4  | 0.4  | 0.6  | 0.7  | 0.8  | 0.9  |
| CHA | 0.9  | 2.3  | 2.5  | 2.7  | 3.0  | 3.2  | 3.4  | 3.6  | 3.9  | 4.5  |
| EUR | 0.8  | 1.1  | 1.3  | 1.5  | 1.8  | 1.7  | 1.4  | 1.4  | 1.3  | 1.3  |
| IND | 0.8  | 2.4  | 2.6  | 3.0  | 3.3  | 3.7  | 4.1  | 4.5  | 4.9  | 5.6  |
| JPN | 0.2  | 0.2  | 0.2  | 0.2  | 0.2  | 0.2  | 0.2  | 0.2  | 0.1  | 0.1  |
| LAM | 0.4  | 0.8  | 0.9  | 1.3  | 1.5  | 1.6  | 1.8  | 2.2  | 2.5  | 2.7  |
| MEA | 0.1  | 0.2  | 0.2  | 0.3  | 0.5  | 0.6  | 0.7  | 0.9  | 1.0  | 1.1  |
| NEU | 0.1  | 0.2  | 0.2  | 0.3  | 0.3  | 0.4  | 0.4  | 0.4  | 0.4  | 0.5  |
| OAS | 0.7  | 1.7  | 1.9  | 2.2  | 2.5  | 2.8  | 3.1  | 3.3  | 3.8  | 4.1  |
| REF | 0.6  | 1.5  | 1.8  | 1.9  | 2.2  | 2.0  | 1.0  | 0.7  | 0.6  | 0.6  |
| SSA | 0.1  | 0.1  | 0.2  | 0.2  | 0.2  | 0.2  | 0.2  | 0.3  | 0.4  | 0.5  |
| USA | 0.6  | 0.9  | 1.1  | 1.2  | 1.3  | 1.3  | 1.4  | 1.6  | 1.6  | 1.7  |

Table 820: ceds — Emissions—NH3—Land—Agriculture—Agricultural Soils (Mt NH3/yr)

|     | 1965 | 1970 | 1975 | 1980 | 1985 | 1990 | 1995 | 2000 | 2005 | 2010 |
|-----|------|------|------|------|------|------|------|------|------|------|
| GLO | 15.6 | 17.8 | 19.6 | 22.2 | 24.4 | 25.3 | 26.1 | 27.4 | 30.1 | 32.3 |
| CAZ | 0.9  | 0.9  | 1.0  | 1.0  | 1.1  | 1.1  | 1.2  | 1.2  | 1.2  | 1.3  |
| CHA | 1.9  | 2.2  | 2.5  | 3.4  | 3.8  | 4.6  | 5.2  | 5.4  | 6.6  | 7.3  |
| EUR | 2.9  | 3.3  | 3.6  | 3.9  | 4.1  | 3.6  | 3.3  | 3.2  | 3.1  | 3.1  |
| IND | 0.8  | 1.0  | 1.1  | 1.3  | 1.5  | 1.8  | 2.1  | 2.3  | 2.8  | 3.4  |
| JPN | 0.2  | 0.2  | 0.2  | 0.2  | 0.2  | 0.2  | 0.2  | 0.1  | 0.1  | 0.1  |
| LAM | 2.2  | 2.5  | 2.8  | 3.1  | 3.6  | 3.8  | 4.2  | 4.7  | 5.1  | 5.4  |
| MEA | 0.5  | 0.6  | 0.7  | 0.8  | 0.9  | 1.1  | 1.3  | 1.5  | 1.6  | 1.7  |
| NEU | 0.4  | 0.5  | 0.5  | 0.5  | 0.6  | 0.5  | 0.5  | 0.5  | 0.5  | 0.4  |
| OAS | 0.8  | 1.0  | 1.1  | 1.4  | 1.7  | 2.0  | 2.3  | 2.6  | 2.8  | 3.1  |
| REF | 1.4  | 1.8  | 2.0  | 2.2  | 2.5  | 2.2  | 1.4  | 1.1  | 1.1  | 1.2  |
| SSA | 1.3  | 1.4  | 1.5  | 1.7  | 1.8  | 1.9  | 2.1  | 2.3  | 2.5  | 2.7  |
| USA | 2.2  | 2.5  | 2.7  | 2.6  | 2.6  | 2.5  | 2.4  | 2.4  | 2.6  | 2.6  |

Table 821: IPCC — Emissions—NH3—Land—Agriculture—Agricultural Soils (Mt NH3/yr)

|     | 1965 | 1970 | 1975 | 1980 | 1985 | 1990 | 1995 | 2000 | 2005 | 2010 |
|-----|------|------|------|------|------|------|------|------|------|------|
| GLO | 11.8 | 14.7 | 17.2 | 20.5 | 22.4 | 23.8 | 23.9 | 24.1 | 26.9 | 29.9 |
| CAZ | 0.8  | 0.9  | 1.0  | 1.0  | 1.1  | 1.1  | 1.2  | 1.4  | 1.0  | 1.4  |
| CHA | 0.7  | 0.9  | 1.2  | 2.7  | 3.2  | 4.5  | 5.1  | 4.8  | 6.6  | 7.3  |
| EUR | 1.6  | 2.4  | 3.0  | 3.5  | 3.9  | 3.3  | 2.8  | 2.6  | 2.4  | 2.4  |
| IND | 0.7  | 0.6  | 0.7  | 1.0  | 1.5  | 1.7  | 2.1  | 2.3  | 2.9  | 3.5  |
| JPN | 0.2  | 0.2  | 0.2  | 0.2  | 0.2  | 0.2  | 0.2  | 0.1  | 0.1  | 0.1  |
| LAM | 2.2  | 2.5  | 2.7  | 3.0  | 3.1  | 3.2  | 3.2  | 3.6  | 3.5  | 4.3  |
| MEA | 0.5  | 0.5  | 0.7  | 0.8  | 1.0  | 1.0  | 1.2  | 1.3  | 1.3  | 1.4  |
| NEU | 0.2  | 0.2  | 0.2  | 0.3  | 0.3  | 0.3  | 0.3  | 0.3  | 0.4  | 0.3  |
| OAS | 0.7  | 0.8  | 1.0  | 1.2  | 1.5  | 1.9  | 1.9  | 2.0  | 2.4  | 2.8  |
| REF | 0.8  | 1.0  | 1.6  | 1.8  | 2.1  | 1.7  | 0.8  | 0.9  | 1.2  | 1.1  |
| SSA | 2.0  | 2.3  | 2.4  | 2.3  | 2.5  | 2.4  | 2.5  | 2.5  | 2.7  | 3.1  |
| USA | 1.5  | 2.4  | 2.5  | 2.9  | 2.1  | 2.5  | 2.6  | 2.3  | 2.3  | 2.1  |

Table 822: Nsurplus2 — Emissions—NH3—Land—Agriculture—Agricultural Soils (Mt NH3/yr)

## 14.1.3 Agriculture—Agricultural Soils—Inorganic Fertilizers

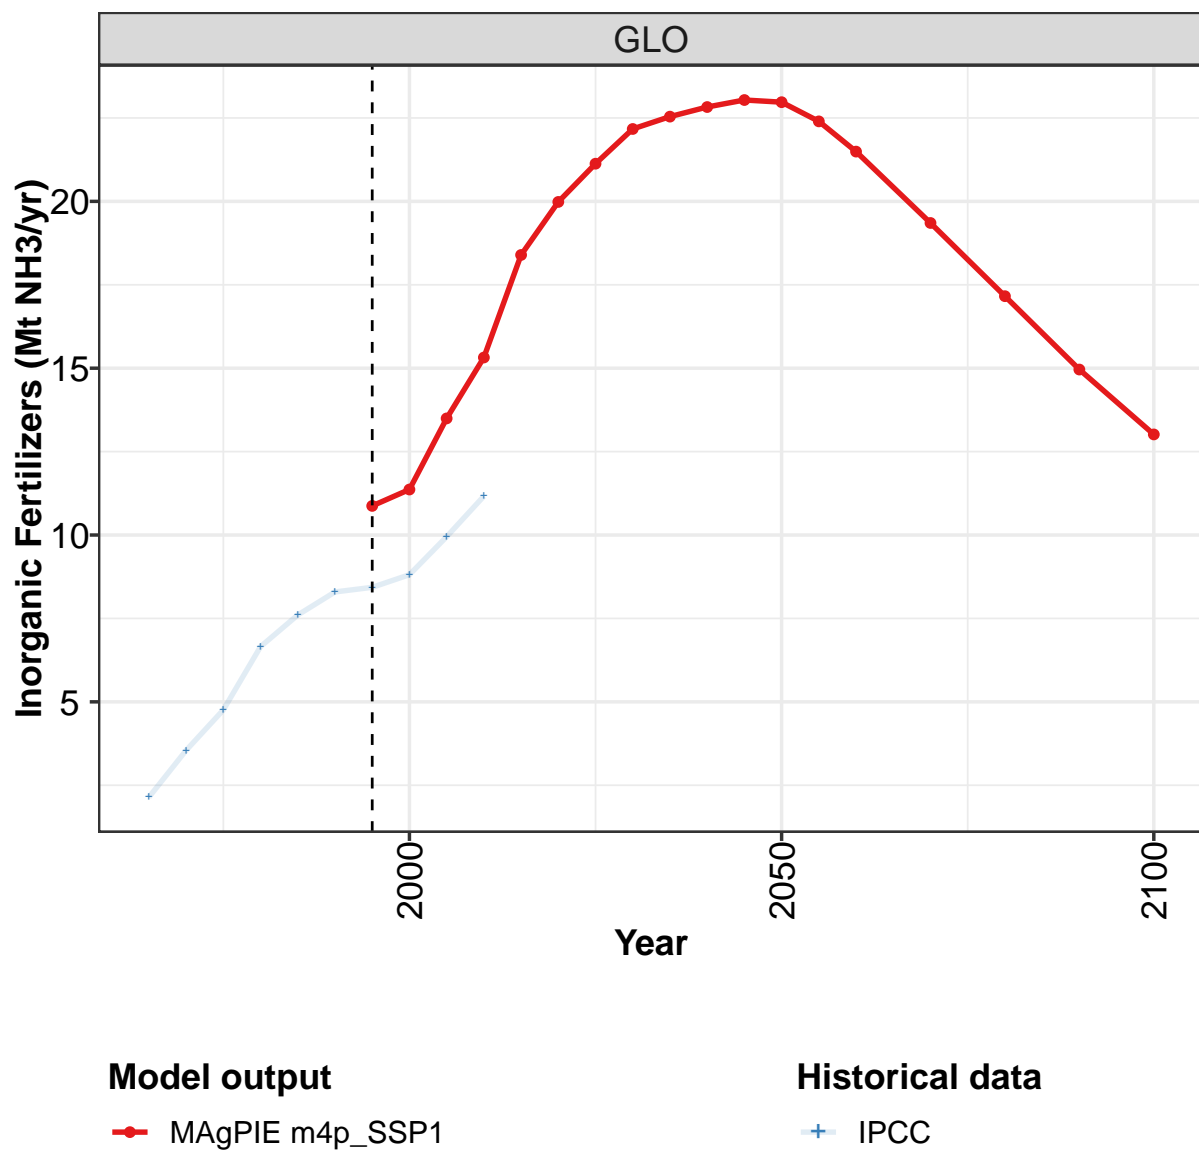

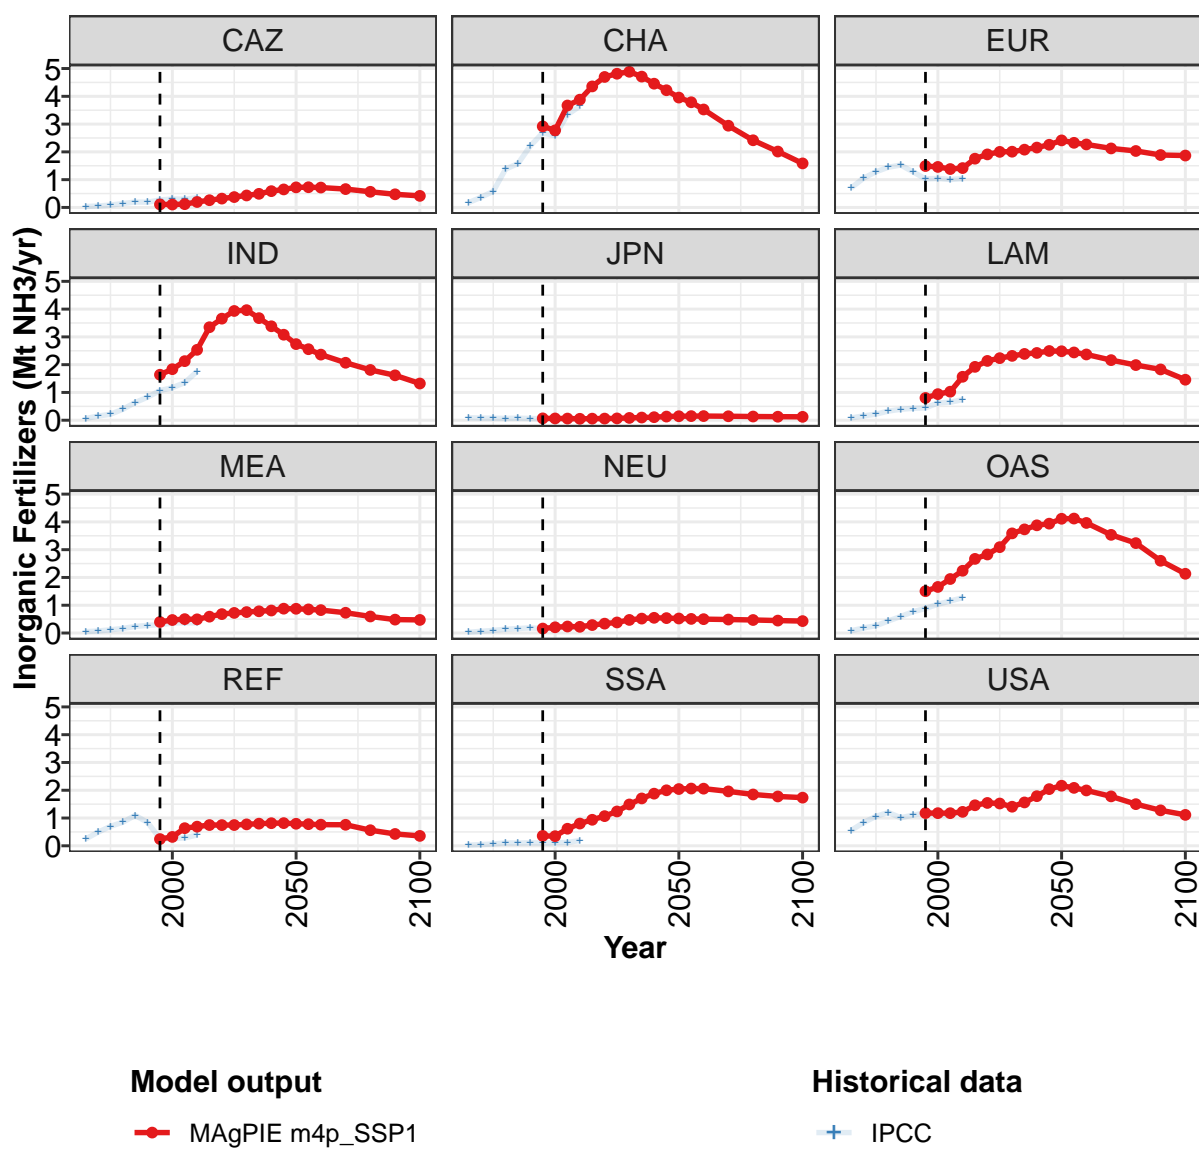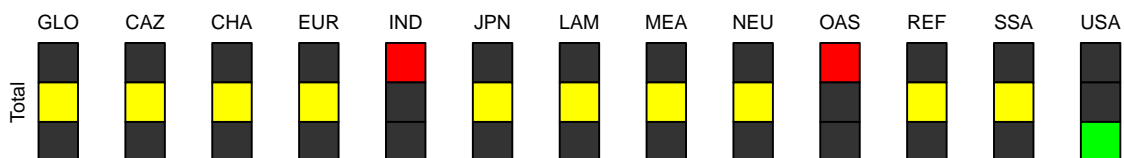

Figure 247: MAgPIE m4p\_SSP1 — Emissions—NH<sub>3</sub>—Land—Agriculture—Agricultural Soils—Inorganic Fertilizers (Mt NH<sub>3</sub>/yr)

|     | 1995 | 2000 | 2005 | 2010 | 2015 | 2020 | 2025 | 2030 | 2035 | 2040 | 2045 |
|-----|------|------|------|------|------|------|------|------|------|------|------|
| GLO | 10.9 | 11.4 | 13.5 | 15.3 | 18.4 | 20.0 | 21.1 | 22.2 | 22.5 | 22.8 | 23.0 |
| CAZ | 0.1  | 0.1  | 0.1  | 0.2  | 0.3  | 0.3  | 0.4  | 0.4  | 0.5  | 0.6  | 0.6  |
| CHA | 2.9  | 2.8  | 3.7  | 3.9  | 4.4  | 4.7  | 4.8  | 4.9  | 4.7  | 4.5  | 4.2  |
| EUR | 1.5  | 1.5  | 1.4  | 1.4  | 1.8  | 1.9  | 2.0  | 2.0  | 2.1  | 2.2  | 2.3  |
| IND | 1.6  | 1.8  | 2.1  | 2.5  | 3.3  | 3.7  | 3.9  | 4.0  | 3.7  | 3.4  | 3.1  |
| JPN | 0.1  | 0.1  | 0.1  | 0.1  | 0.1  | 0.1  | 0.1  | 0.1  | 0.1  | 0.1  | 0.1  |
| LAM | 0.8  | 0.9  | 1.0  | 1.6  | 1.9  | 2.1  | 2.2  | 2.3  | 2.4  | 2.4  | 2.5  |
| MEA | 0.4  | 0.5  | 0.5  | 0.5  | 0.6  | 0.7  | 0.7  | 0.8  | 0.8  | 0.8  | 0.9  |
| NEU | 0.2  | 0.2  | 0.2  | 0.2  | 0.3  | 0.3  | 0.4  | 0.5  | 0.5  | 0.5  | 0.5  |
| OAS | 1.5  | 1.7  | 1.9  | 2.2  | 2.7  | 2.8  | 3.1  | 3.6  | 3.7  | 3.9  | 3.9  |
| REF | 0.2  | 0.3  | 0.6  | 0.7  | 0.7  | 0.7  | 0.7  | 0.8  | 0.8  | 0.8  | 0.8  |
| SSA | 0.4  | 0.3  | 0.6  | 0.8  | 0.9  | 1.1  | 1.2  | 1.5  | 1.7  | 1.9  | 2.0  |
| USA | 1.2  | 1.2  | 1.2  | 1.2  | 1.5  | 1.5  | 1.5  | 1.4  | 1.6  | 1.8  | 2.0  |

Table 823: MAgPIE m4p\_SSP1 — Emissions—NH3—Land—Agriculture—Agricultural Soils—Inorganic Fertilizers (Mt NH3/yr) [PART 1/2]

|     | 2050 | 2055 | 2060 | 2070 | 2080 | 2090 | 2100 |
|-----|------|------|------|------|------|------|------|
| GLO | 23.0 | 22.4 | 21.5 | 19.4 | 17.2 | 15.0 | 13.0 |
| CAZ | 0.7  | 0.7  | 0.7  | 0.7  | 0.6  | 0.5  | 0.4  |
| CHA | 4.0  | 3.8  | 3.5  | 2.9  | 2.4  | 2.0  | 1.6  |
| EUR | 2.4  | 2.3  | 2.3  | 2.1  | 2.0  | 1.9  | 1.9  |
| IND | 2.7  | 2.6  | 2.4  | 2.1  | 1.8  | 1.6  | 1.3  |
| JPN | 0.1  | 0.1  | 0.1  | 0.1  | 0.1  | 0.1  | 0.1  |
| LAM | 2.5  | 2.4  | 2.4  | 2.2  | 2.0  | 1.8  | 1.5  |
| MEA | 0.9  | 0.9  | 0.8  | 0.7  | 0.6  | 0.5  | 0.5  |
| NEU | 0.5  | 0.5  | 0.5  | 0.5  | 0.5  | 0.4  | 0.4  |
| OAS | 4.1  | 4.1  | 4.0  | 3.5  | 3.2  | 2.6  | 2.1  |
| REF | 0.8  | 0.8  | 0.8  | 0.8  | 0.6  | 0.4  | 0.4  |
| SSA | 2.0  | 2.1  | 2.1  | 2.0  | 1.8  | 1.8  | 1.7  |
| USA | 2.2  | 2.1  | 2.0  | 1.8  | 1.5  | 1.3  | 1.1  |

Table 824: MAgPIE m4p\_SSP1 — Emissions—NH3—Land—Agriculture—Agricultural Soils—Inorganic Fertilizers (Mt NH3/yr) [PART 2/2]

|     | 1965 | 1970 | 1975 | 1980 | 1985 | 1990 | 1995 | 2000 | 2005 | 2010 |
|-----|------|------|------|------|------|------|------|------|------|------|
| GLO | 2.1  | 3.5  | 4.8  | 6.7  | 7.6  | 8.3  | 8.4  | 8.8  | 9.9  | 11.2 |
| CAZ | 0.0  | 0.1  | 0.1  | 0.1  | 0.2  | 0.2  | 0.3  | 0.3  | 0.3  | 0.4  |
| CHA | 0.2  | 0.4  | 0.6  | 1.4  | 1.6  | 2.2  | 2.7  | 2.6  | 3.3  | 3.6  |
| EUR | 0.7  | 1.1  | 1.3  | 1.4  | 1.5  | 1.3  | 1.0  | 1.0  | 1.0  | 1.0  |
| IND | 0.1  | 0.1  | 0.2  | 0.4  | 0.6  | 0.8  | 1.1  | 1.2  | 1.4  | 1.8  |
| JPN | 0.1  | 0.1  | 0.1  | 0.1  | 0.1  | 0.1  | 0.1  | 0.0  | 0.0  | 0.0  |
| LAM | 0.1  | 0.2  | 0.2  | 0.3  | 0.4  | 0.4  | 0.4  | 0.6  | 0.6  | 0.7  |
| MEA | 0.0  | 0.1  | 0.1  | 0.2  | 0.2  | 0.3  | 0.3  | 0.4  | 0.4  | 0.4  |
| NEU | 0.0  | 0.1  | 0.1  | 0.1  | 0.2  | 0.2  | 0.2  | 0.2  | 0.2  | 0.2  |
| OAS | 0.1  | 0.2  | 0.3  | 0.4  | 0.6  | 0.8  | 0.9  | 1.0  | 1.2  | 1.3  |
| REF | 0.2  | 0.5  | 0.7  | 0.9  | 1.1  | 0.8  | 0.3  | 0.3  | 0.3  | 0.4  |
| SSA | 0.0  | 0.0  | 0.1  | 0.1  | 0.1  | 0.1  | 0.1  | 0.1  | 0.1  | 0.2  |
| USA | 0.6  | 0.8  | 1.1  | 1.2  | 1.0  | 1.1  | 1.2  | 1.1  | 1.1  | 1.2  |

Table 825: IPCC — Emissions—NH3—Land—Agriculture—Agricultural Soils—Inorganic Fertilizers (Mt NH3/yr)

14.1.4 Agriculture—Agricultural Soils—Manure applied to Croplands

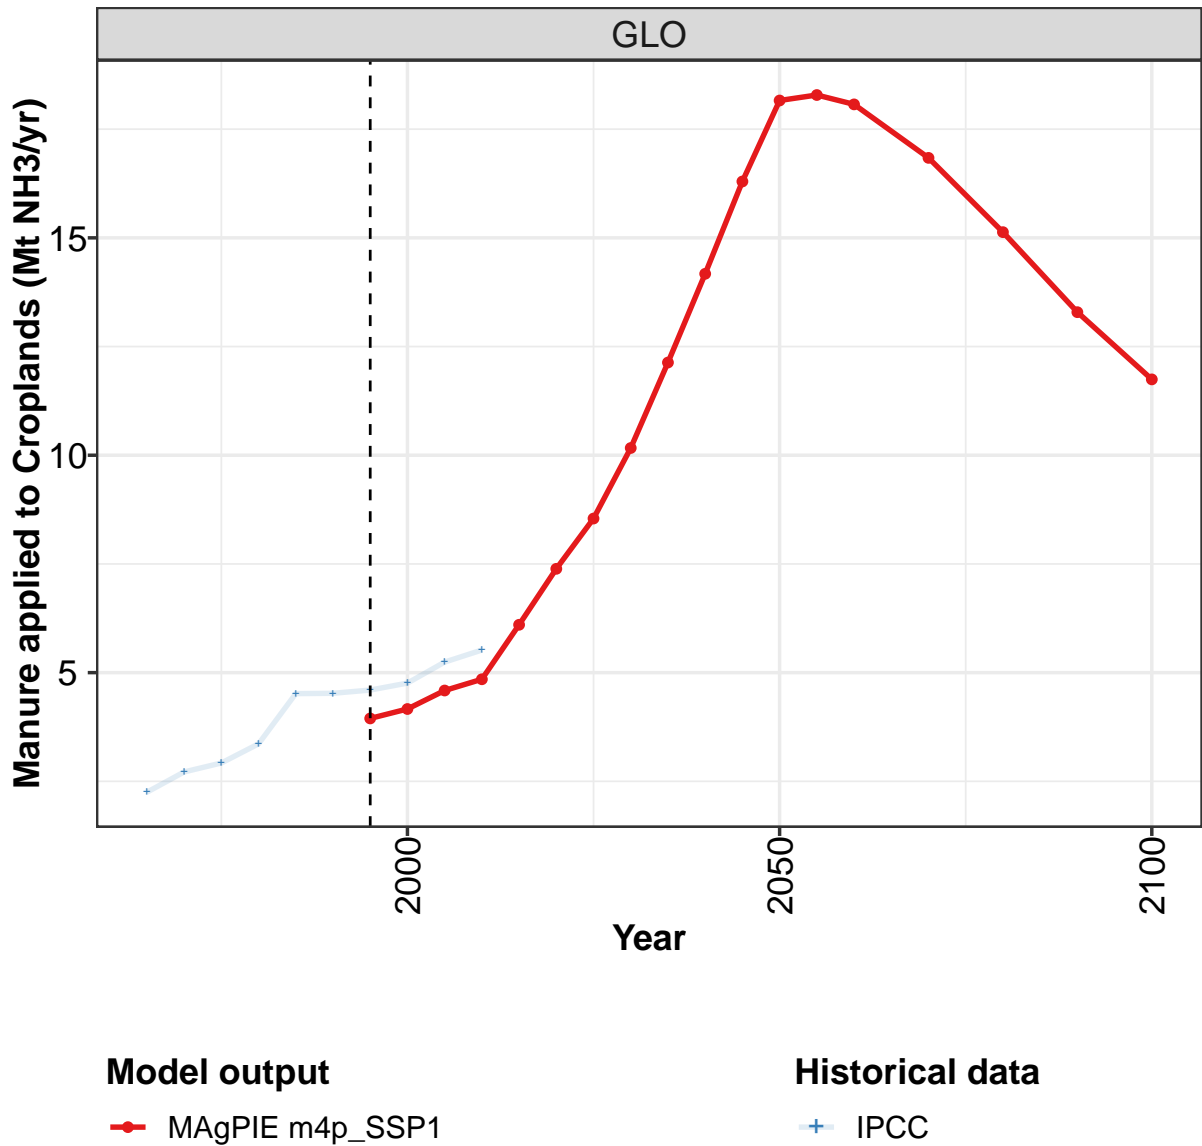



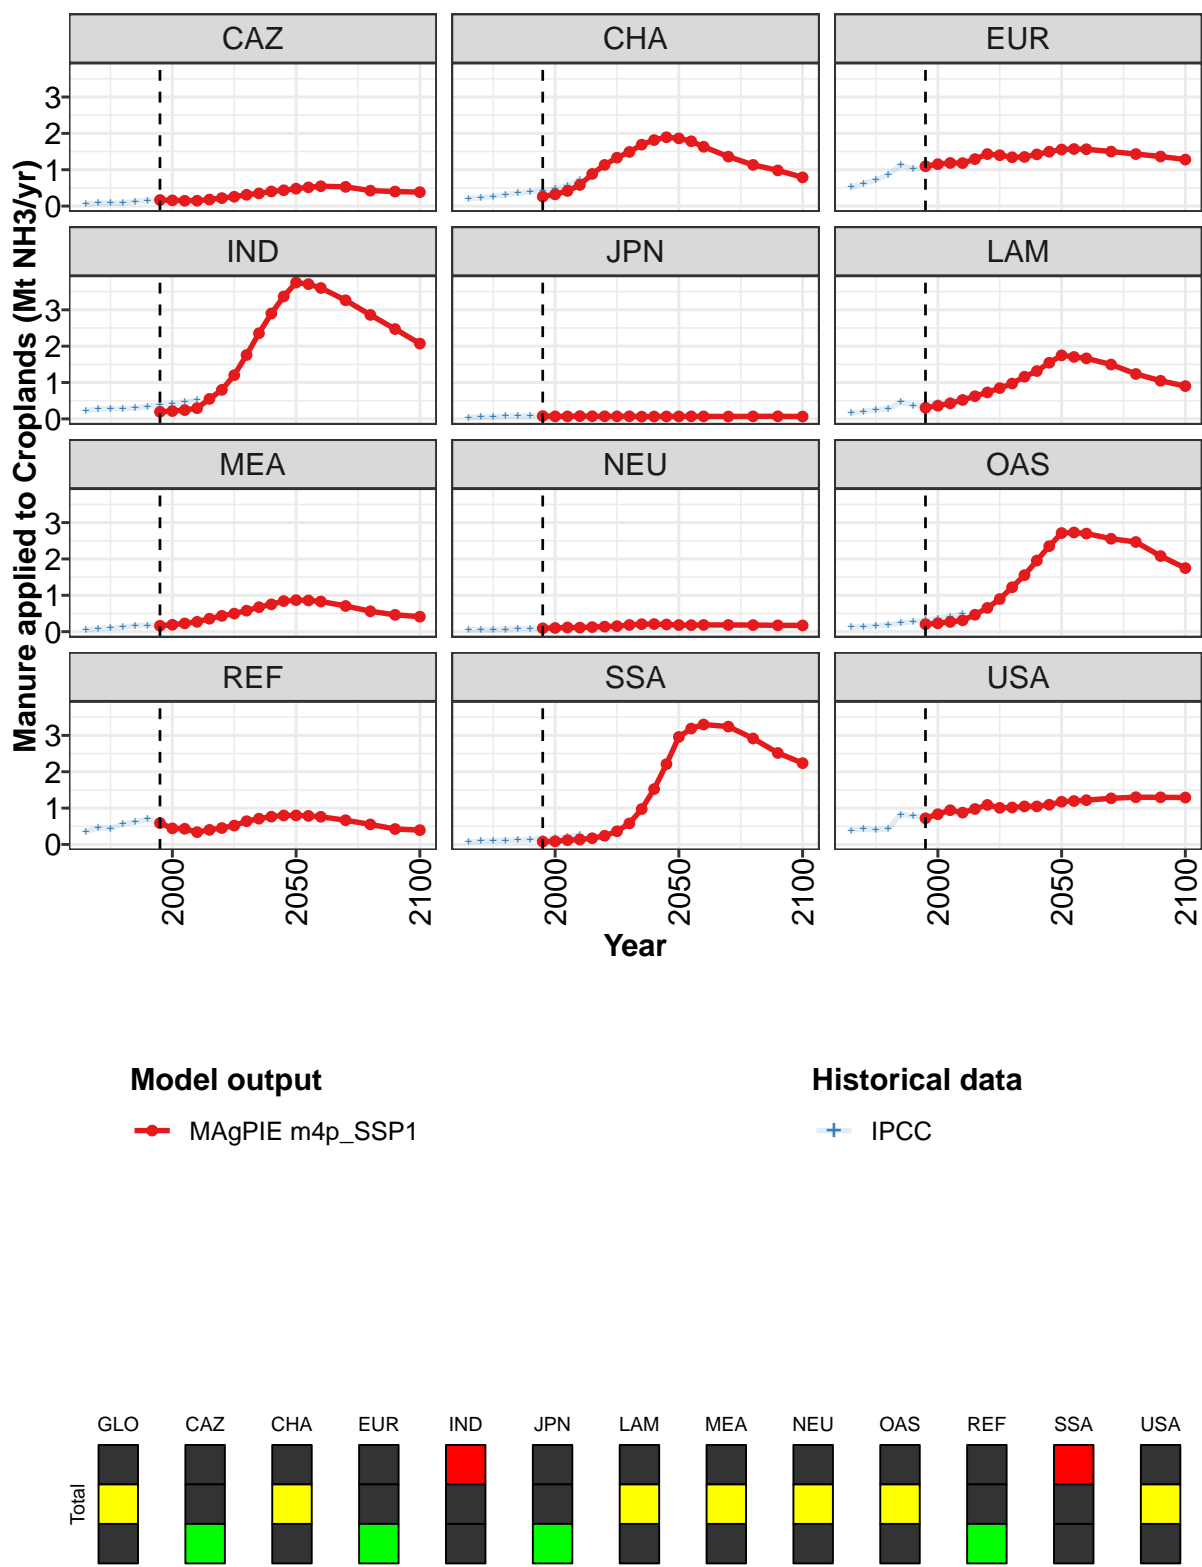

Figure 248: MAgPIE m4p\_SSP1 — Emissions—NH3—Land—Agriculture—Agricultural Soils—Manure applied to Croplands (Mt NH3/yr)

|     | 1995 | 2000 | 2005 | 2010 | 2015 | 2020 | 2025 | 2030 | 2035 | 2040 | 2045 |
|-----|------|------|------|------|------|------|------|------|------|------|------|
| GLO | 3.9  | 4.2  | 4.6  | 4.8  | 6.1  | 7.4  | 8.5  | 10.2 | 12.1 | 14.2 | 16.3 |
| CAZ | 0.2  | 0.2  | 0.1  | 0.1  | 0.2  | 0.2  | 0.3  | 0.3  | 0.3  | 0.4  | 0.4  |
| CHA | 0.3  | 0.3  | 0.4  | 0.6  | 0.9  | 1.1  | 1.3  | 1.5  | 1.7  | 1.8  | 1.9  |
| EUR | 1.1  | 1.2  | 1.2  | 1.2  | 1.3  | 1.4  | 1.4  | 1.3  | 1.4  | 1.4  | 1.5  |
| IND | 0.2  | 0.2  | 0.2  | 0.3  | 0.5  | 0.8  | 1.2  | 1.8  | 2.4  | 2.9  | 3.4  |
| JPN | 0.1  | 0.1  | 0.1  | 0.1  | 0.1  | 0.1  | 0.1  | 0.1  | 0.1  | 0.1  | 0.1  |
| LAM | 0.3  | 0.4  | 0.4  | 0.5  | 0.6  | 0.7  | 0.8  | 1.0  | 1.2  | 1.3  | 1.5  |
| MEA | 0.2  | 0.2  | 0.2  | 0.3  | 0.4  | 0.4  | 0.5  | 0.6  | 0.7  | 0.8  | 0.8  |
| NEU | 0.1  | 0.1  | 0.1  | 0.1  | 0.1  | 0.1  | 0.2  | 0.2  | 0.2  | 0.2  | 0.2  |
| OAS | 0.2  | 0.2  | 0.3  | 0.3  | 0.5  | 0.7  | 0.9  | 1.2  | 1.6  | 2.0  | 2.4  |
| REF | 0.6  | 0.4  | 0.4  | 0.3  | 0.4  | 0.5  | 0.5  | 0.6  | 0.7  | 0.8  | 0.8  |
| SSA | 0.1  | 0.1  | 0.1  | 0.1  | 0.2  | 0.2  | 0.4  | 0.6  | 1.0  | 1.5  | 2.2  |
| USA | 0.7  | 0.8  | 0.9  | 0.9  | 1.0  | 1.1  | 1.0  | 1.0  | 1.0  | 1.0  | 1.1  |

Table 826: MAgPIE m4p\_SSP1 — Emissions—NH3—Land—Agriculture—Agricultural Soils—Manure applied to Croplands (Mt NH3/yr) [PART 1/2]

|     | 2050 | 2055 | 2060 | 2070 | 2080 | 2090 | 2100 |
|-----|------|------|------|------|------|------|------|
| GLO | 18.2 | 18.3 | 18.1 | 16.8 | 15.1 | 13.3 | 11.7 |
| CAZ | 0.5  | 0.5  | 0.5  | 0.5  | 0.4  | 0.4  | 0.4  |
| CHA | 1.9  | 1.8  | 1.6  | 1.4  | 1.1  | 1.0  | 0.8  |
| EUR | 1.6  | 1.6  | 1.6  | 1.5  | 1.4  | 1.4  | 1.3  |
| IND | 3.7  | 3.7  | 3.6  | 3.3  | 2.9  | 2.5  | 2.1  |
| JPN | 0.1  | 0.1  | 0.1  | 0.1  | 0.1  | 0.1  | 0.1  |
| LAM | 1.7  | 1.7  | 1.7  | 1.5  | 1.2  | 1.0  | 0.9  |
| MEA | 0.9  | 0.9  | 0.8  | 0.7  | 0.6  | 0.5  | 0.4  |
| NEU | 0.2  | 0.2  | 0.2  | 0.2  | 0.2  | 0.2  | 0.2  |
| OAS | 2.7  | 2.7  | 2.7  | 2.6  | 2.5  | 2.1  | 1.7  |
| REF | 0.8  | 0.8  | 0.8  | 0.7  | 0.6  | 0.4  | 0.4  |
| SSA | 3.0  | 3.2  | 3.3  | 3.2  | 2.9  | 2.5  | 2.2  |
| USA | 1.2  | 1.2  | 1.2  | 1.3  | 1.3  | 1.3  | 1.3  |

Table 827: MAgPIE m4p\_SSP1 — Emissions—NH3—Land—Agriculture—Agricultural Soils—Manure applied to Croplands (Mt NH3/yr) [PART 2/2]

|     | 1965 | 1970 | 1975 | 1980 | 1985 | 1990 | 1995 | 2000 | 2005 | 2010 |
|-----|------|------|------|------|------|------|------|------|------|------|
| GLO | 2.25 | 2.72 | 2.92 | 3.36 | 4.52 | 4.52 | 4.60 | 4.76 | 5.24 | 5.52 |
| CAZ | 0.06 | 0.08 | 0.08 | 0.08 | 0.13 | 0.16 | 0.17 | 0.17 | 0.17 | 0.17 |
| CHA | 0.21 | 0.23 | 0.27 | 0.31 | 0.36 | 0.39 | 0.43 | 0.48 | 0.57 | 0.73 |
| EUR | 0.52 | 0.63 | 0.72 | 0.87 | 1.13 | 1.03 | 1.04 | 1.07 | 1.11 | 1.10 |
| IND | 0.23 | 0.27 | 0.28 | 0.28 | 0.30 | 0.35 | 0.39 | 0.42 | 0.46 | 0.53 |
| JPN | 0.04 | 0.05 | 0.06 | 0.07 | 0.08 | 0.08 | 0.08 | 0.07 | 0.07 | 0.08 |
| LAM | 0.16 | 0.20 | 0.25 | 0.27 | 0.46 | 0.37 | 0.39 | 0.44 | 0.50 | 0.58 |
| MEA | 0.05 | 0.09 | 0.10 | 0.12 | 0.17 | 0.17 | 0.19 | 0.21 | 0.25 | 0.29 |
| NEU | 0.05 | 0.05 | 0.06 | 0.06 | 0.09 | 0.09 | 0.09 | 0.09 | 0.11 | 0.11 |
| OAS | 0.12 | 0.14 | 0.16 | 0.19 | 0.24 | 0.28 | 0.33 | 0.36 | 0.42 | 0.49 |
| REF | 0.35 | 0.46 | 0.44 | 0.56 | 0.62 | 0.70 | 0.58 | 0.40 | 0.40 | 0.30 |
| SSA | 0.07 | 0.09 | 0.11 | 0.11 | 0.13 | 0.14 | 0.15 | 0.18 | 0.22 | 0.26 |
| USA | 0.39 | 0.42 | 0.41 | 0.43 | 0.82 | 0.78 | 0.75 | 0.87 | 0.96 | 0.90 |

Table 828: IPCC — Emissions—NH3—Land—Agriculture—Agricultural Soils—Manure applied to Croplands (Mt NH3/yr)

## 14.1.5 Agriculture—Agricultural Soils—Pasture

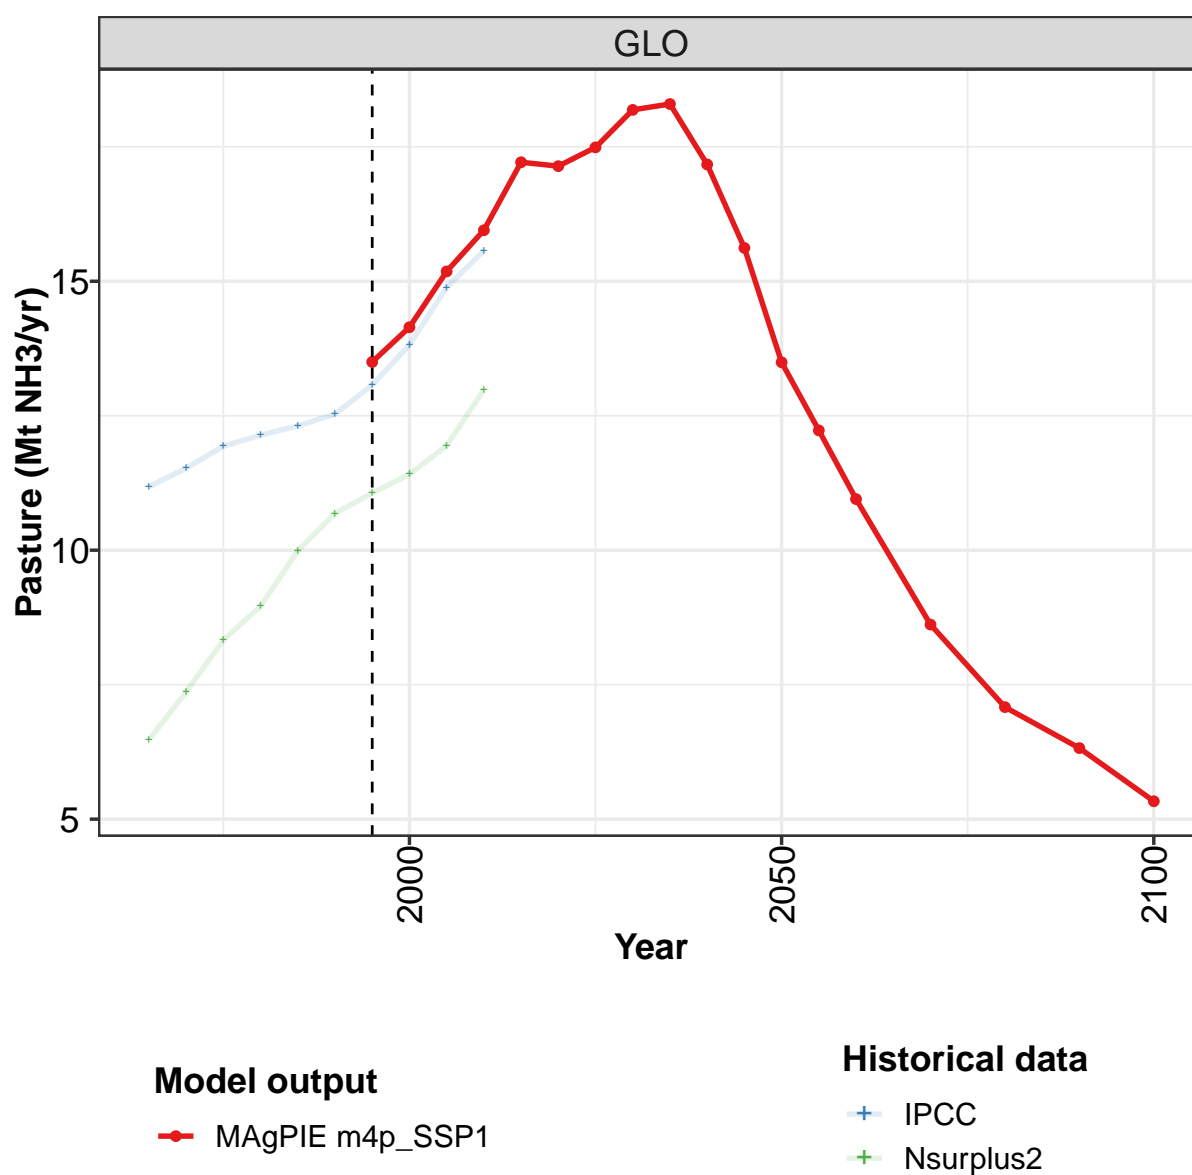

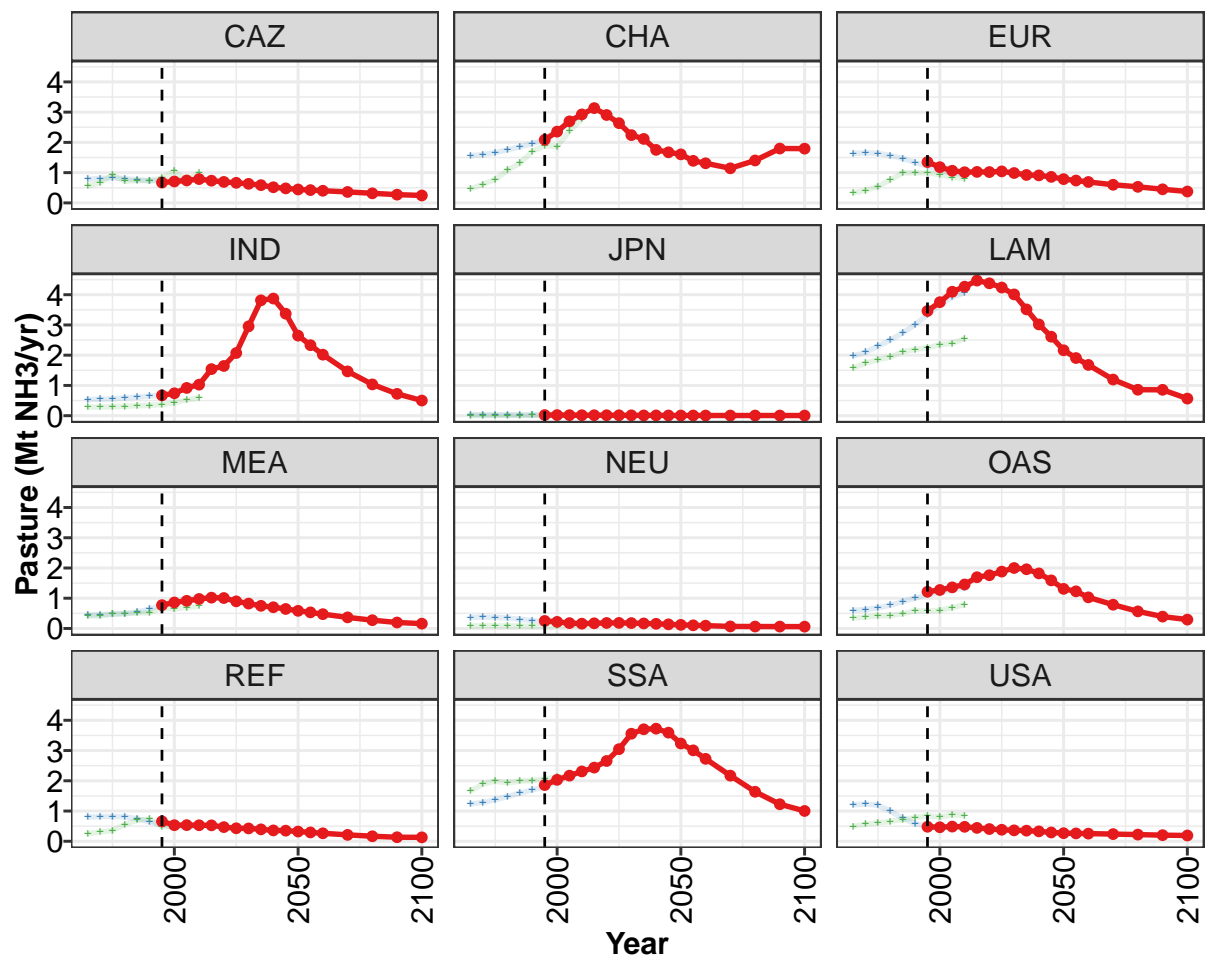

Figure 249: MAgPIE m4p\_SSP1 — Emissions—NH3—Land—Agriculture—Agricultural Soils—Pasture (Mt NH3/yr)

|     | 1995 | 2000 | 2005 | 2010 | 2015 | 2020 | 2025 | 2030 | 2035 | 2040 | 2045 |
|-----|------|------|------|------|------|------|------|------|------|------|------|
| GLO | 13.5 | 14.1 | 15.2 | 15.9 | 17.2 | 17.1 | 17.5 | 18.2 | 18.3 | 17.2 | 15.6 |
| CAZ | 0.7  | 0.7  | 0.7  | 0.8  | 0.7  | 0.7  | 0.7  | 0.6  | 0.6  | 0.5  | 0.5  |
| CHA | 2.1  | 2.4  | 2.7  | 2.9  | 3.1  | 2.9  | 2.6  | 2.2  | 2.1  | 1.8  | 1.7  |
| EUR | 1.3  | 1.2  | 1.1  | 1.0  | 1.0  | 1.0  | 1.0  | 1.0  | 0.9  | 0.9  | 0.9  |
| IND | 0.7  | 0.7  | 0.9  | 1.0  | 1.5  | 1.6  | 2.1  | 3.0  | 3.8  | 3.9  | 3.4  |
| JPN | 0.0  | 0.0  | 0.0  | 0.0  | 0.0  | 0.0  | 0.0  | 0.0  | 0.0  | 0.0  | 0.0  |
| LAM | 3.5  | 3.8  | 4.1  | 4.3  | 4.5  | 4.4  | 4.2  | 4.0  | 3.5  | 3.0  | 2.6  |
| MEA | 0.8  | 0.9  | 0.9  | 1.0  | 1.0  | 1.0  | 0.9  | 0.8  | 0.7  | 0.7  | 0.6  |
| NEU | 0.2  | 0.2  | 0.2  | 0.2  | 0.2  | 0.2  | 0.2  | 0.2  | 0.2  | 0.2  | 0.1  |
| OAS | 1.2  | 1.3  | 1.4  | 1.5  | 1.7  | 1.8  | 1.9  | 2.0  | 2.0  | 1.8  | 1.6  |
| REF | 0.7  | 0.5  | 0.5  | 0.5  | 0.5  | 0.5  | 0.4  | 0.4  | 0.4  | 0.4  | 0.4  |
| SSA | 1.9  | 2.0  | 2.2  | 2.3  | 2.4  | 2.7  | 3.0  | 3.6  | 3.7  | 3.7  | 3.6  |
| USA | 0.5  | 0.5  | 0.5  | 0.5  | 0.4  | 0.4  | 0.4  | 0.4  | 0.4  | 0.3  | 0.3  |

Table 829: MAgPIE m4p\_SSP1 — Emissions—NH3—Land—Agriculture—Agricultural Soils—Pasture (Mt NH3/yr) [PART 1/2]

|     | 2050 | 2055 | 2060 | 2070 | 2080 | 2090 | 2100 |
|-----|------|------|------|------|------|------|------|
| GLO | 13.5 | 12.2 | 11.0 | 8.6  | 7.1  | 6.3  | 5.3  |
| CAZ | 0.4  | 0.4  | 0.4  | 0.4  | 0.3  | 0.3  | 0.2  |
| CHA | 1.6  | 1.4  | 1.3  | 1.1  | 1.4  | 1.8  | 1.8  |
| EUR | 0.8  | 0.7  | 0.7  | 0.6  | 0.5  | 0.5  | 0.4  |
| IND | 2.6  | 2.3  | 2.0  | 1.5  | 1.0  | 0.7  | 0.5  |
| JPN | 0.0  | 0.0  | 0.0  | 0.0  | 0.0  | 0.0  | 0.0  |
| LAM | 2.2  | 1.9  | 1.7  | 1.2  | 0.9  | 0.9  | 0.6  |
| MEA | 0.6  | 0.5  | 0.5  | 0.4  | 0.3  | 0.2  | 0.2  |
| NEU | 0.1  | 0.1  | 0.1  | 0.1  | 0.1  | 0.1  | 0.1  |
| OAS | 1.3  | 1.2  | 1.0  | 0.8  | 0.6  | 0.4  | 0.3  |
| REF | 0.3  | 0.3  | 0.3  | 0.2  | 0.2  | 0.1  | 0.1  |
| SSA | 3.2  | 3.0  | 2.7  | 2.2  | 1.6  | 1.2  | 1.0  |
| USA | 0.3  | 0.3  | 0.3  | 0.2  | 0.2  | 0.2  | 0.2  |

Table 830: MAgPIE m4p\_SSP1 — Emissions—NH3—Land—Agriculture—Agricultural Soils—Pasture (Mt NH3/yr) [PART 2/2]

|     | 1965 | 1970 | 1975 | 1980 | 1985 | 1990 | 1995 | 2000 | 2005 | 2010 |
|-----|------|------|------|------|------|------|------|------|------|------|
| GLO | 11.2 | 11.5 | 11.9 | 12.1 | 12.3 | 12.5 | 13.1 | 13.8 | 14.9 | 15.6 |
| CAZ | 0.8  | 0.8  | 0.8  | 0.8  | 0.8  | 0.7  | 0.7  | 0.8  | 0.8  | 0.8  |
| CHA | 1.6  | 1.6  | 1.7  | 1.8  | 1.9  | 2.0  | 2.1  | 2.4  | 2.7  | 2.9  |
| EUR | 1.6  | 1.7  | 1.6  | 1.6  | 1.5  | 1.3  | 1.2  | 1.1  | 1.0  | 0.9  |
| IND | 0.5  | 0.5  | 0.6  | 0.6  | 0.6  | 0.6  | 0.7  | 0.7  | 1.0  | 1.1  |
| JPN | 0.0  | 0.0  | 0.0  | 0.0  | 0.0  | 0.0  | 0.0  | 0.0  | 0.0  | 0.0  |
| LAM | 2.0  | 2.1  | 2.3  | 2.5  | 2.7  | 3.0  | 3.3  | 3.7  | 3.9  | 4.1  |
| MEA | 0.4  | 0.5  | 0.5  | 0.5  | 0.5  | 0.6  | 0.8  | 0.9  | 1.0  | 1.0  |
| NEU | 0.4  | 0.4  | 0.4  | 0.3  | 0.3  | 0.3  | 0.2  | 0.2  | 0.2  | 0.1  |
| OAS | 0.6  | 0.6  | 0.7  | 0.8  | 0.9  | 1.0  | 1.1  | 1.2  | 1.3  | 1.3  |
| REF | 0.8  | 0.8  | 0.8  | 0.8  | 0.7  | 0.6  | 0.5  | 0.5  | 0.5  | 0.5  |
| SSA | 1.2  | 1.3  | 1.4  | 1.5  | 1.6  | 1.7  | 1.8  | 2.0  | 2.2  | 2.3  |
| USA | 1.2  | 1.2  | 1.2  | 1.0  | 0.8  | 0.6  | 0.5  | 0.5  | 0.5  | 0.5  |

Table 831: IPCC — Emissions—NH3—Land—Agriculture—Agricultural Soils—Pasture (Mt NH3/yr)

|     | 1965 | 1970 | 1975 | 1980 | 1985 | 1990 | 1995 | 2000 | 2005 | 2010 |
|-----|------|------|------|------|------|------|------|------|------|------|
| GLO | 6.5  | 7.4  | 8.3  | 9.0  | 10.0 | 10.7 | 11.1 | 11.4 | 11.9 | 13.0 |
| CAZ | 0.6  | 0.7  | 0.9  | 0.7  | 0.7  | 0.7  | 0.8  | 1.0  | 0.8  | 1.0  |
| CHA | 0.5  | 0.6  | 0.8  | 1.1  | 1.3  | 1.7  | 1.9  | 1.9  | 2.4  | 2.8  |
| EUR | 0.3  | 0.4  | 0.5  | 0.8  | 1.0  | 1.0  | 1.0  | 0.9  | 0.8  | 0.8  |
| IND | 0.3  | 0.3  | 0.3  | 0.3  | 0.3  | 0.3  | 0.4  | 0.4  | 0.5  | 0.6  |
| JPN | 0.0  | 0.0  | 0.0  | 0.0  | 0.0  | 0.0  | 0.0  | 0.0  | 0.0  | 0.0  |
| LAM | 1.6  | 1.7  | 1.9  | 1.9  | 2.1  | 2.2  | 2.2  | 2.3  | 2.4  | 2.6  |
| MEA | 0.4  | 0.4  | 0.5  | 0.5  | 0.5  | 0.5  | 0.7  | 0.6  | 0.7  | 0.7  |
| NEU | 0.1  | 0.1  | 0.1  | 0.1  | 0.1  | 0.1  | 0.1  | 0.1  | 0.1  | 0.1  |
| OAS | 0.3  | 0.4  | 0.4  | 0.4  | 0.5  | 0.6  | 0.6  | 0.6  | 0.7  | 0.8  |
| REF | 0.2  | 0.3  | 0.4  | 0.6  | 0.7  | 0.7  | 0.5  | 0.5  | 0.5  | 0.5  |
| SSA | 1.7  | 1.9  | 2.0  | 1.9  | 2.0  | 2.0  | 2.1  | 2.1  | 2.2  | 2.3  |
| USA | 0.5  | 0.6  | 0.6  | 0.7  | 0.7  | 0.8  | 0.8  | 0.8  | 0.9  | 0.9  |

Table 832: Nsurplus2 — Emissions—NH3—Land—Agriculture—Agricultural Soils—Pasture (Mt NH3/yr)

## 14.1.6 Agriculture—Animal Waste Management

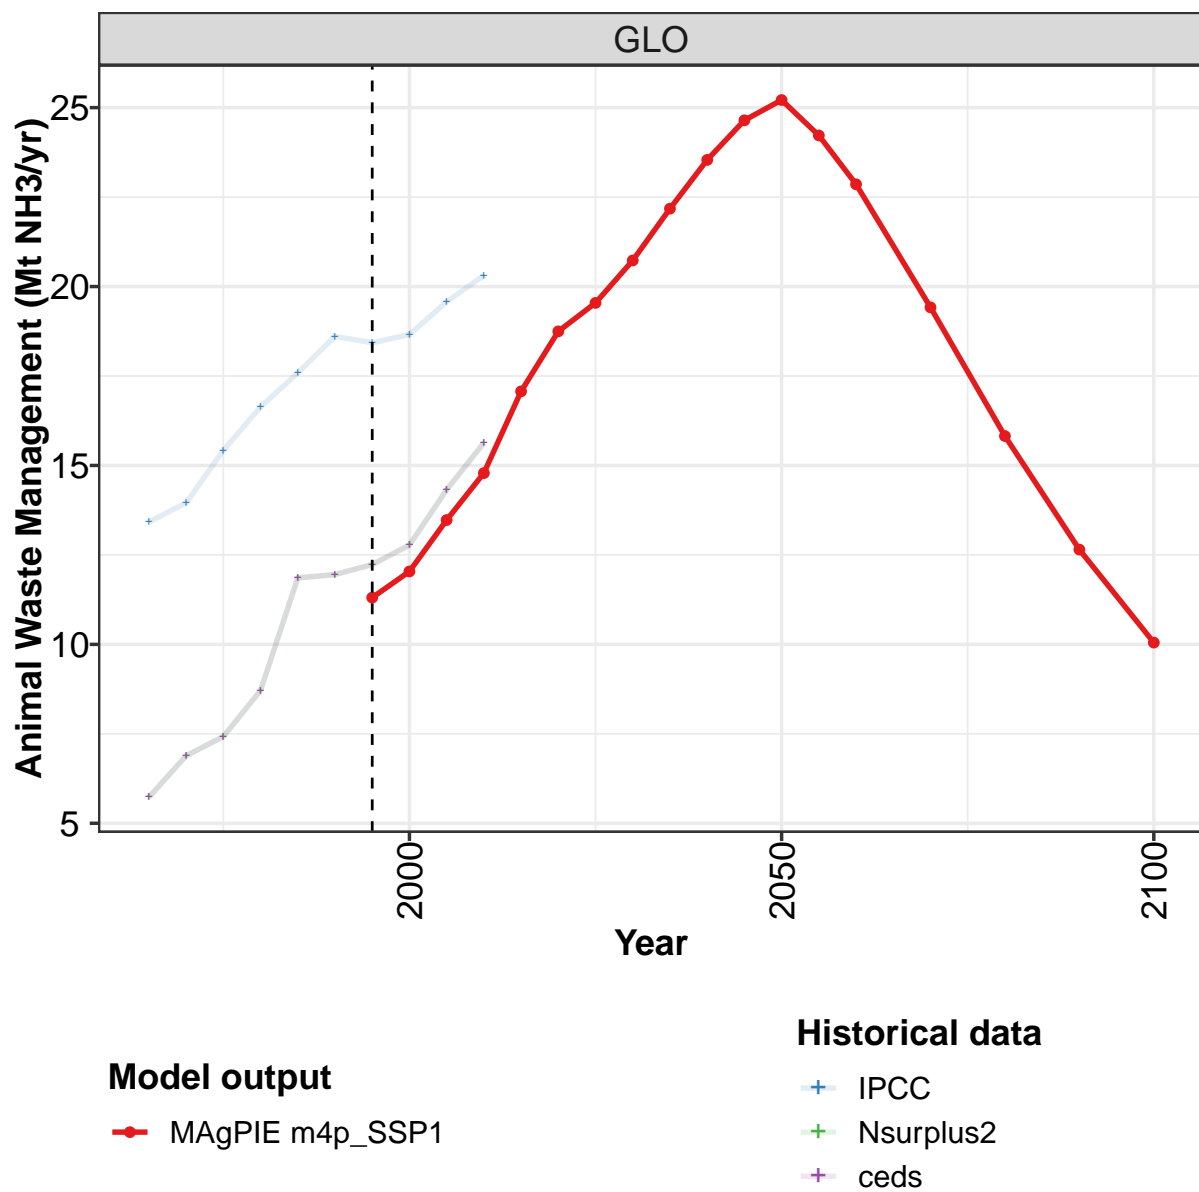

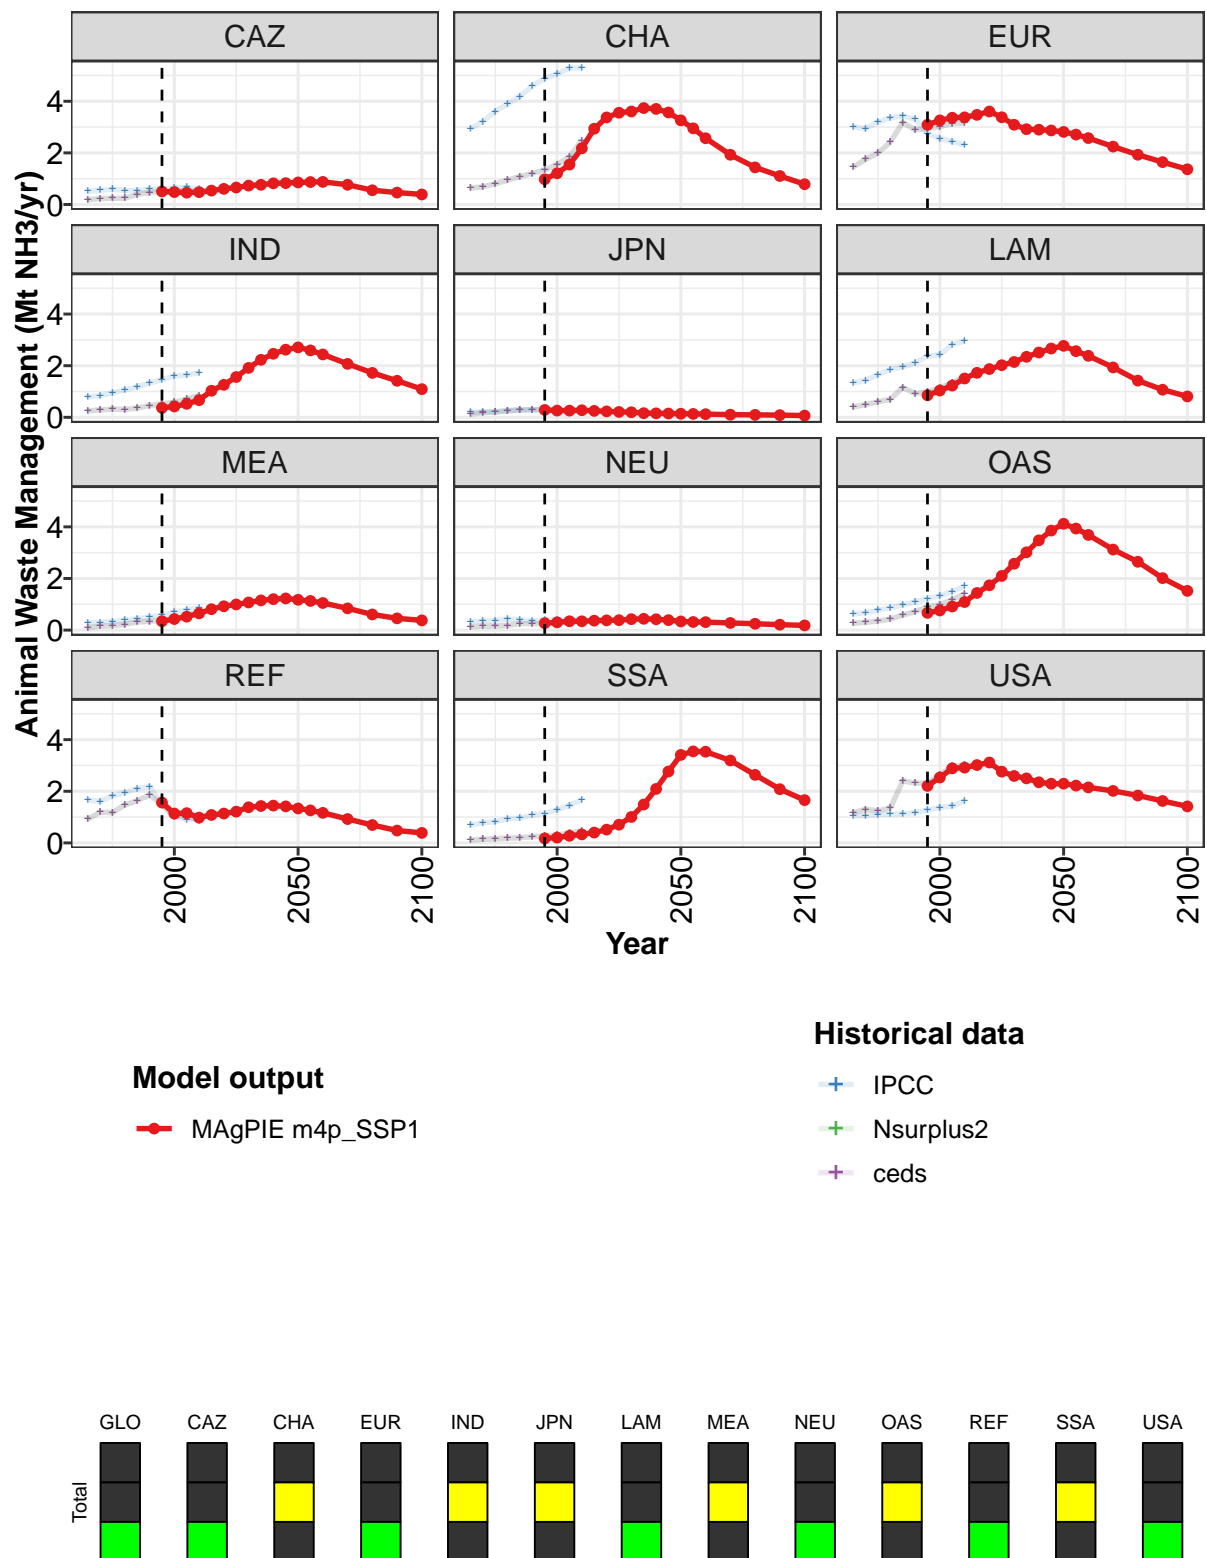

Figure 250: MAgPIE m4p\_SSP1 — Emissions—NH3—Land—Agriculture—Animal Waste Management (Mt NH3/yr)



|     | 1995 | 2000 | 2005 | 2010 | 2015 | 2020 | 2025 | 2030 | 2035 | 2040 | 2045 |
|-----|------|------|------|------|------|------|------|------|------|------|------|
| GLO | 11.3 | 12.0 | 13.5 | 14.8 | 17.1 | 18.7 | 19.5 | 20.7 | 22.2 | 23.5 | 24.6 |
| CAZ | 0.5  | 0.5  | 0.5  | 0.5  | 0.5  | 0.6  | 0.7  | 0.7  | 0.8  | 0.8  | 0.8  |
| CHA | 1.0  | 1.2  | 1.5  | 2.2  | 2.9  | 3.4  | 3.6  | 3.6  | 3.7  | 3.7  | 3.6  |
| EUR | 3.1  | 3.3  | 3.4  | 3.4  | 3.5  | 3.6  | 3.4  | 3.1  | 2.9  | 2.9  | 2.9  |
| IND | 0.4  | 0.4  | 0.5  | 0.7  | 1.0  | 1.3  | 1.6  | 1.9  | 2.2  | 2.5  | 2.6  |
| JPN | 0.3  | 0.3  | 0.3  | 0.3  | 0.2  | 0.2  | 0.2  | 0.2  | 0.2  | 0.2  | 0.1  |
| LAM | 0.9  | 1.0  | 1.2  | 1.5  | 1.7  | 1.9  | 2.0  | 2.1  | 2.3  | 2.5  | 2.7  |
| MEA | 0.3  | 0.4  | 0.5  | 0.6  | 0.8  | 0.9  | 1.0  | 1.1  | 1.2  | 1.2  | 1.2  |
| NEU | 0.3  | 0.3  | 0.3  | 0.3  | 0.4  | 0.4  | 0.4  | 0.4  | 0.4  | 0.4  | 0.4  |
| OAS | 0.7  | 0.8  | 0.9  | 1.1  | 1.4  | 1.7  | 2.1  | 2.6  | 3.0  | 3.5  | 3.9  |
| REF | 1.6  | 1.1  | 1.2  | 1.0  | 1.1  | 1.1  | 1.2  | 1.4  | 1.4  | 1.4  | 1.4  |
| SSA | 0.2  | 0.2  | 0.3  | 0.3  | 0.4  | 0.5  | 0.7  | 1.0  | 1.5  | 2.1  | 2.8  |
| USA | 2.2  | 2.5  | 2.9  | 2.9  | 3.0  | 3.1  | 2.8  | 2.6  | 2.5  | 2.3  | 2.3  |

Table 833: MAgPIE m4p\_SSP1 — Emissions—NH3—Land—Agriculture—Animal Waste Management (Mt NH3/yr) [PART 1/2]

|     | 2050 | 2055 | 2060 | 2070 | 2080 | 2090 | 2100 |
|-----|------|------|------|------|------|------|------|
| GLO | 25.2 | 24.2 | 22.9 | 19.4 | 15.8 | 12.6 | 10.1 |
| CAZ | 0.9  | 0.9  | 0.9  | 0.8  | 0.6  | 0.5  | 0.4  |
| CHA | 3.3  | 3.0  | 2.6  | 1.9  | 1.4  | 1.1  | 0.8  |
| EUR | 2.8  | 2.7  | 2.6  | 2.2  | 1.9  | 1.6  | 1.4  |
| IND | 2.7  | 2.6  | 2.4  | 2.1  | 1.7  | 1.4  | 1.1  |
| JPN | 0.1  | 0.1  | 0.1  | 0.1  | 0.1  | 0.1  | 0.1  |
| LAM | 2.8  | 2.6  | 2.4  | 1.9  | 1.4  | 1.1  | 0.8  |
| MEA | 1.2  | 1.1  | 1.1  | 0.8  | 0.6  | 0.5  | 0.4  |
| NEU | 0.3  | 0.3  | 0.3  | 0.3  | 0.2  | 0.2  | 0.2  |
| OAS | 4.1  | 3.9  | 3.7  | 3.1  | 2.6  | 2.0  | 1.5  |
| REF | 1.3  | 1.3  | 1.2  | 0.9  | 0.7  | 0.5  | 0.4  |
| SSA | 3.4  | 3.5  | 3.5  | 3.2  | 2.6  | 2.1  | 1.7  |
| USA | 2.3  | 2.2  | 2.2  | 2.0  | 1.8  | 1.6  | 1.4  |

Table 834: MAgPIE m4p\_SSP1 — Emissions—NH3—Land—Agriculture—Animal Waste Management (Mt NH3/yr) [PART 2/2]

|     | 1965 | 1970 | 1975 | 1980 | 1985 | 1990 | 1995 | 2000 | 2005 | 2010 |
|-----|------|------|------|------|------|------|------|------|------|------|
| GLO | 13.4 | 14.0 | 15.4 | 16.6 | 17.6 | 18.6 | 18.4 | 18.7 | 19.6 | 20.3 |
| CAZ | 0.5  | 0.6  | 0.6  | 0.6  | 0.5  | 0.6  | 0.6  | 0.6  | 0.7  | 0.6  |
| CHA | 2.9  | 3.2  | 3.6  | 3.9  | 4.2  | 4.6  | 4.9  | 5.1  | 5.3  | 5.3  |
| EUR | 3.0  | 2.9  | 3.2  | 3.4  | 3.4  | 3.3  | 2.7  | 2.6  | 2.4  | 2.3  |
| IND | 0.8  | 0.8  | 0.9  | 1.1  | 1.2  | 1.3  | 1.5  | 1.6  | 1.6  | 1.7  |
| JPN | 0.2  | 0.2  | 0.2  | 0.3  | 0.3  | 0.3  | 0.3  | 0.3  | 0.3  | 0.3  |
| LAM | 1.3  | 1.4  | 1.6  | 1.9  | 1.9  | 2.1  | 2.4  | 2.4  | 2.8  | 3.0  |
| MEA | 0.3  | 0.3  | 0.3  | 0.4  | 0.4  | 0.5  | 0.6  | 0.7  | 0.8  | 0.8  |
| NEU | 0.3  | 0.3  | 0.4  | 0.4  | 0.4  | 0.4  | 0.4  | 0.4  | 0.4  | 0.4  |
| OAS | 0.6  | 0.7  | 0.8  | 0.9  | 1.0  | 1.1  | 1.2  | 1.3  | 1.5  | 1.7  |
| REF | 1.7  | 1.6  | 1.8  | 1.9  | 2.1  | 2.2  | 1.5  | 1.0  | 0.9  | 0.9  |
| SSA | 0.7  | 0.8  | 0.8  | 0.9  | 1.0  | 1.1  | 1.1  | 1.3  | 1.5  | 1.7  |
| USA | 1.0  | 1.1  | 1.1  | 1.1  | 1.1  | 1.2  | 1.3  | 1.4  | 1.4  | 1.6  |

Table 835: ceds — Emissions—NH3—Land—Agriculture—Animal Waste Management (Mt NH3/yr)

|     | 1965 | 1970 | 1975 | 1980 | 1985 | 1990 | 1995 | 2000 | 2005 | 2010 |
|-----|------|------|------|------|------|------|------|------|------|------|
| GLO | 5.7  | 6.9  | 7.4  | 8.7  | 11.9 | 12.0 | 12.2 | 12.8 | 14.3 | 15.6 |
| CAZ | 0.2  | 0.2  | 0.2  | 0.2  | 0.4  | 0.5  | 0.5  | 0.5  | 0.5  | 0.5  |
| CHA | 0.6  | 0.7  | 0.8  | 0.9  | 1.1  | 1.2  | 1.3  | 1.6  | 1.8  | 2.5  |
| EUR | 1.4  | 1.8  | 2.0  | 2.4  | 3.2  | 2.9  | 2.9  | 3.0  | 3.1  | 3.2  |
| IND | 0.2  | 0.3  | 0.3  | 0.3  | 0.4  | 0.5  | 0.5  | 0.6  | 0.7  | 0.9  |
| JPN | 0.1  | 0.2  | 0.2  | 0.3  | 0.3  | 0.3  | 0.3  | 0.3  | 0.3  | 0.3  |
| LAM | 0.4  | 0.5  | 0.6  | 0.7  | 1.2  | 0.9  | 1.0  | 1.1  | 1.3  | 1.6  |
| MEA | 0.1  | 0.2  | 0.2  | 0.2  | 0.3  | 0.3  | 0.4  | 0.5  | 0.5  | 0.7  |
| NEU | 0.1  | 0.2  | 0.2  | 0.2  | 0.3  | 0.2  | 0.3  | 0.3  | 0.3  | 0.3  |
| OAS | 0.3  | 0.3  | 0.3  | 0.4  | 0.6  | 0.7  | 0.9  | 1.0  | 1.2  | 1.4  |
| REF | 0.9  | 1.2  | 1.2  | 1.5  | 1.6  | 1.9  | 1.5  | 1.0  | 1.0  | 0.9  |
| SSA | 0.1  | 0.1  | 0.2  | 0.2  | 0.2  | 0.2  | 0.3  | 0.3  | 0.4  | 0.5  |
| USA | 1.2  | 1.3  | 1.2  | 1.4  | 2.4  | 2.3  | 2.3  | 2.6  | 3.0  | 3.0  |

Table 836: IPCC — Emissions—NH3—Land—Agriculture—Animal Waste Management (Mt NH3/yr)

|     | 1965 | 1970 | 1975 | 1980 | 1985 | 1990 | 1995 | 2000 | 2005 | 2010 |
|-----|------|------|------|------|------|------|------|------|------|------|
| GLO | 5.7  | 6.9  | 7.4  | 8.7  | 11.9 | 12.0 | 12.2 | 12.8 | 14.3 | 15.6 |
| CAZ | 0.2  | 0.2  | 0.2  | 0.2  | 0.4  | 0.5  | 0.5  | 0.5  | 0.5  | 0.5  |
| CHA | 0.6  | 0.7  | 0.8  | 0.9  | 1.1  | 1.2  | 1.3  | 1.6  | 1.8  | 2.5  |
| EUR | 1.4  | 1.8  | 2.0  | 2.4  | 3.2  | 2.9  | 2.9  | 3.0  | 3.1  | 3.2  |
| IND | 0.2  | 0.3  | 0.3  | 0.3  | 0.4  | 0.5  | 0.5  | 0.6  | 0.7  | 0.9  |
| JPN | 0.1  | 0.2  | 0.2  | 0.3  | 0.3  | 0.3  | 0.3  | 0.3  | 0.3  | 0.3  |
| LAM | 0.4  | 0.5  | 0.6  | 0.7  | 1.2  | 0.9  | 1.0  | 1.1  | 1.3  | 1.6  |
| MEA | 0.1  | 0.2  | 0.2  | 0.2  | 0.3  | 0.3  | 0.4  | 0.5  | 0.5  | 0.7  |
| NEU | 0.1  | 0.2  | 0.2  | 0.2  | 0.3  | 0.2  | 0.3  | 0.3  | 0.3  | 0.3  |
| OAS | 0.3  | 0.3  | 0.3  | 0.4  | 0.6  | 0.7  | 0.9  | 1.0  | 1.2  | 1.4  |
| REF | 0.9  | 1.2  | 1.2  | 1.5  | 1.6  | 1.9  | 1.5  | 1.0  | 1.0  | 0.9  |
| SSA | 0.1  | 0.1  | 0.2  | 0.2  | 0.2  | 0.2  | 0.3  | 0.3  | 0.4  | 0.5  |
| USA | 1.2  | 1.3  | 1.2  | 1.4  | 2.4  | 2.3  | 2.3  | 2.6  | 3.0  | 3.0  |

Table 837: Nsurplus2 — Emissions—NH3—Land—Agriculture—Animal Waste Management (Mt NH3/yr)

## 15 NO2

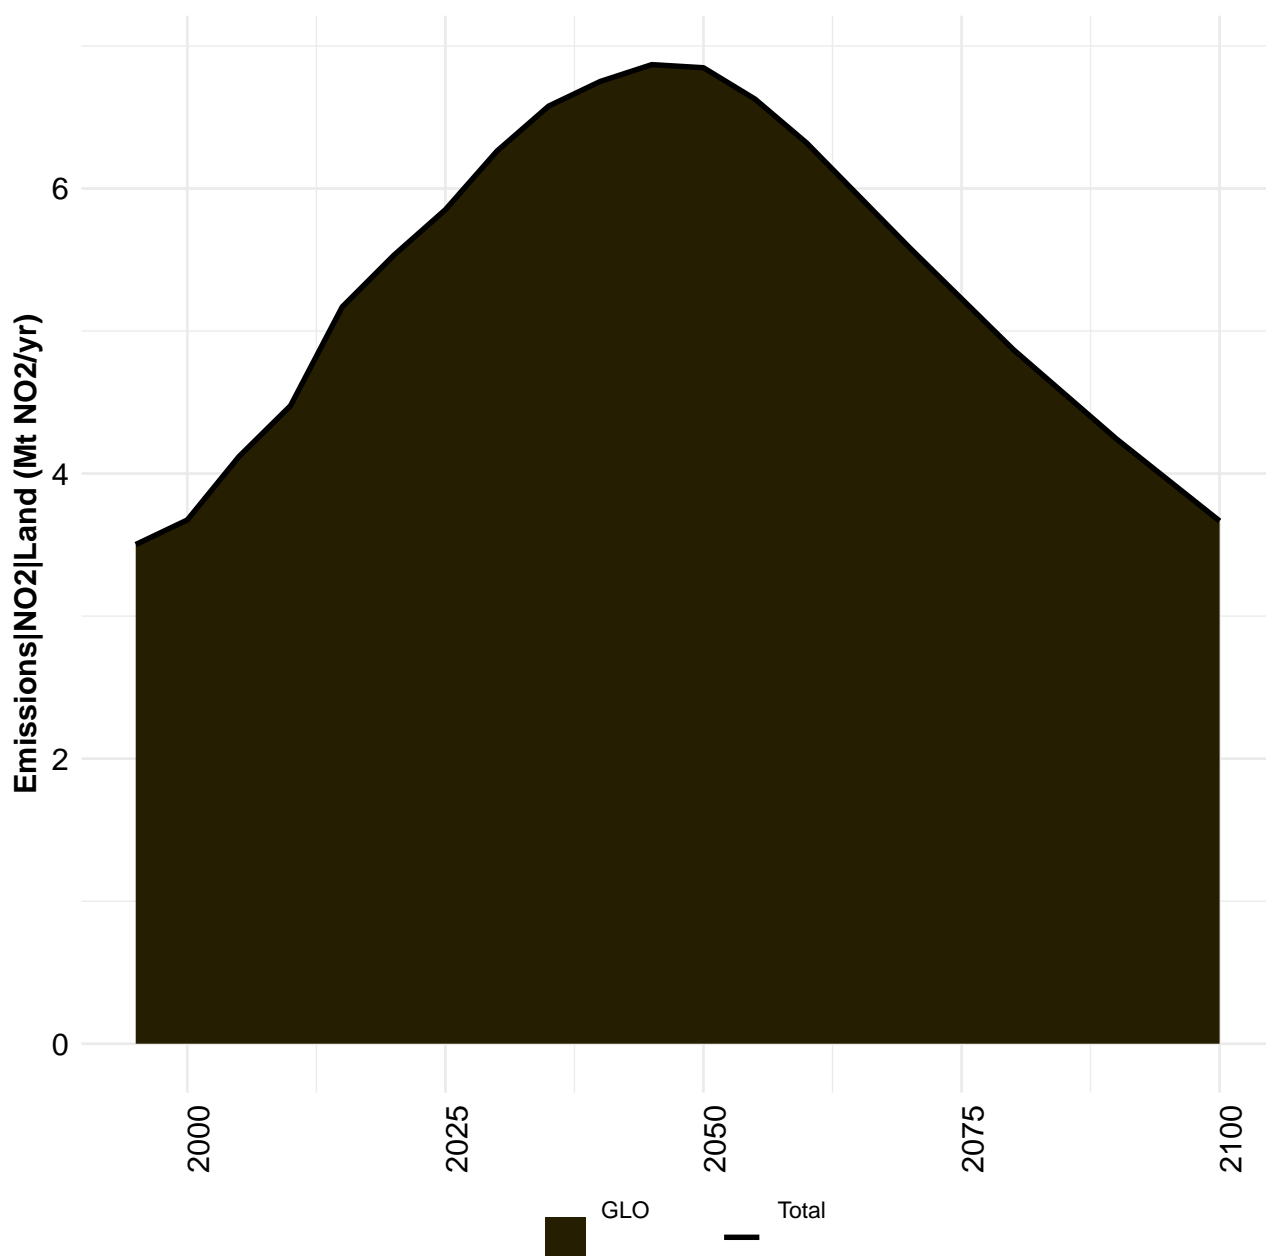

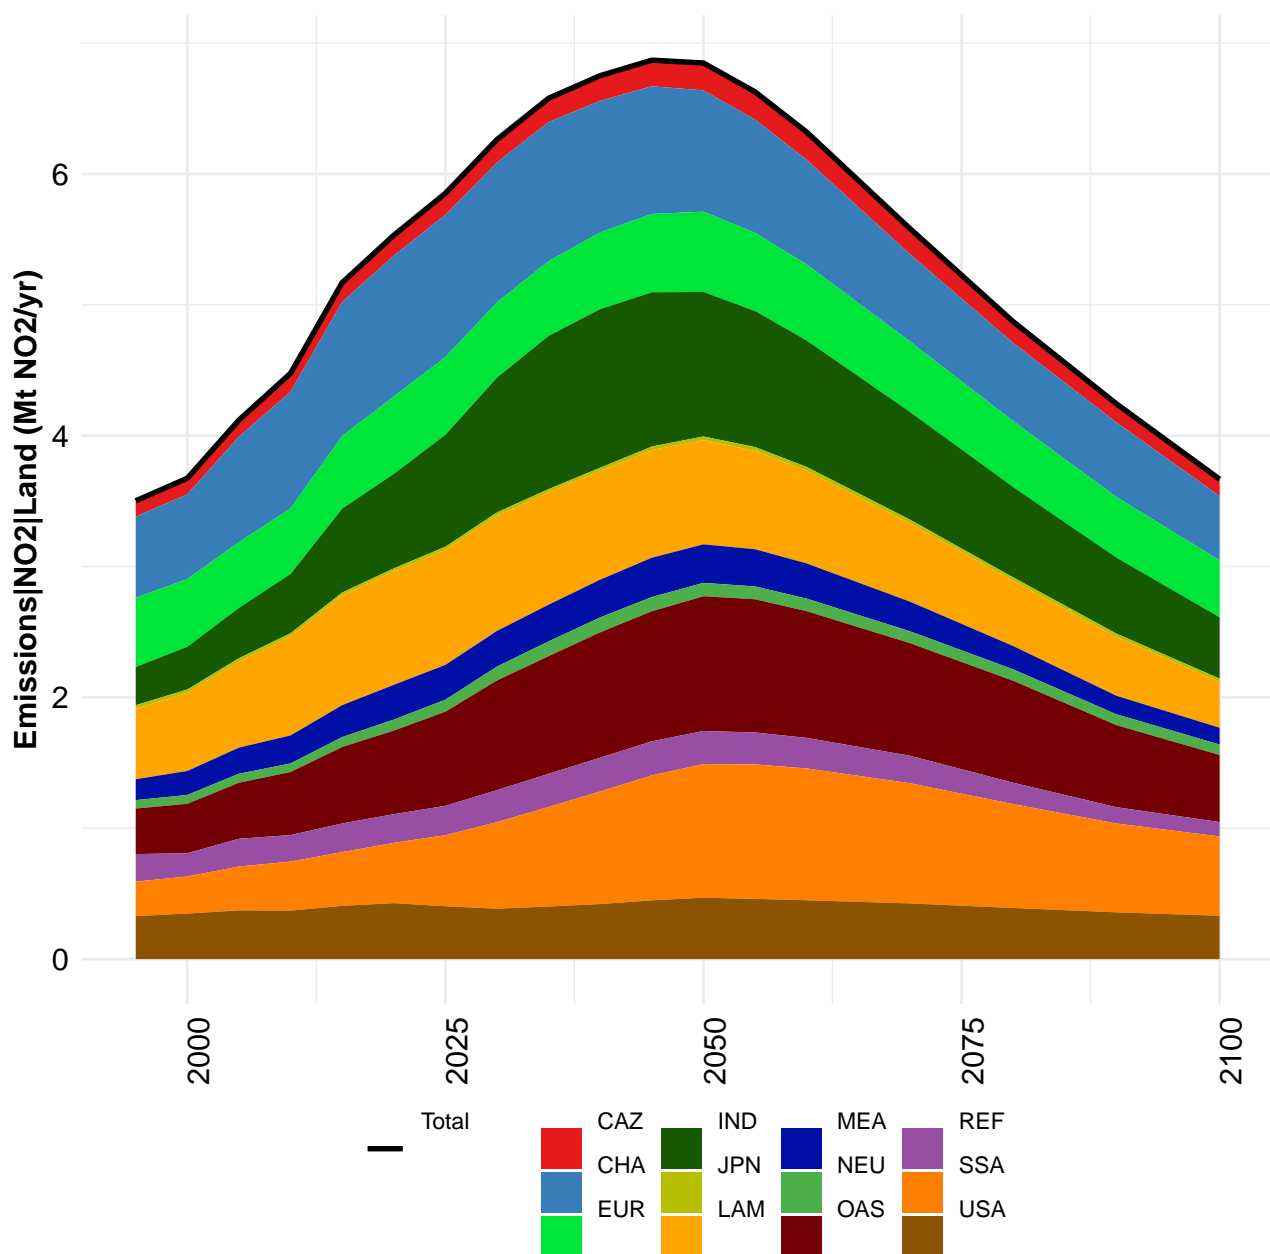

## 15.1 Land

## 15.1.1 Agriculture

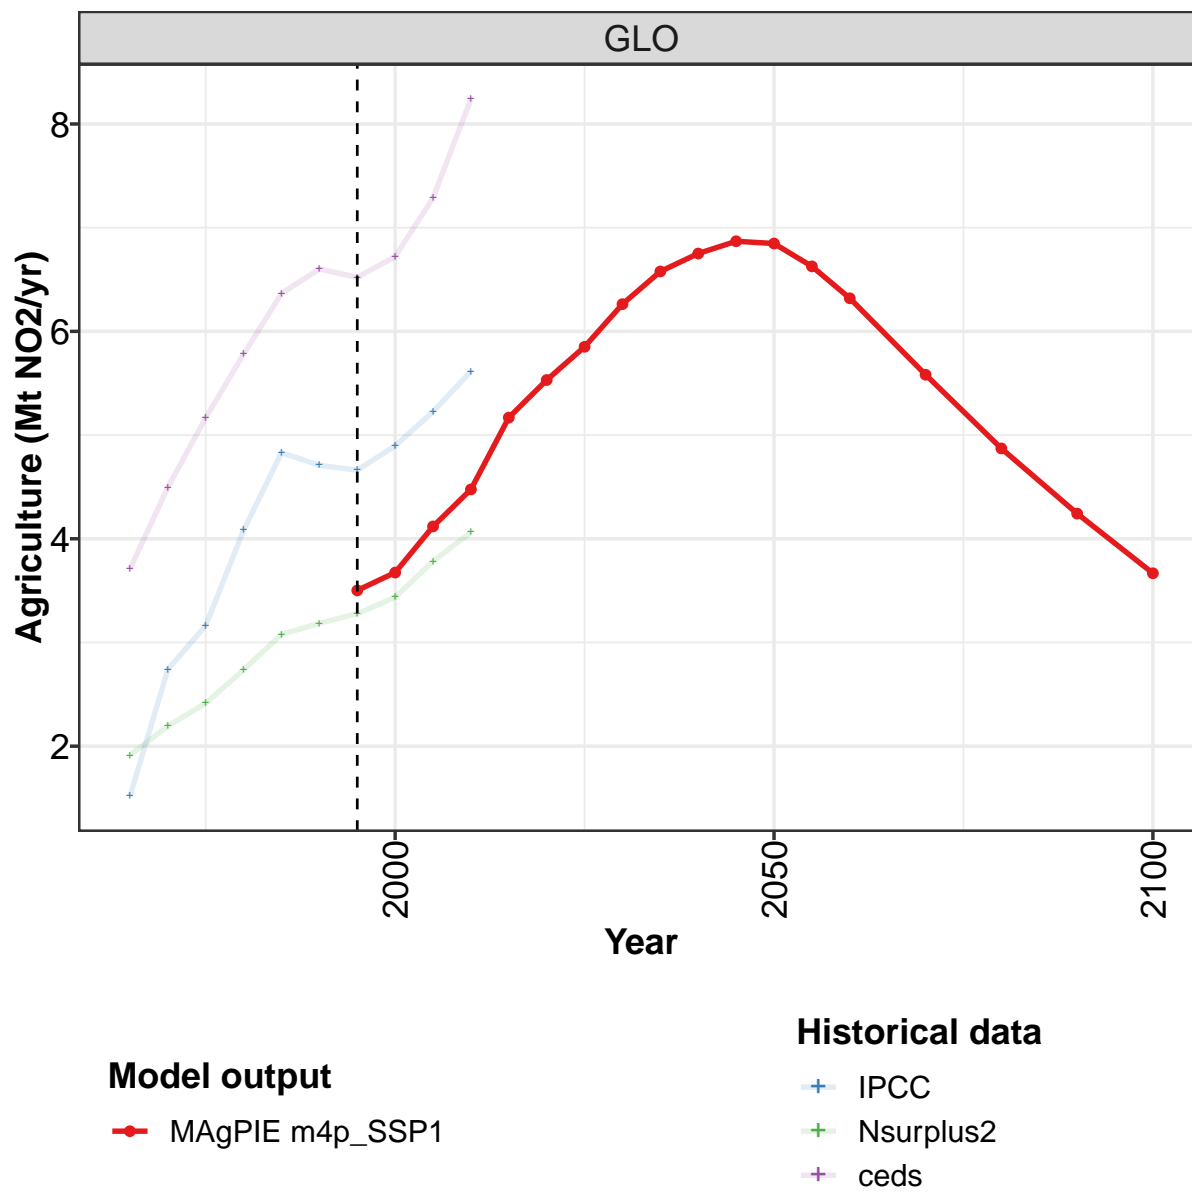

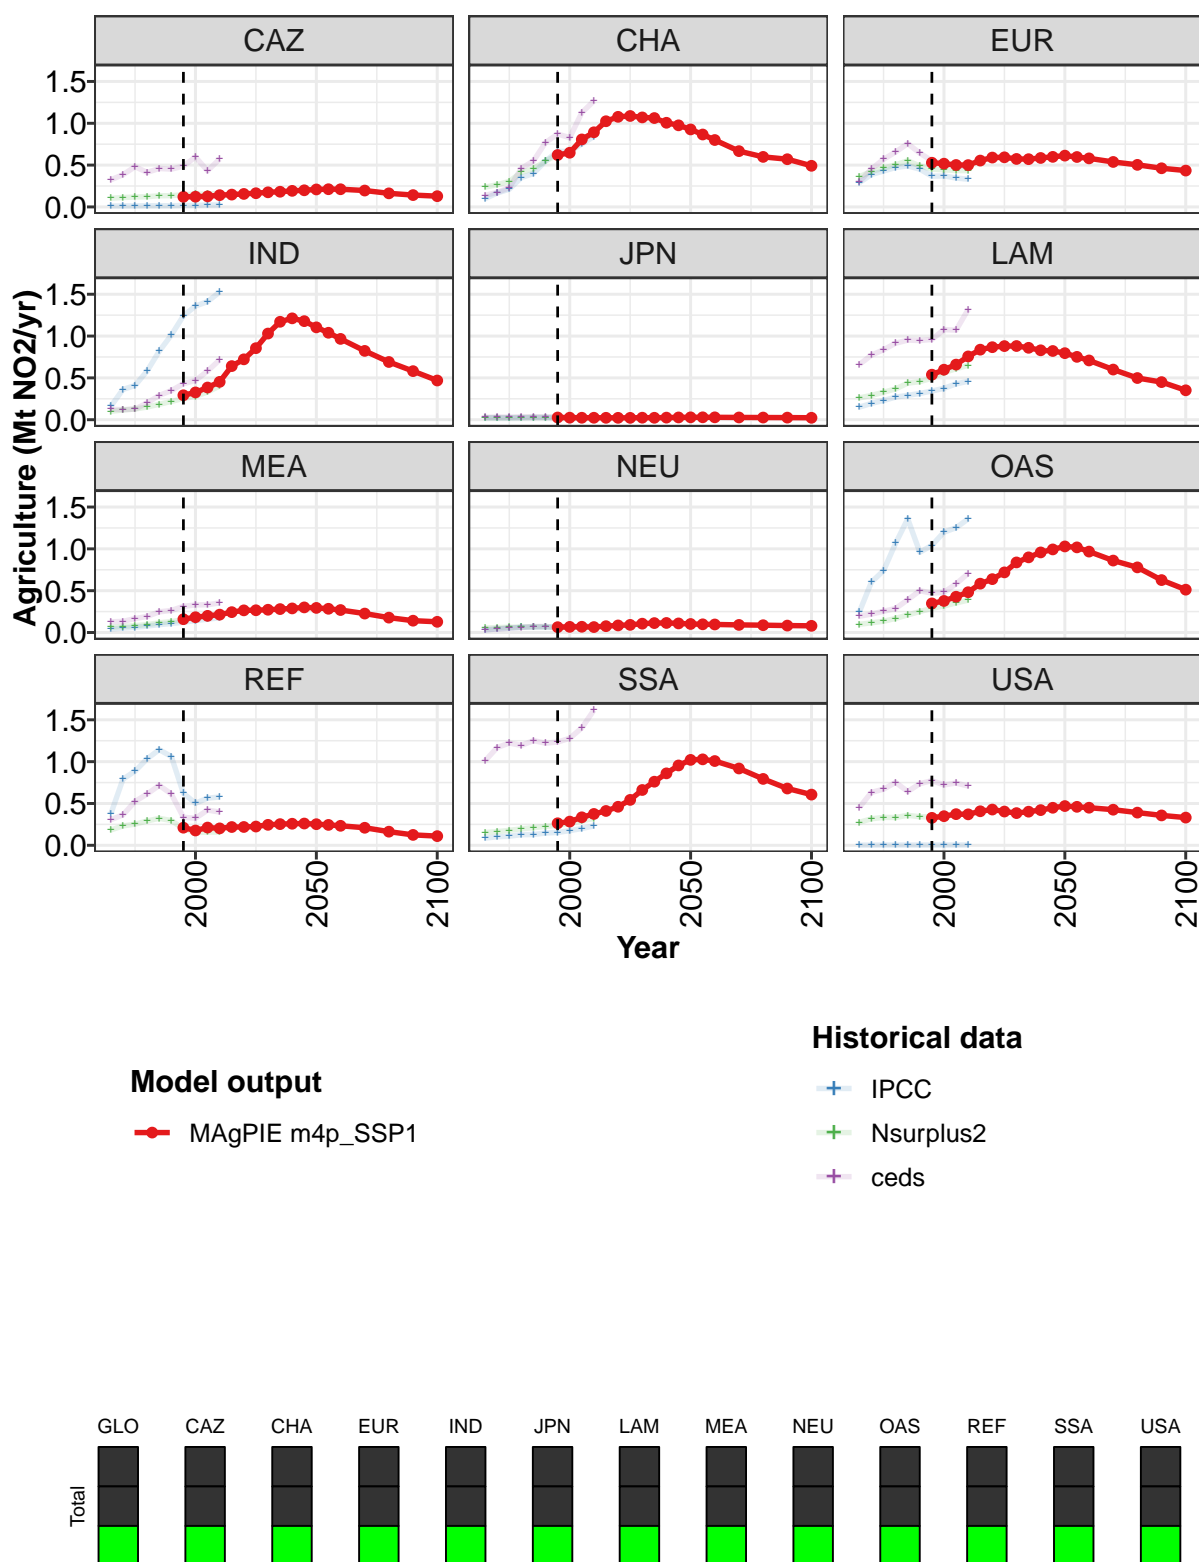

Figure 251: MAgPIE m4p\_SSP1 — Emissions—NO2—Land—Agriculture (Mt NO2/yr)

|     | 1995 | 2000 | 2005 | 2010 | 2015 | 2020 | 2025 | 2030 | 2035 | 2040 | 2045 |
|-----|------|------|------|------|------|------|------|------|------|------|------|
| GLO | 3.50 | 3.67 | 4.12 | 4.48 | 5.17 | 5.53 | 5.85 | 6.26 | 6.58 | 6.75 | 6.87 |
| CAZ | 0.12 | 0.12 | 0.13 | 0.14 | 0.15 | 0.16 | 0.16 | 0.17 | 0.18 | 0.19 | 0.20 |
| CHA | 0.62 | 0.65 | 0.81 | 0.89 | 1.02 | 1.08 | 1.09 | 1.07 | 1.06 | 1.01 | 0.98 |
| EUR | 0.53 | 0.52 | 0.50 | 0.50 | 0.55 | 0.59 | 0.59 | 0.57 | 0.57 | 0.59 | 0.60 |
| IND | 0.29 | 0.33 | 0.39 | 0.45 | 0.64 | 0.72 | 0.86 | 1.03 | 1.17 | 1.21 | 1.18 |
| JPN | 0.03 | 0.02 | 0.02 | 0.02 | 0.02 | 0.02 | 0.02 | 0.02 | 0.02 | 0.03 | 0.03 |
| LAM | 0.54 | 0.60 | 0.66 | 0.76 | 0.84 | 0.87 | 0.88 | 0.88 | 0.86 | 0.83 | 0.82 |
| MEA | 0.16 | 0.18 | 0.20 | 0.21 | 0.24 | 0.26 | 0.27 | 0.27 | 0.28 | 0.29 | 0.30 |
| NEU | 0.06 | 0.07 | 0.07 | 0.07 | 0.08 | 0.08 | 0.09 | 0.11 | 0.11 | 0.11 | 0.11 |
| OAS | 0.35 | 0.38 | 0.43 | 0.48 | 0.58 | 0.64 | 0.72 | 0.84 | 0.90 | 0.96 | 0.99 |
| REF | 0.21 | 0.18 | 0.21 | 0.20 | 0.22 | 0.22 | 0.22 | 0.24 | 0.25 | 0.26 | 0.26 |
| SSA | 0.26 | 0.28 | 0.33 | 0.38 | 0.41 | 0.46 | 0.54 | 0.66 | 0.76 | 0.86 | 0.95 |
| USA | 0.33 | 0.35 | 0.37 | 0.37 | 0.41 | 0.43 | 0.40 | 0.39 | 0.40 | 0.42 | 0.45 |

Table 838: MAgPIE m4p\_SSP1 — Emissions—NO2—Land—Agriculture (Mt NO2/yr) [PART 1/2]

|     | 2050 | 2055 | 2060 | 2070 | 2080 | 2090 | 2100 |
|-----|------|------|------|------|------|------|------|
| GLO | 6.85 | 6.63 | 6.32 | 5.58 | 4.87 | 4.24 | 3.67 |
| CAZ | 0.21 | 0.21 | 0.21 | 0.20 | 0.16 | 0.14 | 0.13 |
| CHA | 0.93 | 0.87 | 0.80 | 0.67 | 0.60 | 0.57 | 0.49 |
| EUR | 0.61 | 0.60 | 0.58 | 0.54 | 0.50 | 0.46 | 0.43 |
| IND | 1.10 | 1.04 | 0.97 | 0.82 | 0.69 | 0.58 | 0.47 |
| JPN | 0.03 | 0.03 | 0.03 | 0.03 | 0.03 | 0.03 | 0.02 |
| LAM | 0.80 | 0.75 | 0.71 | 0.60 | 0.50 | 0.45 | 0.35 |
| MEA | 0.29 | 0.28 | 0.27 | 0.23 | 0.18 | 0.14 | 0.13 |
| NEU | 0.10 | 0.10 | 0.10 | 0.09 | 0.09 | 0.08 | 0.08 |
| OAS | 1.03 | 1.02 | 0.97 | 0.86 | 0.78 | 0.63 | 0.51 |
| REF | 0.25 | 0.24 | 0.23 | 0.21 | 0.16 | 0.12 | 0.11 |
| SSA | 1.02 | 1.03 | 1.01 | 0.92 | 0.79 | 0.68 | 0.61 |
| USA | 0.47 | 0.46 | 0.45 | 0.43 | 0.39 | 0.36 | 0.33 |

Table 839: MAgPIE m4p\_SSP1 — Emissions—NO2—Land—Agriculture (Mt NO2/yr) [PART 2/2]

|     | 1965 | 1970 | 1975 | 1980 | 1985 | 1990 | 1995 | 2000 | 2005 | 2010 |
|-----|------|------|------|------|------|------|------|------|------|------|
| GLO | 1.52 | 2.74 | 3.16 | 4.08 | 4.83 | 4.71 | 4.66 | 4.90 | 5.23 | 5.61 |
| CAZ | 0.01 | 0.01 | 0.01 | 0.01 | 0.01 | 0.01 | 0.02 | 0.02 | 0.02 | 0.02 |
| CHA | 0.10 | 0.17 | 0.21 | 0.35 | 0.40 | 0.55 | 0.66 | 0.66 | 0.75 | 0.84 |
| EUR | 0.29 | 0.39 | 0.43 | 0.47 | 0.49 | 0.45 | 0.37 | 0.37 | 0.35 | 0.33 |
| IND | 0.16 | 0.36 | 0.41 | 0.58 | 0.82 | 1.01 | 1.24 | 1.36 | 1.41 | 1.53 |
| JPN | 0.02 | 0.02 | 0.02 | 0.02 | 0.03 | 0.03 | 0.02 | 0.02 | 0.02 | 0.02 |
| LAM | 0.15 | 0.20 | 0.23 | 0.27 | 0.29 | 0.31 | 0.34 | 0.38 | 0.43 | 0.46 |
| MEA | 0.04 | 0.05 | 0.06 | 0.08 | 0.09 | 0.11 | 0.12 | 0.14 | 0.16 | 0.18 |
| NEU | 0.03 | 0.04 | 0.05 | 0.06 | 0.06 | 0.07 | 0.06 | 0.06 | 0.06 | 0.07 |
| OAS | 0.25 | 0.60 | 0.74 | 1.07 | 1.36 | 0.96 | 1.04 | 1.20 | 1.25 | 1.36 |
| REF | 0.38 | 0.79 | 0.89 | 1.03 | 1.14 | 1.06 | 0.62 | 0.50 | 0.56 | 0.58 |
| SSA | 0.09 | 0.10 | 0.11 | 0.13 | 0.13 | 0.15 | 0.15 | 0.17 | 0.20 | 0.23 |
| USA | 0.00 | 0.00 | 0.00 | 0.00 | 0.00 | 0.00 | 0.00 | 0.00 | 0.00 | 0.00 |

Table 840: ceds — Emissions—NO2—Land—Agriculture (Mt NO2/yr)

|     | 1965 | 1970 | 1975 | 1980 | 1985 | 1990 | 1995 | 2000 | 2005 | 2010 |
|-----|------|------|------|------|------|------|------|------|------|------|
| GLO | 1.91 | 2.19 | 2.41 | 2.74 | 3.08 | 3.18 | 3.28 | 3.44 | 3.78 | 4.06 |
| CAZ | 0.10 | 0.11 | 0.12 | 0.12 | 0.13 | 0.13 | 0.15 | 0.15 | 0.15 | 0.16 |
| CHA | 0.24 | 0.27 | 0.31 | 0.41 | 0.46 | 0.55 | 0.62 | 0.66 | 0.79 | 0.89 |
| EUR | 0.36 | 0.42 | 0.46 | 0.50 | 0.55 | 0.49 | 0.45 | 0.44 | 0.43 | 0.43 |
| IND | 0.10 | 0.12 | 0.13 | 0.15 | 0.18 | 0.22 | 0.25 | 0.28 | 0.33 | 0.40 |
| JPN | 0.02 | 0.02 | 0.02 | 0.03 | 0.03 | 0.03 | 0.03 | 0.02 | 0.02 | 0.02 |
| LAM | 0.26 | 0.29 | 0.33 | 0.37 | 0.44 | 0.45 | 0.50 | 0.56 | 0.61 | 0.65 |
| MEA | 0.06 | 0.07 | 0.08 | 0.09 | 0.12 | 0.13 | 0.15 | 0.18 | 0.20 | 0.21 |
| NEU | 0.05 | 0.06 | 0.06 | 0.07 | 0.07 | 0.07 | 0.06 | 0.06 | 0.06 | 0.06 |
| OAS | 0.10 | 0.12 | 0.13 | 0.17 | 0.21 | 0.25 | 0.29 | 0.32 | 0.35 | 0.39 |
| REF | 0.18 | 0.23 | 0.25 | 0.29 | 0.32 | 0.30 | 0.20 | 0.15 | 0.16 | 0.16 |
| SSA | 0.15 | 0.16 | 0.18 | 0.20 | 0.21 | 0.23 | 0.24 | 0.26 | 0.29 | 0.32 |
| USA | 0.27 | 0.32 | 0.33 | 0.33 | 0.36 | 0.34 | 0.34 | 0.35 | 0.37 | 0.37 |

Table 841: IPCC — Emissions—NO2—Land—Agriculture (Mt NO2/yr)

|     | 1965 | 1970 | 1975 | 1980 | 1985 | 1990 | 1995 | 2000 | 2005 | 2010 |
|-----|------|------|------|------|------|------|------|------|------|------|
| GLO | 3.71 | 4.50 | 5.17 | 5.78 | 6.37 | 6.60 | 6.52 | 6.72 | 7.29 | 8.24 |
| CAZ | 0.32 | 0.39 | 0.48 | 0.41 | 0.46 | 0.45 | 0.49 | 0.60 | 0.43 | 0.57 |
| CHA | 0.14 | 0.17 | 0.23 | 0.46 | 0.55 | 0.77 | 0.87 | 0.83 | 1.13 | 1.27 |
| EUR | 0.30 | 0.45 | 0.57 | 0.66 | 0.76 | 0.64 | 0.55 | 0.52 | 0.48 | 0.48 |
| IND | 0.13 | 0.12 | 0.13 | 0.20 | 0.29 | 0.35 | 0.43 | 0.47 | 0.58 | 0.72 |
| JPN | 0.03 | 0.03 | 0.03 | 0.03 | 0.04 | 0.04 | 0.03 | 0.03 | 0.03 | 0.03 |
| LAM | 0.66 | 0.77 | 0.84 | 0.91 | 0.95 | 0.95 | 0.96 | 1.08 | 1.07 | 1.32 |
| MEA | 0.13 | 0.13 | 0.17 | 0.19 | 0.25 | 0.26 | 0.31 | 0.33 | 0.33 | 0.35 |
| NEU | 0.04 | 0.04 | 0.05 | 0.06 | 0.07 | 0.07 | 0.06 | 0.07 | 0.08 | 0.08 |
| OAS | 0.19 | 0.22 | 0.25 | 0.29 | 0.39 | 0.50 | 0.47 | 0.48 | 0.58 | 0.71 |
| REF | 0.31 | 0.36 | 0.52 | 0.61 | 0.72 | 0.61 | 0.33 | 0.32 | 0.42 | 0.40 |
| SSA | 1.01 | 1.17 | 1.22 | 1.19 | 1.25 | 1.22 | 1.23 | 1.28 | 1.40 | 1.62 |
| USA | 0.45 | 0.63 | 0.67 | 0.75 | 0.64 | 0.74 | 0.77 | 0.72 | 0.74 | 0.71 |

Table 842: Nsurplus2 — Emissions—NO2—Land—Agriculture (Mt NO2/yr)



## 15.1.2 Agriculture—Agricultural Soils

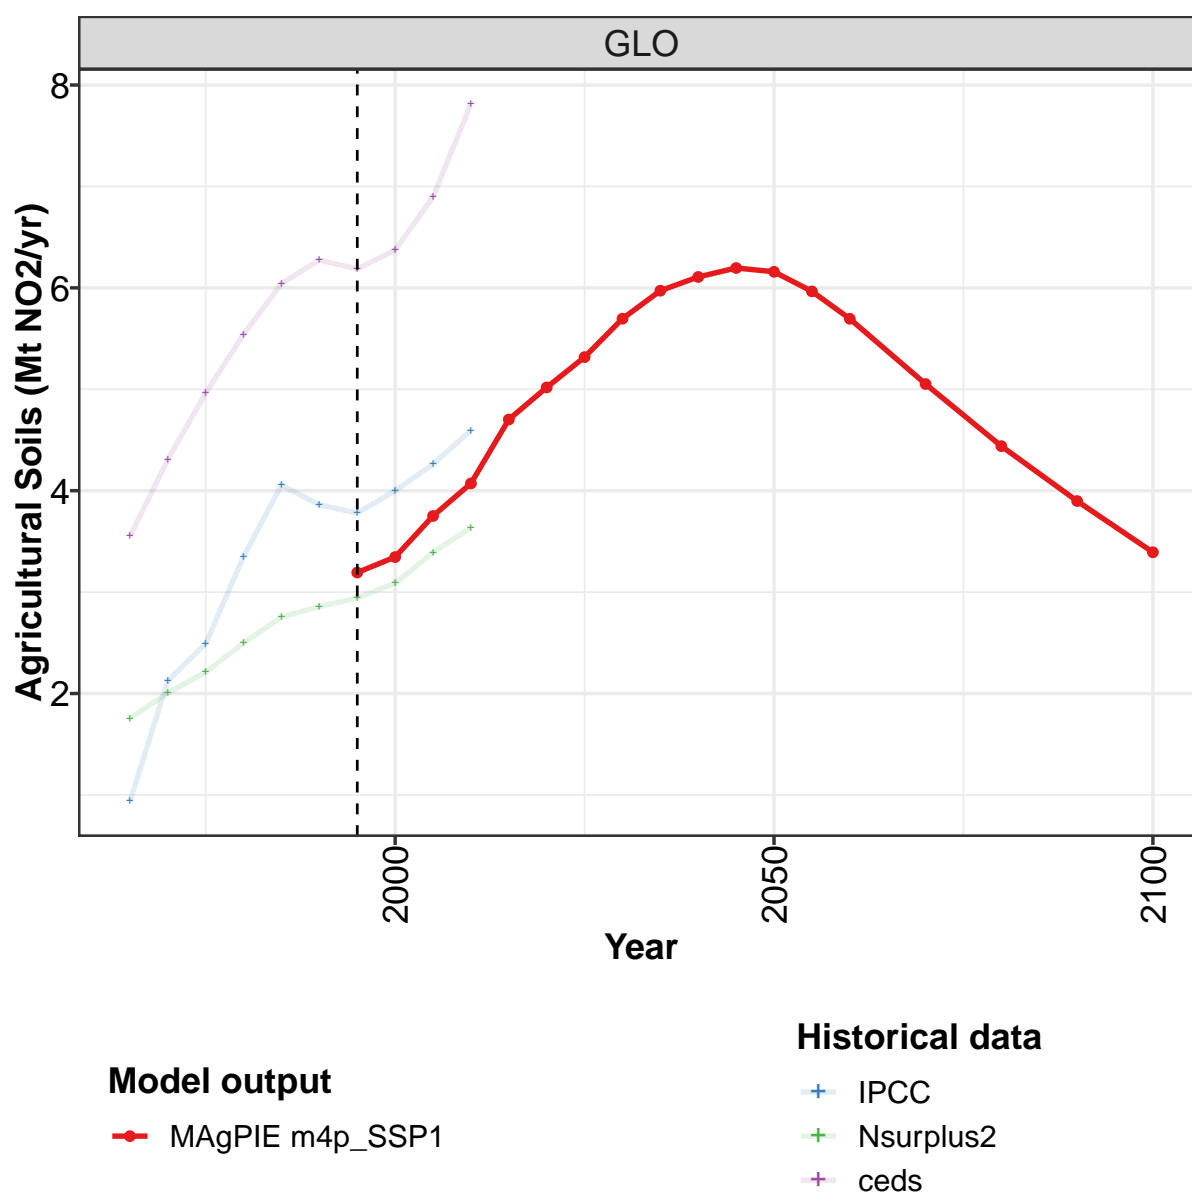

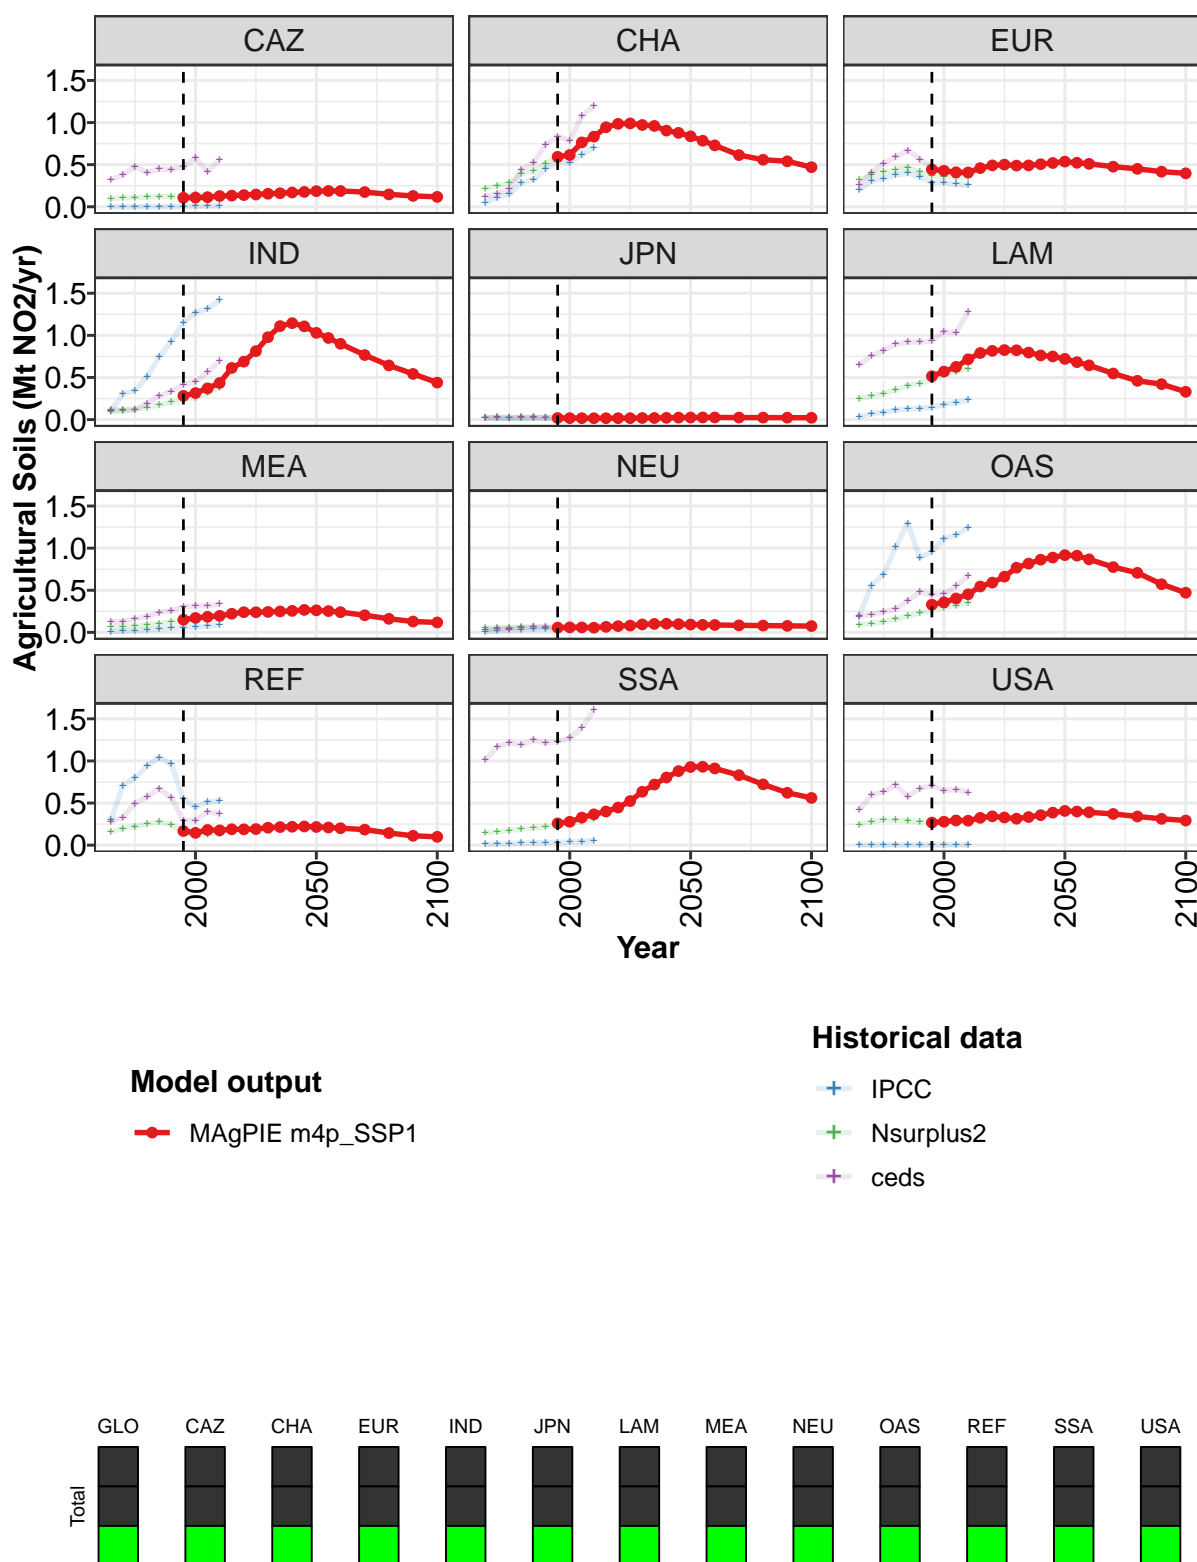Figure 252: MAgPIE m4p\_SSP1 — Emissions—NO<sub>2</sub>—Land—Agriculture—Agricultural Soils (Mt NO<sub>2</sub>/yr)

|     | 1995 | 2000 | 2005 | 2010 | 2015 | 2020 | 2025 | 2030 | 2035 | 2040 | 2045 |
|-----|------|------|------|------|------|------|------|------|------|------|------|
| GLO | 3.19 | 3.35 | 3.75 | 4.07 | 4.70 | 5.02 | 5.32 | 5.70 | 5.97 | 6.11 | 6.20 |
| CAZ | 0.11 | 0.11 | 0.11 | 0.13 | 0.13 | 0.14 | 0.15 | 0.15 | 0.16 | 0.17 | 0.18 |
| CHA | 0.59 | 0.61 | 0.76 | 0.83 | 0.94 | 0.99 | 0.99 | 0.97 | 0.96 | 0.90 | 0.88 |
| EUR | 0.44 | 0.43 | 0.41 | 0.41 | 0.46 | 0.49 | 0.50 | 0.49 | 0.49 | 0.51 | 0.52 |
| IND | 0.28 | 0.32 | 0.37 | 0.43 | 0.61 | 0.69 | 0.81 | 0.98 | 1.11 | 1.14 | 1.11 |
| JPN | 0.02 | 0.02 | 0.02 | 0.02 | 0.02 | 0.02 | 0.02 | 0.02 | 0.02 | 0.02 | 0.02 |
| LAM | 0.52 | 0.57 | 0.63 | 0.72 | 0.79 | 0.82 | 0.83 | 0.82 | 0.80 | 0.76 | 0.75 |
| MEA | 0.15 | 0.17 | 0.19 | 0.20 | 0.22 | 0.24 | 0.24 | 0.24 | 0.25 | 0.26 | 0.27 |
| NEU | 0.06 | 0.06 | 0.06 | 0.06 | 0.07 | 0.07 | 0.08 | 0.09 | 0.10 | 0.10 | 0.10 |
| OAS | 0.33 | 0.36 | 0.40 | 0.45 | 0.54 | 0.59 | 0.66 | 0.77 | 0.82 | 0.86 | 0.89 |
| REF | 0.17 | 0.15 | 0.18 | 0.18 | 0.19 | 0.19 | 0.19 | 0.21 | 0.21 | 0.22 | 0.22 |
| SSA | 0.26 | 0.28 | 0.33 | 0.37 | 0.40 | 0.45 | 0.52 | 0.63 | 0.72 | 0.80 | 0.88 |
| USA | 0.27 | 0.28 | 0.29 | 0.29 | 0.32 | 0.34 | 0.33 | 0.31 | 0.33 | 0.36 | 0.39 |

Table 843: MAgPIE m4p\_SSP1 — Emissions—NO2—Land—Agriculture—Agricultural Soils (Mt NO2/yr)  
[PART 1/2]

|     | 2050 | 2055 | 2060 | 2070 | 2080 | 2090 | 2100 |
|-----|------|------|------|------|------|------|------|
| GLO | 6.16 | 5.97 | 5.70 | 5.05 | 4.44 | 3.90 | 3.39 |
| CAZ | 0.19 | 0.19 | 0.19 | 0.18 | 0.15 | 0.13 | 0.12 |
| CHA | 0.84 | 0.78 | 0.73 | 0.61 | 0.56 | 0.54 | 0.47 |
| EUR | 0.54 | 0.52 | 0.51 | 0.48 | 0.45 | 0.42 | 0.40 |
| IND | 1.03 | 0.97 | 0.90 | 0.77 | 0.64 | 0.54 | 0.44 |
| JPN | 0.02 | 0.03 | 0.03 | 0.02 | 0.02 | 0.02 | 0.02 |
| LAM | 0.72 | 0.68 | 0.64 | 0.55 | 0.46 | 0.42 | 0.33 |
| MEA | 0.26 | 0.25 | 0.24 | 0.20 | 0.16 | 0.13 | 0.12 |
| NEU | 0.09 | 0.09 | 0.09 | 0.08 | 0.08 | 0.08 | 0.07 |
| OAS | 0.92 | 0.91 | 0.87 | 0.78 | 0.71 | 0.57 | 0.47 |
| REF | 0.22 | 0.21 | 0.20 | 0.18 | 0.14 | 0.11 | 0.10 |
| SSA | 0.93 | 0.93 | 0.91 | 0.83 | 0.72 | 0.62 | 0.56 |
| USA | 0.41 | 0.40 | 0.39 | 0.37 | 0.34 | 0.31 | 0.29 |

Table 844: MAgPIE m4p\_SSP1 — Emissions—NO2—Land—Agriculture—Agricultural Soils (Mt NO2/yr)  
[PART 2/2]

|     | 1965 | 1970 | 1975 | 1980 | 1985 | 1990 | 1995 | 2000 | 2005 | 2010 |
|-----|------|------|------|------|------|------|------|------|------|------|
| GLO | 0.94 | 2.13 | 2.49 | 3.35 | 4.06 | 3.86 | 3.78 | 4.00 | 4.26 | 4.60 |
| CAZ | 0.00 | 0.00 | 0.00 | 0.00 | 0.00 | 0.00 | 0.01 | 0.01 | 0.01 | 0.01 |
| CHA | 0.05 | 0.11 | 0.15 | 0.28 | 0.32 | 0.45 | 0.54 | 0.53 | 0.62 | 0.71 |
| EUR | 0.20 | 0.30 | 0.34 | 0.38 | 0.40 | 0.36 | 0.28 | 0.29 | 0.27 | 0.26 |
| IND | 0.11 | 0.30 | 0.35 | 0.51 | 0.74 | 0.93 | 1.15 | 1.27 | 1.32 | 1.42 |
| JPN | 0.02 | 0.02 | 0.02 | 0.02 | 0.02 | 0.02 | 0.02 | 0.02 | 0.02 | 0.01 |
| LAM | 0.03 | 0.07 | 0.09 | 0.11 | 0.12 | 0.13 | 0.15 | 0.18 | 0.20 | 0.23 |
| MEA | 0.01 | 0.02 | 0.02 | 0.03 | 0.04 | 0.05 | 0.06 | 0.07 | 0.07 | 0.09 |
| NEU | 0.01 | 0.02 | 0.03 | 0.04 | 0.04 | 0.04 | 0.04 | 0.04 | 0.04 | 0.05 |
| OAS | 0.20 | 0.55 | 0.69 | 1.01 | 1.29 | 0.89 | 0.96 | 1.11 | 1.16 | 1.25 |
| REF | 0.30 | 0.71 | 0.80 | 0.94 | 1.04 | 0.96 | 0.55 | 0.45 | 0.51 | 0.52 |
| SSA | 0.01 | 0.02 | 0.02 | 0.03 | 0.03 | 0.03 | 0.03 | 0.04 | 0.05 | 0.05 |
| USA | 0.00 | 0.00 | 0.00 | 0.00 | 0.00 | 0.00 | 0.00 | 0.00 | 0.00 | 0.00 |

Table 845: ceds — Emissions—NO2—Land—Agriculture—Agricultural Soils (Mt NO2/yr)

|     | 1965 | 1970 | 1975 | 1980 | 1985 | 1990 | 1995 | 2000 | 2005 | 2010 |
|-----|------|------|------|------|------|------|------|------|------|------|
| GLO | 1.76 | 2.01 | 2.21 | 2.50 | 2.75 | 2.86 | 2.94 | 3.09 | 3.39 | 3.64 |
| CAZ | 0.10 | 0.11 | 0.11 | 0.12 | 0.12 | 0.12 | 0.13 | 0.14 | 0.14 | 0.15 |
| CHA | 0.22 | 0.25 | 0.28 | 0.39 | 0.43 | 0.52 | 0.59 | 0.61 | 0.74 | 0.82 |
| EUR | 0.32 | 0.38 | 0.41 | 0.44 | 0.47 | 0.41 | 0.37 | 0.36 | 0.35 | 0.35 |
| IND | 0.09 | 0.11 | 0.12 | 0.14 | 0.17 | 0.21 | 0.24 | 0.26 | 0.31 | 0.38 |
| JPN | 0.02 | 0.02 | 0.02 | 0.02 | 0.02 | 0.02 | 0.02 | 0.02 | 0.01 | 0.01 |
| LAM | 0.25 | 0.28 | 0.31 | 0.35 | 0.40 | 0.43 | 0.47 | 0.53 | 0.57 | 0.61 |
| MEA | 0.06 | 0.07 | 0.08 | 0.09 | 0.11 | 0.12 | 0.14 | 0.17 | 0.18 | 0.19 |
| NEU | 0.05 | 0.06 | 0.06 | 0.06 | 0.06 | 0.06 | 0.05 | 0.05 | 0.05 | 0.05 |
| OAS | 0.09 | 0.11 | 0.12 | 0.16 | 0.19 | 0.23 | 0.26 | 0.29 | 0.32 | 0.35 |
| REF | 0.16 | 0.20 | 0.22 | 0.25 | 0.28 | 0.25 | 0.16 | 0.13 | 0.13 | 0.13 |
| SSA | 0.15 | 0.16 | 0.17 | 0.19 | 0.21 | 0.22 | 0.23 | 0.25 | 0.28 | 0.31 |
| USA | 0.24 | 0.28 | 0.30 | 0.30 | 0.29 | 0.28 | 0.28 | 0.28 | 0.29 | 0.29 |

Table 846: IPCC — Emissions—NO2—Land—Agriculture—Agricultural Soils (Mt NO2/yr)

|     | 1965 | 1970 | 1975 | 1980 | 1985 | 1990 | 1995 | 2000 | 2005 | 2010 |
|-----|------|------|------|------|------|------|------|------|------|------|
| GLO | 3.55 | 4.31 | 4.96 | 5.54 | 6.04 | 6.27 | 6.19 | 6.37 | 6.90 | 7.81 |
| CAZ | 0.32 | 0.38 | 0.47 | 0.41 | 0.45 | 0.44 | 0.47 | 0.58 | 0.42 | 0.56 |
| CHA | 0.12 | 0.16 | 0.21 | 0.44 | 0.52 | 0.74 | 0.83 | 0.79 | 1.08 | 1.20 |
| EUR | 0.26 | 0.41 | 0.52 | 0.59 | 0.67 | 0.56 | 0.47 | 0.43 | 0.40 | 0.40 |
| IND | 0.12 | 0.11 | 0.12 | 0.19 | 0.28 | 0.34 | 0.42 | 0.45 | 0.56 | 0.69 |
| JPN | 0.03 | 0.03 | 0.03 | 0.03 | 0.03 | 0.03 | 0.02 | 0.02 | 0.02 | 0.02 |
| LAM | 0.65 | 0.76 | 0.82 | 0.90 | 0.92 | 0.92 | 0.93 | 1.05 | 1.03 | 1.27 |
| MEA | 0.13 | 0.13 | 0.16 | 0.19 | 0.24 | 0.25 | 0.30 | 0.32 | 0.32 | 0.34 |
| NEU | 0.03 | 0.04 | 0.05 | 0.06 | 0.06 | 0.07 | 0.05 | 0.06 | 0.07 | 0.07 |
| OAS | 0.19 | 0.21 | 0.24 | 0.28 | 0.38 | 0.48 | 0.45 | 0.45 | 0.55 | 0.67 |
| REF | 0.28 | 0.33 | 0.49 | 0.57 | 0.67 | 0.56 | 0.29 | 0.30 | 0.39 | 0.37 |
| SSA | 1.01 | 1.17 | 1.22 | 1.19 | 1.25 | 1.21 | 1.23 | 1.27 | 1.39 | 1.60 |
| USA | 0.42 | 0.60 | 0.64 | 0.72 | 0.58 | 0.67 | 0.71 | 0.65 | 0.66 | 0.63 |

Table 847: Nsurplus2 — Emissions—NO2—Land—Agriculture—Agricultural Soils (Mt NO2/yr)

## 15.1.3 Agriculture—Agricultural Soils—Inorganic Fertilizers

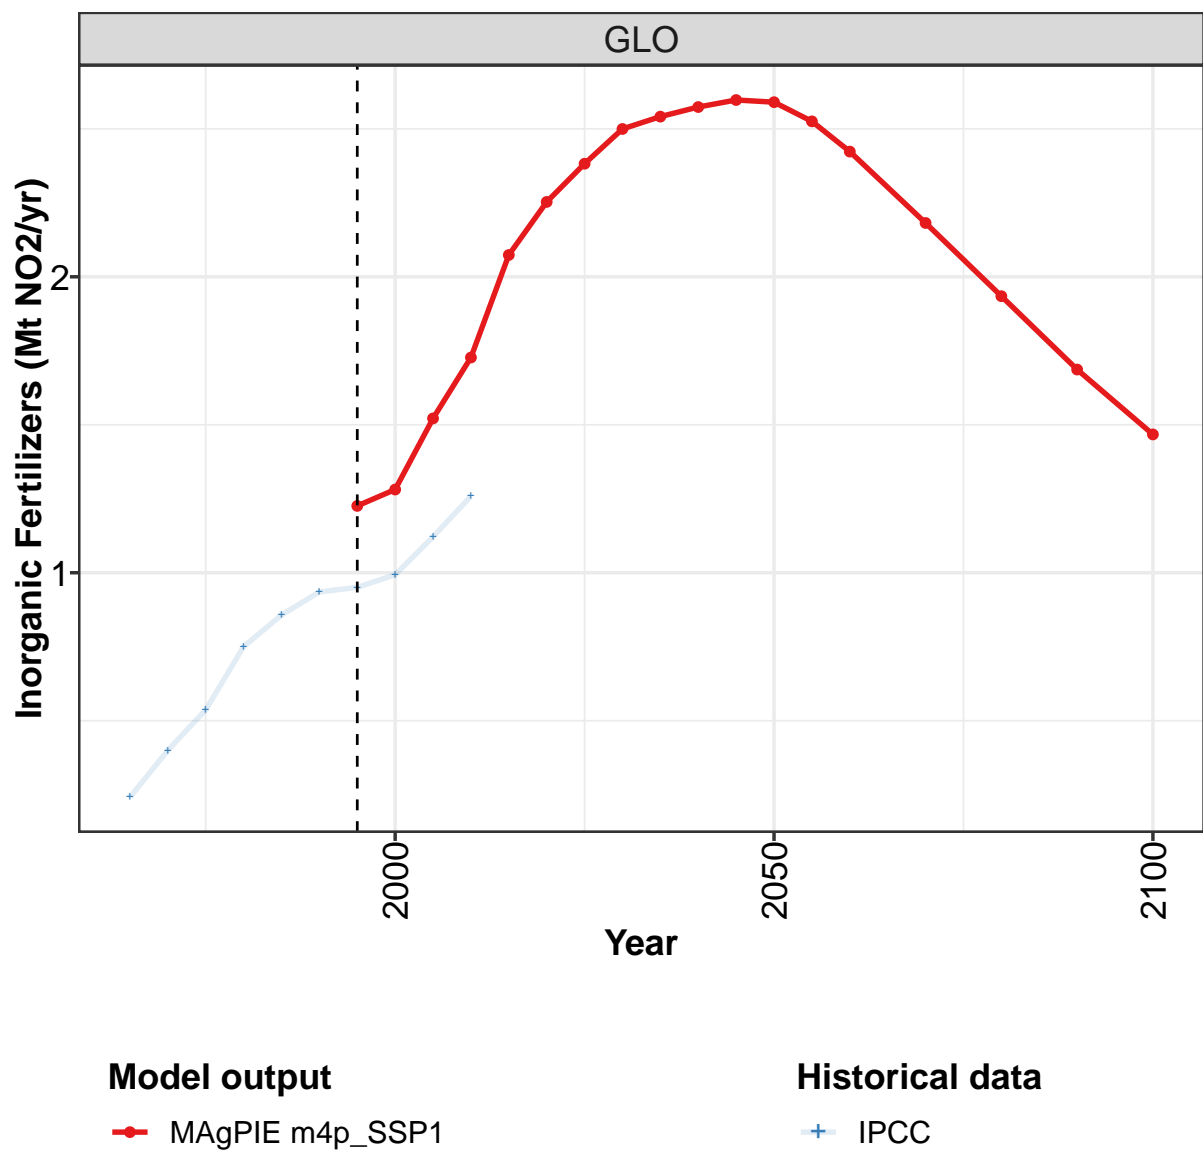

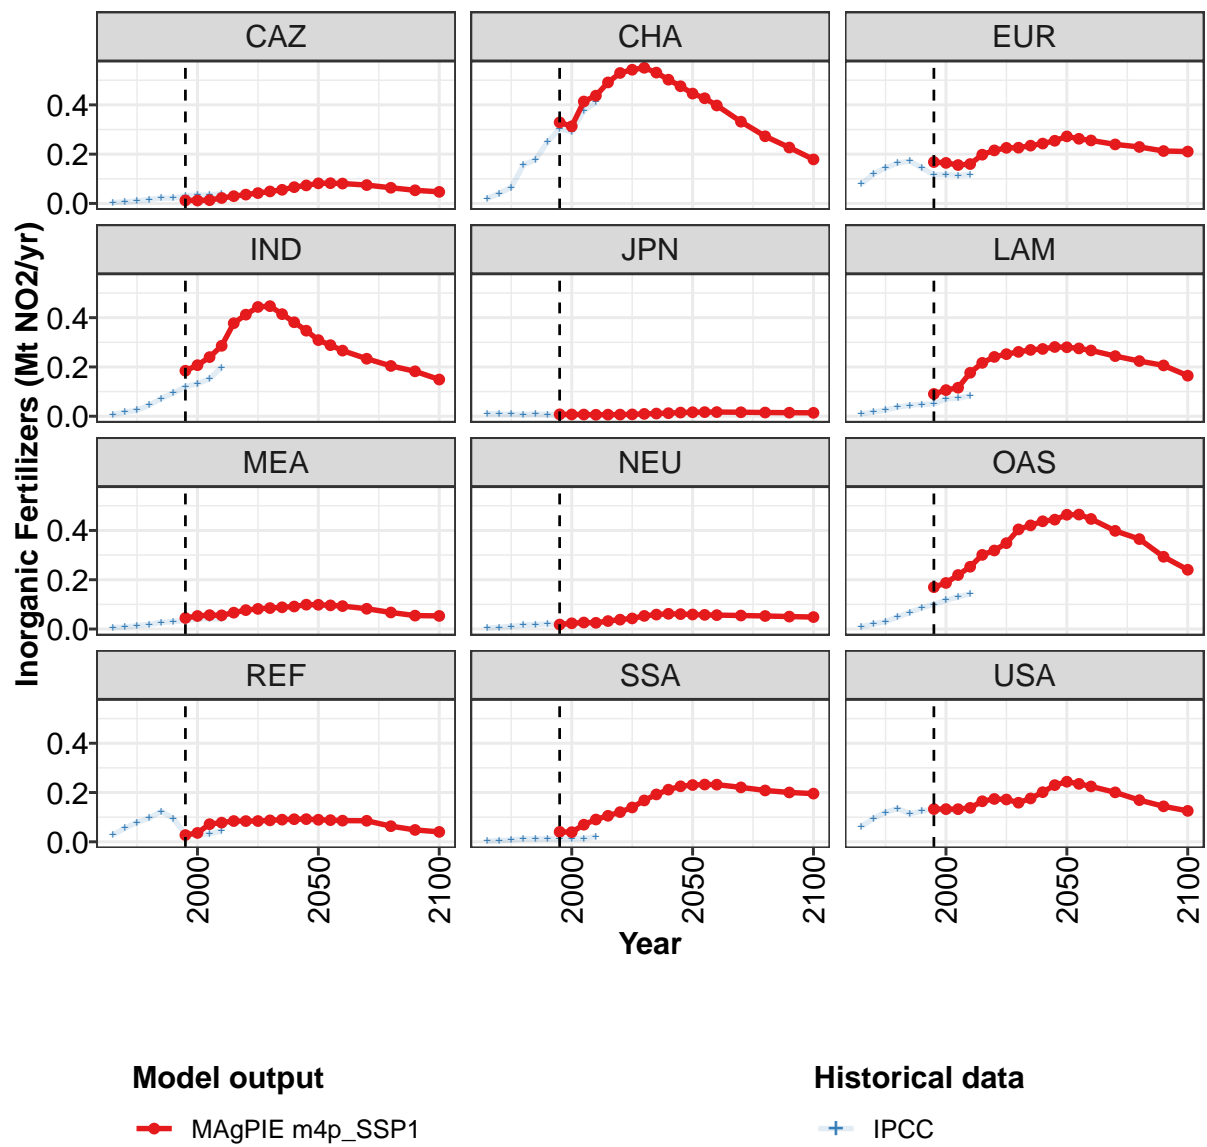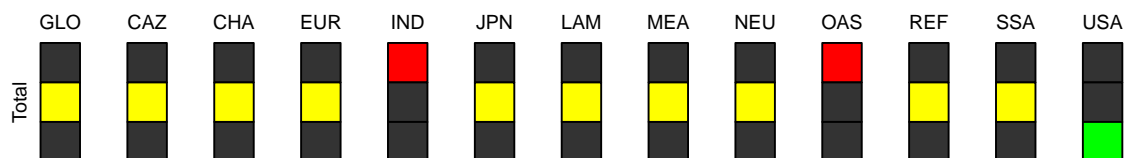

Figure 253: MAGPIE m4p\_SSP1 — Emissions—NO<sub>2</sub>—Land—Agriculture—Agricultural Soils—Inorganic Fertilizers (Mt NO<sub>2</sub>/yr)

|     | 1995 | 2000 | 2005 | 2010 | 2015 | 2020 | 2025 | 2030 | 2035 | 2040 | 2045 |
|-----|------|------|------|------|------|------|------|------|------|------|------|
| GLO | 1.23 | 1.28 | 1.52 | 1.73 | 2.07 | 2.25 | 2.38 | 2.50 | 2.54 | 2.57 | 2.60 |
| CAZ | 0.01 | 0.01 | 0.01 | 0.02 | 0.03 | 0.04 | 0.04 | 0.05 | 0.06 | 0.07 | 0.07 |
| CHA | 0.33 | 0.31 | 0.41 | 0.44 | 0.49 | 0.53 | 0.54 | 0.55 | 0.53 | 0.50 | 0.48 |
| EUR | 0.17 | 0.16 | 0.16 | 0.16 | 0.20 | 0.22 | 0.23 | 0.23 | 0.23 | 0.24 | 0.25 |
| IND | 0.18 | 0.21 | 0.24 | 0.29 | 0.38 | 0.41 | 0.44 | 0.45 | 0.41 | 0.38 | 0.35 |
| JPN | 0.01 | 0.01 | 0.01 | 0.01 | 0.01 | 0.01 | 0.01 | 0.01 | 0.01 | 0.01 | 0.01 |
| LAM | 0.09 | 0.11 | 0.12 | 0.18 | 0.22 | 0.24 | 0.25 | 0.26 | 0.27 | 0.27 | 0.28 |
| MEA | 0.04 | 0.05 | 0.06 | 0.06 | 0.07 | 0.08 | 0.08 | 0.09 | 0.09 | 0.09 | 0.10 |
| NEU | 0.02 | 0.02 | 0.03 | 0.03 | 0.03 | 0.04 | 0.04 | 0.05 | 0.06 | 0.06 | 0.06 |
| OAS | 0.17 | 0.19 | 0.22 | 0.25 | 0.30 | 0.32 | 0.35 | 0.40 | 0.42 | 0.44 | 0.44 |
| REF | 0.03 | 0.04 | 0.07 | 0.08 | 0.08 | 0.08 | 0.08 | 0.09 | 0.09 | 0.09 | 0.09 |
| SSA | 0.04 | 0.04 | 0.07 | 0.09 | 0.11 | 0.12 | 0.14 | 0.17 | 0.19 | 0.21 | 0.23 |
| USA | 0.13 | 0.13 | 0.13 | 0.14 | 0.16 | 0.17 | 0.17 | 0.16 | 0.18 | 0.20 | 0.23 |

Table 848: MAgPIE m4p\_SSP1 — Emissions—NO2—Land—Agriculture—Agricultural Soils—Inorganic Fertilizers (Mt NO2/yr) [PART 1/2]

|     | 2050 | 2055 | 2060 | 2070 | 2080 | 2090 | 2100 |
|-----|------|------|------|------|------|------|------|
| GLO | 2.59 | 2.53 | 2.42 | 2.18 | 1.93 | 1.69 | 1.47 |
| CAZ | 0.08 | 0.08 | 0.08 | 0.07 | 0.06 | 0.05 | 0.05 |
| CHA | 0.45 | 0.43 | 0.40 | 0.33 | 0.27 | 0.23 | 0.18 |
| EUR | 0.27 | 0.26 | 0.26 | 0.24 | 0.23 | 0.21 | 0.21 |
| IND | 0.31 | 0.29 | 0.27 | 0.23 | 0.20 | 0.18 | 0.15 |
| JPN | 0.02 | 0.02 | 0.02 | 0.02 | 0.02 | 0.01 | 0.01 |
| LAM | 0.28 | 0.28 | 0.27 | 0.24 | 0.22 | 0.21 | 0.16 |
| MEA | 0.10 | 0.10 | 0.09 | 0.08 | 0.07 | 0.05 | 0.05 |
| NEU | 0.06 | 0.06 | 0.06 | 0.05 | 0.05 | 0.05 | 0.05 |
| OAS | 0.46 | 0.46 | 0.45 | 0.40 | 0.36 | 0.29 | 0.24 |
| REF | 0.09 | 0.09 | 0.09 | 0.09 | 0.06 | 0.05 | 0.04 |
| SSA | 0.23 | 0.23 | 0.23 | 0.22 | 0.21 | 0.20 | 0.20 |
| USA | 0.24 | 0.24 | 0.22 | 0.20 | 0.17 | 0.14 | 0.13 |

Table 849: MAgPIE m4p\_SSP1 — Emissions—NO2—Land—Agriculture—Agricultural Soils—Inorganic Fertilizers (Mt NO2/yr) [PART 2/2]

|     | 1965 | 1970 | 1975 | 1980 | 1985 | 1990 | 1995 | 2000 | 2005 | 2010 |
|-----|------|------|------|------|------|------|------|------|------|------|
| GLO | 0.24 | 0.40 | 0.54 | 0.75 | 0.86 | 0.94 | 0.95 | 0.99 | 1.12 | 1.26 |
| CAZ | 0.00 | 0.01 | 0.01 | 0.02 | 0.02 | 0.02 | 0.03 | 0.03 | 0.03 | 0.04 |
| CHA | 0.02 | 0.04 | 0.07 | 0.16 | 0.18 | 0.25 | 0.30 | 0.29 | 0.38 | 0.41 |
| EUR | 0.08 | 0.12 | 0.14 | 0.16 | 0.17 | 0.14 | 0.12 | 0.12 | 0.11 | 0.12 |
| IND | 0.01 | 0.02 | 0.02 | 0.04 | 0.07 | 0.09 | 0.12 | 0.13 | 0.15 | 0.20 |
| JPN | 0.01 | 0.01 | 0.01 | 0.01 | 0.01 | 0.01 | 0.01 | 0.01 | 0.00 | 0.00 |
| LAM | 0.01 | 0.02 | 0.02 | 0.04 | 0.04 | 0.05 | 0.05 | 0.07 | 0.07 | 0.08 |
| MEA | 0.01 | 0.01 | 0.01 | 0.02 | 0.03 | 0.03 | 0.03 | 0.04 | 0.04 | 0.04 |
| NEU | 0.00 | 0.01 | 0.01 | 0.02 | 0.02 | 0.02 | 0.02 | 0.02 | 0.02 | 0.02 |
| OAS | 0.01 | 0.02 | 0.03 | 0.05 | 0.07 | 0.09 | 0.10 | 0.12 | 0.13 | 0.14 |
| REF | 0.03 | 0.06 | 0.08 | 0.10 | 0.12 | 0.09 | 0.03 | 0.03 | 0.03 | 0.04 |
| SSA | 0.00 | 0.01 | 0.01 | 0.01 | 0.01 | 0.01 | 0.01 | 0.01 | 0.01 | 0.02 |
| USA | 0.06 | 0.09 | 0.12 | 0.14 | 0.11 | 0.12 | 0.13 | 0.12 | 0.13 | 0.14 |

Table 850: IPCC — Emissions—NO2—Land—Agriculture—Agricultural Soils—Inorganic Fertilizers (Mt NO2/yr)

## 15.1.4 Agriculture—Agricultural Soils—Manure applied to Croplands

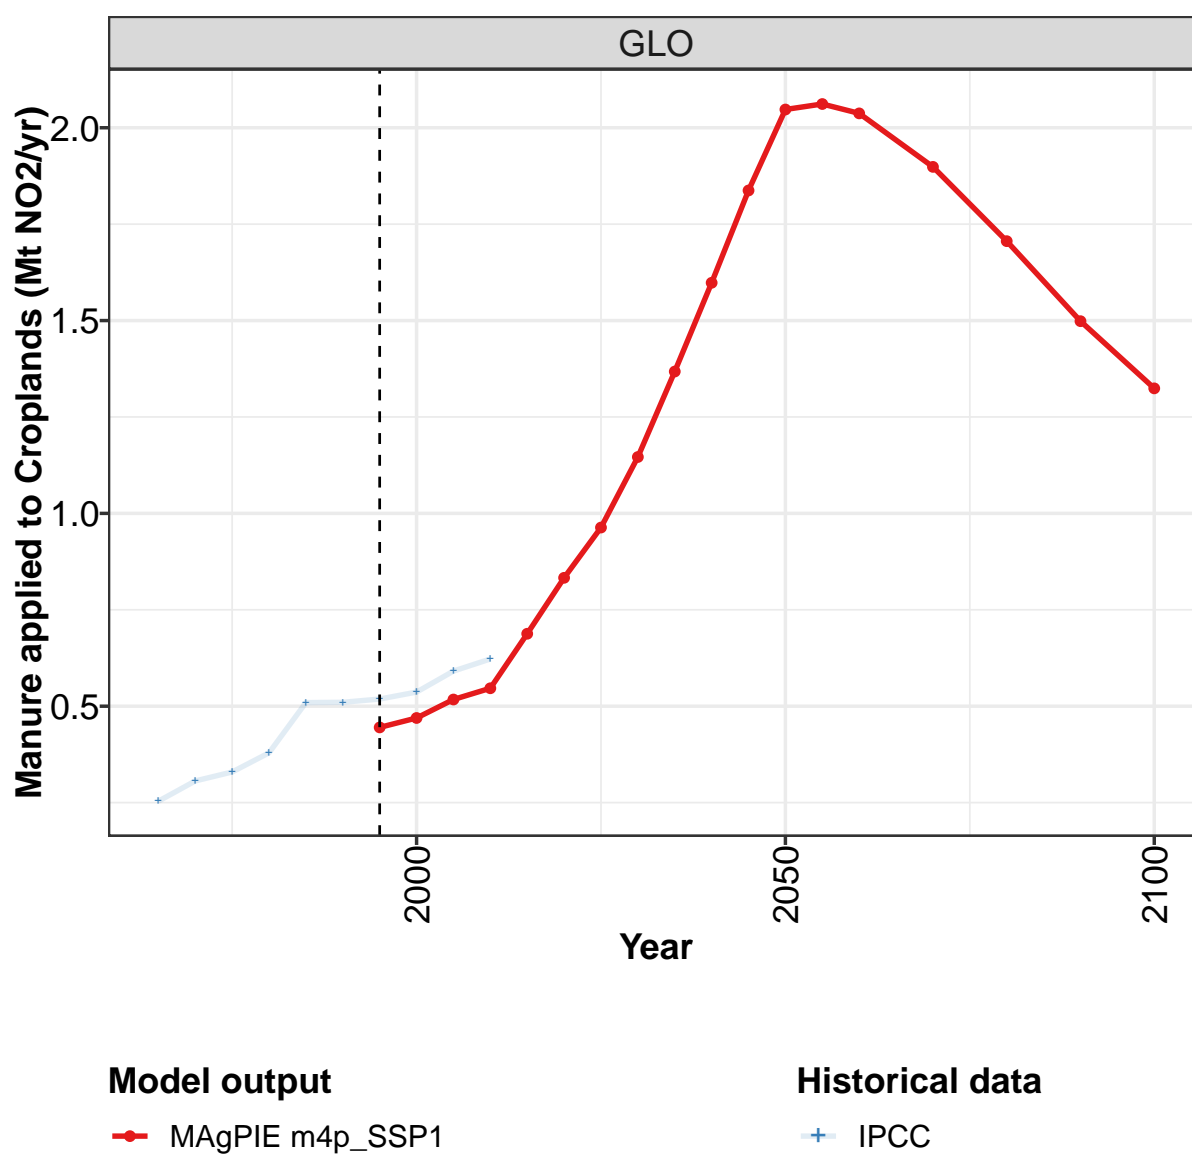



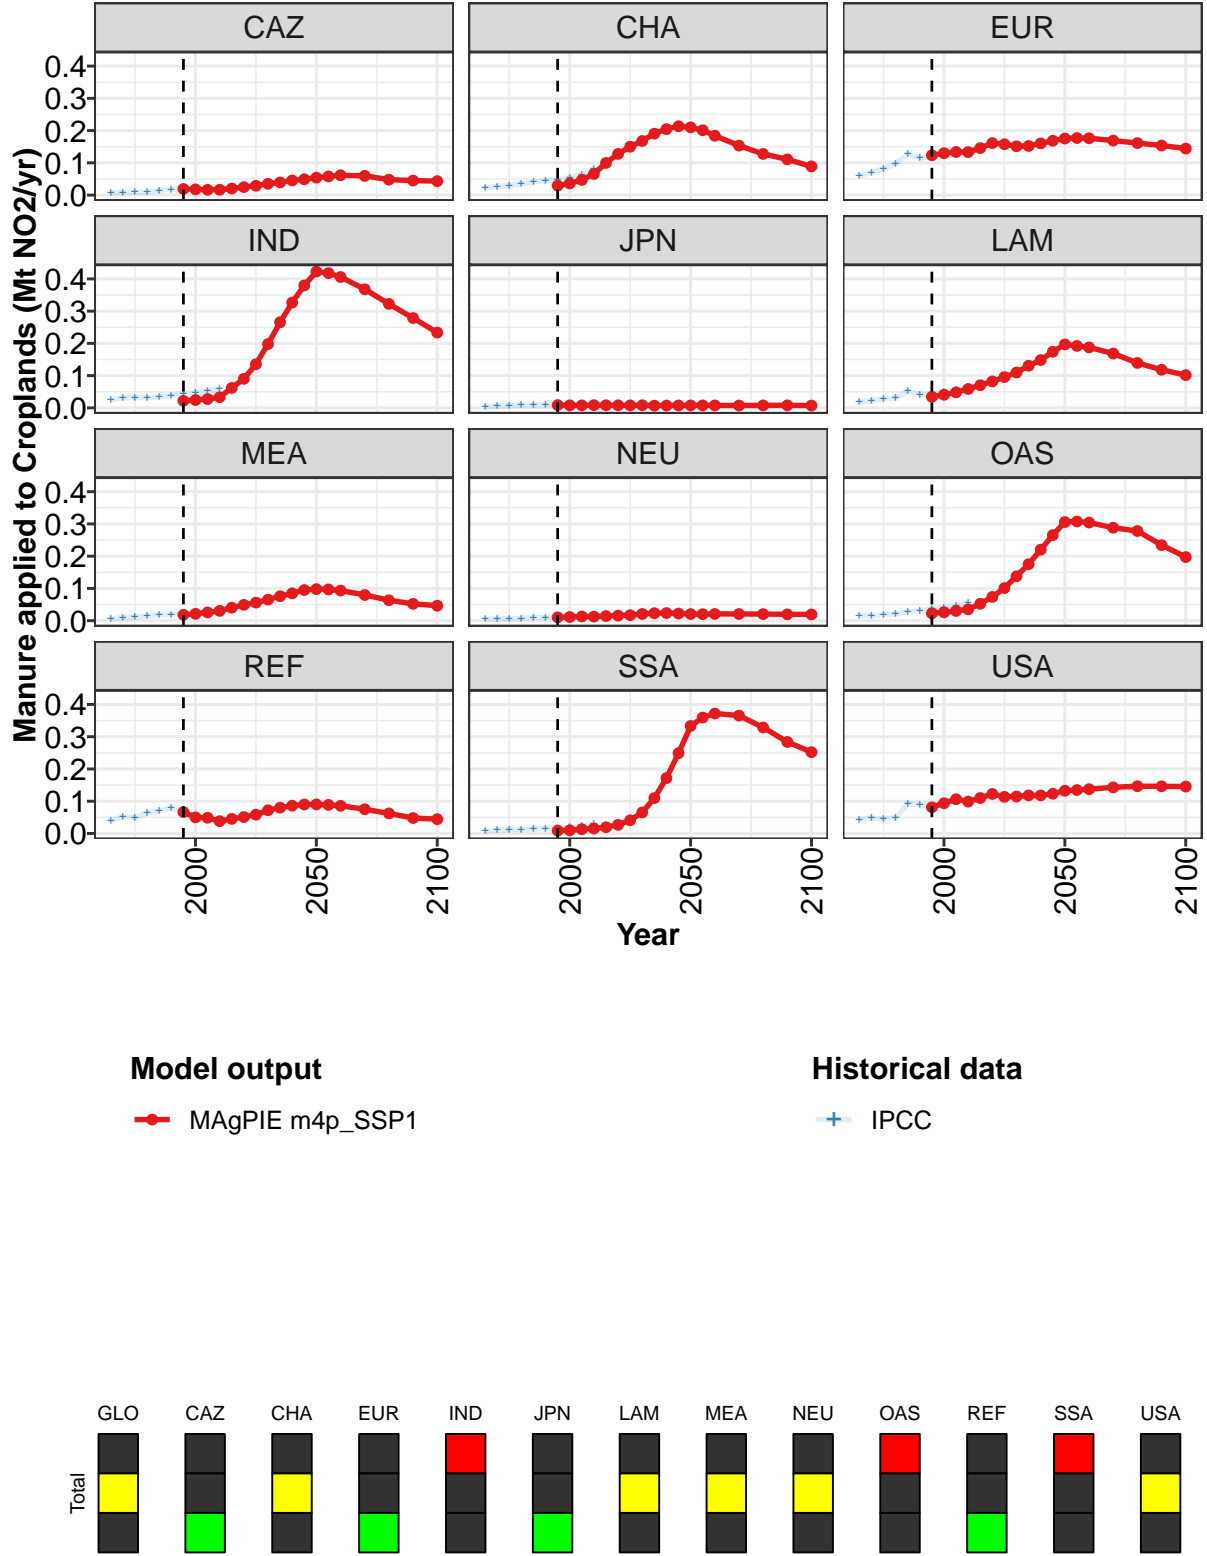

Figure 254: MAgPIE m4p\_SSP1 — Emissions—NO<sub>2</sub>—Land—Agriculture—Agricultural Soils—Manure applied to Croplands (Mt NO<sub>2</sub>/yr)

|     | 1995 | 2000 | 2005 | 2010 | 2015 | 2020 | 2025 | 2030 | 2035 | 2040 | 2045 |
|-----|------|------|------|------|------|------|------|------|------|------|------|
| GLO | 0.45 | 0.47 | 0.52 | 0.55 | 0.69 | 0.83 | 0.96 | 1.15 | 1.37 | 1.60 | 1.84 |
| CAZ | 0.02 | 0.02 | 0.02 | 0.02 | 0.02 | 0.02 | 0.03 | 0.04 | 0.04 | 0.05 | 0.05 |
| CHA | 0.03 | 0.04 | 0.05 | 0.07 | 0.10 | 0.13 | 0.15 | 0.17 | 0.19 | 0.20 | 0.21 |
| EUR | 0.12 | 0.13 | 0.13 | 0.13 | 0.15 | 0.16 | 0.16 | 0.15 | 0.15 | 0.16 | 0.17 |
| IND | 0.02 | 0.02 | 0.03 | 0.03 | 0.06 | 0.09 | 0.14 | 0.20 | 0.27 | 0.33 | 0.38 |
| JPN | 0.01 | 0.01 | 0.01 | 0.01 | 0.01 | 0.01 | 0.01 | 0.01 | 0.01 | 0.01 | 0.01 |
| LAM | 0.03 | 0.04 | 0.05 | 0.06 | 0.07 | 0.08 | 0.10 | 0.11 | 0.13 | 0.15 | 0.17 |
| MEA | 0.02 | 0.02 | 0.03 | 0.03 | 0.04 | 0.05 | 0.06 | 0.07 | 0.08 | 0.08 | 0.09 |
| NEU | 0.01 | 0.01 | 0.01 | 0.01 | 0.01 | 0.02 | 0.02 | 0.02 | 0.02 | 0.02 | 0.02 |
| OAS | 0.02 | 0.03 | 0.03 | 0.04 | 0.05 | 0.07 | 0.10 | 0.14 | 0.18 | 0.22 | 0.27 |
| REF | 0.07 | 0.05 | 0.05 | 0.04 | 0.05 | 0.05 | 0.06 | 0.07 | 0.08 | 0.09 | 0.09 |
| SSA | 0.01 | 0.01 | 0.01 | 0.02 | 0.02 | 0.03 | 0.04 | 0.07 | 0.11 | 0.17 | 0.25 |
| USA | 0.08 | 0.09 | 0.11 | 0.10 | 0.11 | 0.12 | 0.11 | 0.11 | 0.12 | 0.12 | 0.12 |

Table 851: MAgPIE m4p\_SSP1 — Emissions—NO2—Land—Agriculture—Agricultural Soils—Manure applied to Croplands (Mt NO2/yr) [PART 1/2]

|     | 2050 | 2055 | 2060 | 2070 | 2080 | 2090 | 2100 |
|-----|------|------|------|------|------|------|------|
| GLO | 2.05 | 2.06 | 2.04 | 1.90 | 1.71 | 1.50 | 1.32 |
| CAZ | 0.05 | 0.06 | 0.06 | 0.06 | 0.05 | 0.05 | 0.04 |
| CHA | 0.21 | 0.20 | 0.18 | 0.15 | 0.13 | 0.11 | 0.09 |
| EUR | 0.18 | 0.18 | 0.18 | 0.17 | 0.16 | 0.15 | 0.14 |
| IND | 0.42 | 0.42 | 0.41 | 0.37 | 0.32 | 0.28 | 0.23 |
| JPN | 0.01 | 0.01 | 0.01 | 0.01 | 0.01 | 0.01 | 0.01 |
| LAM | 0.20 | 0.19 | 0.19 | 0.17 | 0.14 | 0.12 | 0.10 |
| MEA | 0.10 | 0.10 | 0.09 | 0.08 | 0.06 | 0.05 | 0.05 |
| NEU | 0.02 | 0.02 | 0.02 | 0.02 | 0.02 | 0.02 | 0.02 |
| OAS | 0.31 | 0.31 | 0.30 | 0.29 | 0.28 | 0.23 | 0.20 |
| REF | 0.09 | 0.09 | 0.09 | 0.08 | 0.06 | 0.05 | 0.04 |
| SSA | 0.33 | 0.36 | 0.37 | 0.37 | 0.33 | 0.28 | 0.25 |
| USA | 0.13 | 0.13 | 0.14 | 0.14 | 0.15 | 0.15 | 0.15 |

Table 852: MAgPIE m4p\_SSP1 — Emissions—NO2—Land—Agriculture—Agricultural Soils—Manure applied to Croplands (Mt NO2/yr) [PART 2/2]

|     | 1965  | 1970  | 1975  | 1980  | 1985  | 1990  | 1995  | 2000  | 2005  | 2010  |
|-----|-------|-------|-------|-------|-------|-------|-------|-------|-------|-------|
| GLO | 0.254 | 0.306 | 0.329 | 0.379 | 0.509 | 0.510 | 0.518 | 0.537 | 0.591 | 0.622 |
| CAZ | 0.007 | 0.009 | 0.009 | 0.009 | 0.015 | 0.018 | 0.019 | 0.019 | 0.020 | 0.019 |
| CHA | 0.024 | 0.026 | 0.030 | 0.035 | 0.040 | 0.044 | 0.048 | 0.054 | 0.064 | 0.082 |
| EUR | 0.059 | 0.070 | 0.081 | 0.098 | 0.127 | 0.116 | 0.117 | 0.120 | 0.125 | 0.124 |
| IND | 0.026 | 0.030 | 0.032 | 0.032 | 0.034 | 0.039 | 0.044 | 0.047 | 0.052 | 0.059 |
| JPN | 0.004 | 0.006 | 0.007 | 0.008 | 0.009 | 0.009 | 0.009 | 0.008 | 0.008 | 0.009 |
| LAM | 0.018 | 0.023 | 0.028 | 0.031 | 0.052 | 0.041 | 0.044 | 0.050 | 0.057 | 0.066 |
| MEA | 0.005 | 0.010 | 0.011 | 0.014 | 0.019 | 0.019 | 0.021 | 0.023 | 0.028 | 0.033 |
| NEU | 0.006 | 0.006 | 0.006 | 0.007 | 0.010 | 0.010 | 0.010 | 0.011 | 0.013 | 0.012 |
| OAS | 0.014 | 0.016 | 0.018 | 0.021 | 0.027 | 0.031 | 0.038 | 0.041 | 0.047 | 0.055 |
| REF | 0.040 | 0.051 | 0.050 | 0.063 | 0.070 | 0.078 | 0.066 | 0.045 | 0.045 | 0.034 |
| SSA | 0.008 | 0.010 | 0.012 | 0.013 | 0.014 | 0.016 | 0.017 | 0.020 | 0.025 | 0.029 |
| USA | 0.044 | 0.048 | 0.046 | 0.048 | 0.093 | 0.088 | 0.085 | 0.098 | 0.109 | 0.101 |

Table 853: IPCC — Emissions—NO2—Land—Agriculture—Agricultural Soils—Manure applied to Croplands (Mt NO2/yr)

15.1.5 Agriculture—Agricultural Soils—Pasture

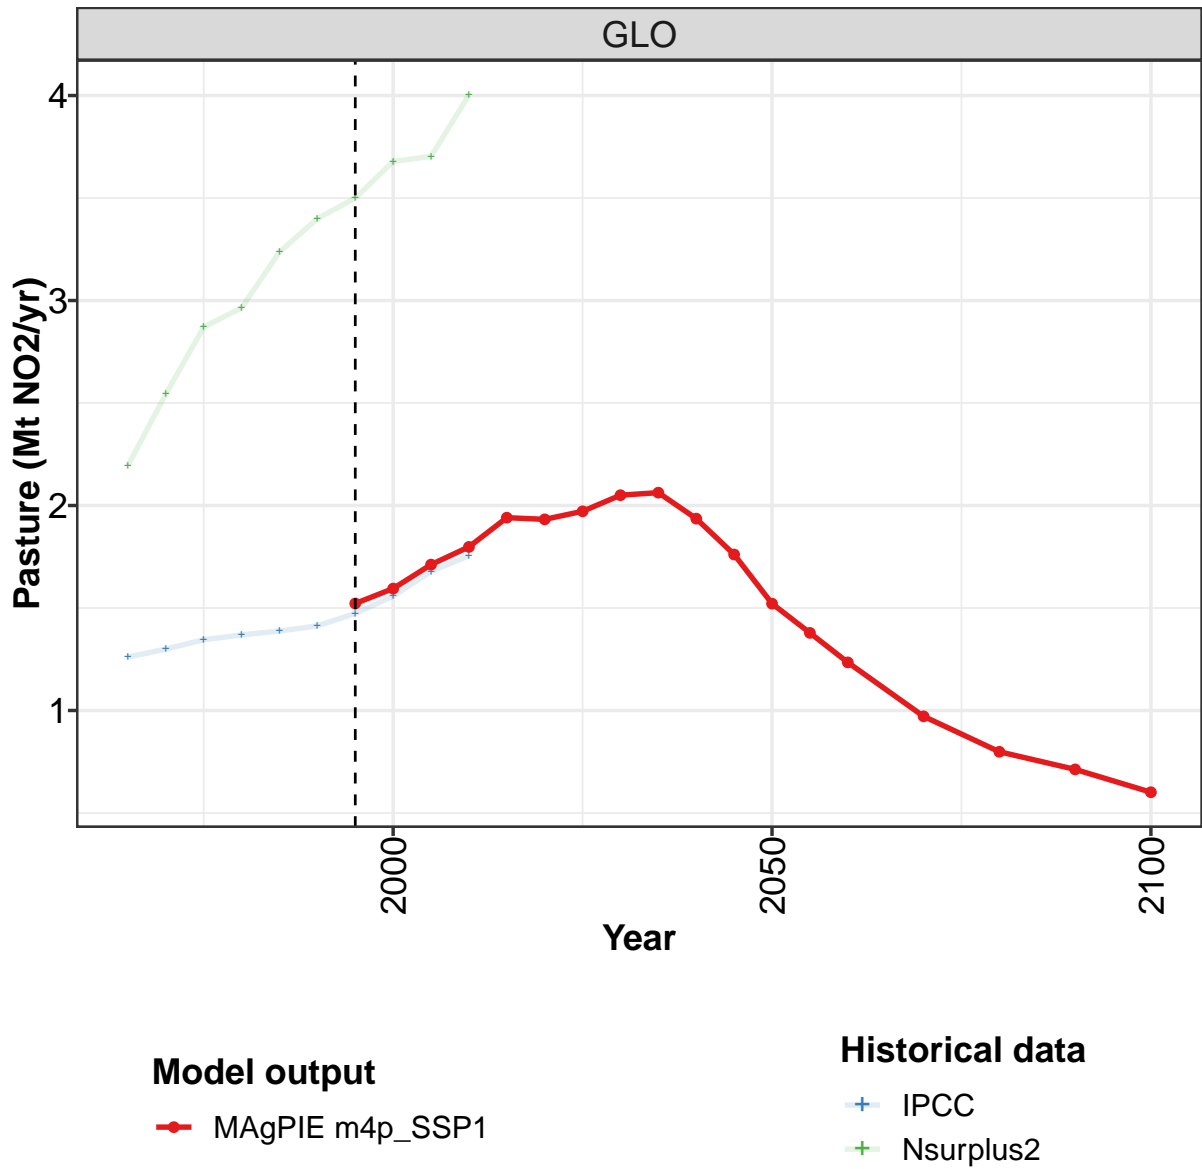

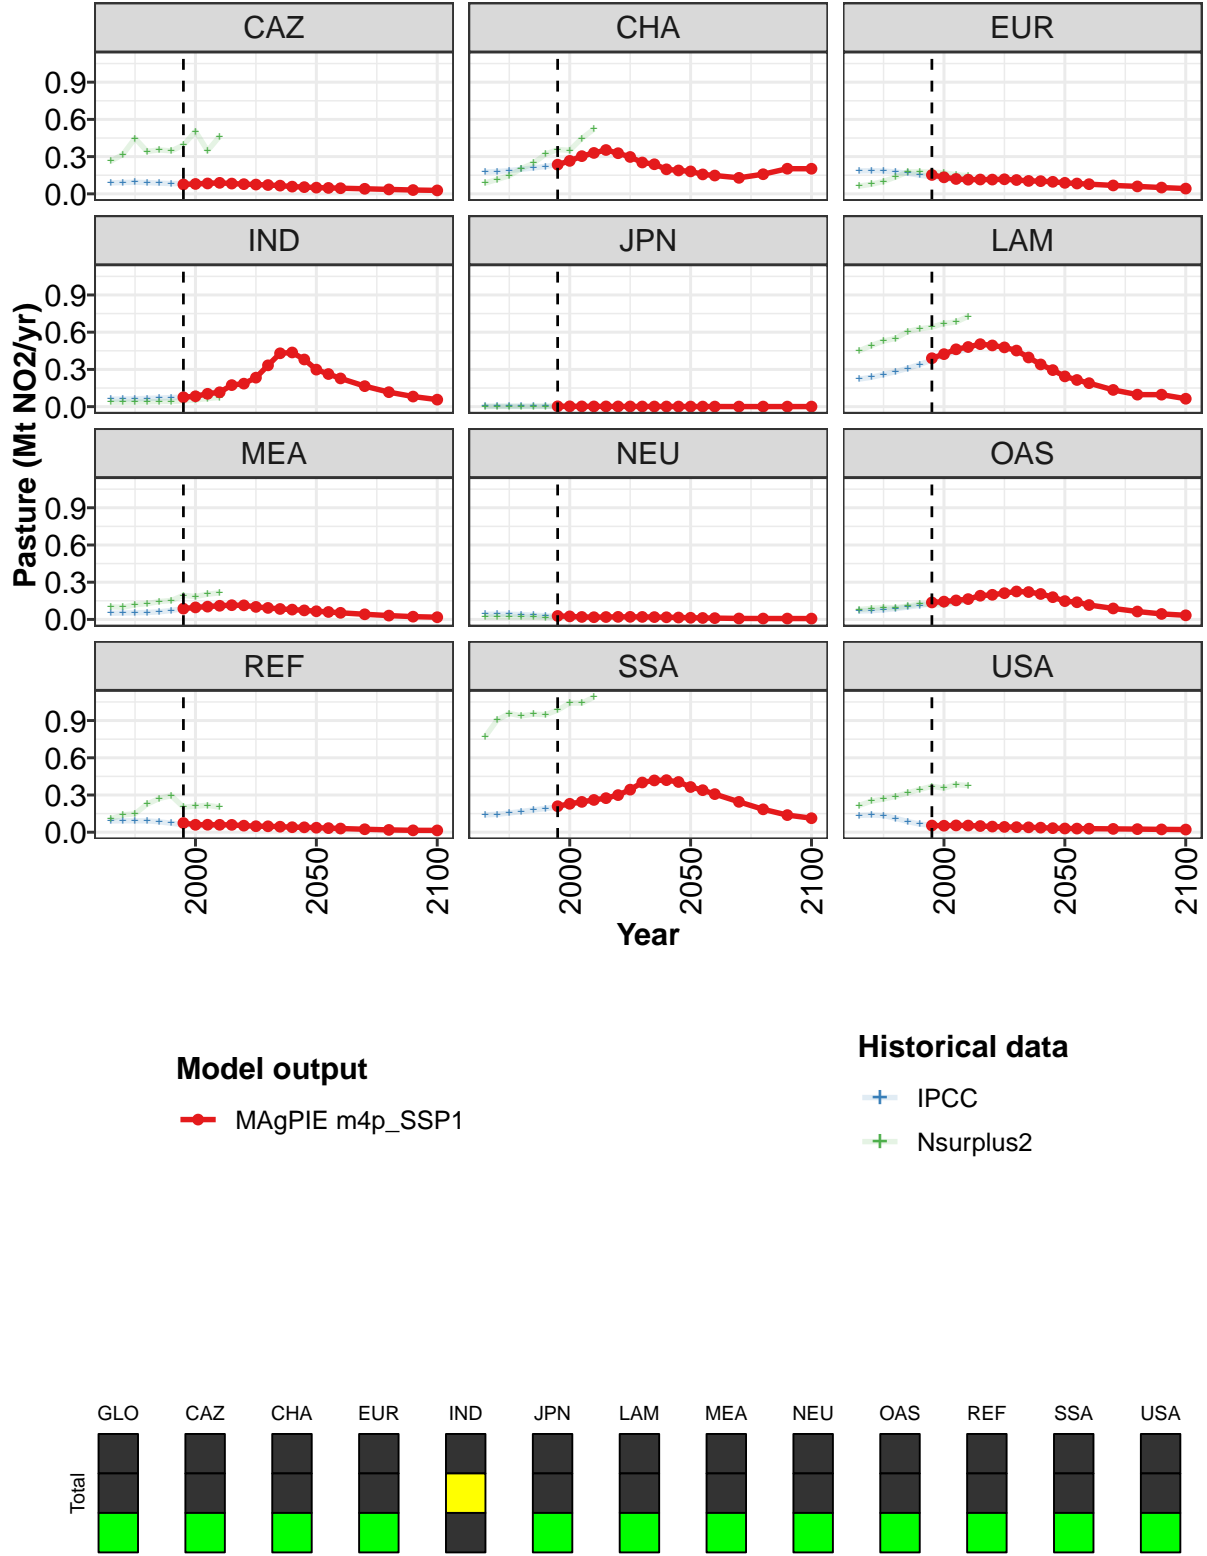

Figure 255: MAgPIE m4p\_SSP1 — Emissions—NO2—Land—Agriculture—Agricultural Soils—Pasture (Mt NO2/yr)

|     | 1995 | 2000 | 2005 | 2010 | 2015 | 2020 | 2025 | 2030 | 2035 | 2040 | 2045 |
|-----|------|------|------|------|------|------|------|------|------|------|------|
| GLO | 1.52 | 1.59 | 1.71 | 1.80 | 1.94 | 1.93 | 1.97 | 2.05 | 2.06 | 1.94 | 1.76 |
| CAZ | 0.08 | 0.08 | 0.08 | 0.09 | 0.08 | 0.08 | 0.07 | 0.07 | 0.07 | 0.06 | 0.05 |
| CHA | 0.24 | 0.27 | 0.30 | 0.33 | 0.35 | 0.33 | 0.30 | 0.25 | 0.24 | 0.20 | 0.19 |
| EUR | 0.15 | 0.13 | 0.12 | 0.11 | 0.12 | 0.12 | 0.12 | 0.11 | 0.10 | 0.10 | 0.10 |
| IND | 0.08 | 0.08 | 0.10 | 0.12 | 0.17 | 0.19 | 0.23 | 0.33 | 0.43 | 0.44 | 0.38 |
| JPN | 0.00 | 0.00 | 0.00 | 0.00 | 0.00 | 0.00 | 0.00 | 0.00 | 0.00 | 0.00 | 0.00 |
| LAM | 0.39 | 0.42 | 0.46 | 0.48 | 0.50 | 0.49 | 0.48 | 0.45 | 0.40 | 0.34 | 0.29 |
| MEA | 0.09 | 0.10 | 0.10 | 0.11 | 0.11 | 0.11 | 0.10 | 0.09 | 0.08 | 0.08 | 0.07 |
| NEU | 0.03 | 0.02 | 0.02 | 0.02 | 0.02 | 0.02 | 0.02 | 0.02 | 0.02 | 0.02 | 0.02 |
| OAS | 0.14 | 0.14 | 0.15 | 0.16 | 0.19 | 0.20 | 0.21 | 0.23 | 0.22 | 0.21 | 0.18 |
| REF | 0.07 | 0.06 | 0.06 | 0.06 | 0.06 | 0.05 | 0.05 | 0.05 | 0.04 | 0.04 | 0.04 |
| SSA | 0.21 | 0.23 | 0.24 | 0.26 | 0.27 | 0.30 | 0.34 | 0.40 | 0.42 | 0.42 | 0.40 |
| USA | 0.05 | 0.05 | 0.05 | 0.05 | 0.05 | 0.05 | 0.04 | 0.04 | 0.04 | 0.04 | 0.03 |

Table 854: MAgPIE m4p\_SSP1 — Emissions—NO2—Land—Agriculture—Agricultural Soils—Pasture (Mt NO2/yr) [PART 1/2]

|     | 2050 | 2055 | 2060 | 2070 | 2080 | 2090 | 2100 |
|-----|------|------|------|------|------|------|------|
| GLO | 1.52 | 1.38 | 1.23 | 0.97 | 0.80 | 0.71 | 0.60 |
| CAZ | 0.05 | 0.05 | 0.05 | 0.04 | 0.04 | 0.03 | 0.03 |
| CHA | 0.18 | 0.16 | 0.15 | 0.13 | 0.16 | 0.20 | 0.20 |
| EUR | 0.09 | 0.08 | 0.08 | 0.07 | 0.06 | 0.05 | 0.04 |
| IND | 0.30 | 0.26 | 0.23 | 0.17 | 0.12 | 0.08 | 0.06 |
| JPN | 0.00 | 0.00 | 0.00 | 0.00 | 0.00 | 0.00 | 0.00 |
| LAM | 0.24 | 0.21 | 0.19 | 0.13 | 0.10 | 0.10 | 0.06 |
| MEA | 0.07 | 0.06 | 0.05 | 0.04 | 0.03 | 0.02 | 0.02 |
| NEU | 0.01 | 0.01 | 0.01 | 0.01 | 0.01 | 0.01 | 0.01 |
| OAS | 0.15 | 0.14 | 0.12 | 0.09 | 0.06 | 0.04 | 0.03 |
| REF | 0.04 | 0.03 | 0.03 | 0.02 | 0.02 | 0.02 | 0.01 |
| SSA | 0.36 | 0.34 | 0.31 | 0.24 | 0.18 | 0.14 | 0.11 |
| USA | 0.03 | 0.03 | 0.03 | 0.03 | 0.02 | 0.02 | 0.02 |

Table 855: MAgPIE m4p\_SSP1 — Emissions—NO2—Land—Agriculture—Agricultural Soils—Pasture (Mt NO2/yr) [PART 2/2]

|     | 1965 | 1970 | 1975 | 1980 | 1985 | 1990 | 1995 | 2000 | 2005 | 2010 |
|-----|------|------|------|------|------|------|------|------|------|------|
| GLO | 1.26 | 1.30 | 1.35 | 1.37 | 1.39 | 1.41 | 1.47 | 1.56 | 1.68 | 1.76 |
| CAZ | 0.09 | 0.09 | 0.09 | 0.09 | 0.09 | 0.08 | 0.08 | 0.09 | 0.09 | 0.09 |
| CHA | 0.18 | 0.18 | 0.19 | 0.20 | 0.21 | 0.22 | 0.24 | 0.27 | 0.30 | 0.33 |
| EUR | 0.18 | 0.19 | 0.18 | 0.18 | 0.17 | 0.15 | 0.14 | 0.12 | 0.11 | 0.11 |
| IND | 0.06 | 0.06 | 0.06 | 0.07 | 0.07 | 0.07 | 0.08 | 0.08 | 0.11 | 0.12 |
| JPN | 0.00 | 0.00 | 0.00 | 0.00 | 0.00 | 0.00 | 0.00 | 0.00 | 0.00 | 0.00 |
| LAM | 0.22 | 0.24 | 0.26 | 0.28 | 0.31 | 0.34 | 0.38 | 0.41 | 0.44 | 0.46 |
| MEA | 0.05 | 0.05 | 0.05 | 0.06 | 0.06 | 0.07 | 0.09 | 0.10 | 0.11 | 0.12 |
| NEU | 0.04 | 0.04 | 0.04 | 0.04 | 0.03 | 0.03 | 0.03 | 0.02 | 0.02 | 0.02 |
| OAS | 0.07 | 0.07 | 0.08 | 0.09 | 0.10 | 0.11 | 0.13 | 0.13 | 0.14 | 0.15 |
| REF | 0.09 | 0.09 | 0.09 | 0.09 | 0.08 | 0.07 | 0.06 | 0.05 | 0.05 | 0.06 |
| SSA | 0.14 | 0.14 | 0.15 | 0.17 | 0.18 | 0.19 | 0.20 | 0.22 | 0.24 | 0.26 |
| USA | 0.14 | 0.14 | 0.13 | 0.11 | 0.09 | 0.07 | 0.06 | 0.05 | 0.05 | 0.06 |

Table 856: IPCC — Emissions—NO2—Land—Agriculture—Agricultural Soils—Pasture (Mt NO2/yr)

|     | 1965 | 1970 | 1975 | 1980 | 1985 | 1990 | 1995 | 2000 | 2005 | 2010 |
|-----|------|------|------|------|------|------|------|------|------|------|
| GLO | 2.20 | 2.54 | 2.87 | 2.96 | 3.24 | 3.40 | 3.50 | 3.68 | 3.70 | 4.00 |
| CAZ | 0.26 | 0.32 | 0.45 | 0.34 | 0.35 | 0.35 | 0.39 | 0.50 | 0.35 | 0.46 |
| CHA | 0.09 | 0.12 | 0.15 | 0.20 | 0.25 | 0.32 | 0.36 | 0.35 | 0.45 | 0.52 |
| EUR | 0.06 | 0.08 | 0.10 | 0.14 | 0.18 | 0.18 | 0.17 | 0.17 | 0.15 | 0.15 |
| IND | 0.04 | 0.04 | 0.04 | 0.04 | 0.04 | 0.04 | 0.05 | 0.05 | 0.07 | 0.07 |
| JPN | 0.00 | 0.00 | 0.00 | 0.00 | 0.00 | 0.00 | 0.00 | 0.00 | 0.00 | 0.00 |
| LAM | 0.45 | 0.49 | 0.53 | 0.55 | 0.61 | 0.63 | 0.64 | 0.67 | 0.68 | 0.73 |
| MEA | 0.10 | 0.10 | 0.12 | 0.13 | 0.14 | 0.15 | 0.19 | 0.18 | 0.20 | 0.21 |
| NEU | 0.02 | 0.02 | 0.02 | 0.02 | 0.02 | 0.02 | 0.02 | 0.02 | 0.02 | 0.02 |
| OAS | 0.08 | 0.09 | 0.10 | 0.09 | 0.11 | 0.13 | 0.12 | 0.12 | 0.14 | 0.16 |
| REF | 0.11 | 0.14 | 0.15 | 0.23 | 0.27 | 0.29 | 0.20 | 0.21 | 0.22 | 0.20 |
| SSA | 0.77 | 0.90 | 0.96 | 0.94 | 0.95 | 0.95 | 0.98 | 1.04 | 1.04 | 1.09 |
| USA | 0.22 | 0.25 | 0.27 | 0.29 | 0.32 | 0.34 | 0.37 | 0.36 | 0.38 | 0.38 |

Table 857: Nsurplus2 — Emissions—NO2—Land—Agriculture—Agricultural Soils—Pasture (Mt NO2/yr)

15.1.6 Agriculture—Animal Waste Management

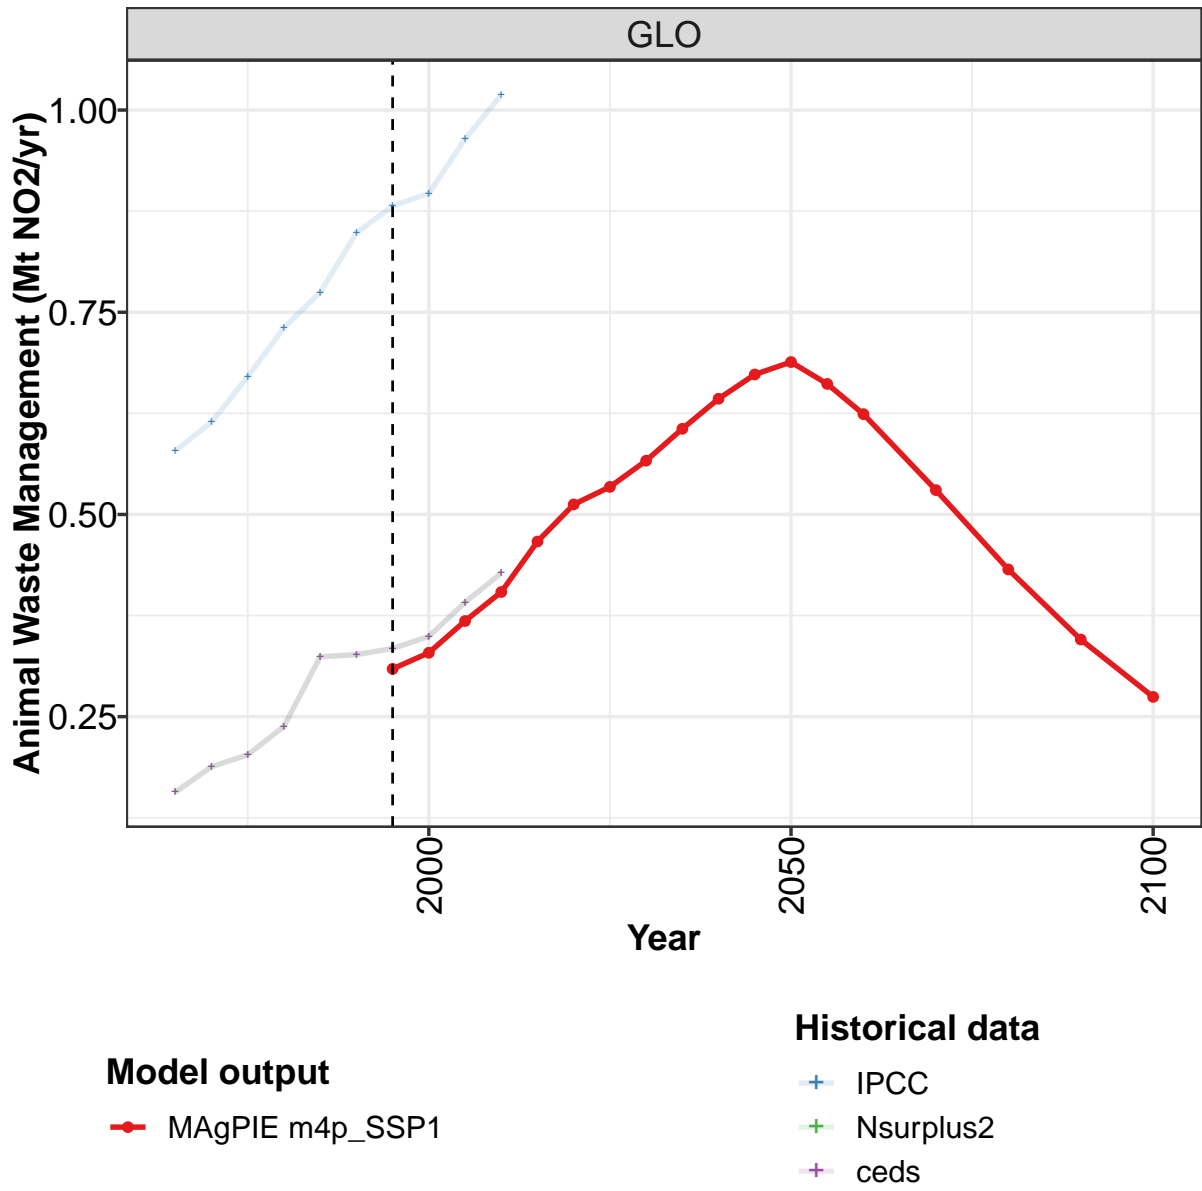

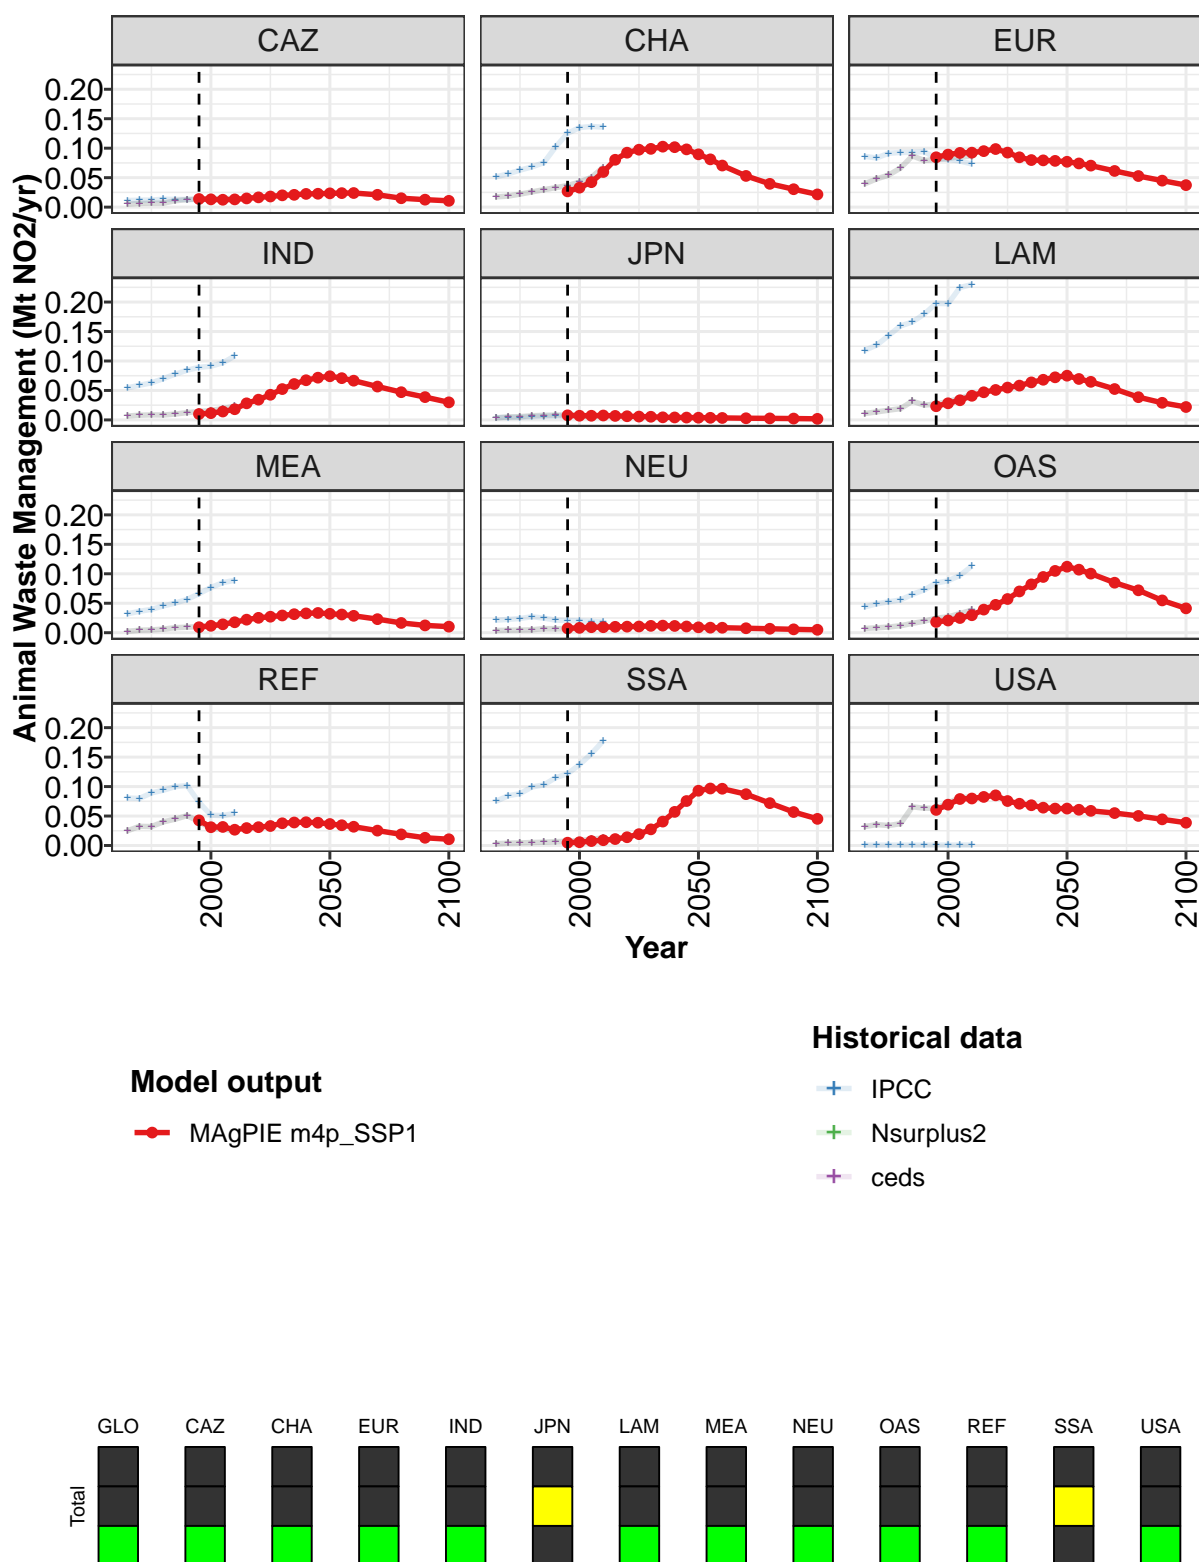

Figure 256: MAGPIE m4p\_SSP1 — Emissions—NO<sub>2</sub>—Land—Agriculture—Animal Waste Management (Mt NO<sub>2</sub>/yr)



|     | 1995  | 2000  | 2005  | 2010  | 2015  | 2020  | 2025  | 2030  | 2035  | 2040  | 2045  |
|-----|-------|-------|-------|-------|-------|-------|-------|-------|-------|-------|-------|
| GLO | 0.309 | 0.329 | 0.368 | 0.404 | 0.467 | 0.512 | 0.534 | 0.567 | 0.606 | 0.643 | 0.673 |
| CAZ | 0.014 | 0.013 | 0.013 | 0.013 | 0.015 | 0.017 | 0.018 | 0.020 | 0.021 | 0.022 | 0.023 |
| CHA | 0.027 | 0.033 | 0.042 | 0.060 | 0.080 | 0.092 | 0.097 | 0.099 | 0.103 | 0.102 | 0.098 |
| EUR | 0.085 | 0.089 | 0.092 | 0.092 | 0.095 | 0.099 | 0.093 | 0.085 | 0.080 | 0.079 | 0.079 |
| IND | 0.010 | 0.012 | 0.014 | 0.018 | 0.028 | 0.034 | 0.043 | 0.052 | 0.061 | 0.067 | 0.072 |
| JPN | 0.008 | 0.007 | 0.007 | 0.008 | 0.007 | 0.006 | 0.006 | 0.005 | 0.004 | 0.004 | 0.004 |
| LAM | 0.023 | 0.028 | 0.033 | 0.041 | 0.047 | 0.051 | 0.055 | 0.058 | 0.064 | 0.068 | 0.072 |
| MEA | 0.009 | 0.012 | 0.014 | 0.018 | 0.022 | 0.025 | 0.027 | 0.029 | 0.031 | 0.033 | 0.034 |
| NEU | 0.007 | 0.008 | 0.009 | 0.009 | 0.010 | 0.010 | 0.011 | 0.012 | 0.012 | 0.012 | 0.011 |
| OAS | 0.018 | 0.021 | 0.025 | 0.030 | 0.039 | 0.047 | 0.057 | 0.070 | 0.082 | 0.095 | 0.105 |
| REF | 0.043 | 0.031 | 0.032 | 0.027 | 0.030 | 0.031 | 0.033 | 0.038 | 0.039 | 0.040 | 0.039 |
| SSA | 0.005 | 0.006 | 0.008 | 0.009 | 0.011 | 0.014 | 0.019 | 0.027 | 0.041 | 0.057 | 0.075 |
| USA | 0.060 | 0.069 | 0.079 | 0.080 | 0.082 | 0.085 | 0.076 | 0.071 | 0.068 | 0.064 | 0.063 |

Table 858: MAgPIE m4p\_SSP1 — Emissions—NO2—Land—Agriculture—Animal Waste Management (Mt NO2/yr) [PART 1/2]

|     | 2050  | 2055  | 2060  | 2070  | 2080  | 2090  | 2100  |
|-----|-------|-------|-------|-------|-------|-------|-------|
| GLO | 0.688 | 0.661 | 0.624 | 0.530 | 0.432 | 0.345 | 0.274 |
| CAZ | 0.023 | 0.024 | 0.024 | 0.021 | 0.015 | 0.013 | 0.011 |
| CHA | 0.090 | 0.081 | 0.071 | 0.053 | 0.040 | 0.030 | 0.022 |
| EUR | 0.077 | 0.074 | 0.070 | 0.061 | 0.053 | 0.045 | 0.037 |
| IND | 0.074 | 0.071 | 0.067 | 0.057 | 0.047 | 0.039 | 0.030 |
| JPN | 0.004 | 0.004 | 0.003 | 0.003 | 0.003 | 0.002 | 0.002 |
| LAM | 0.075 | 0.070 | 0.065 | 0.052 | 0.039 | 0.029 | 0.022 |
| MEA | 0.032 | 0.031 | 0.029 | 0.023 | 0.017 | 0.012 | 0.010 |
| NEU | 0.009 | 0.009 | 0.008 | 0.008 | 0.007 | 0.006 | 0.005 |
| OAS | 0.112 | 0.107 | 0.100 | 0.085 | 0.072 | 0.055 | 0.041 |
| REF | 0.036 | 0.034 | 0.032 | 0.025 | 0.019 | 0.013 | 0.011 |
| SSA | 0.093 | 0.097 | 0.096 | 0.087 | 0.072 | 0.057 | 0.045 |
| USA | 0.063 | 0.061 | 0.059 | 0.055 | 0.050 | 0.044 | 0.039 |

Table 859: MAgPIE m4p\_SSP1 — Emissions—NO2—Land—Agriculture—Animal Waste Management (Mt NO2/yr) [PART 2/2]

|     | 1965 | 1970 | 1975 | 1980 | 1985 | 1990 | 1995 | 2000 | 2005 | 2010 |
|-----|------|------|------|------|------|------|------|------|------|------|
| GLO | 0.58 | 0.61 | 0.67 | 0.73 | 0.77 | 0.85 | 0.88 | 0.90 | 0.96 | 1.02 |
| CAZ | 0.01 | 0.01 | 0.01 | 0.01 | 0.01 | 0.01 | 0.01 | 0.01 | 0.01 | 0.01 |
| CHA | 0.05 | 0.06 | 0.06 | 0.07 | 0.08 | 0.10 | 0.13 | 0.13 | 0.14 | 0.14 |
| EUR | 0.09 | 0.08 | 0.09 | 0.09 | 0.09 | 0.09 | 0.08 | 0.08 | 0.08 | 0.07 |
| IND | 0.05 | 0.06 | 0.06 | 0.07 | 0.08 | 0.08 | 0.09 | 0.09 | 0.10 | 0.11 |
| JPN | 0.00 | 0.00 | 0.00 | 0.01 | 0.01 | 0.01 | 0.01 | 0.01 | 0.01 | 0.01 |
| LAM | 0.12 | 0.13 | 0.14 | 0.16 | 0.17 | 0.18 | 0.20 | 0.20 | 0.22 | 0.23 |
| MEA | 0.03 | 0.04 | 0.04 | 0.05 | 0.05 | 0.06 | 0.07 | 0.08 | 0.09 | 0.09 |
| NEU | 0.02 | 0.02 | 0.02 | 0.03 | 0.02 | 0.02 | 0.02 | 0.02 | 0.02 | 0.02 |
| OAS | 0.04 | 0.05 | 0.05 | 0.06 | 0.07 | 0.07 | 0.08 | 0.09 | 0.10 | 0.11 |
| REF | 0.08 | 0.08 | 0.09 | 0.09 | 0.10 | 0.10 | 0.07 | 0.05 | 0.05 | 0.05 |
| SSA | 0.08 | 0.08 | 0.09 | 0.10 | 0.10 | 0.12 | 0.12 | 0.14 | 0.16 | 0.18 |
| USA | 0.00 | 0.00 | 0.00 | 0.00 | 0.00 | 0.00 | 0.00 | 0.00 | 0.00 | 0.00 |

Table 860: ceds — Emissions—NO2—Land—Agriculture—Animal Waste Management (Mt NO2/yr)

|     | 1965  | 1970  | 1975  | 1980  | 1985  | 1990  | 1995  | 2000  | 2005  | 2010  |
|-----|-------|-------|-------|-------|-------|-------|-------|-------|-------|-------|
| GLO | 0.157 | 0.188 | 0.203 | 0.238 | 0.324 | 0.327 | 0.334 | 0.349 | 0.391 | 0.427 |
| CAZ | 0.005 | 0.006 | 0.007 | 0.007 | 0.011 | 0.013 | 0.014 | 0.014 | 0.015 | 0.014 |
| CHA | 0.017 | 0.019 | 0.022 | 0.026 | 0.030 | 0.033 | 0.037 | 0.042 | 0.051 | 0.068 |
| EUR | 0.040 | 0.048 | 0.054 | 0.066 | 0.087 | 0.079 | 0.081 | 0.083 | 0.086 | 0.086 |
| IND | 0.007 | 0.008 | 0.009 | 0.008 | 0.010 | 0.012 | 0.014 | 0.016 | 0.019 | 0.023 |
| JPN | 0.003 | 0.005 | 0.005 | 0.007 | 0.008 | 0.008 | 0.008 | 0.007 | 0.007 | 0.008 |
| LAM | 0.011 | 0.014 | 0.017 | 0.019 | 0.032 | 0.025 | 0.027 | 0.031 | 0.037 | 0.043 |
| MEA | 0.002 | 0.004 | 0.005 | 0.006 | 0.009 | 0.009 | 0.011 | 0.012 | 0.015 | 0.019 |
| NEU | 0.004 | 0.004 | 0.004 | 0.005 | 0.007 | 0.007 | 0.007 | 0.008 | 0.009 | 0.009 |
| OAS | 0.007 | 0.008 | 0.010 | 0.012 | 0.016 | 0.019 | 0.025 | 0.027 | 0.033 | 0.038 |
| REF | 0.025 | 0.033 | 0.032 | 0.040 | 0.045 | 0.051 | 0.041 | 0.028 | 0.029 | 0.024 |
| SSA | 0.003 | 0.004 | 0.004 | 0.005 | 0.006 | 0.006 | 0.007 | 0.008 | 0.011 | 0.013 |
| USA | 0.032 | 0.035 | 0.034 | 0.037 | 0.066 | 0.063 | 0.063 | 0.072 | 0.081 | 0.082 |

Table 861: IPCC — Emissions—NO2—Land—Agriculture—Animal Waste Management (Mt NO2/yr)

|     | 1965  | 1970  | 1975  | 1980  | 1985  | 1990  | 1995  | 2000  | 2005  | 2010  |
|-----|-------|-------|-------|-------|-------|-------|-------|-------|-------|-------|
| GLO | 0.157 | 0.188 | 0.203 | 0.238 | 0.324 | 0.327 | 0.334 | 0.349 | 0.391 | 0.427 |
| CAZ | 0.005 | 0.006 | 0.007 | 0.007 | 0.011 | 0.013 | 0.014 | 0.014 | 0.015 | 0.014 |
| CHA | 0.017 | 0.019 | 0.022 | 0.026 | 0.030 | 0.033 | 0.037 | 0.042 | 0.051 | 0.068 |
| EUR | 0.040 | 0.048 | 0.054 | 0.066 | 0.087 | 0.079 | 0.081 | 0.083 | 0.086 | 0.086 |
| IND | 0.007 | 0.008 | 0.009 | 0.008 | 0.010 | 0.012 | 0.014 | 0.016 | 0.019 | 0.023 |
| JPN | 0.003 | 0.005 | 0.005 | 0.007 | 0.008 | 0.008 | 0.008 | 0.007 | 0.007 | 0.008 |
| LAM | 0.011 | 0.014 | 0.017 | 0.019 | 0.032 | 0.025 | 0.027 | 0.031 | 0.037 | 0.043 |
| MEA | 0.002 | 0.004 | 0.005 | 0.006 | 0.009 | 0.009 | 0.011 | 0.012 | 0.015 | 0.019 |
| NEU | 0.004 | 0.004 | 0.004 | 0.005 | 0.007 | 0.007 | 0.007 | 0.008 | 0.009 | 0.009 |
| OAS | 0.007 | 0.008 | 0.010 | 0.012 | 0.016 | 0.019 | 0.025 | 0.027 | 0.033 | 0.038 |
| REF | 0.025 | 0.033 | 0.032 | 0.040 | 0.045 | 0.051 | 0.041 | 0.028 | 0.029 | 0.024 |
| SSA | 0.003 | 0.004 | 0.004 | 0.005 | 0.006 | 0.006 | 0.007 | 0.008 | 0.011 | 0.013 |
| USA | 0.032 | 0.035 | 0.034 | 0.037 | 0.066 | 0.063 | 0.063 | 0.072 | 0.081 | 0.082 |

Table 862: Nsurplus2 — Emissions—NO2—Land—Agriculture—Animal Waste Management (Mt NO2/yr)

## 16 NO3Land

### 16.1 Agriculture

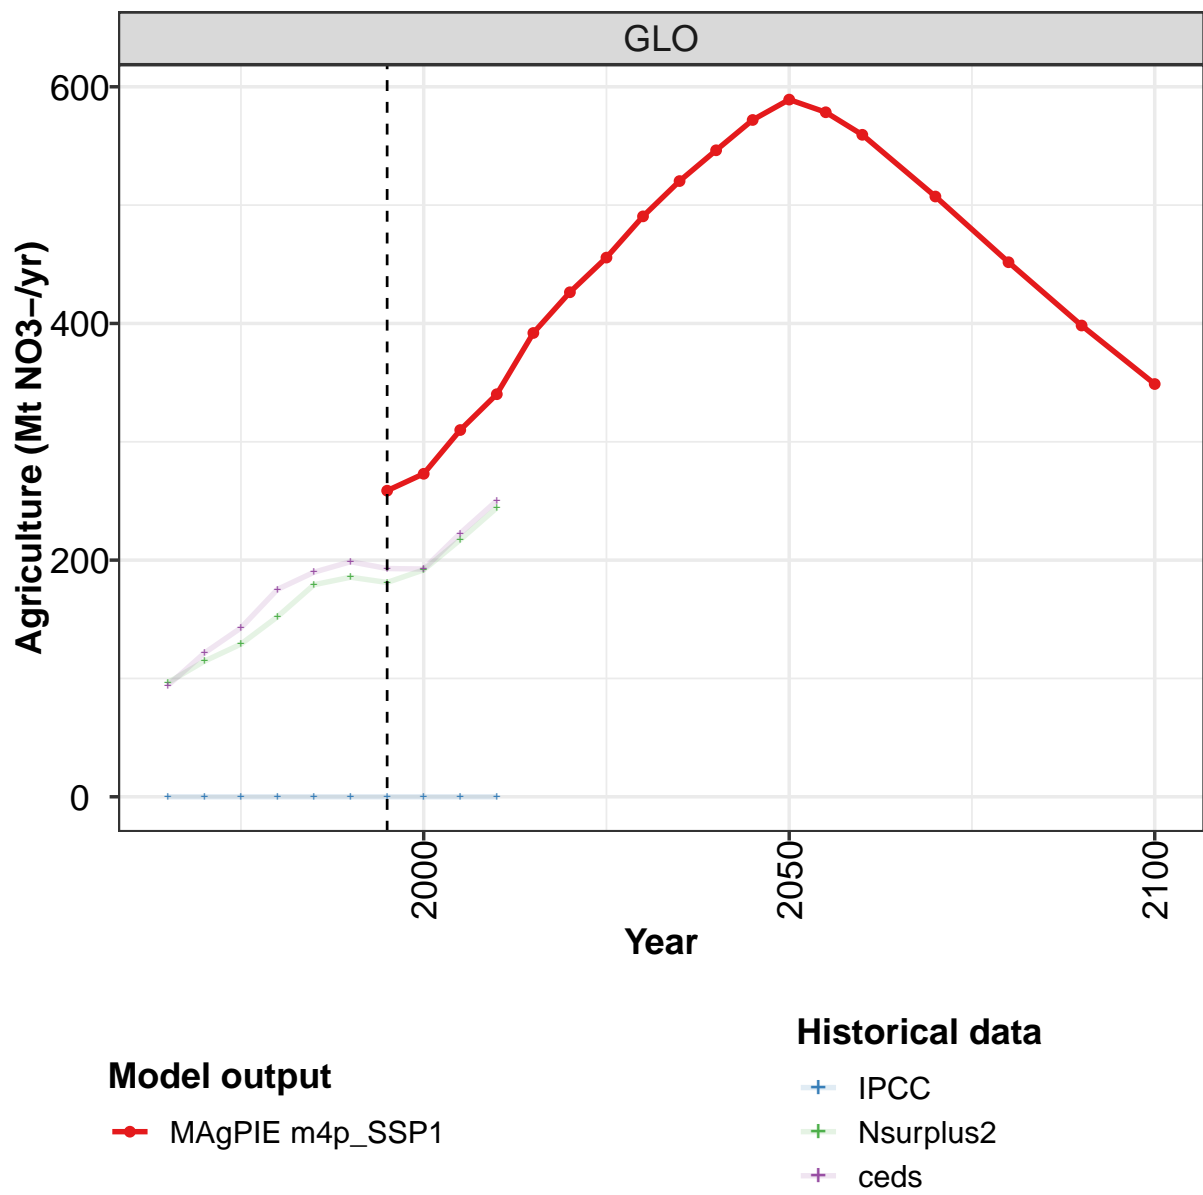

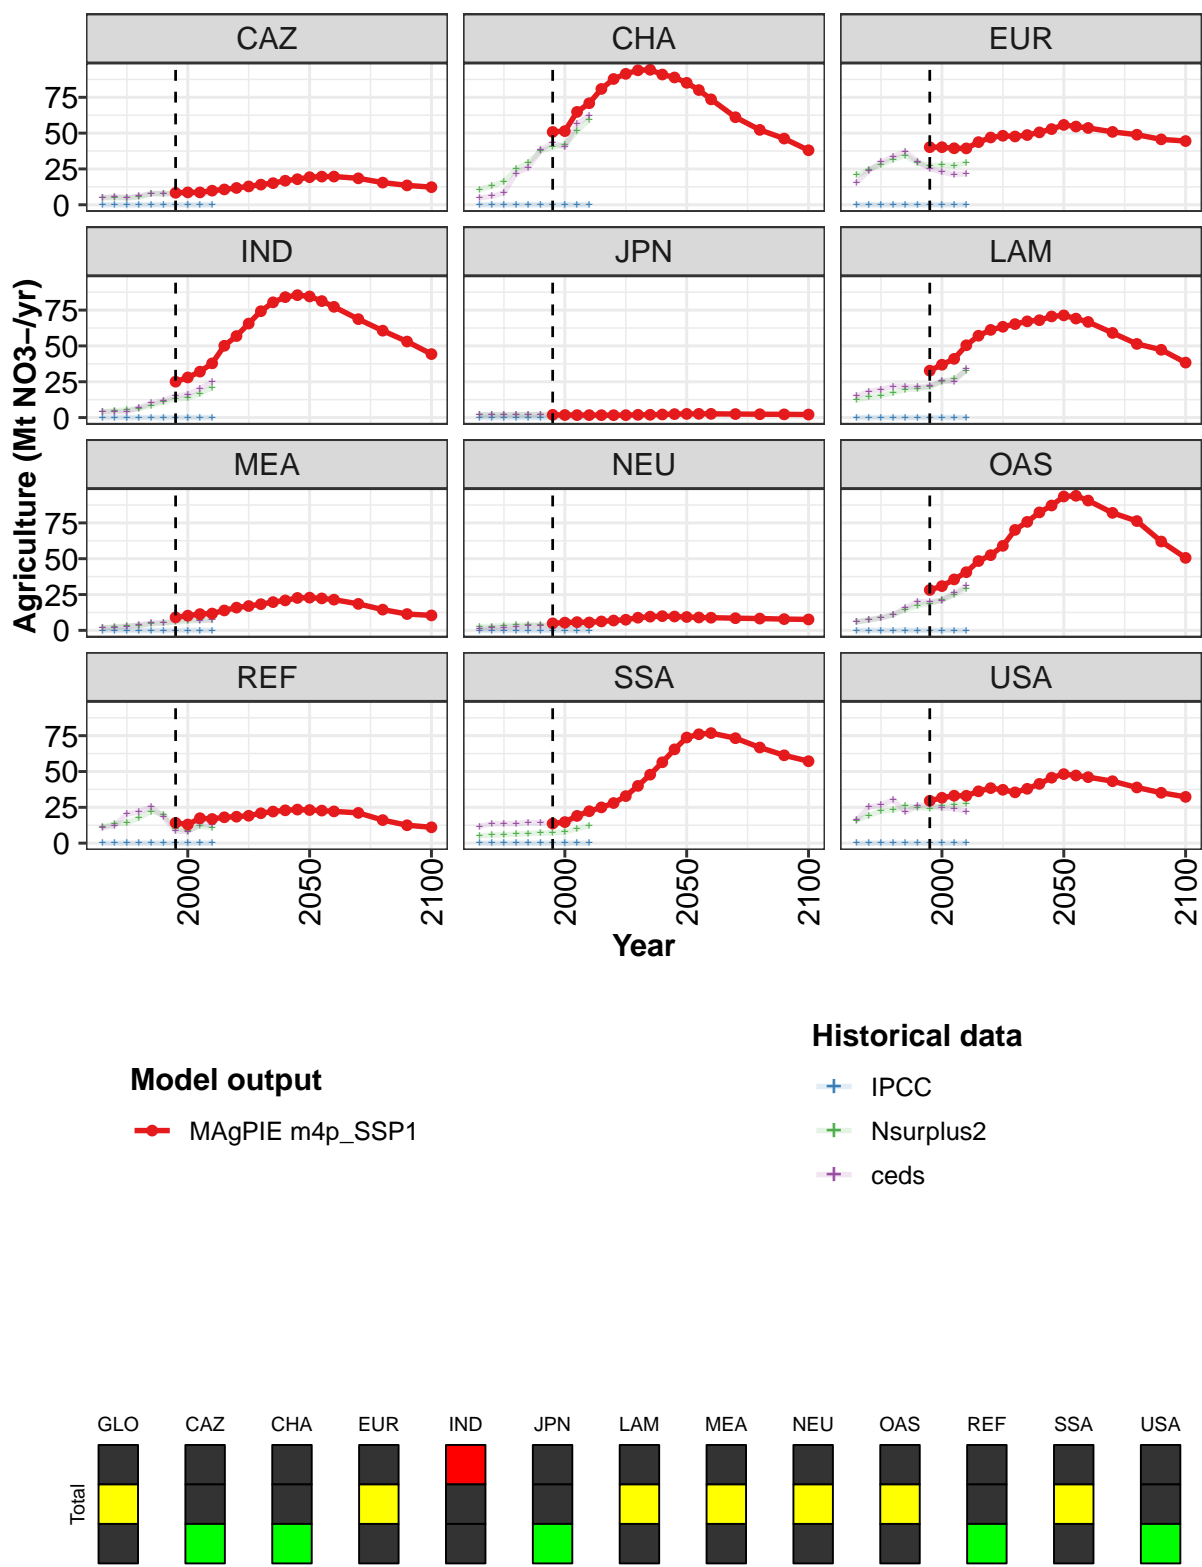

Figure 257: MAgPIE m4p\_SSP1 — Emissions—NO3Land—Agriculture (Mt NO3-/yr)

|     | 1995 | 2000 | 2005 | 2010 | 2015 | 2020 | 2025 | 2030 | 2035 | 2040 | 2045 |
|-----|------|------|------|------|------|------|------|------|------|------|------|
| GLO | 259  | 273  | 310  | 340  | 392  | 426  | 456  | 491  | 520  | 546  | 572  |
| CAZ | 8    | 9    | 9    | 10   | 11   | 12   | 13   | 14   | 15   | 17   | 18   |
| CHA | 51   | 51   | 65   | 71   | 81   | 88   | 91   | 94   | 94   | 91   | 89   |
| EUR | 40   | 40   | 39   | 39   | 44   | 47   | 48   | 48   | 49   | 51   | 53   |
| IND | 25   | 28   | 32   | 38   | 50   | 57   | 66   | 74   | 80   | 84   | 85   |
| JPN | 2    | 2    | 2    | 2    | 2    | 2    | 2    | 2    | 2    | 2    | 2    |
| LAM | 33   | 37   | 41   | 50   | 57   | 61   | 63   | 65   | 67   | 68   | 71   |
| MEA | 9    | 10   | 11   | 12   | 14   | 16   | 17   | 18   | 20   | 21   | 23   |
| NEU | 5    | 5    | 6    | 6    | 6    | 7    | 7    | 9    | 10   | 10   | 10   |
| OAS | 28   | 31   | 36   | 41   | 48   | 53   | 59   | 70   | 76   | 82   | 87   |
| REF | 14   | 13   | 17   | 17   | 18   | 18   | 19   | 21   | 22   | 23   | 23   |
| SSA | 14   | 15   | 19   | 22   | 25   | 28   | 33   | 40   | 48   | 56   | 65   |
| USA | 30   | 32   | 33   | 33   | 36   | 38   | 37   | 35   | 38   | 41   | 46   |

Table 863: MAgPIE m4p\_SSP1 — Emissions—NO3Land—Agriculture (Mt NO3-/yr) [PART 1/2]

|     | 2050 | 2055 | 2060 | 2070 | 2080 | 2090 | 2100 |
|-----|------|------|------|------|------|------|------|
| GLO | 589  | 578  | 559  | 507  | 452  | 398  | 349  |
| CAZ | 19   | 20   | 20   | 18   | 15   | 14   | 12   |
| CHA | 85   | 80   | 74   | 61   | 52   | 46   | 38   |
| EUR | 56   | 55   | 54   | 51   | 49   | 46   | 44   |
| IND | 85   | 81   | 77   | 69   | 61   | 53   | 44   |
| JPN | 3    | 3    | 3    | 2    | 2    | 2    | 2    |
| LAM | 71   | 69   | 67   | 59   | 51   | 47   | 38   |
| MEA | 23   | 22   | 21   | 18   | 14   | 11   | 10   |
| NEU | 9    | 9    | 9    | 8    | 8    | 8    | 8    |
| OAS | 93   | 94   | 91   | 82   | 76   | 62   | 51   |
| REF | 23   | 23   | 22   | 21   | 16   | 12   | 11   |
| SSA | 74   | 76   | 77   | 73   | 67   | 61   | 57   |
| USA | 48   | 47   | 46   | 43   | 39   | 35   | 32   |

Table 864: MAgPIE m4p\_SSP1 — Emissions—NO3Land—Agriculture (Mt NO3-/yr) [PART 2/2]

|     | 1965 | 1970 | 1975 | 1980 | 1985 | 1990 | 1995 | 2000 | 2005 | 2010 |
|-----|------|------|------|------|------|------|------|------|------|------|
| GLO | 0    | 0    | 0    | 0    | 0    | 0    | 0    | 0    | 0    | 0    |
| CAZ | 0    | 0    | 0    | 0    | 0    | 0    | 0    | 0    | 0    | 0    |
| CHA | 0    | 0    | 0    | 0    | 0    | 0    | 0    | 0    | 0    | 0    |
| EUR | 0    | 0    | 0    | 0    | 0    | 0    | 0    | 0    | 0    | 0    |
| IND | 0    | 0    | 0    | 0    | 0    | 0    | 0    | 0    | 0    | 0    |
| JPN | 0    | 0    | 0    | 0    | 0    | 0    | 0    | 0    | 0    | 0    |
| LAM | 0    | 0    | 0    | 0    | 0    | 0    | 0    | 0    | 0    | 0    |
| MEA | 0    | 0    | 0    | 0    | 0    | 0    | 0    | 0    | 0    | 0    |
| NEU | 0    | 0    | 0    | 0    | 0    | 0    | 0    | 0    | 0    | 0    |
| OAS | 0    | 0    | 0    | 0    | 0    | 0    | 0    | 0    | 0    | 0    |
| REF | 0    | 0    | 0    | 0    | 0    | 0    | 0    | 0    | 0    | 0    |
| SSA | 0    | 0    | 0    | 0    | 0    | 0    | 0    | 0    | 0    | 0    |
| USA | 0    | 0    | 0    | 0    | 0    | 0    | 0    | 0    | 0    | 0    |

Table 865: ceds — Emissions—NO3Land—Agriculture (Mt NO3-/yr)

|     | 1965 | 1970 | 1975 | 1980 | 1985 | 1990 | 1995 | 2000 | 2005 | 2010 |
|-----|------|------|------|------|------|------|------|------|------|------|
| GLO | 97   | 115  | 129  | 152  | 179  | 186  | 181  | 192  | 217  | 244  |
| CAZ | 5    | 5    | 5    | 5    | 8    | 8    | 8    | 8    | 9    | 10   |
| CHA | 11   | 13   | 16   | 25   | 29   | 37   | 40   | 42   | 51   | 59   |
| EUR | 21   | 24   | 28   | 32   | 34   | 29   | 27   | 28   | 27   | 29   |
| IND | 4    | 5    | 5    | 6    | 8    | 11   | 13   | 13   | 17   | 21   |
| JPN | 2    | 2    | 2    | 2    | 2    | 2    | 2    | 2    | 2    | 2    |
| LAM | 12   | 14   | 15   | 17   | 20   | 20   | 21   | 25   | 27   | 33   |
| MEA | 2    | 2    | 3    | 4    | 4    | 5    | 6    | 6    | 7    | 7    |
| NEU | 2    | 3    | 3    | 4    | 4    | 4    | 3    | 4    | 4    | 4    |
| OAS | 6    | 7    | 9    | 11   | 14   | 17   | 19   | 21   | 25   | 29   |
| REF | 11   | 14   | 14   | 18   | 22   | 20   | 10   | 9    | 12   | 11   |
| SSA | 5    | 6    | 6    | 6    | 7    | 7    | 7    | 8    | 10   | 12   |
| USA | 16   | 19   | 22   | 23   | 26   | 25   | 24   | 26   | 27   | 28   |

Table 866: IPCC — Emissions—NO3Land—Agriculture (Mt NO3-/yr)

|     | 1965 | 1970 | 1975 | 1980 | 1985 | 1990 | 1995 | 2000 | 2005 | 2010 |
|-----|------|------|------|------|------|------|------|------|------|------|
| GLO | 94   | 121  | 143  | 175  | 190  | 199  | 193  | 192  | 223  | 250  |
| CAZ | 5    | 6    | 5    | 6    | 8    | 8    | 8    | 8    | 7    | 9    |
| CHA | 5    | 6    | 8    | 22   | 26   | 38   | 43   | 40   | 57   | 62   |
| EUR | 16   | 24   | 30   | 34   | 37   | 30   | 25   | 23   | 21   | 22   |
| IND | 4    | 4    | 4    | 7    | 10   | 12   | 15   | 16   | 20   | 25   |
| JPN | 2    | 2    | 2    | 2    | 2    | 2    | 2    | 2    | 2    | 1    |
| LAM | 15   | 18   | 20   | 22   | 22   | 21   | 22   | 26   | 25   | 34   |
| MEA | 2    | 2    | 3    | 4    | 5    | 5    | 6    | 7    | 7    | 7    |
| NEU | 1    | 2    | 2    | 3    | 3    | 3    | 3    | 3    | 3    | 3    |
| OAS | 6    | 7    | 9    | 11   | 16   | 20   | 20   | 21   | 26   | 31   |
| REF | 11   | 12   | 20   | 22   | 25   | 19   | 8    | 8    | 13   | 13   |
| SSA | 12   | 14   | 14   | 14   | 15   | 14   | 14   | 14   | 17   | 21   |
| USA | 16   | 25   | 27   | 30   | 22   | 26   | 27   | 24   | 24   | 22   |

Table 867: Nsurplus2 — Emissions—NO3Land—Agriculture (Mt NO3-/yr)

16.1.1 Agricultural Soils

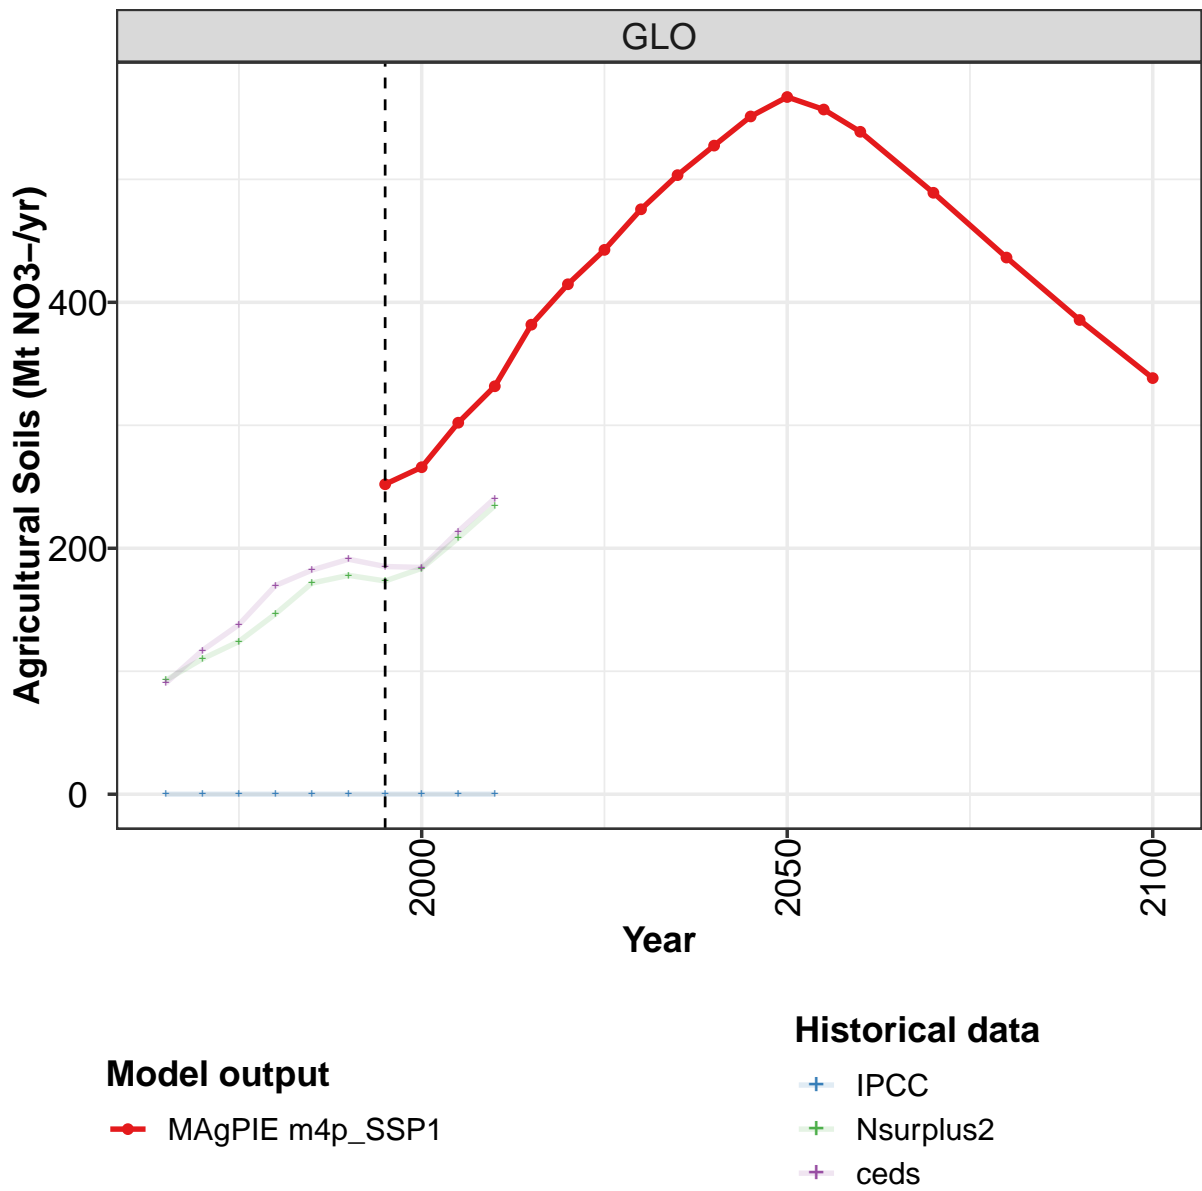

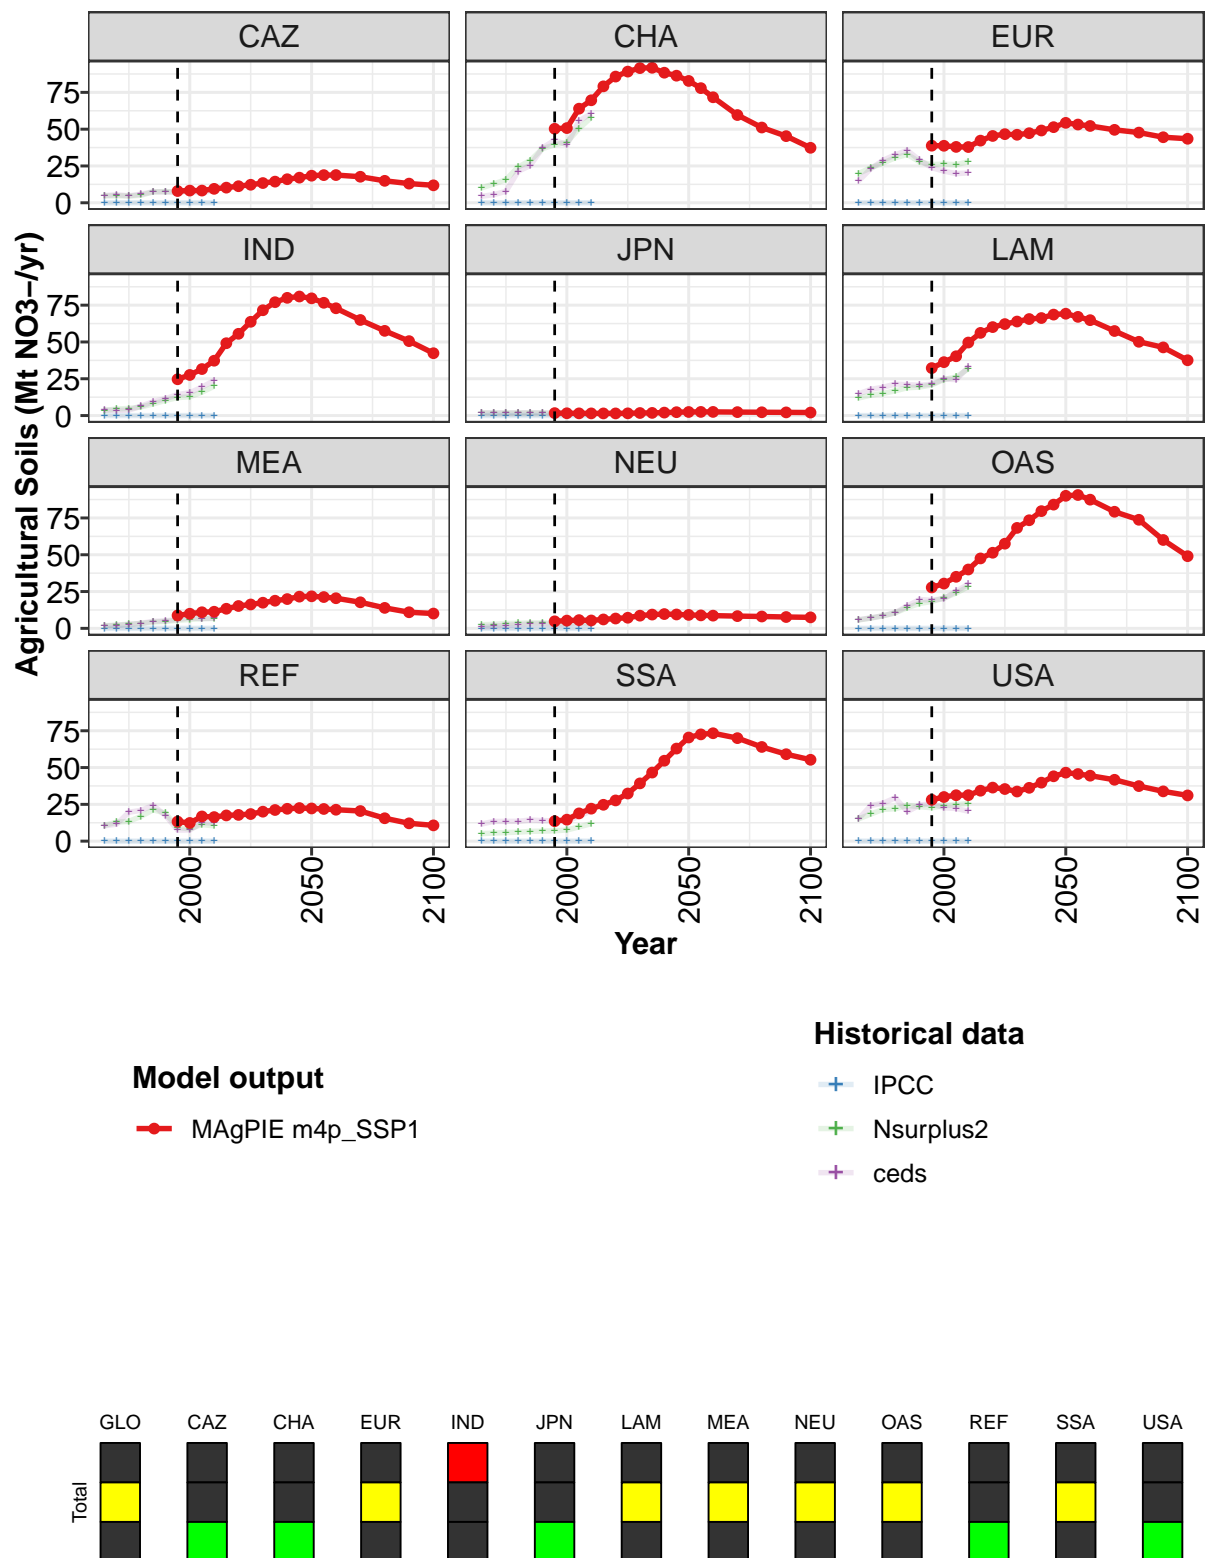Figure 258: MAgPIE m4p\_SSP1 — Emissions—NO<sub>3</sub>Land—Agriculture—Agricultural Soils (Mt NO<sub>3</sub>-/yr)



|     | 1995 | 2000 | 2005 | 2010 | 2015 | 2020 | 2025 | 2030 | 2035 | 2040 | 2045 |
|-----|------|------|------|------|------|------|------|------|------|------|------|
| GLO | 252  | 266  | 302  | 332  | 382  | 415  | 443  | 476  | 503  | 527  | 551  |
| CAZ | 8    | 8    | 8    | 9    | 10   | 11   | 12   | 13   | 14   | 16   | 17   |
| CHA | 50   | 51   | 64   | 70   | 79   | 86   | 89   | 92   | 92   | 88   | 86   |
| EUR | 39   | 39   | 38   | 38   | 42   | 45   | 47   | 46   | 47   | 49   | 51   |
| IND | 25   | 28   | 32   | 37   | 49   | 56   | 64   | 72   | 77   | 80   | 81   |
| JPN | 2    | 2    | 2    | 1    | 1    | 1    | 2    | 2    | 2    | 2    | 2    |
| LAM | 32   | 36   | 40   | 50   | 56   | 60   | 62   | 64   | 66   | 66   | 69   |
| MEA | 9    | 10   | 11   | 11   | 13   | 15   | 16   | 17   | 19   | 20   | 22   |
| NEU | 5    | 5    | 6    | 5    | 6    | 7    | 7    | 9    | 9    | 10   | 9    |
| OAS | 28   | 30   | 35   | 40   | 48   | 51   | 58   | 68   | 73   | 80   | 84   |
| REF | 13   | 12   | 17   | 16   | 17   | 18   | 18   | 20   | 21   | 22   | 22   |
| SSA | 14   | 15   | 19   | 22   | 25   | 28   | 32   | 39   | 47   | 55   | 63   |
| USA | 28   | 30   | 31   | 31   | 34   | 36   | 35   | 34   | 36   | 40   | 44   |

Table 868: MAgPIE m4p\_SSP1 — Emissions—NO3Land—Agriculture—Agricultural Soils (Mt NO3-/yr)  
[PART 1/2]

|     | 2050 | 2055 | 2060 | 2070 | 2080 | 2090 | 2100 |
|-----|------|------|------|------|------|------|------|
| GLO | 567  | 557  | 539  | 489  | 436  | 386  | 338  |
| CAZ | 18   | 19   | 19   | 18   | 15   | 13   | 12   |
| CHA | 83   | 78   | 72   | 60   | 51   | 45   | 37   |
| EUR | 54   | 53   | 52   | 50   | 48   | 45   | 43   |
| IND | 80   | 77   | 73   | 65   | 58   | 51   | 42   |
| JPN | 2    | 2    | 2    | 2    | 2    | 2    | 2    |
| LAM | 69   | 67   | 65   | 57   | 50   | 46   | 38   |
| MEA | 22   | 21   | 20   | 18   | 14   | 11   | 10   |
| NEU | 9    | 9    | 9    | 8    | 8    | 8    | 7    |
| OAS | 90   | 91   | 87   | 79   | 74   | 60   | 49   |
| REF | 22   | 22   | 21   | 20   | 16   | 12   | 11   |
| SSA | 70   | 73   | 73   | 70   | 64   | 59   | 55   |
| USA | 47   | 46   | 44   | 42   | 37   | 34   | 31   |

Table 869: MAgPIE m4p\_SSP1 — Emissions—NO3Land—Agriculture—Agricultural Soils (Mt NO3-/yr)  
[PART 2/2]

|     | 1965 | 1970 | 1975 | 1980 | 1985 | 1990 | 1995 | 2000 | 2005 | 2010 |
|-----|------|------|------|------|------|------|------|------|------|------|
| GLO | 0    | 0    | 0    | 0    | 0    | 0    | 0    | 0    | 0    | 0    |
| CAZ | 0    | 0    | 0    | 0    | 0    | 0    | 0    | 0    | 0    | 0    |
| CHA | 0    | 0    | 0    | 0    | 0    | 0    | 0    | 0    | 0    | 0    |
| EUR | 0    | 0    | 0    | 0    | 0    | 0    | 0    | 0    | 0    | 0    |
| IND | 0    | 0    | 0    | 0    | 0    | 0    | 0    | 0    | 0    | 0    |
| JPN | 0    | 0    | 0    | 0    | 0    | 0    | 0    | 0    | 0    | 0    |
| LAM | 0    | 0    | 0    | 0    | 0    | 0    | 0    | 0    | 0    | 0    |
| MEA | 0    | 0    | 0    | 0    | 0    | 0    | 0    | 0    | 0    | 0    |
| NEU | 0    | 0    | 0    | 0    | 0    | 0    | 0    | 0    | 0    | 0    |
| OAS | 0    | 0    | 0    | 0    | 0    | 0    | 0    | 0    | 0    | 0    |
| REF | 0    | 0    | 0    | 0    | 0    | 0    | 0    | 0    | 0    | 0    |
| SSA | 0    | 0    | 0    | 0    | 0    | 0    | 0    | 0    | 0    | 0    |
| USA | 0    | 0    | 0    | 0    | 0    | 0    | 0    | 0    | 0    | 0    |

Table 870: ceds — Emissions—NO3Land—Agriculture—Agricultural Soils (Mt NO3-/yr)

|     | 1965 | 1970 | 1975 | 1980 | 1985 | 1990 | 1995 | 2000 | 2005 | 2010 |
|-----|------|------|------|------|------|------|------|------|------|------|
| GLO | 93   | 110  | 124  | 147  | 172  | 178  | 173  | 184  | 208  | 235  |
| CAZ | 5    | 5    | 5    | 5    | 7    | 8    | 7    | 8    | 8    | 10   |
| CHA | 10   | 13   | 16   | 24   | 29   | 37   | 39   | 41   | 50   | 58   |
| EUR | 20   | 24   | 27   | 31   | 33   | 28   | 26   | 26   | 26   | 28   |
| IND | 4    | 4    | 5    | 6    | 8    | 10   | 12   | 13   | 16   | 20   |
| JPN | 2    | 2    | 2    | 2    | 2    | 2    | 2    | 1    | 1    | 1    |
| LAM | 12   | 14   | 15   | 17   | 19   | 19   | 21   | 24   | 26   | 32   |
| MEA | 2    | 2    | 3    | 3    | 4    | 5    | 5    | 6    | 7    | 7    |
| NEU | 2    | 3    | 3    | 3    | 4    | 4    | 3    | 3    | 4    | 4    |
| OAS | 6    | 7    | 9    | 11   | 14   | 17   | 18   | 21   | 24   | 28   |
| REF | 11   | 13   | 13   | 17   | 21   | 19   | 9    | 8    | 11   | 10   |
| SSA | 5    | 5    | 6    | 6    | 7    | 7    | 7    | 8    | 10   | 12   |
| USA | 15   | 18   | 22   | 22   | 24   | 23   | 23   | 24   | 25   | 26   |

Table 871: IPCC — Emissions—NO3Land—Agriculture—Agricultural Soils (Mt NO3-/yr)

|     | 1965 | 1970 | 1975 | 1980 | 1985 | 1990 | 1995 | 2000 | 2005 | 2010 |
|-----|------|------|------|------|------|------|------|------|------|------|
| GLO | 90   | 117  | 138  | 170  | 182  | 191  | 185  | 184  | 214  | 241  |
| CAZ | 5    | 5    | 5    | 6    | 7    | 7    | 7    | 8    | 6    | 9    |
| CHA | 4    | 5    | 8    | 21   | 25   | 37   | 43   | 39   | 56   | 61   |
| EUR | 15   | 23   | 29   | 33   | 36   | 29   | 24   | 21   | 20   | 20   |
| IND | 4    | 3    | 4    | 6    | 9    | 11   | 14   | 16   | 19   | 24   |
| JPN | 2    | 2    | 2    | 2    | 2    | 2    | 2    | 1    | 1    | 1    |
| LAM | 15   | 18   | 19   | 21   | 21   | 21   | 21   | 25   | 24   | 33   |
| MEA | 2    | 2    | 3    | 3    | 5    | 5    | 6    | 7    | 7    | 7    |
| NEU | 1    | 1    | 2    | 2    | 3    | 3    | 2    | 3    | 3    | 3    |
| OAS | 6    | 7    | 9    | 11   | 15   | 20   | 19   | 20   | 25   | 30   |
| REF | 10   | 12   | 20   | 21   | 24   | 18   | 7    | 8    | 13   | 12   |
| SSA | 12   | 13   | 13   | 13   | 14   | 14   | 14   | 14   | 17   | 21   |
| USA | 15   | 24   | 26   | 29   | 20   | 24   | 26   | 23   | 22   | 20   |

Table 872: Nsurplus2 — Emissions—NO3Land—Agriculture—Agricultural Soils (Mt NO3-/yr)

## 16.1.2 Agricultural Soils—Decay of Crop Residues

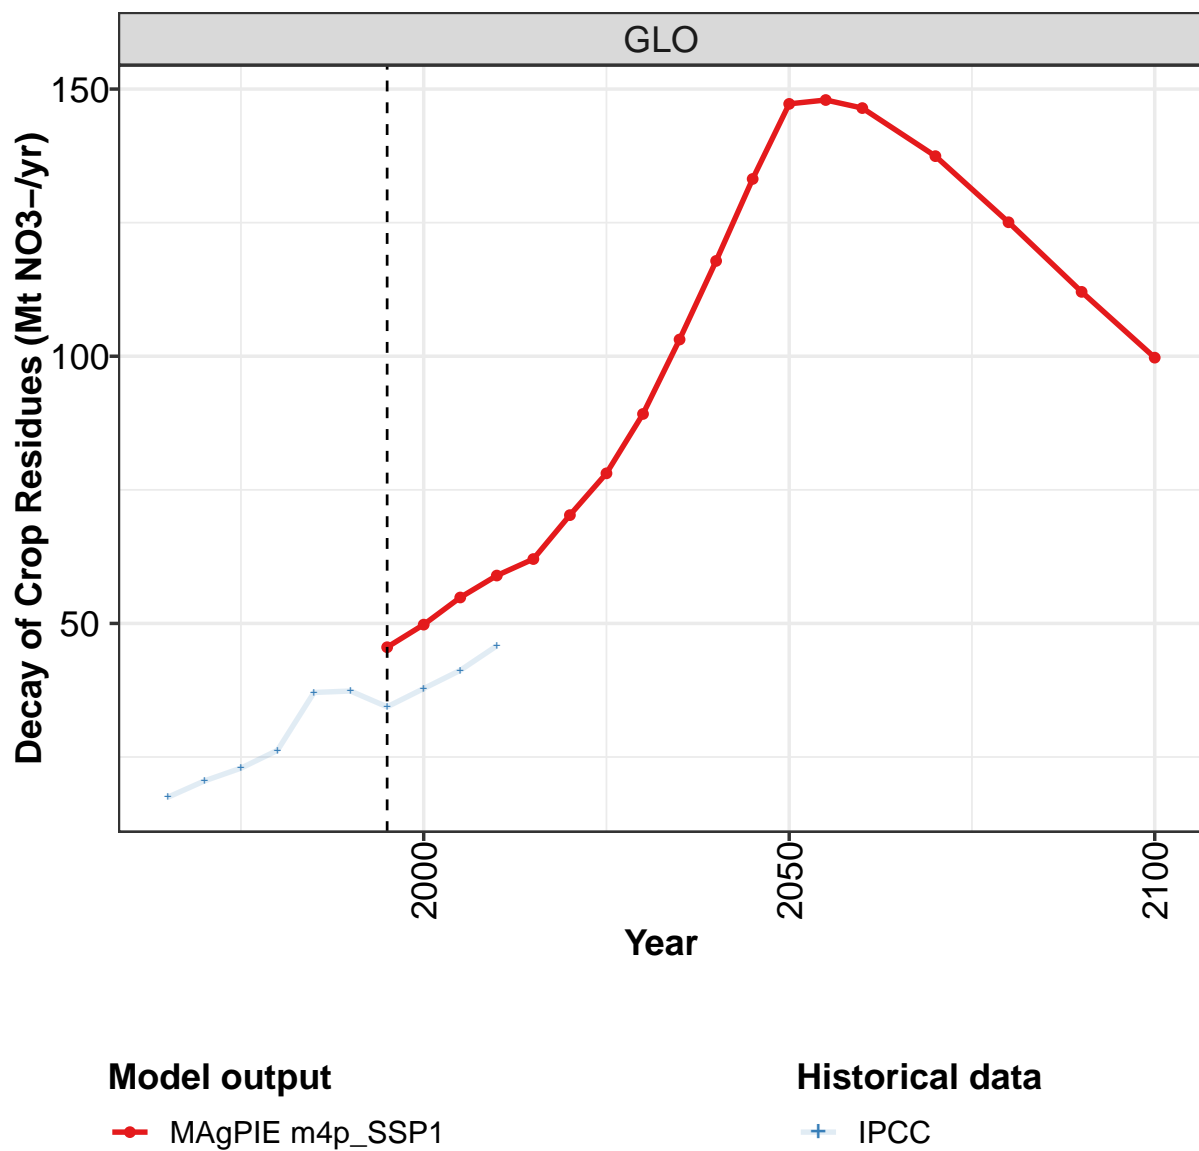

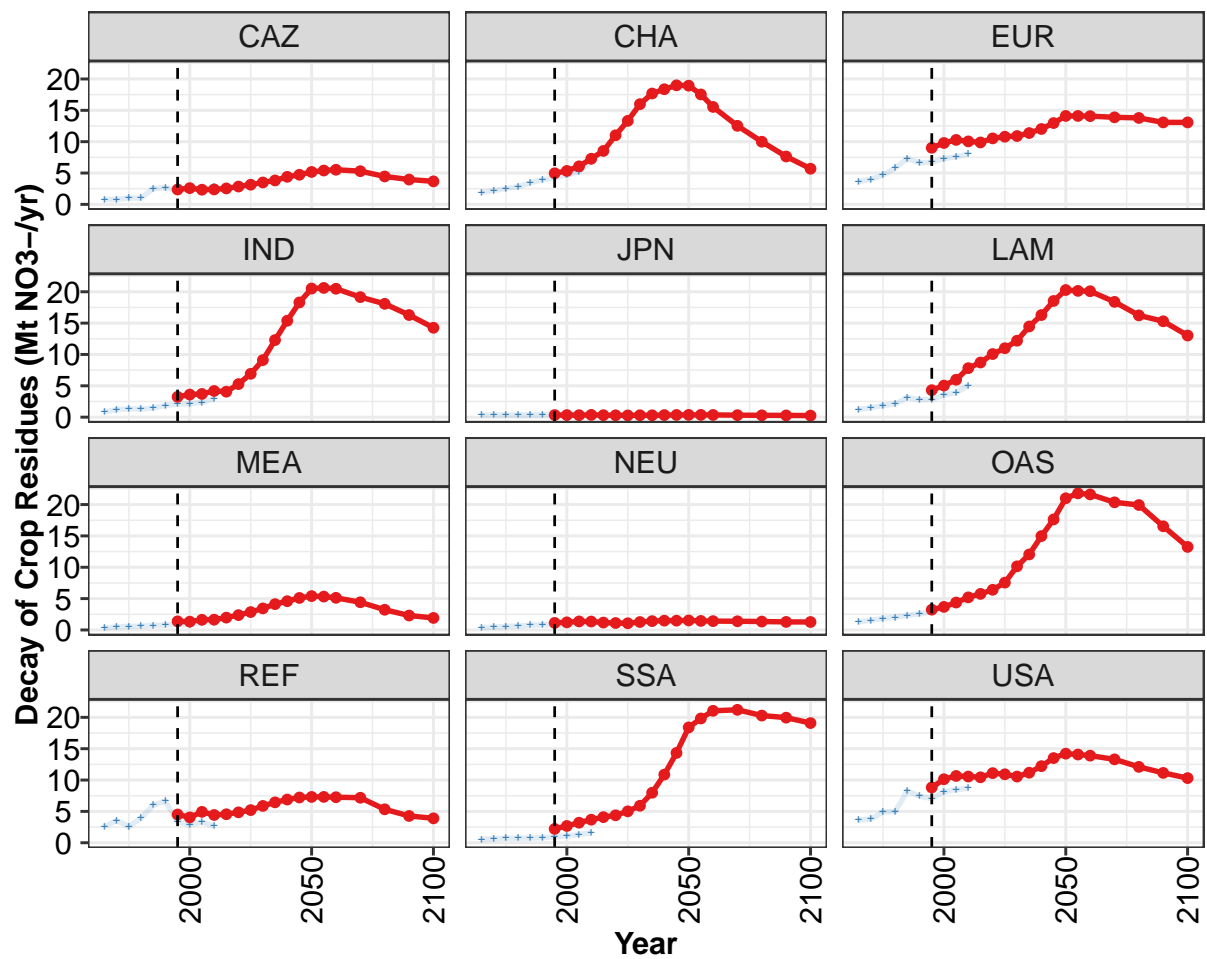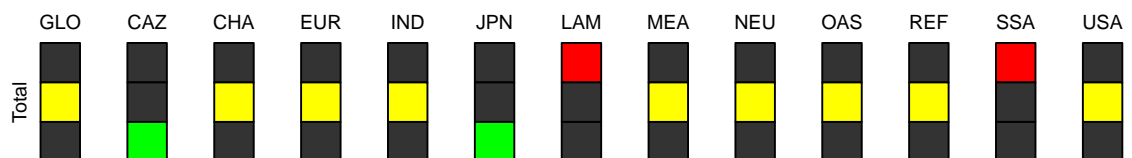

Figure 259: MAGPIE m4p\_SSP1 — Emissions—NO<sub>3</sub>Land—Agriculture—Agricultural Soils—Decay of Crop Residues (Mt NO<sub>3</sub>-/yr)

|     | 1995 | 2000 | 2005 | 2010 | 2015 | 2020 | 2025 | 2030 | 2035 | 2040 | 2045 |
|-----|------|------|------|------|------|------|------|------|------|------|------|
| GLO | 46   | 50   | 55   | 59   | 62   | 70   | 78   | 89   | 103  | 118  | 133  |
| CAZ | 2    | 3    | 2    | 2    | 3    | 3    | 3    | 3    | 4    | 4    | 5    |
| CHA | 5    | 5    | 6    | 7    | 9    | 11   | 13   | 16   | 18   | 18   | 19   |
| EUR | 9    | 10   | 10   | 10   | 10   | 11   | 11   | 11   | 11   | 12   | 13   |
| IND | 3    | 4    | 4    | 4    | 4    | 5    | 7    | 9    | 12   | 15   | 18   |
| JPN | 0    | 0    | 0    | 0    | 0    | 0    | 0    | 0    | 0    | 0    | 0    |
| LAM | 4    | 5    | 6    | 8    | 9    | 10   | 11   | 12   | 14   | 16   | 19   |
| MEA | 1    | 1    | 2    | 2    | 2    | 2    | 3    | 3    | 4    | 5    | 5    |
| NEU | 1    | 1    | 1    | 1    | 1    | 1    | 1    | 1    | 1    | 1    | 1    |
| OAS | 3    | 4    | 4    | 5    | 6    | 6    | 8    | 10   | 12   | 15   | 18   |
| REF | 5    | 4    | 5    | 4    | 5    | 5    | 5    | 6    | 6    | 7    | 7    |
| SSA | 2    | 3    | 3    | 4    | 4    | 4    | 5    | 6    | 8    | 11   | 14   |
| USA | 9    | 10   | 11   | 11   | 10   | 11   | 11   | 11   | 11   | 12   | 14   |

Table 873: MAgPIE m4p\_SSP1 — Emissions—NO3Land—Agriculture—Agricultural Soils—Decay of Crop Residues (Mt NO3-/yr) [PART 1/2]

|     | 2050 | 2055 | 2060 | 2070 | 2080 | 2090 | 2100 |
|-----|------|------|------|------|------|------|------|
| GLO | 147  | 148  | 146  | 137  | 125  | 112  | 100  |
| CAZ | 5    | 5    | 6    | 5    | 4    | 4    | 4    |
| CHA | 19   | 18   | 16   | 13   | 10   | 8    | 6    |
| EUR | 14   | 14   | 14   | 14   | 14   | 13   | 13   |
| IND | 21   | 21   | 20   | 19   | 18   | 16   | 14   |
| JPN | 0    | 0    | 0    | 0    | 0    | 0    | 0    |
| LAM | 20   | 20   | 20   | 18   | 16   | 15   | 13   |
| MEA | 5    | 5    | 5    | 4    | 3    | 2    | 2    |
| NEU | 2    | 1    | 1    | 1    | 1    | 1    | 1    |
| OAS | 21   | 22   | 22   | 20   | 20   | 17   | 13   |
| REF | 7    | 7    | 7    | 7    | 5    | 4    | 4    |
| SSA | 18   | 20   | 21   | 21   | 20   | 20   | 19   |
| USA | 14   | 14   | 14   | 13   | 12   | 11   | 10   |

Table 874: MAgPIE m4p\_SSP1 — Emissions—NO3Land—Agriculture—Agricultural Soils—Decay of Crop Residues (Mt NO3-/yr) [PART 2/2]

|     | 1965 | 1970 | 1975 | 1980 | 1985 | 1990 | 1995 | 2000 | 2005 | 2010 |
|-----|------|------|------|------|------|------|------|------|------|------|
| GLO | 17.5 | 20.5 | 22.9 | 26.3 | 37.1 | 37.3 | 34.4 | 37.8 | 41.2 | 45.8 |
| CAZ | 0.8  | 0.8  | 1.0  | 1.0  | 2.5  | 2.7  | 2.2  | 2.5  | 2.6  | 2.8  |
| CHA | 1.9  | 2.2  | 2.5  | 2.8  | 3.5  | 3.9  | 4.2  | 4.7  | 5.2  | 6.8  |
| EUR | 3.6  | 4.0  | 4.7  | 5.8  | 7.3  | 6.6  | 6.7  | 7.3  | 7.6  | 8.0  |
| IND | 0.9  | 1.2  | 1.3  | 1.3  | 1.5  | 1.9  | 2.1  | 2.1  | 2.4  | 2.9  |
| JPN | 0.3  | 0.4  | 0.4  | 0.4  | 0.4  | 0.4  | 0.4  | 0.3  | 0.3  | 0.4  |
| LAM | 1.2  | 1.5  | 1.9  | 2.1  | 3.1  | 2.8  | 2.8  | 3.5  | 3.9  | 5.0  |
| MEA | 0.3  | 0.5  | 0.6  | 0.6  | 0.7  | 0.8  | 0.9  | 0.9  | 1.2  | 1.2  |
| NEU | 0.4  | 0.4  | 0.6  | 0.6  | 0.8  | 0.8  | 0.8  | 0.8  | 1.0  | 0.9  |
| OAS | 1.3  | 1.5  | 1.8  | 2.0  | 2.3  | 2.6  | 2.9  | 3.5  | 4.0  | 4.8  |
| REF | 2.6  | 3.6  | 2.6  | 3.9  | 6.0  | 6.6  | 3.4  | 2.9  | 3.3  | 2.7  |
| SSA | 0.6  | 0.6  | 0.7  | 0.7  | 0.7  | 0.8  | 0.9  | 1.1  | 1.3  | 1.6  |
| USA | 3.6  | 3.8  | 4.9  | 5.0  | 8.3  | 7.4  | 7.1  | 8.1  | 8.5  | 8.7  |

Table 875: IPCC — Emissions—NO3Land—Agriculture—Agricultural Soils—Decay of Crop Residues (Mt NO3-/yr)

16.1.3 Agricultural Soils—Inorganic Fertilizers

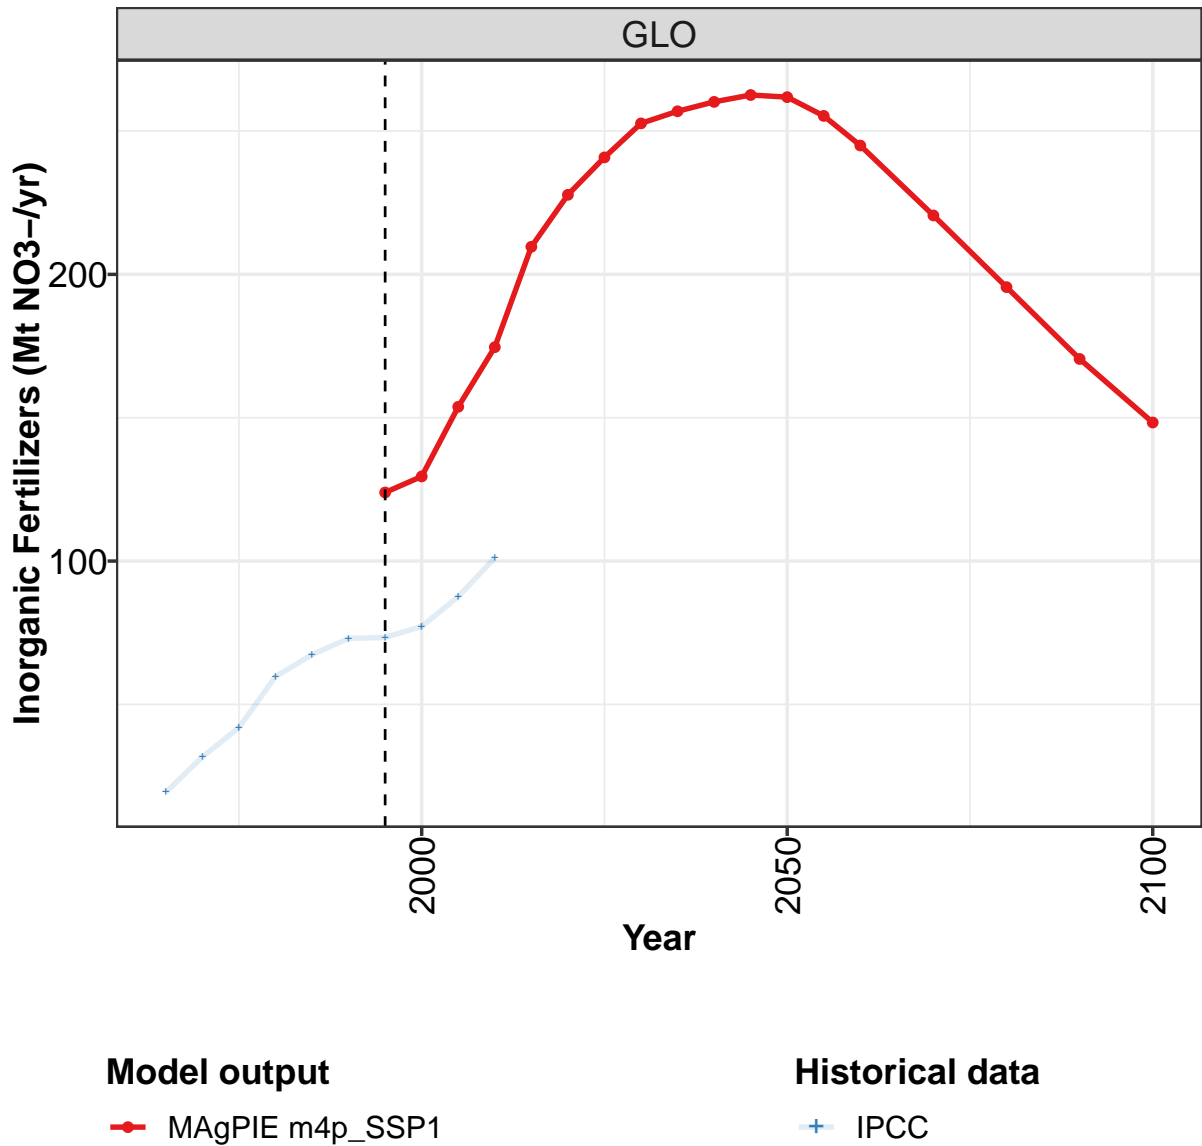

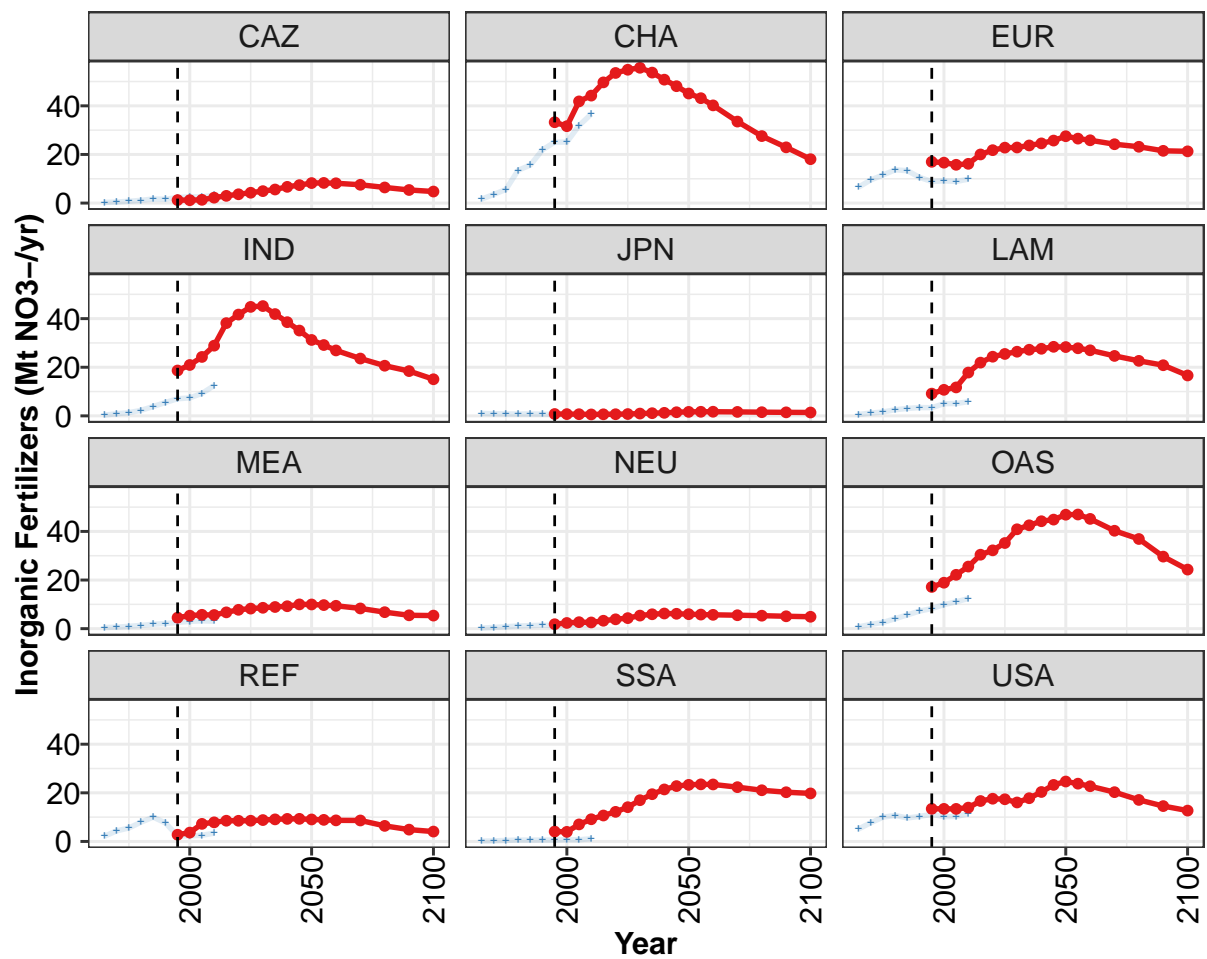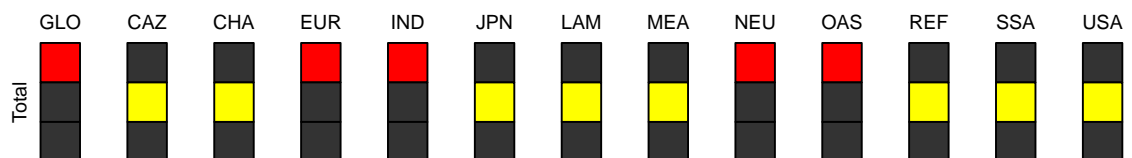

Figure 260: MAgPIE m4p\_SSP1 — Emissions—NO<sub>3</sub>Land—Agriculture—Agricultural Soils—Inorganic Fertilizers (Mt NO<sub>3</sub>-/yr)

|     | 1995 | 2000 | 2005 | 2010 | 2015 | 2020 | 2025 | 2030 | 2035 | 2040 | 2045 |
|-----|------|------|------|------|------|------|------|------|------|------|------|
| GLO | 124  | 130  | 154  | 175  | 210  | 228  | 241  | 253  | 257  | 260  | 263  |
| CAZ | 1    | 1    | 1    | 2    | 3    | 4    | 4    | 5    | 6    | 7    | 7    |
| CHA | 33   | 32   | 42   | 44   | 50   | 54   | 55   | 56   | 54   | 51   | 48   |
| EUR | 17   | 17   | 16   | 16   | 20   | 22   | 23   | 23   | 24   | 25   | 26   |
| IND | 19   | 21   | 24   | 29   | 38   | 42   | 45   | 45   | 42   | 39   | 35   |
| JPN | 1    | 1    | 1    | 1    | 1    | 1    | 1    | 1    | 1    | 1    | 2    |
| LAM | 9    | 11   | 12   | 18   | 22   | 24   | 25   | 26   | 27   | 28   | 28   |
| MEA | 5    | 5    | 6    | 6    | 7    | 8    | 8    | 9    | 9    | 9    | 10   |
| NEU | 2    | 2    | 3    | 3    | 3    | 4    | 4    | 5    | 6    | 6    | 6    |
| OAS | 17   | 19   | 22   | 26   | 30   | 32   | 35   | 41   | 43   | 44   | 45   |
| REF | 3    | 4    | 7    | 8    | 9    | 9    | 9    | 9    | 9    | 9    | 9    |
| SSA | 4    | 4    | 7    | 9    | 11   | 12   | 14   | 17   | 19   | 21   | 23   |
| USA | 13   | 13   | 13   | 14   | 17   | 18   | 17   | 16   | 18   | 20   | 23   |

Table 876: MAgPIE m4p\_SSP1 — Emissions—NO3Land—Agriculture—Agricultural Soils—Inorganic Fertilizers (Mt NO3-/yr) [PART 1/2]

|     | 2050 | 2055 | 2060 | 2070 | 2080 | 2090 | 2100 |
|-----|------|------|------|------|------|------|------|
| GLO | 262  | 255  | 245  | 221  | 196  | 171  | 148  |
| CAZ | 8    | 8    | 8    | 8    | 6    | 5    | 5    |
| CHA | 45   | 43   | 40   | 34   | 28   | 23   | 18   |
| EUR | 28   | 27   | 26   | 24   | 23   | 22   | 21   |
| IND | 31   | 29   | 27   | 24   | 21   | 18   | 15   |
| JPN | 2    | 2    | 2    | 2    | 2    | 1    | 1    |
| LAM | 28   | 28   | 27   | 25   | 23   | 21   | 17   |
| MEA | 10   | 10   | 9    | 8    | 7    | 6    | 5    |
| NEU | 6    | 6    | 6    | 6    | 5    | 5    | 5    |
| OAS | 47   | 47   | 45   | 40   | 37   | 30   | 24   |
| REF | 9    | 9    | 9    | 9    | 6    | 5    | 4    |
| SSA | 23   | 23   | 23   | 22   | 21   | 20   | 20   |
| USA | 25   | 24   | 23   | 20   | 17   | 15   | 13   |

Table 877: MAgPIE m4p\_SSP1 — Emissions—NO3Land—Agriculture—Agricultural Soils—Inorganic Fertilizers (Mt NO3-/yr) [PART 2/2]

|     | 1965 | 1970 | 1975 | 1980 | 1985 | 1990 | 1995 | 2000 | 2005 | 2010 |
|-----|------|------|------|------|------|------|------|------|------|------|
| GLO | 19   | 32   | 42   | 60   | 67   | 73   | 73   | 77   | 88   | 101  |
| CAZ | 0    | 0    | 1    | 1    | 2    | 2    | 2    | 3    | 3    | 3    |
| CHA | 2    | 4    | 6    | 13   | 16   | 22   | 25   | 25   | 32   | 37   |
| EUR | 7    | 10   | 12   | 14   | 13   | 11   | 9    | 9    | 9    | 10   |
| IND | 0    | 1    | 1    | 2    | 4    | 6    | 7    | 7    | 9    | 12   |
| JPN | 1    | 1    | 1    | 1    | 1    | 1    | 1    | 0    | 0    | 0    |
| LAM | 1    | 1    | 2    | 3    | 3    | 3    | 3    | 5    | 5    | 6    |
| MEA | 0    | 1    | 1    | 1    | 2    | 2    | 3    | 3    | 3    | 3    |
| NEU | 0    | 1    | 1    | 1    | 1    | 1    | 1    | 1    | 2    | 1    |
| OAS | 1    | 2    | 3    | 4    | 6    | 7    | 8    | 10   | 11   | 12   |
| REF | 2    | 4    | 6    | 8    | 10   | 8    | 2    | 2    | 3    | 3    |
| SSA | 0    | 0    | 0    | 1    | 1    | 1    | 1    | 1    | 1    | 1    |
| USA | 5    | 8    | 10   | 11   | 10   | 10   | 11   | 10   | 10   | 11   |

Table 878: IPCC — Emissions—NO3Land—Agriculture—Agricultural Soils—Inorganic Fertilizers (Mt NO3-/yr)



## 16.1.4 Agricultural Soils—Manure applied to Croplands

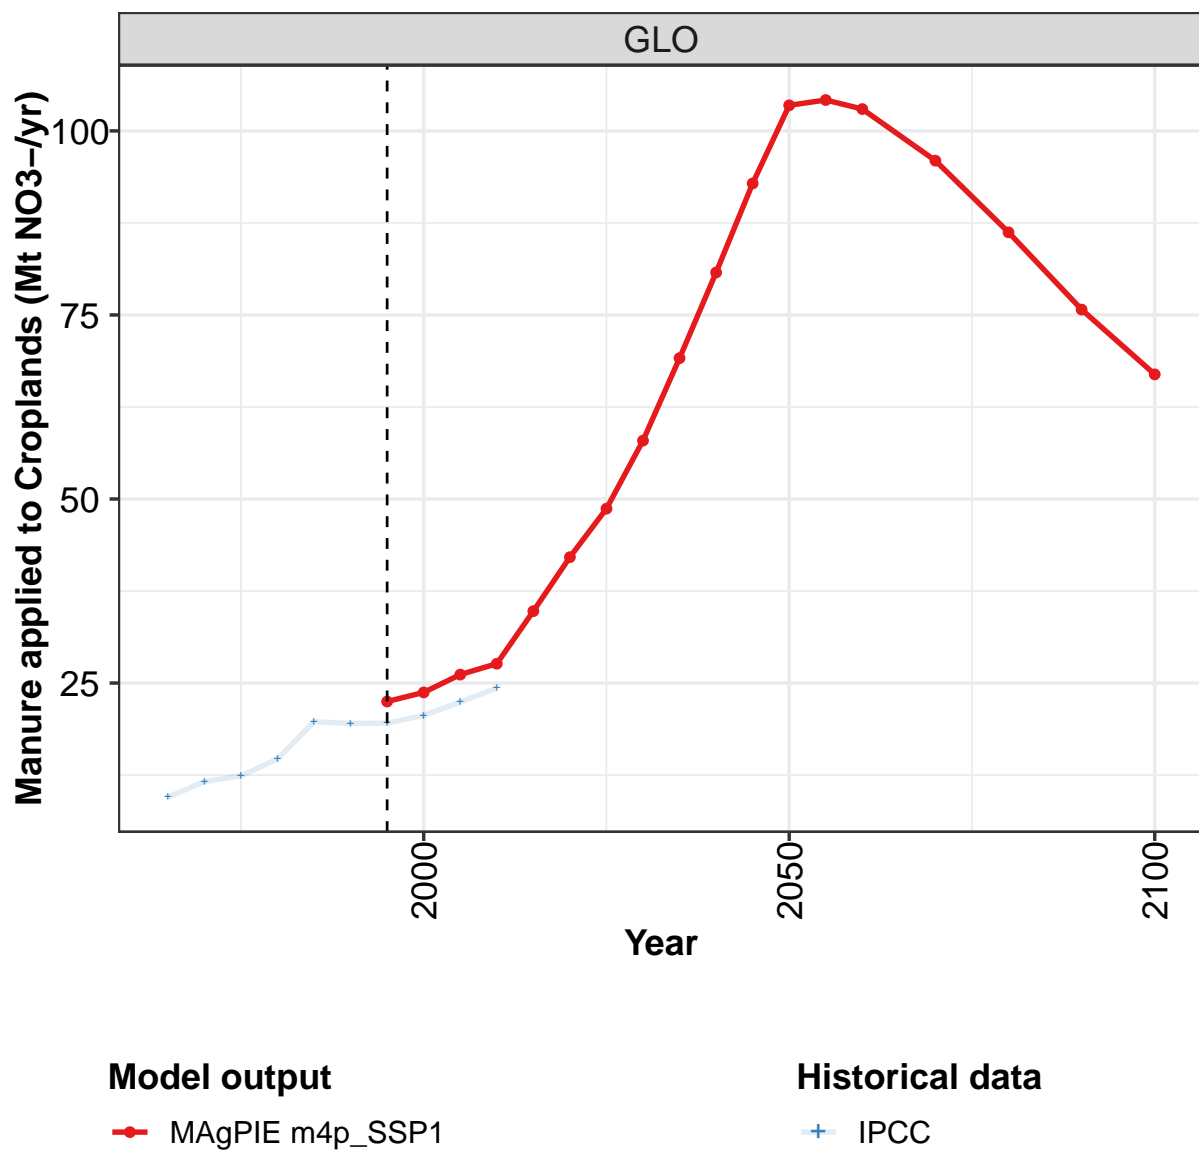

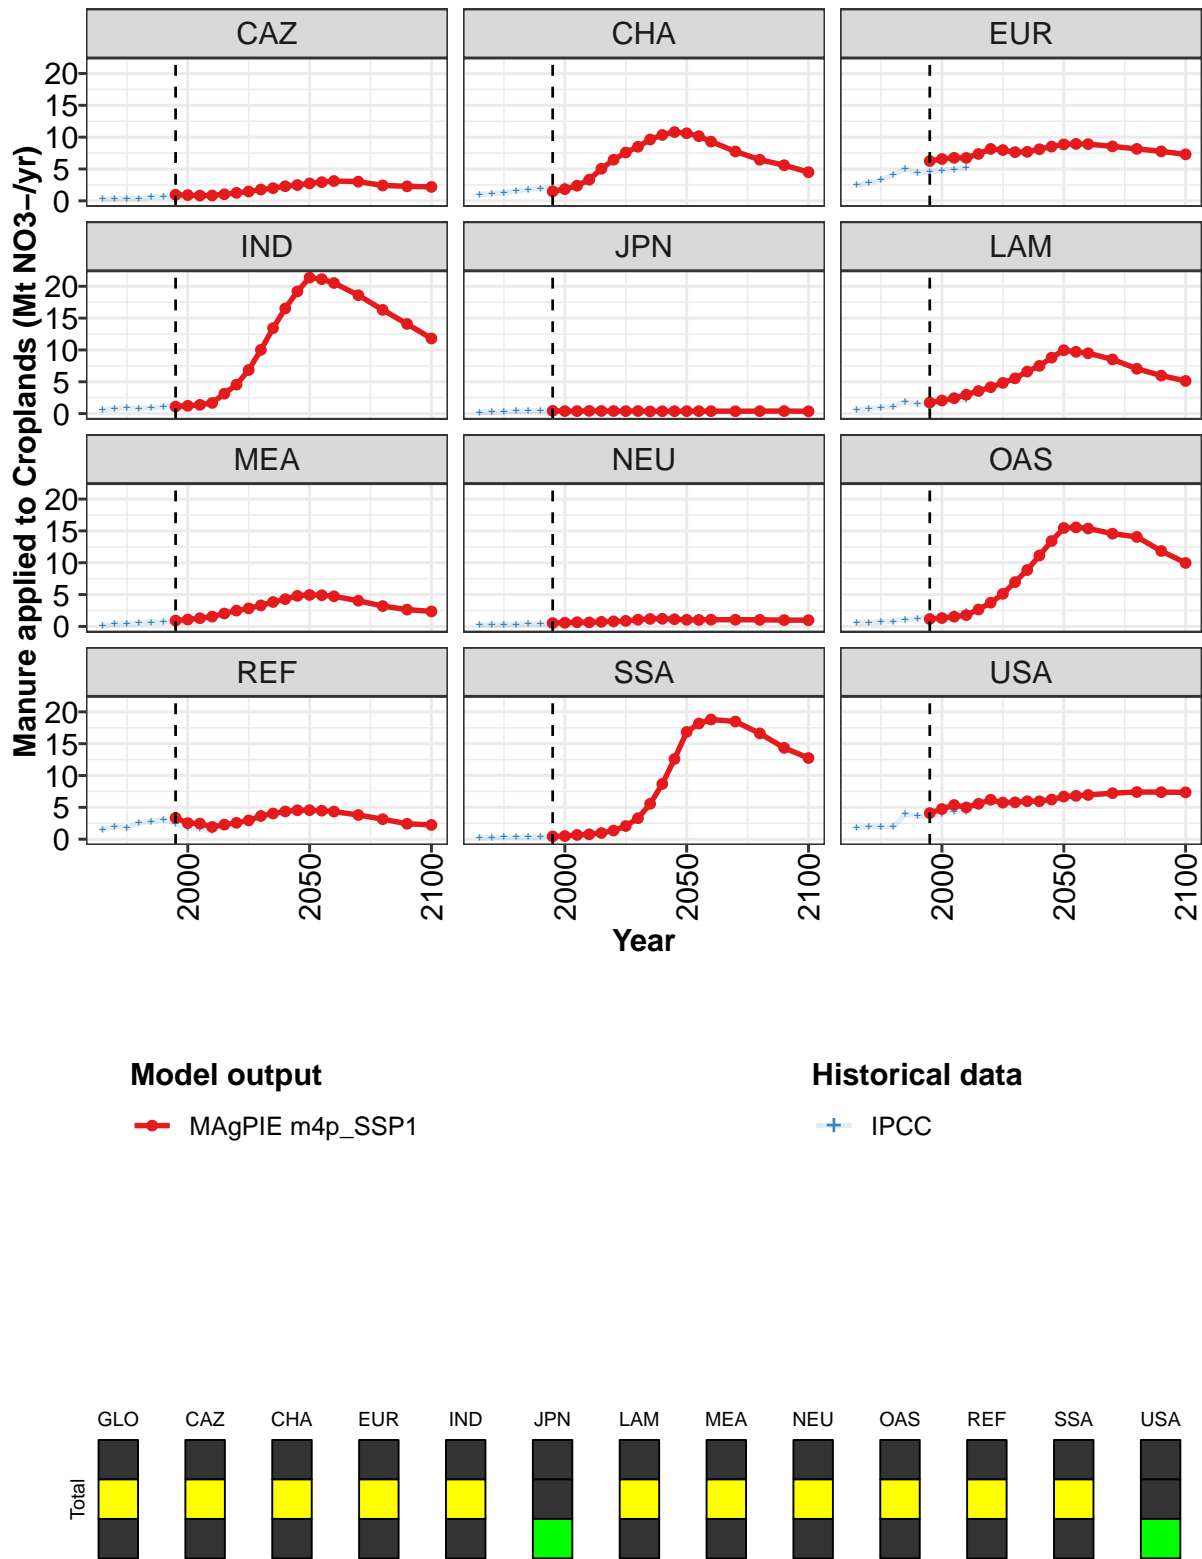

Figure 261: MAgPIE m4p\_SSP1 — Emissions—NO3Land—Agriculture—Agricultural Soils—Manure applied to Croplands (Mt NO3-/yr)

|     | 1995 | 2000 | 2005 | 2010 | 2015 | 2020 | 2025 | 2030 | 2035 | 2040 | 2045 |
|-----|------|------|------|------|------|------|------|------|------|------|------|
| GLO | 22   | 24   | 26   | 28   | 35   | 42   | 49   | 58   | 69   | 81   | 93   |
| CAZ | 1    | 1    | 1    | 1    | 1    | 1    | 1    | 2    | 2    | 2    | 2    |
| CHA | 1    | 2    | 2    | 3    | 5    | 6    | 8    | 8    | 10   | 10   | 11   |
| EUR | 6    | 7    | 7    | 7    | 7    | 8    | 8    | 8    | 8    | 8    | 9    |
| IND | 1    | 1    | 1    | 2    | 3    | 5    | 7    | 10   | 13   | 17   | 19   |
| JPN | 0    | 0    | 0    | 0    | 0    | 0    | 0    | 0    | 0    | 0    | 0    |
| LAM | 2    | 2    | 2    | 3    | 4    | 4    | 5    | 6    | 7    | 7    | 9    |
| MEA | 1    | 1    | 1    | 2    | 2    | 2    | 3    | 3    | 4    | 4    | 5    |
| NEU | 1    | 1    | 1    | 1    | 1    | 1    | 1    | 1    | 1    | 1    | 1    |
| OAS | 1    | 1    | 2    | 2    | 3    | 4    | 5    | 7    | 9    | 11   | 13   |
| REF | 3    | 3    | 2    | 2    | 2    | 3    | 3    | 4    | 4    | 4    | 5    |
| SSA | 0    | 0    | 1    | 1    | 1    | 1    | 2    | 3    | 6    | 9    | 13   |
| USA | 4    | 5    | 5    | 5    | 6    | 6    | 6    | 6    | 6    | 6    | 6    |

Table 879: MAgPIE m4p\_SSP1 — Emissions—NO3Land—Agriculture—Agricultural Soils—Manure applied to Croplands (Mt NO3-/yr) [PART 1/2]

|     | 2050 | 2055 | 2060 | 2070 | 2080 | 2090 | 2100 |
|-----|------|------|------|------|------|------|------|
| GLO | 103  | 104  | 103  | 96   | 86   | 76   | 67   |
| CAZ | 3    | 3    | 3    | 3    | 2    | 2    | 2    |
| CHA | 11   | 10   | 9    | 8    | 6    | 6    | 5    |
| EUR | 9    | 9    | 9    | 9    | 8    | 8    | 7    |
| IND | 21   | 21   | 21   | 19   | 16   | 14   | 12   |
| JPN | 0    | 0    | 0    | 0    | 0    | 0    | 0    |
| LAM | 10   | 10   | 9    | 9    | 7    | 6    | 5    |
| MEA | 5    | 5    | 5    | 4    | 3    | 3    | 2    |
| NEU | 1    | 1    | 1    | 1    | 1    | 1    | 1    |
| OAS | 15   | 16   | 15   | 15   | 14   | 12   | 10   |
| REF | 5    | 4    | 4    | 4    | 3    | 2    | 2    |
| SSA | 17   | 18   | 19   | 18   | 17   | 14   | 13   |
| USA | 7    | 7    | 7    | 7    | 7    | 7    | 7    |

Table 880: MAgPIE m4p\_SSP1 — Emissions—NO3Land—Agriculture—Agricultural Soils—Manure applied to Croplands (Mt NO3-/yr) [PART 2/2]

|     | 1965 | 1970 | 1975 | 1980 | 1985 | 1990 | 1995 | 2000 | 2005 | 2010 |
|-----|------|------|------|------|------|------|------|------|------|------|
| GLO | 9.5  | 11.6 | 12.4 | 14.7 | 19.7 | 19.5 | 19.6 | 20.6 | 22.4 | 24.3 |
| CAZ | 0.3  | 0.3  | 0.4  | 0.3  | 0.6  | 0.7  | 0.7  | 0.7  | 0.7  | 0.8  |
| CHA | 1.0  | 1.1  | 1.3  | 1.5  | 1.8  | 2.0  | 2.0  | 2.3  | 2.7  | 3.7  |
| EUR | 2.5  | 2.9  | 3.2  | 4.1  | 5.0  | 4.3  | 4.6  | 4.8  | 5.0  | 5.2  |
| IND | 0.6  | 0.8  | 0.9  | 0.8  | 0.9  | 1.1  | 1.3  | 1.3  | 1.6  | 1.9  |
| JPN | 0.2  | 0.3  | 0.3  | 0.4  | 0.4  | 0.5  | 0.4  | 0.4  | 0.4  | 0.4  |
| LAM | 0.6  | 0.8  | 1.0  | 1.1  | 1.9  | 1.5  | 1.5  | 1.8  | 2.0  | 2.2  |
| MEA | 0.2  | 0.4  | 0.4  | 0.5  | 0.6  | 0.7  | 0.7  | 0.8  | 1.0  | 1.2  |
| NEU | 0.2  | 0.2  | 0.3  | 0.3  | 0.4  | 0.4  | 0.4  | 0.4  | 0.5  | 0.5  |
| OAS | 0.5  | 0.6  | 0.7  | 0.8  | 1.1  | 1.3  | 1.5  | 1.7  | 1.9  | 2.3  |
| REF | 1.5  | 2.0  | 1.7  | 2.6  | 2.8  | 3.1  | 2.4  | 1.7  | 1.7  | 1.3  |
| SSA | 0.2  | 0.3  | 0.3  | 0.3  | 0.4  | 0.4  | 0.4  | 0.5  | 0.6  | 0.7  |
| USA | 1.8  | 2.0  | 1.9  | 1.9  | 3.9  | 3.6  | 3.6  | 4.0  | 4.4  | 4.2  |

Table 881: IPCC — Emissions—NO3Land—Agriculture—Agricultural Soils—Manure applied to Croplands (Mt NO3-/yr)

## 16.1.5 Agricultural Soils—Pasture

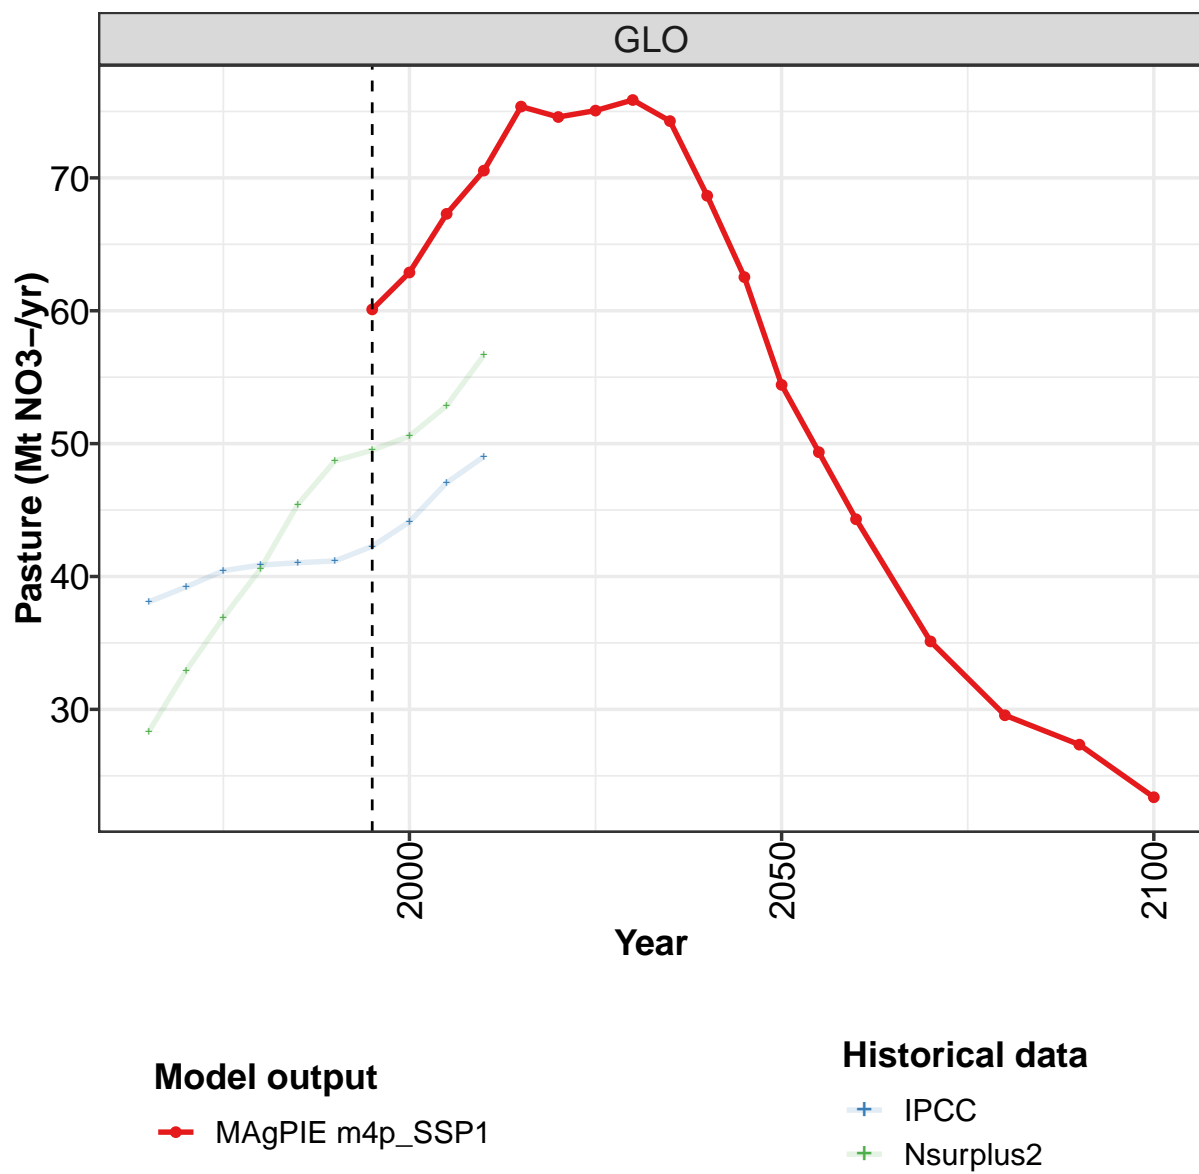

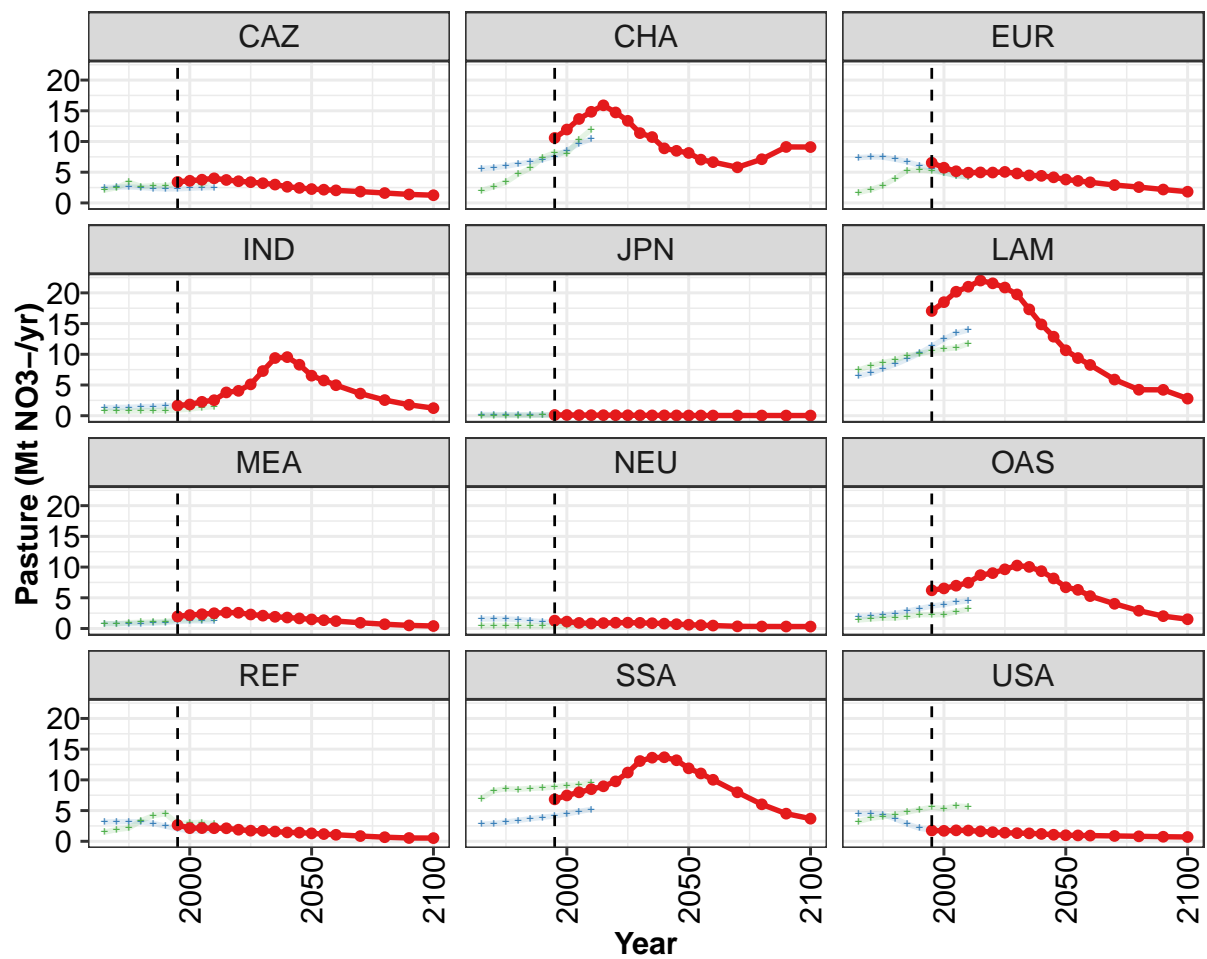**Model output**

—●— MAgPIE m4p\_SSP1

**Historical data**

+ IPCC

+ Nsurplus2

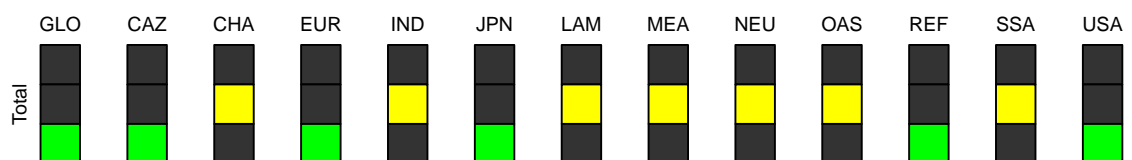

Figure 262: MAgPIE m4p\_SSP1 — Emissions—NO<sub>3</sub>Land—Agriculture—Agricultural Soils—Pasture (Mt NO<sub>3</sub>-/yr)

|     | 1995 | 2000 | 2005 | 2010 | 2015 | 2020 | 2025 | 2030 | 2035 | 2040 | 2045 |
|-----|------|------|------|------|------|------|------|------|------|------|------|
| GLO | 60.1 | 62.9 | 67.3 | 70.5 | 75.4 | 74.6 | 75.1 | 75.9 | 74.3 | 68.7 | 62.5 |
| CAZ | 3.4  | 3.6  | 3.8  | 4.0  | 3.7  | 3.5  | 3.4  | 3.2  | 3.0  | 2.6  | 2.4  |
| CHA | 10.6 | 11.9 | 13.7 | 14.8 | 15.9 | 14.7 | 13.4 | 11.4 | 10.7 | 8.9  | 8.5  |
| EUR | 6.5  | 5.7  | 5.2  | 4.9  | 5.0  | 4.9  | 5.1  | 4.8  | 4.5  | 4.4  | 4.2  |
| IND | 1.7  | 1.8  | 2.3  | 2.5  | 3.8  | 4.1  | 5.1  | 7.3  | 9.4  | 9.5  | 8.3  |
| JPN | 0.1  | 0.1  | 0.1  | 0.1  | 0.1  | 0.1  | 0.1  | 0.1  | 0.1  | 0.1  | 0.0  |
| LAM | 17.1 | 18.5 | 20.2 | 21.0 | 22.0 | 21.6 | 20.9 | 19.7 | 17.3 | 14.9 | 12.9 |
| MEA | 2.0  | 2.2  | 2.3  | 2.5  | 2.6  | 2.6  | 2.3  | 2.1  | 1.9  | 1.8  | 1.6  |
| NEU | 1.3  | 1.1  | 0.9  | 0.8  | 0.9  | 0.9  | 1.0  | 0.9  | 0.9  | 0.8  | 0.7  |
| OAS | 6.2  | 6.5  | 7.0  | 7.5  | 8.7  | 9.0  | 9.6  | 10.3 | 10.0 | 9.3  | 8.2  |
| REF | 2.7  | 2.1  | 2.2  | 2.1  | 2.1  | 1.9  | 1.7  | 1.7  | 1.6  | 1.4  | 1.4  |
| SSA | 6.8  | 7.5  | 8.0  | 8.5  | 9.0  | 9.8  | 11.2 | 13.1 | 13.6 | 13.7 | 13.2 |
| USA | 1.8  | 1.7  | 1.8  | 1.8  | 1.6  | 1.5  | 1.4  | 1.3  | 1.3  | 1.2  | 1.1  |

Table 882: MAgPIE m4p\_SSP1 — Emissions—NO3Land—Agriculture—Agricultural Soils—Pasture (Mt NO3-/yr) [PART 1/2]

|     | 2050 | 2055 | 2060 | 2070 | 2080 | 2090 | 2100 |
|-----|------|------|------|------|------|------|------|
| GLO | 54.4 | 49.4 | 44.3 | 35.1 | 29.6 | 27.3 | 23.4 |
| CAZ | 2.3  | 2.2  | 2.0  | 1.8  | 1.6  | 1.4  | 1.3  |
| CHA | 8.1  | 7.1  | 6.6  | 5.8  | 7.1  | 9.1  | 9.1  |
| EUR | 3.8  | 3.6  | 3.4  | 2.9  | 2.6  | 2.2  | 1.8  |
| IND | 6.5  | 5.7  | 5.0  | 3.6  | 2.5  | 1.8  | 1.2  |
| JPN | 0.0  | 0.0  | 0.0  | 0.0  | 0.0  | 0.0  | 0.0  |
| LAM | 10.7 | 9.4  | 8.3  | 5.9  | 4.2  | 4.2  | 2.8  |
| MEA | 1.5  | 1.4  | 1.2  | 0.9  | 0.7  | 0.5  | 0.4  |
| NEU | 0.6  | 0.5  | 0.5  | 0.4  | 0.3  | 0.3  | 0.3  |
| OAS | 6.7  | 6.3  | 5.3  | 4.0  | 2.9  | 2.0  | 1.5  |
| REF | 1.3  | 1.2  | 1.1  | 0.9  | 0.7  | 0.5  | 0.5  |
| SSA | 11.9 | 11.1 | 10.0 | 8.0  | 6.0  | 4.5  | 3.7  |
| USA | 1.0  | 1.0  | 0.9  | 0.9  | 0.8  | 0.7  | 0.7  |

Table 883: MAgPIE m4p\_SSP1 — Emissions—NO3Land—Agriculture—Agricultural Soils—Pasture (Mt NO3-/yr) [PART 2/2]

|     | 1965 | 1970 | 1975 | 1980 | 1985 | 1990 | 1995 | 2000 | 2005 | 2010 |
|-----|------|------|------|------|------|------|------|------|------|------|
| GLO | 38.1 | 39.2 | 40.4 | 40.9 | 41.0 | 41.2 | 42.3 | 44.1 | 47.1 | 49.0 |
| CAZ | 2.5  | 2.6  | 2.6  | 2.5  | 2.4  | 2.3  | 2.3  | 2.4  | 2.5  | 2.5  |
| CHA | 5.6  | 5.7  | 6.0  | 6.3  | 6.7  | 7.1  | 7.6  | 8.5  | 9.7  | 10.4 |
| EUR | 7.4  | 7.5  | 7.4  | 7.1  | 6.7  | 6.1  | 5.5  | 4.9  | 4.5  | 4.2  |
| IND | 1.3  | 1.3  | 1.4  | 1.5  | 1.5  | 1.6  | 1.7  | 1.8  | 2.4  | 2.7  |
| JPN | 0.2  | 0.2  | 0.2  | 0.2  | 0.1  | 0.1  | 0.1  | 0.1  | 0.1  | 0.1  |
| LAM | 6.5  | 6.9  | 7.7  | 8.4  | 9.2  | 10.2 | 11.3 | 12.5 | 13.4 | 14.0 |
| MEA | 0.8  | 0.8  | 0.8  | 0.8  | 0.9  | 1.0  | 1.1  | 1.2  | 1.2  | 1.2  |
| NEU | 1.5  | 1.6  | 1.6  | 1.5  | 1.3  | 1.1  | 1.0  | 0.8  | 0.7  | 0.6  |
| OAS | 1.9  | 2.0  | 2.2  | 2.4  | 2.8  | 3.2  | 3.7  | 3.9  | 4.3  | 4.5  |
| REF | 3.1  | 3.2  | 3.2  | 3.2  | 2.9  | 2.5  | 2.0  | 1.7  | 1.7  | 1.8  |
| SSA | 2.8  | 2.9  | 3.1  | 3.4  | 3.7  | 3.9  | 4.1  | 4.4  | 4.9  | 5.2  |
| USA | 4.4  | 4.5  | 4.4  | 3.7  | 2.8  | 2.1  | 1.8  | 1.7  | 1.8  | 1.8  |

Table 884: IPCC — Emissions—NO3Land—Agriculture—Agricultural Soils—Pasture (Mt NO3-/yr)

|     | 1965 | 1970 | 1975 | 1980 | 1985 | 1990 | 1995 | 2000 | 2005 | 2010 |
|-----|------|------|------|------|------|------|------|------|------|------|
| GLO | 28.3 | 32.9 | 36.9 | 40.6 | 45.4 | 48.7 | 49.5 | 50.6 | 52.9 | 56.7 |
| CAZ | 2.1  | 2.5  | 3.4  | 2.7  | 2.8  | 2.8  | 3.1  | 3.9  | 2.9  | 3.8  |
| CHA | 2.0  | 2.7  | 3.4  | 4.7  | 5.7  | 7.4  | 8.2  | 8.1  | 10.3 | 12.0 |
| EUR | 1.7  | 2.2  | 2.9  | 4.0  | 5.3  | 5.3  | 5.2  | 4.9  | 4.4  | 4.2  |
| IND | 0.7  | 0.7  | 0.7  | 0.8  | 0.8  | 0.9  | 0.9  | 1.1  | 1.3  | 1.5  |
| JPN | 0.0  | 0.0  | 0.1  | 0.1  | 0.1  | 0.1  | 0.1  | 0.1  | 0.1  | 0.1  |
| LAM | 7.4  | 8.1  | 8.7  | 9.1  | 9.8  | 10.1 | 10.5 | 10.9 | 11.0 | 11.8 |
| MEA | 0.8  | 0.8  | 0.9  | 1.0  | 1.1  | 1.1  | 1.4  | 1.4  | 1.4  | 1.6  |
| NEU | 0.5  | 0.5  | 0.5  | 0.5  | 0.5  | 0.4  | 0.4  | 0.4  | 0.5  | 0.5  |
| OAS | 1.4  | 1.5  | 1.7  | 1.7  | 1.9  | 2.3  | 2.2  | 2.3  | 2.7  | 3.2  |
| REF | 1.5  | 1.9  | 2.2  | 3.4  | 4.2  | 4.5  | 2.9  | 3.0  | 3.1  | 2.9  |
| SSA | 7.0  | 8.2  | 8.6  | 8.5  | 8.6  | 8.7  | 8.8  | 9.1  | 9.2  | 9.5  |
| USA | 3.2  | 3.8  | 4.0  | 4.3  | 4.7  | 5.2  | 5.5  | 5.3  | 5.8  | 5.6  |

Table 885: Nsurplus2 — Emissions—NO3Land—Agriculture—Agricultural Soils—Pasture (Mt NO3-/yr)

## 16.1.6 Animal Waste Management

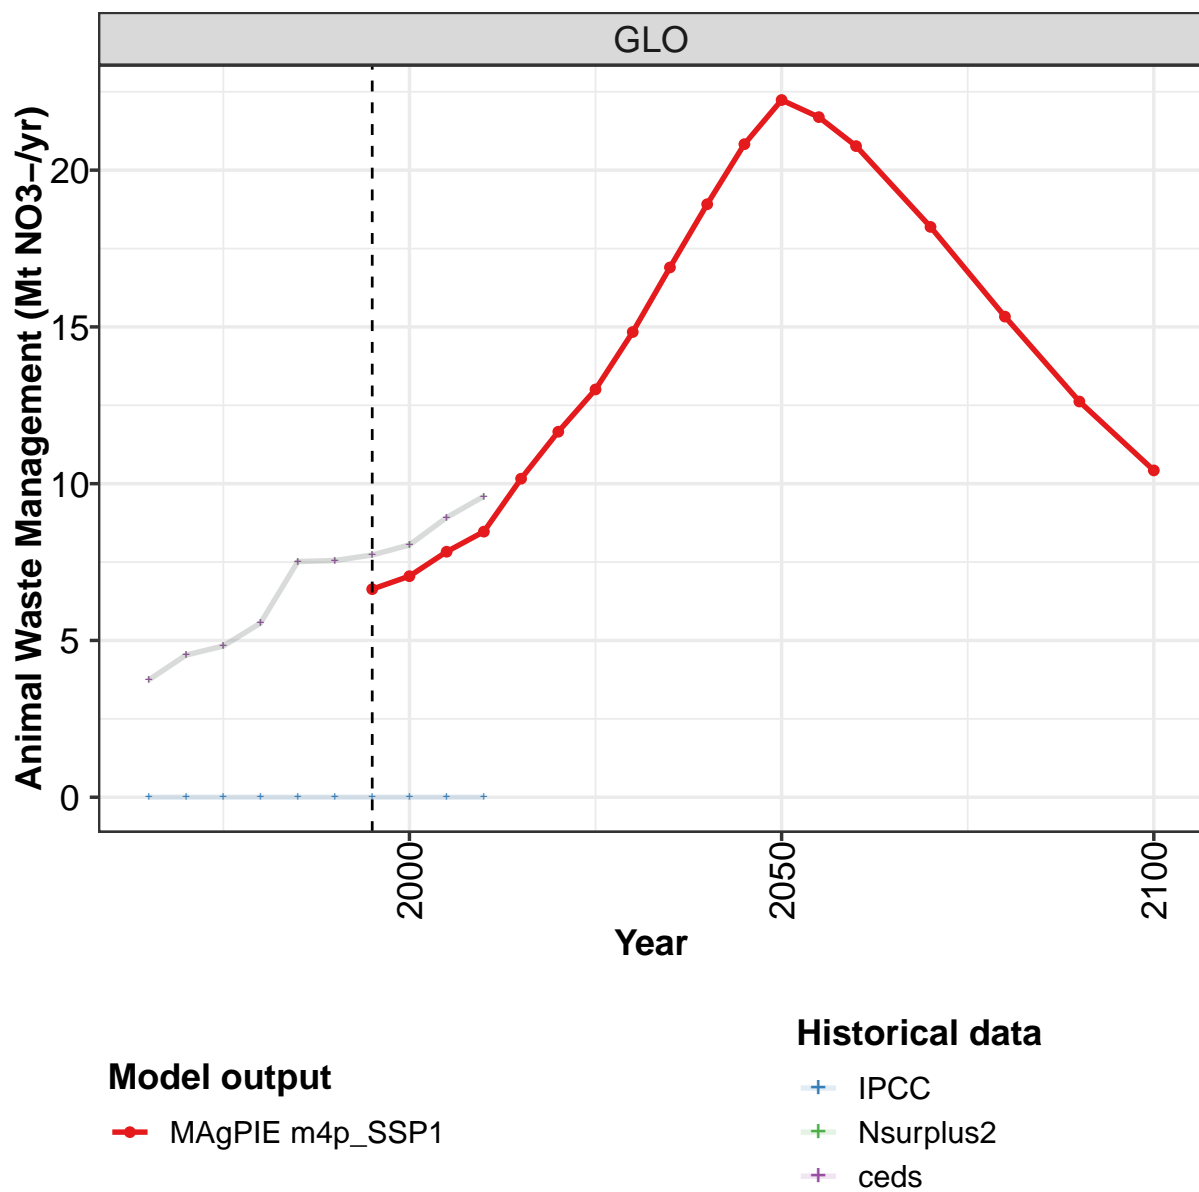



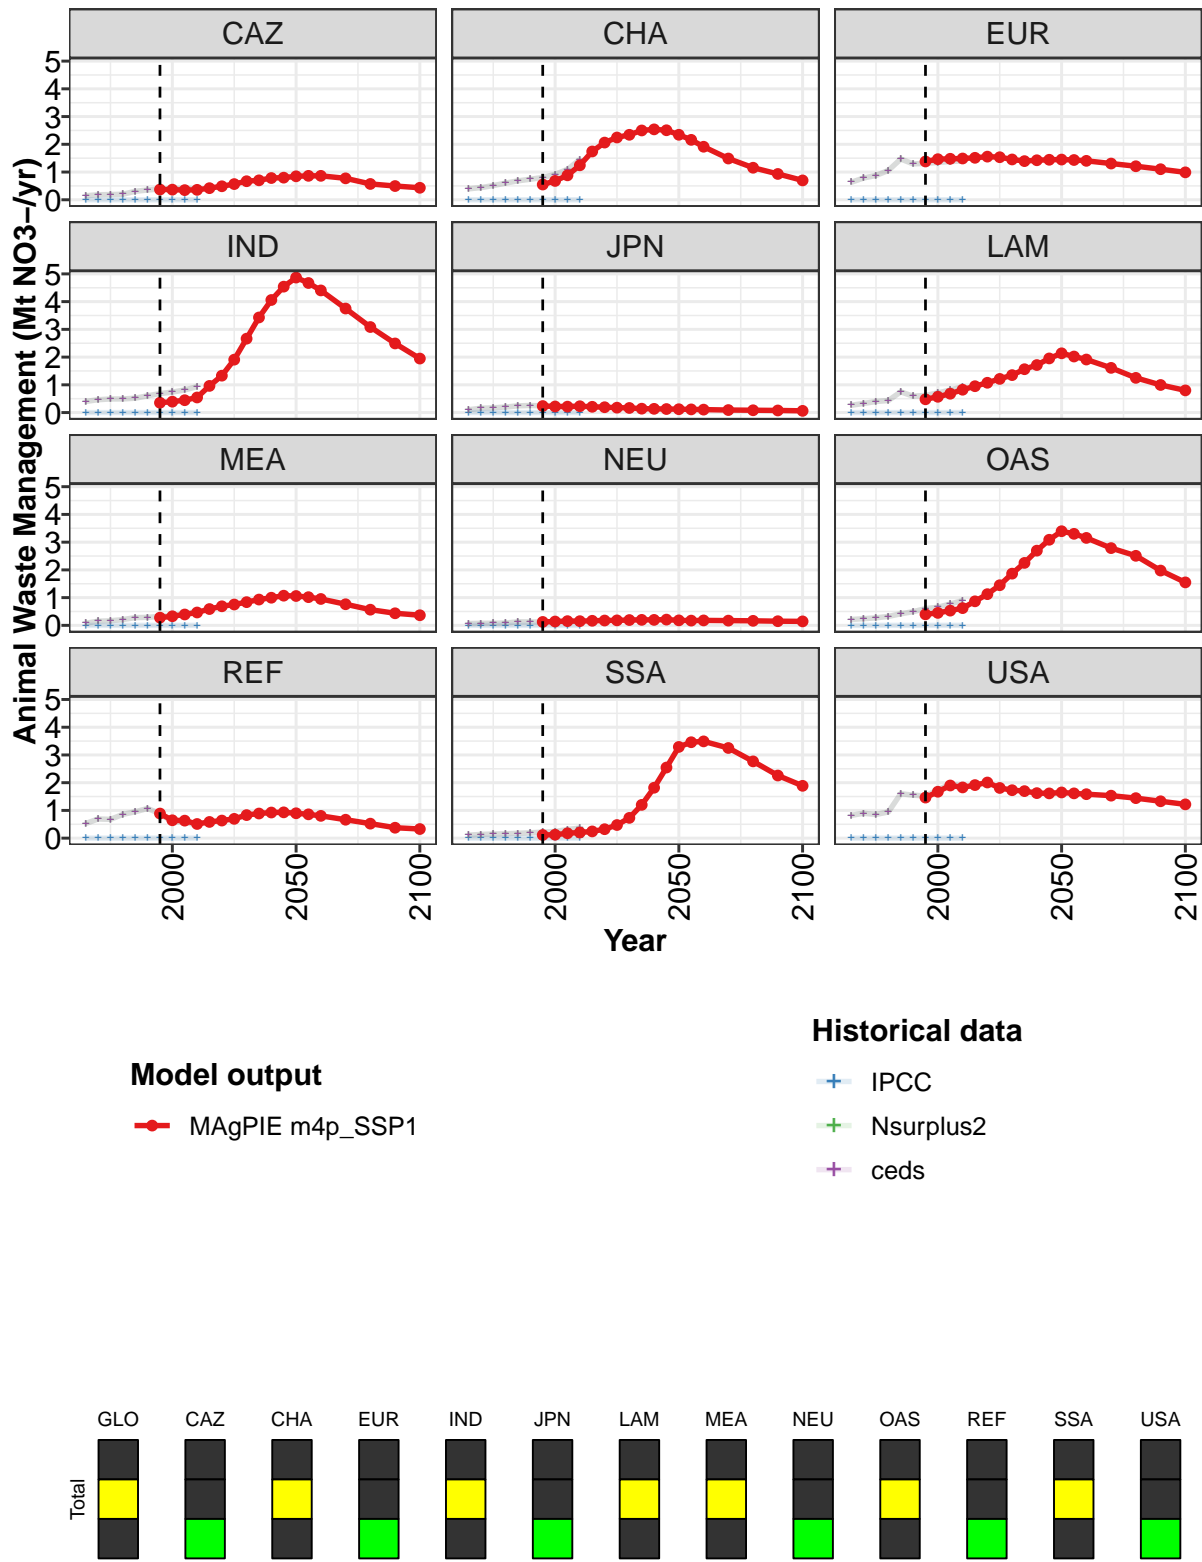

Figure 263: MAgPIE m4p\_SSP1 — Emissions—NO3Land—Agriculture—Animal Waste Management (Mt NO<sub>3</sub>-/yr)

|     | 1995 | 2000 | 2005 | 2010 | 2015 | 2020 | 2025 | 2030 | 2035 | 2040 | 2045 |
|-----|------|------|------|------|------|------|------|------|------|------|------|
| GLO | 6.6  | 7.1  | 7.8  | 8.5  | 10.2 | 11.7 | 13.0 | 14.8 | 16.9 | 18.9 | 20.8 |
| CAZ | 0.4  | 0.4  | 0.3  | 0.4  | 0.4  | 0.5  | 0.6  | 0.7  | 0.7  | 0.8  | 0.8  |
| CHA | 0.5  | 0.7  | 0.9  | 1.2  | 1.7  | 2.1  | 2.2  | 2.3  | 2.5  | 2.5  | 2.5  |
| EUR | 1.4  | 1.5  | 1.5  | 1.5  | 1.5  | 1.6  | 1.5  | 1.5  | 1.4  | 1.4  | 1.4  |
| IND | 0.4  | 0.4  | 0.4  | 0.5  | 1.0  | 1.3  | 1.9  | 2.7  | 3.4  | 4.1  | 4.5  |
| JPN | 0.2  | 0.2  | 0.2  | 0.2  | 0.2  | 0.2  | 0.2  | 0.2  | 0.1  | 0.1  | 0.1  |
| LAM | 0.5  | 0.6  | 0.7  | 0.8  | 1.0  | 1.1  | 1.2  | 1.4  | 1.6  | 1.7  | 2.0  |
| MEA | 0.3  | 0.3  | 0.4  | 0.5  | 0.6  | 0.7  | 0.8  | 0.8  | 0.9  | 1.0  | 1.1  |
| NEU | 0.1  | 0.1  | 0.2  | 0.2  | 0.2  | 0.2  | 0.2  | 0.2  | 0.2  | 0.2  | 0.2  |
| OAS | 0.4  | 0.4  | 0.5  | 0.6  | 0.9  | 1.1  | 1.4  | 1.9  | 2.3  | 2.7  | 3.1  |
| REF | 0.9  | 0.6  | 0.6  | 0.5  | 0.6  | 0.6  | 0.7  | 0.8  | 0.9  | 0.9  | 0.9  |
| SSA | 0.1  | 0.1  | 0.2  | 0.2  | 0.2  | 0.3  | 0.5  | 0.7  | 1.2  | 1.8  | 2.5  |
| USA | 1.5  | 1.7  | 1.9  | 1.8  | 1.9  | 2.0  | 1.8  | 1.7  | 1.7  | 1.6  | 1.6  |

Table 886: MAgPIE m4p\_SSP1 — Emissions—NO3Land—Agriculture—Animal Waste Management (Mt NO3-/yr) [PART 1/2]

|     | 2050 | 2055 | 2060 | 2070 | 2080 | 2090 | 2100 |
|-----|------|------|------|------|------|------|------|
| GLO | 22.2 | 21.7 | 20.8 | 18.2 | 15.3 | 12.6 | 10.4 |
| CAZ | 0.8  | 0.9  | 0.9  | 0.8  | 0.6  | 0.5  | 0.4  |
| CHA | 2.3  | 2.2  | 1.9  | 1.5  | 1.2  | 0.9  | 0.7  |
| EUR | 1.5  | 1.4  | 1.4  | 1.3  | 1.2  | 1.1  | 1.0  |
| IND | 4.9  | 4.7  | 4.4  | 3.8  | 3.1  | 2.5  | 1.9  |
| JPN | 0.1  | 0.1  | 0.1  | 0.1  | 0.1  | 0.1  | 0.1  |
| LAM | 2.1  | 2.0  | 1.9  | 1.6  | 1.3  | 1.0  | 0.8  |
| MEA | 1.1  | 1.0  | 1.0  | 0.8  | 0.6  | 0.4  | 0.4  |
| NEU | 0.2  | 0.2  | 0.2  | 0.2  | 0.2  | 0.2  | 0.1  |
| OAS | 3.4  | 3.3  | 3.2  | 2.8  | 2.5  | 2.0  | 1.5  |
| REF | 0.9  | 0.9  | 0.8  | 0.7  | 0.5  | 0.4  | 0.3  |
| SSA | 3.3  | 3.5  | 3.5  | 3.3  | 2.8  | 2.3  | 1.9  |
| USA | 1.6  | 1.6  | 1.6  | 1.5  | 1.4  | 1.3  | 1.2  |

Table 887: MAgPIE m4p\_SSP1 — Emissions—NO3Land—Agriculture—Animal Waste Management (Mt NO3-/yr) [PART 2/2]

|     | 1965 | 1970 | 1975 | 1980 | 1985 | 1990 | 1995 | 2000 | 2005 | 2010 |
|-----|------|------|------|------|------|------|------|------|------|------|
| GLO | 0    | 0    | 0    | 0    | 0    | 0    | 0    | 0    | 0    | 0    |
| CAZ | 0    | 0    | 0    | 0    | 0    | 0    | 0    | 0    | 0    | 0    |
| CHA | 0    | 0    | 0    | 0    | 0    | 0    | 0    | 0    | 0    | 0    |
| EUR | 0    | 0    | 0    | 0    | 0    | 0    | 0    | 0    | 0    | 0    |
| IND | 0    | 0    | 0    | 0    | 0    | 0    | 0    | 0    | 0    | 0    |
| JPN | 0    | 0    | 0    | 0    | 0    | 0    | 0    | 0    | 0    | 0    |
| LAM | 0    | 0    | 0    | 0    | 0    | 0    | 0    | 0    | 0    | 0    |
| MEA | 0    | 0    | 0    | 0    | 0    | 0    | 0    | 0    | 0    | 0    |
| NEU | 0    | 0    | 0    | 0    | 0    | 0    | 0    | 0    | 0    | 0    |
| OAS | 0    | 0    | 0    | 0    | 0    | 0    | 0    | 0    | 0    | 0    |
| REF | 0    | 0    | 0    | 0    | 0    | 0    | 0    | 0    | 0    | 0    |
| SSA | 0    | 0    | 0    | 0    | 0    | 0    | 0    | 0    | 0    | 0    |
| USA | 0    | 0    | 0    | 0    | 0    | 0    | 0    | 0    | 0    | 0    |

Table 888: ceds — Emissions—NO3Land—Agriculture—Animal Waste Management (Mt NO3-/yr)

|     | 1965 | 1970 | 1975 | 1980 | 1985 | 1990 | 1995 | 2000 | 2005 | 2010 |
|-----|------|------|------|------|------|------|------|------|------|------|
| GLO | 3.75 | 4.53 | 4.82 | 5.56 | 7.52 | 7.55 | 7.72 | 8.05 | 8.92 | 9.60 |
| CAZ | 0.14 | 0.18 | 0.19 | 0.20 | 0.31 | 0.35 | 0.39 | 0.41 | 0.41 | 0.40 |
| CHA | 0.39 | 0.44 | 0.51 | 0.60 | 0.68 | 0.74 | 0.80 | 0.92 | 1.10 | 1.45 |
| EUR | 0.63 | 0.78 | 0.88 | 1.06 | 1.47 | 1.30 | 1.31 | 1.35 | 1.38 | 1.40 |
| IND | 0.40 | 0.46 | 0.49 | 0.49 | 0.52 | 0.60 | 0.68 | 0.74 | 0.82 | 0.93 |
| JPN | 0.10 | 0.16 | 0.17 | 0.20 | 0.24 | 0.25 | 0.24 | 0.23 | 0.22 | 0.23 |
| LAM | 0.26 | 0.33 | 0.40 | 0.43 | 0.75 | 0.59 | 0.62 | 0.71 | 0.81 | 0.93 |
| MEA | 0.08 | 0.15 | 0.16 | 0.21 | 0.28 | 0.29 | 0.32 | 0.36 | 0.42 | 0.50 |
| NEU | 0.06 | 0.07 | 0.08 | 0.08 | 0.13 | 0.12 | 0.12 | 0.13 | 0.15 | 0.15 |
| OAS | 0.21 | 0.24 | 0.27 | 0.32 | 0.42 | 0.49 | 0.60 | 0.65 | 0.77 | 0.89 |
| REF | 0.53 | 0.69 | 0.68 | 0.86 | 0.95 | 1.07 | 0.88 | 0.59 | 0.58 | 0.46 |
| SSA | 0.11 | 0.13 | 0.15 | 0.16 | 0.18 | 0.19 | 0.22 | 0.24 | 0.31 | 0.36 |
| USA | 0.82 | 0.90 | 0.85 | 0.94 | 1.60 | 1.55 | 1.52 | 1.74 | 1.95 | 1.89 |

Table 889: IPCC — Emissions—NO3Land—Agriculture—Animal Waste Management (Mt NO3-/yr)

|     | 1965 | 1970 | 1975 | 1980 | 1985 | 1990 | 1995 | 2000 | 2005 | 2010 |
|-----|------|------|------|------|------|------|------|------|------|------|
| GLO | 3.75 | 4.53 | 4.82 | 5.56 | 7.52 | 7.55 | 7.72 | 8.05 | 8.92 | 9.60 |
| CAZ | 0.14 | 0.18 | 0.19 | 0.20 | 0.31 | 0.35 | 0.39 | 0.41 | 0.41 | 0.40 |
| CHA | 0.39 | 0.44 | 0.51 | 0.60 | 0.68 | 0.74 | 0.80 | 0.92 | 1.10 | 1.45 |
| EUR | 0.63 | 0.78 | 0.88 | 1.06 | 1.47 | 1.30 | 1.31 | 1.35 | 1.38 | 1.40 |
| IND | 0.40 | 0.46 | 0.49 | 0.49 | 0.52 | 0.60 | 0.68 | 0.74 | 0.82 | 0.93 |
| JPN | 0.10 | 0.16 | 0.17 | 0.20 | 0.24 | 0.25 | 0.24 | 0.23 | 0.22 | 0.23 |
| LAM | 0.26 | 0.33 | 0.40 | 0.43 | 0.75 | 0.59 | 0.62 | 0.71 | 0.81 | 0.93 |
| MEA | 0.08 | 0.15 | 0.16 | 0.21 | 0.28 | 0.29 | 0.32 | 0.36 | 0.42 | 0.50 |
| NEU | 0.06 | 0.07 | 0.08 | 0.08 | 0.13 | 0.12 | 0.12 | 0.13 | 0.15 | 0.15 |
| OAS | 0.21 | 0.24 | 0.27 | 0.32 | 0.42 | 0.49 | 0.60 | 0.65 | 0.77 | 0.89 |
| REF | 0.53 | 0.69 | 0.68 | 0.86 | 0.95 | 1.07 | 0.88 | 0.59 | 0.58 | 0.46 |
| SSA | 0.11 | 0.13 | 0.15 | 0.16 | 0.18 | 0.19 | 0.22 | 0.24 | 0.31 | 0.36 |
| USA | 0.82 | 0.90 | 0.85 | 0.94 | 1.60 | 1.55 | 1.52 | 1.74 | 1.95 | 1.89 |

Table 890: Nsurplus2 — Emissions—NO3Land—Agriculture—Animal Waste Management (Mt NO3-/yr)

**Part V****Food Consumption Value**

- 17 Bioenergy crops**
- 18 Crop residues**
- 19 Crops**
- 20 Fish**
- 21 Forage**
- 22 Livestock products**
- 23 Pasture**
- 24 Secondary products**

**Part VI****Food Expenditure Share**

- 25 Bioenergy crops**
- 26 Crop residues**
- 27 Crops**
- 28 Fish**
- 29 Forage**
- 30 Livestock products**
- 31 Pasture**
- 32 Secondary products**

## Part VII

## Household Expenditure

## 33 Food

## 33.1 Expenditure

```
## Error in '[<-.data.frame'('*tmp*', x_hist$scenario != "historical", "id", : missing
values are not allowed in subscripted assignments of data frames
```

```
## Error in '[<-.data.frame'('*tmp*', x_hist$scenario != "historical", "id", : missing
values are not allowed in subscripted assignments of data frames
```

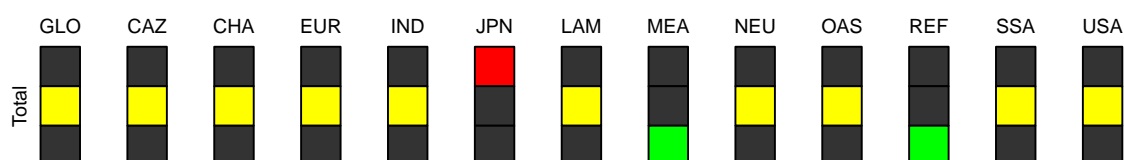

Figure 264: MAGPIE m4p\_SSP1 — Household Expenditure—Food—Expenditure (USD/capita)

|     | 1995 | 2000 | 2005 | 2010 | 2015 | 2020 | 2025 | 2030 | 2035 | 2040 | 2045 |
|-----|------|------|------|------|------|------|------|------|------|------|------|
| GLO | 548  | 506  | 534  | 558  | 596  | 583  | 608  | 636  | 639  | 666  | 666  |
| CAZ | 715  | 739  | 677  | 664  | 740  | 773  | 808  | 794  | 776  | 802  | 795  |
| CHA | 656  | 763  | 879  | 1019 | 937  | 791  | 793  | 778  | 760  | 747  | 740  |
| EUR | 806  | 770  | 747  | 668  | 738  | 744  | 740  | 745  | 741  | 781  | 775  |
| IND | 239  | 257  | 244  | 327  | 379  | 404  | 492  | 536  | 494  | 525  | 544  |
| JPN | 515  | 487  | 470  | 446  | 442  | 437  | 406  | 390  | 371  | 368  | 358  |
| LAM | 626  | 615  | 574  | 585  | 594  | 596  | 601  | 616  | 611  | 630  | 623  |
| MEA | 548  | 375  | 404  | 452  | 497  | 540  | 576  | 632  | 670  | 719  | 725  |
| NEU | 683  | 608  | 620  | 555  | 561  | 577  | 573  | 575  | 561  | 540  | 535  |
| OAS | 239  | 266  | 237  | 294  | 330  | 366  | 393  | 427  | 459  | 497  | 518  |
| REF | 1104 | 516  | 849  | 576  | 741  | 741  | 736  | 774  | 775  | 789  | 794  |
| SSA | 619  | 306  | 359  | 360  | 579  | 602  | 636  | 700  | 757  | 801  | 773  |
| USA | 734  | 930  | 954  | 817  | 841  | 834  | 809  | 860  | 828  | 873  | 858  |

Table 891: MAGPIE m4p\_SSP1 — Household Expenditure—Food—Expenditure (USD/capita) [PART 1/2]

|     | 2050 | 2055 | 2060 | 2070 | 2080 | 2090 | 2100 |
|-----|------|------|------|------|------|------|------|
| GLO | 666  | 644  | 621  | 573  | 532  | 497  | 480  |
| CAZ | 799  | 772  | 764  | 662  | 612  | 585  | 567  |
| CHA | 710  | 654  | 626  | 578  | 553  | 537  | 520  |
| EUR | 754  | 736  | 700  | 639  | 588  | 538  | 520  |
| IND | 565  | 559  | 503  | 453  | 416  | 394  | 382  |
| JPN | 340  | 325  | 311  | 277  | 258  | 247  | 240  |
| LAM | 561  | 503  | 486  | 444  | 414  | 389  | 378  |
| MEA | 715  | 661  | 645  | 596  | 552  | 480  | 431  |
| NEU | 563  | 545  | 517  | 510  | 502  | 501  | 497  |
| OAS | 525  | 514  | 495  | 454  | 415  | 393  | 384  |
| REF | 777  | 727  | 690  | 622  | 579  | 555  | 539  |
| SSA | 816  | 821  | 819  | 756  | 682  | 613  | 574  |
| USA | 826  | 807  | 796  | 723  | 675  | 648  | 649  |

Table 892: MAgPIE m4p\_SSP1 — Household Expenditure—Food—Expenditure (USD/capita) [PART 2/2]

## 33.1.1 Crops

```
## Error in '[<-.data.frame'('*tmp*', x_hist$scenario != "historical", "id", : missing
values are not allowed in subscripted assignments of data frames
```

```
## Error in '[<-.data.frame'('*tmp*', x_hist$scenario != "historical", "id", : missing
values are not allowed in subscripted assignments of data frames
```

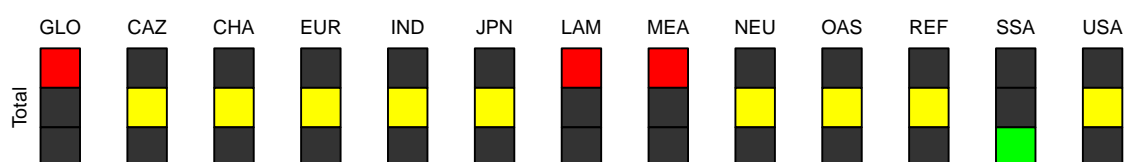

Figure 265: MAgPIE m4p\_SSP1 — Household Expenditure—Food—Expenditure—Crops (USD/capita)

|     | 1995 | 2000 | 2005 | 2010 | 2015 | 2020 | 2025 | 2030 | 2035 | 2040 | 2045 |
|-----|------|------|------|------|------|------|------|------|------|------|------|
| GLO | 155  | 176  | 186  | 199  | 184  | 178  | 181  | 189  | 188  | 188  | 186  |
| CAZ | 131  | 148  | 140  | 156  | 156  | 159  | 154  | 154  | 155  | 159  | 162  |
| CHA | 193  | 255  | 281  | 319  | 259  | 230  | 234  | 247  | 262  | 274  | 284  |
| EUR | 156  | 163  | 158  | 147  | 162  | 166  | 171  | 181  | 185  | 196  | 202  |
| IND | 166  | 187  | 176  | 234  | 183  | 167  | 172  | 162  | 152  | 148  | 151  |
| JPN | 124  | 120  | 122  | 113  | 122  | 121  | 102  | 103  | 105  | 110  | 114  |
| LAM | 120  | 124  | 117  | 123  | 117  | 116  | 114  | 118  | 123  | 130  | 141  |
| MEA | 200  | 211  | 210  | 189  | 218  | 229  | 234  | 261  | 248  | 255  | 245  |
| NEU | 239  | 219  | 310  | 268  | 241  | 255  | 274  | 285  | 289  | 298  | 303  |
| OAS | 107  | 114  | 123  | 128  | 136  | 140  | 137  | 135  | 133  | 132  | 128  |
| REF | 63   | 37   | 92   | 39   | 79   | 72   | 120  | 195  | 197  | 204  | 209  |
| SSA | 163  | 179  | 206  | 207  | 206  | 211  | 210  | 218  | 205  | 186  | 161  |
| USA | 168  | 197  | 186  | 172  | 188  | 193  | 193  | 202  | 208  | 223  | 227  |

Table 893: MAgPIE m4p\_SSP1 — Household Expenditure—Food—Expenditure—Crops (USD/capita) [PART 1/2]

|     | 2050 | 2055 | 2060 | 2070 | 2080 | 2090 | 2100 |
|-----|------|------|------|------|------|------|------|
| GLO | 185  | 182  | 182  | 183  | 187  | 189  | 195  |
| CAZ | 166  | 166  | 172  | 163  | 171  | 177  | 183  |
| CHA | 286  | 278  | 277  | 272  | 271  | 273  | 274  |
| EUR | 206  | 210  | 211  | 206  | 205  | 207  | 212  |
| IND | 154  | 156  | 155  | 160  | 165  | 171  | 180  |
| JPN | 114  | 114  | 116  | 113  | 117  | 120  | 126  |
| LAM | 146  | 146  | 148  | 152  | 155  | 160  | 166  |
| MEA | 237  | 233  | 243  | 256  | 263  | 241  | 239  |
| NEU | 324  | 323  | 316  | 325  | 331  | 338  | 345  |
| OAS | 128  | 130  | 132  | 135  | 144  | 152  | 161  |
| REF | 210  | 207  | 208  | 208  | 209  | 214  | 222  |
| SSA | 149  | 139  | 138  | 142  | 152  | 158  | 170  |
| USA | 230  | 228  | 229  | 216  | 213  | 214  | 222  |

Table 894: MAgPIE m4p\_SSP1 — Household Expenditure—Food—Expenditure—Crops (USD/capita) [PART 2/2]

### 33.1.2 Crops—Cereals

```
## Error in '[<-.data.frame'('*tmp*', x_hist$scenario != "historical", "id", : missing
values are not allowed in subscripted assignments of data frames
```

```
## Error in '[<-.data.frame'('*tmp*', x_hist$scenario != "historical", "id", : missing
values are not allowed in subscripted assignments of data frames
```



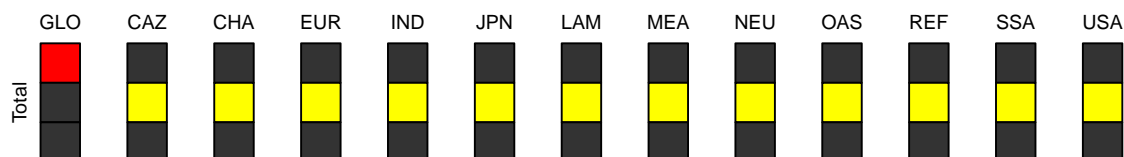

Figure 266: MAgPIE m4p\_SSP1 — Household Expenditure—Food—Expenditure—Crops—Cereals (USD/capita)

|     | 1995 | 2000 | 2005 | 2010 | 2015 | 2020 | 2025 | 2030 | 2035 | 2040 | 2045 |
|-----|------|------|------|------|------|------|------|------|------|------|------|
| GLO | 64   | 65   | 69   | 71   | 54   | 47   | 43   | 42   | 41   | 39   | 37   |
| CAZ | 34   | 45   | 33   | 41   | 38   | 36   | 31   | 30   | 31   | 33   | 34   |
| CHA | 81   | 85   | 81   | 78   | 45   | 31   | 29   | 30   | 31   | 32   | 32   |
| EUR | 30   | 27   | 28   | 23   | 27   | 28   | 27   | 29   | 30   | 32   | 33   |
| IND | 93   | 106  | 96   | 123  | 67   | 53   | 51   | 45   | 48   | 43   | 41   |
| JPN | 42   | 36   | 34   | 35   | 40   | 39   | 20   | 20   | 20   | 23   | 23   |
| LAM | 37   | 32   | 30   | 34   | 28   | 27   | 24   | 25   | 25   | 27   | 30   |
| MEA | 86   | 74   | 91   | 69   | 66   | 68   | 61   | 59   | 56   | 56   | 54   |
| NEU | 36   | 34   | 32   | 38   | 28   | 25   | 9    | 3    | 4    | 5    | 8    |
| OAS | 53   | 56   | 61   | 65   | 54   | 51   | 45   | 41   | 38   | 35   | 32   |
| REF | 57   | 30   | 84   | 28   | 64   | 56   | 45   | 45   | 41   | 41   | 40   |
| SSA | 62   | 65   | 87   | 87   | 82   | 78   | 71   | 70   | 62   | 54   | 42   |
| USA | 32   | 37   | 35   | 30   | 33   | 30   | 26   | 29   | 29   | 36   | 37   |

Table 895: MAgPIE m4p\_SSP1 — Household Expenditure—Food—Expenditure—Crops—Cereals (USD/capita) [PART 1/2]

|     | 2050 | 2055 | 2060 | 2070 | 2080 | 2090 | 2100 |
|-----|------|------|------|------|------|------|------|
| GLO | 35   | 33   | 31   | 27   | 25   | 24   | 24   |
| CAZ | 37   | 36   | 39   | 30   | 28   | 31   | 31   |
| CHA | 30   | 26   | 24   | 21   | 21   | 19   | 19   |
| EUR | 34   | 35   | 34   | 27   | 26   | 24   | 24   |
| IND | 40   | 38   | 34   | 31   | 28   | 27   | 28   |
| JPN | 22   | 20   | 20   | 17   | 16   | 15   | 15   |
| LAM | 30   | 29   | 29   | 25   | 23   | 21   | 24   |
| MEA | 53   | 51   | 52   | 48   | 47   | 44   | 42   |
| NEU | 25   | 20   | 7    | 7    | 6    | 5    | 5    |
| OAS | 31   | 30   | 28   | 23   | 19   | 19   | 19   |
| REF | 39   | 35   | 33   | 28   | 24   | 25   | 28   |
| SSA | 36   | 31   | 29   | 25   | 23   | 21   | 20   |
| USA | 39   | 38   | 37   | 27   | 24   | 22   | 26   |

Table 896: MAgPIE m4p\_SSP1 — Household Expenditure—Food—Expenditure—Crops—Cereals (USD/capita) [PART 2/2]

### 33.1.3 Crops—Oil crops

```
## Error in '[<-.data.frame'('*tmp*', x_hist$scenario != "historical", "id", : missing
values are not allowed in subscripted assignments of data frames
```

```
## Error in '[<-.data.frame'('*tmp*', x_hist$scenario != "historical", "id", : missing
values are not allowed in subscripted assignments of data frames
```

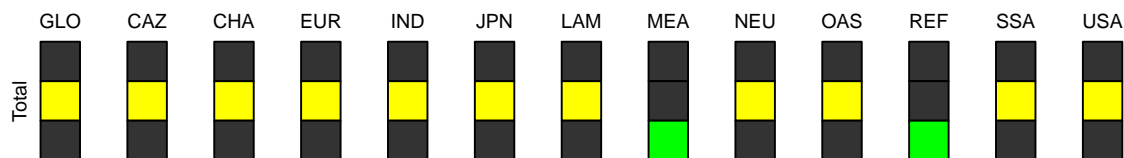

Figure 267: MAgPIE m4p\_SSP1 — Household Expenditure—Food—Expenditure—Crops—Oil crops (USD/capita)

|     | 1995 | 2000 | 2005 | 2010 | 2015 | 2020 | 2025 | 2030 | 2035 | 2040 | 2045 |
|-----|------|------|------|------|------|------|------|------|------|------|------|
| GLO | 6.5  | 7.1  | 8.0  | 8.5  | 7.9  | 7.5  | 7.2  | 6.6  | 5.7  | 5.3  | 4.8  |
| CAZ | 4.3  | 4.0  | 4.1  | 5.4  | 6.6  | 6.4  | 6.7  | 6.6  | 5.8  | 5.8  | 5.7  |
| CHA | 4.7  | 6.4  | 6.3  | 7.5  | 5.8  | 4.5  | 4.0  | 3.9  | 3.9  | 4.0  | 4.0  |
| EUR | 1.9  | 2.0  | 1.9  | 2.5  | 2.8  | 2.7  | 2.5  | 2.4  | 2.3  | 2.4  | 2.4  |
| IND | 7.9  | 5.7  | 6.5  | 10.1 | 8.8  | 8.0  | 8.2  | 7.3  | 5.4  | 5.0  | 4.8  |
| JPN | 8.8  | 10.1 | 10.9 | 9.9  | 10.6 | 10.6 | 10.2 | 9.9  | 9.3  | 9.1  | 9.0  |
| LAM | 2.9  | 5.0  | 6.2  | 5.5  | 5.3  | 4.8  | 4.5  | 3.9  | 3.3  | 3.0  | 2.9  |
| MEA | 1.1  | 1.6  | 1.3  | 1.9  | 2.0  | 1.7  | 1.4  | 1.1  | 1.0  | 0.8  | 0.8  |
| NEU | 1.7  | 3.0  | 3.7  | 3.9  | 4.0  | 3.4  | 1.8  | 1.0  | 1.0  | 1.1  | 1.1  |
| OAS | 15.5 | 16.6 | 16.5 | 13.8 | 12.7 | 11.6 | 10.3 | 8.6  | 7.1  | 6.6  | 6.1  |
| REF | 0.2  | 0.4  | 1.1  | 0.9  | 1.1  | 0.9  | 0.8  | 0.8  | 0.7  | 0.7  | 0.7  |
| SSA | 9.2  | 10.4 | 14.6 | 14.6 | 14.7 | 16.0 | 15.8 | 14.9 | 12.8 | 10.9 | 8.6  |
| USA | 2.9  | 3.4  | 4.3  | 3.9  | 4.7  | 4.6  | 4.4  | 4.2  | 4.1  | 4.4  | 4.3  |

Table 897: MAgPIE m4p\_SSP1 — Household Expenditure—Food—Expenditure—Crops—Oil crops (USD/capita) [PART 1/2]

|     | 2050 | 2055 | 2060 | 2070 | 2080 | 2090 | 2100 |
|-----|------|------|------|------|------|------|------|
| GLO | 4.4  | 4.2  | 4.0  | 3.7  | 3.7  | 3.6  | 3.7  |
| CAZ | 5.4  | 5.3  | 5.2  | 4.8  | 4.6  | 4.5  | 4.4  |
| CHA | 3.7  | 3.4  | 3.3  | 3.0  | 2.8  | 2.8  | 2.8  |
| EUR | 2.4  | 2.3  | 2.2  | 2.0  | 1.8  | 1.7  | 1.6  |
| IND | 4.6  | 4.5  | 4.2  | 3.9  | 3.7  | 3.6  | 3.6  |
| JPN | 8.4  | 8.1  | 7.9  | 7.1  | 6.7  | 6.5  | 6.4  |
| LAM | 2.7  | 2.6  | 2.5  | 2.5  | 2.6  | 2.5  | 2.9  |
| MEA | 0.8  | 0.8  | 0.8  | 0.7  | 0.8  | 1.1  | 1.1  |
| NEU | 1.8  | 1.4  | 0.9  | 0.9  | 0.9  | 0.8  | 1.0  |
| OAS | 5.7  | 5.5  | 5.3  | 5.1  | 5.3  | 5.4  | 5.3  |
| REF | 0.7  | 0.6  | 0.6  | 0.5  | 0.4  | 0.4  | 0.4  |
| SSA | 7.5  | 6.6  | 6.1  | 5.7  | 5.5  | 5.4  | 5.4  |
| USA | 4.1  | 3.9  | 3.7  | 3.1  | 3.0  | 2.9  | 3.0  |

Table 898: MAgPIE m4p\_SSP1 — Household Expenditure—Food—Expenditure—Crops—Oil crops (USD/capita) [PART 2/2]

## 33.1.4 Crops—Other crops

```
## Error in '[<-.data.frame'('*tmp*', x_hist$scenario != "historical", "id", : missing
values are not allowed in subscripted assignments of data frames
```

```
## Error in '[<-.data.frame'('*tmp*', x_hist$scenario != "historical", "id", : missing
values are not allowed in subscripted assignments of data frames
```

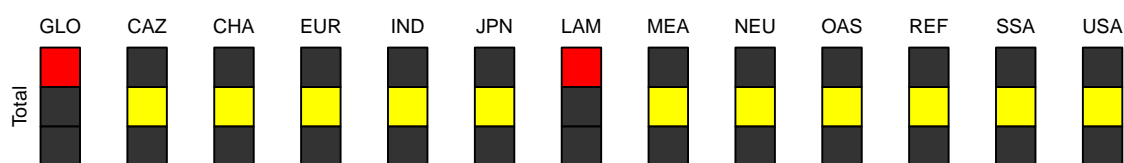

Figure 268: MAgPIE m4p\_SSP1 — Household Expenditure—Food—Expenditure—Crops—Other crops (USD/capita)

|     | 1995 | 2000 | 2005 | 2010 | 2015 | 2020 | 2025 | 2030 | 2035 | 2040 | 2045 |
|-----|------|------|------|------|------|------|------|------|------|------|------|
| GLO | 84   | 103  | 108  | 120  | 122  | 123  | 131  | 140  | 141  | 143  | 144  |
| CAZ | 92   | 99   | 103  | 110  | 112  | 116  | 116  | 117  | 119  | 121  | 122  |
| CHA | 107  | 163  | 194  | 234  | 208  | 195  | 201  | 213  | 227  | 238  | 248  |
| EUR | 124  | 135  | 128  | 121  | 132  | 135  | 141  | 150  | 153  | 162  | 167  |
| IND | 64   | 75   | 73   | 100  | 106  | 106  | 112  | 110  | 98   | 100  | 104  |
| JPN | 73   | 74   | 77   | 69   | 71   | 72   | 72   | 74   | 76   | 78   | 81   |
| LAM | 79   | 87   | 80   | 83   | 84   | 85   | 85   | 89   | 95   | 100  | 109  |
| MEA | 113  | 135  | 118  | 117  | 149  | 159  | 172  | 200  | 192  | 198  | 189  |
| NEU | 202  | 182  | 274  | 226  | 209  | 227  | 264  | 282  | 284  | 291  | 294  |
| OAS | 38   | 41   | 45   | 49   | 69   | 77   | 82   | 85   | 88   | 90   | 90   |
| REF | 6    | 7    | 8    | 10   | 13   | 15   | 74   | 149  | 155  | 163  | 168  |
| SSA | 92   | 104  | 104  | 106  | 109  | 117  | 123  | 133  | 130  | 121  | 110  |
| USA | 133  | 157  | 147  | 138  | 150  | 158  | 163  | 170  | 175  | 182  | 186  |

Table 899: MAgPIE m4p\_SSP1 — Household Expenditure—Food—Expenditure—Crops—Other crops (USD/capita) [PART 1/2]

|     | 2050 | 2055 | 2060 | 2070 | 2080 | 2090 | 2100 |
|-----|------|------|------|------|------|------|------|
| GLO | 145  | 144  | 146  | 152  | 158  | 162  | 168  |
| CAZ | 124  | 125  | 128  | 128  | 139  | 142  | 148  |
| CHA | 252  | 249  | 250  | 248  | 247  | 251  | 252  |
| EUR | 170  | 173  | 174  | 177  | 177  | 182  | 186  |
| IND | 109  | 113  | 116  | 125  | 133  | 140  | 148  |
| JPN | 84   | 86   | 89   | 89   | 94   | 99   | 105  |
| LAM | 113  | 114  | 117  | 124  | 130  | 136  | 139  |
| MEA | 183  | 180  | 190  | 207  | 215  | 195  | 196  |
| NEU | 297  | 301  | 307  | 317  | 324  | 332  | 339  |
| OAS | 92   | 95   | 99   | 107  | 120  | 128  | 137  |
| REF | 170  | 171  | 175  | 180  | 184  | 189  | 194  |
| SSA | 106  | 102  | 103  | 112  | 124  | 132  | 144  |
| USA | 187  | 186  | 187  | 186  | 186  | 189  | 194  |

Table 900: MAgPIE m4p\_SSP1 — Household Expenditure—Food—Expenditure—Crops—Other crops (USD/capita) [PART 2/2]

### 33.1.5 Crops—Sugar crops

```
## Error in '[<-.data.frame'('*tmp*', x_hist$scenario != "historical", "id", : missing
values are not allowed in subscripted assignments of data frames
```

```
## Error in '[<-.data.frame'('*tmp*', x_hist$scenario != "historical", "id", : missing
values are not allowed in subscripted assignments of data frames
```

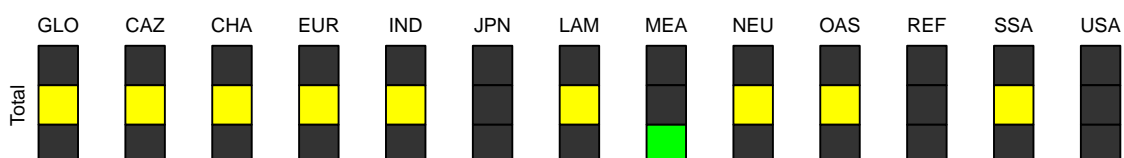

Figure 269: MAgPIE m4p\_SSP1 — Household Expenditure—Food—Expenditure—Crops—Sugar crops (USD/capita)

|     | 1995  | 2000  | 2005  | 2010  | 2015  | 2020  | 2025  | 2030  | 2035  | 2040  | 2045  |
|-----|-------|-------|-------|-------|-------|-------|-------|-------|-------|-------|-------|
| GLO | 0.143 | 0.171 | 0.144 | 0.251 | 0.233 | 0.221 | 0.218 | 0.199 | 0.172 | 0.160 | 0.151 |
| CAZ | 0.000 | 0.000 | 0.000 | 0.000 | 0.000 | 0.000 | 0.000 | 0.000 | 0.000 | 0.000 | 0.000 |
| CHA | 0.007 | 0.005 | 0.002 | 0.002 | 0.001 | 0.001 | 0.001 | 0.001 | 0.001 | 0.001 | 0.001 |
| EUR | 0.000 | 0.000 | 0.000 | 0.000 | 0.000 | 0.000 | 0.000 | 0.000 | 0.000 | 0.000 | 0.000 |
| IND | 0.472 | 0.471 | 0.385 | 0.973 | 0.877 | 0.779 | 0.774 | 0.685 | 0.507 | 0.465 | 0.444 |
| JPN | 0.000 | 0.000 | 0.000 | 0.000 | 0.000 | 0.000 | 0.000 | 0.000 | 0.000 | 0.000 | 0.000 |
| LAM | 0.038 | 0.090 | 0.075 | 0.119 | 0.112 | 0.107 | 0.100 | 0.097 | 0.092 | 0.090 | 0.088 |
| MEA | 0.236 | 0.390 | 0.312 | 0.268 | 0.269 | 0.329 | 0.316 | 0.297 | 0.407 | 0.397 | 0.382 |
| NEU | 0.000 | 0.000 | 0.000 | 0.001 | 0.001 | 0.000 | 0.000 | 0.000 | 0.000 | 0.000 | 0.000 |
| OAS | 0.240 | 0.326 | 0.254 | 0.231 | 0.216 | 0.206 | 0.190 | 0.177 | 0.165 | 0.152 | 0.138 |
| REF | 0.000 | 0.000 | 0.000 | 0.000 | 0.000 | 0.000 | 0.000 | 0.000 | 0.000 | 0.000 | 0.000 |
| SSA | 0.102 | 0.089 | 0.106 | 0.124 | 0.123 | 0.131 | 0.127 | 0.118 | 0.110 | 0.095 | 0.077 |
| USA | 0.000 | 0.000 | 0.000 | 0.000 | 0.000 | 0.000 | 0.000 | 0.000 | 0.000 | 0.000 | 0.000 |

Table 901: MAgPIE m4p\_SSP1 — Household Expenditure—Food—Expenditure—Crops—Sugar crops (USD/capita) [PART 1/2]

|     | 2050  | 2055  | 2060  | 2070  | 2080  | 2090  | 2100  |
|-----|-------|-------|-------|-------|-------|-------|-------|
| GLO | 0.143 | 0.137 | 0.131 | 0.118 | 0.112 | 0.109 | 0.105 |
| CAZ | 0.000 | 0.000 | 0.000 | 0.000 | 0.000 | 0.000 | 0.000 |
| CHA | 0.001 | 0.001 | 0.001 | 0.001 | 0.001 | 0.001 | 0.001 |
| EUR | 0.000 | 0.000 | 0.000 | 0.000 | 0.000 | 0.000 | 0.000 |
| IND | 0.430 | 0.419 | 0.391 | 0.373 | 0.359 | 0.354 | 0.345 |
| JPN | 0.000 | 0.000 | 0.000 | 0.000 | 0.000 | 0.000 | 0.000 |
| LAM | 0.086 | 0.085 | 0.083 | 0.084 | 0.080 | 0.080 | 0.073 |
| MEA | 0.347 | 0.313 | 0.326 | 0.234 | 0.217 | 0.208 | 0.200 |
| NEU | 0.000 | 0.000 | 0.000 | 0.000 | 0.000 | 0.000 | 0.000 |
| OAS | 0.130 | 0.123 | 0.117 | 0.108 | 0.099 | 0.100 | 0.102 |
| REF | 0.000 | 0.000 | 0.000 | 0.000 | 0.000 | 0.000 | 0.000 |
| SSA | 0.067 | 0.059 | 0.054 | 0.051 | 0.050 | 0.051 | 0.051 |
| USA | 0.000 | 0.000 | 0.000 | 0.000 | 0.000 | 0.000 | 0.000 |

Table 902: MAgPIE m4p\_SSP1 — Household Expenditure—Food—Expenditure—Crops—Sugar crops (USD/capita) [PART 2/2]

### 33.1.6 Fish

```
## Error in '[<-.data.frame'('*tmp*', x_hist$scenario != "historical", "id", : missing
values are not allowed in subscripted assignments of data frames
```

```
## Error in '[<-.data.frame'('*tmp*', x_hist$scenario != "historical", "id", : missing
values are not allowed in subscripted assignments of data frames
```

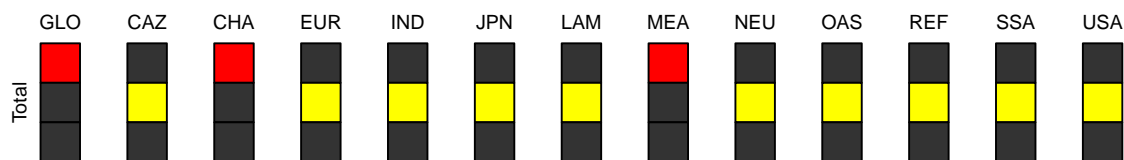

Figure 270: MAgPIE m4p\_SSP1 — Household Expenditure—Food—Expenditure—Fish (USD/capita)

|     | 1995 | 2000 | 2005 | 2010 | 2015 | 2020 | 2025 | 2030 | 2035 | 2040 | 2045 |
|-----|------|------|------|------|------|------|------|------|------|------|------|
| GLO | 5.1  | 5.4  | 5.7  | 6.3  | 7.5  | 8.5  | 9.4  | 10.2 | 10.9 | 11.4 | 11.7 |
| CAZ | 6.3  | 6.6  | 6.7  | 7.1  | 6.8  | 6.6  | 6.4  | 6.3  | 6.1  | 6.0  | 5.9  |
| CHA | 5.2  | 6.5  | 6.9  | 8.7  | 10.8 | 11.8 | 12.0 | 11.5 | 10.8 | 10.2 | 9.6  |
| EUR | 8.0  | 9.1  | 10.5 | 10.7 | 10.5 | 10.4 | 10.2 | 9.9  | 9.6  | 9.4  | 9.2  |
| IND | 1.1  | 1.4  | 1.6  | 2.0  | 3.5  | 4.3  | 5.3  | 6.2  | 6.8  | 7.1  | 7.2  |
| JPN | 42.4 | 38.1 | 36.1 | 30.8 | 29.4 | 28.7 | 27.5 | 26.0 | 24.5 | 23.1 | 21.8 |
| LAM | 3.8  | 3.4  | 2.9  | 3.1  | 3.5  | 3.7  | 3.9  | 3.9  | 3.9  | 3.8  | 3.7  |
| MEA | 2.3  | 2.6  | 3.1  | 3.7  | 4.7  | 5.4  | 6.0  | 6.5  | 6.8  | 6.9  | 6.8  |
| NEU | 4.1  | 3.8  | 3.5  | 3.7  | 3.9  | 4.0  | 4.1  | 4.0  | 3.9  | 3.8  | 3.7  |
| OAS | 6.0  | 6.2  | 7.0  | 8.2  | 11.7 | 14.5 | 17.4 | 20.1 | 22.1 | 23.1 | 23.4 |
| REF | 4.2  | 4.6  | 5.9  | 6.3  | 6.4  | 6.4  | 6.4  | 6.3  | 6.0  | 5.7  | 5.5  |
| SSA | 2.7  | 2.4  | 2.8  | 3.1  | 4.0  | 5.3  | 7.1  | 9.5  | 12.3 | 15.1 | 17.5 |
| USA | 5.9  | 5.9  | 7.5  | 7.3  | 7.1  | 6.8  | 6.6  | 6.3  | 6.1  | 6.0  | 5.8  |

Table 903: MAgPIE m4p\_SSP1 — Household Expenditure—Food—Expenditure—Fish (USD/capita) [PART 1/2]

|     | 2050 | 2055 | 2060 | 2070 | 2080 | 2090 | 2100 |
|-----|------|------|------|------|------|------|------|
| GLO | 11.8 | 11.8 | 11.5 | 10.8 | 9.9  | 9.2  | 8.5  |
| CAZ | 5.8  | 5.7  | 5.6  | 5.3  | 5.0  | 4.8  | 4.5  |
| CHA | 9.2  | 8.8  | 8.5  | 8.1  | 7.7  | 7.4  | 7.1  |
| EUR | 8.7  | 8.4  | 8.3  | 7.9  | 7.6  | 7.3  | 7.0  |
| IND | 7.0  | 6.8  | 6.5  | 5.8  | 5.3  | 4.8  | 4.4  |
| JPN | 20.2 | 18.9 | 17.9 | 15.8 | 13.9 | 12.3 | 10.6 |
| LAM | 3.4  | 3.1  | 3.0  | 2.7  | 2.4  | 2.2  | 1.9  |
| MEA | 6.9  | 6.7  | 6.4  | 5.8  | 5.2  | 4.7  | 4.2  |
| NEU | 3.4  | 3.3  | 3.2  | 3.0  | 2.9  | 2.8  | 2.7  |
| OAS | 23.0 | 22.3 | 21.3 | 19.1 | 17.1 | 15.5 | 14.0 |
| REF | 5.3  | 5.1  | 5.0  | 4.6  | 4.4  | 4.2  | 3.9  |
| SSA | 19.3 | 20.4 | 20.6 | 19.5 | 17.6 | 15.8 | 14.2 |
| USA | 5.6  | 5.6  | 5.5  | 5.3  | 5.2  | 5.1  | 4.9  |

Table 904: MAgPIE m4p\_SSP1 — Household Expenditure—Food—Expenditure—Fish (USD/capita) [PART 2/2]

### 33.1.7 Livestock products

```
## Error in '[<-.data.frame'('*tmp', x_hist$scenario != "historical", "id", : missing
values are not allowed in subscripted assignments of data frames
```

```
## Error in '[<-.data.frame'(*tmp*, x_hist$scenario != "historical", "id", : missing
values are not allowed in subscripted assignments of data frames
```



Figure 271: MAgPIE m4p\_SSP1 — Household Expenditure—Food—Expenditure—Livestock products (USD/capita)

|     | 1995 | 2000 | 2005 | 2010 | 2015 | 2020 | 2025 | 2030 | 2035 | 2040 | 2045 |
|-----|------|------|------|------|------|------|------|------|------|------|------|
| GLO | 306  | 246  | 261  | 264  | 290  | 276  | 292  | 312  | 322  | 351  | 354  |
| CAZ | 469  | 401  | 323  | 392  | 349  | 391  | 432  | 432  | 437  | 464  | 463  |
| CHA | 359  | 423  | 518  | 578  | 500  | 364  | 359  | 341  | 322  | 311  | 307  |
| EUR | 454  | 370  | 396  | 362  | 358  | 362  | 361  | 361  | 363  | 396  | 391  |
| IND | 40   | 36   | 49   | 47   | 117  | 149  | 214  | 263  | 246  | 283  | 302  |
| JPN | 161  | 148  | 143  | 147  | 140  | 132  | 129  | 118  | 111  | 111  | 105  |
| LAM | 403  | 379  | 342  | 334  | 341  | 340  | 346  | 361  | 361  | 399  | 383  |
| MEA | 301  | 132  | 151  | 230  | 229  | 261  | 288  | 318  | 370  | 413  | 429  |
| NEU | 366  | 305  | 242  | 165  | 194  | 201  | 179  | 171  | 168  | 139  | 131  |
| OAS | 89   | 123  | 74   | 133  | 138  | 160  | 182  | 213  | 248  | 284  | 309  |
| REF | 959  | 396  | 628  | 394  | 497  | 502  | 445  | 404  | 411  | 423  | 428  |
| SSA | 402  | 58   | 80   | 82   | 292  | 303  | 325  | 364  | 416  | 461  | 442  |
| USA | 413  | 572  | 470  | 390  | 388  | 376  | 358  | 412  | 383  | 414  | 400  |

Table 905: MAgPIE m4p\_SSP1 — Household Expenditure—Food—Expenditure—Livestock products (USD/capita) [PART 1/2]

|     | 2050 | 2055 | 2060 | 2070 | 2080 | 2090 | 2100 |
|-----|------|------|------|------|------|------|------|
| GLO | 357  | 341  | 320  | 278  | 239  | 208  | 188  |
| CAZ | 473  | 449  | 439  | 359  | 311  | 283  | 267  |
| CHA | 289  | 251  | 232  | 202  | 188  | 177  | 166  |
| EUR | 372  | 356  | 327  | 282  | 242  | 197  | 183  |
| IND | 324  | 319  | 271  | 226  | 192  | 169  | 154  |
| JPN | 95   | 86   | 75   | 57   | 46   | 38   | 34   |
| LAM | 320  | 265  | 240  | 201  | 171  | 147  | 136  |
| MEA | 427  | 378  | 353  | 295  | 247  | 200  | 155  |
| NEU | 144  | 132  | 114  | 103  | 94   | 90   | 83   |
| OAS | 317  | 306  | 289  | 251  | 208  | 184  | 171  |
| REF | 415  | 373  | 340  | 282  | 246  | 222  | 206  |
| SSA | 483  | 491  | 485  | 424  | 352  | 288  | 248  |
| USA | 374  | 363  | 356  | 313  | 279  | 258  | 251  |

Table 906: MAgPIE m4p\_SSP1 — Household Expenditure—Food—Expenditure—Livestock products (USD/capita) [PART 2/2]

## 33.1.8 Secondary products

```
## Error in '[<-.data.frame'('*tmp*', x_hist$scenario != "historical", "id", : missing
values are not allowed in subscripted assignments of data frames
```

```
## Error in '[<-.data.frame'('*tmp*', x_hist$scenario != "historical", "id", : missing
values are not allowed in subscripted assignments of data frames
```

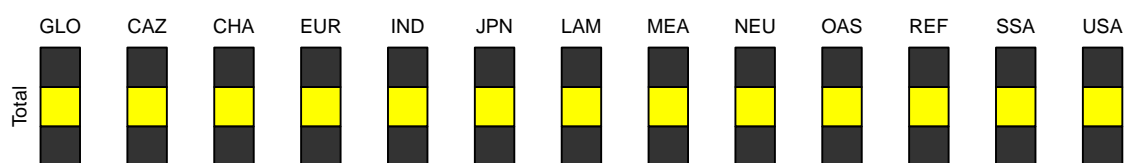

Figure 272: MAgPIE m4p\_SSP1 — Household Expenditure—Food—Expenditure—Secondary products (USD/capita)

|     | 1995 | 2000 | 2005 | 2010 | 2015 | 2020 | 2025 | 2030 | 2035 | 2040 | 2045 |
|-----|------|------|------|------|------|------|------|------|------|------|------|
| GLO | 82   | 79   | 82   | 88   | 115  | 120  | 125  | 125  | 118  | 115  | 114  |
| CAZ | 108  | 184  | 206  | 109  | 227  | 217  | 216  | 201  | 178  | 172  | 165  |
| CHA | 100  | 80   | 74   | 114  | 167  | 184  | 188  | 179  | 165  | 151  | 139  |
| EUR | 188  | 228  | 183  | 148  | 208  | 205  | 198  | 193  | 183  | 179  | 173  |
| IND | 32   | 33   | 18   | 44   | 75   | 84   | 100  | 104  | 89   | 87   | 84   |
| JPN | 188  | 182  | 169  | 155  | 151  | 154  | 148  | 142  | 130  | 124  | 118  |
| LAM | 100  | 109  | 112  | 125  | 132  | 136  | 138  | 134  | 122  | 97   | 95   |
| MEA | 44   | 30   | 40   | 29   | 46   | 44   | 47   | 48   | 45   | 43   | 44   |
| NEU | 73   | 79   | 65   | 118  | 121  | 117  | 116  | 115  | 100  | 99   | 98   |
| OAS | 38   | 23   | 33   | 25   | 45   | 51   | 56   | 58   | 56   | 58   | 57   |
| REF | 78   | 78   | 123  | 136  | 159  | 160  | 163  | 168  | 160  | 156  | 152  |
| SSA | 52   | 66   | 70   | 67   | 76   | 83   | 95   | 109  | 124  | 139  | 153  |
| USA | 147  | 155  | 292  | 248  | 258  | 258  | 251  | 240  | 231  | 230  | 225  |

Table 907: MAgPIE m4p\_SSP1 — Household Expenditure—Food—Expenditure—Secondary products (USD/capita) [PART 1/2]



|     | 2050 | 2055 | 2060 | 2070 | 2080 | 2090 | 2100 |
|-----|------|------|------|------|------|------|------|
| GLO | 112  | 110  | 108  | 102  | 96   | 92   | 88   |
| CAZ | 155  | 151  | 147  | 135  | 125  | 120  | 112  |
| CHA | 126  | 115  | 108  | 95   | 86   | 80   | 72   |
| EUR | 167  | 163  | 154  | 143  | 133  | 126  | 118  |
| IND | 80   | 77   | 71   | 61   | 54   | 49   | 44   |
| JPN | 111  | 106  | 102  | 91   | 82   | 76   | 69   |
| LAM | 92   | 89   | 95   | 89   | 85   | 80   | 75   |
| MEA | 44   | 43   | 43   | 39   | 36   | 34   | 32   |
| NEU | 92   | 88   | 85   | 78   | 74   | 70   | 65   |
| OAS | 56   | 55   | 52   | 49   | 45   | 42   | 39   |
| REF | 147  | 141  | 137  | 127  | 120  | 115  | 107  |
| SSA | 164  | 170  | 175  | 170  | 160  | 151  | 142  |
| USA | 216  | 210  | 206  | 189  | 178  | 171  | 171  |

Table 908: MAgPIE m4p\_SSP1 — Household Expenditure—Food—Expenditure—Secondary products (USD/capita) [PART 2/2]

Part VIII

# Income

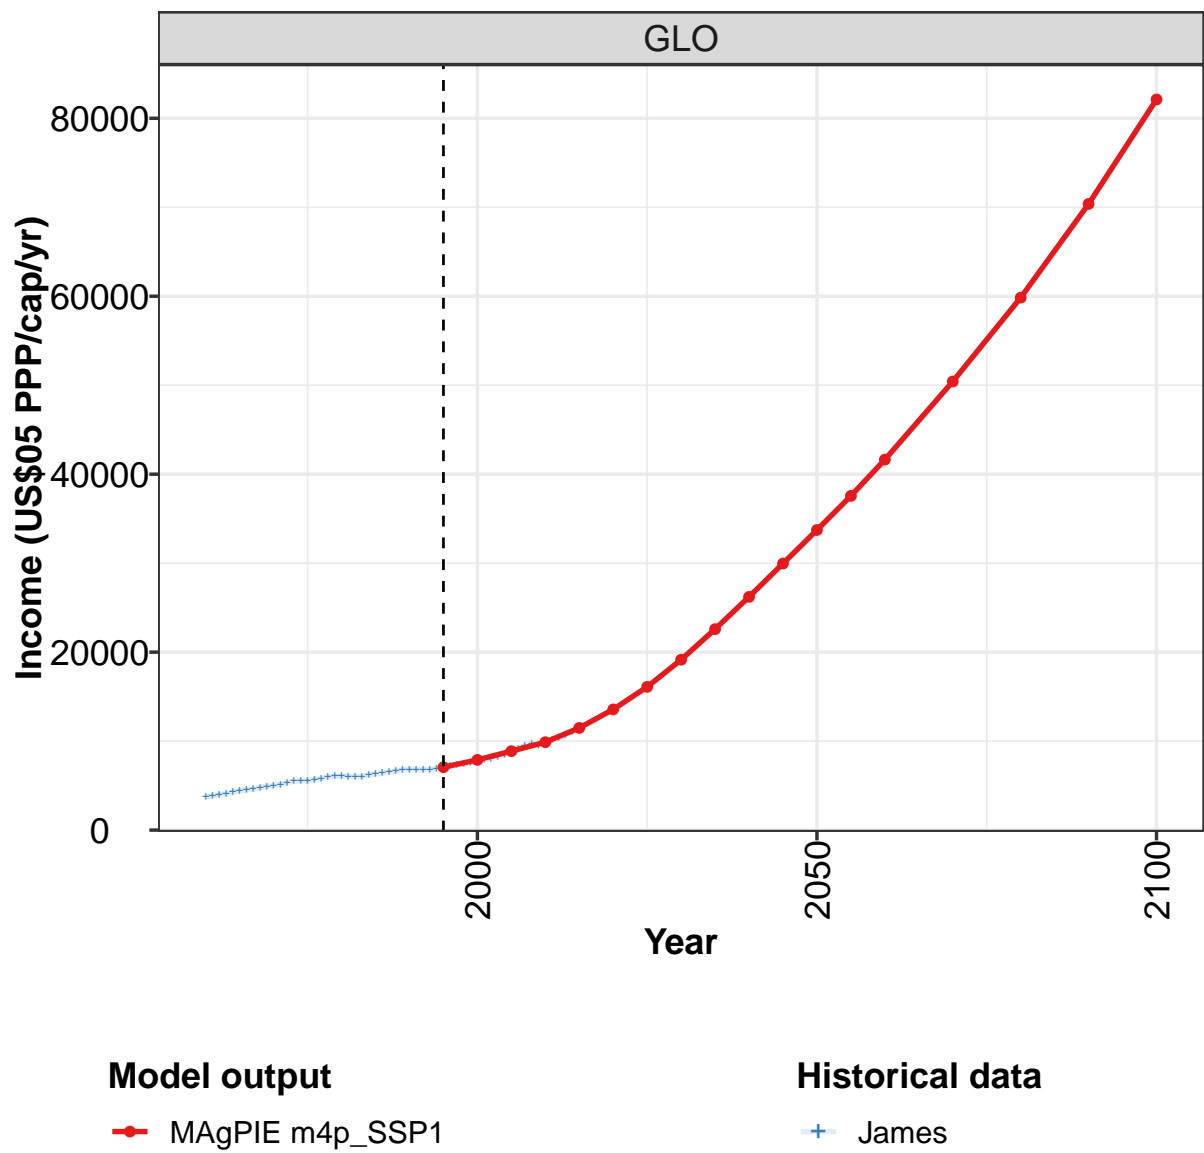

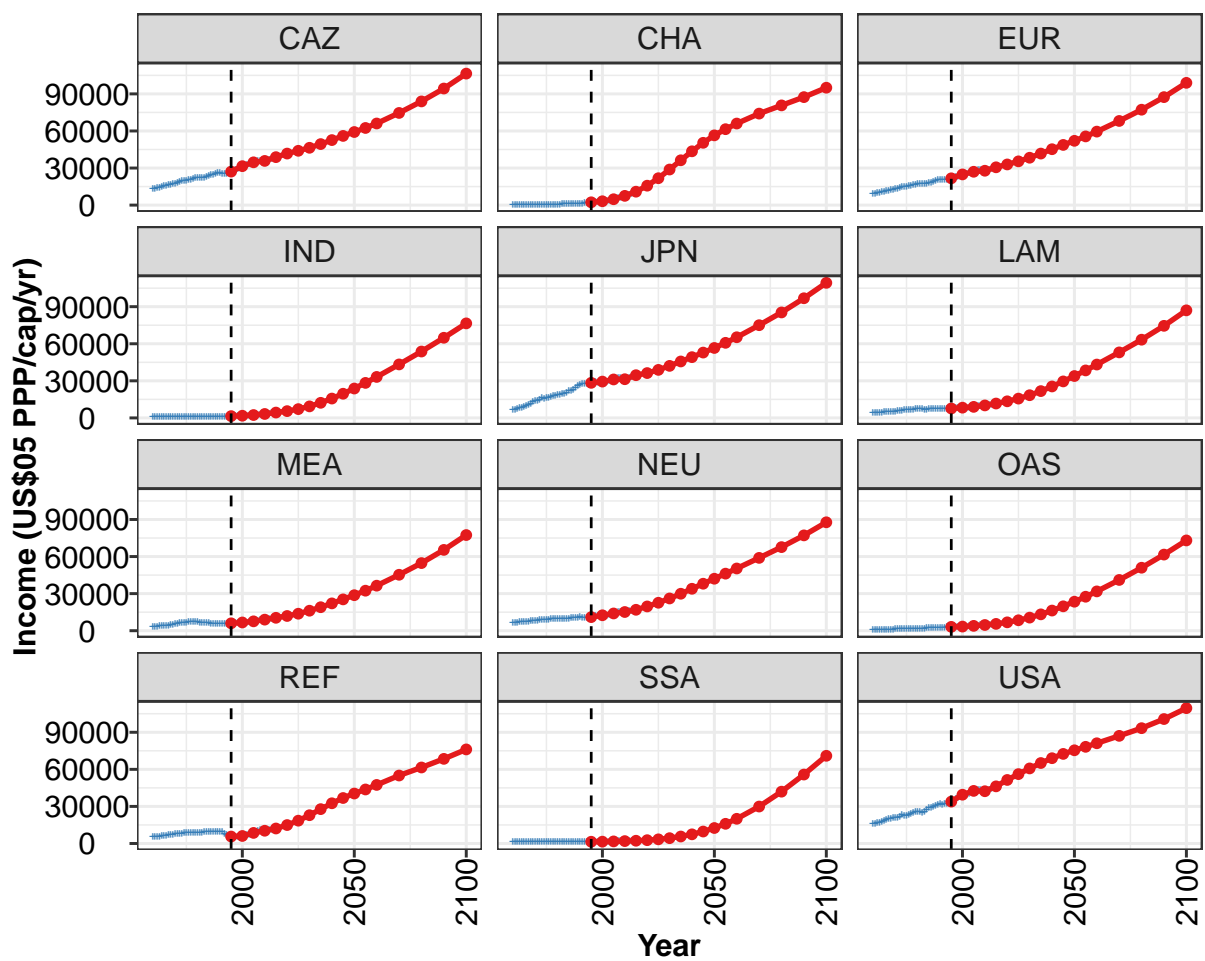

**Model output**

—●— MAgPIE m4p\_SSP1

**Historical data**

+ James

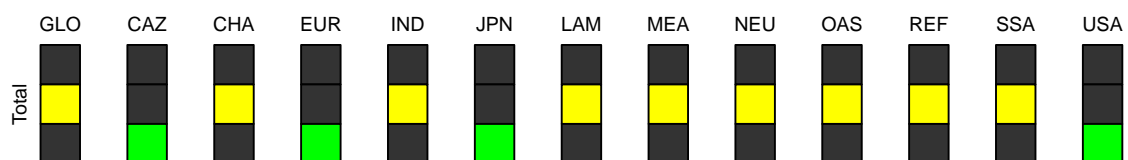

Figure 273: MAgPIE m4p\_SSP1 — Income (US\$05 PPP/cap/yr)

|     | 1995  | 2000  | 2005  | 2010  | 2015  | 2020  | 2025  | 2030  | 2035  | 2040  | 2045  |
|-----|-------|-------|-------|-------|-------|-------|-------|-------|-------|-------|-------|
| GLO | 7073  | 7892  | 8875  | 9881  | 11486 | 13566 | 16101 | 19153 | 22592 | 26218 | 29963 |
| CAZ | 27123 | 31531 | 34642 | 35772 | 38839 | 41723 | 43979 | 46406 | 49399 | 52650 | 56004 |
| CHA | 2294  | 3145  | 4773  | 7508  | 10894 | 15730 | 21776 | 28826 | 36299 | 43562 | 50440 |
| EUR | 21701 | 24870 | 27003 | 27829 | 30612 | 32934 | 35420 | 38356 | 41718 | 45250 | 48719 |
| IND | 1467  | 1778  | 2336  | 3218  | 4354  | 5494  | 7125  | 9349  | 12233 | 15683 | 19582 |
| JPN | 28385 | 29396 | 31129 | 31329 | 34576 | 36297 | 38869 | 42128 | 45689 | 49188 | 52897 |
| LAM | 7651  | 8298  | 8937  | 10115 | 11659 | 13441 | 15629 | 18383 | 21711 | 25463 | 29548 |
| MEA | 6005  | 6669  | 7587  | 8980  | 10449 | 11919 | 13758 | 16188 | 19033 | 22113 | 25365 |
| NEU | 11011 | 12490 | 13974 | 15139 | 16938 | 19636 | 22631 | 26093 | 29916 | 33945 | 38030 |
| OAS | 3138  | 3362  | 3927  | 4630  | 5527  | 6782  | 8449  | 10593 | 13240 | 16316 | 19741 |
| REF | 5643  | 6102  | 8573  | 10334 | 12155 | 14936 | 18482 | 22900 | 27809 | 32574 | 36812 |
| SSA | 1447  | 1497  | 1712  | 1959  | 2250  | 2707  | 3371  | 4335  | 5662  | 7420  | 9689  |
| USA | 33906 | 39506 | 42583 | 42310 | 46247 | 51427 | 56156 | 60765 | 65129 | 69041 | 72516 |

Table 909: MAgPIE m4p\_SSP1 — Income (US\$05 PPP/cap/yr) [PART 1/2]

|     | 2050  | 2055  | 2060  | 2070  | 2080  | 2090   | 2100   |
|-----|-------|-------|-------|-------|-------|--------|--------|
| GLO | 33731 | 37565 | 41640 | 50423 | 59845 | 70378  | 82119  |
| CAZ | 59170 | 62450 | 66058 | 74599 | 83931 | 94352  | 106427 |
| CHA | 56470 | 61458 | 66016 | 74060 | 80724 | 87413  | 95014  |
| EUR | 52054 | 55623 | 59498 | 68125 | 77231 | 87397  | 98959  |
| IND | 23798 | 28354 | 33173 | 43300 | 53744 | 64866  | 76505  |
| JPN | 56607 | 60776 | 65269 | 75037 | 85365 | 96830  | 109313 |
| LAM | 33898 | 38442 | 43198 | 53037 | 63318 | 74535  | 87065  |
| MEA | 28739 | 32408 | 36437 | 45272 | 54733 | 65407  | 77428  |
| NEU | 42085 | 46180 | 50352 | 58940 | 67655 | 77146  | 87730  |
| OAS | 23477 | 27509 | 31820 | 41090 | 50967 | 61597  | 73062  |
| REF | 40445 | 43735 | 47410 | 55033 | 61520 | 68503  | 76139  |
| SSA | 12536 | 15943 | 19996 | 29919 | 41954 | 55804  | 70988  |
| USA | 75434 | 78252 | 81110 | 87120 | 93330 | 100716 | 109530 |

Table 910: MAgPIE m4p\_SSP1 — Income (US\$05 PPP/cap/yr) [PART 2/2]

|     | 1960  | 1961  | 1962  | 1963  | 1964  | 1965  | 1966  | 1967  | 1968  | 1969  | 1970  |
|-----|-------|-------|-------|-------|-------|-------|-------|-------|-------|-------|-------|
| GLO | 3759  | 3866  | 3982  | 4070  | 4258  | 4394  | 4524  | 4606  | 4769  | 4913  | 5038  |
| CAZ | 13146 | 13232 | 13762 | 14252 | 14879 | 15382 | 15934 | 16158 | 16724 | 17373 | 17666 |
| CHA | 348   | 288   | 283   | 303   | 331   | 363   | 382   | 360   | 346   | 373   | 408   |
| EUR | 9030  | 9404  | 9730  | 10077 | 10531 | 10892 | 11245 | 11562 | 12046 | 12580 | 13054 |
| IND | 654   | 664   | 671   | 697   | 730   | 733   | 721   | 757   | 772   | 819   | 827   |
| JPN | 6249  | 6867  | 7352  | 7843  | 8574  | 8924  | 9695  | 10563 | 11673 | 12801 | 13734 |
| LAM | 4102  | 4223  | 4296  | 4352  | 4536  | 4652  | 4738  | 4835  | 5017  | 5168  | 5373  |
| MEA | 3254  | 3332  | 3424  | 3607  | 3823  | 4081  | 4224  | 4381  | 4761  | 5014  | 5340  |
| NEU | 6285  | 6459  | 6609  | 6861  | 7031  | 7124  | 7394  | 7548  | 7740  | 7944  | 8165  |
| OAS | 890   | 914   | 930   | 952   | 975   | 999   | 1030  | 1035  | 1088  | 1137  | 1194  |
| REF | 5379  | 5582  | 5643  | 5449  | 6044  | 6304  | 6528  | 6739  | 7054  | 7091  | 7551  |
| SSA | 1274  | 1273  | 1306  | 1346  | 1385  | 1406  | 1417  | 1406  | 1422  | 1477  | 1549  |
| USA | 15803 | 15934 | 16587 | 17047 | 17709 | 18524 | 19370 | 19646 | 20356 | 20785 | 20648 |

Table 911: James — Income (US\$05 PPP/cap/yr) [PART 1/6]

|     | 1971  | 1972  | 1973  | 1974  | 1975  | 1976  | 1977  | 1978  | 1979  | 1980  | 1981  |
|-----|-------|-------|-------|-------|-------|-------|-------|-------|-------|-------|-------|
| GLO | 5140  | 5285  | 5509  | 5544  | 5523  | 5699  | 5814  | 5949  | 6051  | 6049  | 6048  |
| CAZ | 18166 | 18697 | 19514 | 19771 | 19946 | 20509 | 20823 | 21346 | 21836 | 22085 | 22509 |
| CHA | 425   | 430   | 459   | 461   | 482   | 481   | 506   | 558   | 597   | 633   | 664   |
| EUR | 13434 | 13938 | 14645 | 14956 | 14925 | 15519 | 15896 | 16335 | 16829 | 16982 | 16880 |
| IND | 831   | 813   | 826   | 820   | 863   | 873   | 903   | 942   | 896   | 927   | 964   |
| JPN | 14155 | 15062 | 16014 | 15645 | 15880 | 16305 | 16827 | 17519 | 18281 | 18545 | 19087 |
| LAM | 5571  | 5801  | 6113  | 6353  | 6427  | 6657  | 6806  | 6957  | 7215  | 7457  | 7387  |
| MEA | 5603  | 6055  | 6329  | 6639  | 6660  | 7174  | 7234  | 7125  | 7284  | 6962  | 6686  |
| NEU | 8417  | 8651  | 8787  | 8903  | 8889  | 9192  | 9404  | 9417  | 9412  | 9452  | 9462  |
| OAS | 1240  | 1268  | 1348  | 1392  | 1418  | 1492  | 1565  | 1639  | 1692  | 1716  | 1778  |
| REF | 7680  | 7658  | 8209  | 8372  | 8332  | 8644  | 8779  | 8931  | 8835  | 8792  | 8814  |
| SSA | 1599  | 1613  | 1634  | 1702  | 1668  | 1678  | 1671  | 1643  | 1646  | 1658  | 1663  |
| USA | 21089 | 21973 | 22918 | 22678 | 22481 | 23423 | 24218 | 25229 | 25708 | 25425 | 25806 |

Table 912: James — Income (US\$05 PPP/cap/yr) [PART 2/6]

|     | 1982  | 1983  | 1984  | 1985  | 1986  | 1987  | 1988  | 1989  | 1990  | 1991  | 1992  |
|-----|-------|-------|-------|-------|-------|-------|-------|-------|-------|-------|-------|
| GLO | 5990  | 6040  | 6193  | 6298  | 6400  | 6506  | 6665  | 6774  | 6835  | 6808  | 6793  |
| CAZ | 21899 | 22109 | 23118 | 23945 | 24316 | 24938 | 25679 | 26038 | 25789 | 25102 | 25144 |
| CHA | 714   | 773   | 866   | 955   | 1021  | 1117  | 1208  | 1229  | 1267  | 1359  | 1514  |
| EUR | 16966 | 17228 | 17616 | 17995 | 18472 | 18954 | 19667 | 20226 | 20564 | 20609 | 20678 |
| IND | 976   | 1009  | 1036  | 1070  | 1094  | 1121  | 1194  | 1238  | 1284  | 1268  | 1301  |
| JPN | 19550 | 19905 | 20545 | 21633 | 22144 | 22911 | 24419 | 25605 | 26926 | 27699 | 27840 |
| LAM | 7198  | 6859  | 6968  | 7015  | 7174  | 7244  | 7170  | 7130  | 7056  | 7180  | 7274  |
| MEA | 6548  | 6452  | 6389  | 6269  | 6010  | 5944  | 5808  | 5762  | 5913  | 5946  | 5895  |
| NEU | 9329  | 9415  | 9615  | 9834  | 10068 | 10439 | 10507 | 10558 | 10981 | 10786 | 10710 |
| OAS | 1822  | 1896  | 1958  | 1976  | 2045  | 2133  | 2249  | 2366  | 2501  | 2621  | 2716  |
| REF | 8965  | 9179  | 9225  | 9242  | 9540  | 9594  | 9738  | 9852  | 9541  | 9169  | 7785  |
| SSA | 1624  | 1575  | 1564  | 1552  | 1516  | 1488  | 1516  | 1527  | 1519  | 1485  | 1426  |
| USA | 25105 | 26034 | 27677 | 28572 | 29291 | 29965 | 30894 | 31680 | 31898 | 31381 | 32016 |

Table 913: James — Income (US\$05 PPP/cap/yr) [PART 3/6]

|     | 1993  | 1994  | 1995  | 1996  | 1997  | 1998  | 1999  | 2000  | 2001  | 2002  | 2003  |
|-----|-------|-------|-------|-------|-------|-------|-------|-------|-------|-------|-------|
| GLO | 6805  | 6912  | 7032  | 7185  | 7361  | 7433  | 7595  | 7842  | 7913  | 8025  | 8203  |
| CAZ | 25629 | 26558 | 27122 | 27521 | 28374 | 29291 | 30521 | 31530 | 31864 | 32563 | 33068 |
| CHA | 1725  | 1909  | 2077  | 2250  | 2388  | 2524  | 2689  | 2882  | 3092  | 3350  | 3669  |
| EUR | 20559 | 21098 | 21671 | 22071 | 22639 | 23287 | 23948 | 24840 | 25302 | 25588 | 25896 |
| IND | 1326  | 1383  | 1467  | 1532  | 1594  | 1653  | 1746  | 1778  | 1830  | 1881  | 1980  |
| JPN | 27804 | 27946 | 28385 | 29056 | 29419 | 28727 | 28613 | 29396 | 29395 | 29398 | 29742 |
| LAM | 7421  | 7646  | 7596  | 7733  | 8036  | 8106  | 8021  | 8246  | 8194  | 8131  | 8170  |
| MEA | 5853  | 5870  | 6008  | 6240  | 6271  | 6427  | 6467  | 6673  | 6675  | 6717  | 6933  |
| NEU | 10846 | 10601 | 11009 | 11514 | 12130 | 12351 | 12076 | 12488 | 12112 | 12394 | 12631 |
| OAS | 2823  | 2969  | 3131  | 3273  | 3341  | 3079  | 3194  | 3355  | 3392  | 3517  | 3621  |
| REF | 6912  | 5983  | 5643  | 5433  | 5511  | 5310  | 5582  | 6102  | 6470  | 6838  | 7383  |
| SSA | 1396  | 1384  | 1401  | 1434  | 1448  | 1442  | 1440  | 1451  | 1480  | 1525  | 1563  |
| USA | 32508 | 33449 | 33906 | 34790 | 35945 | 37085 | 38406 | 39506 | 39449 | 39735 | 40368 |

Table 914: James — Income (US\$05 PPP/cap/yr) [PART 4/6]

|     | 2004  | 2005  | 2006  | 2007  | 2008  | 2009  | 2010  | 2011  | 2012  | 2013  | 2014  |
|-----|-------|-------|-------|-------|-------|-------|-------|-------|-------|-------|-------|
| GLO | 8505  | 8820  | 9163  | 9530  | 9689  | 9514  | 9826  | 10099 | 10420 | 10747 | 11089 |
| CAZ | 33819 | 34642 | 35231 | 35829 | 35817 | 35105 | 35771 | 36421 | 37097 | 37696 | 38276 |
| CHA | 4033  | 4488  | 5001  | 5643  | 6136  | 6648  | 7242  | 7833  | 8469  | 9153  | 9892  |
| EUR | 26490 | 26973 | 27789 | 28557 | 28683 | 27387 | 27798 | 28221 | 28772 | 29360 | 29968 |
| IND | 2129  | 2336  | 2522  | 2735  | 2833  | 2994  | 3218  | 3423  | 3630  | 3858  | 4098  |
| JPN | 30532 | 31129 | 31764 | 32515 | 32109 | 30449 | 31329 | 31861 | 32565 | 33243 | 33908 |
| LAM | 8528  | 8888  | 9267  | 9677  | 9952  | 9665  | 10069 | 10350 | 10656 | 10965 | 11279 |
| MEA | 7287  | 7593  | 7942  | 8312  | 8691  | 8738  | 8988  | 9304  | 9595  | 9864  | 10142 |
| NEU | 13332 | 13972 | 14606 | 15122 | 15205 | 14584 | 15137 | 15444 | 15792 | 16160 | 16546 |
| OAS | 3770  | 3920  | 4093  | 4280  | 4397  | 4410  | 4623  | 4782  | 4950  | 5128  | 5319  |
| REF | 8027  | 8573  | 9314  | 10147 | 10684 | 10043 | 10334 | 10653 | 11012 | 11382 | 11769 |
| SSA | 1604  | 1666  | 1732  | 1823  | 1877  | 1871  | 1915  | 1970  | 2037  | 2100  | 2160  |
| USA | 41454 | 42583 | 43308 | 43723 | 43333 | 41589 | 42310 | 42916 | 43809 | 44665 | 45482 |

Table 915: James — Income (US\$05 PPP/cap/yr) [PART 5/6]

|     | 2015  |
|-----|-------|
| GLO | 11446 |
| CAZ | 38838 |
| CHA | 10690 |
| EUR | 30583 |
| IND | 4354  |
| JPN | 34576 |
| LAM | 11619 |
| MEA | 10453 |
| NEU | 16937 |
| OAS | 5521  |
| REF | 12155 |
| SSA | 2220  |
| USA | 46247 |

Table 916: James — Income (US\$05 PPP/cap/yr) [PART 6/6]

## Part IX

## Nutrition

## 34 Calorie Supply

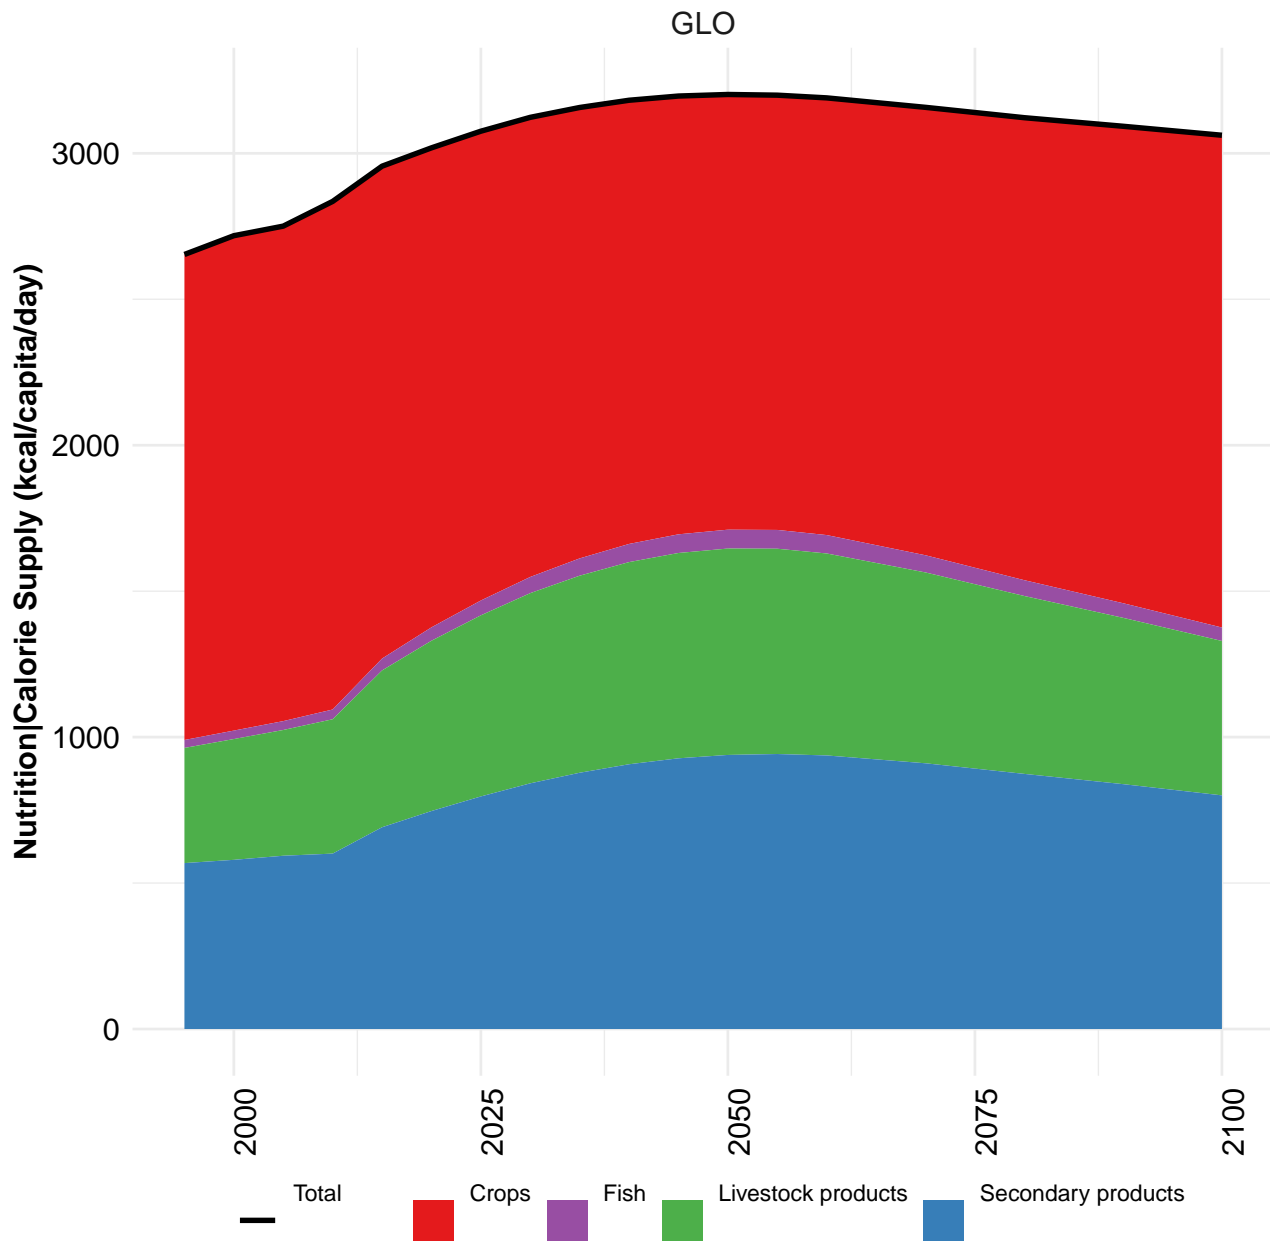

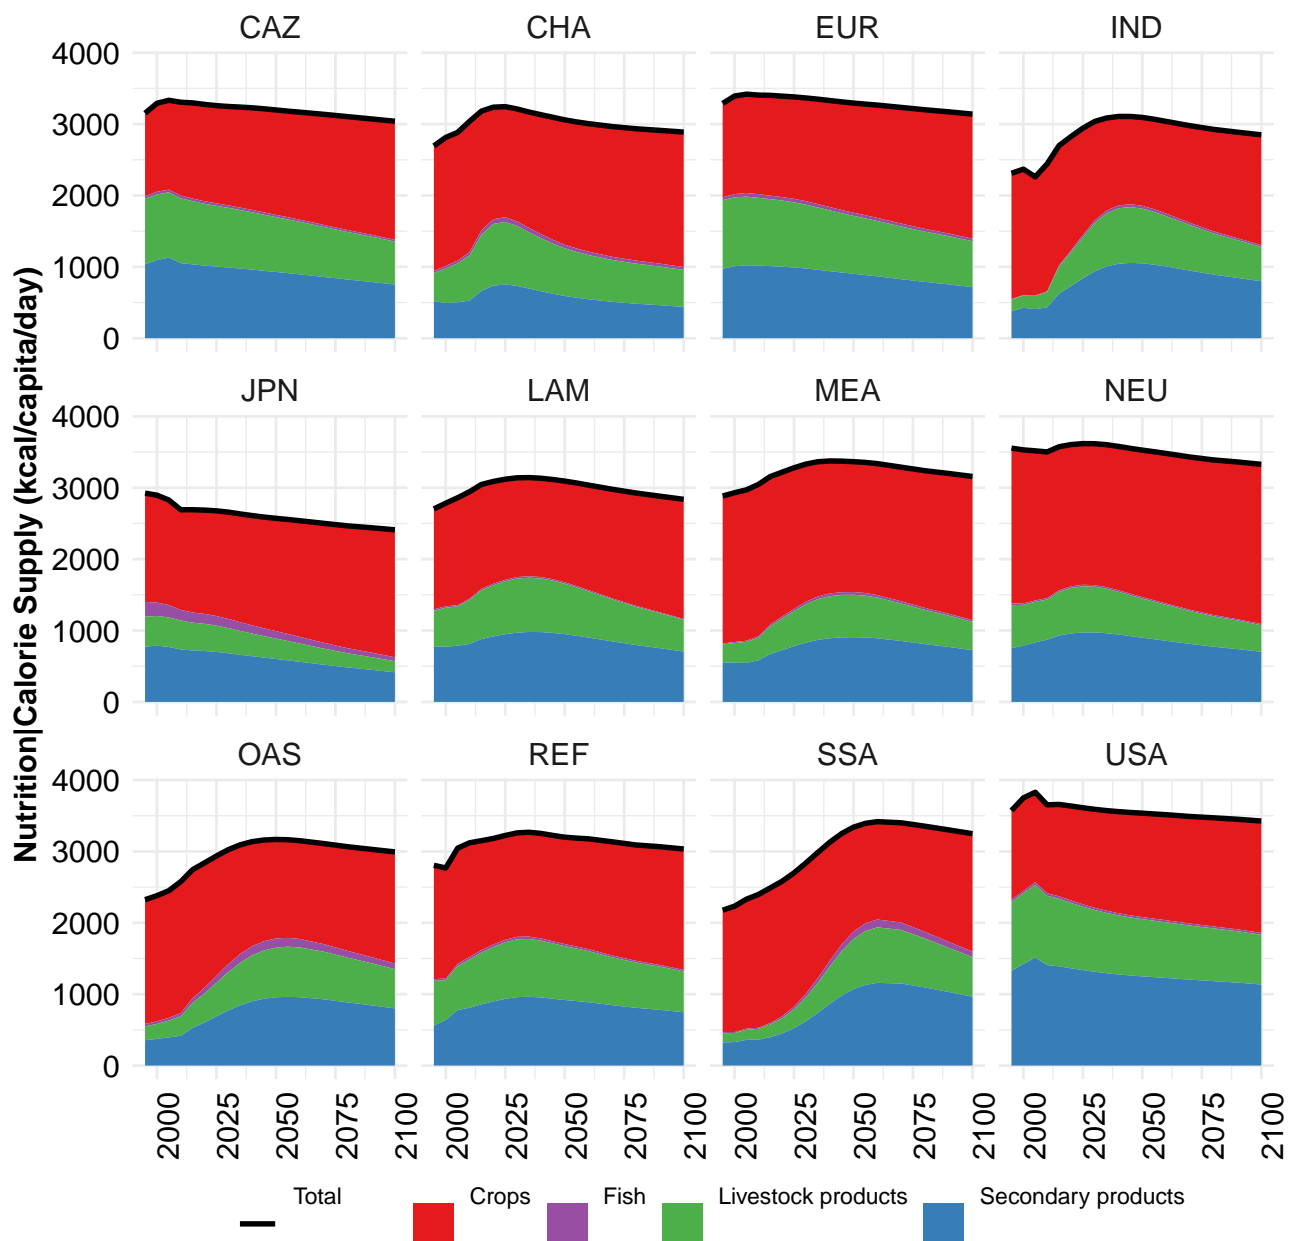



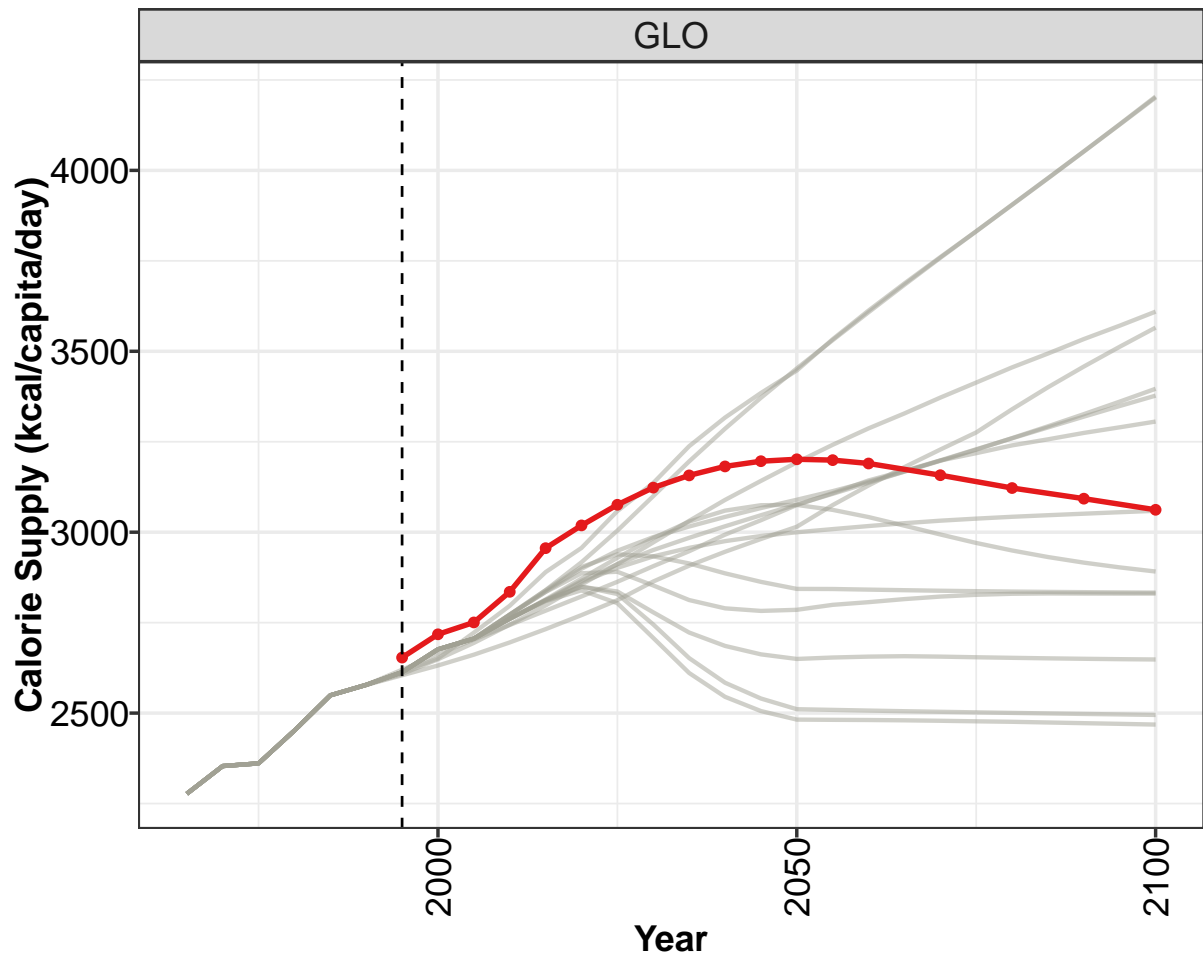

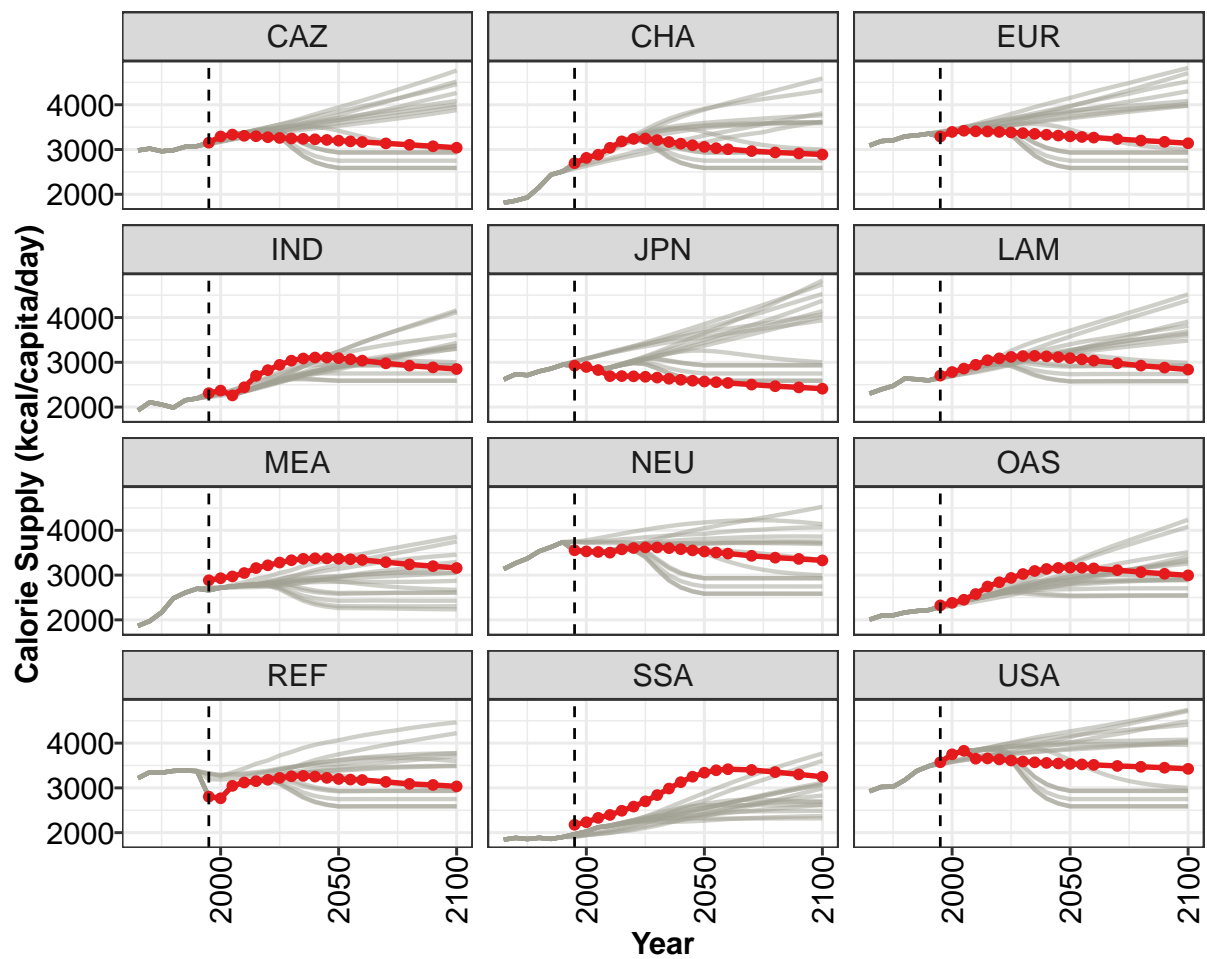**Model output**

—●— MAgPIE m4p\_SSP1

**Other projections**

— Bodirsky2015

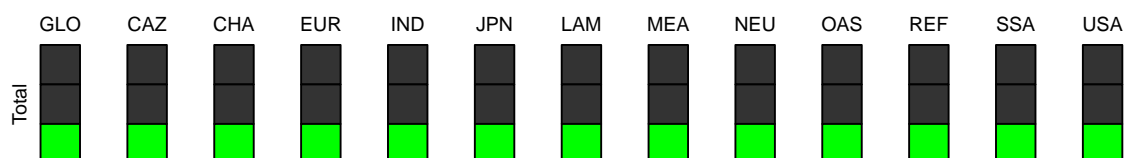

Figure 274: MAgPIE m4p\_SSP1 — Nutrition—Calorie Supply (kcal/capita/day)

|     | 1995 | 2000 | 2005 | 2010 | 2015 | 2020 | 2025 | 2030 | 2035 | 2040 | 2045 |
|-----|------|------|------|------|------|------|------|------|------|------|------|
| GLO | 2654 | 2718 | 2751 | 2835 | 2956 | 3019 | 3076 | 3123 | 3157 | 3182 | 3196 |
| CAZ | 3152 | 3292 | 3334 | 3306 | 3297 | 3276 | 3259 | 3247 | 3238 | 3229 | 3215 |
| CHA | 2694 | 2813 | 2883 | 3039 | 3182 | 3237 | 3244 | 3212 | 3169 | 3132 | 3096 |
| EUR | 3290 | 3393 | 3420 | 3407 | 3403 | 3392 | 3381 | 3366 | 3349 | 3330 | 3312 |
| IND | 2311 | 2369 | 2261 | 2443 | 2699 | 2825 | 2943 | 3037 | 3086 | 3107 | 3107 |
| JPN | 2925 | 2896 | 2828 | 2692 | 2692 | 2687 | 2677 | 2659 | 2633 | 2610 | 2589 |
| LAM | 2703 | 2784 | 2860 | 2945 | 3047 | 3088 | 3120 | 3140 | 3143 | 3133 | 3116 |
| MEA | 2884 | 2931 | 2971 | 3047 | 3157 | 3219 | 3280 | 3332 | 3365 | 3376 | 3373 |
| NEU | 3555 | 3531 | 3518 | 3502 | 3575 | 3605 | 3619 | 3618 | 3603 | 3579 | 3552 |
| OAS | 2324 | 2381 | 2450 | 2577 | 2745 | 2840 | 2937 | 3025 | 3093 | 3137 | 3160 |
| REF | 2805 | 2768 | 3046 | 3121 | 3150 | 3182 | 3224 | 3260 | 3269 | 3252 | 3225 |
| SSA | 2176 | 2233 | 2331 | 2396 | 2489 | 2582 | 2700 | 2839 | 2985 | 3128 | 3250 |
| USA | 3573 | 3750 | 3829 | 3653 | 3658 | 3636 | 3612 | 3590 | 3572 | 3558 | 3546 |

Table 917: MAgPIE m4p\_SSP1 — Nutrition—Calorie Supply (kcal/capita/day) [PART 1/2]

|     | 2050 | 2055 | 2060 | 2070 | 2080 | 2090 | 2100 |
|-----|------|------|------|------|------|------|------|
| GLO | 3202 | 3199 | 3190 | 3158 | 3122 | 3093 | 3062 |
| CAZ | 3198 | 3181 | 3167 | 3137 | 3105 | 3073 | 3040 |
| CHA | 3059 | 3031 | 3006 | 2965 | 2935 | 2912 | 2888 |
| EUR | 3295 | 3280 | 3267 | 3234 | 3201 | 3172 | 3140 |
| IND | 3093 | 3068 | 3038 | 2978 | 2926 | 2887 | 2849 |
| JPN | 2572 | 2556 | 2538 | 2502 | 2467 | 2440 | 2411 |
| LAM | 3093 | 3067 | 3037 | 2979 | 2926 | 2882 | 2838 |
| MEA | 3366 | 3355 | 3338 | 3289 | 3239 | 3200 | 3158 |
| NEU | 3527 | 3505 | 3481 | 3431 | 3389 | 3362 | 3328 |
| OAS | 3168 | 3164 | 3150 | 3111 | 3066 | 3030 | 2994 |
| REF | 3200 | 3186 | 3177 | 3135 | 3090 | 3066 | 3034 |
| SSA | 3340 | 3394 | 3417 | 3401 | 3353 | 3301 | 3248 |
| USA | 3536 | 3525 | 3514 | 3490 | 3471 | 3451 | 3426 |

Table 918: MAgPIE m4p\_SSP1 — Nutrition—Calorie Supply (kcal/capita/day) [PART 2/2]

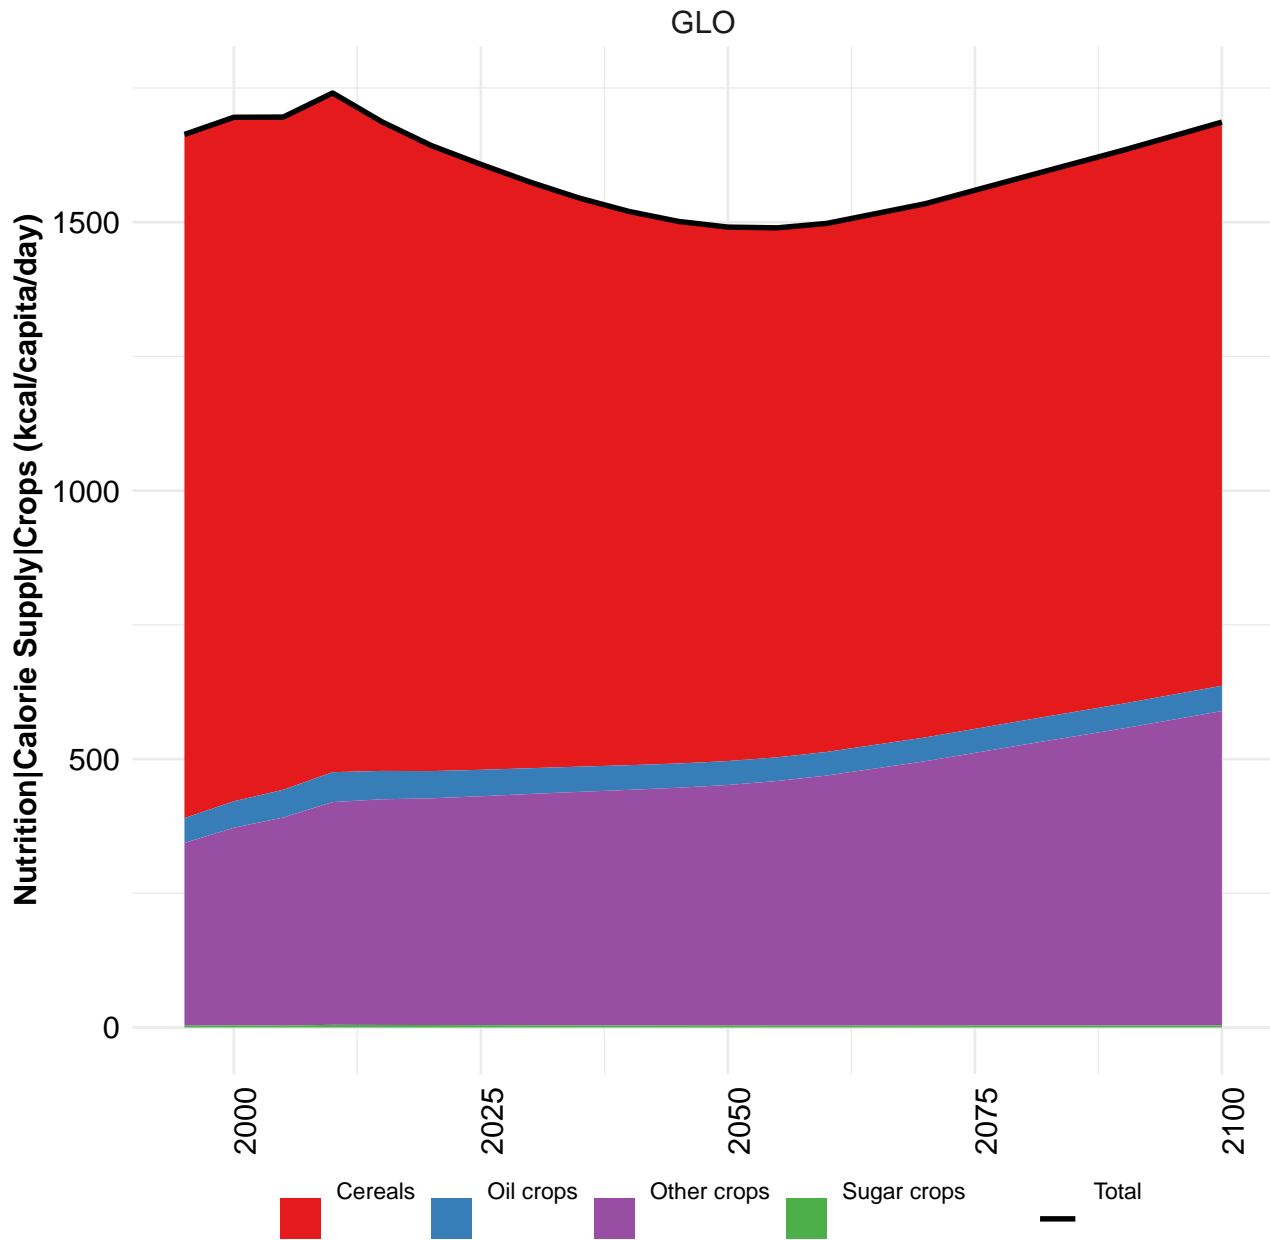

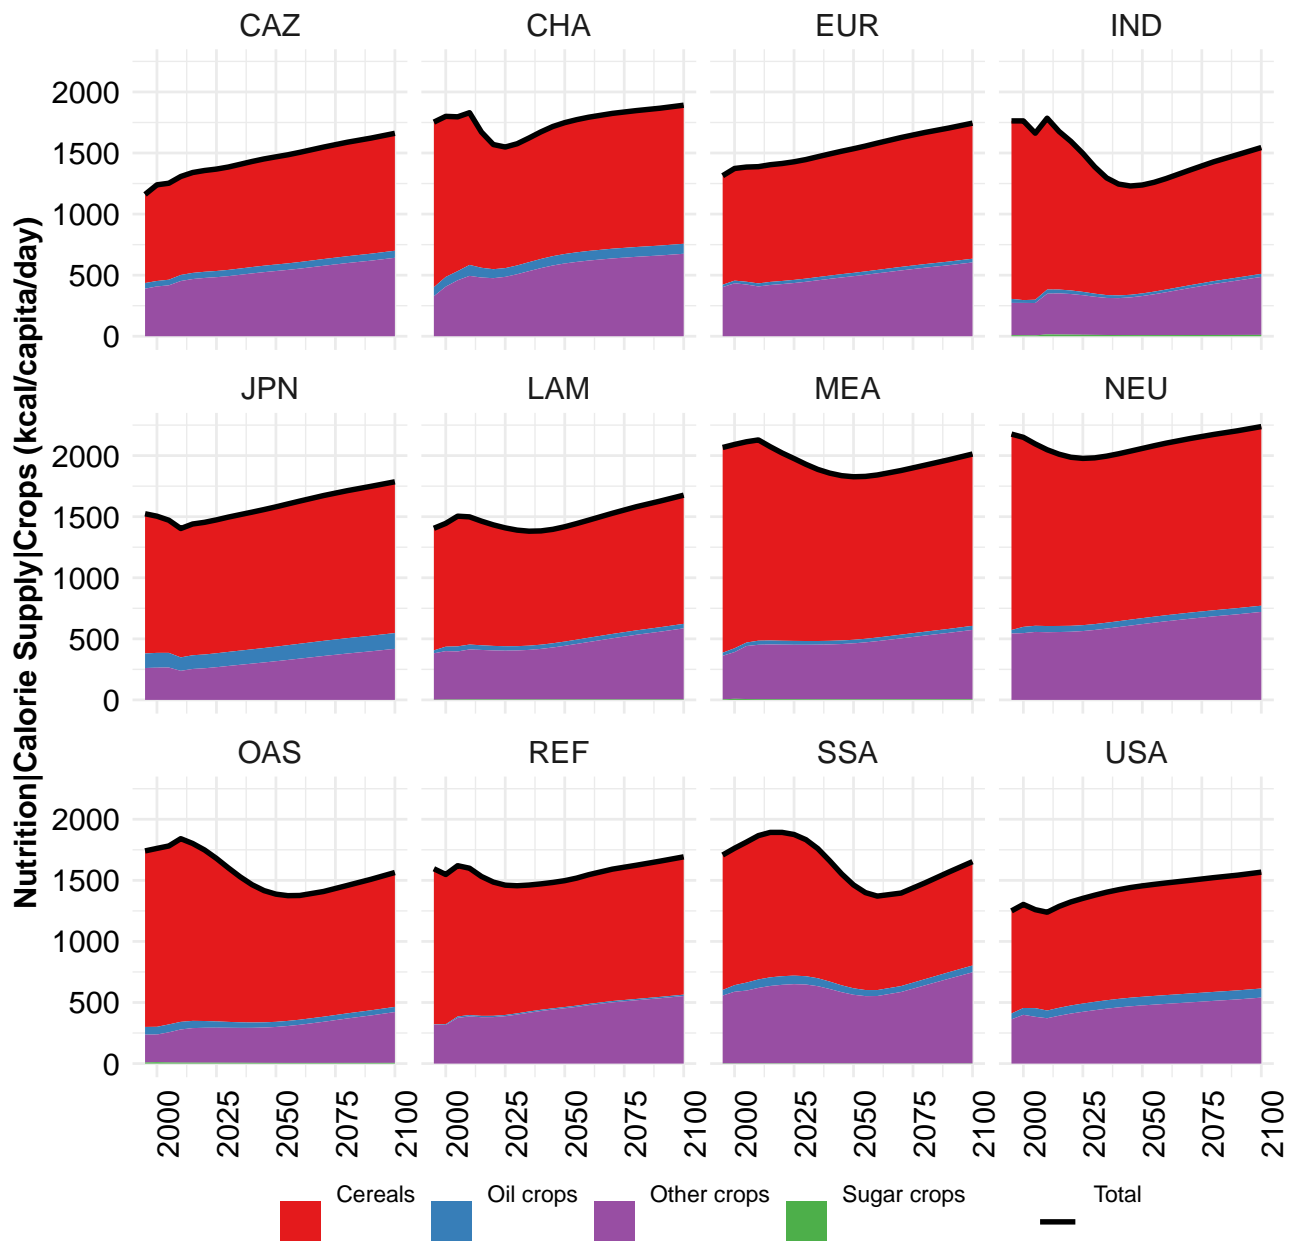

34.1 Crops

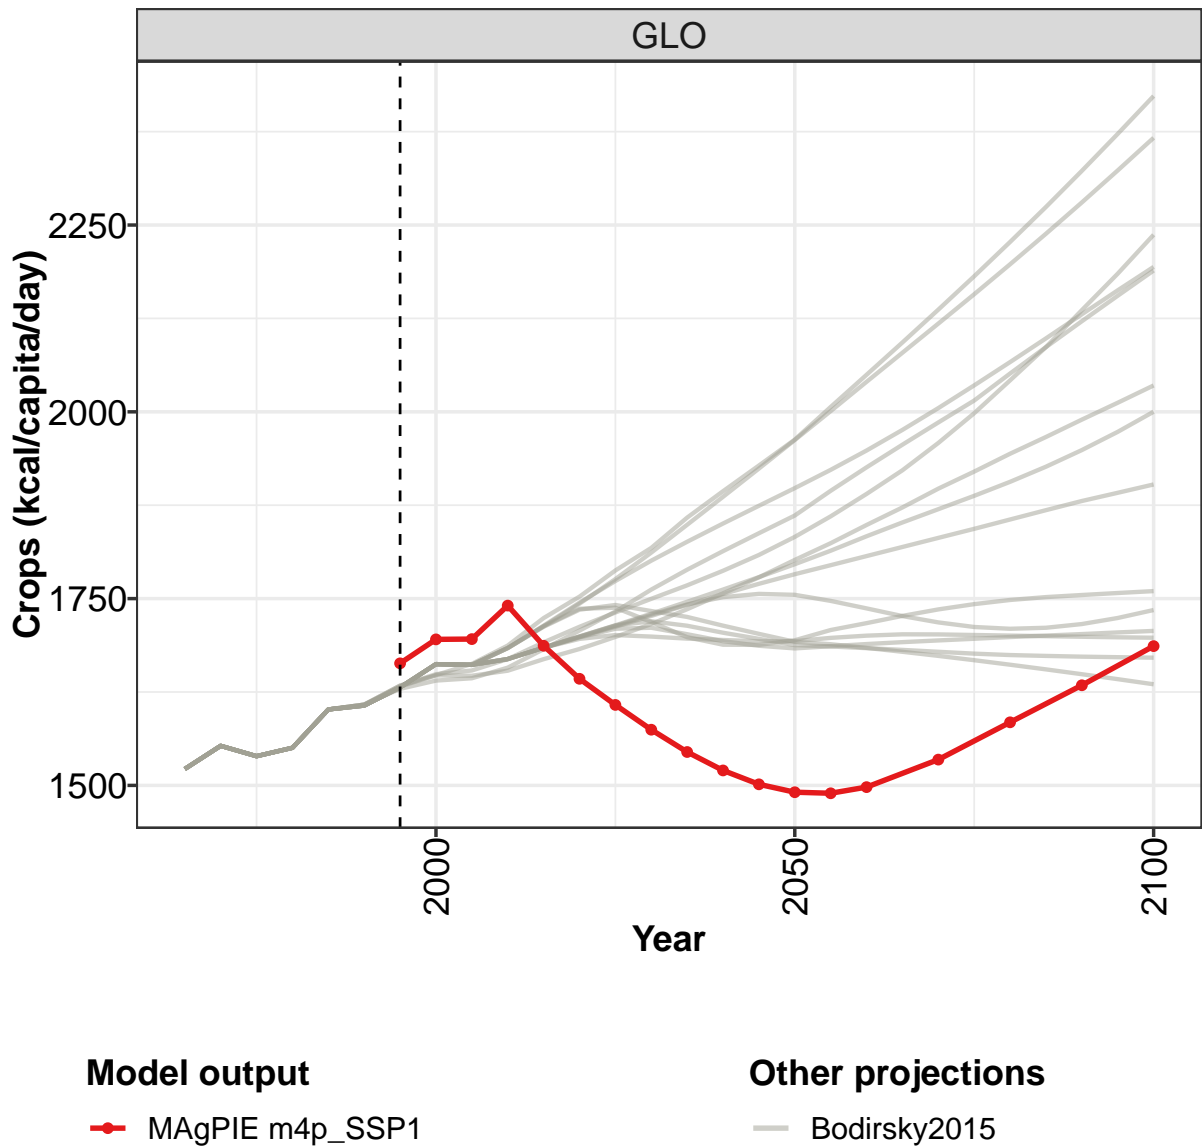

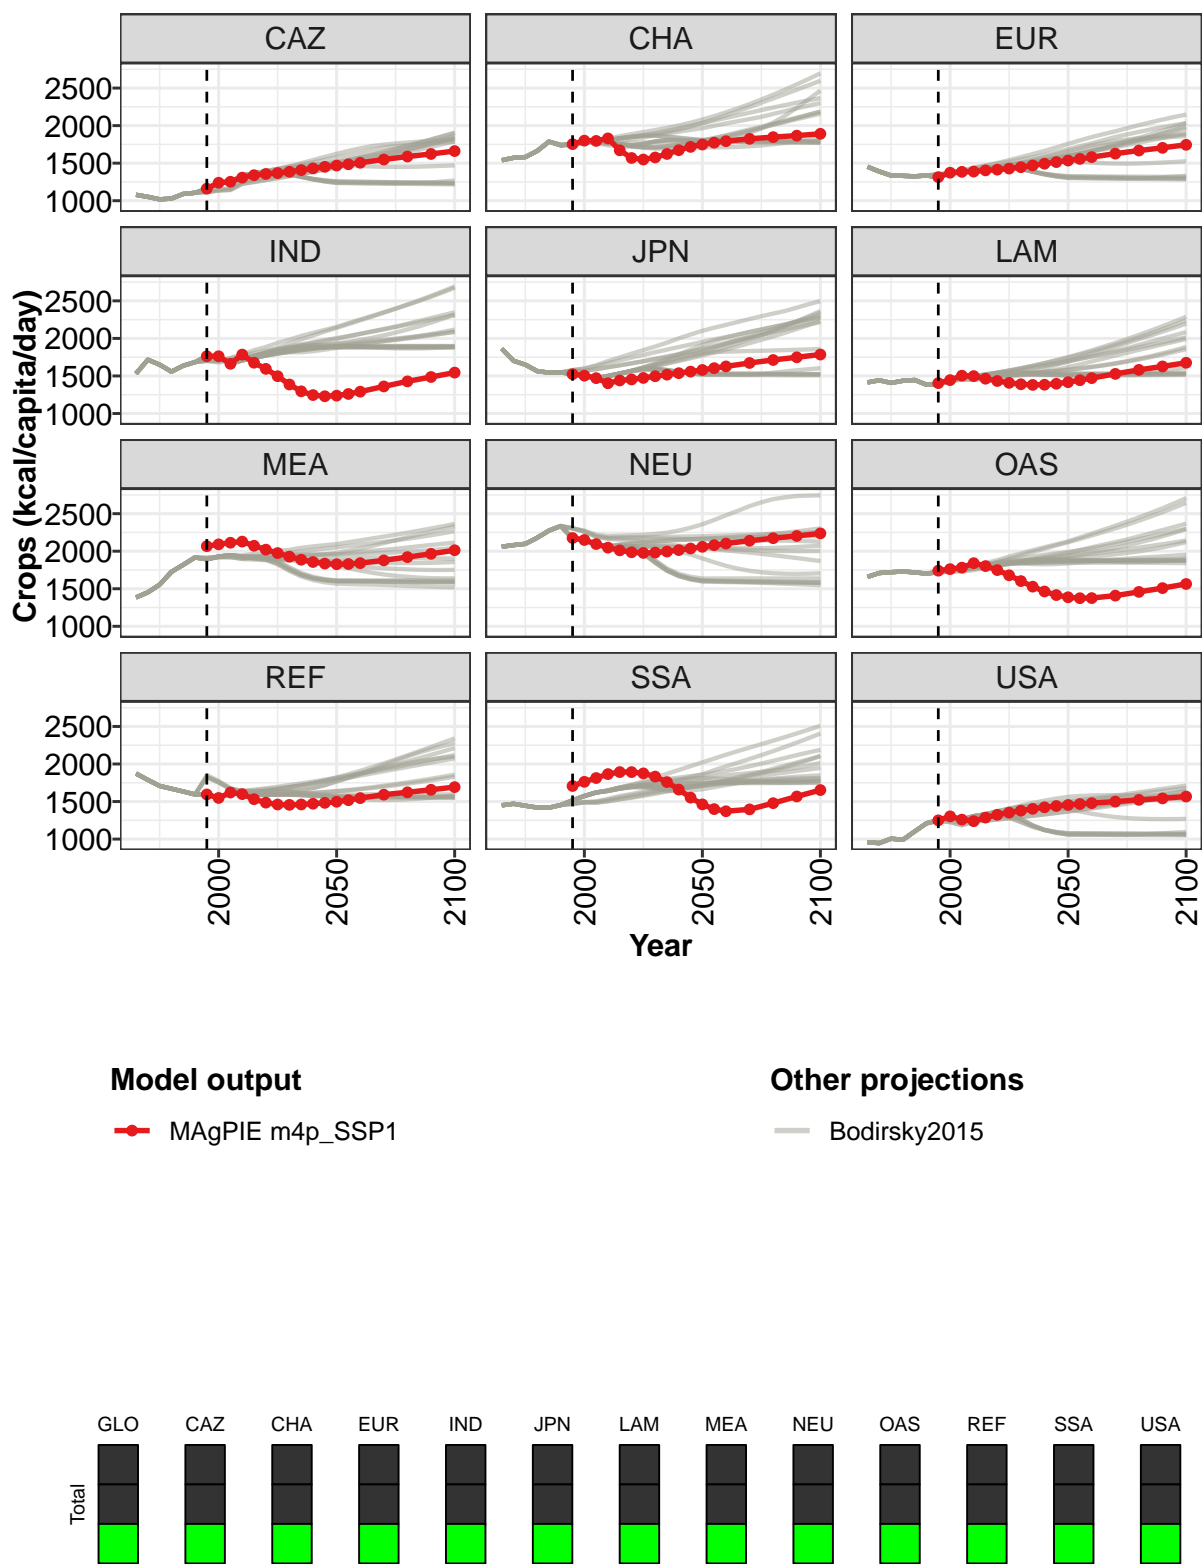

Figure 275: MAgPIE m4p\_SSP1 — Nutrition—Calorie Supply—Crops (kcal/capita/day)

|     | 1995 | 2000 | 2005 | 2010 | 2015 | 2020 | 2025 | 2030 | 2035 | 2040 | 2045 |
|-----|------|------|------|------|------|------|------|------|------|------|------|
| GLO | 1663 | 1695 | 1696 | 1741 | 1687 | 1643 | 1608 | 1575 | 1545 | 1520 | 1501 |
| CAZ | 1161 | 1240 | 1253 | 1308 | 1340 | 1357 | 1368 | 1385 | 1408 | 1431 | 1451 |
| CHA | 1753 | 1800 | 1796 | 1830 | 1671 | 1569 | 1549 | 1576 | 1623 | 1673 | 1717 |
| EUR | 1314 | 1373 | 1385 | 1388 | 1404 | 1414 | 1428 | 1447 | 1470 | 1493 | 1515 |
| IND | 1763 | 1763 | 1662 | 1785 | 1677 | 1595 | 1497 | 1387 | 1296 | 1246 | 1230 |
| JPN | 1524 | 1504 | 1471 | 1403 | 1440 | 1454 | 1474 | 1497 | 1517 | 1537 | 1558 |
| LAM | 1405 | 1445 | 1504 | 1499 | 1463 | 1433 | 1408 | 1390 | 1381 | 1384 | 1396 |
| MEA | 2067 | 2091 | 2113 | 2128 | 2073 | 2021 | 1976 | 1929 | 1887 | 1856 | 1836 |
| NEU | 2176 | 2150 | 2096 | 2048 | 2011 | 1986 | 1977 | 1982 | 1996 | 2015 | 2037 |
| OAS | 1741 | 1762 | 1781 | 1841 | 1802 | 1749 | 1680 | 1602 | 1528 | 1464 | 1416 |
| REF | 1595 | 1548 | 1620 | 1599 | 1532 | 1486 | 1461 | 1456 | 1461 | 1471 | 1483 |
| SSA | 1707 | 1763 | 1813 | 1866 | 1893 | 1893 | 1875 | 1833 | 1760 | 1660 | 1553 |
| USA | 1250 | 1303 | 1260 | 1239 | 1287 | 1324 | 1353 | 1379 | 1403 | 1424 | 1441 |

Table 919: MAgPIE m4p\_SSP1 — Nutrition—Calorie Supply—Crops (kcal/capita/day) [PART 1/2]

|     | 2050 | 2055 | 2060 | 2070 | 2080 | 2090 | 2100 |
|-----|------|------|------|------|------|------|------|
| GLO | 1491 | 1489 | 1498 | 1535 | 1584 | 1634 | 1686 |
| CAZ | 1469 | 1485 | 1505 | 1549 | 1588 | 1622 | 1661 |
| CHA | 1749 | 1773 | 1793 | 1824 | 1847 | 1867 | 1891 |
| EUR | 1535 | 1557 | 1581 | 1627 | 1668 | 1705 | 1745 |
| IND | 1238 | 1261 | 1291 | 1361 | 1428 | 1486 | 1545 |
| JPN | 1580 | 1604 | 1628 | 1673 | 1713 | 1749 | 1786 |
| LAM | 1417 | 1444 | 1471 | 1528 | 1581 | 1627 | 1676 |
| MEA | 1827 | 1830 | 1841 | 1878 | 1922 | 1966 | 2013 |
| NEU | 2059 | 2081 | 2102 | 2139 | 2173 | 2203 | 2238 |
| OAS | 1387 | 1375 | 1376 | 1409 | 1458 | 1509 | 1564 |
| REF | 1498 | 1518 | 1546 | 1592 | 1623 | 1657 | 1692 |
| SSA | 1462 | 1400 | 1371 | 1396 | 1479 | 1568 | 1653 |
| USA | 1455 | 1467 | 1479 | 1500 | 1522 | 1542 | 1567 |

Table 920: MAgPIE m4p\_SSP1 — Nutrition—Calorie Supply—Crops (kcal/capita/day) [PART 2/2]



34.1.1 Cereals

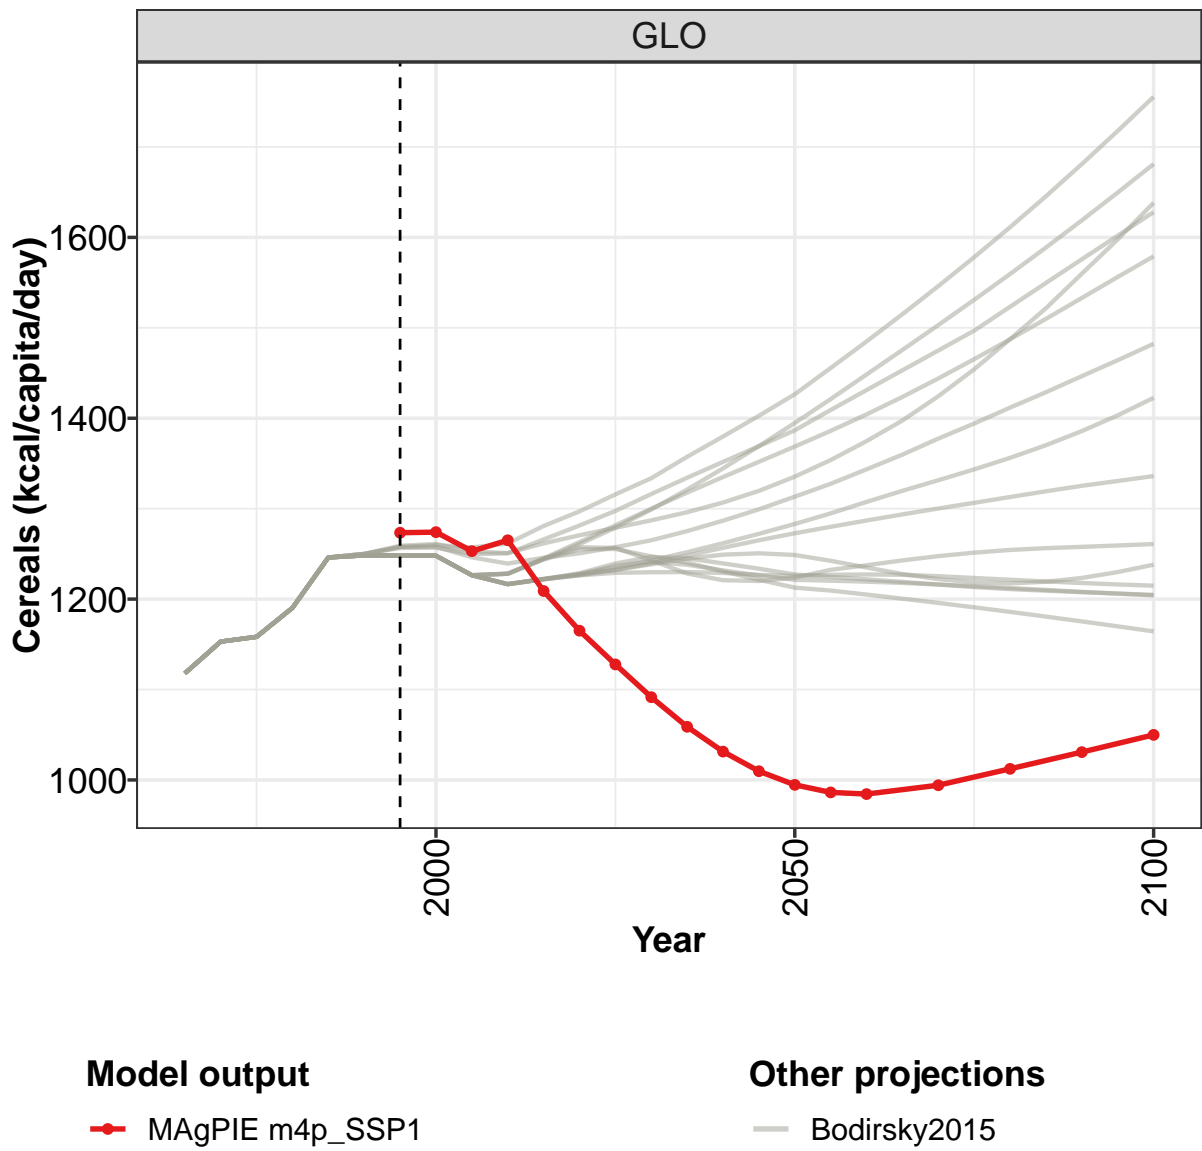

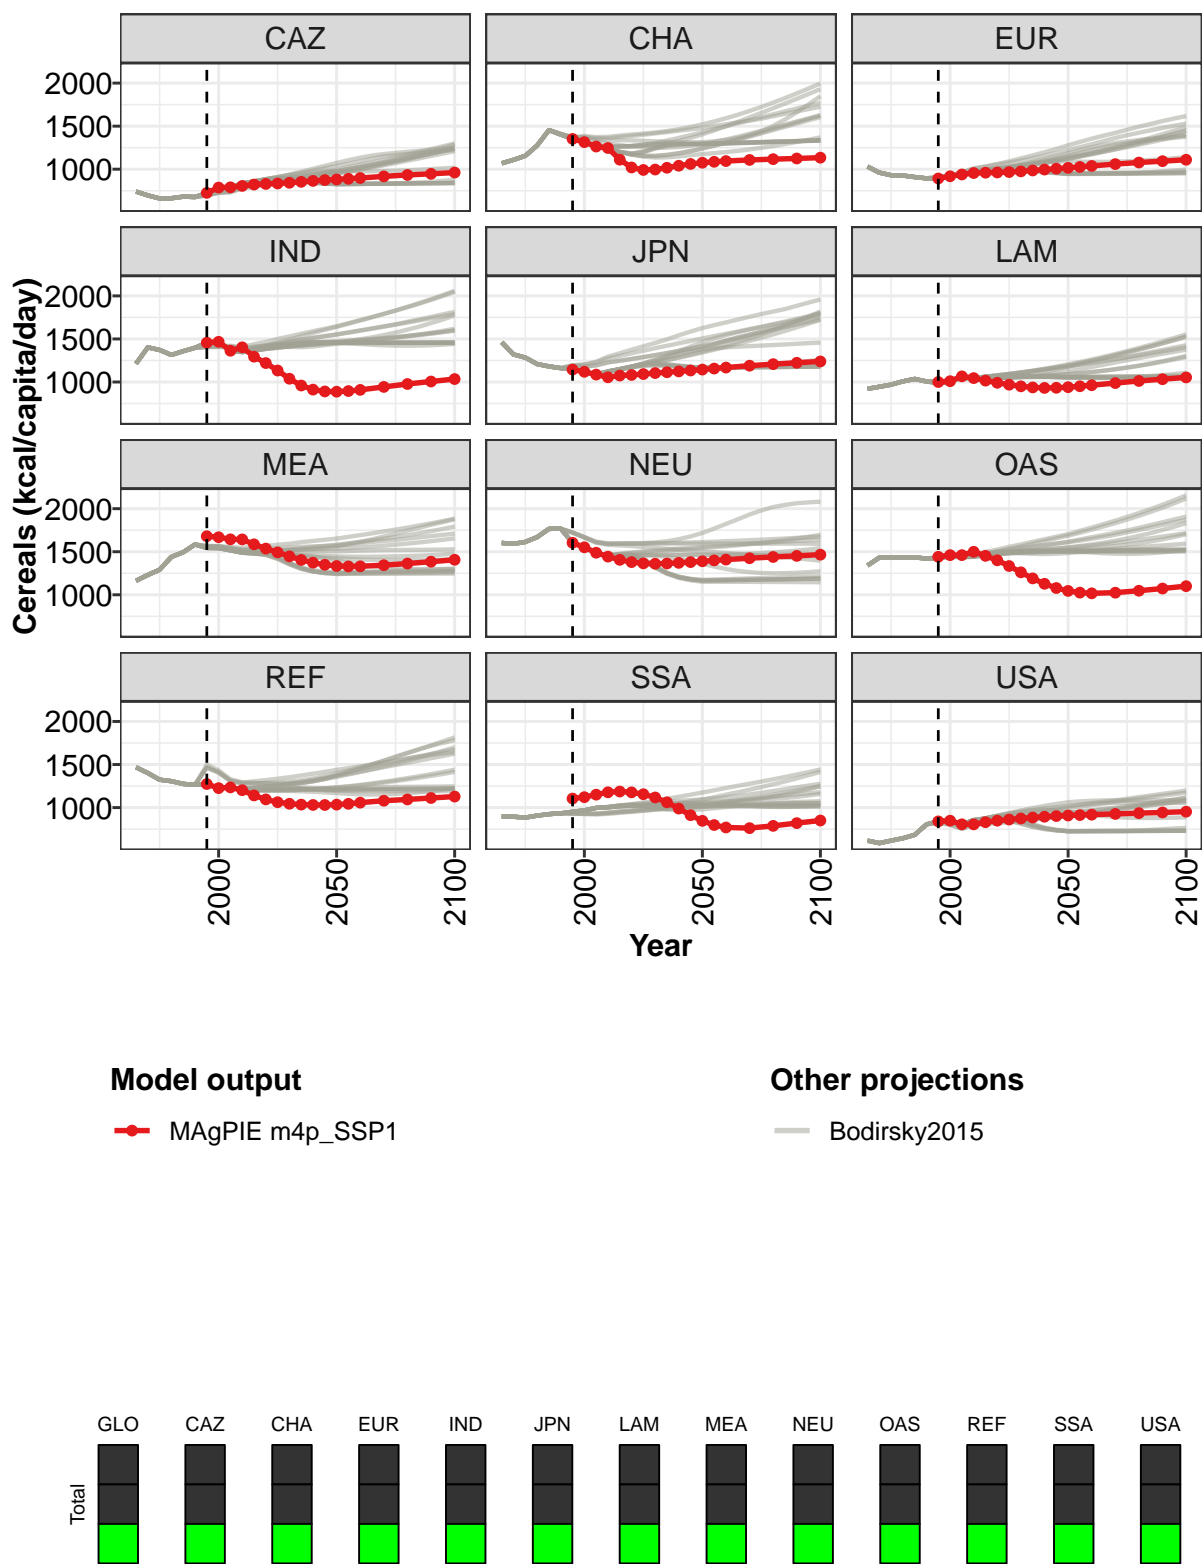

Figure 276: MAgPIE m4p\_SSP1 — Nutrition—Calorie Supply—Crops—Cereals (kcal/capita/day)

|     | 1995 | 2000 | 2005 | 2010 | 2015 | 2020 | 2025 | 2030 | 2035 | 2040 | 2045 |
|-----|------|------|------|------|------|------|------|------|------|------|------|
| GLO | 1273 | 1274 | 1253 | 1265 | 1209 | 1165 | 1128 | 1092 | 1059 | 1031 | 1010 |
| CAZ | 725  | 787  | 790  | 806  | 822  | 829  | 834  | 842  | 853  | 864  | 874  |
| CHA | 1352 | 1315 | 1263 | 1246 | 1111 | 1020 | 991  | 996  | 1017 | 1040 | 1061 |
| EUR | 893  | 918  | 939  | 956  | 960  | 962  | 967  | 975  | 985  | 996  | 1006 |
| IND | 1457 | 1467 | 1363 | 1403 | 1294 | 1220 | 1133 | 1038 | 959  | 912  | 891  |
| JPN | 1144 | 1119 | 1086 | 1055 | 1075 | 1082 | 1092 | 1104 | 1113 | 1123 | 1133 |
| LAM | 1000 | 1009 | 1066 | 1045 | 1016 | 991  | 969  | 950  | 937  | 931  | 933  |
| MEA | 1680 | 1669 | 1644 | 1643 | 1586 | 1537 | 1493 | 1446 | 1405 | 1373 | 1349 |
| NEU | 1604 | 1552 | 1489 | 1443 | 1406 | 1380 | 1365 | 1361 | 1364 | 1371 | 1380 |
| OAS | 1441 | 1461 | 1461 | 1500 | 1452 | 1400 | 1334 | 1261 | 1190 | 1128 | 1079 |
| REF | 1274 | 1226 | 1235 | 1202 | 1141 | 1095 | 1063 | 1045 | 1035 | 1031 | 1030 |
| SSA | 1105 | 1121 | 1150 | 1178 | 1187 | 1177 | 1156 | 1118 | 1061 | 989  | 912  |
| USA | 840  | 848  | 806  | 805  | 830  | 848  | 861  | 873  | 884  | 894  | 902  |

Table 921: MAgPIE m4p\_SSP1 — Nutrition—Calorie Supply—Crops—Cereals (kcal/capita/day) [PART 1/2]

|     | 2050 | 2055 | 2060 | 2070 | 2080 | 2090 | 2100 |
|-----|------|------|------|------|------|------|------|
| GLO | 995  | 986  | 984  | 994  | 1012 | 1031 | 1050 |
| CAZ | 881  | 889  | 898  | 917  | 933  | 947  | 961  |
| CHA | 1075 | 1086 | 1095 | 1108 | 1117 | 1125 | 1134 |
| EUR | 1016 | 1026 | 1038 | 1059 | 1078 | 1093 | 1110 |
| IND | 888  | 895  | 909  | 943  | 977  | 1006 | 1034 |
| JPN | 1144 | 1156 | 1168 | 1189 | 1207 | 1223 | 1239 |
| LAM | 940  | 951  | 962  | 988  | 1012 | 1032 | 1053 |
| MEA | 1335 | 1329 | 1331 | 1344 | 1363 | 1384 | 1407 |
| NEU | 1389 | 1399 | 1409 | 1425 | 1439 | 1452 | 1466 |
| OAS | 1045 | 1025 | 1017 | 1025 | 1047 | 1073 | 1100 |
| REF | 1035 | 1044 | 1058 | 1080 | 1094 | 1111 | 1128 |
| SSA | 846  | 797  | 769  | 761  | 788  | 820  | 850  |
| USA | 908  | 913  | 918  | 926  | 936  | 943  | 952  |

Table 922: MAgPIE m4p\_SSP1 — Nutrition—Calorie Supply—Crops—Cereals (kcal/capita/day) [PART 2/2]

34.1.2 Oil crops

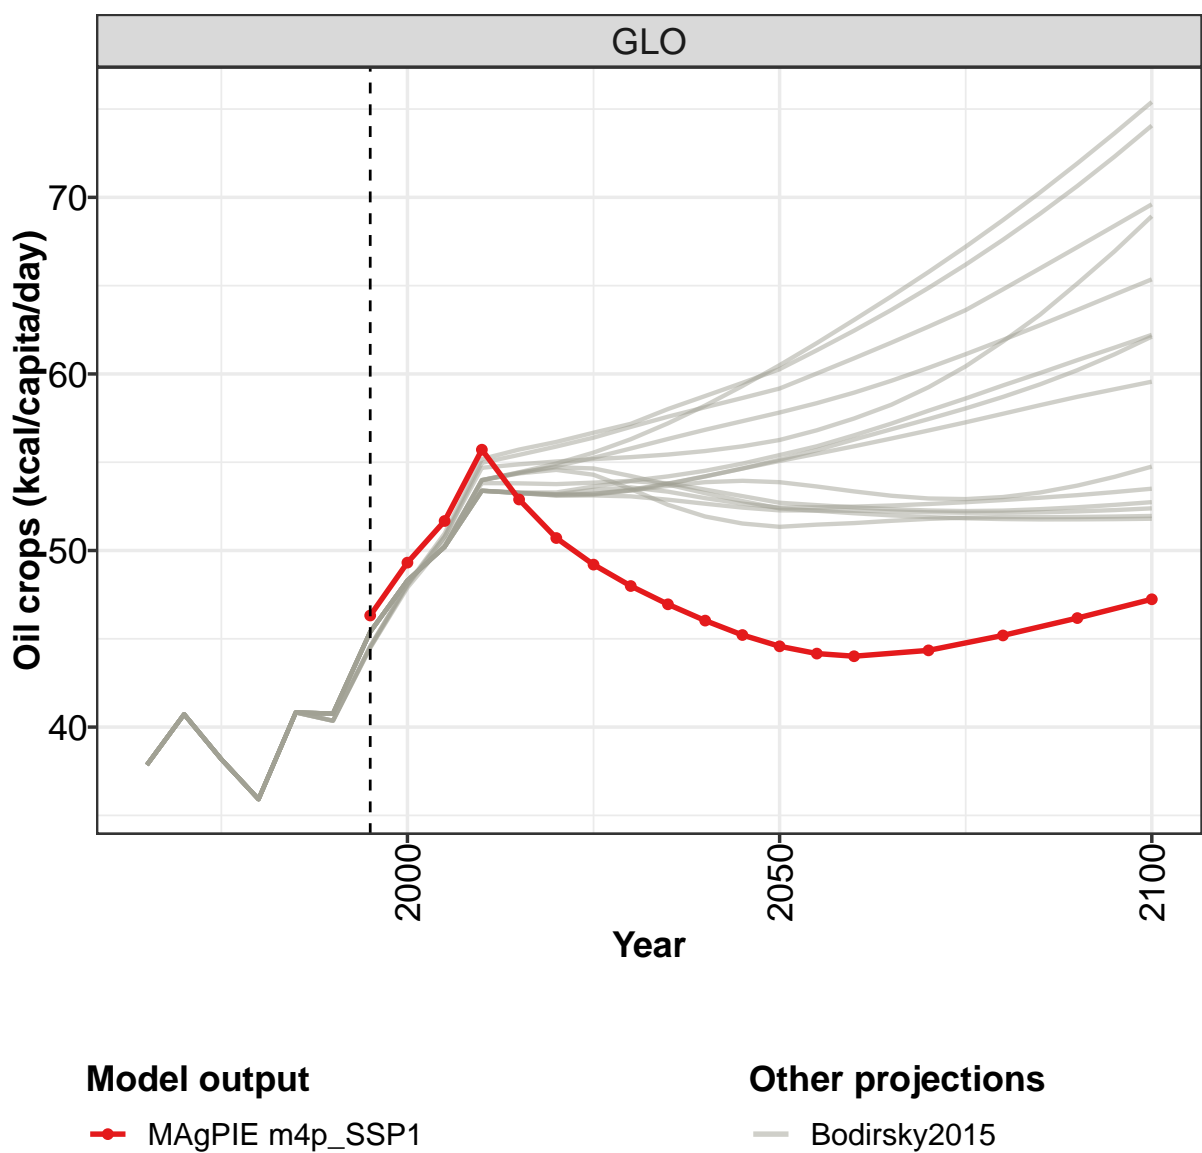

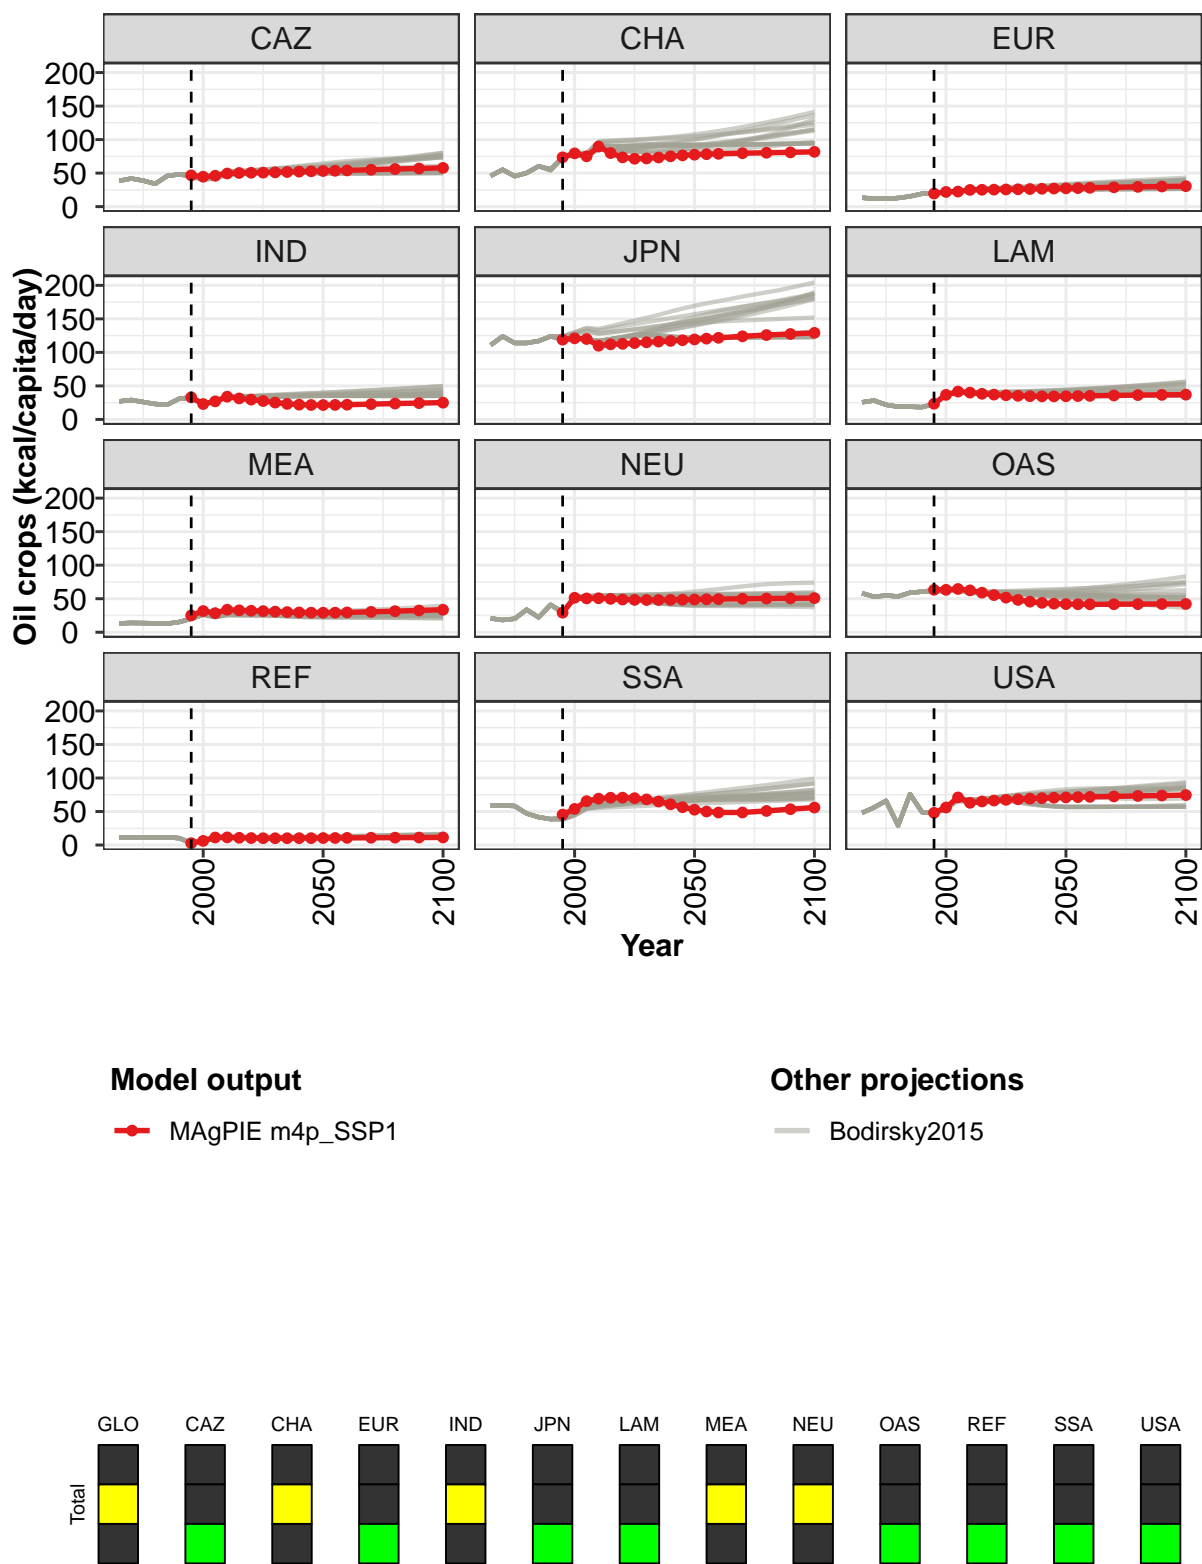

Figure 277: MAgPIE m4p\_SSP1 — Nutrition—Calorie Supply—Crops—Oil crops (kcal/capita/day)

|     | 1995 | 2000 | 2005 | 2010 | 2015 | 2020 | 2025 | 2030 | 2035 | 2040 | 2045 |
|-----|------|------|------|------|------|------|------|------|------|------|------|
| GLO | 46   | 49   | 52   | 56   | 53   | 51   | 49   | 48   | 47   | 46   | 45   |
| CAZ | 47   | 45   | 46   | 49   | 50   | 51   | 51   | 51   | 52   | 52   | 53   |
| CHA | 74   | 79   | 75   | 90   | 80   | 74   | 72   | 72   | 73   | 75   | 76   |
| EUR | 20   | 22   | 22   | 25   | 25   | 25   | 26   | 26   | 26   | 27   | 27   |
| IND | 33   | 23   | 27   | 34   | 31   | 30   | 27   | 25   | 23   | 22   | 22   |
| JPN | 119  | 121  | 120  | 110  | 112  | 113  | 114  | 115  | 116  | 117  | 118  |
| LAM | 23   | 37   | 42   | 40   | 38   | 37   | 36   | 35   | 35   | 34   | 34   |
| MEA | 25   | 32   | 29   | 34   | 33   | 32   | 31   | 31   | 30   | 30   | 29   |
| NEU | 29   | 51   | 50   | 51   | 50   | 49   | 48   | 48   | 48   | 48   | 49   |
| OAS | 63   | 63   | 65   | 62   | 59   | 55   | 52   | 48   | 46   | 44   | 43   |
| REF | 3    | 6    | 11   | 11   | 11   | 10   | 10   | 10   | 10   | 10   | 10   |
| SSA | 45   | 54   | 65   | 69   | 71   | 71   | 70   | 68   | 65   | 61   | 56   |
| USA | 48   | 56   | 71   | 63   | 65   | 66   | 67   | 68   | 69   | 70   | 71   |

Table 923: MAgPIE m4p\_SSP1 — Nutrition—Calorie Supply—Crops—Oil crops (kcal/capita/day) [PART 1/2]

|     | 2050 | 2055 | 2060 | 2070 | 2080 | 2090 | 2100 |
|-----|------|------|------|------|------|------|------|
| GLO | 45   | 44   | 44   | 44   | 45   | 46   | 47   |
| CAZ | 53   | 54   | 54   | 55   | 56   | 57   | 58   |
| CHA | 78   | 78   | 79   | 80   | 80   | 81   | 82   |
| EUR | 27   | 28   | 28   | 29   | 30   | 30   | 31   |
| IND | 22   | 22   | 22   | 23   | 24   | 24   | 25   |
| JPN | 119  | 121  | 122  | 124  | 126  | 128  | 129  |
| LAM | 35   | 35   | 35   | 36   | 36   | 37   | 37   |
| MEA | 29   | 29   | 30   | 30   | 31   | 32   | 34   |
| NEU | 49   | 49   | 49   | 50   | 50   | 51   | 51   |
| OAS | 42   | 42   | 42   | 42   | 42   | 42   | 42   |
| REF | 10   | 11   | 11   | 11   | 11   | 11   | 11   |
| SSA | 53   | 50   | 49   | 49   | 51   | 53   | 56   |
| USA | 71   | 71   | 72   | 73   | 73   | 74   | 75   |

Table 924: MAgPIE m4p\_SSP1 — Nutrition—Calorie Supply—Crops—Oil crops (kcal/capita/day) [PART 2/2]

34.1.3 Other crops

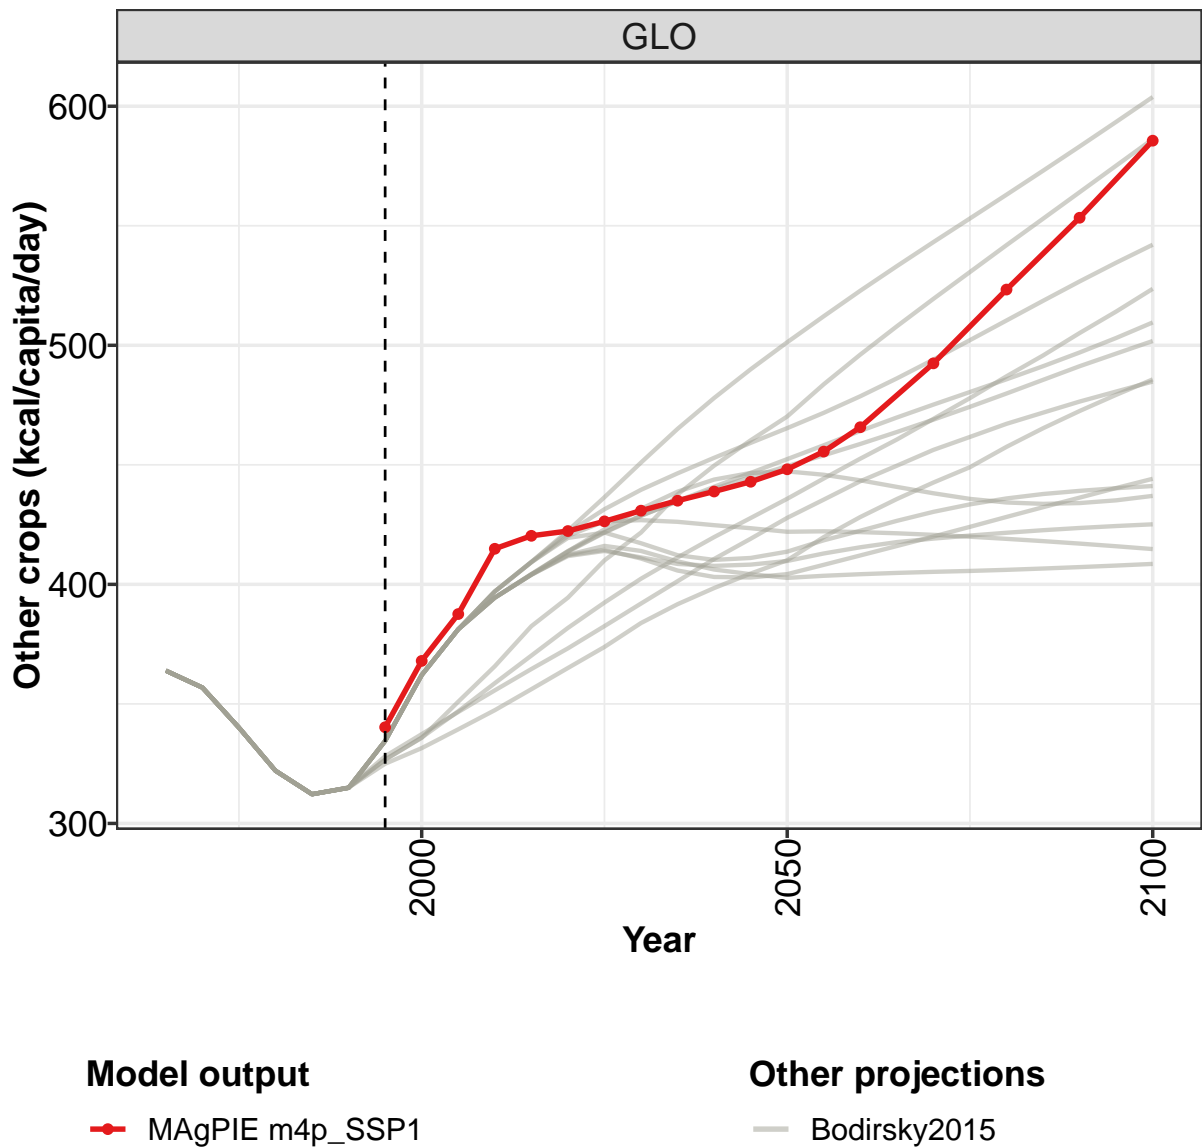

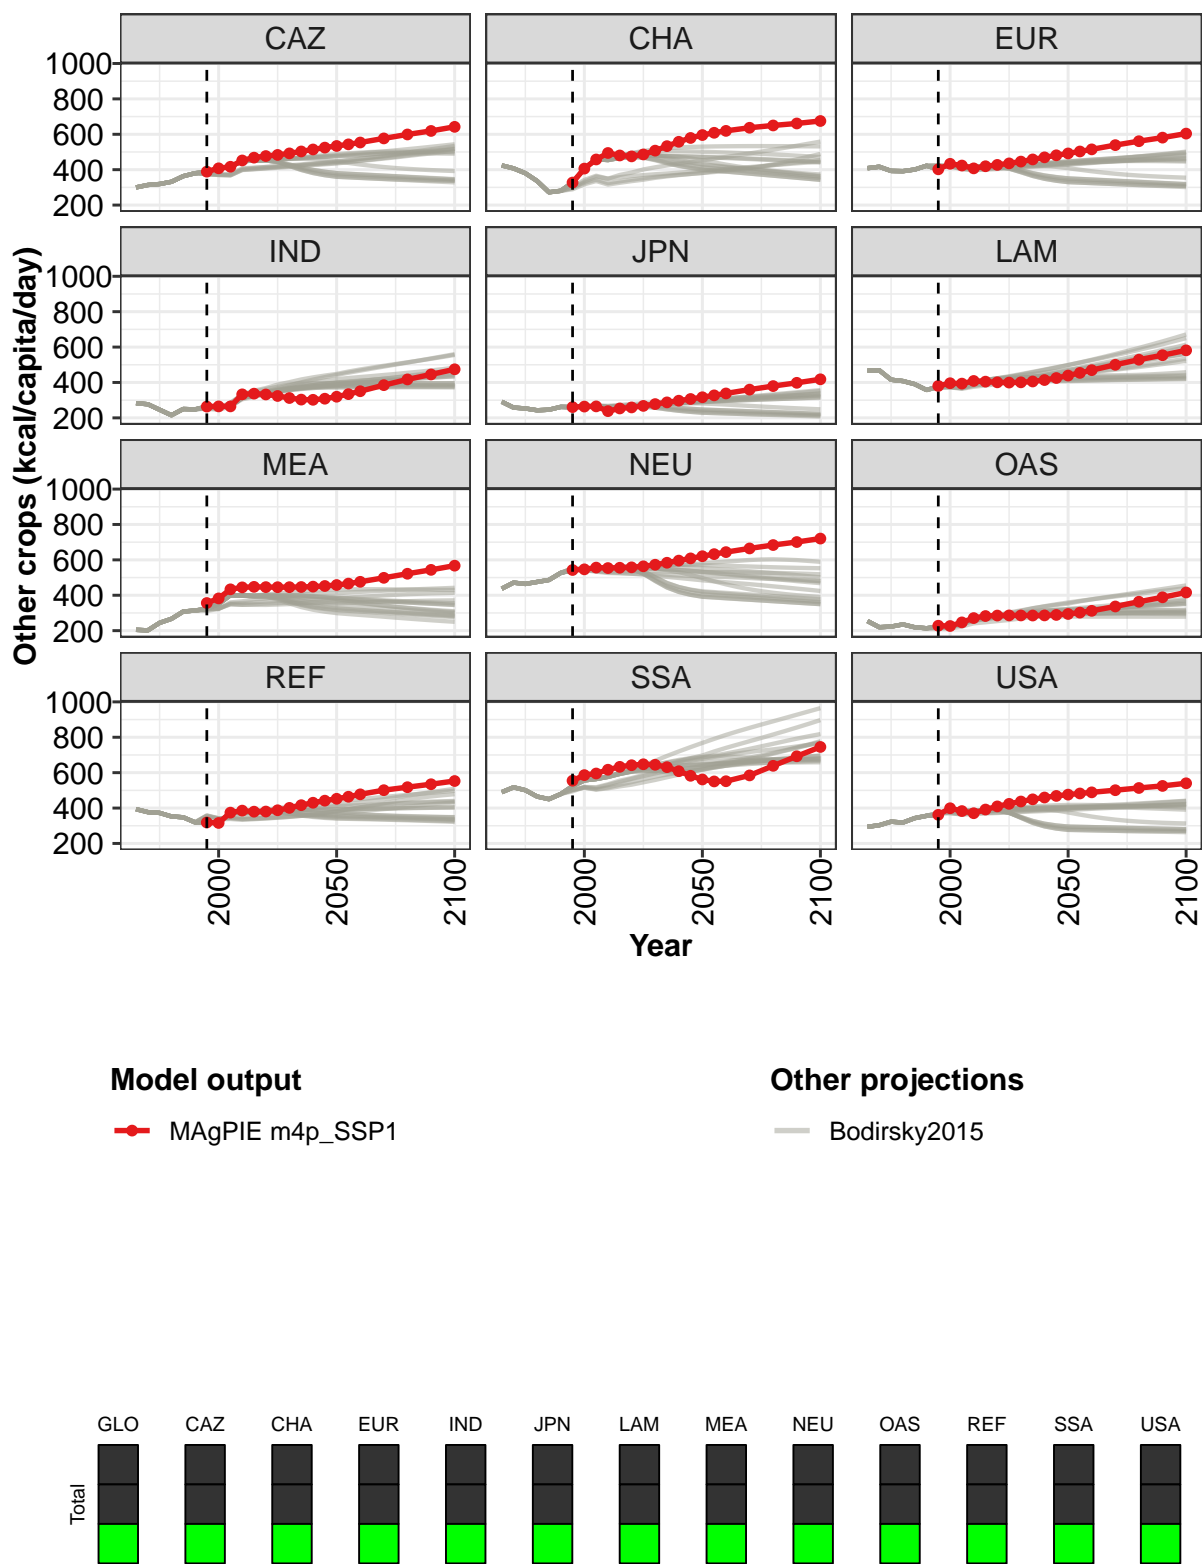

Figure 278: MAgPIE m4p\_SSP1 — Nutrition—Calorie Supply—Crops—Other crops (kcal/capita/day)



|     | 1995 | 2000 | 2005 | 2010 | 2015 | 2020 | 2025 | 2030 | 2035 | 2040 | 2045 |
|-----|------|------|------|------|------|------|------|------|------|------|------|
| GLO | 340  | 368  | 388  | 415  | 420  | 422  | 426  | 431  | 435  | 439  | 443  |
| CAZ | 389  | 408  | 417  | 452  | 468  | 477  | 484  | 492  | 503  | 514  | 525  |
| CHA | 327  | 406  | 458  | 494  | 480  | 475  | 486  | 508  | 533  | 558  | 579  |
| EUR | 402  | 433  | 423  | 408  | 420  | 427  | 436  | 446  | 458  | 470  | 481  |
| IND | 264  | 265  | 265  | 333  | 337  | 332  | 324  | 312  | 303  | 302  | 308  |
| JPN | 261  | 264  | 265  | 238  | 253  | 259  | 268  | 278  | 288  | 297  | 307  |
| LAM | 380  | 396  | 394  | 409  | 405  | 401  | 400  | 401  | 406  | 414  | 425  |
| MEA | 356  | 382  | 434  | 445  | 448  | 446  | 446  | 446  | 447  | 449  | 452  |
| NEU | 543  | 547  | 556  | 554  | 556  | 558  | 564  | 573  | 584  | 596  | 608  |
| OAS | 228  | 226  | 247  | 271  | 283  | 286  | 286  | 286  | 286  | 286  | 289  |
| REF | 319  | 316  | 374  | 386  | 380  | 380  | 388  | 401  | 416  | 430  | 442  |
| SSA | 555  | 586  | 595  | 617  | 633  | 642  | 647  | 645  | 631  | 608  | 582  |
| USA | 362  | 399  | 383  | 371  | 392  | 409  | 424  | 437  | 449  | 460  | 469  |

Table 925: MAgPIE m4p\_SSP1 — Nutrition—Calorie Supply—Crops—Other crops (kcal/capita/day) [PART 1/2]

|     | 2050 | 2055 | 2060 | 2070 | 2080 | 2090 | 2100 |
|-----|------|------|------|------|------|------|------|
| GLO | 448  | 456  | 466  | 492  | 523  | 553  | 586  |
| CAZ | 534  | 543  | 554  | 577  | 599  | 619  | 642  |
| CHA | 596  | 609  | 619  | 637  | 650  | 661  | 675  |
| EUR | 492  | 503  | 515  | 539  | 561  | 581  | 604  |
| IND | 320  | 334  | 351  | 385  | 417  | 445  | 475  |
| JPN | 317  | 327  | 338  | 360  | 380  | 398  | 418  |
| LAM | 439  | 454  | 470  | 500  | 529  | 554  | 582  |
| MEA | 458  | 466  | 476  | 499  | 522  | 544  | 567  |
| NEU | 621  | 632  | 644  | 665  | 684  | 701  | 720  |
| OAS | 294  | 302  | 312  | 337  | 364  | 388  | 416  |
| REF | 453  | 464  | 478  | 501  | 518  | 535  | 553  |
| SSA | 562  | 550  | 552  | 585  | 639  | 693  | 745  |
| USA | 476  | 482  | 489  | 501  | 513  | 525  | 540  |

Table 926: MAgPIE m4p\_SSP1 — Nutrition—Calorie Supply—Crops—Other crops (kcal/capita/day) [PART 2/2]

34.1.4 Sugar crops

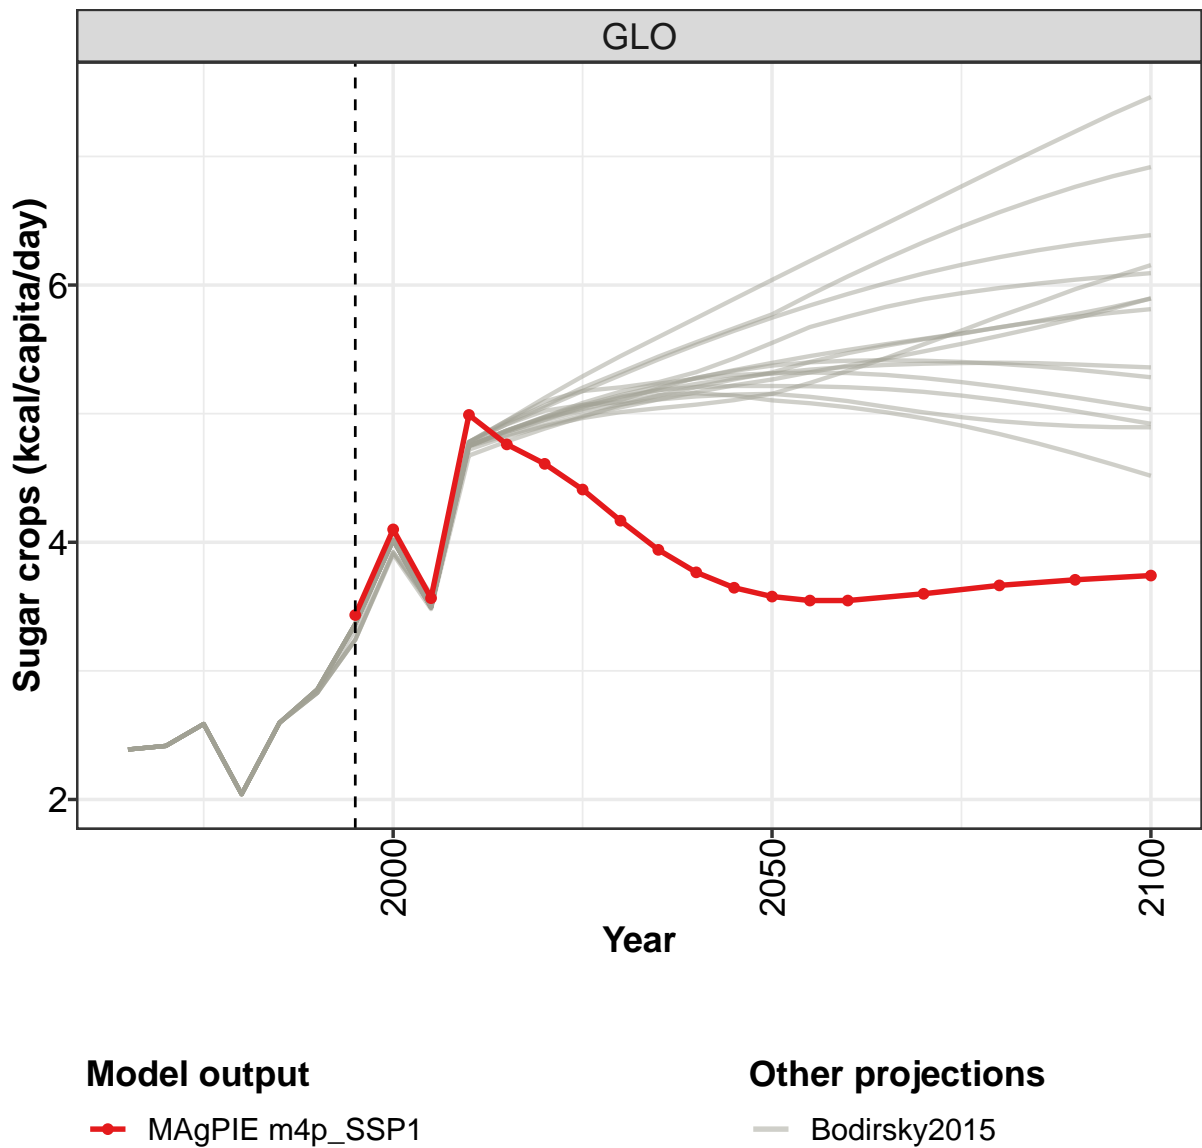

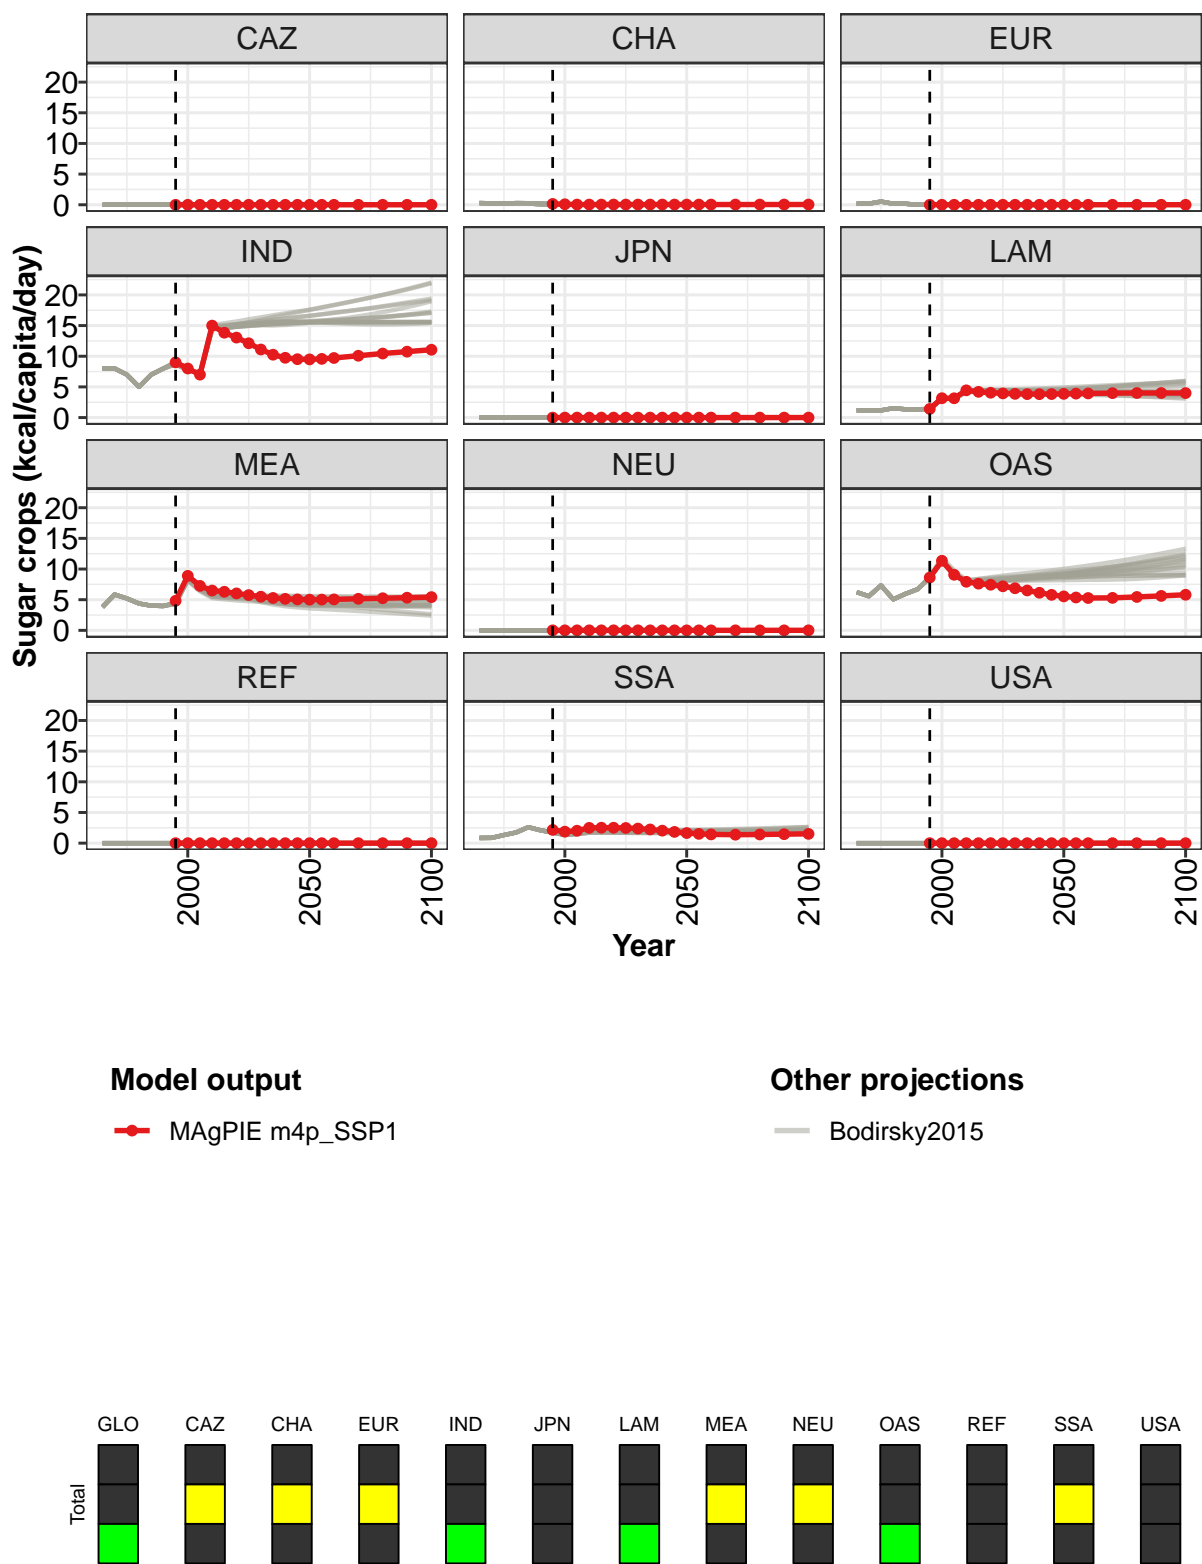

Figure 279: MAgPIE m4p\_SSP1 — Nutrition—Calorie Supply—Crops—Sugar crops (kcal/capita/day)

|     | 1995 | 2000 | 2005 | 2010 | 2015 | 2020 | 2025 | 2030 | 2035 | 2040 | 2045 |
|-----|------|------|------|------|------|------|------|------|------|------|------|
| GLO | 3.4  | 4.1  | 3.6  | 5.0  | 4.8  | 4.6  | 4.4  | 4.2  | 3.9  | 3.8  | 3.6  |
| CAZ | 0.0  | 0.0  | 0.0  | 0.0  | 0.0  | 0.0  | 0.0  | 0.0  | 0.0  | 0.0  | 0.0  |
| CHA | 0.1  | 0.1  | 0.0  | 0.0  | 0.0  | 0.0  | 0.0  | 0.0  | 0.0  | 0.0  | 0.0  |
| EUR | 0.0  | 0.0  | 0.0  | 0.0  | 0.0  | 0.0  | 0.0  | 0.0  | 0.0  | 0.0  | 0.0  |
| IND | 9.0  | 8.0  | 7.0  | 15.0 | 13.8 | 13.0 | 12.1 | 11.1 | 10.3 | 9.7  | 9.5  |
| JPN | 0.0  | 0.0  | 0.0  | 0.0  | 0.0  | 0.0  | 0.0  | 0.0  | 0.0  | 0.0  | 0.0  |
| LAM | 1.4  | 3.2  | 3.1  | 4.4  | 4.2  | 4.0  | 3.9  | 3.9  | 3.8  | 3.8  | 3.8  |
| MEA | 4.8  | 8.9  | 7.3  | 6.5  | 6.3  | 6.0  | 5.8  | 5.5  | 5.3  | 5.1  | 5.0  |
| NEU | 0.0  | 0.0  | 0.0  | 0.0  | 0.0  | 0.0  | 0.0  | 0.0  | 0.0  | 0.0  | 0.0  |
| OAS | 8.6  | 11.3 | 9.1  | 7.9  | 7.6  | 7.4  | 7.2  | 6.9  | 6.5  | 6.1  | 5.8  |
| REF | 0.0  | 0.0  | 0.0  | 0.0  | 0.0  | 0.0  | 0.0  | 0.0  | 0.0  | 0.0  | 0.0  |
| SSA | 2.2  | 1.9  | 2.0  | 2.5  | 2.5  | 2.5  | 2.5  | 2.4  | 2.2  | 2.0  | 1.8  |
| USA | 0.0  | 0.0  | 0.0  | 0.0  | 0.0  | 0.0  | 0.0  | 0.0  | 0.0  | 0.0  | 0.0  |

Table 927: MAgPIE m4p\_SSP1 — Nutrition—Calorie Supply—Crops—Sugar crops (kcal/capita/day) [PART 1/2]

|     | 2050 | 2055 | 2060 | 2070 | 2080 | 2090 | 2100 |
|-----|------|------|------|------|------|------|------|
| GLO | 3.6  | 3.5  | 3.5  | 3.6  | 3.7  | 3.7  | 3.7  |
| CAZ | 0.0  | 0.0  | 0.0  | 0.0  | 0.0  | 0.0  | 0.0  |
| CHA | 0.0  | 0.0  | 0.0  | 0.0  | 0.0  | 0.0  | 0.0  |
| EUR | 0.0  | 0.0  | 0.0  | 0.0  | 0.0  | 0.0  | 0.0  |
| IND | 9.5  | 9.6  | 9.7  | 10.1 | 10.4 | 10.8 | 11.1 |
| JPN | 0.0  | 0.0  | 0.0  | 0.0  | 0.0  | 0.0  | 0.0  |
| LAM | 3.9  | 3.9  | 3.9  | 4.0  | 4.0  | 4.0  | 4.0  |
| MEA | 5.0  | 5.0  | 5.1  | 5.2  | 5.2  | 5.3  | 5.4  |
| NEU | 0.0  | 0.0  | 0.0  | 0.0  | 0.0  | 0.0  | 0.0  |
| OAS | 5.5  | 5.4  | 5.3  | 5.3  | 5.4  | 5.6  | 5.8  |
| REF | 0.0  | 0.0  | 0.0  | 0.0  | 0.0  | 0.0  | 0.0  |
| SSA | 1.7  | 1.5  | 1.4  | 1.4  | 1.4  | 1.5  | 1.5  |
| USA | 0.0  | 0.0  | 0.0  | 0.0  | 0.0  | 0.0  | 0.0  |

Table 928: MAgPIE m4p\_SSP1 — Nutrition—Calorie Supply—Crops—Sugar crops (kcal/capita/day) [PART 2/2]

34.2 Fish

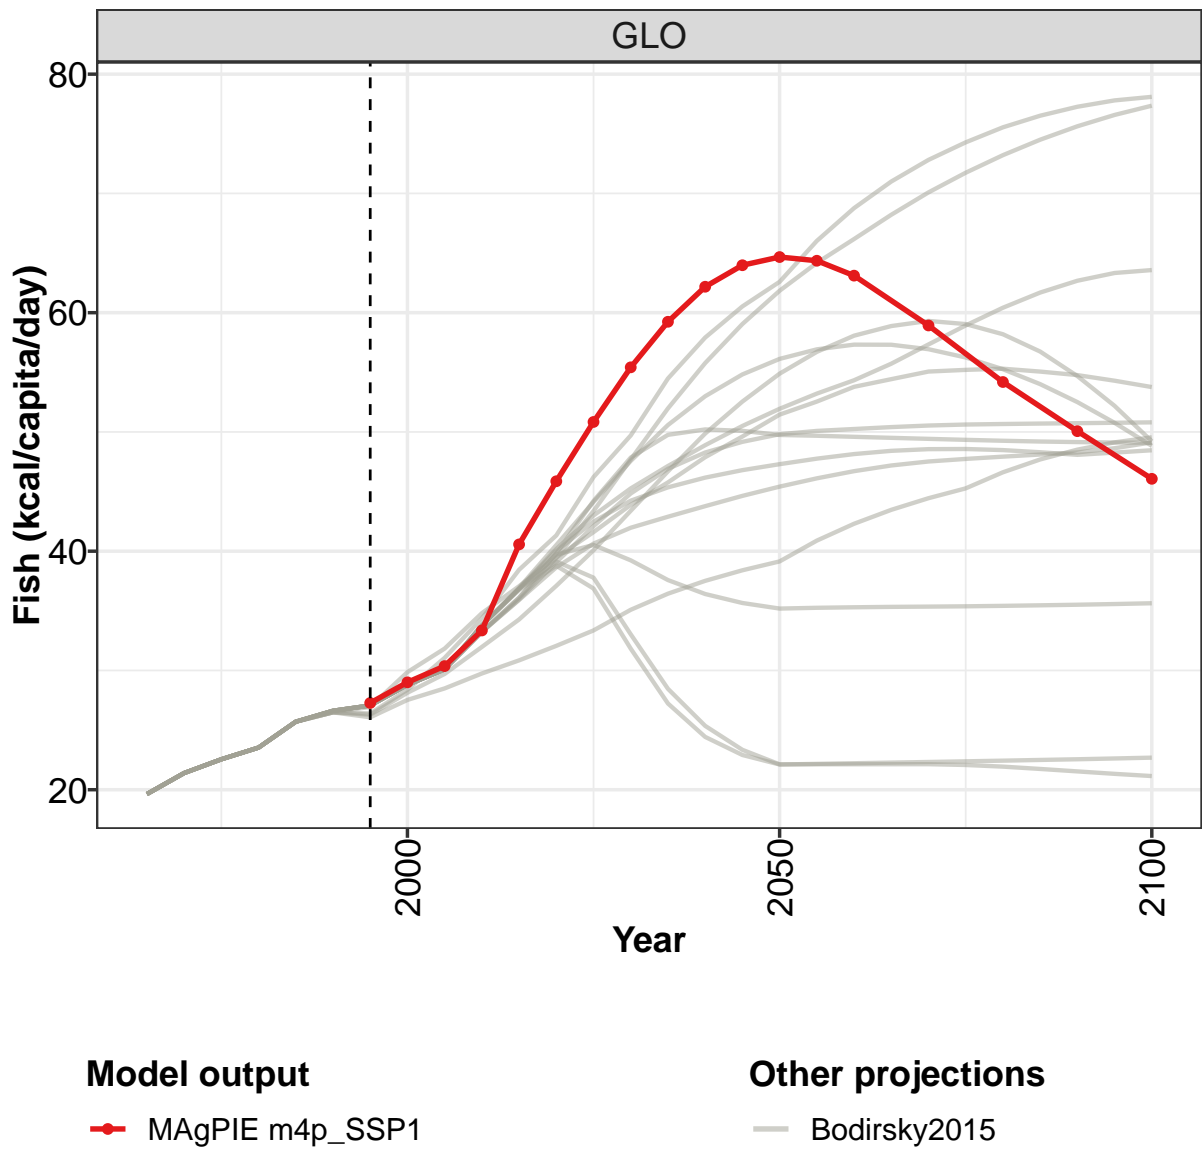

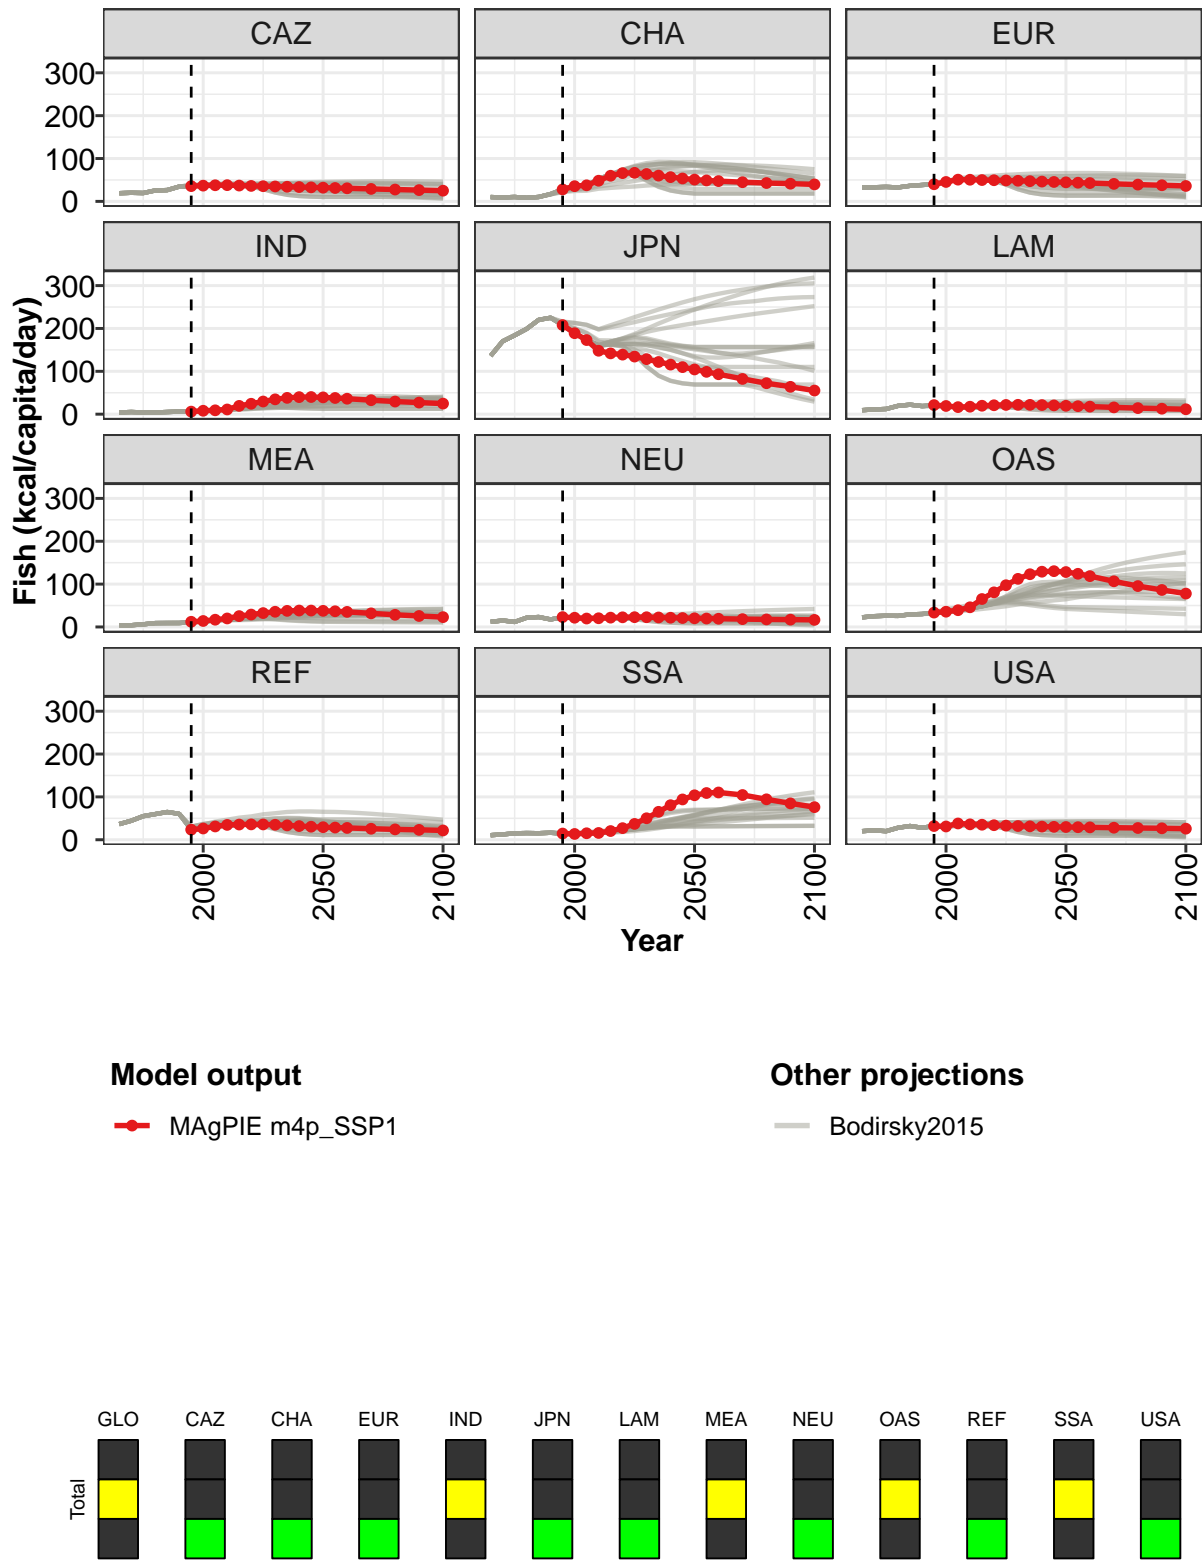

Figure 280: MAgPIE m4p\_SSP1 — Nutrition—Calorie Supply—Fish (kcal/capita/day)

|     | 1995 | 2000 | 2005 | 2010 | 2015 | 2020 | 2025 | 2030 | 2035 | 2040 | 2045 |
|-----|------|------|------|------|------|------|------|------|------|------|------|
| GLO | 27   | 29   | 30   | 33   | 41   | 46   | 51   | 55   | 59   | 62   | 64   |
| CAZ | 36   | 37   | 38   | 38   | 37   | 36   | 35   | 35   | 34   | 33   | 33   |
| CHA | 28   | 36   | 38   | 48   | 60   | 66   | 67   | 64   | 60   | 57   | 53   |
| EUR | 40   | 45   | 51   | 51   | 50   | 49   | 49   | 48   | 47   | 46   | 45   |
| IND | 6    | 8    | 9    | 11   | 19   | 24   | 30   | 35   | 38   | 40   | 40   |
| JPN | 208  | 189  | 173  | 148  | 142  | 139  | 134  | 128  | 122  | 116  | 110  |
| LAM | 21   | 19   | 16   | 17   | 20   | 21   | 22   | 22   | 22   | 21   | 21   |
| MEA | 12   | 14   | 17   | 20   | 25   | 29   | 32   | 36   | 38   | 38   | 38   |
| NEU | 23   | 22   | 20   | 20   | 22   | 23   | 23   | 23   | 22   | 22   | 21   |
| OAS | 34   | 36   | 39   | 46   | 65   | 81   | 97   | 112  | 123  | 129  | 130  |
| REF | 24   | 26   | 31   | 35   | 36   | 36   | 36   | 35   | 34   | 32   | 30   |
| SSA | 15   | 14   | 15   | 16   | 20   | 27   | 37   | 50   | 65   | 81   | 94   |
| USA | 32   | 31   | 38   | 36   | 35   | 34   | 33   | 32   | 31   | 31   | 30   |

Table 929: MAgPIE m4p\_SSP1 — Nutrition—Calorie Supply—Fish (kcal/capita/day) [PART 1/2]

|     | 2050 | 2055 | 2060 | 2070 | 2080 | 2090 | 2100 |
|-----|------|------|------|------|------|------|------|
| GLO | 65   | 64   | 63   | 59   | 54   | 50   | 46   |
| CAZ | 32   | 31   | 31   | 29   | 28   | 26   | 25   |
| CHA | 51   | 49   | 47   | 45   | 43   | 41   | 40   |
| EUR | 44   | 44   | 43   | 41   | 39   | 38   | 36   |
| IND | 39   | 38   | 36   | 33   | 29   | 27   | 25   |
| JPN | 104  | 99   | 93   | 82   | 72   | 64   | 55   |
| LAM | 20   | 19   | 18   | 16   | 14   | 13   | 11   |
| MEA | 38   | 37   | 35   | 32   | 28   | 26   | 23   |
| NEU | 20   | 20   | 19   | 18   | 18   | 17   | 17   |
| OAS | 128  | 124  | 119  | 107  | 95   | 86   | 78   |
| REF | 29   | 28   | 28   | 26   | 24   | 23   | 22   |
| SSA | 104  | 109  | 110  | 104  | 94   | 85   | 76   |
| USA | 30   | 29   | 29   | 28   | 27   | 27   | 26   |

Table 930: MAgPIE m4p\_SSP1 — Nutrition—Calorie Supply—Fish (kcal/capita/day) [PART 2/2]

34.3
Livestock products

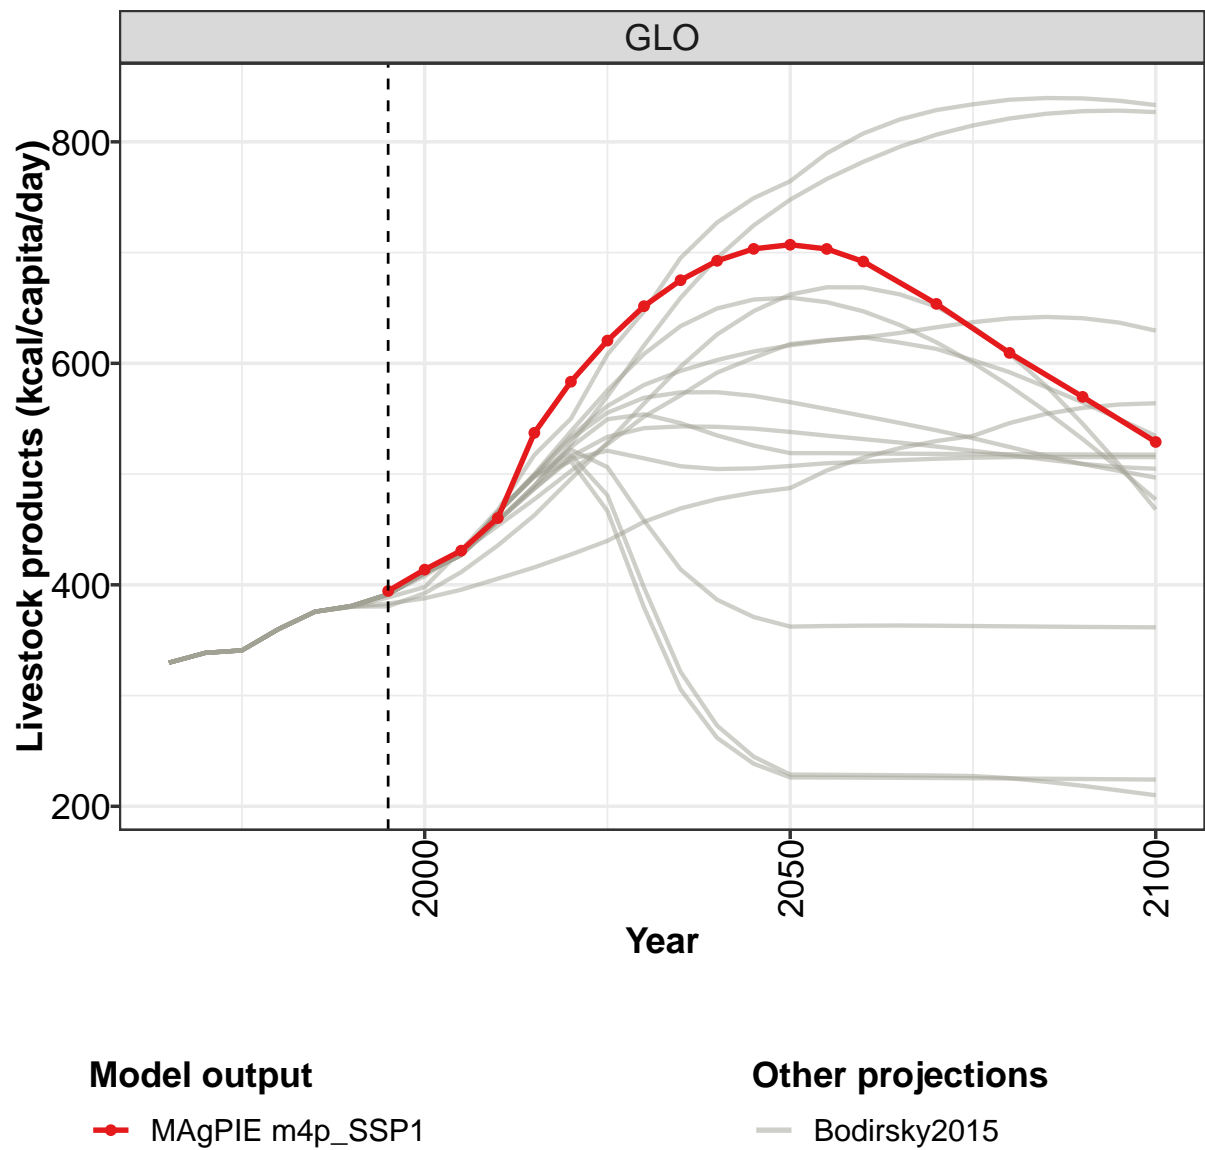



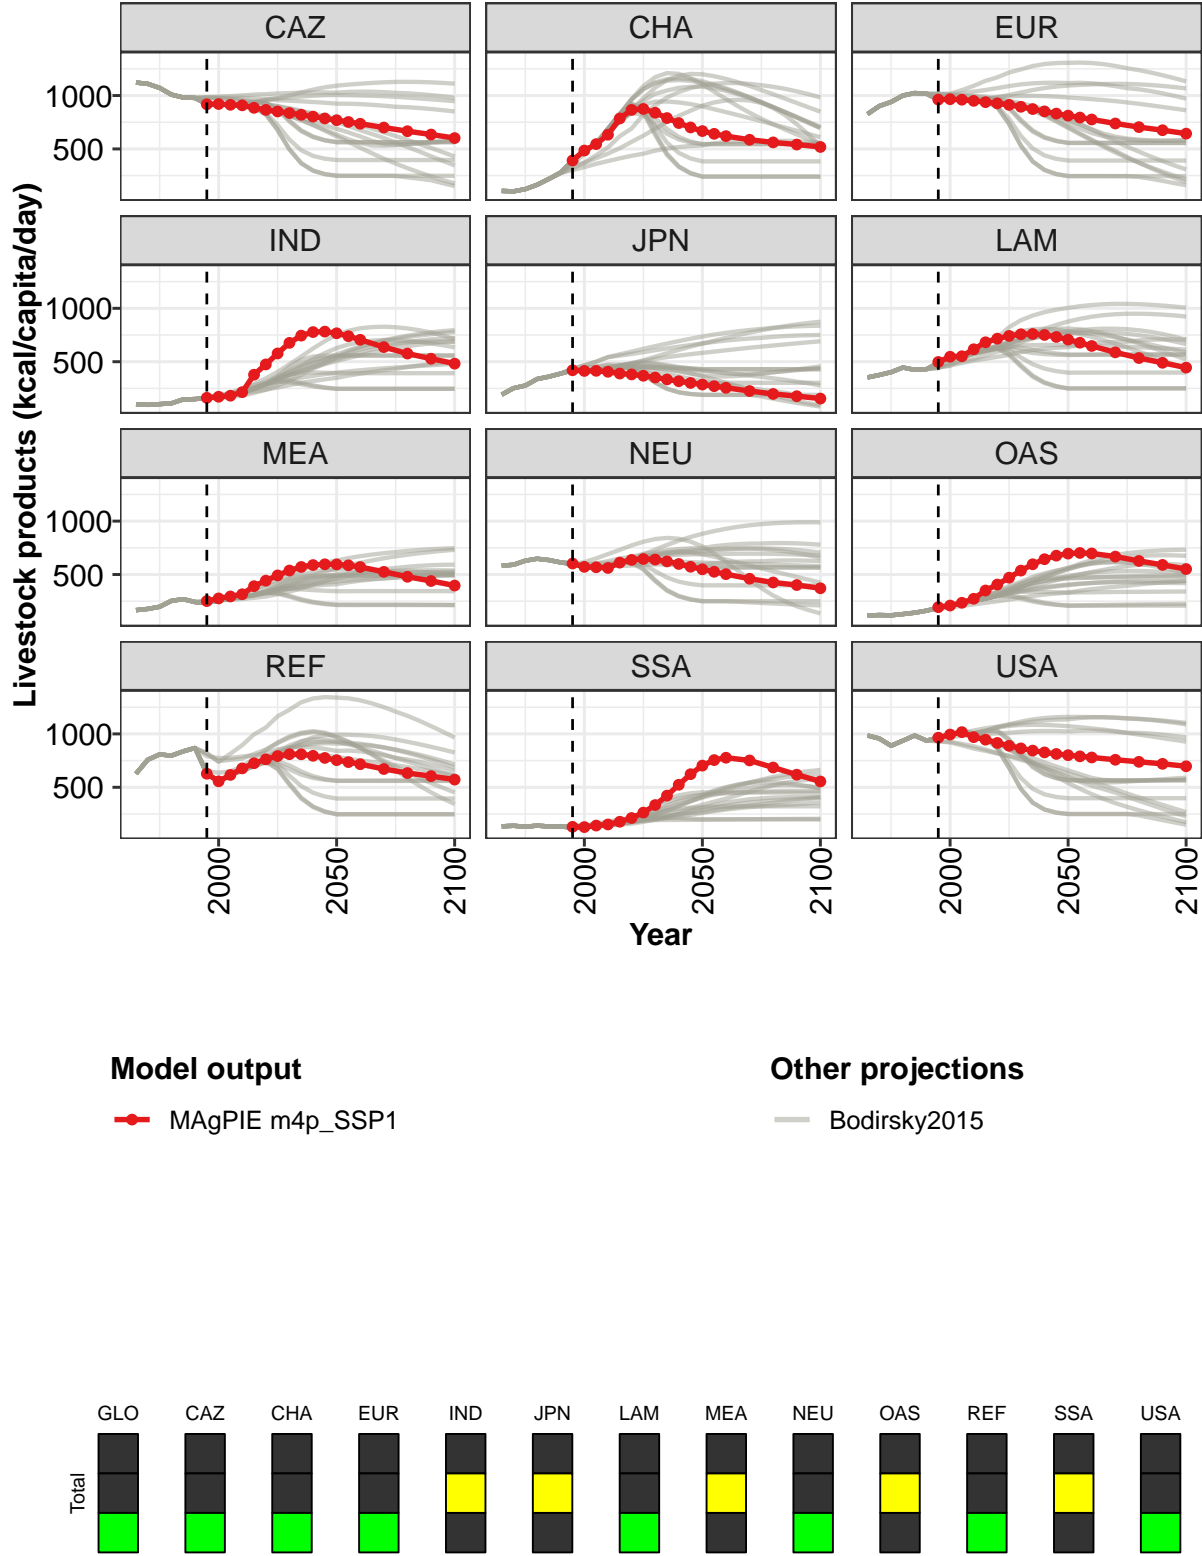

Figure 281: MAgPIE m4p\_SSP1 — Nutrition—Calorie Supply—Livestock products (kcal/capita/day)

|     | 1995 | 2000 | 2005 | 2010 | 2015 | 2020 | 2025 | 2030 | 2035 | 2040 | 2045 |
|-----|------|------|------|------|------|------|------|------|------|------|------|
| GLO | 394  | 414  | 431  | 460  | 537  | 583  | 621  | 652  | 675  | 693  | 703  |
| CAZ | 919  | 921  | 914  | 908  | 885  | 866  | 851  | 836  | 820  | 803  | 786  |
| CHA | 392  | 485  | 545  | 633  | 785  | 865  | 875  | 839  | 789  | 742  | 701  |
| EUR | 962  | 966  | 961  | 950  | 938  | 927  | 913  | 895  | 874  | 852  | 831  |
| IND | 162  | 172  | 182  | 215  | 378  | 475  | 578  | 677  | 745  | 778  | 782  |
| JPN | 420  | 414  | 415  | 406  | 389  | 381  | 369  | 352  | 334  | 317  | 301  |
| LAM | 498  | 547  | 551  | 617  | 682  | 716  | 742  | 758  | 760  | 751  | 732  |
| MEA | 251  | 276  | 295  | 315  | 391  | 443  | 492  | 537  | 571  | 589  | 596  |
| NEU | 603  | 572  | 568  | 561  | 611  | 637  | 646  | 640  | 623  | 599  | 573  |
| OAS | 194  | 210  | 235  | 273  | 350  | 406  | 470  | 537  | 596  | 644  | 677  |
| REF | 627  | 556  | 616  | 677  | 725  | 762  | 793  | 810  | 810  | 795  | 775  |
| SSA | 130  | 127  | 142  | 152  | 177  | 213  | 264  | 334  | 422  | 524  | 623  |
| USA | 965  | 994  | 1017 | 970  | 946  | 916  | 889  | 865  | 844  | 827  | 813  |

Table 931: MAgPIE m4p\_SSP1 — Nutrition—Calorie Supply—Livestock products (kcal/capita/day) [PART 1/2]

|     | 2050 | 2055 | 2060 | 2070 | 2080 | 2090 | 2100 |
|-----|------|------|------|------|------|------|------|
| GLO | 707  | 703  | 692  | 654  | 609  | 570  | 529  |
| CAZ | 769  | 753  | 736  | 700  | 666  | 635  | 602  |
| CHA | 667  | 642  | 620  | 586  | 561  | 541  | 519  |
| EUR | 812  | 794  | 776  | 738  | 704  | 675  | 643  |
| IND | 767  | 739  | 706  | 637  | 576  | 528  | 482  |
| JPN | 286  | 271  | 256  | 226  | 198  | 177  | 155  |
| LAM | 707  | 678  | 648  | 588  | 535  | 490  | 445  |
| MEA | 595  | 586  | 570  | 525  | 479  | 439  | 397  |
| NEU | 549  | 526  | 503  | 461  | 425  | 401  | 371  |
| OAS | 696  | 702  | 697  | 668  | 627  | 590  | 551  |
| REF | 754  | 736  | 716  | 671  | 634  | 605  | 572  |
| SSA | 703  | 755  | 777  | 751  | 686  | 618  | 555  |
| USA | 801  | 790  | 780  | 758  | 739  | 720  | 697  |

Table 932: MAgPIE m4p\_SSP1 — Nutrition—Calorie Supply—Livestock products (kcal/capita/day) [PART 2/2]

34.4 Secondary products

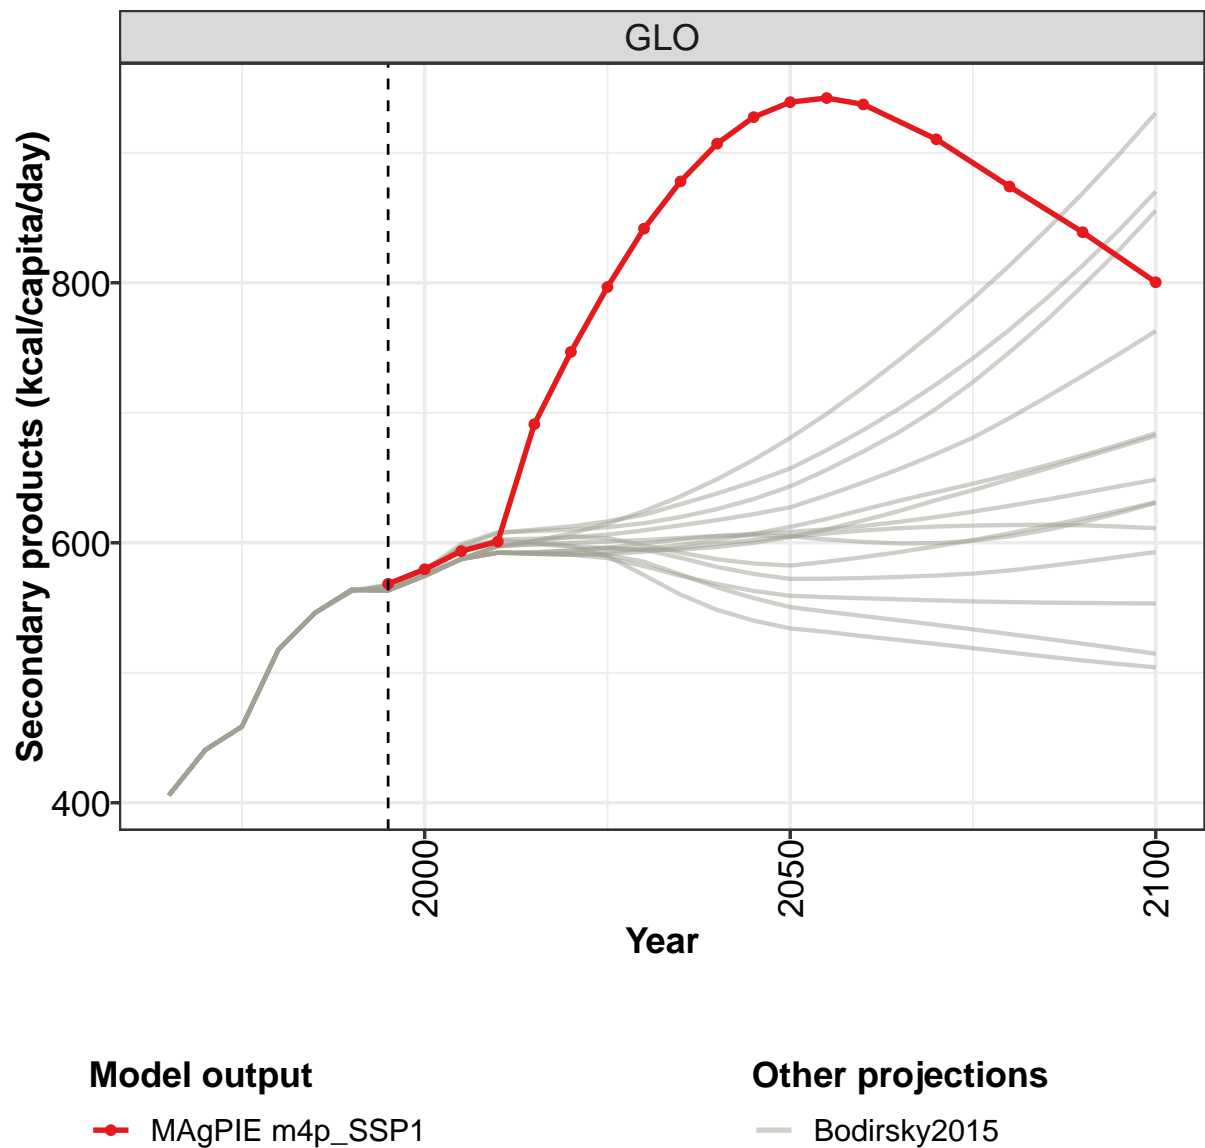

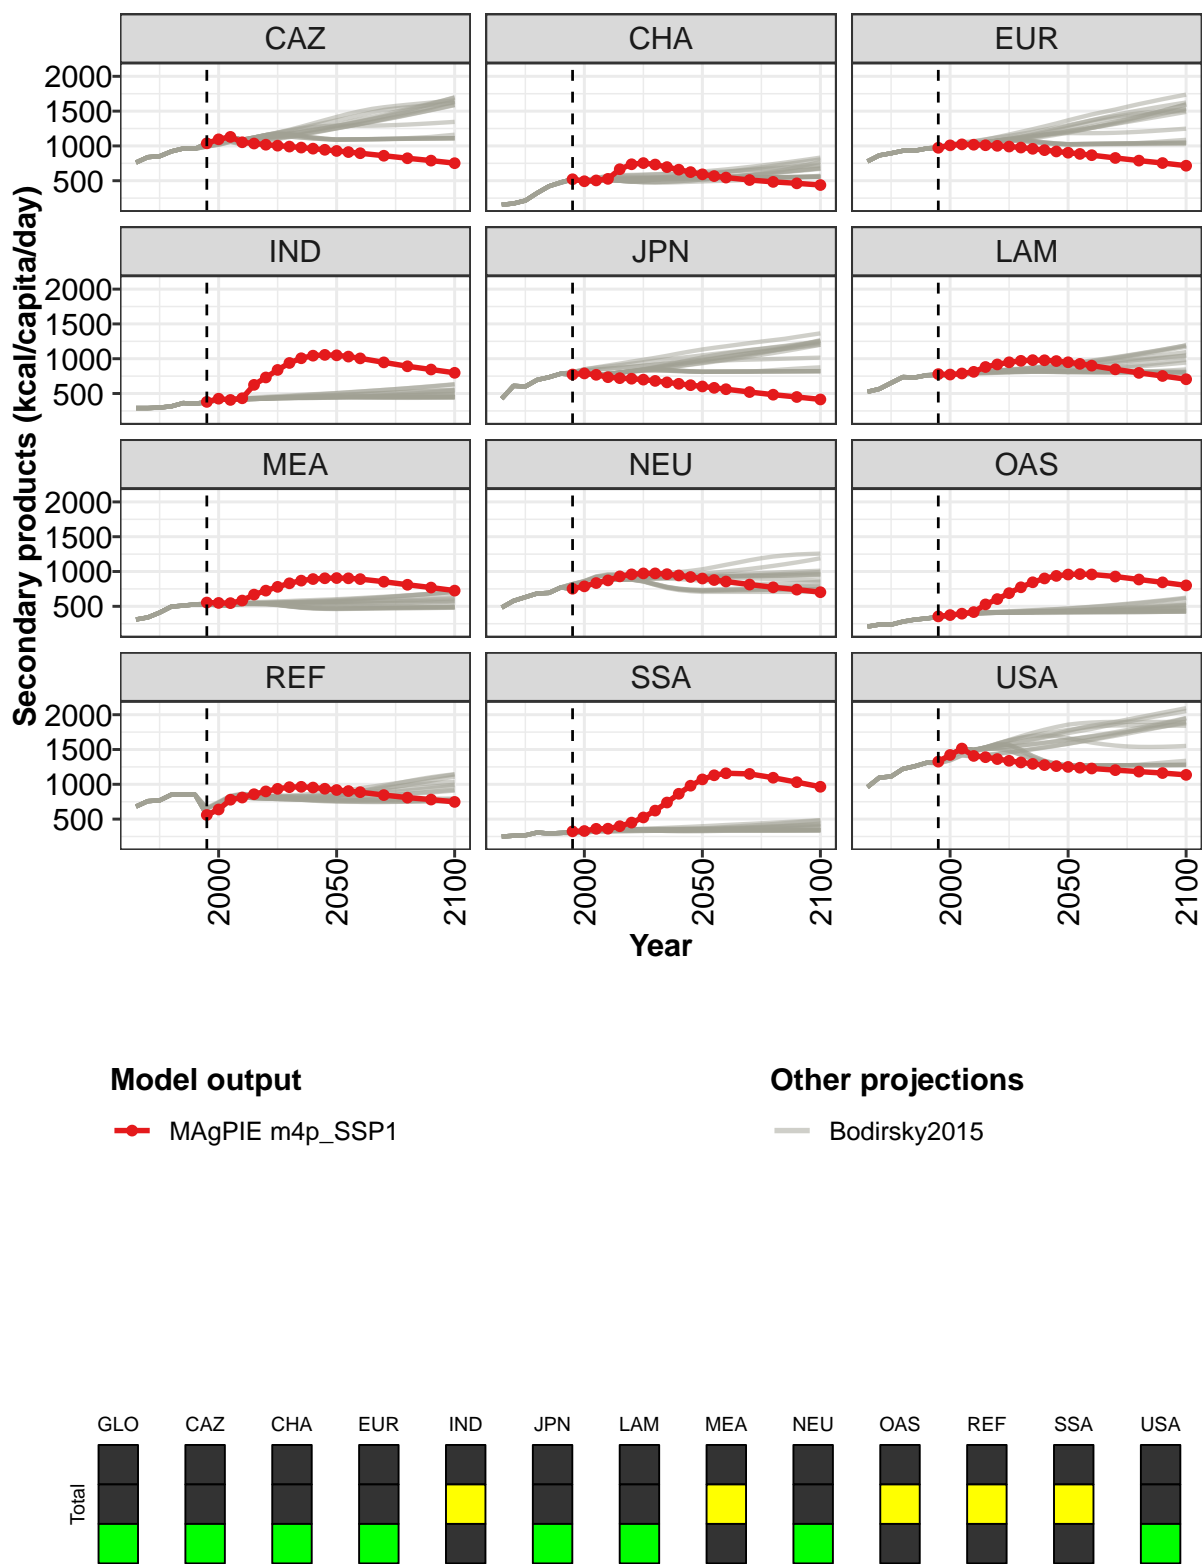

Figure 282: MAgPIE m4p\_SSP1 — Nutrition—Calorie Supply—Secondary products (kcal/capita/day)

|     | 1995 | 2000 | 2005 | 2010 | 2015 | 2020 | 2025 | 2030 | 2035 | 2040 | 2045 |
|-----|------|------|------|------|------|------|------|------|------|------|------|
| GLO | 568  | 580  | 594  | 601  | 691  | 747  | 797  | 842  | 878  | 907  | 927  |
| CAZ | 1037 | 1095 | 1130 | 1053 | 1035 | 1017 | 1004 | 991  | 976  | 961  | 945  |
| CHA | 521  | 493  | 504  | 527  | 666  | 737  | 754  | 733  | 696  | 659  | 624  |
| EUR | 973  | 1008 | 1023 | 1017 | 1010 | 1002 | 991  | 977  | 959  | 940  | 921  |
| IND | 380  | 426  | 408  | 432  | 625  | 731  | 839  | 939  | 1007 | 1044 | 1055 |
| JPN | 773  | 789  | 769  | 735  | 721  | 713  | 700  | 682  | 660  | 640  | 620  |
| LAM | 779  | 773  | 788  | 812  | 881  | 918  | 949  | 970  | 980  | 978  | 967  |
| MEA | 554  | 549  | 546  | 583  | 668  | 726  | 780  | 831  | 869  | 892  | 903  |
| NEU | 753  | 787  | 834  | 872  | 930  | 959  | 973  | 973  | 962  | 944  | 922  |
| OAS | 355  | 374  | 395  | 417  | 528  | 604  | 689  | 773  | 846  | 901  | 937  |
| REF | 560  | 638  | 779  | 810  | 858  | 898  | 935  | 959  | 964  | 954  | 936  |
| SSA | 324  | 329  | 360  | 362  | 398  | 450  | 524  | 622  | 738  | 864  | 980  |
| USA | 1326 | 1422 | 1514 | 1408 | 1390 | 1363 | 1337 | 1314 | 1294 | 1277 | 1262 |

Table 933: MAgPIE m4p\_SSP1 — Nutrition—Calorie Supply—Secondary products (kcal/capita/day) [PART 1/2]

|     | 2050 | 2055 | 2060 | 2070 | 2080 | 2090 | 2100 |
|-----|------|------|------|------|------|------|------|
| GLO | 939  | 942  | 937  | 910  | 874  | 839  | 800  |
| CAZ | 928  | 912  | 895  | 859  | 823  | 789  | 752  |
| CHA | 592  | 567  | 546  | 510  | 484  | 463  | 439  |
| EUR | 903  | 885  | 867  | 827  | 789  | 755  | 716  |
| IND | 1049 | 1031 | 1005 | 947  | 892  | 845  | 798  |
| JPN | 601  | 582  | 562  | 522  | 483  | 450  | 415  |
| LAM | 949  | 926  | 901  | 848  | 797  | 752  | 706  |
| MEA | 906  | 902  | 891  | 854  | 810  | 770  | 726  |
| NEU | 899  | 878  | 856  | 813  | 773  | 740  | 703  |
| OAS | 957  | 963  | 958  | 928  | 885  | 844  | 800  |
| REF | 918  | 903  | 887  | 846  | 809  | 781  | 747  |
| SSA | 1071 | 1130 | 1159 | 1149 | 1095 | 1031 | 965  |
| USA | 1250 | 1238 | 1227 | 1204 | 1183 | 1162 | 1136 |

Table 934: MAgPIE m4p\_SSP1 — Nutrition—Calorie Supply—Secondary products (kcal/capita/day) [PART 2/2]

## 35 Dietary Composition

### 35.1 Livestock Demand Structure

#### 35.1.1 Livestock products—Dairy

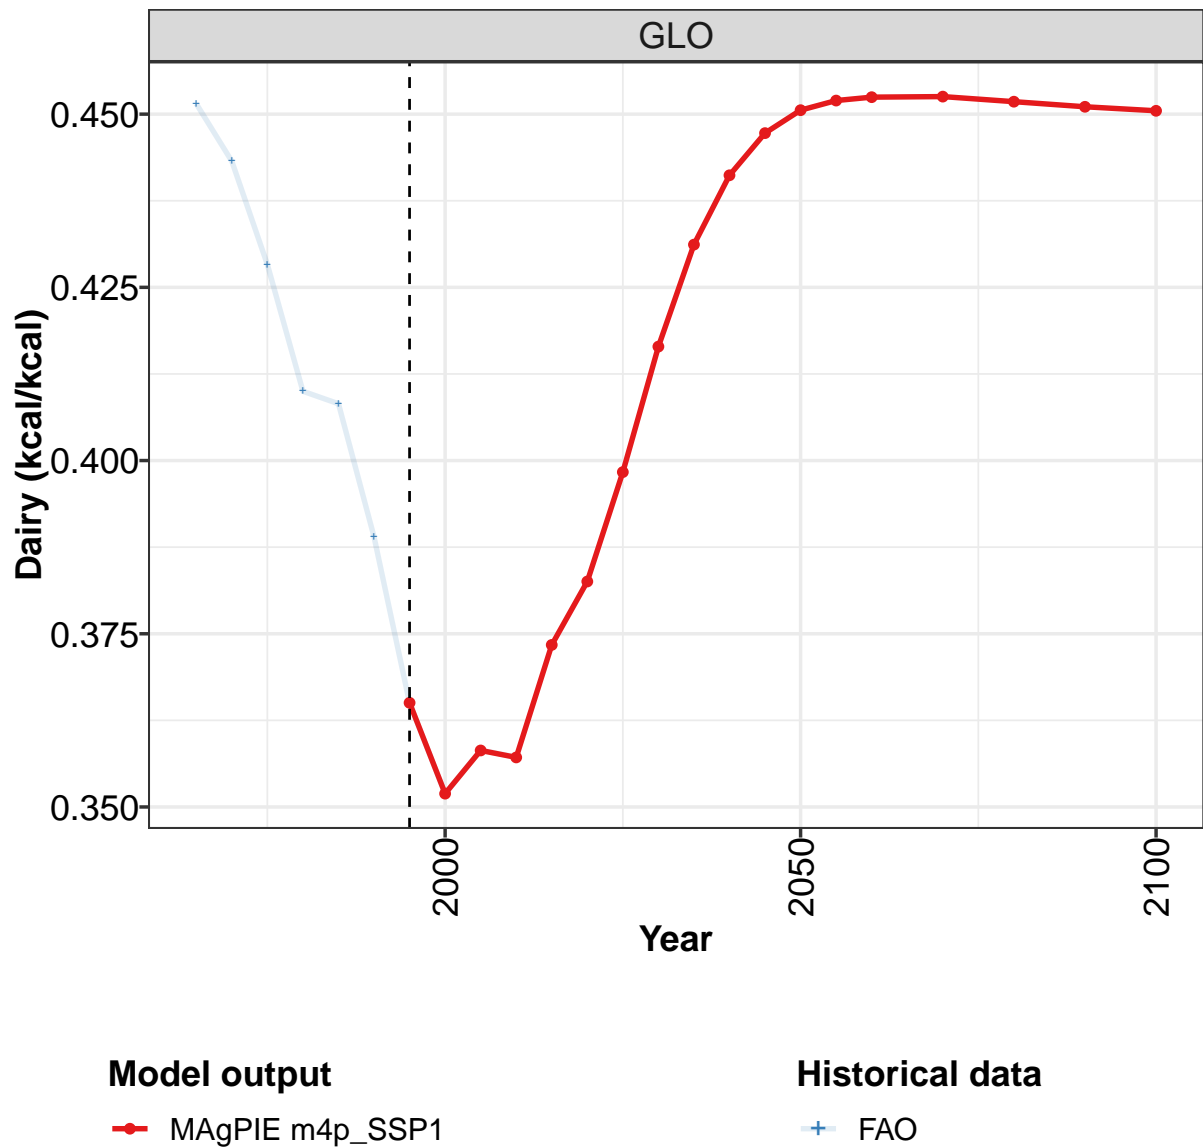

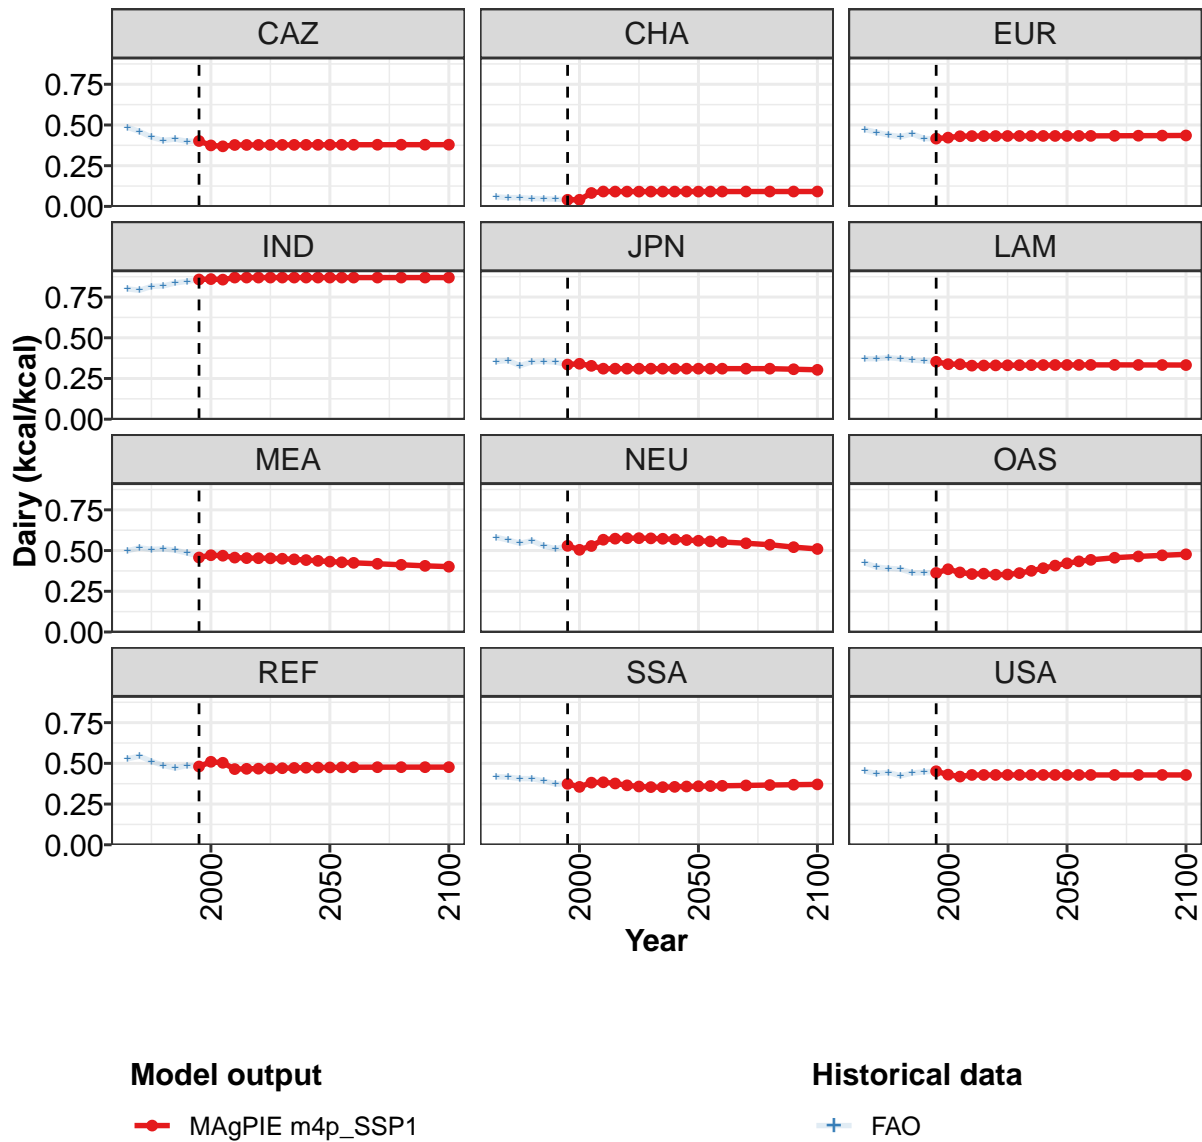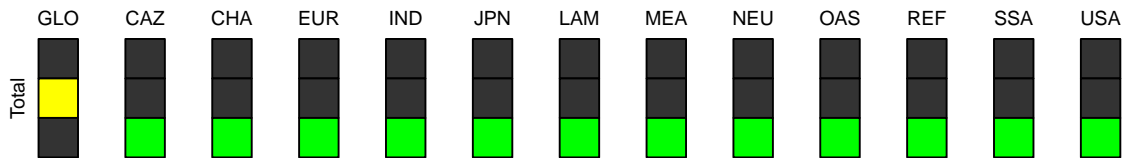

Figure 283: MAgPIE m4p\_SSP1 — Nutrition—Dietary Composition—Livestock Demand Structure—Livestock products—Dairy (kcal/kcal)

|     | 1995  | 2000  | 2005  | 2010  | 2015  | 2020  | 2025  | 2030  | 2035  | 2040  | 2045  |
|-----|-------|-------|-------|-------|-------|-------|-------|-------|-------|-------|-------|
| GLO | 0.365 | 0.352 | 0.358 | 0.357 | 0.373 | 0.383 | 0.398 | 0.416 | 0.431 | 0.441 | 0.447 |
| CAZ | 0.402 | 0.375 | 0.369 | 0.377 | 0.377 | 0.378 | 0.378 | 0.378 | 0.378 | 0.378 | 0.378 |
| CHA | 0.041 | 0.041 | 0.083 | 0.091 | 0.091 | 0.091 | 0.091 | 0.091 | 0.091 | 0.091 | 0.091 |
| EUR | 0.416 | 0.422 | 0.431 | 0.432 | 0.432 | 0.432 | 0.432 | 0.433 | 0.433 | 0.433 | 0.433 |
| IND | 0.858 | 0.860 | 0.857 | 0.870 | 0.870 | 0.870 | 0.870 | 0.870 | 0.870 | 0.870 | 0.870 |
| JPN | 0.336 | 0.341 | 0.328 | 0.310 | 0.310 | 0.310 | 0.310 | 0.310 | 0.310 | 0.310 | 0.310 |
| LAM | 0.353 | 0.338 | 0.338 | 0.329 | 0.330 | 0.331 | 0.331 | 0.332 | 0.332 | 0.333 | 0.333 |
| MEA | 0.458 | 0.472 | 0.469 | 0.457 | 0.454 | 0.453 | 0.453 | 0.450 | 0.446 | 0.442 | 0.437 |
| NEU | 0.529 | 0.505 | 0.528 | 0.567 | 0.573 | 0.576 | 0.576 | 0.575 | 0.572 | 0.569 | 0.565 |
| OAS | 0.363 | 0.385 | 0.366 | 0.356 | 0.358 | 0.352 | 0.353 | 0.362 | 0.376 | 0.392 | 0.408 |
| REF | 0.481 | 0.510 | 0.504 | 0.465 | 0.467 | 0.467 | 0.469 | 0.470 | 0.472 | 0.473 | 0.474 |
| SSA | 0.374 | 0.356 | 0.382 | 0.384 | 0.377 | 0.365 | 0.358 | 0.354 | 0.354 | 0.356 | 0.358 |
| USA | 0.452 | 0.431 | 0.419 | 0.429 | 0.429 | 0.429 | 0.429 | 0.429 | 0.429 | 0.429 | 0.429 |

Table 935: MAGPIE m4p\_SSP1 — Nutrition—Dietary Composition—Livestock Demand Structure—Livestock products—Dairy (kcal/kcal) [PART 1/2]

|     | 2050  | 2055  | 2060  | 2070  | 2080  | 2090  | 2100  |
|-----|-------|-------|-------|-------|-------|-------|-------|
| GLO | 0.451 | 0.452 | 0.452 | 0.453 | 0.452 | 0.451 | 0.450 |
| CAZ | 0.378 | 0.379 | 0.379 | 0.379 | 0.379 | 0.379 | 0.379 |
| CHA | 0.091 | 0.091 | 0.091 | 0.091 | 0.091 | 0.092 | 0.092 |
| EUR | 0.433 | 0.433 | 0.433 | 0.434 | 0.434 | 0.435 | 0.436 |
| IND | 0.870 | 0.870 | 0.870 | 0.870 | 0.870 | 0.870 | 0.870 |
| JPN | 0.310 | 0.310 | 0.310 | 0.310 | 0.310 | 0.307 | 0.303 |
| LAM | 0.333 | 0.333 | 0.333 | 0.334 | 0.333 | 0.333 | 0.333 |
| MEA | 0.432 | 0.428 | 0.425 | 0.419 | 0.413 | 0.406 | 0.401 |
| NEU | 0.560 | 0.557 | 0.553 | 0.545 | 0.536 | 0.521 | 0.510 |
| OAS | 0.422 | 0.434 | 0.443 | 0.456 | 0.464 | 0.471 | 0.477 |
| REF | 0.475 | 0.476 | 0.476 | 0.477 | 0.477 | 0.477 | 0.477 |
| SSA | 0.360 | 0.361 | 0.362 | 0.364 | 0.367 | 0.369 | 0.371 |
| USA | 0.429 | 0.429 | 0.429 | 0.429 | 0.429 | 0.429 | 0.429 |

Table 936: MAGPIE m4p\_SSP1 — Nutrition—Dietary Composition—Livestock Demand Structure—Livestock products—Dairy (kcal/kcal) [PART 2/2]

|     | 1965  | 1970  | 1975  | 1980  | 1985  | 1990  | 1995  | 2000  | 2005  | 2010  |
|-----|-------|-------|-------|-------|-------|-------|-------|-------|-------|-------|
| GLO | 0.452 | 0.443 | 0.428 | 0.410 | 0.408 | 0.389 | 0.365 | 0.352 | 0.358 | 0.357 |
| CAZ | 0.486 | 0.460 | 0.425 | 0.405 | 0.413 | 0.400 | 0.402 | 0.375 | 0.369 | 0.377 |
| CHA | 0.059 | 0.054 | 0.054 | 0.049 | 0.047 | 0.045 | 0.041 | 0.041 | 0.083 | 0.091 |
| EUR | 0.473 | 0.455 | 0.439 | 0.428 | 0.445 | 0.416 | 0.416 | 0.422 | 0.431 | 0.432 |
| IND | 0.800 | 0.792 | 0.816 | 0.818 | 0.837 | 0.847 | 0.858 | 0.861 | 0.857 | 0.870 |
| JPN | 0.354 | 0.361 | 0.329 | 0.352 | 0.356 | 0.350 | 0.336 | 0.341 | 0.328 | 0.310 |
| LAM | 0.372 | 0.372 | 0.378 | 0.371 | 0.362 | 0.359 | 0.353 | 0.338 | 0.337 | 0.329 |
| MEA | 0.499 | 0.517 | 0.507 | 0.511 | 0.502 | 0.485 | 0.465 | 0.480 | 0.477 | 0.466 |
| NEU | 0.582 | 0.565 | 0.545 | 0.561 | 0.528 | 0.511 | 0.530 | 0.505 | 0.529 | 0.568 |
| OAS | 0.424 | 0.399 | 0.391 | 0.386 | 0.362 | 0.364 | 0.363 | 0.386 | 0.366 | 0.356 |
| REF | 0.528 | 0.544 | 0.513 | 0.487 | 0.471 | 0.486 | 0.481 | 0.510 | 0.504 | 0.465 |
| SSA | 0.418 | 0.416 | 0.407 | 0.406 | 0.393 | 0.373 | 0.374 | 0.356 | 0.383 | 0.385 |
| USA | 0.452 | 0.438 | 0.444 | 0.424 | 0.441 | 0.448 | 0.452 | 0.431 | 0.419 | 0.429 |

Table 937: FAO — Nutrition—Dietary Composition—Livestock Demand Structure—Livestock products—Dairy (kcal/kcal)



35.1.2 Livestock products—Eggs

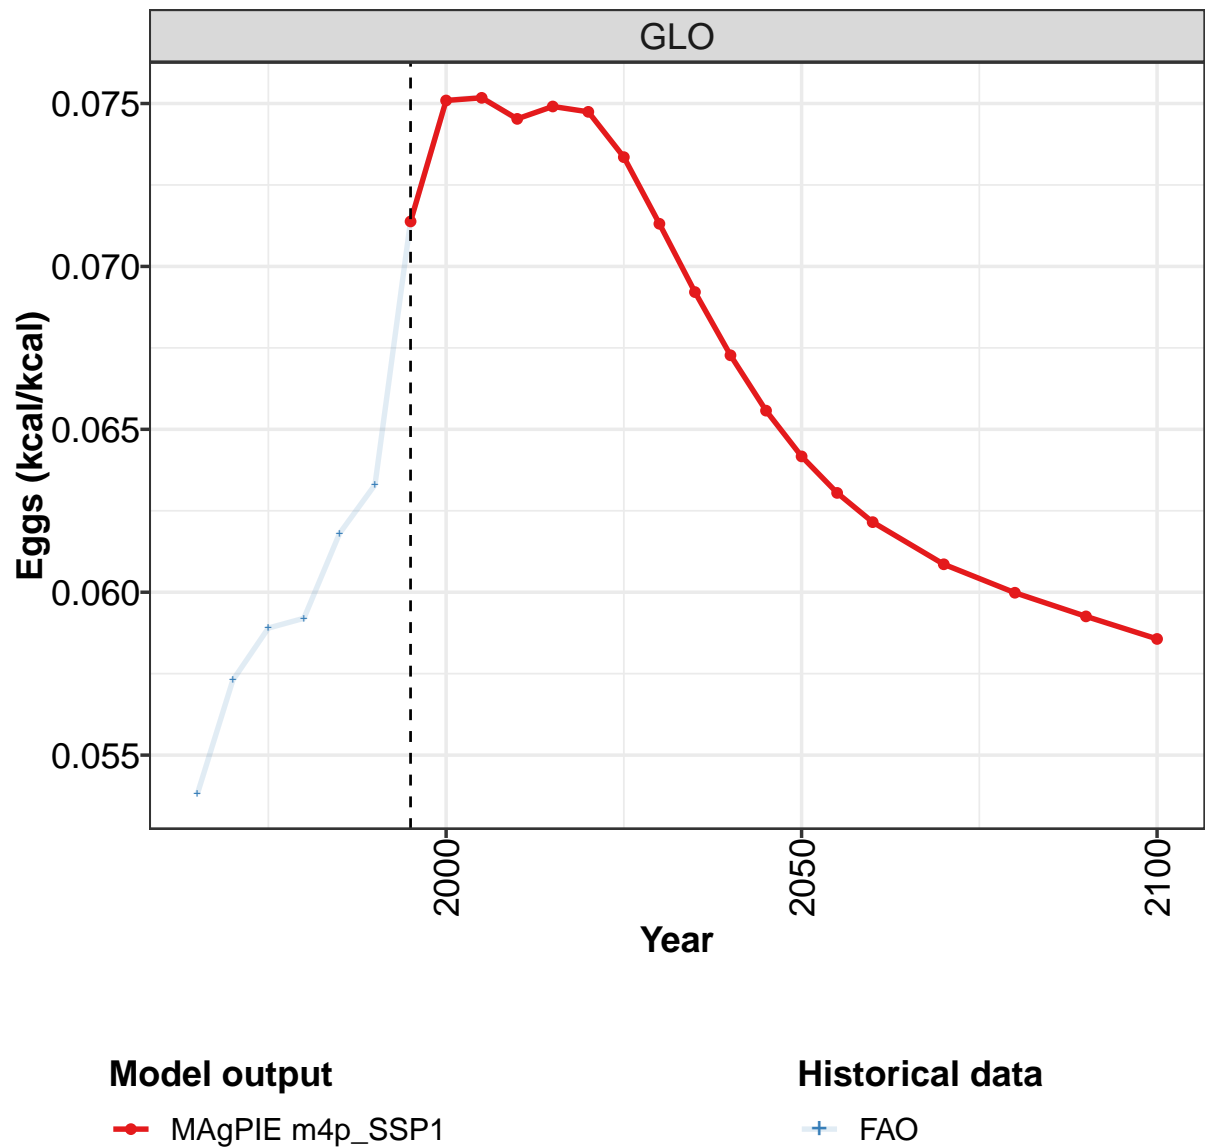

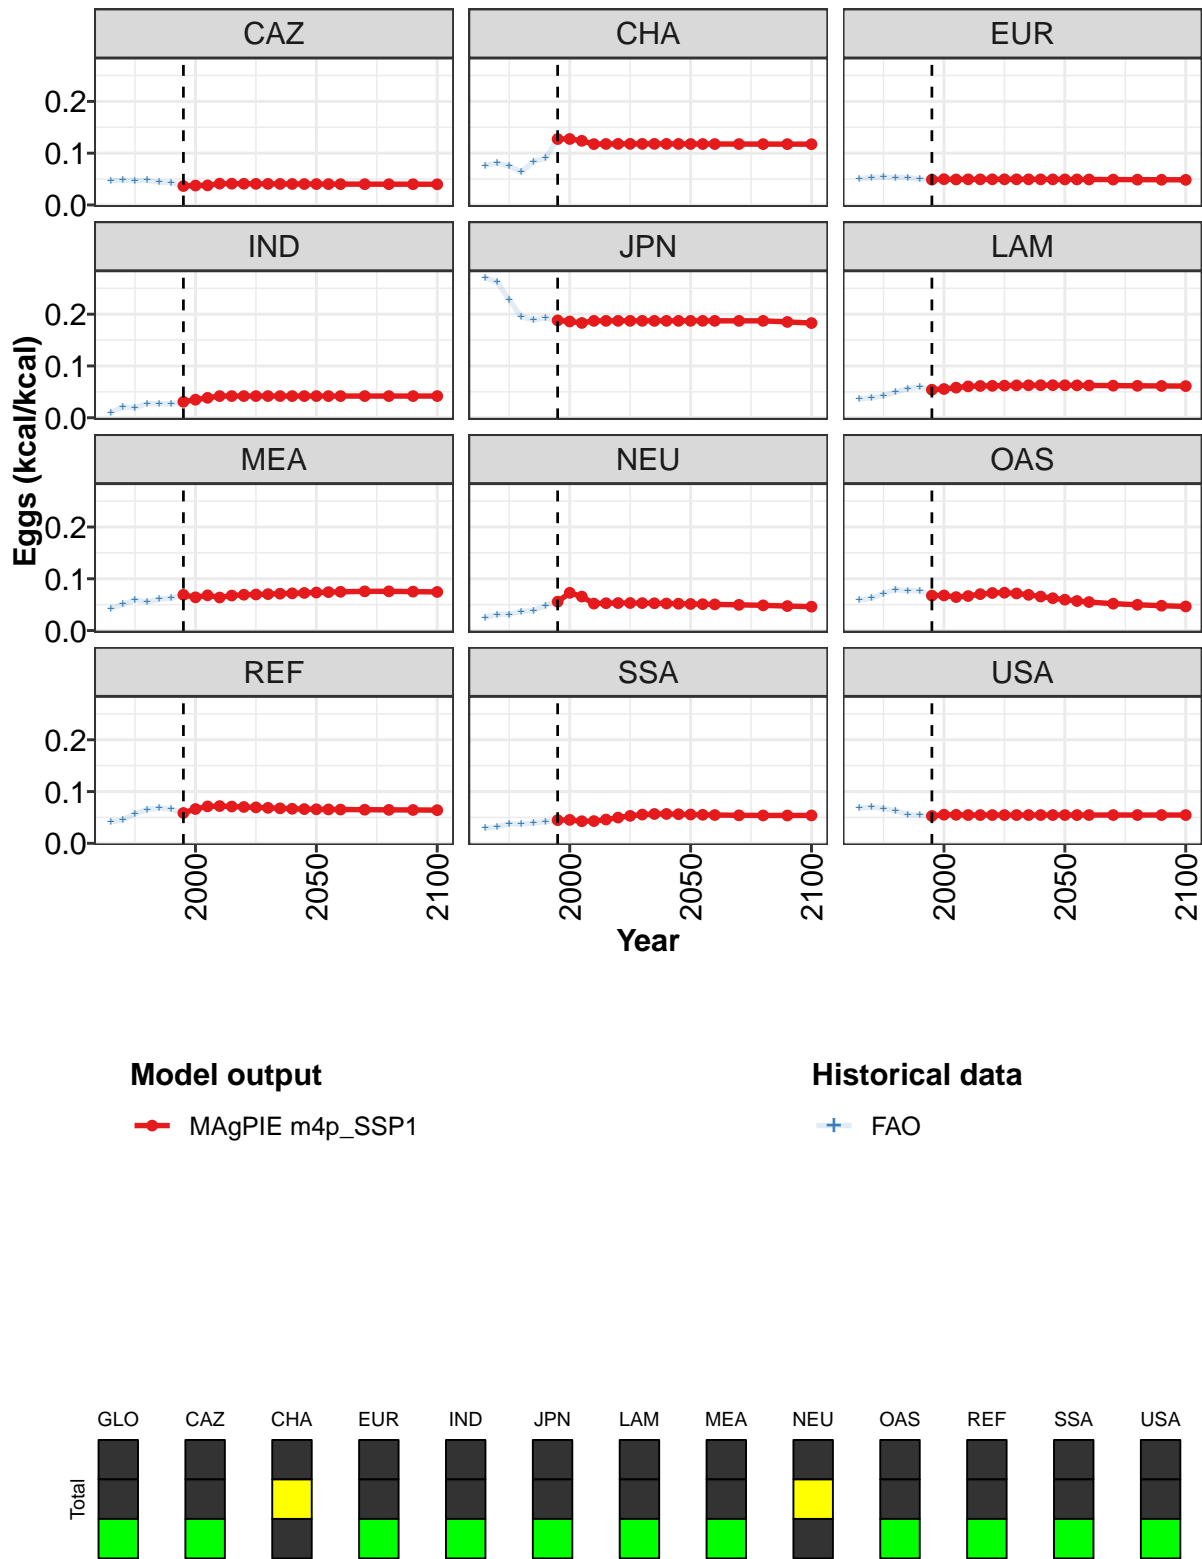

Figure 284: MAgPIE m4p\_SSP1 — Nutrition—Dietary Composition—Livestock Demand Structure—Livestock products—Eggs (kcal/kcal)

|     | 1995  | 2000  | 2005  | 2010  | 2015  | 2020  | 2025  | 2030  | 2035  | 2040  | 2045  |
|-----|-------|-------|-------|-------|-------|-------|-------|-------|-------|-------|-------|
| GLO | 0.071 | 0.075 | 0.075 | 0.075 | 0.075 | 0.075 | 0.073 | 0.071 | 0.069 | 0.067 | 0.066 |
| CAZ | 0.037 | 0.037 | 0.038 | 0.041 | 0.041 | 0.041 | 0.041 | 0.041 | 0.041 | 0.041 | 0.040 |
| CHA | 0.127 | 0.127 | 0.124 | 0.118 | 0.118 | 0.118 | 0.118 | 0.118 | 0.118 | 0.118 | 0.118 |
| EUR | 0.049 | 0.050 | 0.049 | 0.050 | 0.050 | 0.050 | 0.050 | 0.050 | 0.049 | 0.049 | 0.049 |
| IND | 0.031 | 0.035 | 0.038 | 0.042 | 0.042 | 0.042 | 0.042 | 0.042 | 0.042 | 0.042 | 0.042 |
| JPN | 0.188 | 0.186 | 0.183 | 0.187 | 0.187 | 0.187 | 0.187 | 0.187 | 0.187 | 0.187 | 0.187 |
| LAM | 0.054 | 0.056 | 0.058 | 0.061 | 0.061 | 0.062 | 0.062 | 0.062 | 0.063 | 0.063 | 0.063 |
| MEA | 0.069 | 0.064 | 0.068 | 0.064 | 0.068 | 0.069 | 0.070 | 0.070 | 0.071 | 0.072 | 0.073 |
| NEU | 0.056 | 0.073 | 0.066 | 0.052 | 0.053 | 0.053 | 0.053 | 0.053 | 0.053 | 0.052 | 0.052 |
| OAS | 0.068 | 0.068 | 0.065 | 0.067 | 0.070 | 0.073 | 0.073 | 0.072 | 0.069 | 0.066 | 0.062 |
| REF | 0.059 | 0.066 | 0.071 | 0.072 | 0.071 | 0.070 | 0.069 | 0.069 | 0.068 | 0.067 | 0.066 |
| SSA | 0.045 | 0.045 | 0.043 | 0.043 | 0.046 | 0.050 | 0.053 | 0.056 | 0.057 | 0.057 | 0.056 |
| USA | 0.053 | 0.055 | 0.055 | 0.055 | 0.055 | 0.055 | 0.055 | 0.055 | 0.055 | 0.055 | 0.055 |

Table 938: MAGPIE m4p\_SSP1 — Nutrition—Dietary Composition—Livestock Demand Structure—Livestock products—Eggs (kcal/kcal) [PART 1/2]

|     | 2050  | 2055  | 2060  | 2070  | 2080  | 2090  | 2100  |
|-----|-------|-------|-------|-------|-------|-------|-------|
| GLO | 0.064 | 0.063 | 0.062 | 0.061 | 0.060 | 0.059 | 0.059 |
| CAZ | 0.040 | 0.040 | 0.040 | 0.040 | 0.040 | 0.040 | 0.040 |
| CHA | 0.118 | 0.118 | 0.118 | 0.118 | 0.118 | 0.117 | 0.117 |
| EUR | 0.049 | 0.049 | 0.049 | 0.049 | 0.049 | 0.049 | 0.049 |
| IND | 0.042 | 0.042 | 0.042 | 0.042 | 0.042 | 0.042 | 0.042 |
| JPN | 0.187 | 0.187 | 0.187 | 0.187 | 0.187 | 0.185 | 0.183 |
| LAM | 0.063 | 0.063 | 0.062 | 0.062 | 0.062 | 0.061 | 0.061 |
| MEA | 0.073 | 0.074 | 0.075 | 0.076 | 0.076 | 0.075 | 0.075 |
| NEU | 0.051 | 0.051 | 0.051 | 0.050 | 0.049 | 0.047 | 0.046 |
| OAS | 0.060 | 0.057 | 0.055 | 0.052 | 0.050 | 0.048 | 0.047 |
| REF | 0.066 | 0.066 | 0.065 | 0.065 | 0.065 | 0.064 | 0.064 |
| SSA | 0.056 | 0.055 | 0.055 | 0.054 | 0.054 | 0.054 | 0.054 |
| USA | 0.055 | 0.055 | 0.055 | 0.055 | 0.055 | 0.055 | 0.055 |

Table 939: MAGPIE m4p\_SSP1 — Nutrition—Dietary Composition—Livestock Demand Structure—Livestock products—Eggs (kcal/kcal) [PART 2/2]

|     | 1965  | 1970  | 1975  | 1980  | 1985  | 1990  | 1995  | 2000  | 2005  | 2010  |
|-----|-------|-------|-------|-------|-------|-------|-------|-------|-------|-------|
| GLO | 0.054 | 0.057 | 0.059 | 0.059 | 0.062 | 0.063 | 0.071 | 0.075 | 0.075 | 0.074 |
| CAZ | 0.046 | 0.048 | 0.047 | 0.048 | 0.044 | 0.043 | 0.036 | 0.037 | 0.038 | 0.041 |
| CHA | 0.076 | 0.081 | 0.075 | 0.064 | 0.084 | 0.090 | 0.127 | 0.128 | 0.124 | 0.118 |
| EUR | 0.050 | 0.053 | 0.054 | 0.053 | 0.053 | 0.050 | 0.049 | 0.050 | 0.049 | 0.050 |
| IND | 0.010 | 0.021 | 0.019 | 0.027 | 0.027 | 0.027 | 0.031 | 0.035 | 0.038 | 0.042 |
| JPN | 0.271 | 0.262 | 0.227 | 0.195 | 0.189 | 0.193 | 0.188 | 0.186 | 0.183 | 0.187 |
| LAM | 0.036 | 0.039 | 0.043 | 0.049 | 0.057 | 0.059 | 0.054 | 0.055 | 0.058 | 0.060 |
| MEA | 0.043 | 0.051 | 0.059 | 0.055 | 0.060 | 0.063 | 0.069 | 0.063 | 0.068 | 0.063 |
| NEU | 0.025 | 0.031 | 0.031 | 0.037 | 0.039 | 0.049 | 0.056 | 0.073 | 0.066 | 0.052 |
| OAS | 0.059 | 0.062 | 0.072 | 0.079 | 0.076 | 0.077 | 0.067 | 0.068 | 0.064 | 0.067 |
| REF | 0.042 | 0.045 | 0.057 | 0.066 | 0.068 | 0.066 | 0.059 | 0.066 | 0.071 | 0.072 |
| SSA | 0.029 | 0.032 | 0.038 | 0.037 | 0.039 | 0.042 | 0.044 | 0.044 | 0.041 | 0.042 |
| USA | 0.068 | 0.070 | 0.068 | 0.063 | 0.056 | 0.054 | 0.053 | 0.055 | 0.055 | 0.055 |

Table 940: FAO — Nutrition—Dietary Composition—Livestock Demand Structure—Livestock products—Eggs (kcal/kcal)

35.1.3 Livestock products—Monogastric meat

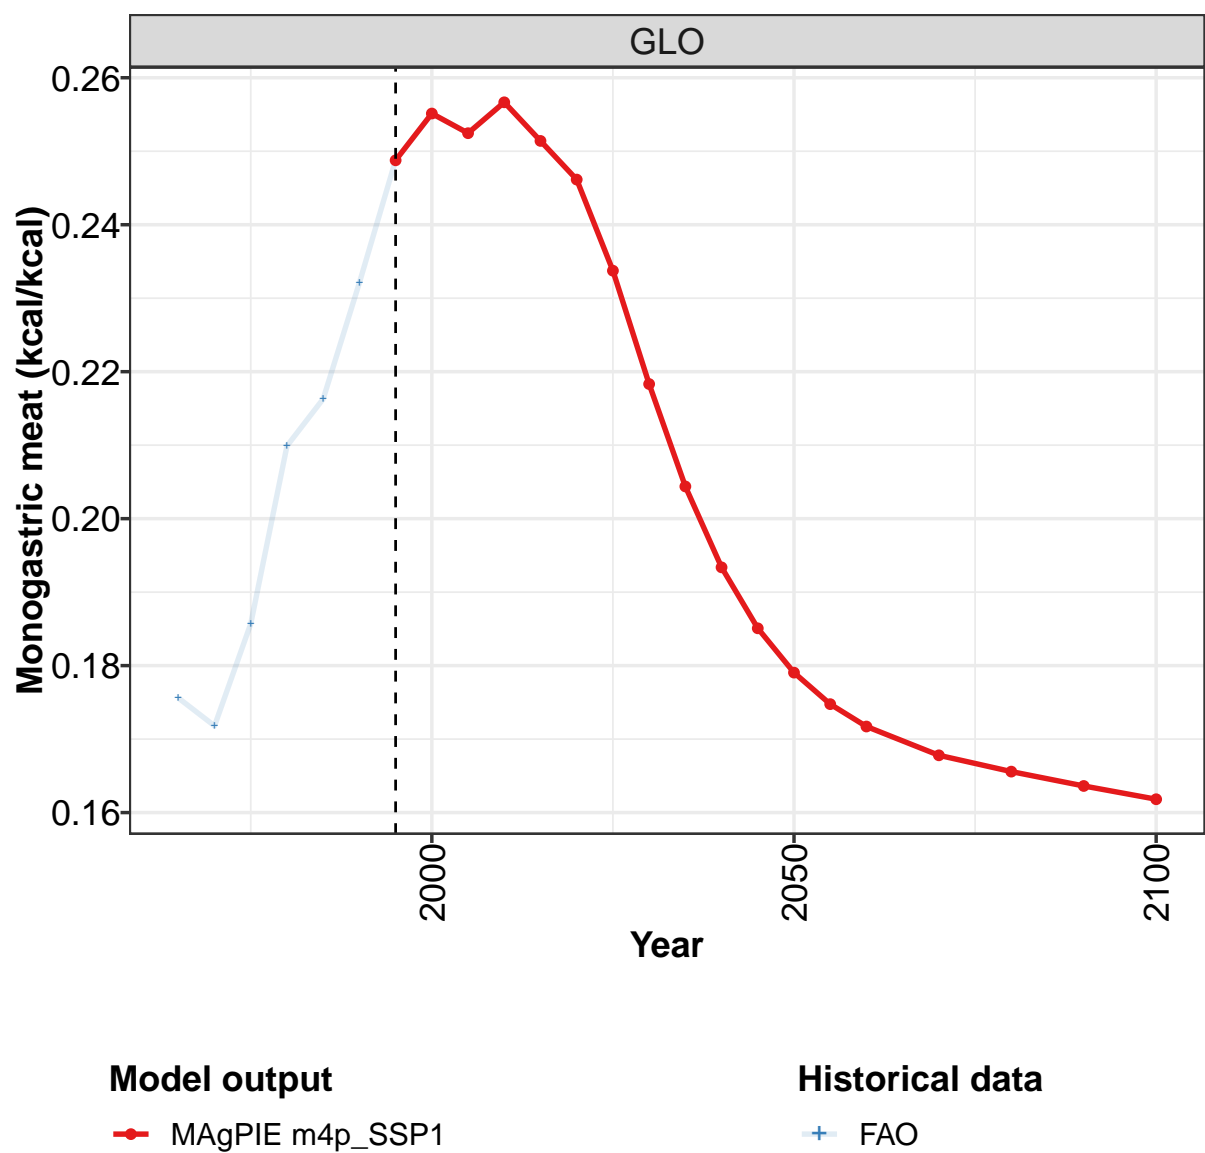

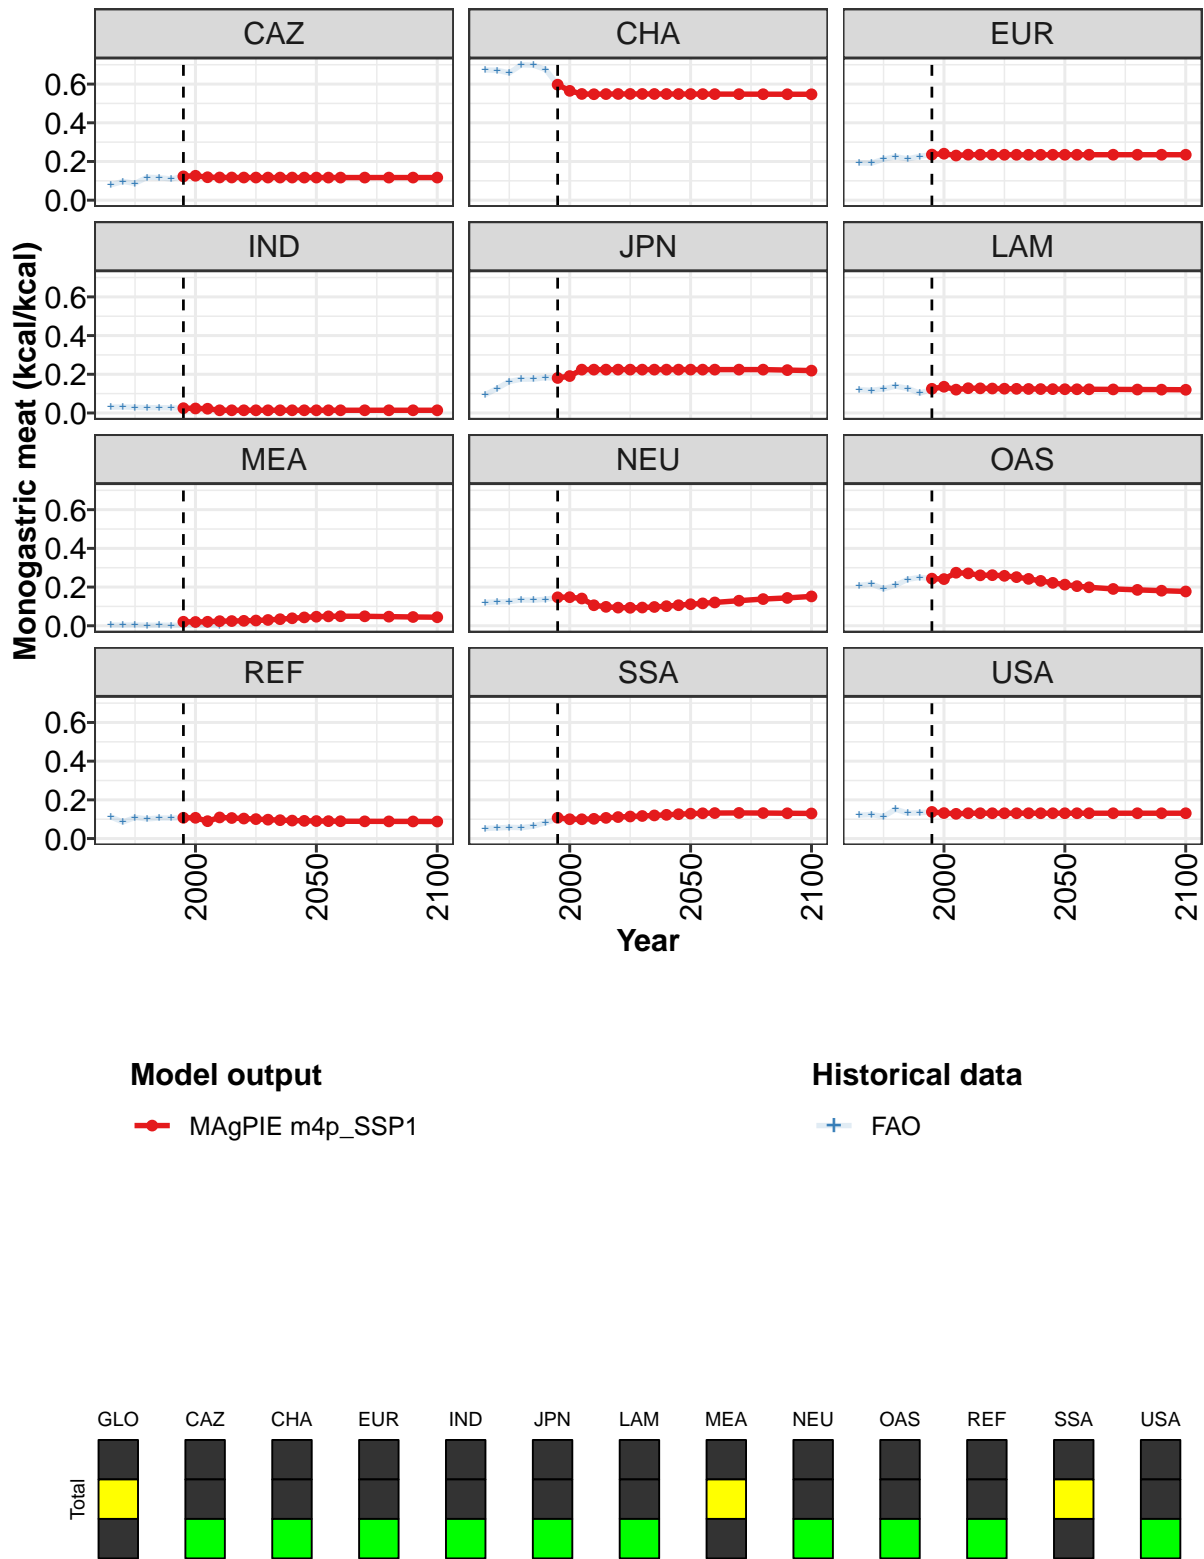

Figure 285: MAgPIE m4p\_SSP1 — Nutrition—Dietary Composition—Livestock Demand Structure—Livestock products—Monogastric meat (kcal/kcal)

|     | 1995  | 2000  | 2005  | 2010  | 2015  | 2020  | 2025  | 2030  | 2035  | 2040  | 2045  |
|-----|-------|-------|-------|-------|-------|-------|-------|-------|-------|-------|-------|
| GLO | 0.249 | 0.255 | 0.252 | 0.257 | 0.251 | 0.246 | 0.234 | 0.218 | 0.204 | 0.193 | 0.185 |
| CAZ | 0.123 | 0.126 | 0.119 | 0.117 | 0.117 | 0.117 | 0.117 | 0.117 | 0.117 | 0.117 | 0.117 |
| CHA | 0.597 | 0.565 | 0.549 | 0.548 | 0.549 | 0.549 | 0.549 | 0.549 | 0.549 | 0.549 | 0.549 |
| EUR | 0.236 | 0.240 | 0.231 | 0.235 | 0.235 | 0.235 | 0.235 | 0.235 | 0.235 | 0.235 | 0.235 |
| IND | 0.025 | 0.023 | 0.022 | 0.014 | 0.014 | 0.014 | 0.014 | 0.014 | 0.014 | 0.014 | 0.014 |
| JPN | 0.181 | 0.191 | 0.224 | 0.224 | 0.224 | 0.224 | 0.224 | 0.224 | 0.224 | 0.224 | 0.224 |
| LAM | 0.125 | 0.136 | 0.121 | 0.128 | 0.127 | 0.126 | 0.126 | 0.125 | 0.124 | 0.124 | 0.123 |
| MEA | 0.021 | 0.020 | 0.021 | 0.024 | 0.024 | 0.026 | 0.027 | 0.030 | 0.034 | 0.039 | 0.043 |
| NEU | 0.147 | 0.148 | 0.141 | 0.106 | 0.098 | 0.094 | 0.093 | 0.094 | 0.097 | 0.101 | 0.106 |
| OAS | 0.244 | 0.241 | 0.274 | 0.271 | 0.261 | 0.262 | 0.258 | 0.251 | 0.242 | 0.232 | 0.222 |
| REF | 0.108 | 0.107 | 0.090 | 0.109 | 0.106 | 0.103 | 0.101 | 0.098 | 0.095 | 0.093 | 0.091 |
| SSA | 0.107 | 0.100 | 0.100 | 0.102 | 0.107 | 0.111 | 0.114 | 0.117 | 0.120 | 0.123 | 0.126 |
| USA | 0.138 | 0.132 | 0.128 | 0.131 | 0.131 | 0.131 | 0.131 | 0.131 | 0.131 | 0.131 | 0.131 |

Table 941: MAGPIE m4p\_SSP1 — Nutrition—Dietary Composition—Livestock Demand Structure—Livestock products—Monogastric meat (kcal/kcal) [PART 1/2]

|     | 2050  | 2055  | 2060  | 2070  | 2080  | 2090  | 2100  |
|-----|-------|-------|-------|-------|-------|-------|-------|
| GLO | 0.179 | 0.175 | 0.172 | 0.168 | 0.166 | 0.164 | 0.162 |
| CAZ | 0.117 | 0.117 | 0.117 | 0.117 | 0.117 | 0.117 | 0.117 |
| CHA | 0.549 | 0.548 | 0.548 | 0.548 | 0.548 | 0.548 | 0.547 |
| EUR | 0.235 | 0.235 | 0.235 | 0.235 | 0.235 | 0.235 | 0.235 |
| IND | 0.014 | 0.014 | 0.014 | 0.014 | 0.014 | 0.014 | 0.014 |
| JPN | 0.224 | 0.224 | 0.224 | 0.224 | 0.224 | 0.222 | 0.219 |
| LAM | 0.123 | 0.123 | 0.122 | 0.122 | 0.121 | 0.121 | 0.120 |
| MEA | 0.047 | 0.049 | 0.049 | 0.049 | 0.047 | 0.045 | 0.044 |
| NEU | 0.111 | 0.116 | 0.120 | 0.130 | 0.138 | 0.144 | 0.152 |
| OAS | 0.213 | 0.205 | 0.199 | 0.190 | 0.185 | 0.181 | 0.177 |
| REF | 0.091 | 0.090 | 0.090 | 0.089 | 0.089 | 0.088 | 0.088 |
| SSA | 0.129 | 0.131 | 0.132 | 0.132 | 0.132 | 0.131 | 0.130 |
| USA | 0.131 | 0.131 | 0.131 | 0.131 | 0.131 | 0.131 | 0.131 |

Table 942: MAGPIE m4p\_SSP1 — Nutrition—Dietary Composition—Livestock Demand Structure—Livestock products—Monogastric meat (kcal/kcal) [PART 2/2]

|     | 1965  | 1970  | 1975  | 1980  | 1985  | 1990  | 1995  | 2000  | 2005  | 2010  |
|-----|-------|-------|-------|-------|-------|-------|-------|-------|-------|-------|
| GLO | 0.176 | 0.172 | 0.186 | 0.210 | 0.216 | 0.232 | 0.249 | 0.255 | 0.253 | 0.257 |
| CAZ | 0.079 | 0.097 | 0.087 | 0.118 | 0.116 | 0.109 | 0.123 | 0.126 | 0.119 | 0.117 |
| CHA | 0.673 | 0.671 | 0.658 | 0.700 | 0.698 | 0.676 | 0.597 | 0.565 | 0.549 | 0.548 |
| EUR | 0.193 | 0.191 | 0.212 | 0.225 | 0.213 | 0.227 | 0.236 | 0.240 | 0.231 | 0.235 |
| IND | 0.030 | 0.031 | 0.029 | 0.027 | 0.027 | 0.027 | 0.025 | 0.023 | 0.022 | 0.014 |
| JPN | 0.094 | 0.127 | 0.163 | 0.175 | 0.175 | 0.182 | 0.181 | 0.191 | 0.224 | 0.224 |
| LAM | 0.120 | 0.117 | 0.124 | 0.138 | 0.127 | 0.102 | 0.123 | 0.134 | 0.119 | 0.127 |
| MEA | 0.004 | 0.003 | 0.004 | 0.002 | 0.003 | 0.002 | 0.002 | 0.003 | 0.003 | 0.002 |
| NEU | 0.120 | 0.124 | 0.125 | 0.134 | 0.132 | 0.137 | 0.147 | 0.147 | 0.141 | 0.106 |
| OAS | 0.209 | 0.216 | 0.191 | 0.209 | 0.240 | 0.250 | 0.244 | 0.241 | 0.275 | 0.271 |
| REF | 0.112 | 0.086 | 0.109 | 0.102 | 0.106 | 0.106 | 0.107 | 0.107 | 0.090 | 0.109 |
| SSA | 0.052 | 0.055 | 0.058 | 0.056 | 0.064 | 0.082 | 0.101 | 0.094 | 0.094 | 0.096 |
| USA | 0.121 | 0.124 | 0.114 | 0.151 | 0.131 | 0.133 | 0.138 | 0.132 | 0.128 | 0.131 |

Table 943: FAO — Nutrition—Dietary Composition—Livestock Demand Structure—Livestock products—Monogastric meat (kcal/kcal)

35.1.4 Livestock products—Poultry meat

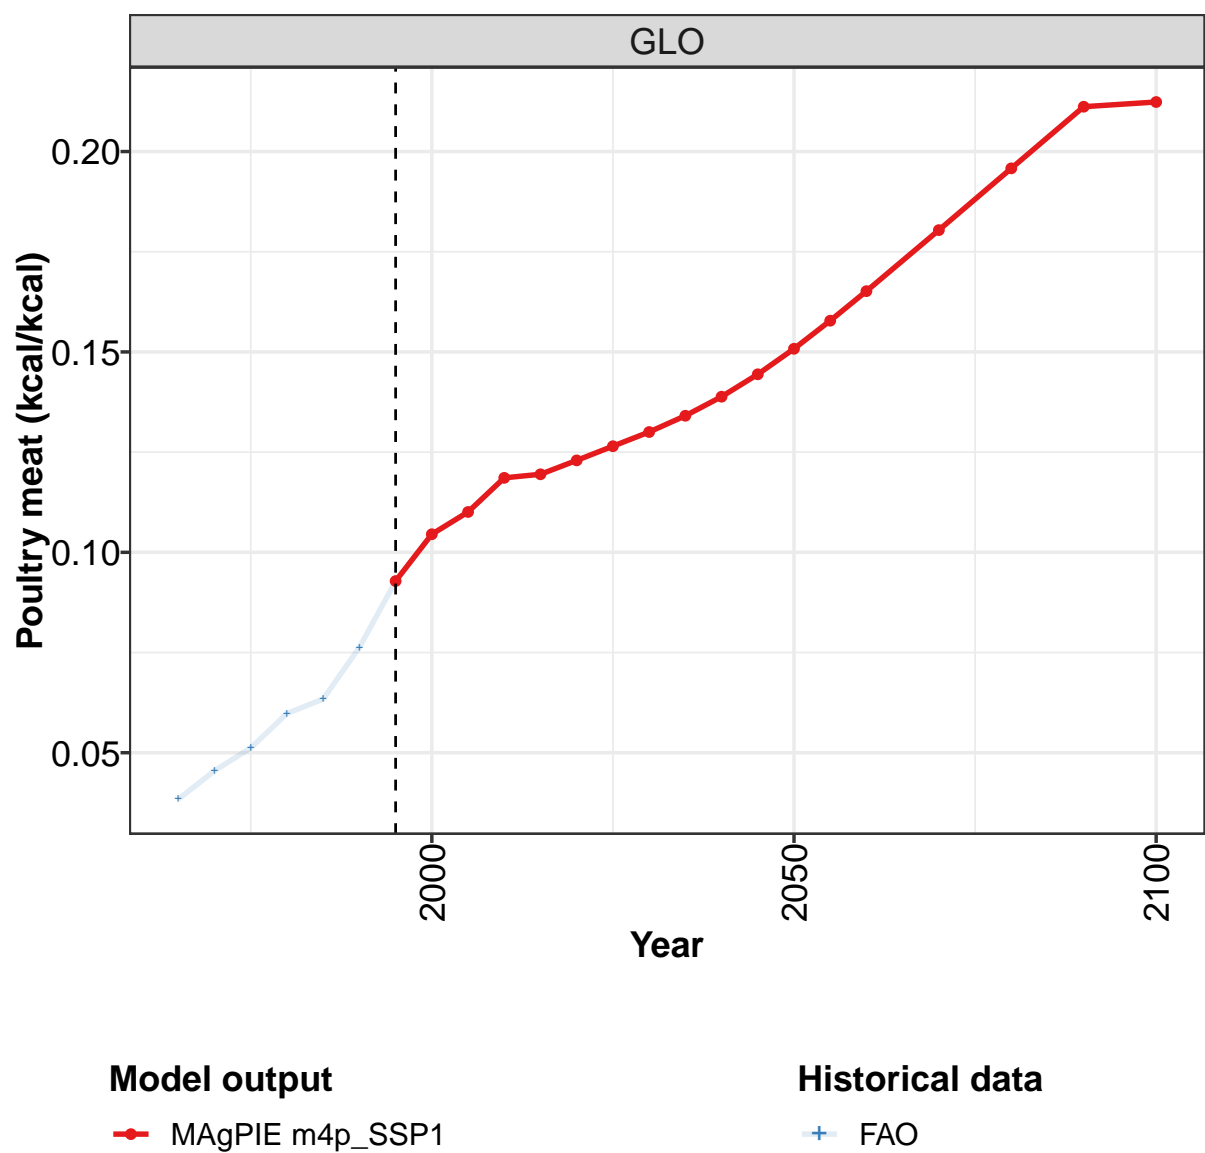

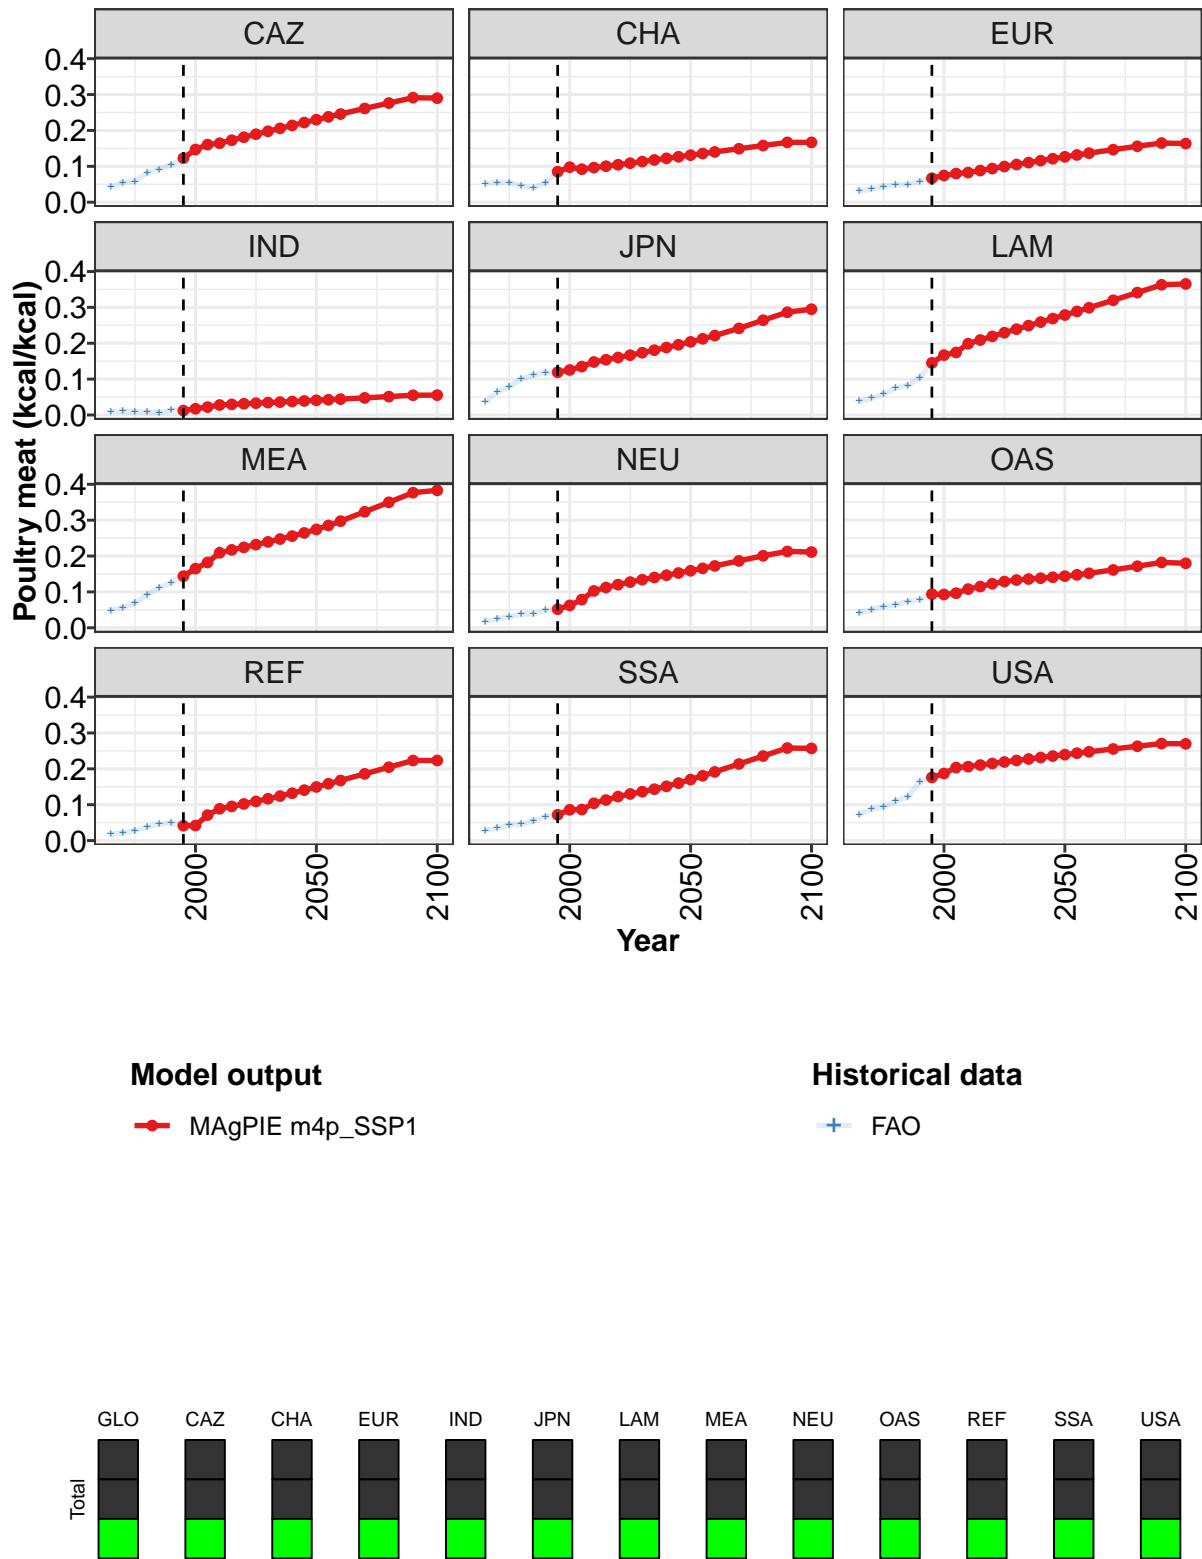

Figure 286: MAgPIE m4p\_SSP1 — Nutrition—Dietary Composition—Livestock Demand Structure—Livestock products—Poultry meat (kcal/kcal)



|     | 1995  | 2000  | 2005  | 2010  | 2015  | 2020  | 2025  | 2030  | 2035  | 2040  | 2045  |
|-----|-------|-------|-------|-------|-------|-------|-------|-------|-------|-------|-------|
| GLO | 0.093 | 0.105 | 0.110 | 0.119 | 0.119 | 0.123 | 0.126 | 0.130 | 0.134 | 0.139 | 0.144 |
| CAZ | 0.123 | 0.147 | 0.161 | 0.165 | 0.173 | 0.181 | 0.189 | 0.198 | 0.206 | 0.214 | 0.222 |
| CHA | 0.085 | 0.098 | 0.092 | 0.097 | 0.100 | 0.104 | 0.109 | 0.113 | 0.118 | 0.122 | 0.127 |
| EUR | 0.067 | 0.074 | 0.080 | 0.083 | 0.088 | 0.094 | 0.100 | 0.105 | 0.110 | 0.116 | 0.121 |
| IND | 0.012 | 0.017 | 0.022 | 0.028 | 0.030 | 0.031 | 0.033 | 0.034 | 0.036 | 0.038 | 0.039 |
| JPN | 0.119 | 0.126 | 0.135 | 0.148 | 0.154 | 0.160 | 0.167 | 0.174 | 0.181 | 0.188 | 0.196 |
| LAM | 0.145 | 0.167 | 0.174 | 0.199 | 0.209 | 0.219 | 0.229 | 0.239 | 0.249 | 0.259 | 0.269 |
| MEA | 0.144 | 0.165 | 0.182 | 0.209 | 0.217 | 0.224 | 0.232 | 0.239 | 0.247 | 0.256 | 0.265 |
| NEU | 0.052 | 0.062 | 0.079 | 0.103 | 0.112 | 0.120 | 0.127 | 0.134 | 0.140 | 0.147 | 0.153 |
| OAS | 0.094 | 0.093 | 0.096 | 0.108 | 0.115 | 0.123 | 0.129 | 0.133 | 0.136 | 0.138 | 0.141 |
| REF | 0.042 | 0.042 | 0.071 | 0.089 | 0.095 | 0.102 | 0.109 | 0.116 | 0.124 | 0.132 | 0.141 |
| SSA | 0.072 | 0.086 | 0.087 | 0.104 | 0.113 | 0.123 | 0.130 | 0.136 | 0.143 | 0.151 | 0.160 |
| USA | 0.176 | 0.187 | 0.204 | 0.206 | 0.211 | 0.215 | 0.219 | 0.223 | 0.227 | 0.232 | 0.236 |

Table 944: MAGPIE m4p\_SSP1 — Nutrition—Dietary Composition—Livestock Demand Structure—Livestock products—Poultry meat (kcal/kcal) [PART 1/2]

|     | 2050  | 2055  | 2060  | 2070  | 2080  | 2090  | 2100  |
|-----|-------|-------|-------|-------|-------|-------|-------|
| GLO | 0.151 | 0.158 | 0.165 | 0.180 | 0.196 | 0.211 | 0.212 |
| CAZ | 0.230 | 0.238 | 0.246 | 0.261 | 0.276 | 0.291 | 0.290 |
| CHA | 0.131 | 0.136 | 0.140 | 0.149 | 0.158 | 0.167 | 0.167 |
| EUR | 0.127 | 0.132 | 0.137 | 0.147 | 0.156 | 0.165 | 0.163 |
| IND | 0.041 | 0.043 | 0.044 | 0.048 | 0.051 | 0.055 | 0.055 |
| JPN | 0.204 | 0.212 | 0.221 | 0.241 | 0.264 | 0.286 | 0.295 |
| LAM | 0.279 | 0.289 | 0.299 | 0.320 | 0.341 | 0.363 | 0.365 |
| MEA | 0.274 | 0.285 | 0.297 | 0.323 | 0.350 | 0.377 | 0.383 |
| NEU | 0.159 | 0.166 | 0.172 | 0.187 | 0.201 | 0.213 | 0.211 |
| OAS | 0.144 | 0.148 | 0.152 | 0.161 | 0.172 | 0.182 | 0.180 |
| REF | 0.150 | 0.158 | 0.168 | 0.186 | 0.205 | 0.223 | 0.223 |
| SSA | 0.170 | 0.181 | 0.191 | 0.213 | 0.236 | 0.258 | 0.257 |
| USA | 0.240 | 0.244 | 0.248 | 0.255 | 0.263 | 0.270 | 0.270 |

Table 945: MAGPIE m4p\_SSP1 — Nutrition—Dietary Composition—Livestock Demand Structure—Livestock products—Poultry meat (kcal/kcal) [PART 2/2]

|     | 1965  | 1970  | 1975  | 1980  | 1985  | 1990  | 1995  | 2000  | 2005  | 2010  |
|-----|-------|-------|-------|-------|-------|-------|-------|-------|-------|-------|
| GLO | 0.038 | 0.045 | 0.051 | 0.060 | 0.063 | 0.076 | 0.093 | 0.104 | 0.110 | 0.119 |
| CAZ | 0.042 | 0.055 | 0.058 | 0.082 | 0.092 | 0.104 | 0.123 | 0.147 | 0.161 | 0.165 |
| CHA | 0.052 | 0.055 | 0.055 | 0.045 | 0.040 | 0.054 | 0.085 | 0.098 | 0.092 | 0.097 |
| EUR | 0.031 | 0.037 | 0.043 | 0.049 | 0.050 | 0.058 | 0.067 | 0.074 | 0.080 | 0.083 |
| IND | 0.010 | 0.010 | 0.010 | 0.009 | 0.007 | 0.013 | 0.012 | 0.017 | 0.022 | 0.028 |
| JPN | 0.036 | 0.064 | 0.079 | 0.101 | 0.111 | 0.118 | 0.119 | 0.126 | 0.135 | 0.148 |
| LAM | 0.038 | 0.047 | 0.058 | 0.075 | 0.083 | 0.104 | 0.146 | 0.168 | 0.175 | 0.200 |
| MEA | 0.048 | 0.057 | 0.069 | 0.092 | 0.112 | 0.125 | 0.148 | 0.169 | 0.188 | 0.218 |
| NEU | 0.018 | 0.025 | 0.031 | 0.038 | 0.038 | 0.049 | 0.052 | 0.062 | 0.079 | 0.103 |
| OAS | 0.043 | 0.050 | 0.059 | 0.064 | 0.073 | 0.078 | 0.094 | 0.093 | 0.096 | 0.108 |
| REF | 0.018 | 0.021 | 0.027 | 0.038 | 0.046 | 0.050 | 0.042 | 0.042 | 0.071 | 0.089 |
| SSA | 0.028 | 0.035 | 0.044 | 0.046 | 0.054 | 0.067 | 0.071 | 0.085 | 0.086 | 0.103 |
| USA | 0.072 | 0.088 | 0.093 | 0.110 | 0.122 | 0.164 | 0.176 | 0.187 | 0.203 | 0.206 |

Table 946: FAO — Nutrition—Dietary Composition—Livestock Demand Structure—Livestock products—Poultry meat (kcal/kcal)

35.1.5 Livestock products—Ruminant meat

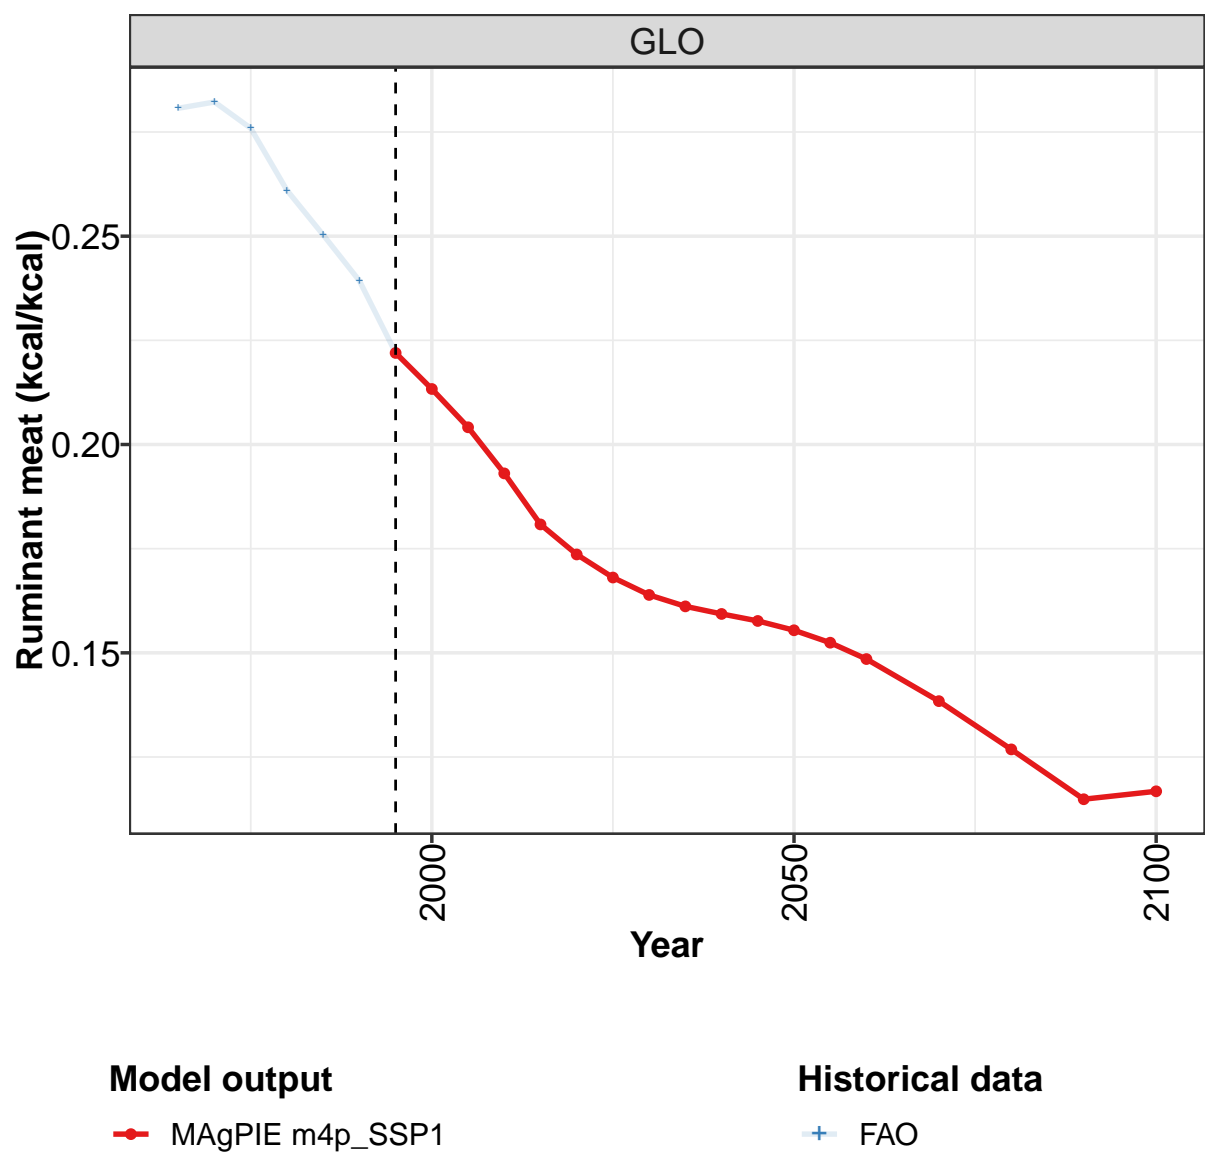

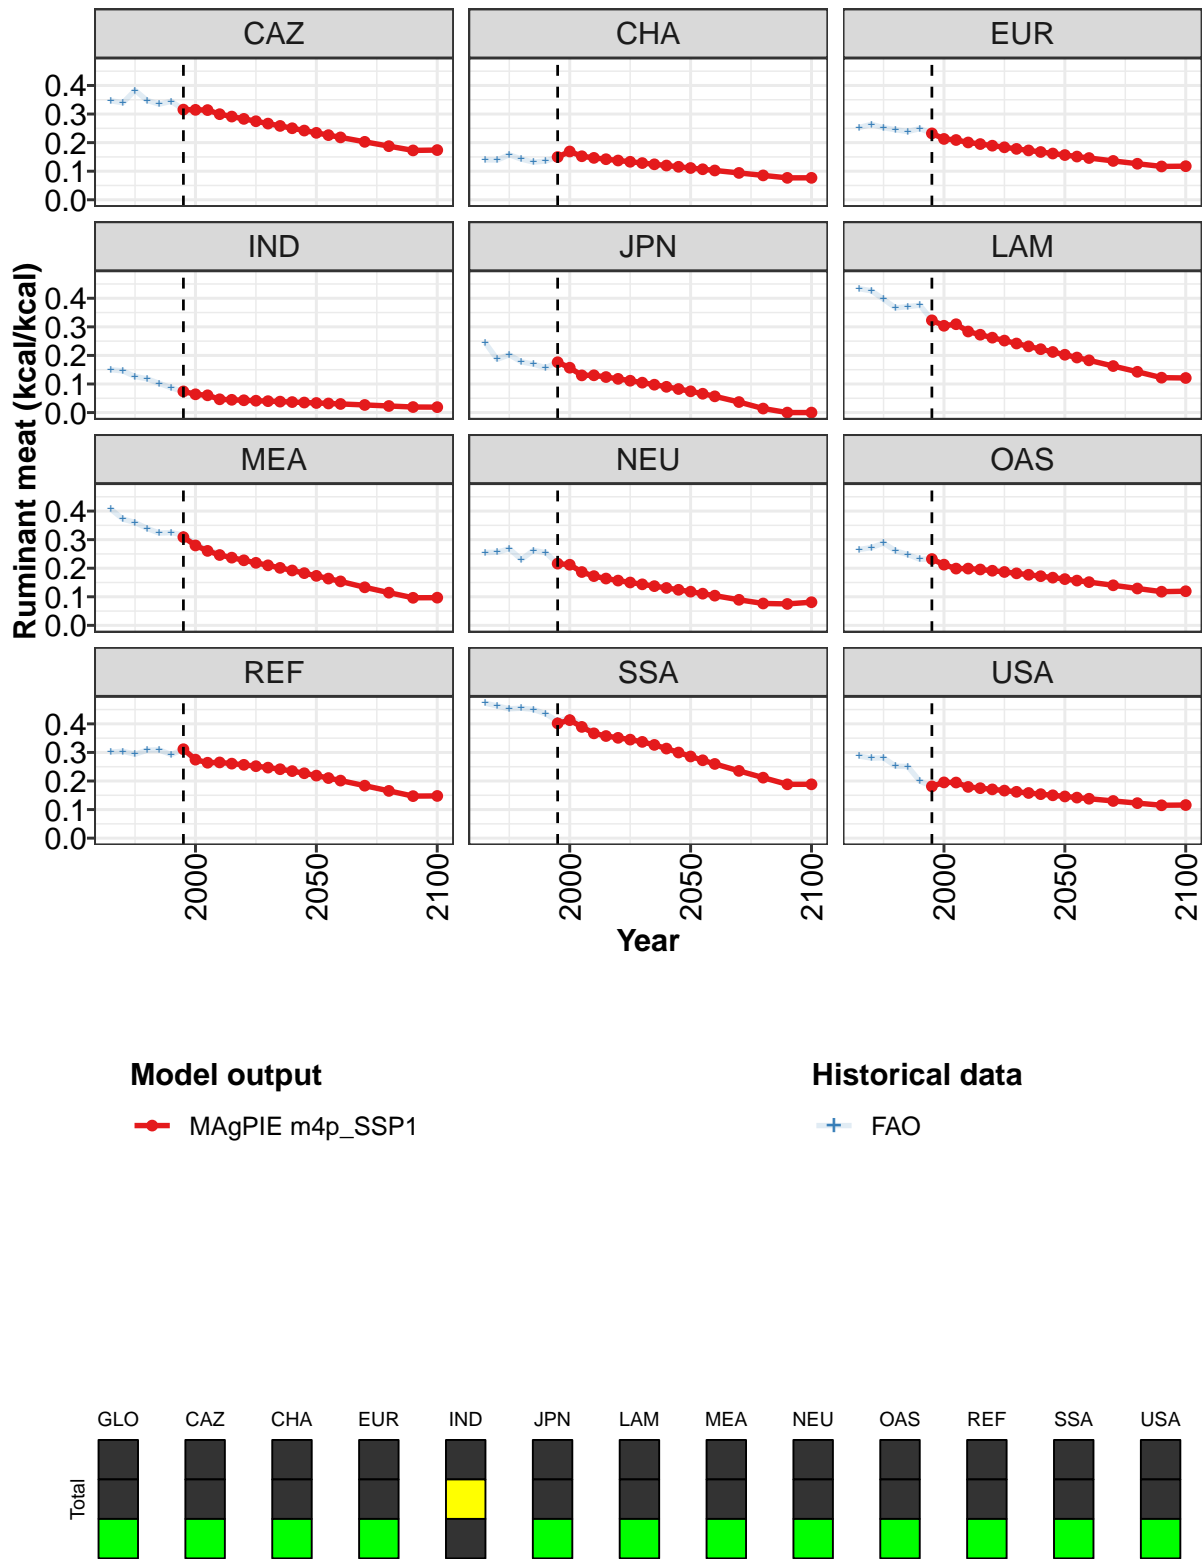

Figure 287: MAgPIE m4p\_SSP1 — Nutrition—Dietary Composition—Livestock Demand Structure—Livestock products—Ruminant meat (kcal/kcal)

|     | 1995  | 2000  | 2005  | 2010  | 2015  | 2020  | 2025  | 2030  | 2035  | 2040  | 2045  |
|-----|-------|-------|-------|-------|-------|-------|-------|-------|-------|-------|-------|
| GLO | 0.222 | 0.213 | 0.204 | 0.193 | 0.181 | 0.174 | 0.168 | 0.164 | 0.161 | 0.159 | 0.158 |
| CAZ | 0.316 | 0.315 | 0.314 | 0.300 | 0.291 | 0.283 | 0.275 | 0.267 | 0.258 | 0.250 | 0.242 |
| CHA | 0.150 | 0.169 | 0.152 | 0.147 | 0.142 | 0.137 | 0.133 | 0.129 | 0.124 | 0.120 | 0.116 |
| EUR | 0.232 | 0.213 | 0.209 | 0.201 | 0.195 | 0.189 | 0.184 | 0.178 | 0.173 | 0.167 | 0.162 |
| IND | 0.074 | 0.064 | 0.060 | 0.047 | 0.045 | 0.043 | 0.041 | 0.040 | 0.038 | 0.037 | 0.035 |
| JPN | 0.176 | 0.157 | 0.130 | 0.131 | 0.124 | 0.118 | 0.111 | 0.105 | 0.098 | 0.090 | 0.082 |
| LAM | 0.323 | 0.304 | 0.309 | 0.284 | 0.272 | 0.262 | 0.252 | 0.242 | 0.232 | 0.222 | 0.212 |
| MEA | 0.309 | 0.280 | 0.261 | 0.246 | 0.237 | 0.228 | 0.219 | 0.210 | 0.201 | 0.192 | 0.183 |
| NEU | 0.216 | 0.212 | 0.187 | 0.172 | 0.164 | 0.157 | 0.150 | 0.144 | 0.137 | 0.131 | 0.124 |
| OAS | 0.232 | 0.212 | 0.199 | 0.199 | 0.196 | 0.191 | 0.187 | 0.182 | 0.177 | 0.172 | 0.167 |
| REF | 0.311 | 0.275 | 0.264 | 0.265 | 0.261 | 0.257 | 0.252 | 0.247 | 0.241 | 0.235 | 0.227 |
| SSA | 0.402 | 0.413 | 0.389 | 0.367 | 0.357 | 0.351 | 0.345 | 0.337 | 0.326 | 0.314 | 0.300 |
| USA | 0.181 | 0.195 | 0.195 | 0.179 | 0.175 | 0.171 | 0.166 | 0.162 | 0.158 | 0.154 | 0.150 |

Table 947: MAGPIE m4p\_SSP1 — Nutrition—Dietary Composition—Livestock Demand Structure—Livestock products—Ruminant meat (kcal/kcal) [PART 1/2]

|     | 2050  | 2055  | 2060  | 2070  | 2080  | 2090  | 2100  |
|-----|-------|-------|-------|-------|-------|-------|-------|
| GLO | 0.155 | 0.152 | 0.149 | 0.138 | 0.127 | 0.115 | 0.117 |
| CAZ | 0.234 | 0.226 | 0.218 | 0.203 | 0.188 | 0.173 | 0.174 |
| CHA | 0.111 | 0.107 | 0.103 | 0.094 | 0.085 | 0.077 | 0.077 |
| EUR | 0.157 | 0.151 | 0.146 | 0.136 | 0.126 | 0.117 | 0.118 |
| IND | 0.034 | 0.032 | 0.030 | 0.027 | 0.023 | 0.019 | 0.019 |
| JPN | 0.074 | 0.066 | 0.057 | 0.037 | 0.014 | 0.000 | 0.000 |
| LAM | 0.202 | 0.193 | 0.183 | 0.163 | 0.143 | 0.122 | 0.121 |
| MEA | 0.173 | 0.164 | 0.154 | 0.133 | 0.114 | 0.096 | 0.097 |
| NEU | 0.118 | 0.111 | 0.104 | 0.089 | 0.077 | 0.075 | 0.081 |
| OAS | 0.162 | 0.157 | 0.151 | 0.140 | 0.129 | 0.118 | 0.119 |
| REF | 0.219 | 0.210 | 0.201 | 0.184 | 0.165 | 0.147 | 0.148 |
| SSA | 0.286 | 0.273 | 0.260 | 0.235 | 0.212 | 0.188 | 0.188 |
| USA | 0.146 | 0.142 | 0.138 | 0.130 | 0.123 | 0.115 | 0.116 |

Table 948: MAGPIE m4p\_SSP1 — Nutrition—Dietary Composition—Livestock Demand Structure—Livestock products—Ruminant meat (kcal/kcal) [PART 2/2]

|     | 1965  | 1970  | 1975  | 1980  | 1985  | 1990  | 1995  | 2000  | 2005  | 2010  |
|-----|-------|-------|-------|-------|-------|-------|-------|-------|-------|-------|
| GLO | 0.281 | 0.282 | 0.276 | 0.261 | 0.250 | 0.239 | 0.222 | 0.213 | 0.204 | 0.193 |
| CAZ | 0.346 | 0.340 | 0.383 | 0.347 | 0.335 | 0.344 | 0.316 | 0.315 | 0.314 | 0.300 |
| CHA | 0.140 | 0.139 | 0.158 | 0.142 | 0.132 | 0.135 | 0.150 | 0.169 | 0.152 | 0.147 |
| EUR | 0.253 | 0.264 | 0.252 | 0.245 | 0.239 | 0.249 | 0.232 | 0.213 | 0.209 | 0.201 |
| IND | 0.150 | 0.146 | 0.126 | 0.118 | 0.102 | 0.087 | 0.074 | 0.064 | 0.060 | 0.046 |
| JPN | 0.245 | 0.186 | 0.202 | 0.177 | 0.169 | 0.157 | 0.176 | 0.157 | 0.130 | 0.131 |
| LAM | 0.433 | 0.426 | 0.397 | 0.366 | 0.371 | 0.376 | 0.325 | 0.305 | 0.311 | 0.285 |
| MEA | 0.406 | 0.372 | 0.360 | 0.339 | 0.323 | 0.325 | 0.316 | 0.284 | 0.265 | 0.251 |
| NEU | 0.255 | 0.256 | 0.268 | 0.231 | 0.263 | 0.255 | 0.216 | 0.212 | 0.187 | 0.172 |
| OAS | 0.266 | 0.272 | 0.288 | 0.261 | 0.248 | 0.231 | 0.232 | 0.212 | 0.199 | 0.199 |
| REF | 0.301 | 0.304 | 0.294 | 0.308 | 0.309 | 0.292 | 0.311 | 0.275 | 0.264 | 0.265 |
| SSA | 0.472 | 0.463 | 0.453 | 0.455 | 0.451 | 0.435 | 0.410 | 0.421 | 0.397 | 0.374 |
| USA | 0.287 | 0.280 | 0.281 | 0.252 | 0.251 | 0.200 | 0.181 | 0.195 | 0.195 | 0.179 |

Table 949: FAO — Nutrition—Dietary Composition—Livestock Demand Structure—Livestock products—Ruminant meat (kcal/kcal)

35.2 Livestock Share

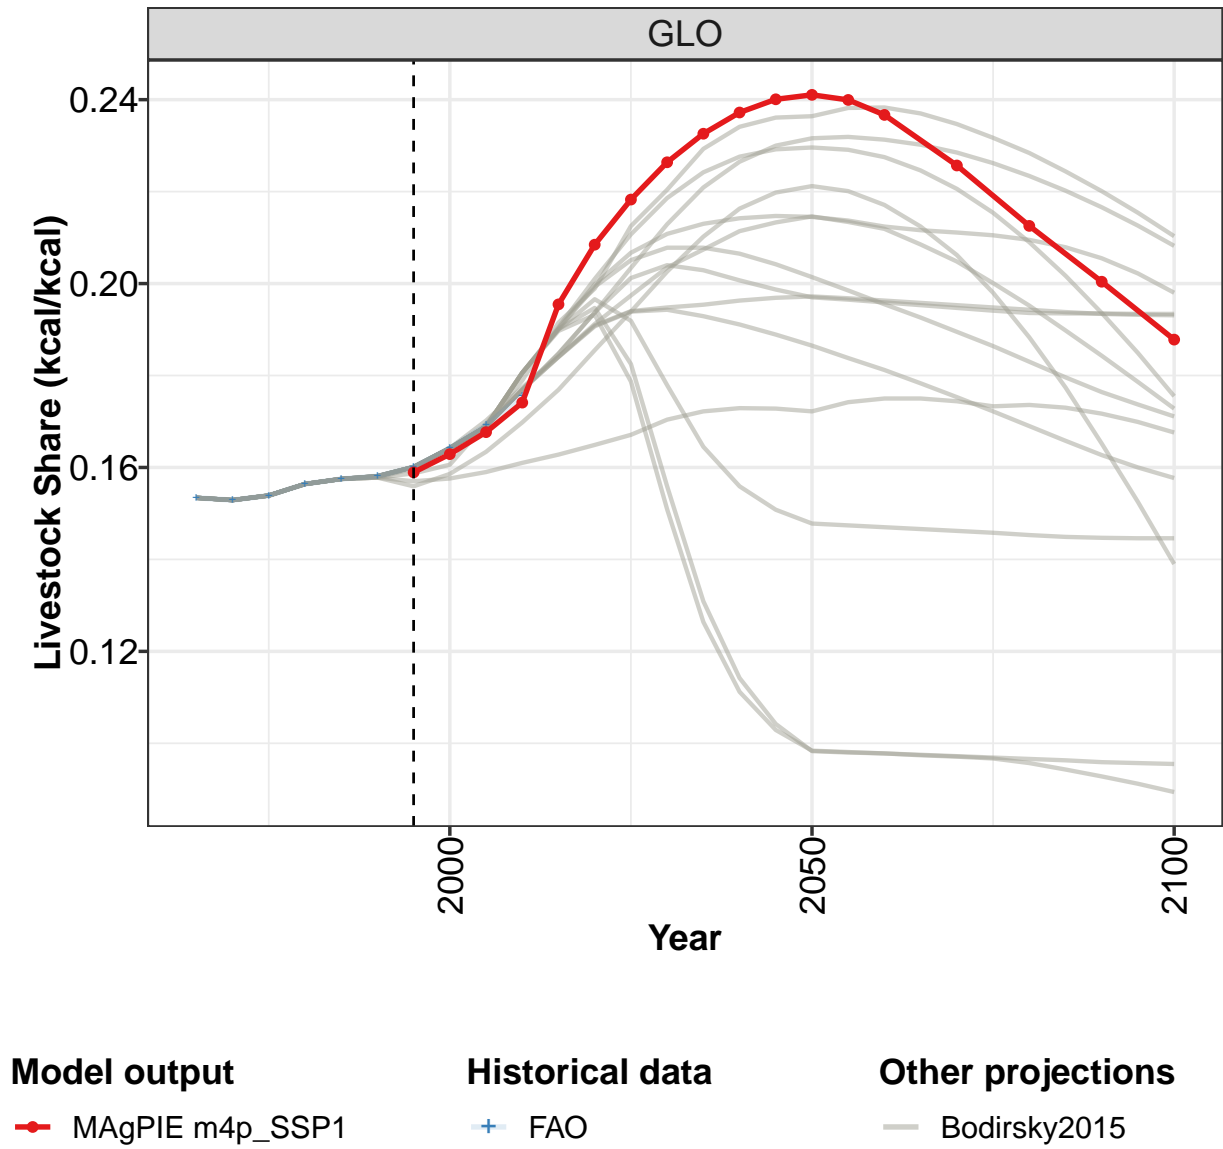

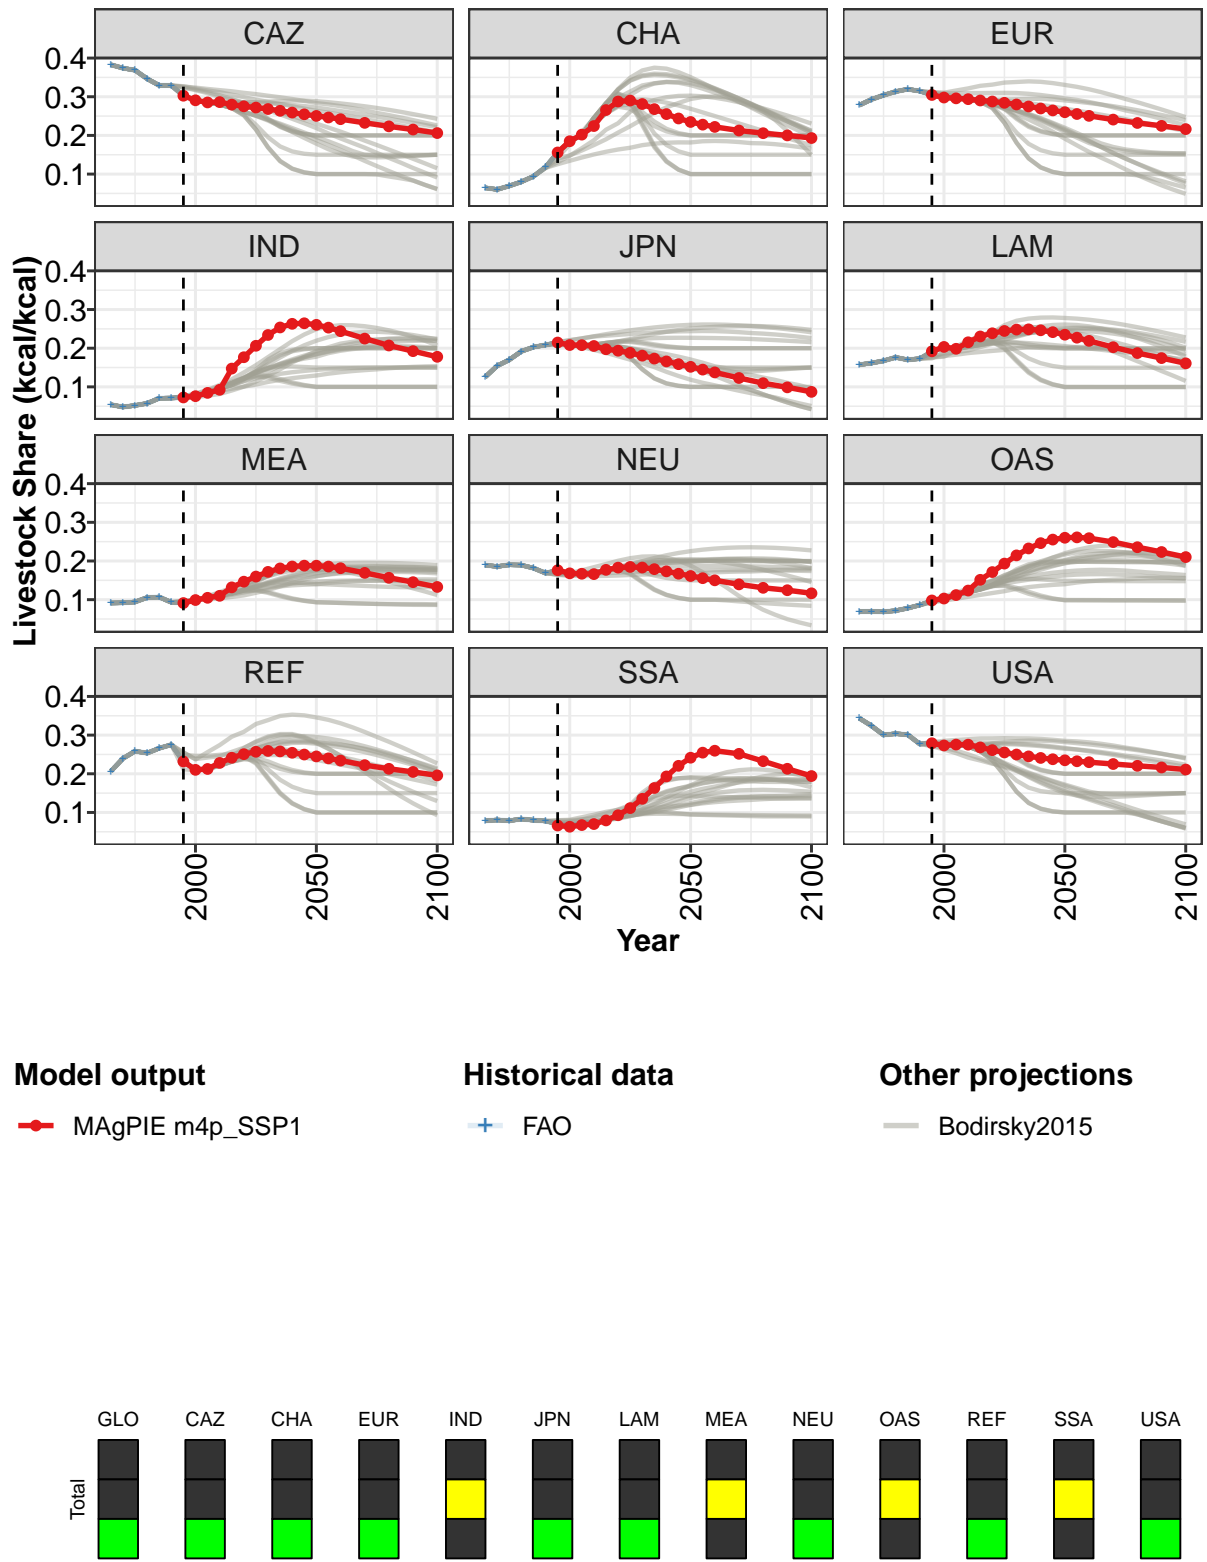

Figure 288: MAgPIE m4p\_SSP1 — Nutrition—Dietary Composition—Livestock Share (kcal/kcal)

|     | 1995  | 2000  | 2005  | 2010  | 2015  | 2020  | 2025  | 2030  | 2035  | 2040  | 2045  |
|-----|-------|-------|-------|-------|-------|-------|-------|-------|-------|-------|-------|
| GLO | 0.159 | 0.163 | 0.168 | 0.174 | 0.195 | 0.208 | 0.218 | 0.226 | 0.233 | 0.237 | 0.240 |
| CAZ | 0.303 | 0.291 | 0.285 | 0.286 | 0.280 | 0.275 | 0.272 | 0.268 | 0.264 | 0.259 | 0.255 |
| CHA | 0.156 | 0.185 | 0.202 | 0.224 | 0.266 | 0.288 | 0.290 | 0.281 | 0.268 | 0.255 | 0.244 |
| EUR | 0.305 | 0.298 | 0.296 | 0.294 | 0.290 | 0.288 | 0.284 | 0.280 | 0.275 | 0.270 | 0.265 |
| IND | 0.073 | 0.076 | 0.084 | 0.093 | 0.147 | 0.177 | 0.206 | 0.234 | 0.254 | 0.263 | 0.265 |
| JPN | 0.215 | 0.208 | 0.208 | 0.206 | 0.197 | 0.194 | 0.188 | 0.181 | 0.173 | 0.166 | 0.159 |
| LAM | 0.192 | 0.203 | 0.199 | 0.215 | 0.230 | 0.239 | 0.245 | 0.248 | 0.249 | 0.246 | 0.242 |
| MEA | 0.091 | 0.099 | 0.105 | 0.110 | 0.132 | 0.147 | 0.160 | 0.172 | 0.181 | 0.186 | 0.188 |
| NEU | 0.176 | 0.168 | 0.167 | 0.166 | 0.177 | 0.183 | 0.185 | 0.183 | 0.179 | 0.173 | 0.167 |
| OAS | 0.098 | 0.103 | 0.112 | 0.124 | 0.151 | 0.171 | 0.193 | 0.215 | 0.232 | 0.246 | 0.255 |
| REF | 0.232 | 0.210 | 0.212 | 0.228 | 0.242 | 0.251 | 0.257 | 0.259 | 0.258 | 0.254 | 0.250 |
| SSA | 0.066 | 0.063 | 0.067 | 0.070 | 0.079 | 0.093 | 0.111 | 0.135 | 0.163 | 0.193 | 0.221 |
| USA | 0.279 | 0.273 | 0.276 | 0.275 | 0.268 | 0.261 | 0.255 | 0.250 | 0.245 | 0.241 | 0.238 |

Table 950: MAgPIE m4p\_SSP1 — Nutrition—Dietary Composition—Livestock Share (kcal/kcal) [PART 1/2]

|     | 2050  | 2055  | 2060  | 2070  | 2080  | 2090  | 2100  |
|-----|-------|-------|-------|-------|-------|-------|-------|
| GLO | 0.241 | 0.240 | 0.237 | 0.226 | 0.213 | 0.200 | 0.188 |
| CAZ | 0.250 | 0.246 | 0.242 | 0.233 | 0.223 | 0.215 | 0.206 |
| CHA | 0.235 | 0.228 | 0.222 | 0.213 | 0.206 | 0.200 | 0.193 |
| EUR | 0.260 | 0.255 | 0.251 | 0.241 | 0.232 | 0.225 | 0.216 |
| IND | 0.261 | 0.253 | 0.244 | 0.225 | 0.207 | 0.192 | 0.178 |
| JPN | 0.152 | 0.145 | 0.137 | 0.123 | 0.110 | 0.099 | 0.087 |
| LAM | 0.235 | 0.227 | 0.219 | 0.203 | 0.187 | 0.174 | 0.161 |
| MEA | 0.188 | 0.186 | 0.181 | 0.169 | 0.157 | 0.145 | 0.133 |
| NEU | 0.161 | 0.156 | 0.150 | 0.140 | 0.131 | 0.125 | 0.116 |
| OAS | 0.260 | 0.261 | 0.259 | 0.249 | 0.236 | 0.223 | 0.210 |
| REF | 0.245 | 0.240 | 0.234 | 0.222 | 0.213 | 0.205 | 0.196 |
| SSA | 0.242 | 0.255 | 0.260 | 0.252 | 0.233 | 0.213 | 0.194 |
| USA | 0.235 | 0.232 | 0.230 | 0.225 | 0.221 | 0.216 | 0.211 |

Table 951: MAgPIE m4p\_SSP1 — Nutrition—Dietary Composition—Livestock Share (kcal/kcal) [PART 2/2]

|     | 1965  | 1970  | 1975  | 1980  | 1985  | 1990  | 1995  | 2000  | 2005  | 2010  |
|-----|-------|-------|-------|-------|-------|-------|-------|-------|-------|-------|
| GLO | 0.153 | 0.153 | 0.154 | 0.156 | 0.158 | 0.158 | 0.160 | 0.164 | 0.169 | 0.176 |
| CAZ | 0.383 | 0.374 | 0.369 | 0.346 | 0.329 | 0.329 | 0.303 | 0.291 | 0.285 | 0.286 |
| CHA | 0.065 | 0.060 | 0.069 | 0.080 | 0.094 | 0.118 | 0.156 | 0.185 | 0.202 | 0.224 |
| EUR | 0.278 | 0.293 | 0.304 | 0.313 | 0.320 | 0.315 | 0.305 | 0.298 | 0.296 | 0.294 |
| IND | 0.054 | 0.048 | 0.052 | 0.057 | 0.071 | 0.071 | 0.073 | 0.076 | 0.085 | 0.092 |
| JPN | 0.125 | 0.154 | 0.170 | 0.192 | 0.203 | 0.208 | 0.215 | 0.208 | 0.208 | 0.206 |
| LAM | 0.157 | 0.162 | 0.167 | 0.176 | 0.170 | 0.173 | 0.191 | 0.203 | 0.198 | 0.215 |
| MEA | 0.091 | 0.092 | 0.094 | 0.106 | 0.107 | 0.093 | 0.091 | 0.100 | 0.105 | 0.109 |
| NEU | 0.189 | 0.186 | 0.190 | 0.189 | 0.182 | 0.169 | 0.176 | 0.168 | 0.167 | 0.166 |
| OAS | 0.069 | 0.070 | 0.069 | 0.072 | 0.078 | 0.086 | 0.097 | 0.102 | 0.111 | 0.123 |
| REF | 0.206 | 0.240 | 0.258 | 0.254 | 0.266 | 0.275 | 0.232 | 0.210 | 0.212 | 0.228 |
| SSA | 0.079 | 0.081 | 0.079 | 0.083 | 0.080 | 0.078 | 0.070 | 0.067 | 0.071 | 0.074 |
| USA | 0.344 | 0.324 | 0.300 | 0.304 | 0.301 | 0.277 | 0.279 | 0.273 | 0.276 | 0.275 |

Table 952: FAO — Nutrition—Dietary Composition—Livestock Share (kcal/kcal)

35.3 Vegetables Fruits Nuts Share

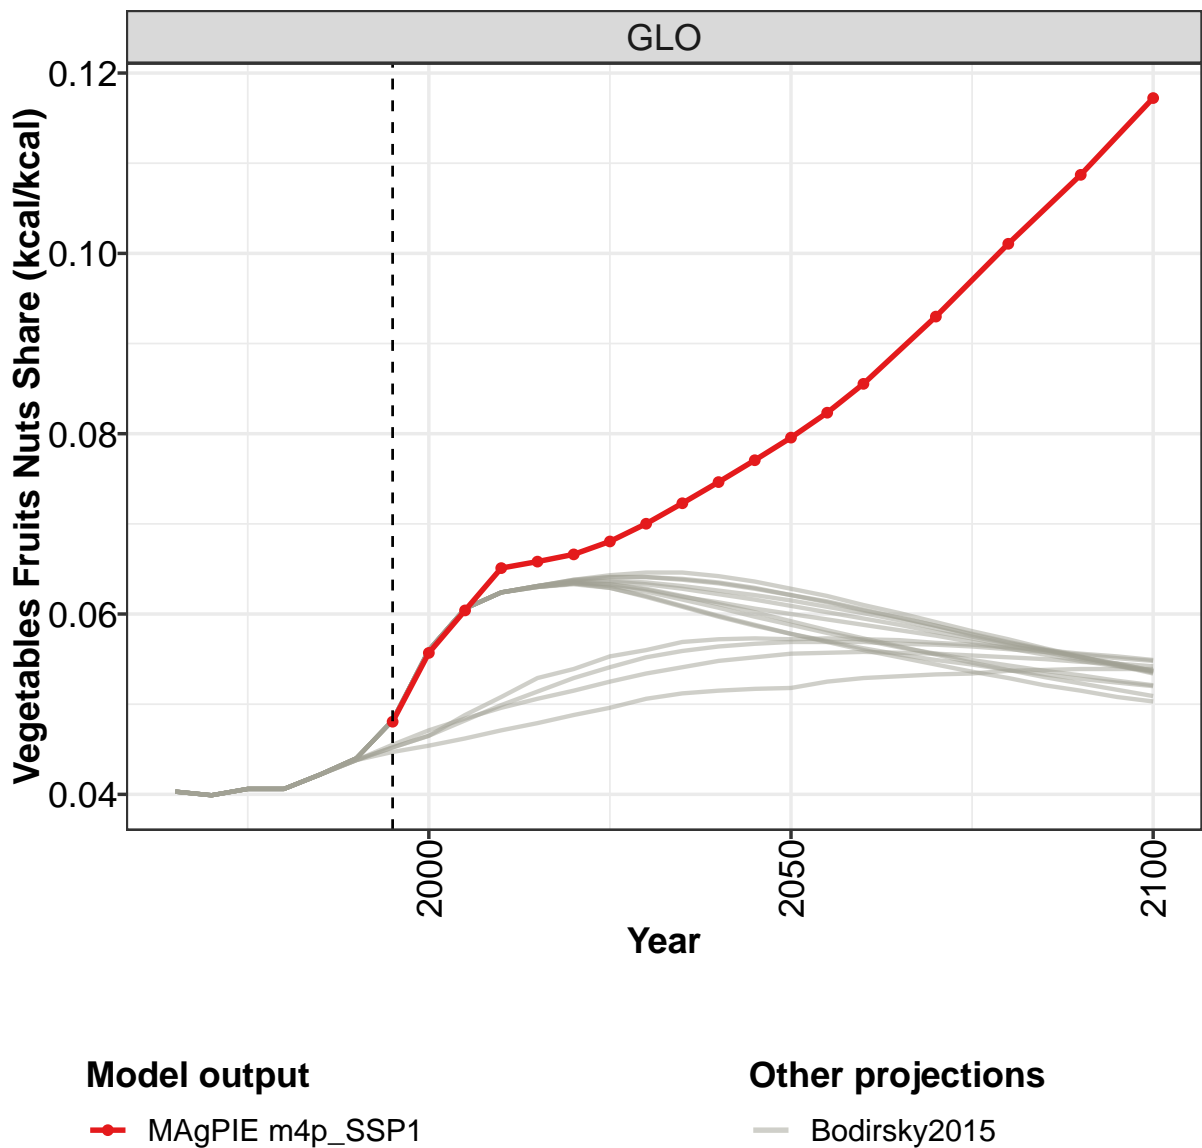



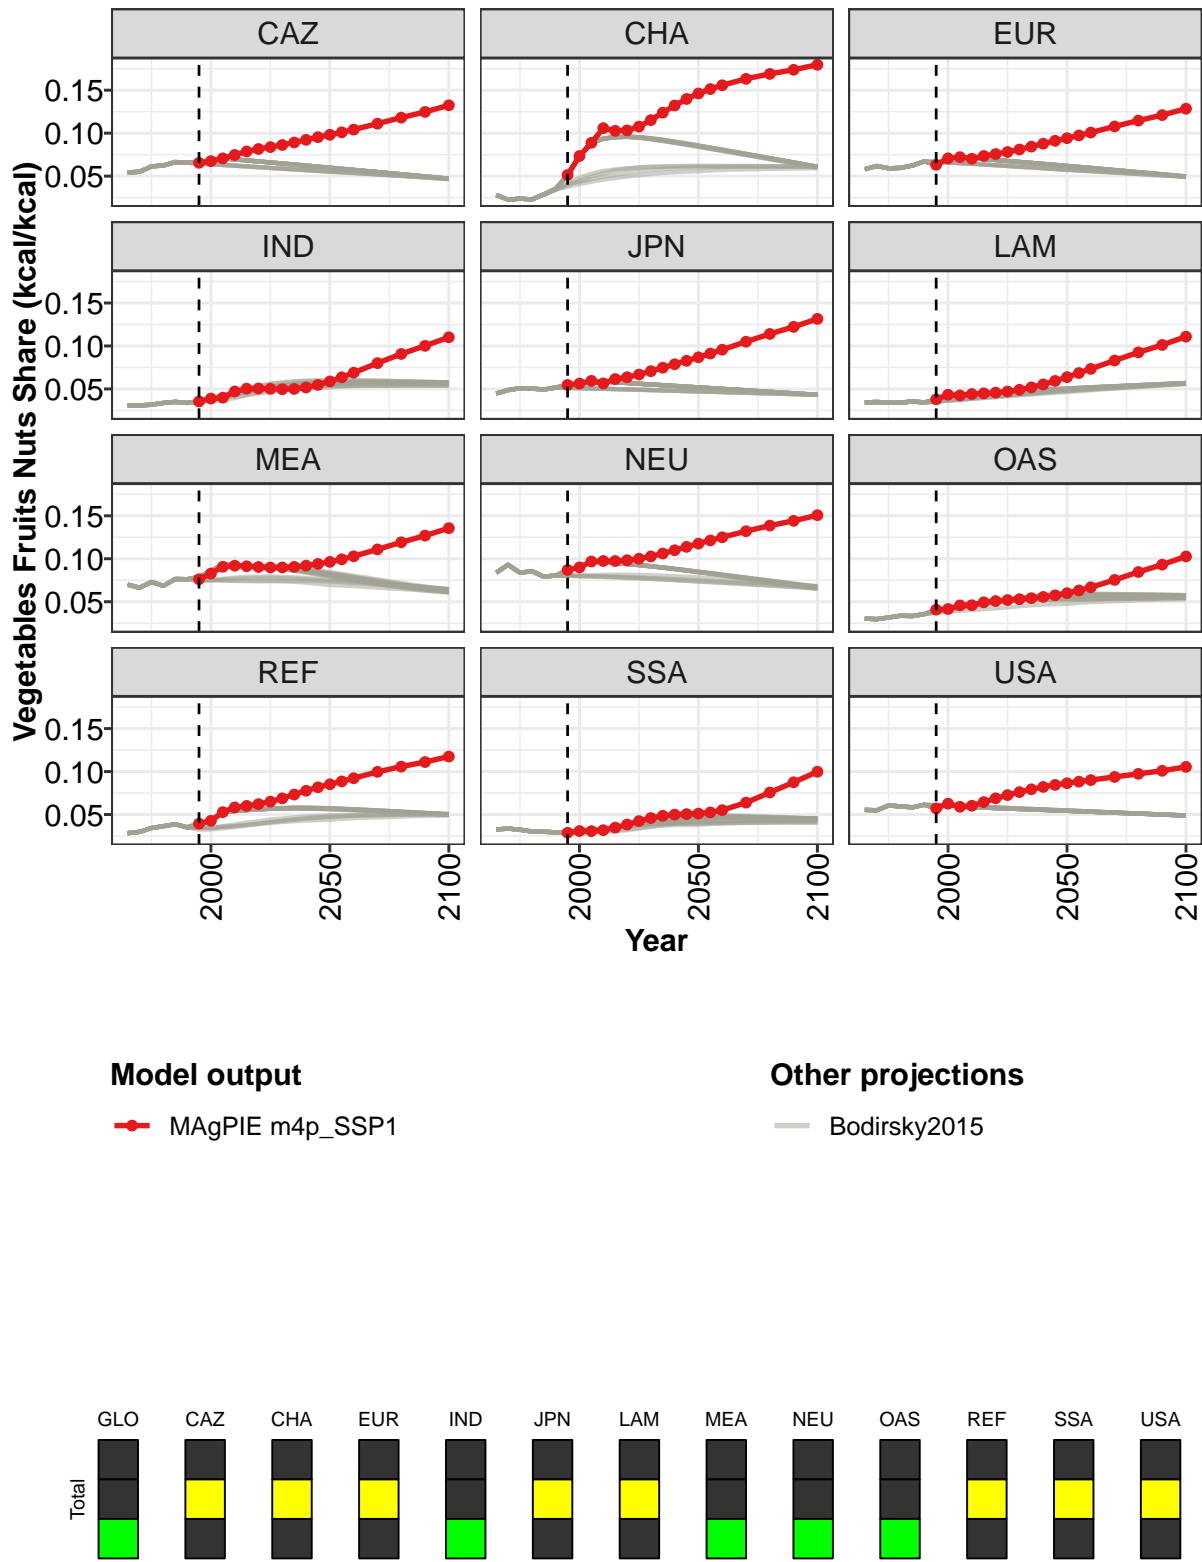

Figure 289: MAgPIE m4p\_SSP1 — Nutrition—Dietary Composition—Vegetables Fruits Nuts Share (kcal/kcal)

|     | 1995  | 2000  | 2005  | 2010  | 2015  | 2020  | 2025  | 2030  | 2035  | 2040  | 2045  |
|-----|-------|-------|-------|-------|-------|-------|-------|-------|-------|-------|-------|
| GLO | 0.048 | 0.056 | 0.060 | 0.065 | 0.066 | 0.067 | 0.068 | 0.070 | 0.072 | 0.075 | 0.077 |
| CAZ | 0.066 | 0.067 | 0.071 | 0.075 | 0.079 | 0.082 | 0.084 | 0.086 | 0.089 | 0.092 | 0.095 |
| CHA | 0.051 | 0.073 | 0.089 | 0.106 | 0.103 | 0.103 | 0.108 | 0.115 | 0.124 | 0.132 | 0.140 |
| EUR | 0.063 | 0.071 | 0.072 | 0.070 | 0.074 | 0.076 | 0.078 | 0.081 | 0.084 | 0.088 | 0.091 |
| IND | 0.035 | 0.039 | 0.040 | 0.047 | 0.050 | 0.051 | 0.050 | 0.050 | 0.050 | 0.052 | 0.055 |
| JPN | 0.055 | 0.056 | 0.059 | 0.056 | 0.062 | 0.064 | 0.067 | 0.071 | 0.075 | 0.079 | 0.083 |
| LAM | 0.038 | 0.043 | 0.042 | 0.044 | 0.045 | 0.046 | 0.047 | 0.049 | 0.052 | 0.055 | 0.059 |
| MEA | 0.076 | 0.083 | 0.091 | 0.092 | 0.091 | 0.090 | 0.090 | 0.090 | 0.091 | 0.092 | 0.094 |
| NEU | 0.087 | 0.090 | 0.097 | 0.097 | 0.097 | 0.098 | 0.100 | 0.103 | 0.106 | 0.110 | 0.114 |
| OAS | 0.041 | 0.042 | 0.046 | 0.046 | 0.049 | 0.051 | 0.052 | 0.053 | 0.054 | 0.056 | 0.058 |
| REF | 0.039 | 0.043 | 0.053 | 0.058 | 0.060 | 0.062 | 0.065 | 0.069 | 0.073 | 0.078 | 0.082 |
| SSA | 0.029 | 0.031 | 0.031 | 0.032 | 0.035 | 0.038 | 0.042 | 0.046 | 0.049 | 0.050 | 0.050 |
| USA | 0.057 | 0.063 | 0.059 | 0.060 | 0.065 | 0.069 | 0.073 | 0.076 | 0.079 | 0.082 | 0.084 |

Table 953: MAgPIE m4p\_SSP1 — Nutrition—Dietary Composition—Vegetables Fruits Nuts Share (kcal/kcal)  
[PART 1/2]

|     | 2050  | 2055  | 2060  | 2070  | 2080  | 2090  | 2100  |
|-----|-------|-------|-------|-------|-------|-------|-------|
| GLO | 0.080 | 0.082 | 0.086 | 0.093 | 0.101 | 0.109 | 0.117 |
| CAZ | 0.098 | 0.101 | 0.104 | 0.111 | 0.118 | 0.125 | 0.132 |
| CHA | 0.146 | 0.151 | 0.156 | 0.163 | 0.169 | 0.174 | 0.180 |
| EUR | 0.094 | 0.097 | 0.101 | 0.108 | 0.115 | 0.121 | 0.128 |
| IND | 0.059 | 0.064 | 0.069 | 0.080 | 0.091 | 0.100 | 0.110 |
| JPN | 0.087 | 0.091 | 0.096 | 0.105 | 0.114 | 0.122 | 0.132 |
| LAM | 0.064 | 0.069 | 0.073 | 0.083 | 0.093 | 0.101 | 0.111 |
| MEA | 0.096 | 0.099 | 0.103 | 0.111 | 0.119 | 0.127 | 0.136 |
| NEU | 0.118 | 0.121 | 0.125 | 0.132 | 0.139 | 0.144 | 0.151 |
| OAS | 0.060 | 0.063 | 0.067 | 0.075 | 0.085 | 0.093 | 0.103 |
| REF | 0.085 | 0.089 | 0.092 | 0.100 | 0.106 | 0.111 | 0.117 |
| SSA | 0.051 | 0.052 | 0.055 | 0.064 | 0.076 | 0.088 | 0.100 |
| USA | 0.086 | 0.088 | 0.090 | 0.094 | 0.097 | 0.101 | 0.105 |

Table 954: MAgPIE m4p\_SSP1 — Nutrition—Dietary Composition—Vegetables Fruits Nuts Share (kcal/kcal)  
[PART 2/2]

Part X

# Population

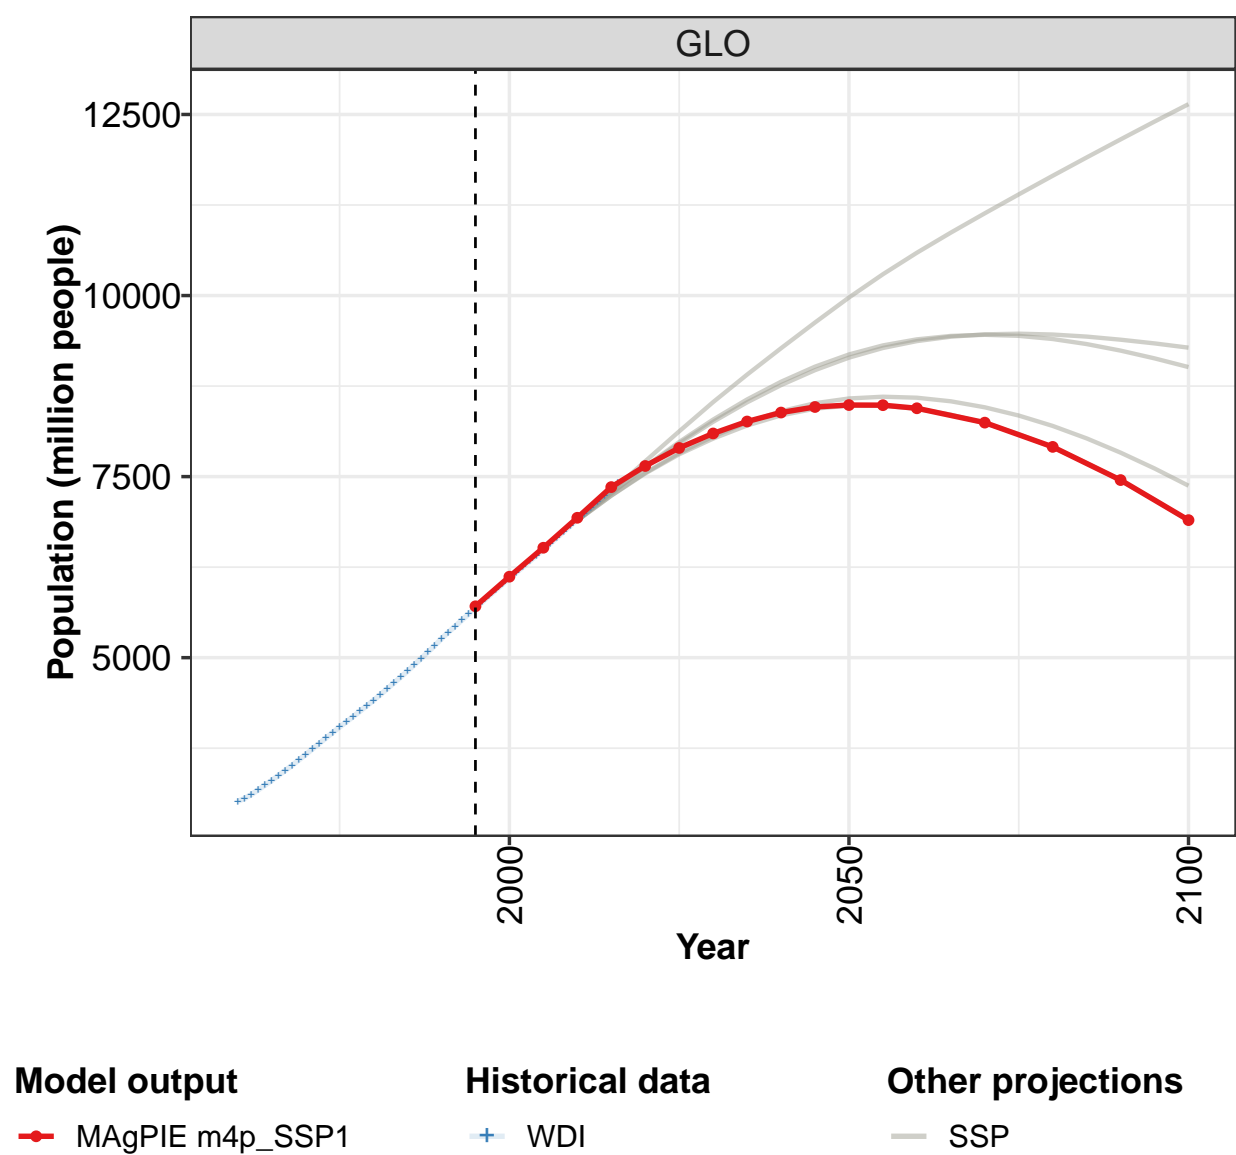

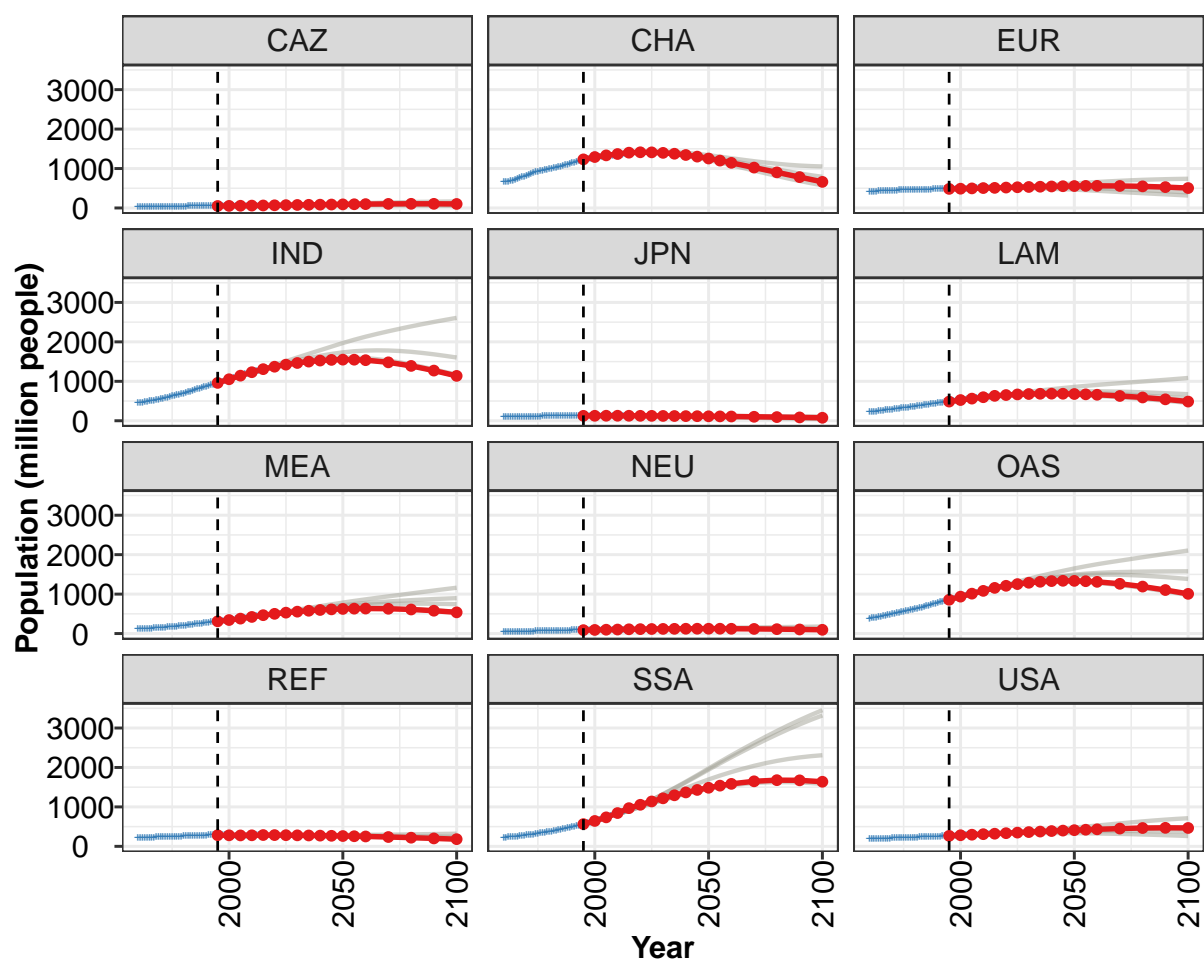

#### Model output

—●— MAgPIE m4p\_SSP1

#### Historical data

+ WDI

#### Other projections

— SSP

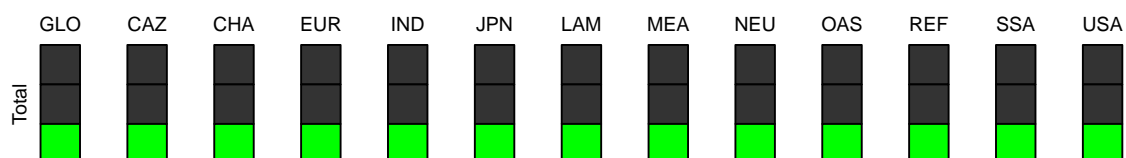

Figure 290: MAgPIE m4p\_SSP1 — Population (million people)

|     | 1995 | 2000 | 2005 | 2010 | 2015 | 2020 | 2025 | 2030 | 2035 | 2040 | 2045 |
|-----|------|------|------|------|------|------|------|------|------|------|------|
| GLO | 5710 | 6118 | 6518 | 6932 | 7356 | 7647 | 7896 | 8096 | 8261 | 8385 | 8461 |
| CAZ | 51   | 54   | 57   | 60   | 64   | 68   | 73   | 77   | 80   | 84   | 88   |
| CHA | 1233 | 1292 | 1334 | 1368 | 1402 | 1412 | 1410 | 1398 | 1375 | 1343 | 1303 |
| EUR | 485  | 489  | 496  | 505  | 510  | 518  | 526  | 533  | 540  | 546  | 552  |
| IND | 960  | 1053 | 1144 | 1231 | 1309 | 1371 | 1423 | 1465 | 1500 | 1527 | 1544 |
| JPN | 125  | 127  | 128  | 128  | 127  | 126  | 125  | 123  | 121  | 119  | 116  |
| LAM | 487  | 526  | 562  | 598  | 632  | 652  | 668  | 678  | 685  | 687  | 685  |
| MEA | 310  | 344  | 379  | 422  | 467  | 501  | 530  | 556  | 579  | 598  | 614  |
| NEU | 88   | 92   | 97   | 102  | 109  | 112  | 116  | 118  | 120  | 122  | 123  |
| OAS | 858  | 936  | 1012 | 1083 | 1158 | 1211 | 1255 | 1288 | 1314 | 1331 | 1338 |
| REF | 283  | 280  | 278  | 281  | 287  | 286  | 283  | 280  | 276  | 272  | 268  |
| SSA | 564  | 644  | 736  | 845  | 969  | 1054 | 1138 | 1218 | 1295 | 1367 | 1431 |
| USA | 266  | 282  | 296  | 309  | 321  | 335  | 349  | 362  | 376  | 388  | 400  |

Table 955: MAgPIE m4p\_SSP1 — Population (million people) [PART 1/2]

|     | 2050 | 2055 | 2060 | 2070 | 2080 | 2090 | 2100 |
|-----|------|------|------|------|------|------|------|
| GLO | 8488 | 8487 | 8444 | 8245 | 7911 | 7452 | 6899 |
| CAZ | 92   | 95   | 98   | 103  | 106  | 105  | 102  |
| CHA | 1254 | 1202 | 1145 | 1024 | 903  | 782  | 662  |
| EUR | 557  | 560  | 562  | 559  | 549  | 530  | 505  |
| IND | 1550 | 1549 | 1536 | 1481 | 1391 | 1272 | 1138 |
| JPN | 114  | 111  | 109  | 102  | 94   | 85   | 77   |
| LAM | 679  | 671  | 659  | 629  | 591  | 544  | 487  |
| MEA | 625  | 632  | 635  | 630  | 611  | 579  | 538  |
| NEU | 123  | 123  | 122  | 118  | 112  | 104  | 96   |
| OAS | 1336 | 1327 | 1311 | 1262 | 1191 | 1104 | 1007 |
| REF | 262  | 257  | 251  | 237  | 220  | 202  | 182  |
| SSA | 1485 | 1539 | 1584 | 1649 | 1679 | 1674 | 1638 |
| USA | 411  | 422  | 432  | 451  | 465  | 471  | 467  |

Table 956: MAgPIE m4p\_SSP1 — Population (million people) [PART 2/2]

|     | 1960 | 1961 | 1962 | 1963 | 1964 | 1965 | 1966 | 1967 | 1968 | 1969 | 1970 |
|-----|------|------|------|------|------|------|------|------|------|------|------|
| GLO | 3016 | 3056 | 3109 | 3173 | 3238 | 3304 | 3374 | 3443 | 3513 | 3587 | 3662 |
| CAZ | 31   | 31   | 32   | 32   | 33   | 34   | 34   | 35   | 36   | 36   | 37   |
| CHA | 670  | 664  | 669  | 686  | 702  | 719  | 739  | 758  | 779  | 800  | 823  |
| EUR | 410  | 413  | 417  | 421  | 424  | 428  | 431  | 434  | 437  | 440  | 442  |
| IND | 449  | 458  | 468  | 478  | 487  | 498  | 508  | 519  | 530  | 542  | 554  |
| JPN | 93   | 95   | 96   | 97   | 98   | 99   | 100  | 101  | 101  | 103  | 104  |
| LAM | 220  | 227  | 233  | 239  | 246  | 253  | 260  | 266  | 273  | 280  | 287  |
| MEA | 113  | 116  | 119  | 122  | 126  | 129  | 133  | 137  | 141  | 145  | 149  |
| NEU | 43   | 44   | 45   | 46   | 47   | 48   | 49   | 50   | 51   | 52   | 53   |
| OAS | 378  | 388  | 398  | 409  | 420  | 431  | 442  | 454  | 466  | 479  | 491  |
| REF | 207  | 210  | 213  | 216  | 220  | 223  | 225  | 228  | 230  | 232  | 234  |
| SSA | 221  | 226  | 232  | 237  | 243  | 249  | 255  | 262  | 268  | 275  | 282  |
| USA | 181  | 184  | 187  | 189  | 192  | 194  | 197  | 199  | 201  | 203  | 205  |

Table 957: WDI — Population (million people) [PART 1/6]

|     | 1971 | 1972 | 1973 | 1974 | 1975 | 1976 | 1977 | 1978 | 1979 | 1980 | 1981 |
|-----|------|------|------|------|------|------|------|------|------|------|------|
| GLO | 3739 | 3815 | 3891 | 3967 | 4042 | 4114 | 4186 | 4260 | 4335 | 4411 | 4489 |
| CAZ | 37   | 38   | 39   | 40   | 40   | 41   | 41   | 42   | 42   | 42   | 43   |
| CHA | 845  | 866  | 886  | 905  | 921  | 935  | 948  | 961  | 974  | 987  | 999  |
| EUR | 445  | 447  | 450  | 453  | 455  | 457  | 459  | 461  | 463  | 465  | 466  |
| IND | 566  | 579  | 593  | 607  | 621  | 636  | 650  | 666  | 681  | 697  | 713  |
| JPN | 106  | 107  | 108  | 110  | 112  | 113  | 114  | 115  | 116  | 117  | 118  |
| LAM | 295  | 302  | 310  | 317  | 325  | 332  | 340  | 348  | 356  | 364  | 372  |
| MEA | 153  | 157  | 162  | 166  | 171  | 176  | 182  | 187  | 193  | 200  | 206  |
| NEU | 54   | 56   | 57   | 58   | 59   | 60   | 61   | 62   | 63   | 64   | 65   |
| OAS | 503  | 516  | 528  | 541  | 554  | 567  | 580  | 594  | 608  | 622  | 636  |
| REF | 237  | 239  | 241  | 243  | 245  | 248  | 250  | 252  | 254  | 257  | 259  |
| SSA | 290  | 298  | 306  | 314  | 323  | 332  | 341  | 351  | 361  | 371  | 382  |
| USA | 208  | 210  | 212  | 214  | 216  | 218  | 220  | 223  | 225  | 227  | 229  |

Table 958: WDI — Population (million people) [PART 2/6]

|     | 1982 | 1983 | 1984 | 1985 | 1986 | 1987 | 1988 | 1989 | 1990 | 1991 | 1992 |
|-----|------|------|------|------|------|------|------|------|------|------|------|
| GLO | 4569 | 4651 | 4732 | 4815 | 4900 | 4988 | 5076 | 5165 | 5263 | 5350 | 5433 |
| CAZ | 44   | 44   | 44   | 45   | 45   | 46   | 47   | 47   | 48   | 49   | 50   |
| CHA | 1014 | 1029 | 1042 | 1057 | 1073 | 1090 | 1108 | 1125 | 1141 | 1157 | 1171 |
| EUR | 468  | 469  | 470  | 471  | 472  | 473  | 475  | 477  | 478  | 479  | 481  |
| IND | 730  | 747  | 764  | 782  | 799  | 817  | 834  | 852  | 870  | 888  | 906  |
| JPN | 118  | 119  | 120  | 121  | 121  | 122  | 123  | 123  | 124  | 124  | 124  |
| LAM | 380  | 388  | 396  | 404  | 412  | 421  | 429  | 437  | 445  | 453  | 462  |
| MEA | 213  | 221  | 228  | 236  | 243  | 251  | 258  | 266  | 275  | 283  | 288  |
| NEU | 67   | 68   | 69   | 70   | 71   | 72   | 74   | 75   | 83   | 84   | 85   |
| OAS | 651  | 666  | 681  | 696  | 712  | 728  | 744  | 760  | 777  | 793  | 809  |
| REF | 261  | 263  | 266  | 268  | 271  | 273  | 276  | 278  | 280  | 281  | 282  |
| SSA | 393  | 404  | 416  | 428  | 440  | 452  | 465  | 478  | 492  | 506  | 520  |
| USA | 232  | 234  | 236  | 238  | 240  | 242  | 244  | 247  | 250  | 253  | 257  |

Table 959: WDI — Population (million people) [PART 3/6]

|     | 1993 | 1994 | 1995 | 1996 | 1997 | 1998 | 1999 | 2000 | 2001 | 2002 | 2003 |
|-----|------|------|------|------|------|------|------|------|------|------|------|
| GLO | 5518 | 5602 | 5686 | 5769 | 5852 | 5933 | 6014 | 6094 | 6173 | 6253 | 6332 |
| CAZ | 50   | 51   | 51   | 52   | 52   | 53   | 53   | 54   | 54   | 55   | 56   |
| CHA | 1185 | 1198 | 1211 | 1224 | 1237 | 1249 | 1260 | 1270 | 1279 | 1288 | 1296 |
| EUR | 482  | 483  | 484  | 485  | 486  | 487  | 488  | 488  | 489  | 491  | 492  |
| IND | 924  | 942  | 960  | 979  | 997  | 1016 | 1035 | 1053 | 1071 | 1090 | 1108 |
| JPN | 125  | 125  | 125  | 126  | 126  | 126  | 127  | 127  | 127  | 127  | 128  |
| LAM | 470  | 478  | 486  | 494  | 502  | 510  | 517  | 525  | 532  | 539  | 547  |
| MEA | 295  | 302  | 310  | 317  | 323  | 330  | 337  | 343  | 350  | 357  | 364  |
| NEU | 86   | 87   | 88   | 89   | 89   | 90   | 91   | 92   | 93   | 94   | 95   |
| OAS | 825  | 842  | 858  | 874  | 890  | 905  | 921  | 936  | 952  | 967  | 982  |
| REF | 283  | 283  | 283  | 282  | 282  | 281  | 281  | 280  | 279  | 279  | 278  |
| SSA | 534  | 548  | 563  | 579  | 594  | 610  | 626  | 643  | 660  | 678  | 696  |
| USA | 260  | 263  | 266  | 269  | 273  | 276  | 279  | 282  | 285  | 288  | 290  |

Table 960: WDI — Population (million people) [PART 4/6]

|     | 2004 | 2005 | 2006 | 2007 | 2008 | 2009 | 2010 | 2011 | 2012 | 2013 | 2014 |
|-----|------|------|------|------|------|------|------|------|------|------|------|
| GLO | 6412 | 6492 | 6574 | 6656 | 6739 | 6822 | 6906 | 6988 | 7068 | 7153 | 7239 |
| CAZ | 56   | 57   | 57   | 58   | 59   | 60   | 60   | 61   | 62   | 63   | 64   |
| CHA | 1303 | 1311 | 1318 | 1325 | 1332 | 1339 | 1345 | 1352 | 1358 | 1365 | 1372 |
| EUR | 494  | 496  | 498  | 500  | 502  | 503  | 505  | 504  | 505  | 507  | 508  |
| IND | 1126 | 1144 | 1162 | 1180 | 1197 | 1214 | 1231 | 1247 | 1263 | 1279 | 1294 |
| JPN | 128  | 128  | 128  | 128  | 128  | 128  | 128  | 128  | 128  | 127  | 127  |
| LAM | 554  | 561  | 568  | 575  | 582  | 589  | 597  | 604  | 611  | 618  | 624  |
| MEA | 371  | 379  | 387  | 395  | 404  | 413  | 421  | 430  | 439  | 448  | 457  |
| NEU | 96   | 97   | 98   | 99   | 100  | 101  | 102  | 103  | 105  | 106  | 107  |
| OAS | 997  | 1012 | 1026 | 1040 | 1054 | 1068 | 1083 | 1097 | 1113 | 1128 | 1143 |
| REF | 278  | 278  | 277  | 278  | 278  | 279  | 281  | 282  | 283  | 285  | 286  |
| SSA | 715  | 735  | 755  | 776  | 798  | 820  | 843  | 867  | 887  | 912  | 937  |
| USA | 293  | 296  | 298  | 301  | 304  | 307  | 309  | 312  | 314  | 316  | 319  |

Table 961: WDI — Population (million people) [PART 5/6]

|     | 2015 | 2016 |
|-----|------|------|
| GLO | 7325 | 7412 |
| CAZ | 64   | 65   |
| CHA | 1379 | 1387 |
| EUR | 510  | 512  |
| IND | 1309 | 1324 |
| JPN | 127  | 127  |
| LAM | 631  | 638  |
| MEA | 466  | 475  |
| NEU | 109  | 110  |
| OAS | 1158 | 1173 |
| REF | 287  | 289  |
| SSA | 963  | 990  |
| USA | 321  | 323  |

Table 962: WDI — Population (million people) [PART 6/6]

Part XI  
Prices

36 Agriculture

36.1 Alcoholic beverages

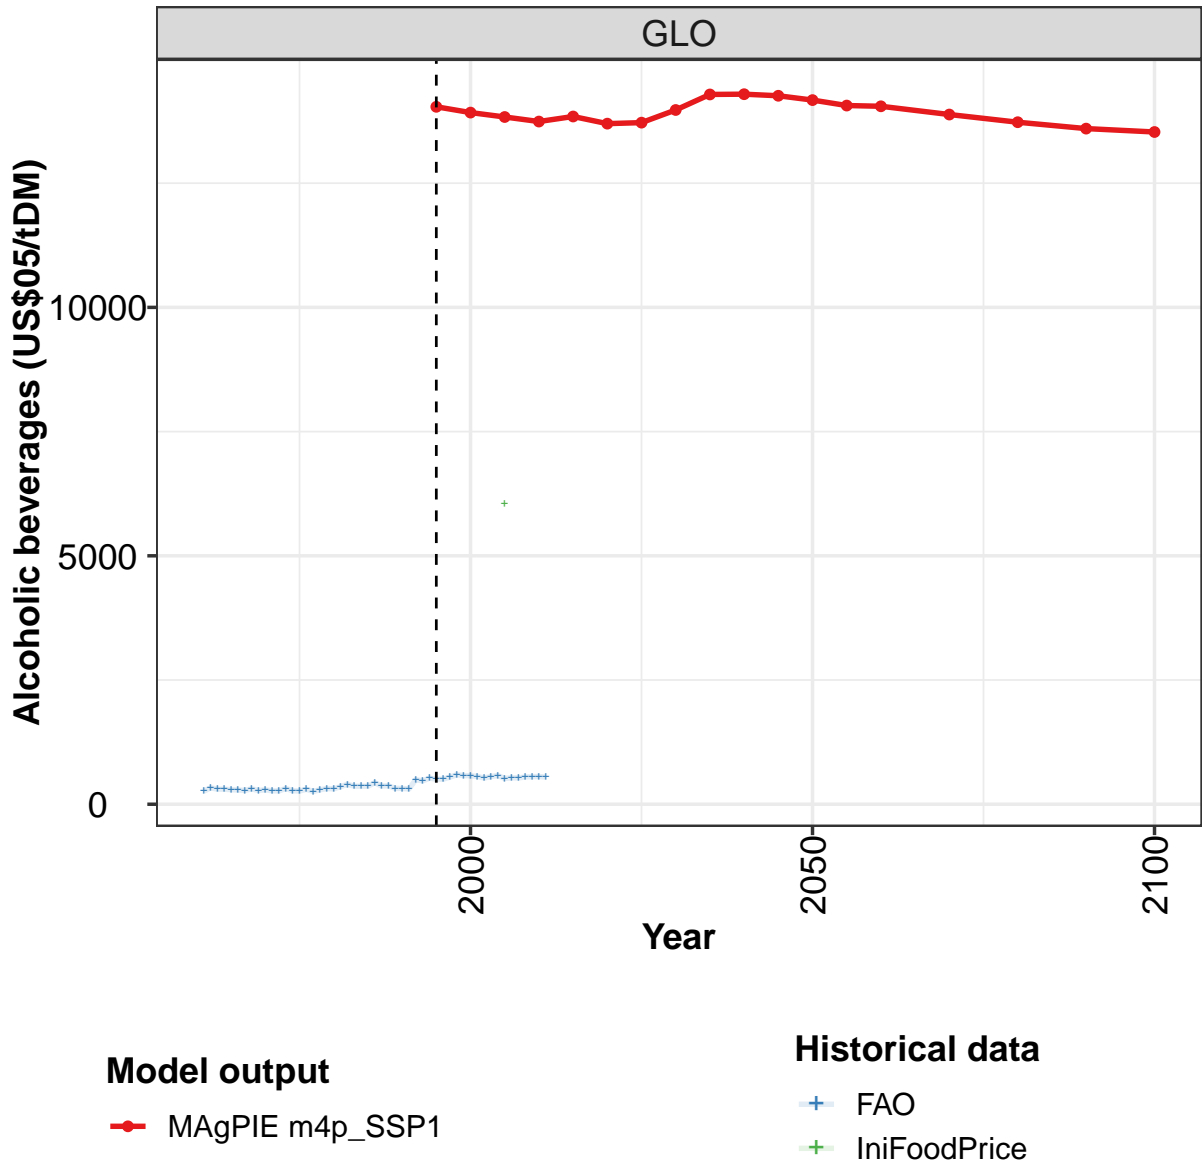



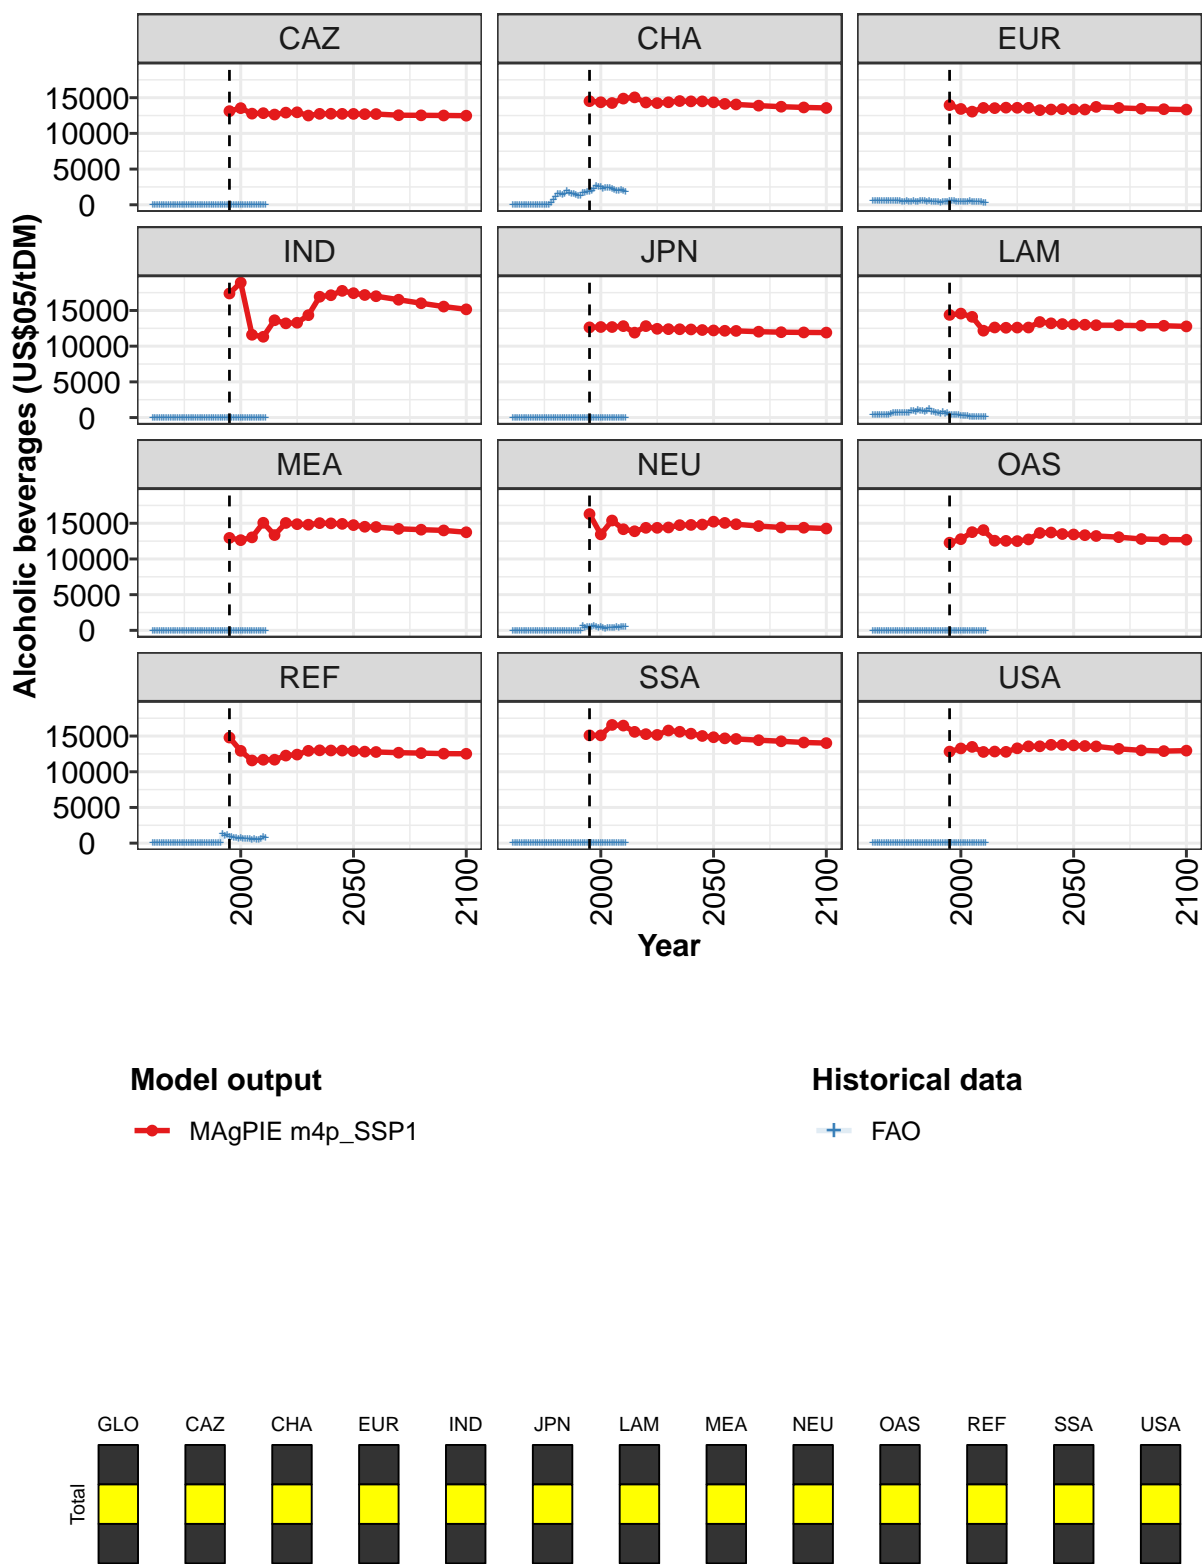

Figure 291: MAgPIE m4p\_SSP1 — Prices—Agriculture—Alcoholic beverages (US\$05/tDM)

|     | 1995  | 2000  | 2005  | 2010  | 2015  | 2020  | 2025  | 2030  | 2035  | 2040  | 2045  |
|-----|-------|-------|-------|-------|-------|-------|-------|-------|-------|-------|-------|
| GLO | 14037 | 13921 | 13832 | 13741 | 13842 | 13698 | 13719 | 13973 | 14286 | 14291 | 14259 |
| CAZ | 13121 | 13538 | 12771 | 12834 | 12640 | 12908 | 12957 | 12504 | 12738 | 12752 | 12738 |
| CHA | 14517 | 14366 | 14255 | 14874 | 15048 | 14329 | 14245 | 14361 | 14532 | 14488 | 14486 |
| EUR | 13963 | 13425 | 13049 | 13571 | 13543 | 13606 | 13589 | 13580 | 13251 | 13345 | 13401 |
| IND | 17384 | 18912 | 11600 | 11321 | 13635 | 13198 | 13280 | 14346 | 16926 | 17142 | 17752 |
| JPN | 12639 | 12687 | 12685 | 12810 | 11900 | 12814 | 12436 | 12386 | 12372 | 12344 | 12267 |
| LAM | 14386 | 14568 | 14114 | 12171 | 12620 | 12583 | 12606 | 12616 | 13389 | 13204 | 13099 |
| MEA | 12953 | 12639 | 13029 | 15071 | 13351 | 15047 | 14880 | 14804 | 15021 | 14990 | 14919 |
| NEU | 16289 | 13446 | 15390 | 14170 | 13886 | 14365 | 14363 | 14414 | 14739 | 14772 | 14827 |
| OAS | 12280 | 12777 | 13759 | 14051 | 12560 | 12539 | 12508 | 12740 | 13642 | 13711 | 13497 |
| REF | 14795 | 12932 | 11584 | 11685 | 11691 | 12268 | 12409 | 12937 | 13002 | 12983 | 12969 |
| SSA | 15101 | 15101 | 16565 | 16471 | 15596 | 15271 | 15165 | 15779 | 15604 | 15337 | 15014 |
| USA | 12827 | 13267 | 13485 | 12780 | 12836 | 12793 | 13286 | 13566 | 13569 | 13774 | 13762 |

Table 963: MAgPIE m4p\_SSP1 — Prices—Agriculture—Alcoholic beverages (US\$05/tDM) [PART 1/2]

|     | 2050  | 2055  | 2060  | 2070  | 2080  | 2090  | 2100  |
|-----|-------|-------|-------|-------|-------|-------|-------|
| GLO | 14172 | 14063 | 14048 | 13882 | 13727 | 13598 | 13530 |
| CAZ | 12731 | 12697 | 12709 | 12545 | 12530 | 12510 | 12479 |
| CHA | 14357 | 14134 | 14054 | 13885 | 13739 | 13636 | 13563 |
| EUR | 13361 | 13344 | 13715 | 13570 | 13459 | 13387 | 13331 |
| IND | 17427 | 17172 | 17001 | 16507 | 16016 | 15549 | 15160 |
| JPN | 12208 | 12161 | 12142 | 12029 | 11961 | 11928 | 11907 |
| LAM | 13040 | 13005 | 12940 | 12933 | 12874 | 12859 | 12769 |
| MEA | 14746 | 14515 | 14478 | 14222 | 14103 | 14000 | 13742 |
| NEU | 15225 | 15056 | 14870 | 14610 | 14416 | 14378 | 14266 |
| OAS | 13430 | 13335 | 13221 | 13058 | 12801 | 12717 | 12698 |
| REF | 12906 | 12822 | 12772 | 12672 | 12615 | 12537 | 12521 |
| SSA | 14840 | 14682 | 14599 | 14424 | 14271 | 14100 | 14019 |
| USA | 13697 | 13606 | 13555 | 13213 | 12998 | 12895 | 12959 |

Table 964: MAgPIE m4p\_SSP1 — Prices—Agriculture—Alcoholic beverages (US\$05/tDM) [PART 2/2]

|     | 1961 | 1962 | 1963 | 1964 | 1965 | 1966 | 1967 | 1968 | 1969 | 1970 | 1971 |
|-----|------|------|------|------|------|------|------|------|------|------|------|
| GLO | 264  | 330  | 304  | 302  | 294  | 286  | 278  | 309  | 276  | 290  | 270  |
| CAZ | 0    | 0    | 0    | 0    | 0    | 0    | 0    | 0    | 0    | 0    | 0    |
| CHA | 0    | 0    | 0    | 0    | 0    | 0    | 0    | 0    | 0    | 0    | 0    |
| EUR | 509  | 614  | 579  | 553  | 537  | 530  | 525  | 590  | 524  | 523  | 498  |
| IND | 0    | 0    | 0    | 0    | 0    | 0    | 0    | 0    | 0    | 0    | 0    |
| JPN | 0    | 0    | 0    | 0    | 0    | 0    | 0    | 0    | 0    | 0    | 0    |
| LAM | 348  | 355  | 384  | 408  | 430  | 425  | 377  | 451  | 473  | 663  | 629  |
| MEA | 0    | 0    | 0    | 0    | 0    | 0    | 0    | 0    | 0    | 0    | 0    |
| NEU | 0    | 0    | 0    | 0    | 0    | 0    | 0    | 0    | 0    | 0    | 0    |
| OAS | 0    | 0    | 0    | 0    | 0    | 0    | 0    | 0    | 0    | 0    | 0    |
| REF | 0    | 0    | 0    | 0    | 0    | 0    | 0    | 0    | 0    | 0    | 0    |
| SSA | 0    | 0    | 0    | 0    | 0    | 0    | 0    | 0    | 0    | 0    | 0    |
| USA | 0    | 0    | 0    | 0    | 0    | 0    | 0    | 0    | 0    | 0    | 0    |

Table 965: FAO — Prices—Agriculture—Alcoholic beverages (US\$05/tDM) [PART 1/5]

|     | 1972 | 1973 | 1974 | 1975 | 1976 | 1977 | 1978 | 1979 | 1980 | 1981 | 1982 |
|-----|------|------|------|------|------|------|------|------|------|------|------|
| GLO | 268  | 317  | 271  | 266  | 301  | 258  | 290  | 316  | 310  | 353  | 401  |
| CAZ | 0    | 0    | 0    | 0    | 0    | 0    | 0    | 0    | 0    | 0    | 0    |
| CHA | 0    | 0    | 0    | 0    | 0    | 0    | 328  | 702  | 1159 | 1601 | 1498 |
| EUR | 494  | 580  | 484  | 483  | 561  | 481  | 478  | 516  | 472  | 484  | 621  |
| IND | 0    | 0    | 0    | 0    | 0    | 0    | 0    | 0    | 0    | 0    | 0    |
| JPN | 0    | 0    | 0    | 0    | 0    | 0    | 0    | 0    | 0    | 0    | 0    |
| LAM | 625  | 658  | 677  | 708  | 709  | 669  | 915  | 937  | 802  | 1039 | 922  |
| MEA | 0    | 0    | 0    | 0    | 0    | 0    | 0    | 0    | 0    | 0    | 0    |
| NEU | 0    | 0    | 0    | 0    | 0    | 0    | 0    | 0    | 0    | 0    | 0    |
| OAS | 0    | 0    | 0    | 0    | 0    | 0    | 0    | 0    | 0    | 0    | 0    |
| REF | 0    | 0    | 0    | 0    | 0    | 0    | 0    | 0    | 0    | 0    | 0    |
| SSA | 0    | 0    | 0    | 0    | 0    | 0    | 0    | 0    | 0    | 0    | 0    |
| USA | 0    | 0    | 0    | 0    | 0    | 0    | 0    | 0    | 0    | 0    | 0    |

Table 966: FAO — Prices—Agriculture—Alcoholic beverages (US\$05/tDM) [PART 2/5]

|     | 1983 | 1984 | 1985 | 1986 | 1987 | 1988 | 1989 | 1990 | 1991 | 1992 | 1993 |
|-----|------|------|------|------|------|------|------|------|------|------|------|
| GLO | 362  | 363  | 363  | 434  | 366  | 370  | 321  | 317  | 309  | 495  | 470  |
| CAZ | 0    | 0    | 0    | 0    | 0    | 0    | 0    | 0    | 0    | 0    | 0    |
| CHA | 1392 | 1532 | 1898 | 1698 | 1559 | 1532 | 1412 | 1230 | 1311 | 1731 | 1678 |
| EUR | 514  | 518  | 426  | 526  | 445  | 435  | 376  | 405  | 348  | 483  | 483  |
| IND | 0    | 0    | 0    | 0    | 0    | 0    | 0    | 0    | 0    | 0    | 0    |
| JPN | 0    | 0    | 0    | 0    | 0    | 0    | 0    | 0    | 0    | 0    | 0    |
| LAM | 909  | 817  | 903  | 1231 | 816  | 805  | 652  | 677  | 557  | 760  | 553  |
| MEA | 0    | 0    | 0    | 0    | 0    | 0    | 0    | 0    | 0    | 0    | 0    |
| NEU | 0    | 0    | 0    | 0    | 0    | 0    | 0    | 0    | 0    | 655  | 386  |
| OAS | 0    | 0    | 0    | 0    | 0    | 0    | 0    | 0    | 0    | 0    | 0    |
| REF | 0    | 0    | 0    | 0    | 0    | 0    | 0    | 0    | 0    | 1308 | 1094 |
| SSA | 0    | 0    | 0    | 0    | 0    | 0    | 0    | 0    | 0    | 0    | 0    |
| USA | 0    | 0    | 0    | 0    | 0    | 0    | 0    | 0    | 0    | 0    | 0    |

Table 967: FAO — Prices—Agriculture—Alcoholic beverages (US\$05/tDM) [PART 3/5]

|     | 1994 | 1995 | 1996 | 1997 | 1998 | 1999 | 2000 | 2001 | 2002 | 2003 | 2004 |
|-----|------|------|------|------|------|------|------|------|------|------|------|
| GLO | 525  | 505  | 505  | 546  | 594  | 576  | 573  | 560  | 527  | 558  | 577  |
| CAZ | 0    | 0    | 0    | 0    | 0    | 0    | 0    | 0    | 0    | 0    | 0    |
| CHA | 1875 | 1841 | 2023 | 2245 | 2672 | 2530 | 2474 | 2260 | 2328 | 2437 | 2310 |
| EUR | 483  | 502  | 517  | 500  | 482  | 481  | 461  | 465  | 437  | 420  | 494  |
| IND | 0    | 0    | 0    | 0    | 0    | 0    | 0    | 0    | 0    | 0    | 0    |
| JPN | 0    | 0    | 0    | 0    | 0    | 0    | 0    | 0    | 0    | 0    | 0    |
| LAM | 696  | 452  | 352  | 373  | 350  | 378  | 307  | 314  | 190  | 226  | 154  |
| MEA | 0    | 0    | 0    | 0    | 0    | 0    | 0    | 0    | 0    | 0    | 0    |
| NEU | 532  | 512  | 555  | 616  | 549  | 386  | 448  | 378  | 275  | 405  | 431  |
| OAS | 0    | 0    | 0    | 0    | 0    | 0    | 0    | 0    | 0    | 0    | 0    |
| REF | 1133 | 836  | 826  | 804  | 695  | 658  | 687  | 660  | 582  | 572  | 554  |
| SSA | 0    | 0    | 0    | 0    | 0    | 0    | 0    | 0    | 0    | 0    | 0    |
| USA | 0    | 0    | 0    | 0    | 0    | 0    | 0    | 0    | 0    | 0    | 0    |

Table 968: FAO — Prices—Agriculture—Alcoholic beverages (US\$05/tDM) [PART 4/5]

|     | 2005 | 2006 | 2007 | 2008 | 2009 | 2010 | 2011 |
|-----|------|------|------|------|------|------|------|
| GLO | 519  | 532  | 529  | 549  | 553  | 558  | 545  |
| CAZ | 0    | 0    | 0    | 0    | 0    | 0    | 0    |
| CHA | 2271 | 2101 | 2007 | 1996 | 2046 | 1982 | 1872 |
| EUR | 352  | 375  | 363  | 370  | 367  | 312  | 340  |
| IND | 0    | 0    | 0    | 0    | 0    | 0    | 0    |
| JPN | 0    | 0    | 0    | 0    | 0    | 0    | 0    |
| LAM | 77   | 100  | 110  | 111  | 79   | 59   | 66   |
| MEA | 0    | 0    | 0    | 0    | 0    | 0    | 0    |
| NEU | 331  | 328  | 458  | 412  | 489  | 478  | 435  |
| OAS | 0    | 0    | 0    | 0    | 0    | 0    | 0    |
| REF | 433  | 561  | 541  | 529  | 556  | 845  | 791  |
| SSA | 0    | 0    | 0    | 0    | 0    | 0    | 0    |
| USA | 0    | 0    | 0    | 0    | 0    | 0    | 0    |

Table 969: FAO — Prices—Agriculture—Alcoholic beverages (US\$05/tDM) [PART 5/5]

|     | 2005 |
|-----|------|
| GLO | 6054 |
| CAZ |      |
| CHA |      |
| EUR |      |
| IND |      |
| JPN |      |
| LAM |      |
| MEA |      |
| NEU |      |
| OAS |      |
| REF |      |
| SSA |      |
| USA |      |

Table 970: IniFoodPrice — Prices—Agriculture—Alcoholic beverages (US\$05/tDM)

36.2 Brans

## geom\_path: Each group consists of only one observation. Do you need to adjust the group## aesthetic?

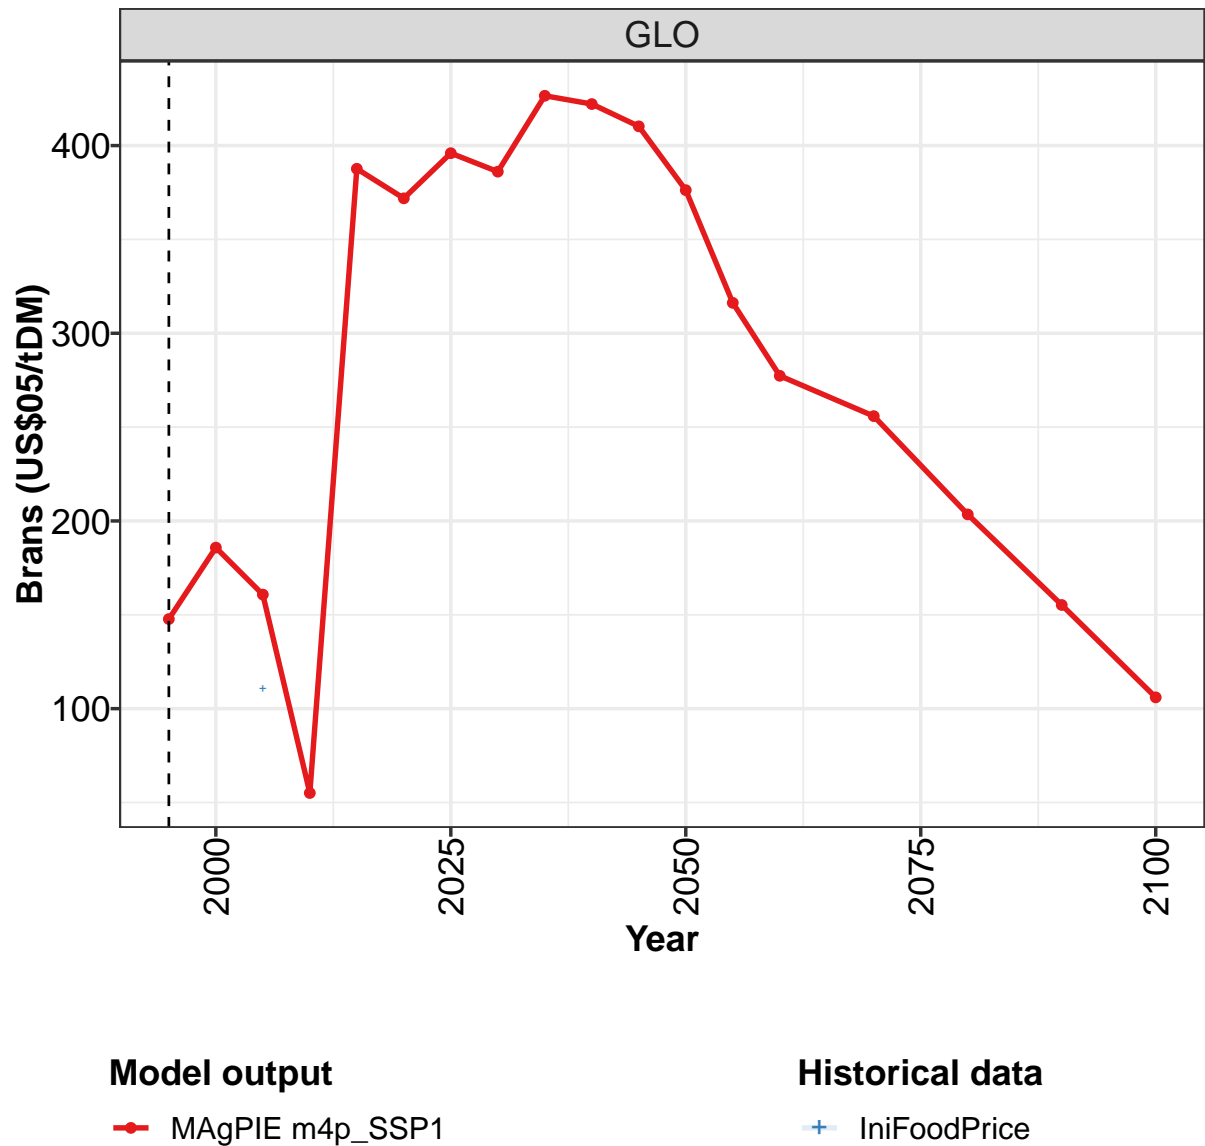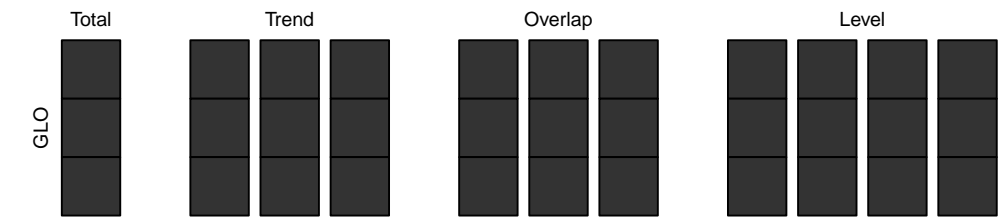

Figure 292: MAgPIE m4p\_SSP1 — Prices—Agriculture—Brans (US\$05/tDM)

|     | 1995 | 2000 | 2005 | 2010 | 2015 | 2020 | 2025 | 2030 | 2035 | 2040 | 2045 |
|-----|------|------|------|------|------|------|------|------|------|------|------|
| GLO | 148  | 186  | 161  | 55   | 388  | 372  | 396  | 386  | 427  | 422  | 410  |

Table 971: MAgPIE m4p\_SSP1 — Prices—Agriculture—Brans (US\$05/tDM) [PART 1/2]

|     | 2050 | 2055 | 2060 | 2070 | 2080 | 2090 | 2100 |
|-----|------|------|------|------|------|------|------|
| GLO | 376  | 316  | 277  | 256  | 204  | 155  | 106  |

Table 972: MAgPIE m4p\_SSP1 — Prices—Agriculture—Brans (US\$05/tDM) [PART 2/2]

|     | 2005 |
|-----|------|
| GLO | 111  |

Table 973: IniFoodPrice — Prices—Agriculture—Brans (US\$05/tDM)

36.3 Cotton lint

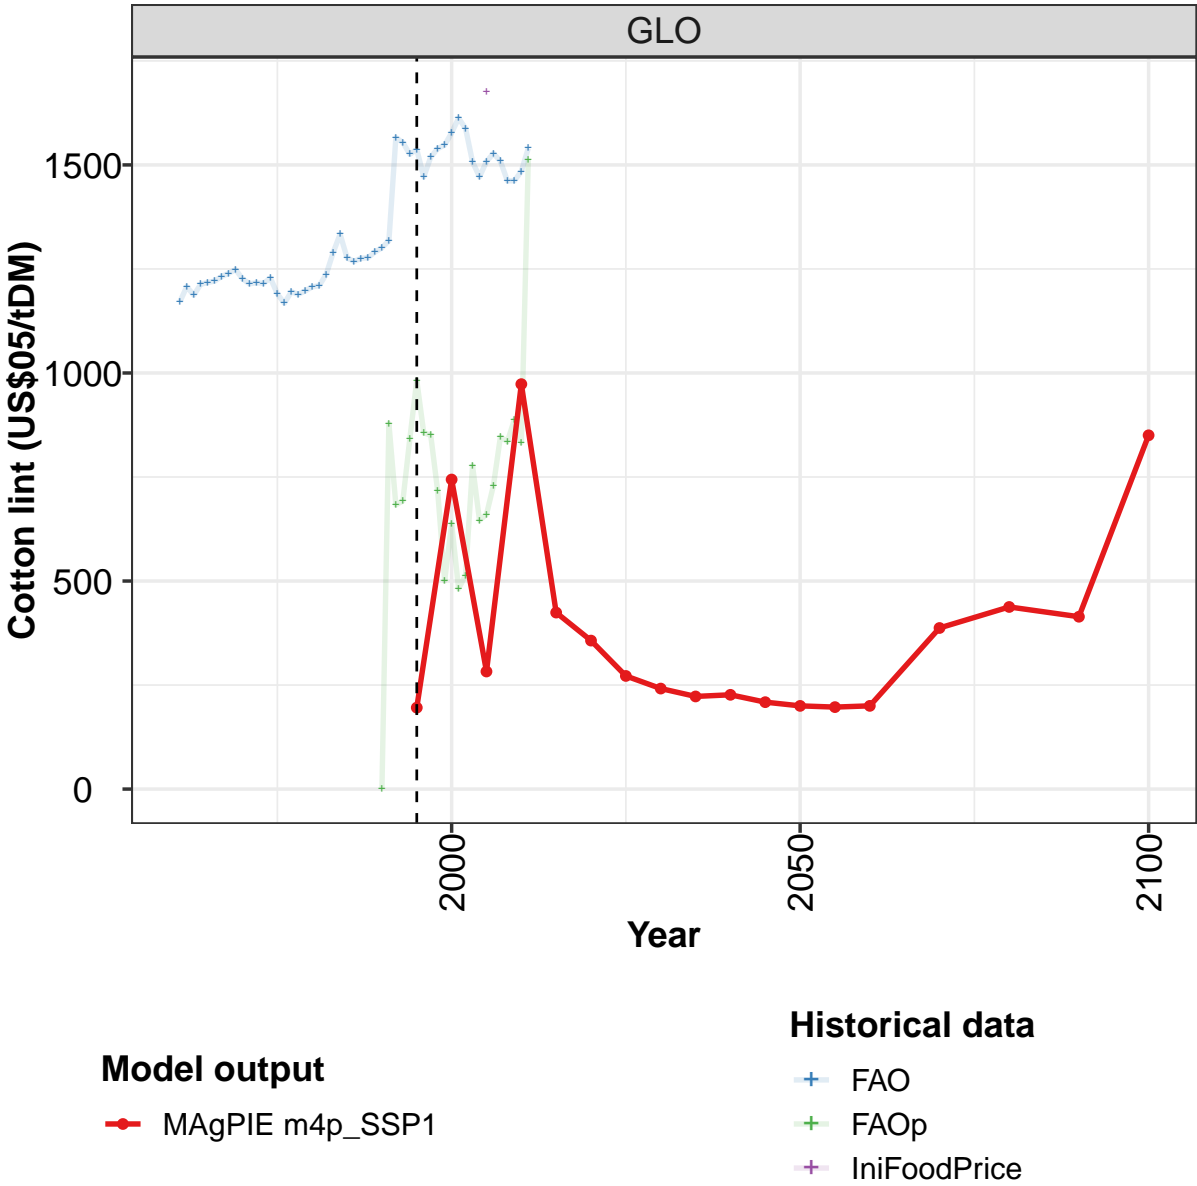

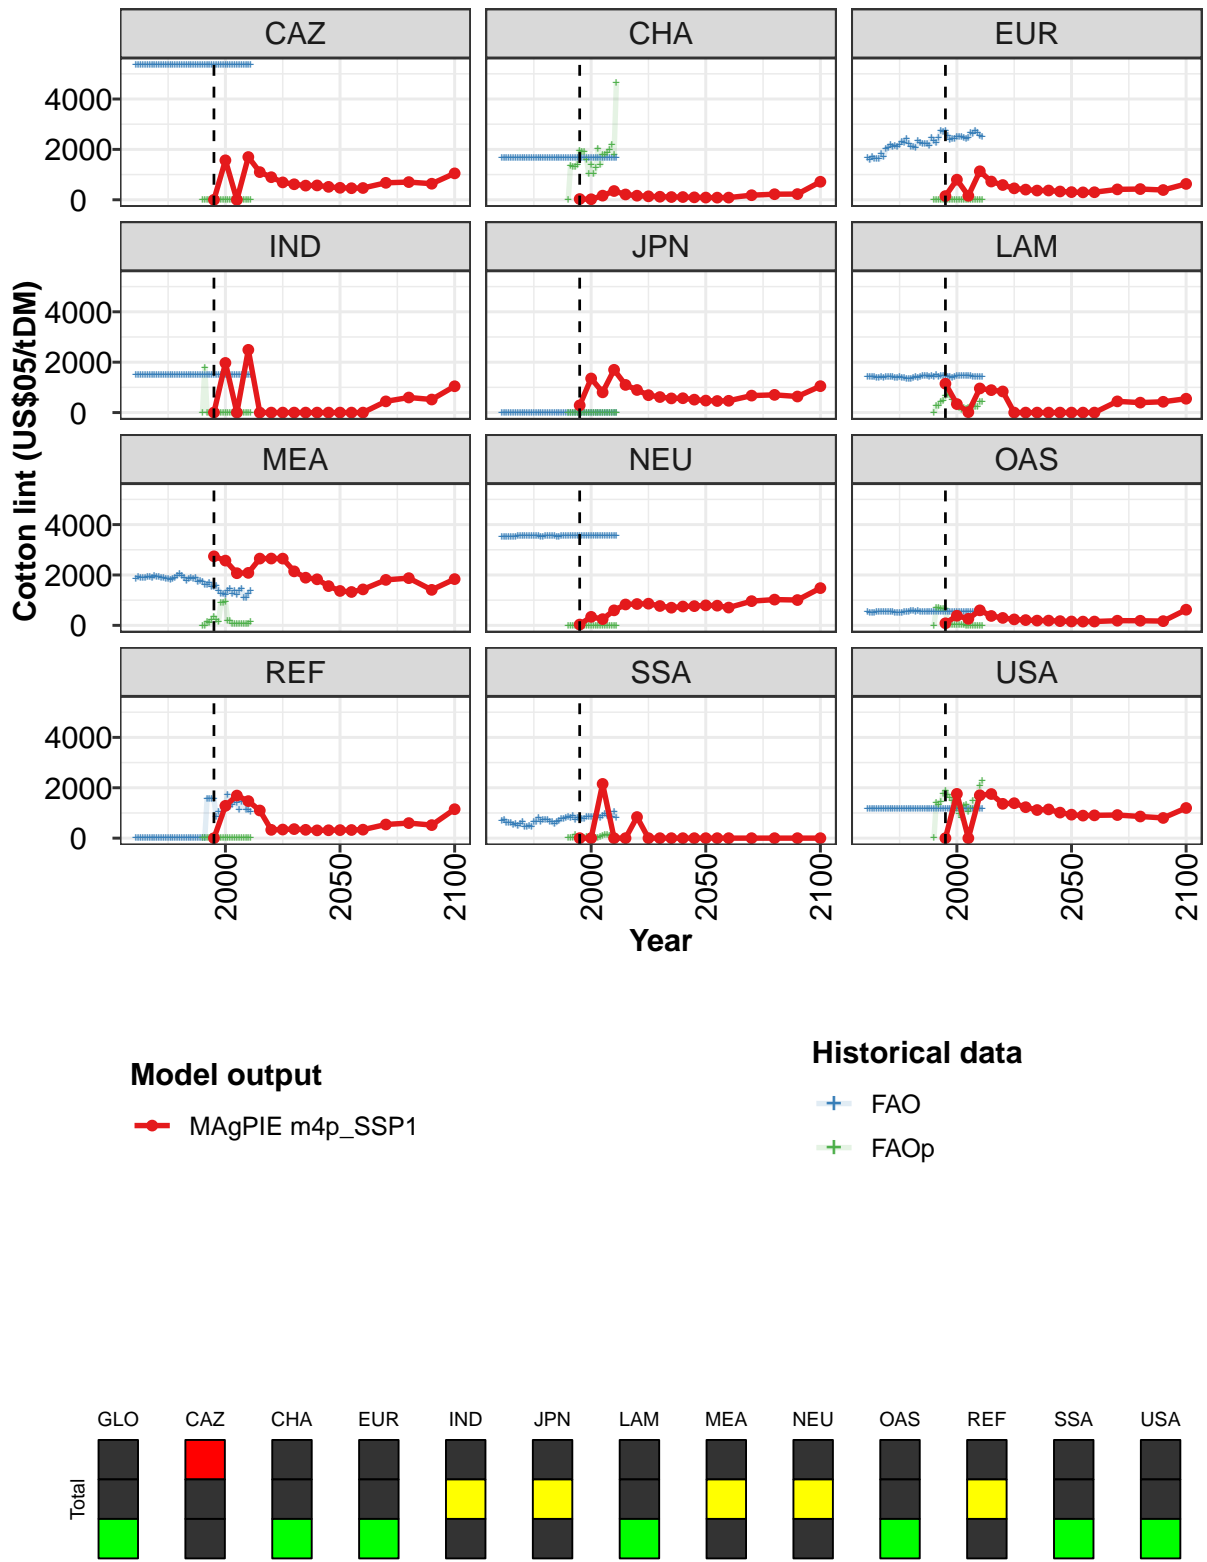

Figure 293: MAgPIE m4p\_SSP1 — Prices—Agriculture—Cotton lint (US\$05/tDM)

|     | 1995 | 2000 | 2005 | 2010 | 2015 | 2020 | 2025 | 2030 | 2035 | 2040 | 2045 |
|-----|------|------|------|------|------|------|------|------|------|------|------|
| GLO | 196  | 744  | 283  | 973  | 424  | 357  | 272  | 242  | 223  | 227  | 209  |
| CAZ | 0    | 1567 | 0    | 1698 | 1099 | 897  | 690  | 617  | 563  | 569  | 513  |
| CHA | 30   | 21   | 165  | 348  | 212  | 163  | 137  | 121  | 109  | 109  | 97   |
| EUR | 148  | 799  | 159  | 1132 | 725  | 585  | 454  | 404  | 366  | 369  | 330  |
| IND | 3    | 1971 | 0    | 2490 | 0    | 0    | 0    | 0    | 0    | 0    | 0    |
| JPN | 287  | 1354 | 804  | 1698 | 1099 | 897  | 690  | 617  | 563  | 569  | 513  |
| LAM | 1146 | 338  | 16   | 958  | 891  | 839  | 0    | 0    | 0    | 0    | 0    |
| MEA | 2741 | 2571 | 2070 | 2084 | 2651 | 2654 | 2650 | 2144 | 1893 | 1828 | 1559 |
| NEU | 32   | 338  | 247  | 596  | 829  | 848  | 861  | 770  | 701  | 749  | 763  |
| OAS | 83   | 382  | 261  | 596  | 374  | 296  | 236  | 209  | 189  | 189  | 169  |
| REF | 0    | 1283 | 1691 | 1472 | 1099 | 330  | 342  | 359  | 331  | 310  | 314  |
| SSA | 0    | 0    | 2154 | 0    | 0    | 838  | 0    | 0    | 0    | 0    | 0    |
| USA | 0    | 1759 | 0    | 1702 | 1752 | 1363 | 1388 | 1229 | 1117 | 1141 | 1015 |

Table 974: MAgPIE m4p\_SSP1 — Prices—Agriculture—Cotton lint (US\$05/tDM) [PART 1/2]

|     | 2050 | 2055 | 2060 | 2070 | 2080 | 2090 | 2100 |
|-----|------|------|------|------|------|------|------|
| GLO | 200  | 197  | 200  | 387  | 438  | 414  | 850  |
| CAZ | 475  | 460  | 467  | 673  | 702  | 638  | 1049 |
| CHA | 89   | 86   | 87   | 181  | 222  | 226  | 715  |
| EUR | 304  | 294  | 299  | 413  | 425  | 388  | 629  |
| IND | 0    | 0    | 0    | 445  | 598  | 519  | 1044 |
| JPN | 475  | 460  | 467  | 673  | 702  | 638  | 1049 |
| LAM | 0    | 0    | 0    | 445  | 395  | 428  | 549  |
| MEA | 1365 | 1326 | 1427 | 1805 | 1875 | 1410 | 1837 |
| NEU | 794  | 782  | 706  | 961  | 1022 | 1005 | 1480 |
| OAS | 155  | 149  | 152  | 185  | 183  | 168  | 622  |
| REF | 320  | 324  | 337  | 542  | 598  | 519  | 1149 |
| SSA | 0    | 0    | 0    | 0    | 0    | 0    | 0    |
| USA | 932  | 895  | 905  | 917  | 860  | 802  | 1198 |

Table 975: MAgPIE m4p\_SSP1 — Prices—Agriculture—Cotton lint (US\$05/tDM) [PART 2/2]

|     | 1961 | 1962 | 1963 | 1964 | 1965 | 1966 | 1967 | 1968 | 1969 | 1970 | 1971 |
|-----|------|------|------|------|------|------|------|------|------|------|------|
| GLO | 1171 | 1207 | 1187 | 1213 | 1217 | 1221 | 1232 | 1239 | 1248 | 1226 | 1214 |
| CAZ | 5358 | 5358 | 5357 | 5359 | 5359 | 5359 | 5359 | 5359 | 5359 | 5359 | 5359 |
| CHA | 1651 | 1650 | 1651 | 1651 | 1651 | 1651 | 1651 | 1651 | 1651 | 1651 | 1651 |
| EUR | 1675 | 1570 | 1706 | 1632 | 1635 | 1613 | 1825 | 1701 | 2010 | 2046 | 2166 |
| IND | 1483 | 1483 | 1483 | 1483 | 1483 | 1483 | 1483 | 1483 | 1483 | 1483 | 1483 |
| JPN | 0    | 0    | 0    | 0    | 0    | 0    | 0    | 0    | 0    | 0    | 0    |
| LAM | 1436 | 1438 | 1410 | 1404 | 1397 | 1395 | 1410 | 1398 | 1410 | 1416 | 1415 |
| MEA | 1863 | 1909 | 1887 | 1878 | 1876 | 1922 | 1934 | 1880 | 1952 | 1925 | 1914 |
| NEU | 3513 | 3521 | 3512 | 3524 | 3512 | 3521 | 3528 | 3550 | 3543 | 3543 | 3552 |
| OAS | 536  | 511  | 506  | 517  | 521  | 547  | 544  | 557  | 526  | 519  | 530  |
| REF | 0    | 0    | 0    | 0    | 0    | 0    | 0    | 0    | 0    | 0    | 0    |
| SSA | 697  | 741  | 621  | 617  | 600  | 531  | 560  | 479  | 565  | 656  | 461  |
| USA | 1180 | 1180 | 1180 | 1180 | 1180 | 1180 | 1180 | 1180 | 1180 | 1180 | 1180 |

Table 976: FAO — Prices—Agriculture—Cotton lint (US\$05/tDM) [PART 1/5]



|     | 1972 | 1973 | 1974 | 1975 | 1976 | 1977 | 1978 | 1979 | 1980 | 1981 | 1982 |
|-----|------|------|------|------|------|------|------|------|------|------|------|
| GLO | 1217 | 1215 | 1228 | 1190 | 1168 | 1195 | 1189 | 1197 | 1207 | 1210 | 1237 |
| CAZ | 5359 | 5359 | 5359 | 5359 | 5359 | 5359 | 5359 | 5359 | 5359 | 5359 | 5359 |
| CHA | 1652 | 1652 | 1652 | 1652 | 1652 | 1652 | 1652 | 1652 | 1652 | 1652 | 1652 |
| EUR | 2093 | 2156 | 2115 | 2202 | 2317 | 2261 | 2418 | 2217 | 2122 | 2098 | 2079 |
| IND | 1483 | 1483 | 1483 | 1483 | 1483 | 1483 | 1483 | 1483 | 1483 | 1483 | 1483 |
| JPN | 0    | 0    | 0    | 0    | 0    | 0    | 0    | 0    | 0    | 0    | 0    |
| LAM | 1400 | 1388 | 1376 | 1406 | 1386 | 1363 | 1348 | 1335 | 1332 | 1388 | 1408 |
| MEA | 1907 | 1885 | 1865 | 1854 | 1823 | 1853 | 1905 | 1968 | 2037 | 1977 | 1894 |
| NEU | 3548 | 3542 | 3546 | 3538 | 3537 | 3542 | 3535 | 3532 | 3547 | 3538 | 3538 |
| OAS | 533  | 512  | 514  | 491  | 486  | 533  | 520  | 554  | 584  | 577  | 559  |
| REF | 0    | 0    | 0    | 0    | 0    | 0    | 0    | 0    | 0    | 0    | 0    |
| SSA | 459  | 501  | 469  | 638  | 638  | 798  | 667  | 744  | 735  | 724  | 666  |
| USA | 1180 | 1180 | 1180 | 1180 | 1180 | 1180 | 1180 | 1180 | 1180 | 1180 | 1180 |

Table 977: FAO — Prices—Agriculture—Cotton lint (US\$05/tDM) [PART 2/5]

|     | 1983 | 1984 | 1985 | 1986 | 1987 | 1988 | 1989 | 1990 | 1991 | 1992 | 1993 |
|-----|------|------|------|------|------|------|------|------|------|------|------|
| GLO | 1289 | 1334 | 1277 | 1268 | 1276 | 1277 | 1291 | 1301 | 1318 | 1566 | 1554 |
| CAZ | 5359 | 5359 | 5359 | 5359 | 5359 | 5359 | 5359 | 5359 | 5359 | 5359 | 5359 |
| CHA | 1652 | 1652 | 1652 | 1652 | 1652 | 1652 | 1652 | 1652 | 1652 | 1652 | 1652 |
| EUR | 2330 | 2267 | 2230 | 2230 | 2228 | 2154 | 2455 | 2326 | 2253 | 2460 | 2730 |
| IND | 1483 | 1483 | 1483 | 1483 | 1483 | 1483 | 1483 | 1483 | 1483 | 1483 | 1483 |
| JPN | 0    | 0    | 0    | 0    | 0    | 0    | 0    | 0    | 0    | 0    | 0    |
| LAM | 1389 | 1416 | 1446 | 1460 | 1454 | 1435 | 1461 | 1425 | 1481 | 1440 | 1467 |
| MEA | 1789 | 1854 | 1876 | 1856 | 1893 | 1721 | 1751 | 1748 | 1629 | 1593 | 1709 |
| NEU | 3549 | 3546 | 3532 | 3533 | 3538 | 3555 | 3550 | 3558 | 3572 | 3572 | 3573 |
| OAS | 564  | 540  | 542  | 538  | 547  | 553  | 553  | 554  | 552  | 558  | 549  |
| REF | 0    | 0    | 0    | 0    | 0    | 0    | 0    | 0    | 0    | 1562 | 1562 |
| SSA | 640  | 557  | 637  | 687  | 754  | 760  | 807  | 844  | 793  | 892  | 747  |
| USA | 1180 | 1180 | 1180 | 1180 | 1180 | 1180 | 1180 | 1180 | 1180 | 1180 | 1180 |

Table 978: FAO — Prices—Agriculture—Cotton lint (US\$05/tDM) [PART 3/5]

|     | 1994 | 1995 | 1996 | 1997 | 1998 | 1999 | 2000 | 2001 | 2002 | 2003 | 2004 |
|-----|------|------|------|------|------|------|------|------|------|------|------|
| GLO | 1526 | 1537 | 1471 | 1519 | 1539 | 1548 | 1577 | 1612 | 1588 | 1507 | 1471 |
| CAZ | 5359 | 5359 | 5359 | 5359 | 5359 | 5359 | 5359 | 5359 | 5359 | 5359 | 5359 |
| CHA | 1652 | 1652 | 1652 | 1652 | 1652 | 1652 | 1652 | 1652 | 1652 | 1652 | 1652 |
| EUR | 2692 | 2738 | 2524 | 2382 | 2427 | 2412 | 2513 | 2501 | 2496 | 2456 | 2419 |
| IND | 1483 | 1483 | 1483 | 1483 | 1483 | 1483 | 1483 | 1483 | 1483 | 1483 | 1483 |
| JPN | 0    | 0    | 0    | 0    | 0    | 0    | 0    | 0    | 0    | 0    | 0    |
| LAM | 1453 | 1442 | 1440 | 1420 | 1396 | 1433 | 1456 | 1446 | 1461 | 1466 | 1455 |
| MEA | 1548 | 1534 | 1578 | 1380 | 1261 | 1266 | 1221 | 1381 | 1438 | 1252 | 1363 |
| NEU | 3573 | 3573 | 3573 | 3573 | 3573 | 3573 | 3573 | 3573 | 3573 | 3573 | 3573 |
| OAS | 546  | 544  | 534  | 529  | 527  | 530  | 528  | 532  | 527  | 526  | 531  |
| REF | 1564 | 1552 | 840  | 1065 | 859  | 1284 | 1328 | 1735 | 1264 | 1322 | 1467 |
| SSA | 801  | 800  | 763  | 774  | 848  | 857  | 849  | 829  | 847  | 892  | 809  |
| USA | 1180 | 1180 | 1180 | 1180 | 1180 | 1180 | 1180 | 1180 | 1180 | 1180 | 1180 |

Table 979: FAO — Prices—Agriculture—Cotton lint (US\$05/tDM) [PART 4/5]

|     | 2005 | 2006 | 2007 | 2008 | 2009 | 2010 | 2011 |
|-----|------|------|------|------|------|------|------|
| GLO | 1508 | 1528 | 1509 | 1462 | 1462 | 1485 | 1540 |
| CAZ | 5359 | 5359 | 5359 | 5359 | 5359 | 5359 | 5359 |
| CHA | 1652 | 1652 | 1652 | 1652 | 1652 | 1652 | 1652 |
| EUR | 2445 | 2650 | 2635 | 2756 | 2675 | 2538 | 2484 |
| IND | 1483 | 1483 | 1483 | 1483 | 1483 | 1483 | 1483 |
| JPN | 0    | 0    | 0    | 0    | 0    | 0    | 0    |
| LAM | 1446 | 1454 | 1439 | 1425 | 1426 | 1421 | 1407 |
| MEA | 1229 | 1382 | 1460 | 1108 | 1079 | 1260 | 1379 |
| NEU | 3573 | 3573 | 3573 | 3573 | 3573 | 3573 | 3573 |
| OAS | 530  | 527  | 524  | 524  | 521  | 507  | 505  |
| REF | 1395 | 1143 | 1446 | 1426 | 1129 | 1146 | 1039 |
| SSA | 875  | 980  | 893  | 836  | 840  | 1042 | 793  |
| USA | 1180 | 1180 | 1180 | 1180 | 1180 | 1180 | 1180 |

Table 980: FAO — Prices—Agriculture—Cotton lint (US\$05/tDM) [PART 5/5]

|     | 1990 | 1991 | 1992 | 1993 | 1994 | 1995 | 1996 | 1997 | 1998 | 1999 | 2000 |
|-----|------|------|------|------|------|------|------|------|------|------|------|
| GLO | 0    | 878  | 683  | 692  | 842  | 982  | 856  | 851  | 716  | 501  | 637  |
| CAZ | 0    | 0    | 0    | 0    | 0    | 0    | 0    | 0    | 0    | 0    | 0    |
| CHA | 0    | 1351 | 1327 | 1292 | 1385 | 1959 | 1923 | 1890 | 1594 | 1024 | 1389 |
| EUR | 0    | 0    | 3    | 2    | 2    | 5    | 4    | 3    | 2    | 2    | 1    |
| IND | 0    | 1774 | 0    | 0    | 0    | 0    | 0    | 0    | 0    | 0    | 0    |
| JPN | 0    | 0    | 0    | 0    | 0    | 0    | 0    | 0    | 0    | 0    | 0    |
| LAM | 0    | 263  | 259  | 428  | 484  | 669  | 688  | 703  | 508  | 320  | 228  |
| MEA | 0    | 0    | 130  | 100  | 203  | 343  | 239  | 148  | 879  | 895  | 943  |
| NEU | 0    | 0    | 0    | 0    | 0    | 0    | 0    | 0    | 0    | 0    | 0    |
| OAS | 0    | 687  | 712  | 660  | 676  | 654  | 4    | 4    | 6    | 5    | 6    |
| REF | 0    | 0    | 0    | 33   | 70   | 64   | 76   | 0    | 0    | 0    | 0    |
| SSA | 0    | 32   | 34   | 115  | 21   | 19   | 20   | 19   | 61   | 62   | 42   |
| USA | 0    | 1423 | 1344 | 1430 | 1763 | 1874 | 1726 | 1621 | 1474 | 1102 | 1220 |

Table 981: FAOp — Prices—Agriculture—Cotton lint (US\$05/tDM) [PART 1/3]

|     | 2001 | 2002 | 2003 | 2004 | 2005 | 2006 | 2007 | 2008 | 2009 | 2010 | 2011 |
|-----|------|------|------|------|------|------|------|------|------|------|------|
| GLO | 482  | 514  | 777  | 646  | 660  | 730  | 847  | 835  | 888  | 833  | 1512 |
| CAZ | 0    | 0    | 0    | 0    | 0    | 0    | 0    | 0    | 0    | 0    | 0    |
| CHA | 1016 | 1284 | 2021 | 1377 | 1781 | 1798 | 1879 | 1981 | 2188 | 1805 | 4630 |
| EUR | 2    | 1    | 1    | 1    | 0    | 0    | 0    | 0    | 0    | 1    | 0    |
| IND | 0    | 0    | 0    | 0    | 0    | 0    | 0    | 0    | 0    | 0    | 0    |
| JPN | 0    | 0    | 0    | 0    | 0    | 0    | 0    | 0    | 0    | 0    | 0    |
| LAM | 187  | 128  | 176  | 165  | 188  | 215  | 210  | 232  | 244  | 420  | 425  |
| MEA | 192  | 177  | 48   | 49   | 48   | 71   | 75   | 53   | 46   | 65   | 154  |
| NEU | 0    | 0    | 0    | 0    | 0    | 0    | 0    | 0    | 0    | 0    | 0    |
| OAS | 11   | 8    | 8    | 1    | 2    | 2    | 1    | 1    | 1    | 1    | 2    |
| REF | 0    | 0    | 0    | 0    | 0    | 0    | 0    | 0    | 0    | 0    | 0    |
| SSA | 38   | 19   | 25   | 40   | 111  | 114  | 148  | 105  | 17   | 18   | 41   |
| USA | 953  | 823  | 1267 | 1330 | 1045 | 1163 | 1501 | 1202 | 1588 | 2072 | 2290 |

Table 982: FAOp — Prices—Agriculture—Cotton lint (US\$05/tDM) [PART 2/3]

|     | 2005 |
|-----|------|
| GLO | 1676 |
| CAZ |      |
| CHA |      |
| EUR |      |
| IND |      |
| JPN |      |
| LAM |      |
| MEA |      |
| NEU |      |
| OAS |      |
| REF |      |
| SSA |      |
| USA |      |

Table 983: IniFoodPrice — Prices—Agriculture—Cotton lint (US\$05/tDM)

36.4 Cotton seed

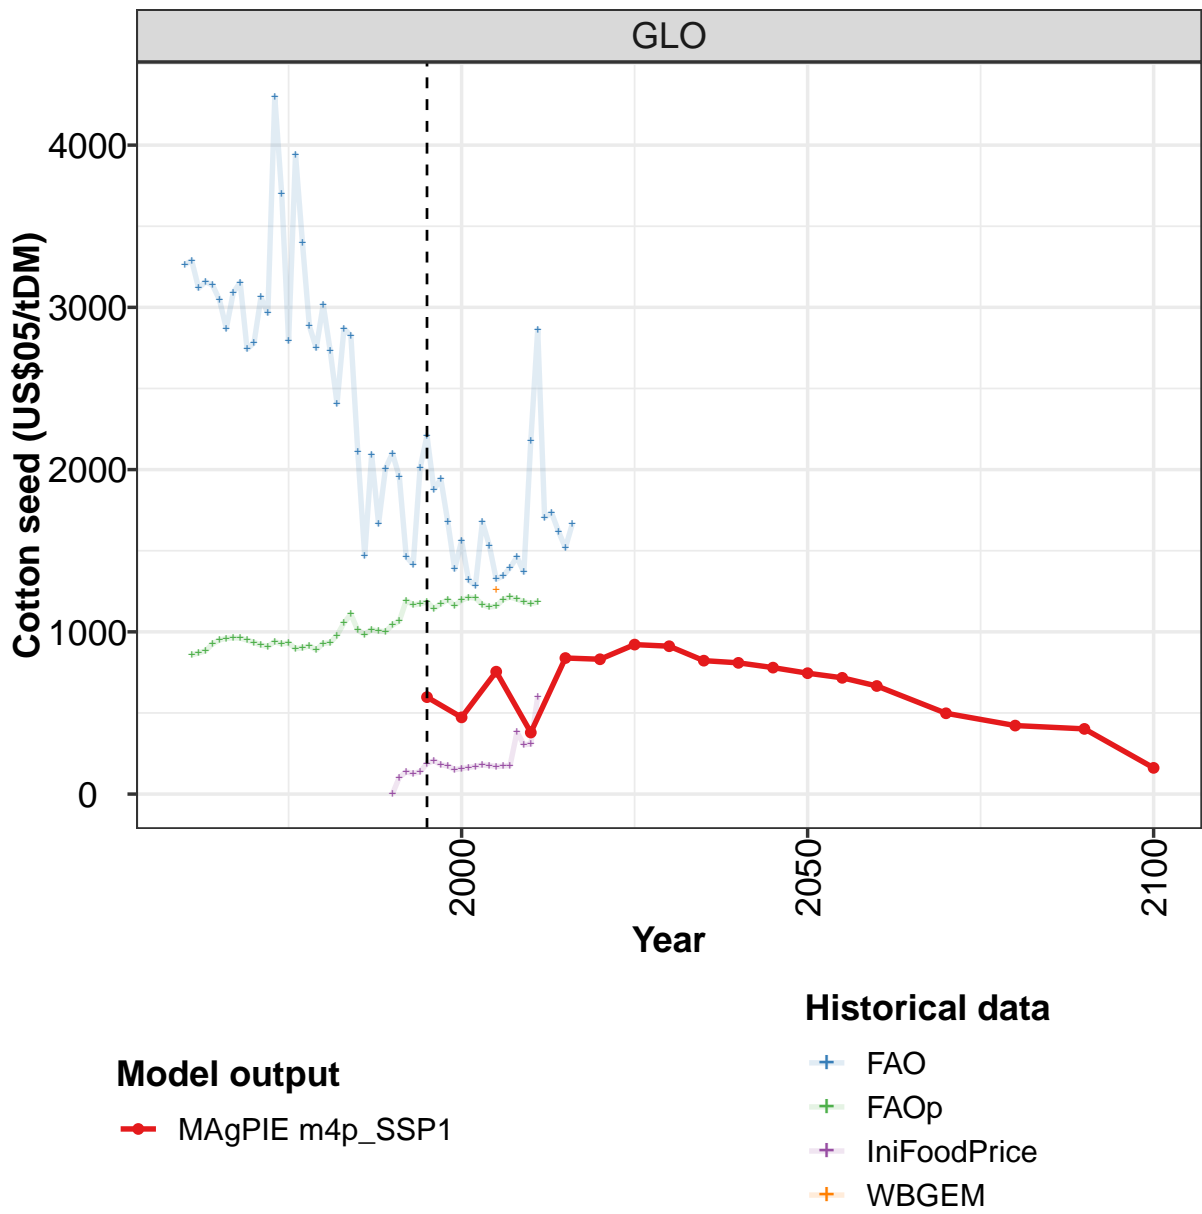

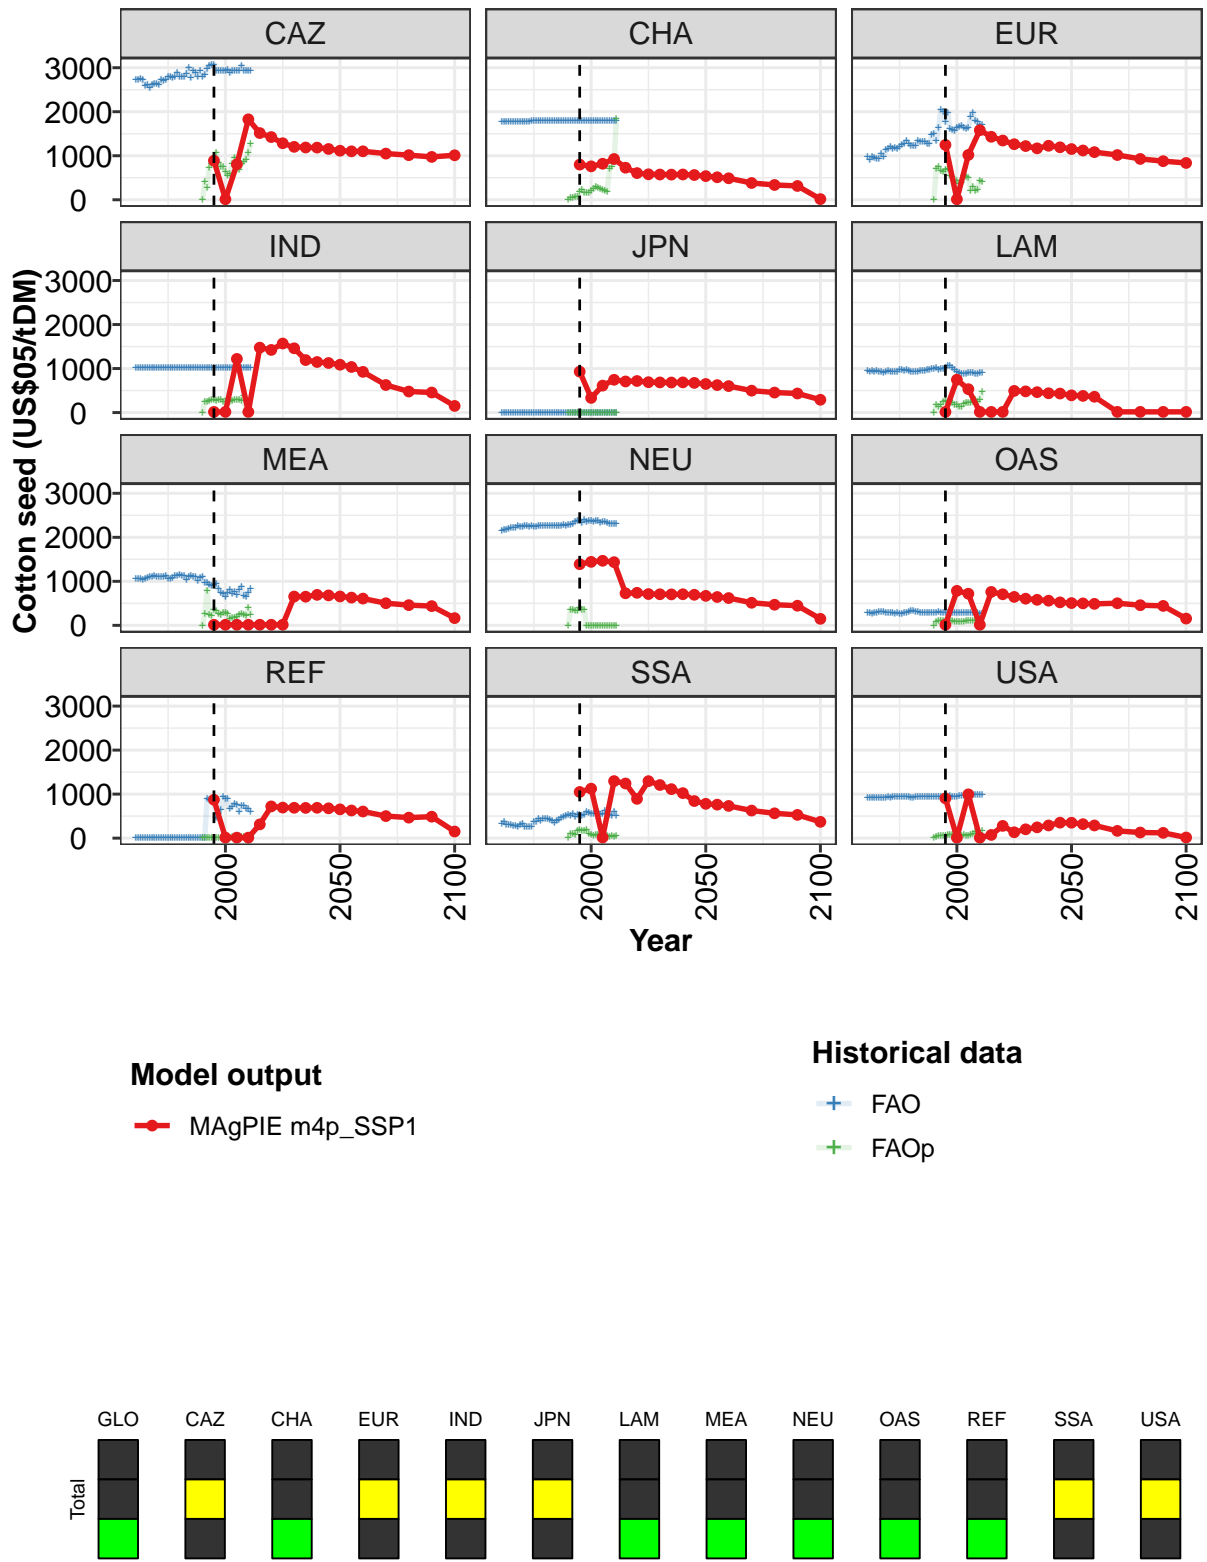

Figure 294: MAGPIE m4p\_SSP1 — Prices—Agriculture—Cotton seed (US\$05/tDM)

|     | 1995 | 2000 | 2005 | 2010 | 2015 | 2020 | 2025 | 2030 | 2035 | 2040 | 2045 |
|-----|------|------|------|------|------|------|------|------|------|------|------|
| GLO | 598  | 473  | 754  | 380  | 839  | 831  | 921  | 911  | 822  | 809  | 780  |
| CAZ | 889  | 12   | 806  | 1828 | 1515 | 1425 | 1284 | 1202 | 1188 | 1186 | 1154 |
| CHA | 799  | 759  | 818  | 927  | 729  | 607  | 579  | 574  | 571  | 575  | 562  |
| EUR | 1247 | 11   | 1019 | 1581 | 1431 | 1346 | 1262 | 1220 | 1169 | 1227 | 1193 |
| IND | 15   | 15   | 1219 | 15   | 1475 | 1423 | 1568 | 1460 | 1193 | 1149 | 1126 |
| JPN | 930  | 333  | 613  | 745  | 707  | 717  | 690  | 686  | 683  | 686  | 674  |
| LAM | 16   | 747  | 532  | 16   | 15   | 15   | 492  | 481  | 464  | 439  | 432  |
| MEA | 14   | 14   | 14   | 14   | 14   | 14   | 14   | 654  | 652  | 693  | 681  |
| NEU | 1389 | 1443 | 1467 | 1436 | 729  | 739  | 712  | 707  | 704  | 707  | 695  |
| OAS | 14   | 784  | 719  | 14   | 760  | 706  | 646  | 606  | 580  | 561  | 523  |
| REF | 872  | 13   | 12   | 12   | 313  | 721  | 695  | 690  | 687  | 690  | 678  |
| SSA | 1049 | 1124 | 15   | 1296 | 1242 | 893  | 1295 | 1207 | 1114 | 1023 | 843  |
| USA | 904  | 11   | 996  | 11   | 73   | 279  | 134  | 201  | 246  | 289  | 352  |

Table 984: MAgPIE m4p\_SSP1 — Prices—Agriculture—Cotton seed (US\$05/tDM) [PART 1/2]

|     | 2050 | 2055 | 2060 | 2070 | 2080 | 2090 | 2100 |
|-----|------|------|------|------|------|------|------|
| GLO | 745  | 717  | 666  | 498  | 422  | 402  | 162  |
| CAZ | 1115 | 1101 | 1101 | 1049 | 1013 | 974  | 1011 |
| CHA | 538  | 512  | 488  | 381  | 336  | 314  | 16   |
| EUR | 1152 | 1120 | 1083 | 1017 | 928  | 877  | 836  |
| IND | 1087 | 1036 | 925  | 627  | 479  | 456  | 151  |
| JPN | 650  | 625  | 602  | 498  | 455  | 433  | 291  |
| LAM | 392  | 379  | 359  | 16   | 16   | 16   | 16   |
| MEA | 657  | 631  | 608  | 503  | 459  | 438  | 165  |
| NEU | 670  | 644  | 621  | 513  | 469  | 447  | 148  |
| OAS | 507  | 499  | 488  | 502  | 458  | 442  | 154  |
| REF | 654  | 629  | 606  | 501  | 466  | 488  | 151  |
| SSA | 780  | 761  | 733  | 627  | 564  | 528  | 371  |
| USA | 351  | 318  | 289  | 165  | 128  | 120  | 15   |

Table 985: MAgPIE m4p\_SSP1 — Prices—Agriculture—Cotton seed (US\$05/tDM) [PART 2/2]

|     | 1960 | 1961 | 1962 | 1963 | 1964 | 1965 | 1966 | 1967 | 1968 | 1969 | 1970 |
|-----|------|------|------|------|------|------|------|------|------|------|------|
| GLO | 3264 | 3288 | 3118 | 3158 | 3137 | 3048 | 2870 | 3090 | 3154 | 2742 | 2781 |
| CAZ |      |      |      |      |      |      |      |      |      |      |      |
| CHA |      |      |      |      |      |      |      |      |      |      |      |
| EUR |      |      |      |      |      |      |      |      |      |      |      |
| IND |      |      |      |      |      |      |      |      |      |      |      |
| JPN |      |      |      |      |      |      |      |      |      |      |      |
| LAM |      |      |      |      |      |      |      |      |      |      |      |
| MEA |      |      |      |      |      |      |      |      |      |      |      |
| NEU |      |      |      |      |      |      |      |      |      |      |      |
| OAS |      |      |      |      |      |      |      |      |      |      |      |
| REF |      |      |      |      |      |      |      |      |      |      |      |
| SSA |      |      |      |      |      |      |      |      |      |      |      |
| USA |      |      |      |      |      |      |      |      |      |      |      |

Table 986: WBGEM — Prices—Agriculture—Cotton seed (US\$05/tDM) [PART 1/6]

|     | 1971 | 1972 | 1973 | 1974 | 1975 | 1976 | 1977 | 1978 | 1979 | 1980 | 1981 |
|-----|------|------|------|------|------|------|------|------|------|------|------|
| GLO | 3062 | 2964 | 4298 | 3699 | 2792 | 3942 | 3399 | 2885 | 2748 | 3018 | 2735 |
| CAZ |      |      |      |      |      |      |      |      |      |      |      |
| CHA |      |      |      |      |      |      |      |      |      |      |      |
| EUR |      |      |      |      |      |      |      |      |      |      |      |
| IND |      |      |      |      |      |      |      |      |      |      |      |
| JPN |      |      |      |      |      |      |      |      |      |      |      |
| LAM |      |      |      |      |      |      |      |      |      |      |      |
| MEA |      |      |      |      |      |      |      |      |      |      |      |
| NEU |      |      |      |      |      |      |      |      |      |      |      |
| OAS |      |      |      |      |      |      |      |      |      |      |      |
| REF |      |      |      |      |      |      |      |      |      |      |      |
| SSA |      |      |      |      |      |      |      |      |      |      |      |
| USA |      |      |      |      |      |      |      |      |      |      |      |

Table 987: WBGEM — Prices—Agriculture—Cotton seed (US\$05/tDM) [PART 2/6]

|     | 1982 | 1983 | 1984 | 1985 | 1986 | 1987 | 1988 | 1989 | 1990 | 1991 | 1992 |
|-----|------|------|------|------|------|------|------|------|------|------|------|
| GLO | 2407 | 2869 | 2825 | 2108 | 1469 | 2092 | 1667 | 2007 | 2100 | 1955 | 1462 |
| CAZ |      |      |      |      |      |      |      |      |      |      |      |
| CHA |      |      |      |      |      |      |      |      |      |      |      |
| EUR |      |      |      |      |      |      |      |      |      |      |      |
| IND |      |      |      |      |      |      |      |      |      |      |      |
| JPN |      |      |      |      |      |      |      |      |      |      |      |
| LAM |      |      |      |      |      |      |      |      |      |      |      |
| MEA |      |      |      |      |      |      |      |      |      |      |      |
| NEU |      |      |      |      |      |      |      |      |      |      |      |
| OAS |      |      |      |      |      |      |      |      |      |      |      |
| REF |      |      |      |      |      |      |      |      |      |      |      |
| SSA |      |      |      |      |      |      |      |      |      |      |      |
| USA |      |      |      |      |      |      |      |      |      |      |      |

Table 988: WBGEM — Prices—Agriculture—Cotton seed (US\$05/tDM) [PART 3/6]

|     | 1993 | 1994 | 1995 | 1996 | 1997 | 1998 | 1999 | 2000 | 2001 | 2002 | 2003 |
|-----|------|------|------|------|------|------|------|------|------|------|------|
| GLO | 1416 | 2010 | 2210 | 1877 | 1942 | 1678 | 1387 | 1562 | 1319 | 1286 | 1677 |
| CAZ |      |      |      |      |      |      |      |      |      |      |      |
| CHA |      |      |      |      |      |      |      |      |      |      |      |
| EUR |      |      |      |      |      |      |      |      |      |      |      |
| IND |      |      |      |      |      |      |      |      |      |      |      |
| JPN |      |      |      |      |      |      |      |      |      |      |      |
| LAM |      |      |      |      |      |      |      |      |      |      |      |
| MEA |      |      |      |      |      |      |      |      |      |      |      |
| NEU |      |      |      |      |      |      |      |      |      |      |      |
| OAS |      |      |      |      |      |      |      |      |      |      |      |
| REF |      |      |      |      |      |      |      |      |      |      |      |
| SSA |      |      |      |      |      |      |      |      |      |      |      |
| USA |      |      |      |      |      |      |      |      |      |      |      |

Table 989: WBGEM — Prices—Agriculture—Cotton seed (US\$05/tDM) [PART 4/6]

|     | 2004 | 2005 | 2006 | 2007 | 2008 | 2009 | 2010 | 2011 | 2012 | 2013 | 2014 |
|-----|------|------|------|------|------|------|------|------|------|------|------|
| GLO | 1533 | 1325 | 1344 | 1396 | 1461 | 1368 | 2180 | 2863 | 1704 | 1734 | 1619 |
| CAZ |      |      |      |      |      |      |      |      |      |      |      |
| CHA |      |      |      |      |      |      |      |      |      |      |      |
| EUR |      |      |      |      |      |      |      |      |      |      |      |
| IND |      |      |      |      |      |      |      |      |      |      |      |
| JPN |      |      |      |      |      |      |      |      |      |      |      |
| LAM |      |      |      |      |      |      |      |      |      |      |      |
| MEA |      |      |      |      |      |      |      |      |      |      |      |
| NEU |      |      |      |      |      |      |      |      |      |      |      |
| OAS |      |      |      |      |      |      |      |      |      |      |      |
| REF |      |      |      |      |      |      |      |      |      |      |      |
| SSA |      |      |      |      |      |      |      |      |      |      |      |
| USA |      |      |      |      |      |      |      |      |      |      |      |

Table 990: WBGEM — Prices—Agriculture—Cotton seed (US\$05/tDM) [PART 5/6]

|     | 2015 | 2016 |
|-----|------|------|
| GLO | 1518 | 1666 |
| CAZ |      |      |
| CHA |      |      |
| EUR |      |      |
| IND |      |      |
| JPN |      |      |
| LAM |      |      |
| MEA |      |      |
| NEU |      |      |
| OAS |      |      |
| REF |      |      |
| SSA |      |      |
| USA |      |      |

Table 991: WBGEM — Prices—Agriculture—Cotton seed (US\$05/tDM) [PART 6/6]

|     | 1961 | 1962 | 1963 | 1964 | 1965 | 1966 | 1967 | 1968 | 1969 | 1970 | 1971 |
|-----|------|------|------|------|------|------|------|------|------|------|------|
| GLO | 858  | 870  | 884  | 925  | 950  | 960  | 963  | 962  | 949  | 935  | 919  |
| CAZ | 2736 | 2735 | 2739 | 2719 | 2595 | 2604 | 2533 | 2622 | 2644 | 2631 | 2611 |
| CHA | 1782 | 1781 | 1782 | 1782 | 1782 | 1783 | 1783 | 1782 | 1783 | 1782 | 1783 |
| EUR | 967  | 908  | 986  | 946  | 937  | 931  | 1034 | 980  | 1127 | 1155 | 1203 |
| IND | 1016 | 1016 | 1016 | 1017 | 1017 | 1017 | 1017 | 1017 | 1017 | 1016 | 1017 |
| JPN | 0    | 0    | 0    | 0    | 0    | 0    | 0    | 0    | 0    | 0    | 0    |
| LAM | 946  | 934  | 939  | 937  | 952  | 924  | 924  | 904  | 922  | 942  | 924  |
| MEA | 1047 | 1066 | 1052 | 1038 | 1052 | 1090 | 1110 | 1100 | 1119 | 1111 | 1099 |
| NEU | 2154 | 2177 | 2178 | 2204 | 2205 | 2225 | 2223 | 2253 | 2242 | 2235 | 2255 |
| OAS | 291  | 277  | 274  | 281  | 285  | 302  | 298  | 310  | 283  | 277  | 283  |
| REF | 0    | 0    | 0    | 0    | 0    | 0    | 0    | 0    | 0    | 0    | 0    |
| SSA | 337  | 371  | 315  | 313  | 306  | 274  | 285  | 264  | 298  | 332  | 252  |
| USA | 916  | 919  | 925  | 920  | 924  | 919  | 907  | 911  | 924  | 930  | 925  |

Table 992: FAO — Prices—Agriculture—Cotton seed (US\$05/tDM) [PART 1/5]



|     | 1972 | 1973 | 1974 | 1975 | 1976 | 1977 | 1978 | 1979 | 1980 | 1981 | 1982 |
|-----|------|------|------|------|------|------|------|------|------|------|------|
| GLO | 910  | 939  | 926  | 931  | 897  | 901  | 914  | 889  | 929  | 932  | 979  |
| CAZ | 2731 | 2707 | 2722 | 2787 | 2789 | 2770 | 2789 | 2888 | 2788 | 2788 | 2791 |
| CHA | 1783 | 1783 | 1783 | 1783 | 1783 | 1783 | 1783 | 1783 | 1783 | 1783 | 1783 |
| EUR | 1150 | 1188 | 1159 | 1214 | 1254 | 1265 | 1341 | 1261 | 1237 | 1215 | 1223 |
| IND | 1017 | 1017 | 1017 | 1017 | 1016 | 1016 | 1017 | 1017 | 1017 | 1016 | 1016 |
| JPN | 0    | 0    | 0    | 0    | 0    | 0    | 0    | 0    | 0    | 0    | 0    |
| LAM | 927  | 915  | 928  | 962  | 966  | 945  | 962  | 939  | 922  | 931  | 935  |
| MEA | 1094 | 1095 | 1125 | 1058 | 1058 | 1088 | 1121 | 1121 | 1154 | 1137 | 1119 |
| NEU | 2256 | 2248 | 2255 | 2247 | 2247 | 2257 | 2251 | 2252 | 2267 | 2258 | 2257 |
| OAS | 286  | 273  | 277  | 262  | 260  | 292  | 285  | 306  | 328  | 322  | 305  |
| REF | 0    | 0    | 0    | 0    | 0    | 0    | 0    | 0    | 0    | 0    | 0    |
| SSA | 253  | 261  | 262  | 368  | 361  | 441  | 395  | 442  | 437  | 433  | 410  |
| USA | 934  | 939  | 936  | 939  | 937  | 942  | 934  | 933  | 927  | 922  | 932  |

Table 993: FAO — Prices—Agriculture—Cotton seed (US\$05/tDM) [PART 2/5]

|     | 1983 | 1984 | 1985 | 1986 | 1987 | 1988 | 1989 | 1990 | 1991 | 1992 | 1993 |
|-----|------|------|------|------|------|------|------|------|------|------|------|
| GLO | 1055 | 1109 | 1010 | 985  | 1014 | 1004 | 1003 | 1042 | 1066 | 1193 | 1166 |
| CAZ | 2851 | 2991 | 2778 | 2924 | 2880 | 2797 | 2922 | 2799 | 2849 | 2987 | 3042 |
| CHA | 1783 | 1783 | 1783 | 1783 | 1783 | 1783 | 1783 | 1783 | 1783 | 1783 | 1783 |
| EUR | 1333 | 1317 | 1326 | 1328 | 1275 | 1261 | 1479 | 1502 | 1336 | 1642 | 2034 |
| IND | 1017 | 1017 | 1016 | 1017 | 1016 | 1017 | 1016 | 1017 | 1017 | 1016 | 1016 |
| JPN | 0    | 0    | 0    | 0    | 0    | 0    | 0    | 0    | 0    | 0    | 0    |
| LAM | 934  | 954  | 948  | 949  | 970  | 962  | 989  | 987  | 1011 | 977  | 986  |
| MEA | 1046 | 1103 | 1136 | 1097 | 1103 | 1006 | 1074 | 1103 | 959  | 967  | 930  |
| NEU | 2268 | 2264 | 2252 | 2253 | 2259 | 2277 | 2272 | 2281 | 2294 | 2305 | 2353 |
| OAS | 314  | 290  | 291  | 285  | 291  | 296  | 295  | 295  | 294  | 297  | 292  |
| REF | 0    | 0    | 0    | 0    | 0    | 0    | 0    | 0    | 0    | 888  | 864  |
| SSA | 390  | 357  | 404  | 424  | 452  | 474  | 503  | 526  | 511  | 553  | 485  |
| USA | 932  | 931  | 934  | 936  | 936  | 934  | 942  | 941  | 934  | 941  | 934  |

Table 994: FAO — Prices—Agriculture—Cotton seed (US\$05/tDM) [PART 3/5]

|     | 1994 | 1995 | 1996 | 1997 | 1998 | 1999 | 2000 | 2001 | 2002 | 2003 | 2004 |
|-----|------|------|------|------|------|------|------|------|------|------|------|
| GLO | 1174 | 1184 | 1144 | 1172 | 1199 | 1162 | 1195 | 1213 | 1208 | 1169 | 1153 |
| CAZ | 3063 | 3067 | 2937 | 2939 | 2935 | 2922 | 2936 | 2953 | 2874 | 2938 | 2935 |
| CHA | 1783 | 1783 | 1783 | 1783 | 1783 | 1783 | 1783 | 1783 | 1783 | 1783 | 1783 |
| EUR | 2005 | 1760 | 1978 | 1611 | 1580 | 1558 | 1645 | 1659 | 1684 | 1625 | 1619 |
| IND | 1017 | 1016 | 1016 | 1017 | 1017 | 1017 | 1017 | 1017 | 1017 | 1016 | 1017 |
| JPN | 0    | 0    | 0    | 0    | 0    | 0    | 0    | 0    | 0    | 0    | 0    |
| LAM | 990  | 1018 | 1065 | 1053 | 1016 | 981  | 932  | 913  | 883  | 882  | 889  |
| MEA | 902  | 913  | 949  | 824  | 750  | 706  | 653  | 738  | 804  | 724  | 760  |
| NEU | 2386 | 2386 | 2320 | 2389 | 2343 | 2372 | 2367 | 2362 | 2365 | 2377 | 2341 |
| OAS | 291  | 289  | 284  | 280  | 278  | 279  | 278  | 281  | 275  | 275  | 277  |
| REF | 857  | 874  | 472  | 562  | 655  | 931  | 897  | 884  | 672  | 722  | 779  |
| SSA | 526  | 534  | 508  | 528  | 588  | 571  | 545  | 558  | 559  | 597  | 523  |
| USA | 939  | 943  | 947  | 954  | 940  | 949  | 950  | 956  | 963  | 958  | 972  |

Table 995: FAO — Prices—Agriculture—Cotton seed (US\$05/tDM) [PART 4/5]

|     | 2005 | 2006 | 2007 | 2008 | 2009 | 2010 | 2011 |
|-----|------|------|------|------|------|------|------|
| GLO | 1158 | 1199 | 1214 | 1201 | 1185 | 1174 | 1183 |
| CAZ | 2935 | 2935 | 3044 | 2935 | 2936 | 2935 | 2920 |
| CHA | 1786 | 1783 | 1783 | 1783 | 1783 | 1783 | 1783 |
| EUR | 1633 | 1881 | 1966 | 1795 | 1767 | 1696 | 1696 |
| IND | 1017 | 1016 | 1016 | 1016 | 1017 | 1016 | 1016 |
| JPN | 0    | 0    | 0    | 0    | 0    | 0    | 0    |
| LAM | 899  | 908  | 896  | 875  | 871  | 911  | 894  |
| MEA | 686  | 809  | 879  | 663  | 649  | 743  | 827  |
| NEU | 2358 | 2348 | 2338 | 2297 | 2297 | 2297 | 2297 |
| OAS | 277  | 282  | 280  | 280  | 278  | 271  | 269  |
| REF | 753  | 609  | 734  | 724  | 672  | 664  | 590  |
| SSA | 555  | 619  | 537  | 524  | 514  | 608  | 502  |
| USA | 998  | 971  | 980  | 987  | 982  | 985  | 977  |

Table 996: FAO — Prices—Agriculture—Cotton seed (US\$05/tDM) [PART 5/5]

|     | 1990 | 1991 | 1992 | 1993 | 1994 | 1995 | 1996 | 1997 | 1998 | 1999 | 2000 |
|-----|------|------|------|------|------|------|------|------|------|------|------|
| GLO | 0    | 103  | 137  | 128  | 137  | 189  | 206  | 181  | 173  | 151  | 158  |
| CAZ | 0    | 400  | 275  | 737  | 827  | 931  | 1073 | 833  | 745  | 748  | 640  |
| CHA | 0    | 45   | 52   | 57   | 64   | 180  | 233  | 159  | 159  | 161  | 198  |
| EUR | 0    | 706  | 745  | 655  | 629  | 671  | 703  | 550  | 519  | 438  | 429  |
| IND | 0    | 252  | 238  | 261  | 301  | 299  | 265  | 282  | 288  | 251  | 239  |
| JPN | 0    | 0    | 0    | 0    | 0    | 0    | 0    | 0    | 0    | 0    | 0    |
| LAM | 0    | 180  | 142  | 178  | 233  | 268  | 236  | 256  | 227  | 167  | 181  |
| MEA | 0    | 259  | 795  | 236  | 210  | 344  | 323  | 267  | 229  | 291  | 282  |
| NEU | 0    | 351  | 345  | 340  | 320  | 402  | 344  | 349  | 0    | 0    | 0    |
| OAS | 0    | 81   | 102  | 111  | 110  | 107  | 108  | 103  | 104  | 92   | 92   |
| REF | 0    | 0    | 0    | 3    | 6    | 8    | 10   | 4    | 4    | 2    | 2    |
| SSA | 3    | 101  | 95   | 82   | 165  | 183  | 163  | 170  | 184  | 102  | 88   |
| USA | 0    | 39   | 53   | 61   | 55   | 58   | 76   | 72   | 77   | 53   | 63   |

Table 997: FAOp — Prices—Agriculture—Cotton seed (US\$05/tDM) [PART 1/3]

|     | 2001 | 2002 | 2003 | 2004 | 2005 | 2006 | 2007 | 2008 | 2009 | 2010 | 2011 |
|-----|------|------|------|------|------|------|------|------|------|------|------|
| GLO | 164  | 171  | 180  | 177  | 170  | 172  | 176  | 382  | 304  | 308  | 602  |
| CAZ | 552  | 582  | 826  | 950  | 698  | 685  | 821  | 872  | 911  | 1068 | 1262 |
| CHA | 244  | 290  | 267  | 244  | 224  | 206  | 191  | 711  | 739  | 852  | 1839 |
| EUR | 367  | 380  | 554  | 515  | 496  | 211  | 301  | 202  | 224  | 429  | 407  |
| IND | 306  | 242  | 265  | 293  | 279  | 292  | 270  | 375  | 0    | 0    | 0    |
| JPN | 0    | 0    | 0    | 0    | 0    | 0    | 0    | 0    | 0    | 0    | 0    |
| LAM | 137  | 129  | 196  | 220  | 212  | 218  | 252  | 299  | 253  | 296  | 469  |
| MEA | 263  | 154  | 162  | 175  | 188  | 238  | 270  | 233  | 210  | 394  | 249  |
| NEU | 0    | 0    | 0    | 0    | 0    | 0    | 0    | 0    | 0    | 0    | 0    |
| OAS | 75   | 89   | 92   | 93   | 93   | 96   | 105  | 100  | 121  | 146  | 0    |
| REF | 3    | 2    | 21   | 20   | 18   | 17   | 27   | 23   | 28   | 37   | 47   |
| SSA | 64   | 70   | 83   | 78   | 78   | 75   | 48   | 39   | 51   | 36   | 56   |
| USA | 54   | 60   | 70   | 64   | 58   | 66   | 97   | 134  | 95   | 96   | 156  |

Table 998: FAOp — Prices—Agriculture—Cotton seed (US\$05/tDM) [PART 2/3]

|     | 2005 |
|-----|------|
| GLO | 1260 |
| CAZ |      |
| CHA |      |
| EUR |      |
| IND |      |
| JPN |      |
| LAM |      |
| MEA |      |
| NEU |      |
| OAS |      |
| REF |      |
| SSA |      |
| USA |      |

Table 999: IniFoodPrice — Prices—Agriculture—Cotton seed (US\$05/tDM)

36.5 Dairy

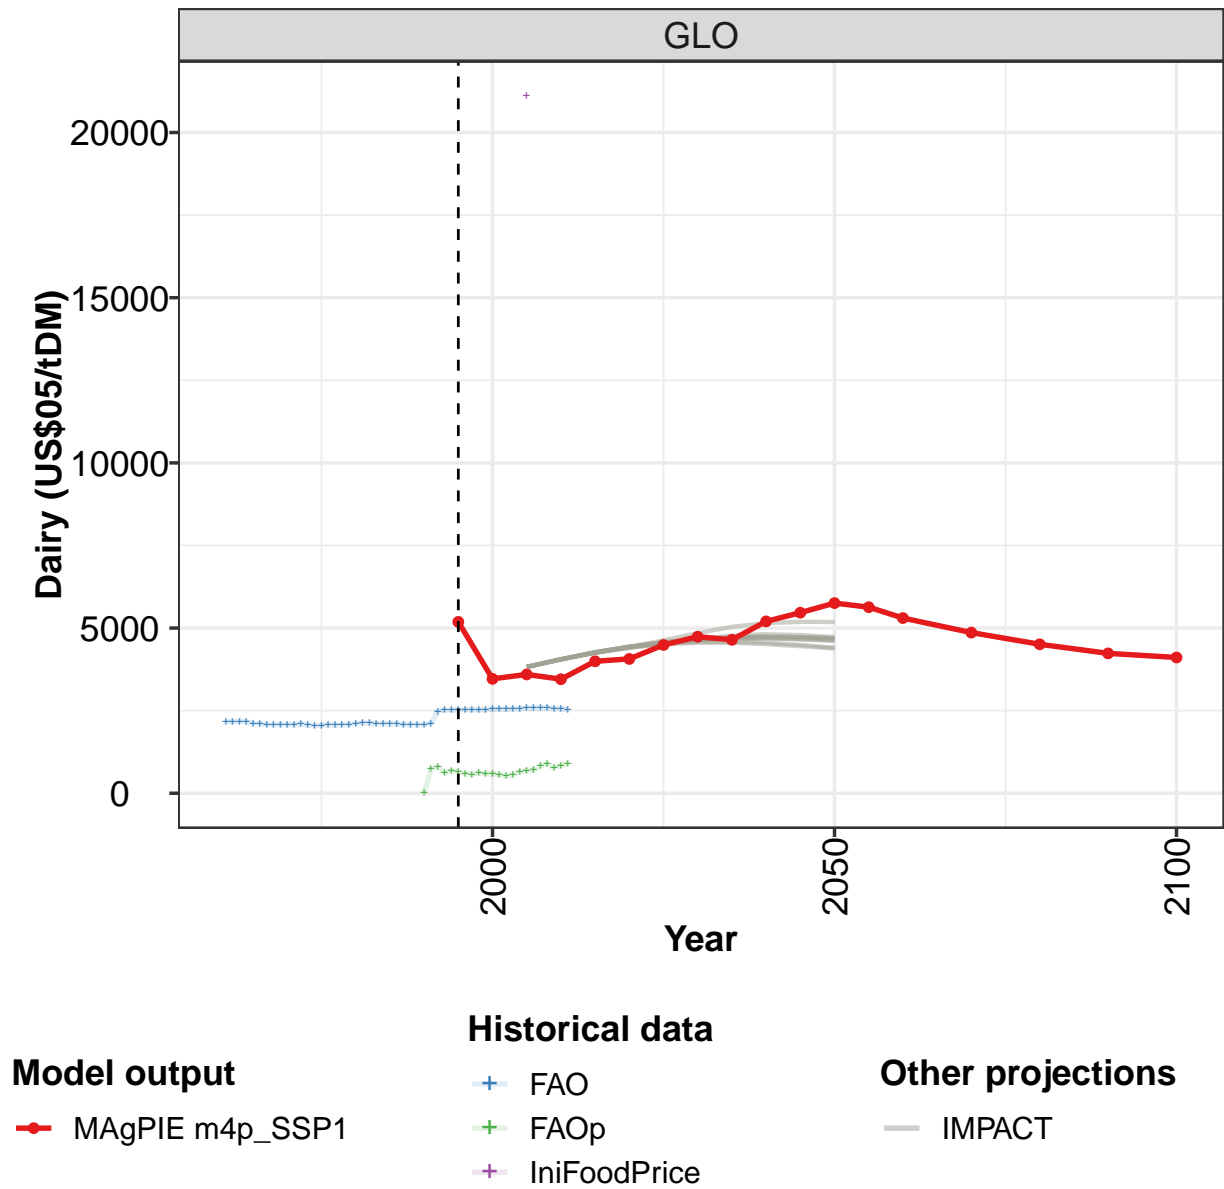

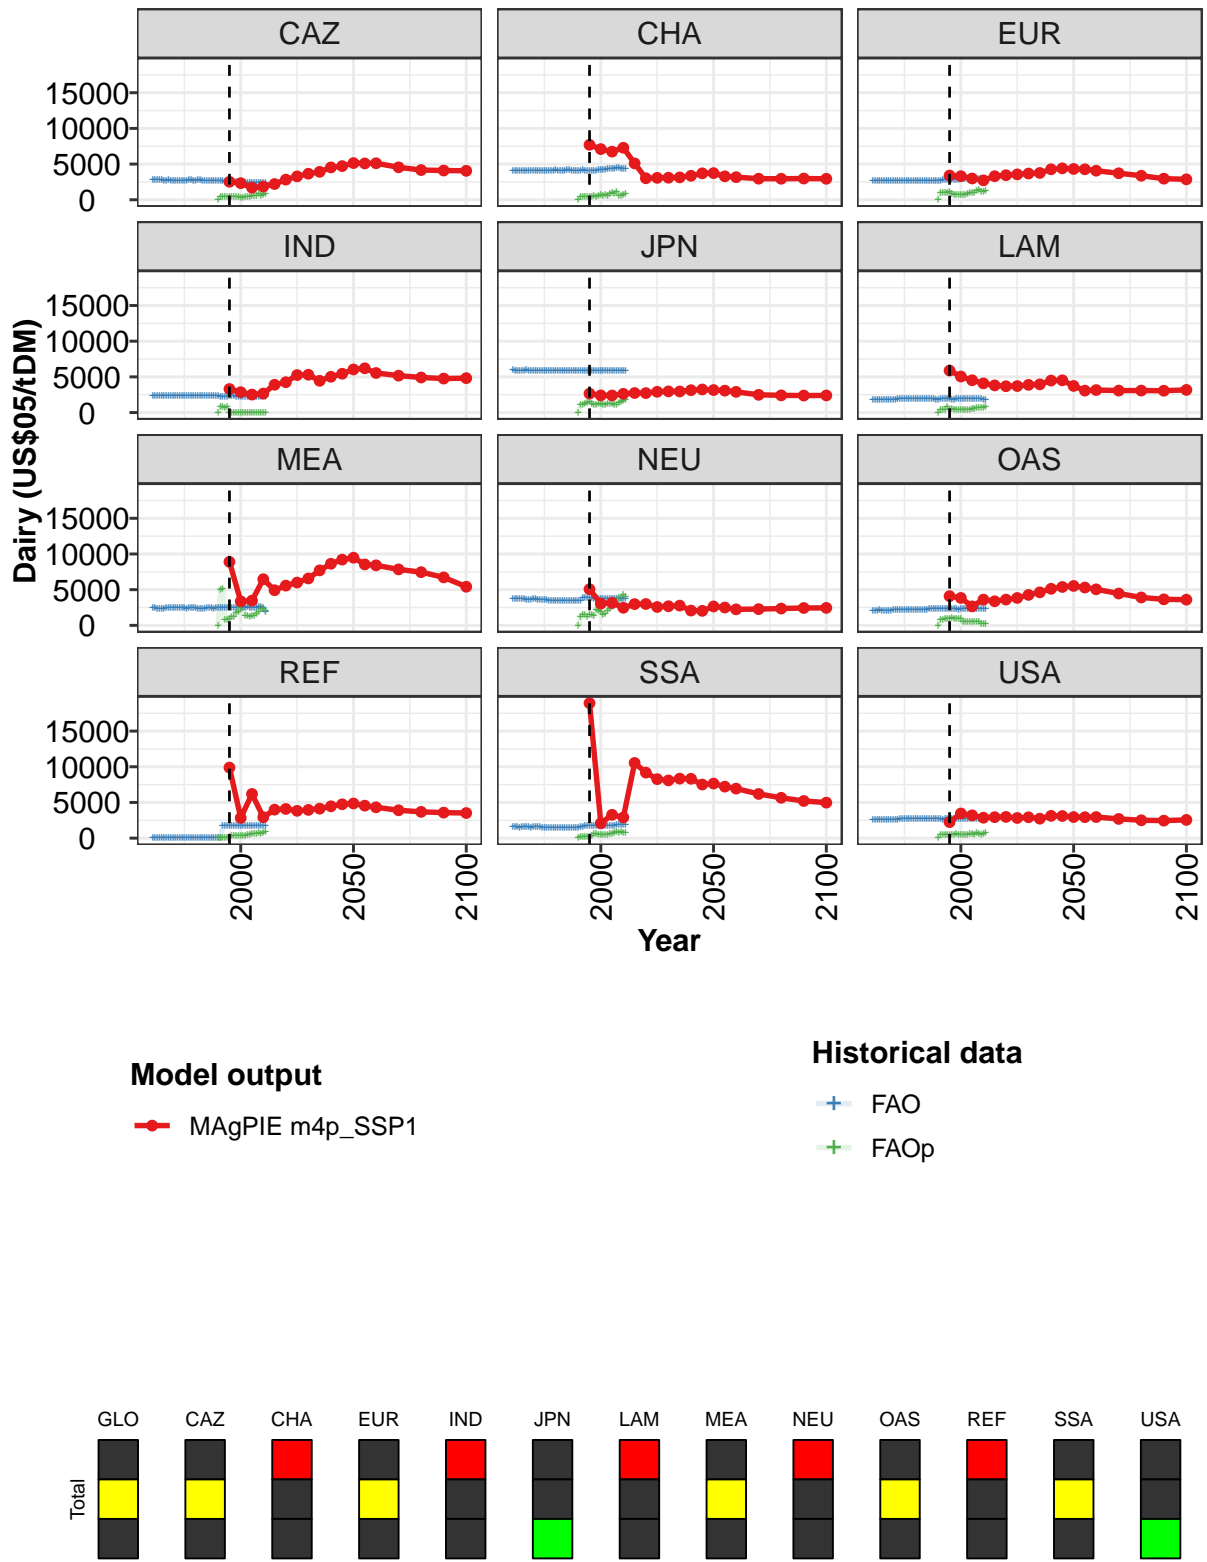

Figure 295: MAgPIE m4p\_SSP1 — Prices—Agriculture—Dairy (US\$05/tDM)

|     | 1995  | 2000 | 2005 | 2010 | 2015  | 2020 | 2025 | 2030 | 2035 | 2040 | 2045 |
|-----|-------|------|------|------|-------|------|------|------|------|------|------|
| GLO | 5188  | 3464 | 3597 | 3452 | 3995  | 4066 | 4489 | 4739 | 4646 | 5202 | 5466 |
| CAZ | 2525  | 2329 | 1695 | 1846 | 2208  | 2822 | 3280 | 3653 | 3916 | 4540 | 4719 |
| CHA | 7704  | 7099 | 6745 | 7288 | 5101  | 3014 | 3072 | 3094 | 3136 | 3361 | 3706 |
| EUR | 3398  | 3306 | 2985 | 2721 | 3304  | 3440 | 3559 | 3678 | 3760 | 4272 | 4405 |
| IND | 3303  | 2860 | 2524 | 2666 | 3897  | 4256 | 5256 | 5304 | 4448 | 5019 | 5444 |
| JPN | 2655  | 2410 | 2396 | 2627 | 2742  | 2731 | 2911 | 2970 | 2959 | 3136 | 3236 |
| LAM | 5886  | 5052 | 4527 | 4093 | 3810  | 3691 | 3717 | 3880 | 3955 | 4486 | 4519 |
| MEA | 8904  | 3369 | 3468 | 6467 | 4924  | 5572 | 6002 | 6571 | 7707 | 8634 | 9214 |
| NEU | 5066  | 3046 | 3148 | 2466 | 2979  | 2992 | 2575 | 2680 | 2769 | 2071 | 2032 |
| OAS | 4093  | 3842 | 2664 | 3614 | 3376  | 3612 | 3841 | 4269 | 4627 | 5124 | 5382 |
| REF | 9890  | 2838 | 6193 | 2937 | 3995  | 4090 | 3830 | 3962 | 4133 | 4462 | 4748 |
| SSA | 18916 | 2086 | 3275 | 2905 | 10541 | 9185 | 8271 | 8092 | 8344 | 8321 | 7514 |
| USA | 2249  | 3455 | 3197 | 2865 | 2941  | 2976 | 2825 | 2927 | 2730 | 3123 | 3105 |

Table 1000: MAgPIE m4p\_SSP1 — Prices—Agriculture—Dairy (US\$05/tDM) [PART 1/2]

|     | 2050 | 2055 | 2060 | 2070 | 2080 | 2090 | 2100 |
|-----|------|------|------|------|------|------|------|
| GLO | 5757 | 5634 | 5304 | 4863 | 4509 | 4234 | 4110 |
| CAZ | 5141 | 5092 | 5117 | 4548 | 4166 | 4100 | 4058 |
| CHA | 3736 | 3288 | 3168 | 2955 | 2947 | 2977 | 2941 |
| EUR | 4320 | 4273 | 4072 | 3717 | 3369 | 2960 | 2864 |
| IND | 6043 | 6203 | 5545 | 5174 | 4919 | 4764 | 4821 |
| JPN | 3155 | 3074 | 2903 | 2488 | 2411 | 2385 | 2399 |
| LAM | 3735 | 3077 | 3156 | 3080 | 3083 | 3061 | 3178 |
| MEA | 9481 | 8539 | 8414 | 7840 | 7456 | 6722 | 5413 |
| NEU | 2648 | 2499 | 2244 | 2275 | 2356 | 2433 | 2448 |
| OAS | 5521 | 5299 | 5050 | 4461 | 3909 | 3647 | 3601 |
| REF | 4859 | 4552 | 4321 | 3907 | 3686 | 3576 | 3522 |
| SSA | 7651 | 7220 | 6942 | 6193 | 5653 | 5210 | 4978 |
| USA | 2961 | 2937 | 2954 | 2695 | 2505 | 2457 | 2556 |

Table 1001: MAgPIE m4p\_SSP1 — Prices—Agriculture—Dairy (US\$05/tDM) [PART 2/2]

|     | 1961 | 1962 | 1963 | 1964 | 1965 | 1966 | 1967 | 1968 | 1969 | 1970 | 1971 |
|-----|------|------|------|------|------|------|------|------|------|------|------|
| GLO | 2162 | 2158 | 2175 | 2165 | 2117 | 2105 | 2084 | 2078 | 2085 | 2079 | 2080 |
| CAZ | 2805 | 2782 | 2773 | 2761 | 2739 | 2723 | 2702 | 2732 | 2724 | 2707 | 2698 |
| CHA | 4077 | 4080 | 4075 | 4061 | 4053 | 4038 | 4029 | 4112 | 4110 | 4108 | 4110 |
| EUR | 2662 | 2662 | 2666 | 2663 | 2654 | 2654 | 2637 | 2631 | 2629 | 2626 | 2624 |
| IND | 2286 | 2299 | 2309 | 2319 | 2324 | 2324 | 2286 | 2289 | 2293 | 2291 | 2294 |
| JPN | 5931 | 5923 | 5920 | 5923 | 5924 | 5924 | 5928 | 5920 | 5913 | 5914 | 5909 |
| LAM | 1798 | 1799 | 1791 | 1780 | 1796 | 1827 | 1840 | 1834 | 1844 | 1857 | 1857 |
| MEA | 2433 | 2427 | 2360 | 2377 | 2370 | 2366 | 2397 | 2413 | 2409 | 2423 | 2444 |
| NEU | 3695 | 3702 | 3710 | 3695 | 3688 | 3653 | 3648 | 3649 | 3642 | 3653 | 3658 |
| OAS | 2093 | 2099 | 2089 | 2116 | 2101 | 2098 | 2084 | 2065 | 2087 | 2124 | 2147 |
| REF | 0    | 0    | 0    | 0    | 0    | 0    | 0    | 0    | 0    | 0    | 0    |
| SSA | 1551 | 1538 | 1531 | 1495 | 1536 | 1535 | 1539 | 1538 | 1519 | 1558 | 1539 |
| USA | 2631 | 2626 | 2629 | 2631 | 2633 | 2638 | 2637 | 2639 | 2640 | 2641 | 2642 |

Table 1002: FAO — Prices—Agriculture—Dairy (US\$05/tDM) [PART 1/5]

|     | 1972 | 1973 | 1974 | 1975 | 1976 | 1977 | 1978 | 1979 | 1980 | 1981 | 1982 |
|-----|------|------|------|------|------|------|------|------|------|------|------|
| GLO | 2091 | 2063 | 2047 | 2055 | 2074 | 2061 | 2073 | 2086 | 2108 | 2123 | 2121 |
| CAZ | 2701 | 2690 | 2716 | 2716 | 2707 | 2733 | 2763 | 2702 | 2727 | 2745 | 2760 |
| CHA | 4107 | 4093 | 4088 | 4084 | 4080 | 4079 | 4110 | 4051 | 4139 | 4102 | 4126 |
| EUR | 2626 | 2616 | 2609 | 2613 | 2618 | 2613 | 2613 | 2619 | 2622 | 2627 | 2626 |
| IND | 2294 | 2294 | 2297 | 2289 | 2291 | 2293 | 2291 | 2296 | 2291 | 2293 | 2296 |
| JPN | 5915 | 5917 | 5920 | 5920 | 5919 | 5912 | 5908 | 5904 | 5909 | 5911 | 5912 |
| LAM | 1876 | 1883 | 1883 | 1880 | 1878 | 1902 | 1906 | 1902 | 1898 | 1897 | 1911 |
| MEA | 2424 | 2443 | 2413 | 2407 | 2388 | 2413 | 2401 | 2401 | 2398 | 2383 | 2381 |
| NEU | 3631 | 3597 | 3548 | 3530 | 3514 | 3493 | 3493 | 3488 | 3487 | 3473 | 3450 |
| OAS | 2148 | 2131 | 2129 | 2134 | 2130 | 2159 | 2157 | 2161 | 2185 | 2176 | 2169 |
| REF | 0    | 0    | 0    | 0    | 0    | 0    | 0    | 0    | 0    | 0    | 0    |
| SSA | 1527 | 1523 | 1512 | 1497 | 1500 | 1477 | 1447 | 1451 | 1471 | 1466 | 1473 |
| USA | 2644 | 2647 | 2646 | 2646 | 2647 | 2646 | 2648 | 2648 | 2646 | 2645 | 2645 |

Table 1003: FAO — Prices—Agriculture—Dairy (US\$05/tDM) [PART 2/5]

|     | 1983 | 1984 | 1985 | 1986 | 1987 | 1988 | 1989 | 1990 | 1991 | 1992 | 1993 |
|-----|------|------|------|------|------|------|------|------|------|------|------|
| GLO | 2105 | 2103 | 2105 | 2096 | 2083 | 2075 | 2070 | 2078 | 2117 | 2481 | 2513 |
| CAZ | 2712 | 2679 | 2656 | 2647 | 2682 | 2686 | 2709 | 2695 | 2667 | 2637 | 2582 |
| CHA | 4115 | 4121 | 4143 | 4141 | 4128 | 4121 | 4119 | 4113 | 4126 | 4136 | 4106 |
| EUR | 2615 | 2611 | 2607 | 2602 | 2602 | 2599 | 2592 | 2600 | 2631 | 2737 | 2836 |
| IND | 2311 | 2313 | 2315 | 2314 | 2303 | 2295 | 2300 | 2285 | 2278 | 2275 | 2274 |
| JPN | 5905 | 5903 | 5897 | 5898 | 5912 | 5914 | 5910 | 5913 | 5913 | 5902 | 5894 |
| LAM | 1898 | 1898 | 1903 | 1891 | 1863 | 1868 | 1847 | 1855 | 1880 | 1882 | 1892 |
| MEA | 2376 | 2386 | 2396 | 2406 | 2414 | 2389 | 2402 | 2405 | 2428 | 2474 | 2497 |
| NEU | 3444 | 3456 | 3449 | 3455 | 3438 | 3454 | 3454 | 3467 | 3506 | 3829 | 3836 |
| OAS | 2162 | 2170 | 2220 | 2279 | 2294 | 2307 | 2336 | 2310 | 2307 | 2309 | 2300 |
| REF | 0    | 0    | 0    | 0    | 0    | 0    | 0    | 0    | 0    | 1679 | 1695 |
| SSA | 1467 | 1455 | 1412 | 1409 | 1437 | 1439 | 1442 | 1496 | 1529 | 1549 | 1698 |
| USA | 2645 | 2648 | 2646 | 2647 | 2649 | 2647 | 2645 | 2645 | 2645 | 2644 | 2645 |

Table 1004: FAO — Prices—Agriculture—Dairy (US\$05/tDM) [PART 3/5]

|     | 1994 | 1995 | 1996 | 1997 | 1998 | 1999 | 2000 | 2001 | 2002 | 2003 | 2004 |
|-----|------|------|------|------|------|------|------|------|------|------|------|
| GLO | 2516 | 2523 | 2528 | 2524 | 2521 | 2523 | 2546 | 2545 | 2544 | 2562 | 2568 |
| CAZ | 2553 | 2572 | 2536 | 2514 | 2511 | 2502 | 2462 | 2448 | 2414 | 2410 | 2416 |
| CHA | 4082 | 4058 | 4071 | 4054 | 4126 | 4138 | 4176 | 4211 | 4256 | 4315 | 4366 |
| EUR | 2843 | 2847 | 2850 | 2851 | 2848 | 2851 | 2921 | 2918 | 2918 | 2917 | 2915 |
| IND | 2276 | 2287 | 2286 | 2284 | 2280 | 2275 | 2274 | 2268 | 2268 | 2271 | 2269 |
| JPN | 5911 | 5911 | 5909 | 5908 | 5906 | 5908 | 5907 | 5911 | 5909 | 5911 | 5911 |
| LAM | 1872 | 1861 | 1853 | 1859 | 1866 | 1866 | 1878 | 1880 | 1884 | 1881 | 1883 |
| MEA | 2488 | 2468 | 2456 | 2458 | 2446 | 2467 | 2471 | 2491 | 2492 | 2546 | 2488 |
| NEU | 3818 | 3807 | 3798 | 3785 | 3761 | 3792 | 3792 | 3794 | 3792 | 3790 | 3786 |
| OAS | 2287 | 2279 | 2272 | 2253 | 2252 | 2246 | 2277 | 2319 | 2283 | 2279 | 2266 |
| REF | 1698 | 1703 | 1711 | 1711 | 1708 | 1718 | 1725 | 1743 | 1754 | 1753 | 1733 |
| SSA | 1678 | 1707 | 1697 | 1691 | 1685 | 1705 | 1708 | 1700 | 1737 | 1737 | 1754 |
| USA | 2645 | 2647 | 2649 | 2650 | 2650 | 2649 | 2649 | 2649 | 2648 | 2650 | 2650 |

Table 1005: FAO — Prices—Agriculture—Dairy (US\$05/tDM) [PART 4/5]

|     | 2005 | 2006 | 2007 | 2008 | 2009 | 2010 | 2011 |
|-----|------|------|------|------|------|------|------|
| GLO | 2575 | 2574 | 2586 | 2582 | 2571 | 2565 | 2534 |
| CAZ | 2416 | 2422 | 2428 | 2440 | 2423 | 2423 | 2417 |
| CHA | 4391 | 4410 | 4423 | 4423 | 4393 | 4386 | 4398 |
| EUR | 2913 | 2911 | 2907 | 2910 | 2905 | 2906 | 2902 |
| IND | 2265 | 2265 | 2256 | 2250 | 2250 | 2250 | 2259 |
| JPN | 5908 | 5909 | 5912 | 5914 | 5907 | 5911 | 5918 |
| LAM | 1869 | 1877 | 1878 | 1882 | 1872 | 1861 | 1852 |
| MEA | 2492 | 2483 | 2491 | 2546 | 2535 | 2517 | 1934 |
| NEU | 3782 | 3779 | 3771 | 3778 | 3782 | 3794 | 3790 |
| OAS | 2272 | 2277 | 2270 | 2270 | 2264 | 2258 | 2253 |
| REF | 1755 | 1675 | 1756 | 1747 | 1741 | 1732 | 1718 |
| SSA | 1739 | 1764 | 1855 | 1892 | 1897 | 1921 | 1909 |
| USA | 2649 | 2648 | 2647 | 2646 | 2647 | 2647 | 2644 |

Table 1006: FAO — Prices—Agriculture—Dairy (US\$05/tDM) [PART 5/5]

|     | 1990 | 1991 | 1992 | 1993 | 1994 | 1995 | 1996 | 1997 | 1998 | 1999 | 2000 |
|-----|------|------|------|------|------|------|------|------|------|------|------|
| GLO | 0    | 735  | 795  | 626  | 688  | 651  | 599  | 569  | 615  | 590  | 586  |
| CAZ | 0    | 388  | 394  | 388  | 384  | 402  | 446  | 413  | 352  | 355  | 329  |
| CHA | 0    | 436  | 457  | 434  | 408  | 436  | 458  | 566  | 402  | 548  | 645  |
| EUR | 0    | 971  | 1042 | 947  | 974  | 1127 | 815  | 733  | 742  | 693  | 636  |
| IND | 0    | 770  | 782  | 681  | 751  | 0    | 0    | 0    | 0    | 0    | 0    |
| JPN | 0    | 1081 | 1152 | 1284 | 1376 | 1476 | 1243 | 1115 | 1034 | 1182 | 1240 |
| LAM | 0    | 356  | 379  | 397  | 787  | 435  | 460  | 456  | 438  | 384  | 422  |
| MEA | 0    | 5009 | 5128 | 843  | 800  | 931  | 1162 | 1144 | 1707 | 1903 | 2399 |
| NEU | 0    | 1232 | 1493 | 1444 | 1253 | 1526 | 1432 | 1314 | 2164 | 2057 | 1943 |
| OAS | 0    | 794  | 815  | 851  | 931  | 991  | 1005 | 963  | 952  | 910  | 868  |
| REF | 0    | 0    | 12   | 45   | 103  | 216  | 329  | 378  | 325  | 273  | 293  |
| SSA | 8    | 152  | 172  | 148  | 181  | 214  | 354  | 566  | 558  | 512  | 468  |
| USA | 0    | 446  | 479  | 467  | 475  | 467  | 533  | 484  | 561  | 520  | 448  |

Table 1007: FAOp — Prices—Agriculture—Dairy (US\$05/tDM) [PART 1/3]

|     | 2001 | 2002 | 2003 | 2004 | 2005 | 2006 | 2007 | 2008 | 2009 | 2010 | 2011 |
|-----|------|------|------|------|------|------|------|------|------|------|------|
| GLO | 564  | 520  | 563  | 660  | 694  | 700  | 830  | 894  | 767  | 840  | 907  |
| CAZ | 344  | 376  | 382  | 455  | 524  | 512  | 597  | 797  | 609  | 726  | 903  |
| CHA | 570  | 686  | 495  | 876  | 919  | 908  | 1146 | 592  | 619  | 744  | 802  |
| EUR | 659  | 674  | 784  | 952  | 992  | 981  | 1193 | 1378 | 1111 | 1141 | 1288 |
| IND | 0    | 0    | 0    | 0    | 0    | 0    | 0    | 0    | 0    | 0    | 0    |
| JPN | 1109 | 1075 | 1176 | 1254 | 1209 | 1118 | 1099 | 1316 | 1572 | 1650 | 1836 |
| LAM | 422  | 386  | 403  | 424  | 490  | 499  | 609  | 703  | 613  | 723  | 763  |
| MEA | 2396 | 1349 | 1305 | 1271 | 1284 | 1393 | 1663 | 1908 | 2307 | 2306 | 1998 |
| NEU | 1498 | 1624 | 2071 | 2390 | 2587 | 2796 | 3202 | 3916 | 3661 | 4222 | 3991 |
| OAS | 473  | 483  | 440  | 445  | 447  | 516  | 524  | 496  | 185  | 194  | 175  |
| REF | 329  | 390  | 419  | 510  | 611  | 643  | 628  | 781  | 618  | 753  | 941  |
| SSA | 477  | 508  | 482  | 566  | 636  | 712  | 889  | 787  | 853  | 768  | 794  |
| USA | 543  | 441  | 454  | 584  | 549  | 469  | 695  | 667  | 467  | 590  | 731  |

Table 1008: FAOp — Prices—Agriculture—Dairy (US\$05/tDM) [PART 2/3]



|     | 2005  |
|-----|-------|
| GLO | 21104 |
| CAZ |       |
| CHA |       |
| EUR |       |
| IND |       |
| JPN |       |
| LAM |       |
| MEA |       |
| NEU |       |
| OAS |       |
| REF |       |
| SSA |       |
| USA |       |

Table 1009: IniFoodPrice — Prices—Agriculture—Dairy (US\$05/tDM)

36.6 Distillers grains

## geom\_path: Each group consists of only one observation. Do you need to adjust the group## aesthetic?

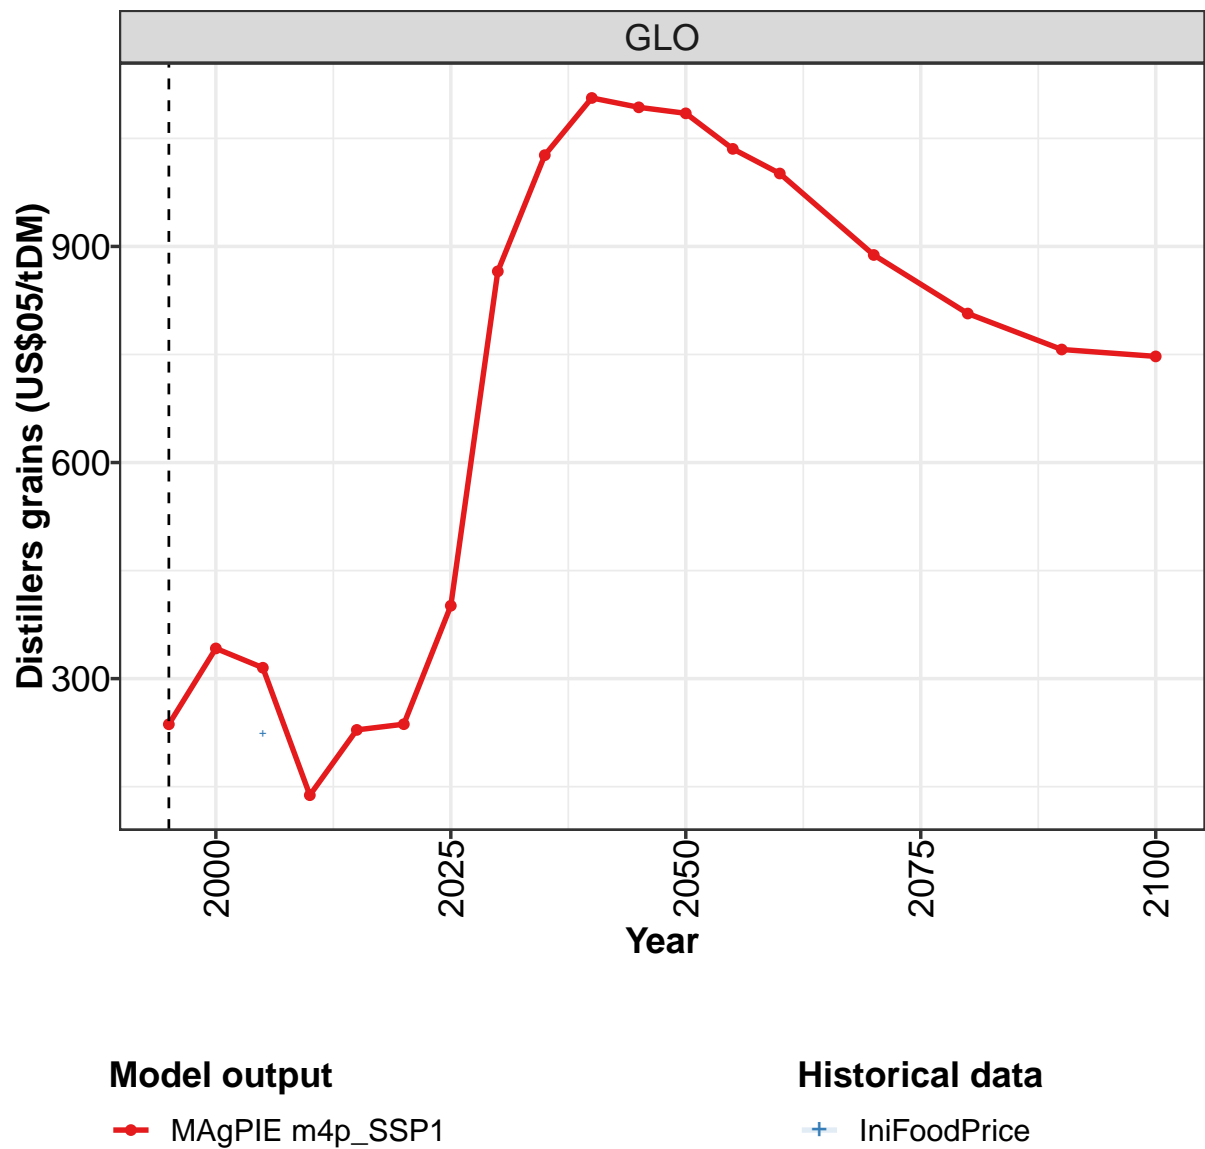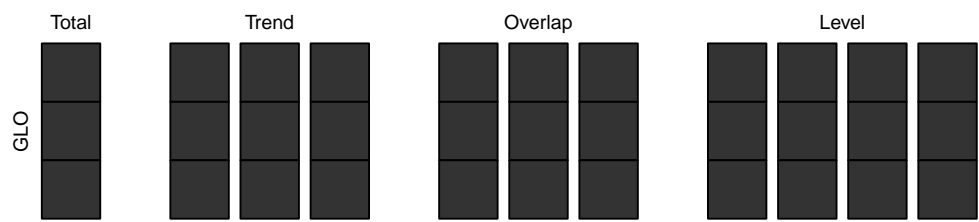

Figure 296: MAgPIE m4p\_SSP1 — Prices—Agriculture—Distillers grains (US\$05/tDM)

|     | 1995 | 2000 | 2005 | 2010 | 2015 | 2020 | 2025 | 2030 | 2035 | 2040 | 2045 |
|-----|------|------|------|------|------|------|------|------|------|------|------|
| GLO | 237  | 342  | 315  | 138  | 229  | 237  | 401  | 865  | 1027 | 1106 | 1093 |

Table 1010: MAgPIE m4p\_SSP1 — Prices—Agriculture—Distillers grains (US\$05/tDM) [PART 1/2]

|     | 2050 | 2055 | 2060 | 2070 | 2080 | 2090 | 2100 |
|-----|------|------|------|------|------|------|------|
| GLO | 1085 | 1035 | 1001 | 888  | 807  | 757  | 747  |

Table 1011: MAgPIE m4p\_SSP1 — Prices—Agriculture—Distillers grains (US\$05/tDM) [PART 2/2]

|     | 2005 |
|-----|------|
| GLO | 223  |

Table 1012: IniFoodPrice — Prices—Agriculture—Distillers grains (US\$05/tDM)

36.7 Eggs

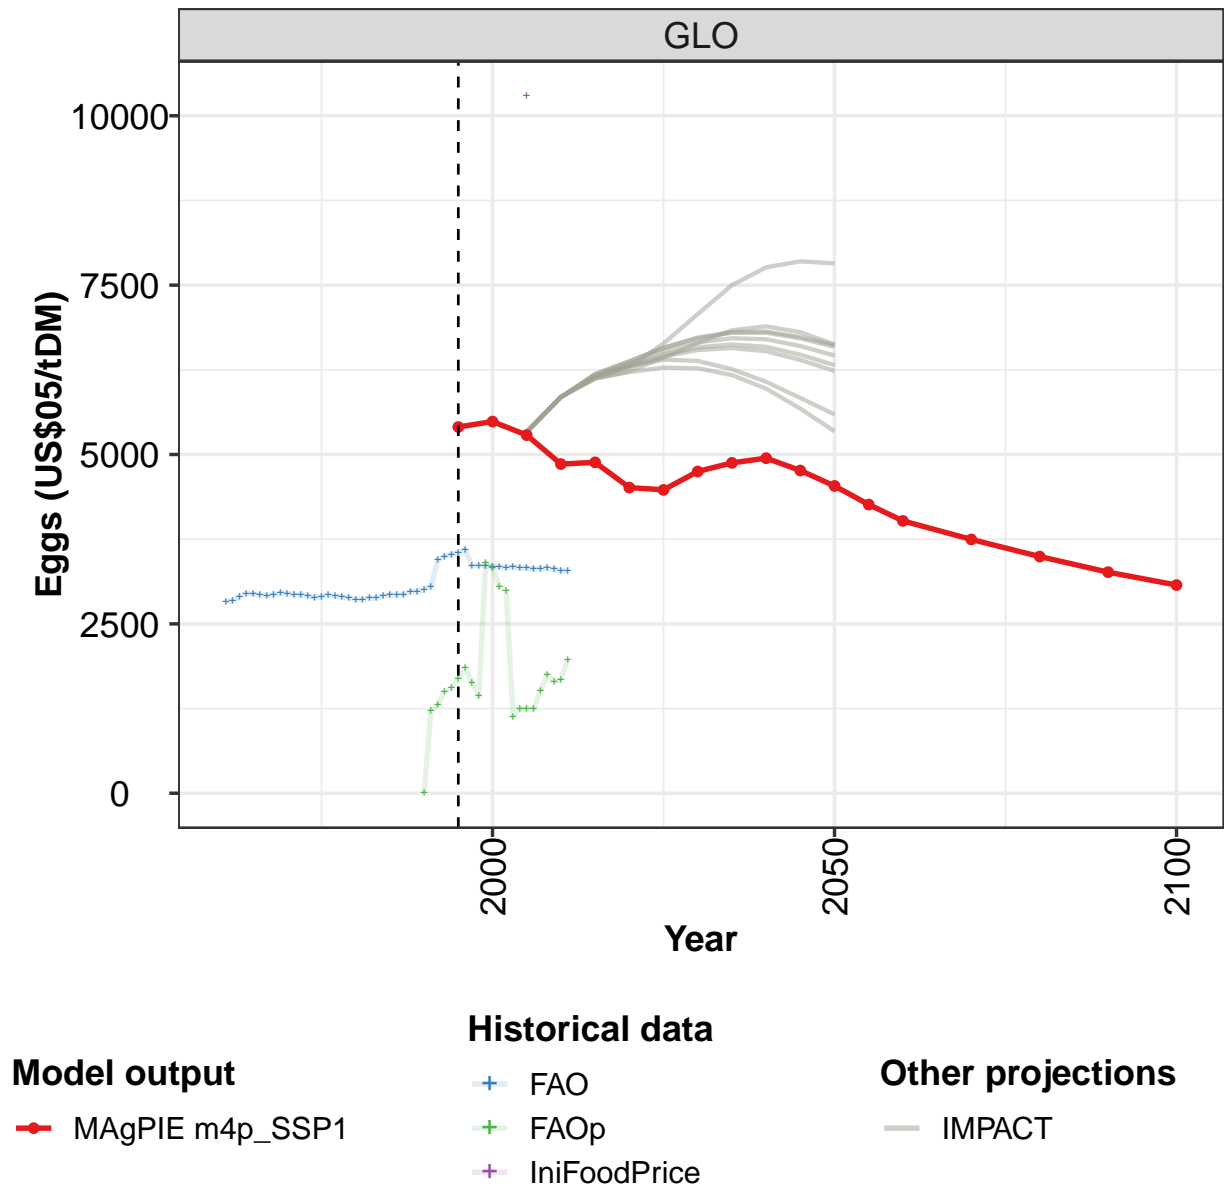

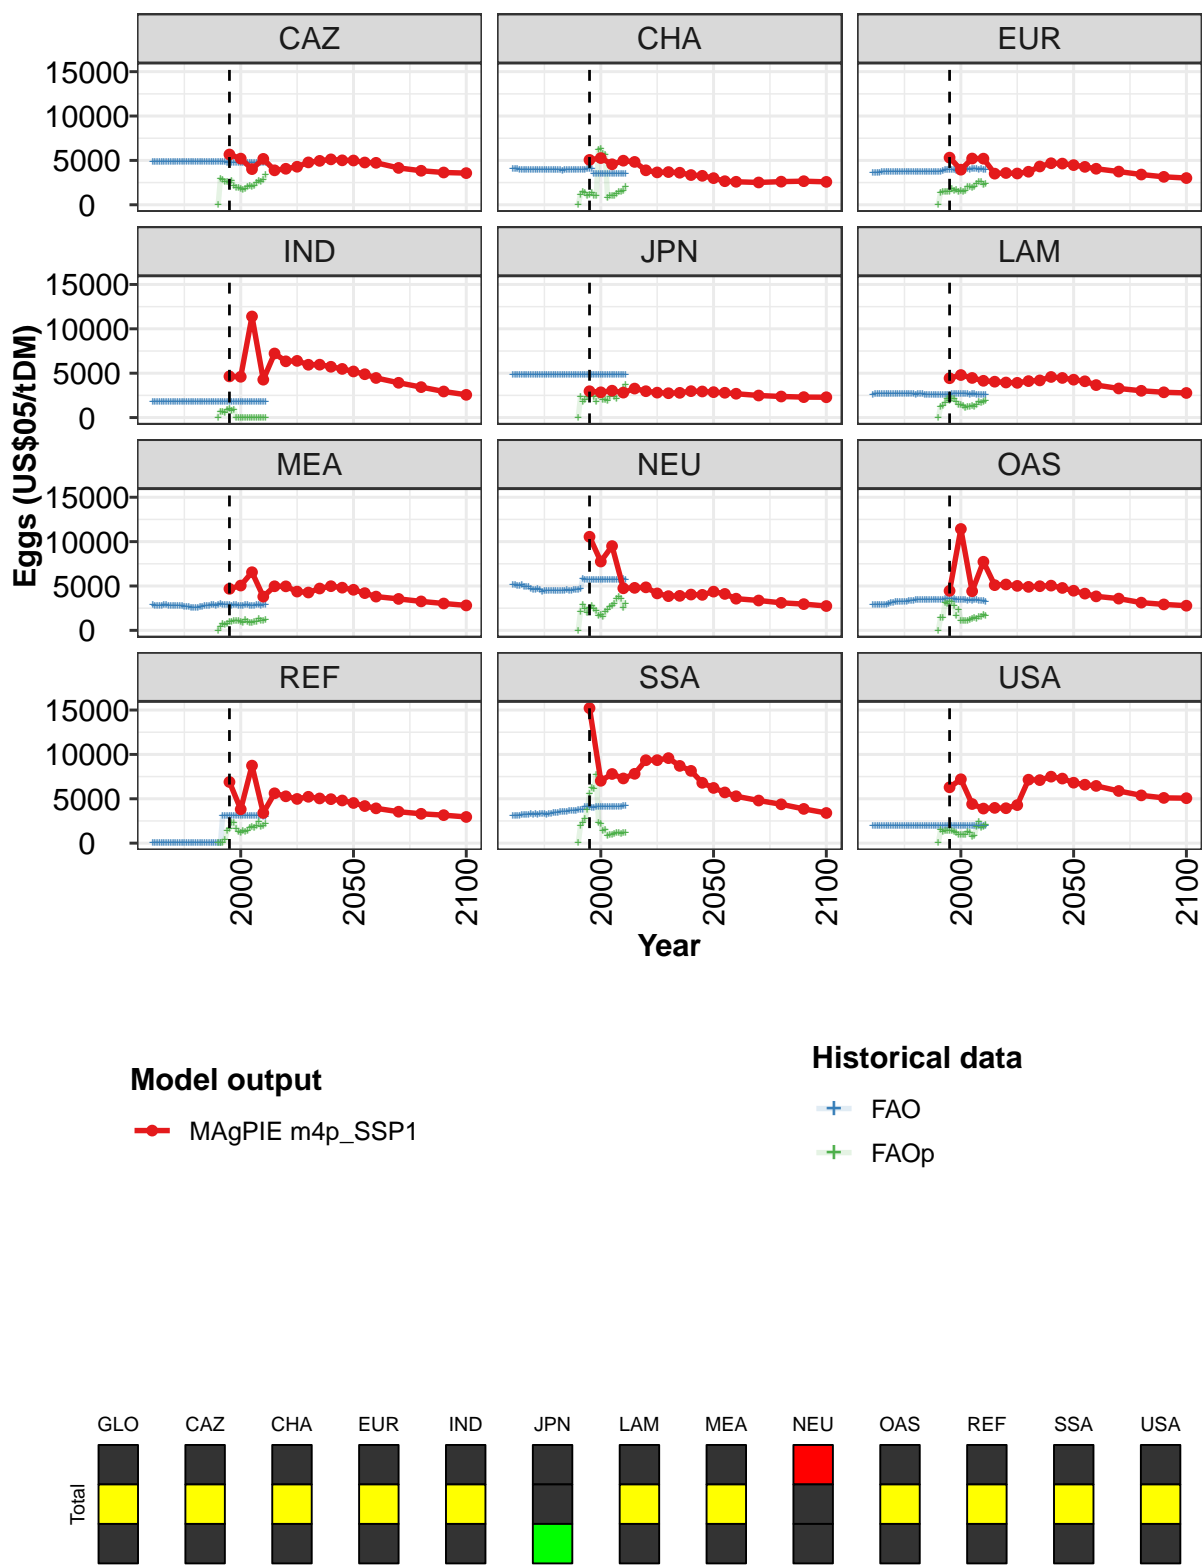

Figure 297: MAgPIE m4p\_SSP1 — Prices—Agriculture—Eggs (US\$05/tDM)

|     | 1995  | 2000  | 2005  | 2010 | 2015 | 2020 | 2025 | 2030 | 2035 | 2040 | 2045 |
|-----|-------|-------|-------|------|------|------|------|------|------|------|------|
| GLO | 5406  | 5486  | 5287  | 4859 | 4884 | 4512 | 4478 | 4750 | 4877 | 4946 | 4764 |
| CAZ | 5665  | 5202  | 4021  | 5173 | 3883 | 4059 | 4290 | 4777 | 4950 | 5119 | 5011 |
| CHA | 5060  | 5264  | 4565  | 4970 | 4832 | 3887 | 3651 | 3688 | 3613 | 3352 | 3265 |
| EUR | 5314  | 3955  | 5215  | 5199 | 3510 | 3580 | 3526 | 3725 | 4317 | 4683 | 4642 |
| IND | 4642  | 4600  | 11396 | 4271 | 7225 | 6341 | 6389 | 5952 | 5962 | 5725 | 5484 |
| JPN | 2968  | 2848  | 3028  | 2815 | 3268 | 2972 | 2812 | 2744 | 2787 | 2978 | 2942 |
| LAM | 4436  | 4795  | 4468  | 4144 | 4043 | 3953 | 3915 | 4111 | 4188 | 4577 | 4467 |
| MEA | 4682  | 5051  | 6555  | 3802 | 4969 | 4961 | 4371 | 4266 | 4716 | 4978 | 4813 |
| NEU | 10552 | 7759  | 9502  | 4743 | 4793 | 4849 | 4164 | 3858 | 3889 | 4035 | 4002 |
| OAS | 4456  | 11426 | 4409  | 7733 | 5098 | 5168 | 5012 | 4902 | 4977 | 5044 | 4780 |
| REF | 6895  | 3814  | 8739  | 3404 | 5619 | 5281 | 4985 | 5225 | 5041 | 4958 | 4809 |
| SSA | 15215 | 7029  | 7798  | 7293 | 7817 | 9348 | 9355 | 9582 | 8708 | 8147 | 6802 |
| USA | 6295  | 7201  | 4409  | 3900 | 3976 | 3939 | 4289 | 7153 | 7107 | 7493 | 7279 |

Table 1013: MAgPIE m4p\_SSP1 — Prices—Agriculture—Eggs (US\$05/tDM) [PART 1/2]

|     | 2050 | 2055 | 2060 | 2070 | 2080 | 2090 | 2100 |
|-----|------|------|------|------|------|------|------|
| GLO | 4536 | 4261 | 4020 | 3746 | 3494 | 3263 | 3073 |
| CAZ | 4990 | 4765 | 4729 | 4154 | 3834 | 3637 | 3569 |
| CHA | 3003 | 2659 | 2592 | 2513 | 2608 | 2659 | 2581 |
| EUR | 4473 | 4275 | 4060 | 3743 | 3409 | 3148 | 3011 |
| IND | 5197 | 4887 | 4465 | 3922 | 3432 | 2940 | 2564 |
| JPN | 2865 | 2798 | 2686 | 2485 | 2375 | 2304 | 2291 |
| LAM | 4271 | 4091 | 3662 | 3279 | 3019 | 2847 | 2773 |
| MEA | 4573 | 4201 | 3805 | 3545 | 3262 | 3027 | 2811 |
| NEU | 4365 | 4108 | 3570 | 3365 | 3105 | 2959 | 2742 |
| OAS | 4467 | 4143 | 3831 | 3579 | 3126 | 2924 | 2780 |
| REF | 4528 | 4183 | 3923 | 3543 | 3309 | 3155 | 2953 |
| SSA | 6224 | 5715 | 5288 | 4805 | 4379 | 3860 | 3402 |
| USA | 6816 | 6587 | 6451 | 5881 | 5384 | 5100 | 5068 |

Table 1014: MAgPIE m4p\_SSP1 — Prices—Agriculture—Eggs (US\$05/tDM) [PART 2/2]

|     | 1961 | 1962 | 1963 | 1964 | 1965 | 1966 | 1967 | 1968 | 1969 | 1970 | 1971 |
|-----|------|------|------|------|------|------|------|------|------|------|------|
| GLO | 2832 | 2846 | 2893 | 2949 | 2947 | 2926 | 2920 | 2928 | 2954 | 2951 | 2933 |
| CAZ | 4798 | 4799 | 4806 | 4794 | 4819 | 4840 | 4837 | 4853 | 4842 | 4836 | 4855 |
| CHA | 4018 | 4013 | 4008 | 4000 | 3968 | 3965 | 3991 | 3957 | 3934 | 3930 | 3965 |
| EUR | 3566 | 3587 | 3646 | 3659 | 3684 | 3711 | 3708 | 3703 | 3698 | 3704 | 3711 |
| IND | 1790 | 1790 | 1790 | 1790 | 1790 | 1790 | 1790 | 1790 | 1790 | 1790 | 1790 |
| JPN | 4869 | 4869 | 4869 | 4869 | 4869 | 4869 | 4869 | 4869 | 4869 | 4869 | 4869 |
| LAM | 2580 | 2628 | 2625 | 2631 | 2628 | 2631 | 2629 | 2626 | 2641 | 2631 | 2659 |
| MEA | 2832 | 2805 | 2807 | 2817 | 2793 | 2852 | 2829 | 2805 | 2774 | 2799 | 2786 |
| NEU | 5138 | 5157 | 5030 | 4972 | 5129 | 4962 | 4941 | 4875 | 4740 | 4619 | 4600 |
| OAS | 2878 | 2888 | 2911 | 2908 | 2917 | 2890 | 2896 | 2963 | 3147 | 3126 | 3171 |
| REF | 0    | 0    | 0    | 0    | 0    | 0    | 0    | 0    | 0    | 0    | 0    |
| SSA | 3087 | 3097 | 3131 | 3134 | 3204 | 3215 | 3216 | 3233 | 3278 | 3247 | 3256 |
| USA | 1902 | 1902 | 1902 | 1902 | 1902 | 1902 | 1902 | 1902 | 1902 | 1902 | 1902 |

Table 1015: FAO — Prices—Agriculture—Eggs (US\$05/tDM) [PART 1/5]

|     | 1972 | 1973 | 1974 | 1975 | 1976 | 1977 | 1978 | 1979 | 1980 | 1981 | 1982 |
|-----|------|------|------|------|------|------|------|------|------|------|------|
| GLO | 2931 | 2910 | 2891 | 2900 | 2928 | 2908 | 2897 | 2882 | 2863 | 2862 | 2880 |
| CAZ | 4882 | 4879 | 4868 | 4887 | 4885 | 4882 | 4894 | 4880 | 4852 | 4871 | 4871 |
| CHA | 3942 | 3969 | 3952 | 3954 | 3948 | 3906 | 3951 | 3888 | 3893 | 3900 | 3907 |
| EUR | 3729 | 3712 | 3721 | 3746 | 3768 | 3751 | 3735 | 3740 | 3700 | 3711 | 3709 |
| IND | 1790 | 1790 | 1790 | 1790 | 1790 | 1790 | 1790 | 1790 | 1790 | 1790 | 1790 |
| JPN | 4869 | 4869 | 4869 | 4869 | 4869 | 4869 | 4869 | 4869 | 4869 | 4869 | 4869 |
| LAM | 2668 | 2704 | 2682 | 2682 | 2692 | 2700 | 2711 | 2690 | 2621 | 2647 | 2658 |
| MEA | 2779 | 2777 | 2758 | 2710 | 2693 | 2684 | 2589 | 2558 | 2544 | 2562 | 2633 |
| NEU | 4657 | 4589 | 4383 | 4442 | 4442 | 4467 | 4516 | 4482 | 4409 | 4442 | 4441 |
| OAS | 3207 | 3198 | 3250 | 3271 | 3261 | 3351 | 3324 | 3334 | 3413 | 3396 | 3397 |
| REF | 0    | 0    | 0    | 0    | 0    | 0    | 0    | 0    | 0    | 0    | 0    |
| SSA | 3250 | 3284 | 3306 | 3322 | 3234 | 3317 | 3361 | 3388 | 3396 | 3417 | 3480 |
| USA | 1902 | 1902 | 1902 | 1902 | 1902 | 1902 | 1902 | 1902 | 1902 | 1902 | 1902 |

Table 1016: FAO — Prices—Agriculture—Eggs (US\$05/tDM) [PART 2/5]

|     | 1983 | 1984 | 1985 | 1986 | 1987 | 1988 | 1989 | 1990 | 1991 | 1992 | 1993 |
|-----|------|------|------|------|------|------|------|------|------|------|------|
| GLO | 2880 | 2909 | 2932 | 2923 | 2932 | 2978 | 2972 | 3007 | 3051 | 3446 | 3496 |
| CAZ | 4866 | 4864 | 4845 | 4845 | 4829 | 4824 | 4842 | 4891 | 4849 | 4813 | 4815 |
| CHA | 3866 | 3904 | 3935 | 3941 | 3941 | 3967 | 3961 | 3966 | 3986 | 3979 | 3988 |
| EUR | 3720 | 3713 | 3695 | 3707 | 3693 | 3736 | 3719 | 3718 | 3714 | 3799 | 3928 |
| IND | 1790 | 1790 | 1790 | 1790 | 1790 | 1790 | 1790 | 1790 | 1790 | 1790 | 1790 |
| JPN | 4869 | 4869 | 4869 | 4869 | 4869 | 4869 | 4869 | 4869 | 4869 | 4869 | 4869 |
| LAM | 2647 | 2604 | 2597 | 2577 | 2580 | 2600 | 2563 | 2542 | 2538 | 2562 | 2590 |
| MEA | 2703 | 2745 | 2774 | 2742 | 2835 | 2867 | 2792 | 2851 | 2960 | 2869 | 2844 |
| NEU | 4501 | 4510 | 4520 | 4495 | 4490 | 4626 | 4573 | 4559 | 4697 | 5804 | 5739 |
| OAS | 3407 | 3409 | 3393 | 3422 | 3436 | 3477 | 3472 | 3434 | 3444 | 3485 | 3521 |
| REF | 0    | 0    | 0    | 0    | 0    | 0    | 0    | 0    | 0    | 3058 | 3056 |
| SSA | 3527 | 3558 | 3572 | 3637 | 3678 | 3645 | 3608 | 3765 | 3773 | 3800 | 4065 |
| USA | 1902 | 1902 | 1902 | 1902 | 1902 | 1902 | 1902 | 1902 | 1902 | 1902 | 1902 |

Table 1017: FAO — Prices—Agriculture—Eggs (US\$05/tDM) [PART 3/5]

|     | 1994 | 1995 | 1996 | 1997 | 1998 | 1999 | 2000 | 2001 | 2002 | 2003 | 2004 |
|-----|------|------|------|------|------|------|------|------|------|------|------|
| GLO | 3524 | 3549 | 3594 | 3364 | 3365 | 3354 | 3346 | 3340 | 3334 | 3346 | 3325 |
| CAZ | 4757 | 4747 | 4739 | 4737 | 4752 | 4739 | 4712 | 4698 | 4694 | 4678 | 4699 |
| CHA | 4003 | 4005 | 4058 | 3496 | 3499 | 3502 | 3504 | 3504 | 3487 | 3510 | 3511 |
| EUR | 3900 | 3904 | 3908 | 3894 | 3864 | 3887 | 3957 | 3966 | 4000 | 4054 | 3986 |
| IND | 1790 | 1790 | 1790 | 1790 | 1790 | 1790 | 1790 | 1790 | 1790 | 1790 | 1790 |
| JPN | 4869 | 4869 | 4869 | 4869 | 4869 | 4869 | 4869 | 4869 | 4869 | 4869 | 4869 |
| LAM | 2598 | 2605 | 2639 | 2637 | 2662 | 2646 | 2641 | 2670 | 2635 | 2631 | 2616 |
| MEA | 2843 | 2889 | 2803 | 2845 | 2854 | 2773 | 2766 | 2765 | 2844 | 2839 | 2759 |
| NEU | 5743 | 5696 | 5710 | 5683 | 5688 | 5691 | 5690 | 5731 | 5739 | 5725 | 5732 |
| OAS | 3518 | 3547 | 3512 | 3505 | 3408 | 3405 | 3398 | 3431 | 3410 | 3378 | 3415 |
| REF | 3073 | 3077 | 3084 | 3092 | 3092 | 3092 | 3109 | 3112 | 3097 | 3099 | 3083 |
| SSA | 4092 | 4052 | 4019 | 3979 | 4103 | 4106 | 4094 | 4096 | 4087 | 4098 | 4103 |
| USA | 1902 | 1902 | 1902 | 1902 | 1902 | 1902 | 1902 | 1902 | 1902 | 1902 | 1902 |

Table 1018: FAO — Prices—Agriculture—Eggs (US\$05/tDM) [PART 4/5]

|     | 2005 | 2006 | 2007 | 2008 | 2009 | 2010 | 2011 |
|-----|------|------|------|------|------|------|------|
| GLO | 3324 | 3312 | 3321 | 3321 | 3308 | 3286 | 3283 |
| CAZ | 4697 | 4750 | 4728 | 4720 | 4714 | 4728 | 4767 |
| CHA | 3517 | 3515 | 3516 | 3521 | 3522 | 3513 | 3522 |
| EUR | 4019 | 4019 | 4019 | 3998 | 4012 | 3944 | 3983 |
| IND | 1790 | 1790 | 1790 | 1790 | 1790 | 1790 | 1790 |
| JPN | 4869 | 4869 | 4869 | 4869 | 4869 | 4869 | 4869 |
| LAM | 2627 | 2626 | 2615 | 2607 | 2581 | 2570 | 2561 |
| MEA | 2796 | 2780 | 2855 | 2900 | 2819 | 2911 | 2875 |
| NEU | 5721 | 5709 | 5698 | 5721 | 5734 | 5755 | 5739 |
| OAS | 3366 | 3408 | 3416 | 3368 | 3335 | 3285 | 3227 |
| REF | 3083 | 3043 | 3070 | 3052 | 3042 | 3023 | 2998 |
| SSA | 4120 | 4132 | 4149 | 4133 | 4148 | 4155 | 4173 |
| USA | 1902 | 1902 | 1902 | 1902 | 1902 | 1902 | 1902 |

Table 1019: FAO — Prices—Agriculture—Eggs (US\$05/tDM) [PART 5/5]

|     | 1990 | 1991 | 1992 | 1993 | 1994 | 1995 | 1996 | 1997 | 1998 | 1999 | 2000 |
|-----|------|------|------|------|------|------|------|------|------|------|------|
| GLO | 0    | 1213 | 1311 | 1499 | 1551 | 1694 | 1849 | 1637 | 1441 | 3399 | 3333 |
| CAZ | 0    | 2912 | 2763 | 2620 | 2639 | 2429 | 2748 | 2114 | 1962 | 1929 | 1800 |
| CHA | 0    | 1179 | 1423 | 1303 | 1019 | 1179 | 1359 | 1055 | 993  | 6215 | 6286 |
| EUR | 0    | 1363 | 1491 | 1487 | 1490 | 1501 | 1783 | 1581 | 1644 | 1427 | 1544 |
| IND | 0    | 696  | 611  | 519  | 854  | 1022 | 718  | 933  | 0    | 0    | 0    |
| JPN | 0    | 2314 | 1786 | 2013 | 2290 | 2714 | 2648 | 2372 | 1833 | 2414 | 2525 |
| LAM | 0    | 1160 | 1309 | 1662 | 2062 | 1924 | 2169 | 2111 | 1737 | 1390 | 1423 |
| MEA | 0    | 393  | 698  | 649  | 785  | 969  | 987  | 1027 | 1030 | 1070 | 962  |
| NEU | 0    | 2095 | 2861 | 2433 | 1947 | 2540 | 2762 | 2472 | 2194 | 1674 | 1810 |
| OAS | 0    | 1388 | 1435 | 3149 | 3021 | 3262 | 3224 | 2751 | 1681 | 2313 | 1072 |
| REF | 0    | 0    | 78   | 355  | 1423 | 1605 | 2322 | 2294 | 1652 | 1258 | 1207 |
| SSA | 0    | 1962 | 2296 | 2716 | 3728 | 5580 | 6284 | 6073 | 7691 | 2346 | 2137 |
| USA | 0    | 1472 | 1255 | 1381 | 1339 | 1362 | 1404 | 1283 | 1148 | 988  | 975  |

Table 1020: FAOp — Prices—Agriculture—Eggs (US\$05/tDM) [PART 1/3]

|     | 2001 | 2002 | 2003 | 2004 | 2005 | 2006 | 2007 | 2008 | 2009 | 2010 | 2011 |
|-----|------|------|------|------|------|------|------|------|------|------|------|
| GLO | 3054 | 2992 | 1123 | 1249 | 1251 | 1240 | 1508 | 1751 | 1647 | 1680 | 1973 |
| CAZ | 1732 | 1797 | 2026 | 2108 | 2042 | 2125 | 2431 | 2742 | 2603 | 2769 | 3422 |
| CHA | 5765 | 5662 | 784  | 987  | 1030 | 976  | 1290 | 1447 | 1477 | 1535 | 2056 |
| EUR | 1482 | 1538 | 2040 | 2013 | 1910 | 2064 | 2315 | 2574 | 2540 | 2210 | 2381 |
| IND | 0    | 0    | 0    | 0    | 0    | 0    | 0    | 0    | 0    | 0    | 0    |
| JPN | 1990 | 1991 | 1865 | 2319 | 2699 | 2285 | 2168 | 2835 | 2768 | 3200 | 3725 |
| LAM | 1359 | 1063 | 1170 | 1245 | 1291 | 1228 | 1422 | 1757 | 1612 | 1792 | 1922 |
| MEA | 868  | 1194 | 912  | 803  | 803  | 979  | 921  | 1262 | 1134 | 1087 | 1189 |
| NEU | 1518 | 2063 | 2359 | 2630 | 2815 | 2956 | 3534 | 3810 | 3519 | 2523 | 2940 |
| OAS | 1090 | 1038 | 1077 | 1197 | 1351 | 1409 | 1358 | 1484 | 1526 | 1729 | 1592 |
| REF | 1395 | 1306 | 1365 | 1683 | 1816 | 1714 | 1912 | 2454 | 1869 | 1942 | 2148 |
| SSA | 1393 | 1473 | 831  | 950  | 967  | 1038 | 1207 | 1131 | 1029 | 1137 | 1207 |
| USA | 993  | 898  | 1255 | 1218 | 758  | 878  | 1862 | 2385 | 1782 | 1867 | 2082 |

Table 1021: FAOp — Prices—Agriculture—Eggs (US\$05/tDM) [PART 2/3]



|     | 2005  |
|-----|-------|
| GLO | 10291 |
| CAZ |       |
| CHA |       |
| EUR |       |
| IND |       |
| JPN |       |
| LAM |       |
| MEA |       |
| NEU |       |
| OAS |       |
| REF |       |
| SSA |       |
| USA |       |

Table 1022: IniFoodPrice — Prices—Agriculture—Eggs (US\$05/tDM)

36.8 Ethanol

## geom\_path: Each group consists of only one observation. Do you need to adjust the group## aesthetic?

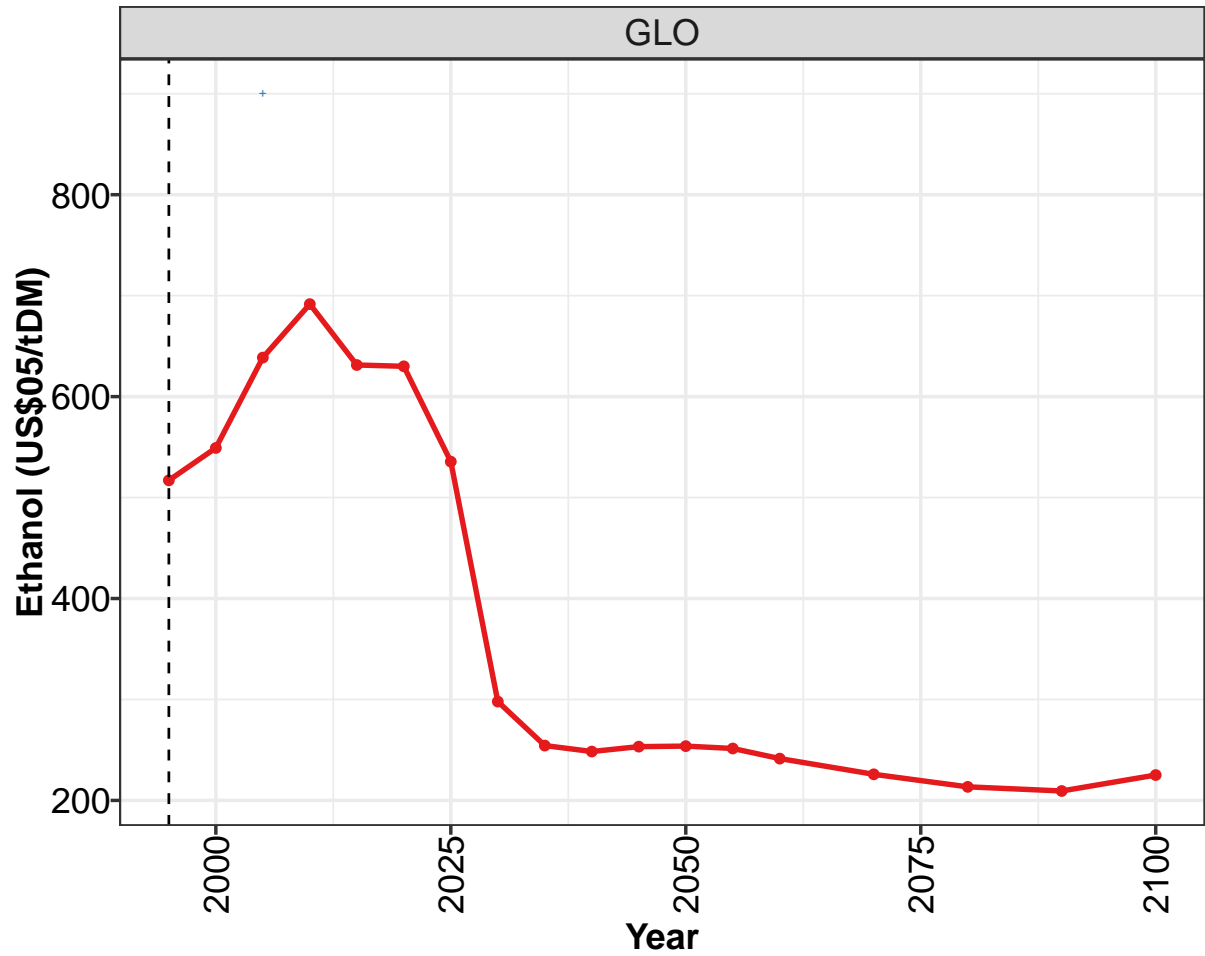

Model output

MAgPIE m4p\_SSP1

Historical data

IniFoodPrice

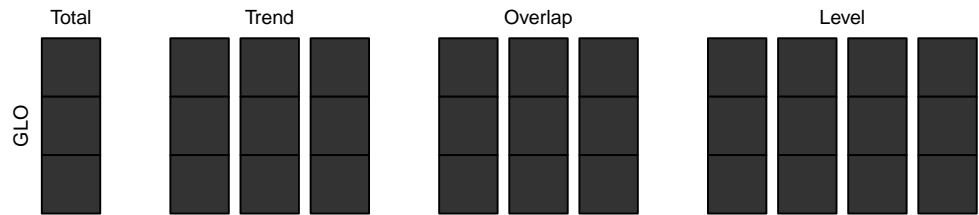

Figure 298: MAgPIE m4p\_SSP1 — Prices—Agriculture—Ethanol (US\$05/tDM)

|     | 1995 | 2000 | 2005 | 2010 | 2015 | 2020 | 2025 | 2030 | 2035 | 2040 | 2045 |
|-----|------|------|------|------|------|------|------|------|------|------|------|
| GLO | 517  | 549  | 639  | 692  | 631  | 630  | 536  | 298  | 254  | 248  | 253  |

Table 1023: MAgPIE m4p\_SSP1 — Prices—Agriculture—Ethanol (US\$05/tDM) [PART 1/2]

|     | 2050 | 2055 | 2060 | 2070 | 2080 | 2090 | 2100 |
|-----|------|------|------|------|------|------|------|
| GLO | 254  | 251  | 241  | 226  | 213  | 209  | 225  |

Table 1024: MAgPIE m4p\_SSP1 — Prices—Agriculture—Ethanol (US\$05/tDM) [PART 2/2]

|     | 2005 |
|-----|------|
| GLO | 900  |

Table 1025: IniFoodPrice — Prices—Agriculture—Ethanol (US\$05/tDM)

36.9 Fish

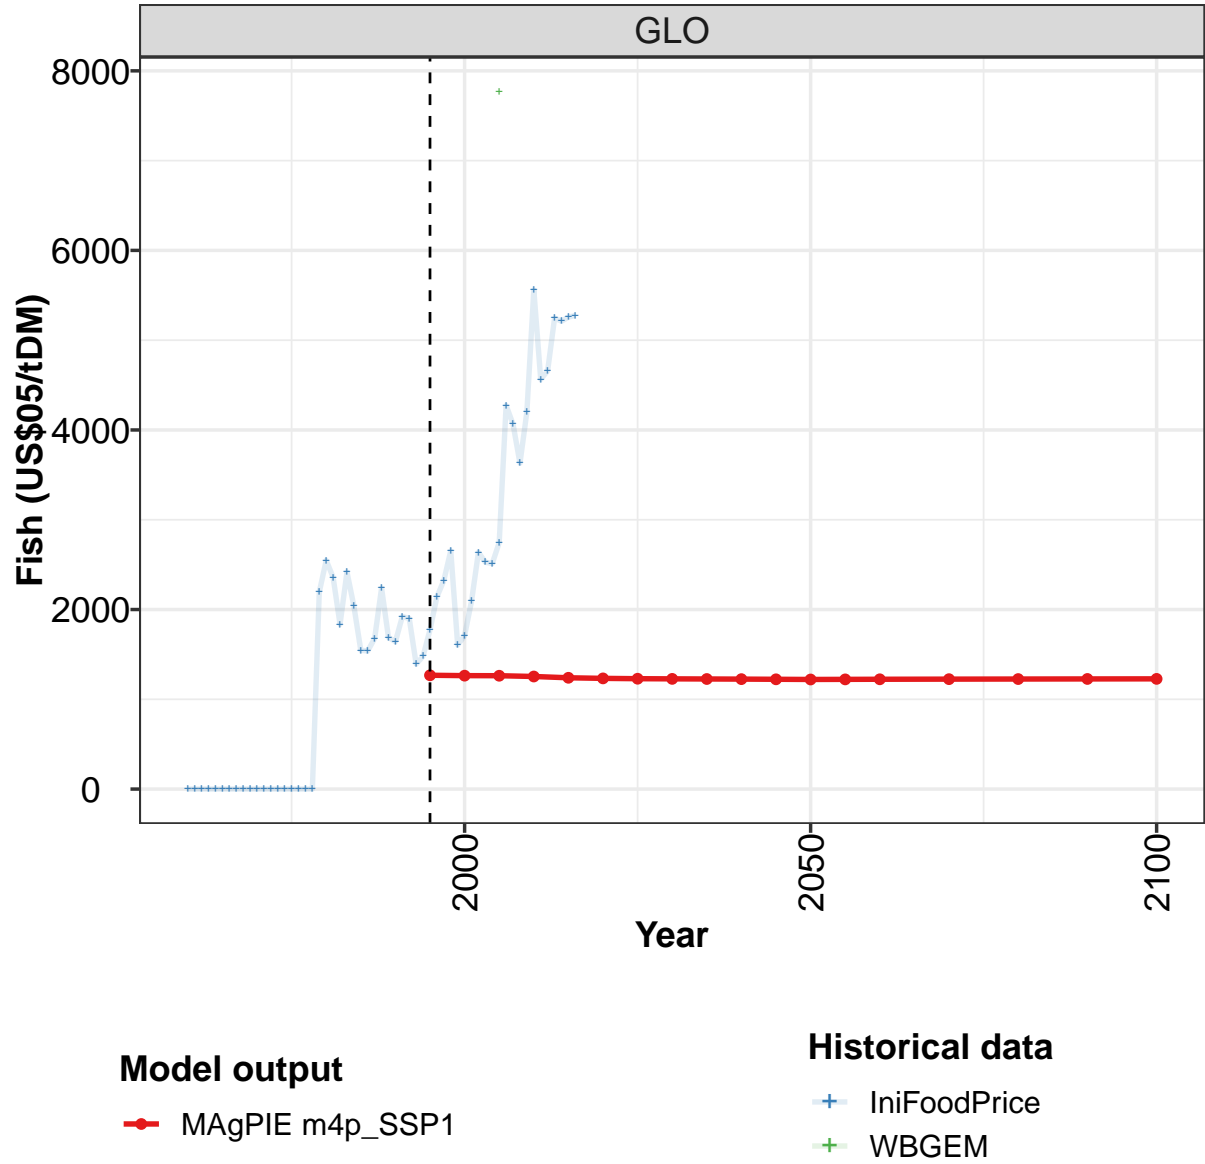

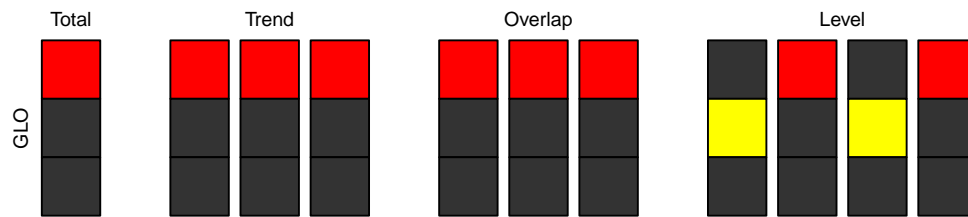

Figure 299: MAgPIE m4p\_SSP1 — Prices—Agriculture—Fish (US\$05/tDM)

|     | 1995 | 2000 | 2005 | 2010 | 2015 | 2020 | 2025 | 2030 | 2035 | 2040 | 2045 |
|-----|------|------|------|------|------|------|------|------|------|------|------|
| GLO | 1268 | 1263 | 1263 | 1254 | 1240 | 1233 | 1229 | 1228 | 1226 | 1225 | 1223 |

Table 1026: MAgPIE m4p\_SSP1 — Prices—Agriculture—Fish (US\$05/tDM) [PART 1/2]

|     | 2050 | 2055 | 2060 | 2070 | 2080 | 2090 | 2100 |
|-----|------|------|------|------|------|------|------|
| GLO | 1221 | 1222 | 1223 | 1225 | 1226 | 1227 | 1228 |

Table 1027: MAgPIE m4p\_SSP1 — Prices—Agriculture—Fish (US\$05/tDM) [PART 2/2]

|     | 1960 | 1961 | 1962 | 1963 | 1964 | 1965 | 1966 | 1967 | 1968 | 1969 | 1970 |
|-----|------|------|------|------|------|------|------|------|------|------|------|
| GLO | 0    | 0    | 0    | 0    | 0    | 0    | 0    | 0    | 0    | 0    | 0    |

Table 1028: WBGEM — Prices—Agriculture—Fish (US\$05/tDM) [PART 1/6]

|     | 1971 | 1972 | 1973 | 1974 | 1975 | 1976 | 1977 | 1978 | 1979 | 1980 | 1981 |
|-----|------|------|------|------|------|------|------|------|------|------|------|
| GLO | 0    | 0    | 0    | 0    | 0    | 0    | 0    | 0    | 2194 | 2548 | 2358 |

Table 1029: WBGEM — Prices—Agriculture—Fish (US\$05/tDM) [PART 2/6]

|     | 1982 | 1983 | 1984 | 1985 | 1986 | 1987 | 1988 | 1989 | 1990 | 1991 | 1992 |
|-----|------|------|------|------|------|------|------|------|------|------|------|
| GLO | 1835 | 2417 | 2038 | 1546 | 1538 | 1679 | 2239 | 1689 | 1642 | 1922 | 1901 |

Table 1030: WBGEM — Prices—Agriculture—Fish (US\$05/tDM) [PART 3/6]

|     | 1993 | 1994 | 1995 | 1996 | 1997 | 1998 | 1999 | 2000 | 2001 | 2002 | 2003 |
|-----|------|------|------|------|------|------|------|------|------|------|------|
| GLO | 1392 | 1481 | 1774 | 2141 | 2324 | 2654 | 1604 | 1710 | 2094 | 2637 | 2527 |

Table 1031: WBGEM — Prices—Agriculture—Fish (US\$05/tDM) [PART 4/6]

|     | 2004 | 2005 | 2006 | 2007 | 2008 | 2009 | 2010 | 2011 | 2012 | 2013 | 2014 |
|-----|------|------|------|------|------|------|------|------|------|------|------|
| GLO | 2513 | 2745 | 4273 | 4064 | 3630 | 4201 | 5559 | 4564 | 4659 | 5245 | 5211 |

Table 1032: WBGEM — Prices—Agriculture—Fish (US\$05/tDM) [PART 5/6]

|     | 2015 | 2016 |
|-----|------|------|
| GLO | 5256 | 5275 |

Table 1033: WBGEM — Prices—Agriculture—Fish (US\$05/tDM) [PART 6/6]

|     |      |
|-----|------|
|     | 2005 |
| GLO | 7766 |

Table 1034: IniFoodPrice — Prices—Agriculture—Fish (US\$05/tDM)

36.10 Forage

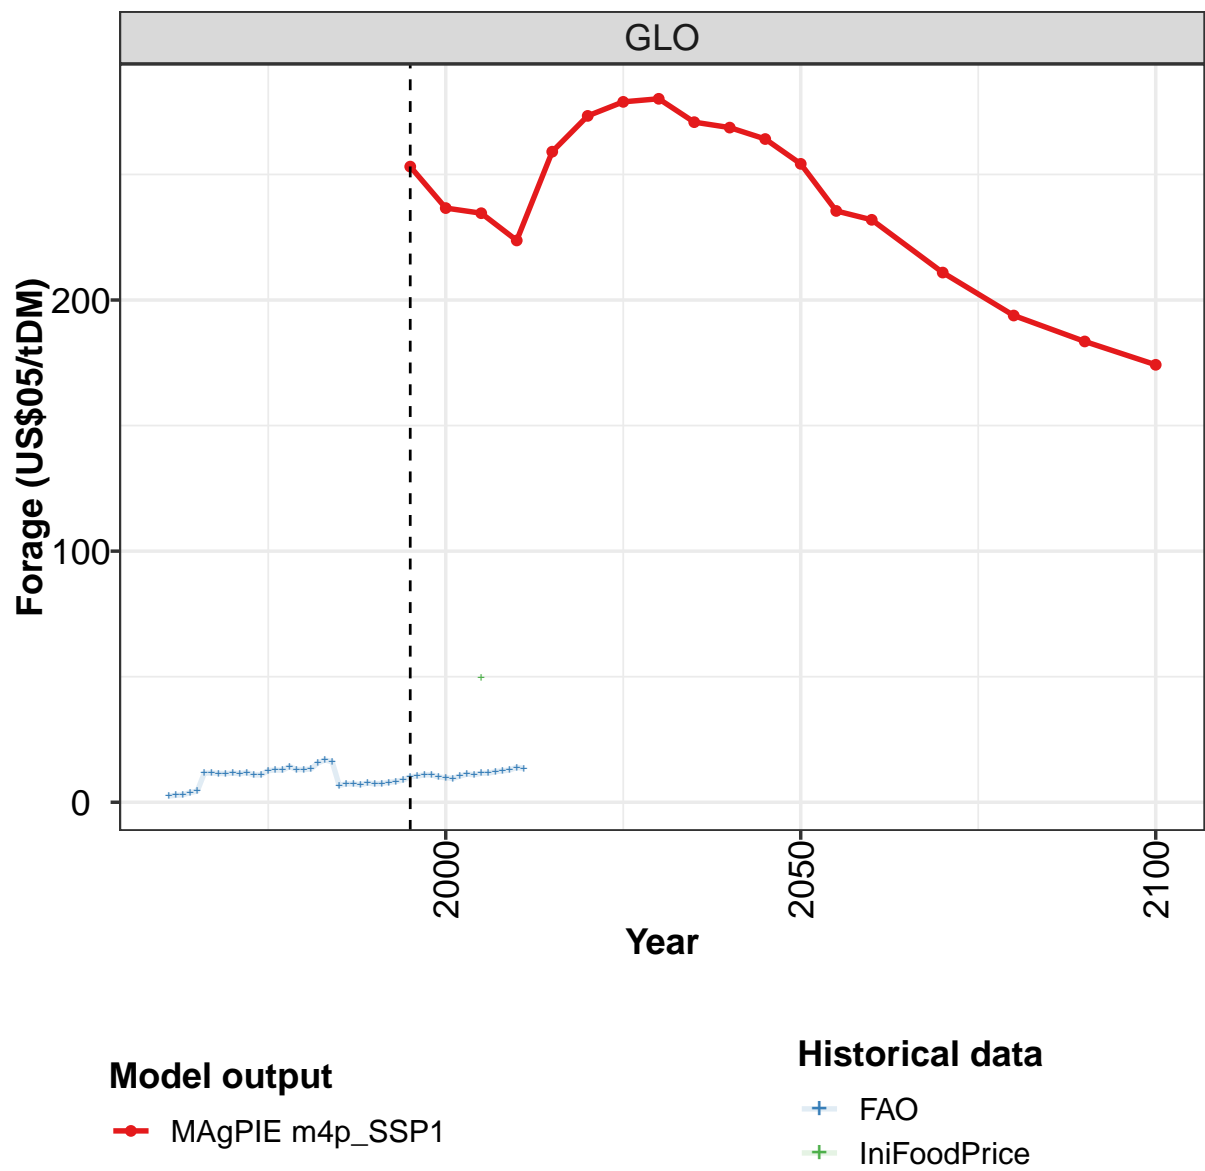

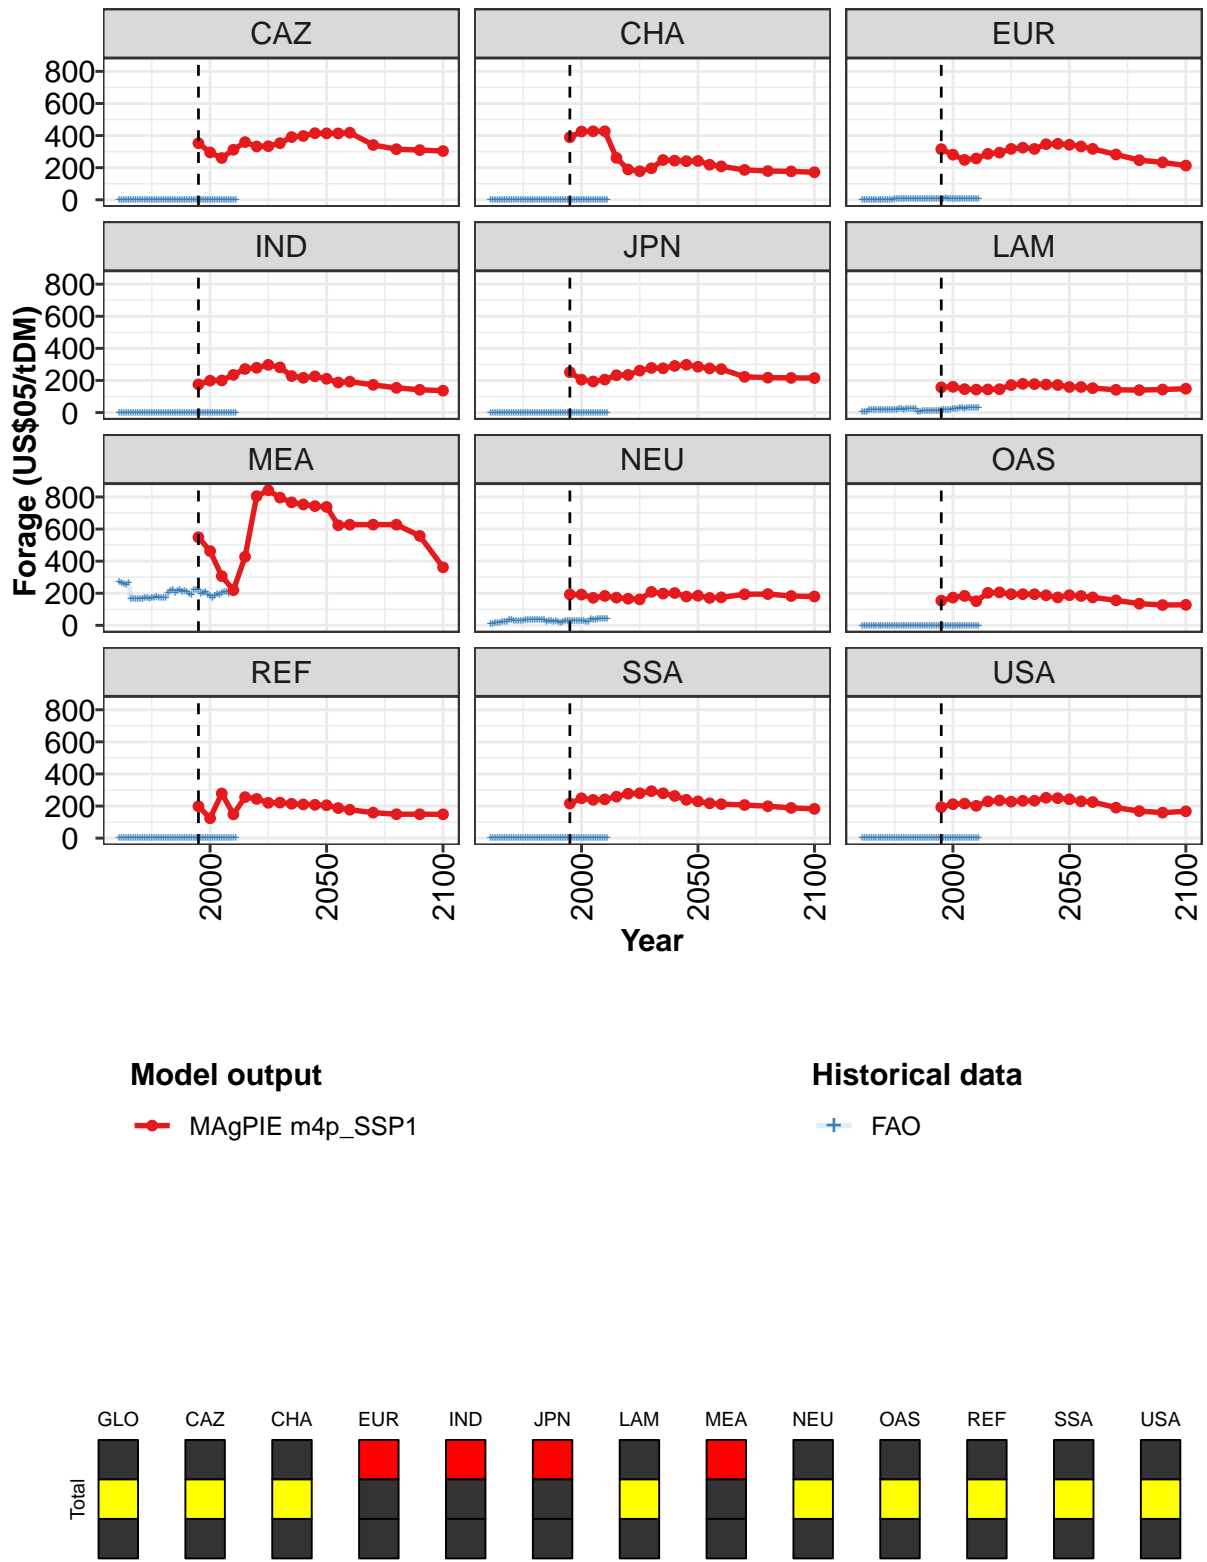

Figure 300: MAgPIE m4p\_SSP1 — Prices—Agriculture—Forage (US\$05/tDM)

|     | 1995 | 2000 | 2005 | 2010 | 2015 | 2020 | 2025 | 2030 | 2035 | 2040 | 2045 |
|-----|------|------|------|------|------|------|------|------|------|------|------|
| GLO | 253  | 237  | 235  | 224  | 259  | 273  | 279  | 280  | 271  | 269  | 264  |
| CAZ | 353  | 295  | 260  | 312  | 359  | 332  | 334  | 353  | 391  | 397  | 415  |
| CHA | 389  | 425  | 427  | 427  | 261  | 189  | 178  | 196  | 248  | 244  | 241  |
| EUR | 315  | 281  | 248  | 257  | 286  | 294  | 317  | 325  | 317  | 346  | 349  |
| IND | 175  | 199  | 200  | 235  | 272  | 279  | 297  | 282  | 228  | 217  | 226  |
| JPN | 251  | 205  | 194  | 206  | 232  | 235  | 261  | 278  | 276  | 290  | 298  |
| LAM | 157  | 161  | 146  | 143  | 144  | 146  | 171  | 179  | 177  | 175  | 172  |
| MEA | 549  | 463  | 307  | 219  | 427  | 805  | 841  | 796  | 766  | 753  | 743  |
| NEU | 193  | 192  | 172  | 183  | 173  | 166  | 162  | 209  | 198  | 202  | 180  |
| OAS | 154  | 173  | 184  | 151  | 203  | 205  | 194  | 194  | 194  | 187  | 174  |
| REF | 199  | 124  | 279  | 148  | 256  | 245  | 220  | 222  | 214  | 210  | 208  |
| SSA | 216  | 248  | 239  | 242  | 259  | 277  | 280  | 293  | 280  | 263  | 239  |
| USA | 193  | 211  | 215  | 201  | 229  | 235  | 227  | 233  | 233  | 251  | 249  |

Table 1035: MAgPIE m4p\_SSP1 — Prices—Agriculture—Forage (US\$05/tDM) [PART 1/2]

|     | 2050 | 2055 | 2060 | 2070 | 2080 | 2090 | 2100 |
|-----|------|------|------|------|------|------|------|
| GLO | 254  | 235  | 232  | 211  | 194  | 184  | 174  |
| CAZ | 414  | 414  | 418  | 341  | 315  | 310  | 304  |
| CHA | 242  | 218  | 208  | 186  | 179  | 177  | 171  |
| EUR | 343  | 332  | 317  | 282  | 247  | 233  | 213  |
| IND | 211  | 187  | 193  | 173  | 154  | 142  | 137  |
| JPN | 286  | 275  | 271  | 223  | 217  | 216  | 215  |
| LAM | 159  | 159  | 152  | 142  | 140  | 144  | 149  |
| MEA | 738  | 624  | 627  | 628  | 628  | 557  | 362  |
| NEU | 185  | 171  | 174  | 193  | 195  | 183  | 180  |
| OAS | 188  | 183  | 174  | 156  | 135  | 127  | 128  |
| REF | 205  | 188  | 177  | 159  | 149  | 149  | 149  |
| SSA | 229  | 217  | 212  | 207  | 199  | 189  | 182  |
| USA | 242  | 230  | 225  | 190  | 168  | 159  | 167  |

Table 1036: MAgPIE m4p\_SSP1 — Prices—Agriculture—Forage (US\$05/tDM) [PART 2/2]

|     | 1961 | 1962 | 1963 | 1964 | 1965 | 1966 | 1967 | 1968 | 1969 | 1970 | 1971 |
|-----|------|------|------|------|------|------|------|------|------|------|------|
| GLO | 2    | 3    | 3    | 4    | 4    | 12   | 12   | 11   | 11   | 12   | 11   |
| CAZ | 0    | 0    | 0    | 0    | 0    | 0    | 0    | 0    | 0    | 0    | 0    |
| CHA | 0    | 0    | 0    | 0    | 0    | 0    | 0    | 0    | 0    | 0    | 0    |
| EUR | 0    | 0    | 0    | 0    | 0    | 0    | 0    | 0    | 0    | 0    | 0    |
| IND | 0    | 0    | 0    | 0    | 0    | 0    | 0    | 0    | 0    | 0    | 0    |
| JPN | 0    | 0    | 0    | 0    | 0    | 0    | 0    | 0    | 0    | 0    | 0    |
| LAM | 6    | 6    | 7    | 15   | 19   | 16   | 18   | 16   | 15   | 18   | 17   |
| MEA | 269  | 264  | 257  | 254  | 266  | 164  | 165  | 163  | 163  | 163  | 165  |
| NEU | 8    | 12   | 14   | 15   | 19   | 23   | 24   | 24   | 36   | 37   | 29   |
| OAS | 0    | 0    | 0    | 0    | 0    | 0    | 0    | 0    | 0    | 0    | 0    |
| REF | 0    | 0    | 0    | 0    | 0    | 0    | 0    | 0    | 0    | 0    | 0    |
| SSA | 0    | 0    | 0    | 0    | 0    | 0    | 0    | 0    | 0    | 0    | 0    |
| USA | 0    | 0    | 0    | 0    | 0    | 0    | 0    | 0    | 0    | 0    | 0    |

Table 1037: FAO — Prices—Agriculture—Forage (US\$05/tDM) [PART 1/5]

|     | 1972 | 1973 | 1974 | 1975 | 1976 | 1977 | 1978 | 1979 | 1980 | 1981 | 1982 |
|-----|------|------|------|------|------|------|------|------|------|------|------|
| GLO | 12   | 11   | 11   | 13   | 13   | 13   | 14   | 13   | 13   | 13   | 16   |
| CAZ | 0    | 0    | 0    | 0    | 0    | 0    | 0    | 0    | 0    | 0    | 0    |
| CHA | 0    | 0    | 0    | 0    | 0    | 0    | 0    | 0    | 0    | 0    | 0    |
| EUR | 0    | 0    | 0    | 7    | 6    | 7    | 7    | 7    | 8    | 9    | 9    |
| IND | 0    | 0    | 0    | 0    | 0    | 0    | 0    | 0    | 0    | 0    | 0    |
| JPN | 0    | 0    | 0    | 0    | 0    | 0    | 0    | 0    | 0    | 0    | 0    |
| LAM | 18   | 18   | 19   | 20   | 20   | 22   | 22   | 20   | 24   | 21   | 23   |
| MEA | 174  | 170  | 168  | 174  | 175  | 179  | 174  | 172  | 171  | 173  | 204  |
| NEU | 29   | 29   | 29   | 31   | 33   | 33   | 33   | 33   | 37   | 37   | 35   |
| OAS | 0    | 0    | 0    | 0    | 0    | 0    | 0    | 0    | 0    | 0    | 0    |
| REF | 0    | 0    | 0    | 0    | 0    | 0    | 0    | 0    | 0    | 0    | 0    |
| SSA | 0    | 0    | 0    | 0    | 0    | 0    | 0    | 0    | 0    | 0    | 0    |
| USA | 0    | 0    | 0    | 0    | 0    | 0    | 0    | 0    | 0    | 0    | 0    |

Table 1038: FAO — Prices—Agriculture—Forage (US\$05/tDM) [PART 2/5]

|     | 1983 | 1984 | 1985 | 1986 | 1987 | 1988 | 1989 | 1990 | 1991 | 1992 | 1993 |
|-----|------|------|------|------|------|------|------|------|------|------|------|
| GLO | 17   | 16   | 7    | 7    | 7    | 7    | 8    | 7    | 7    | 8    | 8    |
| CAZ | 0    | 0    | 0    | 0    | 0    | 0    | 0    | 0    | 0    | 0    | 0    |
| CHA | 0    | 0    | 0    | 0    | 0    | 0    | 0    | 0    | 0    | 0    | 0    |
| EUR | 9    | 8    | 5    | 7    | 6    | 7    | 8    | 7    | 7    | 9    | 9    |
| IND | 0    | 0    | 0    | 0    | 0    | 0    | 0    | 0    | 0    | 0    | 0    |
| JPN | 0    | 0    | 0    | 0    | 0    | 0    | 0    | 0    | 0    | 0    | 0    |
| LAM | 24   | 25   | 7    | 8    | 9    | 9    | 12   | 14   | 13   | 11   | 12   |
| MEA | 217  | 223  | 202  | 215  | 220  | 209  | 216  | 209  | 195  | 192  | 220  |
| NEU | 34   | 35   | 25   | 26   | 26   | 23   | 28   | 22   | 19   | 25   | 26   |
| OAS | 0    | 0    | 0    | 0    | 0    | 0    | 0    | 0    | 0    | 0    | 0    |
| REF | 0    | 0    | 0    | 0    | 0    | 0    | 0    | 0    | 0    | 0    | 0    |
| SSA | 0    | 0    | 0    | 0    | 0    | 0    | 0    | 0    | 0    | 0    | 0    |
| USA | 0    | 0    | 0    | 0    | 0    | 0    | 0    | 0    | 0    | 0    | 0    |

Table 1039: FAO — Prices—Agriculture—Forage (US\$05/tDM) [PART 3/5]

|     | 1994 | 1995 | 1996 | 1997 | 1998 | 1999 | 2000 | 2001 | 2002 | 2003 | 2004 |
|-----|------|------|------|------|------|------|------|------|------|------|------|
| GLO | 9    | 10   | 10   | 11   | 11   | 10   | 10   | 10   | 10   | 11   | 11   |
| CAZ | 0    | 0    | 0    | 0    | 0    | 0    | 0    | 0    | 0    | 0    | 0    |
| CHA | 0    | 0    | 0    | 0    | 0    | 0    | 0    | 0    | 0    | 0    | 0    |
| EUR | 8    | 7    | 8    | 10   | 8    | 9    | 7    | 7    | 8    | 8    | 8    |
| IND | 0    | 0    | 0    | 0    | 0    | 0    | 0    | 0    | 0    | 0    | 0    |
| JPN | 0    | 0    | 0    | 0    | 0    | 0    | 0    | 0    | 0    | 0    | 0    |
| LAM | 14   | 18   | 18   | 17   | 18   | 18   | 22   | 24   | 26   | 27   | 27   |
| MEA | 224  | 224  | 198  | 201  | 207  | 191  | 187  | 172  | 186  | 194  | 189  |
| NEU | 28   | 28   | 26   | 27   | 26   | 26   | 27   | 25   | 24   | 24   | 40   |
| OAS | 0    | 0    | 0    | 0    | 0    | 0    | 0    | 0    | 0    | 0    | 0    |
| REF | 0    | 0    | 0    | 0    | 0    | 0    | 0    | 0    | 0    | 0    | 0    |
| SSA | 0    | 0    | 0    | 0    | 0    | 0    | 0    | 0    | 0    | 0    | 0    |
| USA | 0    | 0    | 0    | 0    | 0    | 0    | 0    | 0    | 0    | 0    | 0    |

Table 1040: FAO — Prices—Agriculture—Forage (US\$05/tDM) [PART 4/5]



|     | 2005 | 2006 | 2007 | 2008 | 2009 | 2010 | 2011 |
|-----|------|------|------|------|------|------|------|
| GLO | 12   | 12   | 12   | 13   | 13   | 14   | 14   |
| CAZ | 0    | 0    | 0    | 0    | 0    | 0    | 0    |
| CHA | 0    | 0    | 0    | 0    | 0    | 0    | 0    |
| EUR | 8    | 7    | 8    | 9    | 8    | 8    | 7    |
| IND | 0    | 0    | 0    | 0    | 0    | 0    | 0    |
| JPN | 0    | 0    | 0    | 0    | 0    | 0    | 0    |
| LAM | 26   | 28   | 28   | 30   | 28   | 29   | 28   |
| MEA | 201  | 207  | 208  | 198  | 207  | 214  | 215  |
| NEU | 36   | 33   | 41   | 42   | 43   | 44   | 43   |
| OAS | 0    | 0    | 0    | 0    | 0    | 0    | 0    |
| REF | 0    | 0    | 0    | 0    | 0    | 0    | 0    |
| SSA | 0    | 0    | 0    | 0    | 0    | 0    | 0    |
| USA | 0    | 0    | 0    | 0    | 0    | 0    | 0    |

Table 1041: FAO — Prices—Agriculture—Forage (US\$05/tDM) [PART 5/5]

|     | 2005 |
|-----|------|
| GLO | 50   |
| CAZ |      |
| CHA |      |
| EUR |      |
| IND |      |
| JPN |      |
| LAM |      |
| MEA |      |
| NEU |      |
| OAS |      |
| REF |      |
| SSA |      |
| USA |      |

Table 1042: IniFoodPrice — Prices—Agriculture—Forage (US\$05/tDM)

36.11 Fruits Vegetables Nuts

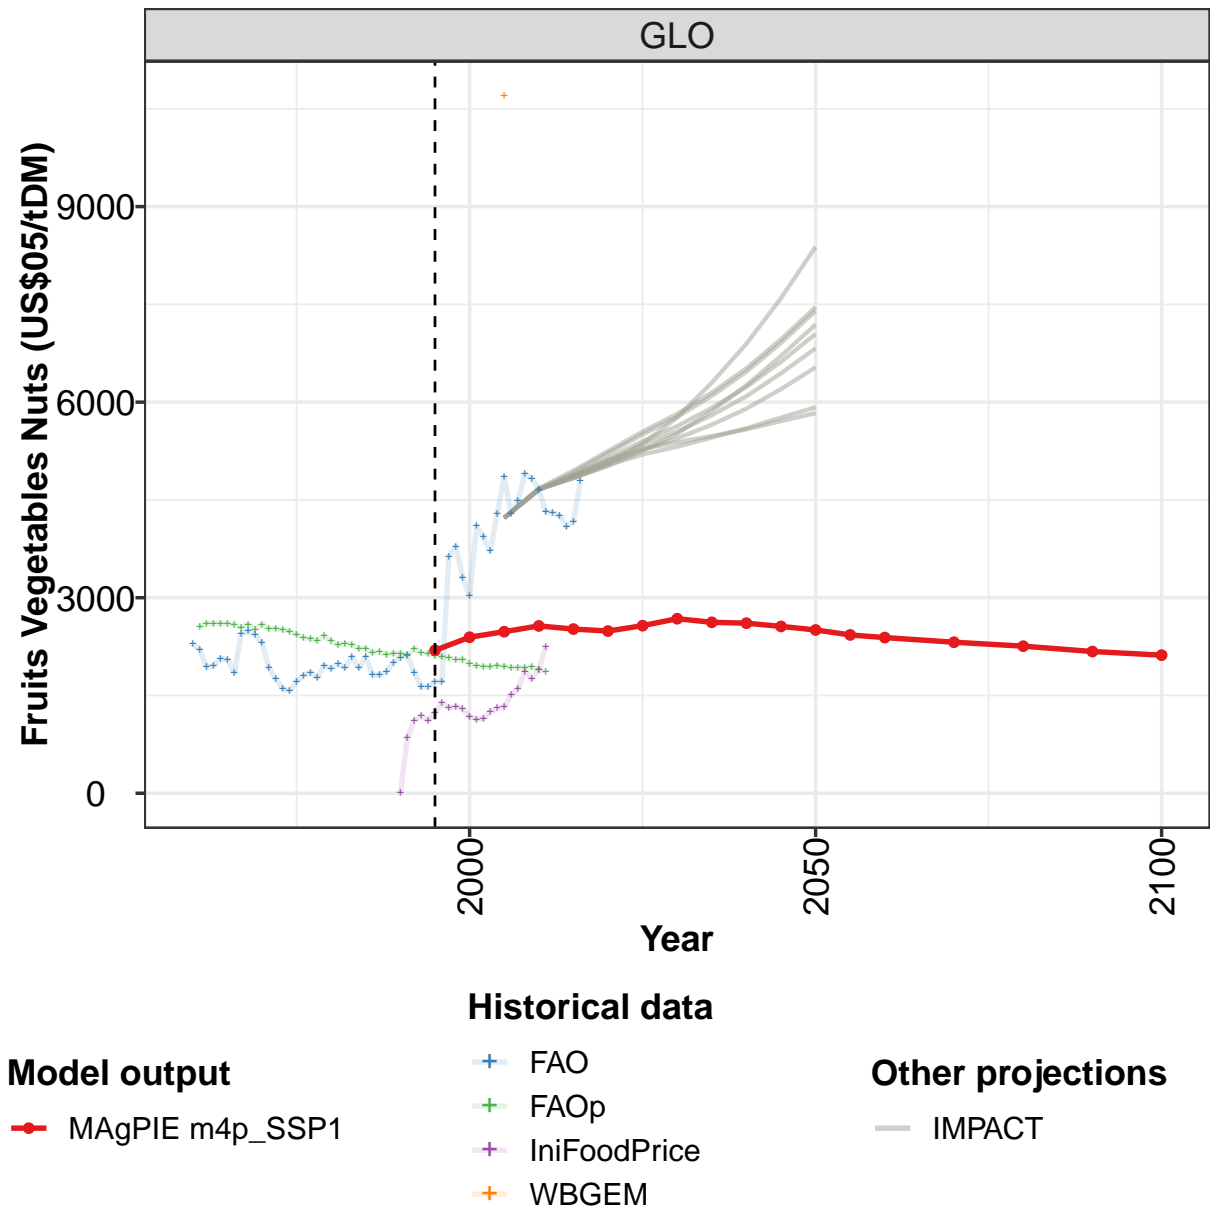

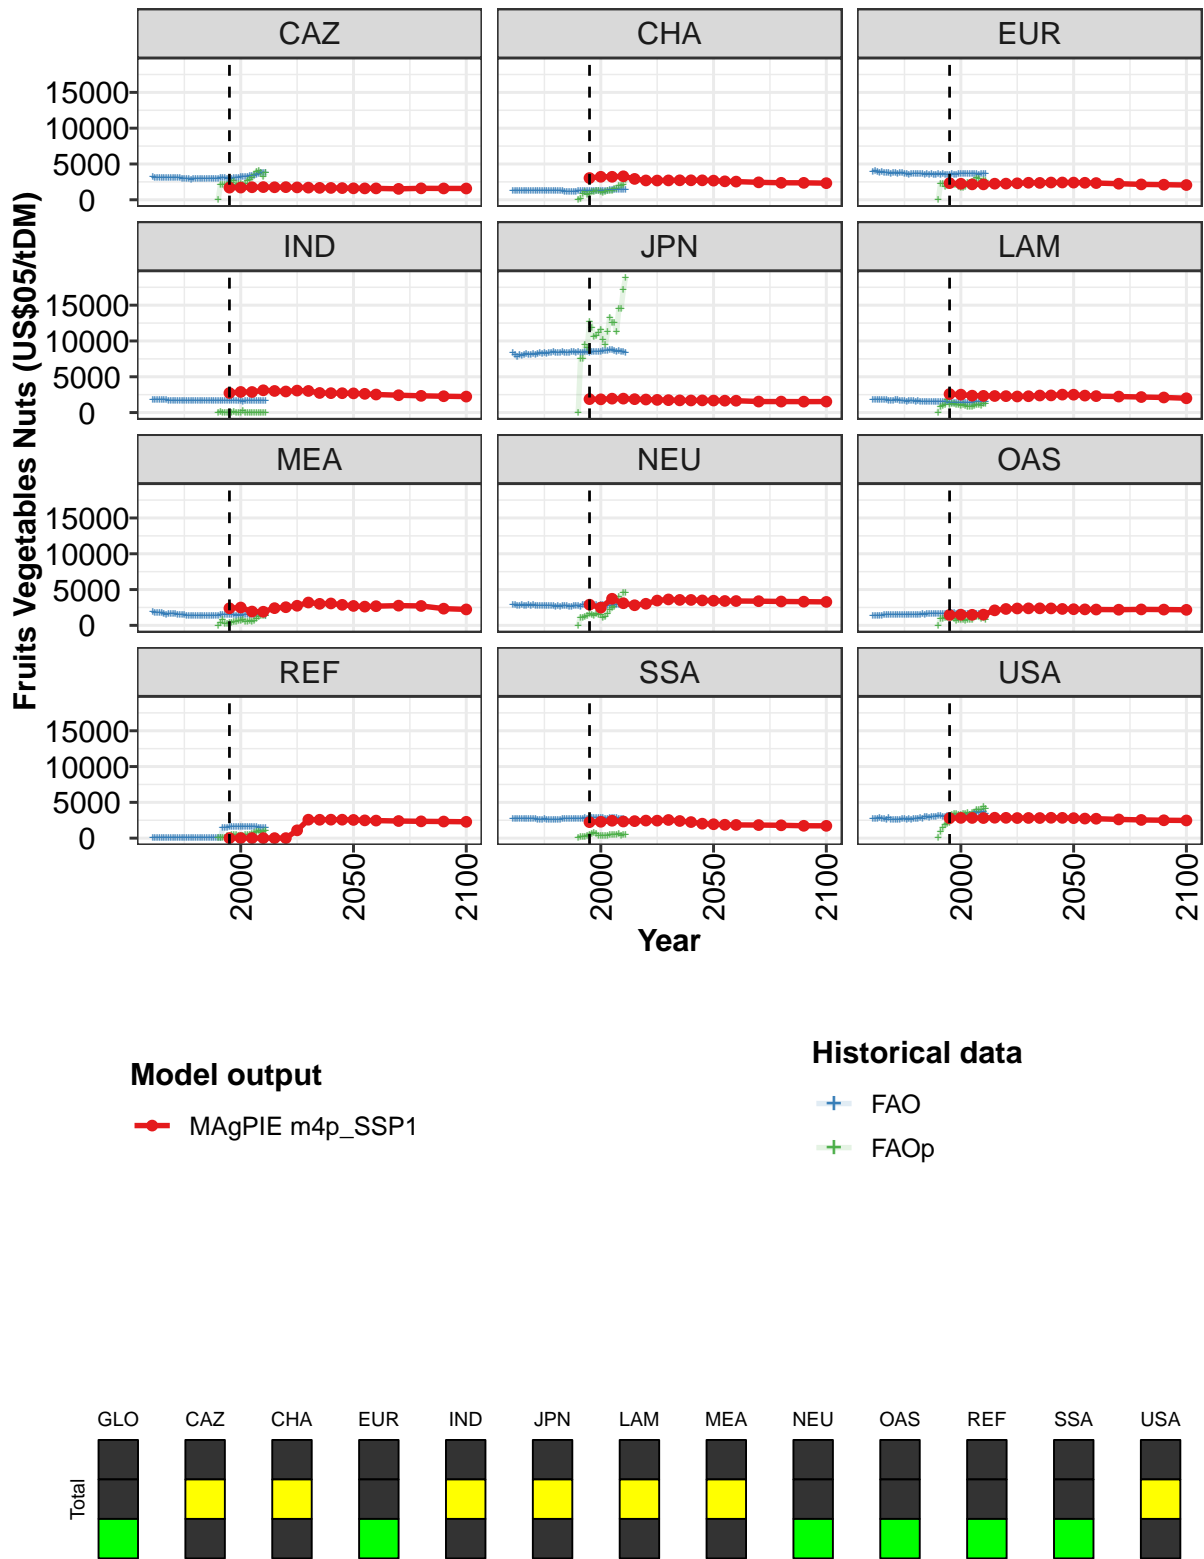

Figure 301: MAGPIE m4p\_SSP1 — Prices—Agriculture—Fruits Vegetables Nuts (US\$05/tDM)

|     | 1995 | 2000 | 2005 | 2010 | 2015 | 2020 | 2025 | 2030 | 2035 | 2040 | 2045 |
|-----|------|------|------|------|------|------|------|------|------|------|------|
| GLO | 2192 | 2393 | 2479 | 2567 | 2519 | 2489 | 2571 | 2678 | 2623 | 2609 | 2560 |
| CAZ | 1699 | 1705 | 1750 | 1772 | 1747 | 1764 | 1732 | 1699 | 1668 | 1654 | 1634 |
| CHA | 3040 | 3213 | 3214 | 3281 | 2918 | 2698 | 2688 | 2706 | 2722 | 2720 | 2718 |
| EUR | 2329 | 2237 | 2154 | 2154 | 2247 | 2257 | 2300 | 2377 | 2357 | 2410 | 2416 |
| IND | 2735 | 2882 | 2876 | 3113 | 3020 | 2945 | 3069 | 3021 | 2739 | 2713 | 2709 |
| JPN | 1880 | 1851 | 1945 | 1948 | 1873 | 1823 | 1773 | 1737 | 1705 | 1693 | 1702 |
| LAM | 2588 | 2503 | 2362 | 2334 | 2317 | 2298 | 2247 | 2284 | 2382 | 2398 | 2506 |
| MEA | 2387 | 2494 | 1932 | 1902 | 2406 | 2538 | 2739 | 3194 | 3006 | 3059 | 2870 |
| NEU | 2889 | 2477 | 3715 | 3092 | 2811 | 3018 | 3466 | 3624 | 3556 | 3552 | 3485 |
| OAS | 1456 | 1489 | 1476 | 1498 | 2098 | 2292 | 2357 | 2375 | 2381 | 2369 | 2295 |
| REF | 9    | 9    | 9    | 9    | 9    | 9    | 1095 | 2581 | 2569 | 2585 | 2580 |
| SSA | 2239 | 2287 | 2428 | 2327 | 2379 | 2455 | 2448 | 2539 | 2400 | 2248 | 2024 |
| USA | 2786 | 2833 | 2826 | 2813 | 2853 | 2840 | 2811 | 2821 | 2815 | 2847 | 2836 |

Table 1043: MAgPIE m4p\_SSP1 — Prices—Agriculture—Fruits Vegetables Nuts (US\$05/tDM) [PART 1/2]

|     | 2050 | 2055 | 2060 | 2070 | 2080 | 2090 | 2100 |
|-----|------|------|------|------|------|------|------|
| GLO | 2505 | 2429 | 2388 | 2317 | 2257 | 2175 | 2119 |
| CAZ | 1604 | 1592 | 1590 | 1523 | 1598 | 1583 | 1576 |
| CHA | 2675 | 2577 | 2538 | 2437 | 2373 | 2366 | 2324 |
| EUR | 2401 | 2374 | 2335 | 2245 | 2147 | 2109 | 2060 |
| IND | 2682 | 2618 | 2522 | 2421 | 2337 | 2282 | 2233 |
| JPN | 1682 | 1663 | 1655 | 1539 | 1535 | 1527 | 1535 |
| LAM | 2496 | 2371 | 2300 | 2237 | 2169 | 2108 | 2000 |
| MEA | 2716 | 2617 | 2678 | 2754 | 2712 | 2333 | 2228 |
| NEU | 3442 | 3408 | 3400 | 3378 | 3335 | 3309 | 3274 |
| OAS | 2257 | 2234 | 2214 | 2186 | 2226 | 2206 | 2171 |
| REF | 2549 | 2485 | 2453 | 2393 | 2349 | 2323 | 2285 |
| SSA | 1945 | 1874 | 1845 | 1828 | 1797 | 1728 | 1720 |
| USA | 2799 | 2738 | 2715 | 2617 | 2544 | 2499 | 2474 |

Table 1044: MAgPIE m4p\_SSP1 — Prices—Agriculture—Fruits Vegetables Nuts (US\$05/tDM) [PART 2/2]

|     | 1960 | 1961 | 1962 | 1963 | 1964 | 1965 | 1966 | 1967 | 1968 | 1969 | 1970 |
|-----|------|------|------|------|------|------|------|------|------|------|------|
| GLO | 2288 | 2204 | 1933 | 1959 | 2064 | 2052 | 1843 | 2440 | 2488 | 2424 | 2311 |
| CAZ |      |      |      |      |      |      |      |      |      |      |      |
| CHA |      |      |      |      |      |      |      |      |      |      |      |
| EUR |      |      |      |      |      |      |      |      |      |      |      |
| IND |      |      |      |      |      |      |      |      |      |      |      |
| JPN |      |      |      |      |      |      |      |      |      |      |      |
| LAM |      |      |      |      |      |      |      |      |      |      |      |
| MEA |      |      |      |      |      |      |      |      |      |      |      |
| NEU |      |      |      |      |      |      |      |      |      |      |      |
| OAS |      |      |      |      |      |      |      |      |      |      |      |
| REF |      |      |      |      |      |      |      |      |      |      |      |
| SSA |      |      |      |      |      |      |      |      |      |      |      |
| USA |      |      |      |      |      |      |      |      |      |      |      |

Table 1045: WBGEM — Prices—Agriculture—Fruits Vegetables Nuts (US\$05/tDM) [PART 1/6]

|     | 1971 | 1972 | 1973 | 1974 | 1975 | 1976 | 1977 | 1978 | 1979 | 1980 | 1981 |
|-----|------|------|------|------|------|------|------|------|------|------|------|
| GLO | 1928 | 1755 | 1601 | 1569 | 1712 | 1800 | 1852 | 1774 | 1960 | 1914 | 1984 |
| CAZ |      |      |      |      |      |      |      |      |      |      |      |
| CHA |      |      |      |      |      |      |      |      |      |      |      |
| EUR |      |      |      |      |      |      |      |      |      |      |      |
| IND |      |      |      |      |      |      |      |      |      |      |      |
| JPN |      |      |      |      |      |      |      |      |      |      |      |
| LAM |      |      |      |      |      |      |      |      |      |      |      |
| MEA |      |      |      |      |      |      |      |      |      |      |      |
| NEU |      |      |      |      |      |      |      |      |      |      |      |
| OAS |      |      |      |      |      |      |      |      |      |      |      |
| REF |      |      |      |      |      |      |      |      |      |      |      |
| SSA |      |      |      |      |      |      |      |      |      |      |      |
| USA |      |      |      |      |      |      |      |      |      |      |      |

Table 1046: WBGEM — Prices—Agriculture—Fruits Vegetables Nuts (US\$05/tDM) [PART 2/6]

|     | 1982 | 1983 | 1984 | 1985 | 1986 | 1987 | 1988 | 1989 | 1990 | 1991 | 1992 |
|-----|------|------|------|------|------|------|------|------|------|------|------|
| GLO | 1923 | 2088 | 1921 | 2088 | 1813 | 1812 | 1867 | 2000 | 2081 | 2117 | 1851 |
| CAZ |      |      |      |      |      |      |      |      |      |      |      |
| CHA |      |      |      |      |      |      |      |      |      |      |      |
| EUR |      |      |      |      |      |      |      |      |      |      |      |
| IND |      |      |      |      |      |      |      |      |      |      |      |
| JPN |      |      |      |      |      |      |      |      |      |      |      |
| LAM |      |      |      |      |      |      |      |      |      |      |      |
| MEA |      |      |      |      |      |      |      |      |      |      |      |
| NEU |      |      |      |      |      |      |      |      |      |      |      |
| OAS |      |      |      |      |      |      |      |      |      |      |      |
| REF |      |      |      |      |      |      |      |      |      |      |      |
| SSA |      |      |      |      |      |      |      |      |      |      |      |
| USA |      |      |      |      |      |      |      |      |      |      |      |

Table 1047: WBGEM — Prices—Agriculture—Fruits Vegetables Nuts (US\$05/tDM) [PART 3/6]

|     | 1993 | 1994 | 1995 | 1996 | 1997 | 1998 | 1999 | 2000 | 2001 | 2002 | 2003 |
|-----|------|------|------|------|------|------|------|------|------|------|------|
| GLO | 1628 | 1632 | 1706 | 1711 | 3632 | 3784 | 3312 | 3026 | 4101 | 3930 | 3722 |
| CAZ |      |      |      |      |      |      |      |      |      |      |      |
| CHA |      |      |      |      |      |      |      |      |      |      |      |
| EUR |      |      |      |      |      |      |      |      |      |      |      |
| IND |      |      |      |      |      |      |      |      |      |      |      |
| JPN |      |      |      |      |      |      |      |      |      |      |      |
| LAM |      |      |      |      |      |      |      |      |      |      |      |
| MEA |      |      |      |      |      |      |      |      |      |      |      |
| NEU |      |      |      |      |      |      |      |      |      |      |      |
| OAS |      |      |      |      |      |      |      |      |      |      |      |
| REF |      |      |      |      |      |      |      |      |      |      |      |
| SSA |      |      |      |      |      |      |      |      |      |      |      |
| USA |      |      |      |      |      |      |      |      |      |      |      |

Table 1048: WBGEM — Prices—Agriculture—Fruits Vegetables Nuts (US\$05/tDM) [PART 4/6]

|     | 2004 | 2005 | 2006 | 2007 | 2008 | 2009 | 2010 | 2011 | 2012 | 2013 | 2014 |
|-----|------|------|------|------|------|------|------|------|------|------|------|
| GLO | 4294 | 4851 | 4291 | 4491 | 4901 | 4828 | 4662 | 4316 | 4300 | 4263 | 4093 |
| CAZ |      |      |      |      |      |      |      |      |      |      |      |
| CHA |      |      |      |      |      |      |      |      |      |      |      |
| EUR |      |      |      |      |      |      |      |      |      |      |      |
| IND |      |      |      |      |      |      |      |      |      |      |      |
| JPN |      |      |      |      |      |      |      |      |      |      |      |
| LAM |      |      |      |      |      |      |      |      |      |      |      |
| MEA |      |      |      |      |      |      |      |      |      |      |      |
| NEU |      |      |      |      |      |      |      |      |      |      |      |
| OAS |      |      |      |      |      |      |      |      |      |      |      |
| REF |      |      |      |      |      |      |      |      |      |      |      |
| SSA |      |      |      |      |      |      |      |      |      |      |      |
| USA |      |      |      |      |      |      |      |      |      |      |      |

Table 1049: WBGEM — Prices—Agriculture—Fruits Vegetables Nuts (US\$05/tDM) [PART 5/6]

|     | 2015 | 2016 |
|-----|------|------|
| GLO | 4170 | 4788 |
| CAZ |      |      |
| CHA |      |      |
| EUR |      |      |
| IND |      |      |
| JPN |      |      |
| LAM |      |      |
| MEA |      |      |
| NEU |      |      |
| OAS |      |      |
| REF |      |      |
| SSA |      |      |
| USA |      |      |

Table 1050: WBGEM — Prices—Agriculture—Fruits Vegetables Nuts (US\$05/tDM) [PART 6/6]

|     | 1961 | 1962 | 1963 | 1964 | 1965 | 1966 | 1967 | 1968 | 1969 | 1970 | 1971 |
|-----|------|------|------|------|------|------|------|------|------|------|------|
| GLO | 2556 | 2603 | 2606 | 2607 | 2607 | 2579 | 2546 | 2590 | 2513 | 2588 | 2520 |
| CAZ | 3160 | 3053 | 3126 | 3129 | 3018 | 3083 | 3054 | 3030 | 3048 | 3053 | 3088 |
| CHA | 1308 | 1254 | 1280 | 1294 | 1292 | 1290 | 1287 | 1273 | 1278 | 1275 | 1259 |
| EUR | 3876 | 4000 | 3864 | 3835 | 3919 | 3773 | 3756 | 3816 | 3653 | 3831 | 3763 |
| IND | 1788 | 1774 | 1769 | 1757 | 1732 | 1728 | 1731 | 1715 | 1707 | 1713 | 1711 |
| JPN | 8312 | 8009 | 7733 | 8134 | 7981 | 8034 | 8193 | 8070 | 8096 | 8172 | 8101 |
| LAM | 1846 | 1827 | 1803 | 1750 | 1804 | 1742 | 1767 | 1705 | 1705 | 1705 | 1738 |
| MEA | 1847 | 1716 | 1729 | 1693 | 1736 | 1554 | 1524 | 1629 | 1553 | 1583 | 1606 |
| NEU | 2808 | 2850 | 2779 | 2799 | 2814 | 2781 | 2787 | 2822 | 2679 | 2858 | 2781 |
| OAS | 1343 | 1375 | 1373 | 1400 | 1404 | 1426 | 1420 | 1448 | 1452 | 1459 | 1456 |
| REF | 0    | 0    | 0    | 0    | 0    | 0    | 0    | 0    | 0    | 0    | 0    |
| SSA | 2712 | 2672 | 2710 | 2728 | 2697 | 2697 | 2645 | 2653 | 2659 | 2726 | 2709 |
| USA | 2689 | 2659 | 2746 | 2785 | 2709 | 2664 | 2590 | 2797 | 2616 | 2596 | 2627 |

Table 1051: FAO — Prices—Agriculture—Fruits Vegetables Nuts (US\$05/tDM) [PART 1/5]

|     | 1972 | 1973 | 1974 | 1975 | 1976 | 1977 | 1978 | 1979 | 1980 | 1981 | 1982 |
|-----|------|------|------|------|------|------|------|------|------|------|------|
| GLO | 2527 | 2508 | 2484 | 2437 | 2388 | 2368 | 2342 | 2409 | 2332 | 2276 | 2300 |
| CAZ | 3074 | 3077 | 2981 | 2966 | 2919 | 2905 | 2847 | 2902 | 2925 | 2901 | 2905 |
| CHA | 1295 | 1300 | 1295 | 1284 | 1283 | 1271 | 1263 | 1257 | 1256 | 1249 | 1234 |
| EUR | 3694 | 3755 | 3749 | 3636 | 3674 | 3554 | 3587 | 3700 | 3631 | 3566 | 3608 |
| IND | 1695 | 1702 | 1693 | 1691 | 1683 | 1682 | 1685 | 1690 | 1693 | 1687 | 1691 |
| JPN | 8166 | 8294 | 8195 | 8321 | 8242 | 8302 | 8378 | 8464 | 8348 | 8319 | 8357 |
| LAM | 1717 | 1616 | 1680 | 1636 | 1568 | 1628 | 1651 | 1655 | 1562 | 1589 | 1558 |
| MEA | 1508 | 1535 | 1498 | 1428 | 1366 | 1342 | 1343 | 1361 | 1309 | 1314 | 1279 |
| NEU | 2760 | 2766 | 2739 | 2773 | 2686 | 2717 | 2729 | 2681 | 2641 | 2676 | 2656 |
| OAS | 1487 | 1490 | 1489 | 1439 | 1457 | 1514 | 1470 | 1542 | 1468 | 1481 | 1496 |
| REF | 0    | 0    | 0    | 0    | 0    | 0    | 0    | 0    | 0    | 0    | 0    |
| SSA | 2632 | 2630 | 2574 | 2642 | 2616 | 2599 | 2573 | 2620 | 2620 | 2599 | 2596 |
| USA | 2599 | 2618 | 2681 | 2717 | 2625 | 2688 | 2613 | 2767 | 2638 | 2710 | 2849 |

Table 1052: FAO — Prices—Agriculture—Fruits Vegetables Nuts (US\$05/tDM) [PART 2/5]

|     | 1983 | 1984 | 1985 | 1986 | 1987 | 1988 | 1989 | 1990 | 1991 | 1992 | 1993 |
|-----|------|------|------|------|------|------|------|------|------|------|------|
| GLO | 2270 | 2222 | 2215 | 2153 | 2168 | 2123 | 2147 | 2145 | 2116 | 2213 | 2149 |
| CAZ | 2934 | 2891 | 2978 | 2994 | 2984 | 2995 | 2949 | 2939 | 3024 | 3035 | 3037 |
| CHA | 1219 | 1177 | 1167 | 1126 | 1142 | 1138 | 1152 | 1192 | 1225 | 1213 | 1223 |
| EUR | 3593 | 3554 | 3592 | 3522 | 3592 | 3455 | 3529 | 3566 | 3470 | 3569 | 3529 |
| IND | 1692 | 1685 | 1701 | 1697 | 1691 | 1651 | 1677 | 1668 | 1651 | 1670 | 1641 |
| JPN | 8446 | 8329 | 8357 | 8332 | 8431 | 8440 | 8368 | 8501 | 8403 | 8407 | 8461 |
| LAM | 1558 | 1535 | 1523 | 1509 | 1527 | 1494 | 1451 | 1462 | 1456 | 1450 | 1444 |
| MEA | 1305 | 1305 | 1278 | 1285 | 1310 | 1343 | 1397 | 1341 | 1444 | 1414 | 1462 |
| NEU | 2732 | 2702 | 2666 | 2631 | 2618 | 2721 | 2775 | 2702 | 2620 | 2917 | 2884 |
| OAS | 1557 | 1498 | 1554 | 1568 | 1583 | 1617 | 1634 | 1611 | 1645 | 1668 | 1647 |
| REF | 0    | 0    | 0    | 0    | 0    | 0    | 0    | 0    | 0    | 1406 | 1443 |
| SSA | 2666 | 2685 | 2697 | 2673 | 2667 | 2720 | 2731 | 2696 | 2684 | 2679 | 2776 |
| USA | 2764 | 3020 | 2974 | 2909 | 3022 | 2994 | 2988 | 3156 | 3122 | 3007 | 2947 |

Table 1053: FAO — Prices—Agriculture—Fruits Vegetables Nuts (US\$05/tDM) [PART 3/5]

|     | 1994 | 1995 | 1996 | 1997 | 1998 | 1999 | 2000 | 2001 | 2002 | 2003 | 2004 |
|-----|------|------|------|------|------|------|------|------|------|------|------|
| GLO | 2147 | 2114 | 2100 | 2075 | 2044 | 2054 | 1986 | 1954 | 1943 | 1938 | 1959 |
| CAZ | 2988 | 2988 | 2983 | 3072 | 3098 | 3109 | 3166 | 3227 | 3246 | 3277 | 3282 |
| CHA | 1256 | 1284 | 1291 | 1290 | 1315 | 1316 | 1248 | 1244 | 1256 | 1290 | 1325 |
| EUR | 3539 | 3558 | 3584 | 3551 | 3546 | 3586 | 3694 | 3634 | 3682 | 3591 | 3580 |
| IND | 1683 | 1672 | 1699 | 1700 | 1616 | 1597 | 1598 | 1576 | 1604 | 1602 | 1657 |
| JPN | 8480 | 8411 | 8443 | 8529 | 8466 | 8471 | 8524 | 8568 | 8585 | 8639 | 8719 |
| LAM | 1469 | 1430 | 1404 | 1379 | 1430 | 1389 | 1380 | 1432 | 1409 | 1416 | 1405 |
| MEA | 1446 | 1447 | 1446 | 1462 | 1399 | 1425 | 1381 | 1459 | 1443 | 1495 | 1483 |
| NEU | 2893 | 2812 | 2810 | 2830 | 2807 | 2770 | 2807 | 2806 | 2757 | 2780 | 2704 |
| OAS | 1659 | 1753 | 1723 | 1710 | 1682 | 1728 | 1699 | 1674 | 1678 | 1672 | 1673 |
| REF | 1481 | 1531 | 1545 | 1519 | 1586 | 1562 | 1613 | 1604 | 1638 | 1603 | 1597 |
| SSA | 2769 | 2779 | 2777 | 2803 | 2831 | 2832 | 2856 | 2818 | 2770 | 2768 | 2842 |
| USA | 3055 | 2926 | 2957 | 2959 | 2842 | 3195 | 3021 | 3040 | 3179 | 3158 | 3207 |

Table 1054: FAO — Prices—Agriculture—Fruits Vegetables Nuts (US\$05/tDM) [PART 4/5]

|     | 2005 | 2006 | 2007 | 2008 | 2009 | 2010 | 2011 |
|-----|------|------|------|------|------|------|------|
| GLO | 1948 | 1927 | 1924 | 1932 | 1936 | 1898 | 1867 |
| CAZ | 3385 | 3410 | 3544 | 3570 | 3706 | 3734 | 3829 |
| CHA | 1338 | 1341 | 1365 | 1412 | 1426 | 1408 | 1423 |
| EUR | 3616 | 3597 | 3578 | 3528 | 3594 | 3579 | 3605 |
| IND | 1617 | 1601 | 1593 | 1604 | 1602 | 1581 | 1580 |
| JPN | 8738 | 8571 | 8552 | 8625 | 8512 | 8510 | 8412 |
| LAM | 1420 | 1451 | 1444 | 1462 | 1445 | 1459 | 1472 |
| MEA | 1482 | 1513 | 1499 | 1569 | 1568 | 1557 | 1366 |
| NEU | 2799 | 2837 | 2822 | 2882 | 2840 | 2877 | 2823 |
| OAS | 1671 | 1642 | 1648 | 1633 | 1603 | 1553 | 1537 |
| REF | 1615 | 1556 | 1530 | 1452 | 1458 | 1423 | 1385 |
| SSA | 2824 | 2787 | 2783 | 2769 | 2731 | 2656 | 2618 |
| USA | 3305 | 3368 | 3636 | 3562 | 3610 | 3737 | 3452 |

Table 1055: FAO — Prices—Agriculture—Fruits Vegetables Nuts (US\$05/tDM) [PART 5/5]

|     | 1990 | 1991 | 1992 | 1993 | 1994 | 1995  | 1996  | 1997  | 1998  | 1999  | 2000  |
|-----|------|------|------|------|------|-------|-------|-------|-------|-------|-------|
| GLO | 0    | 848  | 1112 | 1187 | 1117 | 1242  | 1387  | 1308  | 1332  | 1291  | 1178  |
| CAZ | 0    | 2083 | 2075 | 2030 | 2135 | 2313  | 2310  | 2595  | 2111  | 2265  | 2203  |
| CHA | 0    | 100  | 870  | 1085 | 735  | 807   | 1164  | 1057  | 1258  | 1260  | 1055  |
| EUR | 0    | 2264 | 2191 | 1880 | 2015 | 2286  | 2198  | 2143  | 2125  | 1871  | 1688  |
| IND | 0    | 131  | 29   | 30   | 32   | 31    | 37    | 38    | 34    | 30    | 29    |
| JPN | 0    | 7476 | 7502 | 9520 | 8980 | 12627 | 11838 | 10565 | 10749 | 11113 | 11550 |
| LAM | 0    | 864  | 964  | 1096 | 1775 | 1085  | 1194  | 1184  | 1142  | 1031  | 1009  |
| MEA | 0    | 341  | 758  | 247  | 284  | 401   | 418   | 459   | 533   | 643   | 701   |
| NEU | 0    | 1128 | 1116 | 1212 | 1269 | 1586  | 1494  | 1403  | 1676  | 1441  | 1454  |
| OAS | 0    | 874  | 950  | 1034 | 994  | 1132  | 1095  | 895   | 705   | 750   | 801   |
| REF | 0    | 0    | 19   | 99   | 311  | 271   | 406   | 523   | 479   | 380   | 334   |
| SSA | 2    | 131  | 144  | 176  | 295  | 456   | 613   | 699   | 616   | 310   | 265   |
| USA | 0    | 874  | 1386 | 1929 | 2062 | 2213  | 3280  | 3395  | 3413  | 3312  | 3261  |

Table 1056: FAOp — Prices—Agriculture—Fruits Vegetables Nuts (US\$05/tDM) [PART 1/3]

|     | 2001  | 2002 | 2003  | 2004  | 2005  | 2006  | 2007  | 2008  | 2009  | 2010  | 2011  |
|-----|-------|------|-------|-------|-------|-------|-------|-------|-------|-------|-------|
| GLO | 1133  | 1150 | 1247  | 1304  | 1320  | 1505  | 1601  | 1867  | 1757  | 1901  | 2245  |
| CAZ | 2146  | 2247 | 2699  | 2758  | 3027  | 3442  | 3941  | 4023  | 3796  | 3242  | 3770  |
| CHA | 1011  | 1129 | 1186  | 1206  | 1224  | 1470  | 1571  | 1993  | 1909  | 2050  | 2744  |
| EUR | 1724  | 1809 | 2379  | 2364  | 2541  | 2664  | 3088  | 2965  | 2575  | 2735  | 2713  |
| IND | 210   | 4    | 6     | 8     | 7     | 8     | 0     | 0     | 0     | 0     | 0     |
| JPN | 10151 | 9511 | 11282 | 13285 | 12554 | 12582 | 11323 | 14460 | 14496 | 17195 | 18859 |
| LAM | 1034  | 936  | 817   | 841   | 856   | 916   | 1031  | 1094  | 1011  | 1271  | 1290  |
| MEA | 777   | 559  | 558   | 590   | 564   | 696   | 987   | 1256  | 1303  | 1316  | 1371  |
| NEU | 1083  | 1235 | 1641  | 2128  | 2469  | 2662  | 3297  | 3935  | 3406  | 4556  | 4619  |
| OAS | 756   | 681  | 755   | 741   | 725   | 1345  | 1161  | 1131  | 975   | 1104  | 708   |
| REF | 371   | 411  | 462   | 539   | 581   | 705   | 891   | 960   | 741   | 842   | 1026  |
| SSA | 270   | 291  | 370   | 404   | 431   | 476   | 493   | 570   | 390   | 451   | 488   |
| USA | 3393  | 3400 | 3541  | 3310  | 3486  | 3494  | 3983  | 3988  | 4007  | 4343  | 4106  |

Table 1057: FAOp — Prices—Agriculture—Fruits Vegetables Nuts (US\$05/tDM) [PART 2/3]



|     | 2005  |
|-----|-------|
| GLO | 10696 |
| CAZ |       |
| CHA |       |
| EUR |       |
| IND |       |
| JPN |       |
| LAM |       |
| MEA |       |
| NEU |       |
| OAS |       |
| REF |       |
| SSA |       |
| USA |       |

Table 1058: IniFoodPrice — Prices—Agriculture—Fruits Vegetables Nuts (US\$05/tDM)

36.12 Groundnuts

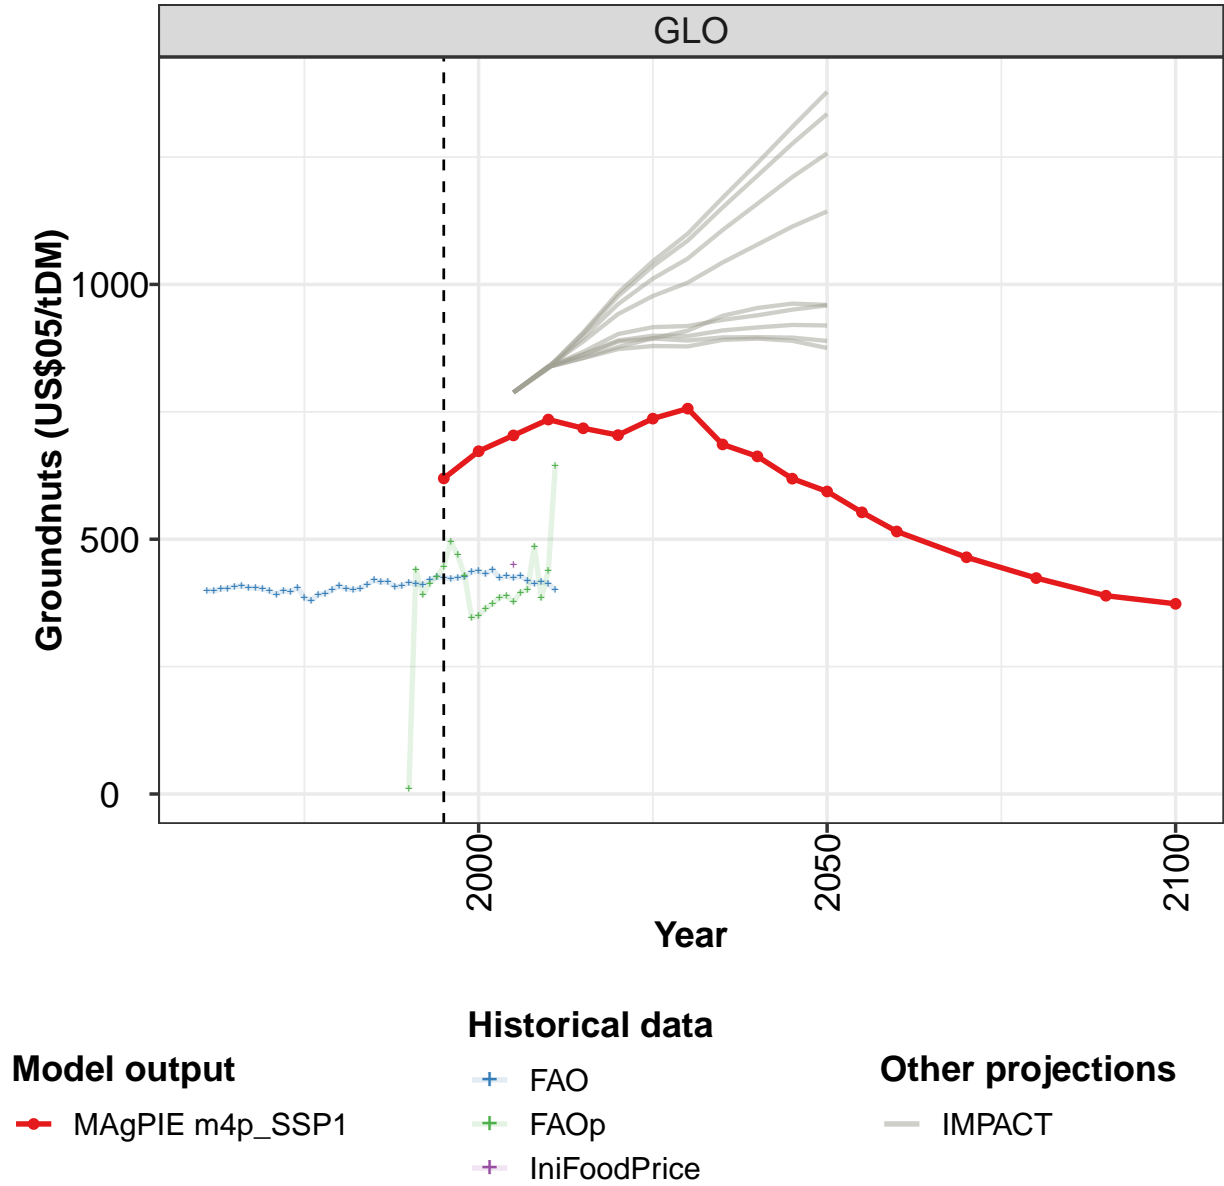

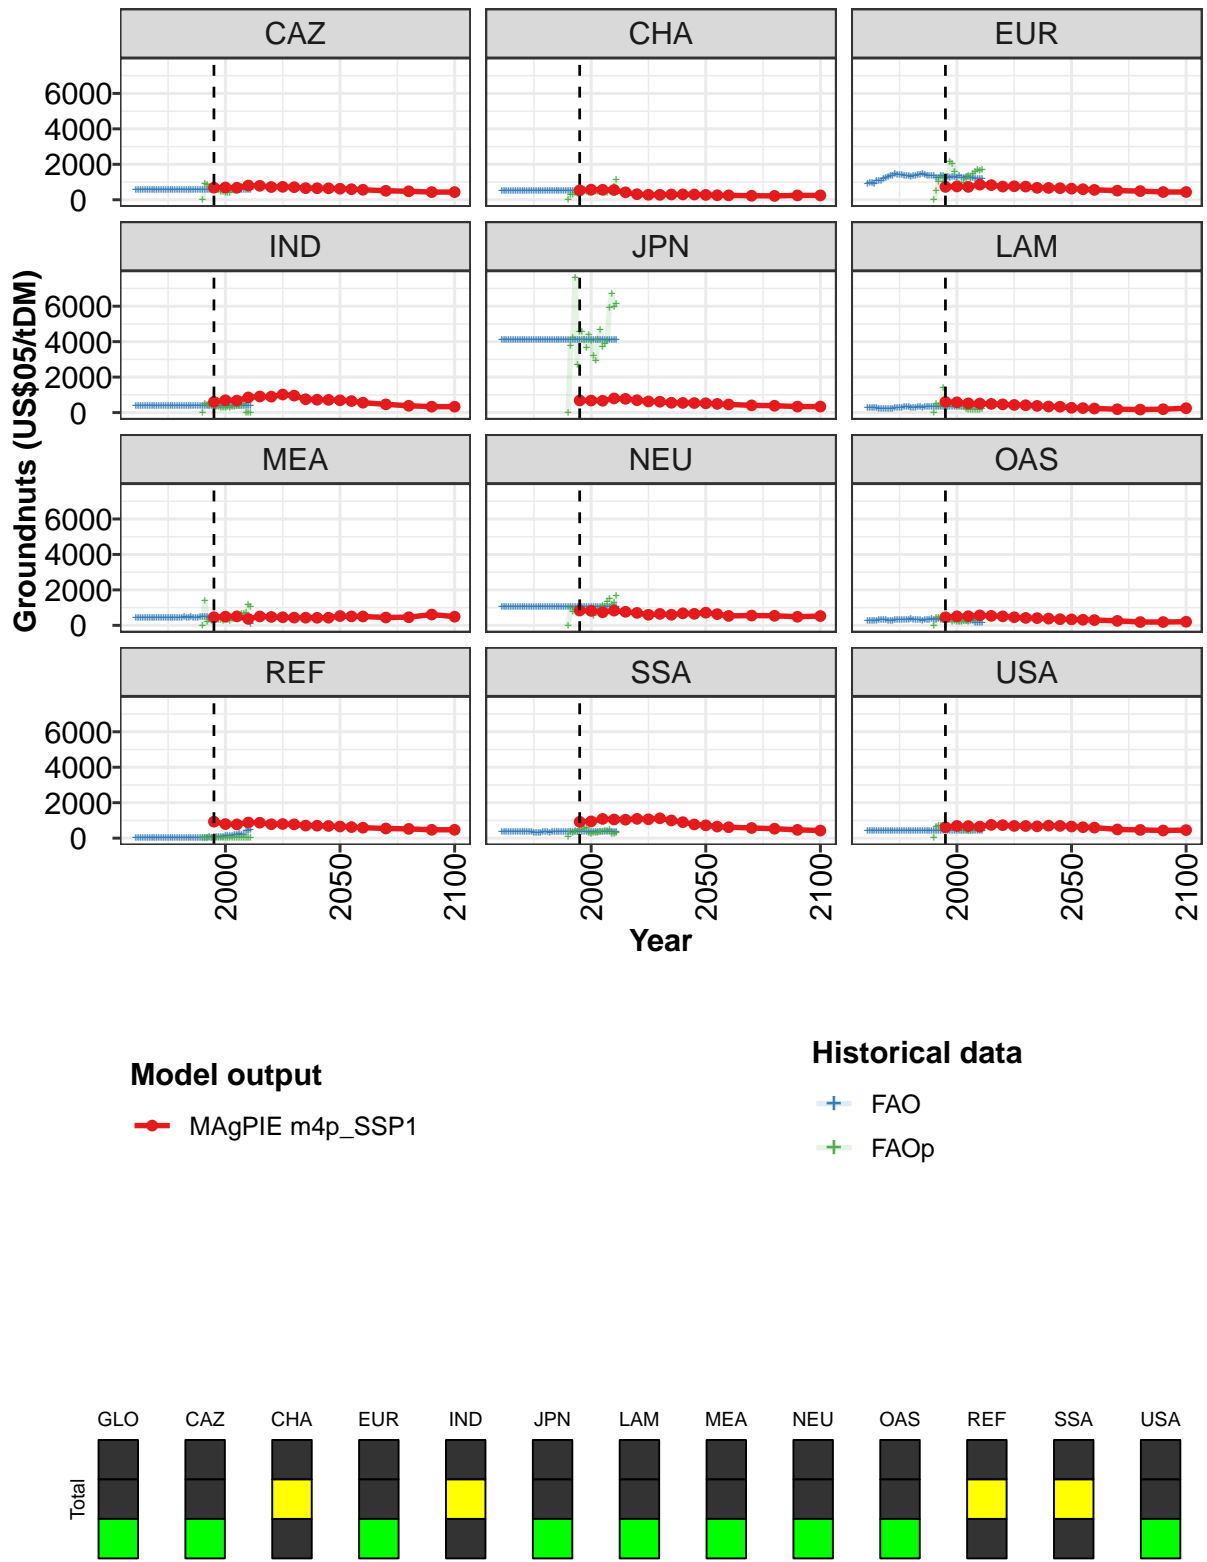

Figure 302: MAGPIE m4p\_SSP1 — Prices—Agriculture—Groundnuts (US\$05/tDM)

|     | 1995 | 2000 | 2005 | 2010 | 2015 | 2020 | 2025 | 2030 | 2035 | 2040 | 2045 |
|-----|------|------|------|------|------|------|------|------|------|------|------|
| GLO | 619  | 673  | 704  | 735  | 718  | 704  | 737  | 756  | 686  | 663  | 619  |
| CAZ | 682  | 695  | 679  | 803  | 789  | 719  | 732  | 711  | 656  | 651  | 645  |
| CHA | 533  | 572  | 565  | 552  | 421  | 315  | 285  | 280  | 300  | 303  | 298  |
| EUR | 728  | 752  | 730  | 853  | 828  | 745  | 763  | 744  | 674  | 669  | 654  |
| IND | 604  | 697  | 676  | 854  | 908  | 897  | 1018 | 956  | 751  | 725  | 716  |
| JPN | 684  | 682  | 668  | 799  | 772  | 696  | 627  | 612  | 553  | 545  | 538  |
| LAM | 604  | 577  | 519  | 512  | 489  | 462  | 429  | 414  | 377  | 342  | 331  |
| MEA | 460  | 492  | 508  | 365  | 504  | 476  | 456  | 437  | 433  | 427  | 433  |
| NEU | 837  | 817  | 738  | 832  | 763  | 704  | 598  | 647  | 600  | 680  | 652  |
| OAS | 455  | 509  | 517  | 563  | 536  | 508  | 459  | 419  | 408  | 383  | 349  |
| REF | 931  | 794  | 776  | 882  | 870  | 787  | 799  | 779  | 710  | 702  | 686  |
| SSA | 922  | 943  | 1086 | 1055 | 1042 | 1090 | 1066 | 1121 | 1000 | 903  | 774  |
| USA | 616  | 691  | 680  | 649  | 748  | 733  | 691  | 687  | 666  | 707  | 692  |

Table 1059: MAgPIE m4p\_SSP1 — Prices—Agriculture—Groundnuts (US\$05/tDM) [PART 1/2]

|     | 2050 | 2055 | 2060 | 2070 | 2080 | 2090 | 2100 |
|-----|------|------|------|------|------|------|------|
| GLO | 594  | 553  | 515  | 465  | 424  | 389  | 373  |
| CAZ | 624  | 596  | 565  | 506  | 478  | 434  | 433  |
| CHA | 276  | 256  | 249  | 229  | 218  | 248  | 248  |
| EUR | 629  | 595  | 559  | 514  | 490  | 437  | 438  |
| IND | 694  | 651  | 558  | 464  | 384  | 333  | 332  |
| JPN | 523  | 490  | 457  | 407  | 385  | 338  | 340  |
| LAM | 271  | 253  | 229  | 190  | 169  | 190  | 246  |
| MEA | 526  | 505  | 501  | 443  | 459  | 611  | 491  |
| NEU | 717  | 635  | 533  | 553  | 542  | 484  | 526  |
| OAS | 336  | 318  | 300  | 253  | 188  | 189  | 204  |
| REF | 660  | 625  | 590  | 545  | 522  | 472  | 472  |
| SSA | 722  | 653  | 619  | 574  | 532  | 467  | 429  |
| USA | 659  | 618  | 597  | 491  | 465  | 433  | 454  |

Table 1060: MAgPIE m4p\_SSP1 — Prices—Agriculture—Groundnuts (US\$05/tDM) [PART 2/2]

|     | 1961 | 1962 | 1963 | 1964 | 1965 | 1966 | 1967 | 1968 | 1969 | 1970 | 1971 |
|-----|------|------|------|------|------|------|------|------|------|------|------|
| GLO | 399  | 398  | 402  | 404  | 407  | 408  | 405  | 405  | 403  | 398  | 392  |
| CAZ | 543  | 544  | 544  | 544  | 543  | 543  | 543  | 544  | 543  | 543  | 543  |
| CHA | 481  | 487  | 497  | 496  | 497  | 504  | 498  | 501  | 502  | 501  | 507  |
| EUR | 899  | 974  | 953  | 915  | 1084 | 1058 | 1073 | 1170 | 1219 | 1271 | 1354 |
| IND | 359  | 359  | 359  | 359  | 359  | 359  | 359  | 359  | 359  | 359  | 359  |
| JPN | 4082 | 4082 | 4082 | 4082 | 4082 | 4082 | 4082 | 4082 | 4082 | 4082 | 4082 |
| LAM | 246  | 254  | 248  | 278  | 243  | 231  | 233  | 229  | 227  | 219  | 236  |
| MEA | 427  | 421  | 419  | 409  | 418  | 412  | 410  | 408  | 409  | 425  | 424  |
| NEU | 1030 | 1030 | 1030 | 1030 | 1030 | 1030 | 1030 | 1030 | 1030 | 1030 | 1030 |
| OAS | 265  | 262  | 245  | 281  | 282  | 317  | 320  | 308  | 295  | 284  | 269  |
| REF | 0    | 0    | 0    | 0    | 0    | 0    | 0    | 0    | 0    | 0    | 0    |
| SSA | 361  | 366  | 371  | 369  | 374  | 367  | 366  | 373  | 374  | 367  | 359  |
| USA | 421  | 421  | 421  | 421  | 421  | 421  | 421  | 421  | 421  | 421  | 421  |

Table 1061: FAO — Prices—Agriculture—Groundnuts (US\$05/tDM) [PART 1/5]

|     | 1972 | 1973 | 1974 | 1975 | 1976 | 1977 | 1978 | 1979 | 1980 | 1981 | 1982 |
|-----|------|------|------|------|------|------|------|------|------|------|------|
| GLO | 399  | 397  | 406  | 385  | 380  | 392  | 393  | 400  | 408  | 403  | 401  |
| CAZ | 543  | 543  | 543  | 543  | 543  | 543  | 544  | 543  | 543  | 543  | 543  |
| CHA | 506  | 506  | 509  | 509  | 505  | 509  | 509  | 513  | 517  | 518  | 518  |
| EUR | 1360 | 1456 | 1431 | 1401 | 1395 | 1358 | 1327 | 1344 | 1323 | 1341 | 1349 |
| IND | 359  | 359  | 359  | 359  | 359  | 359  | 359  | 359  | 359  | 359  | 359  |
| JPN | 4082 | 4082 | 4082 | 4082 | 4082 | 4082 | 4082 | 4082 | 4082 | 4082 | 4082 |
| LAM | 222  | 271  | 290  | 291  | 265  | 322  | 327  | 297  | 268  | 284  | 288  |
| MEA | 412  | 407  | 411  | 417  | 418  | 412  | 425  | 421  | 428  | 438  | 457  |
| NEU | 1030 | 1030 | 1030 | 1030 | 1030 | 1030 | 1030 | 1030 | 1030 | 1030 | 1030 |
| OAS | 274  | 298  | 300  | 308  | 306  | 320  | 318  | 335  | 346  | 325  | 298  |
| REF | 0    | 0    | 0    | 0    | 0    | 0    | 0    | 0    | 0    | 0    | 0    |
| SSA | 365  | 346  | 376  | 316  | 305  | 325  | 330  | 332  | 348  | 337  | 325  |
| USA | 421  | 421  | 421  | 421  | 421  | 421  | 421  | 421  | 421  | 421  | 421  |

Table 1062: FAO — Prices—Agriculture—Groundnuts (US\$05/tDM) [PART 2/5]

|     | 1983 | 1984 | 1985 | 1986 | 1987 | 1988 | 1989 | 1990 | 1991 | 1992 | 1993 |
|-----|------|------|------|------|------|------|------|------|------|------|------|
| GLO | 403  | 412  | 420  | 416  | 417  | 407  | 408  | 415  | 412  | 411  | 421  |
| CAZ | 543  | 543  | 543  | 543  | 543  | 543  | 543  | 543  | 543  | 544  | 543  |
| CHA | 521  | 520  | 522  | 522  | 520  | 521  | 523  | 524  | 522  | 522  | 524  |
| EUR | 1391 | 1435 | 1490 | 1422 | 1367 | 1377 | 1377 | 1342 | 1239 | 1253 | 1340 |
| IND | 359  | 359  | 359  | 359  | 359  | 359  | 359  | 359  | 359  | 359  | 359  |
| JPN | 4082 | 4082 | 4082 | 4082 | 4082 | 4082 | 4082 | 4082 | 4083 | 4082 | 4082 |
| LAM | 310  | 316  | 296  | 326  | 333  | 347  | 345  | 335  | 339  | 323  | 317  |
| MEA | 448  | 452  | 461  | 448  | 445  | 450  | 461  | 485  | 474  | 458  | 452  |
| NEU | 1030 | 1030 | 1030 | 1030 | 1030 | 1030 | 1030 | 1030 | 1030 | 1030 | 1030 |
| OAS | 306  | 308  | 286  | 319  | 314  | 328  | 344  | 333  | 328  | 353  | 328  |
| REF | 0    | 0    | 0    | 0    | 0    | 0    | 0    | 0    | 0    | 39   | 50   |
| SSA | 337  | 343  | 340  | 347  | 339  | 353  | 339  | 339  | 338  | 343  | 349  |
| USA | 421  | 421  | 421  | 421  | 421  | 421  | 421  | 421  | 421  | 421  | 421  |

Table 1063: FAO — Prices—Agriculture—Groundnuts (US\$05/tDM) [PART 3/5]

|     | 1994 | 1995 | 1996 | 1997 | 1998 | 1999 | 2000 | 2001 | 2002 | 2003 | 2004 |
|-----|------|------|------|------|------|------|------|------|------|------|------|
| GLO | 426  | 424  | 423  | 424  | 426  | 436  | 437  | 431  | 440  | 424  | 428  |
| CAZ | 543  | 544  | 544  | 543  | 543  | 543  | 543  | 544  | 543  | 543  | 544  |
| CHA | 525  | 524  | 525  | 525  | 526  | 526  | 526  | 527  | 526  | 526  | 527  |
| EUR | 1342 | 1222 | 1278 | 1246 | 1302 | 1283 | 1260 | 1331 | 1264 | 1253 | 1273 |
| IND | 359  | 359  | 359  | 359  | 359  | 359  | 359  | 359  | 359  | 359  | 359  |
| JPN | 4082 | 4082 | 4082 | 4082 | 4082 | 4082 | 4082 | 4083 | 4082 | 4083 | 4082 |
| LAM | 309  | 307  | 335  | 339  | 336  | 339  | 336  | 332  | 311  | 313  | 310  |
| MEA | 433  | 425  | 423  | 429  | 439  | 425  | 430  | 435  | 424  | 431  | 442  |
| NEU | 1030 | 1030 | 1030 | 1030 | 1030 | 1030 | 1030 | 1030 | 1030 | 1030 | 1030 |
| OAS | 322  | 308  | 302  | 300  | 300  | 301  | 291  | 278  | 273  | 268  | 260  |
| REF | 45   | 60   | 53   | 85   | 87   | 77   | 134  | 111  | 143  | 109  | 218  |
| SSA | 355  | 349  | 375  | 368  | 369  | 374  | 375  | 360  | 373  | 363  | 368  |
| USA | 421  | 421  | 421  | 421  | 421  | 421  | 421  | 421  | 421  | 421  | 421  |

Table 1064: FAO — Prices—Agriculture—Groundnuts (US\$05/tDM) [PART 4/5]

|     | 2005 | 2006 | 2007 | 2008 | 2009 | 2010 | 2011 |
|-----|------|------|------|------|------|------|------|
| GLO | 424  | 428  | 418  | 413  | 416  | 413  | 400  |
| CAZ | 544  | 543  | 543  | 543  | 543  | 544  | 543  |
| CHA | 527  | 526  | 527  | 527  | 527  | 527  | 527  |
| EUR | 1278 | 1259 | 1235 | 1167 | 1185 | 1187 | 1165 |
| IND | 359  | 359  | 359  | 359  | 359  | 359  | 359  |
| JPN | 4082 | 4082 | 4083 | 4082 | 4082 | 4082 | 4082 |
| LAM | 299  | 304  | 320  | 314  | 326  | 324  | 320  |
| MEA | 448  | 448  | 450  | 433  | 430  | 435  | 105  |
| NEU | 1030 | 1030 | 1030 | 1030 | 1030 | 1030 | 1030 |
| OAS | 250  | 253  | 242  | 152  | 145  | 150  | 146  |
| REF | 176  | 269  | 204  | 188  | 402  | 424  | 457  |
| SSA | 373  | 385  | 369  | 365  | 366  | 368  | 343  |
| USA | 421  | 421  | 421  | 421  | 421  | 421  | 421  |

Table 1065: FAO — Prices—Agriculture—Groundnuts (US\$05/tDM) [PART 5/5]

|     | 1990 | 1991 | 1992 | 1993 | 1994 | 1995 | 1996 | 1997 | 1998 | 1999 | 2000 |
|-----|------|------|------|------|------|------|------|------|------|------|------|
| GLO | 10   | 440  | 391  | 413  | 426  | 446  | 495  | 469  | 427  | 346  | 350  |
| CAZ | 0    | 908  | 828  | 735  | 586  | 587  | 608  | 584  | 448  | 453  | 413  |
| CHA | 0    | 309  | 307  | 384  | 359  | 418  | 539  | 541  | 463  | 379  | 401  |
| EUR | 0    | 481  | 1024 | 1294 | 1031 | 1297 | 859  | 2168 | 2006 | 1594 | 729  |
| IND | 0    | 488  | 419  | 376  | 420  | 424  | 354  | 330  | 268  | 285  | 289  |
| JPN | 0    | 3787 | 4235 | 7615 | 2717 | 4545 | 4565 | 4091 | 3646 | 4382 | 4029 |
| LAM | 0    | 480  | 370  | 390  | 1416 | 436  | 450  | 462  | 449  | 395  | 418  |
| MEA | 0    | 1363 | 201  | 289  | 257  | 278  | 301  | 290  | 329  | 258  | 398  |
| NEU | 0    | 982  | 792  | 870  | 741  | 863  | 881  | 826  | 900  | 774  | 860  |
| OAS | 0    | 400  | 404  | 407  | 439  | 435  | 445  | 395  | 210  | 262  | 219  |
| REF | 0    | 0    | 0    | 0    | 0    | 0    | 0    | 0    | 0    | 0    | 0    |
| SSA | 59   | 348  | 277  | 407  | 342  | 475  | 618  | 519  | 610  | 286  | 247  |
| USA | 0    | 664  | 703  | 713  | 678  | 687  | 687  | 658  | 666  | 596  | 643  |

Table 1066: FAOp — Prices—Agriculture—Groundnuts (US\$05/tDM) [PART 1/3]

|     | 2001 | 2002 | 2003 | 2004 | 2005 | 2006 | 2007 | 2008 | 2009 | 2010 | 2011 |
|-----|------|------|------|------|------|------|------|------|------|------|------|
| GLO | 364  | 373  | 386  | 388  | 377  | 395  | 401  | 486  | 385  | 438  | 644  |
| CAZ | 391  | 405  | 545  | 533  | 536  | 561  | 714  | 763  | 768  | 849  | 910  |
| CHA | 440  | 455  | 473  | 446  | 422  | 404  | 394  | 519  | 590  | 751  | 1115 |
| EUR | 906  | 826  | 986  | 1203 | 1379 | 1218 | 1451 | 1557 | 1681 | 1662 | 1682 |
| IND | 302  | 297  | 320  | 352  | 367  | 357  | 399  | 513  | 0    | 0    | 0    |
| JPN | 3204 | 2944 | 4077 | 4647 | 3702 | 3898 | 4042 | 5894 | 6673 | 5970 | 6117 |
| LAM | 363  | 320  | 317  | 189  | 151  | 179  | 133  | 158  | 147  | 172  | 206  |
| MEA | 300  | 250  | 364  | 387  | 425  | 479  | 638  | 659  | 704  | 1132 | 1045 |
| NEU | 556  | 710  | 800  | 959  | 1085 | 1046 | 1336 | 1471 | 1147 | 1277 | 1690 |
| OAS | 199  | 220  | 267  | 254  | 229  | 297  | 340  | 363  | 352  | 499  | 530  |
| REF | 0    | 0    | 0    | 0    | 0    | 0    | 0    | 0    | 0    | 0    | 0    |
| SSA | 283  | 314  | 325  | 357  | 367  | 438  | 415  | 447  | 231  | 219  | 304  |
| USA | 549  | 427  | 452  | 444  | 405  | 415  | 481  | 539  | 508  | 528  | 746  |

Table 1067: FAOp — Prices—Agriculture—Groundnuts (US\$05/tDM) [PART 2/3]

|     | 2005 |
|-----|------|
| GLO | 451  |
| CAZ |      |
| CHA |      |
| EUR |      |
| IND |      |
| JPN |      |
| LAM |      |
| MEA |      |
| NEU |      |
| OAS |      |
| REF |      |
| SSA |      |
| USA |      |

Table 1068: IniFoodPrice — Prices—Agriculture—Groundnuts (US\$05/tDM)

36.13 Maize

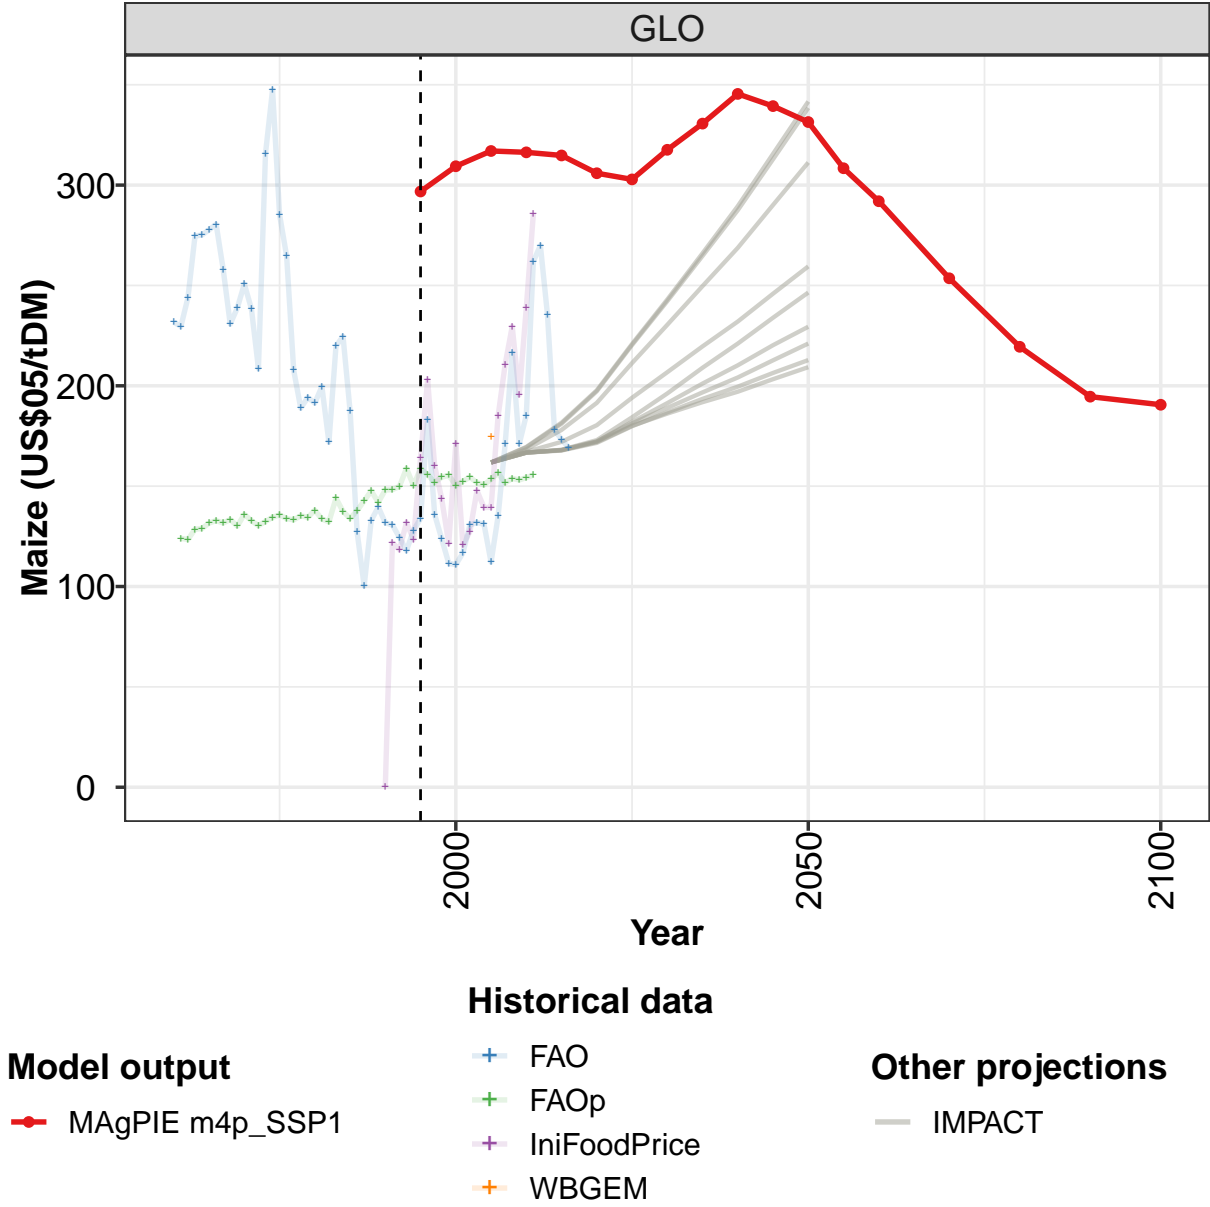



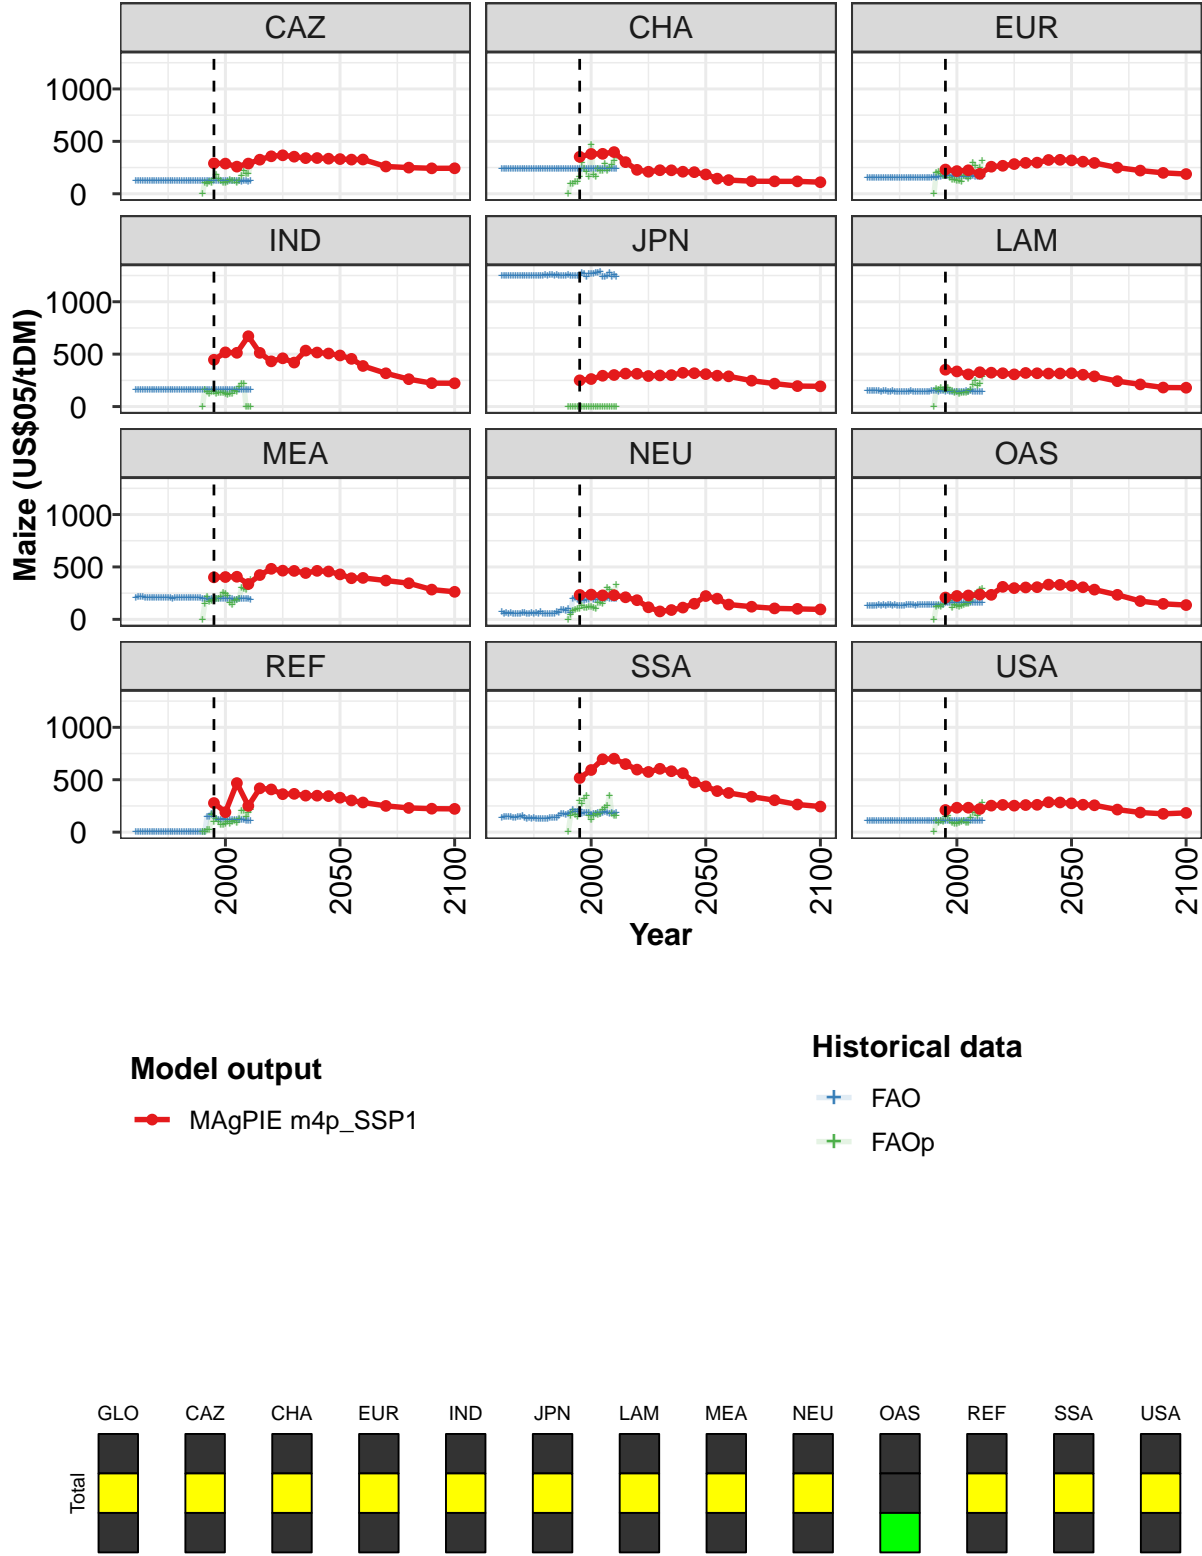

Figure 303: MAGPIE m4p\_SSP1 — Prices—Agriculture—Maize (US\$05/tDM)

|     | 1995 | 2000 | 2005 | 2010 | 2015 | 2020 | 2025 | 2030 | 2035 | 2040 | 2045 |
|-----|------|------|------|------|------|------|------|------|------|------|------|
| GLO | 297  | 309  | 317  | 316  | 315  | 306  | 303  | 318  | 331  | 345  | 339  |
| CAZ | 290  | 288  | 259  | 288  | 325  | 358  | 367  | 354  | 340  | 341  | 335  |
| CHA | 353  | 380  | 381  | 398  | 302  | 228  | 210  | 225  | 224  | 210  | 206  |
| EUR | 231  | 216  | 224  | 191  | 258  | 267  | 283  | 295  | 297  | 323  | 324  |
| IND | 447  | 517  | 513  | 671  | 512  | 431  | 461  | 420  | 534  | 516  | 506  |
| JPN | 250  | 263  | 294  | 301  | 314  | 313  | 292  | 297  | 300  | 322  | 318  |
| LAM | 352  | 335  | 307  | 328  | 323  | 318  | 307  | 321  | 318  | 315  | 315  |
| MEA | 401  | 404  | 407  | 337  | 423  | 482  | 465  | 462  | 442  | 463  | 457  |
| NEU | 233  | 236  | 229  | 230  | 211  | 183  | 115  | 76   | 89   | 112  | 149  |
| OAS | 208  | 223  | 228  | 237  | 234  | 310  | 298  | 304  | 307  | 332  | 329  |
| REF | 278  | 191  | 468  | 251  | 418  | 408  | 363  | 366  | 348  | 348  | 344  |
| SSA | 517  | 593  | 695  | 701  | 650  | 597  | 575  | 604  | 581  | 563  | 474  |
| USA | 211  | 233  | 233  | 221  | 253  | 260  | 253  | 259  | 261  | 285  | 283  |

Table 1069: MAgPIE m4p\_SSP1 — Prices—Agriculture—Maize (US\$05/tDM) [PART 1/2]

|     | 2050 | 2055 | 2060 | 2070 | 2080 | 2090 | 2100 |
|-----|------|------|------|------|------|------|------|
| GLO | 331  | 308  | 292  | 254  | 219  | 195  | 191  |
| CAZ | 331  | 326  | 327  | 260  | 250  | 243  | 243  |
| CHA | 184  | 144  | 131  | 120  | 119  | 118  | 110  |
| EUR | 319  | 306  | 294  | 250  | 221  | 199  | 188  |
| IND | 488  | 455  | 387  | 317  | 261  | 223  | 222  |
| JPN | 310  | 295  | 288  | 247  | 219  | 195  | 193  |
| LAM | 318  | 304  | 288  | 242  | 211  | 181  | 180  |
| MEA | 429  | 393  | 395  | 370  | 345  | 284  | 263  |
| NEU | 222  | 198  | 141  | 121  | 105  | 100  | 95   |
| OAS | 321  | 306  | 284  | 234  | 175  | 148  | 136  |
| REF | 329  | 302  | 283  | 250  | 231  | 224  | 222  |
| SSA | 437  | 392  | 374  | 338  | 305  | 264  | 244  |
| USA | 275  | 262  | 257  | 215  | 187  | 175  | 183  |

Table 1070: MAgPIE m4p\_SSP1 — Prices—Agriculture—Maize (US\$05/tDM) [PART 2/2]

|     | 1960 | 1961 | 1962 | 1963 | 1964 | 1965 | 1966 | 1967 | 1968 | 1969 | 1970 |
|-----|------|------|------|------|------|------|------|------|------|------|------|
| GLO | 232  | 230  | 244  | 275  | 275  | 278  | 280  | 258  | 231  | 239  | 251  |
| CAZ |      |      |      |      |      |      |      |      |      |      |      |
| CHA |      |      |      |      |      |      |      |      |      |      |      |
| EUR |      |      |      |      |      |      |      |      |      |      |      |
| IND |      |      |      |      |      |      |      |      |      |      |      |
| JPN |      |      |      |      |      |      |      |      |      |      |      |
| LAM |      |      |      |      |      |      |      |      |      |      |      |
| MEA |      |      |      |      |      |      |      |      |      |      |      |
| NEU |      |      |      |      |      |      |      |      |      |      |      |
| OAS |      |      |      |      |      |      |      |      |      |      |      |
| REF |      |      |      |      |      |      |      |      |      |      |      |
| SSA |      |      |      |      |      |      |      |      |      |      |      |
| USA |      |      |      |      |      |      |      |      |      |      |      |

Table 1071: WBGEM — Prices—Agriculture—Maize (US\$05/tDM) [PART 1/6]

|     | 1971 | 1972 | 1973 | 1974 | 1975 | 1976 | 1977 | 1978 | 1979 | 1980 | 1981 |
|-----|------|------|------|------|------|------|------|------|------|------|------|
| GLO | 238  | 209  | 316  | 347  | 285  | 265  | 208  | 189  | 194  | 191  | 200  |
| CAZ |      |      |      |      |      |      |      |      |      |      |      |
| CHA |      |      |      |      |      |      |      |      |      |      |      |
| EUR |      |      |      |      |      |      |      |      |      |      |      |
| IND |      |      |      |      |      |      |      |      |      |      |      |
| JPN |      |      |      |      |      |      |      |      |      |      |      |
| LAM |      |      |      |      |      |      |      |      |      |      |      |
| MEA |      |      |      |      |      |      |      |      |      |      |      |
| NEU |      |      |      |      |      |      |      |      |      |      |      |
| OAS |      |      |      |      |      |      |      |      |      |      |      |
| REF |      |      |      |      |      |      |      |      |      |      |      |
| SSA |      |      |      |      |      |      |      |      |      |      |      |
| USA |      |      |      |      |      |      |      |      |      |      |      |

Table 1072: WBGEM — Prices—Agriculture—Maize (US\$05/tDM) [PART 2/6]

|     | 1982 | 1983 | 1984 | 1985 | 1986 | 1987 | 1988 | 1989 | 1990 | 1991 | 1992 |
|-----|------|------|------|------|------|------|------|------|------|------|------|
| GLO | 172  | 220  | 225  | 187  | 127  | 100  | 133  | 140  | 132  | 131  | 125  |
| CAZ |      |      |      |      |      |      |      |      |      |      |      |
| CHA |      |      |      |      |      |      |      |      |      |      |      |
| EUR |      |      |      |      |      |      |      |      |      |      |      |
| IND |      |      |      |      |      |      |      |      |      |      |      |
| JPN |      |      |      |      |      |      |      |      |      |      |      |
| LAM |      |      |      |      |      |      |      |      |      |      |      |
| MEA |      |      |      |      |      |      |      |      |      |      |      |
| NEU |      |      |      |      |      |      |      |      |      |      |      |
| OAS |      |      |      |      |      |      |      |      |      |      |      |
| REF |      |      |      |      |      |      |      |      |      |      |      |
| SSA |      |      |      |      |      |      |      |      |      |      |      |
| USA |      |      |      |      |      |      |      |      |      |      |      |

Table 1073: WBGEM — Prices—Agriculture—Maize (US\$05/tDM) [PART 3/6]

|     | 1993 | 1994 | 1995 | 1996 | 1997 | 1998 | 1999 | 2000 | 2001 | 2002 | 2003 |
|-----|------|------|------|------|------|------|------|------|------|------|------|
| GLO | 118  | 128  | 134  | 183  | 136  | 124  | 112  | 111  | 117  | 131  | 132  |
| CAZ |      |      |      |      |      |      |      |      |      |      |      |
| CHA |      |      |      |      |      |      |      |      |      |      |      |
| EUR |      |      |      |      |      |      |      |      |      |      |      |
| IND |      |      |      |      |      |      |      |      |      |      |      |
| JPN |      |      |      |      |      |      |      |      |      |      |      |
| LAM |      |      |      |      |      |      |      |      |      |      |      |
| MEA |      |      |      |      |      |      |      |      |      |      |      |
| NEU |      |      |      |      |      |      |      |      |      |      |      |
| OAS |      |      |      |      |      |      |      |      |      |      |      |
| REF |      |      |      |      |      |      |      |      |      |      |      |
| SSA |      |      |      |      |      |      |      |      |      |      |      |
| USA |      |      |      |      |      |      |      |      |      |      |      |

Table 1074: WBGEM — Prices—Agriculture—Maize (US\$05/tDM) [PART 4/6]

|     | 2004 | 2005 | 2006 | 2007 | 2008 | 2009 | 2010 | 2011 | 2012 | 2013 | 2014 |
|-----|------|------|------|------|------|------|------|------|------|------|------|
| GLO | 131  | 112  | 135  | 171  | 216  | 171  | 185  | 262  | 270  | 236  | 178  |
| CAZ |      |      |      |      |      |      |      |      |      |      |      |
| CHA |      |      |      |      |      |      |      |      |      |      |      |
| EUR |      |      |      |      |      |      |      |      |      |      |      |
| IND |      |      |      |      |      |      |      |      |      |      |      |
| JPN |      |      |      |      |      |      |      |      |      |      |      |
| LAM |      |      |      |      |      |      |      |      |      |      |      |
| MEA |      |      |      |      |      |      |      |      |      |      |      |
| NEU |      |      |      |      |      |      |      |      |      |      |      |
| OAS |      |      |      |      |      |      |      |      |      |      |      |
| REF |      |      |      |      |      |      |      |      |      |      |      |
| SSA |      |      |      |      |      |      |      |      |      |      |      |
| USA |      |      |      |      |      |      |      |      |      |      |      |

Table 1075: WBGEM — Prices—Agriculture—Maize (US\$05/tDM) [PART 5/6]

|     | 2015 | 2016 |
|-----|------|------|
| GLO | 173  | 169  |
| CAZ |      |      |
| CHA |      |      |
| EUR |      |      |
| IND |      |      |
| JPN |      |      |
| LAM |      |      |
| MEA |      |      |
| NEU |      |      |
| OAS |      |      |
| REF |      |      |
| SSA |      |      |
| USA |      |      |

Table 1076: WBGEM — Prices—Agriculture—Maize (US\$05/tDM) [PART 6/6]

|     | 1961 | 1962 | 1963 | 1964 | 1965 | 1966 | 1967 | 1968 | 1969 | 1970 | 1971 |
|-----|------|------|------|------|------|------|------|------|------|------|------|
| GLO | 124  | 123  | 129  | 129  | 132  | 133  | 132  | 133  | 130  | 136  | 133  |
| CAZ | 127  | 127  | 127  | 123  | 123  | 121  | 122  | 122  | 122  | 122  | 122  |
| CHA | 239  | 238  | 239  | 239  | 239  | 239  | 239  | 239  | 239  | 239  | 239  |
| EUR | 156  | 151  | 153  | 152  | 152  | 151  | 152  | 154  | 152  | 154  | 154  |
| IND | 162  | 162  | 162  | 162  | 162  | 162  | 162  | 162  | 162  | 162  | 162  |
| JPN | 1252 | 1252 | 1252 | 1252 | 1252 | 1252 | 1252 | 1252 | 1252 | 1252 | 1252 |
| LAM | 146  | 146  | 148  | 149  | 149  | 147  | 144  | 147  | 146  | 143  | 143  |
| MEA | 208  | 212  | 213  | 212  | 210  | 207  | 209  | 209  | 210  | 208  | 210  |
| NEU | 74   | 55   | 66   | 53   | 58   | 49   | 57   | 56   | 51   | 59   | 60   |
| OAS | 129  | 133  | 127  | 134  | 131  | 135  | 132  | 137  | 132  | 136  | 134  |
| REF | 0    | 0    | 0    | 0    | 0    | 0    | 0    | 0    | 0    | 0    | 0    |
| SSA | 142  | 143  | 147  | 146  | 145  | 141  | 139  | 148  | 142  | 154  | 140  |
| USA | 106  | 106  | 106  | 106  | 106  | 106  | 106  | 106  | 106  | 106  | 106  |

Table 1077: FAO — Prices—Agriculture—Maize (US\$05/tDM) [PART 1/5]

|     | 1972 | 1973 | 1974 | 1975 | 1976 | 1977 | 1978 | 1979 | 1980 | 1981 | 1982 |
|-----|------|------|------|------|------|------|------|------|------|------|------|
| GLO | 130  | 132  | 134  | 136  | 134  | 133  | 135  | 134  | 138  | 134  | 132  |
| CAZ | 124  | 122  | 121  | 121  | 122  | 122  | 121  | 120  | 120  | 119  | 120  |
| CHA | 238  | 238  | 238  | 238  | 238  | 239  | 239  | 239  | 239  | 239  | 239  |
| EUR | 154  | 152  | 153  | 150  | 154  | 153  | 155  | 152  | 155  | 154  | 152  |
| IND | 162  | 162  | 162  | 162  | 162  | 162  | 162  | 162  | 162  | 162  | 162  |
| JPN | 1252 | 1251 | 1252 | 1252 | 1252 | 1251 | 1252 | 1252 | 1253 | 1252 | 1253 |
| LAM | 146  | 141  | 140  | 144  | 145  | 144  | 144  | 142  | 147  | 141  | 141  |
| MEA | 208  | 208  | 210  | 209  | 206  | 201  | 204  | 205  | 204  | 203  | 207  |
| NEU | 53   | 55   | 60   | 54   | 58   | 54   | 68   | 57   | 54   | 53   | 53   |
| OAS | 132  | 136  | 134  | 134  | 131  | 132  | 136  | 135  | 135  | 136  | 131  |
| REF | 0    | 0    | 0    | 0    | 0    | 0    | 0    | 0    | 0    | 0    | 0    |
| SSA | 126  | 139  | 129  | 135  | 127  | 126  | 125  | 124  | 125  | 126  | 132  |
| USA | 106  | 106  | 106  | 106  | 106  | 106  | 106  | 106  | 106  | 106  | 106  |

Table 1078: FAO — Prices—Agriculture—Maize (US\$05/tDM) [PART 2/5]

|     | 1983 | 1984 | 1985 | 1986 | 1987 | 1988 | 1989 | 1990 | 1991 | 1992 | 1993 |
|-----|------|------|------|------|------|------|------|------|------|------|------|
| GLO | 144  | 137  | 134  | 138  | 143  | 148  | 142  | 148  | 148  | 150  | 159  |
| CAZ | 119  | 120  | 120  | 121  | 120  | 120  | 119  | 120  | 119  | 122  | 119  |
| CHA | 238  | 238  | 238  | 238  | 238  | 238  | 238  | 238  | 238  | 238  | 238  |
| EUR | 153  | 153  | 156  | 153  | 155  | 157  | 154  | 160  | 154  | 164  | 166  |
| IND | 162  | 162  | 162  | 162  | 162  | 162  | 162  | 162  | 162  | 162  | 162  |
| JPN | 1257 | 1252 | 1253 | 1250 | 1250 | 1250 | 1250 | 1253 | 1245 | 1250 | 1250 |
| LAM | 145  | 145  | 144  | 144  | 145  | 145  | 149  | 153  | 149  | 145  | 147  |
| MEA | 206  | 205  | 207  | 207  | 206  | 205  | 204  | 199  | 194  | 193  | 191  |
| NEU | 58   | 54   | 69   | 67   | 87   | 88   | 78   | 98   | 66   | 194  | 201  |
| OAS | 134  | 135  | 135  | 137  | 136  | 139  | 138  | 138  | 135  | 141  | 137  |
| REF | 0    | 0    | 0    | 0    | 0    | 0    | 0    | 0    | 0    | 150  | 150  |
| SSA | 133  | 135  | 138  | 160  | 177  | 171  | 164  | 178  | 189  | 214  | 191  |
| USA | 106  | 106  | 106  | 106  | 106  | 106  | 106  | 106  | 106  | 106  | 106  |

Table 1079: FAO — Prices—Agriculture—Maize (US\$05/tDM) [PART 3/5]

|     | 1994 | 1995 | 1996 | 1997 | 1998 | 1999 | 2000 | 2001 | 2002 | 2003 | 2004 |
|-----|------|------|------|------|------|------|------|------|------|------|------|
| GLO | 150  | 159  | 156  | 152  | 154  | 155  | 150  | 152  | 155  | 152  | 151  |
| CAZ | 119  | 120  | 121  | 121  | 119  | 120  | 121  | 120  | 120  | 119  | 120  |
| CHA | 238  | 238  | 238  | 238  | 239  | 239  | 239  | 239  | 239  | 239  | 239  |
| EUR | 167  | 167  | 168  | 167  | 167  | 166  | 168  | 167  | 167  | 169  | 167  |
| IND | 162  | 162  | 162  | 162  | 162  | 162  | 162  | 162  | 162  | 162  | 162  |
| JPN | 1245 | 1250 | 1273 | 1263 | 1235 | 1263 | 1269 | 1270 | 1278 | 1280 | 1288 |
| LAM | 147  | 146  | 147  | 143  | 140  | 144  | 144  | 144  | 145  | 145  | 147  |
| MEA | 196  | 195  | 195  | 195  | 195  | 196  | 198  | 192  | 192  | 192  | 189  |
| NEU | 189  | 183  | 187  | 180  | 191  | 186  | 210  | 186  | 186  | 205  | 190  |
| OAS | 139  | 154  | 159  | 159  | 154  | 158  | 159  | 155  | 154  | 155  | 156  |
| REF | 178  | 144  | 131  | 116  | 122  | 128  | 116  | 116  | 119  | 116  | 113  |
| SSA | 196  | 213  | 176  | 182  | 184  | 186  | 169  | 177  | 175  | 181  | 171  |
| USA | 106  | 106  | 106  | 106  | 106  | 106  | 106  | 106  | 106  | 106  | 106  |

Table 1080: FAO — Prices—Agriculture—Maize (US\$05/tDM) [PART 4/5]

|     | 2005 | 2006 | 2007 | 2008 | 2009 | 2010 | 2011 |
|-----|------|------|------|------|------|------|------|
| GLO | 153  | 157  | 152  | 154  | 153  | 154  | 155  |
| CAZ | 120  | 120  | 118  | 120  | 120  | 119  | 119  |
| CHA | 239  | 239  | 239  | 239  | 239  | 239  | 239  |
| EUR | 165  | 165  | 168  | 164  | 164  | 164  | 165  |
| IND | 162  | 162  | 162  | 162  | 162  | 162  | 162  |
| JPN | 1238 | 1237 | 1246 | 1278 | 1240 | 1255 | 1240 |
| LAM | 144  | 147  | 143  | 142  | 145  | 141  | 139  |
| MEA | 190  | 192  | 192  | 193  | 196  | 196  | 190  |
| NEU | 198  | 193  | 207  | 196  | 195  | 192  | 195  |
| OAS | 157  | 156  | 158  | 159  | 158  | 158  | 158  |
| REF | 116  | 114  | 117  | 114  | 112  | 109  | 109  |
| SSA | 182  | 190  | 189  | 178  | 182  | 174  | 181  |
| USA | 106  | 106  | 106  | 106  | 106  | 106  | 106  |

Table 1081: FAO — Prices—Agriculture—Maize (US\$05/tDM) [PART 5/5]

|     | 1990 | 1991 | 1992 | 1993 | 1994 | 1995 | 1996 | 1997 | 1998 | 1999 | 2000 |
|-----|------|------|------|------|------|------|------|------|------|------|------|
| GLO | 0    | 122  | 118  | 132  | 123  | 164  | 203  | 160  | 144  | 122  | 171  |
| CAZ | 0    | 109  | 97   | 118  | 100  | 147  | 177  | 145  | 119  | 109  | 103  |
| CHA | 0    | 91   | 96   | 110  | 111  | 162  | 293  | 240  | 212  | 166  | 466  |
| EUR | 0    | 200  | 206  | 186  | 173  | 192  | 197  | 153  | 138  | 133  | 127  |
| IND | 0    | 158  | 140  | 123  | 137  | 137  | 125  | 129  | 127  | 135  | 126  |
| JPN | 0    | 0    | 0    | 0    | 0    | 0    | 0    | 0    | 0    | 0    | 0    |
| LAM | 0    | 171  | 160  | 180  | 164  | 156  | 183  | 151  | 146  | 130  | 142  |
| MEA | 0    | 150  | 220  | 168  | 179  | 183  | 197  | 198  | 217  | 256  | 244  |
| NEU | 0    | 48   | 84   | 93   | 103  | 100  | 130  | 113  | 107  | 122  | 120  |
| OAS | 0    | 116  | 129  | 124  | 141  | 186  | 208  | 179  | 111  | 142  | 129  |
| REF | 0    | 0    | 20   | 18   | 167  | 95   | 125  | 102  | 66   | 66   | 84   |
| SSA | 1    | 152  | 194  | 167  | 151  | 298  | 268  | 318  | 350  | 154  | 114  |
| USA | 0    | 106  | 92   | 111  | 101  | 145  | 159  | 109  | 86   | 82   | 83   |

Table 1082: FAOp — Prices—Agriculture—Maize (US\$05/tDM) [PART 1/3]

|     | 2001 | 2002 | 2003 | 2004 | 2005 | 2006 | 2007 | 2008 | 2009 | 2010 | 2011 |
|-----|------|------|------|------|------|------|------|------|------|------|------|
| GLO | 121  | 127  | 148  | 139  | 139  | 185  | 211  | 230  | 196  | 239  | 286  |
| CAZ | 111  | 132  | 119  | 128  | 107  | 125  | 171  | 215  | 187  | 193  | 275  |
| CHA | 177  | 166  | 243  | 215  | 215  | 286  | 220  | 248  | 276  | 310  | 365  |
| EUR | 124  | 118  | 174  | 174  | 147  | 174  | 296  | 263  | 195  | 247  | 311  |
| IND | 113  | 120  | 123  | 150  | 145  | 192  | 221  | 219  | 0    | 0    | 0    |
| JPN | 0    | 0    | 0    | 0    | 0    | 0    | 0    | 0    | 0    | 0    | 0    |
| LAM | 118  | 129  | 135  | 136  | 140  | 161  | 205  | 250  | 203  | 213  | 286  |
| MEA | 220  | 156  | 139  | 175  | 187  | 200  | 300  | 292  | 283  | 353  | 373  |
| NEU | 109  | 102  | 154  | 160  | 151  | 193  | 298  | 286  | 222  | 258  | 331  |
| OAS | 122  | 125  | 137  | 151  | 147  | 167  | 202  | 242  | 240  | 285  | 289  |
| REF | 96   | 85   | 99   | 104  | 87   | 129  | 207  | 201  | 148  | 186  | 214  |
| SSA | 152  | 176  | 161  | 180  | 213  | 236  | 252  | 351  | 179  | 155  | 152  |
| USA | 89   | 103  | 108  | 92   | 90   | 136  | 188  | 182  | 159  | 232  | 278  |

Table 1083: FAOp — Prices—Agriculture—Maize (US\$05/tDM) [PART 2/3]

|     | 2005 |
|-----|------|
| GLO | 174  |
| CAZ |      |
| CHA |      |
| EUR |      |
| IND |      |
| JPN |      |
| LAM |      |
| MEA |      |
| NEU |      |
| OAS |      |
| REF |      |
| SSA |      |
| USA |      |

Table 1084: IniFoodPrice — Prices—Agriculture—Maize (US\$05/tDM)

36.14 Molasses

## geom\_path: Each group consists of only one observation. Do you need to adjust the group## aesthetic?

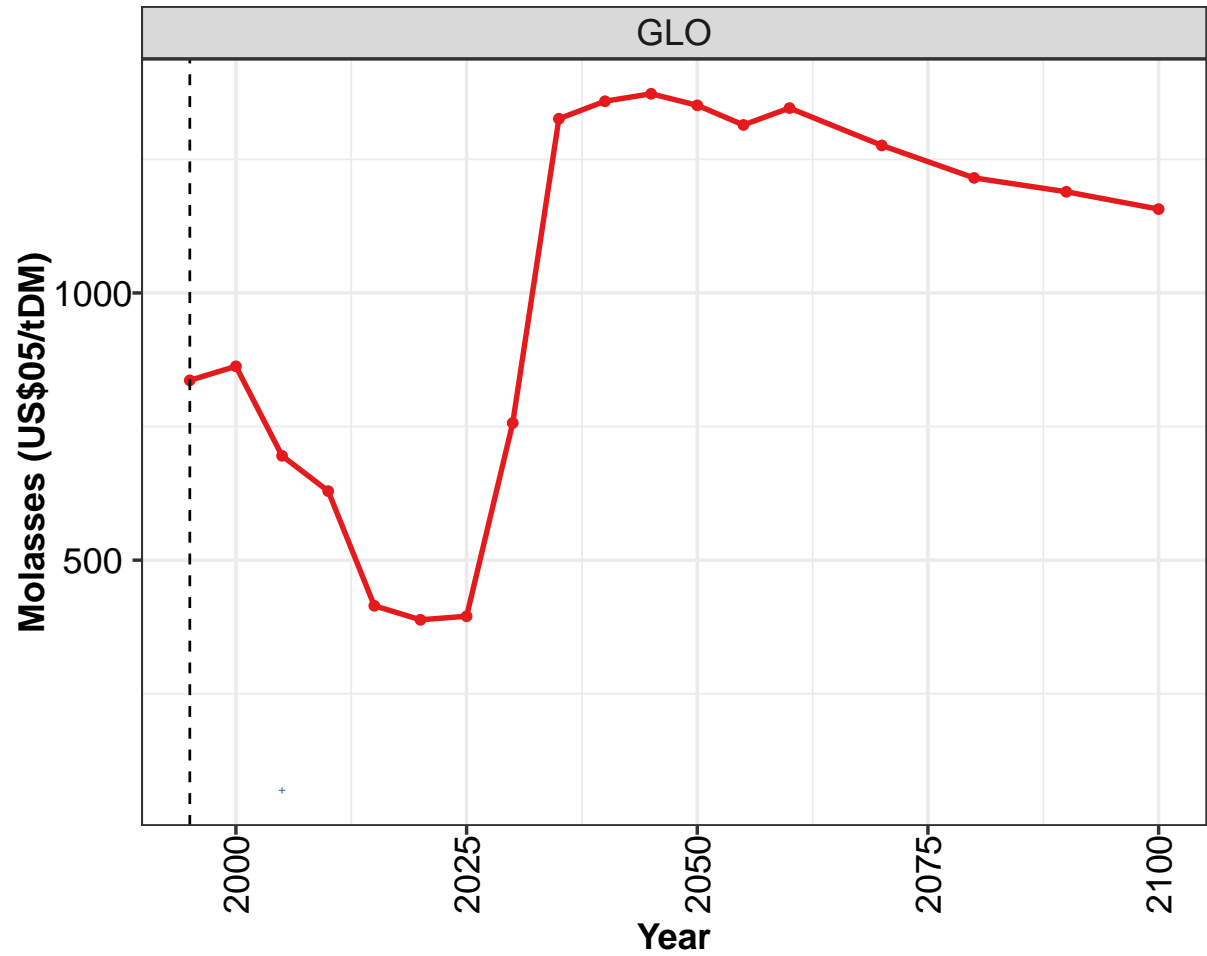

Model output

MAgPIE m4p\_SSP1

Historical data

IniFoodPrice

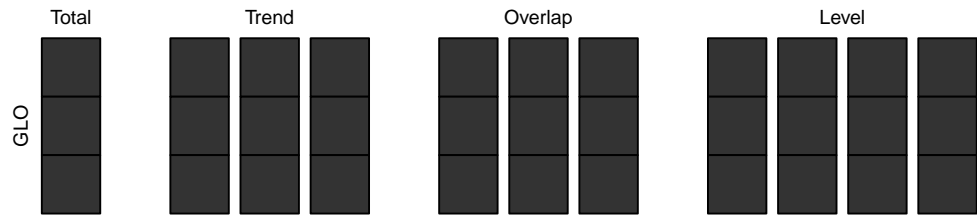

Figure 304: MAgPIE m4p\_SSP1 — Prices—Agriculture—Molasses (US\$05/tDM)



|     | 1995 | 2000 | 2005 | 2010 | 2015 | 2020 | 2025 | 2030 | 2035 | 2040 | 2045 |
|-----|------|------|------|------|------|------|------|------|------|------|------|
| GLO | 836  | 863  | 695  | 629  | 415  | 388  | 395  | 757  | 1326 | 1359 | 1373 |

Table 1085: MAgPIE m4p\_SSP1 — Prices—Agriculture—Molasses (US\$05/tDM) [PART 1/2]

|     | 2050 | 2055 | 2060 | 2070 | 2080 | 2090 | 2100 |
|-----|------|------|------|------|------|------|------|
| GLO | 1351 | 1314 | 1346 | 1276 | 1215 | 1189 | 1157 |

Table 1086: MAgPIE m4p\_SSP1 — Prices—Agriculture—Molasses (US\$05/tDM) [PART 2/2]

|     | 2005 |
|-----|------|
| GLO | 68.0 |

Table 1087: IniFoodPrice — Prices—Agriculture—Molasses (US\$05/tDM)

36.15 Monogastric meat

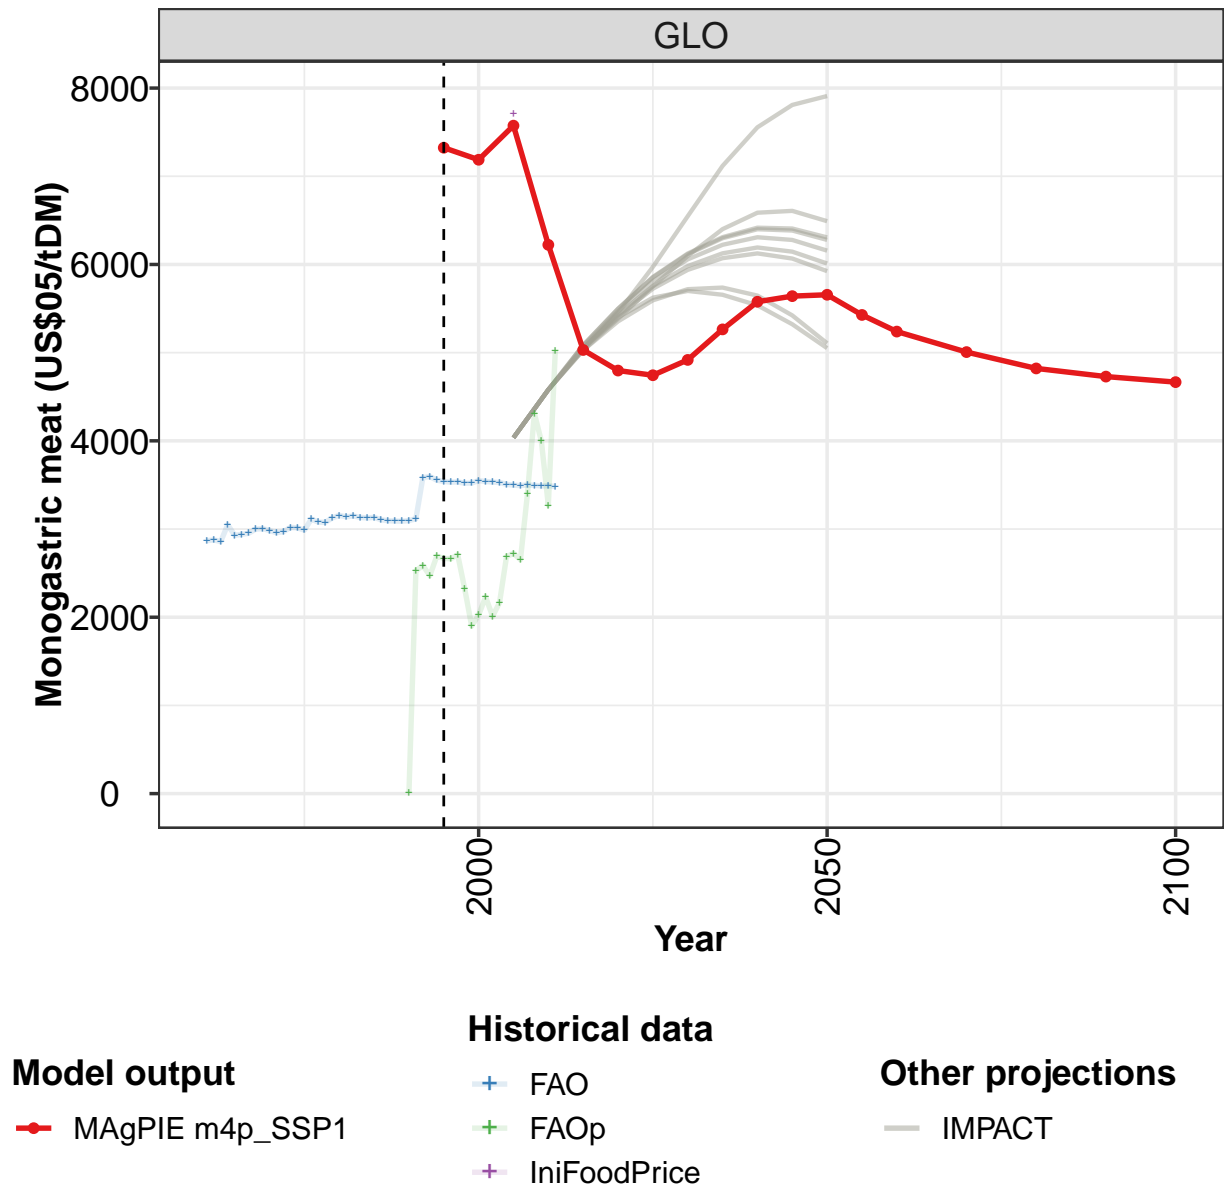

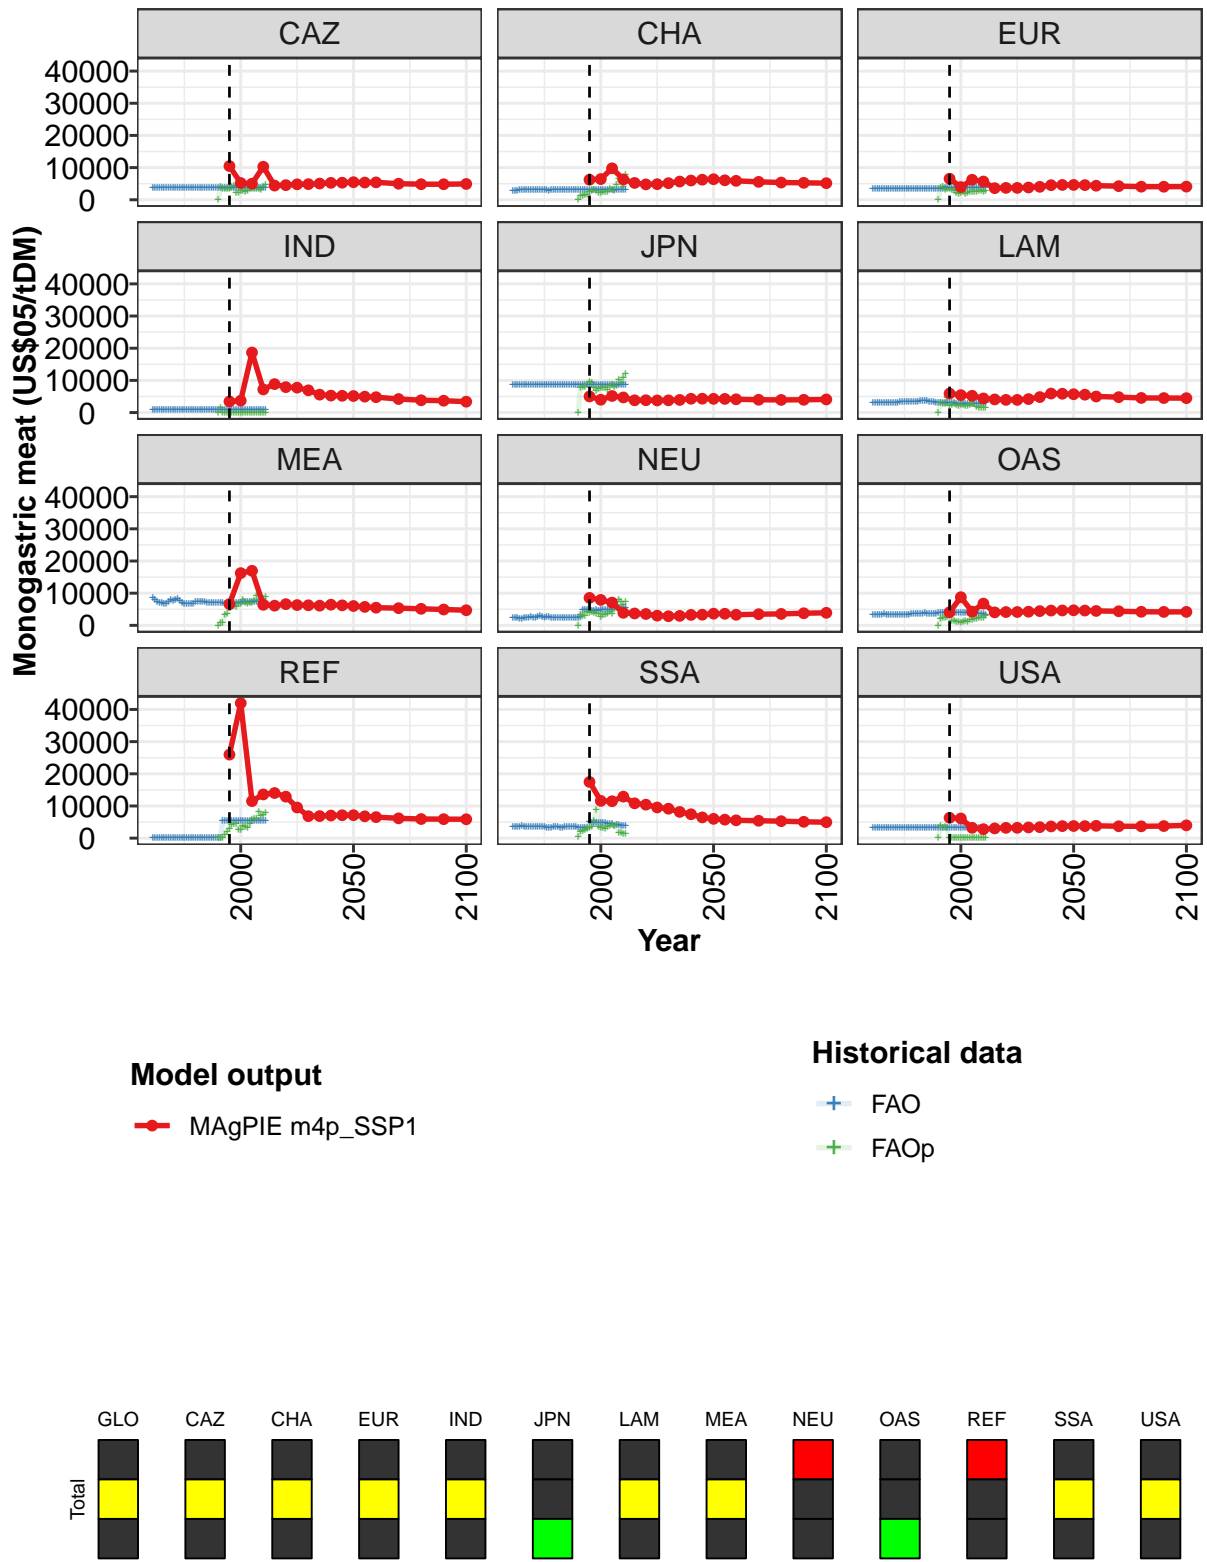

Figure 305: MAGPIE m4p\_SSP1 — Prices—Agriculture—Monogastric meat (US\$05/tDM)

|     | 1995  | 2000  | 2005  | 2010  | 2015  | 2020  | 2025 | 2030 | 2035 | 2040 | 2045 |
|-----|-------|-------|-------|-------|-------|-------|------|------|------|------|------|
| GLO | 7324  | 7187  | 7574  | 6223  | 5031  | 4797  | 4744 | 4918 | 5264 | 5577 | 5641 |
| CAZ | 10477 | 5205  | 5006  | 10276 | 4414  | 4550  | 4800 | 4855 | 5044 | 5261 | 5311 |
| CHA | 6237  | 6437  | 9776  | 6327  | 5237  | 4784  | 4853 | 5167 | 5666 | 5981 | 6244 |
| EUR | 6546  | 3946  | 6219  | 5678  | 3615  | 3700  | 3702 | 3818 | 4030 | 4542 | 4614 |
| IND | 3449  | 3708  | 18661 | 7187  | 8848  | 7907  | 7756 | 6917 | 5570 | 5279 | 5213 |
| JPN | 5015  | 3983  | 5161  | 4709  | 3822  | 3839  | 3774 | 3806 | 3934 | 4298 | 4311 |
| LAM | 5915  | 5419  | 5220  | 4399  | 4090  | 3949  | 3943 | 4191 | 4818 | 5912 | 5852 |
| MEA | 6608  | 16241 | 16964 | 6390  | 6132  | 6595  | 6314 | 6247 | 6120 | 6429 | 6220 |
| NEU | 8543  | 7919  | 7069  | 3903  | 3700  | 3539  | 3016 | 2843 | 2950 | 3253 | 3311 |
| OAS | 4071  | 8751  | 4270  | 6764  | 4046  | 4147  | 4152 | 4248 | 4429 | 4608 | 4627 |
| REF | 25979 | 41965 | 11512 | 13580 | 14037 | 12900 | 9533 | 6835 | 6856 | 7032 | 7125 |
| SSA | 17475 | 11586 | 11481 | 12910 | 10829 | 10419 | 9538 | 9157 | 8158 | 7431 | 6456 |
| USA | 6325  | 6117  | 3218  | 2800  | 3032  | 3202  | 3220 | 3333 | 3418 | 3643 | 3745 |

Table 1088: MAgPIE m4p\_SSP1 — Prices—Agriculture—Monogastric meat (US\$05/tDM) [PART 1/2]

|     | 2050 | 2055 | 2060 | 2070 | 2080 | 2090 | 2100 |
|-----|------|------|------|------|------|------|------|
| GLO | 5656 | 5428 | 5239 | 5006 | 4821 | 4729 | 4666 |
| CAZ | 5471 | 5360 | 5415 | 4998 | 4843 | 4826 | 4922 |
| CHA | 6394 | 6060 | 5890 | 5567 | 5364 | 5275 | 5157 |
| EUR | 4618 | 4567 | 4373 | 4239 | 4075 | 4060 | 4098 |
| IND | 5146 | 4952 | 4784 | 4209 | 3826 | 3688 | 3383 |
| JPN | 4274 | 4245 | 4131 | 3988 | 3930 | 3969 | 4080 |
| LAM | 5696 | 5558 | 5004 | 4796 | 4546 | 4508 | 4486 |
| MEA | 6013 | 5738 | 5492 | 5346 | 5142 | 4934 | 4704 |
| NEU | 3640 | 3608 | 3300 | 3472 | 3557 | 3767 | 3903 |
| OAS | 4689 | 4603 | 4490 | 4381 | 4224 | 4185 | 4190 |
| REF | 7137 | 6799 | 6541 | 6160 | 5947 | 5911 | 5876 |
| SSA | 6005 | 5752 | 5542 | 5407 | 5278 | 5083 | 4960 |
| USA | 3778 | 3752 | 3828 | 3706 | 3677 | 3757 | 3977 |

Table 1089: MAgPIE m4p\_SSP1 — Prices—Agriculture—Monogastric meat (US\$05/tDM) [PART 2/2]

|     | 1961 | 1962 | 1963 | 1964 | 1965 | 1966 | 1967 | 1968 | 1969 | 1970 | 1971 |
|-----|------|------|------|------|------|------|------|------|------|------|------|
| GLO | 2868 | 2876 | 2858 | 3049 | 2929 | 2940 | 2952 | 2998 | 3005 | 2983 | 2959 |
| CAZ | 3701 | 3702 | 3705 | 3706 | 3707 | 3699 | 3687 | 3690 | 3692 | 3685 | 3686 |
| CHA | 2741 | 2801 | 2942 | 2998 | 3016 | 3009 | 3005 | 2995 | 2978 | 2951 | 2969 |
| EUR | 3436 | 3441 | 3431 | 3485 | 3449 | 3446 | 3433 | 3449 | 3465 | 3441 | 3435 |
| IND | 1005 | 1005 | 1005 | 1005 | 1005 | 1005 | 1005 | 1005 | 1005 | 1005 | 1005 |
| JPN | 8612 | 8612 | 8612 | 8612 | 8612 | 8612 | 8612 | 8612 | 8612 | 8612 | 8612 |
| LAM | 3134 | 3111 | 3120 | 3119 | 3069 | 3011 | 3040 | 3040 | 3046 | 3036 | 3015 |
| MEA | 8461 | 8075 | 7201 | 7107 | 7060 | 6668 | 6838 | 7311 | 7880 | 7563 | 8039 |
| NEU | 2225 | 2365 | 2375 | 2161 | 2029 | 2421 | 2405 | 2491 | 2758 | 2478 | 2385 |
| OAS | 3361 | 3281 | 3347 | 3382 | 3432 | 3482 | 3364 | 3370 | 3410 | 3397 | 3362 |
| REF | 0    | 0    | 0    | 0    | 0    | 0    | 0    | 0    | 0    | 0    | 0    |
| SSA | 3512 | 3537 | 3558 | 3573 | 3745 | 3577 | 3550 | 3648 | 3550 | 3542 | 3627 |
| USA | 3317 | 3317 | 3317 | 3317 | 3317 | 3317 | 3317 | 3317 | 3317 | 3317 | 3317 |

Table 1090: FAO — Prices—Agriculture—Monogastric meat (US\$05/tDM) [PART 1/5]

|     | 1972 | 1973 | 1974 | 1975 | 1976 | 1977 | 1978 | 1979 | 1980 | 1981 | 1982 |
|-----|------|------|------|------|------|------|------|------|------|------|------|
| GLO | 2971 | 3018 | 3014 | 2987 | 3113 | 3077 | 3076 | 3126 | 3155 | 3138 | 3148 |
| CAZ | 3685 | 3684 | 3681 | 3687 | 3686 | 3693 | 3686 | 3675 | 3669 | 3669 | 3675 |
| CHA | 2980 | 2955 | 2969 | 2999 | 2951 | 2926 | 2949 | 2962 | 3007 | 3014 | 3022 |
| EUR | 3436 | 3445 | 3440 | 3440 | 3490 | 3481 | 3465 | 3491 | 3492 | 3491 | 3508 |
| IND | 1005 | 1005 | 1005 | 1005 | 1005 | 1005 | 1005 | 1005 | 1005 | 1005 | 1005 |
| JPN | 8612 | 8612 | 8612 | 8612 | 8612 | 8612 | 8612 | 8612 | 8612 | 8612 | 8612 |
| LAM | 3126 | 3222 | 3283 | 3338 | 3386 | 3387 | 3468 | 3455 | 3469 | 3502 | 3589 |
| MEA | 8148 | 7674 | 7002 | 6699 | 6643 | 6810 | 6754 | 6827 | 7466 | 7445 | 7478 |
| NEU | 2636 | 2879 | 2520 | 2478 | 2626 | 2520 | 2245 | 2375 | 2504 | 2424 | 2470 |
| OAS | 3357 | 3384 | 3379 | 3369 | 3371 | 3405 | 3490 | 3695 | 3729 | 3579 | 3609 |
| REF | 0    | 0    | 0    | 0    | 0    | 0    | 0    | 0    | 0    | 0    | 0    |
| SSA | 3653 | 3651 | 3681 | 3526 | 3320 | 3315 | 3322 | 3385 | 3395 | 3379 | 3371 |
| USA | 3317 | 3317 | 3317 | 3317 | 3317 | 3317 | 3317 | 3317 | 3317 | 3317 | 3317 |

Table 1091: FAO — Prices—Agriculture—Monogastric meat (US\$05/tDM) [PART 2/5]

|     | 1983 | 1984 | 1985 | 1986 | 1987 | 1988 | 1989 | 1990 | 1991 | 1992 | 1993 |
|-----|------|------|------|------|------|------|------|------|------|------|------|
| GLO | 3132 | 3126 | 3133 | 3105 | 3095 | 3091 | 3088 | 3096 | 3116 | 3583 | 3595 |
| CAZ | 3674 | 3677 | 3679 | 3679 | 3676 | 3675 | 3676 | 3677 | 3678 | 3677 | 3678 |
| CHA | 3020 | 3022 | 3028 | 3026 | 3026 | 3044 | 3052 | 3050 | 3048 | 3058 | 3065 |
| EUR | 3500 | 3497 | 3492 | 3488 | 3485 | 3474 | 3464 | 3484 | 3484 | 3560 | 3703 |
| IND | 1005 | 1005 | 1005 | 1005 | 1005 | 1005 | 1005 | 1005 | 1005 | 1005 | 1005 |
| JPN | 8612 | 8612 | 8612 | 8612 | 8612 | 8612 | 8612 | 8612 | 8612 | 8612 | 8612 |
| LAM | 3646 | 3695 | 3604 | 3392 | 3280 | 3215 | 3156 | 3130 | 3117 | 3112 | 2996 |
| MEA | 7456 | 7356 | 7087 | 7001 | 6932 | 6966 | 6940 | 6952 | 6943 | 6891 | 6733 |
| NEU | 2486 | 2244 | 2394 | 2499 | 2375 | 2407 | 2448 | 2434 | 2590 | 4811 | 4896 |
| OAS | 3682 | 3776 | 3740 | 3529 | 3599 | 3663 | 3734 | 3831 | 3808 | 4034 | 4037 |
| REF | 0    | 0    | 0    | 0    | 0    | 0    | 0    | 0    | 0    | 5446 | 5457 |
| SSA | 3327 | 3388 | 3477 | 3521 | 3439 | 3525 | 3448 | 3301 | 3257 | 3318 | 3307 |
| USA | 3317 | 3317 | 3317 | 3317 | 3317 | 3317 | 3317 | 3317 | 3317 | 3317 | 3317 |

Table 1092: FAO — Prices—Agriculture—Monogastric meat (US\$05/tDM) [PART 3/5]

|     | 1994 | 1995 | 1996 | 1997 | 1998 | 1999 | 2000 | 2001 | 2002 | 2003 | 2004 |
|-----|------|------|------|------|------|------|------|------|------|------|------|
| GLO | 3554 | 3540 | 3531 | 3534 | 3519 | 3521 | 3549 | 3540 | 3532 | 3528 | 3507 |
| CAZ | 3678 | 3678 | 3678 | 3677 | 3674 | 3668 | 3666 | 3664 | 3663 | 3663 | 3663 |
| CHA | 3067 | 3069 | 3066 | 3095 | 3114 | 3122 | 3119 | 3116 | 3122 | 3130 | 3129 |
| EUR | 3700 | 3666 | 3659 | 3671 | 3660 | 3674 | 3856 | 3853 | 3829 | 3827 | 3822 |
| IND | 1005 | 1005 | 1005 | 1005 | 1005 | 1005 | 1005 | 1005 | 1005 | 1005 | 1005 |
| JPN | 8612 | 8612 | 8612 | 8612 | 8612 | 8612 | 8612 | 8612 | 8612 | 8612 | 8612 |
| LAM | 2945 | 2964 | 2941 | 2954 | 2864 | 2877 | 2860 | 2873 | 2851 | 2799 | 2796 |
| MEA | 6788 | 6910 | 6988 | 7168 | 6993 | 7085 | 7163 | 7219 | 7266 | 7345 | 7360 |
| NEU | 4817 | 4744 | 4633 | 4664 | 4714 | 4676 | 4691 | 4818 | 4745 | 4795 | 4860 |
| OAS | 3995 | 4005 | 4056 | 4035 | 4023 | 4001 | 3919 | 3887 | 3843 | 3875 | 3689 |
| REF | 5460 | 5442 | 5414 | 5392 | 5359 | 5346 | 5378 | 5368 | 5399 | 5410 | 5397 |
| SSA | 3247 | 4982 | 4875 | 4877 | 4910 | 4901 | 4839 | 4715 | 4624 | 4323 | 4373 |
| USA | 3317 | 3317 | 3317 | 3317 | 3317 | 3317 | 3317 | 3317 | 3317 | 3317 | 3317 |

Table 1093: FAO — Prices—Agriculture—Monogastric meat (US\$05/tDM) [PART 4/5]

|     | 2005 | 2006 | 2007 | 2008 | 2009 | 2010 | 2011 |
|-----|------|------|------|------|------|------|------|
| GLO | 3497 | 3493 | 3499 | 3496 | 3488 | 3491 | 3484 |
| CAZ | 3663 | 3663 | 3663 | 3661 | 3658 | 3659 | 3660 |
| CHA | 3132 | 3134 | 3137 | 3145 | 3148 | 3151 | 3150 |
| EUR | 3827 | 3830 | 3830 | 3829 | 3838 | 3833 | 3834 |
| IND | 1005 | 1005 | 1005 | 1005 | 1005 | 1005 | 1005 |
| JPN | 8612 | 8612 | 8612 | 8612 | 8612 | 8612 | 8612 |
| LAM | 2865 | 2877 | 2847 | 2841 | 2836 | 2835 | 2885 |
| MEA | 7369 | 7374 | 7378 | 7391 | 7437 | 7470 | 7464 |
| NEU | 4848 | 5427 | 5330 | 5398 | 5455 | 5429 | 5404 |
| OAS | 3562 | 3578 | 3561 | 3524 | 3450 | 3458 | 3297 |
| REF | 5365 | 5370 | 5388 | 5430 | 5448 | 5449 | 5438 |
| SSA | 4439 | 3974 | 4028 | 4098 | 3885 | 3924 | 3901 |
| USA | 3317 | 3317 | 3317 | 3317 | 3317 | 3317 | 3317 |

Table 1094: FAO — Prices—Agriculture—Monogastric meat (US\$05/tDM) [PART 5/5]

|     | 1990 | 1991 | 1992 | 1993 | 1994 | 1995 | 1996 | 1997 | 1998 | 1999 | 2000 |
|-----|------|------|------|------|------|------|------|------|------|------|------|
| GLO | 4    | 2526 | 2586 | 2472 | 2693 | 2666 | 2663 | 2708 | 2323 | 1900 | 2024 |
| CAZ | 0    | 3904 | 3399 | 3563 | 3344 | 3377 | 4119 | 4206 | 2303 | 2274 | 2887 |
| CHA | 0    | 1304 | 1353 | 1486 | 1544 | 2568 | 2719 | 3105 | 2813 | 2196 | 2296 |
| EUR | 0    | 3780 | 4100 | 3211 | 3473 | 3308 | 3140 | 2642 | 2048 | 1819 | 2059 |
| IND | 0    | 1368 | 0    | 0    | 0    | 0    | 0    | 0    | 0    | 0    | 0    |
| JPN | 0    | 7848 | 7998 | 8071 | 8748 | 9564 | 9159 | 7849 | 6740 | 7524 | 7697 |
| LAM | 0    | 2889 | 2807 | 2580 | 4706 | 2239 | 2299 | 2738 | 2300 | 1979 | 2303 |
| MEA | 0    | 683  | 723  | 3435 | 3709 | 5858 | 5847 | 5969 | 5710 | 6553 | 6781 |
| NEU | 0    | 3420 | 3114 | 3010 | 4077 | 3942 | 4135 | 3896 | 3711 | 3460 | 2557 |
| OAS | 0    | 2175 | 2361 | 2407 | 2582 | 2960 | 1410 | 1488 | 989  | 1108 | 949  |
| REF | 0    | 0    | 187  | 1088 | 2104 | 3016 | 4231 | 4442 | 4387 | 2634 | 2524 |
| SSA | 523  | 2127 | 2162 | 2472 | 2951 | 3164 | 3559 | 5271 | 8817 | 3562 | 3190 |
| USA | 0    | 3813 | 3271 | 3548 | 3130 | 0    | 0    | 0    | 0    | 0    | 0    |

Table 1095: FAOp — Prices—Agriculture—Monogastric meat (US\$05/tDM) [PART 1/3]

|     | 2001 | 2002 | 2003 | 2004 | 2005 | 2006 | 2007 | 2008  | 2009 | 2010  | 2011  |
|-----|------|------|------|------|------|------|------|-------|------|-------|-------|
| GLO | 2230 | 2010 | 2166 | 2687 | 2724 | 2652 | 3395 | 4310  | 3997 | 3269  | 5020  |
| CAZ | 2927 | 2489 | 2735 | 3428 | 3510 | 3293 | 3484 | 3377  | 3215 | 4076  | 4731  |
| CHA | 2475 | 2327 | 2566 | 3325 | 3187 | 2945 | 4761 | 6384  | 5843 | 4162  | 7642  |
| EUR | 2376 | 1862 | 2097 | 2378 | 2460 | 2534 | 2495 | 2935  | 2706 | 2511  | 2827  |
| IND | 0    | 0    | 0    | 0    | 0    | 0    | 0    | 0     | 0    | 0     | 0     |
| JPN | 7598 | 7741 | 6936 | 8400 | 8518 | 7945 | 8246 | 10142 | 9138 | 10850 | 12018 |
| LAM | 2289 | 1984 | 2009 | 2333 | 2810 | 2723 | 1697 | 1551  | 1364 | 1569  | 1416  |
| MEA | 7851 | 7090 | 6796 | 6985 | 7105 | 7754 | 9337 | 7874  | 6592 | 8148  | 8985  |
| NEU | 3146 | 3391 | 3691 | 4235 | 3740 | 5150 | 5935 | 7981  | 7209 | 6407  | 7252  |
| OAS | 1169 | 1297 | 1206 | 1613 | 1722 | 2074 | 2003 | 2269  | 2277 | 2356  | 2870  |
| REF | 3704 | 3428 | 3280 | 4375 | 5844 | 5958 | 5988 | 8232  | 7062 | 7228  | 8013  |
| SSA | 3123 | 3064 | 3532 | 3913 | 4099 | 3729 | 4255 | 1804  | 1704 | 1428  | 1502  |
| USA | 0    | 0    | 0    | 0    | 0    | 0    | 0    | 0     | 0    | 0     | 0     |

Table 1096: FAOp — Prices—Agriculture—Monogastric meat (US\$05/tDM) [PART 2/3]

|     | 2005 |
|-----|------|
| GLO | 7703 |
| CAZ |      |
| CHA |      |
| EUR |      |
| IND |      |
| JPN |      |
| LAM |      |
| MEA |      |
| NEU |      |
| OAS |      |
| REF |      |
| SSA |      |
| USA |      |

Table 1097: IniFoodPrice — Prices—Agriculture—Monogastric meat (US\$05/tDM)

36.16 Non fibrous crop residues

## geom\_path: Each group consists of only one observation. Do you need to adjust the group## aesthetic?

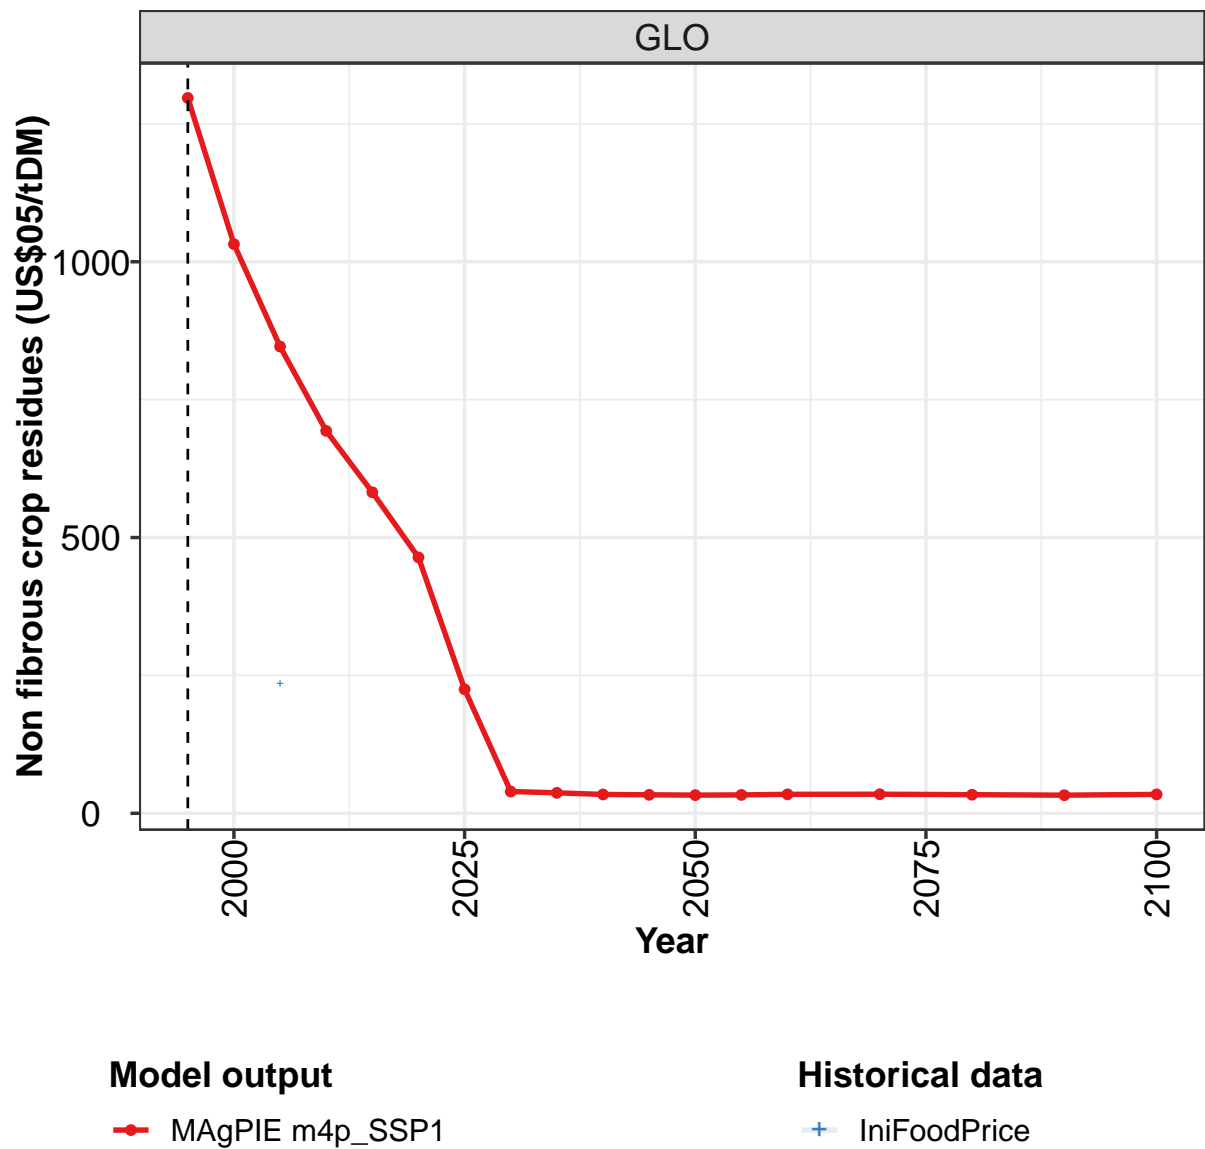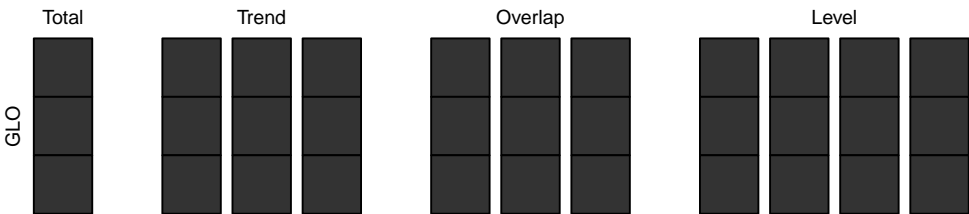

Figure 306: MAgPIE m4p\_SSP1 — Prices—Agriculture—Non fibrous crop residues (US\$05/tDM)



|     | 1995 | 2000 | 2005 | 2010 | 2015 | 2020 | 2025 | 2030 | 2035 | 2040 | 2045 |
|-----|------|------|------|------|------|------|------|------|------|------|------|
| GLO | 1297 | 1032 | 846  | 693  | 582  | 464  | 225  | 39   | 37   | 34   | 34   |

Table 1098: MAgPIE m4p\_SSP1 — Prices—Agriculture—Non fibrous crop residues (US\$05/tDM) [PART 1/2]

|     | 2050 | 2055 | 2060 | 2070 | 2080 | 2090 | 2100 |
|-----|------|------|------|------|------|------|------|
| GLO | 33   | 33   | 34   | 35   | 34   | 33   | 34   |

Table 1099: MAgPIE m4p\_SSP1 — Prices—Agriculture—Non fibrous crop residues (US\$05/tDM) [PART 2/2]

|     | 2005 |
|-----|------|
| GLO | 234  |

Table 1100: IniFoodPrice — Prices—Agriculture—Non fibrous crop residues (US\$05/tDM)

36.17 Oilcakes

## geom\_path: Each group consists of only one observation. Do you need to adjust the group## aesthetic?

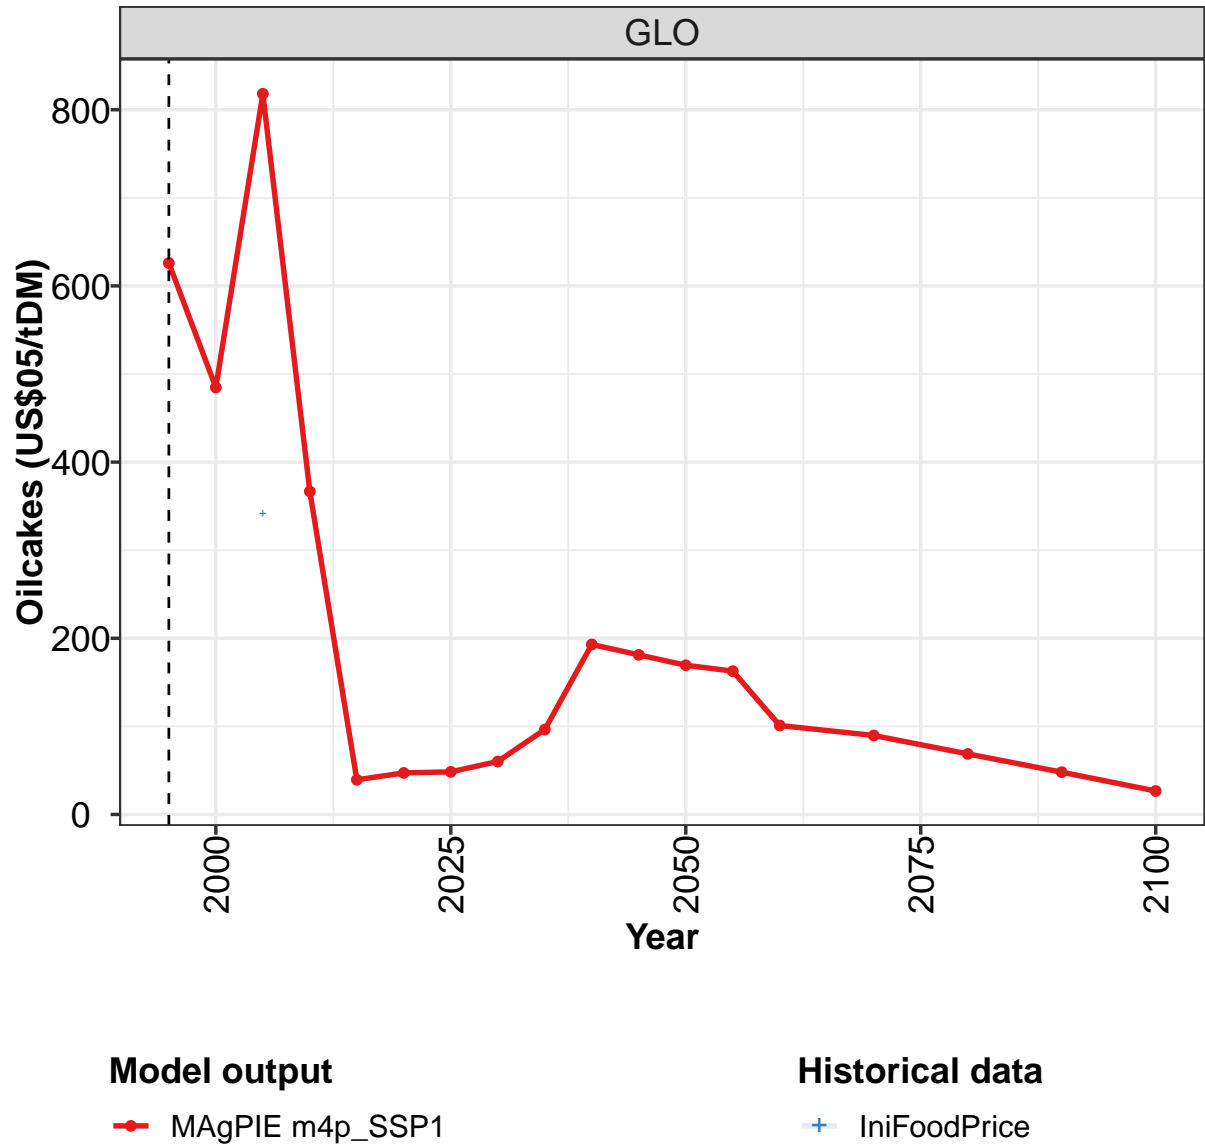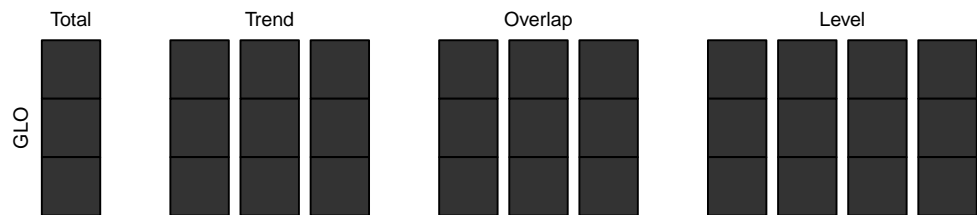

Figure 307: MAgPIE m4p\_SSP1 — Prices—Agriculture—Oilcakes (US\$05/tDM)

|     | 1995 | 2000 | 2005 | 2010 | 2015 | 2020 | 2025 | 2030 | 2035 | 2040 | 2045 |
|-----|------|------|------|------|------|------|------|------|------|------|------|
| GLO | 626  | 485  | 818  | 367  | 39   | 47   | 48   | 60   | 96   | 193  | 181  |

Table 1101: MAgPIE m4p\_SSP1 — Prices—Agriculture—Oilcakes (US\$05/tDM) [PART 1/2]

|     | 2050 | 2055 | 2060 | 2070 | 2080 | 2090 | 2100 |
|-----|------|------|------|------|------|------|------|
| GLO | 169  | 163  | 101  | 90   | 69   | 48   | 27   |

Table 1102: MAgPIE m4p\_SSP1 — Prices—Agriculture—Oilcakes (US\$05/tDM) [PART 2/2]

|     | 2005 |
|-----|------|
| GLO | 341  |

Table 1103: IniFoodPrice — Prices—Agriculture—Oilcakes (US\$05/tDM)

36.18 Oilpalms

## geom\_path: Each group consists of only one observation. Do you need to adjust the group## aesthetic?

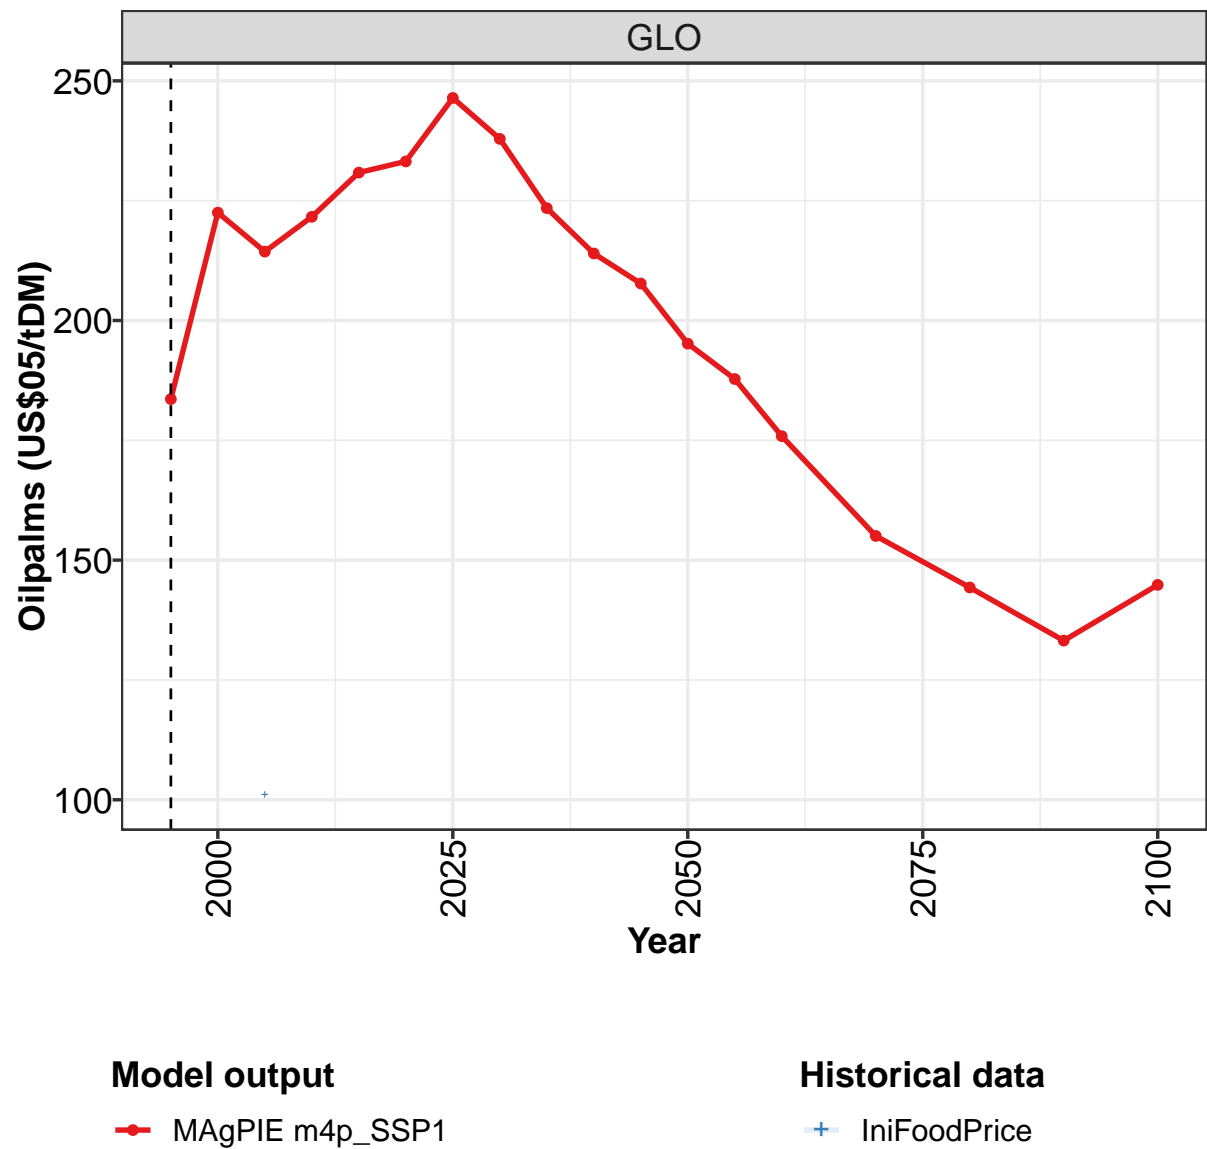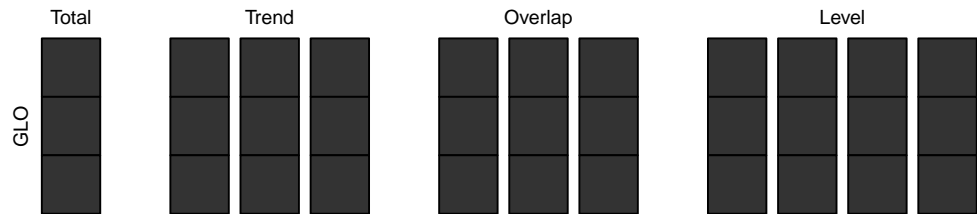

Figure 308: MAgPIE m4p\_SSP1 — Prices—Agriculture—Oilpalms (US\$05/tDM)

|     | 1995 | 2000 | 2005 | 2010 | 2015 | 2020 | 2025 | 2030 | 2035 | 2040 | 2045 |
|-----|------|------|------|------|------|------|------|------|------|------|------|
| GLO | 184  | 223  | 214  | 222  | 231  | 233  | 246  | 238  | 223  | 214  | 208  |

Table 1104: MAgPIE m4p\_SSP1 — Prices—Agriculture—Oilpalms (US\$05/tDM) [PART 1/2]

|     | 2050 | 2055 | 2060 | 2070 | 2080 | 2090 | 2100 |
|-----|------|------|------|------|------|------|------|
| GLO | 195  | 188  | 176  | 155  | 144  | 133  | 145  |

Table 1105: MAgPIE m4p\_SSP1 — Prices—Agriculture—Oilpalms (US\$05/tDM) [PART 2/2]

|     | 2005 |
|-----|------|
| GLO | 101  |

Table 1106: IniFoodPrice — Prices—Agriculture—Oilpalms (US\$05/tDM)

36.19 Oils

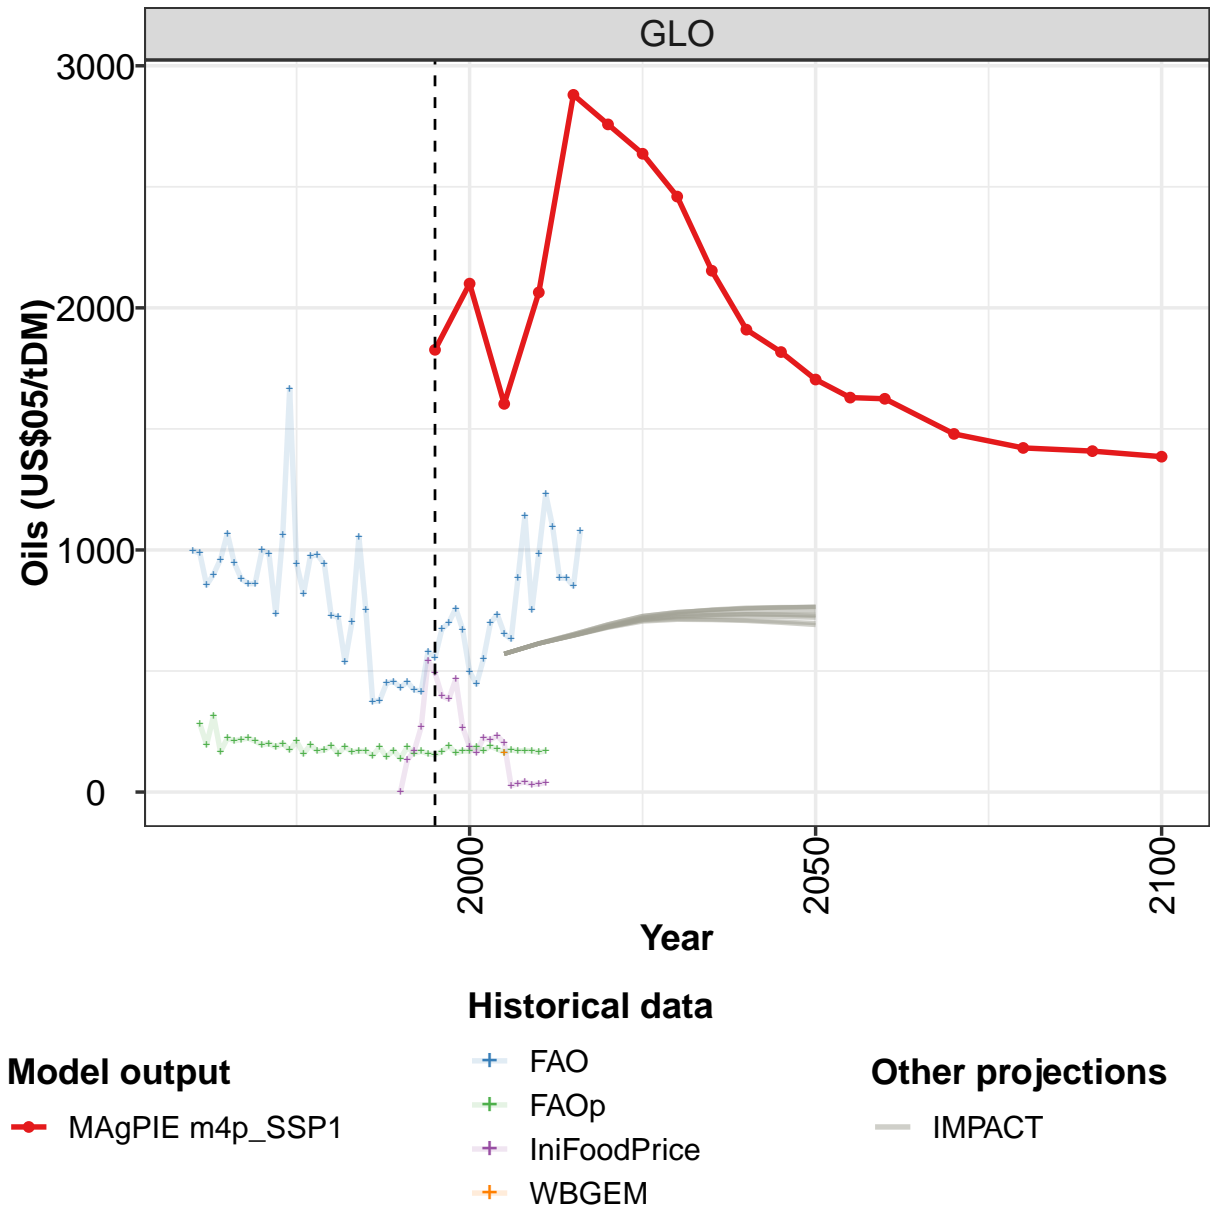

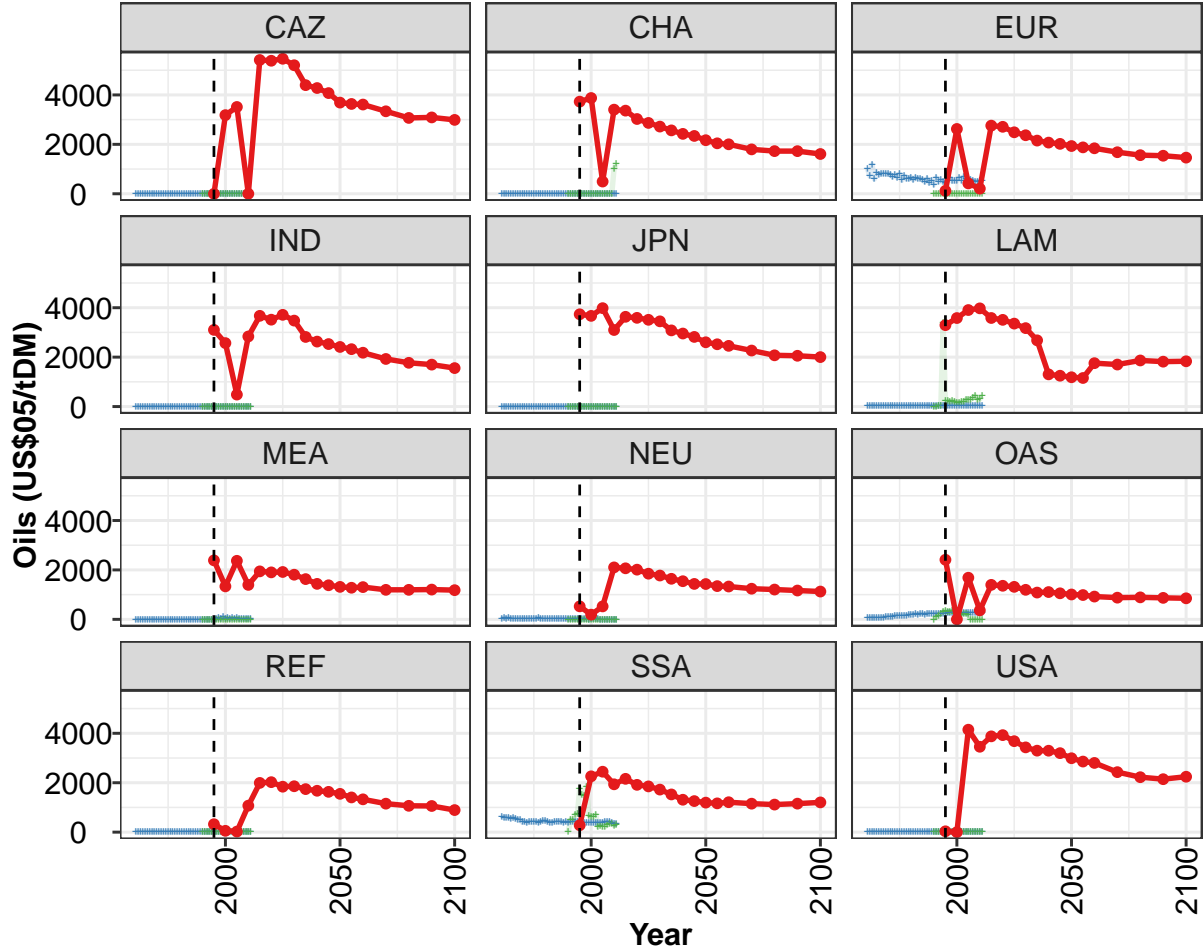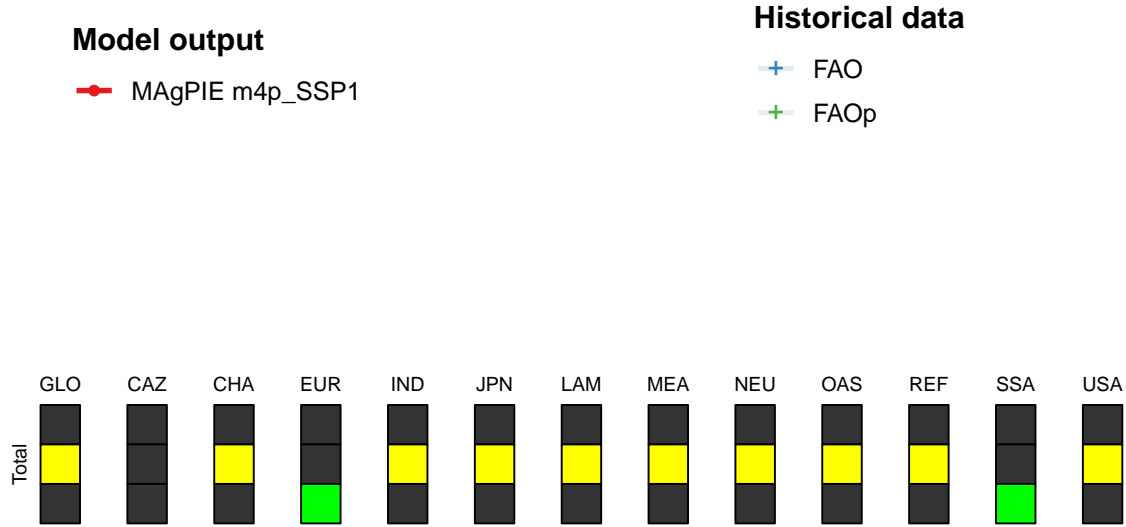

Figure 309: MAgPIE m4p\_SSP1 — Prices—Agriculture—Oils (US\$05/tDM)

|     | 1995 | 2000 | 2005 | 2010 | 2015 | 2020 | 2025 | 2030 | 2035 | 2040 | 2045 |
|-----|------|------|------|------|------|------|------|------|------|------|------|
| GLO | 1827 | 2100 | 1604 | 2064 | 2880 | 2758 | 2637 | 2460 | 2153 | 1910 | 1818 |
| CAZ | 0    | 3183 | 3513 | 2    | 5414 | 5384 | 5463 | 5201 | 4396 | 4279 | 4075 |
| CHA | 3729 | 3876 | 496  | 3405 | 3364 | 3026 | 2868 | 2720 | 2566 | 2424 | 2341 |
| EUR | 119  | 2623 | 419  | 209  | 2758 | 2710 | 2488 | 2369 | 2152 | 2071 | 2019 |
| IND | 3104 | 2569 | 485  | 2838 | 3673 | 3517 | 3713 | 3480 | 2818 | 2630 | 2529 |
| JPN | 3735 | 3670 | 3983 | 3098 | 3633 | 3590 | 3511 | 3449 | 3082 | 2956 | 2819 |
| LAM | 3295 | 3582 | 3906 | 3975 | 3585 | 3510 | 3358 | 3175 | 2681 | 1303 | 1248 |
| MEA | 2387 | 1335 | 2370 | 1395 | 1942 | 1903 | 1918 | 1808 | 1629 | 1437 | 1379 |
| NEU | 526  | 191  | 525  | 2103 | 2066 | 2012 | 1849 | 1774 | 1642 | 1544 | 1434 |
| OAS | 2412 | 0    | 1685 | 364  | 1396 | 1360 | 1316 | 1196 | 1084 | 1105 | 1055 |
| REF | 323  | 54   | 24   | 1073 | 1993 | 2023 | 1839 | 1858 | 1742 | 1676 | 1632 |
| SSA | 280  | 2260 | 2446 | 1937 | 2158 | 1915 | 1851 | 1722 | 1527 | 1312 | 1257 |
| USA | 35   | 0    | 4146 | 3456 | 3877 | 3927 | 3682 | 3431 | 3298 | 3295 | 3197 |

Table 1107: MAgPIE m4p-SSP1 — Prices—Agriculture—Oils (US\$05/tDM) [PART 1/2]

|     | 2050 | 2055 | 2060 | 2070 | 2080 | 2090 | 2100 |
|-----|------|------|------|------|------|------|------|
| GLO | 1704 | 1629 | 1625 | 1479 | 1421 | 1408 | 1385 |
| CAZ | 3690 | 3635 | 3611 | 3338 | 3069 | 3090 | 2990 |
| CHA | 2169 | 2043 | 2002 | 1797 | 1727 | 1726 | 1609 |
| EUR | 1932 | 1878 | 1841 | 1682 | 1562 | 1539 | 1463 |
| IND | 2413 | 2324 | 2180 | 1927 | 1771 | 1697 | 1557 |
| JPN | 2602 | 2521 | 2457 | 2268 | 2075 | 2056 | 2002 |
| LAM | 1187 | 1157 | 1756 | 1701 | 1866 | 1818 | 1833 |
| MEA | 1315 | 1279 | 1306 | 1195 | 1195 | 1206 | 1182 |
| NEU | 1431 | 1346 | 1329 | 1240 | 1207 | 1167 | 1126 |
| OAS | 1008 | 985  | 923  | 878  | 891  | 871  | 852  |
| REF | 1551 | 1406 | 1329 | 1153 | 1067 | 1059 | 894  |
| SSA | 1195 | 1165 | 1211 | 1153 | 1116 | 1154 | 1205 |
| USA | 2991 | 2857 | 2802 | 2429 | 2224 | 2144 | 2243 |

Table 1108: MAgPIE m4p-SSP1 — Prices—Agriculture—Oils (US\$05/tDM) [PART 2/2]

|     | 1960 | 1961 | 1962 | 1963 | 1964 | 1965 | 1966 | 1967 | 1968 | 1969 | 1970 |
|-----|------|------|------|------|------|------|------|------|------|------|------|
| GLO | 997  | 988  | 855  | 900  | 961  | 1068 | 946  | 881  | 861  | 861  | 999  |
| CAZ |      |      |      |      |      |      |      |      |      |      |      |
| CHA |      |      |      |      |      |      |      |      |      |      |      |
| EUR |      |      |      |      |      |      |      |      |      |      |      |
| IND |      |      |      |      |      |      |      |      |      |      |      |
| JPN |      |      |      |      |      |      |      |      |      |      |      |
| LAM |      |      |      |      |      |      |      |      |      |      |      |
| MEA |      |      |      |      |      |      |      |      |      |      |      |
| NEU |      |      |      |      |      |      |      |      |      |      |      |
| OAS |      |      |      |      |      |      |      |      |      |      |      |
| REF |      |      |      |      |      |      |      |      |      |      |      |
| SSA |      |      |      |      |      |      |      |      |      |      |      |
| USA |      |      |      |      |      |      |      |      |      |      |      |

Table 1109: WBGEM — Prices—Agriculture—Oils (US\$05/tDM) [PART 1/6]



|     | 1971 | 1972 | 1973 | 1974 | 1975 | 1976 | 1977 | 1978 | 1979 | 1980 | 1981 |
|-----|------|------|------|------|------|------|------|------|------|------|------|
| GLO | 985  | 736  | 1064 | 1666 | 943  | 819  | 974  | 980  | 943  | 730  | 723  |
| CAZ |      |      |      |      |      |      |      |      |      |      |      |
| CHA |      |      |      |      |      |      |      |      |      |      |      |
| EUR |      |      |      |      |      |      |      |      |      |      |      |
| IND |      |      |      |      |      |      |      |      |      |      |      |
| JPN |      |      |      |      |      |      |      |      |      |      |      |
| LAM |      |      |      |      |      |      |      |      |      |      |      |
| MEA |      |      |      |      |      |      |      |      |      |      |      |
| NEU |      |      |      |      |      |      |      |      |      |      |      |
| OAS |      |      |      |      |      |      |      |      |      |      |      |
| REF |      |      |      |      |      |      |      |      |      |      |      |
| SSA |      |      |      |      |      |      |      |      |      |      |      |
| USA |      |      |      |      |      |      |      |      |      |      |      |

Table 1110: WBGEM — Prices—Agriculture—Oils (US\$05/tDM) [PART 2/6]

|     | 1982 | 1983 | 1984 | 1985 | 1986 | 1987 | 1988 | 1989 | 1990 | 1991 | 1992 |
|-----|------|------|------|------|------|------|------|------|------|------|------|
| GLO | 538  | 702  | 1054 | 755  | 374  | 377  | 450  | 457  | 432  | 454  | 423  |
| CAZ |      |      |      |      |      |      |      |      |      |      |      |
| CHA |      |      |      |      |      |      |      |      |      |      |      |
| EUR |      |      |      |      |      |      |      |      |      |      |      |
| IND |      |      |      |      |      |      |      |      |      |      |      |
| JPN |      |      |      |      |      |      |      |      |      |      |      |
| LAM |      |      |      |      |      |      |      |      |      |      |      |
| MEA |      |      |      |      |      |      |      |      |      |      |      |
| NEU |      |      |      |      |      |      |      |      |      |      |      |
| OAS |      |      |      |      |      |      |      |      |      |      |      |
| REF |      |      |      |      |      |      |      |      |      |      |      |
| SSA |      |      |      |      |      |      |      |      |      |      |      |
| USA |      |      |      |      |      |      |      |      |      |      |      |

Table 1111: WBGEM — Prices—Agriculture—Oils (US\$05/tDM) [PART 3/6]

|     | 1993 | 1994 | 1995 | 1996 | 1997 | 1998 | 1999 | 2000 | 2001 | 2002 | 2003 |
|-----|------|------|------|------|------|------|------|------|------|------|------|
| GLO | 416  | 581  | 556  | 673  | 700  | 758  | 671  | 497  | 446  | 549  | 698  |
| CAZ |      |      |      |      |      |      |      |      |      |      |      |
| CHA |      |      |      |      |      |      |      |      |      |      |      |
| EUR |      |      |      |      |      |      |      |      |      |      |      |
| IND |      |      |      |      |      |      |      |      |      |      |      |
| JPN |      |      |      |      |      |      |      |      |      |      |      |
| LAM |      |      |      |      |      |      |      |      |      |      |      |
| MEA |      |      |      |      |      |      |      |      |      |      |      |
| NEU |      |      |      |      |      |      |      |      |      |      |      |
| OAS |      |      |      |      |      |      |      |      |      |      |      |
| REF |      |      |      |      |      |      |      |      |      |      |      |
| SSA |      |      |      |      |      |      |      |      |      |      |      |
| USA |      |      |      |      |      |      |      |      |      |      |      |

Table 1112: WBGEM — Prices—Agriculture—Oils (US\$05/tDM) [PART 4/6]

|     | 2004 | 2005 | 2006 | 2007 | 2008 | 2009 | 2010 | 2011 | 2012 | 2013 | 2014 |
|-----|------|------|------|------|------|------|------|------|------|------|------|
| GLO | 734  | 654  | 631  | 886  | 1141 | 753  | 985  | 1231 | 1096 | 883  | 884  |
| CAZ |      |      |      |      |      |      |      |      |      |      |      |
| CHA |      |      |      |      |      |      |      |      |      |      |      |
| EUR |      |      |      |      |      |      |      |      |      |      |      |
| IND |      |      |      |      |      |      |      |      |      |      |      |
| JPN |      |      |      |      |      |      |      |      |      |      |      |
| LAM |      |      |      |      |      |      |      |      |      |      |      |
| MEA |      |      |      |      |      |      |      |      |      |      |      |
| NEU |      |      |      |      |      |      |      |      |      |      |      |
| OAS |      |      |      |      |      |      |      |      |      |      |      |
| REF |      |      |      |      |      |      |      |      |      |      |      |
| SSA |      |      |      |      |      |      |      |      |      |      |      |
| USA |      |      |      |      |      |      |      |      |      |      |      |

Table 1113: WBGEM — Prices—Agriculture—Oils (US\$05/tDM) [PART 5/6]

|     | 2015 | 2016 |
|-----|------|------|
| GLO | 851  | 1081 |
| CAZ |      |      |
| CHA |      |      |
| EUR |      |      |
| IND |      |      |
| JPN |      |      |
| LAM |      |      |
| MEA |      |      |
| NEU |      |      |
| OAS |      |      |
| REF |      |      |
| SSA |      |      |
| USA |      |      |

Table 1114: WBGEM — Prices—Agriculture—Oils (US\$05/tDM) [PART 6/6]

|     | 1961 | 1962 | 1963 | 1964 | 1965 | 1966 | 1967 | 1968 | 1969 | 1970 | 1971 |
|-----|------|------|------|------|------|------|------|------|------|------|------|
| GLO | 284  | 196  | 316  | 167  | 223  | 211  | 218  | 222  | 211  | 195  | 201  |
| CAZ | 0    | 0    | 0    | 0    | 0    | 0    | 0    | 0    | 0    | 0    | 0    |
| CHA | 8    | 7    | 6    | 6    | 5    | 7    | 8    | 10   | 11   | 12   | 13   |
| EUR | 1016 | 715  | 1177 | 597  | 842  | 782  | 805  | 829  | 802  | 793  | 787  |
| IND | 0    | 0    | 0    | 0    | 0    | 0    | 0    | 0    | 0    | 0    | 0    |
| JPN | 0    | 0    | 0    | 0    | 0    | 0    | 0    | 0    | 0    | 0    | 0    |
| LAM | 15   | 15   | 17   | 18   | 16   | 16   | 20   | 23   | 19   | 18   | 22   |
| MEA | 0    | 0    | 0    | 0    | 0    | 0    | 0    | 0    | 0    | 0    | 0    |
| NEU | 22   | 44   | 34   | 64   | 36   | 28   | 33   | 26   | 27   | 10   | 29   |
| OAS | 60   | 49   | 53   | 56   | 60   | 65   | 75   | 82   | 93   | 96   | 105  |
| REF | 0    | 0    | 0    | 0    | 0    | 0    | 0    | 0    | 0    | 0    | 0    |
| SSA | 637  | 596  | 584  | 596  | 552  | 584  | 524  | 502  | 489  | 401  | 427  |
| USA | 0    | 0    | 0    | 0    | 0    | 0    | 0    | 0    | 0    | 0    | 0    |

Table 1115: FAO — Prices—Agriculture—Oils (US\$05/tDM) [PART 1/5]

|     | 1972 | 1973 | 1974 | 1975 | 1976 | 1977 | 1978 | 1979 | 1980 | 1981 | 1982 |
|-----|------|------|------|------|------|------|------|------|------|------|------|
| GLO | 186  | 201  | 174  | 210  | 158  | 195  | 170  | 173  | 192  | 160  | 187  |
| CAZ | 0    | 0    | 0    | 0    | 0    | 0    | 0    | 0    | 0    | 0    | 0    |
| CHA | 15   | 15   | 15   | 14   | 16   | 15   | 13   | 12   | 10   | 9    | 8    |
| EUR | 679  | 751  | 651  | 792  | 549  | 714  | 624  | 599  | 667  | 569  | 664  |
| IND | 0    | 0    | 0    | 0    | 0    | 0    | 0    | 0    | 0    | 0    | 0    |
| JPN | 0    | 0    | 0    | 0    | 0    | 0    | 0    | 0    | 0    | 0    | 0    |
| LAM | 23   | 22   | 18   | 15   | 14   | 15   | 14   | 15   | 15   | 18   | 21   |
| MEA | 0    | 0    | 0    | 0    | 0    | 0    | 0    | 0    | 0    | 0    | 0    |
| NEU | 24   | 42   | 32   | 38   | 32   | 45   | 25   | 27   | 21   | 20   | 12   |
| OAS | 115  | 131  | 147  | 150  | 142  | 161  | 159  | 181  | 191  | 190  | 208  |
| REF | 0    | 0    | 0    | 0    | 0    | 0    | 0    | 0    | 0    | 0    | 0    |
| SSA | 384  | 417  | 400  | 415  | 412  | 396  | 423  | 452  | 465  | 404  | 390  |
| USA | 0    | 0    | 0    | 0    | 0    | 0    | 0    | 0    | 0    | 0    | 0    |

Table 1116: FAO — Prices—Agriculture—Oils (US\$05/tDM) [PART 2/5]

|     | 1983 | 1984 | 1985 | 1986 | 1987 | 1988 | 1989 | 1990 | 1991 | 1992 | 1993 |
|-----|------|------|------|------|------|------|------|------|------|------|------|
| GLO | 166  | 169  | 169  | 151  | 185  | 146  | 172  | 139  | 186  | 160  | 168  |
| CAZ | 0    | 0    | 0    | 0    | 0    | 0    | 0    | 0    | 0    | 0    | 0    |
| CHA | 8    | 7    | 9    | 10   | 8    | 8    | 8    | 6    | 6    | 6    | 6    |
| EUR | 608  | 604  | 575  | 478  | 610  | 430  | 544  | 381  | 644  | 493  | 549  |
| IND | 0    | 0    | 0    | 0    | 0    | 0    | 0    | 0    | 0    | 0    | 0    |
| JPN | 0    | 0    | 0    | 0    | 0    | 0    | 0    | 0    | 0    | 0    | 0    |
| LAM | 22   | 25   | 24   | 29   | 30   | 33   | 36   | 37   | 40   | 39   | 42   |
| MEA | 0    | 0    | 0    | 0    | 0    | 0    | 0    | 0    | 0    | 0    | 0    |
| NEU | 37   | 15   | 20   | 9    | 18   | 13   | 15   | 5    | 18   | 8    | 16   |
| OAS | 195  | 219  | 214  | 204  | 210  | 220  | 236  | 225  | 232  | 235  | 241  |
| REF | 0    | 0    | 0    | 0    | 0    | 0    | 0    | 0    | 0    | 0    | 0    |
| SSA | 382  | 404  | 439  | 427  | 438  | 396  | 414  | 398  | 402  | 424  | 425  |
| USA | 0    | 0    | 0    | 0    | 0    | 0    | 0    | 0    | 0    | 0    | 0    |

Table 1117: FAO — Prices—Agriculture—Oils (US\$05/tDM) [PART 3/5]

|     | 1994 | 1995 | 1996 | 1997 | 1998 | 1999 | 2000 | 2001 | 2002 | 2003 | 2004 |
|-----|------|------|------|------|------|------|------|------|------|------|------|
| GLO | 159  | 154  | 168  | 190  | 162  | 170  | 169  | 188  | 170  | 189  | 177  |
| CAZ | 0    | 0    | 0    | 0    | 0    | 0    | 0    | 0    | 0    | 0    | 0    |
| CHA | 6    | 6    | 5    | 5    | 4    | 4    | 4    | 4    | 3    | 3    | 3    |
| EUR | 473  | 451  | 534  | 630  | 505  | 516  | 542  | 632  | 545  | 682  | 611  |
| IND | 0    | 0    | 0    | 0    | 0    | 0    | 0    | 0    | 0    | 0    | 0    |
| JPN | 0    | 0    | 0    | 0    | 0    | 0    | 0    | 0    | 0    | 0    | 0    |
| LAM | 43   | 39   | 39   | 44   | 41   | 38   | 43   | 46   | 42   | 39   | 44   |
| MEA | 0    | 0    | 29   | 66   | 19   | 88   | 13   | 74   | 24   | 45   | 13   |
| NEU | 14   | 17   | 9    | 11   | 3    | 2    | 4    | 6    | 5    | 4    | 3    |
| OAS | 243  | 238  | 247  | 250  | 246  | 261  | 254  | 256  | 259  | 262  | 259  |
| REF | 0    | 0    | 0    | 0    | 0    | 0    | 0    | 0    | 0    | 0    | 0    |
| SSA | 419  | 420  | 386  | 380  | 389  | 388  | 389  | 360  | 363  | 376  | 393  |
| USA | 0    | 0    | 0    | 0    | 0    | 0    | 0    | 0    | 0    | 0    | 0    |

Table 1118: FAO — Prices—Agriculture—Oils (US\$05/tDM) [PART 4/5]

|     | 2005 | 2006 | 2007 | 2008 | 2009 | 2010 | 2011 |
|-----|------|------|------|------|------|------|------|
| GLO | 164  | 174  | 170  | 172  | 170  | 165  | 170  |
| CAZ | 0    | 0    | 0    | 0    | 0    | 0    | 0    |
| CHA | 3    | 3    | 3    | 3    | 3    | 2    | 2    |
| EUR | 518  | 553  | 532  | 479  | 470  | 516  | 539  |
| IND | 0    | 0    | 0    | 0    | 0    | 0    | 0    |
| JPN | 0    | 0    | 0    | 0    | 0    | 0    | 0    |
| LAM | 46   | 47   | 46   | 48   | 52   | 47   | 48   |
| MEA | 60   | 14   | 15   | 27   | 7    | 31   | 27   |
| NEU | 2    | 2    | 2    | 2    | 2    | 2    | 2    |
| OAS | 262  | 267  | 263  | 268  | 267  | 250  | 260  |
| REF | 0    | 0    | 0    | 0    | 0    | 0    | 0    |
| SSA | 390  | 417  | 426  | 418  | 394  | 357  | 341  |
| USA | 0    | 0    | 0    | 0    | 0    | 0    | 0    |

Table 1119: FAO — Prices—Agriculture—Oils (US\$05/tDM) [PART 5/5]

|     | 1990 | 1991 | 1992 | 1993 | 1994 | 1995 | 1996 | 1997 | 1998 | 1999 | 2000 |
|-----|------|------|------|------|------|------|------|------|------|------|------|
| GLO | 0    | 132  | 170  | 268  | 544  | 491  | 397  | 384  | 466  | 267  | 187  |
| CAZ | 0    | 0    | 0    | 0    | 0    | 0    | 0    | 0    | 0    | 0    | 0    |
| CHA | 0    | 0    | 0    | 0    | 0    | 0    | 0    | 0    | 0    | 0    | 0    |
| EUR | 0    | 0    | 0    | 0    | 0    | 0    | 0    | 0    | 0    | 0    | 0    |
| IND | 0    | 0    | 0    | 0    | 0    | 0    | 0    | 0    | 0    | 0    | 0    |
| JPN | 0    | 0    | 0    | 0    | 0    | 0    | 0    | 0    | 0    | 0    | 0    |
| LAM | 0    | 6    | 15   | 35   | 3375 | 235  | 224  | 198  | 221  | 207  | 153  |
| MEA | 0    | 0    | 0    | 0    | 0    | 0    | 0    | 0    | 0    | 0    | 0    |
| NEU | 0    | 0    | 0    | 0    | 0    | 0    | 0    | 0    | 0    | 0    | 0    |
| OAS | 0    | 85   | 137  | 229  | 304  | 360  | 289  | 292  | 341  | 234  | 154  |
| REF | 0    | 0    | 0    | 0    | 0    | 0    | 0    | 0    | 0    | 0    | 0    |
| SSA | 0    | 502  | 481  | 705  | 747  | 1752 | 1512 | 1461 | 1846 | 681  | 610  |
| USA | 0    | 0    | 0    | 0    | 0    | 0    | 0    | 0    | 0    | 0    | 0    |

Table 1120: FAOp — Prices—Agriculture—Oils (US\$05/tDM) [PART 1/3]

|     | 2001 | 2002 | 2003 | 2004 | 2005 | 2006 | 2007 | 2008 | 2009 | 2010 | 2011 |
|-----|------|------|------|------|------|------|------|------|------|------|------|
| GLO | 164  | 224  | 216  | 232  | 202  | 26   | 36   | 42   | 32   | 33   | 40   |
| CAZ | 0    | 0    | 0    | 0    | 0    | 0    | 0    | 0    | 0    | 0    | 0    |
| CHA | 0    | 0    | 0    | 0    | 0    | 0    | 0    | 0    | 0    | 1012 | 1228 |
| EUR | 0    | 0    | 0    | 0    | 0    | 0    | 0    | 0    | 0    | 0    | 0    |
| IND | 0    | 0    | 0    | 0    | 0    | 0    | 0    | 0    | 0    | 0    | 0    |
| JPN | 0    | 0    | 0    | 0    | 0    | 0    | 0    | 0    | 0    | 0    | 0    |
| LAM | 150  | 174  | 202  | 287  | 270  | 277  | 373  | 432  | 270  | 300  | 422  |
| MEA | 0    | 0    | 0    | 0    | 0    | 0    | 0    | 0    | 0    | 0    | 0    |
| NEU | 0    | 0    | 0    | 0    | 0    | 0    | 0    | 0    | 0    | 0    | 0    |
| OAS | 132  | 192  | 219  | 230  | 199  | 0    | 0    | 0    | 0    | 0    | 0    |
| REF | 0    | 0    | 0    | 0    | 0    | 0    | 0    | 0    | 0    | 0    | 0    |
| SSA | 605  | 697  | 211  | 241  | 211  | 216  | 286  | 339  | 333  | 268  | 284  |
| USA | 0    | 0    | 0    | 0    | 0    | 0    | 0    | 0    | 0    | 0    | 0    |

Table 1121: FAOp — Prices—Agriculture—Oils (US\$05/tDM) [PART 2/3]

|     | 2005 |
|-----|------|
| GLO | 164  |
| CAZ |      |
| CHA |      |
| EUR |      |
| IND |      |
| JPN |      |
| LAM |      |
| MEA |      |
| NEU |      |
| OAS |      |
| REF |      |
| SSA |      |
| USA |      |

Table 1122: IniFoodPrice — Prices—Agriculture—Oils (US\$05/tDM)

36.20
Other fibrous crop residues

## geom\_path: Each group consists of only one observation. Do you need to adjust the group## aesthetic?

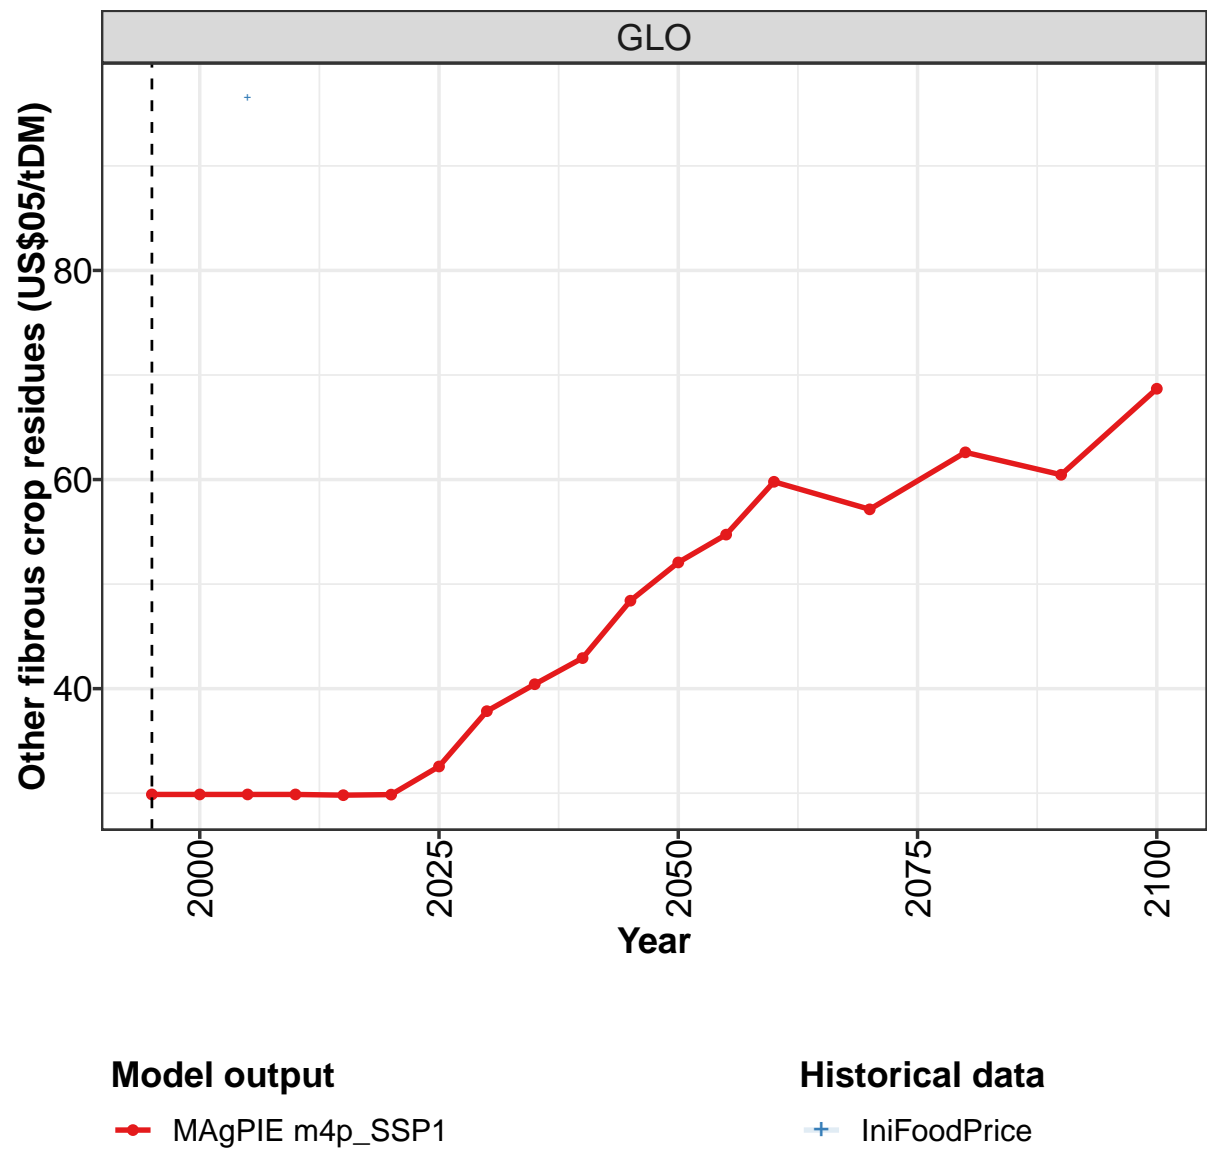

Figure 310: MAGPIE m4p\_SSP1 — Prices—Agriculture—Other fibrous crop residues (US\$05/tDM)

|     | 1995 | 2000 | 2005 | 2010 | 2015 | 2020 | 2025 | 2030 | 2035 | 2040 | 2045 |
|-----|------|------|------|------|------|------|------|------|------|------|------|
| GLO | 29.9 | 29.9 | 29.9 | 29.9 | 29.8 | 29.9 | 32.6 | 37.8 | 40.4 | 42.9 | 48.4 |

Table 1123: MAgPIE m4p\_SSP1 — Prices—Agriculture—Other fibrous crop residues (US\$05/tDM) [PART 1/2]

|     | 2050 | 2055 | 2060 | 2070 | 2080 | 2090 | 2100 |
|-----|------|------|------|------|------|------|------|
| GLO | 52.1 | 54.7 | 59.8 | 57.2 | 62.6 | 60.5 | 68.7 |

Table 1124: MAgPIE m4p\_SSP1 — Prices—Agriculture—Other fibrous crop residues (US\$05/tDM) [PART 2/2]

|     | 2005 |
|-----|------|
| GLO | 96.5 |

Table 1125: IniFoodPrice — Prices—Agriculture—Other fibrous crop residues (US\$05/tDM)

36.21 Other oil crops (incl rapeseed)

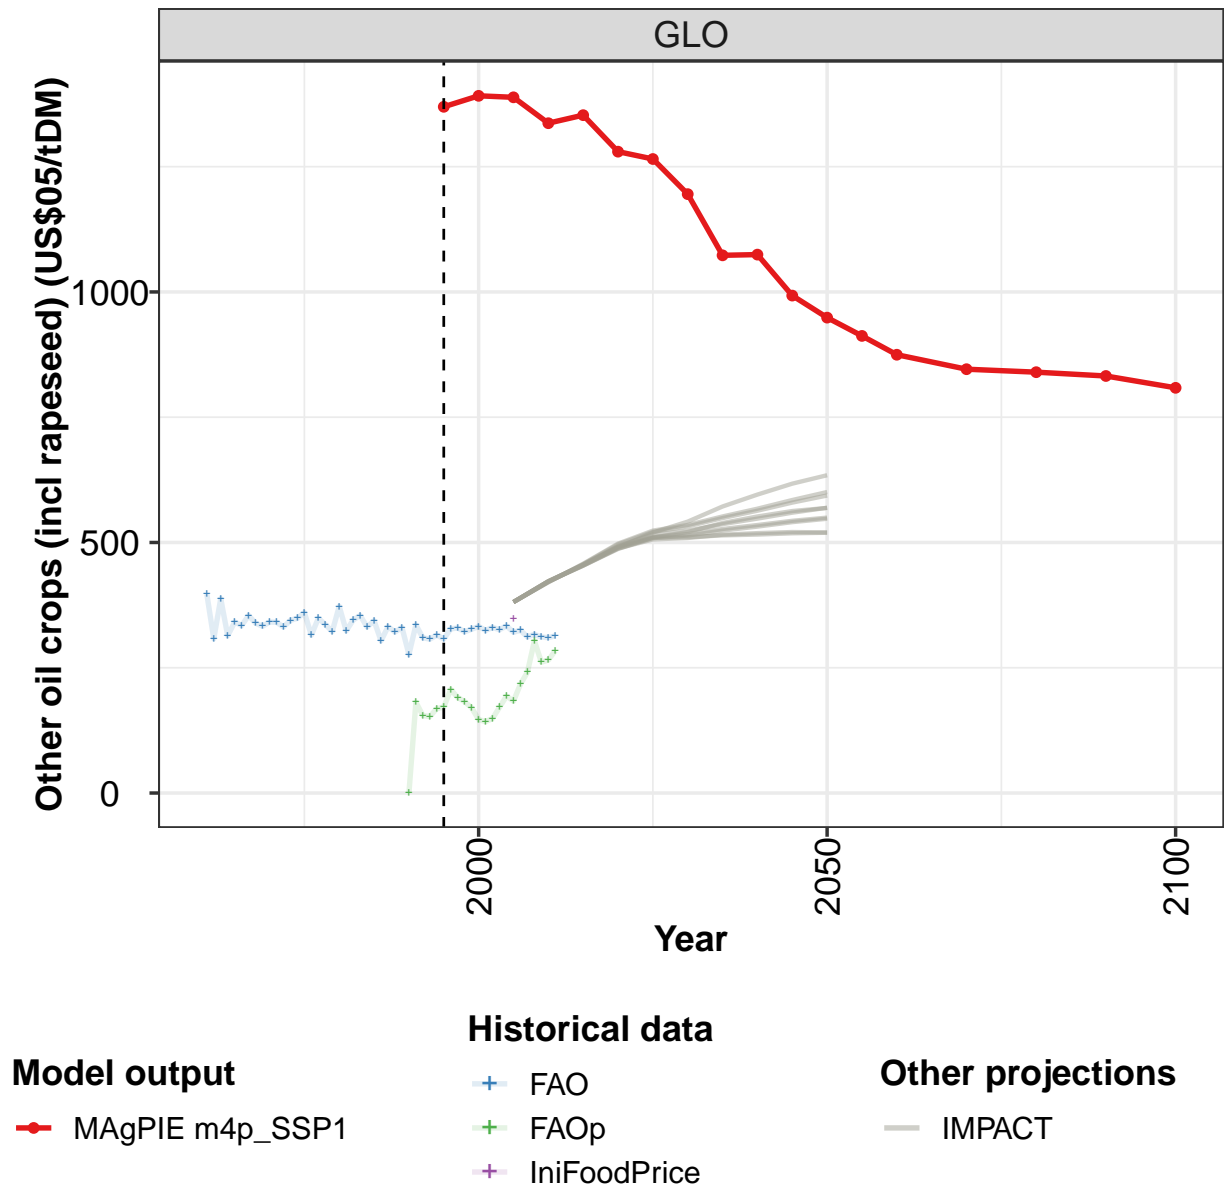



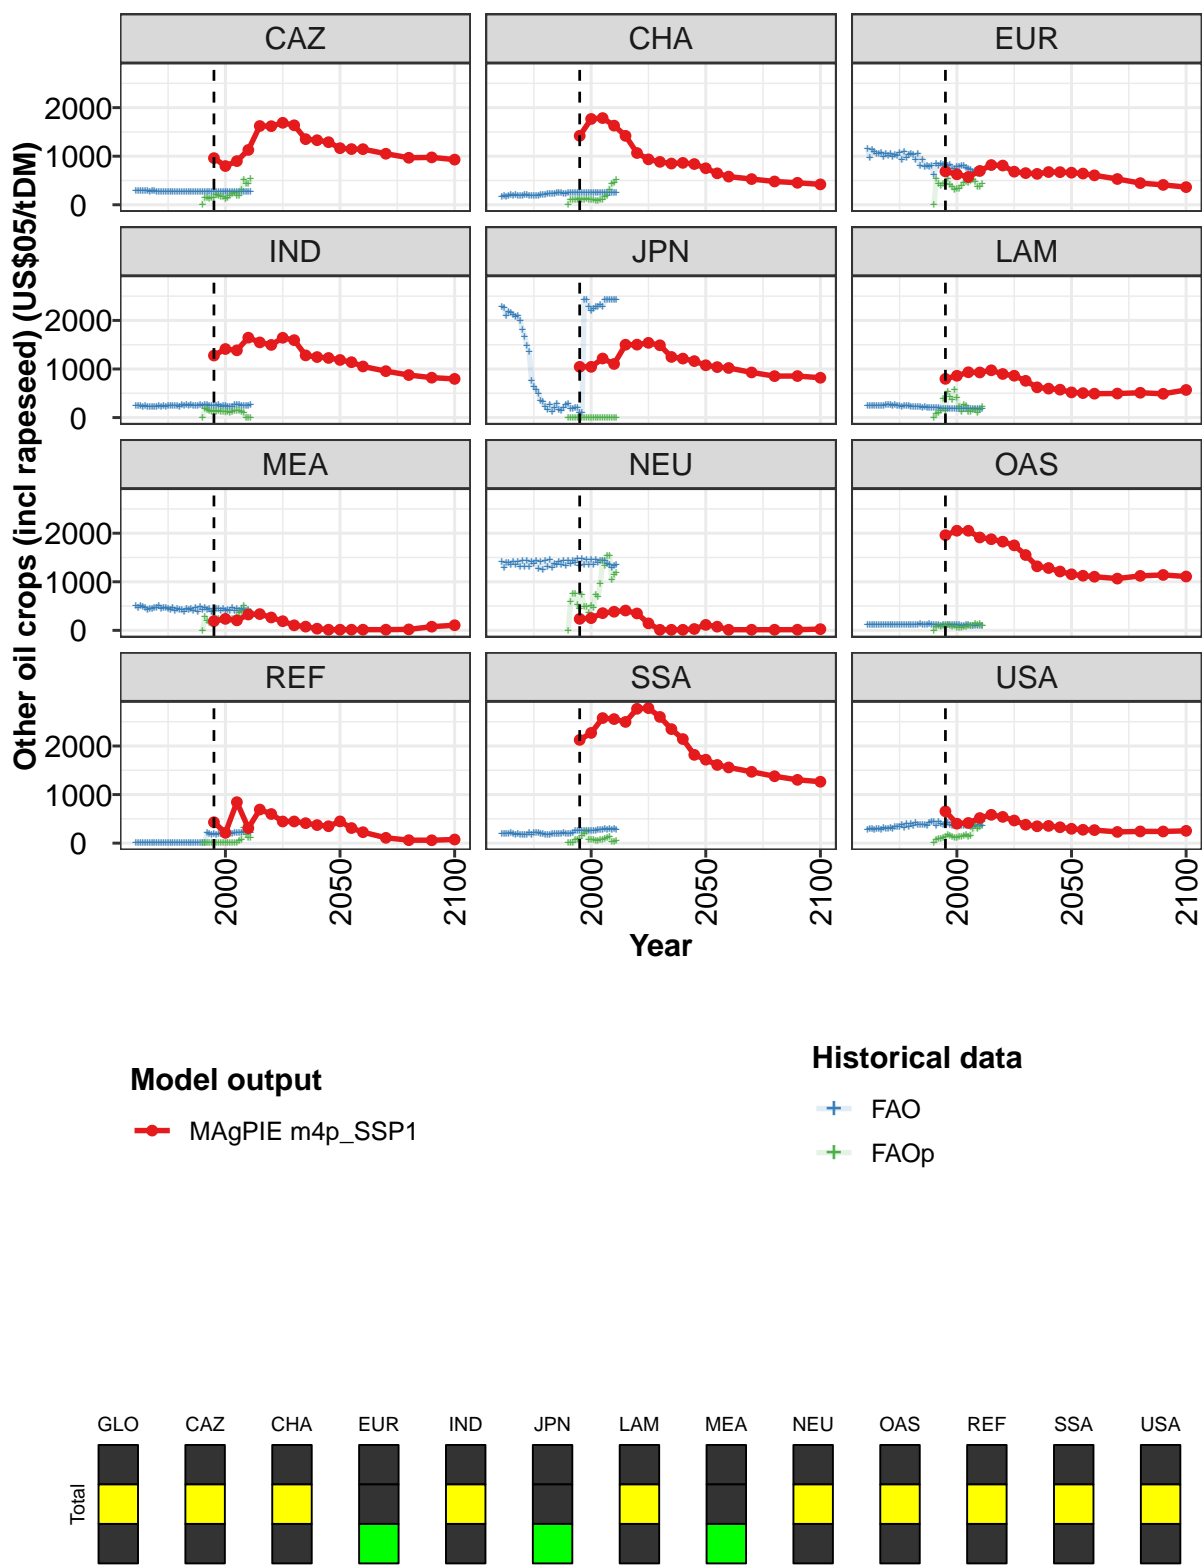

Figure 311: MAgPIE m4p\_SSP1 — Prices—Agriculture—Other oil crops (incl rapeseed) (US\$05/tDM)

|     | 1995 | 2000 | 2005 | 2010 | 2015 | 2020 | 2025 | 2030 | 2035 | 2040 | 2045 |
|-----|------|------|------|------|------|------|------|------|------|------|------|
| GLO | 1370 | 1391 | 1388 | 1337 | 1353 | 1280 | 1265 | 1195 | 1073 | 1074 | 993  |
| CAZ | 961  | 798  | 900  | 1129 | 1622 | 1619 | 1688 | 1637 | 1351 | 1330 | 1289 |
| CHA | 1420 | 1767 | 1786 | 1630 | 1420 | 1066 | 935  | 884  | 849  | 863  | 839  |
| EUR | 687  | 627  | 574  | 697  | 818  | 808  | 682  | 652  | 637  | 674  | 672  |
| IND | 1277 | 1412 | 1385 | 1646 | 1548 | 1496 | 1643 | 1594 | 1281 | 1246 | 1228 |
| JPN | 1045 | 1045 | 1216 | 1104 | 1500 | 1501 | 1539 | 1489 | 1248 | 1215 | 1163 |
| LAM | 797  | 861  | 933  | 929  | 973  | 898  | 862  | 757  | 623  | 596  | 575  |
| MEA | 191  | 237  | 206  | 327  | 335  | 266  | 188  | 104  | 77   | 35   | 14   |
| NEU | 237  | 252  | 354  | 384  | 409  | 348  | 144  | 12   | 12   | 12   | 28   |
| OAS | 1960 | 2052 | 2051 | 1913 | 1877 | 1826 | 1751 | 1552 | 1319 | 1283 | 1212 |
| REF | 431  | 212  | 844  | 310  | 692  | 600  | 446  | 447  | 412  | 373  | 349  |
| SSA | 2126 | 2270 | 2576 | 2555 | 2496 | 2767 | 2780 | 2599 | 2349 | 2144 | 1818 |
| USA | 654  | 401  | 416  | 517  | 584  | 541  | 466  | 379  | 348  | 355  | 328  |

Table 1126: MAgPIE m4p\_SSP1 — Prices—Agriculture—Other oil crops (incl rapeseed) (US\$05/tDM) [PART 1/2]

|     | 2050 | 2055 | 2060 | 2070 | 2080 | 2090 | 2100 |
|-----|------|------|------|------|------|------|------|
| GLO | 949  | 912  | 875  | 846  | 840  | 832  | 809  |
| CAZ | 1165 | 1147 | 1145 | 1051 | 968  | 976  | 930  |
| CHA | 752  | 648  | 580  | 530  | 480  | 453  | 420  |
| EUR | 661  | 643  | 607  | 531  | 446  | 409  | 364  |
| IND | 1186 | 1140 | 1052 | 956  | 876  | 821  | 796  |
| JPN | 1077 | 1039 | 1021 | 929  | 853  | 855  | 820  |
| LAM | 519  | 504  | 492  | 495  | 511  | 489  | 569  |
| MEA | 14   | 14   | 14   | 14   | 20   | 76   | 106  |
| NEU | 113  | 76   | 13   | 13   | 13   | 14   | 25   |
| OAS | 1155 | 1125 | 1104 | 1066 | 1122 | 1141 | 1109 |
| REF | 448  | 311  | 226  | 110  | 61   | 60   | 75   |
| SSA | 1719 | 1610 | 1559 | 1469 | 1378 | 1304 | 1265 |
| USA | 296  | 276  | 269  | 231  | 242  | 241  | 254  |

Table 1127: MAgPIE m4p\_SSP1 — Prices—Agriculture—Other oil crops (incl rapeseed) (US\$05/tDM) [PART 2/2]

|     | 1961 | 1962 | 1963 | 1964 | 1965 | 1966 | 1967 | 1968 | 1969 | 1970 | 1971 |
|-----|------|------|------|------|------|------|------|------|------|------|------|
| GLO | 397  | 308  | 388  | 314  | 341  | 334  | 354  | 339  | 333  | 341  | 341  |
| CAZ | 280  | 283  | 284  | 280  | 281  | 280  | 275  | 285  | 278  | 274  | 269  |
| CHA | 161  | 175  | 174  | 190  | 196  | 195  | 196  | 187  | 185  | 189  | 196  |
| EUR | 1161 | 977  | 1130 | 1091 | 1052 | 1041 | 1067 | 984  | 1056 | 1012 | 1050 |
| IND | 236  | 235  | 234  | 216  | 235  | 221  | 216  | 228  | 215  | 230  | 235  |
| JPN | 2277 | 2262 | 2092 | 2173 | 2158 | 2115 | 2082 | 2088 | 1999 | 1799 | 1667 |
| LAM | 240  | 242  | 249  | 248  | 248  | 237  | 242  | 236  | 255  | 259  | 255  |
| MEA | 511  | 459  | 509  | 490  | 469  | 418  | 453  | 436  | 460  | 475  | 505  |
| NEU | 1411 | 1295 | 1388 | 1391 | 1341 | 1422 | 1353 | 1410 | 1304 | 1425 | 1308 |
| OAS | 110  | 109  | 107  | 108  | 108  | 107  | 111  | 114  | 116  | 117  | 115  |
| REF | 0    | 0    | 0    | 0    | 0    | 0    | 0    | 0    | 0    | 0    | 0    |
| SSA | 197  | 201  | 201  | 201  | 204  | 189  | 182  | 194  | 173  | 178  | 166  |
| USA | 271  | 297  | 286  | 272  | 291  | 288  | 279  | 307  | 302  | 303  | 319  |

Table 1128: FAO — Prices—Agriculture—Other oil crops (incl rapeseed) (US\$05/tDM) [PART 1/5]

|     | 1972 | 1973 | 1974 | 1975 | 1976 | 1977 | 1978 | 1979 | 1980 | 1981 | 1982 |
|-----|------|------|------|------|------|------|------|------|------|------|------|
| GLO | 331  | 345  | 349  | 360  | 315  | 349  | 336  | 322  | 373  | 324  | 345  |
| CAZ | 271  | 273  | 273  | 268  | 272  | 270  | 267  | 267  | 266  | 269  | 269  |
| CHA | 196  | 195  | 192  | 192  | 189  | 187  | 204  | 215  | 209  | 229  | 230  |
| EUR | 992  | 1029 | 1017 | 1067 | 920  | 1094 | 966  | 1025 | 1051 | 1030 | 929  |
| IND | 221  | 236  | 230  | 251  | 244  | 240  | 240  | 239  | 224  | 261  | 251  |
| JPN | 1484 | 1346 | 752  | 641  | 569  | 495  | 350  | 317  | 226  | 168  | 269  |
| LAM | 237  | 259  | 241  | 237  | 232  | 241  | 237  | 239  | 232  | 223  | 212  |
| MEA | 453  | 466  | 459  | 454  | 423  | 465  | 407  | 434  | 419  | 413  | 382  |
| NEU | 1441 | 1306 | 1415 | 1377 | 1431 | 1266 | 1410 | 1244 | 1437 | 1308 | 1447 |
| OAS | 113  | 115  | 119  | 118  | 119  | 116  | 117  | 115  | 105  | 108  | 113  |
| REF | 0    | 0    | 0    | 0    | 0    | 0    | 0    | 0    | 0    | 0    | 0    |
| SSA | 178  | 210  | 168  | 215  | 210  | 204  | 191  | 188  | 183  | 172  | 170  |
| USA | 301  | 331  | 332  | 333  | 387  | 321  | 395  | 338  | 402  | 348  | 410  |

Table 1129: FAO — Prices—Agriculture—Other oil crops (incl rapeseed) (US\$05/tDM) [PART 2/5]

|     | 1983 | 1984 | 1985 | 1986 | 1987 | 1988 | 1989 | 1990 | 1991 | 1992 | 1993 |
|-----|------|------|------|------|------|------|------|------|------|------|------|
| GLO | 354  | 331  | 344  | 304  | 332  | 321  | 330  | 277  | 335  | 310  | 307  |
| CAZ | 266  | 267  | 268  | 269  | 266  | 264  | 266  | 269  | 266  | 265  | 266  |
| CHA | 227  | 229  | 239  | 239  | 245  | 236  | 236  | 243  | 243  | 244  | 243  |
| EUR | 1041 | 794  | 930  | 773  | 804  | 776  | 809  | 616  | 834  | 802  | 837  |
| IND | 255  | 250  | 256  | 248  | 239  | 248  | 254  | 252  | 256  | 253  | 233  |
| JPN | 123  | 199  | 289  | 167  | 149  | 192  | 259  | 280  | 182  | 186  | 192  |
| LAM | 221  | 214  | 210  | 212  | 211  | 207  | 205  | 206  | 206  | 192  | 189  |
| MEA | 454  | 416  | 442  | 411  | 465  | 386  | 485  | 418  | 467  | 419  | 434  |
| NEU | 1290 | 1372 | 1348 | 1416 | 1349 | 1428 | 1335 | 1442 | 1371 | 1429 | 1392 |
| OAS | 122  | 128  | 122  | 120  | 118  | 126  | 122  | 114  | 110  | 110  | 104  |
| REF | 0    | 0    | 0    | 0    | 0    | 0    | 0    | 0    | 0    | 203  | 193  |
| SSA | 185  | 185  | 183  | 188  | 185  | 217  | 202  | 198  | 202  | 207  | 246  |
| USA | 369  | 387  | 382  | 375  | 362  | 425  | 447  | 440  | 367  | 442  | 397  |

Table 1130: FAO — Prices—Agriculture—Other oil crops (incl rapeseed) (US\$05/tDM) [PART 3/5]

|     | 1994 | 1995 | 1996 | 1997 | 1998 | 1999 | 2000 | 2001 | 2002 | 2003 | 2004 |
|-----|------|------|------|------|------|------|------|------|------|------|------|
| GLO | 315  | 308  | 328  | 329  | 322  | 327  | 332  | 325  | 330  | 326  | 333  |
| CAZ | 265  | 267  | 268  | 267  | 268  | 269  | 268  | 270  | 268  | 269  | 268  |
| CHA | 241  | 245  | 244  | 242  | 243  | 245  | 247  | 247  | 247  | 244  | 247  |
| EUR | 828  | 808  | 810  | 814  | 739  | 749  | 791  | 783  | 804  | 795  | 752  |
| IND | 234  | 239  | 243  | 254  | 231  | 243  | 249  | 227  | 228  | 227  | 255  |
| JPN | 203  | 101  | 89   | 2427 | 2427 | 2275 | 2206 | 2236 | 2272 | 2287 | 2318 |
| LAM | 183  | 187  | 190  | 179  | 178  | 178  | 180  | 178  | 171  | 171  | 177  |
| MEA | 385  | 393  | 446  | 438  | 408  | 449  | 403  | 429  | 395  | 458  | 403  |
| NEU | 1464 | 1332 | 1464 | 1357 | 1455 | 1358 | 1463 | 1358 | 1461 | 1389 | 1438 |
| OAS | 109  | 109  | 108  | 108  | 107  | 108  | 110  | 109  | 104  | 101  | 105  |
| REF | 182  | 185  | 177  | 187  | 190  | 204  | 195  | 200  | 196  | 197  | 221  |
| SSA | 247  | 254  | 262  | 260  | 260  | 261  | 261  | 262  | 264  | 270  | 266  |
| USA | 378  | 375  | 429  | 378  | 357  | 368  | 350  | 363  | 356  | 362  | 363  |

Table 1131: FAO — Prices—Agriculture—Other oil crops (incl rapeseed) (US\$05/tDM) [PART 4/5]

|     | 2005 | 2006 | 2007 | 2008 | 2009 | 2010 | 2011 |
|-----|------|------|------|------|------|------|------|
| GLO | 321  | 325  | 312  | 317  | 311  | 310  | 314  |
| CAZ | 268  | 268  | 270  | 269  | 269  | 270  | 270  |
| CHA | 245  | 243  | 241  | 244  | 244  | 243  | 243  |
| EUR | 744  | 720  | 681  | 691  | 648  | 633  | 653  |
| IND | 263  | 254  | 246  | 236  | 241  | 243  | 264  |
| JPN | 2283 | 2427 | 2427 | 2427 | 2427 | 2429 | 2428 |
| LAM | 179  | 179  | 179  | 179  | 181  | 182  | 182  |
| MEA | 440  | 403  | 442  | 420  | 413  | 417  | 364  |
| NEU | 1436 | 1442 | 1379 | 1350 | 1296 | 1326 | 1354 |
| OAS | 105  | 101  | 102  | 103  | 100  | 99   | 99   |
| REF | 206  | 211  | 219  | 242  | 236  | 227  | 208  |
| SSA | 275  | 295  | 284  | 289  | 274  | 295  | 279  |
| USA | 356  | 332  | 379  | 354  | 345  | 380  | 365  |

Table 1132: FAO — Prices—Agriculture—Other oil crops (incl rapeseed) (US\$05/tDM) [PART 5/5]

|     | 1990 | 1991 | 1992 | 1993 | 1994 | 1995 | 1996 | 1997 | 1998 | 1999 | 2000 |
|-----|------|------|------|------|------|------|------|------|------|------|------|
| GLO | 0    | 181  | 155  | 153  | 168  | 172  | 207  | 191  | 182  | 170  | 147  |
| CAZ | 0    | 137  | 147  | 133  | 147  | 151  | 200  | 195  | 165  | 157  | 131  |
| CHA | 0    | 99   | 101  | 104  | 108  | 122  | 110  | 104  | 114  | 113  | 95   |
| EUR | 0    | 532  | 423  | 400  | 437  | 435  | 535  | 416  | 367  | 306  | 328  |
| IND | 0    | 178  | 150  | 135  | 129  | 132  | 117  | 131  | 123  | 118  | 111  |
| JPN | 0    | 0    | 0    | 0    | 0    | 0    | 0    | 0    | 0    | 0    | 0    |
| LAM | 0    | 83   | 91   | 134  | 389  | 146  | 526  | 425  | 366  | 574  | 402  |
| MEA | 0    | 273  | 190  | 165  | 140  | 213  | 238  | 248  | 221  | 261  | 253  |
| NEU | 0    | 592  | 755  | 761  | 520  | 448  | 724  | 493  | 478  | 362  | 507  |
| OAS | 0    | 75   | 86   | 84   | 91   | 102  | 112  | 94   | 79   | 94   | 60   |
| REF | 0    | 0    | 0    | 0    | 1    | 6    | 5    | 6    | 11   | 11   | 9    |
| SSA | 0    | 4    | 4    | 69   | 77   | 92   | 145  | 190  | 242  | 60   | 63   |
| USA | 0    | 73   | 98   | 89   | 100  | 121  | 163  | 162  | 140  | 113  | 118  |

Table 1133: FAOp — Prices—Agriculture—Other oil crops (incl rapeseed) (US\$05/tDM) [PART 1/3]

|     | 2001 | 2002 | 2003 | 2004 | 2005 | 2006 | 2007 | 2008 | 2009 | 2010 | 2011 |
|-----|------|------|------|------|------|------|------|------|------|------|------|
| GLO | 143  | 149  | 171  | 193  | 183  | 217  | 241  | 303  | 261  | 265  | 284  |
| CAZ | 139  | 180  | 219  | 239  | 191  | 187  | 315  | 525  | 441  | 439  | 527  |
| CHA | 94   | 84   | 80   | 97   | 100  | 164  | 193  | 311  | 427  | 447  | 506  |
| EUR | 336  | 385  | 447  | 469  | 448  | 503  | 519  | 483  | 371  | 371  | 431  |
| IND | 114  | 102  | 118  | 134  | 143  | 143  | 112  | 101  | 0    | 0    | 0    |
| JPN | 0    | 0    | 0    | 0    | 0    | 0    | 0    | 0    | 0    | 0    | 0    |
| LAM | 226  | 114  | 256  | 248  | 113  | 119  | 157  | 161  | 95   | 160  | 213  |
| MEA | 246  | 212  | 242  | 218  | 270  | 368  | 389  | 508  | 383  | 393  | 388  |
| NEU | 471  | 742  | 684  | 969  | 1426 | 1325 | 1536 | 1539 | 1032 | 1143 | 1190 |
| OAS | 57   | 61   | 65   | 71   | 93   | 94   | 104  | 132  | 113  | 134  | 87   |
| REF | 7    | 5    | 4    | 9    | 8    | 45   | 78   | 310  | 163  | 119  | 108  |
| SSA | 59   | 53   | 56   | 64   | 65   | 92   | 116  | 122  | 38   | 35   | 39   |
| USA | 140  | 138  | 147  | 162  | 129  | 145  | 291  | 374  | 291  | 330  | 446  |

Table 1134: FAOp — Prices—Agriculture—Other oil crops (incl rapeseed) (US\$05/tDM) [PART 2/3]

|     | 2005 |
|-----|------|
| GLO | 348  |
| CAZ |      |
| CHA |      |
| EUR |      |
| IND |      |
| JPN |      |
| LAM |      |
| MEA |      |
| NEU |      |
| OAS |      |
| REF |      |
| SSA |      |
| USA |      |

Table 1135: IniFoodPrice — Prices—Agriculture—Other oil crops (incl rapeseed) (US\$05/tDM)

36.22 Pasture

## geom\_path: Each group consists of only one observation. Do you need to adjust the group## aesthetic?

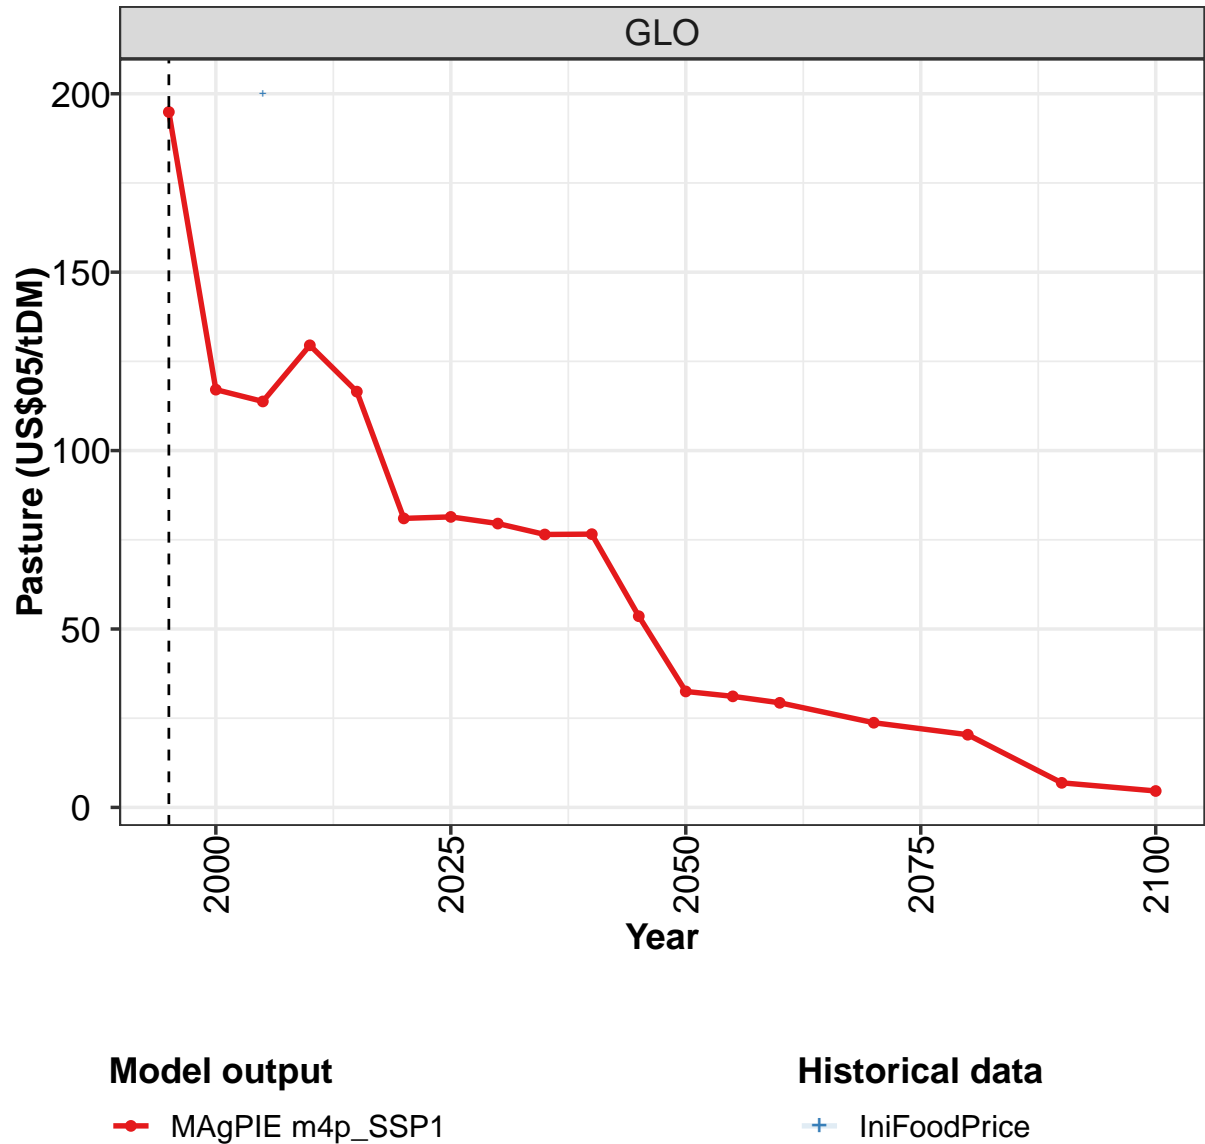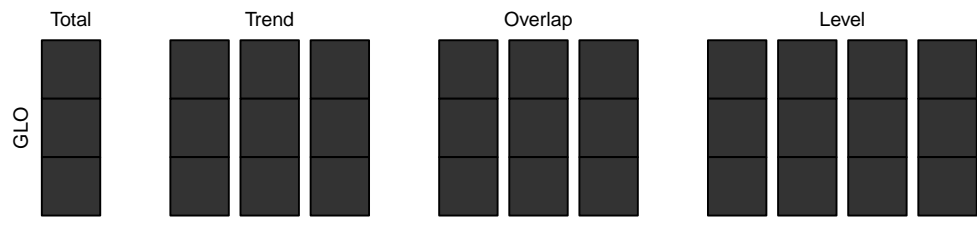

Figure 312: MAgPIE m4p\_SSP1 — Prices—Agriculture—Pasture (US\$05/tDM)

|     | 1995 | 2000 | 2005 | 2010 | 2015 | 2020 | 2025 | 2030 | 2035 | 2040 | 2045 |
|-----|------|------|------|------|------|------|------|------|------|------|------|
| GLO | 195  | 117  | 114  | 130  | 117  | 81   | 81   | 80   | 76   | 77   | 54   |

Table 1136: MAgPIE m4p\_SSP1 — Prices—Agriculture—Pasture (US\$05/tDM) [PART 1/2]

|     | 2050 | 2055 | 2060 | 2070 | 2080 | 2090 | 2100 |
|-----|------|------|------|------|------|------|------|
| GLO | 33   | 31   | 29   | 24   | 20   | 7    | 5    |

Table 1137: MAgPIE m4p\_SSP1 — Prices—Agriculture—Pasture (US\$05/tDM) [PART 2/2]

|     | 2005 |
|-----|------|
| GLO | 200  |

Table 1138: IniFoodPrice — Prices—Agriculture—Pasture (US\$05/tDM)

36.23 Potatoes

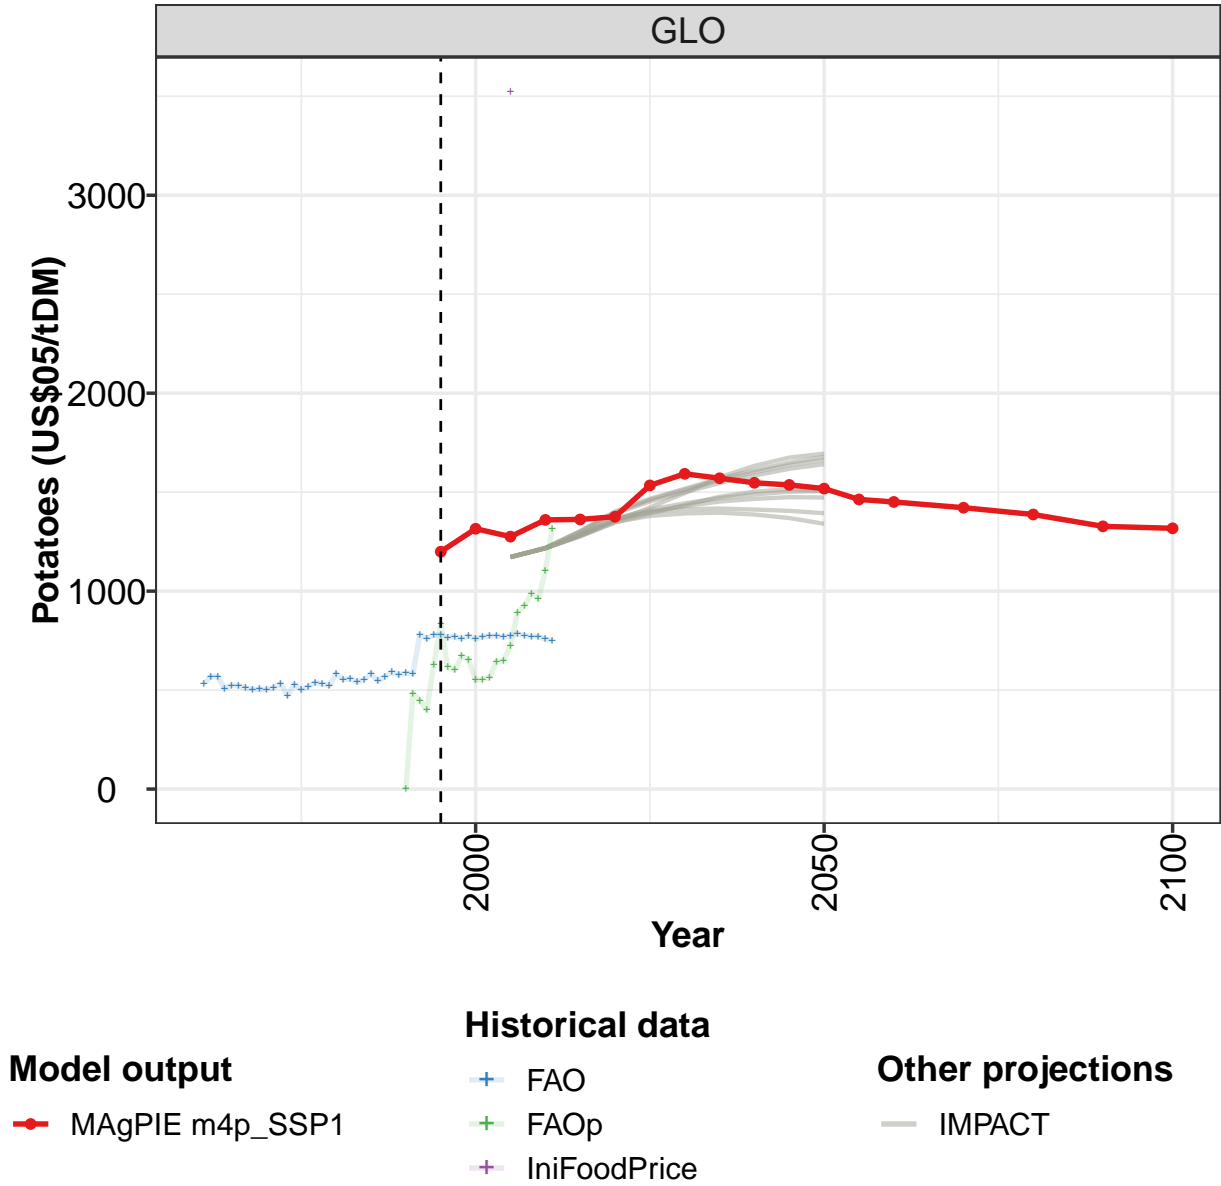

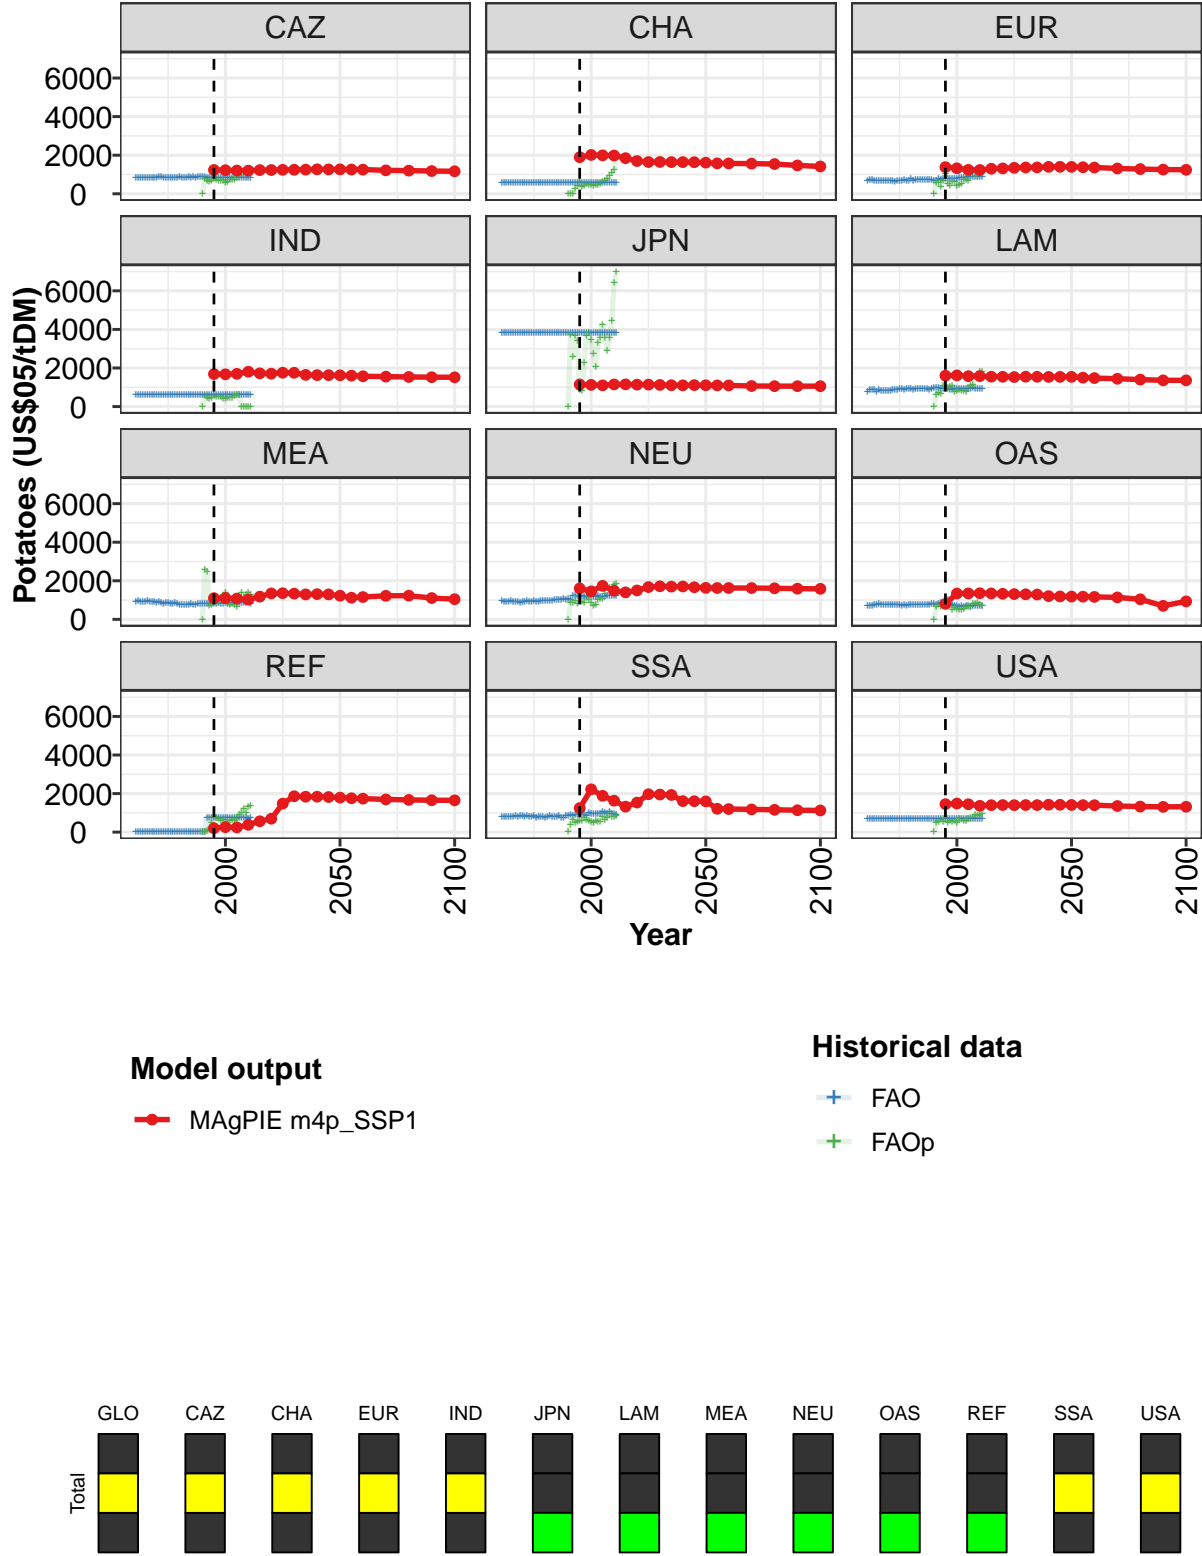

Figure 313: MAgPIE m4p\_SSP1 — Prices—Agriculture—Potatoes (US\$05/tDM)



|     | 1995 | 2000 | 2005 | 2010 | 2015 | 2020 | 2025 | 2030 | 2035 | 2040 | 2045 |
|-----|------|------|------|------|------|------|------|------|------|------|------|
| GLO | 1199 | 1315 | 1275 | 1360 | 1362 | 1376 | 1534 | 1593 | 1570 | 1547 | 1537 |
| CAZ | 1237 | 1222 | 1205 | 1200 | 1229 | 1233 | 1243 | 1246 | 1251 | 1268 | 1264 |
| CHA | 1897 | 2014 | 1992 | 1985 | 1846 | 1697 | 1647 | 1649 | 1643 | 1642 | 1636 |
| EUR | 1382 | 1323 | 1240 | 1234 | 1299 | 1316 | 1346 | 1364 | 1367 | 1396 | 1398 |
| IND | 1686 | 1674 | 1697 | 1806 | 1723 | 1706 | 1756 | 1752 | 1643 | 1631 | 1629 |
| JPN | 1147 | 1126 | 1099 | 1150 | 1151 | 1137 | 1139 | 1122 | 1108 | 1102 | 1113 |
| LAM | 1602 | 1619 | 1576 | 1579 | 1552 | 1544 | 1531 | 1550 | 1544 | 1538 | 1540 |
| MEA | 1102 | 1109 | 1078 | 1023 | 1178 | 1346 | 1355 | 1334 | 1293 | 1309 | 1295 |
| NEU | 1606 | 1454 | 1738 | 1488 | 1400 | 1500 | 1675 | 1715 | 1699 | 1705 | 1667 |
| OAS | 804  | 1340 | 1343 | 1356 | 1343 | 1327 | 1309 | 1300 | 1289 | 1207 | 1189 |
| REF | 208  | 258  | 247  | 381  | 565  | 697  | 1481 | 1862 | 1837 | 1839 | 1821 |
| SSA | 1246 | 2221 | 1883 | 1632 | 1322 | 1534 | 1966 | 1951 | 1929 | 1609 | 1603 |
| USA | 1452 | 1484 | 1449 | 1367 | 1399 | 1406 | 1400 | 1406 | 1403 | 1423 | 1420 |

Table 1139: MAgPIE m4p\_SSP1 — Prices—Agriculture—Potatoes (US\$05/tDM) [PART 1/2]

|     | 2050 | 2055 | 2060 | 2070 | 2080 | 2090 | 2100 |
|-----|------|------|------|------|------|------|------|
| GLO | 1518 | 1463 | 1451 | 1421 | 1387 | 1327 | 1317 |
| CAZ | 1265 | 1257 | 1254 | 1215 | 1200 | 1178 | 1166 |
| CHA | 1614 | 1576 | 1572 | 1562 | 1542 | 1469 | 1416 |
| EUR | 1395 | 1376 | 1361 | 1313 | 1281 | 1255 | 1243 |
| IND | 1622 | 1605 | 1572 | 1552 | 1535 | 1524 | 1518 |
| JPN | 1105 | 1098 | 1096 | 1065 | 1058 | 1058 | 1057 |
| LAM | 1542 | 1499 | 1477 | 1442 | 1399 | 1360 | 1359 |
| MEA | 1227 | 1122 | 1159 | 1220 | 1229 | 1105 | 1047 |
| NEU | 1635 | 1627 | 1625 | 1624 | 1611 | 1592 | 1584 |
| OAS | 1183 | 1176 | 1165 | 1139 | 1039 | 700  | 933  |
| REF | 1792 | 1758 | 1738 | 1696 | 1672 | 1655 | 1649 |
| SSA | 1597 | 1211 | 1198 | 1180 | 1160 | 1136 | 1126 |
| USA | 1410 | 1402 | 1398 | 1356 | 1326 | 1312 | 1317 |

Table 1140: MAgPIE m4p\_SSP1 — Prices—Agriculture—Potatoes (US\$05/tDM) [PART 2/2]

|     | 1961 | 1962 | 1963 | 1964 | 1965 | 1966 | 1967 | 1968 | 1969 | 1970 | 1971 |
|-----|------|------|------|------|------|------|------|------|------|------|------|
| GLO | 532  | 568  | 567  | 508  | 524  | 521  | 512  | 503  | 505  | 504  | 511  |
| CAZ | 822  | 829  | 849  | 833  | 826  | 832  | 845  | 836  | 853  | 843  | 861  |
| CHA | 590  | 590  | 590  | 590  | 590  | 590  | 590  | 590  | 590  | 590  | 590  |
| EUR | 691  | 708  | 705  | 665  | 692  | 682  | 676  | 669  | 668  | 665  | 691  |
| IND | 586  | 586  | 586  | 586  | 586  | 586  | 586  | 586  | 586  | 586  | 586  |
| JPN | 3803 | 3803 | 3803 | 3803 | 3803 | 3803 | 3803 | 3803 | 3803 | 3803 | 3803 |
| LAM | 782  | 873  | 856  | 853  | 784  | 848  | 832  | 833  | 811  | 816  | 834  |
| MEA | 907  | 938  | 905  | 895  | 907  | 938  | 912  | 892  | 891  | 884  | 917  |
| NEU | 948  | 926  | 923  | 922  | 954  | 886  | 922  | 922  | 884  | 899  | 918  |
| OAS | 710  | 701  | 694  | 764  | 762  | 790  | 756  | 759  | 760  | 754  | 761  |
| REF | 0    | 0    | 0    | 0    | 0    | 0    | 0    | 0    | 0    | 0    | 0    |
| SSA | 793  | 785  | 801  | 798  | 794  | 820  | 826  | 819  | 826  | 828  | 818  |
| USA | 668  | 668  | 668  | 668  | 668  | 668  | 668  | 668  | 668  | 668  | 668  |

Table 1141: FAO — Prices—Agriculture—Potatoes (US\$05/tDM) [PART 1/5]

|     | 1972 | 1973 | 1974 | 1975 | 1976 | 1977 | 1978 | 1979 | 1980 | 1981 | 1982 |
|-----|------|------|------|------|------|------|------|------|------|------|------|
| GLO | 533  | 473  | 529  | 501  | 518  | 539  | 531  | 523  | 583  | 553  | 559  |
| CAZ | 875  | 854  | 833  | 853  | 842  | 840  | 846  | 842  | 857  | 852  | 853  |
| CHA | 590  | 590  | 590  | 590  | 589  | 590  | 590  | 590  | 590  | 590  | 590  |
| EUR | 666  | 643  | 673  | 654  | 660  | 700  | 680  | 675  | 753  | 687  | 722  |
| IND | 586  | 586  | 586  | 586  | 586  | 586  | 586  | 586  | 586  | 586  | 586  |
| JPN | 3803 | 3803 | 3803 | 3803 | 3803 | 3803 | 3803 | 3803 | 3803 | 3803 | 3803 |
| LAM | 890  | 882  | 857  | 909  | 898  | 886  | 923  | 937  | 943  | 878  | 925  |
| MEA | 855  | 832  | 852  | 871  | 832  | 824  | 840  | 811  | 772  | 757  | 743  |
| NEU | 945  | 895  | 901  | 963  | 926  | 904  | 975  | 946  | 986  | 970  | 974  |
| OAS | 742  | 759  | 737  | 755  | 708  | 771  | 716  | 737  | 751  | 746  | 733  |
| REF | 0    | 0    | 0    | 0    | 0    | 0    | 0    | 0    | 0    | 0    | 0    |
| SSA | 830  | 812  | 819  | 834  | 759  | 801  | 785  | 814  | 751  | 819  | 846  |
| USA | 668  | 668  | 668  | 668  | 668  | 668  | 668  | 668  | 668  | 668  | 668  |

Table 1142: FAO — Prices—Agriculture—Potatoes (US\$05/tDM) [PART 2/5]

|     | 1983 | 1984 | 1985 | 1986 | 1987 | 1988 | 1989 | 1990 | 1991 | 1992 | 1993 |
|-----|------|------|------|------|------|------|------|------|------|------|------|
| GLO | 540  | 553  | 583  | 545  | 569  | 591  | 576  | 587  | 582  | 780  | 760  |
| CAZ | 853  | 860  | 852  | 856  | 853  | 868  | 861  | 868  | 870  | 849  | 852  |
| CHA | 590  | 590  | 590  | 590  | 590  | 590  | 590  | 590  | 590  | 590  | 590  |
| EUR | 722  | 719  | 728  | 700  | 706  | 700  | 712  | 690  | 693  | 766  | 737  |
| IND | 586  | 586  | 586  | 586  | 586  | 586  | 586  | 586  | 586  | 586  | 586  |
| JPN | 3803 | 3803 | 3803 | 3803 | 3803 | 3803 | 3803 | 3803 | 3803 | 3803 | 3803 |
| LAM | 918  | 928  | 897  | 898  | 913  | 875  | 918  | 981  | 957  | 976  | 933  |
| MEA | 763  | 771  | 804  | 771  | 767  | 809  | 808  | 791  | 809  | 829  | 814  |
| NEU | 954  | 997  | 1024 | 991  | 1036 | 1081 | 1024 | 1045 | 1022 | 1212 | 1228 |
| OAS | 733  | 744  | 753  | 774  | 758  | 749  | 808  | 785  | 769  | 807  | 871  |
| REF | 0    | 0    | 0    | 0    | 0    | 0    | 0    | 0    | 0    | 737  | 723  |
| SSA | 791  | 772  | 818  | 837  | 743  | 747  | 859  | 869  | 890  | 829  | 881  |
| USA | 668  | 668  | 668  | 668  | 668  | 668  | 668  | 668  | 668  | 668  | 668  |

Table 1143: FAO — Prices—Agriculture—Potatoes (US\$05/tDM) [PART 3/5]

|     | 1994 | 1995 | 1996 | 1997 | 1998 | 1999 | 2000 | 2001 | 2002 | 2003 | 2004 |
|-----|------|------|------|------|------|------|------|------|------|------|------|
| GLO | 779  | 780  | 767  | 771  | 760  | 774  | 759  | 770  | 773  | 774  | 768  |
| CAZ | 848  | 840  | 848  | 845  | 847  | 845  | 832  | 844  | 838  | 826  | 830  |
| CHA | 590  | 590  | 590  | 590  | 590  | 590  | 590  | 590  | 590  | 590  | 590  |
| EUR | 780  | 777  | 771  | 787  | 773  | 800  | 789  | 820  | 844  | 851  | 849  |
| IND | 586  | 586  | 586  | 586  | 586  | 586  | 586  | 586  | 586  | 586  | 586  |
| JPN | 3803 | 3803 | 3803 | 3803 | 3803 | 3803 | 3803 | 3803 | 3803 | 3803 | 3803 |
| LAM | 920  | 917  | 916  | 894  | 886  | 908  | 912  | 927  | 915  | 930  | 921  |
| MEA | 817  | 823  | 822  | 843  | 809  | 820  | 853  | 814  | 830  | 850  | 869  |
| NEU | 1197 | 1183 | 1204 | 1185 | 1184 | 1196 | 1217 | 1177 | 1178 | 1198 | 1167 |
| OAS | 836  | 875  | 880  | 796  | 753  | 719  | 698  | 647  | 690  | 670  | 680  |
| REF | 735  | 741  | 728  | 743  | 733  | 739  | 732  | 744  | 745  | 744  | 736  |
| SSA | 901  | 904  | 895  | 897  | 869  | 999  | 938  | 935  | 944  | 946  | 934  |
| USA | 668  | 668  | 668  | 668  | 668  | 668  | 668  | 668  | 668  | 668  | 668  |

Table 1144: FAO — Prices—Agriculture—Potatoes (US\$05/tDM) [PART 4/5]

|     | 2005 | 2006 | 2007 | 2008 | 2009 | 2010 | 2011 |
|-----|------|------|------|------|------|------|------|
| GLO | 775  | 785  | 777  | 772  | 770  | 757  | 751  |
| CAZ | 840  | 828  | 827  | 842  | 830  | 839  | 834  |
| CHA | 590  | 590  | 590  | 590  | 590  | 590  | 590  |
| EUR | 869  | 890  | 858  | 860  | 875  | 866  | 872  |
| IND | 586  | 586  | 586  | 586  | 586  | 586  | 586  |
| JPN | 3803 | 3803 | 3803 | 3803 | 3803 | 3803 | 3803 |
| LAM | 940  | 931  | 957  | 942  | 926  | 926  | 914  |
| MEA | 855  | 857  | 851  | 852  | 886  | 902  | 797  |
| NEU | 1151 | 1195 | 1212 | 1200 | 1199 | 1198 | 1197 |
| OAS | 680  | 663  | 679  | 689  | 708  | 683  | 683  |
| REF | 747  | 745  | 745  | 730  | 740  | 718  | 738  |
| SSA | 1043 | 1025 | 970  | 1072 | 961  | 945  | 924  |
| USA | 668  | 668  | 668  | 668  | 668  | 668  | 668  |

Table 1145: FAO — Prices—Agriculture—Potatoes (US\$05/tDM) [PART 5/5]

|     | 1990 | 1991 | 1992 | 1993 | 1994 | 1995 | 1996 | 1997 | 1998 | 1999 | 2000 |
|-----|------|------|------|------|------|------|------|------|------|------|------|
| GLO | 0    | 484  | 448  | 401  | 629  | 836  | 615  | 601  | 671  | 653  | 550  |
| CAZ | 0    | 771  | 658  | 631  | 697  | 764  | 730  | 683  | 668  | 689  | 596  |
| CHA | 0    | 0    | 0    | 262  | 405  | 612  | 385  | 419  | 532  | 483  | 477  |
| EUR | 0    | 586  | 558  | 371  | 699  | 1026 | 538  | 439  | 623  | 620  | 404  |
| IND | 0    | 584  | 436  | 421  | 458  | 533  | 518  | 522  | 530  | 396  | 427  |
| JPN | 0    | 3698 | 2588 | 3650 | 3429 | 886  | 811  | 2292 | 3688 | 3803 | 3438 |
| LAM | 0    | 586  | 728  | 678  | 1095 | 984  | 977  | 1036 | 1100 | 780  | 831  |
| MEA | 0    | 2583 | 2483 | 717  | 770  | 1090 | 905  | 856  | 1097 | 1188 | 1404 |
| NEU | 0    | 833  | 833  | 944  | 825  | 1215 | 922  | 848  | 1124 | 993  | 860  |
| OAS | 0    | 629  | 740  | 676  | 730  | 968  | 1026 | 735  | 498  | 584  | 544  |
| REF | 0    | 0    | 51   | 140  | 465  | 777  | 745  | 704  | 587  | 661  | 504  |
| SSA | 0    | 372  | 645  | 470  | 562  | 614  | 566  | 753  | 658  | 607  | 537  |
| USA | 0    | 495  | 555  | 618  | 559  | 677  | 491  | 564  | 559  | 577  | 509  |

Table 1146: FAOp — Prices—Agriculture—Potatoes (US\$05/tDM) [PART 1/3]

|     | 2001 | 2002 | 2003 | 2004 | 2005 | 2006 | 2007 | 2008 | 2009 | 2010 | 2011 |
|-----|------|------|------|------|------|------|------|------|------|------|------|
| GLO | 553  | 564  | 645  | 648  | 725  | 893  | 926  | 987  | 960  | 1102 | 1317 |
| CAZ | 615  | 713  | 733  | 746  | 809  | 943  | 1008 | 1214 | 1186 | 1206 | 1311 |
| CHA | 434  | 450  | 461  | 494  | 599  | 678  | 782  | 915  | 1104 | 1248 | 2014 |
| EUR | 483  | 494  | 713  | 728  | 698  | 1158 | 1184 | 1068 | 890  | 1062 | 1163 |
| IND | 464  | 434  | 434  | 571  | 595  | 591  | 0    | 0    | 0    | 0    | 0    |
| JPN | 2715 | 2045 | 3313 | 3582 | 4240 | 3589 | 2909 | 3562 | 4465 | 6392 | 7000 |
| LAM | 877  | 816  | 797  | 744  | 984  | 1065 | 1150 | 1521 | 1643 | 1779 | 1817 |
| MEA | 1020 | 766  | 795  | 733  | 676  | 987  | 1369 | 1135 | 1298 | 1381 | 1277 |
| NEU | 728  | 769  | 1033 | 1051 | 1090 | 1303 | 1625 | 1650 | 1534 | 1787 | 1868 |
| OAS | 493  | 498  | 529  | 653  | 662  | 640  | 820  | 828  | 861  | 745  | 690  |
| REF | 484  | 582  | 659  | 580  | 709  | 901  | 1005 | 1202 | 1000 | 1317 | 1382 |
| SSA | 484  | 584  | 530  | 549  | 806  | 632  | 753  | 974  | 789  | 777  | 857  |
| USA | 700  | 668  | 591  | 568  | 705  | 732  | 755  | 909  | 827  | 923  | 941  |

Table 1147: FAOp — Prices—Agriculture—Potatoes (US\$05/tDM) [PART 2/3]

|     | 2005 |
|-----|------|
| GLO | 3522 |
| CAZ |      |
| CHA |      |
| EUR |      |
| IND |      |
| JPN |      |
| LAM |      |
| MEA |      |
| NEU |      |
| OAS |      |
| REF |      |
| SSA |      |
| USA |      |

Table 1148: IniFoodPrice — Prices—Agriculture—Potatoes (US\$05/tDM)

36.24
Poultry meat

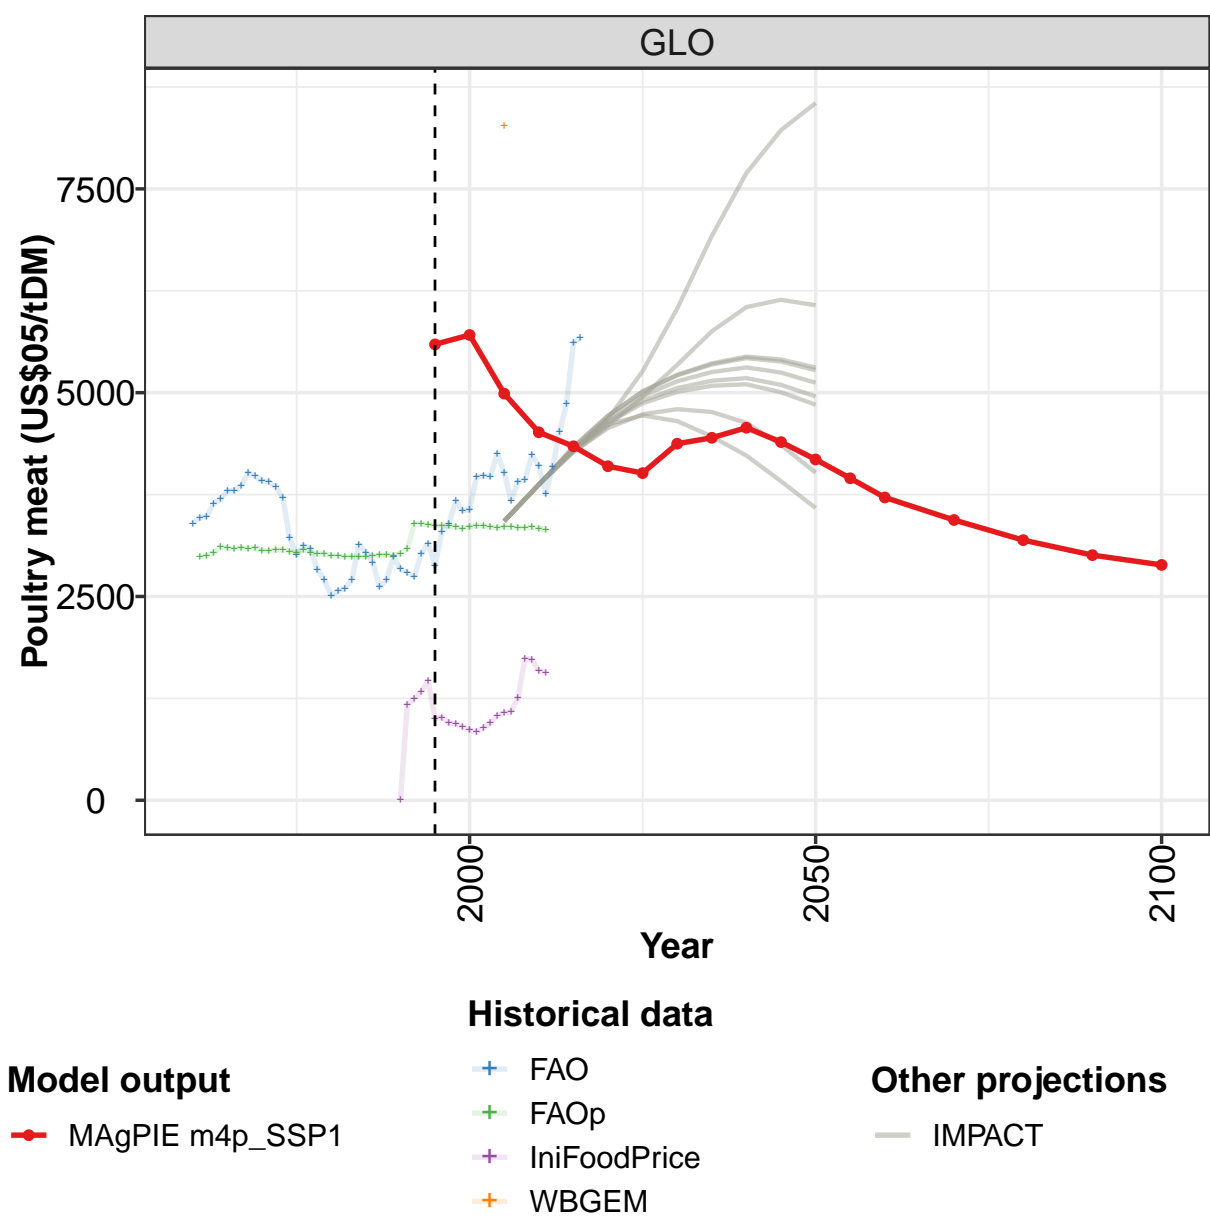

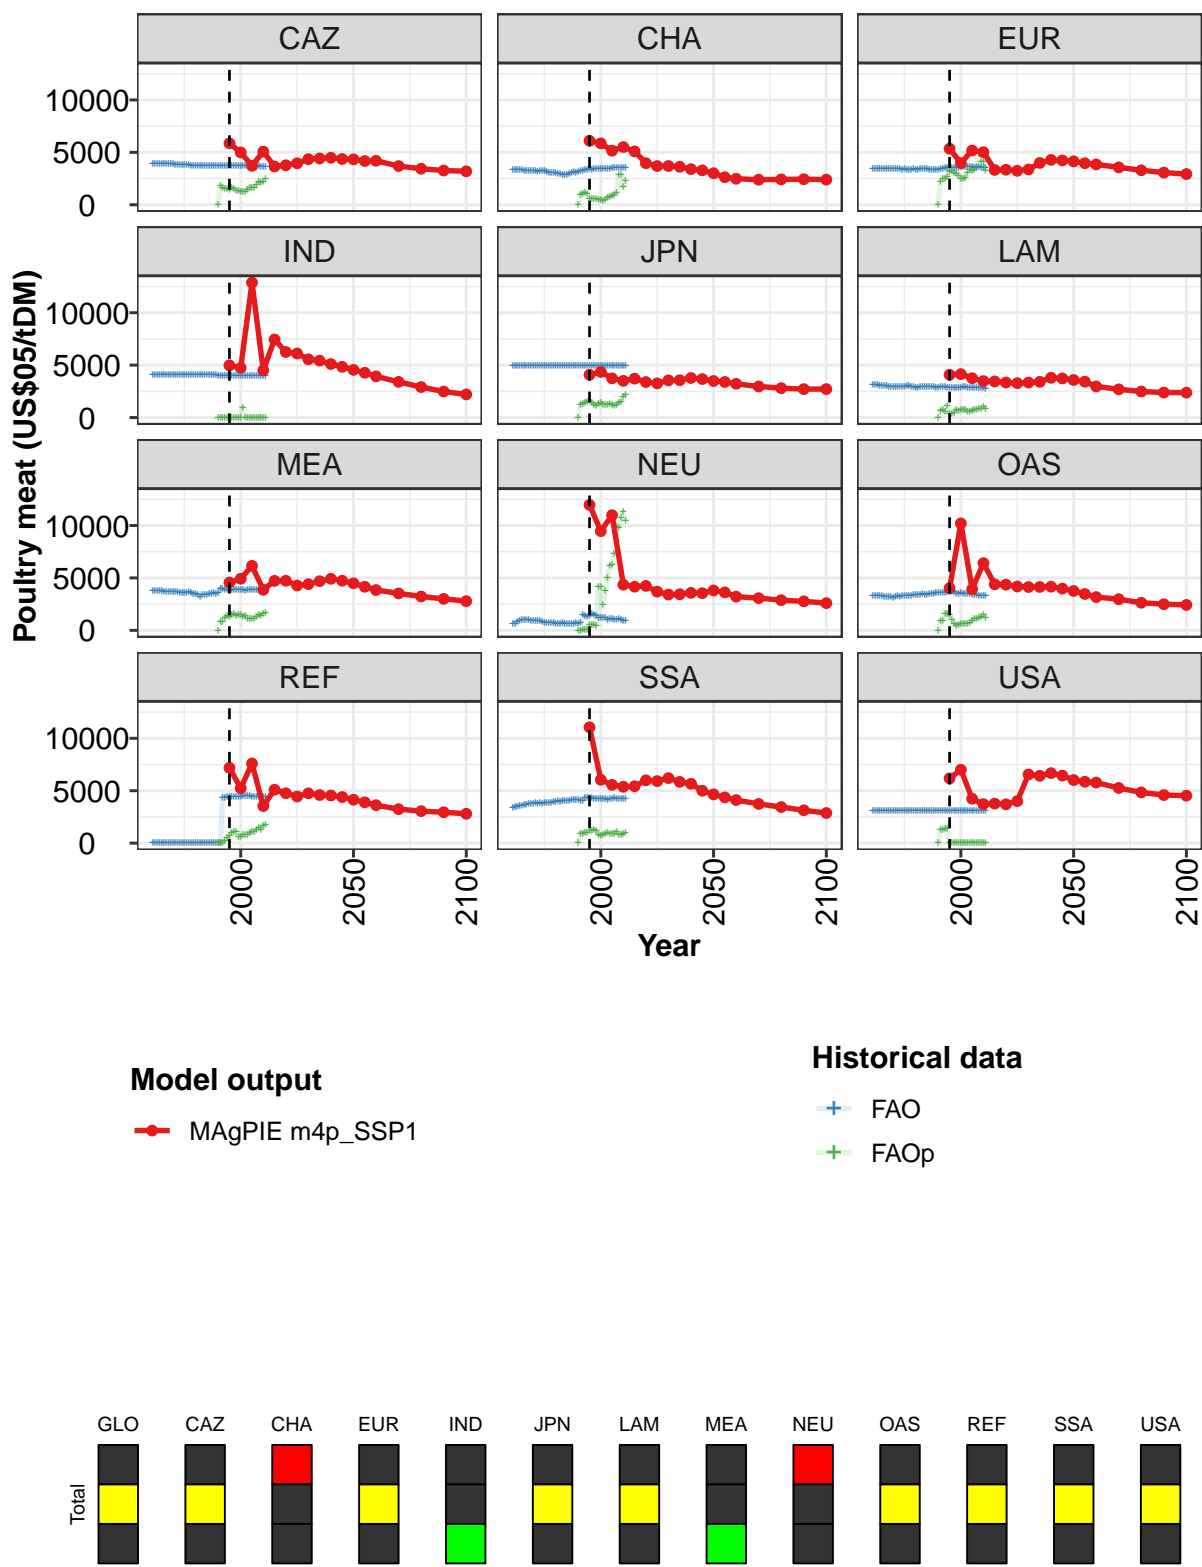

Figure 314: MAgPIE m4p\_SSP1 — Prices—Agriculture—Poultry meat (US\$05/tDM)

|     | 1995  | 2000  | 2005  | 2010 | 2015 | 2020 | 2025 | 2030 | 2035 | 2040 | 2045 |
|-----|-------|-------|-------|------|------|------|------|------|------|------|------|
| GLO | 5593  | 5708  | 4989  | 4514 | 4342 | 4098 | 4014 | 4374 | 4447 | 4570 | 4394 |
| CAZ | 5861  | 4995  | 3719  | 5071 | 3653 | 3770 | 3958 | 4349 | 4417 | 4487 | 4365 |
| CHA | 6104  | 5858  | 5166  | 5507 | 5092 | 3968 | 3693 | 3699 | 3627 | 3401 | 3285 |
| EUR | 5350  | 3975  | 5178  | 5021 | 3322 | 3340 | 3241 | 3368 | 3991 | 4279 | 4232 |
| IND | 4981  | 4739  | 12876 | 4495 | 7448 | 6253 | 6110 | 5559 | 5430 | 5106 | 4838 |
| JPN | 4085  | 4354  | 3744  | 3504 | 3713 | 3388 | 3259 | 3546 | 3564 | 3777 | 3674 |
| LAM | 4084  | 4147  | 3755  | 3478 | 3450 | 3347 | 3283 | 3338 | 3411 | 3796 | 3731 |
| MEA | 4563  | 4924  | 6153  | 3871 | 4724 | 4733 | 4279 | 4404 | 4687 | 4916 | 4740 |
| NEU | 11968 | 9461  | 10985 | 4356 | 4164 | 4242 | 3693 | 3417 | 3443 | 3573 | 3545 |
| OAS | 4029  | 10201 | 3925  | 6410 | 4392 | 4359 | 4186 | 4133 | 4141 | 4168 | 3977 |
| REF | 7187  | 5237  | 7600  | 3539 | 5097 | 4762 | 4450 | 4751 | 4588 | 4545 | 4399 |
| SSA | 11052 | 6049  | 5559  | 5377 | 5426 | 5993 | 5918 | 6207 | 5846 | 5667 | 4997 |
| USA | 6182  | 6999  | 4243  | 3724 | 3774 | 3705 | 4008 | 6553 | 6424 | 6680 | 6448 |

Table 1149: MAgPIE m4p\_SSP1 — Prices—Agriculture—Poultry meat (US\$05/tDM) [PART 1/2]

|     | 2050 | 2055 | 2060 | 2070 | 2080 | 2090 | 2100 |
|-----|------|------|------|------|------|------|------|
| GLO | 4181 | 3950 | 3715 | 3438 | 3191 | 3007 | 2887 |
| CAZ | 4329 | 4177 | 4195 | 3692 | 3434 | 3269 | 3189 |
| CHA | 3008 | 2632 | 2481 | 2390 | 2422 | 2440 | 2398 |
| EUR | 4137 | 3970 | 3853 | 3568 | 3291 | 3070 | 2929 |
| IND | 4553 | 4274 | 3930 | 3406 | 2908 | 2485 | 2208 |
| JPN | 3488 | 3398 | 3220 | 2965 | 2804 | 2715 | 2717 |
| LAM | 3583 | 3424 | 2971 | 2696 | 2487 | 2386 | 2378 |
| MEA | 4493 | 4158 | 3846 | 3525 | 3232 | 3003 | 2786 |
| NEU | 3807 | 3620 | 3219 | 3076 | 2879 | 2767 | 2599 |
| OAS | 3762 | 3472 | 3176 | 2972 | 2634 | 2493 | 2427 |
| REF | 4145 | 3898 | 3624 | 3241 | 3055 | 2949 | 2803 |
| SSA | 4649 | 4364 | 4111 | 3742 | 3443 | 3136 | 2875 |
| USA | 6020 | 5854 | 5780 | 5263 | 4839 | 4587 | 4528 |

Table 1150: MAgPIE m4p\_SSP1 — Prices—Agriculture—Poultry meat (US\$05/tDM) [PART 2/2]

|     | 1960 | 1961 | 1962 | 1963 | 1964 | 1965 | 1966 | 1967 | 1968 | 1969 | 1970 |
|-----|------|------|------|------|------|------|------|------|------|------|------|
| GLO | 3395 | 3465 | 3481 | 3640 | 3695 | 3796 | 3801 | 3857 | 4013 | 3976 | 3918 |
| CAZ |      |      |      |      |      |      |      |      |      |      |      |
| CHA |      |      |      |      |      |      |      |      |      |      |      |
| EUR |      |      |      |      |      |      |      |      |      |      |      |
| IND |      |      |      |      |      |      |      |      |      |      |      |
| JPN |      |      |      |      |      |      |      |      |      |      |      |
| LAM |      |      |      |      |      |      |      |      |      |      |      |
| MEA |      |      |      |      |      |      |      |      |      |      |      |
| NEU |      |      |      |      |      |      |      |      |      |      |      |
| OAS |      |      |      |      |      |      |      |      |      |      |      |
| REF |      |      |      |      |      |      |      |      |      |      |      |
| SSA |      |      |      |      |      |      |      |      |      |      |      |
| USA |      |      |      |      |      |      |      |      |      |      |      |

Table 1151: WBGEM — Prices—Agriculture—Poultry meat (US\$05/tDM) [PART 1/6]

|     | 1971 | 1972 | 1973 | 1974 | 1975 | 1976 | 1977 | 1978 | 1979 | 1980 | 1981 |
|-----|------|------|------|------|------|------|------|------|------|------|------|
| GLO | 3903 | 3843 | 3709 | 3216 | 3008 | 3123 | 3086 | 2832 | 2704 | 2514 | 2567 |
| CAZ |      |      |      |      |      |      |      |      |      |      |      |
| CHA |      |      |      |      |      |      |      |      |      |      |      |
| EUR |      |      |      |      |      |      |      |      |      |      |      |
| IND |      |      |      |      |      |      |      |      |      |      |      |
| JPN |      |      |      |      |      |      |      |      |      |      |      |
| LAM |      |      |      |      |      |      |      |      |      |      |      |
| MEA |      |      |      |      |      |      |      |      |      |      |      |
| NEU |      |      |      |      |      |      |      |      |      |      |      |
| OAS |      |      |      |      |      |      |      |      |      |      |      |
| REF |      |      |      |      |      |      |      |      |      |      |      |
| SSA |      |      |      |      |      |      |      |      |      |      |      |
| USA |      |      |      |      |      |      |      |      |      |      |      |

Table 1152: WBGEM — Prices—Agriculture—Poultry meat (US\$05/tDM) [PART 2/6]

|     | 1982 | 1983 | 1984 | 1985 | 1986 | 1987 | 1988 | 1989 | 1990 | 1991 | 1992 |
|-----|------|------|------|------|------|------|------|------|------|------|------|
| GLO | 2597 | 2711 | 3137 | 3040 | 2919 | 2615 | 2711 | 2990 | 2834 | 2792 | 2744 |
| CAZ |      |      |      |      |      |      |      |      |      |      |      |
| CHA |      |      |      |      |      |      |      |      |      |      |      |
| EUR |      |      |      |      |      |      |      |      |      |      |      |
| IND |      |      |      |      |      |      |      |      |      |      |      |
| JPN |      |      |      |      |      |      |      |      |      |      |      |
| LAM |      |      |      |      |      |      |      |      |      |      |      |
| MEA |      |      |      |      |      |      |      |      |      |      |      |
| NEU |      |      |      |      |      |      |      |      |      |      |      |
| OAS |      |      |      |      |      |      |      |      |      |      |      |
| REF |      |      |      |      |      |      |      |      |      |      |      |
| SSA |      |      |      |      |      |      |      |      |      |      |      |
| USA |      |      |      |      |      |      |      |      |      |      |      |

Table 1153: WBGEM — Prices—Agriculture—Poultry meat (US\$05/tDM) [PART 3/6]

|     | 1993 | 1994 | 1995 | 1996 | 1997 | 1998 | 1999 | 2000 | 2001 | 2002 | 2003 |
|-----|------|------|------|------|------|------|------|------|------|------|------|
| GLO | 3024 | 3152 | 2882 | 3299 | 3389 | 3669 | 3552 | 3567 | 3967 | 3979 | 3970 |
| CAZ |      |      |      |      |      |      |      |      |      |      |      |
| CHA |      |      |      |      |      |      |      |      |      |      |      |
| EUR |      |      |      |      |      |      |      |      |      |      |      |
| IND |      |      |      |      |      |      |      |      |      |      |      |
| JPN |      |      |      |      |      |      |      |      |      |      |      |
| LAM |      |      |      |      |      |      |      |      |      |      |      |
| MEA |      |      |      |      |      |      |      |      |      |      |      |
| NEU |      |      |      |      |      |      |      |      |      |      |      |
| OAS |      |      |      |      |      |      |      |      |      |      |      |
| REF |      |      |      |      |      |      |      |      |      |      |      |
| SSA |      |      |      |      |      |      |      |      |      |      |      |
| USA |      |      |      |      |      |      |      |      |      |      |      |

Table 1154: WBGEM — Prices—Agriculture—Poultry meat (US\$05/tDM) [PART 4/6]



|     | 2004 | 2005 | 2006 | 2007 | 2008 | 2009 | 2010 | 2011 | 2012 | 2013 | 2014 |
|-----|------|------|------|------|------|------|------|------|------|------|------|
| GLO | 4251 | 4023 | 3675 | 3911 | 3928 | 4238 | 4098 | 3759 | 4086 | 4518 | 4867 |
| CAZ |      |      |      |      |      |      |      |      |      |      |      |
| CHA |      |      |      |      |      |      |      |      |      |      |      |
| EUR |      |      |      |      |      |      |      |      |      |      |      |
| IND |      |      |      |      |      |      |      |      |      |      |      |
| JPN |      |      |      |      |      |      |      |      |      |      |      |
| LAM |      |      |      |      |      |      |      |      |      |      |      |
| MEA |      |      |      |      |      |      |      |      |      |      |      |
| NEU |      |      |      |      |      |      |      |      |      |      |      |
| OAS |      |      |      |      |      |      |      |      |      |      |      |
| REF |      |      |      |      |      |      |      |      |      |      |      |
| SSA |      |      |      |      |      |      |      |      |      |      |      |
| USA |      |      |      |      |      |      |      |      |      |      |      |

Table 1155: WBGEM — Prices—Agriculture—Poultry meat (US\$05/tDM) [PART 5/6]

|     | 2015 | 2016 |
|-----|------|------|
| GLO | 5608 | 5678 |
| CAZ |      |      |
| CHA |      |      |
| EUR |      |      |
| IND |      |      |
| JPN |      |      |
| LAM |      |      |
| MEA |      |      |
| NEU |      |      |
| OAS |      |      |
| REF |      |      |
| SSA |      |      |
| USA |      |      |

Table 1156: WBGEM — Prices—Agriculture—Poultry meat (US\$05/tDM) [PART 6/6]

|     | 1961 | 1962 | 1963 | 1964 | 1965 | 1966 | 1967 | 1968 | 1969 | 1970 | 1971 |
|-----|------|------|------|------|------|------|------|------|------|------|------|
| GLO | 2989 | 3002 | 3034 | 3108 | 3093 | 3088 | 3097 | 3091 | 3098 | 3066 | 3057 |
| CAZ | 3954 | 3953 | 3954 | 3948 | 3935 | 3953 | 3917 | 3893 | 3885 | 3877 | 3841 |
| CHA | 3302 | 3312 | 3318 | 3314 | 3290 | 3282 | 3269 | 3252 | 3250 | 3255 | 3231 |
| EUR | 3407 | 3412 | 3425 | 3429 | 3442 | 3433 | 3427 | 3417 | 3417 | 3391 | 3391 |
| IND | 4065 | 4075 | 4085 | 4093 | 4101 | 4108 | 4103 | 4097 | 4091 | 4086 | 4081 |
| JPN | 4982 | 4982 | 4982 | 4982 | 4982 | 4982 | 4982 | 4982 | 4982 | 4982 | 4982 |
| LAM | 3158 | 3145 | 3098 | 3075 | 3010 | 2989 | 2985 | 2967 | 2949 | 2926 | 2932 |
| MEA | 3806 | 3778 | 3773 | 3767 | 3742 | 3723 | 3715 | 3715 | 3713 | 3708 | 3678 |
| NEU | 589  | 635  | 777  | 876  | 965  | 998  | 1004 | 968  | 919  | 867  | 890  |
| OAS | 3332 | 3309 | 3311 | 3291 | 3273 | 3218 | 3189 | 3237 | 3208 | 3154 | 3214 |
| REF | 0    | 0    | 0    | 0    | 0    | 0    | 0    | 0    | 0    | 0    | 0    |
| SSA | 3410 | 3438 | 3507 | 3564 | 3596 | 3632 | 3680 | 3715 | 3765 | 3776 | 3804 |
| USA | 3105 | 3103 | 3103 | 3103 | 3103 | 3103 | 3104 | 3102 | 3101 | 3101 | 3102 |

Table 1157: FAO — Prices—Agriculture—Poultry meat (US\$05/tDM) [PART 1/5]

|     | 1972 | 1973 | 1974 | 1975 | 1976 | 1977 | 1978 | 1979 | 1980 | 1981 | 1982 |
|-----|------|------|------|------|------|------|------|------|------|------|------|
| GLO | 3067 | 3072 | 3052 | 3038 | 3075 | 3042 | 3022 | 3023 | 3005 | 2996 | 2985 |
| CAZ | 3829 | 3839 | 3805 | 3777 | 3789 | 3770 | 3747 | 3753 | 3722 | 3731 | 3743 |
| CHA | 3177 | 3202 | 3211 | 3195 | 3171 | 3060 | 3026 | 3028 | 3005 | 2948 | 2940 |
| EUR | 3401 | 3400 | 3379 | 3387 | 3380 | 3375 | 3384 | 3390 | 3369 | 3376 | 3386 |
| IND | 4077 | 4078 | 4079 | 4079 | 4079 | 4082 | 4097 | 4102 | 4102 | 4107 | 4111 |
| JPN | 4982 | 4982 | 4982 | 4982 | 4982 | 4982 | 4982 | 4982 | 4982 | 4982 | 4982 |
| LAM | 2928 | 2921 | 2942 | 2982 | 3000 | 2987 | 2949 | 2897 | 2859 | 2870 | 2903 |
| MEA | 3634 | 3606 | 3605 | 3572 | 3596 | 3641 | 3579 | 3503 | 3476 | 3380 | 3210 |
| NEU | 906  | 896  | 844  | 726  | 715  | 743  | 705  | 717  | 671  | 640  | 620  |
| OAS | 3270 | 3234 | 3292 | 3269 | 3290 | 3306 | 3273 | 3361 | 3417 | 3403 | 3420 |
| REF | 0    | 0    | 0    | 0    | 0    | 0    | 0    | 0    | 0    | 0    | 0    |
| SSA | 3765 | 3819 | 3789 | 3845 | 3848 | 3833 | 3886 | 3907 | 3926 | 4002 | 3954 |
| USA | 3102 | 3102 | 3102 | 3101 | 3102 | 3101 | 3101 | 3101 | 3101 | 3101 | 3101 |

Table 1158: FAO — Prices—Agriculture—Poultry meat (US\$05/tDM) [PART 2/5]

|     | 1983 | 1984 | 1985 | 1986 | 1987 | 1988 | 1989 | 1990 | 1991 | 1992 | 1993 |
|-----|------|------|------|------|------|------|------|------|------|------|------|
| GLO | 2990 | 2987 | 2993 | 3002 | 3007 | 3014 | 3005 | 3026 | 3081 | 3389 | 3392 |
| CAZ | 3727 | 3745 | 3726 | 3725 | 3722 | 3722 | 3712 | 3717 | 3713 | 3701 | 3703 |
| CHA | 2875 | 2895 | 2908 | 2982 | 3007 | 3105 | 3082 | 3113 | 3210 | 3242 | 3298 |
| EUR | 3398 | 3389 | 3394 | 3380 | 3374 | 3375 | 3380 | 3374 | 3387 | 3469 | 3543 |
| IND | 4111 | 4107 | 4105 | 4096 | 4050 | 4046 | 4035 | 4021 | 3998 | 3995 | 3993 |
| JPN | 4982 | 4982 | 4982 | 4982 | 4982 | 4982 | 4982 | 4982 | 4982 | 4982 | 4982 |
| LAM | 2893 | 2939 | 2943 | 2967 | 2950 | 2942 | 2874 | 2880 | 2917 | 2906 | 2890 |
| MEA | 3373 | 3357 | 3372 | 3489 | 3517 | 3554 | 3461 | 3565 | 3977 | 3925 | 3911 |
| NEU | 682  | 623  | 662  | 625  | 599  | 624  | 678  | 634  | 685  | 1444 | 1343 |
| OAS | 3465 | 3436 | 3431 | 3475 | 3507 | 3494 | 3562 | 3612 | 3605 | 3597 | 3598 |
| REF | 0    | 0    | 0    | 0    | 0    | 0    | 0    | 0    | 0    | 4350 | 4357 |
| SSA | 4004 | 3994 | 4018 | 4063 | 4102 | 4094 | 4114 | 4130 | 4066 | 4051 | 4294 |
| USA | 3101 | 3101 | 3101 | 3102 | 3103 | 3103 | 3103 | 3103 | 3103 | 3102 | 3102 |

Table 1159: FAO — Prices—Agriculture—Poultry meat (US\$05/tDM) [PART 3/5]

|     | 1994 | 1995 | 1996 | 1997 | 1998 | 1999 | 2000 | 2001 | 2002 | 2003 | 2004 |
|-----|------|------|------|------|------|------|------|------|------|------|------|
| GLO | 3381 | 3372 | 3371 | 3363 | 3350 | 3337 | 3357 | 3366 | 3363 | 3351 | 3340 |
| CAZ | 3715 | 3716 | 3714 | 3687 | 3682 | 3696 | 3695 | 3713 | 3693 | 3684 | 3684 |
| CHA | 3336 | 3402 | 3383 | 3396 | 3427 | 3441 | 3451 | 3461 | 3460 | 3472 | 3480 |
| EUR | 3527 | 3525 | 3511 | 3499 | 3484 | 3486 | 3591 | 3583 | 3582 | 3619 | 3593 |
| IND | 3996 | 3999 | 4002 | 4003 | 3996 | 3991 | 3984 | 3981 | 3974 | 3969 | 3966 |
| JPN | 4982 | 4982 | 4982 | 4982 | 4982 | 4982 | 4982 | 4982 | 4982 | 4982 | 4982 |
| LAM | 2884 | 2882 | 2883 | 2886 | 2870 | 2864 | 2878 | 2904 | 2902 | 2861 | 2836 |
| MEA | 3871 | 3819 | 3860 | 3878 | 3906 | 3851 | 3848 | 3834 | 3812 | 3865 | 3858 |
| NEU | 1295 | 1367 | 1556 | 1509 | 1406 | 1223 | 1193 | 1223 | 1205 | 1026 | 1112 |
| OAS | 3655 | 3653 | 3673 | 3645 | 3525 | 3523 | 3543 | 3523 | 3533 | 3470 | 3495 |
| REF | 4395 | 4422 | 4385 | 4407 | 4421 | 4435 | 4458 | 4474 | 4502 | 4491 | 4483 |
| SSA | 4314 | 4289 | 4296 | 4278 | 4277 | 4246 | 4208 | 4209 | 4223 | 4177 | 4210 |
| USA | 3101 | 3101 | 3101 | 3101 | 3100 | 3100 | 3100 | 3100 | 3100 | 3100 | 3099 |

Table 1160: FAO — Prices—Agriculture—Poultry meat (US\$05/tDM) [PART 4/5]

|     | 2005 | 2006 | 2007 | 2008 | 2009 | 2010 | 2011 |
|-----|------|------|------|------|------|------|------|
| GLO | 3352 | 3352 | 3346 | 3341 | 3350 | 3337 | 3324 |
| CAZ | 3676 | 3668 | 3656 | 3671 | 3660 | 3648 | 3623 |
| CHA | 3501 | 3502 | 3515 | 3533 | 3537 | 3541 | 3537 |
| EUR | 3580 | 3568 | 3567 | 3576 | 3559 | 3550 | 3547 |
| IND | 3963 | 3960 | 3956 | 3955 | 3953 | 3952 | 3953 |
| JPN | 4982 | 4982 | 4982 | 4982 | 4982 | 4982 | 4982 |
| LAM | 2880 | 2880 | 2861 | 2830 | 2826 | 2795 | 2778 |
| MEA | 3881 | 3872 | 3838 | 3883 | 3927 | 3934 | 3872 |
| NEU | 1059 | 1017 | 996  | 1088 | 961  | 910  | 882  |
| OAS | 3424 | 3394 | 3348 | 3308 | 3308 | 3303 | 3312 |
| REF | 4454 | 4434 | 4453 | 4433 | 4433 | 4424 | 4430 |
| SSA | 4212 | 4285 | 4279 | 4279 | 4275 | 4262 | 4248 |
| USA | 3099 | 3099 | 3099 | 3099 | 3099 | 3098 | 3098 |

Table 1161: FAO — Prices—Agriculture—Poultry meat (US\$05/tDM) [PART 5/5]

|     | 1990 | 1991 | 1992 | 1993 | 1994 | 1995 | 1996 | 1997 | 1998 | 1999 | 2000 |
|-----|------|------|------|------|------|------|------|------|------|------|------|
| GLO | 0    | 1174 | 1243 | 1332 | 1460 | 1005 | 1018 | 948  | 936  | 901  | 864  |
| CAZ | 0    | 1790 | 1602 | 1535 | 1485 | 1475 | 1623 | 1538 | 1379 | 1332 | 1284 |
| CHA | 0    | 1000 | 1049 | 1137 | 1026 | 556  | 587  | 541  | 526  | 492  | 457  |
| EUR | 0    | 2212 | 2448 | 2511 | 2626 | 3131 | 3241 | 3078 | 2939 | 2746 | 2499 |
| IND | 0    | 0    | 0    | 0    | 0    | 0    | 0    | 0    | 0    | 0    | 0    |
| JPN | 0    | 1194 | 1276 | 1432 | 1545 | 1597 | 1377 | 1230 | 1143 | 1311 | 1375 |
| LAM | 0    | 689  | 714  | 504  | 1101 | 375  | 405  | 459  | 730  | 669  | 711  |
| MEA | 0    | 807  | 801  | 1215 | 1359 | 1290 | 1514 | 1614 | 1386 | 1454 | 1442 |
| NEU | 0    | 0    | 98   | 67   | 71   | 513  | 537  | 529  | 477  | 4127 | 4136 |
| OAS | 0    | 879  | 924  | 1571 | 1554 | 1516 | 1040 | 650  | 446  | 511  | 621  |
| REF | 0    | 0    | 33   | 254  | 515  | 710  | 962  | 1088 | 1082 | 612  | 631  |
| SSA | 16   | 931  | 852  | 999  | 999  | 1198 | 1221 | 1226 | 1177 | 797  | 744  |
| USA | 0    | 1267 | 1272 | 1338 | 1381 | 0    | 0    | 0    | 0    | 0    | 0    |

Table 1162: FAOp — Prices—Agriculture—Poultry meat (US\$05/tDM) [PART 1/3]

|     | 2001 | 2002 | 2003 | 2004 | 2005 | 2006 | 2007 | 2008 | 2009  | 2010  | 2011  |
|-----|------|------|------|------|------|------|------|------|-------|-------|-------|
| GLO | 835  | 885  | 948  | 1037 | 1070 | 1089 | 1256 | 1742 | 1728  | 1594  | 1559  |
| CAZ | 1263 | 1223 | 1418 | 1609 | 1633 | 1637 | 1899 | 2206 | 2102  | 2217  | 2454  |
| CHA | 352  | 481  | 643  | 806  | 849  | 908  | 1115 | 2842 | 2902  | 1691  | 2266  |
| EUR | 2450 | 2579 | 3007 | 3292 | 3260 | 3310 | 3637 | 4876 | 4133  | 4067  | 3250  |
| IND | 890  | 0    | 0    | 0    | 0    | 0    | 0    | 0    | 0     | 0     | 0     |
| JPN | 1220 | 1183 | 1259 | 1309 | 1208 | 1127 | 1174 | 1435 | 1552  | 1978  | 2194  |
| LAM | 768  | 711  | 594  | 584  | 682  | 712  | 782  | 875  | 878   | 990   | 869   |
| MEA | 1318 | 1419 | 1113 | 1128 | 1143 | 1116 | 1267 | 1457 | 1351  | 1544  | 1697  |
| NEU | 2403 | 3774 | 4976 | 6117 | 6261 | 7279 | 9892 | 9759 | 10714 | 11289 | 10466 |
| OAS | 601  | 655  | 642  | 748  | 954  | 1073 | 1103 | 1181 | 1326  | 1509  | 1177  |
| REF | 785  | 749  | 778  | 950  | 1094 | 1047 | 1233 | 1498 | 1308  | 1644  | 1710  |
| SSA | 794  | 852  | 957  | 931  | 939  | 939  | 1083 | 771  | 840   | 895   | 949   |
| USA | 0    | 0    | 0    | 0    | 0    | 0    | 0    | 0    | 0     | 0     | 0     |

Table 1163: FAOp — Prices—Agriculture—Poultry meat (US\$05/tDM) [PART 2/3]

|     | 2005 |
|-----|------|
| GLO | 8277 |
| CAZ |      |
| CHA |      |
| EUR |      |
| IND |      |
| JPN |      |
| LAM |      |
| MEA |      |
| NEU |      |
| OAS |      |
| REF |      |
| SSA |      |
| USA |      |

Table 1164: IniFoodPrice — Prices—Agriculture—Poultry meat (US\$05/tDM)

36.25 Pulses

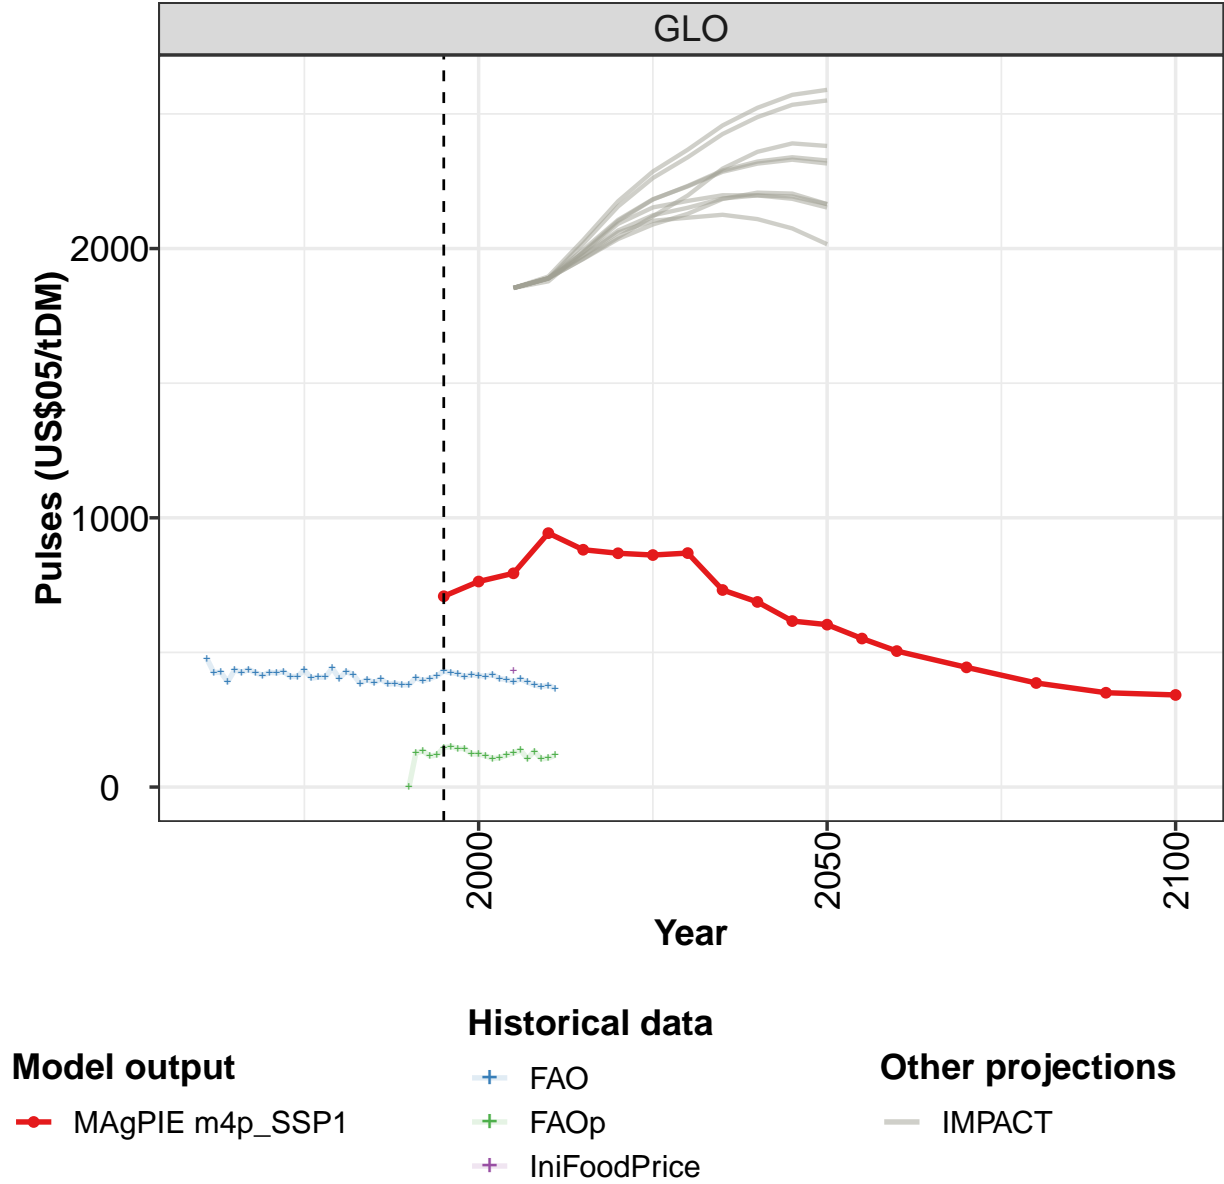

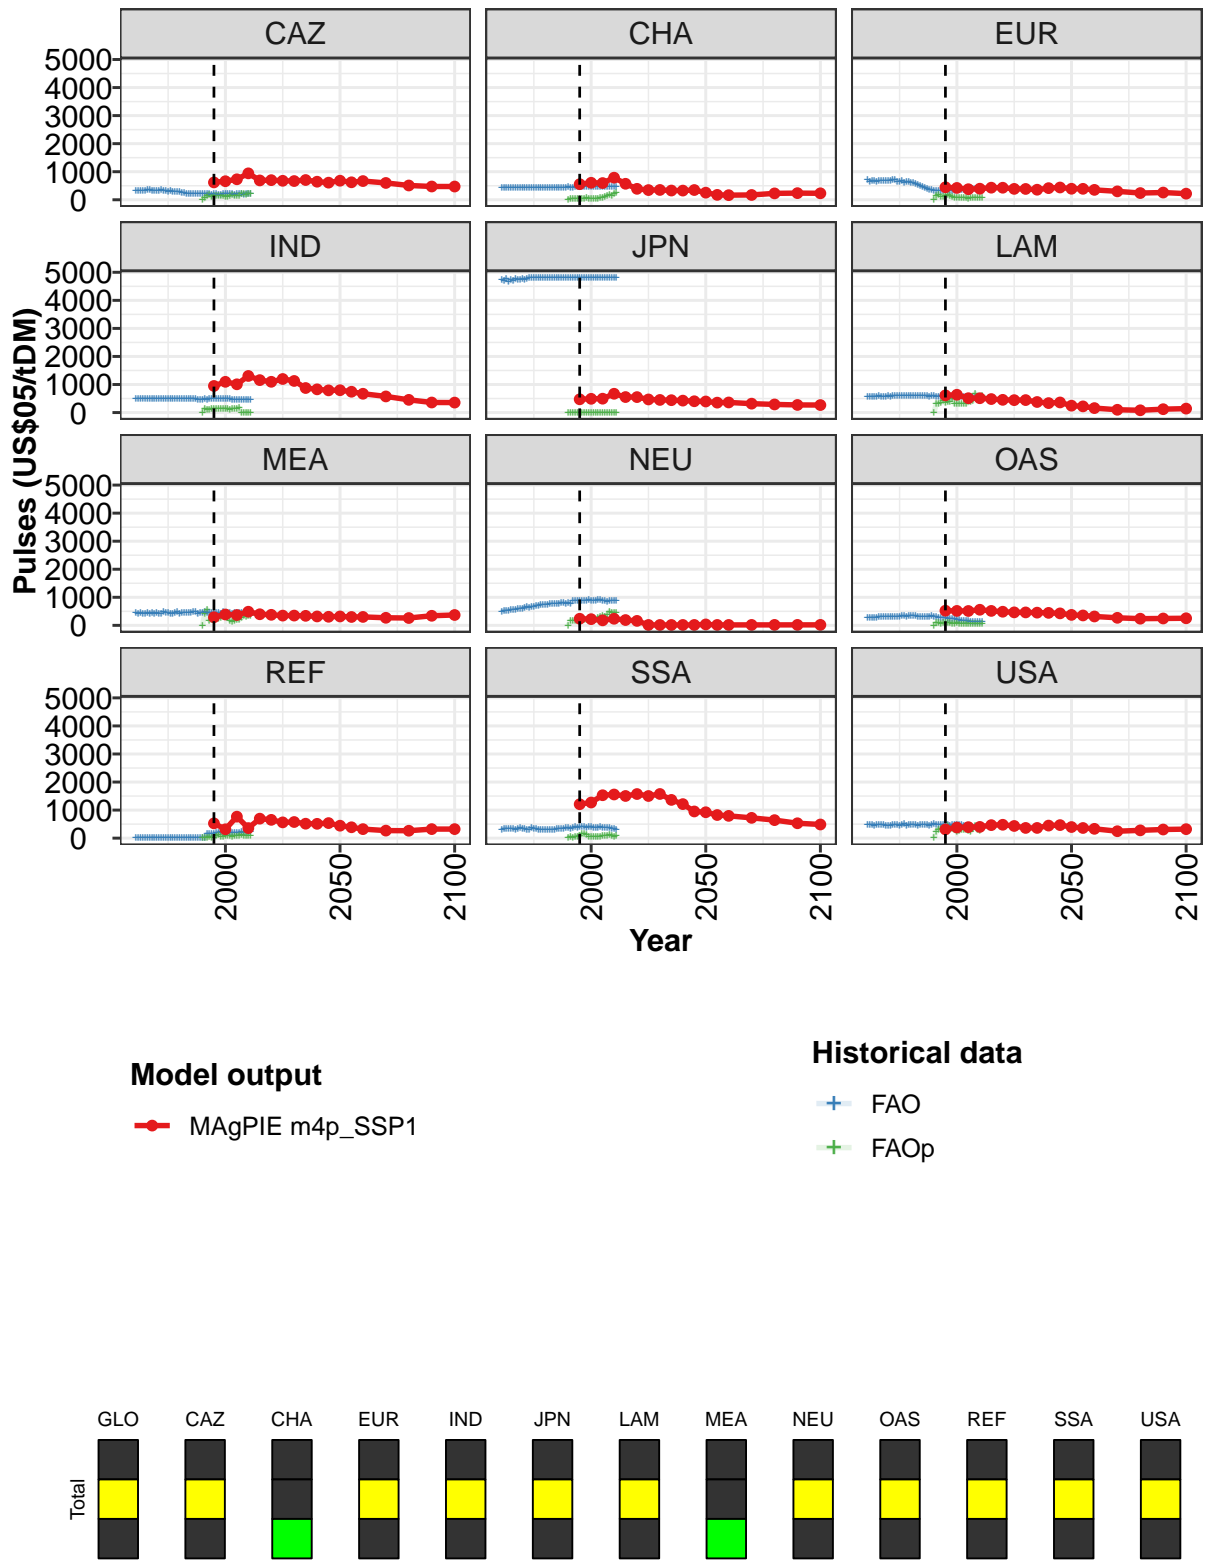

Figure 315: MAgPIE m4p\_SSP1 — Prices—Agriculture—Pulses (US\$05/tDM)

|     | 1995 | 2000 | 2005 | 2010 | 2015 | 2020 | 2025 | 2030 | 2035 | 2040 | 2045 |
|-----|------|------|------|------|------|------|------|------|------|------|------|
| GLO | 709  | 763  | 794  | 943  | 881  | 868  | 862  | 869  | 732  | 688  | 617  |
| CAZ | 619  | 662  | 730  | 943  | 690  | 700  | 677  | 668  | 704  | 645  | 611  |
| CHA | 556  | 606  | 596  | 788  | 571  | 391  | 346  | 351  | 330  | 328  | 348  |
| EUR | 446  | 423  | 377  | 395  | 432  | 430  | 389  | 386  | 359  | 415  | 438  |
| IND | 949  | 1096 | 1008 | 1305 | 1157 | 1097 | 1198 | 1127 | 875  | 828  | 792  |
| JPN | 473  | 491  | 496  | 671  | 554  | 552  | 468  | 451  | 442  | 426  | 404  |
| LAM | 613  | 635  | 512  | 512  | 482  | 454  | 444  | 445  | 377  | 338  | 360  |
| MEA | 290  | 388  | 368  | 486  | 397  | 376  | 348  | 349  | 340  | 318  | 306  |
| NEU | 236  | 221  | 179  | 235  | 190  | 160  | 15   | 15   | 15   | 15   | 15   |
| OAS | 523  | 515  | 513  | 557  | 515  | 486  | 464  | 462  | 454  | 445  | 427  |
| REF | 528  | 316  | 766  | 359  | 696  | 653  | 563  | 575  | 516  | 511  | 537  |
| SSA | 1209 | 1271 | 1530 | 1556 | 1504 | 1573 | 1503 | 1575 | 1364 | 1214 | 952  |
| USA | 312  | 381  | 392  | 401  | 465  | 477  | 435  | 365  | 365  | 448  | 466  |

Table 1165: MAgPIE m4p\_SSP1 — Prices—Agriculture—Pulses (US\$05/tDM) [PART 1/2]

|     | 2050 | 2055 | 2060 | 2070 | 2080 | 2090 | 2100 |
|-----|------|------|------|------|------|------|------|
| GLO | 603  | 552  | 505  | 445  | 387  | 350  | 342  |
| CAZ | 679  | 623  | 667  | 600  | 509  | 473  | 473  |
| CHA | 254  | 175  | 165  | 172  | 228  | 237  | 230  |
| EUR | 393  | 390  | 353  | 300  | 240  | 258  | 218  |
| IND | 797  | 743  | 671  | 575  | 454  | 359  | 356  |
| JPN | 395  | 354  | 361  | 318  | 290  | 272  | 268  |
| LAM | 247  | 221  | 160  | 100  | 81   | 121  | 141  |
| MEA | 318  | 299  | 301  | 270  | 261  | 341  | 370  |
| NEU | 33   | 15   | 16   | 16   | 17   | 17   | 18   |
| OAS | 373  | 354  | 318  | 269  | 238  | 246  | 253  |
| REF | 444  | 388  | 322  | 269  | 265  | 323  | 323  |
| SSA | 923  | 825  | 795  | 723  | 643  | 531  | 487  |
| USA | 397  | 362  | 333  | 247  | 279  | 308  | 321  |

Table 1166: MAgPIE m4p\_SSP1 — Prices—Agriculture—Pulses (US\$05/tDM) [PART 2/2]

|     | 1961 | 1962 | 1963 | 1964 | 1965 | 1966 | 1967 | 1968 | 1969 | 1970 | 1971 |
|-----|------|------|------|------|------|------|------|------|------|------|------|
| GLO | 477  | 425  | 427  | 391  | 435  | 426  | 437  | 425  | 415  | 426  | 424  |
| CAZ | 304  | 317  | 326  | 320  | 330  | 351  | 358  | 321  | 331  | 312  | 303  |
| CHA | 433  | 435  | 433  | 431  | 432  | 434  | 434  | 435  | 437  | 438  | 434  |
| EUR | 703  | 653  | 681  | 674  | 651  | 689  | 675  | 670  | 662  | 674  | 678  |
| IND | 496  | 491  | 496  | 508  | 497  | 486  | 488  | 480  | 483  | 485  | 491  |
| JPN | 4720 | 4690 | 4771 | 4673 | 4716 | 4696 | 4755 | 4744 | 4750 | 4764 | 4750 |
| LAM | 579  | 577  | 571  | 578  | 573  | 582  | 578  | 576  | 579  | 582  | 580  |
| MEA | 437  | 416  | 432  | 414  | 421  | 448  | 402  | 452  | 404  | 460  | 420  |
| NEU | 495  | 508  | 525  | 526  | 550  | 538  | 563  | 577  | 589  | 590  | 626  |
| OAS | 287  | 280  | 271  | 269  | 280  | 288  | 291  | 315  | 297  | 303  | 303  |
| REF | 0    | 0    | 0    | 0    | 0    | 0    | 0    | 0    | 0    | 0    | 0    |
| SSA | 314  | 320  | 328  | 331  | 338  | 329  | 314  | 318  | 355  | 342  | 335  |
| USA | 489  | 459  | 469  | 455  | 466  | 480  | 467  | 462  | 447  | 458  | 439  |

Table 1167: FAO — Prices—Agriculture—Pulses (US\$05/tDM) [PART 1/5]

|     | 1972 | 1973 | 1974 | 1975 | 1976 | 1977 | 1978 | 1979 | 1980 | 1981 | 1982 |
|-----|------|------|------|------|------|------|------|------|------|------|------|
| GLO | 429  | 410  | 411  | 435  | 404  | 408  | 408  | 441  | 404  | 429  | 418  |
| CAZ | 339  | 318  | 303  | 296  | 332  | 289  | 284  | 275  | 273  | 239  | 231  |
| CHA | 436  | 437  | 437  | 437  | 434  | 436  | 432  | 431  | 432  | 434  | 437  |
| EUR | 698  | 706  | 641  | 643  | 669  | 621  | 628  | 639  | 600  | 616  | 567  |
| IND | 498  | 479  | 496  | 487  | 493  | 479  | 491  | 495  | 481  | 479  | 477  |
| JPN | 4785 | 4790 | 4793 | 4791 | 4791 | 4793 | 4794 | 4793 | 4791 | 4787 | 4800 |
| LAM | 584  | 590  | 597  | 593  | 590  | 596  | 593  | 607  | 587  | 588  | 584  |
| MEA | 422  | 471  | 460  | 460  | 426  | 406  | 433  | 471  | 428  | 436  | 464  |
| NEU | 669  | 631  | 655  | 669  | 702  | 695  | 724  | 720  | 742  | 732  | 752  |
| OAS | 299  | 304  | 315  | 318  | 343  | 339  | 321  | 329  | 327  | 332  | 333  |
| REF | 0    | 0    | 0    | 0    | 0    | 0    | 0    | 0    | 0    | 0    | 0    |
| SSA | 280  | 313  | 373  | 348  | 337  | 293  | 307  | 312  | 290  | 299  | 309  |
| USA | 478  | 476  | 460  | 458  | 476  | 500  | 452  | 476  | 474  | 494  | 484  |

Table 1168: FAO — Prices—Agriculture—Pulses (US\$05/tDM) [PART 2/5]

|     | 1983 | 1984 | 1985 | 1986 | 1987 | 1988 | 1989 | 1990 | 1991 | 1992 | 1993 |
|-----|------|------|------|------|------|------|------|------|------|------|------|
| GLO | 385  | 399  | 388  | 401  | 382  | 385  | 379  | 380  | 406  | 394  | 403  |
| CAZ | 214  | 206  | 210  | 202  | 213  | 202  | 205  | 218  | 213  | 209  | 197  |
| CHA | 439  | 439  | 443  | 441  | 439  | 444  | 443  | 447  | 437  | 441  | 454  |
| EUR | 523  | 493  | 462  | 427  | 394  | 366  | 364  | 327  | 330  | 327  | 326  |
| IND | 474  | 489  | 475  | 475  | 474  | 466  | 466  | 458  | 491  | 451  | 476  |
| JPN | 4793 | 4803 | 4803 | 4803 | 4804 | 4804 | 4806 | 4807 | 4807 | 4808 | 4807 |
| LAM | 606  | 603  | 582  | 591  | 586  | 575  | 581  | 587  | 578  | 574  | 581  |
| MEA | 440  | 458  | 463  | 476  | 467  | 411  | 463  | 451  | 479  | 455  | 458  |
| NEU | 759  | 770  | 771  | 774  | 800  | 811  | 769  | 811  | 783  | 876  | 866  |
| OAS | 303  | 295  | 295  | 293  | 308  | 306  | 328  | 301  | 293  | 270  | 263  |
| REF | 0    | 0    | 0    | 0    | 0    | 0    | 0    | 0    | 0    | 146  | 146  |
| SSA | 287  | 285  | 324  | 335  | 329  | 341  | 355  | 361  | 333  | 352  | 397  |
| USA | 455  | 484  | 491  | 467  | 472  | 452  | 459  | 496  | 482  | 480  | 462  |

Table 1169: FAO — Prices—Agriculture—Pulses (US\$05/tDM) [PART 3/5]

|     | 1994 | 1995 | 1996 | 1997 | 1998 | 1999 | 2000 | 2001 | 2002 | 2003 | 2004 |
|-----|------|------|------|------|------|------|------|------|------|------|------|
| GLO | 413  | 431  | 425  | 421  | 410  | 418  | 415  | 411  | 419  | 402  | 400  |
| CAZ | 192  | 196  | 198  | 189  | 188  | 204  | 210  | 224  | 230  | 206  | 188  |
| CHA | 451  | 457  | 456  | 456  | 456  | 465  | 465  | 465  | 460  | 463  | 466  |
| EUR | 330  | 342  | 336  | 328  | 324  | 330  | 338  | 350  | 347  | 343  | 347  |
| IND | 483  | 486  | 475  | 482  | 476  | 476  | 477  | 488  | 476  | 452  | 465  |
| JPN | 4810 | 4811 | 4810 | 4811 | 4811 | 4811 | 4811 | 4810 | 4812 | 4812 | 4812 |
| LAM | 575  | 585  | 583  | 574  | 572  | 566  | 558  | 570  | 570  | 562  | 555  |
| MEA | 457  | 436  | 447  | 443  | 429  | 478  | 463  | 432  | 443  | 430  | 456  |
| NEU | 870  | 879  | 875  | 881  | 888  | 902  | 892  | 892  | 892  | 895  | 895  |
| OAS | 256  | 254  | 241  | 238  | 228  | 219  | 208  | 195  | 175  | 172  | 163  |
| REF | 151  | 166  | 188  | 206  | 220  | 208  | 213  | 196  | 204  | 199  | 195  |
| SSA | 374  | 396  | 394  | 399  | 369  | 391  | 389  | 375  | 356  | 374  | 390  |
| USA | 489  | 464  | 488  | 455  | 460  | 473  | 481  | 466  | 477  | 455  | 381  |

Table 1170: FAO — Prices—Agriculture—Pulses (US\$05/tDM) [PART 4/5]



|     | 2005 | 2006 | 2007 | 2008 | 2009 | 2010 | 2011 |
|-----|------|------|------|------|------|------|------|
| GLO | 391  | 402  | 390  | 380  | 373  | 378  | 367  |
| CAZ | 202  | 208  | 202  | 192  | 200  | 214  | 220  |
| CHA | 464  | 462  | 460  | 463  | 463  | 461  | 458  |
| EUR | 350  | 368  | 384  | 388  | 368  | 352  | 369  |
| IND | 458  | 462  | 453  | 460  | 463  | 452  | 457  |
| JPN | 4812 | 4812 | 4812 | 4812 | 4812 | 4812 | 4812 |
| LAM | 553  | 560  | 549  | 557  | 546  | 542  | 526  |
| MEA | 440  | 451  | 465  | 462  | 446  | 478  | 401  |
| NEU | 878  | 863  | 858  | 869  | 869  | 886  | 889  |
| OAS | 153  | 138  | 136  | 114  | 113  | 112  | 113  |
| REF | 200  | 189  | 217  | 209  | 216  | 234  | 214  |
| SSA | 383  | 382  | 361  | 352  | 341  | 346  | 307  |
| USA | 398  | 401  | 386  | 413  | 384  | 410  | 445  |

Table 1171: FAO — Prices—Agriculture—Pulses (US\$05/tDM) [PART 5/5]

|     | 1990 | 1991 | 1992 | 1993 | 1994 | 1995 | 1996 | 1997 | 1998 | 1999 | 2000 |
|-----|------|------|------|------|------|------|------|------|------|------|------|
| GLO | 0    | 127  | 134  | 115  | 119  | 146  | 151  | 143  | 143  | 123  | 123  |
| CAZ | 0    | 53   | 137  | 181  | 123  | 148  | 149  | 147  | 138  | 128  | 109  |
| CHA | 0    | 27   | 28   | 32   | 24   | 37   | 51   | 51   | 63   | 40   | 45   |
| EUR | 0    | 148  | 175  | 116  | 119  | 150  | 162  | 126  | 110  | 85   | 80   |
| IND | 0    | 130  | 107  | 109  | 122  | 138  | 123  | 127  | 132  | 126  | 118  |
| JPN | 0    | 0    | 0    | 0    | 0    | 0    | 0    | 0    | 0    | 0    | 0    |
| LAM | 0    | 319  | 296  | 360  | 421  | 340  | 370  | 374  | 485  | 320  | 301  |
| MEA | 0    | 403  | 562  | 174  | 204  | 308  | 262  | 244  | 262  | 362  | 385  |
| NEU | 0    | 163  | 162  | 172  | 157  | 264  | 219  | 185  | 195  | 207  | 241  |
| OAS | 0    | 76   | 74   | 64   | 78   | 99   | 98   | 74   | 71   | 73   | 76   |
| REF | 0    | 0    | 20   | 31   | 25   | 27   | 93   | 111  | 66   | 62   | 88   |
| SSA | 0    | 39   | 30   | 51   | 60   | 90   | 144  | 139  | 121  | 54   | 57   |
| USA | 0    | 234  | 305  | 320  | 332  | 310  | 445  | 332  | 341  | 281  | 226  |

Table 1172: FAOp — Prices—Agriculture—Pulses (US\$05/tDM) [PART 1/3]

|     | 2001 | 2002 | 2003 | 2004 | 2005 | 2006 | 2007 | 2008 | 2009 | 2010 | 2011 |
|-----|------|------|------|------|------|------|------|------|------|------|------|
| GLO | 116  | 106  | 109  | 118  | 126  | 137  | 106  | 133  | 105  | 107  | 118  |
| CAZ | 123  | 129  | 168  | 137  | 147  | 131  | 200  | 223  | 192  | 197  | 216  |
| CHA | 48   | 52   | 53   | 59   | 61   | 117  | 141  | 182  | 145  | 204  | 254  |
| EUR | 71   | 69   | 63   | 66   | 48   | 57   | 74   | 74   | 60   | 68   | 78   |
| IND | 119  | 117  | 119  | 132  | 138  | 153  | 0    | 0    | 0    | 0    | 0    |
| JPN | 0    | 0    | 0    | 0    | 0    | 0    | 0    | 0    | 0    | 0    | 0    |
| LAM | 306  | 309  | 317  | 304  | 368  | 370  | 412  | 683  | 524  | 541  | 593  |
| MEA | 279  | 150  | 141  | 167  | 182  | 207  | 258  | 330  | 314  | 329  | 345  |
| NEU | 177  | 210  | 253  | 296  | 331  | 318  | 385  | 492  | 442  | 449  | 447  |
| OAS | 64   | 52   | 53   | 58   | 59   | 46   | 49   | 50   | 44   | 51   | 52   |
| REF | 89   | 72   | 65   | 80   | 74   | 90   | 133  | 90   | 73   | 83   | 101  |
| SSA | 59   | 53   | 55   | 63   | 78   | 80   | 93   | 131  | 68   | 61   | 84   |
| USA | 267  | 291  | 290  | 284  | 255  | 238  | 337  | 436  | 285  | 270  | 367  |

Table 1173: FAOp — Prices—Agriculture—Pulses (US\$05/tDM) [PART 2/3]

|     | 2005 |
|-----|------|
| GLO | 431  |
| CAZ |      |
| CHA |      |
| EUR |      |
| IND |      |
| JPN |      |
| LAM |      |
| MEA |      |
| NEU |      |
| OAS |      |
| REF |      |
| SSA |      |
| USA |      |

Table 1174: IniFoodPrice — Prices—Agriculture—Pulses (US\$05/tDM)

36.26 Rice

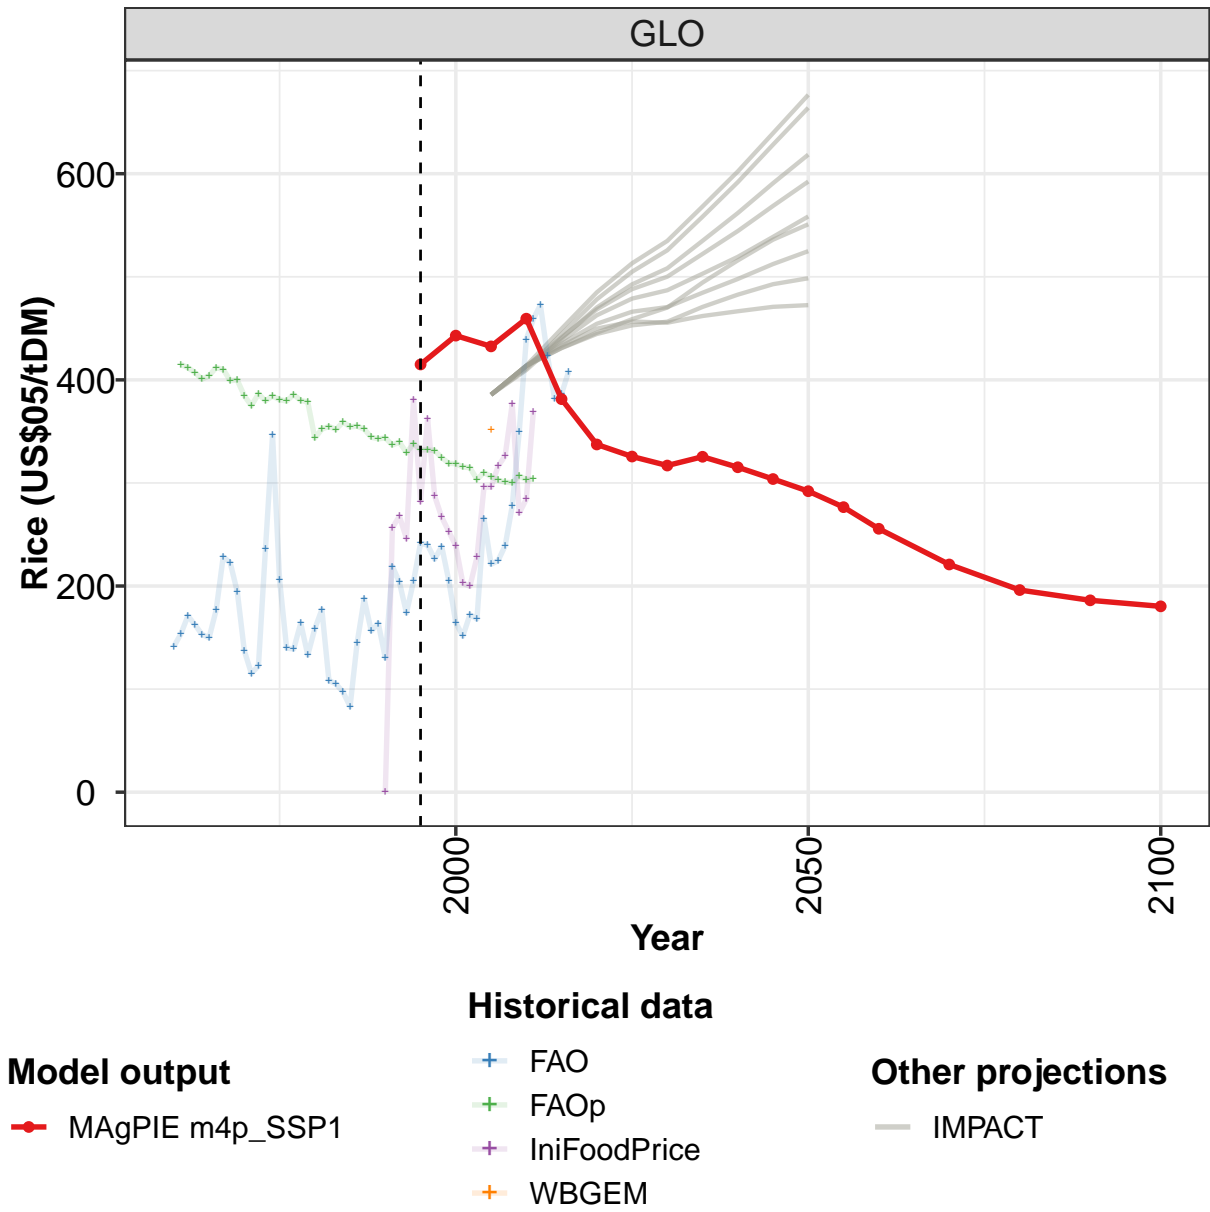

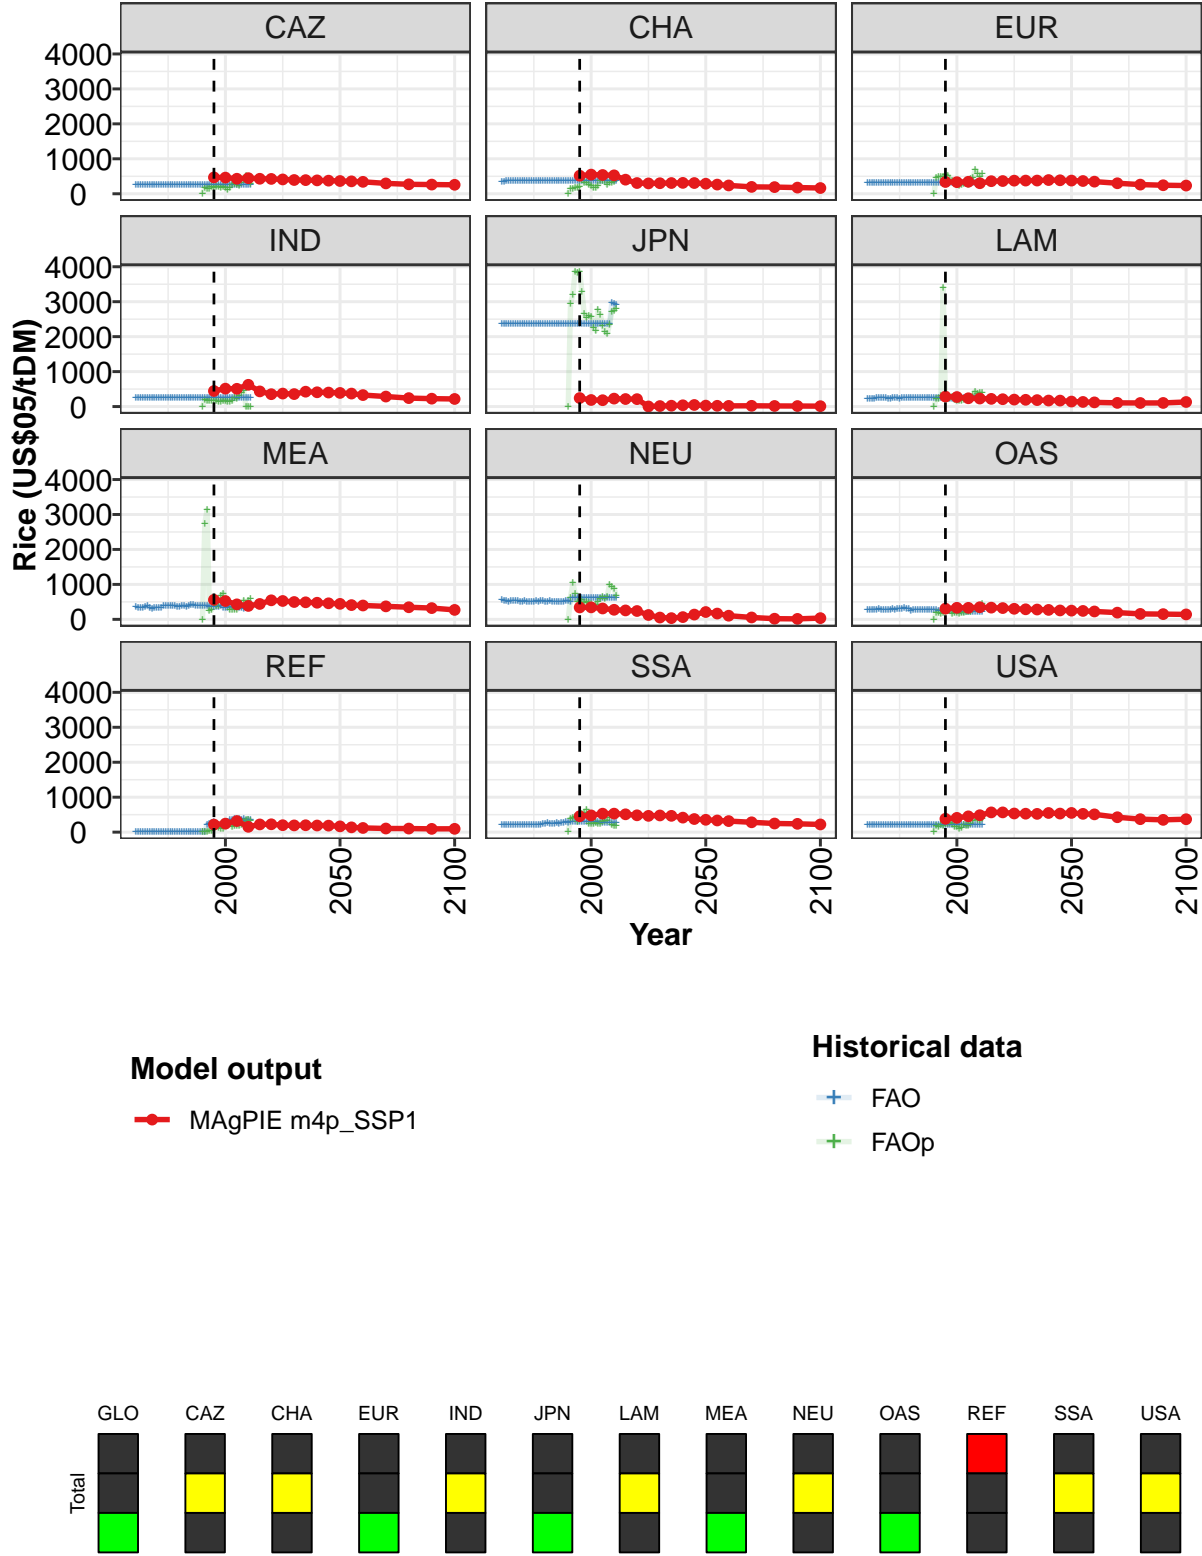

Figure 316: MAGPIE m4p\_SSP1 — Prices—Agriculture—Rice (US\$05/tDM)

|     | 1995 | 2000 | 2005 | 2010 | 2015 | 2020 | 2025 | 2030 | 2035 | 2040 | 2045 |
|-----|------|------|------|------|------|------|------|------|------|------|------|
| GLO | 415  | 443  | 432  | 459  | 381  | 337  | 326  | 317  | 325  | 315  | 304  |
| CAZ | 469  | 463  | 430  | 447  | 429  | 425  | 410  | 395  | 391  | 384  | 376  |
| CHA | 518  | 548  | 537  | 528  | 404  | 308  | 296  | 302  | 308  | 312  | 308  |
| EUR | 337  | 333  | 344  | 302  | 360  | 365  | 376  | 378  | 378  | 393  | 386  |
| IND | 446  | 513  | 509  | 623  | 434  | 354  | 372  | 358  | 426  | 409  | 401  |
| JPN | 244  | 188  | 182  | 227  | 216  | 213  | 4    | 15   | 25   | 37   | 46   |
| LAM | 286  | 273  | 238  | 230  | 220  | 210  | 200  | 194  | 185  | 173  | 171  |
| MEA | 559  | 525  | 430  | 385  | 441  | 545  | 526  | 497  | 488  | 476  | 459  |
| NEU | 341  | 343  | 311  | 274  | 256  | 239  | 126  | 52   | 36   | 64   | 137  |
| OAS | 307  | 331  | 329  | 347  | 335  | 323  | 303  | 288  | 281  | 271  | 256  |
| REF | 218  | 244  | 318  | 153  | 221  | 225  | 199  | 194  | 198  | 191  | 187  |
| SSA | 456  | 479  | 529  | 530  | 511  | 482  | 466  | 478  | 467  | 416  | 376  |
| USA | 383  | 409  | 452  | 486  | 566  | 566  | 534  | 528  | 523  | 549  | 532  |

Table 1175: MAgPIE m4p-SSP1 — Prices—Agriculture—Rice (US\$05/tDM) [PART 1/2]

|     | 2050 | 2055 | 2060 | 2070 | 2080 | 2090 | 2100 |
|-----|------|------|------|------|------|------|------|
| GLO | 292  | 277  | 256  | 221  | 196  | 186  | 180  |
| CAZ | 365  | 356  | 342  | 297  | 270  | 263  | 257  |
| CHA | 288  | 263  | 238  | 197  | 191  | 177  | 165  |
| EUR | 378  | 365  | 347  | 301  | 263  | 244  | 235  |
| IND | 390  | 372  | 329  | 287  | 242  | 226  | 218  |
| JPN | 27   | 22   | 20   | 22   | 18   | 15   | 11   |
| LAM | 143  | 133  | 120  | 106  | 103  | 104  | 131  |
| MEA | 443  | 409  | 397  | 372  | 347  | 322  | 271  |
| NEU | 210  | 166  | 105  | 54   | 19   | 14   | 36   |
| OAS | 250  | 241  | 226  | 193  | 156  | 150  | 141  |
| REF | 165  | 138  | 120  | 105  | 103  | 94   | 96   |
| SSA | 354  | 334  | 317  | 282  | 247  | 238  | 221  |
| USA | 550  | 524  | 510  | 427  | 371  | 352  | 370  |

Table 1176: MAgPIE m4p-SSP1 — Prices—Agriculture—Rice (US\$05/tDM) [PART 2/2]

|     | 1960 | 1961 | 1962 | 1963 | 1964 | 1965 | 1966 | 1967 | 1968 | 1969 | 1970 |
|-----|------|------|------|------|------|------|------|------|------|------|------|
| GLO | 141  | 154  | 171  | 162  | 153  | 150  | 177  | 228  | 223  | 194  | 137  |
| CAZ |      |      |      |      |      |      |      |      |      |      |      |
| CHA |      |      |      |      |      |      |      |      |      |      |      |
| EUR |      |      |      |      |      |      |      |      |      |      |      |
| IND |      |      |      |      |      |      |      |      |      |      |      |
| JPN |      |      |      |      |      |      |      |      |      |      |      |
| LAM |      |      |      |      |      |      |      |      |      |      |      |
| MEA |      |      |      |      |      |      |      |      |      |      |      |
| NEU |      |      |      |      |      |      |      |      |      |      |      |
| OAS |      |      |      |      |      |      |      |      |      |      |      |
| REF |      |      |      |      |      |      |      |      |      |      |      |
| SSA |      |      |      |      |      |      |      |      |      |      |      |
| USA |      |      |      |      |      |      |      |      |      |      |      |

Table 1177: WBGEM — Prices—Agriculture—Rice (US\$05/tDM) [PART 1/6]

|     | 1971 | 1972 | 1973 | 1974 | 1975 | 1976 | 1977 | 1978 | 1979 | 1980 | 1981 |
|-----|------|------|------|------|------|------|------|------|------|------|------|
| GLO | 115  | 122  | 236  | 346  | 206  | 140  | 139  | 164  | 133  | 159  | 177  |
| CAZ |      |      |      |      |      |      |      |      |      |      |      |
| CHA |      |      |      |      |      |      |      |      |      |      |      |
| EUR |      |      |      |      |      |      |      |      |      |      |      |
| IND |      |      |      |      |      |      |      |      |      |      |      |
| JPN |      |      |      |      |      |      |      |      |      |      |      |
| LAM |      |      |      |      |      |      |      |      |      |      |      |
| MEA |      |      |      |      |      |      |      |      |      |      |      |
| NEU |      |      |      |      |      |      |      |      |      |      |      |
| OAS |      |      |      |      |      |      |      |      |      |      |      |
| REF |      |      |      |      |      |      |      |      |      |      |      |
| SSA |      |      |      |      |      |      |      |      |      |      |      |
| USA |      |      |      |      |      |      |      |      |      |      |      |

Table 1178: WBGEM — Prices—Agriculture—Rice (US\$05/tDM) [PART 2/6]

|     | 1982 | 1983 | 1984 | 1985 | 1986 | 1987 | 1988 | 1989 | 1990 | 1991 | 1992 |
|-----|------|------|------|------|------|------|------|------|------|------|------|
| GLO | 108  | 105  | 97   | 83   | 145  | 187  | 156  | 164  | 130  | 219  | 204  |
| CAZ |      |      |      |      |      |      |      |      |      |      |      |
| CHA |      |      |      |      |      |      |      |      |      |      |      |
| EUR |      |      |      |      |      |      |      |      |      |      |      |
| IND |      |      |      |      |      |      |      |      |      |      |      |
| JPN |      |      |      |      |      |      |      |      |      |      |      |
| LAM |      |      |      |      |      |      |      |      |      |      |      |
| MEA |      |      |      |      |      |      |      |      |      |      |      |
| NEU |      |      |      |      |      |      |      |      |      |      |      |
| OAS |      |      |      |      |      |      |      |      |      |      |      |
| REF |      |      |      |      |      |      |      |      |      |      |      |
| SSA |      |      |      |      |      |      |      |      |      |      |      |
| USA |      |      |      |      |      |      |      |      |      |      |      |

Table 1179: WBGEM — Prices—Agriculture—Rice (US\$05/tDM) [PART 3/6]

|     | 1993 | 1994 | 1995 | 1996 | 1997 | 1998 | 1999 | 2000 | 2001 | 2002 | 2003 |
|-----|------|------|------|------|------|------|------|------|------|------|------|
| GLO | 174  | 205  | 242  | 240  | 226  | 238  | 206  | 164  | 151  | 172  | 168  |
| CAZ |      |      |      |      |      |      |      |      |      |      |      |
| CHA |      |      |      |      |      |      |      |      |      |      |      |
| EUR |      |      |      |      |      |      |      |      |      |      |      |
| IND |      |      |      |      |      |      |      |      |      |      |      |
| JPN |      |      |      |      |      |      |      |      |      |      |      |
| LAM |      |      |      |      |      |      |      |      |      |      |      |
| MEA |      |      |      |      |      |      |      |      |      |      |      |
| NEU |      |      |      |      |      |      |      |      |      |      |      |
| OAS |      |      |      |      |      |      |      |      |      |      |      |
| REF |      |      |      |      |      |      |      |      |      |      |      |
| SSA |      |      |      |      |      |      |      |      |      |      |      |
| USA |      |      |      |      |      |      |      |      |      |      |      |

Table 1180: WBGEM — Prices—Agriculture—Rice (US\$05/tDM) [PART 4/6]

|     | 2004 | 2005 | 2006 | 2007 | 2008 | 2009 | 2010 | 2011 | 2012 | 2013 | 2014 |
|-----|------|------|------|------|------|------|------|------|------|------|------|
| GLO | 265  | 221  | 225  | 239  | 278  | 350  | 439  | 459  | 473  | 424  | 382  |
| CAZ |      |      |      |      |      |      |      |      |      |      |      |
| CHA |      |      |      |      |      |      |      |      |      |      |      |
| EUR |      |      |      |      |      |      |      |      |      |      |      |
| IND |      |      |      |      |      |      |      |      |      |      |      |
| JPN |      |      |      |      |      |      |      |      |      |      |      |
| LAM |      |      |      |      |      |      |      |      |      |      |      |
| MEA |      |      |      |      |      |      |      |      |      |      |      |
| NEU |      |      |      |      |      |      |      |      |      |      |      |
| OAS |      |      |      |      |      |      |      |      |      |      |      |
| REF |      |      |      |      |      |      |      |      |      |      |      |
| SSA |      |      |      |      |      |      |      |      |      |      |      |
| USA |      |      |      |      |      |      |      |      |      |      |      |

Table 1181: WBGEM — Prices—Agriculture—Rice (US\$05/tDM) [PART 5/6]

|     | 2015 | 2016 |
|-----|------|------|
| GLO | 386  | 408  |
| CAZ |      |      |
| CHA |      |      |
| EUR |      |      |
| IND |      |      |
| JPN |      |      |
| LAM |      |      |
| MEA |      |      |
| NEU |      |      |
| OAS |      |      |
| REF |      |      |
| SSA |      |      |
| USA |      |      |

Table 1182: WBGEM — Prices—Agriculture—Rice (US\$05/tDM) [PART 6/6]

|     | 1961 | 1962 | 1963 | 1964 | 1965 | 1966 | 1967 | 1968 | 1969 | 1970 | 1971 |
|-----|------|------|------|------|------|------|------|------|------|------|------|
| GLO | 415  | 412  | 407  | 401  | 404  | 412  | 410  | 399  | 400  | 384  | 375  |
| CAZ | 257  | 257  | 257  | 257  | 257  | 257  | 257  | 257  | 257  | 257  | 257  |
| CHA | 353  | 355  | 357  | 358  | 358  | 359  | 359  | 358  | 359  | 360  | 361  |
| EUR | 308  | 306  | 308  | 308  | 308  | 310  | 312  | 312  | 314  | 313  | 316  |
| IND | 257  | 257  | 257  | 257  | 257  | 257  | 257  | 257  | 257  | 257  | 257  |
| JPN | 2365 | 2365 | 2365 | 2365 | 2365 | 2365 | 2365 | 2365 | 2365 | 2365 | 2365 |
| LAM | 234  | 234  | 235  | 237  | 240  | 241  | 240  | 242  | 238  | 235  | 236  |
| MEA | 365  | 341  | 332  | 342  | 365  | 380  | 324  | 313  | 322  | 335  | 325  |
| NEU | 546  | 546  | 524  | 502  | 519  | 532  | 531  | 525  | 503  | 513  | 520  |
| OAS | 287  | 269  | 286  | 288  | 281  | 300  | 282  | 265  | 285  | 278  | 284  |
| REF | 0    | 0    | 0    | 0    | 0    | 0    | 0    | 0    | 0    | 0    | 0    |
| SSA | 203  | 214  | 200  | 204  | 206  | 200  | 219  | 220  | 213  | 214  | 215  |
| USA | 211  | 211  | 211  | 211  | 211  | 211  | 211  | 211  | 211  | 211  | 211  |

Table 1183: FAO — Prices—Agriculture—Rice (US\$05/tDM) [PART 1/5]

|     | 1972 | 1973 | 1974 | 1975 | 1976 | 1977 | 1978 | 1979 | 1980 | 1981 | 1982 |
|-----|------|------|------|------|------|------|------|------|------|------|------|
| GLO | 386  | 380  | 384  | 381  | 379  | 386  | 380  | 378  | 344  | 352  | 355  |
| CAZ | 257  | 257  | 257  | 257  | 257  | 257  | 257  | 257  | 257  | 257  | 257  |
| CHA | 360  | 362  | 361  | 361  | 360  | 361  | 362  | 362  | 363  | 363  | 363  |
| EUR | 314  | 316  | 318  | 318  | 318  | 315  | 318  | 319  | 316  | 317  | 317  |
| IND | 257  | 257  | 257  | 257  | 257  | 257  | 257  | 257  | 257  | 257  | 257  |
| JPN | 2365 | 2365 | 2365 | 2365 | 2365 | 2365 | 2365 | 2365 | 2365 | 2365 | 2365 |
| LAM | 238  | 239  | 237  | 235  | 240  | 238  | 241  | 243  | 242  | 242  | 241  |
| MEA | 344  | 376  | 384  | 386  | 393  | 378  | 387  | 359  | 368  | 401  | 390  |
| NEU | 498  | 512  | 514  | 501  | 529  | 509  | 522  | 532  | 490  | 516  | 522  |
| OAS | 288  | 282  | 290  | 288  | 301  | 317  | 313  | 303  | 251  | 274  | 276  |
| REF | 0    | 0    | 0    | 0    | 0    | 0    | 0    | 0    | 0    | 0    | 0    |
| SSA | 220  | 220  | 224  | 221  | 199  | 214  | 220  | 237  | 248  | 258  | 248  |
| USA | 211  | 211  | 211  | 211  | 211  | 211  | 211  | 211  | 211  | 211  | 211  |

Table 1184: FAO — Prices—Agriculture—Rice (US\$05/tDM) [PART 2/5]

|     | 1983 | 1984 | 1985 | 1986 | 1987 | 1988 | 1989 | 1990 | 1991 | 1992 | 1993 |
|-----|------|------|------|------|------|------|------|------|------|------|------|
| GLO | 352  | 359  | 354  | 355  | 352  | 344  | 343  | 344  | 337  | 340  | 329  |
| CAZ | 257  | 257  | 257  | 257  | 257  | 257  | 257  | 257  | 257  | 257  | 257  |
| CHA | 363  | 364  | 364  | 365  | 365  | 365  | 365  | 366  | 366  | 366  | 366  |
| EUR | 323  | 322  | 323  | 323  | 320  | 321  | 320  | 317  | 315  | 317  | 319  |
| IND | 257  | 257  | 257  | 257  | 257  | 257  | 257  | 257  | 257  | 257  | 257  |
| JPN | 2365 | 2365 | 2365 | 2365 | 2365 | 2365 | 2365 | 2365 | 2365 | 2365 | 2365 |
| LAM | 245  | 241  | 241  | 239  | 243  | 241  | 241  | 244  | 244  | 244  | 242  |
| MEA | 362  | 395  | 409  | 404  | 403  | 391  | 391  | 382  | 397  | 384  | 372  |
| NEU | 516  | 513  | 512  | 497  | 495  | 516  | 544  | 524  | 503  | 618  | 606  |
| OAS | 277  | 280  | 276  | 276  | 275  | 280  | 272  | 269  | 260  | 256  | 244  |
| REF | 0    | 0    | 0    | 0    | 0    | 0    | 0    | 0    | 0    | 219  | 247  |
| SSA | 251  | 251  | 258  | 249  | 259  | 269  | 296  | 278  | 306  | 311  | 302  |
| USA | 211  | 211  | 211  | 211  | 211  | 211  | 211  | 211  | 211  | 211  | 211  |

Table 1185: FAO — Prices—Agriculture—Rice (US\$05/tDM) [PART 3/5]

|     | 1994 | 1995 | 1996 | 1997 | 1998 | 1999 | 2000 | 2001 | 2002 | 2003 | 2004 |
|-----|------|------|------|------|------|------|------|------|------|------|------|
| GLO | 338  | 332  | 332  | 331  | 325  | 319  | 319  | 315  | 315  | 304  | 310  |
| CAZ | 257  | 257  | 257  | 257  | 257  | 257  | 257  | 257  | 257  | 257  | 257  |
| CHA | 366  | 366  | 367  | 366  | 367  | 367  | 366  | 367  | 366  | 366  | 367  |
| EUR | 316  | 315  | 313  | 312  | 312  | 312  | 311  | 311  | 312  | 312  | 312  |
| IND | 257  | 257  | 257  | 257  | 257  | 257  | 257  | 257  | 257  | 257  | 257  |
| JPN | 2365 | 2365 | 2365 | 2365 | 2365 | 2365 | 2365 | 2365 | 2365 | 2365 | 2365 |
| LAM | 238  | 237  | 233  | 232  | 236  | 234  | 240  | 242  | 243  | 239  | 239  |
| MEA | 353  | 353  | 371  | 346  | 382  | 344  | 328  | 339  | 358  | 365  | 341  |
| NEU | 607  | 606  | 611  | 612  | 610  | 608  | 608  | 605  | 605  | 606  | 606  |
| OAS | 248  | 242  | 249  | 252  | 243  | 238  | 236  | 237  | 230  | 222  | 227  |
| REF | 269  | 294  | 209  | 210  | 187  | 212  | 260  | 297  | 350  | 353  | 394  |
| SSA | 286  | 301  | 297  | 303  | 295  | 301  | 302  | 288  | 286  | 283  | 285  |
| USA | 211  | 211  | 211  | 211  | 211  | 211  | 211  | 211  | 211  | 211  | 211  |

Table 1186: FAO — Prices—Agriculture—Rice (US\$05/tDM) [PART 4/5]



|     | 2005 | 2006 | 2007 | 2008 | 2009 | 2010 | 2011 |
|-----|------|------|------|------|------|------|------|
| GLO | 306  | 303  | 301  | 300  | 307  | 303  | 304  |
| CAZ | 257  | 257  | 257  | 257  | 257  | 257  | 257  |
| CHA | 367  | 367  | 368  | 367  | 367  | 367  | 367  |
| EUR | 313  | 314  | 315  | 314  | 315  | 313  | 312  |
| IND | 257  | 257  | 257  | 257  | 257  | 257  | 257  |
| JPN | 2365 | 2365 | 2365 | 2365 | 2957 | 2932 | 2899 |
| LAM | 242  | 241  | 243  | 244  | 241  | 247  | 247  |
| MEA | 350  | 334  | 334  | 315  | 345  | 404  | 359  |
| NEU | 605  | 605  | 605  | 605  | 606  | 606  | 606  |
| OAS | 220  | 216  | 213  | 216  | 217  | 209  | 213  |
| REF | 393  | 379  | 350  | 370  | 327  | 346  | 362  |
| SSA | 279  | 281  | 267  | 279  | 267  | 259  | 264  |
| USA | 211  | 211  | 211  | 211  | 211  | 211  | 211  |

Table 1187: FAO — Prices—Agriculture—Rice (US\$05/tDM) [PART 5/5]

|     | 1990 | 1991 | 1992 | 1993 | 1994 | 1995 | 1996 | 1997 | 1998 | 1999 | 2000 |
|-----|------|------|------|------|------|------|------|------|------|------|------|
| GLO | 0    | 257  | 268  | 246  | 381  | 282  | 362  | 287  | 267  | 253  | 239  |
| CAZ | 0    | 158  | 138  | 134  | 203  | 181  | 210  | 211  | 186  | 197  | 178  |
| CHA | 0    | 140  | 136  | 170  | 168  | 209  | 438  | 302  | 316  | 268  | 234  |
| EUR | 0    | 466  | 477  | 486  | 487  | 541  | 529  | 412  | 375  | 341  | 243  |
| IND | 0    | 184  | 176  | 162  | 162  | 173  | 178  | 137  | 138  | 166  | 152  |
| JPN | 0    | 2949 | 3202 | 3862 | 3837 | 3849 | 3270 | 2642 | 2545 | 2595 | 2565 |
| LAM | 0    | 230  | 215  | 294  | 3399 | 220  | 235  | 242  | 268  | 192  | 179  |
| MEA | 0    | 2744 | 3129 | 251  | 268  | 465  | 388  | 374  | 670  | 743  | 453  |
| NEU | 0    | 631  | 1038 | 741  | 494  | 512  | 565  | 479  | 498  | 460  | 449  |
| OAS | 0    | 188  | 185  | 166  | 187  | 213  | 248  | 232  | 158  | 183  | 195  |
| REF | 0    | 0    | 12   | 28   | 38   | 95   | 139  | 137  | 95   | 105  | 175  |
| SSA | 7    | 386  | 403  | 448  | 296  | 352  | 537  | 543  | 637  | 246  | 244  |
| USA | 0    | 192  | 149  | 202  | 171  | 232  | 244  | 254  | 225  | 151  | 143  |

Table 1188: FAOp — Prices—Agriculture—Rice (US\$05/tDM) [PART 1/3]

|     | 2001 | 2002 | 2003 | 2004 | 2005 | 2006 | 2007 | 2008 | 2009 | 2010 | 2011 |
|-----|------|------|------|------|------|------|------|------|------|------|------|
| GLO | 203  | 200  | 228  | 296  | 296  | 316  | 326  | 376  | 271  | 284  | 369  |
| CAZ | 127  | 171  | 259  | 275  | 261  | 236  | 326  | 400  | 516  | 482  | 284  |
| CHA | 173  | 160  | 236  | 358  | 366  | 377  | 259  | 317  | 324  | 338  | 460  |
| EUR | 242  | 244  | 285  | 272  | 245  | 417  | 467  | 676  | 571  | 483  | 569  |
| IND | 143  | 143  | 154  | 239  | 234  | 298  | 397  | 443  | 0    | 0    | 0    |
| JPN | 2265 | 2171 | 2758 | 2634 | 2318 | 2144 | 2083 | 2352 | 2700 | 2751 | 2801 |
| LAM | 177  | 170  | 202  | 245  | 238  | 239  | 317  | 433  | 378  | 402  | 402  |
| MEA | 542  | 270  | 271  | 284  | 274  | 453  | 402  | 537  | 445  | 544  | 580  |
| NEU | 350  | 427  | 512  | 592  | 632  | 593  | 659  | 987  | 921  | 883  | 662  |
| OAS | 173  | 180  | 178  | 204  | 212  | 220  | 271  | 298  | 270  | 302  | 438  |
| REF | 228  | 266  | 142  | 177  | 183  | 175  | 219  | 299  | 356  | 345  | 336  |
| SSA | 232  | 257  | 241  | 232  | 308  | 317  | 335  | 399  | 214  | 168  | 179  |
| USA | 108  | 114  | 205  | 186  | 194  | 253  | 324  | 425  | 364  | 322  | 368  |

Table 1189: FAOp — Prices—Agriculture—Rice (US\$05/tDM) [PART 2/3]

|     | 2005 |
|-----|------|
| GLO | 352  |
| CAZ |      |
| CHA |      |
| EUR |      |
| IND |      |
| JPN |      |
| LAM |      |
| MEA |      |
| NEU |      |
| OAS |      |
| REF |      |
| SSA |      |
| USA |      |

Table 1190: IniFoodPrice — Prices—Agriculture—Rice (US\$05/tDM)

36.27 Ruminant meat

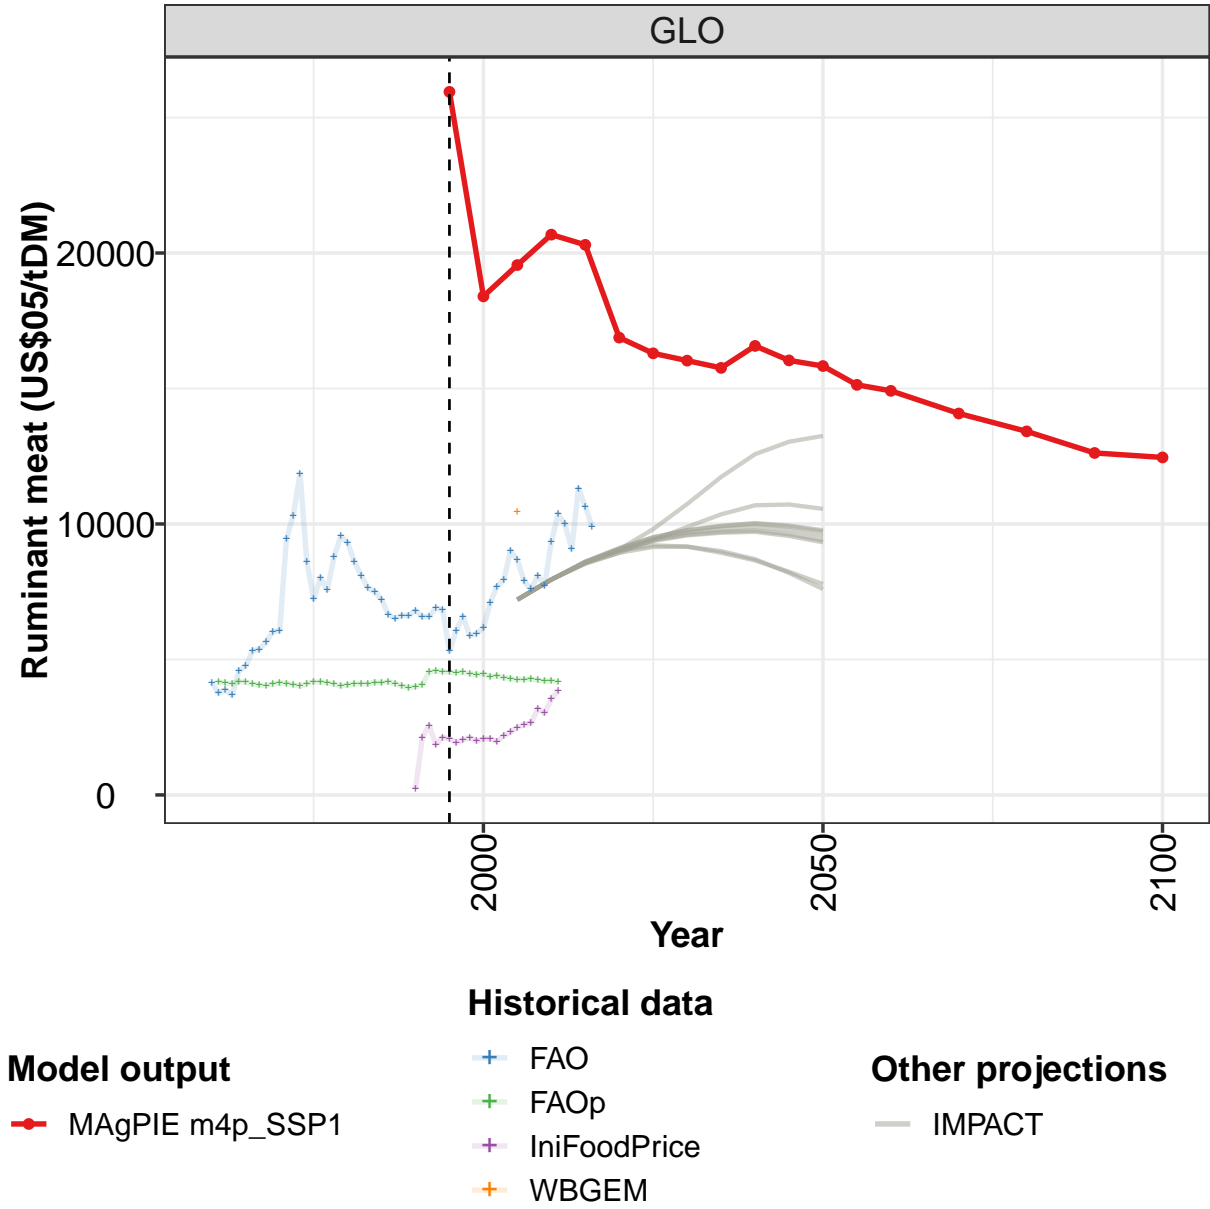

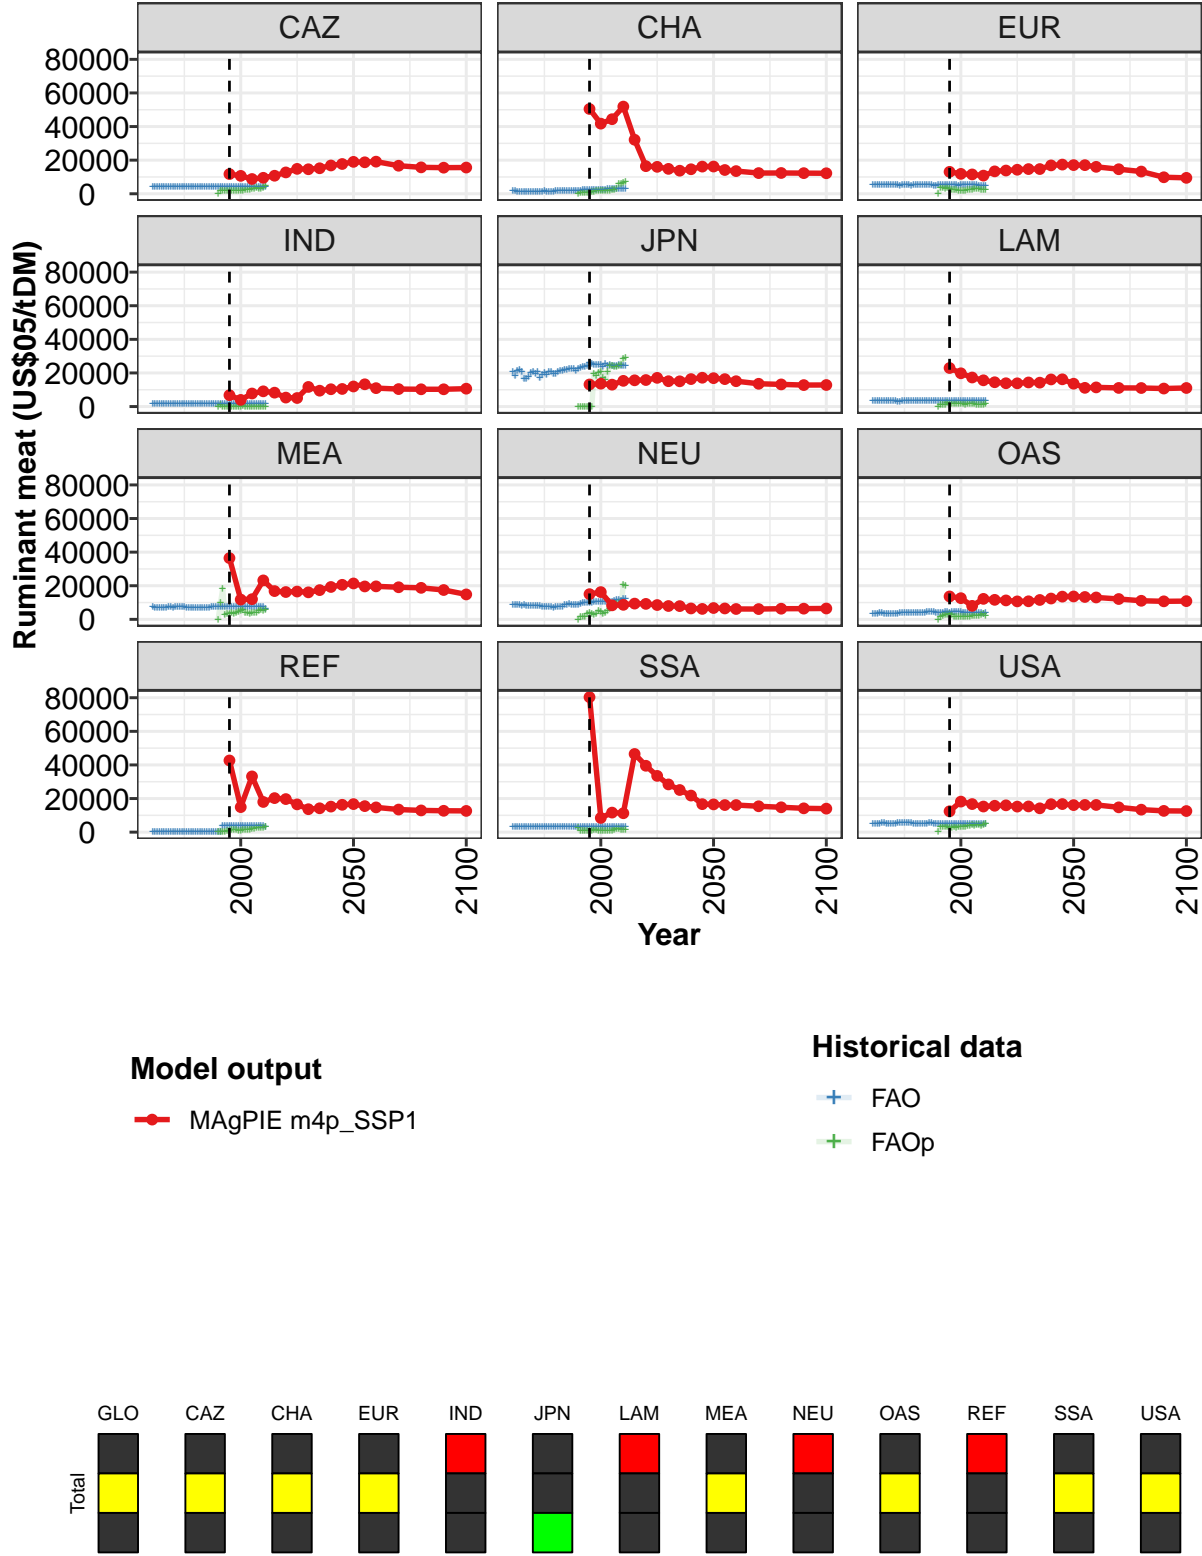

Figure 317: MAgPIE m4p\_SSP1 — Prices—Agriculture—Ruminant meat (US\$05/tDM)

|     | 1995  | 2000  | 2005  | 2010  | 2015  | 2020  | 2025  | 2030  | 2035  | 2040  | 2045  |
|-----|-------|-------|-------|-------|-------|-------|-------|-------|-------|-------|-------|
| GLO | 25949 | 18400 | 19557 | 20680 | 20302 | 16879 | 16298 | 16030 | 15761 | 16573 | 16037 |
| CAZ | 11723 | 10666 | 8793  | 9515  | 10741 | 12715 | 14821 | 14594 | 15190 | 16844 | 17722 |
| CHA | 50463 | 41739 | 44382 | 51902 | 32168 | 16430 | 16035 | 14822 | 13738 | 14603 | 16170 |
| EUR | 13071 | 11852 | 11510 | 10814 | 13340 | 13834 | 14314 | 14703 | 14726 | 16891 | 17375 |
| IND | 6788  | 3969  | 7777  | 9072  | 8290  | 5349  | 5094  | 11688 | 9460  | 10314 | 10486 |
| JPN | 13151 | 13612 | 13054 | 15320 | 15632 | 15800 | 17085 | 15099 | 15042 | 16354 | 17158 |
| LAM | 22946 | 19801 | 17295 | 15638 | 14473 | 13883 | 13846 | 14362 | 14230 | 16144 | 16225 |
| MEA | 36458 | 11776 | 12019 | 23190 | 16828 | 16276 | 16567 | 16085 | 17413 | 19278 | 20567 |
| NEU | 15007 | 16235 | 8343  | 8650  | 9376  | 9214  | 8534  | 7945  | 7898  | 6491  | 6227  |
| OAS | 13643 | 12620 | 8036  | 12196 | 11622 | 11279 | 10700 | 10756 | 11546 | 12404 | 13545 |
| REF | 42668 | 14910 | 33190 | 17979 | 20268 | 19685 | 16533 | 13657 | 14209 | 15211 | 16289 |
| SSA | 80340 | 8478  | 11643 | 11271 | 46538 | 39507 | 33495 | 28415 | 25093 | 21783 | 16673 |
| USA | 12425 | 18188 | 16717 | 15257 | 15709 | 15963 | 15209 | 15316 | 14190 | 16632 | 16713 |

Table 1191: MAgPIE m4p\_SSP1 — Prices—Agriculture—Ruminant meat (US\$05/tDM) [PART 1/2]

|     | 2050  | 2055  | 2060  | 2070  | 2080  | 2090  | 2100  |
|-----|-------|-------|-------|-------|-------|-------|-------|
| GLO | 15829 | 15135 | 14915 | 14079 | 13418 | 12621 | 12457 |
| CAZ | 19002 | 18749 | 19119 | 16695 | 15725 | 15539 | 15620 |
| CHA | 16225 | 14154 | 13502 | 12323 | 12374 | 12283 | 12208 |
| EUR | 17075 | 17035 | 16034 | 14608 | 13226 | 9835  | 9481  |
| IND | 11953 | 13267 | 10975 | 10416 | 10294 | 10285 | 10647 |
| JPN | 16913 | 16348 | 15102 | 13567 | 13187 | 12792 | 12833 |
| LAM | 13609 | 11150 | 11408 | 11091 | 11052 | 10731 | 11062 |
| MEA | 21372 | 19599 | 19641 | 19107 | 18754 | 17474 | 14840 |
| NEU | 6747  | 6499  | 6179  | 6137  | 6337  | 6374  | 6477  |
| OAS | 13627 | 13334 | 13042 | 12113 | 11069 | 10731 | 10849 |
| REF | 16699 | 15504 | 14736 | 13454 | 12937 | 12724 | 12641 |
| SSA | 16533 | 16139 | 16129 | 15413 | 14803 | 14179 | 13989 |
| USA | 16100 | 16212 | 16202 | 14773 | 13389 | 12663 | 12563 |

Table 1192: MAgPIE m4p\_SSP1 — Prices—Agriculture—Ruminant meat (US\$05/tDM) [PART 2/2]

|     | 1960 | 1961 | 1962 | 1963 | 1964 | 1965 | 1966 | 1967 | 1968 | 1969 | 1970 |
|-----|------|------|------|------|------|------|------|------|------|------|------|
| GLO | 4146 | 3765 | 3871 | 3679 | 4579 | 4755 | 5317 | 5368 | 5644 | 6037 | 6054 |
| CAZ |      |      |      |      |      |      |      |      |      |      |      |
| CHA |      |      |      |      |      |      |      |      |      |      |      |
| EUR |      |      |      |      |      |      |      |      |      |      |      |
| IND |      |      |      |      |      |      |      |      |      |      |      |
| JPN |      |      |      |      |      |      |      |      |      |      |      |
| LAM |      |      |      |      |      |      |      |      |      |      |      |
| MEA |      |      |      |      |      |      |      |      |      |      |      |
| NEU |      |      |      |      |      |      |      |      |      |      |      |
| OAS |      |      |      |      |      |      |      |      |      |      |      |
| REF |      |      |      |      |      |      |      |      |      |      |      |
| SSA |      |      |      |      |      |      |      |      |      |      |      |
| USA |      |      |      |      |      |      |      |      |      |      |      |

Table 1193: WBGEM — Prices—Agriculture—Ruminant meat (US\$05/tDM) [PART 1/6]

|     | 1971 | 1972  | 1973  | 1974 | 1975 | 1976 | 1977 | 1978 | 1979 | 1980 | 1981 |
|-----|------|-------|-------|------|------|------|------|------|------|------|------|
| GLO | 9456 | 10310 | 11867 | 8604 | 7229 | 8013 | 7554 | 8781 | 9548 | 9316 | 8602 |
| CAZ |      |       |       |      |      |      |      |      |      |      |      |
| CHA |      |       |       |      |      |      |      |      |      |      |      |
| EUR |      |       |       |      |      |      |      |      |      |      |      |
| IND |      |       |       |      |      |      |      |      |      |      |      |
| JPN |      |       |       |      |      |      |      |      |      |      |      |
| LAM |      |       |       |      |      |      |      |      |      |      |      |
| MEA |      |       |       |      |      |      |      |      |      |      |      |
| NEU |      |       |       |      |      |      |      |      |      |      |      |
| OAS |      |       |       |      |      |      |      |      |      |      |      |
| REF |      |       |       |      |      |      |      |      |      |      |      |
| SSA |      |       |       |      |      |      |      |      |      |      |      |
| USA |      |       |       |      |      |      |      |      |      |      |      |

Table 1194: WBGEM — Prices—Agriculture—Ruminant meat (US\$05/tDM) [PART 2/6]

|     | 1982 | 1983 | 1984 | 1985 | 1986 | 1987 | 1988 | 1989 | 1990 | 1991 | 1992 |
|-----|------|------|------|------|------|------|------|------|------|------|------|
| GLO | 8106 | 7636 | 7492 | 7218 | 6663 | 6514 | 6628 | 6616 | 6803 | 6570 | 6593 |
| CAZ |      |      |      |      |      |      |      |      |      |      |      |
| CHA |      |      |      |      |      |      |      |      |      |      |      |
| EUR |      |      |      |      |      |      |      |      |      |      |      |
| IND |      |      |      |      |      |      |      |      |      |      |      |
| JPN |      |      |      |      |      |      |      |      |      |      |      |
| LAM |      |      |      |      |      |      |      |      |      |      |      |
| MEA |      |      |      |      |      |      |      |      |      |      |      |
| NEU |      |      |      |      |      |      |      |      |      |      |      |
| OAS |      |      |      |      |      |      |      |      |      |      |      |
| REF |      |      |      |      |      |      |      |      |      |      |      |
| SSA |      |      |      |      |      |      |      |      |      |      |      |
| USA |      |      |      |      |      |      |      |      |      |      |      |

Table 1195: WBGEM — Prices—Agriculture—Ruminant meat (US\$05/tDM) [PART 3/6]

|     | 1993 | 1994 | 1995 | 1996 | 1997 | 1998 | 1999 | 2000 | 2001 | 2002 | 2003 |
|-----|------|------|------|------|------|------|------|------|------|------|------|
| GLO | 6896 | 6830 | 5307 | 6070 | 6582 | 5869 | 5954 | 6163 | 7093 | 7699 | 7935 |
| CAZ |      |      |      |      |      |      |      |      |      |      |      |
| CHA |      |      |      |      |      |      |      |      |      |      |      |
| EUR |      |      |      |      |      |      |      |      |      |      |      |
| IND |      |      |      |      |      |      |      |      |      |      |      |
| JPN |      |      |      |      |      |      |      |      |      |      |      |
| LAM |      |      |      |      |      |      |      |      |      |      |      |
| MEA |      |      |      |      |      |      |      |      |      |      |      |
| NEU |      |      |      |      |      |      |      |      |      |      |      |
| OAS |      |      |      |      |      |      |      |      |      |      |      |
| REF |      |      |      |      |      |      |      |      |      |      |      |
| SSA |      |      |      |      |      |      |      |      |      |      |      |
| USA |      |      |      |      |      |      |      |      |      |      |      |

Table 1196: WBGEM — Prices—Agriculture—Ruminant meat (US\$05/tDM) [PART 4/6]

|     | 2004 | 2005 | 2006 | 2007 | 2008 | 2009 | 2010 | 2011  | 2012  | 2013 | 2014  |
|-----|------|------|------|------|------|------|------|-------|-------|------|-------|
| GLO | 9012 | 8668 | 7888 | 7590 | 8092 | 7722 | 9337 | 10362 | 10006 | 9080 | 11309 |
| CAZ |      |      |      |      |      |      |      |       |       |      |       |
| CHA |      |      |      |      |      |      |      |       |       |      |       |
| EUR |      |      |      |      |      |      |      |       |       |      |       |
| IND |      |      |      |      |      |      |      |       |       |      |       |
| JPN |      |      |      |      |      |      |      |       |       |      |       |
| LAM |      |      |      |      |      |      |      |       |       |      |       |
| MEA |      |      |      |      |      |      |      |       |       |      |       |
| NEU |      |      |      |      |      |      |      |       |       |      |       |
| OAS |      |      |      |      |      |      |      |       |       |      |       |
| REF |      |      |      |      |      |      |      |       |       |      |       |
| SSA |      |      |      |      |      |      |      |       |       |      |       |
| USA |      |      |      |      |      |      |      |       |       |      |       |

Table 1197: WBGEM — Prices—Agriculture—Ruminant meat (US\$05/tDM) [PART 5/6]

|     | 2015  | 2016 |
|-----|-------|------|
| GLO | 10644 | 9909 |
| CAZ |       |      |
| CHA |       |      |
| EUR |       |      |
| IND |       |      |
| JPN |       |      |
| LAM |       |      |
| MEA |       |      |
| NEU |       |      |
| OAS |       |      |
| REF |       |      |
| SSA |       |      |
| USA |       |      |

Table 1198: WBGEM — Prices—Agriculture—Ruminant meat (US\$05/tDM) [PART 6/6]

|     | 1961  | 1962  | 1963  | 1964  | 1965  | 1966  | 1967  | 1968  | 1969  | 1970  | 1971  |
|-----|-------|-------|-------|-------|-------|-------|-------|-------|-------|-------|-------|
| GLO | 4174  | 4129  | 4100  | 4194  | 4158  | 4106  | 4048  | 4040  | 4096  | 4142  | 4116  |
| CAZ | 4242  | 4248  | 4268  | 4291  | 4349  | 4328  | 4287  | 4287  | 4274  | 4219  | 4214  |
| CHA | 1581  | 1498  | 1319  | 1226  | 1219  | 1259  | 1281  | 1302  | 1341  | 1338  | 1326  |
| EUR | 5307  | 5305  | 5311  | 5171  | 5143  | 5238  | 5240  | 5214  | 5252  | 5307  | 5246  |
| IND | 1744  | 1782  | 1782  | 1768  | 1754  | 1743  | 1721  | 1698  | 1679  | 1657  | 1630  |
| JPN | 20734 | 18239 | 21150 | 21882 | 20687 | 16476 | 16576 | 17592 | 19984 | 20982 | 19738 |
| LAM | 3166  | 3168  | 3161  | 3165  | 3174  | 3180  | 3177  | 3151  | 3152  | 3138  | 3156  |
| MEA | 7250  | 7163  | 7103  | 7115  | 7128  | 7158  | 7157  | 7236  | 7234  | 7151  | 7198  |
| NEU | 8522  | 8429  | 8605  | 8469  | 8282  | 8399  | 8157  | 7811  | 8113  | 8165  | 7976  |
| OAS | 3457  | 3539  | 3598  | 3759  | 3619  | 3427  | 3437  | 3414  | 3391  | 3518  | 3513  |
| REF | 0     | 0     | 0     | 0     | 0     | 0     | 0     | 0     | 0     | 0     | 0     |
| SSA | 3097  | 3053  | 3086  | 3127  | 3133  | 3088  | 3101  | 3154  | 3243  | 3163  | 3224  |
| USA | 5102  | 5083  | 5088  | 5143  | 5309  | 5340  | 5268  | 5252  | 5269  | 5271  | 5175  |

Table 1199: FAO — Prices—Agriculture—Ruminant meat (US\$05/tDM) [PART 1/5]

|     | 1972  | 1973  | 1974  | 1975  | 1976  | 1977  | 1978  | 1979  | 1980  | 1981  | 1982  |
|-----|-------|-------|-------|-------|-------|-------|-------|-------|-------|-------|-------|
| GLO | 4072  | 4010  | 4107  | 4172  | 4164  | 4135  | 4094  | 4021  | 4054  | 4093  | 4109  |
| CAZ | 4236  | 4252  | 4270  | 4328  | 4344  | 4348  | 4329  | 4279  | 4224  | 4226  | 4244  |
| CHA | 1304  | 1366  | 1429  | 1481  | 1404  | 1423  | 1473  | 1456  | 1536  | 1537  | 1548  |
| EUR | 5056  | 5044  | 5121  | 5098  | 5114  | 5085  | 5045  | 5084  | 5143  | 5114  | 5088  |
| IND | 1613  | 1602  | 1589  | 1593  | 1585  | 1580  | 1588  | 1589  | 1595  | 1601  | 1603  |
| JPN | 20517 | 16869 | 18739 | 20010 | 18910 | 20448 | 20695 | 19243 | 19328 | 20860 | 21176 |
| LAM | 3122  | 3125  | 3145  | 3158  | 3155  | 3144  | 3140  | 3137  | 3142  | 3153  | 3154  |
| MEA | 7237  | 7283  | 7237  | 7217  | 7164  | 7056  | 6956  | 6866  | 6791  | 6871  | 6957  |
| NEU | 7889  | 7917  | 7672  | 7743  | 7657  | 7732  | 7455  | 7191  | 7271  | 7521  | 7557  |
| OAS | 3577  | 3707  | 3844  | 4093  | 3970  | 3858  | 3870  | 3941  | 3956  | 3956  | 3910  |
| REF | 0     | 0     | 0     | 0     | 0     | 0     | 0     | 0     | 0     | 0     | 0     |
| SSA | 3235  | 3127  | 3154  | 3168  | 3183  | 3192  | 3253  | 3291  | 3408  | 3344  | 3350  |
| USA | 5284  | 5292  | 5316  | 5538  | 5537  | 5446  | 5391  | 5124  | 5053  | 5139  | 5252  |

Table 1200: FAO — Prices—Agriculture—Ruminant meat (US\$05/tDM) [PART 2/5]

|     | 1983  | 1984  | 1985  | 1986  | 1987  | 1988  | 1989  | 1990  | 1991  | 1992  | 1993  |
|-----|-------|-------|-------|-------|-------|-------|-------|-------|-------|-------|-------|
| GLO | 4094  | 4154  | 4153  | 4178  | 4110  | 4023  | 3963  | 3996  | 4063  | 4543  | 4567  |
| CAZ | 4231  | 4205  | 4194  | 4208  | 4170  | 4176  | 4152  | 4187  | 4183  | 4150  | 4144  |
| CHA | 1575  | 1583  | 1548  | 1603  | 1757  | 1844  | 1945  | 1970  | 2067  | 2097  | 2226  |
| EUR | 5105  | 5136  | 5130  | 5192  | 5114  | 4997  | 4946  | 5053  | 5168  | 5244  | 5273  |
| IND | 1603  | 1602  | 1592  | 1595  | 1629  | 1630  | 1630  | 1634  | 1633  | 1632  | 1640  |
| JPN | 21337 | 22099 | 22073 | 22458 | 22187 | 22213 | 21519 | 22531 | 23319 | 23743 | 23734 |
| LAM | 3164  | 3158  | 3153  | 3211  | 3203  | 3201  | 3193  | 3290  | 3281  | 3282  | 3270  |
| MEA | 6964  | 6904  | 7056  | 7140  | 7293  | 7365  | 7535  | 7551  | 7609  | 7580  | 7557  |
| NEU | 7595  | 8543  | 8491  | 9103  | 8583  | 8599  | 8811  | 8668  | 9111  | 10074 | 9945  |
| OAS | 3844  | 3993  | 4281  | 4560  | 4483  | 4242  | 3903  | 3873  | 3867  | 4087  | 4258  |
| REF | 0     | 0     | 0     | 0     | 0     | 0     | 0     | 0     | 0     | 3816  | 3882  |
| SSA | 3379  | 3390  | 3366  | 3124  | 3182  | 3138  | 3092  | 3029  | 3046  | 3076  | 3368  |
| USA | 5220  | 5250  | 5253  | 5344  | 5290  | 5197  | 5149  | 5164  | 5126  | 5050  | 5050  |

Table 1201: FAO — Prices—Agriculture—Ruminant meat (US\$05/tDM) [PART 3/5]

|     | 1994  | 1995  | 1996  | 1997  | 1998  | 1999  | 2000  | 2001  | 2002  | 2003  | 2004  |
|-----|-------|-------|-------|-------|-------|-------|-------|-------|-------|-------|-------|
| GLO | 4553  | 4528  | 4517  | 4527  | 4477  | 4441  | 4458  | 4378  | 4398  | 4320  | 4299  |
| CAZ | 4140  | 4106  | 4127  | 4149  | 4169  | 4172  | 4157  | 4136  | 4104  | 4068  | 4126  |
| CHA | 2231  | 2343  | 2429  | 2570  | 2620  | 2616  | 2663  | 2650  | 2653  | 2679  | 2708  |
| EUR | 5245  | 5264  | 5217  | 5188  | 5050  | 5019  | 5180  | 5170  | 5185  | 5110  | 5136  |
| IND | 1649  | 1658  | 1665  | 1675  | 1677  | 1679  | 1680  | 1682  | 1684  | 1686  | 1700  |
| JPN | 24219 | 25985 | 25448 | 24821 | 24797 | 25110 | 25083 | 23732 | 25235 | 24184 | 24651 |
| LAM | 3275  | 3274  | 3253  | 3269  | 3252  | 3220  | 3210  | 3204  | 3206  | 3205  | 3198  |
| MEA | 7393  | 7311  | 7344  | 7286  | 7236  | 7325  | 7396  | 7388  | 7511  | 7408  | 7401  |
| NEU | 10160 | 9974  | 9917  | 10396 | 10296 | 10507 | 10457 | 10574 | 10512 | 10344 | 10636 |
| OAS | 4223  | 4182  | 4224  | 4578  | 4683  | 4478  | 4340  | 4004  | 3833  | 3733  | 3718  |
| REF | 3940  | 3815  | 3878  | 3823  | 3783  | 3709  | 3718  | 3731  | 3737  | 3677  | 3673  |
| SSA | 3389  | 3295  | 3326  | 3336  | 3296  | 3283  | 3275  | 3238  | 3254  | 3255  | 3284  |
| USA | 5074  | 5115  | 5165  | 5158  | 5062  | 5086  | 5159  | 5129  | 5152  | 5096  | 4988  |

Table 1202: FAO — Prices—Agriculture—Ruminant meat (US\$05/tDM) [PART 4/5]



|     | 2005  | 2006  | 2007  | 2008  | 2009  | 2010  | 2011  |
|-----|-------|-------|-------|-------|-------|-------|-------|
| GLO | 4259  | 4267  | 4270  | 4237  | 4208  | 4219  | 4164  |
| CAZ | 4139  | 4121  | 4110  | 4089  | 4083  | 4096  | 4071  |
| CHA | 2705  | 2700  | 2749  | 2730  | 2727  | 2706  | 2703  |
| EUR | 5096  | 5079  | 5052  | 5012  | 5000  | 4937  | 4886  |
| IND | 1712  | 1726  | 1739  | 1749  | 1756  | 1759  | 1770  |
| JPN | 24378 | 24194 | 24351 | 24688 | 24201 | 24293 | 24257 |
| LAM | 3220  | 3261  | 3301  | 3210  | 3201  | 3235  | 3246  |
| MEA | 7382  | 7368  | 7359  | 7382  | 7441  | 7512  | 6365  |
| NEU | 10528 | 11350 | 11576 | 11448 | 11242 | 11982 | 12159 |
| OAS | 3652  | 3668  | 3623  | 3692  | 3767  | 3607  | 3736  |
| REF | 3647  | 3590  | 3611  | 3631  | 3599  | 3550  | 3417  |
| SSA | 3270  | 3196  | 3243  | 3286  | 3264  | 3275  | 3273  |
| USA | 4972  | 5069  | 5049  | 4966  | 4959  | 4972  | 4965  |

Table 1203: FAO — Prices—Agriculture—Ruminant meat (US\$05/tDM) [PART 5/5]

|     | 1990 | 1991 | 1992  | 1993 | 1994 | 1995 | 1996 | 1997  | 1998  | 1999  | 2000  |
|-----|------|------|-------|------|------|------|------|-------|-------|-------|-------|
| GLO | 217  | 2114 | 2565  | 1864 | 2123 | 2071 | 1926 | 2026  | 2108  | 1986  | 2066  |
| CAZ | 0    | 1891 | 1794  | 1746 | 1889 | 1802 | 1723 | 1865  | 1765  | 1883  | 1937  |
| CHA | 0    | 629  | 640   | 703  | 639  | 851  | 891  | 1116  | 1971  | 1748  | 1863  |
| EUR | 0    | 3323 | 3515  | 3259 | 3393 | 3169 | 2430 | 2147  | 2108  | 1708  | 1582  |
| IND | 0    | 959  | 0     | 0    | 0    | 0    | 0    | 0     | 0     | 0     | 0     |
| JPN | 0    | 0    | 0     | 0    | 0    | 0    | 0    | 19687 | 18165 | 20234 | 20698 |
| LAM | 0    | 893  | 1014  | 960  | 2183 | 1792 | 1688 | 1778  | 1819  | 1534  | 1661  |
| MEA | 0    | 9618 | 17971 | 2917 | 3029 | 3474 | 3901 | 3512  | 4018  | 4525  | 5144  |
| NEU | 0    | 1630 | 1762  | 1548 | 3364 | 3797 | 3057 | 2975  | 3510  | 4949  | 4283  |
| OAS | 0    | 1458 | 1874  | 2983 | 2866 | 3023 | 2482 | 1740  | 1346  | 1404  | 1328  |
| REF | 0    | 0    | 80    | 391  | 705  | 1005 | 1434 | 1443  | 1508  | 1038  | 1058  |
| SSA | 2412 | 608  | 581   | 730  | 827  | 1022 | 1074 | 1183  | 1229  | 657   | 628   |
| USA | 0    | 3306 | 3252  | 3339 | 3095 | 2837 | 2732 | 2911  | 2746  | 2918  | 3161  |

Table 1204: FAOp — Prices—Agriculture—Ruminant meat (US\$05/tDM) [PART 1/3]

|     | 2001  | 2002  | 2003  | 2004  | 2005  | 2006  | 2007  | 2008  | 2009  | 2010  | 2011  |
|-----|-------|-------|-------|-------|-------|-------|-------|-------|-------|-------|-------|
| GLO | 2071  | 1974  | 2184  | 2314  | 2490  | 2605  | 2650  | 3169  | 3017  | 3536  | 3838  |
| CAZ | 2024  | 2319  | 2353  | 2663  | 3045  | 3050  | 3283  | 3149  | 3130  | 3661  | 4777  |
| CHA | 1834  | 1866  | 1952  | 1979  | 2122  | 2353  | 2835  | 5672  | 5837  | 6521  | 7271  |
| EUR | 1601  | 1831  | 2244  | 2433  | 2537  | 2677  | 2752  | 2780  | 2173  | 2088  | 2222  |
| IND | 480   | 0     | 0     | 0     | 0     | 0     | 0     | 0     | 0     | 0     | 0     |
| JPN | 16997 | 15646 | 20502 | 24020 | 24475 | 23534 | 23604 | 24141 | 25013 | 28420 | 29262 |
| LAM | 1558  | 1341  | 1428  | 1499  | 1724  | 1800  | 1096  | 1075  | 987   | 1272  | 1394  |
| MEA | 5451  | 3685  | 3616  | 3465  | 3687  | 3934  | 4143  | 4926  | 5480  | 5351  | 5409  |
| NEU | 3244  | 3828  | 5389  | 6508  | 6670  | 7605  | 9189  | 9693  | 8961  | 20711 | 20180 |
| OAS | 1332  | 1738  | 1748  | 1750  | 2031  | 2136  | 2310  | 2083  | 2687  | 3484  | 2109  |
| REF | 1399  | 1388  | 1295  | 1687  | 2115  | 2281  | 2640  | 2822  | 2455  | 2615  | 3098  |
| SSA | 679   | 769   | 926   | 984   | 1102  | 1381  | 1698  | 1858  | 1199  | 1231  | 1409  |
| USA | 3281  | 3060  | 3657  | 3944  | 4114  | 4004  | 4124  | 4085  | 3674  | 4228  | 5180  |

Table 1205: FAOp — Prices—Agriculture—Ruminant meat (US\$05/tDM) [PART 2/3]

|     | 2005  |
|-----|-------|
| GLO | 10464 |
| CAZ |       |
| CHA |       |
| EUR |       |
| IND |       |
| JPN |       |
| LAM |       |
| MEA |       |
| NEU |       |
| OAS |       |
| REF |       |
| SSA |       |
| USA |       |

Table 1206: IniFoodPrice — Prices—Agriculture—Ruminant meat (US\$05/tDM)

36.28 Short rotation grasses

## geom\_path: Each group consists of only one observation. Do you need to adjust the group## aesthetic?

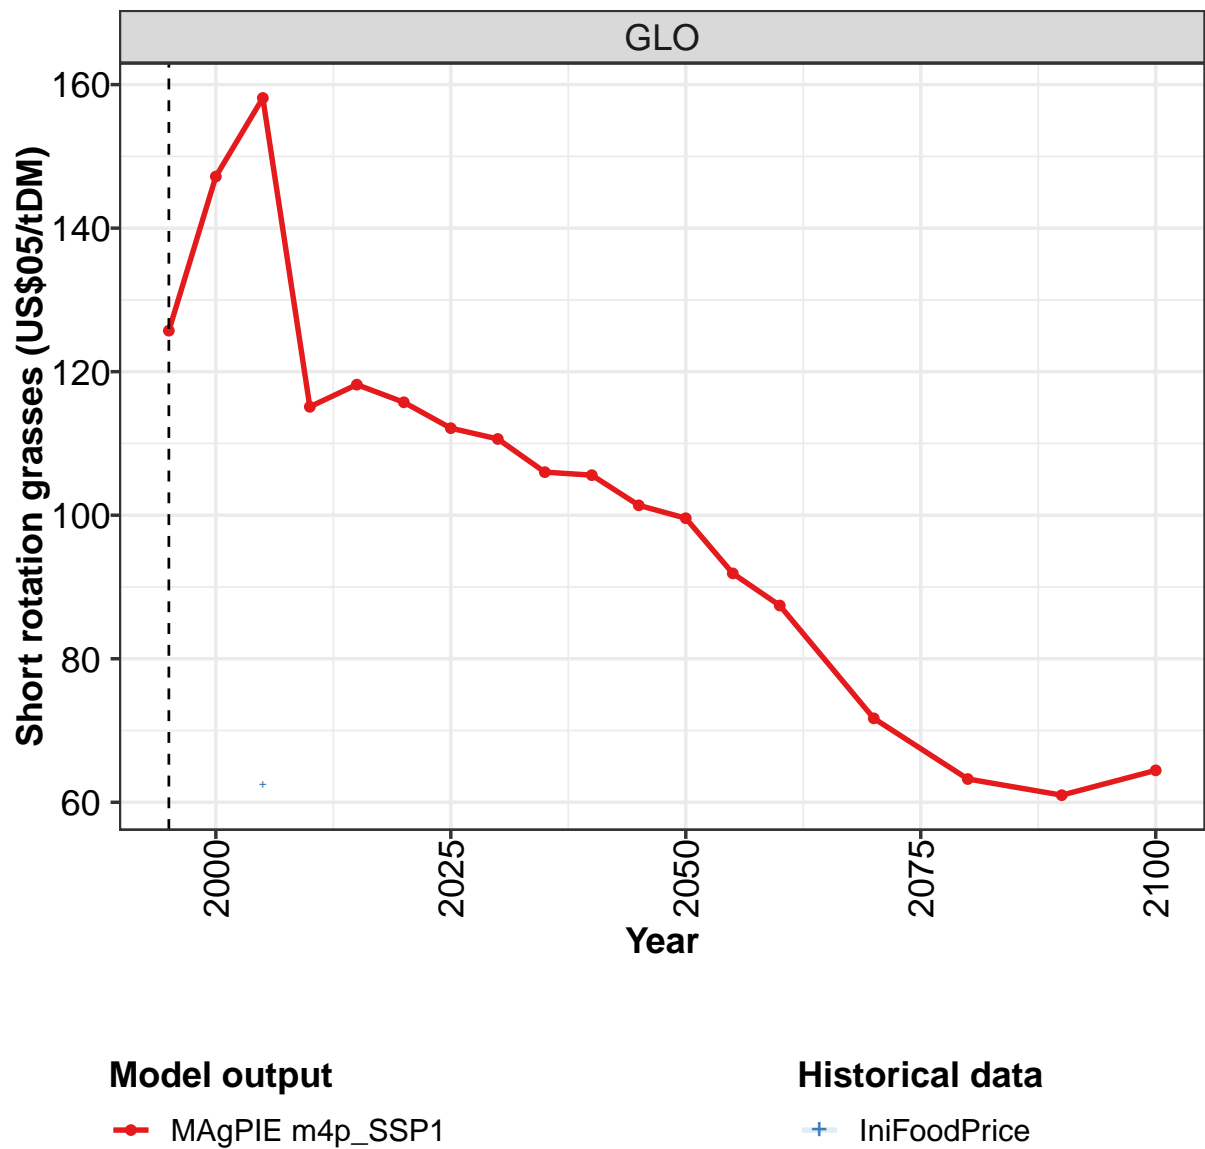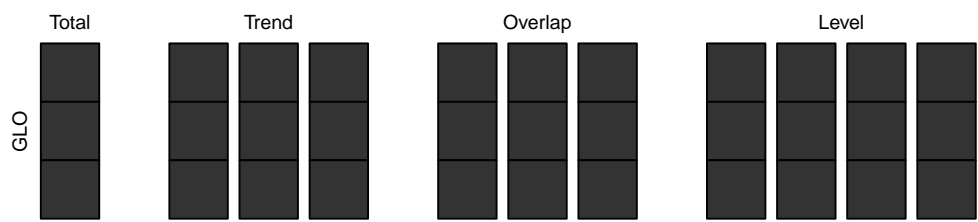

Figure 318: MAgPIE m4p\_SSP1 — Prices—Agriculture—Short rotation grasses (US\$05/tDM)

|     | 1995 | 2000 | 2005 | 2010 | 2015 | 2020 | 2025 | 2030 | 2035 | 2040 | 2045 |
|-----|------|------|------|------|------|------|------|------|------|------|------|
| GLO | 126  | 147  | 158  | 115  | 118  | 116  | 112  | 111  | 106  | 106  | 101  |

Table 1207: MAgPIE m4p\_SSP1 — Prices—Agriculture—Short rotation grasses (US\$05/tDM) [PART 1/2]

|     | 2050 | 2055 | 2060 | 2070 | 2080 | 2090 | 2100 |
|-----|------|------|------|------|------|------|------|
| GLO | 100  | 92   | 87   | 72   | 63   | 61   | 64   |

Table 1208: MAgPIE m4p\_SSP1 — Prices—Agriculture—Short rotation grasses (US\$05/tDM) [PART 2/2]

|     | 2005 |
|-----|------|
| GLO | 62.5 |

Table 1209: IniFoodPrice — Prices—Agriculture—Short rotation grasses (US\$05/tDM)

36.29 Soybean

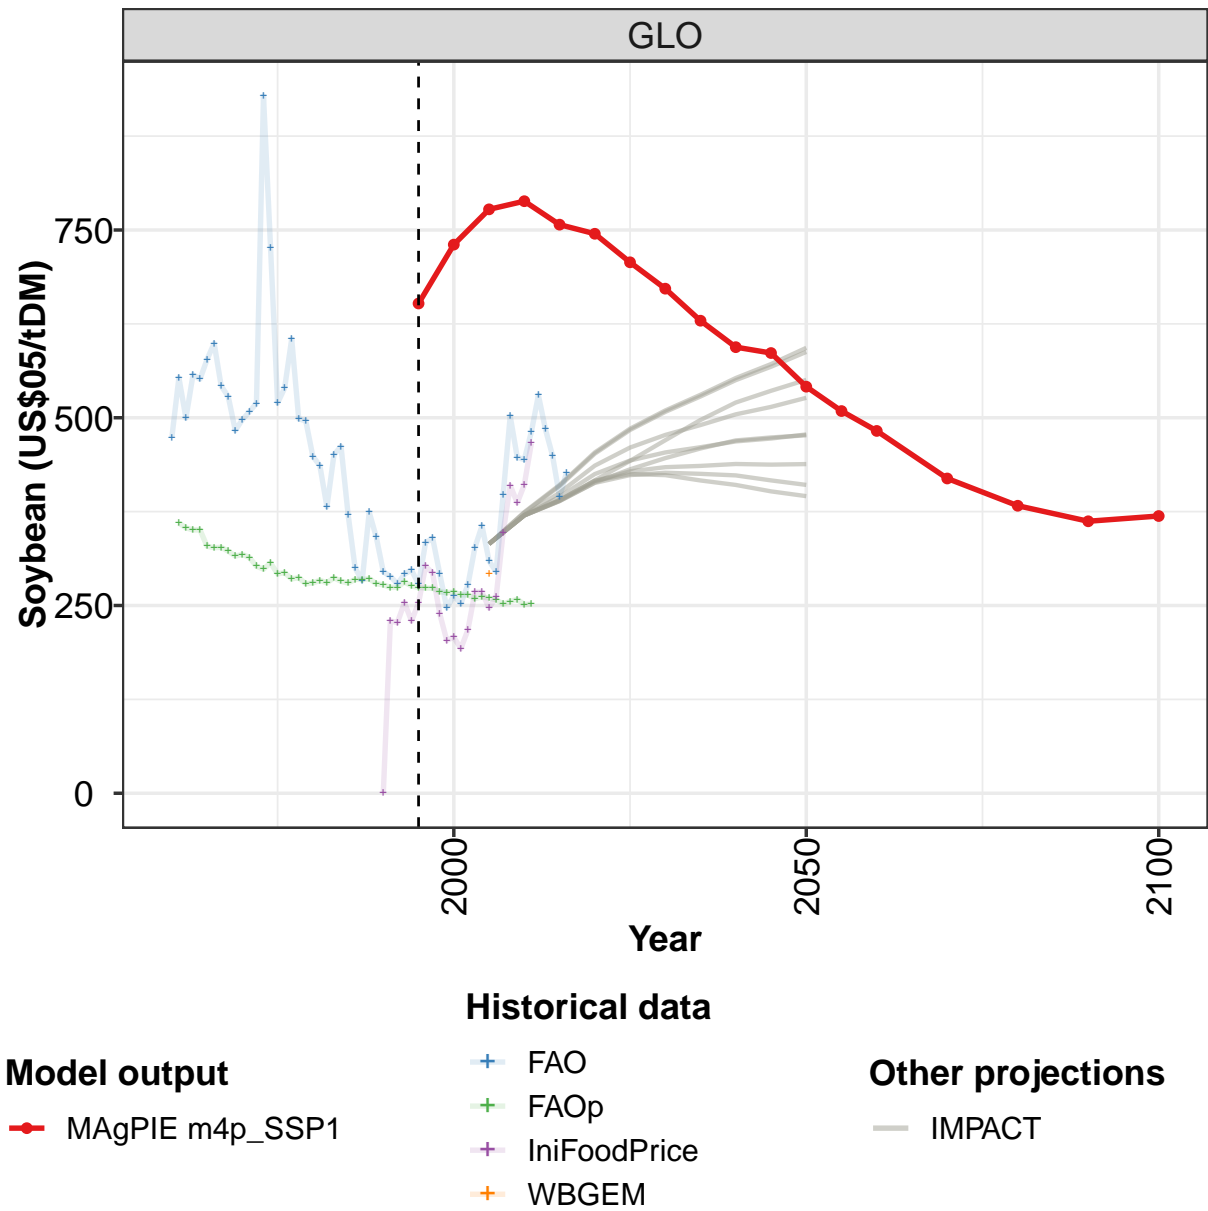

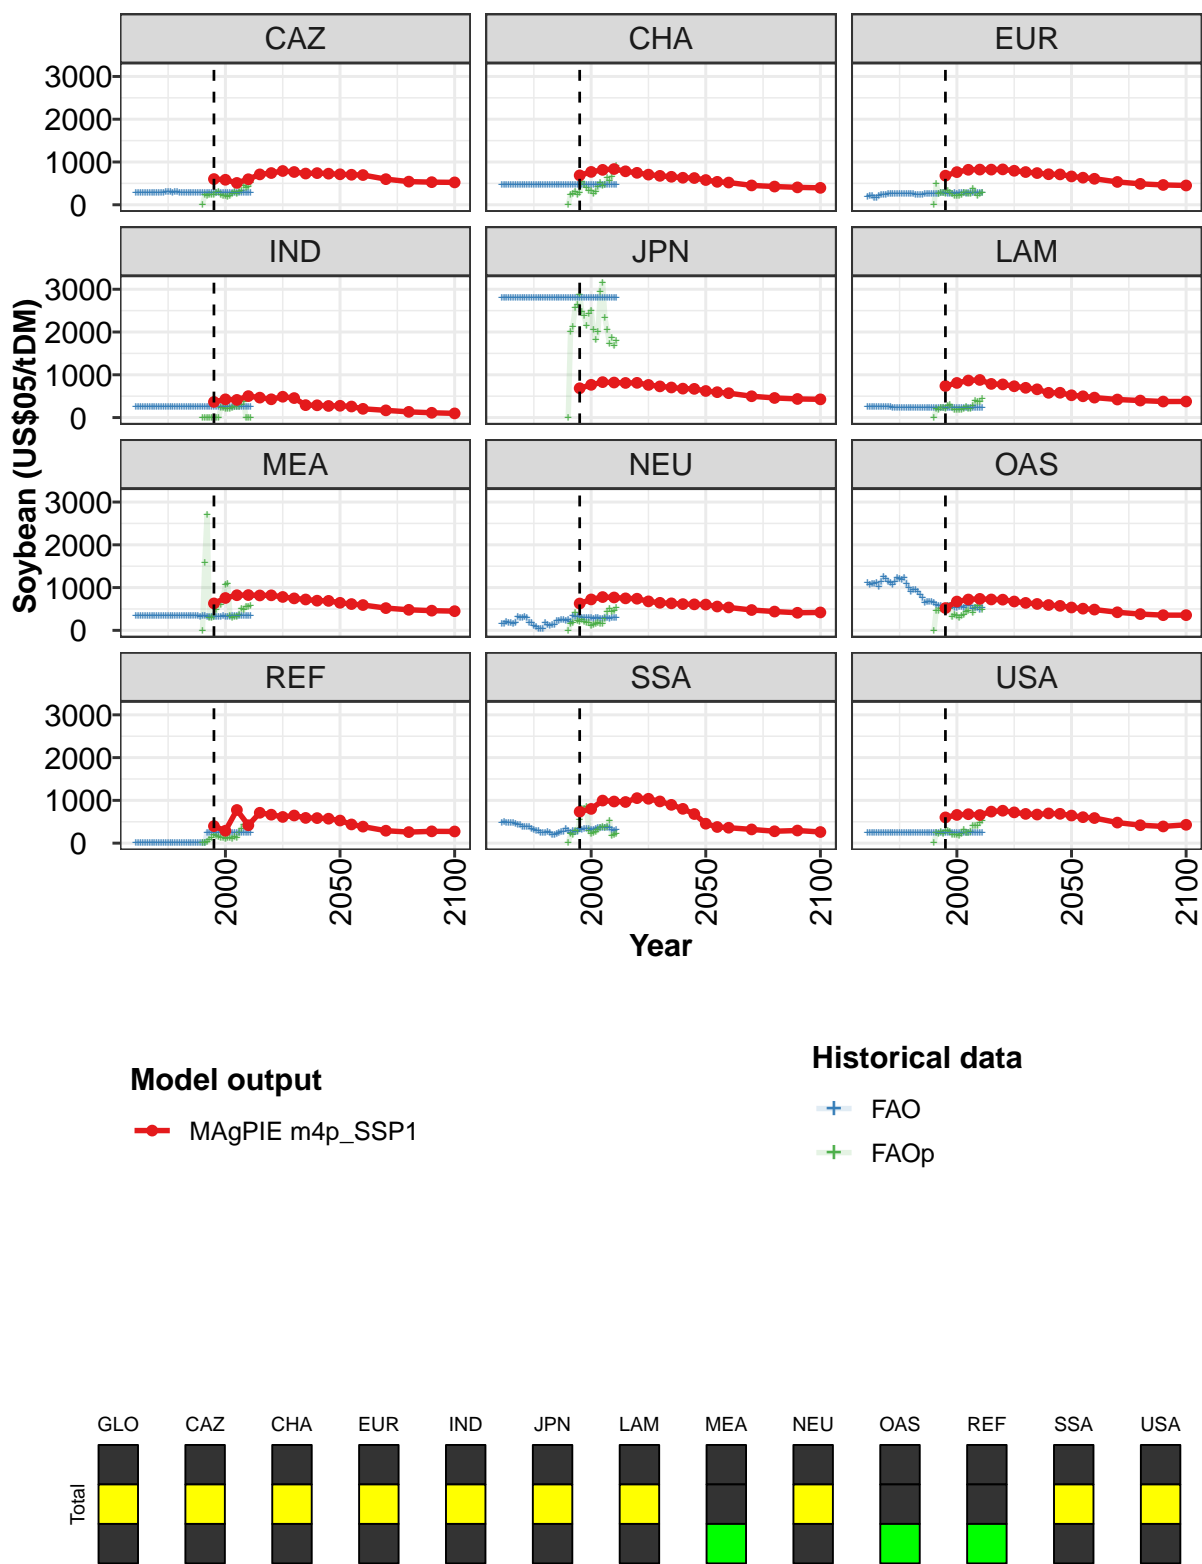

Figure 319: MAgPIE m4p\_SSP1 — Prices—Agriculture—Soybean (US\$05/tDM)

|     | 1995 | 2000 | 2005 | 2010 | 2015 | 2020 | 2025 | 2030 | 2035 | 2040 | 2045 |
|-----|------|------|------|------|------|------|------|------|------|------|------|
| GLO | 652  | 731  | 778  | 788  | 757  | 745  | 707  | 672  | 629  | 594  | 586  |
| CAZ | 602  | 585  | 511  | 598  | 711  | 742  | 790  | 767  | 730  | 740  | 727  |
| CHA | 688  | 769  | 816  | 836  | 783  | 747  | 705  | 677  | 655  | 632  | 625  |
| EUR | 681  | 764  | 818  | 823  | 822  | 828  | 796  | 765  | 742  | 714  | 710  |
| IND | 366  | 426  | 413  | 502  | 466  | 427  | 487  | 456  | 291  | 287  | 272  |
| JPN | 686  | 765  | 829  | 819  | 810  | 812  | 763  | 729  | 704  | 677  | 671  |
| LAM | 738  | 810  | 866  | 879  | 787  | 776  | 732  | 696  | 661  | 579  | 580  |
| MEA | 630  | 757  | 822  | 825  | 817  | 820  | 781  | 748  | 722  | 694  | 690  |
| NEU | 628  | 723  | 779  | 770  | 748  | 740  | 678  | 644  | 632  | 614  | 608  |
| OAS | 522  | 674  | 722  | 737  | 723  | 718  | 675  | 642  | 618  | 593  | 573  |
| REF | 399  | 290  | 776  | 420  | 710  | 666  | 613  | 647  | 590  | 586  | 572  |
| SSA | 737  | 801  | 996  | 974  | 963  | 1053 | 1038 | 976  | 896  | 802  | 681  |
| USA | 602  | 660  | 677  | 659  | 738  | 759  | 720  | 684  | 669  | 695  | 686  |

Table 1210: MAgPIE m4p\_SSP1 — Prices—Agriculture—Soybean (US\$05/tDM) [PART 1/2]

|     | 2050 | 2055 | 2060 | 2070 | 2080 | 2090 | 2100 |
|-----|------|------|------|------|------|------|------|
| GLO | 541  | 509  | 482  | 419  | 383  | 362  | 369  |
| CAZ | 713  | 703  | 695  | 599  | 541  | 529  | 523  |
| CHA | 579  | 536  | 520  | 453  | 426  | 407  | 396  |
| EUR | 663  | 634  | 608  | 534  | 489  | 463  | 451  |
| IND | 276  | 258  | 204  | 169  | 133  | 112  | 97   |
| JPN | 622  | 594  | 570  | 498  | 459  | 435  | 426  |
| LAM | 522  | 498  | 467  | 422  | 398  | 375  | 376  |
| MEA | 644  | 616  | 592  | 520  | 481  | 461  | 449  |
| NEU | 603  | 558  | 535  | 476  | 439  | 411  | 419  |
| OAS | 535  | 507  | 486  | 423  | 380  | 355  | 356  |
| REF | 529  | 438  | 387  | 291  | 259  | 276  | 273  |
| SSA | 455  | 378  | 361  | 321  | 278  | 295  | 261  |
| USA | 645  | 607  | 587  | 481  | 420  | 391  | 429  |

Table 1211: MAgPIE m4p\_SSP1 — Prices—Agriculture—Soybean (US\$05/tDM) [PART 2/2]

|     | 1960 | 1961 | 1962 | 1963 | 1964 | 1965 | 1966 | 1967 | 1968 | 1969 | 1970 |
|-----|------|------|------|------|------|------|------|------|------|------|------|
| GLO | 474  | 553  | 499  | 557  | 552  | 578  | 599  | 542  | 528  | 483  | 497  |
| CAZ |      |      |      |      |      |      |      |      |      |      |      |
| CHA |      |      |      |      |      |      |      |      |      |      |      |
| EUR |      |      |      |      |      |      |      |      |      |      |      |
| IND |      |      |      |      |      |      |      |      |      |      |      |
| JPN |      |      |      |      |      |      |      |      |      |      |      |
| LAM |      |      |      |      |      |      |      |      |      |      |      |
| MEA |      |      |      |      |      |      |      |      |      |      |      |
| NEU |      |      |      |      |      |      |      |      |      |      |      |
| OAS |      |      |      |      |      |      |      |      |      |      |      |
| REF |      |      |      |      |      |      |      |      |      |      |      |
| SSA |      |      |      |      |      |      |      |      |      |      |      |
| USA |      |      |      |      |      |      |      |      |      |      |      |

Table 1212: WBGEM — Prices—Agriculture—Soybean (US\$05/tDM) [PART 1/6]

|     | 1971 | 1972 | 1973 | 1974 | 1975 | 1976 | 1977 | 1978 | 1979 | 1980 | 1981 |
|-----|------|------|------|------|------|------|------|------|------|------|------|
| GLO | 508  | 519  | 928  | 727  | 520  | 540  | 605  | 499  | 496  | 449  | 436  |
| CAZ |      |      |      |      |      |      |      |      |      |      |      |
| CHA |      |      |      |      |      |      |      |      |      |      |      |
| EUR |      |      |      |      |      |      |      |      |      |      |      |
| IND |      |      |      |      |      |      |      |      |      |      |      |
| JPN |      |      |      |      |      |      |      |      |      |      |      |
| LAM |      |      |      |      |      |      |      |      |      |      |      |
| MEA |      |      |      |      |      |      |      |      |      |      |      |
| NEU |      |      |      |      |      |      |      |      |      |      |      |
| OAS |      |      |      |      |      |      |      |      |      |      |      |
| REF |      |      |      |      |      |      |      |      |      |      |      |
| SSA |      |      |      |      |      |      |      |      |      |      |      |
| USA |      |      |      |      |      |      |      |      |      |      |      |

Table 1213: WBGEM — Prices—Agriculture—Soybean (US\$05/tDM) [PART 2/6]

|     | 1982 | 1983 | 1984 | 1985 | 1986 | 1987 | 1988 | 1989 | 1990 | 1991 | 1992 |
|-----|------|------|------|------|------|------|------|------|------|------|------|
| GLO | 381  | 451  | 462  | 371  | 300  | 283  | 374  | 341  | 295  | 289  | 279  |
| CAZ |      |      |      |      |      |      |      |      |      |      |      |
| CHA |      |      |      |      |      |      |      |      |      |      |      |
| EUR |      |      |      |      |      |      |      |      |      |      |      |
| IND |      |      |      |      |      |      |      |      |      |      |      |
| JPN |      |      |      |      |      |      |      |      |      |      |      |
| LAM |      |      |      |      |      |      |      |      |      |      |      |
| MEA |      |      |      |      |      |      |      |      |      |      |      |
| NEU |      |      |      |      |      |      |      |      |      |      |      |
| OAS |      |      |      |      |      |      |      |      |      |      |      |
| REF |      |      |      |      |      |      |      |      |      |      |      |
| SSA |      |      |      |      |      |      |      |      |      |      |      |
| USA |      |      |      |      |      |      |      |      |      |      |      |

Table 1214: WBGEM — Prices—Agriculture—Soybean (US\$05/tDM) [PART 3/6]

|     | 1993 | 1994 | 1995 | 1996 | 1997 | 1998 | 1999 | 2000 | 2001 | 2002 | 2003 |
|-----|------|------|------|------|------|------|------|------|------|------|------|
| GLO | 292  | 297  | 279  | 334  | 340  | 292  | 247  | 263  | 253  | 278  | 327  |
| CAZ |      |      |      |      |      |      |      |      |      |      |      |
| CHA |      |      |      |      |      |      |      |      |      |      |      |
| EUR |      |      |      |      |      |      |      |      |      |      |      |
| IND |      |      |      |      |      |      |      |      |      |      |      |
| JPN |      |      |      |      |      |      |      |      |      |      |      |
| LAM |      |      |      |      |      |      |      |      |      |      |      |
| MEA |      |      |      |      |      |      |      |      |      |      |      |
| NEU |      |      |      |      |      |      |      |      |      |      |      |
| OAS |      |      |      |      |      |      |      |      |      |      |      |
| REF |      |      |      |      |      |      |      |      |      |      |      |
| SSA |      |      |      |      |      |      |      |      |      |      |      |
| USA |      |      |      |      |      |      |      |      |      |      |      |

Table 1215: WBGEM — Prices—Agriculture—Soybean (US\$05/tDM) [PART 4/6]



|     | 2004 | 2005 | 2006 | 2007 | 2008 | 2009 | 2010 | 2011 | 2012 | 2013 | 2014 |
|-----|------|------|------|------|------|------|------|------|------|------|------|
| GLO | 356  | 309  | 295  | 397  | 502  | 447  | 444  | 481  | 530  | 485  | 450  |
| CAZ |      |      |      |      |      |      |      |      |      |      |      |
| CHA |      |      |      |      |      |      |      |      |      |      |      |
| EUR |      |      |      |      |      |      |      |      |      |      |      |
| IND |      |      |      |      |      |      |      |      |      |      |      |
| JPN |      |      |      |      |      |      |      |      |      |      |      |
| LAM |      |      |      |      |      |      |      |      |      |      |      |
| MEA |      |      |      |      |      |      |      |      |      |      |      |
| NEU |      |      |      |      |      |      |      |      |      |      |      |
| OAS |      |      |      |      |      |      |      |      |      |      |      |
| REF |      |      |      |      |      |      |      |      |      |      |      |
| SSA |      |      |      |      |      |      |      |      |      |      |      |
| USA |      |      |      |      |      |      |      |      |      |      |      |

Table 1216: WBGEM — Prices—Agriculture—Soybean (US\$05/tDM) [PART 5/6]

|     | 2015 | 2016 |
|-----|------|------|
| GLO | 395  | 427  |
| CAZ |      |      |
| CHA |      |      |
| EUR |      |      |
| IND |      |      |
| JPN |      |      |
| LAM |      |      |
| MEA |      |      |
| NEU |      |      |
| OAS |      |      |
| REF |      |      |
| SSA |      |      |
| USA |      |      |

Table 1217: WBGEM — Prices—Agriculture—Soybean (US\$05/tDM) [PART 6/6]

|     | 1961 | 1962 | 1963 | 1964 | 1965 | 1966 | 1967 | 1968 | 1969 | 1970 | 1971 |
|-----|------|------|------|------|------|------|------|------|------|------|------|
| GLO | 360  | 353  | 351  | 351  | 329  | 327  | 327  | 322  | 316  | 318  | 314  |
| CAZ | 286  | 286  | 286  | 286  | 286  | 286  | 286  | 286  | 286  | 287  | 288  |
| CHA | 472  | 472  | 472  | 472  | 471  | 472  | 471  | 471  | 472  | 472  | 472  |
| EUR | 179  | 214  | 204  | 156  | 156  | 214  | 232  | 243  | 240  | 251  | 253  |
| IND | 254  | 254  | 253  | 253  | 253  | 253  | 253  | 253  | 253  | 253  | 253  |
| JPN | 2812 | 2812 | 2812 | 2812 | 2812 | 2812 | 2812 | 2812 | 2812 | 2812 | 2812 |
| LAM | 245  | 244  | 246  | 251  | 246  | 246  | 249  | 254  | 249  | 246  | 240  |
| MEA | 338  | 338  | 338  | 338  | 338  | 332  | 332  | 332  | 332  | 334  | 332  |
| NEU | 156  | 165  | 208  | 168  | 167  | 151  | 185  | 314  | 289  | 304  | 307  |
| OAS | 1103 | 1067 | 1096 | 1081 | 1111 | 1023 | 1130 | 1254 | 1216 | 1135 | 1105 |
| REF | 0    | 0    | 0    | 0    | 0    | 0    | 0    | 0    | 0    | 0    | 0    |
| SSA | 481  | 491  | 482  | 471  | 470  | 475  | 459  | 439  | 437  | 379  | 394  |
| USA | 246  | 246  | 246  | 246  | 246  | 246  | 246  | 246  | 246  | 246  | 246  |

Table 1218: FAO — Prices—Agriculture—Soybean (US\$05/tDM) [PART 1/5]

|     | 1972 | 1973 | 1974 | 1975 | 1976 | 1977 | 1978 | 1979 | 1980 | 1981 | 1982 |
|-----|------|------|------|------|------|------|------|------|------|------|------|
| GLO | 302  | 298  | 307  | 292  | 294  | 285  | 287  | 279  | 280  | 284  | 280  |
| CAZ | 290  | 290  | 294  | 294  | 294  | 290  | 293  | 293  | 291  | 291  | 290  |
| CHA | 471  | 472  | 471  | 472  | 472  | 472  | 473  | 474  | 474  | 475  | 475  |
| EUR | 251  | 256  | 260  | 265  | 263  | 258  | 262  | 262  | 261  | 255  | 242  |
| IND | 253  | 254  | 253  | 253  | 253  | 253  | 253  | 253  | 253  | 253  | 253  |
| JPN | 2812 | 2812 | 2812 | 2812 | 2812 | 2812 | 2812 | 2812 | 2812 | 2812 | 2812 |
| LAM | 239  | 236  | 234  | 235  | 232  | 231  | 229  | 228  | 229  | 228  | 227  |
| MEA | 335  | 337  | 334  | 333  | 333  | 335  | 340  | 343  | 345  | 347  | 346  |
| NEU | 297  | 178  | 184  | 96   | 79   | 42   | 28   | 26   | 177  | 129  | 111  |
| OAS | 1076 | 1130 | 1226 | 1195 | 1185 | 1236 | 1084 | 1003 | 908  | 951  | 950  |
| REF | 0    | 0    | 0    | 0    | 0    | 0    | 0    | 0    | 0    | 0    | 0    |
| SSA | 373  | 382  | 335  | 312  | 287  | 281  | 244  | 241  | 239  | 255  | 244  |
| USA | 246  | 246  | 246  | 246  | 246  | 246  | 246  | 246  | 246  | 246  | 246  |

Table 1219: FAO — Prices—Agriculture—Soybean (US\$05/tDM) [PART 2/5]

|     | 1983 | 1984 | 1985 | 1986 | 1987 | 1988 | 1989 | 1990 | 1991 | 1992 | 1993 |
|-----|------|------|------|------|------|------|------|------|------|------|------|
| GLO | 287  | 282  | 280  | 285  | 285  | 286  | 279  | 277  | 274  | 274  | 281  |
| CAZ | 289  | 290  | 291  | 291  | 289  | 289  | 291  | 289  | 288  | 288  | 287  |
| CHA | 475  | 475  | 475  | 475  | 475  | 475  | 475  | 475  | 475  | 475  | 475  |
| EUR | 237  | 239  | 245  | 250  | 255  | 258  | 258  | 259  | 254  | 263  | 269  |
| IND | 253  | 253  | 253  | 253  | 253  | 253  | 253  | 253  | 253  | 253  | 253  |
| JPN | 2812 | 2812 | 2812 | 2812 | 2812 | 2812 | 2812 | 2812 | 2812 | 2812 | 2812 |
| LAM | 228  | 225  | 226  | 224  | 226  | 223  | 227  | 223  | 222  | 222  | 223  |
| MEA | 345  | 345  | 345  | 346  | 351  | 340  | 323  | 335  | 352  | 322  | 322  |
| NEU | 119  | 131  | 217  | 234  | 243  | 239  | 231  | 252  | 193  | 333  | 324  |
| OAS | 892  | 832  | 764  | 654  | 663  | 678  | 676  | 649  | 595  | 575  | 573  |
| REF | 0    | 0    | 0    | 0    | 0    | 0    | 0    | 0    | 0    | 251  | 251  |
| SSA | 191  | 188  | 216  | 237  | 254  | 272  | 341  | 293  | 245  | 300  | 261  |
| USA | 246  | 246  | 246  | 246  | 246  | 246  | 246  | 246  | 246  | 246  | 246  |

Table 1220: FAO — Prices—Agriculture—Soybean (US\$05/tDM) [PART 3/5]

|     | 1994 | 1995 | 1996 | 1997 | 1998 | 1999 | 2000 | 2001 | 2002 | 2003 | 2004 |
|-----|------|------|------|------|------|------|------|------|------|------|------|
| GLO | 276  | 274  | 273  | 273  | 268  | 267  | 268  | 264  | 264  | 259  | 261  |
| CAZ | 288  | 287  | 287  | 287  | 287  | 288  | 288  | 287  | 287  | 286  | 287  |
| CHA | 475  | 475  | 475  | 476  | 476  | 476  | 476  | 476  | 476  | 476  | 476  |
| EUR | 270  | 270  | 268  | 267  | 268  | 271  | 268  | 271  | 272  | 270  | 268  |
| IND | 253  | 253  | 253  | 253  | 253  | 253  | 253  | 253  | 253  | 253  | 253  |
| JPN | 2812 | 2812 | 2812 | 2812 | 2812 | 2812 | 2812 | 2812 | 2812 | 2812 | 2812 |
| LAM | 223  | 222  | 221  | 223  | 221  | 220  | 220  | 220  | 220  | 220  | 220  |
| MEA | 325  | 321  | 315  | 324  | 324  | 330  | 328  | 328  | 328  | 331  | 333  |
| NEU | 324  | 317  | 293  | 292  | 301  | 285  | 286  | 279  | 289  | 295  | 277  |
| OAS | 554  | 561  | 573  | 585  | 567  | 525  | 528  | 549  | 542  | 521  | 571  |
| REF | 252  | 252  | 253  | 253  | 251  | 249  | 250  | 251  | 249  | 248  | 247  |
| SSA | 262  | 338  | 317  | 344  | 346  | 339  | 322  | 315  | 342  | 353  | 364  |
| USA | 246  | 246  | 246  | 246  | 246  | 246  | 246  | 246  | 246  | 246  | 246  |

Table 1221: FAO — Prices—Agriculture—Soybean (US\$05/tDM) [PART 4/5]

|     | 2005 | 2006 | 2007 | 2008 | 2009 | 2010 | 2011 |
|-----|------|------|------|------|------|------|------|
| GLO | 260  | 258  | 252  | 255  | 258  | 251  | 252  |
| CAZ | 287  | 287  | 287  | 286  | 287  | 287  | 286  |
| CHA | 476  | 476  | 476  | 476  | 476  | 476  | 476  |
| EUR | 269  | 269  | 270  | 273  | 272  | 273  | 273  |
| IND | 253  | 253  | 253  | 253  | 253  | 253  | 253  |
| JPN | 2812 | 2812 | 2812 | 2812 | 2812 | 2812 | 2812 |
| LAM | 219  | 219  | 219  | 219  | 221  | 219  | 221  |
| MEA | 333  | 331  | 333  | 335  | 333  | 334  | 334  |
| NEU | 266  | 283  | 283  | 282  | 283  | 286  | 293  |
| OAS | 620  | 583  | 509  | 534  | 532  | 472  | 520  |
| REF | 247  | 246  | 248  | 247  | 249  | 247  | 250  |
| SSA | 352  | 355  | 353  | 352  | 308  | 285  | 317  |
| USA | 246  | 246  | 246  | 246  | 246  | 246  | 246  |

Table 1222: FAO — Prices—Agriculture—Soybean (US\$05/tDM) [PART 5/5]

|     | 1990 | 1991 | 1992 | 1993 | 1994 | 1995 | 1996 | 1997 | 1998 | 1999 | 2000 |
|-----|------|------|------|------|------|------|------|------|------|------|------|
| GLO | 0    | 229  | 227  | 254  | 230  | 253  | 303  | 293  | 239  | 204  | 208  |
| CAZ | 0    | 222  | 220  | 242  | 241  | 238  | 288  | 297  | 239  | 203  | 200  |
| CHA | 0    | 226  | 268  | 315  | 238  | 278  | 539  | 475  | 408  | 320  | 324  |
| EUR | 0    | 480  | 252  | 282  | 272  | 265  | 319  | 287  | 262  | 208  | 199  |
| IND | 0    | 0    | 0    | 0    | 0    | 0    | 0    | 0    | 217  | 221  | 217  |
| JPN | 0    | 2001 | 2134 | 2564 | 2637 | 2861 | 2464 | 2372 | 2157 | 2435 | 2508 |
| LAM | 0    | 194  | 192  | 222  | 226  | 210  | 271  | 290  | 224  | 170  | 187  |
| MEA | 0    | 1581 | 2706 | 305  | 285  | 328  | 488  | 605  | 601  | 776  | 1056 |
| NEU | 0    | 152  | 181  | 408  | 230  | 208  | 238  | 205  | 180  | 183  | 114  |
| OAS | 0    | 464  | 461  | 493  | 511  | 540  | 564  | 499  | 312  | 374  | 329  |
| REF | 0    | 0    | 38   | 71   | 122  | 186  | 162  | 140  | 121  | 116  | 93   |
| SSA | 0    | 208  | 206  | 296  | 286  | 538  | 810  | 797  | 860  | 283  | 217  |
| USA | 0    | 231  | 230  | 265  | 226  | 278  | 278  | 268  | 204  | 191  | 188  |

Table 1223: FAOp — Prices—Agriculture—Soybean (US\$05/tDM) [PART 1/3]

|     | 2001 | 2002 | 2003 | 2004 | 2005 | 2006 | 2007 | 2008 | 2009 | 2010 | 2011 |
|-----|------|------|------|------|------|------|------|------|------|------|------|
| GLO | 193  | 218  | 268  | 268  | 247  | 261  | 347  | 410  | 387  | 411  | 466  |
| CAZ | 190  | 211  | 263  | 302  | 257  | 302  | 321  | 440  | 409  | 421  | 503  |
| CHA | 268  | 301  | 411  | 510  | 452  | 465  | 622  | 564  | 656  | 832  | 905  |
| EUR | 213  | 231  | 288  | 285  | 257  | 251  | 374  | 281  | 213  | 263  | 285  |
| IND | 211  | 205  | 225  | 249  | 258  | 254  | 293  | 360  | 0    | 0    | 0    |
| JPN | 2048 | 1814 | 2007 | 2946 | 3156 | 2334 | 2042 | 1734 | 1860 | 1681 | 1806 |
| LAM | 175  | 182  | 216  | 241  | 210  | 209  | 272  | 384  | 372  | 362  | 433  |
| MEA | 1086 | 350  | 300  | 314  | 323  | 353  | 505  | 480  | 560  | 557  | 583  |
| NEU | 133  | 152  | 182  | 155  | 154  | 277  | 444  | 496  | 432  | 447  | 527  |
| OAS | 295  | 334  | 370  | 442  | 456  | 723  | 410  | 534  | 572  | 577  | 471  |
| REF | 118  | 124  | 103  | 137  | 122  | 236  | 340  | 429  | 381  | 376  | 418  |
| SSA | 249  | 263  | 302  | 358  | 377  | 368  | 391  | 526  | 172  | 200  | 227  |
| USA | 181  | 229  | 304  | 238  | 234  | 266  | 418  | 412  | 396  | 467  | 517  |

Table 1224: FAOp — Prices—Agriculture—Soybean (US\$05/tDM) [PART 2/3]

|     | 2005 |
|-----|------|
| GLO | 293  |
| CAZ |      |
| CHA |      |
| EUR |      |
| IND |      |
| JPN |      |
| LAM |      |
| MEA |      |
| NEU |      |
| OAS |      |
| REF |      |
| SSA |      |
| USA |      |

Table 1225: IniFoodPrice — Prices—Agriculture—Soybean (US\$05/tDM)

36.30 Straw

## geom\_path: Each group consists of only one observation. Do you need to adjust the group## aesthetic?

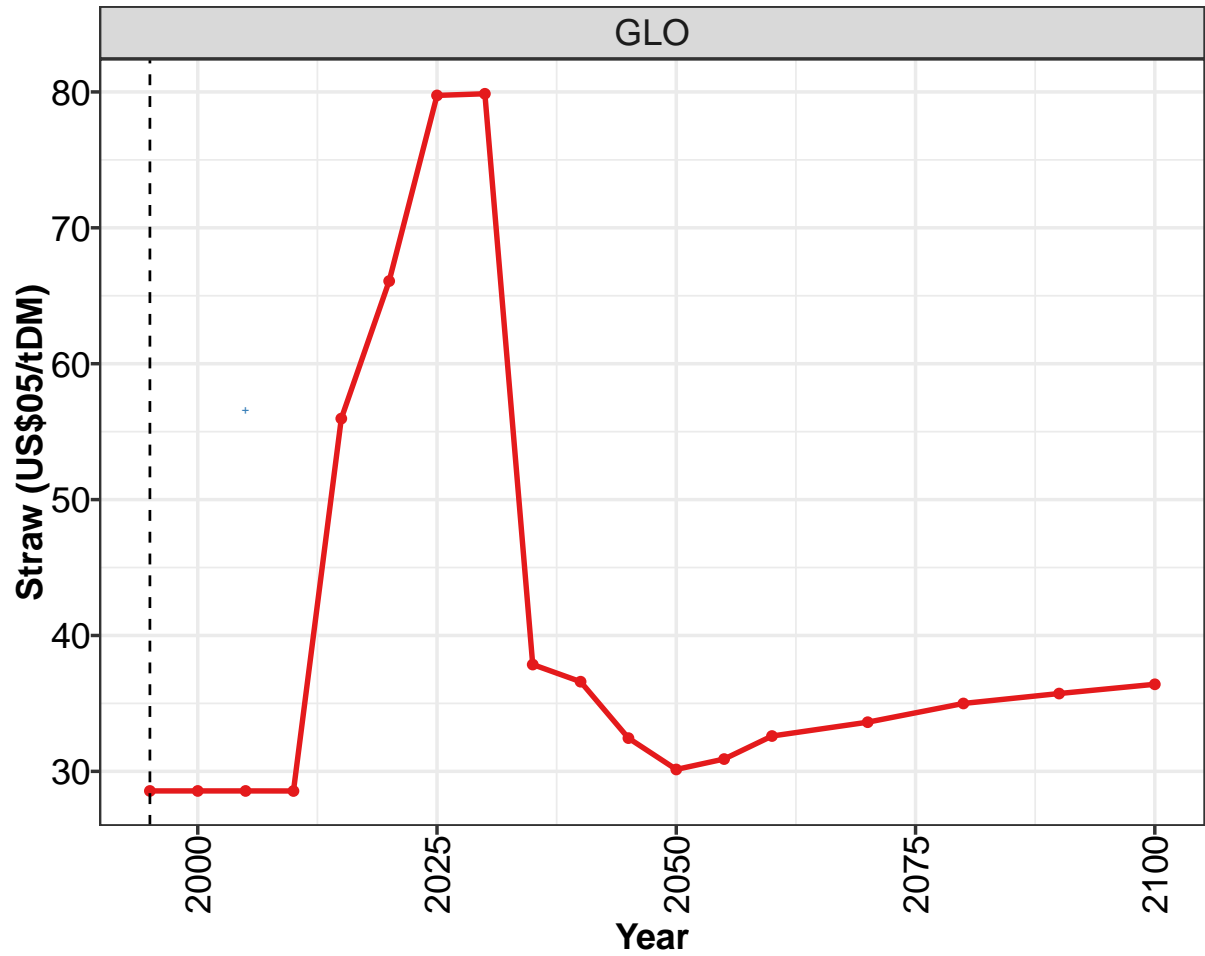

Model output

MAgPIE m4p\_SSP1

Historical data

IniFoodPrice

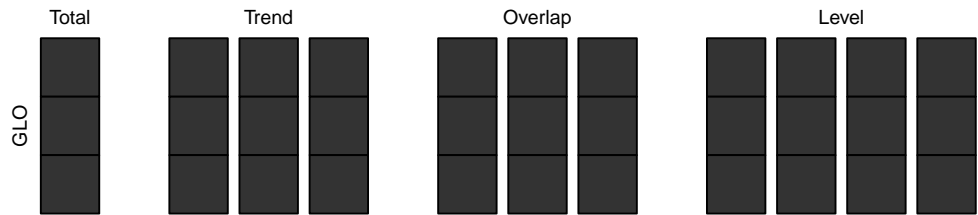

Figure 320: MAgPIE m4p\_SSP1 — Prices—Agriculture—Straw (US\$05/tDM)

|     | 1995 | 2000 | 2005 | 2010 | 2015 | 2020 | 2025 | 2030 | 2035 | 2040 | 2045 |
|-----|------|------|------|------|------|------|------|------|------|------|------|
| GLO | 28.6 | 28.6 | 28.6 | 28.6 | 56.0 | 66.1 | 79.7 | 79.9 | 37.9 | 36.6 | 32.4 |

Table 1226: MAgPIE m4p\_SSP1 — Prices—Agriculture—Straw (US\$05/tDM) [PART 1/2]

|     | 2050 | 2055 | 2060 | 2070 | 2080 | 2090 | 2100 |
|-----|------|------|------|------|------|------|------|
| GLO | 30.1 | 30.9 | 32.6 | 33.6 | 35.0 | 35.7 | 36.4 |

Table 1227: MAgPIE m4p\_SSP1 — Prices—Agriculture—Straw (US\$05/tDM) [PART 2/2]

|     | 2005 |
|-----|------|
| GLO | 56.5 |

Table 1228: IniFoodPrice — Prices—Agriculture—Straw (US\$05/tDM)

36.31 Sugar

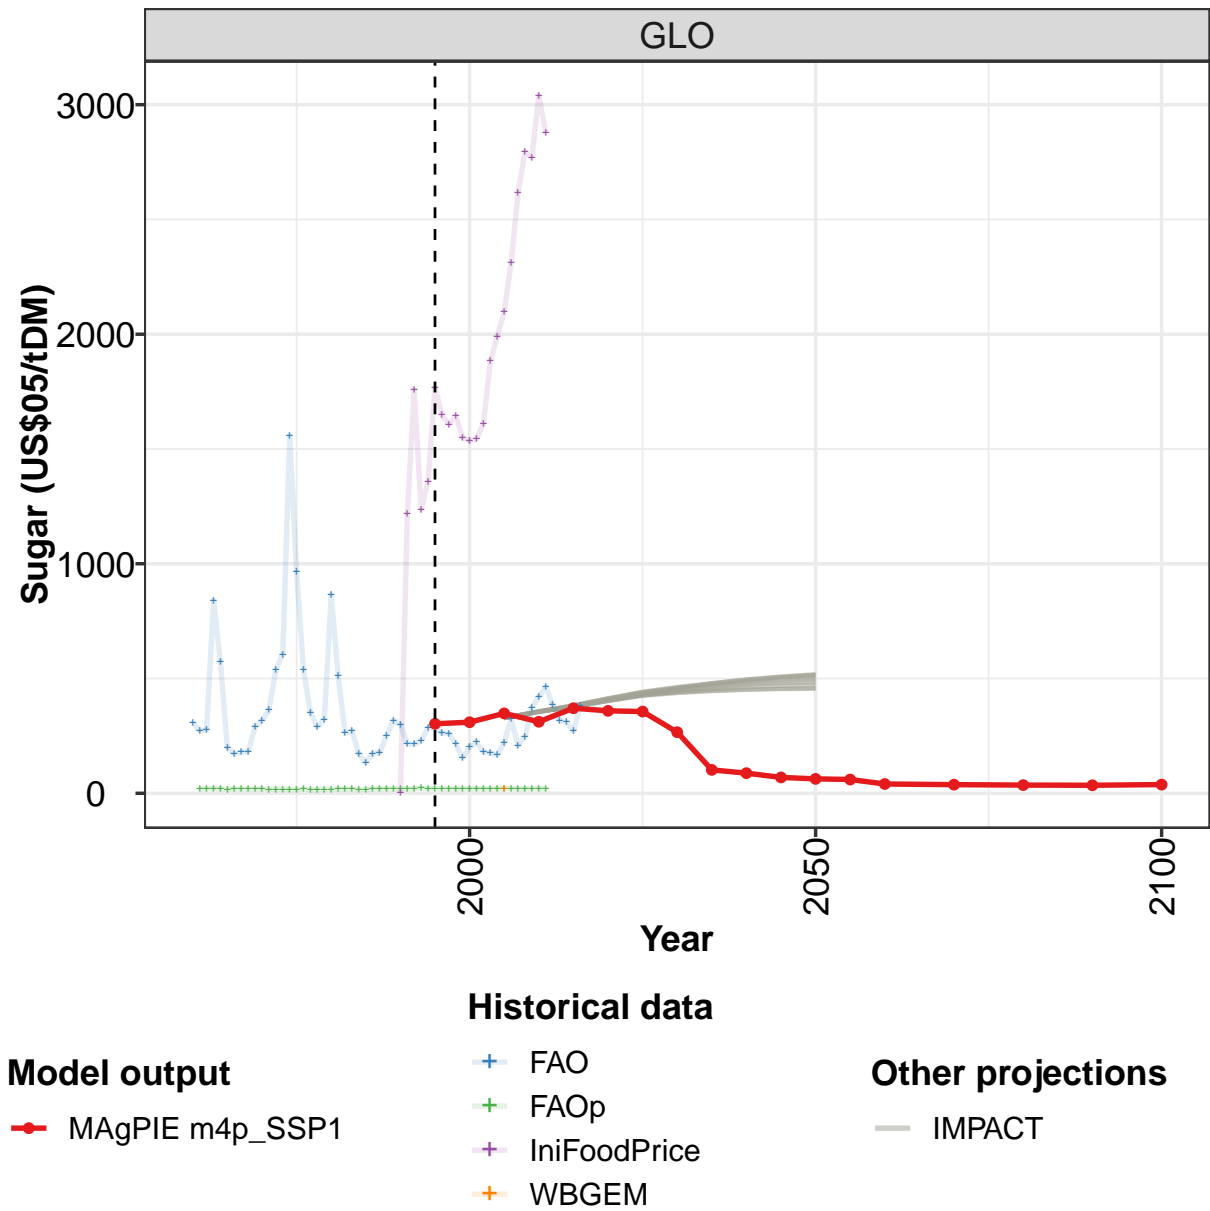

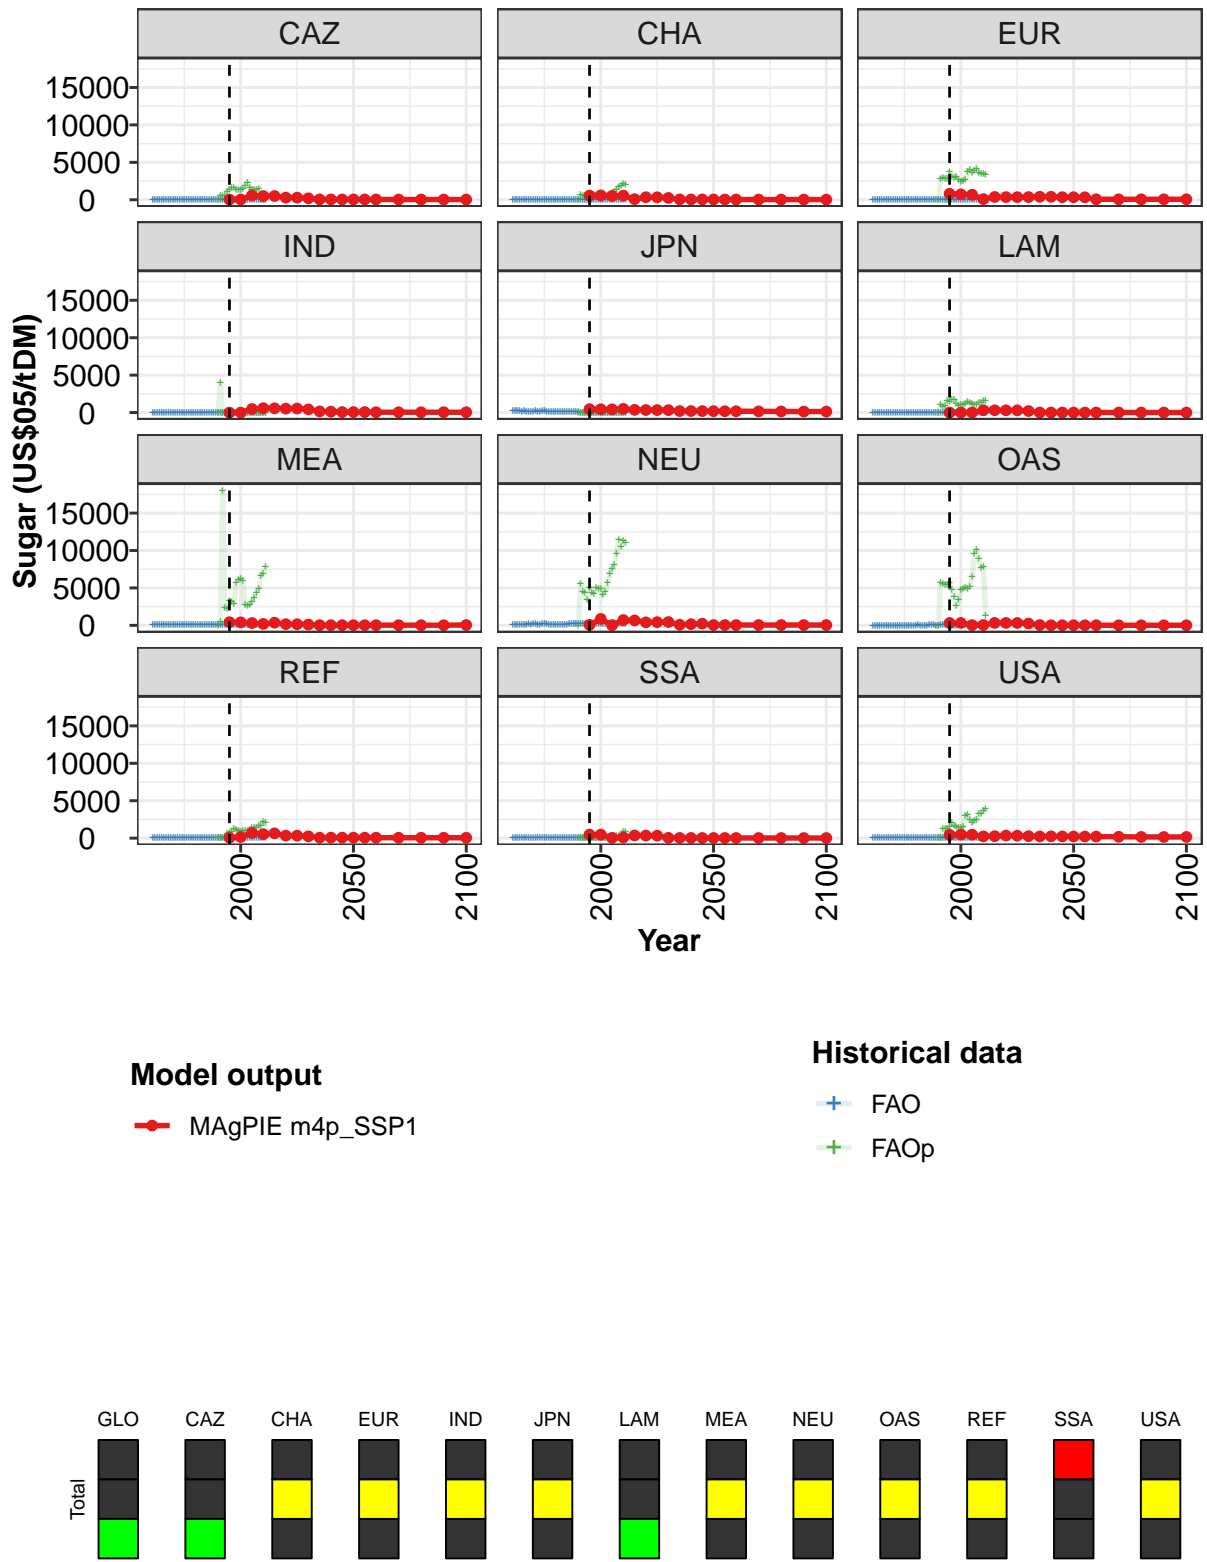

Figure 321: MAgPIE m4p\_SSP1 — Prices—Agriculture—Sugar (US\$05/tDM)



|     | 1995 | 2000 | 2005 | 2010 | 2015 | 2020 | 2025 | 2030 | 2035 | 2040 | 2045 |
|-----|------|------|------|------|------|------|------|------|------|------|------|
| GLO | 303  | 310  | 348  | 312  | 371  | 359  | 356  | 266  | 102  | 88   | 69   |
| CAZ | 35   | 41   | 581  | 501  | 499  | 292  | 284  | 195  | 50   | 48   | 46   |
| CHA | 556  | 581  | 514  | 556  | 83   | 340  | 331  | 244  | 50   | 48   | 47   |
| EUR | 806  | 724  | 674  | 87   | 378  | 361  | 352  | 359  | 399  | 406  | 347  |
| IND | 0    | 0    | 478  | 586  | 564  | 526  | 536  | 424  | 155  | 121  | 68   |
| JPN | 461  | 437  | 434  | 499  | 359  | 345  | 333  | 326  | 199  | 204  | 197  |
| LAM | 10   | 9    | 7    | 313  | 305  | 303  | 295  | 207  | 9    | 6    | 7    |
| MEA | 421  | 405  | 314  | 189  | 357  | 164  | 153  | 108  | 26   | 25   | 24   |
| NEU | 67   | 863  | 25   | 713  | 656  | 410  | 428  | 441  | 83   | 155  | 225  |
| OAS | 324  | 322  | 32   | 45   | 328  | 326  | 316  | 244  | 43   | 18   | 18   |
| REF | 59   | 152  | 704  | 534  | 640  | 340  | 332  | 244  | 73   | 71   | 69   |
| SSA | 469  | 476  | 37   | 94   | 357  | 340  | 331  | 46   | 34   | 32   | 28   |
| USA | 454  | 484  | 465  | 235  | 262  | 341  | 332  | 264  | 229  | 241  | 233  |

Table 1229: MAgPIE m4p\_SSP1 — Prices—Agriculture—Sugar (US\$05/tDM) [PART 1/2]

|     | 2050 | 2055 | 2060 | 2070 | 2080 | 2090 | 2100 |
|-----|------|------|------|------|------|------|------|
| GLO | 63   | 60   | 41   | 38   | 36   | 35   | 38   |
| CAZ | 44   | 44   | 44   | 36   | 34   | 33   | 33   |
| CHA | 43   | 36   | 33   | 31   | 31   | 31   | 29   |
| EUR | 340  | 335  | 72   | 65   | 64   | 63   | 63   |
| IND | 68   | 65   | 44   | 43   | 43   | 42   | 42   |
| JPN | 188  | 181  | 178  | 158  | 145  | 134  | 133  |
| LAM | 7    | 6    | 6    | 5    | 5    | 4    | 4    |
| MEA | 24   | 23   | 23   | 22   | 22   | 21   | 44   |
| NEU | 45   | 44   | 44   | 43   | 43   | 42   | 42   |
| OAS | 18   | 17   | 16   | 14   | 11   | 10   | 9    |
| REF | 67   | 64   | 61   | 57   | 54   | 53   | 53   |
| SSA | 26   | 23   | 23   | 21   | 19   | 17   | 16   |
| USA | 223  | 214  | 210  | 183  | 165  | 156  | 162  |

Table 1230: MAgPIE m4p\_SSP1 — Prices—Agriculture—Sugar (US\$05/tDM) [PART 2/2]

|     | 1960 | 1961 | 1962 | 1963 | 1964 | 1965 | 1966 | 1967 | 1968 | 1969 | 1970 |
|-----|------|------|------|------|------|------|------|------|------|------|------|
| GLO | 309  | 273  | 278  | 840  | 571  | 198  | 172  | 180  | 181  | 289  | 317  |
| CAZ |      |      |      |      |      |      |      |      |      |      |      |
| CHA |      |      |      |      |      |      |      |      |      |      |      |
| EUR |      |      |      |      |      |      |      |      |      |      |      |
| IND |      |      |      |      |      |      |      |      |      |      |      |
| JPN |      |      |      |      |      |      |      |      |      |      |      |
| LAM |      |      |      |      |      |      |      |      |      |      |      |
| MEA |      |      |      |      |      |      |      |      |      |      |      |
| NEU |      |      |      |      |      |      |      |      |      |      |      |
| OAS |      |      |      |      |      |      |      |      |      |      |      |
| REF |      |      |      |      |      |      |      |      |      |      |      |
| SSA |      |      |      |      |      |      |      |      |      |      |      |
| USA |      |      |      |      |      |      |      |      |      |      |      |

Table 1231: WBGEM — Prices—Agriculture—Sugar (US\$05/tDM) [PART 1/6]

|     | 1971 | 1972 | 1973 | 1974 | 1975 | 1976 | 1977 | 1978 | 1979 | 1980 | 1981 |
|-----|------|------|------|------|------|------|------|------|------|------|------|
| GLO | 363  | 538  | 604  | 1556 | 965  | 539  | 350  | 290  | 321  | 866  | 512  |
| CAZ |      |      |      |      |      |      |      |      |      |      |      |
| CHA |      |      |      |      |      |      |      |      |      |      |      |
| EUR |      |      |      |      |      |      |      |      |      |      |      |
| IND |      |      |      |      |      |      |      |      |      |      |      |
| JPN |      |      |      |      |      |      |      |      |      |      |      |
| LAM |      |      |      |      |      |      |      |      |      |      |      |
| MEA |      |      |      |      |      |      |      |      |      |      |      |
| NEU |      |      |      |      |      |      |      |      |      |      |      |
| OAS |      |      |      |      |      |      |      |      |      |      |      |
| REF |      |      |      |      |      |      |      |      |      |      |      |
| SSA |      |      |      |      |      |      |      |      |      |      |      |
| USA |      |      |      |      |      |      |      |      |      |      |      |

Table 1232: WBGEM — Prices—Agriculture—Sugar (US\$05/tDM) [PART 2/6]

|     | 1982 | 1983 | 1984 | 1985 | 1986 | 1987 | 1988 | 1989 | 1990 | 1991 | 1992 |
|-----|------|------|------|------|------|------|------|------|------|------|------|
| GLO | 262  | 271  | 170  | 134  | 174  | 177  | 251  | 317  | 299  | 216  | 214  |
| CAZ |      |      |      |      |      |      |      |      |      |      |      |
| CHA |      |      |      |      |      |      |      |      |      |      |      |
| EUR |      |      |      |      |      |      |      |      |      |      |      |
| IND |      |      |      |      |      |      |      |      |      |      |      |
| JPN |      |      |      |      |      |      |      |      |      |      |      |
| LAM |      |      |      |      |      |      |      |      |      |      |      |
| MEA |      |      |      |      |      |      |      |      |      |      |      |
| NEU |      |      |      |      |      |      |      |      |      |      |      |
| OAS |      |      |      |      |      |      |      |      |      |      |      |
| REF |      |      |      |      |      |      |      |      |      |      |      |
| SSA |      |      |      |      |      |      |      |      |      |      |      |
| USA |      |      |      |      |      |      |      |      |      |      |      |

Table 1233: WBGEM — Prices—Agriculture—Sugar (US\$05/tDM) [PART 3/6]

|     | 1993 | 1994 | 1995 | 1996 | 1997 | 1998 | 1999 | 2000 | 2001 | 2002 | 2003 |
|-----|------|------|------|------|------|------|------|------|------|------|------|
| GLO | 229  | 285  | 285  | 261  | 261  | 214  | 153  | 203  | 222  | 179  | 176  |
| CAZ |      |      |      |      |      |      |      |      |      |      |      |
| CHA |      |      |      |      |      |      |      |      |      |      |      |
| EUR |      |      |      |      |      |      |      |      |      |      |      |
| IND |      |      |      |      |      |      |      |      |      |      |      |
| JPN |      |      |      |      |      |      |      |      |      |      |      |
| LAM |      |      |      |      |      |      |      |      |      |      |      |
| MEA |      |      |      |      |      |      |      |      |      |      |      |
| NEU |      |      |      |      |      |      |      |      |      |      |      |
| OAS |      |      |      |      |      |      |      |      |      |      |      |
| REF |      |      |      |      |      |      |      |      |      |      |      |
| SSA |      |      |      |      |      |      |      |      |      |      |      |
| USA |      |      |      |      |      |      |      |      |      |      |      |

Table 1234: WBGEM — Prices—Agriculture—Sugar (US\$05/tDM) [PART 4/6]

|     | 2004 | 2005 | 2006 | 2007 | 2008 | 2009 | 2010 | 2011 | 2012 | 2013 | 2014 |
|-----|------|------|------|------|------|------|------|------|------|------|------|
| GLO | 166  | 222  | 324  | 208  | 245  | 371  | 420  | 462  | 386  | 318  | 311  |
| CAZ |      |      |      |      |      |      |      |      |      |      |      |
| CHA |      |      |      |      |      |      |      |      |      |      |      |
| EUR |      |      |      |      |      |      |      |      |      |      |      |
| IND |      |      |      |      |      |      |      |      |      |      |      |
| JPN |      |      |      |      |      |      |      |      |      |      |      |
| LAM |      |      |      |      |      |      |      |      |      |      |      |
| MEA |      |      |      |      |      |      |      |      |      |      |      |
| NEU |      |      |      |      |      |      |      |      |      |      |      |
| OAS |      |      |      |      |      |      |      |      |      |      |      |
| REF |      |      |      |      |      |      |      |      |      |      |      |
| SSA |      |      |      |      |      |      |      |      |      |      |      |
| USA |      |      |      |      |      |      |      |      |      |      |      |

Table 1235: WBGEM — Prices—Agriculture—Sugar (US\$05/tDM) [PART 5/6]

|     | 2015 | 2016 |
|-----|------|------|
| GLO | 271  | 380  |
| CAZ |      |      |
| CHA |      |      |
| EUR |      |      |
| IND |      |      |
| JPN |      |      |
| LAM |      |      |
| MEA |      |      |
| NEU |      |      |
| OAS |      |      |
| REF |      |      |
| SSA |      |      |
| USA |      |      |

Table 1236: WBGEM — Prices—Agriculture—Sugar (US\$05/tDM) [PART 6/6]

|     | 1961 | 1962 | 1963 | 1964 | 1965 | 1966 | 1967 | 1968 | 1969 | 1970 | 1971 |
|-----|------|------|------|------|------|------|------|------|------|------|------|
| GLO | 18   | 21   | 21   | 19   | 17   | 18   | 19   | 19   | 18   | 18   | 17   |
| CAZ | 58   | 38   | 52   | 42   | 46   | 39   | 36   | 29   | 45   | 42   | 36   |
| CHA | 19   | 24   | 21   | 15   | 12   | 12   | 14   | 15   | 18   | 18   | 18   |
| EUR | 26   | 31   | 33   | 31   | 32   | 32   | 35   | 35   | 31   | 37   | 31   |
| IND | 4    | 5    | 5    | 4    | 5    | 6    | 7    | 7    | 6    | 6    | 6    |
| JPN | 203  | 295  | 213  | 178  | 141  | 174  | 165  | 170  | 154  | 157  | 185  |
| LAM | 7    | 9    | 9    | 9    | 8    | 9    | 8    | 8    | 8    | 7    | 7    |
| MEA | 67   | 68   | 63   | 62   | 56   | 48   | 48   | 39   | 36   | 38   | 39   |
| NEU | 124  | 130  | 135  | 133  | 110  | 107  | 107  | 156  | 115  | 206  | 143  |
| OAS | 2    | 1    | 1    | 1    | 1    | 1    | 1    | 1    | 1    | 1    | 1    |
| REF | 0    | 0    | 0    | 0    | 0    | 0    | 0    | 0    | 0    | 0    | 0    |
| SSA | 10   | 9    | 8    | 8    | 9    | 7    | 6    | 7    | 6    | 7    | 6    |
| USA | 58   | 55   | 52   | 47   | 41   | 40   | 35   | 28   | 43   | 35   | 29   |

Table 1237: FAO — Prices—Agriculture—Sugar (US\$05/tDM) [PART 1/5]

|     | 1972 | 1973 | 1974 | 1975 | 1976 | 1977 | 1978 | 1979 | 1980 | 1981 | 1982 |
|-----|------|------|------|------|------|------|------|------|------|------|------|
| GLO | 17   | 17   | 17   | 16   | 19   | 15   | 16   | 17   | 17   | 18   | 18   |
| CAZ | 36   | 40   | 34   | 36   | 33   | 32   | 43   | 43   | 40   | 39   | 38   |
| CHA | 19   | 15   | 13   | 15   | 14   | 12   | 12   | 16   | 17   | 14   | 14   |
| EUR | 27   | 28   | 30   | 26   | 37   | 25   | 24   | 25   | 25   | 24   | 31   |
| IND | 7    | 7    | 7    | 6    | 6    | 6    | 5    | 6    | 8    | 6    | 6    |
| JPN | 135  | 165  | 218  | 177  | 150  | 139  | 113  | 90   | 63   | 59   | 65   |
| LAM | 8    | 8    | 8    | 8    | 8    | 8    | 9    | 9    | 9    | 10   | 7    |
| MEA | 52   | 42   | 42   | 39   | 38   | 38   | 47   | 45   | 48   | 43   | 39   |
| NEU | 135  | 129  | 153  | 154  | 175  | 112  | 113  | 132  | 138  | 136  | 139  |
| OAS | 1    | 2    | 1    | 2    | 2    | 3    | 4    | 4    | 4    | 14   | 6    |
| REF | 0    | 0    | 0    | 0    | 0    | 0    | 0    | 0    | 0    | 0    | 0    |
| SSA | 6    | 6    | 6    | 7    | 6    | 6    | 6    | 6    | 6    | 5    | 5    |
| USA | 29   | 33   | 26   | 23   | 23   | 22   | 28   | 28   | 22   | 19   | 23   |

Table 1238: FAO — Prices—Agriculture—Sugar (US\$05/tDM) [PART 2/5]

|     | 1983 | 1984 | 1985 | 1986 | 1987 | 1988 | 1989 | 1990 | 1991 | 1992 | 1993 |
|-----|------|------|------|------|------|------|------|------|------|------|------|
| GLO | 18   | 17   | 16   | 19   | 19   | 19   | 19   | 18   | 18   | 20   | 22   |
| CAZ | 43   | 43   | 45   | 42   | 44   | 38   | 29   | 36   | 35   | 39   | 29   |
| CHA | 16   | 14   | 13   | 14   | 20   | 17   | 15   | 14   | 12   | 11   | 13   |
| EUR | 37   | 31   | 26   | 32   | 33   | 34   | 39   | 30   | 31   | 32   | 35   |
| IND | 6    | 6    | 6    | 7    | 6    | 6    | 6    | 5    | 5    | 5    | 5    |
| JPN | 63   | 57   | 61   | 45   | 49   | 39   | 41   | 39   | 33   | 32   | 31   |
| LAM | 9    | 7    | 8    | 10   | 10   | 10   | 10   | 10   | 10   | 10   | 11   |
| MEA | 38   | 39   | 40   | 38   | 45   | 44   | 50   | 47   | 46   | 46   | 51   |
| NEU | 116  | 123  | 135  | 170  | 142  | 184  | 164  | 180  | 188  | 225  | 244  |
| OAS | 6    | 7    | 8    | 12   | 9    | 11   | 9    | 9    | 11   | 9    | 9    |
| REF | 0    | 0    | 0    | 0    | 0    | 0    | 0    | 0    | 0    | 42   | 40   |
| SSA | 7    | 5    | 6    | 6    | 7    | 7    | 8    | 8    | 8    | 11   | 22   |
| USA | 20   | 15   | 12   | 16   | 17   | 16   | 13   | 14   | 15   | 14   | 15   |

Table 1239: FAO — Prices—Agriculture—Sugar (US\$05/tDM) [PART 3/5]

|     | 1994 | 1995 | 1996 | 1997 | 1998 | 1999 | 2000 | 2001 | 2002 | 2003 | 2004 |
|-----|------|------|------|------|------|------|------|------|------|------|------|
| GLO | 21   | 22   | 19   | 18   | 19   | 19   | 20   | 20   | 19   | 19   | 20   |
| CAZ | 35   | 25   | 26   | 26   | 29   | 28   | 24   | 32   | 25   | 26   | 25   |
| CHA | 14   | 13   | 13   | 12   | 11   | 16   | 18   | 14   | 12   | 14   | 16   |
| EUR | 34   | 38   | 27   | 26   | 29   | 30   | 31   | 38   | 30   | 39   | 36   |
| IND | 5    | 5    | 4    | 4    | 4    | 4    | 4    | 4    | 4    | 4    | 5    |
| JPN | 30   | 27   | 27   | 26   | 25   | 29   | 30   | 27   | 28   | 28   | 28   |
| LAM | 10   | 9    | 8    | 8    | 8    | 9    | 9    | 8    | 8    | 7    | 7    |
| MEA | 56   | 54   | 66   | 56   | 57   | 52   | 50   | 47   | 45   | 34   | 48   |
| NEU | 219  | 363  | 209  | 188  | 190  | 233  | 181  | 213  | 238  | 270  | 250  |
| OAS | 9    | 10   | 8    | 8    | 8    | 10   | 17   | 20   | 18   | 15   | 13   |
| REF | 50   | 45   | 58   | 75   | 78   | 76   | 65   | 63   | 56   | 48   | 42   |
| SSA | 19   | 19   | 18   | 15   | 16   | 16   | 16   | 18   | 18   | 17   | 17   |
| USA | 13   | 13   | 12   | 11   | 12   | 11   | 12   | 10   | 9    | 10   | 10   |

Table 1240: FAO — Prices—Agriculture—Sugar (US\$05/tDM) [PART 4/5]

|     | 2005 | 2006 | 2007 | 2008 | 2009 | 2010 | 2011 |
|-----|------|------|------|------|------|------|------|
| GLO | 21   | 21   | 19   | 20   | 21   | 21   | 20   |
| CAZ | 26   | 33   | 25   | 27   | 29   | 30   | 33   |
| CHA | 16   | 14   | 12   | 15   | 18   | 18   | 17   |
| EUR | 35   | 44   | 39   | 43   | 40   | 45   | 40   |
| IND | 5    | 4    | 3    | 4    | 5    | 5    | 4    |
| JPN | 27   | 26   | 27   | 27   | 22   | 23   | 23   |
| LAM | 8    | 8    | 7    | 7    | 6    | 6    | 7    |
| MEA | 56   | 58   | 66   | 69   | 75   | 63   | 64   |
| NEU | 249  | 280  | 251  | 232  | 206  | 221  | 259  |
| OAS | 23   | 22   | 23   | 20   | 23   | 22   | 16   |
| REF | 41   | 37   | 37   | 41   | 44   | 48   | 26   |
| SSA | 17   | 19   | 16   | 16   | 14   | 17   | 15   |
| USA | 9    | 8    | 8    | 9    | 8    | 9    | 8    |

Table 1241: FAO — Prices—Agriculture—Sugar (US\$05/tDM) [PART 5/5]

|     | 1990 | 1991 | 1992  | 1993 | 1994 | 1995 | 1996 | 1997 | 1998 | 1999 | 2000 |
|-----|------|------|-------|------|------|------|------|------|------|------|------|
| GLO | 0    | 1218 | 1758  | 1235 | 1359 | 1769 | 1648 | 1608 | 1643 | 1549 | 1535 |
| CAZ | 0    | 488  | 496   | 491  | 1125 | 1328 | 1566 | 1611 | 1289 | 1272 | 1271 |
| CHA | 0    | 599  | 532   | 596  | 544  | 763  | 608  | 675  | 567  | 715  | 729  |
| EUR | 0    | 2743 | 2955  | 2758 | 2786 | 3685 | 3110 | 2913 | 3018 | 2705 | 2401 |
| IND | 0    | 3989 | 0     | 0    | 0    | 0    | 0    | 0    | 0    | 0    | 0    |
| JPN | 0    | 0    | 0     | 0    | 0    | 0    | 0    | 0    | 0    | 0    | 0    |
| LAM | 0    | 1081 | 829   | 862  | 1523 | 1477 | 1716 | 1738 | 1164 | 966  | 999  |
| MEA | 0    | 507  | 18037 | 2325 | 2153 | 3252 | 3175 | 2819 | 5746 | 6031 | 6165 |
| NEU | 0    | 5510 | 4515  | 4404 | 3399 | 4972 | 4332 | 4178 | 4998 | 4891 | 4826 |
| OAS | 0    | 5691 | 5523  | 5434 | 5391 | 5647 | 4727 | 3870 | 2564 | 3396 | 4736 |
| REF | 0    | 0    | 0     | 10   | 630  | 691  | 789  | 1298 | 1174 | 994  | 843  |
| SSA | 2    | 2    | 59    | 57   | 19   | 28   | 27   | 26   | 31   | 30   | 30   |
| USA | 0    | 0    | 1237  | 1212 | 1187 | 1540 | 1997 | 1691 | 1484 | 1349 | 1342 |

Table 1242: FAOp — Prices—Agriculture—Sugar (US\$05/tDM) [PART 1/3]

|     | 2001 | 2002 | 2003 | 2004 | 2005 | 2006 | 2007  | 2008  | 2009  | 2010  | 2011  |
|-----|------|------|------|------|------|------|-------|-------|-------|-------|-------|
| GLO | 1544 | 1611 | 1884 | 1991 | 2097 | 2312 | 2615  | 2793  | 2770  | 3038  | 2875  |
| CAZ | 1403 | 1879 | 2323 | 1648 | 1279 | 1311 | 1371  | 1535  | 0     | 0     | 0     |
| CHA | 608  | 543  | 520  | 711  | 905  | 1132 | 1401  | 1745  | 1813  | 2097  | 1998  |
| EUR | 2599 | 2731 | 3741 | 3982 | 3641 | 3893 | 4088  | 3625  | 3534  | 3486  | 3354  |
| IND | 0    | 0    | 0    | 0    | 0    | 0    | 0     | 0     | 0     | 0     | 0     |
| JPN | 0    | 0    | 0    | 0    | 0    | 0    | 0     | 0     | 0     | 0     | 0     |
| LAM | 1002 | 1205 | 1387 | 1296 | 1209 | 1032 | 1090  | 1338  | 1367  | 1584  | 1606  |
| MEA | 5941 | 2707 | 2607 | 2681 | 3119 | 3665 | 4393  | 4828  | 6560  | 6930  | 7879  |
| NEU | 4019 | 4435 | 5714 | 6947 | 7587 | 8031 | 9603  | 11423 | 10523 | 11284 | 10996 |
| OAS | 4898 | 5074 | 4924 | 5161 | 6543 | 9543 | 10082 | 8874  | 7659  | 7806  | 1330  |
| REF | 960  | 932  | 1005 | 1121 | 1329 | 1324 | 1409  | 1705  | 1590  | 2187  | 2105  |
| SSA | 29   | 24   | 31   | 17   | 22   | 288  | 295   | 262   | 173   | 882   | 796   |
| USA | 1583 | 2985 | 3119 | 2447 | 2074 | 2260 | 2421  | 3196  | 3312  | 3640  | 3969  |

Table 1243: FAOp — Prices—Agriculture—Sugar (US\$05/tDM) [PART 2/3]

|     | 2005 |
|-----|------|
| GLO | 22   |
| CAZ |      |
| CHA |      |
| EUR |      |
| IND |      |
| JPN |      |
| LAM |      |
| MEA |      |
| NEU |      |
| OAS |      |
| REF |      |
| SSA |      |
| USA |      |

Table 1244: IniFoodPrice — Prices—Agriculture—Sugar (US\$05/tDM)

36.32
Sugar beet

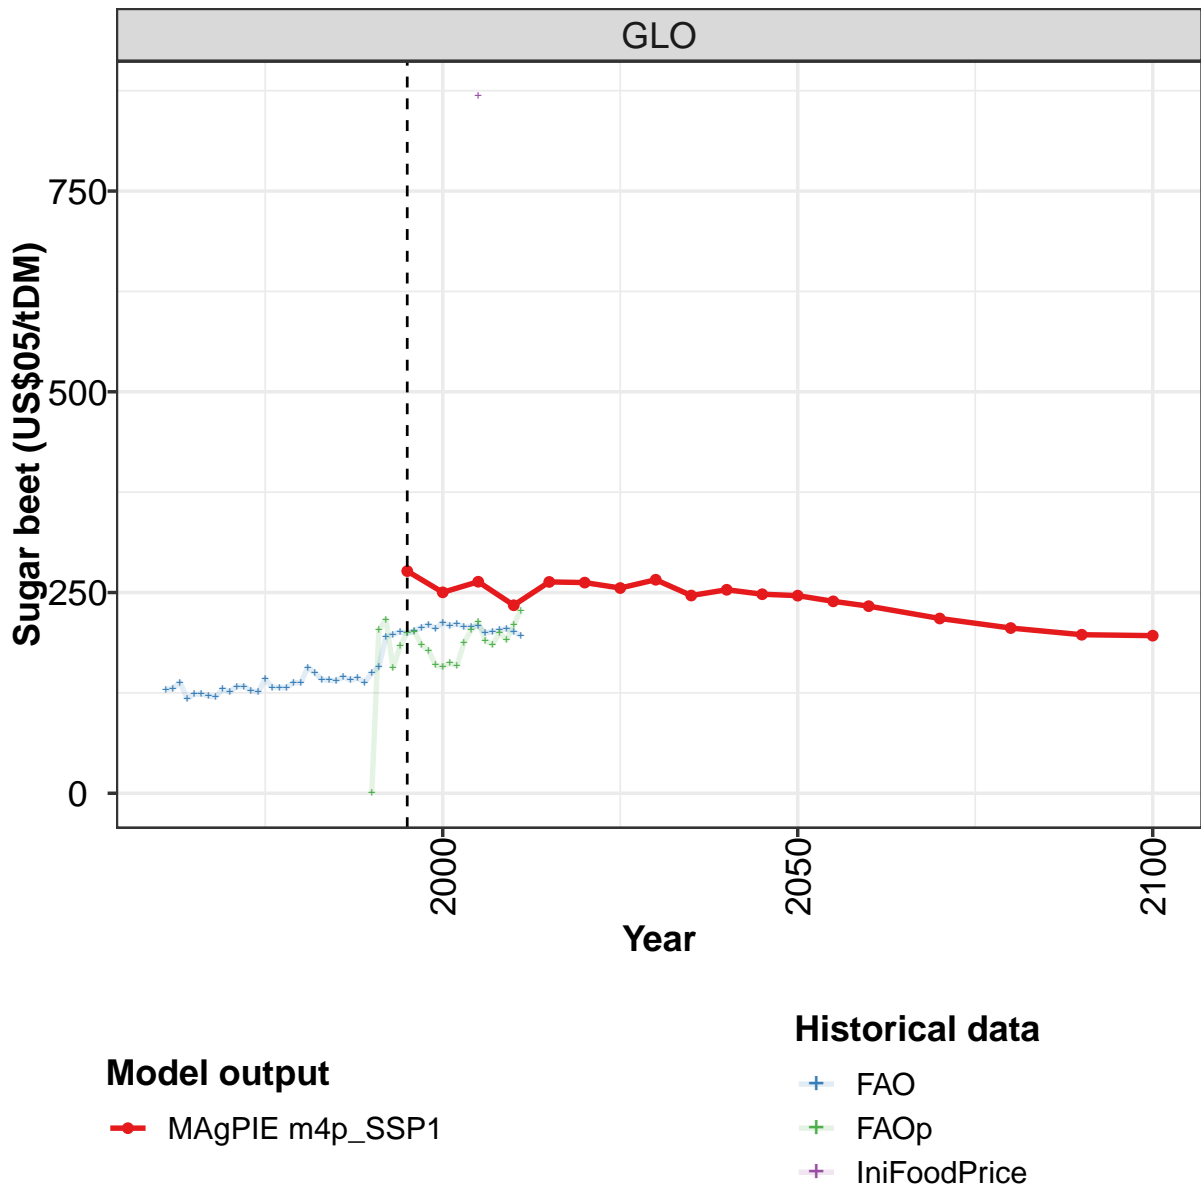

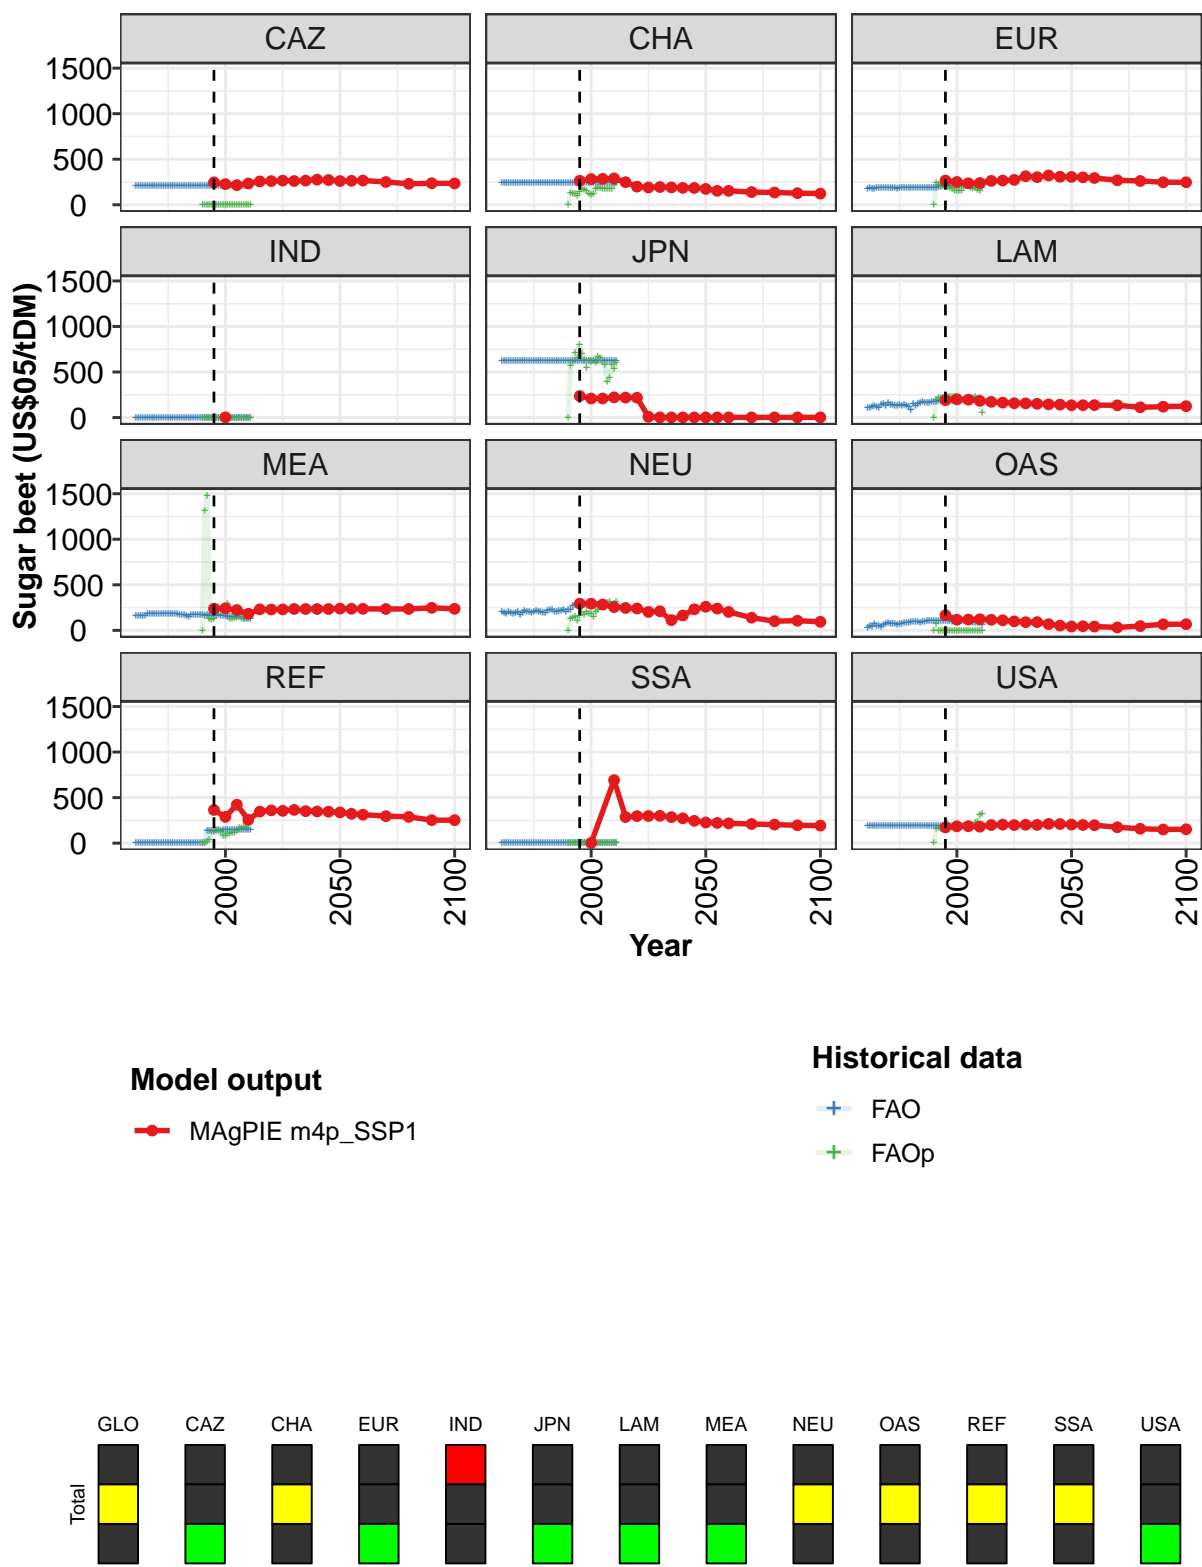

Figure 322: MAGPIE m4p\_SSP1 — Prices—Agriculture—Sugar beet (US\$05/tDM)



|     | 1995 | 2000 | 2005 | 2010 | 2015 | 2020 | 2025 | 2030 | 2035 | 2040 | 2045 |
|-----|------|------|------|------|------|------|------|------|------|------|------|
| GLO | 277  | 250  | 263  | 234  | 263  | 262  | 256  | 266  | 246  | 253  | 248  |
| CAZ | 246  | 227  | 215  | 234  | 256  | 260  | 266  | 261  | 266  | 276  | 271  |
| CHA | 264  | 282  | 285  | 289  | 248  | 199  | 190  | 195  | 191  | 185  | 185  |
| EUR | 267  | 251  | 236  | 239  | 262  | 266  | 273  | 313  | 303  | 321  | 308  |
| IND |      | 2    |      |      |      |      |      |      |      |      |      |
| JPN | 237  | 209  | 210  | 222  | 219  | 218  | 9    | 2    | 2    | 2    | 2    |
| LAM | 191  | 201  | 197  | 183  | 173  | 164  | 157  | 156  | 151  | 145  | 142  |
| MEA | 238  | 242  | 223  | 182  | 230  | 229  | 230  | 235  | 235  | 234  | 235  |
| NEU | 294  | 293  | 283  | 255  | 246  | 241  | 202  | 210  | 112  | 164  | 231  |
| OAS | 166  | 117  | 119  | 123  | 117  | 111  | 99   | 90   | 90   | 68   | 52   |
| REF | 364  | 288  | 422  | 257  | 346  | 360  | 355  | 365  | 351  | 348  | 346  |
| SSA |      | 2    |      | 692  | 287  | 297  | 298  | 300  | 286  | 272  | 245  |
| USA | 173  | 185  | 186  | 181  | 199  | 203  | 199  | 202  | 200  | 211  | 210  |

Table 1245: MAgPIE m4p\_SSP1 — Prices—Agriculture—Sugar beet (US\$05/tDM) [PART 1/2]

|     | 2050 | 2055 | 2060 | 2070 | 2080 | 2090 | 2100 |
|-----|------|------|------|------|------|------|------|
| GLO | 246  | 239  | 233  | 218  | 206  | 197  | 196  |
| CAZ | 261  | 263  | 266  | 250  | 230  | 237  | 234  |
| CHA | 174  | 153  | 153  | 140  | 135  | 127  | 123  |
| EUR | 306  | 301  | 294  | 269  | 261  | 247  | 247  |
| IND |      |      |      |      |      |      |      |
| JPN | 2    | 2    | 2    | 2    | 2    | 2    | 2    |
| LAM | 135  | 136  | 137  | 135  | 113  | 120  | 125  |
| MEA | 239  | 237  | 236  | 234  | 235  | 247  | 236  |
| NEU | 259  | 239  | 202  | 139  | 101  | 106  | 94   |
| OAS | 43   | 45   | 42   | 32   | 47   | 66   | 68   |
| REF | 338  | 322  | 313  | 297  | 288  | 252  | 252  |
| SSA | 228  | 222  | 217  | 210  | 204  | 196  | 193  |
| USA | 204  | 200  | 197  | 175  | 158  | 150  | 152  |

Table 1246: MAgPIE m4p\_SSP1 — Prices—Agriculture—Sugar beet (US\$05/tDM) [PART 2/2]

|     | 1961 | 1962 | 1963 | 1964 | 1965 | 1966 | 1967 | 1968 | 1969 | 1970 | 1971 |
|-----|------|------|------|------|------|------|------|------|------|------|------|
| GLO | 129  | 131  | 138  | 118  | 123  | 124  | 121  | 120  | 130  | 126  | 133  |
| CAZ | 207  | 207  | 207  | 207  | 207  | 207  | 207  | 207  | 207  | 207  | 207  |
| CHA | 239  | 239  | 239  | 239  | 239  | 239  | 239  | 239  | 239  | 239  | 239  |
| EUR | 180  | 183  | 181  | 180  | 186  | 181  | 183  | 182  | 185  | 184  | 184  |
| IND | 0    | 0    | 0    | 0    | 0    | 0    | 0    | 0    | 0    | 0    | 0    |
| JPN | 619  | 619  | 619  | 619  | 619  | 619  | 619  | 619  | 619  | 619  | 619  |
| LAM | 109  | 107  | 118  | 131  | 117  | 106  | 136  | 155  | 126  | 157  | 138  |
| MEA | 155  | 165  | 165  | 159  | 162  | 179  | 180  | 183  | 180  | 178  | 178  |
| NEU | 205  | 194  | 185  | 205  | 189  | 177  | 195  | 205  | 167  | 196  | 217  |
| OAS | 33   | 45   | 44   | 72   | 46   | 56   | 41   | 61   | 76   | 81   | 74   |
| REF | 0    | 0    | 0    | 0    | 0    | 0    | 0    | 0    | 0    | 0    | 0    |
| SSA | 0    | 0    | 0    | 0    | 0    | 0    | 0    | 0    | 0    | 0    | 0    |
| USA | 192  | 192  | 192  | 192  | 192  | 192  | 192  | 192  | 192  | 192  | 192  |

Table 1247: FAO — Prices—Agriculture—Sugar beet (US\$05/tDM) [PART 1/5]

|     | 1972 | 1973 | 1974 | 1975 | 1976 | 1977 | 1978 | 1979 | 1980 | 1981 | 1982 |
|-----|------|------|------|------|------|------|------|------|------|------|------|
| GLO | 133  | 128  | 126  | 142  | 132  | 132  | 132  | 138  | 138  | 157  | 150  |
| CAZ | 207  | 207  | 207  | 207  | 207  | 207  | 207  | 207  | 207  | 207  | 207  |
| CHA | 239  | 239  | 239  | 239  | 239  | 239  | 239  | 239  | 239  | 239  | 239  |
| EUR | 183  | 184  | 179  | 186  | 192  | 186  | 186  | 183  | 186  | 189  | 185  |
| IND | 0    | 0    | 0    | 0    | 0    | 0    | 0    | 0    | 0    | 0    | 0    |
| JPN | 619  | 619  | 619  | 619  | 619  | 619  | 619  | 619  | 619  | 619  | 619  |
| LAM | 143  | 128  | 129  | 135  | 134  | 144  | 127  | 119  | 87   | 148  | 132  |
| MEA | 182  | 185  | 183  | 180  | 181  | 177  | 179  | 176  | 172  | 169  | 168  |
| NEU | 209  | 202  | 191  | 203  | 215  | 205  | 206  | 198  | 190  | 210  | 222  |
| OAS | 77   | 67   | 59   | 69   | 76   | 81   | 82   | 83   | 91   | 97   | 96   |
| REF | 0    | 0    | 0    | 0    | 0    | 0    | 0    | 0    | 0    | 0    | 0    |
| SSA | 0    | 0    | 0    | 0    | 0    | 0    | 0    | 0    | 0    | 0    | 0    |
| USA | 192  | 192  | 192  | 192  | 192  | 192  | 192  | 192  | 192  | 192  | 192  |

Table 1248: FAO — Prices—Agriculture—Sugar beet (US\$05/tDM) [PART 2/5]

|     | 1983 | 1984 | 1985 | 1986 | 1987 | 1988 | 1989 | 1990 | 1991 | 1992 | 1993 |
|-----|------|------|------|------|------|------|------|------|------|------|------|
| GLO | 142  | 141  | 140  | 145  | 141  | 144  | 138  | 150  | 157  | 195  | 198  |
| CAZ | 207  | 207  | 207  | 207  | 207  | 207  | 207  | 207  | 207  | 207  | 207  |
| CHA | 239  | 239  | 239  | 239  | 239  | 239  | 239  | 239  | 239  | 239  | 239  |
| EUR | 189  | 186  | 184  | 188  | 189  | 191  | 189  | 190  | 189  | 196  | 203  |
| IND | 0    | 0    | 0    | 0    | 0    | 0    | 0    | 0    | 0    | 0    | 0    |
| JPN | 619  | 619  | 619  | 619  | 619  | 619  | 619  | 619  | 619  | 619  | 619  |
| LAM | 148  | 163  | 169  | 165  | 167  | 166  | 174  | 168  | 171  | 179  | 185  |
| MEA | 156  | 148  | 168  | 171  | 170  | 171  | 167  | 168  | 165  | 166  | 165  |
| NEU | 222  | 204  | 201  | 213  | 216  | 230  | 203  | 224  | 226  | 272  | 285  |
| OAS | 94   | 88   | 96   | 97   | 100  | 100  | 100  | 100  | 101  | 101  | 100  |
| REF | 0    | 0    | 0    | 0    | 0    | 0    | 0    | 0    | 0    | 140  | 139  |
| SSA | 0    | 0    | 0    | 0    | 0    | 0    | 0    | 0    | 0    | 0    | 0    |
| USA | 192  | 192  | 192  | 192  | 192  | 192  | 192  | 192  | 192  | 192  | 192  |

Table 1249: FAO — Prices—Agriculture—Sugar beet (US\$05/tDM) [PART 3/5]

|     | 1994 | 1995 | 1996 | 1997 | 1998 | 1999 | 2000 | 2001 | 2002 | 2003 | 2004 |
|-----|------|------|------|------|------|------|------|------|------|------|------|
| GLO | 201  | 199  | 203  | 206  | 210  | 205  | 212  | 209  | 211  | 207  | 207  |
| CAZ | 207  | 207  | 207  | 207  | 207  | 207  | 207  | 207  | 207  | 207  | 207  |
| CHA | 239  | 239  | 239  | 239  | 239  | 239  | 239  | 239  | 239  | 239  | 239  |
| EUR | 204  | 203  | 203  | 203  | 205  | 204  | 213  | 212  | 212  | 211  | 211  |
| IND | 0    | 0    | 0    | 0    | 0    | 0    | 0    | 0    | 0    | 0    | 0    |
| JPN | 619  | 619  | 619  | 619  | 619  | 619  | 619  | 619  | 619  | 619  | 619  |
| LAM | 187  | 188  | 189  | 188  | 188  | 188  | 188  | 188  | 188  | 190  | 190  |
| MEA | 163  | 164  | 164  | 167  | 161  | 160  | 155  | 146  | 148  | 152  | 150  |
| NEU | 276  | 279  | 278  | 284  | 286  | 280  | 292  | 281  | 283  | 283  | 276  |
| OAS | 100  | 100  | 100  | 100  | 99   | 100  | 100  | 100  | 101  | 100  | 99   |
| REF | 138  | 139  | 139  | 138  | 138  | 142  | 145  | 144  | 145  | 146  | 145  |
| SSA | 0    | 0    | 0    | 0    | 0    | 0    | 0    | 0    | 0    | 0    | 0    |
| USA | 192  | 192  | 192  | 192  | 192  | 192  | 192  | 192  | 192  | 192  | 192  |

Table 1250: FAO — Prices—Agriculture—Sugar beet (US\$05/tDM) [PART 4/5]

|     | 2005 | 2006 | 2007 | 2008 | 2009 | 2010 | 2011 |
|-----|------|------|------|------|------|------|------|
| GLO | 208  | 200  | 201  | 203  | 205  | 202  | 196  |
| CAZ | 207  | 207  | 207  | 207  | 207  | 207  | 207  |
| CHA | 239  | 239  | 239  | 239  | 239  | 239  | 239  |
| EUR | 213  | 208  | 207  | 206  | 206  | 206  | 205  |
| IND | 0    | 0    | 0    | 0    | 0    | 0    | 0    |
| JPN | 619  | 619  | 619  | 619  | 619  | 619  | 619  |
| LAM | 191  | 193  | 196  | 197  | 201  | 197  | 193  |
| MEA | 149  | 149  | 139  | 123  | 127  | 126  | 125  |
| NEU | 274  | 276  | 275  | 285  | 283  | 279  | 282  |
| OAS | 99   | 98   | 87   | 83   | 86   | 78   | 59   |
| REF | 145  | 144  | 146  | 146  | 148  | 146  | 146  |
| SSA | 0    | 0    | 0    | 0    | 0    | 0    | 0    |
| USA | 192  | 192  | 192  | 192  | 192  | 192  | 192  |

Table 1251: FAO — Prices—Agriculture—Sugar beet (US\$05/tDM) [PART 5/5]

|     | 1990 | 1991 | 1992 | 1993 | 1994 | 1995 | 1996 | 1997 | 1998 | 1999 | 2000 |
|-----|------|------|------|------|------|------|------|------|------|------|------|
| GLO | 0    | 203  | 216  | 156  | 183  | 200  | 201  | 185  | 178  | 160  | 157  |
| CAZ | 0    | 0    | 0    | 0    | 0    | 0    | 0    | 0    | 0    | 0    | 0    |
| CHA | 0    | 129  | 119  | 124  | 98   | 144  | 171  | 167  | 150  | 121  | 107  |
| EUR | 0    | 237  | 220  | 199  | 219  | 239  | 211  | 182  | 175  | 156  | 152  |
| IND | 0    | 0    | 0    | 0    | 0    | 0    | 0    | 0    | 0    | 0    | 0    |
| JPN | 0    | 571  | 609  | 712  | 657  | 801  | 705  | 632  | 545  | 620  | 612  |
| LAM | 0    | 194  | 213  | 219  | 215  | 215  | 227  | 232  | 234  | 233  | 233  |
| MEA | 0    | 1310 | 1482 | 131  | 119  | 130  | 191  | 254  | 238  | 230  | 248  |
| NEU | 0    | 127  | 143  | 146  | 104  | 157  | 193  | 171  | 201  | 183  | 184  |
| OAS | 0    | 75   | 0    | 0    | 0    | 0    | 0    | 0    | 0    | 0    | 0    |
| REF | 0    | 0    | 11   | 40   | 125  | 120  | 148  | 148  | 125  | 77   | 86   |
| SSA | 0    | 0    | 0    | 0    | 0    | 0    | 0    | 0    | 0    | 0    | 0    |
| USA | 0    | 163  | 171  | 163  | 163  | 158  | 208  | 179  | 167  | 171  | 158  |

Table 1252: FAOp — Prices—Agriculture—Sugar beet (US\$05/tDM) [PART 1/3]

|     | 2001 | 2002 | 2003 | 2004 | 2005 | 2006 | 2007 | 2008 | 2009 | 2010 | 2011 |
|-----|------|------|------|------|------|------|------|------|------|------|------|
| GLO | 162  | 159  | 188  | 203  | 213  | 190  | 185  | 200  | 191  | 210  | 228  |
| CAZ | 0    | 0    | 0    | 0    | 0    | 0    | 0    | 0    | 0    | 0    | 0    |
| CHA | 125  | 176  | 192  | 183  | 177  | 173  | 172  | 178  | 171  | 215  | 271  |
| EUR | 152  | 151  | 196  | 222  | 227  | 181  | 180  | 182  | 164  | 156  | 181  |
| IND | 0    | 0    | 0    | 0    | 0    | 0    | 0    | 0    | 0    | 0    | 0    |
| JPN | 619  | 604  | 666  | 658  | 620  | 577  | 393  | 433  | 575  | 538  | 607  |
| LAM | 213  | 198  | 191  | 190  | 189  | 197  | 216  | 230  | 204  | 212  | 50   |
| MEA | 295  | 127  | 125  | 135  | 143  | 169  | 136  | 126  | 169  | 180  | 205  |
| NEU | 153  | 205  | 228  | 283  | 274  | 249  | 298  | 308  | 276  | 290  | 310  |
| OAS | 0    | 0    | 0    | 0    | 0    | 0    | 0    | 0    | 0    | 0    | 0    |
| REF | 100  | 98   | 113  | 116  | 141  | 165  | 155  | 184  | 173  | 224  | 239  |
| SSA | 0    | 0    | 0    | 0    | 0    | 0    | 0    | 0    | 0    | 0    | 0    |
| USA | 183  | 183  | 192  | 171  | 200  | 204  | 192  | 221  | 233  | 308  | 321  |

Table 1253: FAOp — Prices—Agriculture—Sugar beet (US\$05/tDM) [PART 2/3]

|     | 2005 |
|-----|------|
| GLO | 868  |
| CAZ |      |
| CHA |      |
| EUR |      |
| IND |      |
| JPN |      |
| LAM |      |
| MEA |      |
| NEU |      |
| OAS |      |
| REF |      |
| SSA |      |
| USA |      |

Table 1254: IniFoodPrice — Prices—Agriculture—Sugar beet (US\$05/tDM)

36.33
Sugar cane

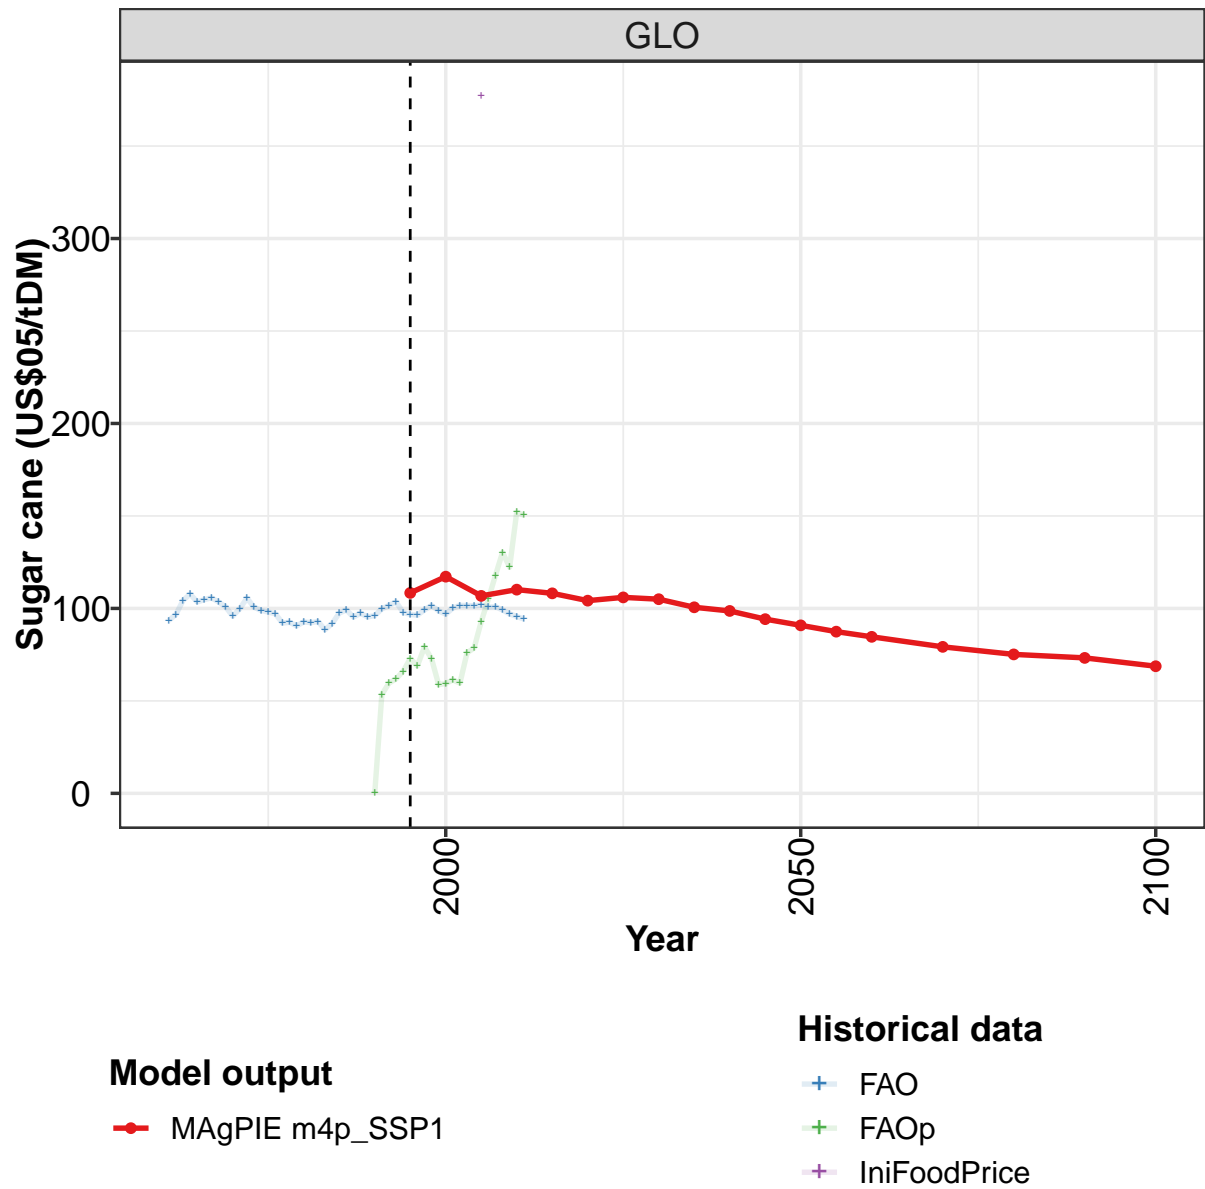

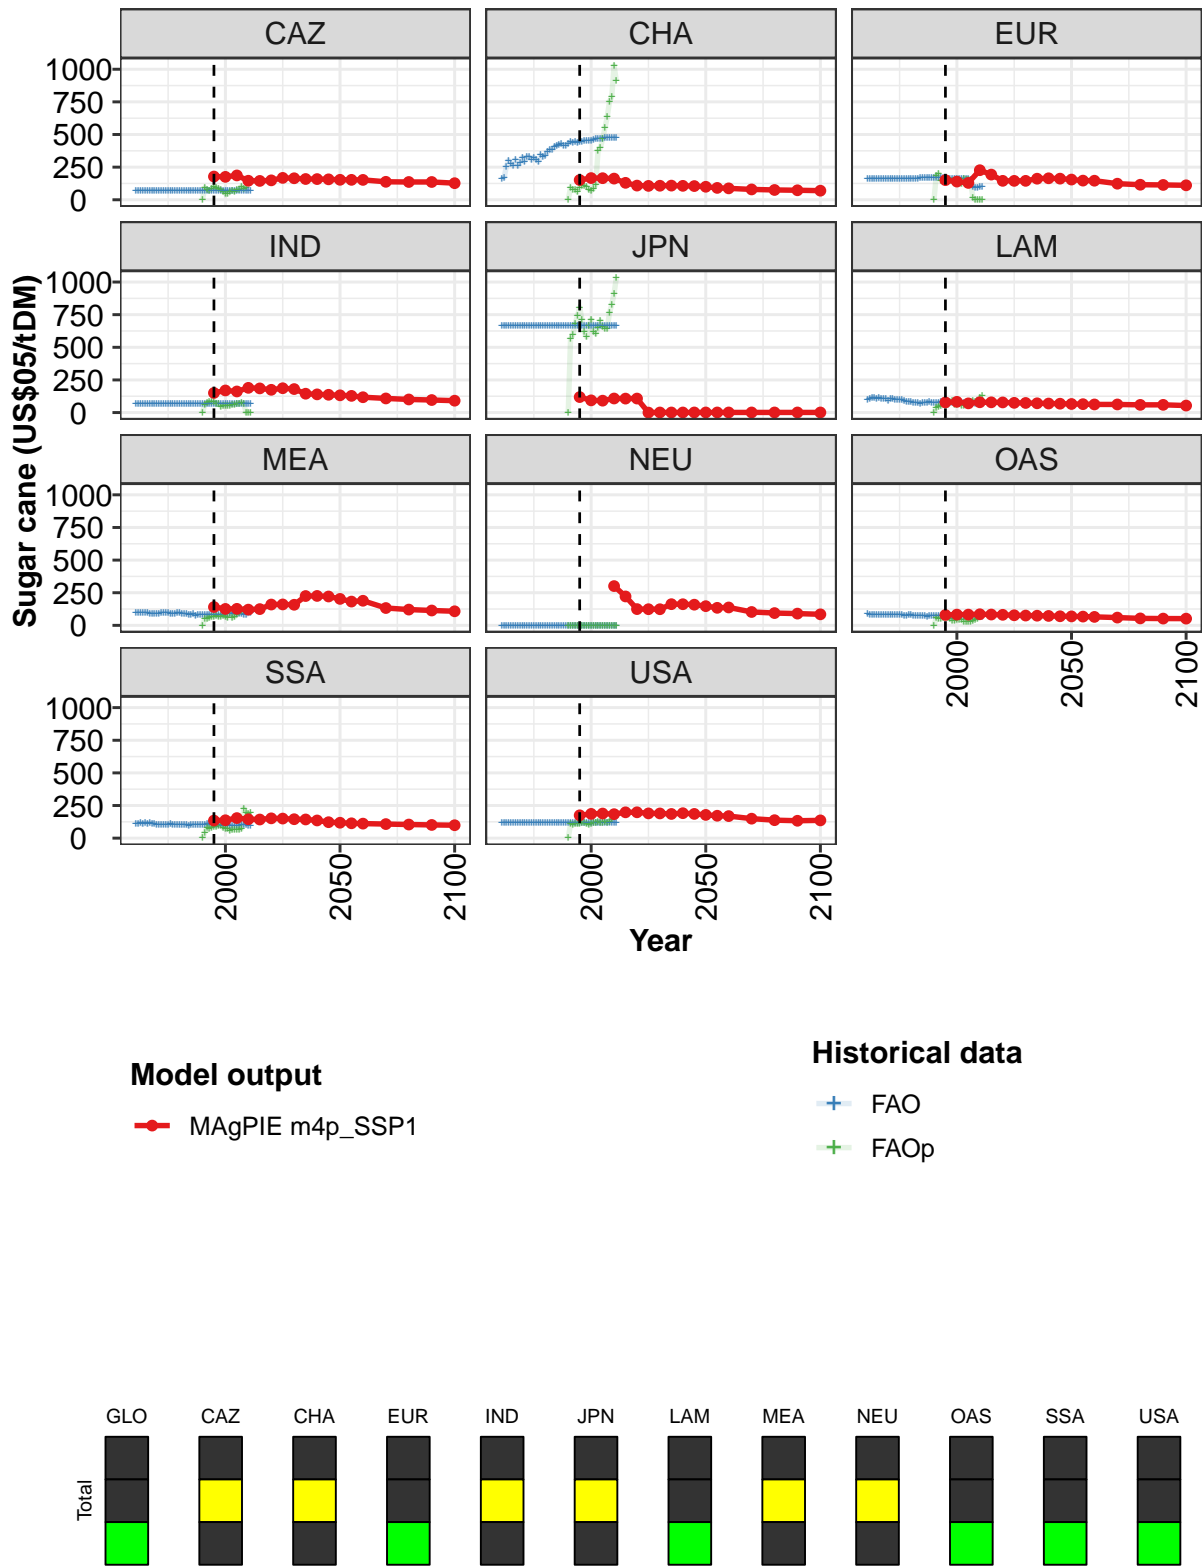

Figure 323: MAgPIE m4p\_SSP1 — Prices—Agriculture—Sugar cane (US\$05/tDM)

|     | 1995 | 2000 | 2005 | 2010 | 2015 | 2020 | 2025 | 2030 | 2035 | 2040 | 2045 |
|-----|------|------|------|------|------|------|------|------|------|------|------|
| GLO | 108  | 117  | 107  | 110  | 108  | 104  | 106  | 105  | 101  | 99   | 94   |
| CAZ | 178  | 176  | 187  | 146  | 145  | 149  | 168  | 165  | 159  | 159  | 157  |
| CHA | 151  | 166  | 165  | 162  | 130  | 109  | 106  | 108  | 109  | 107  | 105  |
| EUR | 150  | 140  | 129  | 227  | 193  | 145  | 145  | 145  | 162  | 165  | 162  |
| IND | 150  | 169  | 162  | 189  | 185  | 174  | 187  | 180  | 144  | 139  | 136  |
| JPN | 119  | 94   | 91   | 108  | 107  | 107  | 0    | 1    | 1    | 1    | 1    |
| LAM | 78   | 82   | 71   | 79   | 78   | 78   | 75   | 74   | 71   | 69   | 68   |
| MEA | 140  | 126  | 127  | 121  | 125  | 160  | 160  | 158  | 225  | 226  | 221  |
| NEU |      |      |      | 301  | 222  | 125  | 124  | 124  | 162  | 162  | 158  |
| OAS | 80   | 83   | 82   | 85   | 83   | 81   | 77   | 75   | 74   | 72   | 70   |
| SSA | 135  | 137  | 154  | 145  | 143  | 152  | 150  | 145  | 143  | 136  | 122  |
| USA | 175  | 186  | 189  | 184  | 198  | 198  | 190  | 189  | 186  | 191  | 186  |

Table 1255: MAgPIE m4p\_SSP1 — Prices—Agriculture—Sugar cane (US\$05/tDM) [PART 1/2]

|     | 2050 | 2055 | 2060 | 2070 | 2080 | 2090 | 2100 |
|-----|------|------|------|------|------|------|------|
| GLO | 91   | 87   | 85   | 79   | 75   | 73   | 69   |
| CAZ | 153  | 153  | 152  | 138  | 136  | 136  | 127  |
| CHA | 100  | 91   | 87   | 79   | 75   | 73   | 70   |
| EUR | 155  | 147  | 146  | 123  | 115  | 114  | 111  |
| IND | 132  | 128  | 118  | 108  | 100  | 96   | 91   |
| JPN | 1    | 1    | 1    | 1    | 1    | 1    | 1    |
| LAM | 66   | 64   | 62   | 62   | 59   | 59   | 54   |
| MEA | 203  | 182  | 189  | 133  | 121  | 114  | 108  |
| NEU | 147  | 135  | 137  | 103  | 94   | 90   | 85   |
| OAS | 69   | 67   | 65   | 60   | 53   | 52   | 52   |
| SSA | 118  | 114  | 111  | 108  | 104  | 101  | 99   |
| USA | 178  | 172  | 169  | 149  | 138  | 133  | 136  |

Table 1256: MAgPIE m4p\_SSP1 — Prices—Agriculture—Sugar cane (US\$05/tDM) [PART 2/2]

|     | 1961 | 1962 | 1963 | 1964 | 1965 | 1966 | 1967 | 1968 | 1969 | 1970 | 1971 |
|-----|------|------|------|------|------|------|------|------|------|------|------|
| GLO | 94   | 97   | 104  | 108  | 104  | 105  | 106  | 103  | 101  | 96   | 100  |
| CAZ | 71   | 71   | 71   | 71   | 71   | 71   | 71   | 71   | 71   | 71   | 71   |
| CHA | 163  | 166  | 255  | 302  | 275  | 263  | 306  | 260  | 281  | 325  | 293  |
| EUR | 162  | 157  | 158  | 158  | 160  | 159  | 159  | 159  | 160  | 159  | 160  |
| IND | 63   | 63   | 63   | 63   | 63   | 63   | 63   | 63   | 63   | 63   | 63   |
| JPN | 667  | 667  | 667  | 667  | 667  | 667  | 667  | 667  | 667  | 667  | 667  |
| LAM | 100  | 107  | 114  | 113  | 106  | 115  | 107  | 107  | 106  | 93   | 104  |
| MEA | 96   | 96   | 96   | 96   | 99   | 97   | 91   | 89   | 91   | 91   | 92   |
| NEU | 0    | 0    | 0    | 0    | 0    | 0    | 0    | 0    | 0    | 0    | 0    |
| OAS | 85   | 84   | 82   | 84   | 82   | 79   | 80   | 83   | 80   | 80   | 81   |
| SSA | 113  | 108  | 114  | 107  | 117  | 107  | 115  | 112  | 111  | 105  | 104  |
| USA | 119  | 119  | 119  | 119  | 119  | 119  | 119  | 119  | 119  | 119  | 119  |

Table 1257: FAO — Prices—Agriculture—Sugar cane (US\$05/tDM) [PART 1/5]

|     | 1972 | 1973 | 1974 | 1975 | 1976 | 1977 | 1978 | 1979 | 1980 | 1981 | 1982 |
|-----|------|------|------|------|------|------|------|------|------|------|------|
| GLO | 106  | 101  | 99   | 98   | 97   | 92   | 93   | 91   | 93   | 92   | 93   |
| CAZ | 71   | 71   | 71   | 71   | 71   | 71   | 71   | 71   | 71   | 71   | 71   |
| CHA | 328  | 326  | 305  | 322  | 309  | 290  | 341  | 328  | 339  | 367  | 385  |
| EUR | 158  | 161  | 158  | 160  | 160  | 159  | 160  | 162  | 163  | 161  | 163  |
| IND | 63   | 63   | 63   | 63   | 63   | 63   | 63   | 63   | 63   | 63   | 63   |
| JPN | 667  | 667  | 667  | 667  | 667  | 667  | 667  | 667  | 667  | 667  | 667  |
| LAM | 108  | 99   | 100  | 97   | 96   | 87   | 85   | 79   | 80   | 76   | 75   |
| MEA | 94   | 95   | 94   | 93   | 89   | 89   | 88   | 97   | 95   | 90   | 89   |
| NEU | 0    | 0    | 0    | 0    | 0    | 0    | 0    | 0    | 0    | 0    | 0    |
| OAS | 81   | 81   | 81   | 83   | 80   | 77   | 77   | 79   | 80   | 77   | 75   |
| SSA | 104  | 105  | 105  | 101  | 108  | 104  | 104  | 104  | 100  | 99   | 104  |
| USA | 119  | 119  | 119  | 119  | 119  | 119  | 119  | 119  | 119  | 119  | 119  |

Table 1258: FAO — Prices—Agriculture—Sugar cane (US\$05/tDM) [PART 2/5]

|     | 1983 | 1984 | 1985 | 1986 | 1987 | 1988 | 1989 | 1990 | 1991 | 1992 | 1993 |
|-----|------|------|------|------|------|------|------|------|------|------|------|
| GLO | 89   | 92   | 97   | 99   | 95   | 97   | 95   | 96   | 100  | 102  | 103  |
| CAZ | 71   | 71   | 71   | 71   | 71   | 71   | 71   | 71   | 71   | 71   | 71   |
| CHA | 383  | 404  | 417  | 423  | 426  | 416  | 417  | 432  | 444  | 440  | 442  |
| EUR | 164  | 165  | 165  | 165  | 165  | 165  | 165  | 166  | 165  | 165  | 165  |
| IND | 63   | 63   | 63   | 63   | 63   | 63   | 63   | 63   | 63   | 63   | 63   |
| JPN | 667  | 667  | 667  | 667  | 667  | 667  | 667  | 667  | 667  | 667  | 667  |
| LAM | 72   | 71   | 73   | 77   | 76   | 79   | 76   | 73   | 74   | 76   | 82   |
| MEA | 85   | 82   | 83   | 85   | 76   | 83   | 83   | 82   | 79   | 82   | 84   |
| NEU | 0    | 0    | 0    | 0    | 0    | 0    | 0    | 0    | 0    | 0    | 0    |
| OAS | 74   | 76   | 73   | 74   | 69   | 72   | 72   | 73   | 72   | 72   | 73   |
| SSA | 99   | 98   | 101  | 99   | 100  | 100  | 99   | 100  | 100  | 108  | 112  |
| USA | 119  | 119  | 119  | 119  | 119  | 119  | 119  | 119  | 119  | 119  | 119  |

Table 1259: FAO — Prices—Agriculture—Sugar cane (US\$05/tDM) [PART 3/5]

|     | 1994 | 1995 | 1996 | 1997 | 1998 | 1999 | 2000 | 2001 | 2002 | 2003 | 2004 |
|-----|------|------|------|------|------|------|------|------|------|------|------|
| GLO | 98   | 97   | 96   | 99   | 102  | 99   | 97   | 100  | 102  | 102  | 101  |
| CAZ | 71   | 71   | 71   | 71   | 71   | 71   | 71   | 71   | 71   | 71   | 71   |
| CHA | 436  | 442  | 446  | 452  | 455  | 455  | 455  | 461  | 464  | 466  | 469  |
| EUR | 165  | 164  | 162  | 163  | 164  | 165  | 164  | 164  | 164  | 164  | 163  |
| IND | 63   | 63   | 63   | 63   | 63   | 63   | 63   | 63   | 63   | 63   | 63   |
| JPN | 667  | 667  | 667  | 667  | 667  | 667  | 667  | 667  | 667  | 667  | 667  |
| LAM | 76   | 76   | 76   | 74   | 77   | 79   | 78   | 79   | 76   | 77   | 75   |
| MEA | 84   | 83   | 81   | 80   | 80   | 83   | 85   | 87   | 88   | 92   | 94   |
| NEU | 0    | 0    | 0    | 0    | 0    | 0    | 0    | 0    | 0    | 0    | 0    |
| OAS | 72   | 69   | 69   | 69   | 69   | 68   | 69   | 69   | 69   | 67   | 68   |
| SSA | 99   | 100  | 101  | 99   | 100  | 95   | 100  | 101  | 97   | 96   | 97   |
| USA | 119  | 119  | 119  | 119  | 119  | 119  | 119  | 119  | 119  | 119  | 119  |

Table 1260: FAO — Prices—Agriculture—Sugar cane (US\$05/tDM) [PART 4/5]



|     | 2005 | 2006 | 2007 | 2008 | 2009 | 2010 | 2011 |
|-----|------|------|------|------|------|------|------|
| GLO | 102  | 101  | 101  | 99   | 97   | 96   | 94   |
| CAZ | 71   | 71   | 71   | 71   | 71   | 71   | 71   |
| CHA | 470  | 472  | 472  | 472  | 473  | 472  | 472  |
| EUR | 161  | 150  | 99   | 94   | 93   | 97   | 98   |
| IND | 63   | 63   | 63   | 63   | 63   | 63   | 63   |
| JPN | 667  | 667  | 667  | 667  | 667  | 667  | 667  |
| LAM | 76   | 75   | 73   | 69   | 67   | 67   | 67   |
| MEA | 92   | 90   | 90   | 81   | 79   | 93   | 96   |
| NEU | 0    | 0    | 0    | 0    | 0    | 0    | 0    |
| OAS | 70   | 70   | 67   | 65   | 67   | 66   | 65   |
| SSA | 98   | 97   | 102  | 103  | 100  | 98   | 97   |
| USA | 119  | 119  | 119  | 119  | 119  | 119  | 119  |

Table 1261: FAO — Prices—Agriculture—Sugar cane (US\$05/tDM) [PART 5/5]

|     | 1990 | 1991 | 1992 | 1993 | 1994 | 1995 | 1996 | 1997 | 1998 | 1999 | 2000 |
|-----|------|------|------|------|------|------|------|------|------|------|------|
| GLO | 0    | 53   | 60   | 62   | 66   | 73   | 69   | 79   | 73   | 59   | 59   |
| CAZ | 0    | 92   | 76   | 71   | 81   | 99   | 93   | 88   | 74   | 65   | 49   |
| CHA | 0    | 92   | 80   | 74   | 61   | 91   | 109  | 108  | 98   | 78   | 69   |
| EUR | 0    | 186  | 198  | 147  | 148  | 169  | 163  | 146  | 146  | 144  | 124  |
| IND | 0    | 61   | 76   | 79   | 80   | 85   | 66   | 69   | 47   | 48   | 49   |
| JPN | 0    | 563  | 597  | 680  | 740  | 805  | 708  | 618  | 579  | 666  | 709  |
| LAM | 0    | 38   | 44   | 49   | 57   | 60   | 61   | 83   | 87   | 62   | 63   |
| MEA | 0    | 47   | 49   | 55   | 62   | 68   | 70   | 67   | 68   | 70   | 69   |
| NEU | 0    | 0    | 0    | 0    | 0    | 0    | 0    | 0    | 0    | 0    | 0    |
| OAS | 0    | 56   | 52   | 51   | 55   | 62   | 59   | 54   | 38   | 38   | 44   |
| SSA | 1    | 43   | 82   | 72   | 80   | 88   | 87   | 96   | 96   | 78   | 72   |
| USA | 0    | 107  | 104  | 107  | 107  | 111  | 115  | 115  | 111  | 104  | 107  |

Table 1262: FAOp — Prices—Agriculture—Sugar cane (US\$05/tDM) [PART 1/3]

|     | 2001 | 2002 | 2003 | 2004 | 2005 | 2006 | 2007 | 2008 | 2009 | 2010 | 2011 |
|-----|------|------|------|------|------|------|------|------|------|------|------|
| GLO | 61   | 60   | 76   | 79   | 93   | 105  | 118  | 130  | 122  | 152  | 150  |
| CAZ | 44   | 62   | 67   | 63   | 74   | 78   | 102  | 81   | 94   | 150  | 145  |
| CHA | 83   | 117  | 373  | 397  | 465  | 549  | 634  | 752  | 793  | 1027 | 912  |
| EUR | 130  | 119  | 160  | 156  | 152  | 130  | 17   | 0    | 0    | 0    | 0    |
| IND | 49   | 53   | 58   | 61   | 64   | 66   | 73   | 69   | 0    | 0    | 0    |
| JPN | 621  | 604  | 649  | 702  | 655  | 644  | 641  | 765  | 828  | 911  | 1034 |
| LAM | 66   | 54   | 56   | 57   | 75   | 86   | 90   | 83   | 86   | 111  | 127  |
| MEA | 57   | 90   | 56   | 65   | 84   | 94   | 102  | 118  | 128  | 131  | 116  |
| NEU | 0    | 0    | 0    | 0    | 0    | 0    | 0    | 0    | 0    | 0    | 0    |
| OAS | 44   | 40   | 28   | 26   | 27   | 29   | 36   | 45   | 53   | 71   | 79   |
| SSA | 71   | 59   | 64   | 65   | 66   | 65   | 71   | 225  | 195  | 183  | 194  |
| USA | 119  | 115  | 122  | 115  | 115  | 126  | 119  | 122  | 141  | 170  | 193  |

Table 1263: FAOp — Prices—Agriculture—Sugar cane (US\$05/tDM) [PART 2/3]

|     | 2005 |
|-----|------|
| GLO | 377  |
| CAZ |      |
| CHA |      |
| EUR |      |
| IND |      |
| JPN |      |
| LAM |      |
| MEA |      |
| NEU |      |
| OAS |      |
| SSA |      |
| USA |      |

Table 1264: IniFoodPrice — Prices—Agriculture—Sugar cane (US\$05/tDM)

36.34 Sunflower

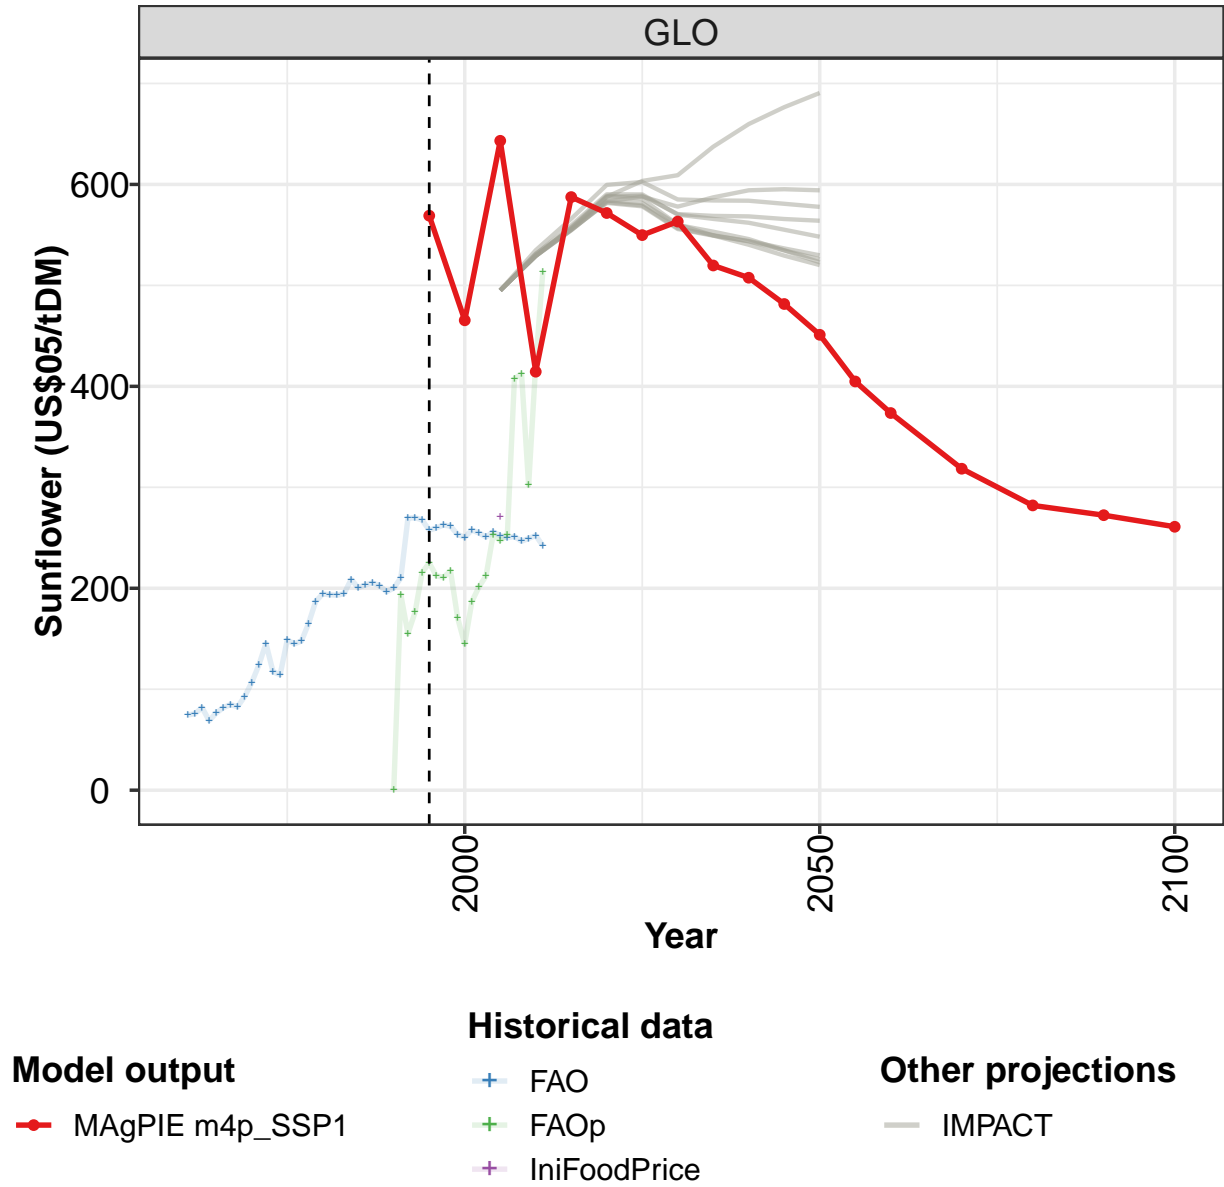

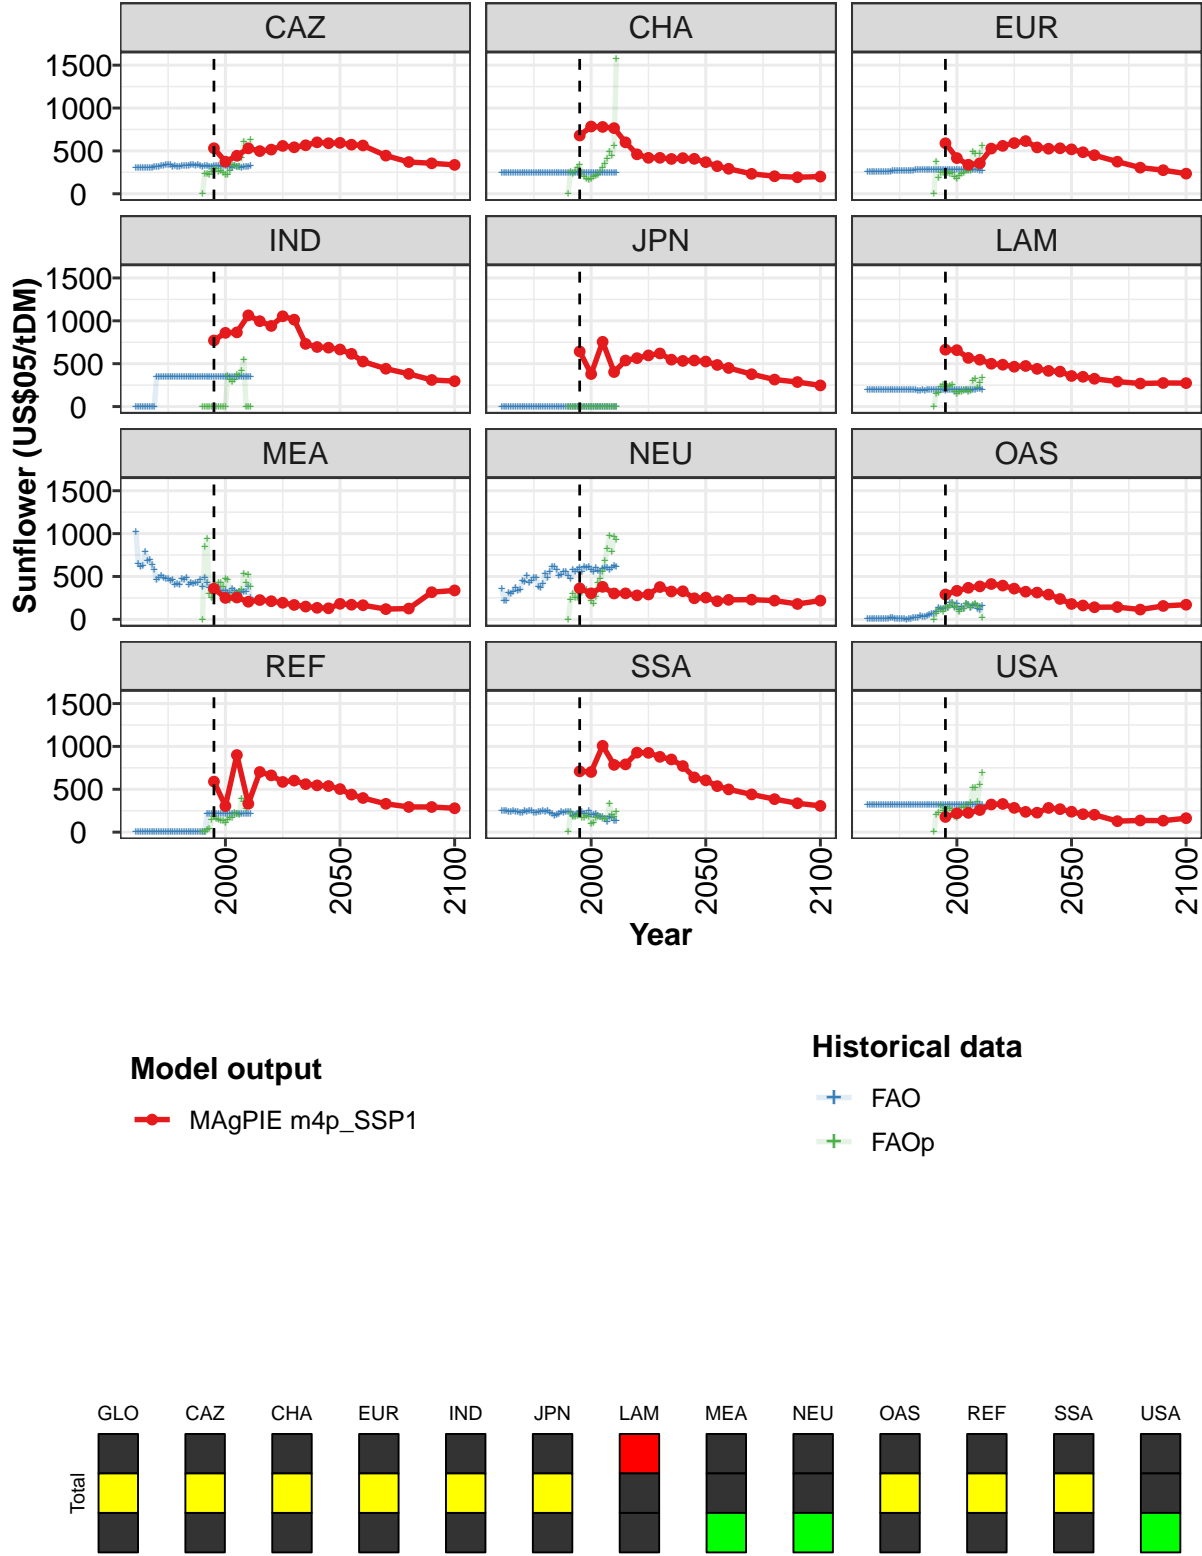

Figure 324: MAGPIE m4p\_SSP1 — Prices—Agriculture—Sunflower (US\$05/tDM)

|     | 1995 | 2000 | 2005 | 2010 | 2015 | 2020 | 2025 | 2030 | 2035 | 2040 | 2045 |
|-----|------|------|------|------|------|------|------|------|------|------|------|
| GLO | 569  | 465  | 643  | 415  | 587  | 572  | 550  | 563  | 520  | 508  | 482  |
| CAZ | 531  | 374  | 444  | 530  | 498  | 515  | 558  | 542  | 566  | 600  | 589  |
| CHA | 680  | 785  | 780  | 766  | 600  | 460  | 419  | 420  | 406  | 416  | 408  |
| EUR | 589  | 416  | 338  | 356  | 527  | 559  | 591  | 615  | 541  | 526  | 531  |
| IND | 771  | 860  | 865  | 1064 | 996  | 940  | 1053 | 1014 | 731  | 695  | 687  |
| JPN | 643  | 379  | 755  | 403  | 537  | 565  | 597  | 620  | 547  | 533  | 538  |
| LAM | 663  | 658  | 567  | 547  | 500  | 488  | 465  | 474  | 440  | 417  | 408  |
| MEA | 359  | 250  | 255  | 206  | 225  | 212  | 194  | 168  | 149  | 135  | 129  |
| NEU | 361  | 304  | 379  | 302  | 304  | 280  | 290  | 377  | 325  | 328  | 246  |
| OAS | 290  | 333  | 368  | 385  | 412  | 394  | 359  | 323  | 313  | 289  | 238  |
| REF | 590  | 304  | 900  | 331  | 702  | 662  | 586  | 601  | 560  | 546  | 538  |
| SSA | 709  | 702  | 1007 | 785  | 791  | 928  | 925  | 879  | 848  | 771  | 639  |
| USA | 177  | 220  | 225  | 258  | 323  | 329  | 283  | 237  | 227  | 283  | 269  |

Table 1265: MAgPIE m4p-SSP1 — Prices—Agriculture—Sunflower (US\$05/tDM) [PART 1/2]

|     | 2050 | 2055 | 2060 | 2070 | 2080 | 2090 | 2100 |
|-----|------|------|------|------|------|------|------|
| GLO | 451  | 405  | 374  | 318  | 282  | 272  | 261  |
| CAZ | 594  | 573  | 563  | 445  | 371  | 355  | 337  |
| CHA | 369  | 322  | 292  | 233  | 205  | 192  | 201  |
| EUR | 518  | 485  | 450  | 374  | 305  | 275  | 235  |
| IND | 665  | 615  | 525  | 441  | 381  | 310  | 296  |
| JPN | 525  | 485  | 450  | 378  | 315  | 286  | 247  |
| LAM | 357  | 347  | 324  | 291  | 269  | 275  | 274  |
| MEA | 181  | 171  | 165  | 120  | 126  | 317  | 338  |
| NEU | 254  | 212  | 227  | 230  | 219  | 179  | 219  |
| OAS | 180  | 162  | 141  | 143  | 114  | 156  | 171  |
| REF | 503  | 438  | 398  | 330  | 294  | 293  | 279  |
| SSA | 605  | 537  | 499  | 440  | 385  | 337  | 306  |
| USA | 238  | 210  | 203  | 128  | 136  | 133  | 163  |

Table 1266: MAgPIE m4p-SSP1 — Prices—Agriculture—Sunflower (US\$05/tDM) [PART 2/2]

|     | 1961 | 1962 | 1963 | 1964 | 1965 | 1966 | 1967 | 1968 | 1969 | 1970 | 1971 |
|-----|------|------|------|------|------|------|------|------|------|------|------|
| GLO | 75   | 76   | 82   | 69   | 76   | 82   | 85   | 83   | 93   | 107  | 124  |
| CAZ | 304  | 303  | 303  | 302  | 302  | 305  | 301  | 307  | 310  | 313  | 317  |
| CHA | 245  | 245  | 245  | 245  | 245  | 245  | 245  | 245  | 245  | 245  | 245  |
| EUR | 256  | 255  | 254  | 254  | 253  | 255  | 254  | 254  | 254  | 261  | 262  |
| IND | 0    | 0    | 0    | 0    | 0    | 0    | 0    | 0    | 0    | 347  | 347  |
| JPN | 0    | 0    | 0    | 0    | 0    | 0    | 0    | 0    | 0    | 0    | 0    |
| LAM | 193  | 192  | 195  | 195  | 192  | 194  | 191  | 191  | 191  | 191  | 195  |
| MEA | 1022 | 649  | 616  | 625  | 783  | 685  | 690  | 632  | 576  | 457  | 486  |
| NEU | 352  | 221  | 221  | 305  | 296  | 325  | 373  | 336  | 347  | 449  | 438  |
| OAS | 4    | 4    | 5    | 5    | 6    | 5    | 6    | 7    | 8    | 10   | 14   |
| REF | 0    | 0    | 0    | 0    | 0    | 0    | 0    | 0    | 0    | 0    | 0    |
| SSA | 244  | 244  | 244  | 236  | 235  | 245  | 243  | 237  | 231  | 227  | 247  |
| USA | 319  | 318  | 319  | 319  | 319  | 319  | 319  | 319  | 319  | 319  | 319  |

Table 1267: FAO — Prices—Agriculture—Sunflower (US\$05/tDM) [PART 1/5]

|     | 1972 | 1973 | 1974 | 1975 | 1976 | 1977 | 1978 | 1979 | 1980 | 1981 | 1982 |
|-----|------|------|------|------|------|------|------|------|------|------|------|
| GLO | 145  | 117  | 114  | 149  | 145  | 148  | 165  | 187  | 194  | 194  | 193  |
| CAZ | 328  | 331  | 341  | 335  | 334  | 320  | 324  | 319  | 319  | 323  | 323  |
| CHA | 245  | 245  | 245  | 245  | 245  | 245  | 245  | 245  | 245  | 245  | 245  |
| EUR | 263  | 263  | 266  | 269  | 266  | 265  | 266  | 267  | 273  | 269  | 276  |
| IND | 347  | 347  | 347  | 347  | 347  | 347  | 347  | 347  | 347  | 347  | 347  |
| JPN | 0    | 0    | 0    | 0    | 0    | 0    | 0    | 0    | 0    | 0    | 0    |
| LAM | 193  | 192  | 190  | 192  | 192  | 191  | 191  | 191  | 191  | 191  | 190  |
| MEA | 511  | 489  | 468  | 468  | 454  | 459  | 407  | 411  | 403  | 468  | 464  |
| NEU | 505  | 432  | 449  | 489  | 483  | 381  | 371  | 410  | 536  | 485  | 560  |
| OAS | 21   | 11   | 5    | 6    | 5    | 4    | 0    | 3    | 4    | 23   | 22   |
| REF | 0    | 0    | 0    | 0    | 0    | 0    | 0    | 0    | 0    | 0    | 0    |
| SSA | 239  | 253  | 250  | 229  | 226  | 241  | 236  | 243  | 232  | 252  | 224  |
| USA | 319  | 319  | 319  | 319  | 319  | 319  | 319  | 319  | 319  | 319  | 319  |

Table 1268: FAO — Prices—Agriculture—Sunflower (US\$05/tDM) [PART 2/5]

|     | 1983 | 1984 | 1985 | 1986 | 1987 | 1988 | 1989 | 1990 | 1991 | 1992 | 1993 |
|-----|------|------|------|------|------|------|------|------|------|------|------|
| GLO | 195  | 209  | 201  | 203  | 205  | 203  | 196  | 200  | 210  | 269  | 270  |
| CAZ | 329  | 329  | 336  | 338  | 332  | 336  | 331  | 316  | 322  | 324  | 315  |
| CHA | 245  | 245  | 245  | 245  | 245  | 245  | 245  | 245  | 245  | 245  | 245  |
| EUR | 277  | 280  | 281  | 278  | 280  | 281  | 279  | 282  | 278  | 280  | 285  |
| IND | 347  | 347  | 347  | 347  | 347  | 347  | 347  | 347  | 347  | 347  | 347  |
| JPN | 0    | 0    | 0    | 0    | 0    | 0    | 0    | 0    | 0    | 0    | 0    |
| LAM | 189  | 190  | 190  | 190  | 192  | 194  | 197  | 197  | 192  | 191  | 192  |
| MEA | 490  | 408  | 431  | 411  | 421  | 424  | 458  | 381  | 490  | 432  | 372  |
| NEU | 618  | 609  | 578  | 511  | 522  | 552  | 559  | 508  | 479  | 579  | 559  |
| OAS | 23   | 36   | 36   | 25   | 42   | 53   | 67   | 66   | 83   | 131  | 125  |
| REF | 0    | 0    | 0    | 0    | 0    | 0    | 0    | 0    | 0    | 212  | 212  |
| SSA | 211  | 194  | 205  | 215  | 236  | 229  | 236  | 233  | 232  | 186  | 204  |
| USA | 319  | 319  | 319  | 319  | 319  | 319  | 319  | 319  | 319  | 319  | 319  |

Table 1269: FAO — Prices—Agriculture—Sunflower (US\$05/tDM) [PART 3/5]

|     | 1994 | 1995 | 1996 | 1997 | 1998 | 1999 | 2000 | 2001 | 2002 | 2003 | 2004 |
|-----|------|------|------|------|------|------|------|------|------|------|------|
| GLO | 268  | 258  | 260  | 263  | 262  | 253  | 250  | 258  | 255  | 251  | 256  |
| CAZ | 319  | 327  | 323  | 330  | 319  | 327  | 325  | 317  | 311  | 304  | 322  |
| CHA | 245  | 245  | 245  | 245  | 245  | 245  | 245  | 245  | 245  | 245  | 245  |
| EUR | 282  | 279  | 283  | 285  | 282  | 279  | 283  | 282  | 279  | 277  | 276  |
| IND | 347  | 347  | 347  | 347  | 347  | 347  | 347  | 347  | 347  | 347  | 347  |
| JPN | 0    | 0    | 0    | 0    | 0    | 0    | 0    | 0    | 0    | 0    | 0    |
| LAM | 190  | 190  | 191  | 190  | 191  | 190  | 191  | 191  | 191  | 191  | 192  |
| MEA | 331  | 351  | 353  | 378  | 333  | 306  | 337  | 311  | 315  | 359  | 332  |
| NEU | 578  | 596  | 553  | 610  | 599  | 611  | 582  | 560  | 600  | 571  | 561  |
| OAS | 119  | 140  | 136  | 192  | 194  | 149  | 181  | 113  | 145  | 123  | 181  |
| REF | 212  | 212  | 211  | 213  | 213  | 214  | 212  | 214  | 213  | 213  | 213  |
| SSA | 213  | 238  | 237  | 213  | 217  | 244  | 201  | 204  | 217  | 188  | 181  |
| USA | 319  | 319  | 319  | 319  | 319  | 319  | 319  | 319  | 319  | 319  | 319  |

Table 1270: FAO — Prices—Agriculture—Sunflower (US\$05/tDM) [PART 4/5]

|     | 2005 | 2006 | 2007 | 2008 | 2009 | 2010 | 2011 |
|-----|------|------|------|------|------|------|------|
| GLO | 252  | 250  | 251  | 247  | 249  | 252  | 242  |
| CAZ | 317  | 315  | 303  | 315  | 313  | 315  | 330  |
| CHA | 245  | 245  | 245  | 245  | 245  | 245  | 245  |
| EUR | 275  | 275  | 281  | 276  | 277  | 272  | 273  |
| IND | 347  | 347  | 347  | 347  | 347  | 347  | 347  |
| JPN | 0    | 0    | 0    | 0    | 0    | 0    | 0    |
| LAM | 192  | 192  | 198  | 198  | 203  | 211  | 198  |
| MEA | 310  | 324  | 308  | 325  | 327  | 378  | 247  |
| NEU | 592  | 603  | 604  | 576  | 600  | 619  | 609  |
| OAS | 165  | 138  | 160  | 165  | 126  | 107  | 161  |
| REF | 213  | 213  | 213  | 212  | 212  | 212  | 212  |
| SSA | 175  | 156  | 121  | 181  | 169  | 131  | 129  |
| USA | 319  | 319  | 319  | 319  | 319  | 319  | 319  |

Table 1271: FAO — Prices—Agriculture—Sunflower (US\$05/tDM) [PART 5/5]

|     | 1990 | 1991 | 1992 | 1993 | 1994 | 1995 | 1996 | 1997 | 1998 | 1999 | 2000 |
|-----|------|------|------|------|------|------|------|------|------|------|------|
| GLO | 0    | 193  | 155  | 176  | 216  | 225  | 212  | 211  | 217  | 171  | 145  |
| CAZ | 0    | 234  | 237  | 220  | 261  | 296  | 297  | 257  | 264  | 243  | 224  |
| CHA | 0    | 262  | 234  | 255  | 306  | 334  | 250  | 200  | 177  | 162  | 170  |
| EUR | 0    | 377  | 181  | 242  | 245  | 260  | 241  | 229  | 249  | 198  | 177  |
| IND | 0    | 0    | 0    | 0    | 0    | 0    | 0    | 0    | 0    | 0    | 0    |
| JPN | 0    | 0    | 0    | 0    | 0    | 0    | 0    | 0    | 0    | 0    | 0    |
| LAM | 0    | 150  | 158  | 235  | 250  | 230  | 230  | 242  | 258  | 173  | 146  |
| MEA | 0    | 852  | 934  | 293  | 254  | 310  | 353  | 421  | 423  | 376  | 470  |
| NEU | 0    | 231  | 303  | 250  | 256  | 322  | 307  | 342  | 344  | 279  | 211  |
| OAS | 0    | 67   | 112  | 107  | 94   | 138  | 129  | 160  | 195  | 139  | 147  |
| REF | 0    | 0    | 26   | 42   | 146  | 183  | 161  | 144  | 138  | 132  | 107  |
| SSA | 0    | 222  | 178  | 182  | 189  | 229  | 172  | 168  | 195  | 184  | 97   |
| USA | 0    | 206  | 231  | 305  | 254  | 273  | 273  | 275  | 252  | 178  | 163  |

Table 1272: FAOp — Prices—Agriculture—Sunflower (US\$05/tDM) [PART 1/3]

|     | 2001 | 2002 | 2003 | 2004 | 2005 | 2006 | 2007 | 2008 | 2009 | 2010 | 2011 |
|-----|------|------|------|------|------|------|------|------|------|------|------|
| GLO | 187  | 201  | 212  | 253  | 247  | 253  | 408  | 412  | 302  | 422  | 514  |
| CAZ | 218  | 274  | 340  | 331  | 314  | 319  | 424  | 610  | 564  | 499  | 627  |
| CHA | 200  | 207  | 217  | 257  | 300  | 349  | 409  | 495  | 441  | 556  | 1575 |
| EUR | 212  | 237  | 240  | 271  | 271  | 273  | 489  | 472  | 317  | 461  | 558  |
| IND | 357  | 311  | 289  | 318  | 366  | 356  | 414  | 547  | 0    | 0    | 0    |
| JPN | 0    | 0    | 0    | 0    | 0    | 0    | 0    | 0    | 0    | 0    | 0    |
| LAM | 175  | 172  | 182  | 196  | 170  | 181  | 302  | 324  | 219  | 274  | 337  |
| MEA | 461  | 222  | 262  | 293  | 286  | 318  | 340  | 528  | 423  | 523  | 381  |
| NEU | 186  | 259  | 424  | 468  | 552  | 680  | 823  | 970  | 784  | 959  | 924  |
| OAS | 83   | 124  | 118  | 178  | 167  | 139  | 171  | 182  | 158  | 150  | 14   |
| REF | 145  | 165  | 169  | 223  | 209  | 198  | 392  | 350  | 272  | 390  | 426  |
| SSA | 111  | 168  | 178  | 185  | 157  | 154  | 151  | 335  | 204  | 183  | 237  |
| USA | 228  | 287  | 287  | 325  | 287  | 344  | 514  | 517  | 358  | 553  | 690  |

Table 1273: FAOp — Prices—Agriculture—Sunflower (US\$05/tDM) [PART 2/3]

|     | 2005 |
|-----|------|
| GLO | 271  |
| CAZ |      |
| CHA |      |
| EUR |      |
| IND |      |
| JPN |      |
| LAM |      |
| MEA |      |
| NEU |      |
| OAS |      |
| REF |      |
| SSA |      |
| USA |      |

Table 1274: IniFoodPrice — Prices—Agriculture—Sunflower (US\$05/tDM)

36.35 Temperate cereals

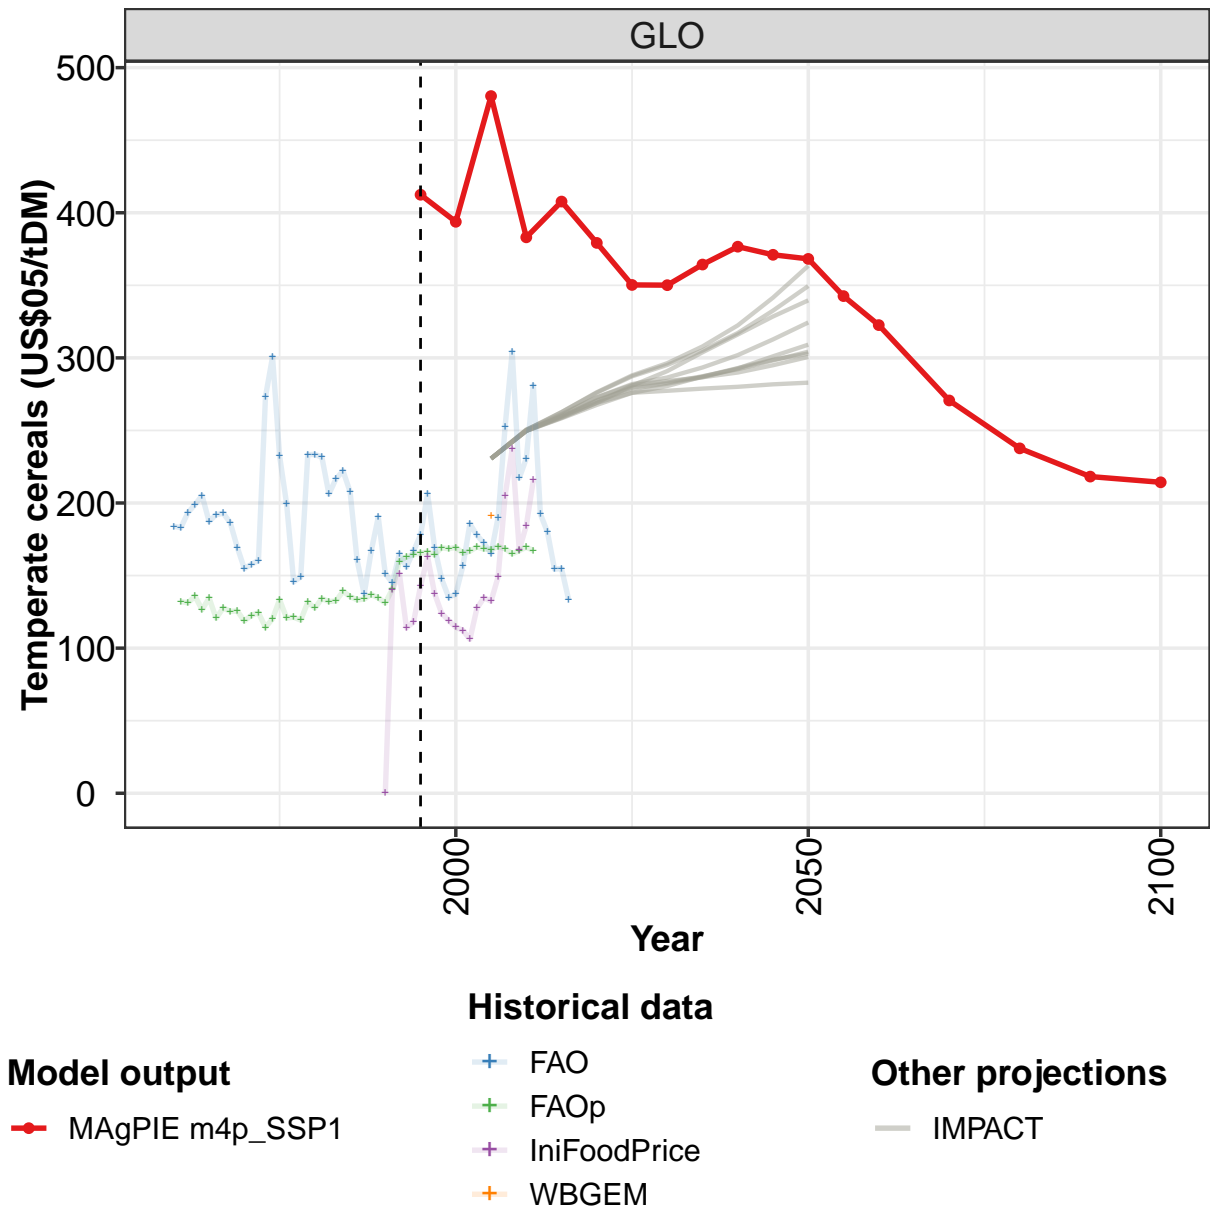



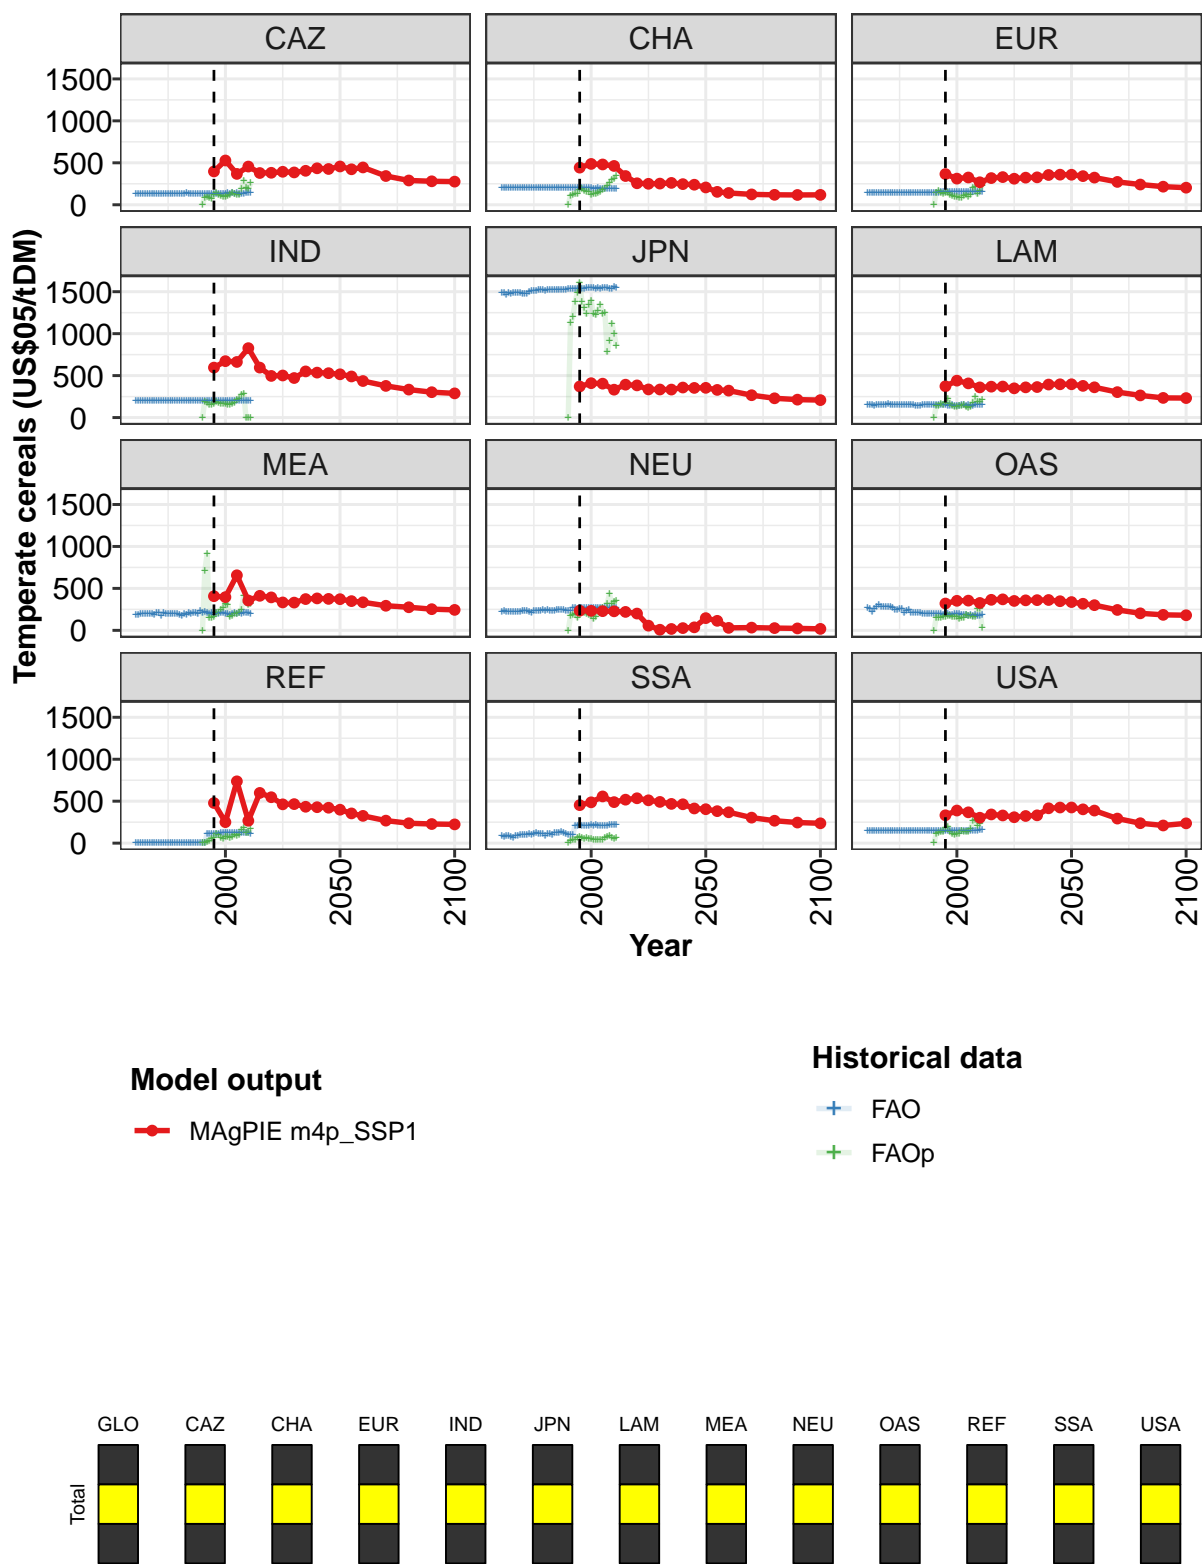

Figure 325: MAgPIE m4p\_SSP1 — Prices—Agriculture—Temperate cereals (US\$05/tDM)

|     | 1995 | 2000 | 2005 | 2010 | 2015 | 2020 | 2025 | 2030 | 2035 | 2040 | 2045 |
|-----|------|------|------|------|------|------|------|------|------|------|------|
| GLO | 412  | 394  | 480  | 383  | 408  | 379  | 350  | 350  | 364  | 377  | 371  |
| CAZ | 397  | 528  | 368  | 456  | 379  | 382  | 393  | 386  | 405  | 435  | 427  |
| CHA | 443  | 487  | 480  | 463  | 343  | 257  | 250  | 253  | 261  | 246  | 239  |
| EUR | 366  | 312  | 325  | 268  | 318  | 330  | 311  | 323  | 327  | 355  | 359  |
| IND | 596  | 672  | 663  | 827  | 596  | 496  | 502  | 471  | 550  | 536  | 529  |
| JPN | 371  | 410  | 404  | 333  | 392  | 384  | 336  | 335  | 334  | 358  | 353  |
| LAM | 373  | 440  | 408  | 360  | 368  | 370  | 348  | 360  | 364  | 394  | 397  |
| MEA | 407  | 396  | 657  | 356  | 412  | 393  | 333  | 331  | 373  | 381  | 375  |
| NEU | 234  | 233  | 229  | 227  | 220  | 200  | 56   | 8    | 17   | 27   | 36   |
| OAS | 320  | 352  | 354  | 327  | 364  | 370  | 351  | 358  | 360  | 362  | 347  |
| REF | 478  | 250  | 737  | 267  | 599  | 548  | 463  | 466  | 434  | 429  | 422  |
| SSA | 453  | 487  | 557  | 489  | 518  | 535  | 511  | 492  | 468  | 463  | 414  |
| USA | 332  | 389  | 367  | 303  | 342  | 330  | 309  | 324  | 332  | 416  | 425  |

Table 1275: MAgPIE m4p\_SSP1 — Prices—Agriculture—Temperate cereals (US\$05/tDM) [PART 1/2]

|     | 2050 | 2055 | 2060 | 2070 | 2080 | 2090 | 2100 |
|-----|------|------|------|------|------|------|------|
| GLO | 368  | 343  | 323  | 271  | 238  | 218  | 214  |
| CAZ | 456  | 423  | 445  | 343  | 290  | 280  | 276  |
| CHA | 207  | 154  | 141  | 124  | 119  | 117  | 118  |
| EUR | 358  | 342  | 324  | 273  | 241  | 216  | 204  |
| IND | 516  | 490  | 436  | 377  | 333  | 302  | 288  |
| JPN | 354  | 330  | 321  | 266  | 230  | 214  | 208  |
| LAM | 397  | 378  | 361  | 303  | 264  | 234  | 232  |
| MEA | 372  | 349  | 335  | 293  | 275  | 253  | 244  |
| NEU | 146  | 114  | 30   | 33   | 27   | 23   | 18   |
| OAS | 338  | 317  | 300  | 244  | 203  | 185  | 180  |
| REF | 399  | 355  | 325  | 268  | 237  | 228  | 224  |
| SSA | 405  | 382  | 368  | 304  | 267  | 246  | 237  |
| USA | 425  | 403  | 388  | 293  | 238  | 211  | 236  |

Table 1276: MAgPIE m4p\_SSP1 — Prices—Agriculture—Temperate cereals (US\$05/tDM) [PART 2/2]

|     | 1960 | 1961 | 1962 | 1963 | 1964 | 1965 | 1966 | 1967 | 1968 | 1969 | 1970 |
|-----|------|------|------|------|------|------|------|------|------|------|------|
| GLO | 184  | 183  | 193  | 199  | 205  | 187  | 192  | 193  | 186  | 169  | 155  |
| CAZ |      |      |      |      |      |      |      |      |      |      |      |
| CHA |      |      |      |      |      |      |      |      |      |      |      |
| EUR |      |      |      |      |      |      |      |      |      |      |      |
| IND |      |      |      |      |      |      |      |      |      |      |      |
| JPN |      |      |      |      |      |      |      |      |      |      |      |
| LAM |      |      |      |      |      |      |      |      |      |      |      |
| MEA |      |      |      |      |      |      |      |      |      |      |      |
| NEU |      |      |      |      |      |      |      |      |      |      |      |
| OAS |      |      |      |      |      |      |      |      |      |      |      |
| REF |      |      |      |      |      |      |      |      |      |      |      |
| SSA |      |      |      |      |      |      |      |      |      |      |      |
| USA |      |      |      |      |      |      |      |      |      |      |      |

Table 1277: WBGEM — Prices—Agriculture—Temperate cereals (US\$05/tDM) [PART 1/6]

|     | 1971 | 1972 | 1973 | 1974 | 1975 | 1976 | 1977 | 1978 | 1979 | 1980 | 1981 |
|-----|------|------|------|------|------|------|------|------|------|------|------|
| GLO | 158  | 160  | 273  | 301  | 232  | 199  | 146  | 149  | 233  | 234  | 232  |
| CAZ |      |      |      |      |      |      |      |      |      |      |      |
| CHA |      |      |      |      |      |      |      |      |      |      |      |
| EUR |      |      |      |      |      |      |      |      |      |      |      |
| IND |      |      |      |      |      |      |      |      |      |      |      |
| JPN |      |      |      |      |      |      |      |      |      |      |      |
| LAM |      |      |      |      |      |      |      |      |      |      |      |
| MEA |      |      |      |      |      |      |      |      |      |      |      |
| NEU |      |      |      |      |      |      |      |      |      |      |      |
| OAS |      |      |      |      |      |      |      |      |      |      |      |
| REF |      |      |      |      |      |      |      |      |      |      |      |
| SSA |      |      |      |      |      |      |      |      |      |      |      |
| USA |      |      |      |      |      |      |      |      |      |      |      |

Table 1278: WBGEM — Prices—Agriculture—Temperate cereals (US\$05/tDM) [PART 2/6]

|     | 1982 | 1983 | 1984 | 1985 | 1986 | 1987 | 1988 | 1989 | 1990 | 1991 | 1992 |
|-----|------|------|------|------|------|------|------|------|------|------|------|
| GLO | 206  | 217  | 222  | 208  | 161  | 137  | 167  | 190  | 151  | 145  | 165  |
| CAZ |      |      |      |      |      |      |      |      |      |      |      |
| CHA |      |      |      |      |      |      |      |      |      |      |      |
| EUR |      |      |      |      |      |      |      |      |      |      |      |
| IND |      |      |      |      |      |      |      |      |      |      |      |
| JPN |      |      |      |      |      |      |      |      |      |      |      |
| LAM |      |      |      |      |      |      |      |      |      |      |      |
| MEA |      |      |      |      |      |      |      |      |      |      |      |
| NEU |      |      |      |      |      |      |      |      |      |      |      |
| OAS |      |      |      |      |      |      |      |      |      |      |      |
| REF |      |      |      |      |      |      |      |      |      |      |      |
| SSA |      |      |      |      |      |      |      |      |      |      |      |
| USA |      |      |      |      |      |      |      |      |      |      |      |

Table 1279: WBGEM — Prices—Agriculture—Temperate cereals (US\$05/tDM) [PART 3/6]

|     | 1993 | 1994 | 1995 | 1996 | 1997 | 1998 | 1999 | 2000 | 2001 | 2002 | 2003 |
|-----|------|------|------|------|------|------|------|------|------|------|------|
| GLO | 156  | 167  | 178  | 206  | 169  | 148  | 135  | 137  | 156  | 186  | 178  |
| CAZ |      |      |      |      |      |      |      |      |      |      |      |
| CHA |      |      |      |      |      |      |      |      |      |      |      |
| EUR |      |      |      |      |      |      |      |      |      |      |      |
| IND |      |      |      |      |      |      |      |      |      |      |      |
| JPN |      |      |      |      |      |      |      |      |      |      |      |
| LAM |      |      |      |      |      |      |      |      |      |      |      |
| MEA |      |      |      |      |      |      |      |      |      |      |      |
| NEU |      |      |      |      |      |      |      |      |      |      |      |
| OAS |      |      |      |      |      |      |      |      |      |      |      |
| REF |      |      |      |      |      |      |      |      |      |      |      |
| SSA |      |      |      |      |      |      |      |      |      |      |      |
| USA |      |      |      |      |      |      |      |      |      |      |      |

Table 1280: WBGEM — Prices—Agriculture—Temperate cereals (US\$05/tDM) [PART 4/6]

|     | 2004 | 2005 | 2006 | 2007 | 2008 | 2009 | 2010 | 2011 | 2012 | 2013 | 2014 |
|-----|------|------|------|------|------|------|------|------|------|------|------|
| GLO | 172  | 165  | 190  | 253  | 304  | 217  | 231  | 281  | 192  | 180  | 154  |
| CAZ |      |      |      |      |      |      |      |      |      |      |      |
| CHA |      |      |      |      |      |      |      |      |      |      |      |
| EUR |      |      |      |      |      |      |      |      |      |      |      |
| IND |      |      |      |      |      |      |      |      |      |      |      |
| JPN |      |      |      |      |      |      |      |      |      |      |      |
| LAM |      |      |      |      |      |      |      |      |      |      |      |
| MEA |      |      |      |      |      |      |      |      |      |      |      |
| NEU |      |      |      |      |      |      |      |      |      |      |      |
| OAS |      |      |      |      |      |      |      |      |      |      |      |
| REF |      |      |      |      |      |      |      |      |      |      |      |
| SSA |      |      |      |      |      |      |      |      |      |      |      |
| USA |      |      |      |      |      |      |      |      |      |      |      |

Table 1281: WBGEM — Prices—Agriculture—Temperate cereals (US\$05/tDM) [PART 5/6]

|     | 2015 | 2016 |
|-----|------|------|
| GLO | 155  | 134  |
| CAZ |      |      |
| CHA |      |      |
| EUR |      |      |
| IND |      |      |
| JPN |      |      |
| LAM |      |      |
| MEA |      |      |
| NEU |      |      |
| OAS |      |      |
| REF |      |      |
| SSA |      |      |
| USA |      |      |

Table 1282: WBGEM — Prices—Agriculture—Temperate cereals (US\$05/tDM) [PART 6/6]

|     | 1961 | 1962 | 1963 | 1964 | 1965 | 1966 | 1967 | 1968 | 1969 | 1970 | 1971 |
|-----|------|------|------|------|------|------|------|------|------|------|------|
| GLO | 132  | 131  | 136  | 126  | 135  | 121  | 128  | 125  | 126  | 119  | 123  |
| CAZ | 136  | 132  | 131  | 134  | 129  | 133  | 131  | 136  | 131  | 129  | 127  |
| CHA | 204  | 201  | 201  | 201  | 201  | 203  | 202  | 202  | 204  | 204  | 203  |
| EUR | 138  | 141  | 140  | 140  | 142  | 141  | 141  | 140  | 140  | 140  | 140  |
| IND | 202  | 202  | 203  | 203  | 203  | 203  | 203  | 203  | 204  | 204  | 204  |
| JPN | 1483 | 1483 | 1467 | 1482 | 1480 | 1483 | 1483 | 1484 | 1487 | 1478 | 1480 |
| LAM | 153  | 155  | 148  | 146  | 154  | 154  | 151  | 155  | 153  | 161  | 156  |
| MEA | 182  | 181  | 193  | 192  | 193  | 198  | 193  | 201  | 190  | 205  | 213  |
| NEU | 222  | 229  | 226  | 225  | 226  | 219  | 221  | 225  | 223  | 231  | 228  |
| OAS | 264  | 252  | 225  | 262  | 277  | 303  | 286  | 283  | 279  | 276  | 278  |
| REF | 0    | 0    | 0    | 0    | 0    | 0    | 0    | 0    | 0    | 0    | 0    |
| SSA | 84   | 75   | 83   | 89   | 76   | 69   | 89   | 93   | 94   | 95   | 96   |
| USA | 145  | 145  | 145  | 146  | 146  | 146  | 147  | 147  | 146  | 146  | 147  |

Table 1283: FAO — Prices—Agriculture—Temperate cereals (US\$05/tDM) [PART 1/5]

|     | 1972 | 1973 | 1974 | 1975 | 1976 | 1977 | 1978 | 1979 | 1980 | 1981 | 1982 |
|-----|------|------|------|------|------|------|------|------|------|------|------|
| GLO | 124  | 114  | 120  | 133  | 121  | 121  | 119  | 132  | 128  | 134  | 132  |
| CAZ | 126  | 132  | 133  | 132  | 130  | 128  | 136  | 137  | 130  | 132  | 126  |
| CHA | 203  | 203  | 203  | 203  | 202  | 201  | 202  | 201  | 201  | 201  | 200  |
| EUR | 140  | 138  | 139  | 141  | 139  | 138  | 139  | 141  | 142  | 141  | 141  |
| IND | 204  | 204  | 204  | 204  | 204  | 204  | 204  | 205  | 205  | 205  | 205  |
| JPN | 1481 | 1499 | 1506 | 1505 | 1508 | 1517 | 1518 | 1518 | 1514 | 1520 | 1522 |
| LAM | 149  | 151  | 155  | 150  | 147  | 156  | 150  | 150  | 151  | 149  | 143  |
| MEA | 179  | 210  | 193  | 202  | 193  | 203  | 195  | 203  | 185  | 177  | 197  |
| NEU | 230  | 221  | 214  | 236  | 232  | 234  | 237  | 243  | 237  | 243  | 239  |
| OAS | 270  | 249  | 243  | 258  | 256  | 210  | 237  | 244  | 212  | 214  | 213  |
| REF | 0    | 0    | 0    | 0    | 0    | 0    | 0    | 0    | 0    | 0    | 0    |
| SSA | 97   | 107  | 104  | 117  | 128  | 112  | 114  | 113  | 91   | 111  | 116  |
| USA | 148  | 148  | 149  | 149  | 150  | 149  | 149  | 150  | 151  | 150  | 151  |

Table 1284: FAO — Prices—Agriculture—Temperate cereals (US\$05/tDM) [PART 2/5]

|     | 1983 | 1984 | 1985 | 1986 | 1987 | 1988 | 1989 | 1990 | 1991 | 1992 | 1993 |
|-----|------|------|------|------|------|------|------|------|------|------|------|
| GLO | 133  | 139  | 136  | 133  | 134  | 137  | 135  | 131  | 141  | 160  | 163  |
| CAZ | 137  | 137  | 133  | 131  | 129  | 134  | 131  | 131  | 129  | 132  | 132  |
| CHA | 200  | 200  | 199  | 198  | 199  | 198  | 198  | 198  | 198  | 199  | 198  |
| EUR | 140  | 142  | 141  | 142  | 142  | 142  | 141  | 140  | 142  | 146  | 153  |
| IND | 205  | 205  | 205  | 205  | 205  | 205  | 205  | 205  | 205  | 205  | 205  |
| JPN | 1520 | 1522 | 1524 | 1526 | 1526 | 1527 | 1528 | 1529 | 1531 | 1533 | 1532 |
| LAM | 145  | 146  | 154  | 155  | 156  | 155  | 154  | 151  | 152  | 150  | 150  |
| MEA | 190  | 214  | 199  | 206  | 212  | 194  | 227  | 205  | 218  | 204  | 194  |
| NEU | 236  | 238  | 242  | 244  | 242  | 240  | 237  | 239  | 238  | 269  | 267  |
| OAS | 215  | 213  | 203  | 199  | 197  | 203  | 202  | 200  | 197  | 198  | 195  |
| REF | 0    | 0    | 0    | 0    | 0    | 0    | 0    | 0    | 0    | 110  | 111  |
| SSA | 97   | 121  | 118  | 124  | 133  | 126  | 107  | 103  | 103  | 104  | 210  |
| USA | 150  | 150  | 150  | 150  | 150  | 152  | 151  | 152  | 151  | 151  | 152  |

Table 1285: FAO — Prices—Agriculture—Temperate cereals (US\$05/tDM) [PART 3/5]

|     | 1994 | 1995 | 1996 | 1997 | 1998 | 1999 | 2000 | 2001 | 2002 | 2003 | 2004 |
|-----|------|------|------|------|------|------|------|------|------|------|------|
| GLO | 165  | 166  | 166  | 164  | 169  | 168  | 169  | 165  | 167  | 170  | 168  |
| CAZ | 128  | 133  | 135  | 134  | 136  | 137  | 136  | 139  | 133  | 139  | 136  |
| CHA | 197  | 197  | 197  | 197  | 197  | 197  | 198  | 196  | 196  | 197  | 196  |
| EUR | 153  | 152  | 153  | 152  | 152  | 152  | 155  | 153  | 154  | 155  | 154  |
| IND | 205  | 205  | 205  | 205  | 205  | 205  | 205  | 205  | 205  | 205  | 205  |
| JPN | 1534 | 1537 | 1540 | 1539 | 1541 | 1541 | 1545 | 1543 | 1540 | 1543 | 1538 |
| LAM | 148  | 149  | 144  | 145  | 147  | 143  | 143  | 145  | 148  | 148  | 146  |
| MEA | 205  | 187  | 204  | 199  | 205  | 208  | 202  | 193  | 189  | 202  | 209  |
| NEU | 263  | 264  | 271  | 264  | 265  | 267  | 270  | 266  | 267  | 271  | 265  |
| OAS | 190  | 195  | 193  | 186  | 187  | 192  | 200  | 202  | 188  | 182  | 190  |
| REF | 111  | 113  | 111  | 112  | 119  | 120  | 122  | 118  | 121  | 127  | 124  |
| SSA | 208  | 219  | 211  | 210  | 210  | 211  | 215  | 212  | 215  | 212  | 212  |
| USA | 152  | 152  | 152  | 152  | 152  | 153  | 152  | 153  | 152  | 153  | 153  |

Table 1286: FAO — Prices—Agriculture—Temperate cereals (US\$05/tDM) [PART 4/5]

|     | 2005 | 2006 | 2007 | 2008 | 2009 | 2010 | 2011 |
|-----|------|------|------|------|------|------|------|
| GLO | 168  | 170  | 168  | 165  | 167  | 170  | 167  |
| CAZ | 138  | 130  | 132  | 136  | 138  | 140  | 142  |
| CHA | 195  | 195  | 196  | 196  | 196  | 195  | 196  |
| EUR | 153  | 155  | 155  | 155  | 153  | 154  | 154  |
| IND | 205  | 205  | 205  | 205  | 205  | 205  | 205  |
| JPN | 1547 | 1550 | 1543 | 1540 | 1536 | 1554 | 1552 |
| LAM | 149  | 145  | 144  | 154  | 153  | 147  | 147  |
| MEA | 199  | 205  | 201  | 214  | 212  | 204  | 201  |
| NEU | 269  | 269  | 269  | 270  | 270  | 271  | 270  |
| OAS | 178  | 180  | 175  | 185  | 172  | 173  | 183  |
| REF | 125  | 128  | 125  | 119  | 123  | 121  | 115  |
| SSA | 211  | 212  | 209  | 219  | 216  | 221  | 223  |
| USA | 153  | 153  | 153  | 153  | 153  | 153  | 153  |

Table 1287: FAO — Prices—Agriculture—Temperate cereals (US\$05/tDM) [PART 5/5]

|     | 1990 | 1991 | 1992 | 1993 | 1994 | 1995 | 1996 | 1997 | 1998 | 1999 | 2000 |
|-----|------|------|------|------|------|------|------|------|------|------|------|
| GLO | 0    | 140  | 151  | 114  | 118  | 143  | 163  | 137  | 124  | 119  | 114  |
| CAZ | 0    | 88   | 91   | 81   | 75   | 120  | 144  | 116  | 106  | 100  | 96   |
| CHA | 0    | 111  | 124  | 128  | 127  | 175  | 190  | 169  | 150  | 152  | 119  |
| EUR | 0    | 149  | 167  | 139  | 131  | 139  | 146  | 118  | 104  | 97   | 91   |
| IND | 0    | 192  | 171  | 153  | 155  | 166  | 185  | 173  | 163  | 168  | 168  |
| JPN | 0    | 1125 | 1198 | 1377 | 1490 | 1609 | 1378 | 1313 | 1231 | 1339 | 1389 |
| LAM | 0    | 136  | 144  | 160  | 154  | 181  | 224  | 163  | 141  | 132  | 134  |
| MEA | 0    | 708  | 908  | 147  | 145  | 161  | 207  | 210  | 241  | 273  | 318  |
| NEU | 0    | 170  | 190  | 192  | 152  | 204  | 244  | 211  | 200  | 183  | 169  |
| OAS | 0    | 151  | 155  | 152  | 156  | 159  | 173  | 174  | 157  | 158  | 163  |
| REF | 0    | 0    | 13   | 28   | 50   | 64   | 112  | 103  | 63   | 57   | 75   |
| SSA | 0    | 33   | 35   | 37   | 65   | 71   | 63   | 50   | 60   | 47   | 48   |
| USA | 0    | 117  | 129  | 131  | 137  | 182  | 192  | 138  | 108  | 103  | 108  |

Table 1288: FAOp — Prices—Agriculture—Temperate cereals (US\$05/tDM) [PART 1/3]

|     | 2001 | 2002 | 2003 | 2004 | 2005 | 2006 | 2007 | 2008 | 2009 | 2010 | 2011 |
|-----|------|------|------|------|------|------|------|------|------|------|------|
| GLO | 112  | 106  | 128  | 135  | 132  | 149  | 205  | 237  | 168  | 184  | 216  |
| CAZ | 106  | 124  | 144  | 129  | 119  | 121  | 189  | 288  | 203  | 185  | 257  |
| CHA | 129  | 127  | 137  | 159  | 179  | 193  | 225  | 260  | 298  | 310  | 346  |
| EUR | 86   | 82   | 106  | 114  | 99   | 122  | 198  | 211  | 125  | 168  | 227  |
| IND | 158  | 158  | 170  | 178  | 214  | 223  | 275  | 282  | 0    | 0    | 0    |
| JPN | 1237 | 1221 | 1274 | 1345 | 1239 | 1249 | 780  | 919  | 1123 | 1004 | 852  |
| LAM | 138  | 142  | 149  | 130  | 119  | 130  | 176  | 247  | 191  | 187  | 209  |
| MEA | 308  | 163  | 175  | 198  | 200  | 209  | 250  | 414  | 335  | 302  | 322  |
| NEU | 136  | 167  | 225  | 251  | 269  | 248  | 321  | 432  | 318  | 341  | 355  |
| OAS | 139  | 145  | 154  | 182  | 176  | 170  | 167  | 161  | 258  | 259  | 29   |
| REF | 75   | 58   | 74   | 96   | 87   | 101  | 154  | 185  | 127  | 128  | 177  |
| SSA | 45   | 42   | 45   | 45   | 41   | 59   | 79   | 91   | 66   | 55   | 59   |
| USA | 115  | 147  | 141  | 139  | 141  | 174  | 263  | 280  | 204  | 233  | 298  |

Table 1289: FAOp — Prices—Agriculture—Temperate cereals (US\$05/tDM) [PART 2/3]

|     | 2005 |
|-----|------|
| GLO | 191  |
| CAZ |      |
| CHA |      |
| EUR |      |
| IND |      |
| JPN |      |
| LAM |      |
| MEA |      |
| NEU |      |
| OAS |      |
| REF |      |
| SSA |      |
| USA |      |

Table 1290: IniFoodPrice — Prices—Agriculture—Temperate cereals (US\$05/tDM)

36.36
Tropical cereals

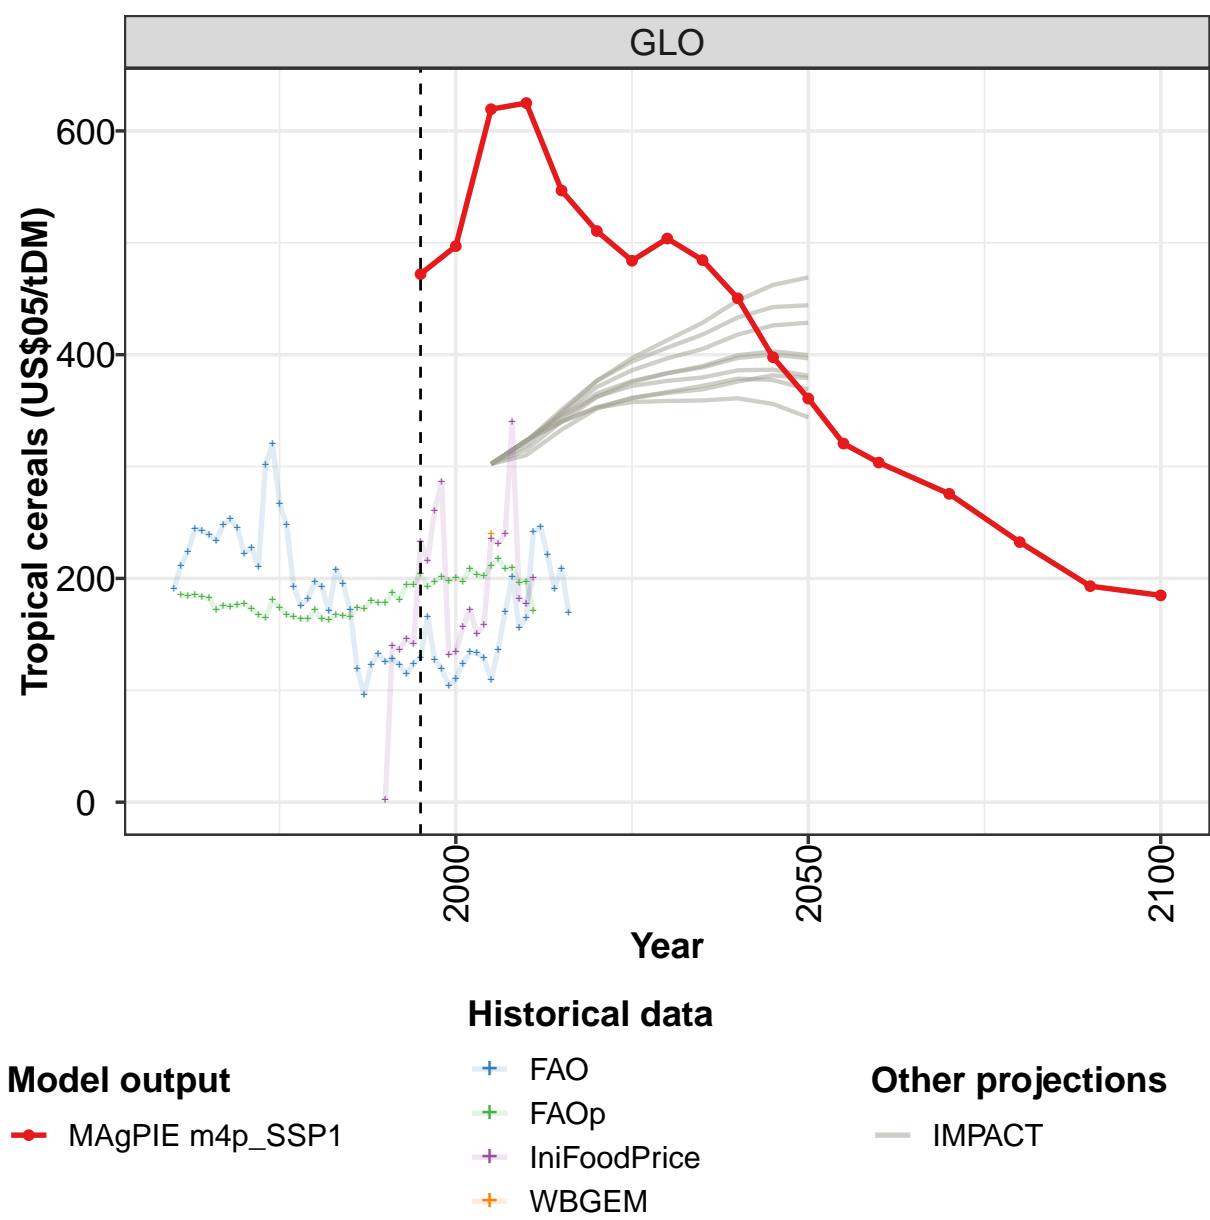



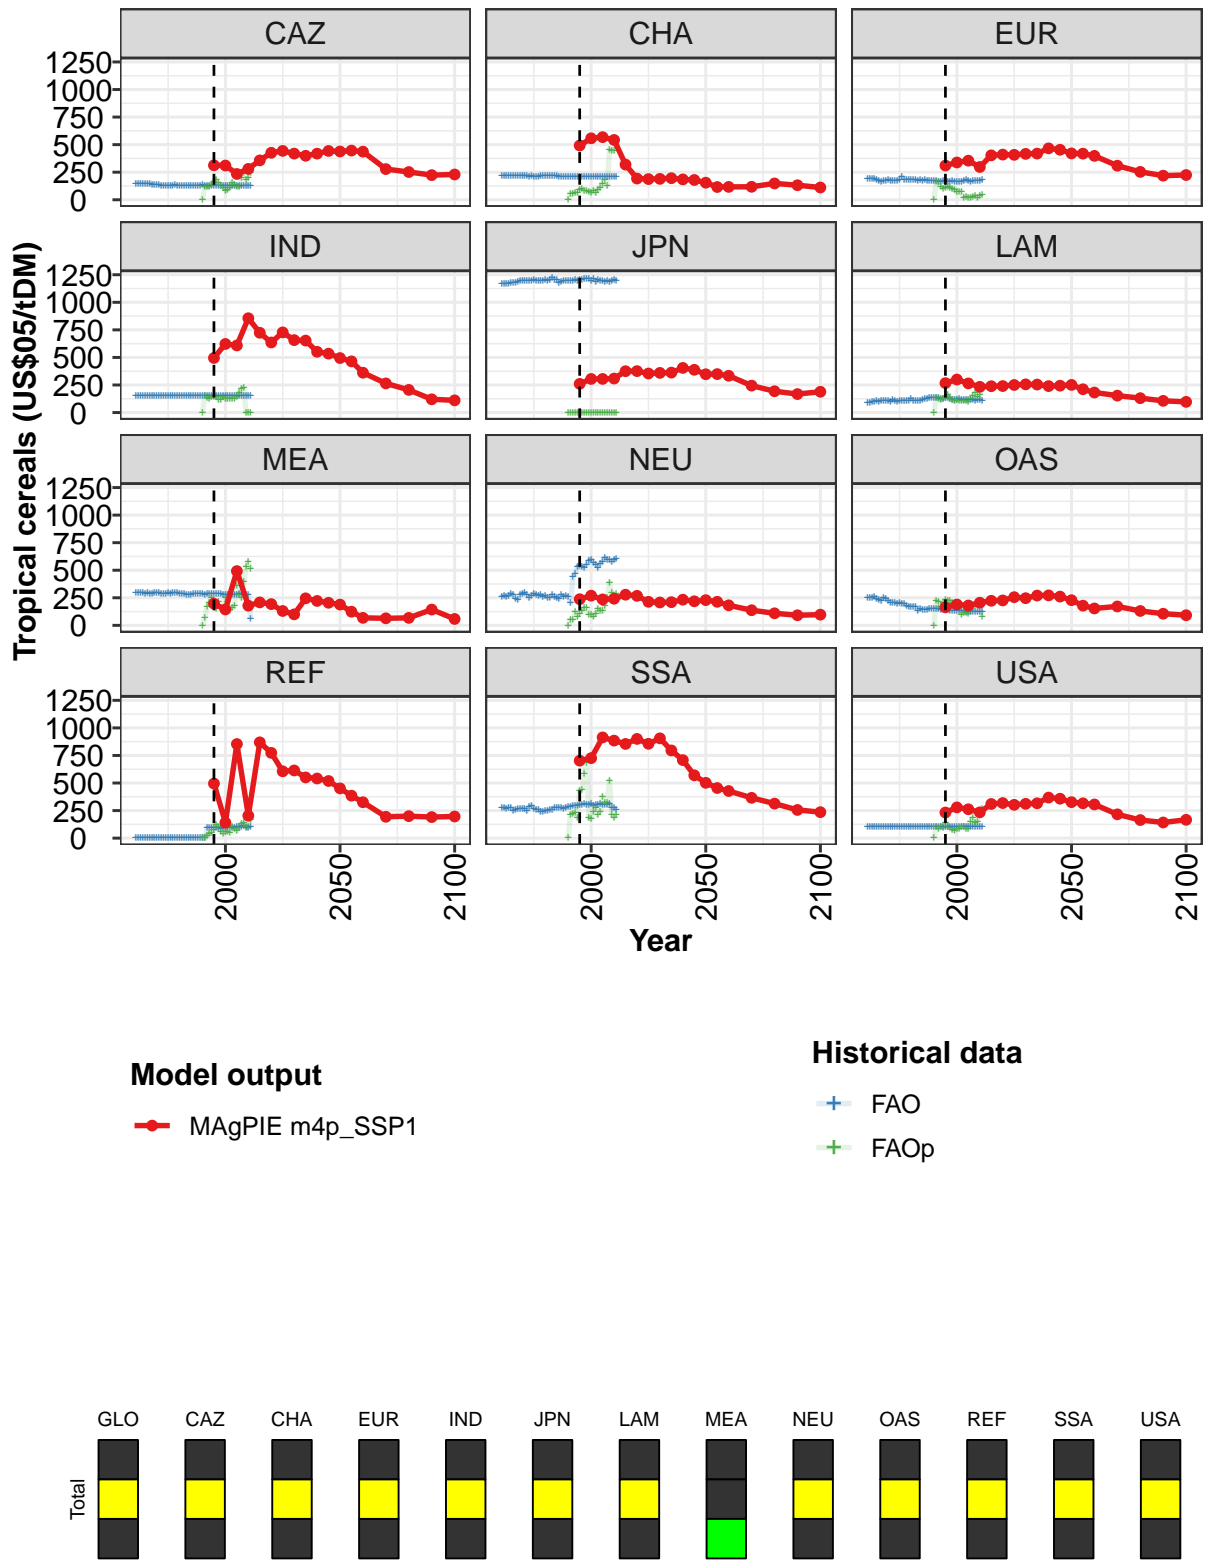

Figure 326: MAGPIE m4p\_SSP1 — Prices—Agriculture—Tropical cereals (US\$05/tDM)

|     | 1995 | 2000 | 2005 | 2010 | 2015 | 2020 | 2025 | 2030 | 2035 | 2040 | 2045 |
|-----|------|------|------|------|------|------|------|------|------|------|------|
| GLO | 472  | 497  | 619  | 625  | 547  | 511  | 484  | 504  | 485  | 450  | 398  |
| CAZ | 313  | 311  | 234  | 280  | 357  | 426  | 444  | 419  | 399  | 419  | 443  |
| CHA | 492  | 558  | 568  | 543  | 319  | 193  | 188  | 190  | 196  | 185  | 180  |
| EUR | 311  | 338  | 355  | 298  | 403  | 410  | 408  | 416  | 419  | 466  | 454  |
| IND | 495  | 623  | 609  | 856  | 724  | 636  | 728  | 657  | 653  | 551  | 534  |
| JPN | 260  | 305  | 305  | 309  | 375  | 376  | 354  | 360  | 362  | 405  | 388  |
| LAM | 267  | 300  | 265  | 234  | 239  | 241  | 250  | 256  | 254  | 240  | 244  |
| MEA | 197  | 144  | 492  | 179  | 208  | 193  | 131  | 100  | 245  | 222  | 205  |
| NEU | 237  | 269  | 236  | 241  | 278  | 268  | 214  | 208  | 210  | 233  | 218  |
| OAS | 163  | 190  | 181  | 205  | 223  | 226  | 256  | 247  | 271  | 272  | 261  |
| REF | 495  | 141  | 854  | 204  | 869  | 774  | 606  | 614  | 551  | 541  | 519  |
| SSA | 703  | 726  | 914  | 885  | 855  | 900  | 856  | 906  | 796  | 708  | 570  |
| USA | 233  | 279  | 262  | 234  | 310  | 318  | 302  | 311  | 316  | 368  | 358  |

Table 1291: MAgPIE m4p\_SSP1 — Prices—Agriculture—Tropical cereals (US\$05/tDM) [PART 1/2]

|     | 2050 | 2055 | 2060 | 2070 | 2080 | 2090 | 2100 |
|-----|------|------|------|------|------|------|------|
| GLO | 361  | 321  | 304  | 276  | 232  | 193  | 185  |
| CAZ | 438  | 447  | 437  | 278  | 252  | 224  | 229  |
| CHA | 155  | 116  | 117  | 118  | 148  | 132  | 111  |
| EUR | 421  | 419  | 398  | 309  | 253  | 219  | 225  |
| IND | 495  | 464  | 362  | 264  | 206  | 120  | 111  |
| JPN | 348  | 349  | 334  | 244  | 193  | 168  | 189  |
| LAM | 251  | 212  | 182  | 154  | 131  | 106  | 97   |
| MEA | 189  | 124  | 68   | 64   | 68   | 143  | 58   |
| NEU | 229  | 214  | 182  | 137  | 110  | 92   | 97   |
| OAS | 228  | 179  | 153  | 172  | 131  | 106  | 92   |
| REF | 452  | 385  | 326  | 194  | 200  | 191  | 197  |
| SSA | 502  | 455  | 428  | 366  | 313  | 256  | 236  |
| USA | 326  | 316  | 306  | 216  | 164  | 142  | 166  |

Table 1292: MAgPIE m4p\_SSP1 — Prices—Agriculture—Tropical cereals (US\$05/tDM) [PART 2/2]

|     | 1960 | 1961 | 1962 | 1963 | 1964 | 1965 | 1966 | 1967 | 1968 | 1969 | 1970 |
|-----|------|------|------|------|------|------|------|------|------|------|------|
| GLO | 190  | 212  | 224  | 244  | 243  | 239  | 234  | 248  | 253  | 246  | 222  |
| CAZ |      |      |      |      |      |      |      |      |      |      |      |
| CHA |      |      |      |      |      |      |      |      |      |      |      |
| EUR |      |      |      |      |      |      |      |      |      |      |      |
| IND |      |      |      |      |      |      |      |      |      |      |      |
| JPN |      |      |      |      |      |      |      |      |      |      |      |
| LAM |      |      |      |      |      |      |      |      |      |      |      |
| MEA |      |      |      |      |      |      |      |      |      |      |      |
| NEU |      |      |      |      |      |      |      |      |      |      |      |
| OAS |      |      |      |      |      |      |      |      |      |      |      |
| REF |      |      |      |      |      |      |      |      |      |      |      |
| SSA |      |      |      |      |      |      |      |      |      |      |      |
| USA |      |      |      |      |      |      |      |      |      |      |      |

Table 1293: WBGEM — Prices—Agriculture—Tropical cereals (US\$05/tDM) [PART 1/6]

|     | 1971 | 1972 | 1973 | 1974 | 1975 | 1976 | 1977 | 1978 | 1979 | 1980 | 1981 |
|-----|------|------|------|------|------|------|------|------|------|------|------|
| GLO | 228  | 210  | 301  | 320  | 267  | 248  | 193  | 176  | 182  | 197  | 193  |
| CAZ |      |      |      |      |      |      |      |      |      |      |      |
| CHA |      |      |      |      |      |      |      |      |      |      |      |
| EUR |      |      |      |      |      |      |      |      |      |      |      |
| IND |      |      |      |      |      |      |      |      |      |      |      |
| JPN |      |      |      |      |      |      |      |      |      |      |      |
| LAM |      |      |      |      |      |      |      |      |      |      |      |
| MEA |      |      |      |      |      |      |      |      |      |      |      |
| NEU |      |      |      |      |      |      |      |      |      |      |      |
| OAS |      |      |      |      |      |      |      |      |      |      |      |
| REF |      |      |      |      |      |      |      |      |      |      |      |
| SSA |      |      |      |      |      |      |      |      |      |      |      |
| USA |      |      |      |      |      |      |      |      |      |      |      |

Table 1294: WBGEM — Prices—Agriculture—Tropical cereals (US\$05/tDM) [PART 2/6]

|     | 1982 | 1983 | 1984 | 1985 | 1986 | 1987 | 1988 | 1989 | 1990 | 1991 | 1992 |
|-----|------|------|------|------|------|------|------|------|------|------|------|
| GLO | 171  | 208  | 195  | 172  | 120  | 96   | 122  | 133  | 125  | 128  | 123  |
| CAZ |      |      |      |      |      |      |      |      |      |      |      |
| CHA |      |      |      |      |      |      |      |      |      |      |      |
| EUR |      |      |      |      |      |      |      |      |      |      |      |
| IND |      |      |      |      |      |      |      |      |      |      |      |
| JPN |      |      |      |      |      |      |      |      |      |      |      |
| LAM |      |      |      |      |      |      |      |      |      |      |      |
| MEA |      |      |      |      |      |      |      |      |      |      |      |
| NEU |      |      |      |      |      |      |      |      |      |      |      |
| OAS |      |      |      |      |      |      |      |      |      |      |      |
| REF |      |      |      |      |      |      |      |      |      |      |      |
| SSA |      |      |      |      |      |      |      |      |      |      |      |
| USA |      |      |      |      |      |      |      |      |      |      |      |

Table 1295: WBGEM — Prices—Agriculture—Tropical cereals (US\$05/tDM) [PART 3/6]

|     | 1993 | 1994 | 1995 | 1996 | 1997 | 1998 | 1999 | 2000 | 2001 | 2002 | 2003 |
|-----|------|------|------|------|------|------|------|------|------|------|------|
| GLO | 114  | 124  | 129  | 166  | 127  | 119  | 104  | 110  | 124  | 134  | 133  |
| CAZ |      |      |      |      |      |      |      |      |      |      |      |
| CHA |      |      |      |      |      |      |      |      |      |      |      |
| EUR |      |      |      |      |      |      |      |      |      |      |      |
| IND |      |      |      |      |      |      |      |      |      |      |      |
| JPN |      |      |      |      |      |      |      |      |      |      |      |
| LAM |      |      |      |      |      |      |      |      |      |      |      |
| MEA |      |      |      |      |      |      |      |      |      |      |      |
| NEU |      |      |      |      |      |      |      |      |      |      |      |
| OAS |      |      |      |      |      |      |      |      |      |      |      |
| REF |      |      |      |      |      |      |      |      |      |      |      |
| SSA |      |      |      |      |      |      |      |      |      |      |      |
| USA |      |      |      |      |      |      |      |      |      |      |      |

Table 1296: WBGEM — Prices—Agriculture—Tropical cereals (US\$05/tDM) [PART 4/6]

|     | 2004 | 2005 | 2006 | 2007 | 2008 | 2009 | 2010 | 2011 | 2012 | 2013 | 2014 |
|-----|------|------|------|------|------|------|------|------|------|------|------|
| GLO | 129  | 109  | 136  | 170  | 201  | 156  | 165  | 241  | 246  | 221  | 191  |
| CAZ |      |      |      |      |      |      |      |      |      |      |      |
| CHA |      |      |      |      |      |      |      |      |      |      |      |
| EUR |      |      |      |      |      |      |      |      |      |      |      |
| IND |      |      |      |      |      |      |      |      |      |      |      |
| JPN |      |      |      |      |      |      |      |      |      |      |      |
| LAM |      |      |      |      |      |      |      |      |      |      |      |
| MEA |      |      |      |      |      |      |      |      |      |      |      |
| NEU |      |      |      |      |      |      |      |      |      |      |      |
| OAS |      |      |      |      |      |      |      |      |      |      |      |
| REF |      |      |      |      |      |      |      |      |      |      |      |
| SSA |      |      |      |      |      |      |      |      |      |      |      |
| USA |      |      |      |      |      |      |      |      |      |      |      |

Table 1297: WBGEM — Prices—Agriculture—Tropical cereals (US\$05/tDM) [PART 5/6]

|     | 2015 | 2016 |
|-----|------|------|
| GLO | 209  | 170  |
| CAZ |      |      |
| CHA |      |      |
| EUR |      |      |
| IND |      |      |
| JPN |      |      |
| LAM |      |      |
| MEA |      |      |
| NEU |      |      |
| OAS |      |      |
| REF |      |      |
| SSA |      |      |
| USA |      |      |

Table 1298: WBGEM — Prices—Agriculture—Tropical cereals (US\$05/tDM) [PART 6/6]

|     | 1961 | 1962 | 1963 | 1964 | 1965 | 1966 | 1967 | 1968 | 1969 | 1970 | 1971 |
|-----|------|------|------|------|------|------|------|------|------|------|------|
| GLO | 185  | 184  | 185  | 183  | 182  | 172  | 175  | 175  | 176  | 178  | 173  |
| CAZ | 146  | 148  | 147  | 145  | 145  | 143  | 141  | 137  | 136  | 135  | 132  |
| CHA | 217  | 214  | 215  | 215  | 214  | 216  | 216  | 216  | 216  | 217  | 216  |
| EUR | 194  | 194  | 187  | 193  | 181  | 170  | 166  | 171  | 175  | 180  | 174  |
| IND | 153  | 154  | 153  | 153  | 153  | 153  | 153  | 154  | 153  | 151  | 152  |
| JPN | 1171 | 1169 | 1172 | 1172 | 1175 | 1181 | 1177 | 1186 | 1198 | 1198 | 1198 |
| LAM | 89   | 89   | 94   | 96   | 105  | 101  | 110  | 111  | 108  | 103  | 101  |
| MEA | 291  | 294  | 295  | 293  | 290  | 293  | 287  | 291  | 293  | 293  | 294  |
| NEU | 257  | 272  | 259  | 270  | 285  | 279  | 245  | 234  | 281  | 285  | 292  |
| OAS | 247  | 248  | 251  | 258  | 241  | 233  | 221  | 251  | 239  | 220  | 208  |
| REF | 0    | 0    | 0    | 0    | 0    | 0    | 0    | 0    | 0    | 0    | 0    |
| SSA | 275  | 278  | 271  | 274  | 275  | 252  | 258  | 264  | 267  | 269  | 266  |
| USA | 104  | 104  | 104  | 104  | 104  | 104  | 104  | 104  | 104  | 104  | 104  |

Table 1299: FAO — Prices—Agriculture—Tropical cereals (US\$05/tDM) [PART 1/5]

|     | 1972 | 1973 | 1974 | 1975 | 1976 | 1977 | 1978 | 1979 | 1980 | 1981 | 1982 |
|-----|------|------|------|------|------|------|------|------|------|------|------|
| GLO | 167  | 165  | 181  | 174  | 168  | 166  | 163  | 164  | 172  | 164  | 163  |
| CAZ | 128  | 129  | 130  | 128  | 128  | 128  | 132  | 130  | 127  | 128  | 129  |
| CHA | 214  | 213  | 214  | 212  | 210  | 213  | 213  | 213  | 213  | 214  | 215  |
| EUR | 174  | 174  | 174  | 184  | 208  | 178  | 184  | 181  | 180  | 177  | 177  |
| IND | 152  | 152  | 154  | 152  | 153  | 154  | 153  | 154  | 153  | 153  | 154  |
| JPN | 1199 | 1198 | 1199 | 1200 | 1200 | 1198 | 1198 | 1198 | 1201 | 1199 | 1201 |
| LAM | 112  | 103  | 100  | 108  | 108  | 105  | 106  | 109  | 122  | 110  | 106  |
| MEA | 285  | 285  | 288  | 295  | 291  | 291  | 291  | 294  | 289  | 288  | 287  |
| NEU | 281  | 249  | 272  | 287  | 282  | 267  | 274  | 256  | 270  | 254  | 253  |
| OAS | 207  | 209  | 198  | 201  | 198  | 196  | 180  | 171  | 166  | 171  | 167  |
| REF | 0    | 0    | 0    | 0    | 0    | 0    | 0    | 0    | 0    | 0    | 0    |
| SSA | 246  | 284  | 295  | 269  | 257  | 260  | 239  | 242  | 244  | 249  | 257  |
| USA | 104  | 104  | 104  | 104  | 104  | 104  | 104  | 104  | 104  | 104  | 104  |

Table 1300: FAO — Prices—Agriculture—Tropical cereals (US\$05/tDM) [PART 2/5]

|     | 1983 | 1984 | 1985 | 1986 | 1987 | 1988 | 1989 | 1990 | 1991 | 1992 | 1993 |
|-----|------|------|------|------|------|------|------|------|------|------|------|
| GLO | 168  | 167  | 166  | 174  | 173  | 180  | 178  | 178  | 187  | 181  | 195  |
| CAZ | 130  | 128  | 127  | 128  | 129  | 130  | 127  | 132  | 129  | 129  | 129  |
| CHA | 214  | 214  | 215  | 212  | 211  | 210  | 212  | 211  | 209  | 209  | 210  |
| EUR | 176  | 178  | 174  | 177  | 176  | 174  | 174  | 169  | 169  | 164  | 165  |
| IND | 153  | 153  | 154  | 153  | 155  | 152  | 153  | 153  | 153  | 153  | 154  |
| JPN | 1225 | 1201 | 1202 | 1176 | 1190 | 1199 | 1196 | 1198 | 1193 | 1195 | 1201 |
| LAM | 107  | 110  | 115  | 123  | 129  | 130  | 138  | 134  | 133  | 130  | 122  |
| MEA | 278  | 278  | 279  | 282  | 287  | 285  | 290  | 286  | 277  | 282  | 282  |
| NEU | 275  | 255  | 253  | 239  | 274  | 261  | 265  | 256  | 202  | 439  | 467  |
| OAS | 136  | 150  | 140  | 139  | 143  | 152  | 153  | 154  | 151  | 148  | 144  |
| REF | 0    | 0    | 0    | 0    | 0    | 0    | 0    | 0    | 0    | 95   | 93   |
| SSA | 255  | 279  | 272  | 278  | 279  | 271  | 280  | 282  | 281  | 293  | 296  |
| USA | 104  | 104  | 104  | 104  | 104  | 104  | 104  | 104  | 104  | 104  | 104  |

Table 1301: FAO — Prices—Agriculture—Tropical cereals (US\$05/tDM) [PART 3/5]

|     | 1994 | 1995 | 1996 | 1997 | 1998 | 1999 | 2000 | 2001 | 2002 | 2003 | 2004 |
|-----|------|------|------|------|------|------|------|------|------|------|------|
| GLO | 195  | 204  | 193  | 197  | 201  | 197  | 201  | 197  | 209  | 204  | 202  |
| CAZ | 130  | 130  | 127  | 128  | 129  | 128  | 129  | 129  | 129  | 128  | 128  |
| CHA | 207  | 208  | 209  | 208  | 211  | 211  | 212  | 211  | 210  | 210  | 212  |
| EUR | 172  | 169  | 167  | 166  | 169  | 168  | 166  | 166  | 165  | 169  | 177  |
| IND | 152  | 153  | 153  | 151  | 152  | 153  | 151  | 151  | 153  | 150  | 151  |
| JPN | 1194 | 1205 | 1200 | 1212 | 1212 | 1212 | 1198 | 1212 | 1182 | 1201 | 1198 |
| LAM | 129  | 134  | 131  | 125  | 118  | 118  | 118  | 121  | 119  | 116  | 116  |
| MEA | 289  | 286  | 282  | 285  | 283  | 282  | 281  | 281  | 280  | 278  | 275  |
| NEU | 529  | 542  | 529  | 523  | 548  | 587  | 599  | 570  | 551  | 526  | 558  |
| OAS | 156  | 152  | 150  | 135  | 136  | 129  | 135  | 131  | 128  | 129  | 126  |
| REF | 93   | 91   | 92   | 91   | 88   | 94   | 98   | 95   | 99   | 95   | 95   |
| SSA | 291  | 302  | 299  | 307  | 304  | 304  | 311  | 295  | 301  | 303  | 307  |
| USA | 104  | 104  | 104  | 104  | 104  | 105  | 104  | 105  | 104  | 105  | 105  |

Table 1302: FAO — Prices—Agriculture—Tropical cereals (US\$05/tDM) [PART 4/5]

|     | 2005 | 2006 | 2007 | 2008 | 2009 | 2010 | 2011 |
|-----|------|------|------|------|------|------|------|
| GLO | 211  | 218  | 209  | 210  | 196  | 197  | 171  |
| CAZ | 126  | 127  | 129  | 126  | 127  | 128  | 128  |
| CHA | 211  | 211  | 213  | 211  | 212  | 210  | 212  |
| EUR | 169  | 167  | 168  | 176  | 172  | 176  | 181  |
| IND | 151  | 151  | 150  | 151  | 152  | 150  | 150  |
| JPN | 1192 | 1184 | 1194 | 1182 | 1191 | 1207 | 1191 |
| LAM | 112  | 114  | 112  | 109  | 112  | 112  | 106  |
| MEA | 280  | 283  | 283  | 280  | 275  | 276  | 60   |
| NEU | 577  | 610  | 592  | 592  | 575  | 593  | 607  |
| OAS | 120  | 124  | 128  | 123  | 124  | 126  | 122  |
| REF | 100  | 100  | 105  | 109  | 93   | 95   | 102  |
| SSA | 303  | 304  | 303  | 308  | 273  | 274  | 260  |
| USA | 105  | 105  | 105  | 105  | 104  | 105  | 105  |

Table 1303: FAO — Prices—Agriculture—Tropical cereals (US\$05/tDM) [PART 5/5]

|     | 1990 | 1991 | 1992 | 1993 | 1994 | 1995 | 1996 | 1997 | 1998 | 1999 | 2000 |
|-----|------|------|------|------|------|------|------|------|------|------|------|
| GLO | 2    | 139  | 136  | 146  | 141  | 233  | 216  | 260  | 286  | 132  | 134  |
| CAZ | 0    | 119  | 118  | 121  | 139  | 165  | 181  | 155  | 125  | 113  | 83   |
| CHA | 0    | 56   | 57   | 66   | 64   | 92   | 98   | 77   | 78   | 70   | 67   |
| EUR | 0    | 167  | 159  | 119  | 101  | 104  | 117  | 110  | 97   | 88   | 70   |
| IND | 0    | 155  | 134  | 129  | 141  | 147  | 143  | 115  | 117  | 146  | 122  |
| JPN | 0    | 0    | 0    | 0    | 0    | 0    | 0    | 0    | 0    | 0    | 0    |
| LAM | 0    | 137  | 128  | 112  | 123  | 136  | 162  | 126  | 115  | 104  | 112  |
| MEA | 0    | 66   | 172  | 204  | 251  | 178  | 147  | 210  | 153  | 137  | 249  |
| NEU | 0    | 49   | 53   | 121  | 79   | 106  | 130  | 156  | 155  | 100  | 96   |
| OAS | 0    | 221  | 213  | 165  | 205  | 229  | 222  | 219  | 203  | 171  | 193  |
| REF | 0    | 0    | 21   | 37   | 47   | 80   | 120  | 101  | 60   | 43   | 60   |
| SSA | 7    | 210  | 223  | 230  | 186  | 426  | 441  | 586  | 682  | 184  | 173  |
| USA | 0    | 100  | 83   | 102  | 94   | 140  | 103  | 97   | 73   | 71   | 86   |

Table 1304: FAOp — Prices—Agriculture—Tropical cereals (US\$05/tDM) [PART 1/3]

|     | 2001 | 2002 | 2003 | 2004 | 2005 | 2006 | 2007 | 2008 | 2009 | 2010 | 2011 |
|-----|------|------|------|------|------|------|------|------|------|------|------|
| GLO | 157  | 172  | 150  | 158  | 235  | 231  | 240  | 340  | 182  | 177  | 201  |
| CAZ | 89   | 110  | 157  | 138  | 119  | 120  | 197  | 244  | 182  | 200  | 244  |
| CHA | 84   | 63   | 90   | 112  | 147  | 180  | 126  | 458  | 447  | 446  | 498  |
| EUR | 73   | 76   | 22   | 24   | 20   | 17   | 32   | 33   | 22   | 34   | 44   |
| IND | 123  | 129  | 128  | 128  | 147  | 178  | 213  | 222  | 0    | 0    | 0    |
| JPN | 0    | 0    | 0    | 0    | 0    | 0    | 0    | 0    | 0    | 0    | 0    |
| LAM | 107  | 110  | 107  | 106  | 95   | 123  | 154  | 175  | 142  | 159  | 223  |
| MEA | 217  | 146  | 157  | 176  | 357  | 273  | 248  | 395  | 530  | 574  | 514  |
| NEU | 81   | 108  | 152  | 134  | 134  | 178  | 249  | 389  | 293  | 266  | 284  |
| OAS | 172  | 99   | 114  | 113  | 108  | 139  | 168  | 175  | 184  | 202  | 82   |
| REF | 59   | 52   | 100  | 86   | 64   | 91   | 134  | 138  | 103  | 105  | 168  |
| SSA | 241  | 273  | 211  | 240  | 376  | 320  | 323  | 522  | 210  | 189  | 209  |
| USA | 87   | 105  | 108  | 81   | 85   | 149  | 183  | 143  | 144  | 225  | 269  |

Table 1305: FAOp — Prices—Agriculture—Tropical cereals (US\$05/tDM) [PART 2/3]

|     | 2005 |
|-----|------|
| GLO | 240  |
| CAZ |      |
| CHA |      |
| EUR |      |
| IND |      |
| JPN |      |
| LAM |      |
| MEA |      |
| NEU |      |
| OAS |      |
| REF |      |
| SSA |      |
| USA |      |

Table 1306: IniFoodPrice — Prices—Agriculture—Tropical cereals (US\$05/tDM)

36.37 Tropical roots

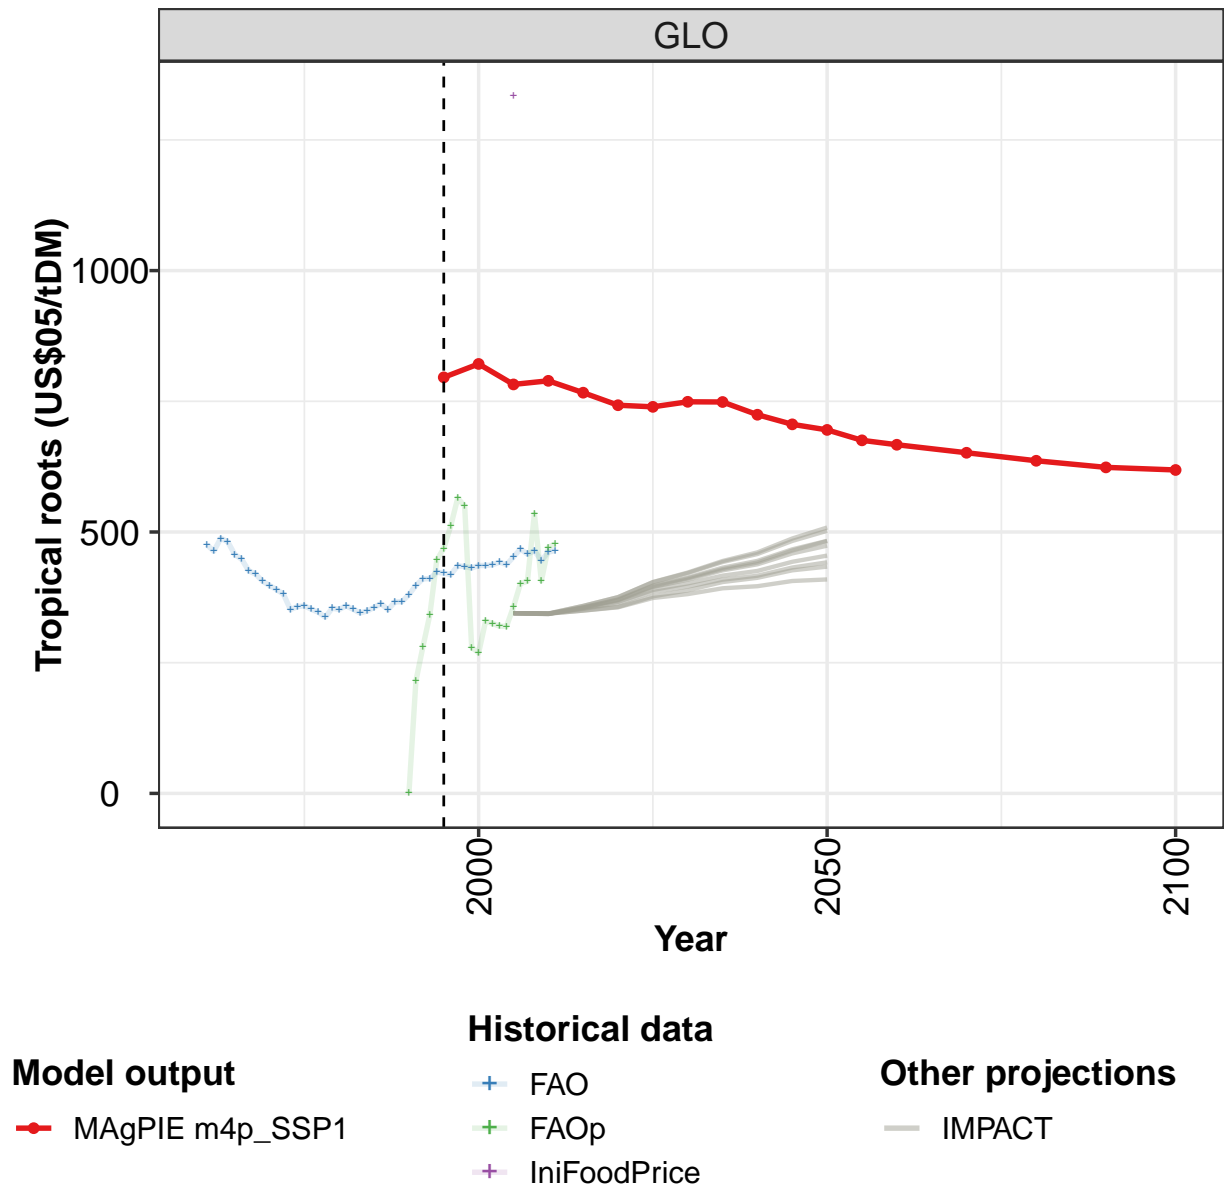



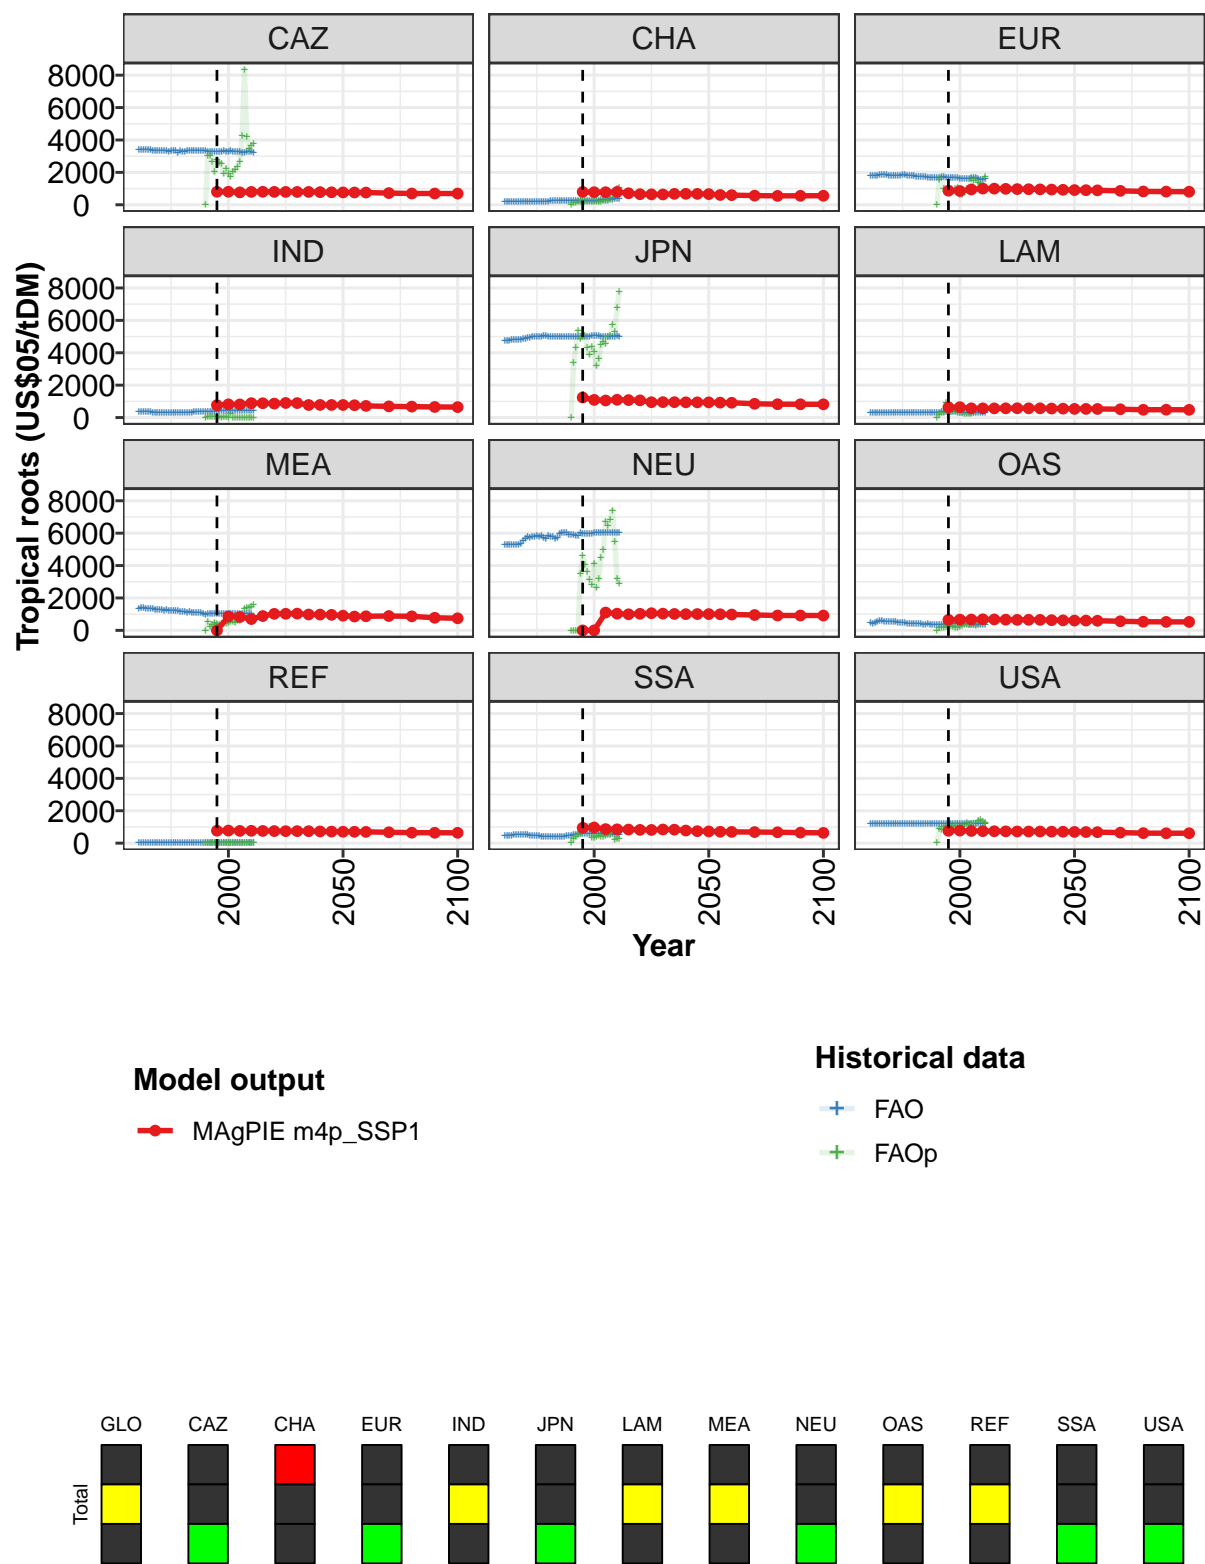

Figure 327: MAGPIE m4p\_SSP1 — Prices—Agriculture—Tropical roots (US\$05/tDM)

|     | 1995 | 2000 | 2005 | 2010 | 2015 | 2020 | 2025 | 2030 | 2035 | 2040 | 2045 |
|-----|------|------|------|------|------|------|------|------|------|------|------|
| GLO | 796  | 821  | 782  | 789  | 766  | 743  | 739  | 749  | 749  | 724  | 706  |
| CAZ | 805  | 804  | 766  | 794  | 803  | 796  | 794  | 793  | 793  | 781  | 771  |
| CHA | 795  | 775  | 776  | 794  | 712  | 653  | 643  | 636  | 673  | 676  | 673  |
| EUR | 868  | 850  | 944  | 999  | 998  | 982  | 969  | 962  | 952  | 940  | 926  |
| IND | 765  | 817  | 811  | 891  | 885  | 862  | 901  | 894  | 776  | 780  | 780  |
| JPN | 1239 | 1093 | 1055 | 1099 | 1079 | 1062 | 948  | 954  | 950  | 942  | 940  |
| LAM | 636  | 643  | 571  | 568  | 568  | 571  | 575  | 572  | 574  | 556  | 551  |
| MEA | 0    | 862  | 825  | 697  | 885  | 1019 | 1025 | 1035 | 980  | 975  | 959  |
| NEU | 0    | 2    | 1100 | 1031 | 994  | 1024 | 1058 | 1032 | 1014 | 1002 | 1007 |
| OAS | 652  | 665  | 670  | 683  | 676  | 660  | 648  | 652  | 649  | 630  | 617  |
| REF | 768  | 779  | 757  | 763  | 754  | 746  | 740  | 742  | 741  | 724  | 715  |
| SSA | 948  | 970  | 867  | 856  | 839  | 820  | 816  | 844  | 834  | 779  | 739  |
| USA | 764  | 777  | 752  | 738  | 735  | 729  | 720  | 720  | 718  | 712  | 704  |

Table 1307: MAgPIE m4p\_SSP1 — Prices—Agriculture—Tropical roots (US\$05/tDM) [PART 1/2]

|     | 2050 | 2055 | 2060 | 2070 | 2080 | 2090 | 2100 |
|-----|------|------|------|------|------|------|------|
| GLO | 695  | 675  | 667  | 652  | 636  | 624  | 619  |
| CAZ | 762  | 759  | 755  | 721  | 695  | 695  | 692  |
| CHA | 660  | 606  | 595  | 565  | 550  | 554  | 559  |
| EUR | 908  | 902  | 891  | 859  | 821  | 813  | 806  |
| IND | 778  | 761  | 719  | 691  | 676  | 655  | 648  |
| JPN | 939  | 925  | 914  | 850  | 825  | 821  | 818  |
| LAM | 537  | 535  | 532  | 515  | 481  | 485  | 479  |
| MEA | 907  | 853  | 870  | 885  | 865  | 777  | 746  |
| NEU | 1005 | 996  | 978  | 950  | 917  | 918  | 916  |
| OAS | 607  | 602  | 591  | 562  | 532  | 523  | 523  |
| REF | 705  | 702  | 695  | 673  | 645  | 641  | 639  |
| SSA | 724  | 704  | 696  | 685  | 673  | 649  | 635  |
| USA | 693  | 686  | 679  | 648  | 619  | 611  | 613  |

Table 1308: MAgPIE m4p\_SSP1 — Prices—Agriculture—Tropical roots (US\$05/tDM) [PART 2/2]

|     | 1961 | 1962 | 1963 | 1964 | 1965 | 1966 | 1967 | 1968 | 1969 | 1970 | 1971 |
|-----|------|------|------|------|------|------|------|------|------|------|------|
| GLO | 476  | 463  | 488  | 481  | 457  | 448  | 426  | 419  | 406  | 398  | 390  |
| CAZ | 3390 | 3384 | 3384 | 3385 | 3374 | 3379 | 3358 | 3356 | 3343 | 3339 | 3353 |
| CHA | 185  | 185  | 188  | 189  | 187  | 183  | 184  | 188  | 188  | 188  | 192  |
| EUR | 1792 | 1794 | 1795 | 1787 | 1820 | 1835 | 1842 | 1821 | 1786 | 1788 | 1795 |
| IND | 334  | 349  | 359  | 329  | 337  | 332  | 318  | 301  | 300  | 288  | 300  |
| JPN | 4760 | 4766 | 4769 | 4782 | 4791 | 4800 | 4816 | 4819 | 4848 | 4857 | 4910 |
| LAM | 306  | 303  | 298  | 295  | 295  | 300  | 299  | 295  | 298  | 304  | 310  |
| MEA | 1344 | 1386 | 1366 | 1359 | 1357 | 1347 | 1352 | 1284 | 1256 | 1279 | 1265 |
| NEU | 5281 | 5278 | 5270 | 5263 | 5285 | 5282 | 5314 | 5315 | 5547 | 5637 | 5779 |
| OAS | 438  | 437  | 466  | 502  | 580  | 595  | 550  | 545  | 545  | 545  | 537  |
| REF | 0    | 0    | 0    | 0    | 0    | 0    | 0    | 0    | 0    | 0    | 0    |
| SSA | 451  | 452  | 467  | 479  | 503  | 520  | 521  | 521  | 539  | 533  | 507  |
| USA | 1194 | 1189 | 1191 | 1197 | 1190 | 1194 | 1192 | 1192 | 1190 | 1190 | 1193 |

Table 1309: FAO — Prices—Agriculture—Tropical roots (US\$05/tDM) [PART 1/5]

|     | 1972 | 1973 | 1974 | 1975 | 1976 | 1977 | 1978 | 1979 | 1980 | 1981 | 1982 |
|-----|------|------|------|------|------|------|------|------|------|------|------|
| GLO | 381  | 352  | 357  | 359  | 352  | 346  | 337  | 354  | 352  | 359  | 352  |
| CAZ | 3335 | 3305 | 3298 | 3316 | 3336 | 3342 | 3221 | 3316 | 3252 | 3301 | 3339 |
| CHA | 196  | 189  | 194  | 195  | 199  | 199  | 200  | 208  | 213  | 223  | 223  |
| EUR | 1817 | 1784 | 1807 | 1827 | 1842 | 1800 | 1803 | 1801 | 1773 | 1708 | 1742 |
| IND | 285  | 281  | 283  | 286  | 290  | 302  | 316  | 306  | 312  | 314  | 315  |
| JPN | 4930 | 4990 | 5003 | 4989 | 5004 | 4992 | 5019 | 5026 | 5008 | 4986 | 4986 |
| LAM | 312  | 320  | 320  | 317  | 315  | 314  | 317  | 318  | 320  | 316  | 311  |
| MEA | 1231 | 1276 | 1203 | 1224 | 1189 | 1189 | 1191 | 1146 | 1170 | 1164 | 1113 |
| NEU | 5728 | 5782 | 5766 | 5810 | 5800 | 5840 | 5702 | 5675 | 5820 | 5786 | 5750 |
| OAS | 528  | 498  | 473  | 485  | 452  | 436  | 396  | 425  | 396  | 395  | 386  |
| REF | 0    | 0    | 0    | 0    | 0    | 0    | 0    | 0    | 0    | 0    | 0    |
| SSA | 459  | 458  | 449  | 452  | 424  | 414  | 409  | 423  | 423  | 410  | 402  |
| USA | 1192 | 1193 | 1192 | 1190 | 1187 | 1192 | 1189 | 1186 | 1189 | 1187 | 1184 |

Table 1310: FAO — Prices—Agriculture—Tropical roots (US\$05/tDM) [PART 2/5]

|     | 1983 | 1984 | 1985 | 1986 | 1987 | 1988 | 1989 | 1990 | 1991 | 1992 | 1993 |
|-----|------|------|------|------|------|------|------|------|------|------|------|
| GLO | 345  | 349  | 356  | 363  | 352  | 366  | 367  | 380  | 398  | 410  | 411  |
| CAZ | 3346 | 3337 | 3335 | 3336 | 3327 | 3329 | 3340 | 3317 | 3280 | 3269 | 3279 |
| CHA | 222  | 226  | 230  | 237  | 231  | 235  | 230  | 230  | 236  | 242  | 239  |
| EUR | 1742 | 1709 | 1738 | 1690 | 1665 | 1683 | 1686 | 1671 | 1691 | 1676 | 1701 |
| IND | 322  | 325  | 330  | 347  | 350  | 344  | 358  | 365  | 367  | 369  | 387  |
| JPN | 5004 | 5005 | 4980 | 4987 | 4992 | 5003 | 4984 | 4994 | 5006 | 4981 | 4972 |
| LAM | 317  | 321  | 314  | 311  | 316  | 319  | 313  | 317  | 325  | 333  | 336  |
| MEA | 1138 | 1100 | 1068 | 1065 | 1111 | 1057 | 1031 | 989  | 1020 | 1046 | 1025 |
| NEU | 5682 | 5719 | 5986 | 6004 | 6017 | 6014 | 5869 | 5917 | 5926 | 5842 | 5817 |
| OAS | 385  | 372  | 373  | 400  | 370  | 357  | 345  | 362  | 365  | 361  | 361  |
| REF | 0    | 0    | 0    | 0    | 0    | 0    | 0    | 0    | 0    | 0    | 0    |
| SSA | 385  | 392  | 390  | 393  | 393  | 437  | 451  | 478  | 518  | 543  | 562  |
| USA | 1185 | 1191 | 1188 | 1193 | 1198 | 1203 | 1200 | 1194 | 1199 | 1199 | 1199 |

Table 1311: FAO — Prices—Agriculture—Tropical roots (US\$05/tDM) [PART 3/5]

|     | 1994 | 1995 | 1996 | 1997 | 1998 | 1999 | 2000 | 2001 | 2002 | 2003 | 2004 |
|-----|------|------|------|------|------|------|------|------|------|------|------|
| GLO | 423  | 421  | 418  | 435  | 434  | 431  | 436  | 436  | 437  | 442  | 438  |
| CAZ | 3257 | 3247 | 3254 | 3269 | 3304 | 3276 | 3280 | 3319 | 3300 | 3266 | 3247 |
| CHA | 246  | 245  | 235  | 252  | 248  | 246  | 258  | 264  | 268  | 277  | 277  |
| EUR | 1693 | 1688 | 1686 | 1642 | 1669 | 1663 | 1618 | 1621 | 1626 | 1605 | 1581 |
| IND | 385  | 383  | 390  | 407  | 406  | 422  | 408  | 400  | 397  | 413  | 420  |
| JPN | 5005 | 5009 | 4997 | 4993 | 4998 | 5034 | 5020 | 5018 | 5018 | 5005 | 4991 |
| LAM | 331  | 331  | 349  | 338  | 338  | 332  | 325  | 323  | 316  | 316  | 310  |
| MEA | 1046 | 1036 | 1021 | 1027 | 1032 | 1033 | 1021 | 1006 | 1042 | 1007 | 1035 |
| NEU | 6021 | 5954 | 5945 | 5938 | 5953 | 5981 | 6011 | 6031 | 6039 | 6040 | 6042 |
| OAS | 376  | 401  | 382  | 384  | 404  | 409  | 407  | 402  | 410  | 382  | 341  |
| REF | 0    | 0    | 0    | 0    | 0    | 0    | 0    | 0    | 0    | 0    | 0    |
| SSA | 570  | 566  | 569  | 571  | 569  | 573  | 570  | 560  | 555  | 566  | 563  |
| USA | 1196 | 1198 | 1195 | 1195 | 1209 | 1217 | 1217 | 1213 | 1207 | 1200 | 1193 |

Table 1312: FAO — Prices—Agriculture—Tropical roots (US\$05/tDM) [PART 4/5]

|     | 2005 | 2006 | 2007 | 2008 | 2009 | 2010 | 2011 |
|-----|------|------|------|------|------|------|------|
| GLO | 452  | 468  | 458  | 464  | 445  | 462  | 464  |
| CAZ | 3258 | 3200 | 3222 | 3248 | 3280 | 3284 | 3236 |
| CHA | 285  | 321  | 341  | 337  | 351  | 363  | 365  |
| EUR | 1599 | 1677 | 1687 | 1589 | 1551 | 1568 | 1577 |
| IND | 414  | 419  | 425  | 425  | 422  | 441  | 438  |
| JPN | 4992 | 4987 | 4991 | 4994 | 4986 | 5019 | 5006 |
| LAM | 308  | 312  | 307  | 313  | 316  | 316  | 319  |
| MEA | 1010 | 1024 | 1003 | 1026 | 1016 | 1040 | 677  |
| NEU | 6042 | 6038 | 6042 | 6041 | 6023 | 6024 | 6024 |
| OAS | 373  | 358  | 358  | 346  | 333  | 355  | 370  |
| REF | 0    | 0    | 0    | 0    | 0    | 0    | 0    |
| SSA | 576  | 582  | 556  | 571  | 529  | 542  | 544  |
| USA | 1197 | 1192 | 1198 | 1190 | 1189 | 1184 | 1182 |

Table 1313: FAO — Prices—Agriculture—Tropical roots (US\$05/tDM) [PART 5/5]

|     | 1990 | 1991 | 1992 | 1993 | 1994 | 1995 | 1996 | 1997 | 1998 | 1999 | 2000 |
|-----|------|------|------|------|------|------|------|------|------|------|------|
| GLO | 0    | 215  | 280  | 342  | 447  | 469  | 512  | 565  | 550  | 279  | 269  |
| CAZ | 0    | 3026 | 3015 | 2656 | 2020 | 2783 | 2575 | 2514 | 1941 | 2237 | 1897 |
| CHA | 0    | 107  | 143  | 189  | 172  | 271  | 196  | 215  | 186  | 185  | 175  |
| EUR | 0    | 1528 | 1715 | 984  | 892  | 985  | 959  | 860  | 965  | 1058 | 617  |
| IND | 0    | 29   | 24   | 18   | 19   | 21   | 25   | 16   | 17   | 17   | 14   |
| JPN | 0    | 3366 | 4301 | 5377 | 4889 | 4994 | 5058 | 4288 | 3881 | 4341 | 4061 |
| LAM | 0    | 178  | 281  | 293  | 882  | 415  | 366  | 395  | 403  | 288  | 285  |
| MEA | 0    | 518  | 208  | 338  | 461  | 413  | 341  | 382  | 429  | 412  | 480  |
| NEU | 0    | 0    | 0    | 0    | 3495 | 4587 | 4067 | 3590 | 3135 | 2799 | 4108 |
| OAS | 0    | 159  | 164  | 162  | 196  | 267  | 252  | 233  | 151  | 179  | 209  |
| REF | 0    | 0    | 0    | 0    | 0    | 0    | 0    | 0    | 0    | 0    | 0    |
| SSA | 1    | 296  | 391  | 528  | 553  | 717  | 933  | 1015 | 1021 | 358  | 325  |
| USA | 0    | 883  | 814  | 998  | 928  | 1051 | 953  | 1042 | 1017 | 1167 | 1024 |

Table 1314: FAOp — Prices—Agriculture—Tropical roots (US\$05/tDM) [PART 1/3]

|     | 2001 | 2002 | 2003 | 2004 | 2005 | 2006 | 2007 | 2008 | 2009 | 2010 | 2011 |
|-----|------|------|------|------|------|------|------|------|------|------|------|
| GLO | 329  | 325  | 320  | 320  | 357  | 401  | 406  | 534  | 407  | 471  | 478  |
| CAZ | 1753 | 2037 | 2170 | 2333 | 2637 | 4246 | 8334 | 4220 | 3446 | 3653 | 3737 |
| CHA | 209  | 189  | 197  | 223  | 227  | 266  | 328  | 434  | 836  | 1008 | 1076 |
| EUR | 631  | 734  | 970  | 863  | 1693 | 1460 | 1587 | 1369 | 1314 | 997  | 1717 |
| IND | 256  | 0    | 0    | 0    | 0    | 0    | 0    | 0    | 0    | 0    | 0    |
| JPN | 3184 | 3624 | 4476 | 4661 | 4528 | 5006 | 5073 | 5704 | 5324 | 6787 | 7787 |
| LAM | 270  | 217  | 236  | 244  | 262  | 285  | 333  | 420  | 438  | 491  | 545  |
| MEA | 517  | 555  | 475  | 564  | 599  | 906  | 1311 | 1387 | 1413 | 1433 | 1581 |
| NEU | 2642 | 3214 | 4502 | 4943 | 6711 | 6437 | 6833 | 7382 | 5483 | 3174 | 2870 |
| OAS | 297  | 338  | 346  | 313  | 365  | 328  | 263  | 417  | 393  | 512  | 467  |
| REF | 0    | 0    | 0    | 0    | 0    | 0    | 0    | 0    | 0    | 0    | 0    |
| SSA | 409  | 433  | 392  | 382  | 442  | 510  | 502  | 664  | 225  | 257  | 251  |
| USA | 1024 | 1118 | 1267 | 1160 | 1199 | 1204 | 1210 | 1392 | 1439 | 1309 | 1241 |

Table 1315: FAOp — Prices—Agriculture—Tropical roots (US\$05/tDM) [PART 2/3]

|     | 2005 |
|-----|------|
| GLO | 1334 |
| CAZ |      |
| CHA |      |
| EUR |      |
| IND |      |
| JPN |      |
| LAM |      |
| MEA |      |
| NEU |      |
| OAS |      |
| REF |      |
| SSA |      |
| USA |      |

Table 1316: IniFoodPrice — Prices—Agriculture—Tropical roots (US\$05/tDM)

## 37 Bioenergy

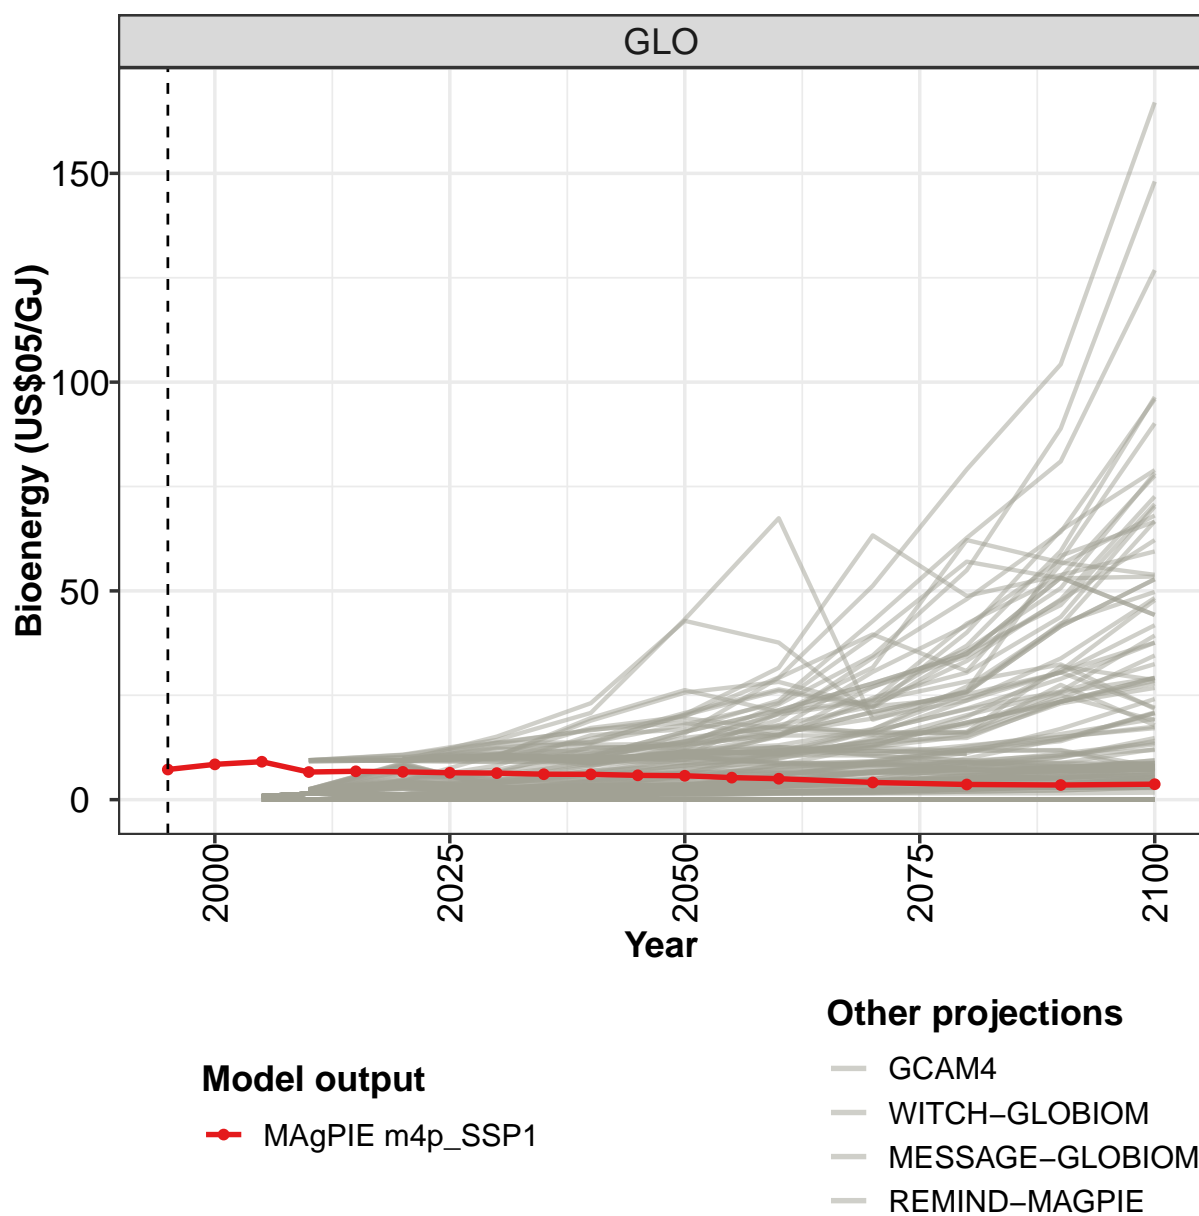

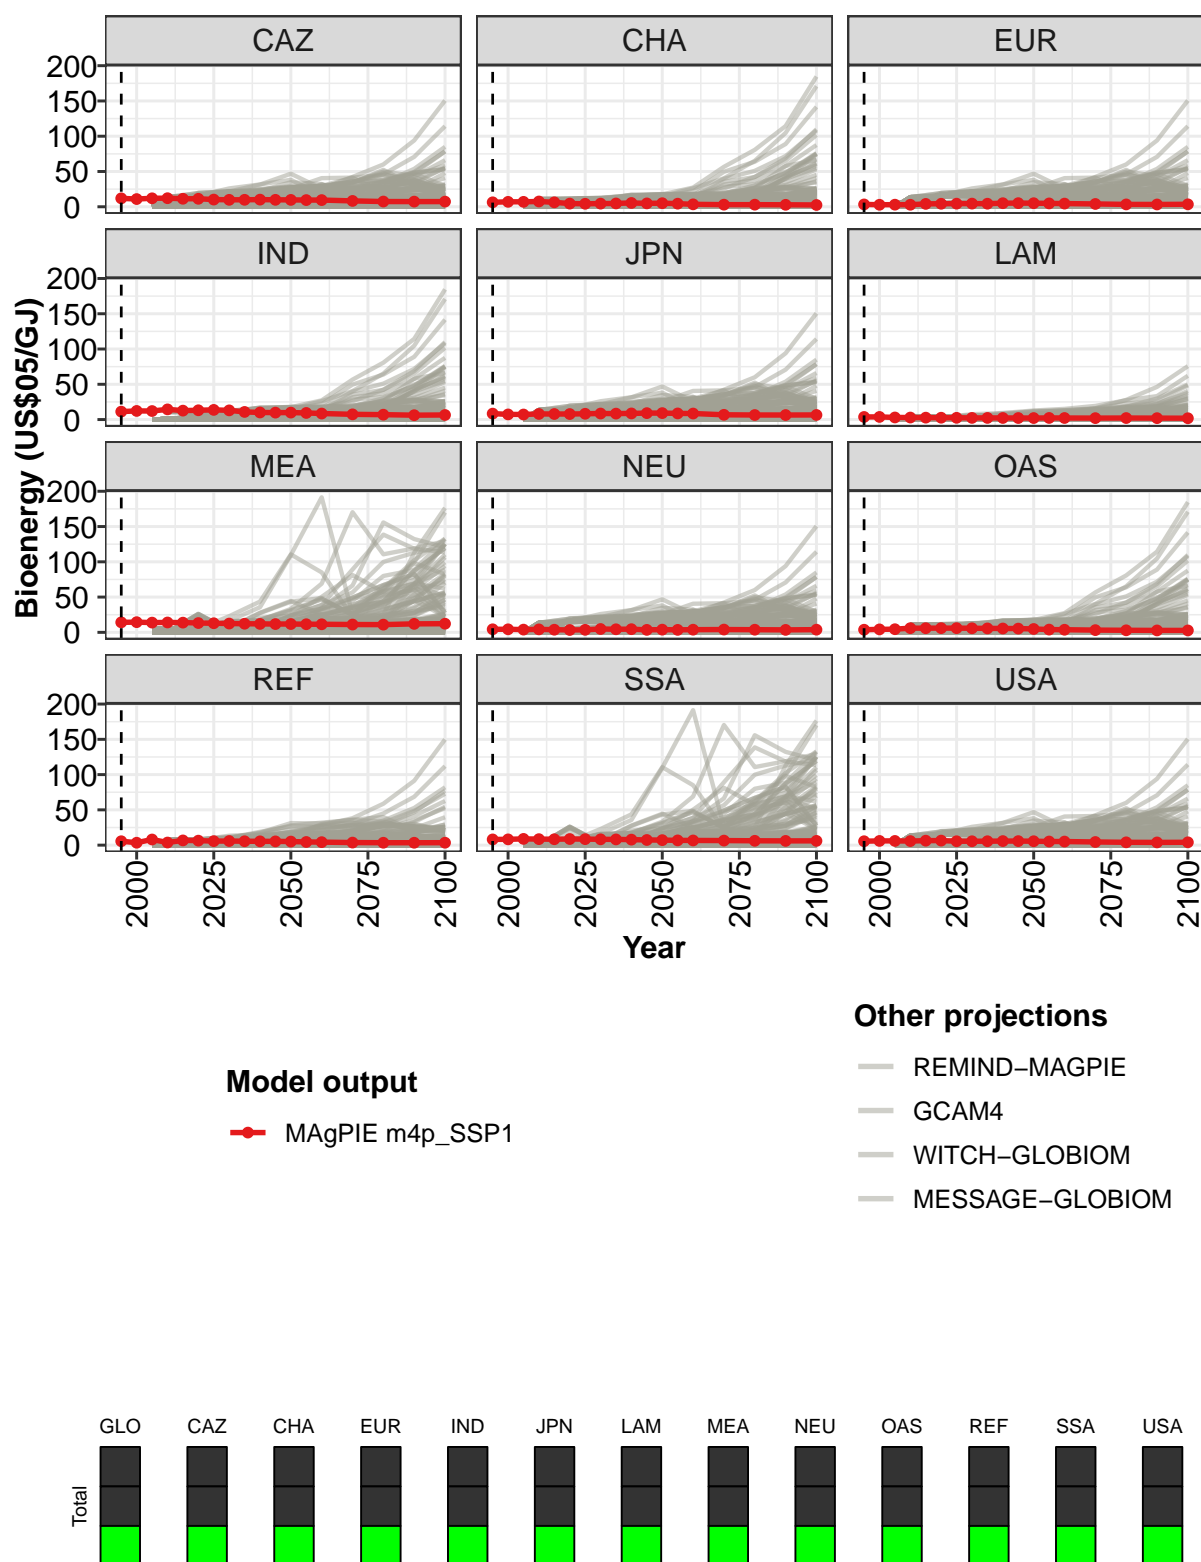

Figure 328: MAgPIE m4p\_SSP1 — Prices—Bioenergy (US\$05/GJ)

|     | 1995 | 2000 | 2005 | 2010 | 2015 | 2020 | 2025 | 2030 | 2035 | 2040 | 2045 |
|-----|------|------|------|------|------|------|------|------|------|------|------|
| GLO | 7.2  | 8.5  | 9.1  | 6.6  | 6.8  | 6.6  | 6.4  | 6.4  | 6.1  | 6.1  | 5.8  |
| CAZ | 12.0 | 10.9 | 12.0 | 12.2 | 11.4 | 11.3 | 10.2 | 9.9  | 9.9  | 10.2 | 9.9  |
| CHA | 6.3  | 7.0  | 7.0  | 7.5  | 6.3  | 4.5  | 4.3  | 4.5  | 4.7  | 5.4  | 4.8  |
| EUR | 3.3  | 2.9  | 3.0  | 2.9  | 4.1  | 4.3  | 4.4  | 4.5  | 4.4  | 5.1  | 5.1  |
| IND | 11.3 | 12.2 | 12.1 | 14.4 | 12.7 | 13.2 | 13.7 | 13.0 | 10.8 | 10.1 | 9.8  |
| JPN | 8.5  | 7.3  | 7.2  | 8.0  | 7.9  | 7.8  | 8.2  | 8.6  | 8.4  | 8.7  | 9.1  |
| LAM | 3.7  | 3.8  | 3.0  | 2.9  | 2.8  | 2.6  | 2.5  | 2.4  | 2.3  | 2.3  | 2.2  |
| MEA | 14.2 | 14.5 | 13.9 | 14.0 | 13.8 | 13.2 | 12.9 | 12.5 | 12.2 | 12.0 | 11.8 |
| NEU | 4.4  | 4.3  | 3.9  | 4.2  | 3.7  | 3.4  | 3.6  | 4.8  | 4.4  | 4.5  | 3.6  |
| OAS | 3.7  | 4.2  | 4.5  | 6.0  | 5.9  | 6.0  | 6.0  | 5.8  | 5.6  | 5.5  | 5.4  |
| REF | 5.6  | 3.5  | 8.0  | 3.7  | 6.7  | 6.4  | 5.7  | 5.8  | 5.5  | 5.4  | 5.4  |
| SSA | 8.1  | 8.2  | 8.9  | 8.5  | 8.4  | 8.7  | 8.5  | 8.3  | 8.1  | 7.8  | 7.3  |
| USA | 5.6  | 6.0  | 6.0  | 5.8  | 6.4  | 6.5  | 5.5  | 5.5  | 5.6  | 5.8  | 5.7  |

Table 1317: MAgPIE m4p\_SSP1 — Prices—Bioenergy (US\$05/GJ) [PART 1/2]

|     | 2050 | 2055 | 2060 | 2070 | 2080 | 2090 | 2100 |
|-----|------|------|------|------|------|------|------|
| GLO | 5.7  | 5.3  | 5.0  | 4.1  | 3.6  | 3.5  | 3.7  |
| CAZ | 9.7  | 9.5  | 9.5  | 8.3  | 7.4  | 7.3  | 7.3  |
| CHA | 5.1  | 4.4  | 3.4  | 3.0  | 3.0  | 2.8  | 2.6  |
| EUR | 5.1  | 4.8  | 4.5  | 4.0  | 3.3  | 3.3  | 3.5  |
| IND | 9.9  | 9.4  | 8.6  | 7.4  | 6.9  | 6.2  | 6.5  |
| JPN | 9.2  | 8.7  | 8.6  | 6.8  | 6.5  | 6.4  | 6.5  |
| LAM | 2.1  | 2.3  | 2.2  | 2.1  | 2.2  | 2.0  | 1.9  |
| MEA | 11.8 | 11.5 | 11.4 | 11.1 | 11.0 | 12.1 | 12.3 |
| NEU | 3.9  | 3.5  | 3.8  | 4.0  | 3.8  | 3.5  | 3.8  |
| OAS | 4.8  | 3.9  | 3.7  | 3.2  | 2.9  | 2.7  | 2.7  |
| REF | 5.1  | 4.5  | 4.3  | 3.6  | 3.4  | 3.4  | 3.5  |
| SSA | 7.1  | 6.8  | 6.6  | 6.5  | 6.2  | 6.0  | 6.1  |
| USA | 5.6  | 5.2  | 5.1  | 4.5  | 4.0  | 3.9  | 4.0  |

Table 1318: MAgPIE m4p\_SSP1 — Prices—Bioenergy (US\$05/GJ) [PART 2/2]



## 38 Food Price Index

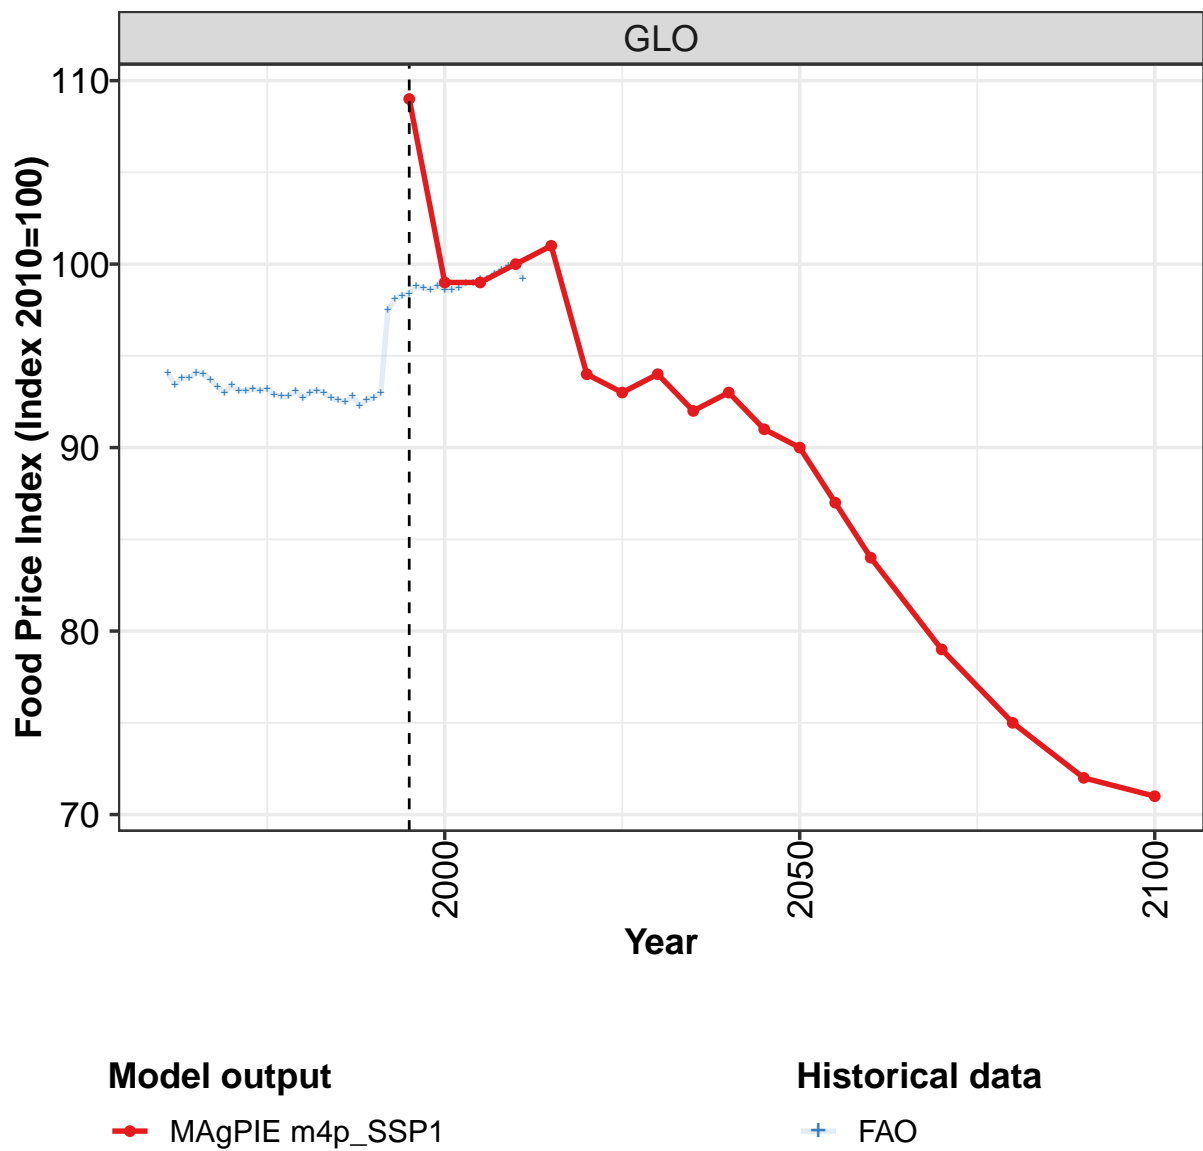

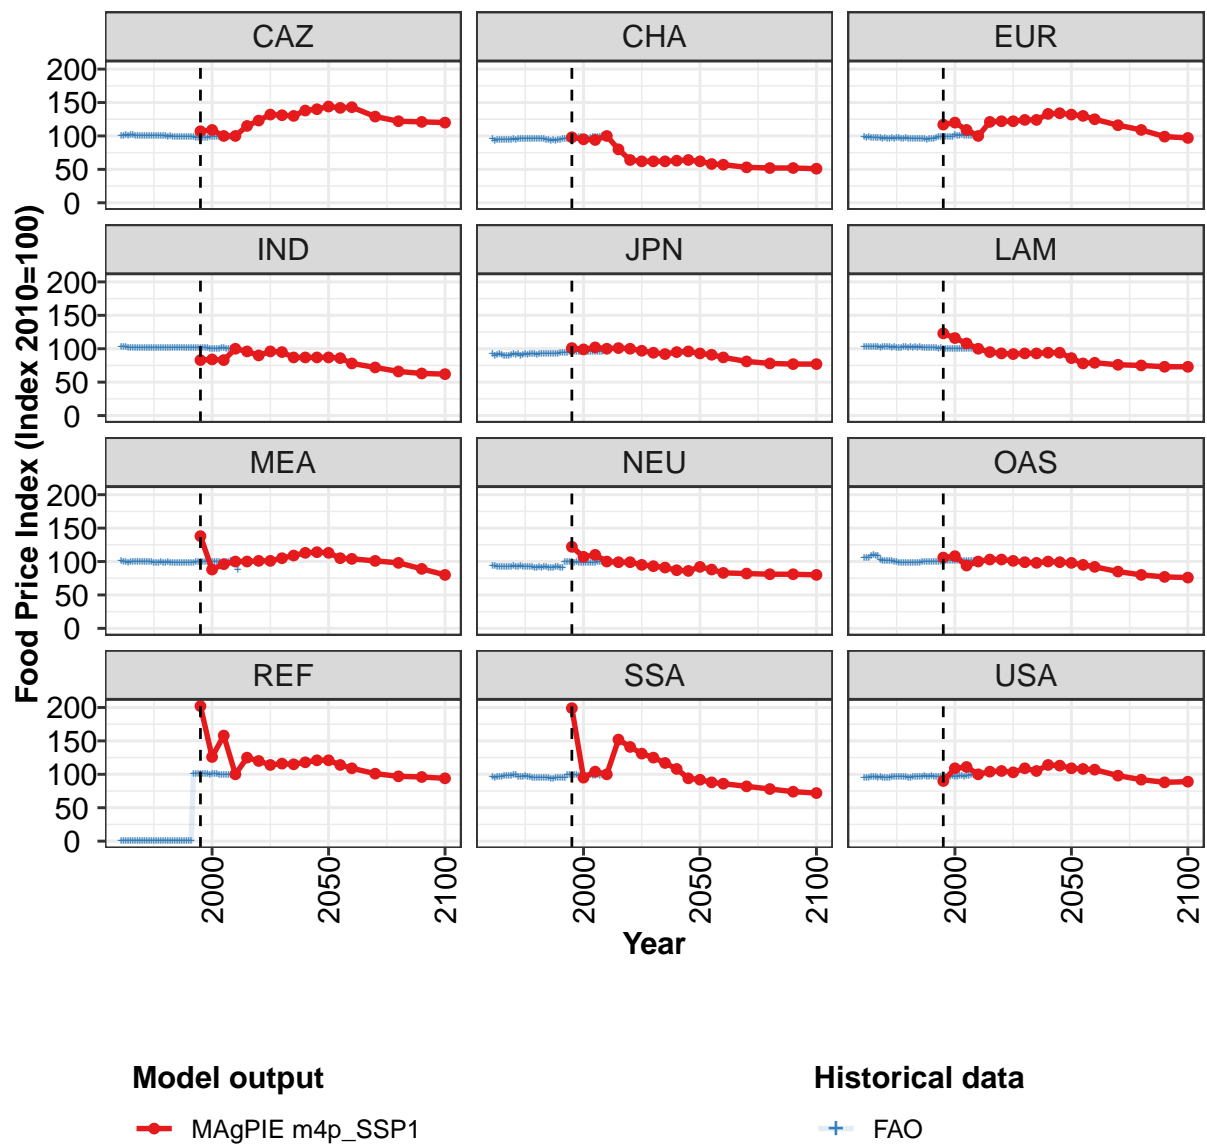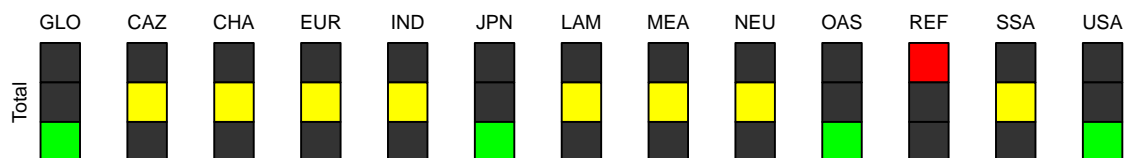

Figure 329: MAgPIE m4p\_SSP1 — Prices—Food Price Index (Index 2010=100)

|     | 1995 | 2000 | 2005 | 2010 | 2015 | 2020 | 2025 | 2030 | 2035 | 2040 | 2045 |
|-----|------|------|------|------|------|------|------|------|------|------|------|
| GLO | 109  | 99   | 99   | 100  | 101  | 94   | 93   | 94   | 92   | 93   | 91   |
| CAZ | 107  | 109  | 100  | 100  | 115  | 123  | 132  | 131  | 130  | 138  | 140  |
| CHA | 98   | 95   | 94   | 100  | 80   | 64   | 62   | 62   | 62   | 63   | 64   |
| EUR | 117  | 120  | 109  | 100  | 121  | 122  | 122  | 124  | 124  | 133  | 134  |
| IND | 83   | 84   | 83   | 100  | 96   | 90   | 96   | 95   | 87   | 87   | 87   |
| JPN | 101  | 99   | 102  | 100  | 101  | 100  | 97   | 94   | 92   | 95   | 96   |
| LAM | 123  | 116  | 108  | 100  | 95   | 93   | 92   | 93   | 93   | 94   | 94   |
| MEA | 138  | 88   | 96   | 100  | 100  | 101  | 101  | 105  | 109  | 113  | 114  |
| NEU | 122  | 107  | 110  | 100  | 99   | 99   | 95   | 93   | 91   | 87   | 86   |
| OAS | 106  | 108  | 94   | 100  | 103  | 103  | 101  | 99   | 98   | 100  | 99   |
| REF | 202  | 126  | 158  | 100  | 125  | 120  | 114  | 116  | 115  | 118  | 121  |
| SSA | 199  | 95   | 104  | 100  | 152  | 141  | 131  | 125  | 117  | 108  | 94   |
| USA | 90   | 109  | 111  | 100  | 104  | 105  | 103  | 109  | 105  | 114  | 113  |

Table 1319: MAgPIE m4p\_SSP1 — Prices—Food Price Index (Index 2010=100) [PART 1/2]

|     | 2050 | 2055 | 2060 | 2070 | 2080 | 2090 | 2100 |
|-----|------|------|------|------|------|------|------|
| GLO | 90   | 87   | 84   | 79   | 75   | 72   | 71   |
| CAZ | 144  | 142  | 143  | 129  | 122  | 121  | 120  |
| CHA | 62   | 58   | 57   | 53   | 52   | 52   | 51   |
| EUR | 132  | 130  | 125  | 116  | 109  | 99   | 97   |
| IND | 87   | 86   | 78   | 72   | 66   | 63   | 62   |
| JPN | 93   | 91   | 87   | 81   | 78   | 77   | 77   |
| LAM | 86   | 78   | 79   | 76   | 75   | 73   | 73   |
| MEA | 113  | 105  | 104  | 101  | 98   | 89   | 80   |
| NEU | 92   | 88   | 83   | 82   | 81   | 81   | 80   |
| OAS | 98   | 95   | 92   | 85   | 80   | 77   | 76   |
| REF | 121  | 114  | 109  | 101  | 97   | 96   | 94   |
| SSA | 92   | 88   | 86   | 82   | 78   | 74   | 72   |
| USA | 109  | 108  | 107  | 98   | 92   | 88   | 89   |

Table 1320: MAgPIE m4p\_SSP1 — Prices—Food Price Index (Index 2010=100) [PART 2/2]

|     | 1961 | 1962 | 1963 | 1964 | 1965 | 1966 | 1967 | 1968 | 1969 | 1970 | 1971 |
|-----|------|------|------|------|------|------|------|------|------|------|------|
| GLO | 94   | 93   | 94   | 94   | 94   | 94   | 94   | 93   | 93   | 93   | 93   |
| CAZ | 101  | 100  | 101  | 101  | 101  | 102  | 101  | 100  | 100  | 100  | 100  |
| CHA | 95   | 93   | 94   | 94   | 94   | 94   | 94   | 94   | 94   | 95   | 94   |
| EUR | 99   | 98   | 98   | 97   | 98   | 97   | 97   | 97   | 96   | 97   | 96   |
| IND | 103  | 103  | 103  | 102  | 102  | 102  | 102  | 101  | 101  | 101  | 101  |
| JPN | 92   | 90   | 91   | 92   | 91   | 89   | 90   | 90   | 91   | 92   | 91   |
| LAM | 104  | 103  | 103  | 102  | 103  | 102  | 102  | 102  | 102  | 102  | 103  |
| MEA | 100  | 100  | 99   | 99   | 99   | 100  | 100  | 100  | 100  | 100  | 99   |
| NEU | 93   | 93   | 92   | 93   | 92   | 92   | 92   | 93   | 92   | 94   | 92   |
| OAS | 105  | 105  | 106  | 108  | 110  | 109  | 109  | 102  | 101  | 101  | 102  |
| REF | 0    | 0    | 0    | 0    | 0    | 0    | 0    | 0    | 0    | 0    | 0    |
| SSA | 96   | 96   | 96   | 97   | 97   | 98   | 98   | 98   | 98   | 99   | 99   |
| USA | 95   | 95   | 95   | 96   | 96   | 96   | 95   | 96   | 95   | 95   | 95   |

Table 1321: FAO — Prices—Food Price Index (Index 2010=100) [PART 1/5]

|     | 1972 | 1973 | 1974 | 1975 | 1976 | 1977 | 1978 | 1979 | 1980 | 1981 | 1982 |
|-----|------|------|------|------|------|------|------|------|------|------|------|
| GLO | 93   | 93   | 93   | 93   | 93   | 93   | 93   | 93   | 93   | 93   | 93   |
| CAZ | 100  | 100  | 100  | 100  | 101  | 100  | 100  | 100  | 100  | 99   | 100  |
| CHA | 95   | 95   | 95   | 95   | 95   | 95   | 95   | 96   | 96   | 96   | 96   |
| EUR | 96   | 97   | 96   | 97   | 97   | 96   | 96   | 97   | 96   | 96   | 96   |
| IND | 101  | 101  | 101  | 101  | 101  | 101  | 101  | 101  | 101  | 101  | 101  |
| JPN | 92   | 90   | 91   | 92   | 91   | 92   | 92   | 92   | 91   | 92   | 93   |
| LAM | 102  | 102  | 102  | 102  | 101  | 101  | 102  | 102  | 101  | 102  | 102  |
| MEA | 100  | 100  | 99   | 98   | 98   | 98   | 99   | 98   | 98   | 99   | 98   |
| NEU | 92   | 93   | 93   | 92   | 92   | 93   | 92   | 91   | 91   | 92   | 91   |
| OAS | 101  | 101  | 100  | 99   | 98   | 98   | 98   | 98   | 98   | 98   | 98   |
| REF | 0    | 0    | 0    | 0    | 0    | 0    | 0    | 0    | 0    | 0    | 0    |
| SSA | 96   | 97   | 96   | 98   | 96   | 96   | 95   | 94   | 95   | 95   | 94   |
| USA | 95   | 96   | 96   | 97   | 97   | 96   | 96   | 96   | 95   | 95   | 97   |

Table 1322: FAO — Prices—Food Price Index (Index 2010=100) [PART 2/5]

|     | 1983 | 1984 | 1985 | 1986 | 1987 | 1988 | 1989 | 1990 | 1991 | 1992 | 1993 |
|-----|------|------|------|------|------|------|------|------|------|------|------|
| GLO | 93   | 93   | 93   | 92   | 93   | 92   | 93   | 93   | 93   | 98   | 98   |
| CAZ | 99   | 99   | 98   | 98   | 98   | 98   | 98   | 98   | 98   | 98   | 98   |
| CHA | 95   | 94   | 94   | 93   | 94   | 93   | 94   | 94   | 95   | 95   | 96   |
| EUR | 96   | 96   | 96   | 96   | 96   | 95   | 96   | 96   | 96   | 98   | 99   |
| IND | 102  | 102  | 102  | 102  | 102  | 101  | 101  | 101  | 101  | 101  | 101  |
| JPN | 93   | 93   | 93   | 93   | 93   | 93   | 93   | 94   | 94   | 94   | 94   |
| LAM | 102  | 102  | 102  | 102  | 101  | 101  | 101  | 101  | 101  | 101  | 100  |
| MEA | 99   | 98   | 98   | 98   | 97   | 98   | 99   | 98   | 98   | 98   | 99   |
| NEU | 92   | 92   | 90   | 91   | 91   | 92   | 93   | 91   | 91   | 99   | 99   |
| OAS | 98   | 98   | 99   | 100  | 100  | 100  | 99   | 99   | 100  | 100  | 99   |
| REF | 0    | 0    | 0    | 0    | 0    | 0    | 0    | 0    | 0    | 100  | 100  |
| SSA | 96   | 94   | 94   | 94   | 93   | 95   | 95   | 95   | 94   | 94   | 99   |
| USA | 96   | 97   | 97   | 97   | 98   | 97   | 97   | 98   | 97   | 97   | 96   |

Table 1323: FAO — Prices—Food Price Index (Index 2010=100) [PART 3/5]

|     | 1994 | 1995 | 1996 | 1997 | 1998 | 1999 | 2000 | 2001 | 2002 | 2003 | 2004 |
|-----|------|------|------|------|------|------|------|------|------|------|------|
| GLO | 98   | 98   | 99   | 99   | 99   | 99   | 99   | 99   | 99   | 99   | 99   |
| CAZ | 98   | 98   | 98   | 98   | 98   | 99   | 98   | 99   | 99   | 98   | 98   |
| CHA | 96   | 97   | 98   | 97   | 98   | 98   | 96   | 96   | 96   | 97   | 98   |
| EUR | 99   | 98   | 99   | 99   | 98   | 98   | 101  | 101  | 101  | 101  | 101  |
| IND | 101  | 101  | 102  | 102  | 101  | 100  | 100  | 100  | 100  | 100  | 101  |
| JPN | 95   | 95   | 95   | 95   | 95   | 95   | 95   | 95   | 95   | 95   | 96   |
| LAM | 101  | 100  | 100  | 100  | 100  | 100  | 100  | 100  | 100  | 100  | 100  |
| MEA | 99   | 99   | 100  | 100  | 99   | 100  | 100  | 100  | 100  | 100  | 99   |
| NEU | 99   | 100  | 98   | 99   | 98   | 98   | 98   | 99   | 98   | 98   | 98   |
| OAS | 100  | 101  | 100  | 101  | 101  | 102  | 101  | 101  | 102  | 101  | 101  |
| REF | 101  | 100  | 101  | 100  | 100  | 100  | 100  | 100  | 100  | 99   | 99   |
| SSA | 99   | 99   | 99   | 99   | 98   | 99   | 99   | 98   | 98   | 99   | 98   |
| USA | 97   | 96   | 97   | 97   | 96   | 98   | 97   | 97   | 98   | 98   | 97   |

Table 1324: FAO — Prices—Food Price Index (Index 2010=100) [PART 4/5]

|     | 2005 | 2006 | 2007 | 2008 | 2009 | 2010 | 2011 |
|-----|------|------|------|------|------|------|------|
| GLO | 99   | 99   | 100  | 100  | 100  | 100  | 99   |
| CAZ | 99   | 99   | 99   | 99   | 100  | 100  | 101  |
| CHA | 98   | 98   | 99   | 100  | 100  | 100  | 100  |
| EUR | 101  | 101  | 100  | 100  | 100  | 100  | 100  |
| IND | 101  | 100  | 100  | 100  | 100  | 100  | 100  |
| JPN | 96   | 95   | 95   | 95   | 100  | 100  | 99   |
| LAM | 100  | 100  | 100  | 100  | 100  | 100  | 100  |
| MEA | 100  | 100  | 100  | 101  | 101  | 100  | 88   |
| NEU | 99   | 100  | 99   | 100  | 99   | 100  | 99   |
| OAS | 101  | 101  | 101  | 101  | 100  | 100  | 100  |
| REF | 99   | 99   | 99   | 99   | 100  | 100  | 99   |
| SSA | 98   | 99   | 98   | 99   | 99   | 98   | 98   |
| USA | 98   | 98   | 100  | 99   | 99   | 100  | 99   |

Table 1325: FAO — Prices—Food Price Index (Index 2010=100) [PART 5/5]

**39 GHG Emission****40 Land****41 Water**

Part XII

# Production

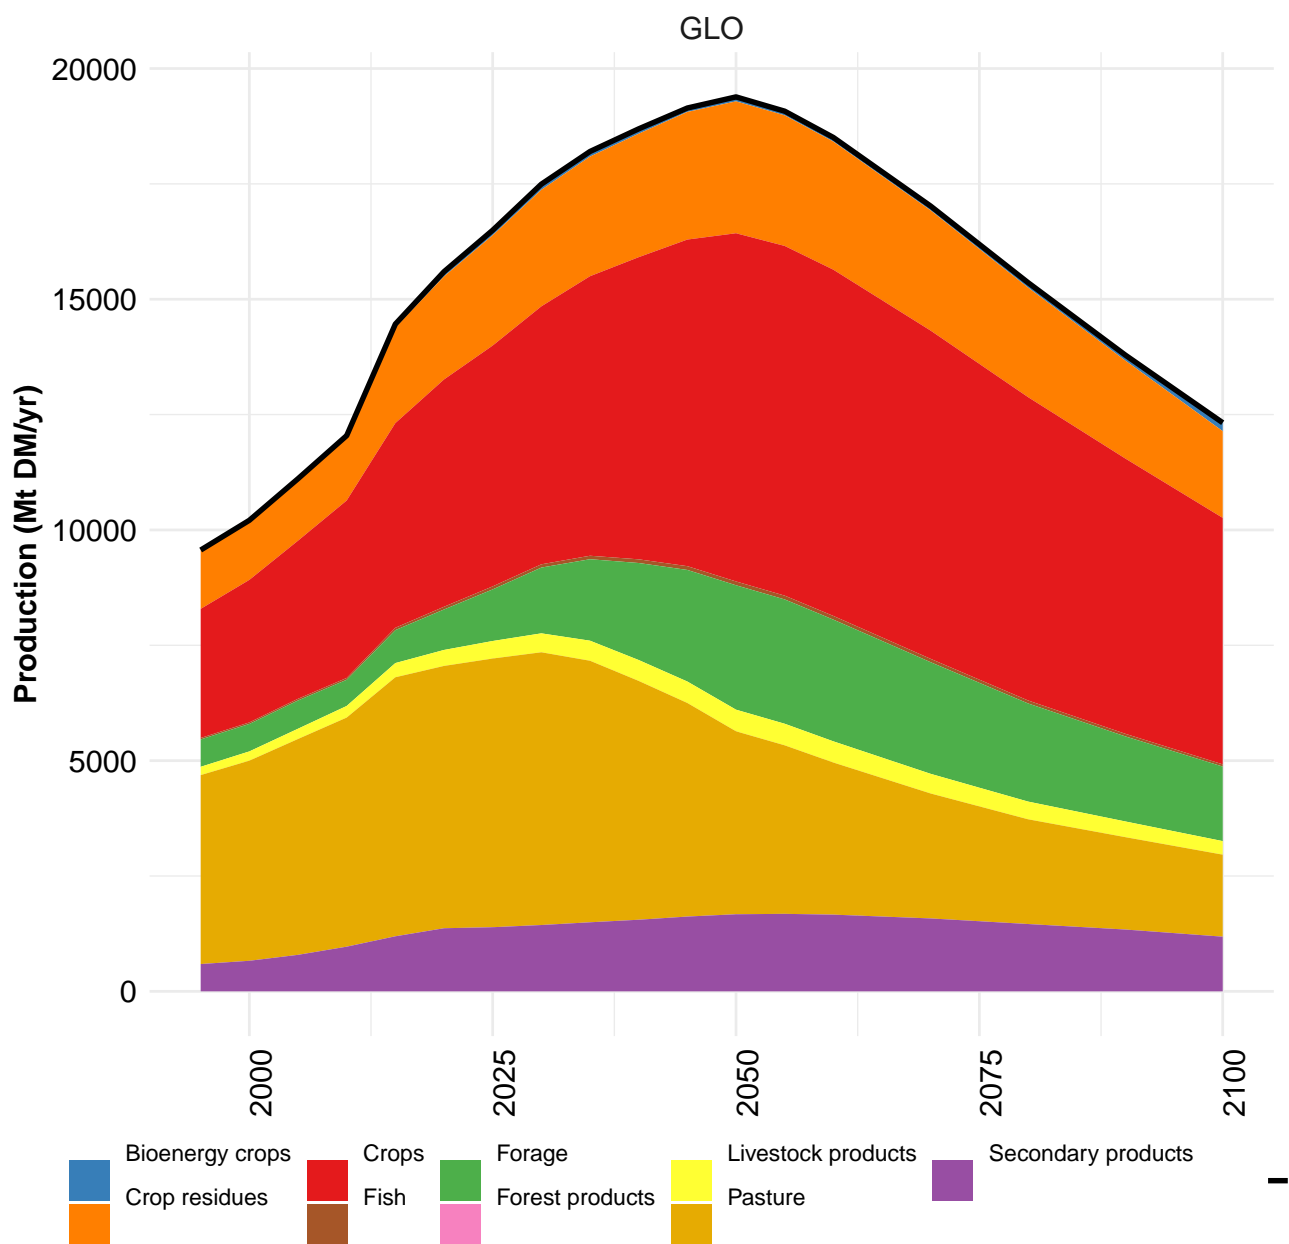

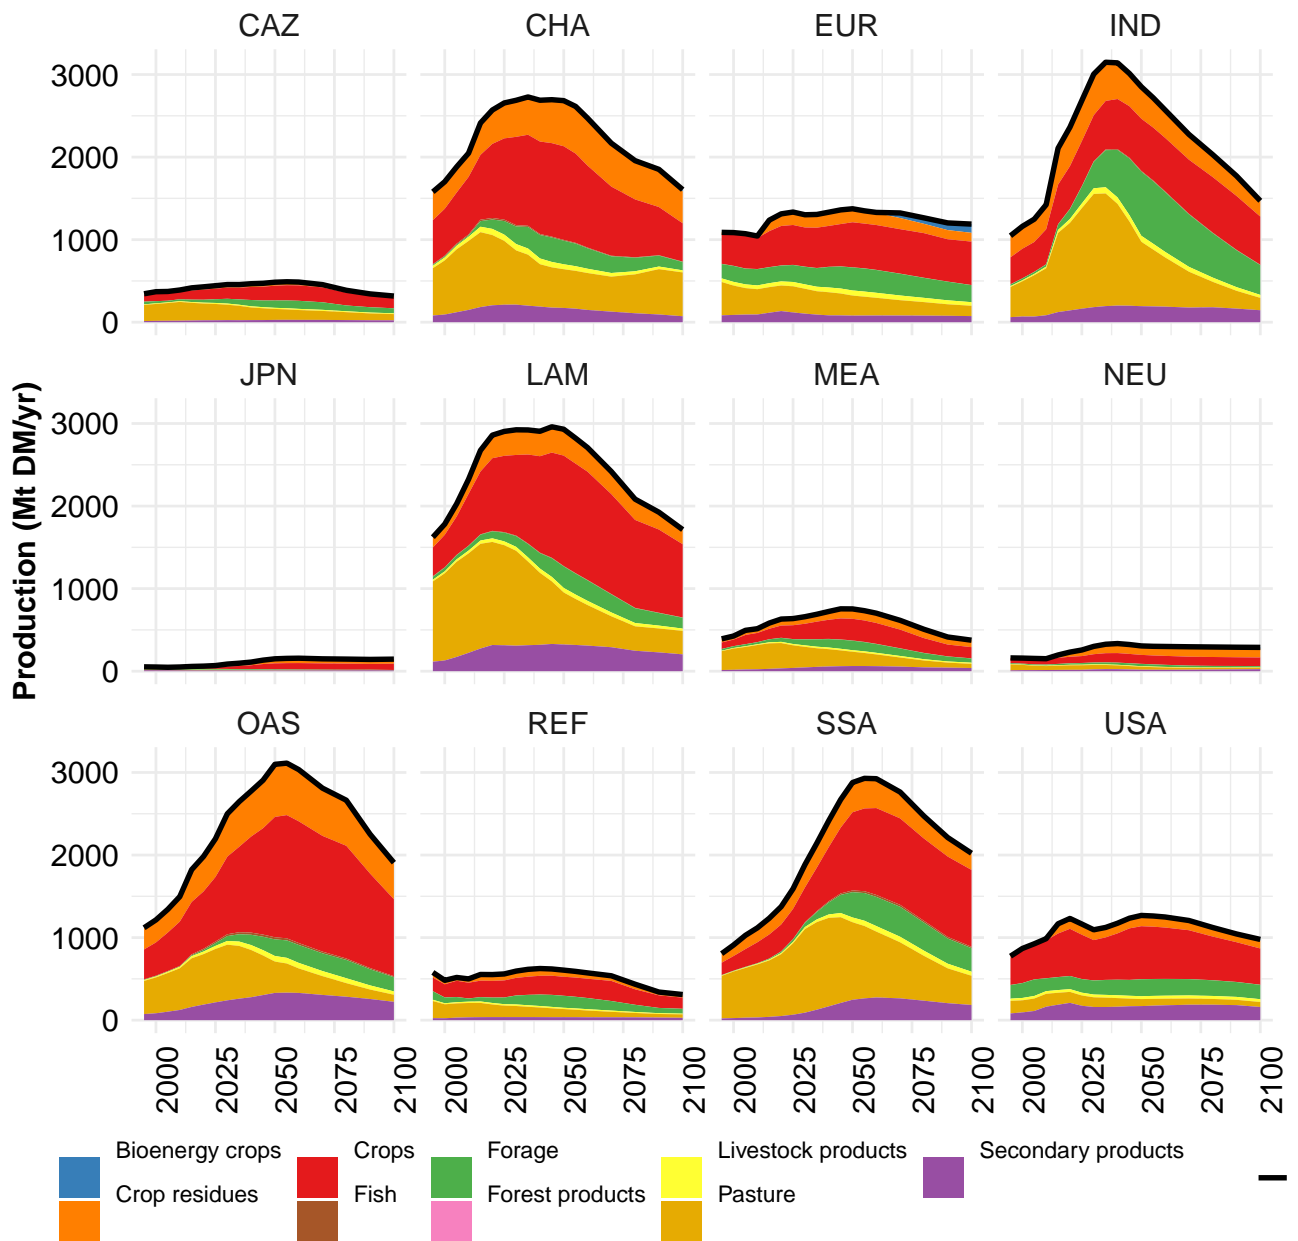

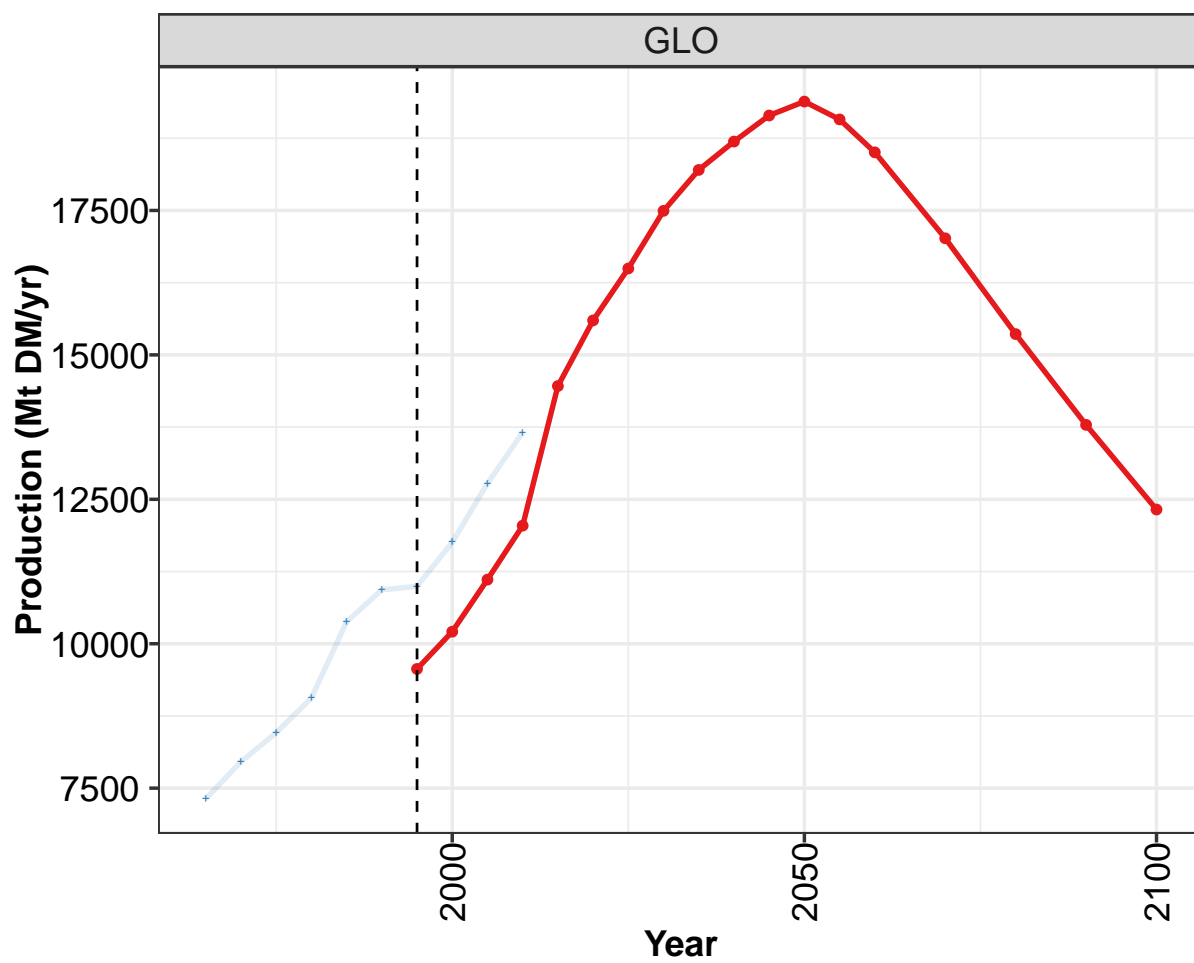

**Model output**

—●— MAgPIE m4p\_SSP1

**Historical data**

—+— FAO



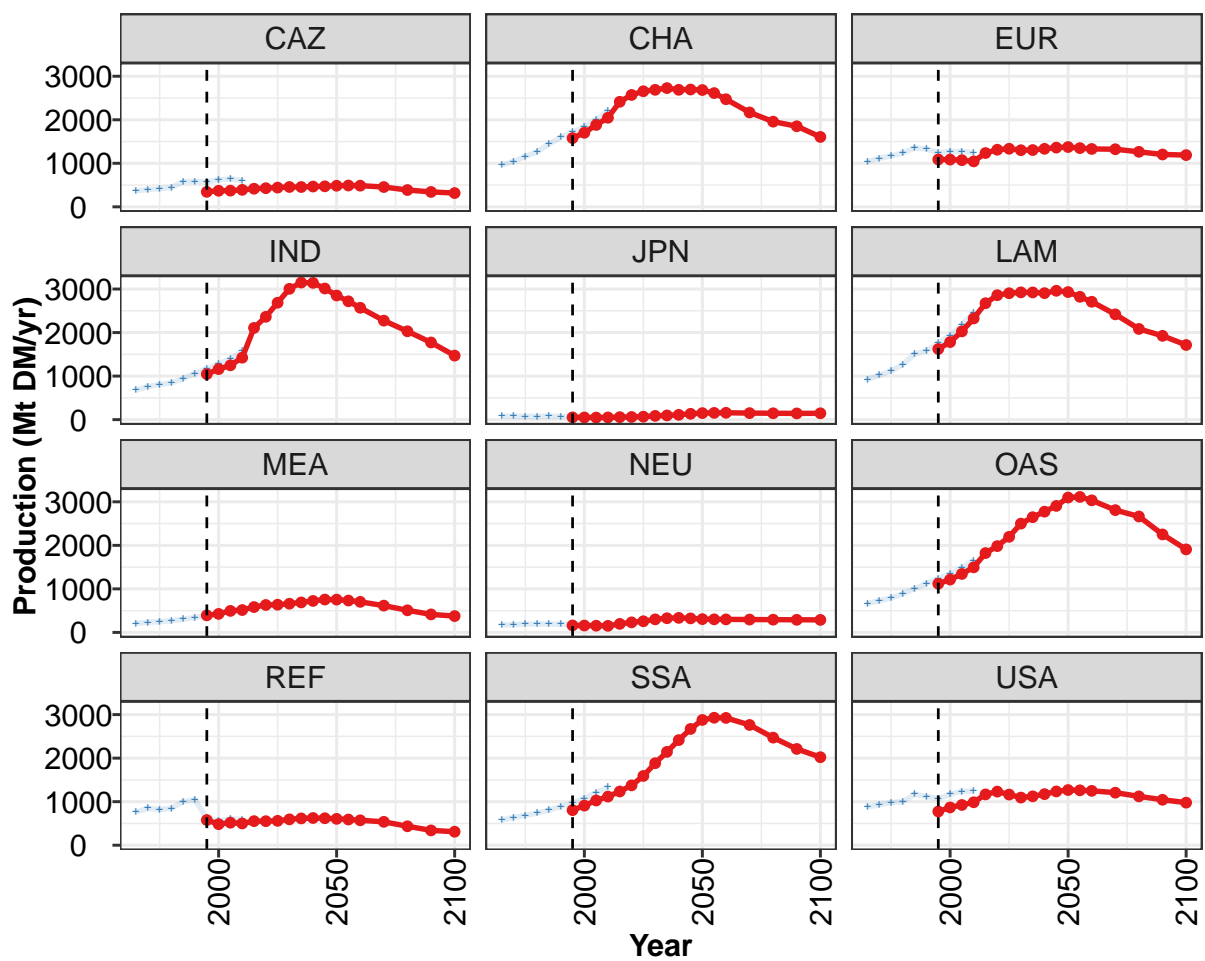

**Model output**

—●— MAgPIE m4p\_SSP1

**Historical data**

+— FAO

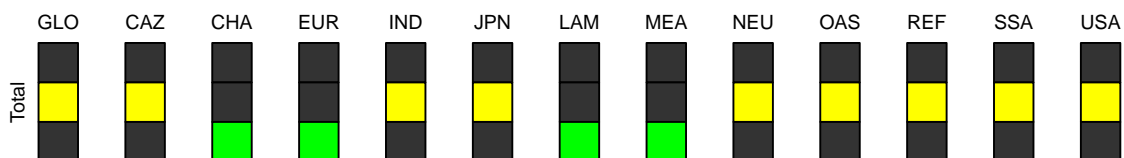

Figure 330: MAgPIE m4p\_SSP1 — Production (Mt DM/yr)

|     | 1995 | 2000  | 2005  | 2010  | 2015  | 2020  | 2025  | 2030  | 2035  | 2040  | 2045  |
|-----|------|-------|-------|-------|-------|-------|-------|-------|-------|-------|-------|
| GLO | 9564 | 10209 | 11110 | 12044 | 14461 | 15597 | 16496 | 17493 | 18202 | 18693 | 19144 |
| CAZ | 344  | 369   | 372   | 390   | 416   | 429   | 442   | 456   | 456   | 466   | 471   |
| CHA | 1579 | 1702  | 1882  | 2047  | 2413  | 2570  | 2656  | 2688  | 2728  | 2689  | 2695  |
| EUR | 1088 | 1085  | 1072  | 1044  | 1236  | 1312  | 1334  | 1301  | 1305  | 1333  | 1360  |
| IND | 1047 | 1161  | 1248  | 1423  | 2107  | 2362  | 2686  | 3005  | 3149  | 3141  | 3013  |
| JPN | 53   | 50    | 47    | 51    | 57    | 61    | 68    | 86    | 97    | 110   | 134   |
| LAM | 1623 | 1781  | 2028  | 2324  | 2674  | 2859  | 2904  | 2924  | 2922  | 2906  | 2960  |
| MEA | 392  | 426   | 495   | 514   | 583   | 631   | 637   | 660   | 690   | 723   | 755   |
| NEU | 161  | 158   | 155   | 151   | 196   | 231   | 257   | 300   | 326   | 335   | 323   |
| OAS | 1119 | 1215  | 1343  | 1496  | 1823  | 1983  | 2197  | 2500  | 2647  | 2775  | 2906  |
| REF | 578  | 483   | 517   | 500   | 553   | 552   | 560   | 594   | 616   | 625   | 620   |
| SSA | 805  | 910   | 1028  | 1118  | 1234  | 1375  | 1591  | 1884  | 2144  | 2416  | 2671  |
| USA | 775  | 868   | 925   | 987   | 1167  | 1232  | 1164  | 1094  | 1123  | 1174  | 1235  |

Table 1326: MAgPIE m4p-SSP1 — Production (Mt DM/yr) [PART 1/2]

|     | 2050  | 2055  | 2060  | 2070  | 2080  | 2090  | 2100  |
|-----|-------|-------|-------|-------|-------|-------|-------|
| GLO | 19385 | 19076 | 18506 | 17019 | 15360 | 13789 | 12323 |
| CAZ | 485   | 490   | 486   | 455   | 387   | 343   | 317   |
| CHA | 2684  | 2613  | 2472  | 2168  | 1957  | 1851  | 1606  |
| EUR | 1374  | 1349  | 1330  | 1323  | 1264  | 1203  | 1188  |
| IND | 2852  | 2718  | 2570  | 2275  | 2030  | 1772  | 1471  |
| JPN | 150   | 155   | 157   | 150   | 147   | 142   | 146   |
| LAM | 2930  | 2822  | 2708  | 2419  | 2084  | 1925  | 1715  |
| MEA | 754   | 733   | 702   | 616   | 508   | 414   | 376   |
| NEU | 306   | 301   | 299   | 296   | 293   | 290   | 288   |
| OAS | 3099  | 3113  | 3035  | 2810  | 2664  | 2252  | 1907  |
| REF | 606   | 591   | 572   | 537   | 435   | 340   | 310   |
| SSA | 2878  | 2929  | 2924  | 2763  | 2472  | 2212  | 2022  |
| USA | 1268  | 1262  | 1249  | 1207  | 1122  | 1044  | 978   |

Table 1327: MAgPIE m4p-SSP1 — Production (Mt DM/yr) [PART 2/2]

|     | 1965 | 1970 | 1975 | 1980 | 1985  | 1990  | 1995  | 2000  | 2005  | 2010  |
|-----|------|------|------|------|-------|-------|-------|-------|-------|-------|
| GLO | 7317 | 7958 | 8459 | 9061 | 10381 | 10933 | 10993 | 11756 | 12774 | 13658 |
| CAZ | 368  | 397  | 417  | 445  | 578   | 583   | 570   | 621   | 643   | 603   |
| CHA | 961  | 1042 | 1160 | 1264 | 1439  | 1599  | 1716  | 1836  | 1998  | 2207  |
| EUR | 1041 | 1114 | 1167 | 1236 | 1355  | 1327  | 1243  | 1271  | 1271  | 1247  |
| IND | 678  | 759  | 808  | 843  | 942   | 1062  | 1168  | 1278  | 1395  | 1577  |
| JPN | 83   | 80   | 73   | 75   | 80    | 75    | 67    | 61    | 57    | 59    |
| LAM | 921  | 1020 | 1118 | 1269 | 1505  | 1582  | 1760  | 1936  | 2181  | 2454  |
| MEA | 208  | 231  | 249  | 266  | 304   | 343   | 397   | 438   | 513   | 524   |
| NEU | 170  | 178  | 191  | 193  | 193   | 189   | 174   | 172   | 173   | 173   |
| OAS | 664  | 726  | 791  | 887  | 1004  | 1124  | 1234  | 1339  | 1486  | 1651  |
| REF | 759  | 849  | 820  | 846  | 1002  | 1044  | 622   | 558   | 612   | 591   |
| SSA | 580  | 635  | 684  | 737  | 806   | 887   | 969   | 1071  | 1210  | 1333  |
| USA | 882  | 927  | 980  | 1000 | 1172  | 1117  | 1072  | 1174  | 1237  | 1241  |

Table 1328: FAO — Production (Mt DM/yr)

## 42 Bioenergy crops

## 43 Crop residues

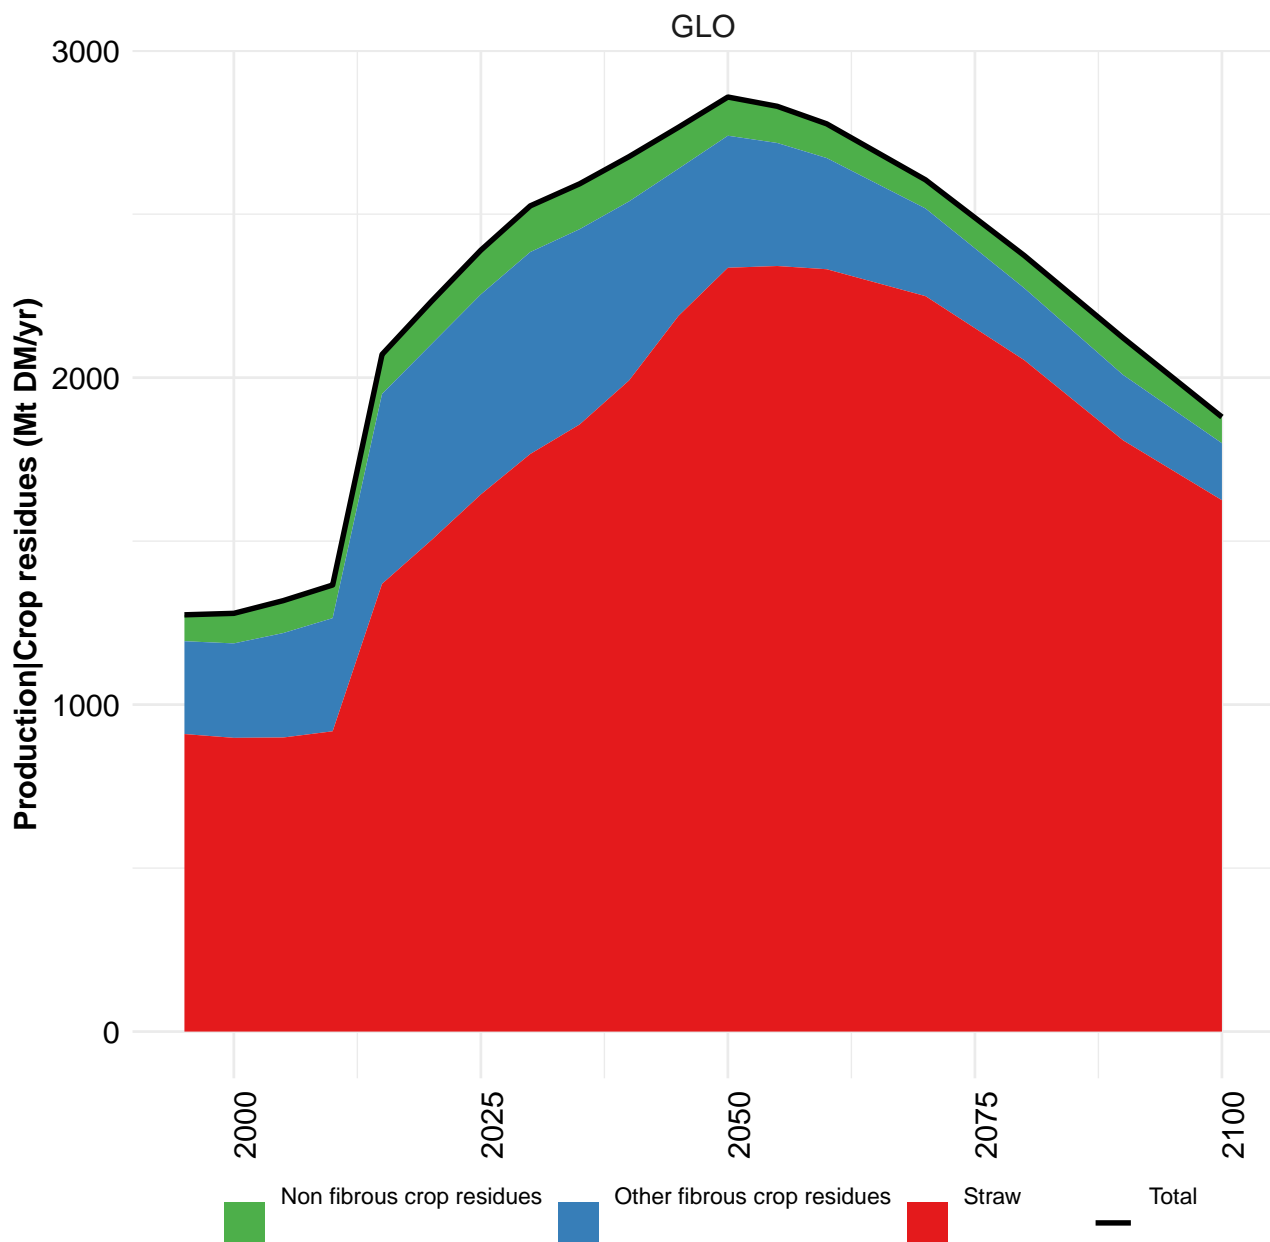

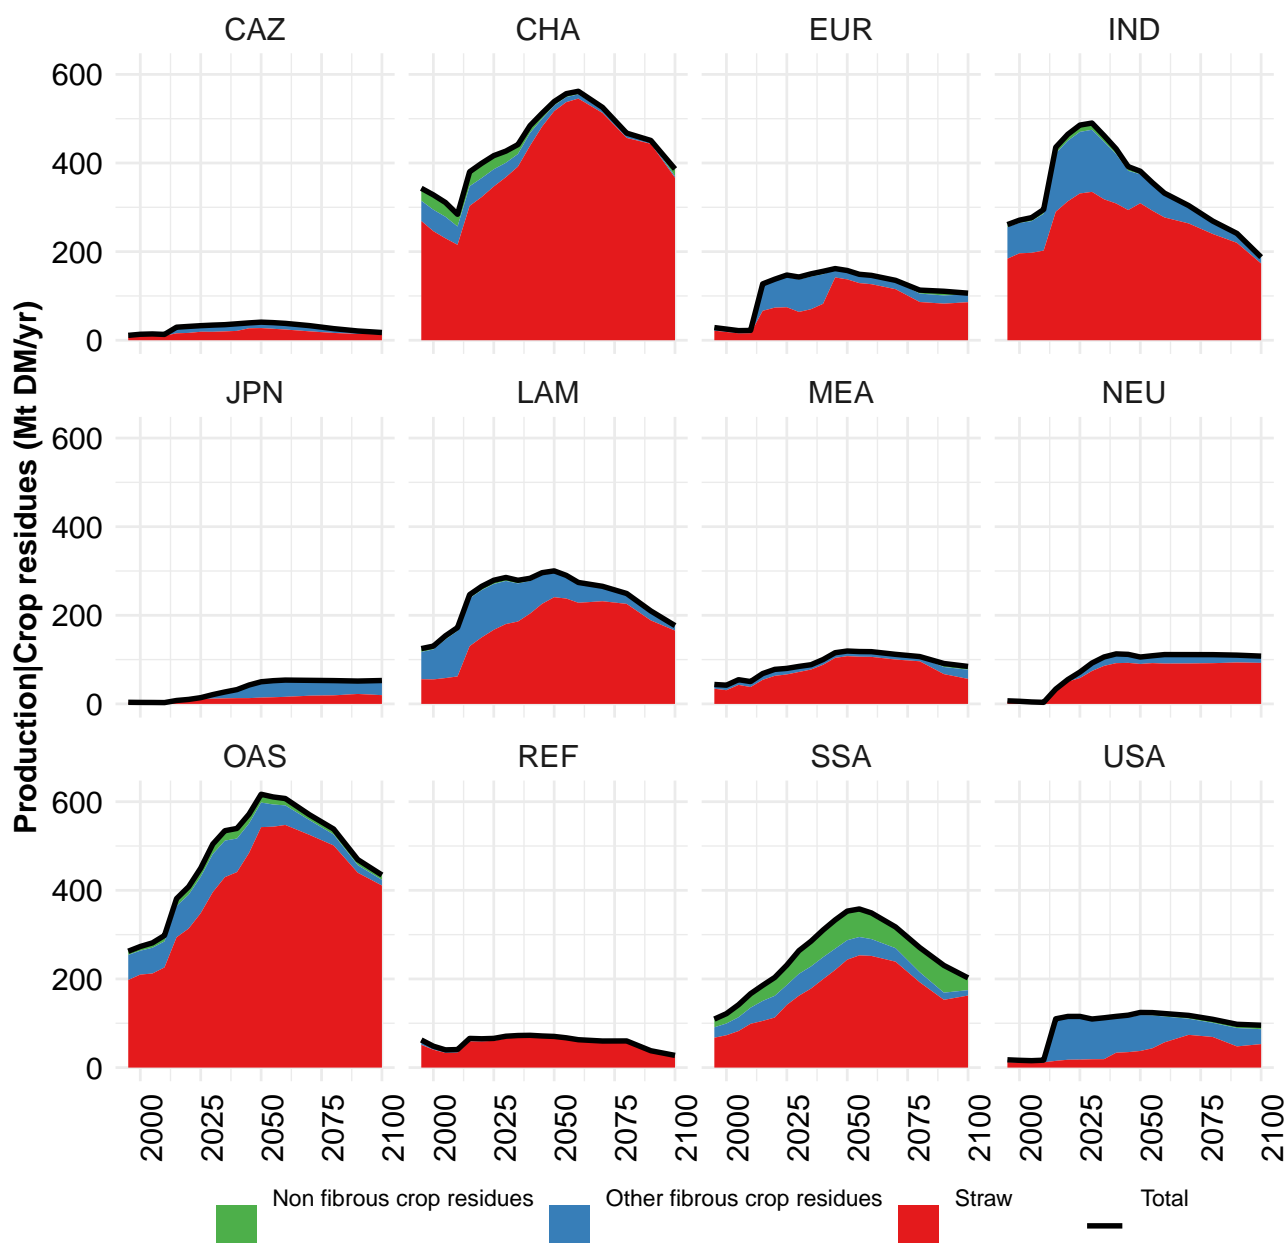

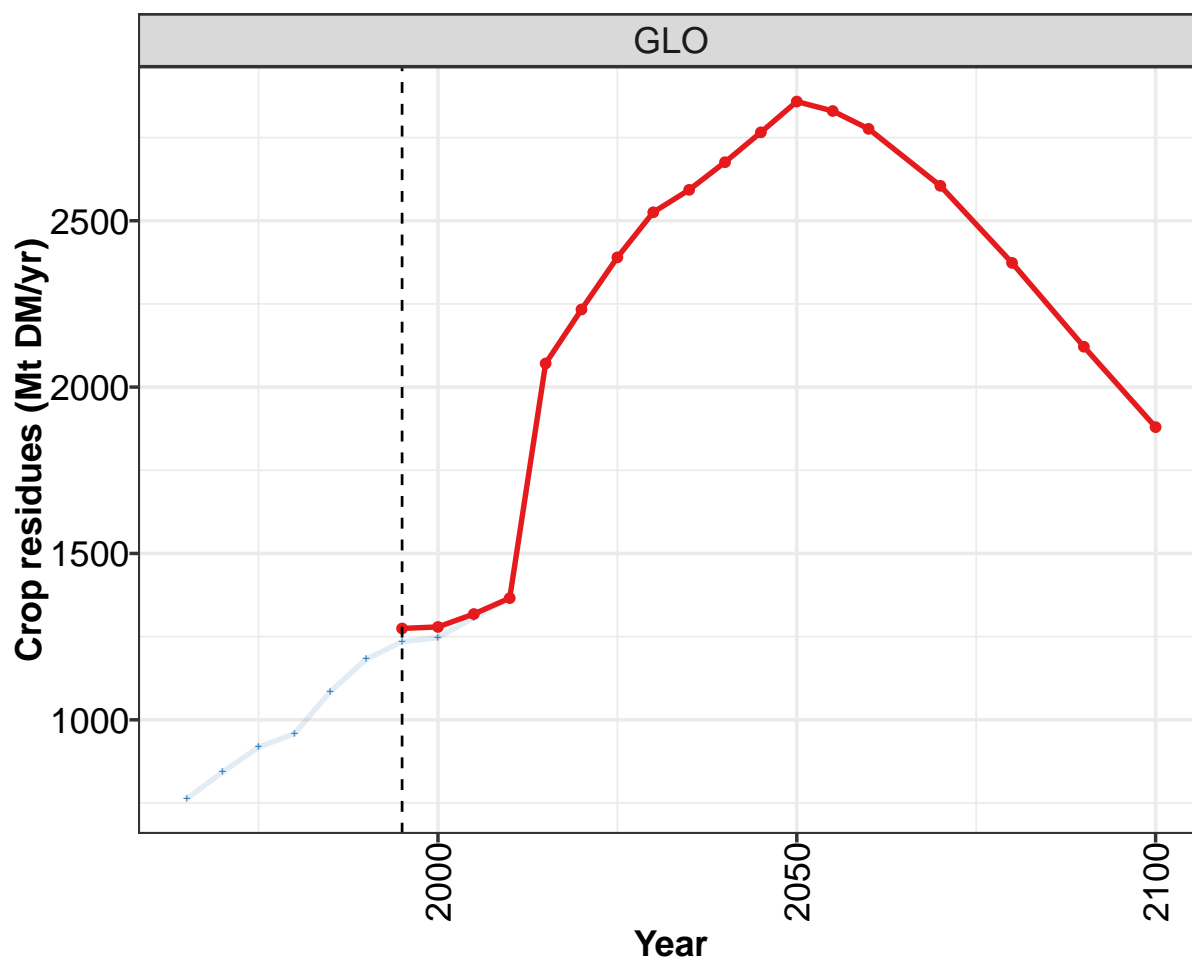**Model output**

—●— MAgPIE m4p\_SSP1

**Historical data**

—+— FAO

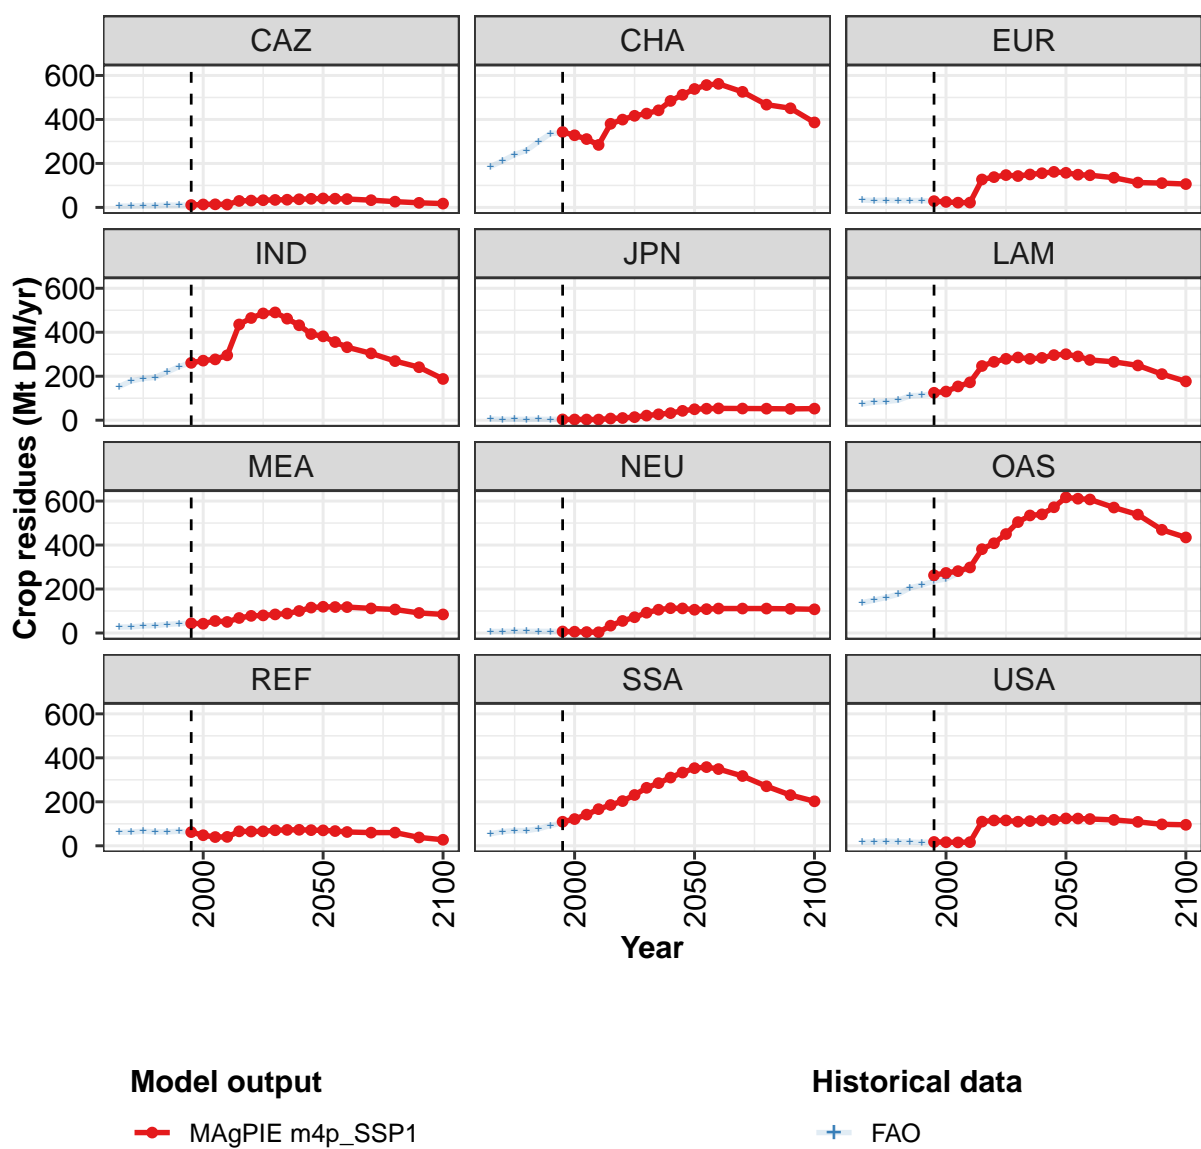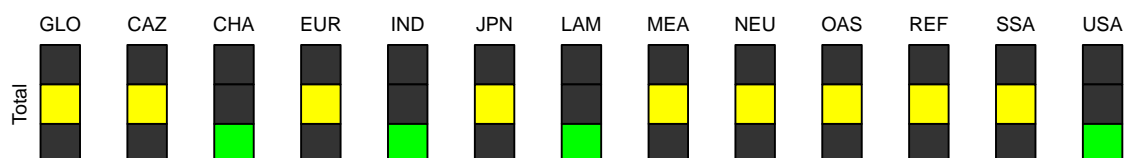

Figure 331: MAGPIE m4p\_SSP1 — Production—Crop residues (Mt DM/yr)

|     | 1995 | 2000 | 2005 | 2010 | 2015 | 2020 | 2025 | 2030 | 2035 | 2040 | 2045 |
|-----|------|------|------|------|------|------|------|------|------|------|------|
| GLO | 1275 | 1279 | 1318 | 1366 | 2071 | 2233 | 2390 | 2525 | 2593 | 2676 | 2766 |
| CAZ | 11   | 13   | 14   | 13   | 29   | 31   | 33   | 34   | 35   | 37   | 39   |
| CHA | 343  | 328  | 311  | 284  | 380  | 399  | 417  | 427  | 442  | 484  | 512  |
| EUR | 29   | 25   | 22   | 22   | 127  | 138  | 147  | 143  | 150  | 156  | 162  |
| IND | 261  | 271  | 277  | 295  | 435  | 465  | 486  | 490  | 462  | 432  | 392  |
| JPN | 4    | 3    | 3    | 3    | 8    | 10   | 14   | 21   | 27   | 32   | 43   |
| LAM | 125  | 130  | 154  | 172  | 247  | 265  | 279  | 285  | 279  | 283  | 296  |
| MEA | 44   | 42   | 55   | 50   | 68   | 78   | 80   | 85   | 88   | 100  | 116  |
| NEU | 7    | 6    | 4    | 3    | 33   | 55   | 72   | 92   | 106  | 113  | 112  |
| OAS | 263  | 273  | 281  | 298  | 381  | 408  | 450  | 504  | 535  | 540  | 572  |
| REF | 62   | 48   | 40   | 41   | 66   | 65   | 66   | 71   | 72   | 73   | 71   |
| SSA | 109  | 122  | 142  | 167  | 186  | 203  | 231  | 264  | 285  | 310  | 333  |
| USA | 18   | 16   | 16   | 17   | 110  | 115  | 115  | 110  | 112  | 115  | 118  |

Table 1329: MAgPIE m4p\_SSP1 — Production—Crop residues (Mt DM/yr) [PART 1/2]

|     | 2050 | 2055 | 2060 | 2070 | 2080 | 2090 | 2100 |
|-----|------|------|------|------|------|------|------|
| GLO | 2858 | 2830 | 2776 | 2605 | 2373 | 2121 | 1880 |
| CAZ | 41   | 40   | 38   | 33   | 26   | 21   | 17   |
| CHA | 539  | 556  | 562  | 526  | 467  | 451  | 387  |
| EUR | 157  | 149  | 146  | 135  | 113  | 111  | 106  |
| IND | 381  | 356  | 332  | 304  | 269  | 241  | 188  |
| JPN | 50   | 52   | 54   | 53   | 53   | 52   | 53   |
| LAM | 300  | 290  | 274  | 265  | 249  | 210  | 177  |
| MEA | 119  | 118  | 118  | 112  | 107  | 91   | 85   |
| NEU | 106  | 109  | 111  | 111  | 111  | 110  | 108  |
| OAS | 617  | 611  | 607  | 571  | 538  | 469  | 435  |
| REF | 70   | 67   | 63   | 60   | 60   | 38   | 27   |
| SSA | 353  | 358  | 349  | 317  | 271  | 231  | 202  |
| USA | 124  | 124  | 122  | 118  | 109  | 98   | 96   |

Table 1330: MAgPIE m4p\_SSP1 — Production—Crop residues (Mt DM/yr) [PART 2/2]

|     | 1965 | 1970 | 1975 | 1980 | 1985 | 1990 | 1995 | 2000 | 2005 | 2010 |
|-----|------|------|------|------|------|------|------|------|------|------|
| GLO | 763  | 843  | 918  | 958  | 1085 | 1182 | 1235 | 1247 | 1307 | 1365 |
| CAZ | 6    | 7    | 9    | 9    | 11   | 10   | 12   | 16   | 17   | 15   |
| CHA | 186  | 212  | 240  | 260  | 299  | 337  | 339  | 327  | 310  | 284  |
| EUR | 33   | 32   | 32   | 31   | 31   | 32   | 27   | 24   | 21   | 21   |
| IND | 153  | 179  | 190  | 195  | 219  | 244  | 262  | 272  | 280  | 298  |
| JPN | 6    | 4    | 4    | 4    | 4    | 4    | 4    | 3    | 3    | 3    |
| LAM | 74   | 82   | 85   | 91   | 111  | 113  | 121  | 128  | 150  | 167  |
| MEA | 27   | 28   | 32   | 34   | 39   | 42   | 45   | 42   | 55   | 50   |
| NEU | 7    | 7    | 8    | 8    | 8    | 7    | 7    | 6    | 4    | 3    |
| OAS | 138  | 150  | 161  | 176  | 205  | 219  | 236  | 246  | 271  | 299  |
| REF | 61   | 63   | 66   | 63   | 63   | 66   | 60   | 46   | 39   | 40   |
| SSA | 55   | 64   | 70   | 69   | 77   | 93   | 104  | 119  | 141  | 167  |
| USA | 16   | 18   | 20   | 19   | 17   | 15   | 18   | 17   | 16   | 17   |

Table 1331: FAO — Production—Crop residues (Mt DM/yr)

43.1 Non fibrous crop residues

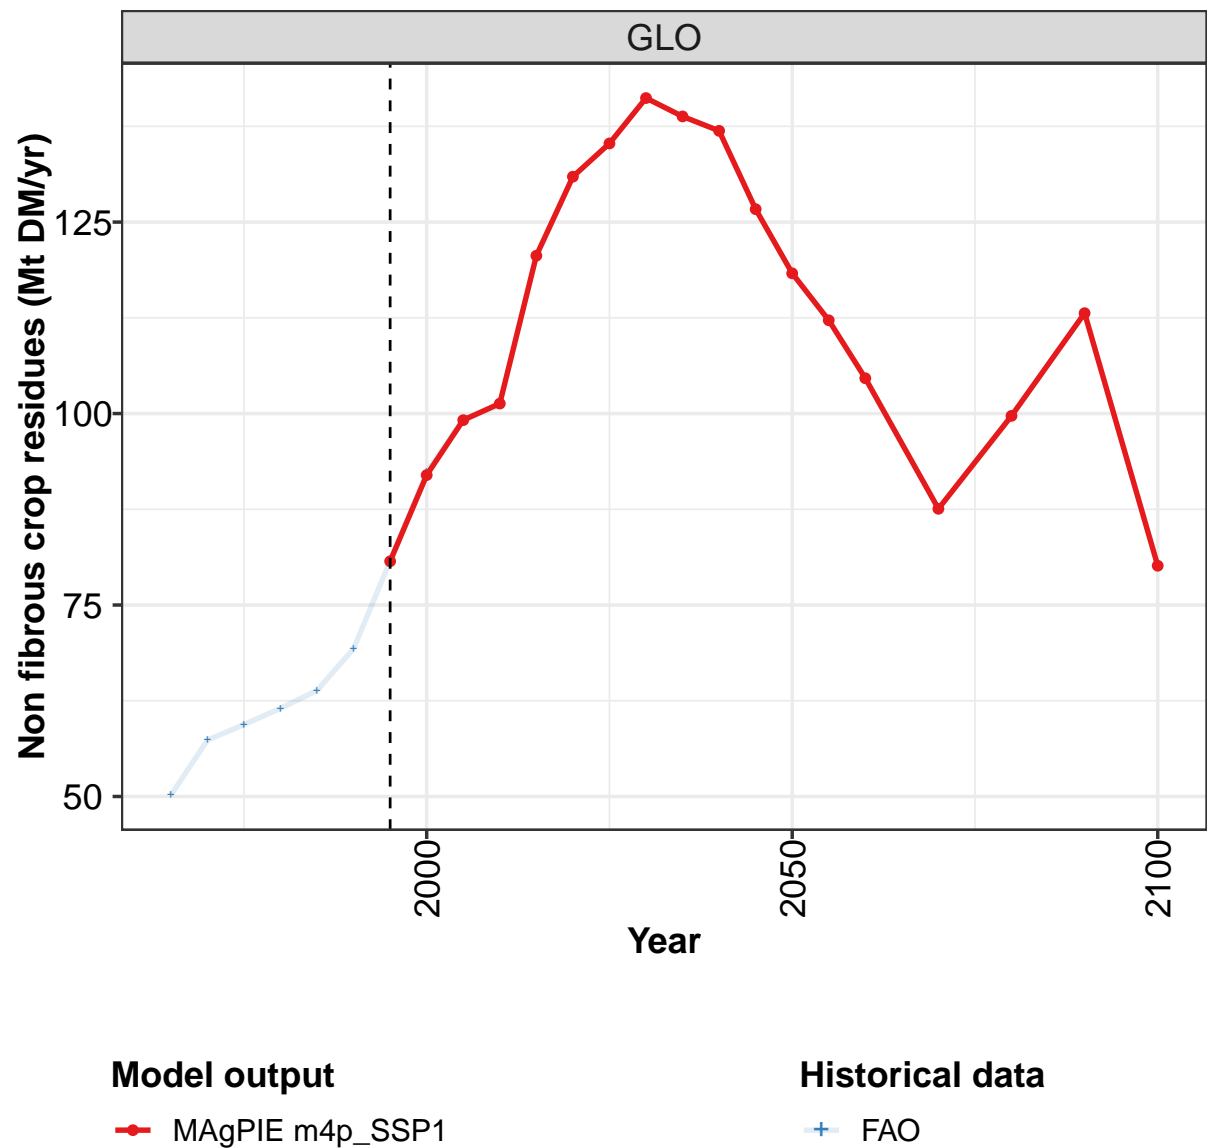



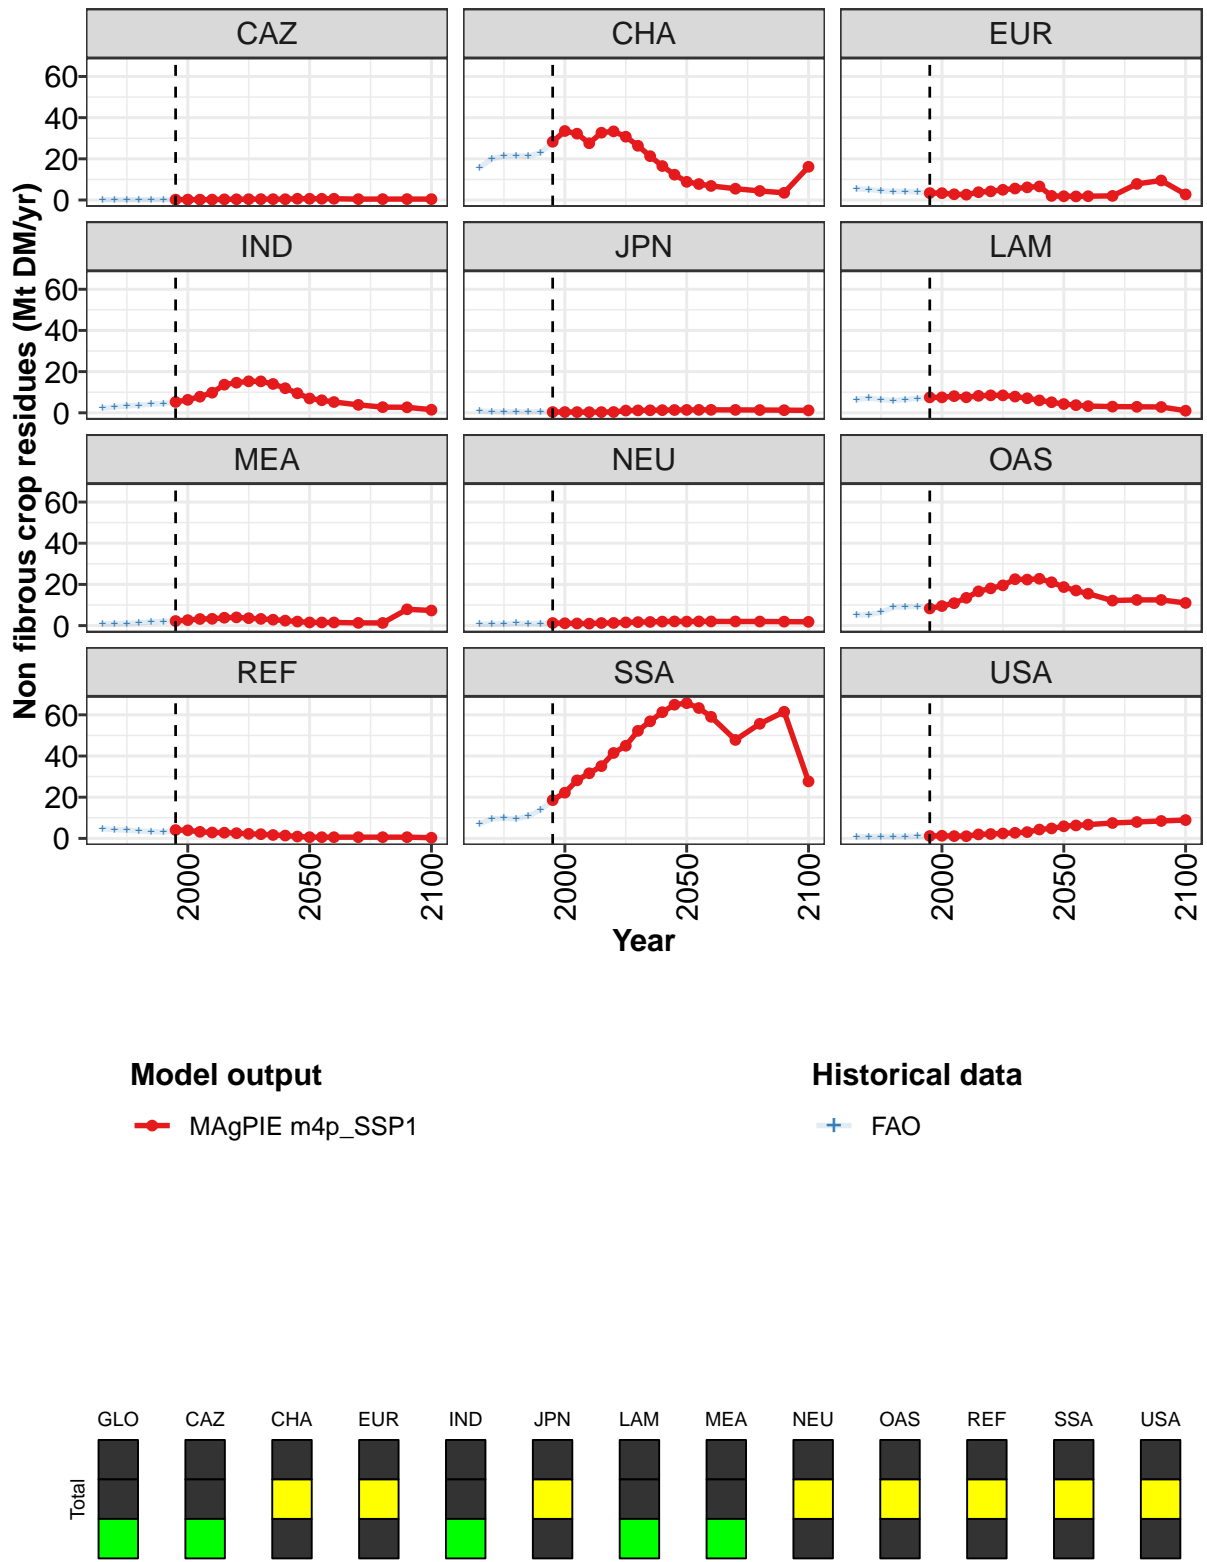

Figure 332: MAgPIE m4p\_SSP1 — Production—Crop residues—Non fibrous crop residues (Mt DM/yr)

|     | 1995 | 2000 | 2005 | 2010 | 2015 | 2020 | 2025 | 2030 | 2035 | 2040 | 2045 |
|-----|------|------|------|------|------|------|------|------|------|------|------|
| GLO | 81   | 92   | 99   | 101  | 121  | 131  | 135  | 141  | 139  | 137  | 127  |
| CAZ | 0    | 0    | 0    | 0    | 0    | 0    | 0    | 0    | 0    | 0    | 1    |
| CHA | 28   | 34   | 32   | 28   | 33   | 33   | 31   | 26   | 21   | 17   | 12   |
| EUR | 3    | 3    | 3    | 3    | 4    | 4    | 5    | 6    | 6    | 7    | 2    |
| IND | 5    | 6    | 8    | 10   | 14   | 15   | 15   | 15   | 14   | 12   | 9    |
| JPN | 0    | 0    | 0    | 0    | 0    | 0    | 1    | 1    | 1    | 1    | 1    |
| LAM | 8    | 8    | 8    | 8    | 8    | 8    | 8    | 8    | 7    | 6    | 5    |
| MEA | 2    | 3    | 3    | 3    | 4    | 4    | 4    | 3    | 3    | 2    | 2    |
| NEU | 1    | 1    | 1    | 1    | 1    | 1    | 2    | 2    | 2    | 2    | 2    |
| OAS | 8    | 9    | 11   | 13   | 17   | 18   | 20   | 23   | 22   | 23   | 21   |
| REF | 4    | 4    | 3    | 3    | 3    | 3    | 2    | 2    | 2    | 1    | 1    |
| SSA | 19   | 22   | 28   | 32   | 35   | 41   | 45   | 52   | 57   | 61   | 65   |
| USA | 1    | 1    | 1    | 1    | 2    | 2    | 2    | 3    | 3    | 4    | 5    |

Table 1332: MAgPIE m4p\_SSP1 — Production—Crop residues—Non fibrous crop residues (Mt DM/yr) [PART 1/2]

|     | 2050 | 2055 | 2060 | 2070 | 2080 | 2090 | 2100 |
|-----|------|------|------|------|------|------|------|
| GLO | 118  | 112  | 105  | 88   | 100  | 113  | 80   |
| CAZ | 1    | 1    | 1    | 0    | 0    | 0    | 0    |
| CHA | 9    | 8    | 7    | 5    | 4    | 3    | 16   |
| EUR | 2    | 2    | 2    | 2    | 8    | 9    | 3    |
| IND | 7    | 6    | 5    | 4    | 3    | 3    | 2    |
| JPN | 1    | 1    | 1    | 1    | 1    | 1    | 1    |
| LAM | 4    | 4    | 3    | 3    | 3    | 3    | 1    |
| MEA | 2    | 2    | 2    | 1    | 1    | 8    | 7    |
| NEU | 2    | 2    | 2    | 2    | 2    | 2    | 2    |
| OAS | 19   | 17   | 15   | 12   | 12   | 12   | 11   |
| REF | 1    | 1    | 1    | 1    | 1    | 1    | 0    |
| SSA | 66   | 63   | 59   | 48   | 56   | 62   | 28   |
| USA | 6    | 6    | 7    | 7    | 8    | 8    | 9    |

Table 1333: MAgPIE m4p\_SSP1 — Production—Crop residues—Non fibrous crop residues (Mt DM/yr) [PART 2/2]

|     | 1965 | 1970 | 1975 | 1980 | 1985 | 1990 | 1995 | 2000 | 2005 | 2010 |
|-----|------|------|------|------|------|------|------|------|------|------|
| GLO | 50   | 57   | 59   | 62   | 64   | 69   | 81   | 92   | 99   | 101  |
| CAZ | 0    | 0    | 0    | 0    | 0    | 0    | 0    | 0    | 0    | 0    |
| CHA | 16   | 20   | 21   | 22   | 21   | 23   | 28   | 33   | 32   | 28   |
| EUR | 5    | 5    | 5    | 4    | 4    | 4    | 3    | 3    | 3    | 3    |
| IND | 2    | 3    | 3    | 4    | 4    | 4    | 5    | 6    | 8    | 10   |
| JPN | 1    | 1    | 0    | 0    | 0    | 0    | 0    | 0    | 0    | 0    |
| LAM | 6    | 7    | 6    | 6    | 6    | 7    | 7    | 7    | 8    | 7    |
| MEA | 1    | 1    | 1    | 1    | 2    | 2    | 2    | 3    | 3    | 3    |
| NEU | 1    | 1    | 1    | 1    | 1    | 1    | 1    | 1    | 1    | 1    |
| OAS | 5    | 5    | 6    | 9    | 9    | 9    | 9    | 10   | 11   | 13   |
| REF | 5    | 4    | 4    | 4    | 3    | 3    | 4    | 4    | 3    | 3    |
| SSA | 7    | 9    | 10   | 9    | 11   | 14   | 19   | 23   | 28   | 32   |
| USA | 1    | 1    | 1    | 1    | 1    | 1    | 1    | 1    | 1    | 1    |

Table 1334: FAO — Production—Crop residues—Non fibrous crop residues (Mt DM/yr)

43.2 Other fibrous crop residues

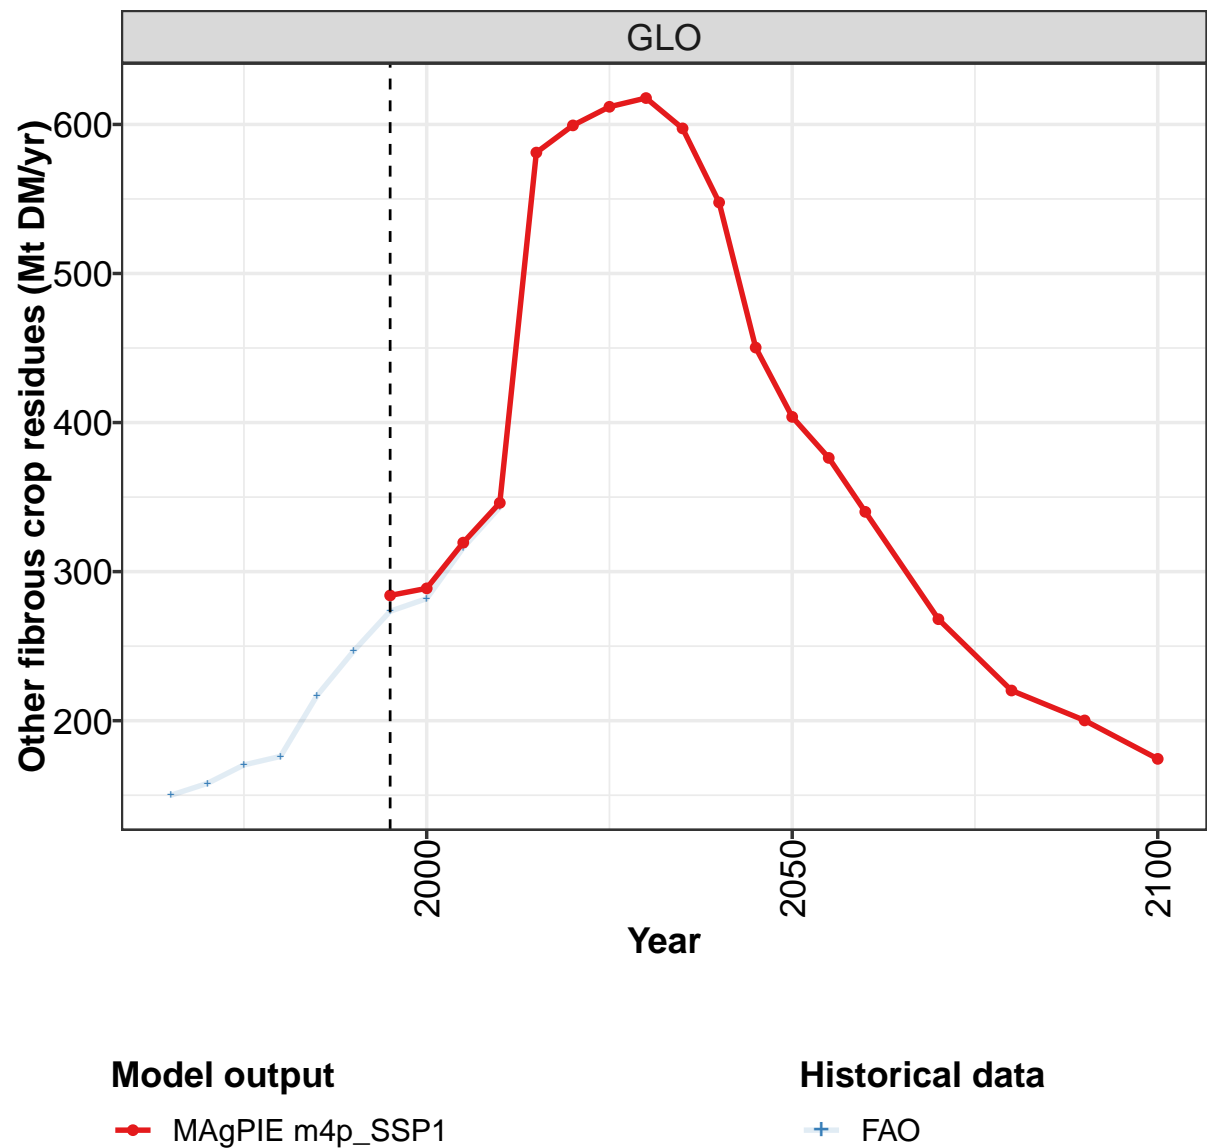

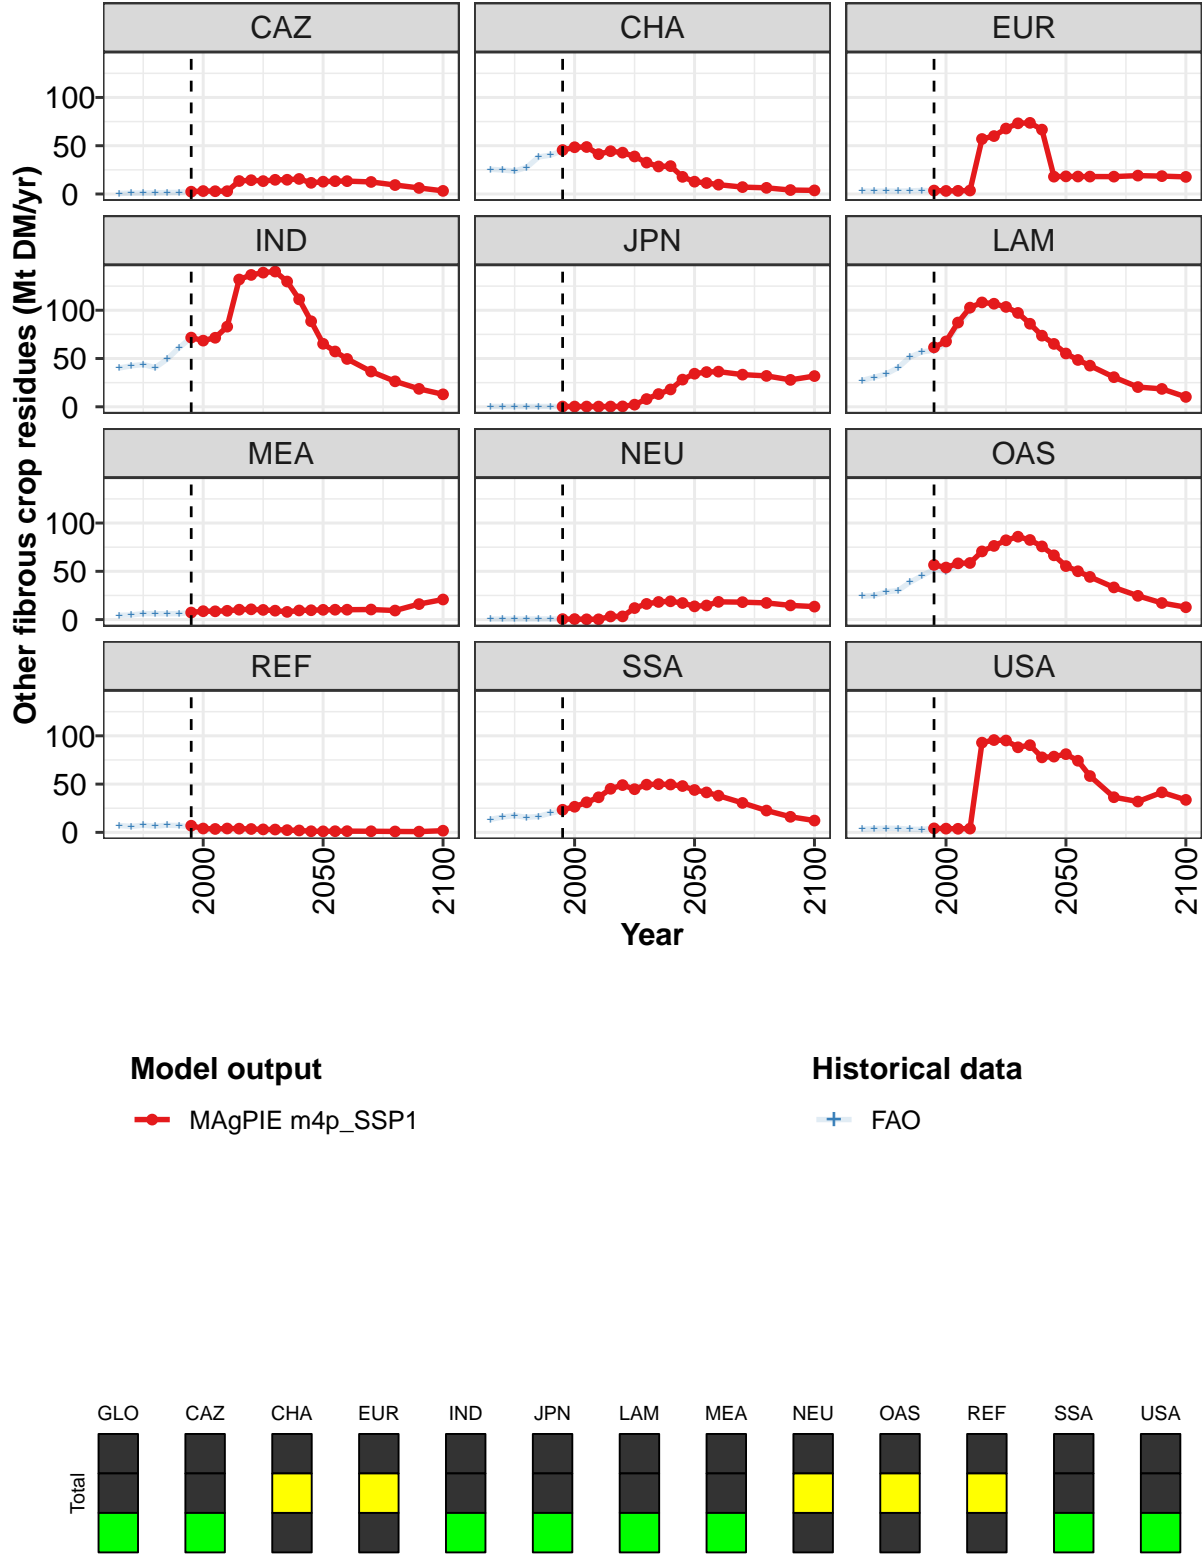

Figure 333: MAgPIE m4p\_SSP1 — Production—Crop residues—Other fibrous crop residues (Mt DM/yr)

|     | 1995 | 2000 | 2005 | 2010 | 2015 | 2020 | 2025 | 2030 | 2035 | 2040 | 2045 |
|-----|------|------|------|------|------|------|------|------|------|------|------|
| GLO | 284  | 289  | 319  | 346  | 581  | 599  | 612  | 618  | 597  | 548  | 450  |
| CAZ | 2    | 3    | 3    | 3    | 13   | 14   | 13   | 15   | 15   | 16   | 12   |
| CHA | 46   | 48   | 49   | 41   | 44   | 43   | 39   | 33   | 29   | 29   | 18   |
| EUR | 4    | 3    | 3    | 4    | 57   | 60   | 68   | 73   | 74   | 67   | 18   |
| IND | 72   | 69   | 72   | 83   | 132  | 137  | 139  | 140  | 130  | 111  | 89   |
| JPN | 0    | 0    | 0    | 0    | 0    | 0    | 2    | 8    | 13   | 18   | 28   |
| LAM | 62   | 68   | 87   | 103  | 108  | 107  | 103  | 97   | 86   | 74   | 65   |
| MEA | 7    | 9    | 9    | 9    | 10   | 11   | 10   | 9    | 8    | 9    | 10   |
| NEU | 0    | 1    | 0    | 0    | 3    | 3    | 12   | 16   | 18   | 19   | 17   |
| OAS | 57   | 54   | 58   | 59   | 71   | 76   | 82   | 86   | 82   | 76   | 67   |
| REF | 7    | 4    | 4    | 4    | 4    | 4    | 3    | 3    | 2    | 2    | 1    |
| SSA | 23   | 27   | 31   | 36   | 45   | 49   | 45   | 49   | 50   | 50   | 48   |
| USA | 4    | 4    | 4    | 4    | 93   | 96   | 95   | 88   | 90   | 78   | 79   |

Table 1335: MAgPIE m4p\_SSP1 — Production—Crop residues—Other fibrous crop residues (Mt DM/yr)  
[PART 1/2]

|     | 2050 | 2055 | 2060 | 2070 | 2080 | 2090 | 2100 |
|-----|------|------|------|------|------|------|------|
| GLO | 404  | 376  | 340  | 268  | 220  | 200  | 174  |
| CAZ | 13   | 13   | 13   | 12   | 9    | 6    | 3    |
| CHA | 13   | 11   | 10   | 7    | 6    | 4    | 4    |
| EUR | 18   | 18   | 18   | 18   | 19   | 19   | 18   |
| IND | 65   | 57   | 50   | 37   | 26   | 19   | 13   |
| JPN | 34   | 36   | 36   | 33   | 32   | 28   | 32   |
| LAM | 55   | 49   | 43   | 31   | 20   | 19   | 10   |
| MEA | 10   | 10   | 10   | 10   | 9    | 16   | 21   |
| NEU | 14   | 15   | 18   | 18   | 17   | 15   | 13   |
| OAS | 55   | 50   | 44   | 33   | 25   | 17   | 13   |
| REF | 1    | 1    | 1    | 1    | 1    | 1    | 2    |
| SSA | 44   | 41   | 38   | 31   | 23   | 16   | 12   |
| USA | 81   | 74   | 58   | 36   | 32   | 41   | 34   |

Table 1336: MAgPIE m4p\_SSP1 — Production—Crop residues—Other fibrous crop residues (Mt DM/yr)  
[PART 2/2]

|     | 1965 | 1970 | 1975 | 1980 | 1985 | 1990 | 1995 | 2000 | 2005 | 2010 |
|-----|------|------|------|------|------|------|------|------|------|------|
| GLO | 150  | 158  | 170  | 176  | 217  | 247  | 273  | 282  | 316  | 343  |
| CAZ | 1    | 1    | 1    | 1    | 2    | 2    | 3    | 4    | 4    | 3    |
| CHA | 26   | 25   | 24   | 28   | 38   | 40   | 45   | 48   | 48   | 41   |
| EUR | 3    | 3    | 3    | 3    | 3    | 4    | 3    | 3    | 3    | 4    |
| IND | 40   | 42   | 44   | 41   | 49   | 61   | 72   | 69   | 72   | 83   |
| JPN | 0    | 0    | 0    | 0    | 0    | 0    | 0    | 0    | 0    | 0    |
| LAM | 27   | 31   | 34   | 41   | 52   | 57   | 58   | 65   | 85   | 99   |
| MEA | 4    | 5    | 6    | 6    | 6    | 6    | 7    | 9    | 9    | 9    |
| NEU | 1    | 1    | 1    | 1    | 1    | 1    | 1    | 1    | 0    | 0    |
| OAS | 24   | 25   | 29   | 30   | 39   | 46   | 52   | 50   | 56   | 58   |
| REF | 7    | 6    | 7    | 6    | 7    | 7    | 5    | 3    | 3    | 4    |
| SSA | 14   | 16   | 17   | 16   | 17   | 20   | 23   | 26   | 31   | 36   |
| USA | 3    | 4    | 4    | 4    | 3    | 3    | 4    | 4    | 4    | 4    |

Table 1337: FAO — Production—Crop residues—Other fibrous crop residues (Mt DM/yr)

43.3 Straw

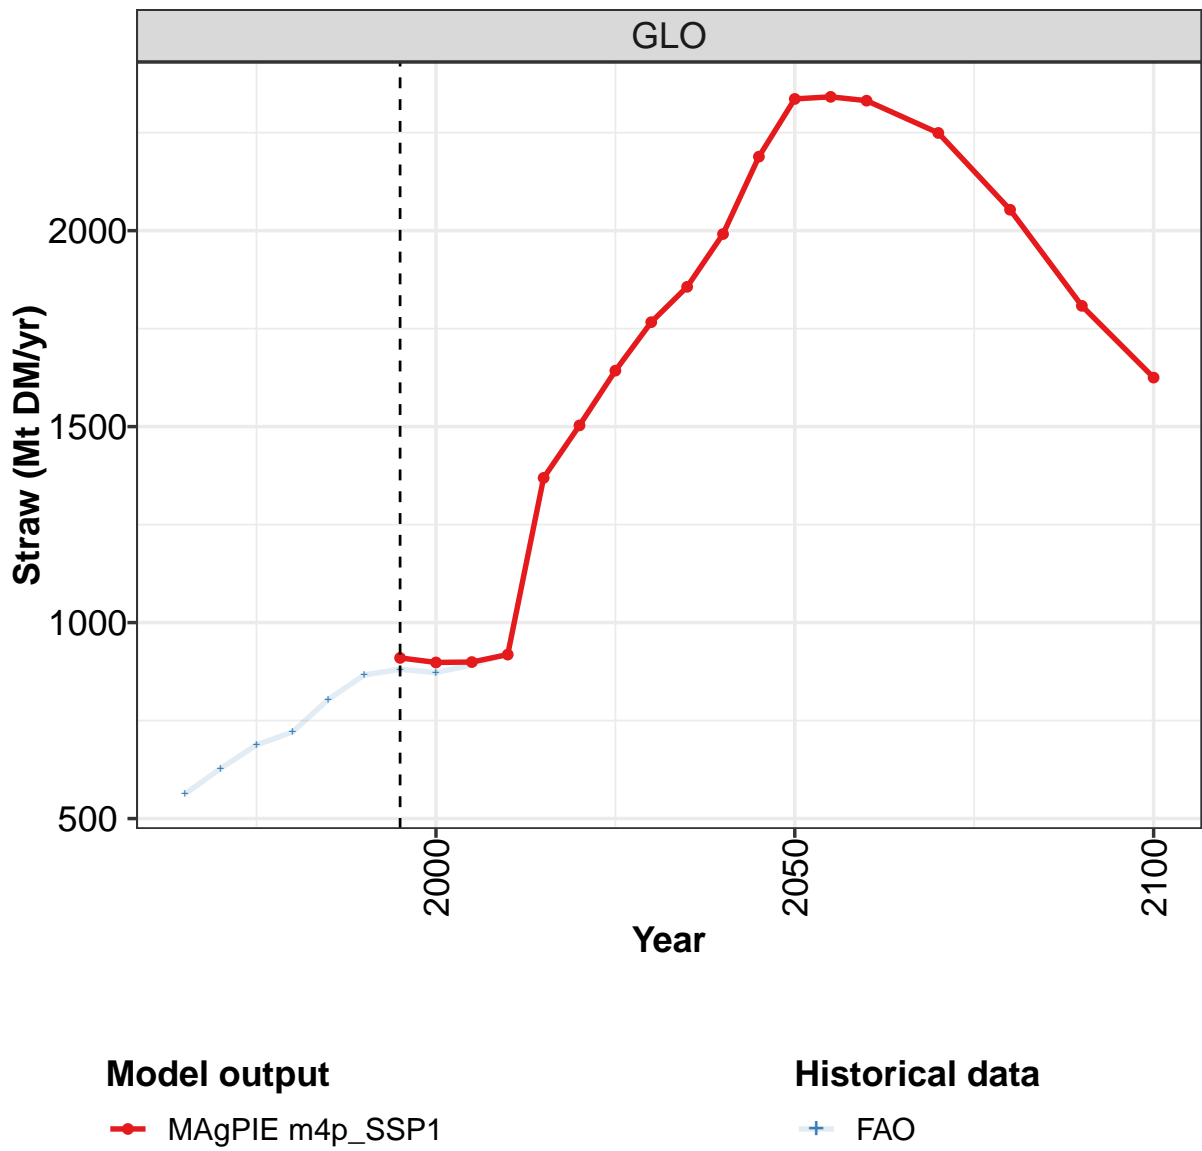

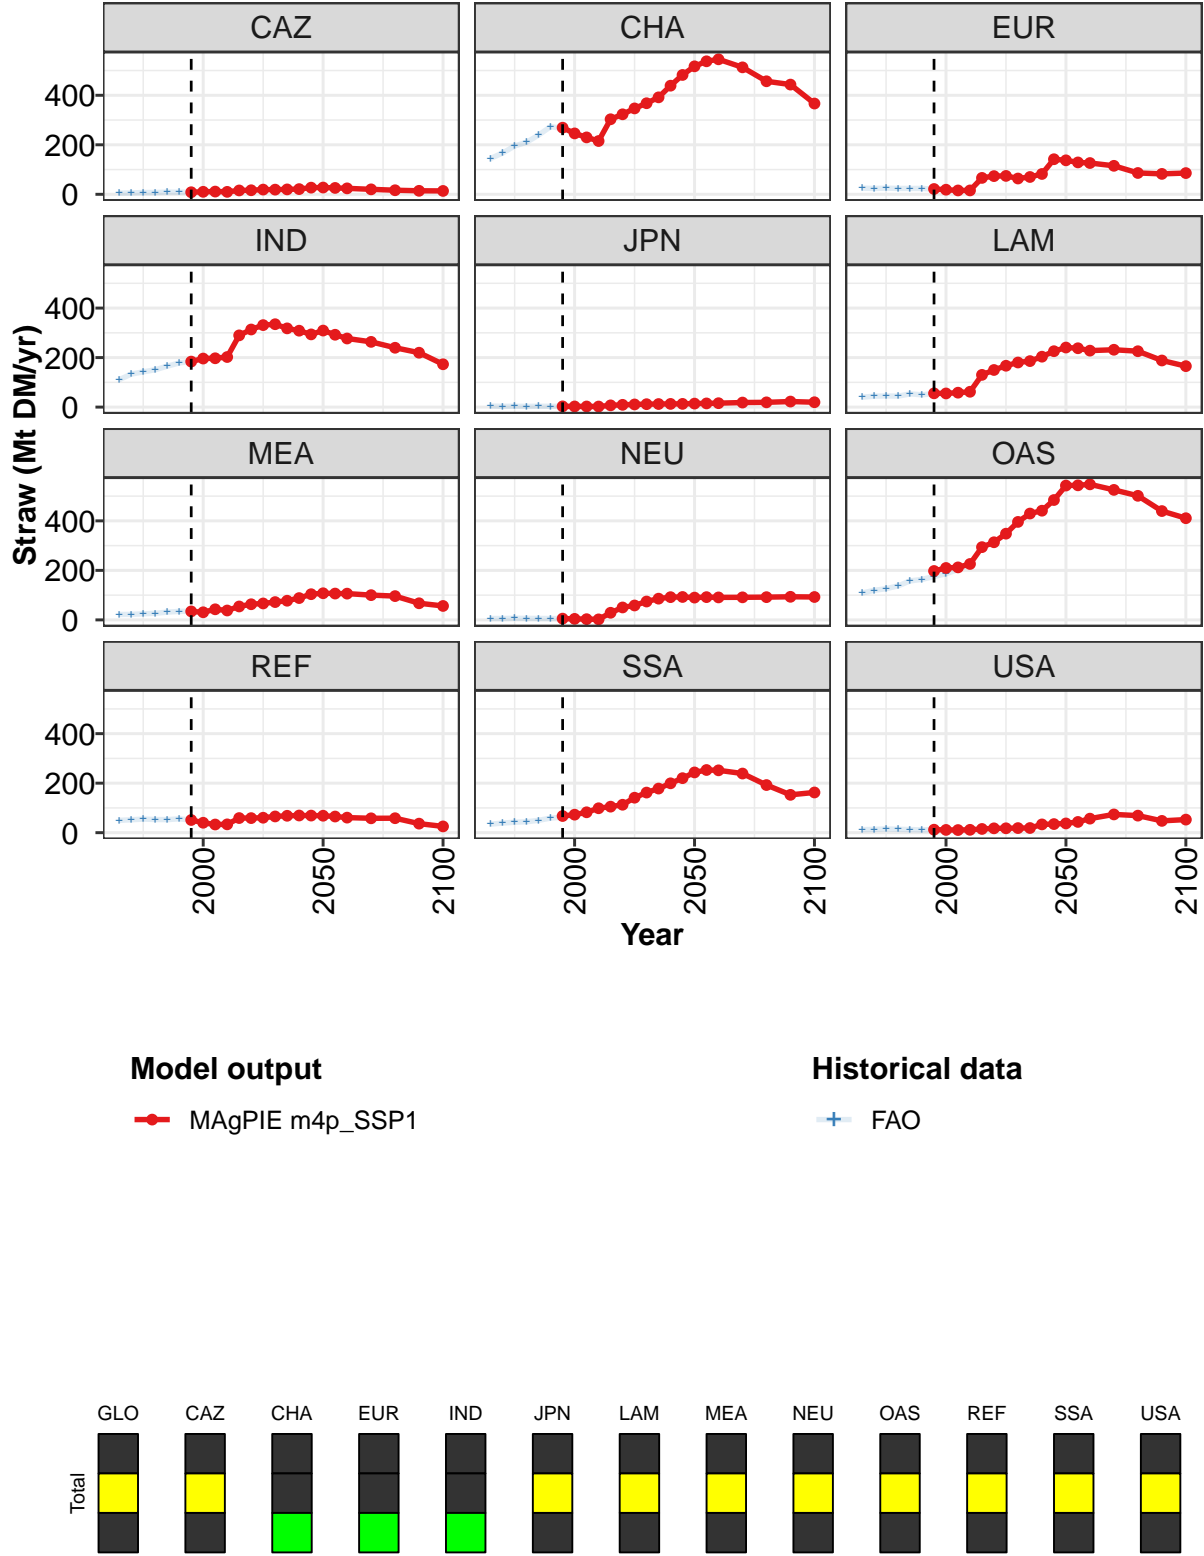

Figure 334: MAgPIE m4p\_SSP1 — Production—Crop residues—Straw (Mt DM/yr)

|     | 1995 | 2000 | 2005 | 2010 | 2015 | 2020 | 2025 | 2030 | 2035 | 2040 | 2045 |
|-----|------|------|------|------|------|------|------|------|------|------|------|
| GLO | 910  | 898  | 899  | 918  | 1369 | 1503 | 1643 | 1767 | 1857 | 1991 | 2189 |
| CAZ | 8    | 10   | 11   | 10   | 16   | 17   | 19   | 19   | 20   | 21   | 27   |
| CHA | 269  | 246  | 230  | 215  | 303  | 323  | 347  | 368  | 392  | 439  | 482  |
| EUR | 22   | 19   | 16   | 16   | 66   | 74   | 74   | 64   | 70   | 82   | 142  |
| IND | 184  | 196  | 197  | 202  | 290  | 314  | 331  | 335  | 318  | 309  | 294  |
| JPN | 3    | 3    | 3    | 2    | 7    | 9    | 11   | 12   | 13   | 13   | 13   |
| LAM | 56   | 55   | 58   | 62   | 130  | 150  | 167  | 180  | 186  | 204  | 226  |
| MEA | 34   | 31   | 43   | 38   | 54   | 63   | 66   | 72   | 78   | 88   | 104  |
| NEU | 5    | 4    | 3    | 2    | 29   | 50   | 58   | 74   | 86   | 92   | 93   |
| OAS | 198  | 210  | 212  | 226  | 294  | 314  | 348  | 396  | 430  | 441  | 484  |
| REF | 51   | 40   | 33   | 34   | 59   | 59   | 60   | 66   | 68   | 69   | 69   |
| SSA | 67   | 73   | 82   | 99   | 105  | 113  | 141  | 162  | 178  | 200  | 220  |
| USA | 12   | 11   | 11   | 12   | 15   | 18   | 18   | 19   | 19   | 33   | 35   |

Table 1338: MAgPIE m4p\_SSP1 — Production—Crop residues—Straw (Mt DM/yr) [PART 1/2]

|     | 2050 | 2055 | 2060 | 2070 | 2080 | 2090 | 2100 |
|-----|------|------|------|------|------|------|------|
| GLO | 2336 | 2341 | 2332 | 2249 | 2053 | 1808 | 1625 |
| CAZ | 27   | 26   | 24   | 20   | 16   | 14   | 14   |
| CHA | 517  | 537  | 545  | 513  | 457  | 443  | 367  |
| EUR | 137  | 129  | 126  | 115  | 86   | 83   | 86   |
| IND | 309  | 292  | 277  | 264  | 240  | 220  | 173  |
| JPN | 14   | 15   | 16   | 18   | 19   | 22   | 20   |
| LAM | 241  | 238  | 228  | 232  | 226  | 188  | 165  |
| MEA | 108  | 106  | 106  | 100  | 96   | 67   | 56   |
| NEU | 90   | 92   | 91   | 91   | 92   | 93   | 93   |
| OAS | 543  | 544  | 548  | 525  | 501  | 440  | 411  |
| REF | 69   | 65   | 61   | 58   | 59   | 37   | 25   |
| SSA | 244  | 253  | 252  | 239  | 192  | 153  | 163  |
| USA | 37   | 44   | 57   | 74   | 69   | 48   | 53   |

Table 1339: MAgPIE m4p\_SSP1 — Production—Crop residues—Straw (Mt DM/yr) [PART 2/2]

|     | 1965 | 1970 | 1975 | 1980 | 1985 | 1990 | 1995 | 2000 | 2005 | 2010 |
|-----|------|------|------|------|------|------|------|------|------|------|
| GLO | 563  | 628  | 688  | 721  | 804  | 866  | 881  | 873  | 892  | 921  |
| CAZ | 5    | 6    | 7    | 7    | 9    | 8    | 9    | 12   | 14   | 12   |
| CHA | 145  | 167  | 195  | 210  | 239  | 274  | 266  | 246  | 230  | 215  |
| EUR | 25   | 24   | 25   | 24   | 24   | 24   | 21   | 18   | 15   | 15   |
| IND | 111  | 133  | 142  | 151  | 165  | 178  | 185  | 198  | 200  | 205  |
| JPN | 4    | 3    | 4    | 3    | 3    | 3    | 3    | 3    | 3    | 2    |
| LAM | 40   | 44   | 45   | 44   | 53   | 50   | 55   | 56   | 57   | 60   |
| MEA | 22   | 22   | 25   | 27   | 31   | 34   | 35   | 31   | 43   | 38   |
| NEU | 6    | 6    | 7    | 6    | 6    | 6    | 5    | 4    | 3    | 2    |
| OAS | 108  | 119  | 126  | 137  | 157  | 164  | 175  | 186  | 204  | 227  |
| REF | 50   | 52   | 55   | 53   | 53   | 56   | 51   | 39   | 32   | 33   |
| SSA | 35   | 39   | 42   | 44   | 50   | 59   | 63   | 70   | 81   | 99   |
| USA | 12   | 13   | 15   | 14   | 13   | 11   | 13   | 12   | 11   | 12   |

Table 1340: FAO — Production—Crop residues—Straw (Mt DM/yr)



44 Crops

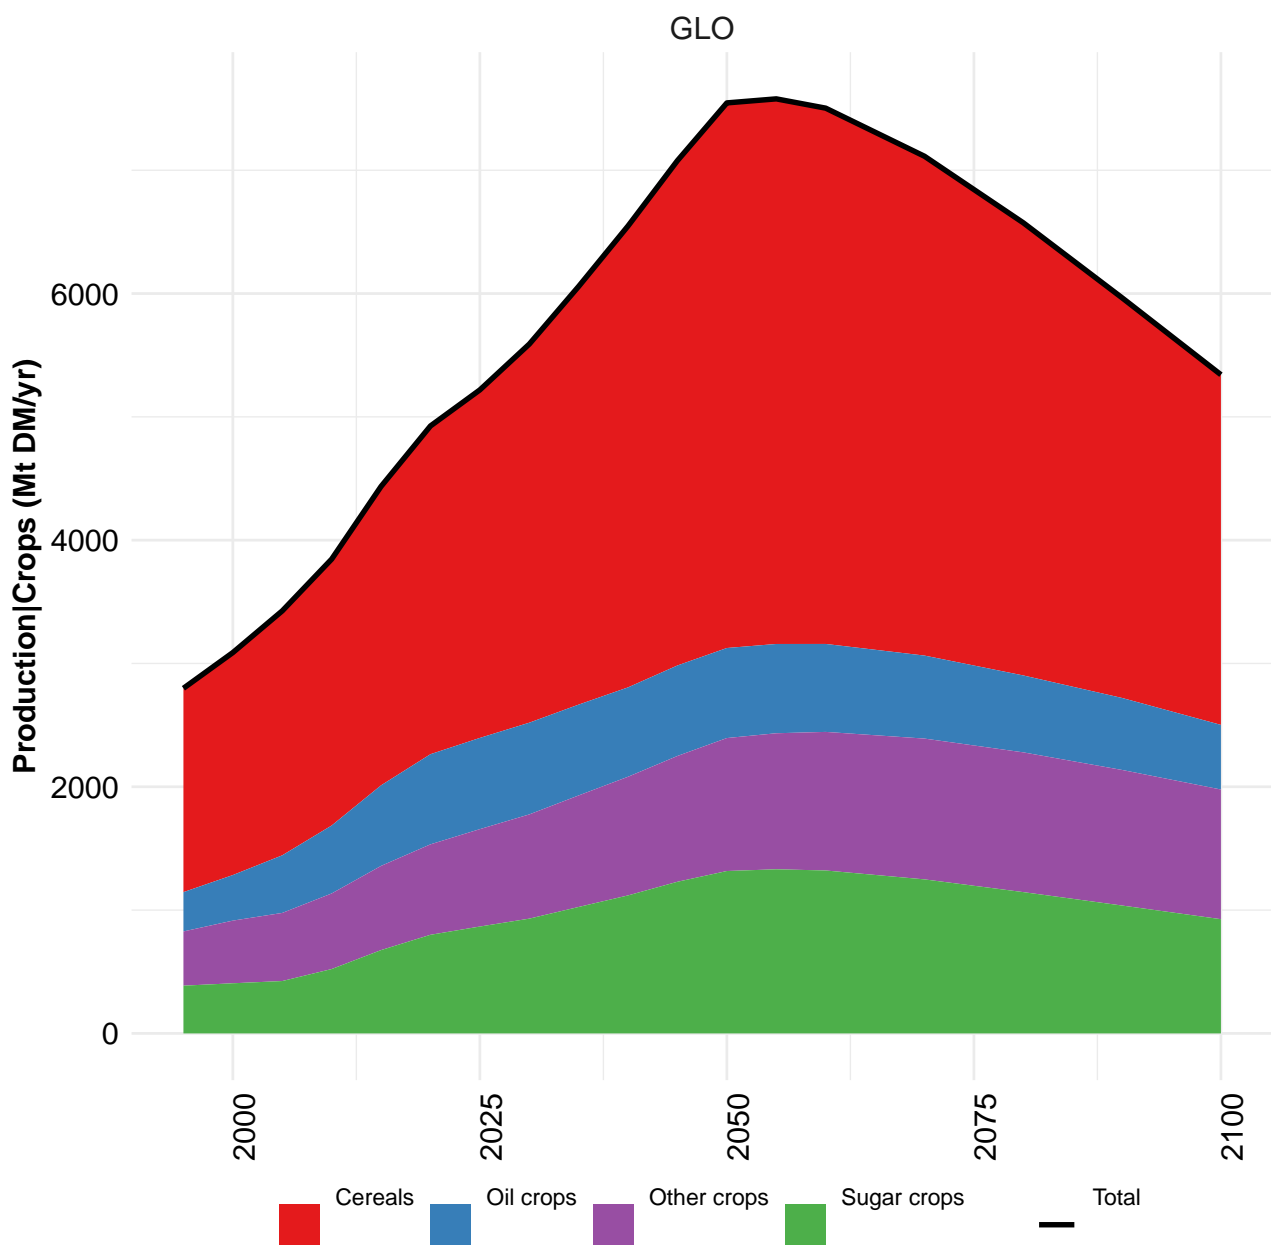

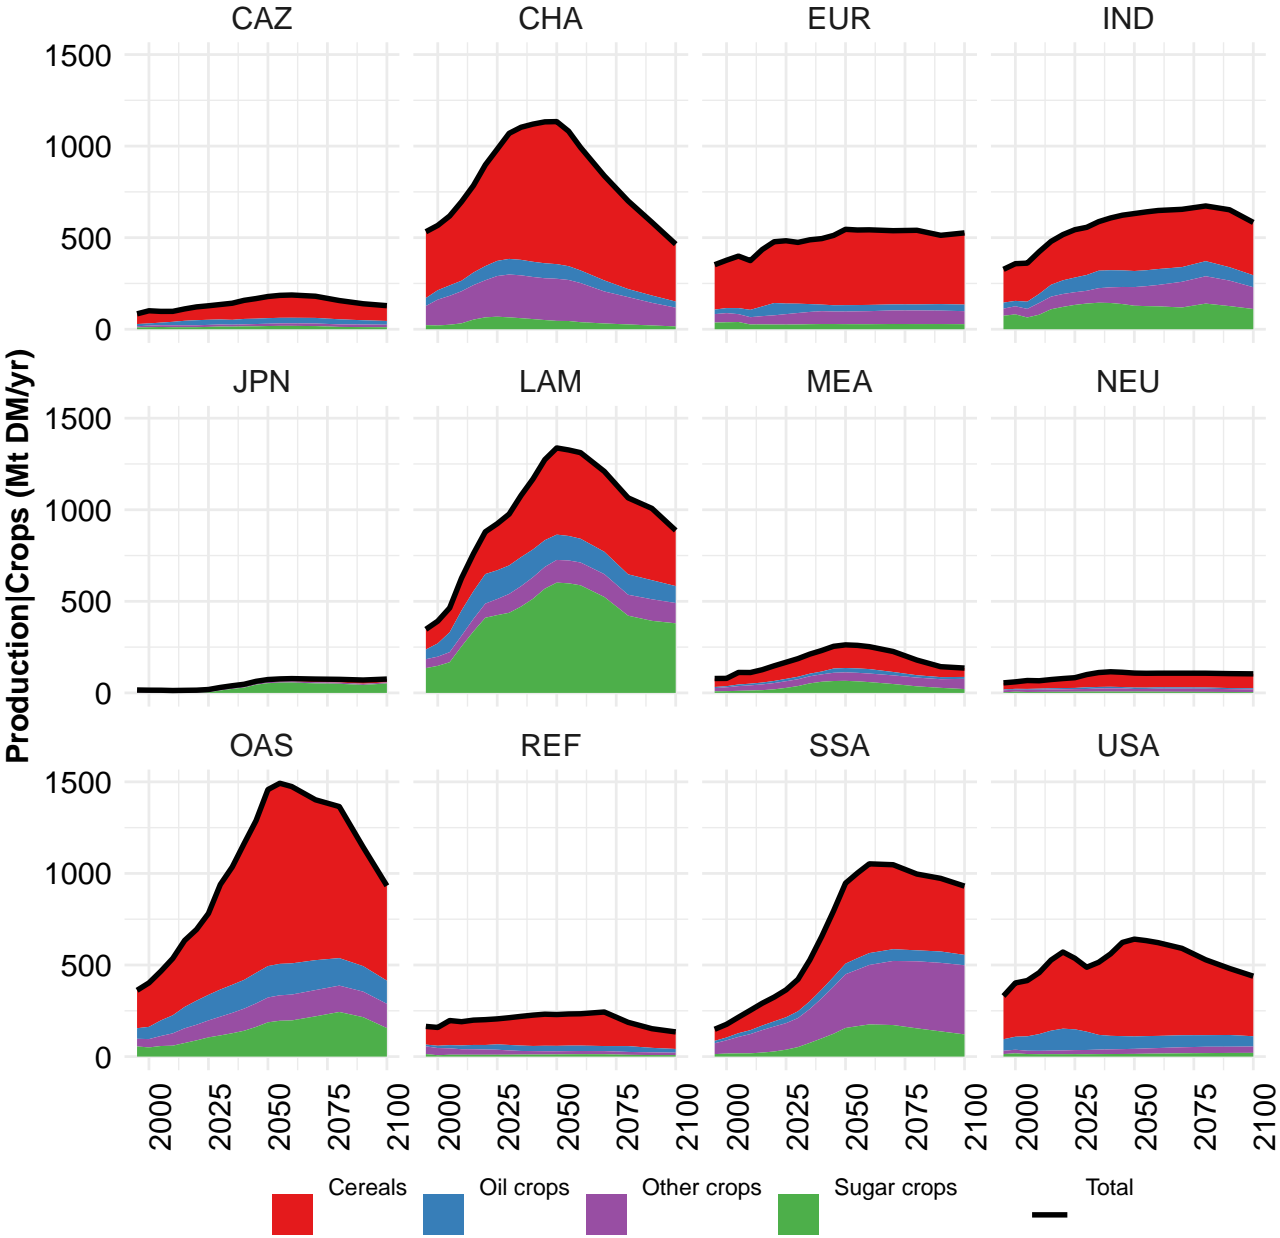

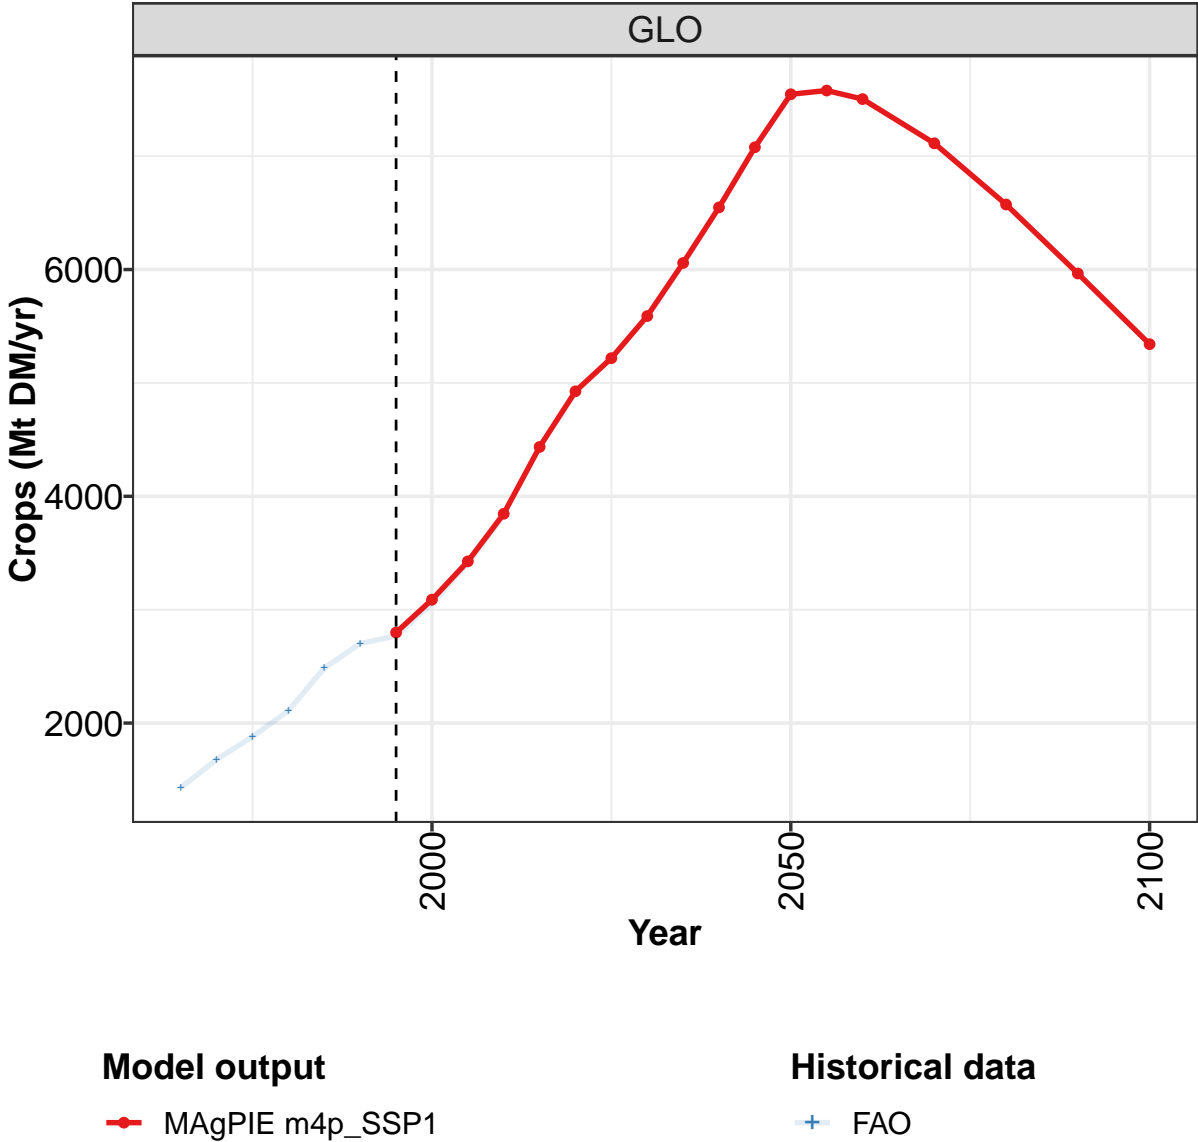

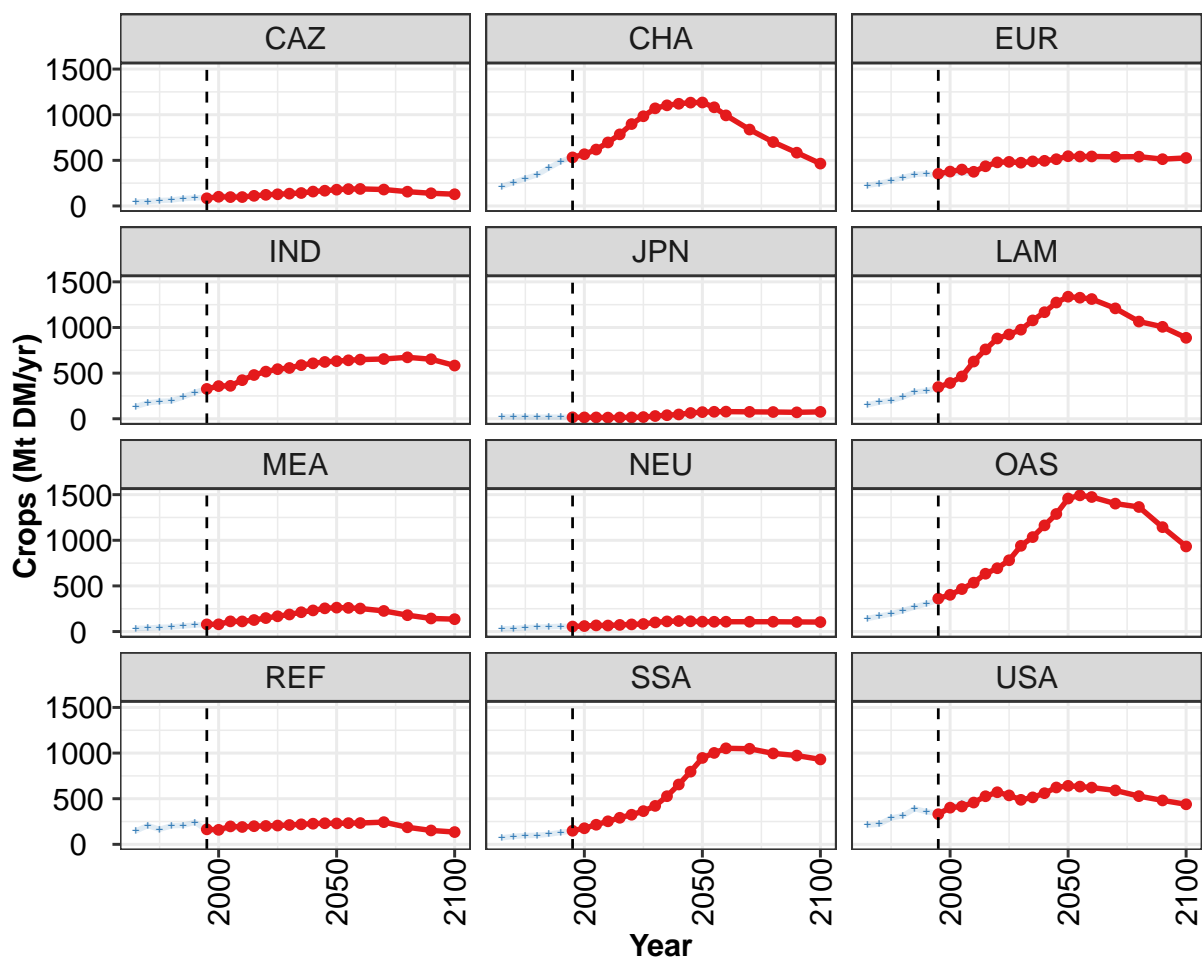

Model output

—●— MAGPIE m4p\_SSP1

Historical data

—+— FAO

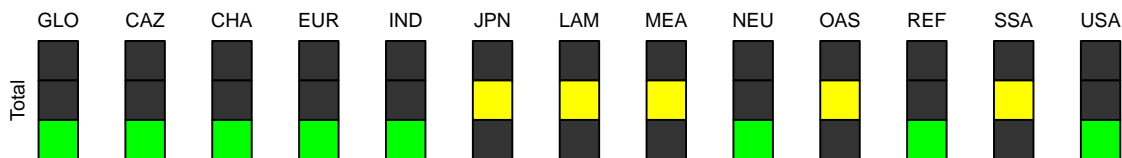

Figure 335: MAGPIE m4p\_SSP1 — Production—Crops (Mt DM/yr)

|     | 1995 | 2000 | 2005 | 2010 | 2015 | 2020 | 2025 | 2030 | 2035 | 2040 | 2045 |
|-----|------|------|------|------|------|------|------|------|------|------|------|
| GLO | 2799 | 3088 | 3426 | 3846 | 4436 | 4926 | 5219 | 5590 | 6058 | 6548 | 7078 |
| CAZ | 84   | 101  | 97   | 98   | 111  | 122  | 128  | 135  | 142  | 158  | 167  |
| CHA | 532  | 567  | 618  | 696  | 785  | 898  | 983  | 1070 | 1103 | 1120 | 1132 |
| EUR | 352  | 377  | 399  | 375  | 435  | 478  | 483  | 474  | 488  | 495  | 512  |
| IND | 327  | 358  | 361  | 423  | 480  | 517  | 543  | 557  | 587  | 608  | 623  |
| JPN | 16   | 15   | 15   | 13   | 14   | 15   | 18   | 30   | 39   | 47   | 63   |
| LAM | 347  | 392  | 464  | 627  | 760  | 880  | 924  | 976  | 1078 | 1168 | 1274 |
| MEA | 79   | 79   | 112  | 111  | 127  | 148  | 167  | 187  | 212  | 232  | 255  |
| NEU | 55   | 60   | 68   | 66   | 73   | 78   | 83   | 100  | 111  | 115  | 113  |
| OAS | 362  | 402  | 466  | 536  | 634  | 694  | 781  | 940  | 1035 | 1163 | 1288 |
| REF | 165  | 159  | 197  | 190  | 199  | 202  | 206  | 212  | 220  | 226  | 231  |
| SSA | 149  | 176  | 215  | 253  | 291  | 325  | 364  | 422  | 528  | 656  | 796  |
| USA | 331  | 402  | 415  | 458  | 527  | 571  | 537  | 488  | 515  | 561  | 623  |

Table 1341: MAgPIE m4p\_SSP1 — Production—Crops (Mt DM/yr) [PART 1/2]

|     | 2050 | 2055 | 2060 | 2070 | 2080 | 2090 | 2100 |
|-----|------|------|------|------|------|------|------|
| GLO | 7546 | 7579 | 7503 | 7113 | 6574 | 5965 | 5342 |
| CAZ | 179  | 185  | 187  | 180  | 157  | 139  | 129  |
| CHA | 1134 | 1081 | 993  | 838  | 701  | 584  | 465  |
| EUR | 546  | 542  | 543  | 538  | 540  | 513  | 526  |
| IND | 632  | 641  | 648  | 655  | 673  | 652  | 583  |
| JPN | 73   | 76   | 78   | 76   | 74   | 70   | 76   |
| LAM | 1338 | 1327 | 1312 | 1210 | 1065 | 1007 | 887  |
| MEA | 262  | 260  | 253  | 226  | 179  | 143  | 136  |
| NEU | 108  | 107  | 108  | 108  | 108  | 105  | 104  |
| OAS | 1458 | 1492 | 1474 | 1402 | 1365 | 1144 | 933  |
| REF | 229  | 233  | 234  | 243  | 187  | 152  | 135  |
| SSA | 947  | 1002 | 1052 | 1047 | 997  | 973  | 931  |
| USA | 641  | 633  | 622  | 591  | 528  | 481  | 439  |

Table 1342: MAgPIE m4p\_SSP1 — Production—Crops (Mt DM/yr) [PART 2/2]

|     | 1965 | 1970 | 1975 | 1980 | 1985 | 1990 | 1995 | 2000 | 2005 | 2010 |
|-----|------|------|------|------|------|------|------|------|------|------|
| GLO | 1430 | 1679 | 1880 | 2110 | 2486 | 2702 | 2769 | 3057 | 3404 | 3830 |
| CAZ | 44   | 47   | 60   | 64   | 81   | 88   | 95   | 109  | 116  | 108  |
| CHA | 214  | 258  | 301  | 342  | 417  | 488  | 536  | 569  | 615  | 702  |
| EUR | 226  | 245  | 278  | 311  | 345  | 353  | 333  | 356  | 363  | 353  |
| IND | 135  | 173  | 190  | 196  | 239  | 289  | 330  | 360  | 360  | 426  |
| JPN | 21   | 20   | 19   | 17   | 19   | 17   | 16   | 15   | 15   | 13   |
| LAM | 153  | 182  | 199  | 237  | 294  | 305  | 343  | 384  | 462  | 615  |
| MEA | 34   | 38   | 46   | 50   | 61   | 70   | 78   | 78   | 108  | 108  |
| NEU | 29   | 33   | 43   | 48   | 52   | 58   | 54   | 57   | 65   | 63   |
| OAS | 143  | 168  | 194  | 229  | 269  | 304  | 345  | 394  | 455  | 535  |
| REF | 148  | 206  | 164  | 204  | 208  | 241  | 153  | 144  | 188  | 173  |
| SSA | 72   | 87   | 97   | 99   | 111  | 131  | 148  | 176  | 216  | 258  |
| USA | 210  | 221  | 289  | 314  | 390  | 358  | 338  | 415  | 440  | 475  |

Table 1343: FAO — Production—Crops (Mt DM/yr)

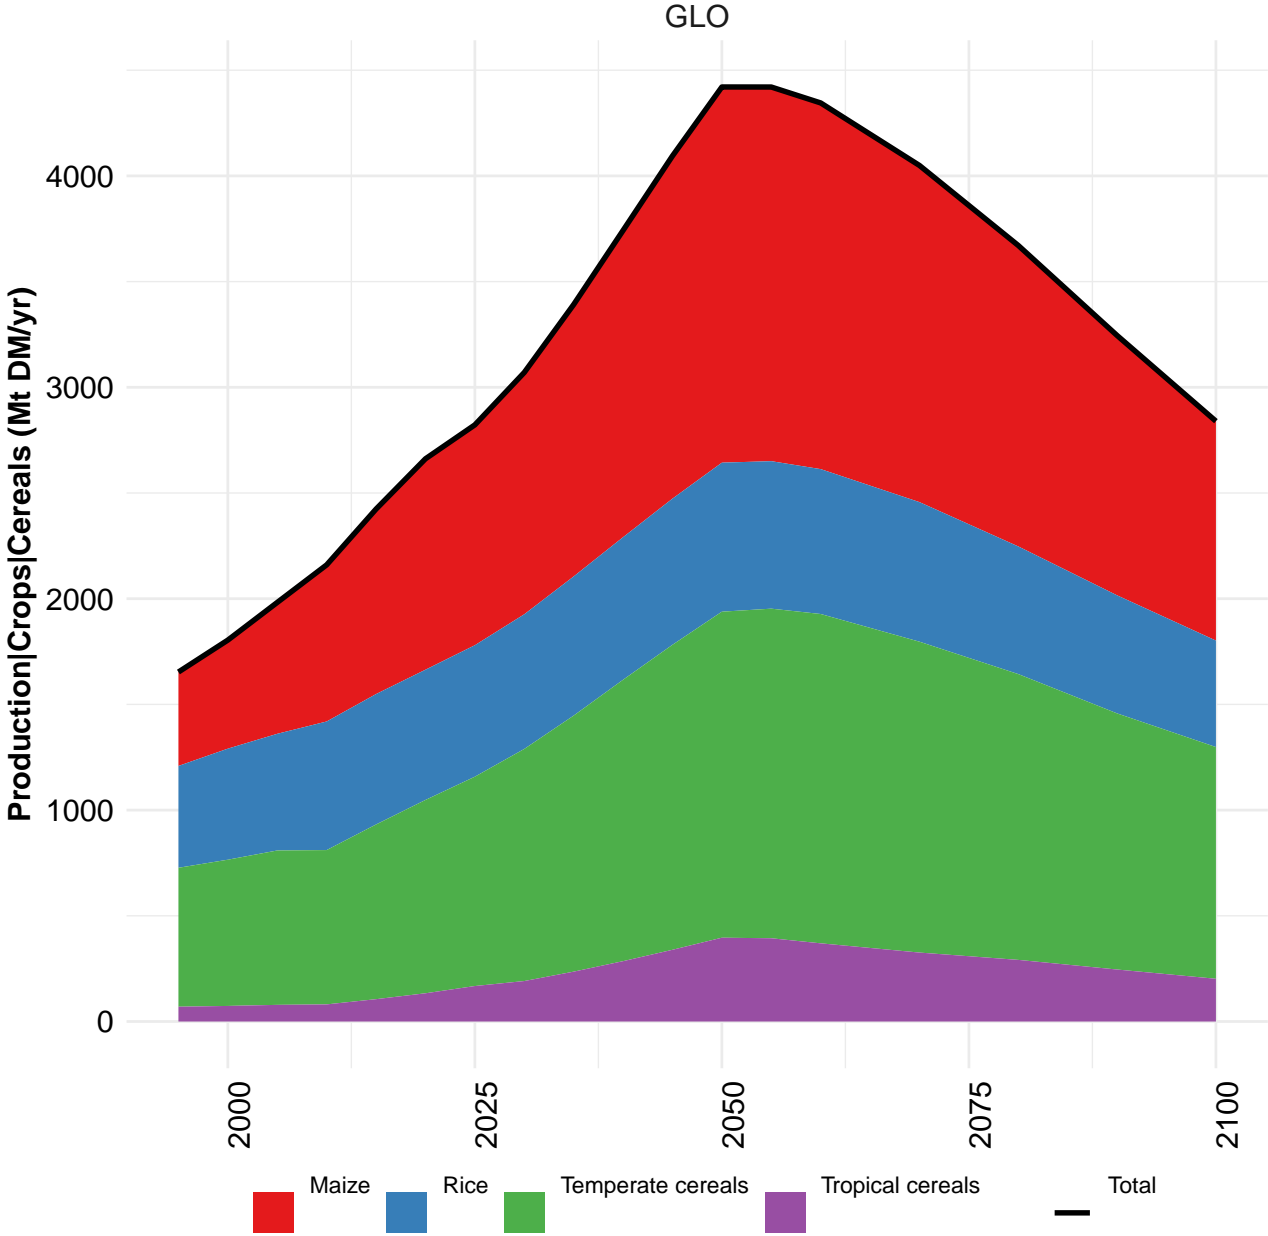

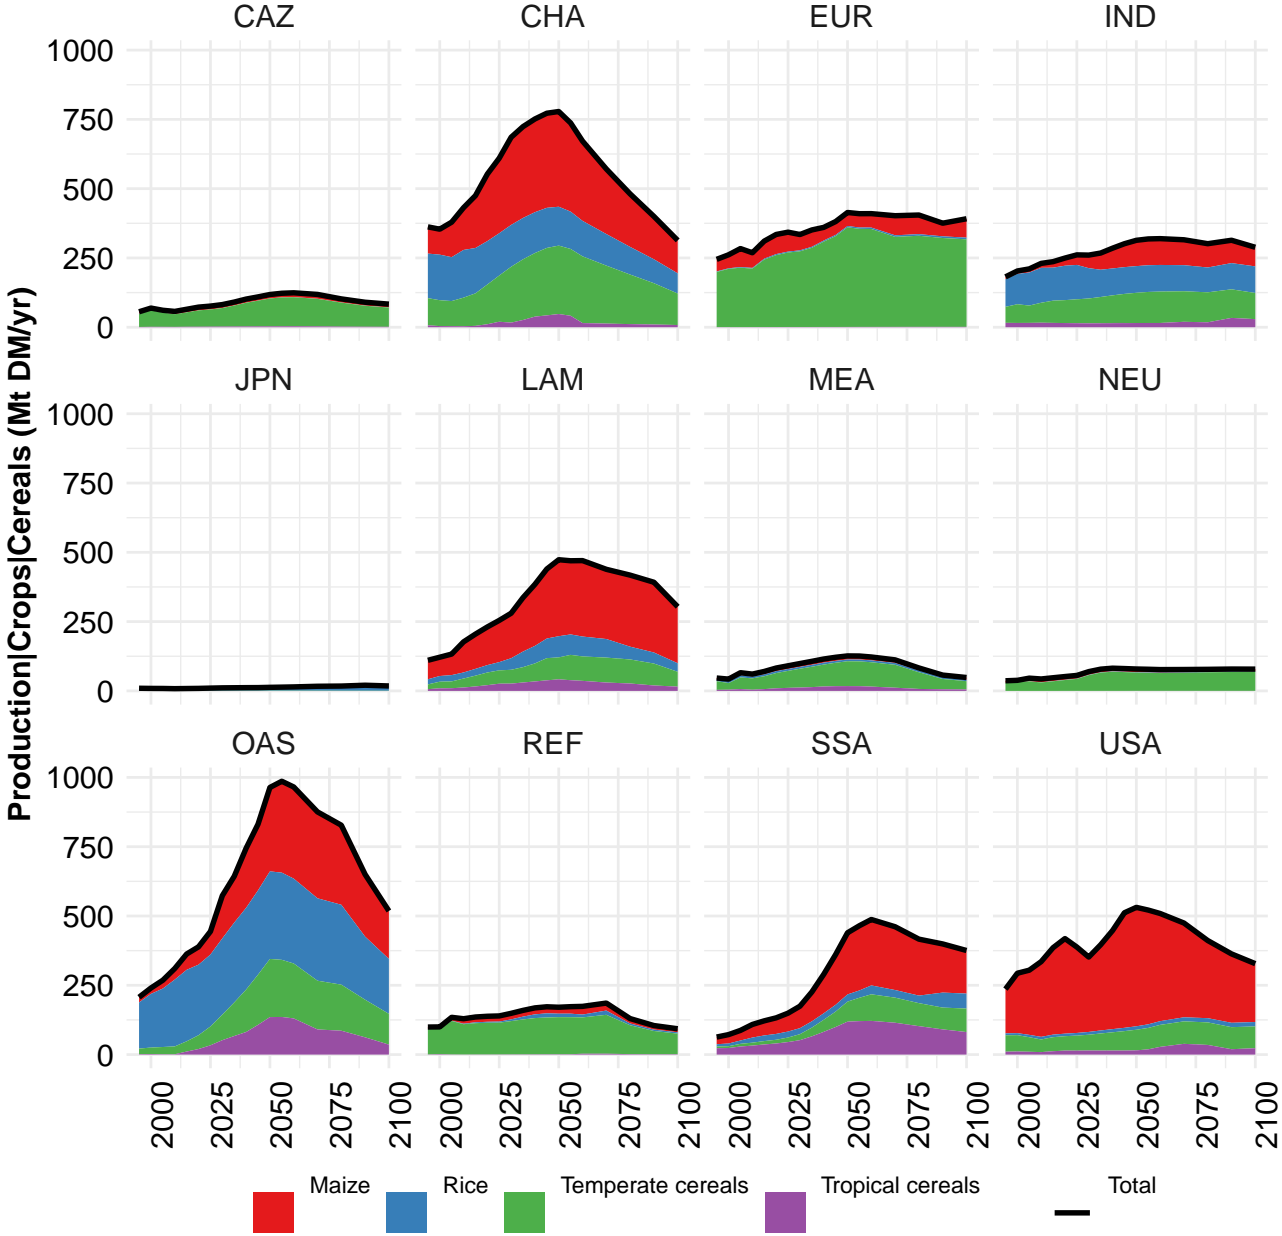

44.1 Cereals

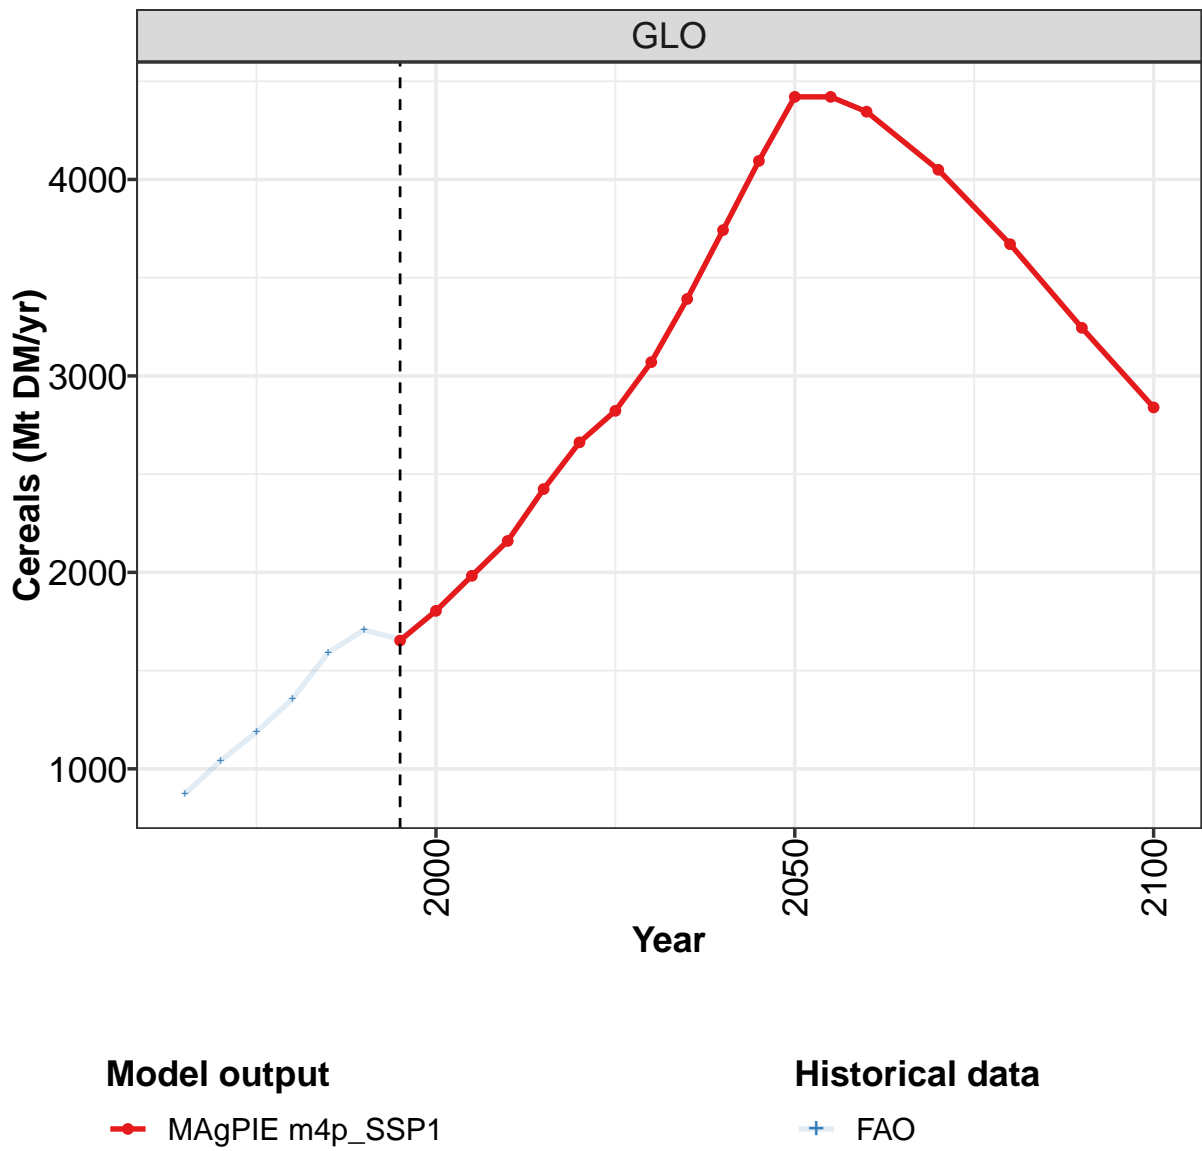



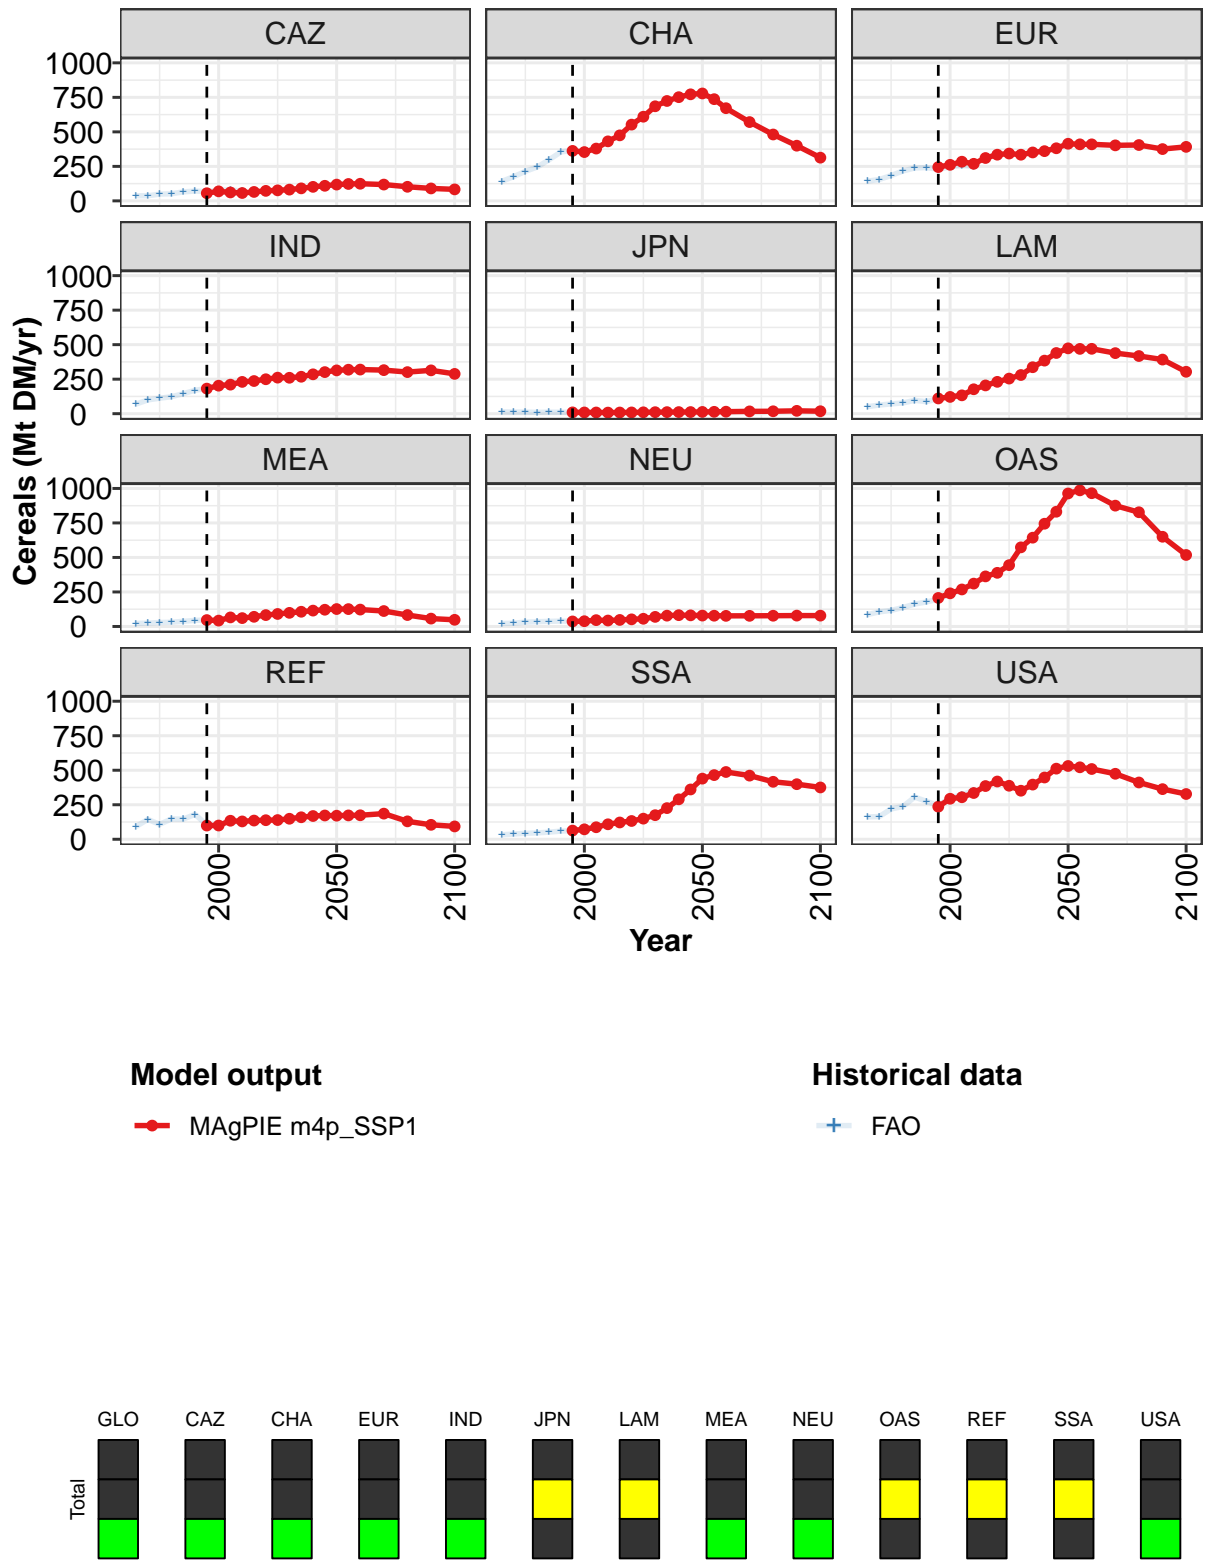

Figure 336: MAgPIE m4p\_SSP1 — Production—Crops—Cereals (Mt DM/yr)

|     | 1995 | 2000 | 2005 | 2010 | 2015 | 2020 | 2025 | 2030 | 2035 | 2040 | 2045 |
|-----|------|------|------|------|------|------|------|------|------|------|------|
| GLO | 1653 | 1804 | 1982 | 2160 | 2424 | 2662 | 2822 | 3070 | 3392 | 3742 | 4095 |
| CAZ | 56   | 69   | 61   | 57   | 65   | 73   | 76   | 82   | 91   | 102  | 110  |
| CHA | 362  | 354  | 379  | 431  | 475  | 553  | 610  | 686  | 724  | 751  | 772  |
| EUR | 245  | 261  | 284  | 269  | 311  | 335  | 343  | 335  | 351  | 360  | 381  |
| IND | 182  | 203  | 210  | 230  | 237  | 250  | 261  | 260  | 268  | 285  | 301  |
| JPN | 10   | 9    | 9    | 8    | 9    | 9    | 10   | 11   | 11   | 12   | 12   |
| LAM | 110  | 122  | 133  | 177  | 205  | 231  | 254  | 280  | 337  | 385  | 440  |
| MEA | 46   | 43   | 66   | 61   | 70   | 83   | 91   | 99   | 107  | 115  | 121  |
| NEU | 37   | 38   | 46   | 43   | 47   | 52   | 56   | 70   | 79   | 82   | 81   |
| OAS | 207  | 240  | 268  | 310  | 363  | 389  | 444  | 573  | 643  | 745  | 831  |
| REF | 99   | 100  | 134  | 129  | 136  | 138  | 139  | 149  | 159  | 168  | 172  |
| SSA | 63   | 72   | 87   | 109  | 122  | 132  | 149  | 175  | 226  | 290  | 361  |
| USA | 236  | 294  | 304  | 335  | 386  | 419  | 388  | 352  | 396  | 447  | 512  |

Table 1344: MAgPIE m4p\_SSP1 — Production—Crops—Cereals (Mt DM/yr) [PART 1/2]

|     | 2050 | 2055 | 2060 | 2070 | 2080 | 2090 | 2100 |
|-----|------|------|------|------|------|------|------|
| GLO | 4421 | 4421 | 4345 | 4049 | 3671 | 3245 | 2840 |
| CAZ | 118  | 123  | 124  | 118  | 102  | 90   | 83   |
| CHA | 778  | 737  | 672  | 571  | 481  | 400  | 313  |
| EUR | 414  | 410  | 410  | 402  | 405  | 375  | 391  |
| IND | 314  | 319  | 320  | 316  | 301  | 314  | 288  |
| JPN | 13   | 14   | 14   | 17   | 17   | 21   | 18   |
| LAM | 473  | 470  | 470  | 439  | 418  | 392  | 304  |
| MEA | 126  | 126  | 122  | 112  | 83   | 57   | 48   |
| NEU | 79   | 78   | 77   | 77   | 78   | 79   | 79   |
| OAS | 964  | 986  | 966  | 876  | 828  | 650  | 518  |
| REF | 171  | 173  | 174  | 186  | 130  | 105  | 93   |
| SSA | 439  | 465  | 487  | 461  | 416  | 399  | 376  |
| USA | 531  | 521  | 509  | 475  | 411  | 363  | 328  |

Table 1345: MAgPIE m4p\_SSP1 — Production—Crops—Cereals (Mt DM/yr) [PART 2/2]

|     | 1965 | 1970 | 1975 | 1980 | 1985 | 1990 | 1995 | 2000 | 2005 | 2010 |
|-----|------|------|------|------|------|------|------|------|------|------|
| GLO | 872  | 1041 | 1188 | 1356 | 1593 | 1707 | 1659 | 1802 | 1984 | 2167 |
| CAZ | 37   | 37   | 49   | 51   | 65   | 71   | 68   | 76   | 81   | 70   |
| CHA | 142  | 176  | 214  | 245  | 297  | 354  | 366  | 356  | 376  | 436  |
| EUR | 143  | 155  | 184  | 217  | 238  | 241  | 229  | 247  | 256  | 249  |
| IND | 70   | 100  | 112  | 123  | 145  | 169  | 184  | 205  | 210  | 234  |
| JPN | 13   | 12   | 12   | 9    | 11   | 10   | 10   | 9    | 9    | 8    |
| LAM | 51   | 63   | 71   | 78   | 97   | 87   | 109  | 121  | 135  | 170  |
| MEA | 23   | 24   | 29   | 31   | 37   | 44   | 47   | 42   | 65   | 61   |
| NEU | 21   | 24   | 31   | 34   | 37   | 39   | 37   | 37   | 45   | 41   |
| OAS | 86   | 106  | 116  | 137  | 162  | 178  | 198  | 233  | 265  | 313  |
| REF | 92   | 144  | 108  | 147  | 146  | 180  | 104  | 102  | 133  | 118  |
| SSA | 33   | 38   | 43   | 46   | 52   | 59   | 63   | 72   | 88   | 112  |
| USA | 162  | 164  | 219  | 238  | 305  | 275  | 244  | 301  | 322  | 353  |

Table 1346: FAO — Production—Crops—Cereals (Mt DM/yr)

44.1.1 Maize

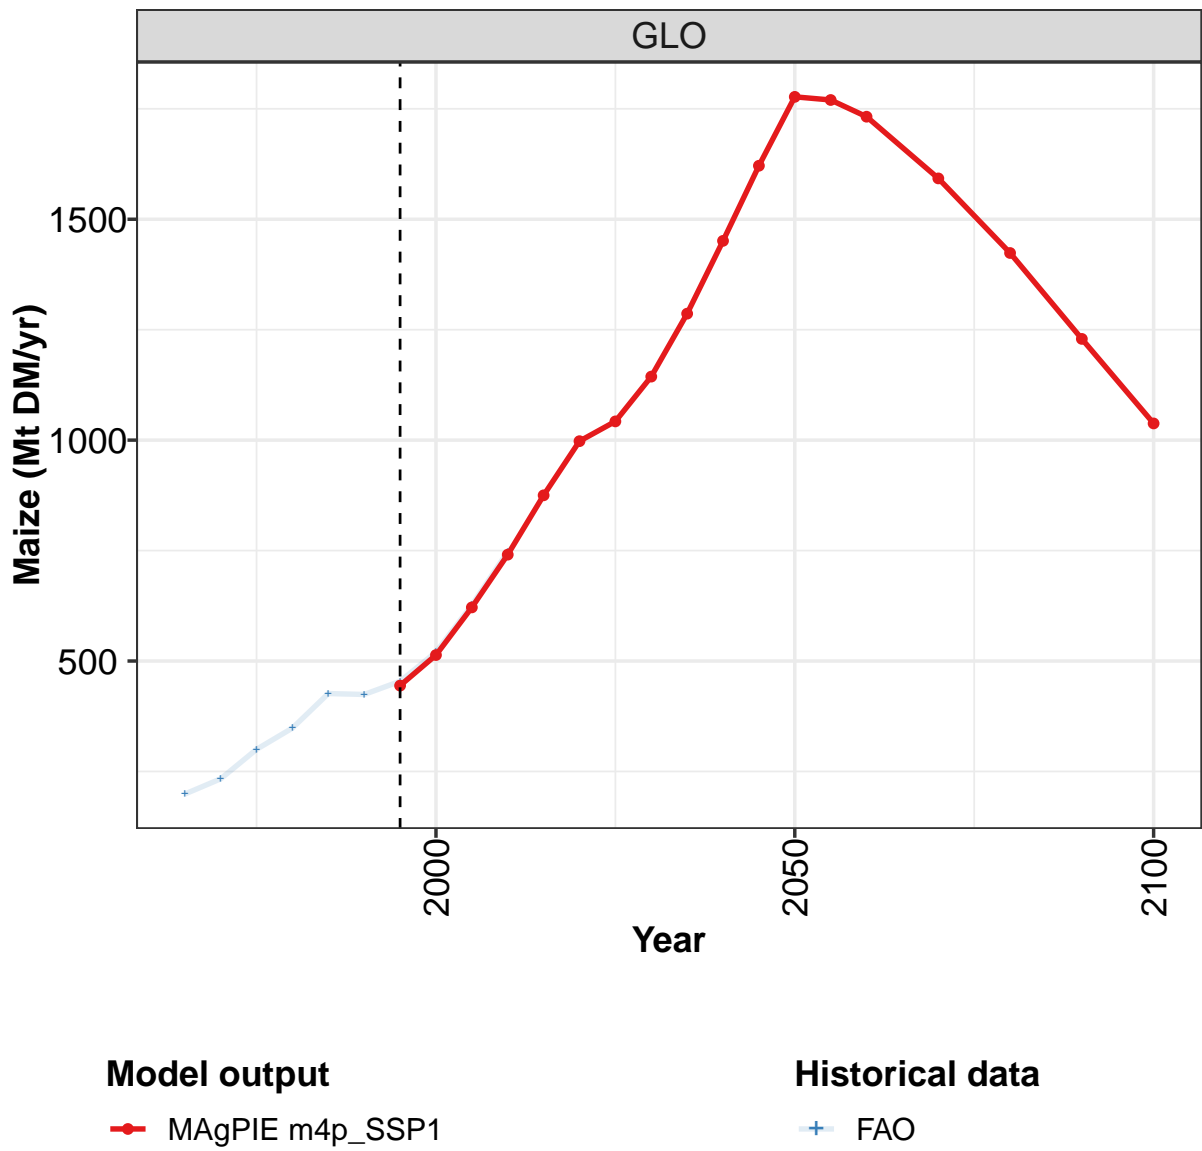

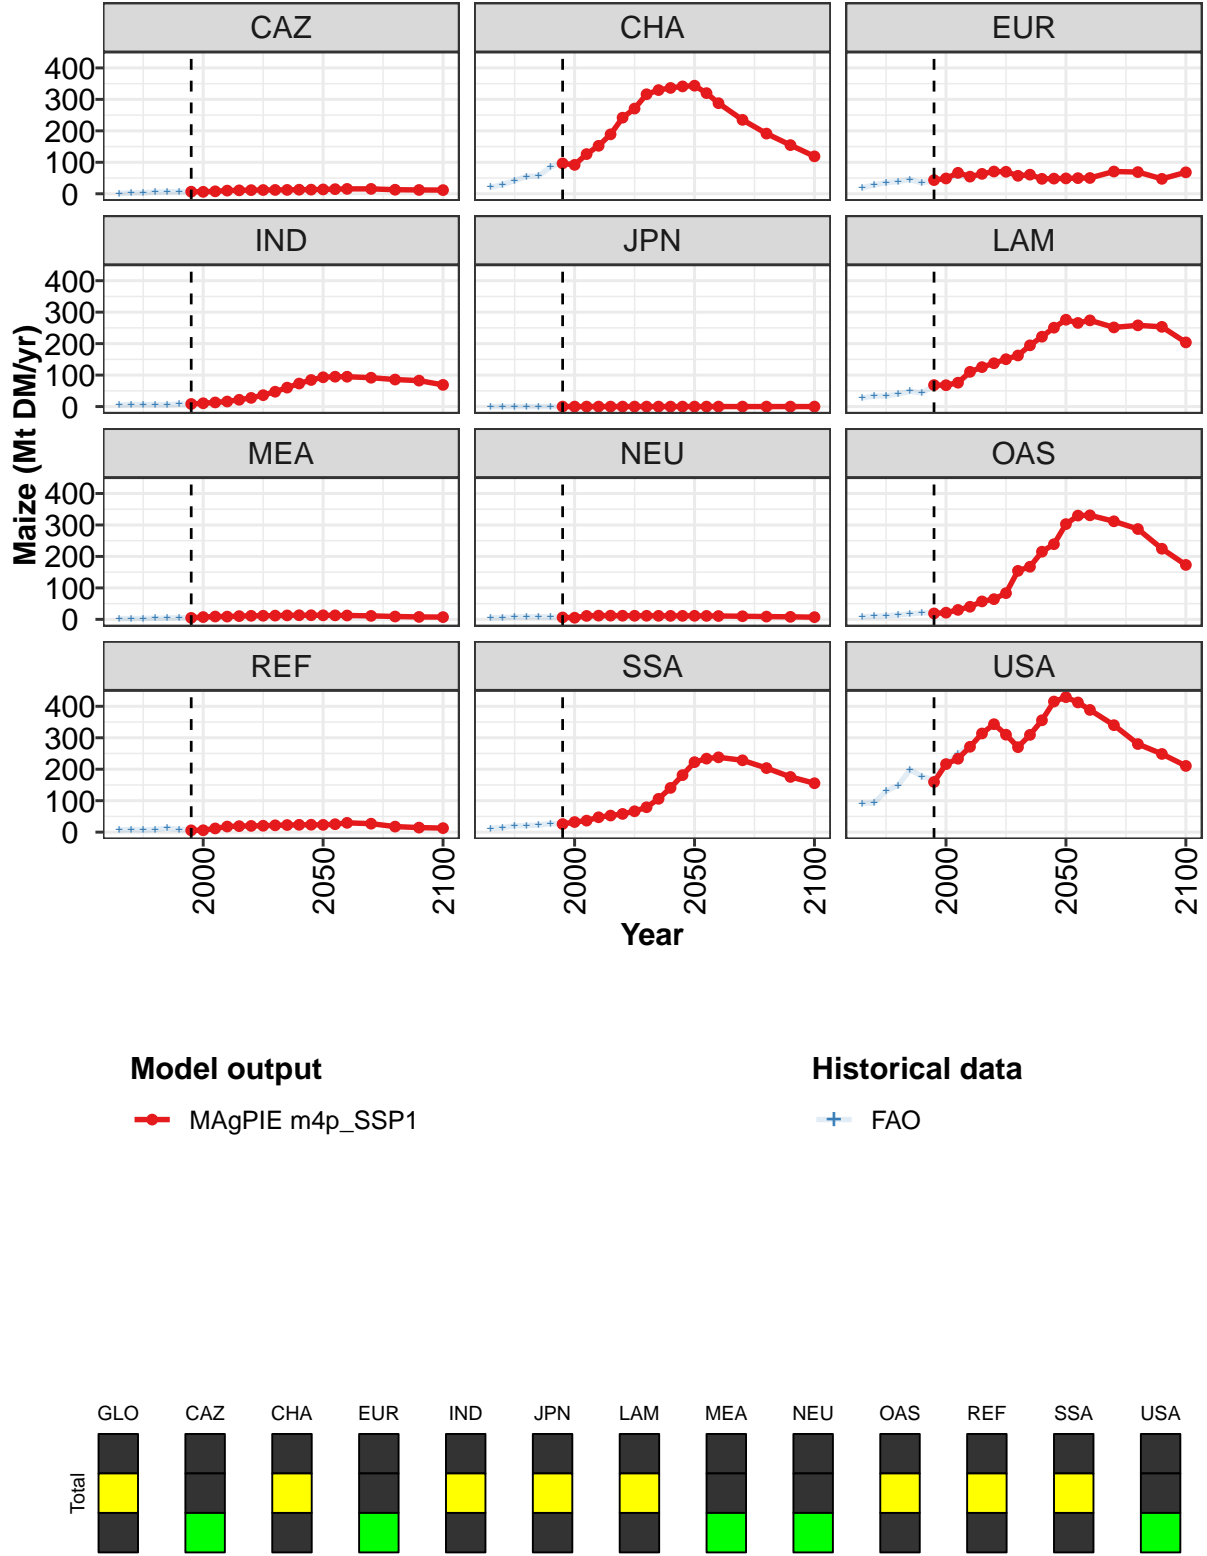

Figure 337: MAgPIE m4p\_SSP1 — Production—Crops—Cereals—Maize (Mt DM/yr)

|     | 1995 | 2000 | 2005 | 2010 | 2015 | 2020 | 2025 | 2030 | 2035 | 2040 | 2045 |
|-----|------|------|------|------|------|------|------|------|------|------|------|
| GLO | 444  | 514  | 621  | 741  | 875  | 998  | 1042 | 1144 | 1286 | 1451 | 1621 |
| CAZ | 7    | 6    | 8    | 10   | 11   | 12   | 12   | 12   | 12   | 13   | 13   |
| CHA | 97   | 92   | 126  | 152  | 189  | 242  | 271  | 316  | 330  | 336  | 341  |
| EUR | 43   | 49   | 67   | 55   | 63   | 71   | 70   | 57   | 61   | 47   | 48   |
| IND | 8    | 11   | 13   | 16   | 22   | 28   | 36   | 47   | 60   | 73   | 84   |
| JPN | 0    | 0    | 0    | 0    | 0    | 0    | 0    | 0    | 0    | 0    | 0    |
| LAM | 68   | 68   | 76   | 110  | 125  | 138  | 151  | 162  | 195  | 222  | 251  |
| MEA | 5    | 7    | 9    | 9    | 10   | 11   | 12   | 12   | 13   | 13   | 13   |
| NEU | 6    | 5    | 11   | 12   | 12   | 12   | 11   | 11   | 11   | 11   | 11   |
| OAS | 19   | 21   | 30   | 40   | 57   | 64   | 83   | 154  | 167  | 215  | 239  |
| REF | 6    | 6    | 12   | 18   | 19   | 20   | 20   | 22   | 23   | 23   | 24   |
| SSA | 26   | 32   | 37   | 47   | 53   | 58   | 66   | 79   | 106  | 141  | 181  |
| USA | 159  | 216  | 233  | 271  | 314  | 343  | 310  | 270  | 309  | 356  | 415  |

Table 1347: MAgPIE m4p\_SSP1 — Production—Crops—Cereals—Maize (Mt DM/yr) [PART 1/2]

|     | 2050 | 2055 | 2060 | 2070 | 2080 | 2090 | 2100 |
|-----|------|------|------|------|------|------|------|
| GLO | 1777 | 1770 | 1732 | 1593 | 1424 | 1229 | 1038 |
| CAZ | 14   | 15   | 16   | 16   | 13   | 12   | 12   |
| CHA | 344  | 320  | 288  | 235  | 191  | 155  | 119  |
| EUR | 49   | 50   | 50   | 71   | 69   | 47   | 68   |
| IND | 93   | 95   | 95   | 92   | 86   | 82   | 69   |
| JPN | 0    | 0    | 0    | 0    | 0    | 0    | 0    |
| LAM | 276  | 266  | 274  | 252  | 258  | 253  | 204  |
| MEA | 13   | 13   | 12   | 11   | 9    | 8    | 7    |
| NEU | 11   | 11   | 11   | 10   | 9    | 8    | 7    |
| OAS | 303  | 330  | 331  | 312  | 287  | 225  | 173  |
| REF | 23   | 25   | 30   | 27   | 18   | 15   | 13   |
| SSA | 222  | 234  | 238  | 228  | 204  | 176  | 156  |
| USA | 429  | 412  | 388  | 340  | 280  | 249  | 211  |

Table 1348: MAgPIE m4p\_SSP1 — Production—Crops—Cereals—Maize (Mt DM/yr) [PART 2/2]

|     | 1965 | 1970 | 1975 | 1980 | 1985 | 1990 | 1995 | 2000 | 2005 | 2010 |
|-----|------|------|------|------|------|------|------|------|------|------|
| GLO | 199  | 233  | 300  | 348  | 426  | 424  | 454  | 520  | 627  | 748  |
| CAZ | 2    | 3    | 3    | 5    | 7    | 7    | 7    | 7    | 9    | 11   |
| CHA | 21   | 29   | 42   | 55   | 56   | 86   | 99   | 93   | 123  | 156  |
| EUR | 19   | 28   | 35   | 39   | 45   | 34   | 44   | 47   | 58   | 52   |
| IND | 4    | 7    | 6    | 6    | 6    | 8    | 8    | 11   | 13   | 19   |
| JPN | 0    | 0    | 0    | 0    | 0    | 0    | 0    | 0    | 0    | 0    |
| LAM | 27   | 34   | 34   | 40   | 49   | 44   | 66   | 67   | 77   | 103  |
| MEA | 2    | 2    | 3    | 3    | 4    | 5    | 5    | 7    | 9    | 9    |
| NEU | 5    | 6    | 8    | 8    | 9    | 7    | 8    | 6    | 11   | 11   |
| OAS | 8    | 10   | 12   | 14   | 18   | 21   | 20   | 23   | 30   | 41   |
| REF | 7    | 8    | 6    | 8    | 13   | 9    | 6    | 7    | 12   | 16   |
| SSA | 12   | 15   | 20   | 21   | 23   | 27   | 26   | 32   | 37   | 51   |
| USA | 92   | 93   | 131  | 148  | 198  | 177  | 165  | 222  | 248  | 278  |

Table 1349: FAO — Production—Crops—Cereals—Maize (Mt DM/yr)

44.1.2 Rice

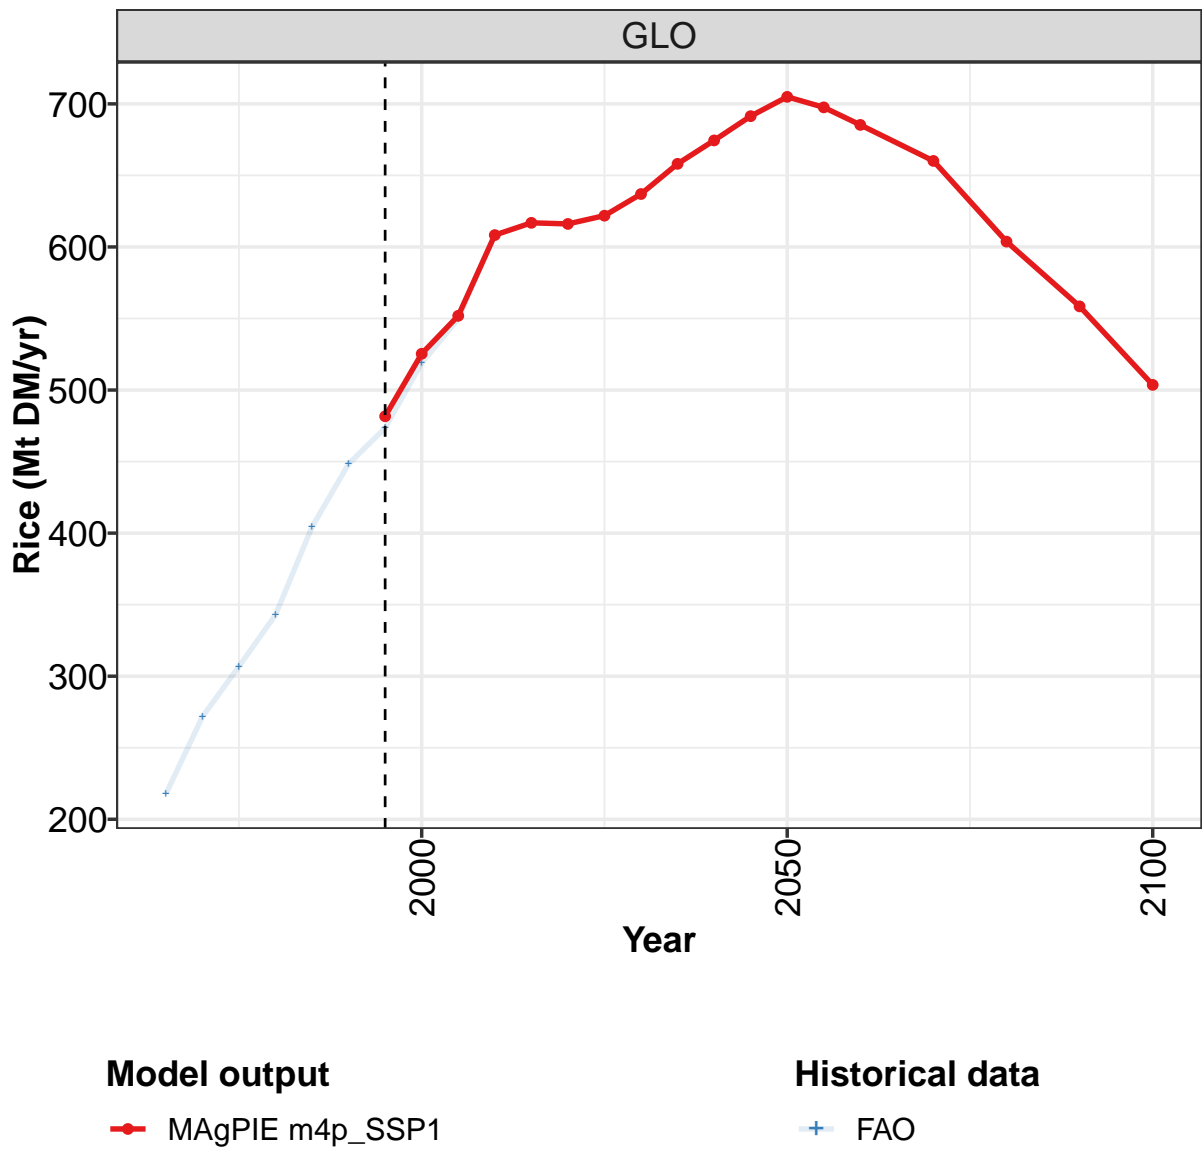

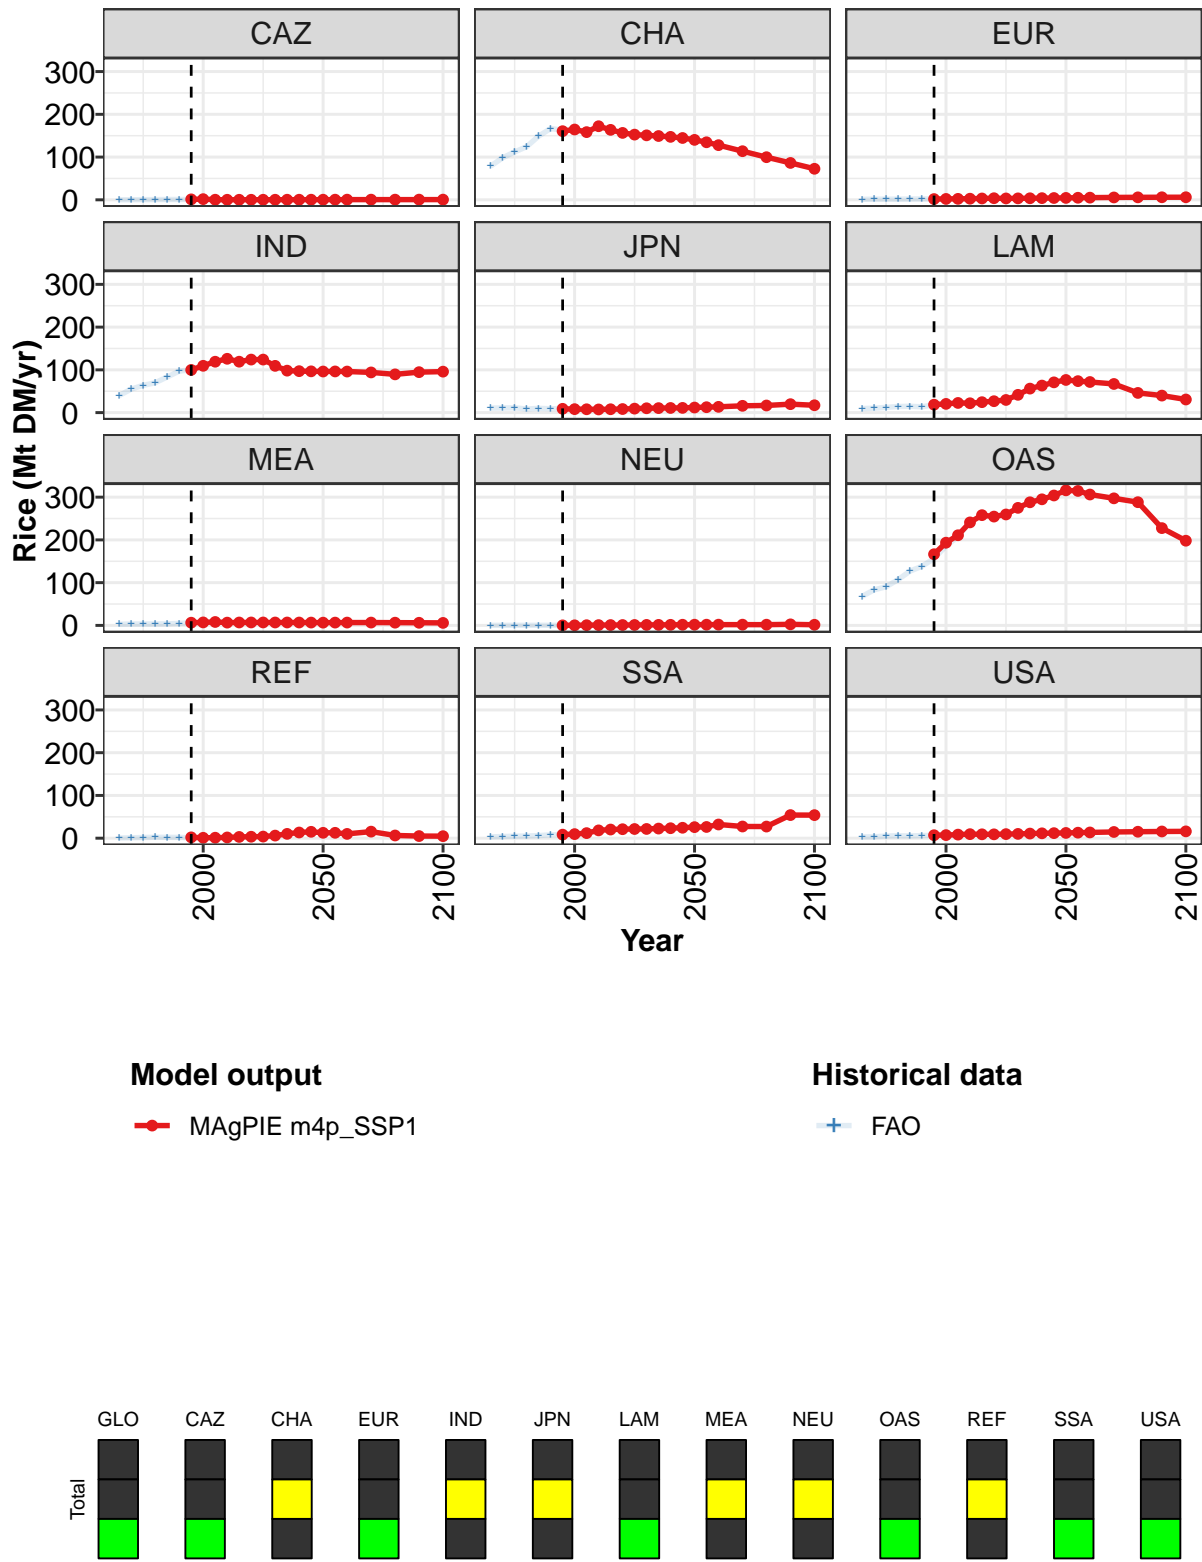

Figure 338: MAgPIE m4p\_SSP1 — Production—Crops—Cereals—Rice (Mt DM/yr)

|     | 1995 | 2000 | 2005 | 2010 | 2015 | 2020 | 2025 | 2030 | 2035 | 2040 | 2045 |
|-----|------|------|------|------|------|------|------|------|------|------|------|
| GLO | 482  | 525  | 552  | 608  | 617  | 616  | 622  | 637  | 658  | 674  | 691  |
| CAZ | 1    | 2    | 0    | 0    | 0    | 0    | 0    | 0    | 0    | 0    | 0    |
| CHA | 161  | 164  | 158  | 172  | 164  | 157  | 153  | 151  | 149  | 147  | 145  |
| EUR | 2    | 2    | 2    | 3    | 3    | 4    | 3    | 3    | 4    | 4    | 4    |
| IND | 100  | 110  | 119  | 126  | 119  | 124  | 124  | 109  | 98   | 97   | 97   |
| JPN | 9    | 8    | 8    | 7    | 8    | 8    | 9    | 10   | 11   | 11   | 11   |
| LAM | 19   | 20   | 23   | 22   | 24   | 27   | 30   | 42   | 56   | 63   | 71   |
| MEA | 6    | 7    | 8    | 7    | 7    | 7    | 7    | 7    | 7    | 7    | 7    |
| NEU | 0    | 0    | 1    | 1    | 1    | 1    | 1    | 1    | 1    | 1    | 2    |
| OAS | 167  | 194  | 211  | 241  | 258  | 255  | 260  | 275  | 288  | 295  | 304  |
| REF | 2    | 1    | 1    | 2    | 3    | 4    | 4    | 6    | 10   | 13   | 15   |
| SSA | 8    | 10   | 12   | 18   | 20   | 21   | 22   | 22   | 23   | 23   | 24   |
| USA | 7    | 7    | 8    | 9    | 9    | 9    | 10   | 10   | 11   | 11   | 12   |

Table 1350: MAgPIE m4p\_SSP1 — Production—Crops—Cereals—Rice (Mt DM/yr) [PART 1/2]

|     | 2050 | 2055 | 2060 | 2070 | 2080 | 2090 | 2100 |
|-----|------|------|------|------|------|------|------|
| GLO | 705  | 698  | 685  | 660  | 604  | 558  | 504  |
| CAZ | 0    | 0    | 0    | 1    | 0    | 1    | 1    |
| CHA | 140  | 135  | 128  | 114  | 100  | 86   | 73   |
| EUR | 5    | 5    | 5    | 6    | 6    | 6    | 6    |
| IND | 96   | 96   | 96   | 94   | 89   | 95   | 96   |
| JPN | 12   | 13   | 14   | 16   | 17   | 20   | 17   |
| LAM | 76   | 74   | 72   | 67   | 46   | 40   | 31   |
| MEA | 7    | 7    | 7    | 7    | 6    | 6    | 6    |
| NEU | 2    | 2    | 2    | 2    | 2    | 3    | 2    |
| OAS | 316  | 315  | 306  | 297  | 288  | 228  | 198  |
| REF | 13   | 13   | 10   | 15   | 6    | 5    | 5    |
| SSA | 26   | 26   | 32   | 27   | 27   | 54   | 54   |
| USA | 12   | 13   | 14   | 15   | 15   | 16   | 16   |

Table 1351: MAgPIE m4p\_SSP1 — Production—Crops—Cereals—Rice (Mt DM/yr) [PART 2/2]

|     | 1965 | 1970 | 1975 | 1980 | 1985 | 1990 | 1995 | 2000 | 2005 | 2010 |
|-----|------|------|------|------|------|------|------|------|------|------|
| GLO | 218  | 272  | 307  | 343  | 404  | 448  | 473  | 519  | 550  | 609  |
| CAZ | 0    | 0    | 0    | 1    | 1    | 1    | 1    | 1    | 0    | 0    |
| CHA | 79   | 98   | 112  | 124  | 149  | 167  | 163  | 165  | 158  | 172  |
| EUR | 1    | 2    | 2    | 2    | 2    | 2    | 2    | 2    | 2    | 3    |
| IND | 40   | 55   | 64   | 70   | 83   | 97   | 100  | 111  | 120  | 125  |
| JPN | 11   | 11   | 11   | 8    | 10   | 9    | 9    | 8    | 8    | 7    |
| LAM | 9    | 10   | 12   | 14   | 15   | 14   | 19   | 20   | 23   | 22   |
| MEA | 3    | 3    | 3    | 3    | 4    | 5    | 6    | 7    | 8    | 7    |
| NEU | 0    | 0    | 0    | 0    | 0    | 0    | 0    | 0    | 1    | 1    |
| OAS | 68   | 83   | 90   | 107  | 127  | 138  | 156  | 186  | 208  | 243  |
| REF | 0    | 1    | 2    | 2    | 2    | 2    | 1    | 1    | 1    | 2    |
| SSA | 3    | 4    | 5    | 5    | 6    | 8    | 8    | 10   | 12   | 18   |
| USA | 3    | 3    | 5    | 6    | 5    | 6    | 7    | 8    | 9    | 10   |

Table 1352: FAO — Production—Crops—Cereals—Rice (Mt DM/yr)



44.1.3 Temperate cereals

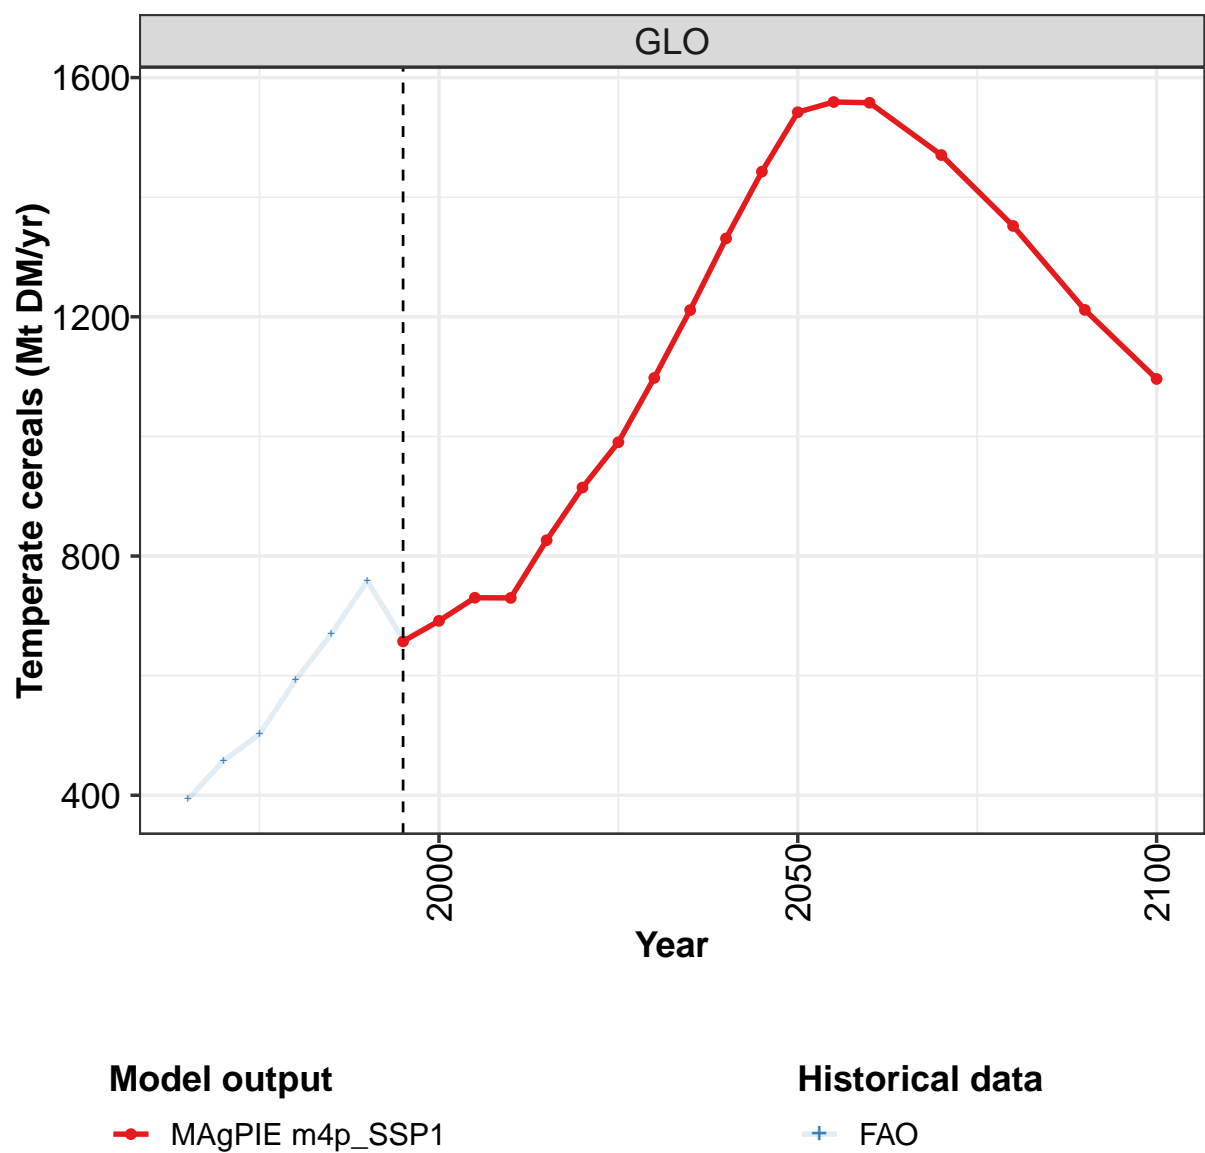

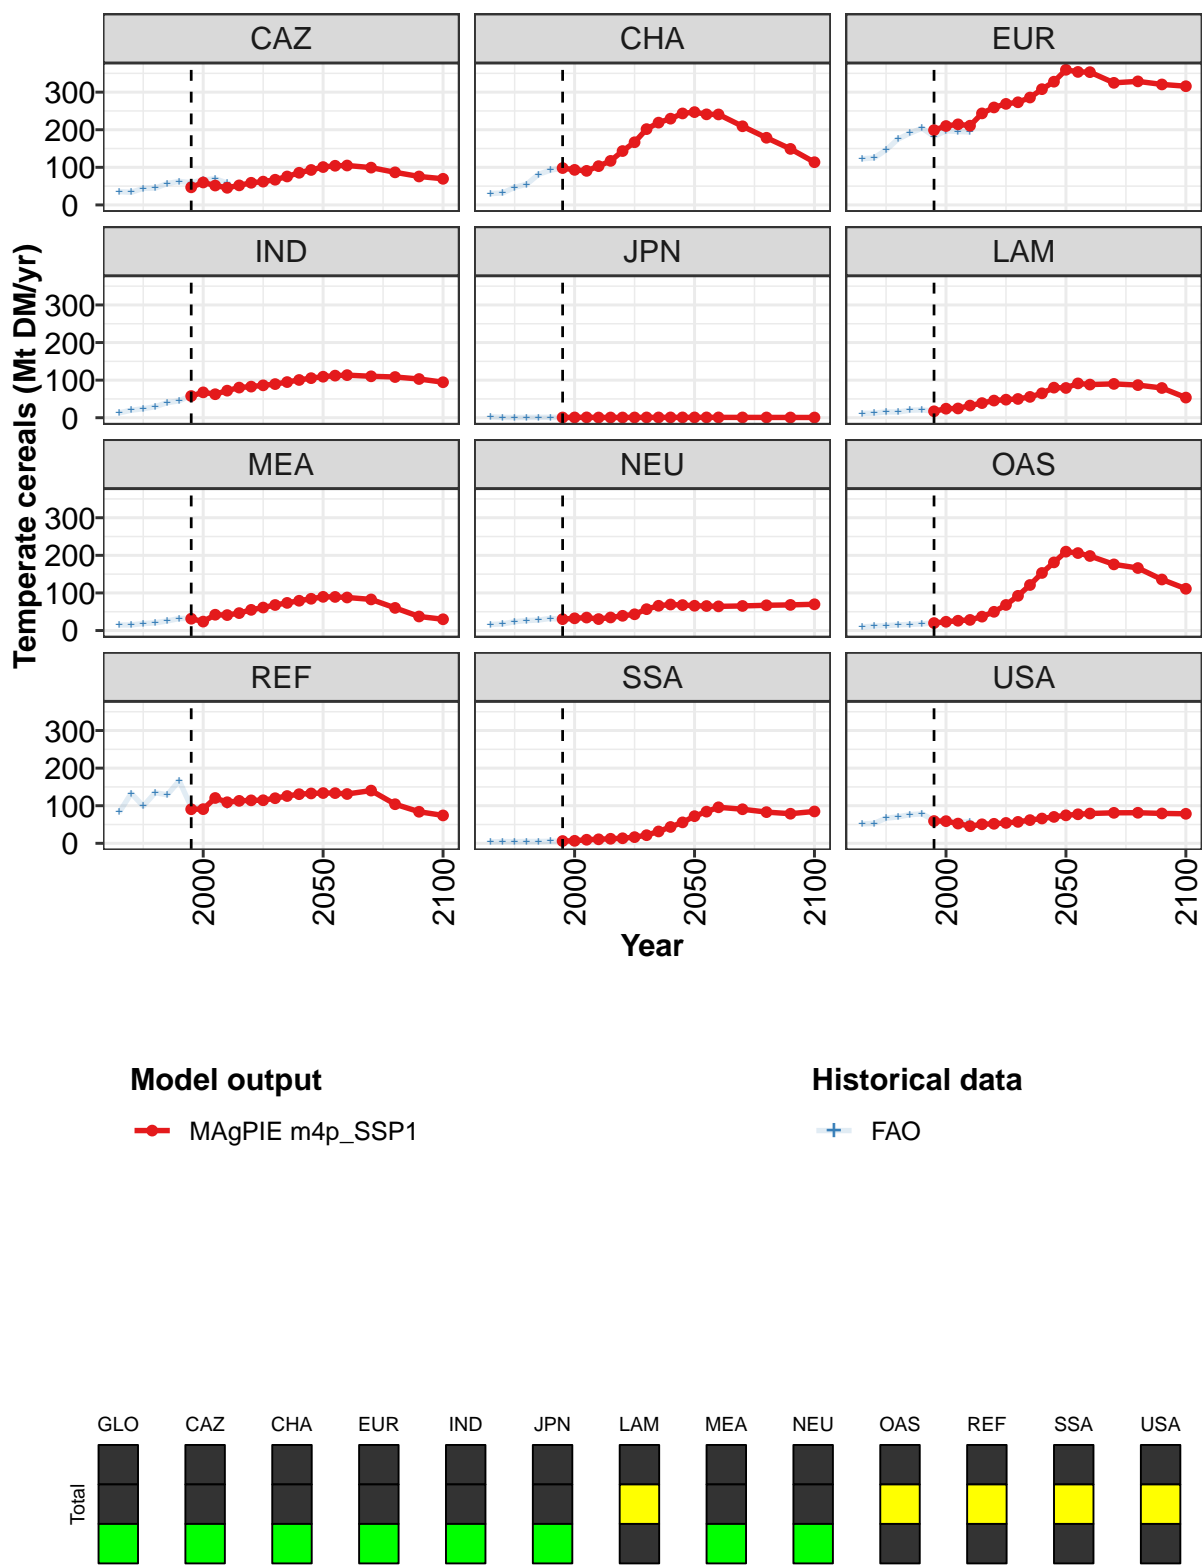

Figure 339: MAgPIE m4p\_SSP1 — Production—Crops—Cereals—Temperate cereals (Mt DM/yr)

|     | 1995 | 2000 | 2005 | 2010 | 2015 | 2020 | 2025 | 2030 | 2035 | 2040 | 2045 |
|-----|------|------|------|------|------|------|------|------|------|------|------|
| GLO | 657  | 692  | 730  | 730  | 826  | 915  | 990  | 1098 | 1211 | 1331 | 1443 |
| CAZ | 47   | 60   | 52   | 46   | 52   | 59   | 62   | 67   | 76   | 86   | 93   |
| CHA | 98   | 93   | 91   | 103  | 117  | 143  | 167  | 202  | 219  | 230  | 243  |
| EUR | 199  | 210  | 214  | 211  | 244  | 259  | 269  | 273  | 286  | 308  | 328  |
| IND | 58   | 67   | 63   | 72   | 80   | 83   | 86   | 90   | 95   | 100  | 105  |
| JPN | 1    | 1    | 1    | 1    | 1    | 1    | 1    | 1    | 1    | 1    | 1    |
| LAM | 17   | 24   | 25   | 32   | 39   | 46   | 48   | 50   | 55   | 65   | 80   |
| MEA | 31   | 24   | 42   | 41   | 46   | 55   | 61   | 68   | 74   | 79   | 85   |
| NEU | 30   | 33   | 35   | 31   | 35   | 39   | 43   | 57   | 66   | 69   | 68   |
| OAS | 20   | 23   | 26   | 28   | 37   | 50   | 68   | 92   | 121  | 153  | 181  |
| REF | 91   | 91   | 121  | 109  | 113  | 114  | 115  | 120  | 126  | 131  | 133  |
| SSA | 6    | 7    | 10   | 11   | 12   | 13   | 16   | 22   | 32   | 44   | 56   |
| USA | 59   | 59   | 53   | 46   | 51   | 52   | 54   | 57   | 62   | 66   | 70   |

Table 1353: MAgPIE m4p\_SSP1 — Production—Crops—Cereals—Temperate cereals (Mt DM/yr) [PART 1/2]

|     | 2050 | 2055 | 2060 | 2070 | 2080 | 2090 | 2100 |
|-----|------|------|------|------|------|------|------|
| GLO | 1542 | 1559 | 1558 | 1471 | 1352 | 1212 | 1096 |
| CAZ | 101  | 104  | 105  | 99   | 87   | 76   | 70   |
| CHA | 247  | 241  | 241  | 209  | 179  | 149  | 114  |
| EUR | 360  | 354  | 353  | 325  | 329  | 321  | 316  |
| IND | 109  | 112  | 113  | 110  | 108  | 103  | 94   |
| JPN | 1    | 1    | 1    | 1    | 1    | 1    | 1    |
| LAM | 79   | 91   | 88   | 90   | 87   | 79   | 54   |
| MEA | 90   | 89   | 88   | 83   | 60   | 37   | 30   |
| NEU | 66   | 65   | 64   | 65   | 67   | 68   | 70   |
| OAS | 210  | 206  | 198  | 176  | 166  | 136  | 111  |
| REF | 134  | 134  | 131  | 140  | 104  | 84   | 74   |
| SSA | 72   | 84   | 96   | 91   | 83   | 79   | 85   |
| USA | 74   | 77   | 79   | 81   | 81   | 80   | 79   |

Table 1354: MAgPIE m4p\_SSP1 — Production—Crops—Cereals—Temperate cereals (Mt DM/yr) [PART 2/2]

|     | 1965 | 1970 | 1975 | 1980 | 1985 | 1990 | 1995 | 2000 | 2005 | 2010 |
|-----|------|------|------|------|------|------|------|------|------|------|
| GLO | 393  | 458  | 502  | 592  | 670  | 758  | 661  | 690  | 728  | 729  |
| CAZ | 35   | 34   | 44   | 45   | 57   | 63   | 59   | 66   | 70   | 58   |
| CHA | 30   | 32   | 47   | 55   | 81   | 93   | 98   | 94   | 91   | 105  |
| EUR | 123  | 125  | 146  | 175  | 191  | 204  | 183  | 197  | 195  | 194  |
| IND | 13   | 20   | 24   | 29   | 40   | 45   | 59   | 68   | 61   | 72   |
| JPN | 2    | 1    | 0    | 1    | 1    | 1    | 1    | 1    | 1    | 1    |
| LAM | 12   | 12   | 16   | 15   | 20   | 21   | 17   | 24   | 25   | 33   |
| MEA | 15   | 15   | 18   | 21   | 25   | 32   | 32   | 24   | 42   | 42   |
| NEU | 16   | 17   | 23   | 27   | 28   | 32   | 29   | 31   | 33   | 29   |
| OAS | 9    | 12   | 13   | 15   | 16   | 18   | 20   | 23   | 26   | 28   |
| REF | 83   | 133  | 99   | 135  | 129  | 166  | 96   | 93   | 119  | 100  |
| SSA | 4    | 5    | 4    | 5    | 5    | 5    | 6    | 7    | 9    | 11   |
| USA | 52   | 53   | 67   | 70   | 76   | 78   | 61   | 61   | 56   | 57   |

Table 1355: FAO — Production—Crops—Cereals—Temperate cereals (Mt DM/yr)

44.1.4 Tropical cereals

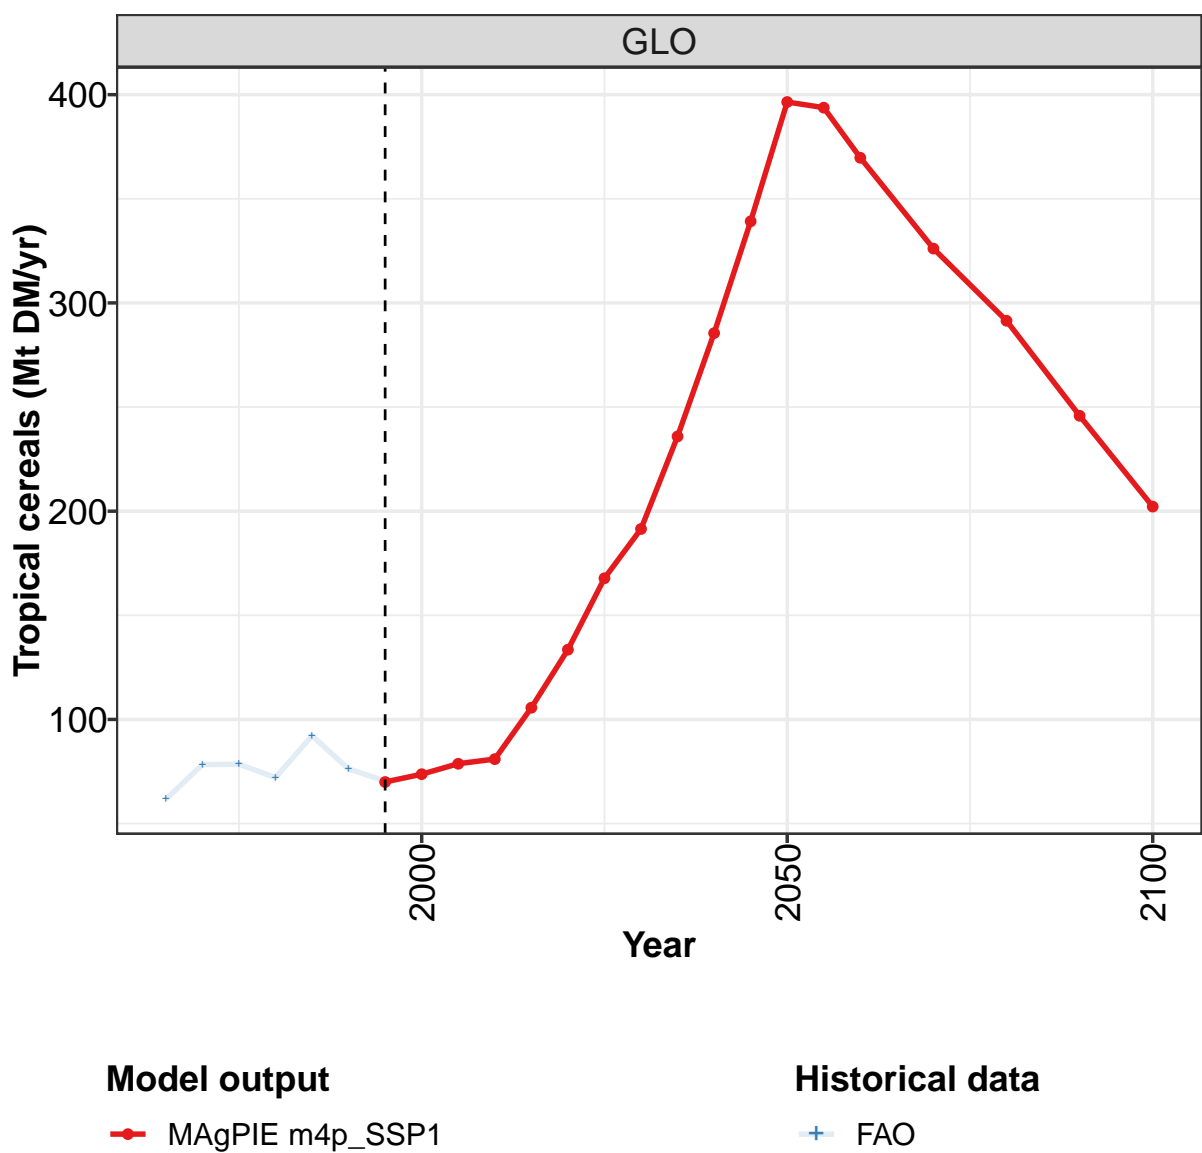

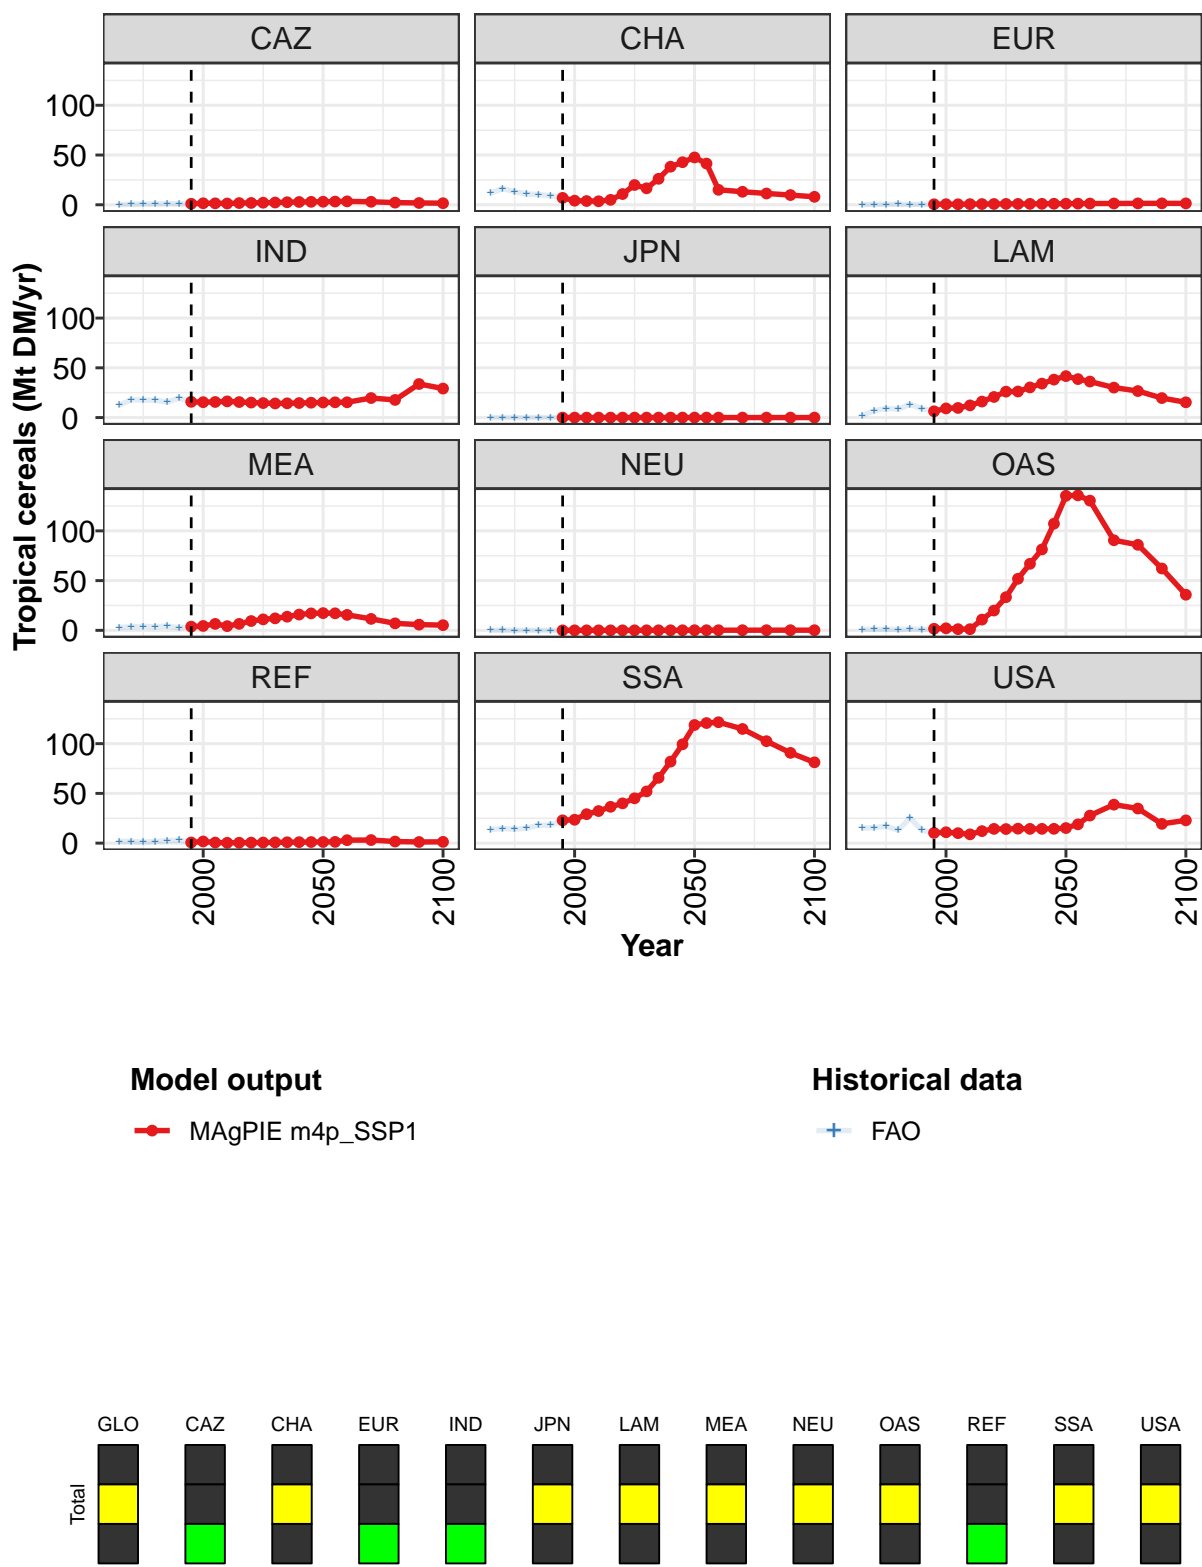

Figure 340: MAGPIE m4p\_SSP1 — Production—Crops—Cereals—Tropical cereals (Mt DM/yr)

|     | 1995 | 2000 | 2005 | 2010 | 2015 | 2020 | 2025 | 2030 | 2035 | 2040 | 2045 |
|-----|------|------|------|------|------|------|------|------|------|------|------|
| GLO | 70   | 74   | 79   | 81   | 106  | 133  | 168  | 191  | 236  | 285  | 339  |
| CAZ | 1    | 2    | 1    | 1    | 2    | 2    | 2    | 2    | 3    | 3    | 3    |
| CHA | 7    | 4    | 4    | 4    | 5    | 11   | 20   | 17   | 26   | 38   | 43   |
| EUR | 1    | 1    | 0    | 1    | 1    | 1    | 1    | 1    | 1    | 1    | 1    |
| IND | 16   | 15   | 16   | 16   | 16   | 15   | 15   | 14   | 14   | 15   | 15   |
| JPN | 0    | 0    | 0    | 0    | 0    | 0    | 0    | 0    | 0    | 0    | 0    |
| LAM | 6    | 9    | 10   | 12   | 16   | 21   | 26   | 26   | 30   | 34   | 38   |
| MEA | 4    | 4    | 7    | 4    | 7    | 9    | 11   | 12   | 14   | 16   | 17   |
| NEU | 0    | 0    | 0    | 0    | 0    | 0    | 0    | 0    | 0    | 0    | 0    |
| OAS | 2    | 2    | 1    | 1    | 11   | 20   | 33   | 52   | 67   | 81   | 107  |
| REF | 1    | 2    | 1    | 0    | 0    | 1    | 1    | 1    | 1    | 1    | 1    |
| SSA | 23   | 24   | 29   | 32   | 37   | 40   | 45   | 52   | 66   | 82   | 99   |
| USA | 10   | 11   | 10   | 9    | 12   | 14   | 14   | 15   | 14   | 14   | 14   |

Table 1356: MAgPIE m4p\_SSP1 — Production—Crops—Cereals—Tropical cereals (Mt DM/yr) [PART 1/2]

|     | 2050 | 2055 | 2060 | 2070 | 2080 | 2090 | 2100 |
|-----|------|------|------|------|------|------|------|
| GLO | 396  | 394  | 370  | 326  | 291  | 246  | 202  |
| CAZ | 3    | 3    | 3    | 3    | 2    | 2    | 2    |
| CHA | 48   | 41   | 15   | 13   | 11   | 10   | 8    |
| EUR | 1    | 1    | 1    | 1    | 1    | 1    | 1    |
| IND | 15   | 15   | 15   | 20   | 18   | 34   | 29   |
| JPN | 0    | 0    | 0    | 0    | 0    | 0    | 0    |
| LAM | 42   | 39   | 36   | 30   | 27   | 20   | 15   |
| MEA | 17   | 17   | 16   | 12   | 7    | 6    | 5    |
| NEU | 0    | 0    | 0    | 0    | 0    | 0    | 0    |
| OAS | 135  | 136  | 130  | 91   | 86   | 62   | 36   |
| REF | 1    | 1    | 3    | 3    | 2    | 1    | 1    |
| SSA | 119  | 121  | 122  | 115  | 102  | 91   | 81   |
| USA | 15   | 19   | 28   | 39   | 35   | 19   | 23   |

Table 1357: MAgPIE m4p\_SSP1 — Production—Crops—Cereals—Tropical cereals (Mt DM/yr) [PART 2/2]

|     | 1965 | 1970 | 1975 | 1980 | 1985 | 1990 | 1995 | 2000 | 2005 | 2010 |
|-----|------|------|------|------|------|------|------|------|------|------|
| GLO | 61.7 | 78.3 | 78.5 | 72.1 | 92.1 | 76.2 | 70.4 | 73.3 | 79.4 | 81.4 |
| CAZ | 0.2  | 0.5  | 0.8  | 0.8  | 1.2  | 0.9  | 1.2  | 1.9  | 1.8  | 1.4  |
| CHA | 11.7 | 16.3 | 13.2 | 10.8 | 10.3 | 9.1  | 6.9  | 4.2  | 3.8  | 3.5  |
| EUR | 0.2  | 0.4  | 0.5  | 0.6  | 0.3  | 0.5  | 0.5  | 0.6  | 0.5  | 0.6  |
| IND | 12.5 | 17.8 | 17.6 | 17.4 | 15.5 | 19.5 | 15.8 | 15.5 | 15.6 | 17.6 |
| JPN | 0.0  | 0.0  | 0.0  | 0.0  | 0.0  | 0.0  | 0.0  | 0.0  | 0.0  | 0.0  |
| LAM | 2.2  | 6.7  | 9.2  | 8.4  | 13.3 | 8.9  | 7.0  | 10.0 | 10.0 | 12.2 |
| MEA | 3.0  | 3.4  | 4.0  | 3.5  | 4.4  | 2.3  | 3.8  | 4.1  | 6.4  | 4.2  |
| NEU | 0.1  | 0.1  | 0.1  | 0.1  | 0.1  | 0.0  | 0.0  | 0.0  | 0.0  | 0.0  |
| OAS | 1.0  | 1.1  | 1.1  | 1.0  | 1.3  | 1.1  | 1.0  | 1.1  | 1.1  | 1.2  |
| REF | 1.8  | 1.7  | 1.0  | 1.6  | 2.6  | 2.9  | 0.7  | 1.5  | 0.6  | 0.3  |
| SSA | 13.7 | 14.7 | 14.0 | 15.0 | 18.0 | 18.1 | 23.0 | 23.8 | 30.4 | 32.2 |
| USA | 15.1 | 15.4 | 16.9 | 13.1 | 25.2 | 13.0 | 10.4 | 10.7 | 9.1  | 8.0  |

Table 1358: FAO — Production—Crops—Cereals—Tropical cereals (Mt DM/yr)

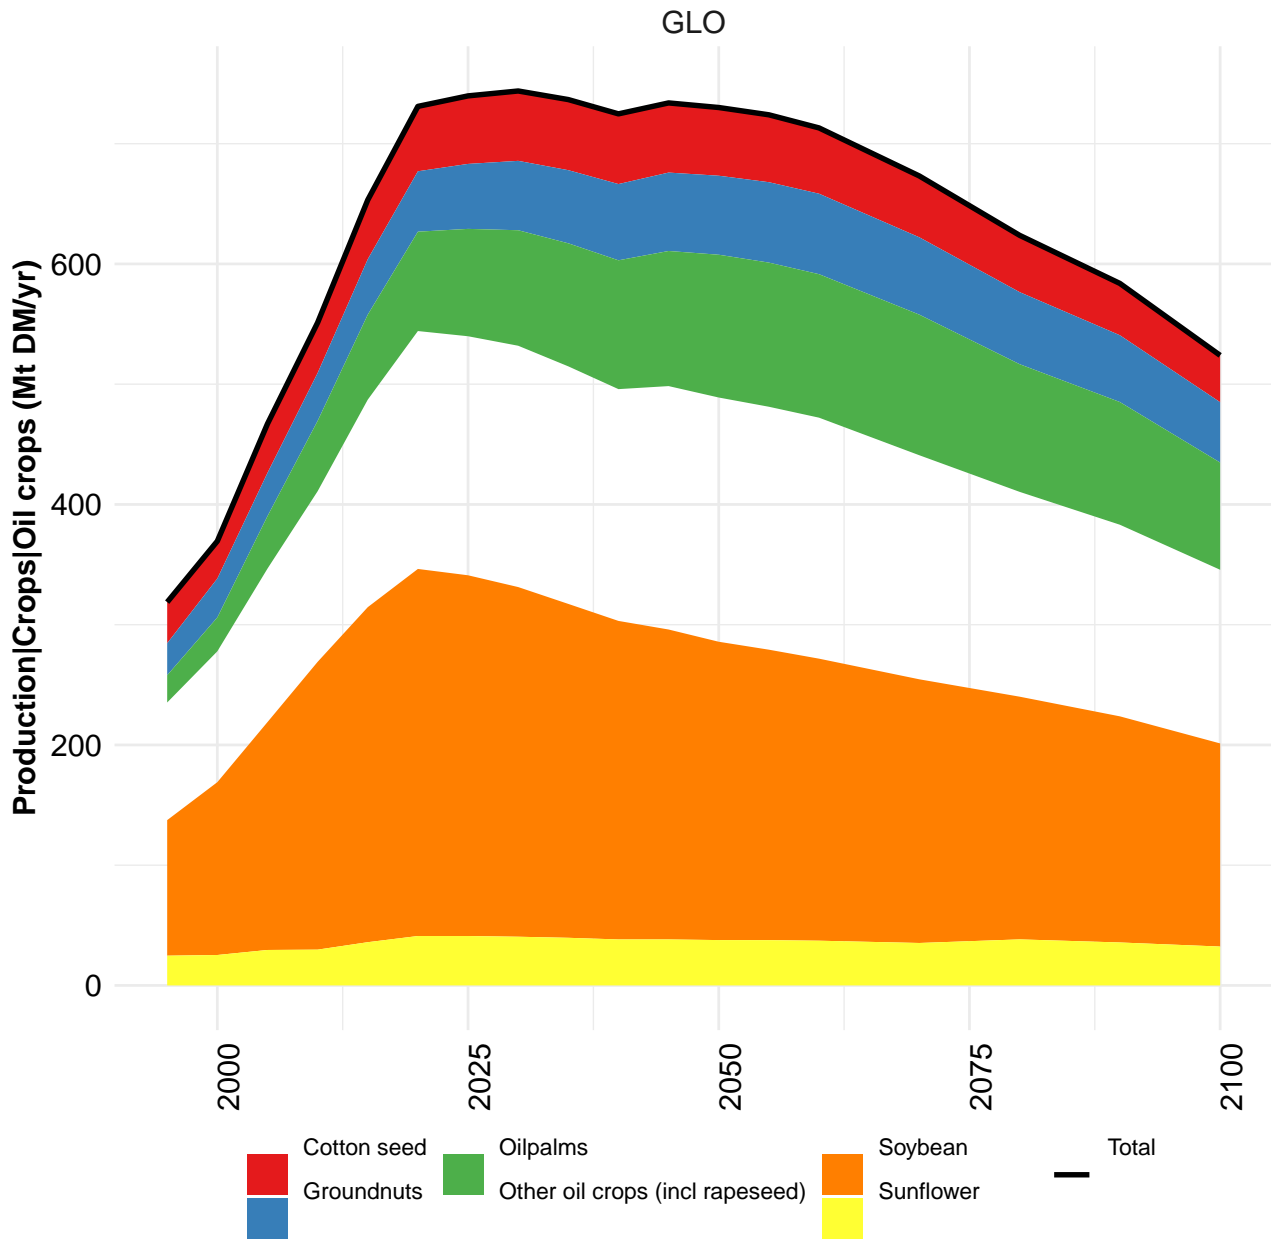

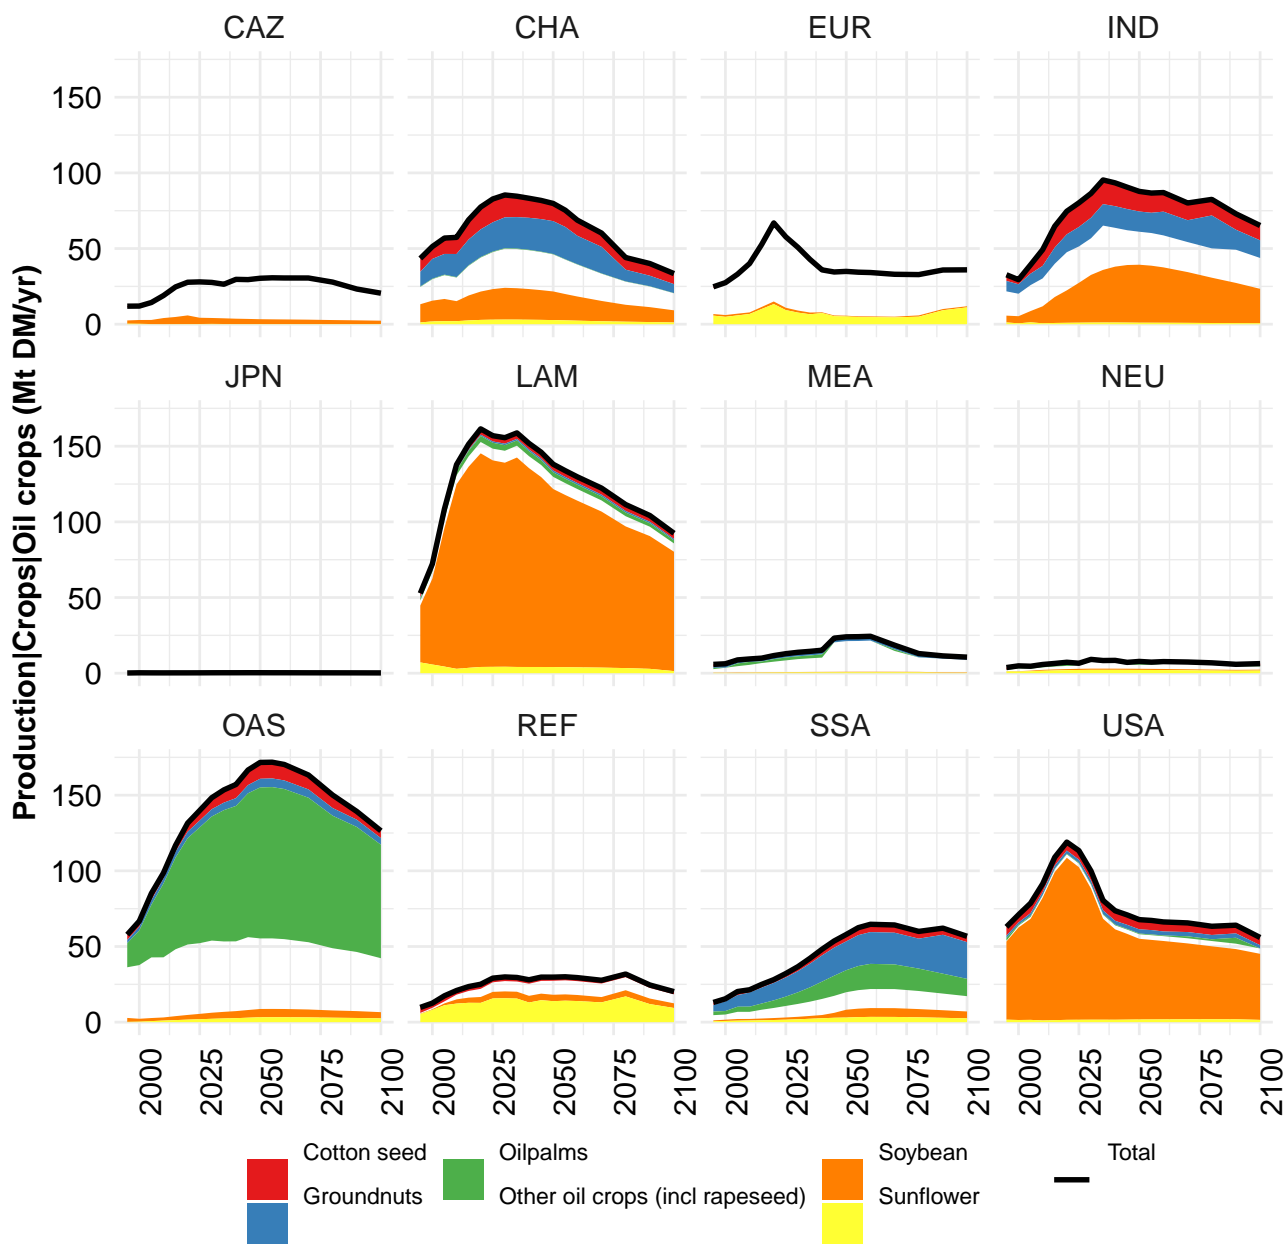



44.2 Oil crops

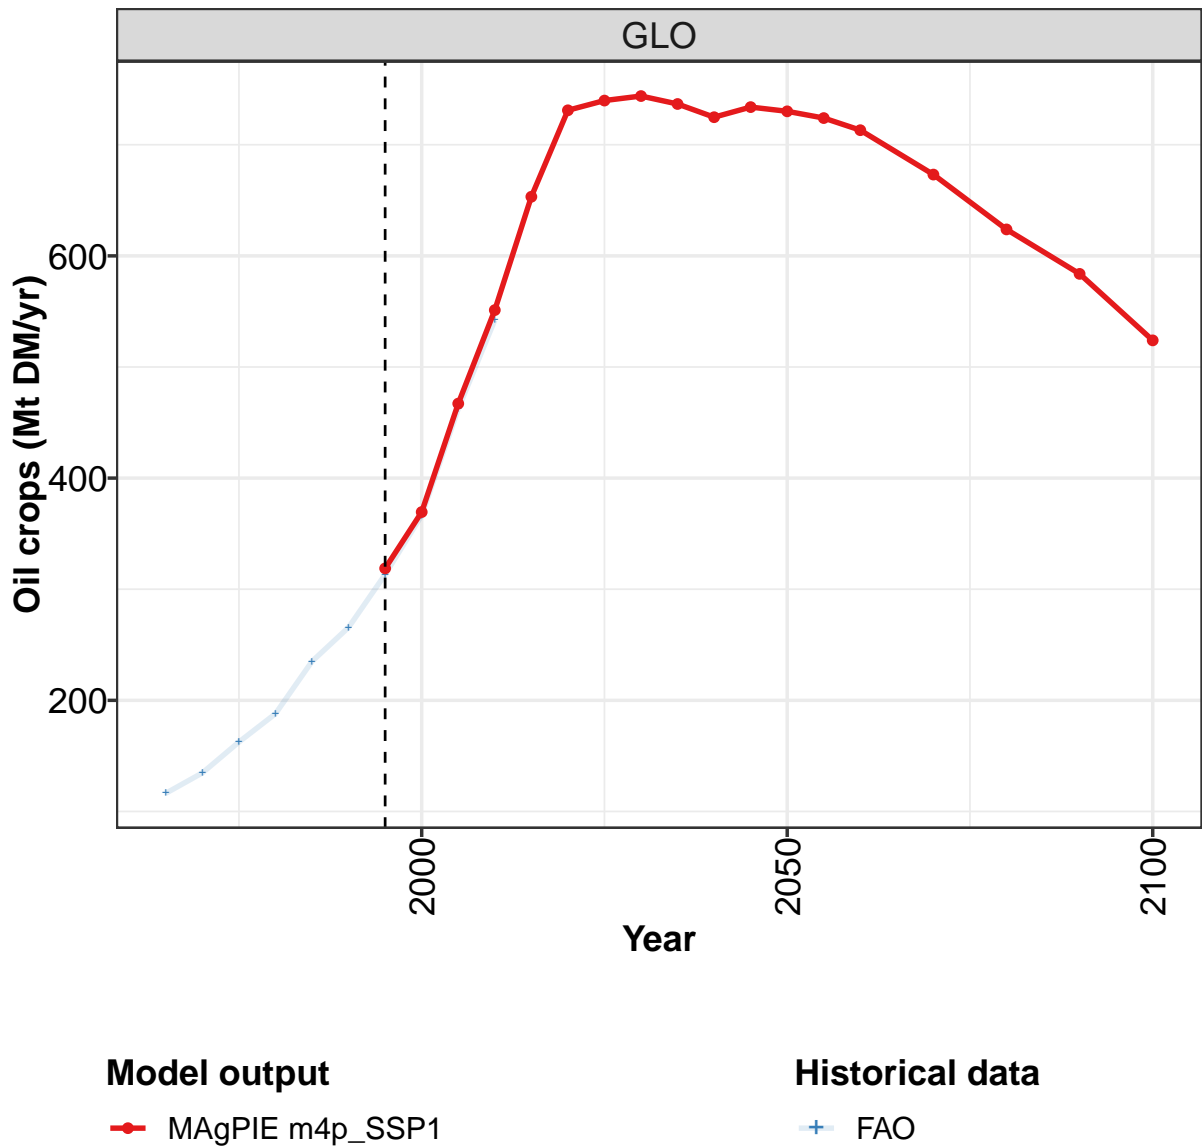

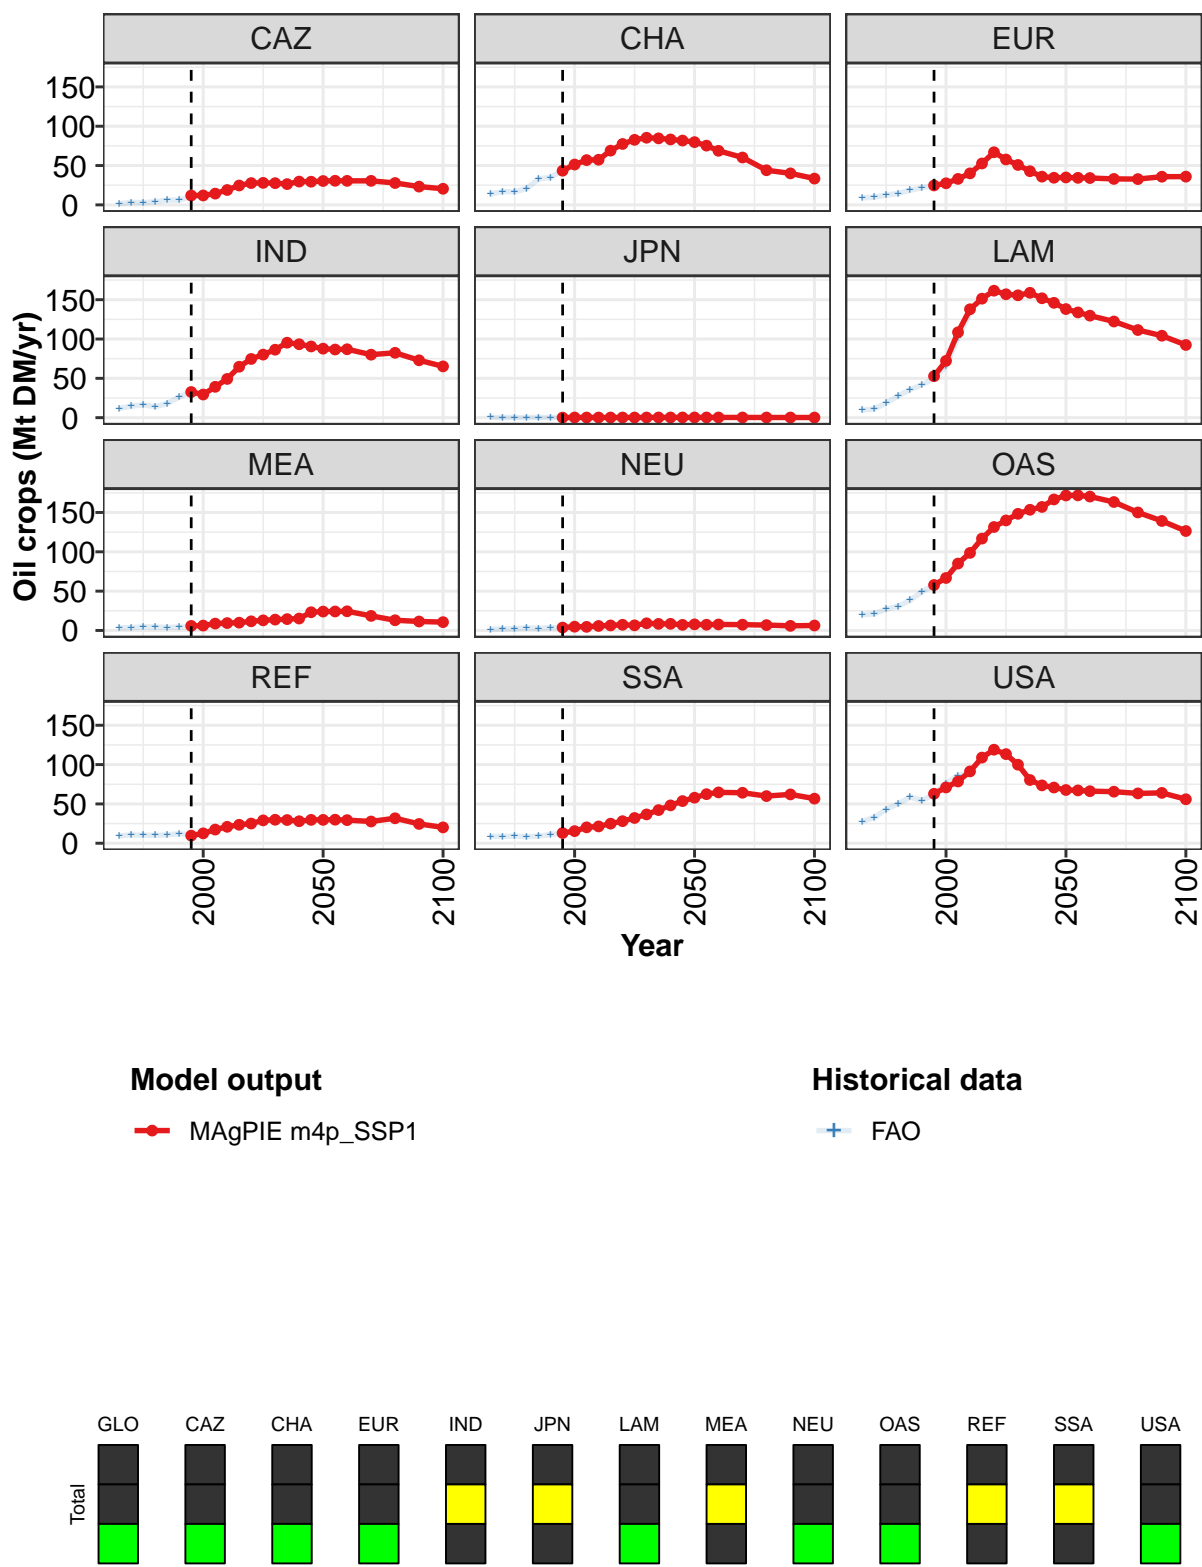

Figure 341: MAgPIE m4p\_SSP1 — Production—Crops—Oil crops (Mt DM/yr)

|     | 1995 | 2000 | 2005 | 2010 | 2015 | 2020 | 2025 | 2030 | 2035 | 2040 | 2045 |
|-----|------|------|------|------|------|------|------|------|------|------|------|
| GLO | 319  | 369  | 467  | 551  | 653  | 731  | 740  | 744  | 737  | 725  | 734  |
| CAZ | 12   | 12   | 14   | 19   | 25   | 28   | 28   | 28   | 26   | 30   | 29   |
| CHA | 43   | 51   | 57   | 57   | 69   | 77   | 83   | 85   | 85   | 83   | 82   |
| EUR | 25   | 27   | 33   | 40   | 53   | 67   | 58   | 51   | 43   | 36   | 35   |
| IND | 33   | 29   | 39   | 49   | 65   | 75   | 80   | 86   | 95   | 93   | 91   |
| JPN | 0    | 0    | 0    | 0    | 0    | 0    | 0    | 0    | 0    | 0    | 0    |
| LAM | 53   | 72   | 109  | 138  | 151  | 161  | 157  | 156  | 159  | 152  | 146  |
| MEA | 6    | 6    | 9    | 9    | 10   | 12   | 13   | 14   | 14   | 15   | 23   |
| NEU | 4    | 5    | 5    | 6    | 6    | 7    | 7    | 9    | 8    | 8    | 7    |
| OAS | 58   | 67   | 85   | 99   | 117  | 132  | 140  | 148  | 153  | 157  | 167  |
| REF | 10   | 13   | 17   | 21   | 24   | 25   | 29   | 30   | 30   | 28   | 30   |
| SSA | 13   | 15   | 20   | 21   | 25   | 28   | 32   | 37   | 42   | 48   | 54   |
| USA | 63   | 71   | 79   | 91   | 109  | 119  | 113  | 100  | 80   | 74   | 71   |

Table 1359: MAgPIE m4p-SSP1 — Production—Crops—Oil crops (Mt DM/yr) [PART 1/2]

|     | 2050 | 2055 | 2060 | 2070 | 2080 | 2090 | 2100 |
|-----|------|------|------|------|------|------|------|
| GLO | 730  | 724  | 713  | 673  | 624  | 584  | 524  |
| CAZ | 30   | 31   | 31   | 31   | 28   | 23   | 20   |
| CHA | 80   | 75   | 69   | 60   | 44   | 40   | 33   |
| EUR | 35   | 34   | 34   | 33   | 33   | 36   | 36   |
| IND | 88   | 87   | 87   | 80   | 82   | 73   | 65   |
| JPN | 0    | 0    | 0    | 0    | 0    | 0    | 0    |
| LAM | 138  | 134  | 130  | 122  | 111  | 104  | 92   |
| MEA | 24   | 24   | 24   | 19   | 13   | 11   | 11   |
| NEU | 8    | 7    | 8    | 7    | 7    | 6    | 6    |
| OAS | 172  | 172  | 170  | 163  | 150  | 139  | 126  |
| REF | 30   | 30   | 29   | 28   | 32   | 25   | 20   |
| SSA | 58   | 62   | 65   | 64   | 60   | 62   | 57   |
| USA | 68   | 67   | 66   | 66   | 63   | 64   | 56   |

Table 1360: MAgPIE m4p-SSP1 — Production—Crops—Oil crops (Mt DM/yr) [PART 2/2]

|     | 1965 | 1970 | 1975 | 1980 | 1985 | 1990 | 1995 | 2000 | 2005 | 2010 |
|-----|------|------|------|------|------|------|------|------|------|------|
| GLO | 116  | 135  | 163  | 188  | 235  | 266  | 313  | 366  | 462  | 542  |
| CAZ | 1    | 3    | 3    | 4    | 6    | 6    | 10   | 13   | 15   | 19   |
| CHA | 14   | 17   | 17   | 21   | 33   | 35   | 44   | 52   | 56   | 57   |
| EUR | 9    | 10   | 12   | 15   | 19   | 22   | 25   | 28   | 33   | 39   |
| IND | 12   | 15   | 16   | 14   | 18   | 26   | 33   | 29   | 39   | 49   |
| JPN | 0    | 0    | 0    | 0    | 0    | 0    | 0    | 0    | 0    | 0    |
| LAM | 9    | 11   | 18   | 27   | 36   | 42   | 50   | 66   | 101  | 133  |
| MEA | 3    | 4    | 5    | 4    | 4    | 4    | 5    | 6    | 7    | 7    |
| NEU | 1    | 2    | 2    | 3    | 3    | 4    | 3    | 4    | 4    | 5    |
| OAS | 20   | 21   | 27   | 31   | 38   | 49   | 58   | 66   | 84   | 100  |
| REF | 9    | 11   | 10   | 10   | 11   | 12   | 11   | 11   | 17   | 20   |
| SSA | 9    | 9    | 9    | 8    | 9    | 11   | 12   | 15   | 20   | 22   |
| USA | 28   | 33   | 43   | 50   | 59   | 54   | 62   | 76   | 86   | 90   |

Table 1361: FAO — Production—Crops—Oil crops (Mt DM/yr)

44.2.1 Cotton seed

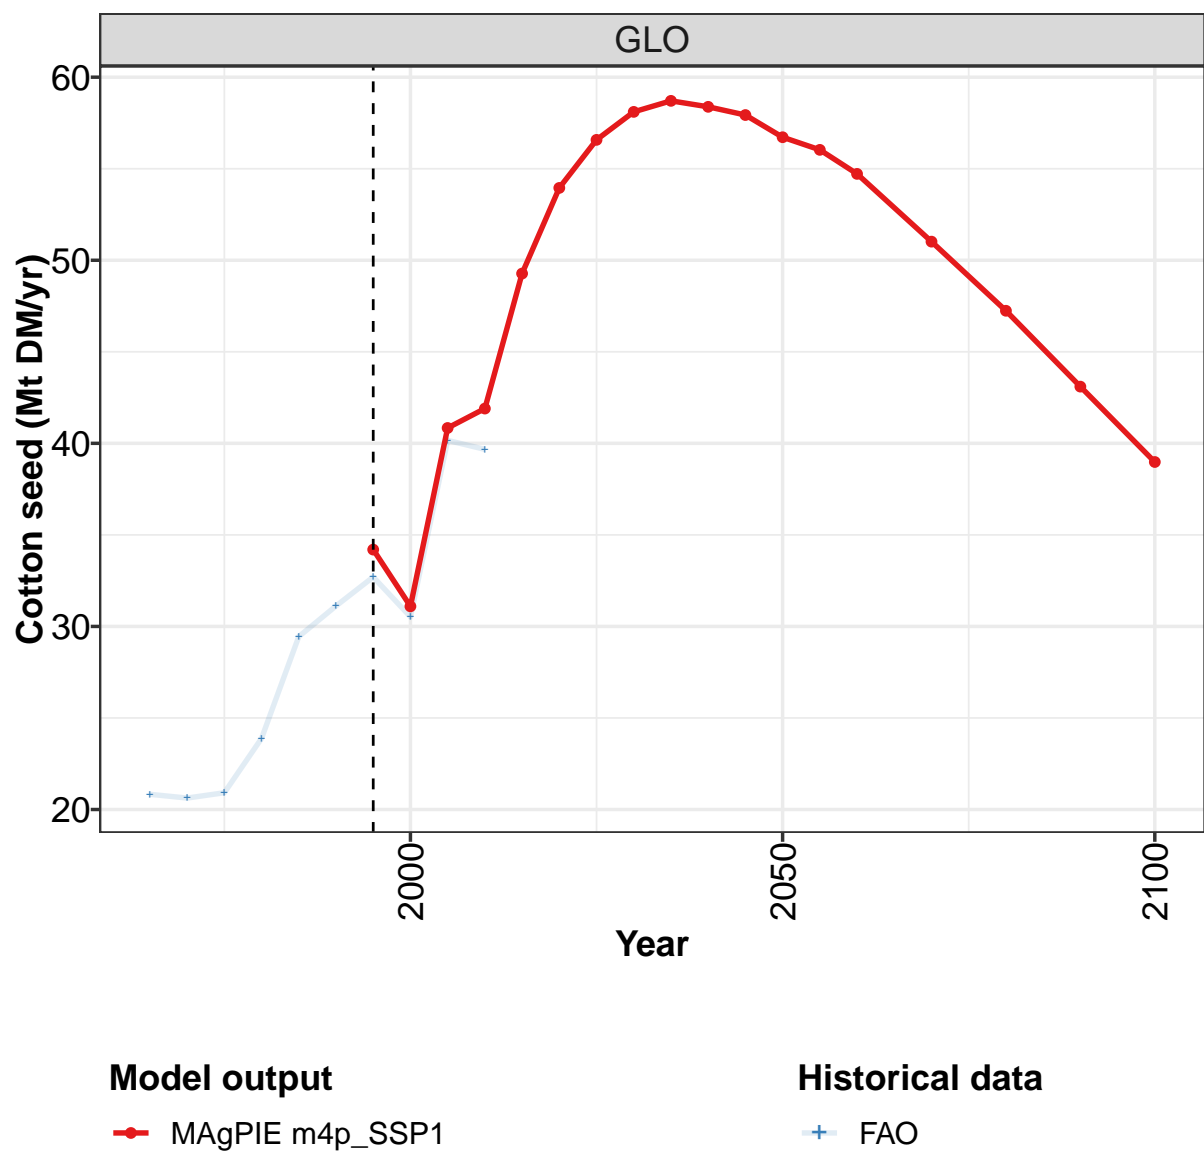

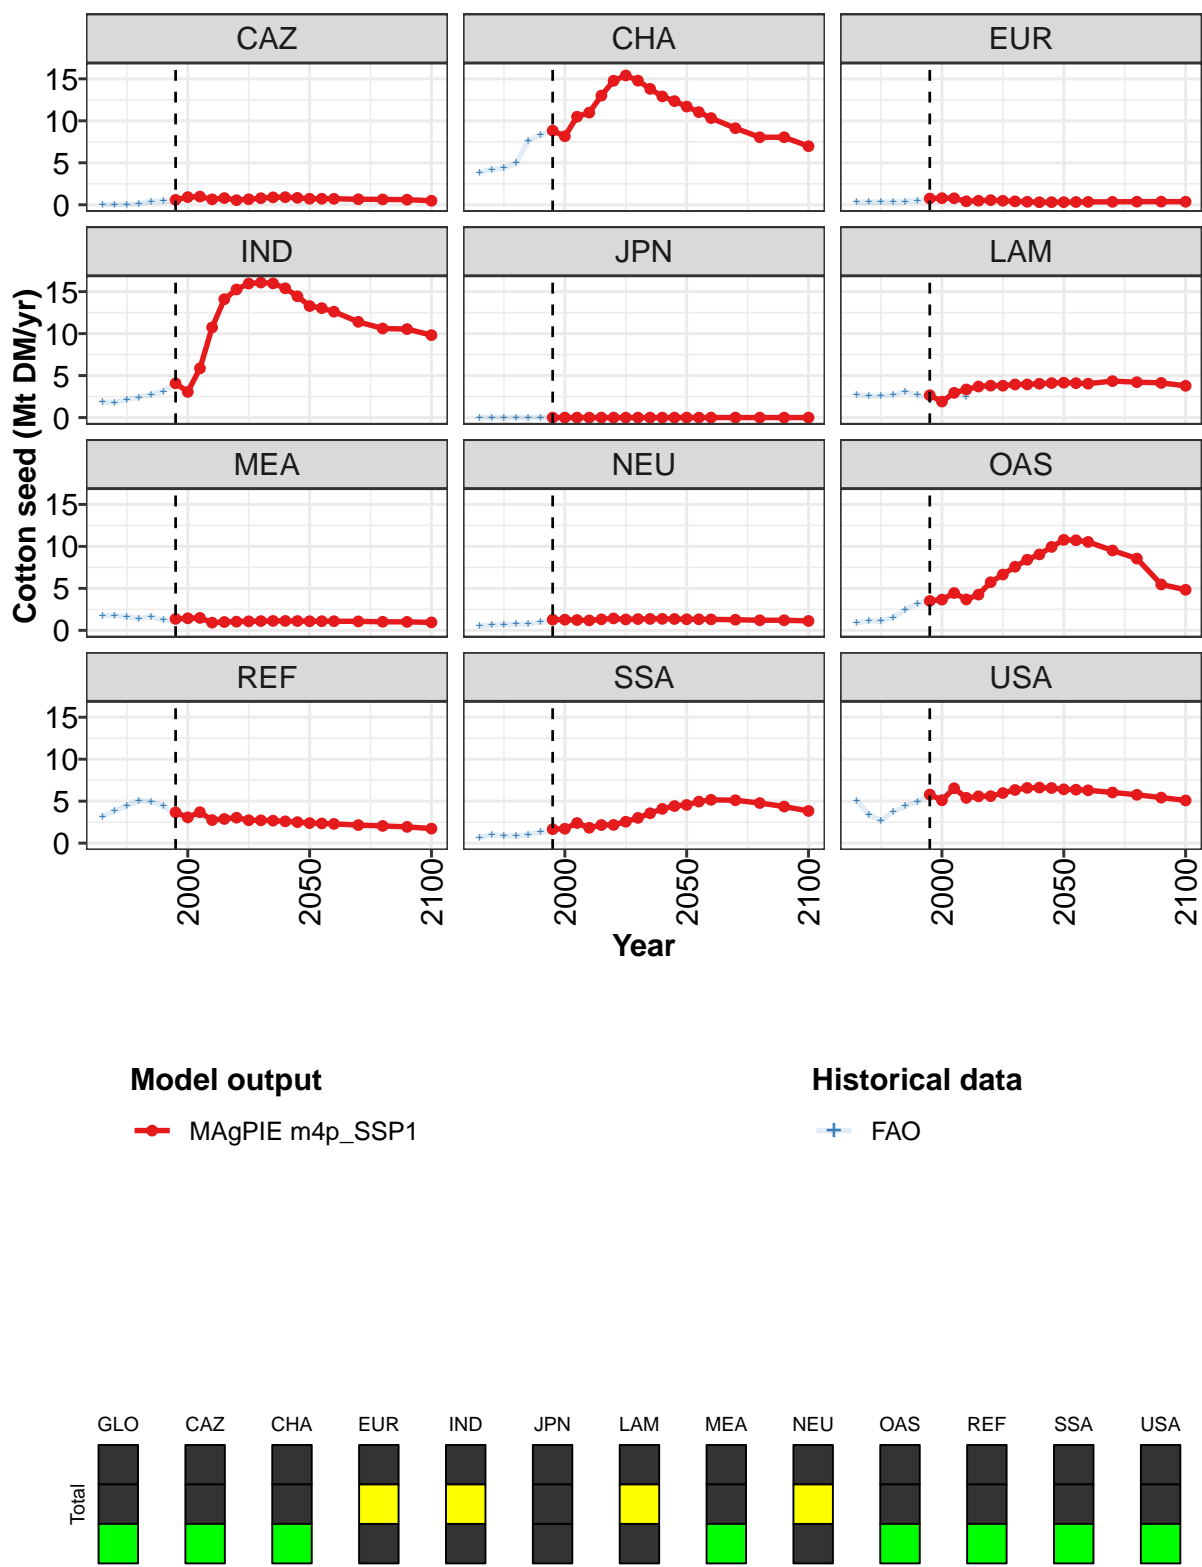

Figure 342: MAgPIE m4p\_SSP1 — Production—Crops—Oil crops—Cotton seed (Mt DM/yr)

|     | 1995 | 2000 | 2005 | 2010 | 2015 | 2020 | 2025 | 2030 | 2035 | 2040 | 2045 |
|-----|------|------|------|------|------|------|------|------|------|------|------|
| GLO | 34.2 | 31.1 | 40.8 | 41.9 | 49.3 | 54.0 | 56.6 | 58.1 | 58.7 | 58.4 | 57.9 |
| CAZ | 0.6  | 0.9  | 1.0  | 0.6  | 0.8  | 0.6  | 0.7  | 0.8  | 0.9  | 0.9  | 0.8  |
| CHA | 8.8  | 8.2  | 10.5 | 11.0 | 13.0 | 14.8 | 15.4 | 14.8 | 13.8 | 12.9 | 12.3 |
| EUR | 0.7  | 0.8  | 0.8  | 0.4  | 0.5  | 0.6  | 0.5  | 0.4  | 0.4  | 0.3  | 0.3  |
| IND | 4.1  | 3.1  | 5.9  | 10.7 | 14.1 | 15.3 | 16.0 | 16.1 | 16.0 | 15.4 | 14.4 |
| JPN | 0.0  | 0.0  | 0.0  | 0.0  | 0.0  | 0.0  | 0.0  | 0.0  | 0.0  | 0.0  | 0.0  |
| LAM | 2.7  | 1.9  | 2.9  | 3.4  | 3.7  | 3.8  | 3.8  | 3.9  | 3.9  | 4.0  | 4.1  |
| MEA | 1.4  | 1.4  | 1.5  | 0.9  | 1.0  | 1.0  | 1.1  | 1.1  | 1.1  | 1.1  | 1.1  |
| NEU | 1.3  | 1.3  | 1.2  | 1.2  | 1.3  | 1.4  | 1.3  | 1.3  | 1.4  | 1.4  | 1.4  |
| OAS | 3.5  | 3.7  | 4.5  | 3.7  | 4.3  | 5.7  | 6.6  | 7.6  | 8.4  | 9.0  | 9.9  |
| REF | 3.7  | 3.1  | 3.7  | 2.8  | 2.9  | 3.0  | 2.7  | 2.7  | 2.7  | 2.6  | 2.5  |
| SSA | 1.7  | 1.7  | 2.4  | 1.8  | 2.2  | 2.2  | 2.6  | 3.0  | 3.6  | 4.1  | 4.4  |
| USA | 5.8  | 5.1  | 6.5  | 5.4  | 5.6  | 5.6  | 6.0  | 6.3  | 6.6  | 6.6  | 6.6  |

Table 1362: MAgPIE m4p\_SSP1 — Production—Crops—Oil crops—Cotton seed (Mt DM/yr) [PART 1/2]

|     | 2050 | 2055 | 2060 | 2070 | 2080 | 2090 | 2100 |
|-----|------|------|------|------|------|------|------|
| GLO | 56.7 | 56.0 | 54.7 | 51.0 | 47.2 | 43.1 | 39.0 |
| CAZ | 0.7  | 0.7  | 0.7  | 0.7  | 0.6  | 0.6  | 0.5  |
| CHA | 11.7 | 11.0 | 10.3 | 9.1  | 8.0  | 8.0  | 7.0  |
| EUR | 0.3  | 0.3  | 0.3  | 0.4  | 0.4  | 0.4  | 0.4  |
| IND | 13.3 | 13.0 | 12.6 | 11.4 | 10.6 | 10.5 | 9.8  |
| JPN | 0.0  | 0.0  | 0.0  | 0.0  | 0.0  | 0.0  | 0.0  |
| LAM | 4.2  | 4.1  | 4.0  | 4.3  | 4.2  | 4.1  | 3.8  |
| MEA | 1.1  | 1.1  | 1.1  | 1.1  | 1.0  | 1.0  | 0.9  |
| NEU | 1.3  | 1.3  | 1.3  | 1.3  | 1.2  | 1.2  | 1.1  |
| OAS | 10.8 | 10.7 | 10.5 | 9.5  | 8.6  | 5.5  | 4.8  |
| REF | 2.4  | 2.3  | 2.3  | 2.2  | 2.0  | 1.9  | 1.7  |
| SSA | 4.6  | 5.0  | 5.2  | 5.1  | 4.8  | 4.4  | 3.8  |
| USA | 6.4  | 6.4  | 6.3  | 6.0  | 5.8  | 5.4  | 5.1  |

Table 1363: MAgPIE m4p\_SSP1 — Production—Crops—Oil crops—Cotton seed (Mt DM/yr) [PART 2/2]

|     | 1965 | 1970 | 1975 | 1980 | 1985 | 1990 | 1995 | 2000 | 2005 | 2010 |
|-----|------|------|------|------|------|------|------|------|------|------|
| GLO | 20.8 | 20.6 | 20.9 | 23.9 | 29.4 | 31.1 | 32.7 | 30.5 | 40.2 | 39.7 |
| CAZ | 0.0  | 0.0  | 0.0  | 0.1  | 0.4  | 0.5  | 0.4  | 1.0  | 0.8  | 0.5  |
| CHA | 3.9  | 4.2  | 4.4  | 5.0  | 7.6  | 8.3  | 8.8  | 8.1  | 10.5 | 11.0 |
| EUR | 0.3  | 0.3  | 0.3  | 0.3  | 0.4  | 0.5  | 0.7  | 0.8  | 0.8  | 0.4  |
| IND | 1.9  | 1.8  | 2.2  | 2.4  | 2.8  | 3.1  | 4.1  | 3.1  | 5.9  | 10.6 |
| JPN | 0.0  | 0.0  | 0.0  | 0.0  | 0.0  | 0.0  | 0.0  | 0.0  | 0.0  | 0.0  |
| LAM | 2.7  | 2.6  | 2.6  | 2.7  | 3.1  | 2.7  | 2.3  | 1.8  | 2.9  | 2.5  |
| MEA | 1.8  | 1.8  | 1.6  | 1.4  | 1.6  | 1.2  | 1.2  | 1.4  | 1.4  | 0.7  |
| NEU | 0.5  | 0.6  | 0.7  | 0.7  | 0.8  | 1.0  | 1.2  | 1.2  | 1.2  | 1.2  |
| OAS | 0.9  | 1.1  | 1.1  | 1.5  | 2.5  | 3.2  | 3.5  | 3.6  | 4.3  | 3.7  |
| REF | 3.2  | 3.9  | 4.4  | 5.1  | 4.9  | 4.4  | 3.4  | 2.7  | 3.3  | 2.5  |
| SSA | 0.6  | 1.0  | 0.9  | 0.8  | 1.0  | 1.3  | 1.4  | 1.6  | 2.3  | 1.6  |
| USA | 5.1  | 3.4  | 2.7  | 3.7  | 4.4  | 5.0  | 5.7  | 5.4  | 6.8  | 5.1  |

Table 1364: FAO — Production—Crops—Oil crops—Cotton seed (Mt DM/yr)

44.2.2 Groundnuts

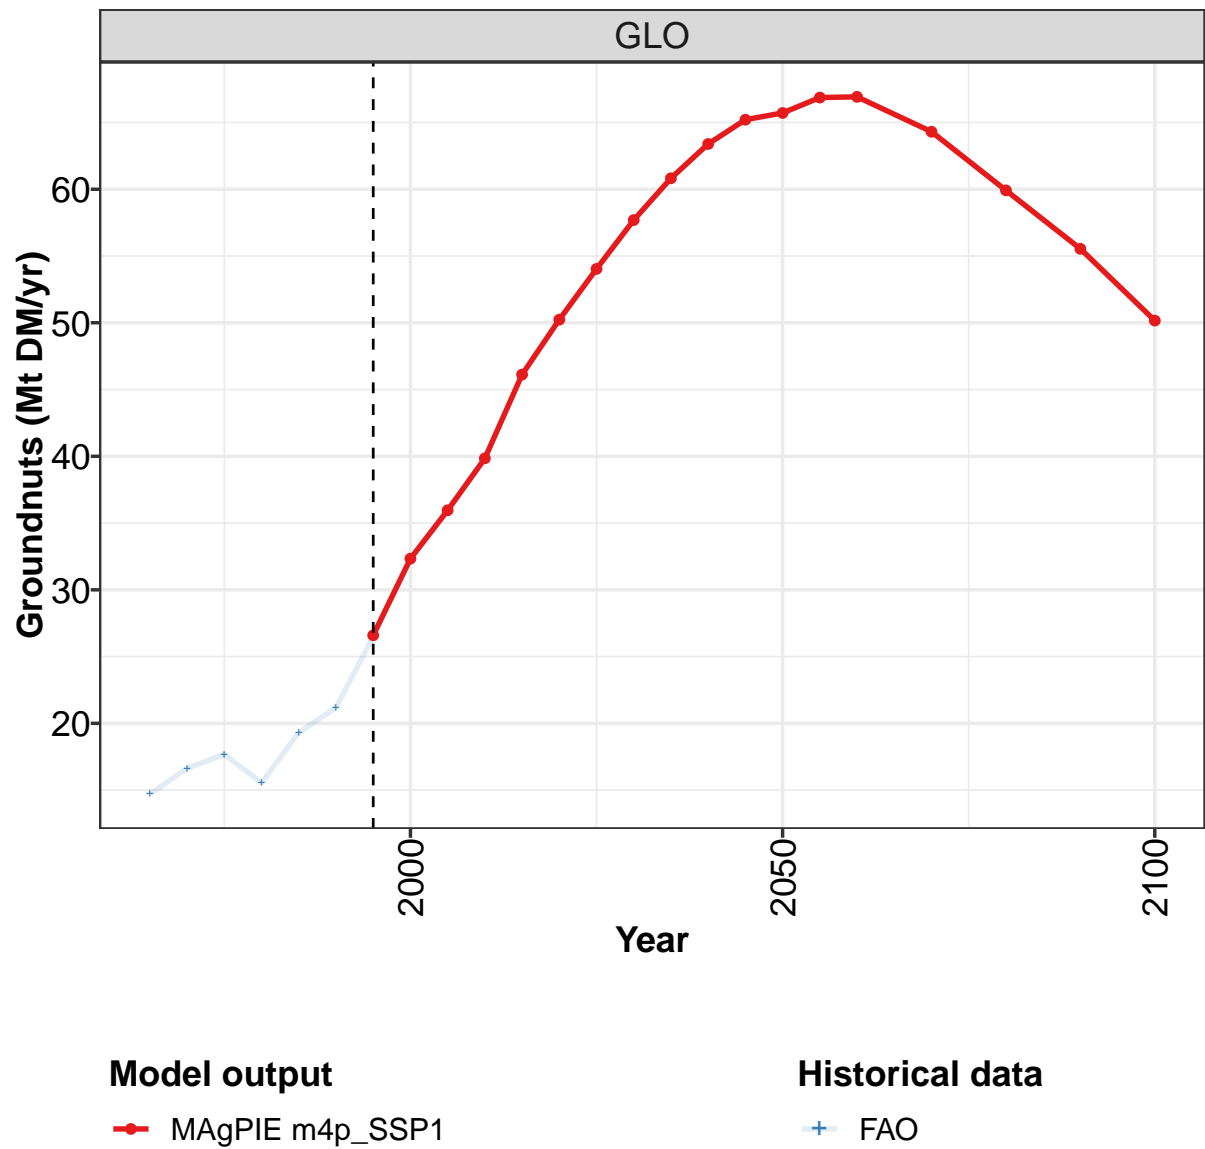

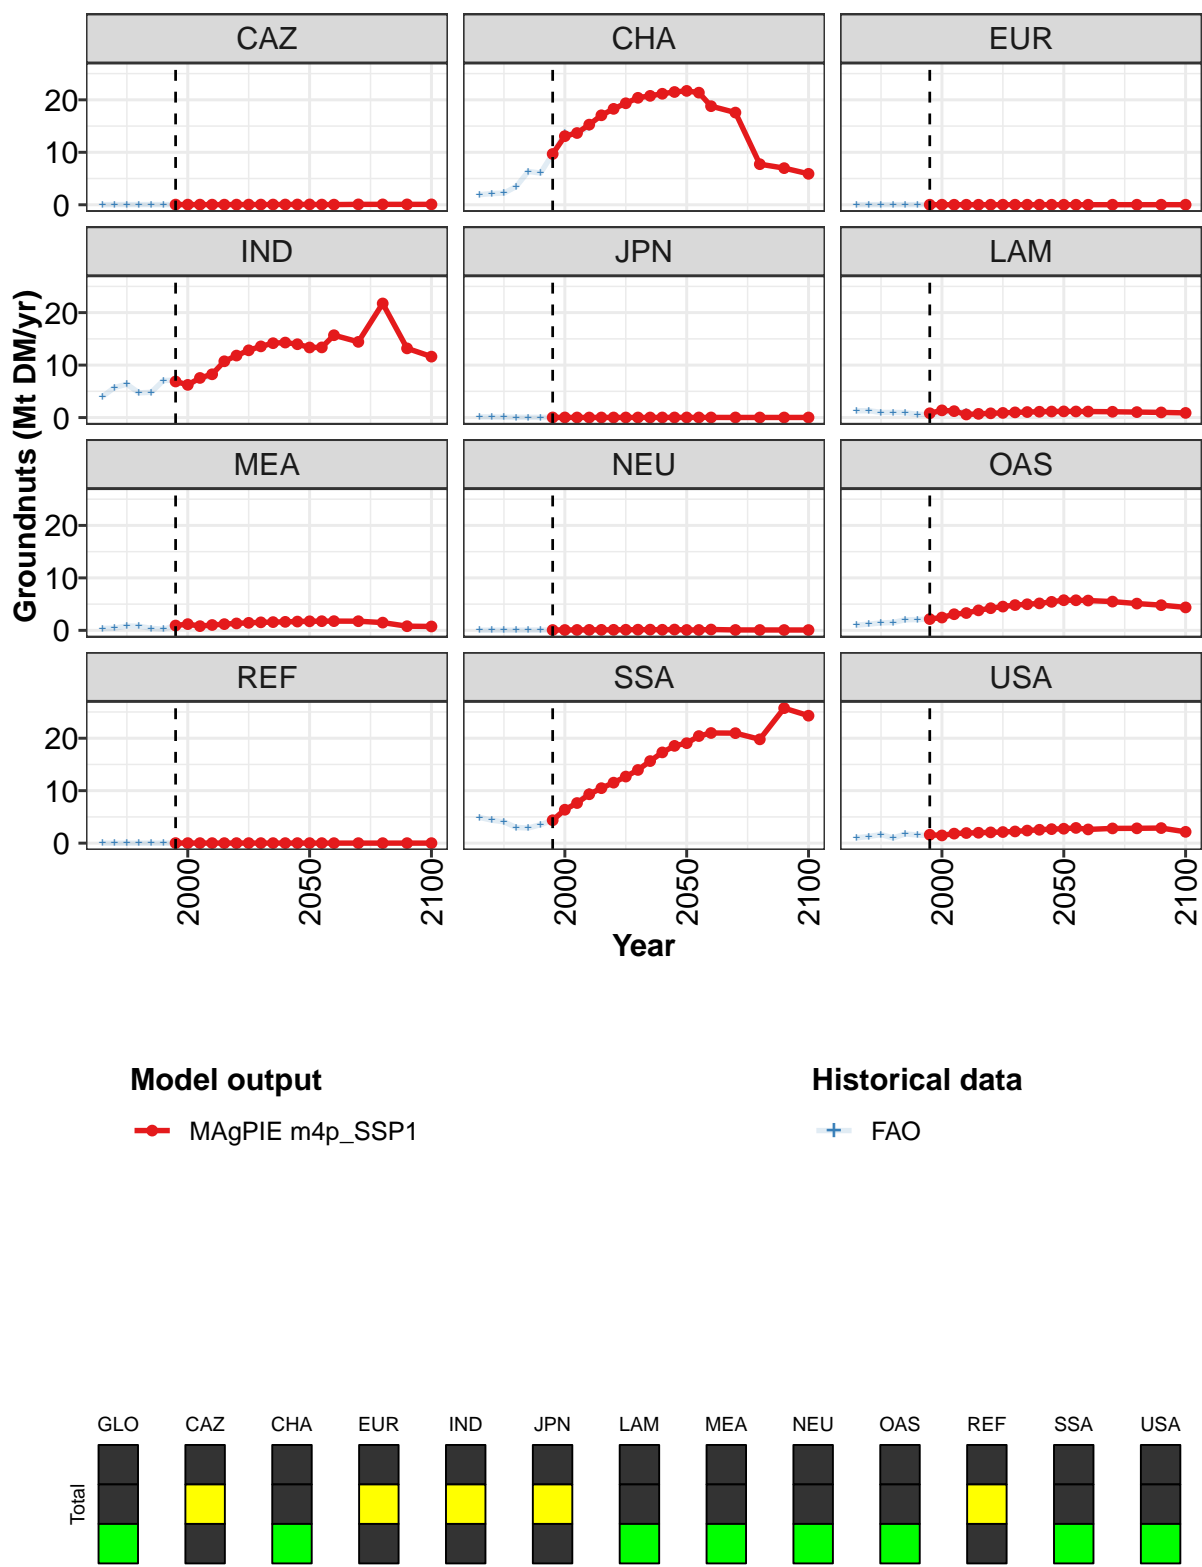

Figure 343: MAgPIE m4p\_SSP1 — Production—Crops—Oil crops—Groundnuts (Mt DM/yr)



|     | 1995 | 2000 | 2005 | 2010 | 2015 | 2020 | 2025 | 2030 | 2035 | 2040 | 2045 |
|-----|------|------|------|------|------|------|------|------|------|------|------|
| GLO | 26.6 | 32.3 | 36.0 | 39.8 | 46.1 | 50.2 | 54.0 | 57.7 | 60.8 | 63.4 | 65.2 |
| CAZ | 0.0  | 0.0  | 0.0  | 0.0  | 0.0  | 0.0  | 0.0  | 0.0  | 0.0  | 0.1  | 0.1  |
| CHA | 9.7  | 13.1 | 13.7 | 15.3 | 17.1 | 18.3 | 19.4 | 20.4 | 20.8 | 21.2 | 21.5 |
| EUR | 0.0  | 0.0  | 0.0  | 0.0  | 0.0  | 0.0  | 0.0  | 0.0  | 0.0  | 0.0  | 0.0  |
| IND | 6.9  | 6.2  | 7.6  | 8.2  | 10.7 | 11.8 | 12.8 | 13.6 | 14.2 | 14.3 | 14.0 |
| JPN | 0.0  | 0.0  | 0.0  | 0.0  | 0.0  | 0.0  | 0.0  | 0.0  | 0.0  | 0.0  | 0.0  |
| LAM | 0.8  | 1.4  | 1.2  | 0.6  | 0.7  | 0.8  | 0.9  | 1.0  | 1.1  | 1.1  | 1.2  |
| MEA | 0.9  | 1.2  | 0.8  | 1.0  | 1.2  | 1.3  | 1.4  | 1.5  | 1.6  | 1.6  | 1.7  |
| NEU | 0.1  | 0.1  | 0.1  | 0.1  | 0.1  | 0.1  | 0.1  | 0.1  | 0.1  | 0.1  | 0.2  |
| OAS | 2.2  | 2.4  | 3.1  | 3.3  | 3.8  | 4.2  | 4.5  | 4.8  | 5.0  | 5.1  | 5.4  |
| REF | 0.0  | 0.0  | 0.0  | 0.0  | 0.0  | 0.0  | 0.0  | 0.0  | 0.0  | 0.0  | 0.0  |
| SSA | 4.4  | 6.4  | 7.6  | 9.3  | 10.5 | 11.5 | 12.7 | 14.0 | 15.6 | 17.3 | 18.5 |
| USA | 1.6  | 1.5  | 1.8  | 1.9  | 2.0  | 2.1  | 2.1  | 2.2  | 2.4  | 2.6  | 2.7  |

Table 1365: MAgPIE m4p\_SSP1 — Production—Crops—Oil crops—Groundnuts (Mt DM/yr) [PART 1/2]

|     | 2050 | 2055 | 2060 | 2070 | 2080 | 2090 | 2100 |
|-----|------|------|------|------|------|------|------|
| GLO | 65.7 | 66.9 | 66.9 | 64.3 | 59.9 | 55.5 | 50.2 |
| CAZ | 0.1  | 0.0  | 0.0  | 0.1  | 0.1  | 0.1  | 0.1  |
| CHA | 21.7 | 21.4 | 18.8 | 17.6 | 7.7  | 7.0  | 5.9  |
| EUR | 0.0  | 0.0  | 0.0  | 0.0  | 0.0  | 0.0  | 0.0  |
| IND | 13.4 | 13.4 | 15.7 | 14.4 | 21.7 | 13.2 | 11.6 |
| JPN | 0.0  | 0.0  | 0.0  | 0.0  | 0.0  | 0.0  | 0.0  |
| LAM | 1.2  | 1.2  | 1.1  | 1.1  | 1.0  | 1.0  | 0.9  |
| MEA | 1.7  | 1.7  | 1.8  | 1.7  | 1.5  | 0.8  | 0.7  |
| NEU | 0.1  | 0.1  | 0.2  | 0.1  | 0.1  | 0.1  | 0.1  |
| OAS | 5.8  | 5.7  | 5.7  | 5.5  | 5.1  | 4.8  | 4.4  |
| REF | 0.0  | 0.0  | 0.0  | 0.0  | 0.0  | 0.0  | 0.0  |
| SSA | 19.1 | 20.4 | 21.0 | 21.0 | 19.8 | 25.7 | 24.3 |
| USA | 2.7  | 2.9  | 2.6  | 2.8  | 2.8  | 2.9  | 2.2  |

Table 1366: MAgPIE m4p\_SSP1 — Production—Crops—Oil crops—Groundnuts (Mt DM/yr) [PART 2/2]

|     | 1965 | 1970 | 1975 | 1980 | 1985 | 1990 | 1995 | 2000 | 2005 | 2010 |
|-----|------|------|------|------|------|------|------|------|------|------|
| GLO | 14.7 | 16.6 | 17.7 | 15.5 | 19.3 | 21.2 | 26.5 | 32.3 | 35.9 | 39.8 |
| CAZ | 0.0  | 0.0  | 0.0  | 0.0  | 0.0  | 0.0  | 0.0  | 0.0  | 0.0  | 0.0  |
| CHA | 1.9  | 2.1  | 2.2  | 3.5  | 6.3  | 6.0  | 9.7  | 13.6 | 13.5 | 14.8 |
| EUR | 0.0  | 0.0  | 0.0  | 0.0  | 0.0  | 0.0  | 0.0  | 0.0  | 0.0  | 0.0  |
| IND | 4.0  | 5.7  | 6.3  | 4.7  | 4.8  | 7.1  | 7.1  | 6.1  | 7.5  | 7.8  |
| JPN | 0.1  | 0.1  | 0.1  | 0.1  | 0.0  | 0.0  | 0.0  | 0.0  | 0.0  | 0.0  |
| LAM | 1.3  | 1.3  | 1.0  | 1.0  | 0.9  | 0.6  | 0.6  | 0.9  | 1.1  | 1.2  |
| MEA | 0.4  | 0.4  | 0.8  | 0.8  | 0.4  | 0.2  | 0.9  | 1.2  | 0.8  | 1.0  |
| NEU | 0.0  | 0.0  | 0.0  | 0.0  | 0.1  | 0.1  | 0.1  | 0.1  | 0.1  | 0.1  |
| OAS | 1.0  | 1.2  | 1.4  | 1.5  | 2.0  | 2.1  | 2.2  | 2.5  | 3.1  | 3.3  |
| REF | 0.0  | 0.0  | 0.0  | 0.0  | 0.0  | 0.0  | 0.0  | 0.0  | 0.0  | 0.0  |
| SSA | 4.9  | 4.4  | 4.1  | 3.0  | 2.9  | 3.5  | 4.4  | 6.5  | 7.6  | 9.8  |
| USA | 1.0  | 1.3  | 1.6  | 1.0  | 1.8  | 1.5  | 1.5  | 1.4  | 2.1  | 1.8  |

Table 1367: FAO — Production—Crops—Oil crops—Groundnuts (Mt DM/yr)

44.2.3 Oilpalms

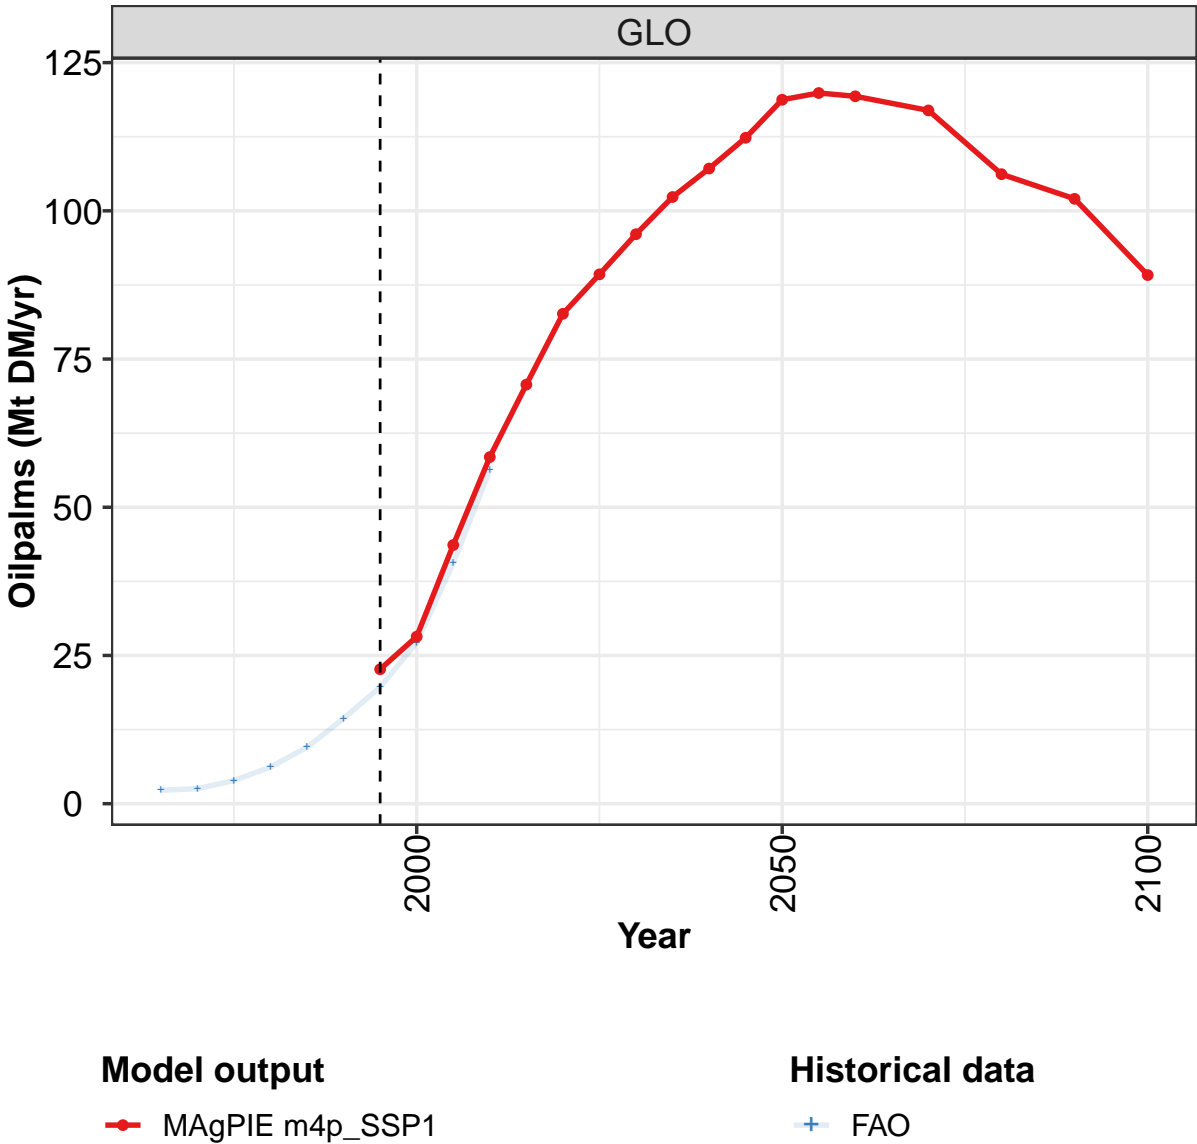

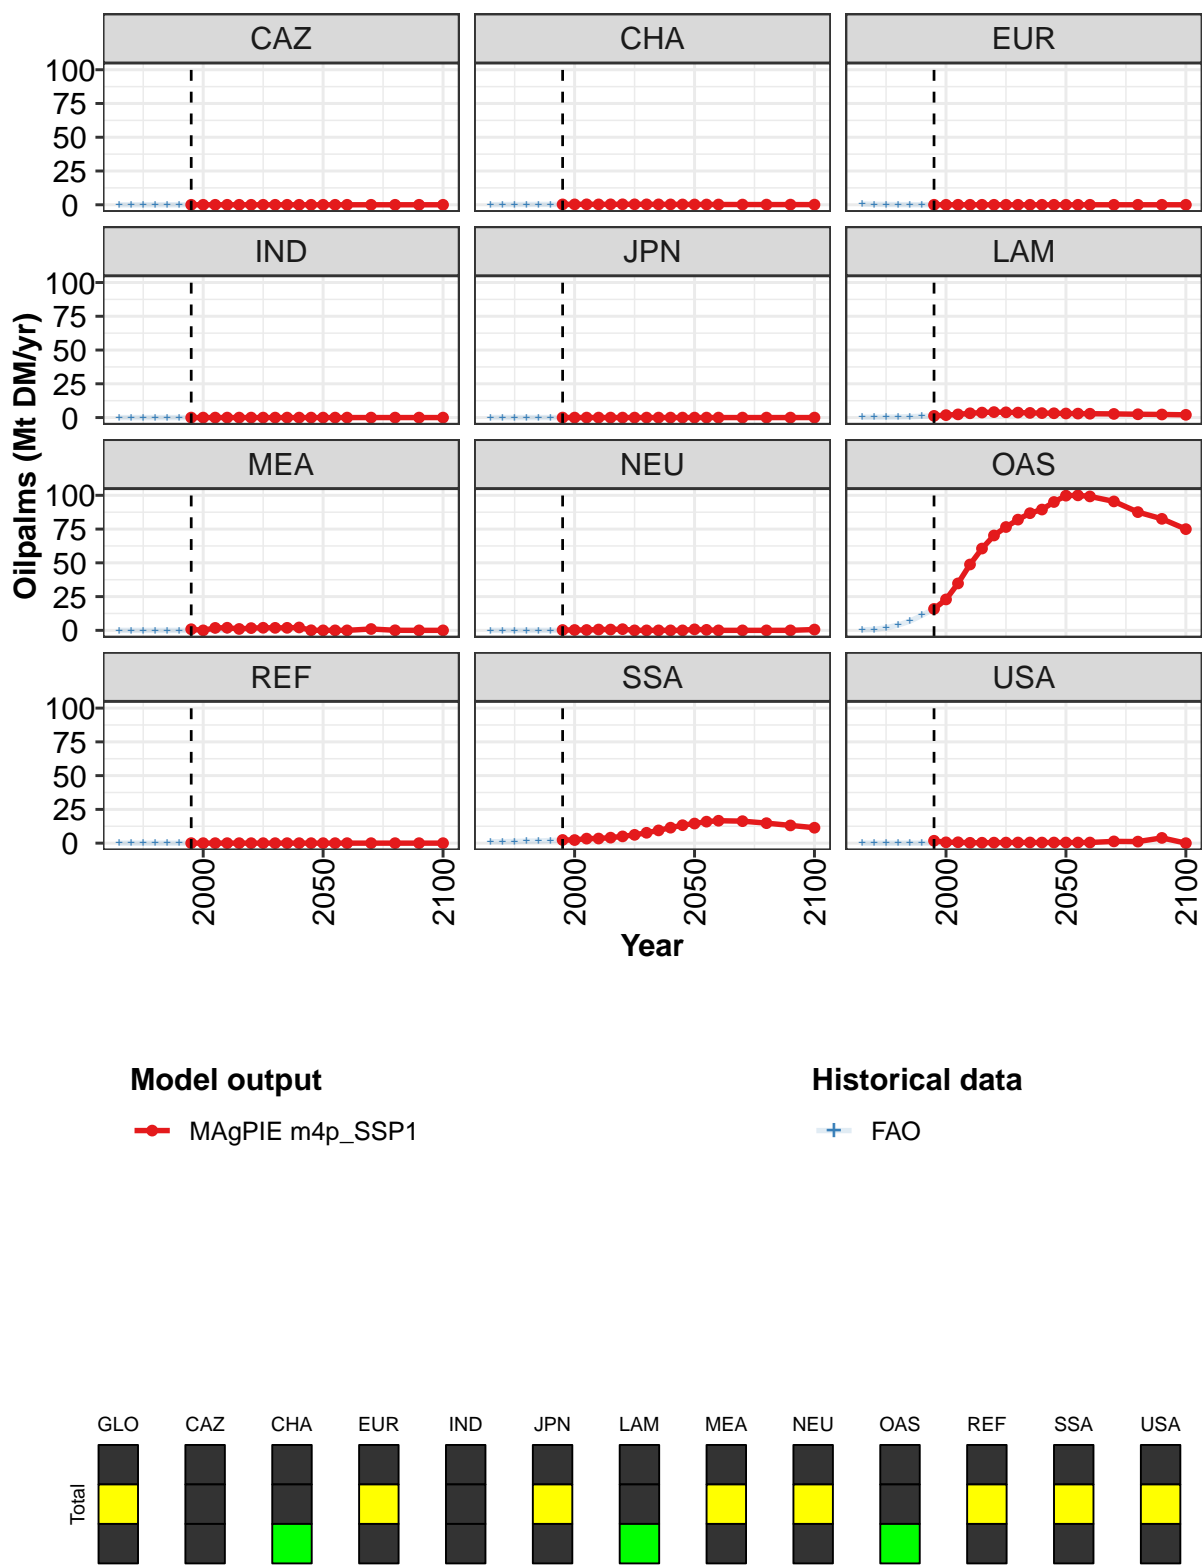

Figure 344: MAgPIE m4p\_SSP1 — Production—Crops—Oil crops—Oilpalms (Mt DM/yr)

|     | 1995 | 2000 | 2005 | 2010 | 2015 | 2020 | 2025 | 2030 | 2035 | 2040 | 2045 |
|-----|------|------|------|------|------|------|------|------|------|------|------|
| GLO | 23   | 28   | 44   | 58   | 71   | 83   | 89   | 96   | 102  | 107  | 112  |
| CAZ | 0    | 0    | 0    | 0    | 0    | 0    | 0    | 0    | 0    | 0    | 0    |
| CHA | 0    | 0    | 0    | 0    | 0    | 0    | 0    | 0    | 0    | 0    | 0    |
| EUR | 0    | 0    | 0    | 0    | 0    | 0    | 0    | 0    | 0    | 0    | 0    |
| IND | 0    | 0    | 0    | 0    | 0    | 0    | 0    | 0    | 0    | 0    | 0    |
| JPN | 0    | 0    | 0    | 0    | 0    | 0    | 0    | 0    | 0    | 0    | 0    |
| LAM | 1    | 2    | 2    | 3    | 4    | 4    | 4    | 4    | 3    | 3    | 3    |
| MEA | 1    | 0    | 2    | 2    | 1    | 2    | 2    | 2    | 2    | 2    | 0    |
| NEU | 0    | 0    | 0    | 1    | 1    | 1    | 0    | 0    | 0    | 0    | 0    |
| OAS | 16   | 23   | 35   | 49   | 61   | 70   | 77   | 82   | 87   | 89   | 95   |
| REF | 0    | 0    | 0    | 0    | 0    | 0    | 0    | 0    | 0    | 0    | 0    |
| SSA | 2    | 2    | 3    | 3    | 4    | 5    | 6    | 8    | 9    | 11   | 13   |
| USA | 2    | 1    | 1    | 0    | 0    | 0    | 0    | 0    | 0    | 0    | 0    |

Table 1368: MAgPIE m4p\_SSP1 — Production—Crops—Oil crops—Oilpalms (Mt DM/yr) [PART 1/2]

|     | 2050 | 2055 | 2060 | 2070 | 2080 | 2090 | 2100 |
|-----|------|------|------|------|------|------|------|
| GLO | 119  | 120  | 119  | 117  | 106  | 102  | 89   |
| CAZ | 0    | 0    | 0    | 0    | 0    | 0    | 0    |
| CHA | 0    | 0    | 0    | 0    | 0    | 0    | 0    |
| EUR | 0    | 0    | 0    | 0    | 0    | 0    | 0    |
| IND | 0    | 0    | 0    | 0    | 0    | 0    | 0    |
| JPN | 0    | 0    | 0    | 0    | 0    | 0    | 0    |
| LAM | 3    | 3    | 3    | 3    | 2    | 2    | 2    |
| MEA | 0    | 0    | 0    | 1    | 0    | 0    | 0    |
| NEU | 1    | 0    | 0    | 0    | 0    | 0    | 1    |
| OAS | 100  | 100  | 99   | 95   | 88   | 83   | 75   |
| REF | 0    | 0    | 0    | 0    | 0    | 0    | 0    |
| SSA | 15   | 16   | 17   | 16   | 15   | 13   | 11   |
| USA | 0    | 0    | 0    | 1    | 1    | 4    | 0    |

Table 1369: MAgPIE m4p\_SSP1 — Production—Crops—Oil crops—Oilpalms (Mt DM/yr) [PART 2/2]

|     | 1965 | 1970 | 1975 | 1980 | 1985 | 1990 | 1995 | 2000 | 2005 | 2010 |
|-----|------|------|------|------|------|------|------|------|------|------|
| GLO | 2.3  | 2.5  | 3.9  | 6.2  | 9.5  | 14.4 | 19.7 | 27.2 | 40.6 | 56.3 |
| CAZ | 0.0  | 0.0  | 0.0  | 0.0  | 0.0  | 0.0  | 0.0  | 0.0  | 0.0  | 0.0  |
| CHA | 0.1  | 0.1  | 0.2  | 0.2  | 0.3  | 0.2  | 0.3  | 0.3  | 0.3  | 0.3  |
| EUR | 0.6  | 0.3  | 0.2  | 0.1  | 0.1  | 0.0  | 0.0  | 0.0  | 0.0  | 0.0  |
| IND | 0.0  | 0.0  | 0.0  | 0.0  | 0.0  | 0.0  | 0.0  | 0.0  | 0.0  | 0.0  |
| JPN | 0.0  | 0.0  | 0.0  | 0.0  | 0.0  | 0.0  | 0.0  | 0.0  | 0.0  | 0.0  |
| LAM | 0.2  | 0.3  | 0.3  | 0.4  | 0.7  | 1.0  | 1.2  | 1.7  | 2.3  | 3.0  |
| MEA | 0.0  | 0.0  | 0.0  | 0.0  | 0.0  | 0.0  | 0.0  | 0.0  | 0.0  | 0.0  |
| NEU | 0.0  | 0.0  | 0.0  | 0.0  | 0.0  | 0.0  | 0.0  | 0.0  | 0.0  | 0.0  |
| OAS | 0.3  | 0.7  | 1.9  | 3.9  | 6.9  | 11.2 | 15.9 | 23.0 | 34.6 | 49.6 |
| REF | 0.0  | 0.0  | 0.0  | 0.0  | 0.0  | 0.0  | 0.0  | 0.0  | 0.0  | 0.0  |
| SSA | 1.1  | 1.0  | 1.2  | 1.5  | 1.6  | 1.9  | 2.3  | 2.3  | 3.4  | 3.4  |
| USA | 0.0  | 0.0  | 0.0  | 0.0  | 0.0  | 0.0  | 0.0  | 0.0  | 0.0  | 0.0  |

Table 1370: FAO — Production—Crops—Oil crops—Oilpalms (Mt DM/yr)

44.2.4 Other oil crops (incl rapeseed)

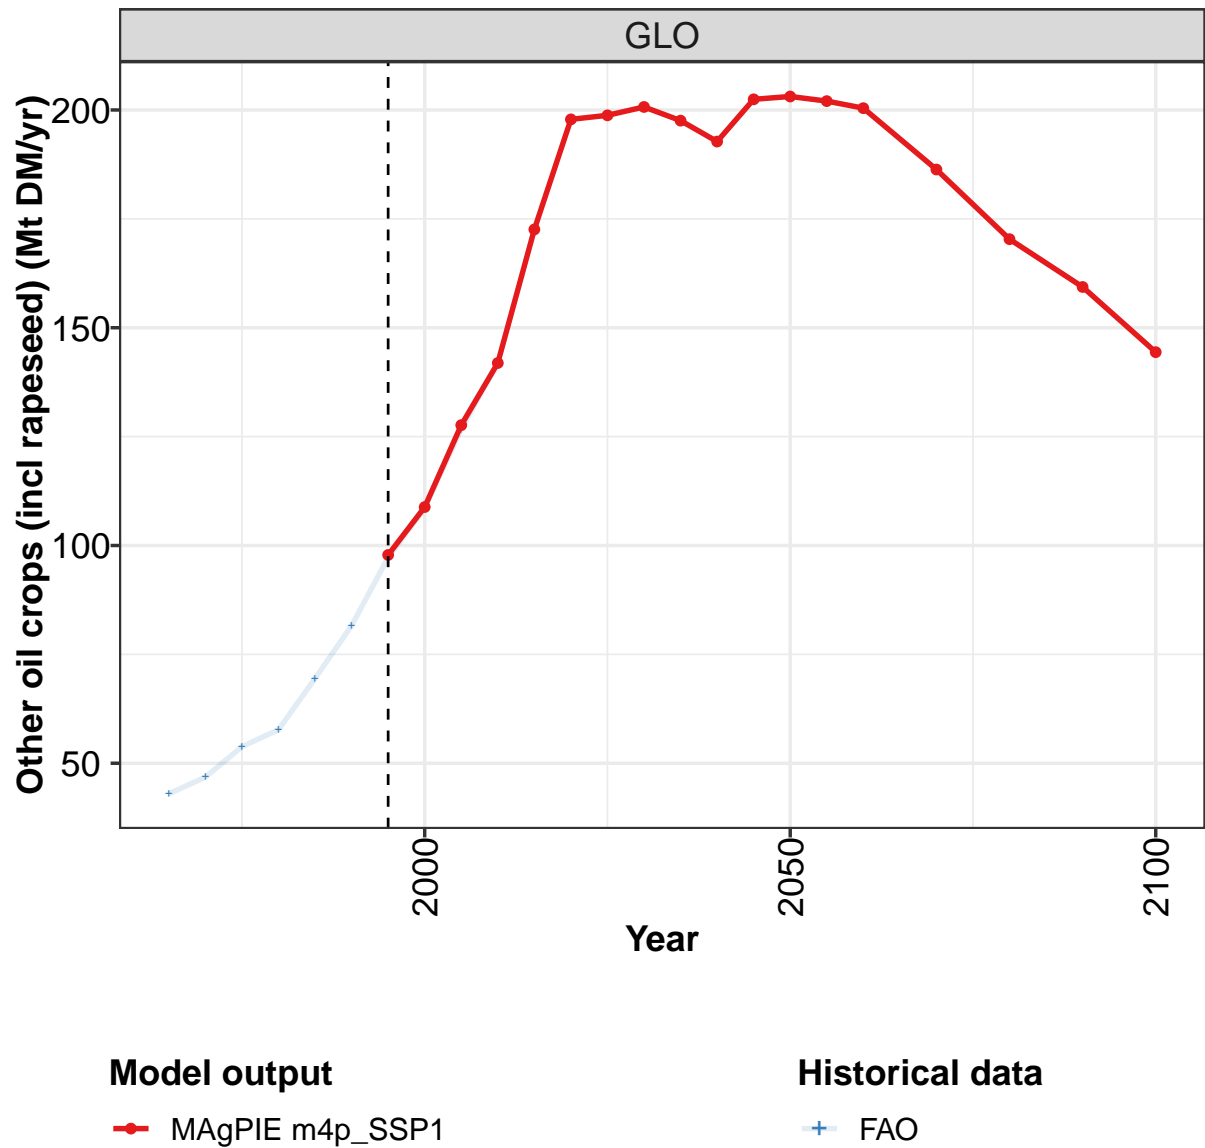

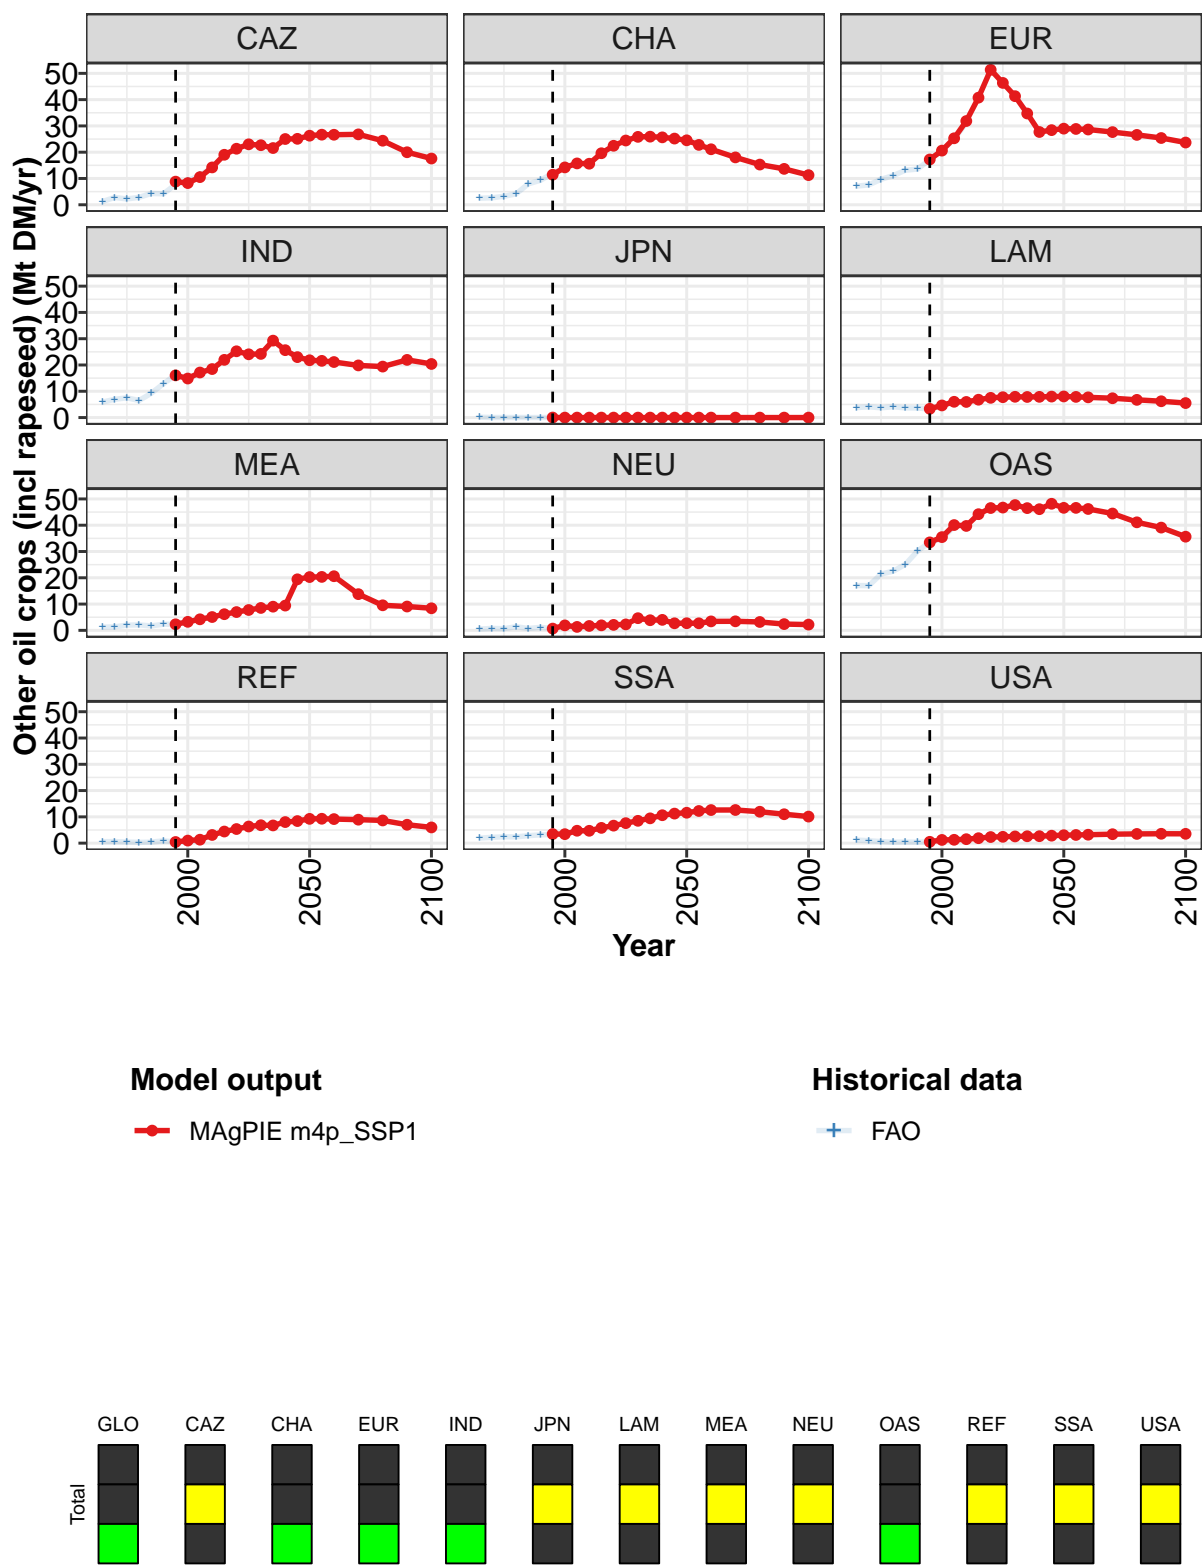

Figure 345: MAgPIE m4p\_SSP1 — Production—Crops—Oil crops—Other oil crops (incl rapeseed) (Mt DM/yr)

|     | 1995 | 2000 | 2005 | 2010 | 2015 | 2020 | 2025 | 2030 | 2035 | 2040 | 2045 |
|-----|------|------|------|------|------|------|------|------|------|------|------|
| GLO | 98   | 109  | 128  | 142  | 173  | 198  | 199  | 201  | 198  | 193  | 202  |
| CAZ | 9    | 8    | 11   | 14   | 19   | 21   | 23   | 23   | 22   | 25   | 25   |
| CHA | 11   | 14   | 16   | 16   | 20   | 22   | 24   | 26   | 26   | 26   | 25   |
| EUR | 17   | 21   | 25   | 32   | 41   | 51   | 46   | 41   | 35   | 28   | 28   |
| IND | 16   | 15   | 17   | 18   | 22   | 25   | 24   | 24   | 29   | 26   | 23   |
| JPN | 0    | 0    | 0    | 0    | 0    | 0    | 0    | 0    | 0    | 0    | 0    |
| LAM | 3    | 5    | 6    | 6    | 7    | 8    | 8    | 8    | 8    | 8    | 8    |
| MEA | 2    | 3    | 4    | 5    | 6    | 7    | 8    | 9    | 9    | 9    | 19   |
| NEU | 1    | 2    | 1    | 2    | 2    | 2    | 2    | 5    | 4    | 4    | 3    |
| OAS | 33   | 35   | 40   | 40   | 44   | 47   | 47   | 48   | 47   | 46   | 48   |
| REF | 0    | 1    | 1    | 3    | 4    | 5    | 6    | 7    | 7    | 8    | 8    |
| SSA | 3    | 3    | 5    | 5    | 6    | 7    | 8    | 9    | 9    | 11   | 11   |
| USA | 1    | 1    | 1    | 2    | 2    | 2    | 2    | 3    | 3    | 3    | 3    |

Table 1371: MAgPIE m4p\_SSP1 — Production—Crops—Oil crops—Other oil crops (incl rapeseed) (Mt DM/yr)  
[PART 1/2]

|     | 2050 | 2055 | 2060 | 2070 | 2080 | 2090 | 2100 |
|-----|------|------|------|------|------|------|------|
| GLO | 203  | 202  | 200  | 186  | 170  | 159  | 144  |
| CAZ | 26   | 27   | 27   | 27   | 24   | 20   | 18   |
| CHA | 25   | 23   | 21   | 18   | 15   | 14   | 11   |
| EUR | 29   | 29   | 29   | 28   | 27   | 25   | 24   |
| IND | 22   | 22   | 21   | 20   | 19   | 22   | 20   |
| JPN | 0    | 0    | 0    | 0    | 0    | 0    | 0    |
| LAM | 8    | 8    | 8    | 7    | 7    | 6    | 6    |
| MEA | 20   | 20   | 21   | 14   | 10   | 9    | 8    |
| NEU | 3    | 3    | 3    | 3    | 3    | 2    | 2    |
| OAS | 47   | 47   | 46   | 44   | 41   | 39   | 36   |
| REF | 9    | 9    | 9    | 9    | 9    | 7    | 6    |
| SSA | 12   | 12   | 13   | 13   | 12   | 11   | 10   |
| USA | 3    | 3    | 3    | 3    | 4    | 4    | 4    |

Table 1372: MAgPIE m4p\_SSP1 — Production—Crops—Oil crops—Other oil crops (incl rapeseed) (Mt DM/yr)  
[PART 2/2]

|     | 1965 | 1970 | 1975 | 1980 | 1985 | 1990 | 1995 | 2000 | 2005 | 2010 |
|-----|------|------|------|------|------|------|------|------|------|------|
| GLO | 43   | 47   | 54   | 58   | 69   | 82   | 97   | 109  | 127  | 142  |
| CAZ | 1    | 3    | 2    | 3    | 4    | 4    | 8    | 9    | 11   | 14   |
| CHA | 2    | 3    | 3    | 4    | 8    | 9    | 12   | 14   | 16   | 16   |
| EUR | 7    | 8    | 10   | 11   | 13   | 14   | 17   | 21   | 25   | 31   |
| IND | 6    | 7    | 8    | 6    | 9    | 13   | 16   | 15   | 17   | 19   |
| JPN | 0    | 0    | 0    | 0    | 0    | 0    | 0    | 0    | 0    | 0    |
| LAM | 4    | 4    | 4    | 4    | 4    | 4    | 3    | 4    | 6    | 6    |
| MEA | 1    | 1    | 2    | 2    | 2    | 2    | 2    | 3    | 4    | 5    |
| NEU | 0    | 1    | 1    | 1    | 1    | 1    | 1    | 2    | 1    | 2    |
| OAS | 17   | 17   | 21   | 23   | 25   | 30   | 34   | 35   | 39   | 40   |
| REF | 1    | 1    | 0    | 0    | 0    | 1    | 0    | 1    | 1    | 3    |
| SSA | 2    | 2    | 2    | 2    | 3    | 3    | 3    | 3    | 5    | 5    |
| USA | 1    | 1    | 1    | 0    | 0    | 0    | 1    | 1    | 1    | 2    |

Table 1373: FAO — Production—Crops—Oil crops—Other oil crops (incl rapeseed) (Mt DM/yr)

44.2.5 Soybean

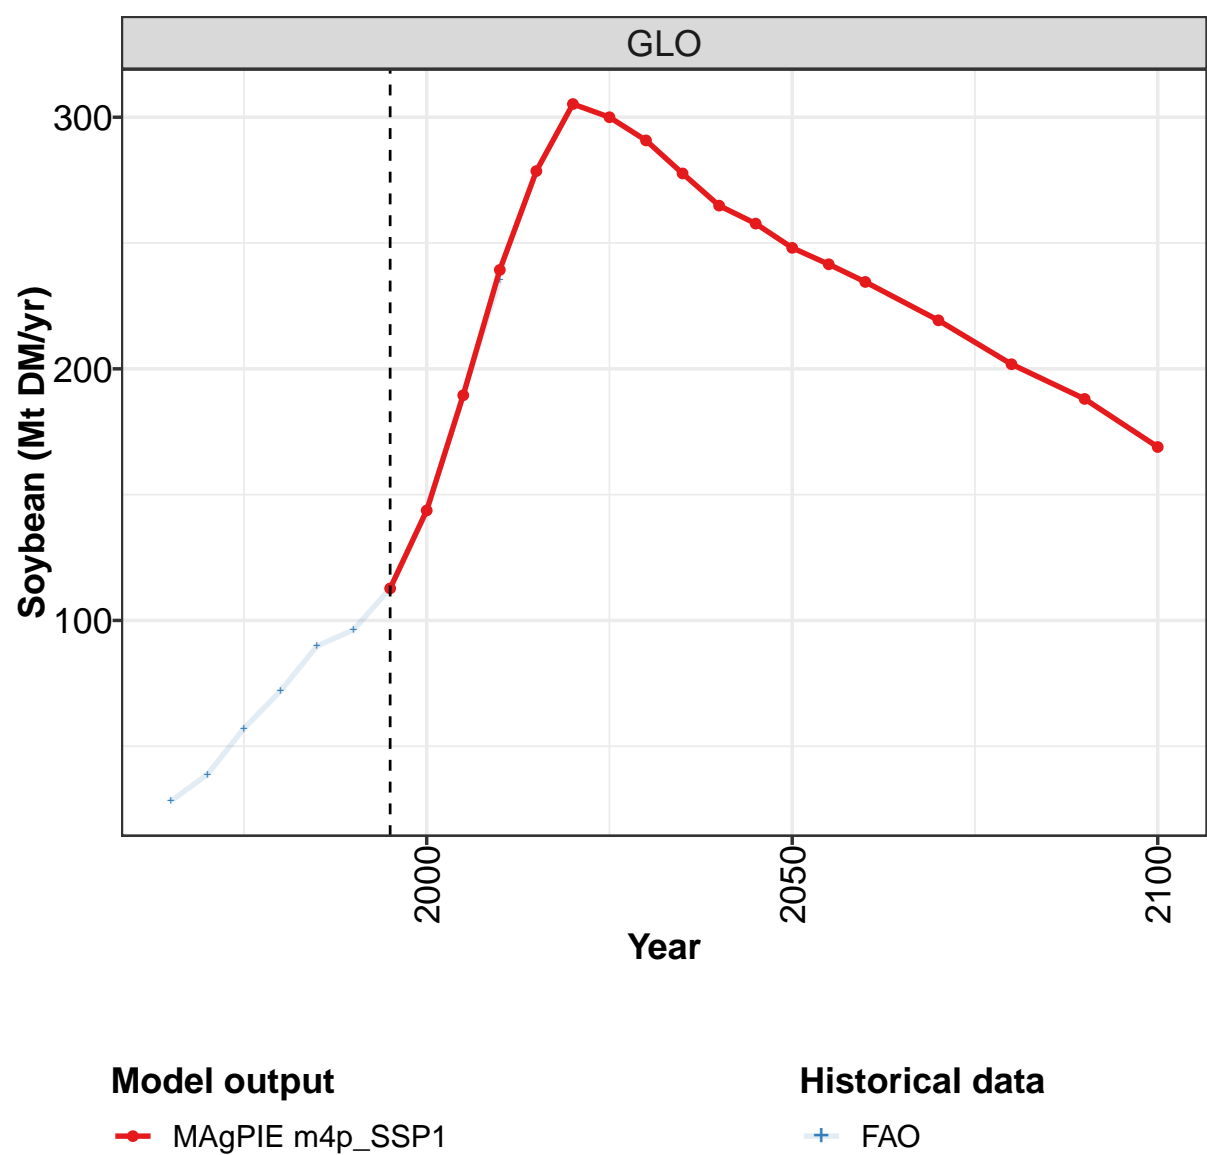



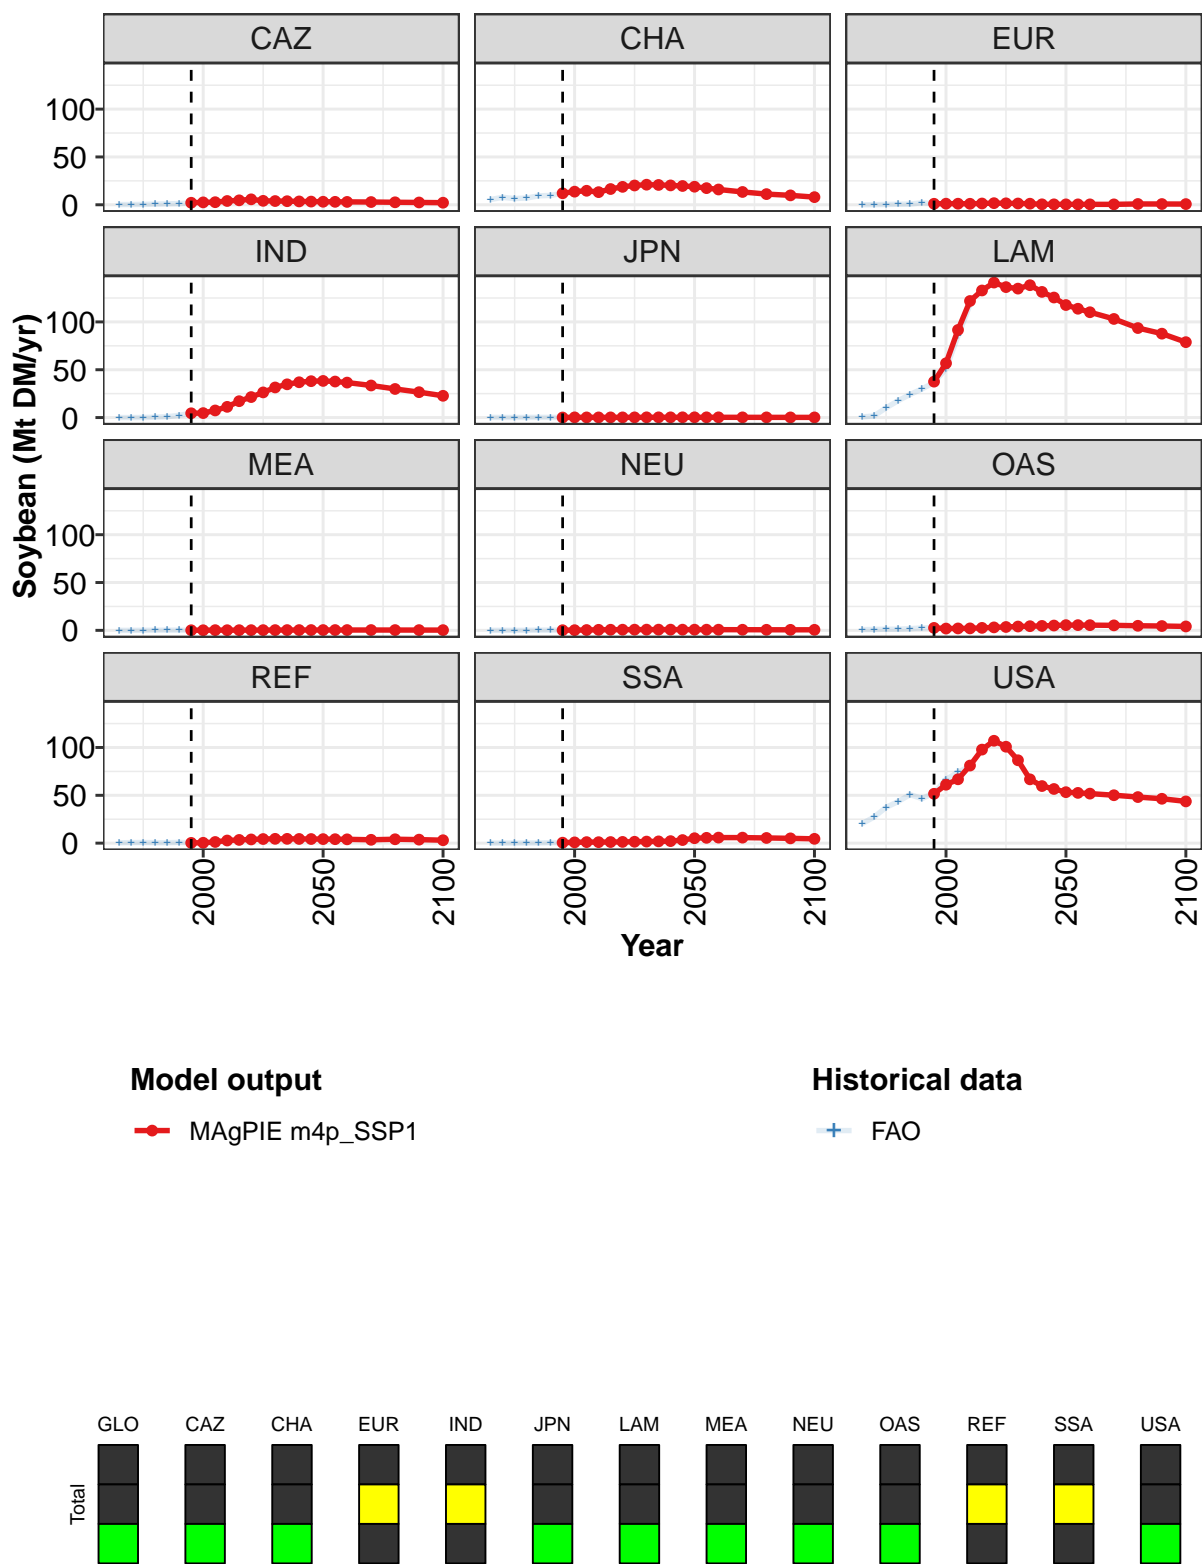

Figure 346: MAgPIE m4p\_SSP1 — Production—Crops—Oil crops—Soybean (Mt DM/yr)

|     | 1995 | 2000 | 2005 | 2010 | 2015 | 2020 | 2025 | 2030 | 2035 | 2040 | 2045 |
|-----|------|------|------|------|------|------|------|------|------|------|------|
| GLO | 113  | 144  | 190  | 239  | 279  | 305  | 300  | 291  | 278  | 265  | 258  |
| CAZ | 2    | 3    | 3    | 4    | 5    | 6    | 4    | 4    | 4    | 4    | 3    |
| CHA | 12   | 14   | 15   | 13   | 16   | 19   | 20   | 21   | 21   | 20   | 20   |
| EUR | 1    | 1    | 1    | 1    | 1    | 2    | 2    | 1    | 1    | 1    | 0    |
| IND | 4    | 5    | 7    | 11   | 17   | 21   | 26   | 31   | 35   | 37   | 38   |
| JPN | 0    | 0    | 0    | 0    | 0    | 0    | 0    | 0    | 0    | 0    | 0    |
| LAM | 38   | 57   | 92   | 122  | 133  | 141  | 136  | 135  | 138  | 131  | 126  |
| MEA | 0    | 0    | 0    | 0    | 0    | 0    | 0    | 0    | 0    | 0    | 0    |
| NEU | 0    | 0    | 0    | 1    | 1    | 1    | 1    | 1    | 1    | 1    | 1    |
| OAS | 3    | 2    | 2    | 2    | 3    | 3    | 4    | 4    | 4    | 5    | 5    |
| REF | 0    | 0    | 1    | 3    | 3    | 4    | 4    | 5    | 5    | 4    | 4    |
| SSA | 0    | 1    | 1    | 1    | 1    | 1    | 1    | 2    | 2    | 2    | 3    |
| USA | 52   | 61   | 67   | 81   | 98   | 107  | 101  | 87   | 67   | 60   | 57   |

Table 1374: MAgPIE m4p\_SSP1 — Production—Crops—Oil crops—Soybean (Mt DM/yr) [PART 1/2]

|     | 2050 | 2055 | 2060 | 2070 | 2080 | 2090 | 2100 |
|-----|------|------|------|------|------|------|------|
| GLO | 248  | 242  | 235  | 219  | 202  | 188  | 169  |
| CAZ | 3    | 3    | 3    | 3    | 3    | 2    | 2    |
| CHA | 19   | 17   | 16   | 13   | 11   | 10   | 8    |
| EUR | 0    | 0    | 0    | 0    | 1    | 1    | 1    |
| IND | 38   | 38   | 37   | 34   | 30   | 27   | 23   |
| JPN | 0    | 0    | 0    | 0    | 0    | 0    | 0    |
| LAM | 118  | 114  | 110  | 103  | 94   | 88   | 79   |
| MEA | 0    | 0    | 0    | 0    | 0    | 0    | 0    |
| NEU | 1    | 1    | 1    | 1    | 1    | 1    | 1    |
| OAS | 5    | 5    | 5    | 5    | 5    | 5    | 4    |
| REF | 4    | 4    | 4    | 4    | 4    | 4    | 3    |
| SSA | 5    | 6    | 6    | 6    | 5    | 5    | 5    |
| USA | 53   | 53   | 52   | 50   | 48   | 46   | 44   |

Table 1375: MAgPIE m4p\_SSP1 — Production—Crops—Oil crops—Soybean (Mt DM/yr) [PART 2/2]

|     | 1965 | 1970 | 1975 | 1980 | 1985 | 1990 | 1995 | 2000 | 2005 | 2010 |
|-----|------|------|------|------|------|------|------|------|------|------|
| GLO | 28   | 39   | 57   | 72   | 90   | 96   | 113  | 143  | 191  | 235  |
| CAZ | 0    | 0    | 0    | 1    | 1    | 1    | 2    | 2    | 3    | 4    |
| CHA | 6    | 8    | 6    | 7    | 9    | 10   | 12   | 14   | 15   | 13   |
| EUR | 0    | 0    | 0    | 1    | 1    | 2    | 1    | 1    | 1    | 1    |
| IND | 0    | 0    | 0    | 0    | 1    | 2    | 5    | 5    | 7    | 11   |
| JPN | 0    | 0    | 0    | 0    | 0    | 0    | 0    | 0    | 0    | 0    |
| LAM | 1    | 2    | 10   | 18   | 24   | 30   | 37   | 51   | 85   | 118  |
| MEA | 0    | 0    | 0    | 0    | 0    | 0    | 0    | 0    | 0    | 0    |
| NEU | 0    | 0    | 0    | 0    | 0    | 0    | 0    | 0    | 0    | 1    |
| OAS | 1    | 1    | 1    | 1    | 2    | 3    | 3    | 2    | 2    | 2    |
| REF | 0    | 1    | 1    | 0    | 0    | 1    | 0    | 0    | 1    | 3    |
| SSA | 0    | 0    | 0    | 0    | 0    | 1    | 0    | 1    | 1    | 1    |
| USA | 20   | 27   | 37   | 43   | 51   | 47   | 53   | 67   | 74   | 80   |

Table 1376: FAO — Production—Crops—Oil crops—Soybean (Mt DM/yr)

44.2.6 Sunflower

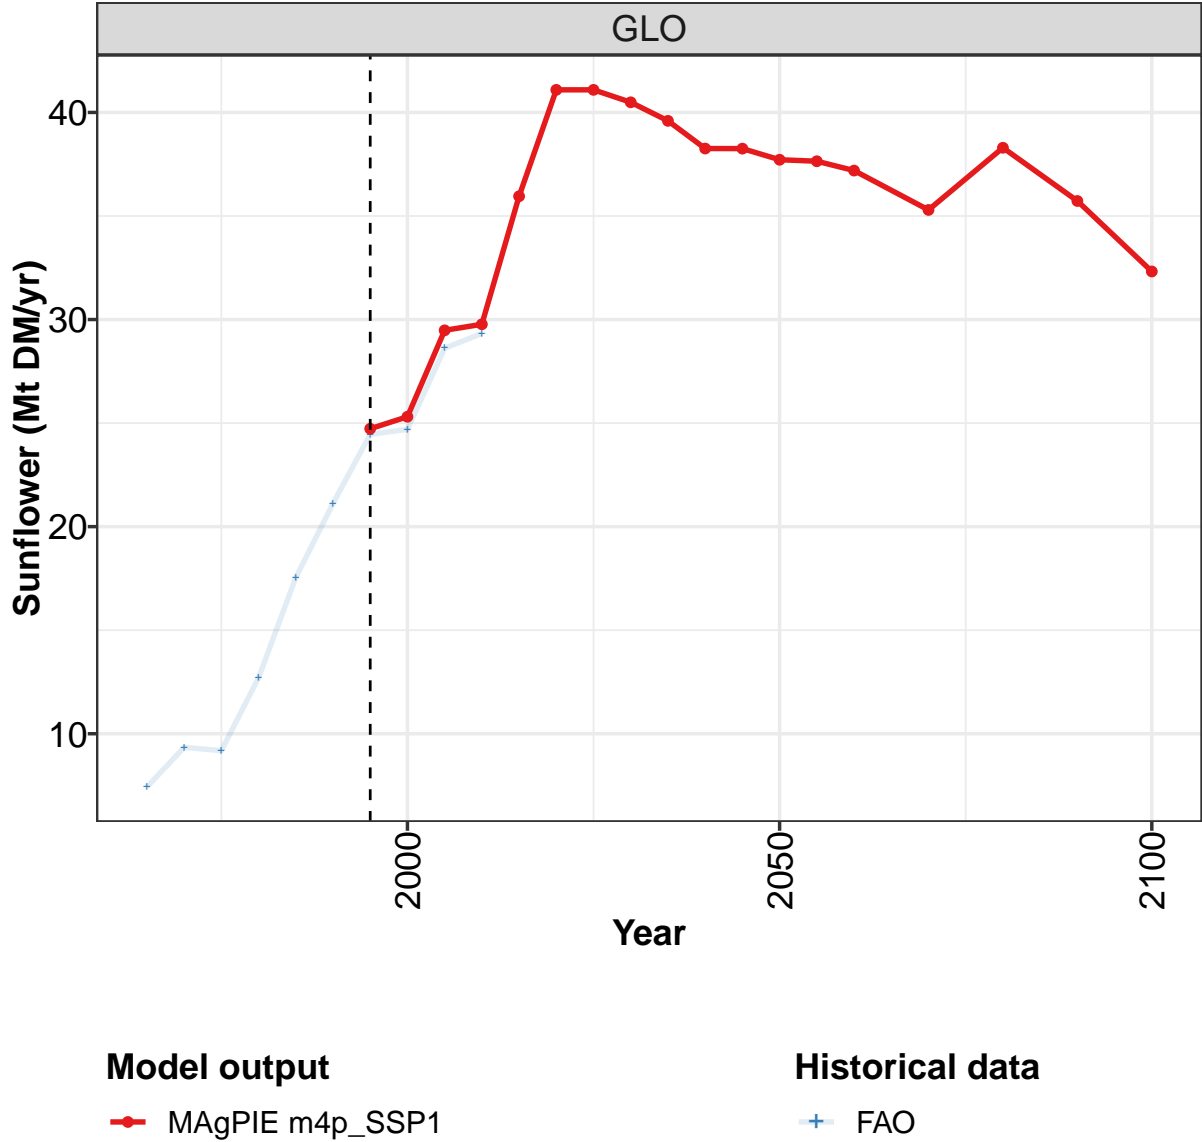

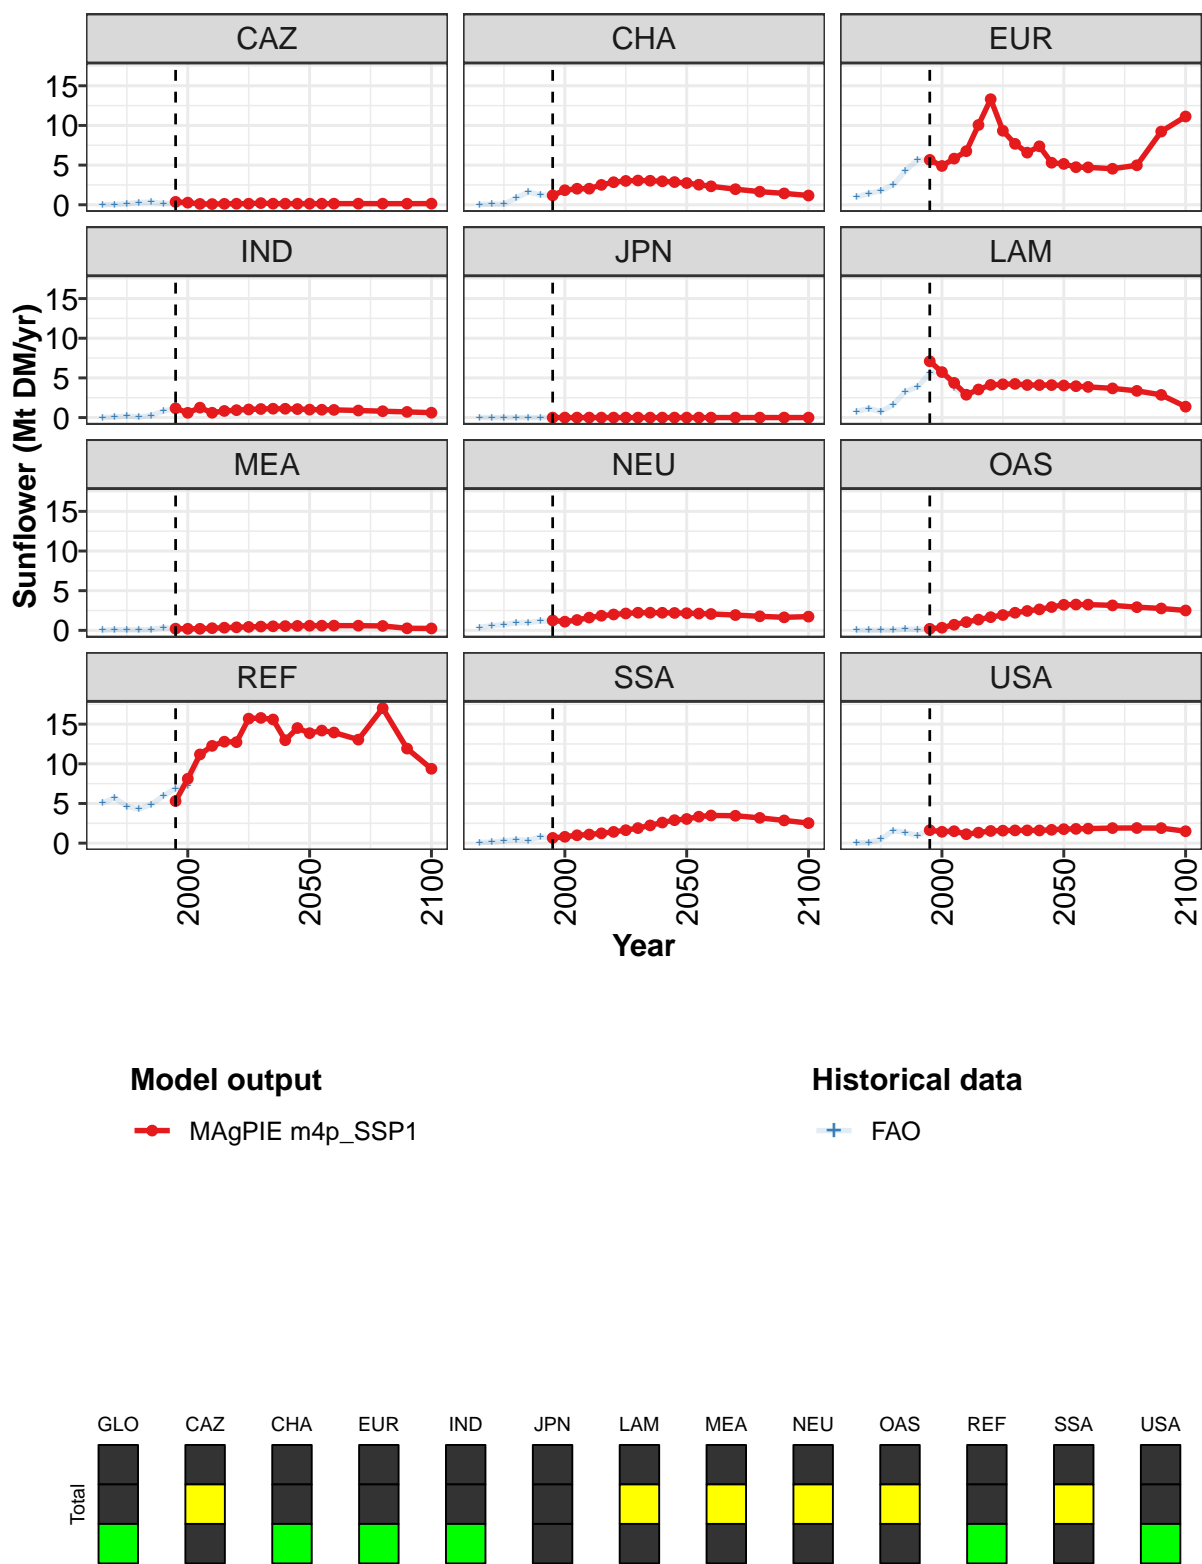

Figure 347: MAgPIE m4p\_SSP1 — Production—Crops—Oil crops—Sunflower (Mt DM/yr)

|     | 1995 | 2000 | 2005 | 2010 | 2015 | 2020 | 2025 | 2030 | 2035 | 2040 | 2045 |
|-----|------|------|------|------|------|------|------|------|------|------|------|
| GLO | 24.7 | 25.3 | 29.5 | 29.8 | 36.0 | 41.1 | 41.1 | 40.5 | 39.6 | 38.3 | 38.3 |
| CAZ | 0.4  | 0.3  | 0.1  | 0.1  | 0.1  | 0.1  | 0.1  | 0.2  | 0.1  | 0.1  | 0.1  |
| CHA | 1.2  | 1.8  | 2.0  | 2.0  | 2.5  | 2.8  | 3.0  | 3.1  | 3.0  | 3.0  | 2.9  |
| EUR | 5.7  | 4.9  | 5.8  | 6.8  | 10.1 | 13.3 | 9.3  | 7.7  | 6.6  | 7.4  | 5.3  |
| IND | 1.2  | 0.6  | 1.3  | 0.6  | 0.8  | 0.9  | 1.0  | 1.1  | 1.1  | 1.1  | 1.1  |
| JPN | 0.0  | 0.0  | 0.0  | 0.0  | 0.0  | 0.0  | 0.0  | 0.0  | 0.0  | 0.0  | 0.0  |
| LAM | 7.1  | 5.7  | 4.4  | 2.9  | 3.5  | 4.1  | 4.2  | 4.2  | 4.1  | 4.1  | 4.1  |
| MEA | 0.2  | 0.2  | 0.2  | 0.3  | 0.3  | 0.4  | 0.4  | 0.5  | 0.5  | 0.5  | 0.6  |
| NEU | 1.2  | 1.1  | 1.3  | 1.6  | 1.8  | 2.0  | 2.1  | 2.2  | 2.2  | 2.2  | 2.2  |
| OAS | 0.2  | 0.3  | 0.7  | 1.0  | 1.4  | 1.7  | 1.9  | 2.2  | 2.4  | 2.6  | 2.9  |
| REF | 5.3  | 8.1  | 11.2 | 12.3 | 12.8 | 12.7 | 15.7 | 15.8 | 15.6 | 13.0 | 14.5 |
| SSA | 0.7  | 0.8  | 1.0  | 1.1  | 1.2  | 1.4  | 1.6  | 1.9  | 2.2  | 2.6  | 2.9  |
| USA | 1.6  | 1.4  | 1.5  | 1.1  | 1.3  | 1.5  | 1.6  | 1.6  | 1.6  | 1.6  | 1.7  |

Table 1377: MAgPIE m4p\_SSP1 — Production—Crops—Oil crops—Sunflower (Mt DM/yr) [PART 1/2]

|     | 2050 | 2055 | 2060 | 2070 | 2080 | 2090 | 2100 |
|-----|------|------|------|------|------|------|------|
| GLO | 37.7 | 37.6 | 37.2 | 35.3 | 38.3 | 35.7 | 32.3 |
| CAZ | 0.1  | 0.1  | 0.1  | 0.1  | 0.1  | 0.1  | 0.1  |
| CHA | 2.7  | 2.5  | 2.3  | 2.0  | 1.7  | 1.4  | 1.2  |
| EUR | 5.2  | 4.7  | 4.7  | 4.5  | 5.0  | 9.2  | 11.1 |
| IND | 1.0  | 1.0  | 1.0  | 0.9  | 0.8  | 0.7  | 0.6  |
| JPN | 0.0  | 0.0  | 0.0  | 0.0  | 0.0  | 0.0  | 0.0  |
| LAM | 4.0  | 4.0  | 3.9  | 3.7  | 3.4  | 2.9  | 1.4  |
| MEA | 0.6  | 0.6  | 0.6  | 0.6  | 0.6  | 0.3  | 0.2  |
| NEU | 2.2  | 2.1  | 2.1  | 1.9  | 1.8  | 1.6  | 1.7  |
| OAS | 3.2  | 3.3  | 3.2  | 3.1  | 2.9  | 2.8  | 2.5  |
| REF | 13.9 | 14.2 | 13.9 | 13.1 | 17.0 | 11.9 | 9.4  |
| SSA | 3.0  | 3.3  | 3.5  | 3.5  | 3.2  | 2.9  | 2.5  |
| USA | 1.8  | 1.8  | 1.8  | 1.9  | 1.9  | 1.9  | 1.5  |

Table 1378: MAgPIE m4p\_SSP1 — Production—Crops—Oil crops—Sunflower (Mt DM/yr) [PART 2/2]

|     | 1965 | 1970 | 1975 | 1980 | 1985 | 1990 | 1995 | 2000 | 2005 | 2010 |
|-----|------|------|------|------|------|------|------|------|------|------|
| GLO | 7.4  | 9.3  | 9.2  | 12.7 | 17.5 | 21.1 | 24.5 | 24.7 | 28.6 | 29.3 |
| CAZ | 0.0  | 0.0  | 0.1  | 0.3  | 0.3  | 0.2  | 0.2  | 0.3  | 0.1  | 0.1  |
| CHA | 0.1  | 0.1  | 0.1  | 0.8  | 1.6  | 1.2  | 1.2  | 1.8  | 1.8  | 2.1  |
| EUR | 1.0  | 1.4  | 1.8  | 2.5  | 4.3  | 5.7  | 5.6  | 4.9  | 5.7  | 6.6  |
| IND | 0.0  | 0.1  | 0.2  | 0.1  | 0.3  | 0.8  | 1.2  | 0.6  | 1.3  | 0.6  |
| JPN | 0.0  | 0.0  | 0.0  | 0.0  | 0.0  | 0.0  | 0.0  | 0.0  | 0.0  | 0.0  |
| LAM | 0.8  | 1.1  | 0.8  | 1.6  | 3.3  | 3.9  | 5.6  | 6.0  | 3.8  | 2.7  |
| MEA | 0.0  | 0.1  | 0.1  | 0.1  | 0.1  | 0.3  | 0.2  | 0.2  | 0.2  | 0.3  |
| NEU | 0.4  | 0.6  | 0.7  | 1.0  | 1.0  | 1.2  | 1.1  | 1.1  | 1.3  | 1.6  |
| OAS | 0.0  | 0.0  | 0.0  | 0.0  | 0.2  | 0.1  | 0.2  | 0.3  | 0.7  | 1.1  |
| REF | 5.1  | 5.7  | 4.6  | 4.3  | 4.9  | 6.0  | 6.9  | 7.3  | 11.0 | 12.0 |
| SSA | 0.1  | 0.1  | 0.3  | 0.4  | 0.4  | 0.8  | 0.6  | 0.8  | 1.0  | 1.1  |
| USA | 0.0  | 0.1  | 0.5  | 1.6  | 1.3  | 1.0  | 1.7  | 1.5  | 1.7  | 1.2  |

Table 1379: FAO — Production—Crops—Oil crops—Sunflower (Mt DM/yr)

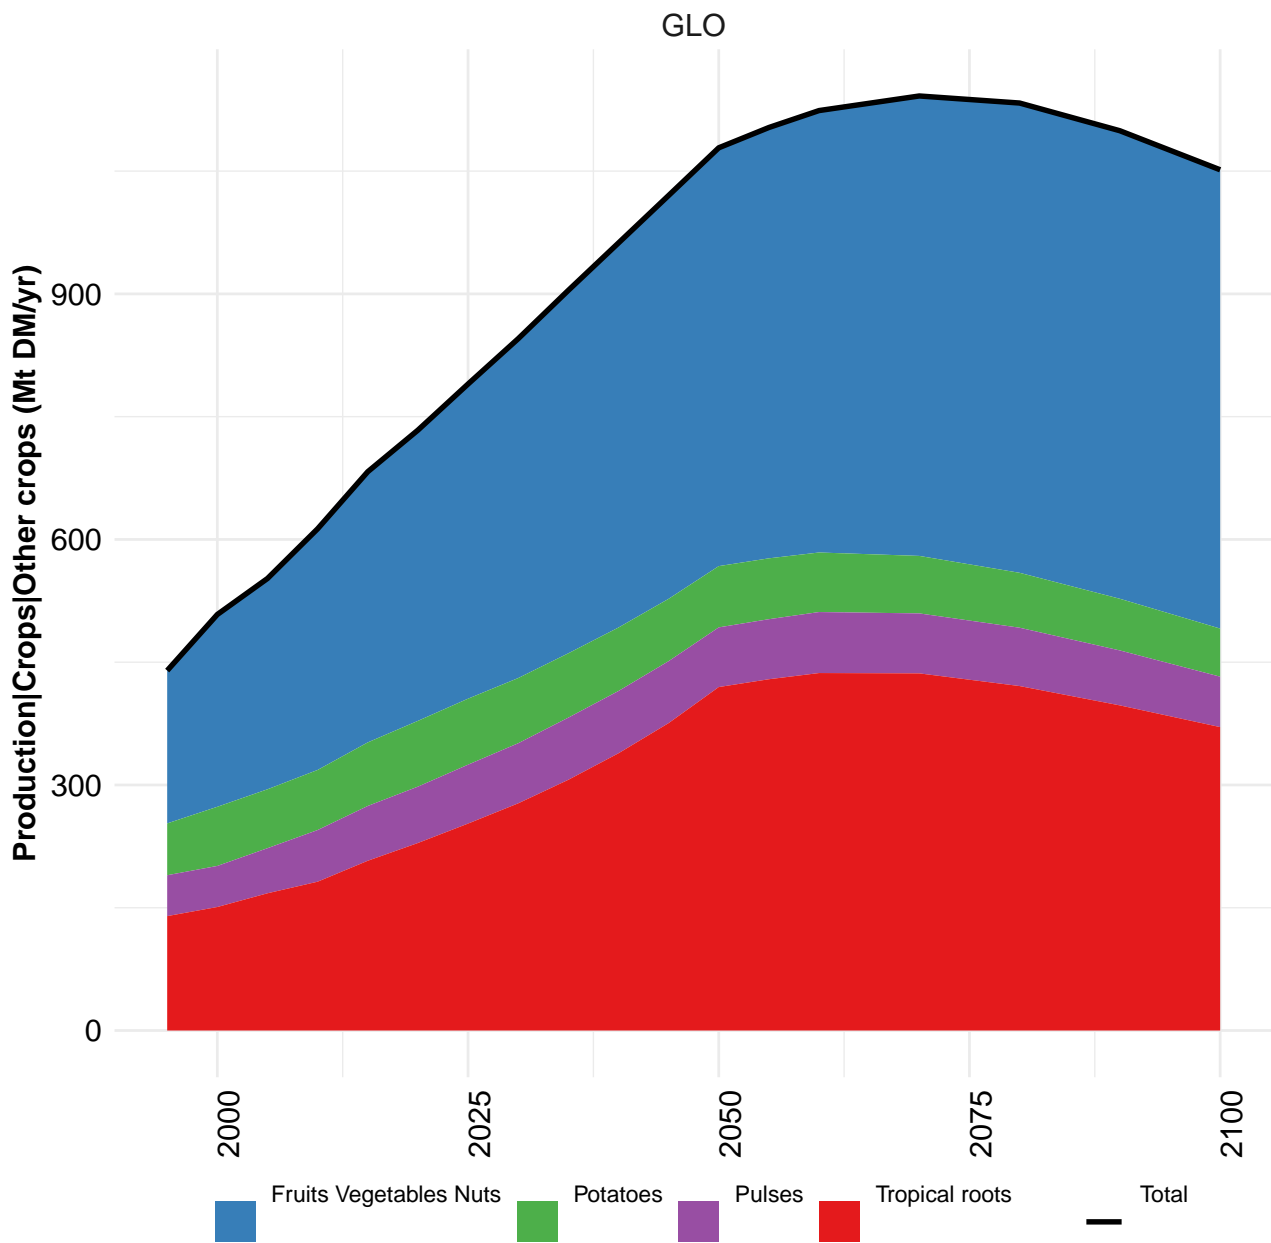

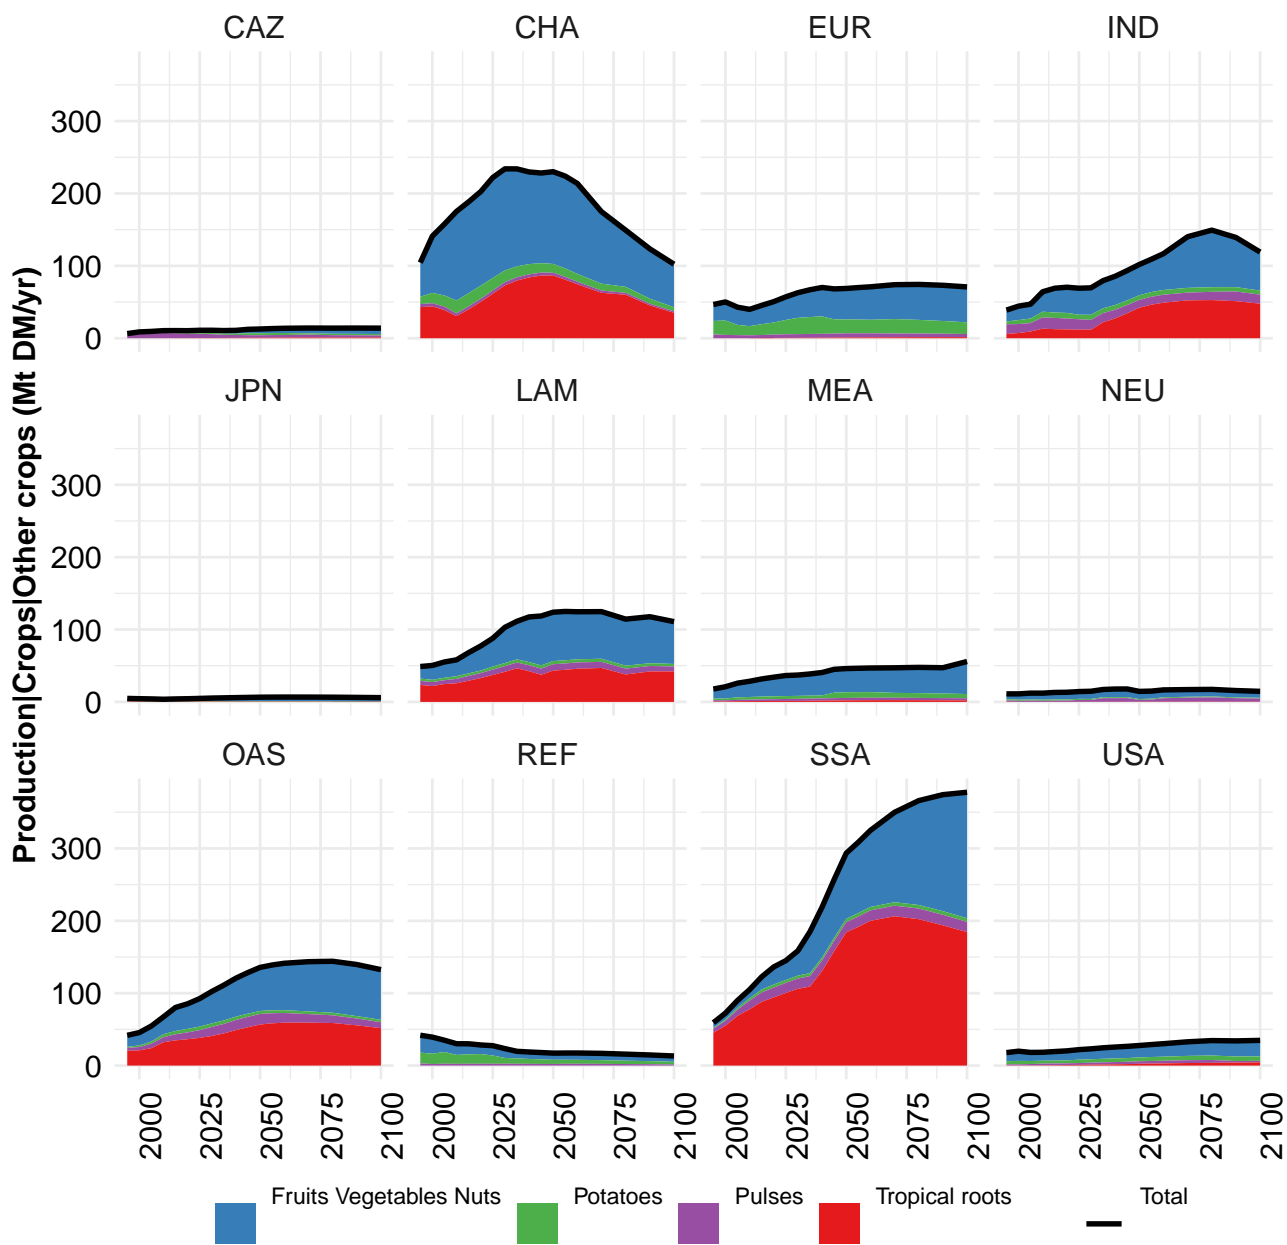

44.3 Other crops

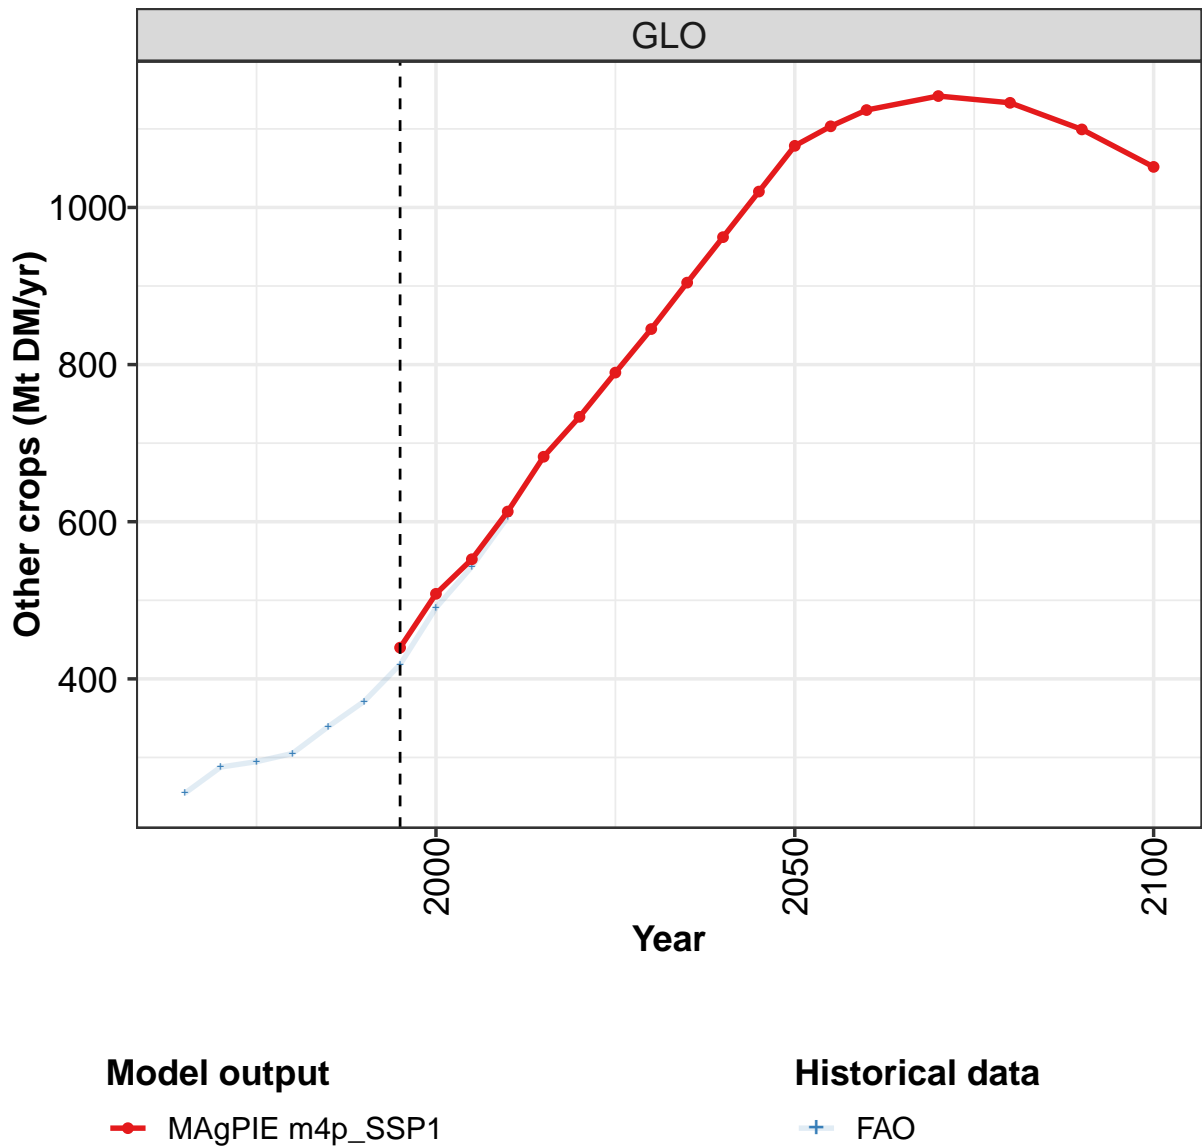



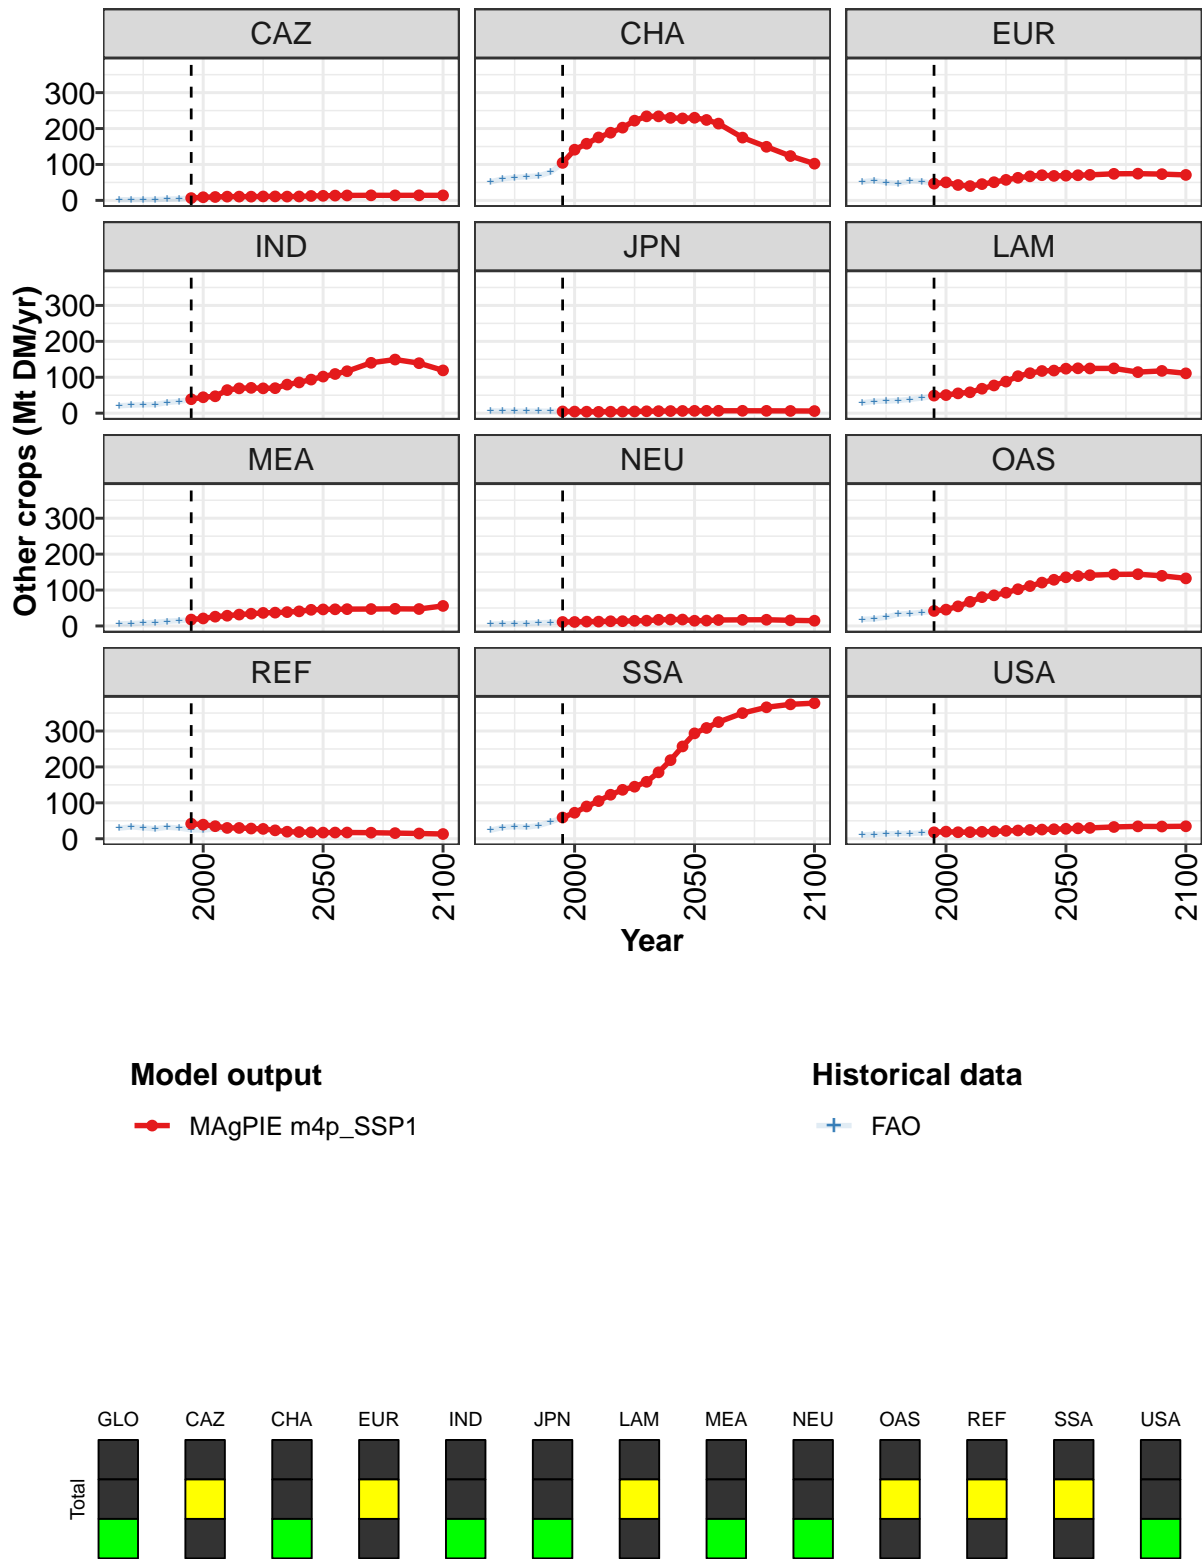

Figure 348: MAgPIE m4p\_SSP1 — Production—Crops—Other crops (Mt DM/yr)

|     | 1995 | 2000 | 2005 | 2010 | 2015 | 2020 | 2025 | 2030 | 2035 | 2040 | 2045 |
|-----|------|------|------|------|------|------|------|------|------|------|------|
| GLO | 440  | 508  | 552  | 613  | 683  | 734  | 790  | 845  | 904  | 962  | 1020 |
| CAZ | 6    | 9    | 9    | 11   | 11   | 10   | 11   | 11   | 11   | 11   | 12   |
| CHA | 104  | 141  | 158  | 175  | 188  | 203  | 222  | 234  | 234  | 230  | 228  |
| EUR | 47   | 50   | 43   | 40   | 45   | 51   | 57   | 63   | 67   | 70   | 68   |
| IND | 39   | 44   | 47   | 64   | 69   | 70   | 69   | 70   | 80   | 86   | 94   |
| JPN | 5    | 4    | 4    | 4    | 4    | 4    | 5    | 5    | 6    | 6    | 6    |
| LAM | 49   | 50   | 55   | 58   | 68   | 77   | 88   | 103  | 111  | 117  | 119  |
| MEA | 18   | 21   | 26   | 29   | 32   | 34   | 36   | 37   | 39   | 41   | 45   |
| NEU | 11   | 11   | 12   | 12   | 13   | 13   | 14   | 15   | 17   | 18   | 18   |
| OAS | 42   | 46   | 55   | 67   | 80   | 85   | 93   | 102  | 111  | 121  | 129  |
| REF | 42   | 39   | 35   | 30   | 30   | 28   | 27   | 23   | 20   | 19   | 18   |
| SSA | 59   | 72   | 90   | 105  | 123  | 136  | 145  | 159  | 185  | 219  | 257  |
| USA | 18   | 20   | 18   | 18   | 19   | 20   | 22   | 23   | 25   | 26   | 27   |

Table 1380: MAgPIE m4p\_SSP1 — Production—Crops—Other crops (Mt DM/yr) [PART 1/2]

|     | 2050 | 2055 | 2060 | 2070 | 2080 | 2090 | 2100 |
|-----|------|------|------|------|------|------|------|
| GLO | 1078 | 1103 | 1124 | 1142 | 1133 | 1099 | 1052 |
| CAZ | 13   | 13   | 14   | 14   | 14   | 14   | 14   |
| CHA | 230  | 224  | 214  | 175  | 149  | 123  | 102  |
| EUR | 69   | 70   | 71   | 74   | 74   | 73   | 71   |
| IND | 102  | 109  | 117  | 140  | 149  | 139  | 119  |
| JPN | 7    | 7    | 7    | 7    | 7    | 6    | 6    |
| LAM | 124  | 125  | 125  | 125  | 114  | 118  | 111  |
| MEA | 46   | 46   | 47   | 47   | 48   | 47   | 56   |
| NEU | 15   | 15   | 17   | 17   | 17   | 16   | 15   |
| OAS | 136  | 139  | 141  | 144  | 144  | 140  | 133  |
| REF | 17   | 17   | 17   | 17   | 16   | 15   | 13   |
| SSA | 293  | 309  | 325  | 350  | 366  | 374  | 378  |
| USA | 28   | 29   | 30   | 33   | 35   | 34   | 35   |

Table 1381: MAgPIE m4p\_SSP1 — Production—Crops—Other crops (Mt DM/yr) [PART 2/2]

|     | 1965 | 1970 | 1975 | 1980 | 1985 | 1990 | 1995 | 2000 | 2005 | 2010 |
|-----|------|------|------|------|------|------|------|------|------|------|
| GLO | 254  | 288  | 295  | 305  | 339  | 371  | 418  | 490  | 543  | 606  |
| CAZ | 2    | 2    | 2    | 2    | 3    | 4    | 7    | 9    | 10   | 10   |
| CHA | 52   | 60   | 64   | 66   | 68   | 78   | 104  | 141  | 158  | 176  |
| EUR | 52   | 56   | 50   | 47   | 54   | 53   | 46   | 49   | 42   | 40   |
| IND | 21   | 22   | 23   | 24   | 30   | 33   | 39   | 44   | 47   | 65   |
| JPN | 6    | 6    | 6    | 6    | 6    | 5    | 5    | 4    | 4    | 4    |
| LAM | 29   | 33   | 33   | 35   | 38   | 42   | 48   | 51   | 55   | 58   |
| MEA | 6    | 7    | 8    | 10   | 13   | 15   | 17   | 20   | 25   | 27   |
| NEU | 5    | 6    | 6    | 7    | 9    | 10   | 10   | 11   | 12   | 12   |
| OAS | 19   | 20   | 24   | 33   | 35   | 38   | 40   | 45   | 53   | 65   |
| REF | 29   | 33   | 30   | 28   | 32   | 30   | 25   | 24   | 28   | 24   |
| SSA | 24   | 32   | 34   | 32   | 37   | 47   | 59   | 72   | 90   | 107  |
| USA | 11   | 12   | 13   | 14   | 15   | 16   | 18   | 20   | 18   | 18   |

Table 1382: FAO — Production—Crops—Other crops (Mt DM/yr)

44.3.1
Fruits Vegetables Nuts

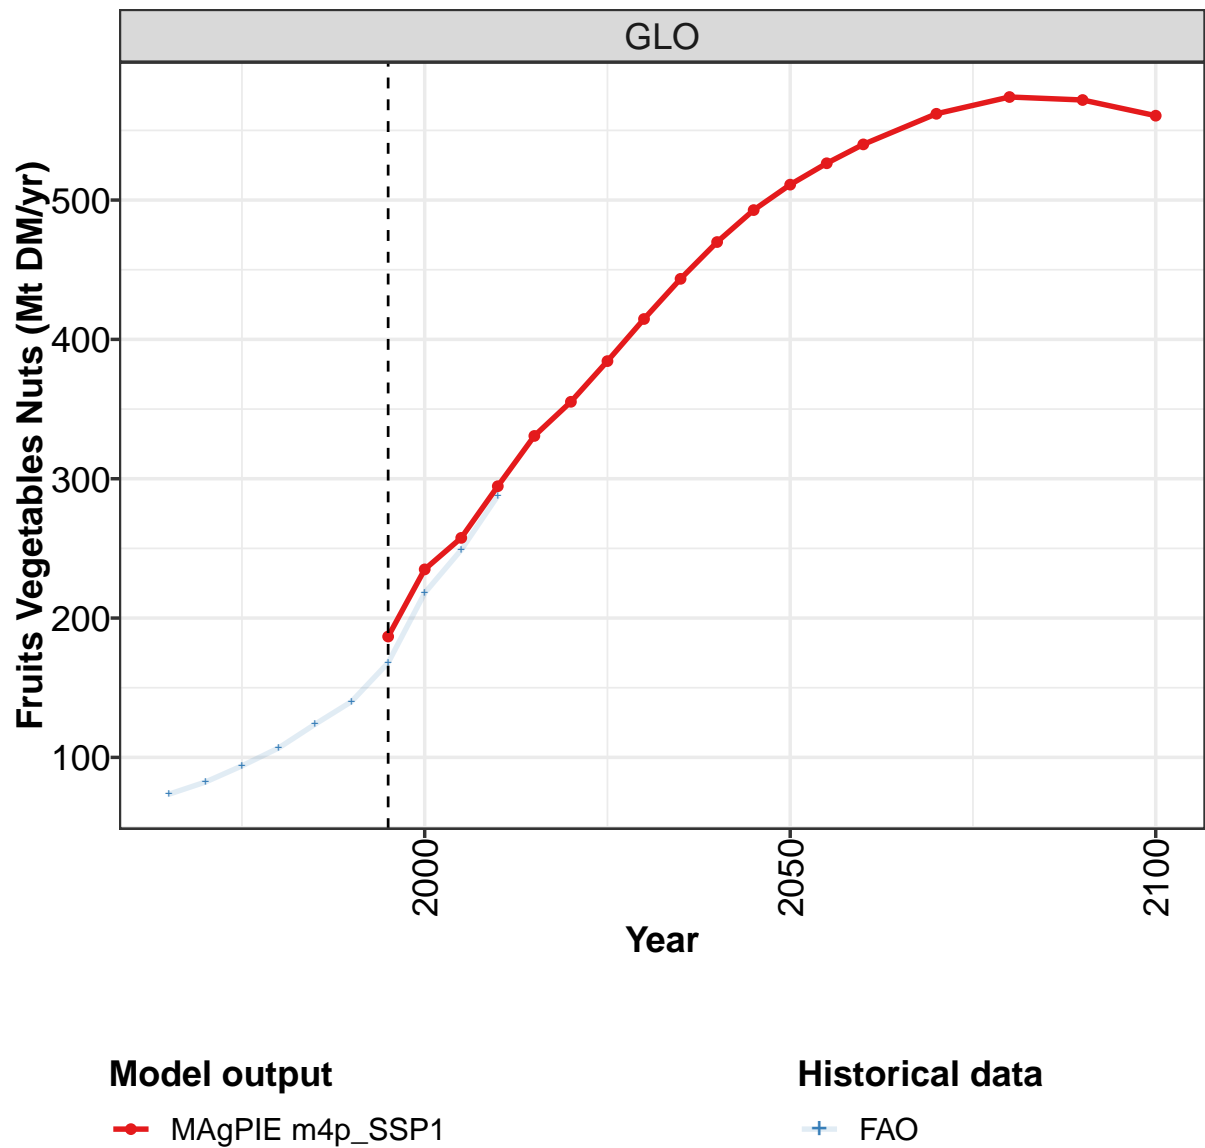

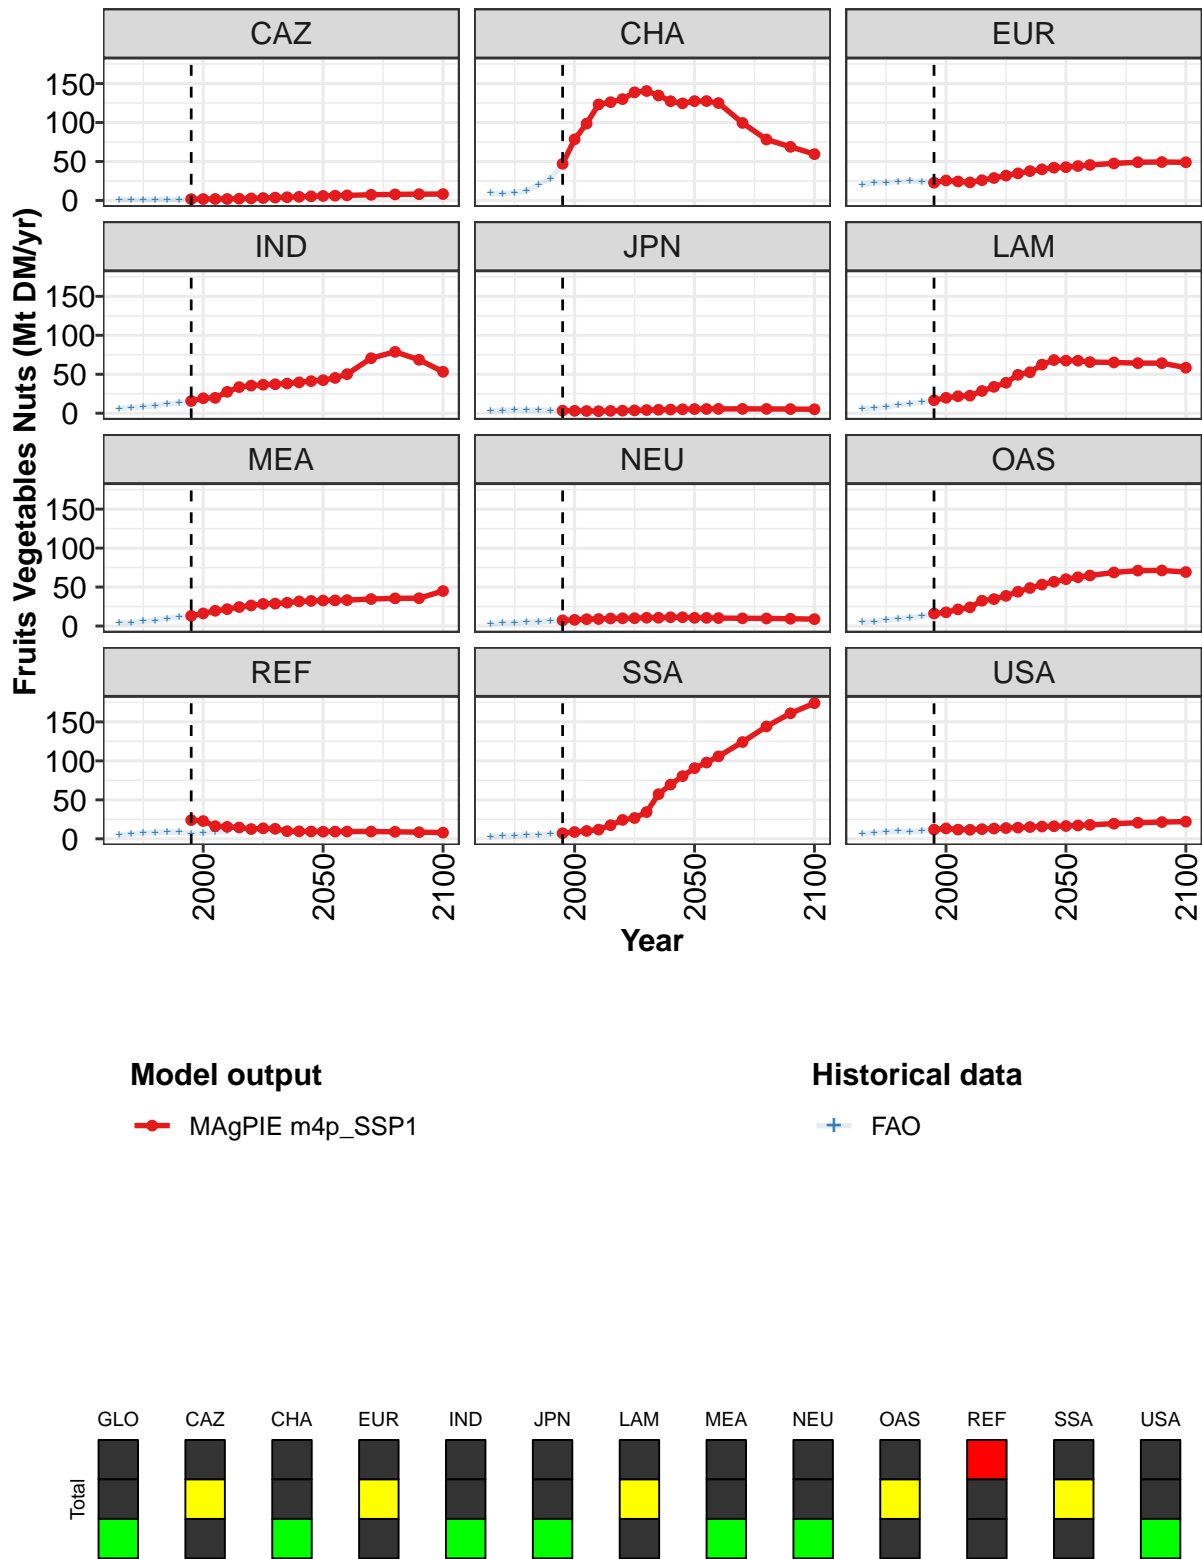

Figure 349: MAgPIE m4p\_SSP1 — Production—Crops—Other crops—Fruits Vegetables Nuts (Mt DM/yr)

|     | 1995 | 2000 | 2005 | 2010 | 2015 | 2020 | 2025 | 2030 | 2035 | 2040 | 2045 |
|-----|------|------|------|------|------|------|------|------|------|------|------|
| GLO | 187  | 235  | 258  | 295  | 331  | 355  | 384  | 415  | 443  | 470  | 493  |
| CAZ | 2    | 2    | 2    | 2    | 2    | 3    | 3    | 4    | 4    | 5    | 5    |
| CHA | 47   | 78   | 99   | 123  | 126  | 130  | 139  | 140  | 135  | 127  | 125  |
| EUR | 23   | 26   | 24   | 23   | 26   | 29   | 32   | 35   | 38   | 40   | 42   |
| IND | 16   | 19   | 20   | 27   | 34   | 35   | 37   | 37   | 38   | 40   | 41   |
| JPN | 3    | 3    | 3    | 3    | 3    | 3    | 4    | 4    | 4    | 5    | 5    |
| LAM | 17   | 20   | 22   | 23   | 29   | 34   | 39   | 49   | 53   | 62   | 68   |
| MEA | 13   | 16   | 20   | 22   | 24   | 26   | 28   | 29   | 30   | 32   | 32   |
| NEU | 7    | 8    | 9    | 9    | 10   | 10   | 10   | 11   | 11   | 11   | 11   |
| OAS | 16   | 18   | 21   | 24   | 33   | 35   | 39   | 44   | 49   | 53   | 57   |
| REF | 24   | 23   | 16   | 15   | 15   | 13   | 14   | 13   | 10   | 10   | 9    |
| SSA | 7    | 9    | 10   | 12   | 17   | 24   | 27   | 34   | 57   | 70   | 80   |
| USA | 12   | 13   | 12   | 12   | 12   | 13   | 14   | 14   | 15   | 16   | 16   |

Table 1383: MAgPIE m4p\_SSP1 — Production—Crops—Other crops—Fruits Vegetables Nuts (Mt DM/yr)  
[PART 1/2]

|     | 2050 | 2055 | 2060 | 2070 | 2080 | 2090 | 2100 |
|-----|------|------|------|------|------|------|------|
| GLO | 511  | 526  | 540  | 562  | 574  | 572  | 561  |
| CAZ | 6    | 6    | 7    | 7    | 8    | 8    | 8    |
| CHA | 127  | 127  | 125  | 99   | 78   | 69   | 59   |
| EUR | 43   | 44   | 46   | 48   | 49   | 49   | 49   |
| IND | 42   | 45   | 50   | 71   | 79   | 69   | 53   |
| JPN | 5    | 5    | 6    | 6    | 6    | 5    | 5    |
| LAM | 68   | 67   | 66   | 65   | 64   | 64   | 58   |
| MEA | 33   | 33   | 33   | 35   | 36   | 36   | 45   |
| NEU | 11   | 10   | 10   | 10   | 10   | 9    | 9    |
| OAS | 60   | 63   | 65   | 69   | 71   | 71   | 69   |
| REF | 9    | 9    | 9    | 9    | 9    | 9    | 8    |
| SSA | 91   | 98   | 106  | 124  | 144  | 161  | 174  |
| USA | 16   | 17   | 18   | 19   | 21   | 22   | 22   |

Table 1384: MAgPIE m4p\_SSP1 — Production—Crops—Other crops—Fruits Vegetables Nuts (Mt DM/yr)  
[PART 2/2]

|     | 1965 | 1970 | 1975 | 1980 | 1985 | 1990 | 1995 | 2000 | 2005 | 2010 |
|-----|------|------|------|------|------|------|------|------|------|------|
| GLO | 74   | 82   | 94   | 107  | 124  | 140  | 168  | 218  | 249  | 288  |
| CAZ | 1    | 1    | 1    | 1    | 1    | 1    | 2    | 2    | 2    | 2    |
| CHA | 9    | 9    | 10   | 12   | 20   | 28   | 47   | 78   | 98   | 123  |
| EUR | 20   | 23   | 23   | 24   | 25   | 25   | 23   | 26   | 24   | 23   |
| IND | 6    | 7    | 8    | 10   | 12   | 13   | 16   | 19   | 20   | 28   |
| JPN | 3    | 4    | 4    | 4    | 4    | 4    | 3    | 3    | 3    | 3    |
| LAM | 6    | 7    | 8    | 10   | 12   | 14   | 17   | 20   | 22   | 23   |
| MEA | 4    | 5    | 6    | 7    | 10   | 11   | 13   | 16   | 19   | 21   |
| NEU | 3    | 4    | 4    | 5    | 6    | 6    | 7    | 8    | 8    | 9    |
| OAS | 5    | 6    | 8    | 10   | 11   | 13   | 16   | 18   | 21   | 23   |
| REF | 5    | 6    | 7    | 8    | 9    | 8    | 7    | 7    | 9    | 10   |
| SSA | 3    | 4    | 4    | 5    | 5    | 6    | 7    | 9    | 10   | 12   |
| USA | 7    | 8    | 9    | 10   | 9    | 10   | 12   | 13   | 12   | 12   |

Table 1385: FAO — Production—Crops—Other crops—Fruits Vegetables Nuts (Mt DM/yr)

44.3.2 Potatoes

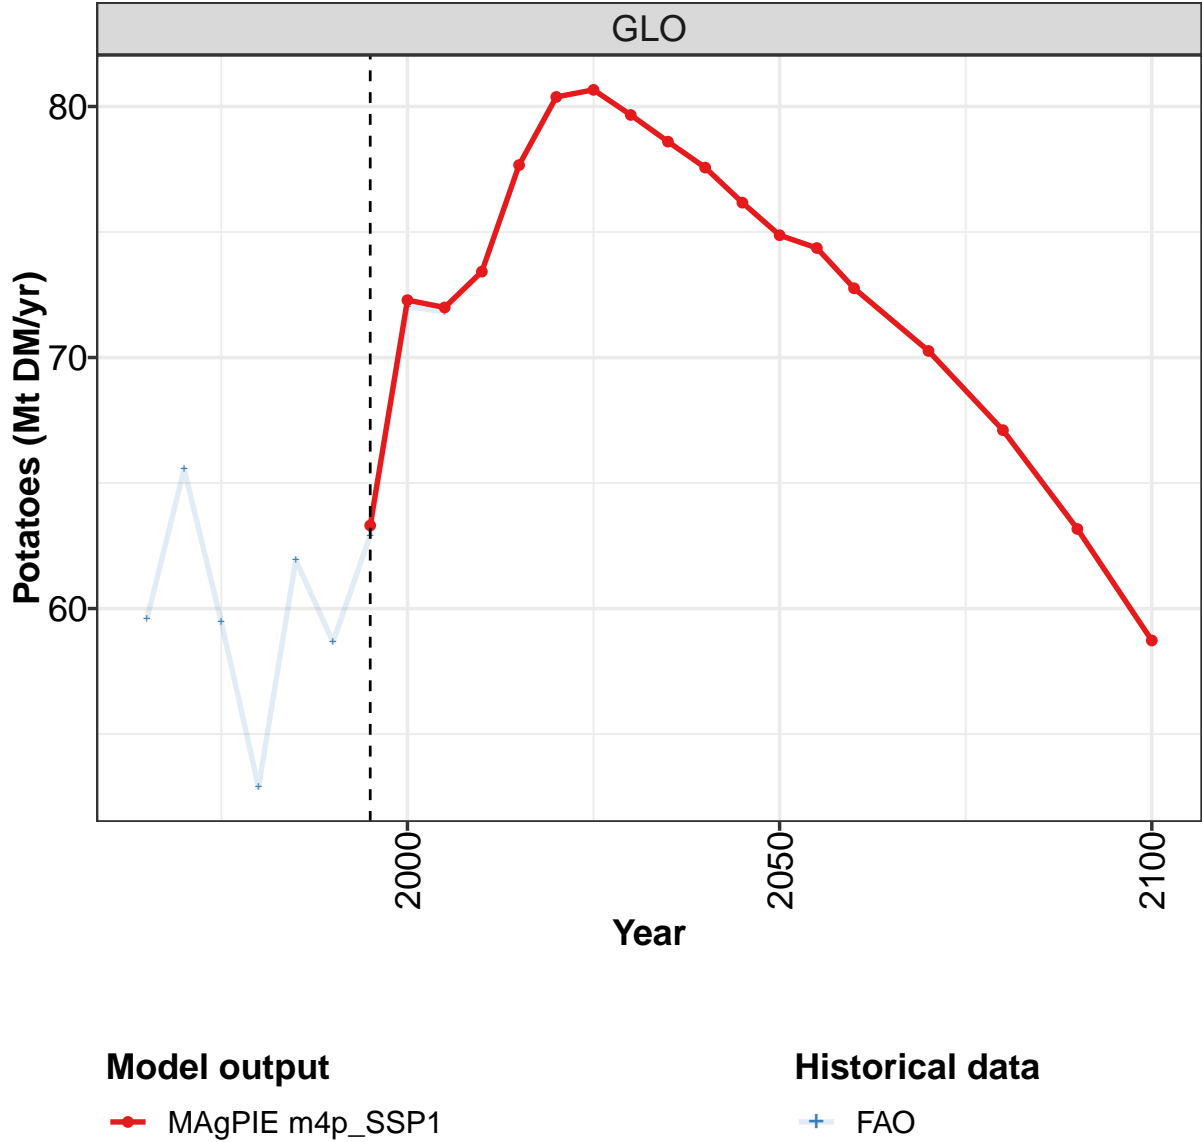

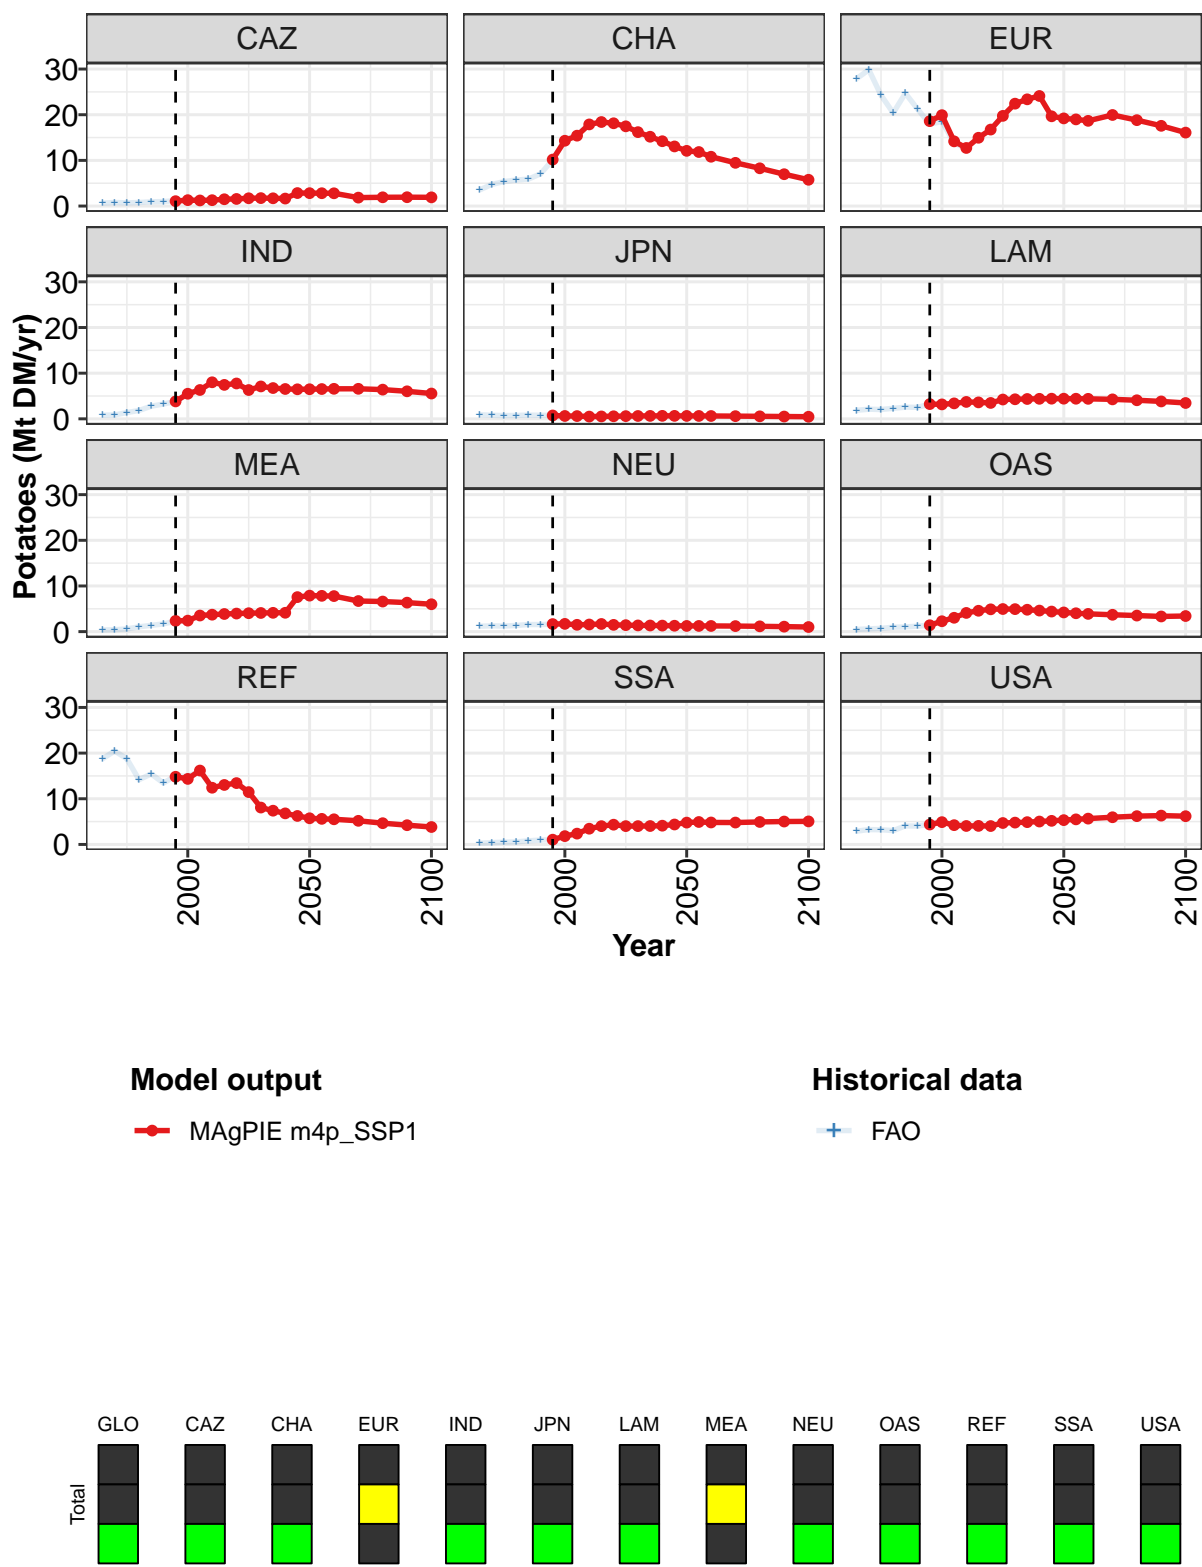

Figure 350: MAgPIE m4p\_SSP1 — Production—Crops—Other crops—Potatoes (Mt DM/yr)

|     | 1995 | 2000 | 2005 | 2010 | 2015 | 2020 | 2025 | 2030 | 2035 | 2040 | 2045 |
|-----|------|------|------|------|------|------|------|------|------|------|------|
| GLO | 63.3 | 72.3 | 72.0 | 73.4 | 77.7 | 80.4 | 80.7 | 79.7 | 78.6 | 77.6 | 76.2 |
| CAZ | 1.1  | 1.3  | 1.2  | 1.3  | 1.5  | 1.6  | 1.7  | 1.7  | 1.7  | 1.6  | 2.9  |
| CHA | 10.2 | 14.3 | 15.4 | 17.9 | 18.4 | 18.1 | 17.5 | 16.2 | 15.2 | 14.2 | 13.1 |
| EUR | 18.6 | 19.9 | 14.2 | 12.7 | 15.0 | 16.8 | 19.8 | 22.4 | 23.4 | 24.1 | 19.7 |
| IND | 3.8  | 5.5  | 6.3  | 8.0  | 7.4  | 7.7  | 6.3  | 7.1  | 6.7  | 6.5  | 6.5  |
| JPN | 0.7  | 0.6  | 0.6  | 0.5  | 0.5  | 0.6  | 0.6  | 0.6  | 0.6  | 0.7  | 0.7  |
| LAM | 3.2  | 3.2  | 3.4  | 3.7  | 3.6  | 3.5  | 4.2  | 4.3  | 4.4  | 4.4  | 4.4  |
| MEA | 2.4  | 2.4  | 3.5  | 3.7  | 3.9  | 4.0  | 4.0  | 4.1  | 4.1  | 4.1  | 7.6  |
| NEU | 1.7  | 1.7  | 1.5  | 1.6  | 1.7  | 1.5  | 1.4  | 1.4  | 1.3  | 1.3  | 1.3  |
| OAS | 1.4  | 2.3  | 3.0  | 4.1  | 4.6  | 4.9  | 5.0  | 4.9  | 4.8  | 4.6  | 4.4  |
| REF | 14.8 | 14.4 | 16.2 | 12.4 | 13.0 | 13.4 | 11.5 | 8.1  | 7.4  | 6.8  | 6.2  |
| SSA | 1.0  | 1.8  | 2.4  | 3.5  | 4.0  | 4.3  | 4.0  | 4.0  | 4.0  | 4.1  | 4.4  |
| USA | 4.4  | 4.9  | 4.2  | 4.0  | 4.1  | 4.0  | 4.7  | 4.8  | 4.9  | 5.0  | 5.2  |

Table 1386: MAgPIE m4p\_SSP1 — Production—Crops—Other crops—Potatoes (Mt DM/yr) [PART 1/2]

|     | 2050 | 2055 | 2060 | 2070 | 2080 | 2090 | 2100 |
|-----|------|------|------|------|------|------|------|
| GLO | 74.9 | 74.4 | 72.8 | 70.3 | 67.1 | 63.2 | 58.7 |
| CAZ | 2.8  | 2.8  | 2.8  | 1.8  | 1.9  | 1.9  | 1.9  |
| CHA | 12.1 | 11.8 | 10.8 | 9.5  | 8.3  | 7.0  | 5.8  |
| EUR | 19.2 | 19.0 | 18.7 | 19.9 | 18.8 | 17.6 | 16.1 |
| IND | 6.5  | 6.5  | 6.6  | 6.6  | 6.4  | 6.0  | 5.6  |
| JPN | 0.6  | 0.6  | 0.6  | 0.6  | 0.6  | 0.5  | 0.5  |
| LAM | 4.4  | 4.4  | 4.4  | 4.3  | 4.1  | 3.8  | 3.5  |
| MEA | 7.9  | 7.8  | 7.8  | 6.7  | 6.6  | 6.4  | 6.0  |
| NEU | 1.3  | 1.3  | 1.2  | 1.2  | 1.2  | 1.1  | 1.0  |
| OAS | 4.2  | 4.0  | 3.9  | 3.7  | 3.5  | 3.3  | 3.4  |
| REF | 5.7  | 5.6  | 5.5  | 5.2  | 4.7  | 4.2  | 3.8  |
| SSA | 4.8  | 4.9  | 4.8  | 4.8  | 4.9  | 5.0  | 5.0  |
| USA | 5.3  | 5.5  | 5.7  | 6.0  | 6.2  | 6.3  | 6.2  |

Table 1387: MAgPIE m4p\_SSP1 — Production—Crops—Other crops—Potatoes (Mt DM/yr) [PART 2/2]

|     | 1965 | 1970 | 1975 | 1980 | 1985 | 1990 | 1995 | 2000 | 2005 | 2010 |
|-----|------|------|------|------|------|------|------|------|------|------|
| GLO | 59.6 | 65.6 | 59.5 | 52.9 | 61.9 | 58.7 | 62.9 | 72.0 | 71.8 | 73.4 |
| CAZ | 0.6  | 0.8  | 0.7  | 0.8  | 0.9  | 1.0  | 1.2  | 1.4  | 1.4  | 1.4  |
| CHA | 3.5  | 4.7  | 5.4  | 5.7  | 5.9  | 7.0  | 10.1 | 14.6 | 15.6 | 18.0 |
| EUR | 27.9 | 29.8 | 24.3 | 20.4 | 24.7 | 21.2 | 17.9 | 18.5 | 13.8 | 12.6 |
| IND | 0.8  | 0.9  | 1.4  | 1.8  | 2.8  | 3.2  | 3.8  | 5.5  | 6.3  | 8.0  |
| JPN | 0.9  | 0.8  | 0.7  | 0.8  | 0.8  | 0.8  | 0.7  | 0.6  | 0.6  | 0.5  |
| LAM | 1.9  | 2.1  | 2.0  | 2.3  | 2.6  | 2.5  | 3.2  | 3.1  | 3.4  | 3.7  |
| MEA | 0.4  | 0.4  | 0.6  | 1.1  | 1.4  | 1.7  | 2.3  | 2.4  | 3.5  | 3.6  |
| NEU | 1.2  | 1.3  | 1.2  | 1.4  | 1.6  | 1.5  | 1.6  | 1.7  | 1.5  | 1.6  |
| OAS | 0.5  | 0.6  | 0.7  | 1.0  | 1.0  | 1.2  | 1.4  | 2.3  | 3.1  | 4.1  |
| REF | 18.8 | 20.5 | 18.8 | 14.2 | 15.4 | 13.4 | 15.0 | 14.9 | 16.0 | 12.4 |
| SSA | 0.3  | 0.4  | 0.5  | 0.6  | 0.8  | 1.0  | 1.0  | 1.8  | 2.4  | 3.5  |
| USA | 2.9  | 3.3  | 3.2  | 3.0  | 4.1  | 4.0  | 4.4  | 5.1  | 4.2  | 4.0  |

Table 1388: FAO — Production—Crops—Other crops—Potatoes (Mt DM/yr)



44.3.3 Pulses

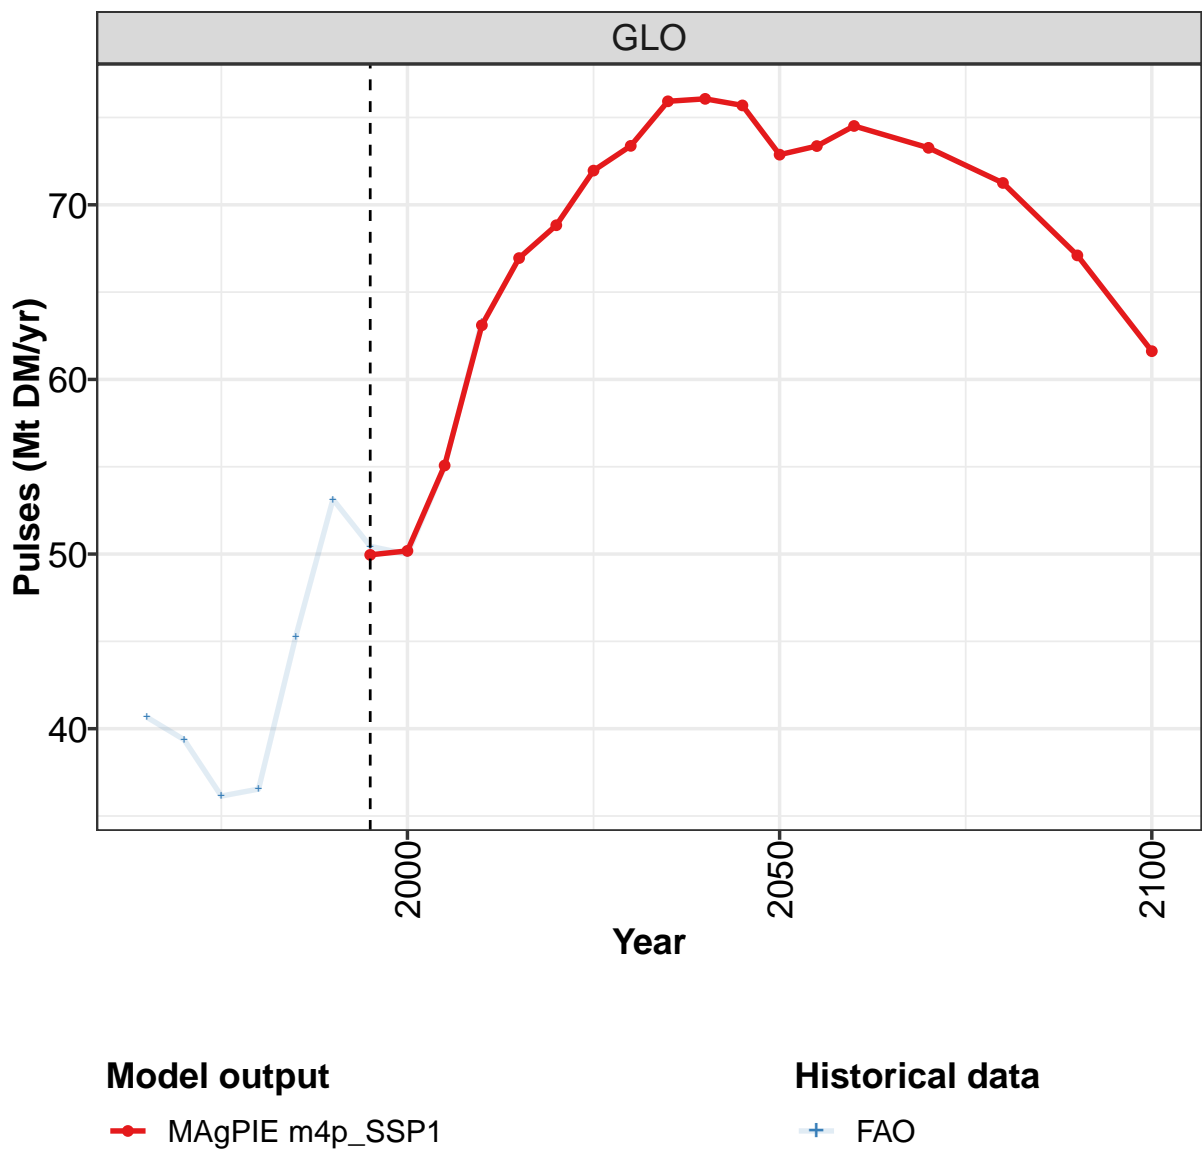

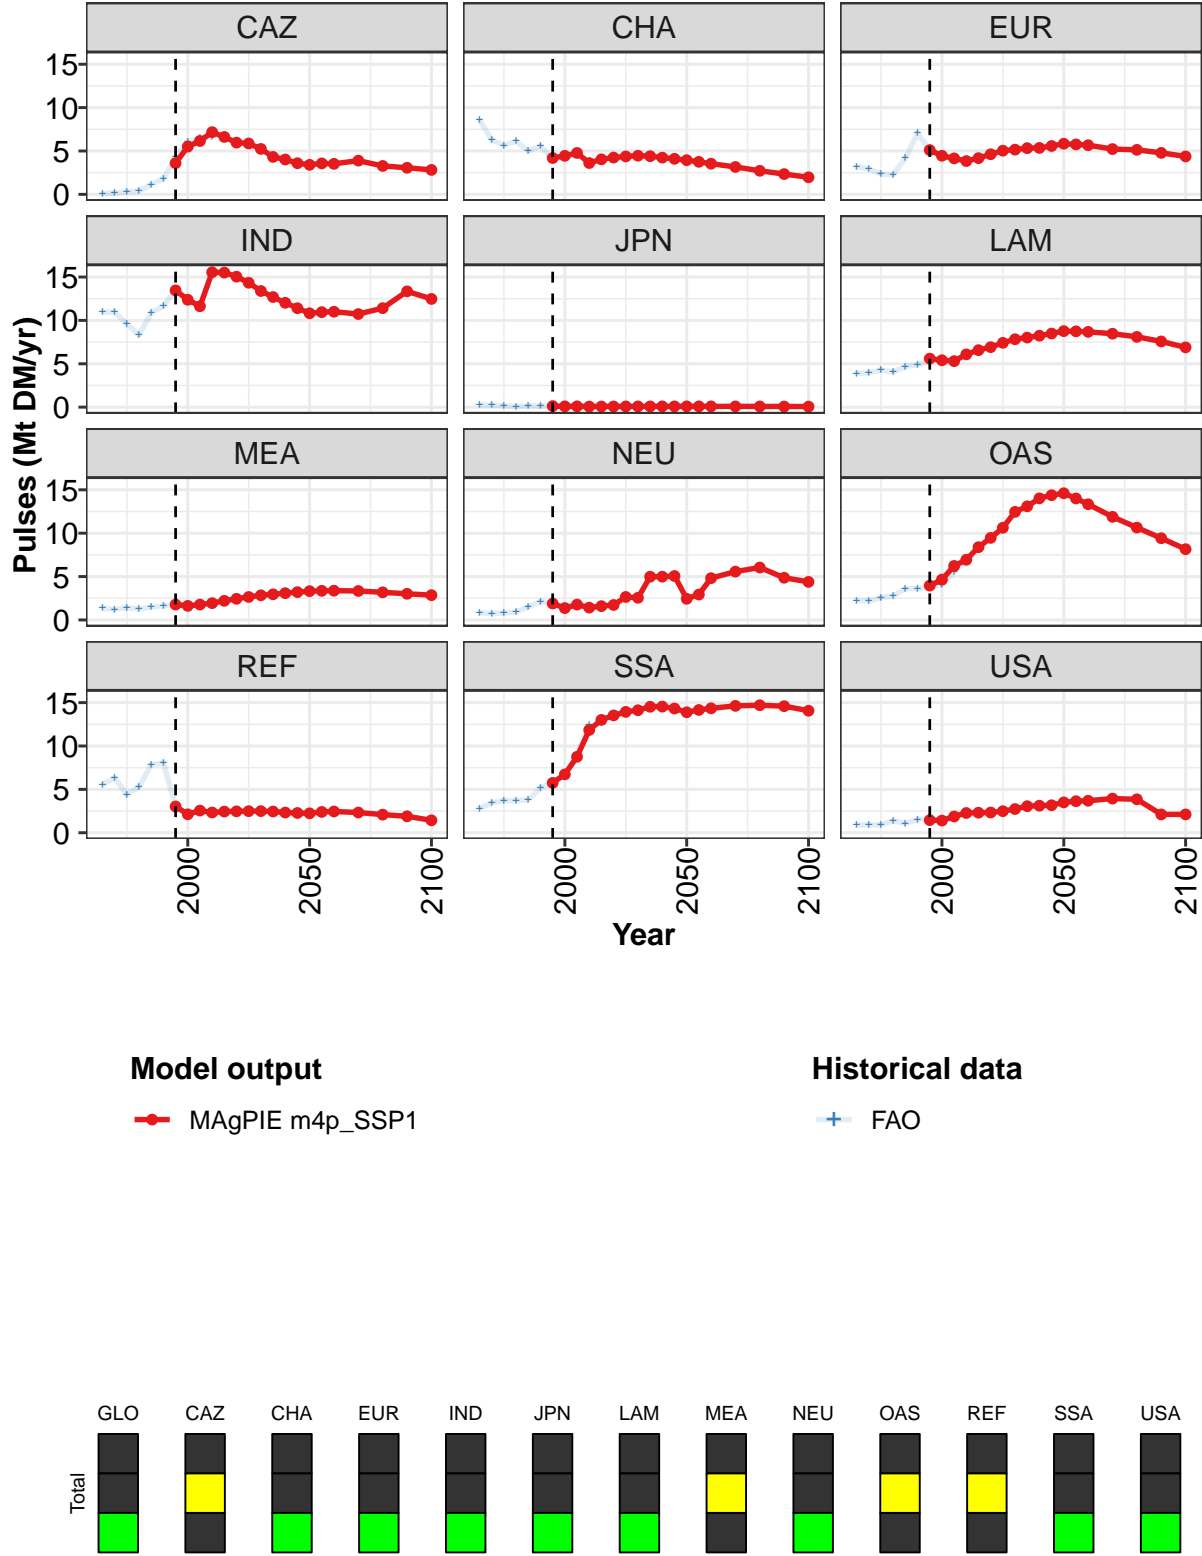

Figure 351: MAgPIE m4p\_SSP1 — Production—Crops—Other crops—Pulses (Mt DM/yr)

|     | 1995 | 2000 | 2005 | 2010 | 2015 | 2020 | 2025 | 2030 | 2035 | 2040 | 2045 |
|-----|------|------|------|------|------|------|------|------|------|------|------|
| GLO | 50.0 | 50.2 | 55.1 | 63.1 | 66.9 | 68.8 | 72.0 | 73.4 | 75.9 | 76.1 | 75.7 |
| CAZ | 3.6  | 5.5  | 6.2  | 7.2  | 6.6  | 6.0  | 5.9  | 5.2  | 4.3  | 4.0  | 3.6  |
| CHA | 4.2  | 4.4  | 4.8  | 3.6  | 4.0  | 4.2  | 4.4  | 4.5  | 4.4  | 4.2  | 4.1  |
| EUR | 5.1  | 4.5  | 4.1  | 3.8  | 4.2  | 4.6  | 5.0  | 5.2  | 5.3  | 5.4  | 5.6  |
| IND | 13.5 | 12.4 | 11.6 | 15.6 | 15.5 | 15.0 | 14.3 | 13.4 | 12.7 | 12.0 | 11.4 |
| JPN | 0.1  | 0.1  | 0.1  | 0.1  | 0.1  | 0.1  | 0.1  | 0.1  | 0.1  | 0.1  | 0.1  |
| LAM | 5.6  | 5.4  | 5.3  | 6.1  | 6.6  | 6.9  | 7.4  | 7.8  | 8.0  | 8.2  | 8.5  |
| MEA | 1.8  | 1.6  | 1.8  | 1.9  | 2.2  | 2.4  | 2.6  | 2.8  | 3.0  | 3.1  | 3.2  |
| NEU | 1.9  | 1.4  | 1.8  | 1.4  | 1.6  | 1.7  | 2.7  | 2.6  | 5.0  | 5.0  | 5.1  |
| OAS | 4.0  | 4.7  | 6.2  | 6.9  | 8.4  | 9.5  | 10.6 | 12.5 | 13.1 | 14.0 | 14.4 |
| REF | 3.0  | 2.1  | 2.6  | 2.3  | 2.4  | 2.5  | 2.5  | 2.5  | 2.5  | 2.3  | 2.3  |
| SSA | 5.7  | 6.7  | 8.8  | 11.9 | 13.0 | 13.5 | 13.9 | 14.1 | 14.5 | 14.5 | 14.3 |
| USA | 1.5  | 1.4  | 1.9  | 2.3  | 2.3  | 2.3  | 2.5  | 2.7  | 3.1  | 3.1  | 3.2  |

Table 1389: MAgPIE m4p\_SSP1 — Production—Crops—Other crops—Pulses (Mt DM/yr) [PART 1/2]

|     | 2050 | 2055 | 2060 | 2070 | 2080 | 2090 | 2100 |
|-----|------|------|------|------|------|------|------|
| GLO | 72.9 | 73.4 | 74.5 | 73.3 | 71.3 | 67.1 | 61.6 |
| CAZ | 3.4  | 3.6  | 3.5  | 3.9  | 3.3  | 3.1  | 2.8  |
| CHA | 3.9  | 3.8  | 3.5  | 3.2  | 2.7  | 2.3  | 2.0  |
| EUR | 5.8  | 5.8  | 5.7  | 5.2  | 5.1  | 4.8  | 4.4  |
| IND | 10.8 | 11.0 | 11.0 | 10.7 | 11.4 | 13.4 | 12.5 |
| JPN | 0.1  | 0.1  | 0.1  | 0.1  | 0.1  | 0.1  | 0.1  |
| LAM | 8.8  | 8.7  | 8.7  | 8.5  | 8.1  | 7.6  | 6.9  |
| MEA | 3.3  | 3.4  | 3.4  | 3.3  | 3.2  | 3.0  | 2.9  |
| NEU | 2.4  | 2.9  | 4.8  | 5.6  | 6.0  | 4.9  | 4.4  |
| OAS | 14.6 | 14.0 | 13.3 | 11.9 | 10.6 | 9.4  | 8.2  |
| REF | 2.2  | 2.4  | 2.5  | 2.3  | 2.1  | 1.9  | 1.4  |
| SSA | 13.9 | 14.2 | 14.3 | 14.6 | 14.7 | 14.6 | 14.1 |
| USA | 3.5  | 3.6  | 3.7  | 3.9  | 3.9  | 2.1  | 2.1  |

Table 1390: MAgPIE m4p\_SSP1 — Production—Crops—Other crops—Pulses (Mt DM/yr) [PART 2/2]

|     | 1965 | 1970 | 1975 | 1980 | 1985 | 1990 | 1995 | 2000 | 2005 | 2010 |
|-----|------|------|------|------|------|------|------|------|------|------|
| GLO | 40.7 | 39.4 | 36.1 | 36.5 | 45.3 | 53.1 | 50.4 | 50.0 | 55.0 | 63.3 |
| CAZ | 0.1  | 0.2  | 0.3  | 0.4  | 1.1  | 1.8  | 4.3  | 6.1  | 6.5  | 6.7  |
| CHA | 8.6  | 6.3  | 5.6  | 6.1  | 5.0  | 5.6  | 4.1  | 4.3  | 4.7  | 3.5  |
| EUR | 3.2  | 3.0  | 2.3  | 2.3  | 4.2  | 7.0  | 5.0  | 4.4  | 4.1  | 3.8  |
| IND | 10.9 | 11.0 | 9.6  | 8.3  | 10.9 | 11.7 | 13.5 | 12.4 | 11.7 | 15.6 |
| JPN | 0.3  | 0.2  | 0.2  | 0.1  | 0.1  | 0.1  | 0.1  | 0.1  | 0.1  | 0.1  |
| LAM | 3.9  | 4.0  | 4.3  | 4.1  | 4.7  | 4.9  | 5.4  | 5.4  | 5.3  | 6.1  |
| MEA | 1.3  | 1.2  | 1.4  | 1.3  | 1.5  | 1.6  | 1.8  | 1.6  | 1.8  | 1.9  |
| NEU | 0.8  | 0.8  | 0.8  | 0.9  | 1.5  | 2.1  | 1.9  | 1.3  | 1.6  | 1.4  |
| OAS | 2.3  | 2.2  | 2.6  | 2.8  | 3.6  | 3.6  | 3.9  | 4.1  | 5.6  | 7.0  |
| REF | 5.6  | 6.3  | 4.4  | 5.3  | 7.8  | 8.1  | 3.1  | 2.0  | 2.7  | 2.4  |
| SSA | 2.8  | 3.4  | 3.7  | 3.7  | 3.8  | 5.1  | 5.8  | 6.8  | 8.9  | 12.5 |
| USA | 0.9  | 0.9  | 0.9  | 1.4  | 1.1  | 1.5  | 1.6  | 1.4  | 1.9  | 2.4  |

Table 1391: FAO — Production—Crops—Other crops—Pulses (Mt DM/yr)

44.3.4
Tropical roots

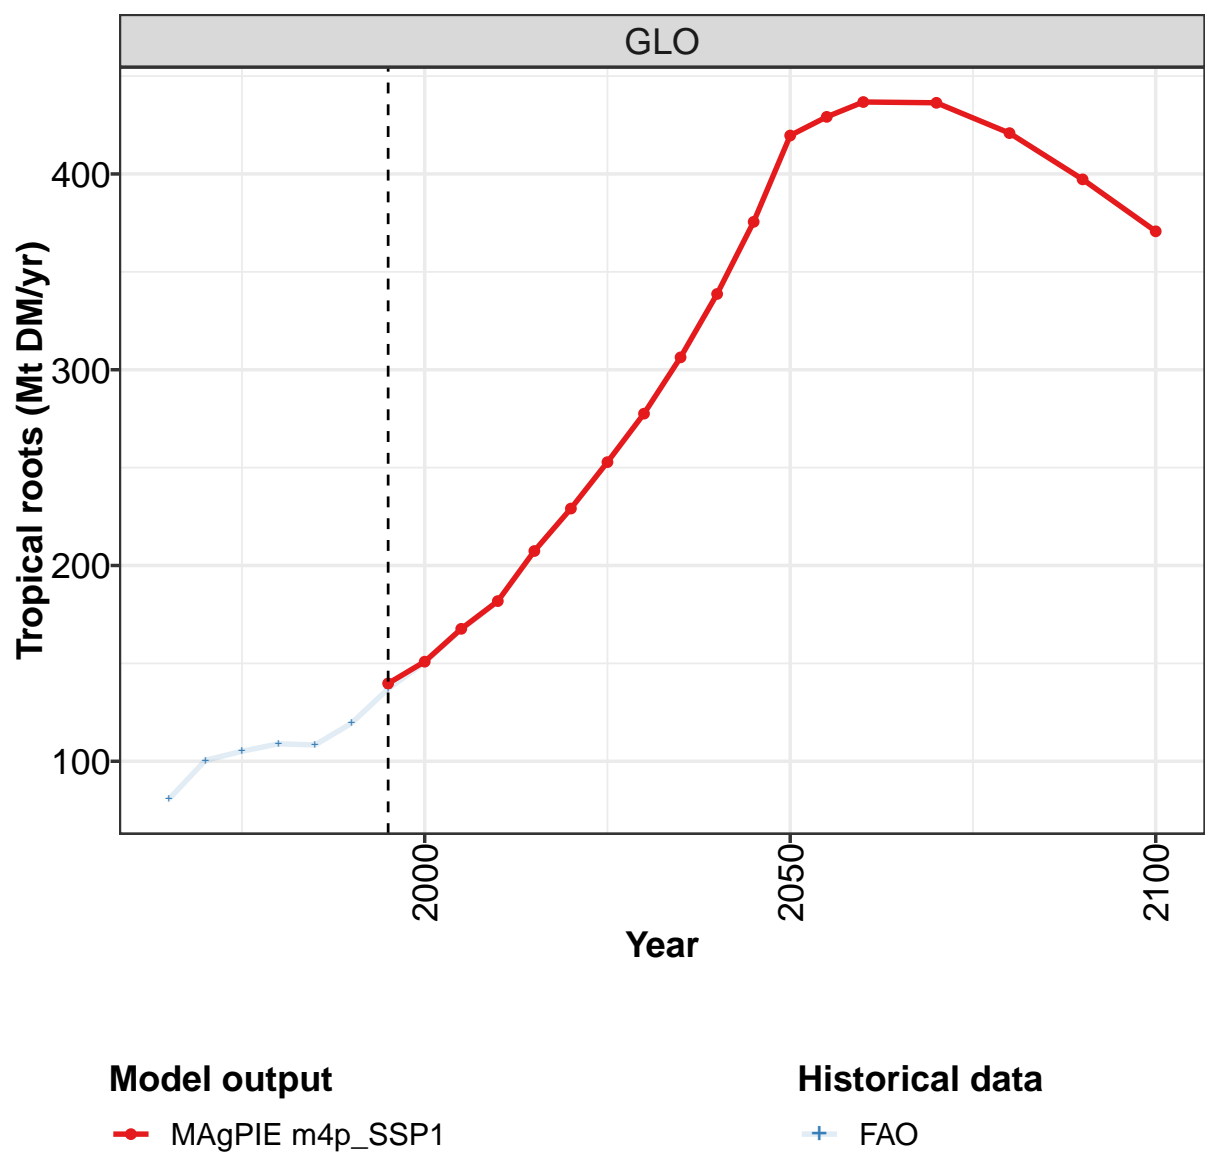

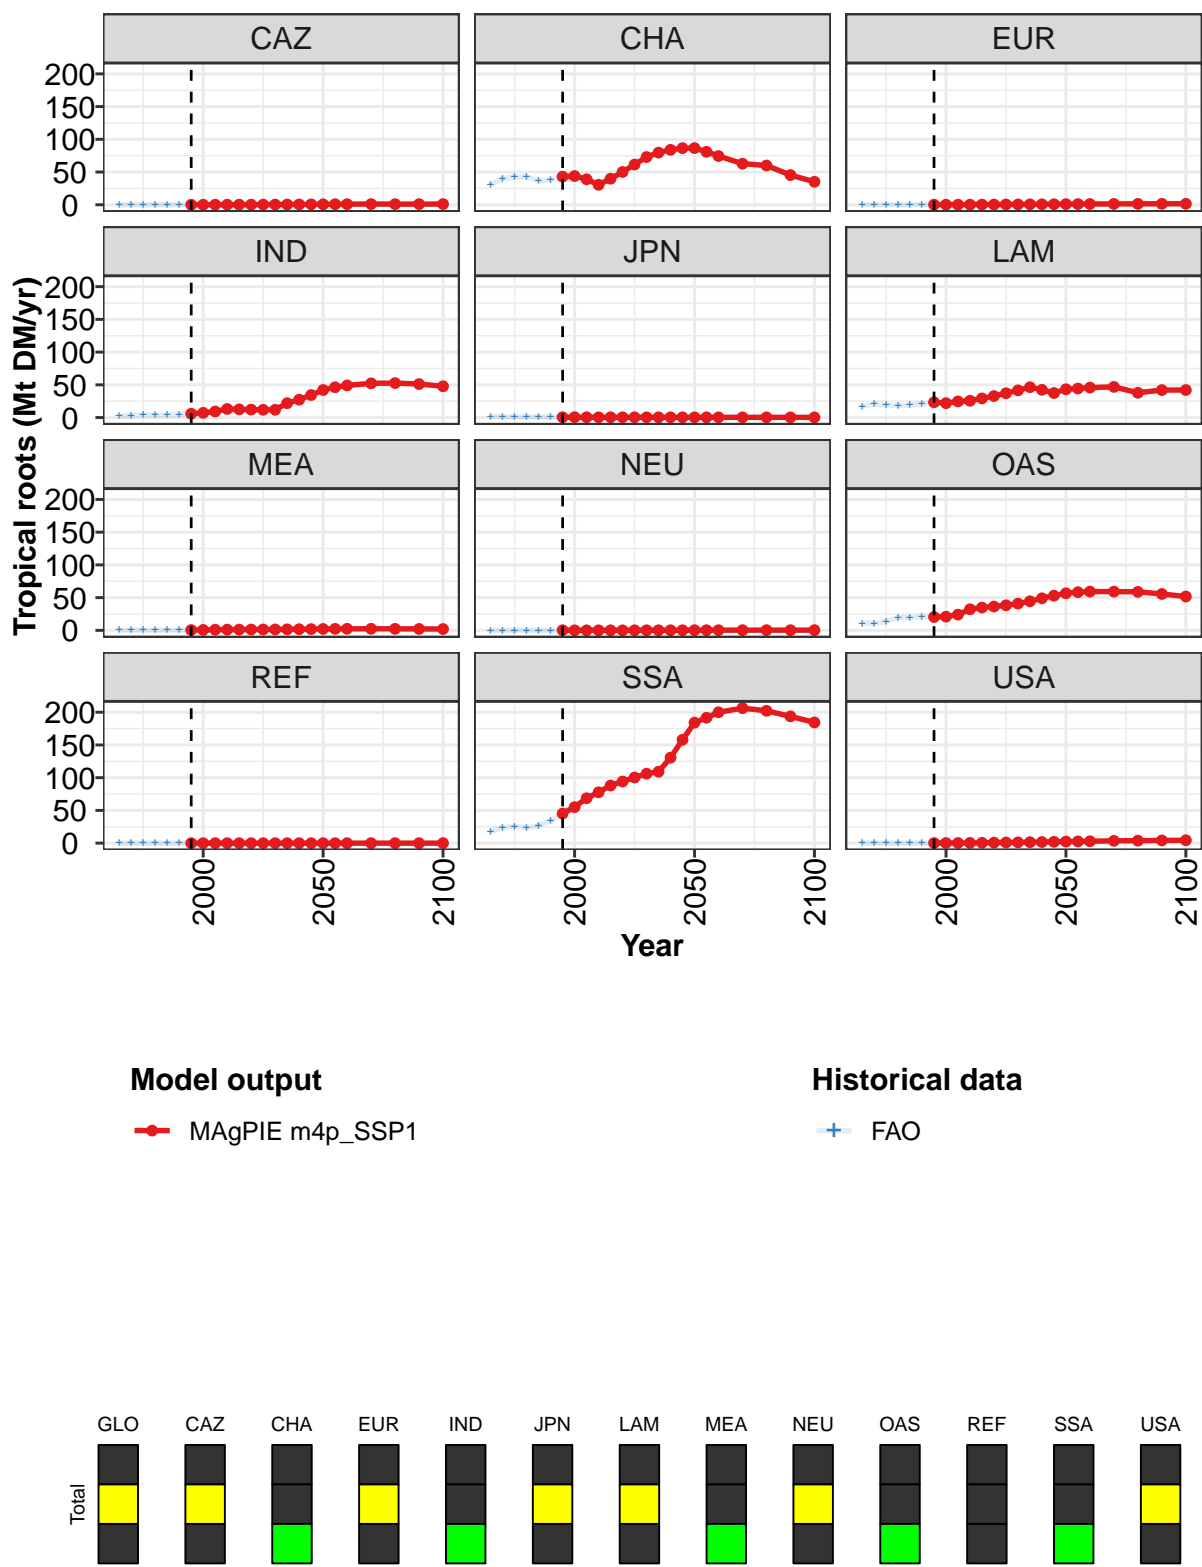

Figure 352: MAgPIE m4p\_SSP1 — Production—Crops—Other crops—Tropical roots (Mt DM/yr)

|     | 1995 | 2000 | 2005 | 2010 | 2015 | 2020 | 2025 | 2030 | 2035 | 2040 | 2045 |
|-----|------|------|------|------|------|------|------|------|------|------|------|
| GLO | 140  | 151  | 168  | 182  | 207  | 229  | 253  | 278  | 306  | 339  | 376  |
| CAZ | 0    | 0    | 0    | 0    | 0    | 0    | 0    | 0    | 0    | 1    | 1    |
| CHA | 43   | 44   | 39   | 31   | 40   | 50   | 61   | 73   | 80   | 84   | 87   |
| EUR | 0    | 0    | 0    | 0    | 0    | 0    | 0    | 1    | 1    | 1    | 1    |
| IND | 6    | 7    | 9    | 13   | 13   | 12   | 12   | 12   | 22   | 27   | 34   |
| JPN | 1    | 1    | 1    | 0    | 0    | 0    | 0    | 0    | 0    | 0    | 0    |
| LAM | 23   | 22   | 25   | 26   | 29   | 33   | 37   | 42   | 46   | 42   | 38   |
| MEA | 1    | 1    | 1    | 1    | 1    | 1    | 1    | 1    | 2    | 2    | 2    |
| NEU | 0    | 0    | 0    | 0    | 0    | 0    | 0    | 0    | 0    | 0    | 0    |
| OAS | 20   | 21   | 24   | 32   | 35   | 36   | 38   | 41   | 44   | 49   | 53   |
| REF | 0    | 0    | 0    | 0    | 0    | 0    | 0    | 0    | 0    | 0    | 0    |
| SSA | 45   | 55   | 69   | 78   | 88   | 94   | 100  | 106  | 109  | 131  | 158  |
| USA | 0    | 0    | 0    | 0    | 1    | 1    | 1    | 1    | 1    | 2    | 2    |

Table 1392: MAgPIE m4p\_SSP1 — Production—Crops—Other crops—Tropical roots (Mt DM/yr) [PART 1/2]

|     | 2050 | 2055 | 2060 | 2070 | 2080 | 2090 | 2100 |
|-----|------|------|------|------|------|------|------|
| GLO | 420  | 429  | 437  | 436  | 421  | 397  | 371  |
| CAZ | 1    | 1    | 1    | 1    | 1    | 1    | 1    |
| CHA | 87   | 81   | 74   | 63   | 60   | 45   | 35   |
| EUR | 1    | 1    | 1    | 1    | 1    | 1    | 1    |
| IND | 42   | 46   | 49   | 52   | 53   | 51   | 48   |
| JPN | 0    | 0    | 0    | 0    | 0    | 0    | 0    |
| LAM | 43   | 44   | 46   | 47   | 38   | 42   | 42   |
| MEA | 2    | 2    | 2    | 2    | 2    | 2    | 2    |
| NEU | 0    | 0    | 0    | 0    | 0    | 0    | 0    |
| OAS | 57   | 58   | 59   | 59   | 59   | 56   | 52   |
| REF | 0    | 0    | 0    | 0    | 0    | 0    | 0    |
| SSA | 184  | 192  | 200  | 206  | 202  | 194  | 184  |
| USA | 2    | 3    | 3    | 3    | 4    | 4    | 4    |

Table 1393: MAgPIE m4p\_SSP1 — Production—Crops—Other crops—Tropical roots (Mt DM/yr) [PART 2/2]

|     | 1965 | 1970 | 1975 | 1980 | 1985 | 1990 | 1995 | 2000 | 2005 | 2010 |
|-----|------|------|------|------|------|------|------|------|------|------|
| GLO | 81   | 101  | 105  | 109  | 108  | 119  | 137  | 150  | 167  | 181  |
| CAZ | 0    | 0    | 0    | 0    | 0    | 0    | 0    | 0    | 0    | 0    |
| CHA | 30   | 40   | 42   | 42   | 37   | 38   | 43   | 44   | 39   | 31   |
| EUR | 0    | 0    | 0    | 0    | 0    | 0    | 0    | 0    | 0    | 0    |
| IND | 3    | 3    | 4    | 4    | 4    | 5    | 6    | 7    | 9    | 13   |
| JPN | 2    | 1    | 1    | 1    | 1    | 1    | 1    | 1    | 1    | 0    |
| LAM | 17   | 20   | 19   | 19   | 19   | 21   | 22   | 22   | 25   | 25   |
| MEA | 0    | 0    | 0    | 0    | 0    | 0    | 0    | 1    | 1    | 1    |
| NEU | 0    | 0    | 0    | 0    | 0    | 0    | 0    | 0    | 0    | 0    |
| OAS | 11   | 11   | 13   | 20   | 20   | 20   | 19   | 21   | 24   | 31   |
| REF | 0    | 0    | 0    | 0    | 0    | 0    | 0    | 0    | 0    | 0    |
| SSA | 17   | 24   | 25   | 24   | 27   | 35   | 45   | 55   | 68   | 79   |
| USA | 0    | 0    | 0    | 0    | 0    | 0    | 0    | 0    | 0    | 0    |

Table 1394: FAO — Production—Crops—Other crops—Tropical roots (Mt DM/yr)

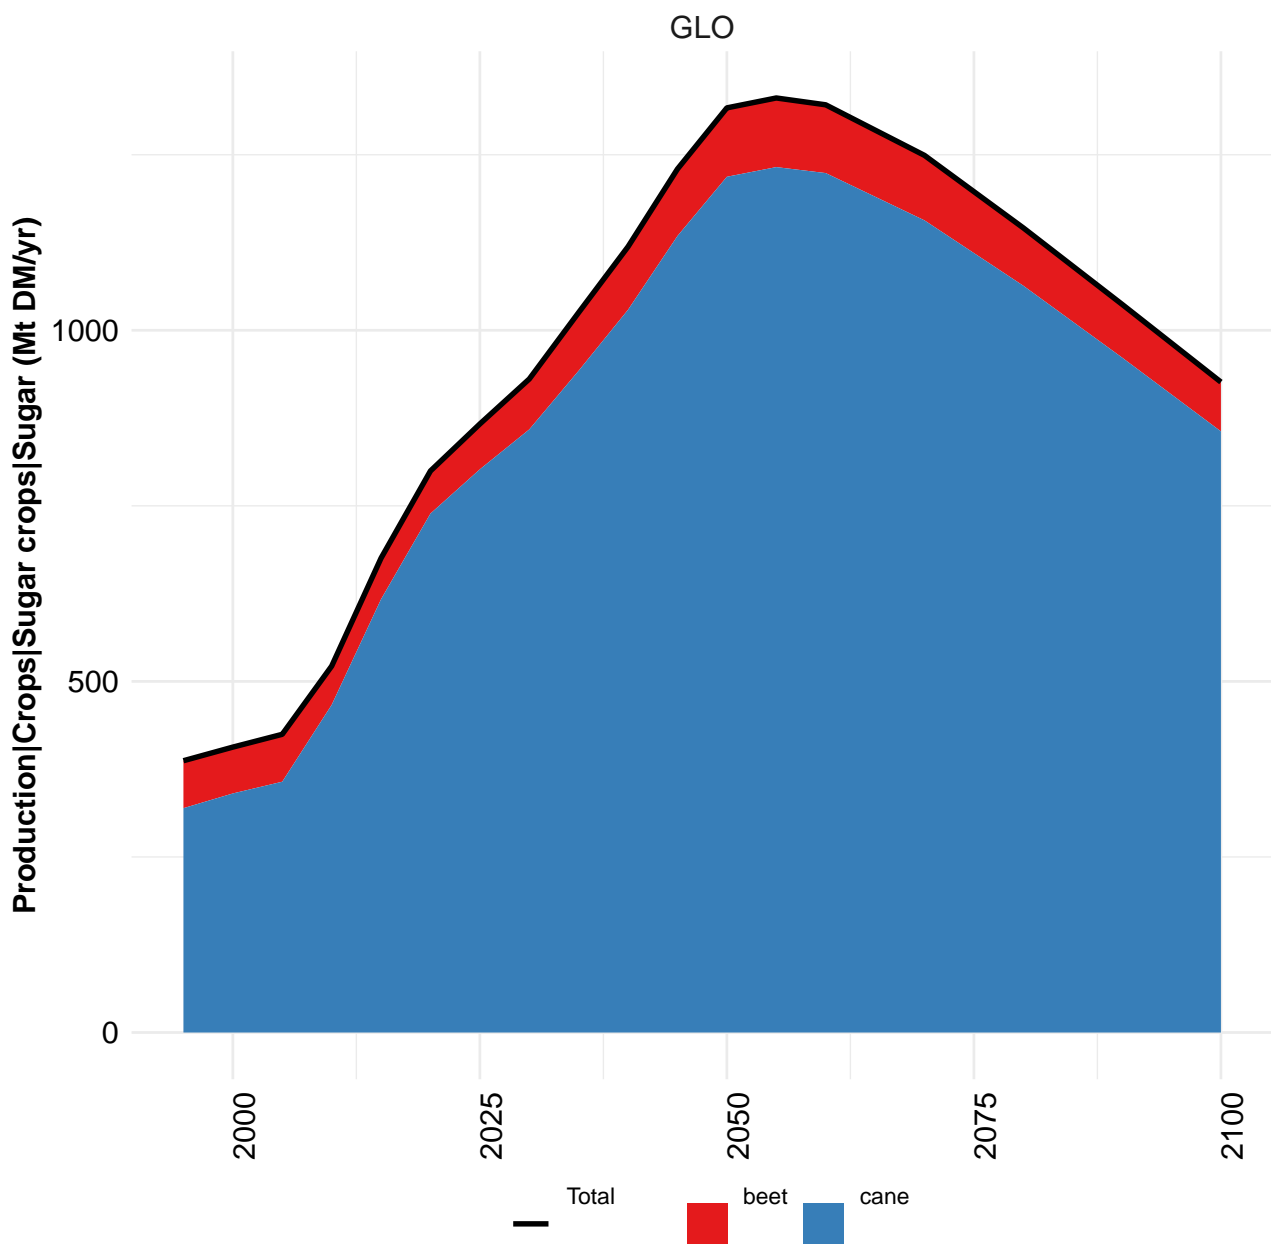

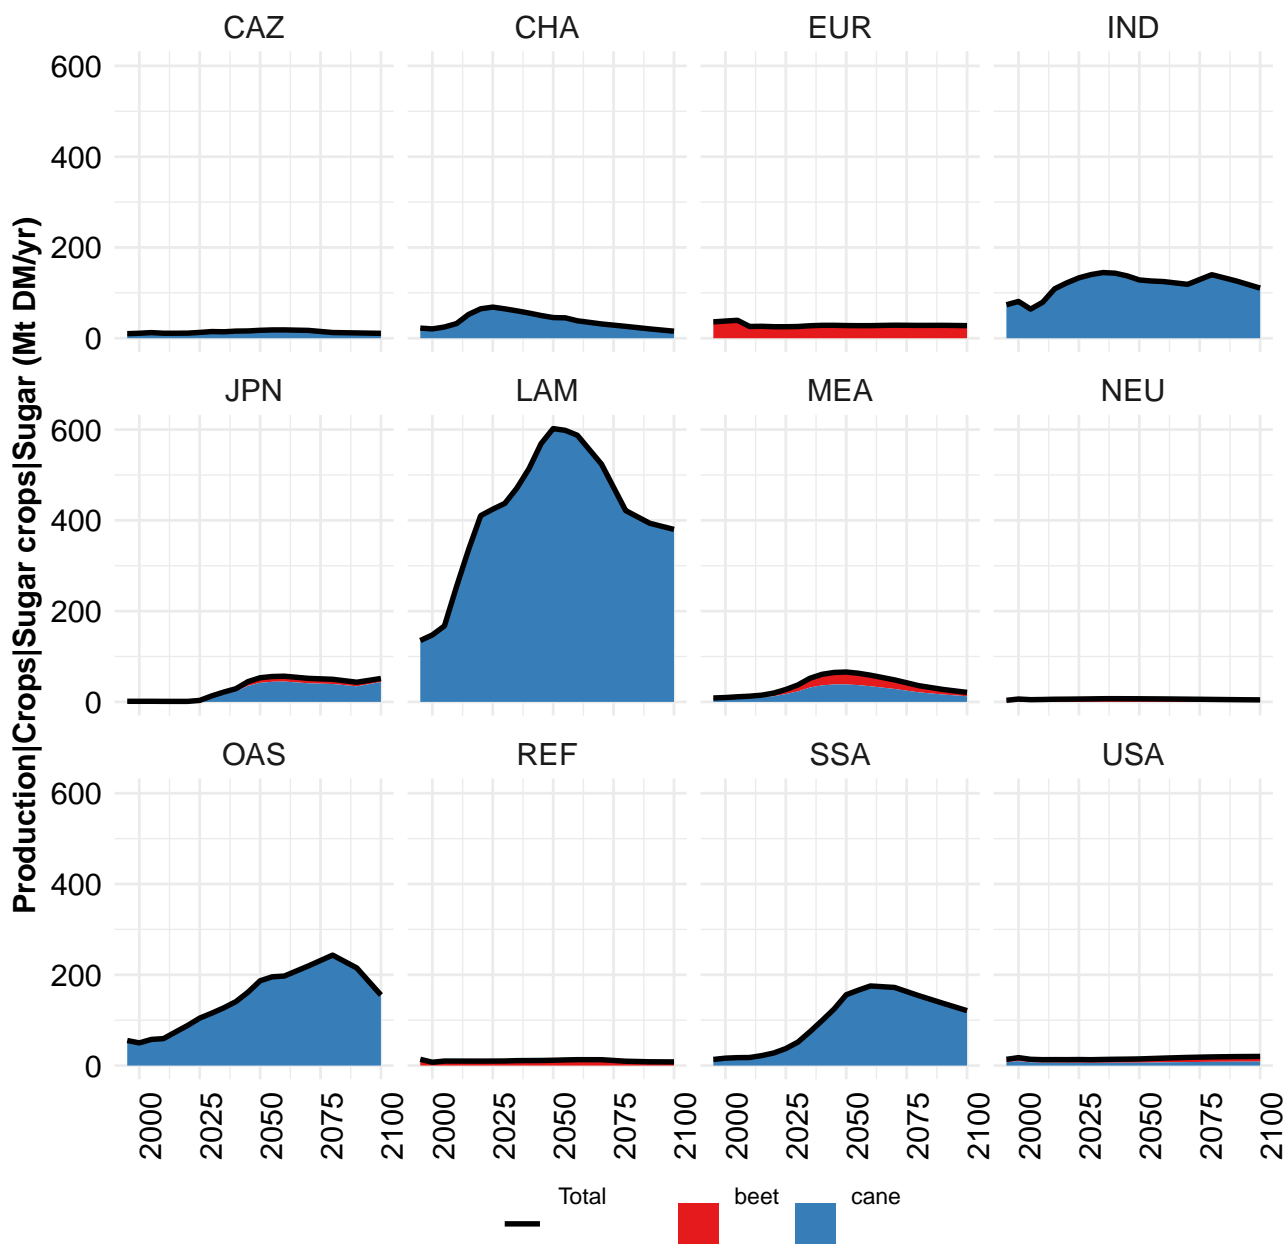



44.4 Sugar crops

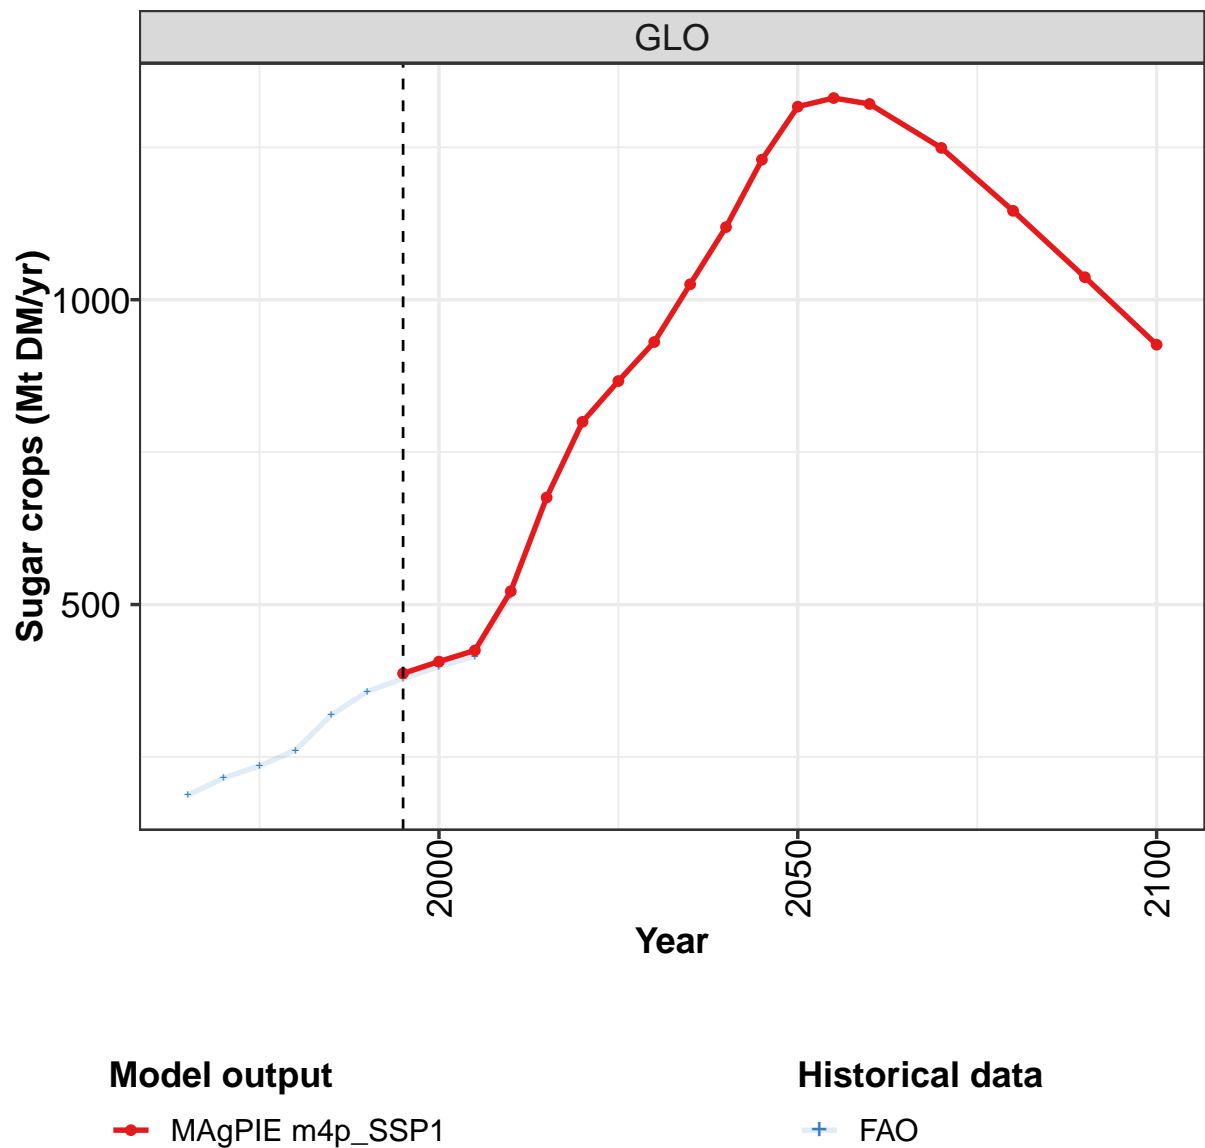

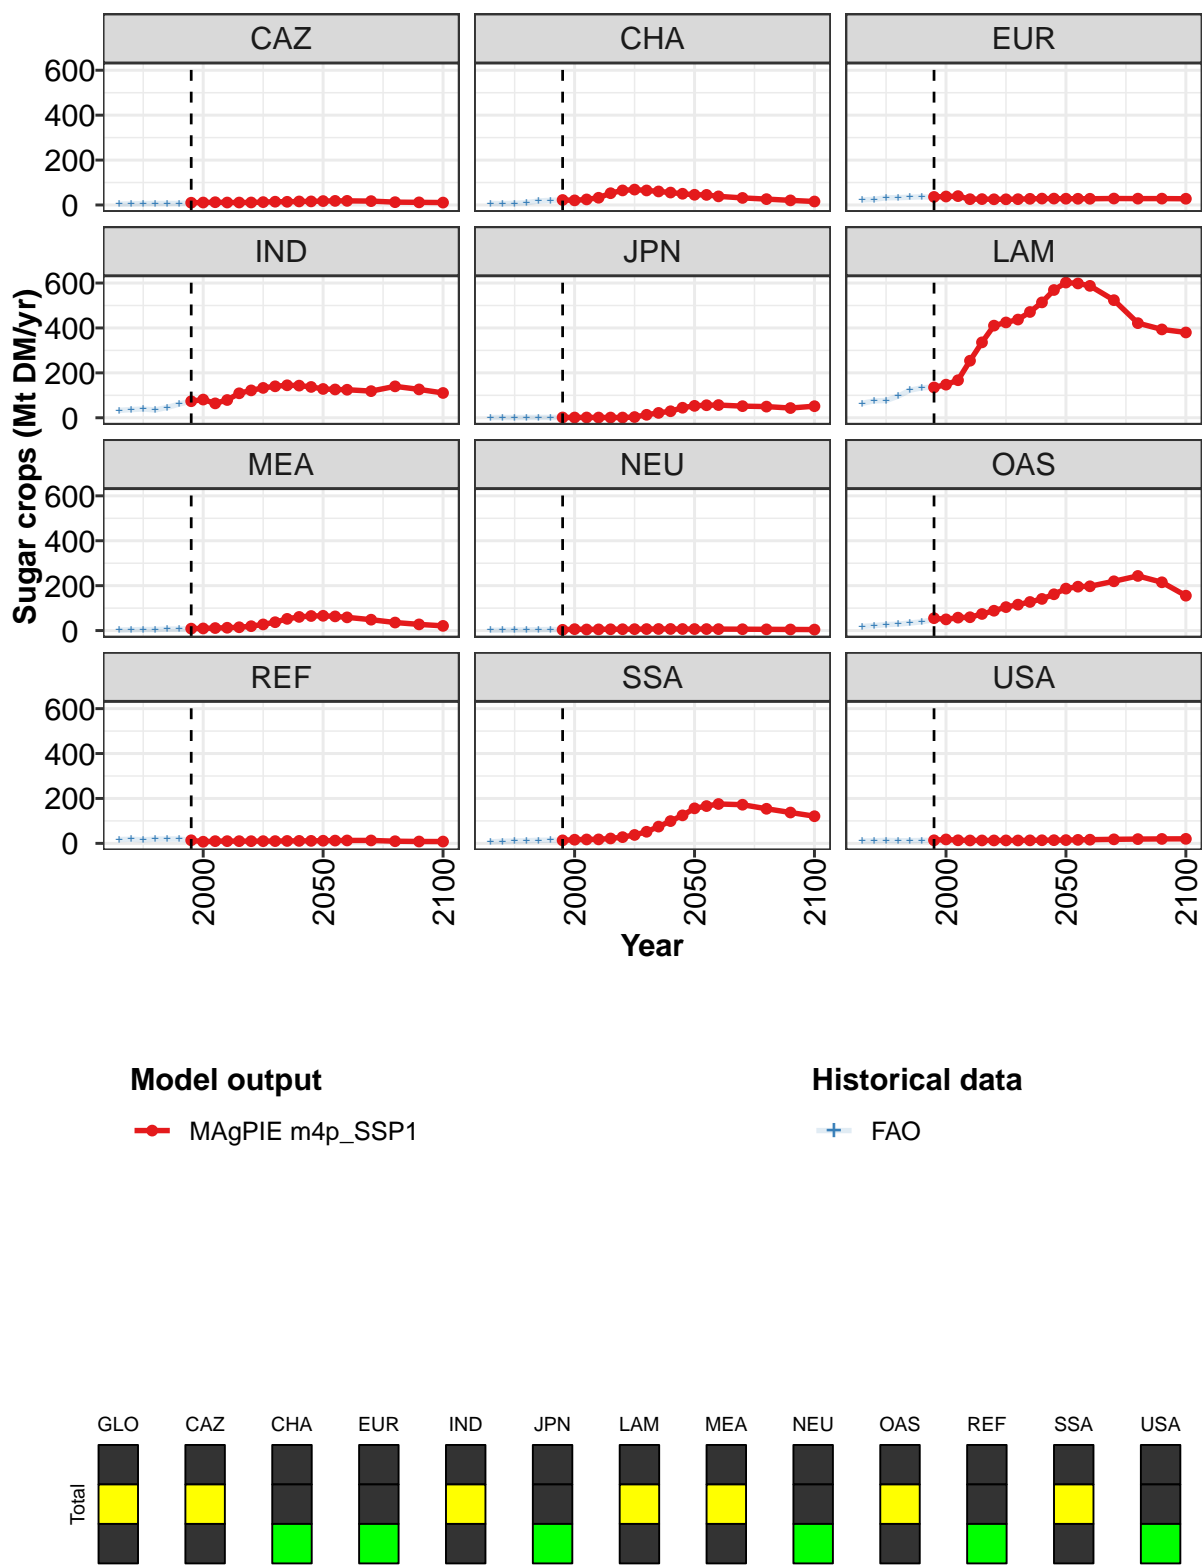

Figure 353: MAgPIE m4p\_SSP1 — Production—Crops—Sugar crops (Mt DM/yr)

|     | 1995 | 2000 | 2005 | 2010 | 2015 | 2020 | 2025 | 2030 | 2035 | 2040 | 2045 |
|-----|------|------|------|------|------|------|------|------|------|------|------|
| GLO | 387  | 406  | 425  | 522  | 676  | 800  | 867  | 931  | 1025 | 1119 | 1230 |
| CAZ | 10   | 11   | 12   | 11   | 11   | 11   | 13   | 15   | 14   | 16   | 16   |
| CHA | 22   | 21   | 25   | 32   | 53   | 65   | 69   | 65   | 60   | 55   | 50   |
| EUR | 36   | 38   | 40   | 26   | 26   | 25   | 25   | 26   | 28   | 28   | 28   |
| IND | 74   | 81   | 64   | 79   | 109  | 122  | 133  | 140  | 145  | 143  | 137  |
| JPN | 1    | 1    | 1    | 1    | 1    | 1    | 3    | 13   | 22   | 29   | 45   |
| LAM | 135  | 148  | 167  | 254  | 336  | 410  | 425  | 437  | 471  | 514  | 569  |
| MEA | 9    | 10   | 11   | 13   | 15   | 20   | 27   | 37   | 52   | 61   | 65   |
| NEU | 3    | 6    | 5    | 5    | 6    | 6    | 6    | 7    | 7    | 7    | 7    |
| OAS | 55   | 50   | 58   | 59   | 74   | 88   | 105  | 115  | 127  | 141  | 162  |
| REF | 14   | 7    | 10   | 10   | 10   | 10   | 10   | 10   | 11   | 11   | 11   |
| SSA | 13   | 16   | 17   | 18   | 22   | 28   | 37   | 52   | 75   | 99   | 125  |
| USA | 14   | 18   | 14   | 13   | 13   | 13   | 13   | 13   | 13   | 14   | 14   |

Table 1395: MAgPIE m4p\_SSP1 — Production—Crops—Sugar crops (Mt DM/yr) [PART 1/2]

|     | 2050 | 2055 | 2060 | 2070 | 2080 | 2090 | 2100 |
|-----|------|------|------|------|------|------|------|
| GLO | 1317 | 1331 | 1321 | 1249 | 1146 | 1037 | 926  |
| CAZ | 18   | 18   | 18   | 17   | 13   | 12   | 11   |
| CHA | 46   | 45   | 38   | 31   | 26   | 21   | 16   |
| EUR | 28   | 28   | 28   | 29   | 28   | 28   | 28   |
| IND | 128  | 126  | 125  | 119  | 140  | 126  | 110  |
| JPN | 53   | 56   | 57   | 52   | 50   | 43   | 52   |
| LAM | 602  | 598  | 588  | 524  | 422  | 393  | 380  |
| MEA | 66   | 63   | 59   | 48   | 36   | 27   | 21   |
| NEU | 7    | 7    | 7    | 6    | 5    | 5    | 4    |
| OAS | 187  | 195  | 197  | 220  | 243  | 215  | 155  |
| REF | 12   | 12   | 13   | 13   | 10   | 8    | 8    |
| SSA | 156  | 166  | 175  | 172  | 154  | 137  | 121  |
| USA | 15   | 16   | 16   | 18   | 19   | 20   | 20   |

Table 1396: MAgPIE m4p\_SSP1 — Production—Crops—Sugar crops (Mt DM/yr) [PART 2/2]

|     | 1965 | 1970 | 1975 | 1980 | 1985 | 1990 | 1995 | 2000 | 2005 | 2010 |
|-----|------|------|------|------|------|------|------|------|------|------|
| GLO | 187  | 215  | 235  | 261  | 319  | 357  | 379  | 398  | 415  | 515  |
| CAZ | 4    | 5    | 6    | 7    | 7    | 7    | 10   | 11   | 10   | 9    |
| CHA | 7    | 6    | 7    | 10   | 18   | 21   | 22   | 21   | 26   | 32   |
| EUR | 23   | 25   | 32   | 33   | 34   | 37   | 33   | 33   | 33   | 25   |
| IND | 33   | 36   | 39   | 35   | 46   | 61   | 74   | 81   | 64   | 79   |
| JPN | 1    | 1    | 1    | 1    | 2    | 1    | 1    | 1    | 1    | 1    |
| LAM | 64   | 75   | 77   | 96   | 123  | 134  | 137  | 146  | 172  | 254  |
| MEA | 2    | 4    | 5    | 5    | 7    | 7    | 9    | 9    | 11   | 12   |
| NEU | 1    | 2    | 3    | 3    | 4    | 5    | 3    | 5    | 5    | 5    |
| OAS | 18   | 22   | 27   | 29   | 34   | 39   | 49   | 50   | 52   | 57   |
| REF | 17   | 19   | 16   | 19   | 19   | 20   | 13   | 7    | 10   | 10   |
| SSA | 7    | 9    | 11   | 12   | 14   | 14   | 13   | 16   | 18   | 17   |
| USA | 10   | 11   | 13   | 12   | 12   | 13   | 14   | 18   | 14   | 14   |

Table 1397: FAO — Production—Crops—Sugar crops (Mt DM/yr)

44.4.1 Sugar beet

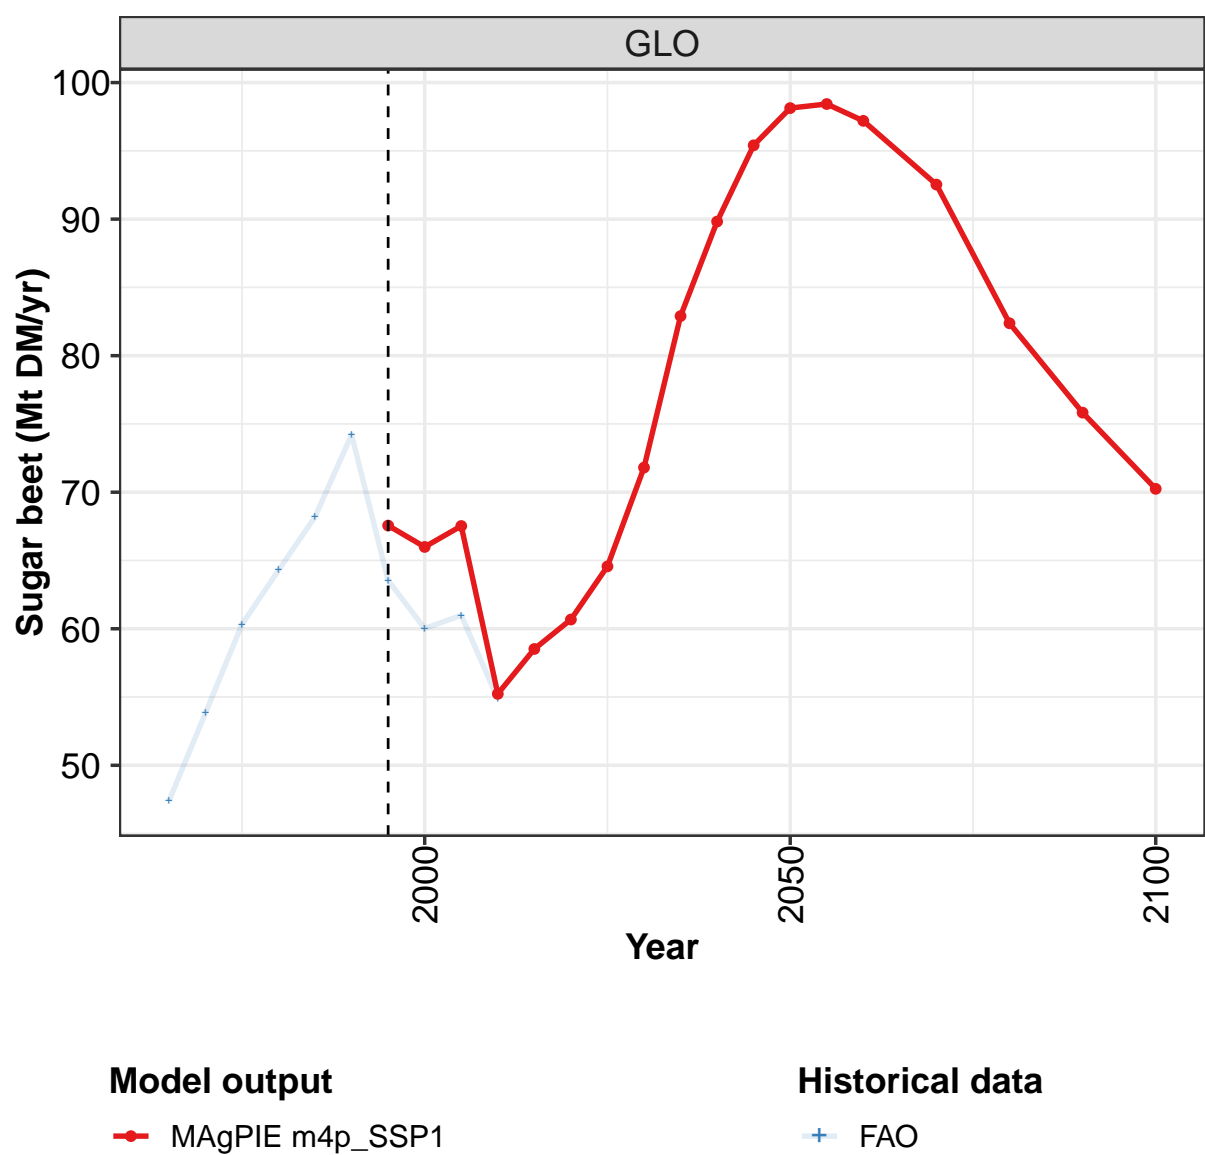

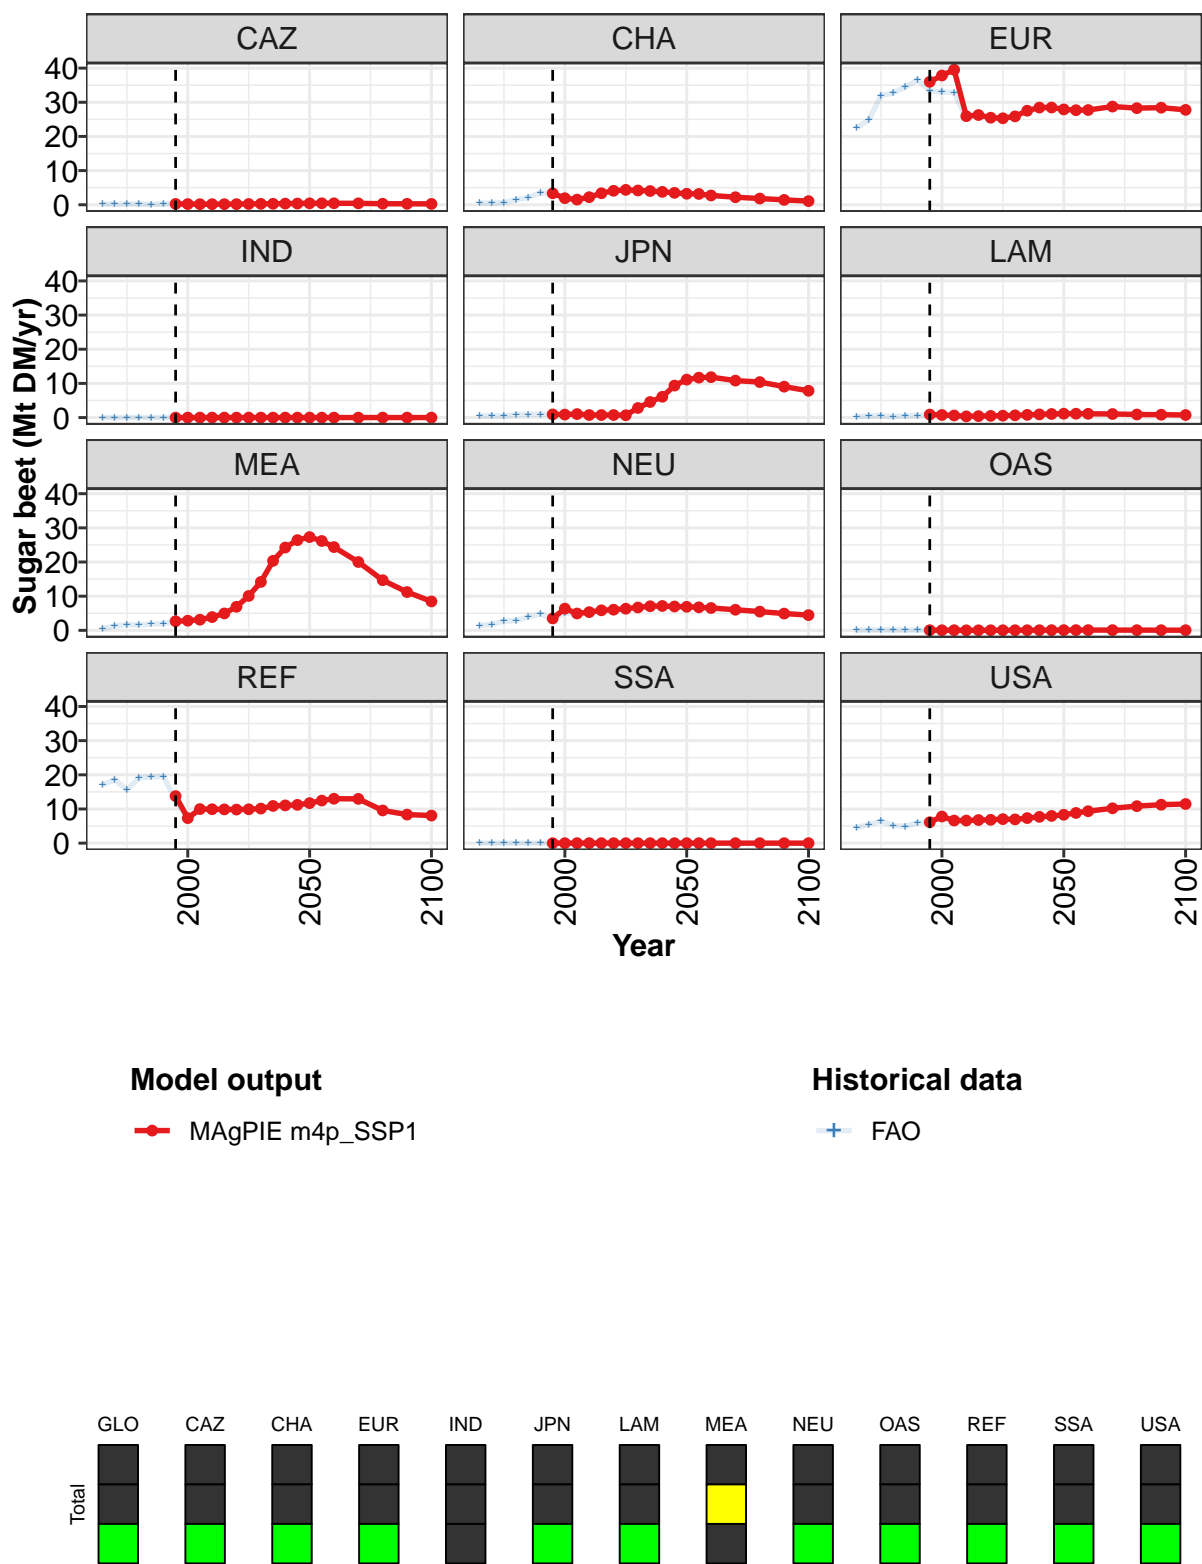

Figure 354: MAgPIE m4p\_SSP1 — Production—Crops—Sugar crops—Sugar beet (Mt DM/yr)

|     | 1995 | 2000 | 2005 | 2010 | 2015 | 2020 | 2025 | 2030 | 2035 | 2040 | 2045 |
|-----|------|------|------|------|------|------|------|------|------|------|------|
| GLO | 67.6 | 66.0 | 67.5 | 55.2 | 58.5 | 60.7 | 64.6 | 71.8 | 82.9 | 89.8 | 95.4 |
| CAZ | 0.3  | 0.2  | 0.2  | 0.2  | 0.2  | 0.2  | 0.2  | 0.3  | 0.3  | 0.3  | 0.4  |
| CHA | 3.4  | 1.9  | 1.5  | 2.2  | 3.4  | 4.1  | 4.4  | 4.2  | 4.0  | 3.8  | 3.5  |
| EUR | 36.0 | 37.8 | 39.5 | 25.9 | 26.3 | 25.5 | 25.3 | 25.9 | 27.5 | 28.5 | 28.5 |
| IND | 0.0  | 0.0  | 0.0  | 0.0  | 0.0  | 0.0  | 0.0  | 0.0  | 0.0  | 0.0  | 0.0  |
| JPN | 0.9  | 0.9  | 1.0  | 0.7  | 0.7  | 0.7  | 0.7  | 2.8  | 4.6  | 6.1  | 9.4  |
| LAM | 0.9  | 0.8  | 0.6  | 0.4  | 0.4  | 0.5  | 0.6  | 0.7  | 0.8  | 0.9  | 1.1  |
| MEA | 2.7  | 2.8  | 3.1  | 3.9  | 5.0  | 6.9  | 10.1 | 14.2 | 20.4 | 24.3 | 26.4 |
| NEU | 3.5  | 6.4  | 4.9  | 5.3  | 5.9  | 6.1  | 6.3  | 6.7  | 7.1  | 7.1  | 7.0  |
| OAS | 0.1  | 0.0  | 0.0  | 0.0  | 0.0  | 0.0  | 0.0  | 0.0  | 0.0  | 0.1  | 0.1  |
| REF | 13.8 | 7.3  | 10.0 | 9.9  | 9.9  | 9.8  | 9.9  | 10.1 | 10.9 | 11.1 | 11.2 |
| SSA | 0.0  | 0.0  | 0.0  | 0.0  | 0.0  | 0.0  | 0.0  | 0.0  | 0.0  | 0.0  | 0.0  |
| USA | 6.1  | 7.8  | 6.6  | 6.6  | 6.8  | 6.8  | 7.0  | 7.0  | 7.3  | 7.7  | 8.0  |

Table 1398: MAgPIE m4p\_SSP1 — Production—Crops—Sugar crops—Sugar beet (Mt DM/yr) [PART 1/2]

|     | 2050 | 2055 | 2060 | 2070 | 2080 | 2090 | 2100 |
|-----|------|------|------|------|------|------|------|
| GLO | 98.1 | 98.4 | 97.2 | 92.5 | 82.4 | 75.8 | 70.2 |
| CAZ | 0.4  | 0.4  | 0.4  | 0.4  | 0.3  | 0.3  | 0.3  |
| CHA | 3.2  | 3.2  | 2.7  | 2.2  | 1.8  | 1.4  | 1.1  |
| EUR | 27.9 | 27.7 | 27.7 | 28.7 | 28.3 | 28.4 | 27.8 |
| IND | 0.0  | 0.0  | 0.0  | 0.0  | 0.0  | 0.0  | 0.0  |
| JPN | 11.1 | 11.7 | 11.8 | 10.8 | 10.4 | 9.0  | 7.8  |
| LAM | 1.1  | 1.1  | 1.1  | 1.0  | 0.9  | 0.8  | 0.8  |
| MEA | 27.3 | 26.2 | 24.4 | 20.0 | 14.7 | 11.2 | 8.5  |
| NEU | 6.9  | 6.7  | 6.5  | 6.0  | 5.5  | 4.9  | 4.5  |
| OAS | 0.1  | 0.1  | 0.1  | 0.1  | 0.1  | 0.1  | 0.1  |
| REF | 11.7 | 12.5 | 13.0 | 13.0 | 9.6  | 8.4  | 8.1  |
| SSA | 0.0  | 0.0  | 0.0  | 0.0  | 0.0  | 0.0  | 0.0  |
| USA | 8.3  | 8.8  | 9.3  | 10.2 | 10.8 | 11.3 | 11.5 |

Table 1399: MAgPIE m4p\_SSP1 — Production—Crops—Sugar crops—Sugar beet (Mt DM/yr) [PART 2/2]

|     | 1965 | 1970 | 1975 | 1980 | 1985 | 1990 | 1995 | 2000 | 2005 | 2010 |
|-----|------|------|------|------|------|------|------|------|------|------|
| GLO | 47.4 | 53.8 | 60.3 | 64.3 | 68.2 | 74.2 | 63.5 | 60.0 | 61.0 | 54.9 |
| CAZ | 0.2  | 0.2  | 0.2  | 0.2  | 0.1  | 0.2  | 0.2  | 0.2  | 0.1  | 0.1  |
| CHA | 0.5  | 0.5  | 0.6  | 1.5  | 2.1  | 3.5  | 3.4  | 1.9  | 1.9  | 2.2  |
| EUR | 22.5 | 24.9 | 32.0 | 32.7 | 34.4 | 36.5 | 33.4 | 33.1 | 32.8 | 25.2 |
| IND | 0.0  | 0.0  | 0.0  | 0.0  | 0.0  | 0.0  | 0.0  | 0.0  | 0.0  | 0.0  |
| JPN | 0.4  | 0.6  | 0.4  | 0.9  | 0.9  | 1.0  | 0.9  | 0.9  | 1.0  | 0.7  |
| LAM | 0.3  | 0.5  | 0.5  | 0.2  | 0.6  | 0.6  | 0.9  | 0.7  | 0.6  | 0.4  |
| MEA | 0.5  | 1.3  | 1.7  | 1.6  | 1.8  | 2.0  | 2.7  | 2.8  | 3.1  | 3.8  |
| NEU | 1.4  | 1.7  | 2.7  | 2.9  | 3.9  | 4.8  | 3.3  | 5.1  | 4.7  | 5.4  |
| OAS | 0.0  | 0.1  | 0.1  | 0.1  | 0.0  | 0.1  | 0.0  | 0.0  | 0.0  | 0.0  |
| REF | 17.0 | 18.6 | 15.6 | 19.1 | 19.4 | 19.6 | 12.6 | 7.4  | 10.0 | 9.9  |
| SSA | 0.0  | 0.0  | 0.0  | 0.0  | 0.0  | 0.0  | 0.0  | 0.0  | 0.0  | 0.0  |
| USA | 4.5  | 5.5  | 6.5  | 5.1  | 4.9  | 6.0  | 6.1  | 7.8  | 6.6  | 7.0  |

Table 1400: FAO — Production—Crops—Sugar crops—Sugar beet (Mt DM/yr)

44.4.2 Sugar cane

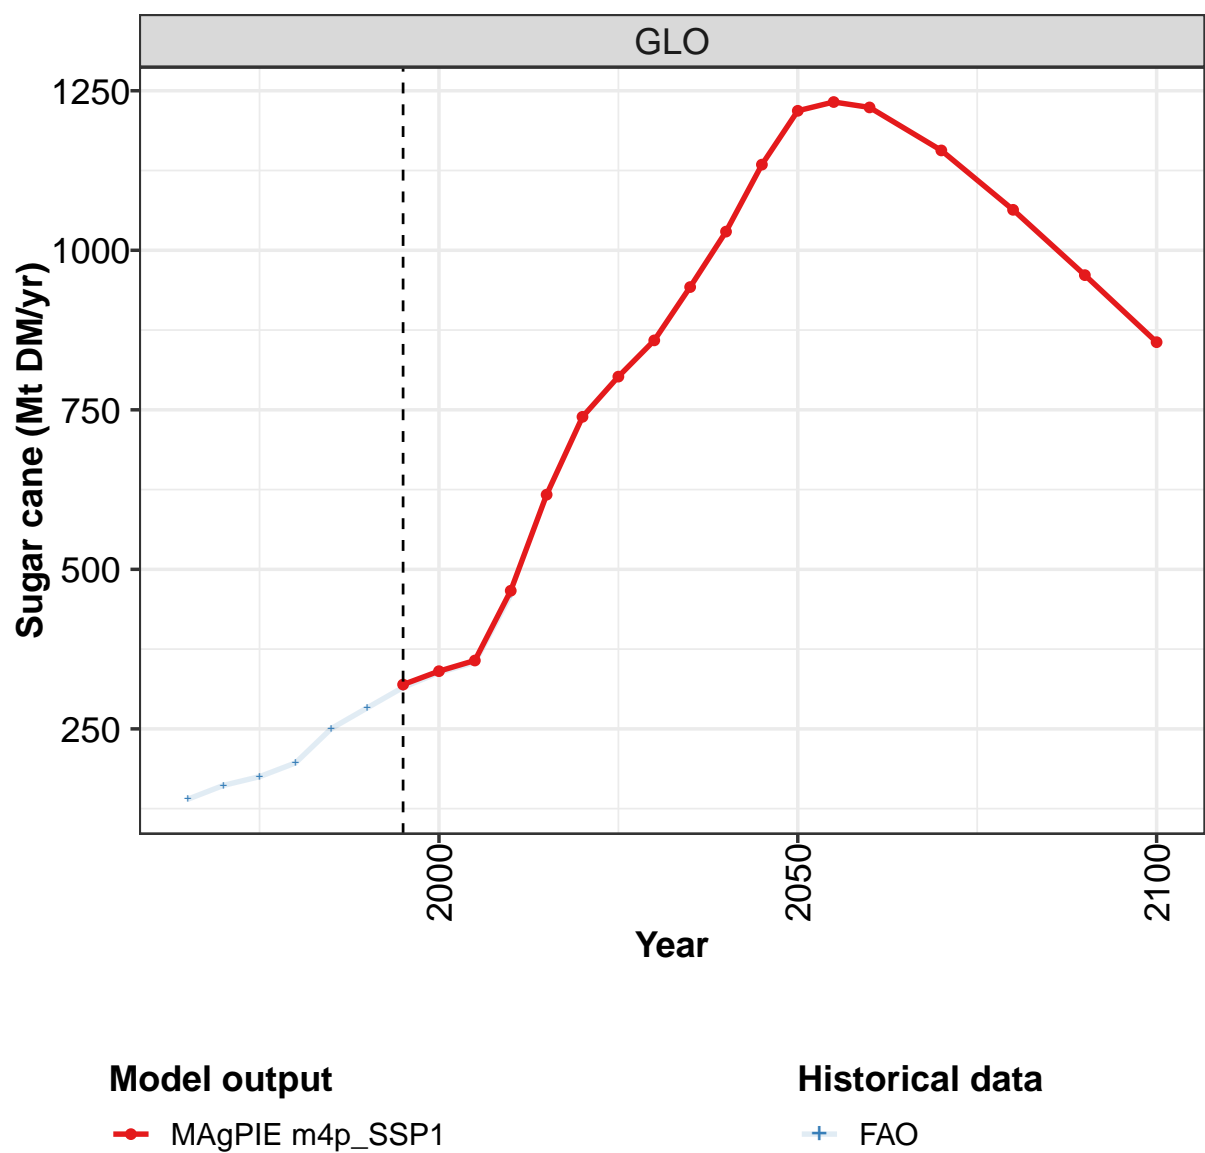

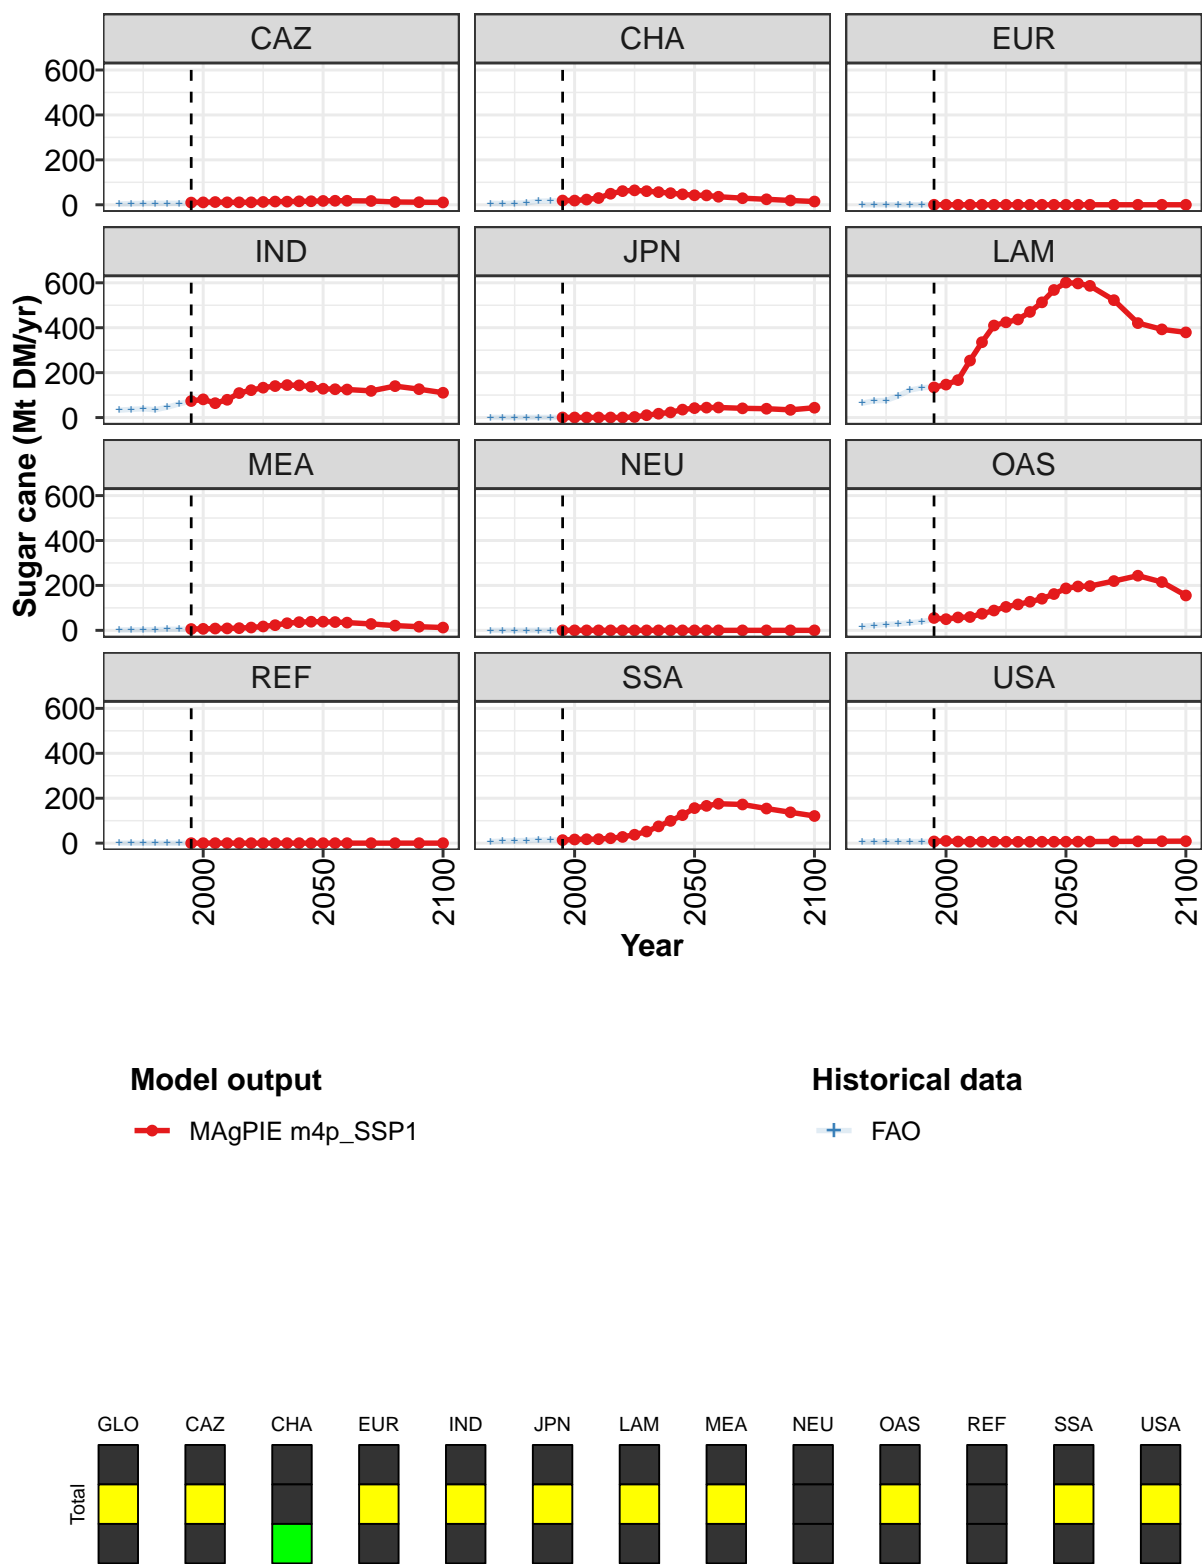

Figure 355: MAgPIE m4p\_SSP1 — Production—Crops—Sugar crops—Sugar cane (Mt DM/yr)



|     | 1995 | 2000 | 2005 | 2010 | 2015 | 2020 | 2025 | 2030 | 2035 | 2040 | 2045 |
|-----|------|------|------|------|------|------|------|------|------|------|------|
| GLO | 319  | 340  | 357  | 467  | 617  | 739  | 802  | 859  | 942  | 1029 | 1134 |
| CAZ | 10   | 11   | 12   | 11   | 11   | 11   | 13   | 14   | 14   | 15   | 16   |
| CHA | 19   | 19   | 23   | 30   | 49   | 61   | 64   | 61   | 56   | 52   | 47   |
| EUR | 0    | 0    | 0    | 0    | 0    | 0    | 0    | 0    | 0    | 0    | 0    |
| IND | 74   | 81   | 64   | 79   | 109  | 122  | 133  | 140  | 145  | 143  | 137  |
| JPN | 0    | 0    | 0    | 0    | 0    | 0    | 3    | 11   | 17   | 23   | 35   |
| LAM | 134  | 147  | 167  | 254  | 336  | 410  | 424  | 437  | 470  | 513  | 568  |
| MEA | 6    | 7    | 8    | 9    | 10   | 13   | 17   | 23   | 32   | 37   | 39   |
| NEU | 0    | 0    | 0    | 0    | 0    | 0    | 0    | 0    | 0    | 0    | 0    |
| OAS | 55   | 50   | 58   | 59   | 74   | 88   | 105  | 115  | 127  | 141  | 162  |
| REF | 0    | 0    | 0    | 0    | 0    | 0    | 0    | 0    | 0    | 0    | 0    |
| SSA | 13   | 16   | 17   | 18   | 22   | 28   | 37   | 52   | 75   | 99   | 125  |
| USA | 8    | 10   | 7    | 6    | 6    | 6    | 6    | 6    | 6    | 6    | 6    |

Table 1401: MAgPIE m4p\_SSP1 — Production—Crops—Sugar crops—Sugar cane (Mt DM/yr) [PART 1/2]

|     | 2050 | 2055 | 2060 | 2070 | 2080 | 2090 | 2100 |
|-----|------|------|------|------|------|------|------|
| GLO | 1219 | 1232 | 1224 | 1157 | 1063 | 961  | 856  |
| CAZ | 17   | 18   | 18   | 17   | 12   | 11   | 11   |
| CHA | 42   | 42   | 36   | 29   | 24   | 19   | 14   |
| EUR | 0    | 0    | 0    | 0    | 0    | 0    | 0    |
| IND | 128  | 126  | 125  | 119  | 140  | 126  | 110  |
| JPN | 42   | 44   | 45   | 41   | 39   | 34   | 44   |
| LAM | 601  | 597  | 586  | 523  | 421  | 393  | 379  |
| MEA | 39   | 37   | 34   | 28   | 21   | 16   | 12   |
| NEU | 0    | 0    | 0    | 0    | 0    | 0    | 0    |
| OAS | 187  | 195  | 197  | 219  | 243  | 215  | 155  |
| REF | 0    | 0    | 0    | 0    | 0    | 0    | 0    |
| SSA | 156  | 166  | 175  | 172  | 154  | 137  | 121  |
| USA | 6    | 7    | 7    | 8    | 8    | 9    | 9    |

Table 1402: MAgPIE m4p\_SSP1 — Production—Crops—Sugar crops—Sugar cane (Mt DM/yr) [PART 2/2]

|     | 1965 | 1970 | 1975 | 1980 | 1985 | 1990 | 1995 | 2000 | 2005 | 2010 |
|-----|------|------|------|------|------|------|------|------|------|------|
| GLO | 140  | 162  | 175  | 197  | 251  | 283  | 315  | 338  | 354  | 460  |
| CAZ | 4    | 5    | 6    | 6    | 7    | 7    | 9    | 10   | 10   | 8    |
| CHA | 6    | 5    | 7    | 9    | 16   | 17   | 19   | 19   | 24   | 30   |
| EUR | 0    | 0    | 0    | 0    | 0    | 0    | 0    | 0    | 0    | 0    |
| IND | 33   | 36   | 39   | 35   | 46   | 61   | 74   | 81   | 64   | 79   |
| JPN | 1    | 1    | 1    | 1    | 1    | 1    | 0    | 0    | 0    | 0    |
| LAM | 64   | 75   | 76   | 96   | 122  | 133  | 136  | 145  | 171  | 254  |
| MEA | 1    | 2    | 3    | 3    | 5    | 5    | 6    | 7    | 8    | 8    |
| NEU | 0    | 0    | 0    | 0    | 0    | 0    | 0    | 0    | 0    | 0    |
| OAS | 18   | 22   | 27   | 29   | 34   | 39   | 49   | 50   | 52   | 57   |
| REF | 0    | 0    | 0    | 0    | 0    | 0    | 0    | 0    | 0    | 0    |
| SSA | 7    | 9    | 11   | 12   | 14   | 14   | 13   | 16   | 18   | 17   |
| USA | 6    | 6    | 7    | 7    | 7    | 7    | 8    | 10   | 7    | 7    |

Table 1403: FAO — Production—Crops—Sugar crops—Sugar cane (Mt DM/yr)

## 45 Fish

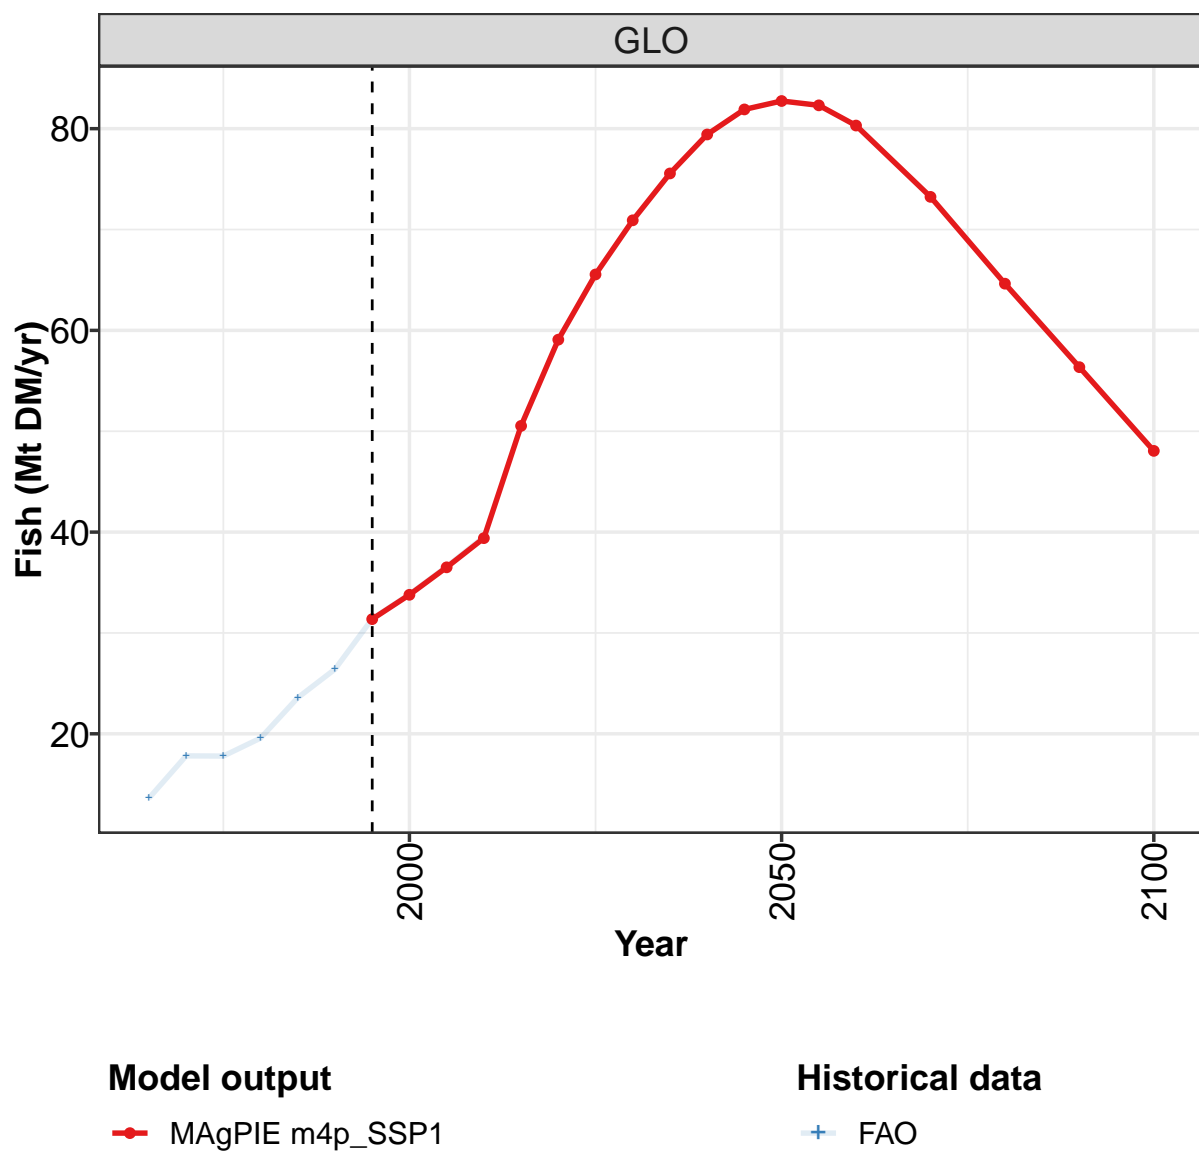

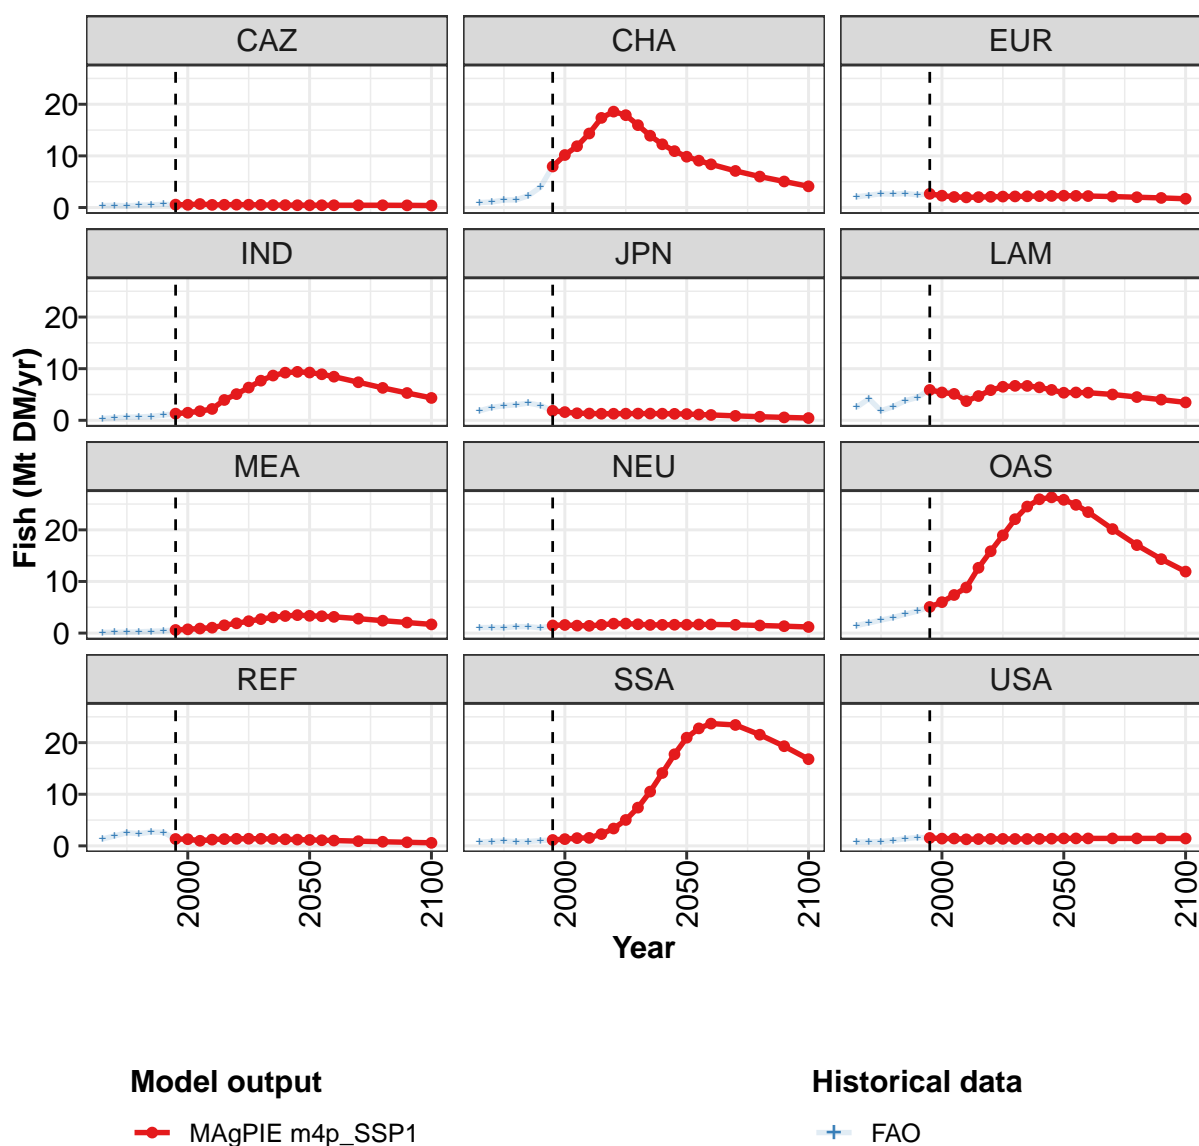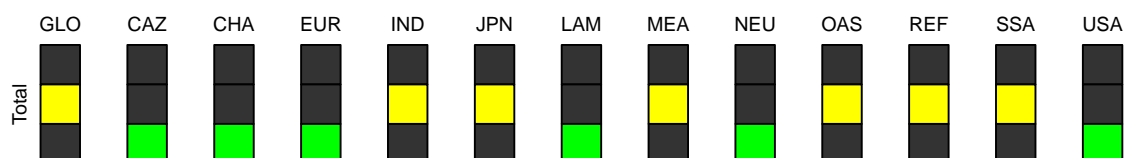

Figure 356: MAgPIE m4p\_SSP1 — Production—Fish (Mt DM/yr)

|     | 1995 | 2000 | 2005 | 2010 | 2015 | 2020 | 2025 | 2030 | 2035 | 2040 | 2045 |
|-----|------|------|------|------|------|------|------|------|------|------|------|
| GLO | 31.4 | 33.8 | 36.5 | 39.4 | 50.5 | 59.1 | 65.5 | 70.9 | 75.6 | 79.4 | 81.9 |
| CAZ | 0.6  | 0.5  | 0.7  | 0.5  | 0.5  | 0.6  | 0.5  | 0.5  | 0.5  | 0.5  | 0.4  |
| CHA | 7.9  | 10.2 | 11.9 | 14.3 | 17.4 | 18.6 | 17.9 | 16.0 | 13.9 | 12.2 | 10.9 |
| EUR | 2.6  | 2.3  | 2.0  | 2.0  | 2.0  | 2.1  | 2.1  | 2.1  | 2.2  | 2.2  | 2.2  |
| IND | 1.3  | 1.5  | 1.8  | 2.2  | 3.9  | 5.1  | 6.3  | 7.7  | 8.7  | 9.2  | 9.4  |
| JPN | 1.8  | 1.6  | 1.4  | 1.3  | 1.3  | 1.3  | 1.3  | 1.3  | 1.3  | 1.3  | 1.3  |
| LAM | 5.9  | 5.4  | 5.1  | 3.7  | 4.7  | 5.8  | 6.5  | 6.7  | 6.7  | 6.4  | 5.9  |
| MEA | 0.6  | 0.7  | 0.9  | 1.1  | 1.5  | 1.9  | 2.3  | 2.7  | 3.1  | 3.3  | 3.5  |
| NEU | 1.5  | 1.6  | 1.5  | 1.4  | 1.6  | 1.8  | 1.9  | 1.7  | 1.6  | 1.6  | 1.6  |
| OAS | 5.1  | 6.0  | 7.4  | 8.8  | 12.7 | 15.9 | 18.9 | 22.1 | 24.5 | 25.9 | 26.3 |
| REF | 1.3  | 1.3  | 1.0  | 1.2  | 1.3  | 1.4  | 1.4  | 1.4  | 1.3  | 1.3  | 1.2  |
| SSA | 1.1  | 1.3  | 1.5  | 1.6  | 2.3  | 3.4  | 5.0  | 7.4  | 10.5 | 14.1 | 17.7 |
| USA | 1.5  | 1.4  | 1.4  | 1.3  | 1.3  | 1.4  | 1.4  | 1.3  | 1.3  | 1.4  | 1.4  |

Table 1404: MAgPIE m4p\_SSP1 — Production—Fish (Mt DM/yr) [PART 1/2]

|     | 2050 | 2055 | 2060 | 2070 | 2080 | 2090 | 2100 |
|-----|------|------|------|------|------|------|------|
| GLO | 82.7 | 82.3 | 80.3 | 73.2 | 64.6 | 56.4 | 48.1 |
| CAZ | 0.4  | 0.4  | 0.4  | 0.4  | 0.4  | 0.4  | 0.4  |
| CHA | 9.8  | 9.1  | 8.4  | 7.1  | 6.0  | 5.0  | 4.1  |
| EUR | 2.3  | 2.3  | 2.2  | 2.1  | 2.0  | 1.9  | 1.7  |
| IND | 9.3  | 8.9  | 8.5  | 7.4  | 6.3  | 5.3  | 4.3  |
| JPN | 1.2  | 1.1  | 1.0  | 0.9  | 0.7  | 0.6  | 0.4  |
| LAM | 5.3  | 5.4  | 5.3  | 5.0  | 4.5  | 4.0  | 3.5  |
| MEA | 3.4  | 3.3  | 3.1  | 2.8  | 2.4  | 2.0  | 1.7  |
| NEU | 1.6  | 1.7  | 1.7  | 1.6  | 1.5  | 1.3  | 1.2  |
| OAS | 25.8 | 24.8 | 23.4 | 20.2 | 17.0 | 14.3 | 11.9 |
| REF | 1.2  | 1.1  | 1.0  | 0.9  | 0.8  | 0.7  | 0.6  |
| SSA | 21.0 | 22.8 | 23.7 | 23.4 | 21.5 | 19.3 | 16.8 |
| USA | 1.4  | 1.4  | 1.4  | 1.4  | 1.4  | 1.4  | 1.4  |

Table 1405: MAgPIE m4p\_SSP1 — Production—Fish (Mt DM/yr) [PART 2/2]

|     | 1965 | 1970 | 1975 | 1980 | 1985 | 1990 | 1995 | 2000 | 2005 | 2010 |
|-----|------|------|------|------|------|------|------|------|------|------|
| GLO | 13.6 | 17.8 | 17.8 | 19.6 | 23.6 | 26.4 | 31.4 | 33.8 | 36.6 | 39.5 |
| CAZ | 0.4  | 0.4  | 0.3  | 0.5  | 0.5  | 0.6  | 0.5  | 0.5  | 0.6  | 0.5  |
| CHA | 1.0  | 1.1  | 1.5  | 1.5  | 2.3  | 3.9  | 8.0  | 10.1 | 11.9 | 14.3 |
| EUR | 2.1  | 2.4  | 2.7  | 2.6  | 2.7  | 2.5  | 2.6  | 2.3  | 2.0  | 2.0  |
| IND | 0.4  | 0.5  | 0.6  | 0.7  | 0.8  | 1.0  | 1.3  | 1.5  | 1.8  | 2.3  |
| JPN | 1.8  | 2.5  | 2.8  | 3.0  | 3.3  | 2.9  | 1.8  | 1.6  | 1.4  | 1.3  |
| LAM | 2.5  | 4.2  | 1.8  | 2.7  | 3.8  | 4.4  | 6.0  | 5.7  | 5.5  | 3.8  |
| MEA | 0.1  | 0.2  | 0.2  | 0.2  | 0.3  | 0.4  | 0.6  | 0.7  | 0.9  | 1.1  |
| NEU | 1.1  | 1.1  | 1.0  | 1.3  | 1.3  | 1.0  | 1.4  | 1.6  | 1.5  | 1.5  |
| OAS | 1.5  | 2.0  | 2.5  | 3.0  | 3.7  | 4.3  | 5.1  | 5.7  | 7.1  | 8.8  |
| REF | 1.3  | 1.9  | 2.6  | 2.4  | 2.7  | 2.6  | 1.3  | 1.2  | 1.0  | 1.2  |
| SSA | 0.7  | 0.9  | 1.0  | 0.8  | 0.8  | 1.0  | 1.1  | 1.3  | 1.5  | 1.5  |
| USA | 0.7  | 0.8  | 0.8  | 1.1  | 1.4  | 1.6  | 1.6  | 1.4  | 1.5  | 1.3  |

Table 1406: FAO — Production—Fish (Mt DM/yr)

## 46 Forage

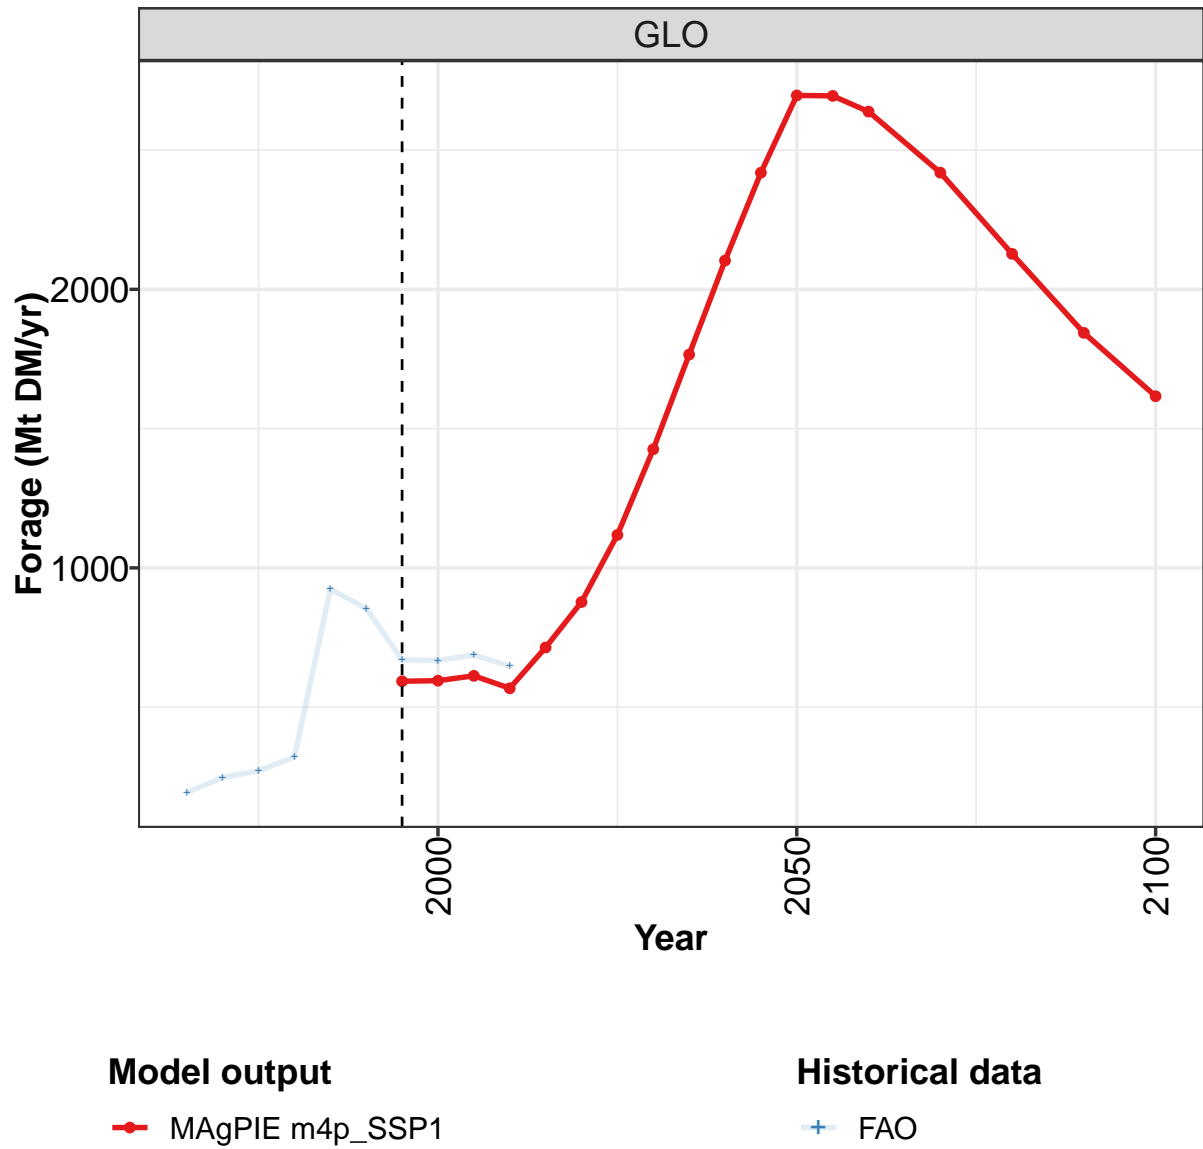

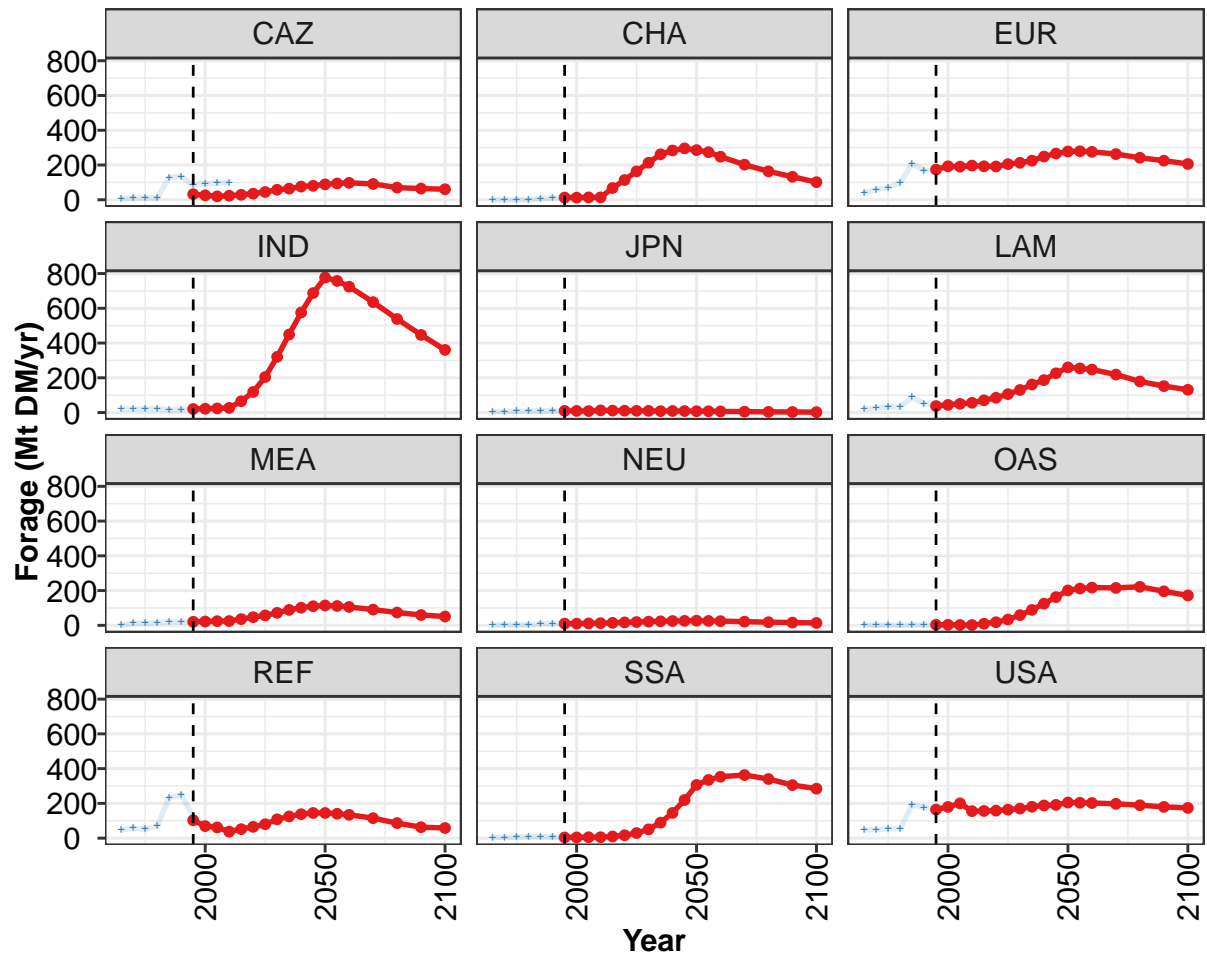

**Model output**

—●— MAgPIE m4p\_SSP1

**Historical data**

+— FAO

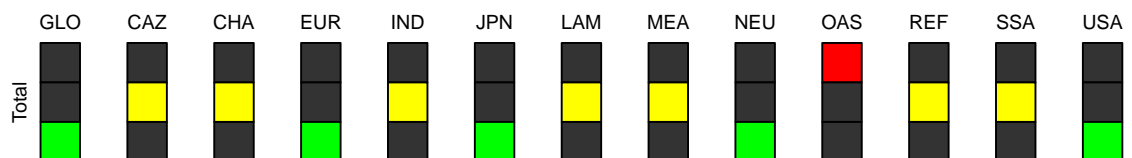

Figure 357: MAgPIE m4p\_SSP1 — Production—Forage (Mt DM/yr)

|     | 1995 | 2000 | 2005 | 2010 | 2015 | 2020 | 2025 | 2030 | 2035 | 2040 | 2045 |
|-----|------|------|------|------|------|------|------|------|------|------|------|
| GLO | 593  | 595  | 613  | 568  | 714  | 878  | 1118 | 1426 | 1766 | 2103 | 2419 |
| CAZ | 32   | 26   | 20   | 23   | 29   | 35   | 45   | 58   | 64   | 76   | 80   |
| CHA | 13   | 12   | 14   | 14   | 68   | 114  | 164  | 213  | 262  | 284  | 296  |
| EUR | 174  | 193  | 191  | 197  | 193  | 192  | 205  | 213  | 225  | 249  | 266  |
| IND | 20   | 22   | 24   | 27   | 65   | 119  | 204  | 321  | 449  | 576  | 687  |
| JPN | 10   | 10   | 9    | 13   | 11   | 11   | 10   | 10   | 8    | 9    | 9    |
| LAM | 37   | 44   | 50   | 56   | 71   | 85   | 106  | 130  | 161  | 187  | 226  |
| MEA | 21   | 22   | 24   | 25   | 36   | 47   | 57   | 72   | 89   | 102  | 110  |
| NEU | 10   | 10   | 11   | 13   | 15   | 17   | 19   | 22   | 23   | 25   | 26   |
| OAS | 4    | 3    | 2    | 2    | 9    | 18   | 34   | 59   | 89   | 125  | 162  |
| REF | 103  | 69   | 62   | 38   | 52   | 65   | 80   | 108  | 125  | 138  | 145  |
| SSA | 4    | 4    | 5    | 5    | 10   | 17   | 29   | 51   | 89   | 145  | 220  |
| USA | 165  | 180  | 200  | 155  | 156  | 158  | 164  | 170  | 180  | 188  | 192  |

Table 1407: MAgPIE m4p\_SSP1 — Production—Forage (Mt DM/yr) [PART 1/2]

|     | 2050 | 2055 | 2060 | 2070 | 2080 | 2090 | 2100 |
|-----|------|------|------|------|------|------|------|
| GLO | 2696 | 2695 | 2638 | 2419 | 2127 | 1844 | 1616 |
| CAZ | 89   | 94   | 98   | 91   | 70   | 64   | 61   |
| CHA | 286  | 274  | 248  | 202  | 164  | 132  | 101  |
| EUR | 278  | 279  | 276  | 263  | 242  | 225  | 206  |
| IND | 777  | 758  | 724  | 636  | 538  | 447  | 361  |
| JPN | 8    | 7    | 7    | 5    | 4    | 3    | 2    |
| LAM | 260  | 254  | 248  | 219  | 179  | 152  | 131  |
| MEA | 115  | 111  | 106  | 91   | 74   | 60   | 51   |
| NEU | 27   | 26   | 24   | 21   | 18   | 16   | 14   |
| OAS | 201  | 212  | 217  | 216  | 222  | 196  | 172  |
| REF | 145  | 140  | 134  | 115  | 87   | 63   | 59   |
| SSA | 306  | 335  | 353  | 363  | 340  | 305  | 285  |
| USA | 205  | 204  | 202  | 198  | 190  | 180  | 174  |

Table 1408: MAgPIE m4p\_SSP1 — Production—Forage (Mt DM/yr) [PART 2/2]

|     | 1965 | 1970 | 1975 | 1980 | 1985 | 1990 | 1995 | 2000 | 2005 | 2010 |
|-----|------|------|------|------|------|------|------|------|------|------|
| GLO | 193  | 247  | 272  | 321  | 923  | 855  | 670  | 667  | 688  | 647  |
| CAZ | 7    | 9    | 10   | 10   | 128  | 135  | 85   | 93   | 96   | 99   |
| CHA | 0    | 0    | 0    | 0    | 8    | 10   | 11   | 12   | 13   | 14   |
| EUR | 40   | 57   | 71   | 97   | 206  | 168  | 169  | 182  | 186  | 196  |
| IND | 19   | 21   | 21   | 22   | 15   | 18   | 20   | 22   | 25   | 28   |
| JPN | 3    | 6    | 8    | 9    | 10   | 10   | 9    | 9    | 8    | 12   |
| LAM | 21   | 27   | 33   | 31   | 88   | 51   | 46   | 50   | 51   | 54   |
| MEA | 2    | 14   | 13   | 15   | 21   | 20   | 20   | 21   | 23   | 25   |
| NEU | 2    | 2    | 3    | 3    | 11   | 11   | 11   | 10   | 12   | 13   |
| OAS | 1    | 1    | 1    | 1    | 3    | 2    | 2    | 2    | 2    | 2    |
| REF | 47   | 57   | 52   | 71   | 232  | 248  | 123  | 77   | 65   | 38   |
| SSA | 4    | 5    | 6    | 9    | 9    | 7    | 5    | 5    | 5    | 5    |
| USA | 47   | 48   | 54   | 53   | 193  | 175  | 170  | 185  | 201  | 162  |

Table 1409: FAO — Production—Forage (Mt DM/yr)

## 47 Forest products

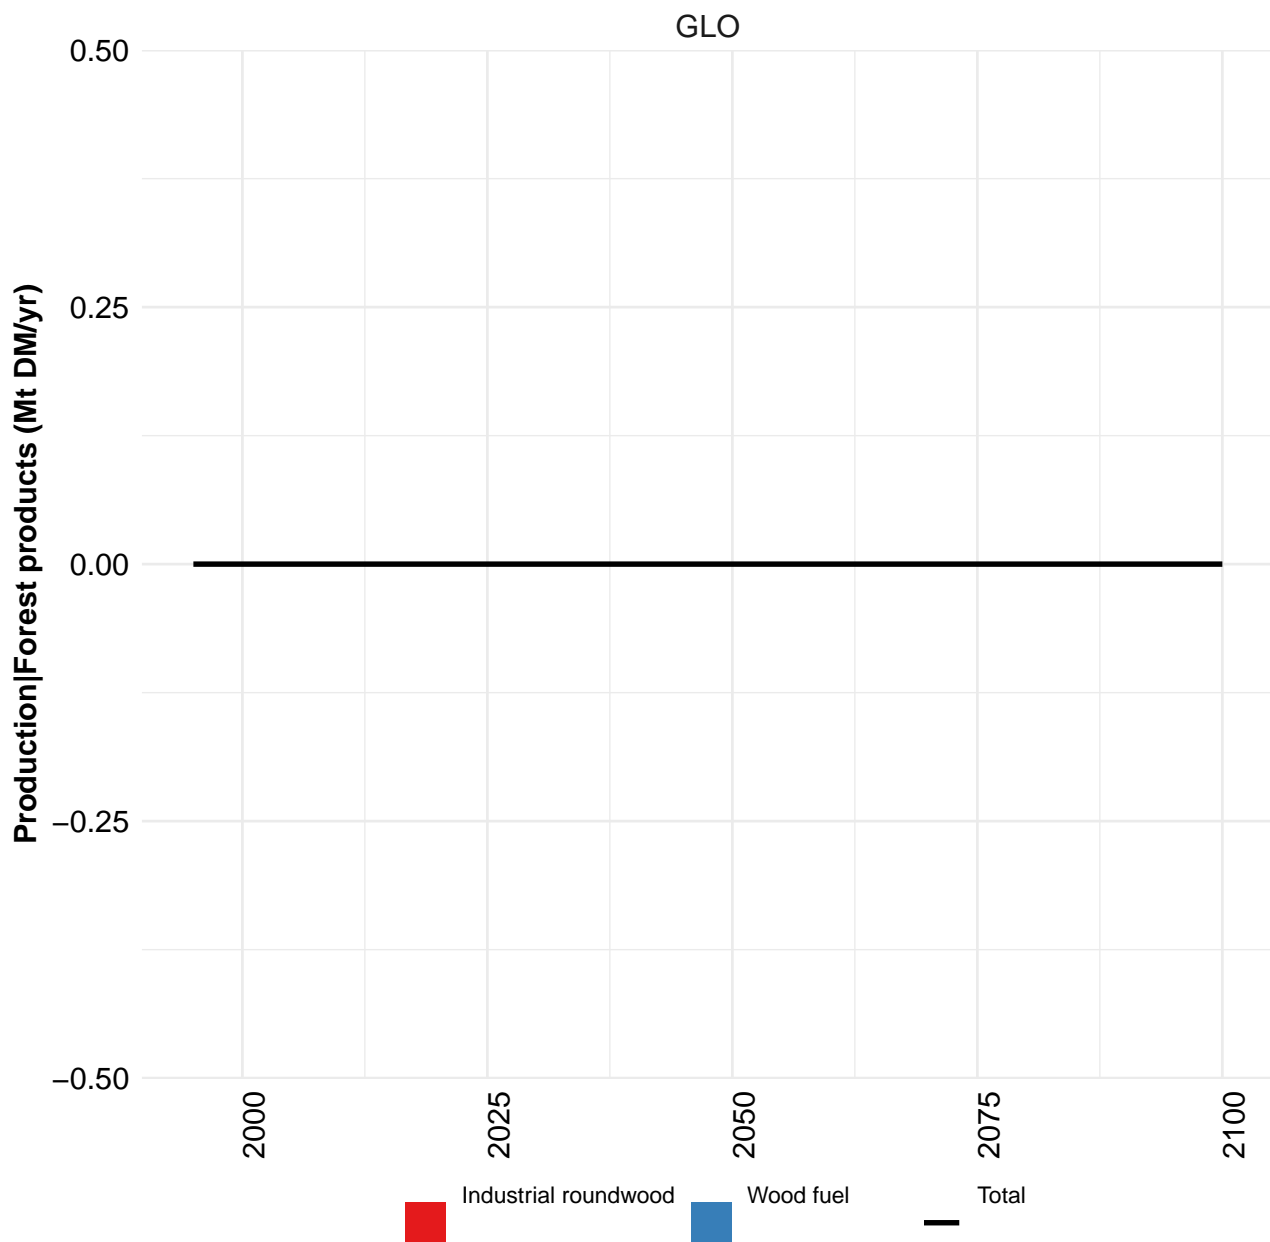



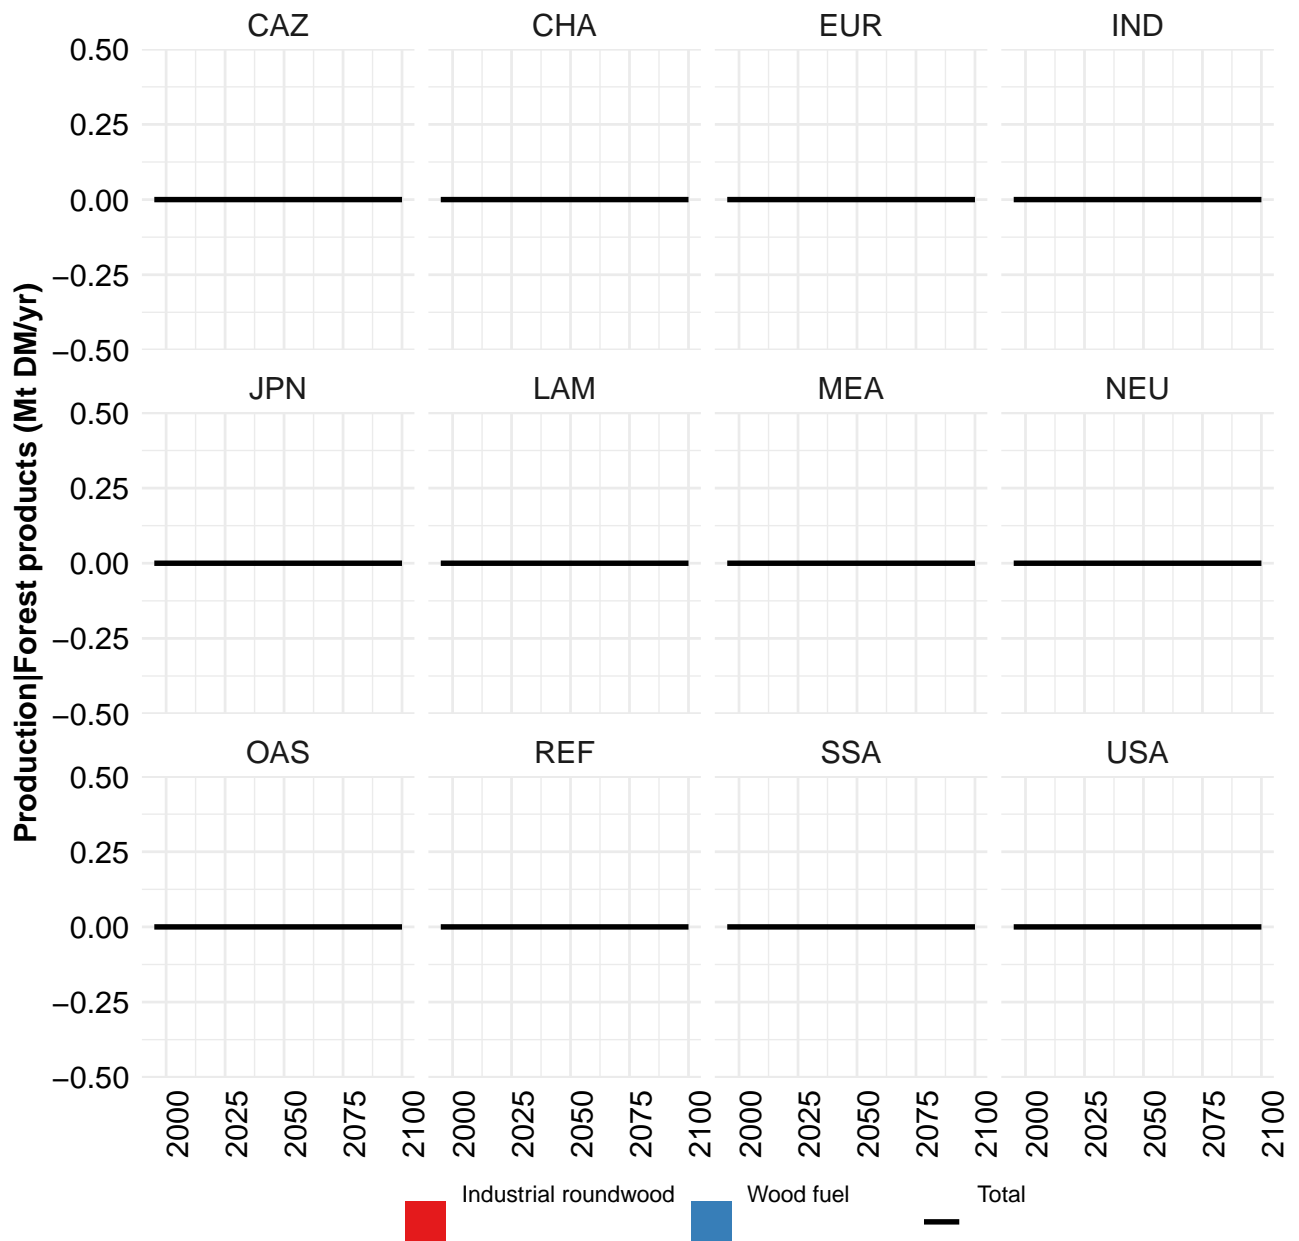

## 48 Livestock products

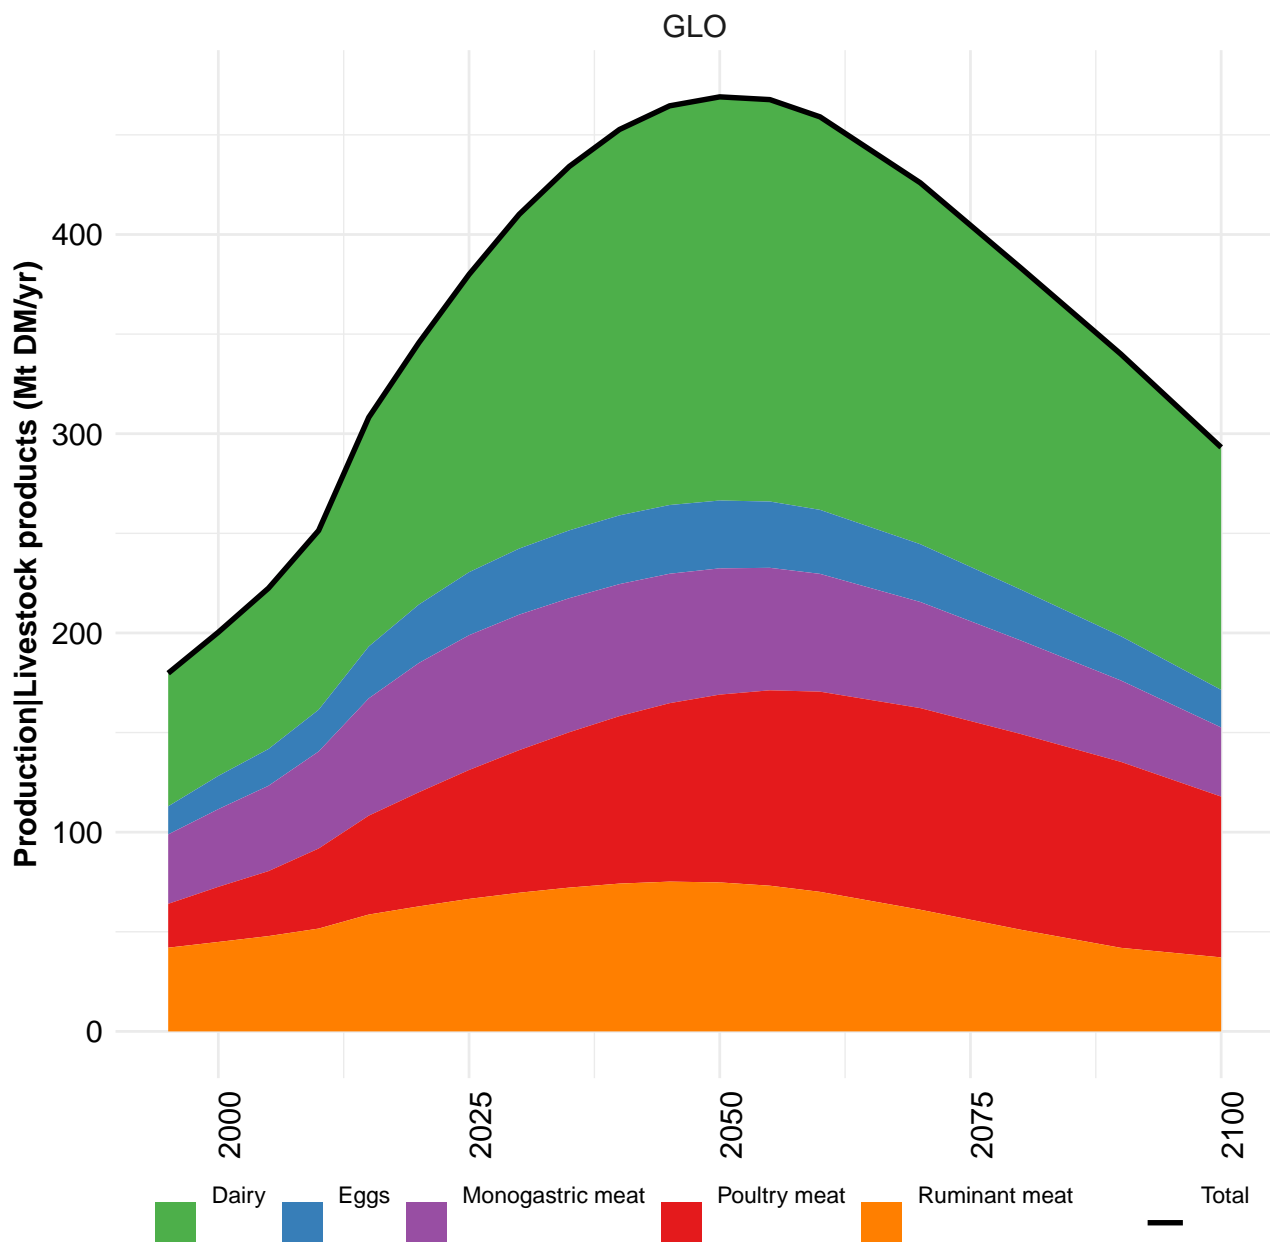

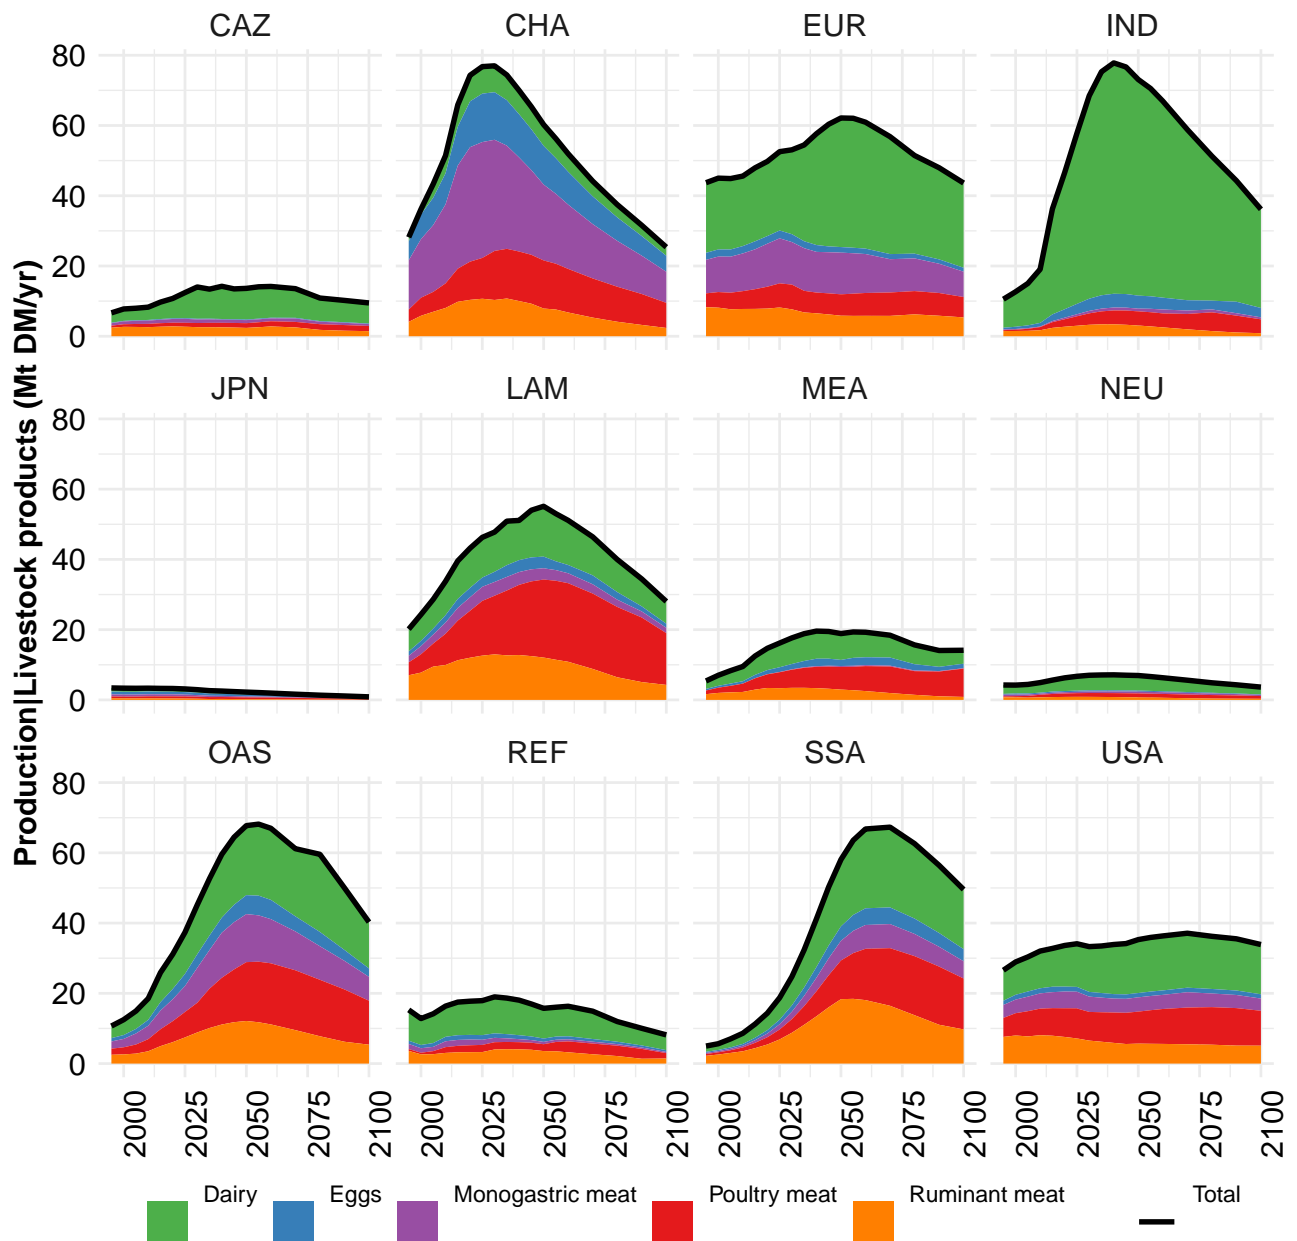

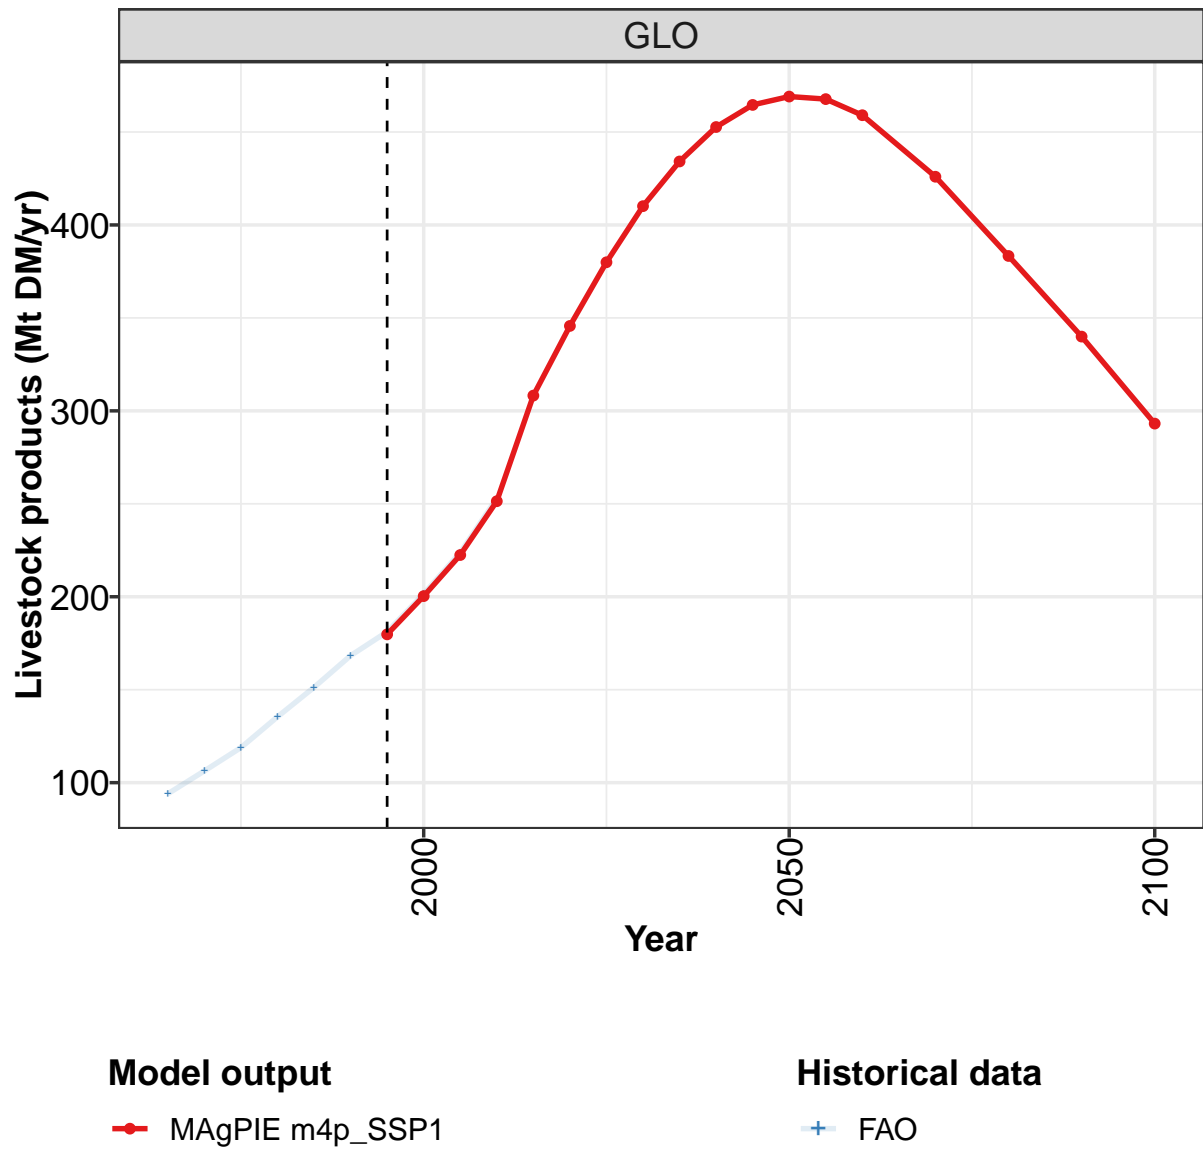

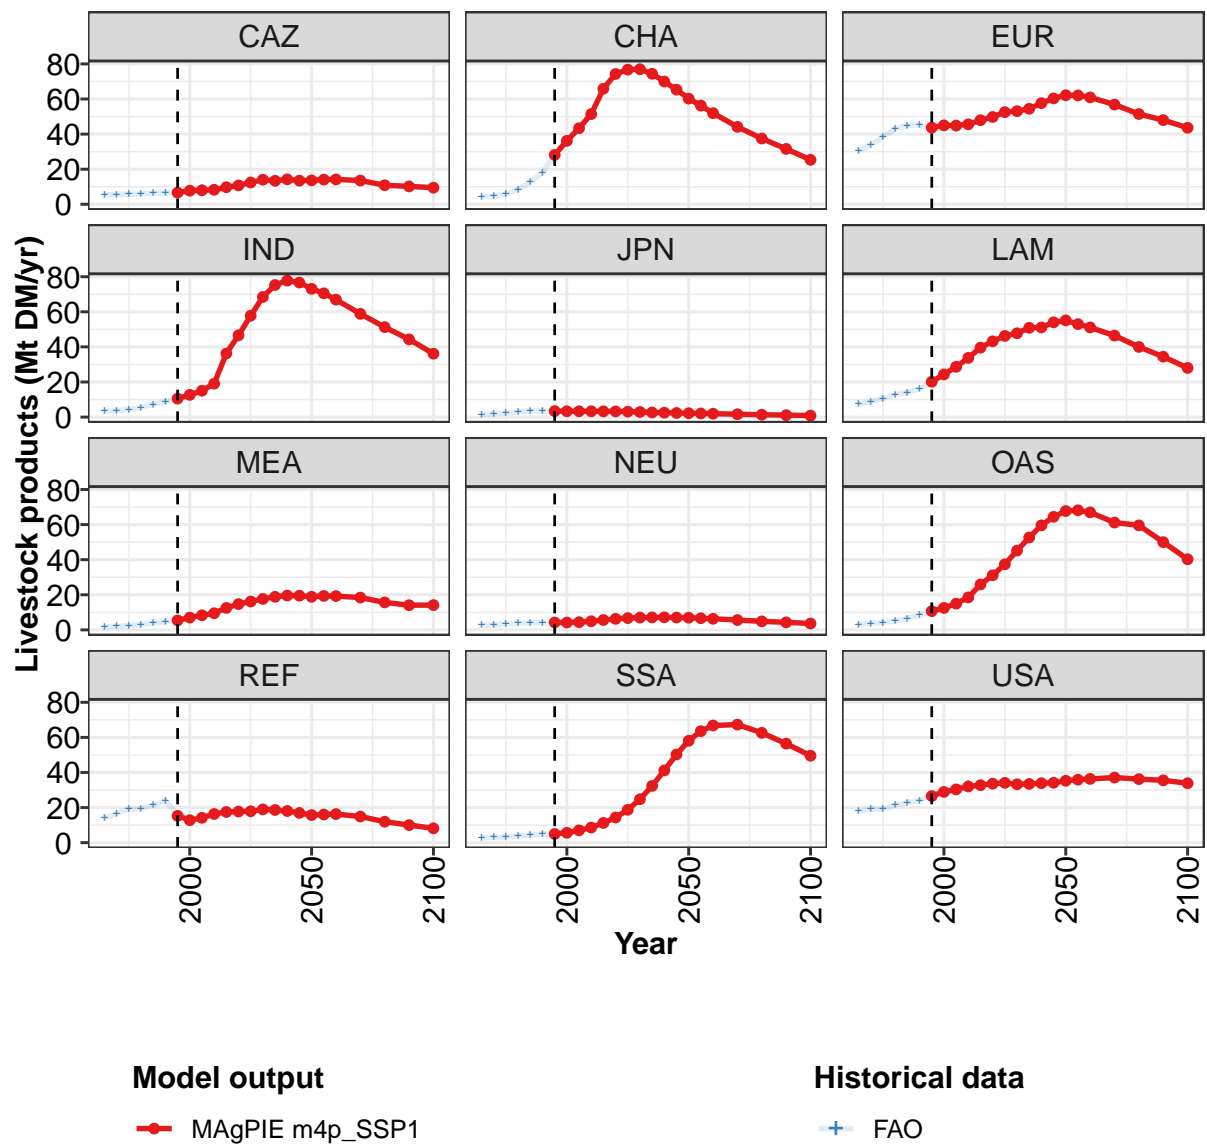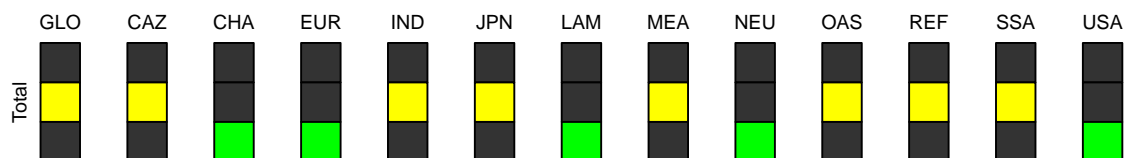

Figure 358: MAgPIE m4p\_SSP1 — Production—Livestock products (Mt DM/yr)

|     | 1995 | 2000 | 2005 | 2010 | 2015 | 2020 | 2025 | 2030 | 2035 | 2040 | 2045 |
|-----|------|------|------|------|------|------|------|------|------|------|------|
| GLO | 180  | 200  | 222  | 251  | 308  | 346  | 380  | 410  | 434  | 453  | 465  |
| CAZ | 7    | 8    | 8    | 8    | 10   | 11   | 12   | 14   | 13   | 14   | 13   |
| CHA | 28   | 36   | 43   | 51   | 66   | 74   | 77   | 77   | 74   | 70   | 65   |
| EUR | 44   | 45   | 45   | 46   | 48   | 50   | 53   | 53   | 54   | 58   | 60   |
| IND | 11   | 13   | 15   | 19   | 36   | 47   | 58   | 68   | 75   | 78   | 77   |
| JPN | 3    | 3    | 3    | 3    | 3    | 3    | 3    | 3    | 3    | 3    | 2    |
| LAM | 20   | 24   | 29   | 34   | 40   | 43   | 46   | 48   | 51   | 51   | 54   |
| MEA | 5    | 7    | 8    | 10   | 13   | 15   | 16   | 18   | 19   | 20   | 19   |
| NEU | 4    | 4    | 4    | 5    | 6    | 6    | 7    | 7    | 7    | 7    | 7    |
| OAS | 11   | 12   | 15   | 19   | 26   | 31   | 37   | 45   | 53   | 60   | 64   |
| REF | 15   | 13   | 14   | 16   | 18   | 18   | 18   | 19   | 19   | 18   | 17   |
| SSA | 5    | 6    | 7    | 9    | 11   | 14   | 19   | 25   | 32   | 41   | 50   |
| USA | 27   | 29   | 30   | 32   | 33   | 34   | 34   | 33   | 33   | 34   | 34   |

Table 1410: MAgPIE m4p\_SSP1 — Production—Livestock products (Mt DM/yr) [PART 1/2]

|     | 2050 | 2055 | 2060 | 2070 | 2080 | 2090 | 2100 |
|-----|------|------|------|------|------|------|------|
| GLO | 469  | 468  | 459  | 426  | 383  | 340  | 293  |
| CAZ | 14   | 14   | 14   | 14   | 11   | 10   | 9    |
| CHA | 60   | 56   | 52   | 44   | 37   | 32   | 25   |
| EUR | 62   | 62   | 61   | 57   | 51   | 48   | 44   |
| IND | 73   | 71   | 67   | 59   | 51   | 44   | 36   |
| JPN | 2    | 2    | 2    | 2    | 1    | 1    | 1    |
| LAM | 55   | 53   | 51   | 46   | 40   | 34   | 28   |
| MEA | 19   | 19   | 19   | 18   | 16   | 14   | 14   |
| NEU | 7    | 7    | 6    | 6    | 5    | 4    | 4    |
| OAS | 68   | 68   | 67   | 61   | 60   | 50   | 40   |
| REF | 16   | 16   | 16   | 15   | 12   | 10   | 8    |
| SSA | 58   | 64   | 67   | 67   | 63   | 56   | 50   |
| USA | 35   | 36   | 36   | 37   | 36   | 36   | 34   |

Table 1411: MAgPIE m4p\_SSP1 — Production—Livestock products (Mt DM/yr) [PART 2/2]

|     | 1965 | 1970 | 1975 | 1980 | 1985 | 1990 | 1995 | 2000 | 2005 | 2010 |
|-----|------|------|------|------|------|------|------|------|------|------|
| GLO | 94   | 106  | 119  | 135  | 151  | 168  | 181  | 202  | 224  | 253  |
| CAZ | 5    | 6    | 6    | 6    | 6    | 7    | 7    | 9    | 9    | 10   |
| CHA | 4    | 5    | 6    | 9    | 13   | 18   | 28   | 36   | 44   | 52   |
| EUR | 30   | 34   | 38   | 43   | 45   | 45   | 43   | 44   | 43   | 44   |
| IND | 3    | 4    | 4    | 5    | 7    | 9    | 11   | 13   | 15   | 19   |
| JPN | 1    | 2    | 2    | 3    | 3    | 4    | 3    | 3    | 3    | 3    |
| LAM | 7    | 9    | 10   | 13   | 14   | 16   | 20   | 24   | 29   | 33   |
| MEA | 2    | 2    | 2    | 3    | 4    | 5    | 6    | 7    | 8    | 10   |
| NEU | 3    | 3    | 3    | 4    | 4    | 4    | 4    | 4    | 4    | 5    |
| OAS | 3    | 4    | 4    | 5    | 6    | 8    | 11   | 13   | 15   | 19   |
| REF | 14   | 17   | 19   | 19   | 21   | 24   | 16   | 13   | 14   | 16   |
| SSA | 3    | 3    | 3    | 4    | 4    | 5    | 5    | 6    | 7    | 9    |
| USA | 18   | 19   | 19   | 21   | 23   | 24   | 27   | 30   | 31   | 33   |

Table 1412: FAO — Production—Livestock products (Mt DM/yr)

48.1 Dairy

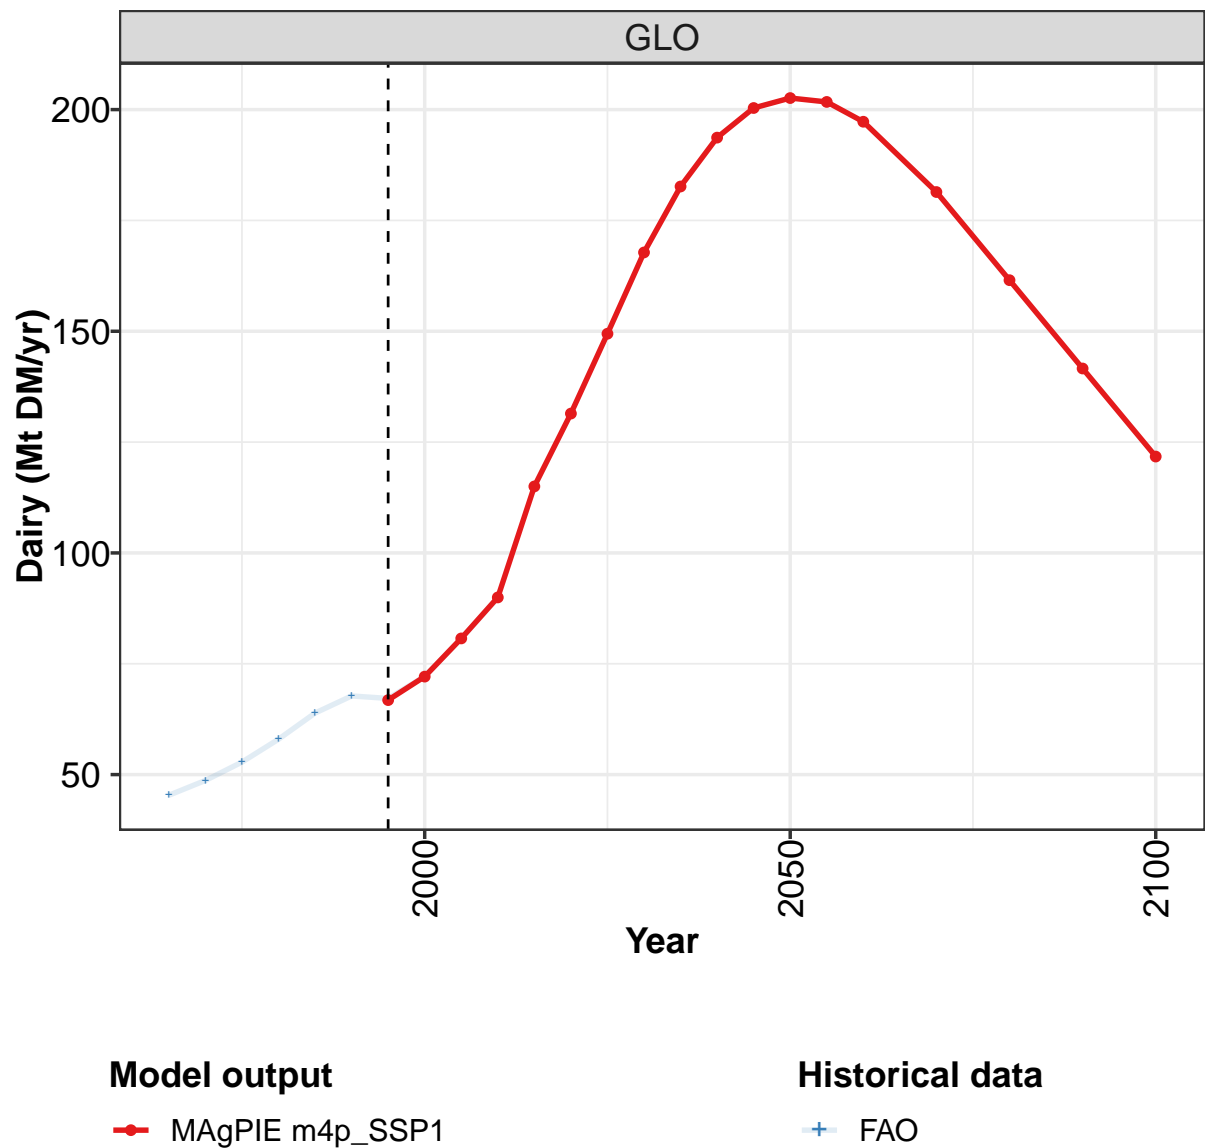

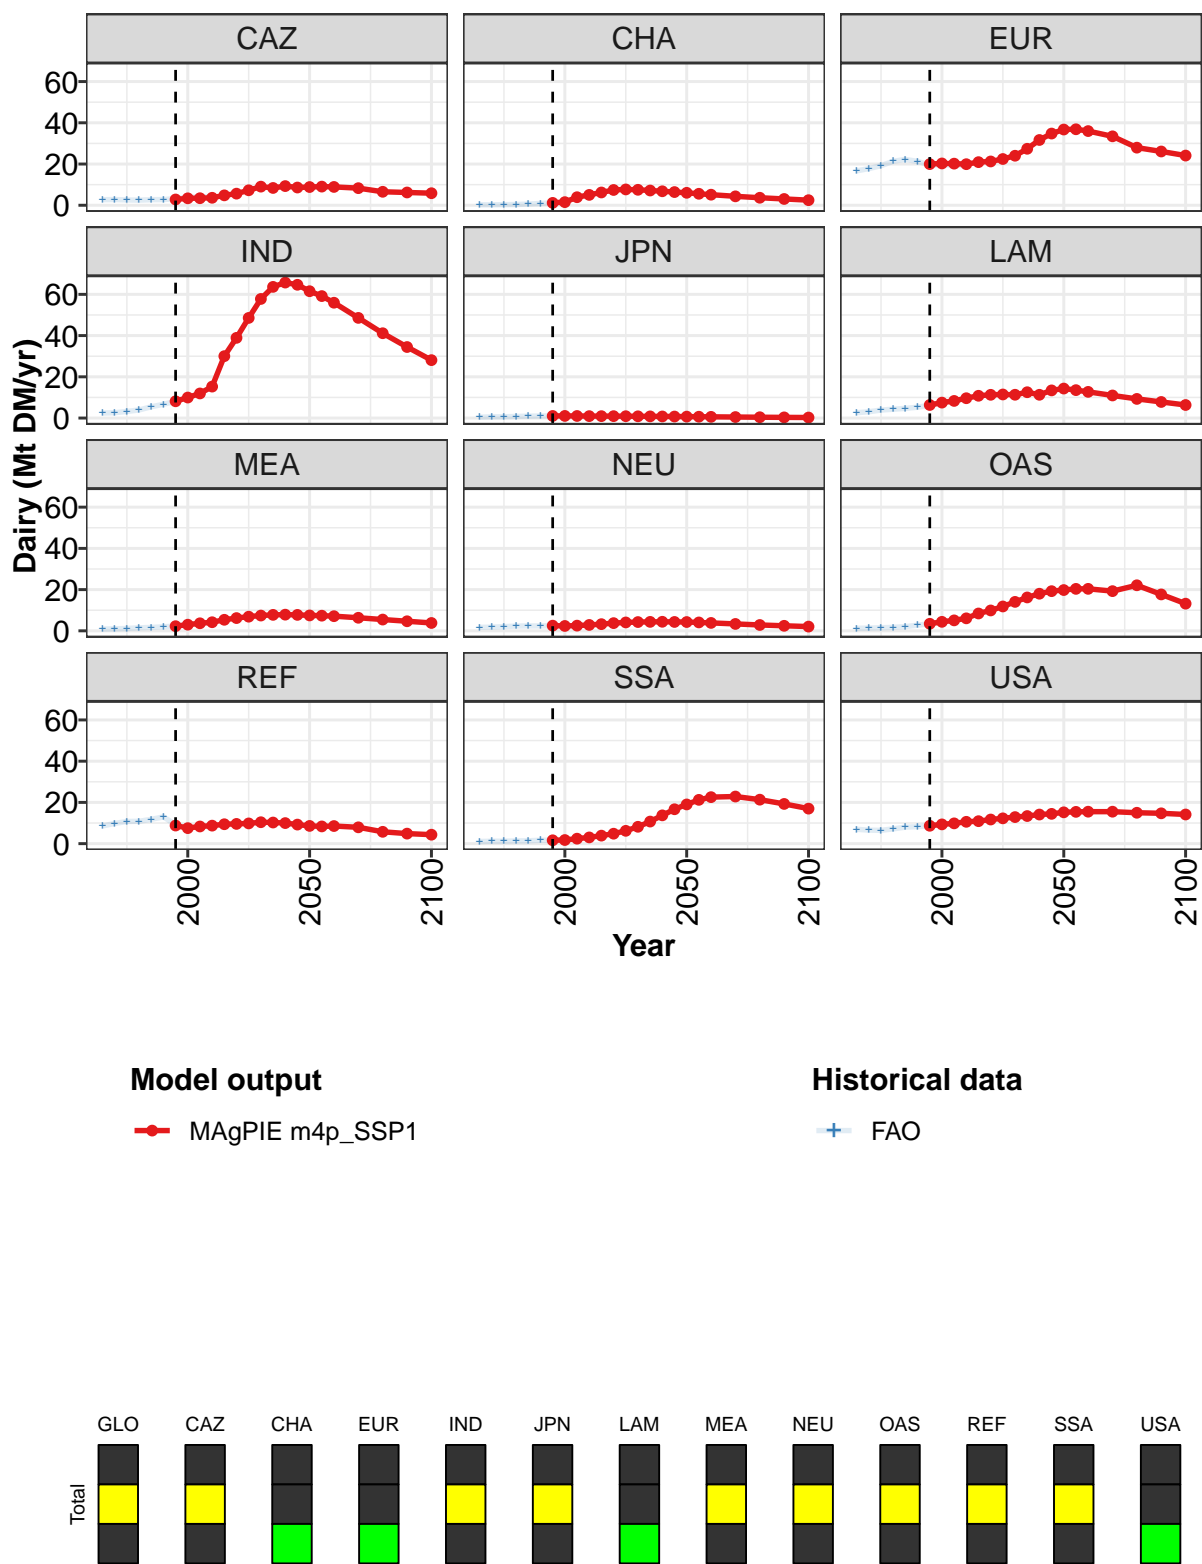

Figure 359: MAgPIE m4p\_SSP1 — Production—Livestock products—Dairy (Mt DM/yr)



|     | 1995 | 2000 | 2005 | 2010 | 2015 | 2020 | 2025 | 2030 | 2035 | 2040 | 2045 |
|-----|------|------|------|------|------|------|------|------|------|------|------|
| GLO | 67   | 72   | 81   | 90   | 115  | 131  | 149  | 168  | 183  | 194  | 200  |
| CAZ | 3    | 3    | 3    | 4    | 5    | 6    | 7    | 9    | 8    | 9    | 9    |
| CHA | 1    | 2    | 4    | 5    | 6    | 7    | 8    | 8    | 7    | 7    | 6    |
| EUR | 20   | 20   | 20   | 20   | 21   | 21   | 22   | 24   | 27   | 32   | 35   |
| IND | 8    | 10   | 12   | 15   | 30   | 39   | 49   | 58   | 64   | 66   | 65   |
| JPN | 1    | 1    | 1    | 1    | 1    | 1    | 1    | 1    | 1    | 1    | 1    |
| LAM | 6    | 7    | 8    | 10   | 11   | 11   | 11   | 11   | 13   | 11   | 13   |
| MEA | 2    | 3    | 4    | 4    | 5    | 6    | 7    | 7    | 8    | 8    | 8    |
| NEU | 3    | 2    | 3    | 3    | 3    | 4    | 4    | 4    | 4    | 4    | 4    |
| OAS | 3    | 4    | 5    | 6    | 8    | 10   | 12   | 14   | 16   | 18   | 19   |
| REF | 9    | 8    | 8    | 9    | 9    | 10   | 10   | 10   | 10   | 10   | 9    |
| SSA | 2    | 2    | 2    | 3    | 4    | 5    | 6    | 8    | 11   | 14   | 17   |
| USA | 9    | 9    | 10   | 11   | 11   | 12   | 12   | 13   | 13   | 14   | 14   |

Table 1413: MAgPIE m4p-SSP1 — Production—Livestock products—Dairy (Mt DM/yr) [PART 1/2]

|     | 2050 | 2055 | 2060 | 2070 | 2080 | 2090 | 2100 |
|-----|------|------|------|------|------|------|------|
| GLO | 203  | 202  | 197  | 181  | 162  | 142  | 122  |
| CAZ | 9    | 9    | 9    | 8    | 7    | 6    | 6    |
| CHA | 6    | 6    | 5    | 4    | 4    | 3    | 2    |
| EUR | 37   | 37   | 36   | 33   | 28   | 26   | 24   |
| IND | 62   | 59   | 56   | 49   | 41   | 34   | 28   |
| JPN | 1    | 1    | 1    | 0    | 0    | 0    | 0    |
| LAM | 14   | 14   | 13   | 11   | 9    | 8    | 6    |
| MEA | 7    | 7    | 7    | 6    | 5    | 5    | 4    |
| NEU | 4    | 4    | 4    | 3    | 3    | 2    | 2    |
| OAS | 20   | 20   | 20   | 19   | 22   | 18   | 13   |
| REF | 9    | 8    | 9    | 8    | 6    | 5    | 4    |
| SSA | 19   | 21   | 23   | 23   | 21   | 19   | 17   |
| USA | 15   | 15   | 16   | 16   | 15   | 15   | 14   |

Table 1414: MAgPIE m4p-SSP1 — Production—Livestock products—Dairy (Mt DM/yr) [PART 2/2]

|     | 1965 | 1970 | 1975 | 1980 | 1985 | 1990 | 1995 | 2000 | 2005 | 2010 |
|-----|------|------|------|------|------|------|------|------|------|------|
| GLO | 45.3 | 48.7 | 52.8 | 58.0 | 63.9 | 67.7 | 67.2 | 72.2 | 80.7 | 89.9 |
| CAZ | 2.7  | 2.8  | 2.6  | 2.5  | 2.7  | 2.8  | 3.2  | 3.9  | 4.1  | 4.3  |
| CHA | 0.2  | 0.2  | 0.3  | 0.4  | 0.6  | 0.9  | 1.2  | 1.5  | 3.9  | 5.0  |
| EUR | 16.7 | 17.8 | 19.2 | 21.3 | 22.2 | 21.3 | 19.5 | 19.5 | 19.4 | 19.2 |
| IND | 2.4  | 2.6  | 3.2  | 3.9  | 5.5  | 6.7  | 8.1  | 10.0 | 12.0 | 15.3 |
| JPN | 0.4  | 0.6  | 0.6  | 0.8  | 0.9  | 1.0  | 1.0  | 1.0  | 1.0  | 1.0  |
| LAM | 2.6  | 3.1  | 3.9  | 4.3  | 4.7  | 5.2  | 6.3  | 7.5  | 8.3  | 9.7  |
| MEA | 0.9  | 1.0  | 1.2  | 1.5  | 1.7  | 2.0  | 2.3  | 3.1  | 3.7  | 4.2  |
| NEU | 1.7  | 1.8  | 2.0  | 2.3  | 2.4  | 2.4  | 2.5  | 2.4  | 2.5  | 2.9  |
| OAS | 1.2  | 1.3  | 1.5  | 1.7  | 2.1  | 2.7  | 3.5  | 4.4  | 5.1  | 6.1  |
| REF | 8.6  | 9.8  | 10.8 | 10.8 | 11.8 | 13.0 | 9.2  | 7.7  | 8.2  | 8.5  |
| SSA | 1.0  | 1.2  | 1.2  | 1.3  | 1.4  | 1.6  | 1.7  | 1.8  | 2.4  | 3.0  |
| USA | 7.0  | 6.5  | 6.4  | 7.2  | 8.0  | 8.2  | 8.7  | 9.3  | 9.9  | 10.8 |

Table 1415: FAO — Production—Livestock products—Dairy (Mt DM/yr)

48.2 Eggs

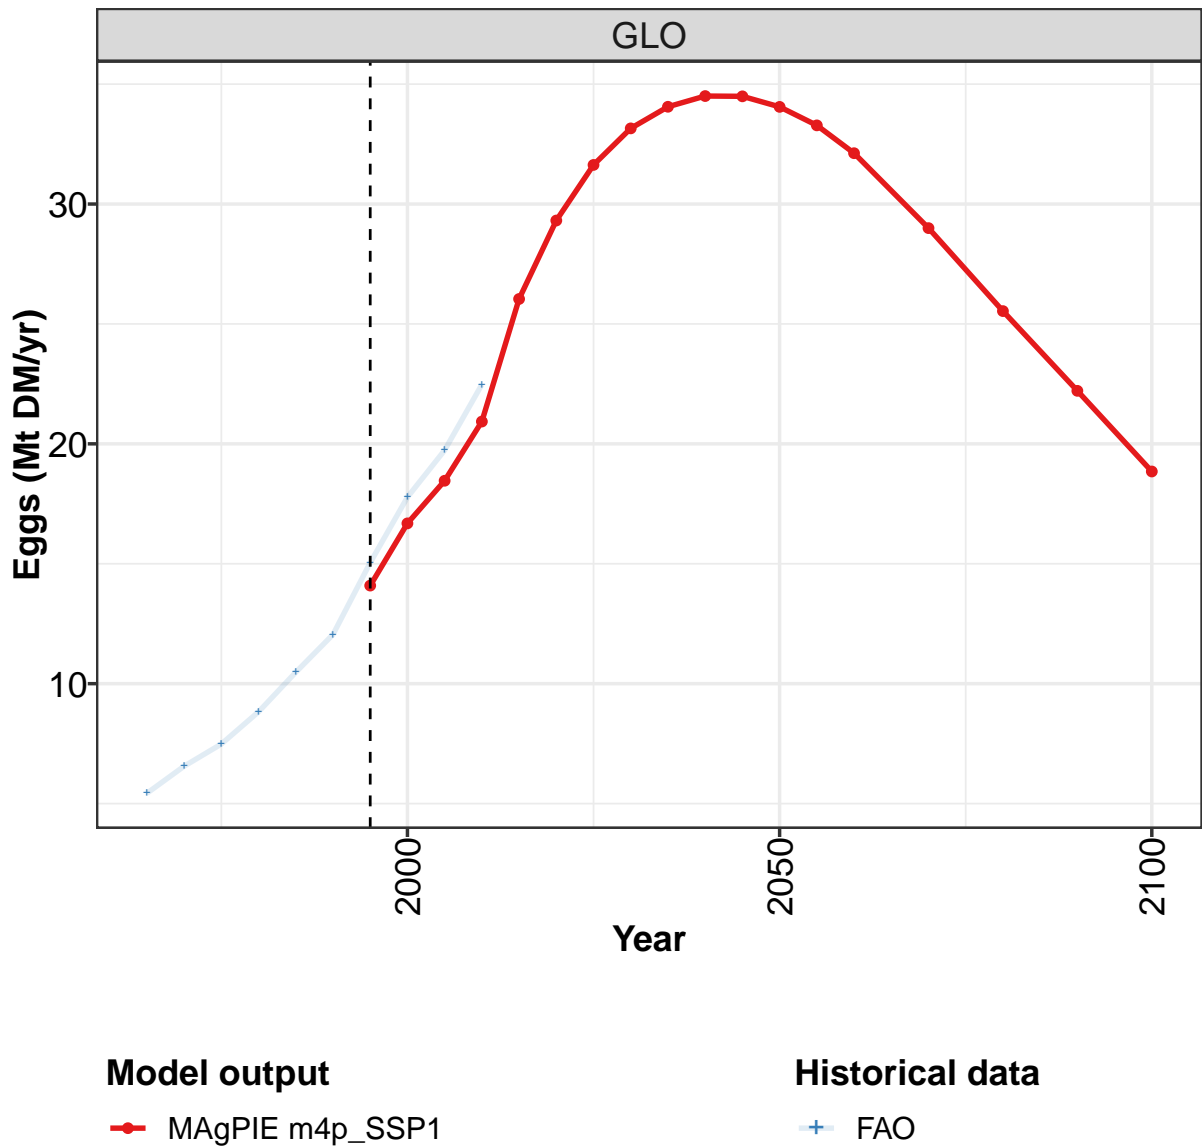

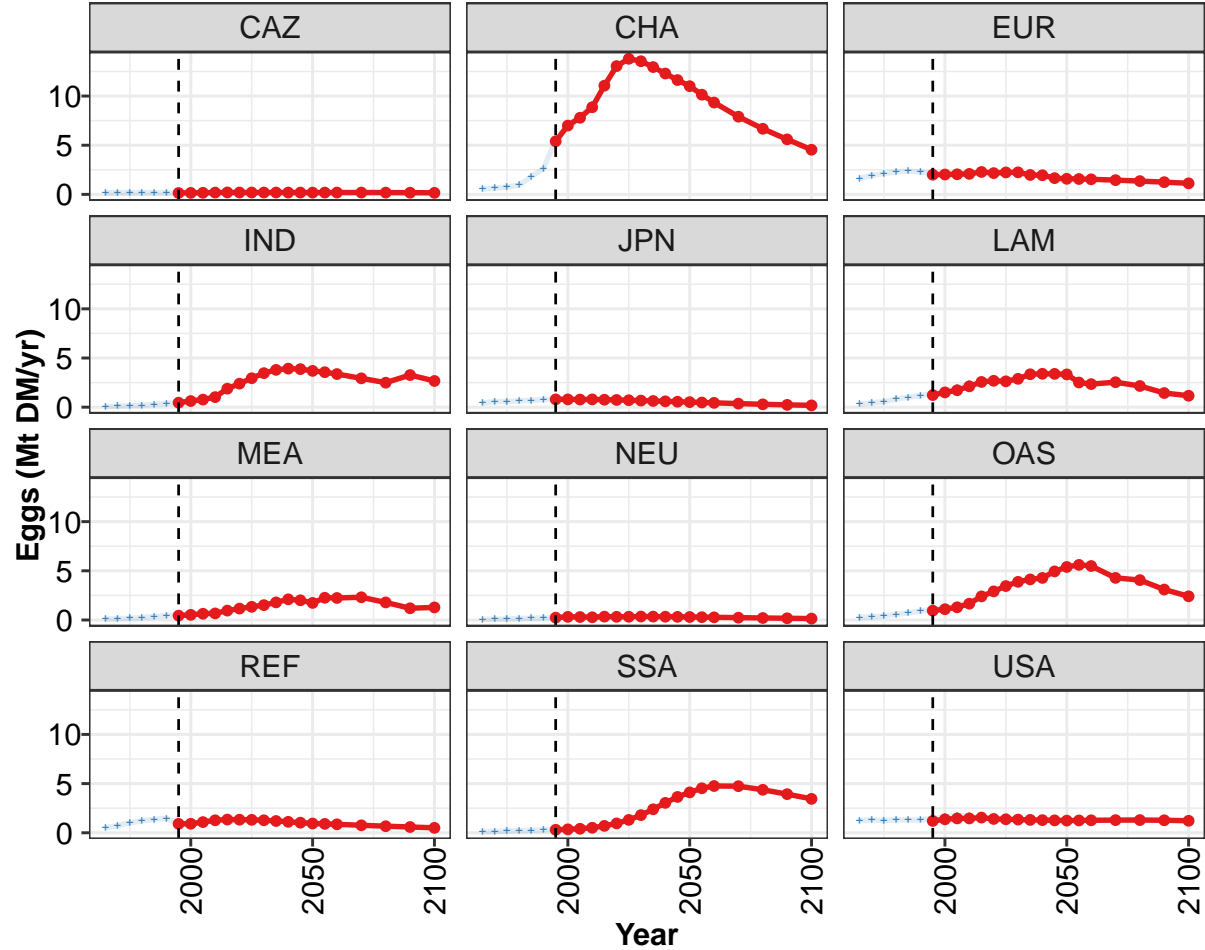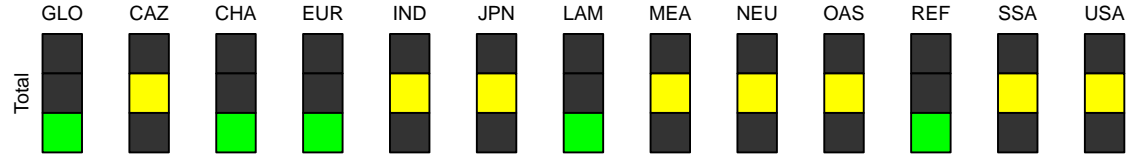

Figure 360: MAgPIE m4p\_SSP1 — Production—Livestock products—Eggs (Mt DM/yr)

|     | 1995 | 2000 | 2005 | 2010 | 2015 | 2020 | 2025 | 2030 | 2035 | 2040 | 2045 |
|-----|------|------|------|------|------|------|------|------|------|------|------|
| GLO | 14.1 | 16.7 | 18.5 | 20.9 | 26.0 | 29.3 | 31.6 | 33.2 | 34.1 | 34.5 | 34.5 |
| CAZ | 0.1  | 0.2  | 0.2  | 0.2  | 0.2  | 0.2  | 0.2  | 0.2  | 0.2  | 0.2  | 0.2  |
| CHA | 5.4  | 7.0  | 7.8  | 8.9  | 11.1 | 13.0 | 13.8 | 13.5 | 12.9 | 12.3 | 11.6 |
| EUR | 2.0  | 2.0  | 2.0  | 2.1  | 2.3  | 2.2  | 2.2  | 2.2  | 2.0  | 1.9  | 1.7  |
| IND | 0.5  | 0.6  | 0.8  | 1.0  | 1.9  | 2.4  | 2.9  | 3.5  | 3.8  | 3.9  | 3.9  |
| JPN | 0.8  | 0.8  | 0.8  | 0.8  | 0.8  | 0.7  | 0.7  | 0.7  | 0.6  | 0.6  | 0.6  |
| LAM | 1.2  | 1.5  | 1.7  | 2.1  | 2.6  | 2.7  | 2.6  | 2.9  | 3.3  | 3.4  | 3.4  |
| MEA | 0.4  | 0.5  | 0.6  | 0.7  | 1.0  | 1.2  | 1.3  | 1.5  | 1.8  | 2.1  | 2.0  |
| NEU | 0.2  | 0.3  | 0.3  | 0.3  | 0.3  | 0.3  | 0.3  | 0.4  | 0.3  | 0.3  | 0.3  |
| OAS | 1.0  | 1.1  | 1.3  | 1.7  | 2.4  | 2.9  | 3.5  | 3.9  | 4.1  | 4.3  | 4.9  |
| REF | 0.9  | 0.9  | 1.1  | 1.3  | 1.3  | 1.3  | 1.3  | 1.3  | 1.2  | 1.1  | 1.0  |
| SSA | 0.3  | 0.3  | 0.4  | 0.5  | 0.7  | 1.0  | 1.3  | 1.8  | 2.4  | 3.0  | 3.6  |
| USA | 1.2  | 1.4  | 1.5  | 1.5  | 1.5  | 1.4  | 1.4  | 1.3  | 1.3  | 1.3  | 1.3  |

Table 1416: MAgPIE m4p\_SSP1 — Production—Livestock products—Eggs (Mt DM/yr) [PART 1/2]

|     | 2050 | 2055 | 2060 | 2070 | 2080 | 2090 | 2100 |
|-----|------|------|------|------|------|------|------|
| GLO | 34.1 | 33.3 | 32.1 | 29.0 | 25.5 | 22.2 | 18.8 |
| CAZ | 0.2  | 0.2  | 0.2  | 0.2  | 0.2  | 0.2  | 0.2  |
| CHA | 11.0 | 10.1 | 9.3  | 7.9  | 6.7  | 5.6  | 4.5  |
| EUR | 1.6  | 1.6  | 1.5  | 1.5  | 1.4  | 1.2  | 1.1  |
| IND | 3.7  | 3.6  | 3.4  | 2.9  | 2.5  | 3.3  | 2.7  |
| JPN | 0.5  | 0.5  | 0.4  | 0.4  | 0.3  | 0.2  | 0.2  |
| LAM | 3.3  | 2.5  | 2.4  | 2.5  | 2.2  | 1.4  | 1.2  |
| MEA | 1.7  | 2.3  | 2.2  | 2.3  | 1.8  | 1.2  | 1.3  |
| NEU | 0.3  | 0.3  | 0.3  | 0.2  | 0.2  | 0.2  | 0.1  |
| OAS | 5.4  | 5.6  | 5.5  | 4.3  | 4.1  | 3.1  | 2.4  |
| REF | 0.9  | 0.9  | 0.9  | 0.8  | 0.7  | 0.6  | 0.5  |
| SSA | 4.1  | 4.5  | 4.8  | 4.7  | 4.4  | 3.9  | 3.4  |
| USA | 1.2  | 1.3  | 1.3  | 1.3  | 1.3  | 1.3  | 1.2  |

Table 1417: MAgPIE m4p\_SSP1 — Production—Livestock products—Eggs (Mt DM/yr) [PART 2/2]

|     | 1965 | 1970 | 1975 | 1980 | 1985 | 1990 | 1995 | 2000 | 2005 | 2010 |
|-----|------|------|------|------|------|------|------|------|------|------|
| GLO | 5.4  | 6.6  | 7.5  | 8.8  | 10.5 | 12.0 | 15.0 | 17.8 | 19.7 | 22.5 |
| CAZ | 0.2  | 0.2  | 0.2  | 0.2  | 0.2  | 0.2  | 0.2  | 0.2  | 0.2  | 0.2  |
| CHA | 0.5  | 0.6  | 0.7  | 0.9  | 1.8  | 2.6  | 5.5  | 7.2  | 8.0  | 9.1  |
| EUR | 1.6  | 1.9  | 2.1  | 2.3  | 2.4  | 2.3  | 2.1  | 2.2  | 2.2  | 2.2  |
| IND | 0.1  | 0.1  | 0.1  | 0.2  | 0.3  | 0.4  | 0.5  | 0.7  | 0.8  | 1.1  |
| JPN | 0.4  | 0.6  | 0.6  | 0.6  | 0.7  | 0.8  | 0.8  | 0.8  | 0.8  | 0.8  |
| LAM | 0.3  | 0.4  | 0.6  | 0.8  | 1.0  | 1.2  | 1.4  | 1.7  | 1.9  | 2.4  |
| MEA | 0.1  | 0.1  | 0.2  | 0.2  | 0.4  | 0.4  | 0.5  | 0.6  | 0.7  | 0.8  |
| NEU | 0.1  | 0.1  | 0.1  | 0.1  | 0.2  | 0.2  | 0.2  | 0.3  | 0.3  | 0.3  |
| OAS | 0.3  | 0.3  | 0.4  | 0.6  | 0.7  | 0.9  | 1.1  | 1.3  | 1.5  | 1.9  |
| REF | 0.5  | 0.7  | 1.0  | 1.2  | 1.4  | 1.5  | 0.9  | 0.9  | 1.1  | 1.3  |
| SSA | 0.1  | 0.1  | 0.2  | 0.2  | 0.2  | 0.3  | 0.3  | 0.4  | 0.4  | 0.6  |
| USA | 1.3  | 1.3  | 1.2  | 1.3  | 1.3  | 1.3  | 1.4  | 1.6  | 1.7  | 1.7  |

Table 1418: FAO — Production—Livestock products—Eggs (Mt DM/yr)

48.3 Monogastric meat

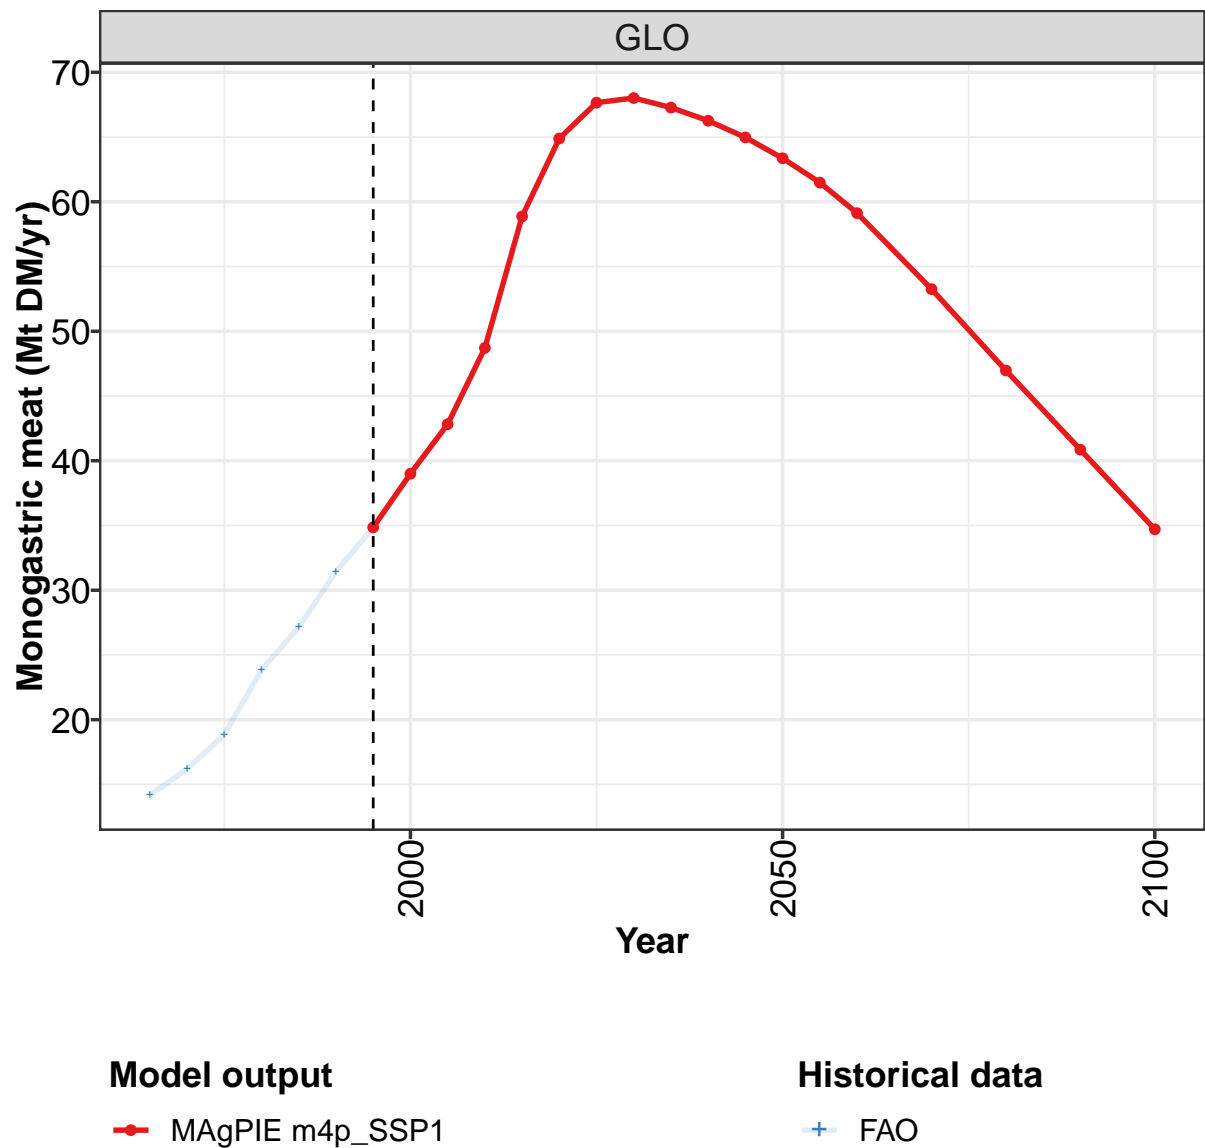

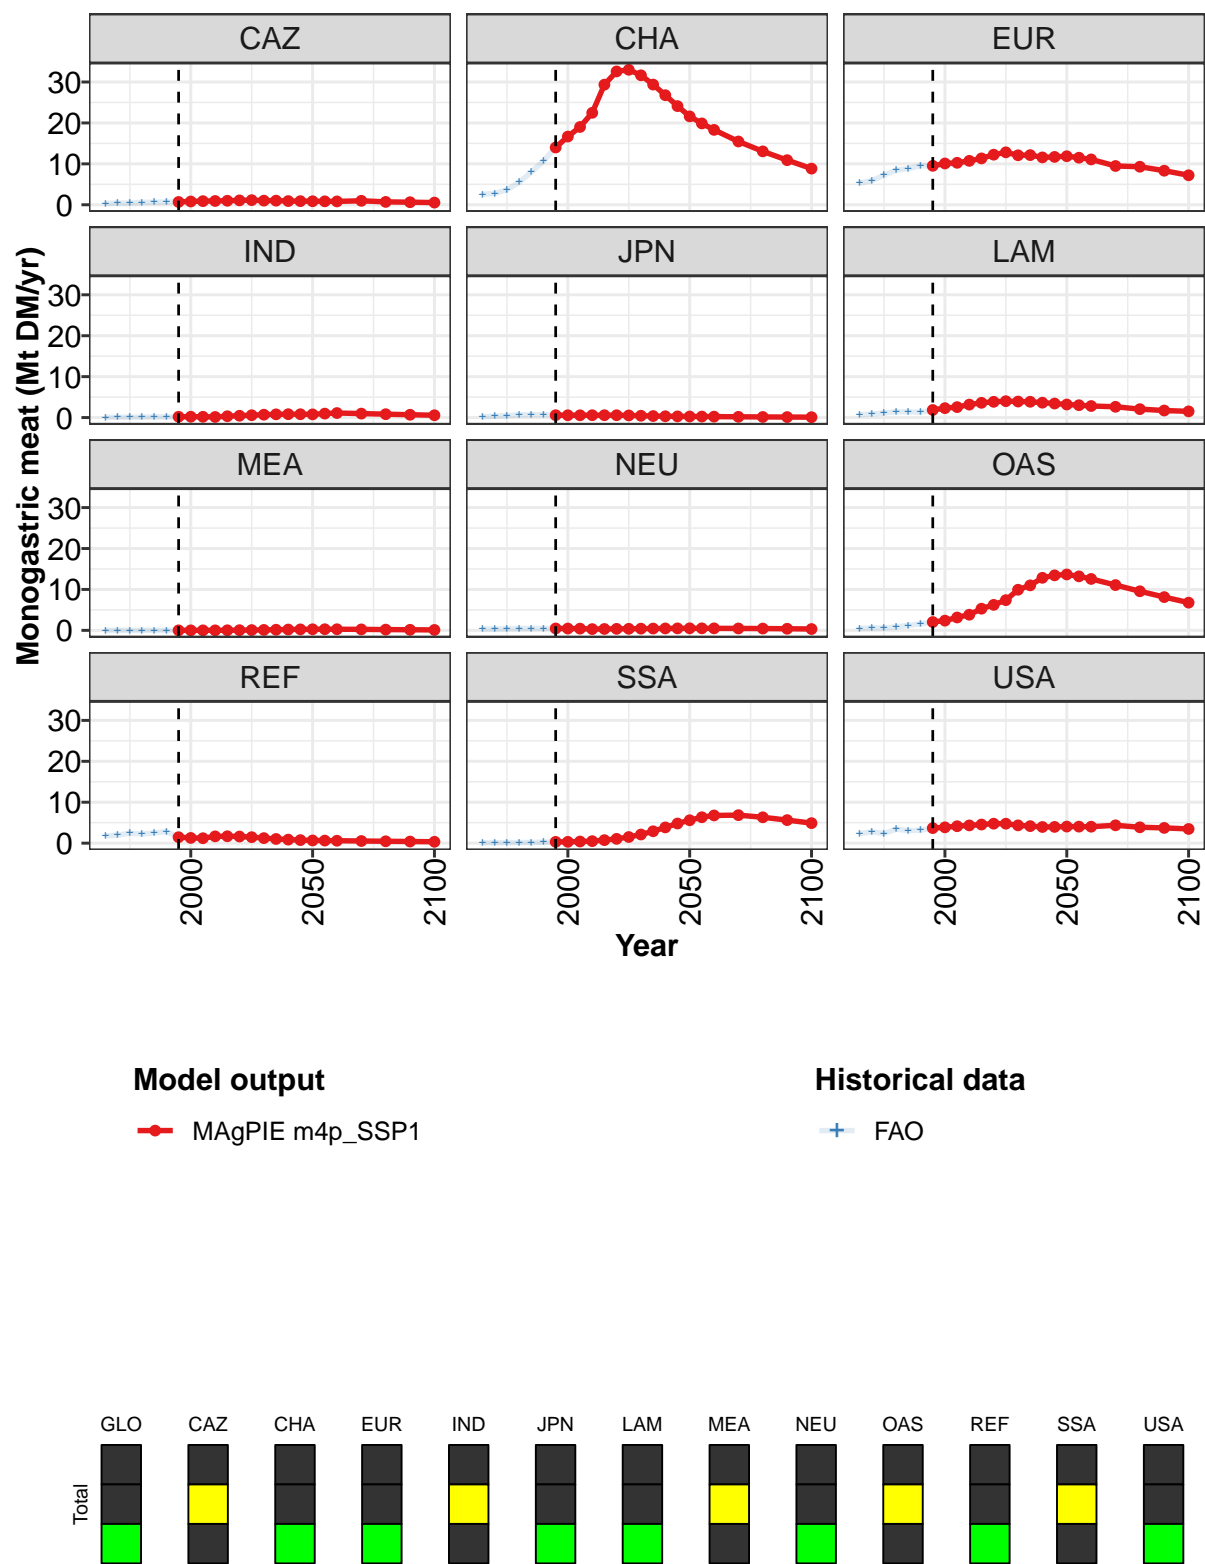

Figure 361: MAGPIE m4p\_SSP1 — Production—Livestock products—Monogastric meat (Mt DM/yr)

|     | 1995 | 2000 | 2005 | 2010 | 2015 | 2020 | 2025 | 2030 | 2035 | 2040 | 2045 |
|-----|------|------|------|------|------|------|------|------|------|------|------|
| GLO | 34.9 | 39.0 | 42.8 | 48.7 | 58.9 | 64.9 | 67.7 | 68.0 | 67.3 | 66.3 | 65.0 |
| CAZ | 0.7  | 0.8  | 0.9  | 0.9  | 1.0  | 1.1  | 1.1  | 1.0  | 1.0  | 0.9  | 0.9  |
| CHA | 14.0 | 16.7 | 19.0 | 22.5 | 29.4 | 32.6 | 33.0 | 31.6 | 29.4 | 26.8 | 24.1 |
| EUR | 9.5  | 10.1 | 10.3 | 10.7 | 11.3 | 12.2 | 12.8 | 12.1 | 12.1 | 11.6 | 11.7 |
| IND | 0.2  | 0.2  | 0.2  | 0.2  | 0.3  | 0.5  | 0.6  | 0.7  | 0.8  | 0.8  | 0.8  |
| JPN | 0.6  | 0.6  | 0.6  | 0.6  | 0.6  | 0.6  | 0.5  | 0.4  | 0.4  | 0.3  | 0.3  |
| LAM | 1.9  | 2.3  | 2.6  | 3.2  | 3.6  | 3.9  | 4.0  | 3.9  | 3.9  | 3.6  | 3.4  |
| MEA | 0.0  | 0.0  | 0.0  | 0.0  | 0.0  | 0.1  | 0.1  | 0.1  | 0.2  | 0.2  | 0.2  |
| NEU | 0.5  | 0.4  | 0.4  | 0.3  | 0.3  | 0.4  | 0.4  | 0.4  | 0.4  | 0.5  | 0.5  |
| OAS | 2.0  | 2.4  | 3.1  | 3.8  | 5.3  | 6.2  | 7.4  | 9.9  | 11.0 | 12.8 | 13.4 |
| REF | 1.5  | 1.3  | 1.2  | 1.7  | 1.7  | 1.6  | 1.5  | 1.2  | 1.0  | 0.9  | 0.8  |
| SSA | 0.3  | 0.3  | 0.4  | 0.5  | 0.7  | 1.1  | 1.5  | 2.1  | 2.9  | 3.8  | 4.8  |
| USA | 3.7  | 3.9  | 4.1  | 4.3  | 4.6  | 4.8  | 4.8  | 4.4  | 4.2  | 4.0  | 4.0  |

Table 1419: MAgPIE m4p\_SSP1 — Production—Livestock products—Monogastric meat (Mt DM/yr) [PART 1/2]

|     | 2050 | 2055 | 2060 | 2070 | 2080 | 2090 | 2100 |
|-----|------|------|------|------|------|------|------|
| GLO | 63.4 | 61.5 | 59.1 | 53.3 | 47.0 | 40.9 | 34.7 |
| CAZ | 0.9  | 0.8  | 0.8  | 1.0  | 0.7  | 0.6  | 0.5  |
| CHA | 21.6 | 19.9 | 18.3 | 15.5 | 13.1 | 10.9 | 8.8  |
| EUR | 11.9 | 11.5 | 11.1 | 9.5  | 9.3  | 8.3  | 7.2  |
| IND | 0.8  | 1.0  | 1.1  | 1.0  | 0.8  | 0.7  | 0.6  |
| JPN | 0.3  | 0.3  | 0.2  | 0.2  | 0.2  | 0.1  | 0.1  |
| LAM | 3.2  | 3.0  | 2.8  | 2.6  | 2.1  | 1.7  | 1.5  |
| MEA | 0.3  | 0.3  | 0.3  | 0.2  | 0.2  | 0.1  | 0.1  |
| NEU | 0.5  | 0.5  | 0.5  | 0.5  | 0.4  | 0.4  | 0.3  |
| OAS | 13.7 | 13.2 | 12.6 | 11.1 | 9.6  | 8.1  | 6.8  |
| REF | 0.7  | 0.6  | 0.6  | 0.5  | 0.5  | 0.4  | 0.3  |
| SSA | 5.6  | 6.3  | 6.8  | 6.8  | 6.3  | 5.6  | 4.9  |
| USA | 4.1  | 4.0  | 4.0  | 4.4  | 3.9  | 3.7  | 3.5  |

Table 1420: MAgPIE m4p\_SSP1 — Production—Livestock products—Monogastric meat (Mt DM/yr) [PART 2/2]

|     | 1965 | 1970 | 1975 | 1980 | 1985 | 1990 | 1995 | 2000 | 2005 | 2010 |
|-----|------|------|------|------|------|------|------|------|------|------|
| GLO | 14.2 | 16.2 | 18.9 | 23.8 | 27.1 | 31.4 | 34.9 | 39.0 | 42.8 | 48.7 |
| CAZ | 0.3  | 0.4  | 0.4  | 0.6  | 0.6  | 0.7  | 0.8  | 0.9  | 1.1  | 1.0  |
| CHA | 2.5  | 2.8  | 3.6  | 5.5  | 8.0  | 10.7 | 14.1 | 16.7 | 19.0 | 22.5 |
| EUR | 5.3  | 5.9  | 7.2  | 8.4  | 8.8  | 9.5  | 9.4  | 9.9  | 9.9  | 10.5 |
| IND | 0.1  | 0.1  | 0.1  | 0.1  | 0.2  | 0.2  | 0.2  | 0.2  | 0.2  | 0.2  |
| JPN | 0.2  | 0.3  | 0.5  | 0.7  | 0.7  | 0.7  | 0.6  | 0.6  | 0.6  | 0.6  |
| LAM | 0.7  | 0.9  | 1.1  | 1.4  | 1.4  | 1.3  | 1.9  | 2.3  | 2.6  | 3.0  |
| MEA | 0.0  | 0.0  | 0.0  | 0.0  | 0.0  | 0.0  | 0.0  | 0.0  | 0.0  | 0.0  |
| NEU | 0.3  | 0.3  | 0.4  | 0.5  | 0.5  | 0.5  | 0.5  | 0.4  | 0.4  | 0.3  |
| OAS | 0.5  | 0.6  | 0.6  | 0.8  | 1.2  | 1.6  | 2.0  | 2.4  | 3.2  | 3.8  |
| REF | 1.8  | 1.9  | 2.5  | 2.2  | 2.5  | 2.8  | 1.5  | 1.3  | 1.2  | 1.7  |
| SSA | 0.1  | 0.1  | 0.1  | 0.1  | 0.2  | 0.2  | 0.3  | 0.3  | 0.4  | 0.5  |
| USA | 2.3  | 2.8  | 2.4  | 3.4  | 3.0  | 3.2  | 3.7  | 3.9  | 4.3  | 4.6  |

Table 1421: FAO — Production—Livestock products—Monogastric meat (Mt DM/yr)

48.4 Poultry meat

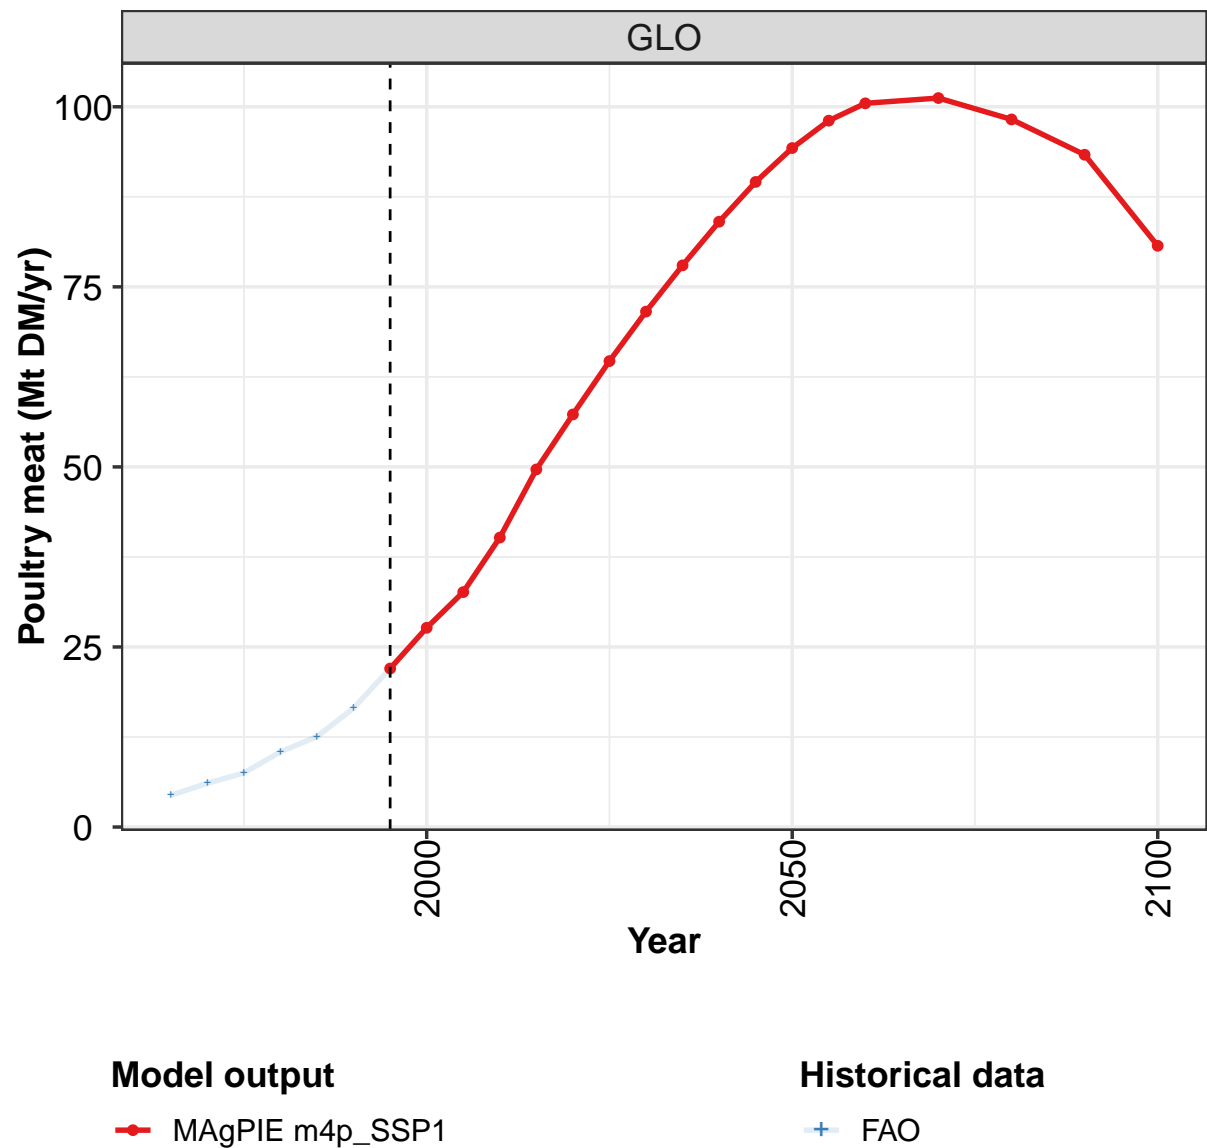



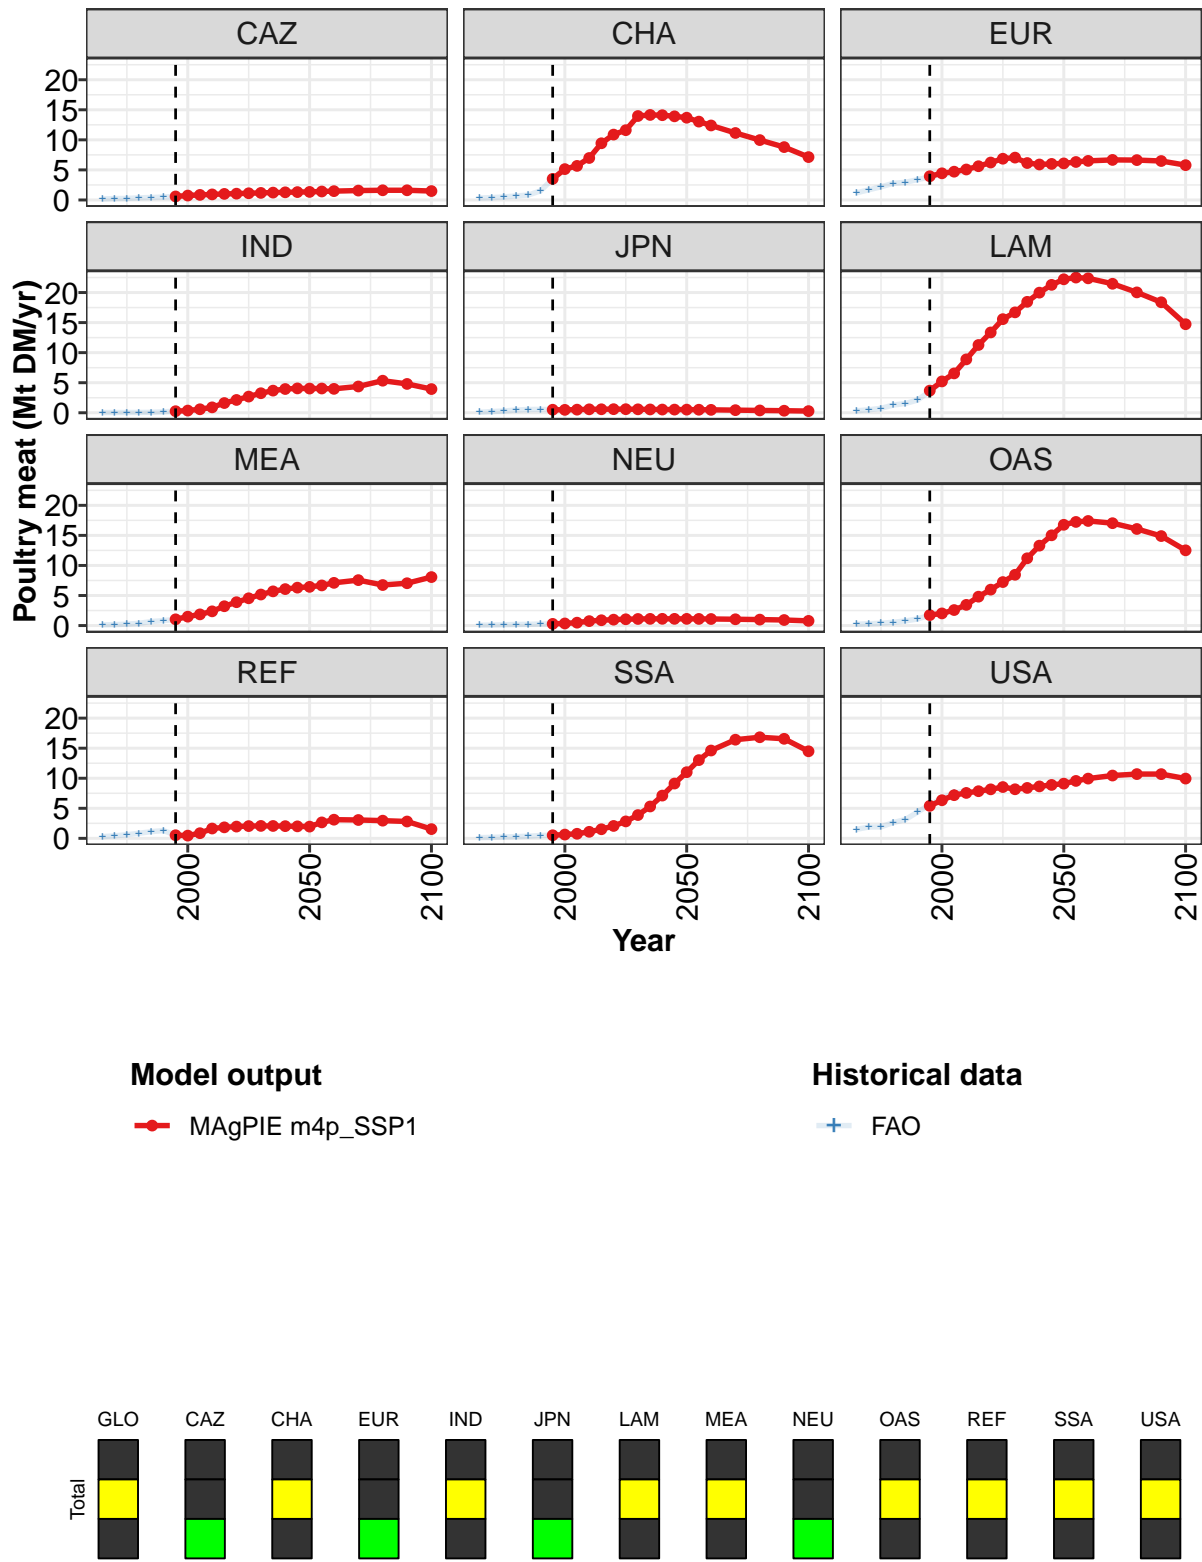

Figure 362: MAgPIE m4p\_SSP1 — Production—Livestock products—Poultry meat (Mt DM/yr)

|     | 1995 | 2000 | 2005 | 2010 | 2015 | 2020 | 2025 | 2030 | 2035 | 2040 | 2045 |
|-----|------|------|------|------|------|------|------|------|------|------|------|
| GLO | 22   | 28   | 33   | 40   | 50   | 57   | 65   | 72   | 78   | 84   | 90   |
| CAZ | 1    | 1    | 1    | 1    | 1    | 1    | 1    | 1    | 1    | 1    | 1    |
| CHA | 4    | 5    | 6    | 7    | 9    | 11   | 12   | 14   | 14   | 14   | 14   |
| EUR | 4    | 4    | 5    | 5    | 6    | 6    | 7    | 7    | 6    | 6    | 6    |
| IND | 0    | 0    | 1    | 1    | 2    | 2    | 3    | 3    | 4    | 4    | 4    |
| JPN | 1    | 0    | 1    | 1    | 1    | 1    | 1    | 1    | 1    | 1    | 1    |
| LAM | 4    | 5    | 7    | 9    | 11   | 13   | 16   | 17   | 18   | 20   | 21   |
| MEA | 1    | 1    | 2    | 2    | 3    | 4    | 5    | 5    | 6    | 6    | 6    |
| NEU | 0    | 0    | 0    | 1    | 1    | 1    | 1    | 1    | 1    | 1    | 1    |
| OAS | 2    | 2    | 3    | 3    | 5    | 6    | 7    | 8    | 11   | 13   | 15   |
| REF | 1    | 0    | 1    | 2    | 2    | 2    | 2    | 2    | 2    | 2    | 2    |
| SSA | 1    | 1    | 1    | 1    | 2    | 2    | 3    | 4    | 5    | 7    | 9    |
| USA | 5    | 6    | 7    | 8    | 8    | 8    | 9    | 8    | 8    | 9    | 9    |

Table 1422: MAgPIE m4p\_SSP1 — Production—Livestock products—Poultry meat (Mt DM/yr) [PART 1/2]

|     | 2050 | 2055 | 2060 | 2070 | 2080 | 2090 | 2100 |
|-----|------|------|------|------|------|------|------|
| GLO | 94   | 98   | 100  | 101  | 98   | 93   | 81   |
| CAZ | 1    | 1    | 1    | 2    | 2    | 2    | 1    |
| CHA | 14   | 13   | 12   | 11   | 10   | 9    | 7    |
| EUR | 6    | 6    | 7    | 7    | 7    | 6    | 6    |
| IND | 4    | 4    | 4    | 4    | 5    | 5    | 4    |
| JPN | 1    | 1    | 0    | 0    | 0    | 0    | 0    |
| LAM | 22   | 22   | 22   | 21   | 20   | 18   | 15   |
| MEA | 6    | 7    | 7    | 8    | 7    | 7    | 8    |
| NEU | 1    | 1    | 1    | 1    | 1    | 1    | 1    |
| OAS | 17   | 17   | 17   | 17   | 16   | 15   | 13   |
| REF | 2    | 3    | 3    | 3    | 3    | 3    | 2    |
| SSA | 11   | 13   | 15   | 16   | 17   | 17   | 14   |
| USA | 9    | 10   | 10   | 10   | 11   | 11   | 10   |

Table 1423: MAgPIE m4p\_SSP1 — Production—Livestock products—Poultry meat (Mt DM/yr) [PART 2/2]

|     | 1965 | 1970 | 1975 | 1980 | 1985 | 1990 | 1995 | 2000 | 2005 | 2010 |
|-----|------|------|------|------|------|------|------|------|------|------|
| GLO | 4.4  | 6.1  | 7.5  | 10.4 | 12.6 | 16.5 | 22.0 | 27.7 | 32.6 | 40.2 |
| CAZ | 0.2  | 0.2  | 0.3  | 0.4  | 0.4  | 0.5  | 0.6  | 0.7  | 0.9  | 0.9  |
| CHA | 0.3  | 0.4  | 0.5  | 0.7  | 0.8  | 1.5  | 3.5  | 5.1  | 5.7  | 7.0  |
| EUR | 1.2  | 1.7  | 2.2  | 2.8  | 2.9  | 3.4  | 3.8  | 4.3  | 4.4  | 4.9  |
| IND | 0.0  | 0.0  | 0.0  | 0.1  | 0.1  | 0.2  | 0.3  | 0.4  | 0.6  | 0.9  |
| JPN | 0.1  | 0.2  | 0.3  | 0.5  | 0.5  | 0.6  | 0.5  | 0.5  | 0.5  | 0.6  |
| LAM | 0.3  | 0.5  | 0.7  | 1.3  | 1.5  | 2.1  | 3.6  | 5.1  | 6.5  | 8.7  |
| MEA | 0.1  | 0.2  | 0.2  | 0.4  | 0.7  | 0.8  | 1.0  | 1.5  | 1.9  | 2.4  |
| NEU | 0.1  | 0.1  | 0.1  | 0.2  | 0.2  | 0.3  | 0.3  | 0.3  | 0.5  | 0.7  |
| OAS | 0.2  | 0.3  | 0.4  | 0.5  | 0.8  | 1.1  | 1.7  | 2.0  | 2.5  | 3.4  |
| REF | 0.3  | 0.4  | 0.6  | 0.8  | 1.1  | 1.3  | 0.5  | 0.5  | 0.9  | 1.6  |
| SSA | 0.1  | 0.2  | 0.2  | 0.3  | 0.4  | 0.5  | 0.5  | 0.6  | 0.8  | 1.1  |
| USA | 1.5  | 1.9  | 1.9  | 2.6  | 3.1  | 4.4  | 5.6  | 6.6  | 7.5  | 7.9  |

Table 1424: FAO — Production—Livestock products—Poultry meat (Mt DM/yr)

48.5 Ruminant meat

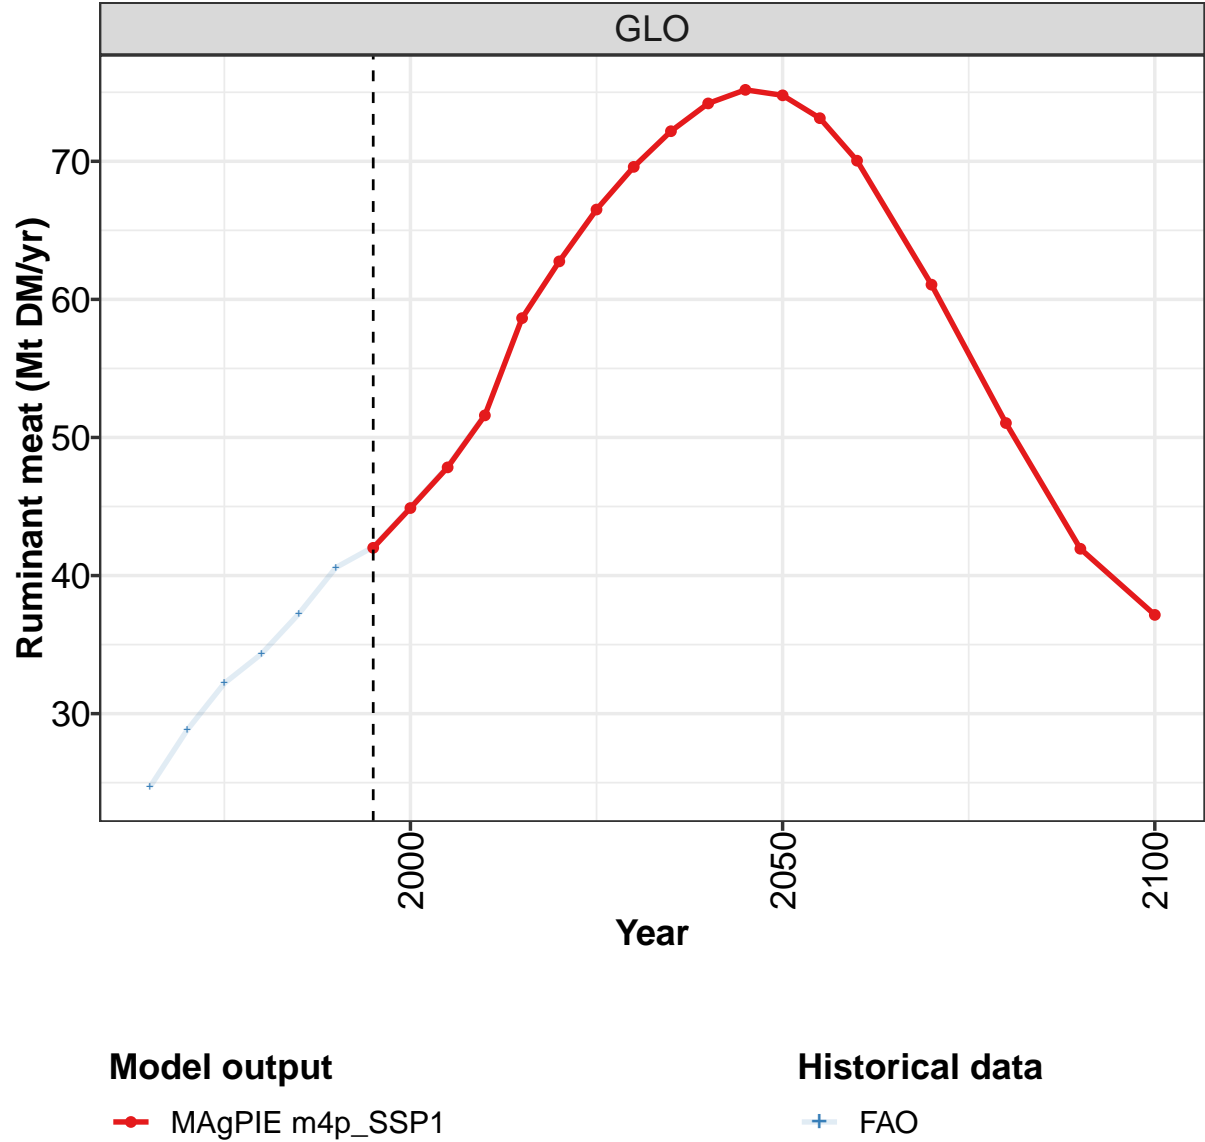

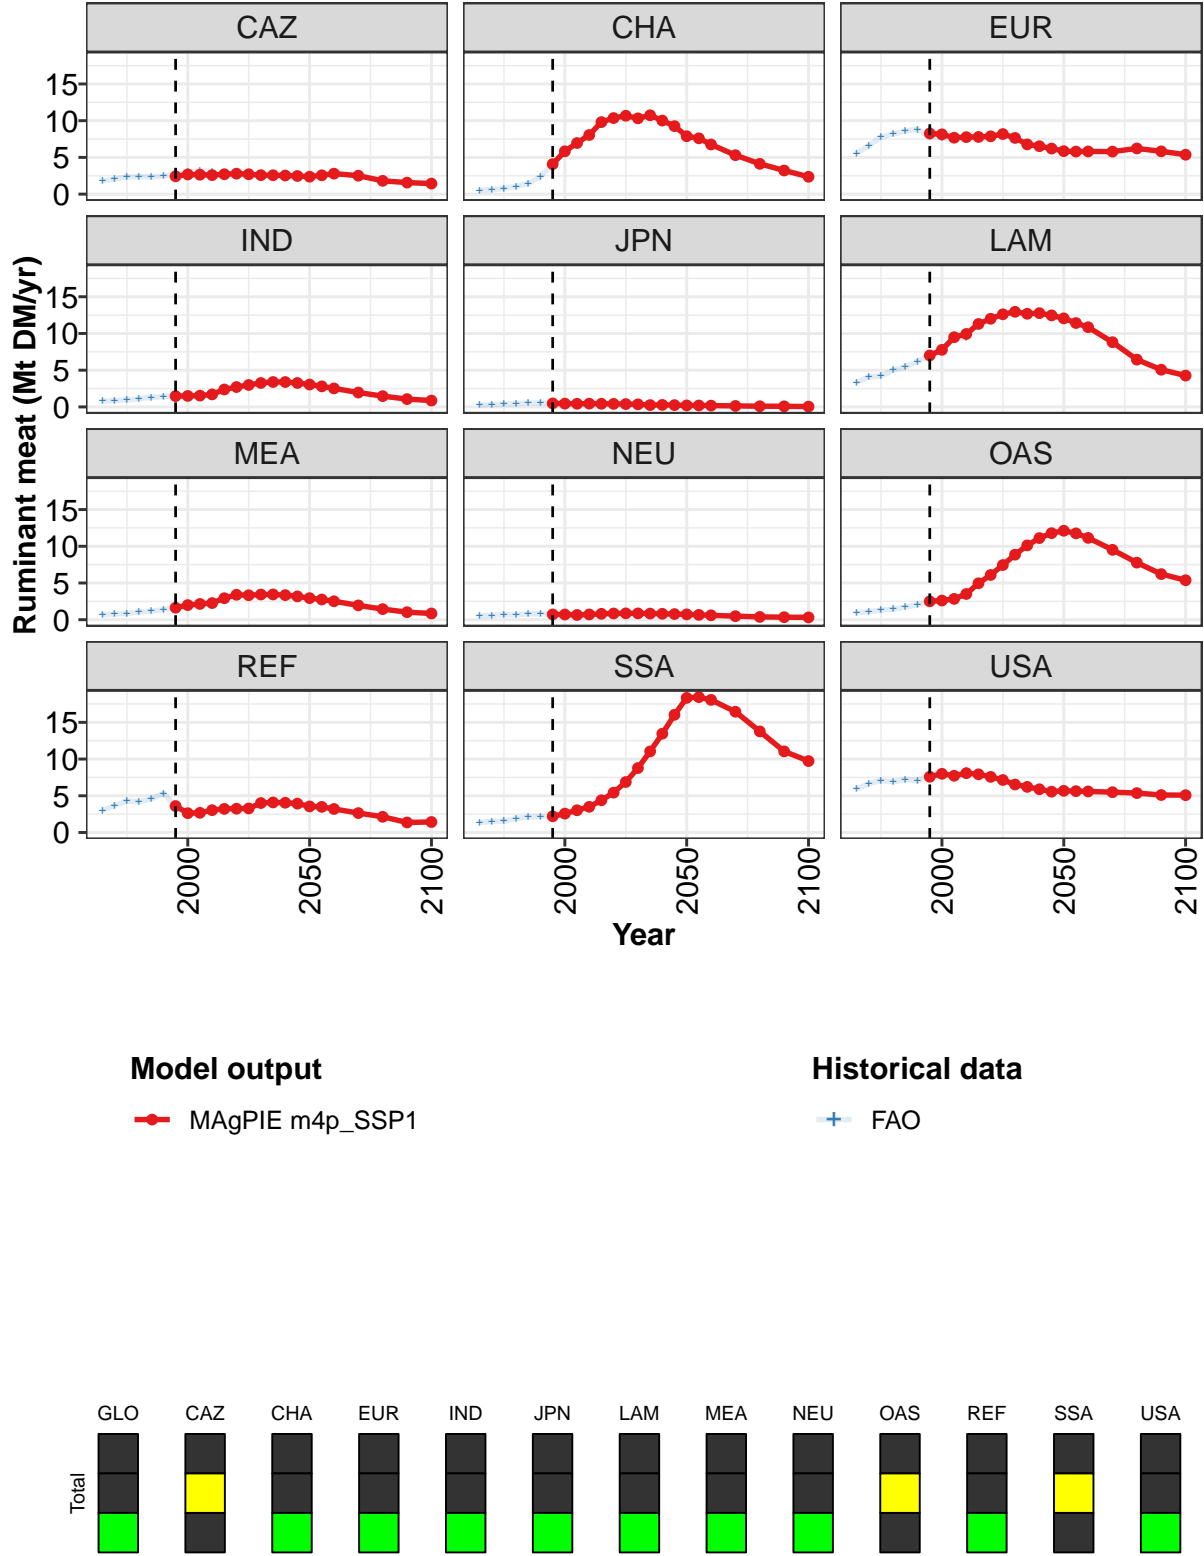

Figure 363: MAgPIE m4p\_SSP1 — Production—Livestock products—Ruminant meat (Mt DM/yr)

|     | 1995 | 2000 | 2005 | 2010 | 2015 | 2020 | 2025 | 2030 | 2035 | 2040 | 2045 |
|-----|------|------|------|------|------|------|------|------|------|------|------|
| GLO | 42.0 | 44.9 | 47.8 | 51.6 | 58.6 | 62.8 | 66.5 | 69.6 | 72.2 | 74.2 | 75.2 |
| CAZ | 2.4  | 2.7  | 2.6  | 2.6  | 2.7  | 2.8  | 2.7  | 2.6  | 2.6  | 2.5  | 2.5  |
| CHA | 4.1  | 5.8  | 7.0  | 8.0  | 9.8  | 10.4 | 10.7 | 10.3 | 10.7 | 10.0 | 9.3  |
| EUR | 8.3  | 8.1  | 7.7  | 7.8  | 7.8  | 7.9  | 8.2  | 7.7  | 6.8  | 6.5  | 6.2  |
| IND | 1.5  | 1.5  | 1.5  | 1.7  | 2.4  | 2.7  | 3.0  | 3.3  | 3.4  | 3.4  | 3.3  |
| JPN | 0.5  | 0.5  | 0.4  | 0.4  | 0.4  | 0.4  | 0.4  | 0.3  | 0.3  | 0.3  | 0.2  |
| LAM | 7.0  | 7.8  | 9.5  | 9.9  | 11.3 | 12.0 | 12.6 | 13.0 | 12.7 | 12.8 | 12.5 |
| MEA | 1.6  | 2.0  | 2.1  | 2.3  | 2.9  | 3.4  | 3.3  | 3.4  | 3.4  | 3.3  | 3.2  |
| NEU | 0.7  | 0.7  | 0.6  | 0.7  | 0.8  | 0.9  | 0.9  | 0.9  | 0.8  | 0.8  | 0.8  |
| OAS | 2.5  | 2.6  | 2.8  | 3.5  | 5.0  | 6.1  | 7.4  | 8.9  | 10.1 | 11.1 | 11.8 |
| REF | 3.6  | 2.6  | 2.7  | 3.0  | 3.2  | 3.2  | 3.3  | 4.0  | 4.1  | 4.1  | 3.9  |
| SSA | 2.2  | 2.6  | 3.0  | 3.5  | 4.4  | 5.4  | 6.9  | 8.8  | 11.0 | 13.5 | 16.0 |
| USA | 7.6  | 8.0  | 7.7  | 8.1  | 7.9  | 7.6  | 7.2  | 6.5  | 6.2  | 5.9  | 5.6  |

Table 1425: MAgPIE m4p\_SSP1 — Production—Livestock products—Ruminant meat (Mt DM/yr) [PART 1/2]

|     | 2050 | 2055 | 2060 | 2070 | 2080 | 2090 | 2100 |
|-----|------|------|------|------|------|------|------|
| GLO | 74.8 | 73.1 | 70.0 | 61.1 | 51.0 | 41.9 | 37.2 |
| CAZ | 2.4  | 2.6  | 2.8  | 2.5  | 1.8  | 1.6  | 1.4  |
| CHA | 7.9  | 7.6  | 6.8  | 5.3  | 4.1  | 3.2  | 2.4  |
| EUR | 5.9  | 5.8  | 5.8  | 5.8  | 6.2  | 5.8  | 5.4  |
| IND | 3.0  | 2.8  | 2.5  | 2.0  | 1.5  | 1.1  | 0.9  |
| JPN | 0.2  | 0.2  | 0.2  | 0.1  | 0.1  | 0.1  | 0.0  |
| LAM | 12.1 | 11.4 | 10.9 | 8.8  | 6.4  | 5.1  | 4.3  |
| MEA | 2.9  | 2.8  | 2.5  | 2.0  | 1.4  | 1.0  | 0.9  |
| NEU | 0.7  | 0.7  | 0.6  | 0.5  | 0.4  | 0.3  | 0.3  |
| OAS | 12.1 | 11.8 | 11.1 | 9.5  | 7.8  | 6.2  | 5.4  |
| REF | 3.6  | 3.5  | 3.2  | 2.6  | 2.1  | 1.4  | 1.4  |
| SSA | 18.3 | 18.4 | 18.1 | 16.4 | 13.8 | 11.0 | 9.7  |
| USA | 5.7  | 5.6  | 5.6  | 5.5  | 5.4  | 5.1  | 5.1  |

Table 1426: MAgPIE m4p\_SSP1 — Production—Livestock products—Ruminant meat (Mt DM/yr) [PART 2/2]

|     | 1965 | 1970 | 1975 | 1980 | 1985 | 1990 | 1995 | 2000 | 2005 | 2010 |
|-----|------|------|------|------|------|------|------|------|------|------|
| GLO | 24.7 | 28.8 | 32.2 | 34.3 | 37.2 | 40.6 | 42.1 | 44.9 | 47.9 | 51.7 |
| CAZ | 1.8  | 2.0  | 2.3  | 2.4  | 2.3  | 2.4  | 2.7  | 3.0  | 3.2  | 3.0  |
| CHA | 0.5  | 0.6  | 0.8  | 1.0  | 1.4  | 2.4  | 4.1  | 5.8  | 6.9  | 8.0  |
| EUR | 5.5  | 6.6  | 7.7  | 8.2  | 8.6  | 8.8  | 7.8  | 7.6  | 7.4  | 7.5  |
| IND | 0.8  | 0.9  | 1.0  | 1.1  | 1.3  | 1.4  | 1.5  | 1.5  | 1.6  | 1.8  |
| JPN | 0.3  | 0.3  | 0.4  | 0.5  | 0.5  | 0.5  | 0.5  | 0.4  | 0.4  | 0.4  |
| LAM | 3.3  | 4.1  | 4.2  | 5.0  | 5.4  | 6.2  | 7.0  | 7.8  | 9.2  | 9.5  |
| MEA | 0.7  | 0.8  | 0.9  | 1.0  | 1.2  | 1.4  | 1.6  | 2.0  | 2.2  | 2.3  |
| NEU | 0.5  | 0.6  | 0.7  | 0.7  | 0.8  | 0.8  | 0.7  | 0.7  | 0.6  | 0.7  |
| OAS | 1.0  | 1.1  | 1.3  | 1.4  | 1.7  | 2.0  | 2.5  | 2.6  | 2.8  | 3.5  |
| REF | 3.0  | 3.6  | 4.3  | 4.2  | 4.6  | 5.3  | 3.6  | 2.6  | 2.7  | 3.0  |
| SSA | 1.4  | 1.5  | 1.6  | 1.9  | 2.1  | 2.2  | 2.2  | 2.6  | 3.0  | 3.5  |
| USA | 5.9  | 6.7  | 7.1  | 6.9  | 7.2  | 7.1  | 7.8  | 8.2  | 7.8  | 8.4  |

Table 1427: FAO — Production—Livestock products—Ruminant meat (Mt DM/yr)

## 49 Pasture

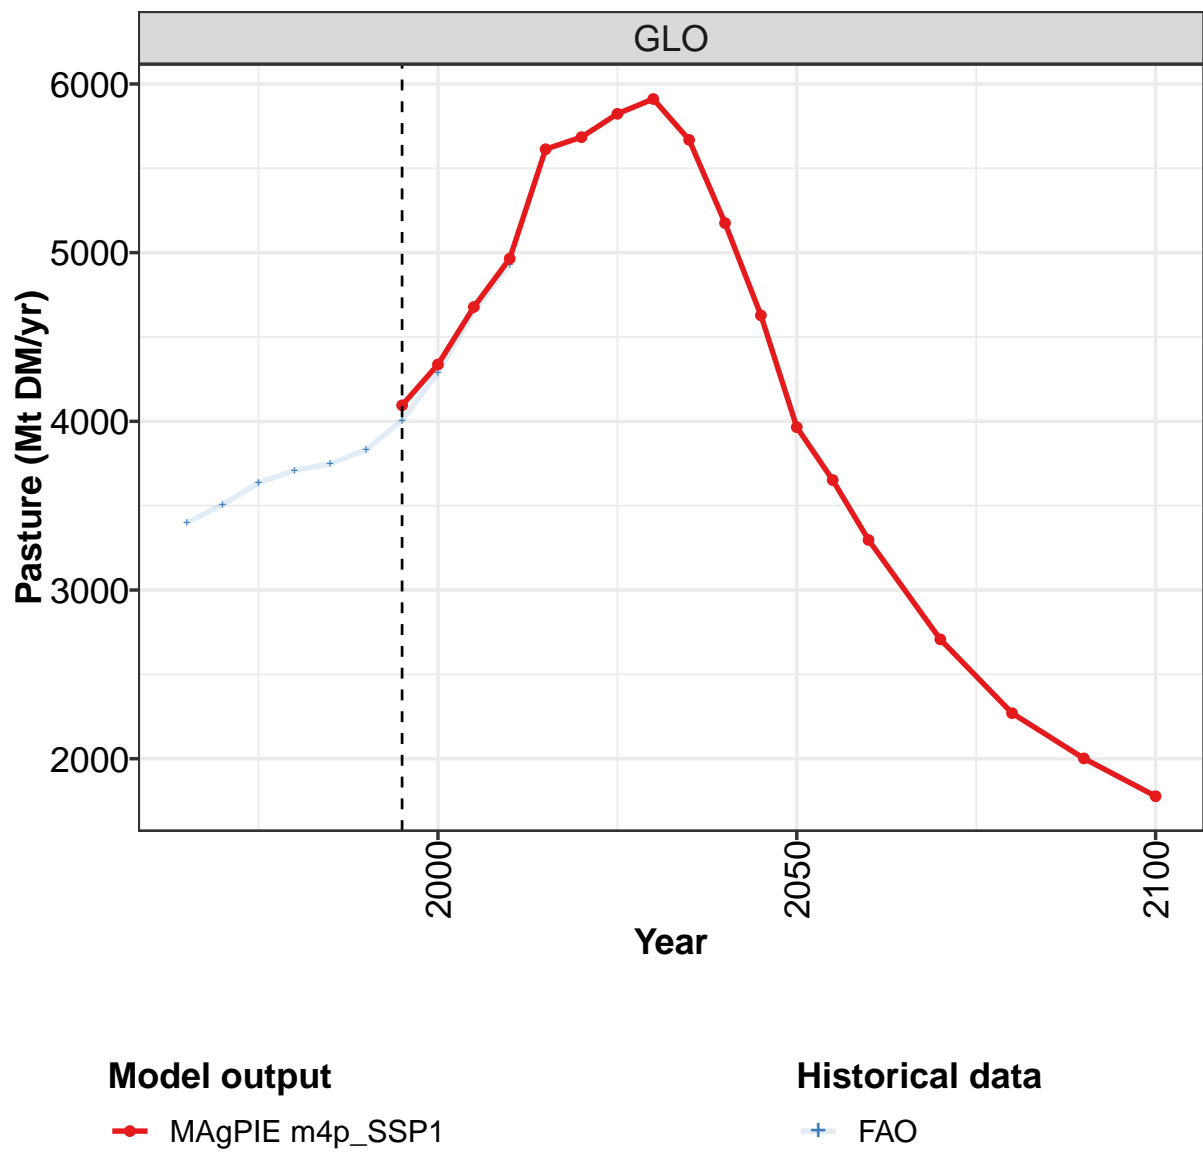

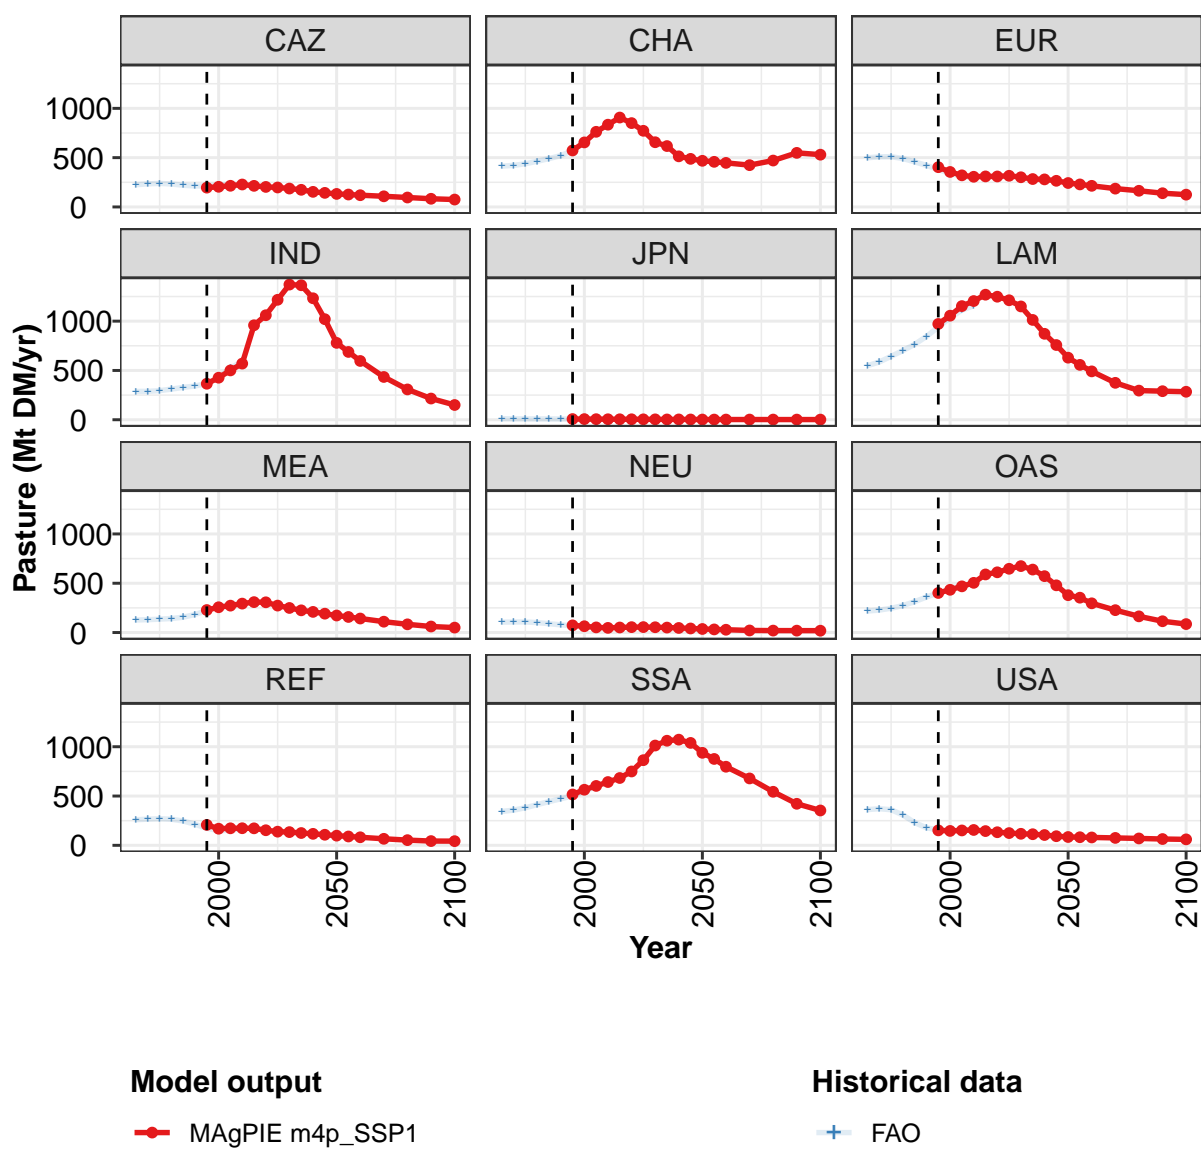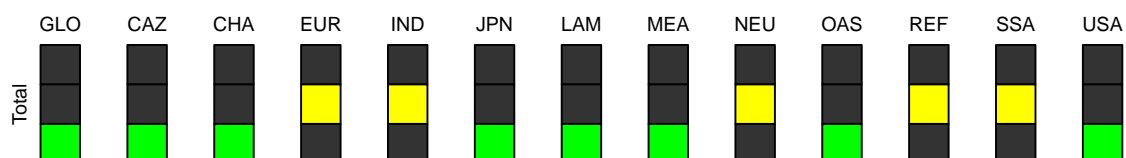

Figure 364: MAgPIE m4p\_SSP1 — Production—Pasture (Mt DM/yr)

|     | 1995 | 2000 | 2005 | 2010 | 2015 | 2020 | 2025 | 2030 | 2035 | 2040 | 2045 |
|-----|------|------|------|------|------|------|------|------|------|------|------|
| GLO | 4095 | 4337 | 4678 | 4965 | 5613 | 5685 | 5823 | 5911 | 5669 | 5176 | 4628 |
| CAZ | 196  | 205  | 215  | 228  | 214  | 203  | 198  | 187  | 174  | 153  | 143  |
| CHA | 573  | 655  | 762  | 835  | 907  | 851  | 773  | 657  | 618  | 513  | 488  |
| EUR | 404  | 355  | 321  | 306  | 310  | 309  | 316  | 301  | 283  | 280  | 265  |
| IND | 365  | 427  | 501  | 570  | 959  | 1060 | 1217 | 1371 | 1364 | 1232 | 1020 |
| JPN | 7    | 7    | 6    | 5    | 5    | 5    | 4    | 4    | 3    | 3    | 3    |
| LAM | 972  | 1056 | 1153 | 1204 | 1269 | 1248 | 1212 | 1149 | 1013 | 872  | 758  |
| MEA | 228  | 257  | 273  | 294  | 309  | 307  | 273  | 250  | 225  | 209  | 191  |
| NEU | 73   | 64   | 52   | 47   | 51   | 55   | 55   | 54   | 50   | 46   | 41   |
| OAS | 401  | 434  | 468  | 504  | 589  | 611  | 647  | 674  | 639  | 572  | 479  |
| REF | 207  | 169  | 173  | 174  | 172  | 153  | 139  | 134  | 125  | 117  | 107  |
| SSA | 516  | 564  | 603  | 642  | 683  | 749  | 864  | 1012 | 1061 | 1072 | 1039 |
| USA | 152  | 146  | 151  | 156  | 145  | 133  | 124  | 117  | 113  | 105  | 93   |

Table 1428: MAgPIE m4p\_SSP1 — Production—Pasture (Mt DM/yr) [PART 1/2]

|     | 2050 | 2055 | 2060 | 2070 | 2080 | 2090 | 2100 |
|-----|------|------|------|------|------|------|------|
| GLO | 3965 | 3652 | 3297 | 2708 | 2270 | 2002 | 1778 |
| CAZ | 132  | 126  | 119  | 108  | 96   | 83   | 75   |
| CHA | 468  | 458  | 447  | 424  | 471  | 549  | 530  |
| EUR | 243  | 229  | 214  | 186  | 164  | 139  | 125  |
| IND | 780  | 688  | 596  | 434  | 308  | 215  | 150  |
| JPN | 2    | 2    | 2    | 2    | 2    | 2    | 2    |
| LAM | 630  | 557  | 491  | 375  | 296  | 290  | 284  |
| MEA | 173  | 158  | 142  | 110  | 83   | 61   | 50   |
| NEU | 36   | 32   | 28   | 21   | 20   | 19   | 19   |
| OAS | 379  | 354  | 297  | 227  | 164  | 115  | 86   |
| REF | 98   | 90   | 82   | 66   | 53   | 43   | 42   |
| SSA | 938  | 876  | 798  | 679  | 543  | 422  | 354  |
| USA | 85   | 82   | 80   | 75   | 70   | 64   | 60   |

Table 1429: MAgPIE m4p\_SSP1 — Production—Pasture (Mt DM/yr) [PART 2/2]

|     | 1965 | 1970 | 1975 | 1980 | 1985 | 1990 | 1995 | 2000 | 2005 | 2010 |
|-----|------|------|------|------|------|------|------|------|------|------|
| GLO | 3399 | 3506 | 3636 | 3709 | 3748 | 3832 | 4006 | 4290 | 4653 | 4931 |
| CAZ | 225  | 234  | 239  | 233  | 220  | 212  | 215  | 223  | 229  | 231  |
| CHA | 414  | 422  | 438  | 463  | 490  | 521  | 572  | 657  | 760  | 832  |
| EUR | 499  | 509  | 510  | 491  | 457  | 421  | 381  | 339  | 309  | 296  |
| IND | 287  | 288  | 295  | 311  | 328  | 342  | 367  | 429  | 522  | 594  |
| JPN | 10   | 10   | 9    | 9    | 8    | 8    | 7    | 7    | 6    | 5    |
| LAM | 548  | 586  | 643  | 702  | 765  | 845  | 939  | 1034 | 1113 | 1157 |
| MEA | 127  | 130  | 136  | 142  | 156  | 183  | 222  | 260  | 284  | 294  |
| NEU | 105  | 107  | 107  | 101  | 89   | 78   | 68   | 59   | 51   | 47   |
| OAS | 218  | 228  | 246  | 273  | 313  | 360  | 402  | 438  | 475  | 503  |
| REF | 260  | 266  | 270  | 265  | 246  | 213  | 173  | 148  | 152  | 168  |
| SSA | 344  | 357  | 381  | 412  | 443  | 471  | 502  | 546  | 600  | 640  |
| USA | 362  | 371  | 361  | 307  | 230  | 177  | 157  | 149  | 152  | 162  |

Table 1430: FAO — Production—Pasture (Mt DM/yr)



50 Secondary products

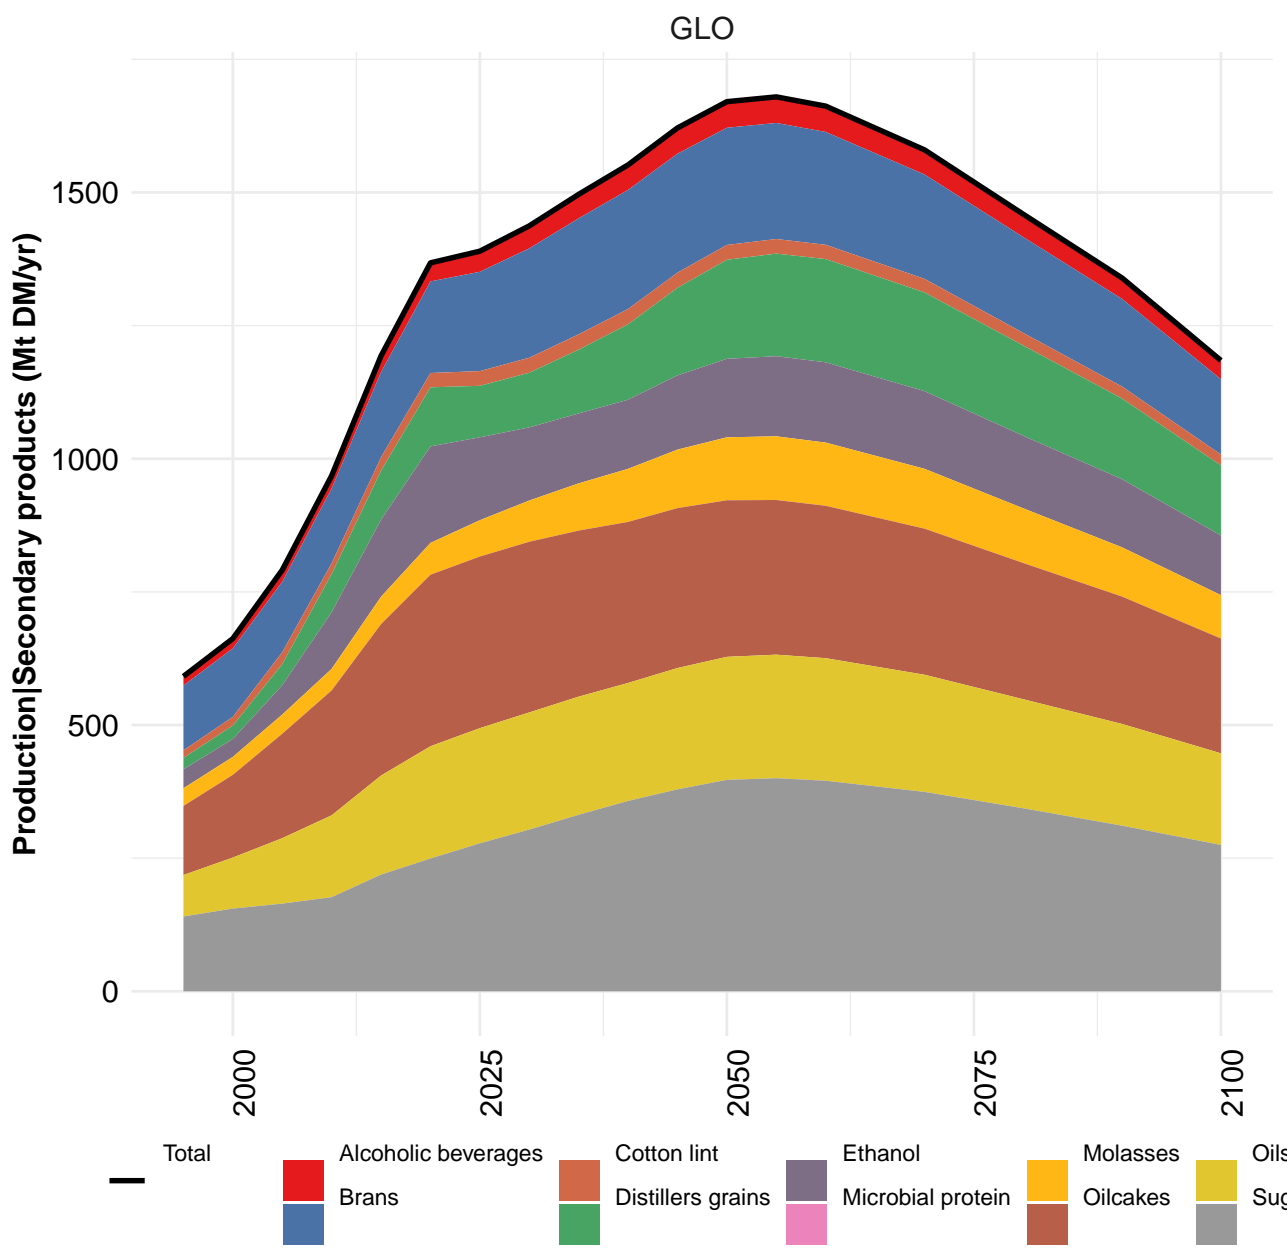

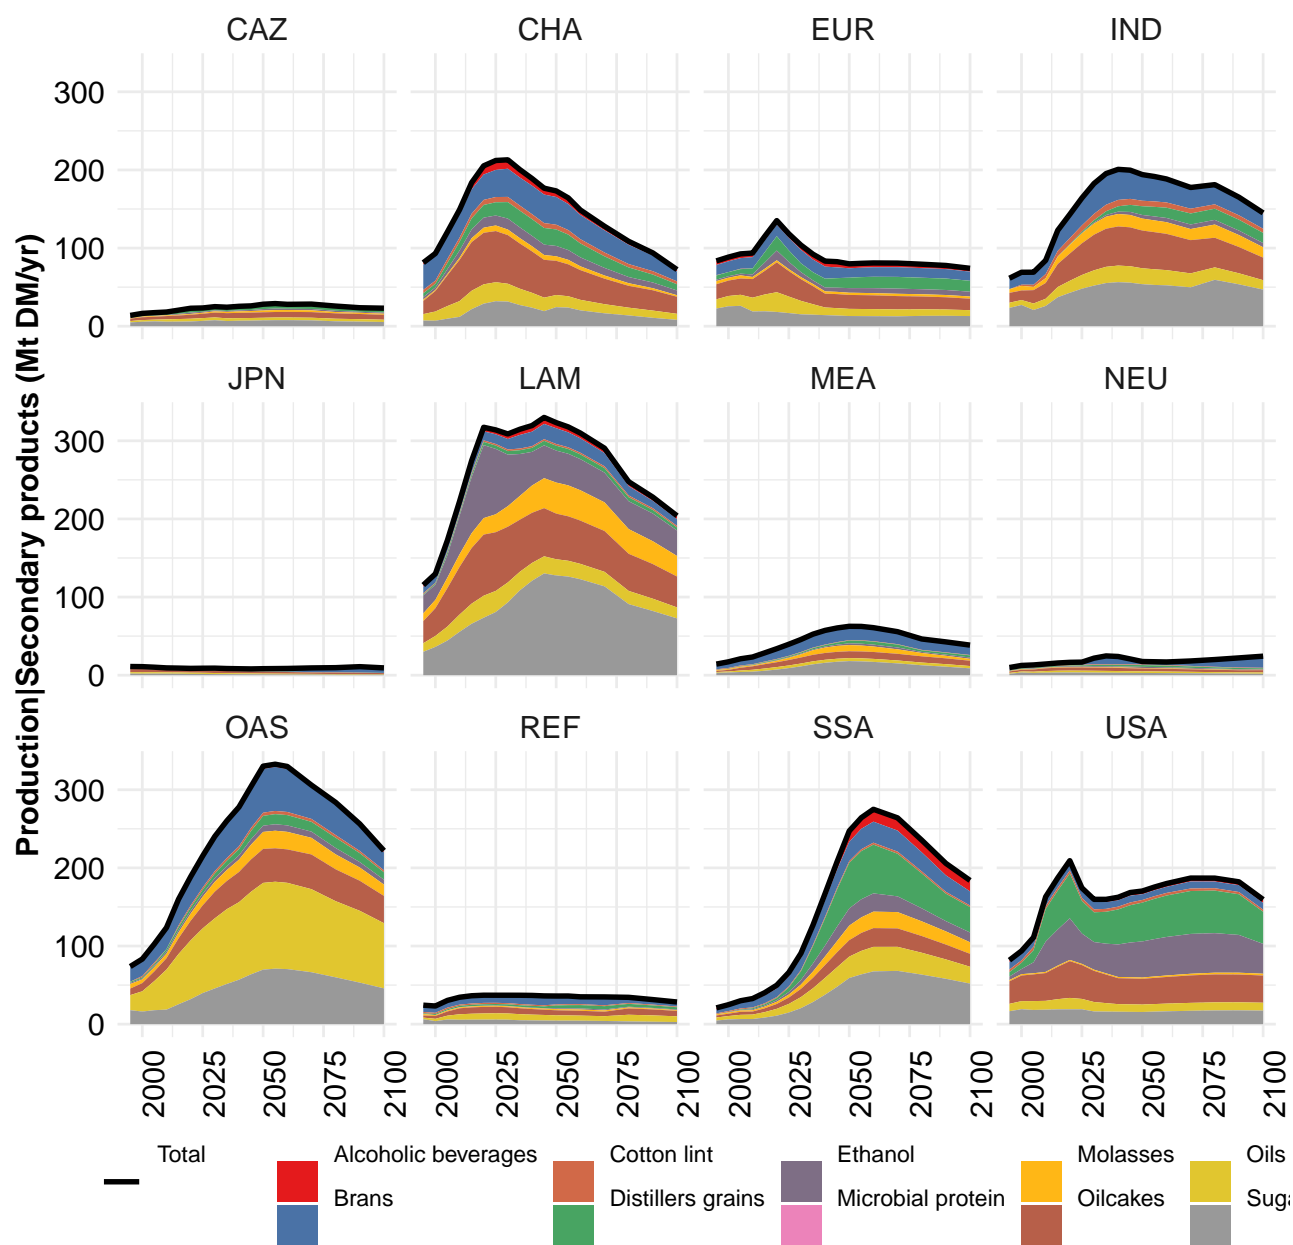

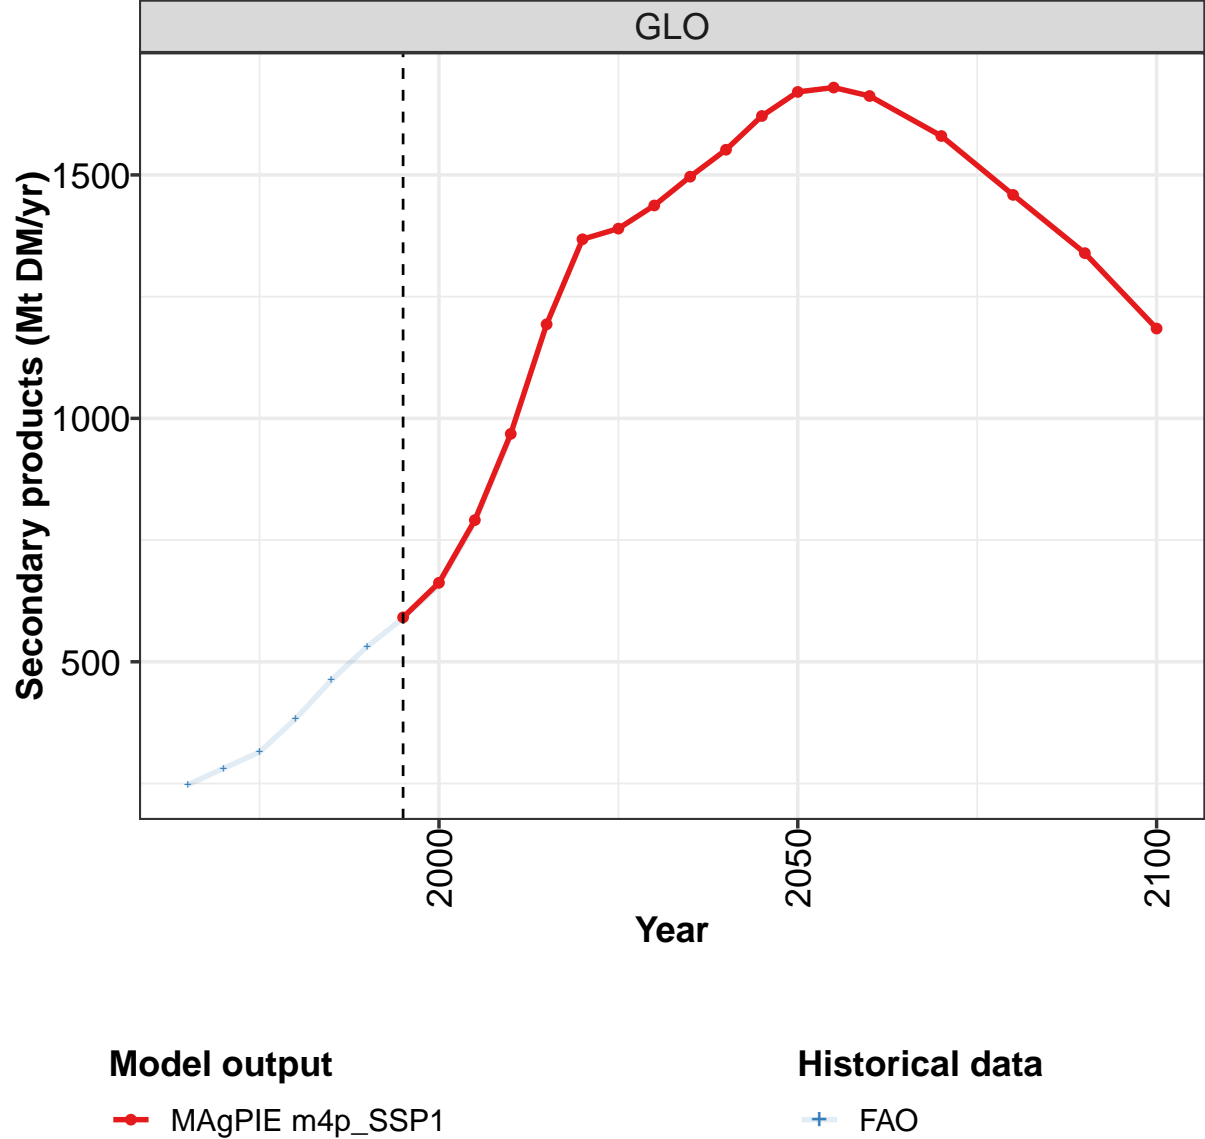

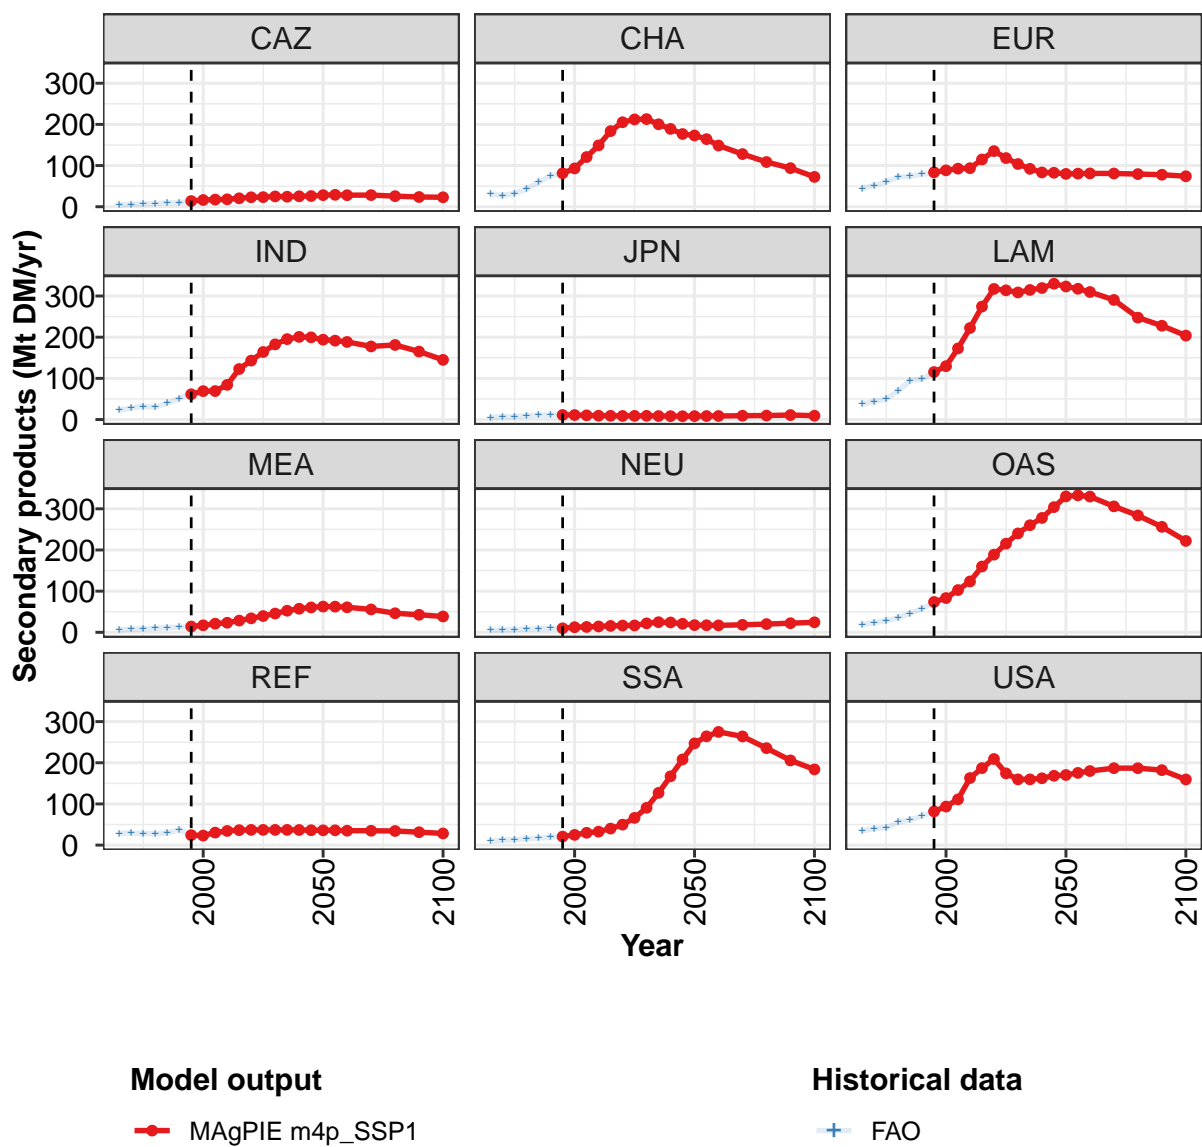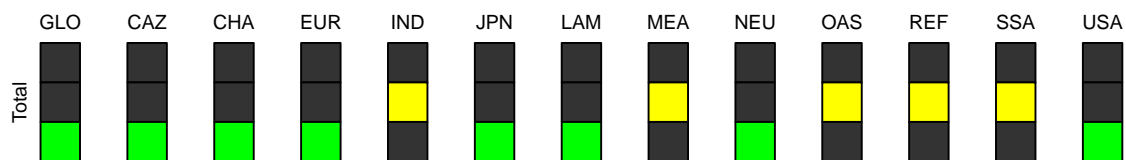

Figure 365: MAgPIE m4p\_SSP1 — Production—Secondary products (Mt DM/yr)

|     | 1995 | 2000 | 2005 | 2010 | 2015 | 2020 | 2025 | 2030 | 2035 | 2040 | 2045 |
|-----|------|------|------|------|------|------|------|------|------|------|------|
| GLO | 591  | 662  | 791  | 968  | 1193 | 1368 | 1390 | 1437 | 1496 | 1552 | 1621 |
| CAZ | 14   | 16   | 17   | 18   | 21   | 23   | 23   | 25   | 24   | 25   | 26   |
| CHA | 81   | 93   | 121  | 149  | 184  | 205  | 212  | 213  | 200  | 189  | 177  |
| EUR | 84   | 88   | 93   | 94   | 115  | 135  | 118  | 104  | 92   | 83   | 83   |
| IND | 61   | 69   | 69   | 84   | 123  | 143  | 164  | 183  | 195  | 201  | 200  |
| JPN | 11   | 11   | 10   | 9    | 9    | 9    | 9    | 9    | 9    | 8    | 8    |
| LAM | 115  | 130  | 173  | 222  | 274  | 317  | 314  | 309  | 315  | 319  | 330  |
| MEA | 14   | 17   | 21   | 23   | 29   | 34   | 40   | 46   | 53   | 57   | 60   |
| NEU | 10   | 12   | 13   | 14   | 16   | 16   | 17   | 22   | 25   | 24   | 21   |
| OAS | 74   | 83   | 103  | 124  | 160  | 189  | 215  | 240  | 260  | 278  | 304  |
| REF | 24   | 23   | 30   | 34   | 36   | 37   | 37   | 37   | 37   | 37   | 36   |
| SSA | 21   | 25   | 30   | 33   | 40   | 50   | 66   | 91   | 127  | 167  | 208  |
| USA | 82   | 94   | 111  | 163  | 187  | 209  | 174  | 160  | 160  | 162  | 168  |

Table 1431: MAgPIE m4p-SSP1 — Production—Secondary products (Mt DM/yr) [PART 1/2]

|     | 2050 | 2055 | 2060 | 2070 | 2080 | 2090 | 2100 |
|-----|------|------|------|------|------|------|------|
| GLO | 1671 | 1680 | 1662 | 1580 | 1459 | 1339 | 1185 |
| CAZ | 28   | 29   | 28   | 28   | 26   | 24   | 23   |
| CHA | 173  | 164  | 149  | 128  | 109  | 94   | 72   |
| EUR | 80   | 80   | 81   | 81   | 79   | 78   | 74   |
| IND | 194  | 192  | 188  | 178  | 181  | 165  | 145  |
| JPN | 8    | 8    | 9    | 9    | 10   | 11   | 9    |
| LAM | 323  | 318  | 310  | 291  | 248  | 228  | 204  |
| MEA | 63   | 62   | 61   | 56   | 46   | 43   | 38   |
| NEU | 18   | 17   | 17   | 18   | 20   | 22   | 24   |
| OAS | 330  | 333  | 330  | 306  | 284  | 256  | 222  |
| REF | 36   | 36   | 35   | 35   | 34   | 31   | 28   |
| SSA | 247  | 264  | 275  | 264  | 236  | 206  | 184  |
| USA | 170  | 175  | 180  | 187  | 187  | 182  | 160  |

Table 1432: MAgPIE m4p-SSP1 — Production—Secondary products (Mt DM/yr) [PART 2/2]

|     | 1965 | 1970 | 1975 | 1980 | 1985 | 1990 | 1995 | 2000 | 2005 | 2010 |
|-----|------|------|------|------|------|------|------|------|------|------|
| GLO | 247  | 281  | 315  | 383  | 462  | 532  | 590  | 657  | 786  | 964  |
| CAZ | 5    | 6    | 7    | 8    | 9    | 10   | 13   | 16   | 16   | 18   |
| CHA | 30   | 27   | 32   | 43   | 60   | 75   | 81   | 93   | 120  | 149  |
| EUR | 45   | 51   | 60   | 72   | 74   | 79   | 82   | 86   | 88   | 92   |
| IND | 23   | 28   | 32   | 30   | 40   | 51   | 64   | 69   | 69   | 84   |
| JPN | 5    | 7    | 7    | 9    | 11   | 11   | 11   | 11   | 10   | 9    |
| LAM | 37   | 44   | 49   | 70   | 94   | 98   | 115  | 127  | 175  | 218  |
| MEA | 6    | 8    | 9    | 10   | 12   | 12   | 14   | 17   | 20   | 23   |
| NEU | 5    | 6    | 7    | 8    | 9    | 10   | 9    | 11   | 13   | 14   |
| OAS | 19   | 23   | 28   | 35   | 46   | 58   | 73   | 83   | 101  | 126  |
| REF | 28   | 30   | 28   | 28   | 30   | 37   | 23   | 22   | 30   | 34   |
| SSA | 9    | 12   | 13   | 15   | 17   | 20   | 21   | 25   | 30   | 32   |
| USA | 35   | 40   | 42   | 56   | 62   | 70   | 83   | 96   | 114  | 164  |

Table 1433: FAO — Production—Secondary products (Mt DM/yr)

50.1 Alcoholic beverages

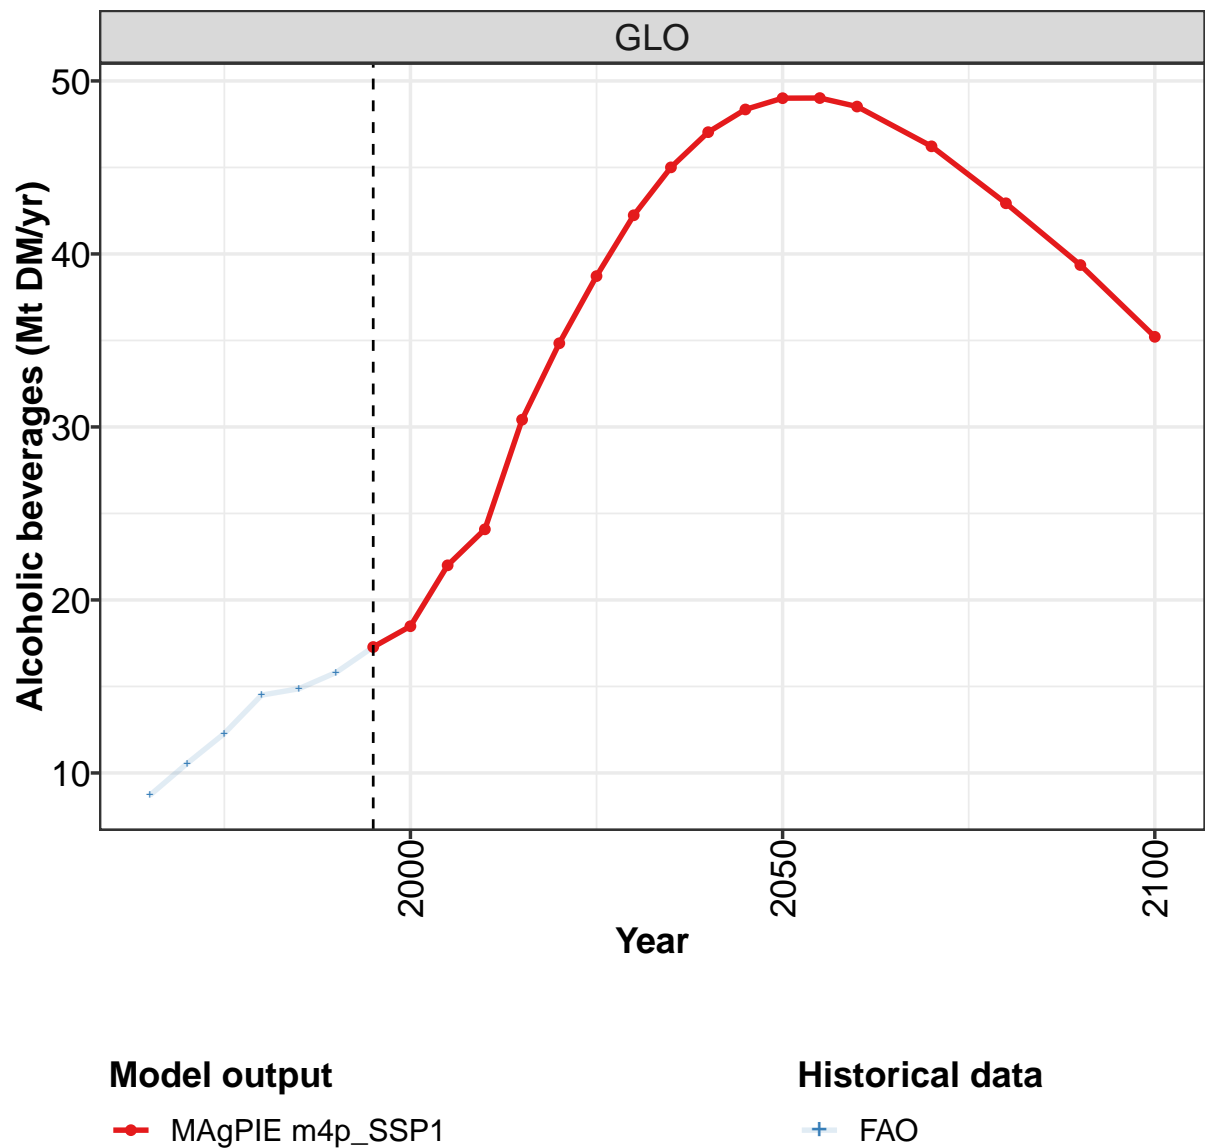

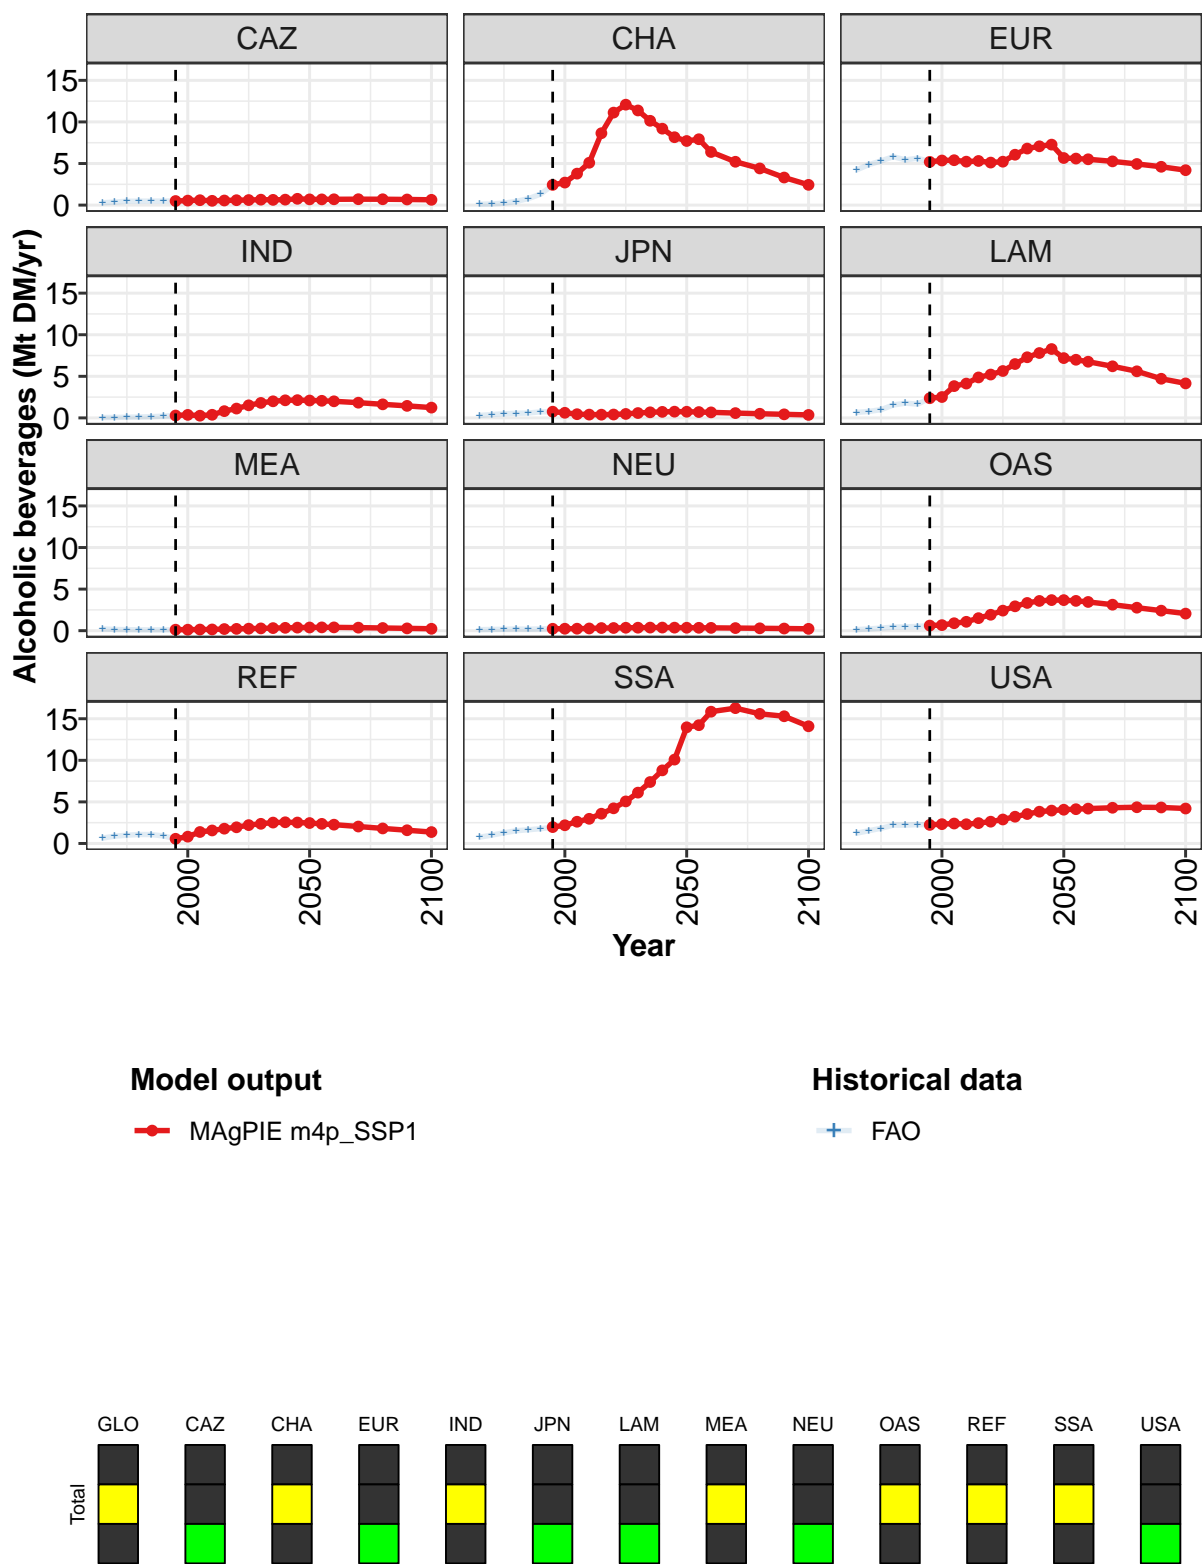

Figure 366: MAgPIE m4p\_SSP1 — Production—Secondary products—Alcoholic beverages (Mt DM/yr)

|     | 1995 | 2000 | 2005 | 2010 | 2015 | 2020 | 2025 | 2030 | 2035 | 2040 | 2045 |
|-----|------|------|------|------|------|------|------|------|------|------|------|
| GLO | 17.3 | 18.5 | 22.0 | 24.1 | 30.4 | 34.8 | 38.7 | 42.2 | 45.0 | 47.0 | 48.4 |
| CAZ | 0.5  | 0.5  | 0.6  | 0.5  | 0.6  | 0.6  | 0.6  | 0.7  | 0.6  | 0.7  | 0.8  |
| CHA | 2.4  | 2.7  | 3.8  | 5.1  | 8.6  | 11.1 | 12.1 | 11.4 | 10.1 | 9.2  | 8.2  |
| EUR | 5.2  | 5.4  | 5.4  | 5.2  | 5.3  | 5.1  | 5.2  | 6.1  | 6.8  | 7.1  | 7.3  |
| IND | 0.3  | 0.4  | 0.3  | 0.4  | 0.8  | 1.1  | 1.5  | 1.8  | 2.0  | 2.1  | 2.1  |
| JPN | 0.7  | 0.6  | 0.4  | 0.4  | 0.4  | 0.4  | 0.5  | 0.6  | 0.7  | 0.7  | 0.8  |
| LAM | 2.4  | 2.5  | 3.8  | 4.1  | 4.9  | 5.2  | 5.6  | 6.5  | 7.3  | 7.8  | 8.3  |
| MEA | 0.1  | 0.1  | 0.1  | 0.2  | 0.2  | 0.2  | 0.2  | 0.3  | 0.3  | 0.3  | 0.4  |
| NEU | 0.2  | 0.2  | 0.2  | 0.3  | 0.3  | 0.3  | 0.4  | 0.4  | 0.4  | 0.4  | 0.4  |
| OAS | 0.6  | 0.7  | 0.9  | 1.1  | 1.5  | 1.9  | 2.4  | 2.9  | 3.3  | 3.6  | 3.7  |
| REF | 0.6  | 0.8  | 1.4  | 1.6  | 1.8  | 1.9  | 2.2  | 2.4  | 2.5  | 2.6  | 2.5  |
| SSA | 2.0  | 2.2  | 2.6  | 3.0  | 3.6  | 4.2  | 5.1  | 6.1  | 7.4  | 8.8  | 10.1 |
| USA | 2.2  | 2.3  | 2.4  | 2.3  | 2.5  | 2.6  | 2.9  | 3.2  | 3.5  | 3.8  | 4.0  |

Table 1434: MAgPIE m4p\_SSP1 — Production—Secondary products—Alcoholic beverages (Mt DM/yr) [PART 1/2]

|     | 2050 | 2055 | 2060 | 2070 | 2080 | 2090 | 2100 |
|-----|------|------|------|------|------|------|------|
| GLO | 49.0 | 49.0 | 48.5 | 46.2 | 42.9 | 39.4 | 35.2 |
| CAZ | 0.7  | 0.7  | 0.7  | 0.7  | 0.7  | 0.7  | 0.6  |
| CHA | 7.7  | 7.9  | 6.4  | 5.2  | 4.4  | 3.3  | 2.4  |
| EUR | 5.7  | 5.6  | 5.5  | 5.3  | 4.9  | 4.6  | 4.2  |
| IND | 2.1  | 2.1  | 2.0  | 1.8  | 1.6  | 1.4  | 1.2  |
| JPN | 0.7  | 0.7  | 0.7  | 0.6  | 0.5  | 0.4  | 0.4  |
| LAM | 7.2  | 7.0  | 6.8  | 6.2  | 5.6  | 4.7  | 4.2  |
| MEA | 0.4  | 0.4  | 0.4  | 0.4  | 0.3  | 0.3  | 0.2  |
| NEU | 0.4  | 0.3  | 0.3  | 0.3  | 0.3  | 0.3  | 0.2  |
| OAS | 3.7  | 3.6  | 3.5  | 3.1  | 2.8  | 2.4  | 2.1  |
| REF | 2.5  | 2.4  | 2.3  | 2.0  | 1.8  | 1.6  | 1.4  |
| SSA | 14.0 | 14.2 | 15.8 | 16.3 | 15.6 | 15.3 | 14.1 |
| USA | 4.1  | 4.1  | 4.2  | 4.3  | 4.4  | 4.3  | 4.2  |

Table 1435: MAgPIE m4p\_SSP1 — Production—Secondary products—Alcoholic beverages (Mt DM/yr) [PART 2/2]

|     | 1965 | 1970 | 1975 | 1980 | 1985 | 1990 | 1995 | 2000 | 2005 | 2010 |
|-----|------|------|------|------|------|------|------|------|------|------|
| GLO | 8.7  | 10.5 | 12.3 | 14.5 | 14.9 | 15.8 | 17.3 | 18.5 | 22.0 | 24.1 |
| CAZ | 0.3  | 0.4  | 0.5  | 0.5  | 0.5  | 0.5  | 0.5  | 0.5  | 0.6  | 0.5  |
| CHA | 0.1  | 0.1  | 0.2  | 0.4  | 0.8  | 1.3  | 2.4  | 2.7  | 3.8  | 5.1  |
| EUR | 4.2  | 4.9  | 5.3  | 5.8  | 5.4  | 5.6  | 5.2  | 5.4  | 5.3  | 5.1  |
| IND | 0.0  | 0.1  | 0.1  | 0.1  | 0.1  | 0.2  | 0.3  | 0.4  | 0.3  | 0.4  |
| JPN | 0.3  | 0.4  | 0.5  | 0.6  | 0.6  | 0.7  | 0.7  | 0.6  | 0.4  | 0.4  |
| LAM | 0.7  | 0.8  | 1.0  | 1.6  | 1.8  | 1.7  | 2.4  | 2.5  | 3.9  | 4.2  |
| MEA | 0.2  | 0.2  | 0.1  | 0.1  | 0.1  | 0.1  | 0.1  | 0.1  | 0.1  | 0.2  |
| NEU | 0.1  | 0.2  | 0.2  | 0.2  | 0.2  | 0.2  | 0.2  | 0.2  | 0.2  | 0.3  |
| OAS | 0.1  | 0.2  | 0.3  | 0.4  | 0.5  | 0.5  | 0.6  | 0.7  | 0.9  | 1.0  |
| REF | 0.6  | 0.9  | 1.0  | 1.1  | 1.1  | 0.9  | 0.6  | 0.8  | 1.4  | 1.6  |
| SSA | 0.8  | 1.0  | 1.3  | 1.5  | 1.6  | 1.8  | 1.9  | 2.2  | 2.6  | 3.0  |
| USA | 1.2  | 1.5  | 1.8  | 2.2  | 2.2  | 2.3  | 2.2  | 2.3  | 2.4  | 2.3  |

Table 1436: FAO — Production—Secondary products—Alcoholic beverages (Mt DM/yr)



50.2 Brans

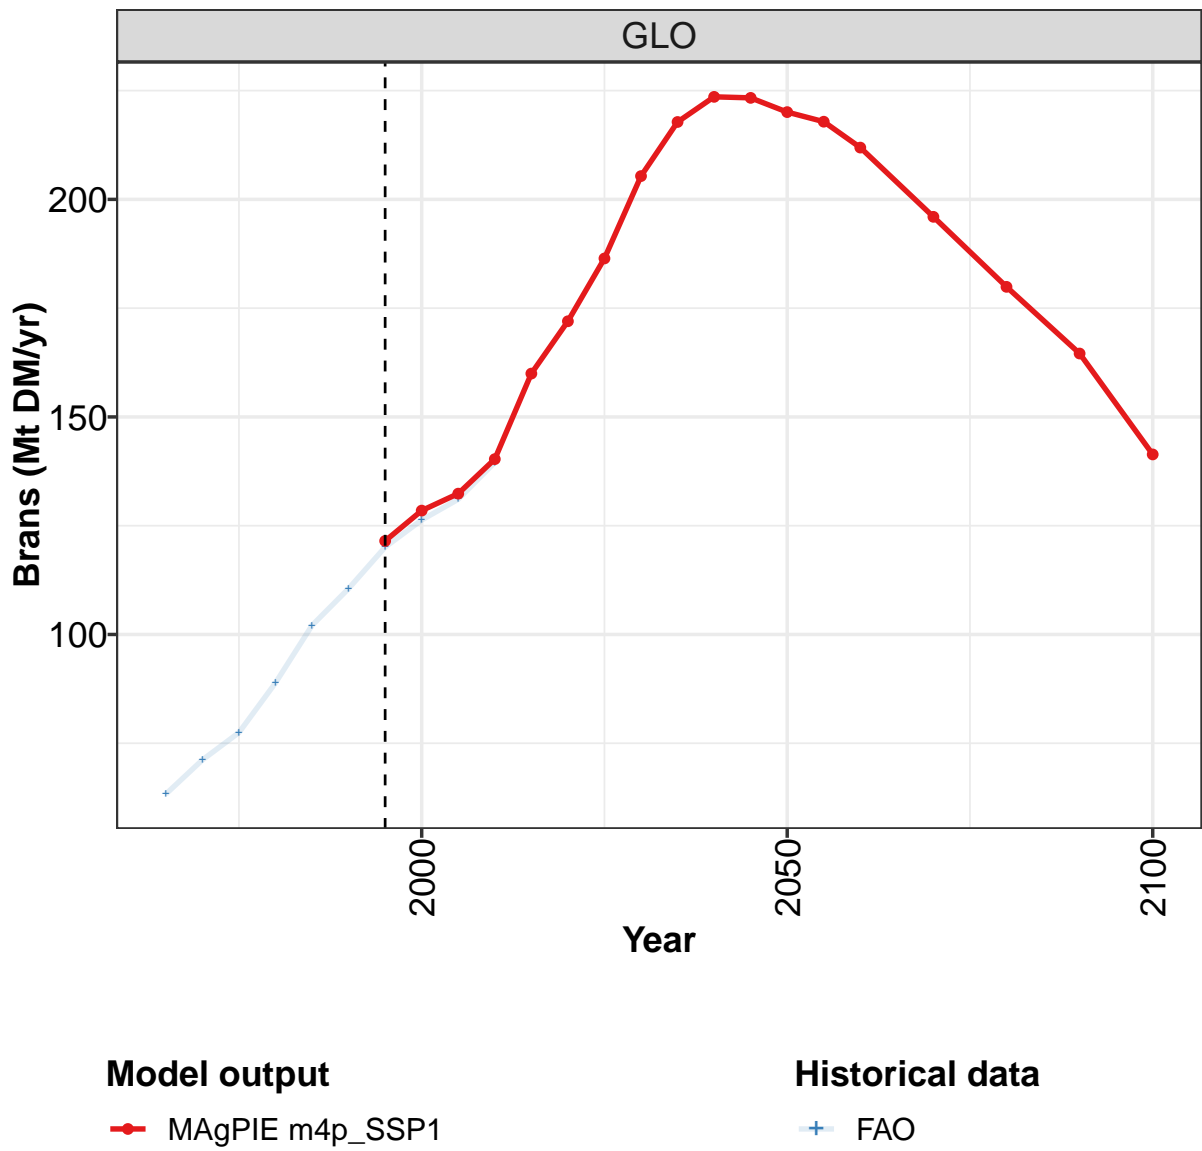

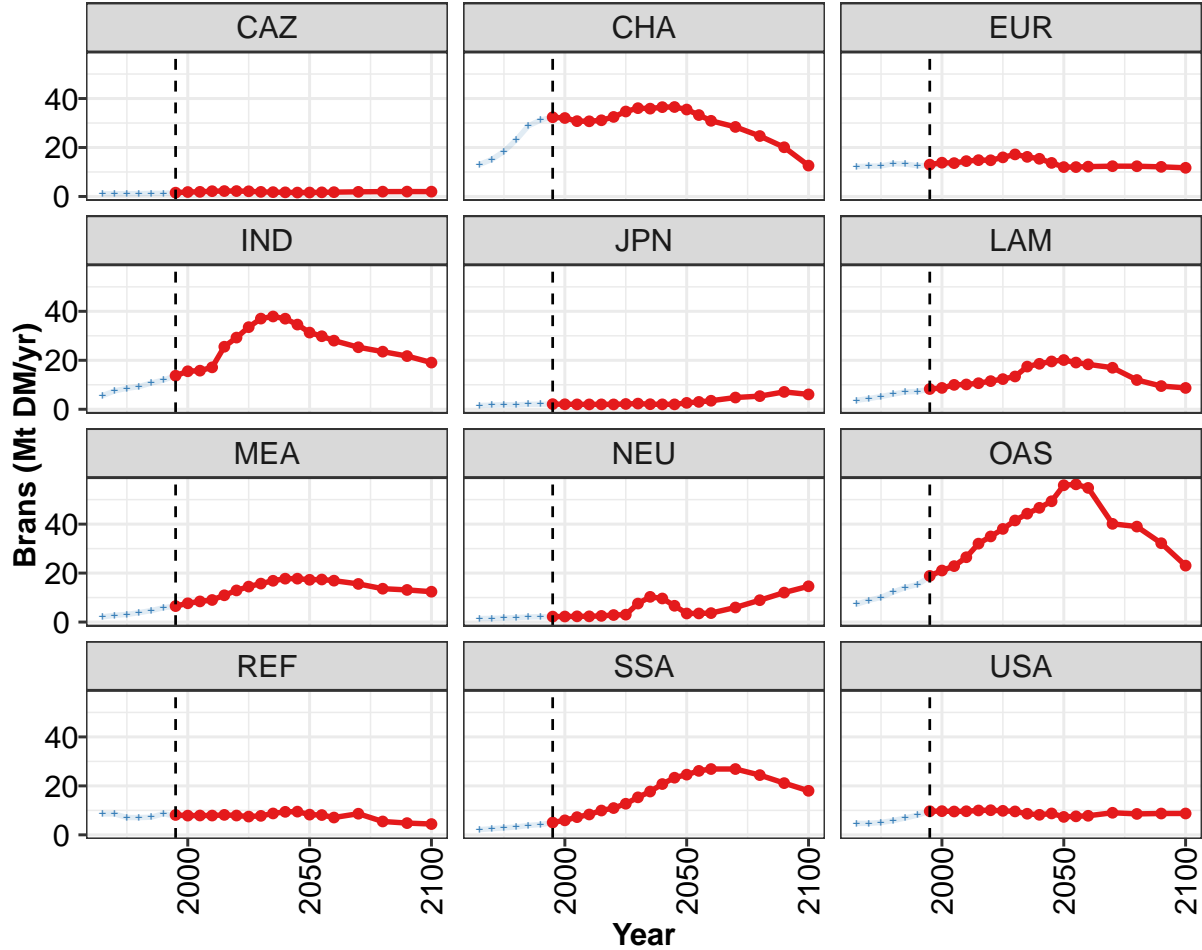

Model output

—●— MAGPIE m4p\_SSP1

Historical data

—+— FAO

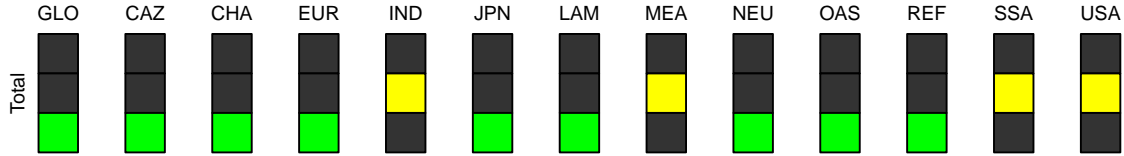

Figure 367: MAGPIE m4p\_SSP1 — Production—Secondary products—Brans (Mt DM/yr)

|     | 1995 | 2000 | 2005 | 2010 | 2015 | 2020 | 2025 | 2030 | 2035 | 2040 | 2045 |
|-----|------|------|------|------|------|------|------|------|------|------|------|
| GLO | 122  | 128  | 132  | 140  | 160  | 172  | 186  | 205  | 218  | 224  | 223  |
| CAZ | 2    | 2    | 2    | 2    | 2    | 2    | 2    | 2    | 2    | 2    | 2    |
| CHA | 32   | 32   | 31   | 31   | 31   | 32   | 35   | 36   | 36   | 36   | 37   |
| EUR | 13   | 14   | 14   | 14   | 15   | 15   | 16   | 17   | 16   | 15   | 14   |
| IND | 14   | 16   | 16   | 17   | 26   | 29   | 34   | 37   | 38   | 37   | 35   |
| JPN | 2    | 2    | 2    | 2    | 2    | 2    | 2    | 2    | 2    | 2    | 2    |
| LAM | 8    | 9    | 10   | 10   | 11   | 12   | 12   | 13   | 17   | 19   | 20   |
| MEA | 7    | 8    | 8    | 9    | 11   | 13   | 14   | 16   | 17   | 18   | 18   |
| NEU | 2    | 2    | 2    | 2    | 3    | 3    | 3    | 8    | 10   | 10   | 7    |
| OAS | 19   | 21   | 23   | 26   | 32   | 35   | 38   | 41   | 44   | 47   | 49   |
| REF | 8    | 8    | 8    | 8    | 8    | 8    | 7    | 8    | 9    | 9    | 9    |
| SSA | 5    | 6    | 7    | 8    | 10   | 11   | 13   | 15   | 18   | 21   | 23   |
| USA | 10   | 10   | 10   | 10   | 10   | 10   | 10   | 10   | 9    | 8    | 9    |

Table 1437: MAgPIE m4p\_SSP1 — Production—Secondary products—Brans (Mt DM/yr) [PART 1/2]

|     | 2050 | 2055 | 2060 | 2070 | 2080 | 2090 | 2100 |
|-----|------|------|------|------|------|------|------|
| GLO | 220  | 218  | 212  | 196  | 180  | 165  | 141  |
| CAZ | 2    | 2    | 2    | 2    | 2    | 2    | 2    |
| CHA | 36   | 33   | 31   | 28   | 25   | 20   | 13   |
| EUR | 12   | 12   | 12   | 12   | 12   | 12   | 12   |
| IND | 31   | 30   | 28   | 25   | 24   | 22   | 19   |
| JPN | 3    | 3    | 3    | 5    | 5    | 7    | 6    |
| LAM | 20   | 19   | 18   | 17   | 12   | 9    | 9    |
| MEA | 17   | 17   | 17   | 16   | 14   | 13   | 12   |
| NEU | 4    | 4    | 4    | 6    | 9    | 12   | 15   |
| OAS | 56   | 56   | 55   | 40   | 39   | 32   | 23   |
| REF | 8    | 8    | 7    | 9    | 5    | 5    | 4    |
| SSA | 25   | 26   | 27   | 27   | 24   | 21   | 18   |
| USA | 7    | 8    | 8    | 9    | 9    | 9    | 9    |

Table 1438: MAgPIE m4p\_SSP1 — Production—Secondary products—Brans (Mt DM/yr) [PART 2/2]

|     | 1965 | 1970 | 1975 | 1980 | 1985 | 1990 | 1995 | 2000 | 2005 | 2010 |
|-----|------|------|------|------|------|------|------|------|------|------|
| GLO | 63   | 71   | 77   | 89   | 102  | 111  | 120  | 126  | 131  | 140  |
| CAZ | 1    | 1    | 1    | 1    | 1    | 1    | 2    | 2    | 2    | 2    |
| CHA | 13   | 15   | 18   | 23   | 29   | 31   | 32   | 32   | 31   | 31   |
| EUR | 12   | 12   | 12   | 13   | 13   | 13   | 13   | 13   | 13   | 14   |
| IND | 6    | 8    | 9    | 9    | 11   | 12   | 14   | 16   | 16   | 17   |
| JPN | 2    | 2    | 2    | 2    | 2    | 2    | 2    | 2    | 2    | 2    |
| LAM | 4    | 4    | 5    | 6    | 7    | 7    | 8    | 9    | 10   | 10   |
| MEA | 2    | 3    | 3    | 4    | 5    | 6    | 7    | 7    | 8    | 9    |
| NEU | 1    | 2    | 2    | 2    | 2    | 2    | 2    | 2    | 2    | 2    |
| OAS | 7    | 9    | 10   | 12   | 14   | 15   | 19   | 21   | 23   | 26   |
| REF | 9    | 9    | 7    | 7    | 7    | 9    | 8    | 8    | 8    | 8    |
| SSA | 2    | 3    | 3    | 3    | 4    | 4    | 5    | 6    | 7    | 8    |
| USA | 5    | 5    | 5    | 6    | 7    | 8    | 10   | 10   | 10   | 10   |

Table 1439: FAO — Production—Secondary products—Brans (Mt DM/yr)

50.3 Cotton lint

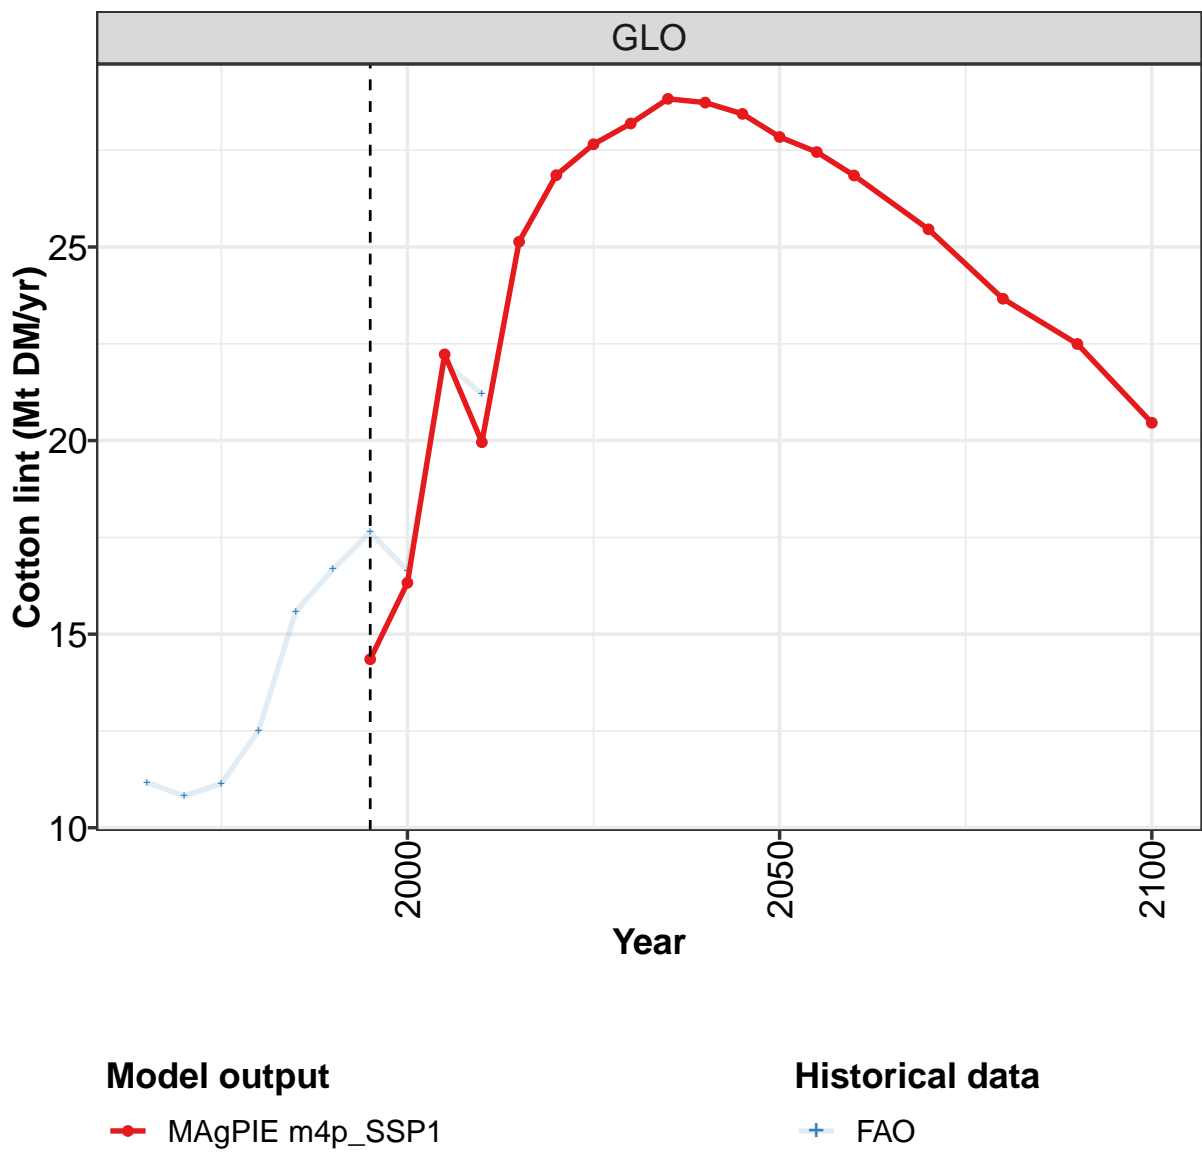

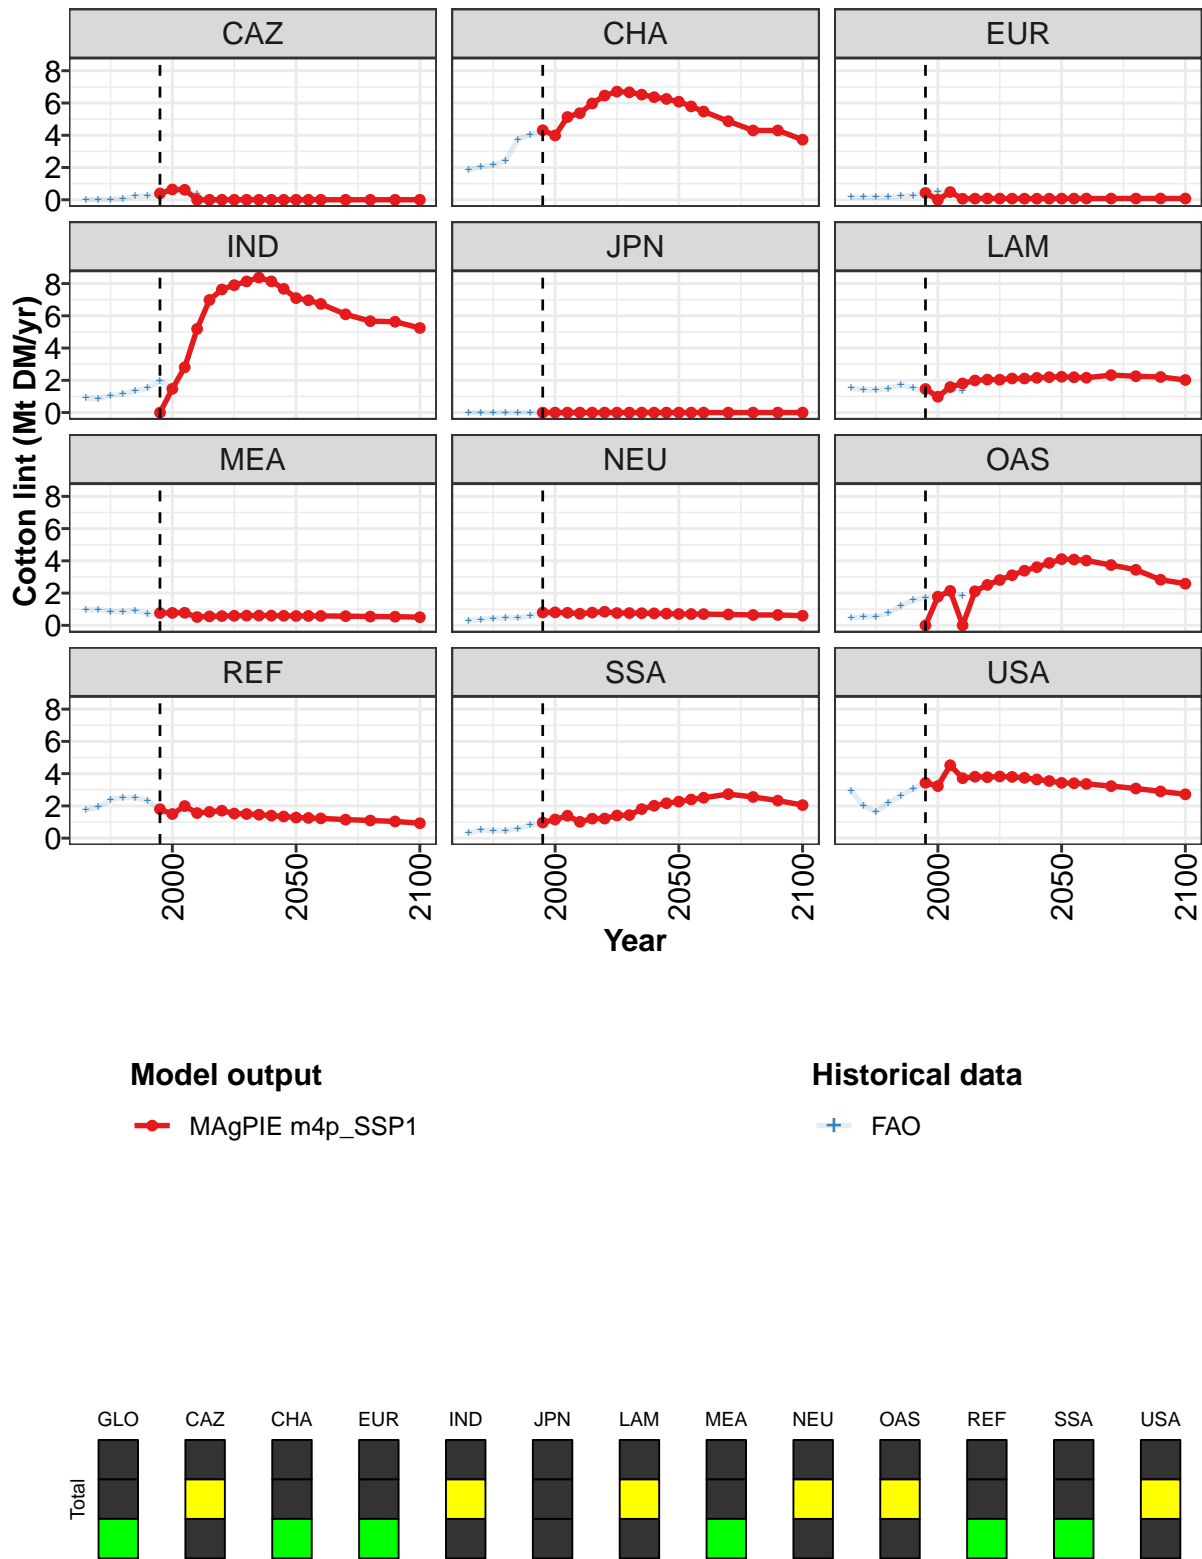

Figure 368: MAGPIE m4p\_SSP1 — Production—Secondary products—Cotton lint (Mt DM/yr)

|     | 1995 | 2000 | 2005 | 2010 | 2015 | 2020 | 2025 | 2030 | 2035 | 2040 | 2045 |
|-----|------|------|------|------|------|------|------|------|------|------|------|
| GLO | 14.4 | 16.3 | 22.2 | 20.0 | 25.1 | 26.9 | 27.7 | 28.2 | 28.8 | 28.7 | 28.4 |
| CAZ | 0.4  | 0.6  | 0.6  | 0.0  | 0.0  | 0.0  | 0.0  | 0.0  | 0.0  | 0.0  | 0.0  |
| CHA | 4.3  | 4.0  | 5.1  | 5.4  | 6.0  | 6.5  | 6.7  | 6.7  | 6.5  | 6.4  | 6.3  |
| EUR | 0.4  | 0.0  | 0.5  | 0.1  | 0.1  | 0.1  | 0.1  | 0.1  | 0.1  | 0.1  | 0.1  |
| IND | 0.0  | 1.5  | 2.8  | 5.2  | 7.0  | 7.6  | 7.9  | 8.1  | 8.4  | 8.1  | 7.7  |
| JPN | 0.0  | 0.0  | 0.0  | 0.0  | 0.0  | 0.0  | 0.0  | 0.0  | 0.0  | 0.0  | 0.0  |
| LAM | 1.5  | 1.0  | 1.6  | 1.8  | 2.0  | 2.0  | 2.0  | 2.1  | 2.1  | 2.2  | 2.2  |
| MEA | 0.8  | 0.8  | 0.8  | 0.5  | 0.6  | 0.6  | 0.6  | 0.6  | 0.6  | 0.6  | 0.6  |
| NEU | 0.8  | 0.8  | 0.8  | 0.7  | 0.8  | 0.8  | 0.8  | 0.8  | 0.8  | 0.7  | 0.7  |
| OAS | 0.0  | 1.8  | 2.1  | 0.0  | 2.1  | 2.5  | 2.8  | 3.1  | 3.4  | 3.6  | 3.9  |
| REF | 1.8  | 1.5  | 2.0  | 1.6  | 1.6  | 1.7  | 1.5  | 1.5  | 1.5  | 1.4  | 1.3  |
| SSA | 1.0  | 1.2  | 1.4  | 1.0  | 1.2  | 1.2  | 1.4  | 1.4  | 1.8  | 2.0  | 2.2  |
| USA | 3.4  | 3.2  | 4.5  | 3.7  | 3.8  | 3.8  | 3.8  | 3.8  | 3.7  | 3.6  | 3.5  |

Table 1440: MAgPIE m4p\_SSP1 — Production—Secondary products—Cotton lint (Mt DM/yr) [PART 1/2]

|     | 2050 | 2055 | 2060 | 2070 | 2080 | 2090 | 2100 |
|-----|------|------|------|------|------|------|------|
| GLO | 27.8 | 27.5 | 26.8 | 25.5 | 23.7 | 22.5 | 20.5 |
| CAZ | 0.0  | 0.0  | 0.0  | 0.0  | 0.0  | 0.0  | 0.0  |
| CHA | 6.1  | 5.8  | 5.5  | 4.9  | 4.3  | 4.3  | 3.7  |
| EUR | 0.1  | 0.1  | 0.1  | 0.1  | 0.1  | 0.1  | 0.1  |
| IND | 7.1  | 7.0  | 6.7  | 6.1  | 5.7  | 5.6  | 5.2  |
| JPN | 0.0  | 0.0  | 0.0  | 0.0  | 0.0  | 0.0  | 0.0  |
| LAM | 2.2  | 2.2  | 2.2  | 2.3  | 2.3  | 2.2  | 2.0  |
| MEA | 0.6  | 0.6  | 0.6  | 0.6  | 0.5  | 0.5  | 0.5  |
| NEU | 0.7  | 0.7  | 0.7  | 0.7  | 0.6  | 0.6  | 0.6  |
| OAS | 4.1  | 4.1  | 4.0  | 3.7  | 3.4  | 2.8  | 2.6  |
| REF | 1.3  | 1.3  | 1.2  | 1.1  | 1.1  | 1.0  | 0.9  |
| SSA | 2.3  | 2.4  | 2.5  | 2.7  | 2.6  | 2.3  | 2.0  |
| USA | 3.4  | 3.4  | 3.4  | 3.2  | 3.1  | 2.9  | 2.7  |

Table 1441: MAgPIE m4p\_SSP1 — Production—Secondary products—Cotton lint (Mt DM/yr) [PART 2/2]

|     | 1965 | 1970 | 1975 | 1980 | 1985 | 1990 | 1995 | 2000 | 2005 | 2010 |
|-----|------|------|------|------|------|------|------|------|------|------|
| GLO | 11.2 | 10.8 | 11.1 | 12.5 | 15.6 | 16.7 | 17.6 | 16.6 | 22.0 | 21.2 |
| CAZ | 0.0  | 0.0  | 0.0  | 0.1  | 0.2  | 0.3  | 0.3  | 0.7  | 0.6  | 0.3  |
| CHA | 1.9  | 2.1  | 2.1  | 2.4  | 3.7  | 4.1  | 4.3  | 4.0  | 5.1  | 5.4  |
| EUR | 0.2  | 0.2  | 0.2  | 0.2  | 0.2  | 0.3  | 0.4  | 0.5  | 0.5  | 0.2  |
| IND | 0.9  | 0.9  | 1.0  | 1.2  | 1.3  | 1.5  | 2.0  | 1.5  | 2.8  | 5.1  |
| JPN | 0.0  | 0.0  | 0.0  | 0.0  | 0.0  | 0.0  | 0.0  | 0.0  | 0.0  | 0.0  |
| LAM | 1.5  | 1.4  | 1.4  | 1.5  | 1.7  | 1.5  | 1.3  | 1.0  | 1.6  | 1.3  |
| MEA | 1.0  | 1.0  | 0.9  | 0.8  | 0.9  | 0.7  | 0.7  | 0.7  | 0.7  | 0.4  |
| NEU | 0.3  | 0.4  | 0.4  | 0.5  | 0.5  | 0.6  | 0.8  | 0.8  | 0.8  | 0.7  |
| OAS | 0.4  | 0.5  | 0.5  | 0.8  | 1.2  | 1.6  | 1.7  | 1.8  | 2.1  | 1.8  |
| REF | 1.7  | 1.9  | 2.4  | 2.5  | 2.5  | 2.3  | 1.7  | 1.3  | 1.8  | 1.4  |
| SSA | 0.3  | 0.5  | 0.5  | 0.5  | 0.6  | 0.8  | 0.9  | 1.1  | 1.4  | 0.9  |
| USA | 2.9  | 2.0  | 1.6  | 2.2  | 2.6  | 3.0  | 3.5  | 3.4  | 4.7  | 3.5  |

Table 1442: FAO — Production—Secondary products—Cotton lint (Mt DM/yr)

50.4 Distillers grains

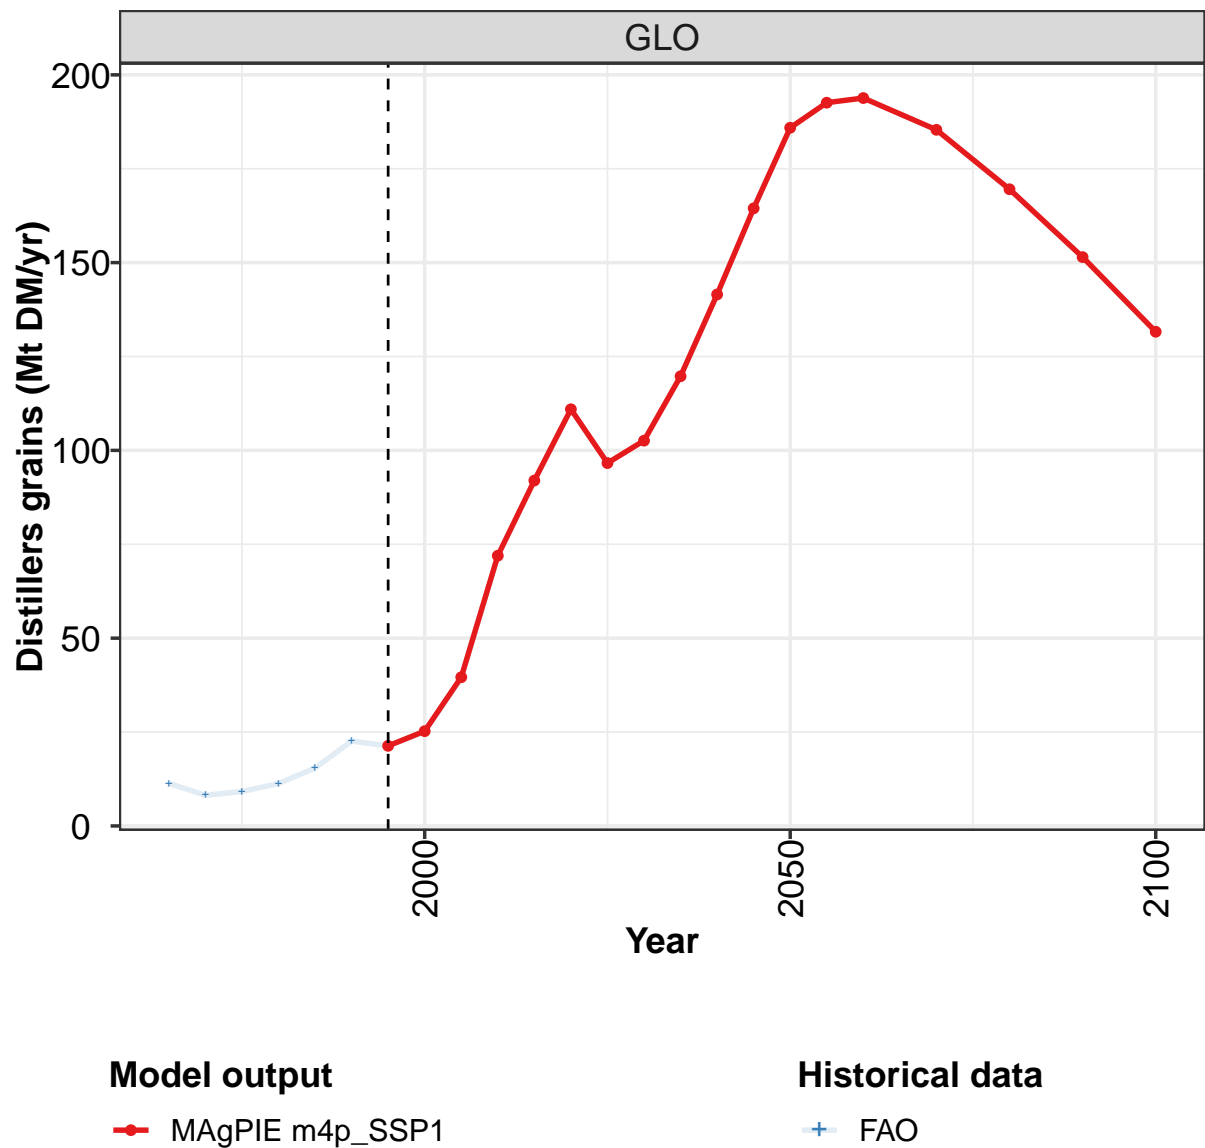

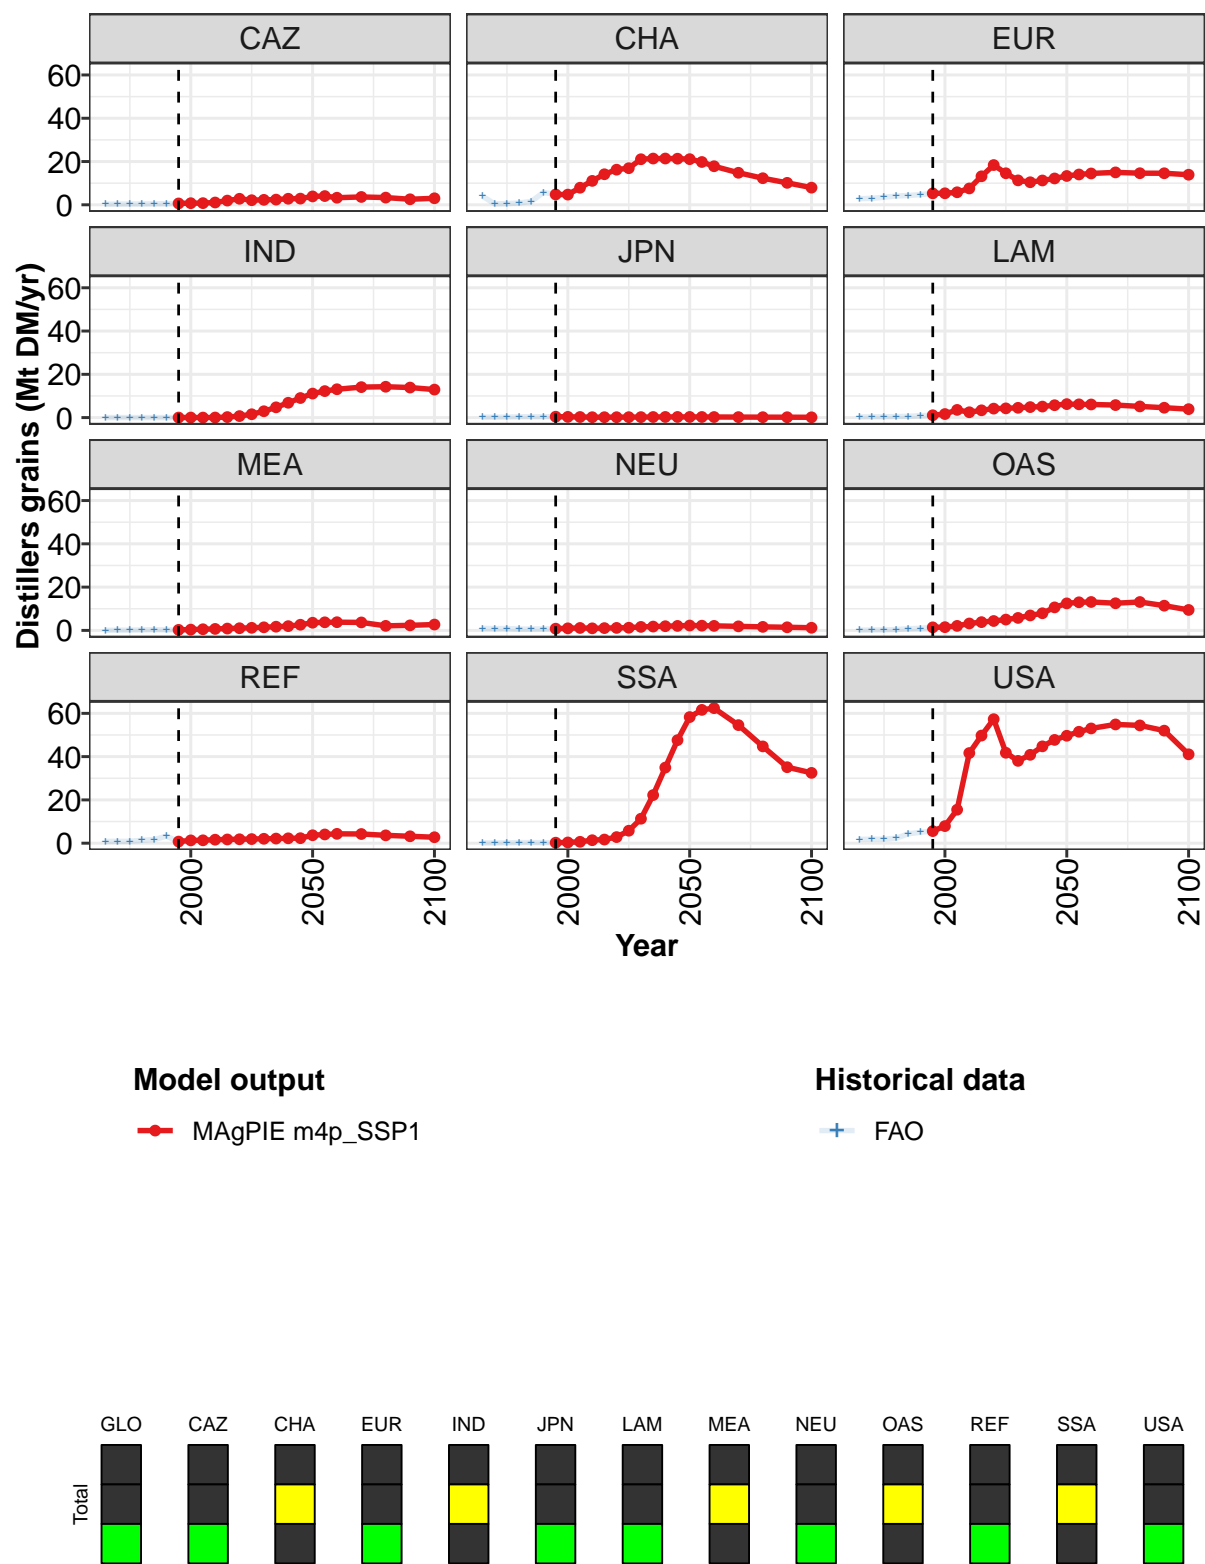

Figure 369: MAgPIE m4p\_SSP1 — Production—Secondary products—Distillers grains (Mt DM/yr)



|     | 1995 | 2000 | 2005 | 2010 | 2015 | 2020 | 2025 | 2030 | 2035 | 2040 | 2045 |
|-----|------|------|------|------|------|------|------|------|------|------|------|
| GLO | 21   | 25   | 40   | 72   | 92   | 111  | 97   | 103  | 120  | 142  | 164  |
| CAZ | 1    | 1    | 1    | 1    | 2    | 3    | 2    | 2    | 2    | 3    | 3    |
| CHA | 5    | 5    | 8    | 11   | 14   | 16   | 17   | 21   | 21   | 21   | 21   |
| EUR | 5    | 5    | 6    | 8    | 13   | 18   | 15   | 11   | 10   | 11   | 12   |
| IND | 0    | 0    | 0    | 0    | 0    | 1    | 2    | 3    | 5    | 7    | 9    |
| JPN | 0    | 0    | 0    | 0    | 0    | 0    | 0    | 0    | 0    | 0    | 0    |
| LAM | 1    | 2    | 4    | 2    | 3    | 4    | 4    | 5    | 5    | 5    | 6    |
| MEA | 0    | 0    | 1    | 1    | 1    | 1    | 1    | 1    | 2    | 2    | 3    |
| NEU | 1    | 1    | 1    | 1    | 1    | 1    | 1    | 2    | 2    | 2    | 2    |
| OAS | 1    | 2    | 2    | 3    | 4    | 4    | 5    | 6    | 7    | 8    | 11   |
| REF | 1    | 1    | 1    | 2    | 2    | 2    | 2    | 2    | 2    | 2    | 2    |
| SSA | 0    | 0    | 1    | 1    | 2    | 3    | 6    | 11   | 22   | 35   | 48   |
| USA | 6    | 8    | 15   | 42   | 50   | 57   | 42   | 38   | 41   | 45   | 48   |

Table 1443: MAgPIE m4p\_SSP1 — Production—Secondary products—Distillers grains (Mt DM/yr) [PART 1/2]

|     | 2050 | 2055 | 2060 | 2070 | 2080 | 2090 | 2100 |
|-----|------|------|------|------|------|------|------|
| GLO | 186  | 193  | 194  | 185  | 170  | 151  | 132  |
| CAZ | 4    | 4    | 3    | 4    | 3    | 3    | 3    |
| CHA | 21   | 20   | 18   | 15   | 12   | 10   | 8    |
| EUR | 13   | 14   | 14   | 15   | 15   | 15   | 14   |
| IND | 11   | 12   | 13   | 14   | 14   | 14   | 13   |
| JPN | 0    | 0    | 0    | 0    | 0    | 0    | 0    |
| LAM | 6    | 6    | 6    | 6    | 5    | 5    | 4    |
| MEA | 4    | 4    | 4    | 4    | 2    | 2    | 3    |
| NEU | 2    | 2    | 2    | 2    | 2    | 1    | 1    |
| OAS | 12   | 13   | 13   | 13   | 13   | 11   | 9    |
| REF | 4    | 4    | 4    | 4    | 4    | 3    | 3    |
| SSA | 58   | 62   | 62   | 55   | 45   | 35   | 32   |
| USA | 50   | 51   | 53   | 55   | 54   | 52   | 41   |

Table 1444: MAgPIE m4p\_SSP1 — Production—Secondary products—Distillers grains (Mt DM/yr) [PART 2/2]

|     | 1965 | 1970 | 1975 | 1980 | 1985 | 1990 | 1995 | 2000 | 2005 | 2010 |
|-----|------|------|------|------|------|------|------|------|------|------|
| GLO | 11.3 | 8.2  | 9.2  | 11.3 | 15.4 | 22.6 | 21.3 | 25.0 | 39.3 | 71.8 |
| CAZ | 0.3  | 0.3  | 0.4  | 0.4  | 0.4  | 0.5  | 0.6  | 0.8  | 0.7  | 1.1  |
| CHA | 4.0  | 0.4  | 0.6  | 0.8  | 1.6  | 5.7  | 4.8  | 4.7  | 7.9  | 11.1 |
| EUR | 2.8  | 3.0  | 3.5  | 4.0  | 4.3  | 4.7  | 5.3  | 5.2  | 5.7  | 7.4  |
| IND | 0.0  | 0.0  | 0.0  | 0.0  | 0.0  | 0.0  | 0.0  | 0.0  | 0.0  | 0.0  |
| JPN | 0.2  | 0.2  | 0.2  | 0.4  | 0.4  | 0.4  | 0.4  | 0.3  | 0.3  | 0.2  |
| LAM | 0.3  | 0.3  | 0.4  | 0.5  | 0.6  | 0.9  | 1.1  | 1.7  | 3.6  | 2.5  |
| MEA | 0.0  | 0.1  | 0.1  | 0.2  | 0.3  | 0.2  | 0.3  | 0.4  | 0.5  | 0.7  |
| NEU | 0.9  | 0.8  | 0.9  | 0.6  | 0.6  | 0.7  | 0.8  | 0.9  | 1.1  | 1.0  |
| OAS | 0.1  | 0.2  | 0.2  | 0.4  | 0.8  | 1.0  | 1.4  | 1.5  | 2.1  | 3.2  |
| REF | 0.8  | 0.8  | 0.9  | 1.3  | 1.7  | 3.2  | 0.7  | 1.3  | 1.3  | 1.6  |
| SSA | 0.1  | 0.1  | 0.2  | 0.3  | 0.3  | 0.2  | 0.2  | 0.3  | 0.6  | 1.4  |
| USA | 1.8  | 1.8  | 1.9  | 2.3  | 4.3  | 5.0  | 5.6  | 7.9  | 15.5 | 41.7 |

Table 1445: FAO — Production—Secondary products—Distillers grains (Mt DM/yr)

50.5 Ethanol

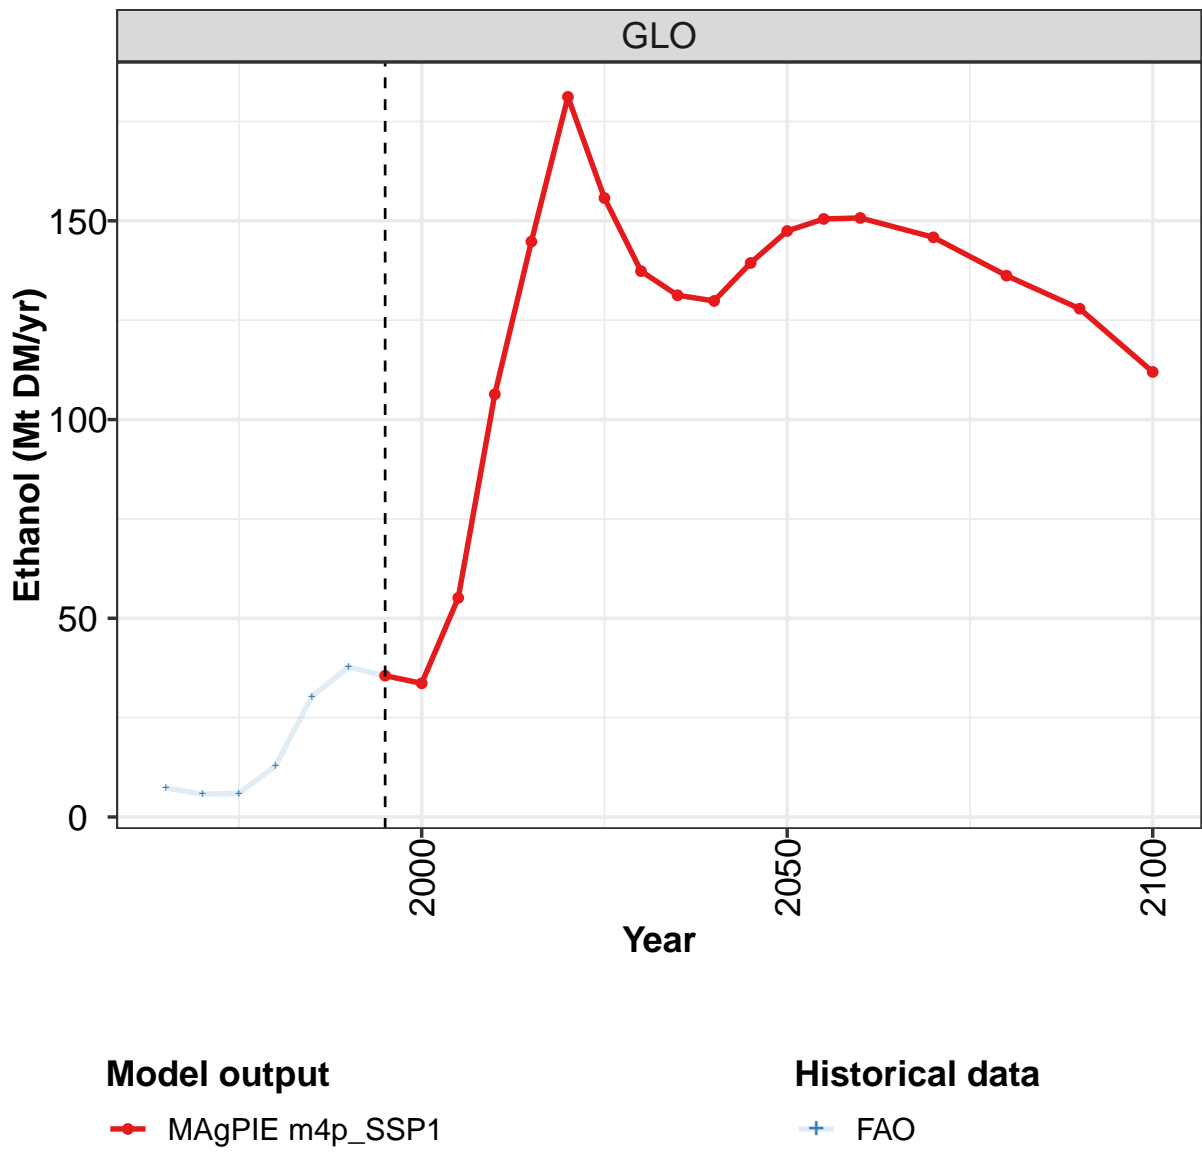

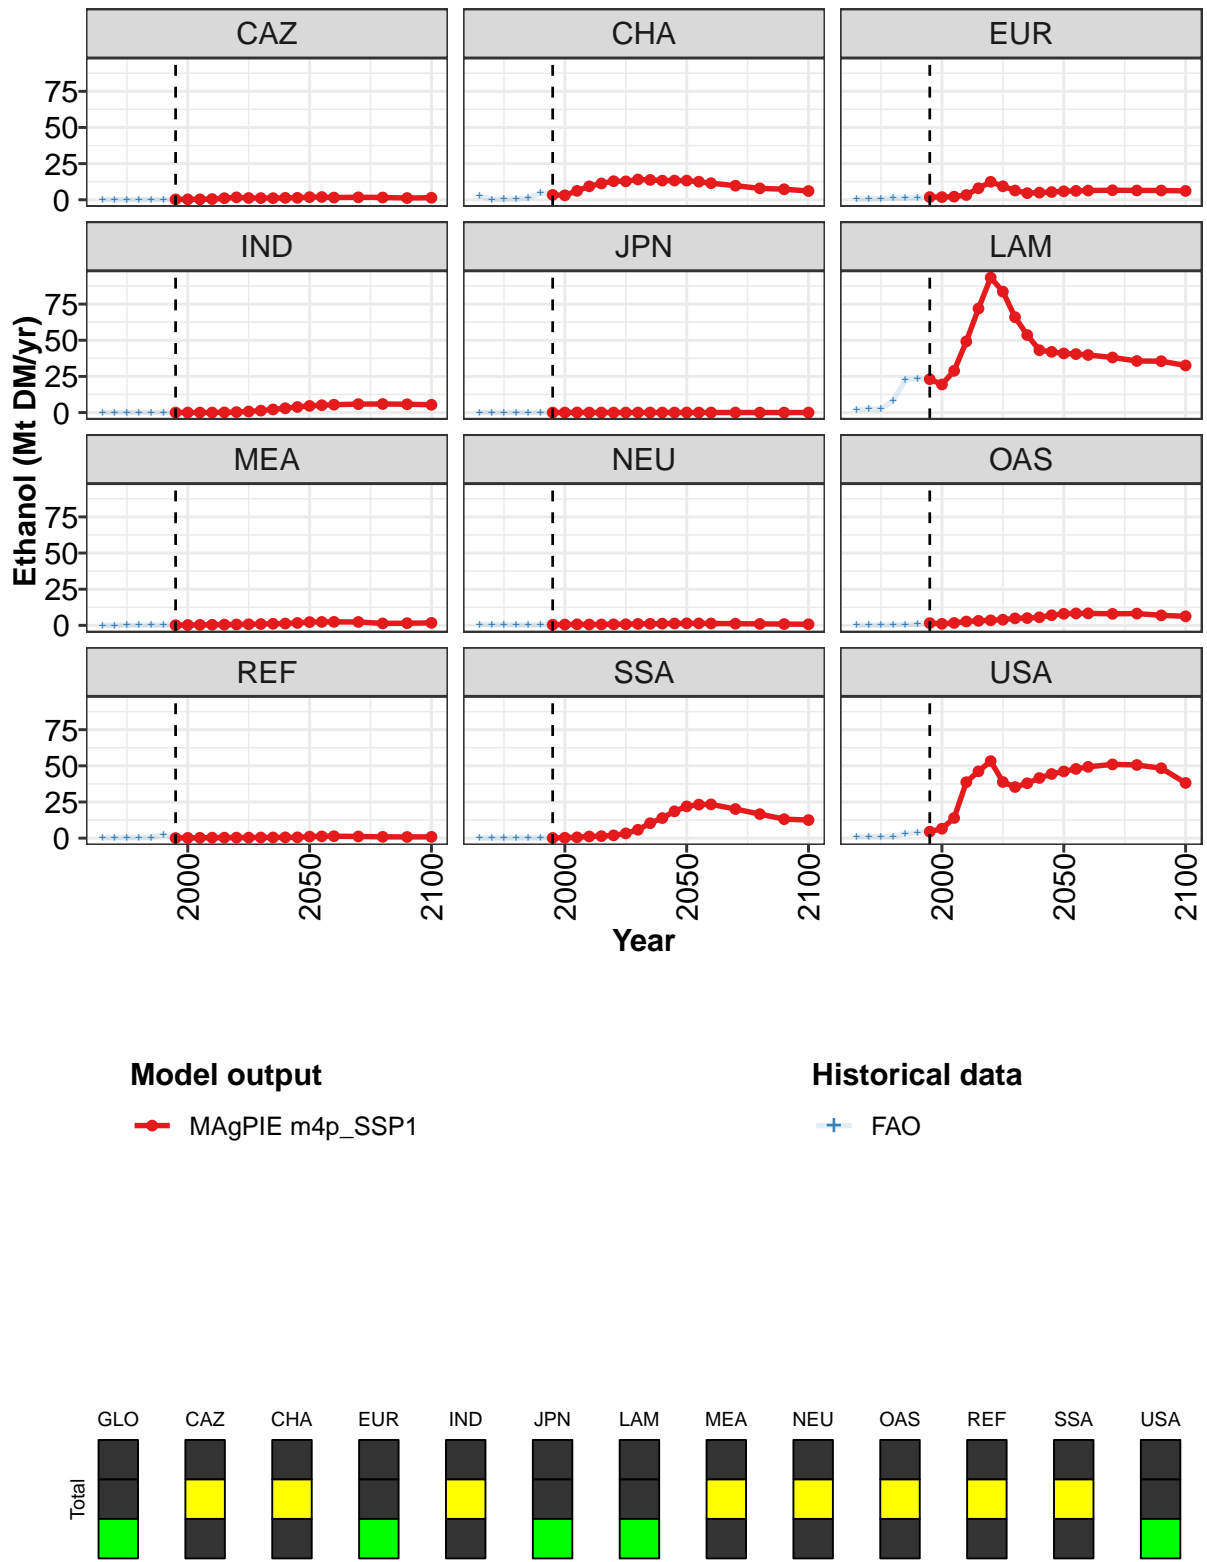

Figure 370: MAgPIE m4p\_SSP1 — Production—Secondary products—Ethanol (Mt DM/yr)

|     | 1995 | 2000 | 2005 | 2010 | 2015 | 2020 | 2025 | 2030 | 2035 | 2040 | 2045 |
|-----|------|------|------|------|------|------|------|------|------|------|------|
| GLO | 36   | 34   | 55   | 106  | 145  | 181  | 156  | 137  | 131  | 130  | 139  |
| CAZ | 0    | 0    | 0    | 1    | 1    | 2    | 1    | 1    | 1    | 1    | 1    |
| CHA | 3    | 3    | 6    | 9    | 11   | 13   | 13   | 14   | 14   | 13   | 13   |
| EUR | 2    | 2    | 2    | 3    | 8    | 12   | 9    | 6    | 5    | 5    | 5    |
| IND | 0    | 0    | 0    | 0    | 0    | 0    | 1    | 1    | 2    | 3    | 4    |
| JPN | 0    | 0    | 0    | 0    | 0    | 0    | 0    | 0    | 0    | 0    | 0    |
| LAM | 23   | 19   | 29   | 49   | 72   | 93   | 84   | 66   | 54   | 43   | 42   |
| MEA | 0    | 0    | 0    | 0    | 1    | 1    | 1    | 1    | 1    | 1    | 2    |
| NEU | 0    | 1    | 1    | 1    | 1    | 1    | 1    | 1    | 1    | 1    | 1    |
| OAS | 2    | 1    | 2    | 3    | 3    | 3    | 4    | 5    | 5    | 6    | 7    |
| REF | 0    | 0    | 0    | 0    | 0    | 0    | 0    | 0    | 0    | 1    | 1    |
| SSA | 0    | 0    | 1    | 1    | 1    | 2    | 3    | 6    | 10   | 14   | 19   |
| USA | 4    | 7    | 14   | 39   | 46   | 53   | 39   | 35   | 38   | 42   | 44   |

Table 1446: MAgPIE m4p\_SSP1 — Production—Secondary products—Ethanol (Mt DM/yr) [PART 1/2]

|     | 2050 | 2055 | 2060 | 2070 | 2080 | 2090 | 2100 |
|-----|------|------|------|------|------|------|------|
| GLO | 147  | 150  | 151  | 146  | 136  | 128  | 112  |
| CAZ | 2    | 2    | 2    | 2    | 2    | 1    | 1    |
| CHA | 13   | 13   | 11   | 10   | 8    | 7    | 6    |
| EUR | 6    | 6    | 6    | 7    | 6    | 6    | 6    |
| IND | 5    | 5    | 5    | 6    | 6    | 6    | 5    |
| JPN | 0    | 0    | 0    | 0    | 0    | 0    | 0    |
| LAM | 41   | 40   | 40   | 38   | 36   | 36   | 33   |
| MEA | 2    | 2    | 2    | 2    | 1    | 1    | 2    |
| NEU | 1    | 1    | 1    | 1    | 1    | 1    | 1    |
| OAS | 8    | 8    | 8    | 8    | 8    | 7    | 6    |
| REF | 1    | 1    | 1    | 1    | 1    | 1    | 1    |
| SSA | 22   | 23   | 23   | 20   | 17   | 13   | 13   |
| USA | 46   | 48   | 49   | 51   | 51   | 48   | 38   |

Table 1447: MAgPIE m4p\_SSP1 — Production—Secondary products—Ethanol (Mt DM/yr) [PART 2/2]

|     | 1965 | 1970 | 1975 | 1980 | 1985 | 1990 | 1995 | 2000 | 2005 | 2010 |
|-----|------|------|------|------|------|------|------|------|------|------|
| GLO | 7    | 6    | 6    | 13   | 30   | 38   | 35   | 34   | 55   | 106  |
| CAZ | 0    | 0    | 0    | 0    | 0    | 0    | 0    | 0    | 0    | 1    |
| CHA | 3    | 0    | 0    | 1    | 1    | 5    | 3    | 3    | 6    | 9    |
| EUR | 1    | 1    | 1    | 1    | 1    | 2    | 2    | 2    | 2    | 3    |
| IND | 0    | 0    | 0    | 0    | 0    | 0    | 0    | 0    | 0    | 0    |
| JPN | 0    | 0    | 0    | 0    | 0    | 0    | 0    | 0    | 0    | 0    |
| LAM | 2    | 3    | 2    | 8    | 23   | 23   | 23   | 19   | 29   | 49   |
| MEA | 0    | 0    | 0    | 0    | 0    | 0    | 0    | 0    | 0    | 0    |
| NEU | 1    | 0    | 1    | 0    | 0    | 0    | 0    | 1    | 1    | 1    |
| OAS | 0    | 0    | 0    | 0    | 1    | 1    | 2    | 1    | 2    | 3    |
| REF | 0    | 0    | 0    | 0    | 0    | 2    | 0    | 0    | 0    | 0    |
| SSA | 0    | 0    | 0    | 0    | 0    | 0    | 0    | 0    | 1    | 1    |
| USA | 1    | 1    | 1    | 1    | 3    | 4    | 4    | 7    | 14   | 39   |

Table 1448: FAO — Production—Secondary products—Ethanol (Mt DM/yr)

50.6 Molasses

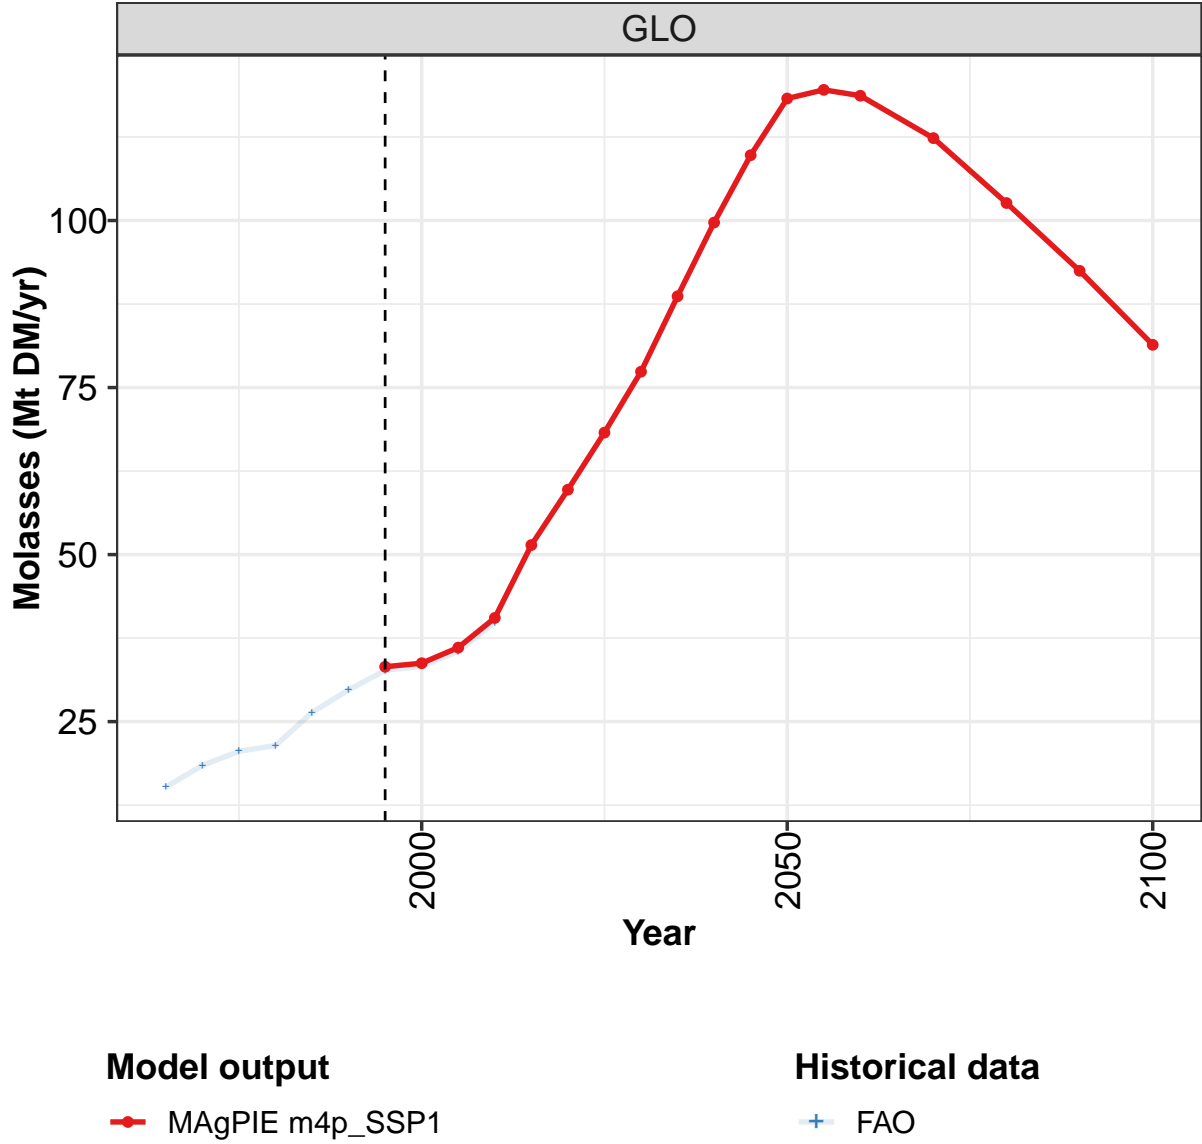

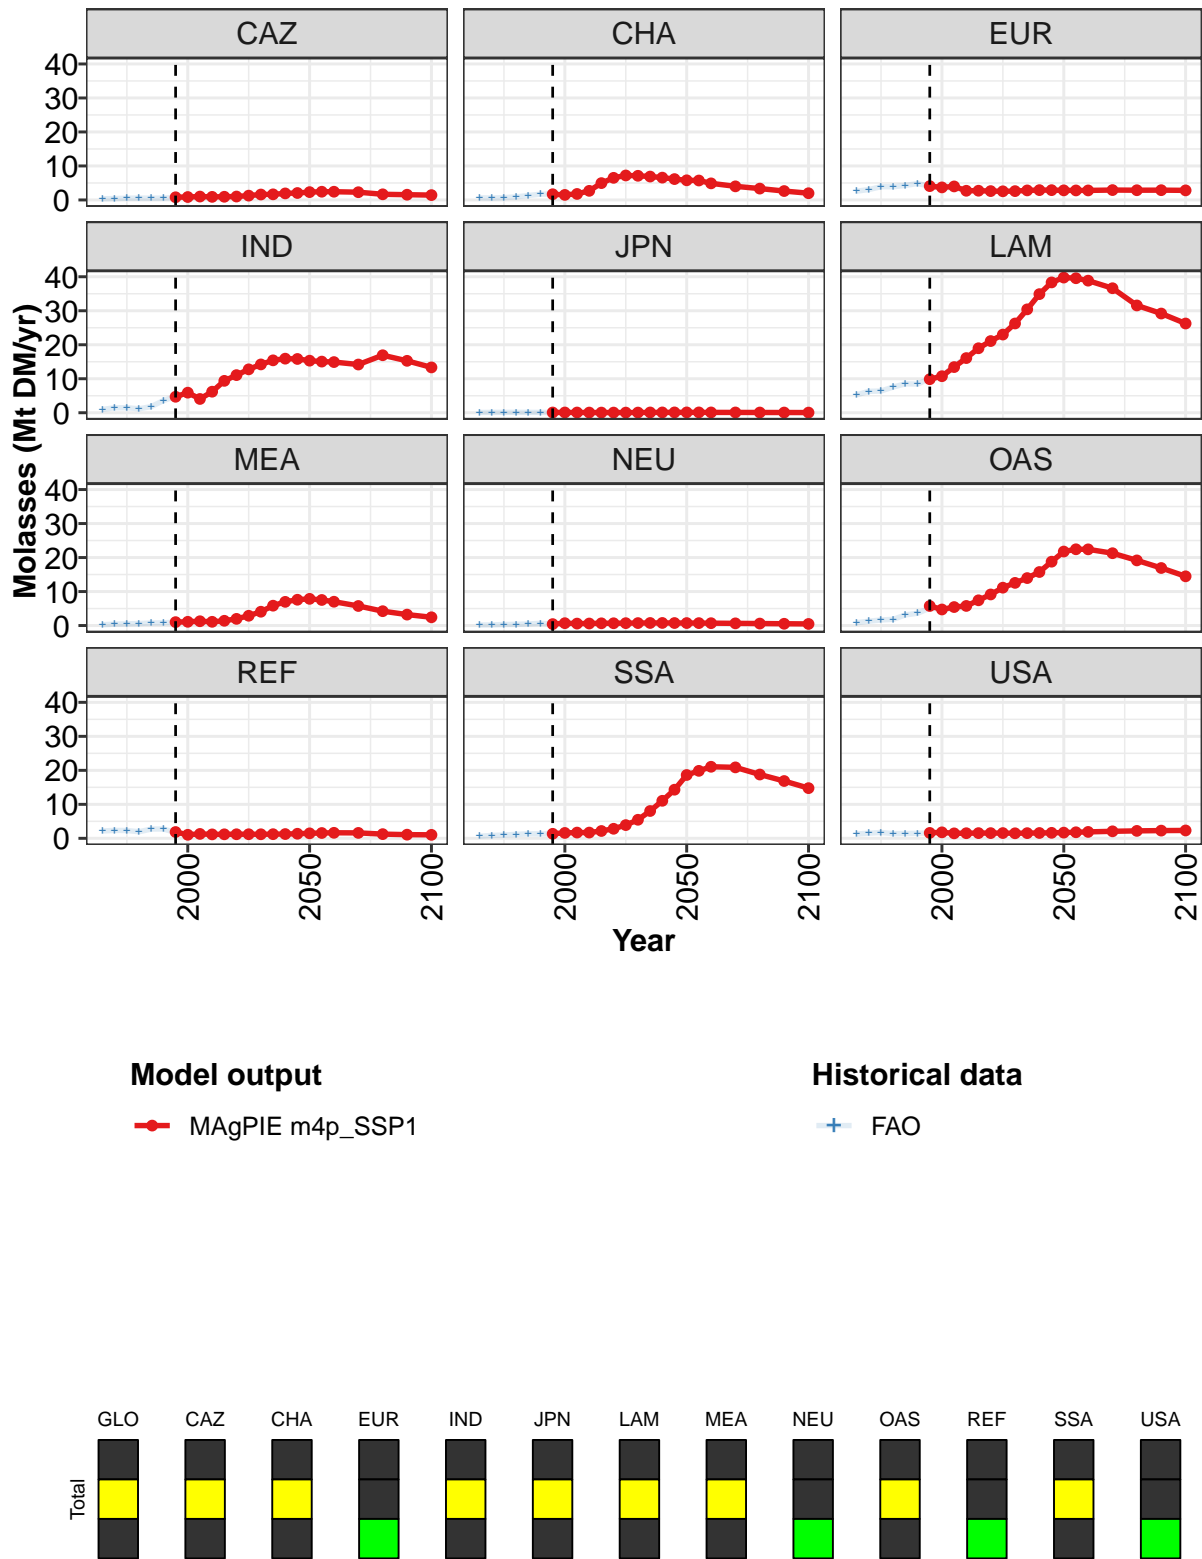

Figure 371: MAgPIE m4p\_SSP1 — Production—Secondary products—Molasses (Mt DM/yr)

|     | 1995 | 2000 | 2005 | 2010 | 2015 | 2020 | 2025 | 2030 | 2035 | 2040 | 2045 |
|-----|------|------|------|------|------|------|------|------|------|------|------|
| GLO | 33   | 34   | 36   | 41   | 51   | 60   | 68   | 77   | 89   | 100  | 110  |
| CAZ | 1    | 1    | 1    | 1    | 1    | 1    | 1    | 2    | 2    | 2    | 2    |
| CHA | 2    | 1    | 2    | 3    | 5    | 7    | 7    | 7    | 7    | 7    | 6    |
| EUR | 4    | 4    | 4    | 3    | 3    | 3    | 3    | 3    | 3    | 3    | 3    |
| IND | 5    | 6    | 4    | 6    | 9    | 11   | 13   | 14   | 15   | 16   | 16   |
| JPN | 0    | 0    | 0    | 0    | 0    | 0    | 0    | 0    | 0    | 0    | 0    |
| LAM | 10   | 11   | 13   | 16   | 19   | 21   | 23   | 26   | 30   | 35   | 38   |
| MEA | 1    | 1    | 1    | 1    | 1    | 2    | 3    | 4    | 6    | 7    | 8    |
| NEU | 0    | 1    | 1    | 1    | 1    | 1    | 1    | 1    | 1    | 1    | 1    |
| OAS | 6    | 5    | 5    | 6    | 7    | 9    | 11   | 13   | 14   | 16   | 19   |
| REF | 2    | 1    | 1    | 1    | 1    | 1    | 1    | 1    | 1    | 1    | 1    |
| SSA | 1    | 2    | 2    | 2    | 2    | 3    | 4    | 5    | 8    | 11   | 14   |
| USA | 2    | 2    | 1    | 2    | 2    | 2    | 2    | 1    | 2    | 2    | 2    |

Table 1449: MAgPIE m4p-SSP1 — Production—Secondary products—Molasses (Mt DM/yr) [PART 1/2]

|     | 2050 | 2055 | 2060 | 2070 | 2080 | 2090 | 2100 |
|-----|------|------|------|------|------|------|------|
| GLO | 118  | 120  | 119  | 112  | 103  | 92   | 81   |
| CAZ | 2    | 2    | 2    | 2    | 2    | 2    | 1    |
| CHA | 6    | 6    | 5    | 4    | 3    | 3    | 2    |
| EUR | 3    | 3    | 3    | 3    | 3    | 3    | 3    |
| IND | 15   | 15   | 15   | 14   | 17   | 15   | 13   |
| JPN | 0    | 0    | 0    | 0    | 0    | 0    | 0    |
| LAM | 40   | 40   | 39   | 37   | 32   | 29   | 26   |
| MEA | 8    | 8    | 7    | 6    | 4    | 3    | 2    |
| NEU | 1    | 1    | 1    | 1    | 1    | 1    | 0    |
| OAS | 22   | 22   | 22   | 21   | 19   | 17   | 14   |
| REF | 1    | 2    | 2    | 2    | 1    | 1    | 1    |
| SSA | 19   | 20   | 21   | 21   | 19   | 17   | 15   |
| USA | 2    | 2    | 2    | 2    | 2    | 2    | 2    |

Table 1450: MAgPIE m4p-SSP1 — Production—Secondary products—Molasses (Mt DM/yr) [PART 2/2]

|     | 1965 | 1970 | 1975 | 1980 | 1985 | 1990 | 1995 | 2000 | 2005 | 2010 |
|-----|------|------|------|------|------|------|------|------|------|------|
| GLO | 15.2 | 18.5 | 20.6 | 21.4 | 26.4 | 29.8 | 32.7 | 33.3 | 35.5 | 39.8 |
| CAZ | 0.3  | 0.4  | 0.5  | 0.5  | 0.5  | 0.5  | 0.8  | 0.8  | 0.8  | 0.7  |
| CHA | 0.6  | 0.6  | 0.7  | 0.9  | 1.3  | 1.7  | 1.7  | 1.5  | 1.8  | 2.7  |
| EUR | 2.6  | 3.1  | 3.9  | 3.9  | 4.3  | 4.8  | 4.0  | 3.5  | 3.7  | 2.7  |
| IND | 1.0  | 1.5  | 1.5  | 1.2  | 1.8  | 3.6  | 4.8  | 5.9  | 4.1  | 6.2  |
| JPN | 0.1  | 0.1  | 0.1  | 0.1  | 0.1  | 0.1  | 0.1  | 0.1  | 0.1  | 0.1  |
| LAM | 5.3  | 6.3  | 6.4  | 7.6  | 8.5  | 8.4  | 10.1 | 10.6 | 13.9 | 16.1 |
| MEA | 0.2  | 0.4  | 0.5  | 0.6  | 0.8  | 0.8  | 1.0  | 1.1  | 1.3  | 1.1  |
| NEU | 0.2  | 0.2  | 0.3  | 0.4  | 0.5  | 0.6  | 0.4  | 0.6  | 0.6  | 0.6  |
| OAS | 0.8  | 1.3  | 1.6  | 1.8  | 3.1  | 3.6  | 5.1  | 4.8  | 4.9  | 5.4  |
| REF | 2.2  | 2.3  | 2.3  | 1.9  | 2.7  | 2.8  | 1.7  | 1.0  | 1.3  | 1.2  |
| SSA | 0.6  | 0.9  | 1.0  | 1.2  | 1.3  | 1.3  | 1.3  | 1.6  | 1.7  | 1.6  |
| USA | 1.3  | 1.5  | 1.7  | 1.4  | 1.4  | 1.5  | 1.6  | 1.8  | 1.5  | 1.6  |

Table 1451: FAO — Production—Secondary products—Molasses (Mt DM/yr)

50.7 Oilcakes

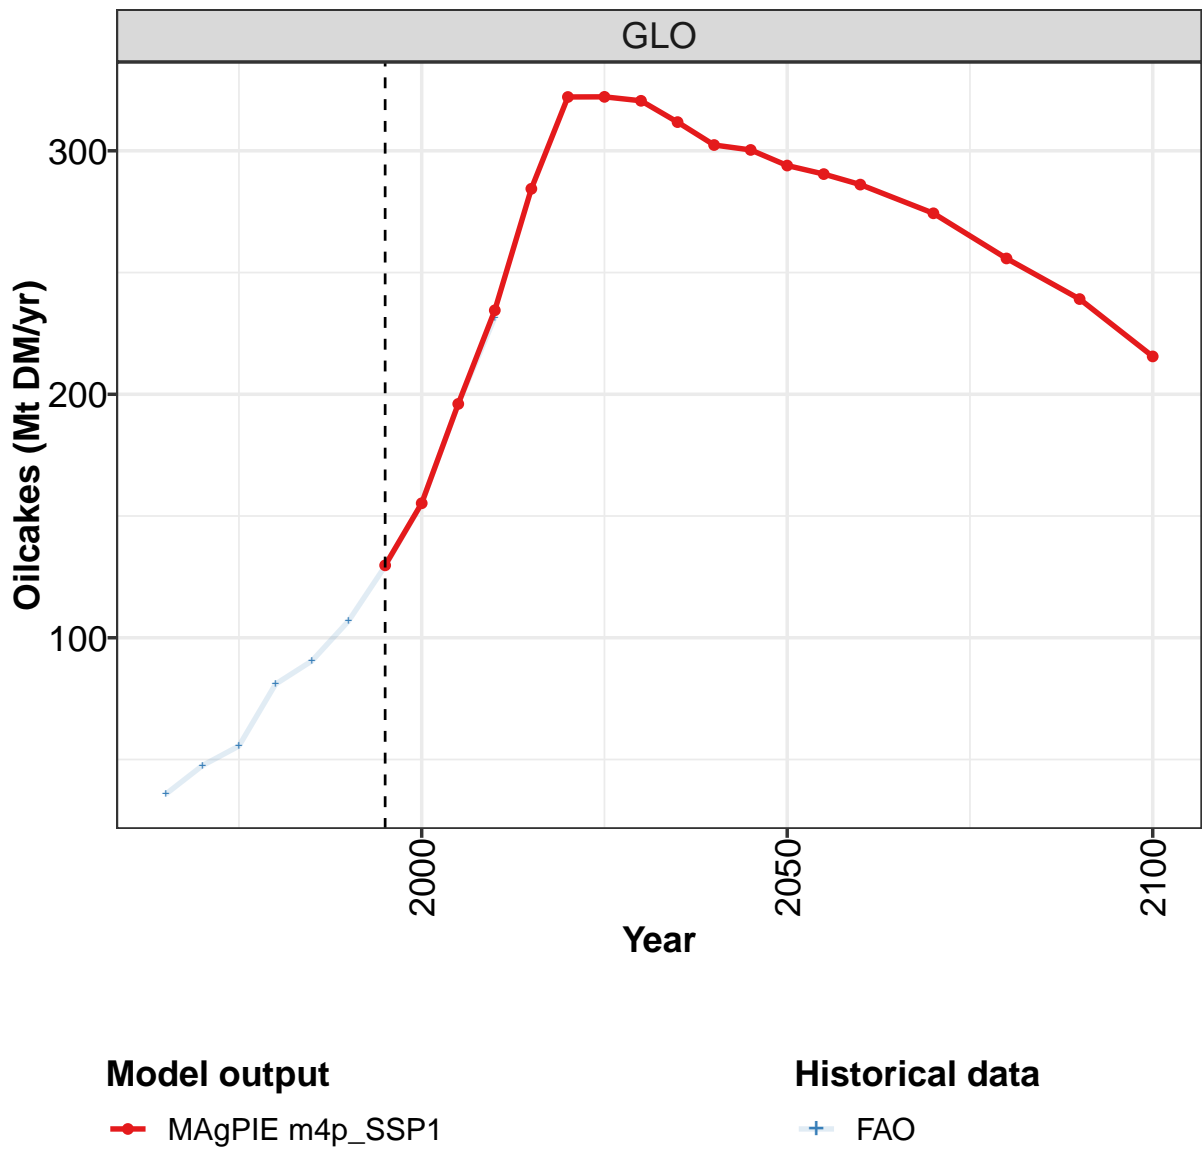



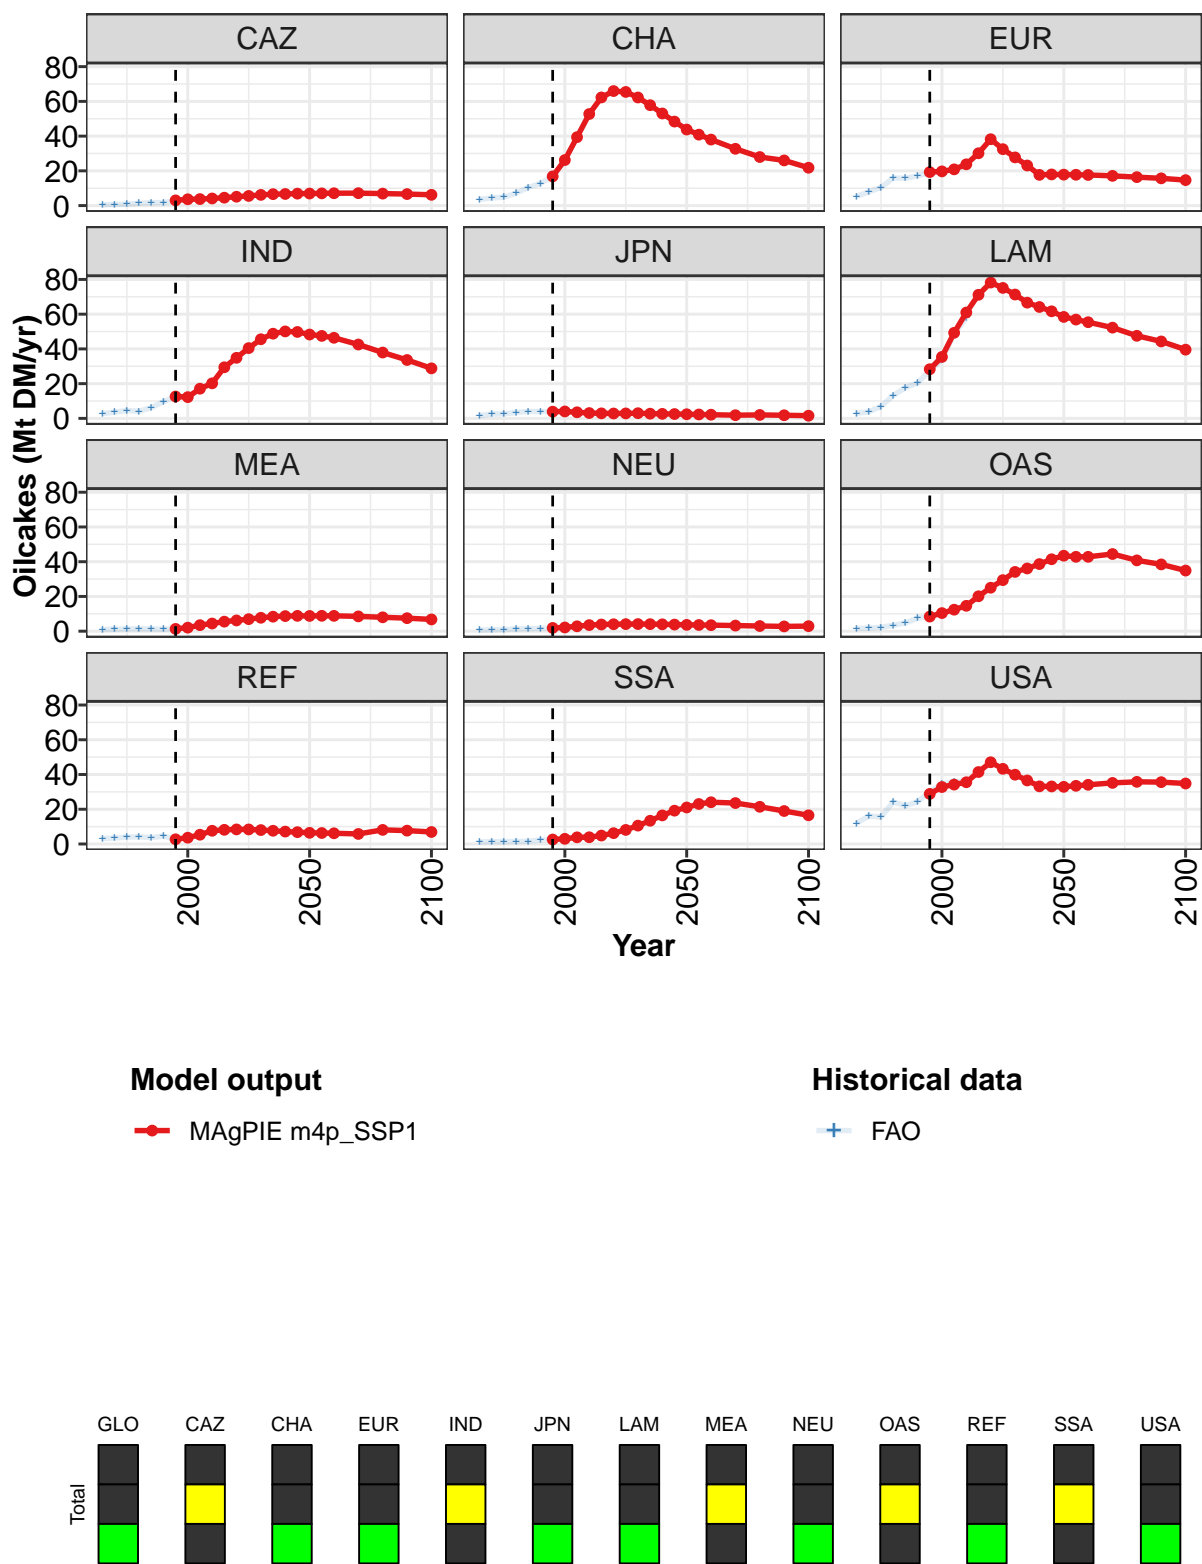

Figure 372: MAgPIE m4p\_SSP1 — Production—Secondary products—Oilcakes (Mt DM/yr)

|     | 1995 | 2000 | 2005 | 2010 | 2015 | 2020 | 2025 | 2030 | 2035 | 2040 | 2045 |
|-----|------|------|------|------|------|------|------|------|------|------|------|
| GLO | 130  | 155  | 196  | 234  | 284  | 322  | 322  | 321  | 312  | 302  | 300  |
| CAZ | 3    | 4    | 4    | 4    | 5    | 5    | 6    | 6    | 7    | 7    | 7    |
| CHA | 17   | 26   | 39   | 53   | 62   | 66   | 65   | 62   | 58   | 53   | 48   |
| EUR | 19   | 20   | 21   | 24   | 30   | 38   | 33   | 28   | 23   | 18   | 18   |
| IND | 13   | 12   | 17   | 20   | 29   | 35   | 40   | 46   | 49   | 50   | 50   |
| JPN | 4    | 4    | 4    | 3    | 3    | 3    | 3    | 3    | 3    | 3    | 3    |
| LAM | 28   | 35   | 49   | 61   | 71   | 78   | 75   | 71   | 67   | 64   | 62   |
| MEA | 1    | 2    | 3    | 4    | 5    | 6    | 7    | 8    | 8    | 9    | 9    |
| NEU | 2    | 2    | 3    | 4    | 4    | 4    | 4    | 4    | 4    | 4    | 4    |
| OAS | 8    | 10   | 12   | 15   | 20   | 25   | 29   | 34   | 36   | 39   | 41   |
| REF | 3    | 4    | 5    | 8    | 8    | 8    | 8    | 8    | 8    | 7    | 7    |
| SSA | 3    | 3    | 4    | 4    | 5    | 6    | 8    | 11   | 13   | 16   | 19   |
| USA | 29   | 33   | 34   | 36   | 41   | 47   | 43   | 40   | 37   | 33   | 33   |

Table 1452: MAgPIE m4p-SSP1 — Production—Secondary products—Oilcakes (Mt DM/yr) [PART 1/2]

|     | 2050 | 2055 | 2060 | 2070 | 2080 | 2090 | 2100 |
|-----|------|------|------|------|------|------|------|
| GLO | 294  | 290  | 286  | 274  | 256  | 239  | 216  |
| CAZ | 7    | 7    | 7    | 7    | 7    | 7    | 6    |
| CHA | 44   | 41   | 38   | 33   | 28   | 26   | 22   |
| EUR | 18   | 18   | 18   | 17   | 16   | 16   | 15   |
| IND | 48   | 47   | 46   | 43   | 38   | 34   | 29   |
| JPN | 2    | 2    | 2    | 2    | 2    | 2    | 2    |
| LAM | 58   | 57   | 55   | 52   | 48   | 44   | 40   |
| MEA | 9    | 9    | 9    | 9    | 8    | 7    | 7    |
| NEU | 4    | 4    | 3    | 3    | 3    | 3    | 3    |
| OAS | 43   | 43   | 43   | 44   | 41   | 38   | 35   |
| REF | 6    | 6    | 6    | 6    | 8    | 8    | 7    |
| SSA | 21   | 23   | 24   | 24   | 21   | 19   | 17   |
| USA | 33   | 33   | 34   | 35   | 36   | 36   | 35   |

Table 1453: MAgPIE m4p-SSP1 — Production—Secondary products—Oilcakes (Mt DM/yr) [PART 2/2]

|     | 1965 | 1970 | 1975 | 1980 | 1985 | 1990 | 1995 | 2000 | 2005 | 2010 |
|-----|------|------|------|------|------|------|------|------|------|------|
| GLO | 36   | 48   | 56   | 81   | 91   | 107  | 129  | 155  | 196  | 232  |
| CAZ | 0    | 1    | 1    | 1    | 2    | 2    | 3    | 3    | 4    | 4    |
| CHA | 4    | 4    | 5    | 7    | 10   | 13   | 17   | 26   | 39   | 53   |
| EUR | 5    | 8    | 10   | 16   | 16   | 17   | 19   | 20   | 20   | 23   |
| IND | 3    | 4    | 5    | 4    | 6    | 10   | 13   | 12   | 17   | 20   |
| JPN | 2    | 3    | 3    | 3    | 4    | 4    | 4    | 4    | 4    | 3    |
| LAM | 3    | 4    | 7    | 13   | 18   | 20   | 27   | 34   | 49   | 58   |
| MEA | 1    | 1    | 1    | 1    | 1    | 1    | 1    | 2    | 3    | 4    |
| NEU | 1    | 1    | 1    | 1    | 1    | 2    | 2    | 2    | 3    | 3    |
| OAS | 2    | 2    | 2    | 3    | 5    | 7    | 9    | 10   | 13   | 15   |
| REF | 3    | 3    | 4    | 4    | 4    | 5    | 3    | 3    | 5    | 8    |
| SSA | 1    | 1    | 1    | 1    | 2    | 2    | 2    | 3    | 4    | 4    |
| USA | 12   | 16   | 15   | 24   | 22   | 24   | 30   | 35   | 36   | 36   |

Table 1454: FAO — Production—Secondary products—Oilcakes (Mt DM/yr)

50.8 Oils

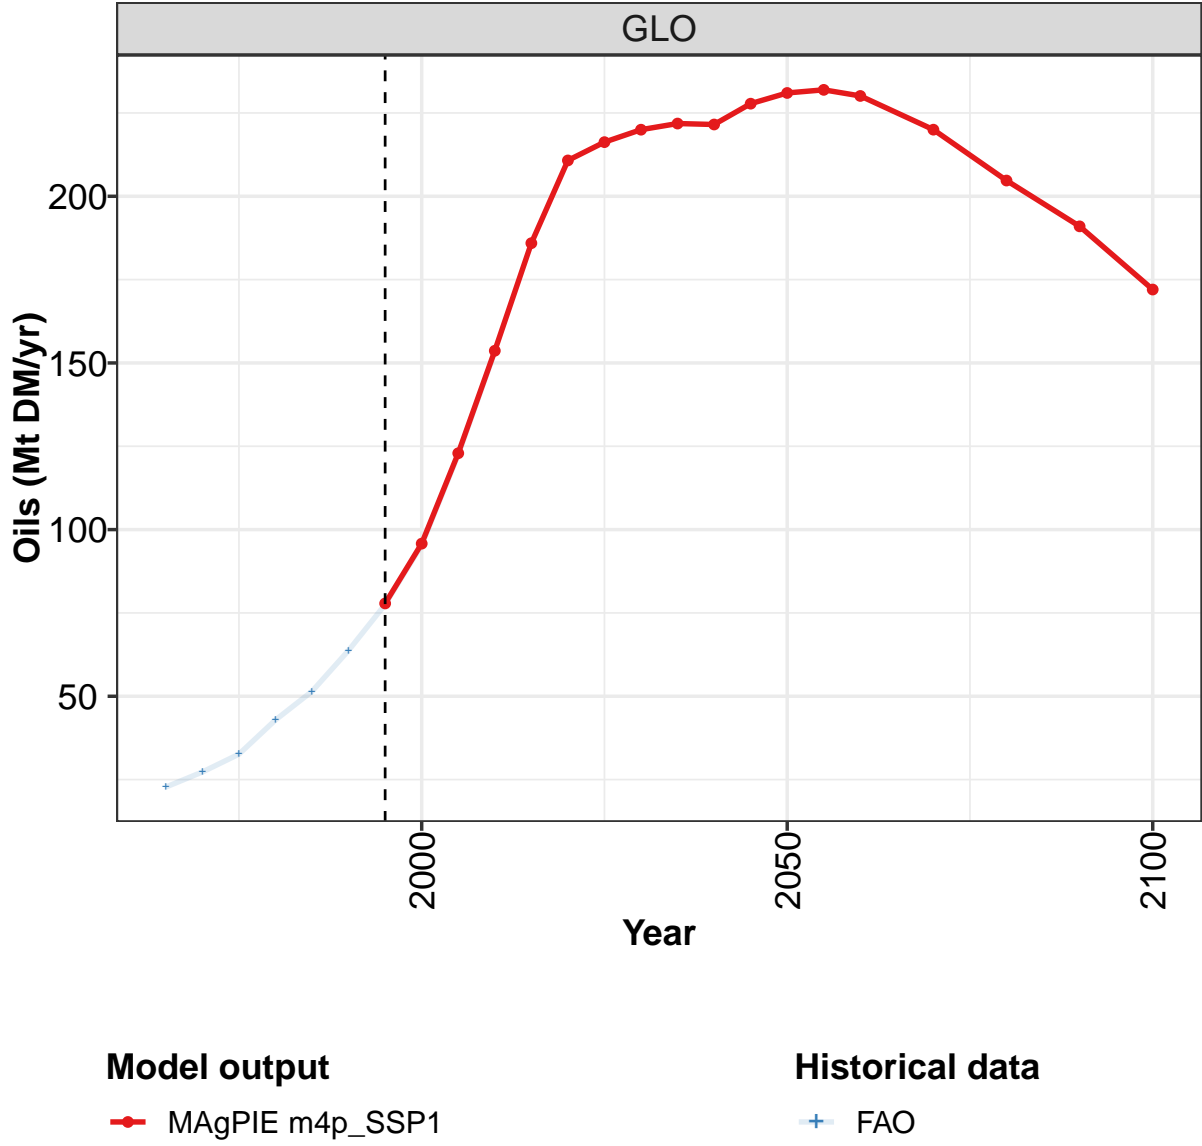

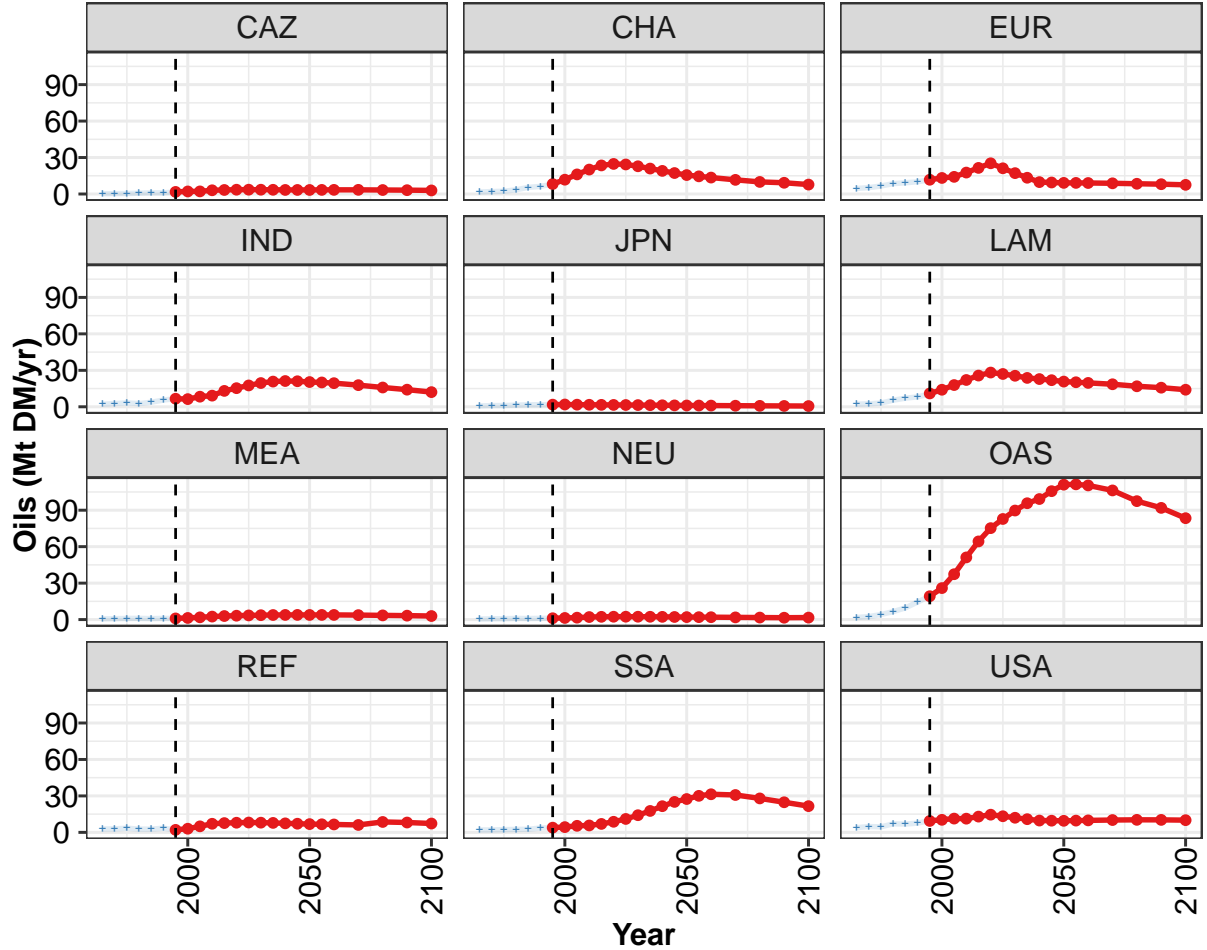

Model output

MAgPIE m4p\_SSP1

Historical data

FAO

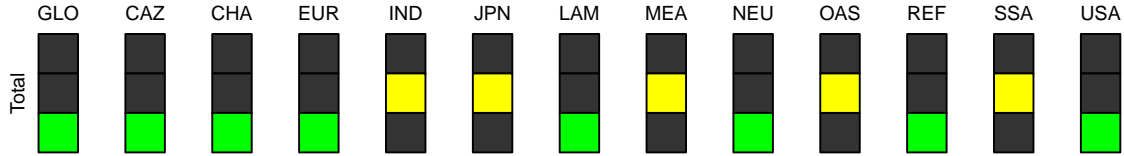

Figure 373: MAgPIE m4p\_SSP1 — Production—Secondary products—Oils (Mt DM/yr)

|     | 1995 | 2000 | 2005 | 2010 | 2015 | 2020 | 2025 | 2030 | 2035 | 2040 | 2045 |
|-----|------|------|------|------|------|------|------|------|------|------|------|
| GLO | 78   | 96   | 123  | 154  | 186  | 211  | 216  | 220  | 222  | 222  | 228  |
| CAZ | 2    | 2    | 2    | 3    | 3    | 4    | 4    | 4    | 3    | 3    | 3    |
| CHA | 8    | 12   | 16   | 20   | 24   | 25   | 24   | 23   | 21   | 19   | 17   |
| EUR | 12   | 13   | 14   | 18   | 21   | 25   | 21   | 17   | 13   | 10   | 9    |
| IND | 7    | 6    | 8    | 9    | 13   | 15   | 18   | 20   | 21   | 21   | 21   |
| JPN | 2    | 2    | 2    | 2    | 2    | 2    | 1    | 1    | 1    | 1    | 1    |
| LAM | 11   | 14   | 18   | 22   | 26   | 28   | 27   | 26   | 24   | 23   | 22   |
| MEA | 1    | 1    | 2    | 2    | 3    | 3    | 3    | 4    | 4    | 4    | 4    |
| NEU | 1    | 1    | 2    | 2    | 2    | 2    | 2    | 2    | 2    | 2    | 2    |
| OAS | 19   | 26   | 37   | 51   | 64   | 75   | 83   | 90   | 96   | 99   | 106  |
| REF | 2    | 3    | 5    | 7    | 8    | 8    | 8    | 8    | 8    | 7    | 7    |
| SSA | 4    | 4    | 5    | 6    | 7    | 9    | 11   | 14   | 18   | 22   | 25   |
| USA | 9    | 10   | 11   | 11   | 13   | 15   | 13   | 12   | 11   | 10   | 10   |

Table 1455: MAgPIE m4p\_SSP1 — Production—Secondary products—Oils (Mt DM/yr) [PART 1/2]

|     | 2050 | 2055 | 2060 | 2070 | 2080 | 2090 | 2100 |
|-----|------|------|------|------|------|------|------|
| GLO | 231  | 232  | 230  | 220  | 205  | 191  | 172  |
| CAZ | 3    | 3    | 3    | 3    | 3    | 3    | 3    |
| CHA | 16   | 15   | 14   | 12   | 10   | 9    | 8    |
| EUR | 9    | 9    | 9    | 9    | 8    | 8    | 8    |
| IND | 20   | 20   | 19   | 18   | 16   | 14   | 12   |
| JPN | 1    | 1    | 1    | 1    | 1    | 1    | 1    |
| LAM | 21   | 20   | 20   | 19   | 17   | 16   | 14   |
| MEA | 4    | 4    | 4    | 4    | 3    | 3    | 3    |
| NEU | 2    | 2    | 2    | 2    | 2    | 2    | 2    |
| OAS | 111  | 111  | 110  | 106  | 97   | 92   | 83   |
| REF | 7    | 7    | 7    | 6    | 9    | 8    | 7    |
| SSA | 27   | 30   | 31   | 31   | 28   | 25   | 22   |
| USA | 10   | 10   | 10   | 10   | 10   | 10   | 10   |

Table 1456: MAgPIE m4p\_SSP1 — Production—Secondary products—Oils (Mt DM/yr) [PART 2/2]

|     | 1965 | 1970 | 1975 | 1980 | 1985 | 1990 | 1995 | 2000 | 2005 | 2010 |
|-----|------|------|------|------|------|------|------|------|------|------|
| GLO | 23   | 27   | 33   | 43   | 51   | 64   | 78   | 95   | 122  | 153  |
| CAZ | 0    | 0    | 0    | 1    | 1    | 1    | 2    | 2    | 2    | 3    |
| CHA | 2    | 2    | 2    | 3    | 5    | 6    | 8    | 12   | 16   | 20   |
| EUR | 5    | 5    | 7    | 9    | 9    | 10   | 12   | 13   | 14   | 18   |
| IND | 2    | 3    | 3    | 3    | 4    | 6    | 7    | 6    | 8    | 9    |
| JPN | 1    | 1    | 1    | 1    | 2    | 2    | 2    | 2    | 2    | 2    |
| LAM | 2    | 2    | 3    | 5    | 7    | 8    | 11   | 13   | 18   | 21   |
| MEA | 1    | 1    | 1    | 1    | 1    | 1    | 1    | 1    | 2    | 2    |
| NEU | 0    | 1    | 1    | 1    | 1    | 1    | 1    | 1    | 2    | 2    |
| OAS | 2    | 2    | 4    | 7    | 10   | 14   | 19   | 26   | 37   | 52   |
| REF | 3    | 3    | 3    | 3    | 3    | 3    | 2    | 3    | 5    | 7    |
| SSA | 2    | 2    | 2    | 2    | 3    | 4    | 4    | 4    | 5    | 6    |
| USA | 4    | 5    | 5    | 7    | 7    | 8    | 10   | 11   | 12   | 11   |

Table 1457: FAO — Production—Secondary products—Oils (Mt DM/yr)

50.9 Sugar

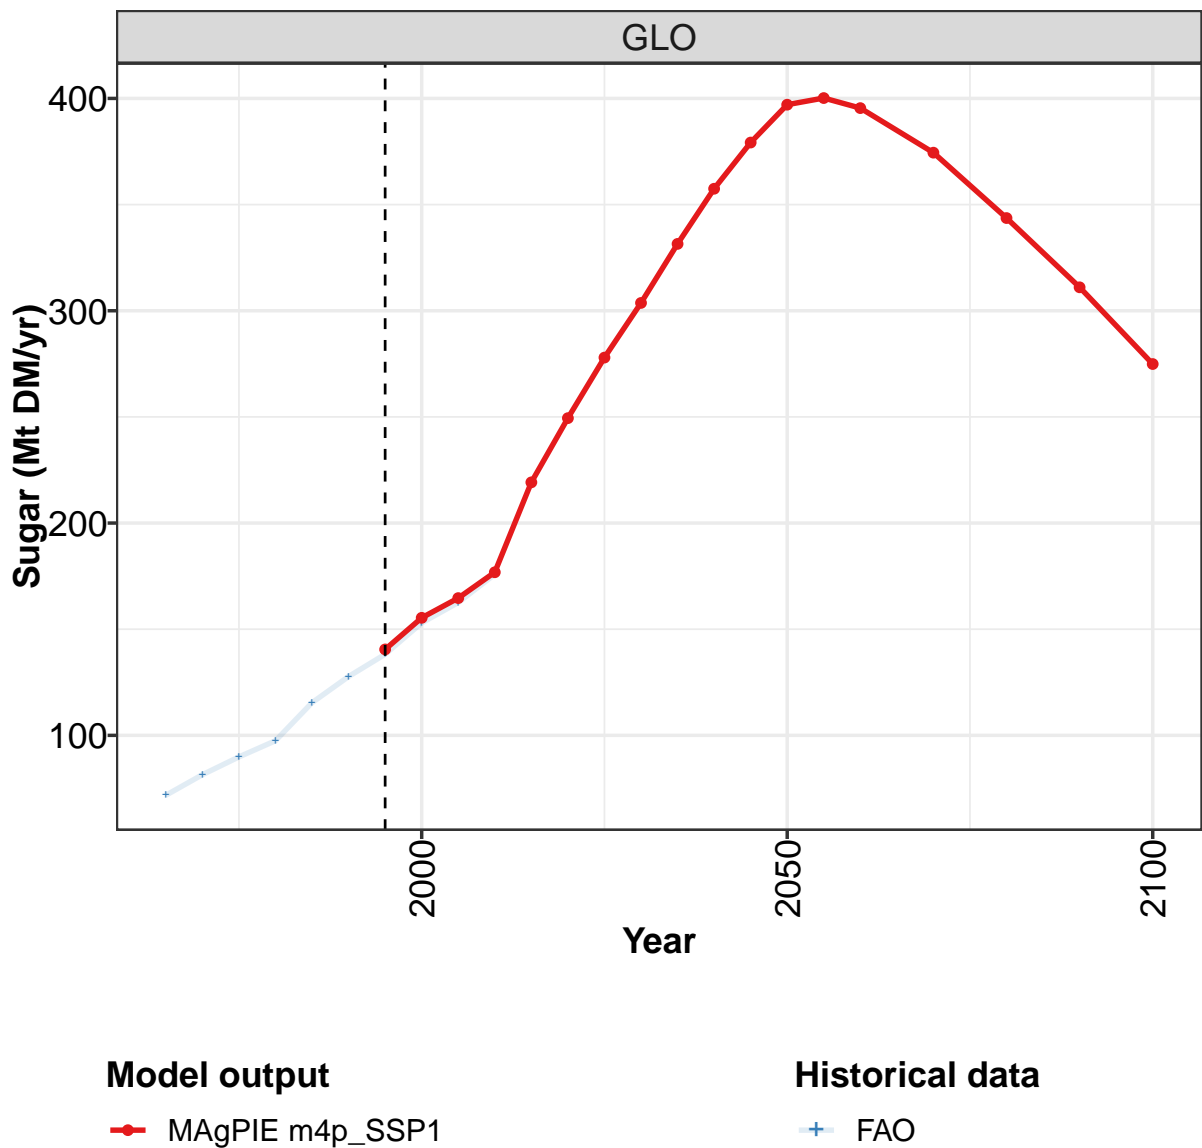

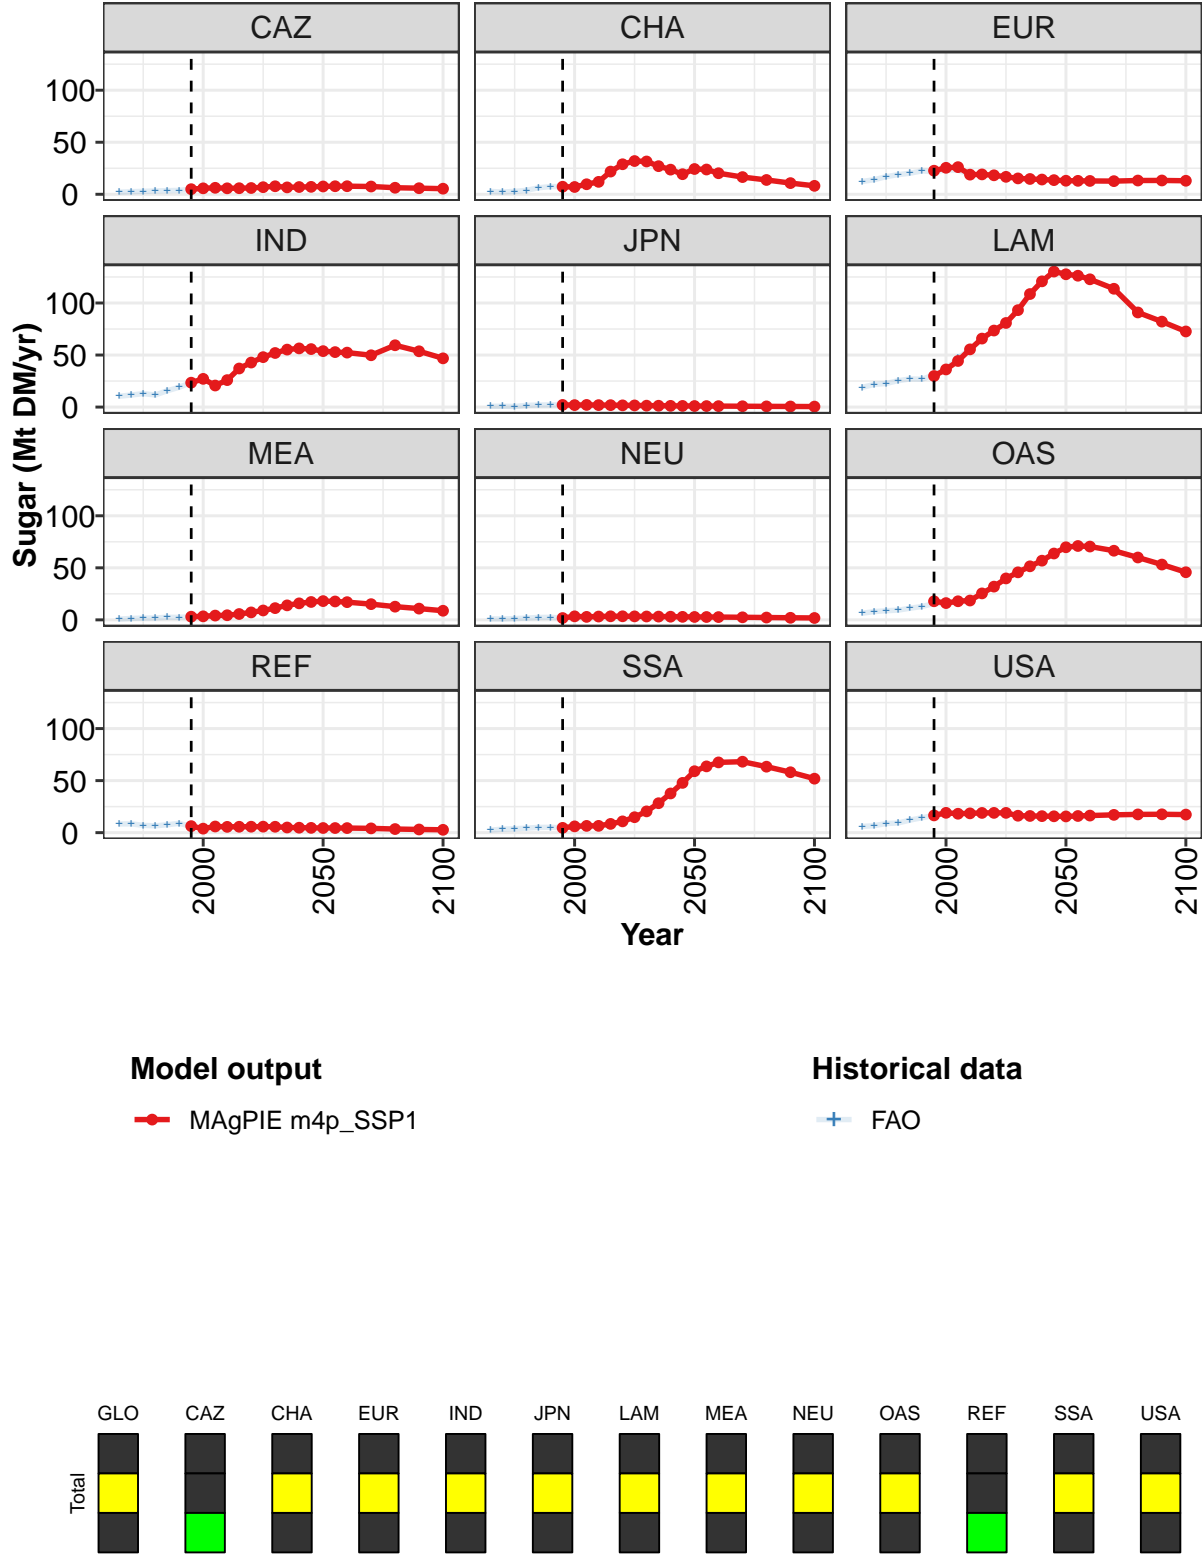

Figure 374: MAgPIE m4p\_SSP1 — Production—Secondary products—Sugar (Mt DM/yr)

|     | 1995 | 2000 | 2005 | 2010 | 2015 | 2020 | 2025 | 2030 | 2035 | 2040 | 2045 |
|-----|------|------|------|------|------|------|------|------|------|------|------|
| GLO | 140  | 155  | 165  | 177  | 219  | 249  | 278  | 304  | 332  | 357  | 379  |
| CAZ | 5    | 6    | 6    | 6    | 6    | 6    | 7    | 8    | 7    | 7    | 7    |
| CHA | 7    | 7    | 10   | 12   | 22   | 29   | 32   | 32   | 27   | 24   | 19   |
| EUR | 23   | 25   | 26   | 19   | 19   | 18   | 17   | 15   | 15   | 14   | 14   |
| IND | 23   | 27   | 21   | 26   | 37   | 43   | 48   | 52   | 55   | 56   | 56   |
| JPN | 2    | 2    | 2    | 2    | 2    | 2    | 2    | 1    | 1    | 1    | 1    |
| LAM | 30   | 36   | 44   | 55   | 66   | 74   | 81   | 93   | 109  | 121  | 130  |
| MEA | 3    | 3    | 4    | 4    | 6    | 7    | 9    | 11   | 14   | 16   | 17   |
| NEU | 2    | 3    | 3    | 3    | 3    | 3    | 3    | 3    | 3    | 3    | 3    |
| OAS | 18   | 16   | 18   | 19   | 25   | 32   | 40   | 46   | 51   | 57   | 64   |
| REF | 6    | 4    | 6    | 6    | 6    | 6    | 6    | 6    | 5    | 5    | 5    |
| SSA | 5    | 6    | 7    | 7    | 8    | 11   | 15   | 20   | 28   | 38   | 48   |
| USA | 17   | 19   | 18   | 19   | 19   | 19   | 19   | 16   | 16   | 16   | 16   |

Table 1458: MAgPIE m4p\_SSP1 — Production—Secondary products—Sugar (Mt DM/yr) [PART 1/2]

|     | 2050 | 2055 | 2060 | 2070 | 2080 | 2090 | 2100 |
|-----|------|------|------|------|------|------|------|
| GLO | 397  | 400  | 395  | 374  | 344  | 311  | 275  |
| CAZ | 8    | 8    | 8    | 7    | 6    | 6    | 5    |
| CHA | 24   | 24   | 20   | 17   | 14   | 11   | 8    |
| EUR | 13   | 13   | 13   | 13   | 13   | 13   | 13   |
| IND | 54   | 53   | 52   | 50   | 59   | 54   | 47   |
| JPN | 1    | 1    | 1    | 1    | 1    | 1    | 0    |
| LAM | 128  | 126  | 123  | 114  | 91   | 82   | 73   |
| MEA | 18   | 18   | 17   | 15   | 13   | 11   | 9    |
| NEU | 3    | 3    | 3    | 2    | 2    | 2    | 2    |
| OAS | 70   | 71   | 70   | 66   | 60   | 53   | 46   |
| REF | 4    | 4    | 4    | 4    | 3    | 3    | 3    |
| SSA | 59   | 64   | 68   | 68   | 63   | 58   | 52   |
| USA | 16   | 16   | 16   | 17   | 18   | 18   | 17   |

Table 1459: MAgPIE m4p\_SSP1 — Production—Secondary products—Sugar (Mt DM/yr) [PART 2/2]

|     | 1965 | 1970 | 1975 | 1980 | 1985 | 1990 | 1995 | 2000 | 2005 | 2010 |
|-----|------|------|------|------|------|------|------|------|------|------|
| GLO | 72   | 81   | 90   | 97   | 115  | 128  | 138  | 153  | 163  | 176  |
| CAZ | 2    | 2    | 3    | 3    | 3    | 4    | 5    | 6    | 5    | 5    |
| CHA | 3    | 2    | 3    | 4    | 6    | 7    | 7    | 7    | 10   | 12   |
| EUR | 12   | 14   | 17   | 19   | 20   | 23   | 22   | 23   | 23   | 19   |
| IND | 10   | 12   | 13   | 12   | 16   | 19   | 24   | 27   | 21   | 26   |
| JPN | 1    | 1    | 1    | 2    | 2    | 2    | 2    | 2    | 2    | 2    |
| LAM | 19   | 22   | 23   | 25   | 27   | 27   | 31   | 37   | 47   | 55   |
| MEA | 1    | 1    | 2    | 2    | 3    | 2    | 3    | 3    | 4    | 4    |
| NEU | 1    | 1    | 1    | 2    | 2    | 2    | 2    | 3    | 3    | 3    |
| OAS | 6    | 8    | 9    | 9    | 11   | 13   | 16   | 16   | 17   | 18   |
| REF | 8    | 8    | 7    | 7    | 8    | 9    | 6    | 4    | 6    | 6    |
| SSA | 2    | 3    | 4    | 4    | 5    | 5    | 5    | 6    | 7    | 6    |
| USA | 6    | 7    | 9    | 9    | 12   | 14   | 17   | 19   | 18   | 20   |

Table 1460: FAO — Production—Secondary products—Sugar (Mt DM/yr)



Part XIII

# Productivity

51 Landuse Intensity Indicator Tau

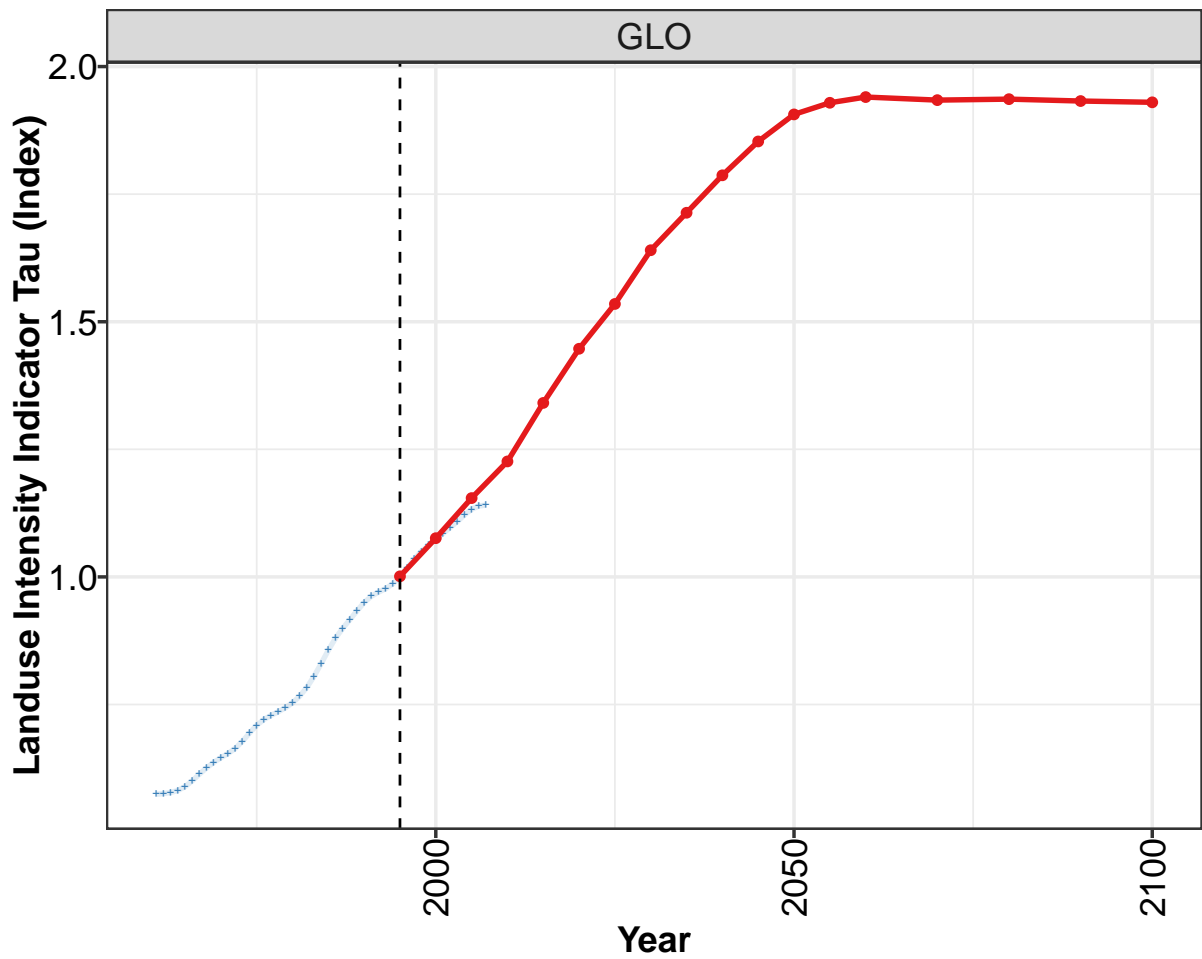

**Model output**  
MAgPIE m4p\_SSP1

**Historical data**  
dietrich\_et\_al\_2012

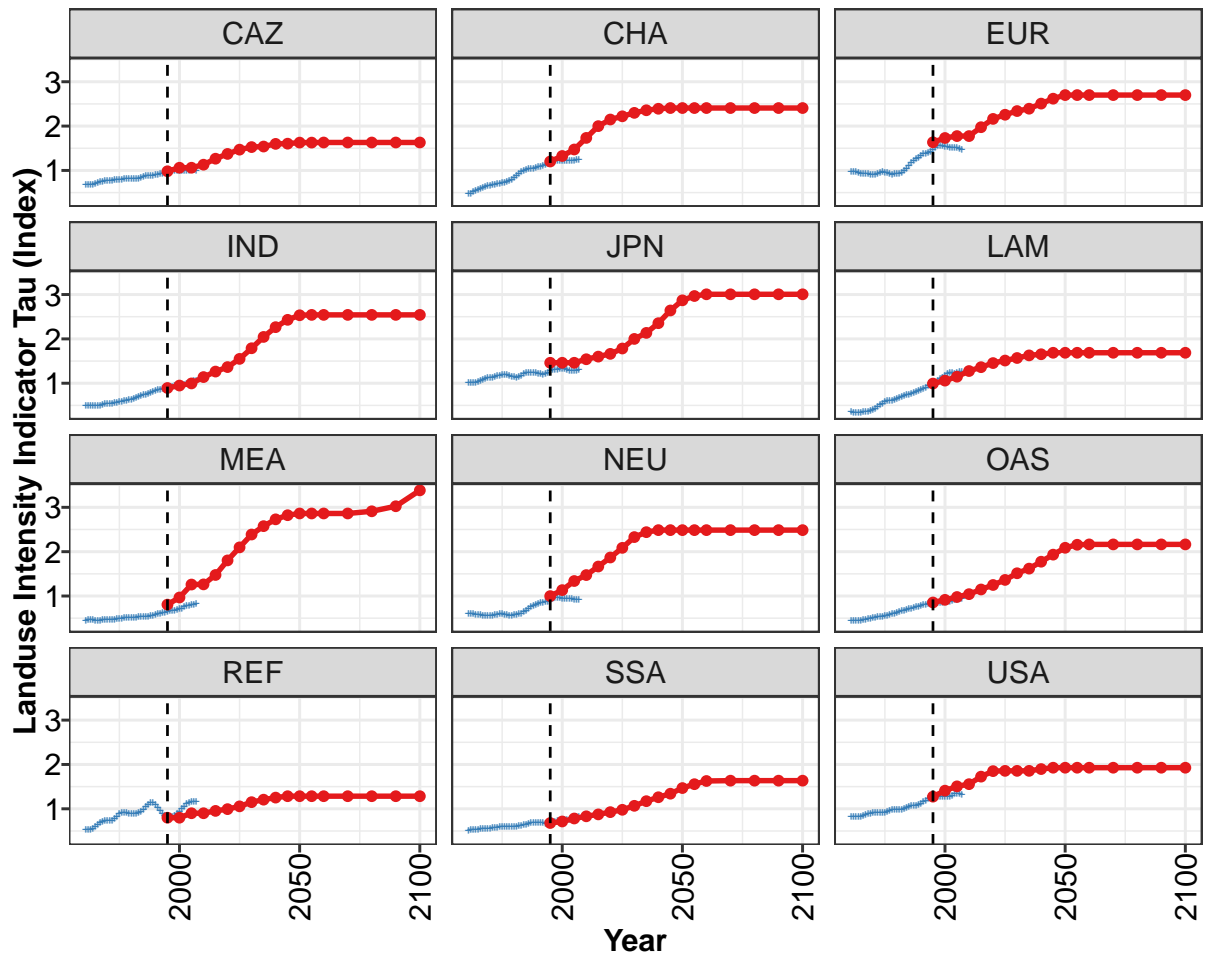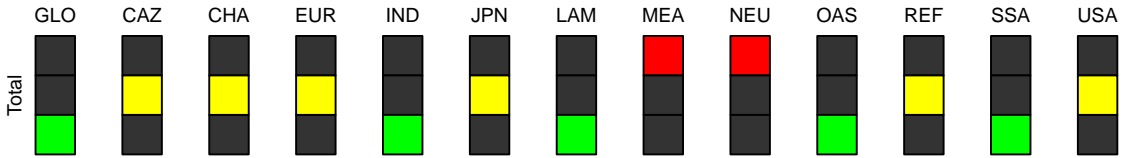

Figure 375: MAgPIE m4p\_SSP1 — Productivity—Landuse Intensity Indicator Tau (Index)

|     | 1995 | 2000 | 2005 | 2010 | 2015 | 2020 | 2025 | 2030 | 2035 | 2040 | 2045 |
|-----|------|------|------|------|------|------|------|------|------|------|------|
| GLO | 1.00 | 1.08 | 1.15 | 1.23 | 1.34 | 1.45 | 1.53 | 1.64 | 1.71 | 1.79 | 1.85 |
| CAZ | 0.98 | 1.06 | 1.06 | 1.13 | 1.26 | 1.37 | 1.47 | 1.53 | 1.54 | 1.60 | 1.60 |
| CHA | 1.20 | 1.33 | 1.47 | 1.73 | 2.00 | 2.15 | 2.22 | 2.30 | 2.36 | 2.39 | 2.41 |
| EUR | 1.64 | 1.73 | 1.78 | 1.78 | 1.98 | 2.16 | 2.26 | 2.34 | 2.39 | 2.51 | 2.62 |
| IND | 0.89 | 0.95 | 1.00 | 1.14 | 1.26 | 1.36 | 1.55 | 1.79 | 2.04 | 2.27 | 2.43 |
| JPN | 1.46 | 1.46 | 1.46 | 1.54 | 1.60 | 1.66 | 1.78 | 2.00 | 2.14 | 2.35 | 2.64 |
| LAM | 0.99 | 1.06 | 1.15 | 1.28 | 1.36 | 1.46 | 1.51 | 1.57 | 1.63 | 1.65 | 1.69 |
| MEA | 0.81 | 0.97 | 1.26 | 1.26 | 1.48 | 1.80 | 2.10 | 2.39 | 2.58 | 2.73 | 2.82 |
| NEU | 1.00 | 1.13 | 1.34 | 1.47 | 1.67 | 1.87 | 2.09 | 2.33 | 2.44 | 2.49 | 2.49 |
| OAS | 0.85 | 0.91 | 0.98 | 1.04 | 1.15 | 1.25 | 1.36 | 1.51 | 1.62 | 1.77 | 1.93 |
| REF | 0.80 | 0.80 | 0.90 | 0.90 | 0.95 | 0.99 | 1.06 | 1.15 | 1.21 | 1.25 | 1.28 |
| SSA | 0.68 | 0.71 | 0.78 | 0.83 | 0.87 | 0.93 | 0.98 | 1.07 | 1.17 | 1.26 | 1.34 |
| USA | 1.27 | 1.41 | 1.51 | 1.56 | 1.73 | 1.85 | 1.86 | 1.86 | 1.86 | 1.90 | 1.93 |

Table 1461: MAgPIE m4p\_SSP1 — Productivity—Landuse Intensity Indicator Tau (Index) [PART 1/2]

|     | 2050 | 2055 | 2060 | 2070 | 2080 | 2090 | 2100 |
|-----|------|------|------|------|------|------|------|
| GLO | 1.91 | 1.93 | 1.94 | 1.93 | 1.94 | 1.93 | 1.93 |
| CAZ | 1.63 | 1.63 | 1.63 | 1.63 | 1.63 | 1.63 | 1.63 |
| CHA | 2.41 | 2.41 | 2.41 | 2.41 | 2.41 | 2.41 | 2.41 |
| EUR | 2.70 | 2.70 | 2.70 | 2.70 | 2.70 | 2.70 | 2.70 |
| IND | 2.53 | 2.54 | 2.54 | 2.54 | 2.54 | 2.54 | 2.54 |
| JPN | 2.87 | 2.97 | 3.01 | 3.01 | 3.01 | 3.01 | 3.01 |
| LAM | 1.69 | 1.69 | 1.69 | 1.69 | 1.69 | 1.69 | 1.69 |
| MEA | 2.86 | 2.86 | 2.86 | 2.86 | 2.91 | 3.02 | 3.38 |
| NEU | 2.49 | 2.49 | 2.49 | 2.49 | 2.49 | 2.49 | 2.49 |
| OAS | 2.09 | 2.16 | 2.16 | 2.16 | 2.16 | 2.16 | 2.16 |
| REF | 1.28 | 1.28 | 1.28 | 1.28 | 1.28 | 1.28 | 1.28 |
| SSA | 1.47 | 1.56 | 1.63 | 1.64 | 1.64 | 1.64 | 1.64 |
| USA | 1.93 | 1.93 | 1.93 | 1.93 | 1.93 | 1.93 | 1.93 |

Table 1462: MAgPIE m4p\_SSP1 — Productivity—Landuse Intensity Indicator Tau (Index) [PART 2/2]

|     | 1961 | 1962 | 1963 | 1964 | 1965 | 1966 | 1967 | 1968 | 1969 | 1970 | 1971 |
|-----|------|------|------|------|------|------|------|------|------|------|------|
| GLO | 0.57 | 0.58 | 0.58 | 0.58 | 0.59 | 0.60 | 0.61 | 0.63 | 0.64 | 0.65 | 0.65 |
| CAZ | 0.69 | 0.69 | 0.69 | 0.69 | 0.70 | 0.71 | 0.73 | 0.75 | 0.76 | 0.77 | 0.77 |
| CHA | 0.47 | 0.48 | 0.51 | 0.54 | 0.57 | 0.60 | 0.61 | 0.63 | 0.65 | 0.66 | 0.68 |
| EUR | 0.97 | 0.97 | 0.96 | 0.95 | 0.94 | 0.93 | 0.92 | 0.91 | 0.91 | 0.91 | 0.91 |
| IND | 0.50 | 0.50 | 0.50 | 0.49 | 0.49 | 0.49 | 0.50 | 0.52 | 0.53 | 0.54 | 0.54 |
| JPN | 1.00 | 1.00 | 1.00 | 1.01 | 1.03 | 1.05 | 1.09 | 1.11 | 1.12 | 1.12 | 1.13 |
| LAM | 0.35 | 0.34 | 0.34 | 0.34 | 0.34 | 0.35 | 0.35 | 0.36 | 0.38 | 0.40 | 0.43 |
| MEA | 0.45 | 0.45 | 0.46 | 0.45 | 0.45 | 0.44 | 0.45 | 0.45 | 0.46 | 0.47 | 0.47 |
| NEU | 0.60 | 0.59 | 0.59 | 0.58 | 0.57 | 0.57 | 0.57 | 0.56 | 0.56 | 0.56 | 0.56 |
| OAS | 0.44 | 0.45 | 0.45 | 0.45 | 0.45 | 0.46 | 0.47 | 0.48 | 0.50 | 0.51 | 0.52 |
| REF | 0.54 | 0.53 | 0.53 | 0.55 | 0.59 | 0.65 | 0.69 | 0.72 | 0.73 | 0.74 | 0.74 |
| SSA | 0.52 | 0.52 | 0.53 | 0.53 | 0.53 | 0.54 | 0.55 | 0.55 | 0.56 | 0.56 | 0.57 |
| USA | 0.82 | 0.81 | 0.81 | 0.81 | 0.82 | 0.84 | 0.86 | 0.88 | 0.89 | 0.91 | 0.91 |

Table 1463: dietrich\_et\_al.2012 — Productivity—Landuse Intensity Indicator Tau (Index) [PART 1/5]

|     | 1972 | 1973 | 1974 | 1975 | 1976 | 1977 | 1978 | 1979 | 1980 | 1981 | 1982 |
|-----|------|------|------|------|------|------|------|------|------|------|------|
| GLO | 0.66 | 0.68 | 0.69 | 0.71 | 0.72 | 0.73 | 0.74 | 0.74 | 0.75 | 0.77 | 0.78 |
| CAZ | 0.78 | 0.78 | 0.78 | 0.79 | 0.80 | 0.81 | 0.82 | 0.81 | 0.81 | 0.80 | 0.81 |
| CHA | 0.69 | 0.70 | 0.71 | 0.72 | 0.73 | 0.75 | 0.77 | 0.80 | 0.83 | 0.87 | 0.92 |
| EUR | 0.93 | 0.94 | 0.96 | 0.96 | 0.94 | 0.92 | 0.91 | 0.92 | 0.92 | 0.94 | 0.96 |
| IND | 0.54 | 0.55 | 0.56 | 0.57 | 0.59 | 0.60 | 0.61 | 0.62 | 0.64 | 0.66 | 0.68 |
| JPN | 1.14 | 1.16 | 1.18 | 1.18 | 1.18 | 1.18 | 1.17 | 1.15 | 1.13 | 1.13 | 1.15 |
| LAM | 0.47 | 0.51 | 0.55 | 0.58 | 0.59 | 0.60 | 0.61 | 0.62 | 0.64 | 0.67 | 0.70 |
| MEA | 0.47 | 0.47 | 0.48 | 0.49 | 0.50 | 0.51 | 0.51 | 0.51 | 0.51 | 0.52 | 0.52 |
| NEU | 0.57 | 0.58 | 0.59 | 0.59 | 0.58 | 0.57 | 0.56 | 0.56 | 0.57 | 0.58 | 0.59 |
| OAS | 0.52 | 0.53 | 0.54 | 0.55 | 0.56 | 0.58 | 0.59 | 0.60 | 0.62 | 0.64 | 0.66 |
| REF | 0.74 | 0.77 | 0.82 | 0.88 | 0.91 | 0.92 | 0.91 | 0.90 | 0.89 | 0.89 | 0.89 |
| SSA | 0.57 | 0.58 | 0.59 | 0.59 | 0.59 | 0.59 | 0.59 | 0.59 | 0.60 | 0.60 | 0.61 |
| USA | 0.91 | 0.90 | 0.90 | 0.91 | 0.94 | 0.96 | 0.98 | 0.99 | 0.99 | 0.98 | 0.98 |

Table 1464: dietrich\_et\_al.2012 — Productivity—Landuse Intensity Indicator Tau (Index) [PART 2/5]

|     | 1983 | 1984 | 1985 | 1986 | 1987 | 1988 | 1989 | 1990 | 1991 | 1992 | 1993 |
|-----|------|------|------|------|------|------|------|------|------|------|------|
| GLO | 0.81 | 0.83 | 0.86 | 0.88 | 0.90 | 0.92 | 0.93 | 0.95 | 0.96 | 0.97 | 0.98 |
| CAZ | 0.82 | 0.84 | 0.87 | 0.88 | 0.88 | 0.87 | 0.88 | 0.89 | 0.91 | 0.92 | 0.93 |
| CHA | 0.96 | 1.00 | 1.02 | 1.03 | 1.04 | 1.04 | 1.06 | 1.07 | 1.09 | 1.11 | 1.13 |
| EUR | 0.99 | 1.04 | 1.10 | 1.17 | 1.22 | 1.25 | 1.29 | 1.34 | 1.37 | 1.39 | 1.40 |
| IND | 0.70 | 0.71 | 0.73 | 0.74 | 0.76 | 0.79 | 0.81 | 0.83 | 0.85 | 0.86 | 0.87 |
| JPN | 1.18 | 1.21 | 1.23 | 1.23 | 1.23 | 1.23 | 1.23 | 1.22 | 1.21 | 1.20 | 1.21 |
| LAM | 0.72 | 0.74 | 0.75 | 0.76 | 0.78 | 0.80 | 0.82 | 0.85 | 0.87 | 0.90 | 0.94 |
| MEA | 0.52 | 0.53 | 0.53 | 0.54 | 0.54 | 0.54 | 0.56 | 0.58 | 0.59 | 0.61 | 0.62 |
| NEU | 0.61 | 0.64 | 0.68 | 0.72 | 0.75 | 0.77 | 0.79 | 0.82 | 0.84 | 0.85 | 0.86 |
| OAS | 0.68 | 0.69 | 0.71 | 0.72 | 0.73 | 0.75 | 0.77 | 0.78 | 0.80 | 0.81 | 0.82 |
| REF | 0.91 | 0.94 | 0.99 | 1.04 | 1.10 | 1.13 | 1.13 | 1.09 | 1.03 | 0.96 | 0.90 |
| SSA | 0.62 | 0.64 | 0.65 | 0.66 | 0.67 | 0.68 | 0.69 | 0.69 | 0.69 | 0.68 | 0.67 |
| USA | 0.99 | 1.02 | 1.05 | 1.07 | 1.08 | 1.07 | 1.09 | 1.12 | 1.16 | 1.19 | 1.22 |

Table 1465: dietrich\_et\_al.2012 — Productivity—Landuse Intensity Indicator Tau (Index) [PART 3/5]

|     | 1994 | 1995 | 1996 | 1997 | 1998 | 1999 | 2000 | 2001 | 2002 | 2003 | 2004 |
|-----|------|------|------|------|------|------|------|------|------|------|------|
| GLO | 0.99 | 1.00 | 1.02 | 1.04 | 1.05 | 1.06 | 1.07 | 1.09 | 1.10 | 1.11 | 1.12 |
| CAZ | 0.95 | 0.97 | 0.98 | 0.99 | 0.99 | 0.99 | 0.99 | 0.99 | 0.99 | 0.99 | 1.00 |
| CHA | 1.15 | 1.17 | 1.19 | 1.21 | 1.22 | 1.21 | 1.21 | 1.21 | 1.21 | 1.21 | 1.22 |
| EUR | 1.43 | 1.47 | 1.51 | 1.54 | 1.55 | 1.55 | 1.54 | 1.53 | 1.52 | 1.52 | 1.51 |
| IND | 0.88 | 0.89 | 0.90 | 0.92 | 0.94 | 0.95 | 0.96 | 0.96 | 0.97 | 0.99 | 1.01 |
| JPN | 1.24 | 1.27 | 1.30 | 1.31 | 1.31 | 1.32 | 1.33 | 1.32 | 1.30 | 1.28 | 1.27 |
| LAM | 0.96 | 0.99 | 1.02 | 1.05 | 1.09 | 1.13 | 1.17 | 1.21 | 1.24 | 1.23 | 1.22 |
| MEA | 0.63 | 0.64 | 0.66 | 0.67 | 0.68 | 0.69 | 0.70 | 0.72 | 0.75 | 0.77 | 0.78 |
| NEU | 0.88 | 0.90 | 0.93 | 0.95 | 0.95 | 0.95 | 0.94 | 0.94 | 0.93 | 0.93 | 0.93 |
| OAS | 0.82 | 0.83 | 0.83 | 0.84 | 0.85 | 0.86 | 0.86 | 0.87 | 0.88 | 0.89 | 0.91 |
| REF | 0.84 | 0.80 | 0.79 | 0.81 | 0.85 | 0.89 | 0.94 | 1.00 | 1.06 | 1.10 | 1.14 |
| SSA | 0.67 | 0.68 | 0.70 | 0.71 | 0.72 | 0.73 | 0.74 | 0.74 | 0.75 | 0.75 | 0.77 |
| USA | 1.24 | 1.25 | 1.27 | 1.27 | 1.28 | 1.27 | 1.27 | 1.27 | 1.28 | 1.30 | 1.33 |

Table 1466: dietrich\_et\_al.2012 — Productivity—Landuse Intensity Indicator Tau (Index) [PART 4/5]

|     | 2005 | 2006 | 2007 |
|-----|------|------|------|
| GLO | 1.13 | 1.14 | 1.14 |
| CAZ | 1.01 | 1.01 | 1.00 |
| CHA | 1.23 | 1.23 | 1.24 |
| EUR | 1.51 | 1.49 | 1.47 |
| IND | 1.03 | 1.05 | 1.06 |
| JPN | 1.28 | 1.29 | 1.29 |
| LAM | 1.23 | 1.25 | 1.27 |
| MEA | 0.80 | 0.81 | 0.82 |
| NEU | 0.93 | 0.92 | 0.91 |
| OAS | 0.93 | 0.94 | 0.94 |
| REF | 1.16 | 1.17 | 1.17 |
| SSA | 0.79 | 0.81 | 0.83 |
| USA | 1.34 | 1.33 | 1.31 |

Table 1467: dietrich\_et\_al\_2012 — Productivity—Landuse Intensity Indicator Tau (Index) [PART 5/5]

## 52 Yield

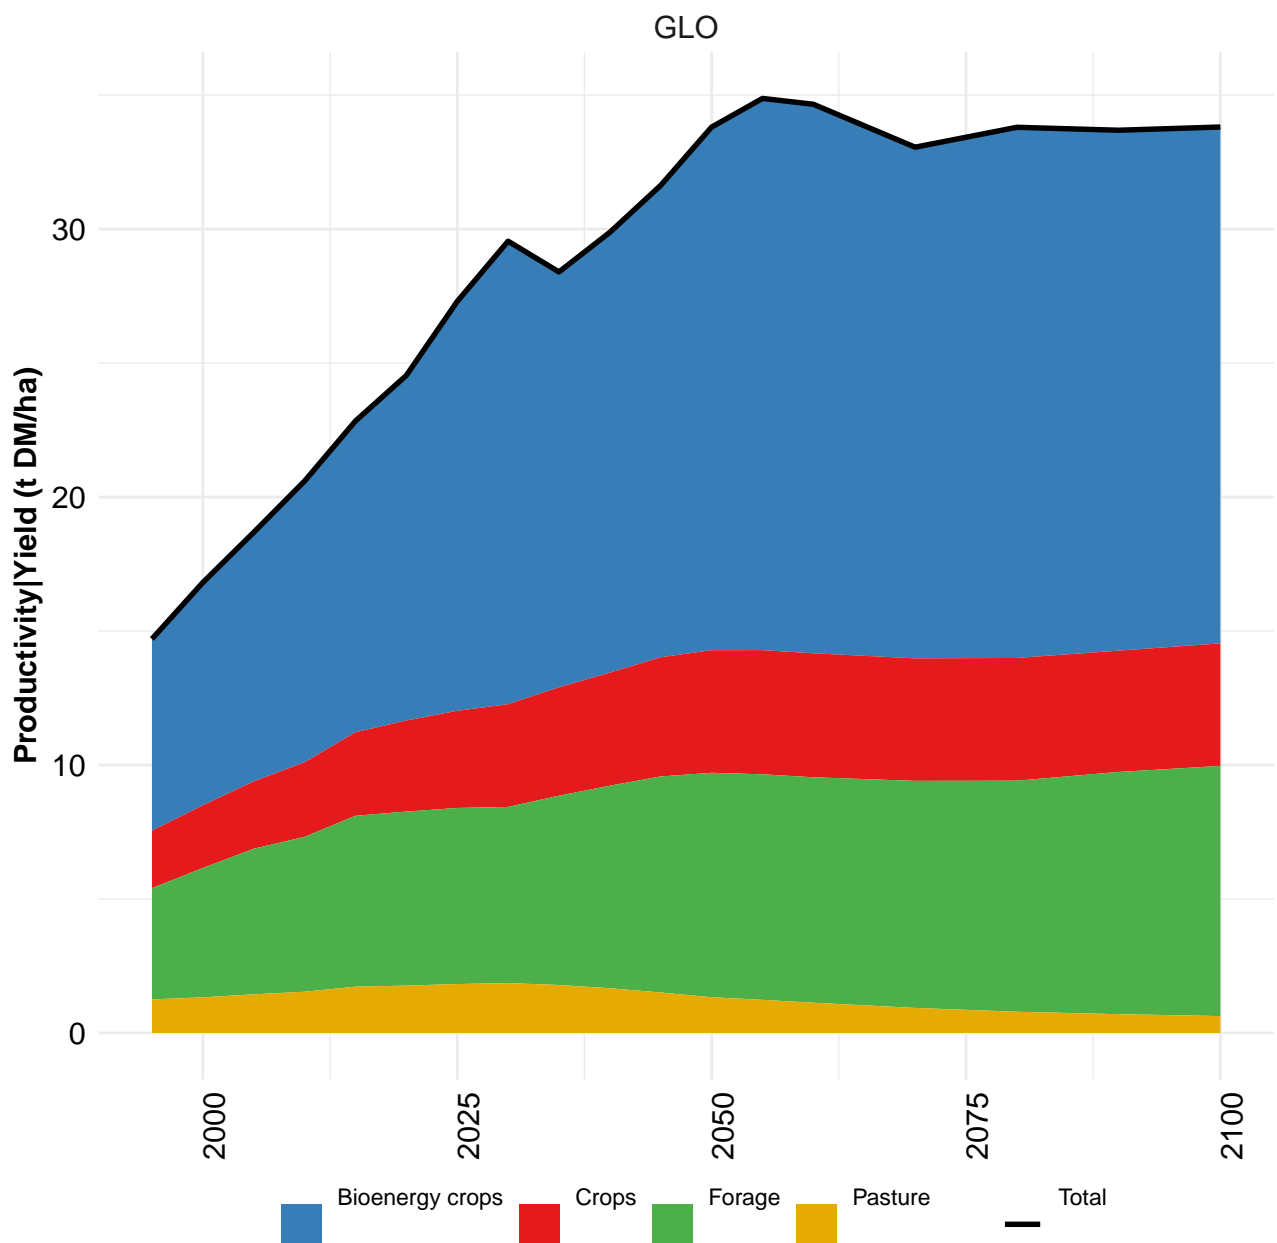

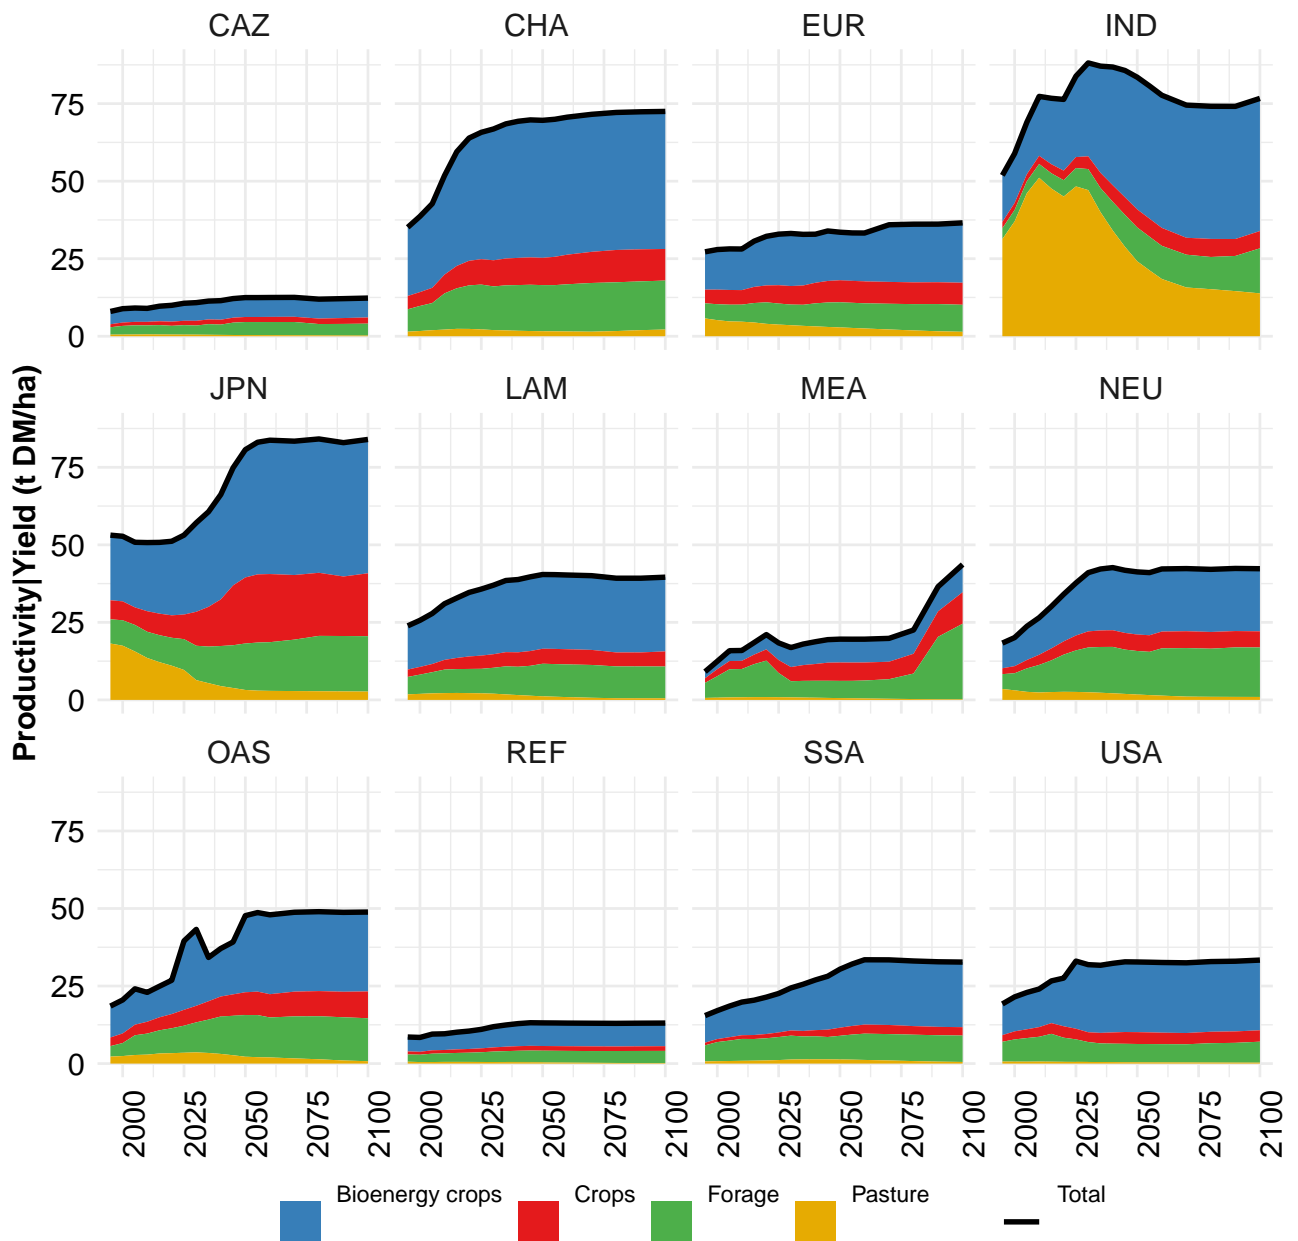

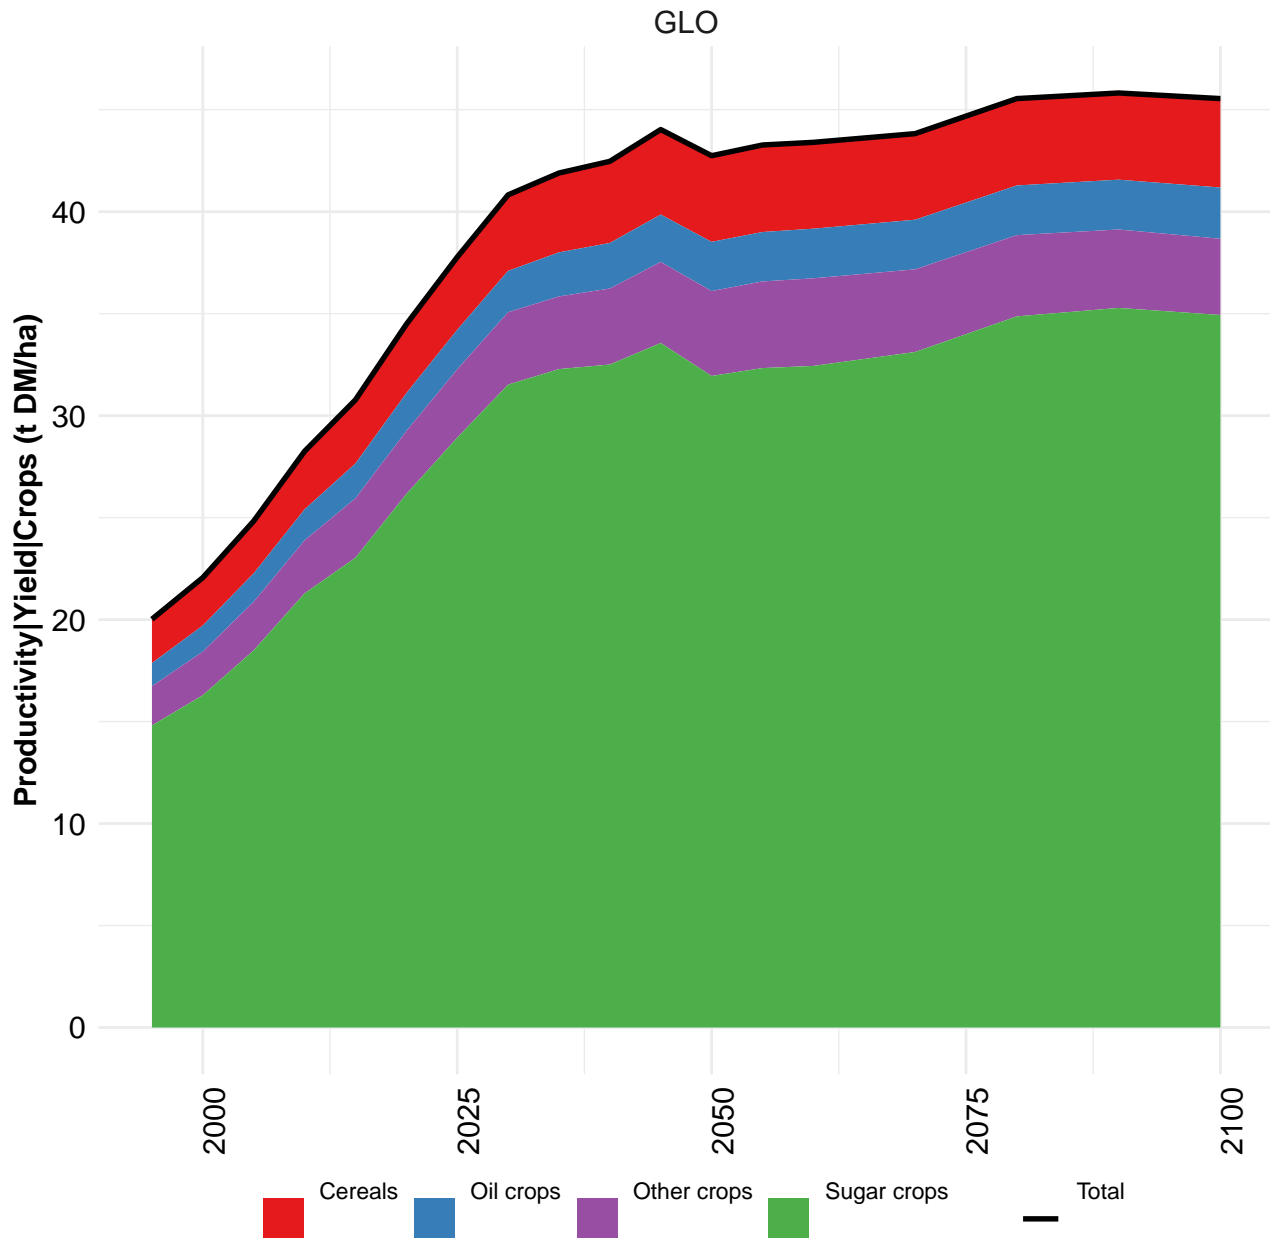



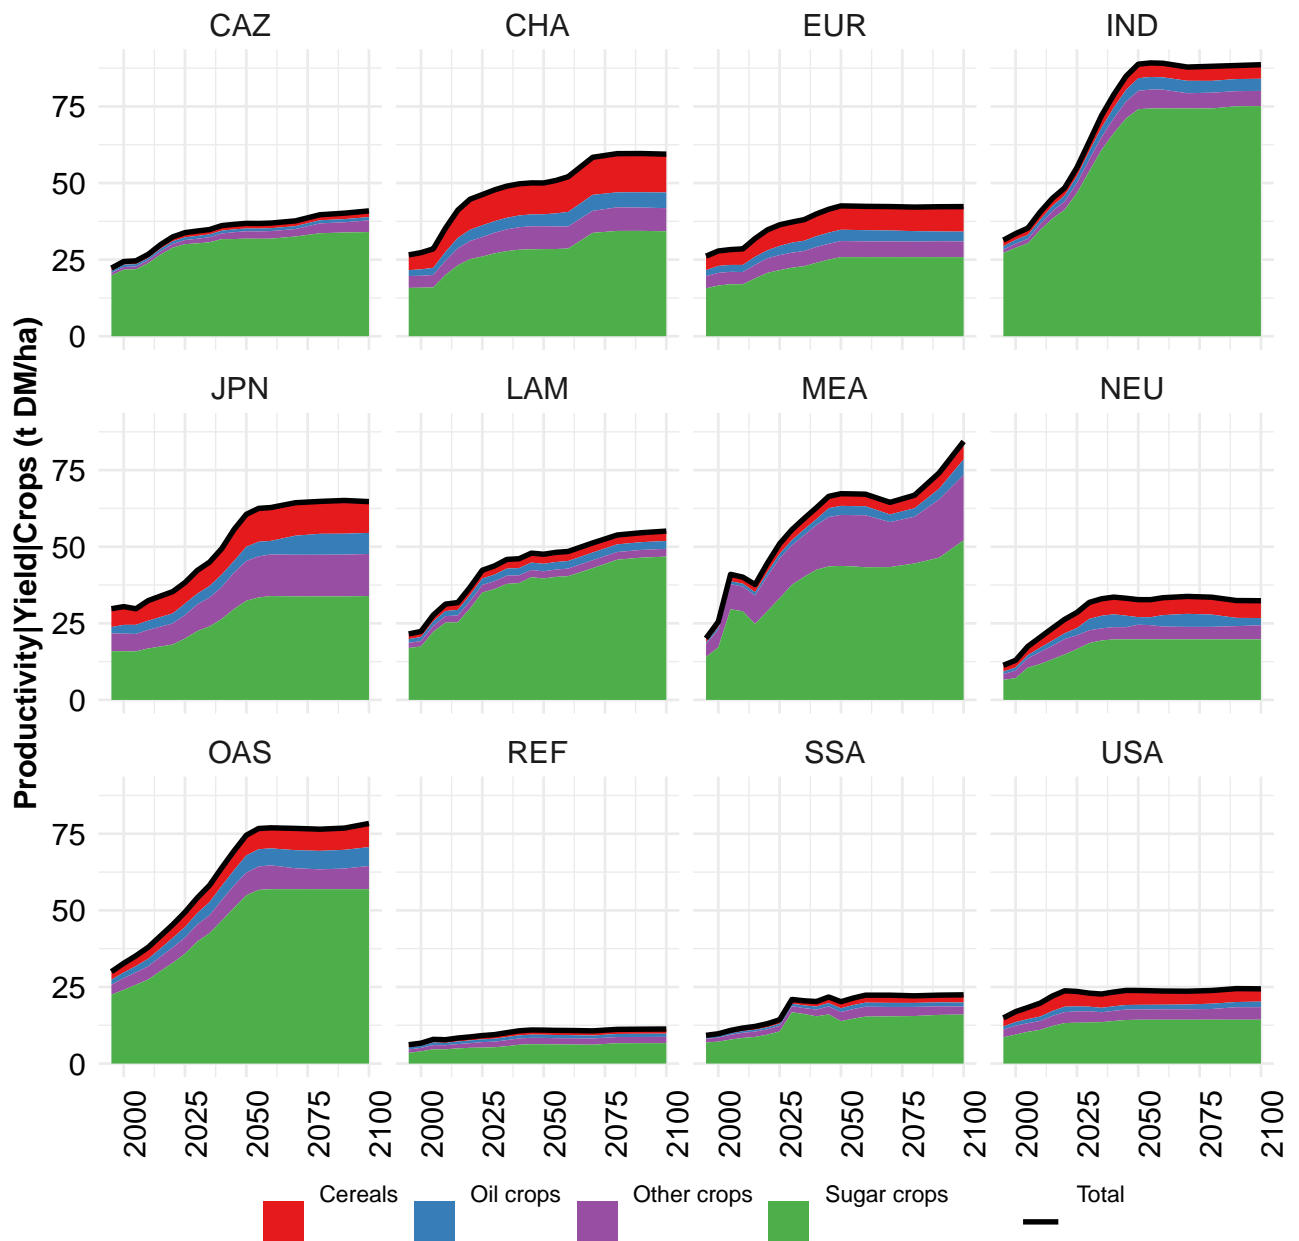

52.1 Crops

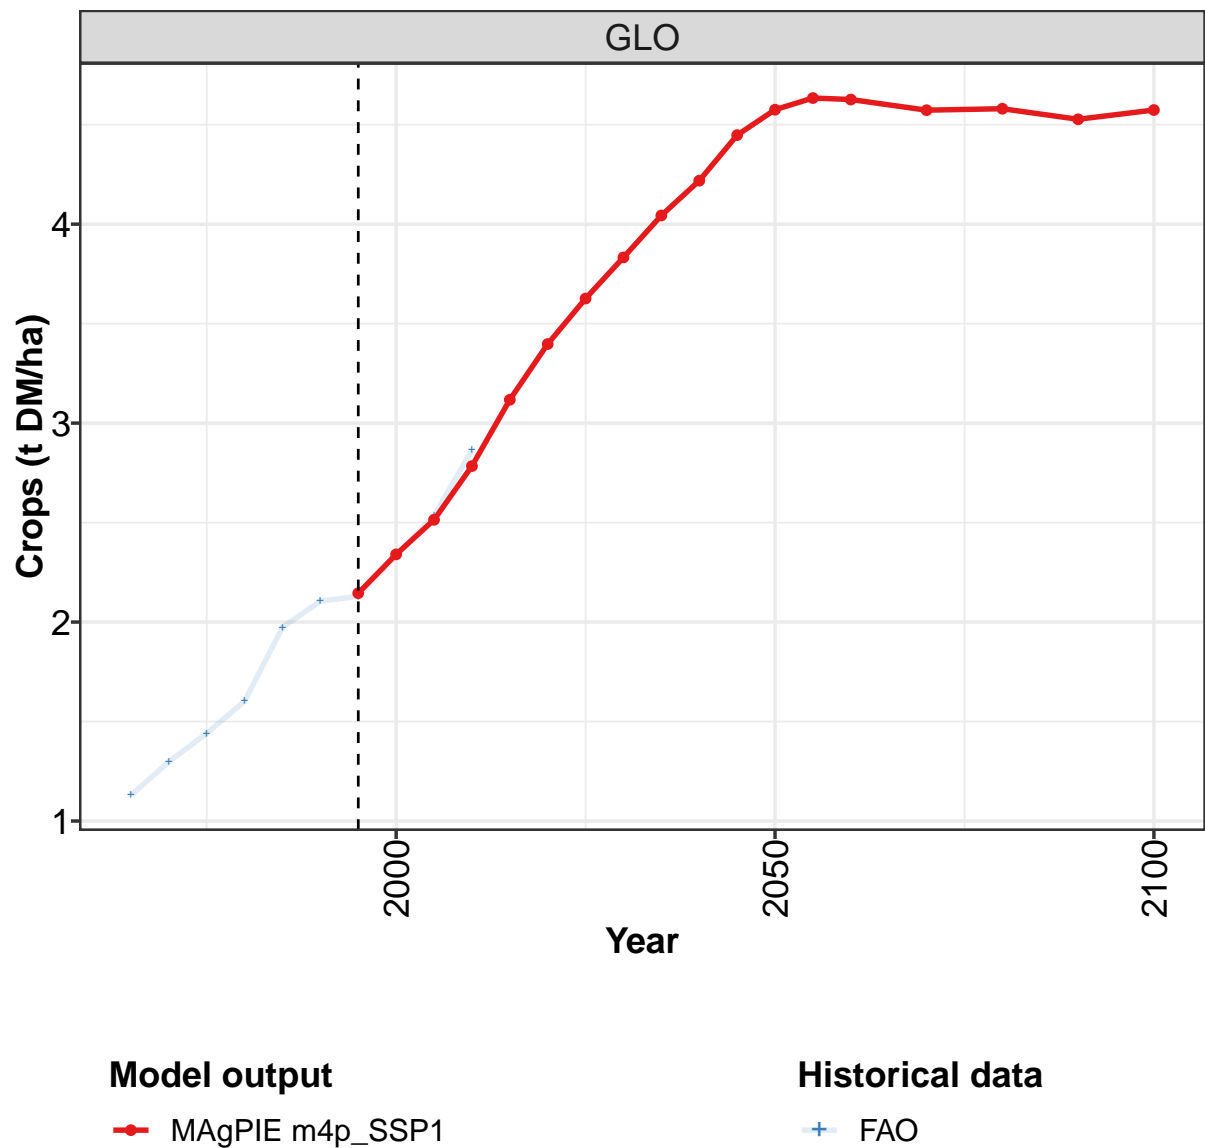

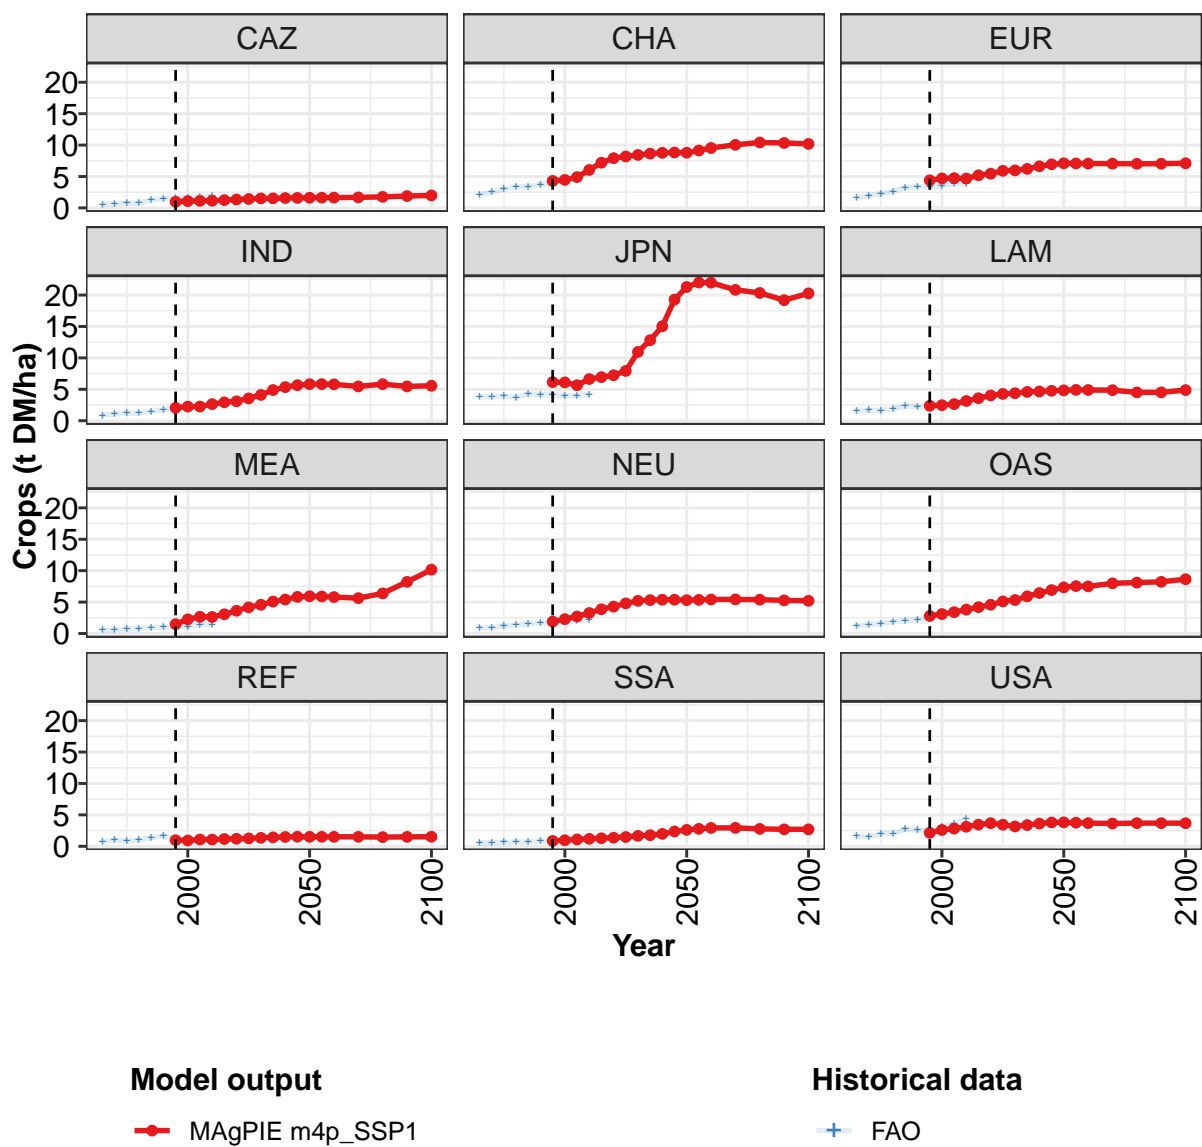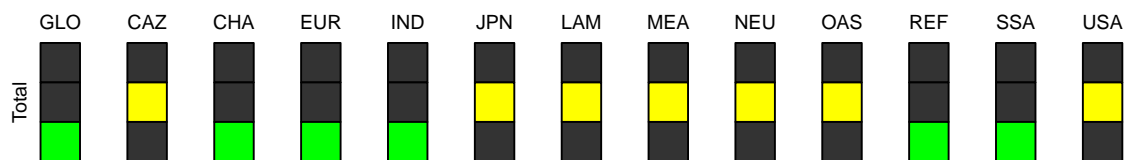

Figure 376: MAgPIE m4p\_SSP1 — Productivity—Yield—Crops (t DM/ha)

|     | 1995 | 2000 | 2005 | 2010 | 2015 | 2020 | 2025 | 2030 | 2035 | 2040 | 2045 |
|-----|------|------|------|------|------|------|------|------|------|------|------|
| GLO | 2.1  | 2.3  | 2.5  | 2.8  | 3.1  | 3.4  | 3.6  | 3.8  | 4.0  | 4.2  | 4.4  |
| CAZ | 1.0  | 1.1  | 1.1  | 1.1  | 1.2  | 1.3  | 1.4  | 1.5  | 1.5  | 1.6  | 1.6  |
| CHA | 4.3  | 4.5  | 4.9  | 6.1  | 7.2  | 7.9  | 8.2  | 8.4  | 8.6  | 8.8  | 8.8  |
| EUR | 4.4  | 4.7  | 4.7  | 4.7  | 5.2  | 5.4  | 5.9  | 6.0  | 6.2  | 6.6  | 6.9  |
| IND | 2.1  | 2.2  | 2.3  | 2.6  | 2.9  | 3.1  | 3.6  | 4.1  | 4.9  | 5.3  | 5.7  |
| JPN | 6.1  | 6.1  | 5.7  | 6.6  | 6.9  | 7.2  | 7.9  | 10.9 | 12.8 | 15.0 | 19.3 |
| LAM | 2.4  | 2.5  | 2.6  | 3.1  | 3.6  | 4.0  | 4.3  | 4.4  | 4.6  | 4.7  | 4.8  |
| MEA | 1.5  | 2.3  | 2.7  | 2.6  | 3.1  | 3.6  | 4.2  | 4.6  | 5.1  | 5.4  | 5.8  |
| NEU | 1.9  | 2.3  | 2.7  | 3.3  | 3.9  | 4.3  | 4.8  | 5.2  | 5.3  | 5.4  | 5.4  |
| OAS | 2.8  | 3.1  | 3.4  | 3.8  | 4.2  | 4.6  | 5.1  | 5.3  | 5.9  | 6.4  | 6.9  |
| REF | 1.0  | 0.9  | 1.1  | 1.1  | 1.2  | 1.2  | 1.3  | 1.3  | 1.4  | 1.5  | 1.5  |
| SSA | 0.9  | 1.0  | 1.1  | 1.2  | 1.3  | 1.4  | 1.5  | 1.7  | 1.8  | 2.0  | 2.4  |
| USA | 2.1  | 2.6  | 2.8  | 3.1  | 3.5  | 3.7  | 3.4  | 3.2  | 3.4  | 3.6  | 3.8  |

Table 1468: MAgPIE m4p-SSP1 — Productivity—Yield—Crops (t DM/ha) [PART 1/2]

|     | 2050 | 2055 | 2060 | 2070 | 2080 | 2090 | 2100 |
|-----|------|------|------|------|------|------|------|
| GLO | 4.6  | 4.6  | 4.6  | 4.6  | 4.6  | 4.5  | 4.6  |
| CAZ | 1.6  | 1.6  | 1.6  | 1.7  | 1.8  | 1.9  | 2.0  |
| CHA | 8.8  | 9.1  | 9.5  | 10.0 | 10.4 | 10.3 | 10.2 |
| EUR | 7.1  | 7.1  | 7.1  | 7.0  | 7.0  | 7.0  | 7.1  |
| IND | 5.8  | 5.8  | 5.8  | 5.5  | 5.8  | 5.5  | 5.6  |
| JPN | 21.3 | 22.0 | 22.0 | 20.8 | 20.3 | 19.2 | 20.3 |
| LAM | 4.8  | 4.9  | 4.9  | 4.9  | 4.5  | 4.5  | 4.9  |
| MEA | 5.9  | 5.9  | 5.8  | 5.6  | 6.4  | 8.2  | 10.2 |
| NEU | 5.3  | 5.4  | 5.4  | 5.4  | 5.4  | 5.3  | 5.2  |
| OAS | 7.4  | 7.5  | 7.5  | 8.0  | 8.1  | 8.2  | 8.6  |
| REF | 1.5  | 1.5  | 1.5  | 1.5  | 1.5  | 1.5  | 1.5  |
| SSA | 2.6  | 2.8  | 2.9  | 2.9  | 2.8  | 2.7  | 2.7  |
| USA | 3.8  | 3.8  | 3.7  | 3.6  | 3.7  | 3.7  | 3.7  |

Table 1469: MAgPIE m4p-SSP1 — Productivity—Yield—Crops (t DM/ha) [PART 2/2]

|     | 1965 | 1970 | 1975 | 1980 | 1985 | 1990 | 1995 | 2000 | 2005 | 2010 |
|-----|------|------|------|------|------|------|------|------|------|------|
| GLO | 1.13 | 1.30 | 1.44 | 1.60 | 1.97 | 2.11 | 2.13 | 2.33 | 2.54 | 2.86 |
| CAZ | 0.58 | 0.58 | 0.74 | 0.77 | 1.27 | 1.47 | 1.61 | 1.66 | 1.79 | 1.85 |
| CHA | 2.05 | 2.52 | 2.99 | 3.41 | 3.35 | 3.74 | 4.15 | 4.43 | 4.97 | 5.80 |
| EUR | 1.68 | 1.90 | 2.25 | 2.64 | 3.26 | 3.39 | 3.32 | 3.58 | 3.85 | 3.89 |
| IND | 0.86 | 1.09 | 1.20 | 1.21 | 1.48 | 1.78 | 2.03 | 2.22 | 2.24 | 2.67 |
| JPN | 3.83 | 3.82 | 3.95 | 3.71 | 4.31 | 4.15 | 4.09 | 3.98 | 3.98 | 4.19 |
| LAM | 1.54 | 1.66 | 1.66 | 1.86 | 2.34 | 2.23 | 2.31 | 2.53 | 2.76 | 3.54 |
| MEA | 0.55 | 0.61 | 0.71 | 0.79 | 0.94 | 1.05 | 1.07 | 1.13 | 1.44 | 1.45 |
| NEU | 0.87 | 0.95 | 1.22 | 1.34 | 1.55 | 1.70 | 1.63 | 1.80 | 2.07 | 2.18 |
| OAS | 1.24 | 1.43 | 1.59 | 1.81 | 2.05 | 2.17 | 2.48 | 2.72 | 3.00 | 3.35 |
| REF | 0.73 | 1.03 | 0.82 | 1.01 | 1.37 | 1.67 | 1.10 | 1.04 | 1.25 | 1.15 |
| SSA | 0.50 | 0.59 | 0.66 | 0.69 | 0.73 | 0.81 | 0.85 | 0.96 | 1.09 | 1.24 |
| USA | 1.60 | 1.53 | 1.97 | 2.06 | 2.75 | 2.56 | 2.44 | 3.13 | 3.61 | 4.37 |

Table 1470: FAO — Productivity—Yield—Crops (t DM/ha)

52.1.1 Cereals

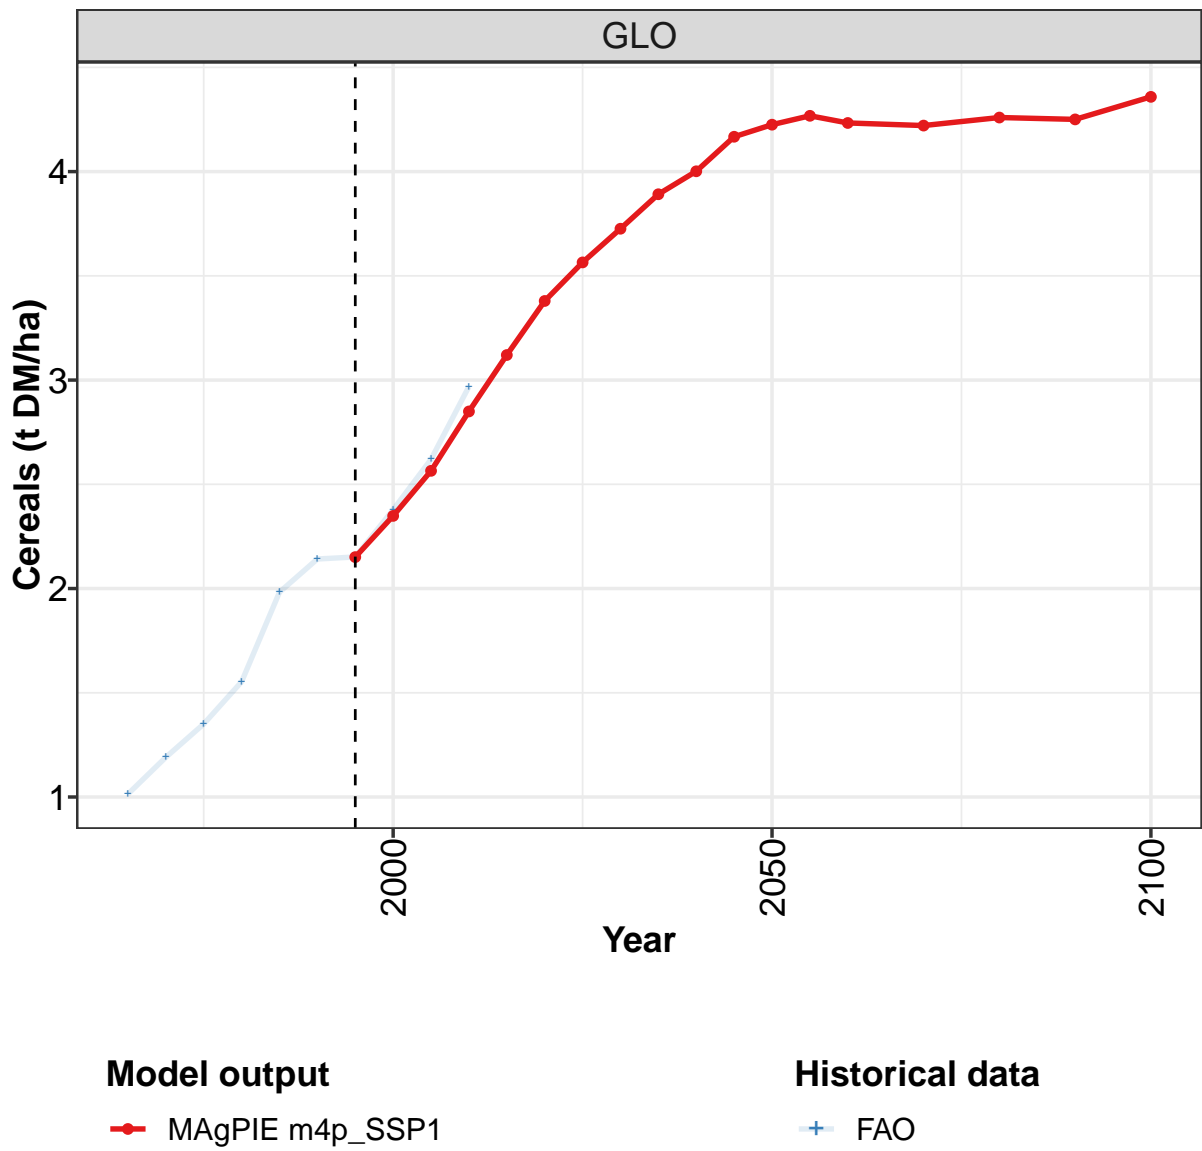

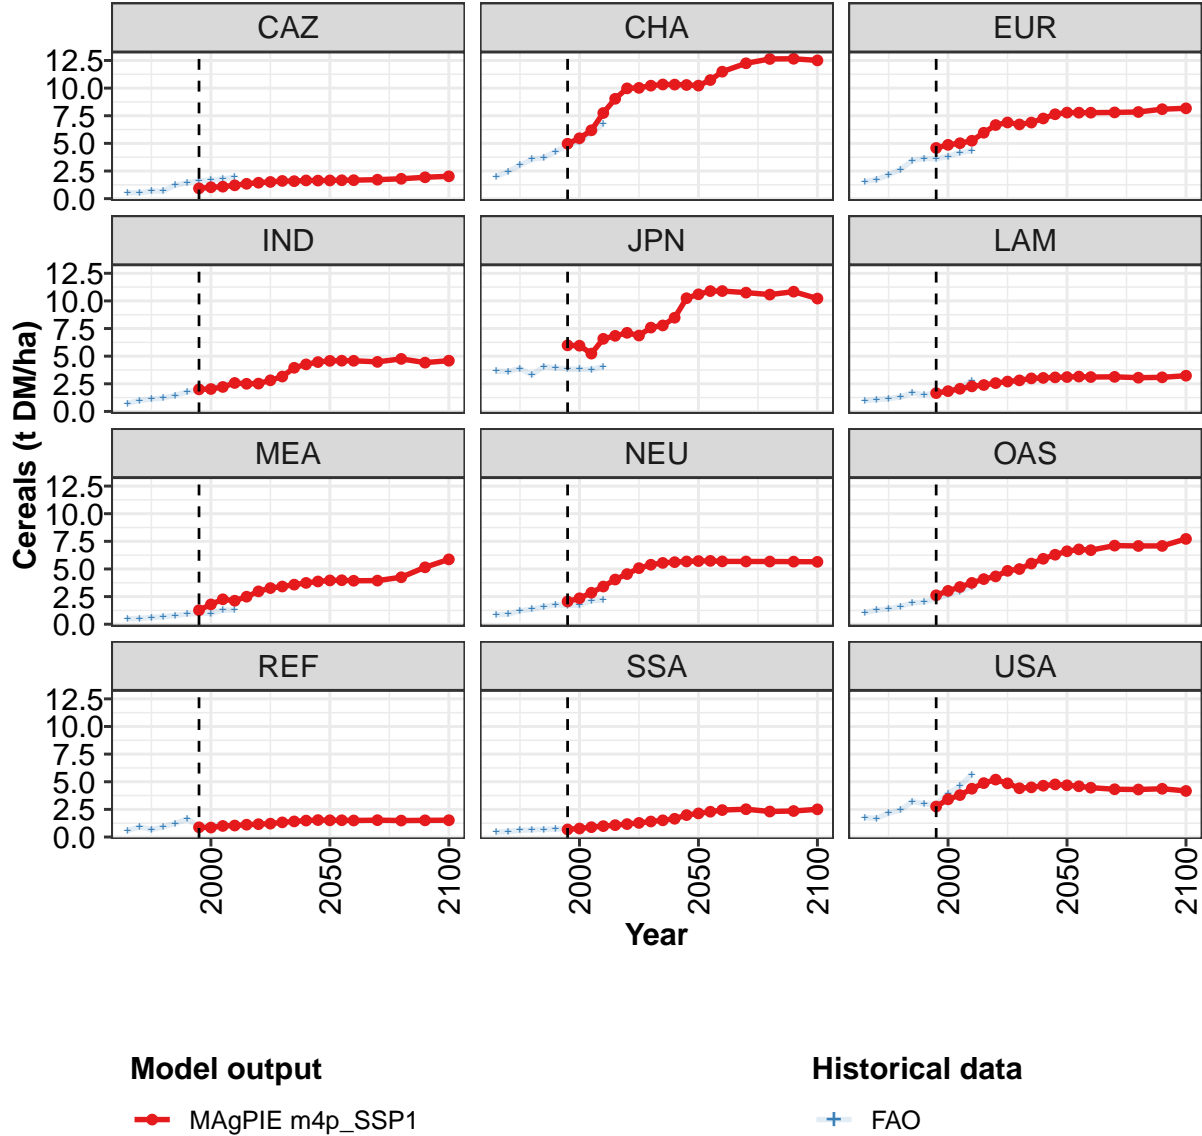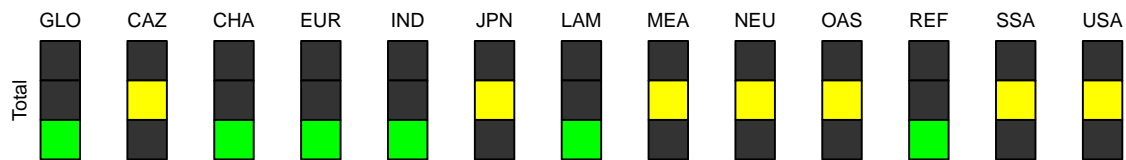

Figure 377: MAGPIE m4p\_SSP1 — Productivity—Yield—Crops—Cereals (t DM/ha)

|     | 1995 | 2000 | 2005 | 2010 | 2015 | 2020 | 2025 | 2030 | 2035 | 2040 | 2045 |
|-----|------|------|------|------|------|------|------|------|------|------|------|
| GLO | 2.2  | 2.3  | 2.6  | 2.8  | 3.1  | 3.4  | 3.6  | 3.7  | 3.9  | 4.0  | 4.2  |
| CAZ | 0.9  | 1.0  | 1.1  | 1.2  | 1.3  | 1.4  | 1.5  | 1.6  | 1.6  | 1.6  | 1.6  |
| CHA | 5.0  | 5.5  | 6.2  | 7.8  | 9.0  | 10.0 | 10.0 | 10.2 | 10.3 | 10.3 | 10.3 |
| EUR | 4.6  | 4.9  | 5.0  | 5.2  | 6.0  | 6.7  | 6.9  | 6.7  | 6.9  | 7.3  | 7.6  |
| IND | 2.0  | 2.0  | 2.2  | 2.6  | 2.5  | 2.5  | 2.8  | 3.2  | 4.0  | 4.3  | 4.5  |
| JPN | 6.0  | 5.9  | 5.2  | 6.6  | 6.8  | 7.1  | 6.9  | 7.6  | 7.8  | 8.5  | 10.2 |
| LAM | 1.7  | 1.8  | 2.1  | 2.3  | 2.4  | 2.6  | 2.7  | 2.8  | 3.0  | 3.0  | 3.1  |
| MEA | 1.3  | 1.8  | 2.3  | 2.1  | 2.5  | 3.0  | 3.3  | 3.4  | 3.6  | 3.7  | 3.9  |
| NEU | 2.1  | 2.3  | 2.9  | 3.4  | 4.0  | 4.5  | 5.1  | 5.4  | 5.5  | 5.6  | 5.7  |
| OAS | 2.6  | 3.0  | 3.4  | 3.7  | 4.1  | 4.3  | 4.8  | 5.0  | 5.5  | 5.9  | 6.3  |
| REF | 0.9  | 0.9  | 1.0  | 1.0  | 1.1  | 1.2  | 1.2  | 1.3  | 1.4  | 1.5  | 1.5  |
| SSA | 0.7  | 0.8  | 0.9  | 1.0  | 1.1  | 1.2  | 1.3  | 1.4  | 1.5  | 1.7  | 2.0  |
| USA | 2.8  | 3.4  | 3.8  | 4.4  | 4.9  | 5.2  | 4.9  | 4.4  | 4.5  | 4.6  | 4.8  |

Table 1471: MAgPIE m4p\_SSP1 — Productivity—Yield—Crops—Cereals (t DM/ha) [PART 1/2]

|     | 2050 | 2055 | 2060 | 2070 | 2080 | 2090 | 2100 |
|-----|------|------|------|------|------|------|------|
| GLO | 4.2  | 4.3  | 4.2  | 4.2  | 4.3  | 4.3  | 4.4  |
| CAZ | 1.6  | 1.7  | 1.7  | 1.7  | 1.8  | 1.9  | 2.0  |
| CHA | 10.2 | 10.7 | 11.5 | 12.2 | 12.6 | 12.7 | 12.5 |
| EUR | 7.8  | 7.8  | 7.8  | 7.8  | 7.8  | 8.1  | 8.2  |
| IND | 4.6  | 4.6  | 4.6  | 4.5  | 4.8  | 4.4  | 4.6  |
| JPN | 10.6 | 10.9 | 10.9 | 10.8 | 10.6 | 10.8 | 10.2 |
| LAM | 3.1  | 3.2  | 3.1  | 3.1  | 3.1  | 3.1  | 3.2  |
| MEA | 4.0  | 4.0  | 3.9  | 3.9  | 4.3  | 5.2  | 5.9  |
| NEU | 5.7  | 5.7  | 5.7  | 5.7  | 5.7  | 5.7  | 5.6  |
| OAS | 6.6  | 6.8  | 6.7  | 7.1  | 7.1  | 7.1  | 7.7  |
| REF | 1.5  | 1.5  | 1.5  | 1.5  | 1.5  | 1.5  | 1.5  |
| SSA | 2.1  | 2.3  | 2.4  | 2.5  | 2.3  | 2.4  | 2.5  |
| USA | 4.7  | 4.6  | 4.5  | 4.3  | 4.3  | 4.4  | 4.2  |

Table 1472: MAgPIE m4p\_SSP1 — Productivity—Yield—Crops—Cereals (t DM/ha) [PART 2/2]

|     | 1965 | 1970 | 1975 | 1980 | 1985 | 1990 | 1995 | 2000 | 2005 | 2010 |
|-----|------|------|------|------|------|------|------|------|------|------|
| GLO | 1.01 | 1.19 | 1.35 | 1.55 | 1.98 | 2.14 | 2.15 | 2.38 | 2.62 | 2.97 |
| CAZ | 0.53 | 0.53 | 0.68 | 0.69 | 1.22 | 1.44 | 1.63 | 1.66 | 1.79 | 1.94 |
| CHA | 2.01 | 2.47 | 3.02 | 3.56 | 3.71 | 4.26 | 4.82 | 5.15 | 5.92 | 6.79 |
| EUR | 1.55 | 1.73 | 2.15 | 2.64 | 3.46 | 3.64 | 3.61 | 3.83 | 4.17 | 4.34 |
| IND | 0.73 | 1.00 | 1.12 | 1.22 | 1.46 | 1.77 | 2.01 | 2.18 | 2.37 | 2.79 |
| JPN | 3.64 | 3.62 | 3.88 | 3.31 | 4.06 | 3.94 | 3.83 | 3.83 | 3.79 | 4.04 |
| LAM | 0.98 | 1.08 | 1.15 | 1.30 | 1.70 | 1.49 | 1.70 | 1.94 | 2.18 | 2.78 |
| MEA | 0.49 | 0.52 | 0.61 | 0.68 | 0.80 | 0.92 | 0.97 | 0.99 | 1.28 | 1.29 |
| NEU | 0.86 | 0.90 | 1.22 | 1.35 | 1.59 | 1.77 | 1.69 | 1.73 | 2.11 | 2.19 |
| OAS | 1.07 | 1.27 | 1.38 | 1.62 | 1.92 | 2.01 | 2.30 | 2.65 | 2.98 | 3.37 |
| REF | 0.58 | 0.92 | 0.68 | 0.92 | 1.24 | 1.62 | 0.99 | 0.98 | 1.20 | 1.12 |
| SSA | 0.44 | 0.51 | 0.61 | 0.65 | 0.69 | 0.73 | 0.74 | 0.83 | 0.95 | 1.14 |
| USA | 1.76 | 1.69 | 2.16 | 2.43 | 3.22 | 3.00 | 2.92 | 3.93 | 4.61 | 5.67 |

Table 1473: FAO — Productivity—Yield—Crops—Cereals (t DM/ha)

52.1.2 Cereals—Maize

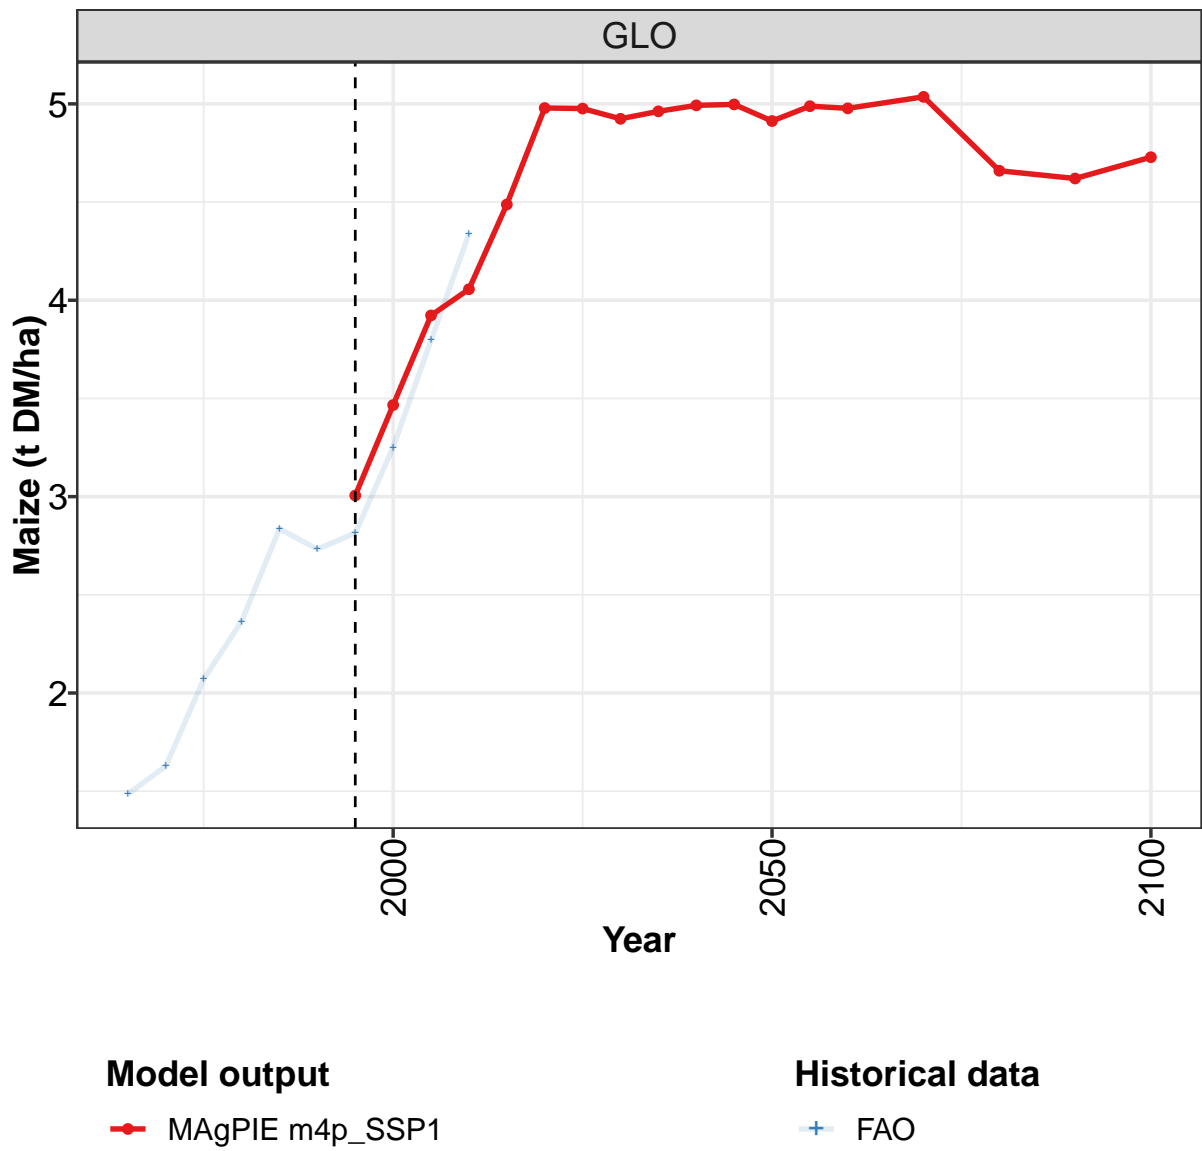



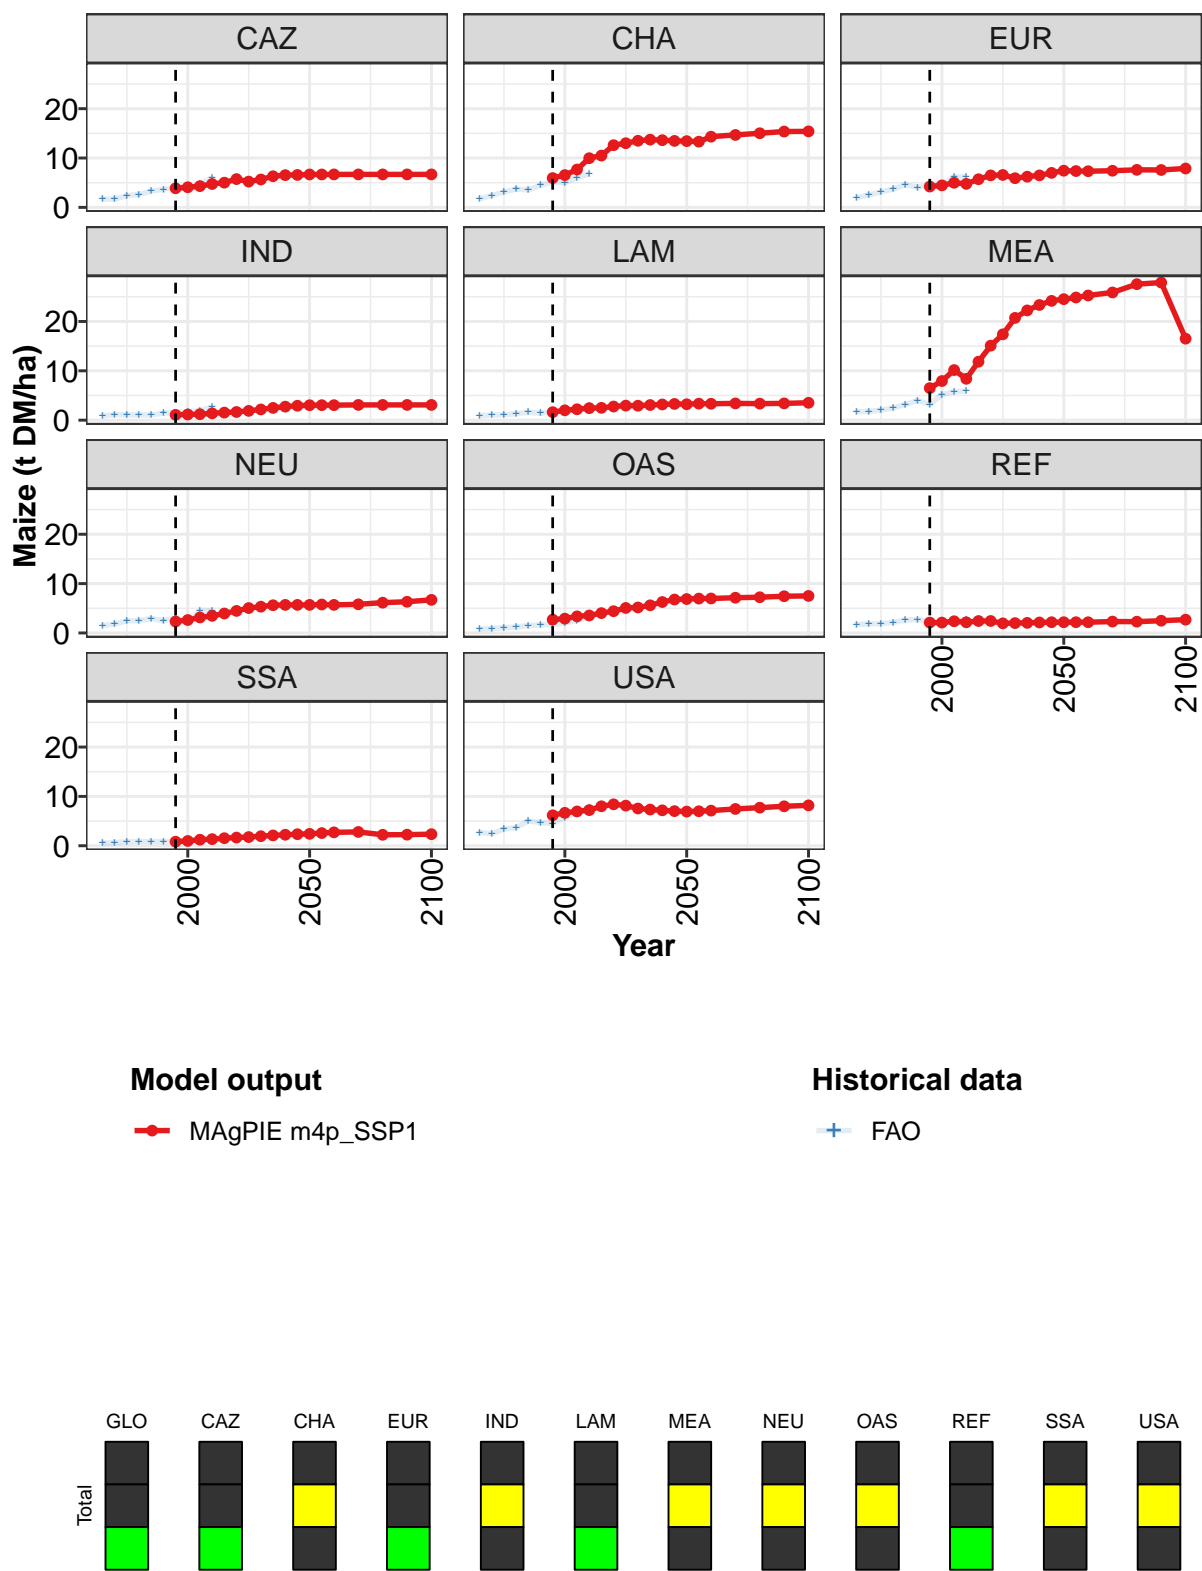

Figure 378: MAGPIE m4p\_SSP1 — Productivity—Yield—Crops—Cereals—Maize (t DM/ha)

|     | 1995 | 2000 | 2005 | 2010 | 2015 | 2020 | 2025 | 2030 | 2035 | 2040 | 2045 |
|-----|------|------|------|------|------|------|------|------|------|------|------|
| GLO | 3.0  | 3.5  | 3.9  | 4.1  | 4.5  | 5.0  | 5.0  | 4.9  | 5.0  | 5.0  | 5.0  |
| CAZ | 3.9  | 4.1  | 4.3  | 4.7  | 5.0  | 5.7  | 5.2  | 5.7  | 6.3  | 6.5  | 6.6  |
| CHA | 5.9  | 6.5  | 7.7  | 10.0 | 10.5 | 12.6 | 13.0 | 13.5 | 13.7 | 13.6 | 13.5 |
| EUR | 4.2  | 4.5  | 5.0  | 4.8  | 5.7  | 6.5  | 6.6  | 5.9  | 6.2  | 6.5  | 7.0  |
| IND | 1.1  | 1.2  | 1.2  | 1.4  | 1.5  | 1.7  | 1.9  | 2.2  | 2.5  | 2.7  | 2.9  |
| LAM | 1.6  | 2.0  | 2.2  | 2.4  | 2.5  | 2.8  | 3.0  | 2.9  | 3.1  | 3.2  | 3.3  |
| MEA | 6.5  | 7.9  | 10.2 | 8.4  | 11.9 | 15.1 | 17.4 | 20.7 | 22.2 | 23.3 | 24.2 |
| NEU | 2.3  | 2.6  | 3.1  | 3.5  | 3.9  | 4.5  | 5.1  | 5.3  | 5.6  | 5.7  | 5.7  |
| OAS | 2.7  | 2.9  | 3.4  | 3.5  | 4.0  | 4.4  | 5.1  | 5.2  | 5.6  | 6.3  | 6.8  |
| REF | 2.1  | 2.1  | 2.4  | 2.2  | 2.4  | 2.4  | 2.0  | 2.0  | 2.0  | 2.1  | 2.2  |
| SSA | 0.8  | 1.0  | 1.2  | 1.3  | 1.5  | 1.7  | 1.8  | 1.9  | 2.1  | 2.2  | 2.3  |
| USA | 6.2  | 6.7  | 7.0  | 7.2  | 8.0  | 8.4  | 8.1  | 7.6  | 7.3  | 7.2  | 7.0  |

Table 1474: MAgPIE m4p\_SSP1 — Productivity—Yield—Crops—Cereals—Maize (t DM/ha) [PART 1/2]

|     | 2050 | 2055 | 2060 | 2070 | 2080 | 2090 | 2100 |
|-----|------|------|------|------|------|------|------|
| GLO | 4.9  | 5.0  | 5.0  | 5.0  | 4.7  | 4.6  | 4.7  |
| CAZ | 6.7  | 6.7  | 6.7  | 6.7  | 6.7  | 6.7  | 6.7  |
| CHA | 13.4 | 13.3 | 14.3 | 14.7 | 15.0 | 15.4 | 15.4 |
| EUR | 7.4  | 7.4  | 7.3  | 7.4  | 7.6  | 7.6  | 7.9  |
| IND | 3.0  | 3.0  | 3.0  | 3.1  | 3.1  | 3.1  | 3.1  |
| LAM | 3.2  | 3.4  | 3.3  | 3.4  | 3.4  | 3.4  | 3.5  |
| MEA | 24.5 | 24.9 | 25.3 | 25.9 | 27.6 | 27.9 | 16.5 |
| NEU | 5.7  | 5.8  | 5.7  | 5.8  | 6.1  | 6.3  | 6.7  |
| OAS | 6.9  | 7.0  | 7.0  | 7.1  | 7.2  | 7.4  | 7.5  |
| REF | 2.2  | 2.2  | 2.2  | 2.3  | 2.3  | 2.5  | 2.7  |
| SSA | 2.4  | 2.6  | 2.7  | 2.8  | 2.2  | 2.2  | 2.3  |
| USA | 6.9  | 7.0  | 7.1  | 7.5  | 7.7  | 8.0  | 8.2  |

Table 1475: MAgPIE m4p\_SSP1 — Productivity—Yield—Crops—Cereals—Maize (t DM/ha) [PART 2/2]

|     | 1965 | 1970 | 1975 | 1980 | 1985 | 1990 | 1995 | 2000 | 2005 | 2010 |
|-----|------|------|------|------|------|------|------|------|------|------|
| GLO | 1.49 | 1.63 | 2.07 | 2.37 | 2.84 | 2.73 | 2.81 | 3.25 | 3.80 | 4.34 |
| CAZ | 1.65 | 1.69 | 2.36 | 2.62 | 3.27 | 3.65 | 4.11 | 3.70 | 4.85 | 5.92 |
| CHA | 1.73 | 2.42 | 3.10 | 3.74 | 3.52 | 4.49 | 5.11 | 5.02 | 6.03 | 6.75 |
| EUR | 1.96 | 2.53 | 3.12 | 3.71 | 4.62 | 4.04 | 4.70 | 4.64 | 6.16 | 6.21 |
| IND | 0.86 | 1.13 | 1.08 | 1.05 | 1.06 | 1.43 | 1.53 | 1.74 | 1.92 | 2.67 |
| LAM | 0.90 | 1.04 | 1.10 | 1.32 | 1.60 | 1.40 | 1.70 | 1.88 | 2.22 | 2.85 |
| MEA | 1.71 | 1.79 | 2.02 | 2.50 | 3.18 | 4.01 | 3.19 | 5.19 | 5.74 | 5.96 |
| NEU | 1.55 | 1.79 | 2.45 | 2.49 | 2.94 | 2.52 | 3.09 | 2.20 | 4.42 | 4.49 |
| OAS | 0.78 | 0.92 | 1.07 | 1.22 | 1.49 | 1.63 | 1.74 | 2.07 | 2.55 | 3.25 |
| REF | 1.71 | 1.85 | 1.88 | 2.15 | 2.61 | 2.73 | 2.20 | 1.75 | 2.71 | 2.64 |
| SSA | 0.53 | 0.64 | 0.82 | 0.88 | 0.86 | 0.87 | 0.83 | 1.05 | 1.07 | 1.36 |
| USA | 2.69 | 2.44 | 3.38 | 3.68 | 5.01 | 4.70 | 4.47 | 5.77 | 6.64 | 7.79 |

Table 1476: FAO — Productivity—Yield—Crops—Cereals—Maize (t DM/ha)

52.1.3 Cereals—Rice

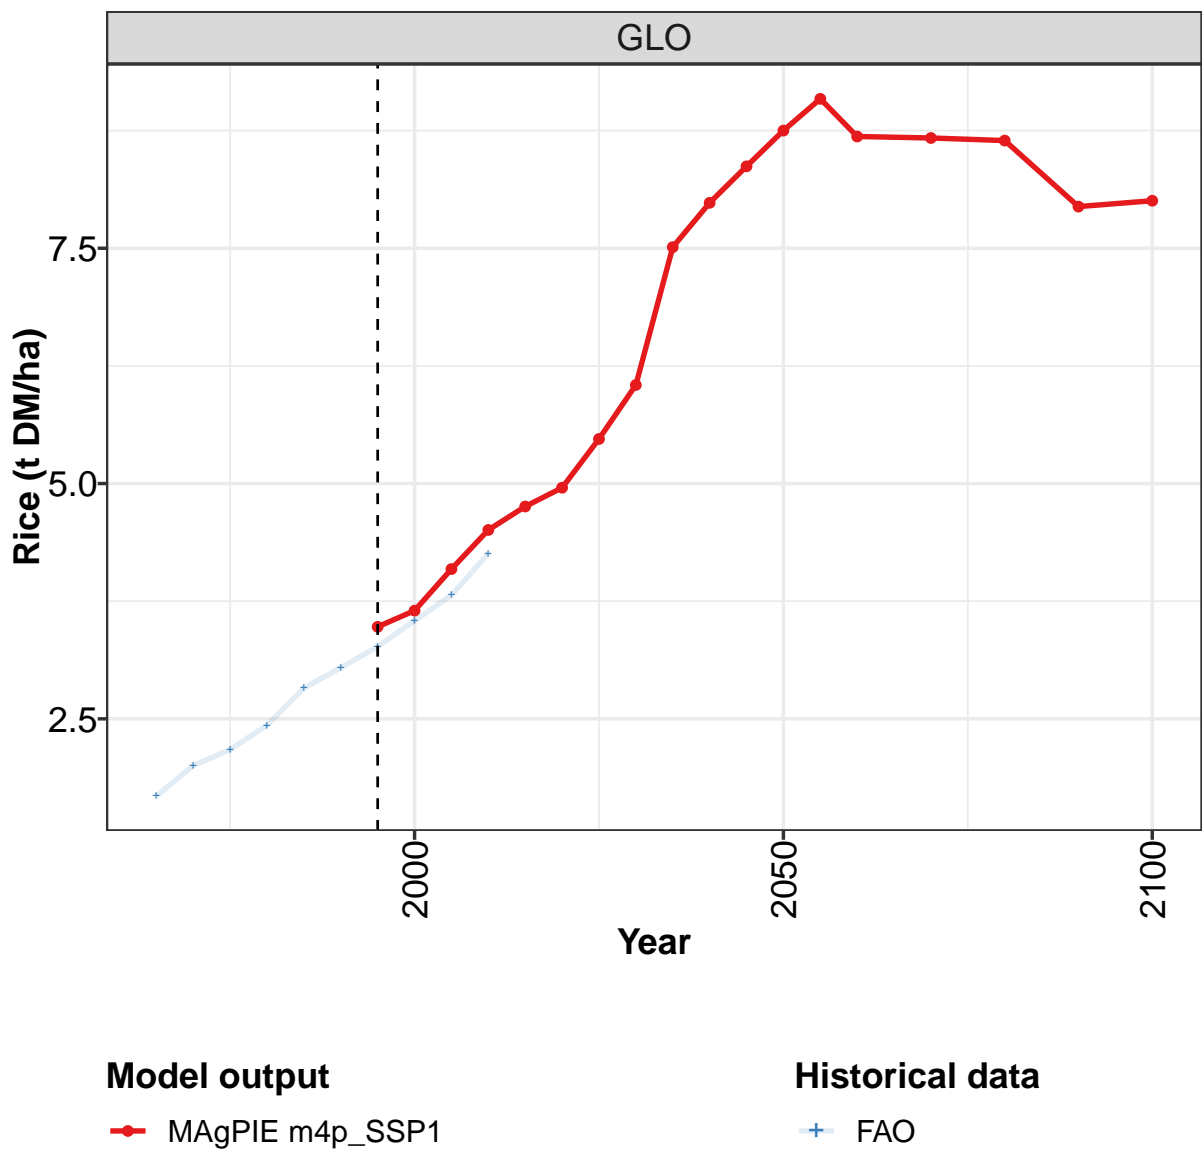

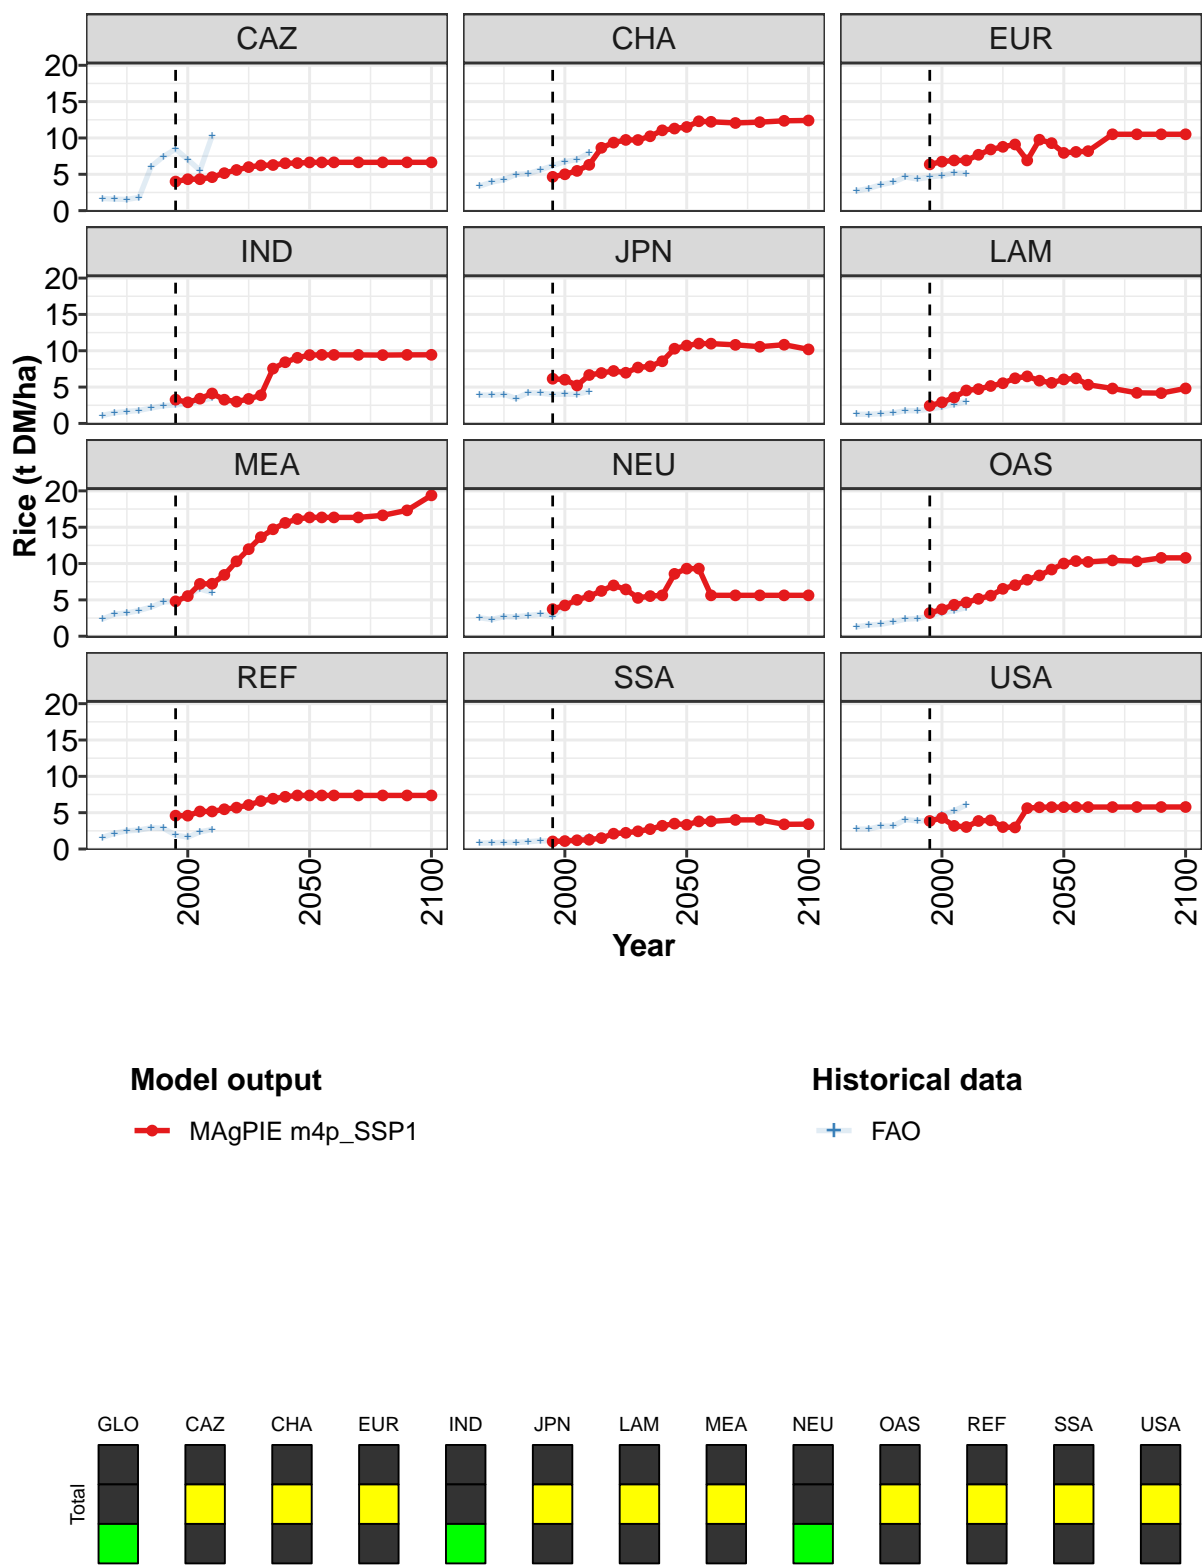

Figure 379: MAGPIE m4p\_SSP1 — Productivity—Yield—Crops—Cereals—Rice (t DM/ha)

|     | 1995 | 2000 | 2005 | 2010 | 2015 | 2020 | 2025 | 2030 | 2035 | 2040 | 2045 |
|-----|------|------|------|------|------|------|------|------|------|------|------|
| GLO | 3.5  | 3.6  | 4.1  | 4.5  | 4.8  | 5.0  | 5.5  | 6.0  | 7.5  | 8.0  | 8.4  |
| CAZ | 4.0  | 4.3  | 4.3  | 4.6  | 5.2  | 5.6  | 6.0  | 6.2  | 6.3  | 6.5  | 6.5  |
| CHA | 4.7  | 5.0  | 5.5  | 6.3  | 8.6  | 9.4  | 9.7  | 9.7  | 10.2 | 11.1 | 11.3 |
| EUR | 6.4  | 6.7  | 6.9  | 6.9  | 7.7  | 8.4  | 8.8  | 9.1  | 6.9  | 9.8  | 9.3  |
| IND | 3.3  | 2.9  | 3.4  | 4.1  | 3.3  | 3.0  | 3.4  | 3.9  | 7.5  | 8.4  | 9.0  |
| JPN | 6.1  | 6.0  | 5.2  | 6.7  | 6.9  | 7.2  | 7.0  | 7.7  | 7.9  | 8.6  | 10.3 |
| LAM | 2.4  | 2.9  | 3.6  | 4.5  | 4.7  | 5.2  | 5.5  | 6.2  | 6.5  | 5.9  | 5.6  |
| MEA | 4.8  | 5.5  | 7.2  | 7.2  | 8.4  | 10.3 | 12.0 | 13.6 | 14.7 | 15.6 | 16.1 |
| NEU | 3.7  | 4.2  | 5.0  | 5.5  | 6.2  | 7.0  | 6.4  | 5.3  | 5.5  | 5.6  | 8.6  |
| OAS | 3.2  | 3.7  | 4.3  | 4.6  | 5.1  | 5.6  | 6.5  | 7.0  | 7.8  | 8.4  | 9.2  |
| REF | 4.6  | 4.6  | 5.2  | 5.2  | 5.5  | 5.7  | 6.1  | 6.6  | 6.9  | 7.2  | 7.4  |
| SSA | 1.0  | 1.1  | 1.2  | 1.3  | 1.5  | 2.1  | 2.2  | 2.4  | 2.7  | 3.2  | 3.5  |
| USA | 3.9  | 4.3  | 3.2  | 3.0  | 3.9  | 3.9  | 3.0  | 3.0  | 5.6  | 5.7  | 5.8  |

Table 1477: MAgPIE m4p\_SSP1 — Productivity—Yield—Crops—Cereals—Rice (t DM/ha) [PART 1/2]

|     | 2050 | 2055 | 2060 | 2070 | 2080 | 2090 | 2100 |
|-----|------|------|------|------|------|------|------|
| GLO | 8.8  | 9.1  | 8.7  | 8.7  | 8.6  | 7.9  | 8.0  |
| CAZ | 6.6  | 6.6  | 6.6  | 6.6  | 6.6  | 6.6  | 6.6  |
| CHA | 11.5 | 12.3 | 12.2 | 12.1 | 12.2 | 12.4 | 12.4 |
| EUR | 7.9  | 8.1  | 8.2  | 10.5 | 10.5 | 10.5 | 10.5 |
| IND | 9.4  | 9.4  | 9.4  | 9.4  | 9.4  | 9.4  | 9.4  |
| JPN | 10.7 | 11.0 | 11.0 | 10.8 | 10.6 | 10.8 | 10.2 |
| LAM | 6.1  | 6.2  | 5.3  | 4.8  | 4.2  | 4.2  | 4.8  |
| MEA | 16.4 | 16.4 | 16.4 | 16.4 | 16.6 | 17.3 | 19.4 |
| NEU | 9.3  | 9.3  | 5.6  | 5.6  | 5.6  | 5.6  | 5.6  |
| OAS | 10.0 | 10.3 | 10.2 | 10.4 | 10.3 | 10.8 | 10.8 |
| REF | 7.4  | 7.4  | 7.4  | 7.4  | 7.4  | 7.4  | 7.4  |
| SSA | 3.3  | 3.8  | 3.8  | 4.0  | 4.0  | 3.4  | 3.4  |
| USA | 5.8  | 5.8  | 5.8  | 5.8  | 5.8  | 5.8  | 5.8  |

Table 1478: MAgPIE m4p\_SSP1 — Productivity—Yield—Crops—Cereals—Rice (t DM/ha) [PART 2/2]

|     | 1965 | 1970 | 1975 | 1980 | 1985 | 1990 | 1995 | 2000 | 2005 | 2010 |
|-----|------|------|------|------|------|------|------|------|------|------|
| GLO | 1.7  | 2.0  | 2.2  | 2.4  | 2.8  | 3.0  | 3.3  | 3.5  | 3.8  | 4.3  |
| CAZ | 1.7  | 1.6  | 1.5  | 1.8  | 6.1  | 7.5  | 8.5  | 7.0  | 5.5  | 10.3 |
| CHA | 3.4  | 3.9  | 4.3  | 5.0  | 5.1  | 5.6  | 6.2  | 6.7  | 7.0  | 8.0  |
| EUR | 2.7  | 3.0  | 3.6  | 3.9  | 4.6  | 4.4  | 4.6  | 4.8  | 5.2  | 5.1  |
| IND | 1.1  | 1.5  | 1.6  | 1.8  | 2.1  | 2.4  | 2.6  | 2.7  | 3.1  | 3.5  |
| JPN | 3.9  | 3.9  | 4.0  | 3.4  | 4.2  | 4.2  | 4.0  | 4.0  | 4.0  | 4.4  |
| LAM | 1.3  | 1.3  | 1.3  | 1.4  | 1.8  | 1.7  | 2.0  | 2.3  | 2.6  | 3.0  |
| MEA | 2.4  | 3.0  | 3.2  | 3.5  | 4.0  | 4.7  | 4.8  | 5.6  | 6.5  | 6.0  |
| NEU | 2.5  | 2.3  | 2.7  | 2.7  | 2.9  | 3.0  | 2.7  | 4.1  | 4.8  | 5.9  |
| OAS | 1.3  | 1.5  | 1.6  | 2.0  | 2.3  | 2.4  | 2.8  | 3.2  | 3.5  | 3.9  |
| REF | 1.6  | 2.2  | 2.5  | 2.6  | 2.9  | 2.9  | 1.9  | 1.6  | 2.4  | 2.7  |
| SSA | 0.8  | 0.8  | 0.9  | 0.9  | 1.0  | 1.1  | 1.1  | 1.2  | 1.3  | 1.7  |
| USA | 2.7  | 2.7  | 3.2  | 3.2  | 4.1  | 3.9  | 3.9  | 4.7  | 5.3  | 6.1  |

Table 1479: FAO — Productivity—Yield—Crops—Cereals—Rice (t DM/ha)

52.1.4 Cereals—Temperate cereals

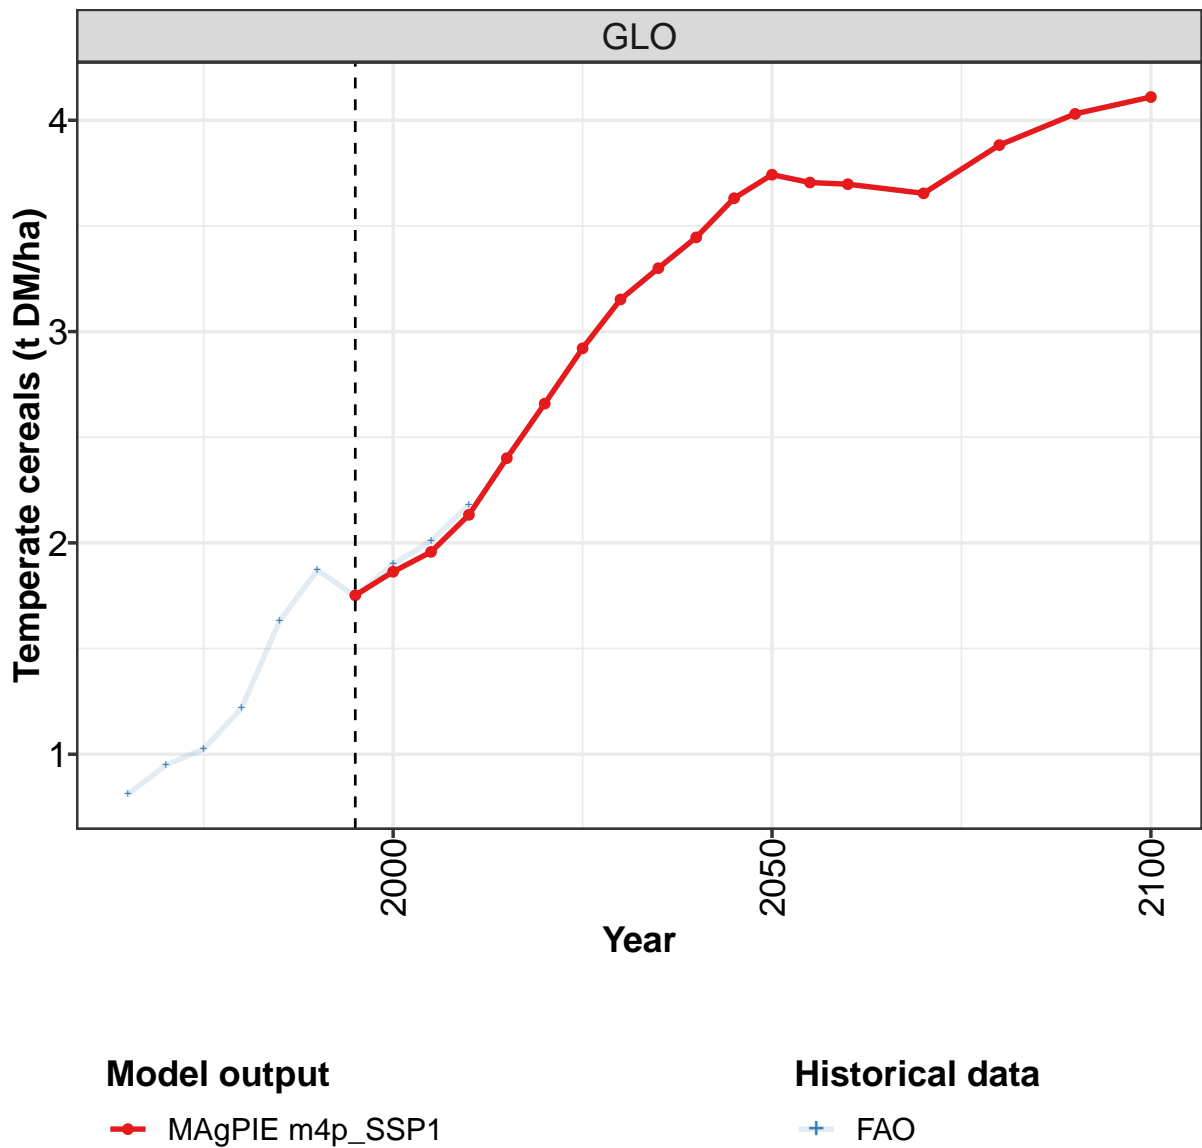

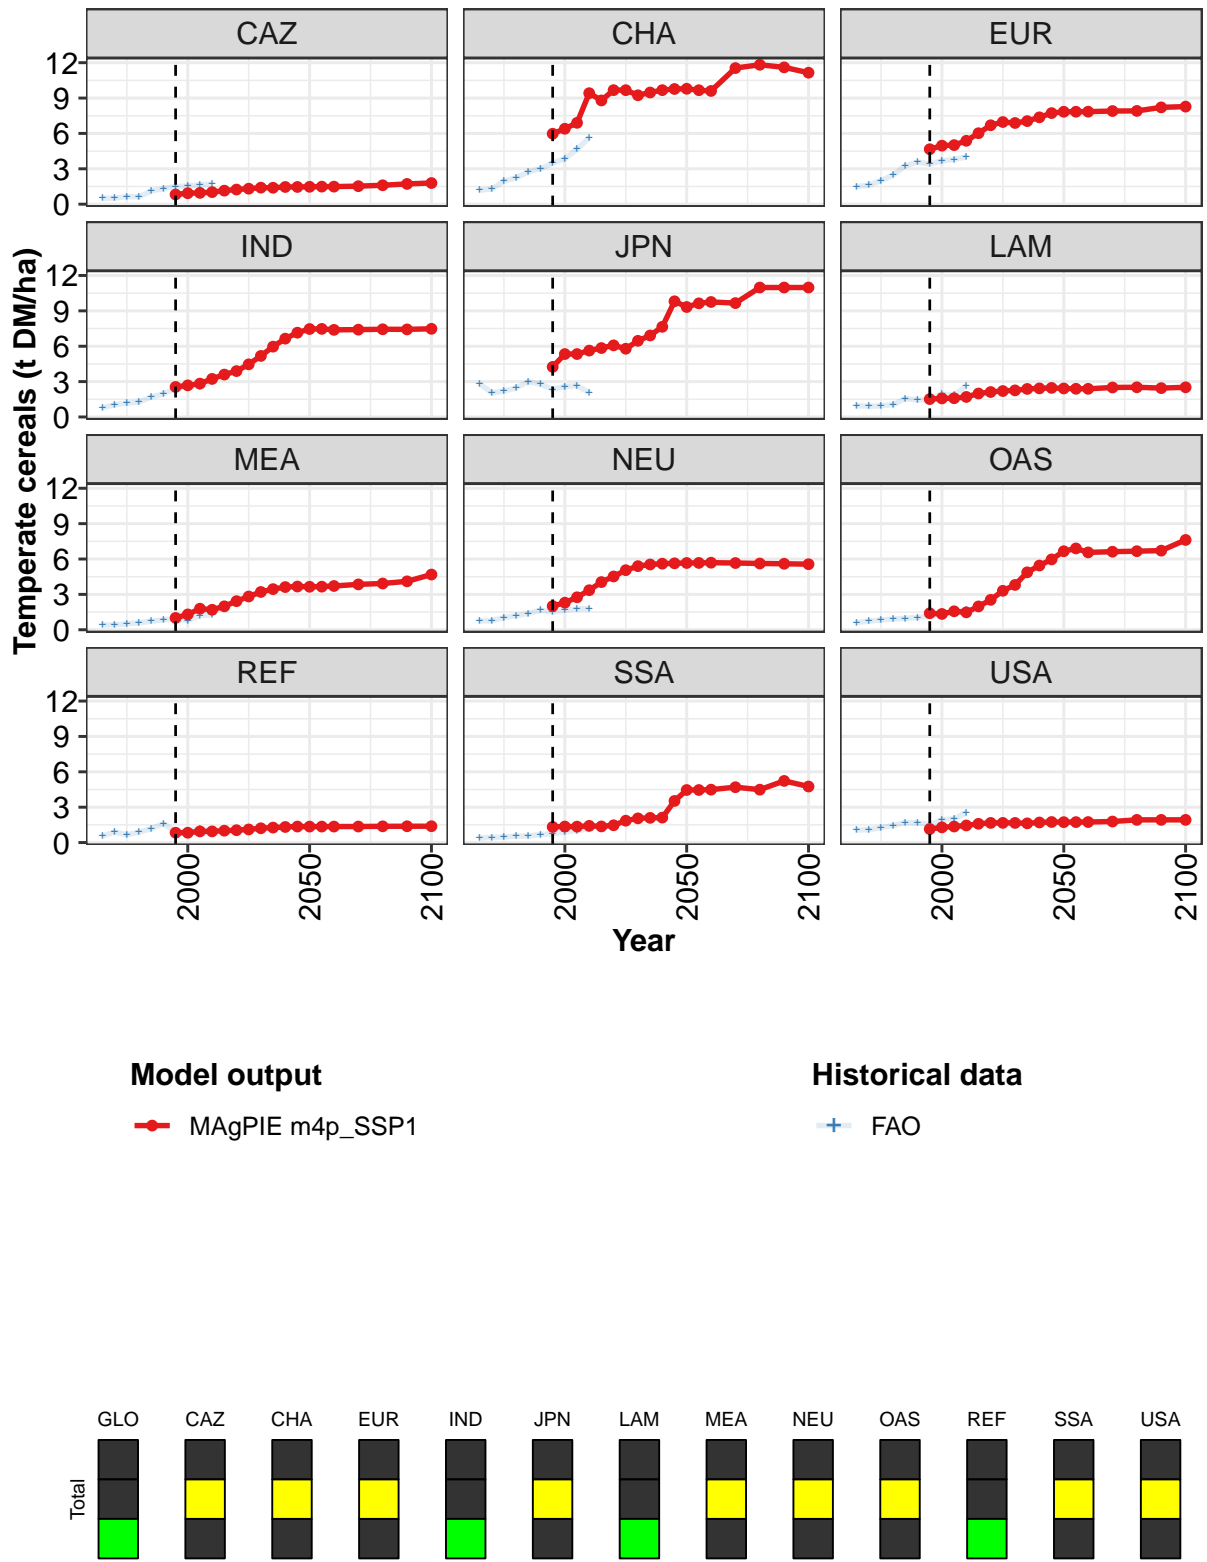

Figure 380: MAgPIE m4p\_SSP1 — Productivity—Yield—Crops—Cereals—Temperate cereals (t DM/ha)

|     | 1995 | 2000 | 2005 | 2010 | 2015 | 2020 | 2025 | 2030 | 2035 | 2040 | 2045 |
|-----|------|------|------|------|------|------|------|------|------|------|------|
| GLO | 1.8  | 1.9  | 2.0  | 2.1  | 2.4  | 2.7  | 2.9  | 3.2  | 3.3  | 3.4  | 3.6  |
| CAZ | 0.8  | 0.9  | 1.0  | 1.0  | 1.1  | 1.2  | 1.3  | 1.4  | 1.4  | 1.5  | 1.5  |
| CHA | 6.0  | 6.4  | 6.9  | 9.4  | 8.8  | 9.7  | 9.7  | 9.2  | 9.5  | 9.7  | 9.8  |
| EUR | 4.7  | 5.0  | 5.0  | 5.4  | 6.0  | 6.7  | 7.0  | 6.9  | 7.0  | 7.4  | 7.7  |
| IND | 2.5  | 2.7  | 2.8  | 3.2  | 3.6  | 3.9  | 4.5  | 5.2  | 6.0  | 6.6  | 7.1  |
| JPN | 4.2  | 5.3  | 5.3  | 5.6  | 5.8  | 6.1  | 5.8  | 6.5  | 6.9  | 7.7  | 9.8  |
| LAM | 1.5  | 1.6  | 1.6  | 1.7  | 2.0  | 2.1  | 2.2  | 2.3  | 2.4  | 2.4  | 2.5  |
| MEA | 1.0  | 1.3  | 1.8  | 1.7  | 2.0  | 2.4  | 2.8  | 3.2  | 3.4  | 3.6  | 3.7  |
| NEU | 2.0  | 2.3  | 2.8  | 3.4  | 4.0  | 4.5  | 5.1  | 5.4  | 5.5  | 5.6  | 5.6  |
| OAS | 1.4  | 1.3  | 1.6  | 1.5  | 2.0  | 2.5  | 3.3  | 3.8  | 4.9  | 5.4  | 6.0  |
| REF | 0.8  | 0.8  | 0.9  | 1.0  | 1.0  | 1.1  | 1.1  | 1.2  | 1.3  | 1.3  | 1.4  |
| SSA | 1.3  | 1.4  | 1.4  | 1.4  | 1.4  | 1.5  | 1.9  | 2.1  | 2.1  | 2.1  | 3.5  |
| USA | 1.1  | 1.3  | 1.4  | 1.5  | 1.6  | 1.7  | 1.7  | 1.7  | 1.6  | 1.7  | 1.7  |

Table 1480: MAgPIE m4p\_SSP1 — Productivity—Yield—Crops—Cereals—Temperate cereals (t DM/ha)  
[PART 1/2]

|     | 2050 | 2055 | 2060 | 2070 | 2080 | 2090 | 2100 |
|-----|------|------|------|------|------|------|------|
| GLO | 3.7  | 3.7  | 3.7  | 3.7  | 3.9  | 4.0  | 4.1  |
| CAZ | 1.5  | 1.5  | 1.5  | 1.5  | 1.6  | 1.7  | 1.8  |
| CHA | 9.8  | 9.7  | 9.6  | 11.5 | 11.8 | 11.6 | 11.2 |
| EUR | 7.8  | 7.8  | 7.8  | 7.9  | 7.9  | 8.2  | 8.3  |
| IND | 7.5  | 7.5  | 7.4  | 7.4  | 7.4  | 7.4  | 7.5  |
| JPN | 9.3  | 9.6  | 9.8  | 9.7  | 11.0 | 11.0 | 11.0 |
| LAM | 2.4  | 2.4  | 2.4  | 2.5  | 2.5  | 2.4  | 2.5  |
| MEA | 3.7  | 3.7  | 3.7  | 3.8  | 3.9  | 4.1  | 4.7  |
| NEU | 5.7  | 5.7  | 5.7  | 5.7  | 5.6  | 5.6  | 5.6  |
| OAS | 6.7  | 6.9  | 6.6  | 6.6  | 6.7  | 6.7  | 7.6  |
| REF | 1.4  | 1.4  | 1.4  | 1.4  | 1.4  | 1.4  | 1.4  |
| SSA | 4.5  | 4.5  | 4.5  | 4.7  | 4.5  | 5.2  | 4.8  |
| USA | 1.7  | 1.7  | 1.7  | 1.8  | 1.9  | 1.9  | 1.9  |

Table 1481: MAgPIE m4p\_SSP1 — Productivity—Yield—Crops—Cereals—Temperate cereals (t DM/ha)  
[PART 2/2]

|     | 1965 | 1970 | 1975 | 1980 | 1985 | 1990 | 1995 | 2000 | 2005 | 2010 |
|-----|------|------|------|------|------|------|------|------|------|------|
| GLO | 0.81 | 0.95 | 1.03 | 1.22 | 1.63 | 1.87 | 1.75 | 1.90 | 2.01 | 2.18 |
| CAZ | 0.51 | 0.51 | 0.65 | 0.63 | 1.12 | 1.34 | 1.50 | 1.54 | 1.65 | 1.71 |
| CHA | 1.19 | 1.28 | 1.96 | 2.25 | 2.73 | 3.01 | 3.49 | 3.86 | 4.66 | 5.64 |
| EUR | 1.50 | 1.61 | 2.00 | 2.48 | 3.26 | 3.57 | 3.41 | 3.67 | 3.80 | 4.01 |
| IND | 0.79 | 1.04 | 1.17 | 1.27 | 1.69 | 1.97 | 2.41 | 2.63 | 2.55 | 2.96 |
| JPN | 2.83 | 2.05 | 2.19 | 2.47 | 2.99 | 2.79 | 2.35 | 2.58 | 2.64 | 2.07 |
| LAM | 0.96 | 0.91 | 0.95 | 1.05 | 1.57 | 1.43 | 1.49 | 1.93 | 1.86 | 2.62 |
| MEA | 0.40 | 0.42 | 0.51 | 0.60 | 0.72 | 0.86 | 0.92 | 0.78 | 1.21 | 1.26 |
| NEU | 0.75 | 0.77 | 1.04 | 1.19 | 1.39 | 1.66 | 1.50 | 1.66 | 1.78 | 1.79 |
| OAS | 0.61 | 0.73 | 0.83 | 0.91 | 0.97 | 1.03 | 1.17 | 1.31 | 1.56 | 1.66 |
| REF | 0.55 | 0.90 | 0.65 | 0.89 | 1.18 | 1.60 | 0.95 | 0.96 | 1.14 | 1.01 |
| SSA | 0.37 | 0.45 | 0.47 | 0.55 | 0.55 | 0.68 | 0.73 | 0.90 | 1.02 | 1.16 |
| USA | 1.06 | 1.08 | 1.27 | 1.45 | 1.70 | 1.67 | 1.53 | 1.90 | 2.02 | 2.53 |

Table 1482: FAO — Productivity—Yield—Crops—Cereals—Temperate cereals (t DM/ha)



52.1.5 Cereals—Tropical cereals

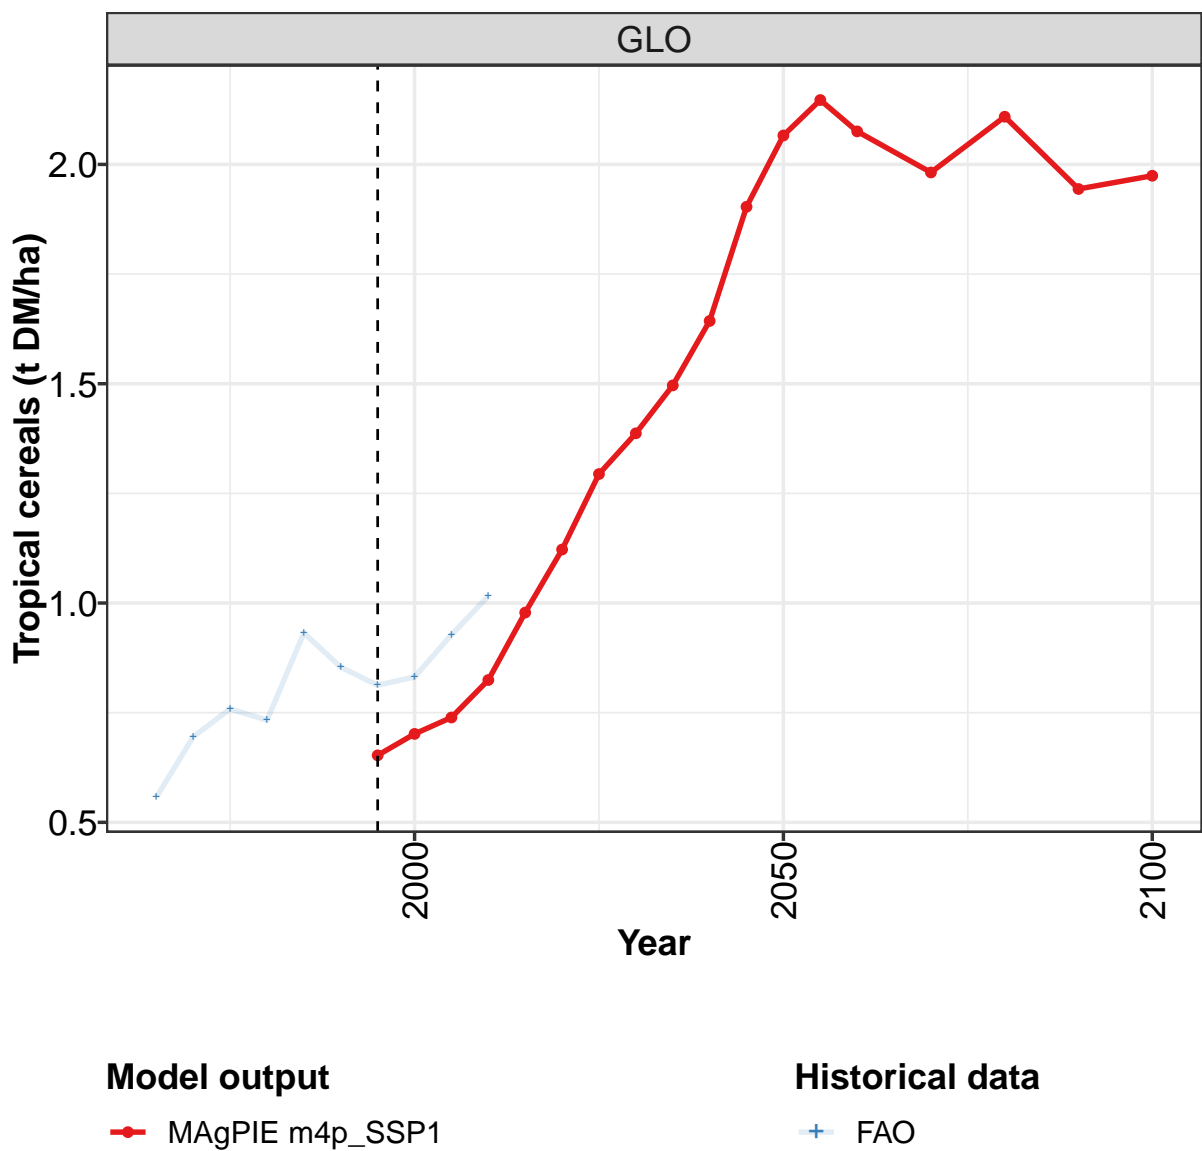

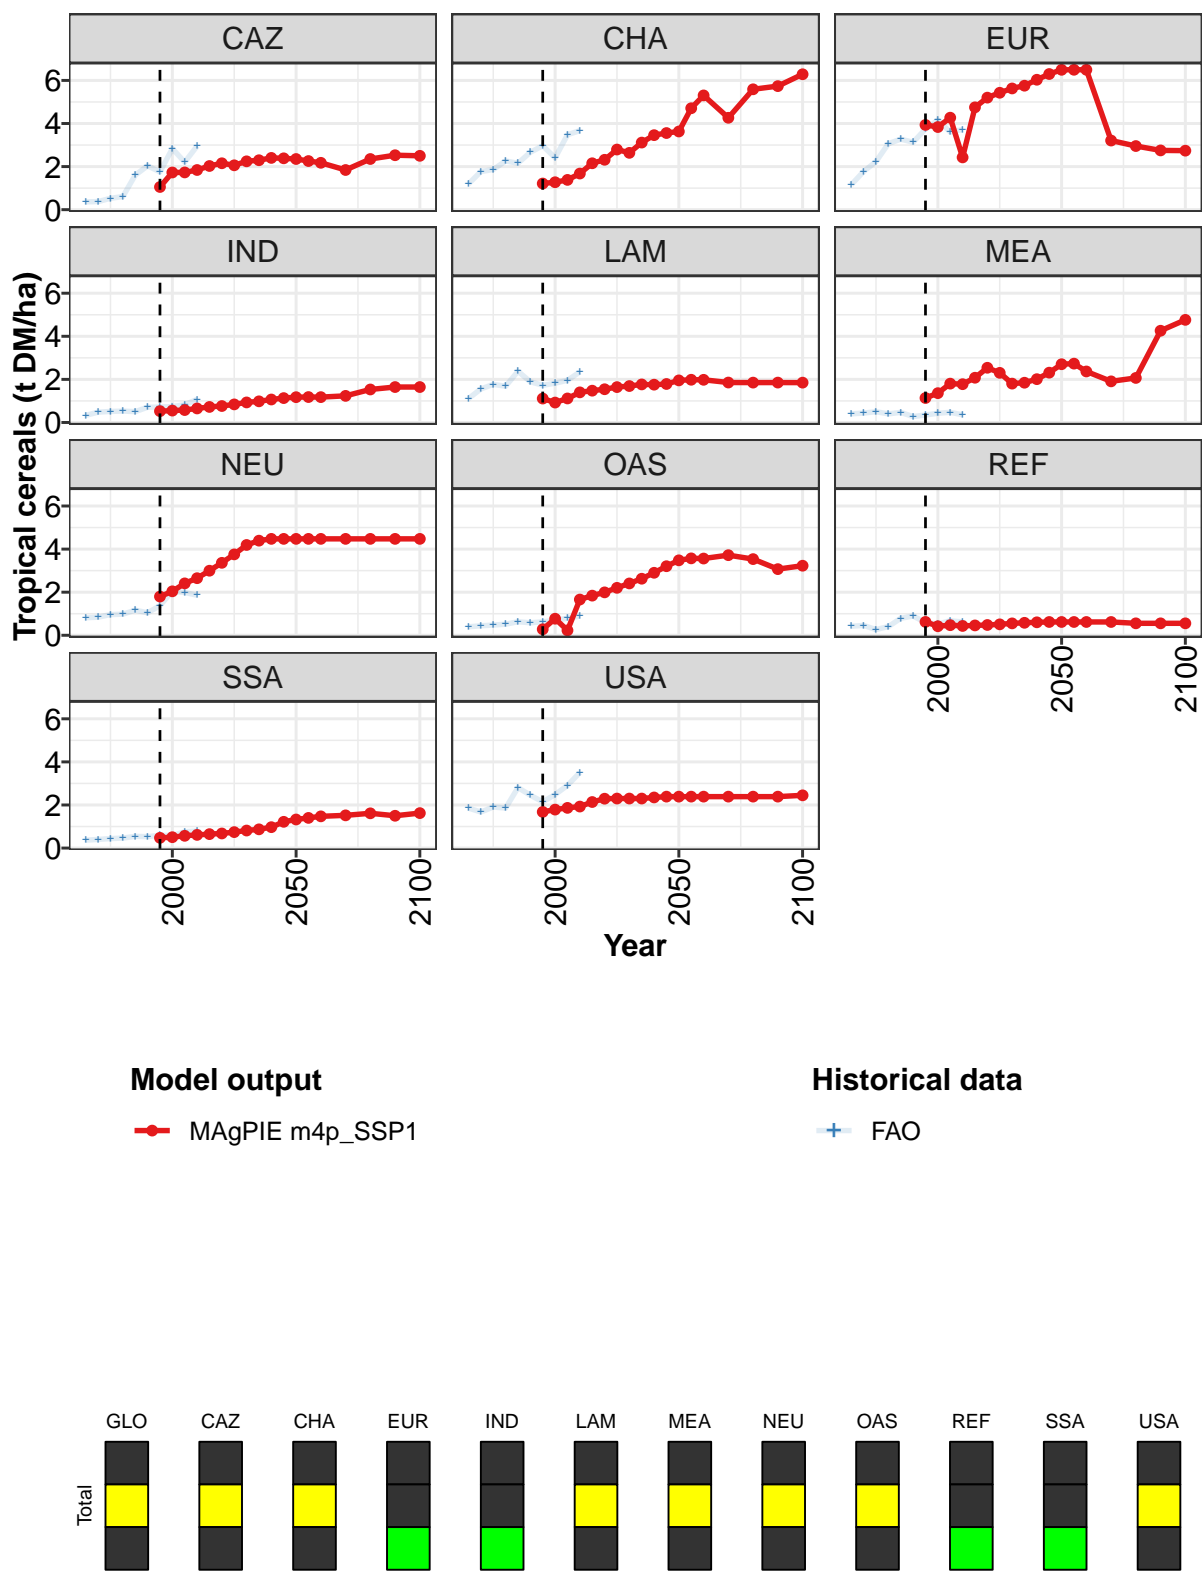

Figure 381: MAgPIE m4p\_SSP1 — Productivity—Yield—Crops—Cereals—Tropical cereals (t DM/ha)

|     | 1995 | 2000 | 2005 | 2010 | 2015 | 2020 | 2025 | 2030 | 2035 | 2040 | 2045 |
|-----|------|------|------|------|------|------|------|------|------|------|------|
| GLO | 0.65 | 0.70 | 0.74 | 0.82 | 0.98 | 1.12 | 1.29 | 1.39 | 1.50 | 1.64 | 1.90 |
| CAZ | 1.05 | 1.73 | 1.73 | 1.84 | 2.03 | 2.16 | 2.06 | 2.25 | 2.30 | 2.40 | 2.39 |
| CHA | 1.22 | 1.27 | 1.38 | 1.68 | 2.16 | 2.32 | 2.79 | 2.64 | 3.12 | 3.46 | 3.56 |
| EUR | 3.93 | 3.84 | 4.27 | 2.43 | 4.75 | 5.20 | 5.43 | 5.63 | 5.76 | 6.03 | 6.30 |
| IND | 0.53 | 0.55 | 0.58 | 0.65 | 0.72 | 0.76 | 0.84 | 0.93 | 0.98 | 1.07 | 1.13 |
| LAM | 1.11 | 0.93 | 1.12 | 1.40 | 1.48 | 1.54 | 1.64 | 1.69 | 1.77 | 1.75 | 1.79 |
| MEA | 1.14 | 1.36 | 1.80 | 1.78 | 2.08 | 2.54 | 2.30 | 1.81 | 1.85 | 2.01 | 2.31 |
| NEU | 1.80 | 2.04 | 2.41 | 2.65 | 3.00 | 3.36 | 3.76 | 4.19 | 4.39 | 4.47 | 4.47 |
| OAS | 0.28 | 0.77 | 0.23 | 1.66 | 1.84 | 1.99 | 2.20 | 2.41 | 2.63 | 2.90 | 3.21 |
| REF | 0.62 | 0.42 | 0.47 | 0.43 | 0.46 | 0.48 | 0.51 | 0.55 | 0.58 | 0.60 | 0.62 |
| SSA | 0.48 | 0.51 | 0.57 | 0.61 | 0.65 | 0.68 | 0.74 | 0.81 | 0.87 | 0.97 | 1.22 |
| USA | 1.68 | 1.79 | 1.87 | 1.93 | 2.14 | 2.29 | 2.30 | 2.30 | 2.30 | 2.35 | 2.39 |

Table 1483: MAgPIE m4p\_SSP1 — Productivity—Yield—Crops—Cereals—Tropical cereals (t DM/ha) [PART 1/2]

|     | 2050 | 2055 | 2060 | 2070 | 2080 | 2090 | 2100 |
|-----|------|------|------|------|------|------|------|
| GLO | 2.07 | 2.15 | 2.08 | 1.98 | 2.11 | 1.94 | 1.97 |
| CAZ | 2.35 | 2.26 | 2.18 | 1.84 | 2.35 | 2.53 | 2.50 |
| CHA | 3.63 | 4.71 | 5.30 | 4.27 | 5.59 | 5.74 | 6.29 |
| EUR | 6.49 | 6.49 | 6.49 | 3.21 | 2.95 | 2.75 | 2.74 |
| IND | 1.18 | 1.18 | 1.18 | 1.24 | 1.53 | 1.64 | 1.65 |
| LAM | 1.95 | 1.98 | 1.98 | 1.85 | 1.85 | 1.85 | 1.85 |
| MEA | 2.70 | 2.73 | 2.37 | 1.91 | 2.07 | 4.26 | 4.76 |
| NEU | 4.47 | 4.47 | 4.47 | 4.47 | 4.47 | 4.47 | 4.47 |
| OAS | 3.48 | 3.57 | 3.56 | 3.72 | 3.54 | 3.07 | 3.23 |
| REF | 0.62 | 0.62 | 0.62 | 0.62 | 0.55 | 0.55 | 0.55 |
| SSA | 1.33 | 1.40 | 1.47 | 1.52 | 1.61 | 1.50 | 1.62 |
| USA | 2.39 | 2.39 | 2.39 | 2.39 | 2.39 | 2.39 | 2.45 |

Table 1484: MAgPIE m4p\_SSP1 — Productivity—Yield—Crops—Cereals—Tropical cereals (t DM/ha) [PART 2/2]

|     | 1965 | 1970 | 1975 | 1980 | 1985 | 1990 | 1995 | 2000 | 2005 | 2010 |
|-----|------|------|------|------|------|------|------|------|------|------|
| GLO | 0.56 | 0.69 | 0.76 | 0.73 | 0.93 | 0.85 | 0.81 | 0.83 | 0.93 | 1.02 |
| CAZ | 0.36 | 0.38 | 0.53 | 0.61 | 1.60 | 2.04 | 1.75 | 2.84 | 2.21 | 2.95 |
| CHA | 1.20 | 1.77 | 1.86 | 2.26 | 2.16 | 2.67 | 2.97 | 2.41 | 3.48 | 3.67 |
| EUR | 1.16 | 1.77 | 2.23 | 3.07 | 3.27 | 3.13 | 3.74 | 4.15 | 3.60 | 3.72 |
| IND | 0.33 | 0.48 | 0.51 | 0.53 | 0.50 | 0.71 | 0.72 | 0.74 | 0.82 | 1.07 |
| LAM | 1.11 | 1.55 | 1.77 | 1.68 | 2.38 | 1.89 | 1.73 | 1.82 | 1.96 | 2.35 |
| MEA | 0.40 | 0.44 | 0.50 | 0.40 | 0.47 | 0.27 | 0.35 | 0.43 | 0.47 | 0.35 |
| NEU | 0.81 | 0.84 | 0.96 | 0.98 | 1.17 | 1.04 | 1.38 | 2.04 | 1.99 | 1.86 |
| OAS | 0.39 | 0.44 | 0.47 | 0.51 | 0.63 | 0.58 | 0.62 | 0.70 | 0.79 | 0.88 |
| REF | 0.42 | 0.46 | 0.26 | 0.40 | 0.79 | 0.89 | 0.59 | 0.52 | 0.67 | 0.62 |
| SSA | 0.37 | 0.40 | 0.44 | 0.46 | 0.54 | 0.53 | 0.59 | 0.58 | 0.75 | 0.79 |
| USA | 1.85 | 1.68 | 1.90 | 1.86 | 2.81 | 2.45 | 2.15 | 2.48 | 2.91 | 3.51 |

Table 1485: FAO — Productivity—Yield—Crops—Cereals—Tropical cereals (t DM/ha)

52.1.6 Oil crops

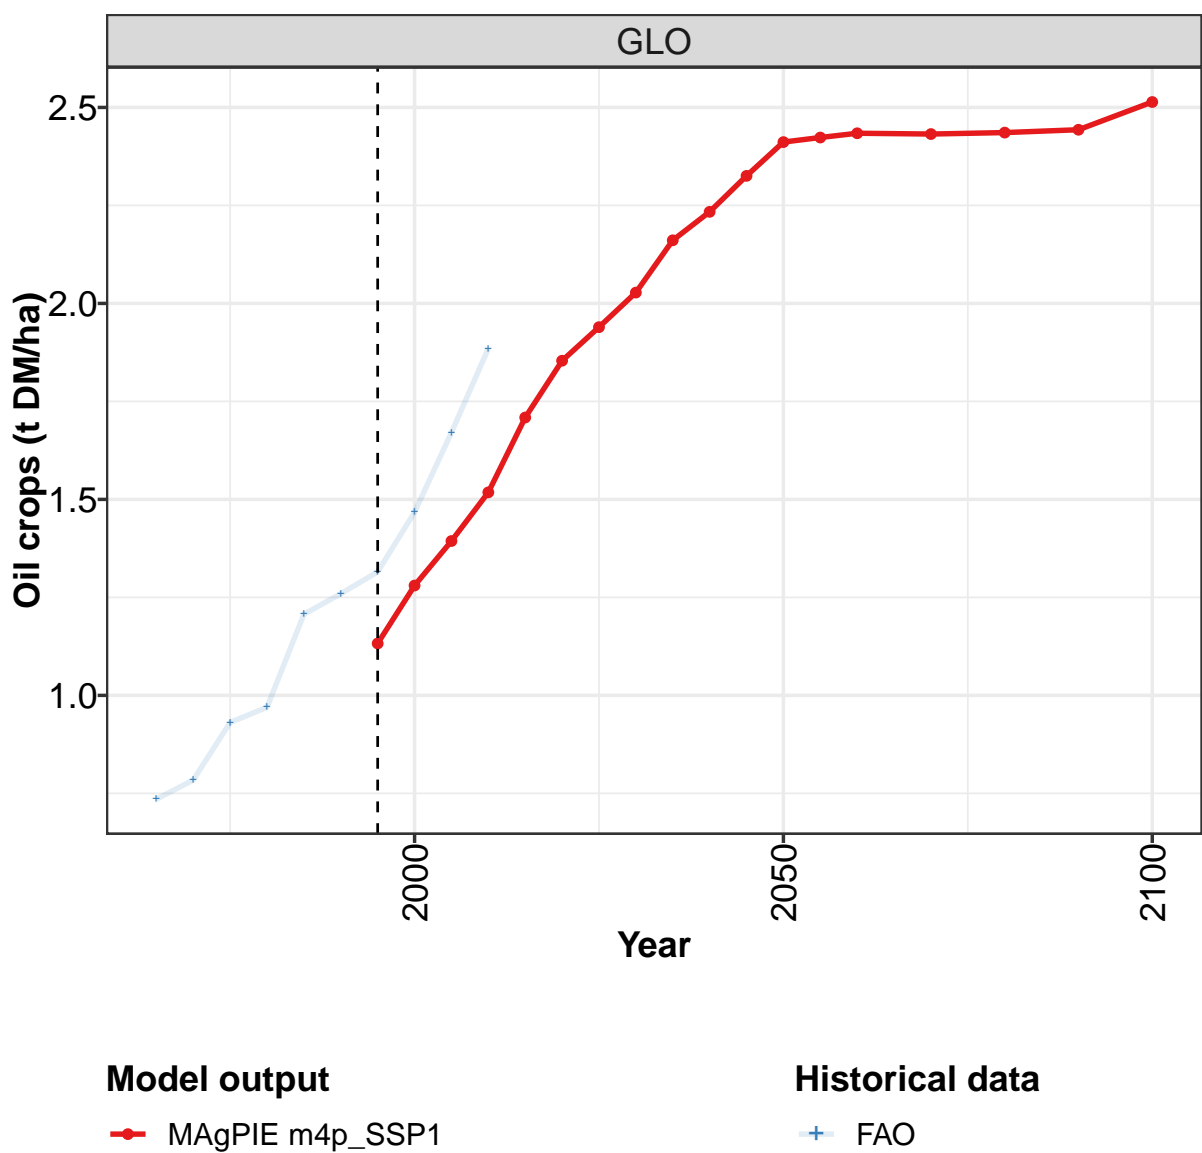

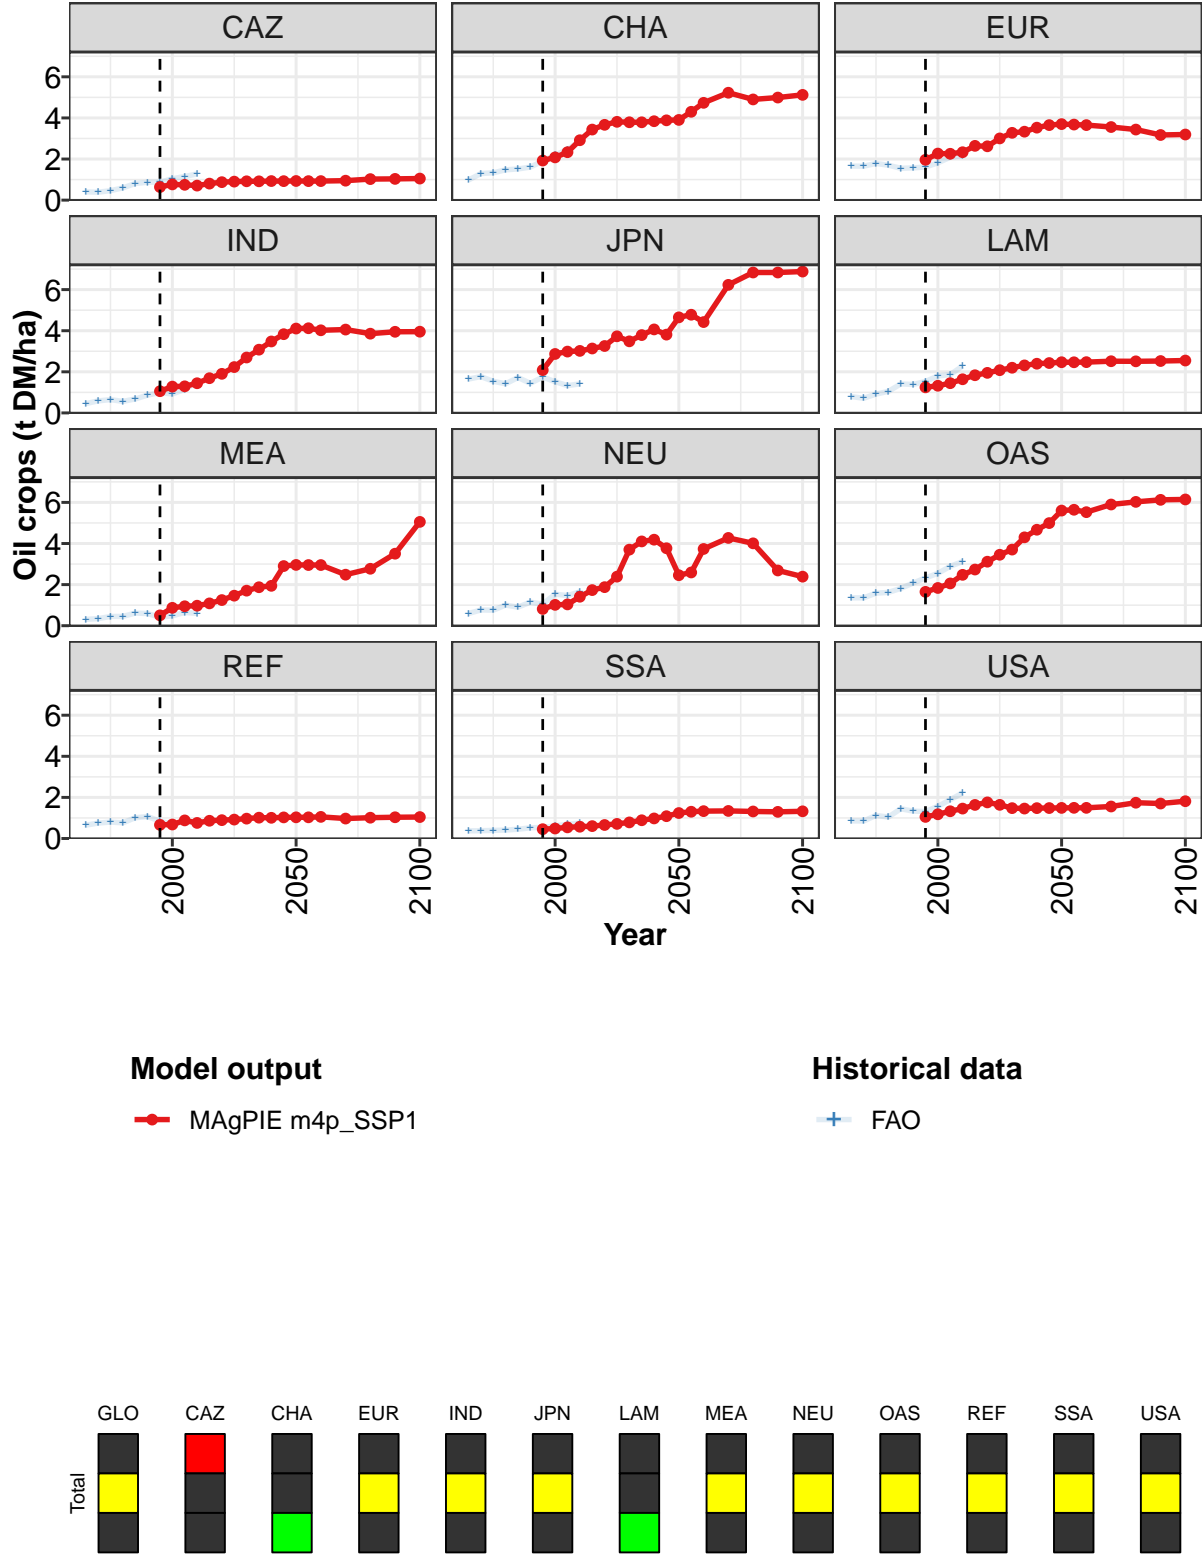

Figure 382: MAgPIE m4p\_SSP1 — Productivity—Yield—Crops—Oil crops (t DM/ha)

|     | 1995 | 2000 | 2005 | 2010 | 2015 | 2020 | 2025 | 2030 | 2035 | 2040 | 2045 |
|-----|------|------|------|------|------|------|------|------|------|------|------|
| GLO | 1.13 | 1.28 | 1.39 | 1.52 | 1.71 | 1.85 | 1.94 | 2.03 | 2.16 | 2.23 | 2.33 |
| CAZ | 0.64 | 0.77 | 0.75 | 0.71 | 0.80 | 0.87 | 0.90 | 0.92 | 0.92 | 0.93 | 0.93 |
| CHA | 1.93 | 2.08 | 2.33 | 2.92 | 3.43 | 3.67 | 3.81 | 3.79 | 3.79 | 3.84 | 3.88 |
| EUR | 1.96 | 2.27 | 2.26 | 2.33 | 2.64 | 2.62 | 3.00 | 3.28 | 3.33 | 3.53 | 3.65 |
| IND | 1.06 | 1.28 | 1.29 | 1.44 | 1.69 | 1.90 | 2.23 | 2.70 | 3.08 | 3.48 | 3.83 |
| JPN | 2.09 | 2.87 | 2.99 | 3.02 | 3.14 | 3.26 | 3.73 | 3.48 | 3.79 | 4.06 | 3.81 |
| LAM | 1.25 | 1.32 | 1.45 | 1.64 | 1.83 | 1.95 | 2.08 | 2.20 | 2.31 | 2.39 | 2.43 |
| MEA | 0.50 | 0.87 | 0.95 | 0.98 | 1.09 | 1.25 | 1.46 | 1.71 | 1.87 | 1.94 | 2.90 |
| NEU | 0.82 | 1.02 | 1.04 | 1.41 | 1.73 | 1.88 | 2.39 | 3.70 | 4.10 | 4.19 | 3.77 |
| OAS | 1.65 | 1.84 | 2.06 | 2.48 | 2.73 | 3.12 | 3.45 | 3.70 | 4.30 | 4.67 | 4.99 |
| REF | 0.66 | 0.68 | 0.88 | 0.76 | 0.86 | 0.89 | 0.92 | 0.97 | 1.02 | 1.01 | 1.03 |
| SSA | 0.46 | 0.49 | 0.54 | 0.57 | 0.60 | 0.66 | 0.71 | 0.78 | 0.89 | 0.98 | 1.09 |
| USA | 1.05 | 1.18 | 1.33 | 1.46 | 1.64 | 1.76 | 1.64 | 1.48 | 1.46 | 1.48 | 1.48 |

Table 1486: MAgPIE m4p\_SSP1 — Productivity—Yield—Crops—Oil crops (t DM/ha) [PART 1/2]

|     | 2050 | 2055 | 2060 | 2070 | 2080 | 2090 | 2100 |
|-----|------|------|------|------|------|------|------|
| GLO | 2.41 | 2.42 | 2.43 | 2.43 | 2.44 | 2.44 | 2.51 |
| CAZ | 0.93 | 0.93 | 0.93 | 0.95 | 1.02 | 1.03 | 1.05 |
| CHA | 3.90 | 4.30 | 4.74 | 5.23 | 4.90 | 4.99 | 5.12 |
| EUR | 3.70 | 3.68 | 3.65 | 3.56 | 3.43 | 3.17 | 3.19 |
| IND | 4.11 | 4.12 | 4.02 | 4.06 | 3.86 | 3.95 | 3.95 |
| JPN | 4.65 | 4.78 | 4.42 | 6.23 | 6.83 | 6.83 | 6.88 |
| LAM | 2.47 | 2.47 | 2.47 | 2.52 | 2.51 | 2.53 | 2.55 |
| MEA | 2.96 | 2.95 | 2.95 | 2.48 | 2.77 | 3.51 | 5.05 |
| NEU | 2.46 | 2.59 | 3.74 | 4.27 | 4.01 | 2.69 | 2.39 |
| OAS | 5.60 | 5.64 | 5.53 | 5.90 | 6.03 | 6.13 | 6.14 |
| REF | 1.03 | 1.03 | 1.05 | 0.97 | 1.01 | 1.03 | 1.04 |
| SSA | 1.24 | 1.30 | 1.33 | 1.34 | 1.32 | 1.30 | 1.32 |
| USA | 1.49 | 1.49 | 1.49 | 1.56 | 1.74 | 1.70 | 1.81 |

Table 1487: MAgPIE m4p\_SSP1 — Productivity—Yield—Crops—Oil crops (t DM/ha) [PART 2/2]

|     | 1965 | 1970 | 1975 | 1980 | 1985 | 1990 | 1995 | 2000 | 2005 | 2010 |
|-----|------|------|------|------|------|------|------|------|------|------|
| GLO | 0.74 | 0.78 | 0.93 | 0.97 | 1.21 | 1.26 | 1.32 | 1.47 | 1.67 | 1.89 |
| CAZ | 0.40 | 0.38 | 0.46 | 0.59 | 0.81 | 0.87 | 0.87 | 1.04 | 1.15 | 1.27 |
| CHA | 0.98 | 1.29 | 1.33 | 1.47 | 1.52 | 1.61 | 1.91 | 2.19 | 2.46 | 2.88 |
| EUR | 1.66 | 1.65 | 1.78 | 1.70 | 1.55 | 1.57 | 1.61 | 1.81 | 2.09 | 2.16 |
| IND | 0.45 | 0.58 | 0.65 | 0.56 | 0.68 | 0.87 | 0.99 | 0.92 | 1.14 | 1.50 |
| JPN | 1.65 | 1.77 | 1.54 | 1.42 | 1.72 | 1.44 | 1.74 | 1.52 | 1.33 | 1.41 |
| LAM | 0.79 | 0.71 | 0.92 | 1.05 | 1.41 | 1.38 | 1.53 | 1.80 | 1.86 | 2.29 |
| MEA | 0.31 | 0.34 | 0.45 | 0.45 | 0.61 | 0.59 | 0.41 | 0.48 | 0.64 | 0.60 |
| NEU | 0.59 | 0.77 | 0.76 | 1.00 | 0.90 | 1.14 | 1.05 | 1.53 | 1.47 | 1.64 |
| OAS | 1.36 | 1.36 | 1.58 | 1.62 | 1.81 | 2.08 | 2.33 | 2.55 | 2.89 | 3.12 |
| REF | 0.65 | 0.75 | 0.80 | 0.76 | 1.01 | 1.07 | 0.84 | 0.70 | 0.82 | 0.75 |
| SSA | 0.37 | 0.38 | 0.39 | 0.41 | 0.45 | 0.52 | 0.54 | 0.61 | 0.70 | 0.74 |
| USA | 0.85 | 0.85 | 1.12 | 1.04 | 1.45 | 1.33 | 1.31 | 1.57 | 1.89 | 2.22 |

Table 1488: FAO — Productivity—Yield—Crops—Oil crops (t DM/ha)

52.1.7 Oil crops—Cotton seed

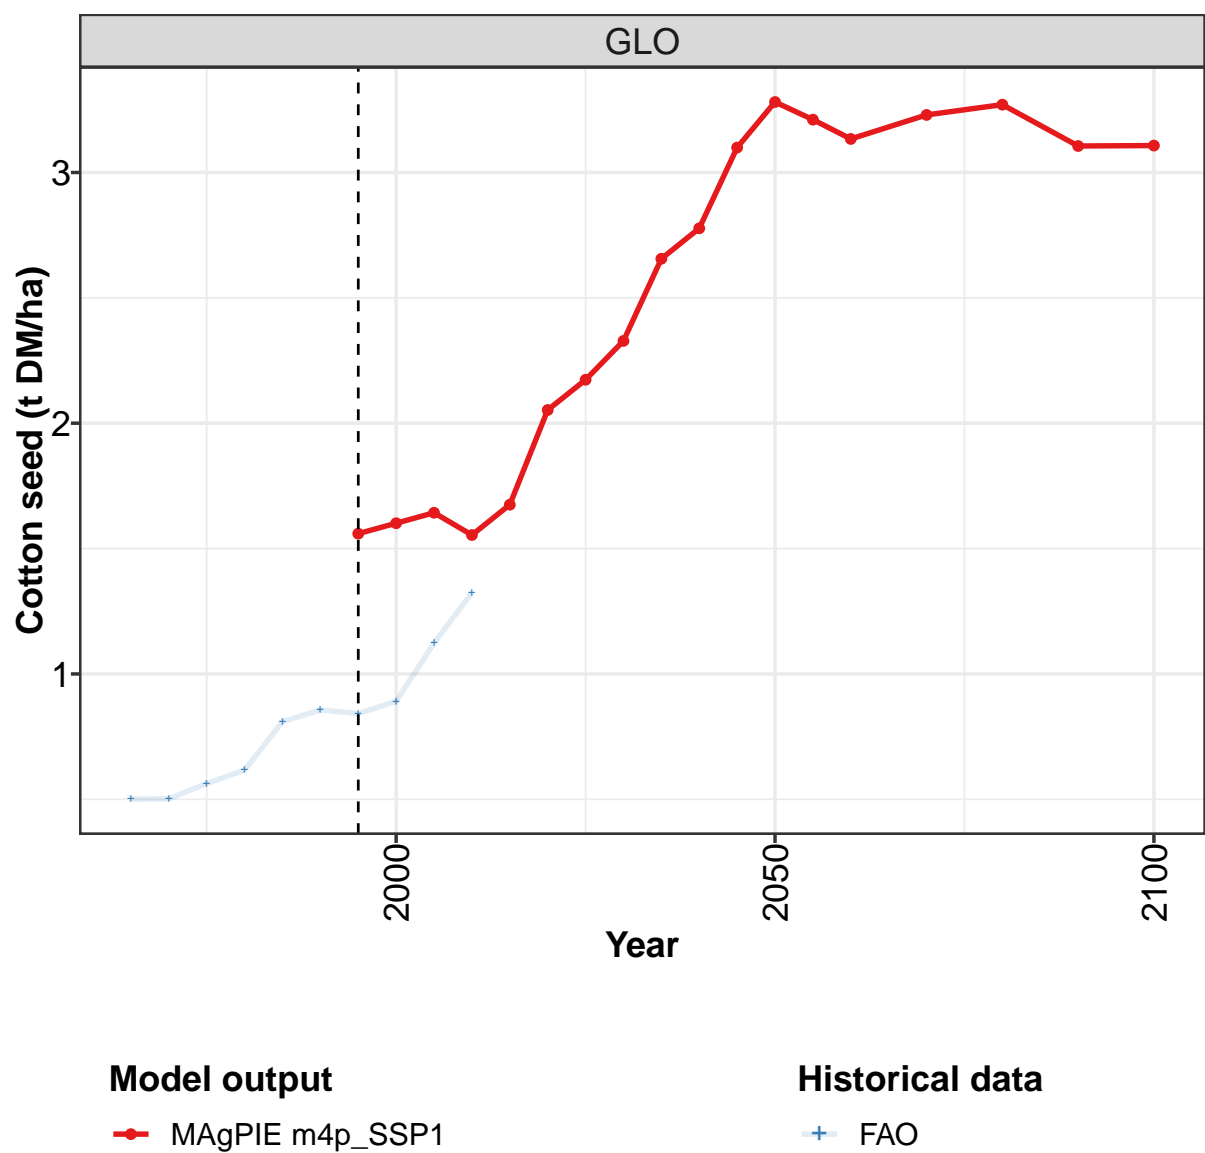

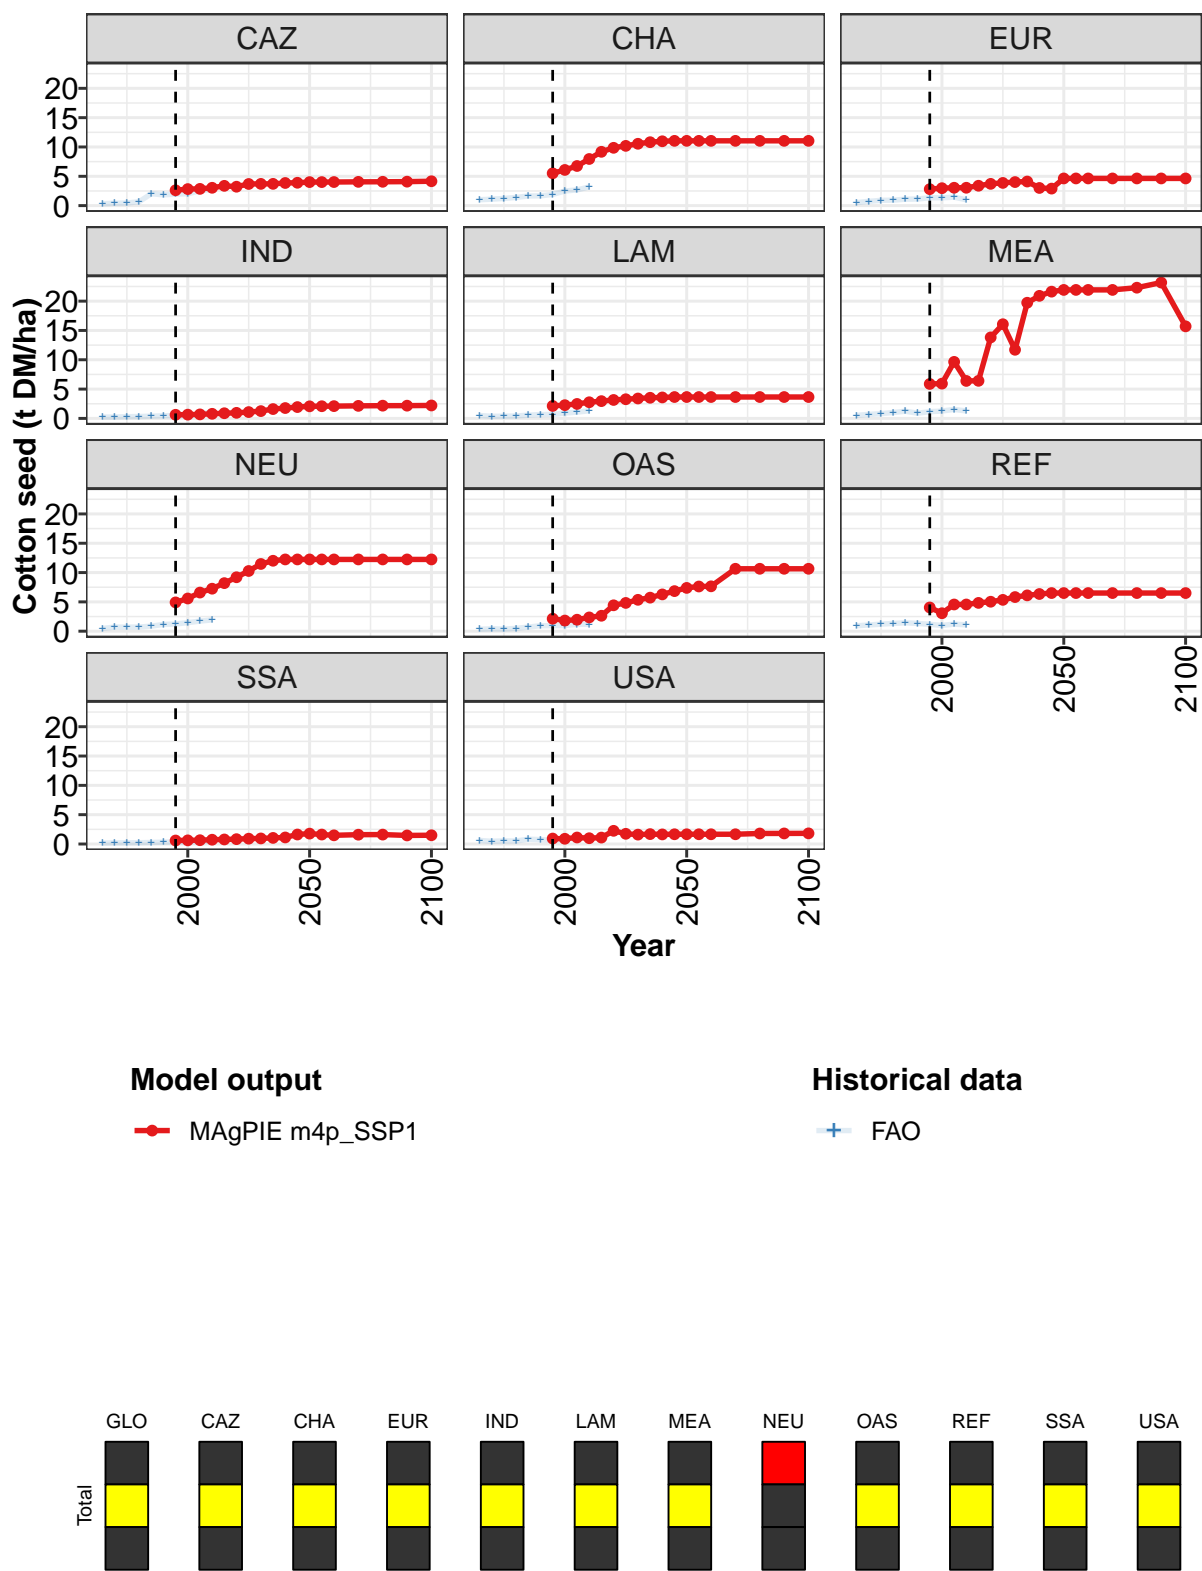

Figure 383: MAGPIE m4p\_SSP1 — Productivity—Yield—Crops—Oil crops—Cotton seed (t DM/ha)



|     | 1995 | 2000 | 2005 | 2010 | 2015 | 2020 | 2025 | 2030 | 2035 | 2040 | 2045 |
|-----|------|------|------|------|------|------|------|------|------|------|------|
| GLO | 1.6  | 1.6  | 1.6  | 1.6  | 1.7  | 2.1  | 2.2  | 2.3  | 2.7  | 2.8  | 3.1  |
| CAZ | 2.6  | 2.8  | 2.9  | 3.0  | 3.4  | 3.2  | 3.7  | 3.7  | 3.7  | 3.9  | 3.9  |
| CHA | 5.5  | 6.1  | 6.8  | 8.0  | 9.2  | 9.9  | 10.2 | 10.5 | 10.8 | 11.0 | 11.0 |
| EUR | 2.8  | 3.0  | 3.1  | 3.1  | 3.4  | 3.7  | 3.9  | 4.0  | 4.1  | 3.0  | 2.9  |
| IND | 0.6  | 0.6  | 0.7  | 0.8  | 0.9  | 1.0  | 1.1  | 1.3  | 1.6  | 1.8  | 1.9  |
| LAM | 2.1  | 2.3  | 2.5  | 2.8  | 2.9  | 3.1  | 3.3  | 3.4  | 3.5  | 3.6  | 3.7  |
| MEA | 5.9  | 5.9  | 9.6  | 6.4  | 6.4  | 13.8 | 16.1 | 11.7 | 19.7 | 20.9 | 21.6 |
| NEU | 4.9  | 5.6  | 6.6  | 7.3  | 8.2  | 9.2  | 10.3 | 11.5 | 12.0 | 12.2 | 12.2 |
| OAS | 2.1  | 1.8  | 2.0  | 2.4  | 2.6  | 4.4  | 4.8  | 5.4  | 5.7  | 6.3  | 6.8  |
| REF | 4.1  | 3.1  | 4.6  | 4.6  | 4.8  | 5.0  | 5.3  | 5.8  | 6.1  | 6.3  | 6.5  |
| SSA | 0.6  | 0.6  | 0.7  | 0.7  | 0.8  | 0.8  | 0.9  | 1.0  | 1.0  | 1.1  | 1.6  |
| USA | 0.9  | 0.9  | 1.1  | 1.0  | 1.1  | 2.2  | 1.7  | 1.6  | 1.7  | 1.6  | 1.7  |

Table 1489: MAgPIE m4p\_SSP1 — Productivity—Yield—Crops—Oil crops—Cotton seed (t DM/ha) [PART 1/2]

|     | 2050 | 2055 | 2060 | 2070 | 2080 | 2090 | 2100 |
|-----|------|------|------|------|------|------|------|
| GLO | 3.3  | 3.2  | 3.1  | 3.2  | 3.3  | 3.1  | 3.1  |
| CAZ | 4.0  | 4.0  | 4.0  | 4.1  | 4.1  | 4.1  | 4.2  |
| CHA | 11.0 | 11.0 | 11.0 | 11.0 | 11.0 | 11.0 | 11.0 |
| EUR | 4.6  | 4.6  | 4.6  | 4.6  | 4.6  | 4.6  | 4.6  |
| IND | 2.1  | 2.1  | 2.1  | 2.1  | 2.2  | 2.2  | 2.2  |
| LAM | 3.7  | 3.7  | 3.7  | 3.7  | 3.7  | 3.7  | 3.7  |
| MEA | 21.9 | 21.9 | 21.9 | 21.9 | 22.3 | 23.2 | 15.7 |
| NEU | 12.2 | 12.2 | 12.2 | 12.2 | 12.2 | 12.2 | 12.2 |
| OAS | 7.4  | 7.6  | 7.7  | 10.6 | 10.6 | 10.6 | 10.6 |
| REF | 6.5  | 6.5  | 6.5  | 6.5  | 6.5  | 6.5  | 6.5  |
| SSA | 1.8  | 1.6  | 1.5  | 1.6  | 1.6  | 1.5  | 1.5  |
| USA | 1.7  | 1.7  | 1.7  | 1.7  | 1.8  | 1.8  | 1.8  |

Table 1490: MAgPIE m4p\_SSP1 — Productivity—Yield—Crops—Oil crops—Cotton seed (t DM/ha) [PART 2/2]

|     | 1965 | 1970 | 1975 | 1980 | 1985 | 1990 | 1995 | 2000 | 2005 | 2010 |
|-----|------|------|------|------|------|------|------|------|------|------|
| GLO | 0.50 | 0.50 | 0.56 | 0.62 | 0.81 | 0.86 | 0.84 | 0.89 | 1.12 | 1.32 |
| CAZ | 0.32 | 0.41 | 0.44 | 0.66 | 2.02 | 1.84 | 1.95 | 2.03 | 2.51 | 2.76 |
| CHA | 1.00 | 1.10 | 1.22 | 1.40 | 1.64 | 1.67 | 1.91 | 2.49 | 2.68 | 3.18 |
| EUR | 0.52 | 0.73 | 0.90 | 0.93 | 1.09 | 1.12 | 1.35 | 1.34 | 1.44 | 0.99 |
| IND | 0.23 | 0.24 | 0.30 | 0.32 | 0.39 | 0.45 | 0.49 | 0.39 | 0.76 | 1.14 |
| LAM | 0.49 | 0.36 | 0.38 | 0.42 | 0.56 | 0.66 | 0.68 | 0.90 | 1.07 | 1.30 |
| MEA | 0.52 | 0.68 | 0.81 | 1.01 | 1.23 | 0.89 | 1.14 | 1.26 | 1.53 | 1.27 |
| NEU | 0.47 | 0.70 | 0.70 | 0.71 | 0.86 | 1.15 | 1.23 | 1.46 | 1.72 | 1.93 |
| OAS | 0.33 | 0.41 | 0.36 | 0.49 | 0.71 | 0.93 | 0.94 | 0.97 | 1.17 | 1.18 |
| REF | 0.92 | 1.06 | 1.20 | 1.32 | 1.43 | 1.32 | 1.17 | 0.99 | 1.21 | 1.08 |
| SSA | 0.15 | 0.20 | 0.20 | 0.22 | 0.26 | 0.32 | 0.34 | 0.33 | 0.41 | 0.47 |
| USA | 0.61 | 0.46 | 0.53 | 0.51 | 0.82 | 0.75 | 0.63 | 0.77 | 0.99 | 1.08 |

Table 1491: FAO — Productivity—Yield—Crops—Oil crops—Cotton seed (t DM/ha)

52.1.8 Oil crops—Groundnuts

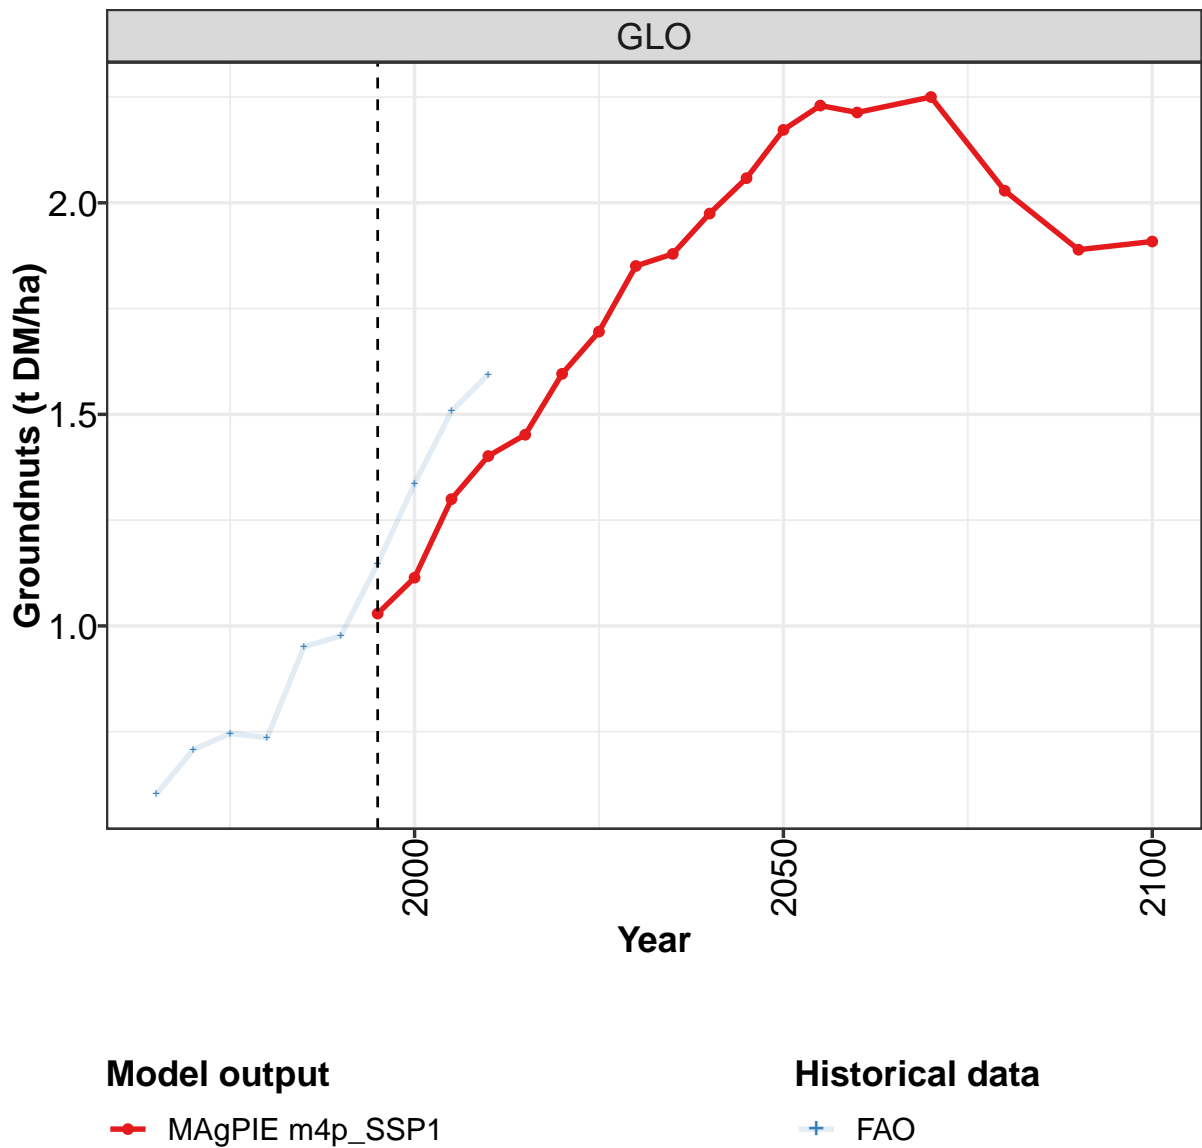

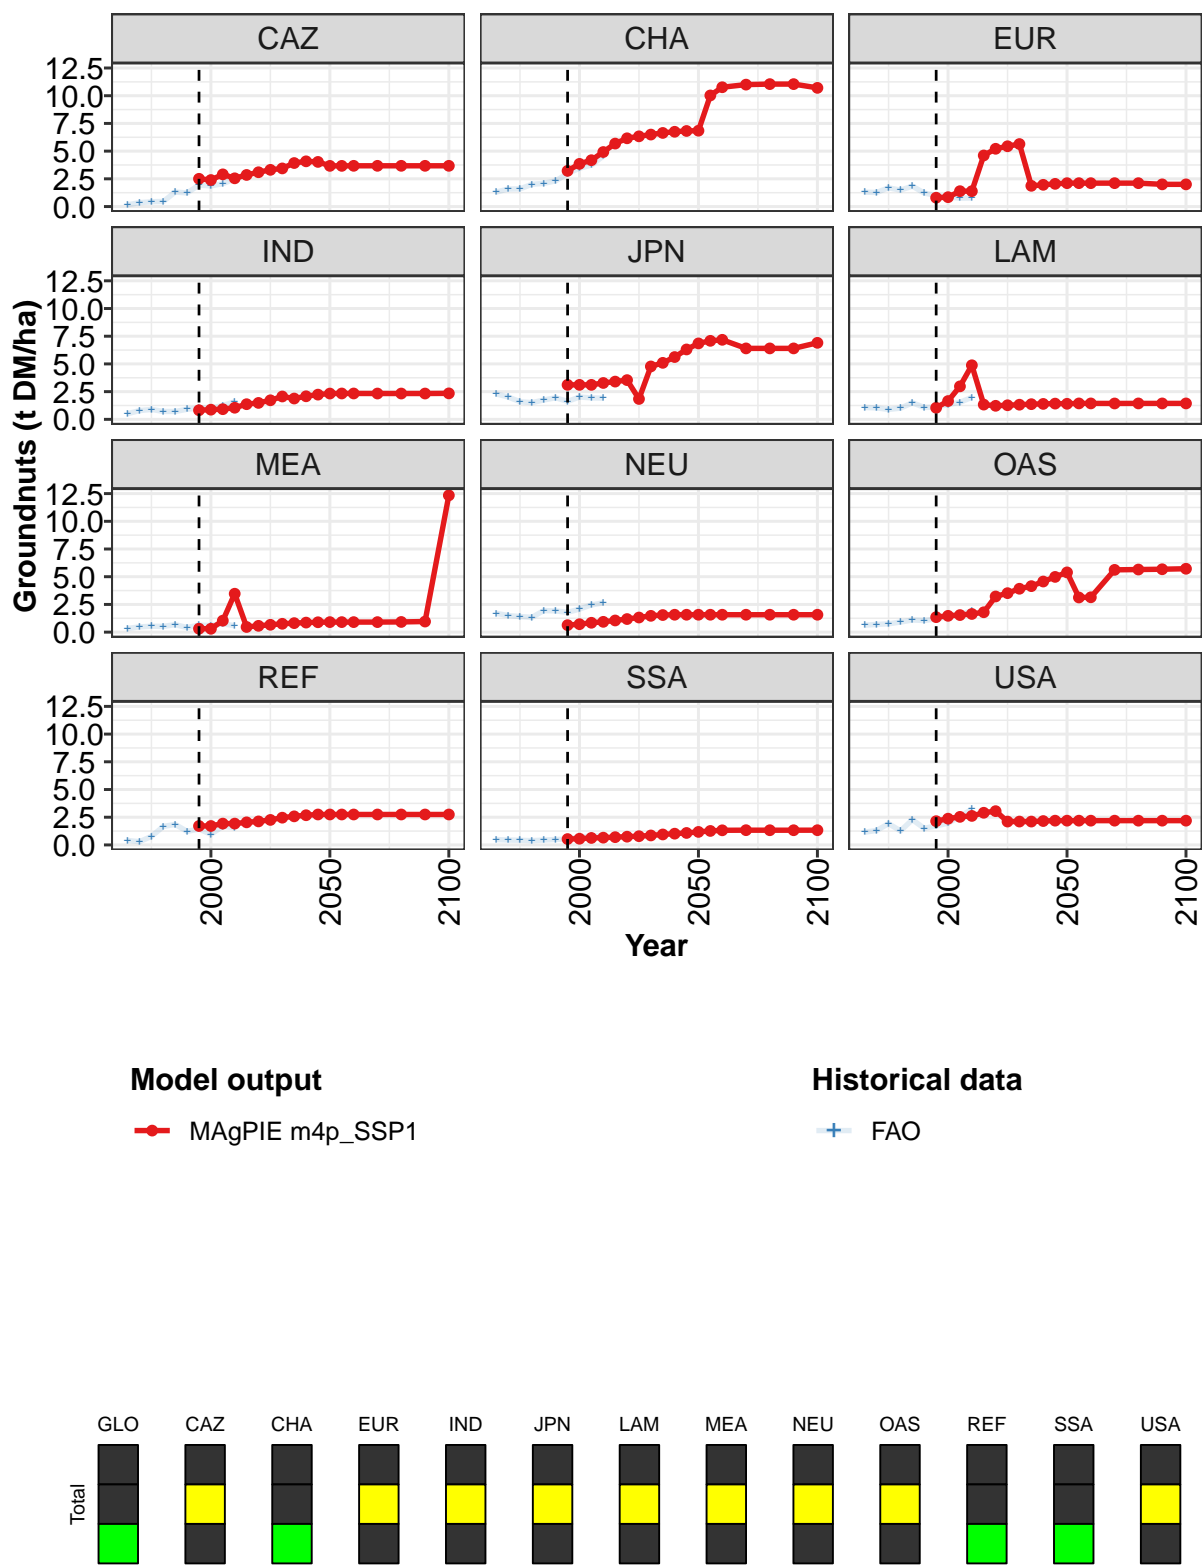

Figure 384: MAgPIE m4p\_SSP1 — Productivity—Yield—Crops—Oil crops—Groundnuts (t DM/ha)

|     | 1995 | 2000 | 2005 | 2010 | 2015 | 2020 | 2025 | 2030 | 2035 | 2040 | 2045 |
|-----|------|------|------|------|------|------|------|------|------|------|------|
| GLO | 1.0  | 1.1  | 1.3  | 1.4  | 1.5  | 1.6  | 1.7  | 1.9  | 1.9  | 2.0  | 2.1  |
| CAZ | 2.5  | 2.4  | 2.9  | 2.5  | 2.9  | 3.1  | 3.3  | 3.4  | 3.9  | 4.1  | 4.0  |
| CHA | 3.2  | 3.9  | 4.2  | 4.9  | 5.7  | 6.2  | 6.3  | 6.5  | 6.6  | 6.8  | 6.8  |
| EUR | 0.8  | 0.8  | 1.4  | 1.4  | 4.6  | 5.2  | 5.4  | 5.6  | 1.9  | 2.0  | 2.0  |
| IND | 0.8  | 0.9  | 0.9  | 1.0  | 1.4  | 1.5  | 1.7  | 2.1  | 1.9  | 2.1  | 2.2  |
| JPN | 3.1  | 3.1  | 3.1  | 3.3  | 3.4  | 3.5  | 1.8  | 4.8  | 5.1  | 5.6  | 6.3  |
| LAM | 1.0  | 1.7  | 3.0  | 4.9  | 1.3  | 1.2  | 1.3  | 1.3  | 1.4  | 1.4  | 1.4  |
| MEA | 0.3  | 0.3  | 1.0  | 3.5  | 0.5  | 0.6  | 0.7  | 0.8  | 0.8  | 0.9  | 0.9  |
| NEU | 0.6  | 0.7  | 0.8  | 0.9  | 1.1  | 1.2  | 1.3  | 1.5  | 1.5  | 1.6  | 1.6  |
| OAS | 1.4  | 1.5  | 1.5  | 1.6  | 1.8  | 3.2  | 3.5  | 3.9  | 4.2  | 4.6  | 5.0  |
| REF | 1.7  | 1.7  | 1.9  | 1.9  | 2.0  | 2.1  | 2.3  | 2.5  | 2.6  | 2.7  | 2.7  |
| SSA | 0.5  | 0.6  | 0.6  | 0.7  | 0.7  | 0.7  | 0.8  | 0.9  | 0.9  | 1.0  | 1.1  |
| USA | 2.1  | 2.4  | 2.5  | 2.6  | 2.9  | 3.0  | 2.1  | 2.1  | 2.1  | 2.2  | 2.2  |

Table 1492: MAgPIE m4p\_SSP1 — Productivity—Yield—Crops—Oil crops—Groundnuts (t DM/ha) [PART 1/2]

|     | 2050 | 2055 | 2060 | 2070 | 2080 | 2090 | 2100 |
|-----|------|------|------|------|------|------|------|
| GLO | 2.2  | 2.2  | 2.2  | 2.3  | 2.0  | 1.9  | 1.9  |
| CAZ | 3.7  | 3.7  | 3.7  | 3.7  | 3.7  | 3.7  | 3.7  |
| CHA | 6.8  | 10.0 | 10.8 | 11.0 | 11.0 | 11.0 | 10.7 |
| EUR | 2.1  | 2.1  | 2.1  | 2.1  | 2.1  | 2.0  | 2.0  |
| IND | 2.3  | 2.3  | 2.3  | 2.3  | 2.3  | 2.3  | 2.3  |
| JPN | 6.9  | 7.1  | 7.2  | 6.4  | 6.4  | 6.4  | 6.9  |
| LAM | 1.4  | 1.4  | 1.4  | 1.4  | 1.4  | 1.4  | 1.4  |
| MEA | 0.9  | 0.9  | 0.9  | 0.9  | 0.9  | 1.0  | 12.3 |
| NEU | 1.6  | 1.6  | 1.6  | 1.6  | 1.6  | 1.6  | 1.6  |
| OAS | 5.4  | 3.1  | 3.1  | 5.6  | 5.6  | 5.7  | 5.7  |
| REF | 2.7  | 2.7  | 2.7  | 2.7  | 2.7  | 2.7  | 2.7  |
| SSA | 1.2  | 1.3  | 1.3  | 1.3  | 1.3  | 1.3  | 1.3  |
| USA | 2.2  | 2.2  | 2.2  | 2.2  | 2.2  | 2.2  | 2.2  |

Table 1493: MAgPIE m4p\_SSP1 — Productivity—Yield—Crops—Oil crops—Groundnuts (t DM/ha) [PART 2/2]

|     | 1965 | 1970 | 1975 | 1980 | 1985 | 1990 | 1995 | 2000 | 2005 | 2010 |
|-----|------|------|------|------|------|------|------|------|------|------|
| GLO | 0.60 | 0.71 | 0.75 | 0.74 | 0.95 | 0.98 | 1.15 | 1.34 | 1.51 | 1.59 |
| CAZ | 0.16 | 0.35 | 0.43 | 0.46 | 1.31 | 1.23 | 1.94 | 1.86 | 2.06 | 2.48 |
| CHA | 1.31 | 1.58 | 1.59 | 2.00 | 2.09 | 2.32 | 2.98 | 3.46 | 3.73 | 4.55 |
| EUR | 1.30 | 1.27 | 1.69 | 1.48 | 1.84 | 1.22 | 1.00 | 0.86 | 0.76 | 0.77 |
| IND | 0.51 | 0.79 | 0.90 | 0.71 | 0.71 | 0.91 | 1.03 | 1.01 | 1.25 | 1.58 |
| JPN | 2.29 | 2.02 | 1.59 | 1.51 | 1.75 | 1.95 | 1.62 | 2.01 | 1.94 | 1.91 |
| LAM | 1.08 | 1.03 | 0.90 | 1.01 | 1.49 | 1.08 | 1.10 | 1.34 | 1.54 | 1.99 |
| MEA | 0.33 | 0.47 | 0.53 | 0.52 | 0.67 | 0.42 | 0.63 | 0.59 | 0.75 | 0.58 |
| NEU | 1.70 | 1.50 | 1.41 | 1.34 | 1.95 | 1.92 | 1.78 | 2.08 | 2.45 | 2.64 |
| OAS | 0.63 | 0.69 | 0.75 | 0.91 | 1.09 | 1.05 | 1.20 | 1.41 | 1.65 | 1.89 |
| REF | 0.41 | 0.29 | 0.77 | 1.67 | 1.85 | 1.22 | 1.43 | 0.96 | 1.68 | 1.55 |
| SSA | 0.48 | 0.44 | 0.42 | 0.38 | 0.44 | 0.49 | 0.53 | 0.72 | 0.79 | 0.81 |
| USA | 1.15 | 1.30 | 1.92 | 1.27 | 2.27 | 1.50 | 1.72 | 1.96 | 2.56 | 3.22 |

Table 1494: FAO — Productivity—Yield—Crops—Oil crops—Groundnuts (t DM/ha)

52.1.9 Oil crops—Oilpalms

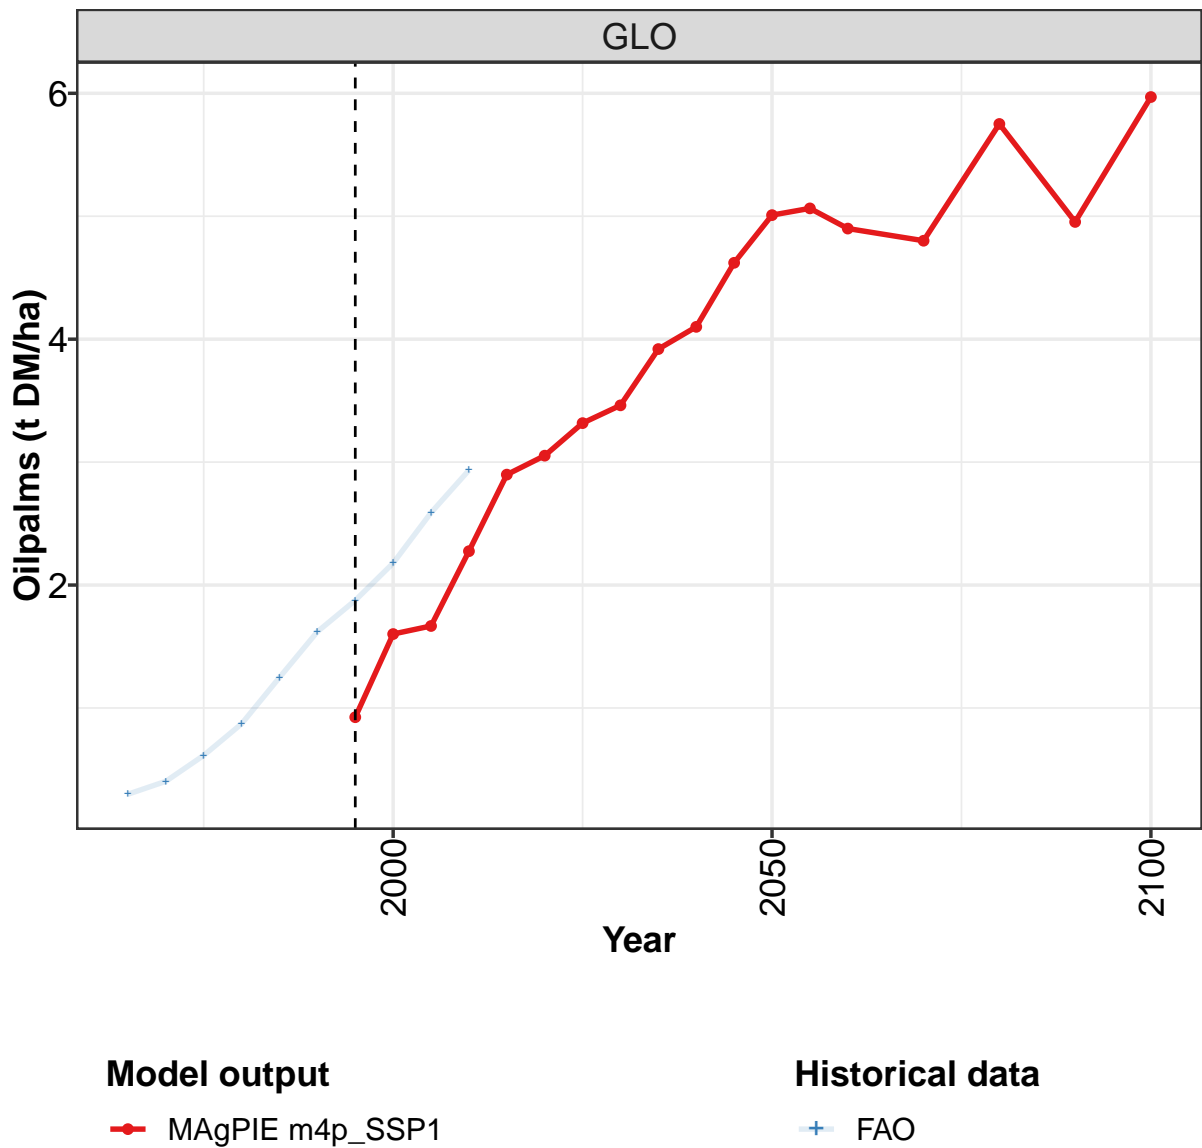

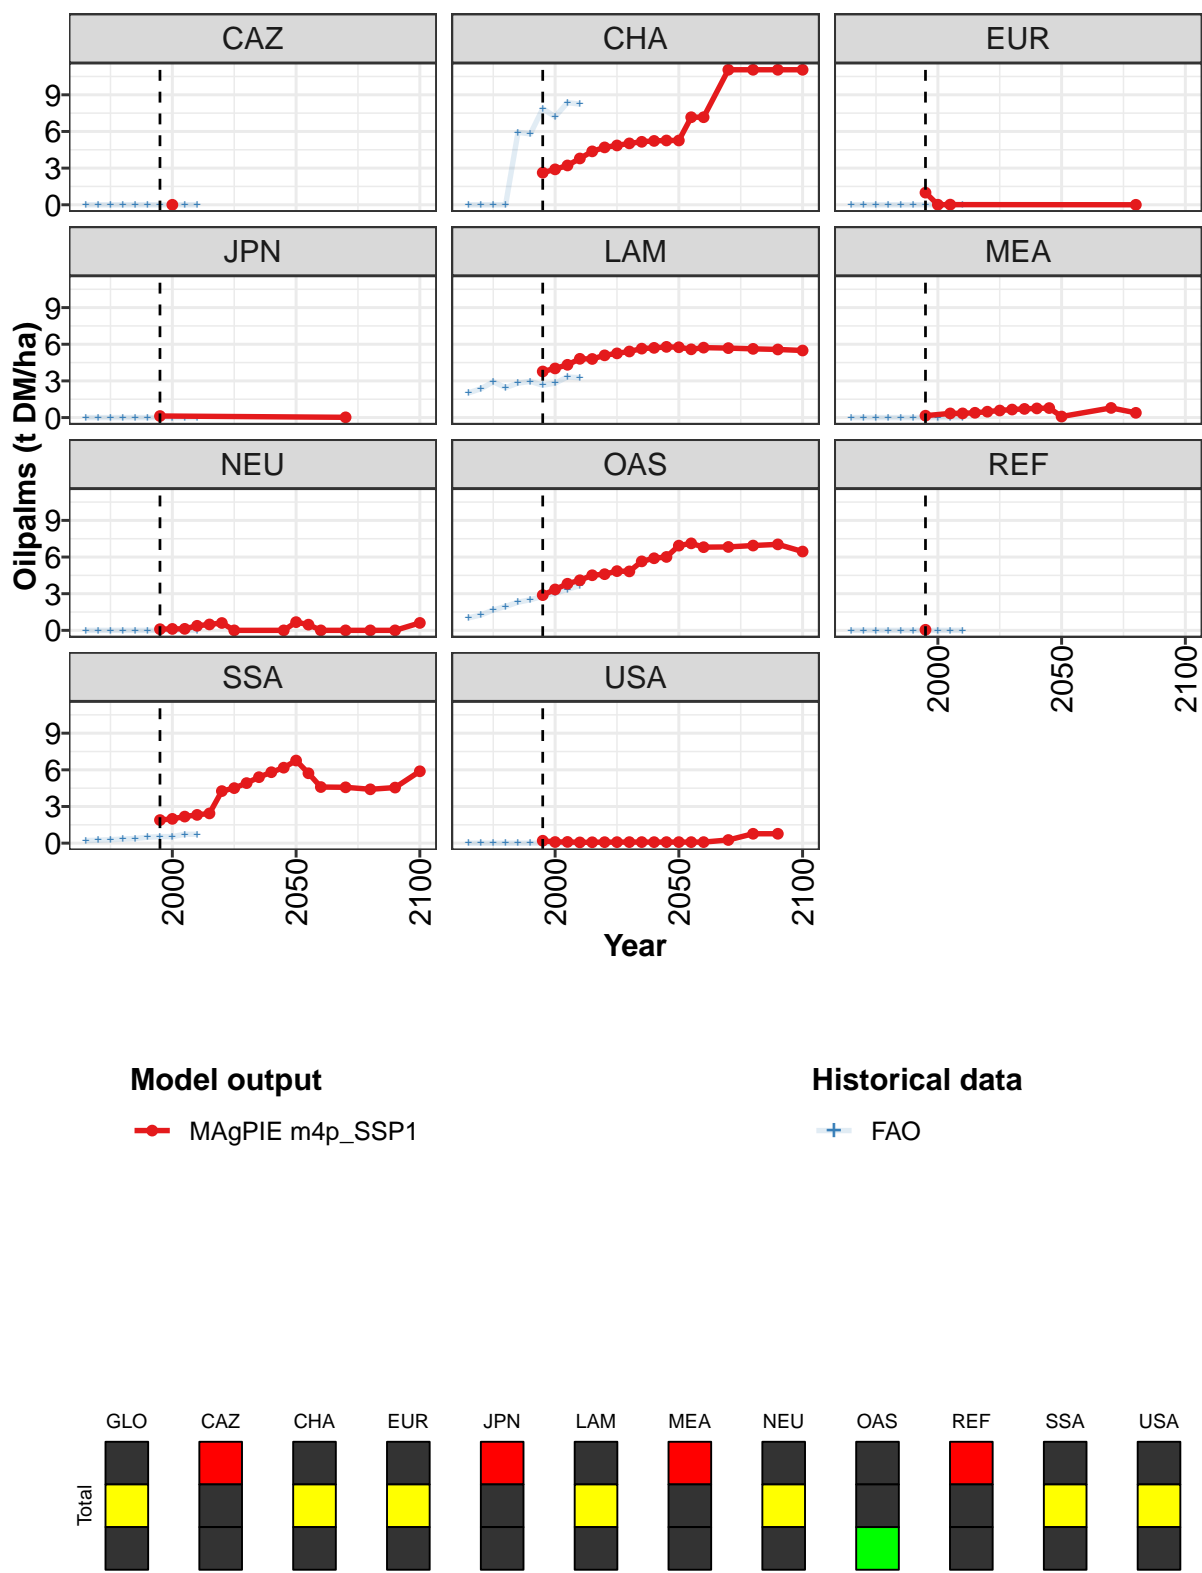

Figure 385: MAgPIE m4p\_SSP1 — Productivity—Yield—Crops—Oil crops—Oilpalms (t DM/ha)

|     | 1995 | 2000 | 2005 | 2010 | 2015 | 2020 | 2025 | 2030 | 2035 | 2040 | 2045 |
|-----|------|------|------|------|------|------|------|------|------|------|------|
| GLO | 1    | 2    | 2    | 2    | 3    | 3    | 3    | 3    | 4    | 4    | 5    |
| CAZ |      | 0    |      |      |      |      |      |      |      |      |      |
| CHA | 3    | 3    | 3    | 4    | 4    | 5    | 5    | 5    | 5    | 5    | 5    |
| EUR | 1    | 0    | 0    |      |      |      |      |      |      |      |      |
| JPN | 0    |      |      |      |      |      |      |      |      |      |      |
| LAM | 4    | 4    | 4    | 5    | 5    | 5    | 5    | 5    | 6    | 6    | 6    |
| MEA | 0    |      | 0    | 0    | 0    | 0    | 1    | 1    | 1    | 1    | 1    |
| NEU | 0    | 0    | 0    | 0    | 0    | 1    | 0    |      |      |      | 0    |
| OAS | 3    | 3    | 4    | 4    | 5    | 5    | 5    | 5    | 6    | 6    | 6    |
| REF | 0    |      |      |      |      |      |      |      |      |      |      |
| SSA | 2    | 2    | 2    | 2    | 2    | 4    | 5    | 5    | 5    | 6    | 6    |
| USA | 0    | 0    | 0    | 0    | 0    | 0    | 0    | 0    | 0    | 0    | 0    |

Table 1495: MAgPIE m4p\_SSP1 — Productivity—Yield—Crops—Oil crops—Oilpalms (t DM/ha) [PART 1/2]

|     | 2050 | 2055 | 2060 | 2070 | 2080 | 2090 | 2100 |
|-----|------|------|------|------|------|------|------|
| GLO | 5    | 5    | 5    | 5    | 6    | 5    | 6    |
| CAZ |      |      |      |      |      |      |      |
| CHA | 5    | 7    | 7    | 11   | 11   | 11   | 11   |
| EUR |      |      |      |      | 0    |      |      |
| JPN |      |      |      | 0    |      |      |      |
| LAM | 6    | 6    | 6    | 6    | 6    | 6    | 5    |
| MEA | 0    |      |      | 1    | 0    |      |      |
| NEU | 1    | 0    | 0    | 0    | 0    | 0    | 1    |
| OAS | 7    | 7    | 7    | 7    | 7    | 7    | 6    |
| REF |      |      |      |      |      |      |      |
| SSA | 7    | 6    | 5    | 5    | 4    | 5    | 6    |
| USA | 0    | 0    | 0    | 0    | 1    | 1    |      |

Table 1496: MAgPIE m4p\_SSP1 — Productivity—Yield—Crops—Oil crops—Oilpalms (t DM/ha) [PART 2/2]

|     | 1965 | 1970 | 1975 | 1980 | 1985 | 1990 | 1995 | 2000 | 2005 | 2010 |
|-----|------|------|------|------|------|------|------|------|------|------|
| GLO | 0.30 | 0.40 | 0.61 | 0.87 | 1.25 | 1.62 | 1.88 | 2.18 | 2.59 | 2.93 |
| CAZ | 0.00 | 0.00 | 0.00 | 0.00 | 0.00 | 0.00 | 0.00 | 0.00 | 0.00 | 0.00 |
| CHA | 0.00 | 0.00 | 0.00 | 0.00 | 5.93 | 5.80 | 7.86 | 7.21 | 8.36 | 8.24 |
| EUR | 0.00 | 0.00 | 0.00 | 0.00 | 0.00 | 0.00 | 0.00 | 0.00 | 0.00 | 0.00 |
| JPN | 0.00 | 0.00 | 0.00 | 0.00 | 0.00 | 0.00 | 0.00 | 0.00 | 0.00 | 0.00 |
| LAM | 2.02 | 2.36 | 2.93 | 2.46 | 2.81 | 2.96 | 2.65 | 2.82 | 3.32 | 3.26 |
| MEA | 0.00 | 0.00 | 0.00 | 0.00 | 0.00 | 0.00 | 0.00 | 0.00 | 0.00 | 0.00 |
| NEU | 0.00 | 0.00 | 0.00 | 0.00 | 0.00 | 0.00 | 0.00 | 0.00 | 0.00 | 0.00 |
| OAS | 1.03 | 1.26 | 1.67 | 1.96 | 2.30 | 2.51 | 2.79 | 3.04 | 3.36 | 3.67 |
| REF | 0.00 | 0.00 | 0.00 | 0.00 | 0.00 | 0.00 | 0.00 | 0.00 | 0.00 | 0.00 |
| SSA | 0.21 | 0.24 | 0.28 | 0.34 | 0.38 | 0.49 | 0.53 | 0.53 | 0.73 | 0.72 |
| USA | 0.00 | 0.00 | 0.00 | 0.00 | 0.00 | 0.00 | 0.00 | 0.00 | 0.00 | 0.00 |

Table 1497: FAO — Productivity—Yield—Crops—Oil crops—Oilpalms (t DM/ha)

52.1.10 Oil crops—Other oil crops (incl rapeseed)

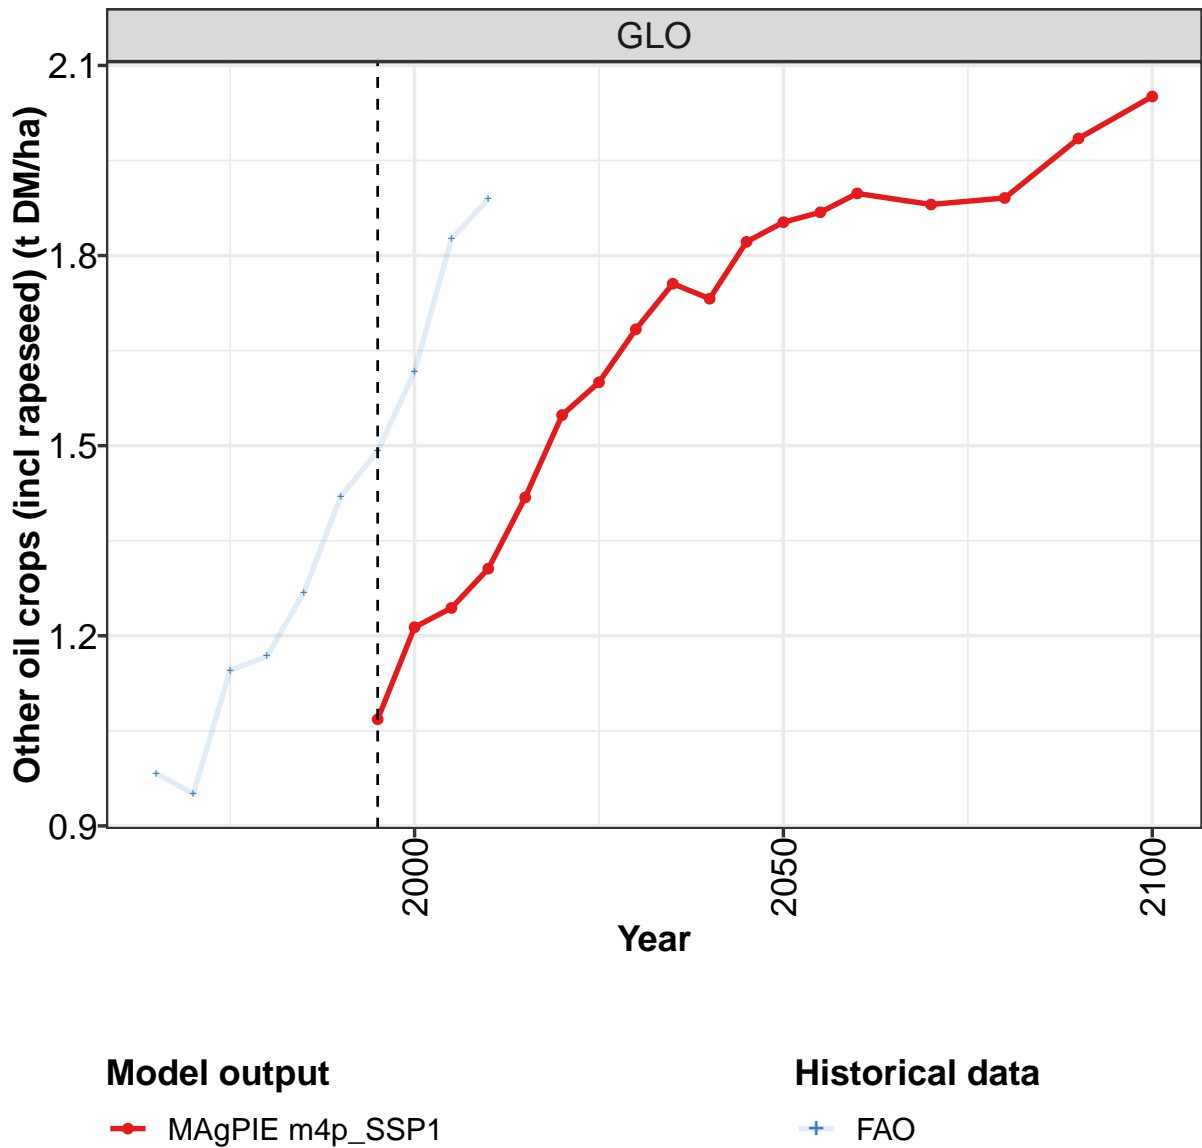



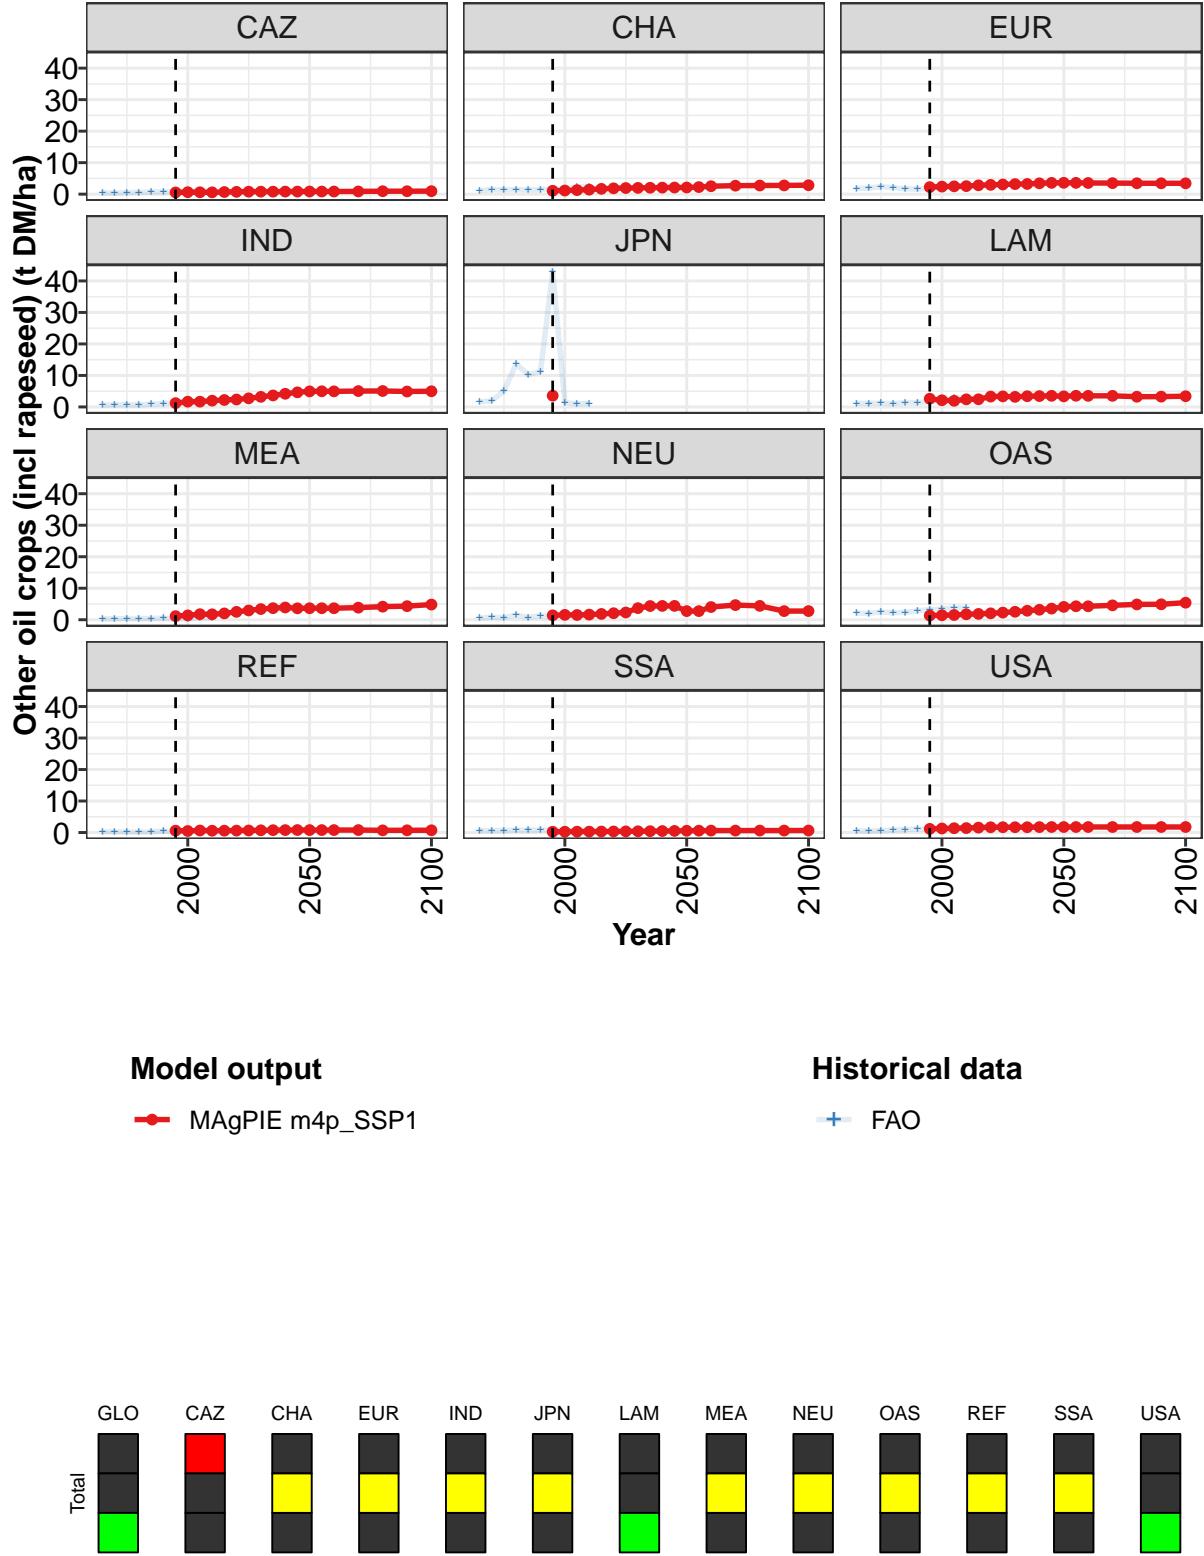

Figure 386: MAgPIE m4p\_SSP1 — Productivity—Yield—Crops—Oil crops—Other oil crops (incl rapeseed) (t DM/ha)

|     | 1995 | 2000 | 2005 | 2010 | 2015 | 2020 | 2025 | 2030 | 2035 | 2040 | 2045 |
|-----|------|------|------|------|------|------|------|------|------|------|------|
| GLO | 1    | 1    | 1    | 1    | 1    | 2    | 2    | 2    | 2    | 2    | 2    |
| CAZ | 1    | 1    | 1    | 1    | 1    | 1    | 1    | 1    | 1    | 1    | 1    |
| CHA | 1    | 1    | 1    | 1    | 2    | 2    | 2    | 2    | 2    | 2    | 2    |
| EUR | 2    | 2    | 2    | 3    | 3    | 3    | 3    | 3    | 3    | 3    | 4    |
| IND | 1    | 2    | 2    | 2    | 2    | 2    | 3    | 3    | 4    | 4    | 5    |
| JPN | 4    |      |      |      |      |      |      |      |      |      |      |
| LAM | 3    | 2    | 2    | 2    | 2    | 3    | 3    | 3    | 3    | 3    | 4    |
| MEA | 1    | 1    | 2    | 2    | 2    | 3    | 3    | 3    | 4    | 4    | 4    |
| NEU | 1    | 2    | 2    | 2    | 2    | 2    | 2    | 4    | 4    | 4    | 4    |
| OAS | 1    | 1    | 2    | 2    | 2    | 2    | 2    | 3    | 3    | 3    | 4    |
| REF | 1    | 0    | 1    | 1    | 1    | 1    | 1    | 1    | 1    | 1    | 1    |
| SSA | 0    | 0    | 0    | 0    | 0    | 0    | 0    | 0    | 0    | 0    | 1    |
| USA | 1    | 1    | 1    | 1    | 2    | 2    | 2    | 2    | 2    | 2    | 2    |

Table 1498: MAgPIE m4p\_SSP1 — Productivity—Yield—Crops—Oil crops—Other oil crops (incl rapeseed) (t DM/ha) [PART 1/2]

|     | 2050 | 2055 | 2060 | 2070 | 2080 | 2090 | 2100 |
|-----|------|------|------|------|------|------|------|
| GLO | 2    | 2    | 2    | 2    | 2    | 2    | 2    |
| CAZ | 1    | 1    | 1    | 1    | 1    | 1    | 1    |
| CHA | 2    | 2    | 3    | 3    | 3    | 3    | 3    |
| EUR | 4    | 4    | 4    | 4    | 3    | 3    | 3    |
| IND | 5    | 5    | 5    | 5    | 5    | 5    | 5    |
| JPN |      |      |      |      |      |      |      |
| LAM | 3    | 4    | 4    | 4    | 3    | 3    | 3    |
| MEA | 4    | 4    | 4    | 4    | 4    | 4    | 5    |
| NEU | 3    | 3    | 4    | 5    | 4    | 3    | 3    |
| OAS | 4    | 4    | 4    | 5    | 5    | 5    | 5    |
| REF | 1    | 1    | 1    | 1    | 1    | 1    | 1    |
| SSA | 1    | 1    | 1    | 1    | 1    | 1    | 1    |
| USA | 2    | 2    | 2    | 2    | 2    | 2    | 2    |

Table 1499: MAgPIE m4p\_SSP1 — Productivity—Yield—Crops—Oil crops—Other oil crops (incl rapeseed) (t DM/ha) [PART 2/2]

|     | 1965 | 1970 | 1975 | 1980 | 1985 | 1990 | 1995 | 2000 | 2005 | 2010 |
|-----|------|------|------|------|------|------|------|------|------|------|
| GLO | 1.0  | 1.0  | 1.1  | 1.2  | 1.3  | 1.4  | 1.5  | 1.6  | 1.8  | 1.9  |
| CAZ | 0.4  | 0.4  | 0.5  | 0.6  | 0.7  | 0.7  | 0.8  | 0.9  | 1.0  | 1.2  |
| CHA | 1.1  | 1.5  | 1.4  | 1.4  | 1.4  | 1.4  | 1.6  | 1.8  | 2.2  | 2.5  |
| EUR | 1.8  | 1.9  | 2.4  | 2.0  | 1.7  | 1.6  | 1.8  | 2.1  | 2.3  | 2.4  |
| IND | 0.6  | 0.7  | 0.7  | 0.6  | 0.9  | 1.1  | 1.4  | 1.3  | 1.5  | 1.9  |
| JPN | 1.6  | 1.9  | 5.0  | 13.6 | 10.3 | 11.3 | 43.0 | 1.4  | 0.9  | 1.1  |
| LAM | 1.2  | 1.2  | 1.2  | 1.1  | 1.4  | 1.4  | 1.8  | 2.2  | 2.8  | 3.0  |
| MEA | 0.3  | 0.3  | 0.4  | 0.4  | 0.4  | 0.5  | 0.3  | 0.4  | 0.6  | 0.6  |
| NEU | 0.5  | 0.8  | 0.7  | 1.4  | 0.8  | 1.2  | 0.7  | 1.9  | 1.3  | 1.4  |
| OAS | 2.1  | 2.0  | 2.4  | 2.2  | 2.4  | 2.8  | 3.2  | 3.4  | 3.7  | 3.7  |
| REF | 0.2  | 0.2  | 0.2  | 0.1  | 0.2  | 0.5  | 0.3  | 0.4  | 0.7  | 0.7  |
| SSA | 0.6  | 0.6  | 0.7  | 0.8  | 0.8  | 0.8  | 0.8  | 0.7  | 0.8  | 0.8  |
| USA | 0.6  | 0.4  | 0.6  | 0.8  | 0.9  | 1.1  | 1.1  | 1.1  | 1.2  | 1.7  |

Table 1500: FAO — Productivity—Yield—Crops—Oil crops—Other oil crops (incl rapeseed) (t DM/ha)

52.1.11 Oil crops—Soybean

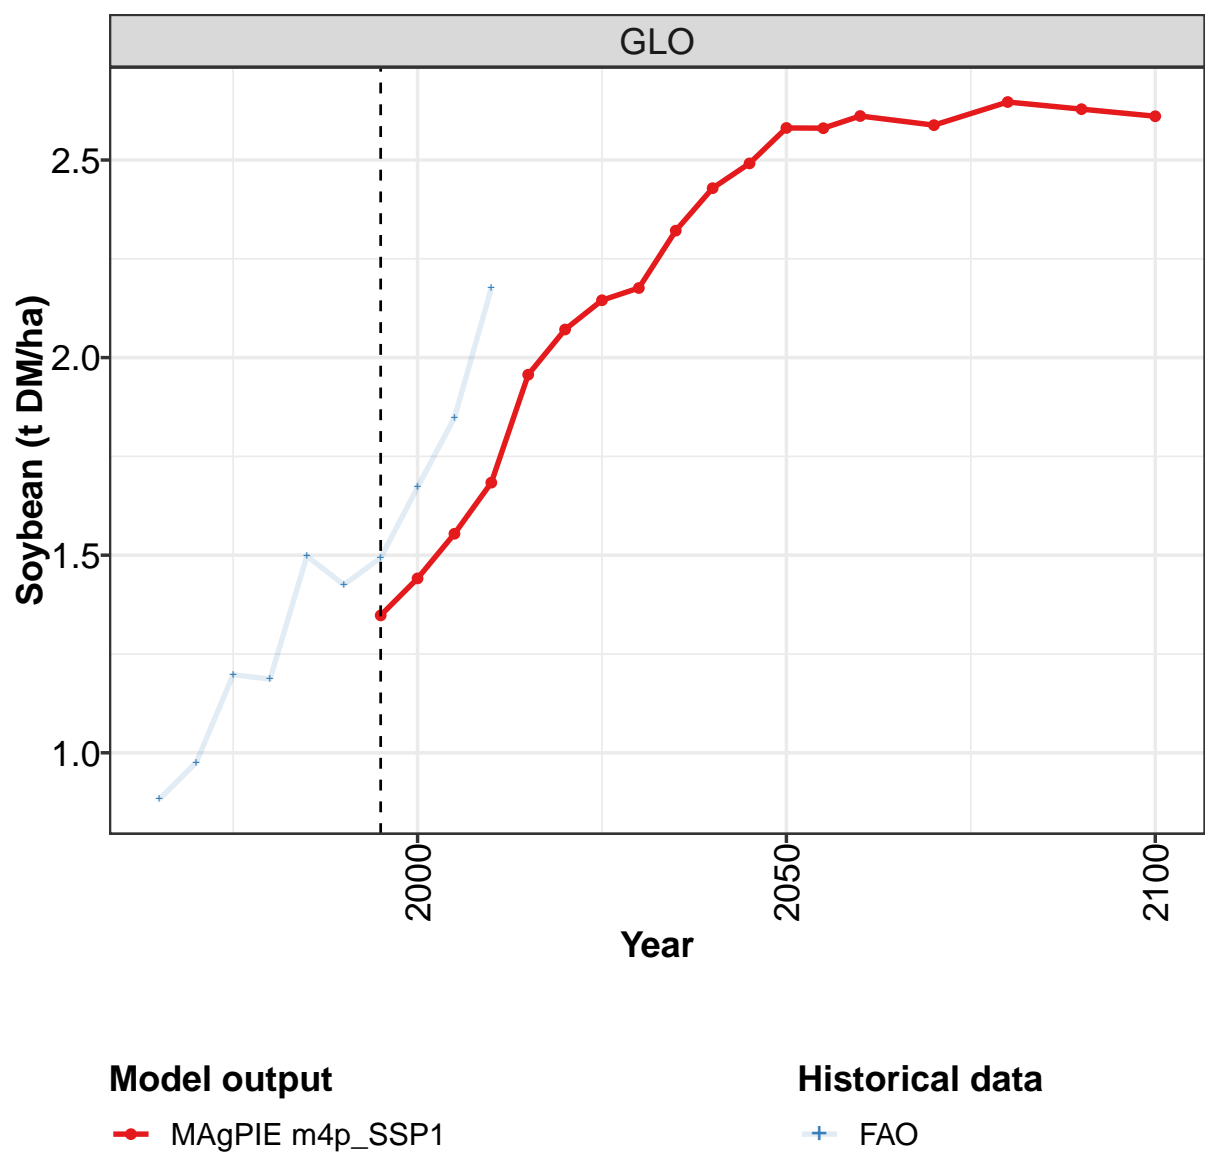

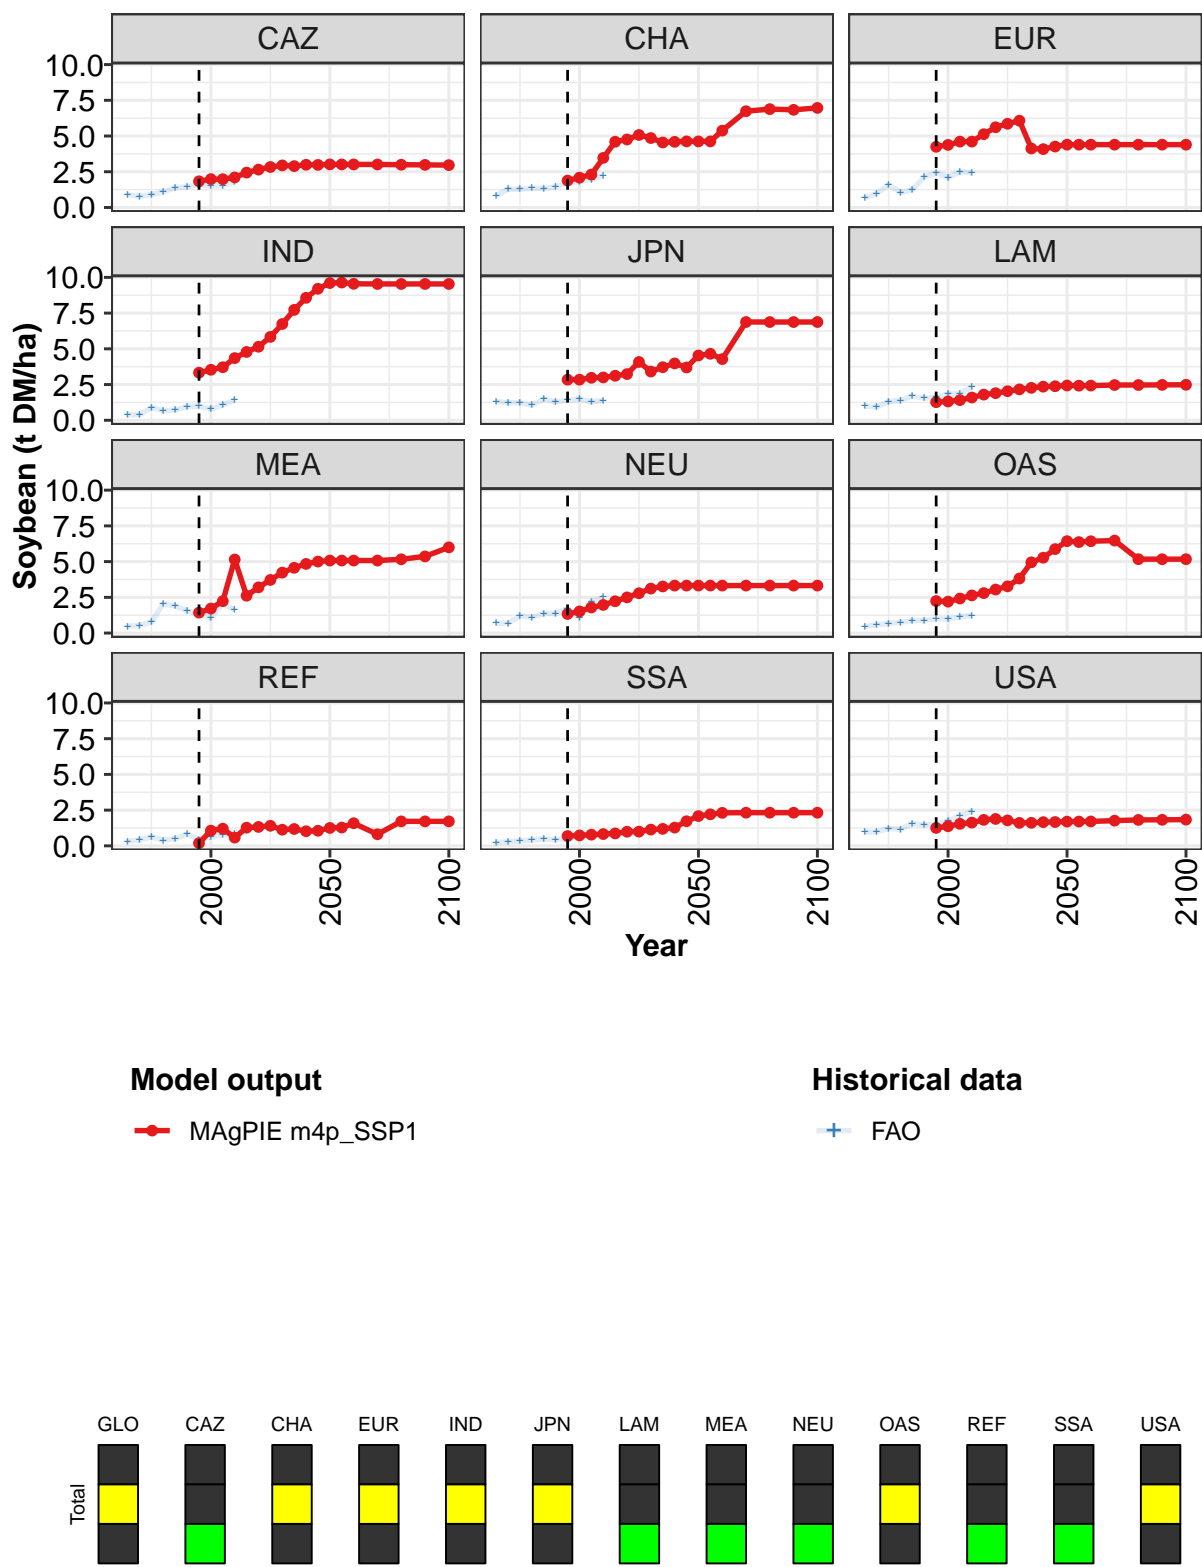

Figure 387: MAgPIE m4p\_SSP1 — Productivity—Yield—Crops—Oil crops—Soybean (t DM/ha)

|     | 1995 | 2000 | 2005 | 2010 | 2015 | 2020 | 2025 | 2030 | 2035 | 2040 | 2045 |
|-----|------|------|------|------|------|------|------|------|------|------|------|
| GLO | 1.35 | 1.44 | 1.55 | 1.68 | 1.96 | 2.07 | 2.15 | 2.18 | 2.32 | 2.43 | 2.49 |
| CAZ | 1.83 | 1.99 | 1.98 | 2.10 | 2.44 | 2.65 | 2.83 | 2.94 | 2.89 | 2.99 | 2.98 |
| CHA | 1.88 | 2.09 | 2.31 | 3.47 | 4.60 | 4.76 | 5.08 | 4.86 | 4.55 | 4.59 | 4.63 |
| EUR | 4.25 | 4.38 | 4.61 | 4.61 | 5.13 | 5.61 | 5.86 | 6.08 | 4.13 | 4.08 | 4.26 |
| IND | 3.33 | 3.54 | 3.71 | 4.35 | 4.78 | 5.15 | 5.84 | 6.74 | 7.73 | 8.57 | 9.20 |
| JPN | 2.84 | 2.84 | 2.97 | 3.00 | 3.11 | 3.24 | 4.08 | 3.41 | 3.71 | 3.98 | 3.70 |
| LAM | 1.27 | 1.32 | 1.41 | 1.59 | 1.80 | 1.90 | 2.04 | 2.16 | 2.27 | 2.35 | 2.38 |
| MEA | 1.43 | 1.72 | 2.23 | 5.15 | 2.62 | 3.20 | 3.72 | 4.23 | 4.57 | 4.84 | 5.01 |
| NEU | 1.33 | 1.52 | 1.79 | 1.97 | 2.23 | 2.50 | 2.79 | 3.11 | 3.26 | 3.32 | 3.32 |
| OAS | 2.24 | 2.20 | 2.42 | 2.64 | 2.80 | 3.05 | 3.27 | 3.82 | 4.95 | 5.28 | 5.88 |
| REF | 0.19 | 1.07 | 1.20 | 0.58 | 1.27 | 1.33 | 1.41 | 1.13 | 1.18 | 1.02 | 1.06 |
| SSA | 0.69 | 0.73 | 0.78 | 0.82 | 0.87 | 0.99 | 1.00 | 1.14 | 1.19 | 1.28 | 1.72 |
| USA | 1.26 | 1.37 | 1.54 | 1.63 | 1.82 | 1.88 | 1.78 | 1.61 | 1.61 | 1.66 | 1.67 |

Table 1501: MAgPIE m4p\_SSP1 — Productivity—Yield—Crops—Oil crops—Soybean (t DM/ha) [PART 1/2]

|     | 2050 | 2055 | 2060 | 2070 | 2080 | 2090 | 2100 |
|-----|------|------|------|------|------|------|------|
| GLO | 2.58 | 2.58 | 2.61 | 2.59 | 2.65 | 2.63 | 2.61 |
| CAZ | 3.02 | 3.01 | 3.01 | 3.01 | 2.99 | 2.98 | 2.96 |
| CHA | 4.63 | 4.63 | 5.38 | 6.74 | 6.88 | 6.83 | 6.97 |
| EUR | 4.40 | 4.40 | 4.40 | 4.40 | 4.40 | 4.40 | 4.40 |
| IND | 9.60 | 9.64 | 9.55 | 9.54 | 9.54 | 9.54 | 9.54 |
| JPN | 4.53 | 4.65 | 4.28 | 6.88 | 6.88 | 6.88 | 6.88 |
| LAM | 2.43 | 2.42 | 2.43 | 2.47 | 2.47 | 2.48 | 2.49 |
| MEA | 5.07 | 5.07 | 5.07 | 5.07 | 5.16 | 5.36 | 6.00 |
| NEU | 3.32 | 3.32 | 3.32 | 3.32 | 3.32 | 3.32 | 3.32 |
| OAS | 6.43 | 6.37 | 6.43 | 6.47 | 5.17 | 5.17 | 5.17 |
| REF | 1.25 | 1.28 | 1.58 | 0.81 | 1.71 | 1.71 | 1.71 |
| SSA | 2.08 | 2.21 | 2.31 | 2.32 | 2.32 | 2.32 | 2.32 |
| USA | 1.70 | 1.70 | 1.71 | 1.76 | 1.82 | 1.82 | 1.84 |

Table 1502: MAgPIE m4p\_SSP1 — Productivity—Yield—Crops—Oil crops—Soybean (t DM/ha) [PART 2/2]

|     | 1965 | 1970 | 1975 | 1980 | 1985 | 1990 | 1995 | 2000 | 2005 | 2010 |
|-----|------|------|------|------|------|------|------|------|------|------|
| GLO | 0.88 | 0.98 | 1.20 | 1.19 | 1.50 | 1.43 | 1.49 | 1.67 | 1.85 | 2.18 |
| CAZ | 0.90 | 0.77 | 0.92 | 1.09 | 1.38 | 1.44 | 1.60 | 1.52 | 1.53 | 1.80 |
| CHA | 0.83 | 1.28 | 1.28 | 1.35 | 1.34 | 1.46 | 1.74 | 1.82 | 1.96 | 2.21 |
| EUR | 0.66 | 0.98 | 1.58 | 1.06 | 1.24 | 2.13 | 2.40 | 2.10 | 2.48 | 2.44 |
| IND | 0.38 | 0.39 | 0.88 | 0.67 | 0.71 | 0.96 | 0.98 | 0.79 | 1.07 | 1.41 |
| JPN | 1.32 | 1.22 | 1.25 | 1.06 | 1.50 | 1.28 | 1.40 | 1.48 | 1.29 | 1.39 |
| LAM | 1.00 | 0.93 | 1.30 | 1.39 | 1.69 | 1.55 | 1.61 | 1.84 | 1.87 | 2.32 |
| MEA | 0.47 | 0.53 | 0.77 | 2.05 | 1.89 | 1.56 | 1.30 | 1.07 | 2.04 | 1.63 |
| NEU | 0.70 | 0.68 | 1.20 | 1.10 | 1.36 | 1.38 | 1.71 | 1.10 | 2.21 | 2.50 |
| OAS | 0.47 | 0.58 | 0.67 | 0.75 | 0.87 | 0.88 | 0.99 | 0.98 | 1.12 | 1.24 |
| REF | 0.32 | 0.42 | 0.61 | 0.39 | 0.50 | 0.83 | 0.43 | 0.61 | 0.77 | 0.82 |
| SSA | 0.22 | 0.29 | 0.35 | 0.41 | 0.48 | 0.43 | 0.48 | 0.80 | 0.78 | 0.83 |
| USA | 0.96 | 0.97 | 1.22 | 1.16 | 1.56 | 1.46 | 1.51 | 1.74 | 2.09 | 2.40 |

Table 1503: FAO — Productivity—Yield—Crops—Oil crops—Soybean (t DM/ha)

52.1.12 Oil crops—Sunflower

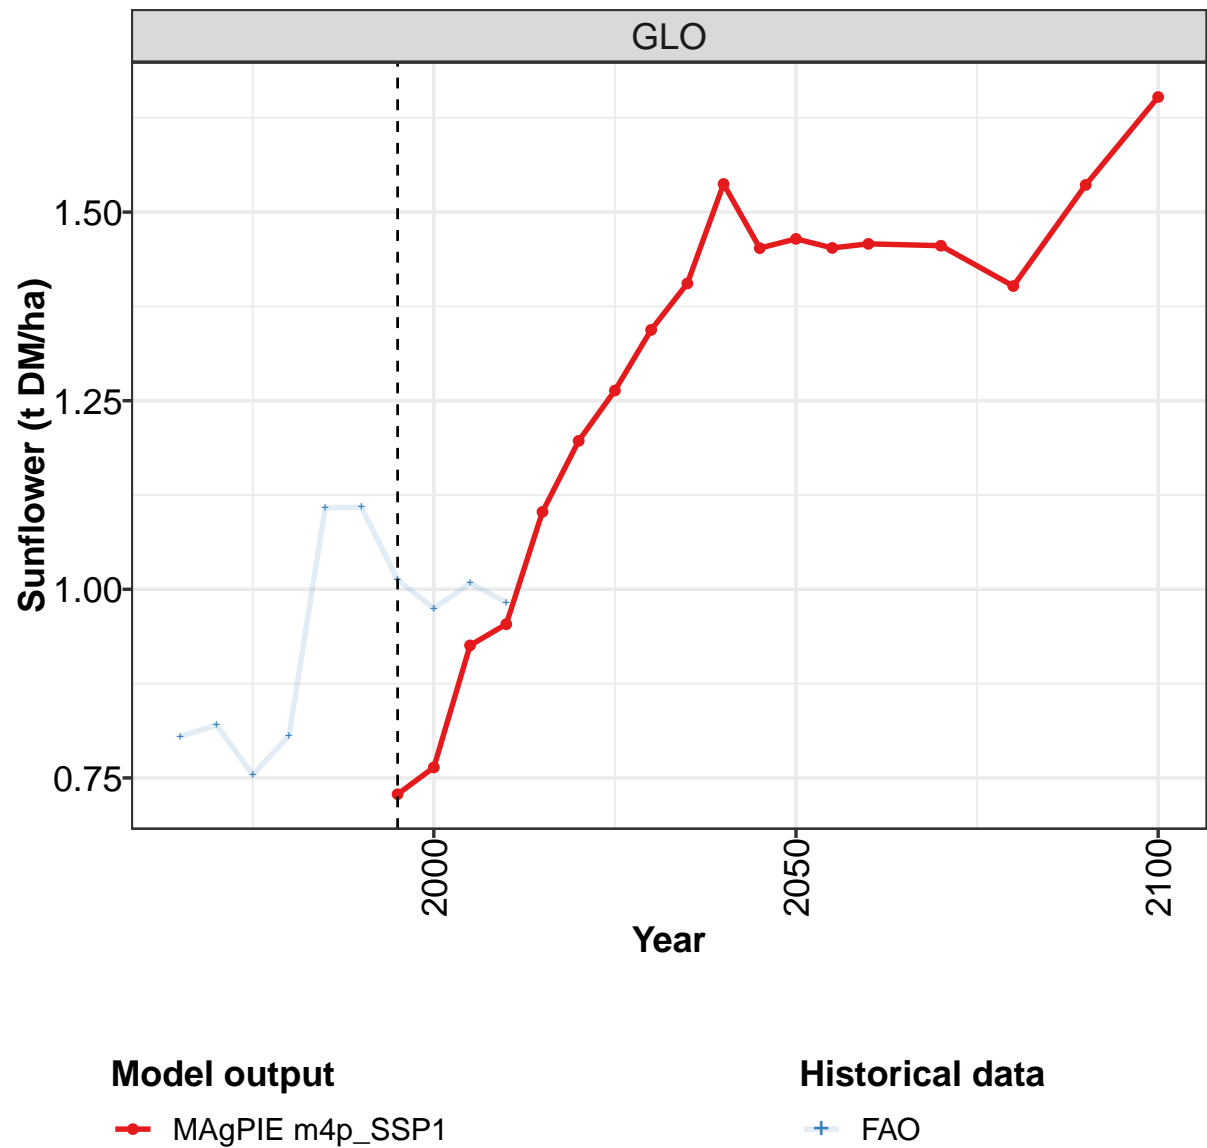

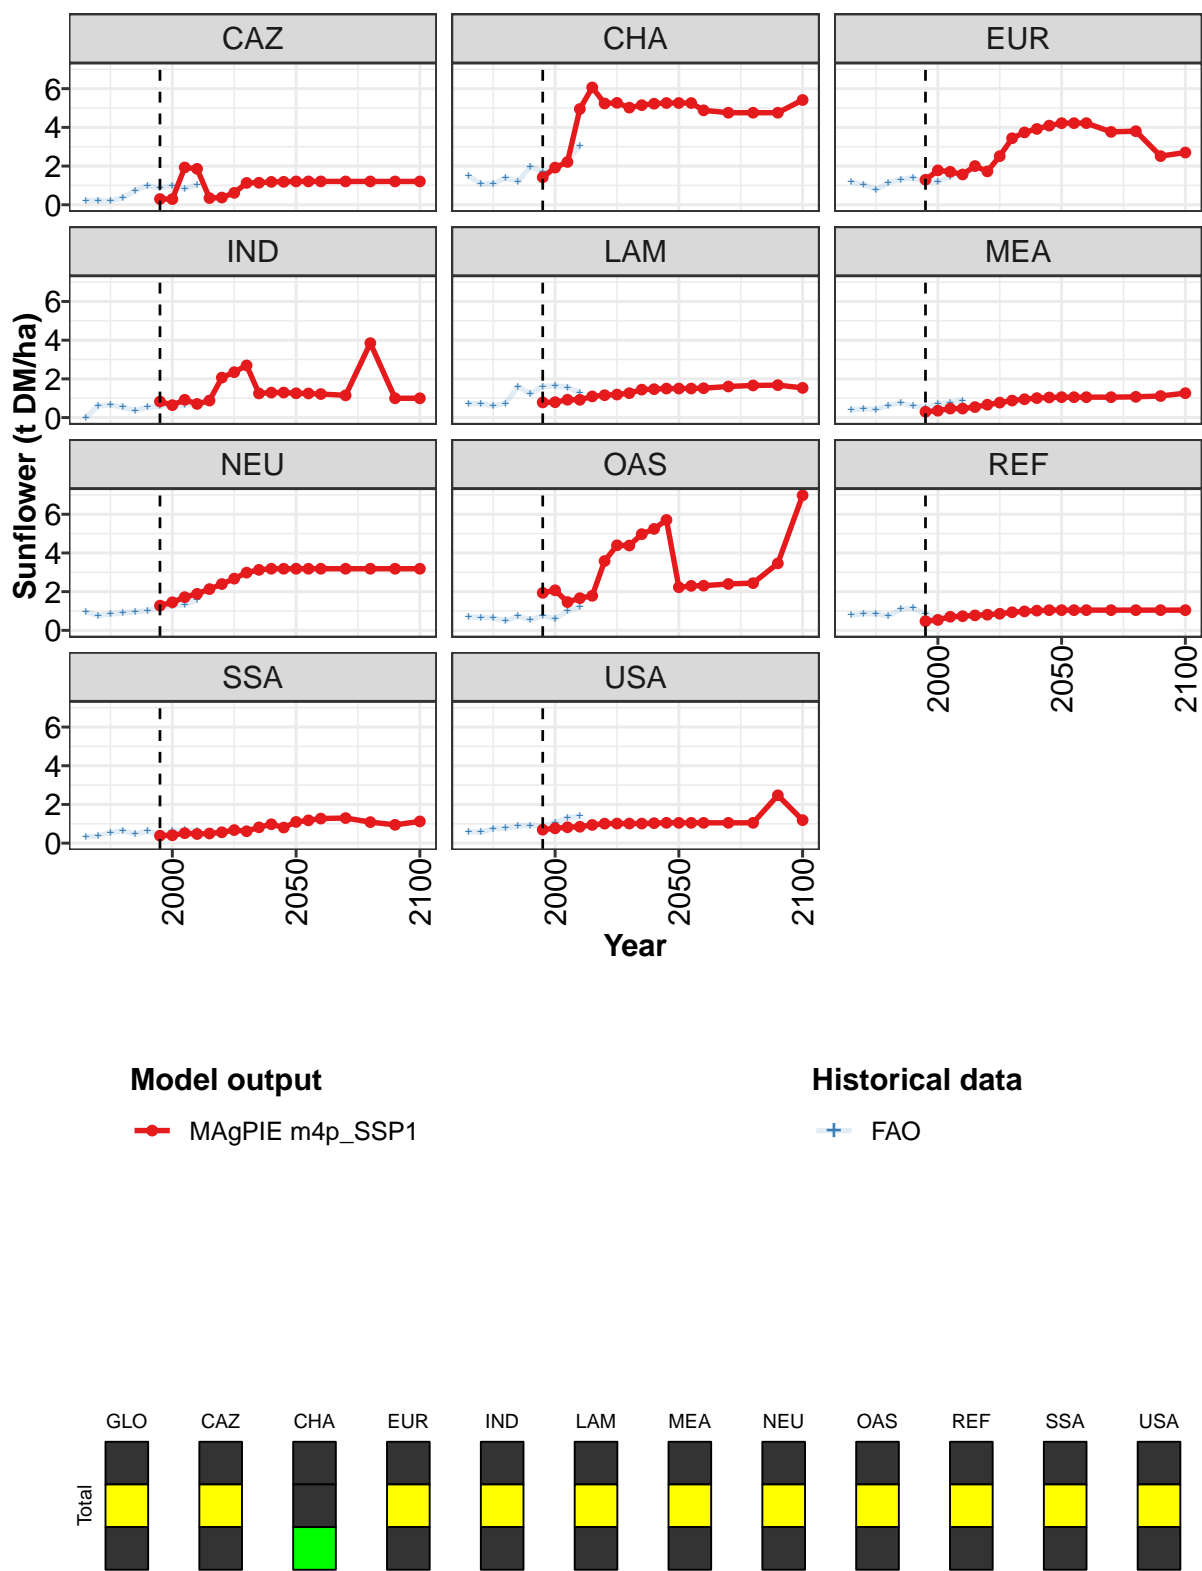

Figure 388: MAGPIE m4p\_SSP1 — Productivity—Yield—Crops—Oil crops—Sunflower (t DM/ha)

|     | 1995 | 2000 | 2005 | 2010 | 2015 | 2020 | 2025 | 2030 | 2035 | 2040 | 2045 |
|-----|------|------|------|------|------|------|------|------|------|------|------|
| GLO | 0.73 | 0.76 | 0.93 | 0.95 | 1.10 | 1.20 | 1.26 | 1.34 | 1.41 | 1.54 | 1.45 |
| CAZ | 0.30 | 0.29 | 1.93 | 1.86 | 0.35 | 0.38 | 0.62 | 1.13 | 1.14 | 1.18 | 1.19 |
| CHA | 1.42 | 1.92 | 2.21 | 4.95 | 6.07 | 5.24 | 5.27 | 5.02 | 5.15 | 5.22 | 5.26 |
| EUR | 1.29 | 1.78 | 1.71 | 1.57 | 2.00 | 1.72 | 2.51 | 3.44 | 3.74 | 3.92 | 4.09 |
| IND | 0.83 | 0.64 | 0.92 | 0.70 | 0.88 | 2.07 | 2.35 | 2.70 | 1.25 | 1.29 | 1.29 |
| LAM | 0.78 | 0.80 | 0.92 | 0.92 | 1.09 | 1.16 | 1.19 | 1.26 | 1.44 | 1.47 | 1.50 |
| MEA | 0.30 | 0.36 | 0.46 | 0.47 | 0.54 | 0.66 | 0.77 | 0.88 | 0.95 | 1.01 | 1.04 |
| NEU | 1.28 | 1.45 | 1.71 | 1.89 | 2.13 | 2.39 | 2.67 | 2.98 | 3.13 | 3.18 | 3.18 |
| OAS | 1.94 | 2.07 | 1.46 | 1.67 | 1.79 | 3.58 | 4.40 | 4.39 | 4.97 | 5.24 | 5.71 |
| REF | 0.47 | 0.54 | 0.70 | 0.73 | 0.78 | 0.81 | 0.86 | 0.94 | 0.98 | 1.02 | 1.04 |
| SSA | 0.39 | 0.41 | 0.51 | 0.47 | 0.50 | 0.56 | 0.68 | 0.62 | 0.82 | 0.98 | 0.81 |
| USA | 0.69 | 0.77 | 0.82 | 0.85 | 0.94 | 1.01 | 1.01 | 1.01 | 1.01 | 1.03 | 1.05 |

Table 1504: MAgPIE m4p\_SSP1 — Productivity—Yield—Crops—Oil crops—Sunflower (t DM/ha) [PART 1/2]

|     | 2050 | 2055 | 2060 | 2070 | 2080 | 2090 | 2100 |
|-----|------|------|------|------|------|------|------|
| GLO | 1.46 | 1.45 | 1.46 | 1.46 | 1.40 | 1.54 | 1.65 |
| CAZ | 1.21 | 1.21 | 1.21 | 1.21 | 1.21 | 1.21 | 1.21 |
| CHA | 5.26 | 5.26 | 4.88 | 4.76 | 4.76 | 4.76 | 5.42 |
| EUR | 4.22 | 4.22 | 4.22 | 3.77 | 3.80 | 2.52 | 2.70 |
| IND | 1.26 | 1.25 | 1.22 | 1.15 | 3.85 | 1.00 | 1.00 |
| LAM | 1.50 | 1.50 | 1.52 | 1.60 | 1.66 | 1.68 | 1.53 |
| MEA | 1.05 | 1.05 | 1.05 | 1.05 | 1.07 | 1.11 | 1.26 |
| NEU | 3.18 | 3.18 | 3.18 | 3.18 | 3.18 | 3.18 | 3.18 |
| OAS | 2.23 | 2.30 | 2.31 | 2.40 | 2.44 | 3.46 | 6.98 |
| REF | 1.04 | 1.04 | 1.04 | 1.04 | 1.04 | 1.04 | 1.04 |
| SSA | 1.10 | 1.18 | 1.27 | 1.30 | 1.09 | 0.95 | 1.12 |
| USA | 1.05 | 1.05 | 1.05 | 1.05 | 1.05 | 2.47 | 1.19 |

Table 1505: MAgPIE m4p\_SSP1 — Productivity—Yield—Crops—Oil crops—Sunflower (t DM/ha) [PART 2/2]

|     | 1965 | 1970 | 1975 | 1980 | 1985 | 1990 | 1995 | 2000 | 2005 | 2010 |
|-----|------|------|------|------|------|------|------|------|------|------|
| GLO | 0.81 | 0.82 | 0.75 | 0.81 | 1.11 | 1.11 | 1.01 | 0.97 | 1.01 | 0.98 |
| CAZ | 0.22 | 0.23 | 0.20 | 0.36 | 0.74 | 0.99 | 0.86 | 1.00 | 0.84 | 1.03 |
| CHA | 1.50 | 1.07 | 1.08 | 1.39 | 1.21 | 1.97 | 1.72 | 1.83 | 2.28 | 3.05 |
| EUR | 1.17 | 1.05 | 0.78 | 1.13 | 1.32 | 1.38 | 1.14 | 1.19 | 1.46 | 1.60 |
| IND | 0.00 | 0.61 | 0.65 | 0.53 | 0.36 | 0.53 | 0.60 | 0.61 | 0.64 | 0.78 |
| LAM | 0.72 | 0.71 | 0.61 | 0.74 | 1.60 | 1.23 | 1.61 | 1.63 | 1.56 | 1.30 |
| MEA | 0.38 | 0.46 | 0.42 | 0.63 | 0.77 | 0.59 | 0.52 | 0.71 | 0.77 | 0.89 |
| NEU | 0.97 | 0.76 | 0.84 | 0.90 | 0.96 | 1.01 | 1.20 | 1.25 | 1.33 | 1.59 |
| OAS | 0.70 | 0.67 | 0.64 | 0.50 | 0.73 | 0.54 | 0.76 | 0.59 | 1.00 | 1.20 |
| REF | 0.79 | 0.86 | 0.86 | 0.73 | 1.10 | 1.15 | 0.86 | 0.66 | 0.77 | 0.69 |
| SSA | 0.32 | 0.37 | 0.55 | 0.65 | 0.46 | 0.63 | 0.45 | 0.64 | 0.67 | 0.65 |
| USA | 0.58 | 0.57 | 0.75 | 0.78 | 0.89 | 0.92 | 0.89 | 1.06 | 1.30 | 1.40 |

Table 1506: FAO — Productivity—Yield—Crops—Oil crops—Sunflower (t DM/ha)



52.1.13 Other crops

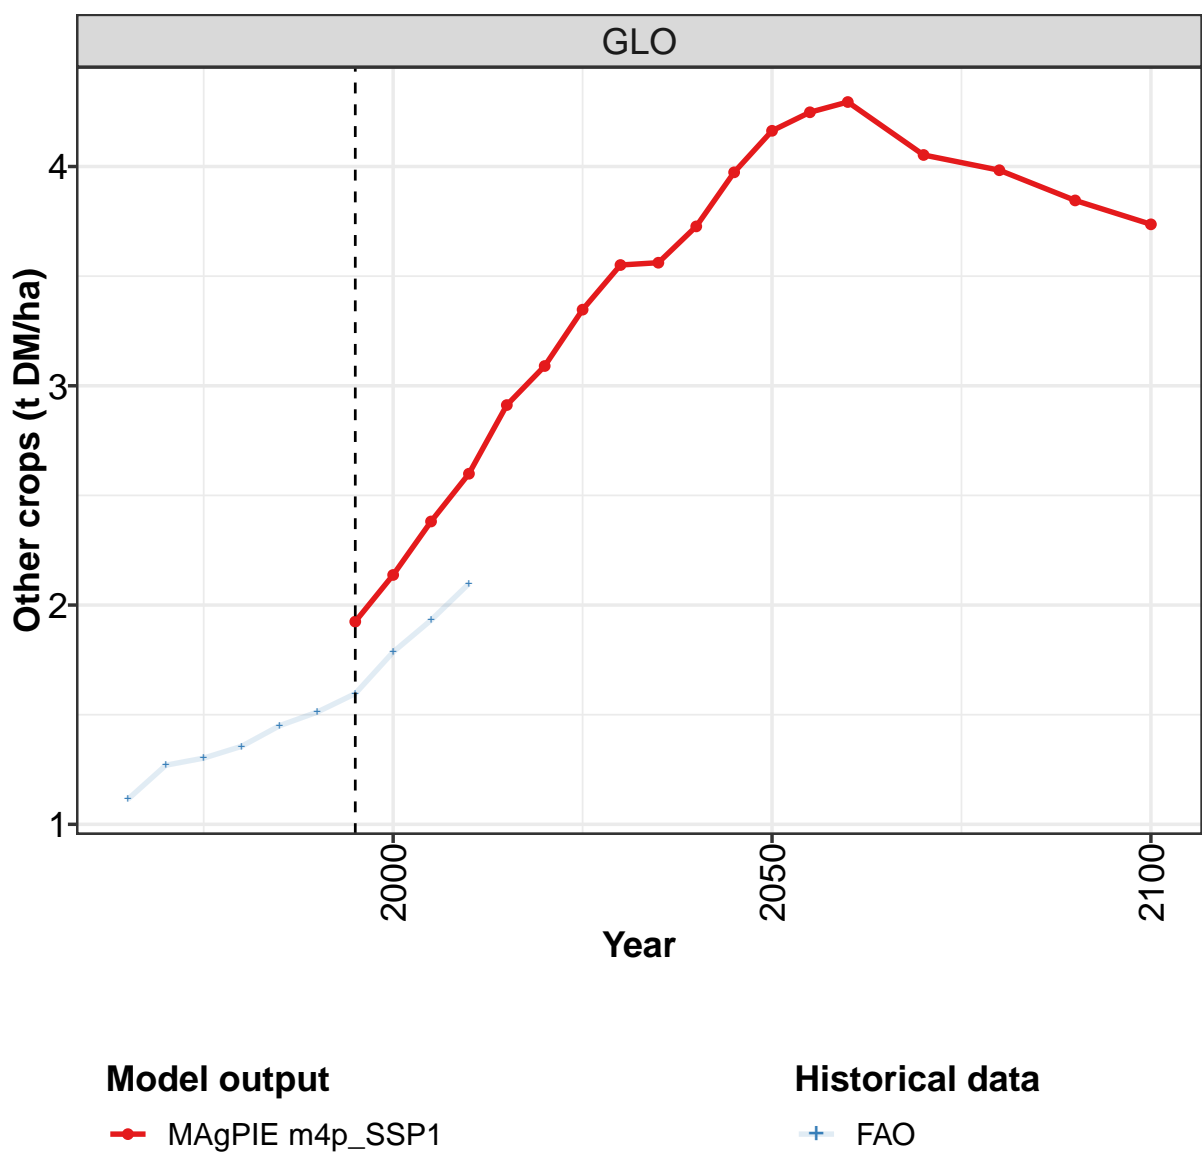

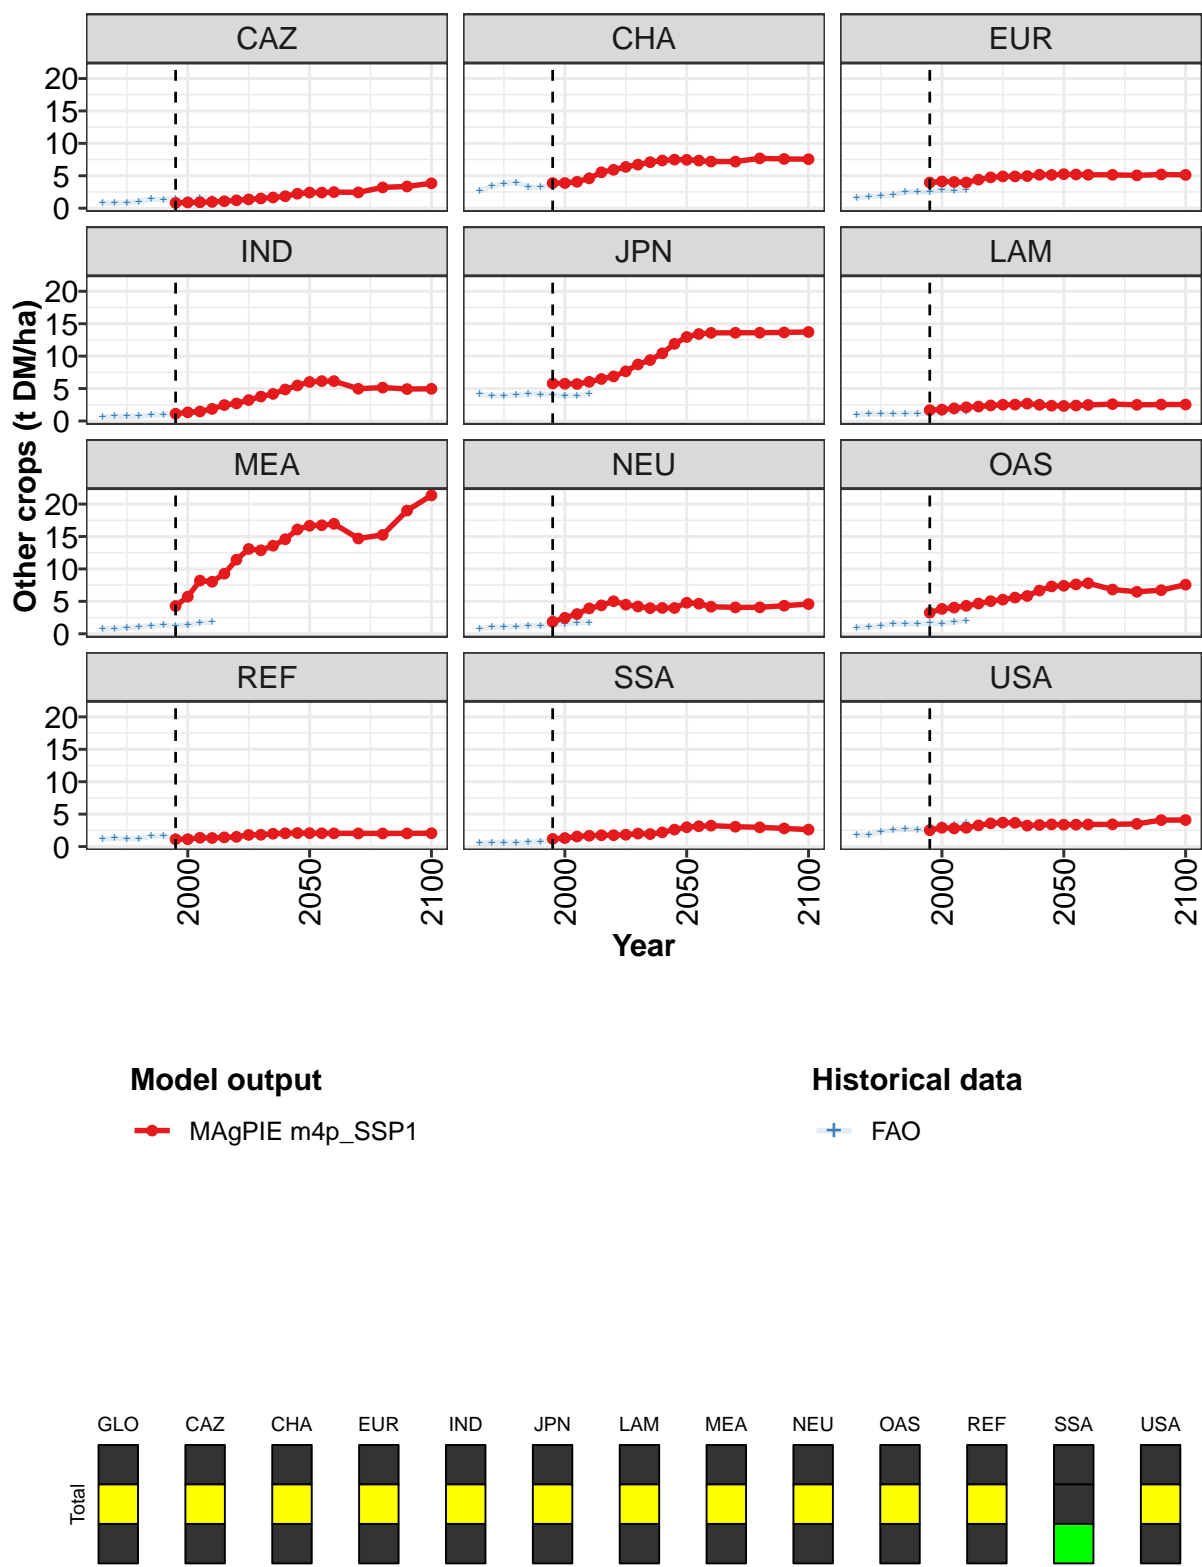

Figure 389: MAgPIE m4p\_SSP1 — Productivity—Yield—Crops—Other crops (t DM/ha)

|     | 1995 | 2000 | 2005 | 2010 | 2015 | 2020 | 2025 | 2030 | 2035 | 2040 | 2045 |
|-----|------|------|------|------|------|------|------|------|------|------|------|
| GLO | 1.9  | 2.1  | 2.4  | 2.6  | 2.9  | 3.1  | 3.3  | 3.6  | 3.6  | 3.7  | 4.0  |
| CAZ | 0.8  | 0.9  | 0.9  | 1.0  | 1.1  | 1.2  | 1.4  | 1.5  | 1.7  | 1.8  | 2.2  |
| CHA | 3.9  | 3.9  | 4.1  | 4.6  | 5.5  | 5.9  | 6.4  | 6.7  | 7.1  | 7.4  | 7.5  |
| EUR | 4.0  | 4.1  | 4.0  | 4.0  | 4.4  | 4.8  | 4.9  | 4.9  | 5.0  | 5.2  | 5.1  |
| IND | 1.1  | 1.3  | 1.5  | 1.9  | 2.5  | 2.7  | 3.2  | 3.8  | 4.2  | 4.9  | 5.5  |
| JPN | 5.8  | 5.7  | 5.7  | 6.0  | 6.5  | 6.9  | 7.7  | 8.7  | 9.4  | 10.4 | 11.9 |
| LAM | 1.7  | 1.8  | 2.0  | 2.1  | 2.2  | 2.4  | 2.5  | 2.5  | 2.7  | 2.5  | 2.4  |
| MEA | 4.3  | 5.7  | 8.2  | 8.0  | 9.3  | 11.4 | 13.1 | 12.9 | 13.6 | 14.6 | 16.1 |
| NEU | 1.9  | 2.5  | 3.0  | 3.9  | 4.4  | 5.0  | 4.5  | 4.2  | 4.0  | 4.0  | 4.0  |
| OAS | 3.3  | 3.8  | 4.0  | 4.3  | 4.7  | 5.0  | 5.3  | 5.6  | 5.8  | 6.7  | 7.3  |
| REF | 1.1  | 1.1  | 1.4  | 1.3  | 1.4  | 1.5  | 1.8  | 1.8  | 2.0  | 2.0  | 2.1  |
| SSA | 1.2  | 1.3  | 1.5  | 1.7  | 1.7  | 1.8  | 1.8  | 2.0  | 1.9  | 2.2  | 2.6  |
| USA | 2.5  | 2.9  | 2.8  | 2.9  | 3.3  | 3.6  | 3.7  | 3.7  | 3.2  | 3.3  | 3.4  |

Table 1507: MAgPIE m4p\_SSP1 — Productivity—Yield—Crops—Other crops (t DM/ha) [PART 1/2]

|     | 2050 | 2055 | 2060 | 2070 | 2080 | 2090 | 2100 |
|-----|------|------|------|------|------|------|------|
| GLO | 4.2  | 4.2  | 4.3  | 4.1  | 4.0  | 3.8  | 3.7  |
| CAZ | 2.4  | 2.4  | 2.5  | 2.4  | 3.2  | 3.4  | 3.8  |
| CHA | 7.5  | 7.3  | 7.2  | 7.2  | 7.7  | 7.6  | 7.5  |
| EUR | 5.2  | 5.2  | 5.1  | 5.1  | 5.1  | 5.2  | 5.1  |
| IND | 6.0  | 6.1  | 6.1  | 5.0  | 5.2  | 4.9  | 5.0  |
| JPN | 13.0 | 13.4 | 13.6 | 13.6 | 13.6 | 13.7 | 13.7 |
| LAM | 2.3  | 2.4  | 2.5  | 2.6  | 2.5  | 2.5  | 2.5  |
| MEA | 16.7 | 16.7 | 17.0 | 14.7 | 15.3 | 19.0 | 21.3 |
| NEU | 4.8  | 4.6  | 4.2  | 4.1  | 4.1  | 4.3  | 4.6  |
| OAS | 7.4  | 7.6  | 7.8  | 6.8  | 6.5  | 6.7  | 7.6  |
| REF | 2.1  | 2.1  | 2.0  | 2.0  | 2.0  | 2.0  | 2.1  |
| SSA | 3.0  | 3.1  | 3.2  | 3.1  | 3.0  | 2.8  | 2.6  |
| USA | 3.4  | 3.4  | 3.4  | 3.4  | 3.5  | 4.1  | 4.1  |

Table 1508: MAgPIE m4p\_SSP1 — Productivity—Yield—Crops—Other crops (t DM/ha) [PART 2/2]

|     | 1965 | 1970 | 1975 | 1980 | 1985 | 1990 | 1995 | 2000 | 2005 | 2010 |
|-----|------|------|------|------|------|------|------|------|------|------|
| GLO | 1.11 | 1.27 | 1.30 | 1.36 | 1.45 | 1.51 | 1.60 | 1.79 | 1.93 | 2.10 |
| CAZ | 0.79 | 0.81 | 0.86 | 1.06 | 1.40 | 1.32 | 1.45 | 1.32 | 1.56 | 1.48 |
| CHA | 2.68 | 3.38 | 3.81 | 3.98 | 3.25 | 3.23 | 3.61 | 4.08 | 4.36 | 4.97 |
| EUR | 1.53 | 1.83 | 1.85 | 2.01 | 2.50 | 2.57 | 2.45 | 2.77 | 2.74 | 2.84 |
| IND | 0.64 | 0.73 | 0.74 | 0.73 | 0.90 | 0.99 | 1.15 | 1.40 | 1.37 | 1.63 |
| JPN | 4.18 | 3.89 | 3.87 | 4.06 | 4.24 | 4.12 | 4.06 | 3.89 | 3.92 | 4.14 |
| LAM | 0.97 | 1.12 | 1.07 | 1.07 | 1.14 | 1.13 | 1.17 | 1.24 | 1.40 | 1.49 |
| MEA | 0.76 | 0.83 | 0.94 | 1.07 | 1.22 | 1.33 | 1.24 | 1.35 | 1.74 | 1.80 |
| NEU | 0.82 | 1.02 | 1.07 | 1.14 | 1.25 | 1.26 | 1.37 | 1.54 | 1.66 | 1.77 |
| OAS | 0.97 | 1.10 | 1.27 | 1.54 | 1.54 | 1.53 | 1.62 | 1.61 | 1.78 | 2.05 |
| REF | 1.15 | 1.30 | 1.22 | 1.23 | 1.62 | 1.65 | 1.47 | 1.44 | 1.68 | 1.60 |
| SSA | 0.53 | 0.63 | 0.66 | 0.64 | 0.66 | 0.81 | 0.92 | 1.04 | 1.21 | 1.35 |
| USA | 1.80 | 1.80 | 2.32 | 2.52 | 2.71 | 2.61 | 2.87 | 3.40 | 3.31 | 3.69 |

Table 1509: FAO — Productivity—Yield—Crops—Other crops (t DM/ha)

52.1.14 Other crops—Fruits Vegetables Nuts

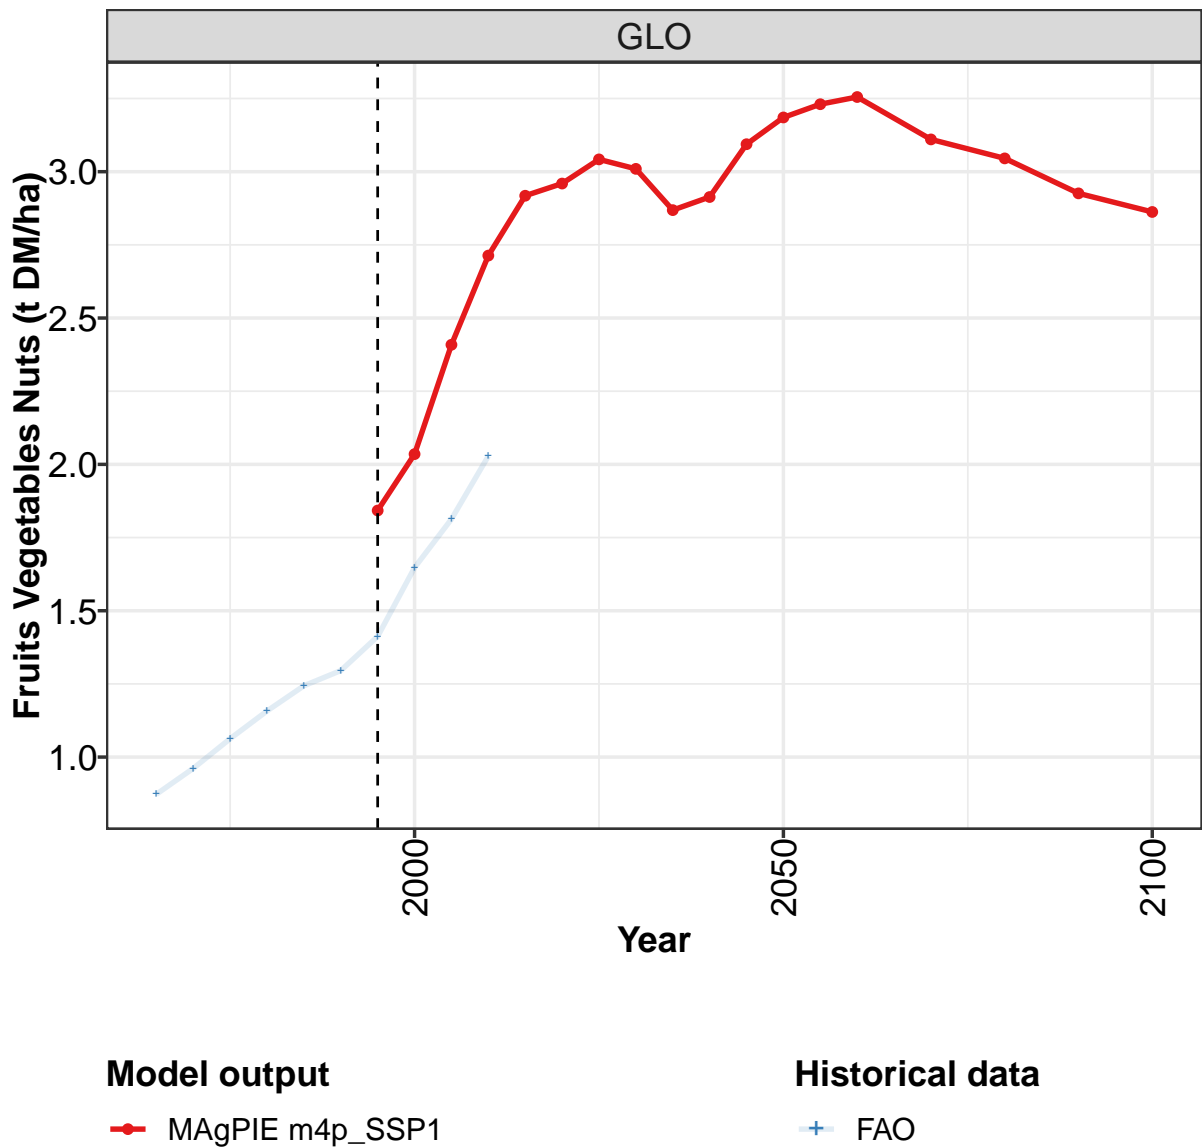

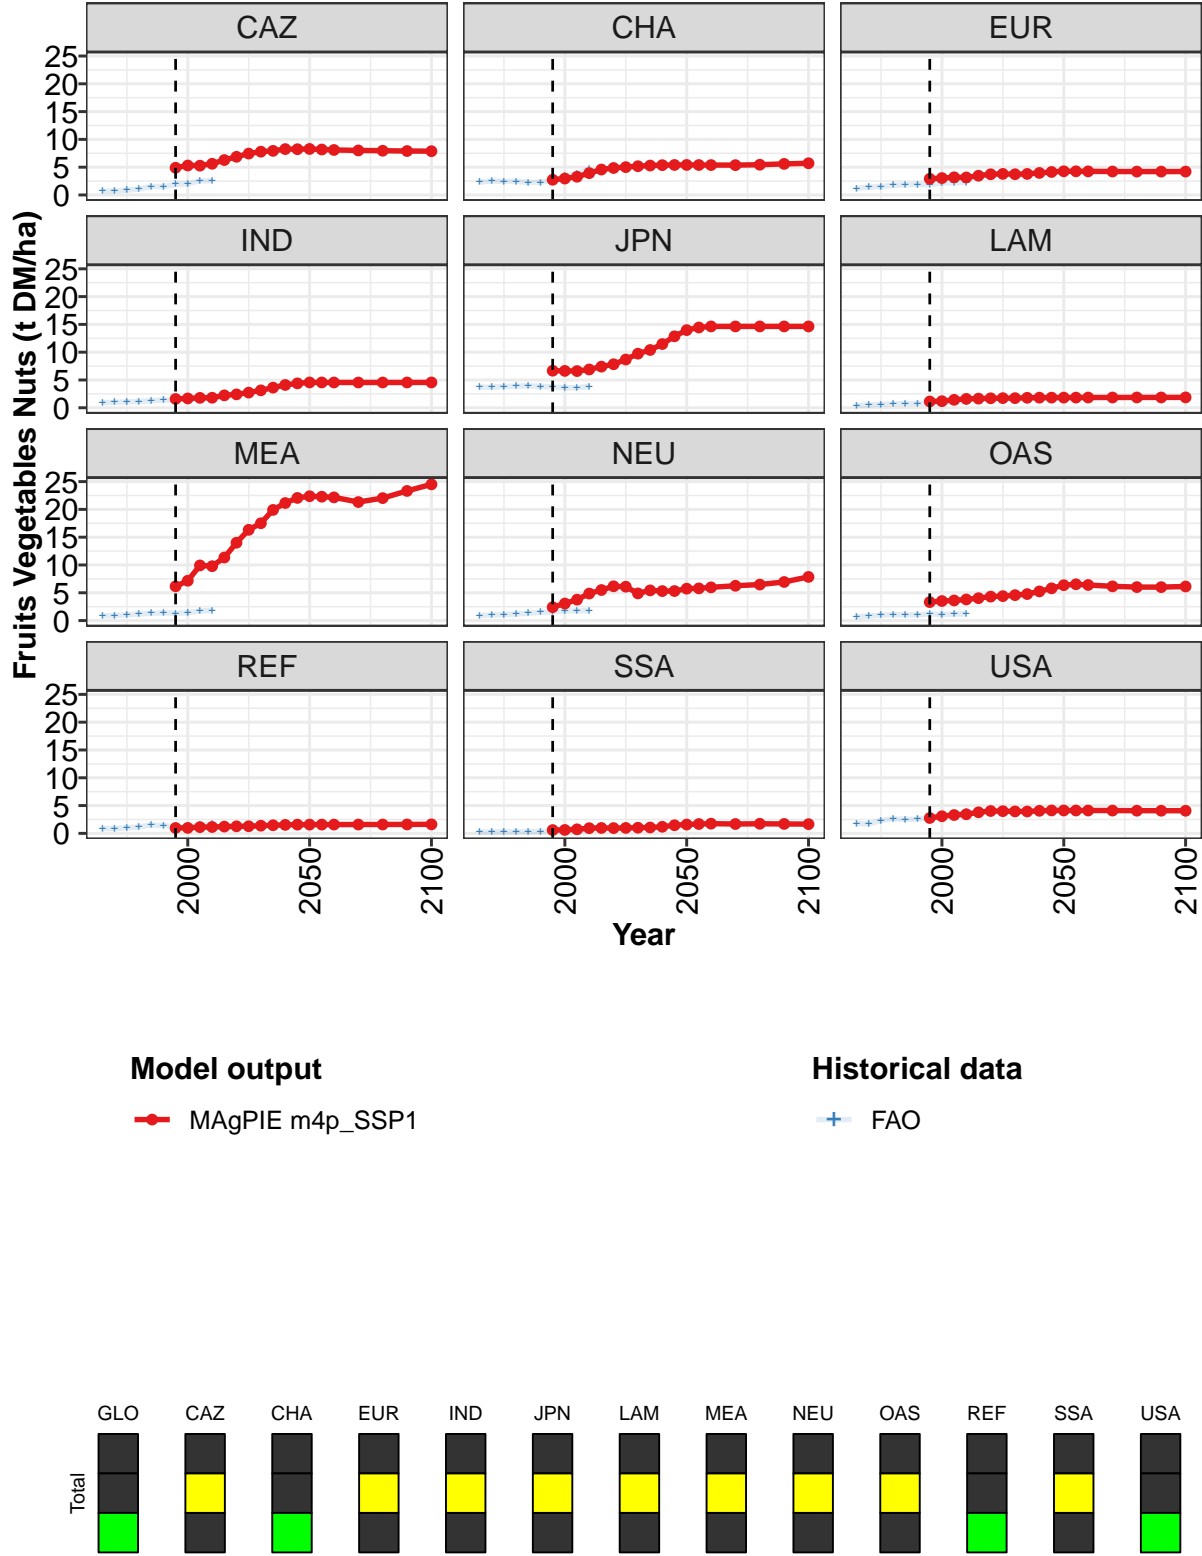

Figure 390: MAgPIE m4p\_SSP1 — Productivity—Yield—Crops—Other crops—Fruits Vegetables Nuts (t DM/ha)

|     | 1995 | 2000 | 2005 | 2010 | 2015 | 2020 | 2025 | 2030 | 2035 | 2040 | 2045 |
|-----|------|------|------|------|------|------|------|------|------|------|------|
| GLO | 1.8  | 2.0  | 2.4  | 2.7  | 2.9  | 3.0  | 3.0  | 3.0  | 2.9  | 2.9  | 3.1  |
| CAZ | 4.9  | 5.3  | 5.3  | 5.6  | 6.3  | 6.9  | 7.4  | 7.8  | 7.9  | 8.3  | 8.2  |
| CHA | 2.7  | 3.0  | 3.3  | 3.9  | 4.6  | 4.9  | 5.0  | 5.2  | 5.3  | 5.4  | 5.4  |
| EUR | 2.9  | 3.0  | 3.2  | 3.2  | 3.5  | 3.7  | 3.8  | 3.7  | 3.8  | 4.0  | 4.1  |
| IND | 1.6  | 1.7  | 1.8  | 1.8  | 2.2  | 2.4  | 2.7  | 3.1  | 3.6  | 4.1  | 4.4  |
| JPN | 6.7  | 6.6  | 6.6  | 6.9  | 7.4  | 7.8  | 8.7  | 9.7  | 10.4 | 11.5 | 12.9 |
| LAM | 1.1  | 1.2  | 1.4  | 1.6  | 1.6  | 1.7  | 1.7  | 1.7  | 1.8  | 1.8  | 1.8  |
| MEA | 6.2  | 7.2  | 9.9  | 9.8  | 11.3 | 14.0 | 16.3 | 17.5 | 19.9 | 21.1 | 22.1 |
| NEU | 2.4  | 3.1  | 3.8  | 4.9  | 5.5  | 6.2  | 6.1  | 4.9  | 5.4  | 5.3  | 5.3  |
| OAS | 3.3  | 3.5  | 3.6  | 3.8  | 4.0  | 4.3  | 4.4  | 4.6  | 4.8  | 5.3  | 5.8  |
| REF | 1.0  | 1.0  | 1.1  | 1.1  | 1.2  | 1.3  | 1.3  | 1.4  | 1.5  | 1.5  | 1.6  |
| SSA | 0.6  | 0.6  | 0.7  | 0.9  | 1.0  | 1.0  | 1.0  | 1.0  | 1.1  | 1.2  | 1.5  |
| USA | 2.8  | 3.1  | 3.3  | 3.4  | 3.8  | 4.0  | 4.0  | 4.0  | 3.9  | 4.1  | 4.1  |

Table 1510: MAGPIE m4p\_SSP1 — Productivity—Yield—Crops—Other crops—Fruits Vegetables Nuts (t DM/ha) [PART 1/2]

|     | 2050 | 2055 | 2060 | 2070 | 2080 | 2090 | 2100 |
|-----|------|------|------|------|------|------|------|
| GLO | 3.2  | 3.2  | 3.3  | 3.1  | 3.0  | 2.9  | 2.9  |
| CAZ | 8.3  | 8.2  | 8.1  | 8.0  | 8.0  | 7.9  | 7.9  |
| CHA | 5.4  | 5.4  | 5.4  | 5.4  | 5.4  | 5.6  | 5.7  |
| EUR | 4.3  | 4.3  | 4.2  | 4.2  | 4.2  | 4.2  | 4.2  |
| IND | 4.6  | 4.6  | 4.6  | 4.5  | 4.5  | 4.6  | 4.6  |
| JPN | 14.0 | 14.4 | 14.6 | 14.6 | 14.6 | 14.6 | 14.6 |
| LAM | 1.8  | 1.8  | 1.8  | 1.9  | 1.9  | 1.9  | 1.9  |
| MEA | 22.4 | 22.3 | 22.2 | 21.3 | 22.0 | 23.3 | 24.5 |
| NEU | 5.7  | 5.8  | 6.0  | 6.3  | 6.5  | 6.9  | 7.9  |
| OAS | 6.4  | 6.5  | 6.4  | 6.2  | 6.0  | 6.0  | 6.1  |
| REF | 1.6  | 1.6  | 1.6  | 1.6  | 1.6  | 1.6  | 1.6  |
| SSA | 1.6  | 1.7  | 1.7  | 1.7  | 1.7  | 1.7  | 1.7  |
| USA | 4.1  | 4.1  | 4.1  | 4.1  | 4.1  | 4.1  | 4.1  |

Table 1511: MAGPIE m4p\_SSP1 — Productivity—Yield—Crops—Other crops—Fruits Vegetables Nuts (t DM/ha) [PART 2/2]

|     | 1965 | 1970 | 1975 | 1980 | 1985 | 1990 | 1995 | 2000 | 2005 | 2010 |
|-----|------|------|------|------|------|------|------|------|------|------|
| GLO | 0.87 | 0.96 | 1.06 | 1.16 | 1.24 | 1.30 | 1.41 | 1.65 | 1.81 | 2.03 |
| CAZ | 0.68 | 0.71 | 0.87 | 1.07 | 1.53 | 1.52 | 1.93 | 2.01 | 2.54 | 2.57 |
| CHA | 2.33 | 2.50 | 2.46 | 2.44 | 2.27 | 2.27 | 2.67 | 3.43 | 3.83 | 4.64 |
| EUR | 1.19 | 1.41 | 1.49 | 1.75 | 1.82 | 1.88 | 1.86 | 2.14 | 2.20 | 2.26 |
| IND | 0.92 | 0.99 | 1.06 | 1.11 | 1.25 | 1.39 | 1.39 | 1.64 | 1.57 | 1.87 |
| JPN | 3.72 | 3.69 | 3.84 | 3.88 | 3.96 | 3.84 | 3.76 | 3.60 | 3.58 | 3.86 |
| LAM | 0.44 | 0.51 | 0.62 | 0.69 | 0.76 | 0.74 | 0.83 | 0.92 | 1.01 | 1.09 |
| MEA | 0.83 | 0.91 | 1.03 | 1.16 | 1.31 | 1.39 | 1.30 | 1.43 | 1.73 | 1.81 |
| NEU | 0.87 | 1.00 | 1.07 | 1.17 | 1.32 | 1.50 | 1.54 | 1.76 | 1.76 | 1.75 |
| OAS | 0.68 | 0.81 | 0.96 | 1.07 | 1.03 | 1.03 | 1.20 | 1.10 | 1.16 | 1.21 |
| REF | 0.90 | 0.84 | 1.00 | 1.16 | 1.49 | 1.42 | 1.12 | 1.13 | 1.49 | 1.69 |
| SSA | 0.22 | 0.26 | 0.27 | 0.28 | 0.29 | 0.34 | 0.39 | 0.42 | 0.48 | 0.51 |
| USA | 1.75 | 1.72 | 2.30 | 2.62 | 2.52 | 2.58 | 2.84 | 3.31 | 3.36 | 3.85 |

Table 1512: FAO — Productivity—Yield—Crops—Other crops—Fruits Vegetables Nuts (t DM/ha)

52.1.15 Other crops—Potatoes

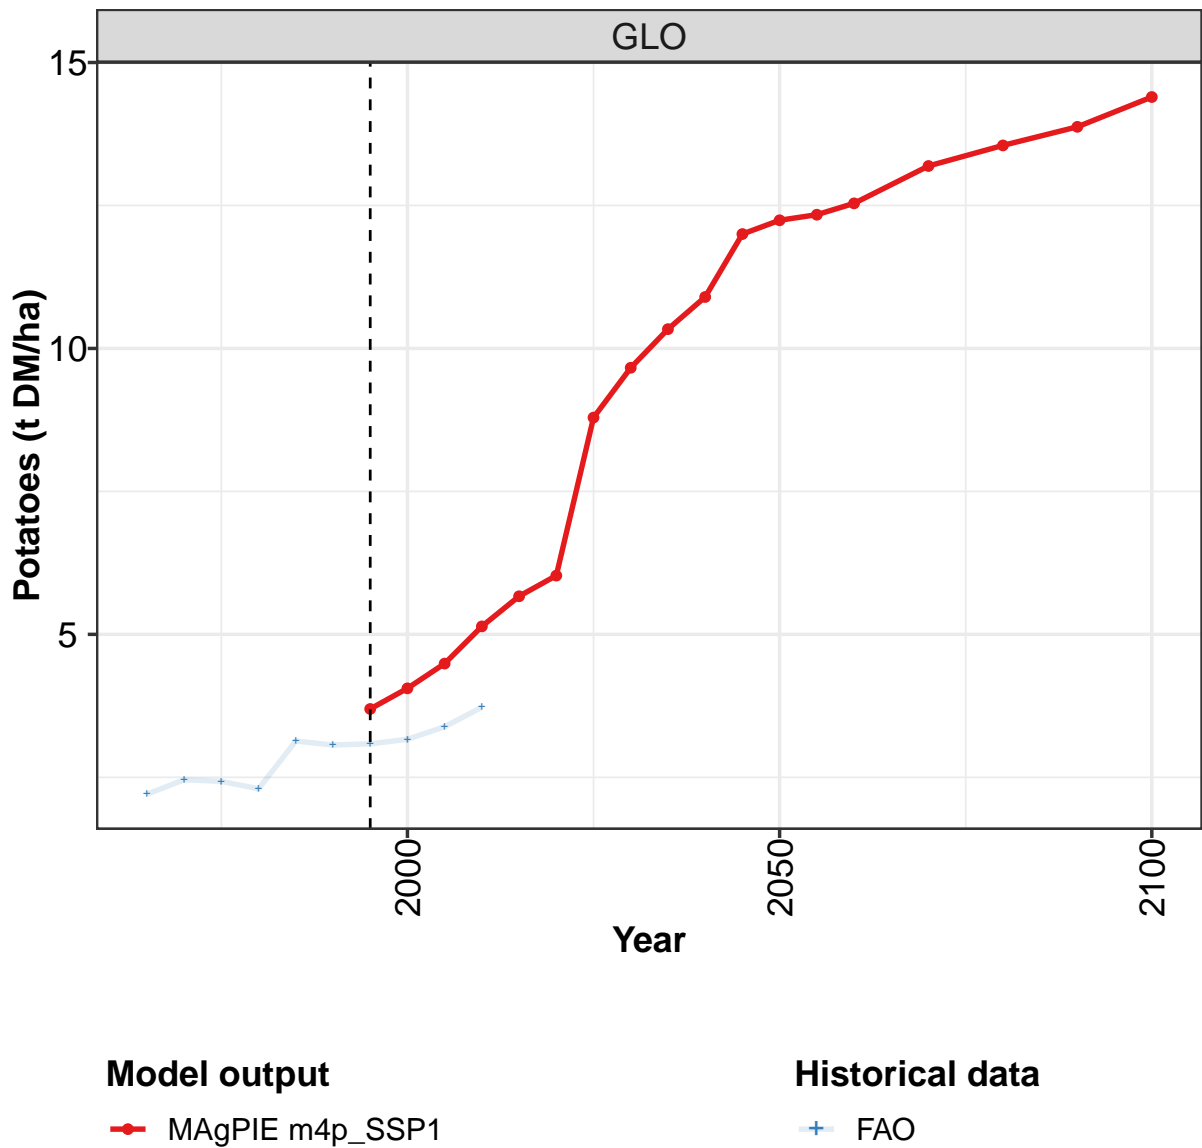

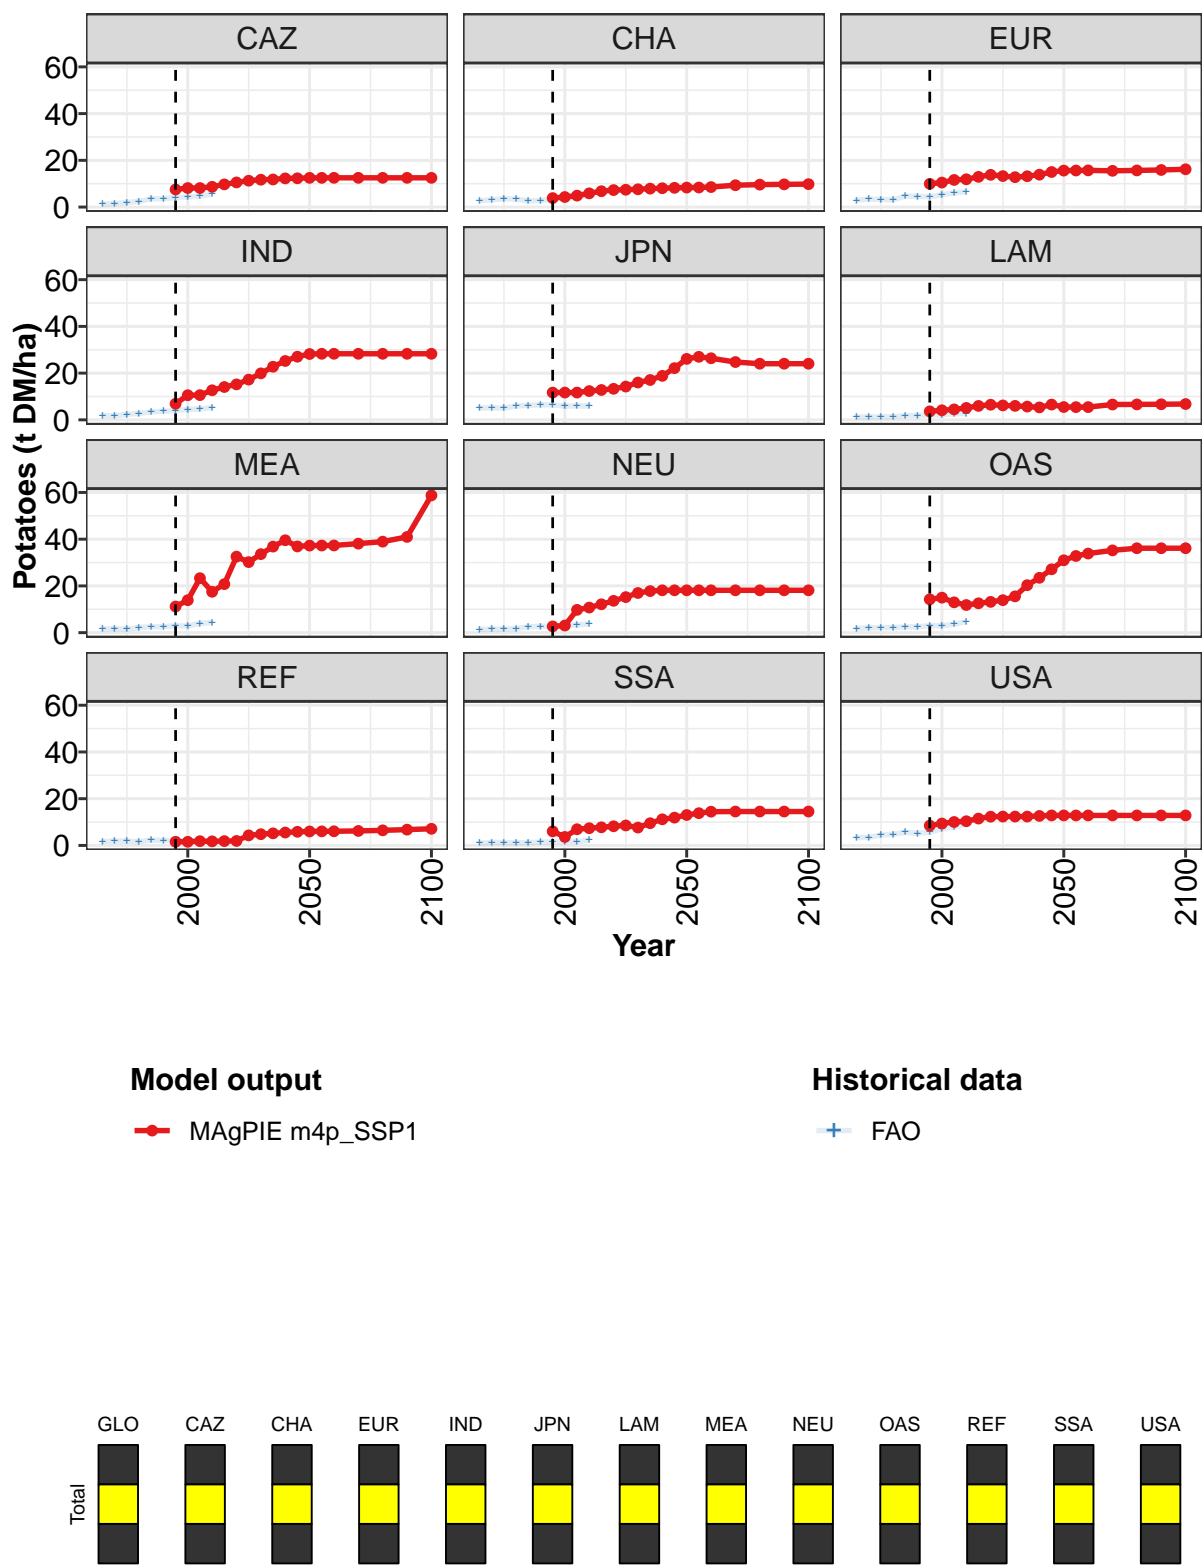

Figure 391: MAgPIE m4p\_SSP1 — Productivity—Yield—Crops—Other crops—Potatoes (t DM/ha)



|     | 1995 | 2000 | 2005 | 2010 | 2015 | 2020 | 2025 | 2030 | 2035 | 2040 | 2045 |
|-----|------|------|------|------|------|------|------|------|------|------|------|
| GLO | 3.7  | 4.1  | 4.5  | 5.1  | 5.7  | 6.0  | 8.8  | 9.7  | 10.3 | 10.9 | 12.0 |
| CAZ | 7.5  | 8.2  | 8.2  | 8.7  | 9.7  | 10.5 | 11.3 | 11.7 | 11.8 | 12.3 | 12.3 |
| CHA | 3.9  | 4.3  | 4.9  | 5.9  | 6.8  | 7.3  | 7.4  | 7.6  | 7.9  | 8.1  | 8.2  |
| EUR | 9.9  | 10.5 | 11.6 | 11.9 | 12.9 | 13.8 | 13.3 | 12.8 | 13.2 | 13.9 | 15.0 |
| IND | 6.9  | 10.6 | 10.6 | 12.7 | 14.1 | 15.2 | 17.2 | 19.9 | 22.8 | 25.2 | 27.0 |
| JPN | 11.7 | 11.7 | 11.7 | 12.3 | 12.8 | 13.3 | 14.3 | 16.0 | 17.1 | 18.8 | 22.2 |
| LAM | 3.6  | 4.1  | 4.5  | 5.1  | 6.0  | 6.5  | 6.2  | 6.0  | 5.7  | 5.3  | 6.5  |
| MEA | 11.2 | 13.9 | 23.3 | 17.5 | 20.8 | 32.5 | 30.2 | 33.6 | 36.8 | 39.6 | 36.9 |
| NEU | 2.7  | 3.1  | 9.8  | 10.7 | 12.1 | 13.6 | 15.2 | 17.0 | 17.8 | 18.1 | 18.1 |
| OAS | 14.3 | 15.0 | 13.0 | 11.8 | 12.6 | 13.2 | 13.9 | 15.5 | 20.3 | 23.5 | 27.1 |
| REF | 1.6  | 1.6  | 1.8  | 1.8  | 1.9  | 1.9  | 4.3  | 4.8  | 5.2  | 5.5  | 5.8  |
| SSA | 6.0  | 3.7  | 6.9  | 7.4  | 7.8  | 8.2  | 8.6  | 7.7  | 9.5  | 11.2 | 11.9 |
| USA | 8.5  | 9.4  | 10.0 | 10.4 | 11.5 | 12.3 | 12.4 | 12.4 | 12.4 | 12.6 | 12.8 |

Table 1513: MAgPIE m4p\_SSP1 — Productivity—Yield—Crops—Other crops—Potatoes (t DM/ha) [PART 1/2]

|     | 2050 | 2055 | 2060 | 2070 | 2080 | 2090 | 2100 |
|-----|------|------|------|------|------|------|------|
| GLO | 12.2 | 12.3 | 12.5 | 13.2 | 13.5 | 13.9 | 14.4 |
| CAZ | 12.5 | 12.5 | 12.5 | 12.5 | 12.5 | 12.5 | 12.5 |
| CHA | 8.3  | 8.4  | 8.6  | 9.4  | 9.6  | 9.7  | 9.8  |
| EUR | 15.6 | 15.7 | 15.7 | 15.5 | 15.7 | 15.9 | 16.2 |
| IND | 28.2 | 28.3 | 28.3 | 28.3 | 28.3 | 28.3 | 28.3 |
| JPN | 26.1 | 27.0 | 26.4 | 24.7 | 24.0 | 24.0 | 24.0 |
| LAM | 5.5  | 5.5  | 5.5  | 6.6  | 6.6  | 6.7  | 6.8  |
| MEA | 37.3 | 37.3 | 37.3 | 38.1 | 39.0 | 41.0 | 58.8 |
| NEU | 18.1 | 18.1 | 18.1 | 18.1 | 18.1 | 18.1 | 18.1 |
| OAS | 31.0 | 32.8 | 33.9 | 35.2 | 36.1 | 36.1 | 36.1 |
| REF | 6.0  | 6.0  | 6.1  | 6.2  | 6.5  | 6.8  | 7.1  |
| SSA | 13.0 | 13.8 | 14.5 | 14.5 | 14.5 | 14.5 | 14.5 |
| USA | 12.8 | 12.8 | 12.8 | 12.8 | 12.8 | 12.8 | 12.8 |

Table 1514: MAgPIE m4p\_SSP1 — Productivity—Yield—Crops—Other crops—Potatoes (t DM/ha) [PART 2/2]

|     | 1965 | 1970 | 1975 | 1980 | 1985 | 1990 | 1995 | 2000 | 2005 | 2010 |
|-----|------|------|------|------|------|------|------|------|------|------|
| GLO | 2.20 | 2.46 | 2.43 | 2.30 | 3.13 | 3.07 | 3.09 | 3.16 | 3.38 | 3.73 |
| CAZ | 1.31 | 1.50 | 1.91 | 2.46 | 3.57 | 3.56 | 4.12 | 4.33 | 4.61 | 5.54 |
| CHA | 2.69 | 3.11 | 3.52 | 3.41 | 2.63 | 2.80 | 3.48 | 3.83 | 4.14 | 4.84 |
| EUR | 2.89 | 3.38 | 3.26 | 3.09 | 4.75 | 4.54 | 4.43 | 5.30 | 6.05 | 6.56 |
| IND | 1.80 | 1.75 | 2.37 | 2.76 | 3.42 | 3.70 | 3.90 | 4.45 | 4.67 | 5.23 |
| JPN | 4.99 | 5.20 | 5.01 | 5.92 | 6.20 | 6.42 | 6.48 | 5.84 | 6.02 | 5.91 |
| LAM | 1.23 | 1.32 | 1.30 | 1.36 | 1.81 | 1.92 | 2.07 | 2.16 | 2.59 | 2.77 |
| MEA | 1.60 | 1.67 | 1.54 | 2.17 | 2.55 | 2.52 | 2.97 | 2.82 | 3.99 | 4.33 |
| NEU | 1.42 | 1.53 | 1.52 | 1.69 | 2.56 | 2.68 | 2.75 | 3.07 | 3.28 | 3.78 |
| OAS | 1.78 | 2.10 | 2.14 | 2.20 | 2.42 | 2.50 | 2.94 | 2.96 | 3.63 | 4.67 |
| REF | 1.71 | 1.88 | 1.84 | 1.57 | 2.28 | 2.17 | 2.11 | 1.80 | 2.02 | 1.84 |
| SSA | 0.99 | 1.27 | 1.21 | 1.11 | 1.22 | 1.44 | 1.42 | 1.58 | 1.65 | 2.24 |
| USA | 3.41 | 3.43 | 4.45 | 4.76 | 5.64 | 5.20 | 5.69 | 7.17 | 7.82 | 9.20 |

Table 1515: FAO — Productivity—Yield—Crops—Other crops—Potatoes (t DM/ha)

52.1.16 Other crops—Pulses

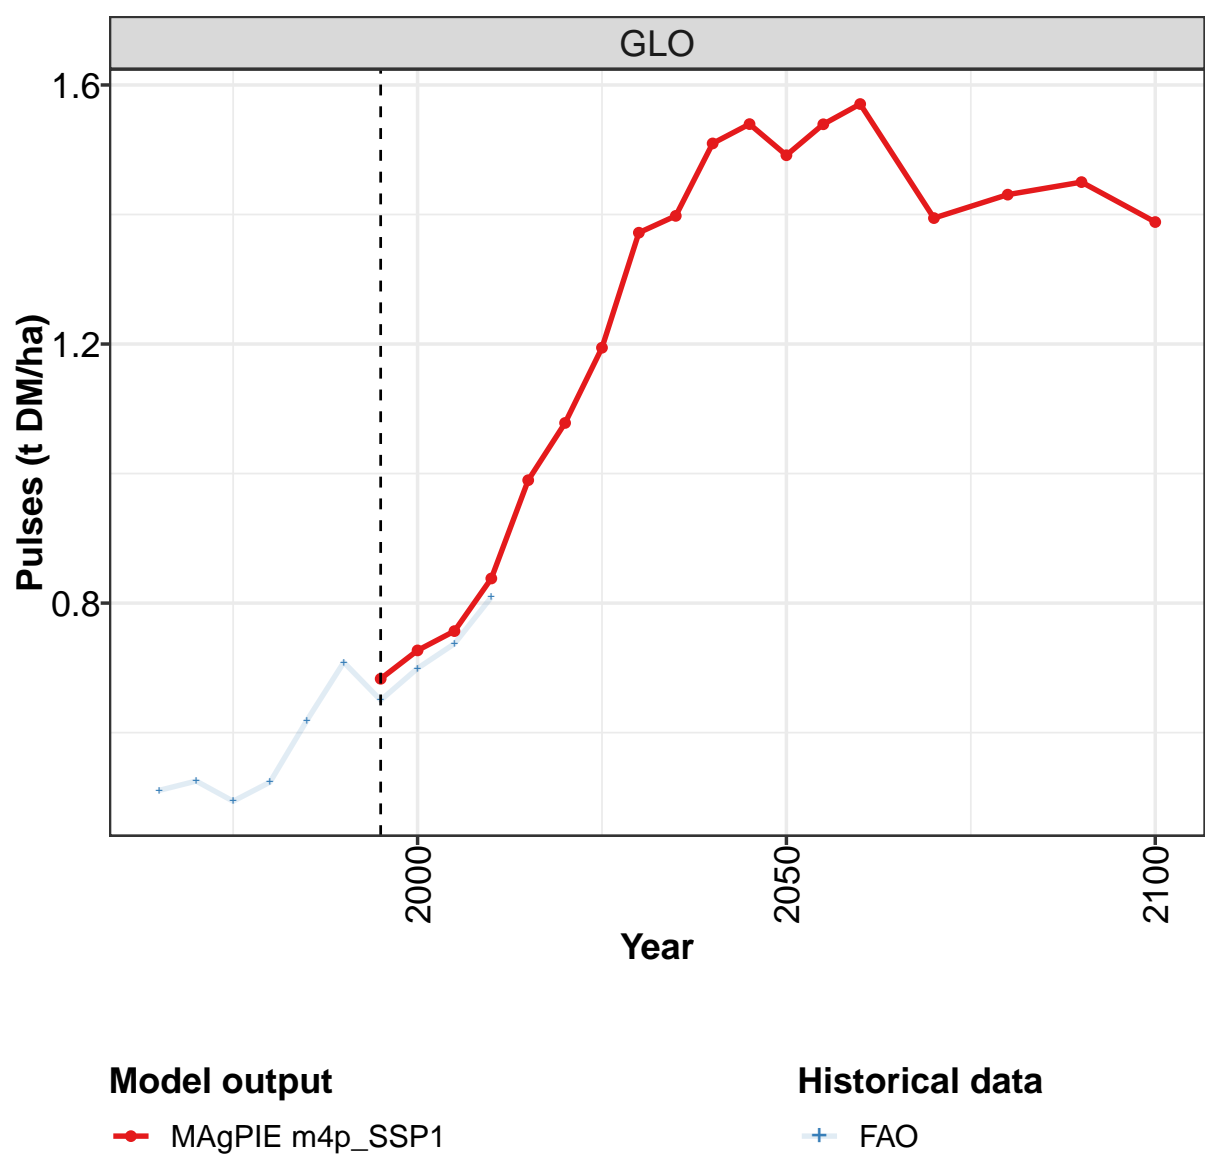

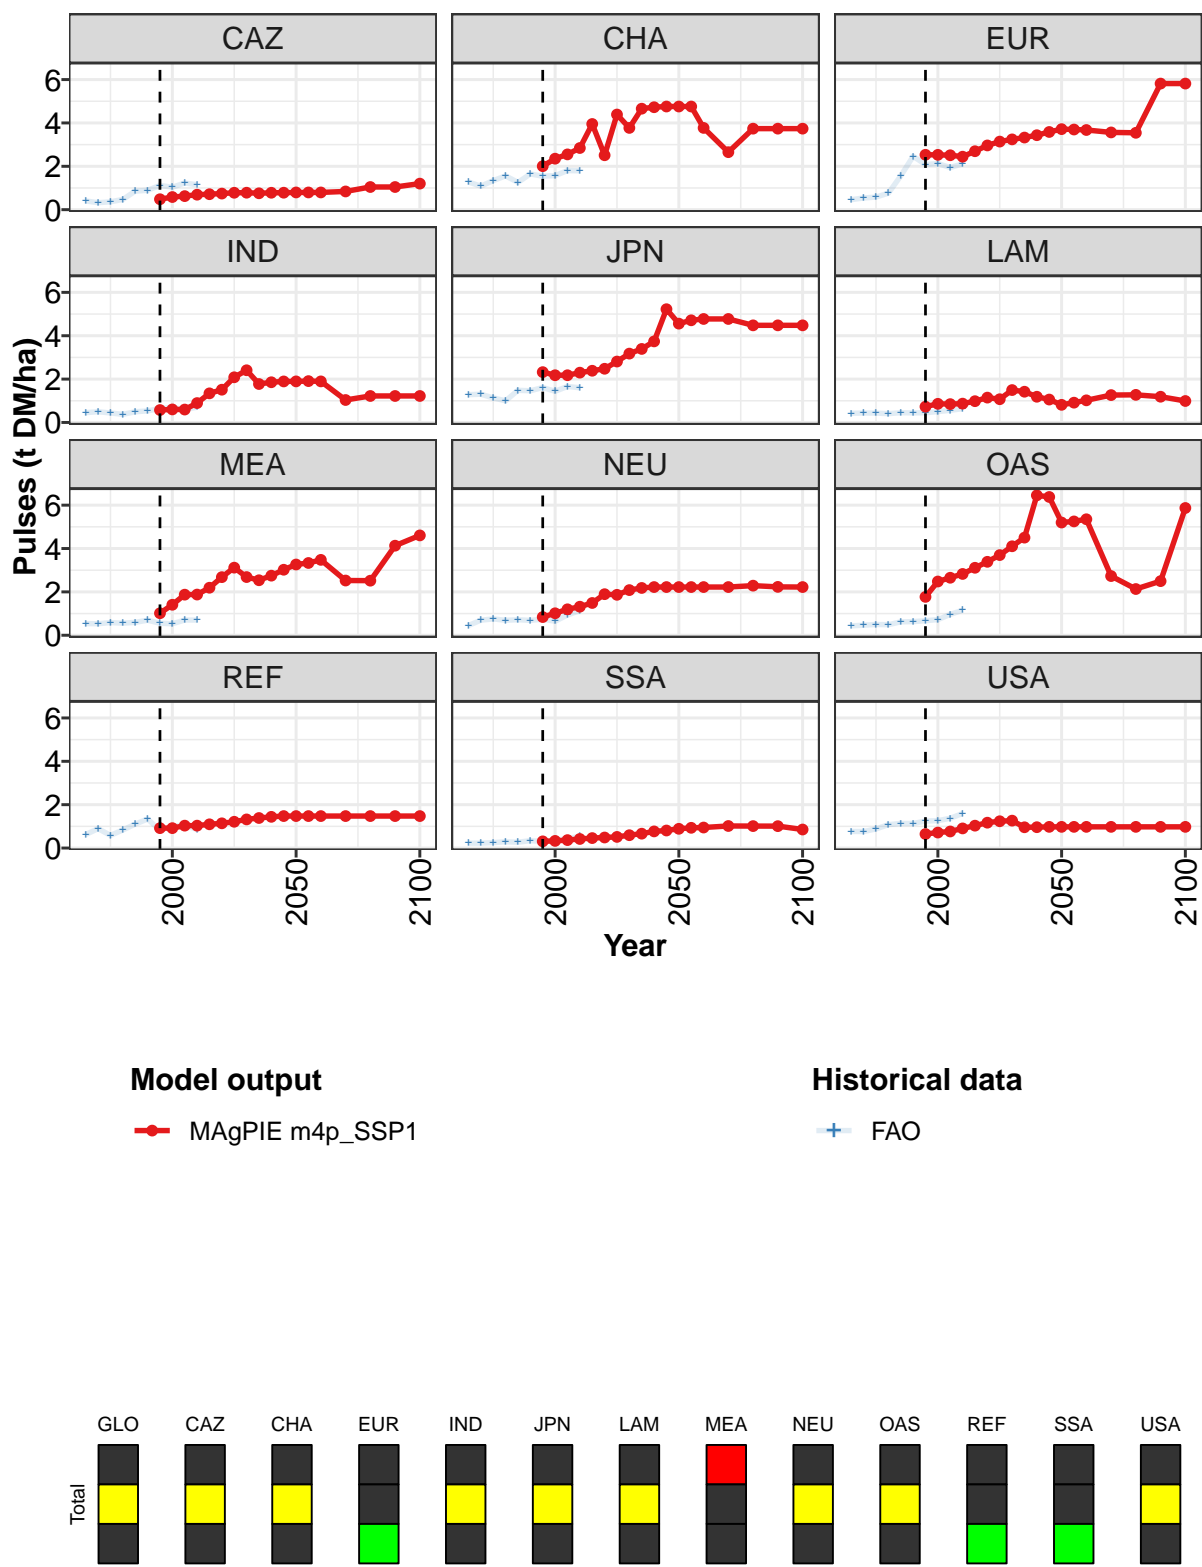

Figure 392: MAgPIE m4p\_SSP1 — Productivity—Yield—Crops—Other crops—Pulses (t DM/ha)

|     | 1995 | 2000 | 2005 | 2010 | 2015 | 2020 | 2025 | 2030 | 2035 | 2040 | 2045 |
|-----|------|------|------|------|------|------|------|------|------|------|------|
| GLO | 0.68 | 0.73 | 0.76 | 0.84 | 0.99 | 1.08 | 1.19 | 1.37 | 1.40 | 1.51 | 1.54 |
| CAZ | 0.48 | 0.58 | 0.62 | 0.69 | 0.71 | 0.74 | 0.78 | 0.78 | 0.76 | 0.78 | 0.78 |
| CHA | 2.01 | 2.35 | 2.55 | 2.84 | 3.95 | 2.51 | 4.39 | 3.77 | 4.66 | 4.73 | 4.76 |
| EUR | 2.53 | 2.53 | 2.51 | 2.44 | 2.70 | 2.96 | 3.14 | 3.24 | 3.33 | 3.43 | 3.58 |
| IND | 0.57 | 0.60 | 0.60 | 0.89 | 1.34 | 1.51 | 2.09 | 2.41 | 1.77 | 1.85 | 1.89 |
| JPN | 2.32 | 2.18 | 2.18 | 2.30 | 2.39 | 2.48 | 2.81 | 3.18 | 3.39 | 3.74 | 5.23 |
| LAM | 0.73 | 0.86 | 0.85 | 0.87 | 0.98 | 1.15 | 1.07 | 1.50 | 1.42 | 1.19 | 1.06 |
| MEA | 1.02 | 1.41 | 1.87 | 1.88 | 2.19 | 2.68 | 3.12 | 2.68 | 2.54 | 2.75 | 3.02 |
| NEU | 0.84 | 1.01 | 1.20 | 1.32 | 1.49 | 1.89 | 1.87 | 2.08 | 2.18 | 2.22 | 2.22 |
| OAS | 1.77 | 2.48 | 2.65 | 2.83 | 3.11 | 3.39 | 3.70 | 4.10 | 4.50 | 6.45 | 6.38 |
| REF | 0.92 | 0.92 | 1.03 | 1.03 | 1.10 | 1.14 | 1.21 | 1.32 | 1.39 | 1.44 | 1.48 |
| SSA | 0.31 | 0.33 | 0.37 | 0.42 | 0.46 | 0.49 | 0.51 | 0.59 | 0.66 | 0.77 | 0.81 |
| USA | 0.65 | 0.72 | 0.76 | 0.91 | 1.03 | 1.17 | 1.24 | 1.26 | 0.96 | 0.96 | 0.98 |

Table 1516: MAgPIE m4p\_SSP1 — Productivity—Yield—Crops—Other crops—Pulses (t DM/ha) [PART 1/2]

|     | 2050 | 2055 | 2060 | 2070 | 2080 | 2090 | 2100 |
|-----|------|------|------|------|------|------|------|
| GLO | 1.49 | 1.54 | 1.57 | 1.39 | 1.43 | 1.45 | 1.39 |
| CAZ | 0.79 | 0.79 | 0.80 | 0.84 | 1.05 | 1.05 | 1.20 |
| CHA | 4.76 | 4.76 | 3.77 | 2.65 | 3.74 | 3.74 | 3.74 |
| EUR | 3.71 | 3.70 | 3.67 | 3.56 | 3.55 | 5.82 | 5.82 |
| IND | 1.89 | 1.91 | 1.90 | 1.04 | 1.22 | 1.22 | 1.22 |
| JPN | 4.56 | 4.71 | 4.77 | 4.77 | 4.48 | 4.48 | 4.48 |
| LAM | 0.81 | 0.91 | 1.02 | 1.26 | 1.27 | 1.19 | 0.99 |
| MEA | 3.26 | 3.33 | 3.48 | 2.53 | 2.52 | 4.13 | 4.61 |
| NEU | 2.22 | 2.22 | 2.22 | 2.22 | 2.29 | 2.23 | 2.22 |
| OAS | 5.20 | 5.25 | 5.35 | 2.73 | 2.13 | 2.50 | 5.87 |
| REF | 1.48 | 1.48 | 1.48 | 1.48 | 1.48 | 1.48 | 1.48 |
| SSA | 0.89 | 0.93 | 0.95 | 1.02 | 1.01 | 1.01 | 0.85 |
| USA | 0.98 | 0.98 | 0.98 | 0.98 | 0.98 | 0.98 | 0.98 |

Table 1517: MAgPIE m4p\_SSP1 — Productivity—Yield—Crops—Other crops—Pulses (t DM/ha) [PART 2/2]

|     | 1965 | 1970 | 1975 | 1980 | 1985 | 1990 | 1995 | 2000 | 2005 | 2010 |
|-----|------|------|------|------|------|------|------|------|------|------|
| GLO | 0.51 | 0.53 | 0.49 | 0.52 | 0.62 | 0.71 | 0.65 | 0.70 | 0.74 | 0.81 |
| CAZ | 0.40 | 0.32 | 0.36 | 0.47 | 0.85 | 0.89 | 1.12 | 1.03 | 1.23 | 1.15 |
| CHA | 1.28 | 1.08 | 1.34 | 1.56 | 1.26 | 1.65 | 1.54 | 1.57 | 1.80 | 1.79 |
| EUR | 0.46 | 0.54 | 0.58 | 0.76 | 1.56 | 2.46 | 2.08 | 2.13 | 1.94 | 2.12 |
| IND | 0.45 | 0.49 | 0.44 | 0.37 | 0.49 | 0.53 | 0.65 | 0.69 | 0.60 | 0.70 |
| JPN | 1.28 | 1.30 | 1.13 | 1.00 | 1.48 | 1.46 | 1.61 | 1.44 | 1.66 | 1.60 |
| LAM | 0.42 | 0.43 | 0.43 | 0.41 | 0.45 | 0.44 | 0.45 | 0.50 | 0.56 | 0.63 |
| MEA | 0.54 | 0.53 | 0.59 | 0.55 | 0.60 | 0.69 | 0.55 | 0.53 | 0.70 | 0.70 |
| NEU | 0.45 | 0.69 | 0.75 | 0.69 | 0.72 | 0.69 | 0.74 | 0.65 | 0.93 | 1.14 |
| OAS | 0.43 | 0.46 | 0.50 | 0.49 | 0.62 | 0.63 | 0.67 | 0.72 | 0.96 | 1.15 |
| REF | 0.62 | 0.89 | 0.58 | 0.83 | 1.10 | 1.34 | 0.82 | 1.00 | 1.06 | 0.85 |
| SSA | 0.23 | 0.23 | 0.25 | 0.29 | 0.27 | 0.34 | 0.30 | 0.38 | 0.42 | 0.56 |
| USA | 0.77 | 0.76 | 0.88 | 1.08 | 1.13 | 1.13 | 1.25 | 1.26 | 1.37 | 1.60 |

Table 1518: FAO — Productivity—Yield—Crops—Other crops—Pulses (t DM/ha)

52.1.17 Other crops—Tropical roots

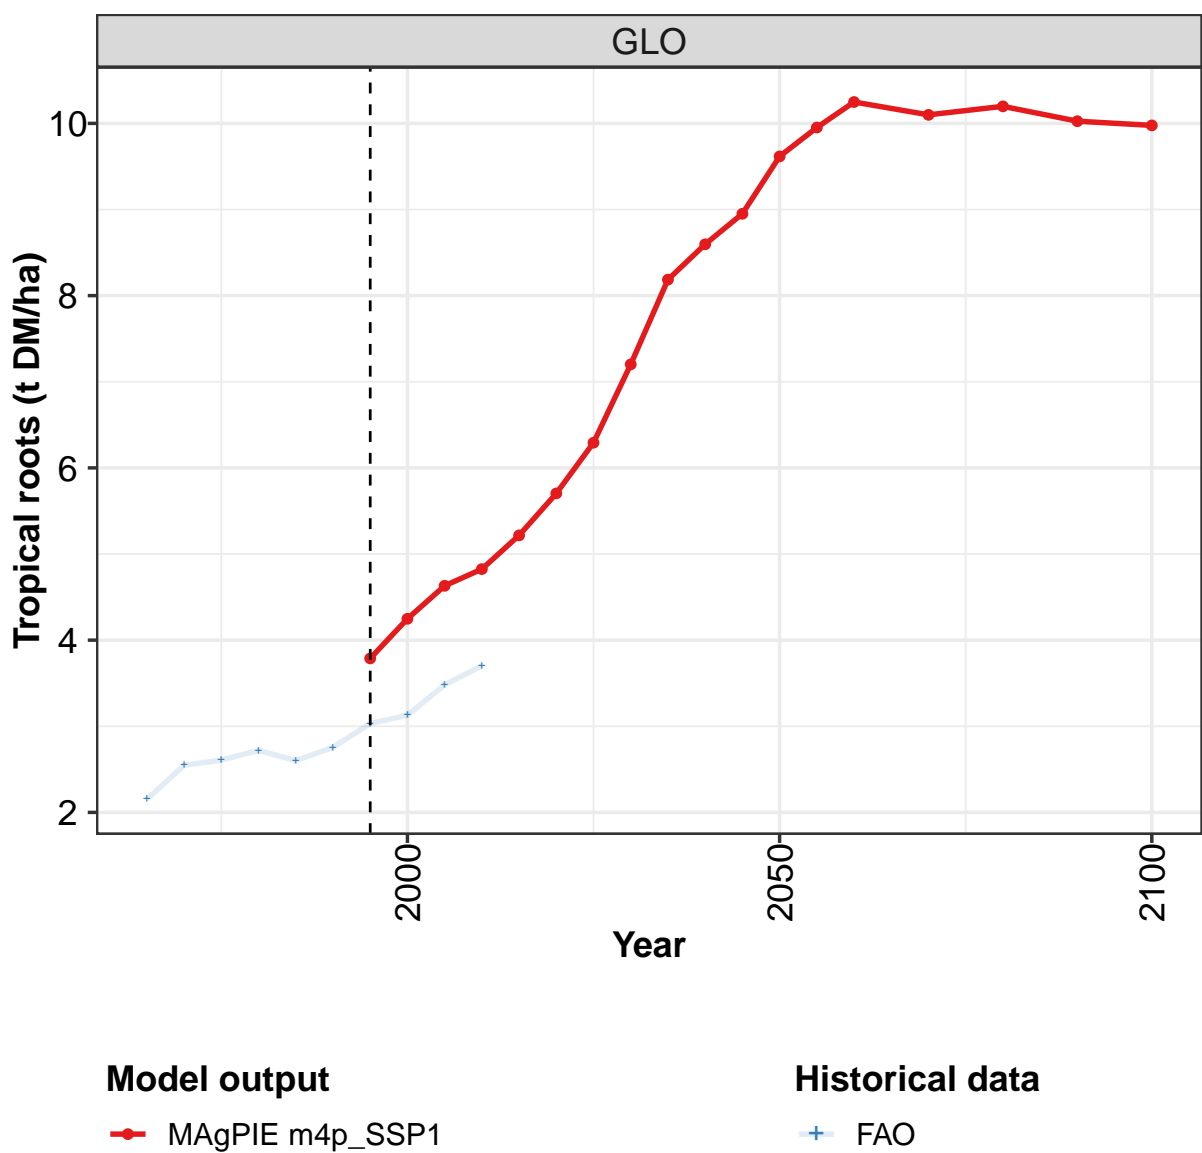

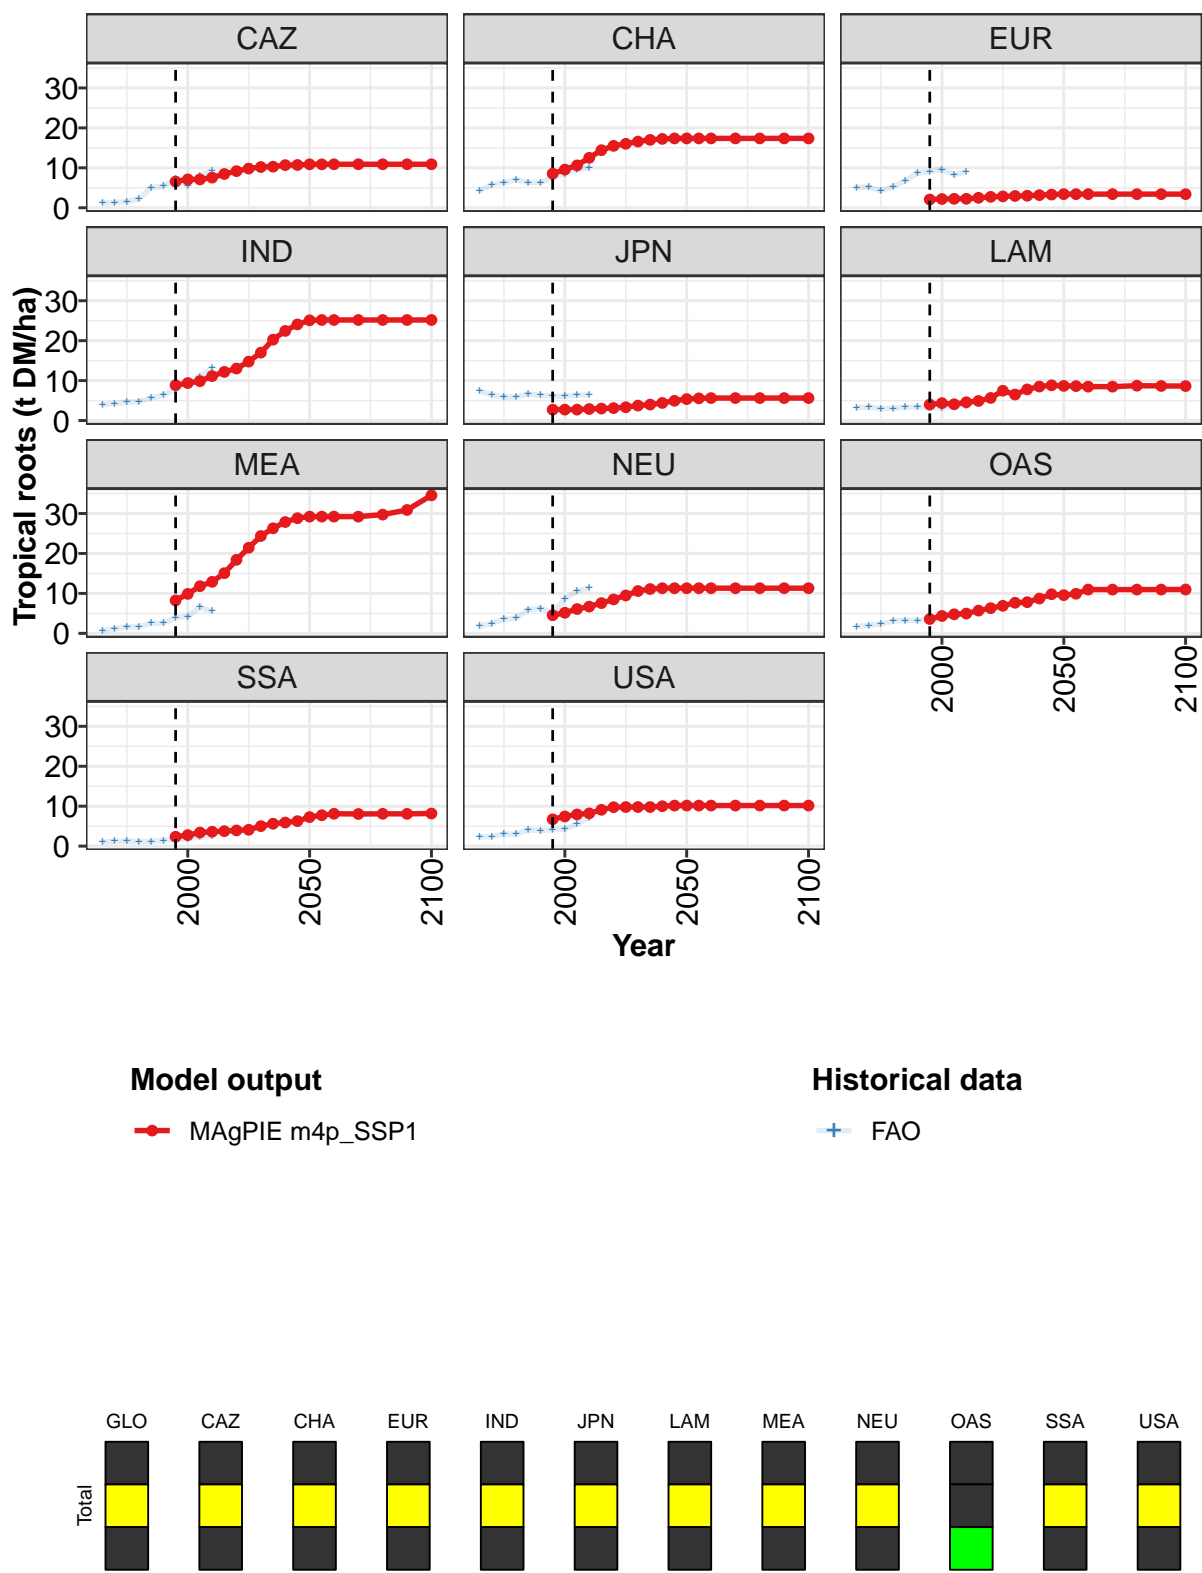

Figure 393: MAGPIE m4p\_SSP1 — Productivity—Yield—Crops—Other crops—Tropical roots (t DM/ha)

|     | 1995 | 2000 | 2005 | 2010 | 2015 | 2020 | 2025 | 2030 | 2035 | 2040 | 2045 |
|-----|------|------|------|------|------|------|------|------|------|------|------|
| GLO | 3.8  | 4.2  | 4.6  | 4.8  | 5.2  | 5.7  | 6.3  | 7.2  | 8.2  | 8.6  | 9.0  |
| CAZ | 6.6  | 7.1  | 7.1  | 7.6  | 8.5  | 9.2  | 9.8  | 10.2 | 10.3 | 10.7 | 10.7 |
| CHA | 8.5  | 9.6  | 10.6 | 12.5 | 14.4 | 15.5 | 16.0 | 16.6 | 17.0 | 17.2 | 17.4 |
| EUR | 2.1  | 2.2  | 2.2  | 2.2  | 2.5  | 2.7  | 2.8  | 3.0  | 3.0  | 3.2  | 3.3  |
| IND | 8.8  | 9.4  | 9.9  | 11.1 | 12.2 | 13.0 | 14.8 | 17.0 | 20.3 | 22.4 | 24.1 |
| JPN | 2.7  | 2.7  | 2.7  | 2.9  | 3.0  | 3.1  | 3.3  | 3.7  | 4.0  | 4.4  | 5.0  |
| LAM | 4.0  | 4.4  | 4.1  | 4.6  | 4.9  | 5.7  | 7.5  | 6.5  | 7.8  | 8.5  | 8.8  |
| MEA | 8.2  | 9.9  | 11.8 | 12.9 | 15.1 | 18.4 | 21.4 | 24.4 | 26.3 | 27.9 | 28.8 |
| NEU | 4.5  | 5.2  | 6.1  | 6.7  | 7.6  | 8.5  | 9.5  | 10.6 | 11.1 | 11.3 | 11.3 |
| OAS | 3.6  | 4.4  | 4.8  | 5.0  | 5.7  | 6.3  | 6.9  | 7.7  | 7.8  | 8.7  | 9.8  |
| SSA | 2.4  | 2.8  | 3.4  | 3.6  | 3.8  | 3.9  | 4.1  | 5.0  | 5.6  | 5.9  | 6.3  |
| USA | 6.7  | 7.4  | 7.9  | 8.2  | 9.1  | 9.8  | 9.8  | 9.8  | 9.8  | 10.0 | 10.2 |

Table 1519: MAgPIE m4p\_SSP1 — Productivity—Yield—Crops—Other crops—Tropical roots (t DM/ha)  
[PART 1/2]

|     | 2050 | 2055 | 2060 | 2070 | 2080 | 2090 | 2100 |
|-----|------|------|------|------|------|------|------|
| GLO | 9.6  | 10.0 | 10.2 | 10.1 | 10.2 | 10.0 | 10.0 |
| CAZ | 10.9 | 10.9 | 10.9 | 10.9 | 10.9 | 10.9 | 10.9 |
| CHA | 17.4 | 17.4 | 17.4 | 17.4 | 17.4 | 17.4 | 17.4 |
| EUR | 3.4  | 3.4  | 3.4  | 3.4  | 3.4  | 3.4  | 3.4  |
| IND | 25.1 | 25.2 | 25.2 | 25.2 | 25.2 | 25.2 | 25.2 |
| JPN | 5.4  | 5.6  | 5.6  | 5.6  | 5.6  | 5.6  | 5.6  |
| LAM | 8.7  | 8.6  | 8.5  | 8.5  | 8.7  | 8.7  | 8.6  |
| MEA | 29.2 | 29.2 | 29.2 | 29.2 | 29.7 | 30.9 | 34.6 |
| NEU | 11.3 | 11.3 | 11.3 | 11.3 | 11.3 | 11.3 | 11.3 |
| OAS | 9.6  | 9.9  | 11.0 | 11.0 | 11.0 | 11.0 | 11.0 |
| SSA | 7.3  | 7.7  | 8.1  | 8.1  | 8.1  | 8.1  | 8.2  |
| USA | 10.2 | 10.2 | 10.2 | 10.2 | 10.2 | 10.2 | 10.2 |

Table 1520: MAgPIE m4p\_SSP1 — Productivity—Yield—Crops—Other crops—Tropical roots (t DM/ha)  
[PART 2/2]

|     | 1965 | 1970 | 1975 | 1980 | 1985 | 1990 | 1995 | 2000 | 2005 | 2010 |
|-----|------|------|------|------|------|------|------|------|------|------|
| GLO | 2.2  | 2.5  | 2.6  | 2.7  | 2.6  | 2.8  | 3.0  | 3.1  | 3.5  | 3.7  |
| CAZ | 1.2  | 1.3  | 1.5  | 2.2  | 5.1  | 5.4  | 7.3  | 5.6  | 8.1  | 9.3  |
| CHA | 4.2  | 5.8  | 6.3  | 7.0  | 6.3  | 6.3  | 7.6  | 8.4  | 9.6  | 10.0 |
| EUR | 5.1  | 5.1  | 4.3  | 5.3  | 6.7  | 8.7  | 9.1  | 9.6  | 8.3  | 9.1  |
| IND | 4.0  | 4.2  | 4.6  | 4.7  | 5.6  | 6.3  | 7.9  | 9.7  | 11.1 | 13.3 |
| JPN | 7.4  | 6.5  | 5.9  | 5.9  | 6.6  | 6.3  | 6.1  | 6.1  | 6.4  | 6.4  |
| LAM | 3.2  | 3.4  | 3.0  | 3.1  | 3.3  | 3.4  | 3.2  | 3.2  | 3.5  | 3.7  |
| MEA | 0.7  | 1.2  | 1.6  | 1.6  | 2.5  | 2.6  | 3.9  | 4.2  | 6.5  | 5.6  |
| NEU | 1.8  | 2.5  | 3.5  | 3.8  | 5.9  | 6.3  | 5.2  | 8.7  | 10.6 | 11.3 |
| OAS | 1.8  | 2.0  | 2.4  | 3.1  | 3.2  | 3.3  | 3.5  | 3.9  | 4.5  | 5.5  |
| SSA | 1.0  | 1.2  | 1.2  | 1.2  | 1.2  | 1.4  | 1.7  | 1.9  | 2.2  | 2.5  |
| USA | 2.3  | 2.4  | 3.0  | 3.0  | 4.1  | 3.8  | 4.2  | 4.2  | 5.5  | 7.1  |

Table 1521: FAO — Productivity—Yield—Crops—Other crops—Tropical roots (t DM/ha)

52.1.18 Sugar crops

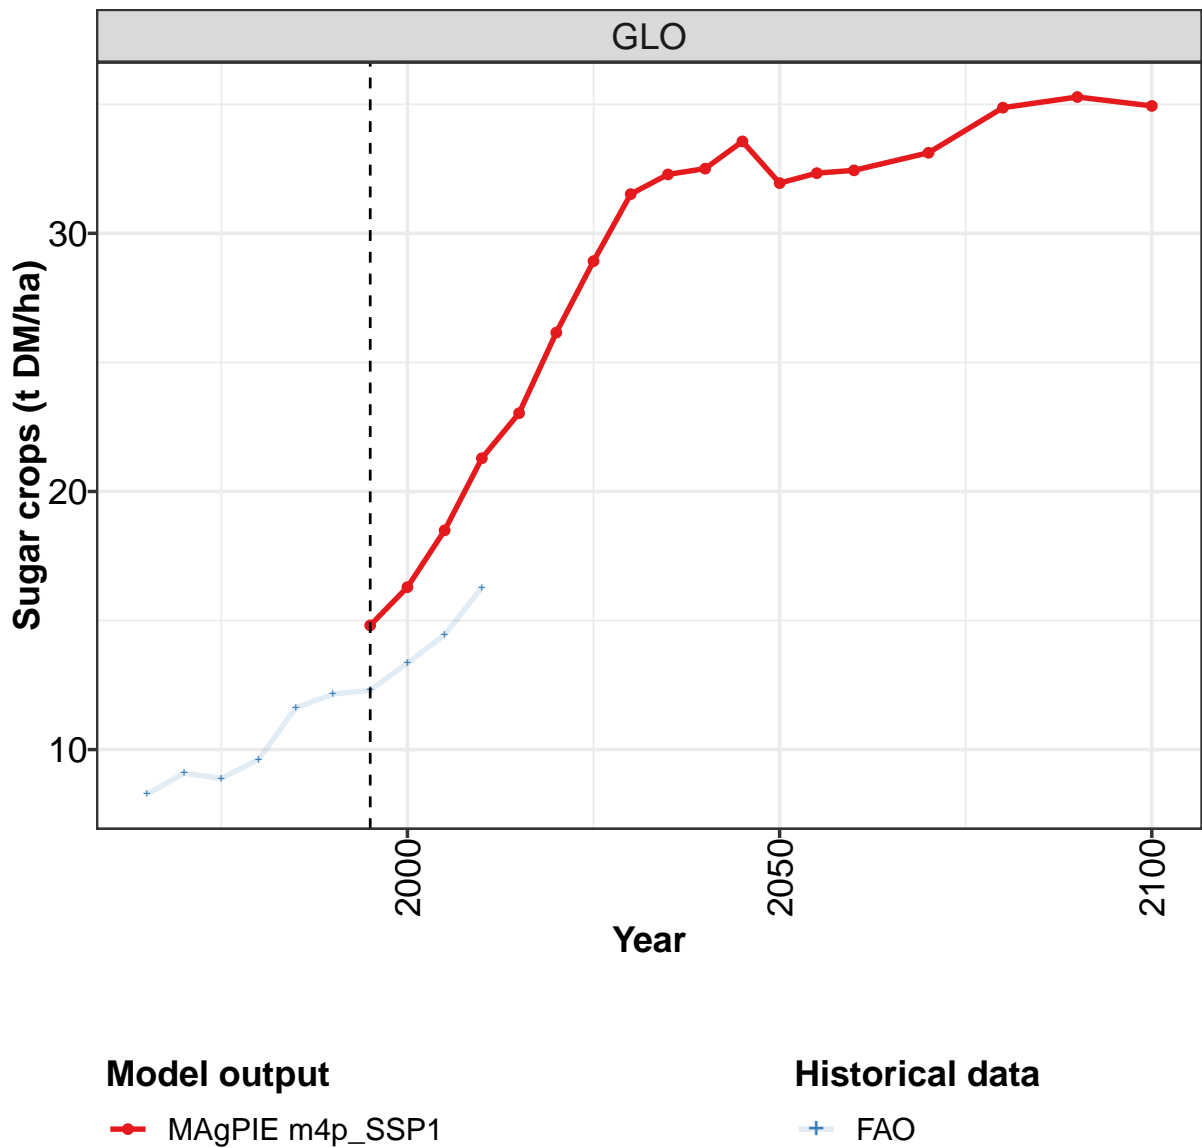



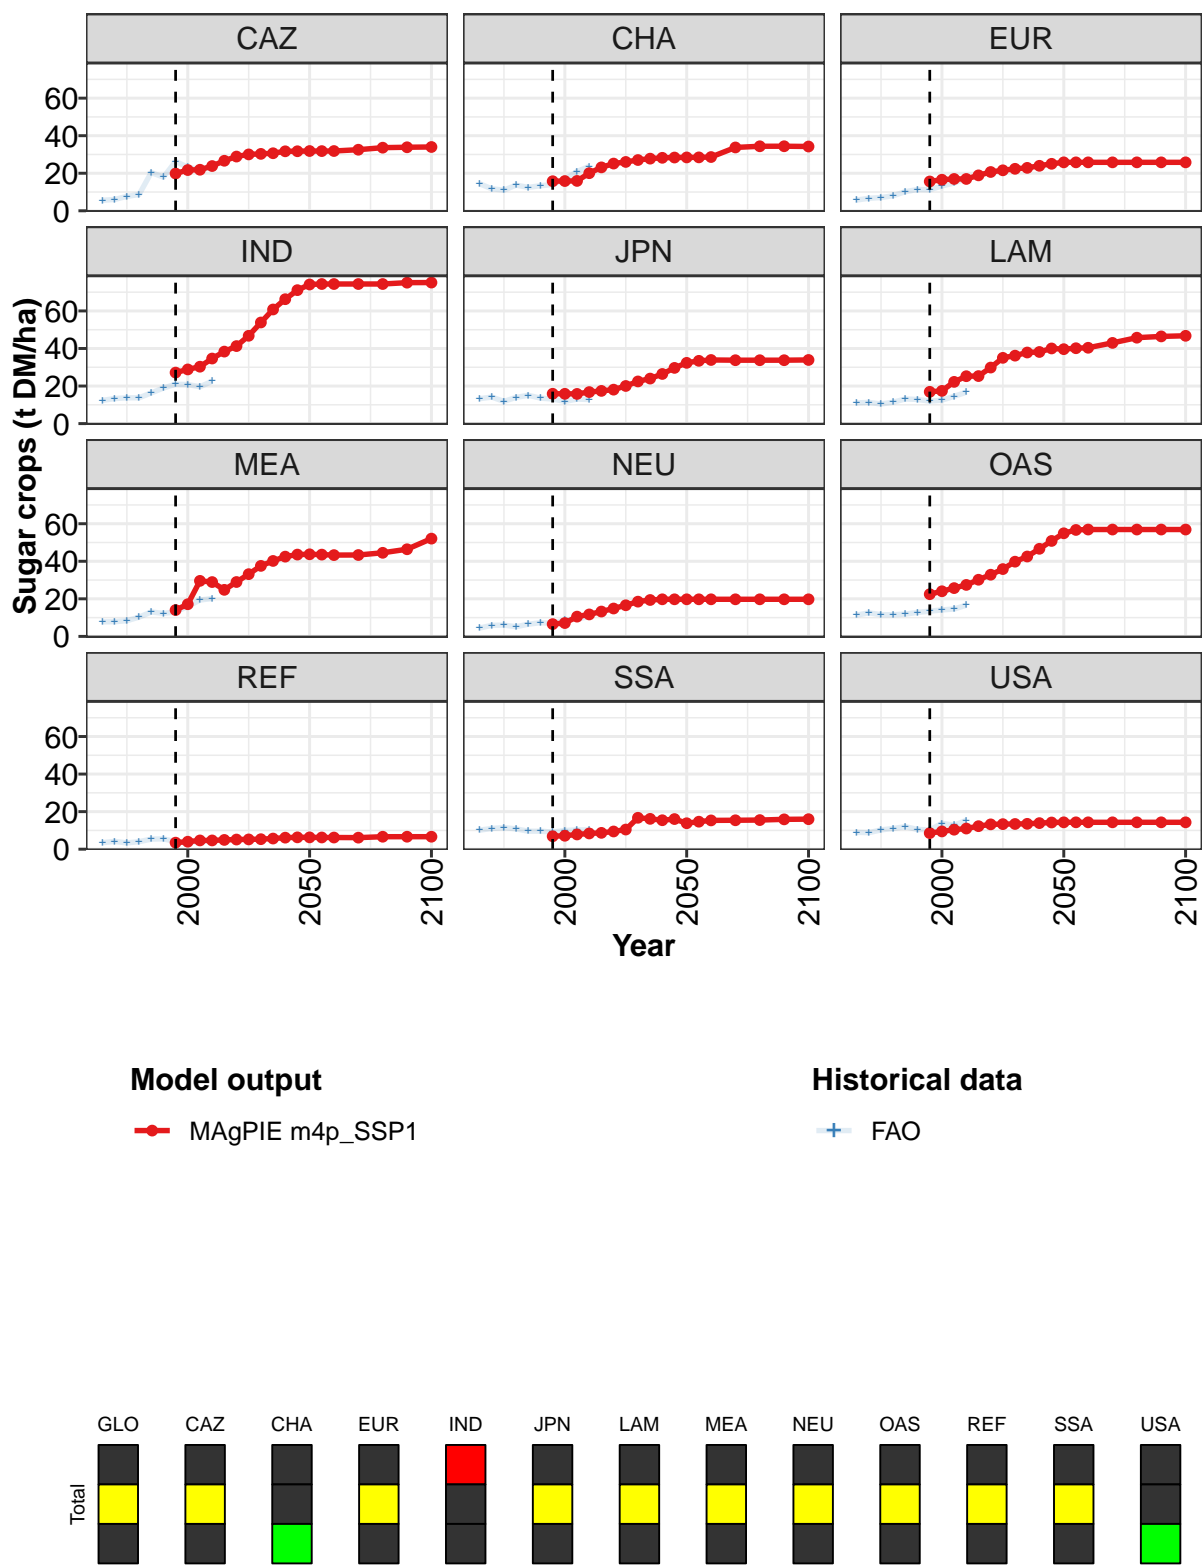

Figure 394: MAgPIE m4p\_SSP1 — Productivity—Yield—Crops—Sugar crops (t DM/ha)

|     | 1995 | 2000 | 2005 | 2010 | 2015 | 2020 | 2025 | 2030 | 2035 | 2040 | 2045 |
|-----|------|------|------|------|------|------|------|------|------|------|------|
| GLO | 14.8 | 16.3 | 18.5 | 21.3 | 23.0 | 26.2 | 28.9 | 31.5 | 32.3 | 32.5 | 33.6 |
| CAZ | 19.9 | 21.7 | 21.9 | 23.8 | 26.7 | 28.9 | 30.0 | 30.3 | 30.7 | 31.7 | 31.7 |
| CHA | 15.8 | 15.9 | 15.9 | 20.0 | 23.1 | 25.2 | 26.0 | 27.1 | 27.8 | 28.2 | 28.4 |
| EUR | 15.6 | 16.6 | 17.0 | 17.0 | 18.9 | 20.7 | 21.6 | 22.4 | 22.9 | 24.0 | 25.0 |
| IND | 27.2 | 28.9 | 30.3 | 34.7 | 38.4 | 41.3 | 46.8 | 53.9 | 60.8 | 66.3 | 71.1 |
| JPN | 15.9 | 15.9 | 15.8 | 16.8 | 17.4 | 18.1 | 20.0 | 22.5 | 24.0 | 26.4 | 29.7 |
| LAM | 16.9 | 17.4 | 22.2 | 25.2 | 25.3 | 29.8 | 35.0 | 36.2 | 37.9 | 38.1 | 40.0 |
| MEA | 14.0 | 17.1 | 29.6 | 28.9 | 24.8 | 29.0 | 33.2 | 37.6 | 40.2 | 42.5 | 43.6 |
| NEU | 6.6  | 7.1  | 10.5 | 11.7 | 13.2 | 14.9 | 16.6 | 18.5 | 19.4 | 19.8 | 19.8 |
| OAS | 22.5 | 24.0 | 25.7 | 27.4 | 30.2 | 32.9 | 35.9 | 39.8 | 42.6 | 46.7 | 50.8 |
| REF | 3.5  | 4.0  | 4.7  | 4.7  | 4.9  | 5.1  | 5.2  | 5.3  | 5.7  | 6.2  | 6.3  |
| SSA | 6.9  | 7.2  | 7.8  | 8.4  | 8.7  | 9.4  | 10.5 | 16.7 | 16.2 | 15.4 | 16.0 |
| USA | 8.6  | 9.5  | 10.4 | 11.0 | 12.3 | 13.2 | 13.3 | 13.4 | 13.5 | 13.9 | 14.2 |

Table 1522: MAGPIE m4p\_SSP1 — Productivity—Yield—Crops—Sugar crops (t DM/ha) [PART 1/2]

|     | 2050 | 2055 | 2060 | 2070 | 2080 | 2090 | 2100 |
|-----|------|------|------|------|------|------|------|
| GLO | 31.9 | 32.3 | 32.4 | 33.1 | 34.9 | 35.3 | 34.9 |
| CAZ | 31.8 | 31.8 | 31.8 | 32.5 | 33.6 | 33.8 | 34.0 |
| CHA | 28.4 | 28.5 | 28.6 | 33.7 | 34.4 | 34.4 | 34.2 |
| EUR | 25.8 | 25.8 | 25.8 | 25.8 | 25.8 | 25.8 | 25.8 |
| IND | 74.1 | 74.3 | 74.3 | 74.3 | 74.3 | 75.1 | 75.1 |
| JPN | 32.4 | 33.4 | 33.9 | 33.8 | 33.8 | 33.8 | 33.9 |
| LAM | 39.6 | 40.1 | 40.4 | 43.0 | 45.8 | 46.4 | 46.8 |
| MEA | 43.7 | 43.6 | 43.3 | 43.3 | 44.5 | 46.4 | 52.1 |
| NEU | 19.8 | 19.8 | 19.8 | 19.8 | 19.8 | 19.8 | 19.8 |
| OAS | 54.9 | 56.7 | 56.9 | 56.9 | 56.9 | 56.9 | 56.9 |
| REF | 6.3  | 6.2  | 6.2  | 6.2  | 6.6  | 6.7  | 6.7  |
| SSA | 13.8 | 14.7 | 15.3 | 15.4 | 15.5 | 15.9 | 16.0 |
| USA | 14.3 | 14.3 | 14.3 | 14.3 | 14.3 | 14.3 | 14.3 |

Table 1523: MAGPIE m4p\_SSP1 — Productivity—Yield—Crops—Sugar crops (t DM/ha) [PART 2/2]

|     | 1965 | 1970 | 1975 | 1980 | 1985 | 1990 | 1995 | 2000 | 2005 | 2010 |
|-----|------|------|------|------|------|------|------|------|------|------|
| GLO | 8.3  | 9.1  | 8.9  | 9.6  | 11.6 | 12.1 | 12.3 | 13.3 | 14.5 | 16.3 |
| CAZ | 5.6  | 6.1  | 7.7  | 8.6  | 20.4 | 17.9 | 26.3 | 23.2 | 21.9 | 23.2 |
| CHA | 14.4 | 11.7 | 11.0 | 13.7 | 12.5 | 13.3 | 14.0 | 16.8 | 20.9 | 23.7 |
| EUR | 5.7  | 6.7  | 7.0  | 8.0  | 10.2 | 11.3 | 11.2 | 13.2 | 14.8 | 17.2 |
| IND | 12.4 | 13.3 | 13.7 | 13.7 | 16.3 | 18.9 | 21.0 | 20.8 | 19.6 | 22.5 |
| JPN | 13.3 | 14.1 | 11.8 | 14.0 | 15.1 | 13.6 | 13.1 | 11.8 | 13.0 | 12.8 |
| LAM | 11.0 | 11.3 | 10.4 | 11.4 | 13.1 | 12.9 | 11.9 | 12.5 | 14.6 | 16.7 |
| MEA | 7.7  | 7.8  | 8.3  | 10.2 | 13.0 | 12.2 | 13.0 | 15.9 | 19.4 | 20.1 |
| NEU | 4.4  | 5.9  | 6.0  | 5.2  | 6.5  | 7.3  | 6.9  | 8.8  | 9.2  | 10.7 |
| OAS | 11.3 | 12.5 | 11.6 | 11.5 | 11.9 | 12.8 | 13.4 | 14.1 | 14.6 | 16.6 |
| REF | 3.5  | 4.1  | 3.3  | 4.0  | 5.3  | 5.5  | 4.0  | 3.2  | 4.6  | 3.9  |
| SSA | 10.1 | 11.1 | 11.5 | 10.8 | 9.6  | 9.6  | 9.1  | 10.0 | 10.3 | 10.3 |
| USA | 9.0  | 8.8  | 10.3 | 11.0 | 12.0 | 10.5 | 10.2 | 13.8 | 12.8 | 15.3 |

Table 1524: FAO — Productivity—Yield—Crops—Sugar crops (t DM/ha)

52.1.19 Sugar crops—Sugar beet

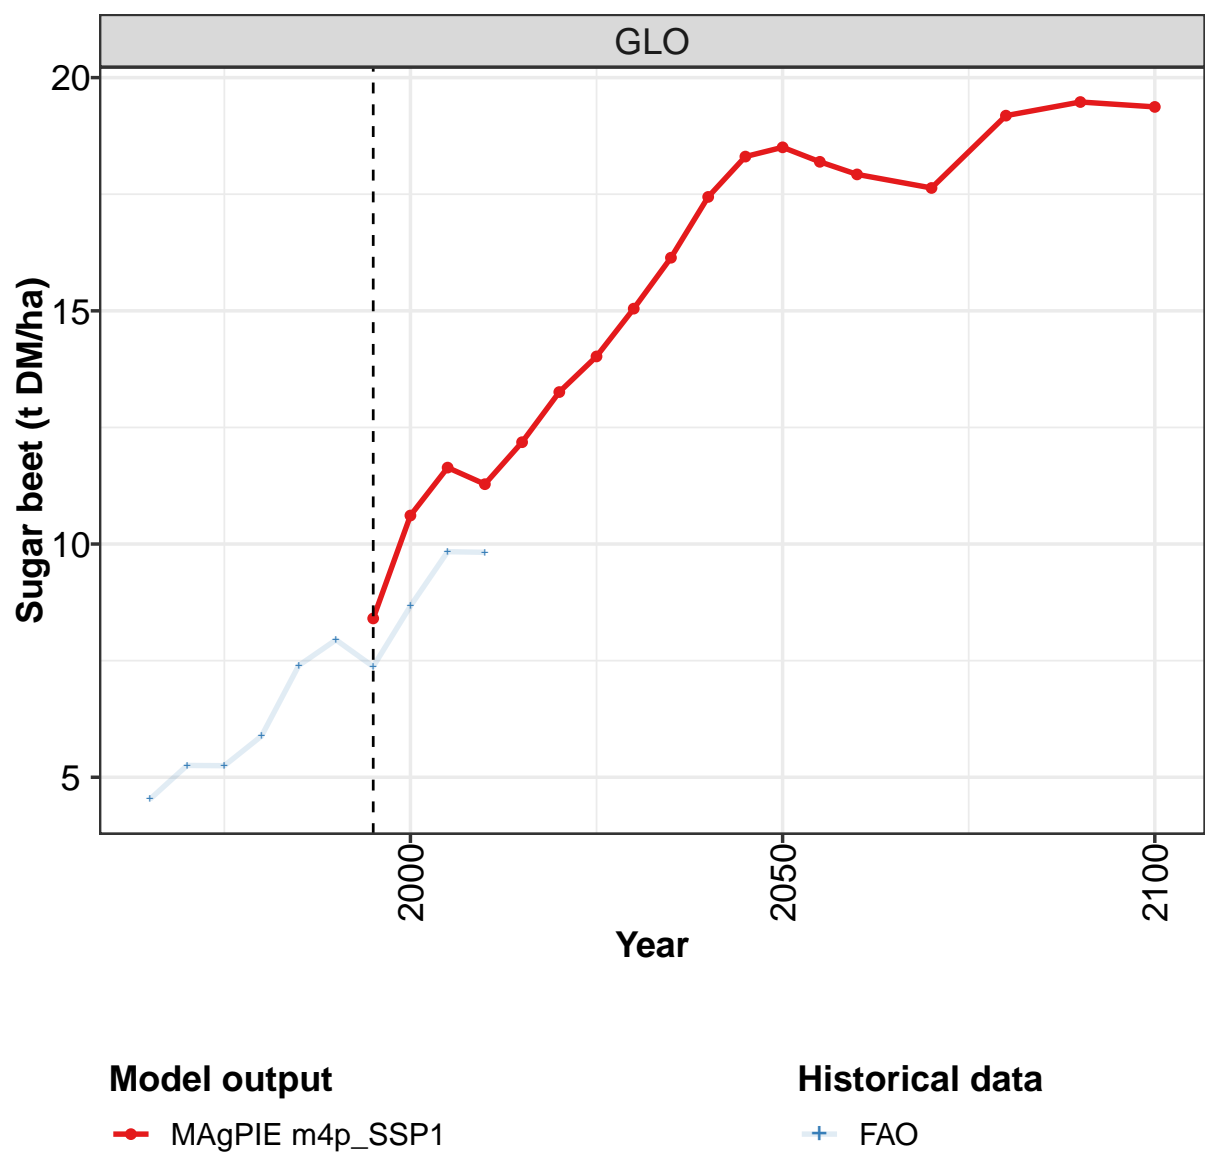

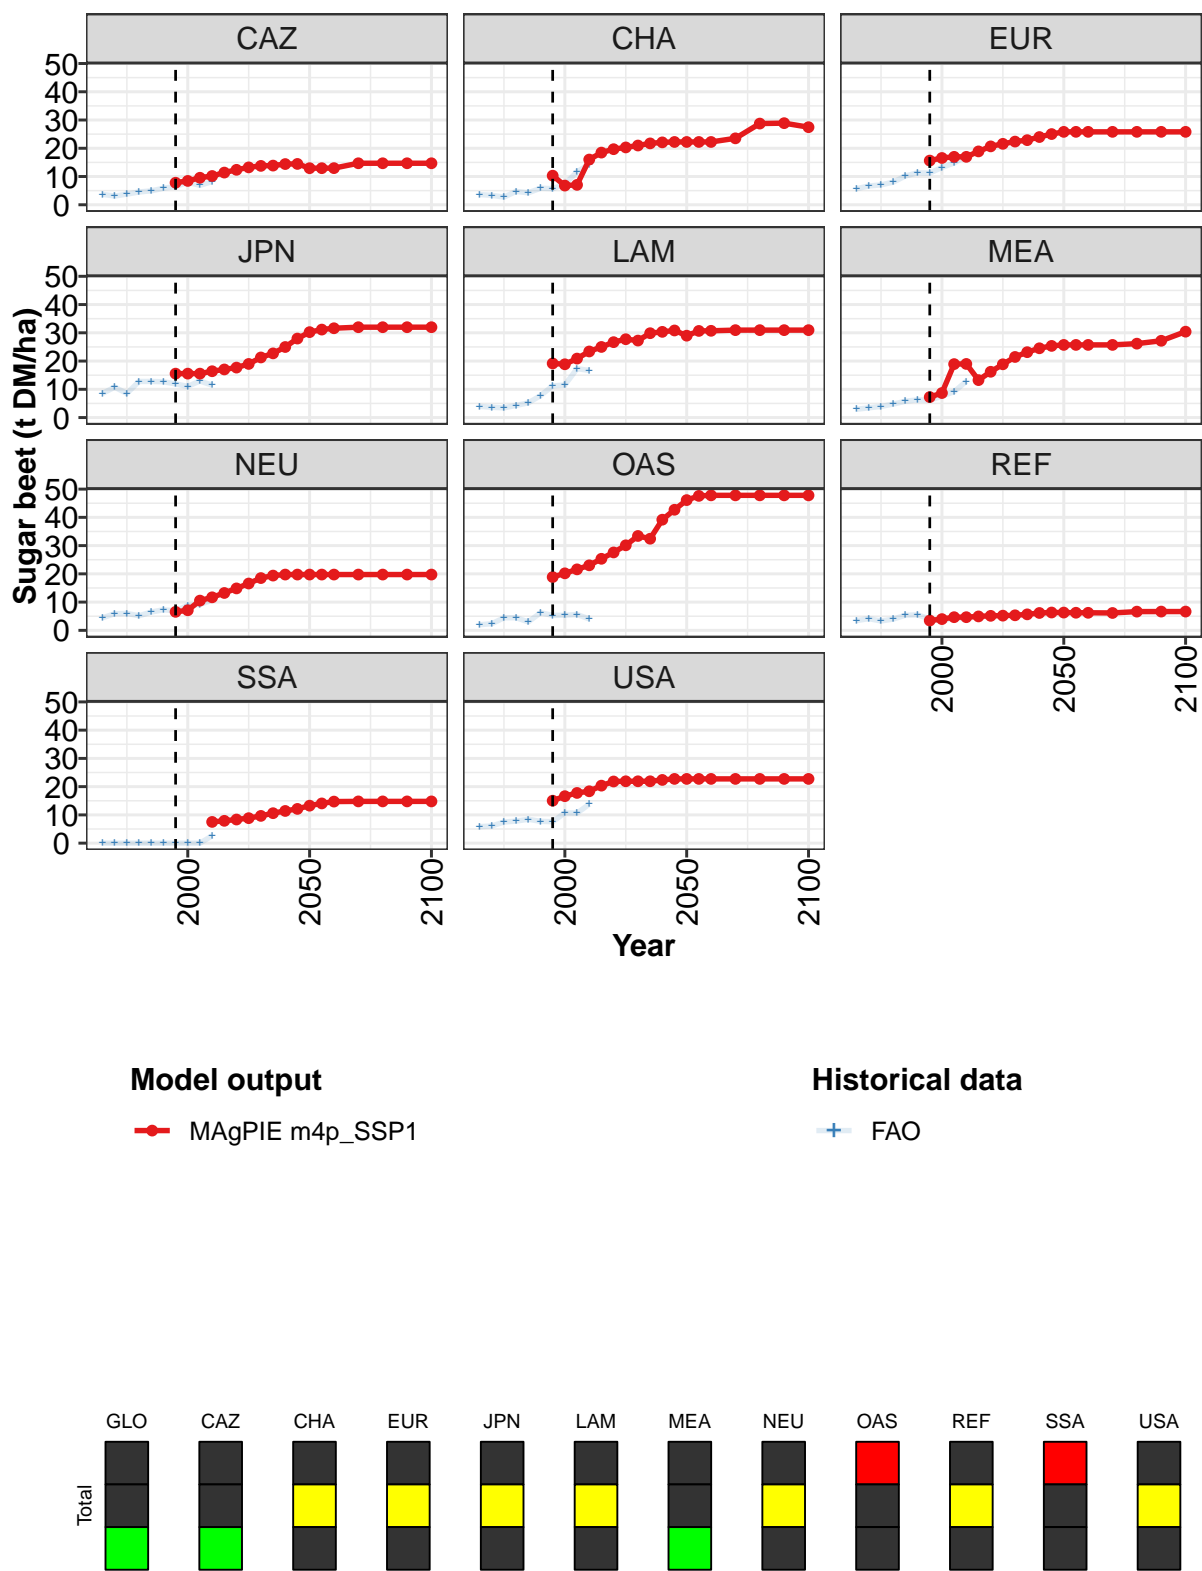

Figure 395: MAgPIE m4p\_SSP1 — Productivity—Yield—Crops—Sugar crops—Sugar beet (t DM/ha)

|     | 1995 | 2000 | 2005 | 2010 | 2015 | 2020 | 2025 | 2030 | 2035 | 2040 | 2045 |
|-----|------|------|------|------|------|------|------|------|------|------|------|
| GLO | 8    | 11   | 12   | 11   | 12   | 13   | 14   | 15   | 16   | 17   | 18   |
| CAZ | 8    | 8    | 10   | 10   | 11   | 12   | 13   | 14   | 14   | 14   | 14   |
| CHA | 10   | 7    | 7    | 16   | 18   | 20   | 20   | 21   | 22   | 22   | 22   |
| EUR | 16   | 17   | 17   | 17   | 19   | 21   | 22   | 22   | 23   | 24   | 25   |
| JPN | 16   | 16   | 16   | 16   | 17   | 18   | 19   | 21   | 23   | 25   | 28   |
| LAM | 19   | 19   | 21   | 23   | 25   | 27   | 28   | 27   | 30   | 30   | 31   |
| MEA | 7    | 9    | 19   | 19   | 13   | 16   | 19   | 21   | 23   | 25   | 25   |
| NEU | 7    | 7    | 11   | 12   | 13   | 15   | 17   | 19   | 19   | 20   | 20   |
| OAS | 19   | 20   | 22   | 23   | 25   | 28   | 30   | 33   | 32   | 39   | 43   |
| REF | 3    | 4    | 5    | 5    | 5    | 5    | 5    | 5    | 6    | 6    | 6    |
| SSA |      |      |      | 8    | 8    | 8    | 9    | 10   | 11   | 11   | 12   |
| USA | 15   | 17   | 18   | 18   | 20   | 22   | 22   | 22   | 22   | 22   | 23   |

Table 1525: MAgPIE m4p\_SSP1 — Productivity—Yield—Crops—Sugar crops—Sugar beet (t DM/ha) [PART 1/2]

|     | 2050 | 2055 | 2060 | 2070 | 2080 | 2090 | 2100 |
|-----|------|------|------|------|------|------|------|
| GLO | 19   | 18   | 18   | 18   | 19   | 19   | 19   |
| CAZ | 13   | 13   | 13   | 15   | 15   | 15   | 15   |
| CHA | 22   | 22   | 22   | 24   | 29   | 29   | 27   |
| EUR | 26   | 26   | 26   | 26   | 26   | 26   | 26   |
| JPN | 30   | 31   | 32   | 32   | 32   | 32   | 32   |
| LAM | 29   | 31   | 31   | 31   | 31   | 31   | 31   |
| MEA | 26   | 26   | 26   | 26   | 26   | 27   | 30   |
| NEU | 20   | 20   | 20   | 20   | 20   | 20   | 20   |
| OAS | 46   | 48   | 48   | 48   | 48   | 48   | 48   |
| REF | 6    | 6    | 6    | 6    | 7    | 7    | 7    |
| SSA | 13   | 14   | 15   | 15   | 15   | 15   | 15   |
| USA | 23   | 23   | 23   | 23   | 23   | 23   | 23   |

Table 1526: MAgPIE m4p\_SSP1 — Productivity—Yield—Crops—Sugar crops—Sugar beet (t DM/ha) [PART 2/2]

|     | 1965 | 1970 | 1975 | 1980 | 1985 | 1990 | 1995 | 2000 | 2005 | 2010 |
|-----|------|------|------|------|------|------|------|------|------|------|
| GLO | 4.5  | 5.3  | 5.2  | 5.9  | 7.4  | 7.9  | 7.4  | 8.7  | 9.8  | 9.8  |
| CAZ | 3.7  | 3.1  | 3.8  | 4.5  | 4.9  | 5.8  | 6.5  | 7.9  | 6.9  | 8.2  |
| CHA | 3.6  | 3.3  | 2.7  | 4.7  | 4.2  | 5.9  | 5.7  | 7.3  | 11.7 | 14.3 |
| EUR | 5.7  | 6.6  | 7.0  | 8.0  | 10.2 | 11.3 | 11.2 | 13.2 | 14.8 | 17.2 |
| JPN | 8.6  | 10.8 | 8.6  | 12.8 | 12.8 | 12.7 | 11.9 | 11.0 | 12.9 | 11.5 |
| LAM | 4.0  | 3.6  | 3.4  | 4.3  | 5.2  | 7.8  | 11.2 | 11.5 | 17.3 | 16.7 |
| MEA | 2.9  | 3.4  | 3.9  | 4.8  | 5.8  | 6.3  | 6.1  | 7.6  | 9.2  | 12.8 |
| NEU | 4.4  | 5.9  | 6.0  | 5.2  | 6.5  | 7.3  | 6.9  | 8.8  | 9.2  | 10.7 |
| OAS | 2.0  | 2.4  | 4.4  | 4.5  | 3.0  | 6.2  | 5.3  | 5.3  | 5.6  | 4.1  |
| REF | 3.5  | 4.1  | 3.3  | 4.0  | 5.3  | 5.5  | 4.0  | 3.2  | 4.6  | 3.9  |
| SSA | 0.0  | 0.0  | 0.0  | 0.0  | 0.0  | 0.0  | 0.0  | 0.0  | 0.0  | 2.6  |
| USA | 5.8  | 6.1  | 7.5  | 7.8  | 8.4  | 7.7  | 7.6  | 10.7 | 10.6 | 13.8 |

Table 1527: FAO — Productivity—Yield—Crops—Sugar crops—Sugar beet (t DM/ha)

52.1.20 Sugar crops—Sugar cane

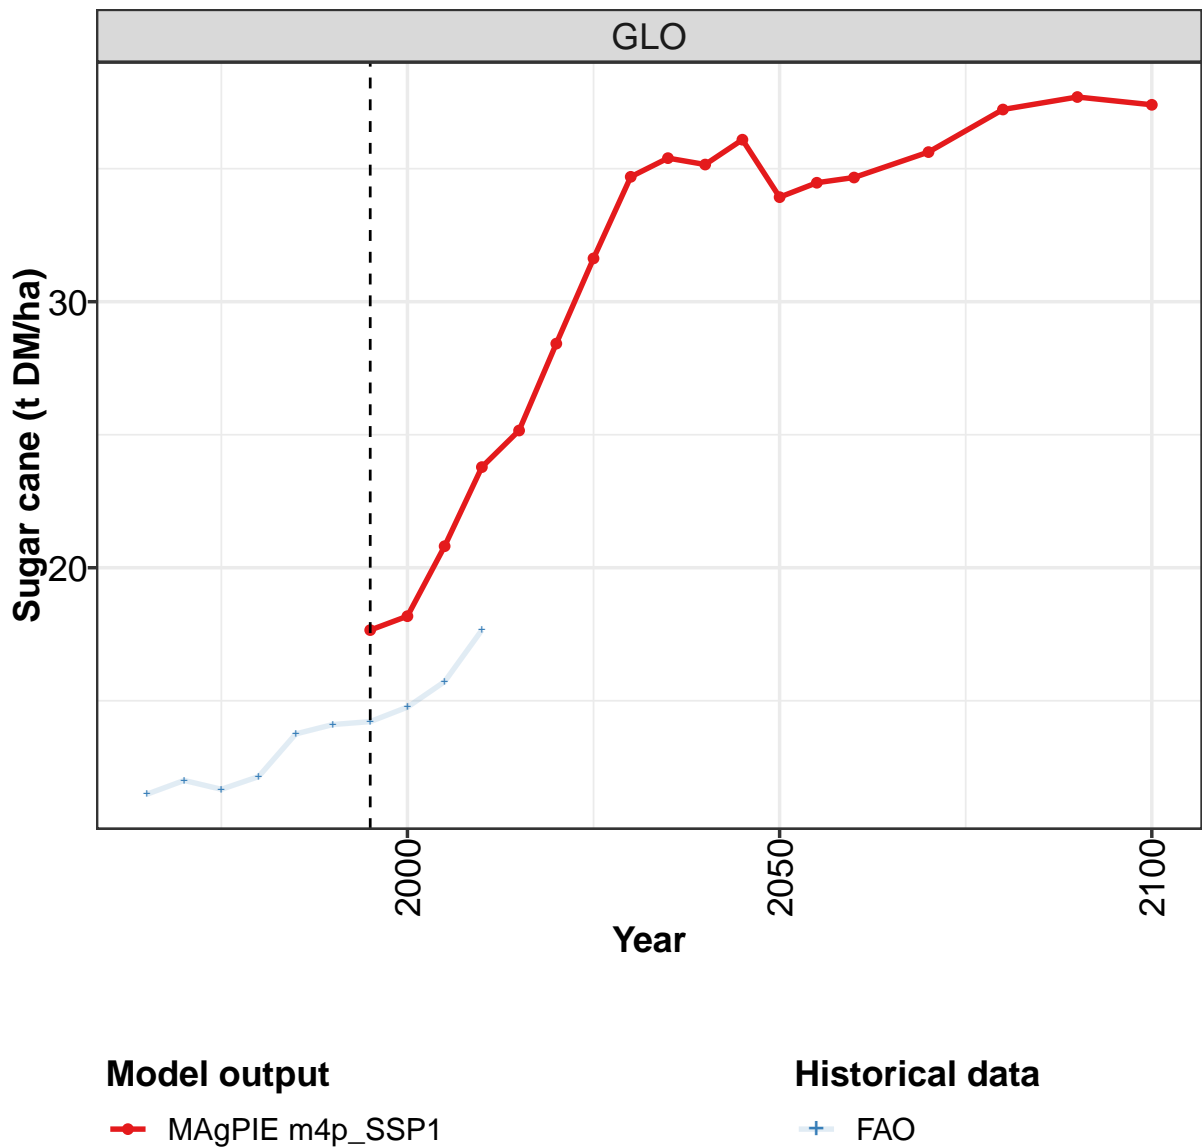

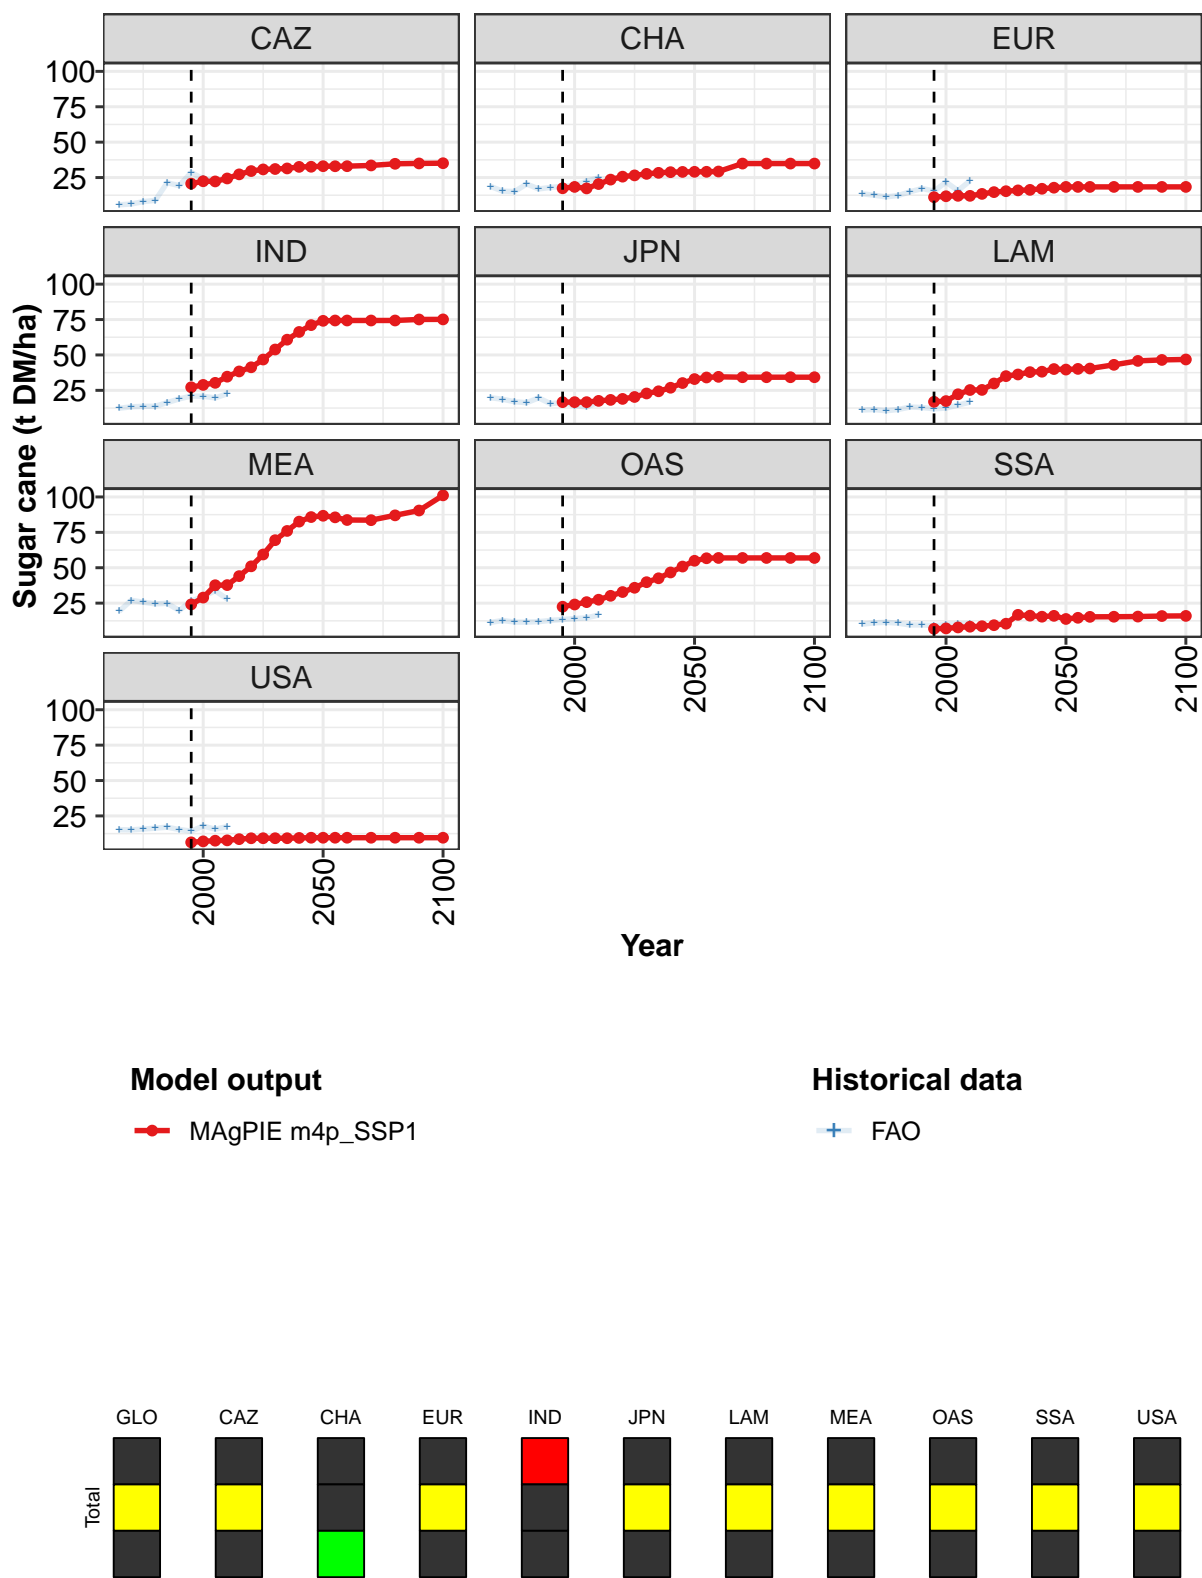

Figure 396: MAgPIE m4p\_SSP1 — Productivity—Yield—Crops—Sugar crops—Sugar cane (t DM/ha)

|     | 1995 | 2000 | 2005 | 2010 | 2015 | 2020 | 2025 | 2030 | 2035 | 2040 | 2045 |
|-----|------|------|------|------|------|------|------|------|------|------|------|
| GLO | 18   | 18   | 21   | 24   | 25   | 28   | 32   | 35   | 35   | 35   | 36   |
| CAZ | 21   | 22   | 22   | 24   | 27   | 30   | 31   | 31   | 31   | 33   | 33   |
| CHA | 17   | 18   | 17   | 20   | 24   | 26   | 27   | 28   | 28   | 29   | 29   |
| EUR | 11   | 12   | 12   | 12   | 13   | 15   | 15   | 16   | 16   | 17   | 18   |
| IND | 27   | 29   | 30   | 35   | 38   | 41   | 47   | 54   | 61   | 66   | 71   |
| JPN | 17   | 17   | 17   | 18   | 18   | 19   | 20   | 23   | 24   | 27   | 30   |
| LAM | 17   | 17   | 22   | 25   | 25   | 30   | 35   | 36   | 38   | 38   | 40   |
| MEA | 24   | 29   | 38   | 38   | 44   | 51   | 59   | 69   | 76   | 83   | 86   |
| OAS | 22   | 24   | 26   | 27   | 30   | 33   | 36   | 40   | 43   | 47   | 51   |
| SSA | 7    | 7    | 8    | 8    | 9    | 9    | 10   | 17   | 16   | 15   | 16   |
| USA | 6    | 7    | 8    | 8    | 9    | 9    | 9    | 9    | 9    | 9    | 10   |

Table 1528: MAgPIE m4p\_SSP1 — Productivity—Yield—Crops—Sugar crops—Sugar cane (t DM/ha) [PART 1/2]

|     | 2050 | 2055 | 2060 | 2070 | 2080 | 2090 | 2100 |
|-----|------|------|------|------|------|------|------|
| GLO | 34   | 34   | 35   | 36   | 37   | 38   | 37   |
| CAZ | 33   | 33   | 33   | 34   | 35   | 35   | 35   |
| CHA | 29   | 29   | 29   | 35   | 35   | 35   | 35   |
| EUR | 18   | 18   | 18   | 18   | 18   | 18   | 18   |
| IND | 74   | 74   | 74   | 74   | 74   | 75   | 75   |
| JPN | 33   | 34   | 35   | 34   | 34   | 34   | 34   |
| LAM | 40   | 40   | 40   | 43   | 46   | 46   | 47   |
| MEA | 87   | 86   | 84   | 84   | 87   | 90   | 101  |
| OAS | 55   | 57   | 57   | 57   | 57   | 57   | 57   |
| SSA | 14   | 15   | 15   | 15   | 16   | 16   | 16   |
| USA | 10   | 10   | 10   | 10   | 10   | 10   | 10   |

Table 1529: MAgPIE m4p\_SSP1 — Productivity—Yield—Crops—Sugar crops—Sugar cane (t DM/ha) [PART 2/2]

|     | 1965 | 1970 | 1975 | 1980 | 1985 | 1990 | 1995 | 2000 | 2005 | 2010 |
|-----|------|------|------|------|------|------|------|------|------|------|
| GLO | 11.5 | 12.0 | 11.7 | 12.1 | 13.8 | 14.1 | 14.2 | 14.8 | 15.7 | 17.7 |
| CAZ | 5.8  | 6.3  | 8.0  | 8.9  | 21.3 | 19.3 | 28.6 | 24.1 | 22.6 | 23.9 |
| CHA | 18.7 | 15.4 | 15.1 | 20.4 | 17.0 | 18.0 | 18.9 | 19.4 | 22.3 | 24.9 |
| EUR | 13.5 | 12.5 | 11.4 | 12.3 | 14.9 | 17.3 | 15.5 | 21.7 | 15.8 | 22.7 |
| IND | 12.4 | 13.3 | 13.7 | 13.7 | 16.3 | 18.9 | 21.0 | 20.8 | 19.6 | 22.5 |
| JPN | 19.8 | 18.7 | 17.0 | 16.3 | 19.7 | 15.5 | 16.6 | 14.1 | 13.3 | 16.5 |
| LAM | 11.1 | 11.4 | 10.6 | 11.5 | 13.2 | 12.9 | 11.9 | 12.5 | 14.5 | 16.7 |
| MEA | 19.3 | 27.0 | 25.7 | 24.5 | 24.9 | 19.8 | 26.5 | 29.7 | 33.7 | 28.0 |
| OAS | 11.4 | 12.7 | 11.6 | 11.6 | 11.9 | 12.8 | 13.5 | 14.1 | 14.6 | 16.6 |
| SSA | 10.1 | 11.1 | 11.5 | 10.8 | 9.6  | 9.6  | 9.1  | 10.0 | 10.3 | 10.3 |
| USA | 15.3 | 15.2 | 15.7 | 16.3 | 17.0 | 15.4 | 14.3 | 17.8 | 15.7 | 17.4 |

Table 1530: FAO — Productivity—Yield—Crops—Sugar crops—Sugar cane (t DM/ha)



52.2 Forage

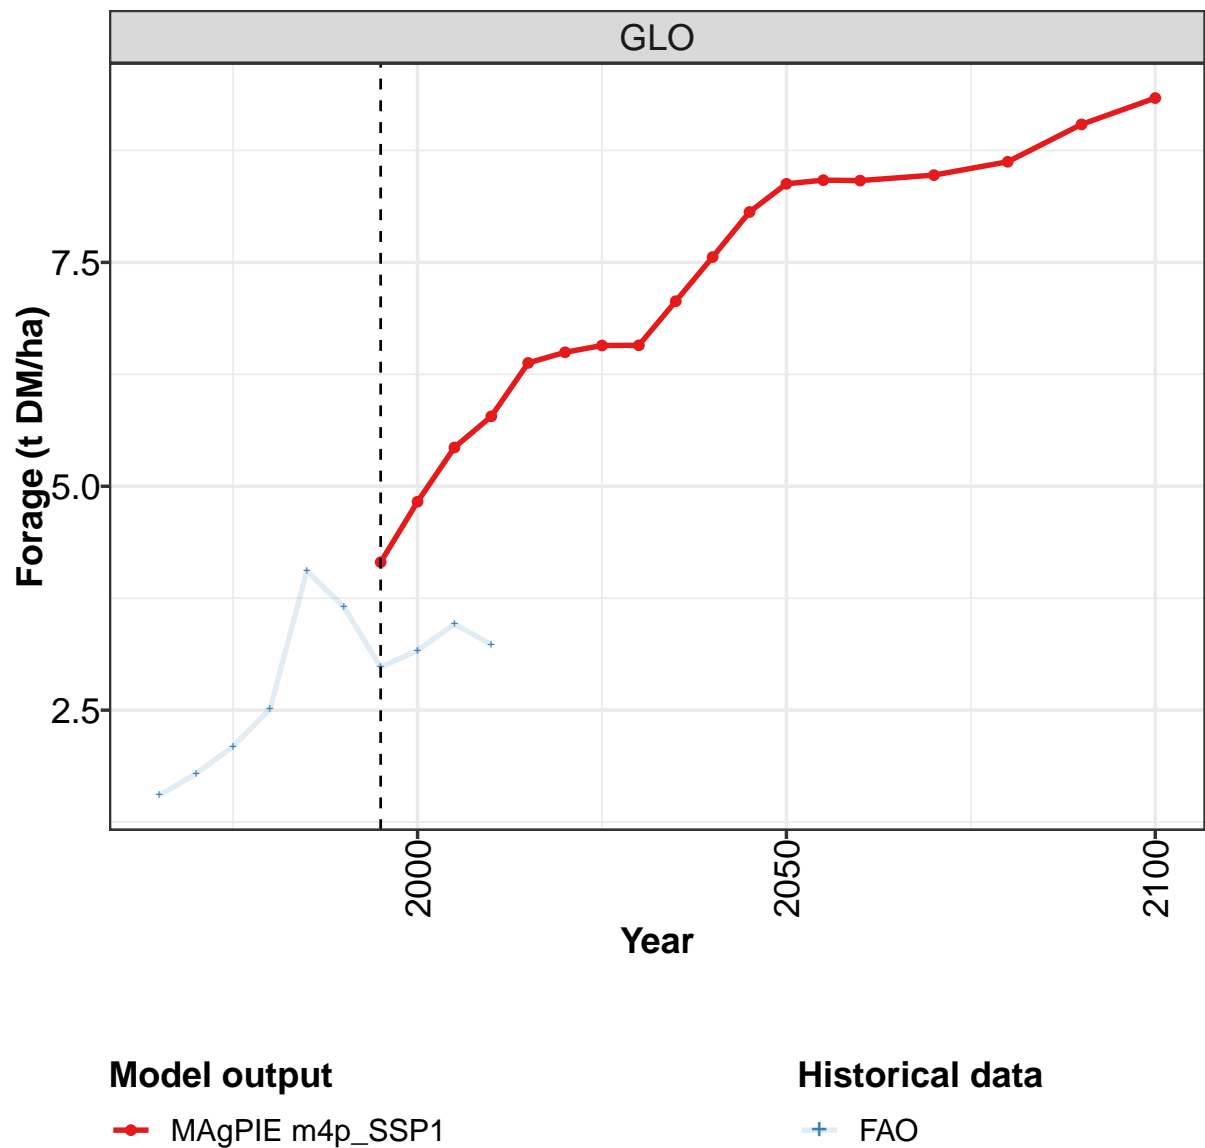

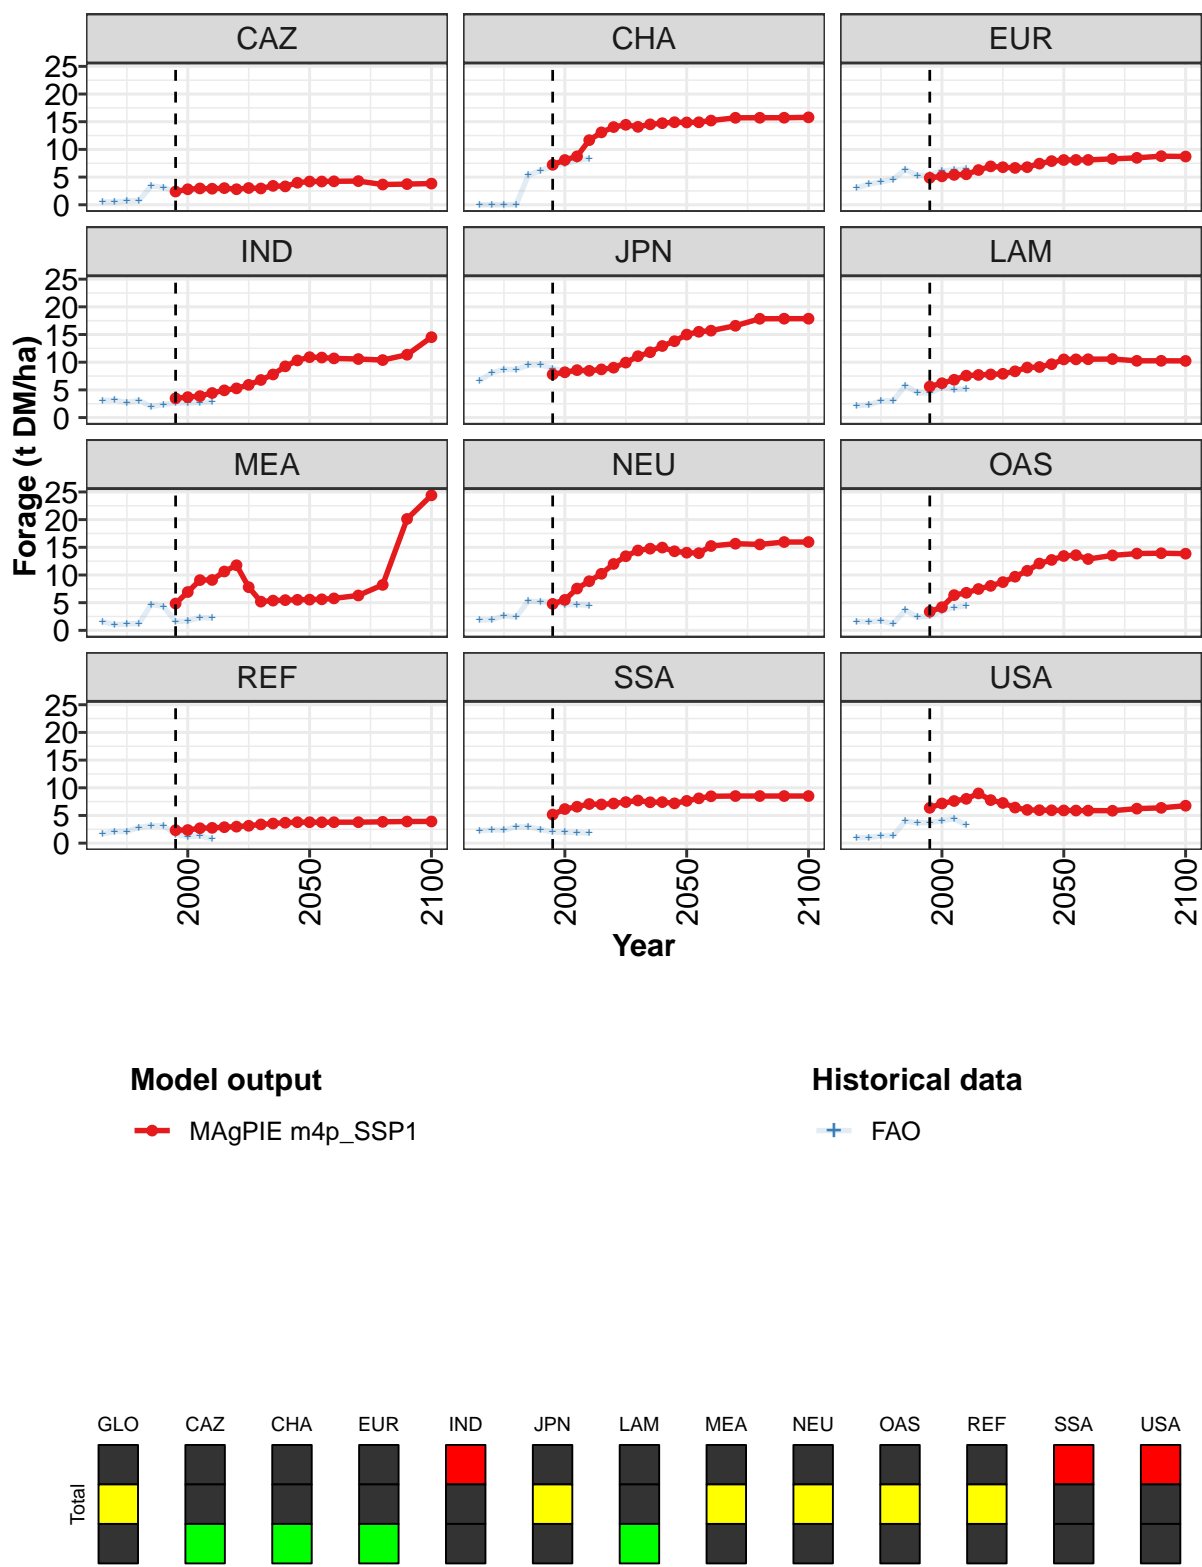

Figure 397: MAgPIE m4p\_SSP1 — Productivity—Yield—Forage (t DM/ha)

|     | 1995 | 2000 | 2005 | 2010 | 2015 | 2020 | 2025 | 2030 | 2035 | 2040 | 2045 |
|-----|------|------|------|------|------|------|------|------|------|------|------|
| GLO | 4.2  | 4.8  | 5.4  | 5.8  | 6.4  | 6.5  | 6.6  | 6.6  | 7.1  | 7.6  | 8.1  |
| CAZ | 2.4  | 2.8  | 3.0  | 2.9  | 3.0  | 2.8  | 3.0  | 2.9  | 3.4  | 3.3  | 4.0  |
| CHA | 7.2  | 8.1  | 8.8  | 11.7 | 13.1 | 14.0 | 14.4 | 14.1 | 14.5 | 14.7 | 14.9 |
| EUR | 4.9  | 5.1  | 5.4  | 5.5  | 6.3  | 6.9  | 6.8  | 6.7  | 6.8  | 7.4  | 7.9  |
| IND | 3.5  | 3.7  | 3.9  | 4.4  | 4.9  | 5.3  | 5.9  | 6.8  | 7.8  | 9.2  | 10.3 |
| JPN | 7.8  | 8.2  | 8.6  | 8.4  | 8.7  | 9.0  | 9.9  | 11.1 | 11.8 | 12.9 | 13.8 |
| LAM | 5.6  | 6.2  | 6.8  | 7.6  | 7.7  | 7.8  | 7.9  | 8.4  | 9.0  | 9.1  | 9.6  |
| MEA | 4.8  | 6.9  | 9.1  | 9.1  | 10.6 | 11.8 | 7.8  | 5.2  | 5.4  | 5.5  | 5.5  |
| NEU | 4.8  | 5.5  | 7.6  | 8.9  | 10.2 | 12.0 | 13.4 | 14.4 | 14.8 | 15.0 | 14.3 |
| OAS | 3.4  | 4.2  | 6.4  | 6.8  | 7.5  | 8.0  | 8.7  | 9.7  | 10.8 | 12.1 | 12.7 |
| REF | 2.3  | 2.4  | 2.7  | 2.8  | 2.9  | 3.0  | 3.1  | 3.4  | 3.5  | 3.7  | 3.8  |
| SSA | 5.2  | 6.2  | 6.6  | 7.1  | 7.0  | 7.2  | 7.4  | 7.7  | 7.4  | 7.4  | 7.2  |
| USA | 6.4  | 7.2  | 7.6  | 8.0  | 9.0  | 7.8  | 7.3  | 6.4  | 6.0  | 6.0  | 5.9  |

Table 1531: MAgPIE m4p-SSP1 — Productivity—Yield—Forage (t DM/ha) [PART 1/2]

|     | 2050 | 2055 | 2060 | 2070 | 2080 | 2090 | 2100 |
|-----|------|------|------|------|------|------|------|
| GLO | 8.4  | 8.4  | 8.4  | 8.5  | 8.6  | 9.0  | 9.3  |
| CAZ | 4.2  | 4.2  | 4.2  | 4.3  | 3.7  | 3.7  | 3.8  |
| CHA | 14.9 | 14.9 | 15.2 | 15.7 | 15.7 | 15.7 | 15.8 |
| EUR | 8.1  | 8.1  | 8.1  | 8.3  | 8.5  | 8.8  | 8.7  |
| IND | 10.9 | 10.8 | 10.7 | 10.6 | 10.4 | 11.3 | 14.5 |
| JPN | 15.0 | 15.5 | 15.7 | 16.6 | 17.8 | 17.9 | 17.9 |
| LAM | 10.5 | 10.5 | 10.5 | 10.6 | 10.3 | 10.3 | 10.2 |
| MEA | 5.6  | 5.6  | 5.8  | 6.3  | 8.2  | 20.1 | 24.4 |
| NEU | 14.0 | 13.9 | 15.2 | 15.7 | 15.5 | 16.0 | 16.0 |
| OAS | 13.4 | 13.6 | 12.9 | 13.5 | 13.9 | 13.9 | 13.9 |
| REF | 3.8  | 3.8  | 3.8  | 3.8  | 3.9  | 3.9  | 3.9  |
| SSA | 7.6  | 8.1  | 8.5  | 8.5  | 8.5  | 8.5  | 8.5  |
| USA | 5.9  | 5.9  | 5.9  | 5.9  | 6.2  | 6.4  | 6.8  |

Table 1532: MAgPIE m4p-SSP1 — Productivity—Yield—Forage (t DM/ha) [PART 2/2]

|     | 1965 | 1970 | 1975 | 1980 | 1985 | 1990 | 1995 | 2000 | 2005 | 2010 |
|-----|------|------|------|------|------|------|------|------|------|------|
| GLO | 1.55 | 1.79 | 2.09 | 2.51 | 4.05 | 3.65 | 2.98 | 3.17 | 3.46 | 3.23 |
| CAZ | 0.50 | 0.53 | 0.69 | 0.78 | 3.39 | 3.16 | 2.42 | 2.59 | 2.58 | 2.93 |
| CHA | 0.00 | 0.00 | 0.00 | 0.00 | 5.36 | 6.15 | 6.99 | 7.36 | 8.05 | 8.36 |
| EUR | 3.05 | 3.72 | 4.13 | 4.60 | 6.40 | 5.25 | 5.42 | 6.10 | 6.31 | 6.49 |
| IND | 3.09 | 3.15 | 2.73 | 3.10 | 1.97 | 2.35 | 2.66 | 2.64 | 2.72 | 2.90 |
| JPN | 6.65 | 8.09 | 8.70 | 8.68 | 9.46 | 9.55 | 8.86 | 8.43 | 8.08 | 8.47 |
| LAM | 2.17 | 2.30 | 3.00 | 3.04 | 5.79 | 4.46 | 4.45 | 5.45 | 5.10 | 5.17 |
| MEA | 1.57 | 1.03 | 1.16 | 1.25 | 4.70 | 4.32 | 1.63 | 1.69 | 2.31 | 2.21 |
| NEU | 1.86 | 1.92 | 2.66 | 2.40 | 5.27 | 5.20 | 5.08 | 4.65 | 4.66 | 4.52 |
| OAS | 1.63 | 1.53 | 1.73 | 1.21 | 3.66 | 2.39 | 2.56 | 3.49 | 4.17 | 4.41 |
| REF | 1.67 | 2.12 | 2.10 | 2.86 | 3.14 | 3.14 | 1.58 | 1.21 | 1.30 | 0.81 |
| SSA | 2.25 | 2.39 | 2.37 | 2.98 | 2.96 | 2.47 | 2.03 | 1.97 | 1.92 | 1.80 |
| USA | 0.99 | 1.03 | 1.31 | 1.39 | 4.01 | 3.65 | 3.72 | 4.06 | 4.41 | 3.25 |

Table 1533: FAO — Productivity—Yield—Forage (t DM/ha)

52.3 Pasture

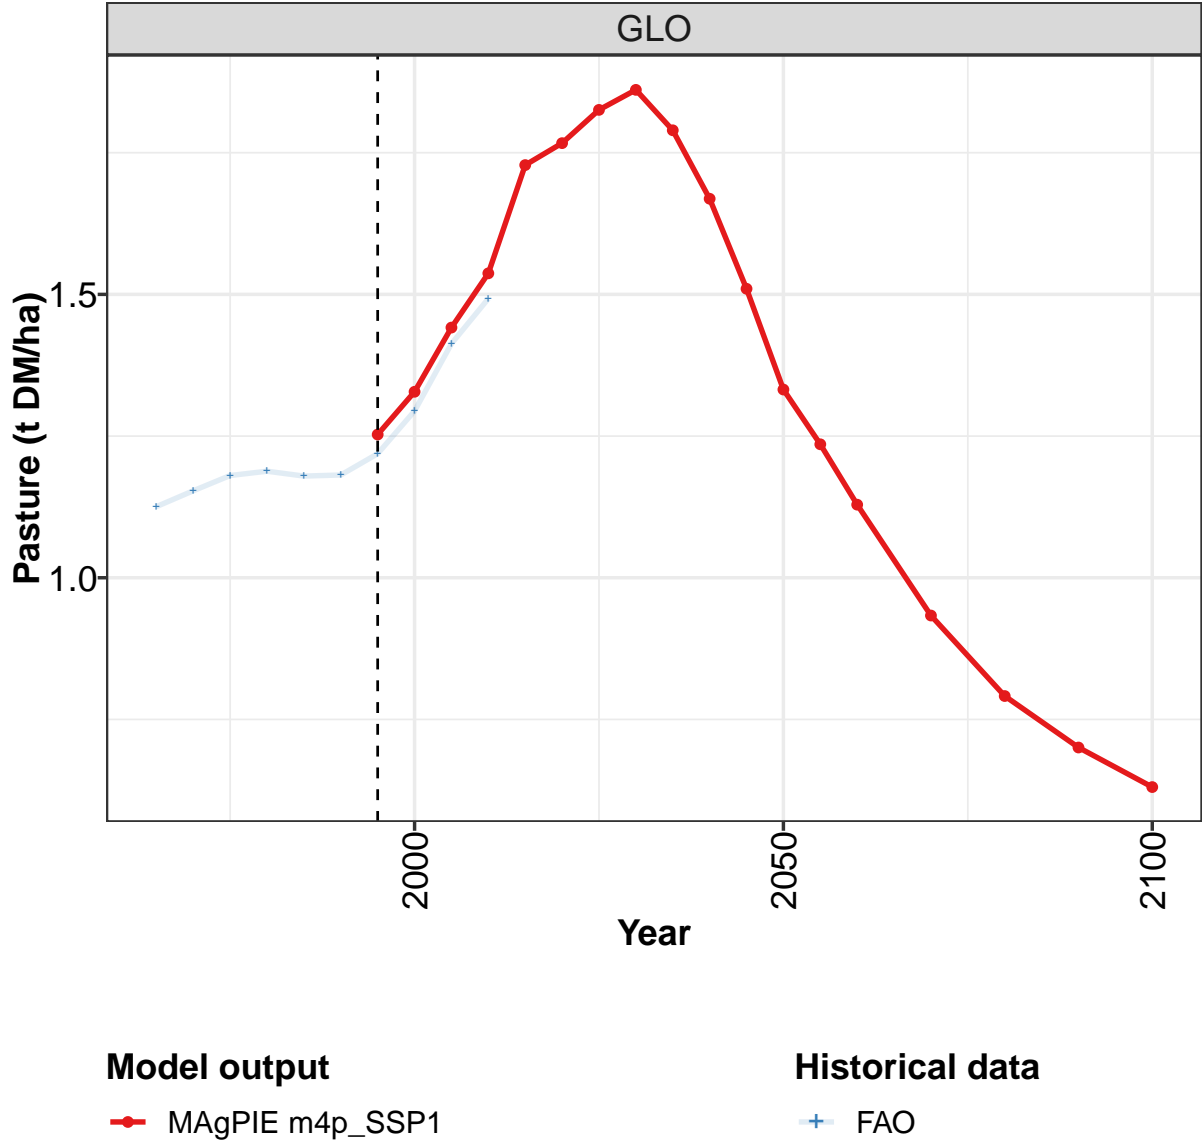

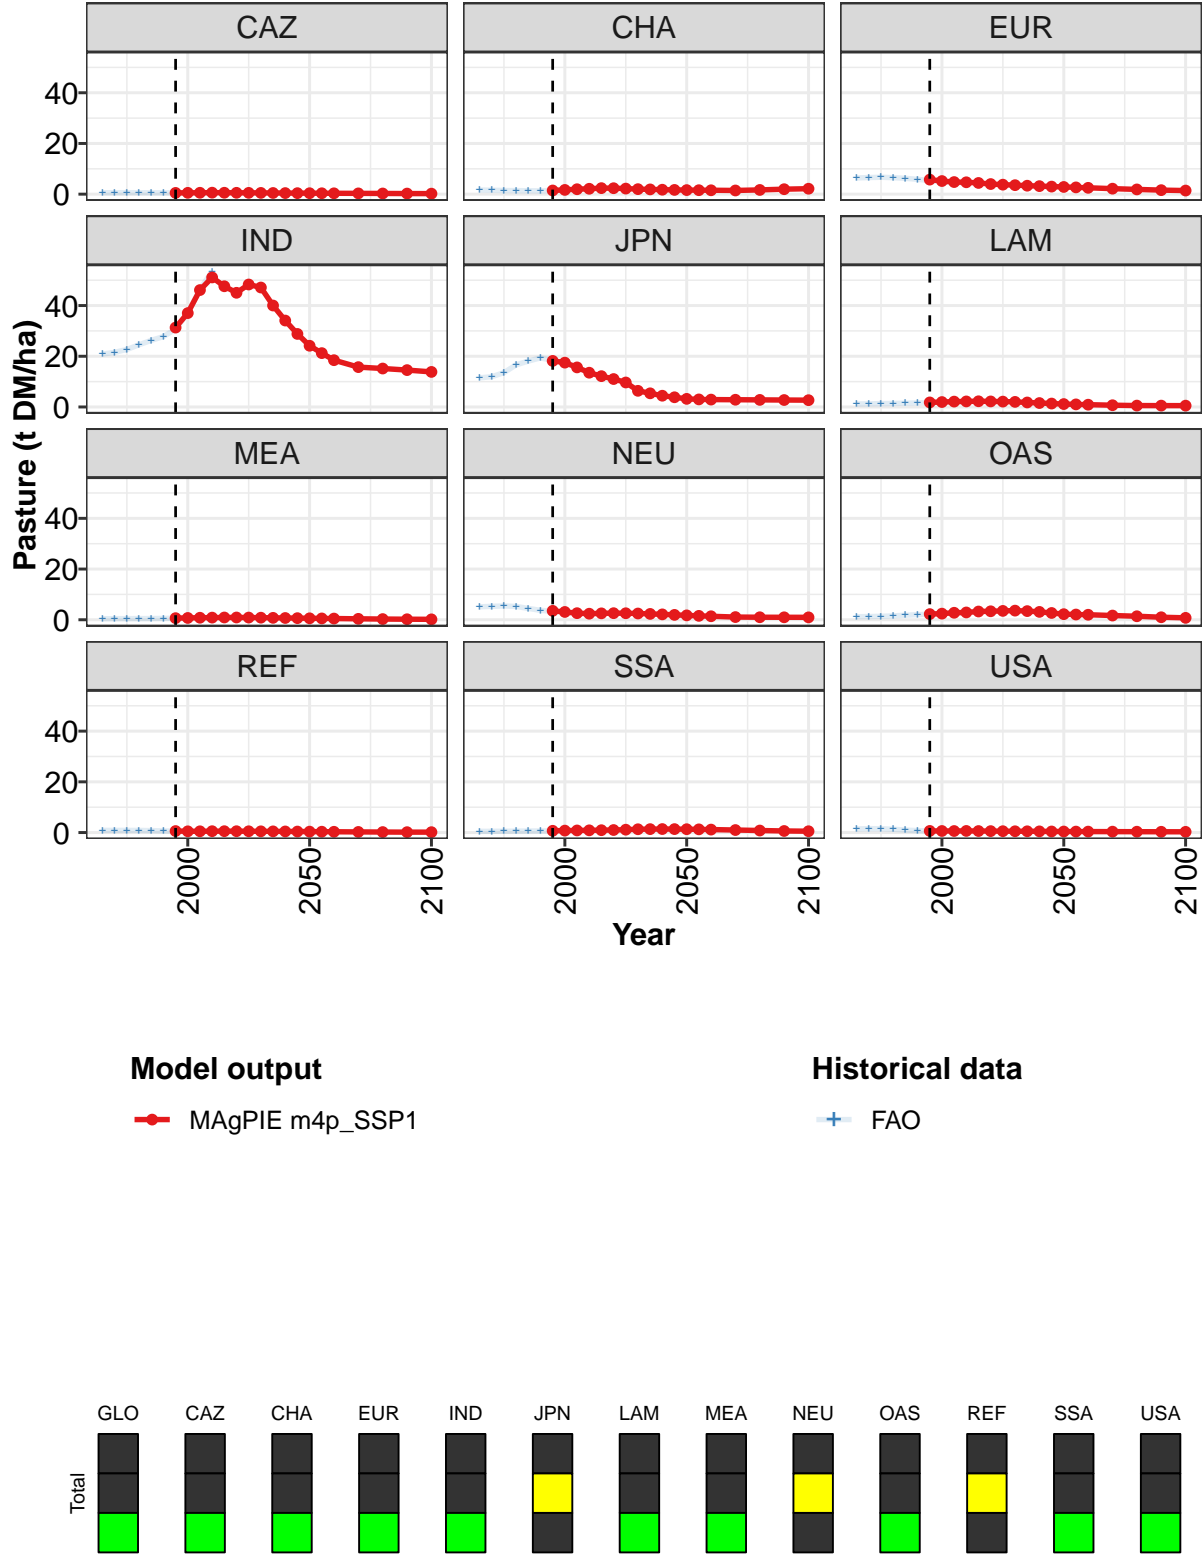

Figure 398: MAgPIE m4p\_SSP1 — Productivity—Yield—Pasture (t DM/ha)

|     | 1995 | 2000 | 2005 | 2010 | 2015 | 2020 | 2025 | 2030 | 2035 | 2040 | 2045 |
|-----|------|------|------|------|------|------|------|------|------|------|------|
| GLO | 1.3  | 1.3  | 1.4  | 1.5  | 1.7  | 1.8  | 1.8  | 1.9  | 1.8  | 1.7  | 1.5  |
| CAZ | 0.5  | 0.5  | 0.6  | 0.6  | 0.6  | 0.5  | 0.5  | 0.5  | 0.5  | 0.4  | 0.4  |
| CHA | 1.5  | 1.7  | 2.0  | 2.1  | 2.4  | 2.4  | 2.2  | 2.0  | 1.9  | 1.8  | 1.7  |
| EUR | 5.7  | 5.2  | 4.8  | 4.7  | 4.4  | 4.0  | 3.8  | 3.6  | 3.3  | 3.2  | 3.0  |
| IND | 31.3 | 37.0 | 46.1 | 51.1 | 47.6 | 45.0 | 48.3 | 47.1 | 40.0 | 34.1 | 28.8 |
| JPN | 18.2 | 17.5 | 15.6 | 13.5 | 12.2 | 11.0 | 9.7  | 6.4  | 5.4  | 4.4  | 3.8  |
| LAM | 1.8  | 2.0  | 2.1  | 2.2  | 2.2  | 2.2  | 2.1  | 2.0  | 1.8  | 1.6  | 1.4  |
| MEA | 0.6  | 0.7  | 0.8  | 0.9  | 0.9  | 0.9  | 0.9  | 0.8  | 0.8  | 0.7  | 0.6  |
| NEU | 3.5  | 3.1  | 2.6  | 2.4  | 2.5  | 2.6  | 2.6  | 2.5  | 2.3  | 2.1  | 1.9  |
| OAS | 2.2  | 2.4  | 2.8  | 2.9  | 3.3  | 3.3  | 3.5  | 3.6  | 3.4  | 3.1  | 2.7  |
| REF | 0.6  | 0.5  | 0.5  | 0.5  | 0.5  | 0.5  | 0.5  | 0.5  | 0.5  | 0.4  | 0.4  |
| SSA | 0.7  | 0.8  | 0.8  | 0.9  | 0.9  | 1.0  | 1.1  | 1.3  | 1.4  | 1.4  | 1.4  |
| USA | 0.6  | 0.6  | 0.6  | 0.6  | 0.6  | 0.6  | 0.5  | 0.5  | 0.5  | 0.5  | 0.4  |

Table 1534: MAgPIE m4p\_SSP1 — Productivity—Yield—Pasture (t DM/ha) [PART 1/2]

|     | 2050 | 2055 | 2060 | 2070 | 2080 | 2090 | 2100 |
|-----|------|------|------|------|------|------|------|
| GLO | 1.3  | 1.2  | 1.1  | 0.9  | 0.8  | 0.7  | 0.6  |
| CAZ | 0.4  | 0.4  | 0.3  | 0.3  | 0.3  | 0.2  | 0.2  |
| CHA | 1.6  | 1.6  | 1.5  | 1.5  | 1.7  | 2.0  | 2.2  |
| EUR | 2.8  | 2.7  | 2.5  | 2.2  | 1.9  | 1.6  | 1.4  |
| IND | 24.1 | 21.2 | 18.5 | 15.7 | 15.2 | 14.5 | 13.8 |
| JPN | 3.2  | 3.0  | 2.9  | 2.8  | 2.8  | 2.7  | 2.7  |
| LAM | 1.2  | 1.0  | 0.9  | 0.7  | 0.5  | 0.5  | 0.5  |
| MEA | 0.6  | 0.5  | 0.5  | 0.4  | 0.3  | 0.2  | 0.2  |
| NEU | 1.7  | 1.5  | 1.4  | 1.1  | 1.0  | 1.0  | 1.0  |
| OAS | 2.2  | 2.1  | 2.0  | 1.7  | 1.4  | 1.0  | 0.8  |
| REF | 0.4  | 0.3  | 0.3  | 0.2  | 0.2  | 0.2  | 0.2  |
| SSA | 1.3  | 1.3  | 1.2  | 1.0  | 0.8  | 0.6  | 0.5  |
| USA | 0.4  | 0.4  | 0.4  | 0.4  | 0.3  | 0.3  | 0.3  |

Table 1535: MAgPIE m4p\_SSP1 — Productivity—Yield—Pasture (t DM/ha) [PART 2/2]

|     | 1965 | 1970 | 1975 | 1980 | 1985 | 1990 | 1995 | 2000 | 2005 | 2010 |
|-----|------|------|------|------|------|------|------|------|------|------|
| GLO | 1.1  | 1.2  | 1.2  | 1.2  | 1.2  | 1.2  | 1.2  | 1.3  | 1.4  | 1.5  |
| CAZ | 0.6  | 0.6  | 0.6  | 0.6  | 0.6  | 0.5  | 0.6  | 0.6  | 0.6  | 0.6  |
| CHA | 1.6  | 1.6  | 1.5  | 1.4  | 1.3  | 1.3  | 1.5  | 1.7  | 2.0  | 2.1  |
| EUR | 6.4  | 6.5  | 6.7  | 6.5  | 6.2  | 5.9  | 5.3  | 4.9  | 4.5  | 4.4  |
| IND | 20.8 | 21.5 | 22.7 | 24.5 | 26.3 | 27.8 | 30.7 | 37.0 | 46.5 | 53.4 |
| JPN | 11.5 | 11.9 | 13.5 | 16.6 | 18.1 | 19.3 | 18.4 | 17.6 | 15.6 | 13.5 |
| LAM | 1.2  | 1.2  | 1.3  | 1.4  | 1.5  | 1.6  | 1.7  | 1.9  | 2.0  | 2.1  |
| MEA | 0.4  | 0.4  | 0.4  | 0.5  | 0.5  | 0.5  | 0.6  | 0.7  | 0.8  | 0.8  |
| NEU | 5.1  | 5.3  | 5.4  | 5.3  | 4.5  | 3.7  | 3.3  | 2.9  | 2.5  | 2.3  |
| OAS | 1.2  | 1.3  | 1.4  | 1.5  | 1.8  | 2.0  | 2.2  | 2.3  | 2.7  | 2.6  |
| REF | 0.8  | 0.9  | 0.9  | 0.8  | 0.8  | 0.7  | 0.5  | 0.4  | 0.4  | 0.5  |
| SSA | 0.5  | 0.5  | 0.5  | 0.6  | 0.6  | 0.6  | 0.7  | 0.8  | 0.8  | 0.9  |
| USA | 1.4  | 1.5  | 1.5  | 1.3  | 1.0  | 0.7  | 0.7  | 0.6  | 0.6  | 0.7  |

Table 1536: FAO — Productivity—Yield—Pasture (t DM/ha)

## 53 Yield-increasing technological change

Part XIV  
Resources

54 Land Cover

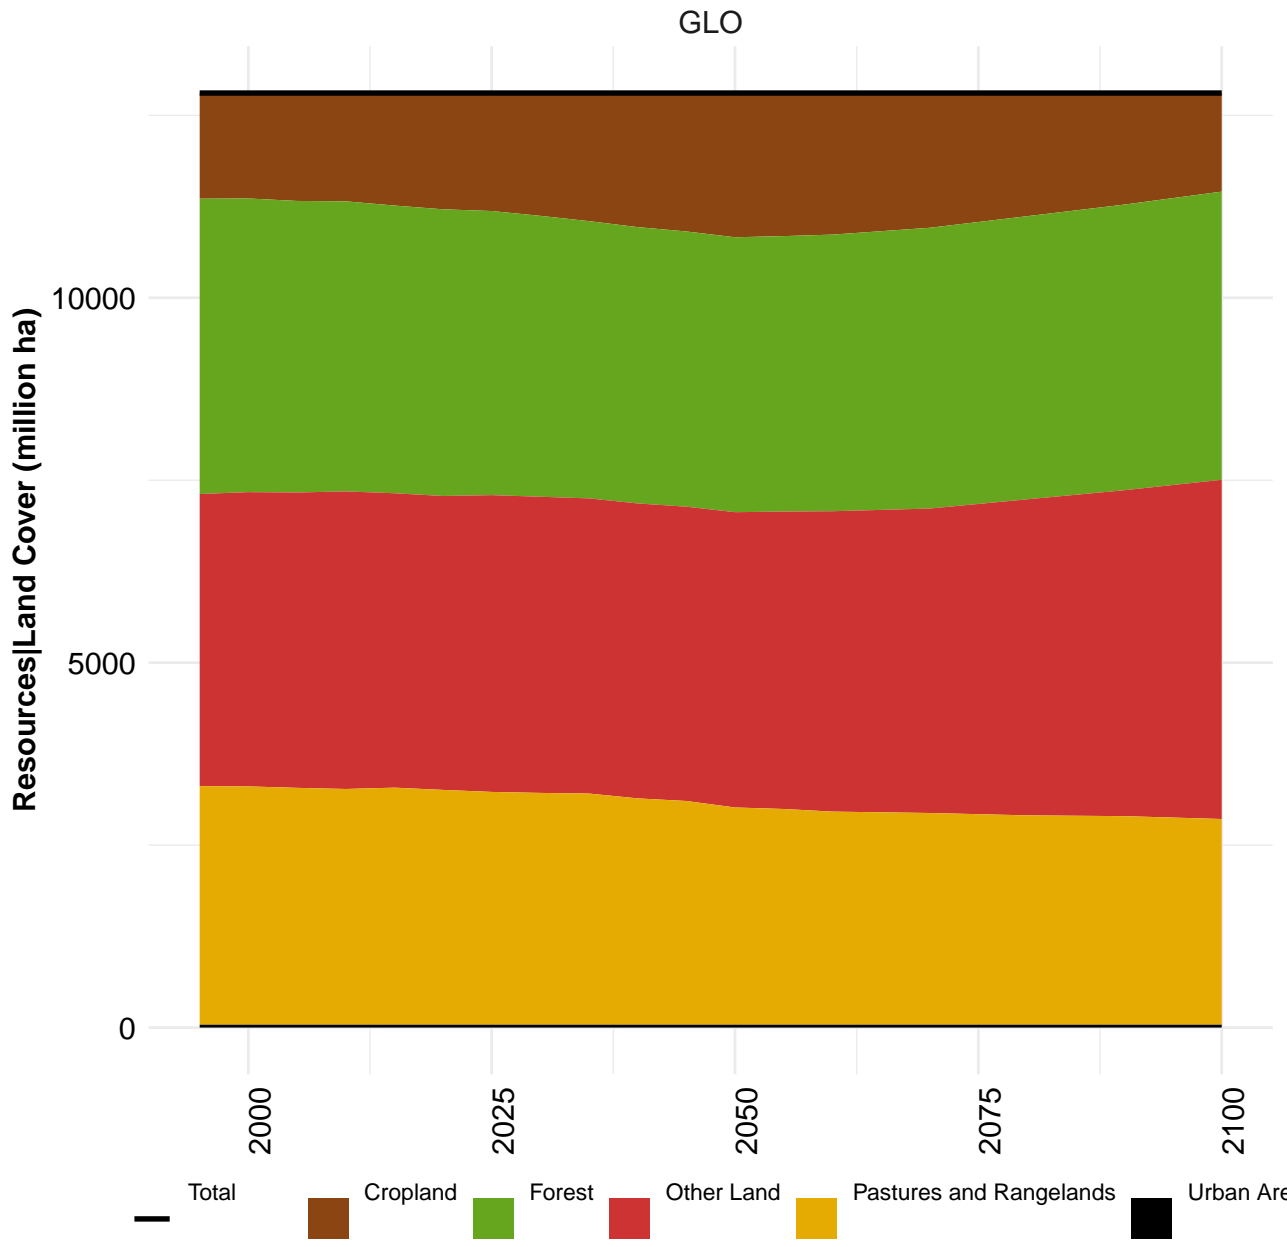

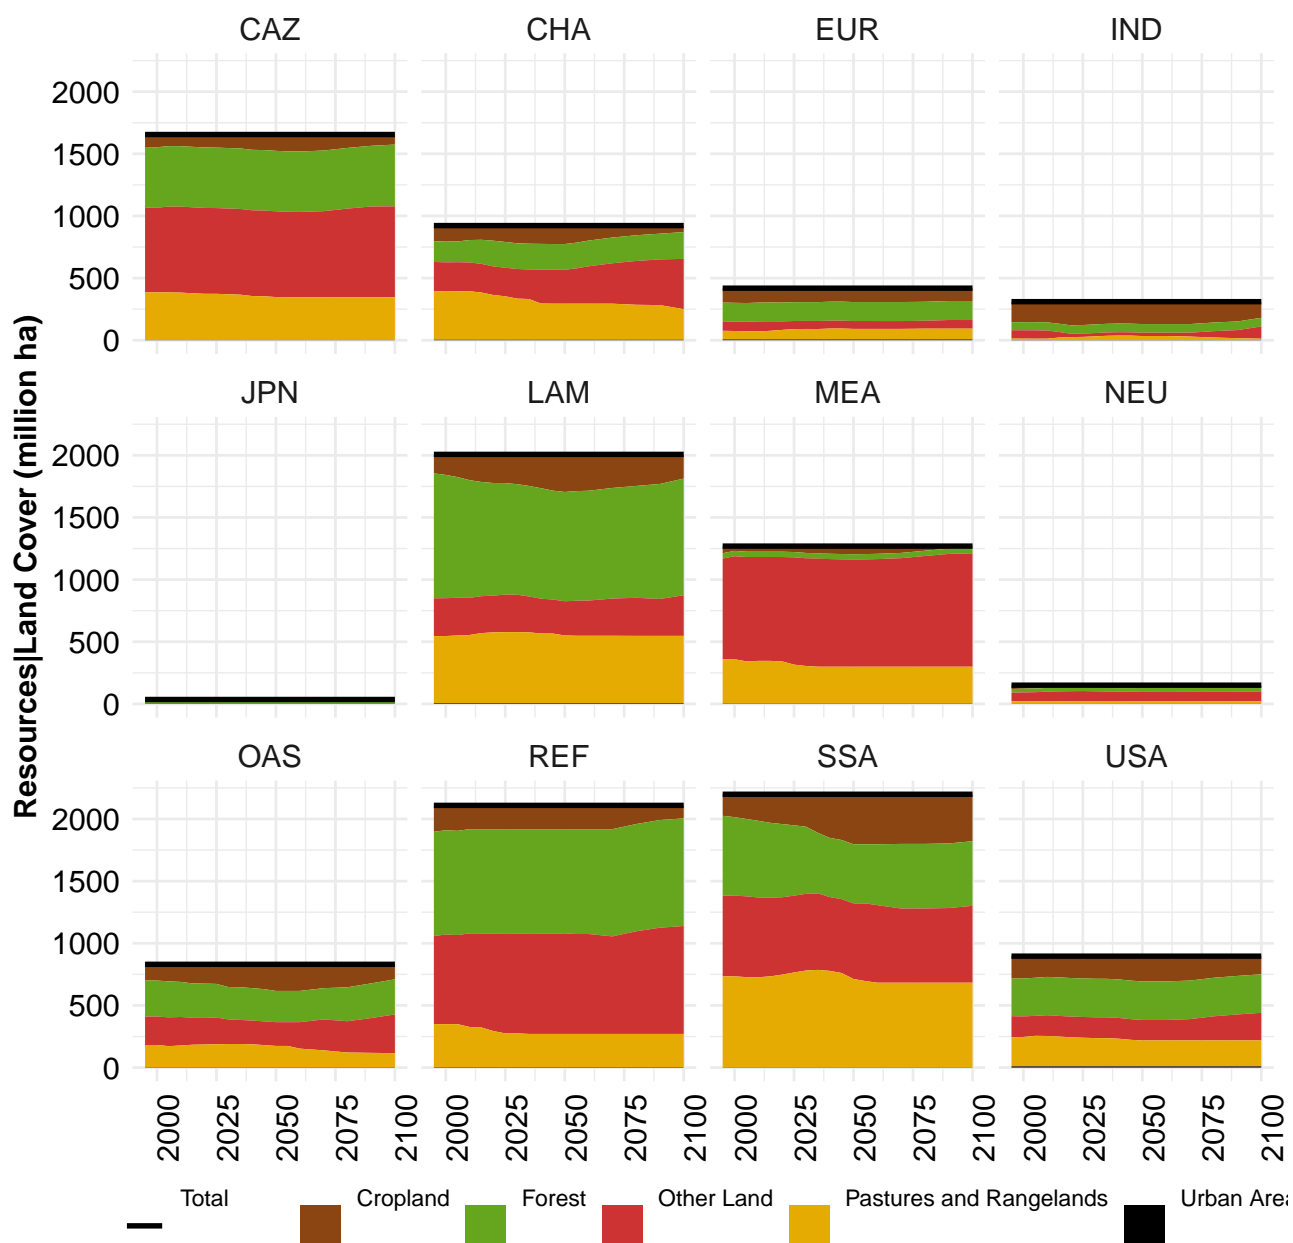



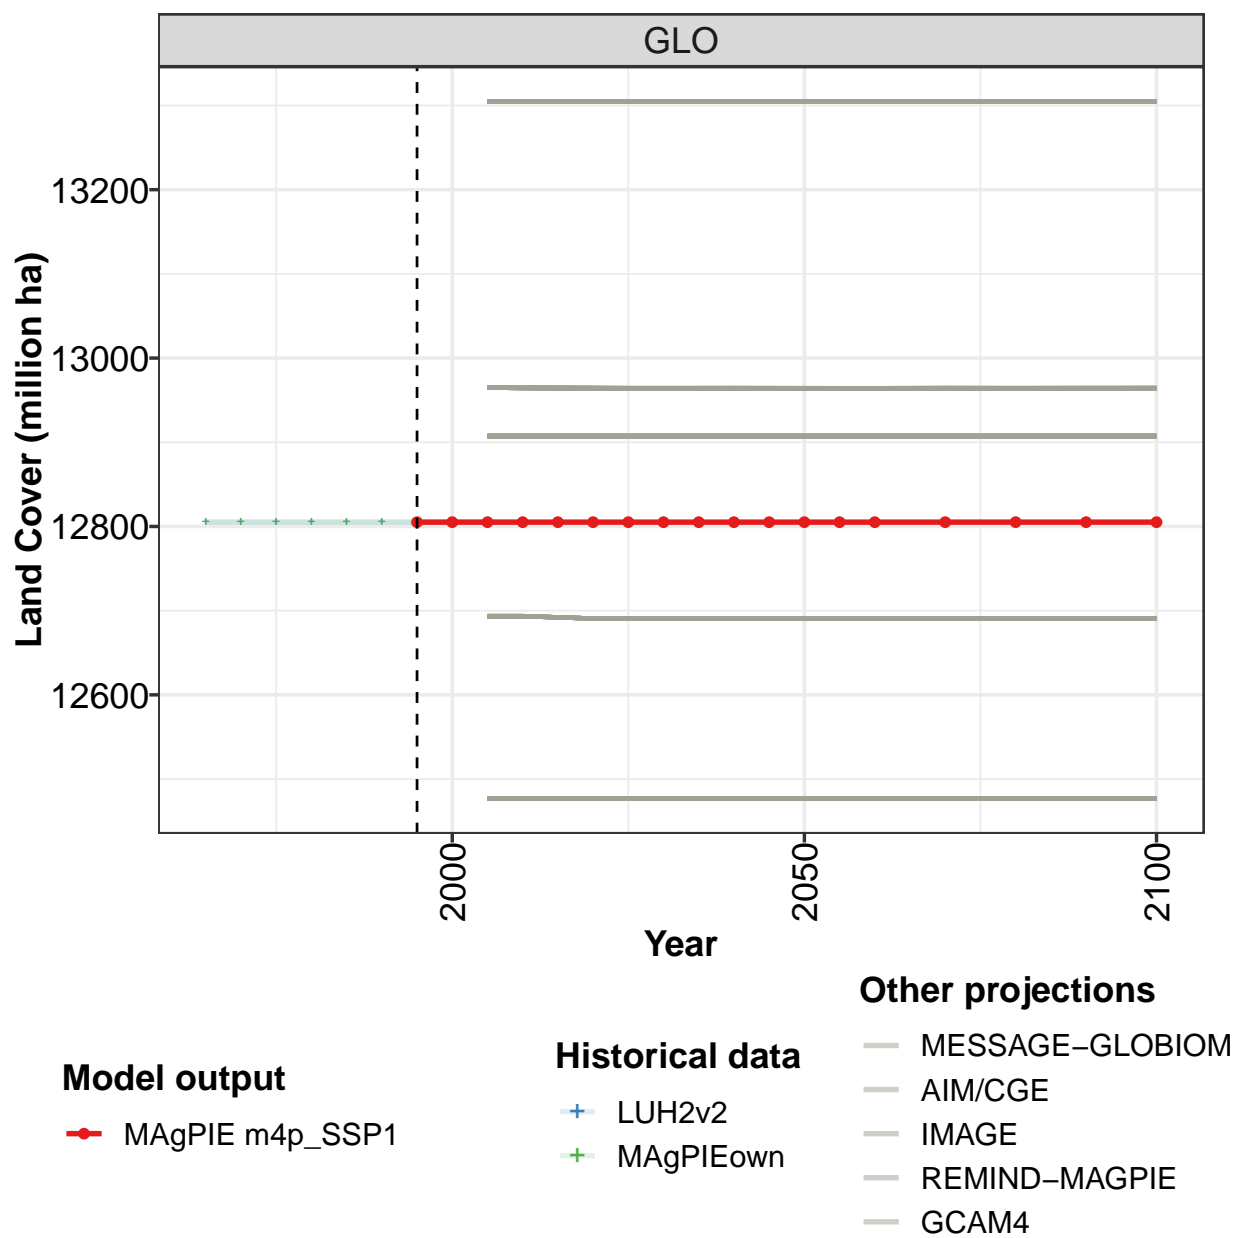

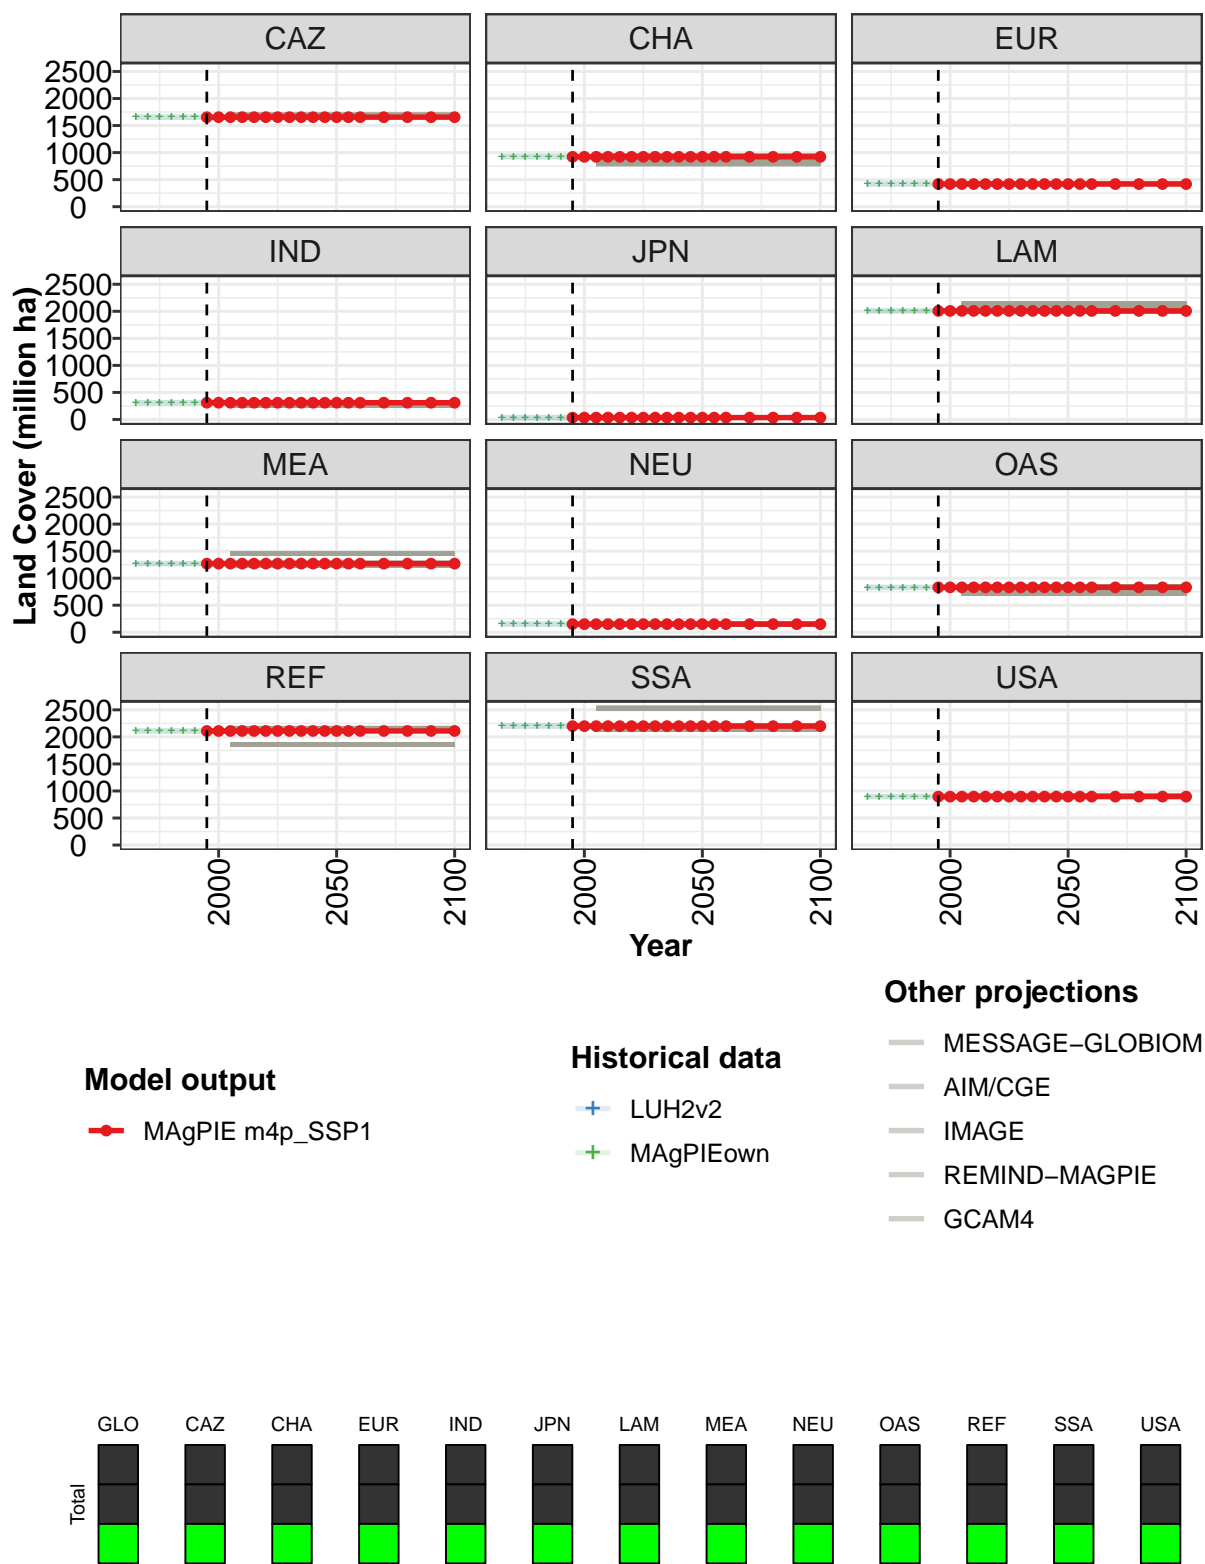

Figure 399: MAgPIE m4p\_SSP1 — Resources—Land Cover (million ha)

|     | 1995  | 2000  | 2005  | 2010  | 2015  | 2020  | 2025  | 2030  | 2035  | 2040  | 2045  |
|-----|-------|-------|-------|-------|-------|-------|-------|-------|-------|-------|-------|
| GLO | 12805 | 12805 | 12805 | 12805 | 12805 | 12805 | 12805 | 12805 | 12805 | 12805 | 12805 |
| CAZ | 1655  | 1655  | 1655  | 1655  | 1655  | 1655  | 1655  | 1655  | 1655  | 1655  | 1655  |
| CHA | 922   | 922   | 922   | 922   | 922   | 922   | 922   | 922   | 922   | 922   | 922   |
| EUR | 419   | 419   | 419   | 419   | 419   | 419   | 419   | 419   | 419   | 419   | 419   |
| IND | 310   | 310   | 310   | 310   | 310   | 310   | 310   | 310   | 310   | 310   | 310   |
| JPN | 35    | 35    | 35    | 35    | 35    | 35    | 35    | 35    | 35    | 35    | 35    |
| LAM | 2007  | 2007  | 2007  | 2007  | 2007  | 2007  | 2007  | 2007  | 2007  | 2007  | 2007  |
| MEA | 1269  | 1269  | 1269  | 1269  | 1269  | 1269  | 1269  | 1269  | 1269  | 1269  | 1269  |
| NEU | 151   | 151   | 151   | 151   | 151   | 151   | 151   | 151   | 151   | 151   | 151   |
| OAS | 831   | 831   | 831   | 831   | 831   | 831   | 831   | 831   | 831   | 831   | 831   |
| REF | 2110  | 2110  | 2110  | 2110  | 2110  | 2110  | 2110  | 2110  | 2110  | 2110  | 2110  |
| SSA | 2199  | 2199  | 2199  | 2199  | 2199  | 2199  | 2199  | 2199  | 2199  | 2199  | 2199  |
| USA | 896   | 896   | 896   | 896   | 896   | 896   | 896   | 896   | 896   | 896   | 896   |

Table 1537: MAgPIE m4p\_SSP1 — Resources—Land Cover (million ha) [PART 1/2]

|     | 2050  | 2055  | 2060  | 2070  | 2080  | 2090  | 2100  |
|-----|-------|-------|-------|-------|-------|-------|-------|
| GLO | 12805 | 12805 | 12805 | 12805 | 12805 | 12805 | 12805 |
| CAZ | 1655  | 1655  | 1655  | 1655  | 1655  | 1655  | 1655  |
| CHA | 922   | 922   | 922   | 922   | 922   | 922   | 922   |
| EUR | 419   | 419   | 419   | 419   | 419   | 419   | 419   |
| IND | 310   | 310   | 310   | 310   | 310   | 310   | 310   |
| JPN | 35    | 35    | 35    | 35    | 35    | 35    | 35    |
| LAM | 2007  | 2007  | 2007  | 2007  | 2007  | 2007  | 2007  |
| MEA | 1269  | 1269  | 1269  | 1269  | 1269  | 1269  | 1269  |
| NEU | 151   | 151   | 151   | 151   | 151   | 151   | 151   |
| OAS | 831   | 831   | 831   | 831   | 831   | 831   | 831   |
| REF | 2110  | 2110  | 2110  | 2110  | 2110  | 2110  | 2110  |
| SSA | 2199  | 2199  | 2199  | 2199  | 2199  | 2199  | 2199  |
| USA | 896   | 896   | 896   | 896   | 896   | 896   | 896   |

Table 1538: MAgPIE m4p\_SSP1 — Resources—Land Cover (million ha) [PART 2/2]

|     | 1965  | 1970  | 1975  | 1980  | 1985  | 1990  | 1995  | 2000  | 2005  | 2010  |
|-----|-------|-------|-------|-------|-------|-------|-------|-------|-------|-------|
| GLO | 12805 | 12805 | 12805 | 12805 | 12805 | 12805 | 12805 | 12805 | 12805 | 12805 |
| CAZ | 1655  | 1655  | 1655  | 1655  | 1655  | 1655  | 1655  | 1655  | 1655  | 1655  |
| CHA | 922   | 922   | 922   | 922   | 922   | 922   | 922   | 922   | 922   | 922   |
| EUR | 419   | 419   | 419   | 419   | 419   | 419   | 419   | 419   | 419   | 419   |
| IND | 310   | 310   | 310   | 310   | 310   | 310   | 310   | 310   | 310   | 310   |
| JPN | 35    | 35    | 35    | 35    | 35    | 35    | 35    | 35    | 35    | 35    |
| LAM | 2007  | 2007  | 2007  | 2007  | 2007  | 2007  | 2007  | 2007  | 2007  | 2007  |
| MEA | 1269  | 1269  | 1269  | 1269  | 1269  | 1269  | 1269  | 1269  | 1269  | 1269  |
| NEU | 151   | 151   | 151   | 151   | 151   | 151   | 151   | 151   | 151   | 151   |
| OAS | 831   | 831   | 831   | 831   | 831   | 831   | 831   | 831   | 831   | 831   |
| REF | 2110  | 2110  | 2110  | 2110  | 2110  | 2110  | 2110  | 2110  | 2110  | 2110  |
| SSA | 2199  | 2199  | 2199  | 2199  | 2199  | 2199  | 2199  | 2199  | 2199  | 2199  |
| USA | 896   | 896   | 896   | 896   | 896   | 896   | 896   | 896   | 896   | 896   |

Table 1539: LUH2v2 — Resources—Land Cover (million ha)

|     | 1965  | 1970  | 1975  | 1980  | 1985  | 1990  | 1995  | 2000  | 2005  | 2010  |
|-----|-------|-------|-------|-------|-------|-------|-------|-------|-------|-------|
| GLO | 12805 | 12805 | 12805 | 12805 | 12805 | 12805 | 12805 | 12805 | 12805 | 12805 |
| CAZ | 1655  | 1655  | 1655  | 1655  | 1655  | 1655  | 1655  | 1655  | 1655  | 1655  |
| CHA | 922   | 922   | 922   | 922   | 922   | 922   | 922   | 922   | 922   | 922   |
| EUR | 419   | 419   | 419   | 419   | 419   | 419   | 419   | 419   | 419   | 419   |
| IND | 310   | 310   | 310   | 310   | 310   | 310   | 310   | 310   | 310   | 310   |
| JPN | 35    | 35    | 35    | 35    | 35    | 35    | 35    | 35    | 35    | 35    |
| LAM | 2007  | 2007  | 2007  | 2007  | 2007  | 2007  | 2007  | 2007  | 2007  | 2007  |
| MEA | 1269  | 1269  | 1269  | 1269  | 1269  | 1269  | 1269  | 1269  | 1269  | 1269  |
| NEU | 151   | 151   | 151   | 151   | 151   | 151   | 151   | 151   | 151   | 151   |
| OAS | 831   | 831   | 831   | 831   | 831   | 831   | 831   | 831   | 831   | 831   |
| REF | 2110  | 2110  | 2110  | 2110  | 2110  | 2110  | 2110  | 2110  | 2110  | 2110  |
| SSA | 2199  | 2199  | 2199  | 2199  | 2199  | 2199  | 2199  | 2199  | 2199  | 2199  |
| USA | 896   | 896   | 896   | 896   | 896   | 896   | 896   | 896   | 896   | 896   |

Table 1540: MAgPIEown — Resources—Land Cover (million ha)

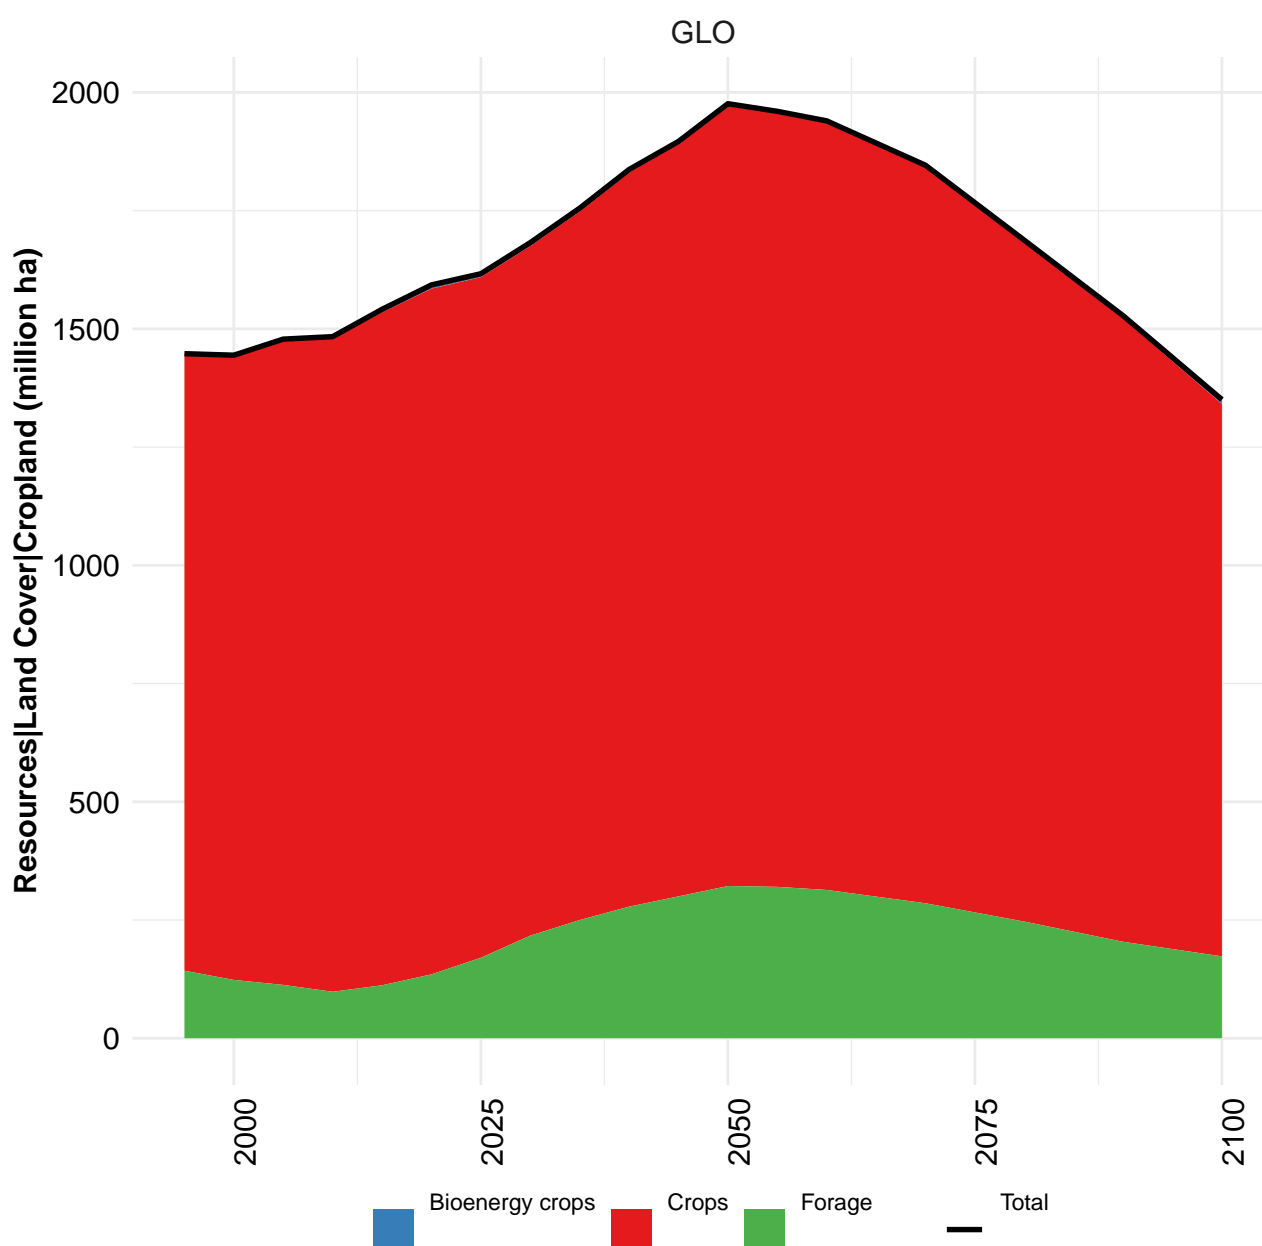

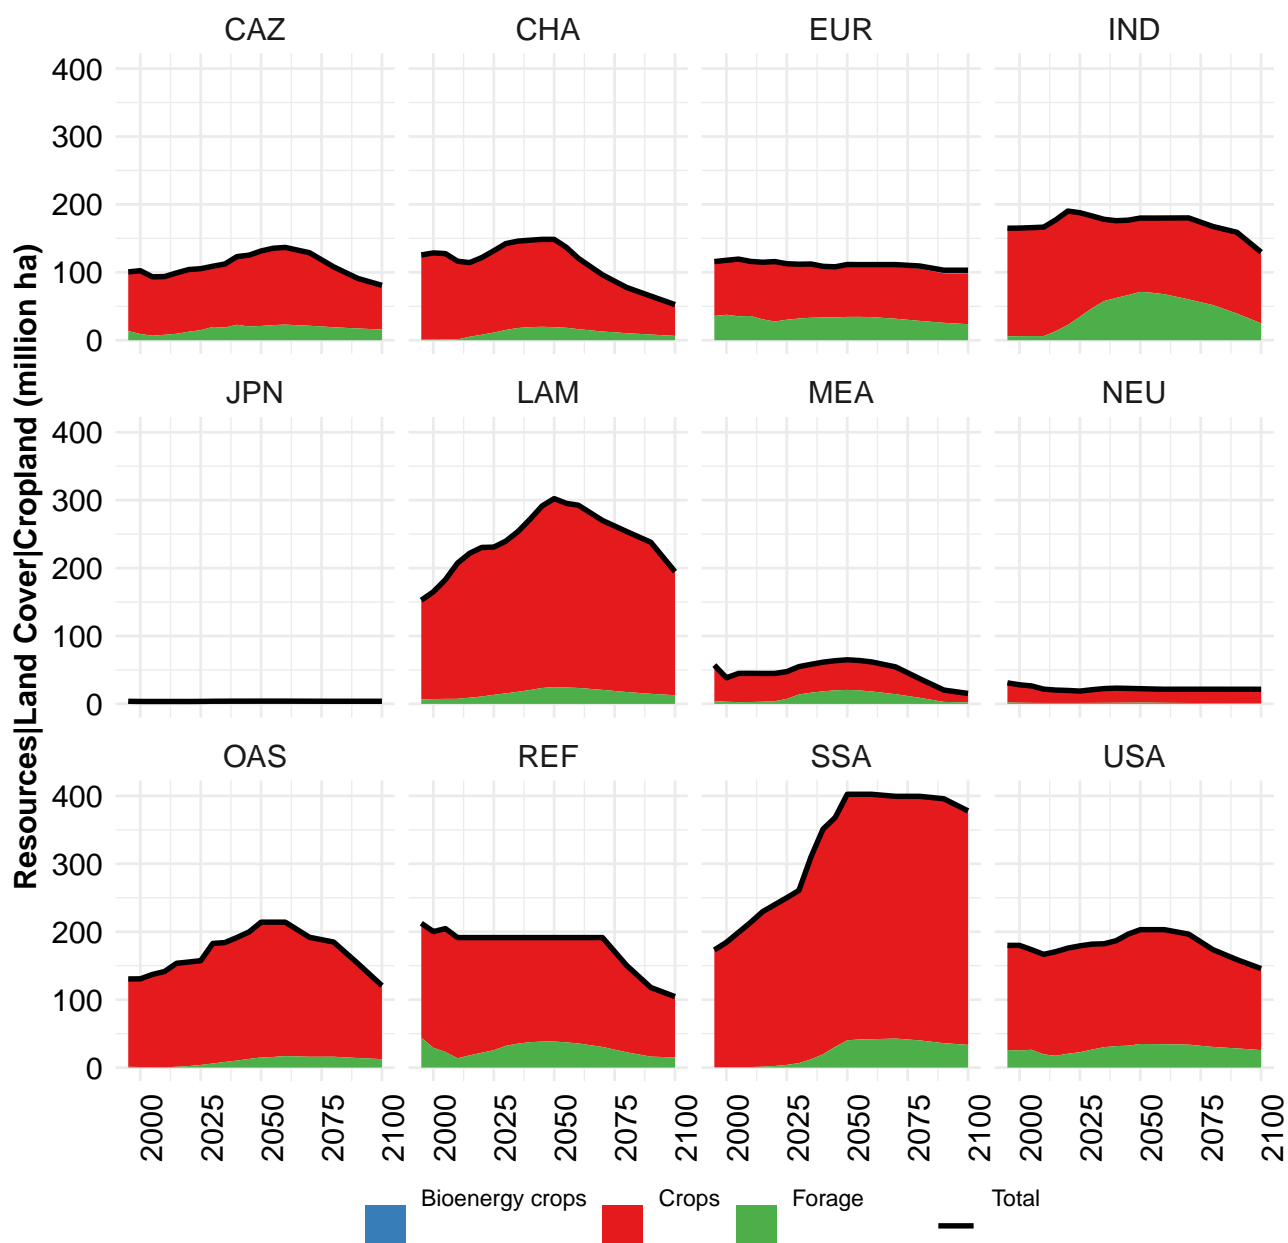

54.1 Cropland

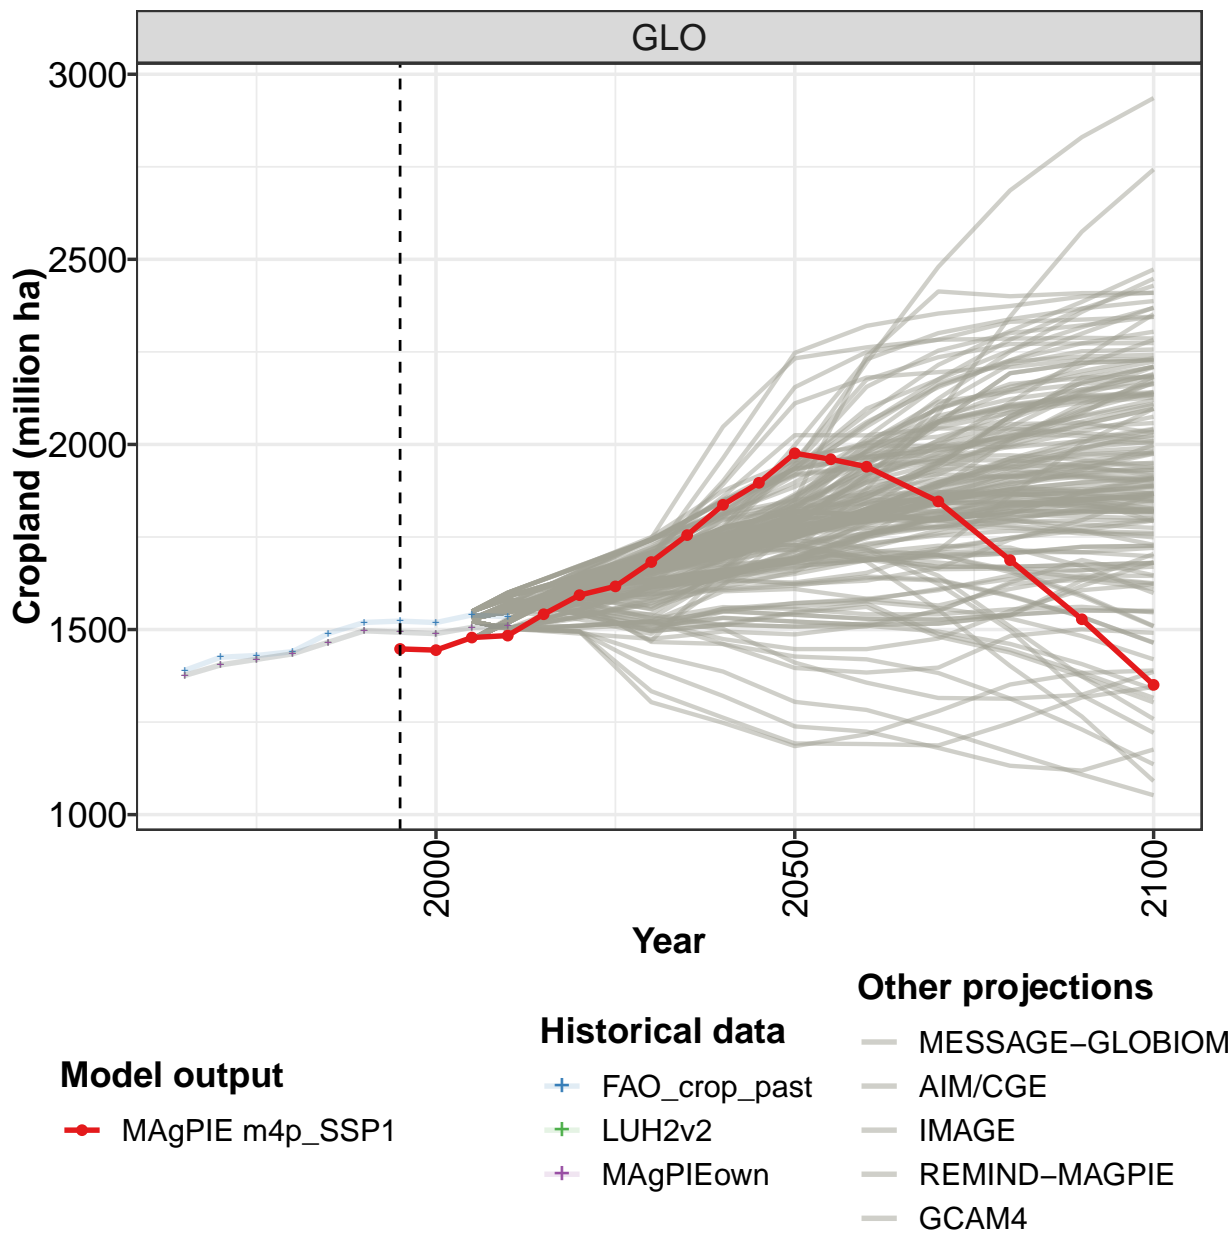

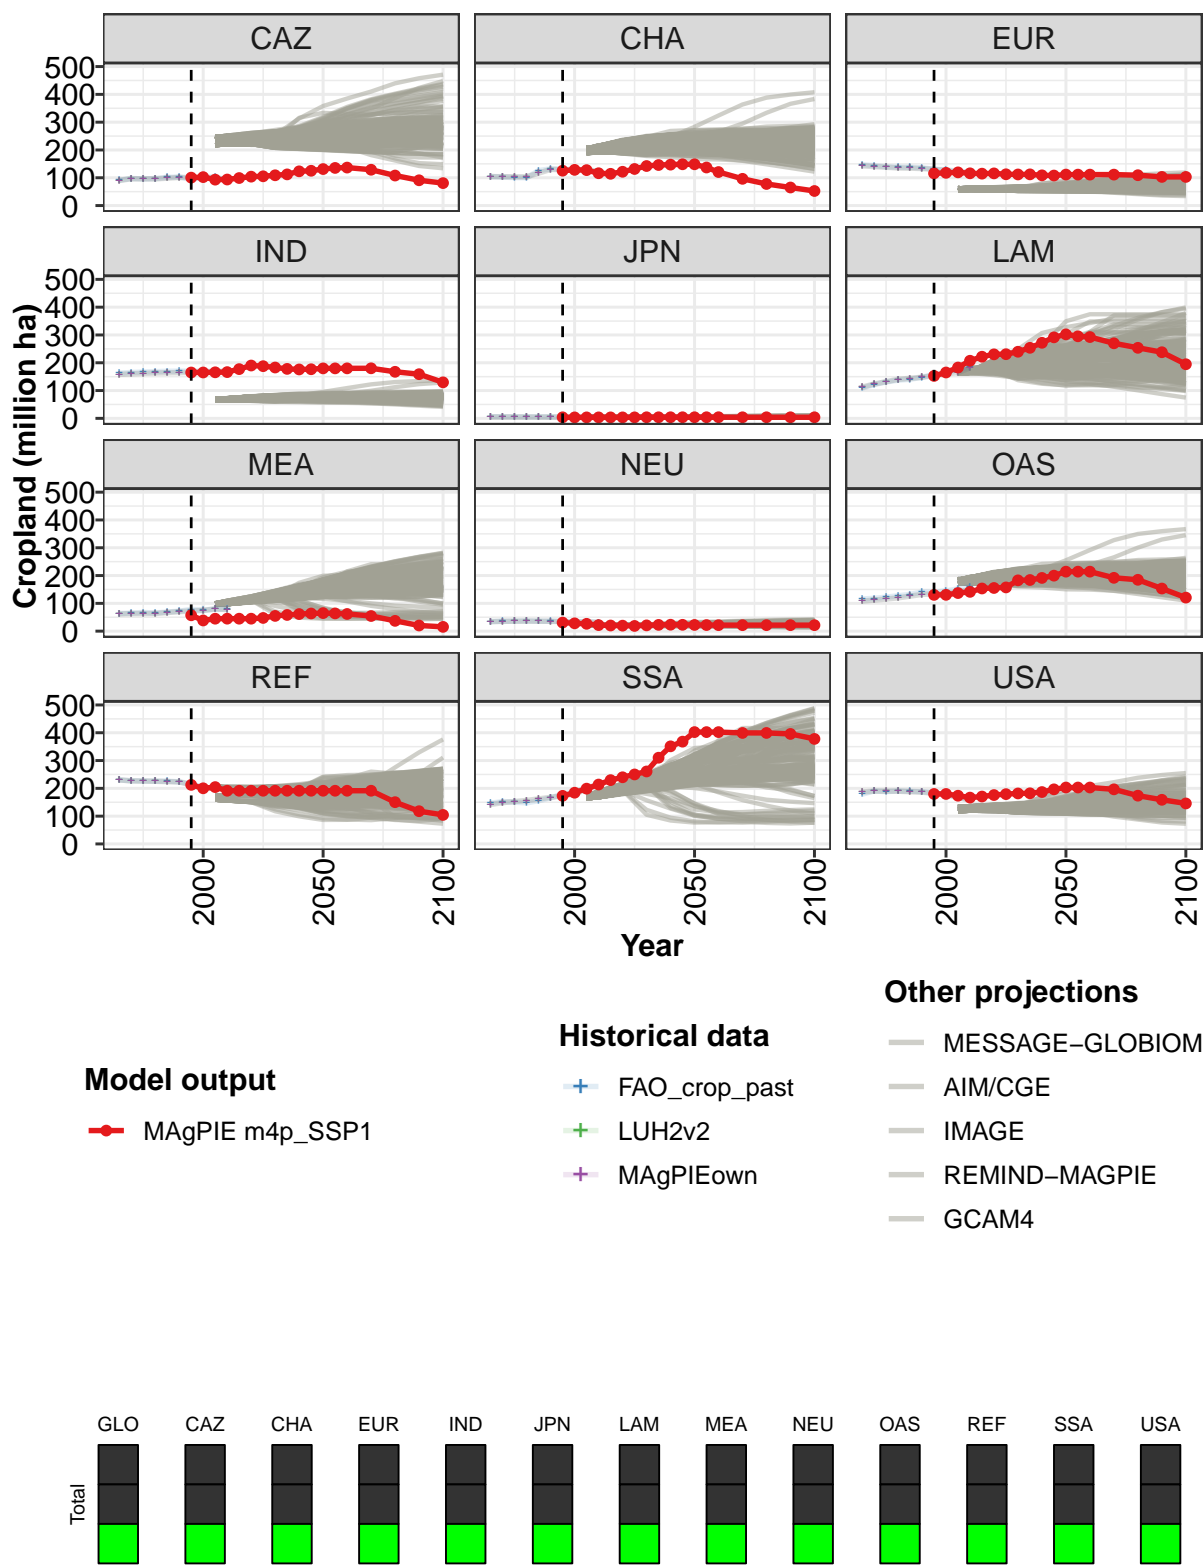

Figure 400: MAgPIE m4p\_SSP1 — Resources—Land Cover—Cropland (million ha)

|     | 1995 | 2000 | 2005 | 2010 | 2015 | 2020 | 2025 | 2030 | 2035 | 2040 | 2045 |
|-----|------|------|------|------|------|------|------|------|------|------|------|
| GLO | 1448 | 1444 | 1478 | 1484 | 1541 | 1593 | 1617 | 1682 | 1755 | 1837 | 1896 |
| CAZ | 101  | 102  | 93   | 94   | 99   | 104  | 105  | 109  | 112  | 123  | 125  |
| CHA | 126  | 129  | 128  | 116  | 114  | 122  | 132  | 142  | 146  | 147  | 149  |
| EUR | 116  | 118  | 119  | 116  | 115  | 116  | 113  | 112  | 112  | 109  | 108  |
| IND | 165  | 165  | 166  | 166  | 177  | 190  | 188  | 183  | 178  | 176  | 177  |
| JPN | 4    | 4    | 4    | 4    | 4    | 4    | 4    | 4    | 4    | 4    | 4    |
| LAM | 153  | 165  | 183  | 207  | 222  | 230  | 231  | 240  | 254  | 272  | 291  |
| MEA | 57   | 38   | 45   | 45   | 45   | 45   | 48   | 55   | 58   | 61   | 64   |
| NEU | 31   | 28   | 26   | 22   | 20   | 20   | 19   | 21   | 23   | 23   | 23   |
| OAS | 130  | 131  | 137  | 141  | 154  | 155  | 157  | 183  | 184  | 192  | 200  |
| REF | 213  | 200  | 205  | 191  | 191  | 191  | 191  | 191  | 191  | 191  | 191  |
| SSA | 173  | 184  | 199  | 214  | 230  | 240  | 250  | 261  | 310  | 351  | 368  |
| USA | 180  | 180  | 174  | 167  | 171  | 176  | 179  | 182  | 182  | 187  | 197  |

Table 1541: MAgPIE m4p\_SSP1 — Resources—Land Cover—Cropland (million ha) [PART 1/2]

|     | 2050 | 2055 | 2060 | 2070 | 2080 | 2090 | 2100 |
|-----|------|------|------|------|------|------|------|
| GLO | 1976 | 1960 | 1940 | 1846 | 1687 | 1528 | 1351 |
| CAZ | 131  | 135  | 137  | 129  | 108  | 91   | 81   |
| CHA | 149  | 137  | 121  | 96   | 78   | 65   | 52   |
| EUR | 112  | 111  | 111  | 111  | 109  | 103  | 103  |
| IND | 180  | 180  | 180  | 180  | 168  | 159  | 130  |
| JPN | 4    | 4    | 4    | 4    | 4    | 4    | 4    |
| LAM | 302  | 295  | 293  | 270  | 254  | 238  | 195  |
| MEA | 65   | 64   | 62   | 55   | 37   | 20   | 15   |
| NEU | 22   | 22   | 22   | 22   | 22   | 22   | 22   |
| OAS | 214  | 214  | 214  | 192  | 185  | 153  | 121  |
| REF | 191  | 191  | 191  | 191  | 150  | 118  | 104  |
| SSA | 402  | 402  | 402  | 399  | 399  | 396  | 378  |
| USA | 203  | 203  | 203  | 196  | 174  | 159  | 146  |

Table 1542: MAgPIE m4p\_SSP1 — Resources—Land Cover—Cropland (million ha) [PART 2/2]

|     | 1965 | 1970 | 1975 | 1980 | 1985 | 1990 | 1995 | 2000 | 2005 | 2010 |
|-----|------|------|------|------|------|------|------|------|------|------|
| GLO | 1390 | 1425 | 1430 | 1440 | 1489 | 1519 | 1523 | 1519 | 1539 | 1534 |
| CAZ | 91   | 98   | 96   | 97   | 102  | 103  | 94   | 101  | 102  | 92   |
| CHA | 105  | 103  | 101  | 100  | 126  | 132  | 131  | 130  | 125  | 123  |
| EUR | 147  | 144  | 140  | 139  | 138  | 136  | 131  | 129  | 123  | 120  |
| IND | 162  | 165  | 167  | 168  | 169  | 170  | 170  | 170  | 170  | 169  |
| JPN | 6    | 6    | 6    | 5    | 5    | 5    | 5    | 5    | 5    | 5    |
| LAM | 109  | 121  | 131  | 137  | 141  | 148  | 159  | 161  | 177  | 184  |
| MEA | 64   | 65   | 67   | 65   | 69   | 72   | 78   | 75   | 80   | 80   |
| NEU | 35   | 36   | 36   | 37   | 36   | 36   | 35   | 34   | 34   | 32   |
| OAS | 116  | 118  | 122  | 127  | 132  | 141  | 140  | 145  | 152  | 160  |
| REF | 231  | 227  | 227  | 226  | 226  | 223  | 217  | 203  | 200  | 198  |
| SSA | 146  | 153  | 150  | 148  | 156  | 166  | 179  | 188  | 203  | 214  |
| USA | 179  | 190  | 188  | 191  | 190  | 188  | 184  | 178  | 168  | 159  |

Table 1543: FAO\_crop\_past — Resources—Land Cover—Cropland (million ha)



|     | 1965 | 1970 | 1975 | 1980 | 1985 | 1990 | 1995 | 2000 | 2005 | 2010 |
|-----|------|------|------|------|------|------|------|------|------|------|
| GLO | 1376 | 1404 | 1419 | 1434 | 1465 | 1497 | 1493 | 1489 | 1506 | 1510 |
| CAZ | 91   | 96   | 96   | 96   | 99   | 101  | 101  | 100  | 101  | 91   |
| CHA | 104  | 104  | 104  | 103  | 117  | 130  | 129  | 128  | 130  | 122  |
| EUR | 143  | 140  | 138  | 135  | 134  | 133  | 130  | 127  | 119  | 118  |
| IND | 158  | 160  | 162  | 163  | 164  | 165  | 166  | 167  | 169  | 168  |
| JPN | 5    | 5    | 5    | 5    | 5    | 5    | 4    | 4    | 4    | 4    |
| LAM | 112  | 124  | 132  | 140  | 144  | 148  | 154  | 160  | 165  | 182  |
| MEA | 62   | 63   | 63   | 64   | 67   | 70   | 72   | 75   | 79   | 78   |
| NEU | 34   | 35   | 36   | 36   | 36   | 35   | 34   | 33   | 33   | 31   |
| OAS | 108  | 112  | 116  | 120  | 126  | 132  | 134  | 136  | 141  | 150  |
| REF | 230  | 227  | 226  | 225  | 224  | 223  | 213  | 203  | 199  | 196  |
| SSA | 142  | 149  | 153  | 157  | 162  | 168  | 173  | 179  | 197  | 212  |
| USA | 187  | 190  | 190  | 190  | 188  | 186  | 182  | 178  | 167  | 158  |

Table 1544: LUH2v2 — Resources—Land Cover—Cropland (million ha)

|     | 1965 | 1970 | 1975 | 1980 | 1985 | 1990 | 1995 | 2000 | 2005 | 2010 |
|-----|------|------|------|------|------|------|------|------|------|------|
| GLO | 1376 | 1404 | 1419 | 1434 | 1465 | 1497 | 1493 | 1489 | 1506 | 1510 |
| CAZ | 91   | 96   | 96   | 96   | 99   | 101  | 101  | 100  | 101  | 91   |
| CHA | 104  | 104  | 104  | 103  | 117  | 130  | 129  | 128  | 130  | 122  |
| EUR | 143  | 140  | 138  | 135  | 134  | 133  | 130  | 127  | 119  | 118  |
| IND | 158  | 160  | 162  | 163  | 164  | 165  | 166  | 167  | 169  | 168  |
| JPN | 5    | 5    | 5    | 5    | 5    | 5    | 4    | 4    | 4    | 4    |
| LAM | 112  | 124  | 132  | 140  | 144  | 148  | 154  | 160  | 165  | 182  |
| MEA | 62   | 63   | 63   | 64   | 67   | 70   | 72   | 75   | 79   | 78   |
| NEU | 34   | 35   | 36   | 36   | 36   | 35   | 34   | 33   | 33   | 31   |
| OAS | 108  | 112  | 116  | 120  | 126  | 132  | 134  | 136  | 141  | 150  |
| REF | 230  | 227  | 226  | 225  | 224  | 223  | 213  | 203  | 199  | 196  |
| SSA | 142  | 149  | 153  | 157  | 162  | 168  | 173  | 179  | 197  | 212  |
| USA | 187  | 190  | 190  | 190  | 188  | 186  | 182  | 178  | 167  | 158  |

Table 1545: MAgPIEown — Resources—Land Cover—Cropland (million ha)

54.1.1 Area actually irrigated

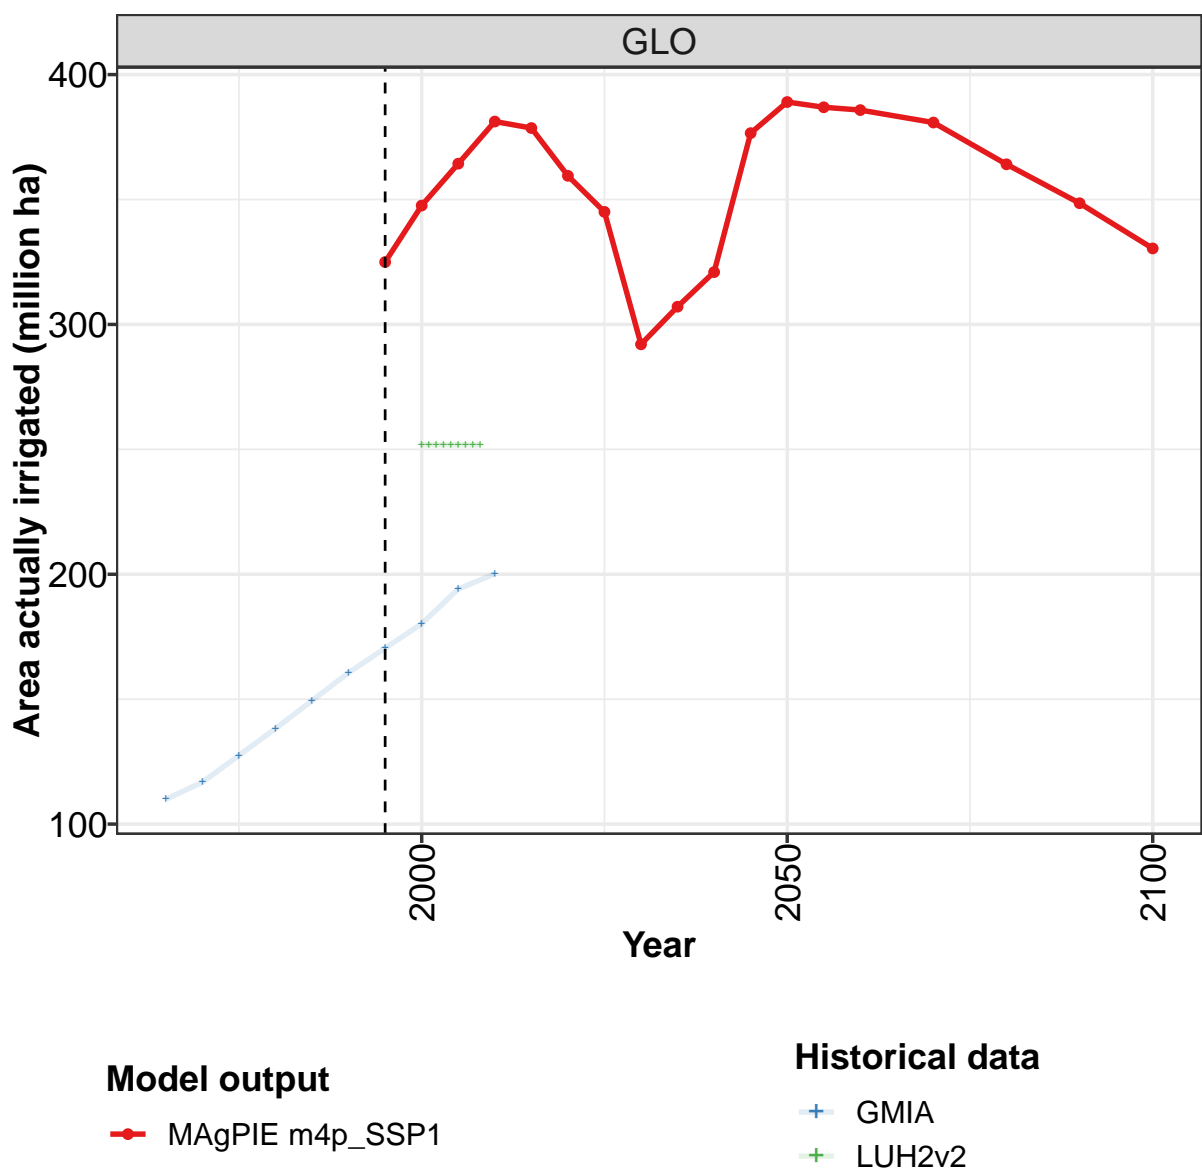

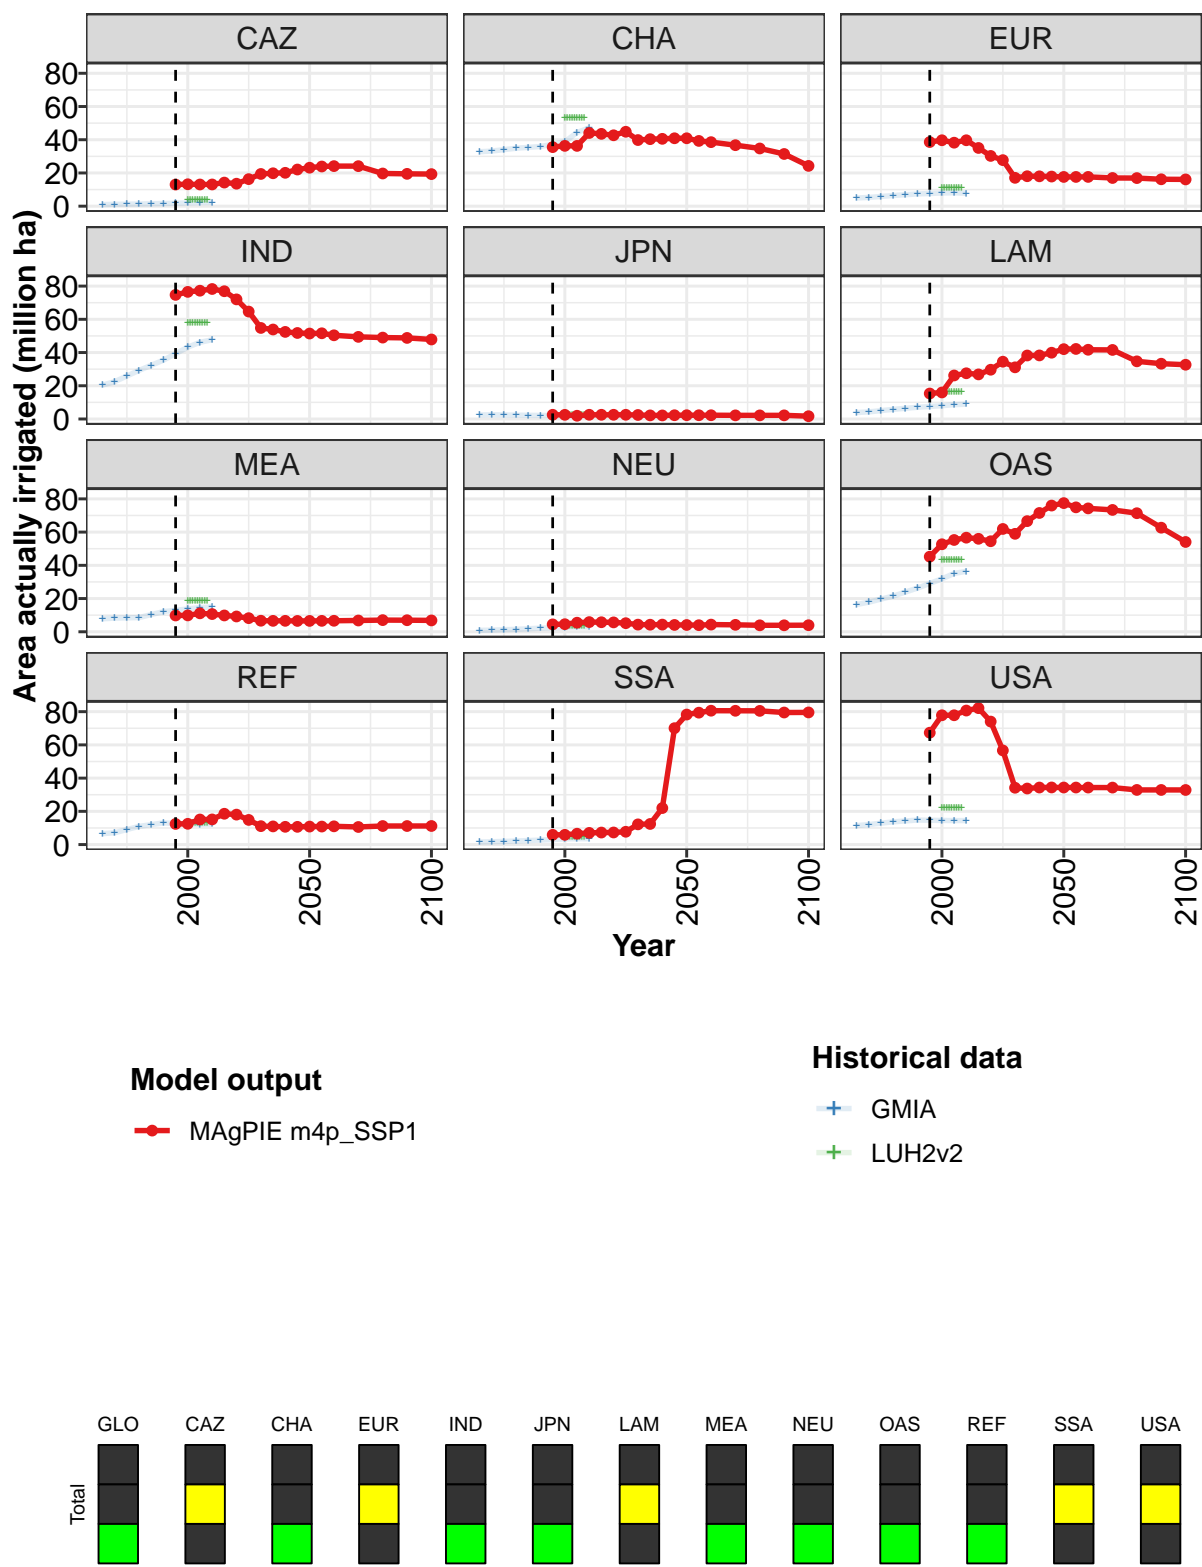

Figure 401: MAgPIE m4p\_SSP1 — Resources—Land Cover—Cropland—Area actually irrigated (million ha)

|     | 1995 | 2000 | 2005 | 2010 | 2015 | 2020 | 2025 | 2030 | 2035 | 2040 | 2045 |
|-----|------|------|------|------|------|------|------|------|------|------|------|
| GLO | 325  | 348  | 364  | 381  | 379  | 359  | 345  | 292  | 307  | 321  | 377  |
| CAZ | 13   | 13   | 13   | 13   | 14   | 14   | 16   | 19   | 20   | 20   | 22   |
| CHA | 36   | 36   | 36   | 44   | 44   | 43   | 45   | 40   | 40   | 41   | 41   |
| EUR | 39   | 40   | 38   | 40   | 35   | 30   | 28   | 17   | 18   | 18   | 18   |
| IND | 75   | 77   | 77   | 78   | 77   | 72   | 65   | 55   | 54   | 52   | 52   |
| JPN | 3    | 3    | 2    | 3    | 3    | 3    | 3    | 2    | 2    | 2    | 2    |
| LAM | 15   | 16   | 26   | 28   | 27   | 30   | 34   | 31   | 38   | 38   | 40   |
| MEA | 10   | 10   | 11   | 11   | 10   | 9    | 8    | 7    | 7    | 7    | 7    |
| NEU | 4    | 5    | 5    | 6    | 6    | 6    | 5    | 4    | 4    | 4    | 4    |
| OAS | 45   | 53   | 55   | 57   | 56   | 55   | 62   | 59   | 67   | 72   | 76   |
| REF | 12   | 13   | 15   | 15   | 19   | 18   | 15   | 11   | 11   | 11   | 11   |
| SSA | 6    | 6    | 7    | 7    | 7    | 7    | 8    | 12   | 12   | 22   | 70   |
| USA | 67   | 78   | 78   | 81   | 82   | 74   | 57   | 34   | 34   | 34   | 34   |

Table 1546: MAgPIE m4p\_SSP1 — Resources—Land Cover—Cropland—Area actually irrigated (million ha)  
[PART 1/2]

|     | 2050 | 2055 | 2060 | 2070 | 2080 | 2090 | 2100 |
|-----|------|------|------|------|------|------|------|
| GLO | 389  | 387  | 386  | 381  | 364  | 349  | 330  |
| CAZ | 23   | 24   | 24   | 24   | 20   | 19   | 19   |
| CHA | 41   | 39   | 39   | 37   | 35   | 31   | 24   |
| EUR | 18   | 18   | 18   | 17   | 17   | 16   | 16   |
| IND | 51   | 52   | 50   | 49   | 49   | 49   | 48   |
| JPN | 2    | 2    | 2    | 2    | 2    | 2    | 2    |
| LAM | 42   | 42   | 42   | 42   | 35   | 33   | 33   |
| MEA | 7    | 7    | 7    | 7    | 7    | 7    | 7    |
| NEU | 4    | 4    | 4    | 4    | 4    | 4    | 4    |
| OAS | 77   | 75   | 74   | 73   | 71   | 63   | 54   |
| REF | 11   | 11   | 11   | 11   | 11   | 11   | 11   |
| SSA | 78   | 79   | 81   | 81   | 80   | 79   | 80   |
| USA | 34   | 34   | 34   | 34   | 33   | 33   | 33   |

Table 1547: MAgPIE m4p\_SSP1 — Resources—Land Cover—Cropland—Area actually irrigated (million ha)  
[PART 2/2]

|     | 1965 | 1970 | 1975 | 1980 | 1985 | 1990 | 1995 | 2000 | 2005 | 2010 |
|-----|------|------|------|------|------|------|------|------|------|------|
| GLO | 110  | 117  | 128  | 138  | 149  | 161  | 170  | 180  | 194  | 200  |
| CAZ | 1    | 1    | 1    | 1    | 1    | 2    | 2    | 2    | 2    | 2    |
| CHA | 33   | 33   | 34   | 35   | 35   | 36   | 37   | 39   | 44   | 47   |
| EUR | 5    | 5    | 6    | 6    | 7    | 7    | 8    | 8    | 8    | 8    |
| IND | 20   | 22   | 26   | 29   | 32   | 35   | 39   | 43   | 46   | 48   |
| JPN | 2    | 3    | 2    | 2    | 2    | 2    | 2    | 2    | 2    | 2    |
| LAM | 4    | 4    | 5    | 6    | 6    | 7    | 8    | 8    | 9    | 9    |
| MEA | 8    | 8    | 8    | 9    | 10   | 12   | 13   | 14   | 15   | 15   |
| NEU | 1    | 1    | 1    | 1    | 2    | 2    | 2    | 3    | 3    | 3    |
| OAS | 16   | 18   | 20   | 21   | 24   | 26   | 29   | 32   | 35   | 36   |
| REF | 7    | 7    | 9    | 11   | 12   | 13   | 13   | 12   | 12   | 12   |
| SSA | 2    | 2    | 2    | 2    | 2    | 3    | 3    | 3    | 3    | 4    |
| USA | 11   | 12   | 13   | 14   | 14   | 15   | 15   | 15   | 14   | 14   |

Table 1548: LUH2v2 — Resources—Land Cover—Cropland—Area actually irrigated (million ha)

|     | 2000 | 2001 | 2002 | 2003 | 2004 | 2005 | 2006 | 2007 | 2008 |
|-----|------|------|------|------|------|------|------|------|------|
| GLO | 252  | 252  | 252  | 252  | 252  | 252  | 252  | 252  | 252  |
| CAZ | 4    | 4    | 4    | 4    | 4    | 4    | 4    | 4    | 4    |
| CHA | 53   | 53   | 53   | 53   | 53   | 53   | 53   | 53   | 53   |
| EUR | 11   | 11   | 11   | 11   | 11   | 11   | 11   | 11   | 11   |
| IND | 58   | 58   | 58   | 58   | 58   | 58   | 58   | 58   | 58   |
| JPN | 3    | 3    | 3    | 3    | 3    | 3    | 3    | 3    | 3    |
| LAM | 16   | 16   | 16   | 16   | 16   | 16   | 16   | 16   | 16   |
| MEA | 19   | 19   | 19   | 19   | 19   | 19   | 19   | 19   | 19   |
| NEU | 4    | 4    | 4    | 4    | 4    | 4    | 4    | 4    | 4    |
| OAS | 43   | 43   | 43   | 43   | 43   | 43   | 43   | 43   | 43   |
| REF | 13   | 13   | 13   | 13   | 13   | 13   | 13   | 13   | 13   |
| SSA | 5    | 5    | 5    | 5    | 5    | 5    | 5    | 5    | 5    |
| USA | 22   | 22   | 22   | 22   | 22   | 22   | 22   | 22   | 22   |

Table 1549: GMIA — Resources—Land Cover—Cropland—Area actually irrigated (million ha)

54.1.2 Area equipped for irrigation

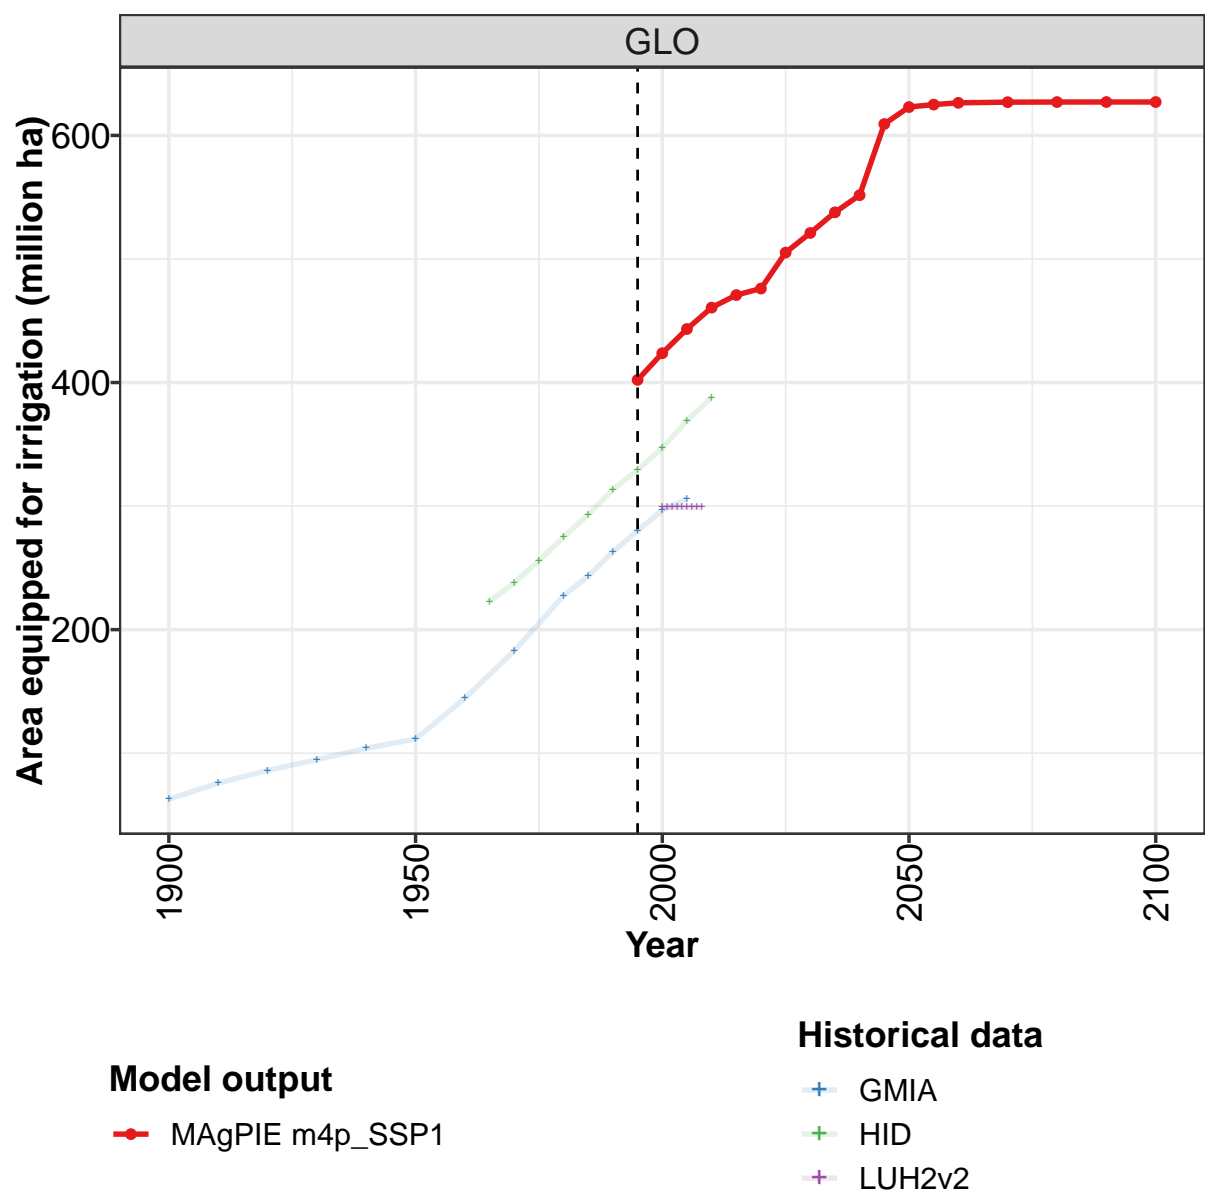

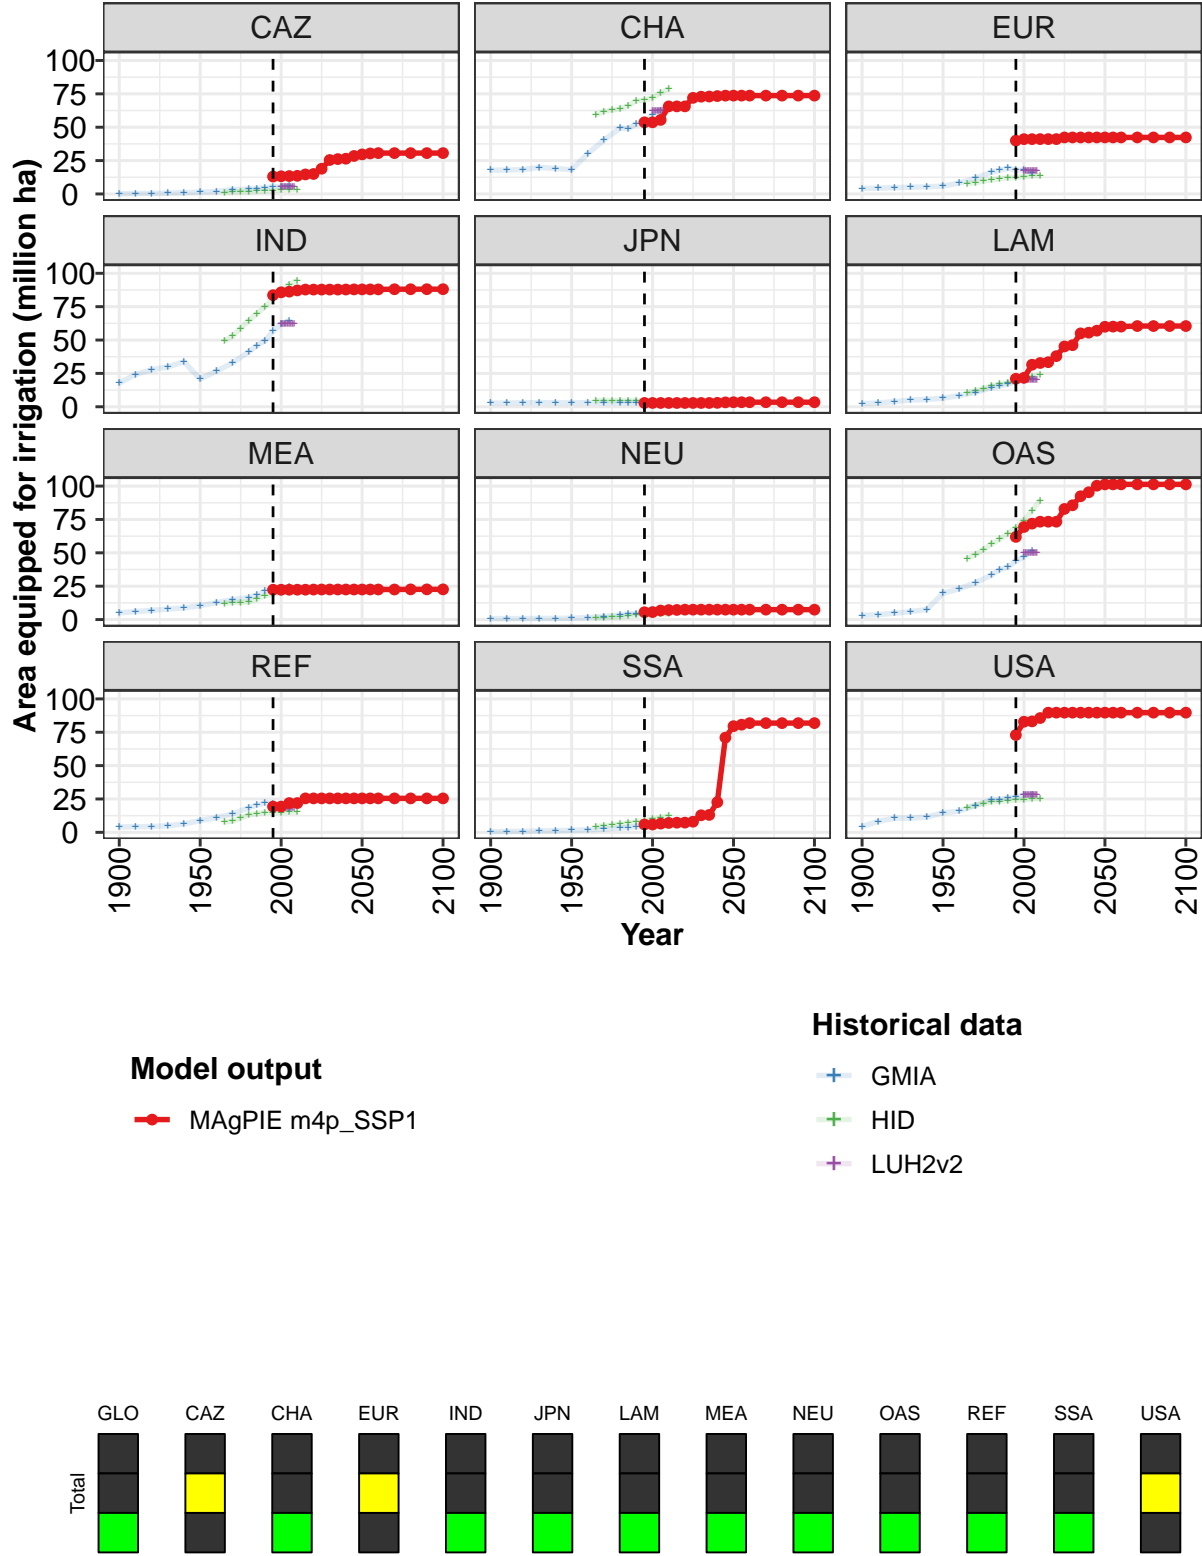

Figure 402: MAGPIE m4p\_SSP1 — Resources—Land Cover—Cropland—Area equipped for irrigation (million ha)

|     | 1995 | 2000 | 2005 | 2010 | 2015 | 2020 | 2025 | 2030 | 2035 | 2040 | 2045 |
|-----|------|------|------|------|------|------|------|------|------|------|------|
| GLO | 402  | 424  | 443  | 461  | 471  | 476  | 505  | 521  | 538  | 552  | 609  |
| CAZ | 13   | 13   | 13   | 14   | 15   | 15   | 19   | 25   | 26   | 26   | 28   |
| CHA | 54   | 54   | 56   | 66   | 66   | 66   | 72   | 73   | 73   | 73   | 74   |
| EUR | 40   | 41   | 41   | 41   | 41   | 41   | 42   | 42   | 42   | 42   | 42   |
| IND | 84   | 86   | 86   | 87   | 88   | 88   | 88   | 88   | 88   | 88   | 88   |
| JPN | 3    | 3    | 3    | 3    | 3    | 3    | 3    | 3    | 3    | 3    | 3    |
| LAM | 21   | 22   | 32   | 33   | 33   | 38   | 45   | 46   | 55   | 56   | 57   |
| MEA | 22   | 22   | 22   | 22   | 22   | 22   | 23   | 23   | 23   | 23   | 23   |
| NEU | 5    | 6    | 7    | 7    | 7    | 7    | 7    | 7    | 7    | 7    | 7    |
| OAS | 62   | 69   | 72   | 73   | 73   | 73   | 83   | 86   | 92   | 95   | 100  |
| REF | 19   | 19   | 22   | 22   | 25   | 25   | 25   | 25   | 25   | 25   | 25   |
| SSA | 6    | 6    | 7    | 7    | 7    | 7    | 8    | 13   | 13   | 23   | 71   |
| USA | 73   | 83   | 83   | 86   | 90   | 90   | 90   | 90   | 90   | 90   | 90   |

Table 1550: MAgPIE m4p\_SSP1 — Resources—Land Cover—Cropland—Area equipped for irrigation (million ha) [PART 1/2]

|     | 2050 | 2055 | 2060 | 2070 | 2080 | 2090 | 2100 |
|-----|------|------|------|------|------|------|------|
| GLO | 623  | 625  | 626  | 627  | 627  | 627  | 627  |
| CAZ | 30   | 30   | 31   | 31   | 31   | 31   | 31   |
| CHA | 74   | 74   | 74   | 74   | 74   | 74   | 74   |
| EUR | 42   | 42   | 42   | 42   | 42   | 42   | 42   |
| IND | 88   | 88   | 88   | 88   | 88   | 88   | 88   |
| JPN | 3    | 3    | 3    | 3    | 3    | 3    | 3    |
| LAM | 60   | 60   | 60   | 60   | 60   | 60   | 60   |
| MEA | 23   | 23   | 23   | 23   | 23   | 23   | 23   |
| NEU | 7    | 7    | 7    | 7    | 7    | 7    | 7    |
| OAS | 101  | 101  | 101  | 101  | 101  | 101  | 101  |
| REF | 25   | 25   | 25   | 25   | 25   | 25   | 25   |
| SSA | 80   | 81   | 82   | 82   | 82   | 82   | 82   |
| USA | 90   | 90   | 90   | 90   | 90   | 90   | 90   |

Table 1551: MAgPIE m4p\_SSP1 — Resources—Land Cover—Cropland—Area equipped for irrigation (million ha) [PART 2/2]

|     | 1900 | 1910 | 1920 | 1930 | 1940 | 1950 | 1960 | 1970 | 1980 | 1985 | 1990 |
|-----|------|------|------|------|------|------|------|------|------|------|------|
| GLO | 63   | 76   | 86   | 95   | 104  | 111  | 144  | 183  | 227  | 243  | 263  |
| CAZ | 0    | 0    | 0    | 1    | 1    | 1    | 2    | 3    | 4    | 4    | 5    |
| CHA | 18   | 18   | 18   | 20   | 19   | 18   | 30   | 40   | 49   | 49   | 52   |
| EUR | 4    | 4    | 5    | 5    | 5    | 6    | 8    | 12   | 16   | 18   | 19   |
| IND | 18   | 24   | 28   | 30   | 34   | 21   | 27   | 33   | 41   | 46   | 49   |
| JPN | 3    | 3    | 3    | 3    | 3    | 3    | 3    | 3    | 3    | 3    | 3    |
| LAM | 2    | 3    | 4    | 5    | 6    | 6    | 8    | 11   | 14   | 16   | 17   |
| MEA | 5    | 6    | 7    | 8    | 9    | 10   | 13   | 15   | 17   | 18   | 21   |
| NEU | 1    | 1    | 1    | 1    | 1    | 1    | 1    | 2    | 3    | 4    | 5    |
| OAS | 3    | 4    | 5    | 6    | 8    | 20   | 23   | 27   | 33   | 37   | 39   |
| REF | 4    | 4    | 4    | 5    | 6    | 9    | 11   | 14   | 18   | 20   | 22   |
| SSA | 1    | 1    | 1    | 1    | 1    | 2    | 2    | 2    | 3    | 4    | 4    |
| USA | 4    | 8    | 11   | 11   | 11   | 15   | 16   | 20   | 25   | 24   | 26   |

Table 1552: HID — Resources—Land Cover—Cropland—Area equipped for irrigation (million ha) [PART 1/2]



|     | 1995 | 2000 | 2005 |
|-----|------|------|------|
| GLO | 280  | 297  | 306  |
| CAZ | 6    | 5    | 6    |
| CHA | 54   | 59   | 62   |
| EUR | 18   | 18   | 16   |
| IND | 57   | 62   | 65   |
| JPN | 3    | 3    | 3    |
| LAM | 19   | 20   | 21   |
| MEA | 23   | 24   | 24   |
| NEU | 5    | 6    | 6    |
| OAS | 44   | 47   | 51   |
| REF | 21   | 20   | 17   |
| SSA | 5    | 5    | 5    |
| USA | 26   | 28   | 28   |

Table 1553: HID — Resources—Land Cover—Cropland—Area equipped for irrigation (million ha) [PART 2/2]

|     | 1965 | 1970 | 1975 | 1980 | 1985 | 1990 | 1995 | 2000 | 2005 | 2010 |
|-----|------|------|------|------|------|------|------|------|------|------|
| GLO | 223  | 238  | 256  | 275  | 293  | 313  | 329  | 347  | 369  | 388  |
| CAZ | 1    | 1    | 2    | 2    | 2    | 2    | 3    | 3    | 3    | 3    |
| CHA | 59   | 62   | 63   | 64   | 66   | 70   | 70   | 72   | 76   | 79   |
| EUR | 8    | 9    | 10   | 11   | 11   | 12   | 12   | 13   | 14   | 14   |
| IND | 49   | 53   | 59   | 65   | 70   | 75   | 81   | 87   | 92   | 95   |
| JPN | 5    | 5    | 5    | 5    | 5    | 5    | 4    | 4    | 4    | 4    |
| LAM | 11   | 12   | 14   | 16   | 17   | 18   | 19   | 20   | 22   | 24   |
| MEA | 12   | 13   | 13   | 13   | 15   | 18   | 19   | 20   | 22   | 23   |
| NEU | 1    | 1    | 2    | 2    | 3    | 3    | 4    | 4    | 4    | 4    |
| OAS | 46   | 49   | 53   | 56   | 60   | 64   | 69   | 74   | 82   | 89   |
| REF | 8    | 8    | 11   | 13   | 14   | 15   | 15   | 15   | 15   | 15   |
| SSA | 4    | 5    | 5    | 6    | 7    | 8    | 9    | 10   | 11   | 12   |
| USA | 19   | 20   | 22   | 23   | 23   | 24   | 24   | 25   | 25   | 25   |

Table 1554: LUH2v2 — Resources—Land Cover—Cropland—Area equipped for irrigation (million ha)

|     | 2000 | 2001 | 2002 | 2003 | 2004 | 2005 | 2006 | 2007 | 2008 |
|-----|------|------|------|------|------|------|------|------|------|
| GLO | 299  | 299  | 299  | 299  | 299  | 299  | 299  | 299  | 299  |
| CAZ | 5    | 5    | 5    | 5    | 5    | 5    | 5    | 5    | 5    |
| CHA | 62   | 62   | 62   | 62   | 62   | 62   | 62   | 62   | 62   |
| EUR | 17   | 17   | 17   | 17   | 17   | 17   | 17   | 17   | 17   |
| IND | 62   | 62   | 62   | 62   | 62   | 62   | 62   | 62   | 62   |
| JPN | 3    | 3    | 3    | 3    | 3    | 3    | 3    | 3    | 3    |
| LAM | 20   | 20   | 20   | 20   | 20   | 20   | 20   | 20   | 20   |
| MEA | 23   | 23   | 23   | 23   | 23   | 23   | 23   | 23   | 23   |
| NEU | 6    | 6    | 6    | 6    | 6    | 6    | 6    | 6    | 6    |
| OAS | 50   | 50   | 50   | 50   | 50   | 50   | 50   | 50   | 50   |
| REF | 19   | 19   | 19   | 19   | 19   | 19   | 19   | 19   | 19   |
| SSA | 5    | 5    | 5    | 5    | 5    | 5    | 5    | 5    | 5    |
| USA | 28   | 28   | 28   | 28   | 28   | 28   | 28   | 28   | 28   |

Table 1555: GMIA — Resources—Land Cover—Cropland—Area equipped for irrigation (million ha)

54.1.3 Bioenergy crops

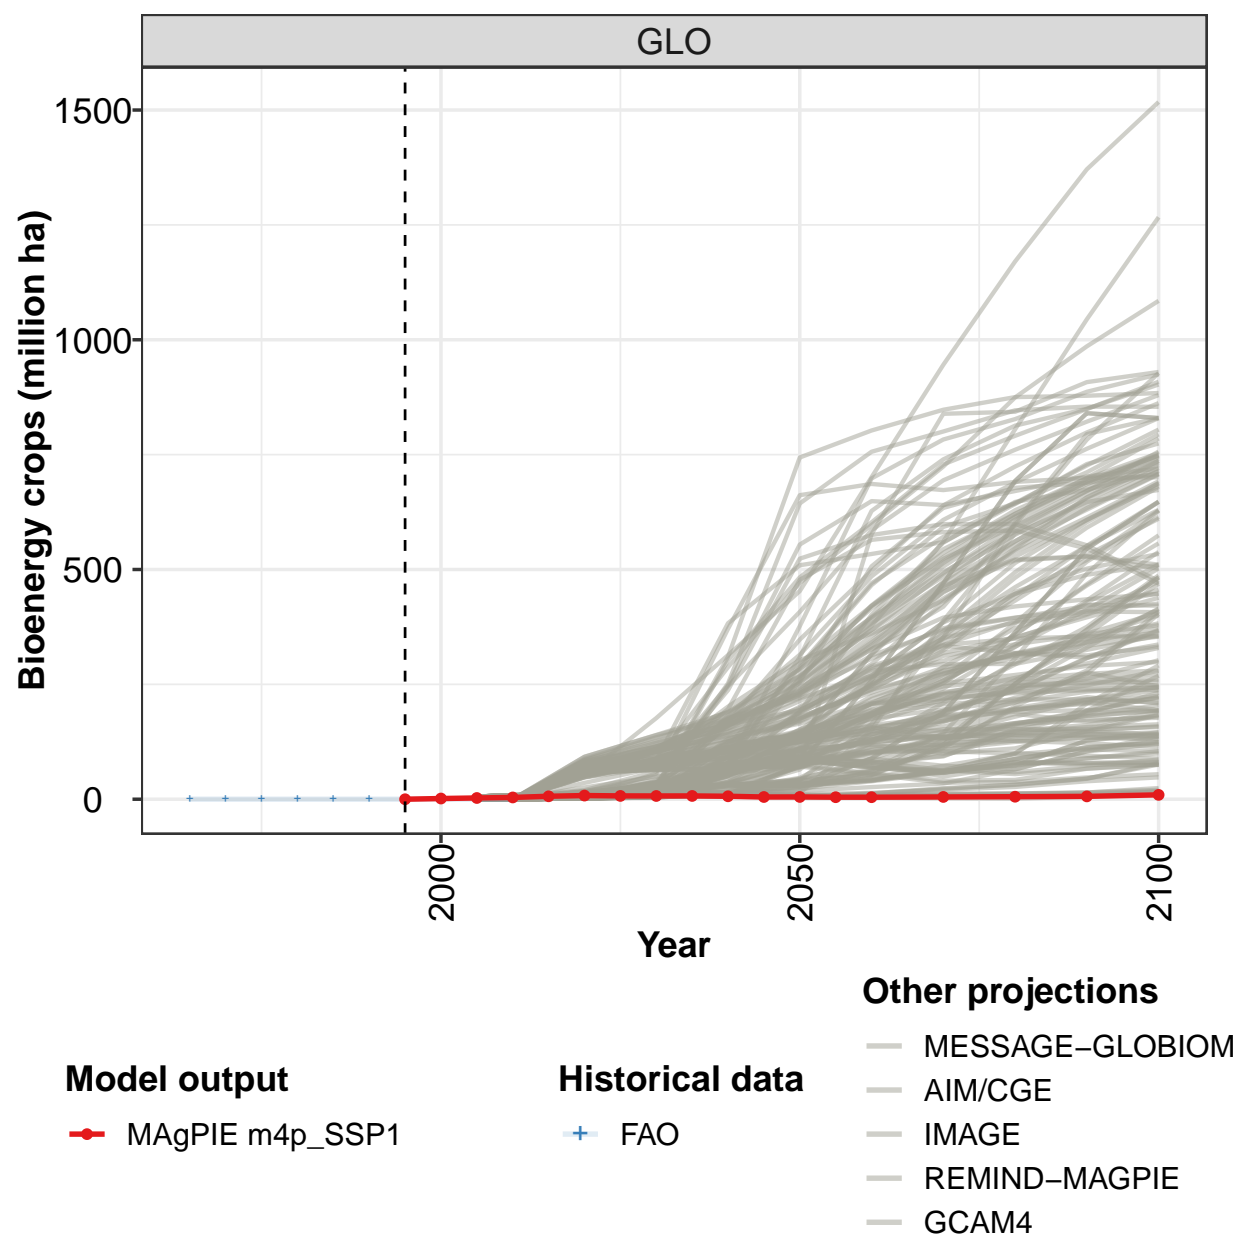

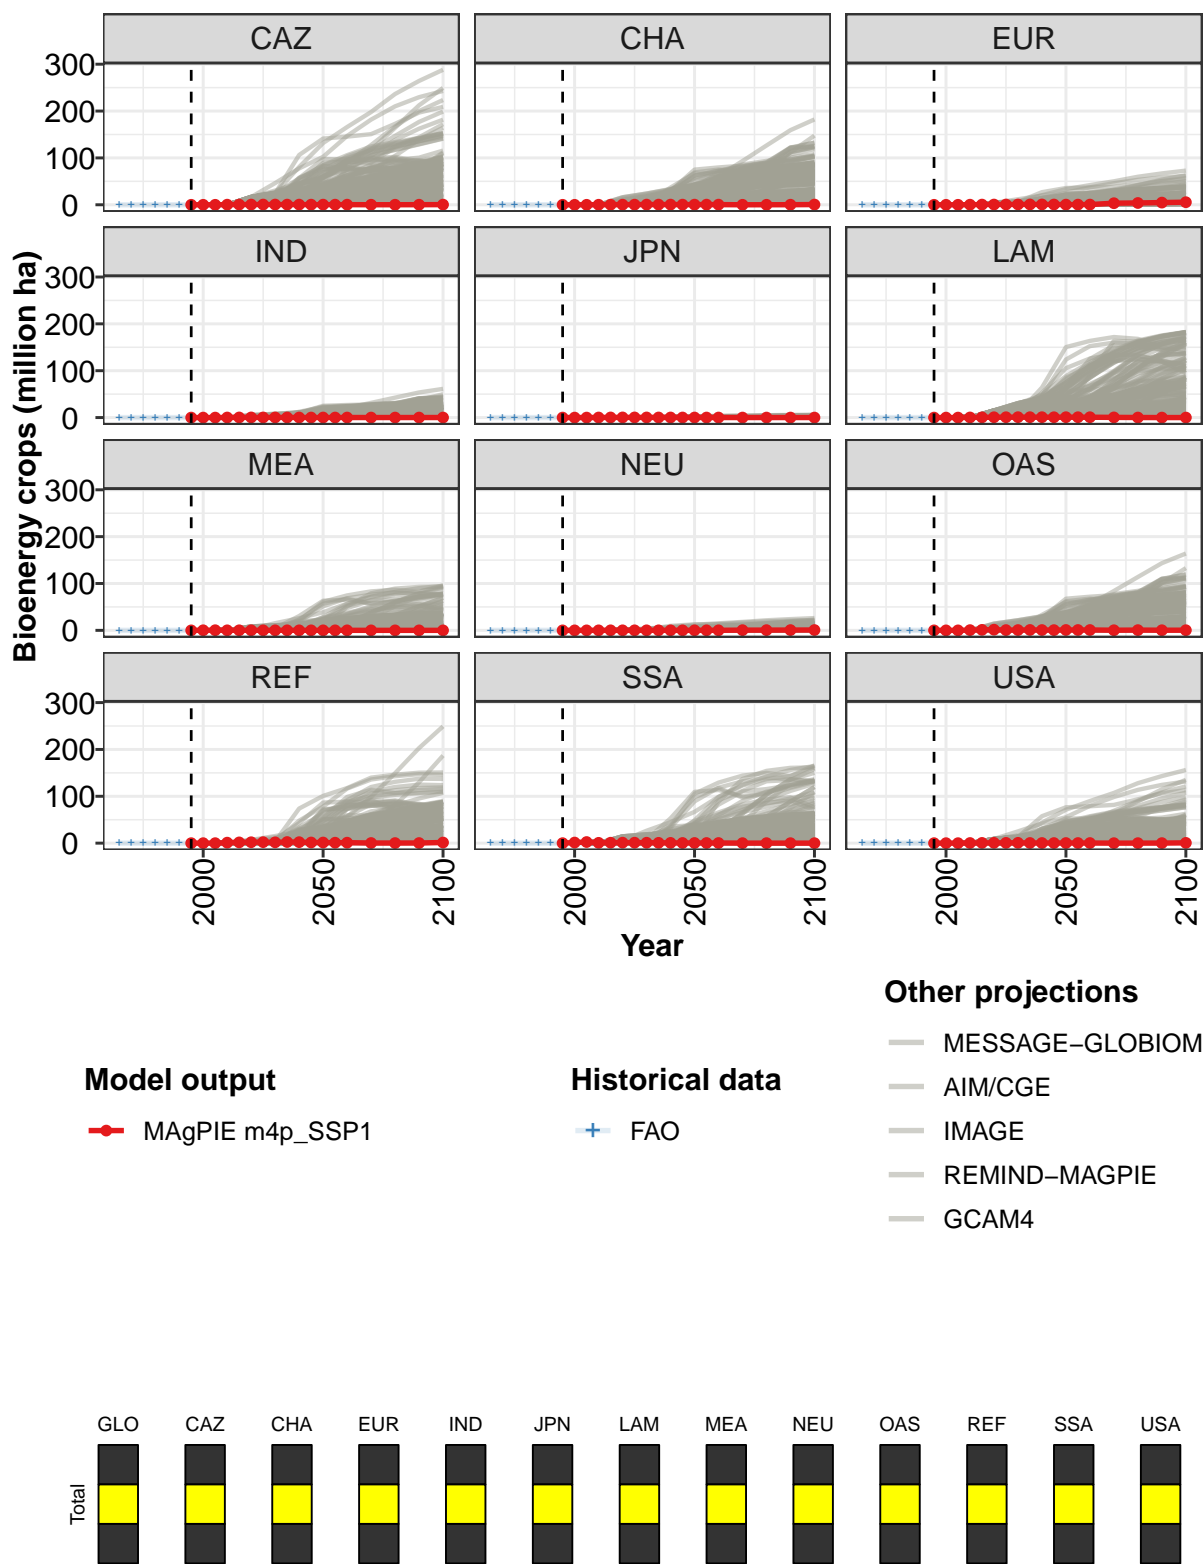

Figure 403: MAgPIE m4p\_SSP1 — Resources—Land Cover—Cropland—Bioenergy crops (million ha)

|     | 1995 | 2000 | 2005 | 2010 | 2015 | 2020 | 2025 | 2030 | 2035 | 2040 | 2045 |
|-----|------|------|------|------|------|------|------|------|------|------|------|
| GLO | 0.00 | 1.52 | 2.72 | 3.88 | 6.43 | 7.97 | 7.23 | 7.11 | 7.13 | 6.43 | 4.85 |
| CAZ | 0.00 | 0.00 | 0.00 | 0.25 | 0.41 | 0.50 | 0.46 | 0.46 | 0.38 | 0.34 | 0.25 |
| CHA | 0.00 | 0.00 | 0.00 | 0.11 | 0.17 | 0.27 | 0.31 | 0.38 | 0.36 | 0.36 | 0.32 |
| EUR | 0.00 | 0.00 | 0.00 | 0.22 | 0.41 | 0.54 | 0.57 | 0.66 | 0.62 | 0.69 | 0.60 |
| IND | 0.00 | 0.00 | 0.00 | 0.14 | 0.25 | 0.31 | 0.28 | 0.25 | 0.19 | 0.16 | 0.12 |
| JPN | 0.00 | 0.00 | 0.00 | 0.13 | 0.24 | 0.31 | 0.29 | 0.27 | 0.22 | 0.18 | 0.12 |
| LAM | 0.00 | 0.00 | 0.00 | 0.24 | 0.49 | 0.67 | 0.75 | 0.87 | 0.80 | 0.80 | 0.68 |
| MEA | 0.00 | 0.20 | 0.30 | 0.09 | 0.14 | 0.12 | 0.10 | 0.08 | 0.12 | 0.05 | 0.04 |
| NEU | 0.00 | 0.00 | 0.00 | 0.05 | 0.09 | 0.12 | 0.11 | 0.12 | 0.10 | 0.11 | 0.10 |
| OAS | 0.00 | 0.00 | 0.00 | 0.52 | 1.07 | 1.47 | 0.59 | 0.62 | 0.85 | 0.73 | 0.55 |
| REF | 0.00 | 0.00 | 0.00 | 1.06 | 1.63 | 1.93 | 2.12 | 1.73 | 2.39 | 2.11 | 1.44 |
| SSA | 0.00 | 1.32 | 2.41 | 0.71 | 0.97 | 1.10 | 1.02 | 0.93 | 0.72 | 0.58 | 0.39 |
| USA | 0.00 | 0.00 | 0.00 | 0.34 | 0.56 | 0.63 | 0.62 | 0.71 | 0.37 | 0.32 | 0.23 |

Table 1556: MAgPIE m4p\_SSP1 — Resources—Land Cover—Cropland—Bioenergy crops (million ha) [PART 1/2]

|     | 2050 | 2055 | 2060 | 2070 | 2080 | 2090 | 2100 |
|-----|------|------|------|------|------|------|------|
| GLO | 5.00 | 4.42 | 4.40 | 4.96 | 5.49 | 6.21 | 9.46 |
| CAZ | 0.28 | 0.26 | 0.26 | 0.06 | 0.09 | 0.13 | 0.34 |
| CHA | 0.32 | 0.32 | 0.30 | 0.00 | 0.05 | 0.12 | 0.47 |
| EUR | 0.39 | 0.38 | 0.40 | 3.34 | 3.83 | 4.65 | 5.48 |
| IND | 0.13 | 0.12 | 0.12 | 0.06 | 0.06 | 0.04 | 0.09 |
| JPN | 0.13 | 0.12 | 0.12 | 0.04 | 0.05 | 0.06 | 0.06 |
| LAM | 0.80 | 0.76 | 0.73 | 0.35 | 0.11 | 0.00 | 0.01 |
| MEA | 0.04 | 0.04 | 0.04 | 0.01 | 0.01 | 0.00 | 0.00 |
| NEU | 0.12 | 0.12 | 0.13 | 0.43 | 0.48 | 0.57 | 0.71 |
| OAS | 0.81 | 0.73 | 0.74 | 0.29 | 0.52 | 0.28 | 0.31 |
| REF | 1.34 | 0.99 | 1.01 | 0.30 | 0.20 | 0.25 | 1.36 |
| SSA | 0.39 | 0.33 | 0.32 | 0.08 | 0.04 | 0.00 | 0.00 |
| USA | 0.26 | 0.25 | 0.25 | 0.00 | 0.03 | 0.10 | 0.61 |

Table 1557: MAgPIE m4p\_SSP1 — Resources—Land Cover—Cropland—Bioenergy crops (million ha) [PART 2/2]

|     | 1965 | 1970 | 1975 | 1980 | 1985 | 1990 | 1995 | 2000 | 2005 | 2010 |
|-----|------|------|------|------|------|------|------|------|------|------|
| GLO | 0    | 0    | 0    | 0    | 0    | 0    | 0    | 0    | 0    | 0    |
| CAZ | 0    | 0    | 0    | 0    | 0    | 0    | 0    | 0    | 0    | 0    |
| CHA | 0    | 0    | 0    | 0    | 0    | 0    | 0    | 0    | 0    | 0    |
| EUR | 0    | 0    | 0    | 0    | 0    | 0    | 0    | 0    | 0    | 0    |
| IND | 0    | 0    | 0    | 0    | 0    | 0    | 0    | 0    | 0    | 0    |
| JPN | 0    | 0    | 0    | 0    | 0    | 0    | 0    | 0    | 0    | 0    |
| LAM | 0    | 0    | 0    | 0    | 0    | 0    | 0    | 0    | 0    | 0    |
| MEA | 0    | 0    | 0    | 0    | 0    | 0    | 0    | 0    | 0    | 0    |
| NEU | 0    | 0    | 0    | 0    | 0    | 0    | 0    | 0    | 0    | 0    |
| OAS | 0    | 0    | 0    | 0    | 0    | 0    | 0    | 0    | 0    | 0    |
| REF | 0    | 0    | 0    | 0    | 0    | 0    | 0    | 0    | 0    | 0    |
| SSA | 0    | 0    | 0    | 0    | 0    | 0    | 0    | 0    | 0    | 0    |
| USA | 0    | 0    | 0    | 0    | 0    | 0    | 0    | 0    | 0    | 0    |

Table 1558: FAO — Resources—Land Cover—Cropland—Bioenergy crops (million ha)

54.1.4 Crops

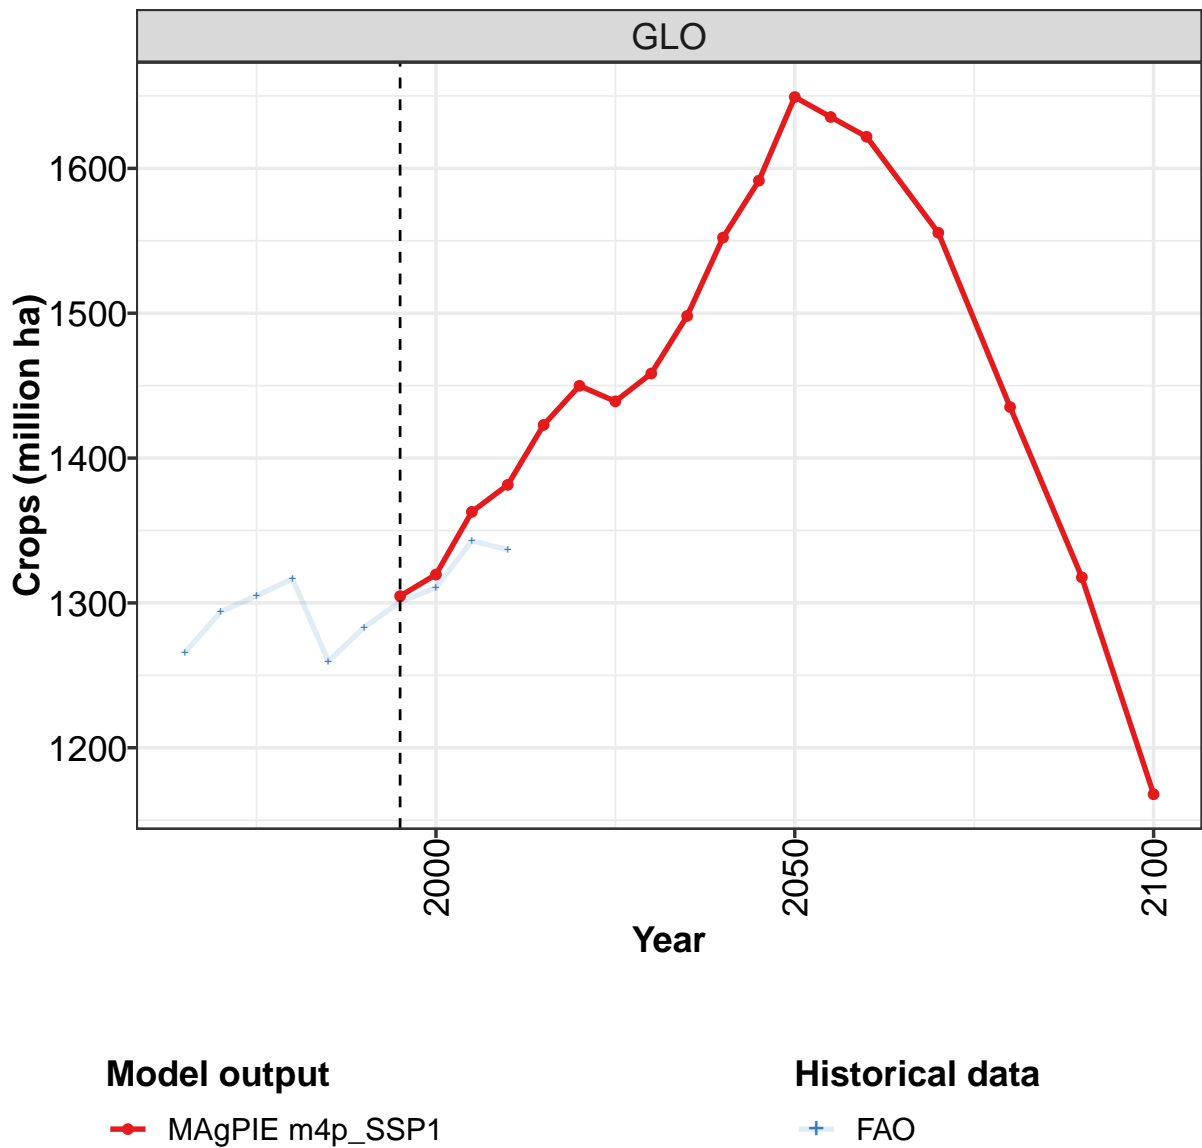

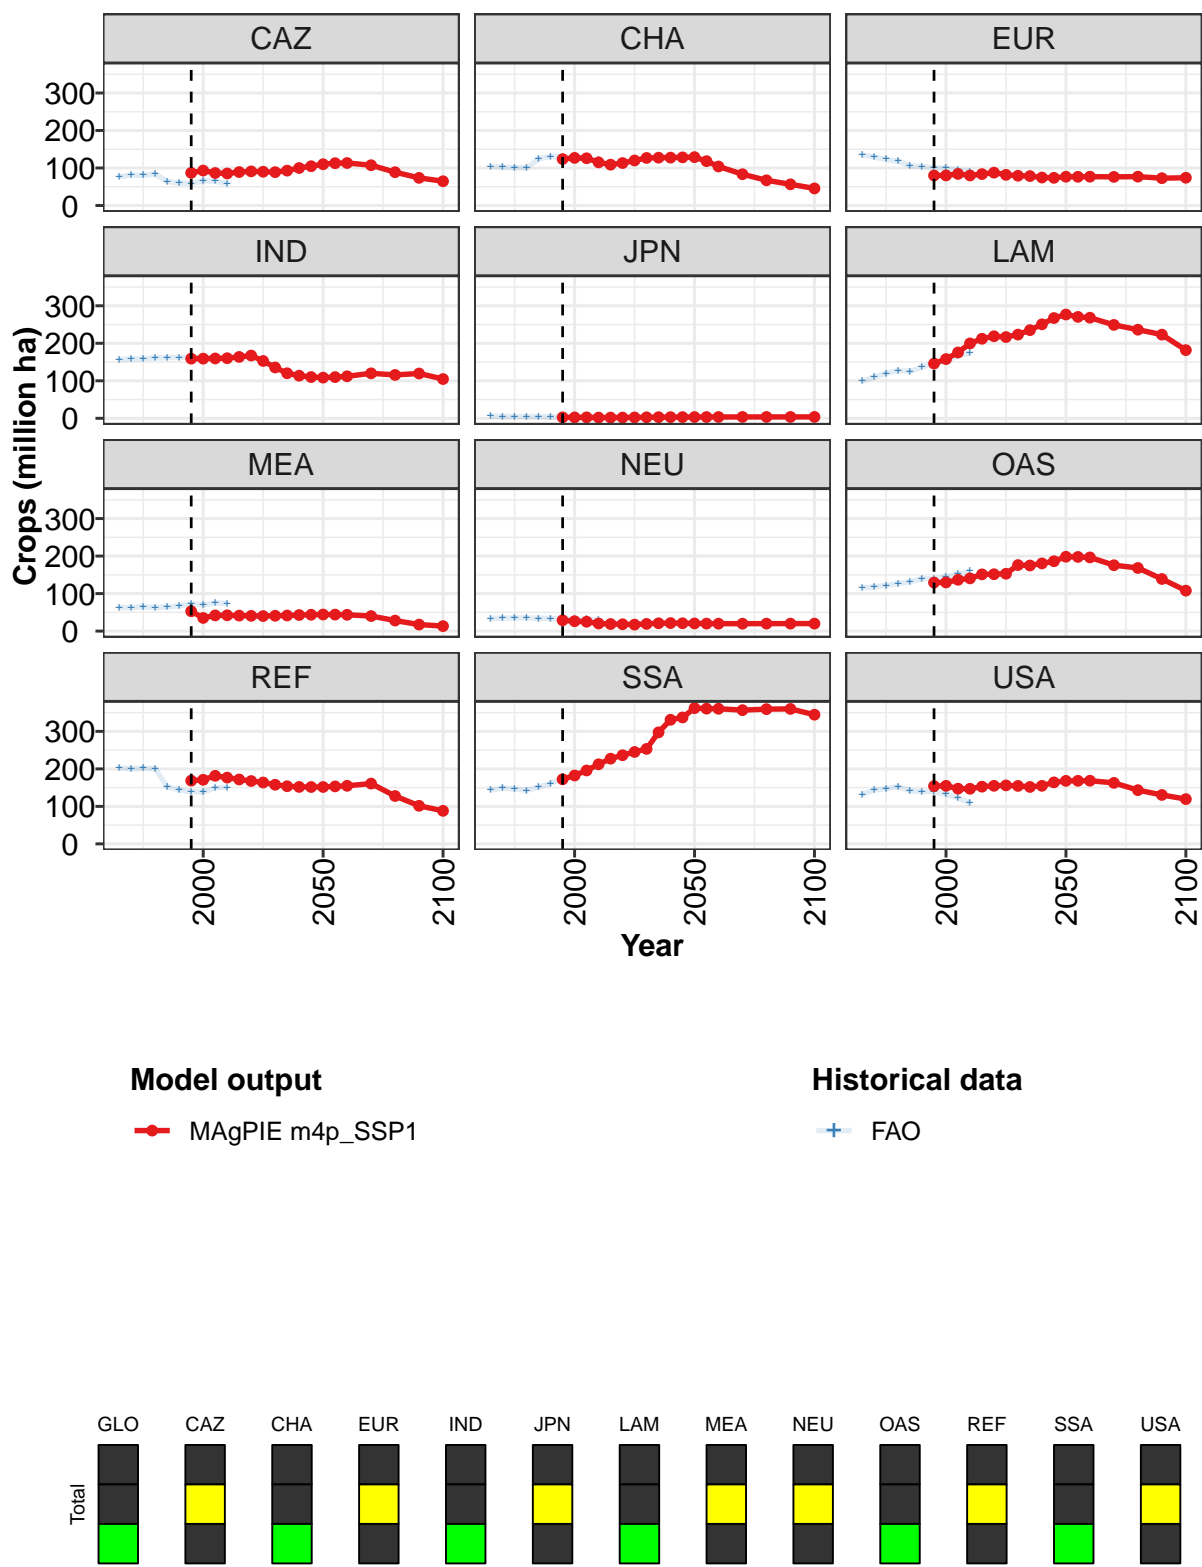

Figure 404: MAgPIE m4p\_SSP1 — Resources—Land Cover—Cropland—Crops (million ha)

|     | 1995 | 2000 | 2005 | 2010 | 2015 | 2020 | 2025 | 2030 | 2035 | 2040 | 2045 |
|-----|------|------|------|------|------|------|------|------|------|------|------|
| GLO | 1305 | 1320 | 1363 | 1381 | 1423 | 1450 | 1439 | 1458 | 1498 | 1552 | 1592 |
| CAZ | 87   | 93   | 87   | 85   | 89   | 91   | 90   | 89   | 93   | 100  | 105  |
| CHA | 124  | 127  | 126  | 115  | 109  | 113  | 120  | 127  | 128  | 128  | 128  |
| EUR | 80   | 80   | 84   | 80   | 84   | 88   | 82   | 79   | 79   | 75   | 74   |
| IND | 159  | 159  | 160  | 160  | 164  | 167  | 153  | 136  | 120  | 114  | 110  |
| JPN | 3    | 2    | 3    | 2    | 2    | 2    | 2    | 3    | 3    | 3    | 3    |
| LAM | 146  | 158  | 176  | 200  | 212  | 219  | 217  | 223  | 235  | 251  | 267  |
| MEA | 53   | 35   | 42   | 42   | 41   | 41   | 40   | 41   | 42   | 43   | 44   |
| NEU | 29   | 26   | 25   | 20   | 19   | 18   | 17   | 19   | 21   | 21   | 21   |
| OAS | 129  | 130  | 137  | 141  | 151  | 152  | 153  | 176  | 175  | 180  | 186  |
| REF | 169  | 171  | 182  | 177  | 172  | 168  | 164  | 158  | 154  | 152  | 152  |
| SSA | 172  | 182  | 196  | 212  | 227  | 236  | 245  | 253  | 297  | 331  | 337  |
| USA | 154  | 155  | 147  | 147  | 153  | 155  | 156  | 155  | 152  | 155  | 164  |

Table 1559: MAgPIE m4p\_SSP1 — Resources—Land Cover—Cropland—Crops (million ha) [PART 1/2]

|     | 2050 | 2055 | 2060 | 2070 | 2080 | 2090 | 2100 |
|-----|------|------|------|------|------|------|------|
| GLO | 1649 | 1635 | 1622 | 1556 | 1435 | 1318 | 1168 |
| CAZ | 110  | 113  | 113  | 107  | 89   | 74   | 65   |
| CHA | 129  | 118  | 104  | 83   | 67   | 56   | 46   |
| EUR | 77   | 77   | 77   | 76   | 77   | 73   | 74   |
| IND | 109  | 110  | 112  | 120  | 116  | 119  | 105  |
| JPN | 3    | 3    | 4    | 4    | 4    | 4    | 4    |
| LAM | 277  | 270  | 268  | 249  | 236  | 223  | 182  |
| MEA | 44   | 44   | 44   | 40   | 28   | 17   | 13   |
| NEU | 20   | 20   | 20   | 20   | 20   | 20   | 20   |
| OAS | 198  | 198  | 197  | 176  | 168  | 139  | 108  |
| REF | 152  | 153  | 155  | 161  | 128  | 102  | 88   |
| SSA | 362  | 361  | 360  | 357  | 359  | 360  | 344  |
| USA | 168  | 168  | 168  | 163  | 143  | 131  | 119  |

Table 1560: MAgPIE m4p\_SSP1 — Resources—Land Cover—Cropland—Crops (million ha) [PART 2/2]

|     | 1965 | 1970 | 1975 | 1980 | 1985 | 1990 | 1995 | 2000 | 2005 | 2010 |
|-----|------|------|------|------|------|------|------|------|------|------|
| GLO | 1266 | 1294 | 1305 | 1317 | 1260 | 1283 | 1301 | 1311 | 1343 | 1337 |
| CAZ | 77   | 81   | 81   | 84   | 64   | 60   | 59   | 66   | 65   | 58   |
| CHA | 105  | 103  | 101  | 100  | 124  | 131  | 129  | 128  | 124  | 121  |
| EUR | 135  | 129  | 123  | 118  | 106  | 104  | 100  | 99   | 94   | 91   |
| IND | 156  | 158  | 159  | 161  | 162  | 162  | 162  | 162  | 161  | 160  |
| JPN | 6    | 5    | 5    | 4    | 4    | 4    | 4    | 4    | 4    | 3    |
| LAM | 99   | 110  | 120  | 127  | 125  | 136  | 148  | 152  | 167  | 174  |
| MEA | 62   | 63   | 65   | 63   | 64   | 67   | 73   | 69   | 75   | 74   |
| NEU | 34   | 35   | 35   | 36   | 34   | 34   | 33   | 32   | 32   | 29   |
| OAS | 115  | 118  | 122  | 127  | 131  | 140  | 139  | 145  | 152  | 160  |
| REF | 202  | 200  | 202  | 201  | 152  | 144  | 139  | 138  | 150  | 151  |
| SSA | 143  | 149  | 146  | 143  | 151  | 161  | 175  | 183  | 198  | 208  |
| USA | 132  | 144  | 147  | 153  | 142  | 140  | 139  | 133  | 122  | 109  |

Table 1561: FAO — Resources—Land Cover—Cropland—Crops (million ha)

54.1.5 Crops—Cereals

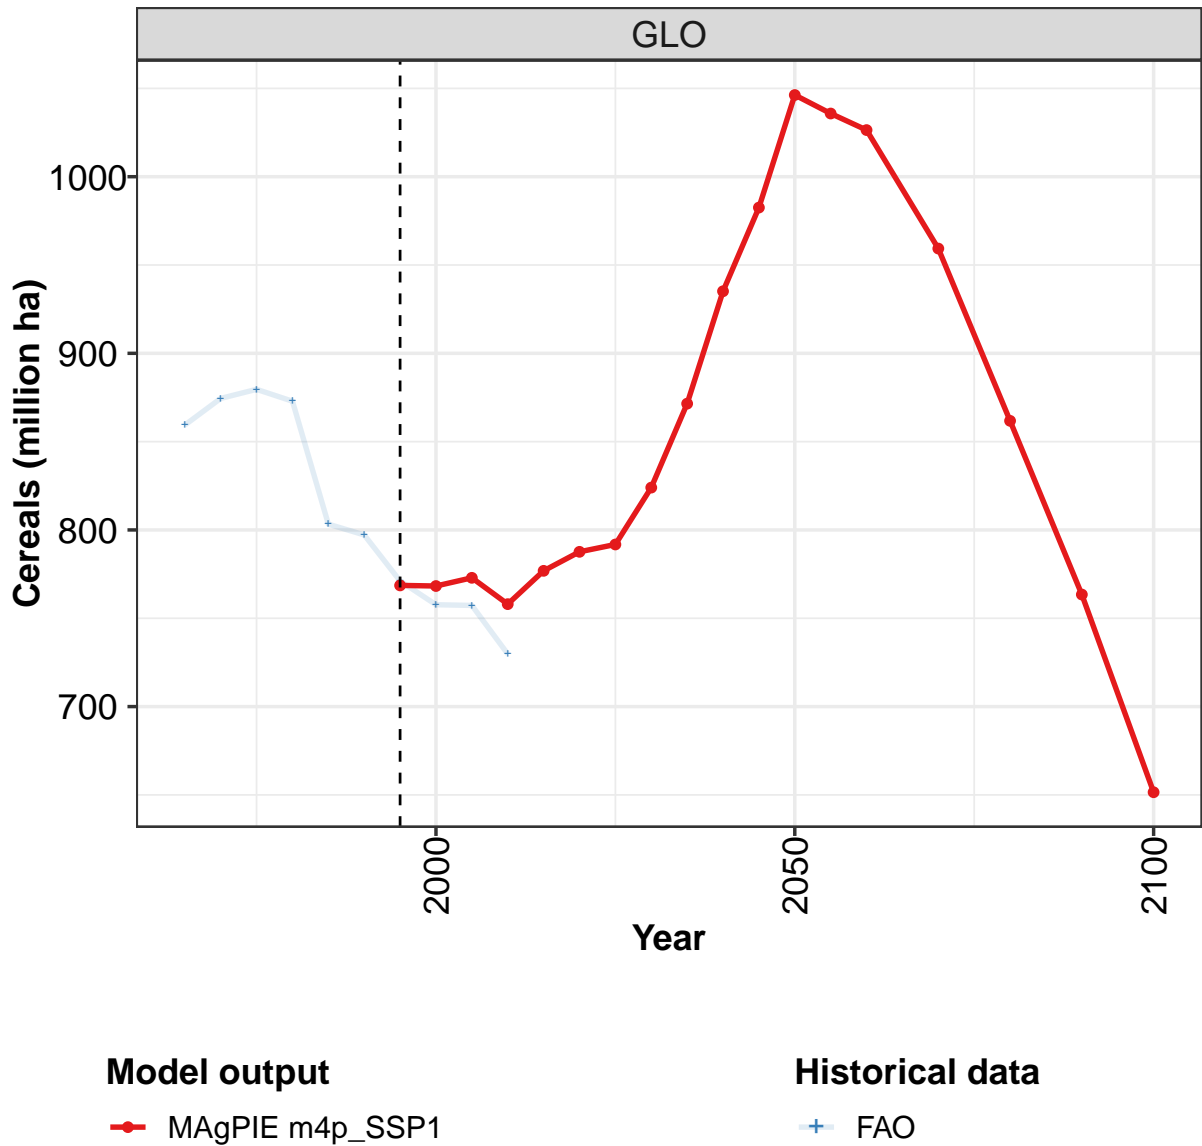



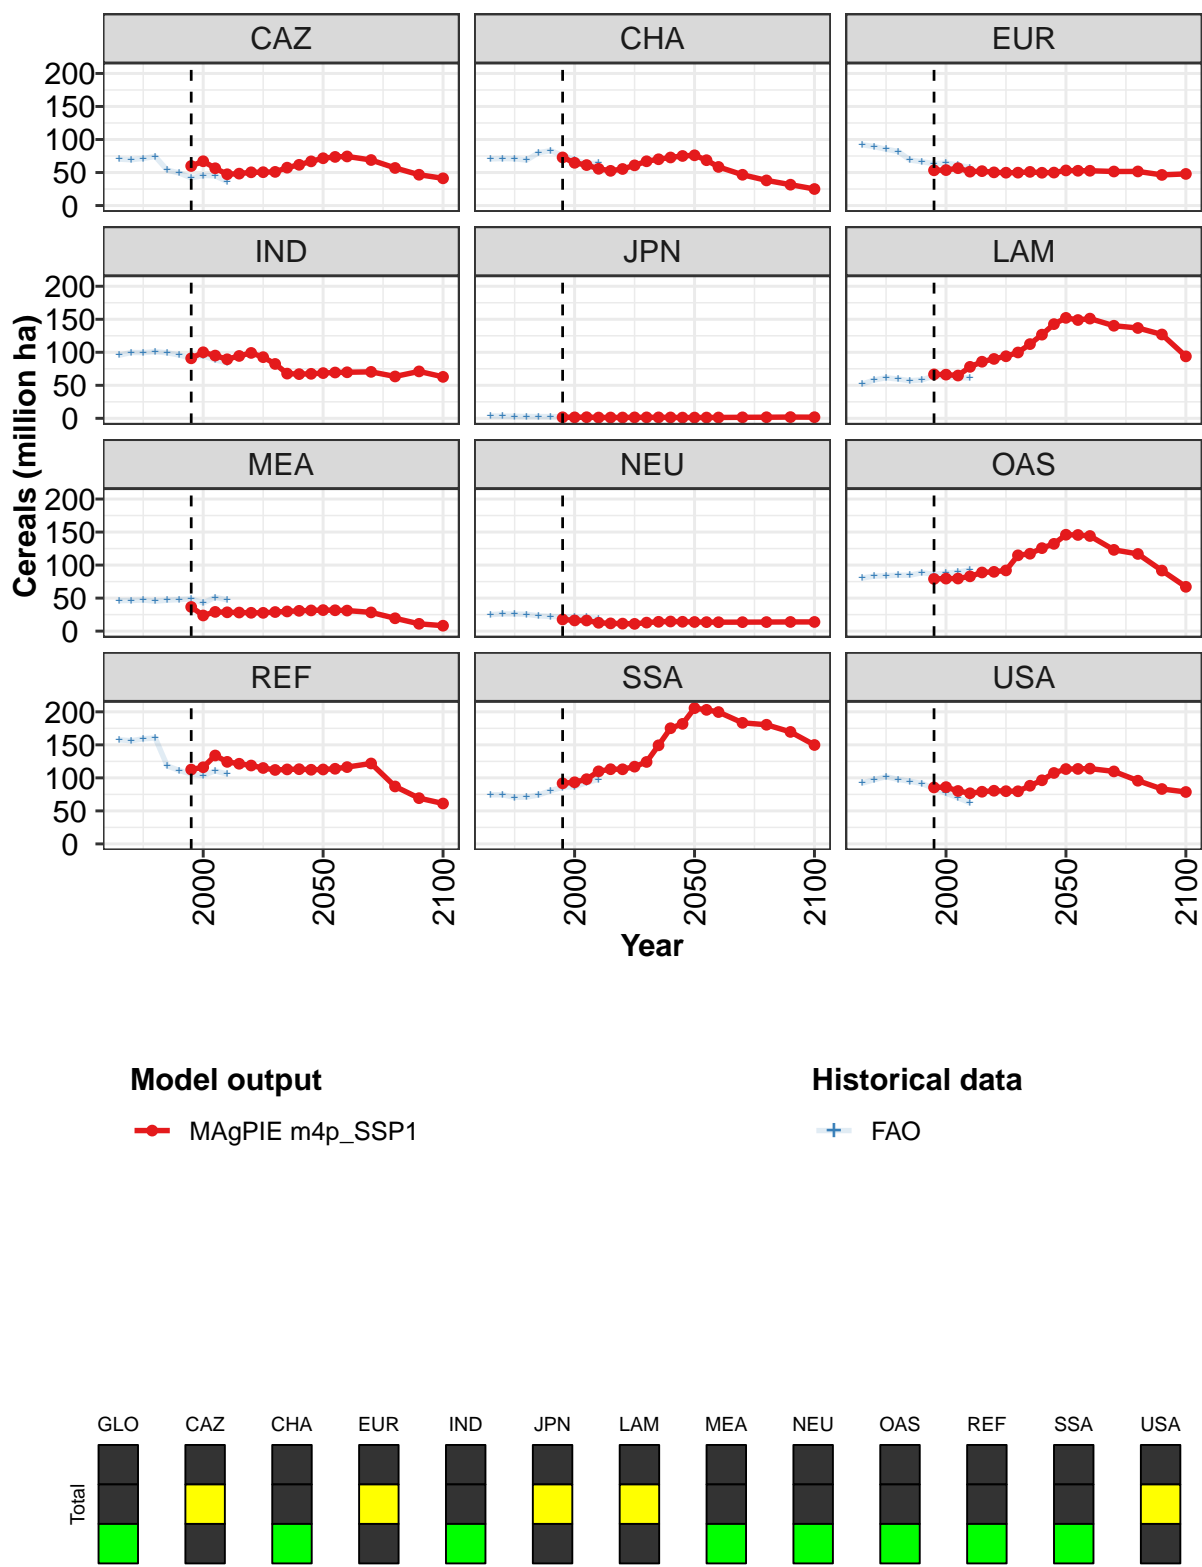

Figure 405: MAgPIE m4p\_SSP1 — Resources—Land Cover—Cropland—Crops—Cereals (million ha)

|     | 1995 | 2000 | 2005 | 2010 | 2015 | 2020 | 2025 | 2030 | 2035 | 2040 | 2045 |
|-----|------|------|------|------|------|------|------|------|------|------|------|
| GLO | 769  | 768  | 773  | 758  | 777  | 788  | 792  | 824  | 872  | 935  | 983  |
| CAZ | 60   | 67   | 56   | 47   | 48   | 50   | 51   | 51   | 57   | 62   | 67   |
| CHA | 73   | 65   | 61   | 56   | 53   | 55   | 61   | 67   | 70   | 73   | 75   |
| EUR | 53   | 54   | 57   | 51   | 52   | 50   | 50   | 50   | 51   | 50   | 50   |
| IND | 91   | 100  | 95   | 89   | 94   | 99   | 93   | 82   | 68   | 67   | 67   |
| JPN | 2    | 2    | 2    | 1    | 1    | 1    | 1    | 1    | 1    | 1    | 1    |
| LAM | 67   | 66   | 65   | 78   | 86   | 90   | 94   | 100  | 112  | 127  | 143  |
| MEA | 37   | 24   | 29   | 29   | 28   | 28   | 28   | 29   | 30   | 31   | 31   |
| NEU | 18   | 16   | 16   | 13   | 12   | 11   | 11   | 13   | 14   | 15   | 14   |
| OAS | 79   | 80   | 80   | 83   | 89   | 90   | 92   | 115  | 117  | 126  | 132  |
| REF | 113  | 116  | 134  | 124  | 121  | 119  | 115  | 112  | 113  | 113  | 112  |
| SSA | 92   | 93   | 98   | 110  | 113  | 113  | 117  | 124  | 149  | 175  | 182  |
| USA | 86   | 86   | 80   | 77   | 79   | 81   | 80   | 80   | 88   | 96   | 107  |

Table 1562: MAgPIE m4p\_SSP1 — Resources—Land Cover—Cropland—Crops—Cereals (million ha) [PART 1/2]

|     | 2050 | 2055 | 2060 | 2070 | 2080 | 2090 | 2100 |
|-----|------|------|------|------|------|------|------|
| GLO | 1046 | 1036 | 1026 | 959  | 862  | 763  | 652  |
| CAZ | 72   | 74   | 74   | 69   | 57   | 47   | 41   |
| CHA | 76   | 69   | 58   | 47   | 38   | 32   | 25   |
| EUR | 53   | 53   | 53   | 52   | 52   | 46   | 48   |
| IND | 69   | 69   | 70   | 70   | 63   | 71   | 63   |
| JPN | 1    | 1    | 1    | 2    | 2    | 2    | 2    |
| LAM | 152  | 149  | 151  | 140  | 137  | 127  | 94   |
| MEA | 32   | 32   | 31   | 28   | 19   | 11   | 8    |
| NEU | 14   | 14   | 14   | 14   | 14   | 14   | 14   |
| OAS | 146  | 146  | 144  | 123  | 117  | 92   | 67   |
| REF | 113  | 114  | 116  | 122  | 87   | 69   | 61   |
| SSA | 206  | 203  | 200  | 183  | 180  | 170  | 150  |
| USA | 113  | 114  | 114  | 110  | 96   | 83   | 79   |

Table 1563: MAgPIE m4p\_SSP1 — Resources—Land Cover—Cropland—Crops—Cereals (million ha) [PART 2/2]

|     | 1965 | 1970 | 1975 | 1980 | 1985 | 1990 | 1995 | 2000 | 2005 | 2010 |
|-----|------|------|------|------|------|------|------|------|------|------|
| GLO | 859  | 874  | 880  | 873  | 803  | 797  | 771  | 758  | 757  | 730  |
| CAZ | 70   | 69   | 71   | 74   | 54   | 49   | 42   | 46   | 45   | 36   |
| CHA | 71   | 71   | 71   | 69   | 80   | 83   | 76   | 69   | 64   | 64   |
| EUR | 92   | 89   | 85   | 82   | 69   | 66   | 63   | 64   | 61   | 57   |
| IND | 96   | 100  | 100  | 101  | 99   | 96   | 91   | 94   | 89   | 84   |
| JPN | 4    | 3    | 3    | 3    | 3    | 3    | 3    | 2    | 2    | 2    |
| LAM | 52   | 58   | 61   | 60   | 57   | 58   | 64   | 63   | 62   | 61   |
| MEA | 46   | 46   | 47   | 45   | 47   | 48   | 49   | 43   | 51   | 47   |
| NEU | 25   | 26   | 26   | 25   | 23   | 22   | 22   | 21   | 21   | 19   |
| OAS | 80   | 83   | 84   | 85   | 85   | 88   | 86   | 88   | 89   | 93   |
| REF | 158  | 156  | 159  | 160  | 118  | 111  | 106  | 104  | 111  | 106  |
| SSA | 74   | 74   | 71   | 71   | 74   | 81   | 86   | 87   | 93   | 98   |
| USA | 92   | 97   | 102  | 98   | 95   | 91   | 84   | 77   | 70   | 62   |

Table 1564: FAO — Resources—Land Cover—Cropland—Crops—Cereals (million ha)

54.1.6 Crops—Cereals—Maize

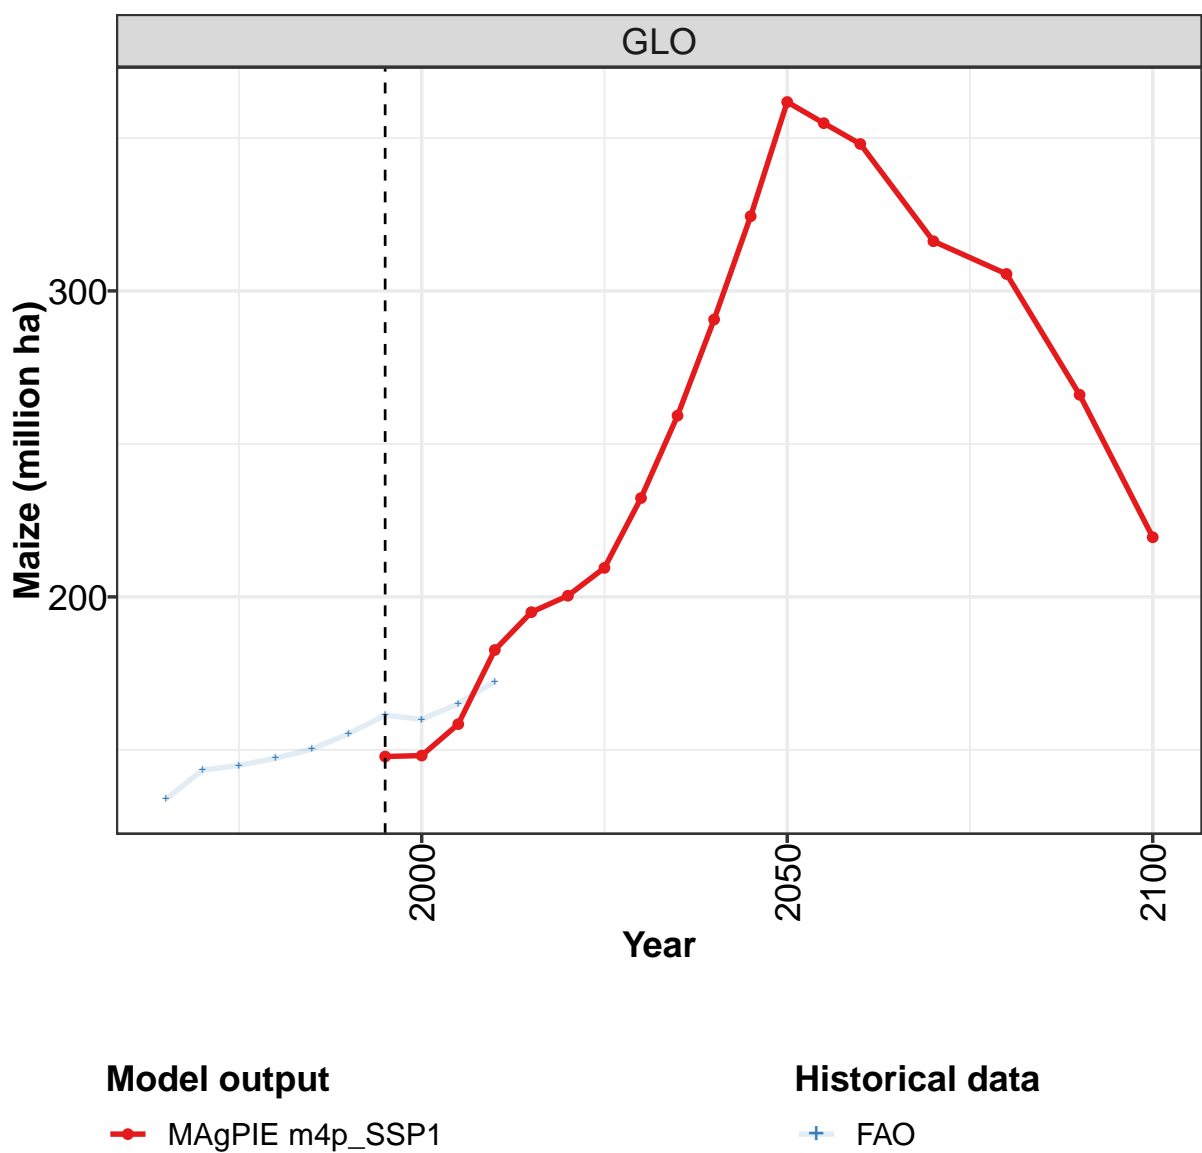

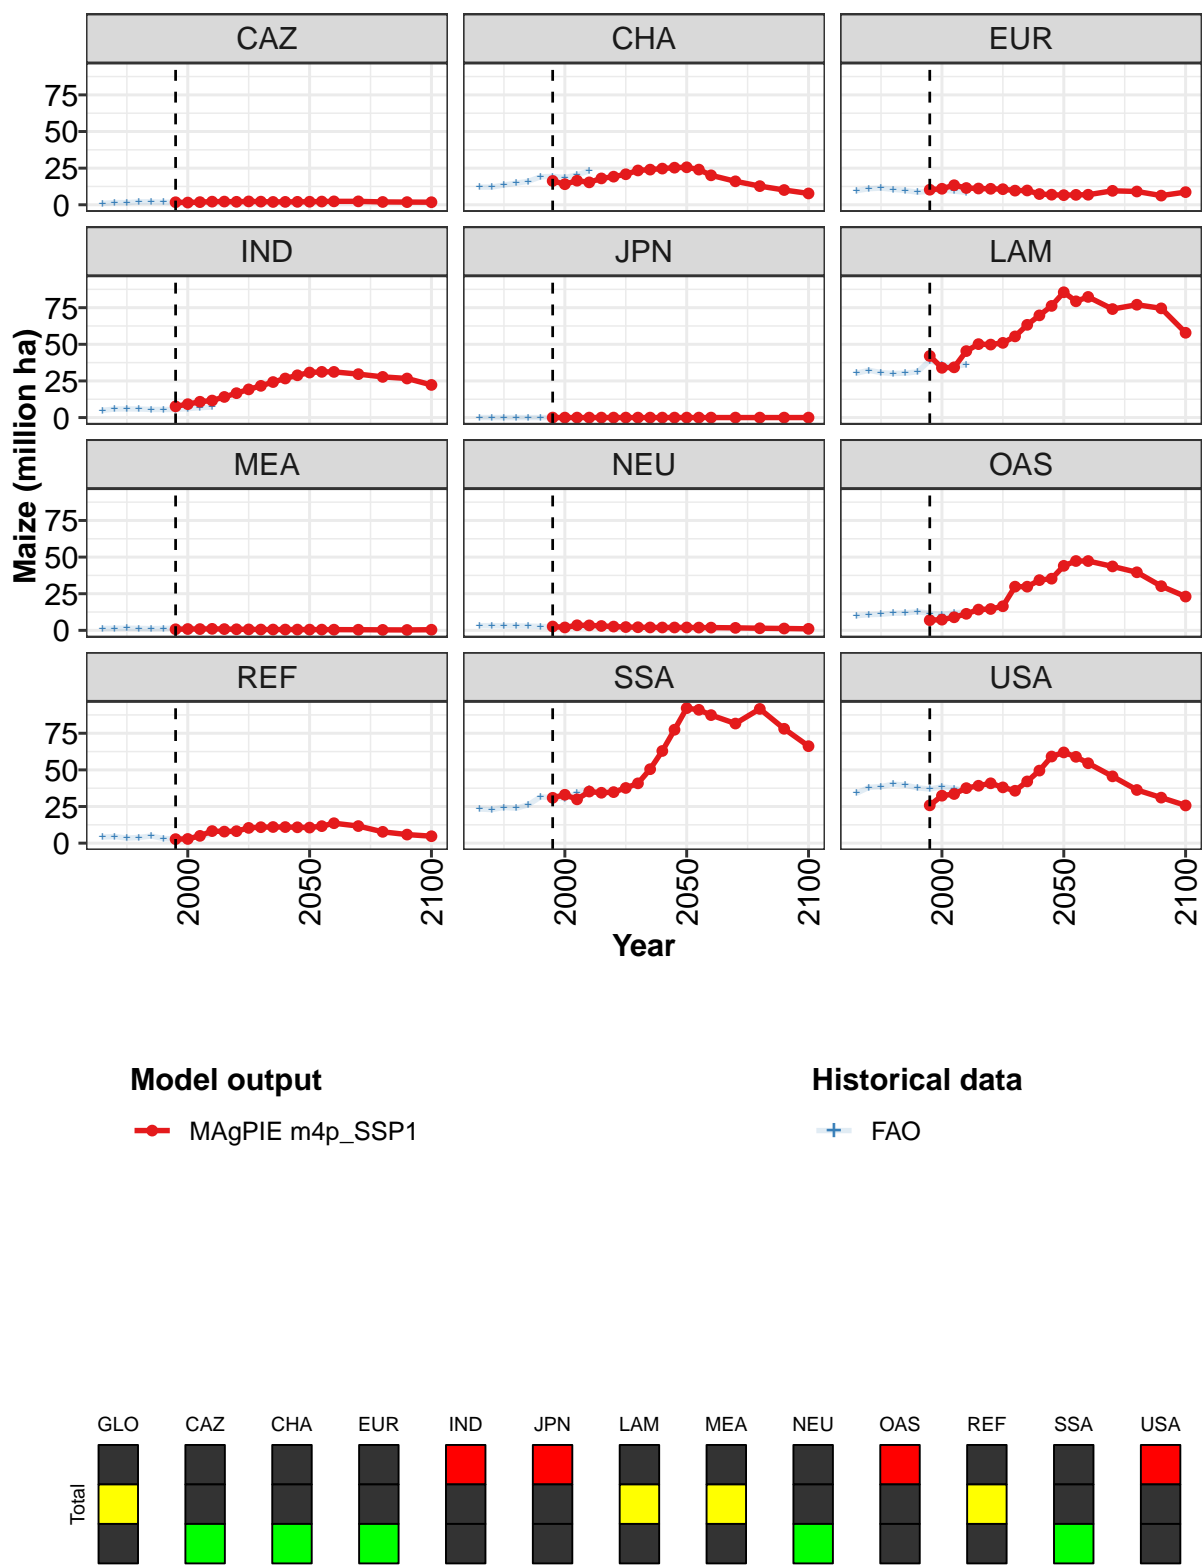

Figure 406: MAGPIE m4p\_SSP1 — Resources—Land Cover—Cropland—Crops—Cereals—Maize (million ha)

|     | 1995 | 2000 | 2005 | 2010 | 2015 | 2020 | 2025 | 2030 | 2035 | 2040 | 2045 |
|-----|------|------|------|------|------|------|------|------|------|------|------|
| GLO | 148  | 148  | 158  | 183  | 195  | 200  | 209  | 232  | 259  | 291  | 324  |
| CAZ | 2    | 2    | 2    | 2    | 2    | 2    | 2    | 2    | 2    | 2    | 2    |
| CHA | 16   | 14   | 16   | 15   | 18   | 19   | 21   | 23   | 24   | 25   | 25   |
| EUR | 10   | 11   | 13   | 11   | 11   | 11   | 11   | 10   | 10   | 7    | 7    |
| IND | 8    | 9    | 11   | 12   | 14   | 17   | 19   | 22   | 24   | 27   | 29   |
| JPN | 0    | 0    | 0    | 0    | 0    | 0    | 0    | 0    | 0    | 0    | 0    |
| LAM | 42   | 34   | 34   | 45   | 50   | 50   | 51   | 55   | 63   | 70   | 76   |
| MEA | 1    | 1    | 1    | 1    | 1    | 1    | 1    | 1    | 1    | 1    | 1    |
| NEU | 3    | 2    | 3    | 3    | 3    | 3    | 2    | 2    | 2    | 2    | 2    |
| OAS | 7    | 7    | 9    | 11   | 14   | 15   | 16   | 30   | 30   | 34   | 35   |
| REF | 3    | 3    | 5    | 8    | 8    | 8    | 10   | 11   | 11   | 11   | 11   |
| SSA | 31   | 33   | 30   | 35   | 34   | 35   | 38   | 41   | 50   | 63   | 77   |
| USA | 26   | 32   | 34   | 38   | 39   | 41   | 38   | 36   | 42   | 50   | 59   |

Table 1565: MAgPIE m4p\_SSP1 — Resources—Land Cover—Cropland—Crops—Cereals—Maize (million ha)  
[PART 1/2]

|     | 2050 | 2055 | 2060 | 2070 | 2080 | 2090 | 2100 |
|-----|------|------|------|------|------|------|------|
| GLO | 362  | 355  | 348  | 316  | 306  | 266  | 219  |
| CAZ | 2    | 2    | 2    | 2    | 2    | 2    | 2    |
| CHA | 26   | 24   | 20   | 16   | 13   | 10   | 8    |
| EUR | 7    | 7    | 7    | 10   | 9    | 6    | 9    |
| IND | 31   | 31   | 31   | 30   | 28   | 27   | 22   |
| JPN | 0    | 0    | 0    | 0    | 0    | 0    | 0    |
| LAM | 86   | 79   | 82   | 74   | 77   | 75   | 58   |
| MEA | 1    | 1    | 0    | 0    | 0    | 0    | 0    |
| NEU | 2    | 2    | 2    | 2    | 1    | 1    | 1    |
| OAS | 44   | 47   | 47   | 44   | 40   | 30   | 23   |
| REF | 11   | 12   | 14   | 12   | 8    | 6    | 5    |
| SSA | 92   | 91   | 87   | 82   | 92   | 78   | 66   |
| USA | 62   | 59   | 55   | 46   | 36   | 31   | 26   |

Table 1566: MAgPIE m4p\_SSP1 — Resources—Land Cover—Cropland—Crops—Cereals—Maize (million ha)  
[PART 2/2]

|     | 1965 | 1970 | 1975 | 1980 | 1985 | 1990 | 1995 | 2000 | 2005 | 2010 |
|-----|------|------|------|------|------|------|------|------|------|------|
| GLO | 134  | 143  | 145  | 147  | 150  | 155  | 161  | 160  | 165  | 172  |
| CAZ | 1    | 1    | 1    | 2    | 2    | 2    | 2    | 2    | 2    | 2    |
| CHA | 12   | 12   | 13   | 15   | 16   | 19   | 19   | 19   | 20   | 23   |
| EUR | 10   | 11   | 11   | 11   | 10   | 9    | 9    | 10   | 9    | 8    |
| IND | 5    | 6    | 6    | 6    | 6    | 6    | 5    | 6    | 7    | 7    |
| JPN | 0    | 0    | 0    | 0    | 0    | 0    | 0    | 0    | 0    | 0    |
| LAM | 30   | 32   | 31   | 30   | 30   | 31   | 39   | 36   | 35   | 36   |
| MEA | 1    | 1    | 1    | 1    | 1    | 1    | 2    | 1    | 2    | 2    |
| NEU | 3    | 3    | 3    | 3    | 3    | 3    | 2    | 3    | 3    | 3    |
| OAS | 10   | 11   | 11   | 12   | 12   | 13   | 12   | 11   | 12   | 13   |
| REF | 4    | 4    | 3    | 4    | 5    | 3    | 3    | 4    | 4    | 6    |
| SSA | 23   | 23   | 24   | 24   | 26   | 32   | 31   | 31   | 34   | 37   |
| USA | 34   | 38   | 39   | 40   | 40   | 38   | 37   | 38   | 37   | 36   |

Table 1567: FAO — Resources—Land Cover—Cropland—Crops—Cereals—Maize (million ha)

54.1.7 Crops—Cereals—Rice

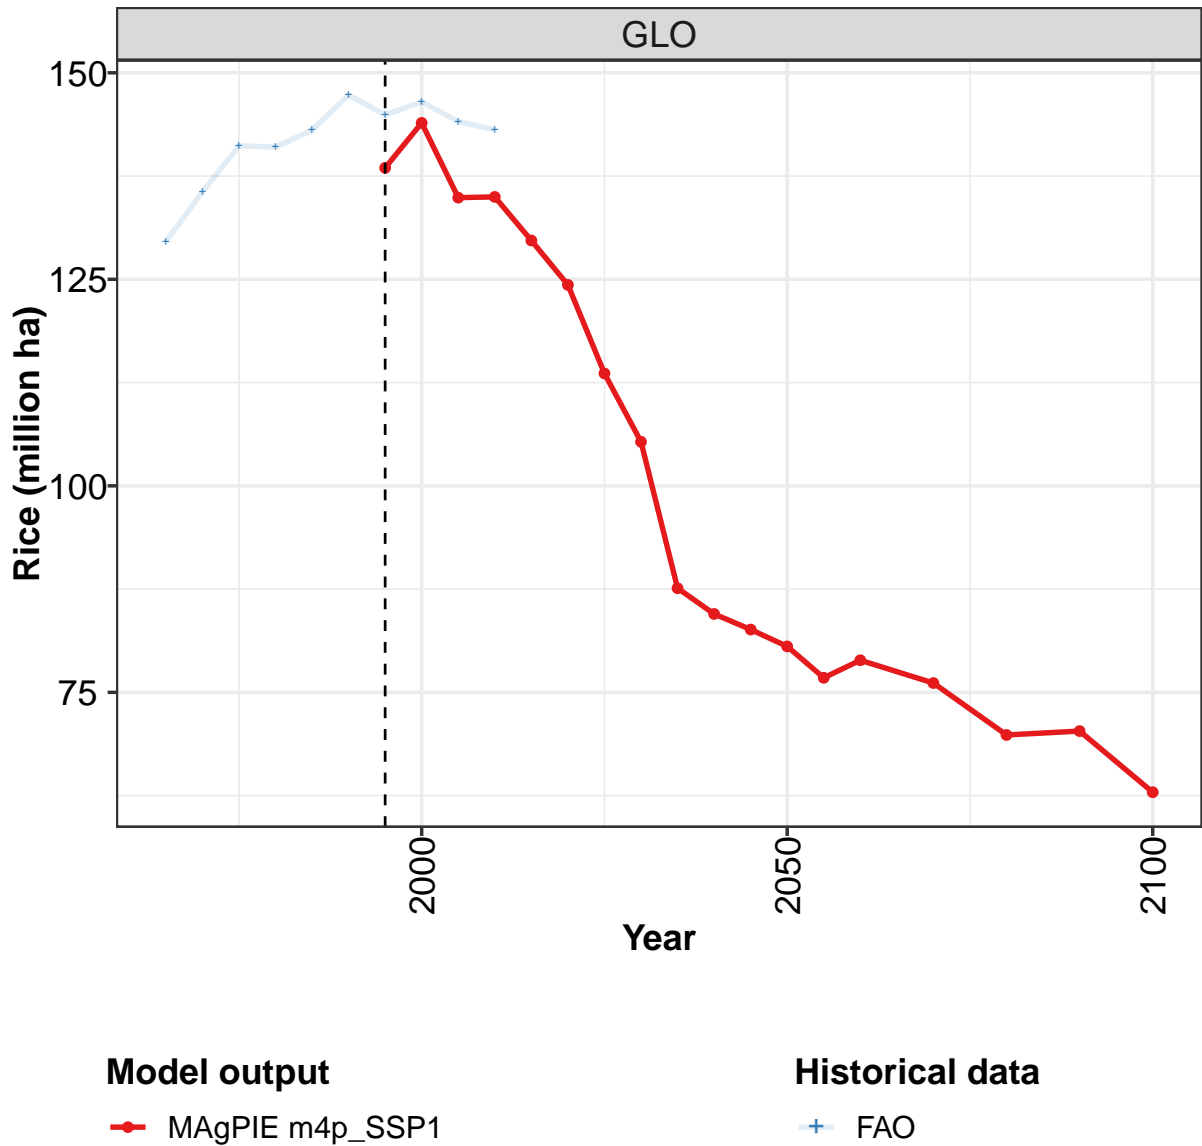

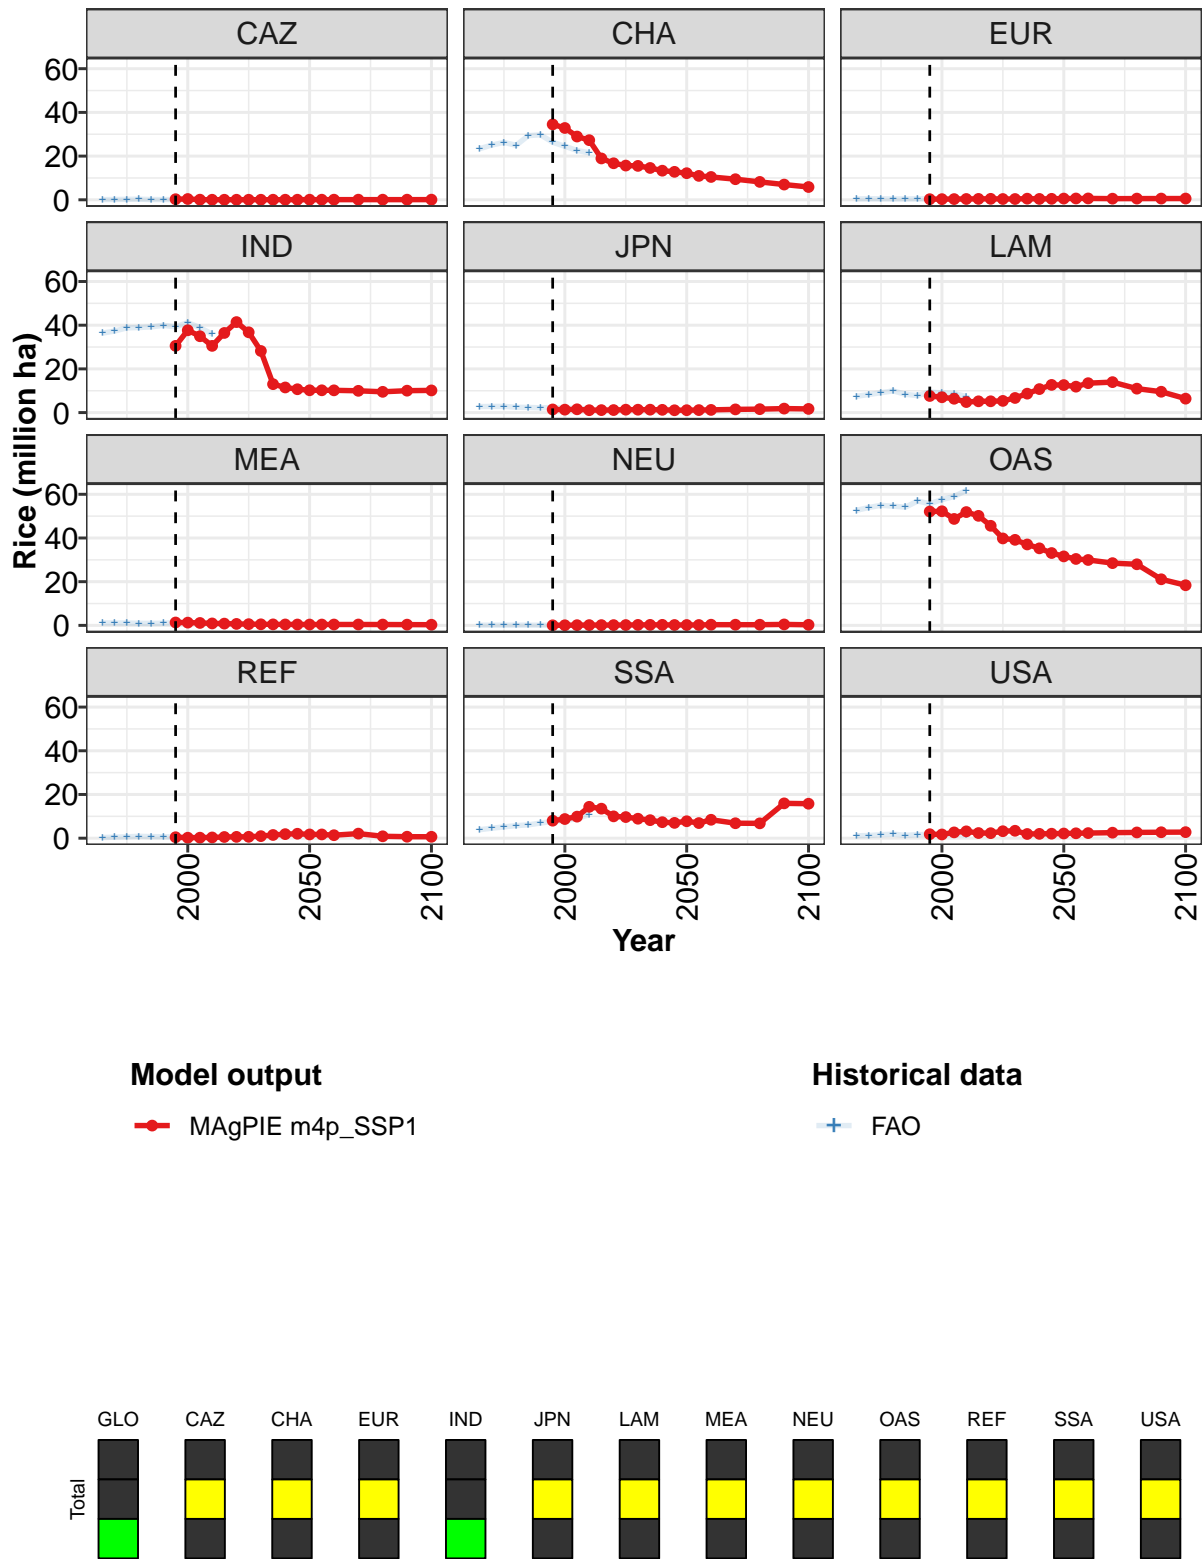

Figure 407: MAGPIE m4p\_SSP1 — Resources—Land Cover—Cropland—Crops—Cereals—Rice (million ha)

|     | 1995 | 2000 | 2005 | 2010 | 2015 | 2020 | 2025 | 2030 | 2035 | 2040 | 2045 |
|-----|------|------|------|------|------|------|------|------|------|------|------|
| GLO | 138  | 144  | 135  | 135  | 130  | 124  | 114  | 105  | 88   | 84   | 83   |
| CAZ | 0    | 0    | 0    | 0    | 0    | 0    | 0    | 0    | 0    | 0    | 0    |
| CHA | 35   | 33   | 29   | 27   | 19   | 17   | 16   | 16   | 15   | 13   | 13   |
| EUR | 0    | 0    | 0    | 0    | 0    | 0    | 0    | 0    | 1    | 0    | 0    |
| IND | 31   | 38   | 35   | 31   | 36   | 41   | 37   | 28   | 13   | 12   | 11   |
| JPN | 1    | 1    | 2    | 1    | 1    | 1    | 1    | 1    | 1    | 1    | 1    |
| LAM | 8    | 7    | 6    | 5    | 5    | 5    | 5    | 7    | 9    | 11   | 13   |
| MEA | 1    | 1    | 1    | 1    | 1    | 1    | 1    | 1    | 0    | 0    | 0    |
| NEU | 0    | 0    | 0    | 0    | 0    | 0    | 0    | 0    | 0    | 0    | 0    |
| OAS | 52   | 52   | 49   | 52   | 50   | 46   | 40   | 39   | 37   | 35   | 33   |
| REF | 0    | 0    | 0    | 0    | 1    | 1    | 1    | 1    | 1    | 2    | 2    |
| SSA | 8    | 9    | 10   | 14   | 14   | 10   | 10   | 9    | 8    | 7    | 7    |
| USA | 2    | 2    | 3    | 3    | 2    | 2    | 3    | 3    | 2    | 2    | 2    |

Table 1568: MAgPIE m4p\_SSP1 — Resources—Land Cover—Cropland—Crops—Cereals—Rice (million ha)  
[PART 1/2]

|     | 2050 | 2055 | 2060 | 2070 | 2080 | 2090 | 2100 |
|-----|------|------|------|------|------|------|------|
| GLO | 81   | 77   | 79   | 76   | 70   | 70   | 63   |
| CAZ | 0    | 0    | 0    | 0    | 0    | 0    | 0    |
| CHA | 12   | 11   | 10   | 9    | 8    | 7    | 6    |
| EUR | 1    | 1    | 1    | 1    | 1    | 1    | 1    |
| IND | 10   | 10   | 10   | 10   | 10   | 10   | 10   |
| JPN | 1    | 1    | 1    | 1    | 2    | 2    | 2    |
| LAM | 13   | 12   | 13   | 14   | 11   | 10   | 6    |
| MEA | 0    | 0    | 0    | 0    | 0    | 0    | 0    |
| NEU | 0    | 0    | 0    | 0    | 0    | 0    | 0    |
| OAS | 32   | 30   | 30   | 28   | 28   | 21   | 18   |
| REF | 2    | 2    | 1    | 2    | 1    | 1    | 1    |
| SSA | 8    | 7    | 8    | 7    | 7    | 16   | 16   |
| USA | 2    | 2    | 2    | 3    | 3    | 3    | 3    |

Table 1569: MAgPIE m4p\_SSP1 — Resources—Land Cover—Cropland—Crops—Cereals—Rice (million ha)  
[PART 2/2]

|     | 1965 | 1970 | 1975 | 1980 | 1985 | 1990 | 1995 | 2000 | 2005 | 2010 |
|-----|------|------|------|------|------|------|------|------|------|------|
| GLO | 130  | 136  | 141  | 141  | 143  | 147  | 145  | 146  | 144  | 143  |
| CAZ | 0    | 0    | 0    | 0    | 0    | 0    | 0    | 0    | 0    | 0    |
| CHA | 23   | 25   | 26   | 25   | 29   | 30   | 26   | 24   | 23   | 22   |
| EUR | 0    | 0    | 0    | 0    | 0    | 0    | 0    | 0    | 0    | 1    |
| IND | 36   | 37   | 39   | 39   | 39   | 40   | 39   | 41   | 39   | 36   |
| JPN | 3    | 3    | 3    | 2    | 2    | 2    | 2    | 2    | 2    | 2    |
| LAM | 7    | 8    | 9    | 10   | 8    | 8    | 9    | 9    | 9    | 7    |
| MEA | 1    | 1    | 1    | 1    | 1    | 1    | 1    | 1    | 1    | 1    |
| NEU | 0    | 0    | 0    | 0    | 0    | 0    | 0    | 0    | 0    | 0    |
| OAS | 53   | 54   | 55   | 55   | 54   | 57   | 56   | 58   | 59   | 62   |
| REF | 0    | 0    | 1    | 1    | 1    | 1    | 1    | 1    | 0    | 1    |
| SSA | 4    | 5    | 5    | 6    | 6    | 7    | 8    | 8    | 9    | 11   |
| USA | 1    | 1    | 2    | 2    | 1    | 2    | 2    | 2    | 2    | 2    |

Table 1570: FAO — Resources—Land Cover—Cropland—Crops—Cereals—Rice (million ha)



54.1.8 Crops—Cereals—Temperate cereals

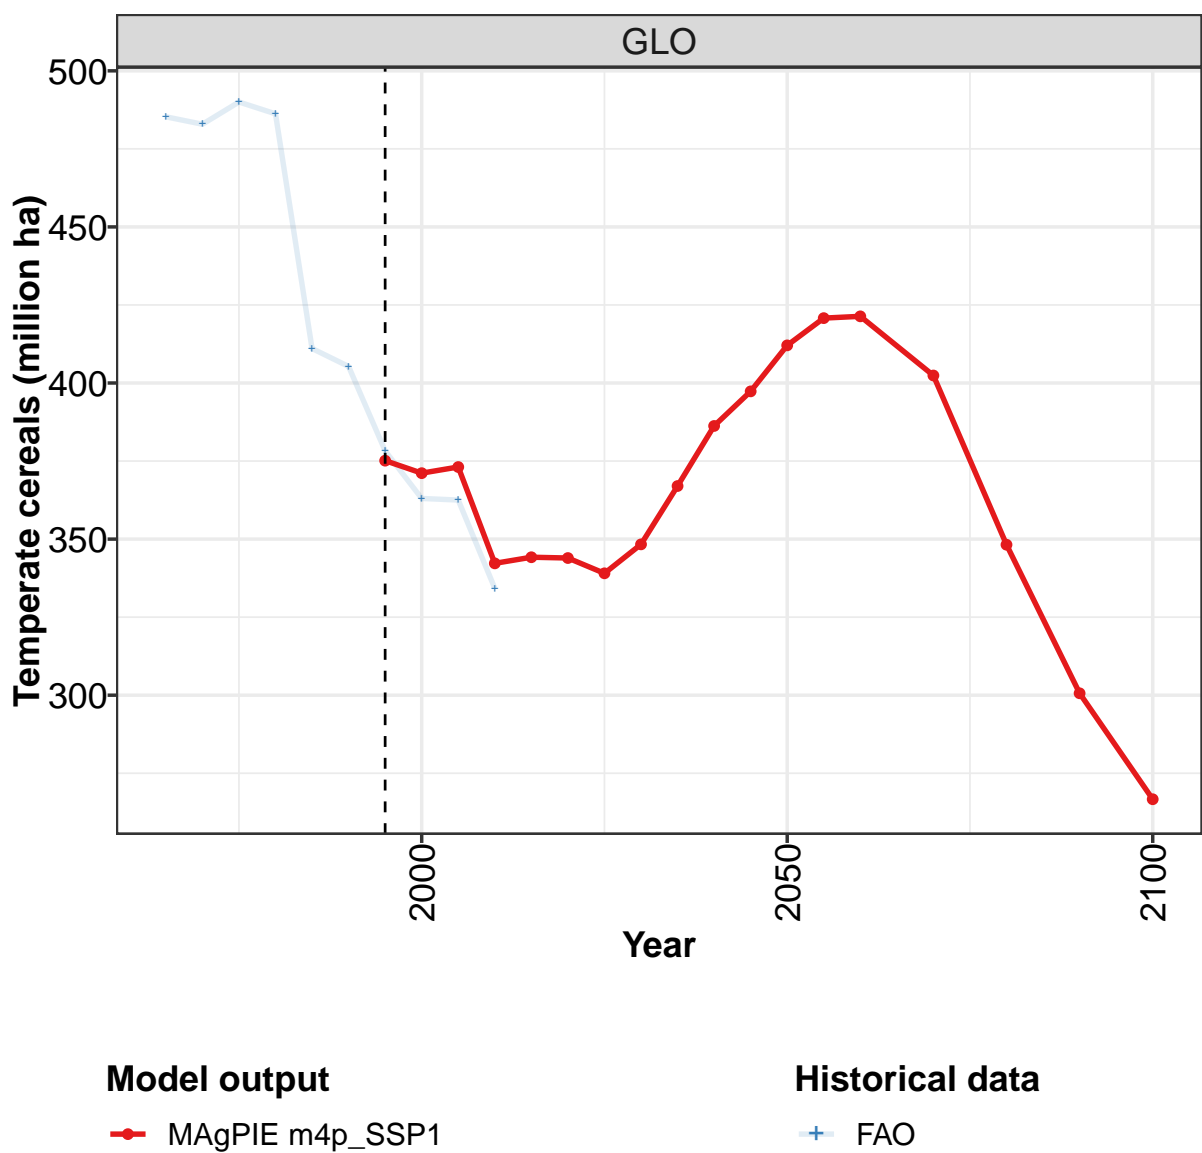

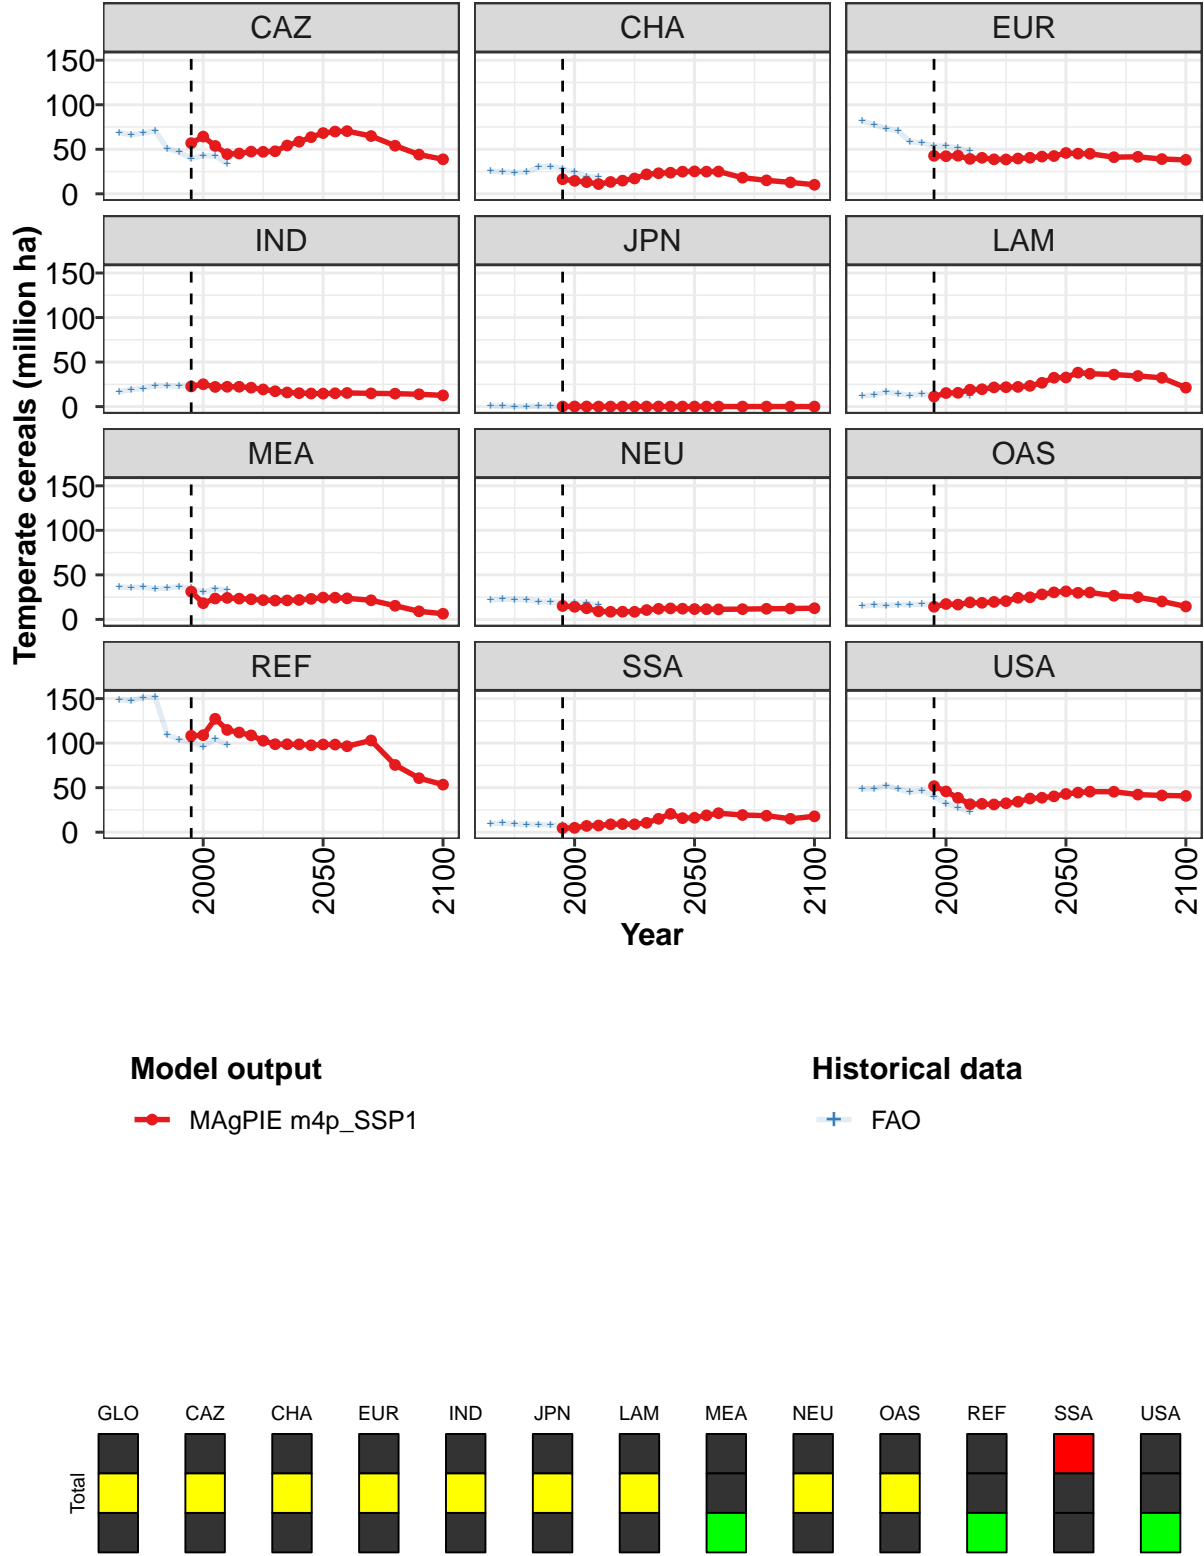

Figure 408: MAgPIE m4p\_SSP1 — Resources—Land Cover—Cropland—Crops—Cereals—Temperate cereals (million ha)

|     | 1995 | 2000 | 2005 | 2010 | 2015 | 2020 | 2025 | 2030 | 2035 | 2040 | 2045 |
|-----|------|------|------|------|------|------|------|------|------|------|------|
| GLO | 375  | 371  | 373  | 342  | 344  | 344  | 339  | 348  | 367  | 386  | 397  |
| CAZ | 57   | 64   | 54   | 45   | 45   | 47   | 47   | 48   | 54   | 58   | 64   |
| CHA | 16   | 15   | 13   | 11   | 13   | 15   | 17   | 22   | 23   | 24   | 25   |
| EUR | 43   | 42   | 43   | 39   | 40   | 39   | 39   | 40   | 41   | 42   | 42   |
| IND | 23   | 25   | 22   | 22   | 22   | 21   | 19   | 17   | 16   | 15   | 15   |
| JPN | 0    | 0    | 0    | 0    | 0    | 0    | 0    | 0    | 0    | 0    | 0    |
| LAM | 11   | 15   | 16   | 19   | 20   | 22   | 22   | 22   | 23   | 27   | 32   |
| MEA | 31   | 18   | 23   | 24   | 23   | 23   | 22   | 21   | 21   | 22   | 23   |
| NEU | 15   | 14   | 13   | 9    | 9    | 9    | 9    | 11   | 12   | 12   | 12   |
| OAS | 14   | 17   | 17   | 19   | 19   | 20   | 21   | 24   | 25   | 28   | 30   |
| REF | 108  | 109  | 127  | 115  | 112  | 109  | 103  | 99   | 99   | 99   | 98   |
| SSA | 5    | 5    | 7    | 8    | 9    | 9    | 9    | 11   | 15   | 21   | 16   |
| USA | 52   | 46   | 39   | 31   | 32   | 31   | 32   | 34   | 38   | 39   | 40   |

Table 1571: MAgPIE m4p\_SSP1 — Resources—Land Cover—Cropland—Crops—Cereals—Temperate cereals (million ha) [PART 1/2]

|     | 2050 | 2055 | 2060 | 2070 | 2080 | 2090 | 2100 |
|-----|------|------|------|------|------|------|------|
| GLO | 412  | 421  | 421  | 402  | 348  | 301  | 267  |
| CAZ | 68   | 70   | 70   | 65   | 54   | 44   | 39   |
| CHA | 25   | 25   | 25   | 18   | 15   | 13   | 10   |
| EUR | 46   | 45   | 45   | 41   | 42   | 39   | 38   |
| IND | 15   | 15   | 15   | 15   | 15   | 14   | 13   |
| JPN | 0    | 0    | 0    | 0    | 0    | 0    | 0    |
| LAM | 33   | 38   | 37   | 36   | 34   | 32   | 21   |
| MEA | 25   | 24   | 24   | 21   | 15   | 9    | 6    |
| NEU | 12   | 11   | 11   | 12   | 12   | 12   | 13   |
| OAS | 31   | 30   | 30   | 27   | 25   | 20   | 15   |
| REF | 99   | 98   | 97   | 103  | 76   | 61   | 53   |
| SSA | 16   | 19   | 21   | 19   | 19   | 15   | 18   |
| USA | 43   | 44   | 46   | 45   | 42   | 41   | 41   |

Table 1572: MAgPIE m4p\_SSP1 — Resources—Land Cover—Cropland—Crops—Cereals—Temperate cereals (million ha) [PART 2/2]

|     | 1965 | 1970 | 1975 | 1980 | 1985 | 1990 | 1995 | 2000 | 2005 | 2010 |
|-----|------|------|------|------|------|------|------|------|------|------|
| GLO | 485  | 483  | 490  | 486  | 411  | 405  | 378  | 363  | 363  | 334  |
| CAZ | 69   | 66   | 68   | 71   | 51   | 47   | 39   | 43   | 42   | 34   |
| CHA | 25   | 25   | 24   | 24   | 30   | 31   | 28   | 24   | 19   | 19   |
| EUR | 82   | 78   | 73   | 71   | 59   | 57   | 54   | 54   | 51   | 48   |
| IND | 17   | 19   | 21   | 23   | 24   | 23   | 24   | 26   | 24   | 24   |
| JPN | 1    | 0    | 0    | 0    | 0    | 0    | 0    | 0    | 0    | 0    |
| LAM | 12   | 13   | 16   | 15   | 13   | 15   | 12   | 12   | 13   | 12   |
| MEA | 36   | 36   | 36   | 34   | 35   | 37   | 35   | 31   | 35   | 33   |
| NEU | 22   | 23   | 23   | 22   | 20   | 19   | 19   | 19   | 18   | 16   |
| OAS | 15   | 16   | 16   | 17   | 17   | 17   | 17   | 18   | 17   | 17   |
| REF | 149  | 147  | 151  | 152  | 109  | 104  | 101  | 96   | 105  | 98   |
| SSA | 10   | 10   | 9    | 9    | 9    | 8    | 8    | 7    | 9    | 9    |
| USA | 49   | 49   | 53   | 49   | 45   | 47   | 40   | 32   | 28   | 23   |

Table 1573: FAO — Resources—Land Cover—Cropland—Crops—Cereals—Temperate cereals (million ha)

54.1.9 Crops—Cereals—Tropical cereals

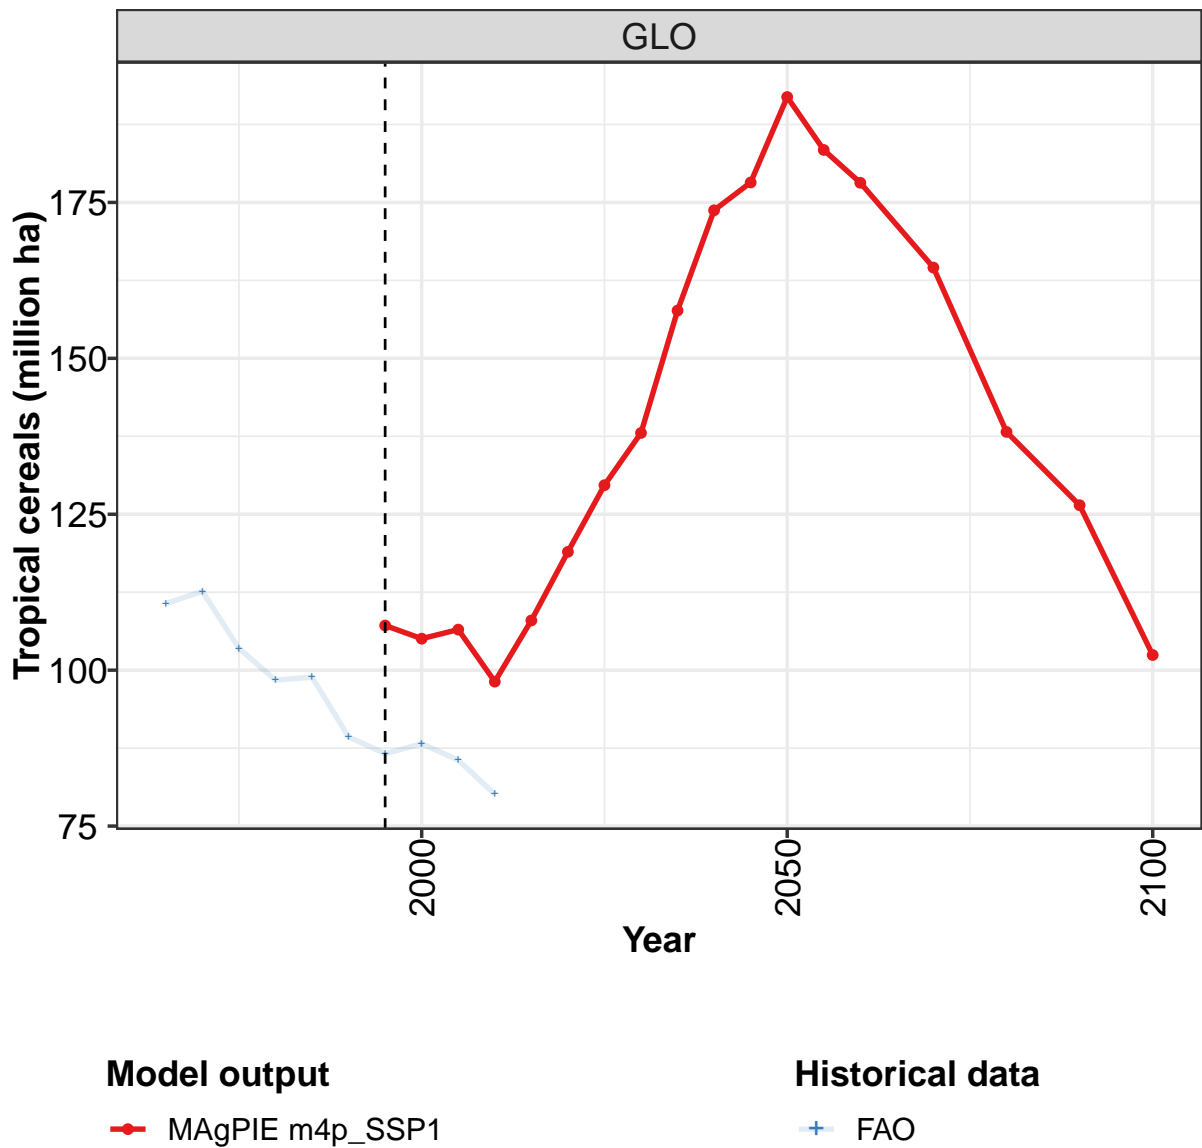

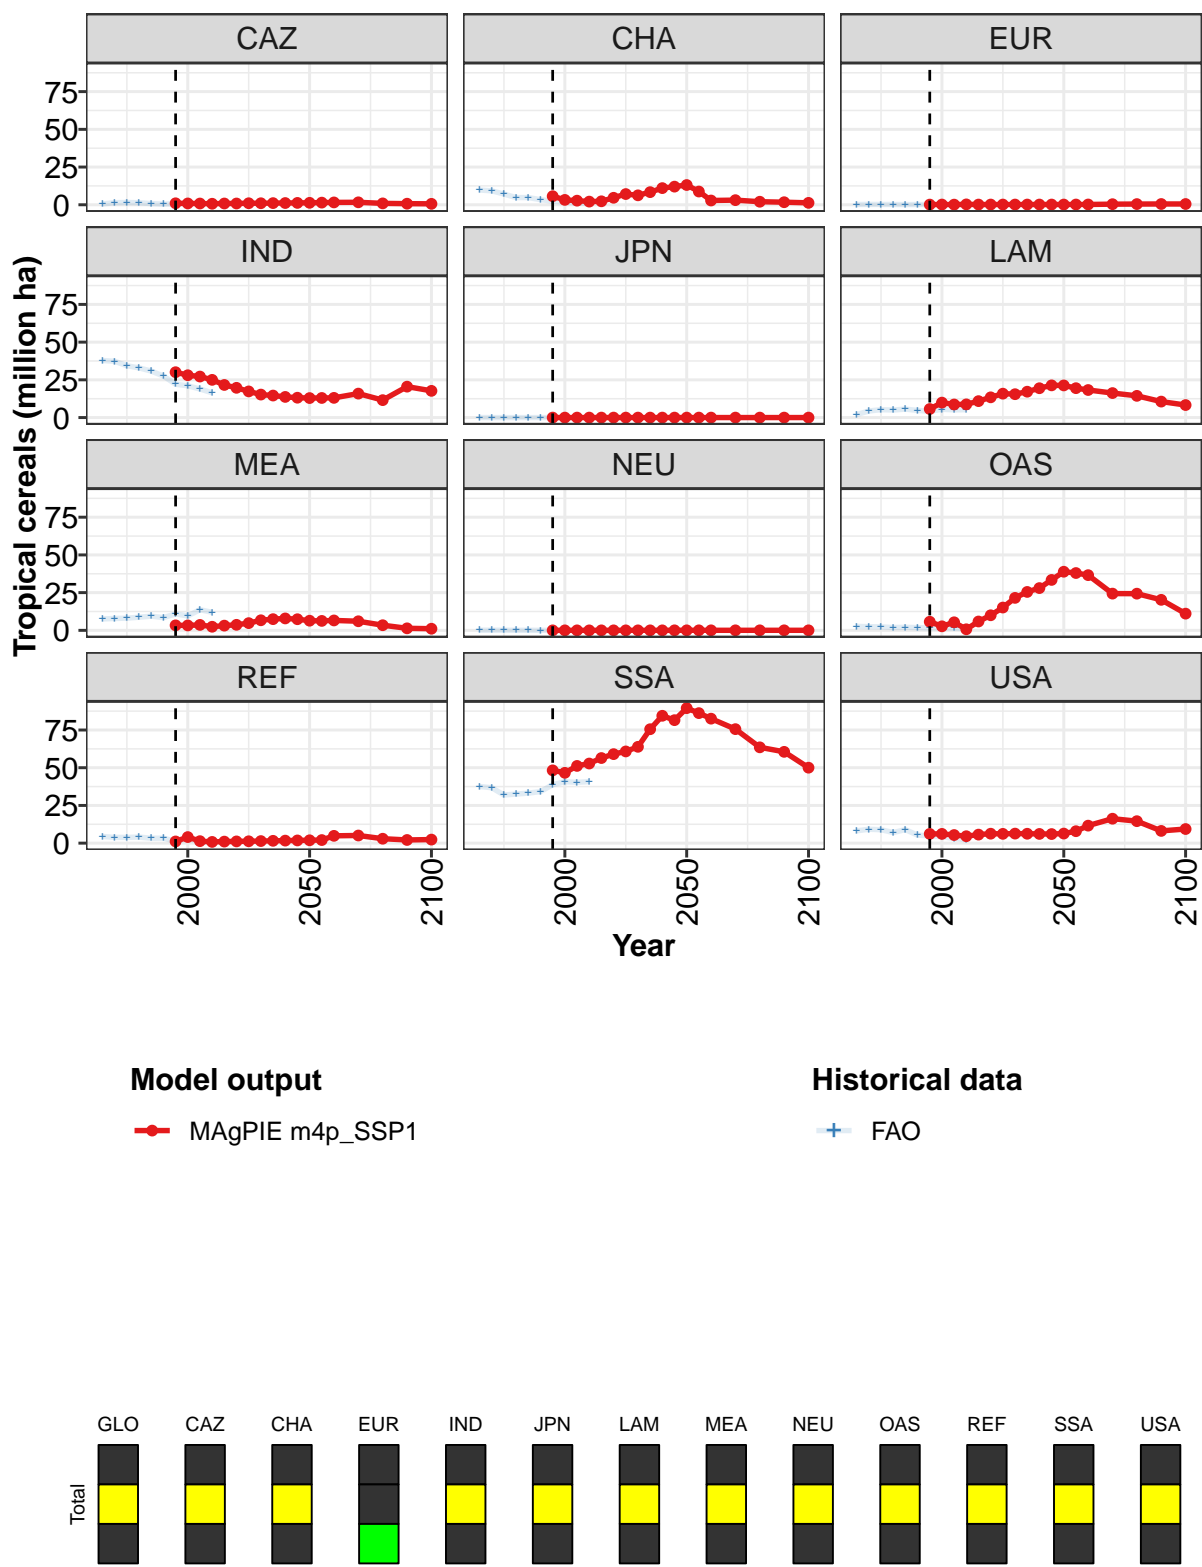

Figure 409: MAgPIE m4p\_SSP1 — Resources—Land Cover—Cropland—Crops—Cereals—Tropical cereals (million ha)

|     | 1995 | 2000 | 2005 | 2010 | 2015 | 2020 | 2025 | 2030 | 2035 | 2040 | 2045 |
|-----|------|------|------|------|------|------|------|------|------|------|------|
| GLO | 107  | 105  | 107  | 98   | 108  | 119  | 130  | 138  | 158  | 174  | 178  |
| CAZ | 1    | 1    | 1    | 1    | 1    | 1    | 1    | 1    | 1    | 1    | 1    |
| CHA | 6    | 3    | 3    | 2    | 2    | 5    | 7    | 6    | 8    | 11   | 12   |
| EUR | 0    | 0    | 0    | 0    | 0    | 0    | 0    | 0    | 0    | 0    | 0    |
| IND | 30   | 28   | 27   | 25   | 22   | 20   | 17   | 15   | 15   | 14   | 13   |
| JPN | 0    | 0    | 0    | 0    | 0    | 0    | 0    | 0    | 0    | 0    | 0    |
| LAM | 6    | 10   | 9    | 9    | 11   | 13   | 16   | 16   | 17   | 19   | 21   |
| MEA | 3    | 3    | 4    | 2    | 3    | 4    | 5    | 7    | 7    | 8    | 7    |
| NEU | 0    | 0    | 0    | 0    | 0    | 0    | 0    | 0    | 0    | 0    | 0    |
| OAS | 6    | 3    | 5    | 1    | 6    | 10   | 15   | 22   | 25   | 28   | 33   |
| REF | 1    | 4    | 1    | 1    | 1    | 1    | 1    | 1    | 2    | 2    | 2    |
| SSA | 48   | 47   | 51   | 53   | 56   | 59   | 61   | 64   | 76   | 84   | 82   |
| USA | 6    | 6    | 5    | 5    | 6    | 6    | 6    | 6    | 6    | 6    | 6    |

Table 1574: MAgPIE m4p\_SSP1 — Resources—Land Cover—Cropland—Crops—Cereals—Tropical cereals (million ha) [PART 1/2]

|     | 2050 | 2055 | 2060 | 2070 | 2080 | 2090 | 2100 |
|-----|------|------|------|------|------|------|------|
| GLO | 192  | 183  | 178  | 165  | 138  | 126  | 102  |
| CAZ | 1    | 1    | 2    | 2    | 1    | 1    | 1    |
| CHA | 13   | 9    | 3    | 3    | 2    | 2    | 1    |
| EUR | 0    | 0    | 0    | 0    | 0    | 1    | 1    |
| IND | 13   | 13   | 13   | 16   | 12   | 21   | 18   |
| JPN | 0    | 0    | 0    | 0    | 0    | 0    | 0    |
| LAM | 21   | 19   | 18   | 16   | 14   | 11   | 8    |
| MEA | 6    | 6    | 7    | 6    | 3    | 1    | 1    |
| NEU | 0    | 0    | 0    | 0    | 0    | 0    | 0    |
| OAS | 39   | 38   | 37   | 24   | 24   | 20   | 11   |
| REF | 2    | 2    | 5    | 5    | 3    | 2    | 2    |
| SSA | 89   | 86   | 83   | 76   | 64   | 61   | 50   |
| USA | 6    | 8    | 12   | 16   | 15   | 8    | 9    |

Table 1575: MAgPIE m4p\_SSP1 — Resources—Land Cover—Cropland—Crops—Cereals—Tropical cereals (million ha) [PART 2/2]

|     | 1965 | 1970 | 1975 | 1980 | 1985 | 1990 | 1995 | 2000 | 2005 | 2010 |
|-----|------|------|------|------|------|------|------|------|------|------|
| GLO | 111  | 113  | 103  | 98   | 99   | 89   | 87   | 88   | 86   | 80   |
| CAZ | 1    | 1    | 2    | 1    | 1    | 0    | 1    | 1    | 1    | 0    |
| CHA | 10   | 9    | 7    | 5    | 5    | 3    | 2    | 2    | 1    | 1    |
| EUR | 0    | 0    | 0    | 0    | 0    | 0    | 0    | 0    | 0    | 0    |
| IND | 38   | 37   | 34   | 33   | 31   | 28   | 22   | 21   | 19   | 16   |
| JPN | 0    | 0    | 0    | 0    | 0    | 0    | 0    | 0    | 0    | 0    |
| LAM | 2    | 4    | 5    | 5    | 6    | 5    | 4    | 5    | 5    | 5    |
| MEA | 8    | 8    | 8    | 9    | 9    | 8    | 11   | 10   | 14   | 12   |
| NEU | 0    | 0    | 0    | 0    | 0    | 0    | 0    | 0    | 0    | 0    |
| OAS | 3    | 2    | 2    | 2    | 2    | 2    | 2    | 2    | 1    | 1    |
| REF | 4    | 4    | 4    | 4    | 3    | 3    | 1    | 3    | 1    | 1    |
| SSA | 38   | 37   | 32   | 33   | 33   | 34   | 39   | 41   | 40   | 41   |
| USA | 8    | 9    | 9    | 7    | 9    | 5    | 5    | 4    | 3    | 2    |

Table 1576: FAO — Resources—Land Cover—Cropland—Crops—Cereals—Tropical cereals (million ha)

54.1.10 Crops—Oil crops

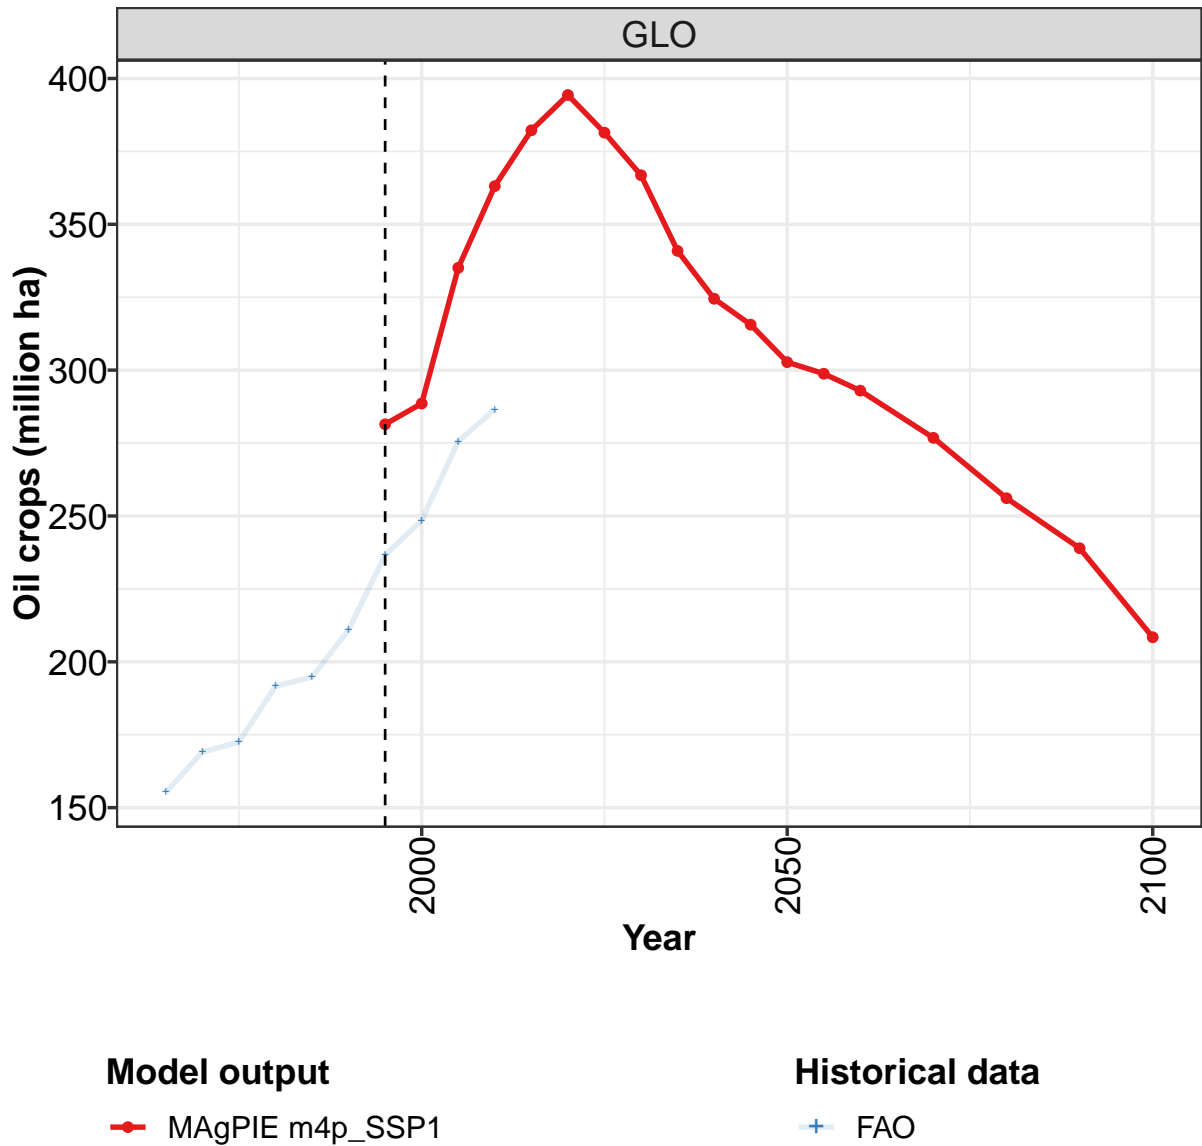

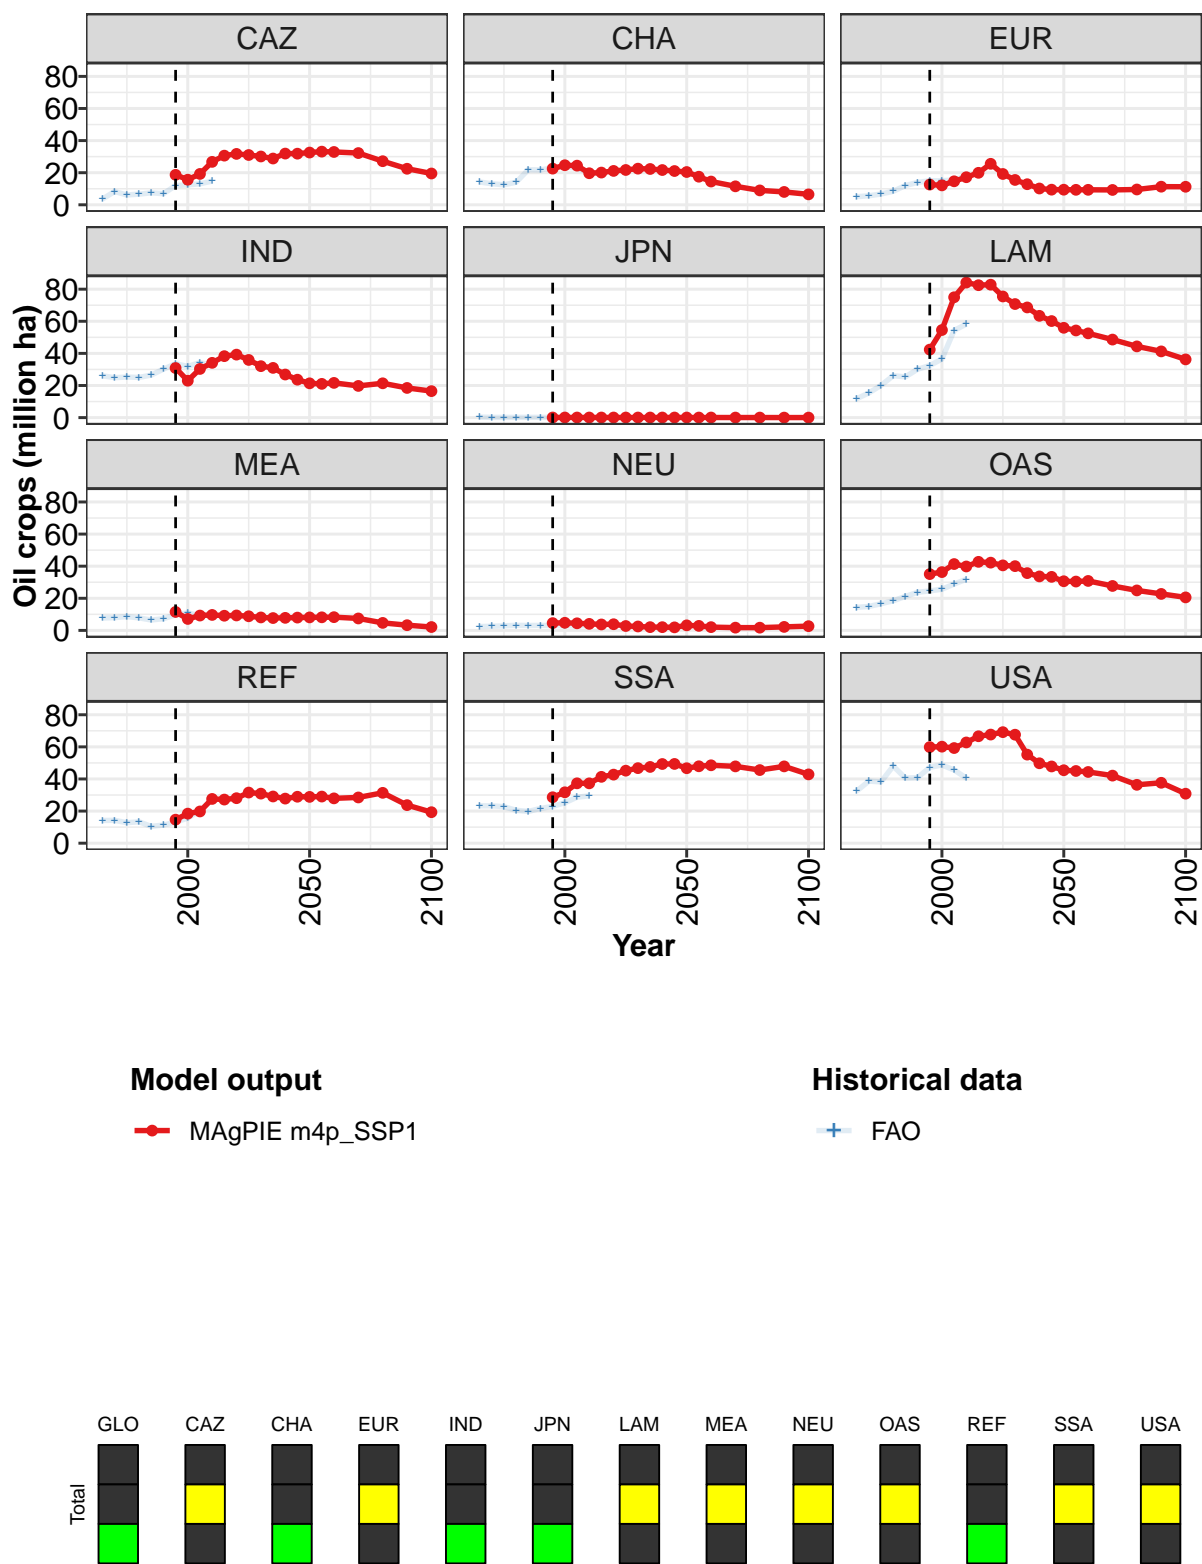

Figure 410: MAgPIE m4p\_SSP1 — Resources—Land Cover—Cropland—Crops—Oil crops (million ha)



|     | 1995 | 2000 | 2005 | 2010 | 2015 | 2020 | 2025 | 2030 | 2035 | 2040 | 2045 |
|-----|------|------|------|------|------|------|------|------|------|------|------|
| GLO | 281  | 289  | 335  | 363  | 382  | 394  | 381  | 367  | 341  | 324  | 316  |
| CAZ | 19   | 16   | 19   | 27   | 31   | 32   | 31   | 30   | 29   | 32   | 32   |
| CHA | 23   | 25   | 24   | 20   | 20   | 21   | 22   | 23   | 22   | 22   | 21   |
| EUR | 13   | 12   | 15   | 17   | 20   | 26   | 19   | 16   | 13   | 10   | 9    |
| IND | 31   | 23   | 30   | 34   | 38   | 39   | 36   | 32   | 31   | 27   | 24   |
| JPN | 0    | 0    | 0    | 0    | 0    | 0    | 0    | 0    | 0    | 0    | 0    |
| LAM | 42   | 55   | 75   | 84   | 82   | 83   | 75   | 71   | 69   | 63   | 60   |
| MEA | 12   | 7    | 9    | 10   | 9    | 9    | 9    | 8    | 8    | 8    | 8    |
| NEU | 5    | 5    | 4    | 4    | 4    | 4    | 3    | 2    | 2    | 2    | 2    |
| OAS | 35   | 36   | 41   | 40   | 43   | 42   | 41   | 40   | 36   | 34   | 33   |
| REF | 15   | 18   | 20   | 28   | 27   | 28   | 32   | 31   | 29   | 28   | 29   |
| SSA | 29   | 32   | 37   | 37   | 41   | 43   | 45   | 47   | 47   | 49   | 49   |
| USA | 60   | 60   | 59   | 63   | 67   | 68   | 69   | 68   | 55   | 50   | 48   |

Table 1577: MAgPIE m4p\_SSP1 — Resources—Land Cover—Cropland—Crops—Oil crops (million ha) [PART 1/2]

|     | 2050 | 2055 | 2060 | 2070 | 2080 | 2090 | 2100 |
|-----|------|------|------|------|------|------|------|
| GLO | 303  | 299  | 293  | 277  | 256  | 239  | 208  |
| CAZ | 33   | 33   | 33   | 32   | 27   | 22   | 20   |
| CHA | 20   | 18   | 15   | 12   | 9    | 8    | 7    |
| EUR | 9    | 9    | 9    | 9    | 10   | 11   | 11   |
| IND | 21   | 21   | 22   | 20   | 21   | 18   | 16   |
| JPN | 0    | 0    | 0    | 0    | 0    | 0    | 0    |
| LAM | 56   | 54   | 52   | 49   | 44   | 41   | 36   |
| MEA | 8    | 8    | 8    | 7    | 5    | 3    | 2    |
| NEU | 3    | 3    | 2    | 2    | 2    | 2    | 3    |
| OAS | 31   | 30   | 31   | 28   | 25   | 23   | 21   |
| REF | 29   | 29   | 28   | 29   | 31   | 24   | 19   |
| SSA | 47   | 48   | 49   | 48   | 46   | 48   | 43   |
| USA | 45   | 45   | 44   | 42   | 36   | 38   | 31   |

Table 1578: MAgPIE m4p\_SSP1 — Resources—Land Cover—Cropland—Crops—Oil crops (million ha) [PART 2/2]

|     | 1965 | 1970 | 1975 | 1980 | 1985 | 1990 | 1995 | 2000 | 2005 | 2010 |
|-----|------|------|------|------|------|------|------|------|------|------|
| GLO | 155  | 169  | 172  | 192  | 195  | 211  | 237  | 248  | 276  | 287  |
| CAZ | 4    | 8    | 6    | 7    | 7    | 7    | 12   | 12   | 13   | 15   |
| CHA | 14   | 13   | 12   | 14   | 22   | 22   | 23   | 24   | 23   | 20   |
| EUR | 5    | 6    | 7    | 8    | 12   | 14   | 15   | 15   | 15   | 18   |
| IND | 26   | 25   | 25   | 25   | 26   | 30   | 34   | 32   | 34   | 33   |
| JPN | 0    | 0    | 0    | 0    | 0    | 0    | 0    | 0    | 0    | 0    |
| LAM | 12   | 15   | 20   | 26   | 25   | 30   | 32   | 36   | 54   | 58   |
| MEA | 8    | 8    | 9    | 8    | 6    | 7    | 10   | 11   | 9    | 11   |
| NEU | 2    | 3    | 3    | 3    | 3    | 3    | 3    | 3    | 3    | 3    |
| OAS | 14   | 15   | 17   | 18   | 21   | 24   | 25   | 26   | 29   | 32   |
| REF | 14   | 14   | 13   | 13   | 10   | 11   | 13   | 16   | 20   | 27   |
| SSA | 23   | 23   | 23   | 20   | 20   | 22   | 23   | 25   | 29   | 29   |
| USA | 32   | 39   | 38   | 48   | 41   | 41   | 47   | 49   | 46   | 41   |

Table 1579: FAO — Resources—Land Cover—Cropland—Crops—Oil crops (million ha)

54.1.11 Crops—Oil crops—Cotton seed

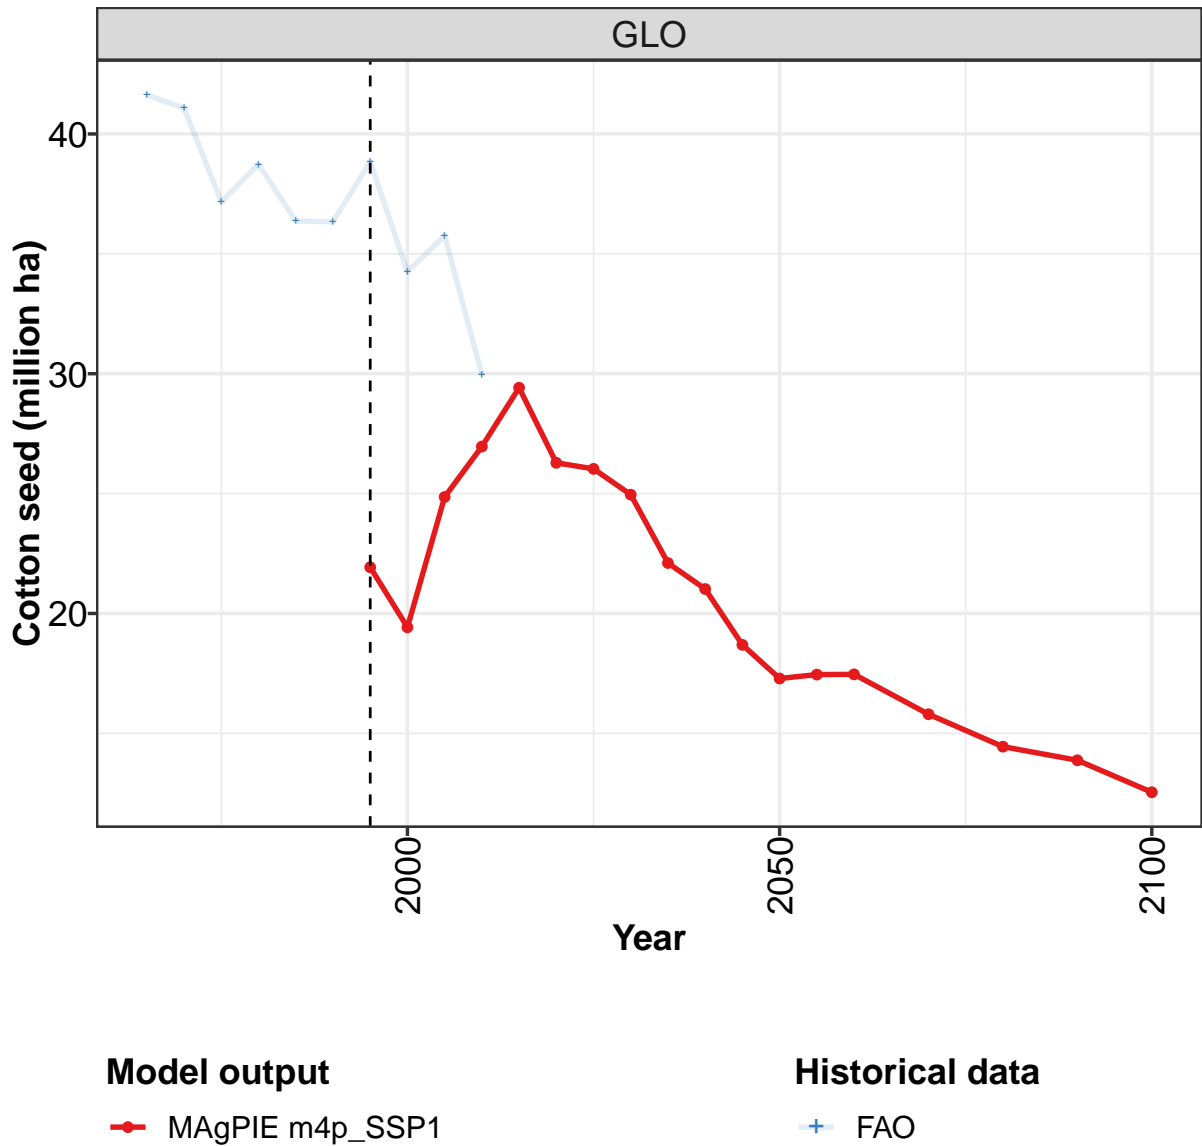

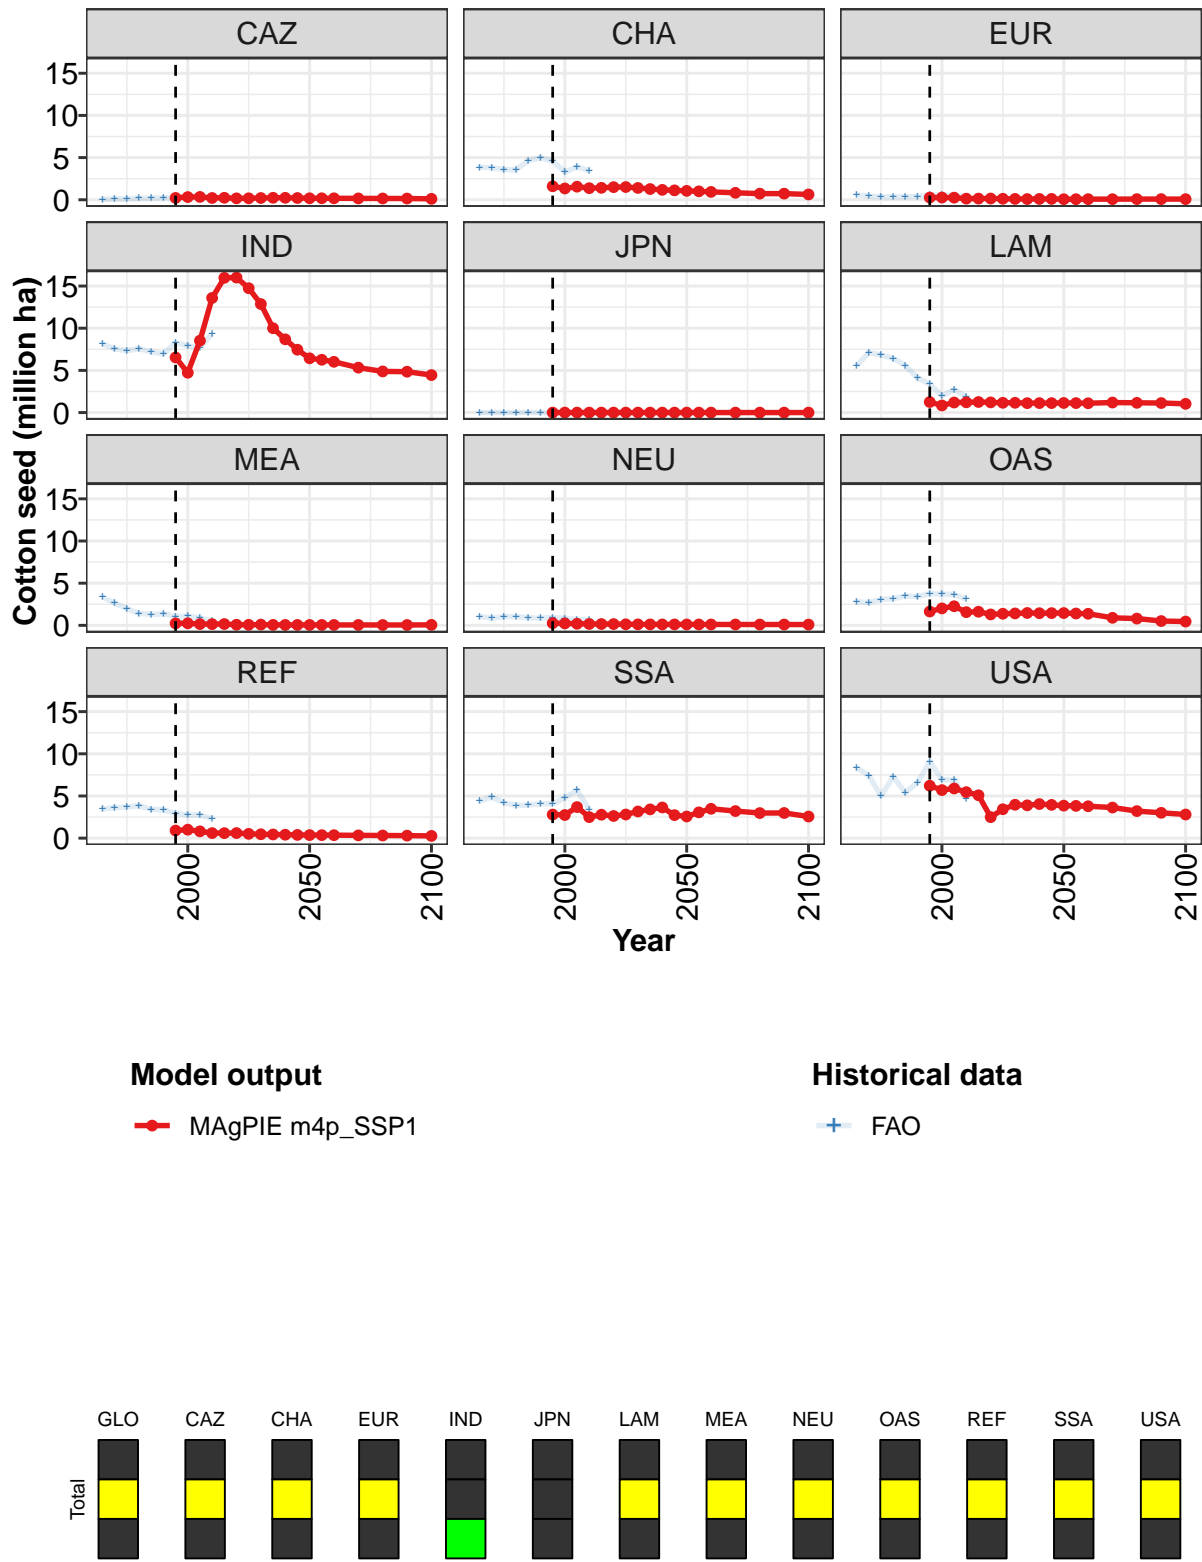

Figure 411: MAGPIE m4p\_SSP1 — Resources—Land Cover—Cropland—Crops—Oil crops—Cotton seed (million ha)

|     | 1995 | 2000 | 2005 | 2010 | 2015 | 2020 | 2025 | 2030 | 2035 | 2040 | 2045 |
|-----|------|------|------|------|------|------|------|------|------|------|------|
| GLO | 21.9 | 19.4 | 24.9 | 27.0 | 29.4 | 26.3 | 26.0 | 25.0 | 22.1 | 21.0 | 18.7 |
| CAZ | 0.2  | 0.3  | 0.3  | 0.2  | 0.2  | 0.2  | 0.2  | 0.2  | 0.2  | 0.2  | 0.2  |
| CHA | 1.6  | 1.3  | 1.6  | 1.4  | 1.4  | 1.5  | 1.5  | 1.4  | 1.3  | 1.2  | 1.1  |
| EUR | 0.3  | 0.3  | 0.3  | 0.1  | 0.1  | 0.1  | 0.1  | 0.1  | 0.1  | 0.1  | 0.1  |
| IND | 6.5  | 4.7  | 8.5  | 13.6 | 16.0 | 16.0 | 14.7 | 12.9 | 10.0 | 8.7  | 7.5  |
| JPN | 0.0  | 0.0  | 0.0  | 0.0  | 0.0  | 0.0  | 0.0  | 0.0  | 0.0  | 0.0  | 0.0  |
| LAM | 1.3  | 0.8  | 1.2  | 1.2  | 1.3  | 1.2  | 1.2  | 1.2  | 1.1  | 1.1  | 1.1  |
| MEA | 0.2  | 0.2  | 0.2  | 0.1  | 0.2  | 0.1  | 0.1  | 0.1  | 0.1  | 0.1  | 0.1  |
| NEU | 0.3  | 0.2  | 0.2  | 0.2  | 0.2  | 0.2  | 0.1  | 0.1  | 0.1  | 0.1  | 0.1  |
| OAS | 1.6  | 2.0  | 2.3  | 1.6  | 1.6  | 1.3  | 1.4  | 1.4  | 1.5  | 1.4  | 1.5  |
| REF | 0.9  | 1.0  | 0.8  | 0.6  | 0.6  | 0.6  | 0.5  | 0.5  | 0.4  | 0.4  | 0.4  |
| SSA | 2.8  | 2.7  | 3.7  | 2.5  | 2.8  | 2.6  | 2.8  | 3.2  | 3.4  | 3.6  | 2.7  |
| USA | 6.2  | 5.7  | 5.9  | 5.5  | 5.1  | 2.5  | 3.4  | 4.0  | 3.9  | 4.0  | 3.9  |

Table 1580: MAgPIE m4p\_SSP1 — Resources—Land Cover—Cropland—Crops—Oil crops—Cotton seed (million ha) [PART 1/2]

|     | 2050 | 2055 | 2060 | 2070 | 2080 | 2090 | 2100 |
|-----|------|------|------|------|------|------|------|
| GLO | 17.3 | 17.5 | 17.5 | 15.8 | 14.4 | 13.9 | 12.5 |
| CAZ | 0.2  | 0.2  | 0.2  | 0.2  | 0.2  | 0.1  | 0.1  |
| CHA | 1.1  | 1.0  | 0.9  | 0.8  | 0.7  | 0.7  | 0.6  |
| EUR | 0.1  | 0.1  | 0.1  | 0.1  | 0.1  | 0.1  | 0.1  |
| IND | 6.4  | 6.3  | 6.0  | 5.3  | 4.9  | 4.8  | 4.4  |
| JPN | 0.0  | 0.0  | 0.0  | 0.0  | 0.0  | 0.0  | 0.0  |
| LAM | 1.1  | 1.1  | 1.1  | 1.2  | 1.2  | 1.1  | 1.0  |
| MEA | 0.0  | 0.0  | 0.0  | 0.0  | 0.0  | 0.0  | 0.1  |
| NEU | 0.1  | 0.1  | 0.1  | 0.1  | 0.1  | 0.1  | 0.1  |
| OAS | 1.5  | 1.4  | 1.4  | 0.9  | 0.8  | 0.5  | 0.5  |
| REF | 0.4  | 0.4  | 0.4  | 0.3  | 0.3  | 0.3  | 0.3  |
| SSA | 2.6  | 3.1  | 3.5  | 3.2  | 3.0  | 3.0  | 2.6  |
| USA | 3.9  | 3.8  | 3.8  | 3.6  | 3.2  | 3.0  | 2.8  |

Table 1581: MAgPIE m4p\_SSP1 — Resources—Land Cover—Cropland—Crops—Oil crops—Cotton seed (million ha) [PART 2/2]

|     | 1965 | 1970 | 1975 | 1980 | 1985 | 1990 | 1995 | 2000 | 2005 | 2010 |
|-----|------|------|------|------|------|------|------|------|------|------|
| GLO | 41.6 | 41.1 | 37.2 | 38.7 | 36.4 | 36.3 | 38.8 | 34.3 | 35.8 | 30.0 |
| CAZ | 0.1  | 0.1  | 0.1  | 0.2  | 0.2  | 0.2  | 0.2  | 0.5  | 0.3  | 0.2  |
| CHA | 3.8  | 3.8  | 3.6  | 3.6  | 4.6  | 5.0  | 4.6  | 3.3  | 3.9  | 3.4  |
| EUR | 0.6  | 0.4  | 0.4  | 0.3  | 0.4  | 0.4  | 0.5  | 0.6  | 0.5  | 0.4  |
| IND | 8.1  | 7.6  | 7.3  | 7.6  | 7.2  | 7.0  | 8.3  | 7.9  | 7.7  | 9.3  |
| JPN | 0.0  | 0.0  | 0.0  | 0.0  | 0.0  | 0.0  | 0.0  | 0.0  | 0.0  | 0.0  |
| LAM | 5.6  | 7.1  | 6.8  | 6.4  | 5.6  | 4.1  | 3.4  | 2.0  | 2.7  | 1.9  |
| MEA | 3.4  | 2.6  | 2.0  | 1.4  | 1.3  | 1.4  | 1.1  | 1.1  | 0.9  | 0.5  |
| NEU | 1.1  | 0.9  | 1.0  | 1.0  | 0.9  | 0.8  | 0.9  | 0.8  | 0.7  | 0.6  |
| OAS | 2.8  | 2.7  | 3.1  | 3.2  | 3.5  | 3.4  | 3.8  | 3.7  | 3.7  | 3.1  |
| REF | 3.4  | 3.6  | 3.7  | 3.8  | 3.4  | 3.4  | 2.9  | 2.7  | 2.8  | 2.3  |
| SSA | 4.4  | 4.9  | 4.2  | 3.9  | 3.9  | 4.1  | 4.1  | 4.8  | 5.7  | 3.4  |
| USA | 8.4  | 7.4  | 5.0  | 7.3  | 5.4  | 6.6  | 9.1  | 6.9  | 6.9  | 4.7  |

Table 1582: FAO — Resources—Land Cover—Cropland—Crops—Oil crops—Cotton seed (million ha)

54.1.12 Crops—Oil crops—Groundnuts

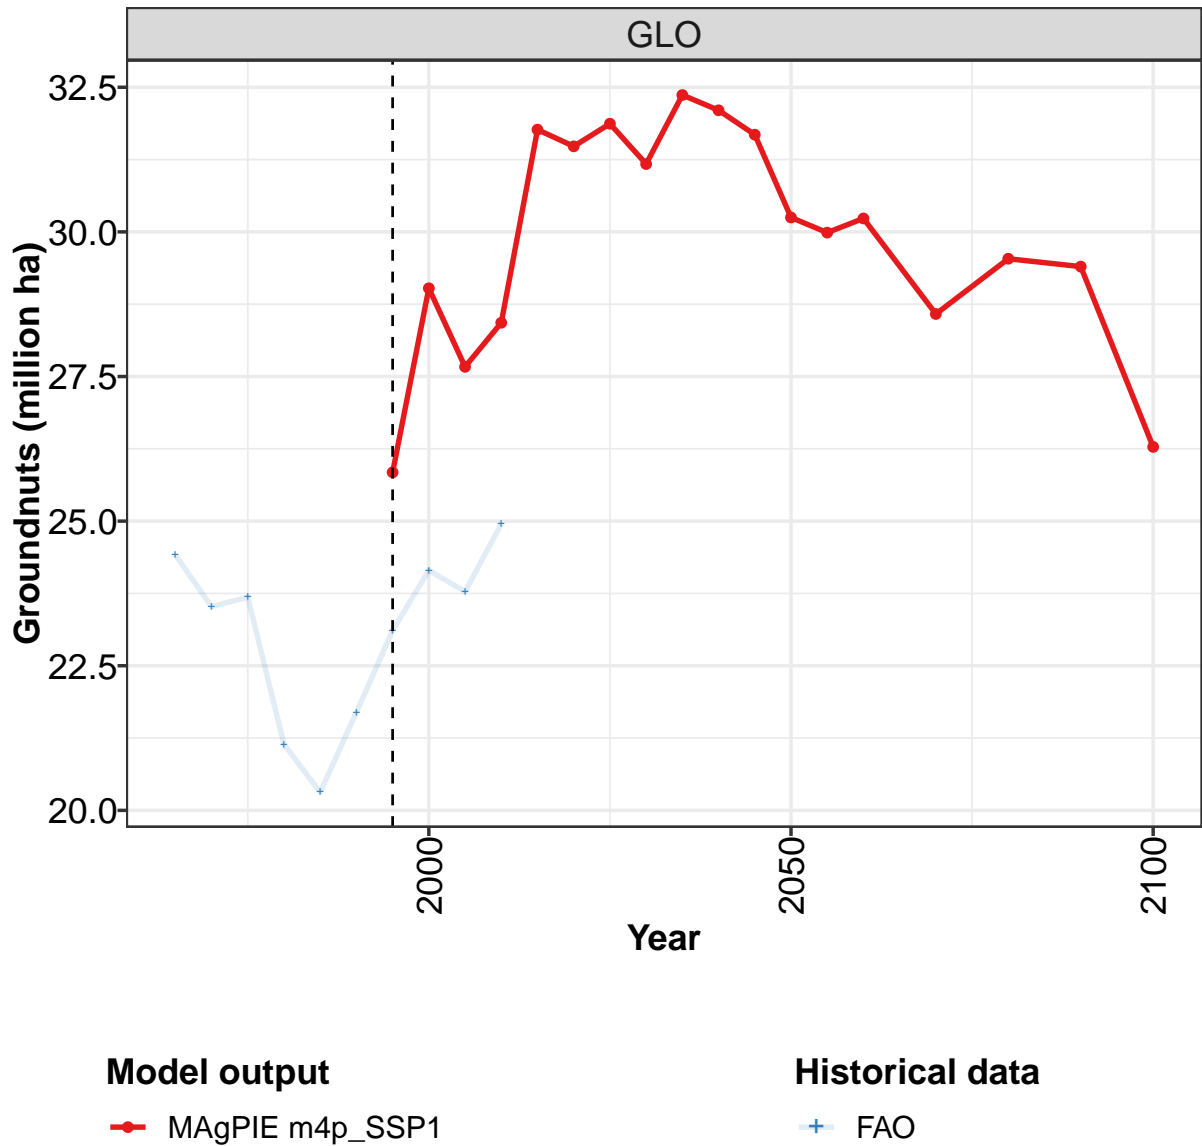

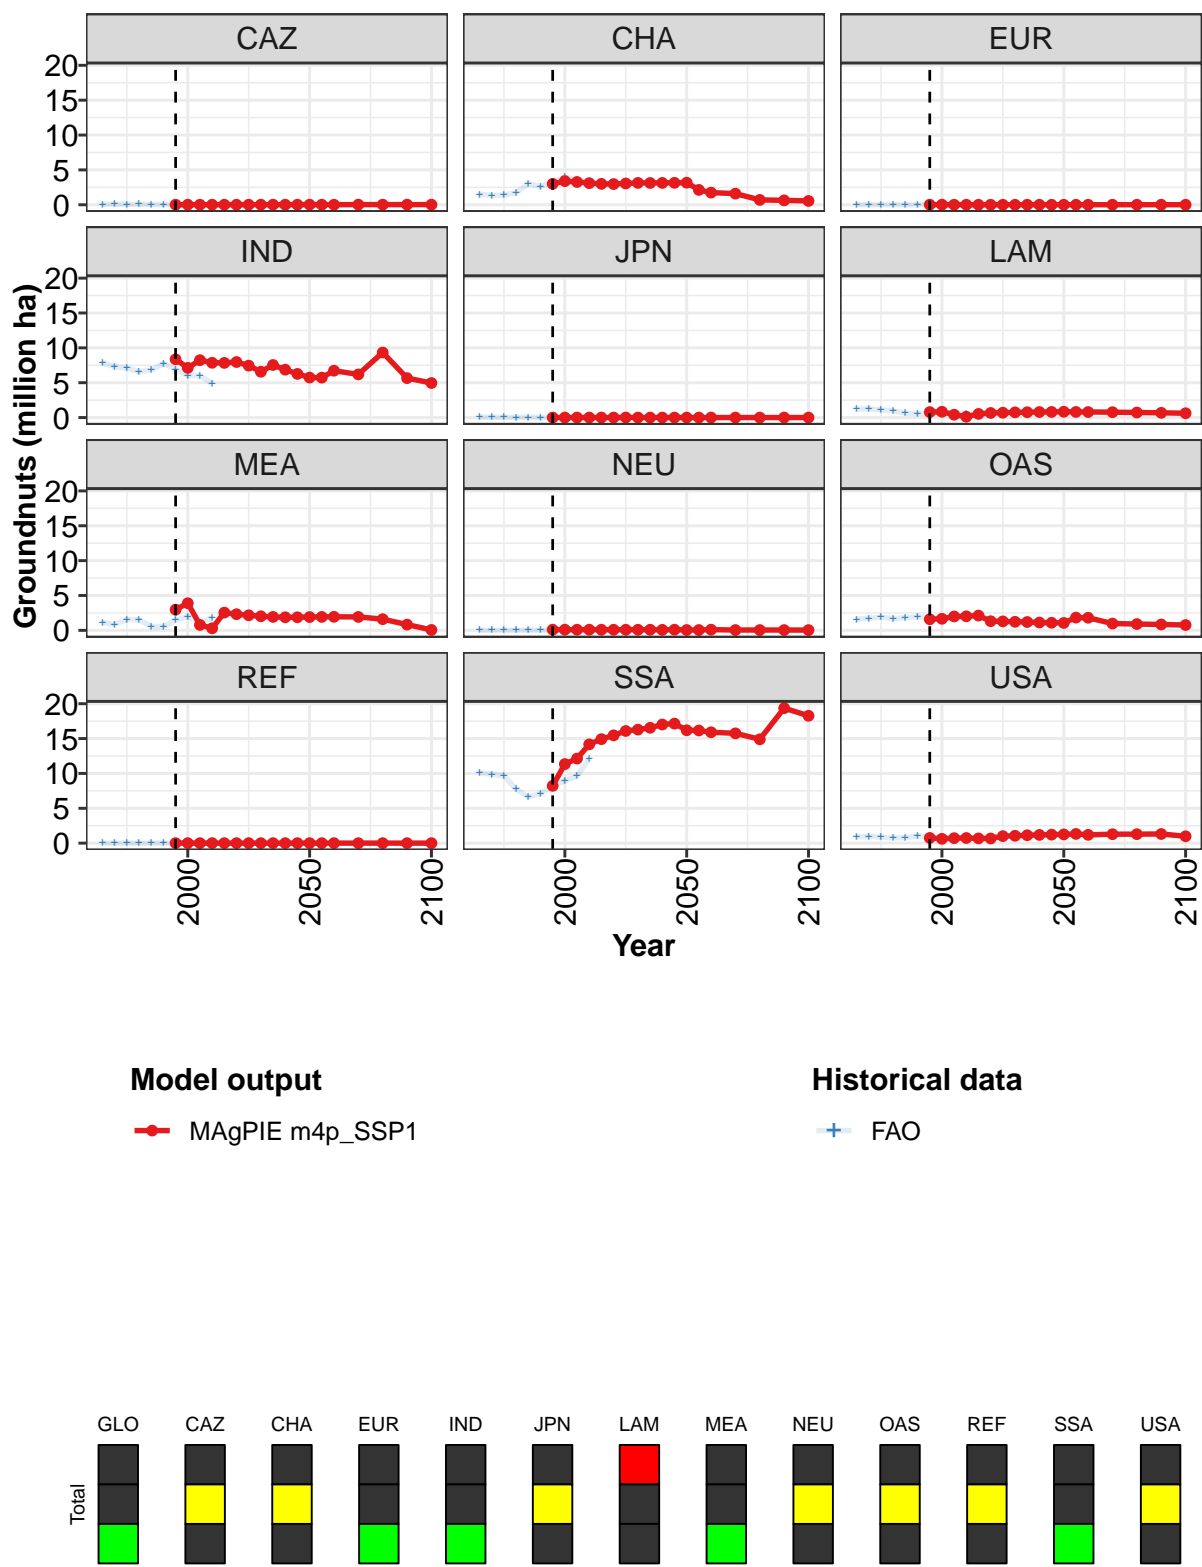

Figure 412: MAgPIE m4p\_SSP1 — Resources—Land Cover—Cropland—Crops—Oil crops—Groundnuts (million ha)

|     | 1995 | 2000 | 2005 | 2010 | 2015 | 2020 | 2025 | 2030 | 2035 | 2040 | 2045 |
|-----|------|------|------|------|------|------|------|------|------|------|------|
| GLO | 25.8 | 29.0 | 27.7 | 28.4 | 31.8 | 31.5 | 31.9 | 31.2 | 32.4 | 32.1 | 31.7 |
| CAZ | 0.0  | 0.0  | 0.0  | 0.0  | 0.0  | 0.0  | 0.0  | 0.0  | 0.0  | 0.0  | 0.0  |
| CHA | 3.0  | 3.4  | 3.3  | 3.1  | 3.0  | 3.0  | 3.1  | 3.1  | 3.1  | 3.1  | 3.2  |
| EUR | 0.0  | 0.0  | 0.0  | 0.0  | 0.0  | 0.0  | 0.0  | 0.0  | 0.0  | 0.0  | 0.0  |
| IND | 8.4  | 7.1  | 8.2  | 7.9  | 7.8  | 8.0  | 7.5  | 6.6  | 7.5  | 6.9  | 6.3  |
| JPN | 0.0  | 0.0  | 0.0  | 0.0  | 0.0  | 0.0  | 0.0  | 0.0  | 0.0  | 0.0  | 0.0  |
| LAM | 0.8  | 0.8  | 0.4  | 0.1  | 0.5  | 0.7  | 0.7  | 0.8  | 0.8  | 0.8  | 0.8  |
| MEA | 3.0  | 3.9  | 0.8  | 0.3  | 2.6  | 2.3  | 2.2  | 2.0  | 1.9  | 1.9  | 1.9  |
| NEU | 0.1  | 0.1  | 0.1  | 0.1  | 0.1  | 0.1  | 0.1  | 0.1  | 0.1  | 0.1  | 0.1  |
| OAS | 1.6  | 1.7  | 2.0  | 2.0  | 2.1  | 1.3  | 1.3  | 1.2  | 1.2  | 1.1  | 1.1  |
| REF | 0.0  | 0.0  | 0.0  | 0.0  | 0.0  | 0.0  | 0.0  | 0.0  | 0.0  | 0.0  | 0.0  |
| SSA | 8.2  | 11.3 | 12.1 | 14.2 | 14.9 | 15.5 | 16.1 | 16.3 | 16.5 | 17.0 | 17.1 |
| USA | 0.7  | 0.6  | 0.7  | 0.7  | 0.7  | 0.7  | 1.0  | 1.1  | 1.1  | 1.2  | 1.2  |

Table 1583: MAgPIE m4p\_SSP1 — Resources—Land Cover—Cropland—Crops—Oil crops—Groundnuts (million ha) [PART 1/2]

|     | 2050 | 2055 | 2060 | 2070 | 2080 | 2090 | 2100 |
|-----|------|------|------|------|------|------|------|
| GLO | 30.2 | 30.0 | 30.2 | 28.6 | 29.5 | 29.4 | 26.3 |
| CAZ | 0.0  | 0.0  | 0.0  | 0.0  | 0.0  | 0.0  | 0.0  |
| CHA | 3.2  | 2.1  | 1.7  | 1.6  | 0.7  | 0.6  | 0.6  |
| EUR | 0.0  | 0.0  | 0.0  | 0.0  | 0.0  | 0.0  | 0.0  |
| IND | 5.7  | 5.7  | 6.7  | 6.2  | 9.3  | 5.7  | 5.0  |
| JPN | 0.0  | 0.0  | 0.0  | 0.0  | 0.0  | 0.0  | 0.0  |
| LAM | 0.8  | 0.8  | 0.8  | 0.8  | 0.7  | 0.7  | 0.6  |
| MEA | 1.9  | 1.9  | 1.9  | 1.9  | 1.6  | 0.8  | 0.1  |
| NEU | 0.0  | 0.0  | 0.1  | 0.0  | 0.0  | 0.0  | 0.0  |
| OAS | 1.1  | 1.8  | 1.8  | 1.0  | 0.9  | 0.8  | 0.8  |
| REF | 0.0  | 0.0  | 0.0  | 0.0  | 0.0  | 0.0  | 0.0  |
| SSA | 16.2 | 16.2 | 15.9 | 15.8 | 14.9 | 19.4 | 18.3 |
| USA | 1.3  | 1.3  | 1.2  | 1.3  | 1.3  | 1.3  | 1.0  |

Table 1584: MAgPIE m4p\_SSP1 — Resources—Land Cover—Cropland—Crops—Oil crops—Groundnuts (million ha) [PART 2/2]

|     | 1965 | 1970 | 1975 | 1980 | 1985 | 1990 | 1995 | 2000 | 2005 | 2010 |
|-----|------|------|------|------|------|------|------|------|------|------|
| GLO | 24.4 | 23.5 | 23.7 | 21.1 | 20.3 | 21.7 | 23.1 | 24.1 | 23.8 | 25.0 |
| CAZ | 0.1  | 0.1  | 0.1  | 0.1  | 0.0  | 0.0  | 0.0  | 0.0  | 0.0  | 0.0  |
| CHA | 1.5  | 1.3  | 1.4  | 1.7  | 3.0  | 2.6  | 3.3  | 3.9  | 3.6  | 3.2  |
| EUR | 0.0  | 0.0  | 0.0  | 0.0  | 0.0  | 0.0  | 0.0  | 0.0  | 0.0  | 0.0  |
| IND | 7.9  | 7.3  | 7.1  | 6.6  | 6.8  | 7.8  | 6.9  | 6.0  | 6.0  | 4.9  |
| JPN | 0.1  | 0.1  | 0.0  | 0.0  | 0.0  | 0.0  | 0.0  | 0.0  | 0.0  | 0.0  |
| LAM | 1.2  | 1.3  | 1.1  | 1.0  | 0.6  | 0.6  | 0.5  | 0.7  | 0.7  | 0.6  |
| MEA | 1.1  | 0.9  | 1.6  | 1.5  | 0.6  | 0.5  | 1.4  | 2.0  | 1.1  | 1.7  |
| NEU | 0.0  | 0.0  | 0.0  | 0.0  | 0.0  | 0.0  | 0.0  | 0.0  | 0.0  | 0.0  |
| OAS | 1.6  | 1.7  | 1.9  | 1.6  | 1.8  | 2.0  | 1.8  | 1.7  | 1.9  | 1.7  |
| REF | 0.0  | 0.0  | 0.0  | 0.0  | 0.0  | 0.0  | 0.0  | 0.0  | 0.0  | 0.0  |
| SSA | 10.1 | 9.9  | 9.6  | 7.8  | 6.6  | 7.1  | 8.2  | 8.9  | 9.6  | 12.1 |
| USA | 0.9  | 1.0  | 0.9  | 0.8  | 0.8  | 1.0  | 0.9  | 0.7  | 0.8  | 0.6  |

Table 1585: FAO — Resources—Land Cover—Cropland—Crops—Oil crops—Groundnuts (million ha)

54.1.13 Crops—Oil crops—Oilpalms

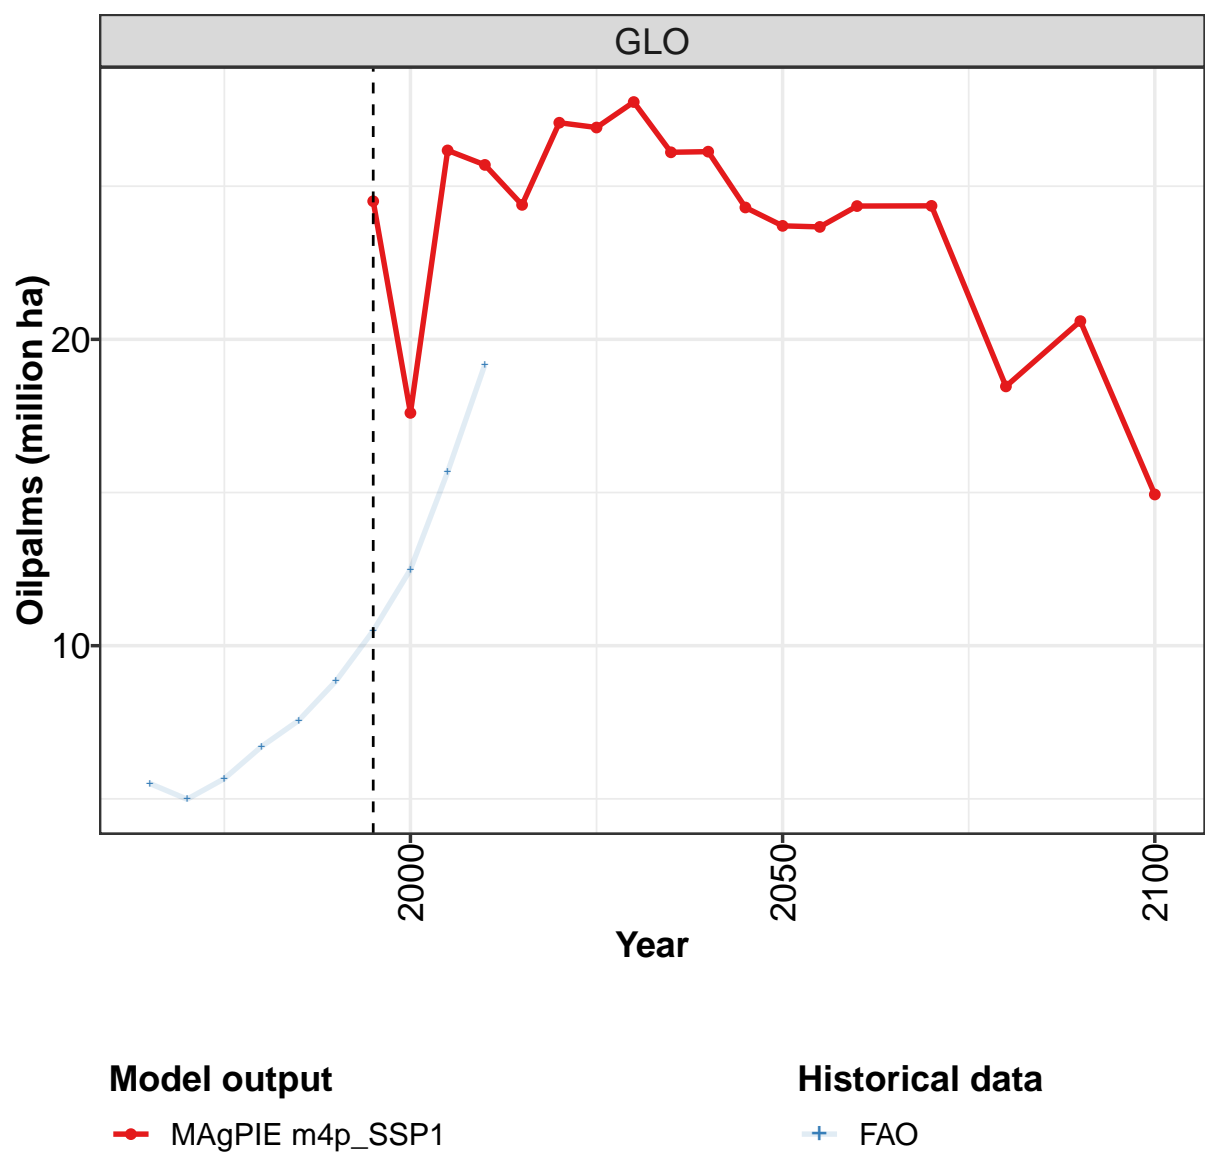



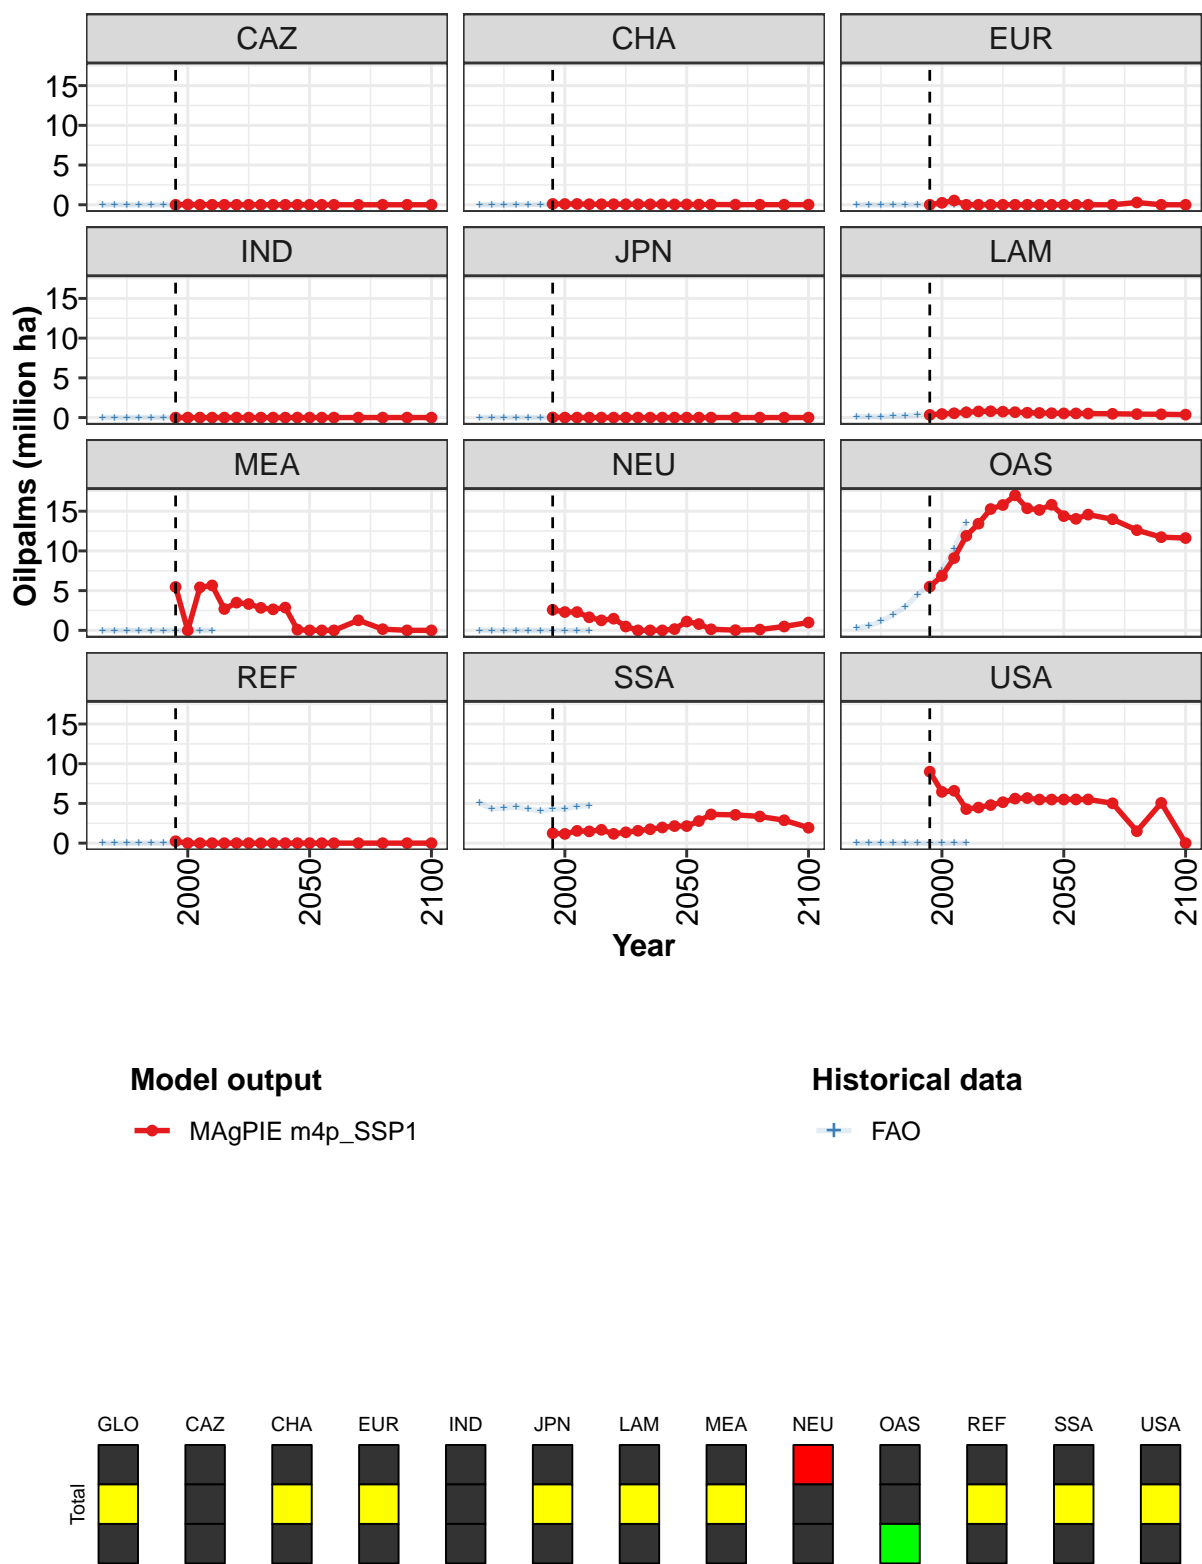

Figure 413: MAgPIE m4p\_SSP1 — Resources—Land Cover—Cropland—Crops—Oil crops—Oilpalms (million ha)

|     | 1995 | 2000 | 2005 | 2010 | 2015 | 2020 | 2025 | 2030 | 2035 | 2040 | 2045 |
|-----|------|------|------|------|------|------|------|------|------|------|------|
| GLO | 24.5 | 17.6 | 26.2 | 25.7 | 24.4 | 27.1 | 26.9 | 27.7 | 26.1 | 26.1 | 24.3 |
| CAZ | 0.0  | 0.0  | 0.0  | 0.0  | 0.0  | 0.0  | 0.0  | 0.0  | 0.0  | 0.0  | 0.0  |
| CHA | 0.1  | 0.1  | 0.1  | 0.1  | 0.1  | 0.1  | 0.1  | 0.1  | 0.1  | 0.1  | 0.0  |
| EUR | 0.0  | 0.2  | 0.5  | 0.0  | 0.0  | 0.0  | 0.0  | 0.0  | 0.0  | 0.0  | 0.0  |
| IND | 0.0  | 0.0  | 0.0  | 0.0  | 0.0  | 0.0  | 0.0  | 0.0  | 0.0  | 0.0  | 0.0  |
| JPN | 0.0  | 0.0  | 0.0  | 0.0  | 0.0  | 0.0  | 0.0  | 0.0  | 0.0  | 0.0  | 0.0  |
| LAM | 0.3  | 0.4  | 0.5  | 0.7  | 0.8  | 0.8  | 0.7  | 0.7  | 0.6  | 0.6  | 0.5  |
| MEA | 5.5  | 0.0  | 5.4  | 5.7  | 2.7  | 3.5  | 3.3  | 2.8  | 2.6  | 2.9  | 0.1  |
| NEU | 2.6  | 2.3  | 2.3  | 1.6  | 1.3  | 1.5  | 0.5  | 0.0  | 0.0  | 0.0  | 0.2  |
| OAS | 5.5  | 6.8  | 9.1  | 11.9 | 13.4 | 15.3 | 15.8 | 17.0 | 15.4 | 15.2 | 15.8 |
| REF | 0.2  | 0.0  | 0.0  | 0.0  | 0.0  | 0.0  | 0.0  | 0.0  | 0.0  | 0.0  | 0.0  |
| SSA | 1.2  | 1.2  | 1.5  | 1.5  | 1.7  | 1.2  | 1.4  | 1.6  | 1.7  | 2.0  | 2.2  |
| USA | 9.0  | 6.5  | 6.6  | 4.3  | 4.5  | 4.8  | 5.2  | 5.6  | 5.7  | 5.5  | 5.5  |

Table 1586: MAgPIE m4p\_SSP1 — Resources—Land Cover—Cropland—Crops—Oil crops—Oilpalms (million ha) [PART 1/2]

|     | 2050 | 2055 | 2060 | 2070 | 2080 | 2090 | 2100 |
|-----|------|------|------|------|------|------|------|
| GLO | 23.7 | 23.7 | 24.4 | 24.4 | 18.5 | 20.6 | 14.9 |
| CAZ | 0.0  | 0.0  | 0.0  | 0.0  | 0.0  | 0.0  | 0.0  |
| CHA | 0.0  | 0.0  | 0.0  | 0.0  | 0.0  | 0.0  | 0.0  |
| EUR | 0.0  | 0.0  | 0.0  | 0.0  | 0.3  | 0.0  | 0.0  |
| IND | 0.0  | 0.0  | 0.0  | 0.0  | 0.0  | 0.0  | 0.0  |
| JPN | 0.0  | 0.0  | 0.0  | 0.0  | 0.0  | 0.0  | 0.0  |
| LAM | 0.5  | 0.5  | 0.5  | 0.5  | 0.4  | 0.4  | 0.4  |
| MEA | 0.0  | 0.0  | 0.0  | 1.3  | 0.2  | 0.0  | 0.0  |
| NEU | 1.1  | 0.8  | 0.1  | 0.0  | 0.1  | 0.5  | 1.0  |
| OAS | 14.4 | 14.0 | 14.6 | 14.0 | 12.6 | 11.7 | 11.6 |
| REF | 0.0  | 0.0  | 0.0  | 0.0  | 0.0  | 0.0  | 0.0  |
| SSA | 2.1  | 2.8  | 3.6  | 3.6  | 3.4  | 2.9  | 1.9  |
| USA | 5.5  | 5.5  | 5.5  | 5.0  | 1.5  | 5.1  | 0.0  |

Table 1587: MAgPIE m4p\_SSP1 — Resources—Land Cover—Cropland—Crops—Oil crops—Oilpalms (million ha) [PART 2/2]

|     | 1965 | 1970 | 1975 | 1980 | 1985 | 1990 | 1995 | 2000 | 2005 | 2010 |
|-----|------|------|------|------|------|------|------|------|------|------|
| GLO | 5.5  | 5.0  | 5.7  | 6.7  | 7.6  | 8.8  | 10.5 | 12.5 | 15.7 | 19.2 |
| CAZ | 0.0  | 0.0  | 0.0  | 0.0  | 0.0  | 0.0  | 0.0  | 0.0  | 0.0  | 0.0  |
| CHA | 0.0  | 0.0  | 0.0  | 0.0  | 0.0  | 0.0  | 0.0  | 0.0  | 0.0  | 0.0  |
| EUR | 0.0  | 0.0  | 0.0  | 0.0  | 0.0  | 0.0  | 0.0  | 0.0  | 0.0  | 0.0  |
| IND | 0.0  | 0.0  | 0.0  | 0.0  | 0.0  | 0.0  | 0.0  | 0.0  | 0.0  | 0.0  |
| JPN | 0.0  | 0.0  | 0.0  | 0.0  | 0.0  | 0.0  | 0.0  | 0.0  | 0.0  | 0.0  |
| LAM | 0.1  | 0.1  | 0.1  | 0.2  | 0.2  | 0.3  | 0.5  | 0.6  | 0.7  | 0.9  |
| MEA | 0.0  | 0.0  | 0.0  | 0.0  | 0.0  | 0.0  | 0.0  | 0.0  | 0.0  | 0.0  |
| NEU | 0.0  | 0.0  | 0.0  | 0.0  | 0.0  | 0.0  | 0.0  | 0.0  | 0.0  | 0.0  |
| OAS | 0.3  | 0.6  | 1.1  | 2.0  | 3.0  | 4.5  | 5.7  | 7.5  | 10.3 | 13.5 |
| REF | 0.0  | 0.0  | 0.0  | 0.0  | 0.0  | 0.0  | 0.0  | 0.0  | 0.0  | 0.0  |
| SSA | 5.1  | 4.3  | 4.4  | 4.5  | 4.3  | 4.0  | 4.3  | 4.3  | 4.6  | 4.7  |
| USA | 0.0  | 0.0  | 0.0  | 0.0  | 0.0  | 0.0  | 0.0  | 0.0  | 0.0  | 0.0  |

Table 1588: FAO — Resources—Land Cover—Cropland—Crops—Oil crops—Oilpalms (million ha)

54.1.14 Crops—Oil crops—Other oil crops (incl rapeseed)

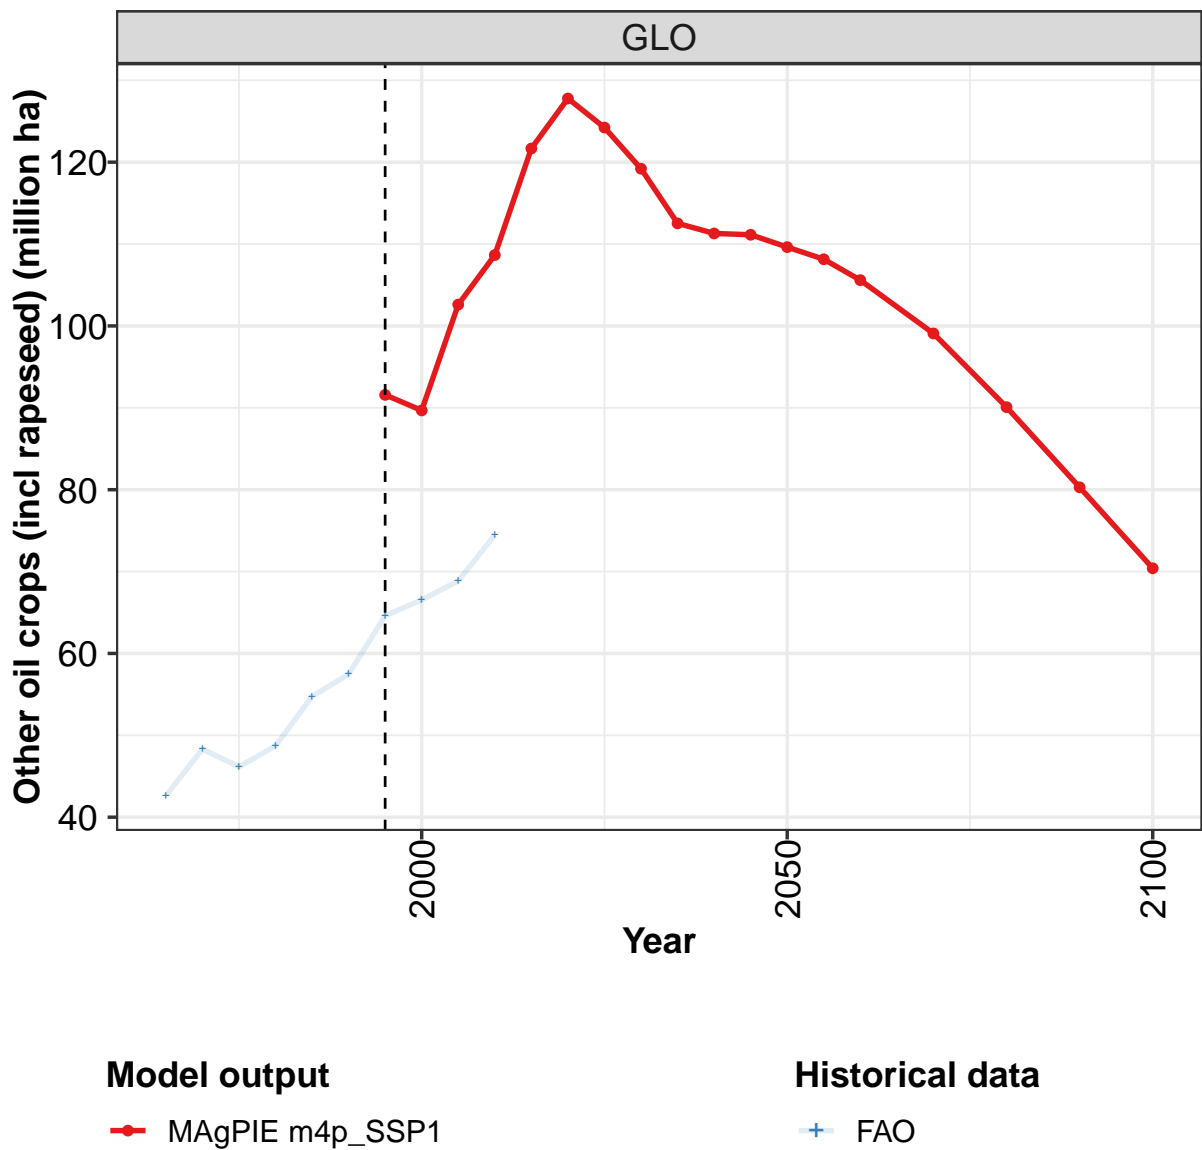

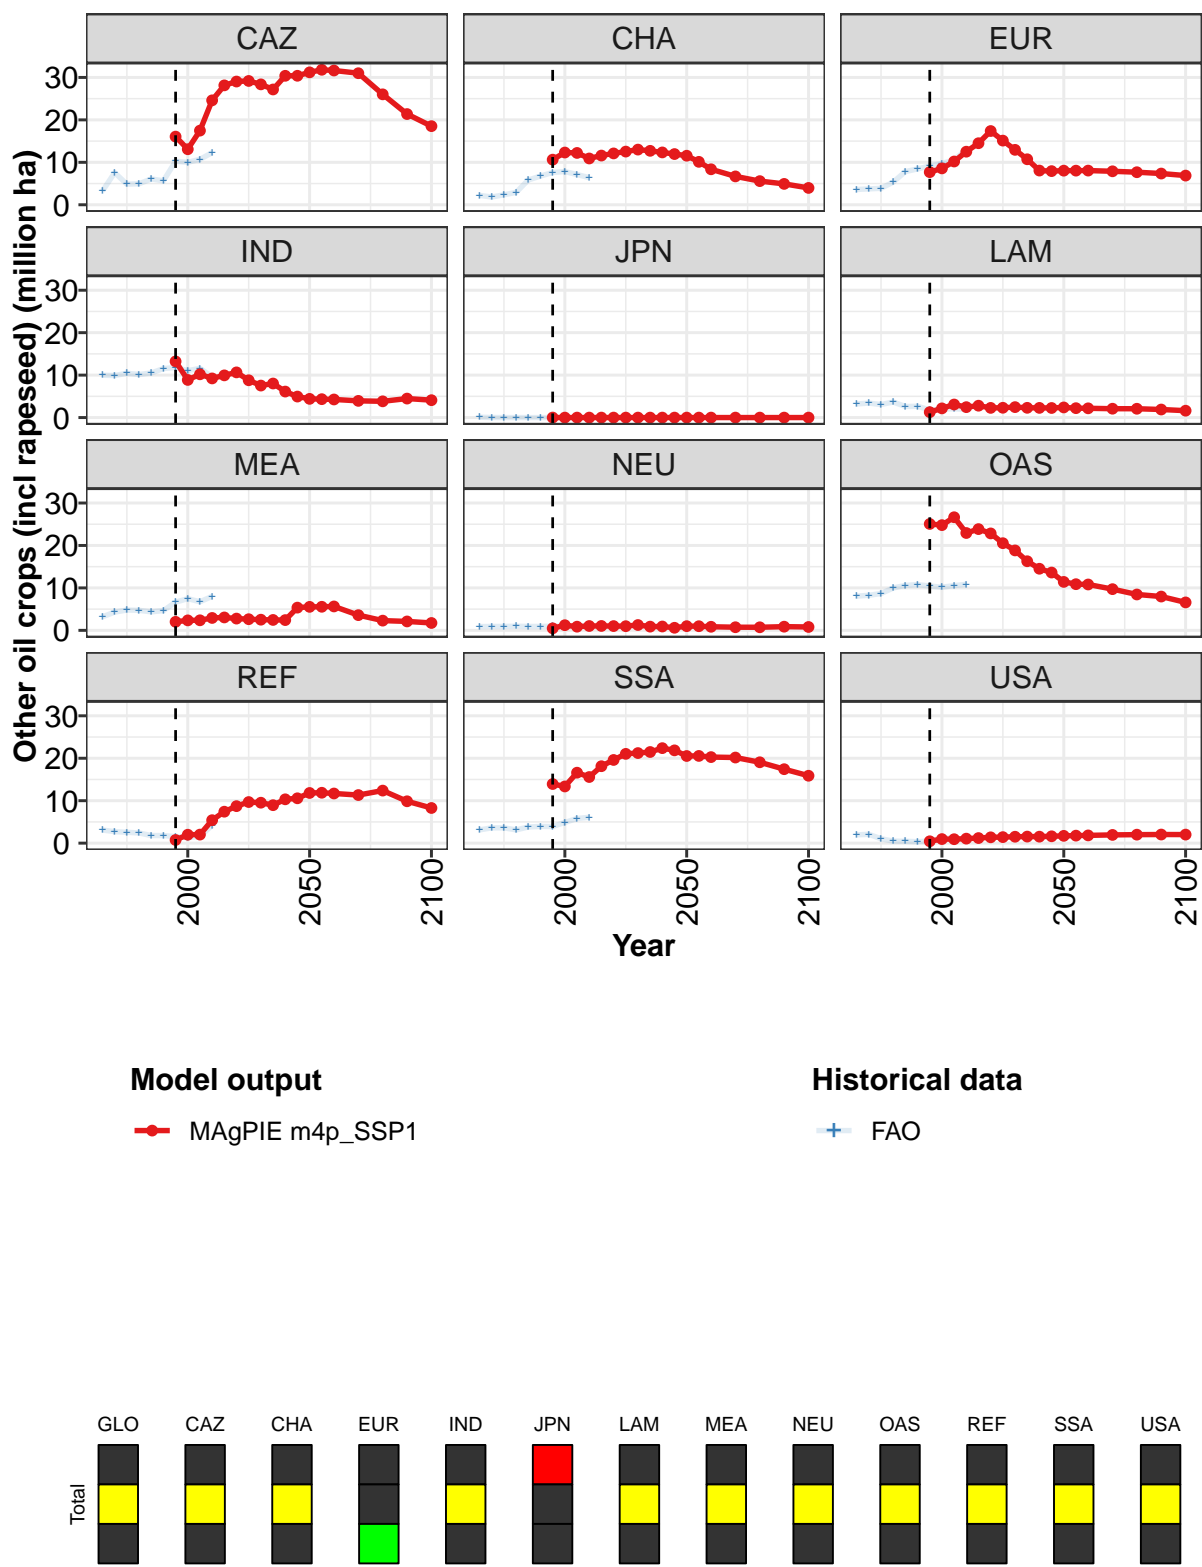

Figure 414: MAgPIE m4p\_SSP1 — Resources—Land Cover—Cropland—Crops—Oil crops—Other oil crops (incl rapeseed) (million ha)

|     | 1995 | 2000 | 2005 | 2010 | 2015 | 2020 | 2025 | 2030 | 2035 | 2040 | 2045 |
|-----|------|------|------|------|------|------|------|------|------|------|------|
| GLO | 92   | 90   | 103  | 109  | 122  | 128  | 124  | 119  | 113  | 111  | 111  |
| CAZ | 16   | 13   | 17   | 25   | 28   | 29   | 29   | 28   | 27   | 30   | 30   |
| CHA | 11   | 12   | 12   | 11   | 12   | 12   | 13   | 13   | 13   | 12   | 12   |
| EUR | 8    | 9    | 10   | 13   | 15   | 17   | 15   | 13   | 11   | 8    | 8    |
| IND | 13   | 9    | 10   | 9    | 10   | 11   | 9    | 8    | 8    | 6    | 5    |
| JPN | 0    | 0    | 0    | 0    | 0    | 0    | 0    | 0    | 0    | 0    | 0    |
| LAM | 1    | 2    | 3    | 2    | 3    | 2    | 2    | 2    | 2    | 2    | 2    |
| MEA | 2    | 2    | 2    | 3    | 3    | 3    | 3    | 3    | 2    | 2    | 5    |
| NEU | 0    | 1    | 1    | 1    | 1    | 1    | 1    | 1    | 1    | 1    | 1    |
| OAS | 25   | 25   | 27   | 23   | 24   | 23   | 21   | 19   | 16   | 15   | 14   |
| REF | 1    | 2    | 2    | 5    | 7    | 9    | 10   | 10   | 9    | 10   | 11   |
| SSA | 14   | 13   | 17   | 16   | 18   | 20   | 21   | 21   | 21   | 22   | 22   |
| USA | 0    | 1    | 1    | 1    | 1    | 1    | 1    | 2    | 2    | 2    | 2    |

Table 1589: MAgPIE m4p\_SSP1 — Resources—Land Cover—Cropland—Crops—Oil crops—Other oil crops (incl rapeseed) (million ha) [PART 1/2]

|     | 2050 | 2055 | 2060 | 2070 | 2080 | 2090 | 2100 |
|-----|------|------|------|------|------|------|------|
| GLO | 110  | 108  | 106  | 99   | 90   | 80   | 70   |
| CAZ | 31   | 32   | 32   | 31   | 26   | 21   | 19   |
| CHA | 12   | 10   | 8    | 7    | 6    | 5    | 4    |
| EUR | 8    | 8    | 8    | 8    | 8    | 7    | 7    |
| IND | 4    | 4    | 4    | 4    | 4    | 4    | 4    |
| JPN | 0    | 0    | 0    | 0    | 0    | 0    | 0    |
| LAM | 2    | 2    | 2    | 2    | 2    | 2    | 2    |
| MEA | 6    | 6    | 6    | 4    | 2    | 2    | 2    |
| NEU | 1    | 1    | 1    | 1    | 1    | 1    | 1    |
| OAS | 11   | 11   | 11   | 10   | 8    | 8    | 7    |
| REF | 12   | 12   | 12   | 11   | 12   | 10   | 8    |
| SSA | 21   | 21   | 20   | 20   | 19   | 17   | 16   |
| USA | 2    | 2    | 2    | 2    | 2    | 2    | 2    |

Table 1590: MAgPIE m4p\_SSP1 — Resources—Land Cover—Cropland—Crops—Oil crops—Other oil crops (incl rapeseed) (million ha) [PART 2/2]

|     | 1965 | 1970 | 1975 | 1980 | 1985 | 1990 | 1995 | 2000 | 2005 | 2010 |
|-----|------|------|------|------|------|------|------|------|------|------|
| GLO | 42.6 | 48.3 | 46.2 | 48.7 | 54.8 | 57.5 | 64.6 | 66.5 | 68.9 | 74.5 |
| CAZ | 3.3  | 7.6  | 4.8  | 5.0  | 6.1  | 5.7  | 10.3 | 10.0 | 10.7 | 12.3 |
| CHA | 2.2  | 1.8  | 2.3  | 2.9  | 5.8  | 6.8  | 7.6  | 7.8  | 7.1  | 6.4  |
| EUR | 3.6  | 3.7  | 3.9  | 5.3  | 7.8  | 8.4  | 9.1  | 9.7  | 10.6 | 13.0 |
| IND | 10.0 | 9.9  | 10.4 | 10.2 | 10.5 | 11.5 | 11.8 | 11.1 | 11.6 | 9.6  |
| JPN | 0.1  | 0.0  | 0.0  | 0.0  | 0.0  | 0.0  | 0.0  | 0.0  | 0.0  | 0.0  |
| LAM | 3.2  | 3.4  | 3.1  | 3.7  | 2.6  | 2.7  | 1.8  | 2.0  | 2.1  | 1.9  |
| MEA | 3.2  | 4.3  | 4.8  | 4.7  | 4.4  | 4.6  | 6.6  | 7.5  | 6.7  | 8.0  |
| NEU | 0.9  | 0.9  | 0.9  | 1.0  | 0.9  | 0.9  | 1.0  | 0.9  | 1.0  | 1.2  |
| OAS | 8.1  | 8.3  | 8.7  | 10.0 | 10.6 | 10.8 | 10.4 | 10.2 | 10.5 | 10.8 |
| REF | 3.1  | 2.7  | 2.6  | 2.4  | 1.8  | 1.8  | 1.5  | 1.3  | 1.6  | 4.2  |
| SSA | 3.1  | 3.6  | 3.6  | 3.1  | 3.8  | 3.9  | 3.9  | 4.9  | 5.8  | 6.1  |
| USA | 2.0  | 2.1  | 1.0  | 0.5  | 0.4  | 0.3  | 0.5  | 1.2  | 1.2  | 0.9  |

Table 1591: FAO — Resources—Land Cover—Cropland—Crops—Oil crops—Other oil crops (incl rapeseed) (million ha)

54.1.15 Crops—Oil crops—Soybean

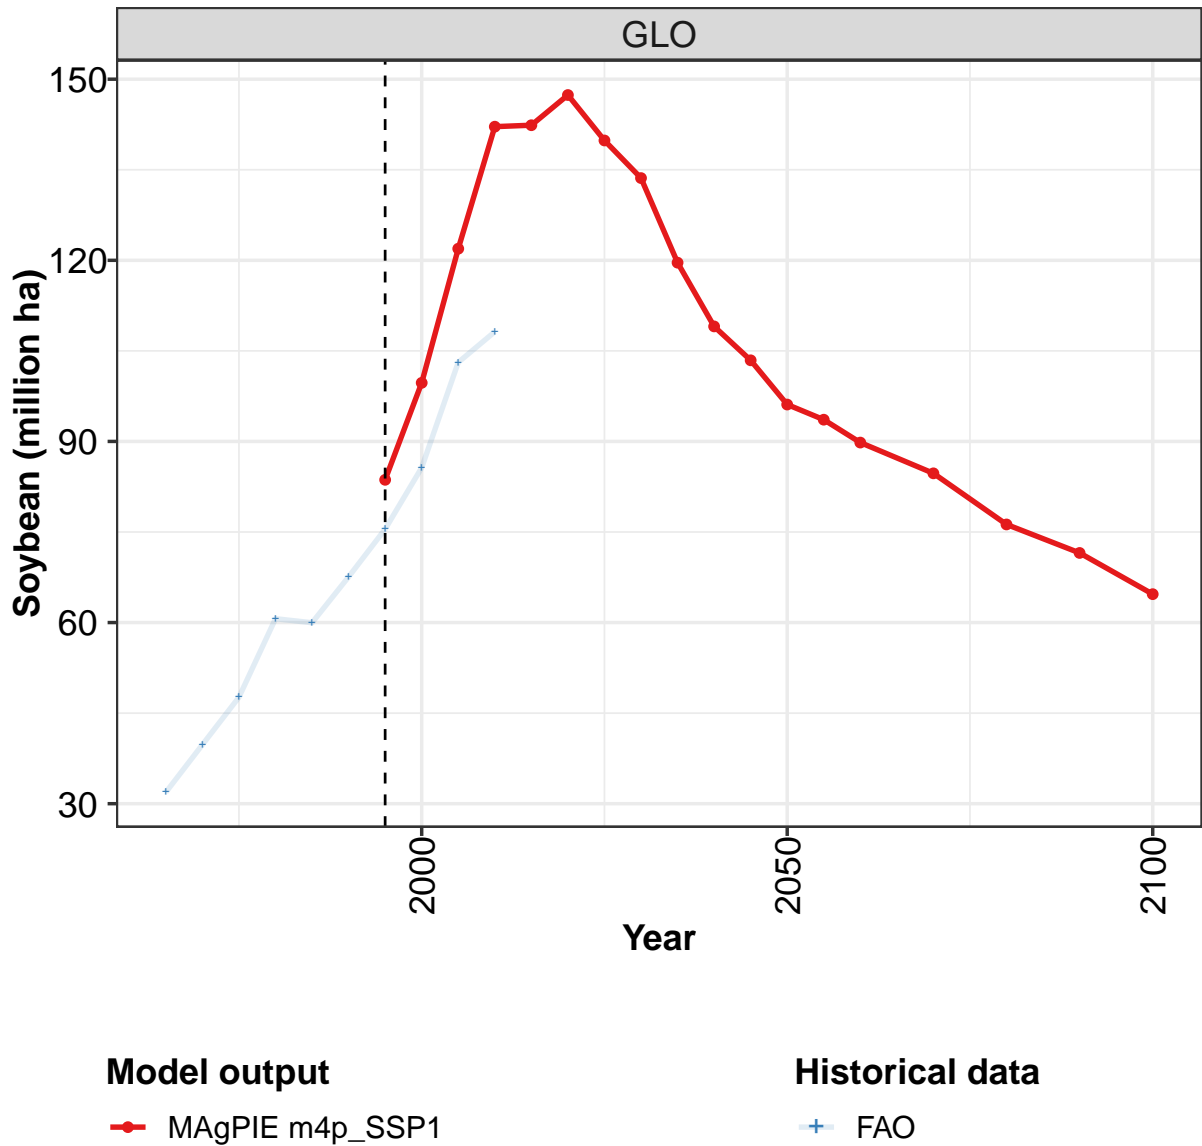

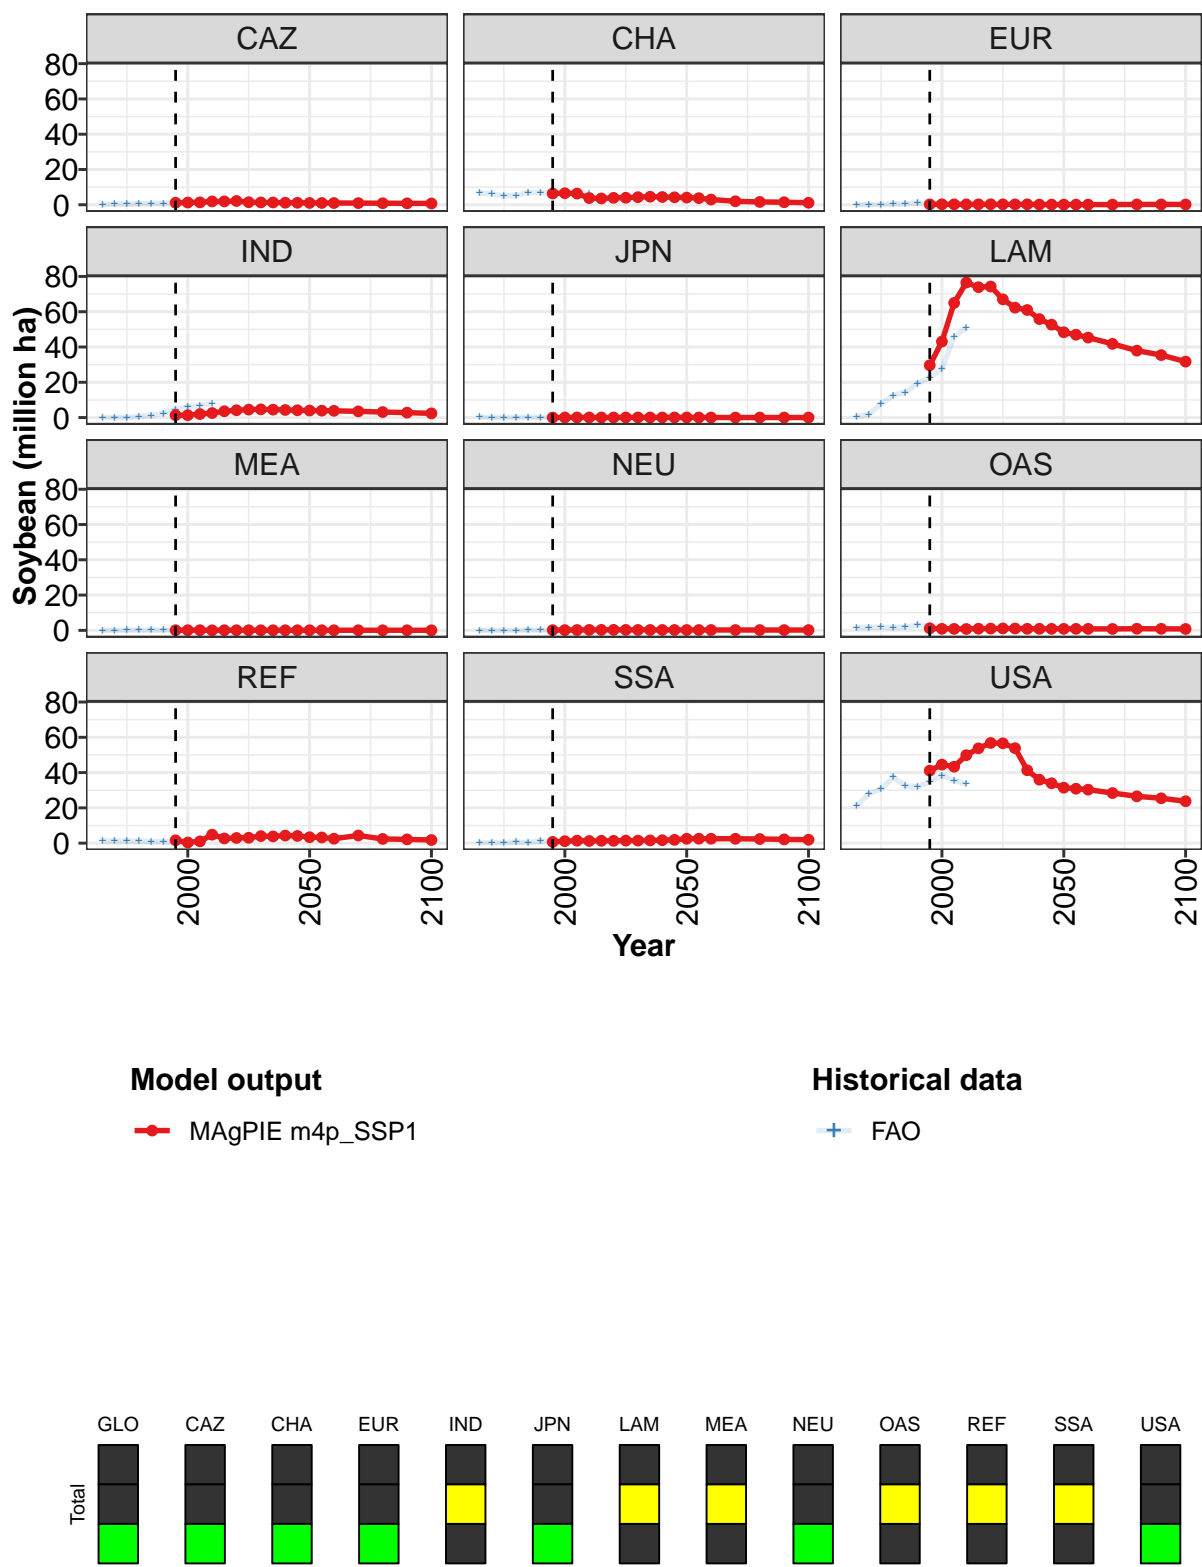

Figure 415: MAgPIE m4p\_SSP1 — Resources—Land Cover—Cropland—Crops—Oil crops—Soybean (million ha)

|     | 1995 | 2000 | 2005 | 2010 | 2015 | 2020 | 2025 | 2030 | 2035 | 2040 | 2045 |
|-----|------|------|------|------|------|------|------|------|------|------|------|
| GLO | 84   | 100  | 122  | 142  | 142  | 147  | 140  | 134  | 120  | 109  | 103  |
| CAZ | 1    | 1    | 1    | 2    | 2    | 2    | 1    | 1    | 1    | 1    | 1    |
| CHA | 6    | 7    | 6    | 4    | 4    | 4    | 4    | 4    | 5    | 4    | 4    |
| EUR | 0    | 0    | 0    | 0    | 0    | 0    | 0    | 0    | 0    | 0    | 0    |
| IND | 1    | 1    | 2    | 3    | 4    | 4    | 5    | 5    | 5    | 4    | 4    |
| JPN | 0    | 0    | 0    | 0    | 0    | 0    | 0    | 0    | 0    | 0    | 0    |
| LAM | 30   | 43   | 65   | 77   | 74   | 74   | 67   | 62   | 61   | 56   | 53   |
| MEA | 0    | 0    | 0    | 0    | 0    | 0    | 0    | 0    | 0    | 0    | 0    |
| NEU | 0    | 0    | 0    | 0    | 0    | 0    | 0    | 0    | 0    | 0    | 0    |
| OAS | 1    | 1    | 1    | 1    | 1    | 1    | 1    | 1    | 1    | 1    | 1    |
| REF | 2    | 0    | 1    | 5    | 3    | 3    | 3    | 4    | 4    | 4    | 4    |
| SSA | 1    | 1    | 1    | 1    | 1    | 1    | 1    | 1    | 2    | 2    | 2    |
| USA | 41   | 45   | 43   | 50   | 54   | 57   | 57   | 54   | 41   | 36   | 34   |

Table 1592: MAgPIE m4p\_SSP1 — Resources—Land Cover—Cropland—Crops—Oil crops—Soybean (million ha) [PART 1/2]

|     | 2050 | 2055 | 2060 | 2070 | 2080 | 2090 | 2100 |
|-----|------|------|------|------|------|------|------|
| GLO | 96   | 94   | 90   | 85   | 76   | 72   | 65   |
| CAZ | 1    | 1    | 1    | 1    | 1    | 1    | 1    |
| CHA | 4    | 4    | 3    | 2    | 2    | 1    | 1    |
| EUR | 0    | 0    | 0    | 0    | 0    | 0    | 0    |
| IND | 4    | 4    | 4    | 4    | 3    | 3    | 2    |
| JPN | 0    | 0    | 0    | 0    | 0    | 0    | 0    |
| LAM | 48   | 47   | 45   | 42   | 38   | 35   | 32   |
| MEA | 0    | 0    | 0    | 0    | 0    | 0    | 0    |
| NEU | 0    | 0    | 0    | 0    | 0    | 0    | 0    |
| OAS | 1    | 1    | 1    | 1    | 1    | 1    | 1    |
| REF | 3    | 3    | 3    | 4    | 2    | 2    | 2    |
| SSA | 2    | 3    | 3    | 2    | 2    | 2    | 2    |
| USA | 31   | 31   | 30   | 28   | 27   | 25   | 24   |

Table 1593: MAgPIE m4p\_SSP1 — Resources—Land Cover—Cropland—Crops—Oil crops—Soybean (million ha) [PART 2/2]

|     | 1965 | 1970 | 1975 | 1980 | 1985 | 1990 | 1995 | 2000 | 2005 | 2010 |
|-----|------|------|------|------|------|------|------|------|------|------|
| GLO | 32   | 40   | 48   | 61   | 60   | 68   | 75   | 86   | 103  | 108  |
| CAZ | 0    | 0    | 0    | 1    | 1    | 1    | 1    | 2    | 2    | 2    |
| CHA | 7    | 6    | 5    | 5    | 7    | 7    | 7    | 8    | 7    | 6    |
| EUR | 0    | 0    | 0    | 1    | 1    | 1    | 0    | 1    | 0    | 0    |
| IND | 0    | 0    | 0    | 1    | 1    | 2    | 5    | 6    | 7    | 8    |
| JPN | 0    | 0    | 0    | 0    | 0    | 0    | 0    | 0    | 0    | 0    |
| LAM | 1    | 2    | 8    | 13   | 14   | 19   | 23   | 28   | 46   | 51   |
| MEA | 0    | 0    | 0    | 0    | 0    | 0    | 0    | 0    | 0    | 0    |
| NEU | 0    | 0    | 0    | 0    | 0    | 0    | 0    | 0    | 0    | 0    |
| OAS | 2    | 2    | 2    | 2    | 2    | 3    | 3    | 2    | 2    | 2    |
| REF | 1    | 1    | 1    | 1    | 1    | 1    | 1    | 1    | 2    | 3    |
| SSA | 0    | 0    | 0    | 1    | 0    | 1    | 1    | 1    | 1    | 2    |
| USA | 21   | 28   | 31   | 37   | 32   | 32   | 35   | 38   | 35   | 34   |

Table 1594: FAO — Resources—Land Cover—Cropland—Crops—Oil crops—Soybean (million ha)



54.1.16 Crops—Oil crops—Sunflower

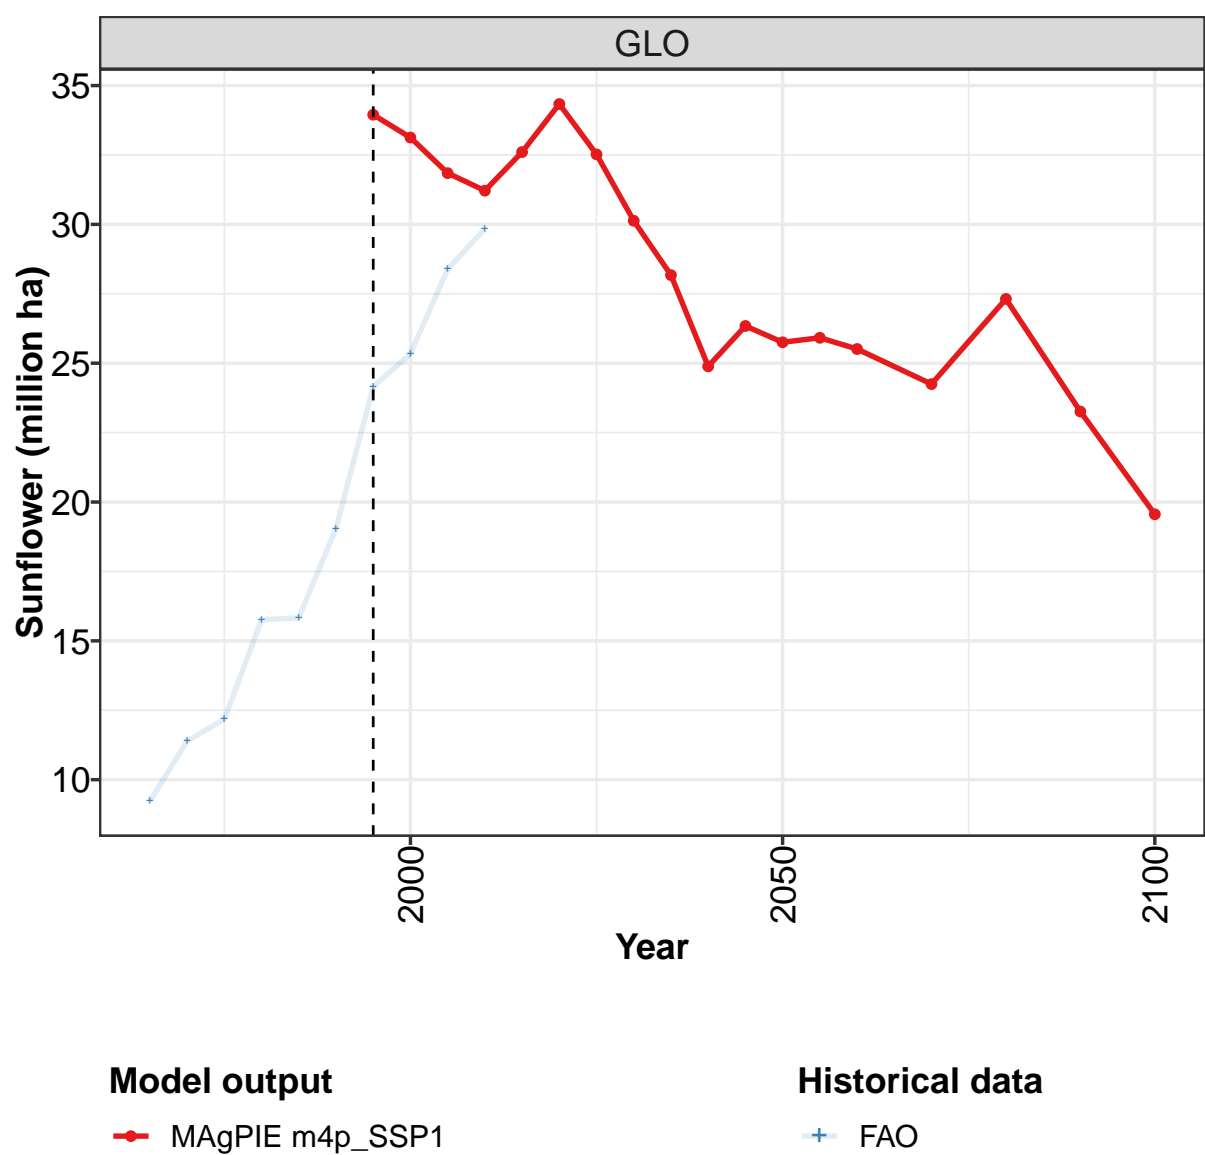

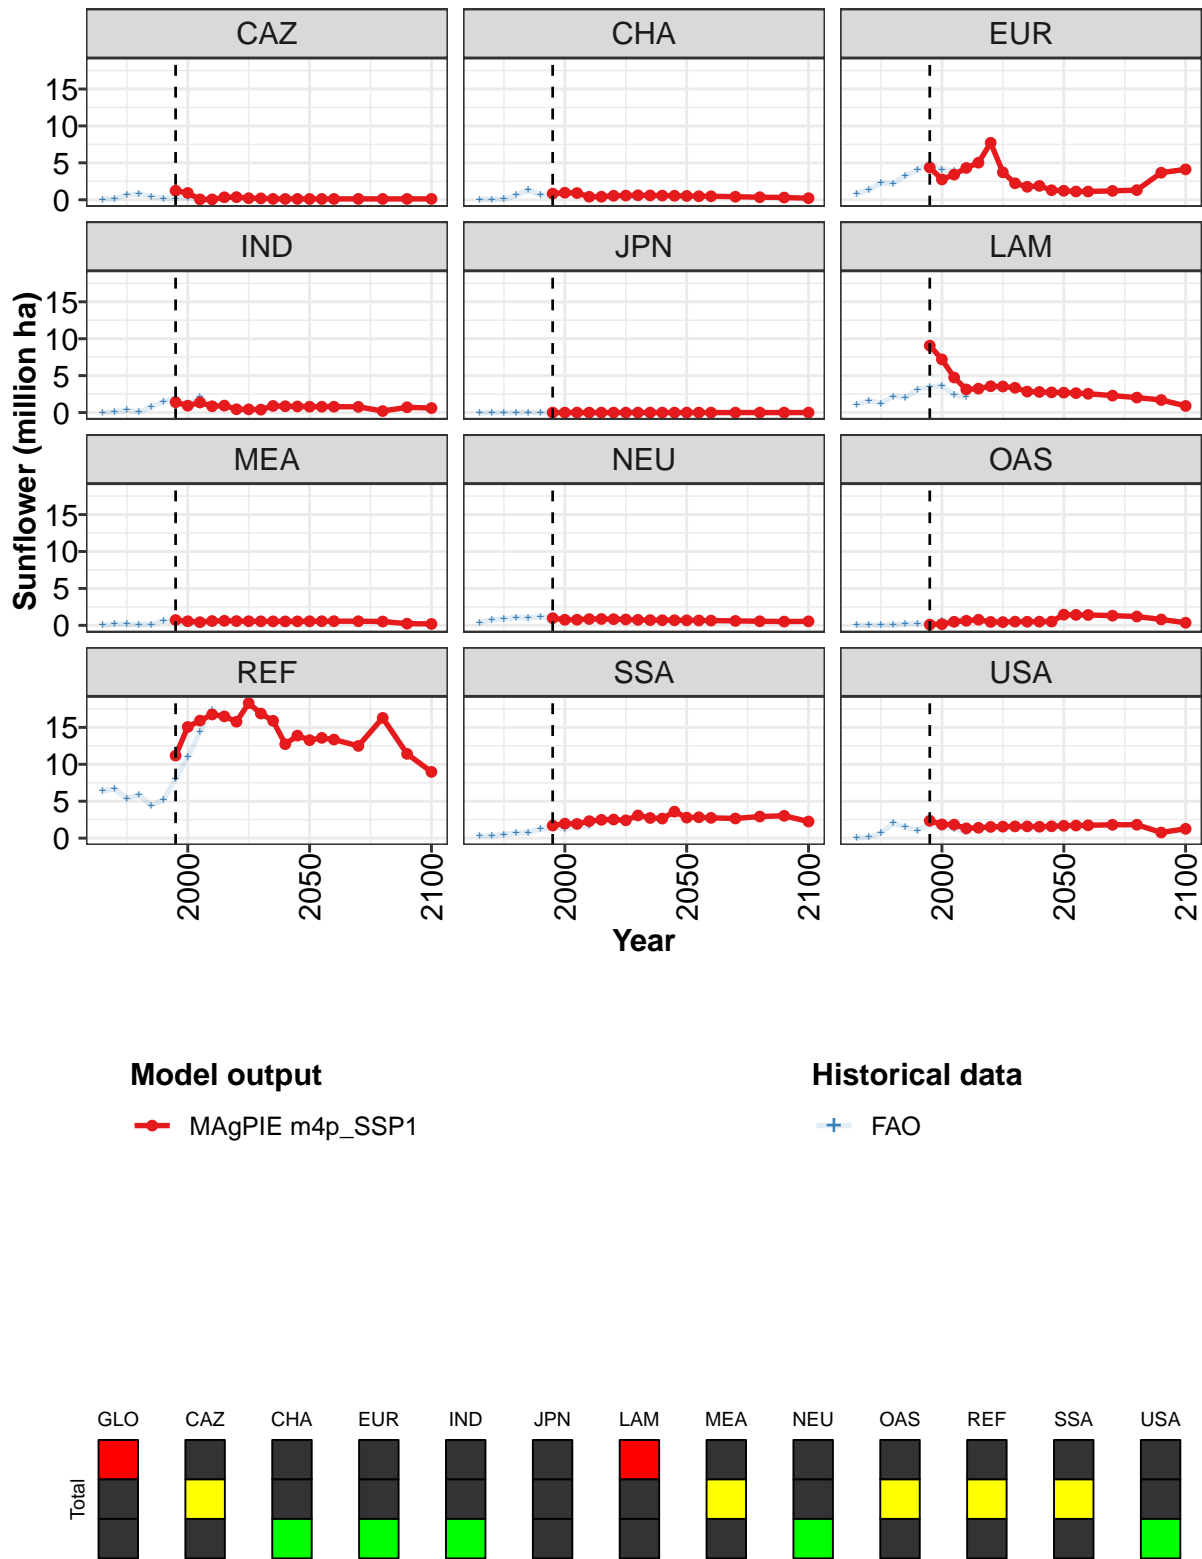

Figure 416: MAgPIE m4p\_SSP1 — Resources—Land Cover—Cropland—Crops—Oil crops—Sunflower (million ha)

|     | 1995 | 2000 | 2005 | 2010 | 2015 | 2020 | 2025 | 2030 | 2035 | 2040 | 2045 |
|-----|------|------|------|------|------|------|------|------|------|------|------|
| GLO | 33.9 | 33.1 | 31.8 | 31.2 | 32.6 | 34.3 | 32.5 | 30.1 | 28.2 | 24.9 | 26.3 |
| CAZ | 1.2  | 0.9  | 0.1  | 0.1  | 0.3  | 0.4  | 0.2  | 0.2  | 0.1  | 0.1  | 0.1  |
| CHA | 0.8  | 1.0  | 0.9  | 0.4  | 0.4  | 0.5  | 0.6  | 0.6  | 0.6  | 0.6  | 0.5  |
| EUR | 4.4  | 2.8  | 3.4  | 4.3  | 5.0  | 7.7  | 3.7  | 2.2  | 1.8  | 1.9  | 1.3  |
| IND | 1.4  | 0.9  | 1.4  | 0.9  | 0.9  | 0.5  | 0.4  | 0.4  | 0.9  | 0.9  | 0.8  |
| JPN | 0.0  | 0.0  | 0.0  | 0.0  | 0.0  | 0.0  | 0.0  | 0.0  | 0.0  | 0.0  | 0.0  |
| LAM | 9.1  | 7.2  | 4.7  | 3.1  | 3.2  | 3.6  | 3.5  | 3.4  | 2.8  | 2.8  | 2.7  |
| MEA | 0.7  | 0.6  | 0.4  | 0.6  | 0.6  | 0.6  | 0.6  | 0.5  | 0.5  | 0.5  | 0.5  |
| NEU | 1.0  | 0.8  | 0.8  | 0.9  | 0.9  | 0.8  | 0.8  | 0.7  | 0.7  | 0.7  | 0.7  |
| OAS | 0.1  | 0.2  | 0.5  | 0.6  | 0.8  | 0.5  | 0.4  | 0.5  | 0.5  | 0.5  | 0.5  |
| REF | 11.2 | 15.1 | 15.9 | 16.7 | 16.5 | 15.8 | 18.3 | 16.9 | 15.9 | 12.7 | 13.9 |
| SSA | 1.7  | 2.0  | 1.9  | 2.3  | 2.5  | 2.5  | 2.4  | 3.1  | 2.7  | 2.7  | 3.6  |
| USA | 2.4  | 1.9  | 1.8  | 1.3  | 1.4  | 1.5  | 1.6  | 1.6  | 1.6  | 1.5  | 1.6  |

Table 1595: MAgPIE m4p\_SSP1 — Resources—Land Cover—Cropland—Crops—Oil crops—Sunflower (million ha) [PART 1/2]

|     | 2050 | 2055 | 2060 | 2070 | 2080 | 2090 | 2100 |
|-----|------|------|------|------|------|------|------|
| GLO | 25.8 | 25.9 | 25.5 | 24.2 | 27.3 | 23.3 | 19.6 |
| CAZ | 0.1  | 0.1  | 0.1  | 0.1  | 0.1  | 0.1  | 0.1  |
| CHA | 0.5  | 0.5  | 0.5  | 0.4  | 0.3  | 0.3  | 0.2  |
| EUR | 1.2  | 1.1  | 1.1  | 1.2  | 1.3  | 3.7  | 4.1  |
| IND | 0.8  | 0.8  | 0.8  | 0.8  | 0.2  | 0.7  | 0.6  |
| JPN | 0.0  | 0.0  | 0.0  | 0.0  | 0.0  | 0.0  | 0.0  |
| LAM | 2.7  | 2.6  | 2.5  | 2.3  | 2.0  | 1.7  | 0.9  |
| MEA | 0.6  | 0.6  | 0.6  | 0.6  | 0.5  | 0.2  | 0.2  |
| NEU | 0.7  | 0.7  | 0.6  | 0.6  | 0.6  | 0.5  | 0.5  |
| OAS | 1.4  | 1.4  | 1.4  | 1.3  | 1.2  | 0.8  | 0.4  |
| REF | 13.3 | 13.6 | 13.4 | 12.5 | 16.3 | 11.4 | 9.0  |
| SSA | 2.8  | 2.8  | 2.7  | 2.7  | 2.9  | 3.0  | 2.3  |
| USA | 1.7  | 1.7  | 1.7  | 1.8  | 1.8  | 0.8  | 1.3  |

Table 1596: MAgPIE m4p\_SSP1 — Resources—Land Cover—Cropland—Crops—Oil crops—Sunflower (million ha) [PART 2/2]

|     | 1965 | 1970 | 1975 | 1980 | 1985 | 1990 | 1995 | 2000 | 2005 | 2010 |
|-----|------|------|------|------|------|------|------|------|------|------|
| GLO | 9.2  | 11.4 | 12.2 | 15.8 | 15.8 | 19.0 | 24.2 | 25.3 | 28.4 | 29.8 |
| CAZ | 0.1  | 0.2  | 0.7  | 0.8  | 0.4  | 0.2  | 0.2  | 0.3  | 0.2  | 0.1  |
| CHA | 0.0  | 0.1  | 0.1  | 0.6  | 1.3  | 0.6  | 0.7  | 1.0  | 0.8  | 0.7  |
| EUR | 0.8  | 1.3  | 2.3  | 2.2  | 3.2  | 4.1  | 4.9  | 4.1  | 3.9  | 4.1  |
| IND | 0.0  | 0.1  | 0.3  | 0.1  | 0.7  | 1.5  | 1.9  | 1.0  | 2.1  | 0.8  |
| JPN | 0.0  | 0.0  | 0.0  | 0.0  | 0.0  | 0.0  | 0.0  | 0.0  | 0.0  | 0.0  |
| LAM | 1.1  | 1.6  | 1.2  | 2.2  | 2.0  | 3.1  | 3.5  | 3.6  | 2.4  | 2.1  |
| MEA | 0.0  | 0.2  | 0.2  | 0.1  | 0.1  | 0.6  | 0.4  | 0.3  | 0.3  | 0.3  |
| NEU | 0.4  | 0.8  | 0.8  | 1.1  | 1.0  | 1.2  | 0.9  | 0.8  | 0.9  | 1.0  |
| OAS | 0.0  | 0.0  | 0.0  | 0.1  | 0.2  | 0.2  | 0.3  | 0.6  | 0.7  | 0.9  |
| REF | 6.4  | 6.6  | 5.4  | 5.9  | 4.4  | 5.2  | 8.0  | 11.0 | 14.4 | 17.4 |
| SSA | 0.3  | 0.3  | 0.5  | 0.7  | 0.8  | 1.3  | 1.4  | 1.2  | 1.5  | 1.7  |
| USA | 0.0  | 0.1  | 0.7  | 2.0  | 1.5  | 1.0  | 1.9  | 1.4  | 1.3  | 0.8  |

Table 1597: FAO — Resources—Land Cover—Cropland—Crops—Oil crops—Sunflower (million ha)

54.1.17 Crops—Other crops

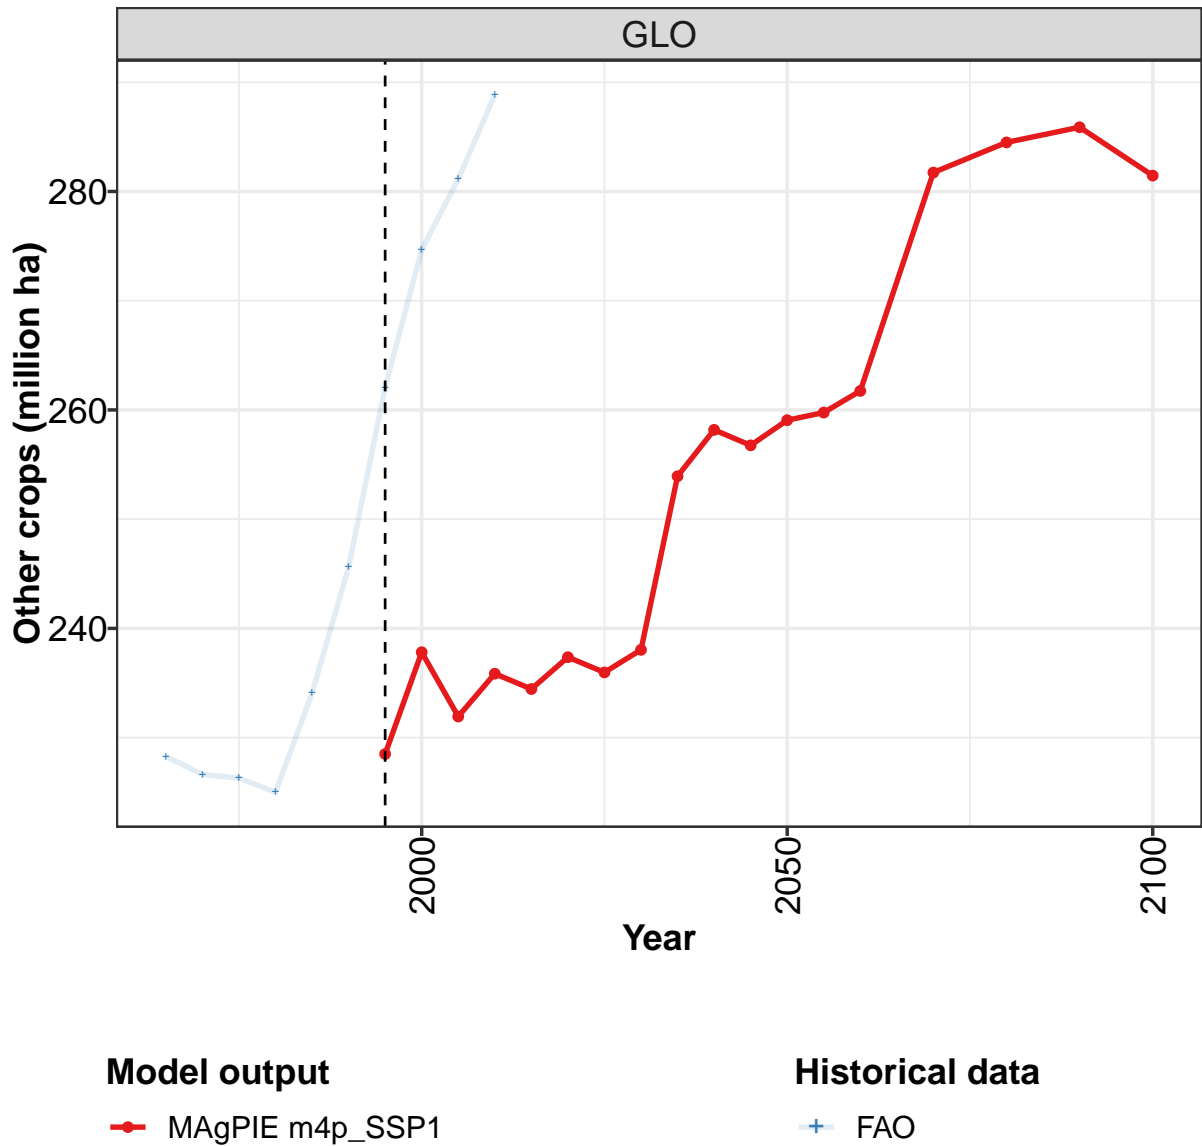

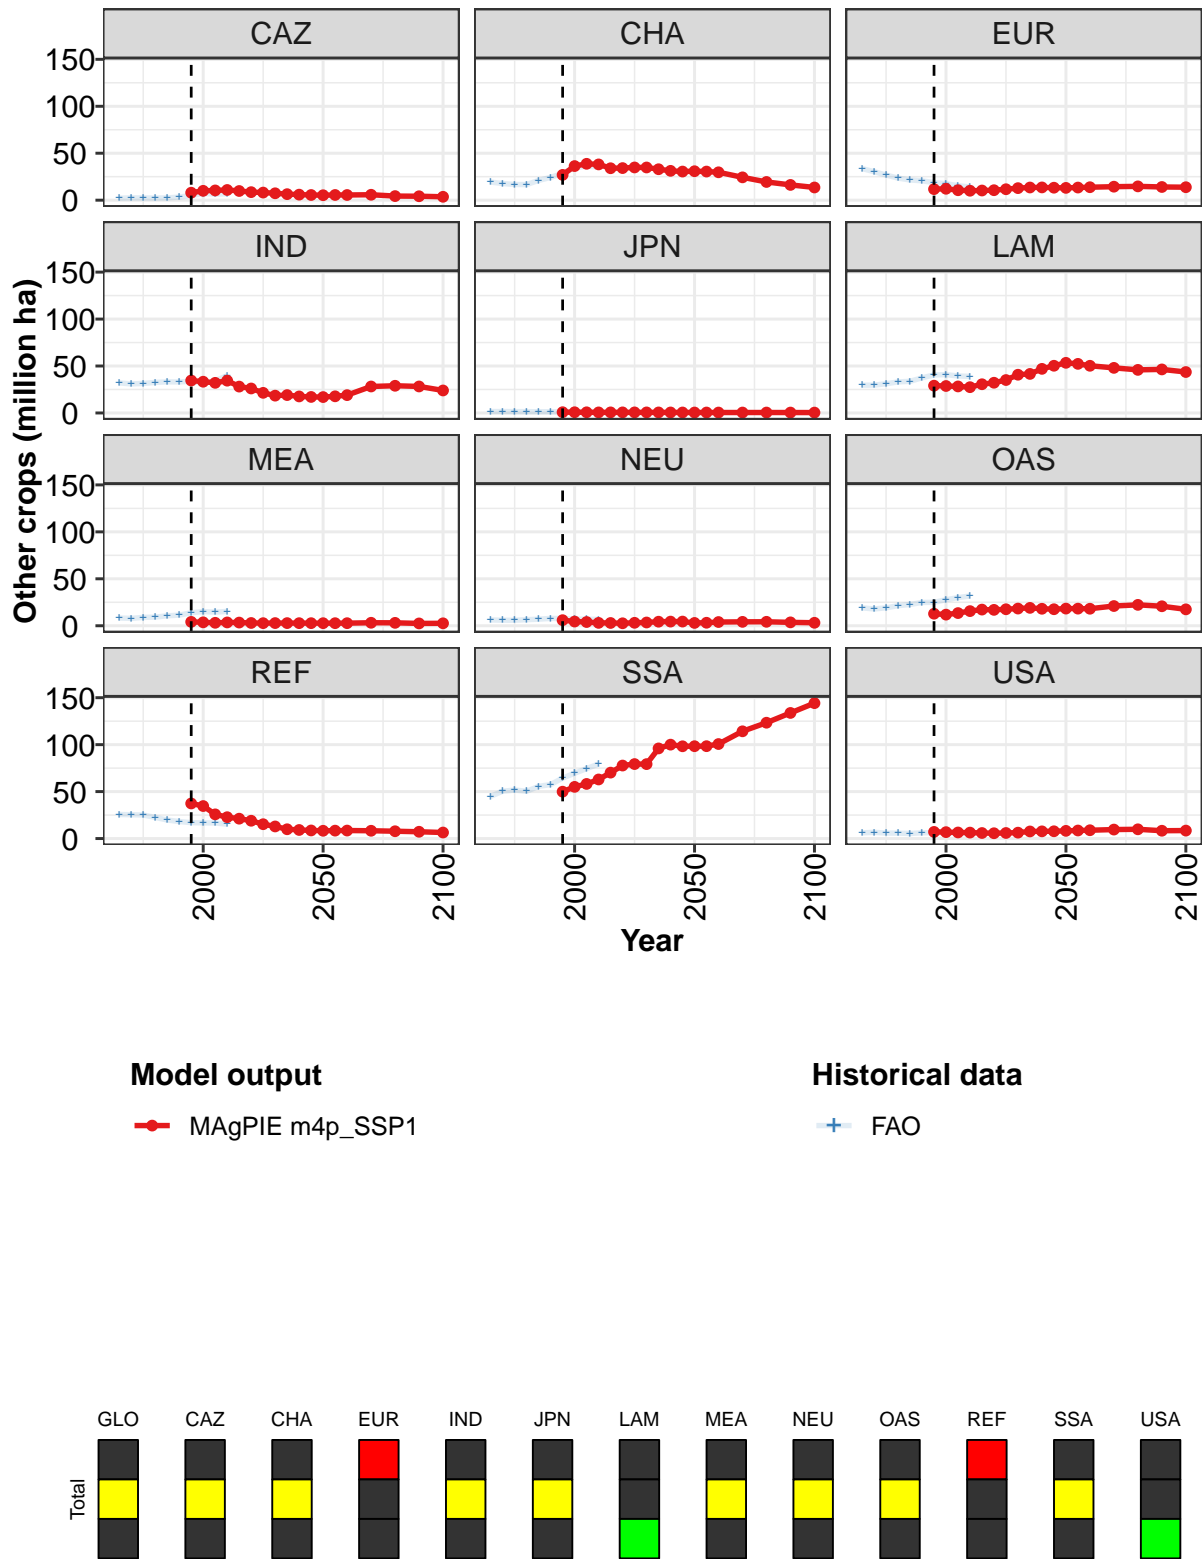

Figure 417: MAgPIE m4p\_SSP1 — Resources—Land Cover—Cropland—Crops—Other crops (million ha)

|     | 1995 | 2000 | 2005 | 2010 | 2015 | 2020 | 2025 | 2030 | 2035 | 2040 | 2045 |
|-----|------|------|------|------|------|------|------|------|------|------|------|
| GLO | 229  | 238  | 232  | 236  | 234  | 237  | 236  | 238  | 254  | 258  | 257  |
| CAZ | 8    | 10   | 10   | 11   | 10   | 9    | 8    | 7    | 6    | 6    | 6    |
| CHA | 27   | 36   | 39   | 38   | 34   | 34   | 35   | 35   | 33   | 31   | 30   |
| EUR | 12   | 12   | 11   | 10   | 10   | 11   | 12   | 13   | 14   | 14   | 13   |
| IND | 35   | 33   | 32   | 34   | 28   | 26   | 21   | 18   | 19   | 18   | 17   |
| JPN | 1    | 1    | 1    | 1    | 1    | 1    | 1    | 1    | 1    | 1    | 1    |
| LAM | 29   | 29   | 28   | 27   | 31   | 32   | 35   | 41   | 42   | 47   | 50   |
| MEA | 4    | 4    | 3    | 4    | 3    | 3    | 3    | 3    | 3    | 3    | 3    |
| NEU | 6    | 5    | 4    | 3    | 3    | 3    | 3    | 4    | 4    | 4    | 4    |
| OAS | 13   | 12   | 14   | 16   | 17   | 17   | 18   | 18   | 19   | 18   | 18   |
| REF | 37   | 35   | 26   | 23   | 21   | 19   | 15   | 13   | 10   | 9    | 9    |
| SSA | 50   | 55   | 58   | 63   | 70   | 78   | 79   | 79   | 96   | 100  | 98   |
| USA | 7    | 7    | 6    | 6    | 6    | 6    | 6    | 6    | 8    | 8    | 8    |

Table 1598: MAgPIE m4p\_SSP1 — Resources—Land Cover—Cropland—Crops—Other crops (million ha)  
[PART 1/2]

|     | 2050 | 2055 | 2060 | 2070 | 2080 | 2090 | 2100 |
|-----|------|------|------|------|------|------|------|
| GLO | 259  | 260  | 262  | 282  | 284  | 286  | 281  |
| CAZ | 5    | 6    | 6    | 6    | 4    | 4    | 4    |
| CHA | 31   | 30   | 30   | 24   | 19   | 16   | 14   |
| EUR | 13   | 13   | 14   | 14   | 15   | 14   | 14   |
| IND | 17   | 18   | 19   | 28   | 29   | 28   | 24   |
| JPN | 1    | 0    | 0    | 0    | 0    | 0    | 0    |
| LAM | 53   | 52   | 50   | 48   | 46   | 46   | 44   |
| MEA | 3    | 3    | 3    | 3    | 3    | 2    | 3    |
| NEU | 3    | 3    | 4    | 4    | 4    | 4    | 3    |
| OAS | 18   | 18   | 18   | 21   | 22   | 21   | 17   |
| REF | 8    | 8    | 9    | 8    | 8    | 7    | 6    |
| SSA | 98   | 98   | 101  | 114  | 123  | 134  | 144  |
| USA | 8    | 9    | 9    | 10   | 10   | 8    | 9    |

Table 1599: MAgPIE m4p\_SSP1 — Resources—Land Cover—Cropland—Crops—Other crops (million ha)  
[PART 2/2]

|     | 1965 | 1970 | 1975 | 1980 | 1985 | 1990 | 1995 | 2000 | 2005 | 2010 |
|-----|------|------|------|------|------|------|------|------|------|------|
| GLO | 228  | 227  | 226  | 225  | 234  | 246  | 262  | 275  | 281  | 289  |
| CAZ | 2    | 2    | 2    | 2    | 2    | 3    | 5    | 7    | 6    | 7    |
| CHA | 19   | 18   | 17   | 17   | 21   | 24   | 29   | 34   | 36   | 35   |
| EUR | 34   | 30   | 27   | 23   | 22   | 21   | 19   | 18   | 15   | 14   |
| IND | 32   | 31   | 31   | 33   | 33   | 33   | 34   | 32   | 34   | 40   |
| JPN | 1    | 2    | 1    | 1    | 1    | 1    | 1    | 1    | 1    | 1    |
| LAM | 30   | 30   | 31   | 33   | 34   | 37   | 40   | 41   | 39   | 39   |
| MEA | 8    | 8    | 9    | 9    | 11   | 11   | 14   | 15   | 15   | 15   |
| NEU | 6    | 6    | 6    | 6    | 7    | 8    | 8    | 7    | 7    | 7    |
| OAS | 19   | 18   | 19   | 21   | 23   | 25   | 25   | 28   | 30   | 32   |
| REF | 26   | 25   | 25   | 23   | 20   | 18   | 17   | 17   | 17   | 15   |
| SSA | 45   | 50   | 52   | 50   | 56   | 58   | 64   | 70   | 75   | 79   |
| USA | 6    | 7    | 6    | 6    | 5    | 6    | 6    | 6    | 6    | 5    |

Table 1600: FAO — Resources—Land Cover—Cropland—Crops—Other crops (million ha)

54.1.18 Crops—Other crops—Fruits Vegetables Nuts

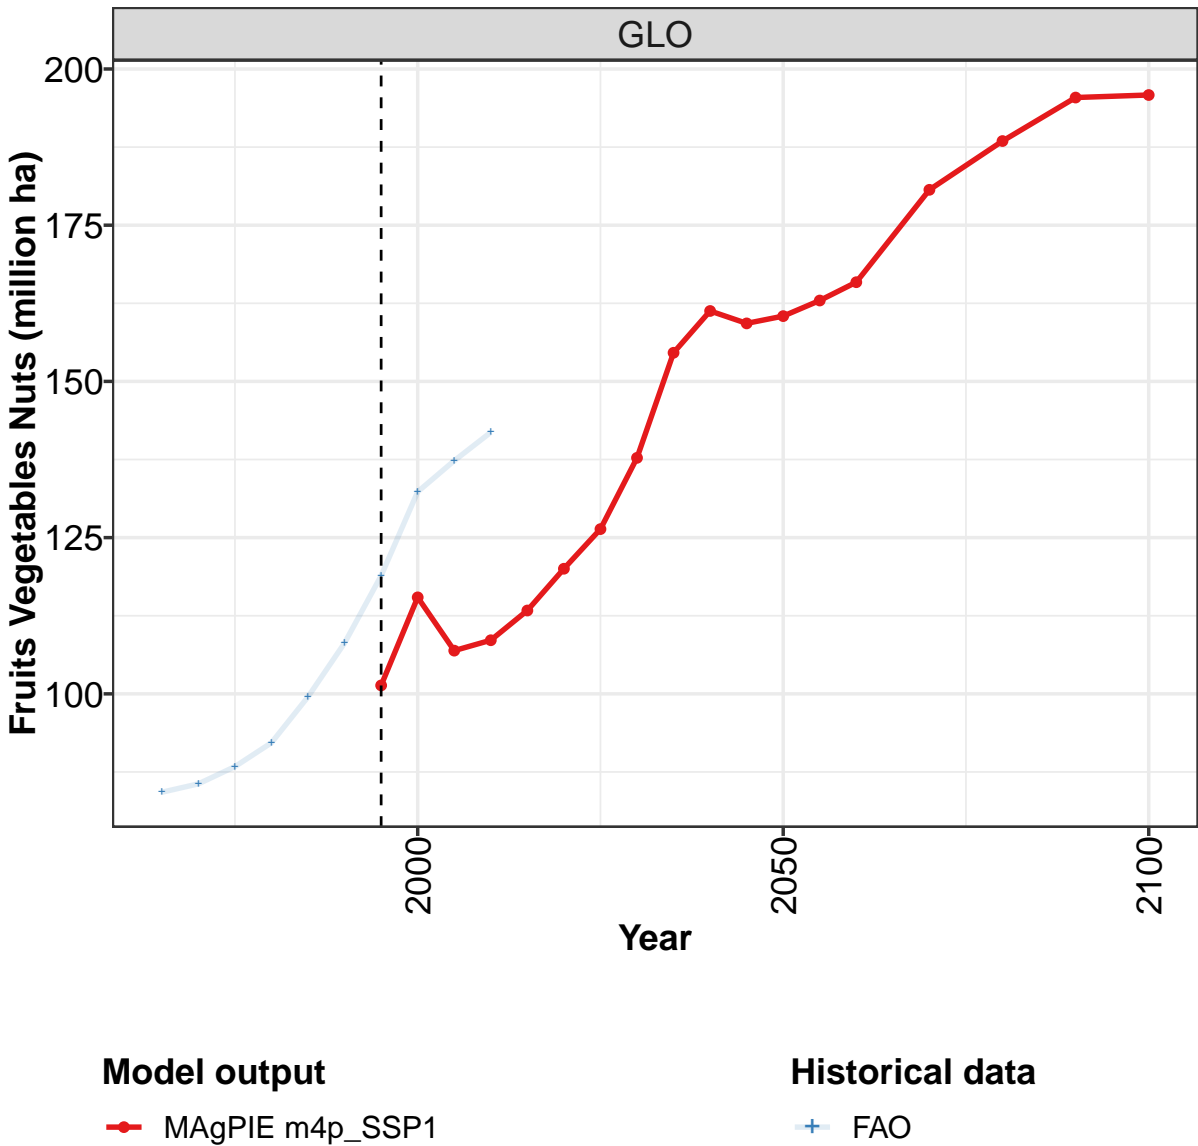

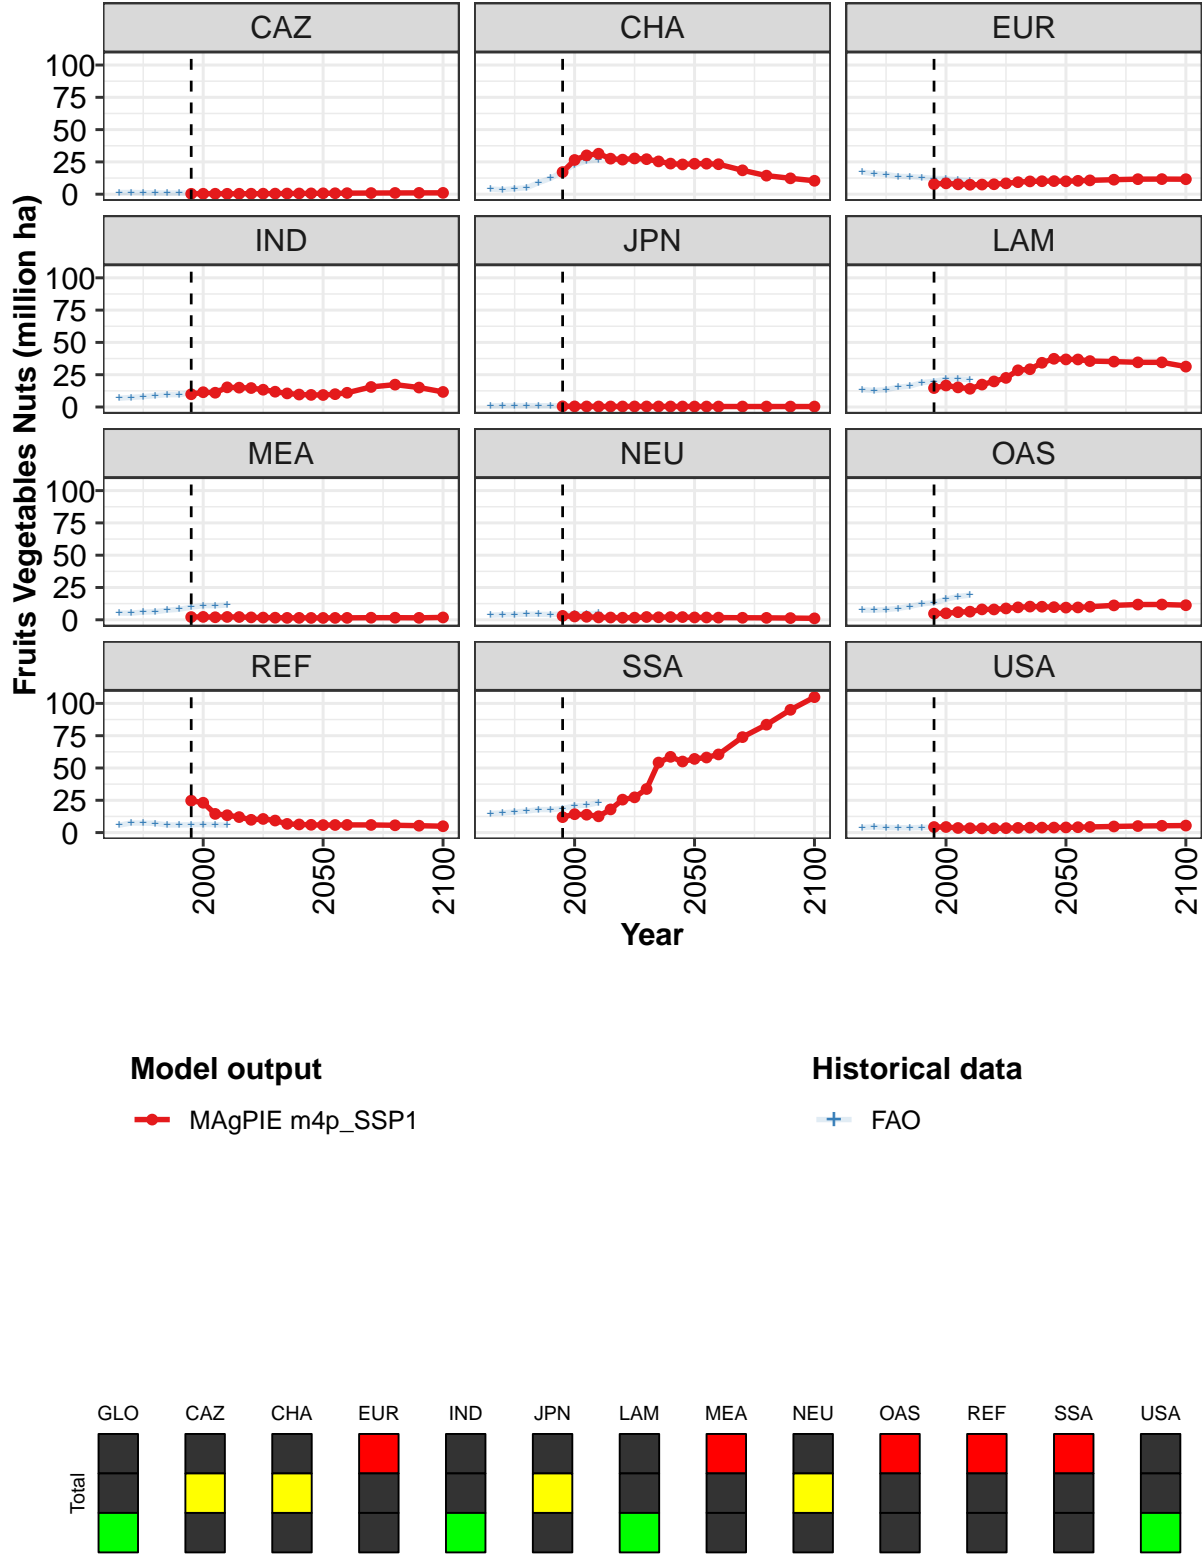

Figure 418: MAgPIE m4p\_SSP1 — Resources—Land Cover—Cropland—Crops—Other crops—Fruits Vegetables Nuts (million ha)



|     | 1995 | 2000 | 2005 | 2010 | 2015 | 2020 | 2025 | 2030 | 2035 | 2040 | 2045 |
|-----|------|------|------|------|------|------|------|------|------|------|------|
| GLO | 101  | 115  | 107  | 109  | 113  | 120  | 126  | 138  | 155  | 161  | 159  |
| CAZ | 0    | 0    | 0    | 0    | 0    | 0    | 0    | 0    | 1    | 1    | 1    |
| CHA | 17   | 27   | 30   | 31   | 28   | 27   | 28   | 27   | 25   | 24   | 23   |
| EUR | 8    | 8    | 8    | 7    | 7    | 8    | 8    | 9    | 10   | 10   | 10   |
| IND | 10   | 11   | 11   | 15   | 15   | 15   | 13   | 12   | 11   | 10   | 9    |
| JPN | 1    | 0    | 0    | 0    | 0    | 0    | 0    | 0    | 0    | 0    | 0    |
| LAM | 15   | 17   | 15   | 14   | 17   | 20   | 23   | 28   | 29   | 34   | 37   |
| MEA | 2    | 2    | 2    | 2    | 2    | 2    | 2    | 2    | 2    | 1    | 1    |
| NEU | 3    | 3    | 2    | 2    | 2    | 2    | 2    | 2    | 2    | 2    | 2    |
| OAS | 5    | 5    | 6    | 6    | 8    | 8    | 9    | 10   | 10   | 10   | 10   |
| REF | 25   | 23   | 14   | 13   | 12   | 10   | 11   | 9    | 7    | 6    | 6    |
| SSA | 12   | 14   | 14   | 13   | 18   | 26   | 27   | 34   | 54   | 59   | 55   |
| USA | 4    | 4    | 4    | 3    | 3    | 3    | 3    | 4    | 4    | 4    | 4    |

Table 1601: MAgPIE m4p\_SSP1 — Resources—Land Cover—Cropland—Crops—Other crops—Fruits Vegetables Nuts (million ha) [PART 1/2]

|     | 2050 | 2055 | 2060 | 2070 | 2080 | 2090 | 2100 |
|-----|------|------|------|------|------|------|------|
| GLO | 160  | 163  | 166  | 181  | 188  | 195  | 196  |
| CAZ | 1    | 1    | 1    | 1    | 1    | 1    | 1    |
| CHA | 24   | 24   | 23   | 19   | 14   | 12   | 10   |
| EUR | 10   | 10   | 11   | 11   | 12   | 12   | 12   |
| IND | 9    | 10   | 11   | 16   | 17   | 15   | 12   |
| JPN | 0    | 0    | 0    | 0    | 0    | 0    | 0    |
| LAM | 37   | 37   | 36   | 35   | 35   | 35   | 31   |
| MEA | 1    | 1    | 2    | 2    | 2    | 2    | 2    |
| NEU | 2    | 2    | 2    | 2    | 2    | 1    | 1    |
| OAS | 9    | 10   | 10   | 11   | 12   | 12   | 11   |
| REF | 6    | 6    | 6    | 6    | 6    | 5    | 5    |
| SSA | 57   | 58   | 61   | 74   | 84   | 95   | 105  |
| USA | 4    | 4    | 4    | 5    | 5    | 5    | 5    |

Table 1602: MAgPIE m4p\_SSP1 — Resources—Land Cover—Cropland—Crops—Other crops—Fruits Vegetables Nuts (million ha) [PART 2/2]

|     | 1965 | 1970 | 1975 | 1980 | 1985 | 1990 | 1995 | 2000 | 2005 | 2010 |
|-----|------|------|------|------|------|------|------|------|------|------|
| GLO | 84   | 86   | 88   | 92   | 100  | 108  | 119  | 132  | 137  | 142  |
| CAZ | 1    | 1    | 1    | 1    | 1    | 1    | 1    | 1    | 1    | 1    |
| CHA | 4    | 3    | 4    | 5    | 9    | 12   | 18   | 23   | 26   | 27   |
| EUR | 17   | 16   | 15   | 14   | 14   | 13   | 12   | 12   | 11   | 10   |
| IND | 7    | 7    | 8    | 9    | 10   | 10   | 11   | 12   | 13   | 15   |
| JPN | 1    | 1    | 1    | 1    | 1    | 1    | 1    | 1    | 1    | 1    |
| LAM | 13   | 13   | 13   | 15   | 16   | 19   | 20   | 22   | 22   | 21   |
| MEA | 5    | 5    | 6    | 6    | 7    | 8    | 10   | 11   | 11   | 11   |
| NEU | 4    | 4    | 4    | 4    | 4    | 4    | 5    | 4    | 5    | 5    |
| OAS | 8    | 7    | 8    | 9    | 10   | 12   | 13   | 16   | 18   | 19   |
| REF | 6    | 7    | 7    | 7    | 6    | 6    | 6    | 6    | 6    | 6    |
| SSA | 15   | 15   | 16   | 17   | 18   | 18   | 19   | 21   | 21   | 23   |
| USA | 4    | 4    | 4    | 4    | 4    | 4    | 4    | 4    | 4    | 3    |

Table 1603: FAO — Resources—Land Cover—Cropland—Crops—Other crops—Fruits Vegetables Nuts (million ha)

54.1.19 Crops—Other crops—Potatoes

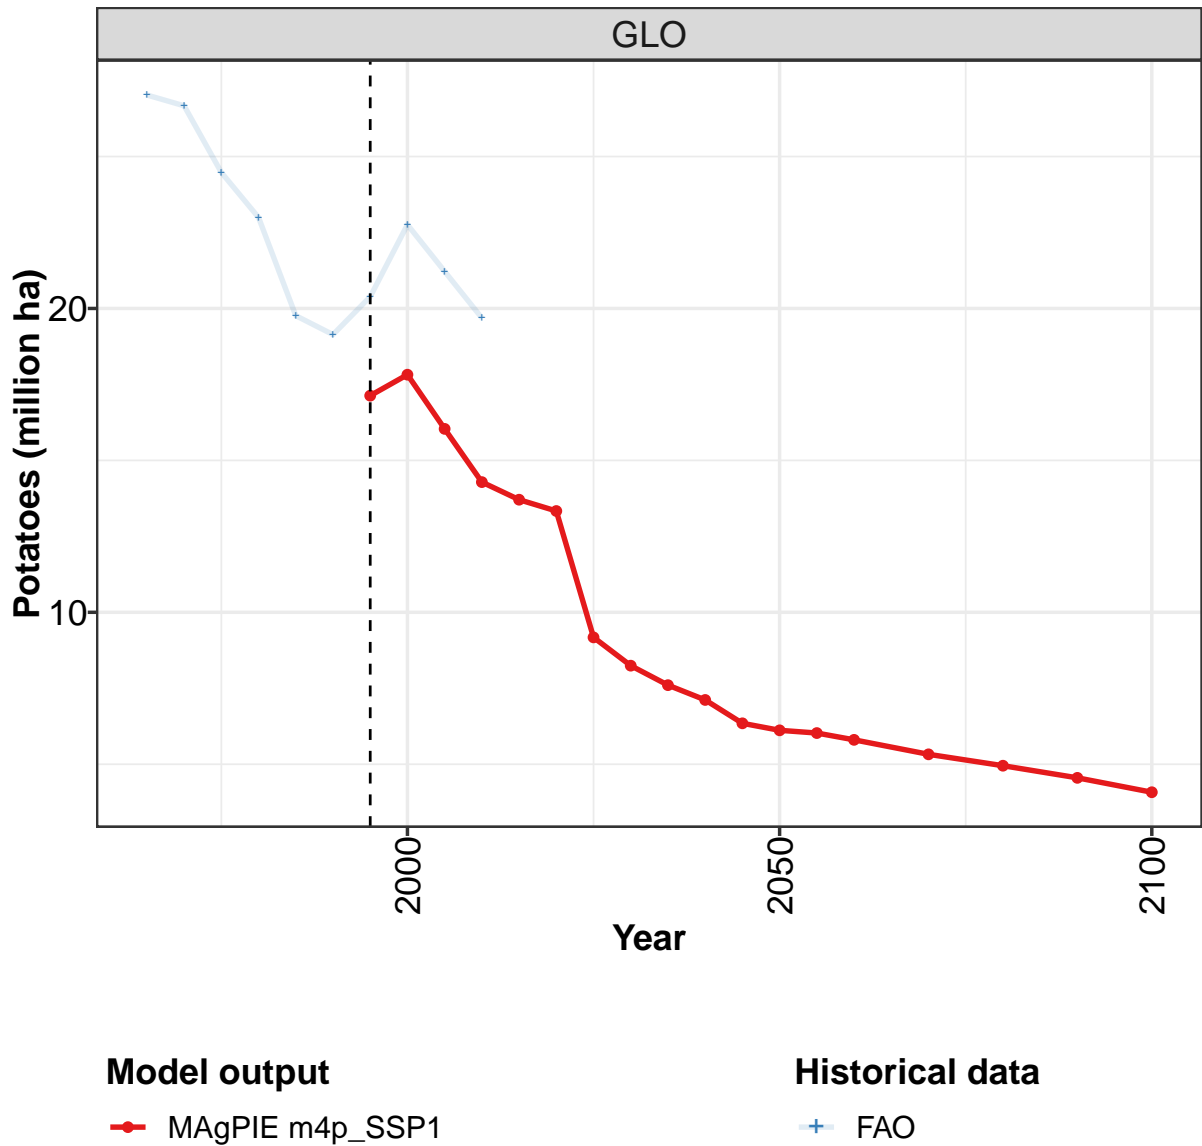

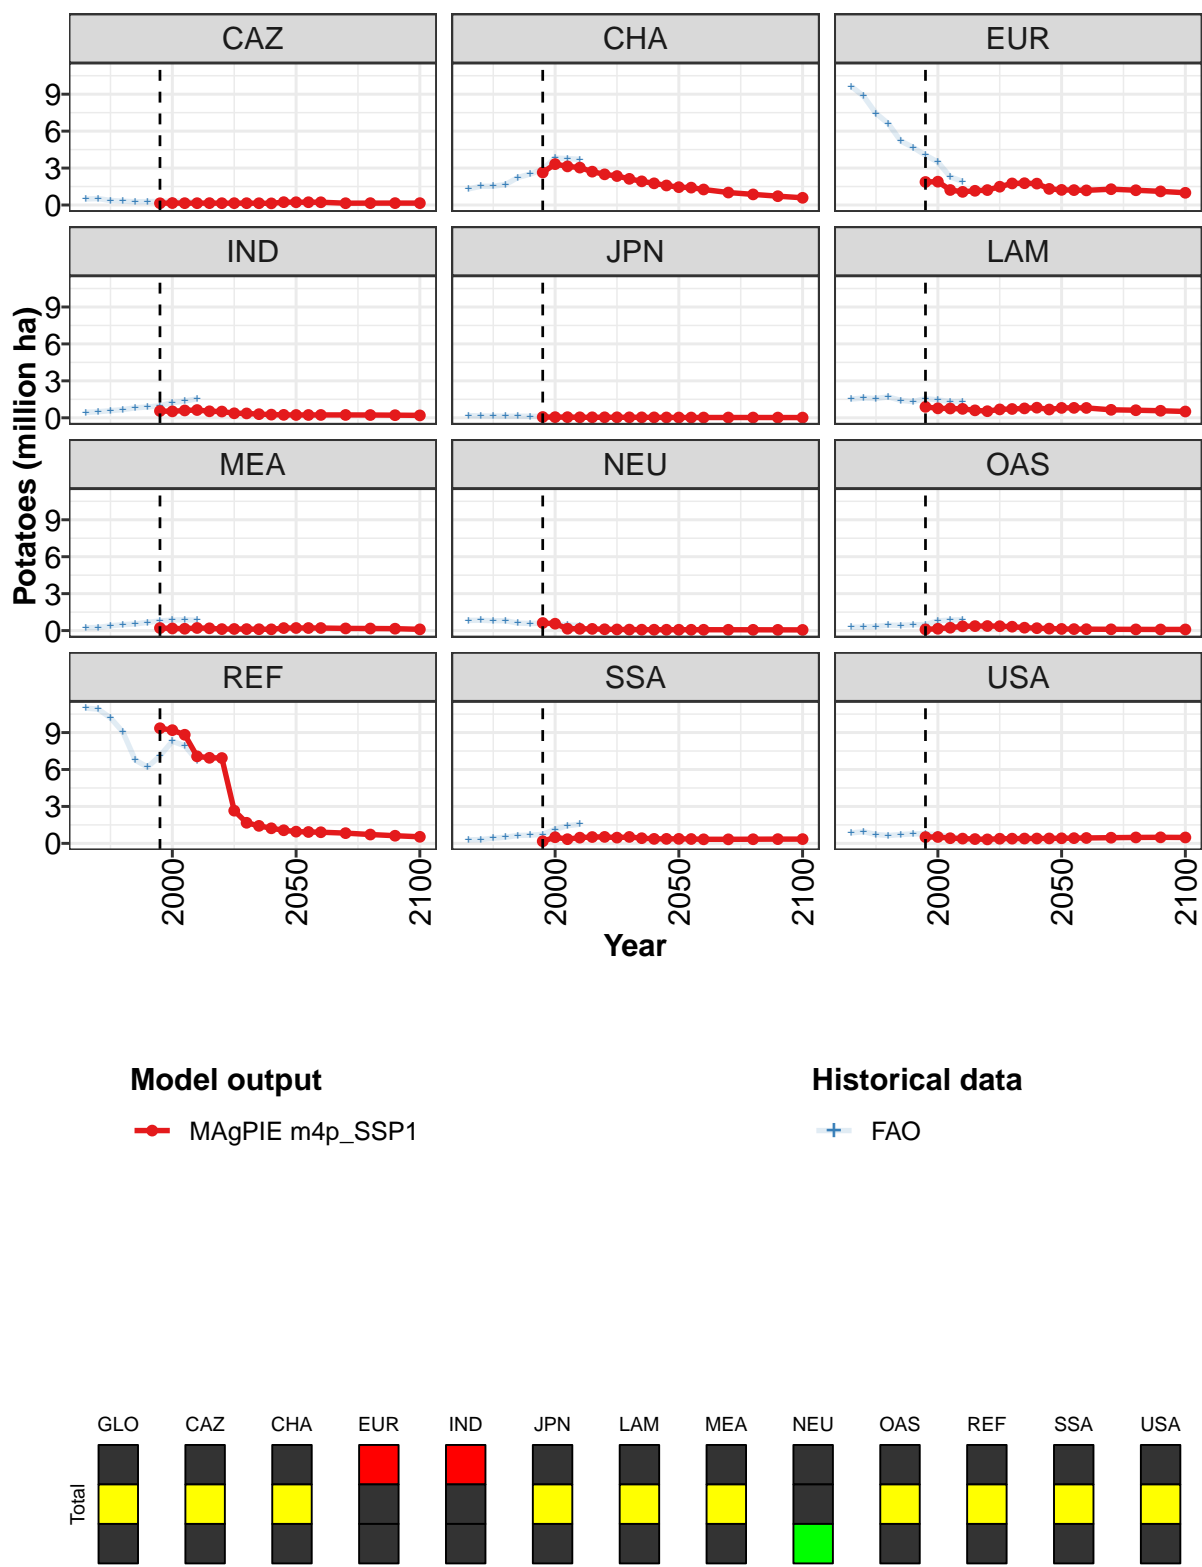

Figure 419: MAgPIE m4p\_SSP1 — Resources—Land Cover—Cropland—Crops—Other crops—Potatoes (million ha)

|     | 1995 | 2000 | 2005 | 2010 | 2015 | 2020 | 2025 | 2030 | 2035 | 2040 | 2045 |
|-----|------|------|------|------|------|------|------|------|------|------|------|
| GLO | 17.1 | 17.8 | 16.0 | 14.3 | 13.7 | 13.3 | 9.2  | 8.2  | 7.6  | 7.1  | 6.3  |
| CAZ | 0.1  | 0.2  | 0.2  | 0.1  | 0.2  | 0.1  | 0.2  | 0.1  | 0.1  | 0.1  | 0.2  |
| CHA | 2.6  | 3.3  | 3.1  | 3.0  | 2.7  | 2.5  | 2.4  | 2.1  | 1.9  | 1.8  | 1.6  |
| EUR | 1.9  | 1.9  | 1.2  | 1.1  | 1.2  | 1.2  | 1.5  | 1.8  | 1.8  | 1.7  | 1.3  |
| IND | 0.6  | 0.5  | 0.6  | 0.6  | 0.5  | 0.5  | 0.4  | 0.4  | 0.3  | 0.3  | 0.2  |
| JPN | 0.1  | 0.1  | 0.1  | 0.0  | 0.0  | 0.0  | 0.0  | 0.0  | 0.0  | 0.0  | 0.0  |
| LAM | 0.9  | 0.8  | 0.8  | 0.7  | 0.6  | 0.5  | 0.7  | 0.7  | 0.8  | 0.8  | 0.7  |
| MEA | 0.2  | 0.2  | 0.2  | 0.2  | 0.2  | 0.1  | 0.1  | 0.1  | 0.1  | 0.1  | 0.2  |
| NEU | 0.6  | 0.6  | 0.2  | 0.1  | 0.1  | 0.1  | 0.1  | 0.1  | 0.1  | 0.1  | 0.1  |
| OAS | 0.1  | 0.2  | 0.2  | 0.3  | 0.4  | 0.4  | 0.4  | 0.3  | 0.2  | 0.2  | 0.2  |
| REF | 9.4  | 9.2  | 8.8  | 7.1  | 7.0  | 6.9  | 2.7  | 1.7  | 1.4  | 1.2  | 1.1  |
| SSA | 0.2  | 0.5  | 0.3  | 0.5  | 0.5  | 0.5  | 0.5  | 0.5  | 0.4  | 0.4  | 0.4  |
| USA | 0.5  | 0.5  | 0.4  | 0.4  | 0.4  | 0.3  | 0.4  | 0.4  | 0.4  | 0.4  | 0.4  |

Table 1604: MAgPIE m4p\_SSP1 — Resources—Land Cover—Cropland—Crops—Other crops—Potatoes (million ha) [PART 1/2]

|     | 2050 | 2055 | 2060 | 2070 | 2080 | 2090 | 2100 |
|-----|------|------|------|------|------|------|------|
| GLO | 6.1  | 6.0  | 5.8  | 5.3  | 5.0  | 4.6  | 4.1  |
| CAZ | 0.2  | 0.2  | 0.2  | 0.1  | 0.2  | 0.2  | 0.2  |
| CHA | 1.4  | 1.4  | 1.3  | 1.0  | 0.9  | 0.7  | 0.6  |
| EUR | 1.2  | 1.2  | 1.2  | 1.3  | 1.2  | 1.1  | 1.0  |
| IND | 0.2  | 0.2  | 0.2  | 0.2  | 0.2  | 0.2  | 0.2  |
| JPN | 0.0  | 0.0  | 0.0  | 0.0  | 0.0  | 0.0  | 0.0  |
| LAM | 0.8  | 0.8  | 0.8  | 0.6  | 0.6  | 0.6  | 0.5  |
| MEA | 0.2  | 0.2  | 0.2  | 0.2  | 0.2  | 0.2  | 0.1  |
| NEU | 0.1  | 0.1  | 0.1  | 0.1  | 0.1  | 0.1  | 0.1  |
| OAS | 0.1  | 0.1  | 0.1  | 0.1  | 0.1  | 0.1  | 0.1  |
| REF | 1.0  | 0.9  | 0.9  | 0.8  | 0.7  | 0.6  | 0.5  |
| SSA | 0.4  | 0.4  | 0.3  | 0.3  | 0.3  | 0.3  | 0.3  |
| USA | 0.4  | 0.4  | 0.4  | 0.5  | 0.5  | 0.5  | 0.5  |

Table 1605: MAgPIE m4p\_SSP1 — Resources—Land Cover—Cropland—Crops—Other crops—Potatoes (million ha) [PART 2/2]

|     | 1965 | 1970 | 1975 | 1980 | 1985 | 1990 | 1995 | 2000 | 2005 | 2010 |
|-----|------|------|------|------|------|------|------|------|------|------|
| GLO | 27.0 | 26.7 | 24.5 | 23.0 | 19.8 | 19.1 | 20.4 | 22.8 | 21.2 | 19.7 |
| CAZ | 0.5  | 0.5  | 0.4  | 0.3  | 0.3  | 0.3  | 0.3  | 0.3  | 0.3  | 0.2  |
| CHA | 1.3  | 1.5  | 1.5  | 1.7  | 2.2  | 2.5  | 2.9  | 3.8  | 3.8  | 3.7  |
| EUR | 9.6  | 8.8  | 7.4  | 6.6  | 5.2  | 4.7  | 4.0  | 3.5  | 2.3  | 1.9  |
| IND | 0.4  | 0.5  | 0.6  | 0.7  | 0.8  | 0.9  | 1.0  | 1.2  | 1.4  | 1.5  |
| JPN | 0.2  | 0.2  | 0.1  | 0.1  | 0.1  | 0.1  | 0.1  | 0.1  | 0.1  | 0.1  |
| LAM | 1.5  | 1.6  | 1.6  | 1.7  | 1.4  | 1.3  | 1.6  | 1.5  | 1.3  | 1.3  |
| MEA | 0.2  | 0.3  | 0.4  | 0.5  | 0.5  | 0.7  | 0.8  | 0.9  | 0.9  | 0.8  |
| NEU | 0.8  | 0.8  | 0.8  | 0.8  | 0.6  | 0.6  | 0.6  | 0.5  | 0.5  | 0.4  |
| OAS | 0.3  | 0.3  | 0.3  | 0.4  | 0.4  | 0.5  | 0.5  | 0.8  | 0.9  | 0.9  |
| REF | 11.0 | 10.9 | 10.2 | 9.1  | 6.8  | 6.2  | 7.1  | 8.3  | 7.9  | 6.7  |
| SSA | 0.3  | 0.3  | 0.4  | 0.5  | 0.6  | 0.7  | 0.7  | 1.1  | 1.4  | 1.6  |
| USA | 0.9  | 0.9  | 0.7  | 0.6  | 0.7  | 0.8  | 0.8  | 0.7  | 0.5  | 0.4  |

Table 1606: FAO — Resources—Land Cover—Cropland—Crops—Other crops—Potatoes (million ha)

54.1.20 Crops—Other crops—Pulses

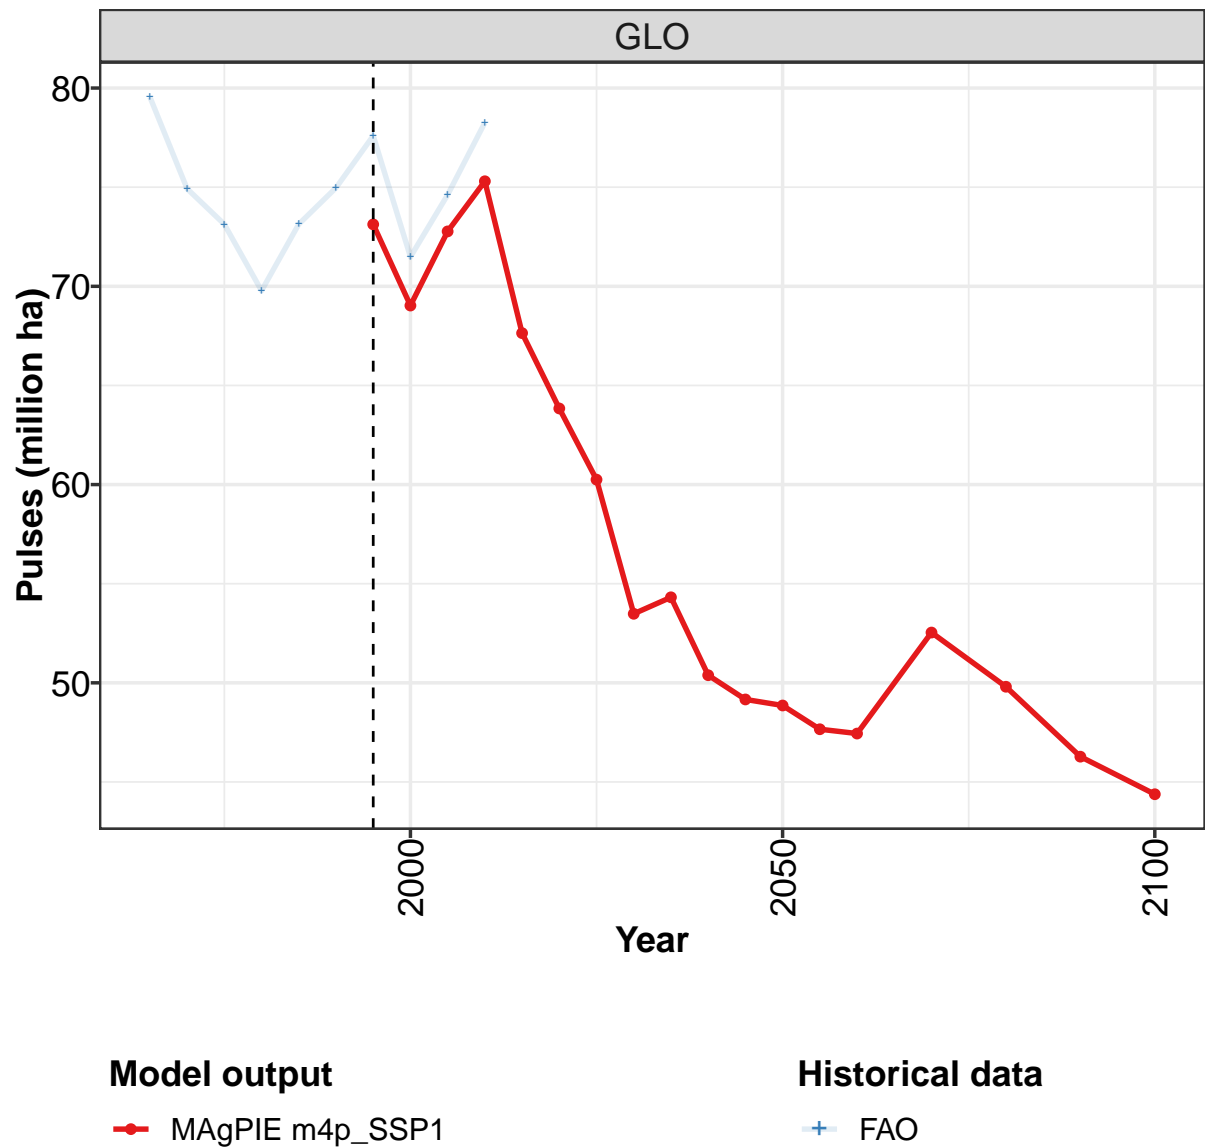

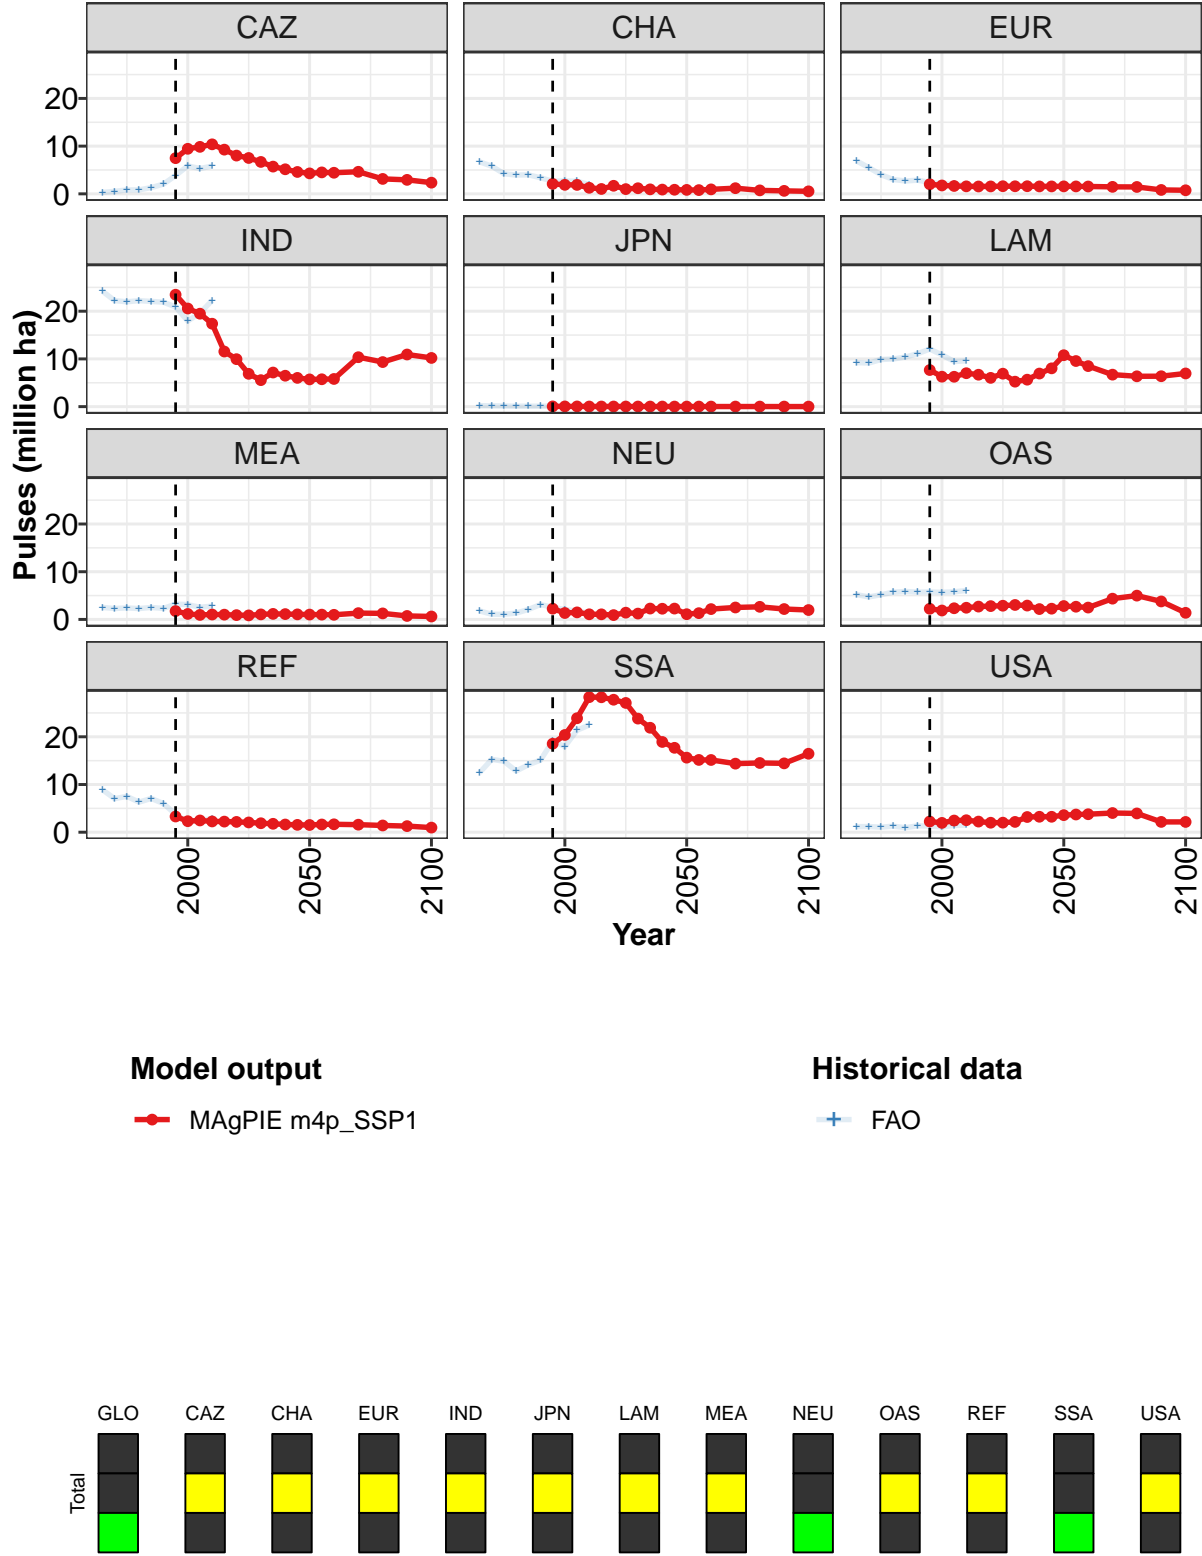

Figure 420: MAGPIE m4p\_SSP1 — Resources—Land Cover—Cropland—Crops—Other crops—Pulses (million ha)

|     | 1995 | 2000 | 2005 | 2010 | 2015 | 2020 | 2025 | 2030 | 2035 | 2040 | 2045 |
|-----|------|------|------|------|------|------|------|------|------|------|------|
| GLO | 73.1 | 69.0 | 72.8 | 75.3 | 67.6 | 63.8 | 60.3 | 53.5 | 54.3 | 50.4 | 49.2 |
| CAZ | 7.5  | 9.4  | 9.9  | 10.4 | 9.3  | 8.0  | 7.5  | 6.7  | 5.7  | 5.2  | 4.6  |
| CHA | 2.1  | 1.9  | 1.9  | 1.3  | 1.0  | 1.7  | 1.0  | 1.2  | 0.9  | 0.9  | 0.9  |
| EUR | 2.0  | 1.8  | 1.7  | 1.6  | 1.5  | 1.6  | 1.6  | 1.6  | 1.6  | 1.6  | 1.6  |
| IND | 23.5 | 20.6 | 19.5 | 17.4 | 11.6 | 10.0 | 6.9  | 5.6  | 7.2  | 6.5  | 6.0  |
| JPN | 0.1  | 0.0  | 0.0  | 0.0  | 0.0  | 0.0  | 0.0  | 0.0  | 0.0  | 0.0  | 0.0  |
| LAM | 7.7  | 6.3  | 6.3  | 7.0  | 6.7  | 6.0  | 6.9  | 5.2  | 5.7  | 6.9  | 8.0  |
| MEA | 1.7  | 1.2  | 0.9  | 1.0  | 1.0  | 0.9  | 0.8  | 1.1  | 1.2  | 1.1  | 1.1  |
| NEU | 2.3  | 1.3  | 1.5  | 1.1  | 1.1  | 0.9  | 1.4  | 1.2  | 2.3  | 2.2  | 2.3  |
| OAS | 2.2  | 1.9  | 2.3  | 2.5  | 2.7  | 2.8  | 2.9  | 3.0  | 2.9  | 2.2  | 2.3  |
| REF | 3.3  | 2.3  | 2.5  | 2.3  | 2.2  | 2.2  | 2.1  | 1.9  | 1.8  | 1.6  | 1.5  |
| SSA | 18.6 | 20.4 | 23.9 | 28.3 | 28.3 | 27.8 | 27.1 | 23.8 | 21.9 | 18.9 | 17.7 |
| USA | 2.2  | 2.0  | 2.5  | 2.5  | 2.2  | 2.0  | 2.0  | 2.2  | 3.2  | 3.2  | 3.2  |

Table 1607: MAgPIE m4p\_SSP1 — Resources—Land Cover—Cropland—Crops—Other crops—Pulses (million ha) [PART 1/2]

|     | 2050 | 2055 | 2060 | 2070 | 2080 | 2090 | 2100 |
|-----|------|------|------|------|------|------|------|
| GLO | 48.9 | 47.7 | 47.4 | 52.5 | 49.8 | 46.3 | 44.4 |
| CAZ | 4.3  | 4.5  | 4.4  | 4.6  | 3.1  | 2.9  | 2.3  |
| CHA | 0.8  | 0.8  | 0.9  | 1.2  | 0.7  | 0.6  | 0.5  |
| EUR | 1.6  | 1.6  | 1.5  | 1.5  | 1.4  | 0.8  | 0.8  |
| IND | 5.7  | 5.7  | 5.8  | 10.4 | 9.3  | 10.9 | 10.2 |
| JPN | 0.0  | 0.0  | 0.0  | 0.0  | 0.0  | 0.0  | 0.0  |
| LAM | 10.8 | 9.6  | 8.5  | 6.7  | 6.4  | 6.4  | 7.0  |
| MEA | 1.0  | 1.0  | 1.0  | 1.3  | 1.3  | 0.7  | 0.6  |
| NEU | 1.1  | 1.3  | 2.2  | 2.5  | 2.6  | 2.2  | 2.0  |
| OAS | 2.8  | 2.7  | 2.5  | 4.4  | 5.0  | 3.8  | 1.4  |
| REF | 1.5  | 1.6  | 1.7  | 1.6  | 1.4  | 1.3  | 1.0  |
| SSA | 15.6 | 15.2 | 15.1 | 14.4 | 14.5 | 14.4 | 16.5 |
| USA | 3.6  | 3.7  | 3.8  | 4.0  | 3.9  | 2.2  | 2.2  |

Table 1608: MAgPIE m4p\_SSP1 — Resources—Land Cover—Cropland—Crops—Other crops—Pulses (million ha) [PART 2/2]

|     | 1965 | 1970 | 1975 | 1980 | 1985 | 1990 | 1995 | 2000 | 2005 | 2010 |
|-----|------|------|------|------|------|------|------|------|------|------|
| GLO | 79.5 | 74.9 | 73.1 | 69.8 | 73.1 | 75.0 | 77.6 | 71.5 | 74.6 | 78.3 |
| CAZ | 0.3  | 0.5  | 0.8  | 0.8  | 1.3  | 2.0  | 3.8  | 5.9  | 5.3  | 5.8  |
| CHA | 6.7  | 5.8  | 4.2  | 3.9  | 4.0  | 3.4  | 2.6  | 2.7  | 2.6  | 2.0  |
| EUR | 6.9  | 5.5  | 4.0  | 3.0  | 2.7  | 2.9  | 2.4  | 2.1  | 2.1  | 1.8  |
| IND | 24.2 | 22.2 | 22.0 | 22.2 | 22.1 | 21.9 | 20.9 | 17.9 | 19.6 | 22.3 |
| JPN | 0.2  | 0.2  | 0.1  | 0.1  | 0.1  | 0.1  | 0.1  | 0.1  | 0.1  | 0.0  |
| LAM | 9.2  | 9.1  | 9.9  | 10.0 | 10.4 | 11.1 | 12.1 | 10.9 | 9.5  | 9.6  |
| MEA | 2.5  | 2.3  | 2.4  | 2.3  | 2.5  | 2.3  | 3.2  | 3.1  | 2.5  | 2.8  |
| NEU | 1.8  | 1.1  | 1.1  | 1.3  | 2.1  | 3.1  | 2.5  | 2.1  | 1.7  | 1.3  |
| OAS | 5.2  | 4.7  | 5.2  | 5.7  | 5.9  | 5.7  | 5.8  | 5.7  | 5.8  | 6.1  |
| REF | 8.9  | 7.0  | 7.5  | 6.3  | 7.1  | 6.0  | 3.8  | 2.0  | 2.6  | 2.8  |
| SSA | 12.5 | 15.3 | 14.9 | 12.8 | 14.1 | 15.1 | 19.1 | 18.0 | 21.4 | 22.5 |
| USA | 1.2  | 1.2  | 1.0  | 1.3  | 1.0  | 1.3  | 1.3  | 1.1  | 1.4  | 1.5  |

Table 1609: FAO — Resources—Land Cover—Cropland—Crops—Other crops—Pulses (million ha)

54.1.21 Crops—Other crops—Tropical roots

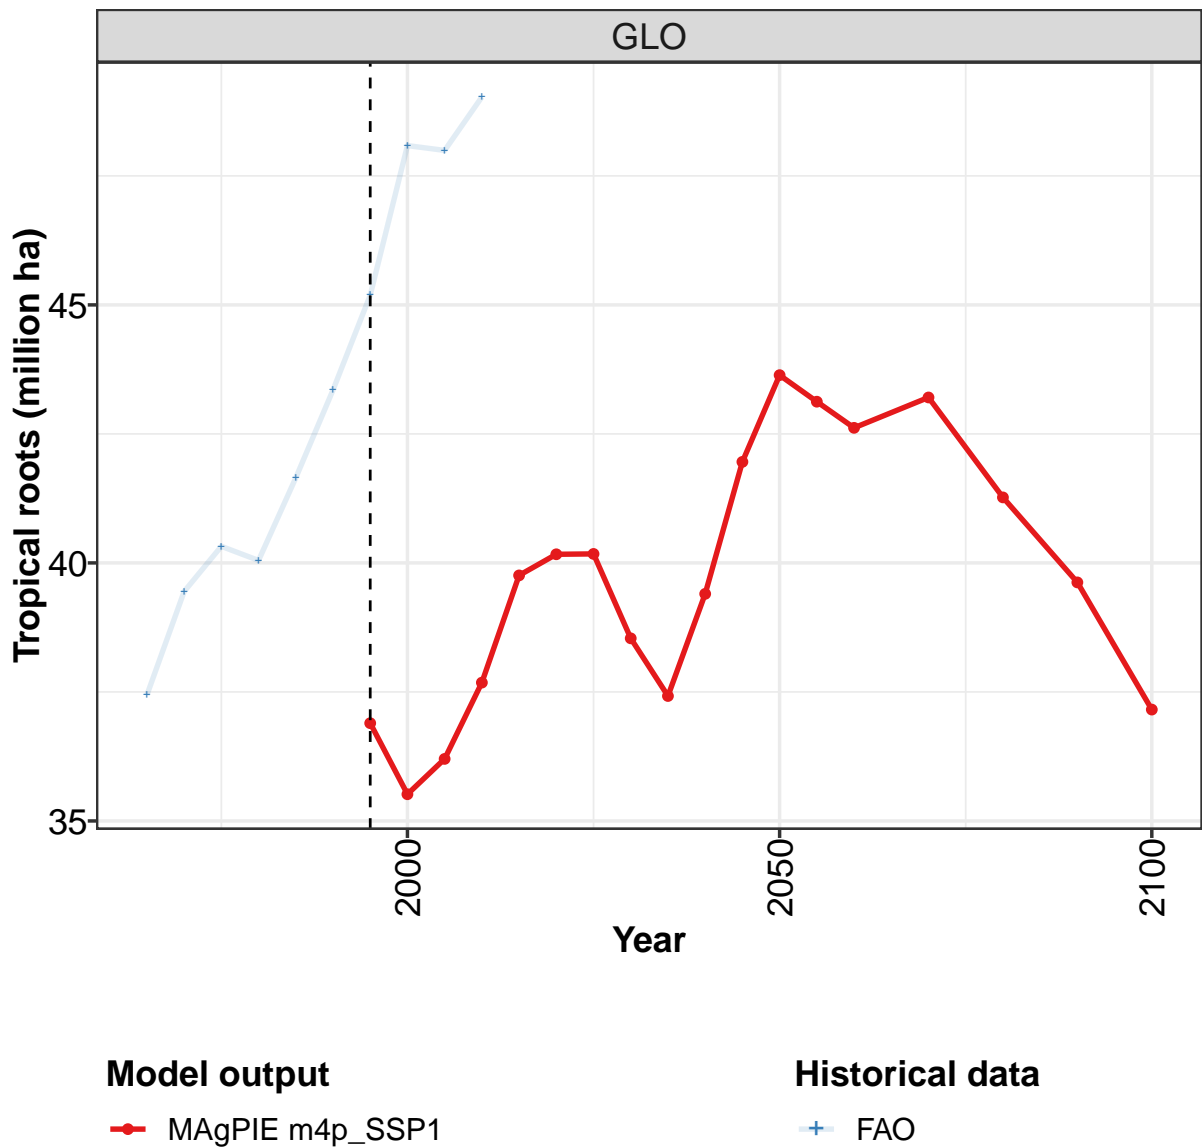



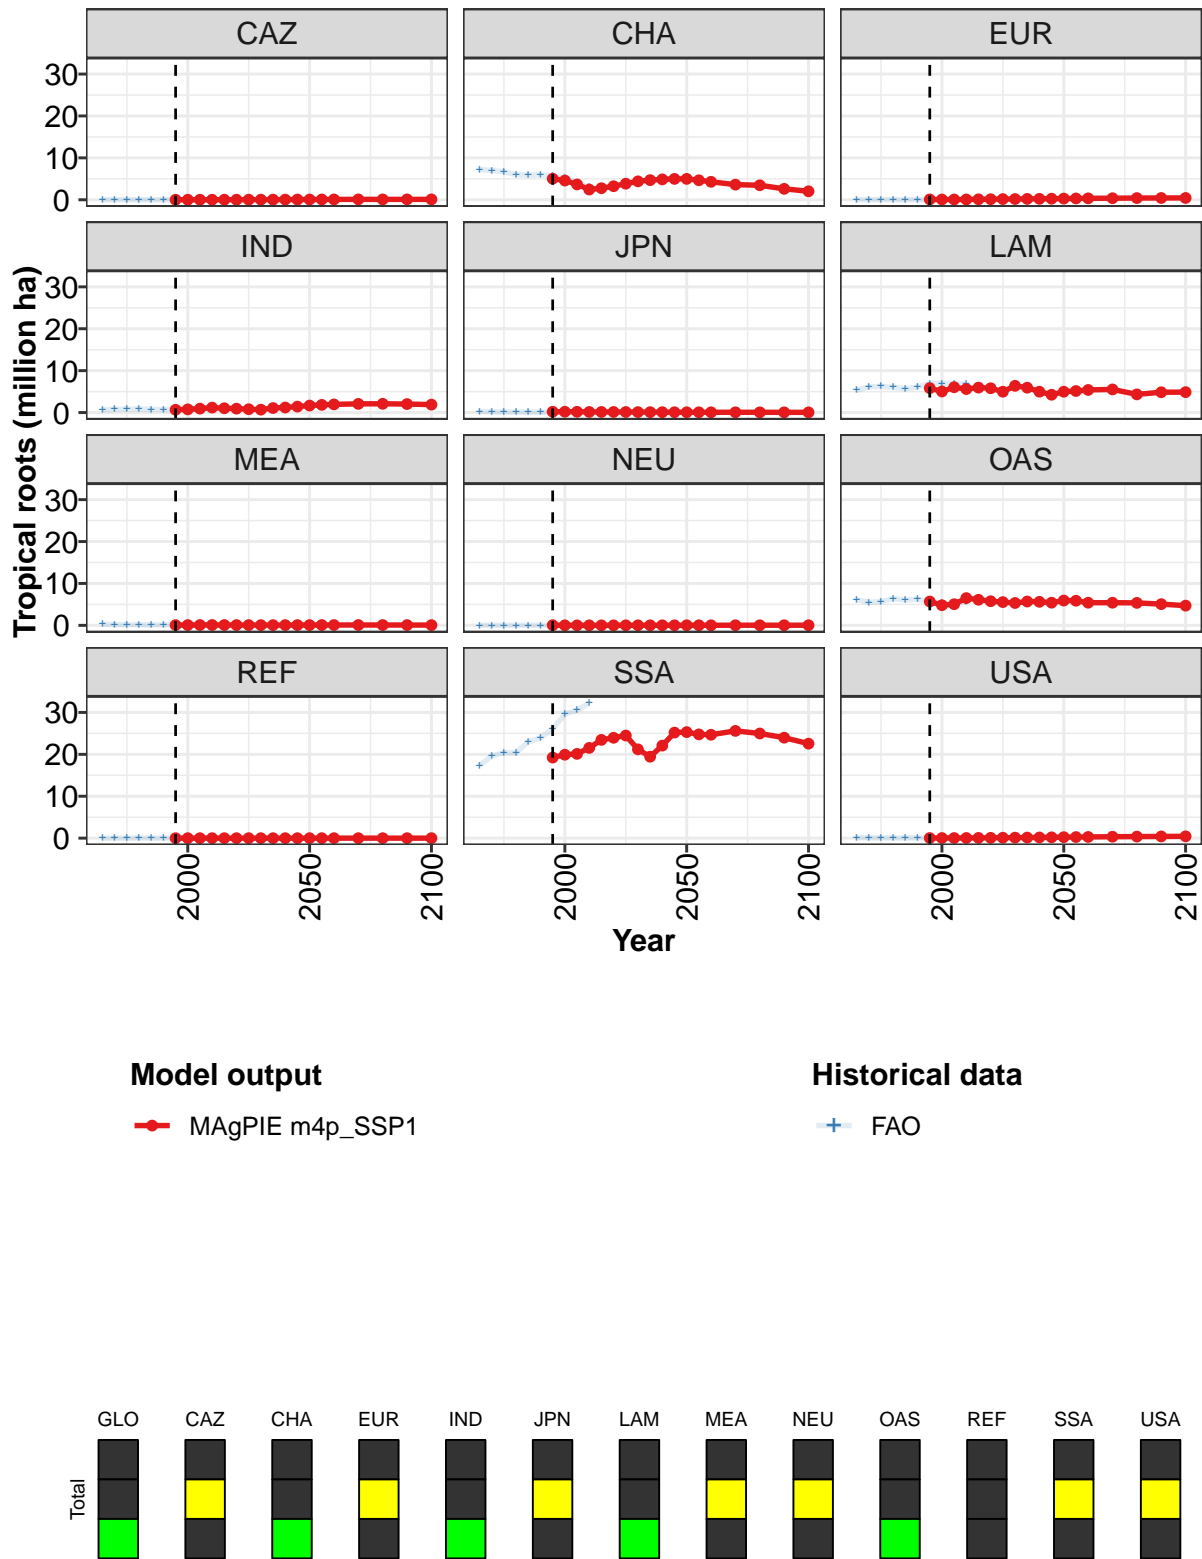

Figure 421: MAGPIE m4p\_SSP1 — Resources—Land Cover—Cropland—Crops—Other crops—Tropical roots (million ha)

|     | 1995 | 2000 | 2005 | 2010 | 2015 | 2020 | 2025 | 2030 | 2035 | 2040 | 2045 |
|-----|------|------|------|------|------|------|------|------|------|------|------|
| GLO | 36.9 | 35.5 | 36.2 | 37.7 | 39.8 | 40.2 | 40.2 | 38.5 | 37.4 | 39.4 | 42.0 |
| CAZ | 0.0  | 0.0  | 0.0  | 0.0  | 0.0  | 0.0  | 0.0  | 0.0  | 0.0  | 0.0  | 0.1  |
| CHA | 5.0  | 4.6  | 3.7  | 2.4  | 2.8  | 3.2  | 3.8  | 4.4  | 4.7  | 4.9  | 5.0  |
| EUR | 0.1  | 0.1  | 0.1  | 0.1  | 0.1  | 0.1  | 0.2  | 0.2  | 0.2  | 0.2  | 0.3  |
| IND | 0.7  | 0.8  | 0.9  | 1.2  | 1.0  | 0.9  | 0.8  | 0.7  | 1.1  | 1.2  | 1.4  |
| JPN | 0.2  | 0.2  | 0.2  | 0.1  | 0.1  | 0.1  | 0.1  | 0.1  | 0.1  | 0.1  | 0.1  |
| LAM | 5.8  | 5.0  | 6.0  | 5.6  | 6.0  | 5.8  | 5.0  | 6.4  | 5.9  | 5.0  | 4.3  |
| MEA | 0.1  | 0.1  | 0.1  | 0.1  | 0.1  | 0.1  | 0.1  | 0.1  | 0.1  | 0.1  | 0.1  |
| NEU | 0.0  | 0.0  | 0.0  | 0.0  | 0.0  | 0.0  | 0.0  | 0.0  | 0.0  | 0.0  | 0.0  |
| OAS | 5.7  | 4.8  | 5.0  | 6.5  | 6.1  | 5.8  | 5.6  | 5.3  | 5.7  | 5.6  | 5.4  |
| REF | 0.0  | 0.0  | 0.0  | 0.0  | 0.0  | 0.0  | 0.0  | 0.0  | 0.0  | 0.0  | 0.0  |
| SSA | 19.2 | 19.9 | 20.1 | 21.5 | 23.5 | 24.0 | 24.5 | 21.2 | 19.4 | 22.1 | 25.2 |
| USA | 0.0  | 0.0  | 0.0  | 0.0  | 0.1  | 0.1  | 0.1  | 0.1  | 0.1  | 0.2  | 0.2  |

Table 1610: MAgPIE m4p\_SSP1 — Resources—Land Cover—Cropland—Crops—Other crops—Tropical roots (million ha) [PART 1/2]

|     | 2050 | 2055 | 2060 | 2070 | 2080 | 2090 | 2100 |
|-----|------|------|------|------|------|------|------|
| GLO | 43.6 | 43.1 | 42.6 | 43.2 | 41.3 | 39.6 | 37.2 |
| CAZ | 0.1  | 0.1  | 0.1  | 0.1  | 0.1  | 0.1  | 0.1  |
| CHA | 5.0  | 4.7  | 4.3  | 3.6  | 3.5  | 2.6  | 2.0  |
| EUR | 0.3  | 0.3  | 0.3  | 0.4  | 0.4  | 0.4  | 0.4  |
| IND | 1.7  | 1.8  | 2.0  | 2.1  | 2.1  | 2.0  | 1.9  |
| JPN | 0.1  | 0.1  | 0.1  | 0.1  | 0.1  | 0.1  | 0.0  |
| LAM | 5.0  | 5.1  | 5.4  | 5.5  | 4.3  | 4.9  | 4.9  |
| MEA | 0.1  | 0.1  | 0.1  | 0.1  | 0.1  | 0.1  | 0.1  |
| NEU | 0.0  | 0.0  | 0.0  | 0.0  | 0.0  | 0.0  | 0.0  |
| OAS | 5.9  | 5.9  | 5.4  | 5.4  | 5.4  | 5.1  | 4.7  |
| REF | 0.0  | 0.0  | 0.0  | 0.0  | 0.0  | 0.0  | 0.0  |
| SSA | 25.3 | 24.8 | 24.7 | 25.6 | 25.0 | 24.0 | 22.6 |
| USA | 0.2  | 0.3  | 0.3  | 0.3  | 0.4  | 0.4  | 0.4  |

Table 1611: MAgPIE m4p\_SSP1 — Resources—Land Cover—Cropland—Crops—Other crops—Tropical roots (million ha) [PART 2/2]

|     | 1965 | 1970 | 1975 | 1980 | 1985 | 1990 | 1995 | 2000 | 2005 | 2010 |
|-----|------|------|------|------|------|------|------|------|------|------|
| GLO | 37.4 | 39.4 | 40.3 | 40.0 | 41.6 | 43.3 | 45.2 | 48.1 | 48.0 | 49.0 |
| CAZ | 0.0  | 0.0  | 0.0  | 0.0  | 0.0  | 0.0  | 0.0  | 0.0  | 0.0  | 0.0  |
| CHA | 7.2  | 7.0  | 6.7  | 6.0  | 5.9  | 6.0  | 5.6  | 5.2  | 4.1  | 3.1  |
| EUR | 0.0  | 0.0  | 0.0  | 0.0  | 0.0  | 0.0  | 0.0  | 0.0  | 0.0  | 0.0  |
| IND | 0.6  | 0.8  | 0.8  | 0.8  | 0.8  | 0.7  | 0.7  | 0.7  | 0.8  | 1.0  |
| JPN | 0.3  | 0.2  | 0.1  | 0.1  | 0.1  | 0.1  | 0.1  | 0.1  | 0.1  | 0.1  |
| LAM | 5.3  | 6.1  | 6.3  | 6.1  | 5.7  | 6.1  | 7.0  | 7.0  | 6.9  | 6.8  |
| MEA | 0.3  | 0.2  | 0.2  | 0.2  | 0.1  | 0.1  | 0.1  | 0.2  | 0.2  | 0.2  |
| NEU | 0.0  | 0.0  | 0.0  | 0.0  | 0.0  | 0.0  | 0.0  | 0.0  | 0.0  | 0.0  |
| OAS | 6.1  | 5.5  | 5.7  | 6.4  | 6.0  | 6.3  | 5.5  | 5.3  | 5.3  | 5.6  |
| REF | 0.0  | 0.0  | 0.0  | 0.0  | 0.0  | 0.0  | 0.0  | 0.0  | 0.0  | 0.0  |
| SSA | 17.4 | 19.6 | 20.4 | 20.4 | 23.0 | 24.0 | 26.1 | 29.6 | 30.5 | 32.2 |
| USA | 0.1  | 0.1  | 0.1  | 0.1  | 0.1  | 0.1  | 0.0  | 0.1  | 0.0  | 0.1  |

Table 1612: FAO — Resources—Land Cover—Cropland—Crops—Other crops—Tropical roots (million ha)

54.1.22 Crops—Sugar crops

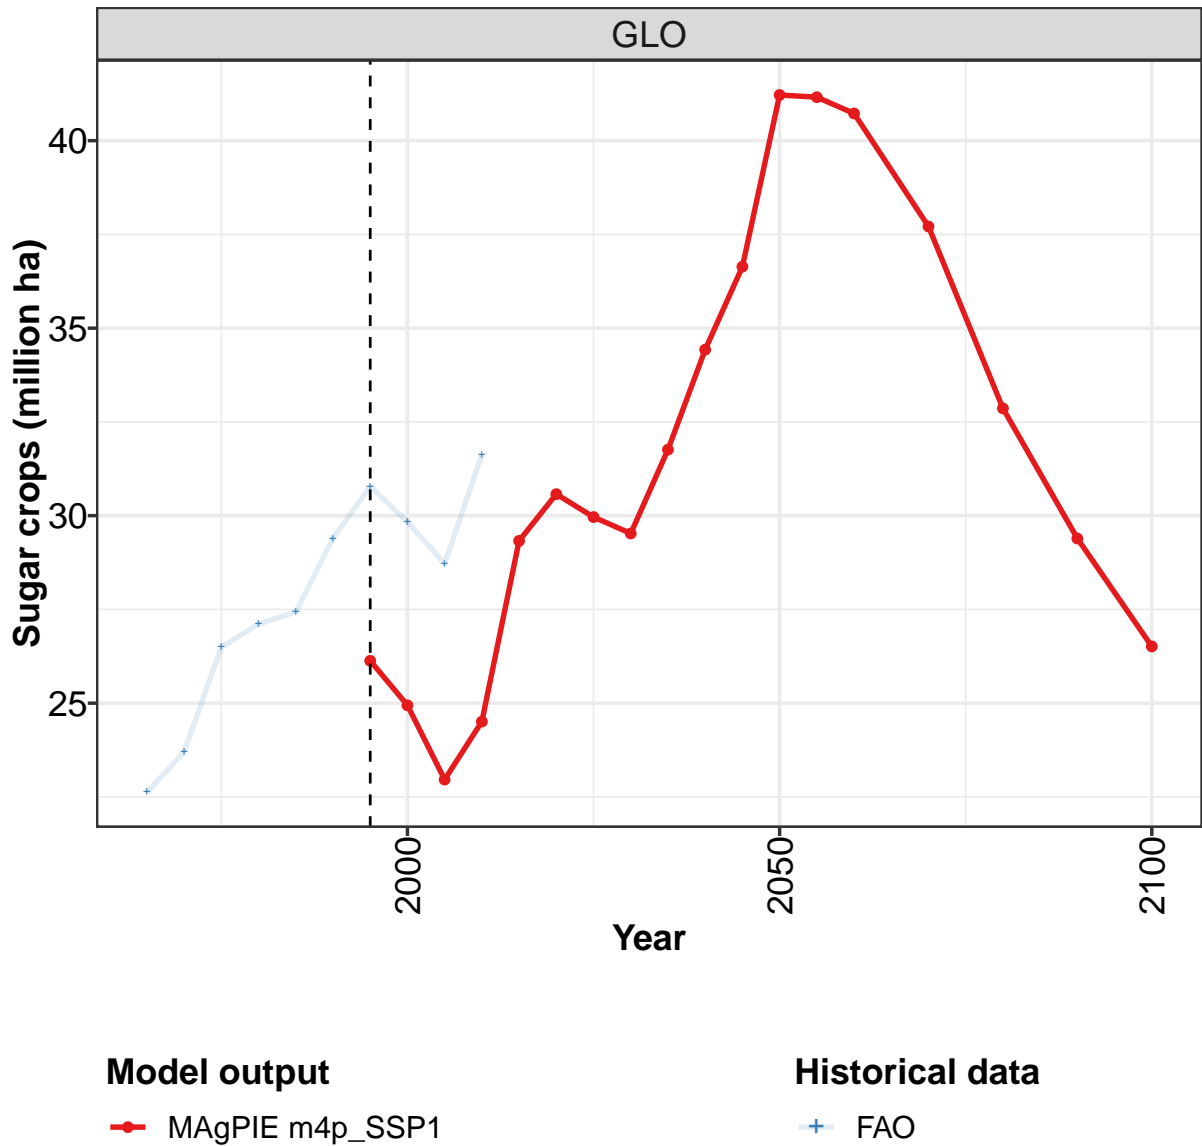

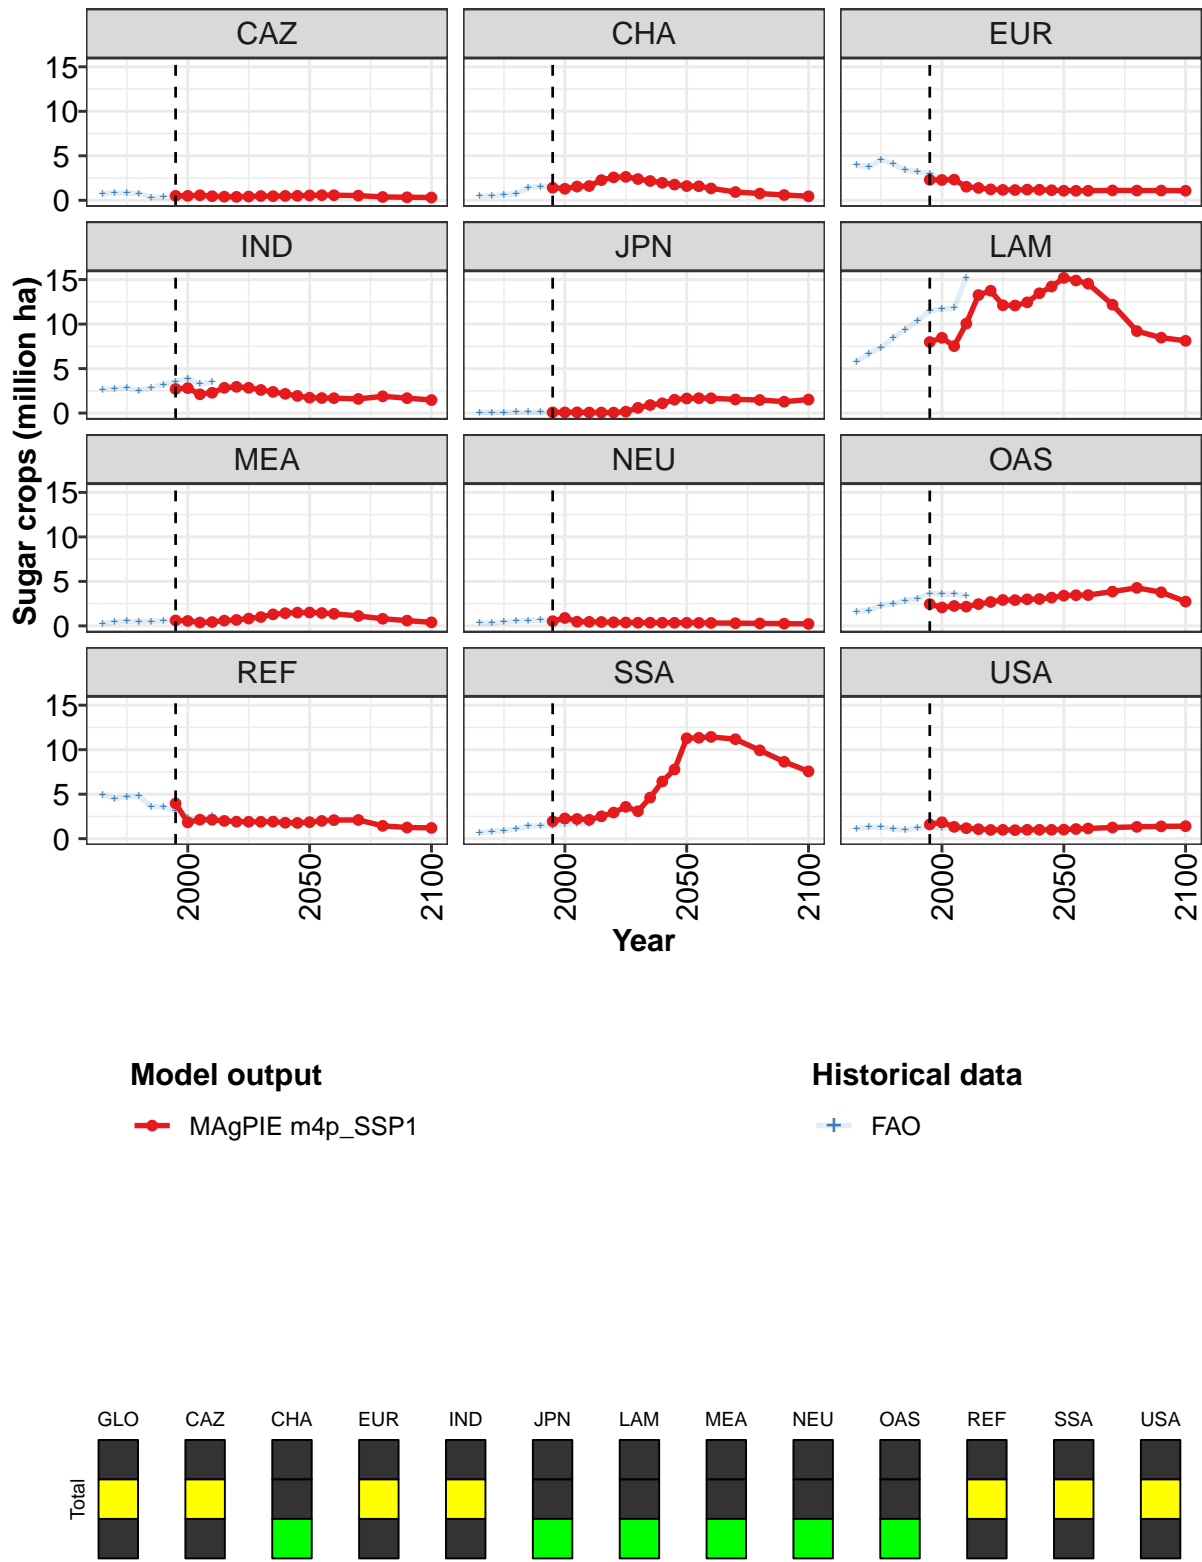

Figure 422: MAGPIE m4p\_SSP1 — Resources—Land Cover—Cropland—Crops—Sugar crops (million ha)

|     | 1995 | 2000 | 2005 | 2010 | 2015 | 2020 | 2025 | 2030 | 2035 | 2040 | 2045 |
|-----|------|------|------|------|------|------|------|------|------|------|------|
| GLO | 26.1 | 24.9 | 23.0 | 24.5 | 29.3 | 30.6 | 30.0 | 29.5 | 31.8 | 34.4 | 36.6 |
| CAZ | 0.5  | 0.5  | 0.6  | 0.5  | 0.4  | 0.4  | 0.4  | 0.5  | 0.5  | 0.5  | 0.5  |
| CHA | 1.4  | 1.3  | 1.6  | 1.6  | 2.3  | 2.6  | 2.6  | 2.4  | 2.2  | 2.0  | 1.8  |
| EUR | 2.3  | 2.3  | 2.3  | 1.5  | 1.4  | 1.2  | 1.2  | 1.2  | 1.2  | 1.2  | 1.1  |
| IND | 2.7  | 2.8  | 2.1  | 2.3  | 2.8  | 3.0  | 2.8  | 2.6  | 2.4  | 2.2  | 1.9  |
| JPN | 0.1  | 0.1  | 0.1  | 0.1  | 0.1  | 0.1  | 0.2  | 0.6  | 0.9  | 1.1  | 1.5  |
| LAM | 8.0  | 8.5  | 7.5  | 10.1 | 13.3 | 13.8 | 12.1 | 12.1 | 12.4 | 13.5 | 14.2 |
| MEA | 0.6  | 0.6  | 0.4  | 0.4  | 0.6  | 0.7  | 0.8  | 1.0  | 1.3  | 1.4  | 1.5  |
| NEU | 0.5  | 0.9  | 0.5  | 0.5  | 0.4  | 0.4  | 0.4  | 0.4  | 0.4  | 0.4  | 0.4  |
| OAS | 2.5  | 2.1  | 2.2  | 2.2  | 2.5  | 2.7  | 2.9  | 2.9  | 3.0  | 3.0  | 3.2  |
| REF | 4.0  | 1.8  | 2.1  | 2.1  | 2.0  | 1.9  | 1.9  | 1.9  | 1.9  | 1.8  | 1.8  |
| SSA | 2.0  | 2.3  | 2.2  | 2.1  | 2.5  | 2.9  | 3.6  | 3.1  | 4.6  | 6.4  | 7.8  |
| USA | 1.6  | 1.9  | 1.3  | 1.2  | 1.1  | 1.0  | 1.0  | 1.0  | 1.0  | 1.0  | 1.0  |

Table 1613: MAgPIE m4p\_SSP1 — Resources—Land Cover—Cropland—Crops—Sugar crops (million ha)  
[PART 1/2]

|     | 2050 | 2055 | 2060 | 2070 | 2080 | 2090 | 2100 |
|-----|------|------|------|------|------|------|------|
| GLO | 41.2 | 41.2 | 40.7 | 37.7 | 32.9 | 29.4 | 26.5 |
| CAZ | 0.5  | 0.6  | 0.6  | 0.5  | 0.4  | 0.3  | 0.3  |
| CHA | 1.6  | 1.6  | 1.3  | 0.9  | 0.8  | 0.6  | 0.5  |
| EUR | 1.1  | 1.1  | 1.1  | 1.1  | 1.1  | 1.1  | 1.1  |
| IND | 1.7  | 1.7  | 1.7  | 1.6  | 1.9  | 1.7  | 1.5  |
| JPN | 1.6  | 1.7  | 1.7  | 1.5  | 1.5  | 1.3  | 1.5  |
| LAM | 15.2 | 14.9 | 14.5 | 12.2 | 9.2  | 8.5  | 8.1  |
| MEA | 1.5  | 1.4  | 1.4  | 1.1  | 0.8  | 0.6  | 0.4  |
| NEU | 0.3  | 0.3  | 0.3  | 0.3  | 0.3  | 0.2  | 0.2  |
| OAS | 3.4  | 3.4  | 3.5  | 3.9  | 4.3  | 3.8  | 2.7  |
| REF | 1.9  | 2.0  | 2.1  | 2.1  | 1.4  | 1.3  | 1.2  |
| SSA | 11.3 | 11.3 | 11.4 | 11.2 | 9.9  | 8.6  | 7.6  |
| USA | 1.0  | 1.1  | 1.1  | 1.3  | 1.3  | 1.4  | 1.4  |

Table 1614: MAgPIE m4p\_SSP1 — Resources—Land Cover—Cropland—Crops—Sugar crops (million ha)  
[PART 2/2]

|     | 1965 | 1970 | 1975 | 1980 | 1985 | 1990 | 1995 | 2000 | 2005 | 2010 |
|-----|------|------|------|------|------|------|------|------|------|------|
| GLO | 22.6 | 23.7 | 26.5 | 27.1 | 27.4 | 29.4 | 30.8 | 29.8 | 28.7 | 31.6 |
| CAZ | 0.7  | 0.8  | 0.8  | 0.8  | 0.3  | 0.4  | 0.4  | 0.5  | 0.5  | 0.4  |
| CHA | 0.5  | 0.5  | 0.7  | 0.7  | 1.4  | 1.5  | 1.6  | 1.2  | 1.2  | 1.4  |
| EUR | 4.0  | 3.8  | 4.6  | 4.1  | 3.4  | 3.2  | 3.0  | 2.5  | 2.2  | 1.5  |
| IND | 2.7  | 2.7  | 2.8  | 2.5  | 2.8  | 3.2  | 3.5  | 3.9  | 3.3  | 3.5  |
| JPN | 0.1  | 0.1  | 0.1  | 0.1  | 0.1  | 0.1  | 0.1  | 0.1  | 0.1  | 0.1  |
| LAM | 5.8  | 6.7  | 7.3  | 8.4  | 9.4  | 10.4 | 11.5 | 11.7 | 11.8 | 15.2 |
| MEA | 0.3  | 0.5  | 0.5  | 0.5  | 0.5  | 0.6  | 0.7  | 0.6  | 0.6  | 0.6  |
| NEU | 0.3  | 0.3  | 0.4  | 0.6  | 0.6  | 0.7  | 0.5  | 0.6  | 0.5  | 0.5  |
| OAS | 1.6  | 1.8  | 2.3  | 2.5  | 2.8  | 3.1  | 3.6  | 3.6  | 3.6  | 3.4  |
| REF | 4.9  | 4.5  | 4.7  | 4.8  | 3.6  | 3.6  | 3.1  | 2.3  | 2.2  | 2.5  |
| SSA | 0.7  | 0.8  | 0.9  | 1.1  | 1.4  | 1.4  | 1.5  | 1.6  | 1.7  | 1.7  |
| USA | 1.1  | 1.3  | 1.3  | 1.1  | 1.0  | 1.2  | 1.3  | 1.3  | 1.1  | 0.9  |

Table 1615: FAO — Resources—Land Cover—Cropland—Crops—Sugar crops (million ha)

54.1.23 Crops—Sugar crops—Sugar beet

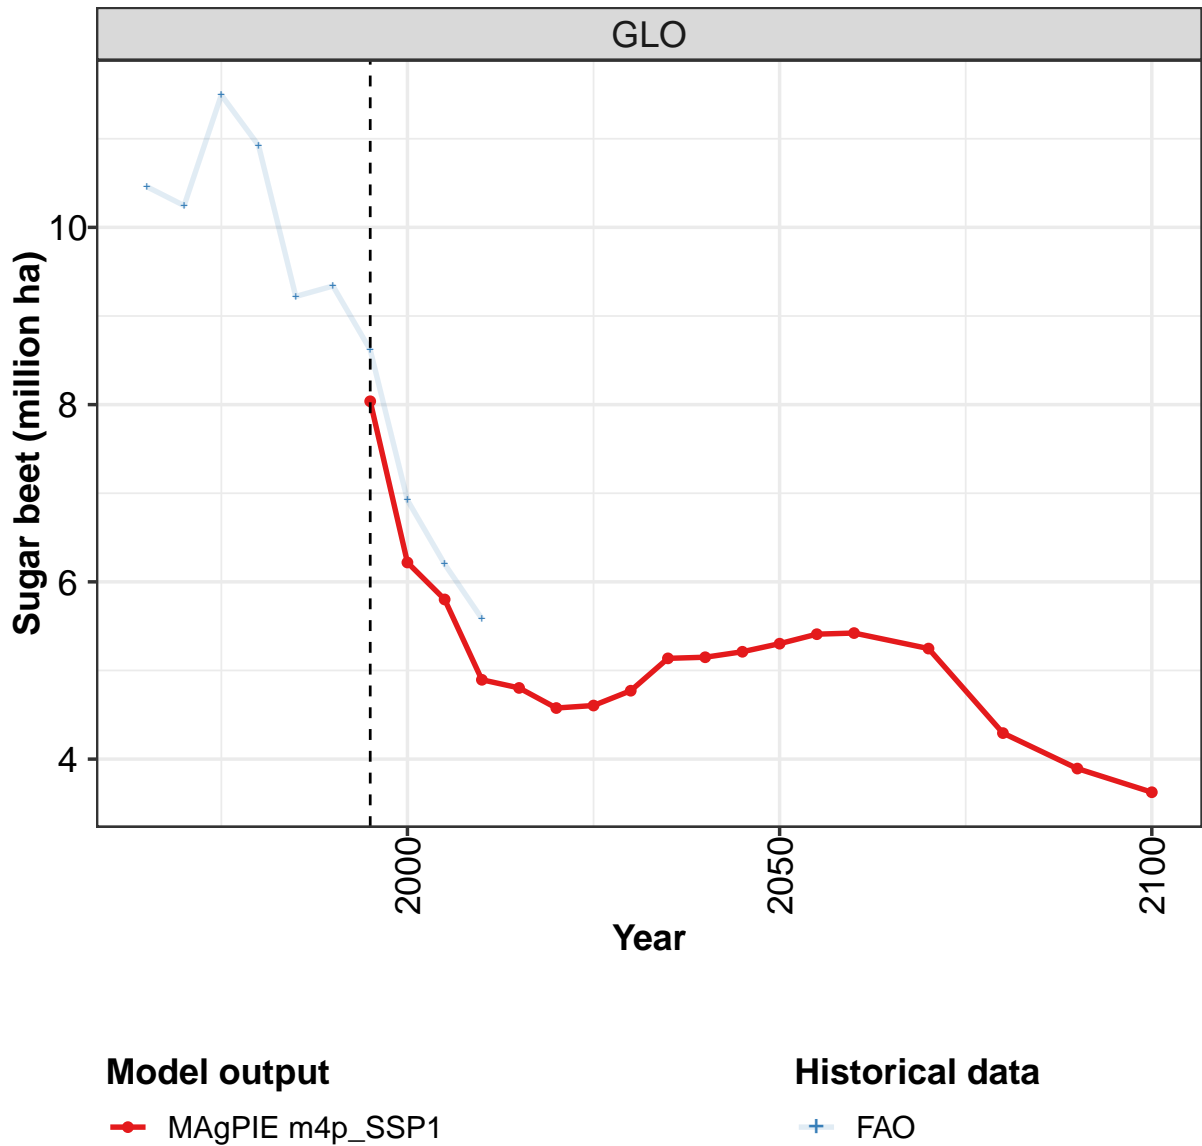

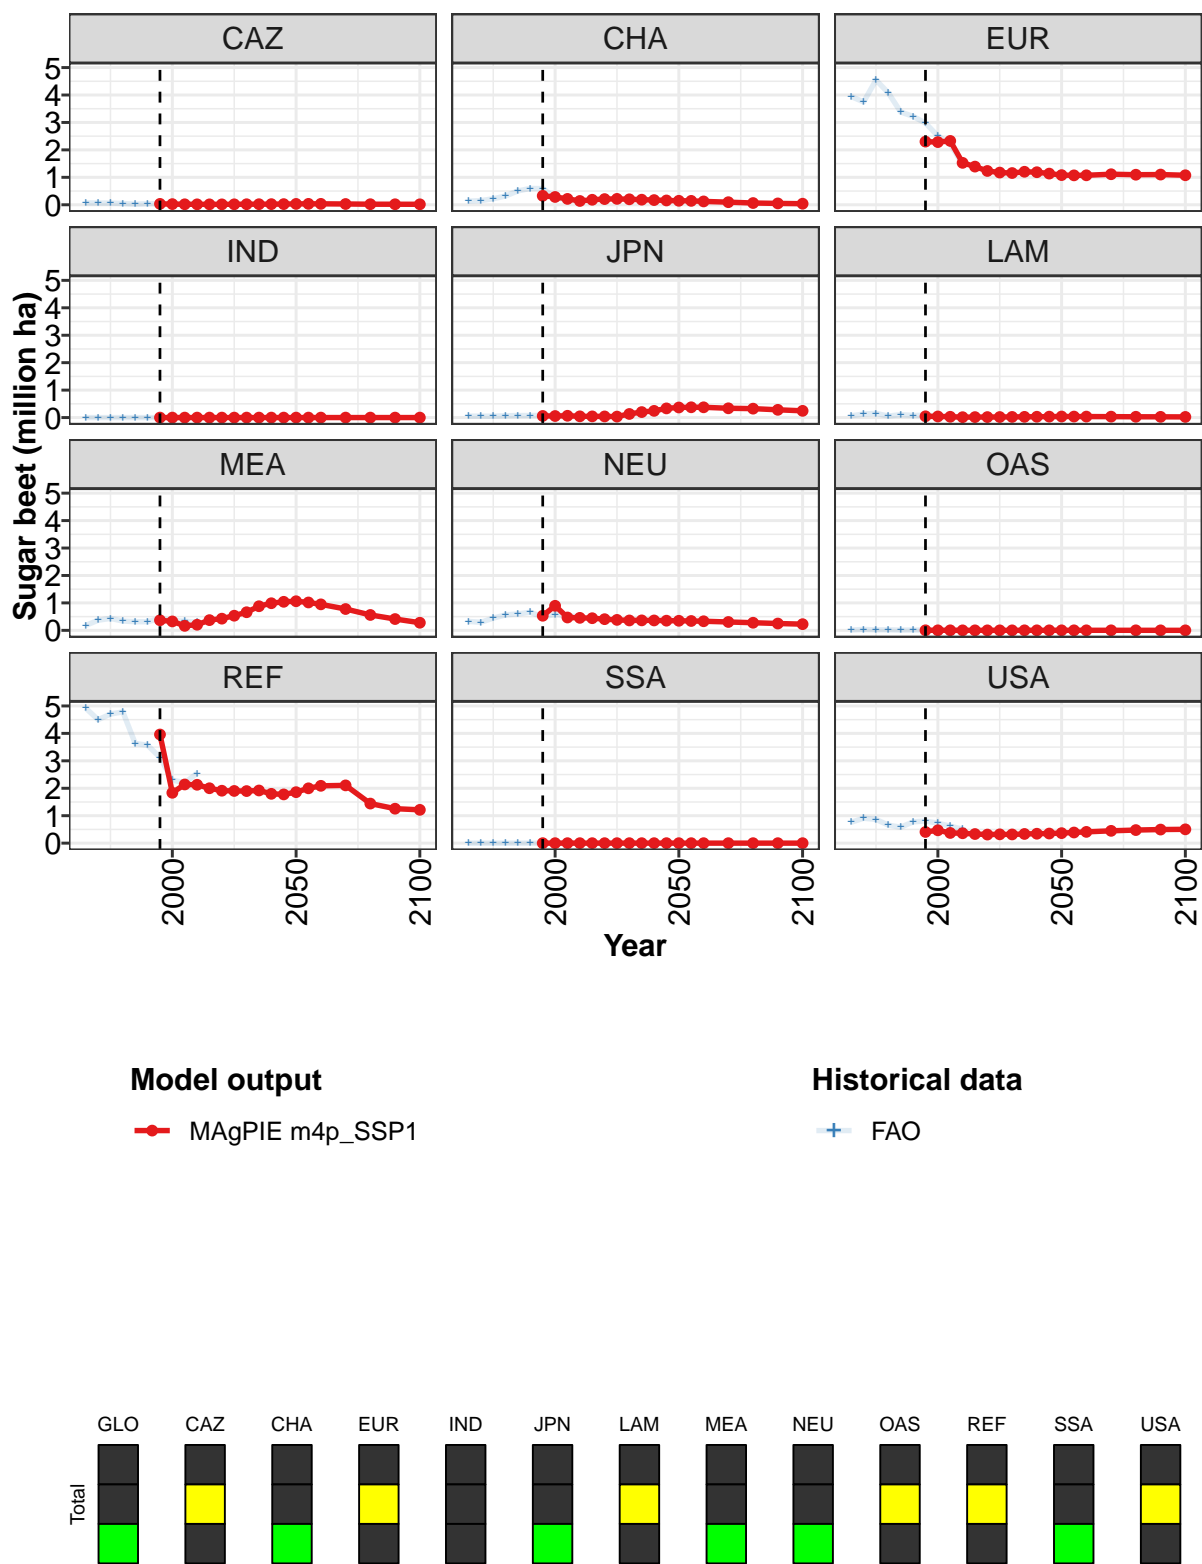

Figure 423: MAgPIE m4p\_SSP1 — Resources—Land Cover—Cropland—Crops—Sugar crops—Sugar beet (million ha)

|     | 1995 | 2000 | 2005 | 2010 | 2015 | 2020 | 2025 | 2030 | 2035 | 2040 | 2045 |
|-----|------|------|------|------|------|------|------|------|------|------|------|
| GLO | 8.04 | 6.22 | 5.80 | 4.89 | 4.80 | 4.58 | 4.60 | 4.77 | 5.14 | 5.15 | 5.21 |
| CAZ | 0.03 | 0.02 | 0.02 | 0.02 | 0.02 | 0.02 | 0.02 | 0.02 | 0.02 | 0.02 | 0.03 |
| CHA | 0.33 | 0.28 | 0.21 | 0.14 | 0.18 | 0.21 | 0.21 | 0.20 | 0.19 | 0.17 | 0.16 |
| EUR | 2.30 | 2.28 | 2.33 | 1.53 | 1.39 | 1.23 | 1.17 | 1.16 | 1.20 | 1.19 | 1.14 |
| IND | 0.00 | 0.00 | 0.00 | 0.00 | 0.00 | 0.00 | 0.00 | 0.00 | 0.00 | 0.00 | 0.00 |
| JPN | 0.06 | 0.06 | 0.07 | 0.05 | 0.04 | 0.04 | 0.04 | 0.13 | 0.20 | 0.24 | 0.33 |
| LAM | 0.05 | 0.04 | 0.03 | 0.02 | 0.02 | 0.02 | 0.02 | 0.02 | 0.03 | 0.03 | 0.03 |
| MEA | 0.37 | 0.33 | 0.16 | 0.21 | 0.37 | 0.43 | 0.53 | 0.66 | 0.88 | 0.99 | 1.04 |
| NEU | 0.53 | 0.90 | 0.47 | 0.46 | 0.44 | 0.41 | 0.38 | 0.36 | 0.36 | 0.36 | 0.35 |
| OAS | 0.00 | 0.00 | 0.00 | 0.00 | 0.00 | 0.00 | 0.00 | 0.00 | 0.00 | 0.00 | 0.00 |
| REF | 3.96 | 1.84 | 2.14 | 2.13 | 2.00 | 1.91 | 1.90 | 1.90 | 1.92 | 1.80 | 1.78 |
| SSA | 0.00 | 0.00 | 0.00 | 0.00 | 0.00 | 0.00 | 0.00 | 0.00 | 0.00 | 0.00 | 0.00 |
| USA | 0.41 | 0.47 | 0.37 | 0.36 | 0.33 | 0.31 | 0.32 | 0.32 | 0.34 | 0.34 | 0.35 |

Table 1616: MAgPIE m4p\_SSP1 — Resources—Land Cover—Cropland—Crops—Sugar crops—Sugar beet (million ha) [PART 1/2]

|     | 2050 | 2055 | 2060 | 2070 | 2080 | 2090 | 2100 |
|-----|------|------|------|------|------|------|------|
| GLO | 5.30 | 5.41 | 5.42 | 5.25 | 4.29 | 3.89 | 3.63 |
| CAZ | 0.03 | 0.03 | 0.03 | 0.03 | 0.02 | 0.02 | 0.02 |
| CHA | 0.15 | 0.14 | 0.12 | 0.09 | 0.06 | 0.05 | 0.04 |
| EUR | 1.08 | 1.07 | 1.07 | 1.11 | 1.10 | 1.10 | 1.08 |
| IND | 0.00 | 0.00 | 0.00 | 0.00 | 0.00 | 0.00 | 0.00 |
| JPN | 0.37 | 0.38 | 0.37 | 0.34 | 0.32 | 0.28 | 0.25 |
| LAM | 0.04 | 0.04 | 0.04 | 0.03 | 0.03 | 0.03 | 0.02 |
| MEA | 1.06 | 1.02 | 0.95 | 0.78 | 0.56 | 0.41 | 0.28 |
| NEU | 0.35 | 0.34 | 0.33 | 0.31 | 0.28 | 0.25 | 0.23 |
| OAS | 0.00 | 0.00 | 0.00 | 0.00 | 0.00 | 0.00 | 0.00 |
| REF | 1.86 | 2.00 | 2.09 | 2.11 | 1.44 | 1.26 | 1.21 |
| SSA | 0.00 | 0.00 | 0.00 | 0.00 | 0.00 | 0.00 | 0.00 |
| USA | 0.37 | 0.39 | 0.41 | 0.45 | 0.48 | 0.50 | 0.50 |

Table 1617: MAgPIE m4p\_SSP1 — Resources—Land Cover—Cropland—Crops—Sugar crops—Sugar beet (million ha) [PART 2/2]

|     | 1965 | 1970 | 1975 | 1980 | 1985 | 1990 | 1995 | 2000 | 2005 | 2010 |
|-----|------|------|------|------|------|------|------|------|------|------|
| GLO | 10.5 | 10.2 | 11.5 | 10.9 | 9.2  | 9.3  | 8.6  | 6.9  | 6.2  | 5.6  |
| CAZ | 0.1  | 0.1  | 0.1  | 0.0  | 0.0  | 0.0  | 0.0  | 0.0  | 0.0  | 0.0  |
| CHA | 0.1  | 0.2  | 0.2  | 0.3  | 0.5  | 0.6  | 0.6  | 0.3  | 0.2  | 0.2  |
| EUR | 3.9  | 3.7  | 4.5  | 4.1  | 3.4  | 3.2  | 3.0  | 2.5  | 2.2  | 1.5  |
| IND | 0.0  | 0.0  | 0.0  | 0.0  | 0.0  | 0.0  | 0.0  | 0.0  | 0.0  | 0.0  |
| JPN | 0.1  | 0.1  | 0.0  | 0.1  | 0.1  | 0.1  | 0.1  | 0.1  | 0.1  | 0.1  |
| LAM | 0.1  | 0.1  | 0.2  | 0.1  | 0.1  | 0.1  | 0.1  | 0.1  | 0.0  | 0.0  |
| MEA | 0.2  | 0.4  | 0.4  | 0.3  | 0.3  | 0.3  | 0.4  | 0.4  | 0.3  | 0.3  |
| NEU | 0.3  | 0.3  | 0.4  | 0.6  | 0.6  | 0.7  | 0.5  | 0.6  | 0.5  | 0.5  |
| OAS | 0.0  | 0.0  | 0.0  | 0.0  | 0.0  | 0.0  | 0.0  | 0.0  | 0.0  | 0.0  |
| REF | 4.9  | 4.5  | 4.7  | 4.8  | 3.6  | 3.6  | 3.1  | 2.3  | 2.2  | 2.5  |
| SSA | 0.0  | 0.0  | 0.0  | 0.0  | 0.0  | 0.0  | 0.0  | 0.0  | 0.0  | 0.0  |
| USA | 0.8  | 0.9  | 0.9  | 0.7  | 0.6  | 0.8  | 0.8  | 0.7  | 0.6  | 0.5  |

Table 1618: FAO — Resources—Land Cover—Cropland—Crops—Sugar crops—Sugar beet (million ha)



54.1.24 Crops—Sugar crops—Sugar cane

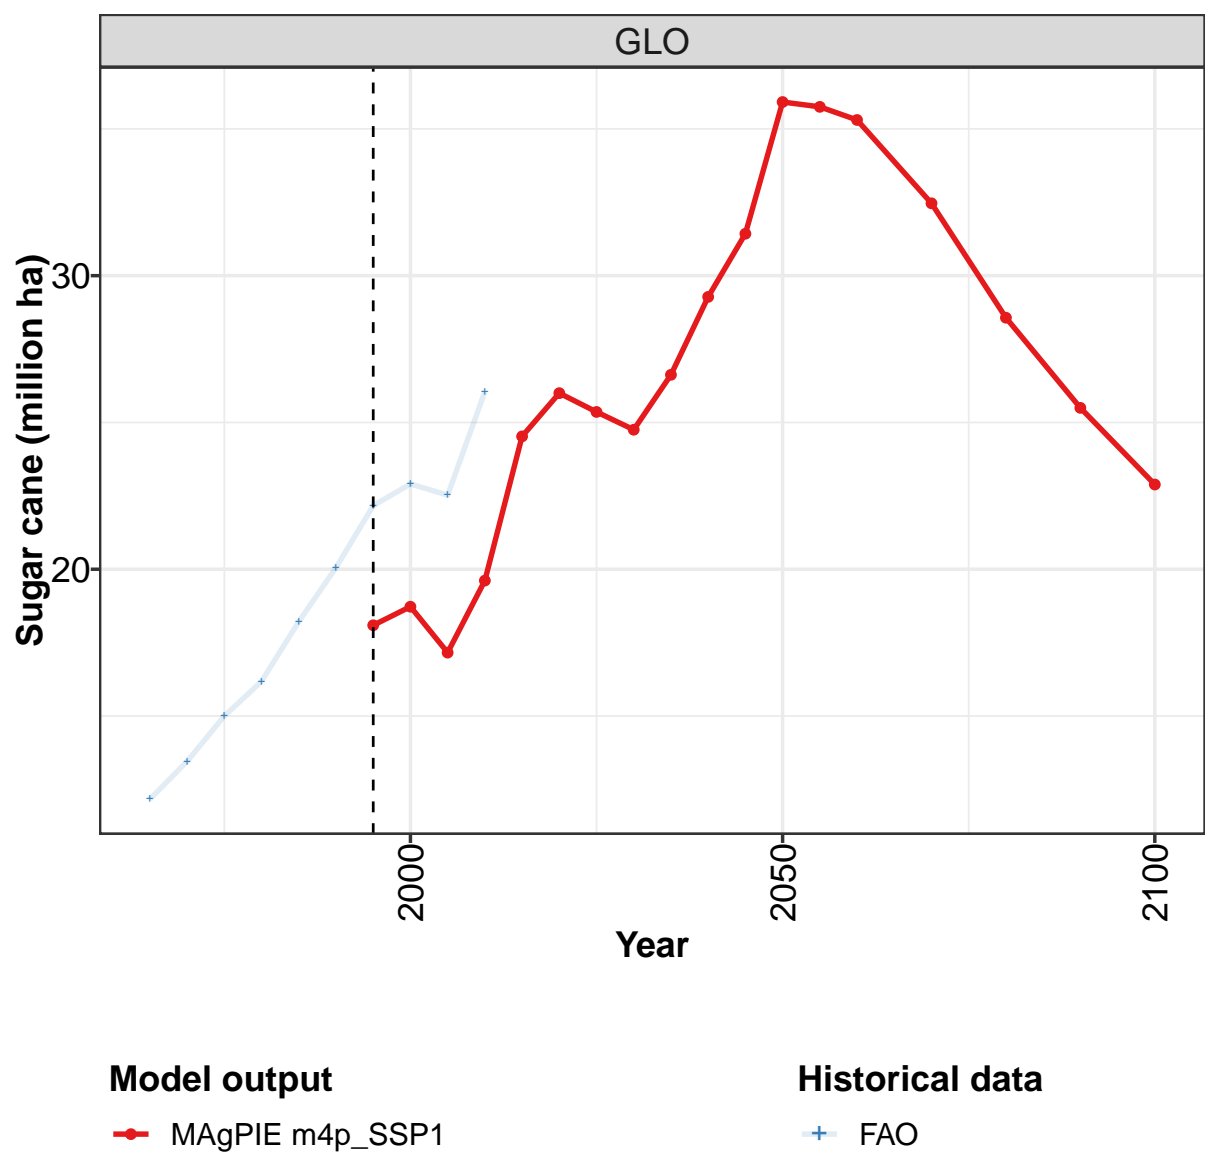

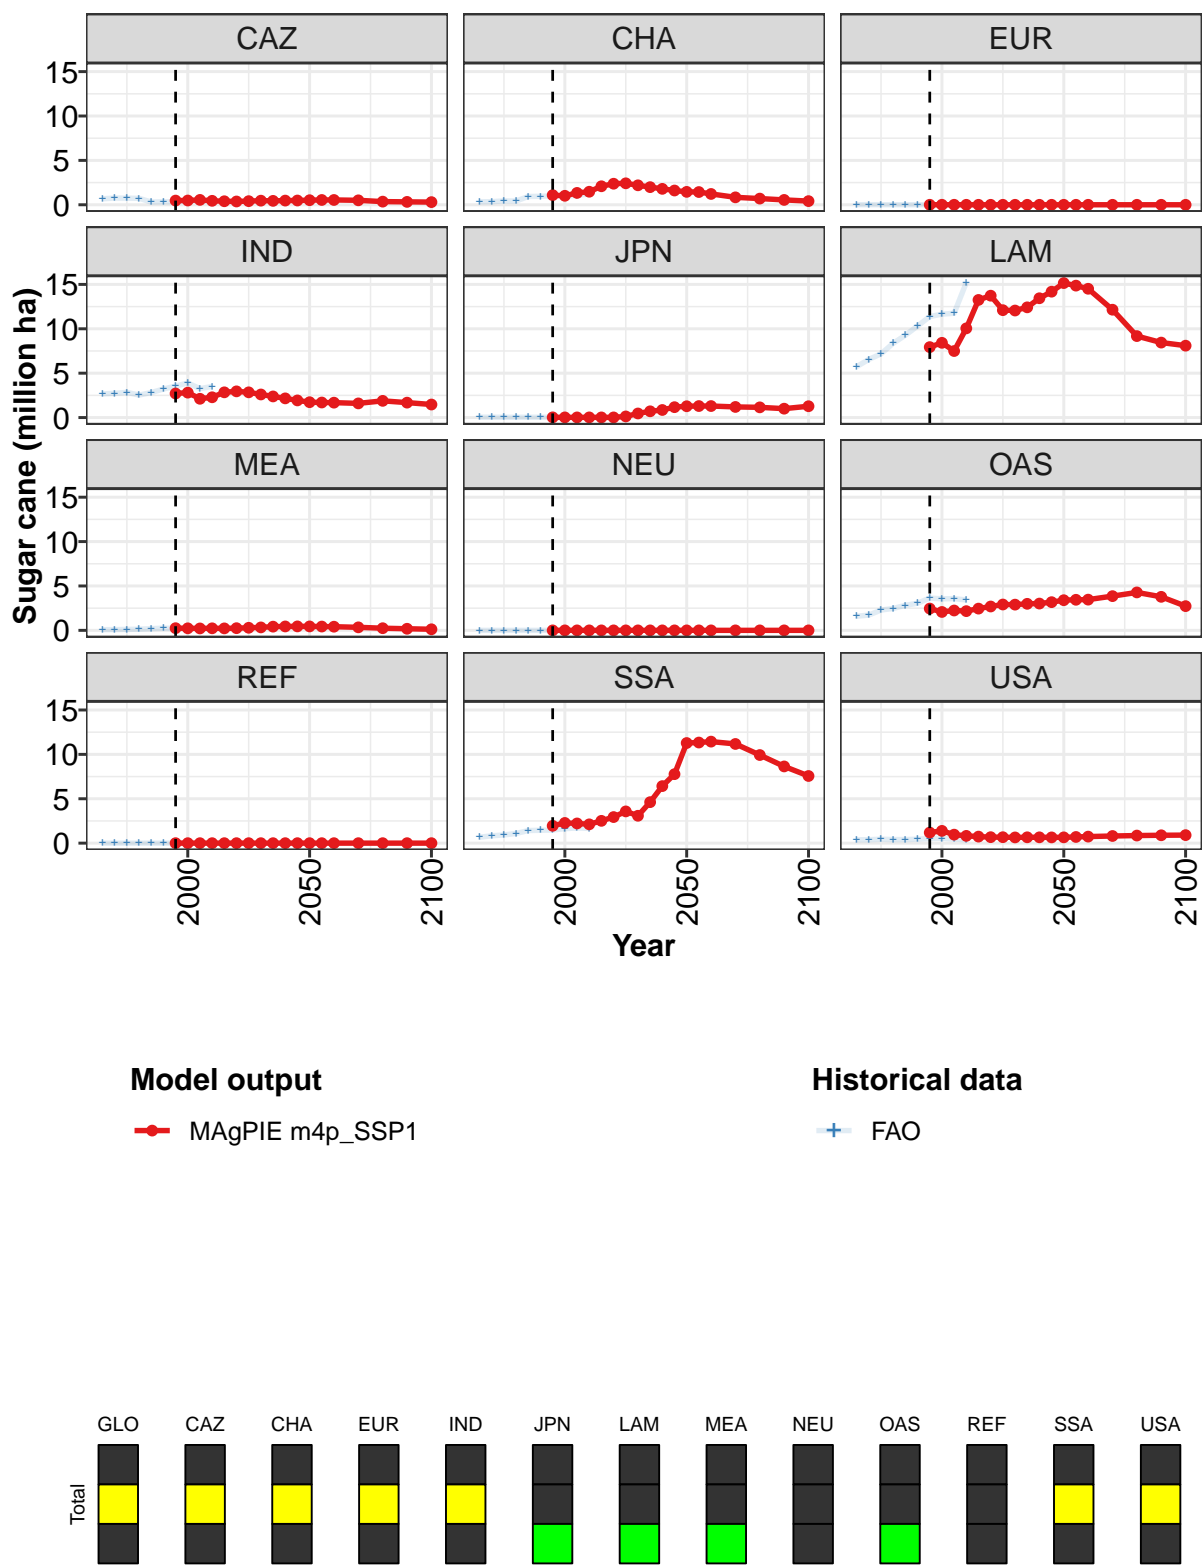

Figure 424: MAgPIE m4p\_SSP1 — Resources—Land Cover—Cropland—Crops—Sugar crops—Sugar cane (million ha)

|     | 1995 | 2000 | 2005 | 2010 | 2015 | 2020 | 2025 | 2030 | 2035 | 2040 | 2045 |
|-----|------|------|------|------|------|------|------|------|------|------|------|
| GLO | 18.1 | 18.7 | 17.2 | 19.6 | 24.5 | 26.0 | 25.4 | 24.8 | 26.6 | 29.3 | 31.4 |
| CAZ | 0.5  | 0.5  | 0.5  | 0.4  | 0.4  | 0.4  | 0.4  | 0.5  | 0.4  | 0.5  | 0.5  |
| CHA | 1.1  | 1.0  | 1.3  | 1.5  | 2.1  | 2.4  | 2.4  | 2.2  | 2.0  | 1.8  | 1.6  |
| EUR | 0.0  | 0.0  | 0.0  | 0.0  | 0.0  | 0.0  | 0.0  | 0.0  | 0.0  | 0.0  | 0.0  |
| IND | 2.7  | 2.8  | 2.1  | 2.3  | 2.8  | 3.0  | 2.8  | 2.6  | 2.4  | 2.2  | 1.9  |
| JPN | 0.0  | 0.0  | 0.0  | 0.0  | 0.0  | 0.0  | 0.1  | 0.5  | 0.7  | 0.9  | 1.2  |
| LAM | 7.9  | 8.4  | 7.5  | 10.1 | 13.3 | 13.7 | 12.1 | 12.1 | 12.4 | 13.4 | 14.2 |
| MEA | 0.2  | 0.2  | 0.2  | 0.2  | 0.2  | 0.2  | 0.3  | 0.3  | 0.4  | 0.4  | 0.4  |
| NEU | 0.0  | 0.0  | 0.0  | 0.0  | 0.0  | 0.0  | 0.0  | 0.0  | 0.0  | 0.0  | 0.0  |
| OAS | 2.5  | 2.1  | 2.2  | 2.2  | 2.5  | 2.7  | 2.9  | 2.9  | 3.0  | 3.0  | 3.2  |
| REF | 0.0  | 0.0  | 0.0  | 0.0  | 0.0  | 0.0  | 0.0  | 0.0  | 0.0  | 0.0  | 0.0  |
| SSA | 2.0  | 2.3  | 2.2  | 2.1  | 2.5  | 2.9  | 3.6  | 3.1  | 4.6  | 6.4  | 7.8  |
| USA | 1.2  | 1.4  | 1.0  | 0.8  | 0.7  | 0.7  | 0.7  | 0.6  | 0.7  | 0.7  | 0.7  |

Table 1619: MAgPIE m4p\_SSP1 — Resources—Land Cover—Cropland—Crops—Sugar crops—Sugar cane (million ha) [PART 1/2]

|     | 2050 | 2055 | 2060 | 2070 | 2080 | 2090 | 2100 |
|-----|------|------|------|------|------|------|------|
| GLO | 35.9 | 35.8 | 35.3 | 32.5 | 28.6 | 25.5 | 22.9 |
| CAZ | 0.5  | 0.5  | 0.5  | 0.5  | 0.4  | 0.3  | 0.3  |
| CHA | 1.5  | 1.4  | 1.2  | 0.8  | 0.7  | 0.5  | 0.4  |
| EUR | 0.0  | 0.0  | 0.0  | 0.0  | 0.0  | 0.0  | 0.0  |
| IND | 1.7  | 1.7  | 1.7  | 1.6  | 1.9  | 1.7  | 1.5  |
| JPN | 1.3  | 1.3  | 1.3  | 1.2  | 1.2  | 1.0  | 1.3  |
| LAM | 15.2 | 14.9 | 14.5 | 12.2 | 9.2  | 8.4  | 8.1  |
| MEA | 0.4  | 0.4  | 0.4  | 0.3  | 0.2  | 0.2  | 0.1  |
| NEU | 0.0  | 0.0  | 0.0  | 0.0  | 0.0  | 0.0  | 0.0  |
| OAS | 3.4  | 3.4  | 3.5  | 3.9  | 4.3  | 3.8  | 2.7  |
| REF | 0.0  | 0.0  | 0.0  | 0.0  | 0.0  | 0.0  | 0.0  |
| SSA | 11.3 | 11.3 | 11.4 | 11.2 | 9.9  | 8.6  | 7.6  |
| USA | 0.7  | 0.7  | 0.7  | 0.8  | 0.9  | 0.9  | 0.9  |

Table 1620: MAgPIE m4p\_SSP1 — Resources—Land Cover—Cropland—Crops—Sugar crops—Sugar cane (million ha) [PART 2/2]

|     | 1965 | 1970 | 1975 | 1980 | 1985 | 1990 | 1995 | 2000 | 2005 | 2010 |
|-----|------|------|------|------|------|------|------|------|------|------|
| GLO | 12.2 | 13.5 | 15.0 | 16.2 | 18.2 | 20.1 | 22.2 | 22.9 | 22.5 | 26.0 |
| CAZ | 0.7  | 0.8  | 0.7  | 0.7  | 0.3  | 0.3  | 0.3  | 0.4  | 0.5  | 0.4  |
| CHA | 0.3  | 0.3  | 0.4  | 0.4  | 0.9  | 1.0  | 1.0  | 1.0  | 1.1  | 1.2  |
| EUR | 0.0  | 0.0  | 0.0  | 0.0  | 0.0  | 0.0  | 0.0  | 0.0  | 0.0  | 0.0  |
| IND | 2.7  | 2.7  | 2.8  | 2.5  | 2.8  | 3.2  | 3.5  | 3.9  | 3.3  | 3.5  |
| JPN | 0.0  | 0.0  | 0.0  | 0.0  | 0.0  | 0.0  | 0.0  | 0.0  | 0.0  | 0.0  |
| LAM | 5.7  | 6.6  | 7.2  | 8.4  | 9.3  | 10.3 | 11.4 | 11.6 | 11.7 | 15.2 |
| MEA | 0.1  | 0.1  | 0.1  | 0.1  | 0.2  | 0.2  | 0.2  | 0.2  | 0.2  | 0.3  |
| NEU | 0.0  | 0.0  | 0.0  | 0.0  | 0.0  | 0.0  | 0.0  | 0.0  | 0.0  | 0.0  |
| OAS | 1.6  | 1.7  | 2.3  | 2.5  | 2.8  | 3.1  | 3.6  | 3.6  | 3.6  | 3.4  |
| REF | 0.0  | 0.0  | 0.0  | 0.0  | 0.0  | 0.0  | 0.0  | 0.0  | 0.0  | 0.0  |
| SSA | 0.7  | 0.8  | 0.9  | 1.1  | 1.4  | 1.4  | 1.5  | 1.6  | 1.7  | 1.7  |
| USA | 0.4  | 0.4  | 0.4  | 0.4  | 0.4  | 0.4  | 0.5  | 0.5  | 0.5  | 0.4  |

Table 1621: FAO — Resources—Land Cover—Cropland—Crops—Sugar crops—Sugar cane (million ha)

54.1.25 Forage

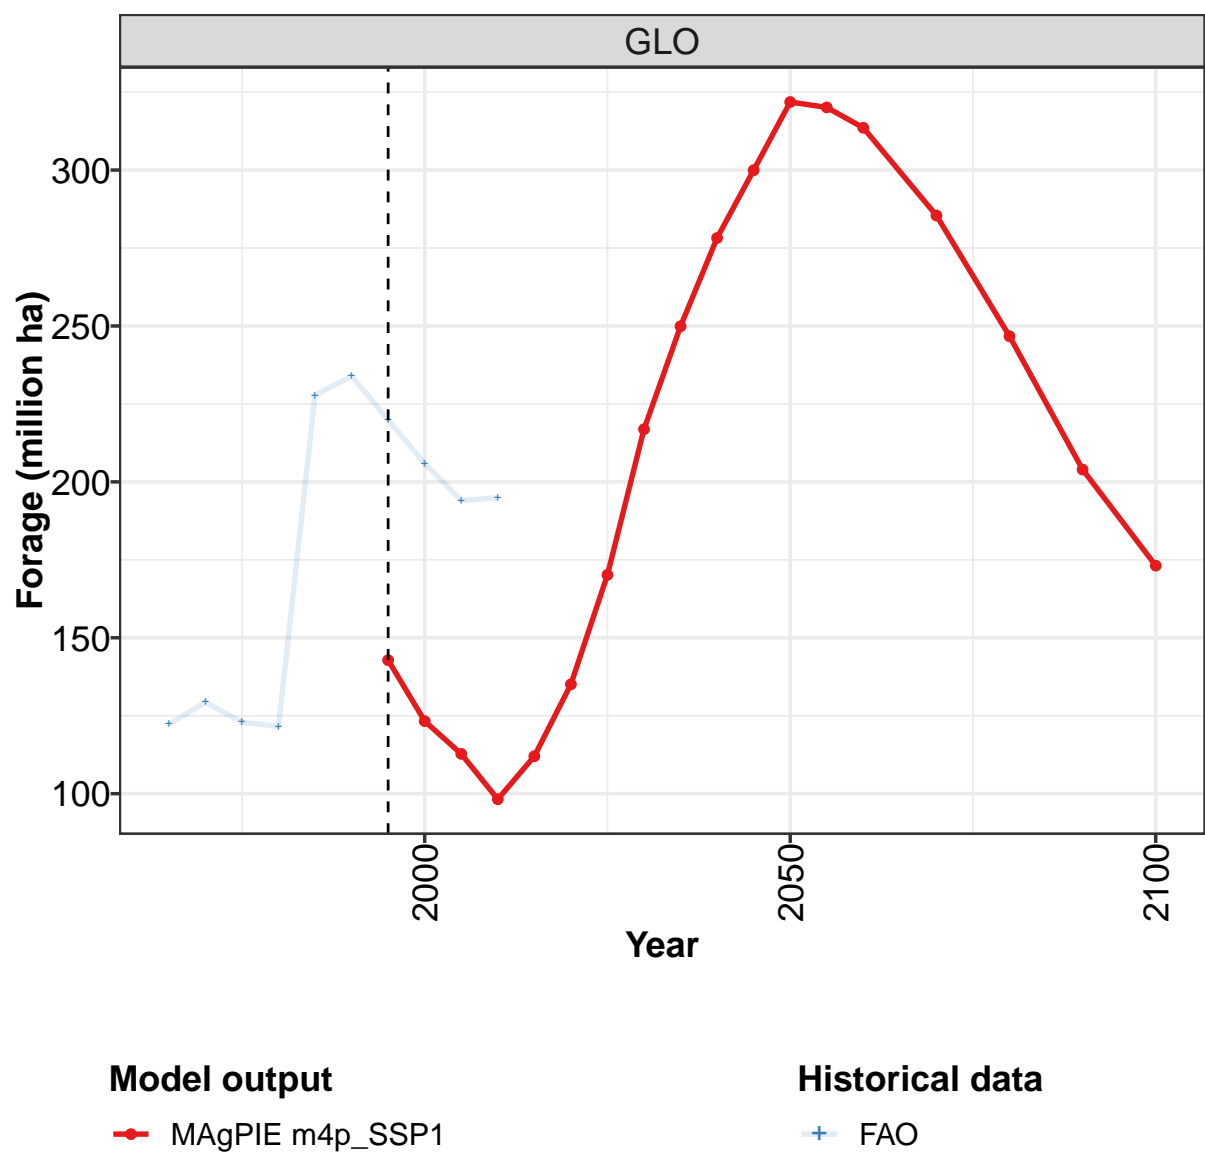

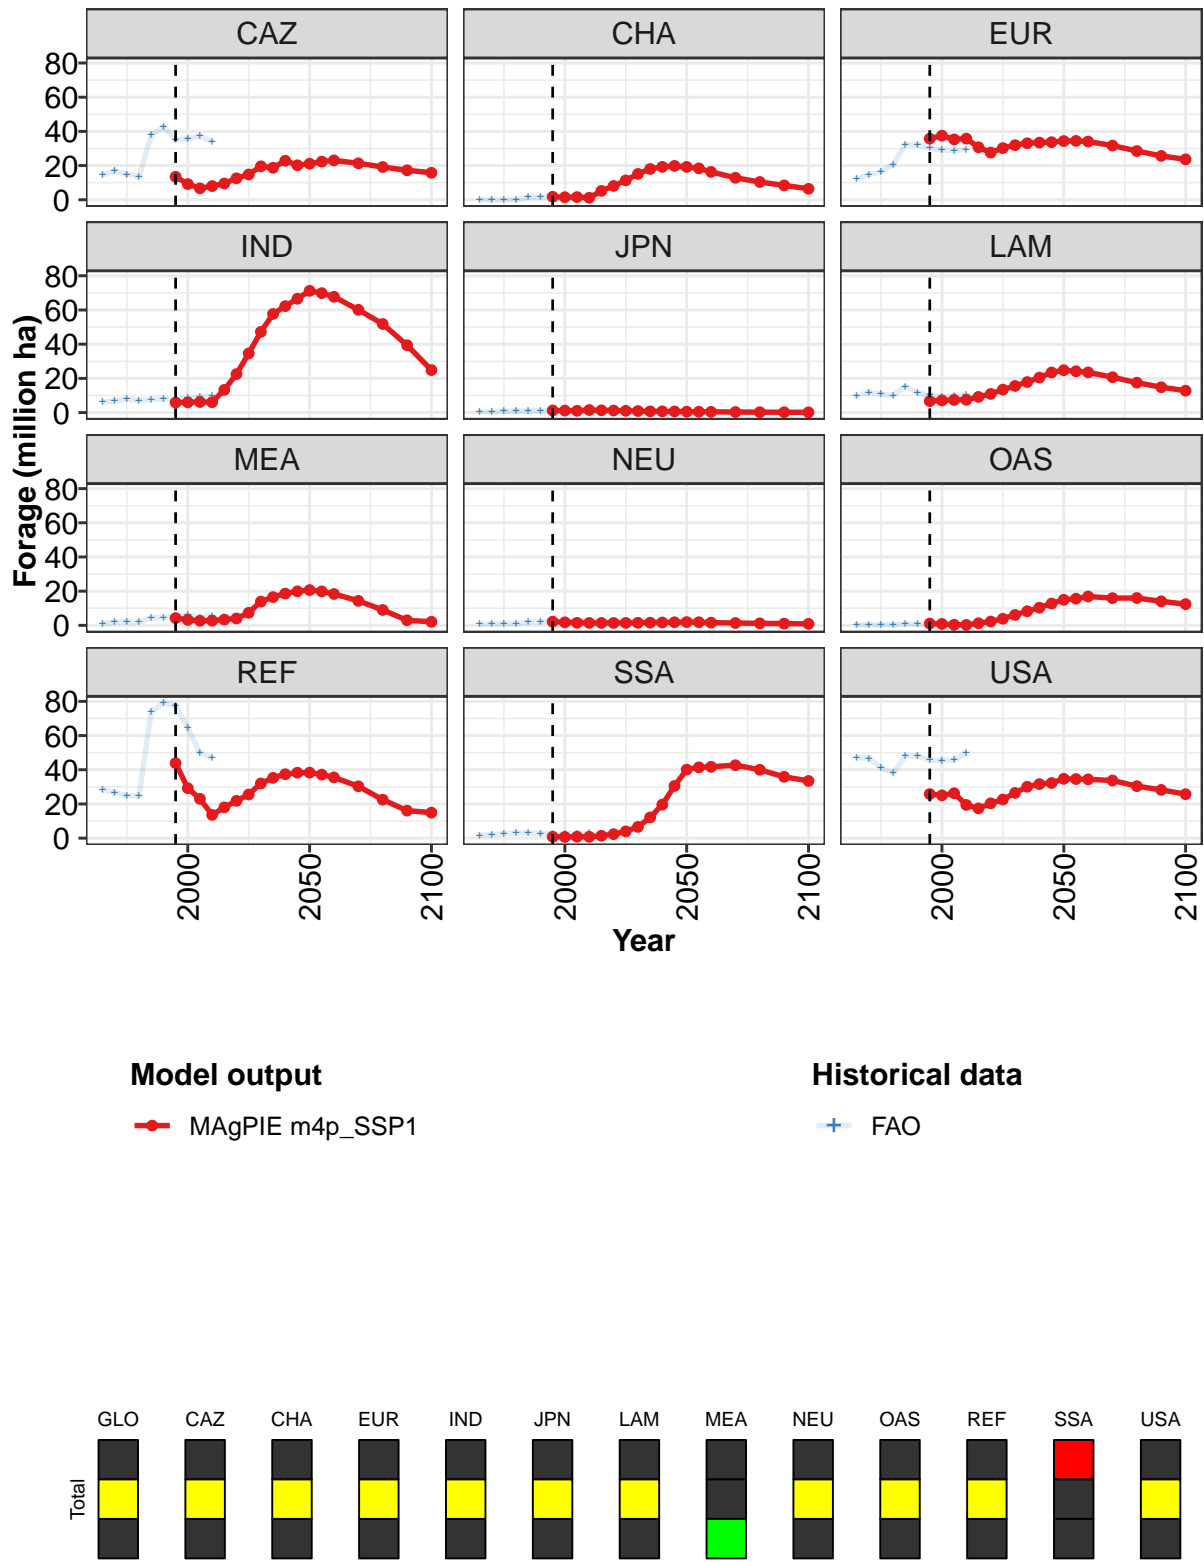

Figure 425: MAgPIE m4p\_SSP1 — Resources—Land Cover—Cropland—Forage (million ha)

|     | 1995 | 2000 | 2005 | 2010 | 2015 | 2020 | 2025 | 2030 | 2035 | 2040 | 2045 |
|-----|------|------|------|------|------|------|------|------|------|------|------|
| GLO | 143  | 123  | 113  | 98   | 112  | 135  | 170  | 217  | 250  | 278  | 300  |
| CAZ | 13   | 9    | 7    | 8    | 10   | 13   | 15   | 20   | 19   | 23   | 20   |
| CHA | 2    | 2    | 2    | 1    | 5    | 8    | 11   | 15   | 18   | 19   | 20   |
| EUR | 36   | 38   | 35   | 36   | 31   | 28   | 30   | 32   | 33   | 33   | 34   |
| IND | 6    | 6    | 6    | 6    | 13   | 23   | 35   | 47   | 58   | 62   | 67   |
| JPN | 1    | 1    | 1    | 1    | 1    | 1    | 1    | 1    | 1    | 1    | 1    |
| LAM | 7    | 7    | 7    | 7    | 9    | 11   | 13   | 16   | 18   | 20   | 23   |
| MEA | 4    | 3    | 3    | 3    | 3    | 4    | 7    | 14   | 17   | 19   | 20   |
| NEU | 2    | 2    | 1    | 1    | 1    | 1    | 1    | 1    | 2    | 2    | 2    |
| OAS | 1    | 1    | 0    | 0    | 1    | 2    | 4    | 6    | 8    | 10   | 13   |
| REF | 44   | 29   | 23   | 14   | 18   | 22   | 26   | 32   | 35   | 37   | 38   |
| SSA | 1    | 1    | 1    | 1    | 1    | 2    | 4    | 7    | 12   | 20   | 31   |
| USA | 26   | 25   | 26   | 19   | 17   | 20   | 23   | 26   | 30   | 32   | 32   |

Table 1622: MAgPIE m4p\_SSP1 — Resources—Land Cover—Cropland—Forage (million ha) [PART 1/2]

|     | 2050 | 2055 | 2060 | 2070 | 2080 | 2090 | 2100 |
|-----|------|------|------|------|------|------|------|
| GLO | 322  | 320  | 314  | 285  | 247  | 204  | 173  |
| CAZ | 21   | 22   | 23   | 21   | 19   | 17   | 16   |
| CHA | 19   | 18   | 16   | 13   | 10   | 8    | 6    |
| EUR | 34   | 34   | 34   | 32   | 29   | 26   | 24   |
| IND | 71   | 70   | 68   | 60   | 52   | 39   | 25   |
| JPN | 1    | 0    | 0    | 0    | 0    | 0    | 0    |
| LAM | 25   | 24   | 24   | 21   | 17   | 15   | 13   |
| MEA | 21   | 20   | 18   | 14   | 9    | 3    | 2    |
| NEU | 2    | 2    | 2    | 1    | 1    | 1    | 1    |
| OAS | 15   | 16   | 17   | 16   | 16   | 14   | 12   |
| REF | 38   | 37   | 36   | 30   | 23   | 16   | 15   |
| SSA | 40   | 41   | 42   | 43   | 40   | 36   | 33   |
| USA | 35   | 35   | 34   | 34   | 30   | 28   | 26   |

Table 1623: MAgPIE m4p\_SSP1 — Resources—Land Cover—Cropland—Forage (million ha) [PART 2/2]

|     | 1965 | 1970 | 1975 | 1980 | 1985 | 1990 | 1995 | 2000 | 2005 | 2010 |
|-----|------|------|------|------|------|------|------|------|------|------|
| GLO | 122  | 129  | 123  | 122  | 228  | 234  | 220  | 206  | 194  | 195  |
| CAZ | 14   | 17   | 15   | 13   | 38   | 43   | 35   | 36   | 37   | 34   |
| CHA | 0    | 0    | 0    | 0    | 2    | 2    | 2    | 2    | 2    | 2    |
| EUR | 12   | 15   | 16   | 21   | 32   | 32   | 30   | 29   | 29   | 30   |
| IND | 6    | 7    | 8    | 7    | 8    | 8    | 8    | 8    | 9    | 10   |
| JPN | 1    | 1    | 1    | 1    | 1    | 1    | 1    | 1    | 1    | 1    |
| LAM | 10   | 12   | 11   | 10   | 15   | 11   | 10   | 9    | 10   | 10   |
| MEA | 1    | 2    | 2    | 2    | 4    | 5    | 6    | 6    | 5    | 6    |
| NEU | 1    | 1    | 1    | 1    | 2    | 2    | 2    | 2    | 3    | 3    |
| OAS | 0    | 0    | 0    | 0    | 1    | 1    | 0    | 0    | 0    | 0    |
| REF | 28   | 27   | 25   | 25   | 74   | 79   | 78   | 64   | 50   | 47   |
| SSA | 2    | 2    | 3    | 3    | 3    | 3    | 2    | 2    | 3    | 3    |
| USA | 47   | 47   | 41   | 38   | 48   | 48   | 46   | 45   | 46   | 50   |

Table 1624: FAO — Resources—Land Cover—Cropland—Forage (million ha)

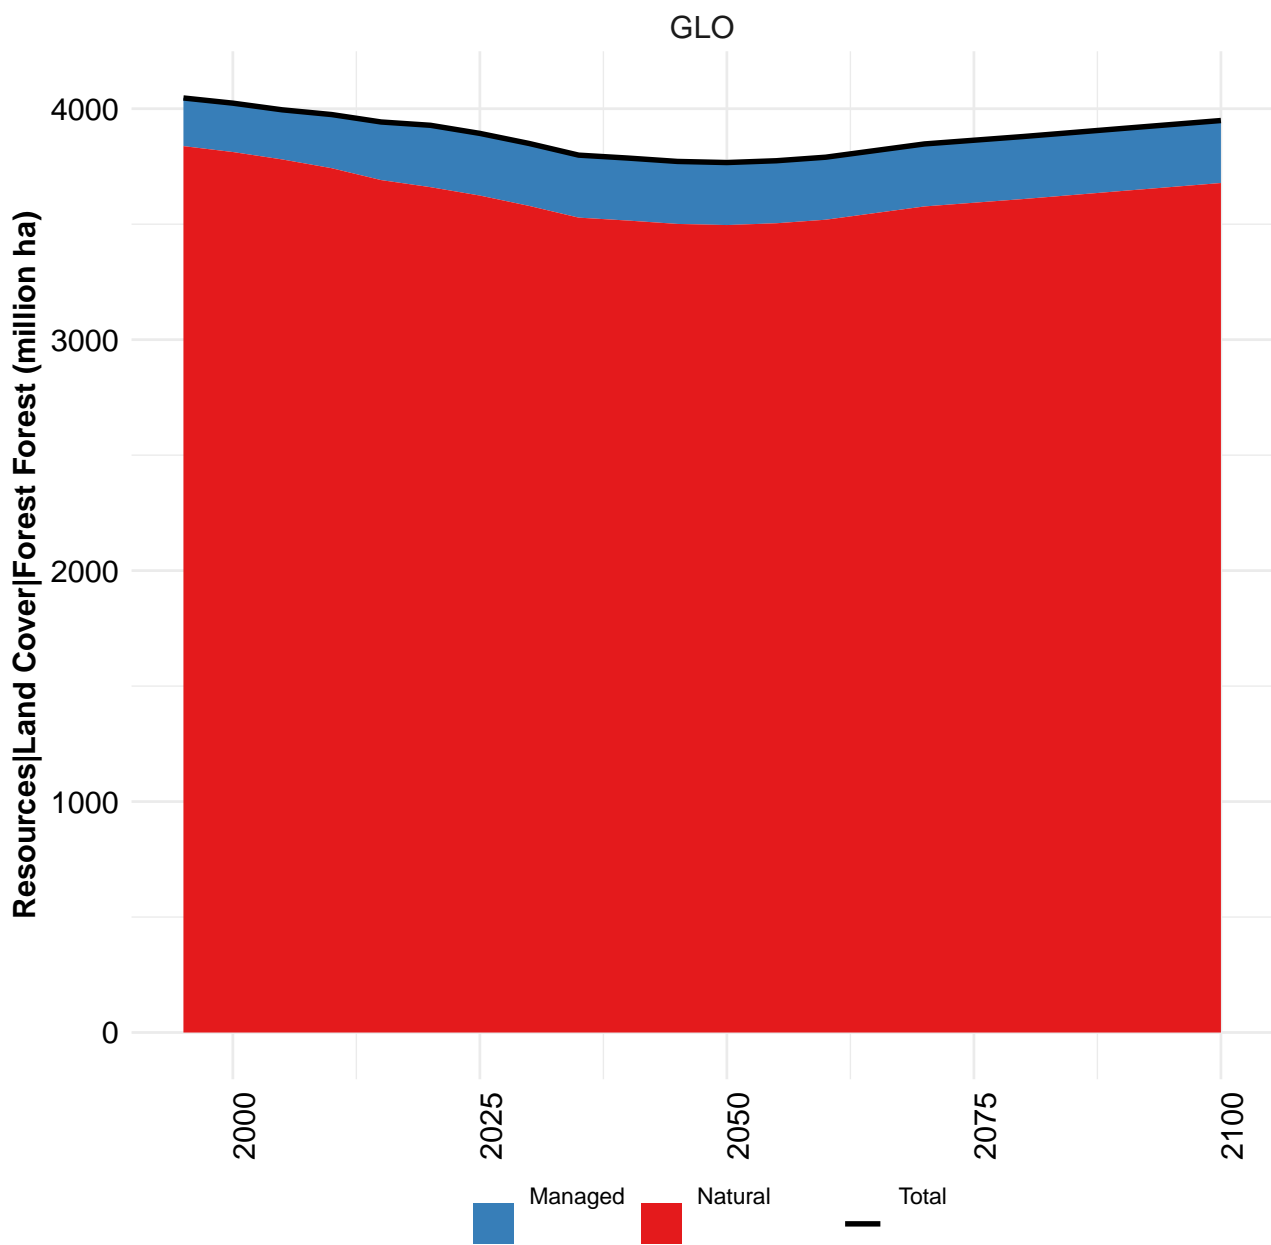

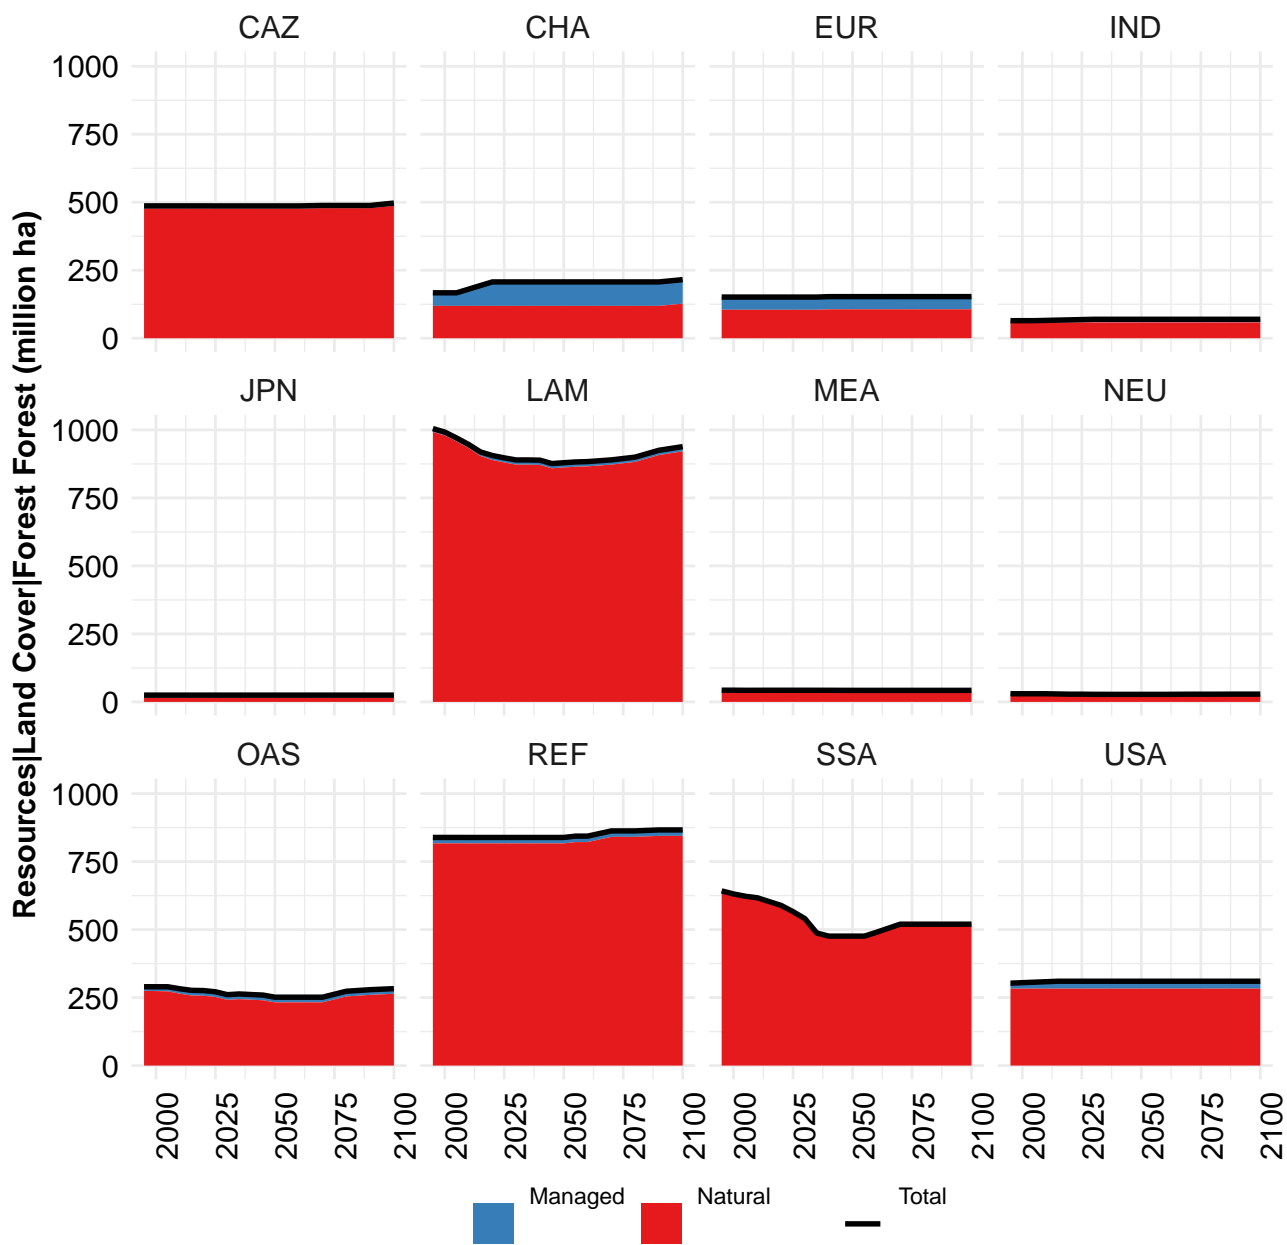



54.2 Forest

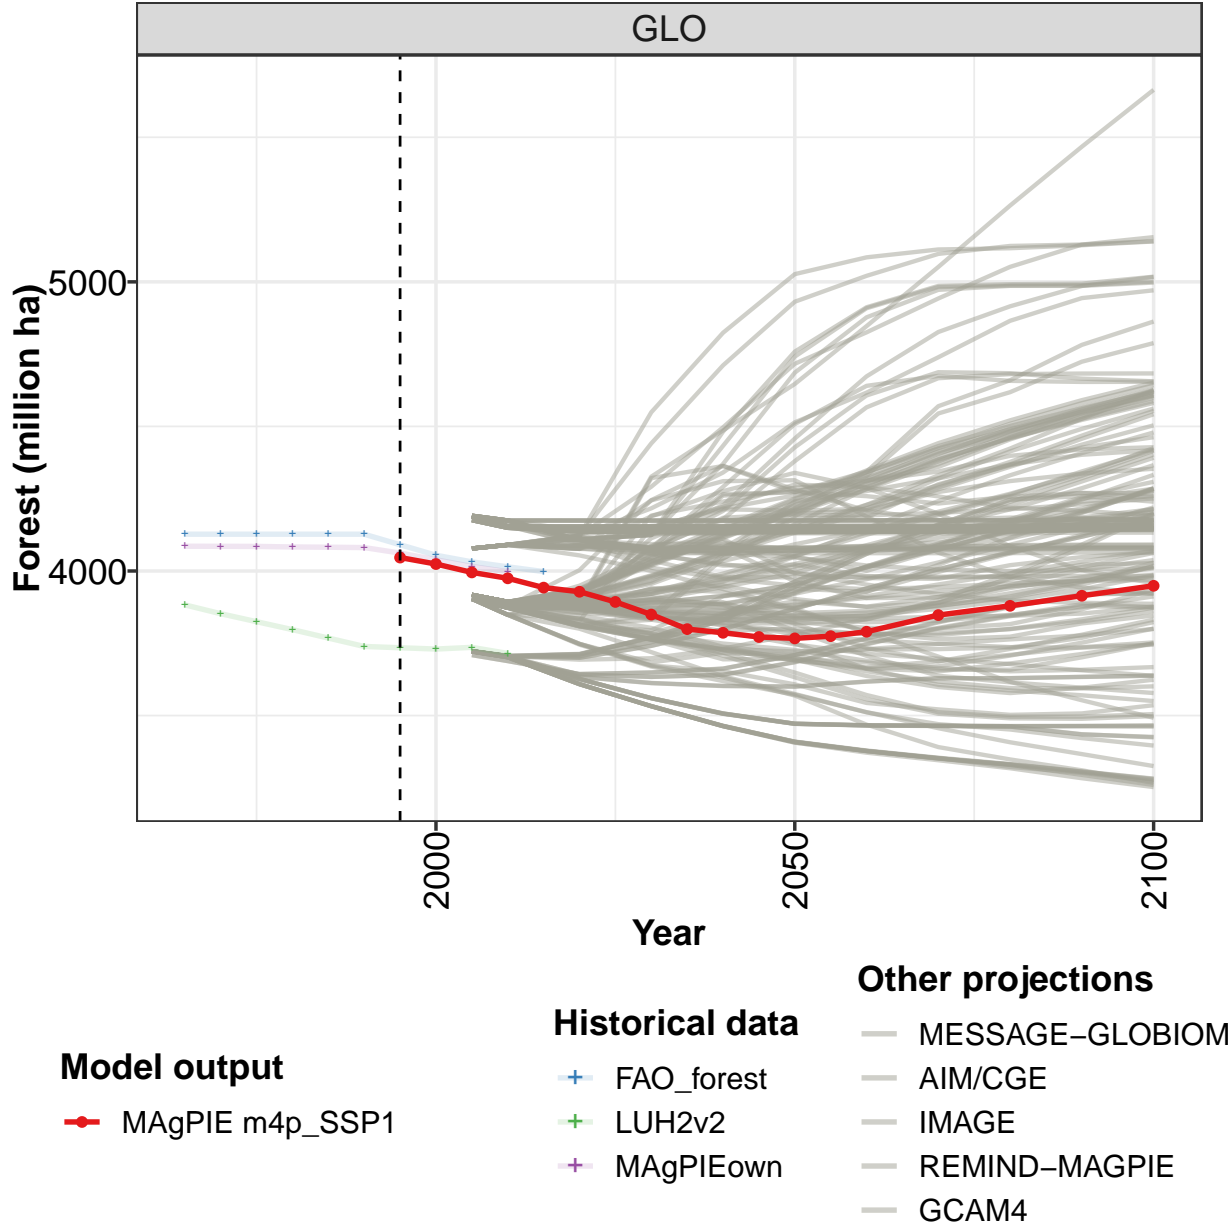

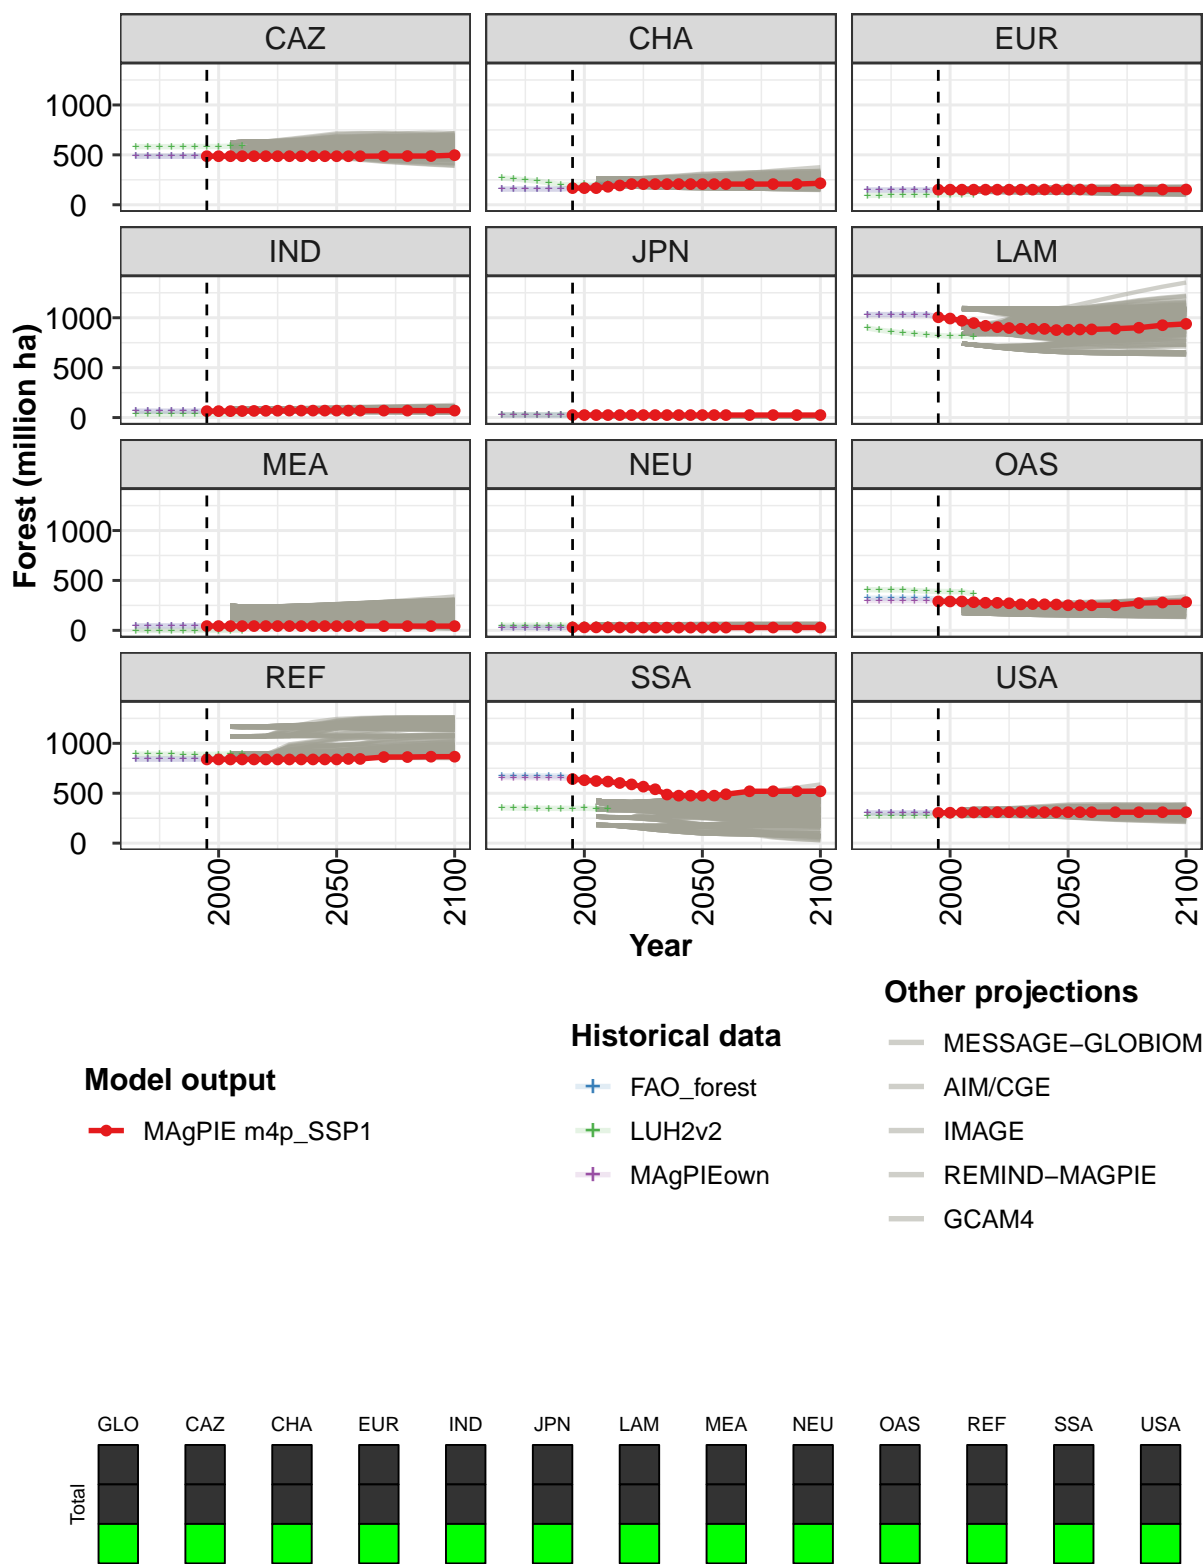

Figure 426: MAgPIE m4p\_SSP1 — Resources—Land Cover—Forest (million ha)

|     | 1995 | 2000 | 2005 | 2010 | 2015 | 2020 | 2025 | 2030 | 2035 | 2040 | 2045 |
|-----|------|------|------|------|------|------|------|------|------|------|------|
| GLO | 4046 | 4024 | 3995 | 3975 | 3943 | 3928 | 3893 | 3849 | 3799 | 3786 | 3772 |
| CAZ | 487  | 487  | 487  | 487  | 487  | 487  | 487  | 487  | 487  | 487  | 487  |
| CHA | 167  | 167  | 167  | 180  | 194  | 207  | 207  | 207  | 207  | 207  | 207  |
| EUR | 151  | 151  | 151  | 151  | 151  | 151  | 151  | 151  | 151  | 153  | 153  |
| IND | 65   | 65   | 65   | 66   | 67   | 68   | 69   | 70   | 70   | 70   | 70   |
| JPN | 25   | 25   | 25   | 25   | 25   | 25   | 25   | 25   | 25   | 25   | 25   |
| LAM | 1005 | 992  | 970  | 947  | 919  | 906  | 897  | 890  | 890  | 889  | 876  |
| MEA | 43   | 43   | 43   | 43   | 43   | 43   | 43   | 43   | 43   | 43   | 43   |
| NEU | 30   | 30   | 30   | 30   | 29   | 28   | 28   | 28   | 28   | 28   | 28   |
| OAS | 290  | 290  | 290  | 282  | 277  | 276  | 271  | 261  | 263  | 261  | 259  |
| REF | 839  | 839  | 839  | 839  | 839  | 839  | 839  | 839  | 839  | 839  | 839  |
| SSA | 642  | 631  | 623  | 617  | 603  | 589  | 566  | 540  | 487  | 476  | 476  |
| USA | 303  | 305  | 307  | 308  | 310  | 310  | 310  | 310  | 310  | 310  | 310  |

Table 1625: MAgPIE m4p\_SSP1 — Resources—Land Cover—Forest (million ha) [PART 1/2]

|     | 2050 | 2055 | 2060 | 2070 | 2080 | 2090 | 2100 |
|-----|------|------|------|------|------|------|------|
| GLO | 3767 | 3775 | 3790 | 3848 | 3880 | 3914 | 3949 |
| CAZ | 487  | 487  | 487  | 488  | 488  | 488  | 497  |
| CHA | 207  | 207  | 207  | 207  | 207  | 207  | 215  |
| EUR | 153  | 153  | 153  | 153  | 153  | 153  | 153  |
| IND | 70   | 70   | 70   | 70   | 70   | 70   | 70   |
| JPN | 25   | 25   | 25   | 25   | 25   | 25   | 25   |
| LAM | 879  | 882  | 884  | 890  | 900  | 925  | 939  |
| MEA | 43   | 43   | 43   | 43   | 43   | 42   | 42   |
| NEU | 28   | 28   | 28   | 28   | 28   | 29   | 29   |
| OAS | 251  | 251  | 251  | 251  | 273  | 279  | 283  |
| REF | 839  | 844  | 844  | 863  | 863  | 866  | 866  |
| SSA | 476  | 476  | 490  | 520  | 520  | 520  | 520  |
| USA | 310  | 310  | 310  | 310  | 310  | 310  | 310  |

Table 1626: MAgPIE m4p\_SSP1 — Resources—Land Cover—Forest (million ha) [PART 2/2]

|     | 1965 | 1970 | 1975 | 1980 | 1985 | 1990 | 1995 | 2000 | 2005 | 2010 | 2015 |
|-----|------|------|------|------|------|------|------|------|------|------|------|
| GLO | 4127 | 4127 | 4127 | 4127 | 4127 | 4127 | 4091 | 4055 | 4032 | 4014 | 3998 |
| CAZ | 486  | 486  | 486  | 486  | 486  | 486  | 487  | 487  | 485  | 481  | 482  |
| CHA | 157  | 157  | 157  | 157  | 157  | 157  | 167  | 177  | 193  | 201  | 208  |
| EUR | 148  | 148  | 148  | 148  | 148  | 148  | 151  | 155  | 157  | 159  | 161  |
| IND | 64   | 64   | 64   | 64   | 64   | 64   | 65   | 65   | 68   | 70   | 71   |
| JPN | 25   | 25   | 25   | 25   | 25   | 25   | 25   | 25   | 25   | 25   | 25   |
| LAM | 1032 | 1032 | 1032 | 1032 | 1032 | 1032 | 1010 | 988  | 964  | 946  | 935  |
| MEA | 44   | 44   | 44   | 44   | 44   | 44   | 44   | 43   | 44   | 44   | 43   |
| NEU | 30   | 30   | 30   | 30   | 30   | 30   | 30   | 31   | 31   | 32   | 33   |
| OAS | 322  | 322  | 322  | 322  | 322  | 322  | 310  | 298  | 292  | 291  | 285  |
| REF | 842  | 842  | 842  | 842  | 842  | 842  | 843  | 843  | 843  | 850  | 850  |
| SSA | 674  | 674  | 674  | 674  | 674  | 674  | 657  | 640  | 625  | 608  | 595  |
| USA | 302  | 302  | 302  | 302  | 302  | 302  | 303  | 304  | 305  | 309  | 310  |

Table 1627: FAO\_forest — Resources—Land Cover—Forest (million ha)

|     | 1965 | 1970 | 1975 | 1980 | 1985 | 1990 | 1995 | 2000 | 2005 | 2010 |
|-----|------|------|------|------|------|------|------|------|------|------|
| GLO | 3883 | 3852 | 3825 | 3797 | 3768 | 3739 | 3735 | 3730 | 3736 | 3715 |
| CAZ | 583  | 582  | 582  | 582  | 583  | 583  | 583  | 584  | 587  | 590  |
| CHA | 267  | 261  | 249  | 237  | 220  | 203  | 204  | 206  | 204  | 207  |
| EUR | 94   | 95   | 96   | 97   | 98   | 98   | 100  | 102  | 103  | 103  |
| IND | 37   | 37   | 36   | 36   | 36   | 36   | 36   | 36   | 36   | 36   |
| JPN | 29   | 29   | 29   | 29   | 29   | 29   | 30   | 30   | 30   | 30   |
| LAM | 897  | 876  | 862  | 847  | 839  | 830  | 823  | 815  | 815  | 808  |
| MEA | 0    | 0    | 0    | 0    | 0    | 0    | 0    | 0    | 0    | 0    |
| NEU | 50   | 50   | 50   | 51   | 50   | 50   | 51   | 52   | 52   | 52   |
| OAS | 408  | 406  | 405  | 404  | 398  | 393  | 390  | 388  | 386  | 368  |
| REF | 892  | 891  | 891  | 890  | 890  | 890  | 890  | 889  | 895  | 895  |
| SSA | 354  | 352  | 350  | 349  | 349  | 348  | 349  | 349  | 345  | 342  |
| USA | 273  | 273  | 274  | 274  | 276  | 278  | 279  | 279  | 282  | 285  |

Table 1628: LUH2v2 — Resources—Land Cover—Forest (million ha)

|     | 1965 | 1970 | 1975 | 1980 | 1985 | 1990 | 1995 | 2000 | 2005 | 2010 |
|-----|------|------|------|------|------|------|------|------|------|------|
| GLO | 4086 | 4085 | 4085 | 4083 | 4082 | 4081 | 4062 | 4039 | 4016 | 3998 |
| CAZ | 486  | 486  | 486  | 486  | 486  | 486  | 487  | 487  | 485  | 481  |
| CHA | 157  | 157  | 157  | 157  | 157  | 157  | 167  | 177  | 193  | 201  |
| EUR | 148  | 148  | 148  | 148  | 148  | 148  | 151  | 155  | 157  | 159  |
| IND | 64   | 64   | 64   | 64   | 64   | 64   | 65   | 65   | 68   | 70   |
| JPN | 25   | 25   | 25   | 25   | 25   | 25   | 25   | 25   | 25   | 25   |
| LAM | 1031 | 1031 | 1031 | 1030 | 1030 | 1030 | 1008 | 986  | 962  | 945  |
| MEA | 44   | 44   | 44   | 44   | 44   | 44   | 44   | 43   | 44   | 44   |
| NEU | 29   | 29   | 29   | 29   | 29   | 29   | 30   | 31   | 31   | 32   |
| OAS | 298  | 298  | 298  | 298  | 298  | 298  | 297  | 297  | 291  | 289  |
| REF | 842  | 842  | 842  | 842  | 842  | 842  | 843  | 843  | 843  | 850  |
| SSA | 658  | 658  | 658  | 656  | 655  | 654  | 642  | 627  | 611  | 594  |
| USA | 302  | 302  | 302  | 302  | 302  | 302  | 303  | 304  | 305  | 309  |

Table 1629: MAgPIEown — Resources—Land Cover—Forest (million ha)

54.2.1 Managed Forest

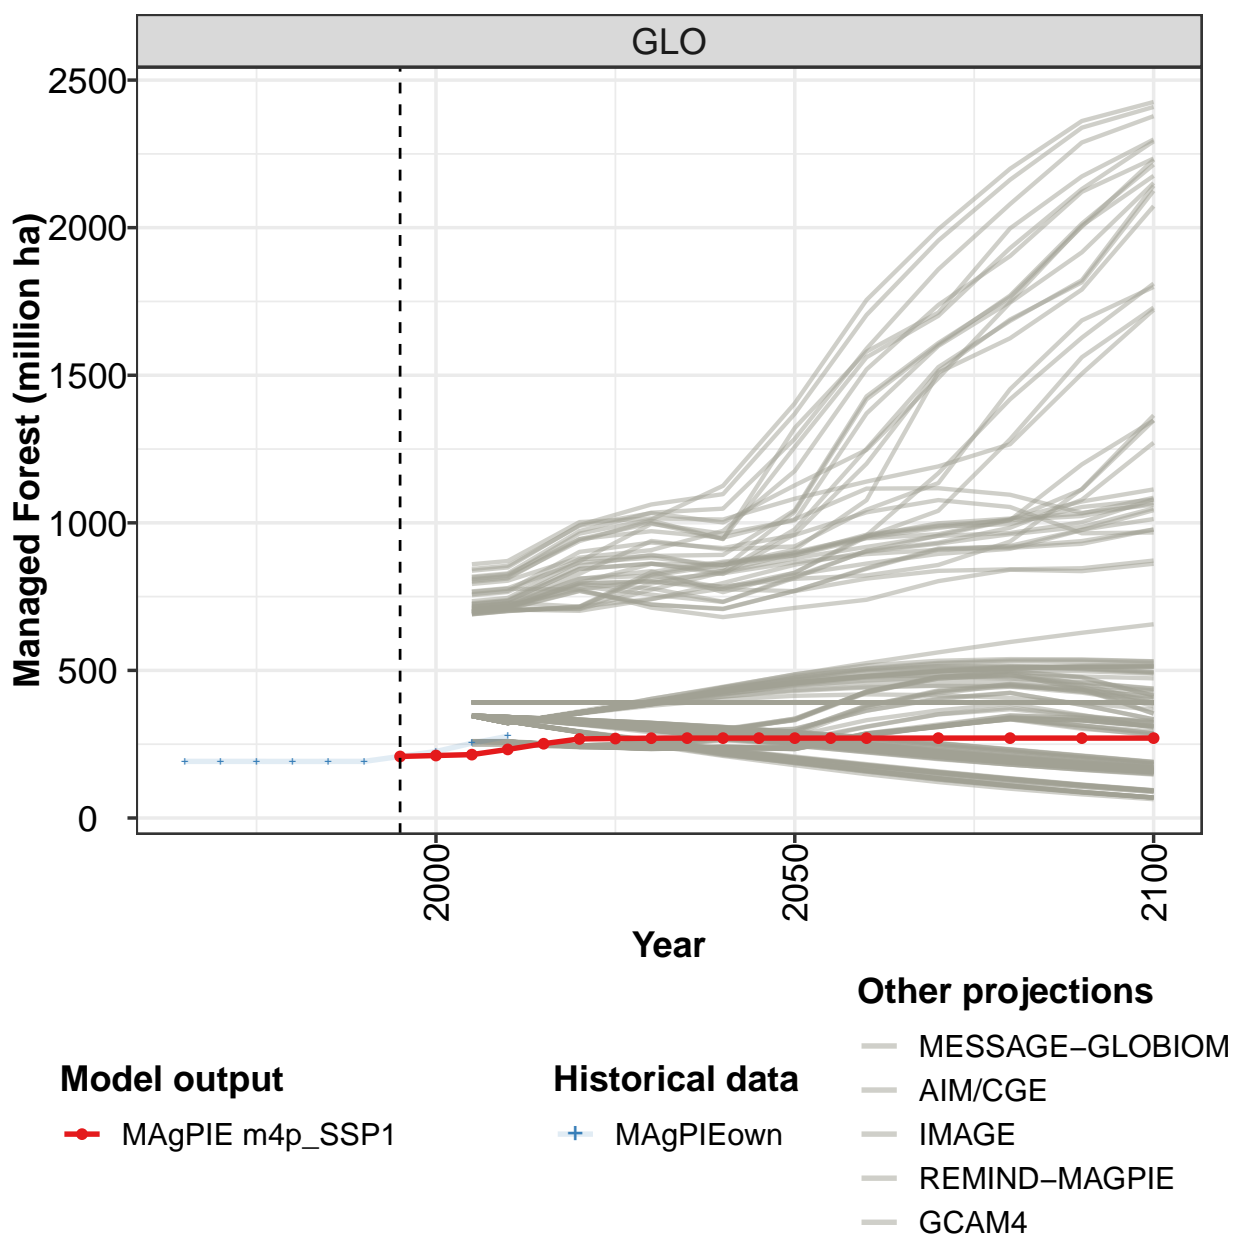

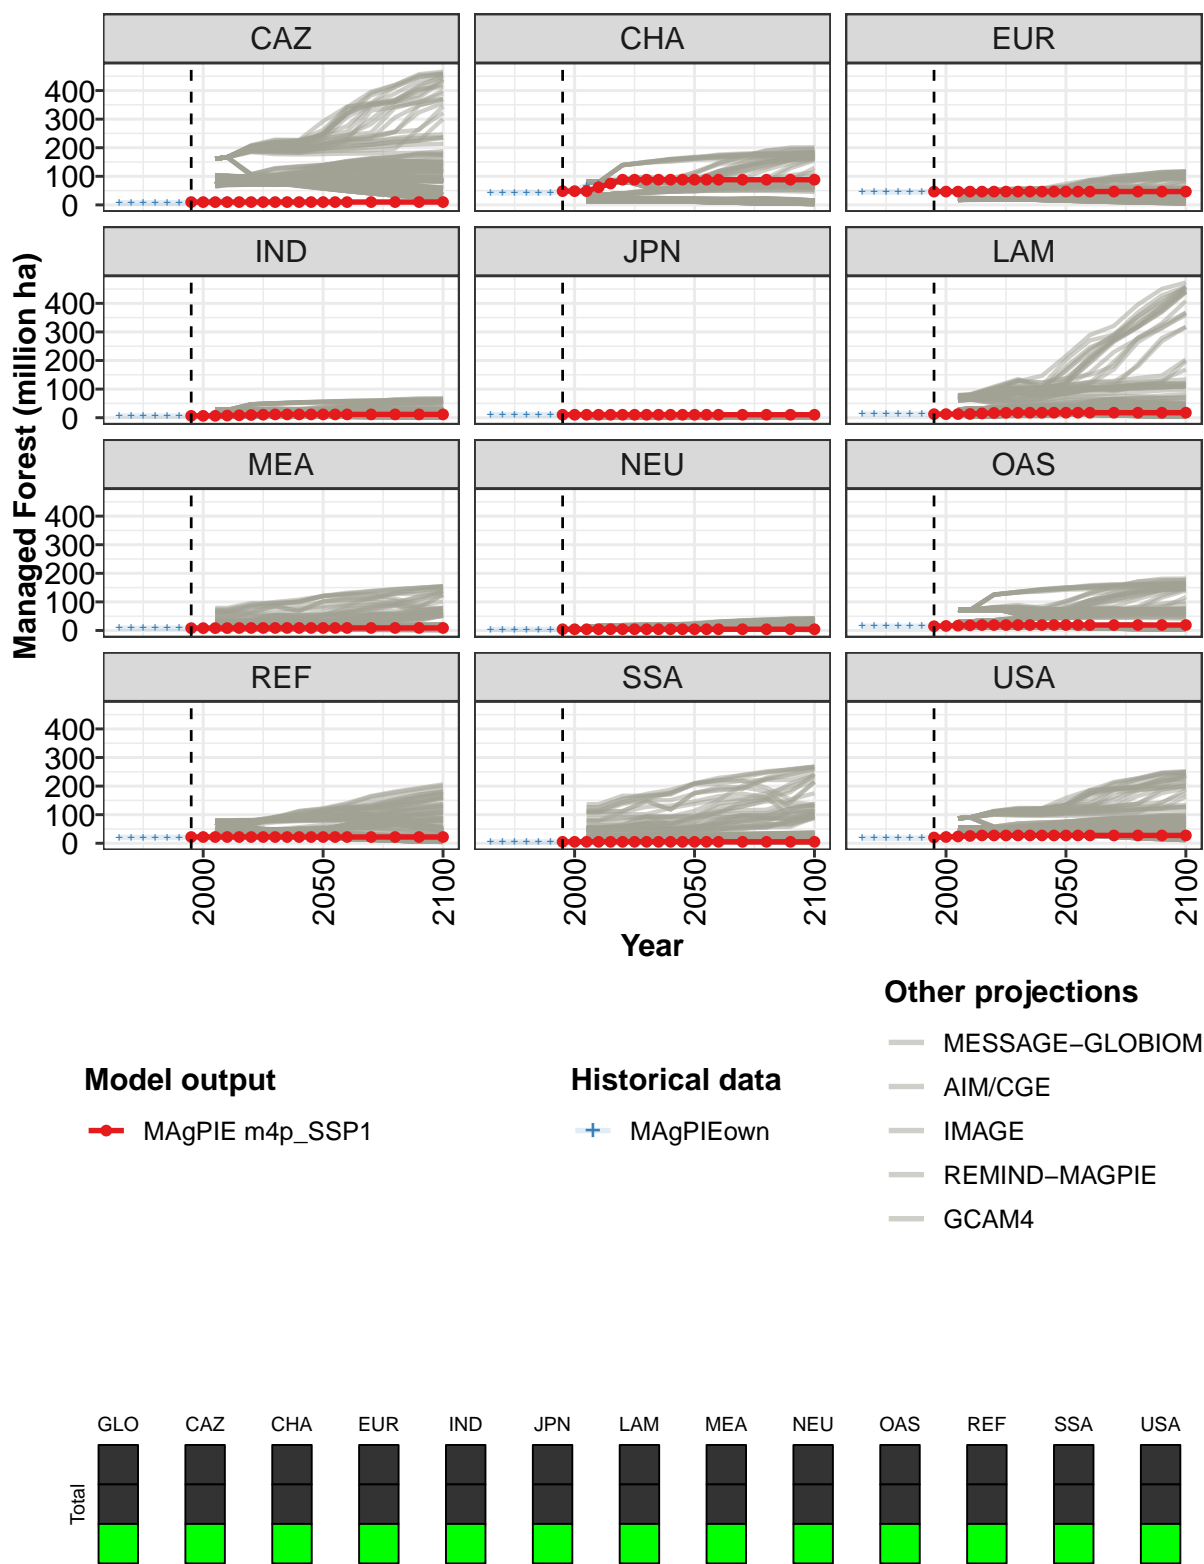

Figure 427: MAgPIE m4p\_SSP1 — Resources—Land Cover—Forest—Managed Forest (million ha)

|     | 1995 | 2000 | 2005 | 2010 | 2015 | 2020 | 2025 | 2030 | 2035 | 2040 | 2045 |
|-----|------|------|------|------|------|------|------|------|------|------|------|
| GLO | 209  | 212  | 215  | 232  | 252  | 268  | 269  | 270  | 271  | 271  | 271  |
| CAZ | 10   | 10   | 10   | 10   | 10   | 10   | 10   | 10   | 10   | 10   | 10   |
| CHA | 48   | 48   | 48   | 62   | 75   | 88   | 88   | 88   | 88   | 88   | 88   |
| EUR | 47   | 47   | 47   | 47   | 47   | 47   | 47   | 47   | 47   | 47   | 47   |
| IND | 6    | 6    | 6    | 7    | 8    | 9    | 10   | 11   | 11   | 11   | 11   |
| JPN | 10   | 10   | 10   | 10   | 10   | 10   | 10   | 10   | 10   | 10   | 10   |
| LAM | 12   | 13   | 13   | 13   | 15   | 17   | 17   | 17   | 17   | 17   | 17   |
| MEA | 8    | 8    | 8    | 8    | 9    | 9    | 9    | 9    | 9    | 9    | 9    |
| NEU | 4    | 4    | 4    | 4    | 4    | 4    | 4    | 4    | 4    | 4    | 4    |
| OAS | 15   | 16   | 17   | 18   | 19   | 19   | 19   | 19   | 19   | 19   | 19   |
| REF | 22   | 22   | 22   | 22   | 22   | 22   | 22   | 22   | 22   | 22   | 22   |
| SSA | 5    | 5    | 5    | 5    | 5    | 5    | 5    | 5    | 5    | 5    | 5    |
| USA | 20   | 22   | 24   | 26   | 27   | 27   | 27   | 27   | 27   | 27   | 27   |

Table 1630: MAgPIE m4p\_SSP1 — Resources—Land Cover—Forest—Managed Forest (million ha) [PART 1/2]

|     | 2050 | 2055 | 2060 | 2070 | 2080 | 2090 | 2100 |
|-----|------|------|------|------|------|------|------|
| GLO | 271  | 271  | 271  | 271  | 271  | 271  | 271  |
| CAZ | 10   | 10   | 10   | 10   | 10   | 10   | 10   |
| CHA | 88   | 88   | 88   | 88   | 88   | 88   | 88   |
| EUR | 47   | 47   | 47   | 47   | 47   | 47   | 47   |
| IND | 11   | 11   | 11   | 11   | 11   | 11   | 11   |
| JPN | 10   | 10   | 10   | 10   | 10   | 10   | 10   |
| LAM | 17   | 17   | 17   | 17   | 17   | 17   | 17   |
| MEA | 9    | 9    | 9    | 9    | 9    | 9    | 9    |
| NEU | 4    | 4    | 4    | 4    | 4    | 4    | 4    |
| OAS | 19   | 19   | 19   | 19   | 19   | 19   | 19   |
| REF | 22   | 22   | 22   | 22   | 22   | 22   | 22   |
| SSA | 5    | 5    | 5    | 5    | 5    | 5    | 5    |
| USA | 27   | 27   | 27   | 27   | 27   | 27   | 27   |

Table 1631: MAgPIE m4p\_SSP1 — Resources—Land Cover—Forest—Managed Forest (million ha) [PART 2/2]

|     | 1965 | 1970 | 1975 | 1980 | 1985 | 1990 | 1995 | 2000 | 2005 | 2010 |
|-----|------|------|------|------|------|------|------|------|------|------|
| GLO | 192  | 192  | 192  | 192  | 192  | 192  | 209  | 225  | 253  | 277  |
| CAZ | 7    | 7    | 7    | 7    | 7    | 7    | 10   | 13   | 15   | 18   |
| CHA | 42   | 42   | 42   | 42   | 42   | 42   | 48   | 54   | 67   | 73   |
| EUR | 45   | 45   | 45   | 45   | 45   | 45   | 47   | 49   | 52   | 54   |
| IND | 6    | 6    | 6    | 6    | 6    | 6    | 6    | 7    | 9    | 11   |
| JPN | 10   | 10   | 10   | 10   | 10   | 10   | 10   | 10   | 10   | 10   |
| LAM | 12   | 12   | 12   | 12   | 12   | 12   | 12   | 12   | 12   | 14   |
| MEA | 8    | 8    | 8    | 8    | 8    | 8    | 8    | 9    | 9    | 10   |
| NEU | 4    | 4    | 4    | 4    | 4    | 4    | 4    | 5    | 5    | 6    |
| OAS | 15   | 15   | 15   | 15   | 15   | 15   | 15   | 15   | 17   | 19   |
| REF | 20   | 20   | 20   | 20   | 20   | 20   | 22   | 24   | 25   | 28   |
| SSA | 5    | 5    | 5    | 5    | 5    | 5    | 5    | 5    | 6    | 7    |
| USA | 18   | 18   | 18   | 18   | 18   | 18   | 20   | 23   | 24   | 26   |

Table 1632: MAgPIEown — Resources—Land Cover—Forest—Managed Forest (million ha)

54.2.2 Natural Forest

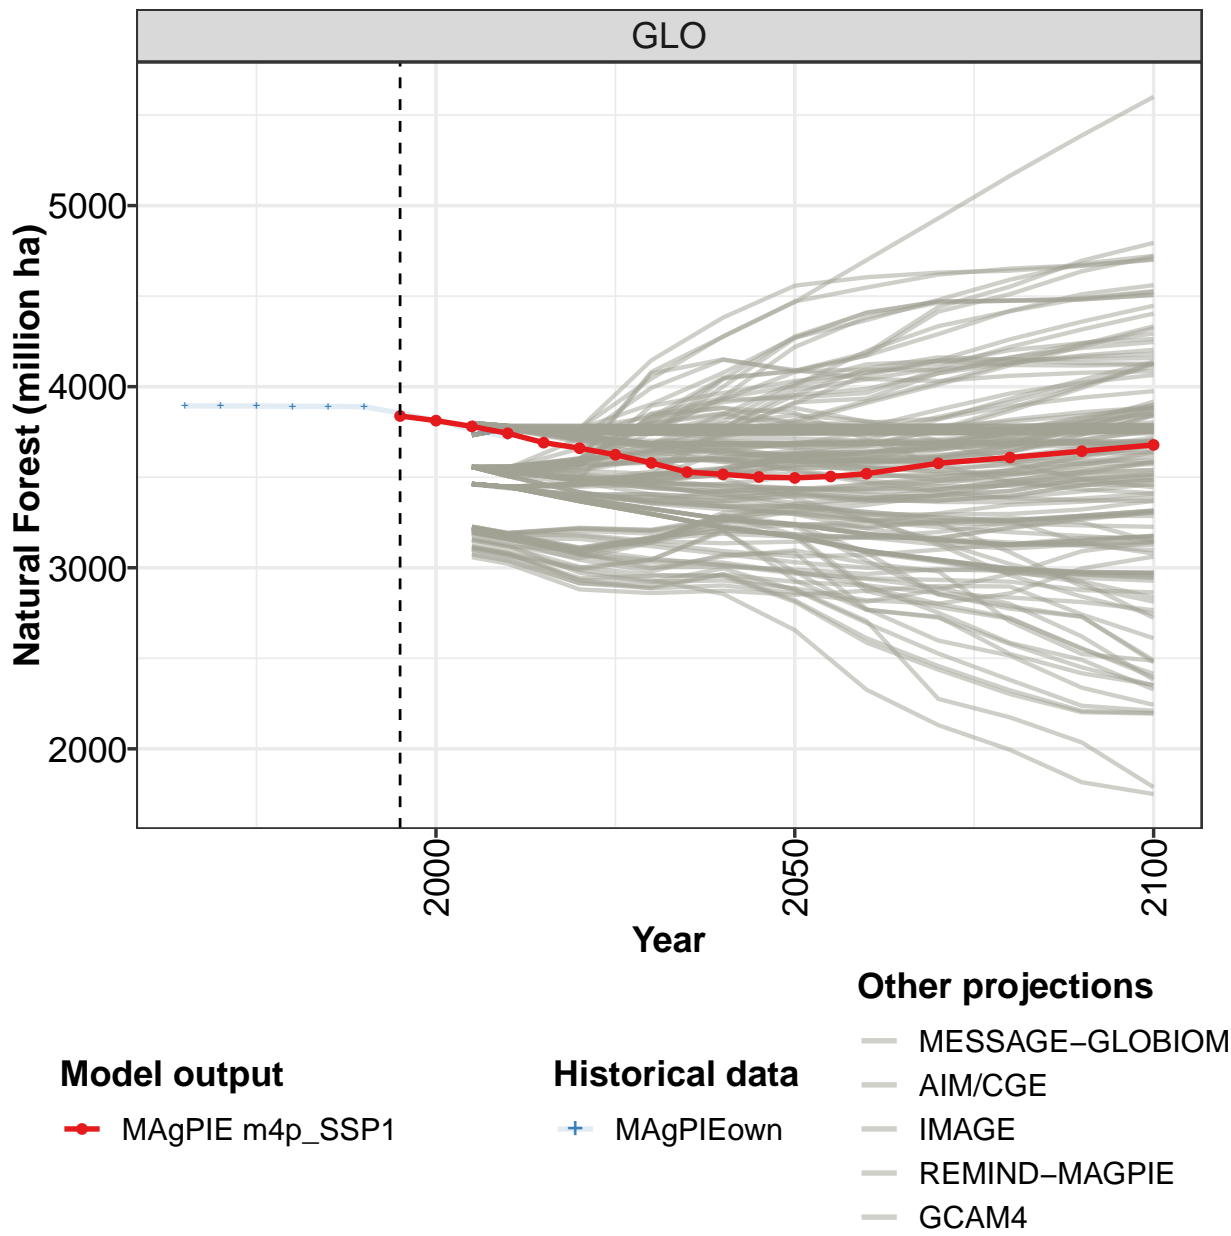



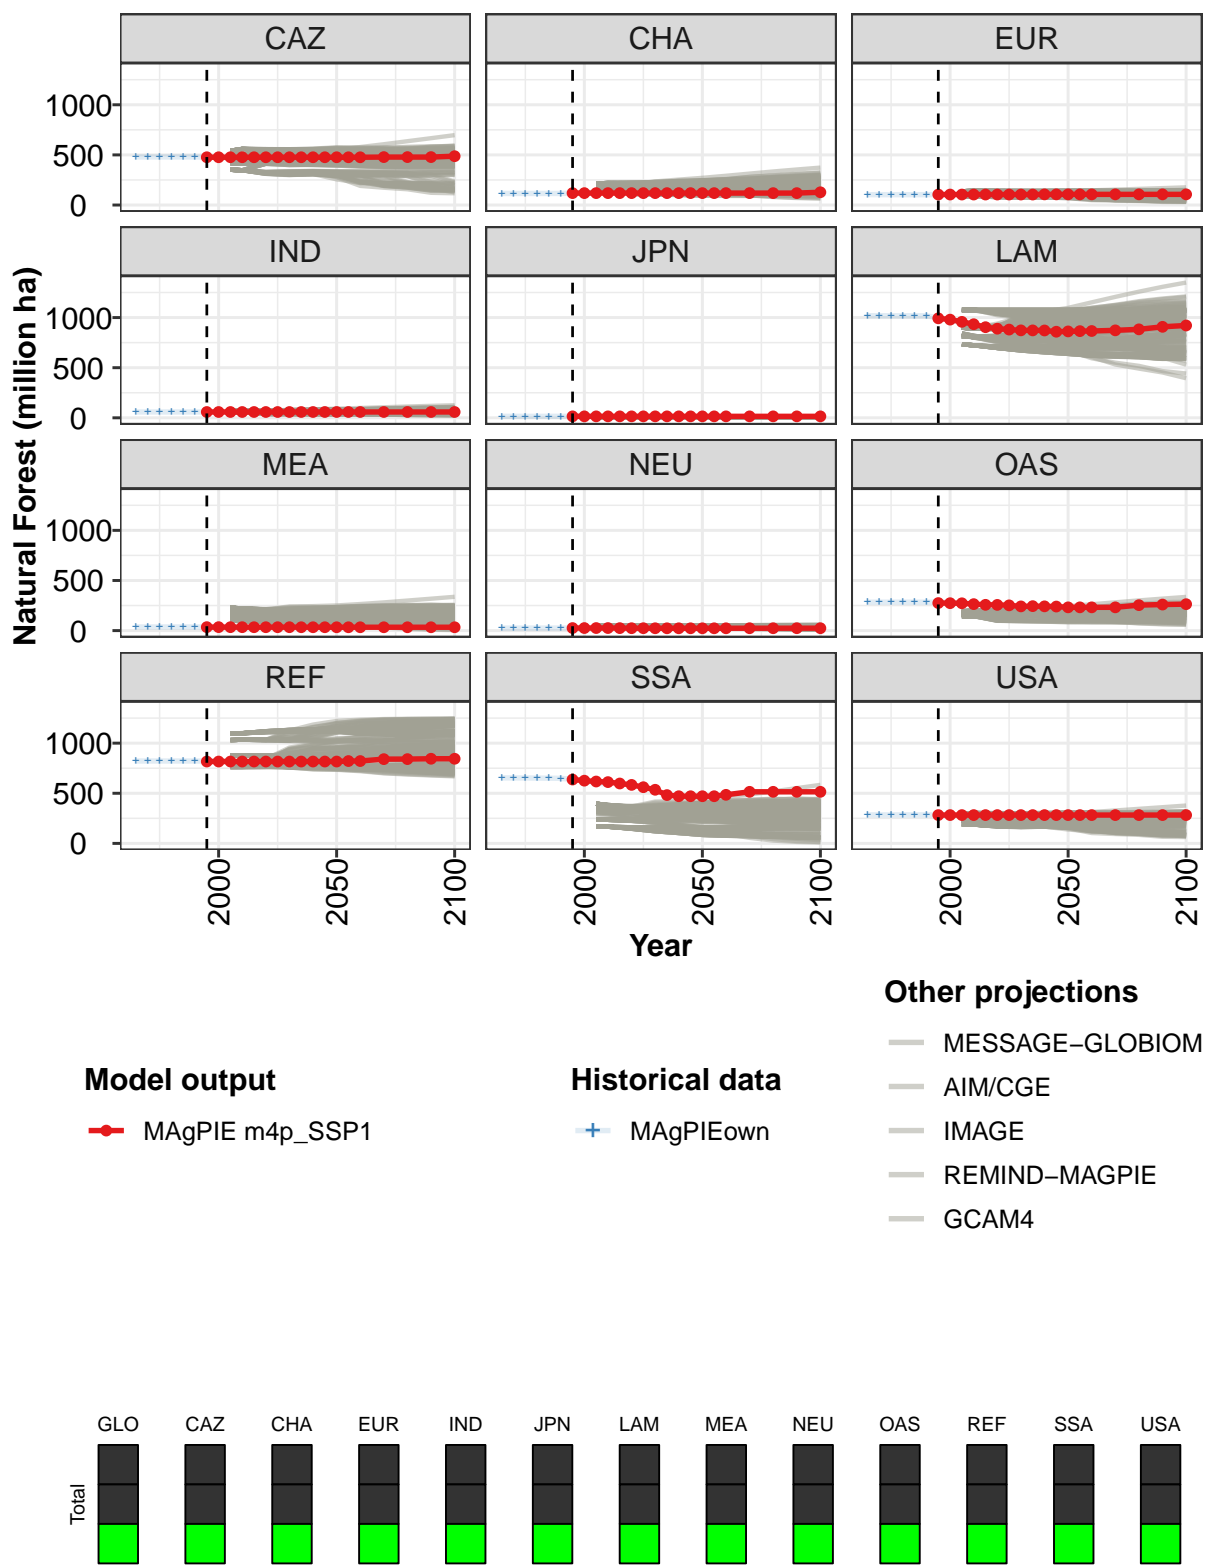

Figure 428: MAGPIE m4p\_SSP1 — Resources—Land Cover—Forest—Natural Forest (million ha)

|     | 1995 | 2000 | 2005 | 2010 | 2015 | 2020 | 2025 | 2030 | 2035 | 2040 | 2045 |
|-----|------|------|------|------|------|------|------|------|------|------|------|
| GLO | 3838 | 3812 | 3780 | 3742 | 3691 | 3660 | 3624 | 3579 | 3528 | 3516 | 3501 |
| CAZ | 477  | 477  | 477  | 477  | 477  | 477  | 477  | 477  | 477  | 477  | 477  |
| CHA | 119  | 119  | 119  | 119  | 119  | 119  | 119  | 119  | 119  | 119  | 119  |
| EUR | 105  | 105  | 105  | 105  | 105  | 105  | 105  | 105  | 105  | 106  | 106  |
| IND | 58   | 58   | 58   | 58   | 58   | 58   | 58   | 58   | 58   | 58   | 58   |
| JPN | 15   | 15   | 15   | 15   | 15   | 15   | 15   | 15   | 15   | 15   | 15   |
| LAM | 993  | 980  | 957  | 934  | 904  | 889  | 880  | 872  | 872  | 871  | 859  |
| MEA | 35   | 35   | 34   | 34   | 34   | 34   | 34   | 34   | 34   | 34   | 34   |
| NEU | 26   | 26   | 26   | 26   | 25   | 24   | 24   | 23   | 23   | 23   | 23   |
| OAS | 275  | 274  | 273  | 264  | 257  | 257  | 252  | 242  | 244  | 242  | 240  |
| REF | 817  | 817  | 817  | 817  | 817  | 817  | 817  | 817  | 817  | 817  | 817  |
| SSA | 637  | 626  | 617  | 612  | 598  | 584  | 561  | 535  | 482  | 471  | 471  |
| USA | 283  | 283  | 283  | 283  | 283  | 283  | 283  | 283  | 283  | 283  | 283  |

Table 1633: MAgPIE m4p\_SSP1 — Resources—Land Cover—Forest—Natural Forest (million ha) [PART 1/2]

|     | 2050 | 2055 | 2060 | 2070 | 2080 | 2090 | 2100 |
|-----|------|------|------|------|------|------|------|
| GLO | 3496 | 3504 | 3519 | 3577 | 3609 | 3644 | 3678 |
| CAZ | 477  | 477  | 477  | 478  | 478  | 478  | 487  |
| CHA | 119  | 119  | 119  | 119  | 119  | 119  | 127  |
| EUR | 106  | 106  | 106  | 106  | 106  | 106  | 106  |
| IND | 58   | 58   | 58   | 58   | 58   | 58   | 58   |
| JPN | 15   | 15   | 15   | 15   | 15   | 15   | 15   |
| LAM | 862  | 865  | 866  | 872  | 883  | 908  | 921  |
| MEA | 34   | 34   | 34   | 34   | 34   | 34   | 34   |
| NEU | 23   | 23   | 23   | 24   | 24   | 24   | 24   |
| OAS | 232  | 232  | 232  | 232  | 254  | 260  | 264  |
| REF | 817  | 822  | 822  | 841  | 841  | 845  | 845  |
| SSA | 471  | 471  | 485  | 515  | 515  | 515  | 515  |
| USA | 283  | 283  | 283  | 283  | 283  | 283  | 283  |

Table 1634: MAgPIE m4p\_SSP1 — Resources—Land Cover—Forest—Natural Forest (million ha) [PART 2/2]

|     | 1965 | 1970 | 1975 | 1980 | 1985 | 1990 | 1995 | 2000 | 2005 | 2010 |
|-----|------|------|------|------|------|------|------|------|------|------|
| GLO | 3894 | 3894 | 3893 | 3891 | 3891 | 3889 | 3853 | 3813 | 3762 | 3721 |
| CAZ | 479  | 479  | 479  | 479  | 479  | 479  | 477  | 474  | 470  | 463  |
| CHA | 115  | 115  | 115  | 115  | 115  | 115  | 119  | 123  | 126  | 128  |
| EUR | 103  | 103  | 103  | 103  | 103  | 103  | 105  | 106  | 105  | 105  |
| IND | 58   | 58   | 58   | 58   | 58   | 58   | 58   | 58   | 58   | 59   |
| JPN | 15   | 15   | 15   | 15   | 15   | 15   | 15   | 15   | 15   | 15   |
| LAM | 1018 | 1018 | 1018 | 1018 | 1018 | 1018 | 996  | 974  | 950  | 930  |
| MEA | 36   | 36   | 36   | 36   | 36   | 36   | 35   | 34   | 35   | 34   |
| NEU | 25   | 25   | 25   | 25   | 25   | 25   | 26   | 26   | 26   | 26   |
| OAS | 284  | 284  | 284  | 284  | 284  | 284  | 283  | 282  | 274  | 270  |
| REF | 822  | 822  | 822  | 822  | 822  | 822  | 821  | 820  | 818  | 821  |
| SSA | 654  | 653  | 653  | 651  | 650  | 649  | 637  | 621  | 605  | 587  |
| USA | 285  | 285  | 285  | 285  | 285  | 285  | 283  | 281  | 280  | 283  |

Table 1635: MAgPIEown — Resources—Land Cover—Forest—Natural Forest (million ha)

54.2.3 Natural Forest—Primary Forest

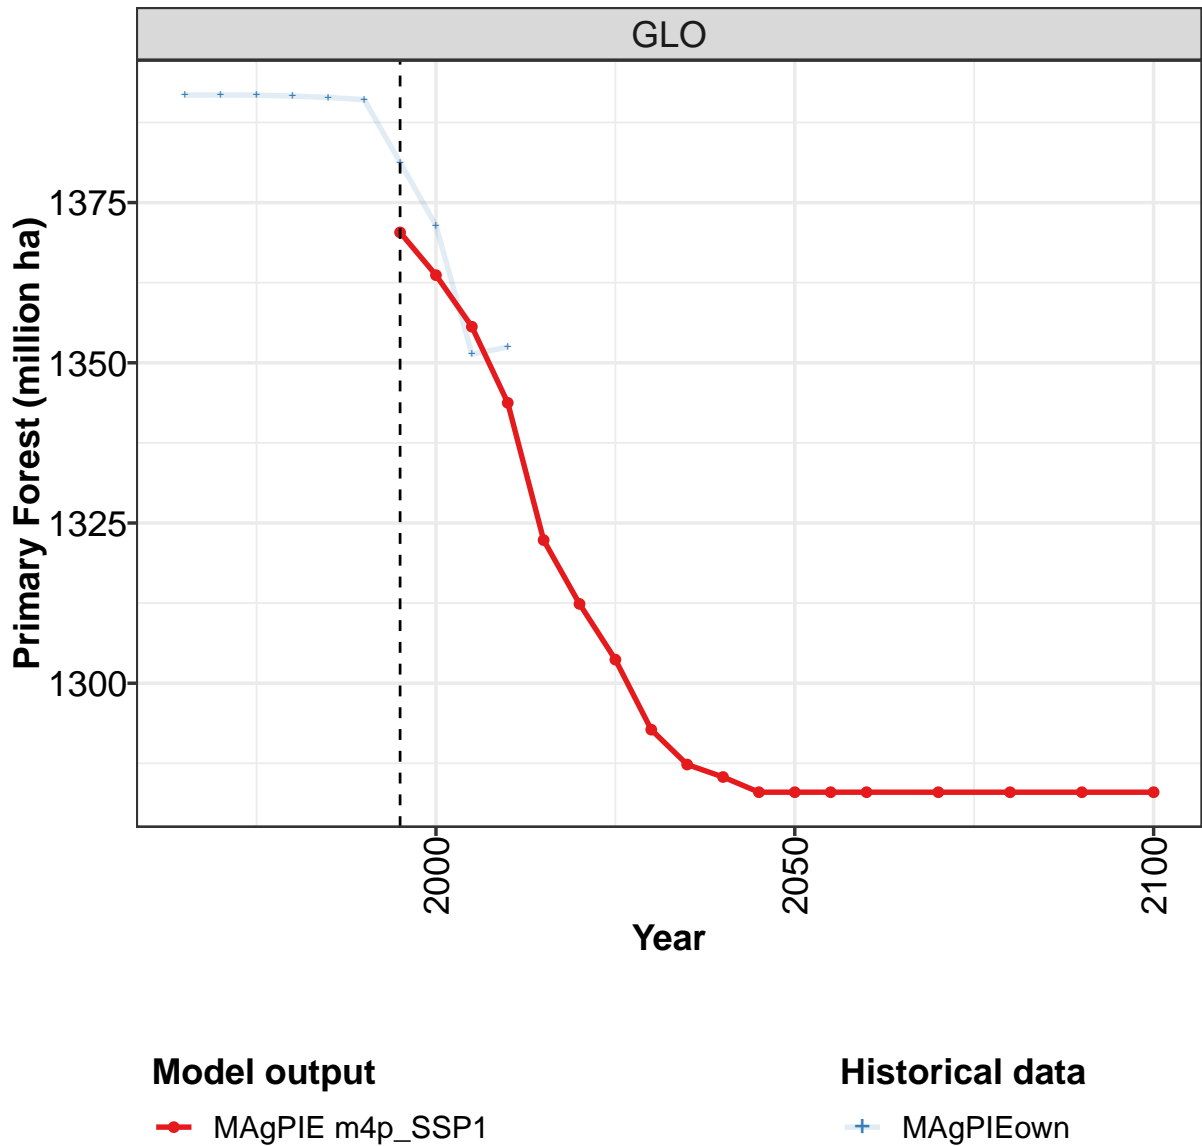

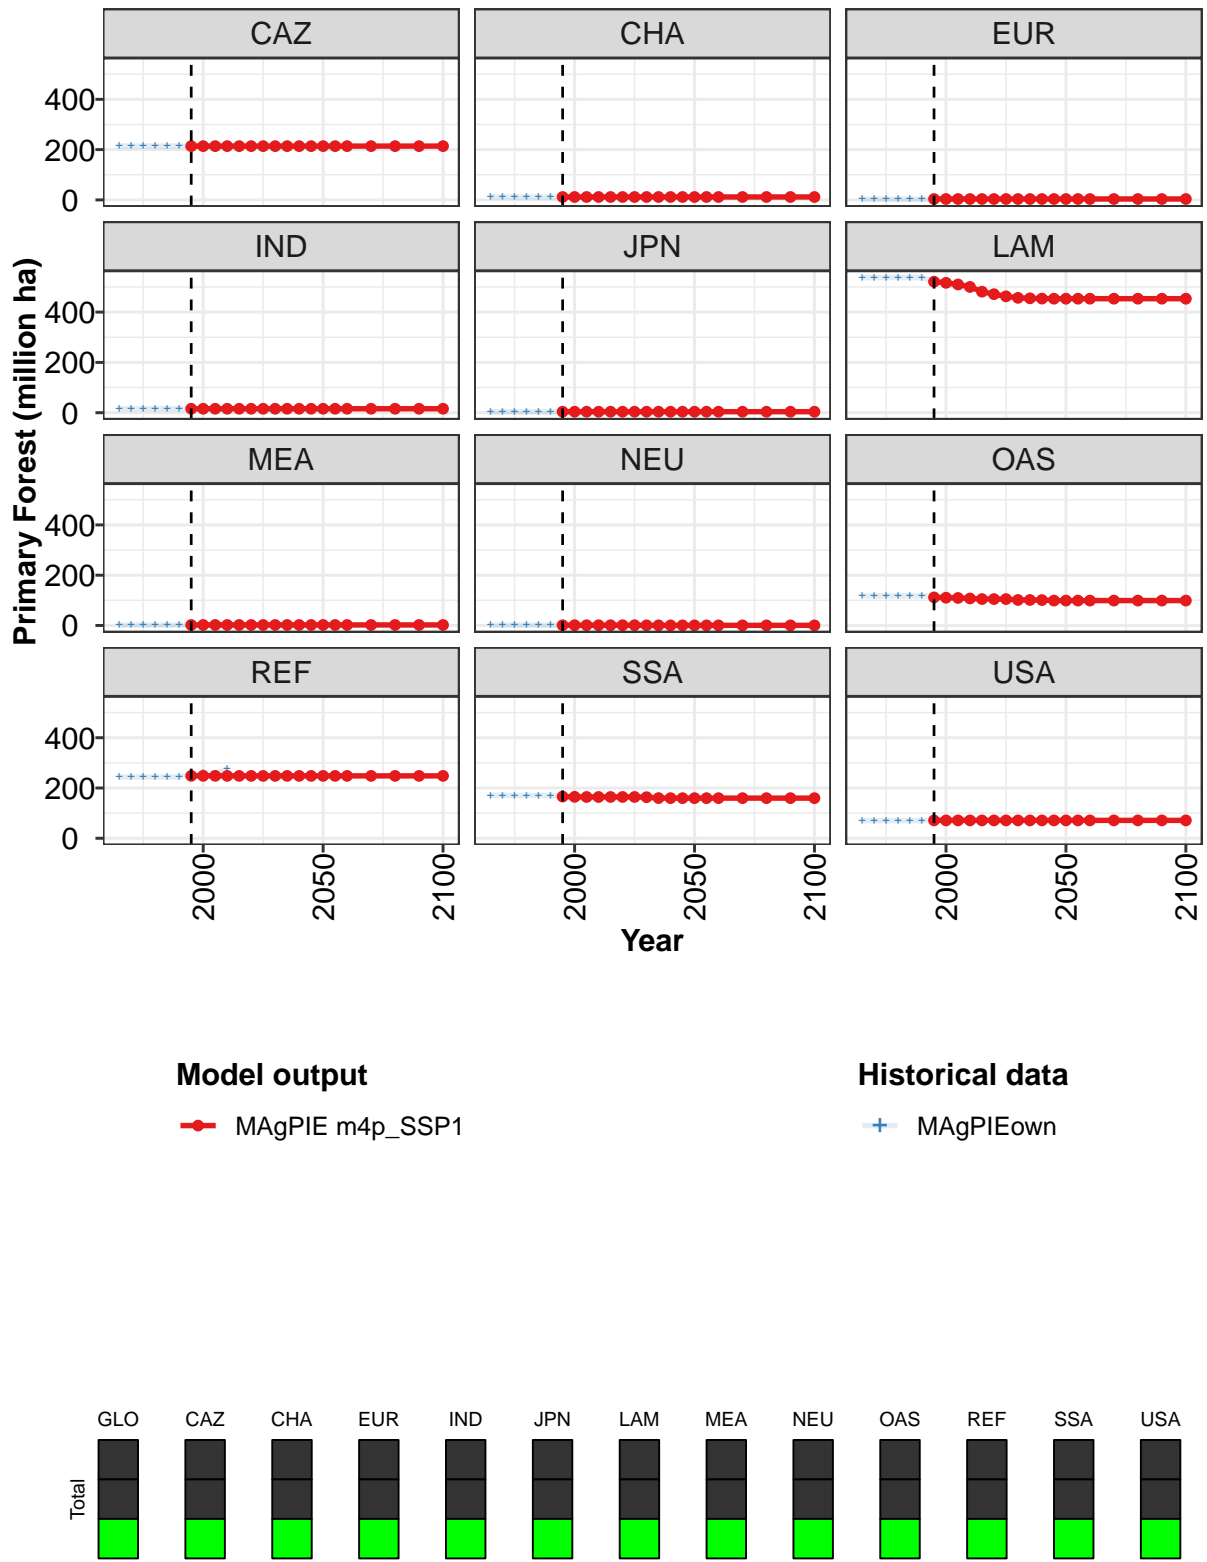

Figure 429: MAgPIE m4p\_SSP1 — Resources—Land Cover—Forest—Natural Forest—Primary Forest (million ha)

|     | 1995 | 2000 | 2005 | 2010 | 2015 | 2020 | 2025 | 2030 | 2035 | 2040 | 2045 |
|-----|------|------|------|------|------|------|------|------|------|------|------|
| GLO | 1370 | 1364 | 1356 | 1344 | 1322 | 1312 | 1304 | 1293 | 1287 | 1285 | 1283 |
| CAZ | 214  | 214  | 214  | 214  | 214  | 214  | 214  | 214  | 214  | 214  | 214  |
| CHA | 12   | 12   | 12   | 12   | 12   | 12   | 12   | 12   | 12   | 12   | 12   |
| EUR | 4    | 4    | 4    | 4    | 4    | 4    | 4    | 4    | 4    | 4    | 4    |
| IND | 16   | 16   | 16   | 16   | 16   | 16   | 16   | 16   | 16   | 16   | 16   |
| JPN | 4    | 4    | 4    | 4    | 4    | 4    | 4    | 4    | 4    | 4    | 4    |
| LAM | 521  | 517  | 510  | 500  | 481  | 471  | 463  | 457  | 455  | 454  | 453  |
| MEA | 2    | 2    | 2    | 2    | 2    | 2    | 2    | 2    | 2    | 2    | 2    |
| NEU | 1    | 1    | 1    | 1    | 1    | 1    | 1    | 1    | 1    | 0    | 0    |
| OAS | 112  | 111  | 110  | 108  | 105  | 105  | 105  | 102  | 101  | 101  | 99   |
| REF | 248  | 248  | 248  | 248  | 248  | 248  | 248  | 248  | 248  | 248  | 248  |
| SSA | 166  | 165  | 164  | 164  | 164  | 164  | 164  | 163  | 160  | 160  | 160  |
| USA | 71   | 71   | 71   | 71   | 71   | 71   | 71   | 71   | 71   | 71   | 71   |

Table 1636: MAgPIE m4p\_SSP1 — Resources—Land Cover—Forest—Natural Forest—Primary Forest (million ha) [PART 1/2]

|     | 2050 | 2055 | 2060 | 2070 | 2080 | 2090 | 2100 |
|-----|------|------|------|------|------|------|------|
| GLO | 1283 | 1283 | 1283 | 1283 | 1283 | 1283 | 1283 |
| CAZ | 214  | 214  | 214  | 214  | 214  | 214  | 214  |
| CHA | 12   | 12   | 12   | 12   | 12   | 12   | 12   |
| EUR | 4    | 4    | 4    | 4    | 4    | 4    | 4    |
| IND | 16   | 16   | 16   | 16   | 16   | 16   | 16   |
| JPN | 4    | 4    | 4    | 4    | 4    | 4    | 4    |
| LAM | 453  | 453  | 453  | 453  | 453  | 453  | 453  |
| MEA | 2    | 2    | 2    | 2    | 2    | 2    | 2    |
| NEU | 0    | 0    | 0    | 0    | 0    | 0    | 0    |
| OAS | 99   | 99   | 99   | 99   | 99   | 99   | 99   |
| REF | 248  | 248  | 248  | 248  | 248  | 248  | 248  |
| SSA | 160  | 160  | 160  | 160  | 160  | 160  | 160  |
| USA | 71   | 71   | 71   | 71   | 71   | 71   | 71   |

Table 1637: MAgPIE m4p\_SSP1 — Resources—Land Cover—Forest—Natural Forest—Primary Forest (million ha) [PART 2/2]

|     | 1965 | 1970 | 1975 | 1980 | 1985 | 1990 | 1995 | 2000 | 2005 | 2010 |
|-----|------|------|------|------|------|------|------|------|------|------|
| GLO | 1392 | 1392 | 1392 | 1392 | 1391 | 1391 | 1381 | 1371 | 1351 | 1352 |
| CAZ | 214  | 214  | 214  | 214  | 214  | 214  | 214  | 214  | 214  | 213  |
| CHA | 12   | 12   | 12   | 12   | 12   | 12   | 12   | 12   | 12   | 12   |
| EUR | 4    | 4    | 4    | 4    | 4    | 4    | 4    | 4    | 4    | 4    |
| IND | 16   | 16   | 16   | 16   | 16   | 16   | 16   | 16   | 16   | 16   |
| JPN | 4    | 4    | 4    | 4    | 4    | 4    | 4    | 4    | 4    | 5    |
| LAM | 537  | 537  | 537  | 537  | 537  | 537  | 525  | 512  | 500  | 490  |
| MEA | 2    | 2    | 2    | 2    | 2    | 2    | 2    | 2    | 2    | 2    |
| NEU | 1    | 1    | 1    | 1    | 1    | 1    | 1    | 1    | 1    | 1    |
| OAS | 118  | 118  | 118  | 118  | 118  | 118  | 115  | 113  | 108  | 106  |
| REF | 244  | 244  | 244  | 244  | 244  | 244  | 252  | 260  | 258  | 276  |
| SSA | 171  | 171  | 170  | 170  | 170  | 170  | 166  | 162  | 158  | 153  |
| USA | 70   | 70   | 70   | 70   | 70   | 70   | 71   | 72   | 76   | 75   |

Table 1638: MAgPIEown — Resources—Land Cover—Forest—Natural Forest—Primary Forest (million ha)

54.2.4 Natural Forest—Secondary Forest

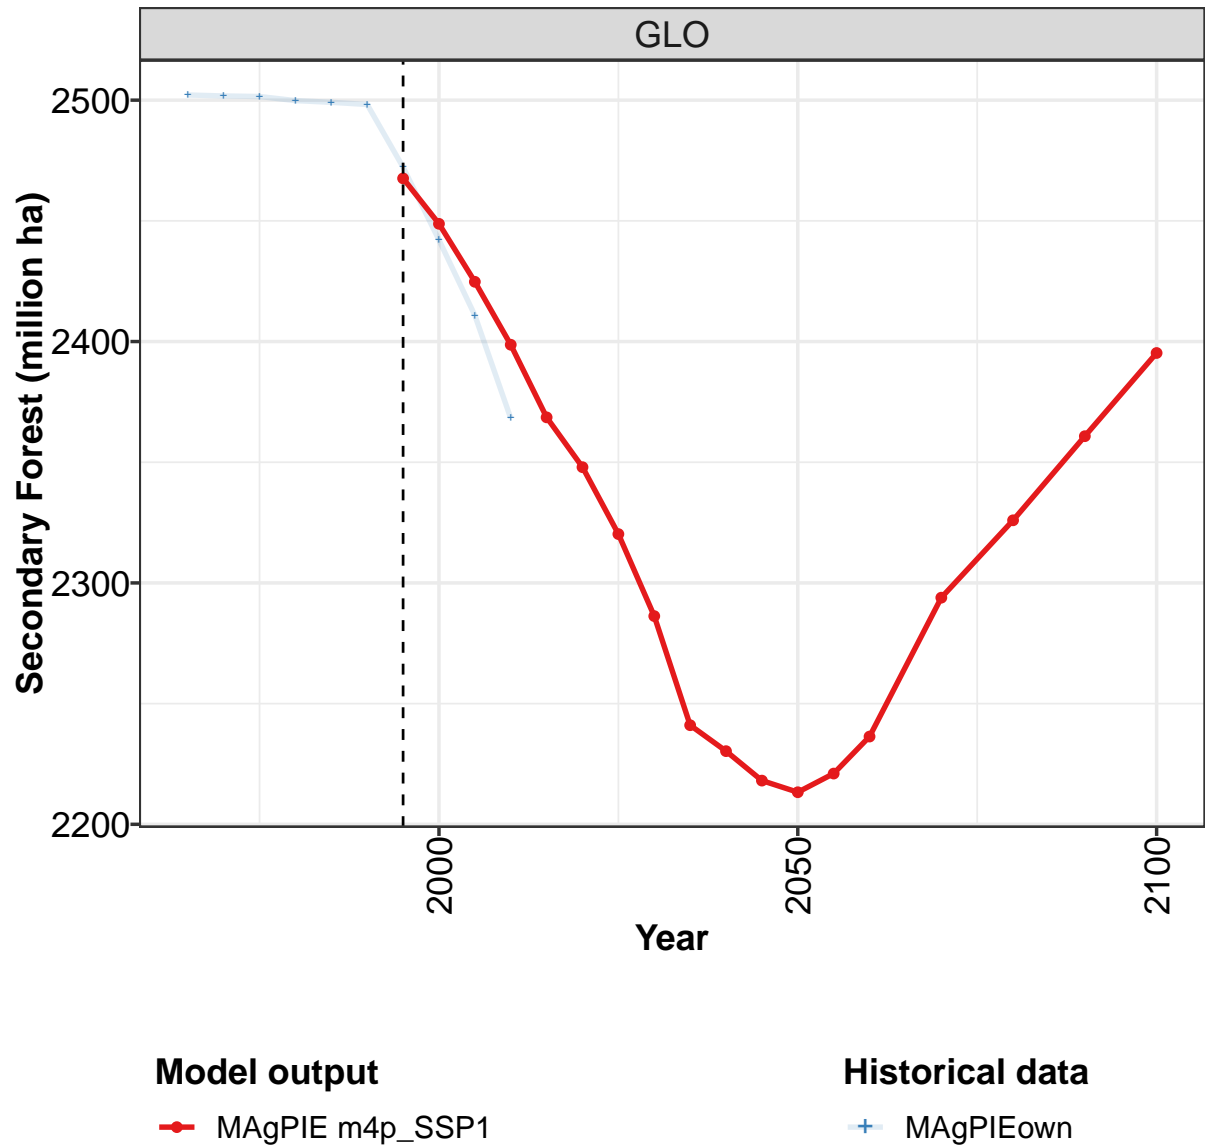

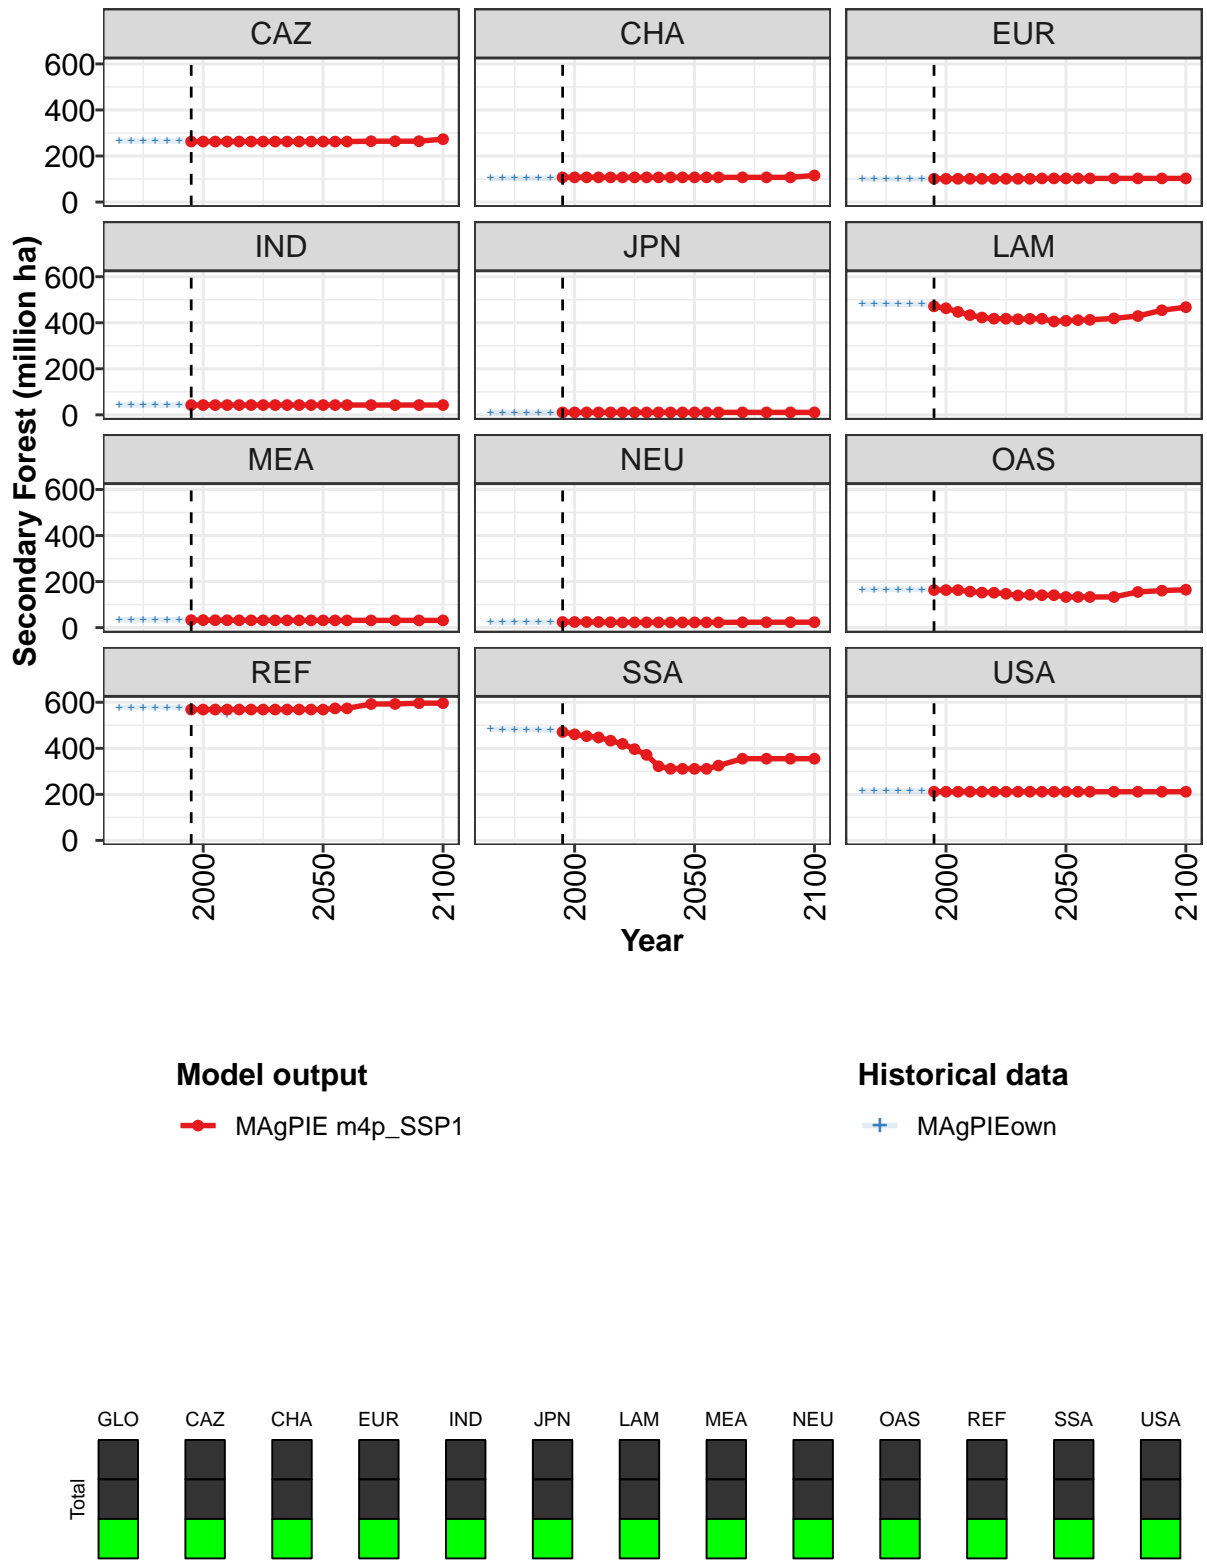

Figure 430: MAGPIE m4p\_SSP1 — Resources—Land Cover—Forest—Natural Forest—Secondary Forest (million ha)

|     | 1995 | 2000 | 2005 | 2010 | 2015 | 2020 | 2025 | 2030 | 2035 | 2040 | 2045 |
|-----|------|------|------|------|------|------|------|------|------|------|------|
| GLO | 2468 | 2449 | 2425 | 2399 | 2369 | 2348 | 2320 | 2286 | 2241 | 2230 | 2218 |
| CAZ | 263  | 263  | 263  | 263  | 263  | 263  | 263  | 263  | 263  | 263  | 263  |
| CHA | 107  | 107  | 107  | 107  | 107  | 107  | 107  | 107  | 107  | 107  | 107  |
| EUR | 101  | 101  | 101  | 101  | 101  | 101  | 101  | 101  | 101  | 103  | 103  |
| IND | 43   | 43   | 43   | 43   | 43   | 43   | 43   | 43   | 43   | 43   | 43   |
| JPN | 11   | 11   | 11   | 11   | 11   | 11   | 11   | 11   | 11   | 11   | 11   |
| LAM | 471  | 463  | 447  | 433  | 423  | 418  | 418  | 415  | 417  | 418  | 405  |
| MEA | 33   | 33   | 32   | 32   | 32   | 32   | 32   | 32   | 32   | 32   | 32   |
| NEU | 24   | 24   | 24   | 24   | 24   | 23   | 23   | 23   | 23   | 23   | 23   |
| OAS | 163  | 163  | 163  | 157  | 152  | 152  | 147  | 140  | 143  | 141  | 141  |
| REF | 569  | 569  | 569  | 569  | 569  | 569  | 569  | 569  | 569  | 569  | 569  |
| SSA | 471  | 461  | 453  | 447  | 433  | 419  | 396  | 372  | 322  | 311  | 311  |
| USA | 212  | 212  | 212  | 212  | 212  | 212  | 212  | 212  | 212  | 212  | 212  |

Table 1639: MAgPIE m4p\_SSP1 — Resources—Land Cover—Forest—Natural Forest—Secondary Forest (million ha) [PART 1/2]

|     | 2050 | 2055 | 2060 | 2070 | 2080 | 2090 | 2100 |
|-----|------|------|------|------|------|------|------|
| GLO | 2213 | 2221 | 2236 | 2294 | 2326 | 2361 | 2395 |
| CAZ | 263  | 263  | 263  | 264  | 264  | 264  | 273  |
| CHA | 107  | 107  | 107  | 107  | 107  | 107  | 116  |
| EUR | 103  | 103  | 103  | 103  | 103  | 103  | 103  |
| IND | 43   | 43   | 43   | 43   | 43   | 43   | 43   |
| JPN | 11   | 11   | 11   | 11   | 11   | 11   | 11   |
| LAM | 409  | 411  | 413  | 419  | 429  | 454  | 468  |
| MEA | 31   | 31   | 31   | 31   | 31   | 31   | 31   |
| NEU | 23   | 23   | 23   | 23   | 23   | 24   | 24   |
| OAS | 133  | 133  | 133  | 133  | 155  | 161  | 165  |
| REF | 569  | 574  | 574  | 593  | 593  | 596  | 596  |
| SSA | 311  | 311  | 325  | 355  | 355  | 355  | 355  |
| USA | 212  | 212  | 212  | 212  | 212  | 212  | 212  |

Table 1640: MAgPIE m4p\_SSP1 — Resources—Land Cover—Forest—Natural Forest—Secondary Forest (million ha) [PART 2/2]

|     | 1965 | 1970 | 1975 | 1980 | 1985 | 1990 | 1995 | 2000 | 2005 | 2010 |
|-----|------|------|------|------|------|------|------|------|------|------|
| GLO | 2502 | 2502 | 2502 | 2500 | 2499 | 2498 | 2472 | 2442 | 2411 | 2368 |
| CAZ | 265  | 265  | 265  | 265  | 265  | 265  | 263  | 260  | 256  | 249  |
| CHA | 104  | 104  | 104  | 104  | 104  | 104  | 107  | 111  | 114  | 116  |
| EUR | 100  | 100  | 100  | 100  | 100  | 100  | 101  | 102  | 101  | 101  |
| IND | 43   | 43   | 43   | 43   | 43   | 43   | 43   | 43   | 43   | 43   |
| JPN | 11   | 11   | 11   | 11   | 11   | 11   | 11   | 10   | 10   | 10   |
| LAM | 481  | 481  | 481  | 481  | 481  | 481  | 471  | 462  | 451  | 440  |
| MEA | 34   | 34   | 34   | 34   | 34   | 34   | 33   | 32   | 33   | 32   |
| NEU | 24   | 24   | 24   | 24   | 24   | 24   | 24   | 25   | 25   | 25   |
| OAS | 166  | 166  | 166  | 166  | 166  | 166  | 167  | 169  | 166  | 165  |
| REF | 578  | 578  | 578  | 578  | 578  | 578  | 569  | 559  | 560  | 546  |
| SSA | 483  | 483  | 482  | 481  | 480  | 479  | 471  | 460  | 448  | 434  |
| USA | 214  | 214  | 214  | 214  | 214  | 214  | 212  | 209  | 205  | 208  |

Table 1641: MAgPIEown — Resources—Land Cover—Forest—Natural Forest—Secondary Forest (million ha)



54.3 Other Land

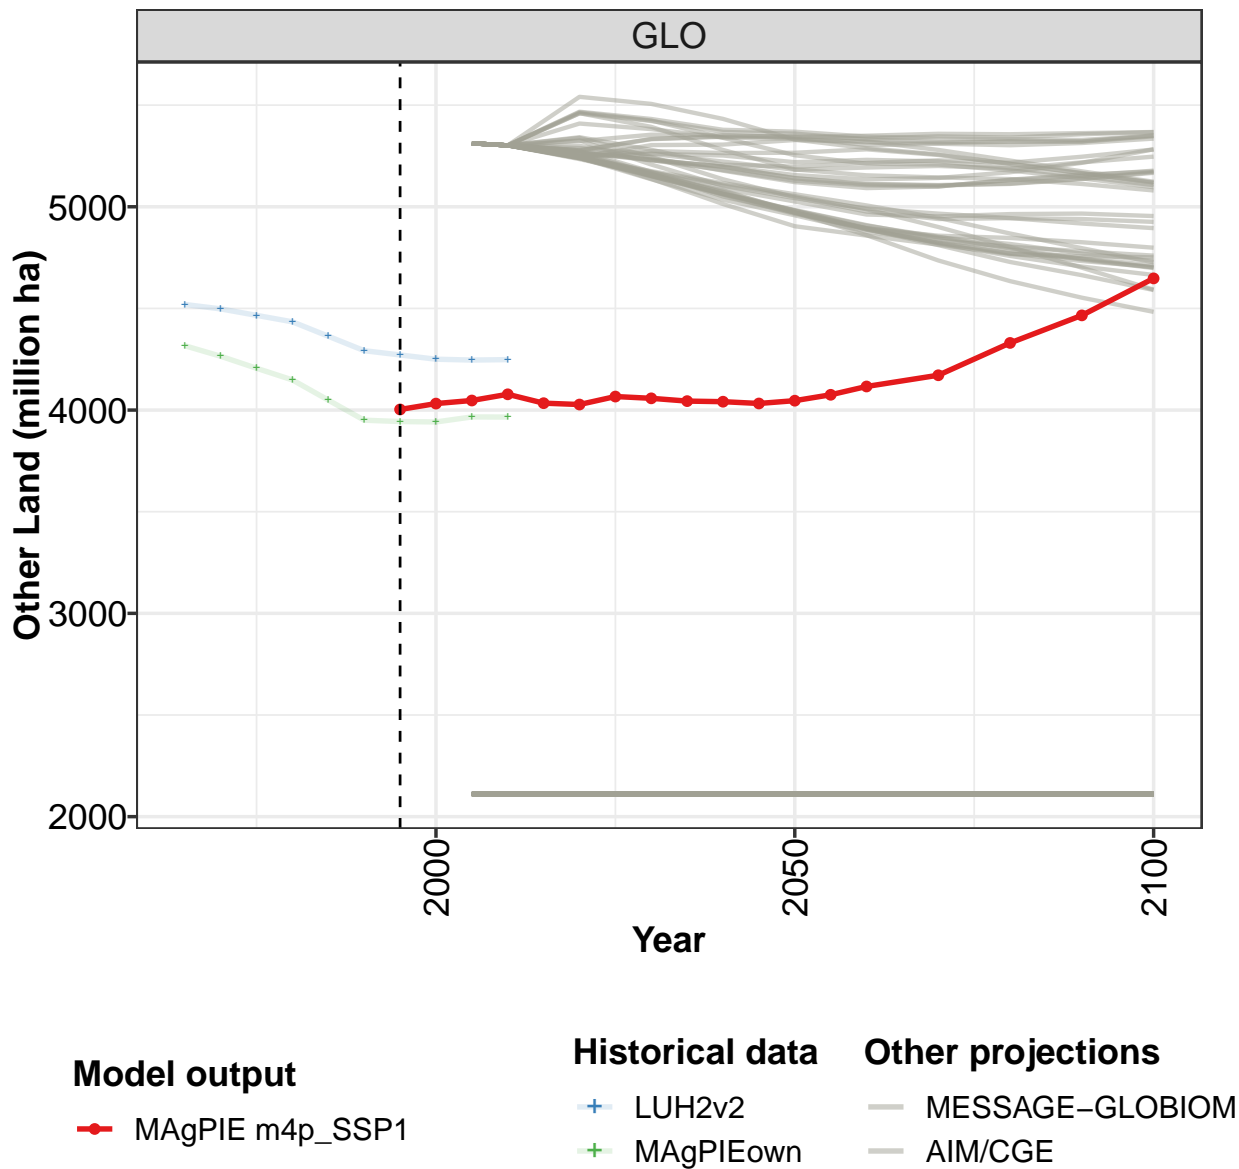

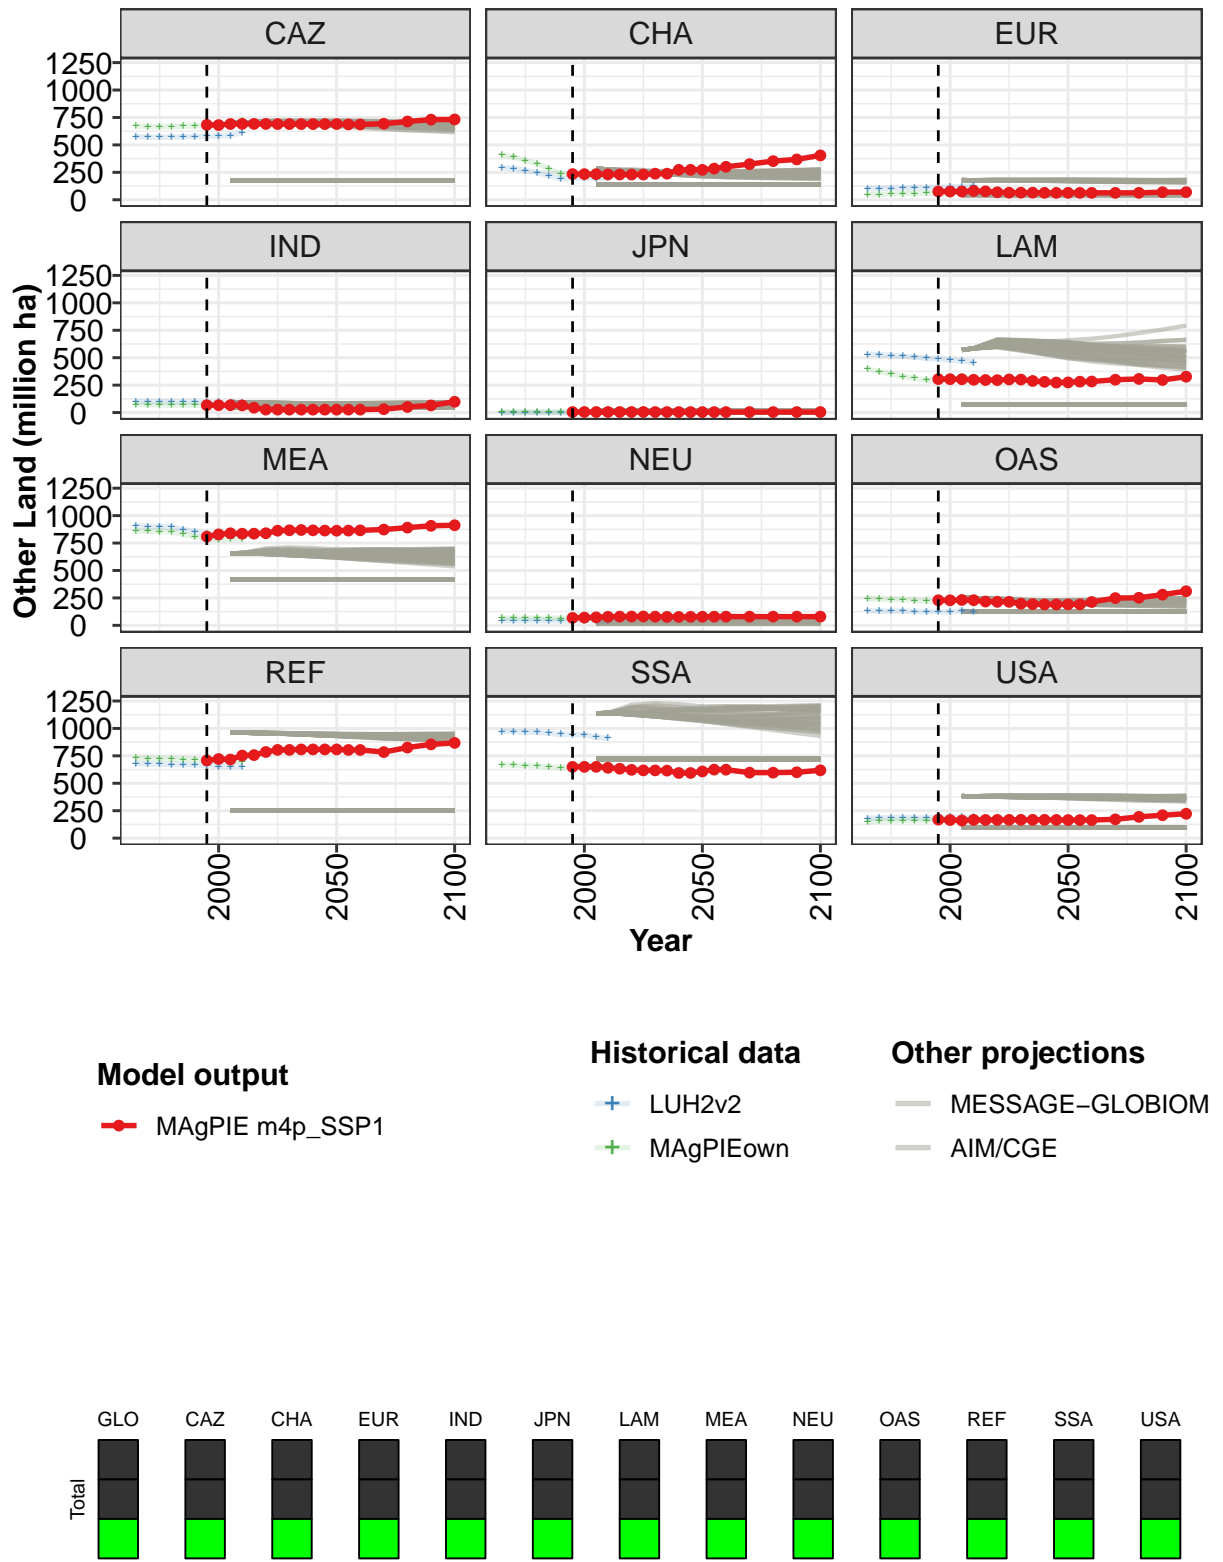

Figure 431: MAgPIE m4p\_SSP1 — Resources—Land Cover—Other Land (million ha)

|     | 1995 | 2000 | 2005 | 2010 | 2015 | 2020 | 2025 | 2030 | 2035 | 2040 | 2045 |
|-----|------|------|------|------|------|------|------|------|------|------|------|
| GLO | 4003 | 4032 | 4047 | 4078 | 4034 | 4027 | 4067 | 4058 | 4044 | 4041 | 4032 |
| CAZ | 683  | 681  | 690  | 692  | 691  | 691  | 690  | 690  | 690  | 690  | 690  |
| CHA | 234  | 234  | 234  | 231  | 231  | 230  | 230  | 238  | 238  | 273  | 273  |
| EUR | 76   | 75   | 75   | 80   | 77   | 68   | 65   | 65   | 65   | 63   | 63   |
| IND | 67   | 67   | 67   | 65   | 45   | 27   | 27   | 27   | 27   | 27   | 27   |
| JPN | 5    | 5    | 5    | 5    | 5    | 5    | 5    | 5    | 5    | 5    | 5    |
| LAM | 305  | 304  | 304  | 299  | 297  | 296  | 302  | 301  | 288  | 280  | 274  |
| MEA | 809  | 829  | 839  | 836  | 836  | 840  | 863  | 867  | 869  | 866  | 864  |
| NEU | 68   | 71   | 73   | 78   | 80   | 80   | 81   | 79   | 78   | 77   | 78   |
| OAS | 229  | 229  | 232  | 229  | 217  | 214  | 214  | 198  | 194  | 191  | 191  |
| REF | 709  | 721  | 717  | 753  | 757  | 786  | 804  | 804  | 809  | 809  | 809  |
| SSA | 650  | 650  | 650  | 642  | 633  | 623  | 618  | 617  | 616  | 594  | 594  |
| USA | 169  | 165  | 161  | 167  | 166  | 167  | 167  | 167  | 167  | 167  | 166  |

Table 1642: MAgPIE m4p\_SSP1 — Resources—Land Cover—Other Land (million ha) [PART 1/2]

|     | 2050 | 2055 | 2060 | 2070 | 2080 | 2090 | 2100 |
|-----|------|------|------|------|------|------|------|
| GLO | 4046 | 4075 | 4116 | 4171 | 4330 | 4466 | 4648 |
| CAZ | 690  | 687  | 687  | 693  | 714  | 731  | 732  |
| CHA | 273  | 284  | 301  | 325  | 352  | 368  | 405  |
| EUR | 63   | 63   | 63   | 63   | 63   | 69   | 69   |
| IND | 27   | 27   | 27   | 31   | 51   | 65   | 98   |
| JPN | 5    | 5    | 5    | 5    | 5    | 5    | 5    |
| LAM | 275  | 282  | 283  | 299  | 306  | 297  | 327  |
| MEA | 863  | 864  | 866  | 873  | 891  | 907  | 912  |
| NEU | 79   | 79   | 80   | 80   | 80   | 80   | 80   |
| OAS | 191  | 191  | 213  | 249  | 252  | 280  | 311  |
| REF | 809  | 804  | 804  | 785  | 826  | 855  | 868  |
| SSA | 608  | 625  | 624  | 597  | 597  | 601  | 618  |
| USA | 165  | 165  | 165  | 171  | 194  | 209  | 222  |

Table 1643: MAgPIE m4p\_SSP1 — Resources—Land Cover—Other Land (million ha) [PART 2/2]

|     | 1965 | 1970 | 1975 | 1980 | 1985 | 1990 | 1995 | 2000 | 2005 | 2010 |
|-----|------|------|------|------|------|------|------|------|------|------|
| GLO | 4519 | 4498 | 4466 | 4434 | 4363 | 4292 | 4271 | 4250 | 4246 | 4248 |
| CAZ | 576  | 571  | 571  | 571  | 574  | 577  | 579  | 581  | 585  | 614  |
| CHA | 295  | 285  | 268  | 250  | 221  | 192  | 194  | 197  | 196  | 200  |
| EUR | 101  | 103  | 105  | 107  | 108  | 110  | 113  | 116  | 122  | 125  |
| IND | 101  | 99   | 98   | 97   | 96   | 96   | 95   | 94   | 93   | 93   |
| JPN | 0    | 0    | 0    | 0    | 0    | 0    | 0    | 0    | 0    | 0    |
| LAM | 531  | 528  | 521  | 513  | 505  | 496  | 487  | 478  | 472  | 456  |
| MEA | 904  | 902  | 900  | 897  | 874  | 852  | 839  | 825  | 835  | 835  |
| NEU | 45   | 44   | 44   | 44   | 44   | 43   | 43   | 44   | 43   | 45   |
| OAS | 133  | 131  | 130  | 130  | 128  | 126  | 125  | 125  | 133  | 122  |
| REF | 680  | 677  | 674  | 672  | 670  | 668  | 661  | 654  | 652  | 654  |
| SSA | 974  | 972  | 968  | 965  | 956  | 947  | 945  | 943  | 922  | 911  |
| USA | 179  | 185  | 187  | 189  | 188  | 186  | 190  | 193  | 192  | 192  |

Table 1644: LUH2v2 — Resources—Land Cover—Other Land (million ha)

|     | 1965 | 1970 | 1975 | 1980 | 1985 | 1990 | 1995 | 2000 | 2005 | 2010 |
|-----|------|------|------|------|------|------|------|------|------|------|
| GLO | 4317 | 4265 | 4206 | 4148 | 4049 | 3950 | 3944 | 3941 | 3966 | 3966 |
| CAZ | 672  | 667  | 667  | 667  | 670  | 674  | 676  | 678  | 687  | 724  |
| CHA | 406  | 389  | 359  | 329  | 283  | 237  | 231  | 225  | 207  | 206  |
| EUR | 47   | 50   | 53   | 56   | 58   | 60   | 61   | 62   | 69   | 69   |
| IND | 74   | 72   | 70   | 69   | 69   | 68   | 66   | 65   | 61   | 59   |
| JPN | 4    | 4    | 4    | 4    | 4    | 4    | 5    | 5    | 5    | 5    |
| LAM | 397  | 374  | 352  | 330  | 313  | 296  | 302  | 308  | 325  | 319  |
| MEA | 860  | 858  | 855  | 853  | 830  | 807  | 795  | 782  | 791  | 791  |
| NEU | 66   | 65   | 65   | 65   | 65   | 64   | 65   | 65   | 64   | 65   |
| OAS | 243  | 239  | 237  | 235  | 228  | 220  | 218  | 216  | 229  | 201  |
| REF | 730  | 726  | 723  | 720  | 718  | 716  | 708  | 700  | 704  | 699  |
| SSA | 669  | 665  | 661  | 658  | 649  | 641  | 652  | 666  | 656  | 659  |
| USA | 149  | 156  | 159  | 161  | 161  | 162  | 165  | 169  | 170  | 168  |

Table 1645: MAgPIEown — Resources—Land Cover—Other Land (million ha)

54.4 Pastures and Rangelands

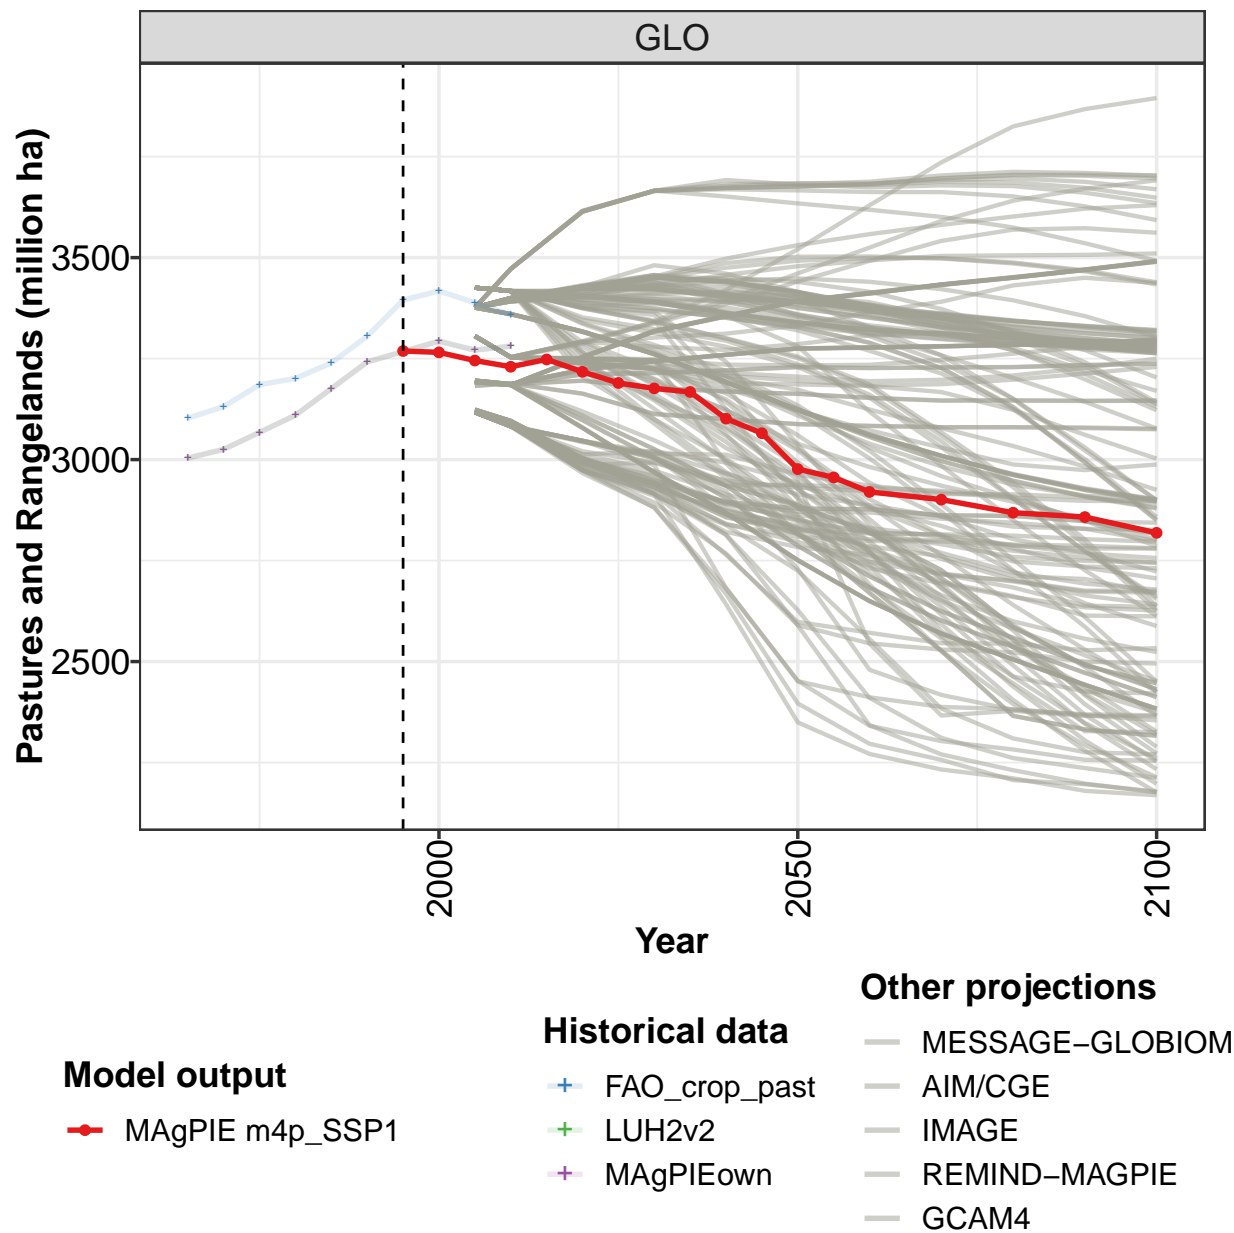

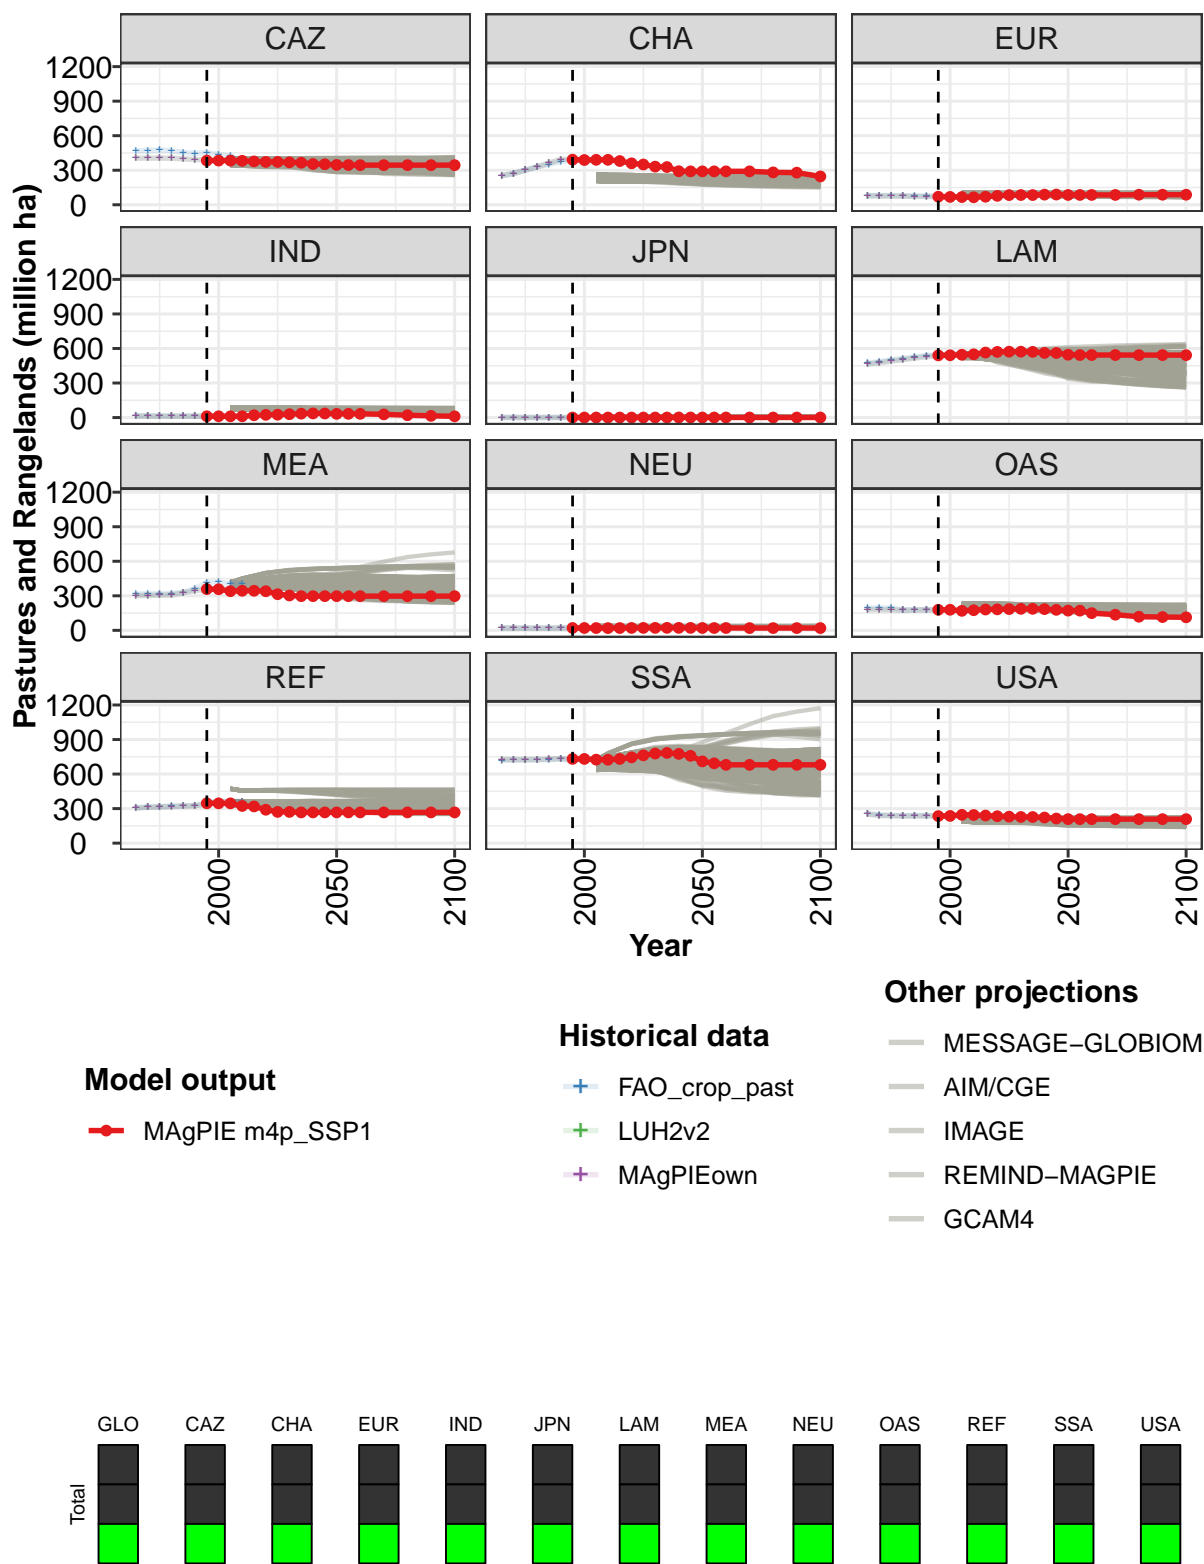

Figure 432: MAgPIE m4p\_SSP1 — Resources—Land Cover—Pastures and Rangelands (million ha)

|     | 1995 | 2000 | 2005 | 2010 | 2015 | 2020 | 2025 | 2030 | 2035 | 2040 | 2045 |
|-----|------|------|------|------|------|------|------|------|------|------|------|
| GLO | 3269 | 3265 | 3245 | 3230 | 3248 | 3217 | 3190 | 3176 | 3168 | 3101 | 3065 |
| CAZ | 384  | 384  | 384  | 382  | 377  | 372  | 372  | 369  | 365  | 354  | 352  |
| CHA | 392  | 389  | 391  | 391  | 380  | 360  | 350  | 331  | 328  | 292  | 290  |
| EUR | 70   | 68   | 67   | 65   | 70   | 77   | 84   | 85   | 85   | 88   | 89   |
| IND | 12   | 12   | 11   | 11   | 20   | 24   | 25   | 29   | 34   | 36   | 35   |
| JPN | 0    | 0    | 0    | 0    | 0    | 0    | 0    | 1    | 1    | 1    | 1    |
| LAM | 540  | 541  | 546  | 550  | 565  | 570  | 572  | 572  | 571  | 562  | 561  |
| MEA | 358  | 357  | 340  | 344  | 344  | 340  | 314  | 303  | 297  | 297  | 297  |
| NEU | 21   | 21   | 20   | 20   | 20   | 21   | 22   | 22   | 22   | 22   | 21   |
| OAS | 179  | 179  | 170  | 175  | 181  | 183  | 185  | 187  | 187  | 184  | 178  |
| REF | 346  | 346  | 346  | 323  | 319  | 290  | 272  | 272  | 267  | 267  | 267  |
| SSA | 732  | 732  | 725  | 725  | 731  | 745  | 763  | 778  | 784  | 776  | 759  |
| USA | 235  | 237  | 246  | 245  | 240  | 234  | 230  | 228  | 227  | 223  | 214  |

Table 1646: MAgPIE m4p\_SSP1 — Resources—Land Cover—Pastures and Rangelands (million ha) [PART 1/2]

|     | 2050 | 2055 | 2060 | 2070 | 2080 | 2090 | 2100 |
|-----|------|------|------|------|------|------|------|
| GLO | 2977 | 2956 | 2920 | 2901 | 2869 | 2858 | 2819 |
| CAZ | 346  | 345  | 344  | 344  | 344  | 344  | 344  |
| CHA | 290  | 290  | 290  | 290  | 282  | 279  | 246  |
| EUR | 85   | 85   | 85   | 85   | 87   | 87   | 87   |
| IND | 32   | 32   | 32   | 28   | 20   | 15   | 11   |
| JPN | 1    | 1    | 1    | 1    | 1    | 1    | 1    |
| LAM | 546  | 543  | 543  | 543  | 543  | 543  | 542  |
| MEA | 297  | 297  | 297  | 297  | 297  | 297  | 297  |
| NEU | 21   | 21   | 21   | 20   | 20   | 20   | 20   |
| OAS | 172  | 171  | 150  | 136  | 118  | 116  | 113  |
| REF | 267  | 267  | 267  | 267  | 267  | 267  | 267  |
| SSA | 710  | 694  | 680  | 680  | 680  | 680  | 680  |
| USA | 209  | 209  | 209  | 209  | 209  | 209  | 209  |

Table 1647: MAgPIE m4p\_SSP1 — Resources—Land Cover—Pastures and Rangelands (million ha) [PART 2/2]

|     | 1965 | 1970 | 1975 | 1980 | 1985 | 1990 | 1995 | 2000 | 2005 | 2010 |
|-----|------|------|------|------|------|------|------|------|------|------|
| GLO | 3102 | 3131 | 3186 | 3201 | 3240 | 3305 | 3395 | 3418 | 3388 | 3358 |
| CAZ | 468  | 469  | 476  | 469  | 455  | 446  | 452  | 437  | 422  | 381  |
| CHA | 251  | 273  | 301  | 328  | 351  | 374  | 393  | 393  | 393  | 393  |
| EUR | 81   | 81   | 80   | 79   | 76   | 76   | 74   | 72   | 70   | 68   |
| IND | 15   | 13   | 13   | 12   | 12   | 11   | 11   | 11   | 10   | 10   |
| JPN | 1    | 1    | 1    | 1    | 0    | 0    | 0    | 0    | 0    | 0    |
| LAM | 473  | 486  | 503  | 514  | 527  | 539  | 547  | 554  | 555  | 561  |
| MEA | 316  | 318  | 319  | 322  | 329  | 362  | 416  | 420  | 405  | 406  |
| NEU | 20   | 20   | 19   | 19   | 19   | 20   | 20   | 21   | 22   | 22   |
| OAS | 194  | 195  | 195  | 178  | 178  | 181  | 173  | 185  | 169  | 169  |
| REF | 307  | 313  | 316  | 320  | 325  | 326  | 355  | 362  | 362  | 363  |
| SSA | 720  | 720  | 721  | 722  | 724  | 730  | 718  | 727  | 735  | 736  |
| USA | 257  | 244  | 242  | 238  | 242  | 239  | 236  | 236  | 244  | 250  |

Table 1648: FAO.crop\_past — Resources—Land Cover—Pastures and Rangelands (million ha)

|     | 1965 | 1970 | 1975 | 1980 | 1985 | 1990 | 1995 | 2000 | 2005 | 2010 |
|-----|------|------|------|------|------|------|------|------|------|------|
| GLO | 3004 | 3025 | 3068 | 3110 | 3176 | 3242 | 3267 | 3293 | 3271 | 3281 |
| CAZ | 405  | 405  | 405  | 405  | 399  | 393  | 391  | 389  | 380  | 358  |
| CHA | 253  | 270  | 300  | 330  | 362  | 395  | 391  | 388  | 388  | 388  |
| EUR | 77   | 76   | 75   | 75   | 73   | 72   | 70   | 69   | 68   | 66   |
| IND | 14   | 13   | 13   | 13   | 12   | 12   | 12   | 12   | 11   | 11   |
| JPN | 1    | 1    | 1    | 1    | 0    | 0    | 0    | 0    | 0    | 0    |
| LAM | 465  | 476  | 490  | 503  | 516  | 529  | 539  | 549  | 549  | 555  |
| MEA | 303  | 303  | 306  | 308  | 327  | 346  | 356  | 367  | 353  | 353  |
| NEU | 21   | 20   | 20   | 19   | 20   | 21   | 21   | 20   | 21   | 21   |
| OAS | 180  | 180  | 178  | 175  | 177  | 178  | 179  | 179  | 166  | 187  |
| REF | 306  | 312  | 315  | 319  | 322  | 325  | 342  | 360  | 360  | 361  |
| SSA | 728  | 726  | 727  | 727  | 731  | 734  | 730  | 725  | 731  | 731  |
| USA | 252  | 241  | 238  | 236  | 236  | 237  | 236  | 236  | 243  | 249  |

Table 1649: LUH2v2 — Resources—Land Cover—Pastures and Rangelands (million ha)

|     | 1965 | 1970 | 1975 | 1980 | 1985 | 1990 | 1995 | 2000 | 2005 | 2010 |
|-----|------|------|------|------|------|------|------|------|------|------|
| GLO | 3004 | 3025 | 3068 | 3110 | 3176 | 3242 | 3267 | 3293 | 3271 | 3281 |
| CAZ | 405  | 405  | 405  | 405  | 399  | 393  | 391  | 389  | 380  | 358  |
| CHA | 253  | 270  | 300  | 330  | 362  | 395  | 391  | 388  | 388  | 388  |
| EUR | 77   | 76   | 75   | 75   | 73   | 72   | 70   | 69   | 68   | 66   |
| IND | 14   | 13   | 13   | 13   | 12   | 12   | 12   | 12   | 11   | 11   |
| JPN | 1    | 1    | 1    | 1    | 0    | 0    | 0    | 0    | 0    | 0    |
| LAM | 465  | 476  | 490  | 503  | 516  | 529  | 539  | 549  | 549  | 555  |
| MEA | 303  | 303  | 306  | 308  | 327  | 346  | 356  | 367  | 353  | 353  |
| NEU | 21   | 20   | 20   | 19   | 20   | 21   | 21   | 20   | 21   | 21   |
| OAS | 180  | 180  | 178  | 175  | 177  | 178  | 179  | 179  | 166  | 187  |
| REF | 306  | 312  | 315  | 319  | 322  | 325  | 342  | 360  | 360  | 361  |
| SSA | 728  | 726  | 727  | 727  | 731  | 734  | 730  | 725  | 731  | 731  |
| USA | 252  | 241  | 238  | 236  | 236  | 237  | 236  | 236  | 243  | 249  |

Table 1650: MAgPIEown — Resources—Land Cover—Pastures and Rangelands (million ha)



54.5 Urban Area

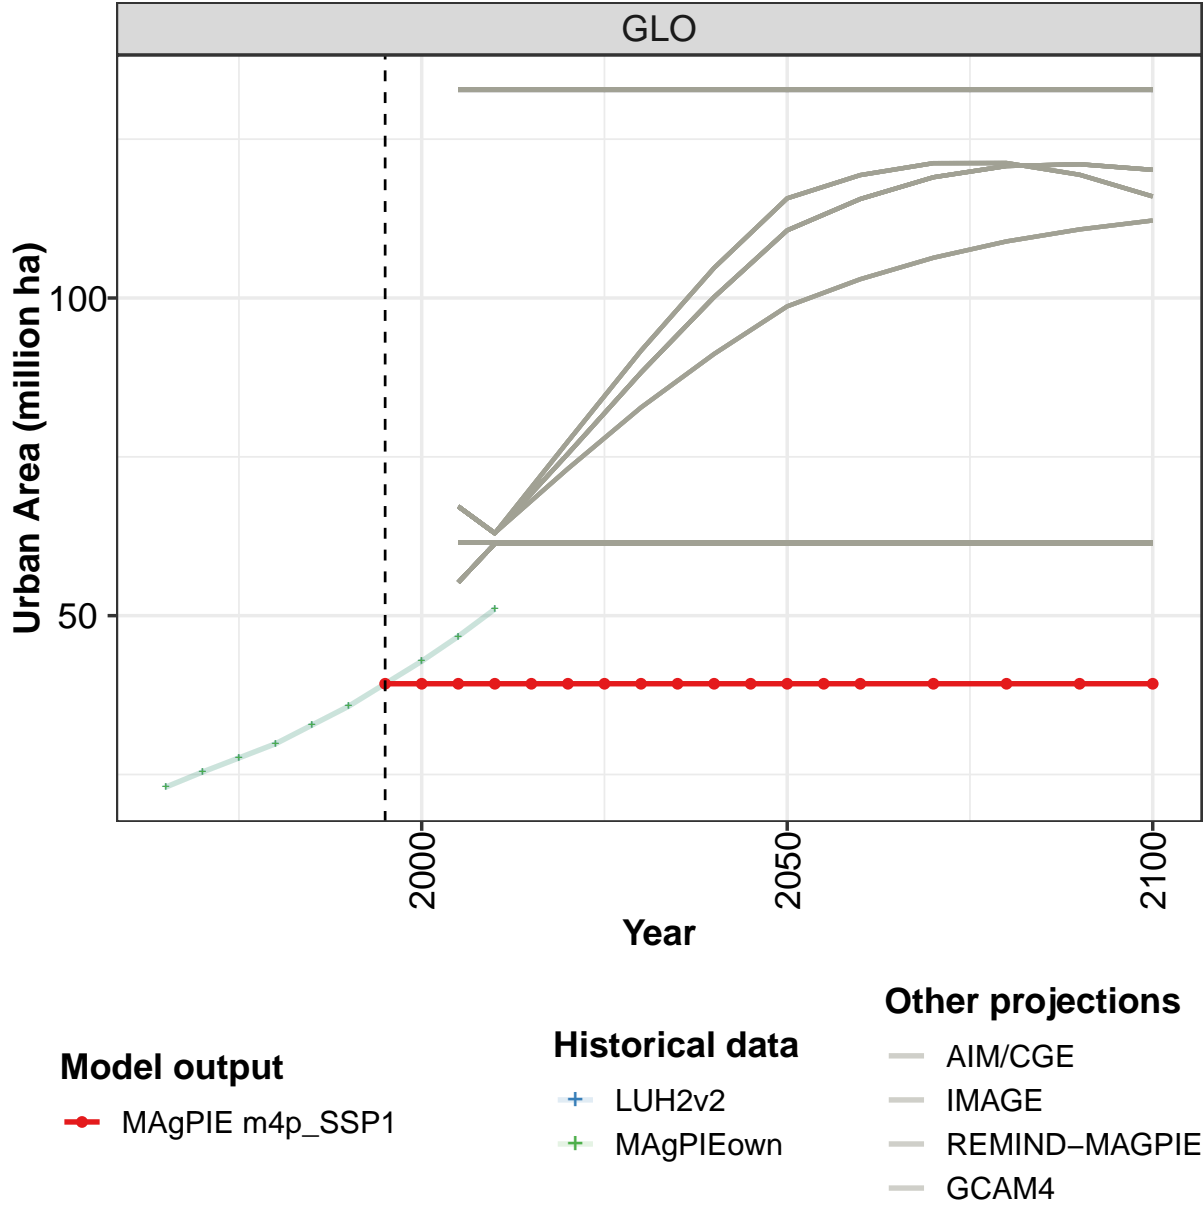

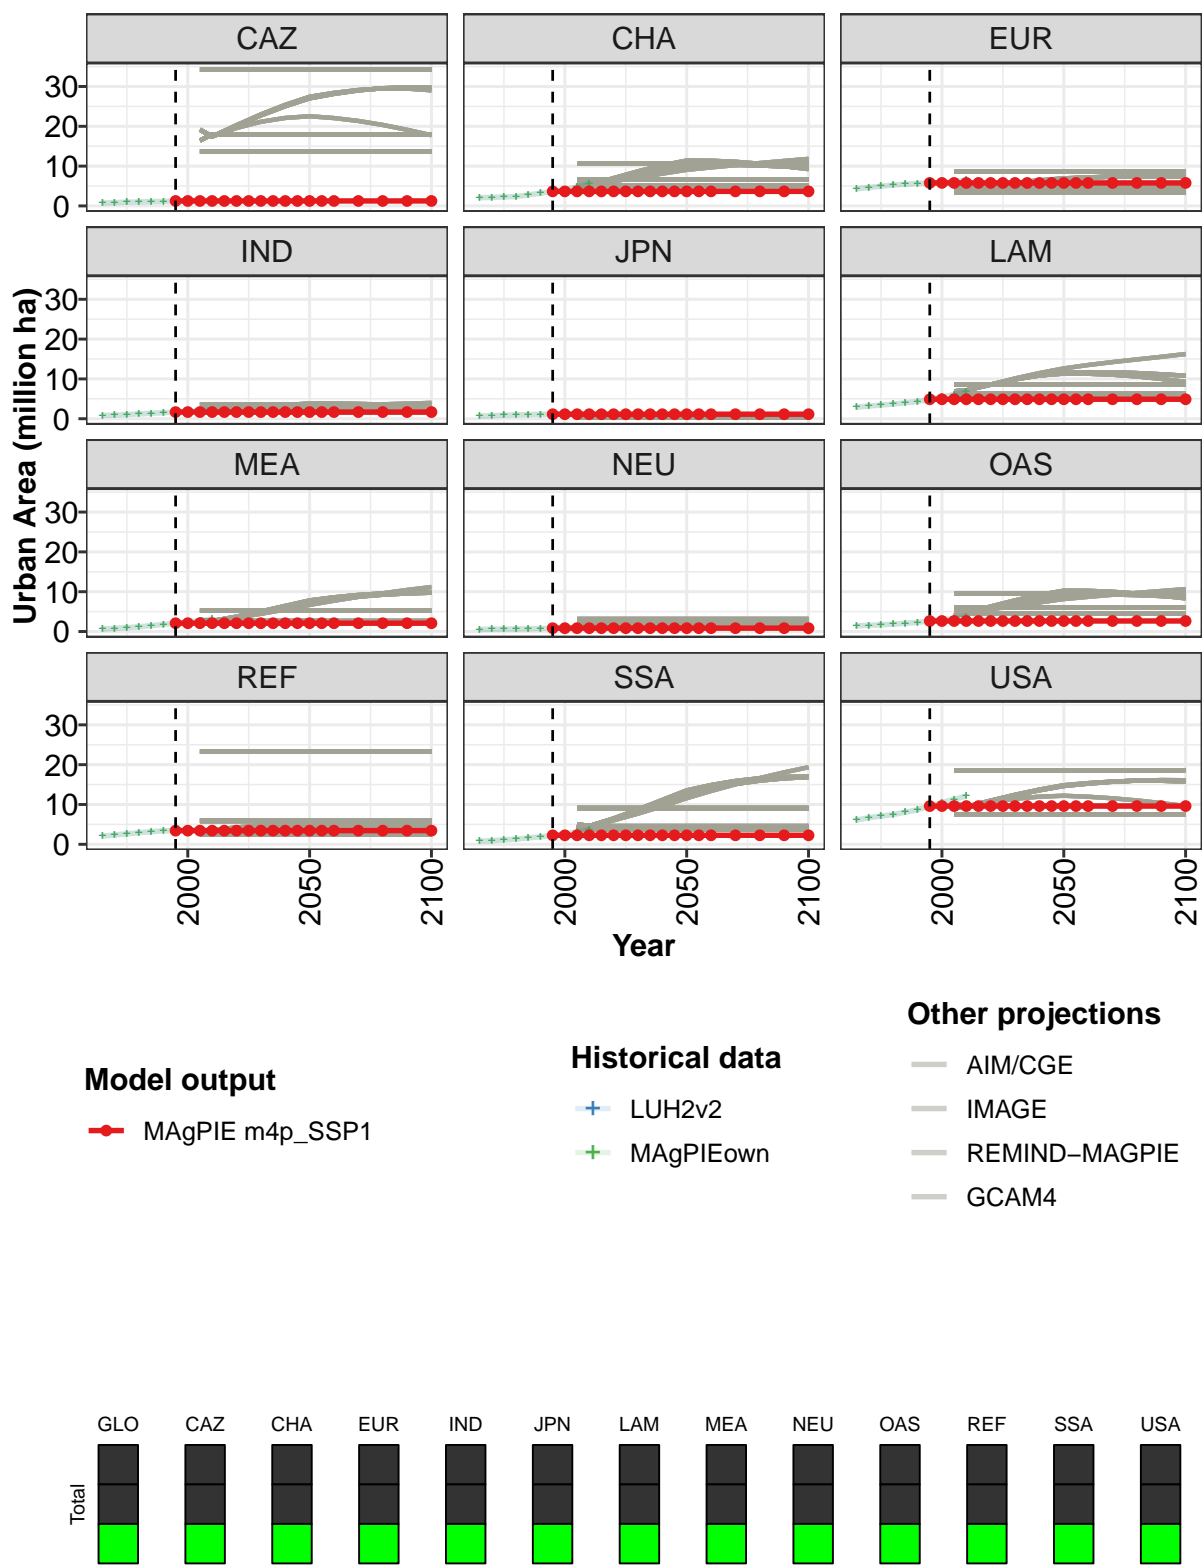

Figure 433: MAgPIE m4p\_SSP1 — Resources—Land Cover—Urban Area (million ha)

|     | 1995 | 2000 | 2005 | 2010 | 2015 | 2020 | 2025 | 2030 | 2035 | 2040 | 2045 |
|-----|------|------|------|------|------|------|------|------|------|------|------|
| GLO | 39.3 | 39.3 | 39.3 | 39.3 | 39.3 | 39.3 | 39.3 | 39.3 | 39.3 | 39.3 | 39.3 |
| CAZ | 1.3  | 1.3  | 1.3  | 1.3  | 1.3  | 1.3  | 1.3  | 1.3  | 1.3  | 1.3  | 1.3  |
| CHA | 3.7  | 3.7  | 3.7  | 3.7  | 3.7  | 3.7  | 3.7  | 3.7  | 3.7  | 3.7  | 3.7  |
| EUR | 5.8  | 5.8  | 5.8  | 5.8  | 5.8  | 5.8  | 5.8  | 5.8  | 5.8  | 5.8  | 5.8  |
| IND | 1.7  | 1.7  | 1.7  | 1.7  | 1.7  | 1.7  | 1.7  | 1.7  | 1.7  | 1.7  | 1.7  |
| JPN | 1.1  | 1.1  | 1.1  | 1.1  | 1.1  | 1.1  | 1.1  | 1.1  | 1.1  | 1.1  | 1.1  |
| LAM | 4.9  | 4.9  | 4.9  | 4.9  | 4.9  | 4.9  | 4.9  | 4.9  | 4.9  | 4.9  | 4.9  |
| MEA | 2.1  | 2.1  | 2.1  | 2.1  | 2.1  | 2.1  | 2.1  | 2.1  | 2.1  | 2.1  | 2.1  |
| NEU | 0.8  | 0.8  | 0.8  | 0.8  | 0.8  | 0.8  | 0.8  | 0.8  | 0.8  | 0.8  | 0.8  |
| OAS | 2.6  | 2.6  | 2.6  | 2.6  | 2.6  | 2.6  | 2.6  | 2.6  | 2.6  | 2.6  | 2.6  |
| REF | 3.4  | 3.4  | 3.4  | 3.4  | 3.4  | 3.4  | 3.4  | 3.4  | 3.4  | 3.4  | 3.4  |
| SSA | 2.3  | 2.3  | 2.3  | 2.3  | 2.3  | 2.3  | 2.3  | 2.3  | 2.3  | 2.3  | 2.3  |
| USA | 9.6  | 9.6  | 9.6  | 9.6  | 9.6  | 9.6  | 9.6  | 9.6  | 9.6  | 9.6  | 9.6  |

Table 1651: MAgPIE m4p\_SSP1 — Resources—Land Cover—Urban Area (million ha) [PART 1/2]

|     | 2050 | 2055 | 2060 | 2070 | 2080 | 2090 | 2100 |
|-----|------|------|------|------|------|------|------|
| GLO | 39.3 | 39.3 | 39.3 | 39.3 | 39.3 | 39.3 | 39.3 |
| CAZ | 1.3  | 1.3  | 1.3  | 1.3  | 1.3  | 1.3  | 1.3  |
| CHA | 3.7  | 3.7  | 3.7  | 3.7  | 3.7  | 3.7  | 3.7  |
| EUR | 5.8  | 5.8  | 5.8  | 5.8  | 5.8  | 5.8  | 5.8  |
| IND | 1.7  | 1.7  | 1.7  | 1.7  | 1.7  | 1.7  | 1.7  |
| JPN | 1.1  | 1.1  | 1.1  | 1.1  | 1.1  | 1.1  | 1.1  |
| LAM | 4.9  | 4.9  | 4.9  | 4.9  | 4.9  | 4.9  | 4.9  |
| MEA | 2.1  | 2.1  | 2.1  | 2.1  | 2.1  | 2.1  | 2.1  |
| NEU | 0.8  | 0.8  | 0.8  | 0.8  | 0.8  | 0.8  | 0.8  |
| OAS | 2.6  | 2.6  | 2.6  | 2.6  | 2.6  | 2.6  | 2.6  |
| REF | 3.4  | 3.4  | 3.4  | 3.4  | 3.4  | 3.4  | 3.4  |
| SSA | 2.3  | 2.3  | 2.3  | 2.3  | 2.3  | 2.3  | 2.3  |
| USA | 9.6  | 9.6  | 9.6  | 9.6  | 9.6  | 9.6  | 9.6  |

Table 1652: MAgPIE m4p\_SSP1 — Resources—Land Cover—Urban Area (million ha) [PART 2/2]

|     | 1965 | 1970 | 1975 | 1980 | 1985 | 1990 | 1995 | 2000 | 2005 | 2010 |
|-----|------|------|------|------|------|------|------|------|------|------|
| GLO | 23.0 | 25.4 | 27.6 | 29.8 | 32.8 | 35.7 | 39.3 | 42.8 | 46.7 | 51.0 |
| CAZ | 0.8  | 0.9  | 0.9  | 1.0  | 1.1  | 1.2  | 1.3  | 1.3  | 1.5  | 1.6  |
| CHA | 2.1  | 2.2  | 2.3  | 2.3  | 2.8  | 3.2  | 3.7  | 4.1  | 4.7  | 5.5  |
| EUR | 4.3  | 4.6  | 4.9  | 5.3  | 5.5  | 5.6  | 5.8  | 5.9  | 6.2  | 6.4  |
| IND | 0.8  | 0.9  | 1.1  | 1.2  | 1.4  | 1.5  | 1.7  | 1.8  | 2.0  | 2.2  |
| JPN | 0.7  | 0.8  | 0.9  | 1.0  | 1.0  | 1.1  | 1.1  | 1.2  | 1.2  | 1.2  |
| LAM | 2.9  | 3.2  | 3.4  | 3.7  | 4.0  | 4.3  | 4.9  | 5.5  | 6.1  | 6.8  |
| MEA | 0.6  | 0.8  | 1.0  | 1.2  | 1.5  | 1.8  | 2.1  | 2.4  | 2.8  | 3.1  |
| NEU | 0.5  | 0.6  | 0.6  | 0.6  | 0.7  | 0.8  | 0.8  | 0.9  | 1.0  | 1.1  |
| OAS | 1.4  | 1.6  | 1.7  | 1.8  | 2.1  | 2.3  | 2.6  | 3.0  | 3.3  | 3.7  |
| REF | 2.1  | 2.4  | 2.6  | 2.9  | 3.2  | 3.4  | 3.4  | 3.5  | 3.5  | 3.6  |
| SSA | 0.8  | 0.9  | 1.1  | 1.3  | 1.6  | 1.9  | 2.3  | 2.6  | 3.1  | 3.7  |
| USA | 6.1  | 6.7  | 7.1  | 7.5  | 8.1  | 8.7  | 9.6  | 10.5 | 11.3 | 12.1 |

Table 1653: LUH2v2 — Resources—Land Cover—Urban Area (million ha)

|     | 1965 | 1970 | 1975 | 1980 | 1985 | 1990 | 1995 | 2000 | 2005 | 2010 |
|-----|------|------|------|------|------|------|------|------|------|------|
| GLO | 23.0 | 25.4 | 27.6 | 29.8 | 32.8 | 35.7 | 39.3 | 42.8 | 46.7 | 51.0 |
| CAZ | 0.8  | 0.9  | 0.9  | 1.0  | 1.1  | 1.2  | 1.3  | 1.3  | 1.5  | 1.6  |
| CHA | 2.1  | 2.2  | 2.3  | 2.3  | 2.8  | 3.2  | 3.7  | 4.1  | 4.7  | 5.5  |
| EUR | 4.3  | 4.6  | 4.9  | 5.3  | 5.5  | 5.6  | 5.8  | 5.9  | 6.2  | 6.4  |
| IND | 0.8  | 0.9  | 1.1  | 1.2  | 1.4  | 1.5  | 1.7  | 1.8  | 2.0  | 2.2  |
| JPN | 0.7  | 0.8  | 0.9  | 1.0  | 1.0  | 1.1  | 1.1  | 1.2  | 1.2  | 1.2  |
| LAM | 2.9  | 3.2  | 3.4  | 3.7  | 4.0  | 4.3  | 4.9  | 5.5  | 6.1  | 6.8  |
| MEA | 0.6  | 0.8  | 1.0  | 1.2  | 1.5  | 1.8  | 2.1  | 2.4  | 2.8  | 3.1  |
| NEU | 0.5  | 0.6  | 0.6  | 0.6  | 0.7  | 0.8  | 0.8  | 0.9  | 1.0  | 1.1  |
| OAS | 1.4  | 1.6  | 1.7  | 1.8  | 2.1  | 2.3  | 2.6  | 3.0  | 3.3  | 3.7  |
| REF | 2.1  | 2.4  | 2.6  | 2.9  | 3.2  | 3.4  | 3.4  | 3.5  | 3.5  | 3.6  |
| SSA | 0.8  | 0.9  | 1.1  | 1.3  | 1.6  | 1.9  | 2.3  | 2.6  | 3.1  | 3.7  |
| USA | 6.1  | 6.7  | 7.1  | 7.5  | 8.1  | 8.7  | 9.6  | 10.5 | 11.3 | 12.1 |

Table 1654: MAgPIEown — Resources—Land Cover—Urban Area (million ha)

55 Land Cover Change

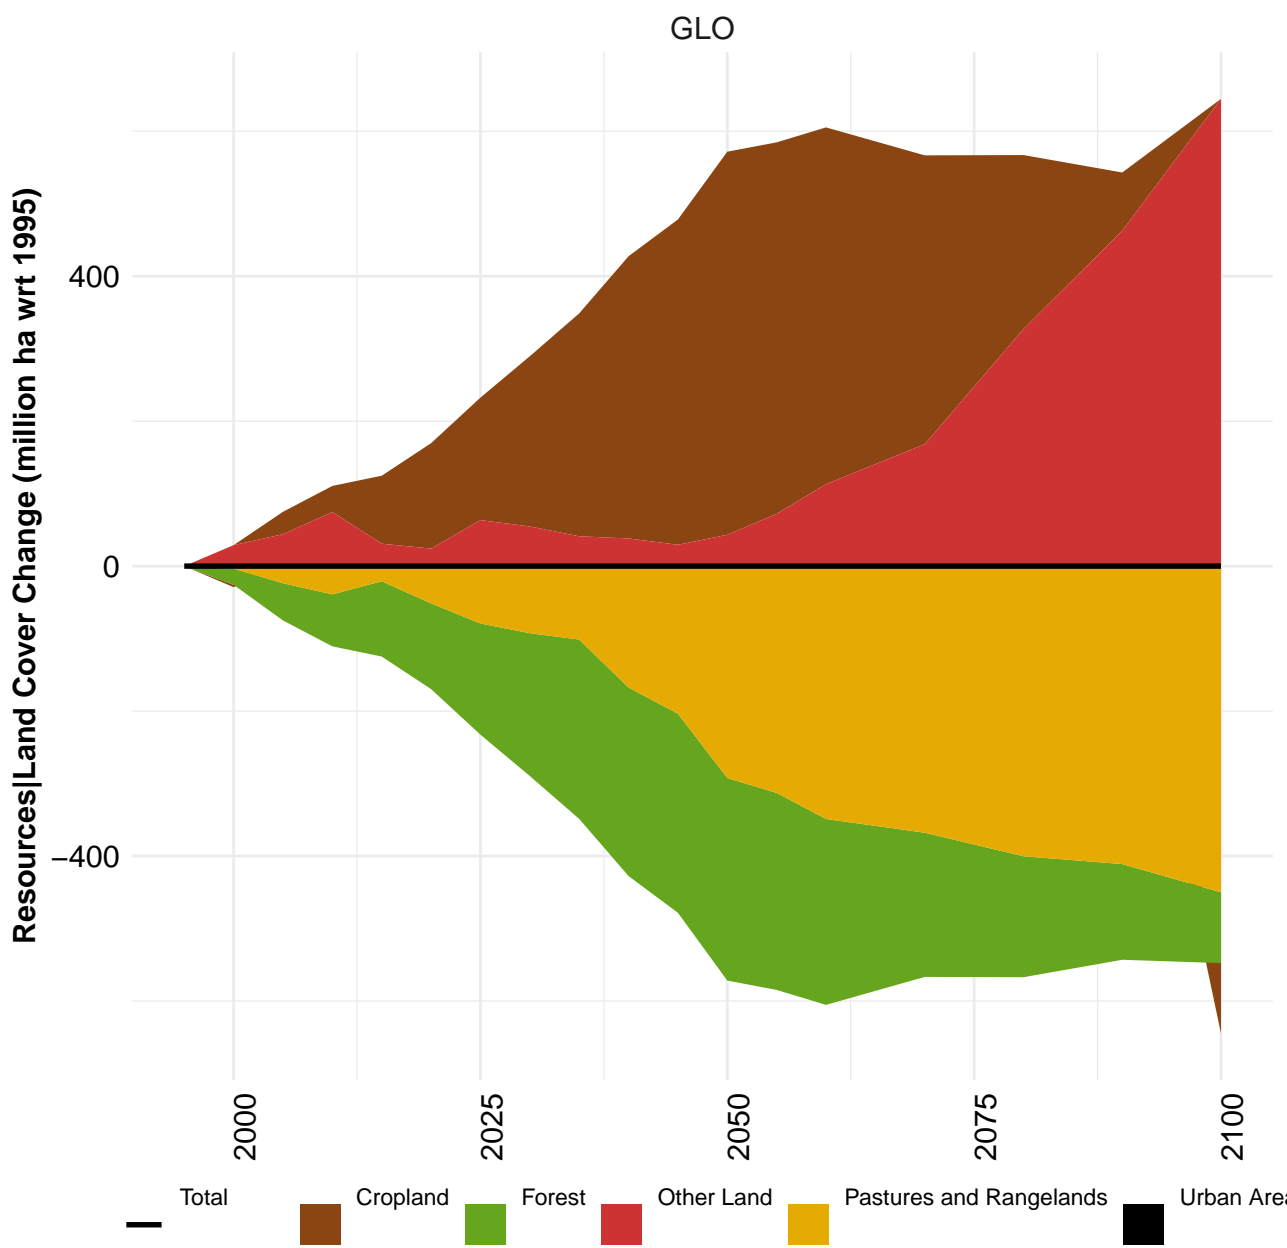

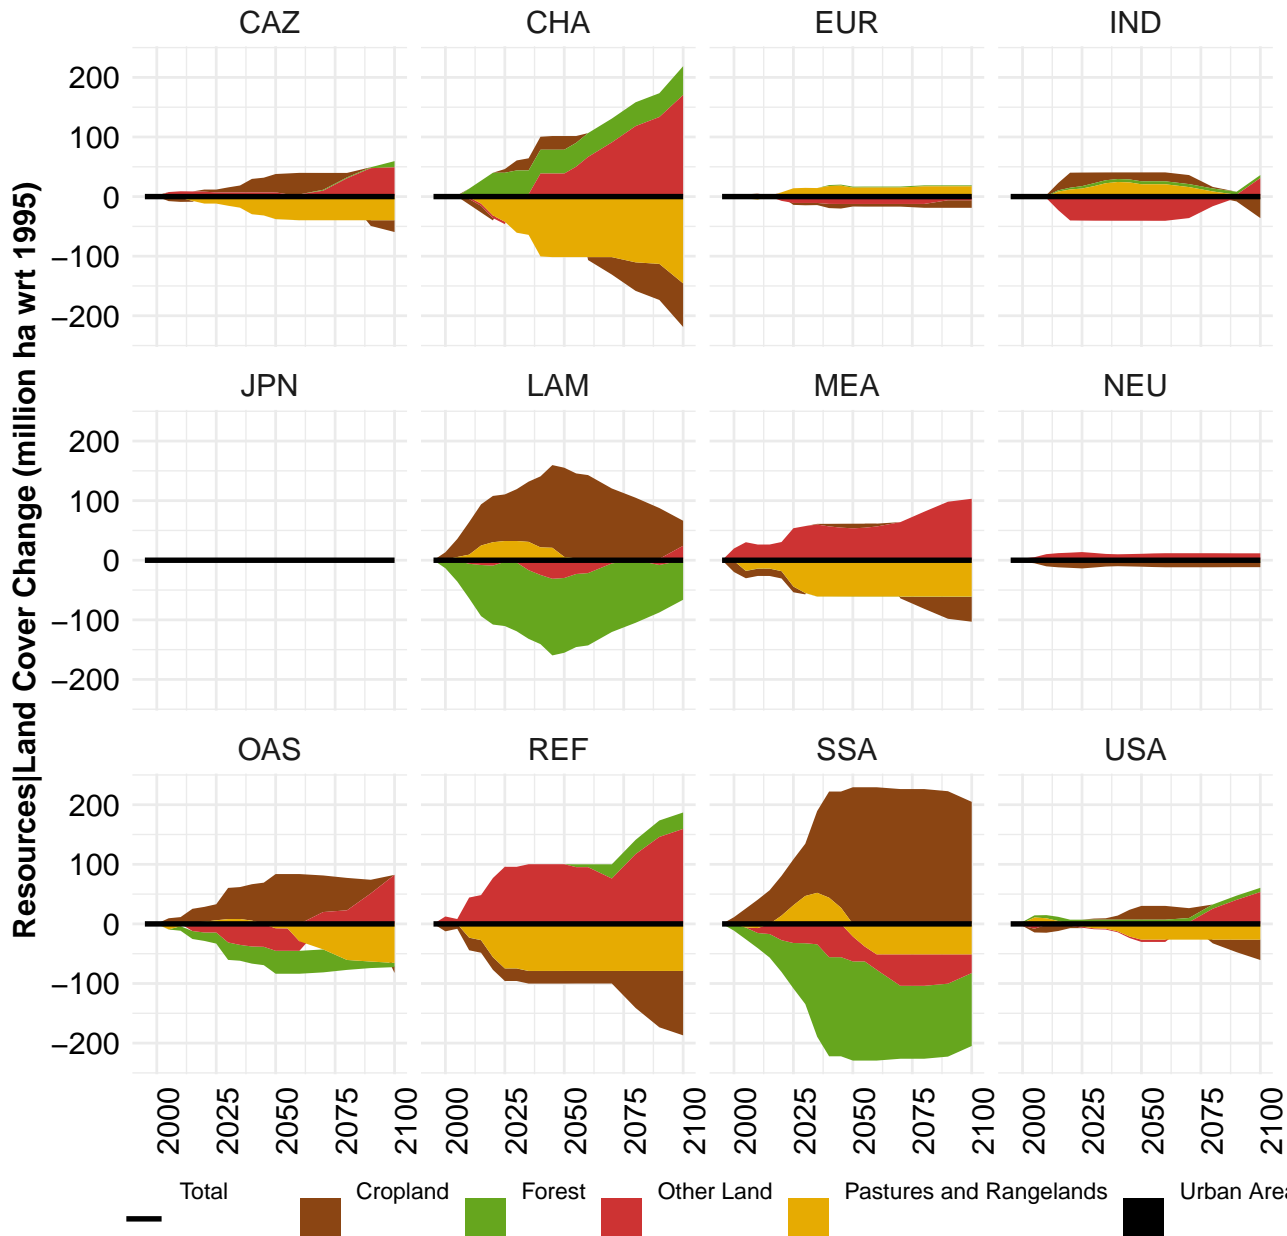

55.1 Cropland

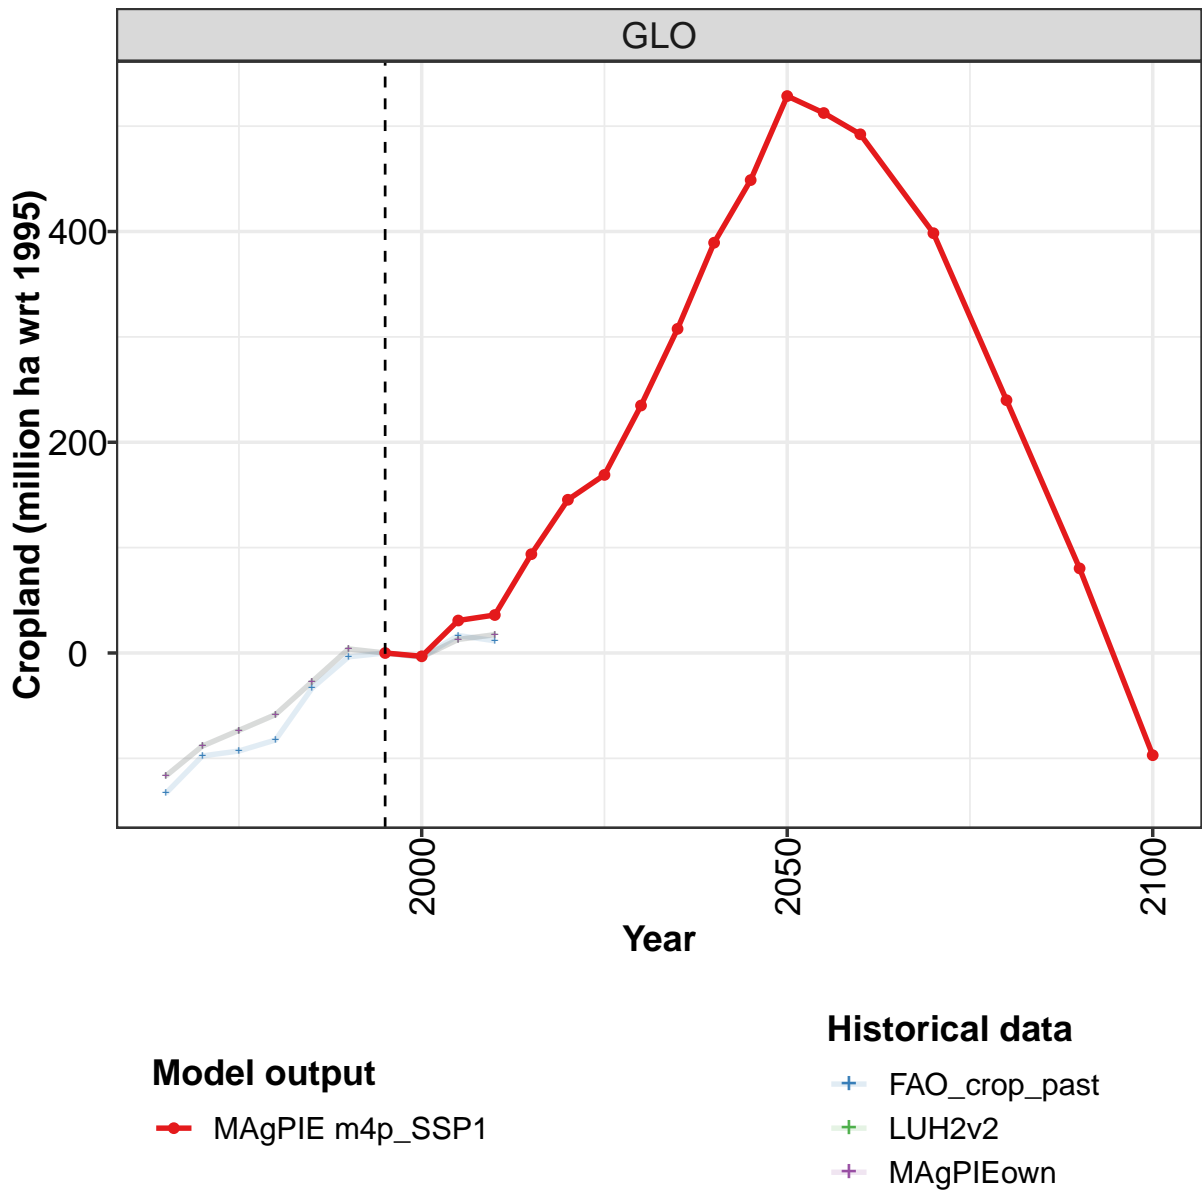

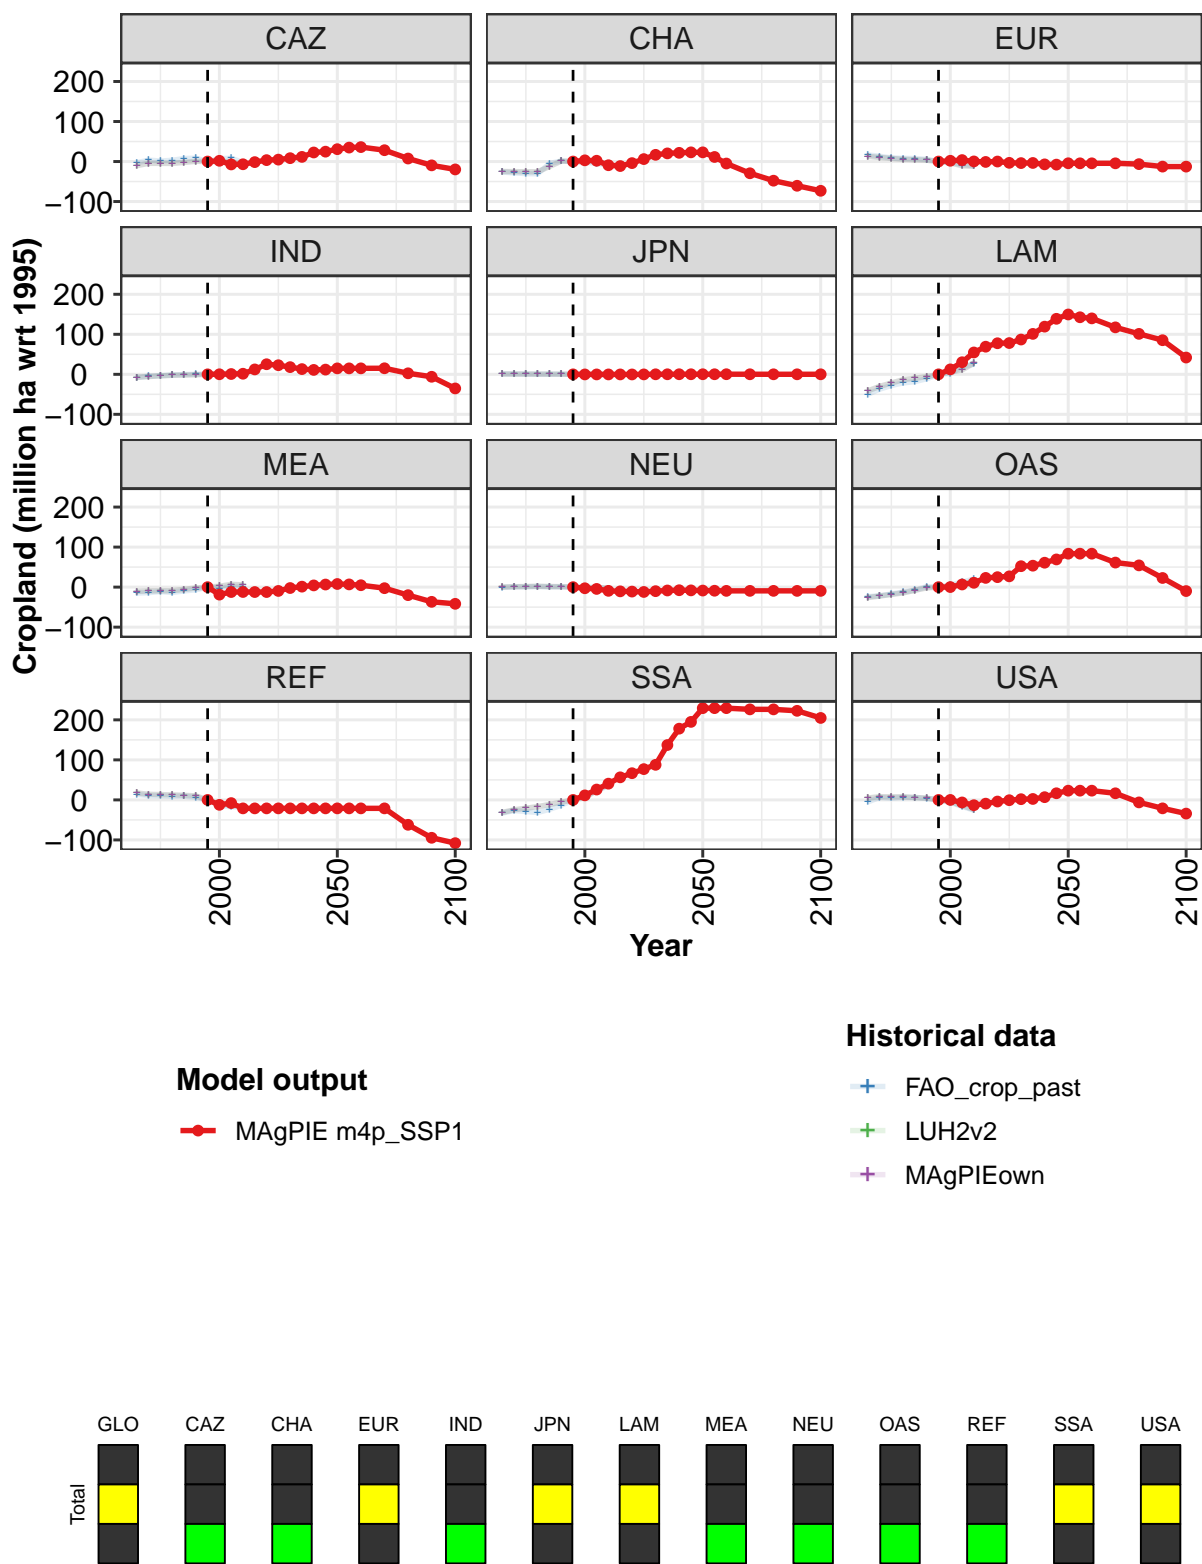

Figure 434: MAgPIE m4p\_SSP1 — Resources—Land Cover Change—Cropland (million ha wrt 1995)



|     | 1995 | 2000 | 2005 | 2010 | 2015 | 2020 | 2025 | 2030 | 2035 | 2040 | 2045 |
|-----|------|------|------|------|------|------|------|------|------|------|------|
| GLO | 0    | -3   | 31   | 36   | 94   | 145  | 169  | 235  | 308  | 389  | 449  |
| CAZ | 0    | 2    | -7   | -7   | -1   | 4    | 5    | 8    | 12   | 23   | 25   |
| CHA | 0    | 3    | 2    | -9   | -11  | -4   | 6    | 17   | 20   | 22   | 23   |
| EUR | 0    | 2    | 4    | 0    | -1   | 0    | -3   | -4   | -4   | -7   | -8   |
| IND | 0    | 0    | 1    | 2    | 12   | 25   | 23   | 18   | 13   | 11   | 12   |
| JPN | 0    | -0   | -0   | -0   | -0   | -0   | -0   | 0    | 0    | 0    | 0    |
| LAM | 0    | 12   | 30   | 55   | 69   | 78   | 78   | 87   | 101  | 119  | 139  |
| MEA | 0    | -19  | -12  | -12  | -12  | -12  | -10  | -2   | 1    | 4    | 6    |
| NEU | 0    | -3   | -4   | -9   | -11  | -11  | -12  | -10  | -8   | -8   | -8   |
| OAS | 0    | 0    | 7    | 11   | 23   | 25   | 27   | 52   | 54   | 61   | 69   |
| REF | 0    | -12  | -8   | -21  | -21  | -21  | -21  | -21  | -21  | -21  | -21  |
| SSA | 0    | 11   | 26   | 41   | 56   | 67   | 77   | 88   | 137  | 178  | 195  |
| USA | 0    | -0   | -6   | -13  | -9   | -4   | -1   | 2    | 2    | 7    | 17   |

Table 1655: MAgPIE m4p\_SSP1 — Resources—Land Cover Change—Cropland (million ha wrt 1995) [PART 1/2]

|     | 2050 | 2055 | 2060 | 2070 | 2080 | 2090 | 2100 |
|-----|------|------|------|------|------|------|------|
| GLO | 529  | 512  | 492  | 398  | 240  | 80   | -97  |
| CAZ | 31   | 35   | 36   | 28   | 8    | -10  | -20  |
| CHA | 23   | 11   | -5   | -29  | -48  | -61  | -73  |
| EUR | -4   | -4   | -4   | -4   | -6   | -13  | -13  |
| IND | 15   | 15   | 15   | 15   | 3    | -6   | -35  |
| JPN | 0    | 0    | 0    | 0    | 0    | 0    | 0    |
| LAM | 150  | 143  | 140  | 117  | 101  | 85   | 42   |
| MEA | 8    | 7    | 5    | -3   | -20  | -37  | -42  |
| NEU | -9   | -9   | -9   | -9   | -9   | -9   | -9   |
| OAS | 84   | 84   | 84   | 61   | 54   | 23   | -10  |
| REF | -21  | -21  | -21  | -21  | -62  | -95  | -108 |
| SSA | 229  | 229  | 229  | 226  | 226  | 223  | 205  |
| USA | 23   | 23   | 23   | 17   | -6   | -21  | -34  |

Table 1656: MAgPIE m4p\_SSP1 — Resources—Land Cover Change—Cropland (million ha wrt 1995) [PART 2/2]

|     | 1965   | 1970  | 1975  | 1980  | 1985  | 1990  | 1995 | 2000  | 2005  | 2010  |
|-----|--------|-------|-------|-------|-------|-------|------|-------|-------|-------|
| GLO | -133.1 | -97.7 | -93.0 | -82.6 | -33.4 | -3.7  | 0.0  | -4.0  | 16.6  | 11.6  |
| CAZ | -3.1   | 3.5   | 1.3   | 3.1   | 7.5   | 8.4   | 0.0  | 7.1   | 8.1   | -2.3  |
| CHA | -26.4  | -28.4 | -30.2 | -30.7 | -5.0  | 1.3   | 0.0  | -0.9  | -5.4  | -8.3  |
| EUR | 16.5   | 13.1  | 9.1   | 8.0   | 7.4   | 5.5   | 0.0  | -2.0  | -7.4  | -10.3 |
| IND | -7.5   | -4.9  | -3.1  | -1.8  | -0.6  | 0.2   | 0.0  | 0.2   | -0.2  | -0.7  |
| JPN | 1.0    | 0.8   | 0.5   | 0.4   | 0.3   | 0.2   | 0.0  | -0.2  | -0.3  | -0.4  |
| LAM | -50.1  | -37.3 | -27.9 | -21.6 | -18.2 | -11.1 | 0.0  | 2.1   | 18.6  | 25.3  |
| MEA | -14.9  | -13.8 | -11.2 | -13.4 | -9.5  | -6.8  | 0.0  | -3.2  | 1.5   | 1.2   |
| NEU | -0.5   | 0.6   | 0.8   | 1.6   | 0.7   | 0.8   | 0.0  | -1.1  | -1.0  | -3.3  |
| OAS | -23.9  | -21.6 | -17.4 | -12.3 | -7.4  | 1.1   | 0.0  | 5.6   | 12.3  | 20.4  |
| REF | 13.9   | 10.4  | 9.9   | 9.0   | 9.3   | 6.5   | 0.0  | -14.1 | -17.0 | -19.1 |
| SSA | -32.8  | -26.6 | -29.0 | -31.5 | -23.6 | -13.4 | 0.0  | 8.6   | 23.9  | 34.8  |
| USA | -5.3   | 6.4   | 4.1   | 6.5   | 5.7   | 3.6   | 0.0  | -6.1  | -16.3 | -25.6 |

Table 1657: FAO\_crop\_past — Resources—Land Cover Change—Cropland (million ha wrt 1995)

|     | 1965   | 1970  | 1975  | 1980  | 1985  | 1990 | 1995 | 2000  | 2005  | 2010  |
|-----|--------|-------|-------|-------|-------|------|------|-------|-------|-------|
| GLO | -116.7 | -88.3 | -73.4 | -58.5 | -27.3 | 3.8  | 0.0  | -3.8  | 12.9  | 17.4  |
| CAZ | -10.3  | -4.5  | -4.6  | -4.8  | -2.1  | 0.6  | 0.0  | -0.6  | 0.5   | -9.8  |
| CHA | -24.9  | -25.3 | -25.5 | -25.7 | -12.4 | 1.0  | 0.0  | -1.0  | 1.1   | -7.1  |
| EUR | 13.0   | 10.2  | 7.9   | 5.5   | 4.4   | 3.3  | 0.0  | -3.3  | -10.5 | -11.8 |
| IND | -7.5   | -5.5  | -4.0  | -2.4  | -1.8  | -1.2 | 0.0  | 1.2   | 2.8   | 2.6   |
| JPN | 0.7    | 0.7   | 0.5   | 0.4   | 0.3   | 0.2  | 0.0  | -0.2  | -0.3  | -0.4  |
| LAM | -41.5  | -30.2 | -21.8 | -13.4 | -9.7  | -5.9 | 0.0  | 5.9   | 11.0  | 28.1  |
| MEA | -10.7  | -9.5  | -9.2  | -9.0  | -5.6  | -2.2 | 0.0  | 2.2   | 6.9   | 5.7   |
| NEU | -0.0   | 1.0   | 1.4   | 1.9   | 1.5   | 1.1  | 0.0  | -1.1  | -0.9  | -3.0  |
| OAS | -26.1  | -22.3 | -18.4 | -14.4 | -8.1  | -1.8 | 0.0  | 1.8   | 7.0   | 15.6  |
| REF | 17.2   | 14.0  | 13.3  | 12.6  | 11.3  | 10.1 | 0.0  | -10.1 | -13.8 | -16.8 |
| SSA | -31.4  | -24.7 | -20.8 | -16.8 | -11.3 | -5.8 | 0.0  | 5.8   | 23.5  | 38.2  |
| USA | 4.8    | 8.0   | 7.8   | 7.7   | 6.1   | 4.4  | 0.0  | -4.4  | -14.6 | -23.9 |

Table 1658: LUH2v2 — Resources—Land Cover Change—Cropland (million ha wrt 1995)

|     | 1965   | 1970  | 1975  | 1980  | 1985  | 1990 | 1995 | 2000  | 2005  | 2010  |
|-----|--------|-------|-------|-------|-------|------|------|-------|-------|-------|
| GLO | -116.7 | -88.3 | -73.4 | -58.5 | -27.3 | 3.8  | 0.0  | -3.8  | 12.9  | 17.4  |
| CAZ | -10.3  | -4.5  | -4.6  | -4.8  | -2.1  | 0.6  | 0.0  | -0.6  | 0.5   | -9.8  |
| CHA | -24.9  | -25.3 | -25.5 | -25.7 | -12.4 | 1.0  | 0.0  | -1.0  | 1.1   | -7.1  |
| EUR | 13.0   | 10.2  | 7.9   | 5.5   | 4.4   | 3.3  | 0.0  | -3.3  | -10.5 | -11.8 |
| IND | -7.5   | -5.5  | -4.0  | -2.4  | -1.8  | -1.2 | 0.0  | 1.2   | 2.8   | 2.6   |
| JPN | 0.7    | 0.7   | 0.5   | 0.4   | 0.3   | 0.2  | 0.0  | -0.2  | -0.3  | -0.4  |
| LAM | -41.5  | -30.2 | -21.8 | -13.4 | -9.7  | -5.9 | 0.0  | 5.9   | 11.0  | 28.1  |
| MEA | -10.7  | -9.5  | -9.2  | -9.0  | -5.6  | -2.2 | 0.0  | 2.2   | 6.9   | 5.7   |
| NEU | -0.0   | 1.0   | 1.4   | 1.9   | 1.5   | 1.1  | 0.0  | -1.1  | -0.9  | -3.0  |
| OAS | -26.1  | -22.3 | -18.4 | -14.4 | -8.1  | -1.8 | 0.0  | 1.8   | 7.0   | 15.6  |
| REF | 17.2   | 14.0  | 13.3  | 12.6  | 11.3  | 10.1 | 0.0  | -10.1 | -13.8 | -16.8 |
| SSA | -31.4  | -24.7 | -20.8 | -16.8 | -11.3 | -5.8 | 0.0  | 5.8   | 23.5  | 38.2  |
| USA | 4.8    | 8.0   | 7.8   | 7.7   | 6.1   | 4.4  | 0.0  | -4.4  | -14.6 | -23.9 |

Table 1659: MAgPIEown — Resources—Land Cover Change—Cropland (million ha wrt 1995)

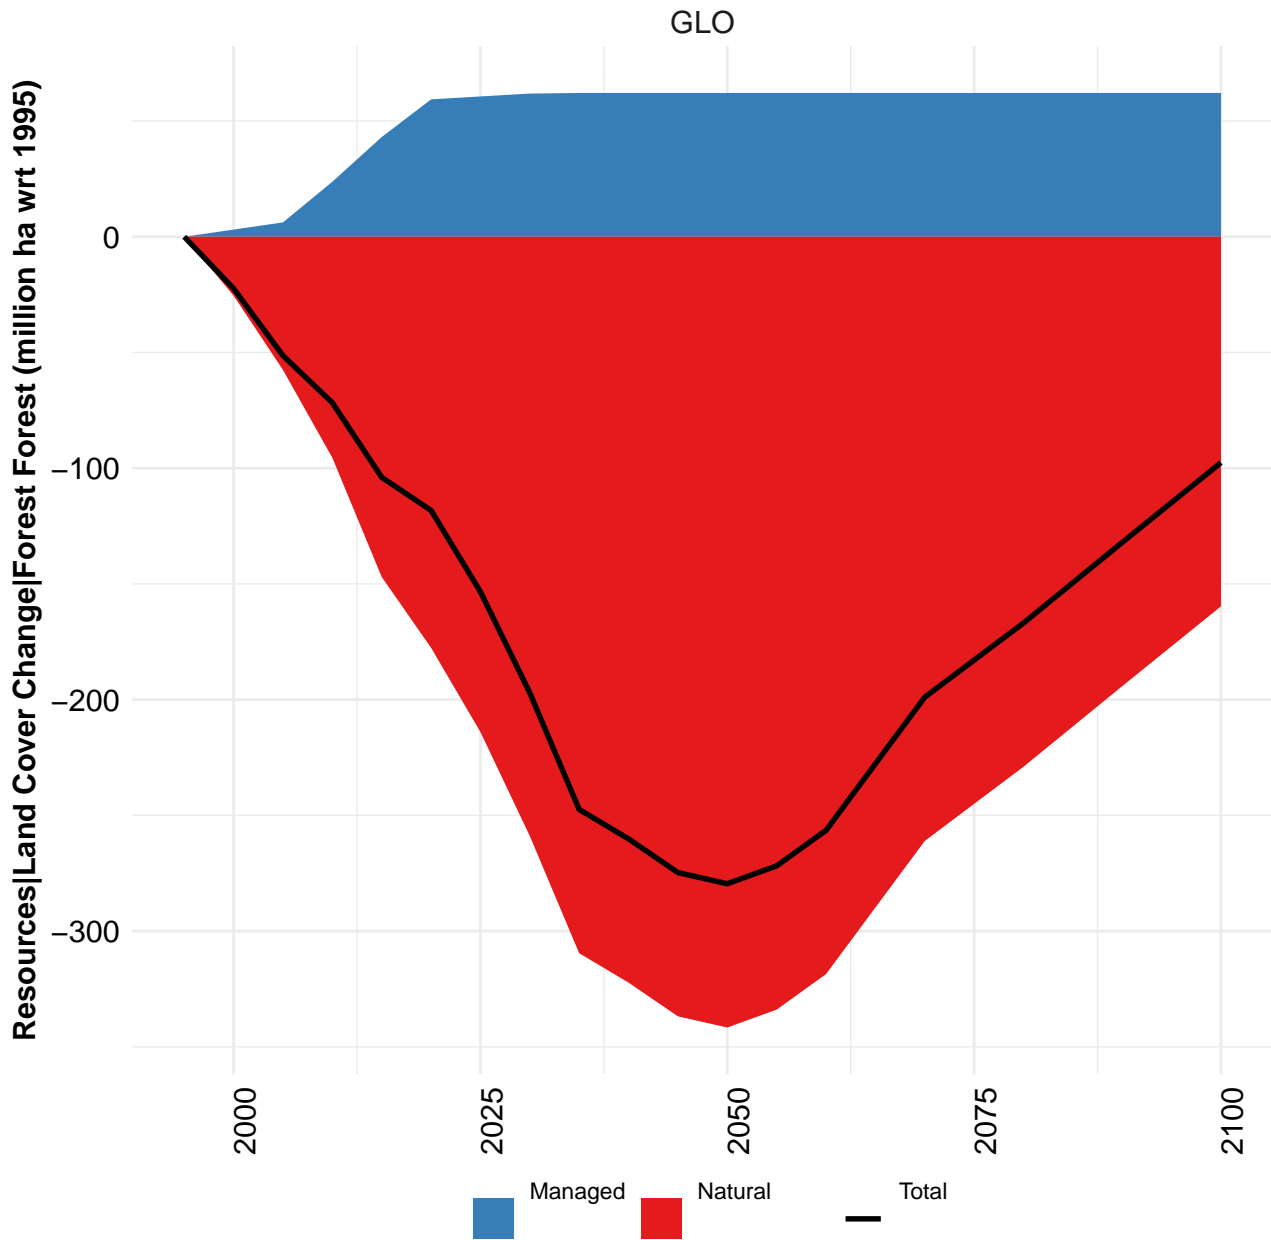

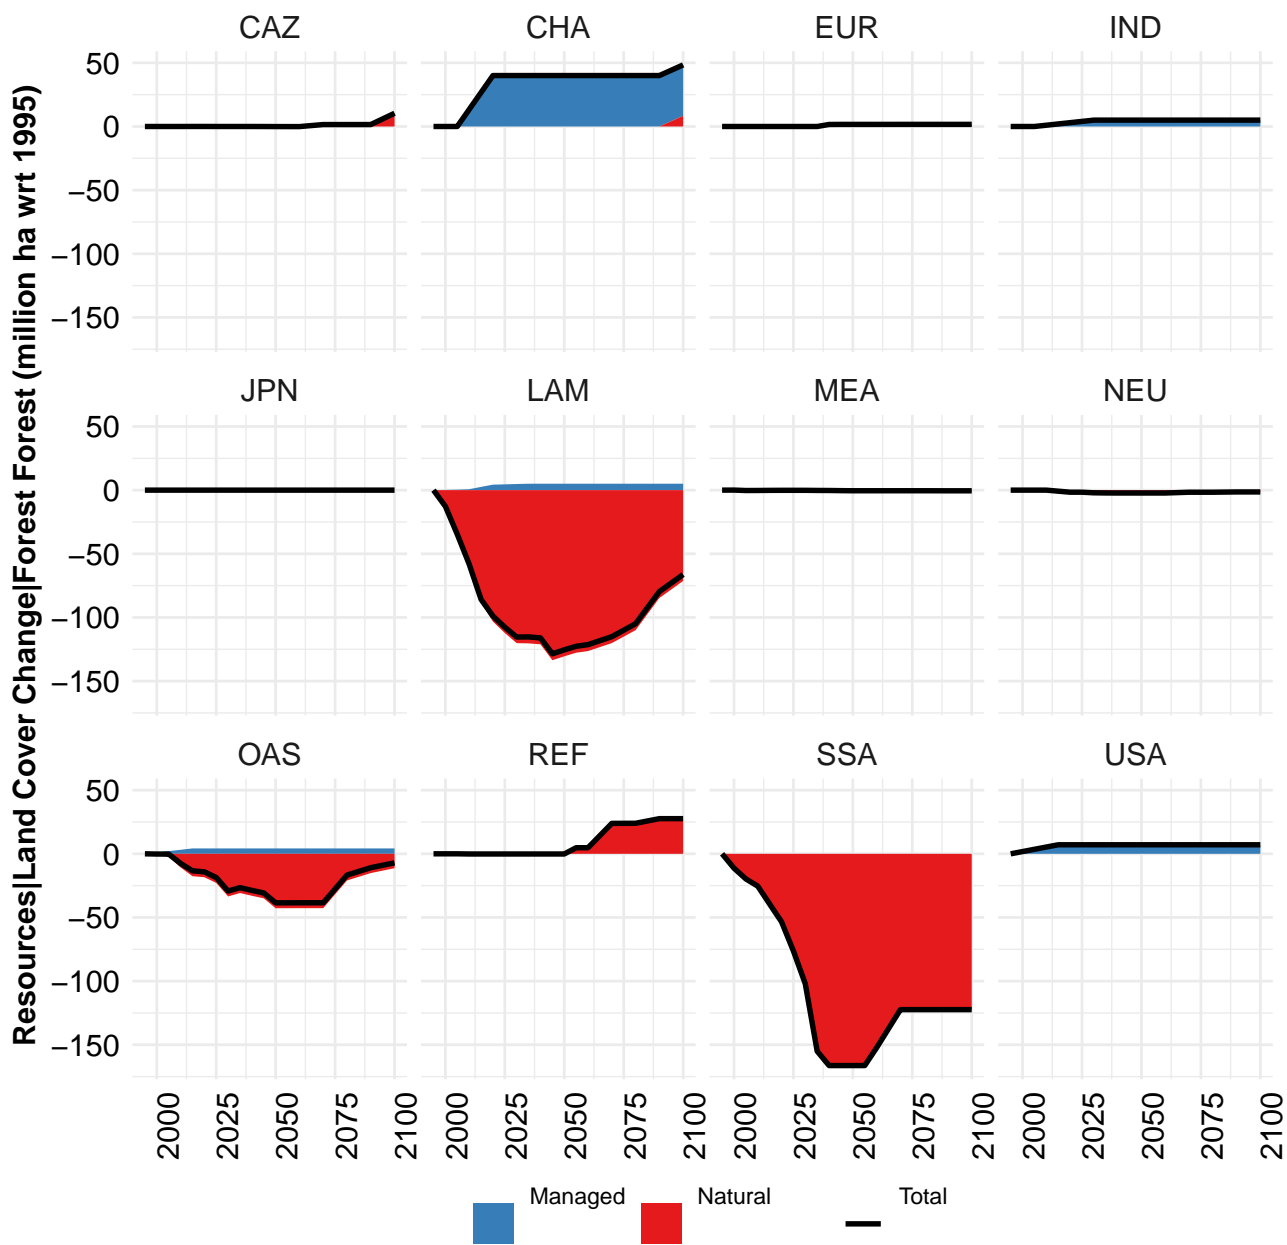

55.2 Forest

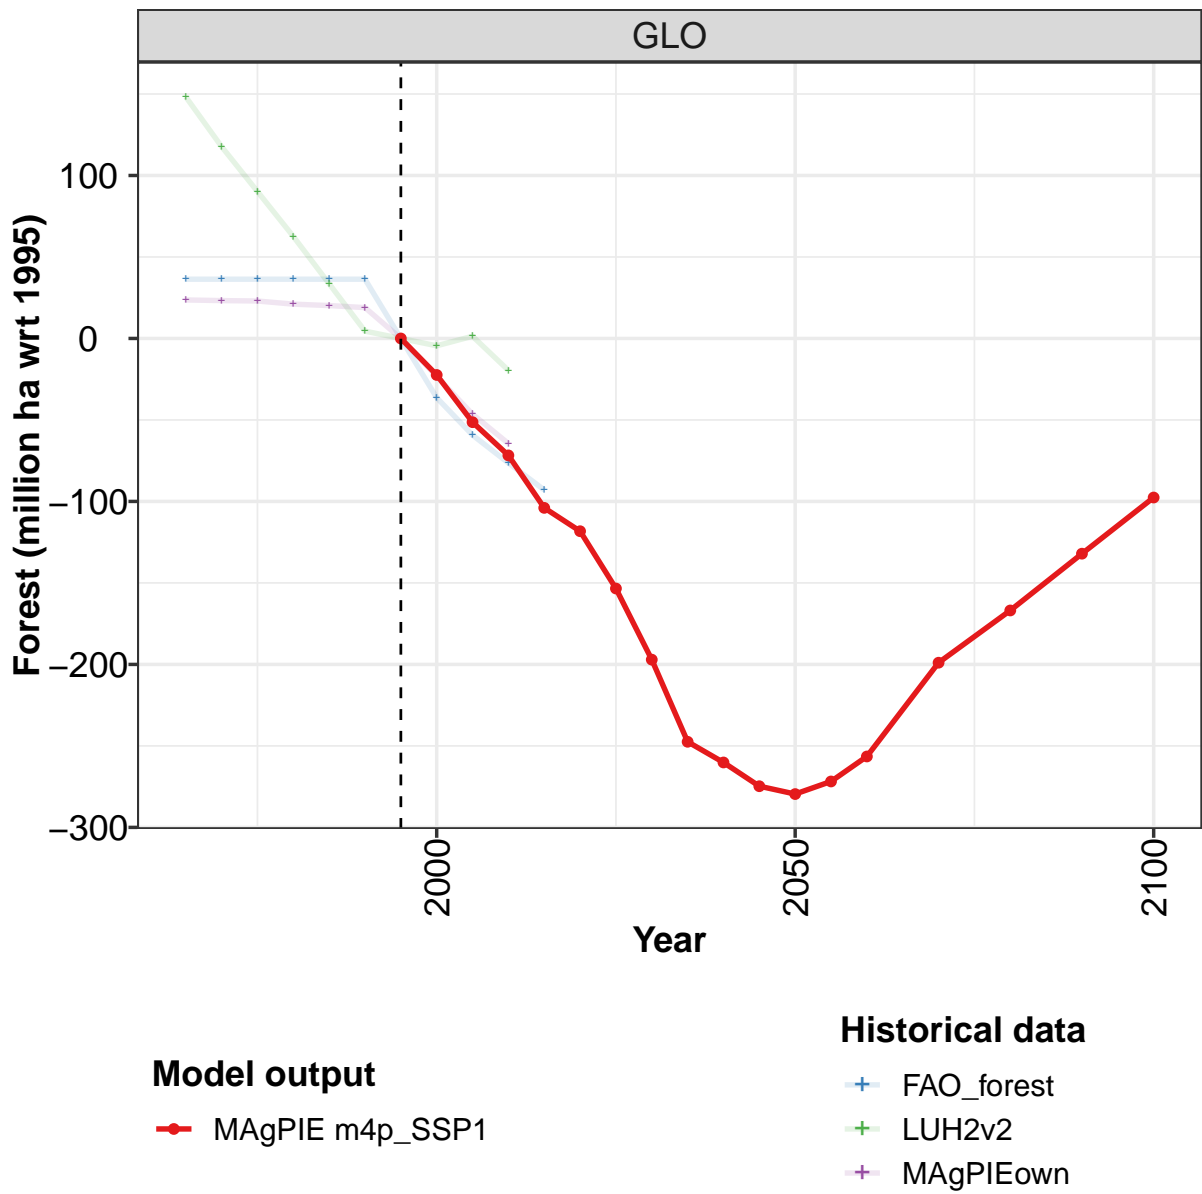

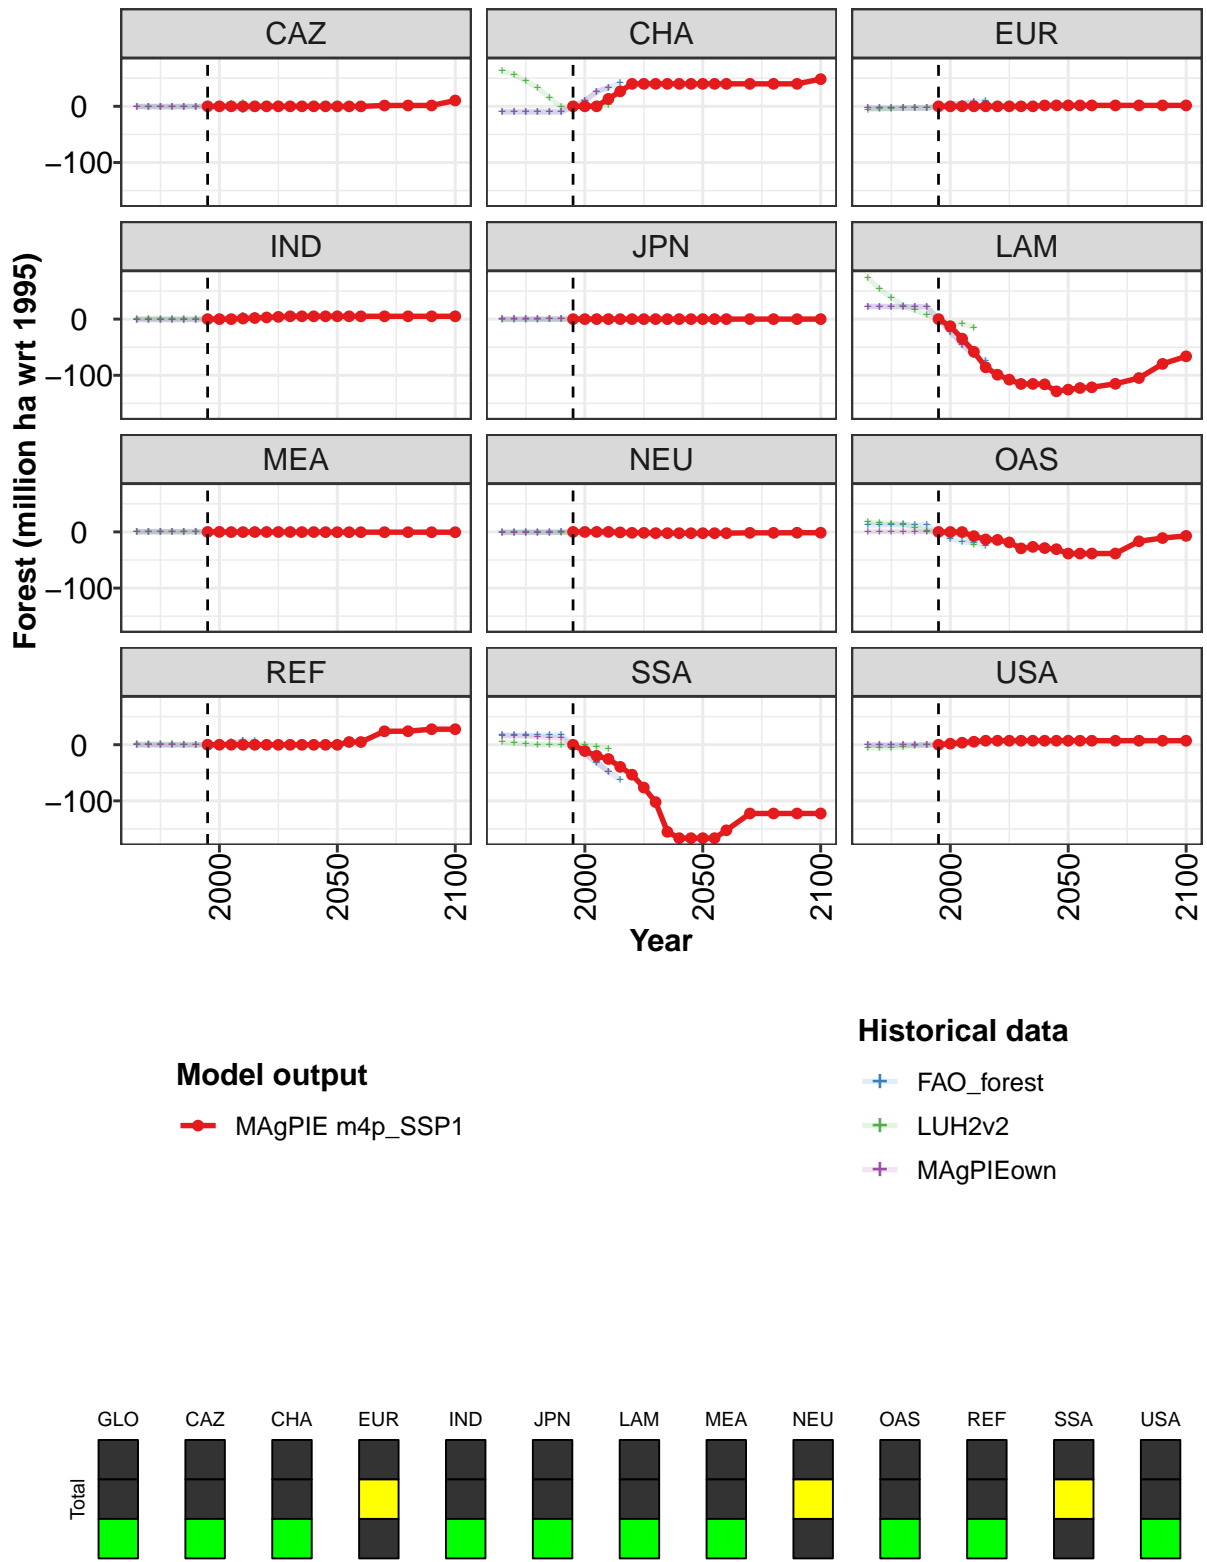

Figure 435: MAgPIE m4p\_SSP1 — Resources—Land Cover Change—Forest (million ha wrt 1995)

|     | 1995 | 2000  | 2005  | 2010  | 2015   | 2020   | 2025   | 2030   | 2035   | 2040   | 2045   |
|-----|------|-------|-------|-------|--------|--------|--------|--------|--------|--------|--------|
| GLO | 0.0  | -22.4 | -51.4 | -71.7 | -103.9 | -118.3 | -153.4 | -197.1 | -247.5 | -260.2 | -274.7 |
| CAZ | 0.0  | 0.0   | 0.0   | 0.0   | 0.0    | 0.0    | -0.0   | -0.0   | -0.0   | -0.0   | -0.0   |
| CHA | 0.0  | 0.0   | 0.0   | 13.3  | 26.7   | 40.0   | 40.0   | 40.0   | 40.0   | 40.0   | 40.0   |
| EUR | 0.0  | 0.0   | 0.0   | 0.0   | 0.0    | 0.0    | 0.0    | 0.0    | 0.0    | 1.6    | 1.6    |
| IND | 0.0  | 0.0   | 0.0   | 1.0   | 2.0    | 3.0    | 4.0    | 5.0    | 5.0    | 5.0    | 5.0    |
| JPN | 0.0  | 0.0   | 0.0   | 0.0   | 0.0    | 0.0    | 0.0    | 0.0    | 0.0    | 0.0    | 0.0    |
| LAM | 0.0  | -12.8 | -34.7 | -58.1 | -85.8  | -98.9  | -107.7 | -115.4 | -115.3 | -116.1 | -128.6 |
| MEA | 0.0  | 0.0   | -0.3  | -0.2  | -0.2   | -0.1   | -0.1   | -0.1   | -0.2   | -0.3   | -0.4   |
| NEU | 0.0  | 0.0   | -0.0  | -0.0  | -0.8   | -1.6   | -1.6   | -2.1   | -2.2   | -2.3   | -2.3   |
| OAS | 0.0  | -0.2  | -0.2  | -7.5  | -13.4  | -14.2  | -18.6  | -29.3  | -26.6  | -28.7  | -30.8  |
| REF | 0.0  | 0.0   | 0.0   | -0.1  | -0.1   | -0.1   | -0.1   | -0.1   | -0.1   | -0.1   | -0.1   |
| SSA | 0.0  | -11.3 | -19.7 | -25.4 | -39.4  | -53.4  | -76.3  | -102.1 | -155.1 | -166.3 | -166.3 |
| USA | 0.0  | 1.8   | 3.6   | 5.3   | 7.1    | 7.1    | 7.1    | 7.1    | 7.1    | 7.1    | 7.1    |

Table 1660: MAgPIE m4p\_SSP1 — Resources—Land Cover Change—Forest (million ha wrt 1995) [PART 1/2]

|     | 2050   | 2055   | 2060   | 2070   | 2080   | 2090   | 2100   |
|-----|--------|--------|--------|--------|--------|--------|--------|
| GLO | -279.5 | -271.8 | -256.5 | -198.9 | -166.9 | -132.1 | -97.6  |
| CAZ | -0.1   | -0.1   | -0.1   | 1.5    | 1.5    | 1.5    | 10.4   |
| CHA | 40.0   | 40.0   | 40.0   | 40.0   | 40.0   | 40.0   | 48.4   |
| EUR | 1.6    | 1.6    | 1.6    | 1.7    | 1.7    | 1.7    | 1.7    |
| IND | 5.0    | 5.0    | 5.0    | 5.0    | 5.0    | 5.0    | 5.0    |
| JPN | 0.0    | 0.0    | 0.0    | 0.0    | 0.0    | 0.0    | 0.0    |
| LAM | -125.5 | -122.6 | -121.4 | -115.1 | -104.9 | -79.7  | -66.3  |
| MEA | -0.5   | -0.5   | -0.5   | -0.5   | -0.5   | -0.5   | -0.5   |
| NEU | -2.3   | -2.3   | -2.3   | -1.6   | -1.6   | -1.4   | -1.4   |
| OAS | -38.5  | -38.5  | -38.5  | -38.5  | -16.7  | -10.9  | -7.1   |
| REF | -0.1   | 4.8    | 4.8    | 23.9   | 24.0   | 27.6   | 27.6   |
| SSA | -166.3 | -166.3 | -152.3 | -122.4 | -122.4 | -122.4 | -122.4 |
| USA | 7.1    | 7.1    | 7.1    | 7.1    | 7.1    | 7.1    | 7.1    |

Table 1661: MAgPIE m4p\_SSP1 — Resources—Land Cover Change—Forest (million ha wrt 1995) [PART 2/2]

|     | 1965 | 1970 | 1975 | 1980 | 1985 | 1990 | 1995 | 2000  | 2005  | 2010  | 2015  |
|-----|------|------|------|------|------|------|------|-------|-------|-------|-------|
| GLO | 36.3 | 36.3 | 36.3 | 36.3 | 36.3 | 36.3 | 0.0  | -36.3 | -59.3 | -76.4 | -92.9 |
| CAZ | -0.2 | -0.2 | -0.2 | -0.2 | -0.2 | -0.2 | 0.0  | 0.2   | -1.2  | -6.0  | -4.7  |
| CHA | -9.9 | -9.9 | -9.9 | -9.9 | -9.9 | -9.9 | 0.0  | 9.9   | 26.0  | 33.5  | 41.3  |
| EUR | -3.4 | -3.4 | -3.4 | -3.4 | -3.4 | -3.4 | 0.0  | 3.4   | 5.4   | 7.9   | 9.7   |
| IND | -0.7 | -0.7 | -0.7 | -0.7 | -0.7 | -0.7 | 0.0  | 0.7   | 3.0   | 5.1   | 6.0   |
| JPN | 0.0  | 0.0  | 0.0  | 0.0  | 0.0  | 0.0  | 0.0  | -0.0  | 0.0   | 0.1   | 0.0   |
| LAM | 22.3 | 22.3 | 22.3 | 22.3 | 22.3 | 22.3 | 0.0  | -22.3 | -46.1 | -63.9 | -74.8 |
| MEA | 0.6  | 0.6  | 0.6  | 0.6  | 0.6  | 0.6  | 0.0  | -0.6  | 0.4   | 0.3   | -0.5  |
| NEU | -0.4 | -0.4 | -0.4 | -0.4 | -0.4 | -0.4 | 0.0  | 0.4   | 0.9   | 1.9   | 2.5   |
| OAS | 12.3 | 12.3 | 12.3 | 12.3 | 12.3 | 12.3 | 0.0  | -12.3 | -17.8 | -19.5 | -24.7 |
| REF | -0.6 | -0.6 | -0.6 | -0.6 | -0.6 | -0.6 | 0.0  | 0.6   | 0.5   | 6.9   | 6.9   |
| SSA | 16.9 | 16.9 | 16.9 | 16.9 | 16.9 | 16.9 | 0.0  | -16.9 | -32.2 | -48.4 | -61.8 |
| USA | -0.5 | -0.5 | -0.5 | -0.5 | -0.5 | -0.5 | 0.0  | 0.5   | 1.8   | 5.7   | 7.1   |

Table 1662: FAO\_forest — Resources—Land Cover Change—Forest (million ha wrt 1995)

|     | 1965 | 1970 | 1975 | 1980 | 1985 | 1990 | 1995 | 2000 | 2005 | 2010 |
|-----|------|------|------|------|------|------|------|------|------|------|
| GLO | 148  | 118  | 90   | 63   | 34   | 5    | 0    | -5   | 1    | -20  |
| CAZ | -1   | -1   | -1   | -1   | -1   | -0   | 0    | 0    | 4    | 7    |
| CHA | 63   | 56   | 45   | 33   | 16   | -1   | 0    | 1    | 0    | 3    |
| EUR | -6   | -5   | -4   | -3   | -2   | -2   | 0    | 2    | 3    | 3    |
| IND | 1    | 1    | 0    | 0    | 0    | 0    | 0    | -0   | -0   | -0   |
| JPN | -1   | -1   | -1   | -0   | -0   | -0   | 0    | 0    | 0    | 0    |
| LAM | 74   | 53   | 39   | 24   | 16   | 8    | 0    | -8   | -8   | -15  |
| MEA | 0    | 0    | 0    | 0    | 0    | 0    | 0    | 0    | 0    | 0    |
| NEU | -1   | -1   | -1   | -1   | -1   | -1   | 0    | 1    | 1    | 1    |
| OAS | 18   | 16   | 15   | 14   | 8    | 2    | 0    | -2   | -4   | -22  |
| REF | 2    | 2    | 1    | 1    | 1    | 0    | 0    | -0   | 5    | 5    |
| SSA | 5    | 3    | 2    | 0    | -0   | -0   | 0    | 0    | -4   | -7   |
| USA | -6   | -5   | -5   | -4   | -2   | -1   | 0    | 1    | 3    | 6    |

Table 1663: LUH2v2 — Resources—Land Cover Change—Forest (million ha wrt 1995)

|     | 1965 | 1970 | 1975 | 1980 | 1985 | 1990 | 1995 | 2000  | 2005  | 2010  |
|-----|------|------|------|------|------|------|------|-------|-------|-------|
| GLO | 23.6 | 23.2 | 23.0 | 21.1 | 20.2 | 18.9 | 0.0  | -23.4 | -46.4 | -64.5 |
| CAZ | -0.2 | -0.2 | -0.2 | -0.4 | -0.2 | -0.2 | 0.0  | 0.2   | -1.2  | -6.0  |
| CHA | -9.9 | -9.9 | -9.9 | -9.9 | -9.9 | -9.9 | 0.0  | 9.9   | 26.0  | 33.5  |
| EUR | -3.4 | -3.4 | -3.4 | -3.4 | -3.4 | -3.4 | 0.0  | 3.4   | 5.4   | 7.9   |
| IND | -0.7 | -0.7 | -0.7 | -0.7 | -0.7 | -0.7 | 0.0  | 0.7   | 3.0   | 5.1   |
| JPN | 0.0  | 0.0  | 0.0  | 0.0  | 0.0  | 0.0  | 0.0  | -0.0  | 0.0   | 0.1   |
| LAM | 22.5 | 22.4 | 22.3 | 22.0 | 21.9 | 21.8 | 0.0  | -22.2 | -45.9 | -63.7 |
| MEA | 0.6  | 0.6  | 0.6  | 0.6  | 0.6  | 0.6  | 0.0  | -0.6  | 0.4   | 0.3   |
| NEU | -1.1 | -1.0 | -0.9 | -0.8 | -0.7 | -0.7 | 0.0  | 0.5   | 1.0   | 1.9   |
| OAS | 1.0  | 1.0  | 1.0  | 1.0  | 0.9  | 0.9  | 0.0  | -0.9  | -6.3  | -8.0  |
| REF | -0.6 | -0.6 | -0.6 | -0.6 | -0.6 | -0.6 | 0.0  | 0.6   | 0.5   | 6.9   |
| SSA | 16.1 | 15.7 | 15.4 | 13.9 | 12.8 | 11.7 | 0.0  | -15.5 | -31.0 | -48.1 |
| USA | -0.5 | -0.5 | -0.5 | -0.5 | -0.5 | -0.5 | 0.0  | 0.5   | 1.8   | 5.7   |

Table 1664: MAgPIEown — Resources—Land Cover Change—Forest (million ha wrt 1995)



55.2.1 Managed Forest

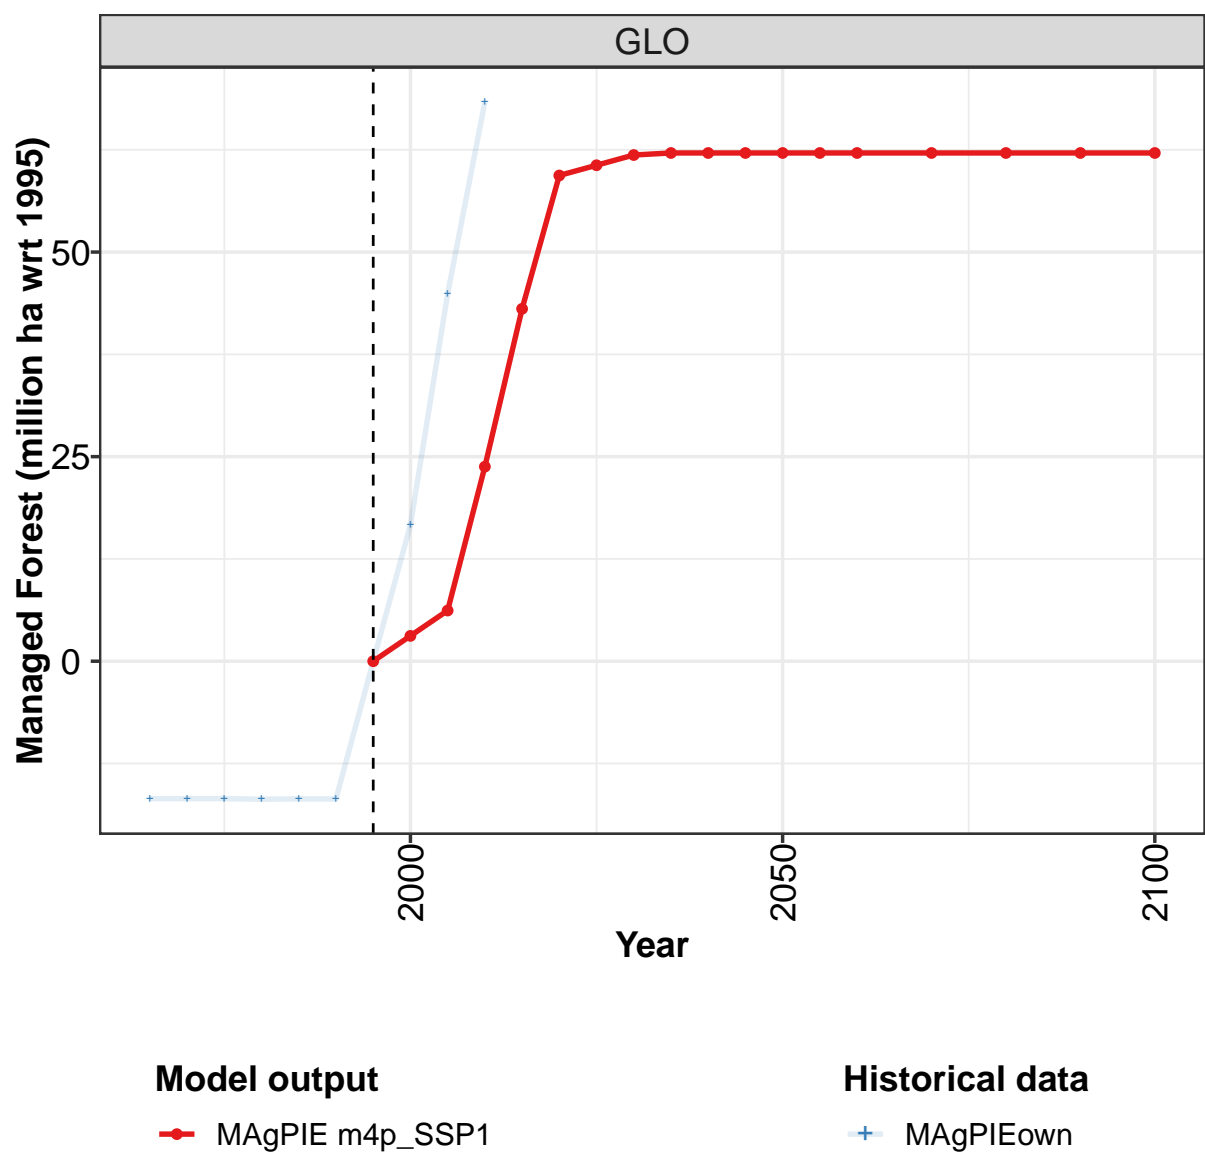

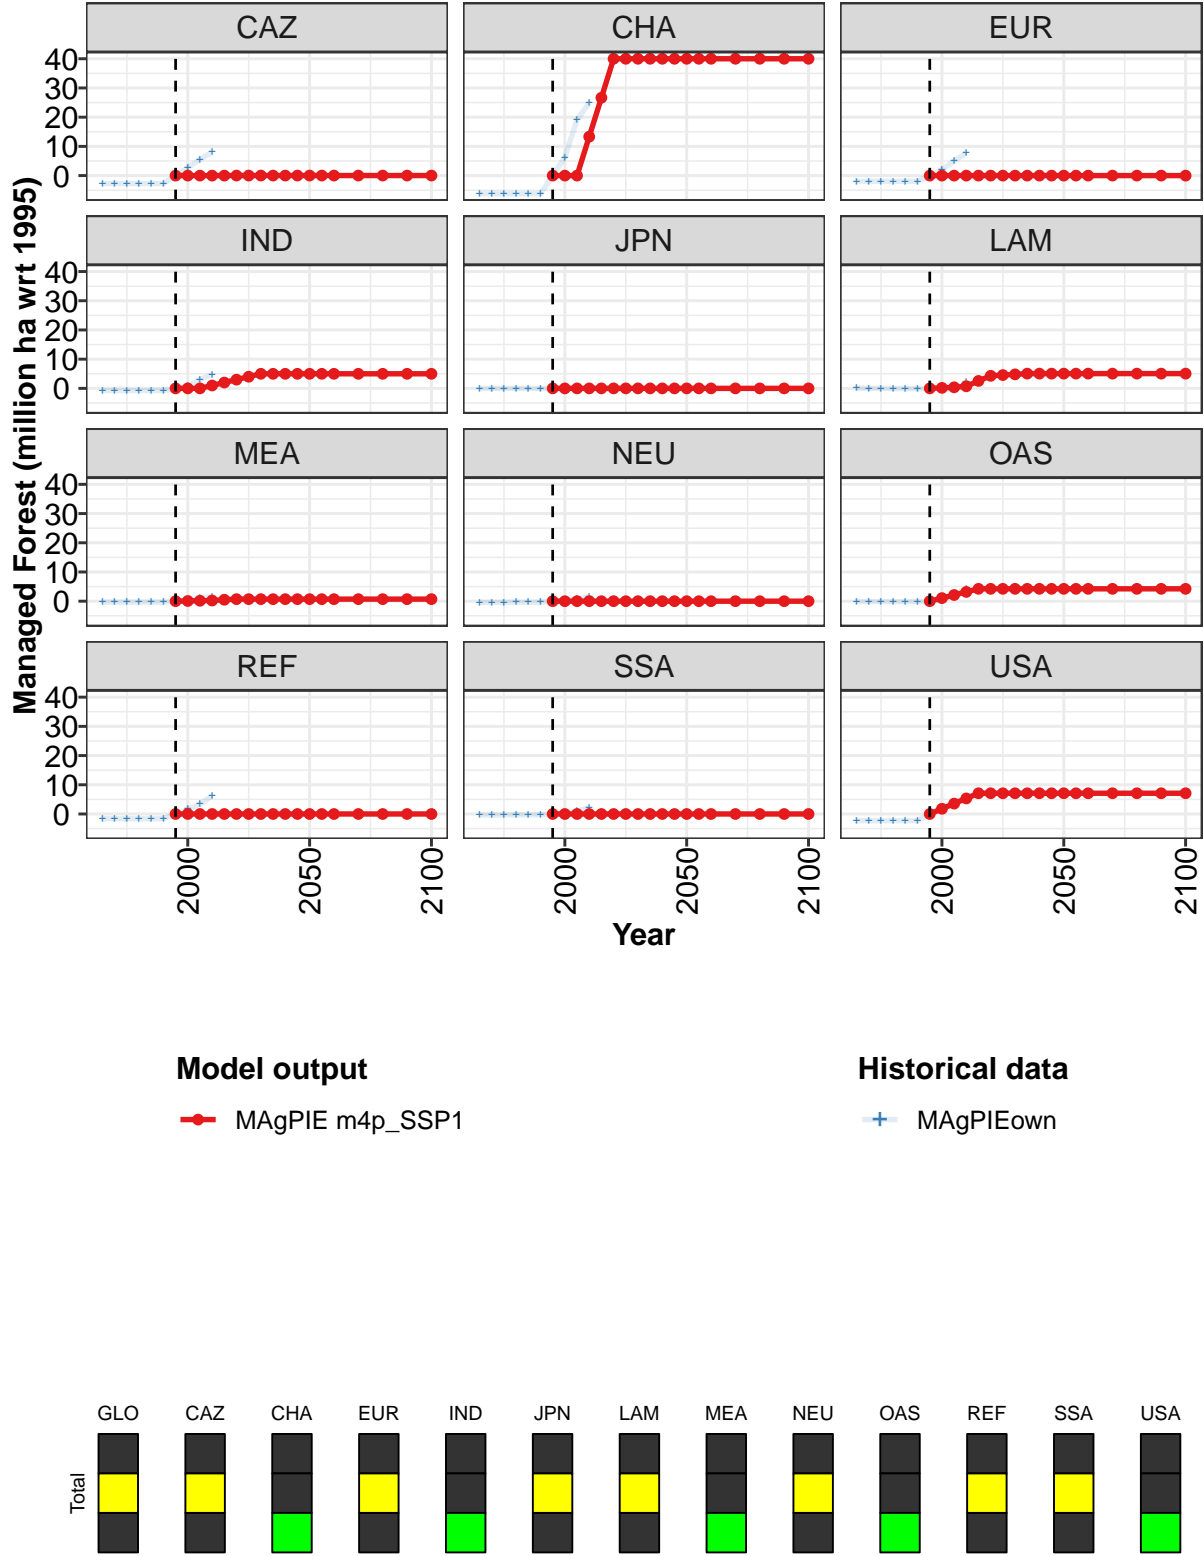

Figure 436: MAgPIE m4p\_SSP1 — Resources—Land Cover Change—Forest—Managed Forest (million ha wrt 1995)

|     | 1995 | 2000 | 2005 | 2010 | 2015 | 2020 | 2025 | 2030 | 2035 | 2040 | 2045 |
|-----|------|------|------|------|------|------|------|------|------|------|------|
| GLO | 0.0  | 3.1  | 6.2  | 23.8 | 43.1 | 59.4 | 60.6 | 61.9 | 62.1 | 62.1 | 62.1 |
| CAZ | 0.0  | 0.0  | 0.0  | 0.0  | 0.0  | 0.0  | 0.0  | 0.0  | 0.0  | 0.0  | 0.0  |
| CHA | 0.0  | 0.0  | 0.0  | 13.3 | 26.7 | 40.0 | 40.0 | 40.0 | 40.0 | 40.0 | 40.0 |
| EUR | 0.0  | 0.0  | 0.0  | 0.0  | 0.0  | 0.0  | 0.0  | 0.0  | 0.0  | 0.0  | 0.0  |
| IND | 0.0  | 0.0  | 0.0  | 1.0  | 2.0  | 3.0  | 4.0  | 5.0  | 5.0  | 5.0  | 5.0  |
| JPN | 0.0  | 0.0  | 0.0  | 0.0  | 0.0  | 0.0  | 0.0  | 0.0  | 0.0  | 0.0  | 0.0  |
| LAM | 0.0  | 0.2  | 0.4  | 0.7  | 2.6  | 4.3  | 4.6  | 4.8  | 5.1  | 5.1  | 5.1  |
| MEA | 0.0  | 0.1  | 0.2  | 0.2  | 0.5  | 0.7  | 0.7  | 0.7  | 0.7  | 0.7  | 0.7  |
| NEU | 0.0  | 0.0  | 0.0  | 0.0  | 0.0  | 0.0  | 0.0  | 0.0  | 0.0  | 0.0  | 0.0  |
| OAS | 0.0  | 1.1  | 2.1  | 3.2  | 4.2  | 4.2  | 4.2  | 4.2  | 4.2  | 4.2  | 4.2  |
| REF | 0.0  | 0.0  | 0.0  | 0.0  | 0.0  | 0.0  | 0.0  | 0.0  | 0.0  | 0.0  | 0.0  |
| SSA | 0.0  | 0.0  | 0.0  | 0.0  | 0.0  | 0.0  | 0.0  | 0.0  | 0.0  | 0.0  | 0.0  |
| USA | 0.0  | 1.8  | 3.6  | 5.3  | 7.1  | 7.1  | 7.1  | 7.1  | 7.1  | 7.1  | 7.1  |

Table 1665: MAgPIE m4p\_SSP1 — Resources—Land Cover Change—Forest—Managed Forest (million ha wrt 1995) [PART 1/2]

|     | 2050 | 2055 | 2060 | 2070 | 2080 | 2090 | 2100 |
|-----|------|------|------|------|------|------|------|
| GLO | 62.1 | 62.1 | 62.1 | 62.1 | 62.1 | 62.1 | 62.1 |
| CAZ | 0.0  | 0.0  | 0.0  | 0.0  | 0.0  | 0.0  | 0.0  |
| CHA | 40.0 | 40.0 | 40.0 | 40.0 | 40.0 | 40.0 | 40.0 |
| EUR | 0.0  | 0.0  | 0.0  | 0.0  | 0.0  | 0.0  | 0.0  |
| IND | 5.0  | 5.0  | 5.0  | 5.0  | 5.0  | 5.0  | 5.0  |
| JPN | 0.0  | 0.0  | 0.0  | 0.0  | 0.0  | 0.0  | 0.0  |
| LAM | 5.1  | 5.1  | 5.1  | 5.1  | 5.1  | 5.1  | 5.1  |
| MEA | 0.7  | 0.7  | 0.7  | 0.7  | 0.7  | 0.7  | 0.7  |
| NEU | 0.0  | 0.0  | 0.0  | 0.0  | 0.0  | 0.0  | 0.0  |
| OAS | 4.2  | 4.2  | 4.2  | 4.2  | 4.2  | 4.2  | 4.2  |
| REF | 0.0  | 0.0  | 0.0  | 0.0  | 0.0  | 0.0  | 0.0  |
| SSA | 0.0  | 0.0  | 0.0  | 0.0  | 0.0  | 0.0  | 0.0  |
| USA | 7.1  | 7.1  | 7.1  | 7.1  | 7.1  | 7.1  | 7.1  |

Table 1666: MAgPIE m4p\_SSP1 — Resources—Land Cover Change—Forest—Managed Forest (million ha wrt 1995) [PART 2/2]

|     | 1965  | 1970  | 1975  | 1980  | 1985  | 1990  | 1995 | 2000 | 2005 | 2010 |
|-----|-------|-------|-------|-------|-------|-------|------|------|------|------|
| GLO | -16.8 | -16.8 | -16.8 | -16.9 | -16.8 | -16.8 | 0.0  | 16.7 | 44.9 | 68.3 |
| CAZ | -2.7  | -2.7  | -2.7  | -2.8  | -2.7  | -2.7  | 0.0  | 2.7  | 5.5  | 8.1  |
| CHA | -6.2  | -6.2  | -6.2  | -6.2  | -6.2  | -6.2  | 0.0  | 6.2  | 19.0 | 24.9 |
| EUR | -2.0  | -2.0  | -2.0  | -2.0  | -2.0  | -2.0  | 0.0  | 2.0  | 5.0  | 7.8  |
| IND | -0.7  | -0.7  | -0.7  | -0.7  | -0.7  | -0.7  | 0.0  | 0.7  | 3.0  | 4.7  |
| JPN | -0.0  | -0.0  | -0.0  | -0.0  | -0.0  | -0.0  | 0.0  | 0.0  | 0.0  | -0.0 |
| LAM | 0.0   | 0.0   | -0.0  | -0.1  | -0.1  | -0.1  | 0.0  | -0.1 | -0.3 | 2.1  |
| MEA | -0.3  | -0.3  | -0.3  | -0.3  | -0.3  | -0.3  | 0.0  | 0.3  | 1.2  | 1.5  |
| NEU | -0.4  | -0.4  | -0.4  | -0.4  | -0.4  | -0.3  | 0.0  | 0.3  | 0.7  | 1.5  |
| OAS | -0.1  | -0.1  | -0.1  | -0.1  | -0.1  | -0.2  | 0.0  | 0.2  | 2.2  | 4.2  |
| REF | -1.6  | -1.6  | -1.6  | -1.6  | -1.6  | -1.6  | 0.0  | 1.6  | 3.3  | 6.2  |
| SSA | -0.3  | -0.3  | -0.3  | -0.3  | -0.3  | -0.3  | 0.0  | 0.3  | 1.0  | 2.1  |
| USA | -2.3  | -2.3  | -2.3  | -2.3  | -2.3  | -2.3  | 0.0  | 2.3  | 4.2  | 5.3  |

Table 1667: MAgPIEown — Resources—Land Cover Change—Forest—Managed Forest (million ha wrt 1995)

55.2.2 Natural Forest

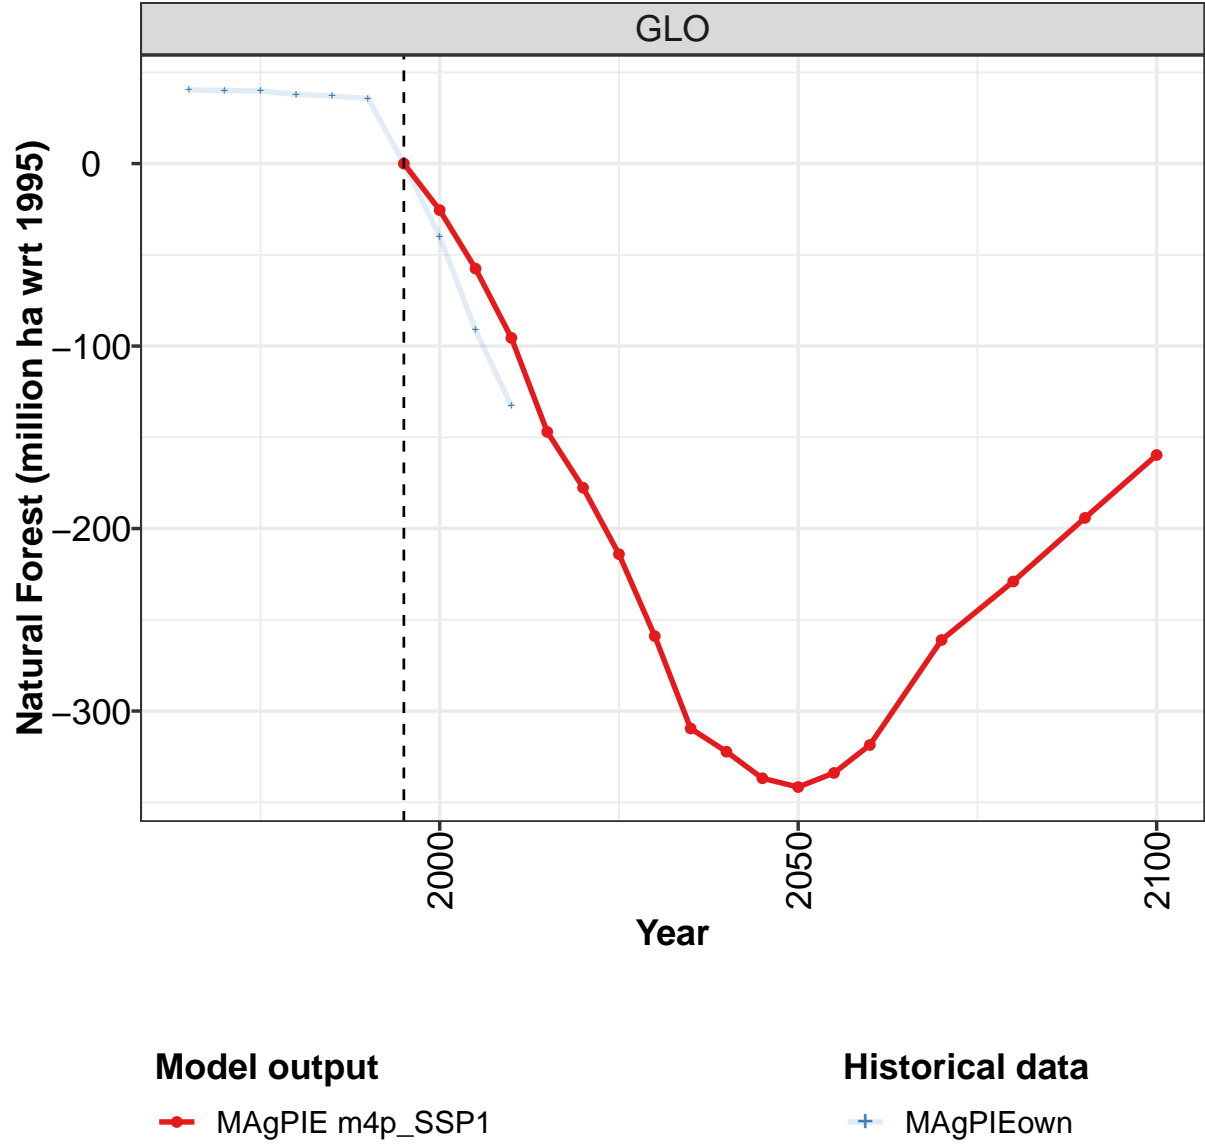

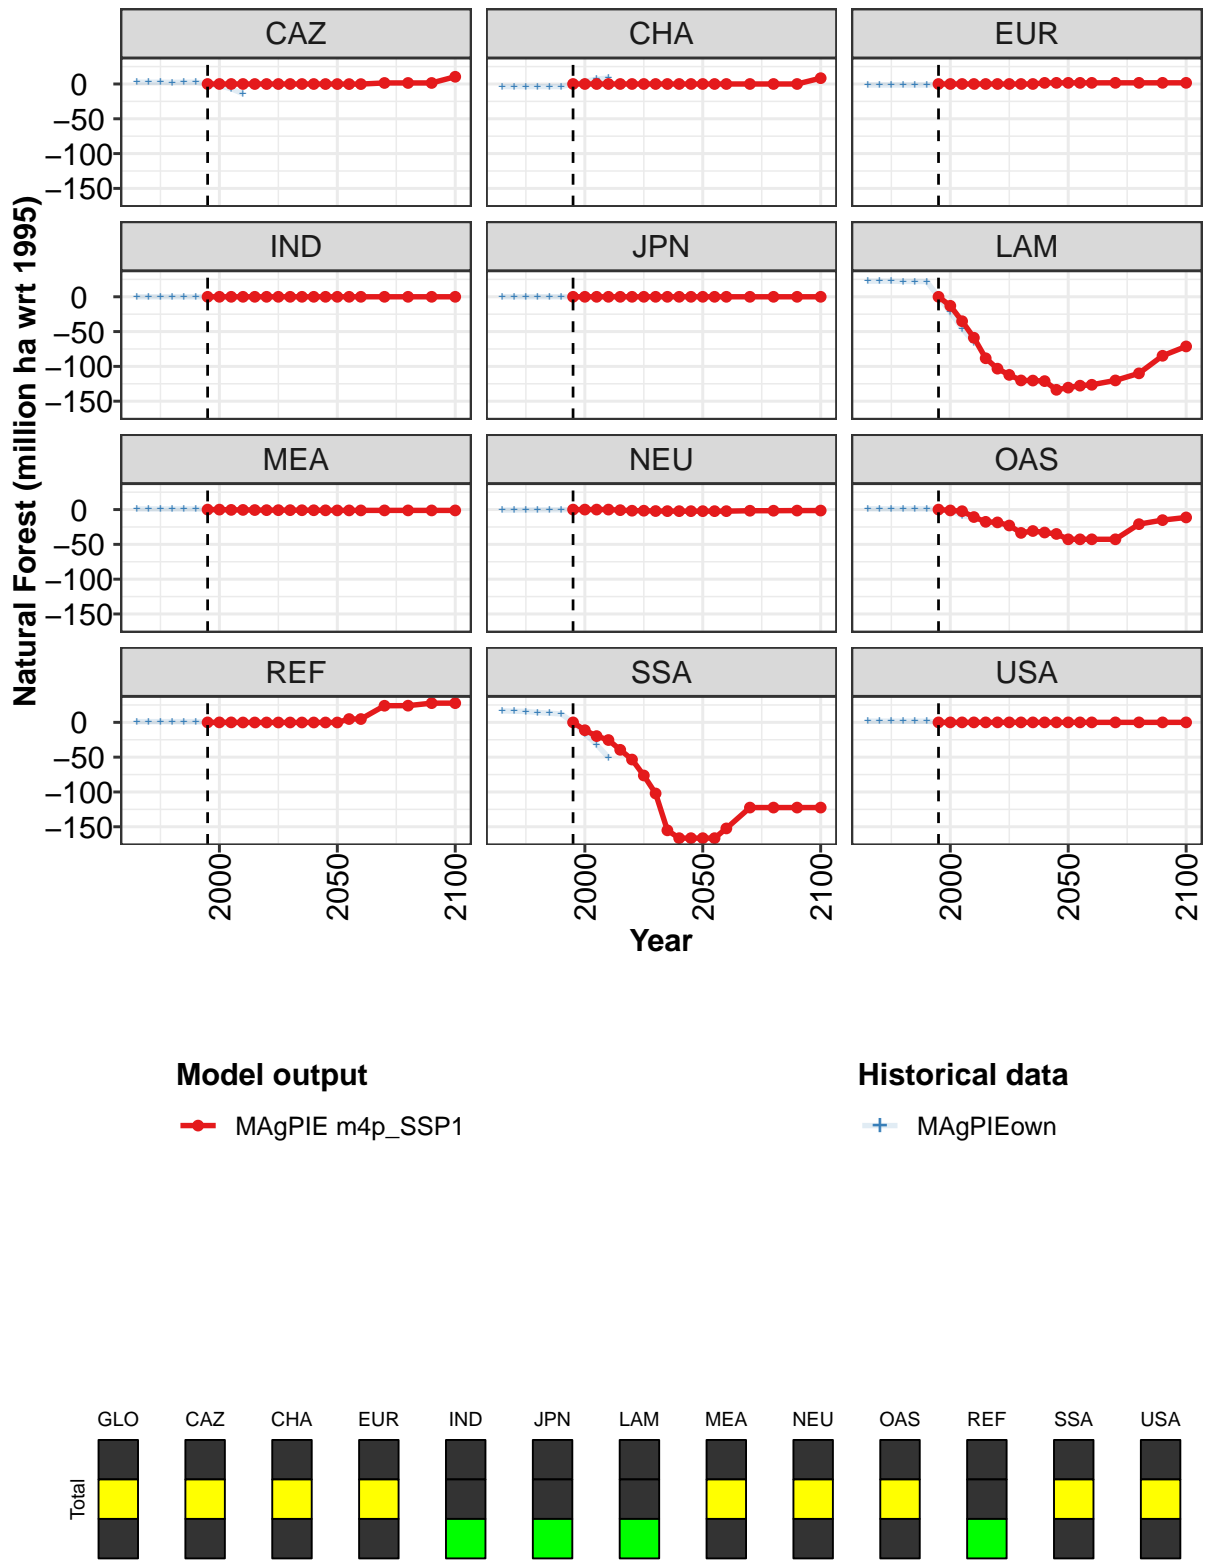

Figure 437: MAgPIE m4p\_SSP1 — Resources—Land Cover Change—Forest—Natural Forest (million ha wrt 1995)

|     | 1995 | 2000  | 2005  | 2010  | 2015   | 2020   | 2025   | 2030   | 2035   | 2040   | 2045   |
|-----|------|-------|-------|-------|--------|--------|--------|--------|--------|--------|--------|
| GLO | 0.0  | -25.5 | -57.6 | -95.5 | -147.0 | -177.6 | -214.0 | -258.9 | -309.6 | -322.3 | -336.8 |
| CAZ | 0.0  | 0.0   | 0.0   | 0.0   | -0.0   | -0.0   | -0.0   | -0.0   | -0.0   | -0.0   | -0.0   |
| CHA | 0.0  | 0.0   | 0.0   | 0.0   | 0.0    | 0.0    | 0.0    | 0.0    | 0.0    | 0.0    | 0.0    |
| EUR | 0.0  | 0.0   | 0.0   | 0.0   | 0.0    | 0.0    | 0.0    | 0.0    | 0.0    | 1.6    | 1.6    |
| IND | 0.0  | 0.0   | 0.0   | 0.0   | 0.0    | 0.0    | 0.0    | 0.0    | 0.0    | 0.0    | 0.0    |
| JPN | 0.0  | 0.0   | 0.0   | 0.0   | 0.0    | 0.0    | 0.0    | 0.0    | 0.0    | 0.0    | 0.0    |
| LAM | 0.0  | -13.0 | -35.1 | -58.8 | -88.3  | -103.3 | -112.2 | -120.2 | -120.4 | -121.1 | -133.6 |
| MEA | 0.0  | -0.0  | -0.4  | -0.5  | -0.7   | -0.8   | -0.8   | -0.8   | -0.9   | -1.0   | -1.1   |
| NEU | 0.0  | 0.0   | -0.0  | -0.0  | -0.8   | -1.6   | -1.6   | -2.1   | -2.2   | -2.3   | -2.3   |
| OAS | 0.0  | -1.2  | -2.3  | -10.7 | -17.6  | -18.4  | -22.9  | -33.5  | -30.8  | -33.0  | -35.0  |
| REF | 0.0  | 0.0   | 0.0   | -0.1  | -0.1   | -0.1   | -0.1   | -0.1   | -0.1   | -0.1   | -0.1   |
| SSA | 0.0  | -11.3 | -19.7 | -25.4 | -39.4  | -53.4  | -76.3  | -102.1 | -155.1 | -166.3 | -166.3 |
| USA | 0.0  | 0.0   | 0.0   | 0.0   | 0.0    | 0.0    | 0.0    | 0.0    | 0.0    | 0.0    | 0.0    |

Table 1668: MAgPIE m4p\_SSP1 — Resources—Land Cover Change—Forest—Natural Forest (million ha wrt 1995) [PART 1/2]

|     | 2050   | 2055   | 2060   | 2070   | 2080   | 2090   | 2100   |
|-----|--------|--------|--------|--------|--------|--------|--------|
| GLO | -341.7 | -333.9 | -318.6 | -261.1 | -229.0 | -194.2 | -159.7 |
| CAZ | -0.1   | -0.1   | -0.1   | 1.5    | 1.5    | 1.5    | 10.4   |
| CHA | 0.0    | 0.0    | 0.0    | 0.0    | 0.0    | 0.0    | 8.4    |
| EUR | 1.6    | 1.6    | 1.6    | 1.7    | 1.7    | 1.7    | 1.7    |
| IND | 0.0    | 0.0    | 0.0    | 0.0    | 0.0    | 0.0    | 0.0    |
| JPN | 0.0    | 0.0    | 0.0    | 0.0    | 0.0    | 0.0    | 0.0    |
| LAM | -130.5 | -127.7 | -126.4 | -120.2 | -110.0 | -84.7  | -71.3  |
| MEA | -1.2   | -1.2   | -1.2   | -1.2   | -1.2   | -1.2   | -1.2   |
| NEU | -2.3   | -2.3   | -2.3   | -1.6   | -1.6   | -1.4   | -1.4   |
| OAS | -42.7  | -42.7  | -42.7  | -42.7  | -20.9  | -15.1  | -11.3  |
| REF | -0.1   | 4.8    | 4.8    | 23.9   | 24.0   | 27.6   | 27.6   |
| SSA | -166.3 | -166.3 | -152.3 | -122.4 | -122.4 | -122.4 | -122.4 |
| USA | 0.0    | 0.0    | 0.0    | 0.0    | 0.0    | 0.0    | 0.0    |

Table 1669: MAgPIE m4p\_SSP1 — Resources—Land Cover Change—Forest—Natural Forest (million ha wrt 1995) [PART 2/2]

|     | 1965 | 1970 | 1975 | 1980 | 1985 | 1990 | 1995 | 2000  | 2005  | 2010   |
|-----|------|------|------|------|------|------|------|-------|-------|--------|
| GLO | 40.4 | 40.0 | 39.8 | 37.9 | 37.0 | 35.8 | 0.0  | -40.0 | -91.3 | -132.8 |
| CAZ | 2.6  | 2.6  | 2.6  | 2.3  | 2.6  | 2.6  | 0.0  | -2.6  | -6.8  | -14.0  |
| CHA | -3.7 | -3.7 | -3.7 | -3.7 | -3.7 | -3.7 | 0.0  | 3.7   | 6.9   | 8.6    |
| EUR | -1.5 | -1.5 | -1.5 | -1.5 | -1.5 | -1.5 | 0.0  | 1.5   | 0.4   | 0.1    |
| IND | 0.0  | 0.0  | 0.0  | 0.0  | 0.0  | 0.0  | 0.0  | 0.0   | 0.0   | 0.4    |
| JPN | 0.1  | 0.1  | 0.1  | 0.1  | 0.1  | 0.1  | 0.0  | -0.1  | 0.0   | 0.1    |
| LAM | 22.4 | 22.4 | 22.3 | 22.1 | 22.0 | 21.9 | 0.0  | -22.2 | -45.6 | -65.8  |
| MEA | 0.9  | 0.9  | 0.9  | 0.9  | 0.9  | 0.9  | 0.0  | -0.9  | -0.7  | -1.2   |
| NEU | -0.7 | -0.6 | -0.5 | -0.4 | -0.4 | -0.3 | 0.0  | 0.2   | 0.4   | 0.3    |
| OAS | 1.1  | 1.1  | 1.1  | 1.1  | 1.1  | 1.0  | 0.0  | -1.0  | -8.6  | -12.2  |
| REF | 1.0  | 1.0  | 1.0  | 1.0  | 1.0  | 1.0  | 0.0  | -1.0  | -2.9  | 0.7    |
| SSA | 16.5 | 16.0 | 15.7 | 14.2 | 13.1 | 12.0 | 0.0  | -15.8 | -32.1 | -50.2  |
| USA | 1.8  | 1.8  | 1.8  | 1.8  | 1.8  | 1.8  | 0.0  | -1.8  | -2.4  | 0.4    |

Table 1670: MAgPIEown — Resources—Land Cover Change—Forest—Natural Forest (million ha wrt 1995)

55.2.3 Natural Forest—Primary Forest

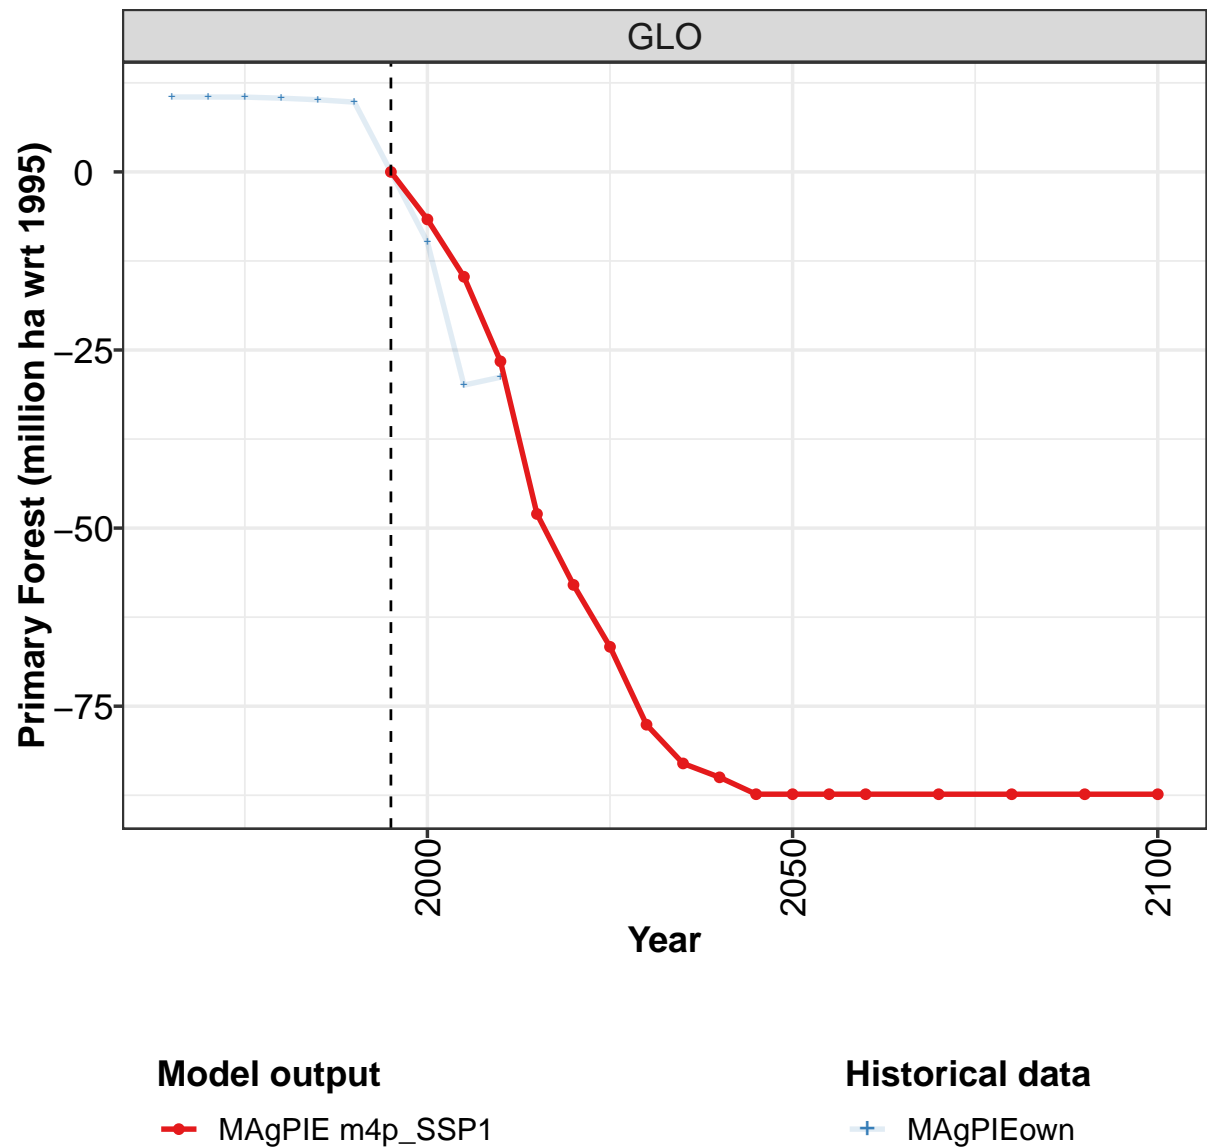

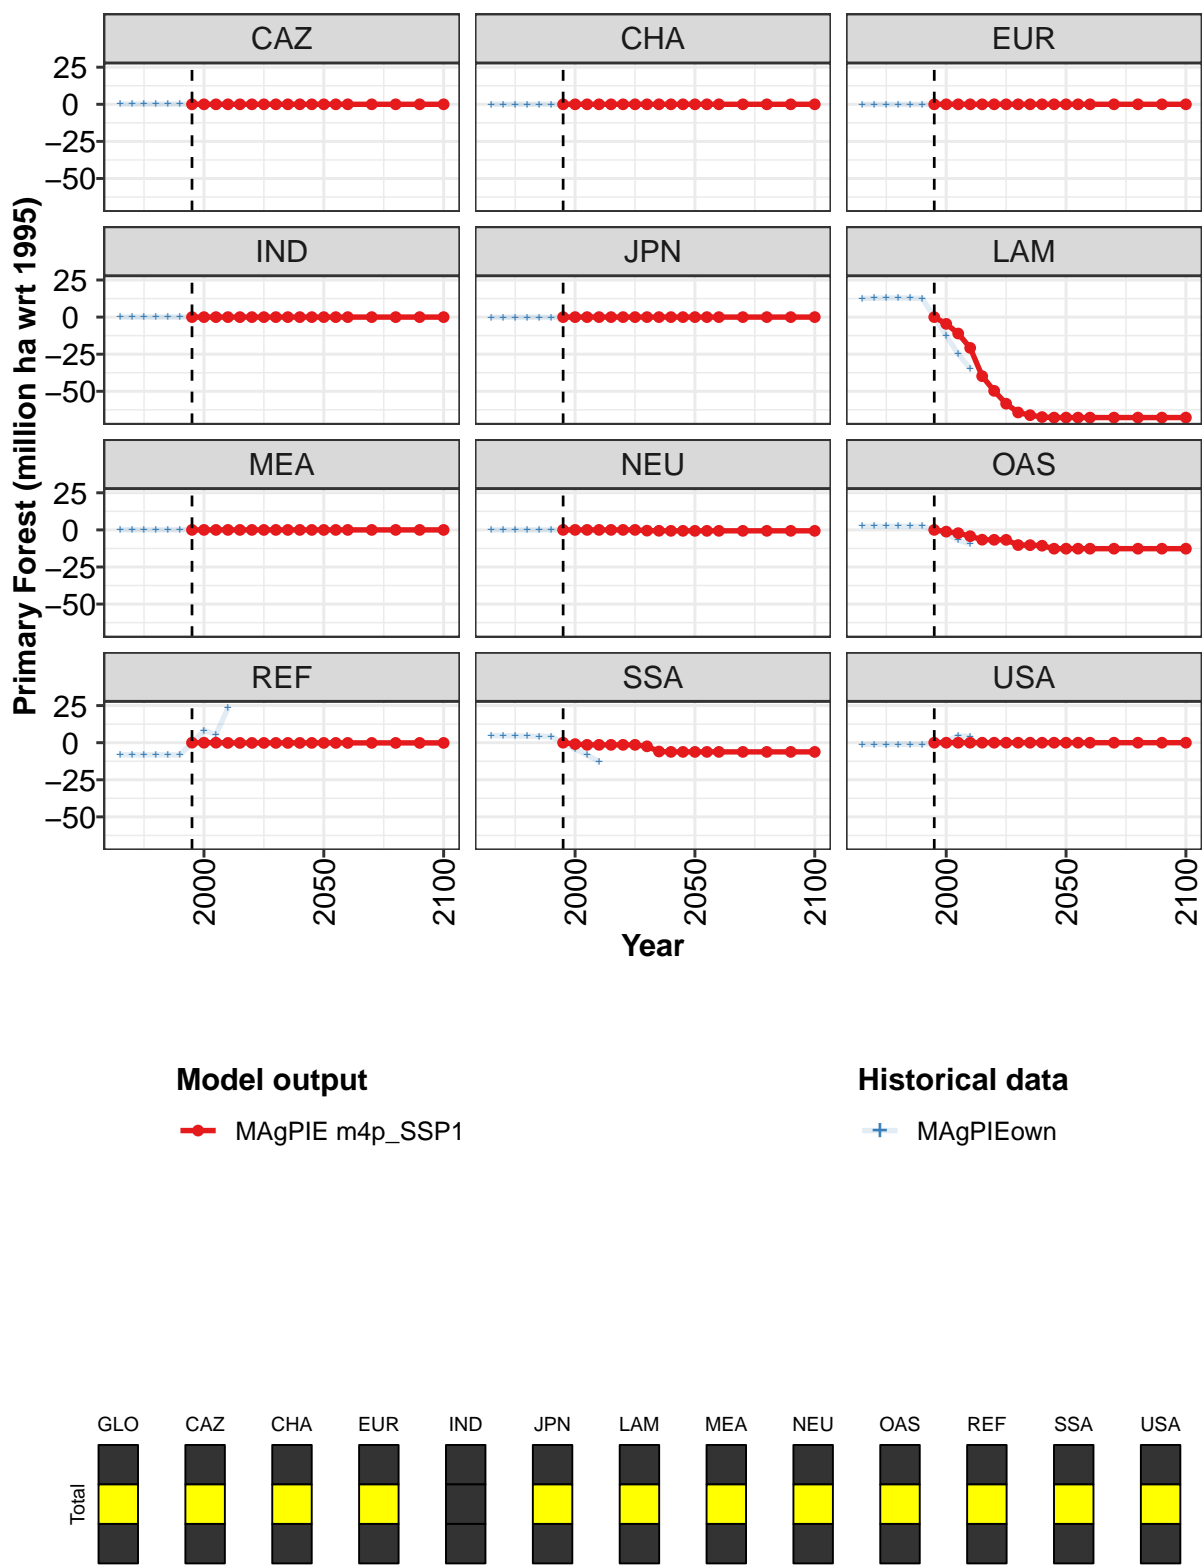

Figure 438: MAgPIE m4p\_SSP1 — Resources—Land Cover Change—Forest—Natural Forest—Primary Forest (million ha wrt 1995)



|     | 1995 | 2000 | 2005 | 2010 | 2015 | 2020 | 2025 | 2030 | 2035 | 2040 | 2045 |
|-----|------|------|------|------|------|------|------|------|------|------|------|
| GLO | 0    | -7   | -15  | -27  | -48  | -58  | -67  | -78  | -83  | -85  | -87  |
| CAZ | 0    | 0    | 0    | 0    | 0    | 0    | 0    | 0    | 0    | 0    | 0    |
| CHA | 0    | 0    | 0    | 0    | 0    | 0    | 0    | 0    | 0    | 0    | 0    |
| EUR | 0    | 0    | 0    | 0    | 0    | 0    | 0    | 0    | 0    | 0    | 0    |
| IND | 0    | 0    | 0    | 0    | 0    | 0    | 0    | 0    | 0    | 0    | 0    |
| JPN | 0    | 0    | 0    | 0    | 0    | 0    | 0    | 0    | 0    | 0    | 0    |
| LAM | 0    | -5   | -11  | -21  | -40  | -50  | -58  | -64  | -66  | -67  | -68  |
| MEA | 0    | 0    | -0   | -0   | -0   | -0   | -0   | -0   | -0   | -0   | -0   |
| NEU | 0    | 0    | -0   | -0   | -0   | -0   | -0   | -0   | -1   | -1   | -1   |
| OAS | 0    | -1   | -2   | -4   | -7   | -7   | -7   | -10  | -10  | -11  | -13  |
| REF | 0    | 0    | 0    | -0   | -0   | -0   | -0   | -0   | -0   | -0   | -0   |
| SSA | 0    | -1   | -1   | -1   | -1   | -1   | -1   | -2   | -6   | -6   | -6   |
| USA | 0    | 0    | 0    | 0    | 0    | 0    | 0    | 0    | 0    | 0    | 0    |

Table 1671: MAgPIE m4p.SSP1 — Resources—Land Cover Change—Forest—Natural Forest—Primary Forest (million ha wrt 1995) [PART 1/2]

|     | 2050 | 2055 | 2060 | 2070 | 2080 | 2090 | 2100 |
|-----|------|------|------|------|------|------|------|
| GLO | -87  | -87  | -87  | -87  | -87  | -87  | -87  |
| CAZ | 0    | 0    | 0    | 0    | 0    | 0    | 0    |
| CHA | 0    | 0    | 0    | 0    | 0    | 0    | 0    |
| EUR | 0    | 0    | 0    | 0    | 0    | 0    | 0    |
| IND | 0    | 0    | 0    | 0    | 0    | 0    | 0    |
| JPN | 0    | 0    | 0    | 0    | 0    | 0    | 0    |
| LAM | -68  | -68  | -68  | -68  | -68  | -68  | -68  |
| MEA | -0   | -0   | -0   | -0   | -0   | -0   | -0   |
| NEU | -1   | -1   | -1   | -1   | -1   | -1   | -1   |
| OAS | -13  | -13  | -13  | -13  | -13  | -13  | -13  |
| REF | -0   | -0   | -0   | -0   | -0   | -0   | -0   |
| SSA | -6   | -6   | -6   | -6   | -6   | -6   | -6   |
| USA | 0    | 0    | 0    | 0    | 0    | 0    | 0    |

Table 1672: MAgPIE m4p.SSP1 — Resources—Land Cover Change—Forest—Natural Forest—Primary Forest (million ha wrt 1995) [PART 2/2]

|     | 1965 | 1970 | 1975 | 1980 | 1985 | 1990 | 1995 | 2000  | 2005  | 2010  |
|-----|------|------|------|------|------|------|------|-------|-------|-------|
| GLO | 10.5 | 10.5 | 10.5 | 10.3 | 10.1 | 9.8  | 0.0  | -9.9  | -29.9 | -28.8 |
| CAZ | 0.1  | 0.1  | 0.1  | 0.1  | 0.1  | 0.1  | 0.0  | -0.1  | -0.3  | -0.7  |
| CHA | 0.0  | 0.0  | 0.0  | 0.0  | 0.0  | 0.0  | 0.0  | -0.0  | -0.0  | -0.0  |
| EUR | -0.1 | -0.1 | -0.1 | -0.1 | -0.1 | -0.1 | 0.0  | 0.1   | 0.1   | 0.4   |
| IND | 0.0  | 0.0  | 0.0  | 0.0  | 0.0  | 0.0  | 0.0  | 0.0   | 0.0   | 0.0   |
| JPN | -0.1 | -0.1 | -0.1 | -0.1 | -0.1 | -0.1 | 0.0  | 0.1   | 0.5   | 0.9   |
| LAM | 12.6 | 12.7 | 12.8 | 12.9 | 12.8 | 12.6 | 0.0  | -12.6 | -25.0 | -34.5 |
| MEA | 0.1  | 0.1  | 0.1  | 0.1  | 0.1  | 0.1  | 0.0  | -0.1  | -0.1  | -0.2  |
| NEU | -0.0 | -0.0 | -0.0 | -0.0 | -0.0 | -0.0 | 0.0  | 0.0   | 0.0   | 0.1   |
| OAS | 2.5  | 2.5  | 2.5  | 2.5  | 2.5  | 2.4  | 0.0  | -2.4  | -7.0  | -9.5  |
| REF | -8.2 | -8.2 | -8.2 | -8.2 | -8.2 | -8.2 | 0.0  | 8.2   | 5.6   | 23.3  |
| SSA | 4.8  | 4.7  | 4.6  | 4.4  | 4.3  | 4.2  | 0.0  | -4.2  | -8.3  | -12.7 |
| USA | -1.1 | -1.1 | -1.1 | -1.1 | -1.1 | -1.1 | 0.0  | 1.1   | 4.6   | 4.1   |

Table 1673: MAgPIEown — Resources—Land Cover Change—Forest—Natural Forest—Primary Forest (million ha wrt 1995)

55.2.4 Natural Forest—Secondary Forest

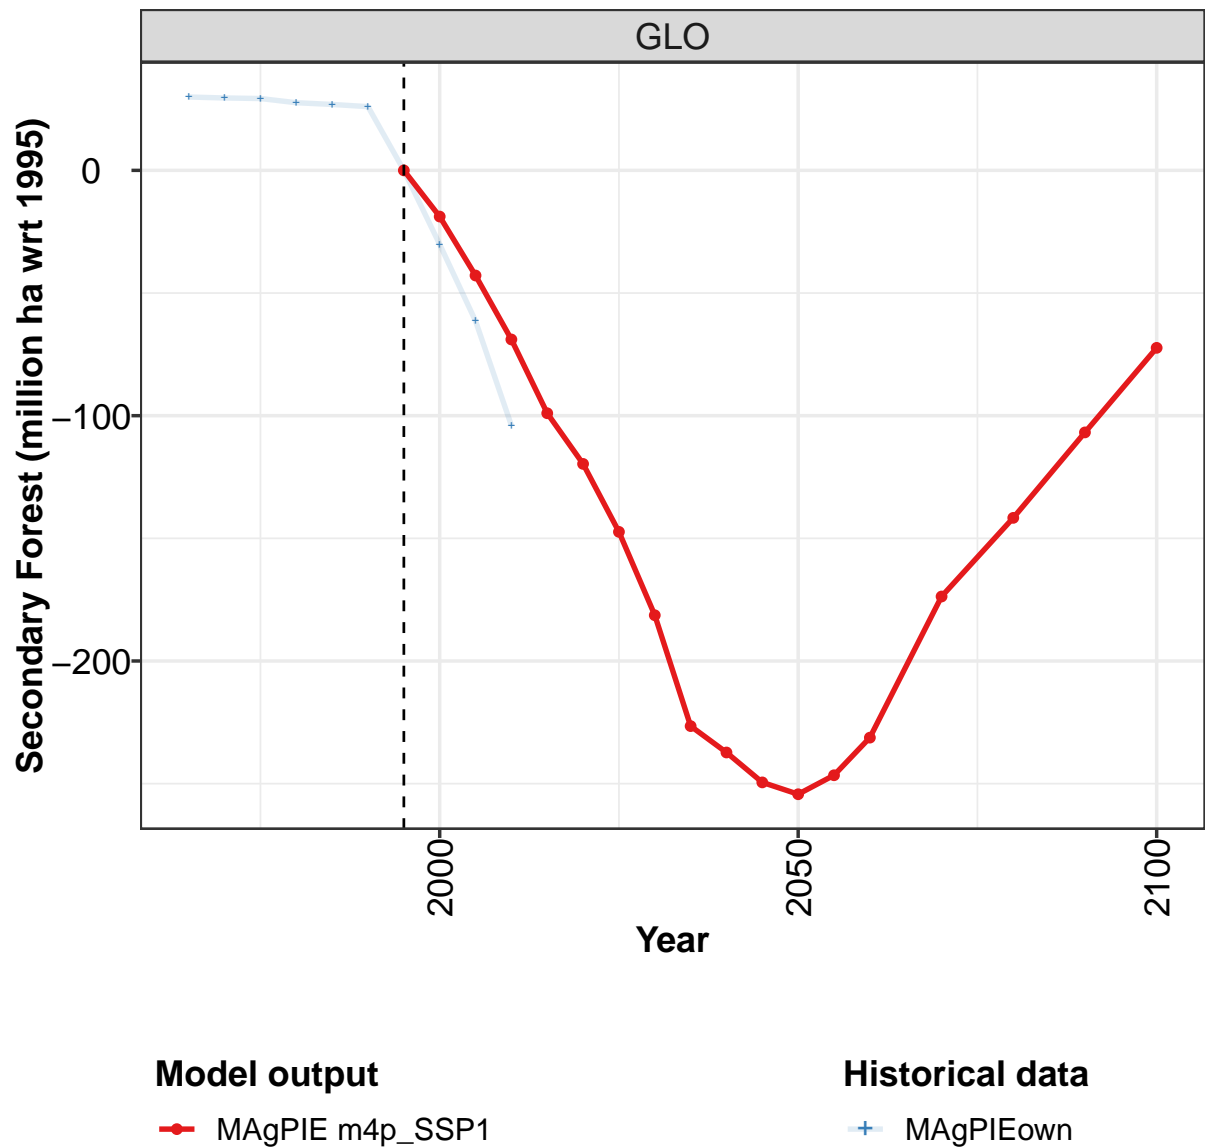

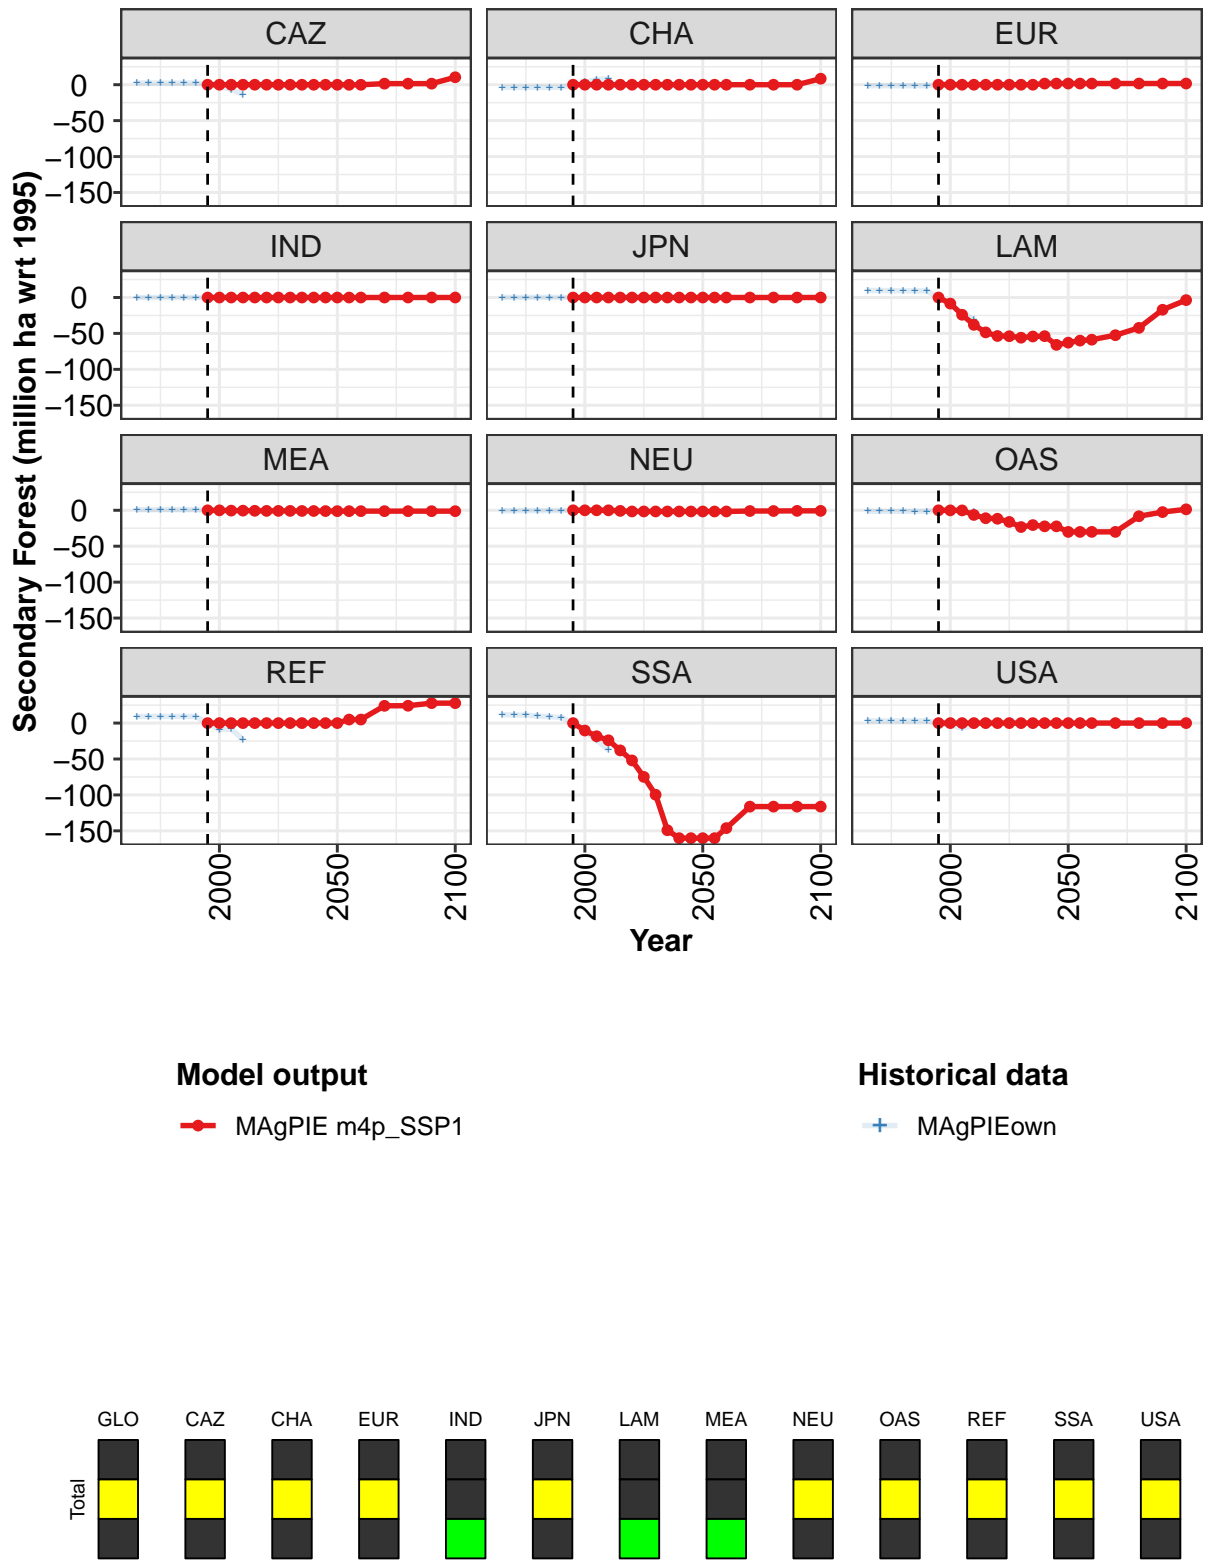

Figure 439: MAgPIE m4p\_SSP1 — Resources—Land Cover Change—Forest—Natural Forest—Secondary Forest (million ha wrt 1995)

|     | 1995 | 2000  | 2005  | 2010  | 2015  | 2020   | 2025   | 2030   | 2035   | 2040   | 2045   |
|-----|------|-------|-------|-------|-------|--------|--------|--------|--------|--------|--------|
| GLO | 0.0  | -18.8 | -42.8 | -68.9 | -99.0 | -119.6 | -147.4 | -181.3 | -226.5 | -237.3 | -249.5 |
| CAZ | 0.0  | 0.0   | 0.0   | 0.0   | -0.0  | -0.0   | -0.0   | -0.0   | -0.0   | -0.0   | -0.0   |
| CHA | 0.0  | 0.0   | 0.0   | 0.0   | 0.0   | 0.0    | 0.0    | 0.0    | 0.0    | 0.0    | 0.0    |
| EUR | 0.0  | 0.0   | 0.0   | 0.0   | 0.0   | 0.0    | 0.0    | 0.0    | 0.0    | 1.6    | 1.6    |
| IND | 0.0  | 0.0   | 0.0   | 0.0   | 0.0   | 0.0    | 0.0    | 0.0    | 0.0    | 0.0    | 0.0    |
| JPN | 0.0  | 0.0   | 0.0   | 0.0   | 0.0   | 0.0    | 0.0    | 0.0    | 0.0    | 0.0    | 0.0    |
| LAM | 0.0  | -8.4  | -24.0 | -38.1 | -48.5 | -53.5  | -53.9  | -55.9  | -54.3  | -53.8  | -65.9  |
| MEA | 0.0  | -0.0  | -0.4  | -0.5  | -0.7  | -0.8   | -0.8   | -0.8   | -0.9   | -1.0   | -1.1   |
| NEU | 0.0  | 0.0   | 0.0   | 0.0   | -0.8  | -1.6   | -1.6   | -1.6   | -1.6   | -1.6   | -1.6   |
| OAS | 0.0  | -0.1  | -0.1  | -6.5  | -11.0 | -11.7  | -16.2  | -23.3  | -20.5  | -22.3  | -22.3  |
| REF | 0.0  | 0.0   | 0.0   | 0.0   | 0.0   | 0.0    | 0.0    | 0.0    | 0.0    | 0.0    | 0.0    |
| SSA | 0.0  | -10.3 | -18.3 | -23.9 | -38.0 | -51.9  | -74.9  | -99.7  | -149.1 | -160.1 | -160.1 |
| USA | 0.0  | 0.0   | 0.0   | 0.0   | 0.0   | 0.0    | 0.0    | 0.0    | 0.0    | 0.0    | 0.0    |

Table 1674: MAgPIE m4p\_SSP1 — Resources—Land Cover Change—Forest—Natural Forest—Secondary Forest (million ha wrt 1995) [PART 1/2]

|     | 2050   | 2055   | 2060   | 2070   | 2080   | 2090   | 2100   |
|-----|--------|--------|--------|--------|--------|--------|--------|
| GLO | -254.3 | -246.6 | -231.2 | -173.7 | -141.6 | -106.8 | -72.3  |
| CAZ | -0.1   | -0.1   | -0.1   | 1.5    | 1.5    | 1.5    | 10.4   |
| CHA | 0.0    | 0.0    | 0.0    | 0.0    | 0.0    | 0.0    | 8.4    |
| EUR | 1.6    | 1.6    | 1.6    | 1.7    | 1.7    | 1.7    | 1.7    |
| IND | 0.0    | 0.0    | 0.0    | 0.0    | 0.0    | 0.0    | 0.0    |
| JPN | 0.0    | 0.0    | 0.0    | 0.0    | 0.0    | 0.0    | 0.0    |
| LAM | -62.8  | -60.0  | -58.7  | -52.5  | -42.3  | -17.0  | -3.6   |
| MEA | -1.2   | -1.2   | -1.2   | -1.2   | -1.2   | -1.2   | -1.2   |
| NEU | -1.6   | -1.6   | -1.6   | -1.0   | -1.0   | -0.8   | -0.8   |
| OAS | -30.1  | -30.1  | -30.0  | -30.0  | -8.3   | -2.5   | 1.3    |
| REF | 0.0    | 4.9    | 4.9    | 24.0   | 24.1   | 27.8   | 27.8   |
| SSA | -160.1 | -160.1 | -146.2 | -116.2 | -116.2 | -116.2 | -116.2 |
| USA | 0.0    | 0.0    | 0.0    | 0.0    | 0.0    | 0.0    | 0.0    |

Table 1675: MAgPIE m4p\_SSP1 — Resources—Land Cover Change—Forest—Natural Forest—Secondary Forest (million ha wrt 1995) [PART 2/2]

|     | 1965 | 1970 | 1975 | 1980 | 1985 | 1990 | 1995 | 2000  | 2005  | 2010   |
|-----|------|------|------|------|------|------|------|-------|-------|--------|
| GLO | 29.9 | 29.5 | 29.3 | 27.6 | 26.9 | 26.0 | 0.0  | -30.2 | -61.4 | -104.0 |
| CAZ | 2.4  | 2.4  | 2.4  | 2.2  | 2.4  | 2.4  | 0.0  | -2.4  | -6.4  | -13.3  |
| CHA | -3.7 | -3.7 | -3.7 | -3.7 | -3.7 | -3.7 | 0.0  | 3.7   | 6.9   | 8.7    |
| EUR | -1.4 | -1.4 | -1.4 | -1.4 | -1.4 | -1.4 | 0.0  | 1.4   | 0.3   | -0.4   |
| IND | 0.0  | 0.0  | 0.0  | 0.0  | 0.0  | 0.0  | 0.0  | 0.0   | 0.0   | 0.4    |
| JPN | 0.2  | 0.2  | 0.2  | 0.2  | 0.2  | 0.2  | 0.0  | -0.2  | -0.5  | -0.8   |
| LAM | 9.8  | 9.7  | 9.5  | 9.2  | 9.3  | 9.3  | 0.0  | -9.6  | -20.6 | -31.2  |
| MEA | 0.9  | 0.9  | 0.9  | 0.9  | 0.9  | 0.9  | 0.0  | -0.9  | -0.6  | -1.1   |
| NEU | -0.7 | -0.6 | -0.5 | -0.4 | -0.4 | -0.3 | 0.0  | 0.1   | 0.3   | 0.3    |
| OAS | -1.4 | -1.4 | -1.4 | -1.4 | -1.4 | -1.4 | 0.0  | 1.4   | -1.6  | -2.8   |
| REF | 9.3  | 9.3  | 9.3  | 9.3  | 9.3  | 9.3  | 0.0  | -9.3  | -8.4  | -22.6  |
| SSA | 11.6 | 11.3 | 11.2 | 9.8  | 8.8  | 7.9  | 0.0  | -11.6 | -23.7 | -37.5  |
| USA | 2.9  | 2.9  | 2.9  | 2.9  | 2.9  | 2.9  | 0.0  | -2.9  | -7.0  | -3.7   |

Table 1676: MAgPIEown — Resources—Land Cover Change—Forest—Natural Forest—Secondary Forest (million ha wrt 1995)

55.3 Other Land

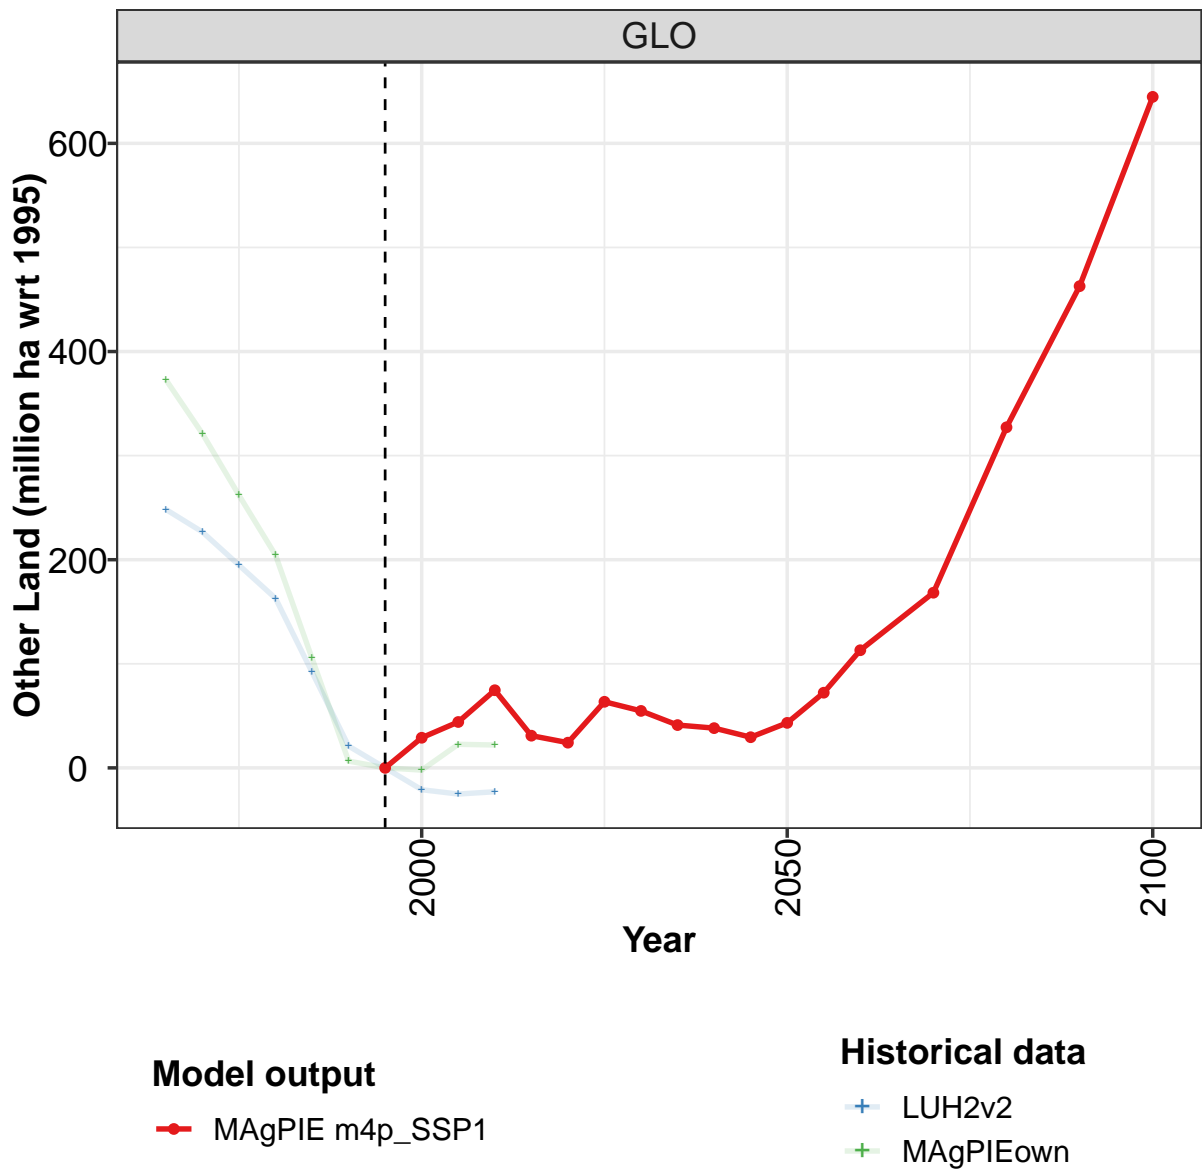

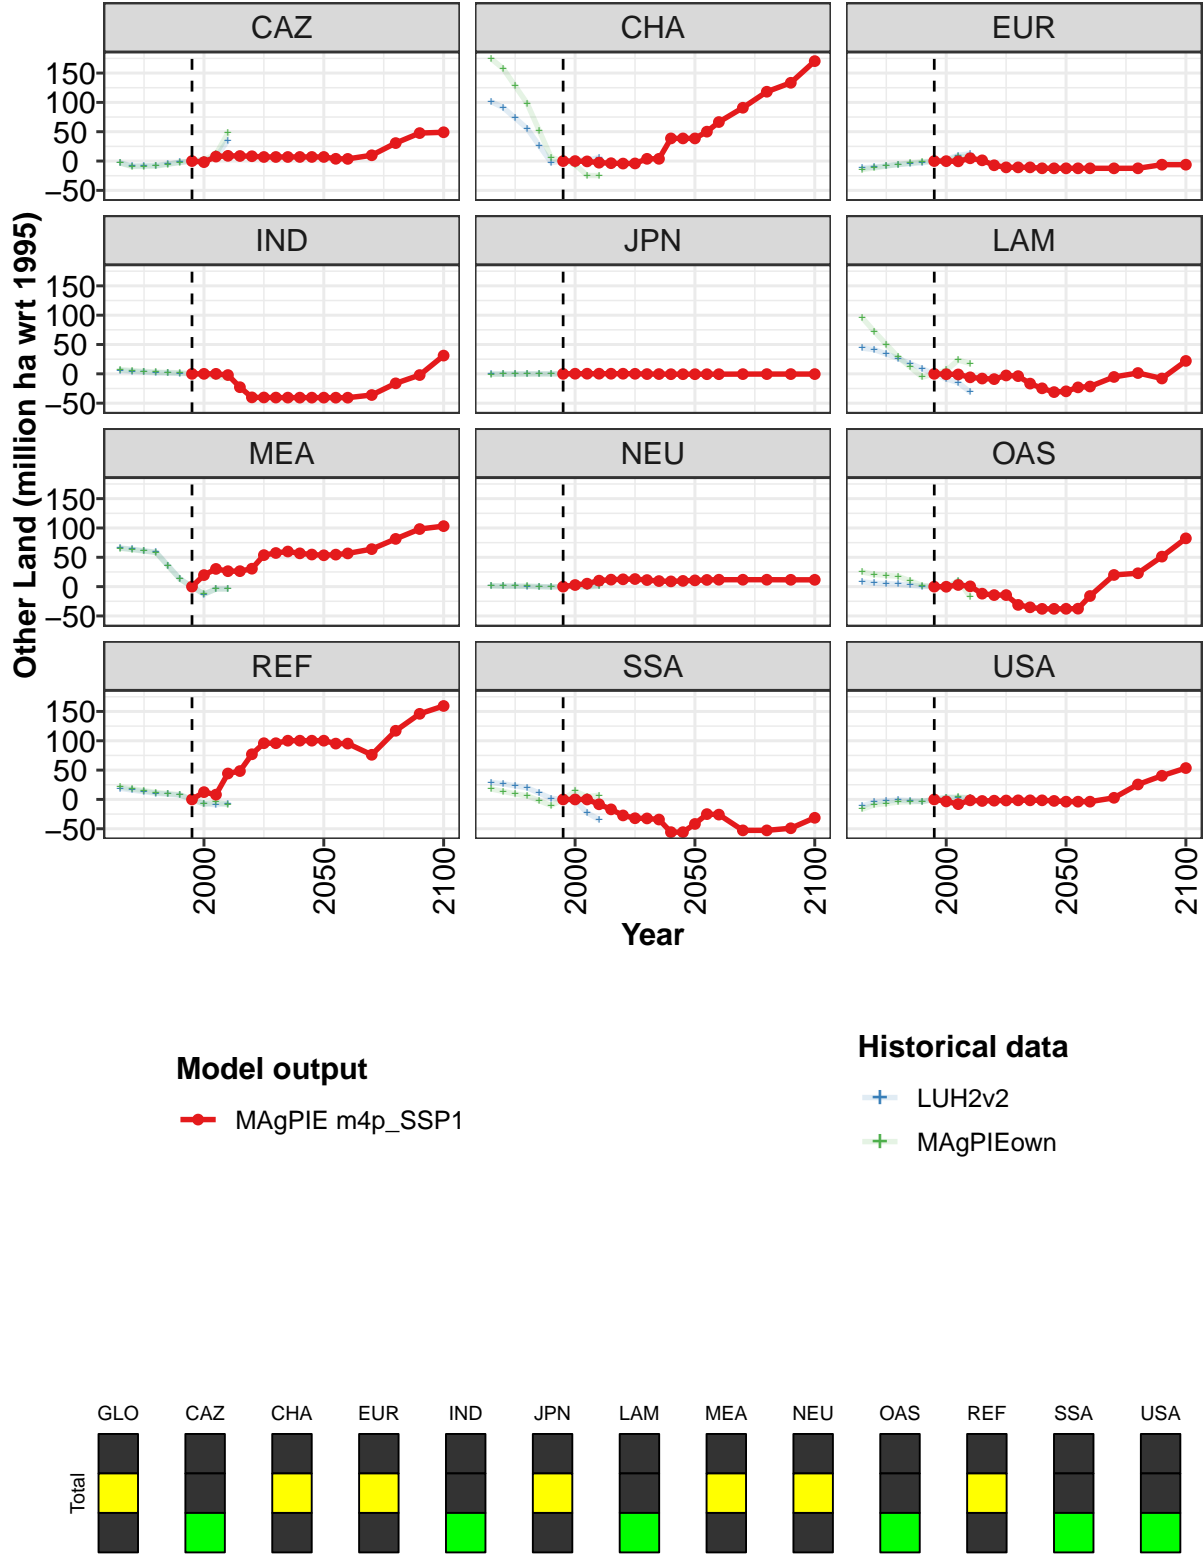

Figure 440: MAgPIE m4p\_SSP1 — Resources—Land Cover Change—Other Land (million ha wrt 1995)

|     | 1995 | 2000 | 2005 | 2010 | 2015 | 2020 | 2025 | 2030 | 2035 | 2040 | 2045 |
|-----|------|------|------|------|------|------|------|------|------|------|------|
| GLO | 0    | 29   | 44   | 75   | 31   | 24   | 64   | 55   | 41   | 38   | 29   |
| CAZ | 0    | -2   | 8    | 9    | 9    | 8    | 7    | 7    | 7    | 7    | 7    |
| CHA | 0    | -0   | -1   | -3   | -4   | -4   | -4   | 4    | 4    | 39   | 39   |
| EUR | 0    | -0   | -1   | 5    | 1    | -7   | -11  | -11  | -11  | -12  | -12  |
| IND | 0    | 0    | 0    | -2   | -23  | -40  | -40  | -40  | -41  | -41  | -41  |
| JPN | 0    | 0    | 0    | 0    | 0    | 0    | 0    | -0   | -0   | -1   | -1   |
| LAM | 0    | -1   | -1   | -6   | -8   | -9   | -3   | -4   | -17  | -25  | -31  |
| MEA | 0    | 20   | 30   | 26   | 26   | 31   | 54   | 57   | 60   | 57   | 55   |
| NEU | 0    | 3    | 5    | 10   | 12   | 12   | 13   | 11   | 10   | 9    | 10   |
| OAS | 0    | -0   | 3    | 1    | -12  | -14  | -14  | -31  | -35  | -38  | -38  |
| REF | 0    | 12   | 8    | 44   | 48   | 77   | 96   | 96   | 100  | 100  | 100  |
| SSA | 0    | -0   | -0   | -8   | -17  | -27  | -32  | -32  | -34  | -56  | -56  |
| USA | 0    | -3   | -8   | -2   | -3   | -2   | -2   | -2   | -2   | -2   | -3   |

Table 1677: MAgPIE m4p\_SSP1 — Resources—Land Cover Change—Other Land (million ha wrt 1995) [PART 1/2]

|     | 2050 | 2055 | 2060 | 2070 | 2080 | 2090 | 2100 |
|-----|------|------|------|------|------|------|------|
| GLO | 43   | 72   | 113  | 168  | 327  | 463  | 645  |
| CAZ | 7    | 4    | 4    | 10   | 31   | 48   | 49   |
| CHA | 39   | 50   | 67   | 91   | 118  | 133  | 170  |
| EUR | -12  | -12  | -12  | -12  | -12  | -6   | -6   |
| IND | -41  | -41  | -41  | -36  | -16  | -2   | 31   |
| JPN | -1   | -1   | -1   | -0   | -0   | -0   | -0   |
| LAM | -30  | -23  | -22  | -5   | 1    | -8   | 22   |
| MEA | 54   | 55   | 57   | 64   | 81   | 98   | 103  |
| NEU | 11   | 11   | 12   | 12   | 12   | 12   | 12   |
| OAS | -38  | -38  | -16  | 20   | 23   | 51   | 82   |
| REF | 100  | 95   | 95   | 76   | 117  | 146  | 159  |
| SSA | -42  | -25  | -26  | -53  | -53  | -49  | -31  |
| USA | -4   | -4   | -4   | 3    | 25   | 40   | 53   |

Table 1678: MAgPIE m4p\_SSP1 — Resources—Land Cover Change—Other Land (million ha wrt 1995) [PART 2/2]

|     | 1965 | 1970 | 1975 | 1980 | 1985 | 1990 | 1995 | 2000 | 2005 | 2010 |
|-----|------|------|------|------|------|------|------|------|------|------|
| GLO | 248  | 227  | 195  | 163  | 92   | 21   | 0    | -21  | -25  | -23  |
| CAZ | -3   | -8   | -8   | -8   | -5   | -2   | 0    | 2    | 6    | 35   |
| CHA | 101  | 91   | 73   | 55   | 26   | -3   | 0    | 3    | 1    | 6    |
| EUR | -12  | -10  | -8   | -6   | -4   | -3   | 0    | 3    | 10   | 13   |
| IND | 6    | 4    | 3    | 2    | 1    | 1    | 0    | -1   | -2   | -2   |
| JPN | 0    | 0    | 0    | 0    | 0    | 0    | 0    | 0    | 0    | 0    |
| LAM | 44   | 41   | 34   | 26   | 17   | 9    | 0    | -9   | -15  | -31  |
| MEA | 66   | 64   | 61   | 59   | 36   | 13   | 0    | -13  | -4   | -4   |
| NEU | 1    | 1    | 1    | 1    | 0    | -0   | 0    | 0    | -0   | 2    |
| OAS | 8    | 6    | 5    | 4    | 2    | 1    | 0    | -1   | 8    | -3   |
| REF | 19   | 16   | 13   | 10   | 9    | 7    | 0    | -7   | -9   | -7   |
| SSA | 29   | 27   | 23   | 20   | 11   | 2    | 0    | -2   | -23  | -34  |
| USA | -11  | -5   | -3   | -1   | -2   | -3   | 0    | 3    | 3    | 3    |

Table 1679: LUH2v2 — Resources—Land Cover Change—Other Land (million ha wrt 1995)

|     | 1965 | 1970 | 1975 | 1980 | 1985 | 1990 | 1995 | 2000 | 2005 | 2010 |
|-----|------|------|------|------|------|------|------|------|------|------|
| GLO | 373  | 321  | 262  | 204  | 105  | 7    | 0    | -2   | 23   | 22   |
| CAZ | -4   | -9   | -9   | -9   | -6   | -2   | 0    | 2    | 12   | 48   |
| CHA | 174  | 158  | 128  | 98   | 52   | 6    | 0    | -6   | -25  | -25  |
| EUR | -14  | -12  | -9   | -6   | -3   | -1   | 0    | 1    | 7    | 8    |
| IND | 7    | 6    | 4    | 3    | 2    | 2    | 0    | -2   | -5   | -7   |
| JPN | -1   | -1   | -1   | -0   | -0   | -0   | 0    | 0    | 0    | 0    |
| LAM | 95   | 72   | 50   | 28   | 11   | -6   | 0    | 6    | 23   | 18   |
| MEA | 65   | 63   | 61   | 58   | 35   | 13   | 0    | -13  | -4   | -4   |
| NEU | 2    | 1    | 1    | 1    | 0    | -1   | 0    | 1    | -1   | 1    |
| OAS | 25   | 21   | 19   | 17   | 10   | 2    | 0    | -2   | 11   | -17  |
| REF | 21   | 18   | 15   | 12   | 10   | 8    | 0    | -8   | -5   | -9   |
| SSA | 18   | 14   | 9    | 6    | -2   | -10  | 0    | 14   | 5    | 7    |
| USA | -17  | -9   | -7   | -5   | -4   | -3   | 0    | 3    | 4    | 3    |

Table 1680: MAgPIEown — Resources—Land Cover Change—Other Land (million ha wrt 1995)



55.4 Pastures and Rangelands

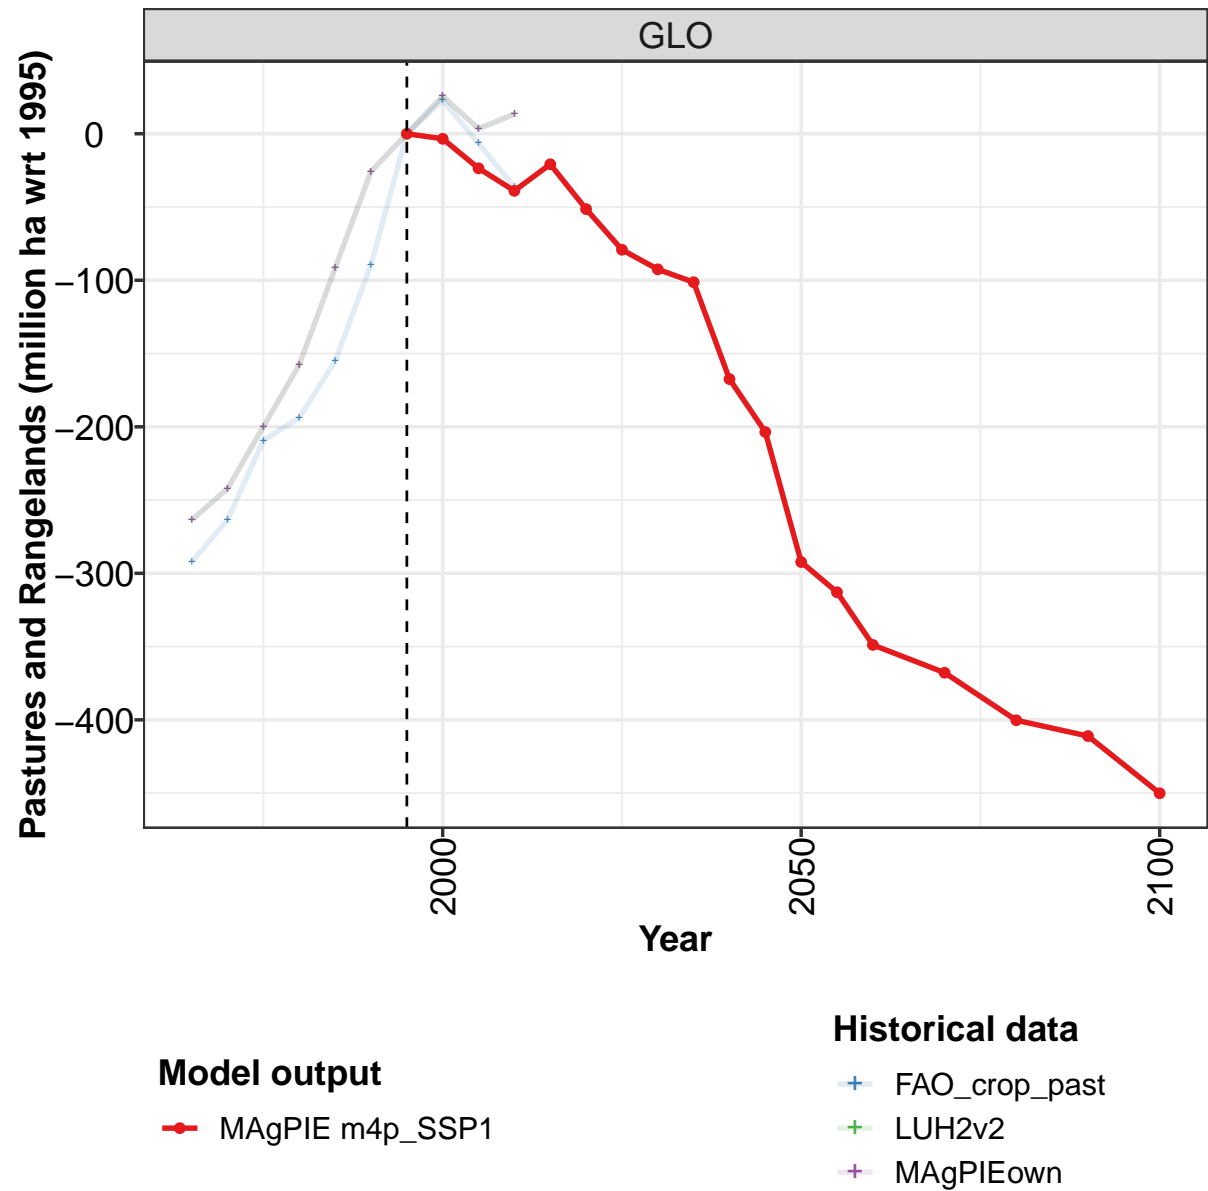

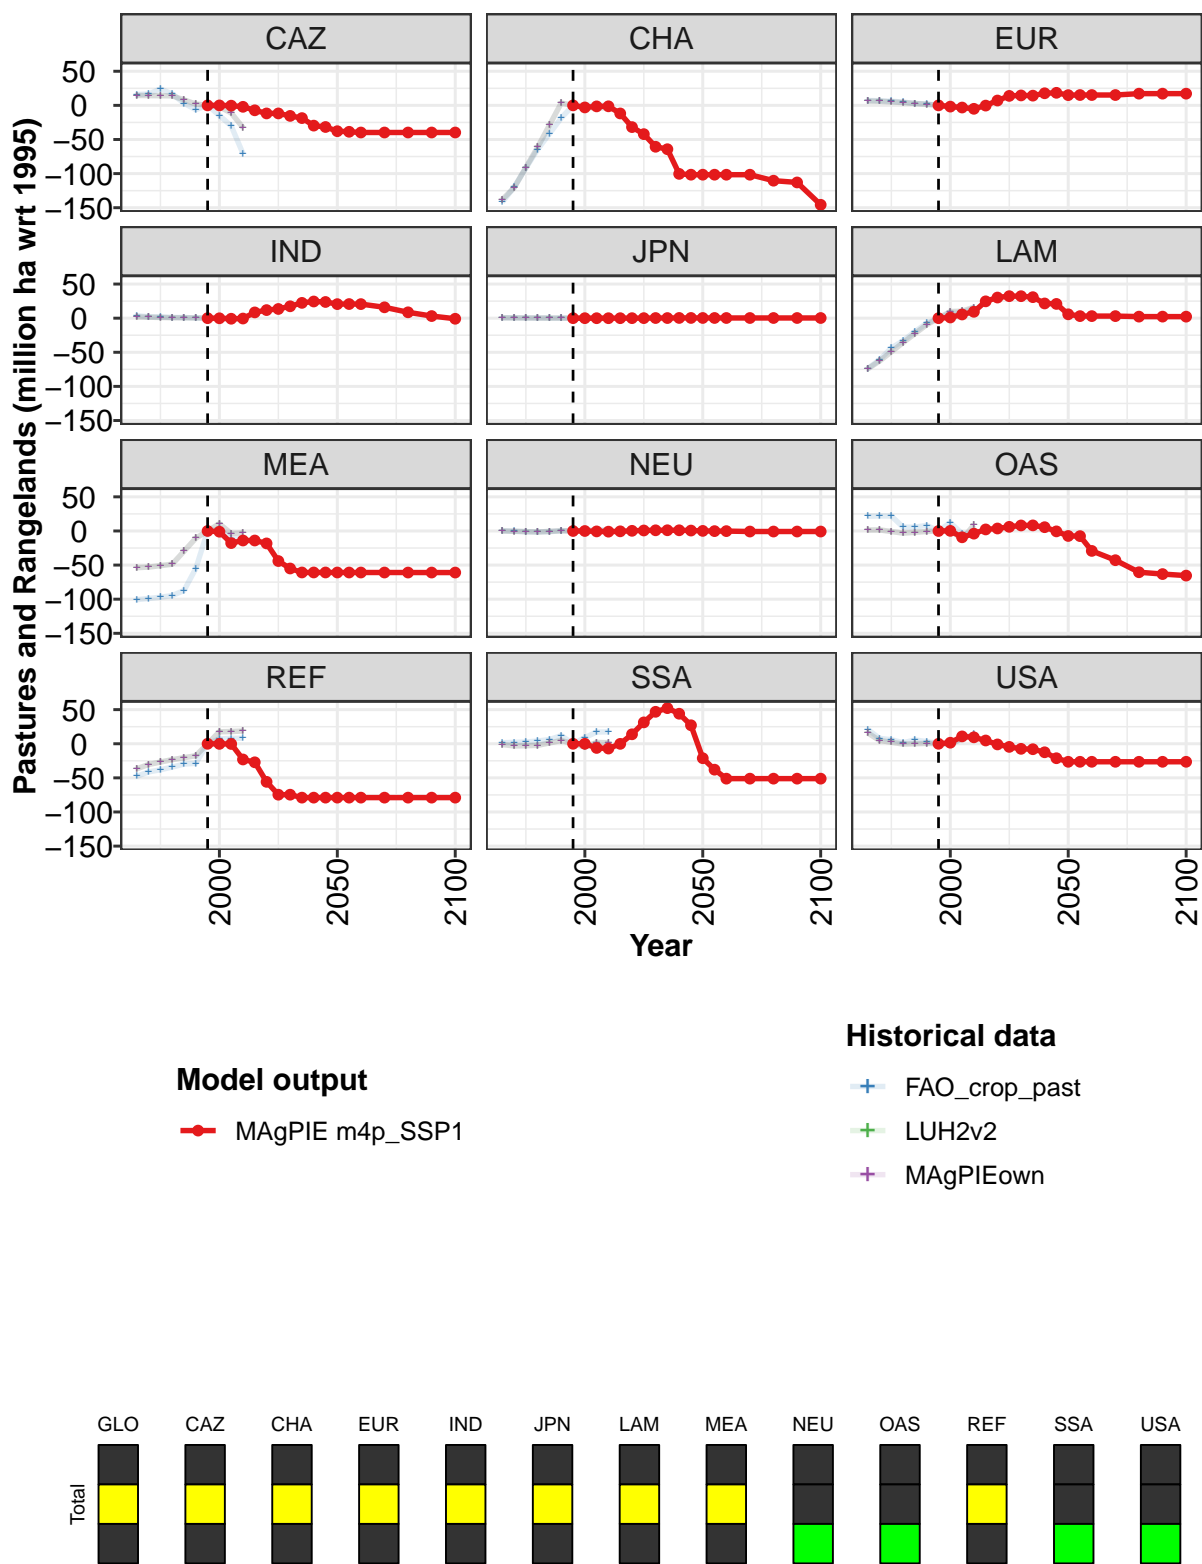

Figure 441: MAgPIE m4p\_SSP1 — Resources—Land Cover Change—Pastures and Rangelands (million ha wrt 1995)

|     | 1995 | 2000 | 2005  | 2010  | 2015  | 2020  | 2025  | 2030  | 2035   | 2040   | 2045   |
|-----|------|------|-------|-------|-------|-------|-------|-------|--------|--------|--------|
| GLO | 0.0  | -3.4 | -23.6 | -38.9 | -20.8 | -51.4 | -79.1 | -92.5 | -101.3 | -167.4 | -203.6 |
| CAZ | 0.0  | -0.0 | -0.4  | -2.1  | -7.2  | -11.8 | -11.8 | -15.4 | -18.6  | -29.6  | -31.7  |
| CHA | 0.0  | -3.0 | -1.5  | -1.3  | -11.8 | -31.8 | -42.1 | -60.6 | -64.2  | -100.4 | -101.6 |
| EUR | 0.0  | -1.8 | -3.1  | -5.0  | -0.3  | 7.2   | 13.9  | 14.6  | 14.3   | 17.8   | 18.4   |
| IND | 0.0  | -0.1 | -0.8  | -0.5  | 8.5   | 11.9  | 13.5  | 17.4  | 22.4   | 24.5   | 23.7   |
| JPN | 0.0  | -0.0 | -0.0  | -0.0  | 0.0   | 0.0   | 0.1   | 0.3   | 0.2    | 0.4    | 0.4    |
| LAM | 0.0  | 1.0  | 5.5   | 9.4   | 24.7  | 30.3  | 32.3  | 32.2  | 30.8   | 21.6   | 20.9   |
| MEA | 0.0  | -1.1 | -17.7 | -13.9 | -13.9 | -18.2 | -44.1 | -55.0 | -60.8  | -60.8  | -60.8  |
| NEU | 0.0  | -0.0 | -0.6  | -1.0  | -0.5  | 0.3   | 0.7   | 1.0   | 1.1    | 1.0    | 0.6    |
| OAS | 0.0  | 0.2  | -9.3  | -3.9  | 2.3   | 3.6   | 6.1   | 8.1   | 8.2    | 5.5    | -0.6   |
| REF | 0.0  | -0.2 | -0.3  | -23.0 | -27.2 | -55.8 | -74.6 | -74.6 | -78.9  | -78.9  | -78.9  |
| SSA | 0.0  | 0.0  | -6.1  | -7.0  | -0.1  | 13.9  | 31.4  | 46.9  | 52.2   | 44.0   | 27.1   |
| USA | 0.0  | 1.6  | 10.8  | 9.5   | 4.8   | -1.0  | -4.6  | -7.4  | -8.0   | -12.5  | -21.2  |

Table 1681: MAgPIE m4p\_SSP1 — Resources—Land Cover Change—Pastures and Rangelands (million ha wrt 1995) [PART 1/2]

|     | 2050   | 2055   | 2060   | 2070   | 2080   | 2090   | 2100   |
|-----|--------|--------|--------|--------|--------|--------|--------|
| GLO | -292.3 | -312.9 | -348.9 | -367.8 | -400.3 | -411.1 | -450.1 |
| CAZ | -37.8  | -38.7  | -39.7  | -39.7  | -39.7  | -39.7  | -39.7  |
| CHA | -101.6 | -101.6 | -101.6 | -101.6 | -110.3 | -112.9 | -145.7 |
| EUR | 15.0   | 15.2   | 15.2   | 15.2   | 17.2   | 17.2   | 17.2   |
| IND | 20.6   | 20.7   | 20.6   | 16.0   | 8.6    | 3.1    | -0.8   |
| JPN | 0.3    | 0.3    | 0.3    | 0.3    | 0.3    | 0.3    | 0.3    |
| LAM | 5.7    | 3.1    | 3.1    | 3.1    | 2.3    | 2.3    | 2.2    |
| MEA | -60.9  | -60.9  | -60.9  | -60.9  | -60.9  | -60.9  | -60.9  |
| NEU | 0.1    | -0.2   | -0.2   | -0.8   | -0.8   | -0.8   | -0.8   |
| OAS | -7.3   | -7.5   | -29.2  | -42.8  | -60.5  | -63.2  | -65.4  |
| REF | -78.9  | -78.9  | -78.9  | -78.9  | -78.9  | -78.9  | -78.9  |
| SSA | -21.2  | -38.0  | -51.1  | -51.1  | -51.1  | -51.1  | -51.1  |
| USA | -26.4  | -26.4  | -26.4  | -26.4  | -26.4  | -26.4  | -26.4  |

Table 1682: MAgPIE m4p\_SSP1 — Resources—Land Cover Change—Pastures and Rangelands (million ha wrt 1995) [PART 2/2]

|     | 1965   | 1970   | 1975   | 1980   | 1985   | 1990  | 1995 | 2000  | 2005  | 2010  |
|-----|--------|--------|--------|--------|--------|-------|------|-------|-------|-------|
| GLO | -292.3 | -263.4 | -209.2 | -193.8 | -155.2 | -89.4 | 0.0  | 22.9  | -6.5  | -36.5 |
| CAZ | 16.0   | 16.7   | 24.1   | 16.7   | 3.0    | -6.3  | 0.0  | -14.9 | -30.0 | -70.8 |
| CHA | -141.8 | -119.8 | -91.8  | -64.5  | -41.5  | -18.4 | 0.0  | 0.0   | 0.0   | -0.0  |
| EUR | 7.2    | 6.8    | 6.1    | 4.8    | 2.7    | 2.3   | 0.0  | -2.1  | -3.3  | -5.5  |
| IND | 3.7    | 2.0    | 1.8    | 1.1    | 1.0    | 0.3   | 0.0  | -0.2  | -0.6  | -0.7  |
| JPN | 0.6    | 0.5    | 0.3    | 0.2    | 0.1    | 0.0   | 0.0  | 0.0   | -0.4  | -0.4  |
| LAM | -73.9  | -60.9  | -43.7  | -33.0  | -19.7  | -7.3  | 0.0  | 6.9   | 8.6   | 14.3  |
| MEA | -100.7 | -98.9  | -97.1  | -94.7  | -87.2  | -55.0 | 0.0  | 3.0   | -11.6 | -10.9 |
| NEU | 0.3    | -0.3   | -1.2   | -1.4   | -1.0   | 0.4   | 0.0  | 1.3   | 1.8   | 1.9   |
| OAS | 21.5   | 21.9   | 21.9   | 5.5    | 5.6    | 8.2   | 0.0  | 12.2  | -3.9  | -3.7  |
| REF | -47.6  | -41.3  | -38.1  | -34.2  | -29.9  | -28.7 | 0.0  | 7.1   | 7.8   | 8.2   |
| SSA | 1.4    | 2.1    | 2.6    | 4.1    | 6.2    | 12.0  | 0.0  | 9.1   | 17.1  | 17.4  |
| USA | 21.0   | 7.9    | 5.9    | 1.5    | 5.6    | 3.2   | 0.0  | 0.3   | 8.0   | 13.9  |

Table 1683: FAO\_crop\_past — Resources—Land Cover Change—Pastures and Rangelands (million ha wrt 1995)

|     | 1965   | 1970   | 1975   | 1980   | 1985  | 1990  | 1995 | 2000 | 2005  | 2010  |
|-----|--------|--------|--------|--------|-------|-------|------|------|-------|-------|
| GLO | -263.6 | -242.1 | -199.8 | -157.6 | -91.7 | -25.7 | 0.0  | 25.7 | 3.5   | 13.4  |
| CAZ | 14.5   | 14.3   | 14.2   | 14.0   | 8.0   | 2.0   | 0.0  | -2.0 | -11.1 | -32.5 |
| CHA | -137.9 | -120.8 | -91.0  | -61.2  | -28.9 | 3.4   | 0.0  | -3.4 | -3.6  | -3.4  |
| EUR | 6.3    | 6.0    | 5.1    | 4.1    | 2.8   | 1.5   | 0.0  | -1.5 | -2.6  | -4.8  |
| IND | 1.8    | 1.4    | 1.1    | 0.7    | 0.5   | 0.4   | 0.0  | -0.4 | -0.7  | -0.8  |
| JPN | 0.5    | 0.4    | 0.3    | 0.1    | 0.1   | 0.0   | 0.0  | -0.0 | -0.0  | -0.0  |
| LAM | -74.3  | -62.8  | -49.3  | -35.7  | -22.7 | -9.6  | 0.0  | 9.6  | 10.3  | 15.9  |
| MEA | -53.8  | -53.0  | -50.8  | -48.7  | -29.7 | -10.6 | 0.0  | 10.6 | -3.7  | -2.9  |
| NEU | -0.1   | -0.5   | -1.0   | -1.5   | -0.6  | 0.3   | 0.0  | -0.3 | 0.2   | 0.2   |
| OAS | 1.4    | 1.5    | -0.8   | -3.2   | -2.0  | -0.8  | 0.0  | 0.8  | -12.1 | 8.8   |
| REF | -36.7  | -30.4  | -26.8  | -23.3  | -20.4 | -17.6 | 0.0  | 17.6 | 17.9  | 18.7  |
| SSA | -1.1   | -3.3   | -2.8   | -2.4   | 1.2   | 4.8   | 0.0  | -4.8 | 1.9   | 1.5   |
| USA | 15.8   | 4.9    | 2.2    | -0.5   | 0.0   | 0.6   | 0.0  | -0.6 | 7.0   | 12.7  |

Table 1684: LUH2v2 — Resources—Land Cover Change—Pastures and Rangelands (million ha wrt 1995)

|     | 1965   | 1970   | 1975   | 1980   | 1985  | 1990  | 1995 | 2000 | 2005  | 2010  |
|-----|--------|--------|--------|--------|-------|-------|------|------|-------|-------|
| GLO | -263.6 | -242.1 | -199.8 | -157.6 | -91.7 | -25.7 | 0.0  | 25.7 | 3.5   | 13.4  |
| CAZ | 14.5   | 14.3   | 14.2   | 14.0   | 8.0   | 2.0   | 0.0  | -2.0 | -11.1 | -32.5 |
| CHA | -137.9 | -120.8 | -91.0  | -61.2  | -28.9 | 3.4   | 0.0  | -3.4 | -3.6  | -3.4  |
| EUR | 6.3    | 6.0    | 5.1    | 4.1    | 2.8   | 1.5   | 0.0  | -1.5 | -2.6  | -4.8  |
| IND | 1.8    | 1.4    | 1.1    | 0.7    | 0.5   | 0.4   | 0.0  | -0.4 | -0.7  | -0.8  |
| JPN | 0.5    | 0.4    | 0.3    | 0.1    | 0.1   | 0.0   | 0.0  | -0.0 | -0.0  | -0.0  |
| LAM | -74.3  | -62.8  | -49.3  | -35.7  | -22.7 | -9.6  | 0.0  | 9.6  | 10.3  | 15.9  |
| MEA | -53.8  | -53.0  | -50.8  | -48.7  | -29.7 | -10.6 | 0.0  | 10.6 | -3.7  | -2.9  |
| NEU | -0.1   | -0.5   | -1.0   | -1.5   | -0.6  | 0.3   | 0.0  | -0.3 | 0.2   | 0.2   |
| OAS | 1.4    | 1.5    | -0.8   | -3.2   | -2.0  | -0.8  | 0.0  | 0.8  | -12.1 | 8.8   |
| REF | -36.7  | -30.4  | -26.8  | -23.3  | -20.4 | -17.6 | 0.0  | 17.6 | 17.9  | 18.7  |
| SSA | -1.1   | -3.3   | -2.8   | -2.4   | 1.2   | 4.8   | 0.0  | -4.8 | 1.9   | 1.5   |
| USA | 15.8   | 4.9    | 2.2    | -0.5   | 0.0   | 0.6   | 0.0  | -0.6 | 7.0   | 12.7  |

Table 1685: MAgPIEown — Resources—Land Cover Change—Pastures and Rangelands (million ha wrt 1995)

## 56 Nitrogen

### 56.1 Cropland Budget

#### 56.1.1 Balance

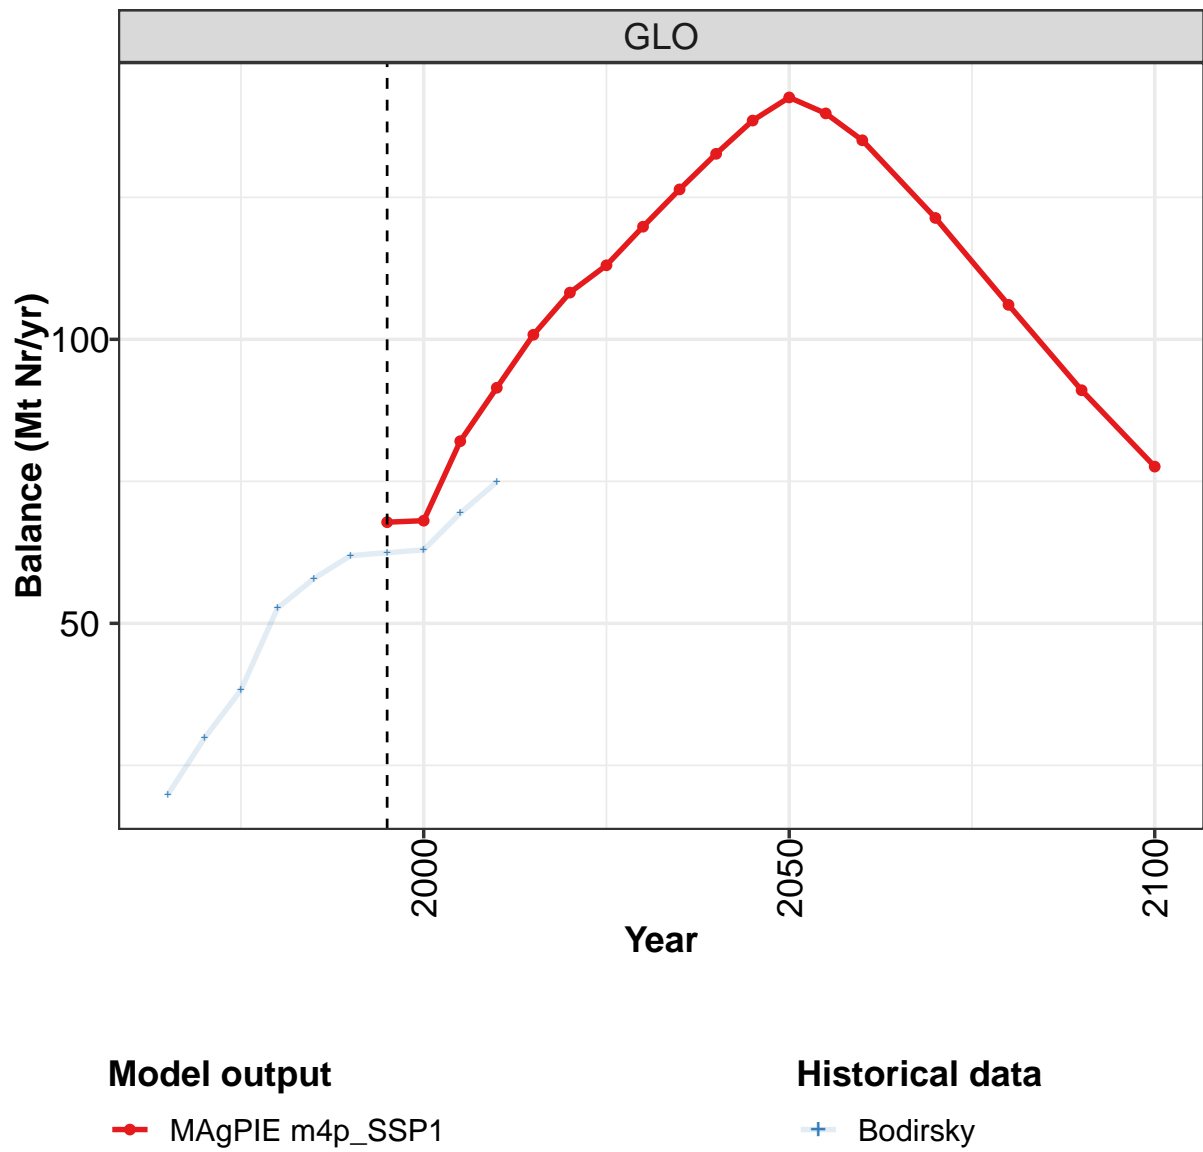

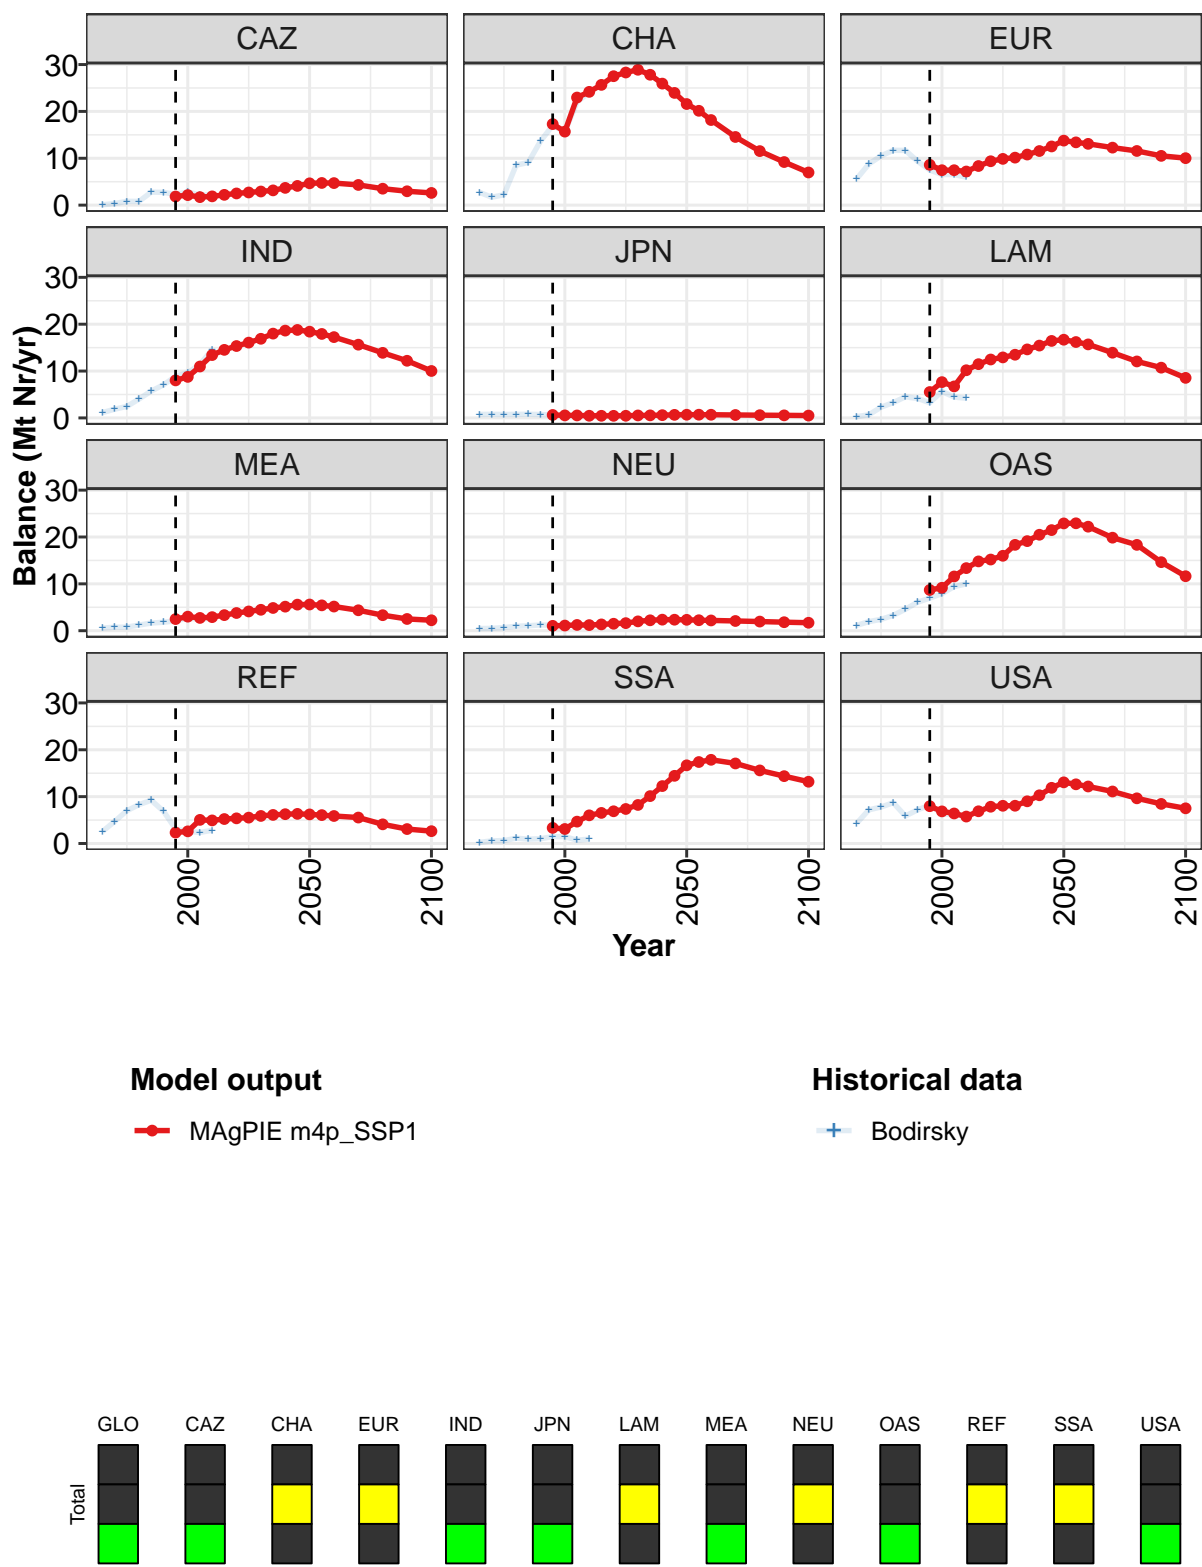

Figure 442: MAgPIE m4p\_SSP1 — Resources—Nitrogen—Cropland Budget—Balance (Mt Nr/yr)

|     | 1995 | 2000 | 2005 | 2010 | 2015 | 2020 | 2025 | 2030 | 2035 | 2040 | 2045 |
|-----|------|------|------|------|------|------|------|------|------|------|------|
| GLO | 68   | 68   | 82   | 91   | 101  | 108  | 113  | 120  | 126  | 133  | 139  |
| CAZ | 2    | 2    | 2    | 2    | 2    | 2    | 3    | 3    | 3    | 4    | 4    |
| CHA | 17   | 16   | 23   | 24   | 26   | 28   | 28   | 29   | 28   | 26   | 24   |
| EUR | 9    | 7    | 7    | 7    | 8    | 9    | 10   | 10   | 11   | 12   | 13   |
| IND | 8    | 9    | 11   | 13   | 15   | 15   | 16   | 17   | 18   | 19   | 19   |
| JPN | 1    | 1    | 1    | 0    | 0    | 0    | 0    | 1    | 1    | 1    | 1    |
| LAM | 6    | 8    | 7    | 10   | 11   | 12   | 13   | 13   | 15   | 15   | 16   |
| MEA | 2    | 3    | 3    | 3    | 3    | 4    | 4    | 4    | 5    | 5    | 6    |
| NEU | 1    | 1    | 1    | 1    | 1    | 1    | 2    | 2    | 2    | 2    | 2    |
| OAS | 9    | 9    | 12   | 13   | 15   | 15   | 16   | 18   | 19   | 20   | 21   |
| REF | 2    | 3    | 5    | 5    | 5    | 5    | 6    | 6    | 6    | 6    | 6    |
| SSA | 3    | 3    | 5    | 6    | 7    | 7    | 7    | 8    | 10   | 12   | 14   |
| USA | 8    | 7    | 6    | 6    | 7    | 8    | 8    | 8    | 9    | 10   | 12   |

Table 1686: MAgPIE m4p\_SSP1 — Resources—Nitrogen—Cropland Budget—Balance (Mt Nr/yr) [PART 1/2]

|     | 2050 | 2055 | 2060 | 2070 | 2080 | 2090 | 2100 |
|-----|------|------|------|------|------|------|------|
| GLO | 143  | 140  | 135  | 121  | 106  | 91   | 78   |
| CAZ | 5    | 5    | 5    | 4    | 4    | 3    | 3    |
| CHA | 22   | 20   | 18   | 15   | 12   | 9    | 7    |
| EUR | 14   | 13   | 13   | 12   | 12   | 11   | 10   |
| IND | 18   | 18   | 17   | 16   | 14   | 12   | 10   |
| JPN | 1    | 1    | 1    | 1    | 1    | 1    | 1    |
| LAM | 17   | 16   | 16   | 14   | 12   | 11   | 9    |
| MEA | 6    | 5    | 5    | 4    | 3    | 3    | 2    |
| NEU | 2    | 2    | 2    | 2    | 2    | 2    | 2    |
| OAS | 23   | 23   | 22   | 20   | 18   | 15   | 12   |
| REF | 6    | 6    | 6    | 6    | 4    | 3    | 3    |
| SSA | 17   | 17   | 18   | 17   | 16   | 14   | 13   |
| USA | 13   | 13   | 12   | 11   | 10   | 8    | 8    |

Table 1687: MAgPIE m4p\_SSP1 — Resources—Nitrogen—Cropland Budget—Balance (Mt Nr/yr) [PART 2/2]

|     | 1965 | 1970 | 1975 | 1980 | 1985 | 1990 | 1995 | 2000 | 2005 | 2010 |
|-----|------|------|------|------|------|------|------|------|------|------|
| GLO | 19.8 | 29.8 | 38.3 | 52.7 | 57.9 | 61.9 | 62.4 | 62.9 | 69.4 | 74.9 |
| CAZ | 0.1  | 0.3  | 0.8  | 0.8  | 2.8  | 2.7  | 2.3  | 2.8  | 2.1  | 2.2  |
| CHA | 2.7  | 1.7  | 2.2  | 8.5  | 9.1  | 13.7 | 17.0 | 15.6 | 22.0 | 24.0 |
| EUR | 5.6  | 8.8  | 10.5 | 11.7 | 11.7 | 9.4  | 7.5  | 6.5  | 6.5  | 5.9  |
| IND | 1.1  | 1.9  | 2.4  | 4.0  | 5.7  | 7.1  | 8.9  | 9.6  | 11.4 | 14.6 |
| JPN | 0.7  | 0.8  | 0.7  | 0.8  | 0.8  | 0.7  | 0.6  | 0.5  | 0.5  | 0.5  |
| LAM | 0.3  | 0.7  | 2.3  | 3.3  | 4.5  | 4.2  | 3.2  | 5.6  | 4.5  | 4.2  |
| MEA | 0.6  | 0.7  | 0.8  | 1.2  | 1.6  | 1.8  | 2.1  | 2.7  | 2.4  | 2.7  |
| NEU | 0.5  | 0.5  | 0.7  | 1.0  | 1.1  | 1.2  | 1.2  | 1.1  | 1.2  | 1.1  |
| OAS | 1.1  | 1.9  | 2.4  | 3.3  | 4.6  | 6.1  | 7.0  | 7.9  | 9.4  | 10.0 |
| REF | 2.6  | 4.7  | 7.0  | 8.3  | 9.2  | 6.9  | 3.1  | 2.6  | 2.4  | 2.8  |
| SSA | 0.2  | 0.6  | 0.6  | 1.1  | 0.9  | 1.0  | 1.5  | 1.5  | 0.7  | 0.9  |
| USA | 4.3  | 7.2  | 7.8  | 8.7  | 5.9  | 7.2  | 8.2  | 6.3  | 6.1  | 5.9  |

Table 1688: Bodirsky — Resources—Nitrogen—Cropland Budget—Balance (Mt Nr/yr)

56.1.2 Balance—Balanceflow

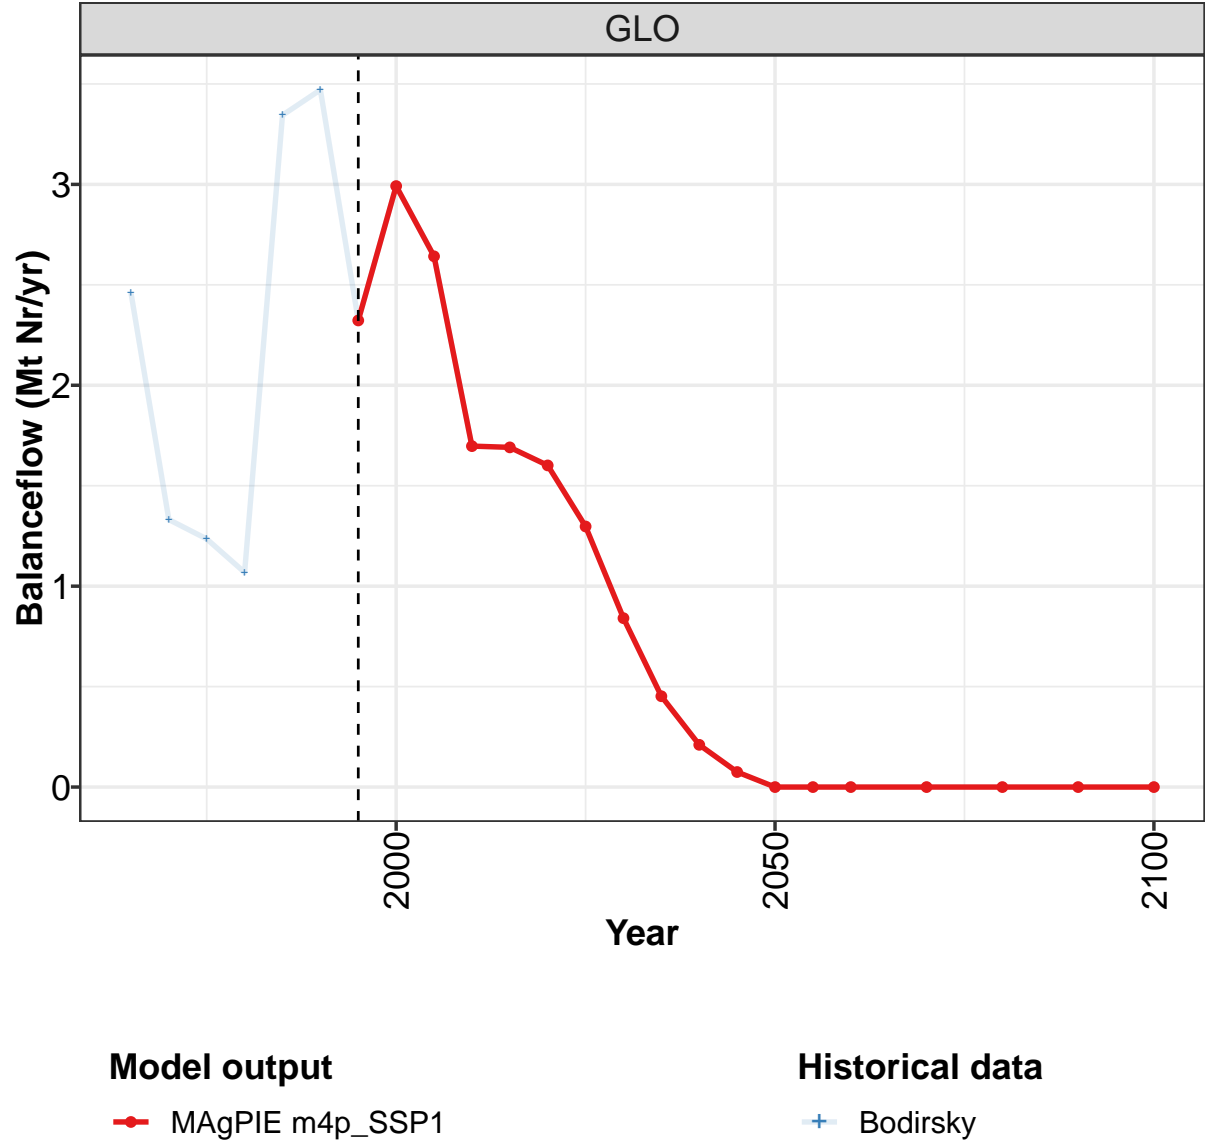



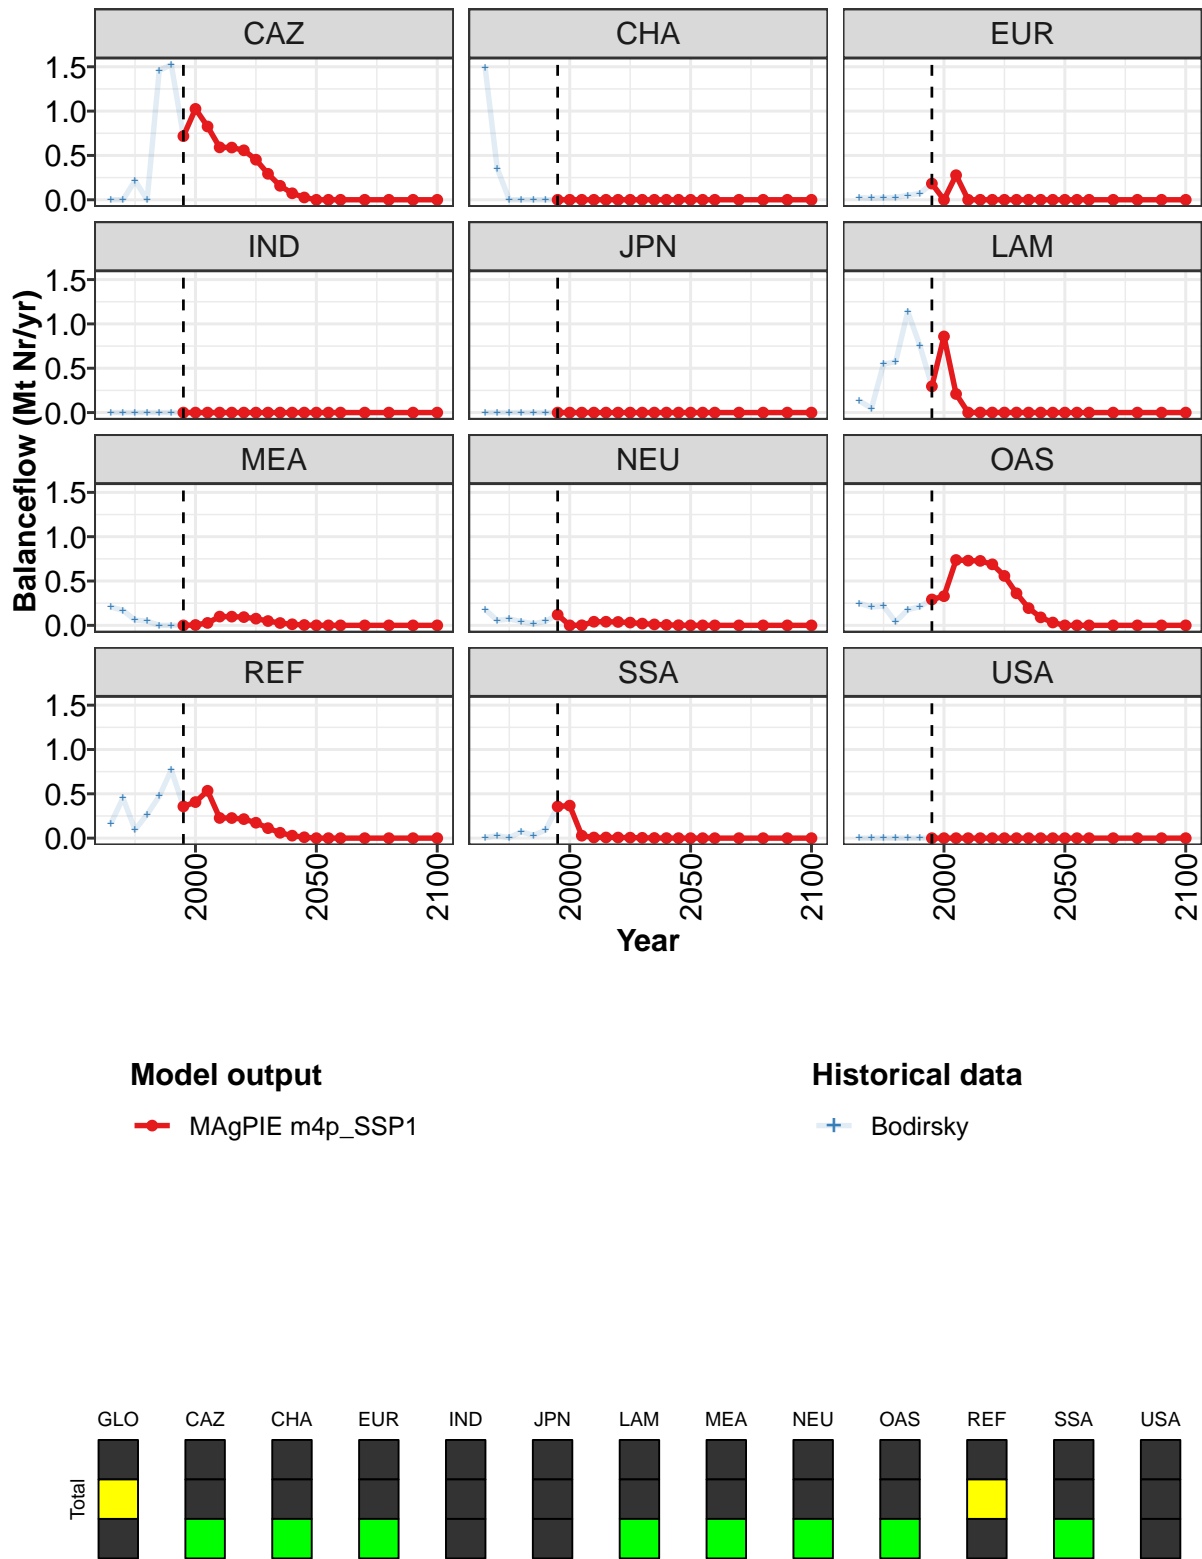

Figure 443: MAgPIE m4p\_SSP1 — Resources—Nitrogen—Cropland Budget—Balance—Balanceflow (Mt Nr/yr)

|     | 1995 | 2000 | 2005 | 2010 | 2015 | 2020 | 2025 | 2030 | 2035 | 2040 | 2045 |
|-----|------|------|------|------|------|------|------|------|------|------|------|
| GLO | 2.32 | 2.99 | 2.64 | 1.70 | 1.69 | 1.60 | 1.30 | 0.84 | 0.45 | 0.21 | 0.07 |
| CAZ | 0.72 | 1.03 | 0.83 | 0.59 | 0.59 | 0.56 | 0.45 | 0.29 | 0.16 | 0.07 | 0.03 |
| CHA | 0.00 | 0.00 | 0.00 | 0.00 | 0.00 | 0.00 | 0.00 | 0.00 | 0.00 | 0.00 | 0.00 |
| EUR | 0.18 | 0.00 | 0.28 | 0.00 | 0.00 | 0.00 | 0.00 | 0.00 | 0.00 | 0.00 | 0.00 |
| IND | 0.00 | 0.00 | 0.00 | 0.00 | 0.00 | 0.00 | 0.00 | 0.00 | 0.00 | 0.00 | 0.00 |
| JPN | 0.00 | 0.00 | 0.00 | 0.00 | 0.00 | 0.00 | 0.00 | 0.00 | 0.00 | 0.00 | 0.00 |
| LAM | 0.30 | 0.86 | 0.21 | 0.00 | 0.00 | 0.00 | 0.00 | 0.00 | 0.00 | 0.00 | 0.00 |
| MEA | 0.00 | 0.00 | 0.03 | 0.10 | 0.10 | 0.09 | 0.08 | 0.05 | 0.03 | 0.01 | 0.00 |
| NEU | 0.12 | 0.00 | 0.00 | 0.04 | 0.04 | 0.04 | 0.03 | 0.02 | 0.01 | 0.01 | 0.00 |
| OAS | 0.29 | 0.33 | 0.74 | 0.73 | 0.73 | 0.69 | 0.56 | 0.36 | 0.19 | 0.09 | 0.03 |
| REF | 0.36 | 0.41 | 0.53 | 0.23 | 0.23 | 0.21 | 0.17 | 0.11 | 0.06 | 0.03 | 0.01 |
| SSA | 0.36 | 0.37 | 0.03 | 0.01 | 0.01 | 0.01 | 0.01 | 0.00 | 0.00 | 0.00 | 0.00 |
| USA | 0.00 | 0.00 | 0.00 | 0.00 | 0.00 | 0.00 | 0.00 | 0.00 | 0.00 | 0.00 | 0.00 |

Table 1689: MAgPIE m4p\_SSP1 — Resources—Nitrogen—Cropland Budget—Balance—Balanceflow (Mt Nr/yr) [PART 1/2]

|     | 2050 | 2055 | 2060 | 2070 | 2080 | 2090 | 2100 |
|-----|------|------|------|------|------|------|------|
| GLO | 0.00 | 0.00 | 0.00 | 0.00 | 0.00 | 0.00 | 0.00 |
| CAZ | 0.00 | 0.00 | 0.00 | 0.00 | 0.00 | 0.00 | 0.00 |
| CHA | 0.00 | 0.00 | 0.00 | 0.00 | 0.00 | 0.00 | 0.00 |
| EUR | 0.00 | 0.00 | 0.00 | 0.00 | 0.00 | 0.00 | 0.00 |
| IND | 0.00 | 0.00 | 0.00 | 0.00 | 0.00 | 0.00 | 0.00 |
| JPN | 0.00 | 0.00 | 0.00 | 0.00 | 0.00 | 0.00 | 0.00 |
| LAM | 0.00 | 0.00 | 0.00 | 0.00 | 0.00 | 0.00 | 0.00 |
| MEA | 0.00 | 0.00 | 0.00 | 0.00 | 0.00 | 0.00 | 0.00 |
| NEU | 0.00 | 0.00 | 0.00 | 0.00 | 0.00 | 0.00 | 0.00 |
| OAS | 0.00 | 0.00 | 0.00 | 0.00 | 0.00 | 0.00 | 0.00 |
| REF | 0.00 | 0.00 | 0.00 | 0.00 | 0.00 | 0.00 | 0.00 |
| SSA | 0.00 | 0.00 | 0.00 | 0.00 | 0.00 | 0.00 | 0.00 |
| USA | 0.00 | 0.00 | 0.00 | 0.00 | 0.00 | 0.00 | 0.00 |

Table 1690: MAgPIE m4p\_SSP1 — Resources—Nitrogen—Cropland Budget—Balance—Balanceflow (Mt Nr/yr) [PART 2/2]

|     | 1965 | 1970 | 1975 | 1980 | 1985 | 1990 | 1995 | 2000 | 2005 | 2010 |
|-----|------|------|------|------|------|------|------|------|------|------|
| GLO | 2.46 | 1.33 | 1.24 | 1.07 | 3.34 | 3.47 | 2.32 | 2.99 | 2.64 | 1.70 |
| CAZ | 0.00 | 0.00 | 0.22 | 0.00 | 1.46 | 1.52 | 0.72 | 1.03 | 0.83 | 0.59 |
| CHA | 1.49 | 0.35 | 0.00 | 0.00 | 0.00 | 0.00 | 0.00 | 0.00 | 0.00 | 0.00 |
| EUR | 0.02 | 0.02 | 0.02 | 0.03 | 0.05 | 0.07 | 0.18 | 0.00 | 0.28 | 0.00 |
| IND | 0.00 | 0.00 | 0.00 | 0.00 | 0.00 | 0.00 | 0.00 | 0.00 | 0.00 | 0.00 |
| JPN | 0.00 | 0.00 | 0.00 | 0.00 | 0.00 | 0.00 | 0.00 | 0.00 | 0.00 | 0.00 |
| LAM | 0.13 | 0.05 | 0.55 | 0.57 | 1.14 | 0.76 | 0.30 | 0.86 | 0.21 | 0.00 |
| MEA | 0.21 | 0.17 | 0.06 | 0.05 | 0.00 | 0.00 | 0.00 | 0.00 | 0.03 | 0.10 |
| NEU | 0.18 | 0.06 | 0.07 | 0.04 | 0.02 | 0.05 | 0.12 | 0.00 | 0.00 | 0.04 |
| OAS | 0.25 | 0.21 | 0.22 | 0.04 | 0.18 | 0.21 | 0.29 | 0.33 | 0.74 | 0.73 |
| REF | 0.17 | 0.45 | 0.10 | 0.27 | 0.47 | 0.77 | 0.36 | 0.41 | 0.53 | 0.23 |
| SSA | 0.01 | 0.03 | 0.01 | 0.07 | 0.03 | 0.09 | 0.36 | 0.37 | 0.03 | 0.01 |
| USA | 0.00 | 0.00 | 0.00 | 0.00 | 0.00 | 0.00 | 0.00 | 0.00 | 0.00 | 0.00 |

Table 1691: Bodirsky — Resources—Nitrogen—Cropland Budget—Balance—Balanceflow (Mt Nr/yr)

56.1.3 Balance—Nutrient Surplus

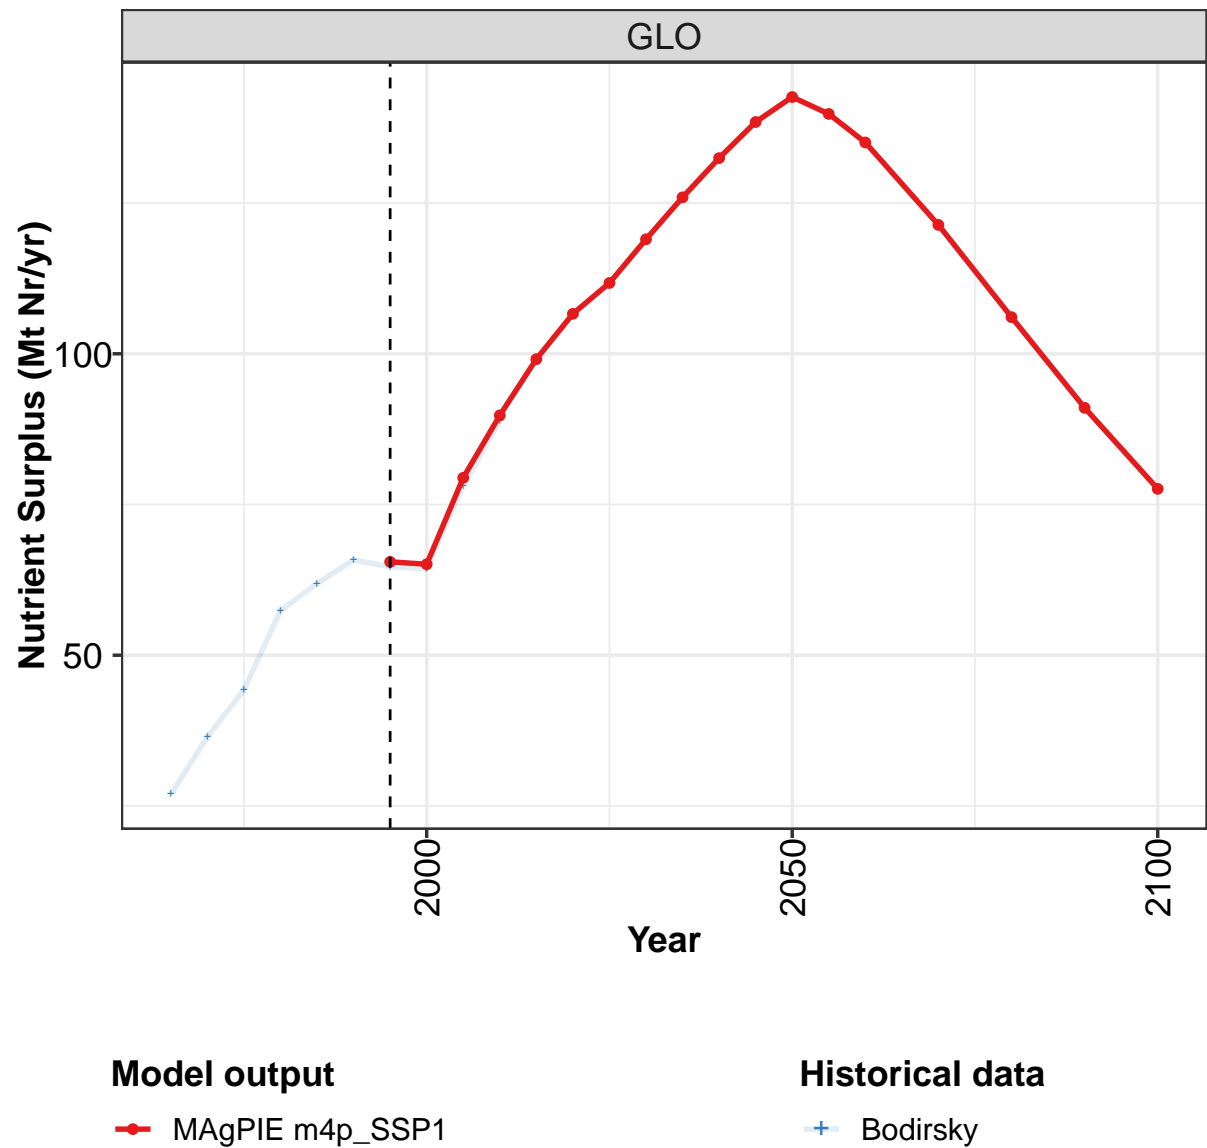

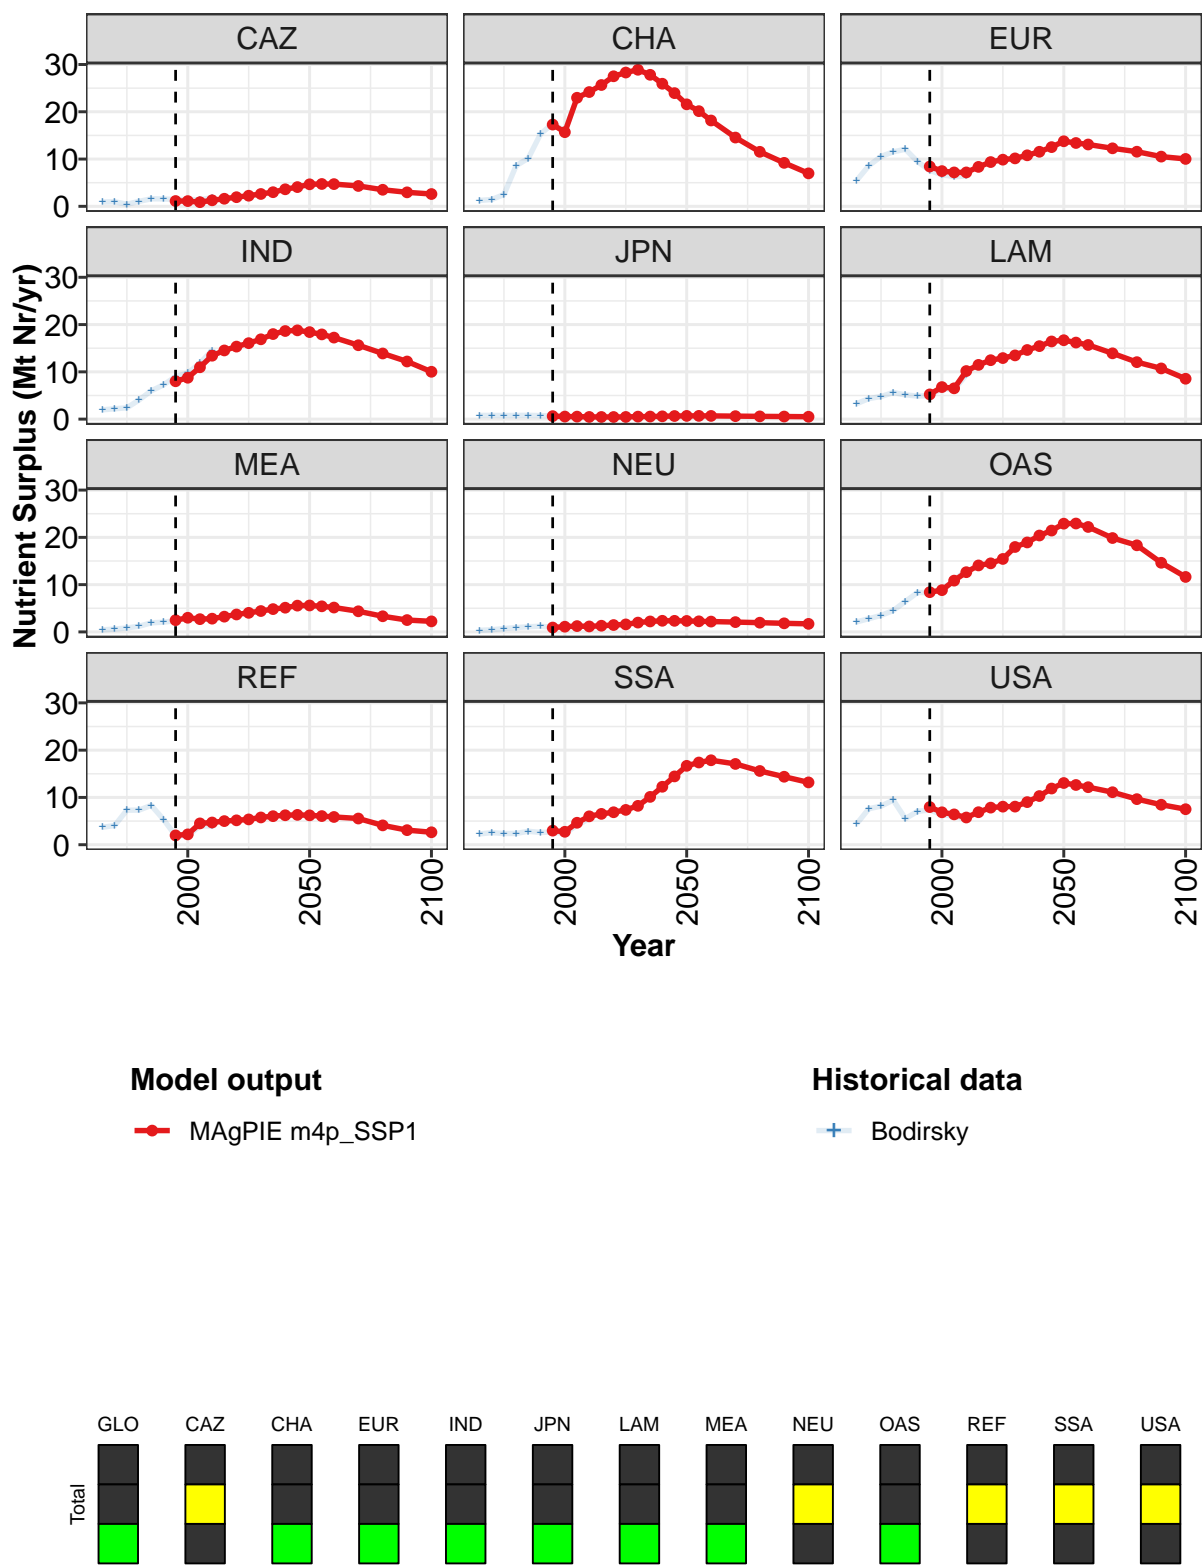

Figure 444: MAgPIE m4p\_SSP1 — Resources—Nitrogen—Cropland Budget—Balance—Nutrient Surplus (Mt Nr/yr)

|     | 1995 | 2000 | 2005 | 2010 | 2015 | 2020 | 2025 | 2030 | 2035 | 2040 | 2045 |
|-----|------|------|------|------|------|------|------|------|------|------|------|
| GLO | 65   | 65   | 79   | 90   | 99   | 107  | 112  | 119  | 126  | 132  | 138  |
| CAZ | 1    | 1    | 1    | 1    | 2    | 2    | 2    | 3    | 3    | 4    | 4    |
| CHA | 17   | 16   | 23   | 24   | 26   | 28   | 28   | 29   | 28   | 26   | 24   |
| EUR | 8    | 7    | 7    | 7    | 8    | 9    | 10   | 10   | 11   | 12   | 13   |
| IND | 8    | 9    | 11   | 13   | 15   | 15   | 16   | 17   | 18   | 19   | 19   |
| JPN | 1    | 1    | 1    | 0    | 0    | 0    | 0    | 1    | 1    | 1    | 1    |
| LAM | 5    | 7    | 7    | 10   | 11   | 12   | 13   | 13   | 15   | 15   | 16   |
| MEA | 2    | 3    | 3    | 3    | 3    | 4    | 4    | 4    | 5    | 5    | 6    |
| NEU | 1    | 1    | 1    | 1    | 1    | 1    | 2    | 2    | 2    | 2    | 2    |
| OAS | 8    | 9    | 11   | 13   | 14   | 15   | 15   | 18   | 19   | 20   | 21   |
| REF | 2    | 2    | 5    | 5    | 5    | 5    | 5    | 6    | 6    | 6    | 6    |
| SSA | 3    | 3    | 5    | 6    | 7    | 7    | 7    | 8    | 10   | 12   | 14   |
| USA | 8    | 7    | 6    | 6    | 7    | 8    | 8    | 8    | 9    | 10   | 12   |

Table 1692: MAgPIE m4p\_SSP1 — Resources—Nitrogen—Cropland Budget—Balance—Nutrient Surplus (Mt Nr/yr) [PART 1/2]

|     | 2050 | 2055 | 2060 | 2070 | 2080 | 2090 | 2100 |
|-----|------|------|------|------|------|------|------|
| GLO | 143  | 140  | 135  | 121  | 106  | 91   | 78   |
| CAZ | 5    | 5    | 5    | 4    | 4    | 3    | 3    |
| CHA | 22   | 20   | 18   | 15   | 12   | 9    | 7    |
| EUR | 14   | 13   | 13   | 12   | 12   | 11   | 10   |
| IND | 18   | 18   | 17   | 16   | 14   | 12   | 10   |
| JPN | 1    | 1    | 1    | 1    | 1    | 1    | 1    |
| LAM | 17   | 16   | 16   | 14   | 12   | 11   | 9    |
| MEA | 6    | 5    | 5    | 4    | 3    | 3    | 2    |
| NEU | 2    | 2    | 2    | 2    | 2    | 2    | 2    |
| OAS | 23   | 23   | 22   | 20   | 18   | 15   | 12   |
| REF | 6    | 6    | 6    | 6    | 4    | 3    | 3    |
| SSA | 17   | 17   | 18   | 17   | 16   | 14   | 13   |
| USA | 13   | 13   | 12   | 11   | 10   | 8    | 8    |

Table 1693: MAgPIE m4p\_SSP1 — Resources—Nitrogen—Cropland Budget—Balance—Nutrient Surplus (Mt Nr/yr) [PART 2/2]

|     | 1965 | 1970 | 1975 | 1980 | 1985 | 1990 | 1995 | 2000 | 2005 | 2010 |
|-----|------|------|------|------|------|------|------|------|------|------|
| GLO | 26.9 | 36.4 | 44.3 | 57.4 | 61.9 | 65.8 | 64.6 | 64.4 | 78.1 | 88.8 |
| CAZ | 0.9  | 1.0  | 0.4  | 1.0  | 1.6  | 1.6  | 1.4  | 1.4  | 1.4  | 1.8  |
| CHA | 1.2  | 1.5  | 2.5  | 8.6  | 10.2 | 15.3 | 17.5 | 16.0 | 22.9 | 24.5 |
| EUR | 5.5  | 8.6  | 10.6 | 11.5 | 12.1 | 9.5  | 7.6  | 6.7  | 6.3  | 6.4  |
| IND | 2.0  | 2.2  | 2.4  | 4.0  | 6.0  | 7.2  | 9.0  | 9.7  | 11.9 | 14.6 |
| JPN | 0.8  | 0.8  | 0.8  | 0.8  | 0.8  | 0.8  | 0.6  | 0.5  | 0.5  | 0.4  |
| LAM | 3.3  | 4.3  | 4.8  | 5.6  | 5.1  | 4.9  | 5.0  | 6.5  | 6.2  | 9.4  |
| MEA | 0.4  | 0.6  | 0.8  | 1.2  | 1.9  | 2.1  | 2.4  | 2.9  | 2.6  | 2.8  |
| NEU | 0.3  | 0.5  | 0.7  | 0.9  | 1.1  | 1.2  | 1.0  | 1.1  | 1.2  | 1.2  |
| OAS | 2.1  | 2.8  | 3.5  | 4.5  | 6.4  | 8.3  | 8.3  | 8.9  | 11.0 | 13.0 |
| REF | 3.7  | 4.1  | 7.3  | 7.3  | 8.3  | 5.4  | 1.9  | 1.9  | 4.0  | 3.9  |
| SSA | 2.3  | 2.6  | 2.4  | 2.4  | 2.8  | 2.6  | 2.7  | 2.4  | 4.1  | 5.5  |
| USA | 4.4  | 7.6  | 8.2  | 9.4  | 5.5  | 7.1  | 7.3  | 6.4  | 6.0  | 5.4  |

Table 1694: Bodirsky — Resources—Nitrogen—Cropland Budget—Balance—Nutrient Surplus (Mt Nr/yr)

56.1.4 Inputs

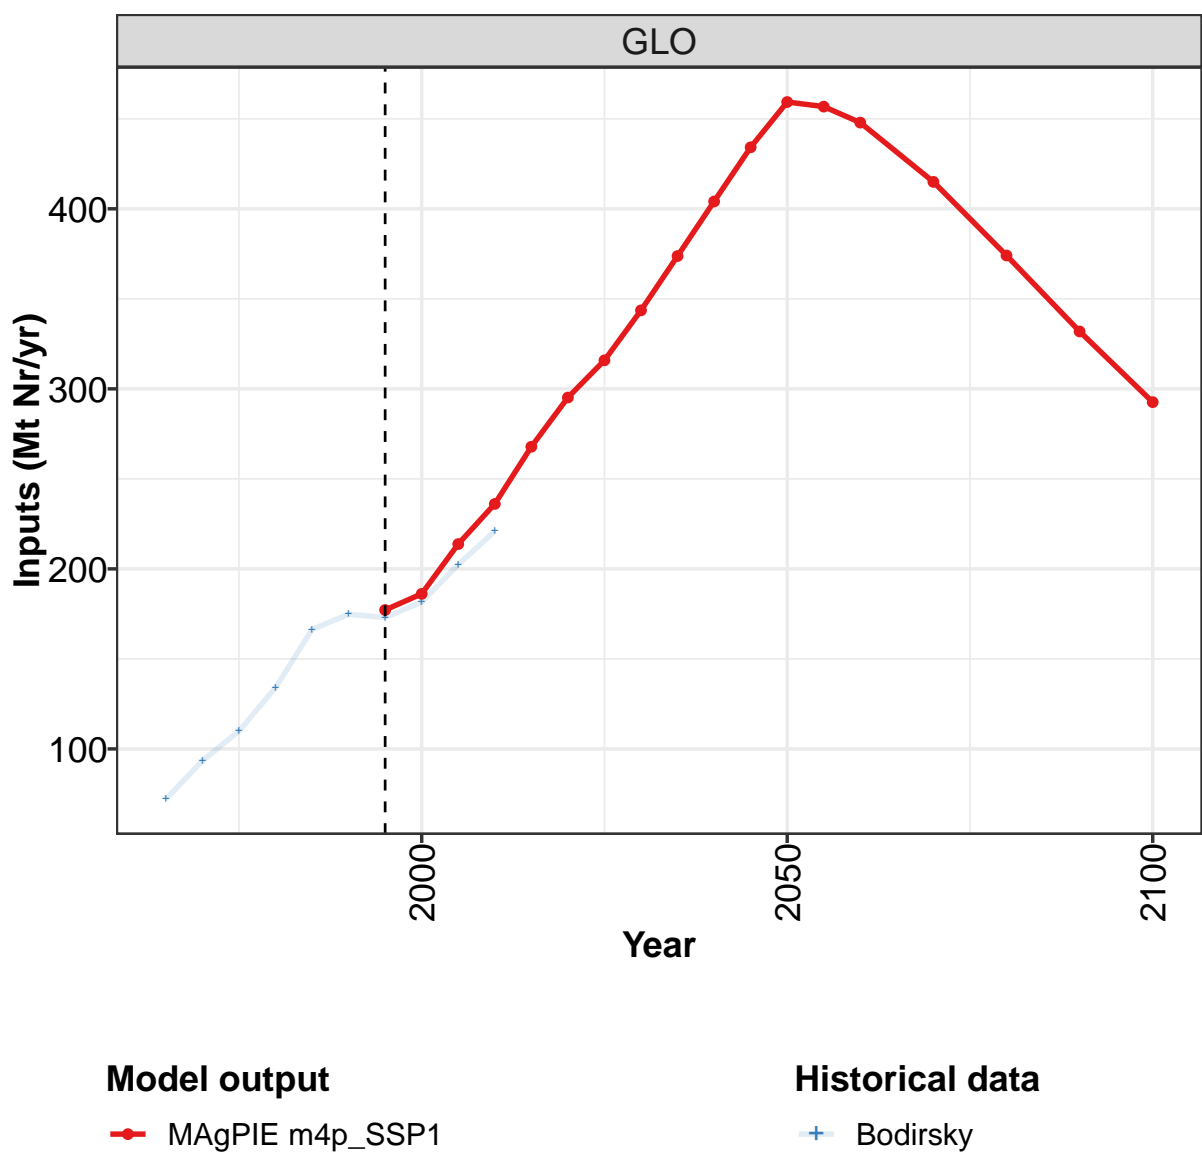

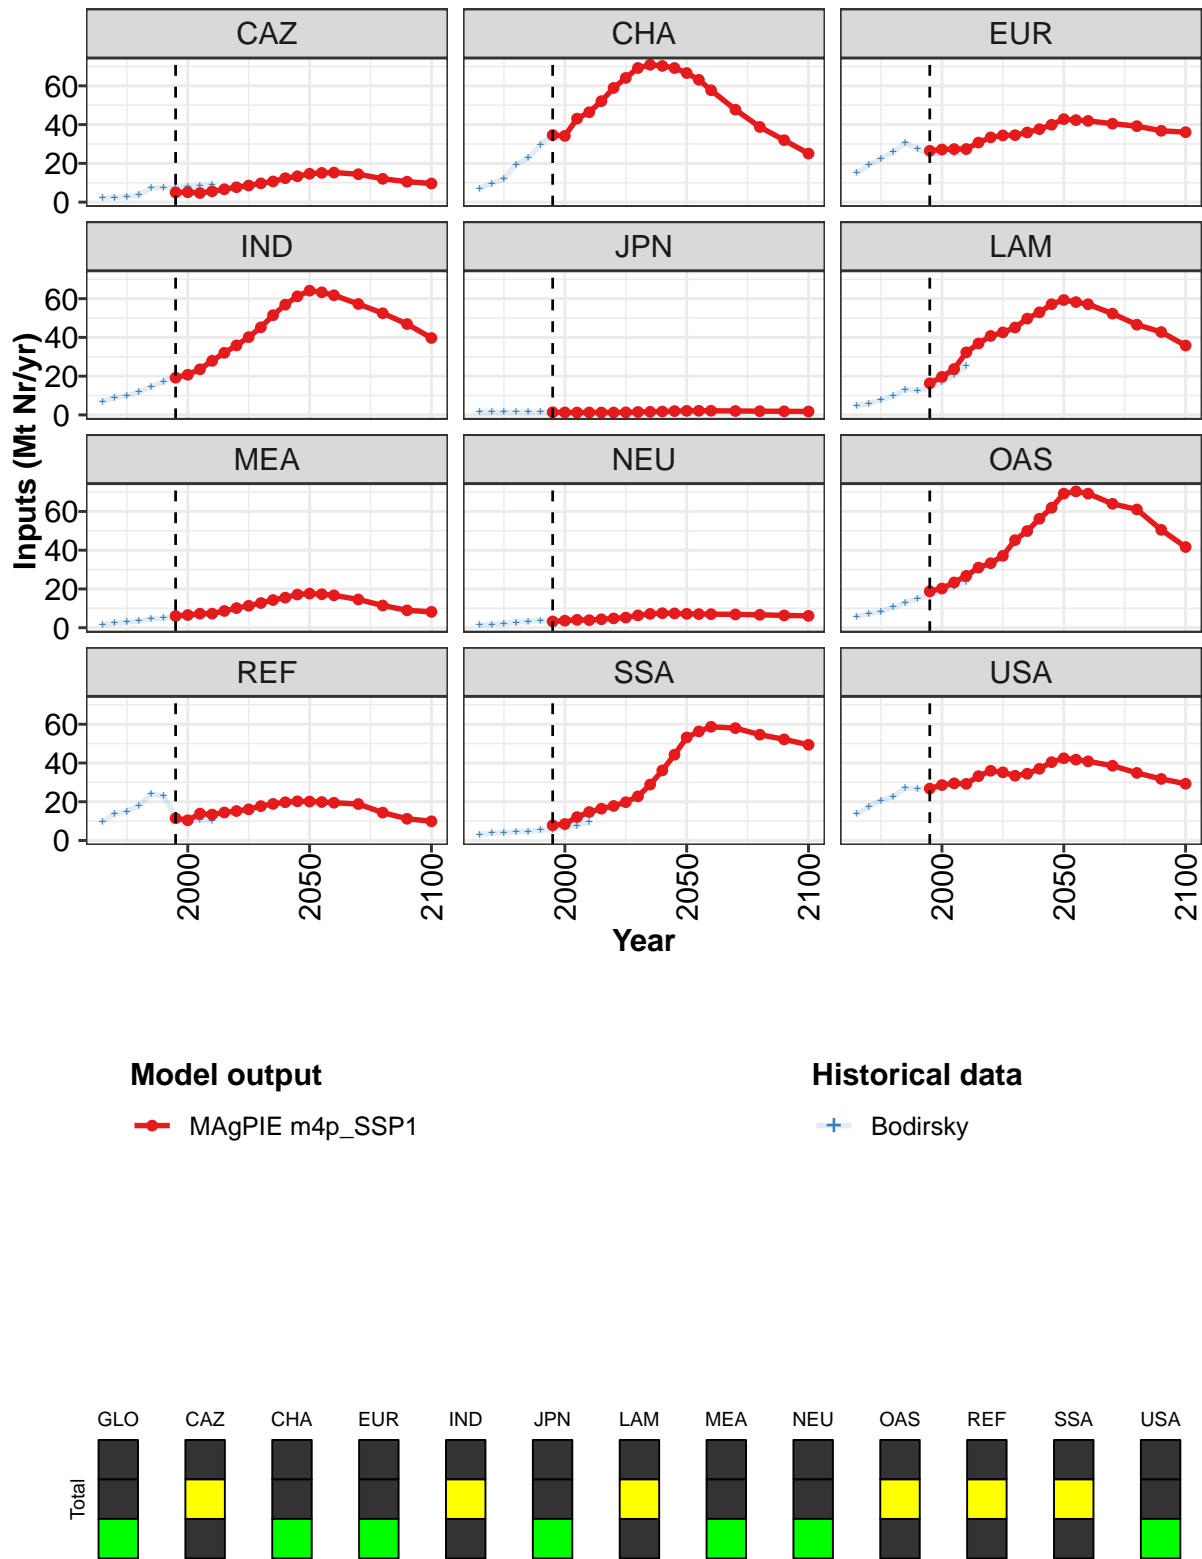

Figure 445: MAgPIE m4p\_SSP1 — Resources—Nitrogen—Cropland Budget—Inputs (Mt Nr/yr)

|     | 1995 | 2000 | 2005 | 2010 | 2015 | 2020 | 2025 | 2030 | 2035 | 2040 | 2045 |
|-----|------|------|------|------|------|------|------|------|------|------|------|
| GLO | 177  | 186  | 214  | 236  | 268  | 295  | 316  | 344  | 374  | 404  | 434  |
| CAZ | 5    | 5    | 5    | 6    | 7    | 8    | 9    | 10   | 11   | 12   | 13   |
| CHA | 35   | 34   | 43   | 46   | 52   | 59   | 64   | 69   | 71   | 70   | 69   |
| EUR | 26   | 27   | 27   | 27   | 31   | 33   | 34   | 35   | 36   | 38   | 40   |
| IND | 19   | 21   | 24   | 28   | 32   | 36   | 40   | 45   | 51   | 57   | 61   |
| JPN | 1    | 1    | 1    | 1    | 1    | 1    | 1    | 2    | 2    | 2    | 2    |
| LAM | 16   | 20   | 24   | 32   | 37   | 41   | 43   | 45   | 50   | 53   | 57   |
| MEA | 6    | 7    | 7    | 7    | 9    | 10   | 11   | 13   | 14   | 16   | 17   |
| NEU | 3    | 4    | 4    | 4    | 4    | 5    | 5    | 6    | 7    | 7    | 7    |
| OAS | 19   | 20   | 23   | 27   | 31   | 33   | 37   | 45   | 50   | 56   | 62   |
| REF | 11   | 10   | 14   | 13   | 14   | 15   | 16   | 18   | 19   | 20   | 20   |
| SSA | 8    | 9    | 12   | 15   | 16   | 18   | 20   | 23   | 29   | 36   | 44   |
| USA | 27   | 29   | 30   | 29   | 33   | 36   | 35   | 33   | 34   | 37   | 40   |

Table 1695: MAgPIE m4p\_SSP1 — Resources—Nitrogen—Cropland Budget—Inputs (Mt Nr/yr) [PART 1/2]

|     | 2050 | 2055 | 2060 | 2070 | 2080 | 2090 | 2100 |
|-----|------|------|------|------|------|------|------|
| GLO | 459  | 457  | 448  | 415  | 374  | 332  | 293  |
| CAZ | 15   | 15   | 15   | 14   | 12   | 11   | 10   |
| CHA | 67   | 63   | 58   | 48   | 39   | 32   | 25   |
| EUR | 43   | 42   | 42   | 40   | 39   | 37   | 36   |
| IND | 64   | 63   | 62   | 57   | 52   | 47   | 40   |
| JPN | 2    | 2    | 2    | 2    | 2    | 2    | 2    |
| LAM | 59   | 58   | 57   | 52   | 47   | 43   | 36   |
| MEA | 18   | 17   | 17   | 15   | 11   | 9    | 8    |
| NEU | 7    | 7    | 7    | 7    | 7    | 6    | 6    |
| OAS | 69   | 70   | 69   | 64   | 61   | 51   | 42   |
| REF | 20   | 20   | 19   | 19   | 14   | 11   | 10   |
| SSA | 53   | 56   | 59   | 58   | 55   | 52   | 49   |
| USA | 42   | 42   | 41   | 39   | 35   | 32   | 29   |

Table 1696: MAgPIE m4p\_SSP1 — Resources—Nitrogen—Cropland Budget—Inputs (Mt Nr/yr) [PART 2/2]

|     | 1965 | 1970 | 1975 | 1980 | 1985 | 1990 | 1995 | 2000 | 2005 | 2010 |
|-----|------|------|------|------|------|------|------|------|------|------|
| GLO | 72   | 93   | 110  | 134  | 166  | 175  | 173  | 182  | 202  | 221  |
| CAZ | 2    | 2    | 3    | 4    | 7    | 8    | 7    | 8    | 8    | 9    |
| CHA | 7    | 10   | 12   | 20   | 23   | 29   | 34   | 34   | 42   | 47   |
| EUR | 15   | 19   | 22   | 26   | 31   | 27   | 25   | 25   | 25   | 25   |
| IND | 7    | 9    | 10   | 12   | 14   | 17   | 20   | 22   | 24   | 29   |
| JPN | 1    | 2    | 2    | 2    | 2    | 2    | 1    | 1    | 1    | 1    |
| LAM | 4    | 6    | 8    | 10   | 13   | 13   | 14   | 17   | 21   | 25   |
| MEA | 2    | 2    | 3    | 4    | 5    | 5    | 6    | 6    | 7    | 7    |
| NEU | 1    | 2    | 2    | 3    | 3    | 4    | 3    | 4    | 4    | 4    |
| OAS | 6    | 7    | 8    | 11   | 13   | 15   | 17   | 19   | 21   | 24   |
| REF | 10   | 14   | 15   | 18   | 24   | 23   | 12   | 10   | 11   | 10   |
| SSA | 3    | 4    | 4    | 5    | 5    | 5    | 6    | 7    | 8    | 9    |
| USA | 14   | 17   | 21   | 23   | 27   | 27   | 27   | 29   | 30   | 30   |

Table 1697: Bodirsky — Resources—Nitrogen—Cropland Budget—Inputs (Mt Nr/yr)



56.1.5 Inputs—Ash from Burned Crop Residues

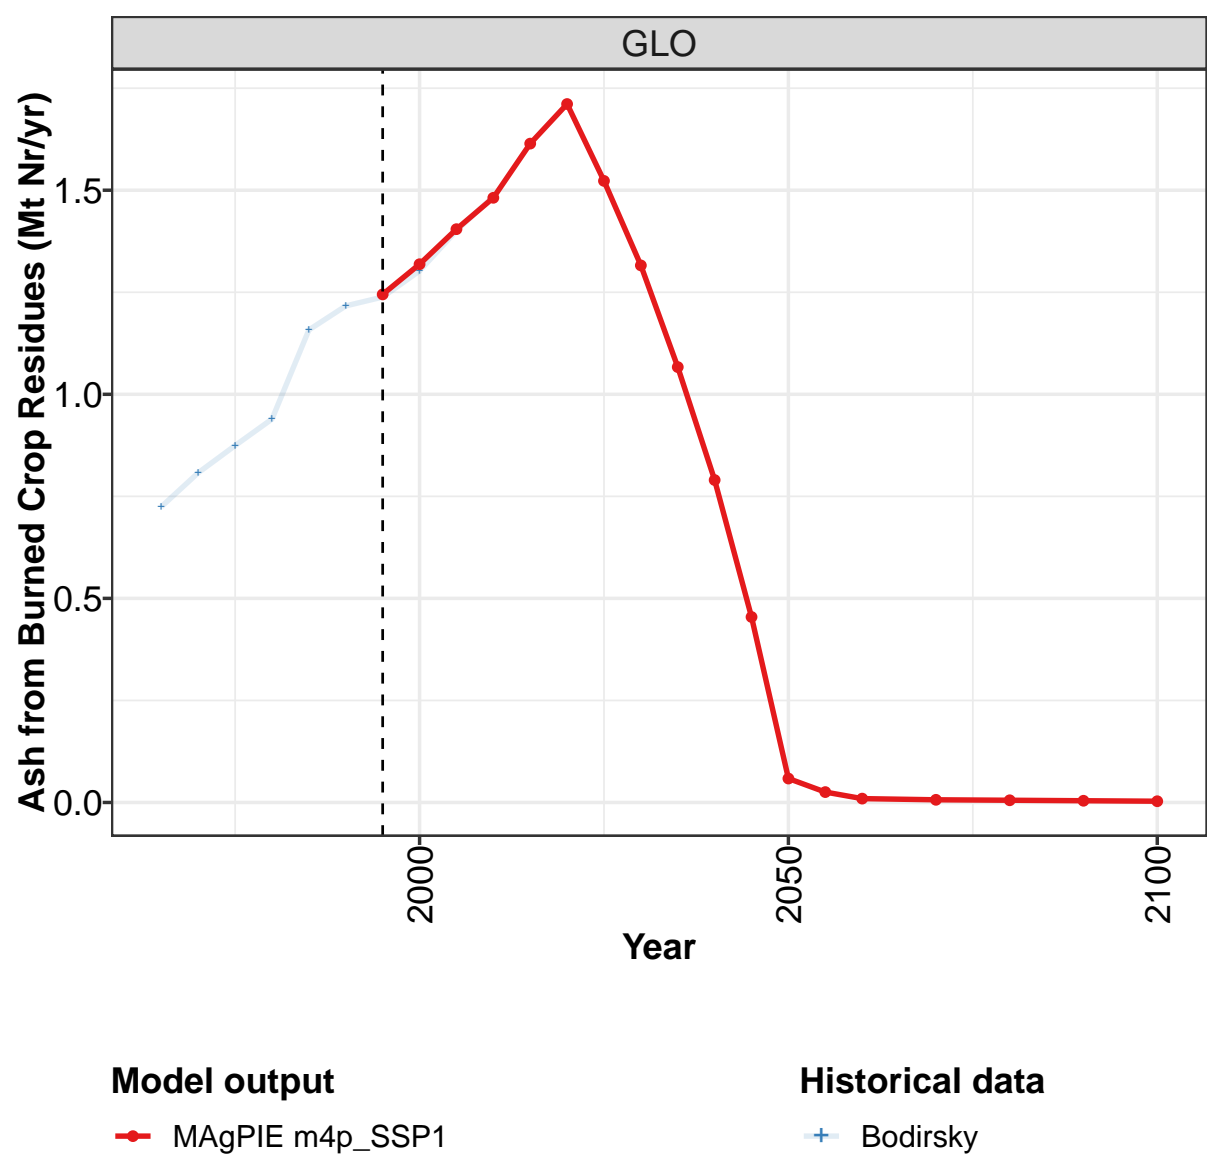

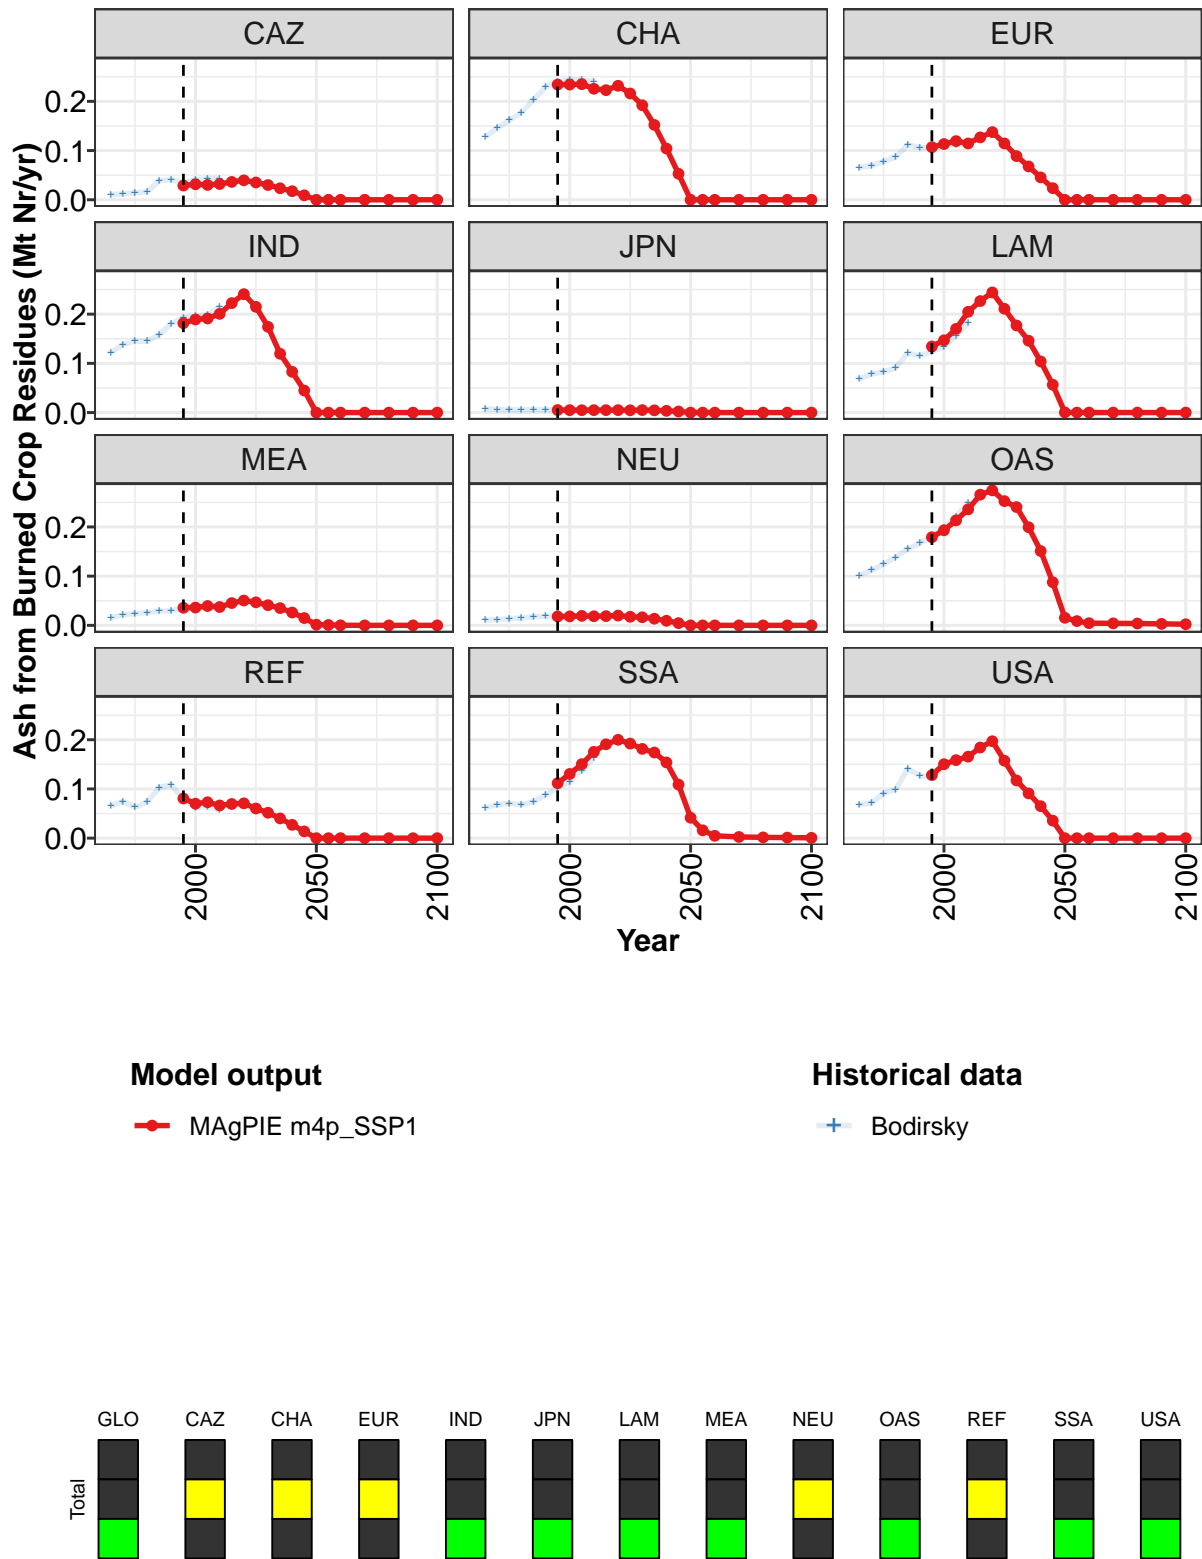

Figure 446: MAgPIE m4p\_SSP1 — Resources—Nitrogen—Cropland Budget—Inputs—Ash from Burned Crop Residues (Mt Nr/yr)

|     | 1995 | 2000 | 2005 | 2010 | 2015 | 2020 | 2025 | 2030 | 2035 | 2040 | 2045 |
|-----|------|------|------|------|------|------|------|------|------|------|------|
| GLO | 1.24 | 1.32 | 1.40 | 1.48 | 1.61 | 1.71 | 1.52 | 1.32 | 1.07 | 0.79 | 0.45 |
| CAZ | 0.03 | 0.03 | 0.03 | 0.03 | 0.04 | 0.04 | 0.04 | 0.03 | 0.02 | 0.02 | 0.01 |
| CHA | 0.23 | 0.23 | 0.23 | 0.23 | 0.22 | 0.23 | 0.22 | 0.19 | 0.15 | 0.10 | 0.05 |
| EUR | 0.11 | 0.11 | 0.12 | 0.11 | 0.13 | 0.14 | 0.11 | 0.09 | 0.07 | 0.05 | 0.02 |
| IND | 0.18 | 0.19 | 0.19 | 0.20 | 0.22 | 0.24 | 0.21 | 0.17 | 0.12 | 0.08 | 0.04 |
| JPN | 0.01 | 0.00 | 0.00 | 0.00 | 0.00 | 0.00 | 0.00 | 0.01 | 0.00 | 0.00 | 0.00 |
| LAM | 0.13 | 0.15 | 0.17 | 0.20 | 0.23 | 0.24 | 0.21 | 0.18 | 0.15 | 0.10 | 0.06 |
| MEA | 0.04 | 0.04 | 0.04 | 0.04 | 0.05 | 0.05 | 0.05 | 0.04 | 0.04 | 0.03 | 0.01 |
| NEU | 0.02 | 0.02 | 0.02 | 0.02 | 0.02 | 0.02 | 0.02 | 0.02 | 0.01 | 0.01 | 0.00 |
| OAS | 0.18 | 0.19 | 0.21 | 0.24 | 0.27 | 0.27 | 0.25 | 0.24 | 0.20 | 0.15 | 0.09 |
| REF | 0.08 | 0.07 | 0.07 | 0.07 | 0.07 | 0.07 | 0.06 | 0.05 | 0.04 | 0.03 | 0.01 |
| SSA | 0.11 | 0.13 | 0.15 | 0.18 | 0.19 | 0.20 | 0.19 | 0.18 | 0.17 | 0.15 | 0.11 |
| USA | 0.13 | 0.15 | 0.16 | 0.17 | 0.18 | 0.20 | 0.16 | 0.12 | 0.09 | 0.07 | 0.04 |

Table 1698: MAgPIE m4p.SSP1 — Resources—Nitrogen—Cropland Budget—Inputs—Ash from Burned Crop Residues (Mt Nr/yr) [PART 1/2]

|     | 2050 | 2055 | 2060 | 2070 | 2080 | 2090 | 2100 |
|-----|------|------|------|------|------|------|------|
| GLO | 0.06 | 0.03 | 0.01 | 0.01 | 0.01 | 0.00 | 0.00 |
| CAZ | 0.00 | 0.00 | 0.00 | 0.00 | 0.00 | 0.00 | 0.00 |
| CHA | 0.00 | 0.00 | 0.00 | 0.00 | 0.00 | 0.00 | 0.00 |
| EUR | 0.00 | 0.00 | 0.00 | 0.00 | 0.00 | 0.00 | 0.00 |
| IND | 0.00 | 0.00 | 0.00 | 0.00 | 0.00 | 0.00 | 0.00 |
| JPN | 0.00 | 0.00 | 0.00 | 0.00 | 0.00 | 0.00 | 0.00 |
| LAM | 0.00 | 0.00 | 0.00 | 0.00 | 0.00 | 0.00 | 0.00 |
| MEA | 0.00 | 0.00 | 0.00 | 0.00 | 0.00 | 0.00 | 0.00 |
| NEU | 0.00 | 0.00 | 0.00 | 0.00 | 0.00 | 0.00 | 0.00 |
| OAS | 0.02 | 0.01 | 0.00 | 0.00 | 0.00 | 0.00 | 0.00 |
| REF | 0.00 | 0.00 | 0.00 | 0.00 | 0.00 | 0.00 | 0.00 |
| SSA | 0.04 | 0.02 | 0.00 | 0.00 | 0.00 | 0.00 | 0.00 |
| USA | 0.00 | 0.00 | 0.00 | 0.00 | 0.00 | 0.00 | 0.00 |

Table 1699: MAgPIE m4p.SSP1 — Resources—Nitrogen—Cropland Budget—Inputs—Ash from Burned Crop Residues (Mt Nr/yr) [PART 2/2]

|     | 1965 | 1970 | 1975 | 1980 | 1985 | 1990 | 1995 | 2000 | 2005 | 2010 |
|-----|------|------|------|------|------|------|------|------|------|------|
| GLO | 0.72 | 0.81 | 0.87 | 0.94 | 1.16 | 1.22 | 1.24 | 1.30 | 1.40 | 1.48 |
| CAZ | 0.01 | 0.01 | 0.01 | 0.02 | 0.04 | 0.04 | 0.04 | 0.04 | 0.04 | 0.04 |
| CHA | 0.13 | 0.15 | 0.16 | 0.18 | 0.20 | 0.23 | 0.24 | 0.24 | 0.24 | 0.24 |
| EUR | 0.07 | 0.07 | 0.08 | 0.09 | 0.11 | 0.11 | 0.10 | 0.11 | 0.11 | 0.11 |
| IND | 0.12 | 0.14 | 0.14 | 0.14 | 0.16 | 0.18 | 0.19 | 0.20 | 0.20 | 0.21 |
| JPN | 0.01 | 0.01 | 0.01 | 0.01 | 0.01 | 0.01 | 0.01 | 0.01 | 0.00 | 0.01 |
| LAM | 0.07 | 0.08 | 0.08 | 0.09 | 0.12 | 0.12 | 0.12 | 0.13 | 0.16 | 0.18 |
| MEA | 0.02 | 0.02 | 0.02 | 0.03 | 0.03 | 0.03 | 0.03 | 0.04 | 0.04 | 0.04 |
| NEU | 0.01 | 0.01 | 0.01 | 0.01 | 0.02 | 0.02 | 0.02 | 0.02 | 0.02 | 0.02 |
| OAS | 0.10 | 0.11 | 0.12 | 0.14 | 0.16 | 0.17 | 0.18 | 0.20 | 0.22 | 0.25 |
| REF | 0.07 | 0.07 | 0.06 | 0.07 | 0.10 | 0.11 | 0.08 | 0.06 | 0.06 | 0.06 |
| SSA | 0.06 | 0.07 | 0.07 | 0.07 | 0.07 | 0.09 | 0.10 | 0.11 | 0.14 | 0.16 |
| USA | 0.07 | 0.07 | 0.09 | 0.10 | 0.14 | 0.13 | 0.12 | 0.15 | 0.16 | 0.16 |

Table 1700: Bodirsky — Resources—Nitrogen—Cropland Budget—Inputs—Ash from Burned Crop Residues (Mt Nr/yr)

56.1.6 Inputs—Atmospheric Deposition

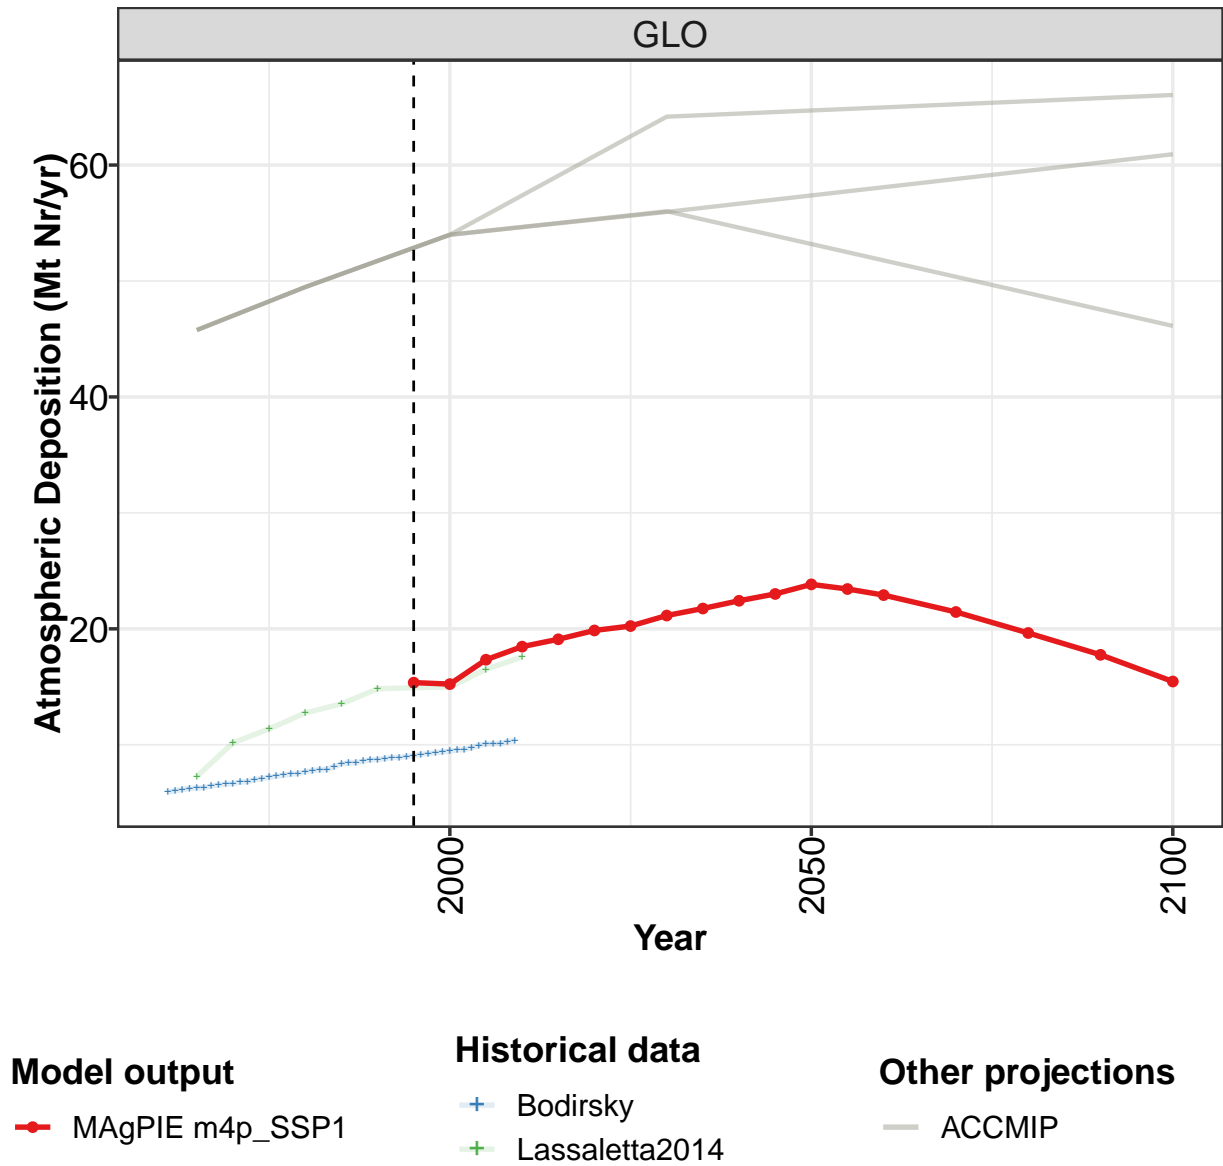

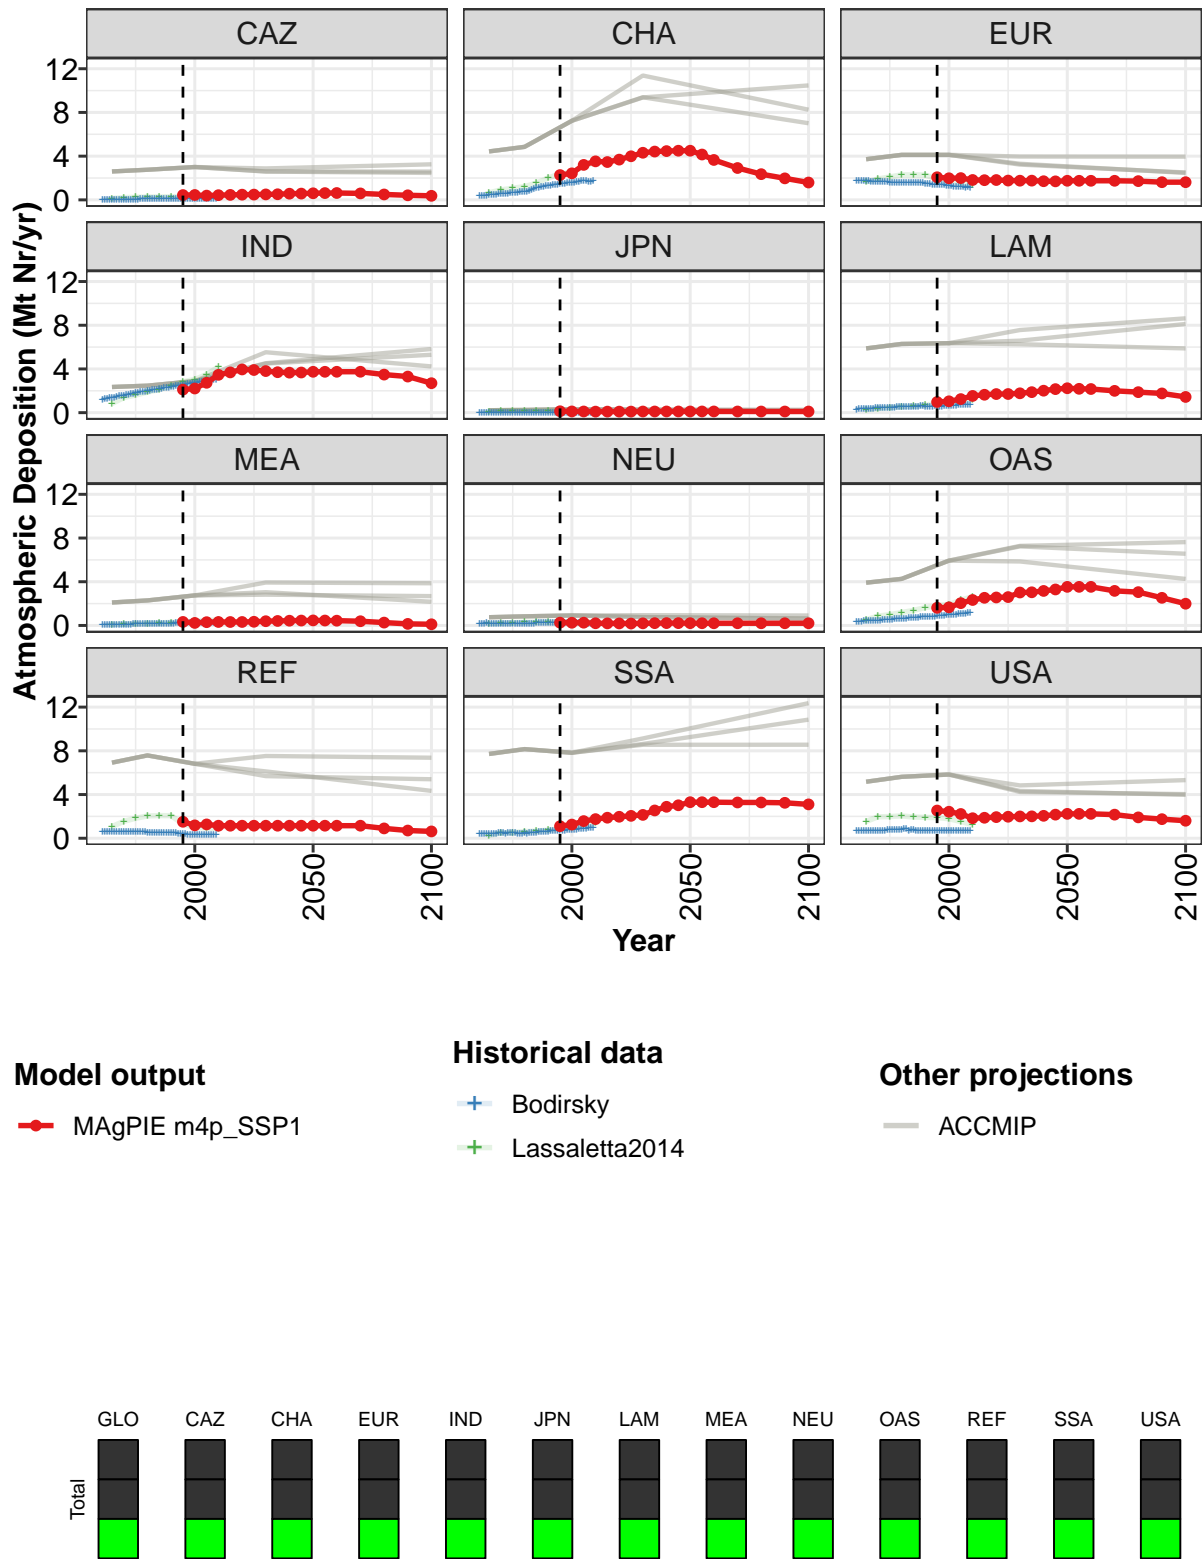

Figure 447: MAgPIE m4p\_SSP1 — Resources—Nitrogen—Cropland Budget—Inputs—Atmospheric Deposition (Mt Nr/yr)

|     | 1995 | 2000 | 2005 | 2010 | 2015 | 2020 | 2025 | 2030 | 2035 | 2040 | 2045 |
|-----|------|------|------|------|------|------|------|------|------|------|------|
| GLO | 15.4 | 15.2 | 17.3 | 18.5 | 19.1 | 19.9 | 20.2 | 21.1 | 21.8 | 22.4 | 23.0 |
| CAZ | 0.4  | 0.5  | 0.4  | 0.4  | 0.5  | 0.5  | 0.5  | 0.5  | 0.5  | 0.6  | 0.6  |
| CHA | 2.3  | 2.4  | 3.2  | 3.5  | 3.5  | 3.7  | 4.0  | 4.3  | 4.4  | 4.5  | 4.5  |
| EUR | 2.1  | 2.0  | 2.0  | 1.8  | 1.8  | 1.8  | 1.8  | 1.8  | 1.8  | 1.7  | 1.7  |
| IND | 2.1  | 2.2  | 2.7  | 3.5  | 3.7  | 4.0  | 3.9  | 3.8  | 3.7  | 3.7  | 3.7  |
| JPN | 0.1  | 0.1  | 0.1  | 0.1  | 0.1  | 0.1  | 0.1  | 0.1  | 0.1  | 0.1  | 0.1  |
| LAM | 1.0  | 1.0  | 1.2  | 1.5  | 1.6  | 1.7  | 1.7  | 1.8  | 1.9  | 2.0  | 2.2  |
| MEA | 0.3  | 0.2  | 0.3  | 0.3  | 0.3  | 0.3  | 0.3  | 0.4  | 0.4  | 0.4  | 0.5  |
| NEU | 0.3  | 0.3  | 0.3  | 0.2  | 0.2  | 0.2  | 0.2  | 0.2  | 0.2  | 0.2  | 0.2  |
| OAS | 1.6  | 1.7  | 2.0  | 2.3  | 2.5  | 2.6  | 2.6  | 3.0  | 3.0  | 3.2  | 3.3  |
| REF | 1.5  | 1.2  | 1.3  | 1.1  | 1.1  | 1.1  | 1.1  | 1.1  | 1.1  | 1.1  | 1.1  |
| SSA | 1.1  | 1.3  | 1.6  | 1.8  | 1.9  | 2.0  | 2.1  | 2.1  | 2.5  | 2.9  | 3.0  |
| USA | 2.5  | 2.4  | 2.2  | 1.8  | 1.9  | 1.9  | 2.0  | 2.0  | 2.0  | 2.1  | 2.2  |

Table 1701: MAgPIE m4p\_SSP1 — Resources—Nitrogen—Cropland Budget—Inputs—Atmospheric Deposition (Mt Nr/yr) [PART 1/2]

|     | 2050 | 2055 | 2060 | 2070 | 2080 | 2090 | 2100 |
|-----|------|------|------|------|------|------|------|
| GLO | 23.8 | 23.4 | 22.9 | 21.5 | 19.6 | 17.8 | 15.5 |
| CAZ | 0.6  | 0.6  | 0.6  | 0.6  | 0.5  | 0.4  | 0.4  |
| CHA | 4.5  | 4.2  | 3.7  | 2.9  | 2.4  | 2.0  | 1.6  |
| EUR | 1.8  | 1.7  | 1.7  | 1.7  | 1.7  | 1.6  | 1.6  |
| IND | 3.7  | 3.7  | 3.7  | 3.7  | 3.5  | 3.3  | 2.7  |
| JPN | 0.1  | 0.1  | 0.1  | 0.1  | 0.1  | 0.1  | 0.1  |
| LAM | 2.2  | 2.2  | 2.2  | 2.0  | 1.9  | 1.8  | 1.4  |
| MEA | 0.5  | 0.5  | 0.4  | 0.4  | 0.3  | 0.1  | 0.1  |
| NEU | 0.2  | 0.2  | 0.2  | 0.2  | 0.2  | 0.2  | 0.2  |
| OAS | 3.5  | 3.5  | 3.5  | 3.2  | 3.0  | 2.5  | 2.0  |
| REF | 1.1  | 1.1  | 1.1  | 1.1  | 0.9  | 0.7  | 0.6  |
| SSA | 3.3  | 3.3  | 3.3  | 3.3  | 3.3  | 3.2  | 3.1  |
| USA | 2.2  | 2.2  | 2.2  | 2.2  | 1.9  | 1.7  | 1.6  |

Table 1702: MAgPIE m4p\_SSP1 — Resources—Nitrogen—Cropland Budget—Inputs—Atmospheric Deposition (Mt Nr/yr) [PART 2/2]

|     | 1961 | 1962 | 1963 | 1964 | 1965 | 1966 | 1967 | 1968 | 1969 | 1970 | 1971 |
|-----|------|------|------|------|------|------|------|------|------|------|------|
| GLO | 5.9  | 6.0  | 6.1  | 6.2  | 6.3  | 6.3  | 6.4  | 6.5  | 6.6  | 6.7  | 6.8  |
| CAZ | 0.0  | 0.0  | 0.0  | 0.0  | 0.0  | 0.0  | 0.0  | 0.1  | 0.0  | 0.0  | 0.1  |
| CHA | 0.3  | 0.4  | 0.4  | 0.4  | 0.4  | 0.4  | 0.5  | 0.5  | 0.5  | 0.5  | 0.6  |
| EUR | 1.8  | 1.8  | 1.8  | 1.7  | 1.7  | 1.7  | 1.7  | 1.7  | 1.7  | 1.7  | 1.7  |
| IND | 1.2  | 1.3  | 1.3  | 1.4  | 1.4  | 1.4  | 1.5  | 1.5  | 1.5  | 1.6  | 1.6  |
| JPN | 0.0  | 0.0  | 0.0  | 0.0  | 0.0  | 0.0  | 0.0  | 0.0  | 0.0  | 0.0  | 0.0  |
| LAM | 0.3  | 0.3  | 0.3  | 0.3  | 0.4  | 0.4  | 0.4  | 0.4  | 0.4  | 0.4  | 0.4  |
| MEA | 0.1  | 0.1  | 0.1  | 0.1  | 0.1  | 0.1  | 0.1  | 0.1  | 0.1  | 0.1  | 0.1  |
| NEU | 0.2  | 0.2  | 0.2  | 0.2  | 0.2  | 0.2  | 0.2  | 0.2  | 0.2  | 0.2  | 0.2  |
| OAS | 0.3  | 0.4  | 0.4  | 0.4  | 0.4  | 0.4  | 0.4  | 0.4  | 0.4  | 0.5  | 0.5  |
| REF | 0.6  | 0.6  | 0.6  | 0.6  | 0.6  | 0.6  | 0.6  | 0.6  | 0.6  | 0.6  | 0.5  |
| SSA | 0.4  | 0.4  | 0.4  | 0.4  | 0.4  | 0.4  | 0.4  | 0.4  | 0.5  | 0.5  | 0.5  |
| USA | 0.7  | 0.6  | 0.7  | 0.7  | 0.7  | 0.7  | 0.7  | 0.7  | 0.7  | 0.7  | 0.7  |

Table 1703: Lassaletta2014 — Resources—Nitrogen—Cropland Budget—Inputs—Atmospheric Deposition (Mt Nr/yr) [PART 1/5]

|     | 1972 | 1973 | 1974 | 1975 | 1976 | 1977 | 1978 | 1979 | 1980 | 1981 | 1982 |
|-----|------|------|------|------|------|------|------|------|------|------|------|
| GLO | 6.8  | 7.0  | 7.1  | 7.2  | 7.3  | 7.4  | 7.5  | 7.5  | 7.7  | 7.8  | 7.9  |
| CAZ | 0.0  | 0.1  | 0.1  | 0.1  | 0.1  | 0.1  | 0.1  | 0.1  | 0.1  | 0.1  | 0.1  |
| CHA | 0.6  | 0.6  | 0.6  | 0.6  | 0.7  | 0.7  | 0.7  | 0.7  | 0.7  | 0.8  | 0.8  |
| EUR | 1.6  | 1.6  | 1.6  | 1.6  | 1.6  | 1.6  | 1.6  | 1.6  | 1.6  | 1.6  | 1.6  |
| IND | 1.7  | 1.7  | 1.8  | 1.8  | 1.8  | 1.9  | 1.9  | 1.9  | 2.0  | 2.0  | 2.1  |
| JPN | 0.0  | 0.0  | 0.0  | 0.0  | 0.0  | 0.0  | 0.0  | 0.0  | 0.0  | 0.0  | 0.0  |
| LAM | 0.4  | 0.4  | 0.4  | 0.5  | 0.5  | 0.5  | 0.5  | 0.5  | 0.5  | 0.5  | 0.5  |
| MEA | 0.1  | 0.1  | 0.1  | 0.1  | 0.1  | 0.1  | 0.1  | 0.1  | 0.1  | 0.1  | 0.1  |
| NEU | 0.2  | 0.2  | 0.2  | 0.2  | 0.2  | 0.2  | 0.2  | 0.2  | 0.2  | 0.2  | 0.2  |
| OAS | 0.5  | 0.5  | 0.5  | 0.5  | 0.5  | 0.6  | 0.6  | 0.6  | 0.6  | 0.6  | 0.7  |
| REF | 0.6  | 0.6  | 0.6  | 0.6  | 0.6  | 0.6  | 0.6  | 0.5  | 0.5  | 0.5  | 0.5  |
| SSA | 0.5  | 0.5  | 0.5  | 0.5  | 0.5  | 0.5  | 0.5  | 0.4  | 0.5  | 0.4  | 0.5  |
| USA | 0.7  | 0.7  | 0.7  | 0.8  | 0.8  | 0.8  | 0.8  | 0.8  | 0.8  | 0.8  | 0.8  |

Table 1704: Lassaletta2014 — Resources—Nitrogen—Cropland Budget—Inputs—Atmospheric Deposition (Mt Nr/yr) [PART 2/5]

|     | 1983 | 1984 | 1985 | 1986 | 1987 | 1988 | 1989 | 1990 | 1991 | 1992 | 1993 |
|-----|------|------|------|------|------|------|------|------|------|------|------|
| GLO | 7.9  | 8.1  | 8.4  | 8.4  | 8.5  | 8.6  | 8.7  | 8.7  | 8.8  | 8.9  | 8.9  |
| CAZ | 0.1  | 0.1  | 0.1  | 0.1  | 0.1  | 0.1  | 0.1  | 0.1  | 0.1  | 0.1  | 0.1  |
| CHA | 0.9  | 1.0  | 1.1  | 1.1  | 1.2  | 1.2  | 1.2  | 1.3  | 1.3  | 1.4  | 1.4  |
| EUR | 1.6  | 1.6  | 1.6  | 1.6  | 1.6  | 1.5  | 1.5  | 1.5  | 1.5  | 1.4  | 1.4  |
| IND | 2.1  | 2.1  | 2.2  | 2.2  | 2.2  | 2.3  | 2.3  | 2.4  | 2.4  | 2.4  | 2.5  |
| JPN | 0.0  | 0.0  | 0.0  | 0.0  | 0.0  | 0.0  | 0.0  | 0.0  | 0.0  | 0.0  | 0.0  |
| LAM | 0.5  | 0.5  | 0.6  | 0.6  | 0.6  | 0.6  | 0.6  | 0.6  | 0.6  | 0.6  | 0.6  |
| MEA | 0.1  | 0.1  | 0.2  | 0.2  | 0.2  | 0.2  | 0.2  | 0.2  | 0.2  | 0.2  | 0.2  |
| NEU | 0.2  | 0.2  | 0.2  | 0.2  | 0.2  | 0.2  | 0.2  | 0.2  | 0.2  | 0.2  | 0.2  |
| OAS | 0.7  | 0.7  | 0.7  | 0.7  | 0.7  | 0.7  | 0.8  | 0.8  | 0.8  | 0.8  | 0.8  |
| REF | 0.5  | 0.5  | 0.5  | 0.5  | 0.5  | 0.5  | 0.5  | 0.5  | 0.5  | 0.5  | 0.4  |
| SSA | 0.5  | 0.5  | 0.5  | 0.5  | 0.6  | 0.6  | 0.6  | 0.6  | 0.6  | 0.7  | 0.7  |
| USA | 0.7  | 0.8  | 0.8  | 0.7  | 0.7  | 0.7  | 0.7  | 0.7  | 0.7  | 0.7  | 0.7  |

Table 1705: Lassaletta2014 — Resources—Nitrogen—Cropland Budget—Inputs—Atmospheric Deposition (Mt Nr/yr) [PART 3/5]

|     | 1994 | 1995 | 1996 | 1997 | 1998 | 1999 | 2000 | 2001 | 2002 | 2003 | 2004 |
|-----|------|------|------|------|------|------|------|------|------|------|------|
| GLO | 9.0  | 9.1  | 9.2  | 9.2  | 9.3  | 9.4  | 9.5  | 9.5  | 9.6  | 9.7  | 10.0 |
| CAZ | 0.1  | 0.1  | 0.1  | 0.1  | 0.1  | 0.1  | 0.1  | 0.1  | 0.1  | 0.1  | 0.1  |
| CHA | 1.4  | 1.4  | 1.5  | 1.5  | 1.5  | 1.6  | 1.6  | 1.6  | 1.6  | 1.6  | 1.7  |
| EUR | 1.4  | 1.4  | 1.4  | 1.4  | 1.3  | 1.3  | 1.3  | 1.3  | 1.2  | 1.2  | 1.2  |
| IND | 2.5  | 2.5  | 2.6  | 2.6  | 2.7  | 2.7  | 2.8  | 2.8  | 2.8  | 2.8  | 2.9  |
| JPN | 0.0  | 0.0  | 0.0  | 0.0  | 0.0  | 0.0  | 0.0  | 0.0  | 0.0  | 0.0  | 0.0  |
| LAM | 0.6  | 0.6  | 0.6  | 0.6  | 0.6  | 0.6  | 0.6  | 0.6  | 0.6  | 0.7  | 0.7  |
| MEA | 0.2  | 0.2  | 0.2  | 0.2  | 0.2  | 0.2  | 0.2  | 0.2  | 0.2  | 0.3  | 0.2  |
| NEU | 0.2  | 0.2  | 0.2  | 0.2  | 0.2  | 0.2  | 0.2  | 0.2  | 0.2  | 0.2  | 0.2  |
| OAS | 0.8  | 0.9  | 0.9  | 0.9  | 0.9  | 0.9  | 0.9  | 1.0  | 1.0  | 1.0  | 1.0  |
| REF | 0.4  | 0.4  | 0.4  | 0.4  | 0.3  | 0.3  | 0.3  | 0.3  | 0.3  | 0.3  | 0.3  |
| SSA | 0.7  | 0.7  | 0.7  | 0.7  | 0.7  | 0.7  | 0.7  | 0.8  | 0.8  | 0.8  | 0.9  |
| USA | 0.7  | 0.7  | 0.7  | 0.7  | 0.7  | 0.7  | 0.7  | 0.7  | 0.7  | 0.7  | 0.7  |

Table 1706: Lassaletta2014 — Resources—Nitrogen—Cropland Budget—Inputs—Atmospheric Deposition (Mt Nr/yr) [PART 4/5]

|     | 2005 | 2006 | 2007 | 2008 | 2009 |
|-----|------|------|------|------|------|
| GLO | 10.1 | 10.1 | 10.1 | 10.3 | 10.4 |
| CAZ | 0.1  | 0.1  | 0.1  | 0.1  | 0.1  |
| CHA | 1.7  | 1.8  | 1.7  | 1.7  | 1.7  |
| EUR | 1.2  | 1.2  | 1.1  | 1.2  | 1.1  |
| IND | 2.9  | 2.9  | 3.0  | 3.0  | 3.0  |
| JPN | 0.0  | 0.0  | 0.0  | 0.0  | 0.0  |
| LAM | 0.7  | 0.7  | 0.7  | 0.8  | 0.7  |
| MEA | 0.3  | 0.3  | 0.3  | 0.3  | 0.3  |
| NEU | 0.2  | 0.2  | 0.2  | 0.2  | 0.2  |
| OAS | 1.1  | 1.1  | 1.1  | 1.1  | 1.1  |
| REF | 0.3  | 0.3  | 0.3  | 0.3  | 0.3  |
| SSA | 0.9  | 0.9  | 0.9  | 0.9  | 0.9  |
| USA | 0.7  | 0.7  | 0.7  | 0.7  | 0.7  |

Table 1707: Lassaletta2014 — Resources—Nitrogen—Cropland Budget—Inputs—Atmospheric Deposition (Mt Nr/yr) [PART 5/5]

|     | 1965 | 1970 | 1975 | 1980 | 1985 | 1990 | 1995 | 2000 | 2005 | 2010 |
|-----|------|------|------|------|------|------|------|------|------|------|
| GLO | 7.3  | 10.2 | 11.4 | 12.7 | 13.5 | 14.8 | 14.9 | 15.0 | 16.5 | 17.6 |
| CAZ | 0.1  | 0.2  | 0.2  | 0.3  | 0.3  | 0.3  | 0.3  | 0.3  | 0.3  | 0.3  |
| CHA | 0.6  | 0.9  | 1.1  | 1.2  | 1.5  | 2.0  | 2.4  | 2.5  | 3.1  | 3.4  |
| EUR | 1.6  | 1.9  | 2.1  | 2.3  | 2.3  | 2.3  | 1.9  | 1.7  | 1.6  | 1.4  |
| IND | 0.8  | 1.4  | 1.6  | 1.9  | 2.1  | 2.5  | 2.8  | 3.0  | 3.5  | 4.2  |
| JPN | 0.1  | 0.2  | 0.2  | 0.2  | 0.2  | 0.1  | 0.1  | 0.1  | 0.1  | 0.1  |
| LAM | 0.3  | 0.4  | 0.5  | 0.6  | 0.6  | 0.7  | 0.9  | 0.9  | 1.1  | 1.2  |
| MEA | 0.1  | 0.1  | 0.2  | 0.2  | 0.2  | 0.3  | 0.3  | 0.4  | 0.5  | 0.5  |
| NEU | 0.2  | 0.2  | 0.3  | 0.3  | 0.3  | 0.3  | 0.3  | 0.3  | 0.4  | 0.3  |
| OAS | 0.5  | 0.9  | 1.0  | 1.2  | 1.4  | 1.6  | 1.8  | 1.9  | 2.3  | 2.6  |
| REF | 1.1  | 1.5  | 1.8  | 2.0  | 2.1  | 2.1  | 1.3  | 1.0  | 0.9  | 0.9  |
| SSA | 0.3  | 0.5  | 0.5  | 0.6  | 0.6  | 0.7  | 0.9  | 1.0  | 1.3  | 1.4  |
| USA | 1.5  | 2.0  | 2.0  | 2.0  | 1.9  | 1.9  | 1.9  | 1.8  | 1.5  | 1.3  |

Table 1708: Bodirsky — Resources—Nitrogen—Cropland Budget—Inputs—Atmospheric Deposition (Mt Nr/yr)



56.1.7 Inputs—Biological Fixation Freelifving Microorganisms

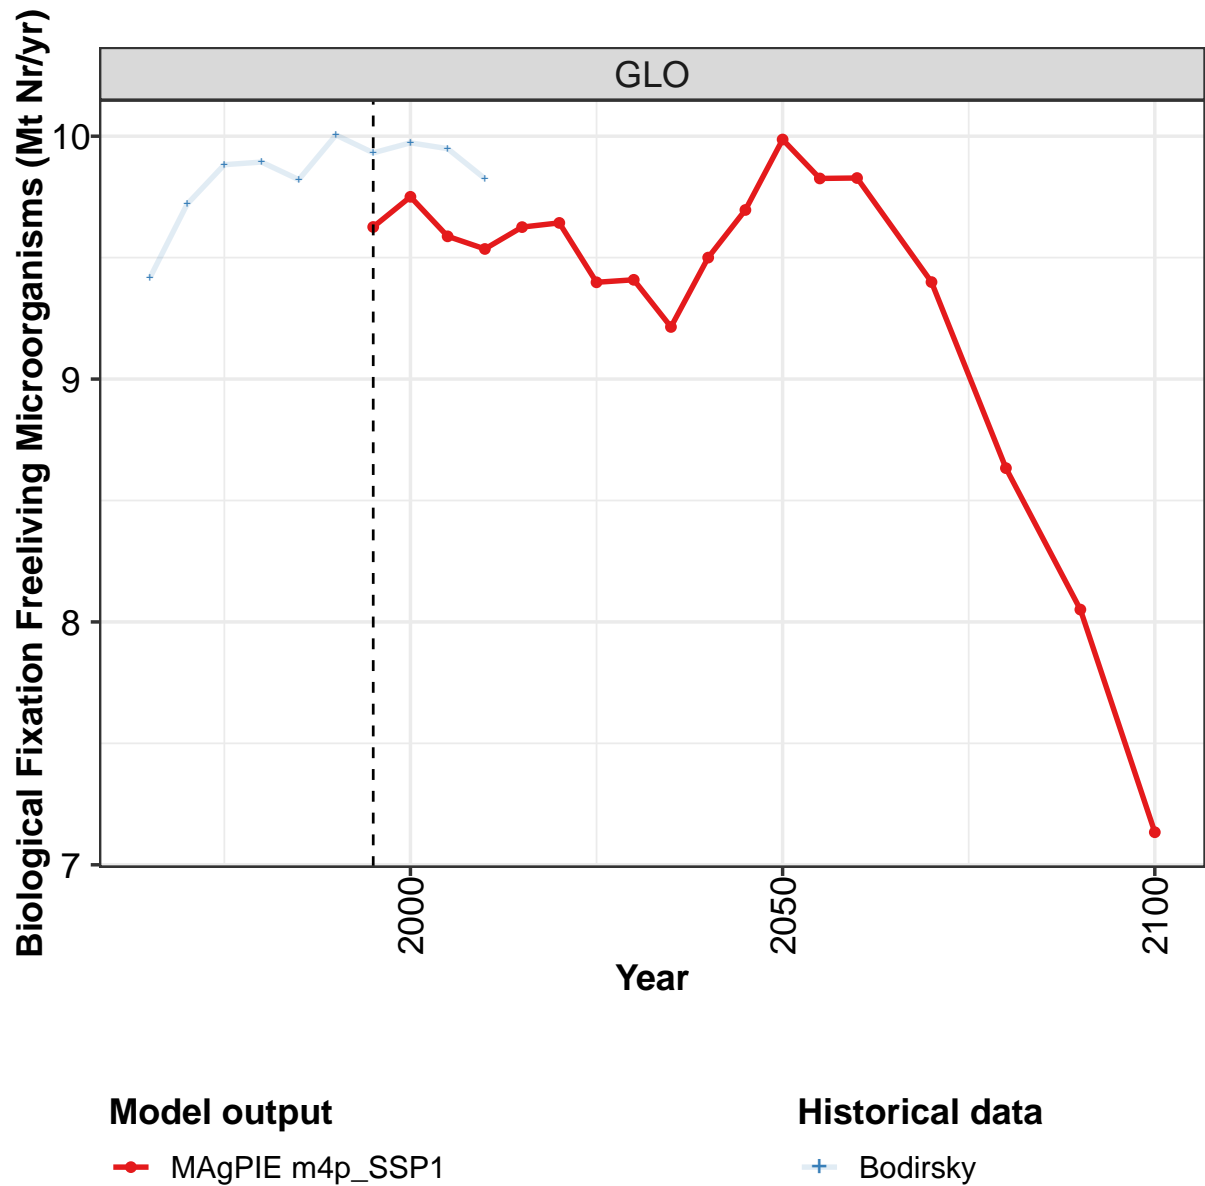

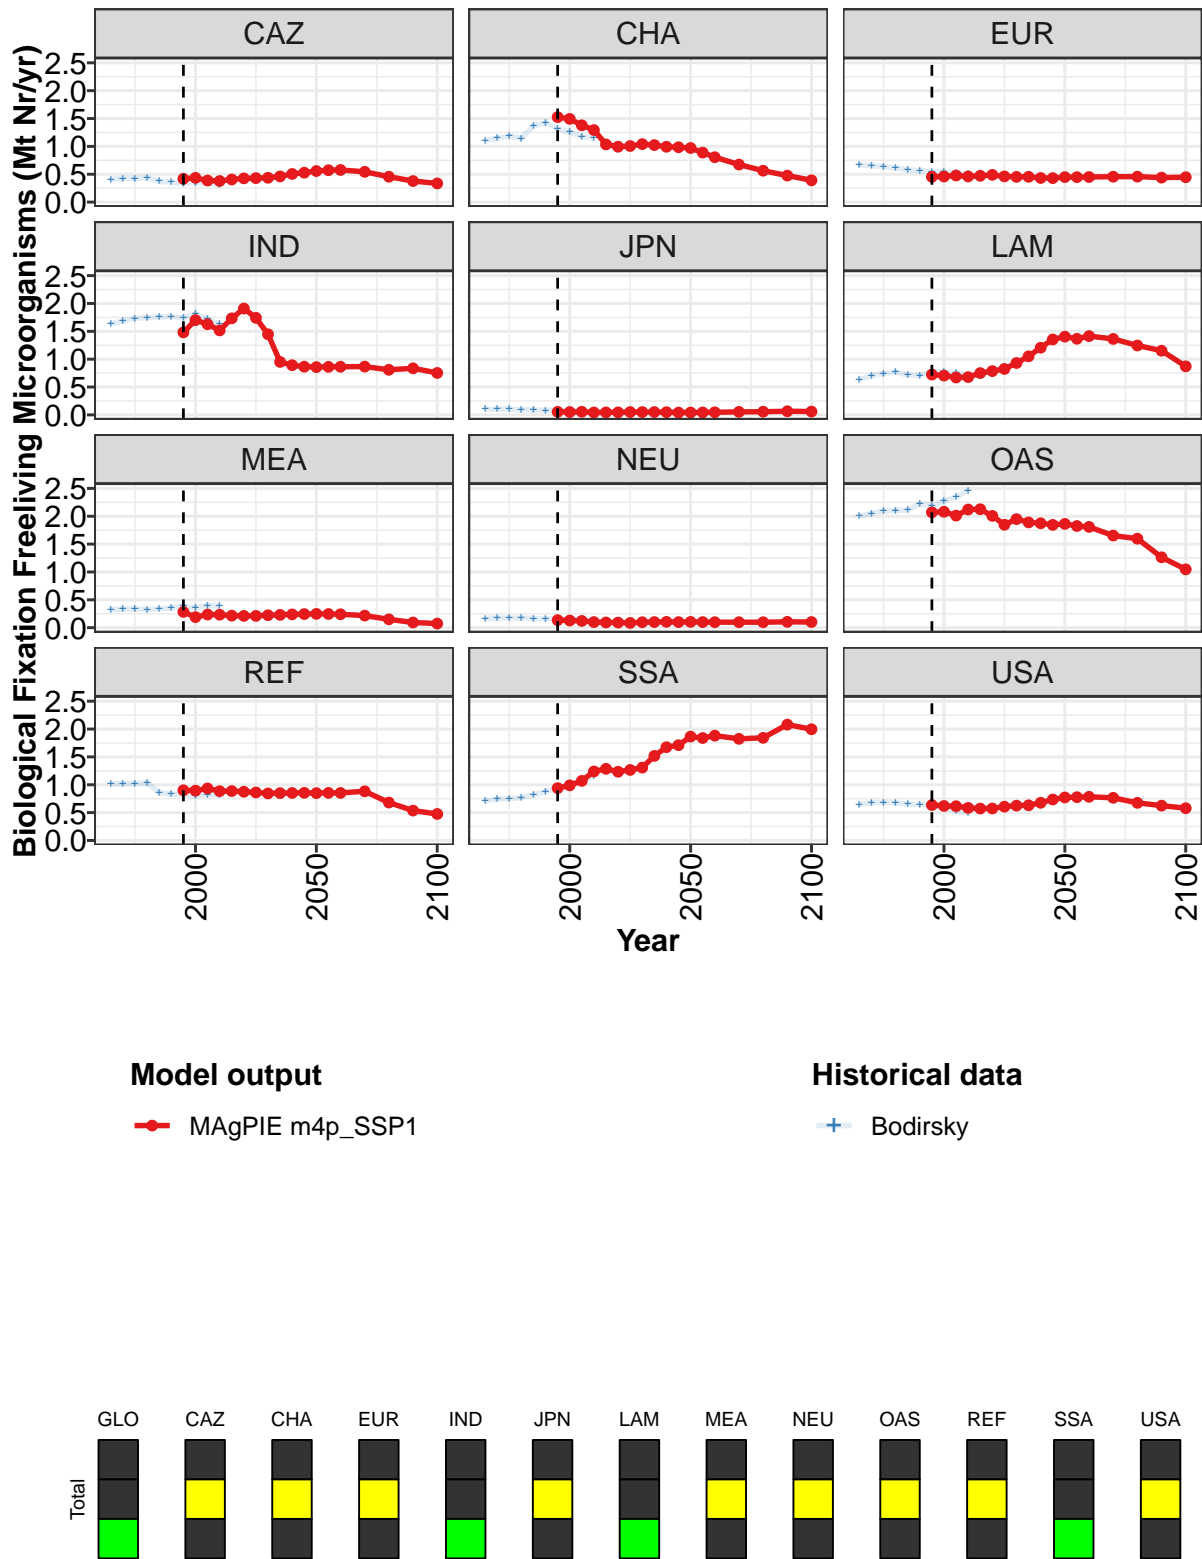

Figure 448: MAgPIE m4p\_SSP1 — Resources—Nitrogen—Cropland Budget—Inputs—Biological Fixation Free-living Microorganisms (Mt Nr/yr)

|     | 1995 | 2000 | 2005 | 2010 | 2015 | 2020 | 2025 | 2030 | 2035 | 2040 | 2045 |
|-----|------|------|------|------|------|------|------|------|------|------|------|
| GLO | 9.63 | 9.75 | 9.59 | 9.54 | 9.63 | 9.64 | 9.40 | 9.41 | 9.21 | 9.50 | 9.70 |
| CAZ | 0.42 | 0.44 | 0.39 | 0.38 | 0.41 | 0.43 | 0.43 | 0.44 | 0.46 | 0.51 | 0.53 |
| CHA | 1.53 | 1.49 | 1.38 | 1.29 | 1.04 | 0.99 | 1.01 | 1.04 | 1.02 | 0.99 | 0.98 |
| EUR | 0.45 | 0.46 | 0.48 | 0.46 | 0.47 | 0.49 | 0.46 | 0.45 | 0.45 | 0.43 | 0.43 |
| IND | 1.48 | 1.70 | 1.63 | 1.52 | 1.73 | 1.91 | 1.74 | 1.45 | 0.95 | 0.89 | 0.87 |
| JPN | 0.05 | 0.05 | 0.06 | 0.04 | 0.04 | 0.05 | 0.05 | 0.05 | 0.05 | 0.05 | 0.04 |
| LAM | 0.72 | 0.71 | 0.67 | 0.68 | 0.75 | 0.79 | 0.83 | 0.93 | 1.05 | 1.21 | 1.35 |
| MEA | 0.28 | 0.19 | 0.24 | 0.23 | 0.22 | 0.21 | 0.21 | 0.22 | 0.23 | 0.24 | 0.24 |
| NEU | 0.14 | 0.13 | 0.12 | 0.10 | 0.09 | 0.09 | 0.09 | 0.10 | 0.10 | 0.10 | 0.10 |
| OAS | 2.07 | 2.08 | 2.01 | 2.12 | 2.13 | 2.01 | 1.85 | 1.95 | 1.89 | 1.87 | 1.85 |
| REF | 0.90 | 0.89 | 0.93 | 0.89 | 0.89 | 0.87 | 0.86 | 0.84 | 0.85 | 0.85 | 0.86 |
| SSA | 0.94 | 0.99 | 1.07 | 1.24 | 1.29 | 1.23 | 1.27 | 1.31 | 1.52 | 1.67 | 1.71 |
| USA | 0.64 | 0.62 | 0.62 | 0.59 | 0.57 | 0.57 | 0.61 | 0.63 | 0.63 | 0.68 | 0.74 |

Table 1709: MAgPIE m4p\_SSP1 — Resources—Nitrogen—Cropland Budget—Inputs—Biological Fixation Free-living Microorganisms (Mt Nr/yr) [PART 1/2]

|     | 2050 | 2055 | 2060 | 2070 | 2080 | 2090 | 2100 |
|-----|------|------|------|------|------|------|------|
| GLO | 9.99 | 9.83 | 9.83 | 9.40 | 8.63 | 8.05 | 7.13 |
| CAZ | 0.56 | 0.57 | 0.58 | 0.54 | 0.46 | 0.38 | 0.34 |
| CHA | 0.97 | 0.89 | 0.81 | 0.67 | 0.56 | 0.48 | 0.39 |
| EUR | 0.45 | 0.45 | 0.45 | 0.46 | 0.46 | 0.44 | 0.45 |
| IND | 0.86 | 0.86 | 0.86 | 0.87 | 0.81 | 0.84 | 0.75 |
| JPN | 0.04 | 0.04 | 0.05 | 0.05 | 0.06 | 0.06 | 0.06 |
| LAM | 1.40 | 1.37 | 1.41 | 1.36 | 1.25 | 1.15 | 0.87 |
| MEA | 0.25 | 0.25 | 0.24 | 0.22 | 0.15 | 0.09 | 0.07 |
| NEU | 0.10 | 0.10 | 0.10 | 0.10 | 0.10 | 0.10 | 0.10 |
| OAS | 1.86 | 1.83 | 1.81 | 1.65 | 1.60 | 1.26 | 1.05 |
| REF | 0.85 | 0.85 | 0.85 | 0.88 | 0.68 | 0.54 | 0.48 |
| SSA | 1.87 | 1.84 | 1.88 | 1.82 | 1.84 | 2.08 | 2.00 |
| USA | 0.77 | 0.78 | 0.78 | 0.77 | 0.68 | 0.63 | 0.58 |

Table 1710: MAgPIE m4p\_SSP1 — Resources—Nitrogen—Cropland Budget—Inputs—Biological Fixation Free-living Microorganisms (Mt Nr/yr) [PART 2/2]

|     | 1965 | 1970 | 1975 | 1980 | 1985 | 1990 | 1995 | 2000 | 2005 | 2010 |
|-----|------|------|------|------|------|------|------|------|------|------|
| GLO | 9.4  | 9.7  | 9.9  | 9.9  | 9.8  | 10.0 | 9.9  | 10.0 | 9.9  | 9.8  |
| CAZ | 0.4  | 0.4  | 0.4  | 0.4  | 0.4  | 0.4  | 0.3  | 0.4  | 0.3  | 0.3  |
| CHA | 1.1  | 1.1  | 1.2  | 1.1  | 1.4  | 1.4  | 1.3  | 1.3  | 1.2  | 1.1  |
| EUR | 0.7  | 0.7  | 0.6  | 0.6  | 0.6  | 0.6  | 0.5  | 0.5  | 0.5  | 0.5  |
| IND | 1.6  | 1.7  | 1.7  | 1.7  | 1.8  | 1.8  | 1.7  | 1.8  | 1.7  | 1.6  |
| JPN | 0.1  | 0.1  | 0.1  | 0.1  | 0.1  | 0.1  | 0.1  | 0.1  | 0.1  | 0.1  |
| LAM | 0.6  | 0.7  | 0.7  | 0.8  | 0.7  | 0.7  | 0.8  | 0.8  | 0.8  | 0.7  |
| MEA | 0.3  | 0.3  | 0.3  | 0.3  | 0.3  | 0.4  | 0.4  | 0.4  | 0.4  | 0.4  |
| NEU | 0.2  | 0.2  | 0.2  | 0.2  | 0.2  | 0.2  | 0.2  | 0.2  | 0.2  | 0.1  |
| OAS | 2.0  | 2.1  | 2.1  | 2.1  | 2.1  | 2.2  | 2.2  | 2.3  | 2.3  | 2.5  |
| REF | 1.0  | 1.0  | 1.0  | 1.0  | 0.9  | 0.8  | 0.8  | 0.8  | 0.8  | 0.8  |
| SSA | 0.7  | 0.7  | 0.7  | 0.8  | 0.8  | 0.9  | 0.9  | 1.0  | 1.1  | 1.2  |
| USA | 0.6  | 0.7  | 0.7  | 0.7  | 0.7  | 0.6  | 0.6  | 0.6  | 0.5  | 0.5  |

Table 1711: Bodirsky — Resources—Nitrogen—Cropland Budget—Inputs—Biological Fixation Freelifving Microorganisms (Mt Nr/yr)

56.1.8 Inputs—Biological Fixation Symbiotic Crops

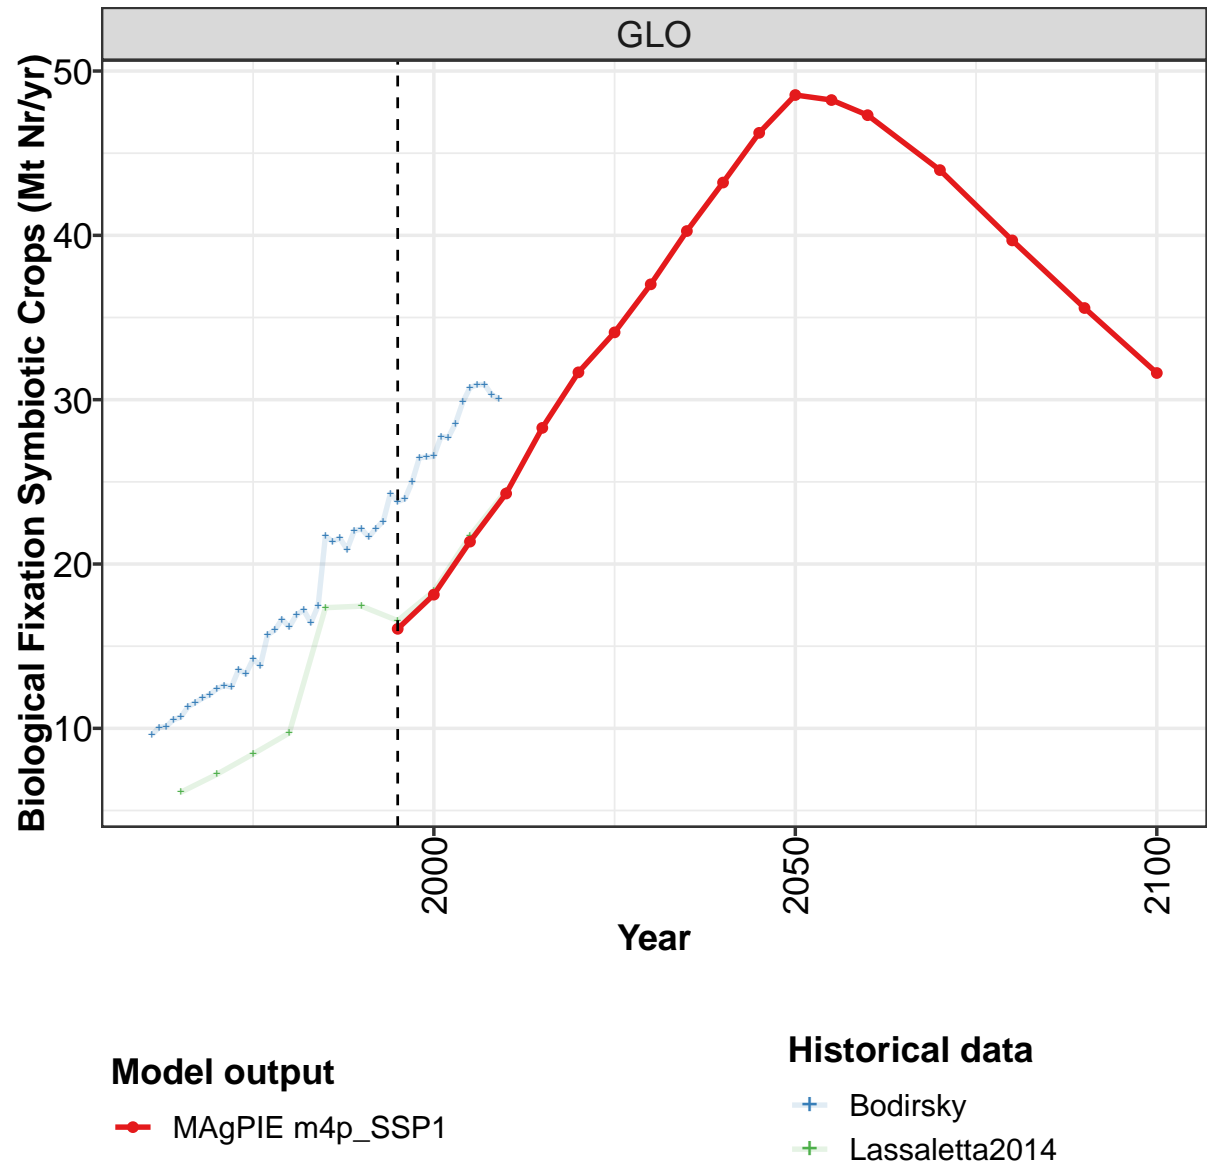

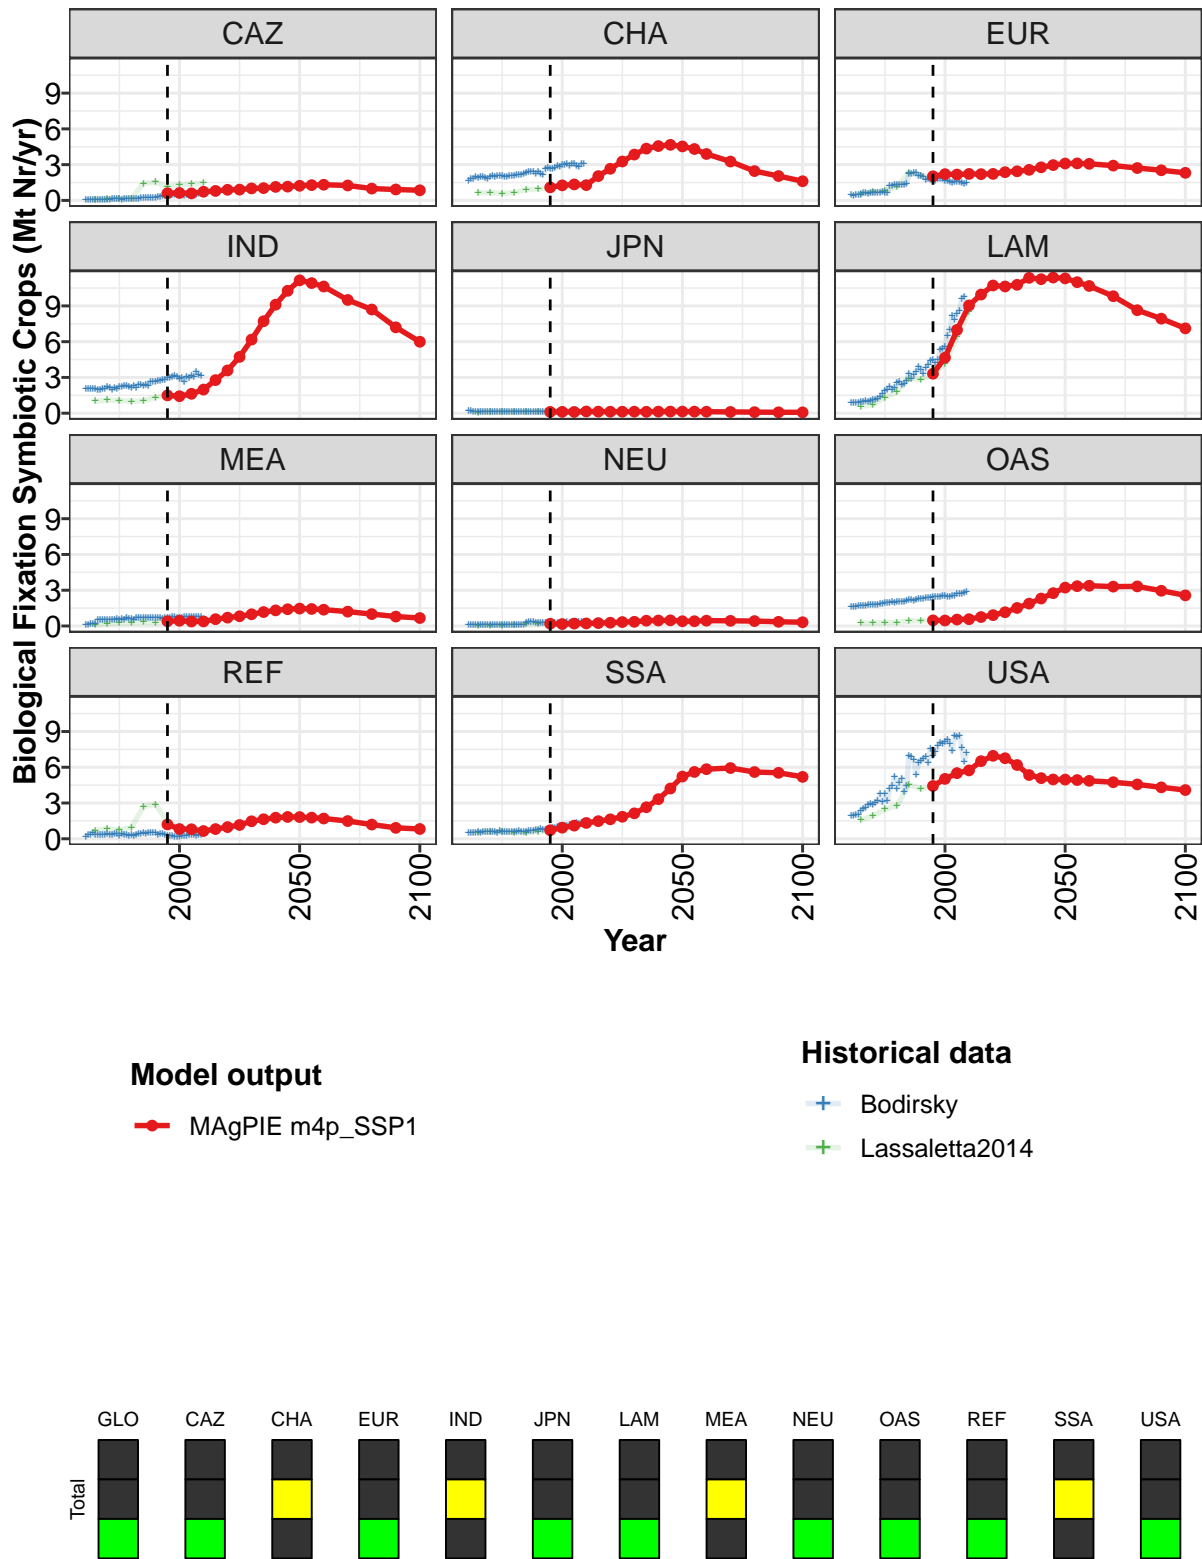

Figure 449: MAgPIE m4p\_SSP1 — Resources—Nitrogen—Cropland Budget—Inputs—Biological Fixation Symbiotic Crops (Mt Nr/yr)

|     | 1995 | 2000 | 2005 | 2010 | 2015 | 2020 | 2025 | 2030 | 2035 | 2040 | 2045 |
|-----|------|------|------|------|------|------|------|------|------|------|------|
| GLO | 16.1 | 18.1 | 21.4 | 24.3 | 28.3 | 31.7 | 34.1 | 37.0 | 40.3 | 43.2 | 46.2 |
| CAZ | 0.6  | 0.6  | 0.6  | 0.7  | 0.8  | 0.9  | 0.9  | 1.0  | 1.0  | 1.1  | 1.2  |
| CHA | 1.1  | 1.3  | 1.3  | 1.3  | 2.0  | 2.7  | 3.3  | 3.8  | 4.3  | 4.6  | 4.7  |
| EUR | 2.0  | 2.2  | 2.2  | 2.2  | 2.2  | 2.2  | 2.4  | 2.4  | 2.6  | 2.8  | 3.0  |
| IND | 1.5  | 1.4  | 1.6  | 2.0  | 2.8  | 3.6  | 4.7  | 6.2  | 7.7  | 9.1  | 10.3 |
| JPN | 0.1  | 0.1  | 0.1  | 0.1  | 0.1  | 0.1  | 0.1  | 0.1  | 0.1  | 0.1  | 0.1  |
| LAM | 3.3  | 4.7  | 7.0  | 9.0  | 10.0 | 10.7 | 10.6 | 10.8 | 11.4 | 11.2 | 11.4 |
| MEA | 0.4  | 0.4  | 0.4  | 0.4  | 0.6  | 0.7  | 0.8  | 1.0  | 1.2  | 1.3  | 1.4  |
| NEU | 0.2  | 0.2  | 0.2  | 0.2  | 0.2  | 0.3  | 0.3  | 0.4  | 0.4  | 0.5  | 0.5  |
| OAS | 0.5  | 0.5  | 0.5  | 0.6  | 0.8  | 0.9  | 1.2  | 1.5  | 1.9  | 2.3  | 2.8  |
| REF | 1.2  | 0.8  | 0.8  | 0.7  | 0.8  | 1.0  | 1.2  | 1.5  | 1.6  | 1.8  | 1.8  |
| SSA | 0.7  | 0.9  | 1.1  | 1.3  | 1.5  | 1.6  | 1.8  | 2.1  | 2.6  | 3.3  | 4.2  |
| USA | 4.4  | 5.0  | 5.5  | 5.7  | 6.5  | 7.0  | 6.8  | 6.2  | 5.3  | 5.1  | 5.0  |

Table 1712: MAgPIE m4p\_SSP1 — Resources—Nitrogen—Cropland Budget—Inputs—Biological Fixation Symbiotic Crops (Mt Nr/yr) [PART 1/2]

|     | 2050 | 2055 | 2060 | 2070 | 2080 | 2090 | 2100 |
|-----|------|------|------|------|------|------|------|
| GLO | 48.5 | 48.2 | 47.3 | 44.0 | 39.7 | 35.6 | 31.6 |
| CAZ | 1.2  | 1.3  | 1.3  | 1.3  | 1.0  | 0.9  | 0.9  |
| CHA | 4.5  | 4.3  | 3.9  | 3.3  | 2.5  | 2.0  | 1.6  |
| EUR | 3.1  | 3.1  | 3.1  | 2.9  | 2.7  | 2.5  | 2.3  |
| IND | 11.1 | 10.9 | 10.6 | 9.5  | 8.7  | 7.2  | 6.0  |
| JPN | 0.1  | 0.1  | 0.1  | 0.1  | 0.1  | 0.1  | 0.1  |
| LAM | 11.3 | 11.0 | 10.7 | 9.8  | 8.6  | 7.9  | 7.1  |
| MEA | 1.5  | 1.4  | 1.4  | 1.2  | 1.0  | 0.8  | 0.7  |
| NEU | 0.4  | 0.4  | 0.4  | 0.4  | 0.4  | 0.4  | 0.3  |
| OAS | 3.2  | 3.3  | 3.4  | 3.3  | 3.3  | 3.0  | 2.6  |
| REF | 1.8  | 1.8  | 1.7  | 1.5  | 1.2  | 0.9  | 0.8  |
| SSA | 5.2  | 5.6  | 5.8  | 5.9  | 5.6  | 5.5  | 5.2  |
| USA | 5.0  | 4.9  | 4.9  | 4.7  | 4.6  | 4.3  | 4.1  |

Table 1713: MAgPIE m4p\_SSP1 — Resources—Nitrogen—Cropland Budget—Inputs—Biological Fixation Symbiotic Crops (Mt Nr/yr) [PART 2/2]

|     | 1961 | 1962 | 1963 | 1964 | 1965 | 1966 | 1967 | 1968 | 1969 | 1970 | 1971 |
|-----|------|------|------|------|------|------|------|------|------|------|------|
| GLO | 9.6  | 10.1 | 10.1 | 10.5 | 10.7 | 11.3 | 11.6 | 11.8 | 12.1 | 12.4 | 12.6 |
| CAZ | 0.1  | 0.1  | 0.1  | 0.1  | 0.1  | 0.1  | 0.1  | 0.1  | 0.1  | 0.1  | 0.1  |
| CHA | 1.7  | 1.8  | 1.8  | 2.0  | 1.9  | 1.9  | 1.9  | 1.9  | 1.8  | 2.0  | 2.1  |
| EUR | 0.4  | 0.4  | 0.5  | 0.5  | 0.5  | 0.6  | 0.6  | 0.6  | 0.6  | 0.6  | 0.6  |
| IND | 2.0  | 2.0  | 2.0  | 2.0  | 2.0  | 1.9  | 2.0  | 2.1  | 2.1  | 2.2  | 2.2  |
| JPN | 0.2  | 0.2  | 0.2  | 0.2  | 0.2  | 0.2  | 0.2  | 0.2  | 0.2  | 0.1  | 0.1  |
| LAM | 0.8  | 0.9  | 0.8  | 0.9  | 0.9  | 0.9  | 1.0  | 1.0  | 1.0  | 1.1  | 1.1  |
| MEA | 0.1  | 0.1  | 0.1  | 0.2  | 0.2  | 0.5  | 0.5  | 0.5  | 0.5  | 0.5  | 0.5  |
| NEU | 0.1  | 0.1  | 0.1  | 0.1  | 0.1  | 0.1  | 0.1  | 0.1  | 0.1  | 0.1  | 0.1  |
| OAS | 1.6  | 1.6  | 1.6  | 1.7  | 1.7  | 1.7  | 1.7  | 1.8  | 1.8  | 1.8  | 1.8  |
| REF | 0.2  | 0.4  | 0.4  | 0.5  | 0.3  | 0.3  | 0.3  | 0.4  | 0.4  | 0.4  | 0.3  |
| SSA | 0.5  | 0.5  | 0.5  | 0.5  | 0.5  | 0.5  | 0.6  | 0.6  | 0.6  | 0.6  | 0.6  |
| USA | 1.9  | 2.0  | 2.0  | 2.0  | 2.3  | 2.5  | 2.6  | 2.8  | 2.9  | 2.9  | 3.0  |

Table 1714: Lassaletta2014 — Resources—Nitrogen—Cropland Budget—Inputs—Biological Fixation Symbiotic Crops (Mt Nr/yr) [PART 1/5]

|     | 1972 | 1973 | 1974 | 1975 | 1976 | 1977 | 1978 | 1979 | 1980 | 1981 | 1982 |
|-----|------|------|------|------|------|------|------|------|------|------|------|
| GLO | 12.5 | 13.6 | 13.3 | 14.2 | 13.8 | 15.7 | 16.0 | 16.6 | 16.2 | 16.9 | 17.2 |
| CAZ | 0.1  | 0.1  | 0.1  | 0.1  | 0.1  | 0.1  | 0.1  | 0.1  | 0.1  | 0.1  | 0.1  |
| CHA | 1.9  | 2.1  | 2.0  | 2.0  | 2.0  | 2.0  | 2.0  | 2.0  | 2.1  | 2.2  | 2.1  |
| EUR | 0.7  | 0.7  | 0.7  | 0.7  | 0.6  | 1.2  | 1.2  | 1.3  | 1.3  | 1.3  | 1.3  |
| IND | 2.0  | 2.1  | 2.0  | 2.2  | 2.2  | 2.3  | 2.3  | 2.3  | 2.1  | 2.3  | 2.2  |
| JPN | 0.1  | 0.1  | 0.1  | 0.1  | 0.1  | 0.1  | 0.1  | 0.1  | 0.1  | 0.1  | 0.1  |
| LAM | 1.2  | 1.4  | 1.6  | 1.9  | 2.0  | 2.2  | 2.0  | 2.1  | 2.6  | 2.6  | 2.4  |
| MEA | 0.6  | 0.5  | 0.6  | 0.5  | 0.6  | 0.6  | 0.7  | 0.6  | 0.6  | 0.6  | 0.6  |
| NEU | 0.1  | 0.1  | 0.1  | 0.1  | 0.1  | 0.1  | 0.1  | 0.1  | 0.1  | 0.1  | 0.1  |
| OAS | 1.8  | 1.8  | 1.9  | 1.9  | 1.9  | 2.0  | 2.0  | 2.0  | 2.0  | 2.1  | 2.0  |
| REF | 0.3  | 0.4  | 0.4  | 0.3  | 0.4  | 0.4  | 0.4  | 0.2  | 0.3  | 0.2  | 0.3  |
| SSA | 0.6  | 0.5  | 0.7  | 0.6  | 0.6  | 0.6  | 0.6  | 0.6  | 0.6  | 0.6  | 0.6  |
| USA | 3.2  | 3.7  | 3.1  | 3.8  | 3.2  | 4.2  | 4.4  | 5.2  | 4.2  | 4.7  | 5.1  |

Table 1715: Lassaletta2014 — Resources—Nitrogen—Cropland Budget—Inputs—Biological Fixation Symbiotic Crops (Mt Nr/yr) [PART 2/5]

|     | 1983 | 1984 | 1985 | 1986 | 1987 | 1988 | 1989 | 1990 | 1991 | 1992 | 1993 |
|-----|------|------|------|------|------|------|------|------|------|------|------|
| GLO | 16.4 | 17.5 | 21.7 | 21.4 | 21.6 | 20.9 | 22.0 | 22.1 | 21.6 | 22.2 | 22.6 |
| CAZ | 0.1  | 0.2  | 0.2  | 0.2  | 0.3  | 0.2  | 0.2  | 0.2  | 0.3  | 0.3  | 0.4  |
| CHA | 2.2  | 2.2  | 2.3  | 2.4  | 2.4  | 2.4  | 2.3  | 2.4  | 2.2  | 2.2  | 2.6  |
| EUR | 1.3  | 1.4  | 2.2  | 2.2  | 2.3  | 2.3  | 2.0  | 2.0  | 2.0  | 1.7  | 1.8  |
| IND | 2.4  | 2.4  | 2.3  | 2.4  | 2.3  | 2.6  | 2.7  | 2.7  | 2.7  | 2.7  | 2.8  |
| JPN | 0.1  | 0.1  | 0.1  | 0.1  | 0.1  | 0.1  | 0.1  | 0.1  | 0.1  | 0.1  | 0.1  |
| LAM | 2.5  | 2.7  | 3.3  | 2.9  | 3.2  | 3.5  | 3.9  | 3.7  | 3.3  | 3.8  | 4.1  |
| MEA | 0.7  | 0.6  | 0.7  | 0.7  | 0.7  | 0.7  | 0.7  | 0.7  | 0.7  | 0.7  | 0.6  |
| NEU | 0.1  | 0.1  | 0.3  | 0.3  | 0.3  | 0.3  | 0.3  | 0.3  | 0.3  | 0.3  | 0.3  |
| OAS | 2.1  | 2.1  | 2.2  | 2.2  | 2.2  | 2.2  | 2.3  | 2.3  | 2.3  | 2.3  | 2.3  |
| REF | 0.4  | 0.4  | 0.5  | 0.4  | 0.5  | 0.5  | 0.5  | 0.5  | 0.3  | 0.4  | 0.4  |
| SSA | 0.6  | 0.6  | 0.6  | 0.7  | 0.7  | 0.7  | 0.8  | 0.7  | 0.8  | 0.8  | 0.8  |
| USA | 3.9  | 4.5  | 6.9  | 6.9  | 6.6  | 5.4  | 6.3  | 6.5  | 6.7  | 6.9  | 6.4  |

Table 1716: Lassaletta2014 — Resources—Nitrogen—Cropland Budget—Inputs—Biological Fixation Symbiotic Crops (Mt Nr/yr) [PART 3/5]

|     | 1994 | 1995 | 1996 | 1997 | 1998 | 1999 | 2000 | 2001 | 2002 | 2003 | 2004 |
|-----|------|------|------|------|------|------|------|------|------|------|------|
| GLO | 24.3 | 23.8 | 24.0 | 25.0 | 26.5 | 26.5 | 26.6 | 27.8 | 27.7 | 28.6 | 29.8 |
| CAZ | 0.4  | 0.4  | 0.4  | 0.5  | 0.5  | 0.5  | 0.5  | 0.4  | 0.4  | 0.4  | 0.5  |
| CHA | 2.8  | 2.7  | 2.7  | 2.7  | 2.9  | 2.9  | 3.0  | 3.0  | 3.1  | 2.9  | 3.1  |
| EUR | 1.7  | 1.7  | 1.7  | 1.8  | 1.8  | 1.8  | 1.6  | 1.6  | 1.6  | 1.5  | 1.6  |
| IND | 2.8  | 2.9  | 3.0  | 3.0  | 3.1  | 3.0  | 2.9  | 2.9  | 2.6  | 3.1  | 2.9  |
| JPN | 0.1  | 0.1  | 0.1  | 0.1  | 0.1  | 0.1  | 0.1  | 0.1  | 0.1  | 0.1  | 0.1  |
| LAM | 4.4  | 4.4  | 4.2  | 4.5  | 5.3  | 5.4  | 5.6  | 6.5  | 7.0  | 8.2  | 7.8  |
| MEA | 0.7  | 0.7  | 0.7  | 0.7  | 0.7  | 0.7  | 0.7  | 0.7  | 0.8  | 0.8  | 0.8  |
| NEU | 0.3  | 0.3  | 0.3  | 0.3  | 0.3  | 0.3  | 0.3  | 0.3  | 0.3  | 0.3  | 0.4  |
| OAS | 2.3  | 2.4  | 2.4  | 2.4  | 2.4  | 2.5  | 2.5  | 2.5  | 2.5  | 2.6  | 2.6  |
| REF | 0.4  | 0.3  | 0.3  | 0.2  | 0.2  | 0.2  | 0.2  | 0.2  | 0.3  | 0.2  | 0.3  |
| SSA | 0.8  | 0.8  | 0.9  | 0.9  | 1.0  | 1.1  | 1.0  | 1.1  | 1.1  | 1.2  | 1.2  |
| USA | 7.6  | 7.0  | 7.3  | 7.8  | 8.0  | 8.0  | 8.1  | 8.3  | 7.9  | 7.4  | 8.6  |

Table 1717: Lassaletta2014 — Resources—Nitrogen—Cropland Budget—Inputs—Biological Fixation Symbiotic Crops (Mt Nr/yr) [PART 4/5]

|     | 2005 | 2006 | 2007 | 2008 | 2009 |
|-----|------|------|------|------|------|
| GLO | 30.7 | 30.9 | 30.9 | 30.3 | 30.0 |
| CAZ | 0.6  | 0.5  | 0.5  | 0.6  | 0.6  |
| CHA | 3.1  | 2.9  | 2.8  | 3.1  | 3.1  |
| EUR | 1.6  | 1.5  | 1.4  | 1.4  | 1.5  |
| IND | 3.1  | 3.1  | 3.5  | 3.3  | 3.1  |
| JPN | 0.1  | 0.1  | 0.1  | 0.1  | 0.1  |
| LAM | 8.3  | 8.6  | 9.6  | 9.8  | 8.7  |
| MEA | 0.8  | 0.8  | 0.8  | 0.8  | 0.8  |
| NEU | 0.4  | 0.4  | 0.3  | 0.3  | 0.3  |
| OAS | 2.7  | 2.7  | 2.7  | 2.8  | 2.8  |
| REF | 0.3  | 0.3  | 0.3  | 0.3  | 0.3  |
| SSA | 1.3  | 1.4  | 1.3  | 1.4  | 1.4  |
| USA | 8.6  | 8.6  | 7.6  | 6.5  | 7.2  |

Table 1718: Lassaletta2014 — Resources—Nitrogen—Cropland Budget—Inputs—Biological Fixation Symbiotic Crops (Mt Nr/yr) [PART 5/5]

|     | 1965 | 1970 | 1975 | 1980 | 1985 | 1990 | 1995 | 2000 | 2005 | 2010 |
|-----|------|------|------|------|------|------|------|------|------|------|
| GLO | 6.1  | 7.2  | 8.4  | 9.7  | 17.3 | 17.4 | 16.6 | 18.4 | 21.7 | 24.5 |
| CAZ | 0.1  | 0.1  | 0.1  | 0.2  | 1.4  | 1.5  | 1.1  | 1.3  | 1.4  | 1.5  |
| CHA | 0.6  | 0.7  | 0.6  | 0.7  | 0.9  | 0.9  | 1.1  | 1.3  | 1.4  | 1.3  |
| EUR | 0.5  | 0.7  | 0.8  | 1.1  | 2.3  | 2.1  | 2.0  | 2.1  | 2.1  | 2.2  |
| IND | 1.0  | 1.1  | 1.1  | 1.0  | 1.0  | 1.3  | 1.5  | 1.4  | 1.7  | 2.0  |
| JPN | 0.1  | 0.1  | 0.1  | 0.1  | 0.1  | 0.1  | 0.1  | 0.1  | 0.1  | 0.1  |
| LAM | 0.6  | 0.7  | 1.3  | 1.8  | 2.9  | 2.8  | 3.2  | 4.2  | 6.4  | 8.5  |
| MEA | 0.1  | 0.2  | 0.2  | 0.3  | 0.3  | 0.3  | 0.3  | 0.4  | 0.4  | 0.4  |
| NEU | 0.1  | 0.1  | 0.1  | 0.1  | 0.2  | 0.2  | 0.2  | 0.2  | 0.2  | 0.2  |
| OAS | 0.2  | 0.2  | 0.3  | 0.3  | 0.4  | 0.5  | 0.5  | 0.5  | 0.5  | 0.6  |
| REF | 0.7  | 0.8  | 0.7  | 0.9  | 2.7  | 2.9  | 1.4  | 0.9  | 0.8  | 0.6  |
| SSA | 0.5  | 0.6  | 0.6  | 0.5  | 0.5  | 0.6  | 0.7  | 0.8  | 1.0  | 1.3  |
| USA | 1.6  | 1.9  | 2.5  | 2.8  | 4.5  | 4.2  | 4.4  | 5.2  | 5.7  | 5.6  |

Table 1719: Bodirsky — Resources—Nitrogen—Cropland Budget—Inputs—Biological Fixation Symbiotic Crops (Mt Nr/yr)



56.1.9 Inputs—Fertilizer

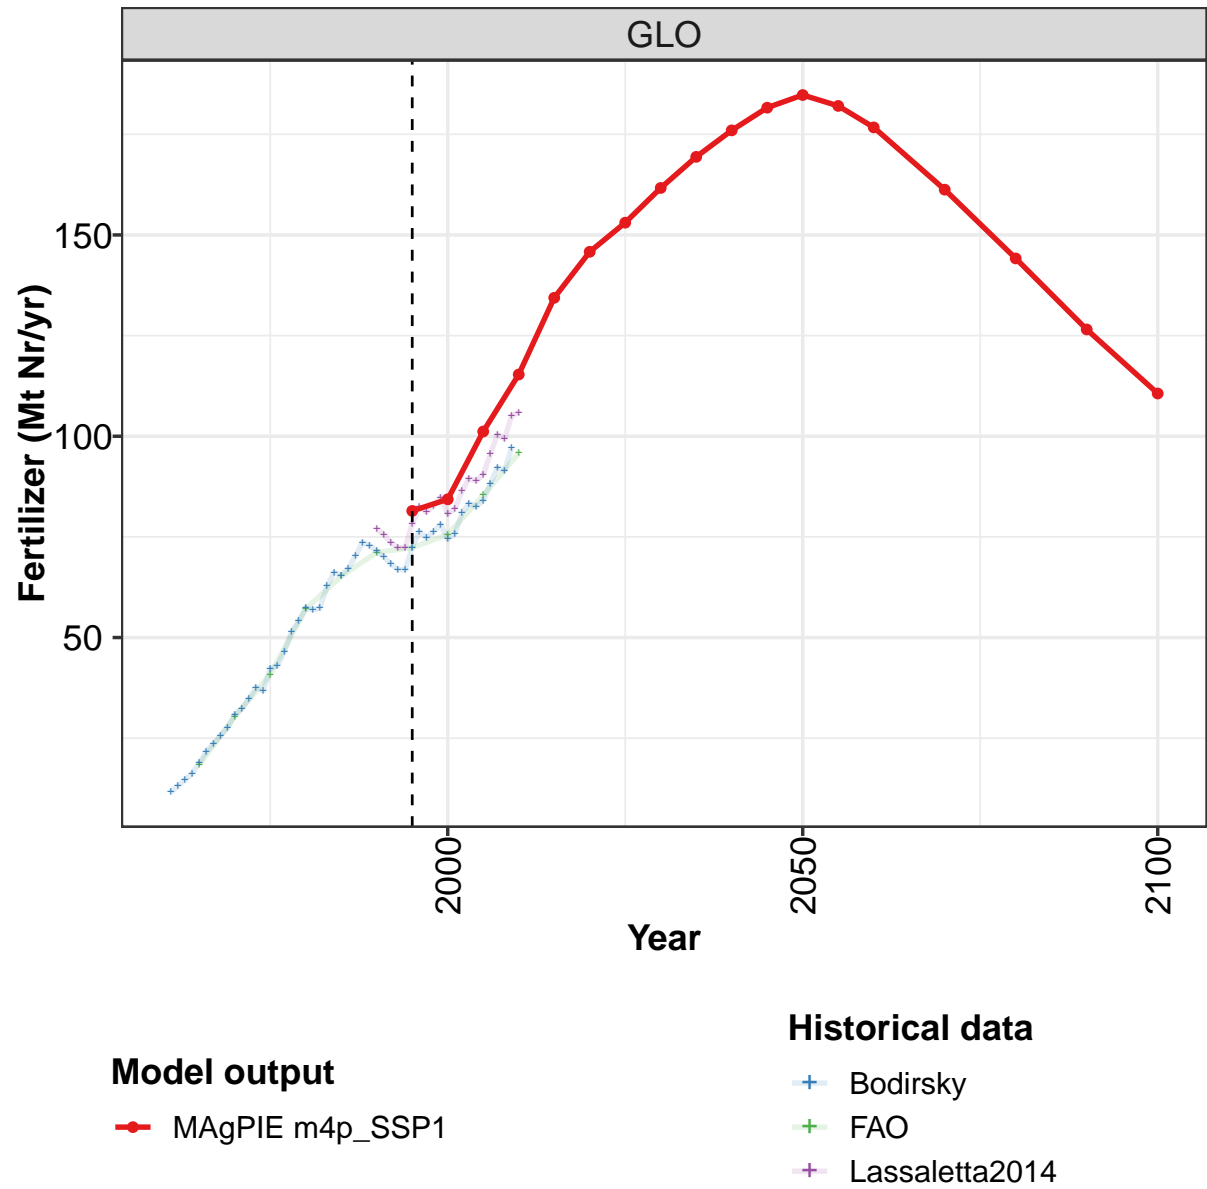

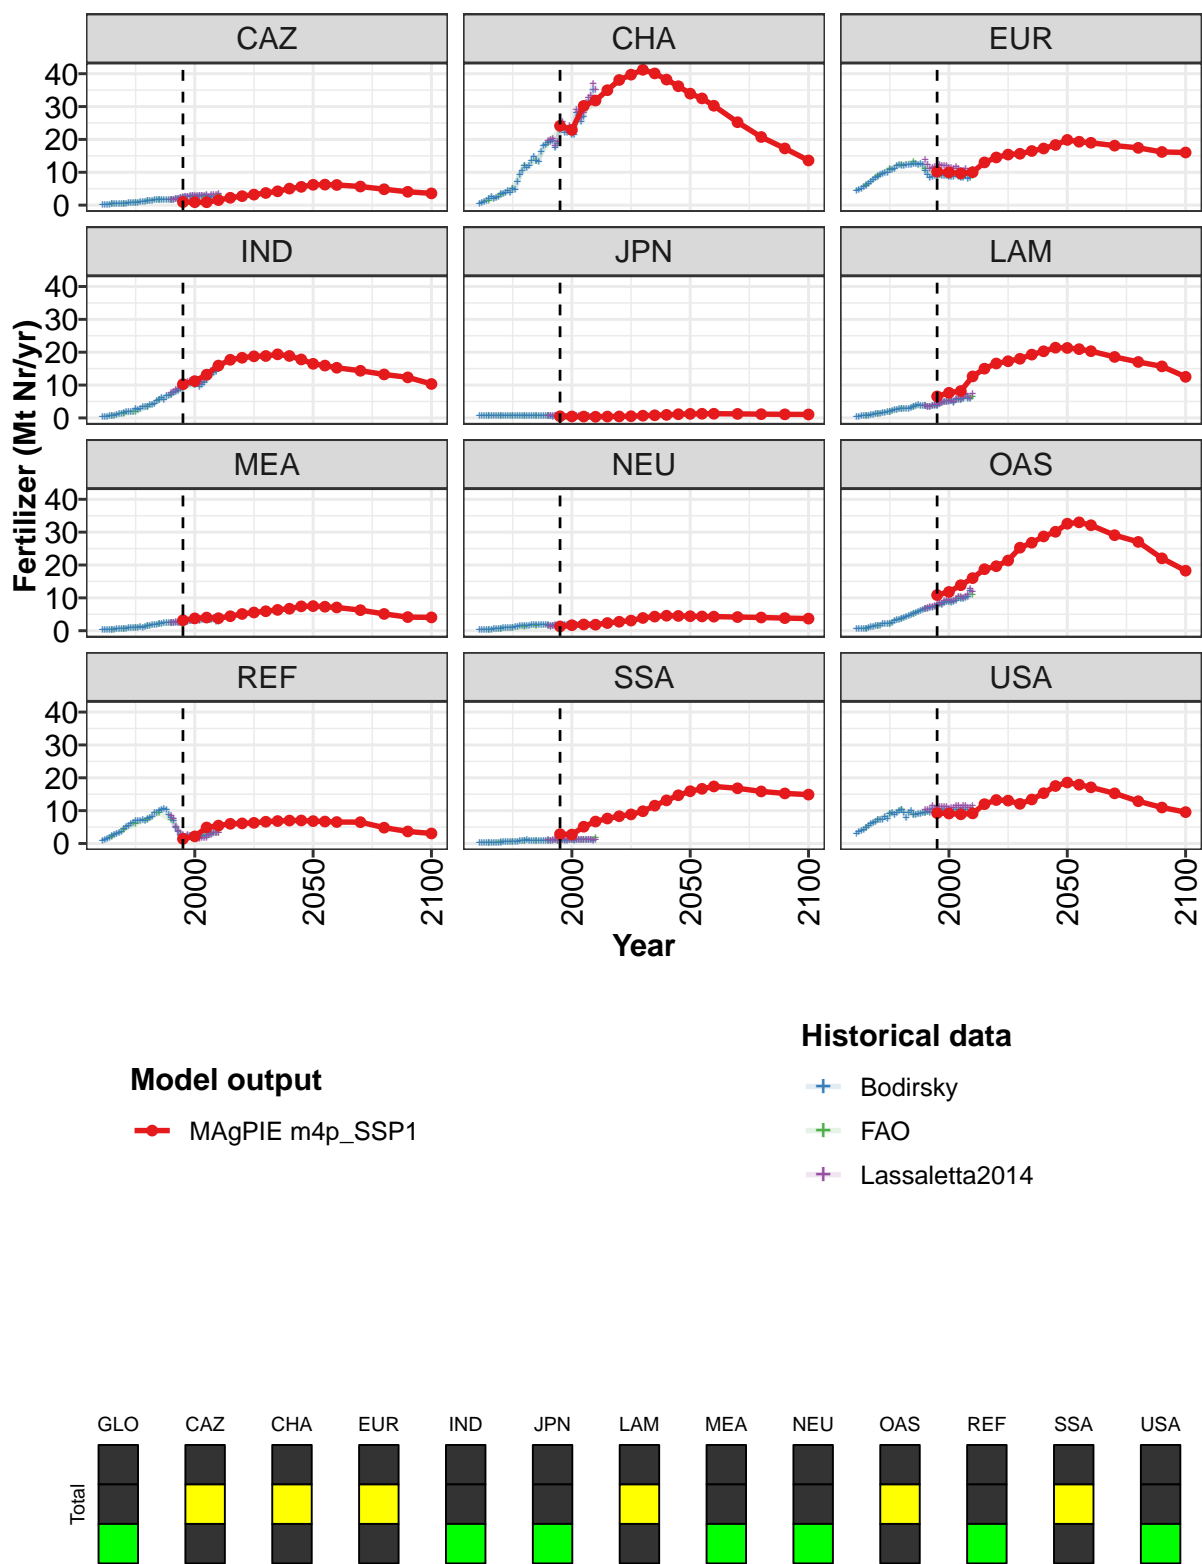

Figure 450: MAGPIE m4p\_SSP1 — Resources—Nitrogen—Cropland Budget—Inputs—Fertilizer (Mt Nr/yr)

|     | 1995 | 2000 | 2005 | 2010 | 2015 | 2020 | 2025 | 2030 | 2035 | 2040 | 2045 |
|-----|------|------|------|------|------|------|------|------|------|------|------|
| GLO | 81   | 84   | 101  | 115  | 134  | 146  | 153  | 162  | 169  | 176  | 182  |
| CAZ | 1    | 1    | 1    | 2    | 2    | 3    | 3    | 4    | 4    | 5    | 6    |
| CHA | 24   | 23   | 30   | 32   | 35   | 38   | 40   | 41   | 40   | 38   | 36   |
| EUR | 10   | 10   | 10   | 10   | 13   | 15   | 15   | 16   | 16   | 17   | 18   |
| IND | 10   | 11   | 13   | 16   | 18   | 18   | 19   | 19   | 19   | 19   | 18   |
| JPN | 1    | 0    | 0    | 0    | 0    | 0    | 1    | 1    | 1    | 1    | 1    |
| LAM | 7    | 8    | 8    | 13   | 15   | 17   | 17   | 18   | 19   | 20   | 21   |
| MEA | 3    | 4    | 4    | 4    | 4    | 5    | 6    | 6    | 6    | 7    | 7    |
| NEU | 1    | 2    | 2    | 2    | 2    | 3    | 3    | 4    | 4    | 5    | 5    |
| OAS | 11   | 12   | 14   | 16   | 19   | 20   | 21   | 25   | 27   | 29   | 30   |
| REF | 1    | 2    | 5    | 5    | 6    | 6    | 6    | 7    | 7    | 7    | 7    |
| SSA | 3    | 3    | 5    | 7    | 8    | 8    | 9    | 10   | 12   | 13   | 15   |
| USA | 9    | 9    | 9    | 9    | 12   | 13   | 13   | 12   | 13   | 15   | 18   |

Table 1720: MAgPIE m4p\_SSP1 — Resources—Nitrogen—Cropland Budget—Inputs—Fertilizer (Mt Nr/yr) [PART 1/2]

|     | 2050 | 2055 | 2060 | 2070 | 2080 | 2090 | 2100 |
|-----|------|------|------|------|------|------|------|
| GLO | 185  | 182  | 177  | 161  | 144  | 127  | 111  |
| CAZ | 6    | 6    | 6    | 6    | 5    | 4    | 4    |
| CHA | 34   | 32   | 30   | 25   | 21   | 17   | 14   |
| EUR | 20   | 19   | 19   | 18   | 17   | 16   | 16   |
| IND | 16   | 16   | 15   | 14   | 13   | 12   | 10   |
| JPN | 1    | 1    | 1    | 1    | 1    | 1    | 1    |
| LAM | 21   | 21   | 20   | 19   | 17   | 16   | 13   |
| MEA | 7    | 7    | 7    | 6    | 5    | 4    | 4    |
| NEU | 4    | 4    | 4    | 4    | 4    | 4    | 4    |
| OAS | 33   | 33   | 32   | 29   | 27   | 22   | 18   |
| REF | 7    | 7    | 7    | 7    | 5    | 4    | 3    |
| SSA | 16   | 17   | 17   | 17   | 16   | 15   | 15   |
| USA | 19   | 18   | 17   | 15   | 13   | 11   | 10   |

Table 1721: MAgPIE m4p\_SSP1 — Resources—Nitrogen—Cropland Budget—Inputs—Fertilizer (Mt Nr/yr) [PART 2/2]

|     | 1961 | 1962 | 1963 | 1964 | 1965 | 1966 | 1967 | 1968 | 1969 | 1970 | 1971 |
|-----|------|------|------|------|------|------|------|------|------|------|------|
| GLO | 11.6 | 13.1 | 14.6 | 16.3 | 18.8 | 21.7 | 23.6 | 25.6 | 27.6 | 30.7 | 32.3 |
| CAZ | 0.1  | 0.2  | 0.2  | 0.2  | 0.3  | 0.4  | 0.5  | 0.4  | 0.4  | 0.4  | 0.5  |
| CHA | 0.5  | 0.8  | 1.0  | 1.2  | 1.8  | 2.7  | 1.9  | 2.1  | 2.6  | 3.3  | 3.3  |
| EUR | 4.5  | 4.7  | 5.0  | 5.4  | 6.0  | 6.6  | 7.2  | 7.9  | 8.2  | 8.7  | 9.1  |
| IND | 0.2  | 0.3  | 0.4  | 0.6  | 0.6  | 0.7  | 1.0  | 1.2  | 1.3  | 1.5  | 1.8  |
| JPN | 0.6  | 0.7  | 0.7  | 0.7  | 0.7  | 0.7  | 0.8  | 0.8  | 0.7  | 0.7  | 0.7  |
| LAM | 0.4  | 0.5  | 0.6  | 0.7  | 0.7  | 0.8  | 0.9  | 1.1  | 1.2  | 1.3  | 1.3  |
| MEA | 0.3  | 0.3  | 0.4  | 0.4  | 0.4  | 0.4  | 0.4  | 0.5  | 0.6  | 0.6  | 0.7  |
| NEU | 0.2  | 0.3  | 0.3  | 0.3  | 0.3  | 0.4  | 0.5  | 0.6  | 0.6  | 0.7  | 0.8  |
| OAS | 0.6  | 0.6  | 0.7  | 0.6  | 0.7  | 0.8  | 1.1  | 1.2  | 1.4  | 1.6  | 1.6  |
| REF | 0.9  | 1.1  | 1.3  | 1.7  | 2.2  | 2.6  | 3.0  | 3.4  | 3.7  | 4.4  | 5.0  |
| SSA | 0.1  | 0.1  | 0.1  | 0.2  | 0.2  | 0.2  | 0.3  | 0.3  | 0.3  | 0.4  | 0.4  |
| USA | 3.1  | 3.6  | 3.9  | 4.2  | 4.8  | 5.4  | 6.1  | 6.2  | 6.6  | 7.2  | 7.1  |

Table 1722: Lassaletta2014 — Resources—Nitrogen—Cropland Budget—Inputs—Fertilizer (Mt Nr/yr) [PART 1/5]

|     | 1972 | 1973 | 1974 | 1975 | 1976 | 1977 | 1978 | 1979 | 1980 | 1981 | 1982 |
|-----|------|------|------|------|------|------|------|------|------|------|------|
| GLO | 34.8 | 37.6 | 36.7 | 42.3 | 43.0 | 46.5 | 51.4 | 54.0 | 57.3 | 56.8 | 57.3 |
| CAZ | 0.6  | 0.7  | 0.7  | 0.7  | 0.8  | 1.0  | 1.1  | 1.1  | 1.2  | 1.2  | 1.3  |
| CHA | 3.8  | 4.4  | 3.8  | 5.0  | 4.7  | 7.0  | 9.1  | 10.5 | 11.9 | 11.3 | 12.0 |
| EUR | 9.4  | 9.9  | 9.9  | 10.6 | 10.8 | 11.0 | 11.8 | 12.2 | 11.9 | 11.9 | 12.1 |
| IND | 1.8  | 1.8  | 1.7  | 2.7  | 2.4  | 2.8  | 3.3  | 3.4  | 3.5  | 3.9  | 3.9  |
| JPN | 0.7  | 0.8  | 0.7  | 0.6  | 0.7  | 0.7  | 0.7  | 0.7  | 0.6  | 0.6  | 0.6  |
| LAM | 1.6  | 1.7  | 1.8  | 1.9  | 2.2  | 2.5  | 2.4  | 2.6  | 2.8  | 2.8  | 2.8  |
| MEA | 0.8  | 0.9  | 0.9  | 1.0  | 1.0  | 1.1  | 1.0  | 1.3  | 1.4  | 1.5  | 1.7  |
| NEU | 0.9  | 0.9  | 0.8  | 1.0  | 1.2  | 1.3  | 1.5  | 1.4  | 1.5  | 1.5  | 1.6  |
| OAS | 2.0  | 2.0  | 2.0  | 2.2  | 2.5  | 2.9  | 3.3  | 3.4  | 3.7  | 3.9  | 4.2  |
| REF | 5.4  | 5.9  | 6.3  | 6.9  | 6.8  | 7.0  | 7.1  | 6.9  | 7.6  | 7.7  | 8.3  |
| SSA | 0.5  | 0.5  | 0.5  | 0.6  | 0.6  | 0.6  | 0.7  | 0.7  | 0.9  | 1.0  | 0.9  |
| USA | 7.3  | 8.0  | 7.5  | 9.1  | 9.3  | 8.7  | 9.3  | 9.9  | 10.3 | 9.5  | 7.8  |

Table 1723: Lassaletta2014 — Resources—Nitrogen—Cropland Budget—Inputs—Fertilizer (Mt Nr/yr) [PART 2/5]

|     | 1983 | 1984 | 1985 | 1986 | 1987 | 1988 | 1989 | 1990 | 1991 | 1992 | 1993 |
|-----|------|------|------|------|------|------|------|------|------|------|------|
| GLO | 62.7 | 66.2 | 65.4 | 67.2 | 70.3 | 73.6 | 72.9 | 71.4 | 70.0 | 68.2 | 66.9 |
| CAZ | 1.6  | 1.7  | 1.6  | 1.5  | 1.6  | 1.6  | 1.6  | 1.6  | 1.8  | 1.9  | 2.0  |
| CHA | 13.4 | 14.8 | 13.5 | 13.2 | 16.4 | 18.0 | 18.3 | 19.0 | 19.4 | 19.7 | 17.4 |
| EUR | 12.3 | 12.3 | 12.5 | 12.5 | 12.3 | 12.5 | 12.2 | 10.5 | 9.4  | 8.4  | 8.6  |
| IND | 4.4  | 5.1  | 5.5  | 6.2  | 5.4  | 6.8  | 6.8  | 7.1  | 7.6  | 7.9  | 8.2  |
| JPN | 0.7  | 0.7  | 0.6  | 0.6  | 0.6  | 0.6  | 0.6  | 0.6  | 0.5  | 0.5  | 0.5  |
| LAM | 2.7  | 3.2  | 3.4  | 3.8  | 3.9  | 3.7  | 3.7  | 3.6  | 3.4  | 3.5  | 3.7  |
| MEA | 1.9  | 1.9  | 2.0  | 2.3  | 2.3  | 2.3  | 2.5  | 2.3  | 2.4  | 2.5  | 2.5  |
| NEU | 1.7  | 1.8  | 1.7  | 1.7  | 1.9  | 1.8  | 1.8  | 1.8  | 1.6  | 1.6  | 1.7  |
| OAS | 4.4  | 4.8  | 5.1  | 5.6  | 5.7  | 6.1  | 6.4  | 6.6  | 6.6  | 7.0  | 7.1  |
| REF | 9.4  | 9.3  | 9.9  | 10.3 | 10.5 | 10.3 | 8.8  | 7.7  | 6.9  | 4.7  | 3.5  |
| SSA | 0.8  | 0.9  | 0.9  | 0.8  | 0.8  | 0.9  | 0.9  | 1.0  | 1.0  | 1.0  | 1.0  |
| USA | 9.5  | 9.8  | 8.9  | 8.7  | 8.9  | 8.9  | 9.3  | 9.5  | 9.6  | 9.5  | 10.5 |

Table 1724: Lassaletta2014 — Resources—Nitrogen—Cropland Budget—Inputs—Fertilizer (Mt Nr/yr) [PART 3/5]

|     | 1994 | 1995 | 1996 | 1997 | 1998 | 1999 | 2000 | 2001 | 2002 | 2003 | 2004 |
|-----|------|------|------|------|------|------|------|------|------|------|------|
| GLO | 66.8 | 72.4 | 76.3 | 74.9 | 76.2 | 78.0 | 74.5 | 75.7 | 80.9 | 83.3 | 82.5 |
| CAZ | 2.1  | 2.3  | 2.5  | 2.5  | 2.6  | 2.8  | 2.6  | 2.7  | 2.7  | 2.7  | 2.7  |
| CHA | 18.5 | 23.0 | 24.4 | 22.2 | 22.1 | 23.3 | 21.3 | 21.6 | 28.0 | 27.3 | 25.5 |
| EUR | 8.8  | 8.6  | 9.3  | 9.0  | 9.0  | 9.0  | 8.6  | 8.7  | 8.7  | 9.2  | 8.7  |
| IND | 8.9  | 9.2  | 9.6  | 10.1 | 10.5 | 10.7 | 10.1 | 10.4 | 9.6  | 10.1 | 10.7 |
| JPN | 0.5  | 0.4  | 0.4  | 0.4  | 0.4  | 0.4  | 0.4  | 0.4  | 0.4  | 0.4  | 0.4  |
| LAM | 3.8  | 3.8  | 4.4  | 4.7  | 4.8  | 4.8  | 5.0  | 5.1  | 4.7  | 5.6  | 5.6  |
| MEA | 2.4  | 2.6  | 2.7  | 2.8  | 3.0  | 3.0  | 3.1  | 3.3  | 3.3  | 3.4  | 3.5  |
| NEU | 1.4  | 1.5  | 1.6  | 1.7  | 1.9  | 1.9  | 1.8  | 1.6  | 1.7  | 1.8  | 2.0  |
| OAS | 7.3  | 7.6  | 8.1  | 7.9  | 8.6  | 8.8  | 8.9  | 8.6  | 8.8  | 9.2  | 10.0 |
| REF | 2.4  | 2.3  | 2.1  | 2.5  | 2.2  | 2.3  | 2.3  | 2.5  | 2.0  | 2.2  | 2.2  |
| SSA | 1.0  | 0.9  | 1.0  | 1.0  | 1.0  | 1.0  | 1.0  | 1.0  | 1.1  | 1.1  | 1.1  |
| USA | 9.7  | 10.2 | 10.2 | 10.1 | 10.2 | 10.1 | 9.4  | 9.8  | 9.8  | 10.3 | 10.1 |

Table 1725: Lassaletta2014 — Resources—Nitrogen—Cropland Budget—Inputs—Fertilizer (Mt Nr/yr) [PART 4/5]

|     | 2005 | 2006 | 2007 | 2008 | 2009 |
|-----|------|------|------|------|------|
| GLO | 84.0 | 88.1 | 92.2 | 91.5 | 97.2 |
| CAZ | 2.8  | 2.3  | 2.6  | 2.5  | 2.3  |
| CHA | 26.9 | 29.8 | 31.1 | 31.7 | 35.2 |
| EUR | 8.4  | 8.3  | 8.8  | 8.0  | 8.3  |
| IND | 11.6 | 12.5 | 13.1 | 13.7 | 14.2 |
| JPN | 0.4  | 0.4  | 0.4  | 0.4  | 0.3  |
| LAM | 5.6  | 5.7  | 7.0  | 6.0  | 5.8  |
| MEA | 3.5  | 3.4  | 3.3  | 3.6  | 2.9  |
| NEU | 1.9  | 1.9  | 1.9  | 1.7  | 2.0  |
| OAS | 9.7  | 9.6  | 9.9  | 10.2 | 12.1 |
| REF | 2.4  | 2.7  | 2.9  | 3.3  | 3.4  |
| SSA | 1.0  | 1.2  | 1.0  | 1.1  | 1.0  |
| USA | 9.8  | 10.3 | 10.2 | 9.4  | 9.7  |

Table 1726: Lassaletta2014 — Resources—Nitrogen—Cropland Budget—Inputs—Fertilizer (Mt Nr/yr) [PART 5/5]

|     | 1965 | 1970 | 1975 | 1980 | 1985 | 1990 | 1995 | 2000 | 2005 | 2010 |
|-----|------|------|------|------|------|------|------|------|------|------|
| GLO | 18.4 | 30.4 | 40.8 | 57.1 | 65.2 | 71.1 | 72.3 | 75.6 | 85.4 | 95.8 |
| CAZ | 0.3  | 0.5  | 0.7  | 1.2  | 1.7  | 1.6  | 2.3  | 2.6  | 2.6  | 3.0  |
| CHA | 1.5  | 3.1  | 5.0  | 11.8 | 13.5 | 19.0 | 23.0 | 22.1 | 28.7 | 31.2 |
| EUR | 6.1  | 9.0  | 11.0 | 12.4 | 13.1 | 11.0 | 8.8  | 9.0  | 8.6  | 8.9  |
| IND | 0.5  | 1.3  | 1.9  | 3.4  | 5.5  | 7.1  | 9.2  | 10.1 | 11.6 | 15.1 |
| JPN | 0.8  | 0.7  | 0.6  | 0.6  | 0.6  | 0.6  | 0.4  | 0.4  | 0.4  | 0.3  |
| LAM | 0.7  | 1.3  | 1.9  | 2.8  | 3.4  | 3.7  | 3.8  | 5.3  | 5.6  | 6.4  |
| MEA | 0.4  | 0.6  | 1.0  | 1.4  | 2.0  | 2.3  | 2.6  | 3.0  | 3.2  | 3.1  |
| NEU | 0.2  | 0.5  | 0.8  | 1.2  | 1.4  | 1.6  | 1.3  | 1.6  | 1.7  | 1.5  |
| OAS | 0.7  | 1.6  | 2.3  | 3.7  | 5.1  | 6.6  | 7.6  | 8.9  | 9.9  | 10.9 |
| REF | 2.1  | 4.2  | 6.0  | 7.3  | 9.4  | 7.2  | 2.2  | 2.2  | 2.5  | 3.4  |
| SSA | 0.2  | 0.4  | 0.6  | 0.9  | 0.9  | 1.0  | 0.9  | 1.0  | 1.0  | 1.6  |
| USA | 4.8  | 7.2  | 9.1  | 10.3 | 8.7  | 9.5  | 10.2 | 9.4  | 9.7  | 10.3 |

Table 1727: Bodirsky — Resources—Nitrogen—Cropland Budget—Inputs—Fertilizer (Mt Nr/yr)

|     | 1990 | 1991 | 1992 | 1993 | 1994 | 1995 | 1996 | 1997 | 1998 | 1999 | 2000 |
|-----|------|------|------|------|------|------|------|------|------|------|------|
| GLO | 77   | 76   | 74   | 72   | 72   | 78   | 82   | 81   | 83   | 85   | 81   |
| CAZ | 2    | 2    | 2    | 2    | 2    | 2    | 3    | 3    | 3    | 3    | 3    |
| CHA | 20   | 20   | 20   | 18   | 19   | 24   | 25   | 23   | 23   | 24   | 22   |
| EUR | 14   | 12   | 11   | 11   | 12   | 11   | 12   | 12   | 12   | 12   | 11   |
| IND | 8    | 8    | 8    | 9    | 10   | 10   | 10   | 11   | 11   | 12   | 11   |
| JPN | 1    | 1    | 1    | 1    | 1    | 1    | 1    | 0    | 0    | 0    | 0    |
| LAM | 4    | 4    | 4    | 4    | 4    | 4    | 4    | 5    | 5    | 5    | 5    |
| MEA | 2    | 2    | 3    | 3    | 2    | 3    | 3    | 3    | 3    | 3    | 3    |
| NEU | 1    | 1    | 1    | 2    | 1    | 1    | 1    | 1    | 2    | 2    | 2    |
| OAS | 7    | 7    | 7    | 7    | 8    | 8    | 8    | 8    | 9    | 9    | 9    |
| REF | 8    | 8    | 5    | 4    | 3    | 3    | 2    | 3    | 2    | 2    | 2    |
| SSA | 1    | 1    | 1    | 1    | 1    | 1    | 1    | 1    | 1    | 1    | 1    |
| USA | 10   | 10   | 10   | 11   | 11   | 11   | 11   | 11   | 11   | 11   | 10   |

Table 1728: FAO — Resources—Nitrogen—Cropland Budget—Inputs—Fertilizer (Mt Nr/yr) [PART 1/2]

|     | 2001 | 2002 | 2003 | 2004 | 2005 | 2006 | 2007 | 2008 | 2009 | 2010 |
|-----|------|------|------|------|------|------|------|------|------|------|
| GLO | 82   | 86   | 90   | 89   | 90   | 96   | 100  | 99   | 105  | 106  |
| CAZ | 3    | 3    | 3    | 3    | 3    | 2    | 3    | 3    | 3    | 3    |
| CHA | 22   | 29   | 28   | 27   | 28   | 31   | 33   | 33   | 37   | 35   |
| EUR | 11   | 11   | 12   | 11   | 10   | 10   | 11   | 10   | 10   | 11   |
| IND | 11   | 10   | 11   | 12   | 13   | 14   | 14   | 15   | 16   | 17   |
| JPN | 0    | 1    | 1    | 1    | 1    | 1    | 1    | 0    | 1    | 0    |
| LAM | 5    | 5    | 6    | 6    | 6    | 6    | 7    | 6    | 6    | 7    |
| MEA | 3    | 3    | 3    | 4    | 4    | 4    | 3    | 4    | 3    | 3    |
| NEU | 1    | 2    | 2    | 2    | 2    | 2    | 2    | 2    | 2    | 2    |
| OAS | 9    | 9    | 10   | 10   | 10   | 10   | 10   | 11   | 13   | 12   |
| REF | 3    | 1    | 2    | 2    | 2    | 3    | 3    | 3    | 3    | 3    |
| SSA | 1    | 1    | 1    | 1    | 1    | 1    | 1    | 1    | 1    | 1    |
| USA | 11   | 11   | 12   | 11   | 11   | 12   | 12   | 11   | 11   | 11   |

Table 1729: FAO — Resources—Nitrogen—Cropland Budget—Inputs—Fertilizer (Mt Nr/yr) [PART 2/2]

56.1.10 Inputs—Manure Recycled from Confinements

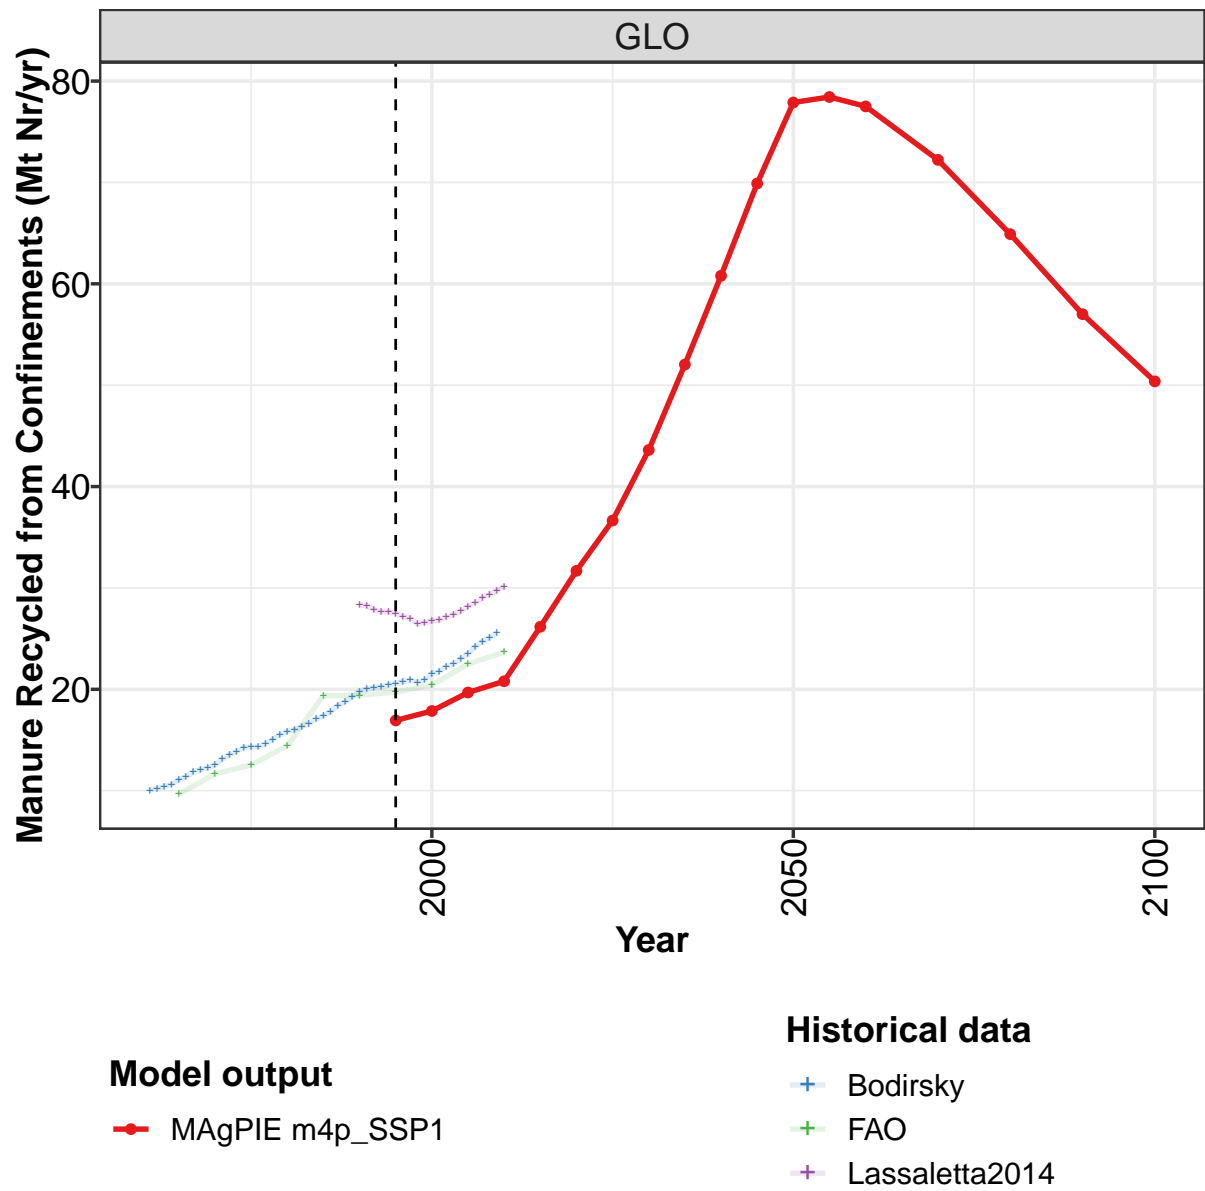

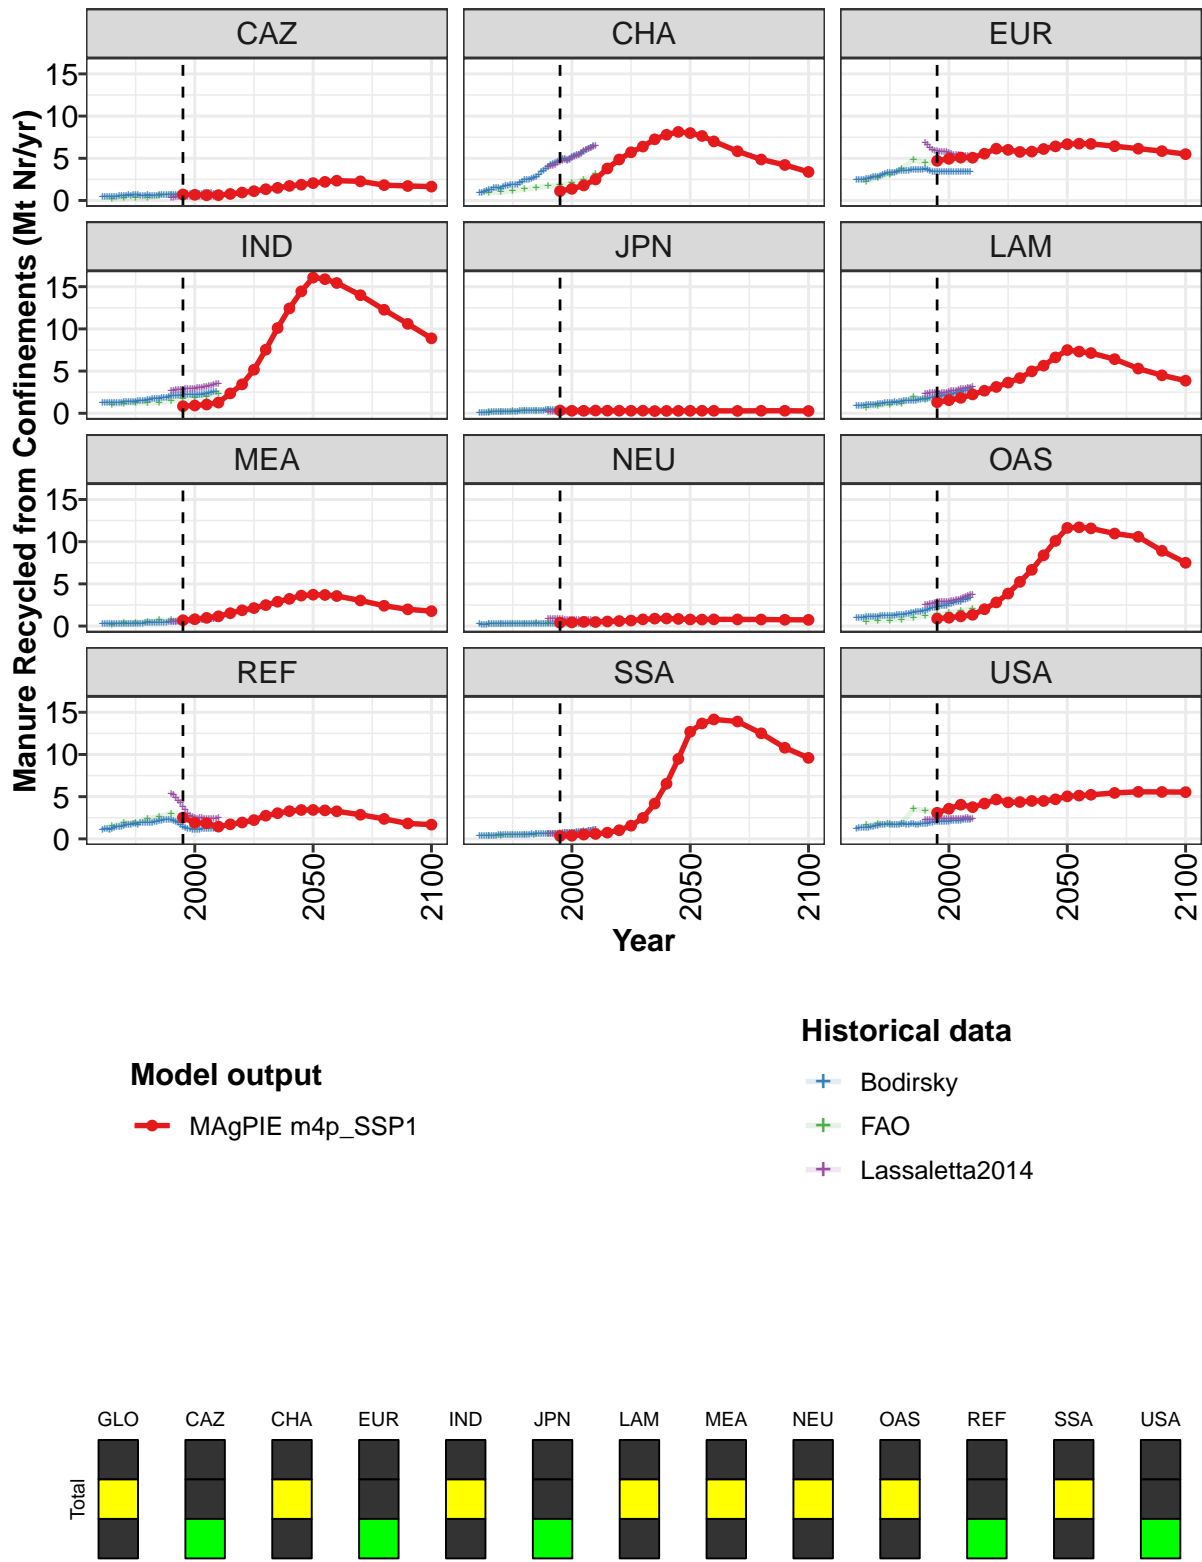

Figure 451: MAgPIE m4p\_SSP1 — Resources—Nitrogen—Cropland Budget—Inputs—Manure Recycled from Confinements (Mt Nr/yr)



|     | 1995 | 2000 | 2005 | 2010 | 2015 | 2020 | 2025 | 2030 | 2035 | 2040 | 2045 |
|-----|------|------|------|------|------|------|------|------|------|------|------|
| GLO | 16.9 | 17.9 | 19.7 | 20.8 | 26.2 | 31.7 | 36.6 | 43.6 | 52.0 | 60.8 | 69.9 |
| CAZ | 0.7  | 0.7  | 0.6  | 0.6  | 0.8  | 0.9  | 1.1  | 1.3  | 1.5  | 1.7  | 1.9  |
| CHA | 1.1  | 1.4  | 1.8  | 2.5  | 3.8  | 4.9  | 5.7  | 6.4  | 7.3  | 7.8  | 8.1  |
| EUR | 4.7  | 4.9  | 5.1  | 5.1  | 5.5  | 6.1  | 6.0  | 5.8  | 5.8  | 6.1  | 6.4  |
| IND | 0.8  | 0.9  | 1.0  | 1.3  | 2.4  | 3.4  | 5.2  | 7.5  | 10.1 | 12.4 | 14.4 |
| JPN | 0.3  | 0.3  | 0.3  | 0.3  | 0.3  | 0.3  | 0.3  | 0.3  | 0.3  | 0.3  | 0.3  |
| LAM | 1.3  | 1.6  | 1.8  | 2.2  | 2.7  | 3.1  | 3.6  | 4.2  | 5.0  | 5.6  | 6.6  |
| MEA | 0.7  | 0.8  | 1.0  | 1.2  | 1.5  | 1.9  | 2.1  | 2.5  | 2.9  | 3.2  | 3.6  |
| NEU | 0.4  | 0.4  | 0.5  | 0.5  | 0.5  | 0.6  | 0.7  | 0.8  | 0.9  | 0.9  | 0.8  |
| OAS | 0.9  | 1.0  | 1.1  | 1.3  | 2.0  | 2.8  | 3.9  | 5.2  | 6.7  | 8.4  | 10.1 |
| REF | 2.5  | 1.9  | 1.9  | 1.5  | 1.7  | 1.9  | 2.2  | 2.7  | 3.0  | 3.3  | 3.4  |
| SSA | 0.3  | 0.4  | 0.5  | 0.6  | 0.7  | 1.0  | 1.6  | 2.5  | 4.2  | 6.5  | 9.5  |
| USA | 3.1  | 3.6  | 4.0  | 3.8  | 4.2  | 4.7  | 4.3  | 4.4  | 4.5  | 4.5  | 4.7  |

Table 1730: MAgPIE m4p\_SSP1 — Resources—Nitrogen—Cropland Budget—Inputs—Manure Recycled from Confinements (Mt Nr/yr) [PART 1/2]

|     | 2050 | 2055 | 2060 | 2070 | 2080 | 2090 | 2100 |
|-----|------|------|------|------|------|------|------|
| GLO | 77.9 | 78.4 | 77.5 | 72.2 | 64.9 | 57.0 | 50.4 |
| CAZ | 2.1  | 2.2  | 2.3  | 2.3  | 1.8  | 1.7  | 1.6  |
| CHA | 8.0  | 7.6  | 7.0  | 5.8  | 4.9  | 4.2  | 3.4  |
| EUR | 6.7  | 6.7  | 6.7  | 6.4  | 6.1  | 5.8  | 5.5  |
| IND | 16.1 | 15.9 | 15.4 | 14.0 | 12.3 | 10.6 | 8.9  |
| JPN | 0.3  | 0.3  | 0.3  | 0.3  | 0.3  | 0.3  | 0.3  |
| LAM | 7.5  | 7.3  | 7.1  | 6.4  | 5.3  | 4.5  | 3.9  |
| MEA | 3.7  | 3.7  | 3.6  | 3.0  | 2.4  | 2.0  | 1.8  |
| NEU | 0.8  | 0.8  | 0.8  | 0.8  | 0.8  | 0.7  | 0.7  |
| OAS | 11.6 | 11.7 | 11.6 | 11.0 | 10.6 | 8.9  | 7.5  |
| REF | 3.4  | 3.4  | 3.3  | 2.9  | 2.4  | 1.8  | 1.7  |
| SSA | 12.7 | 13.7 | 14.2 | 13.9 | 12.5 | 10.8 | 9.6  |
| USA | 5.0  | 5.1  | 5.2  | 5.4  | 5.6  | 5.6  | 5.5  |

Table 1731: MAgPIE m4p\_SSP1 — Resources—Nitrogen—Cropland Budget—Inputs—Manure Recycled from Confinements (Mt Nr/yr) [PART 2/2]

|     | 1961 | 1962 | 1963 | 1964 | 1965 | 1966 | 1967 | 1968 | 1969 | 1970 | 1971 |
|-----|------|------|------|------|------|------|------|------|------|------|------|
| GLO | 10.0 | 10.2 | 10.4 | 10.6 | 11.1 | 11.4 | 11.8 | 12.1 | 12.2 | 12.5 | 13.1 |
| CAZ | 0.4  | 0.4  | 0.5  | 0.5  | 0.5  | 0.5  | 0.5  | 0.5  | 0.5  | 0.6  | 0.6  |
| CHA | 0.9  | 0.9  | 1.0  | 1.1  | 1.2  | 1.3  | 1.5  | 1.5  | 1.5  | 1.4  | 1.6  |
| EUR | 2.5  | 2.5  | 2.5  | 2.5  | 2.6  | 2.6  | 2.7  | 2.8  | 2.8  | 2.8  | 2.9  |
| IND | 1.2  | 1.3  | 1.3  | 1.3  | 1.3  | 1.3  | 1.3  | 1.3  | 1.3  | 1.3  | 1.3  |
| JPN | 0.1  | 0.1  | 0.1  | 0.1  | 0.1  | 0.1  | 0.1  | 0.1  | 0.2  | 0.2  | 0.2  |
| LAM | 0.9  | 0.9  | 0.9  | 0.9  | 1.0  | 1.0  | 1.0  | 1.0  | 1.1  | 1.1  | 1.1  |
| MEA | 0.2  | 0.2  | 0.2  | 0.2  | 0.2  | 0.2  | 0.2  | 0.3  | 0.3  | 0.3  | 0.3  |
| NEU | 0.2  | 0.2  | 0.2  | 0.2  | 0.2  | 0.2  | 0.2  | 0.2  | 0.2  | 0.2  | 0.2  |
| OAS | 0.9  | 1.0  | 1.0  | 1.0  | 1.0  | 1.1  | 1.1  | 1.1  | 1.1  | 1.1  | 1.2  |
| REF | 1.1  | 1.2  | 1.2  | 1.0  | 1.2  | 1.3  | 1.4  | 1.4  | 1.4  | 1.5  | 1.7  |
| SSA | 0.4  | 0.4  | 0.4  | 0.4  | 0.4  | 0.4  | 0.4  | 0.4  | 0.4  | 0.4  | 0.4  |
| USA | 1.2  | 1.3  | 1.3  | 1.4  | 1.3  | 1.4  | 1.4  | 1.5  | 1.5  | 1.6  | 1.6  |

Table 1732: Lassaletta2014 — Resources—Nitrogen—Cropland Budget—Inputs—Manure Recycled from Confinements (Mt Nr/yr) [PART 1/5]

|     | 1972 | 1973 | 1974 | 1975 | 1976 | 1977 | 1978 | 1979 | 1980 | 1981 | 1982 |
|-----|------|------|------|------|------|------|------|------|------|------|------|
| GLO | 13.5 | 13.9 | 14.3 | 14.3 | 14.3 | 14.6 | 15.1 | 15.5 | 15.8 | 16.0 | 16.3 |
| CAZ | 0.6  | 0.6  | 0.6  | 0.6  | 0.6  | 0.6  | 0.6  | 0.6  | 0.6  | 0.6  | 0.6  |
| CHA | 1.7  | 1.8  | 1.8  | 1.9  | 1.9  | 1.9  | 2.1  | 2.2  | 2.4  | 2.5  | 2.5  |
| EUR | 3.0  | 3.1  | 3.2  | 3.2  | 3.3  | 3.3  | 3.4  | 3.5  | 3.5  | 3.5  | 3.5  |
| IND | 1.3  | 1.4  | 1.4  | 1.4  | 1.4  | 1.4  | 1.5  | 1.5  | 1.6  | 1.6  | 1.7  |
| JPN | 0.2  | 0.2  | 0.2  | 0.2  | 0.2  | 0.2  | 0.2  | 0.3  | 0.3  | 0.3  | 0.3  |
| LAM | 1.1  | 1.2  | 1.2  | 1.2  | 1.3  | 1.3  | 1.3  | 1.4  | 1.4  | 1.4  | 1.5  |
| MEA | 0.3  | 0.3  | 0.3  | 0.3  | 0.3  | 0.3  | 0.3  | 0.3  | 0.3  | 0.4  | 0.4  |
| NEU | 0.2  | 0.2  | 0.2  | 0.2  | 0.2  | 0.2  | 0.3  | 0.3  | 0.3  | 0.3  | 0.3  |
| OAS | 1.2  | 1.2  | 1.2  | 1.2  | 1.2  | 1.2  | 1.3  | 1.3  | 1.3  | 1.4  | 1.4  |
| REF | 1.7  | 1.7  | 1.8  | 1.8  | 1.7  | 1.9  | 1.9  | 1.9  | 1.9  | 1.9  | 1.9  |
| SSA | 0.4  | 0.4  | 0.4  | 0.5  | 0.5  | 0.5  | 0.5  | 0.5  | 0.5  | 0.5  | 0.5  |
| USA | 1.7  | 1.7  | 1.8  | 1.7  | 1.7  | 1.7  | 1.7  | 1.7  | 1.7  | 1.8  | 1.7  |

Table 1733: Lassaletta2014 — Resources—Nitrogen—Cropland Budget—Inputs—Manure Recycled from Confinements (Mt Nr/yr) [PART 2/5]

|     | 1983 | 1984 | 1985 | 1986 | 1987 | 1988 | 1989 | 1990 | 1991 | 1992 | 1993 |
|-----|------|------|------|------|------|------|------|------|------|------|------|
| GLO | 16.6 | 17.1 | 17.4 | 17.8 | 18.4 | 18.8 | 19.3 | 19.7 | 20.0 | 20.2 | 20.2 |
| CAZ | 0.6  | 0.6  | 0.6  | 0.6  | 0.6  | 0.6  | 0.7  | 0.7  | 0.7  | 0.7  | 0.7  |
| CHA | 2.6  | 2.7  | 2.9  | 3.0  | 3.4  | 3.6  | 3.8  | 3.9  | 4.2  | 4.3  | 4.5  |
| EUR | 3.6  | 3.6  | 3.7  | 3.7  | 3.7  | 3.7  | 3.7  | 3.7  | 3.7  | 3.5  | 3.4  |
| IND | 1.7  | 1.7  | 1.8  | 1.8  | 1.8  | 1.9  | 1.9  | 2.0  | 2.0  | 2.1  | 2.1  |
| JPN | 0.3  | 0.3  | 0.3  | 0.3  | 0.3  | 0.4  | 0.4  | 0.4  | 0.4  | 0.4  | 0.4  |
| LAM | 1.5  | 1.5  | 1.5  | 1.5  | 1.6  | 1.6  | 1.7  | 1.7  | 1.7  | 1.8  | 1.8  |
| MEA | 0.4  | 0.4  | 0.4  | 0.4  | 0.4  | 0.4  | 0.5  | 0.5  | 0.5  | 0.5  | 0.5  |
| NEU | 0.3  | 0.3  | 0.3  | 0.3  | 0.3  | 0.3  | 0.3  | 0.3  | 0.3  | 0.3  | 0.3  |
| OAS | 1.5  | 1.5  | 1.6  | 1.6  | 1.7  | 1.7  | 1.8  | 1.9  | 1.9  | 2.0  | 2.1  |
| REF | 2.0  | 2.1  | 2.1  | 2.2  | 2.2  | 2.2  | 2.3  | 2.3  | 2.2  | 2.0  | 1.9  |
| SSA | 0.5  | 0.5  | 0.5  | 0.6  | 0.6  | 0.6  | 0.6  | 0.6  | 0.6  | 0.6  | 0.6  |
| USA | 1.7  | 1.7  | 1.7  | 1.7  | 1.7  | 1.7  | 1.7  | 1.8  | 1.8  | 1.9  | 1.9  |

Table 1734: Lassaletta2014 — Resources—Nitrogen—Cropland Budget—Inputs—Manure Recycled from Confinements (Mt Nr/yr) [PART 3/5]

|     | 1994 | 1995 | 1996 | 1997 | 1998 | 1999 | 2000 | 2001 | 2002 | 2003 | 2004 |
|-----|------|------|------|------|------|------|------|------|------|------|------|
| GLO | 20.4 | 20.6 | 20.7 | 20.9 | 20.7 | 20.9 | 21.6 | 21.7 | 22.2 | 22.5 | 23.0 |
| CAZ | 0.7  | 0.7  | 0.8  | 0.8  | 0.8  | 0.8  | 0.8  | 0.8  | 0.9  | 0.8  | 0.9  |
| CHA | 4.6  | 4.7  | 4.9  | 5.0  | 4.8  | 4.8  | 5.2  | 5.3  | 5.4  | 5.4  | 5.6  |
| EUR | 3.4  | 3.4  | 3.4  | 3.4  | 3.4  | 3.4  | 3.4  | 3.4  | 3.4  | 3.4  | 3.4  |
| IND | 2.1  | 2.1  | 2.1  | 2.2  | 2.2  | 2.2  | 2.2  | 2.2  | 2.2  | 2.2  | 2.3  |
| JPN | 0.4  | 0.3  | 0.3  | 0.3  | 0.3  | 0.3  | 0.3  | 0.3  | 0.3  | 0.3  | 0.3  |
| LAM | 1.9  | 2.0  | 2.0  | 2.0  | 2.0  | 2.1  | 2.2  | 2.2  | 2.3  | 2.4  | 2.5  |
| MEA | 0.6  | 0.6  | 0.6  | 0.6  | 0.7  | 0.6  | 0.7  | 0.7  | 0.7  | 0.8  | 0.8  |
| NEU | 0.3  | 0.3  | 0.3  | 0.3  | 0.3  | 0.3  | 0.3  | 0.3  | 0.3  | 0.3  | 0.3  |
| OAS | 2.2  | 2.3  | 2.3  | 2.4  | 2.3  | 2.4  | 2.6  | 2.6  | 2.7  | 2.8  | 2.9  |
| REF | 1.7  | 1.5  | 1.3  | 1.2  | 1.1  | 1.1  | 1.1  | 1.1  | 1.1  | 1.2  | 1.1  |
| SSA | 0.6  | 0.7  | 0.7  | 0.7  | 0.7  | 0.7  | 0.7  | 0.8  | 0.8  | 0.8  | 0.8  |
| USA | 2.0  | 2.0  | 2.0  | 2.0  | 2.0  | 2.1  | 2.1  | 2.1  | 2.1  | 2.1  | 2.1  |

Table 1735: Lassaletta2014 — Resources—Nitrogen—Cropland Budget—Inputs—Manure Recycled from Confinements (Mt Nr/yr) [PART 4/5]

|     | 2005 | 2006 | 2007 | 2008 | 2009 |
|-----|------|------|------|------|------|
| GLO | 23.5 | 24.2 | 24.7 | 25.1 | 25.5 |
| CAZ | 0.9  | 0.9  | 0.9  | 0.8  | 0.8  |
| CHA | 5.7  | 6.0  | 6.1  | 6.3  | 6.5  |
| EUR | 3.4  | 3.4  | 3.4  | 3.4  | 3.4  |
| IND | 2.3  | 2.4  | 2.4  | 2.5  | 2.6  |
| JPN | 0.3  | 0.3  | 0.3  | 0.3  | 0.3  |
| LAM | 2.5  | 2.7  | 2.7  | 2.8  | 2.9  |
| MEA | 0.8  | 0.9  | 0.9  | 0.9  | 0.9  |
| NEU | 0.3  | 0.3  | 0.3  | 0.3  | 0.3  |
| OAS | 2.9  | 3.1  | 3.2  | 3.2  | 3.3  |
| REF | 1.1  | 1.2  | 1.2  | 1.2  | 1.2  |
| SSA | 0.9  | 0.9  | 1.0  | 1.0  | 1.0  |
| USA | 2.2  | 2.3  | 2.3  | 2.3  | 2.2  |

Table 1736: Lassaletta2014 — Resources—Nitrogen—Cropland Budget—Inputs—Manure Recycled from Confinements (Mt Nr/yr) [PART 5/5]

|     | 1965 | 1970 | 1975 | 1980 | 1985 | 1990 | 1995 | 2000 | 2005 | 2010 |
|-----|------|------|------|------|------|------|------|------|------|------|
| GLO | 9.6  | 11.6 | 12.5 | 14.4 | 19.4 | 19.4 | 19.7 | 20.4 | 22.5 | 23.7 |
| CAZ | 0.3  | 0.3  | 0.3  | 0.3  | 0.6  | 0.7  | 0.7  | 0.7  | 0.7  | 0.7  |
| CHA | 0.9  | 1.0  | 1.2  | 1.3  | 1.5  | 1.7  | 1.8  | 2.1  | 2.4  | 3.1  |
| EUR | 2.2  | 2.7  | 3.1  | 3.7  | 4.8  | 4.4  | 4.5  | 4.6  | 4.7  | 4.7  |
| IND | 1.0  | 1.2  | 1.2  | 1.2  | 1.3  | 1.5  | 1.7  | 1.8  | 2.0  | 2.3  |
| JPN | 0.2  | 0.2  | 0.2  | 0.3  | 0.3  | 0.4  | 0.3  | 0.3  | 0.3  | 0.3  |
| LAM | 0.7  | 0.9  | 1.1  | 1.2  | 2.0  | 1.6  | 1.7  | 1.9  | 2.2  | 2.5  |
| MEA | 0.2  | 0.4  | 0.4  | 0.5  | 0.7  | 0.7  | 0.8  | 0.9  | 1.1  | 1.3  |
| NEU | 0.2  | 0.2  | 0.2  | 0.3  | 0.4  | 0.4  | 0.4  | 0.4  | 0.5  | 0.5  |
| OAS | 0.5  | 0.6  | 0.7  | 0.8  | 1.0  | 1.2  | 1.4  | 1.5  | 1.8  | 2.1  |
| REF | 1.5  | 2.0  | 1.9  | 2.4  | 2.7  | 3.0  | 2.5  | 1.7  | 1.7  | 1.3  |
| SSA | 0.3  | 0.4  | 0.5  | 0.5  | 0.5  | 0.6  | 0.7  | 0.8  | 0.9  | 1.1  |
| USA | 1.7  | 1.8  | 1.7  | 1.8  | 3.5  | 3.4  | 3.2  | 3.7  | 4.1  | 3.8  |

Table 1737: Bodirsky — Resources—Nitrogen—Cropland Budget—Inputs—Manure Recycled from Confinements (Mt Nr/yr)

|     | 1990 | 1991 | 1992 | 1993 | 1994 | 1995 | 1996 | 1997 | 1998 | 1999 | 2000 |
|-----|------|------|------|------|------|------|------|------|------|------|------|
| GLO | 28.3 | 28.2 | 27.9 | 27.6 | 27.6 | 27.5 | 27.2 | 27.0 | 26.5 | 26.6 | 26.7 |
| CAZ | 0.4  | 0.4  | 0.4  | 0.4  | 0.4  | 0.4  | 0.4  | 0.4  | 0.4  | 0.4  | 0.4  |
| CHA | 4.0  | 4.1  | 4.1  | 4.2  | 4.4  | 4.6  | 4.8  | 4.9  | 4.7  | 4.9  | 5.0  |
| EUR | 6.8  | 6.6  | 6.3  | 6.0  | 5.9  | 5.8  | 5.8  | 5.8  | 5.7  | 5.7  | 5.6  |
| IND | 2.6  | 2.7  | 2.7  | 2.8  | 2.8  | 2.8  | 2.8  | 2.9  | 2.9  | 2.9  | 2.9  |
| JPN | 0.2  | 0.2  | 0.2  | 0.2  | 0.2  | 0.2  | 0.2  | 0.2  | 0.2  | 0.2  | 0.2  |
| LAM | 2.3  | 2.3  | 2.4  | 2.4  | 2.5  | 2.5  | 2.4  | 2.4  | 2.4  | 2.5  | 2.6  |
| MEA | 0.6  | 0.5  | 0.6  | 0.6  | 0.6  | 0.6  | 0.7  | 0.7  | 0.7  | 0.7  | 0.7  |
| NEU | 0.9  | 0.9  | 0.8  | 0.8  | 0.8  | 0.8  | 0.8  | 0.8  | 0.8  | 0.8  | 0.8  |
| OAS | 2.5  | 2.6  | 2.6  | 2.7  | 2.8  | 2.8  | 2.9  | 2.9  | 2.8  | 2.8  | 2.9  |
| REF | 5.3  | 5.2  | 4.8  | 4.6  | 4.3  | 3.8  | 3.4  | 3.0  | 2.7  | 2.6  | 2.5  |
| SSA | 0.6  | 0.6  | 0.6  | 0.6  | 0.6  | 0.6  | 0.7  | 0.7  | 0.7  | 0.7  | 0.7  |
| USA | 2.2  | 2.2  | 2.3  | 2.3  | 2.3  | 2.4  | 2.4  | 2.4  | 2.4  | 2.4  | 2.4  |

Table 1738: FAO — Resources—Nitrogen—Cropland Budget—Inputs—Manure Recycled from Confinements (Mt Nr/yr) [PART 1/2]

|     | 2001 | 2002 | 2003 | 2004 | 2005 | 2006 | 2007 | 2008 | 2009 | 2010 |
|-----|------|------|------|------|------|------|------|------|------|------|
| GLO | 26.8 | 27.1 | 27.3 | 27.7 | 28.1 | 28.6 | 29.0 | 29.3 | 29.8 | 30.1 |
| CAZ | 0.5  | 0.5  | 0.5  | 0.5  | 0.5  | 0.5  | 0.5  | 0.4  | 0.4  | 0.4  |
| CHA | 5.2  | 5.3  | 5.4  | 5.6  | 5.8  | 6.0  | 6.1  | 6.2  | 6.3  | 6.5  |
| EUR | 5.5  | 5.4  | 5.4  | 5.4  | 5.4  | 5.3  | 5.3  | 5.3  | 5.2  | 5.2  |
| IND | 3.0  | 3.0  | 3.0  | 3.1  | 3.2  | 3.2  | 3.3  | 3.4  | 3.4  | 3.5  |
| JPN | 0.2  | 0.2  | 0.2  | 0.2  | 0.2  | 0.2  | 0.2  | 0.2  | 0.2  | 0.2  |
| LAM | 2.6  | 2.7  | 2.7  | 2.8  | 2.9  | 2.9  | 2.9  | 3.0  | 3.1  | 3.1  |
| MEA | 0.7  | 0.7  | 0.7  | 0.8  | 0.8  | 0.8  | 0.8  | 0.8  | 0.9  | 0.9  |
| NEU | 0.7  | 0.7  | 0.7  | 0.7  | 0.7  | 0.7  | 0.7  | 0.7  | 0.7  | 0.7  |
| OAS | 2.9  | 3.0  | 3.1  | 3.2  | 3.2  | 3.4  | 3.5  | 3.6  | 3.7  | 3.7  |
| REF | 2.4  | 2.4  | 2.5  | 2.4  | 2.3  | 2.3  | 2.4  | 2.4  | 2.4  | 2.5  |
| SSA | 0.7  | 0.8  | 0.8  | 0.8  | 0.8  | 0.9  | 0.9  | 1.0  | 1.0  | 1.0  |
| USA | 2.4  | 2.4  | 2.4  | 2.4  | 2.4  | 2.4  | 2.4  | 2.5  | 2.4  | 2.4  |

Table 1739: FAO — Resources—Nitrogen—Cropland Budget—Inputs—Manure Recycled from Confinements (Mt Nr/yr) [PART 2/2]

56.1.11 Inputs—Recycled Aboveground Crop Residues

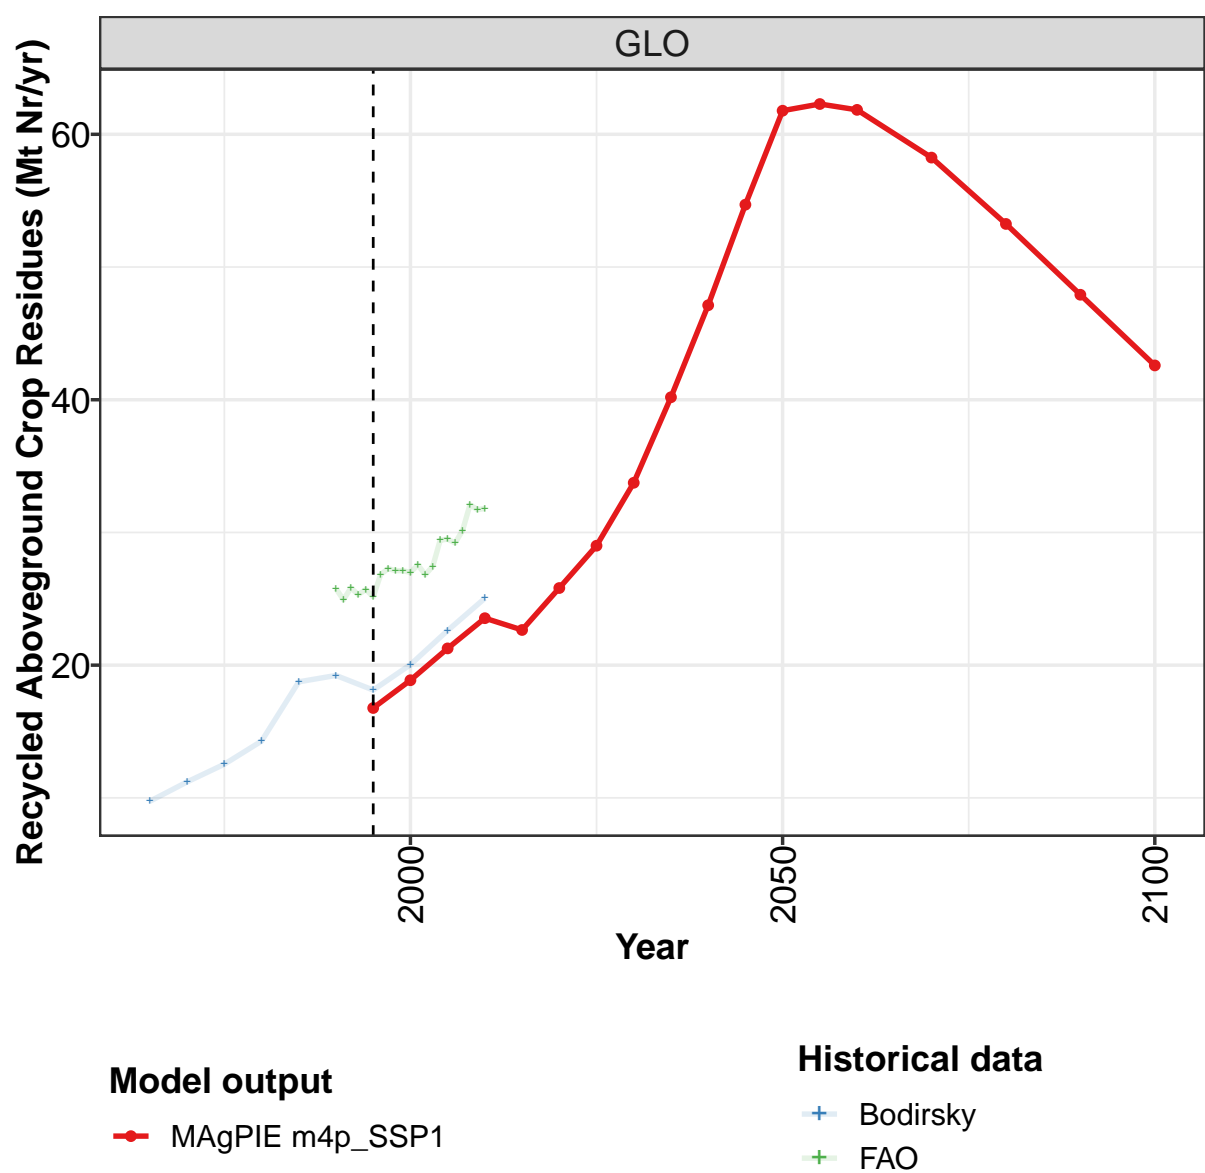

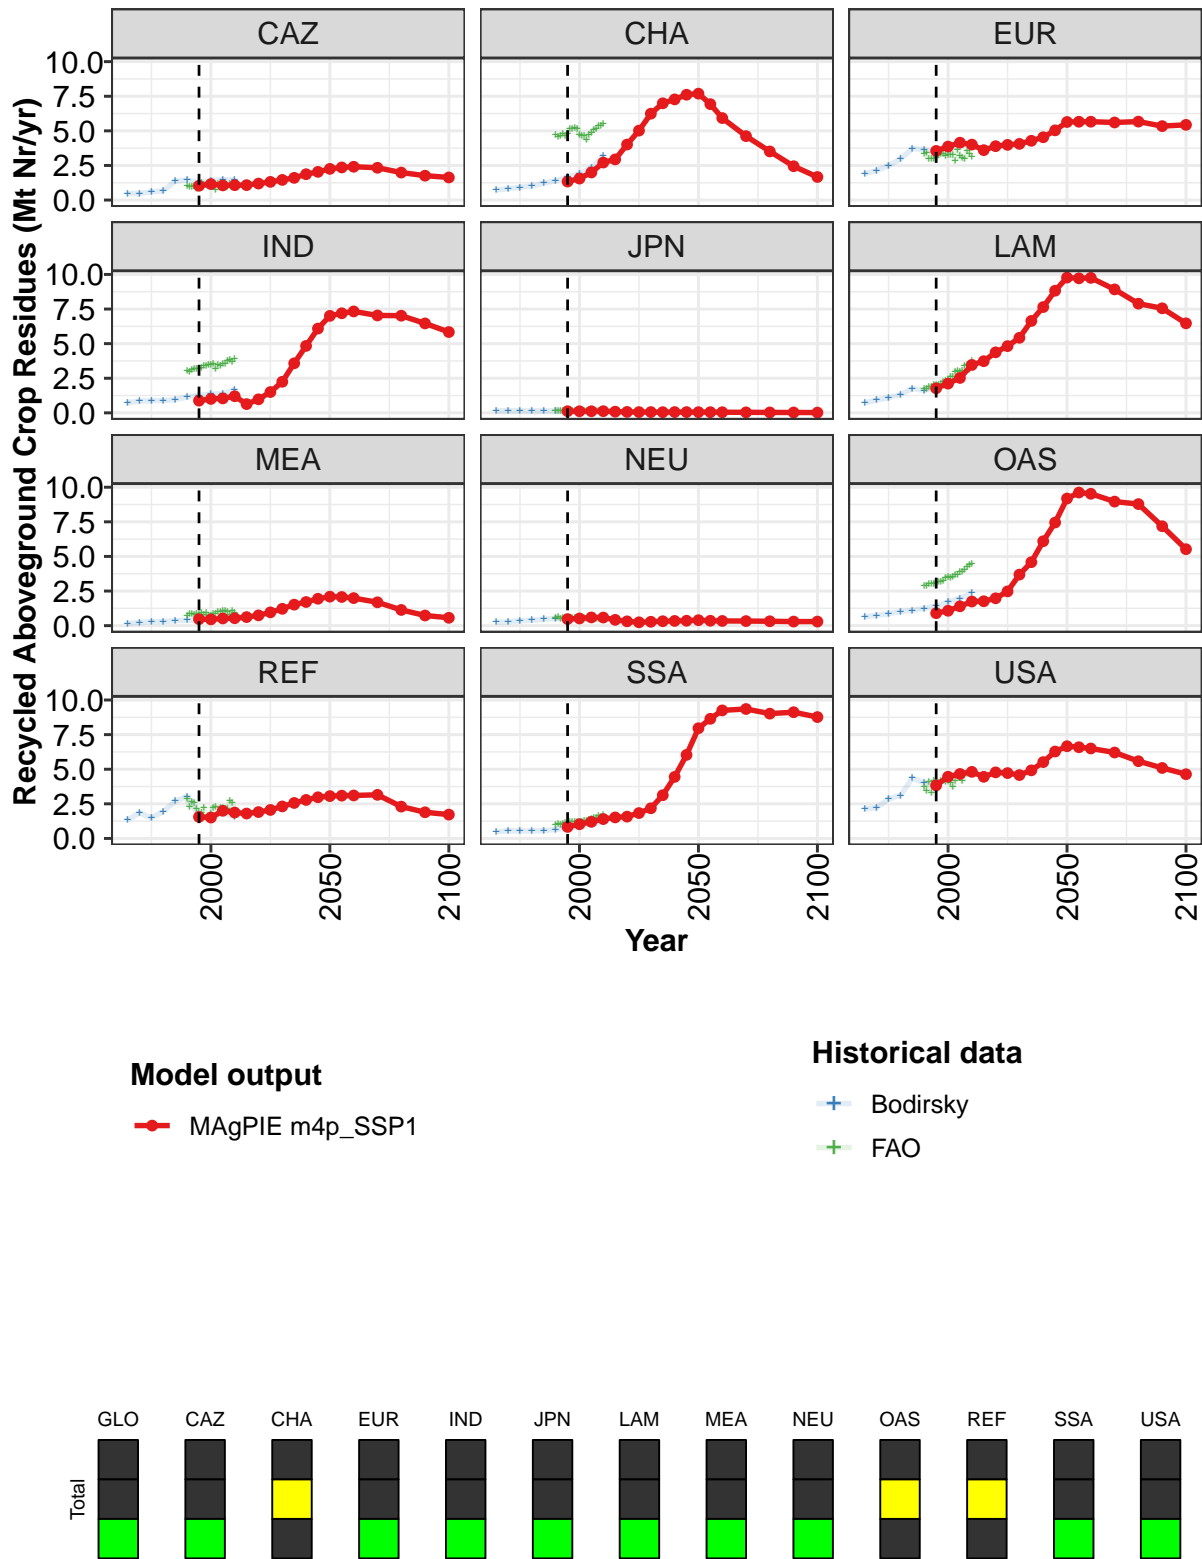

Figure 452: MAgPIE m4p\_SSP1 — Resources—Nitrogen—Cropland Budget—Inputs—Recycled Aboveground Crop Residues (Mt Nr/yr)

|     | 1995 | 2000 | 2005 | 2010 | 2015 | 2020 | 2025 | 2030 | 2035 | 2040 | 2045 |
|-----|------|------|------|------|------|------|------|------|------|------|------|
| GLO | 16.8 | 18.9 | 21.3 | 23.5 | 22.7 | 25.8 | 29.0 | 33.7 | 40.2 | 47.1 | 54.7 |
| CAZ | 1.0  | 1.2  | 1.1  | 1.1  | 1.1  | 1.2  | 1.3  | 1.5  | 1.6  | 1.9  | 2.0  |
| CHA | 1.3  | 1.6  | 2.0  | 2.7  | 2.9  | 4.0  | 5.0  | 6.2  | 7.0  | 7.3  | 7.6  |
| EUR | 3.6  | 3.9  | 4.1  | 4.0  | 3.6  | 3.9  | 4.0  | 4.1  | 4.3  | 4.5  | 5.0  |
| IND | 0.9  | 1.0  | 1.0  | 1.2  | 0.6  | 1.0  | 1.5  | 2.2  | 3.6  | 4.8  | 6.1  |
| JPN | 0.1  | 0.1  | 0.1  | 0.1  | 0.1  | 0.1  | 0.1  | 0.1  | 0.1  | 0.1  | 0.1  |
| LAM | 1.8  | 2.1  | 2.5  | 3.5  | 3.7  | 4.4  | 4.8  | 5.4  | 6.6  | 7.6  | 8.8  |
| MEA | 0.5  | 0.5  | 0.5  | 0.5  | 0.6  | 0.7  | 1.0  | 1.2  | 1.5  | 1.7  | 1.9  |
| NEU | 0.5  | 0.5  | 0.6  | 0.6  | 0.4  | 0.3  | 0.2  | 0.3  | 0.3  | 0.3  | 0.4  |
| OAS | 0.9  | 1.1  | 1.4  | 1.7  | 1.8  | 2.0  | 2.5  | 3.7  | 4.6  | 6.1  | 7.5  |
| REF | 1.6  | 1.5  | 2.0  | 1.9  | 1.8  | 1.9  | 2.1  | 2.3  | 2.6  | 2.8  | 3.0  |
| SSA | 0.8  | 1.0  | 1.2  | 1.4  | 1.5  | 1.6  | 1.8  | 2.2  | 3.1  | 4.4  | 6.0  |
| USA | 3.8  | 4.5  | 4.7  | 4.8  | 4.5  | 4.8  | 4.7  | 4.6  | 4.9  | 5.5  | 6.3  |

Table 1740: MAgPIE m4p\_SSP1 — Resources—Nitrogen—Cropland Budget—Inputs—Recycled Aboveground Crop Residues (Mt Nr/yr) [PART 1/2]

|     | 2050 | 2055 | 2060 | 2070 | 2080 | 2090 | 2100 |
|-----|------|------|------|------|------|------|------|
| GLO | 61.8 | 62.3 | 61.8 | 58.2 | 53.2 | 47.9 | 42.6 |
| CAZ | 2.3  | 2.4  | 2.4  | 2.3  | 2.0  | 1.8  | 1.6  |
| CHA | 7.7  | 6.9  | 5.9  | 4.6  | 3.5  | 2.4  | 1.7  |
| EUR | 5.6  | 5.7  | 5.7  | 5.6  | 5.7  | 5.3  | 5.4  |
| IND | 7.0  | 7.2  | 7.3  | 7.0  | 7.0  | 6.5  | 5.8  |
| JPN | 0.1  | 0.1  | 0.0  | 0.0  | 0.0  | 0.0  | 0.0  |
| LAM | 9.8  | 9.7  | 9.8  | 8.9  | 7.9  | 7.6  | 6.5  |
| MEA | 2.1  | 2.1  | 2.0  | 1.7  | 1.1  | 0.7  | 0.6  |
| NEU | 0.4  | 0.4  | 0.3  | 0.3  | 0.3  | 0.3  | 0.3  |
| OAS | 9.2  | 9.6  | 9.5  | 9.0  | 8.8  | 7.2  | 5.5  |
| REF | 3.1  | 3.1  | 3.1  | 3.1  | 2.3  | 1.9  | 1.7  |
| SSA | 8.0  | 8.6  | 9.3  | 9.4  | 9.0  | 9.1  | 8.8  |
| USA | 6.7  | 6.6  | 6.5  | 6.2  | 5.6  | 5.1  | 4.6  |

Table 1741: MAgPIE m4p\_SSP1 — Resources—Nitrogen—Cropland Budget—Inputs—Recycled Aboveground Crop Residues (Mt Nr/yr) [PART 2/2]

|     | 1965 | 1970 | 1975 | 1980 | 1985 | 1990 | 1995 | 2000 | 2005 | 2010 |
|-----|------|------|------|------|------|------|------|------|------|------|
| GLO | 9.7  | 11.2 | 12.5 | 14.3 | 18.7 | 19.2 | 18.1 | 20.0 | 22.6 | 25.0 |
| CAZ | 0.5  | 0.5  | 0.6  | 0.7  | 1.4  | 1.4  | 1.3  | 1.4  | 1.5  | 1.5  |
| CHA | 0.7  | 0.8  | 0.9  | 1.0  | 1.2  | 1.4  | 1.7  | 1.9  | 2.3  | 3.2  |
| EUR | 1.9  | 2.1  | 2.5  | 3.0  | 3.7  | 3.6  | 3.5  | 3.8  | 4.0  | 4.0  |
| IND | 0.7  | 0.8  | 0.9  | 0.9  | 1.0  | 1.1  | 1.3  | 1.4  | 1.4  | 1.7  |
| JPN | 0.2  | 0.2  | 0.1  | 0.1  | 0.2  | 0.1  | 0.1  | 0.1  | 0.1  | 0.1  |
| LAM | 0.7  | 0.9  | 1.1  | 1.3  | 1.8  | 1.6  | 1.8  | 2.1  | 2.5  | 3.4  |
| MEA | 0.2  | 0.2  | 0.3  | 0.3  | 0.4  | 0.4  | 0.4  | 0.4  | 0.6  | 0.6  |
| NEU | 0.3  | 0.3  | 0.3  | 0.4  | 0.5  | 0.5  | 0.5  | 0.5  | 0.6  | 0.6  |
| OAS | 0.6  | 0.7  | 0.9  | 1.0  | 1.1  | 1.2  | 1.4  | 1.7  | 2.0  | 2.4  |
| REF | 1.3  | 1.8  | 1.5  | 2.0  | 2.7  | 3.0  | 1.6  | 1.4  | 1.8  | 1.6  |
| SSA | 0.5  | 0.5  | 0.5  | 0.5  | 0.6  | 0.6  | 0.7  | 0.8  | 1.0  | 1.2  |
| USA | 2.1  | 2.2  | 2.9  | 3.1  | 4.4  | 4.0  | 3.8  | 4.5  | 4.8  | 4.8  |

Table 1742: Bodirsky — Resources—Nitrogen—Cropland Budget—Inputs—Recycled Aboveground Crop Residues (Mt Nr/yr)

|     | 1990 | 1991 | 1992 | 1993 | 1994 | 1995 | 1996 | 1997 | 1998 | 1999 | 2000 |
|-----|------|------|------|------|------|------|------|------|------|------|------|
| GLO | 25.8 | 24.9 | 25.8 | 25.3 | 25.7 | 25.2 | 26.8 | 27.3 | 27.1 | 27.1 | 27.0 |
| CAZ | 1.0  | 1.0  | 1.0  | 1.0  | 0.8  | 1.0  | 1.2  | 1.1  | 1.1  | 1.2  | 1.1  |
| CHA | 4.7  | 4.6  | 4.7  | 4.8  | 4.6  | 4.8  | 5.1  | 5.2  | 5.2  | 5.2  | 4.7  |
| EUR | 3.3  | 3.4  | 3.0  | 3.0  | 3.0  | 3.0  | 3.2  | 3.4  | 3.4  | 3.2  | 3.2  |
| IND | 3.0  | 3.0  | 3.1  | 3.2  | 3.2  | 3.2  | 3.3  | 3.4  | 3.4  | 3.5  | 3.5  |
| JPN | 0.1  | 0.1  | 0.1  | 0.1  | 0.2  | 0.1  | 0.1  | 0.1  | 0.1  | 0.1  | 0.1  |
| LAM | 1.8  | 1.7  | 1.9  | 1.9  | 2.0  | 2.0  | 2.1  | 2.1  | 2.2  | 2.3  | 2.4  |
| MEA | 0.7  | 0.9  | 0.8  | 0.8  | 0.9  | 0.8  | 1.0  | 0.8  | 0.9  | 0.7  | 0.7  |
| NEU | 0.6  | 0.6  | 0.5  | 0.6  | 0.5  | 0.5  | 0.5  | 0.6  | 0.6  | 0.5  | 0.5  |
| OAS | 2.9  | 2.9  | 3.0  | 3.0  | 3.0  | 3.1  | 3.2  | 3.2  | 3.3  | 3.5  | 3.5  |
| REF | 2.8  | 2.3  | 2.7  | 2.6  | 2.1  | 1.9  | 1.9  | 2.2  | 1.5  | 1.7  | 1.8  |
| SSA | 1.0  | 1.0  | 1.0  | 1.1  | 1.1  | 1.1  | 1.2  | 1.2  | 1.2  | 1.2  | 1.2  |
| USA | 3.8  | 3.4  | 4.1  | 3.3  | 4.2  | 3.5  | 4.0  | 4.1  | 4.3  | 4.1  | 4.2  |

Table 1743: FAO — Resources—Nitrogen—Cropland Budget—Inputs—Recycled Aboveground Crop Residues (Mt Nr/yr) [PART 1/2]

|     | 2001 | 2002 | 2003 | 2004 | 2005 | 2006 | 2007 | 2008 | 2009 | 2010 |
|-----|------|------|------|------|------|------|------|------|------|------|
| GLO | 27.6 | 26.8 | 27.4 | 29.4 | 29.5 | 29.2 | 30.1 | 32.1 | 31.7 | 31.8 |
| CAZ | 1.1  | 0.8  | 1.2  | 1.1  | 1.2  | 0.9  | 1.0  | 1.2  | 1.1  | 1.1  |
| CHA | 4.6  | 4.6  | 4.4  | 4.7  | 4.9  | 5.1  | 5.1  | 5.3  | 5.4  | 5.5  |
| EUR | 3.2  | 3.3  | 2.9  | 3.6  | 3.2  | 3.1  | 3.0  | 3.5  | 3.3  | 3.1  |
| IND | 3.5  | 3.2  | 3.5  | 3.4  | 3.5  | 3.6  | 3.8  | 3.9  | 3.7  | 3.9  |
| JPN | 0.1  | 0.1  | 0.1  | 0.1  | 0.1  | 0.1  | 0.1  | 0.1  | 0.1  | 0.1  |
| LAM | 2.6  | 2.6  | 3.0  | 3.0  | 3.0  | 3.1  | 3.4  | 3.4  | 3.1  | 3.7  |
| MEA | 0.8  | 0.9  | 1.0  | 1.0  | 1.1  | 1.1  | 1.0  | 0.8  | 1.0  | 1.0  |
| NEU | 0.5  | 0.6  | 0.5  | 0.6  | 0.6  | 0.6  | 0.5  | 0.5  | 0.6  | 0.6  |
| OAS | 3.5  | 3.5  | 3.7  | 3.7  | 3.9  | 3.9  | 4.1  | 4.2  | 4.4  | 4.4  |
| REF | 2.2  | 2.3  | 1.8  | 2.2  | 2.2  | 2.2  | 2.2  | 2.7  | 2.6  | 1.9  |
| SSA | 1.2  | 1.3  | 1.3  | 1.3  | 1.4  | 1.5  | 1.5  | 1.6  | 1.5  | 1.7  |
| USA | 4.0  | 3.7  | 4.1  | 4.6  | 4.4  | 4.1  | 4.6  | 4.7  | 4.9  | 4.7  |

Table 1744: FAO — Resources—Nitrogen—Cropland Budget—Inputs—Recycled Aboveground Crop Residues (Mt Nr/yr) [PART 2/2]



## 56.1.12 Inputs—Recycled Belowground Crop Residues

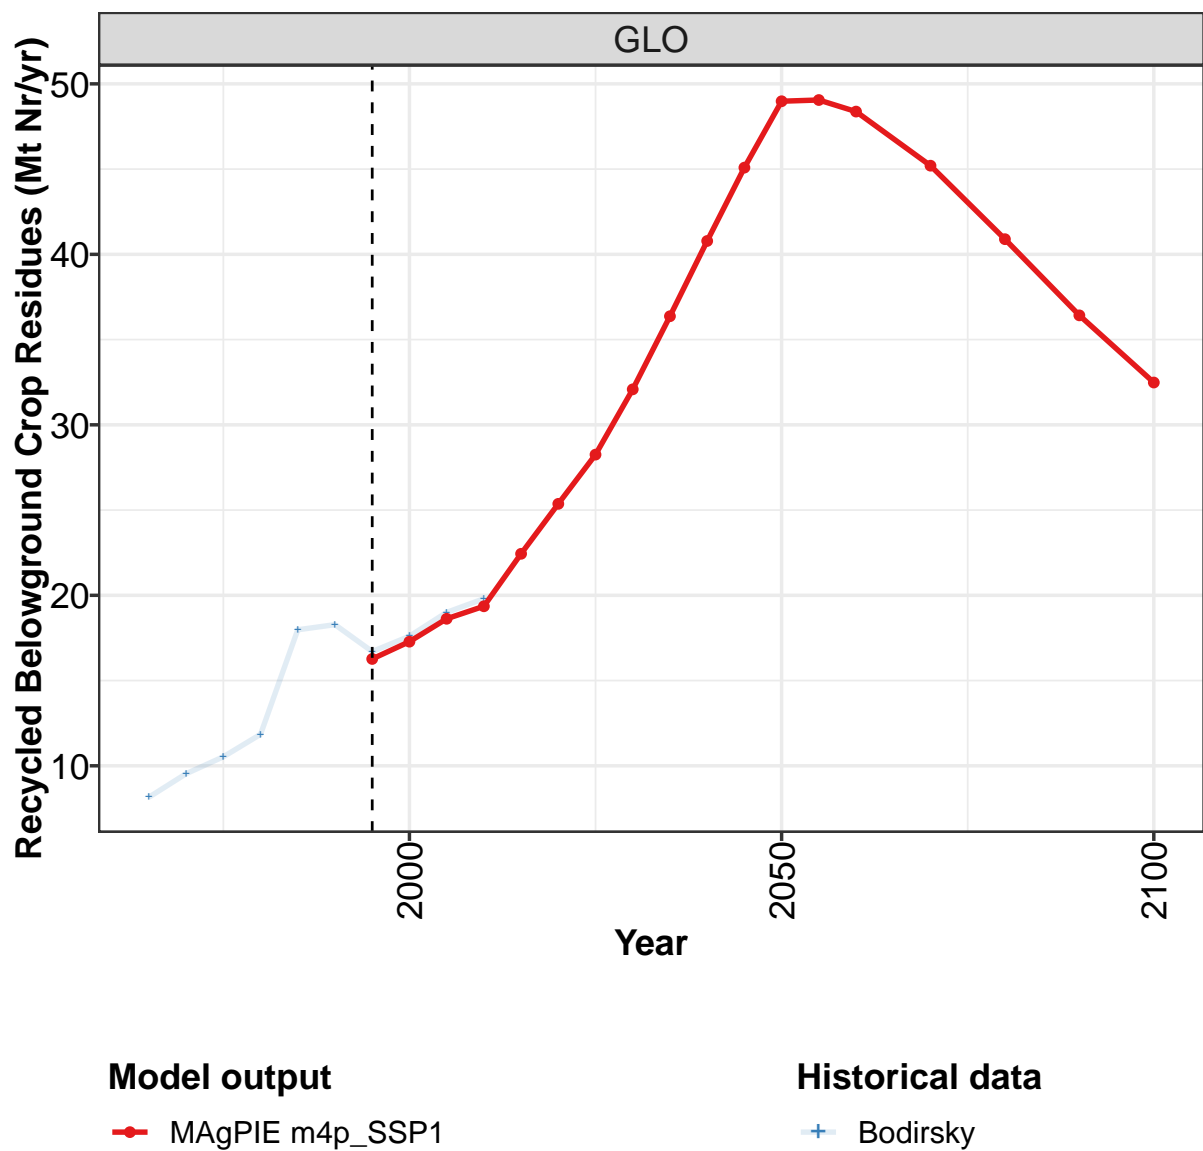

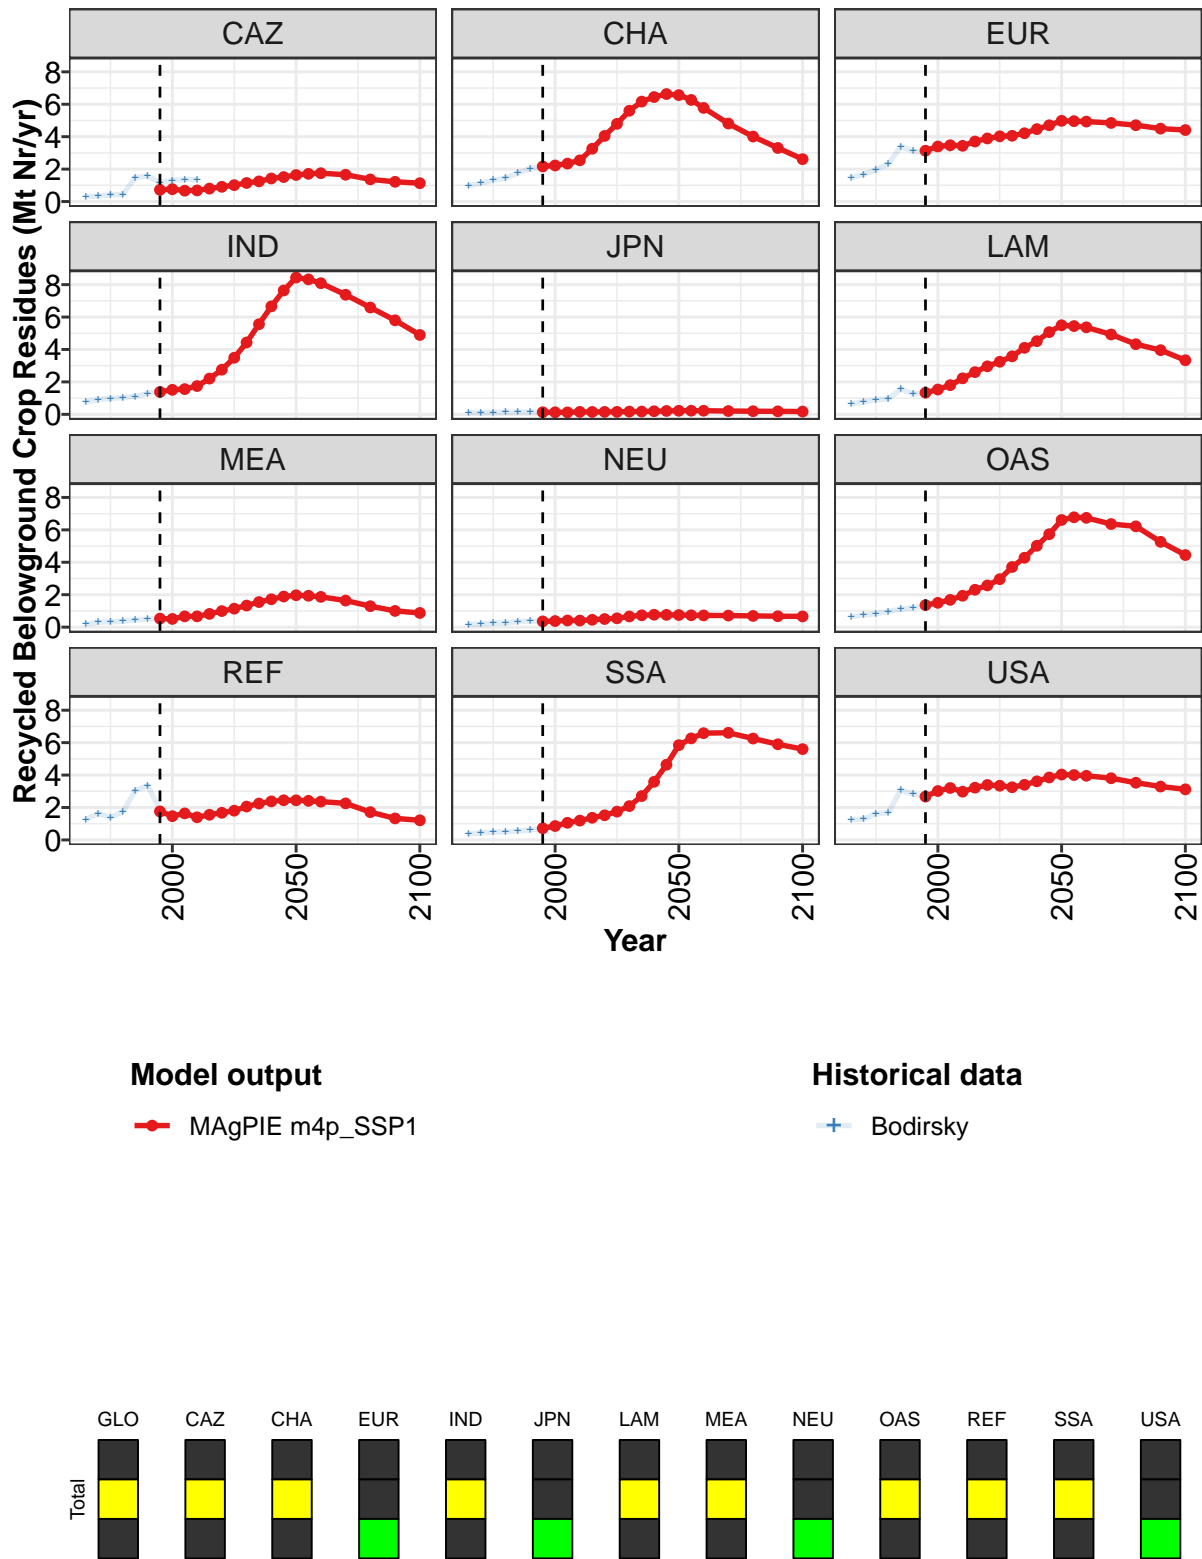

Figure 453: MAgPIE m4p\_SSP1 — Resources—Nitrogen—Cropland Budget—Inputs—Recycled Belowground Crop Residues (Mt Nr/yr)

|     | 1995 | 2000 | 2005 | 2010 | 2015 | 2020 | 2025 | 2030 | 2035 | 2040 | 2045 |
|-----|------|------|------|------|------|------|------|------|------|------|------|
| GLO | 16.3 | 17.3 | 18.6 | 19.4 | 22.4 | 25.4 | 28.3 | 32.1 | 36.4 | 40.8 | 45.1 |
| CAZ | 0.7  | 0.8  | 0.7  | 0.7  | 0.8  | 0.9  | 1.0  | 1.1  | 1.2  | 1.4  | 1.5  |
| CHA | 2.2  | 2.2  | 2.3  | 2.5  | 3.3  | 4.0  | 4.8  | 5.6  | 6.2  | 6.4  | 6.6  |
| EUR | 3.1  | 3.4  | 3.5  | 3.4  | 3.7  | 3.9  | 4.0  | 4.1  | 4.2  | 4.5  | 4.7  |
| IND | 1.4  | 1.5  | 1.6  | 1.7  | 2.2  | 2.8  | 3.5  | 4.4  | 5.6  | 6.7  | 7.6  |
| JPN | 0.1  | 0.1  | 0.1  | 0.2  | 0.1  | 0.1  | 0.2  | 0.2  | 0.2  | 0.2  | 0.2  |
| LAM | 1.3  | 1.5  | 1.8  | 2.2  | 2.6  | 3.0  | 3.2  | 3.6  | 4.1  | 4.5  | 5.1  |
| MEA | 0.5  | 0.5  | 0.7  | 0.7  | 0.8  | 1.0  | 1.1  | 1.3  | 1.5  | 1.7  | 1.9  |
| NEU | 0.4  | 0.4  | 0.4  | 0.4  | 0.5  | 0.5  | 0.5  | 0.7  | 0.7  | 0.8  | 0.8  |
| OAS | 1.4  | 1.5  | 1.7  | 1.9  | 2.3  | 2.6  | 3.0  | 3.7  | 4.3  | 5.0  | 5.7  |
| REF | 1.8  | 1.5  | 1.6  | 1.4  | 1.6  | 1.7  | 1.8  | 2.1  | 2.2  | 2.4  | 2.4  |
| SSA | 0.7  | 0.9  | 1.1  | 1.2  | 1.4  | 1.5  | 1.7  | 2.1  | 2.7  | 3.6  | 4.6  |
| USA | 2.7  | 3.0  | 3.2  | 3.0  | 3.2  | 3.4  | 3.3  | 3.3  | 3.4  | 3.6  | 3.9  |

Table 1745: MAgPIE m4p\_SSP1 — Resources—Nitrogen—Cropland Budget—Inputs—Recycled Belowground Crop Residues (Mt Nr/yr) [PART 1/2]

|     | 2050 | 2055 | 2060 | 2070 | 2080 | 2090 | 2100 |
|-----|------|------|------|------|------|------|------|
| GLO | 49.0 | 49.1 | 48.4 | 45.2 | 40.9 | 36.4 | 32.5 |
| CAZ | 1.6  | 1.7  | 1.7  | 1.7  | 1.4  | 1.2  | 1.1  |
| CHA | 6.6  | 6.3  | 5.8  | 4.8  | 4.0  | 3.3  | 2.6  |
| EUR | 5.0  | 5.0  | 4.9  | 4.8  | 4.7  | 4.5  | 4.4  |
| IND | 8.4  | 8.3  | 8.1  | 7.4  | 6.6  | 5.8  | 4.9  |
| JPN | 0.2  | 0.2  | 0.2  | 0.2  | 0.2  | 0.2  | 0.2  |
| LAM | 5.5  | 5.4  | 5.4  | 4.9  | 4.3  | 4.0  | 3.3  |
| MEA | 2.0  | 1.9  | 1.9  | 1.6  | 1.3  | 1.0  | 0.9  |
| NEU | 0.7  | 0.7  | 0.7  | 0.7  | 0.7  | 0.7  | 0.7  |
| OAS | 6.6  | 6.8  | 6.7  | 6.4  | 6.2  | 5.3  | 4.4  |
| REF | 2.4  | 2.4  | 2.4  | 2.3  | 1.7  | 1.3  | 1.2  |
| SSA | 5.8  | 6.3  | 6.6  | 6.6  | 6.3  | 5.9  | 5.6  |
| USA | 4.0  | 4.0  | 4.0  | 3.8  | 3.5  | 3.3  | 3.1  |

Table 1746: MAgPIE m4p\_SSP1 — Resources—Nitrogen—Cropland Budget—Inputs—Recycled Belowground Crop Residues (Mt Nr/yr) [PART 2/2]

|     | 1965 | 1970 | 1975 | 1980 | 1985 | 1990 | 1995 | 2000 | 2005 | 2010 |
|-----|------|------|------|------|------|------|------|------|------|------|
| GLO | 8.2  | 9.5  | 10.5 | 11.8 | 18.0 | 18.3 | 16.7 | 17.6 | 19.0 | 19.8 |
| CAZ | 0.3  | 0.3  | 0.4  | 0.4  | 1.5  | 1.6  | 1.2  | 1.3  | 1.4  | 1.3  |
| CHA | 1.0  | 1.1  | 1.3  | 1.4  | 1.8  | 2.0  | 2.2  | 2.3  | 2.4  | 2.6  |
| EUR | 1.5  | 1.7  | 1.9  | 2.3  | 3.4  | 3.1  | 3.0  | 3.2  | 3.3  | 3.3  |
| IND | 0.8  | 0.9  | 1.0  | 1.0  | 1.1  | 1.3  | 1.4  | 1.6  | 1.6  | 1.8  |
| JPN | 0.1  | 0.1  | 0.1  | 0.1  | 0.1  | 0.1  | 0.1  | 0.1  | 0.1  | 0.1  |
| LAM | 0.6  | 0.8  | 0.9  | 1.0  | 1.6  | 1.3  | 1.3  | 1.5  | 1.7  | 2.1  |
| MEA | 0.2  | 0.3  | 0.3  | 0.4  | 0.5  | 0.5  | 0.5  | 0.5  | 0.7  | 0.7  |
| NEU | 0.2  | 0.2  | 0.2  | 0.3  | 0.3  | 0.4  | 0.4  | 0.4  | 0.4  | 0.4  |
| OAS | 0.7  | 0.7  | 0.8  | 1.0  | 1.1  | 1.2  | 1.3  | 1.5  | 1.7  | 2.0  |
| REF | 1.3  | 1.6  | 1.4  | 1.7  | 3.0  | 3.4  | 1.9  | 1.4  | 1.6  | 1.2  |
| SSA | 0.4  | 0.4  | 0.5  | 0.5  | 0.5  | 0.6  | 0.7  | 0.8  | 1.0  | 1.2  |
| USA | 1.2  | 1.3  | 1.6  | 1.7  | 3.1  | 2.8  | 2.7  | 3.0  | 3.2  | 3.0  |

Table 1747: Bodirsky — Resources—Nitrogen—Cropland Budget—Inputs—Recycled Belowground Crop Residues (Mt Nr/yr)

56.1.13 Inputs—Seed

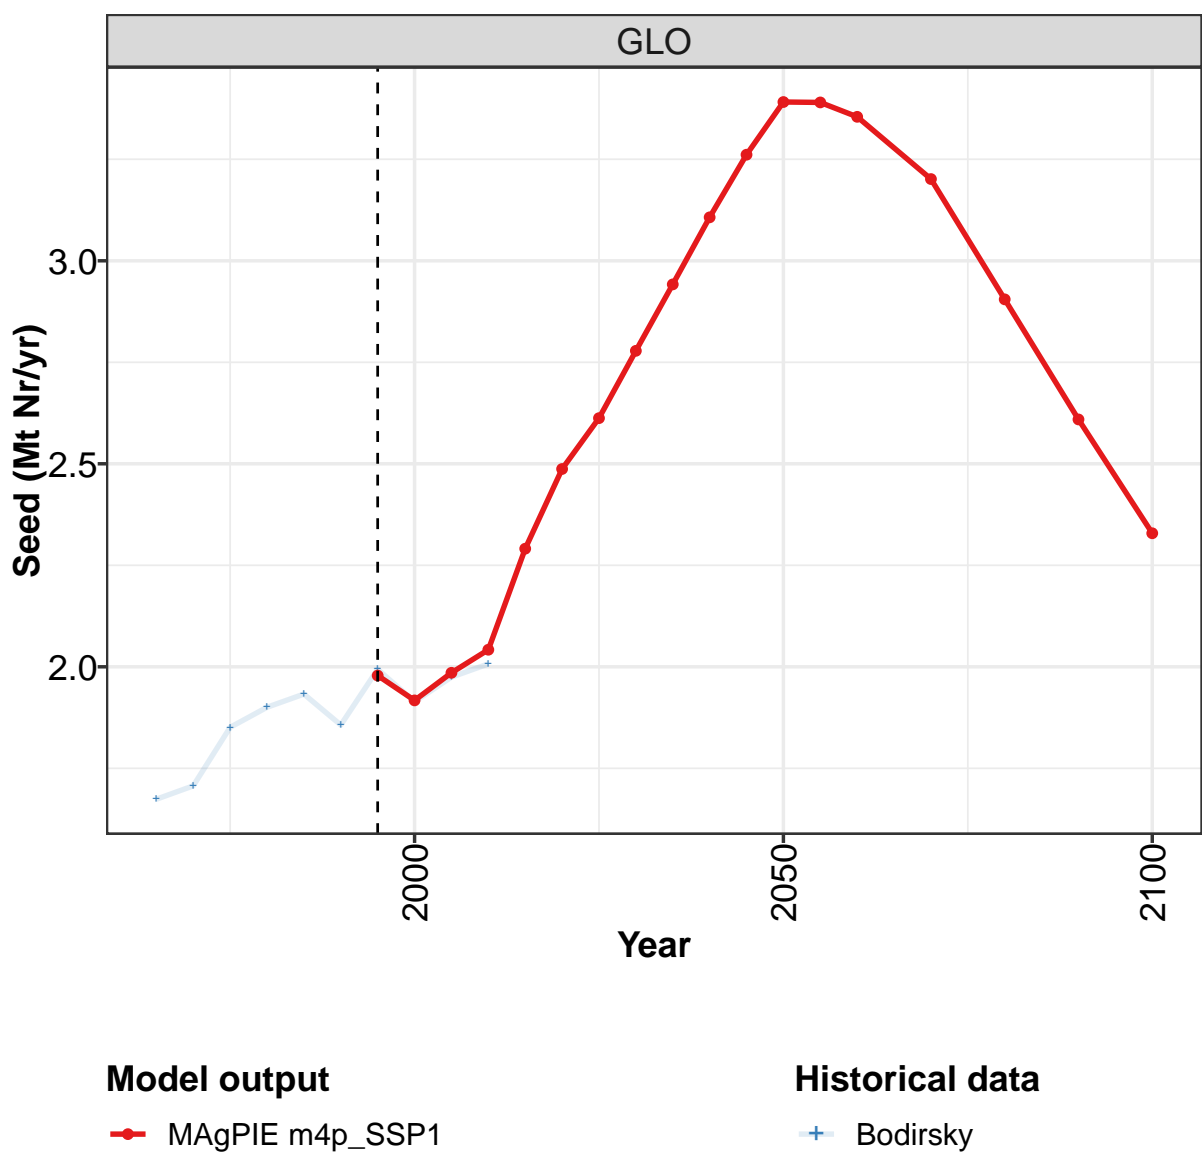

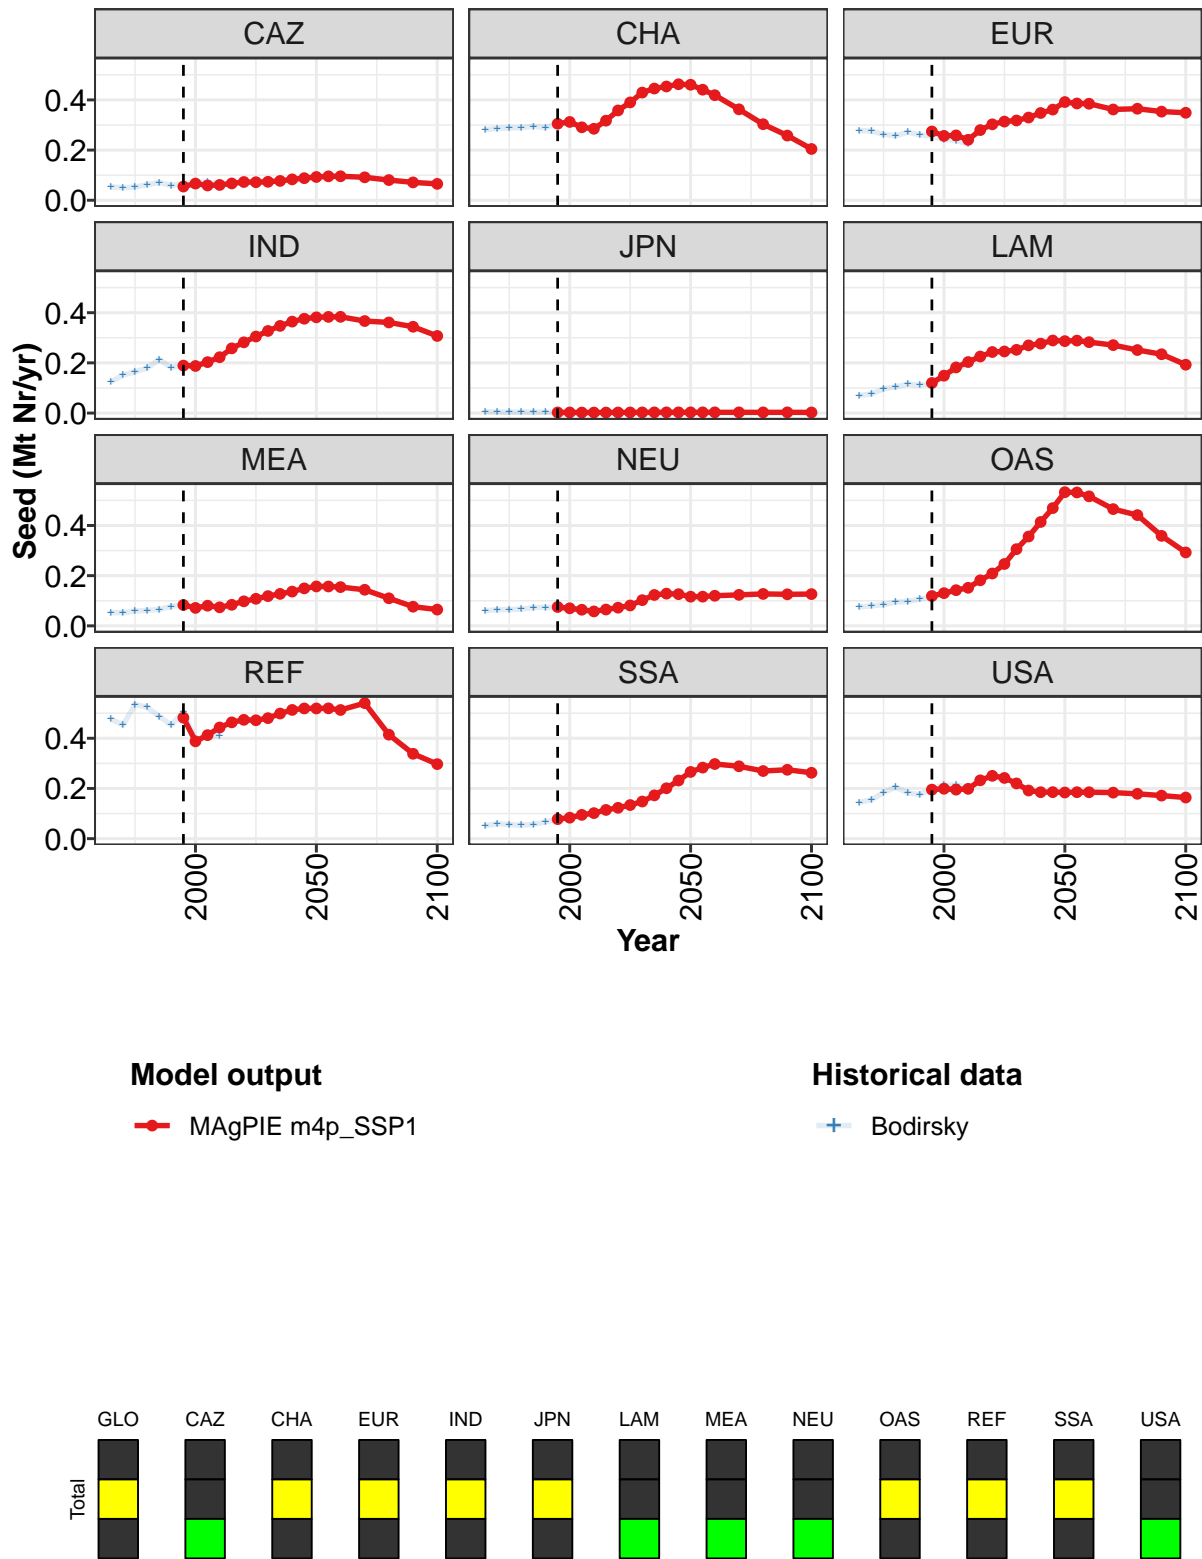

Figure 454: MAgPIE m4p\_SSP1 — Resources—Nitrogen—Cropland Budget—Inputs—Seed (Mt Nr/yr)

|     | 1995 | 2000 | 2005 | 2010 | 2015 | 2020 | 2025 | 2030 | 2035 | 2040 | 2045 |
|-----|------|------|------|------|------|------|------|------|------|------|------|
| GLO | 1.98 | 1.92 | 1.99 | 2.04 | 2.29 | 2.49 | 2.61 | 2.78 | 2.94 | 3.11 | 3.26 |
| CAZ | 0.05 | 0.07 | 0.06 | 0.06 | 0.07 | 0.07 | 0.07 | 0.07 | 0.08 | 0.08 | 0.09 |
| CHA | 0.31 | 0.31 | 0.29 | 0.29 | 0.32 | 0.36 | 0.39 | 0.43 | 0.45 | 0.45 | 0.46 |
| EUR | 0.27 | 0.26 | 0.26 | 0.24 | 0.28 | 0.30 | 0.31 | 0.32 | 0.33 | 0.35 | 0.36 |
| IND | 0.19 | 0.19 | 0.20 | 0.22 | 0.26 | 0.28 | 0.31 | 0.33 | 0.35 | 0.36 | 0.38 |
| JPN | 0.00 | 0.00 | 0.00 | 0.00 | 0.00 | 0.00 | 0.00 | 0.00 | 0.00 | 0.00 | 0.00 |
| LAM | 0.12 | 0.15 | 0.18 | 0.20 | 0.23 | 0.24 | 0.25 | 0.25 | 0.27 | 0.28 | 0.29 |
| MEA | 0.08 | 0.07 | 0.08 | 0.07 | 0.08 | 0.10 | 0.11 | 0.12 | 0.13 | 0.14 | 0.15 |
| NEU | 0.08 | 0.07 | 0.06 | 0.06 | 0.07 | 0.07 | 0.08 | 0.10 | 0.12 | 0.13 | 0.13 |
| OAS | 0.12 | 0.13 | 0.14 | 0.15 | 0.18 | 0.21 | 0.25 | 0.31 | 0.36 | 0.41 | 0.47 |
| REF | 0.48 | 0.39 | 0.41 | 0.44 | 0.46 | 0.47 | 0.47 | 0.48 | 0.50 | 0.51 | 0.52 |
| SSA | 0.08 | 0.08 | 0.09 | 0.10 | 0.11 | 0.12 | 0.13 | 0.15 | 0.17 | 0.20 | 0.23 |
| USA | 0.20 | 0.20 | 0.20 | 0.20 | 0.23 | 0.25 | 0.24 | 0.22 | 0.19 | 0.19 | 0.19 |

Table 1748: MAgPIE m4p\_SSP1 — Resources—Nitrogen—Cropland Budget—Inputs—Seed (Mt Nr/yr) [PART 1/2]

|     | 2050 | 2055 | 2060 | 2070 | 2080 | 2090 | 2100 |
|-----|------|------|------|------|------|------|------|
| GLO | 3.39 | 3.39 | 3.35 | 3.20 | 2.91 | 2.61 | 2.33 |
| CAZ | 0.09 | 0.10 | 0.10 | 0.09 | 0.08 | 0.07 | 0.07 |
| CHA | 0.46 | 0.44 | 0.42 | 0.36 | 0.30 | 0.26 | 0.20 |
| EUR | 0.39 | 0.39 | 0.38 | 0.36 | 0.36 | 0.35 | 0.35 |
| IND | 0.38 | 0.38 | 0.38 | 0.37 | 0.36 | 0.34 | 0.31 |
| JPN | 0.00 | 0.00 | 0.00 | 0.00 | 0.00 | 0.00 | 0.00 |
| LAM | 0.29 | 0.29 | 0.28 | 0.27 | 0.25 | 0.23 | 0.19 |
| MEA | 0.16 | 0.16 | 0.15 | 0.14 | 0.11 | 0.08 | 0.06 |
| NEU | 0.12 | 0.12 | 0.12 | 0.12 | 0.13 | 0.13 | 0.13 |
| OAS | 0.53 | 0.53 | 0.52 | 0.47 | 0.44 | 0.36 | 0.29 |
| REF | 0.52 | 0.52 | 0.51 | 0.54 | 0.41 | 0.34 | 0.30 |
| SSA | 0.27 | 0.28 | 0.30 | 0.29 | 0.27 | 0.27 | 0.26 |
| USA | 0.18 | 0.19 | 0.19 | 0.18 | 0.18 | 0.17 | 0.16 |

Table 1749: MAgPIE m4p\_SSP1 — Resources—Nitrogen—Cropland Budget—Inputs—Seed (Mt Nr/yr) [PART 2/2]

|     | 1965 | 1970 | 1975 | 1980 | 1985 | 1990 | 1995 | 2000 | 2005 | 2010 |
|-----|------|------|------|------|------|------|------|------|------|------|
| GLO | 1.67 | 1.71 | 1.85 | 1.90 | 1.93 | 1.86 | 1.99 | 1.91 | 1.97 | 2.01 |
| CAZ | 0.05 | 0.05 | 0.05 | 0.06 | 0.07 | 0.06 | 0.07 | 0.07 | 0.07 | 0.07 |
| CHA | 0.28 | 0.29 | 0.29 | 0.29 | 0.29 | 0.29 | 0.31 | 0.31 | 0.29 | 0.29 |
| EUR | 0.28 | 0.28 | 0.26 | 0.26 | 0.27 | 0.26 | 0.26 | 0.24 | 0.24 | 0.22 |
| IND | 0.12 | 0.15 | 0.16 | 0.18 | 0.21 | 0.18 | 0.19 | 0.19 | 0.20 | 0.22 |
| JPN | 0.01 | 0.00 | 0.00 | 0.00 | 0.00 | 0.00 | 0.00 | 0.00 | 0.00 | 0.00 |
| LAM | 0.07 | 0.08 | 0.10 | 0.10 | 0.11 | 0.11 | 0.12 | 0.14 | 0.17 | 0.20 |
| MEA | 0.05 | 0.05 | 0.06 | 0.06 | 0.07 | 0.08 | 0.08 | 0.07 | 0.08 | 0.07 |
| NEU | 0.06 | 0.06 | 0.07 | 0.07 | 0.07 | 0.07 | 0.07 | 0.07 | 0.06 | 0.05 |
| OAS | 0.08 | 0.08 | 0.08 | 0.09 | 0.10 | 0.11 | 0.12 | 0.13 | 0.14 | 0.15 |
| REF | 0.48 | 0.45 | 0.54 | 0.52 | 0.49 | 0.45 | 0.51 | 0.39 | 0.41 | 0.41 |
| SSA | 0.05 | 0.06 | 0.06 | 0.05 | 0.06 | 0.07 | 0.08 | 0.08 | 0.09 | 0.10 |
| USA | 0.14 | 0.16 | 0.18 | 0.20 | 0.18 | 0.18 | 0.20 | 0.21 | 0.21 | 0.21 |

Table 1750: Bodirsky — Resources—Nitrogen—Cropland Budget—Inputs—Seed (Mt Nr/yr)

56.1.14 Withdrawals

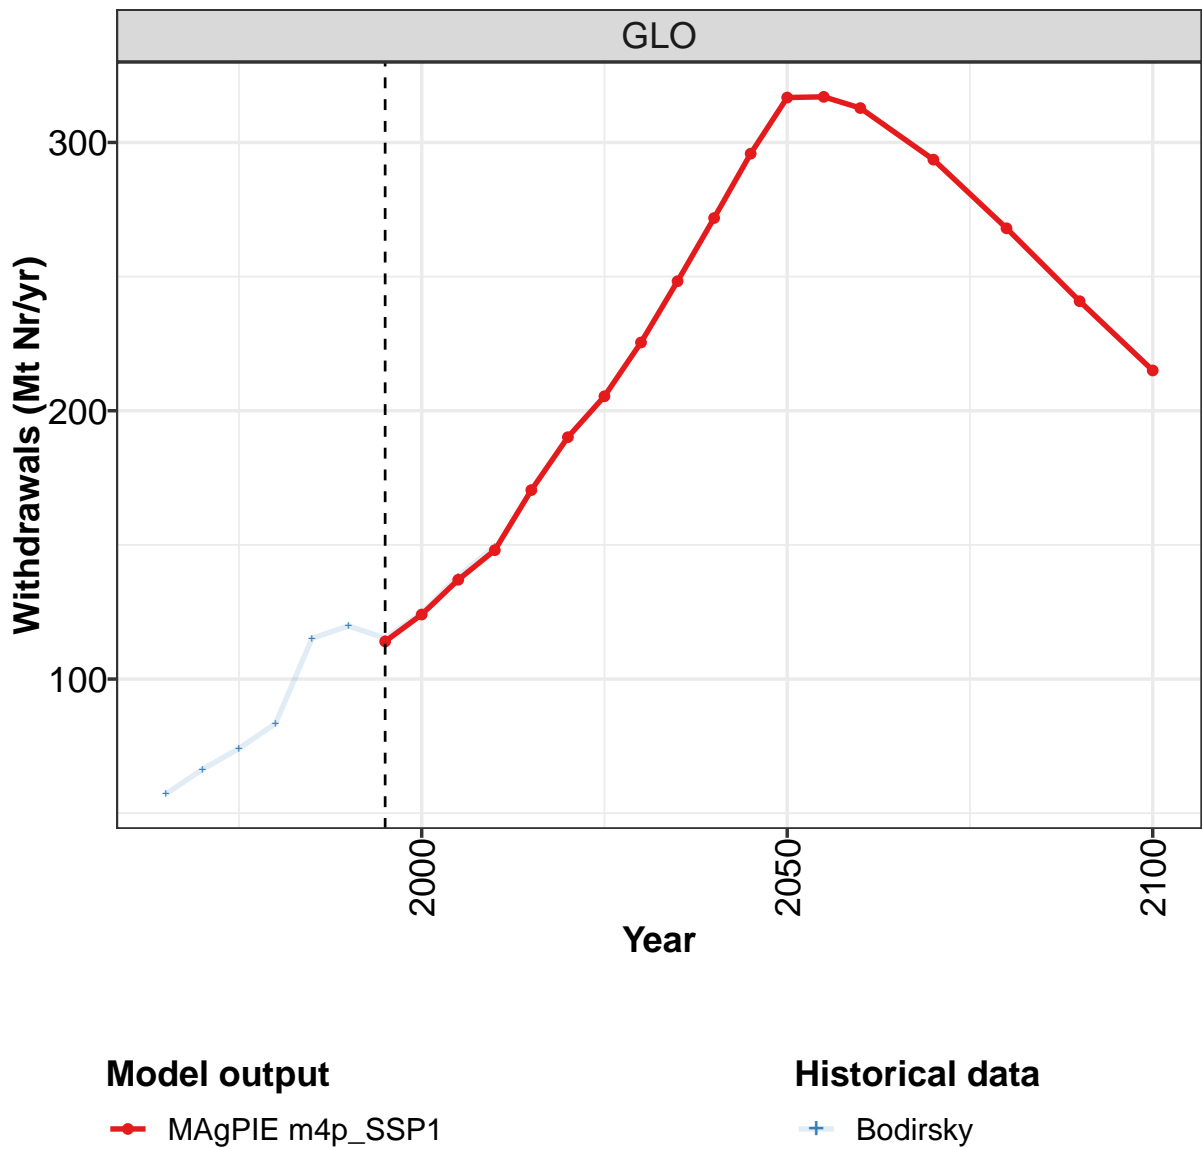

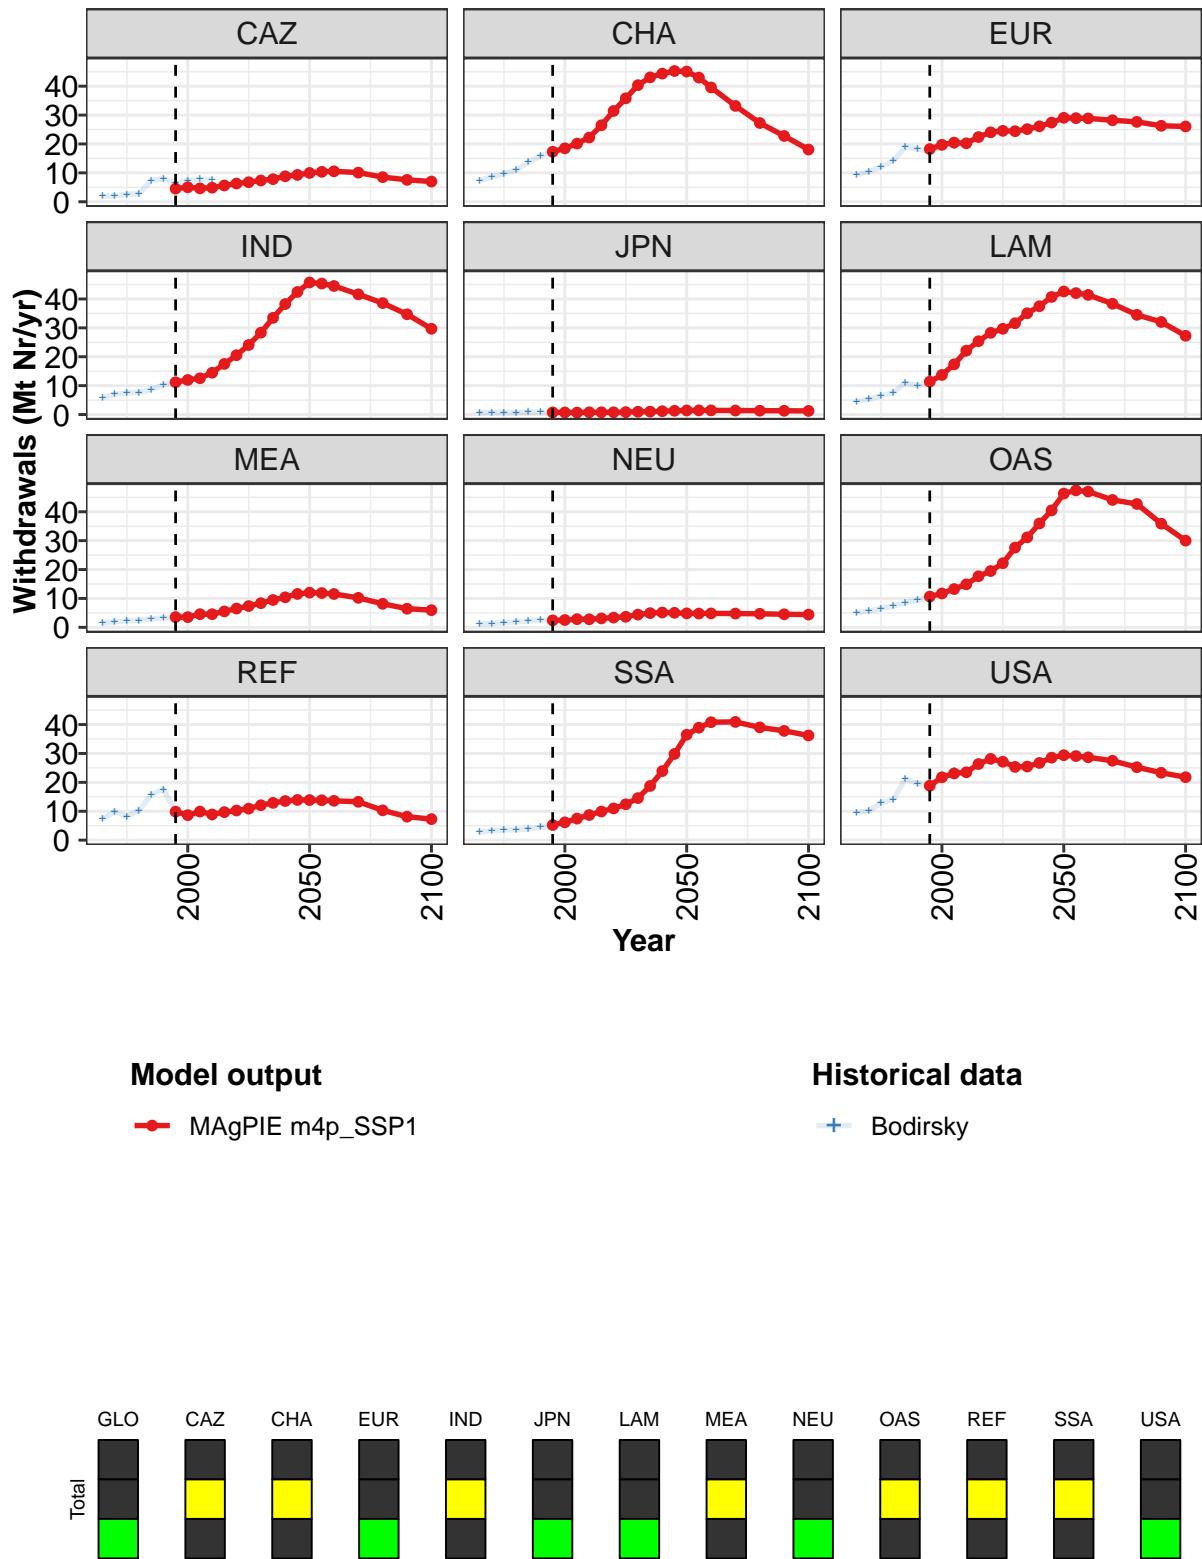

Figure 455: MAgPIE m4p\_SSP1 — Resources—Nitrogen—Cropland Budget—Withdrawals (Mt Nr/yr)



|     | 1995 | 2000 | 2005 | 2010 | 2015 | 2020 | 2025 | 2030 | 2035 | 2040 | 2045 |
|-----|------|------|------|------|------|------|------|------|------|------|------|
| GLO | 114  | 124  | 137  | 148  | 170  | 190  | 205  | 225  | 248  | 272  | 296  |
| CAZ | 5    | 5    | 5    | 5    | 6    | 6    | 7    | 7    | 8    | 9    | 9    |
| CHA | 17   | 19   | 20   | 22   | 26   | 31   | 36   | 40   | 43   | 44   | 45   |
| EUR | 18   | 20   | 20   | 20   | 22   | 24   | 25   | 24   | 25   | 26   | 27   |
| IND | 11   | 12   | 13   | 14   | 18   | 21   | 24   | 28   | 33   | 38   | 42   |
| JPN | 1    | 1    | 1    | 1    | 1    | 1    | 1    | 1    | 1    | 1    | 1    |
| LAM | 11   | 14   | 17   | 22   | 25   | 28   | 30   | 32   | 35   | 37   | 41   |
| MEA | 4    | 4    | 5    | 5    | 6    | 7    | 7    | 8    | 9    | 10   | 12   |
| NEU | 2    | 3    | 3    | 3    | 3    | 3    | 4    | 4    | 5    | 5    | 5    |
| OAS | 11   | 12   | 13   | 15   | 18   | 19   | 22   | 28   | 31   | 36   | 41   |
| REF | 10   | 9    | 10   | 9    | 10   | 10   | 11   | 12   | 13   | 14   | 14   |
| SSA | 5    | 6    | 7    | 9    | 10   | 11   | 12   | 15   | 19   | 24   | 30   |
| USA | 19   | 22   | 23   | 23   | 26   | 28   | 27   | 25   | 25   | 27   | 29   |

Table 1751: MAgPIE m4p\_SSP1 — Resources—Nitrogen—Cropland Budget—Withdrawals (Mt Nr/yr) [PART 1/2]

|     | 2050 | 2055 | 2060 | 2070 | 2080 | 2090 | 2100 |
|-----|------|------|------|------|------|------|------|
| GLO | 317  | 317  | 313  | 294  | 268  | 241  | 215  |
| CAZ | 10   | 10   | 11   | 10   | 9    | 8    | 7    |
| CHA | 45   | 43   | 40   | 33   | 27   | 23   | 18   |
| EUR | 29   | 29   | 29   | 28   | 28   | 26   | 26   |
| IND | 46   | 45   | 45   | 42   | 39   | 35   | 30   |
| JPN | 1    | 1    | 1    | 1    | 1    | 1    | 1    |
| LAM | 43   | 42   | 41   | 38   | 35   | 32   | 27   |
| MEA | 12   | 12   | 12   | 10   | 8    | 6    | 6    |
| NEU | 5    | 5    | 5    | 5    | 5    | 5    | 4    |
| OAS | 46   | 47   | 47   | 44   | 43   | 36   | 30   |
| REF | 14   | 14   | 14   | 13   | 10   | 8    | 7    |
| SSA | 36   | 39   | 41   | 41   | 39   | 38   | 36   |
| USA | 29   | 29   | 29   | 27   | 25   | 23   | 22   |

Table 1752: MAgPIE m4p\_SSP1 — Resources—Nitrogen—Cropland Budget—Withdrawals (Mt Nr/yr) [PART 2/2]

|     | 1965 | 1970 | 1975 | 1980 | 1985 | 1990 | 1995 | 2000 | 2005 | 2010 |
|-----|------|------|------|------|------|------|------|------|------|------|
| GLO | 57   | 66   | 74   | 83   | 115  | 120  | 115  | 125  | 138  | 149  |
| CAZ | 2    | 2    | 3    | 3    | 7    | 8    | 7    | 7    | 8    | 8    |
| CHA | 7    | 9    | 10   | 11   | 14   | 16   | 17   | 19   | 20   | 23   |
| EUR | 9    | 10   | 12   | 14   | 19   | 18   | 17   | 19   | 19   | 19   |
| IND | 6    | 7    | 7    | 8    | 9    | 10   | 12   | 12   | 13   | 15   |
| JPN | 1    | 1    | 1    | 1    | 1    | 1    | 1    | 1    | 1    | 1    |
| LAM | 4    | 5    | 7    | 8    | 11   | 10   | 11   | 13   | 17   | 21   |
| MEA | 1    | 2    | 2    | 2    | 3    | 3    | 3    | 3    | 5    | 5    |
| NEU | 1    | 1    | 2    | 2    | 2    | 3    | 2    | 2    | 3    | 3    |
| OAS | 5    | 6    | 6    | 7    | 9    | 9    | 10   | 12   | 13   | 15   |
| REF | 7    | 10   | 8    | 10   | 16   | 18   | 10   | 8    | 9    | 8    |
| SSA | 3    | 3    | 3    | 4    | 4    | 4    | 5    | 6    | 7    | 8    |
| USA | 10   | 10   | 13   | 14   | 21   | 20   | 19   | 22   | 24   | 24   |

Table 1753: Bodirsky — Resources—Nitrogen—Cropland Budget—Withdrawals (Mt Nr/yr)

56.1.15 Withdrawals—Aboveground Crop Residues

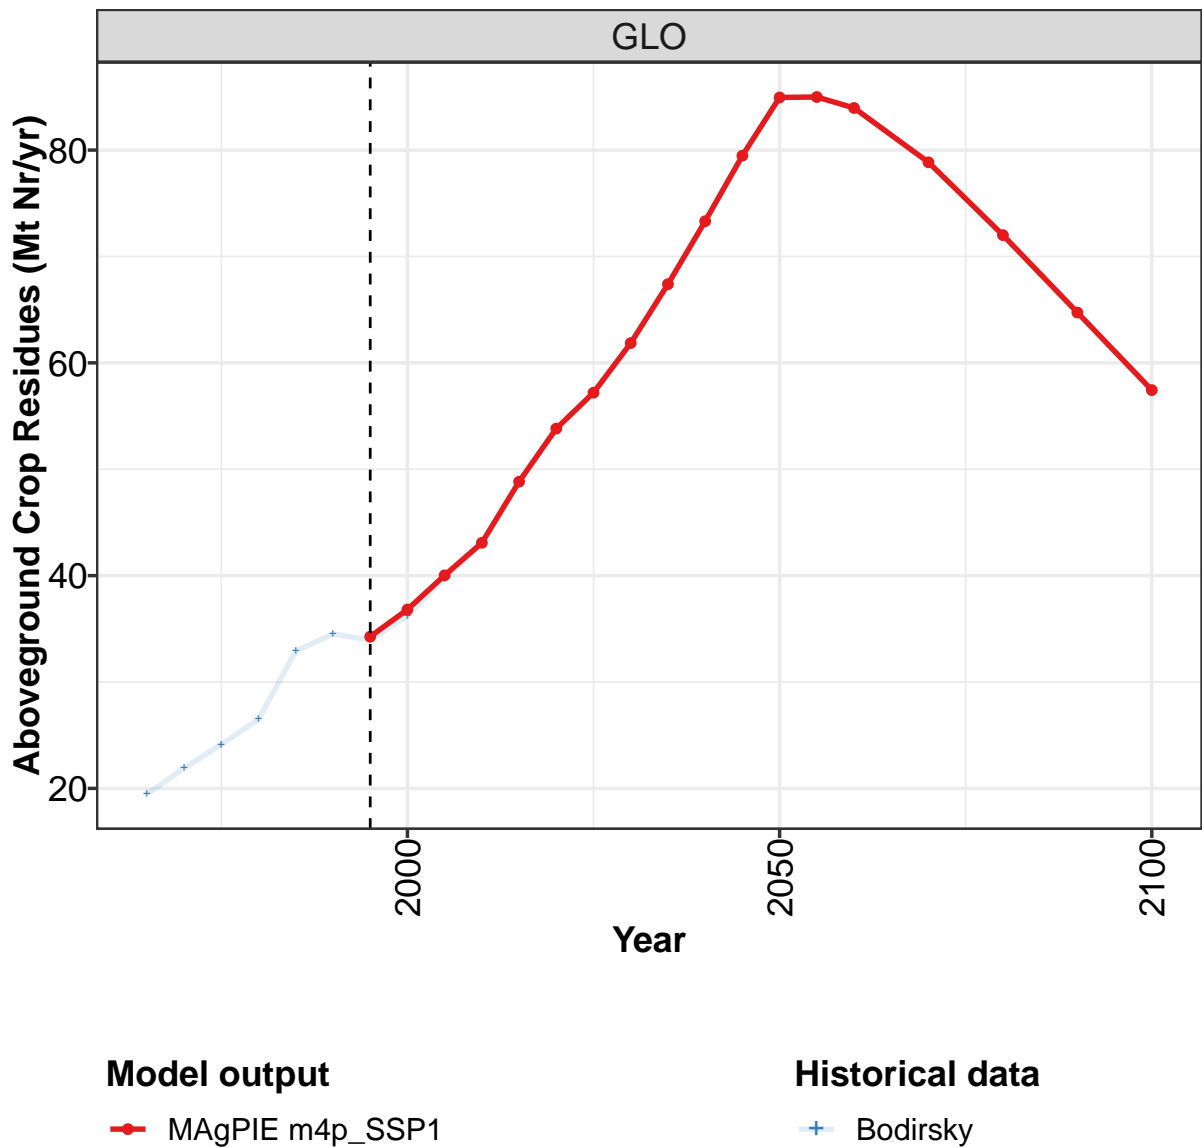

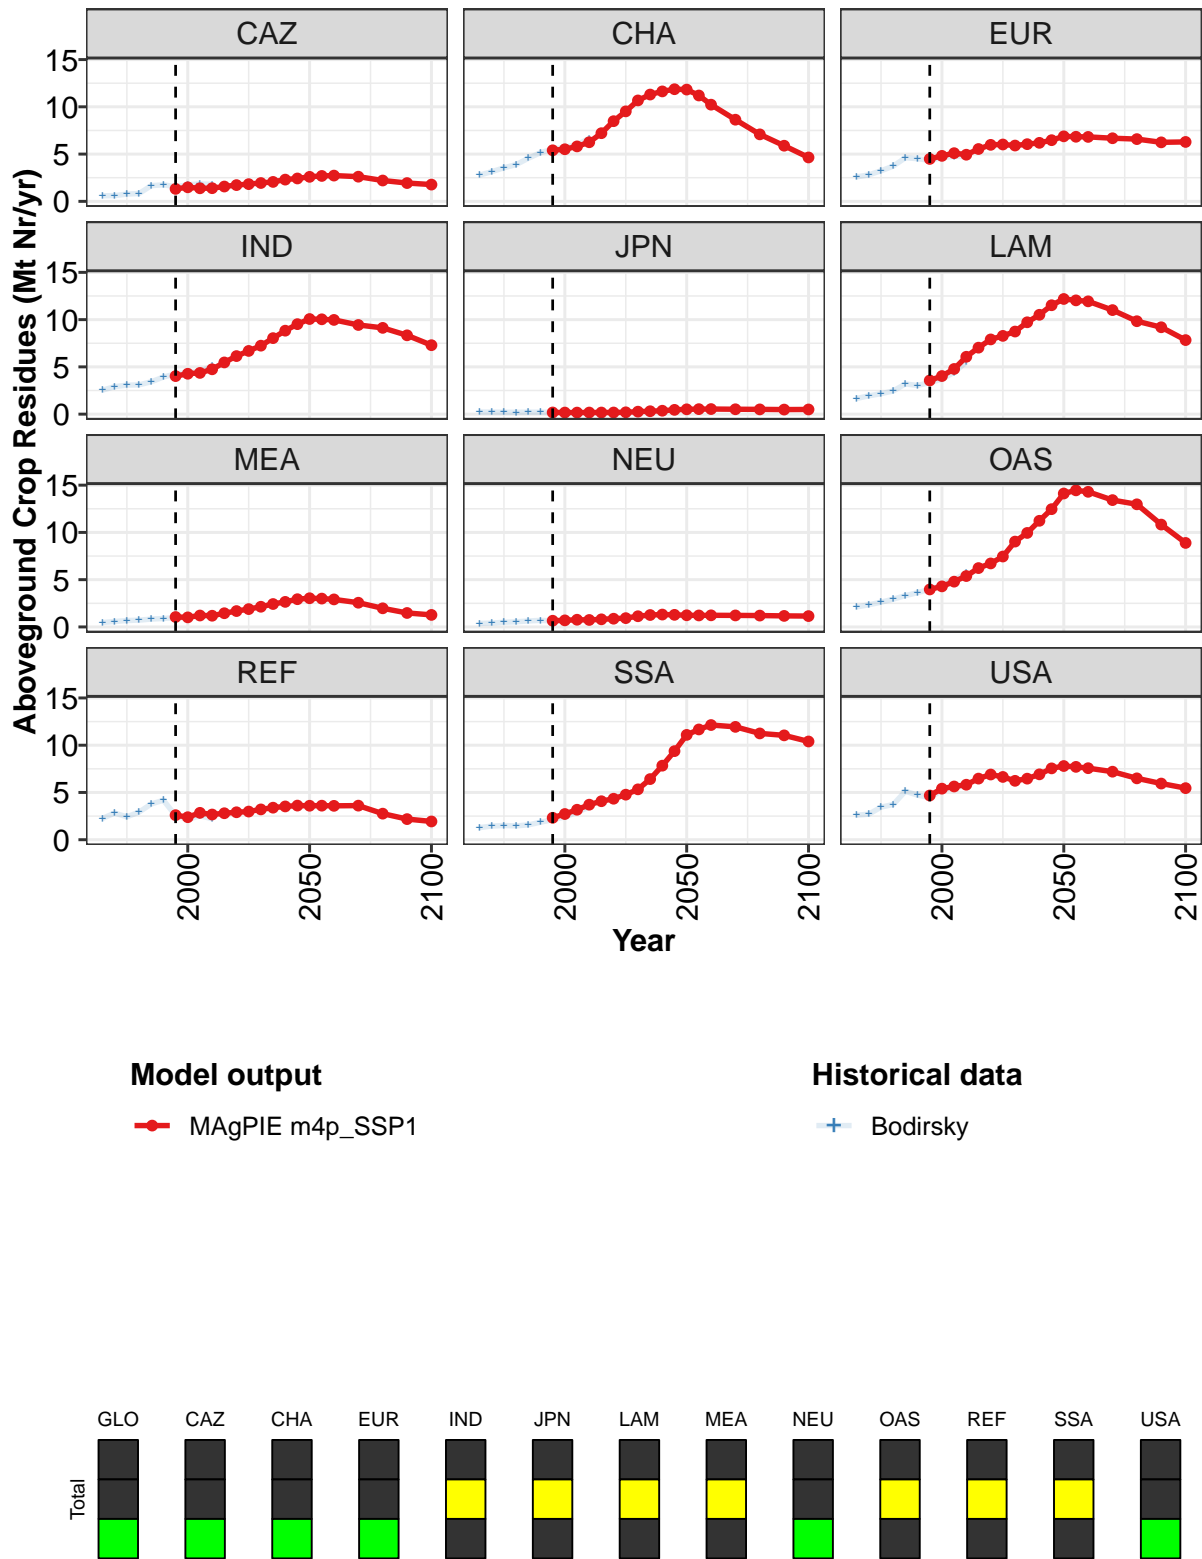

Figure 456: MAgPIE m4p\_SSP1 — Resources—Nitrogen—Cropland Budget—Withdrawals—Aboveground Crop Residues (Mt Nr/yr)

|     | 1995 | 2000 | 2005 | 2010 | 2015 | 2020 | 2025 | 2030 | 2035 | 2040 | 2045 |
|-----|------|------|------|------|------|------|------|------|------|------|------|
| GLO | 34.3 | 36.8 | 40.0 | 43.1 | 48.8 | 53.8 | 57.2 | 61.9 | 67.4 | 73.3 | 79.5 |
| CAZ | 1.3  | 1.5  | 1.4  | 1.4  | 1.6  | 1.7  | 1.8  | 1.9  | 2.1  | 2.3  | 2.4  |
| CHA | 5.4  | 5.5  | 5.8  | 6.3  | 7.2  | 8.5  | 9.5  | 10.7 | 11.3 | 11.6 | 11.9 |
| EUR | 4.5  | 4.8  | 5.1  | 4.9  | 5.5  | 6.0  | 6.0  | 5.9  | 6.1  | 6.2  | 6.5  |
| IND | 4.0  | 4.3  | 4.4  | 4.7  | 5.5  | 6.1  | 6.7  | 7.2  | 8.0  | 8.8  | 9.5  |
| JPN | 0.2  | 0.2  | 0.2  | 0.2  | 0.2  | 0.2  | 0.2  | 0.3  | 0.3  | 0.4  | 0.5  |
| LAM | 3.6  | 4.0  | 4.8  | 6.1  | 7.0  | 7.9  | 8.3  | 8.7  | 9.7  | 10.5 | 11.5 |
| MEA | 1.1  | 1.0  | 1.2  | 1.2  | 1.5  | 1.7  | 1.9  | 2.1  | 2.4  | 2.7  | 2.9  |
| NEU | 0.7  | 0.7  | 0.8  | 0.7  | 0.8  | 0.9  | 0.9  | 1.1  | 1.3  | 1.3  | 1.3  |
| OAS | 4.0  | 4.3  | 4.8  | 5.4  | 6.2  | 6.7  | 7.5  | 9.0  | 9.9  | 11.2 | 12.5 |
| REF | 2.6  | 2.4  | 2.8  | 2.7  | 2.8  | 2.9  | 3.0  | 3.2  | 3.4  | 3.5  | 3.6  |
| SSA | 2.3  | 2.7  | 3.2  | 3.7  | 4.1  | 4.3  | 4.8  | 5.3  | 6.4  | 7.8  | 9.4  |
| USA | 4.7  | 5.4  | 5.6  | 5.8  | 6.5  | 6.9  | 6.6  | 6.2  | 6.5  | 6.9  | 7.6  |

Table 1754: MAgPIE m4p\_SSP1 — Resources—Nitrogen—Cropland Budget—Withdrawals—Aboveground Crop Residues (Mt Nr/yr) [PART 1/2]

|     | 2050 | 2055 | 2060 | 2070 | 2080 | 2090 | 2100 |
|-----|------|------|------|------|------|------|------|
| GLO | 84.9 | 85.0 | 84.0 | 78.9 | 72.0 | 64.7 | 57.4 |
| CAZ | 2.6  | 2.7  | 2.7  | 2.6  | 2.2  | 1.9  | 1.8  |
| CHA | 11.8 | 11.2 | 10.2 | 8.6  | 7.1  | 5.9  | 4.6  |
| EUR | 6.9  | 6.8  | 6.8  | 6.7  | 6.6  | 6.2  | 6.3  |
| IND | 10.1 | 10.0 | 10.0 | 9.4  | 9.1  | 8.3  | 7.3  |
| JPN | 0.5  | 0.5  | 0.5  | 0.5  | 0.5  | 0.5  | 0.5  |
| LAM | 12.2 | 12.0 | 11.9 | 11.0 | 9.8  | 9.2  | 7.8  |
| MEA | 3.0  | 3.0  | 2.9  | 2.6  | 2.0  | 1.5  | 1.3  |
| NEU | 1.2  | 1.2  | 1.2  | 1.2  | 1.2  | 1.2  | 1.1  |
| OAS | 14.1 | 14.5 | 14.3 | 13.4 | 13.0 | 10.8 | 8.9  |
| REF | 3.6  | 3.6  | 3.6  | 3.6  | 2.8  | 2.2  | 1.9  |
| SSA | 11.1 | 11.7 | 12.1 | 11.9 | 11.2 | 11.0 | 10.4 |
| USA | 7.8  | 7.7  | 7.6  | 7.2  | 6.5  | 5.9  | 5.5  |

Table 1755: MAgPIE m4p\_SSP1 — Resources—Nitrogen—Cropland Budget—Withdrawals—Aboveground Crop Residues (Mt Nr/yr) [PART 2/2]

|     | 1965 | 1970 | 1975 | 1980 | 1985 | 1990 | 1995 | 2000 | 2005 | 2010 |
|-----|------|------|------|------|------|------|------|------|------|------|
| GLO | 19.5 | 21.9 | 24.1 | 26.5 | 32.9 | 34.5 | 33.9 | 36.2 | 39.7 | 43.0 |
| CAZ | 0.6  | 0.6  | 0.8  | 0.8  | 1.7  | 1.7  | 1.6  | 1.8  | 1.8  | 1.8  |
| CHA | 2.8  | 3.1  | 3.5  | 3.9  | 4.6  | 5.1  | 5.5  | 5.7  | 6.0  | 6.6  |
| EUR | 2.6  | 2.8  | 3.2  | 3.7  | 4.6  | 4.5  | 4.3  | 4.6  | 4.8  | 4.8  |
| IND | 2.5  | 2.9  | 3.1  | 3.1  | 3.4  | 3.9  | 4.3  | 4.4  | 4.5  | 5.1  |
| JPN | 0.2  | 0.2  | 0.2  | 0.2  | 0.2  | 0.2  | 0.2  | 0.2  | 0.2  | 0.2  |
| LAM | 1.7  | 1.9  | 2.2  | 2.5  | 3.2  | 3.0  | 3.3  | 3.7  | 4.4  | 5.5  |
| MEA | 0.5  | 0.6  | 0.7  | 0.7  | 0.8  | 0.9  | 1.0  | 1.0  | 1.3  | 1.3  |
| NEU | 0.4  | 0.4  | 0.5  | 0.5  | 0.6  | 0.7  | 0.6  | 0.7  | 0.7  | 0.7  |
| OAS | 2.1  | 2.3  | 2.6  | 2.9  | 3.3  | 3.6  | 4.0  | 4.4  | 5.0  | 5.7  |
| REF | 2.3  | 2.8  | 2.4  | 2.9  | 3.8  | 4.2  | 2.5  | 2.1  | 2.5  | 2.2  |
| SSA | 1.3  | 1.4  | 1.5  | 1.5  | 1.6  | 1.9  | 2.1  | 2.4  | 2.9  | 3.4  |
| USA | 2.6  | 2.7  | 3.4  | 3.7  | 5.1  | 4.7  | 4.5  | 5.2  | 5.6  | 5.7  |

Table 1756: Bodirsky — Resources—Nitrogen—Cropland Budget—Withdrawals—Aboveground Crop Residues (Mt Nr/yr)

56.1.16 Withdrawals—Belowground Crop Residues

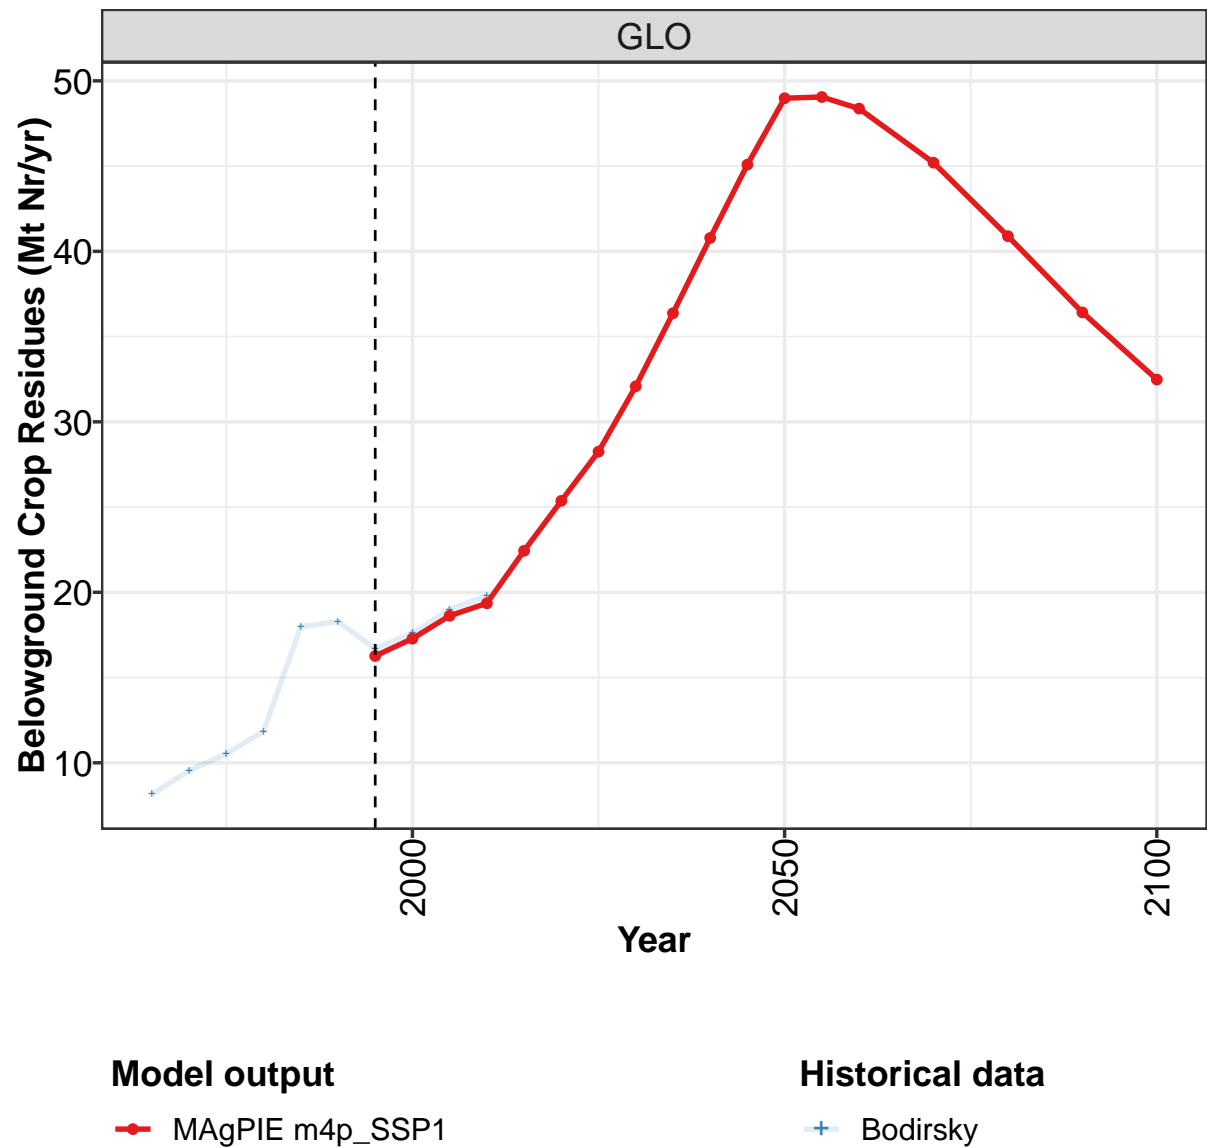

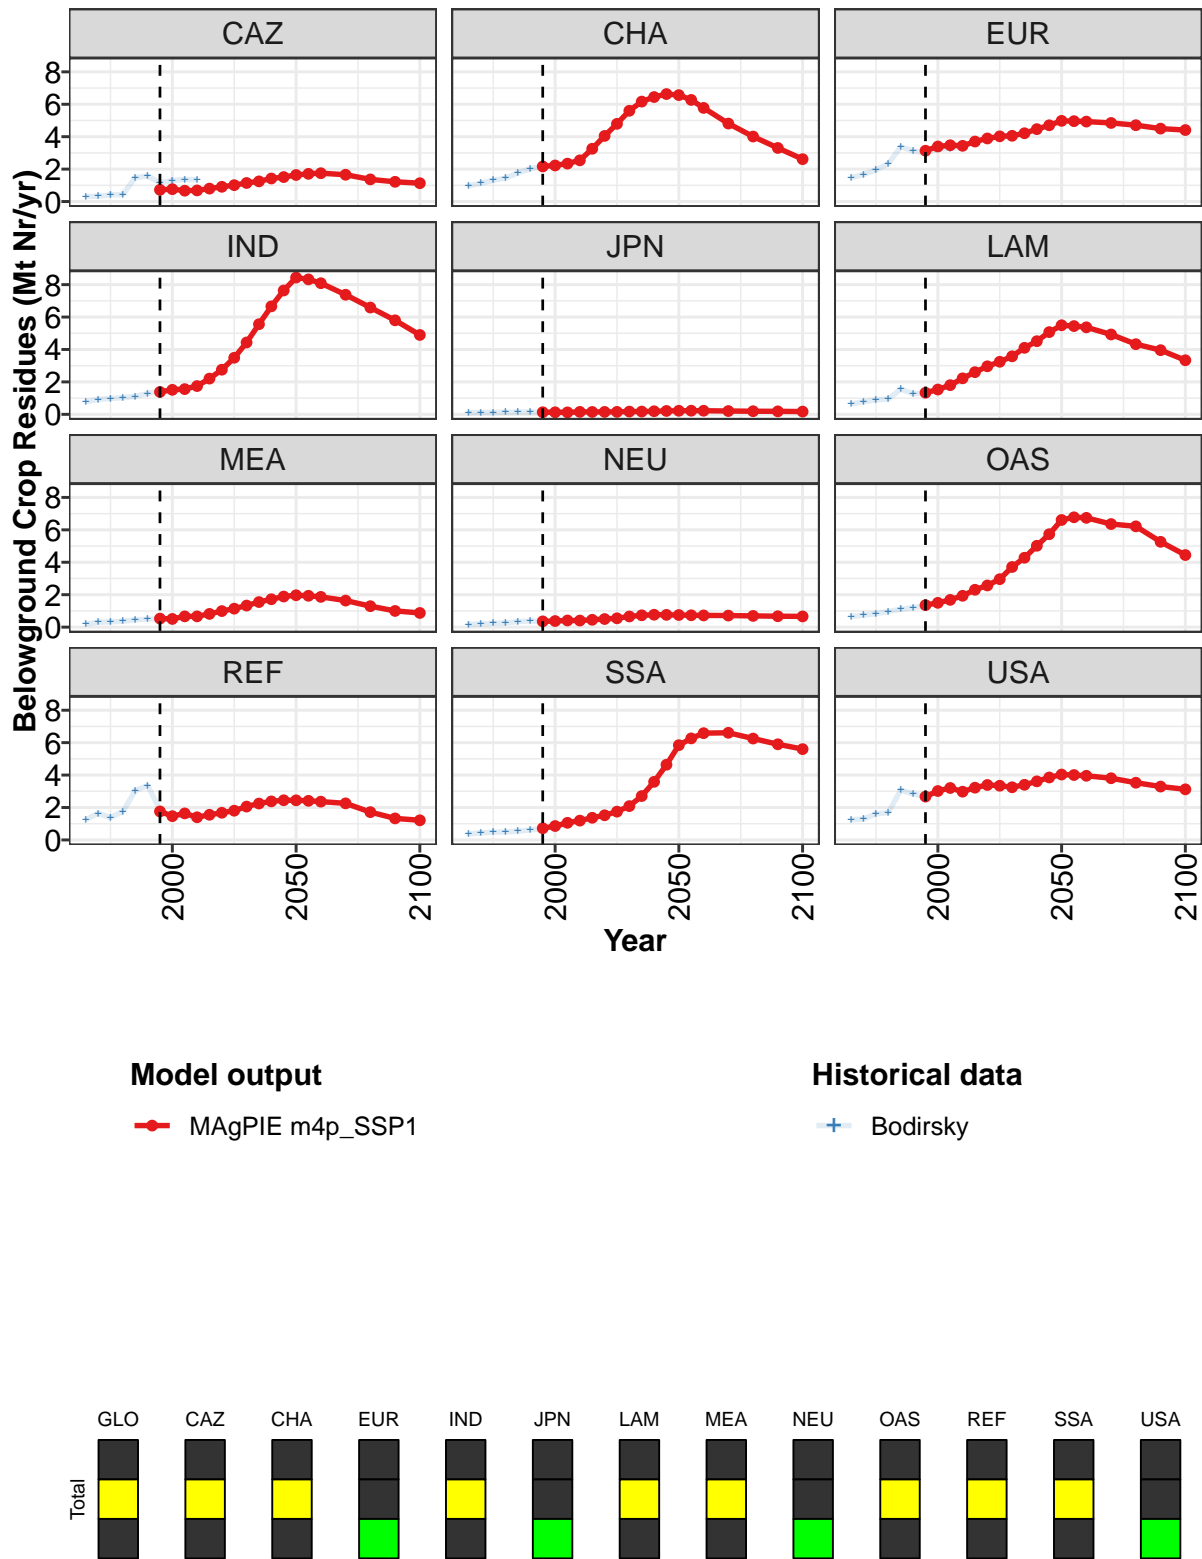

Figure 457: MAgPIE m4p\_SSP1 — Resources—Nitrogen—Cropland Budget—Withdrawals—Belowground Crop Residues (Mt Nr/yr)

|     | 1995 | 2000 | 2005 | 2010 | 2015 | 2020 | 2025 | 2030 | 2035 | 2040 | 2045 |
|-----|------|------|------|------|------|------|------|------|------|------|------|
| GLO | 16.3 | 17.3 | 18.6 | 19.4 | 22.4 | 25.4 | 28.3 | 32.1 | 36.4 | 40.8 | 45.1 |
| CAZ | 0.7  | 0.8  | 0.7  | 0.7  | 0.8  | 0.9  | 1.0  | 1.1  | 1.2  | 1.4  | 1.5  |
| CHA | 2.2  | 2.2  | 2.3  | 2.5  | 3.3  | 4.0  | 4.8  | 5.6  | 6.2  | 6.4  | 6.6  |
| EUR | 3.1  | 3.4  | 3.5  | 3.4  | 3.7  | 3.9  | 4.0  | 4.1  | 4.2  | 4.5  | 4.7  |
| IND | 1.4  | 1.5  | 1.6  | 1.7  | 2.2  | 2.8  | 3.5  | 4.4  | 5.6  | 6.7  | 7.6  |
| JPN | 0.1  | 0.1  | 0.1  | 0.2  | 0.1  | 0.1  | 0.2  | 0.2  | 0.2  | 0.2  | 0.2  |
| LAM | 1.3  | 1.5  | 1.8  | 2.2  | 2.6  | 3.0  | 3.2  | 3.6  | 4.1  | 4.5  | 5.1  |
| MEA | 0.5  | 0.5  | 0.7  | 0.7  | 0.8  | 1.0  | 1.1  | 1.3  | 1.5  | 1.7  | 1.9  |
| NEU | 0.4  | 0.4  | 0.4  | 0.4  | 0.5  | 0.5  | 0.5  | 0.7  | 0.7  | 0.8  | 0.8  |
| OAS | 1.4  | 1.5  | 1.7  | 1.9  | 2.3  | 2.6  | 3.0  | 3.7  | 4.3  | 5.0  | 5.7  |
| REF | 1.8  | 1.5  | 1.6  | 1.4  | 1.6  | 1.7  | 1.8  | 2.1  | 2.2  | 2.4  | 2.4  |
| SSA | 0.7  | 0.9  | 1.1  | 1.2  | 1.4  | 1.5  | 1.7  | 2.1  | 2.7  | 3.6  | 4.6  |
| USA | 2.7  | 3.0  | 3.2  | 3.0  | 3.2  | 3.4  | 3.3  | 3.3  | 3.4  | 3.6  | 3.9  |

Table 1757: MAgPIE m4p\_SSP1 — Resources—Nitrogen—Cropland Budget—Withdrawals—Belowground Crop Residues (Mt Nr/yr) [PART 1/2]

|     | 2050 | 2055 | 2060 | 2070 | 2080 | 2090 | 2100 |
|-----|------|------|------|------|------|------|------|
| GLO | 49.0 | 49.1 | 48.4 | 45.2 | 40.9 | 36.4 | 32.5 |
| CAZ | 1.6  | 1.7  | 1.7  | 1.7  | 1.4  | 1.2  | 1.1  |
| CHA | 6.6  | 6.3  | 5.8  | 4.8  | 4.0  | 3.3  | 2.6  |
| EUR | 5.0  | 5.0  | 4.9  | 4.8  | 4.7  | 4.5  | 4.4  |
| IND | 8.4  | 8.3  | 8.1  | 7.4  | 6.6  | 5.8  | 4.9  |
| JPN | 0.2  | 0.2  | 0.2  | 0.2  | 0.2  | 0.2  | 0.2  |
| LAM | 5.5  | 5.4  | 5.4  | 4.9  | 4.3  | 4.0  | 3.3  |
| MEA | 2.0  | 1.9  | 1.9  | 1.6  | 1.3  | 1.0  | 0.9  |
| NEU | 0.7  | 0.7  | 0.7  | 0.7  | 0.7  | 0.7  | 0.7  |
| OAS | 6.6  | 6.8  | 6.7  | 6.4  | 6.2  | 5.3  | 4.4  |
| REF | 2.4  | 2.4  | 2.4  | 2.3  | 1.7  | 1.3  | 1.2  |
| SSA | 5.8  | 6.3  | 6.6  | 6.6  | 6.3  | 5.9  | 5.6  |
| USA | 4.0  | 4.0  | 4.0  | 3.8  | 3.5  | 3.3  | 3.1  |

Table 1758: MAgPIE m4p\_SSP1 — Resources—Nitrogen—Cropland Budget—Withdrawals—Belowground Crop Residues (Mt Nr/yr) [PART 2/2]

|     | 1965 | 1970 | 1975 | 1980 | 1985 | 1990 | 1995 | 2000 | 2005 | 2010 |
|-----|------|------|------|------|------|------|------|------|------|------|
| GLO | 8.2  | 9.5  | 10.5 | 11.8 | 18.0 | 18.3 | 16.7 | 17.6 | 19.0 | 19.8 |
| CAZ | 0.3  | 0.3  | 0.4  | 0.4  | 1.5  | 1.6  | 1.2  | 1.3  | 1.4  | 1.3  |
| CHA | 1.0  | 1.1  | 1.3  | 1.4  | 1.8  | 2.0  | 2.2  | 2.3  | 2.4  | 2.6  |
| EUR | 1.5  | 1.7  | 1.9  | 2.3  | 3.4  | 3.1  | 3.0  | 3.2  | 3.3  | 3.3  |
| IND | 0.8  | 0.9  | 1.0  | 1.0  | 1.1  | 1.3  | 1.4  | 1.6  | 1.6  | 1.8  |
| JPN | 0.1  | 0.1  | 0.1  | 0.1  | 0.1  | 0.1  | 0.1  | 0.1  | 0.1  | 0.1  |
| LAM | 0.6  | 0.8  | 0.9  | 1.0  | 1.6  | 1.3  | 1.3  | 1.5  | 1.7  | 2.1  |
| MEA | 0.2  | 0.3  | 0.3  | 0.4  | 0.5  | 0.5  | 0.5  | 0.5  | 0.7  | 0.7  |
| NEU | 0.2  | 0.2  | 0.2  | 0.3  | 0.3  | 0.4  | 0.4  | 0.4  | 0.4  | 0.4  |
| OAS | 0.7  | 0.7  | 0.8  | 1.0  | 1.1  | 1.2  | 1.3  | 1.5  | 1.7  | 2.0  |
| REF | 1.3  | 1.6  | 1.4  | 1.7  | 3.0  | 3.4  | 1.9  | 1.4  | 1.6  | 1.2  |
| SSA | 0.4  | 0.4  | 0.5  | 0.5  | 0.5  | 0.6  | 0.7  | 0.8  | 1.0  | 1.2  |
| USA | 1.2  | 1.3  | 1.6  | 1.7  | 3.1  | 2.8  | 2.7  | 3.0  | 3.2  | 3.0  |

Table 1759: Bodirsky — Resources—Nitrogen—Cropland Budget—Withdrawals—Belowground Crop Residues (Mt Nr/yr)

56.1.17 Withdrawals—Harvested Crops

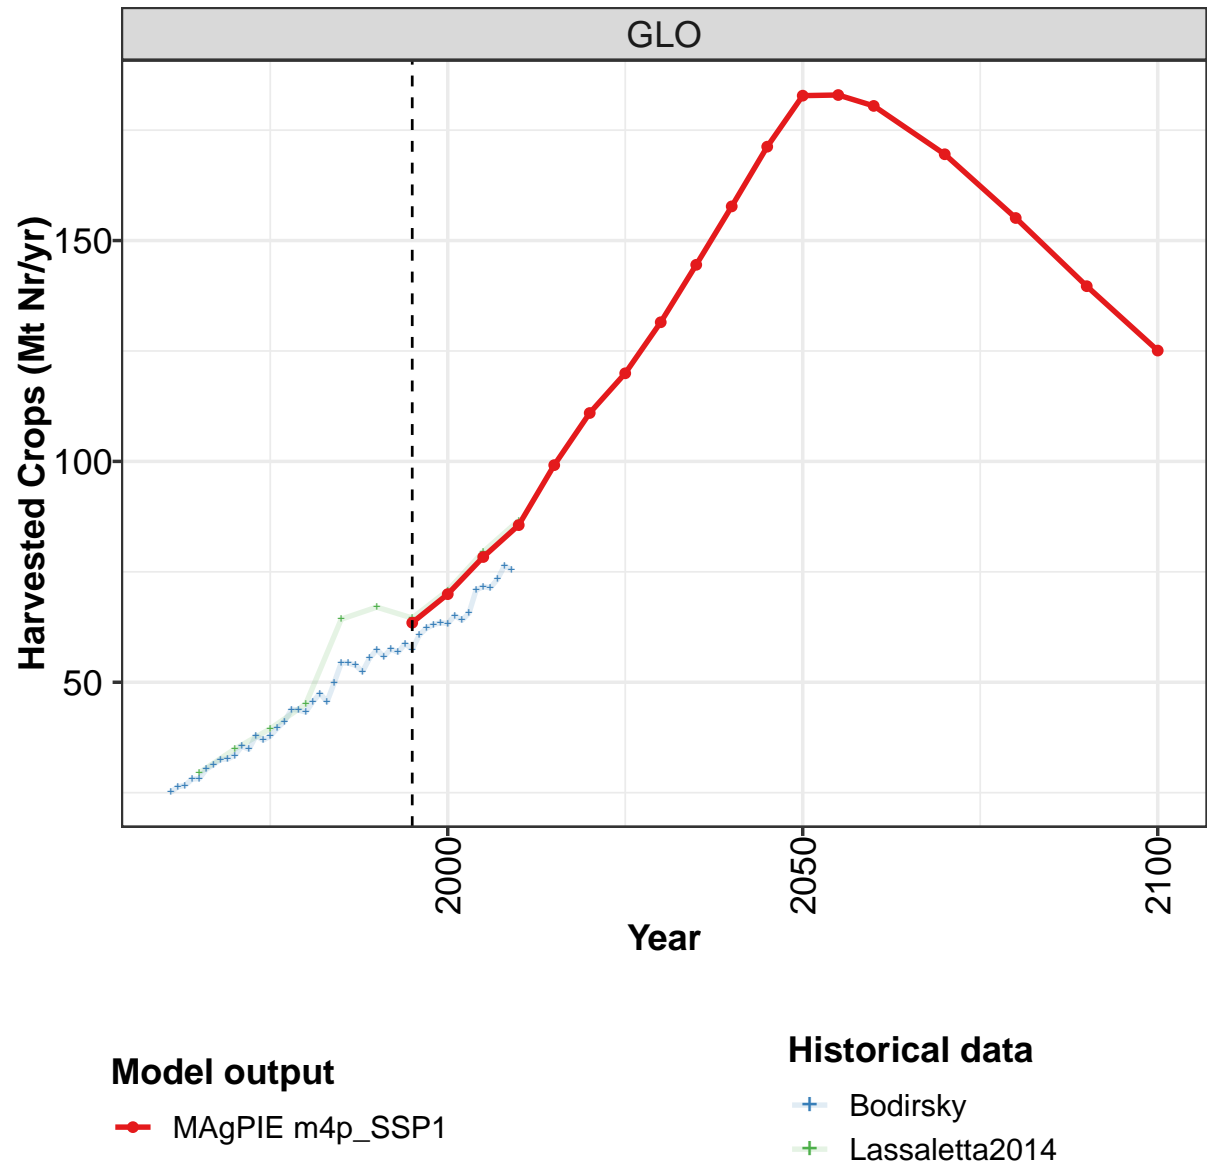



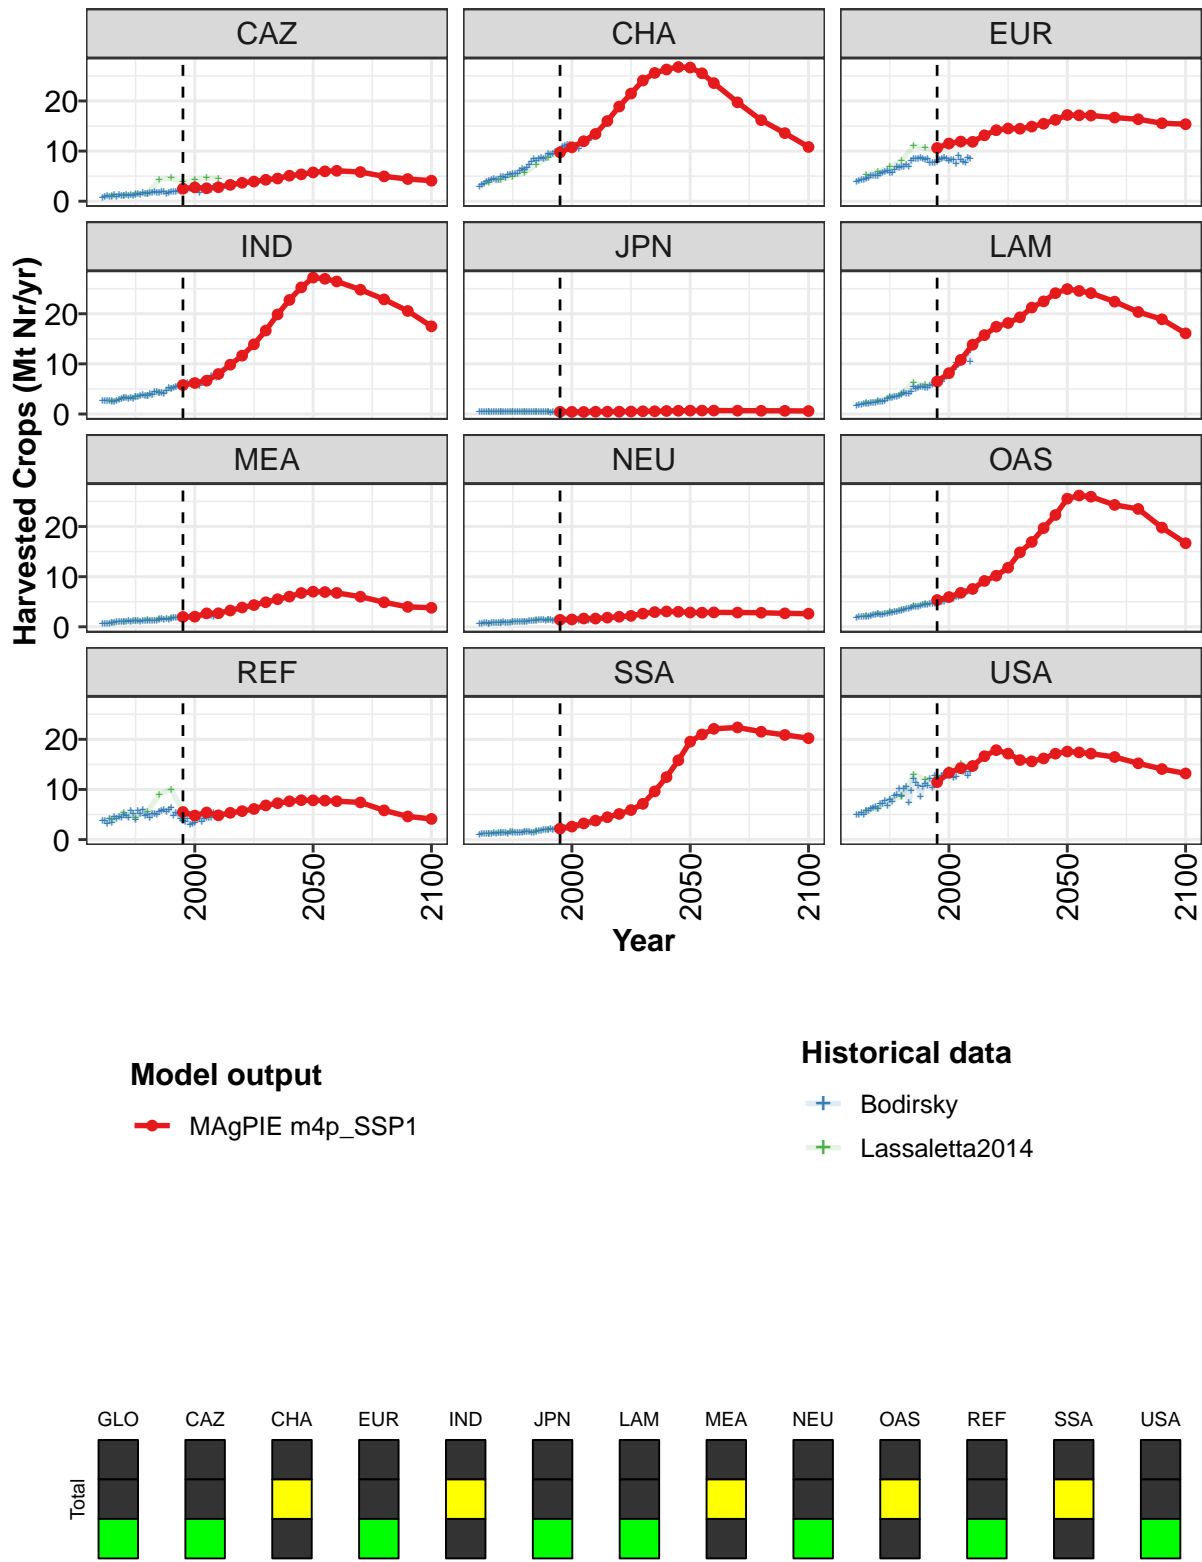

Figure 458: MAgPIE m4p\_SSP1 — Resources—Nitrogen—Cropland Budget—Withdrawals—Harvested Crops (Mt Nr/yr)

|     | 1995 | 2000 | 2005 | 2010 | 2015 | 2020 | 2025 | 2030 | 2035 | 2040 | 2045 |
|-----|------|------|------|------|------|------|------|------|------|------|------|
| GLO | 63   | 70   | 78   | 86   | 99   | 111  | 120  | 132  | 145  | 158  | 171  |
| CAZ | 2    | 3    | 3    | 3    | 3    | 4    | 4    | 4    | 5    | 5    | 5    |
| CHA | 10   | 11   | 12   | 13   | 16   | 19   | 21   | 24   | 26   | 26   | 27   |
| EUR | 11   | 12   | 12   | 12   | 13   | 14   | 15   | 14   | 15   | 15   | 16   |
| IND | 6    | 6    | 7    | 8    | 10   | 12   | 14   | 17   | 20   | 23   | 25   |
| JPN | 0    | 0    | 0    | 0    | 0    | 0    | 0    | 1    | 1    | 1    | 1    |
| LAM | 6    | 8    | 11   | 14   | 16   | 17   | 18   | 19   | 21   | 22   | 24   |
| MEA | 2    | 2    | 3    | 3    | 3    | 4    | 4    | 5    | 6    | 6    | 7    |
| NEU | 1    | 1    | 2    | 2    | 2    | 2    | 2    | 3    | 3    | 3    | 3    |
| OAS | 5    | 6    | 7    | 8    | 9    | 10   | 12   | 15   | 17   | 20   | 22   |
| REF | 6    | 5    | 5    | 5    | 5    | 6    | 6    | 7    | 7    | 8    | 8    |
| SSA | 2    | 3    | 3    | 4    | 4    | 5    | 6    | 7    | 10   | 12   | 16   |
| USA | 11   | 13   | 14   | 15   | 17   | 18   | 17   | 16   | 16   | 16   | 17   |

Table 1760: MAgPIE m4p\_SSP1 — Resources—Nitrogen—Cropland Budget—Withdrawals—Harvested Crops (Mt Nr/yr) [PART 1/2]

|     | 2050 | 2055 | 2060 | 2070 | 2080 | 2090 | 2100 |
|-----|------|------|------|------|------|------|------|
| GLO | 183  | 183  | 180  | 170  | 155  | 140  | 125  |
| CAZ | 6    | 6    | 6    | 6    | 5    | 4    | 4    |
| CHA | 27   | 26   | 24   | 20   | 16   | 14   | 11   |
| EUR | 17   | 17   | 17   | 17   | 16   | 16   | 15   |
| IND | 27   | 27   | 26   | 25   | 23   | 21   | 17   |
| JPN | 1    | 1    | 1    | 1    | 1    | 1    | 1    |
| LAM | 25   | 25   | 24   | 22   | 20   | 19   | 16   |
| MEA | 7    | 7    | 7    | 6    | 5    | 4    | 4    |
| NEU | 3    | 3    | 3    | 3    | 3    | 3    | 3    |
| OAS | 26   | 26   | 26   | 24   | 24   | 20   | 17   |
| REF | 8    | 8    | 8    | 7    | 6    | 5    | 4    |
| SSA | 20   | 21   | 22   | 22   | 22   | 21   | 20   |
| USA | 18   | 17   | 17   | 16   | 15   | 14   | 13   |

Table 1761: MAgPIE m4p\_SSP1 — Resources—Nitrogen—Cropland Budget—Withdrawals—Harvested Crops (Mt Nr/yr) [PART 2/2]

|     | 1961 | 1962 | 1963 | 1964 | 1965 | 1966 | 1967 | 1968 | 1969 | 1970 | 1971 |
|-----|------|------|------|------|------|------|------|------|------|------|------|
| GLO | 25.1 | 26.3 | 26.6 | 28.1 | 28.2 | 30.3 | 31.3 | 32.5 | 32.6 | 33.5 | 35.5 |
| CAZ | 0.6  | 0.9  | 1.0  | 1.0  | 1.0  | 1.2  | 0.9  | 1.2  | 1.2  | 1.0  | 1.3  |
| CHA | 3.0  | 3.3  | 3.5  | 3.9  | 4.0  | 4.4  | 4.4  | 4.3  | 4.3  | 4.8  | 5.0  |
| EUR | 4.0  | 4.2  | 4.2  | 4.3  | 4.5  | 4.7  | 5.1  | 5.1  | 5.1  | 5.0  | 5.5  |
| IND | 2.6  | 2.6  | 2.6  | 2.7  | 2.5  | 2.4  | 2.7  | 2.9  | 2.9  | 3.2  | 3.2  |
| JPN | 0.5  | 0.5  | 0.5  | 0.4  | 0.5  | 0.4  | 0.5  | 0.5  | 0.5  | 0.4  | 0.4  |
| LAM | 1.7  | 1.8  | 1.9  | 2.0  | 2.0  | 2.1  | 2.2  | 2.2  | 2.3  | 2.4  | 2.5  |
| MEA | 0.5  | 0.7  | 0.7  | 0.7  | 0.7  | 0.9  | 1.0  | 1.0  | 1.0  | 1.0  | 1.0  |
| NEU | 0.6  | 0.6  | 0.7  | 0.7  | 0.7  | 0.8  | 0.8  | 0.8  | 0.8  | 0.8  | 0.9  |
| OAS | 1.9  | 2.0  | 2.0  | 2.1  | 2.1  | 2.1  | 2.1  | 2.3  | 2.4  | 2.5  | 2.5  |
| REF | 3.7  | 3.8  | 3.1  | 4.1  | 3.5  | 4.5  | 4.2  | 4.6  | 4.4  | 4.9  | 4.7  |
| SSA | 1.0  | 1.1  | 1.1  | 1.1  | 1.1  | 1.1  | 1.3  | 1.2  | 1.3  | 1.3  | 1.4  |
| USA | 5.0  | 5.0  | 5.3  | 5.0  | 5.7  | 5.7  | 6.2  | 6.4  | 6.5  | 6.2  | 7.1  |

Table 1762: Lassaletta2014 — Resources—Nitrogen—Cropland Budget—Withdrawals—Harvested Crops (Mt Nr/yr) [PART 1/5]

|     | 1972 | 1973 | 1974 | 1975 | 1976 | 1977 | 1978 | 1979 | 1980 | 1981 | 1982 |
|-----|------|------|------|------|------|------|------|------|------|------|------|
| GLO | 34.8 | 37.9 | 36.9 | 37.8 | 39.6 | 41.1 | 43.9 | 43.7 | 43.3 | 45.6 | 47.5 |
| CAZ | 1.1  | 1.2  | 1.1  | 1.3  | 1.4  | 1.4  | 1.6  | 1.5  | 1.4  | 1.7  | 1.6  |
| CHA | 4.7  | 5.2  | 5.3  | 5.5  | 5.5  | 5.4  | 6.1  | 6.4  | 6.3  | 6.6  | 7.2  |
| EUR | 5.7  | 5.8  | 6.0  | 5.7  | 5.6  | 6.4  | 6.8  | 6.6  | 6.9  | 6.8  | 7.2  |
| IND | 3.0  | 3.3  | 3.0  | 3.5  | 3.4  | 3.7  | 3.8  | 3.5  | 3.6  | 3.9  | 3.8  |
| JPN | 0.4  | 0.4  | 0.4  | 0.5  | 0.4  | 0.5  | 0.5  | 0.4  | 0.4  | 0.4  | 0.4  |
| LAM | 2.5  | 2.7  | 3.0  | 3.2  | 3.3  | 3.5  | 3.4  | 3.5  | 3.8  | 4.2  | 4.1  |
| MEA | 1.2  | 1.0  | 1.1  | 1.1  | 1.2  | 1.1  | 1.2  | 1.1  | 1.2  | 1.2  | 1.3  |
| NEU | 0.9  | 0.8  | 0.9  | 1.0  | 1.1  | 1.1  | 1.0  | 1.1  | 1.1  | 1.1  | 1.2  |
| OAS | 2.4  | 2.7  | 2.7  | 2.8  | 2.9  | 2.9  | 3.1  | 3.1  | 3.3  | 3.5  | 3.5  |
| REF | 4.4  | 5.7  | 5.1  | 3.9  | 5.7  | 5.2  | 5.9  | 4.7  | 5.0  | 4.3  | 5.1  |
| SSA | 1.4  | 1.2  | 1.5  | 1.4  | 1.4  | 1.4  | 1.5  | 1.4  | 1.5  | 1.6  | 1.5  |
| USA | 7.1  | 7.8  | 6.7  | 7.9  | 7.6  | 8.7  | 9.0  | 10.1 | 8.7  | 10.2 | 10.5 |

Table 1763: Lassaletta2014 — Resources—Nitrogen—Cropland Budget—Withdrawals—Harvested Crops (Mt Nr/yr) [PART 2/5]

|     | 1983 | 1984 | 1985 | 1986 | 1987 | 1988 | 1989 | 1990 | 1991 | 1992 | 1993 |
|-----|------|------|------|------|------|------|------|------|------|------|------|
| GLO | 45.6 | 49.8 | 54.4 | 54.3 | 53.9 | 52.4 | 55.5 | 57.3 | 55.9 | 57.5 | 56.8 |
| CAZ | 1.8  | 1.8  | 1.8  | 2.0  | 1.8  | 1.5  | 1.7  | 1.9  | 1.9  | 1.9  | 2.1  |
| CHA | 7.9  | 8.4  | 8.1  | 8.4  | 8.7  | 8.5  | 8.6  | 9.5  | 9.3  | 9.4  | 9.9  |
| EUR | 6.9  | 8.1  | 8.4  | 8.4  | 8.5  | 8.6  | 8.5  | 8.3  | 8.5  | 7.6  | 7.7  |
| IND | 4.4  | 4.4  | 4.3  | 4.3  | 4.1  | 4.7  | 5.2  | 5.1  | 5.2  | 5.4  | 5.6  |
| JPN | 0.4  | 0.5  | 0.4  | 0.4  | 0.4  | 0.4  | 0.4  | 0.4  | 0.3  | 0.4  | 0.3  |
| LAM | 4.0  | 4.4  | 5.4  | 5.0  | 5.2  | 5.5  | 5.4  | 5.3  | 5.2  | 5.7  | 5.8  |
| MEA | 1.3  | 1.2  | 1.5  | 1.6  | 1.5  | 1.6  | 1.5  | 1.6  | 1.8  | 1.8  | 1.7  |
| NEU | 1.2  | 1.2  | 1.2  | 1.4  | 1.4  | 1.4  | 1.3  | 1.4  | 1.4  | 1.2  | 1.3  |
| OAS | 3.7  | 3.8  | 4.0  | 4.1  | 3.9  | 4.2  | 4.4  | 4.4  | 4.5  | 4.6  | 4.7  |
| REF | 5.2  | 4.9  | 5.5  | 5.8  | 5.9  | 5.5  | 6.0  | 6.3  | 4.8  | 5.4  | 5.2  |
| SSA | 1.4  | 1.4  | 1.6  | 1.8  | 1.7  | 1.9  | 2.0  | 1.9  | 2.1  | 1.9  | 2.1  |
| USA | 7.4  | 9.7  | 12.1 | 11.4 | 10.8 | 8.6  | 10.5 | 11.2 | 10.8 | 12.2 | 10.3 |

Table 1764: Lassaletta2014 — Resources—Nitrogen—Cropland Budget—Withdrawals—Harvested Crops (Mt Nr/yr) [PART 3/5]

|     | 1994 | 1995 | 1996 | 1997 | 1998 | 1999 | 2000 | 2001 | 2002 | 2003 | 2004 |
|-----|------|------|------|------|------|------|------|------|------|------|------|
| GLO | 58.7 | 57.5 | 60.7 | 62.2 | 63.1 | 63.5 | 63.3 | 65.1 | 64.0 | 65.7 | 70.9 |
| CAZ | 1.9  | 2.2  | 2.5  | 2.3  | 2.5  | 2.7  | 2.5  | 2.3  | 1.7  | 2.5  | 2.5  |
| CHA | 9.9  | 10.3 | 10.9 | 11.0 | 11.2 | 11.2 | 10.9 | 10.8 | 11.0 | 10.5 | 11.5 |
| EUR | 7.6  | 7.8  | 8.2  | 8.6  | 8.6  | 8.5  | 8.2  | 8.2  | 8.3  | 7.4  | 9.1  |
| IND | 5.7  | 5.8  | 6.0  | 6.2  | 6.2  | 6.4  | 6.3  | 6.3  | 5.6  | 6.5  | 6.4  |
| JPN | 0.4  | 0.4  | 0.3  | 0.3  | 0.3  | 0.3  | 0.3  | 0.3  | 0.3  | 0.3  | 0.3  |
| LAM | 6.2  | 6.2  | 6.2  | 6.4  | 7.2  | 7.3  | 7.5  | 8.5  | 8.8  | 10.1 | 9.9  |
| MEA | 1.9  | 1.8  | 2.1  | 1.8  | 2.0  | 1.8  | 1.7  | 1.9  | 2.1  | 2.3  | 2.3  |
| NEU | 1.2  | 1.3  | 1.3  | 1.4  | 1.4  | 1.3  | 1.3  | 1.3  | 1.4  | 1.3  | 1.5  |
| OAS | 4.6  | 4.9  | 5.0  | 4.9  | 5.1  | 5.4  | 5.6  | 5.5  | 5.7  | 5.9  | 6.1  |
| REF | 4.2  | 3.7  | 3.5  | 4.2  | 2.9  | 3.2  | 3.4  | 4.1  | 4.2  | 3.5  | 4.2  |
| SSA | 2.2  | 2.2  | 2.4  | 2.4  | 2.4  | 2.5  | 2.5  | 2.6  | 2.7  | 2.8  | 2.9  |
| USA | 12.8 | 11.0 | 12.2 | 12.7 | 13.1 | 12.8 | 13.1 | 13.0 | 12.3 | 12.5 | 14.3 |

Table 1765: Lassaletta2014 — Resources—Nitrogen—Cropland Budget—Withdrawals—Harvested Crops (Mt Nr/yr) [PART 4/5]

|     | 2005 | 2006 | 2007 | 2008 | 2009 |
|-----|------|------|------|------|------|
| GLO | 71.6 | 71.4 | 73.3 | 76.4 | 75.4 |
| CAZ | 2.7  | 2.2  | 2.3  | 2.8  | 2.7  |
| CHA | 11.7 | 12.0 | 12.1 | 12.9 | 12.9 |
| EUR | 8.3  | 8.0  | 7.7  | 8.7  | 8.6  |
| IND | 6.8  | 6.9  | 7.6  | 7.5  | 7.2  |
| JPN | 0.3  | 0.3  | 0.3  | 0.4  | 0.3  |
| LAM | 10.2 | 10.6 | 11.9 | 12.1 | 10.5 |
| MEA | 2.3  | 2.4  | 2.3  | 2.0  | 2.4  |
| NEU | 1.5  | 1.5  | 1.3  | 1.4  | 1.5  |
| OAS | 6.4  | 6.5  | 6.8  | 7.1  | 7.3  |
| REF | 4.3  | 4.3  | 4.3  | 5.4  | 5.1  |
| SSA | 3.1  | 3.2  | 3.1  | 3.4  | 3.4  |
| USA | 13.9 | 13.5 | 13.6 | 12.7 | 13.5 |

Table 1766: Lassaletta2014 — Resources—Nitrogen—Cropland Budget—Withdrawals—Harvested Crops (Mt Nr/yr) [PART 5/5]

|     | 1965 | 1970 | 1975 | 1980 | 1985 | 1990 | 1995 | 2000 | 2005 | 2010 |
|-----|------|------|------|------|------|------|------|------|------|------|
| GLO | 29.5 | 34.9 | 39.5 | 45.1 | 64.3 | 67.0 | 64.5 | 70.8 | 79.5 | 86.6 |
| CAZ | 1.0  | 1.1  | 1.4  | 1.5  | 4.3  | 4.6  | 3.8  | 4.3  | 4.6  | 4.6  |
| CHA | 3.7  | 4.3  | 4.9  | 5.6  | 7.3  | 8.6  | 9.8  | 10.8 | 11.9 | 13.5 |
| EUR | 5.3  | 5.9  | 6.8  | 8.1  | 11.0 | 10.6 | 10.1 | 10.9 | 11.2 | 11.4 |
| IND | 2.6  | 3.2  | 3.4  | 3.6  | 4.2  | 5.0  | 5.8  | 6.2  | 6.6  | 8.1  |
| JPN | 0.4  | 0.4  | 0.4  | 0.4  | 0.5  | 0.5  | 0.4  | 0.4  | 0.4  | 0.5  |
| LAM | 2.2  | 2.7  | 3.5  | 4.1  | 6.2  | 5.7  | 6.5  | 7.9  | 10.4 | 13.4 |
| MEA | 0.8  | 1.1  | 1.2  | 1.3  | 1.7  | 1.8  | 2.0  | 2.0  | 2.6  | 2.7  |
| NEU | 0.7  | 0.8  | 0.9  | 1.1  | 1.3  | 1.4  | 1.4  | 1.4  | 1.6  | 1.6  |
| OAS | 2.2  | 2.6  | 3.0  | 3.5  | 4.1  | 4.6  | 5.2  | 5.8  | 6.7  | 7.6  |
| REF | 3.9  | 5.4  | 4.4  | 5.6  | 8.9  | 10.0 | 5.6  | 4.5  | 5.2  | 4.4  |
| SSA | 1.2  | 1.4  | 1.5  | 1.6  | 1.7  | 2.0  | 2.2  | 2.6  | 3.2  | 3.9  |
| USA | 5.7  | 6.1  | 7.9  | 8.6  | 13.0 | 12.0 | 11.8 | 13.9 | 15.1 | 15.1 |

Table 1767: Bodirsky — Resources—Nitrogen—Cropland Budget—Withdrawals—Harvested Crops (Mt Nr/yr)

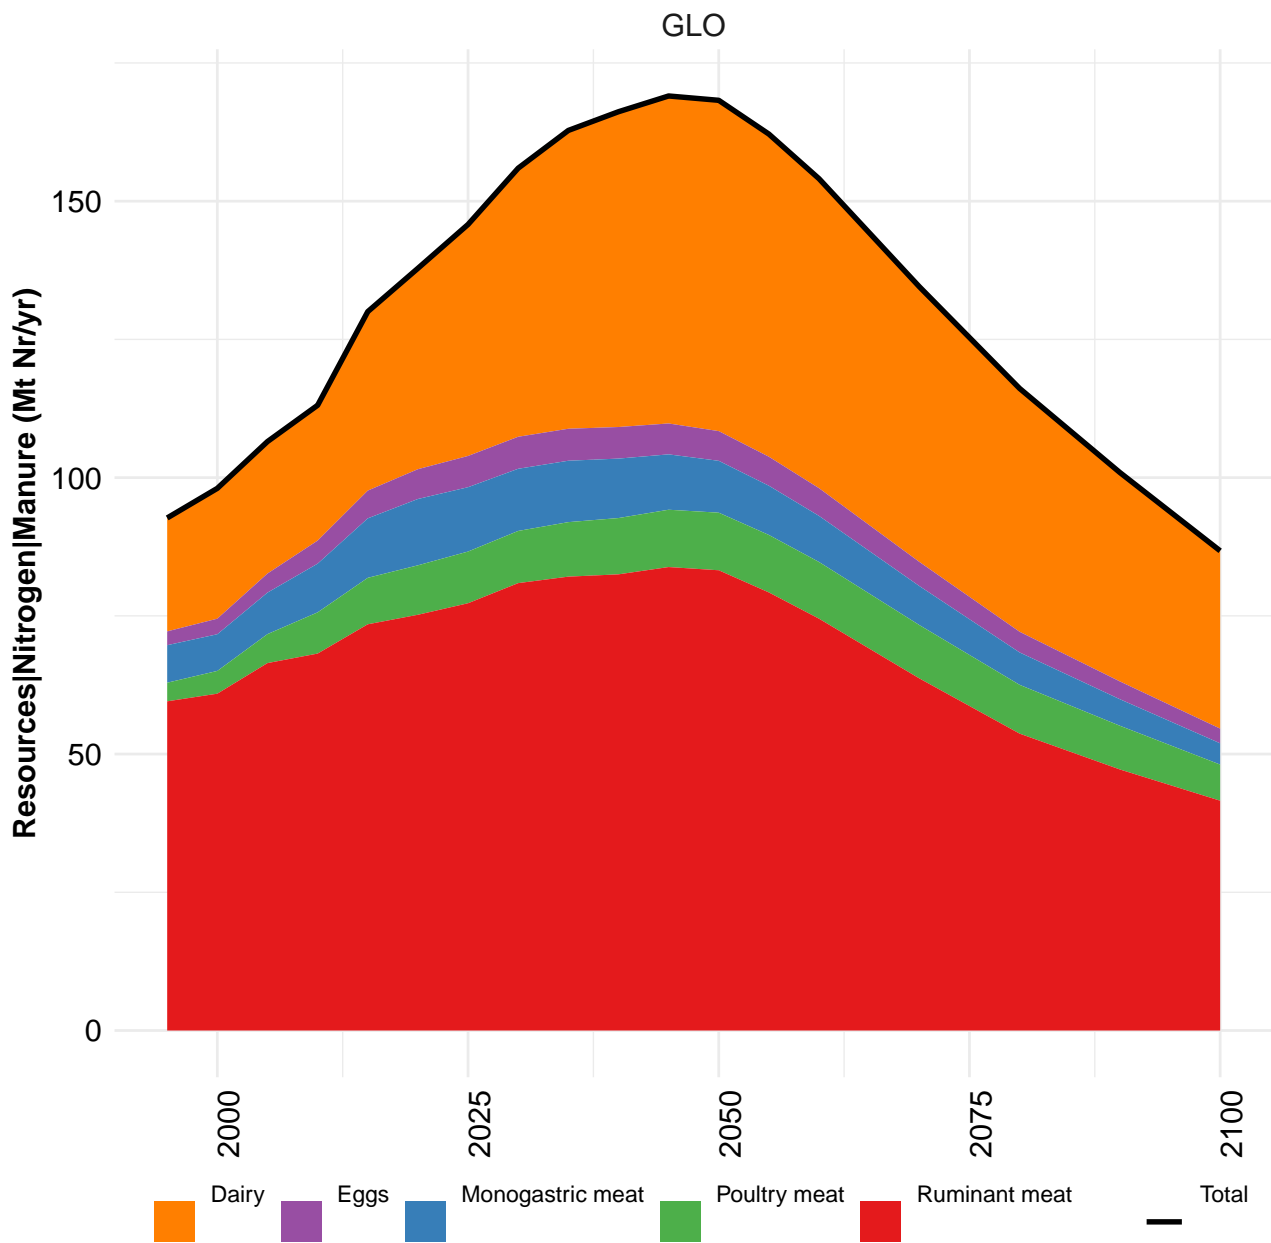

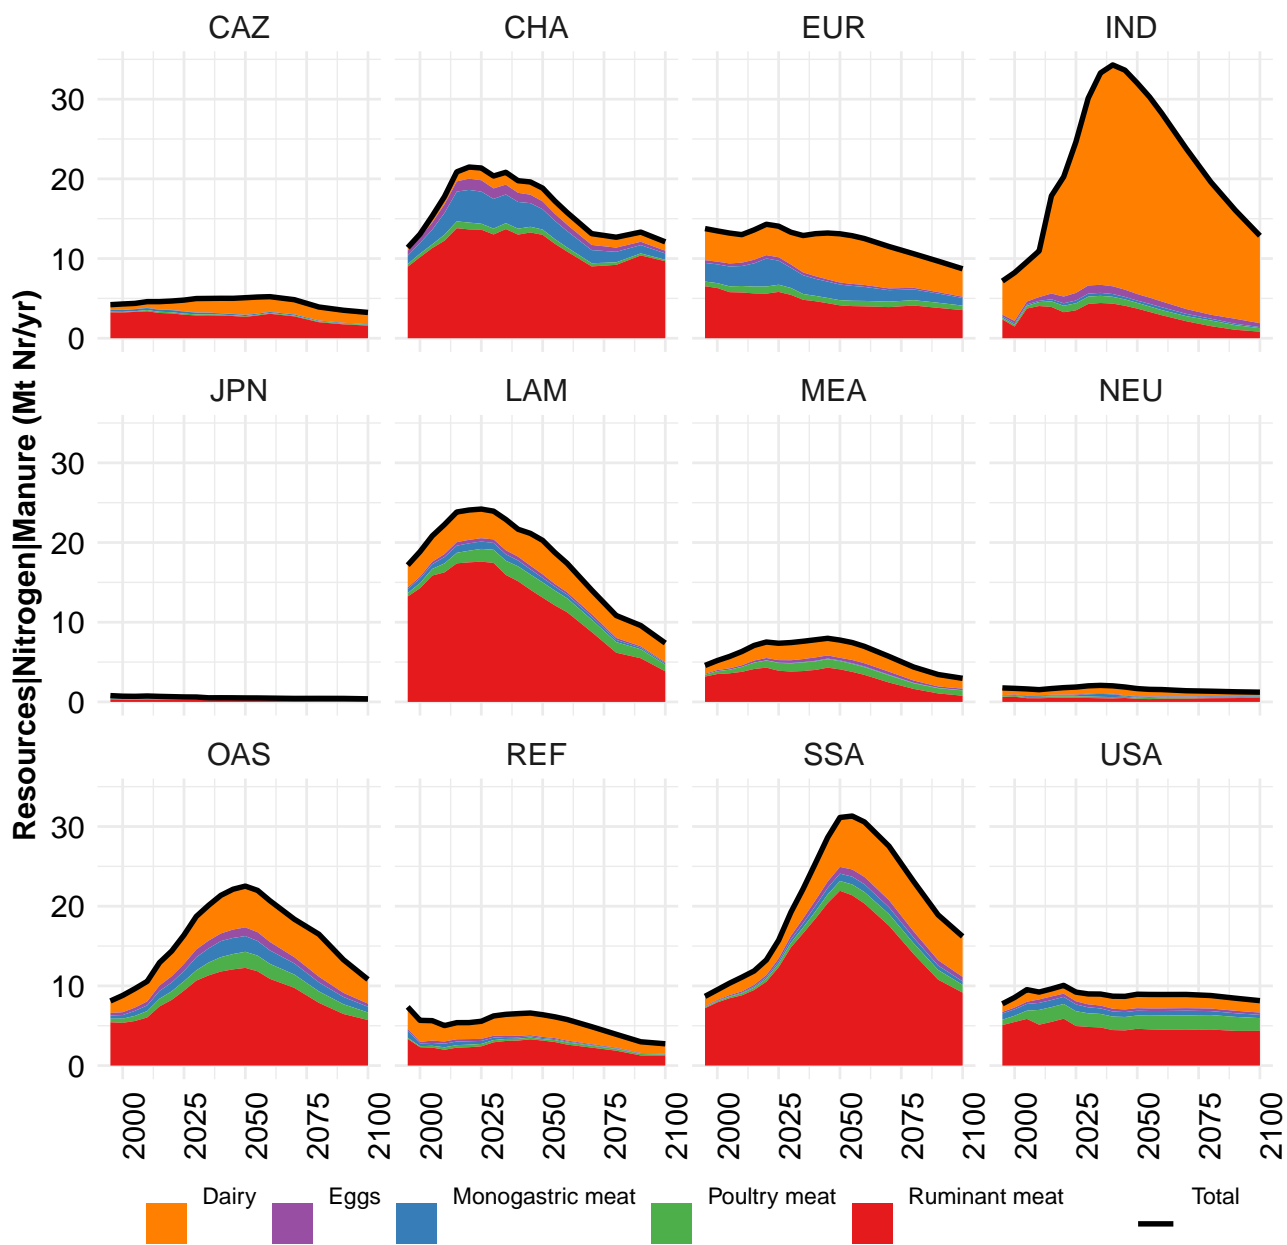

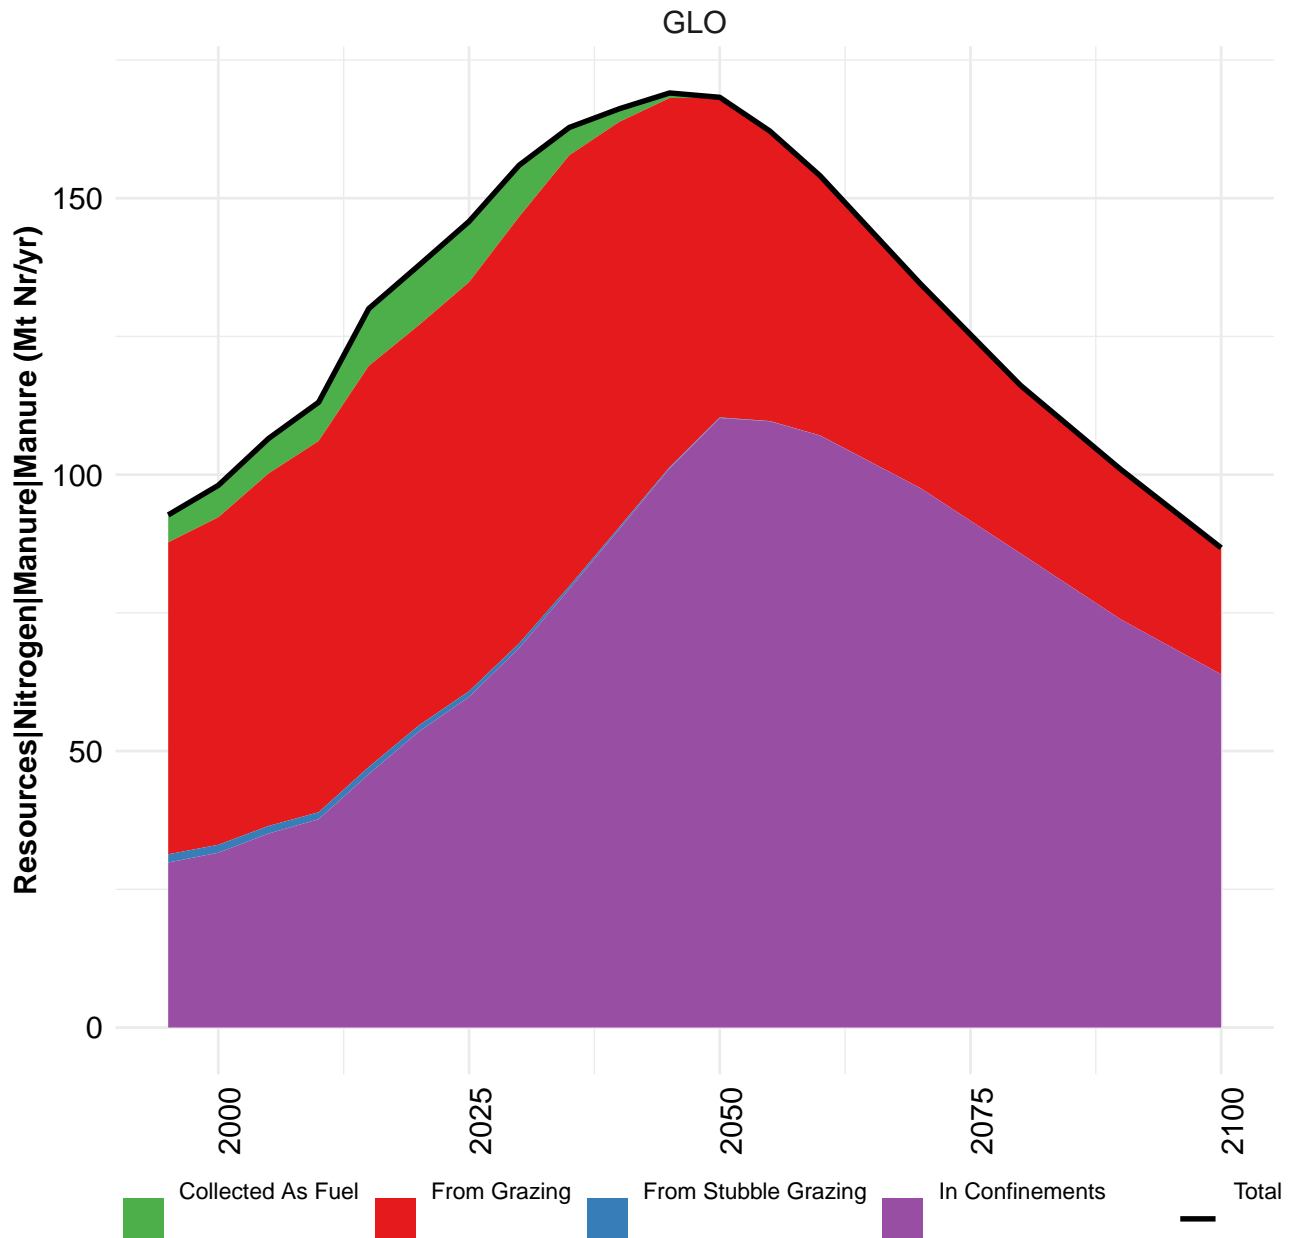

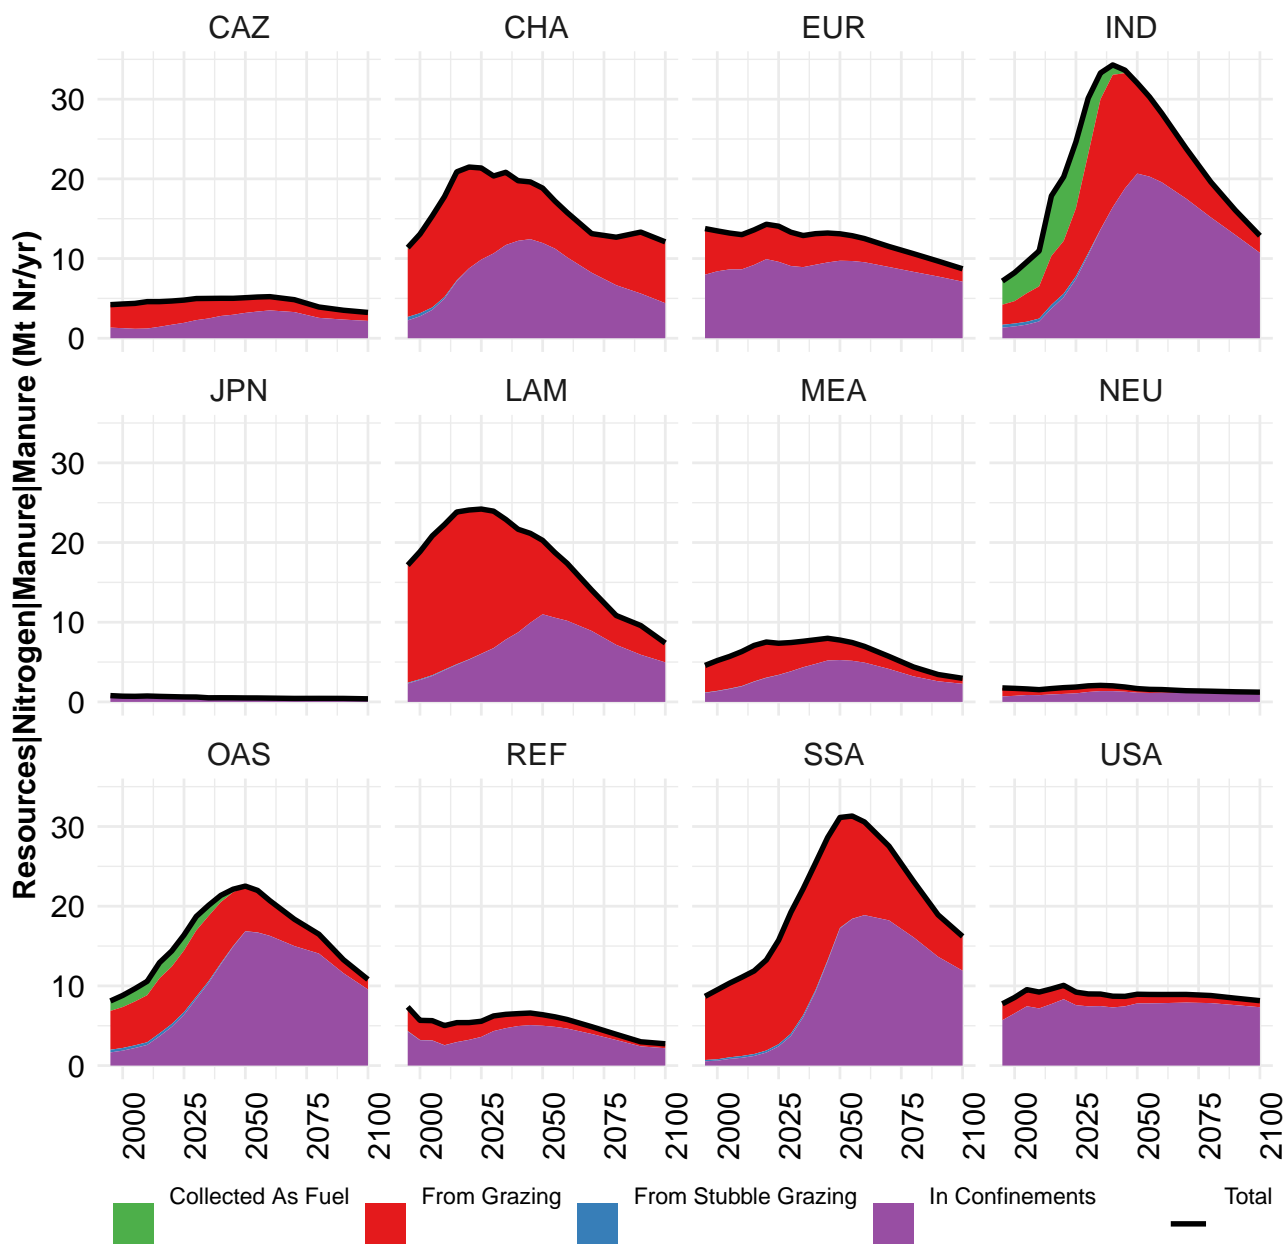



56.2 Manure

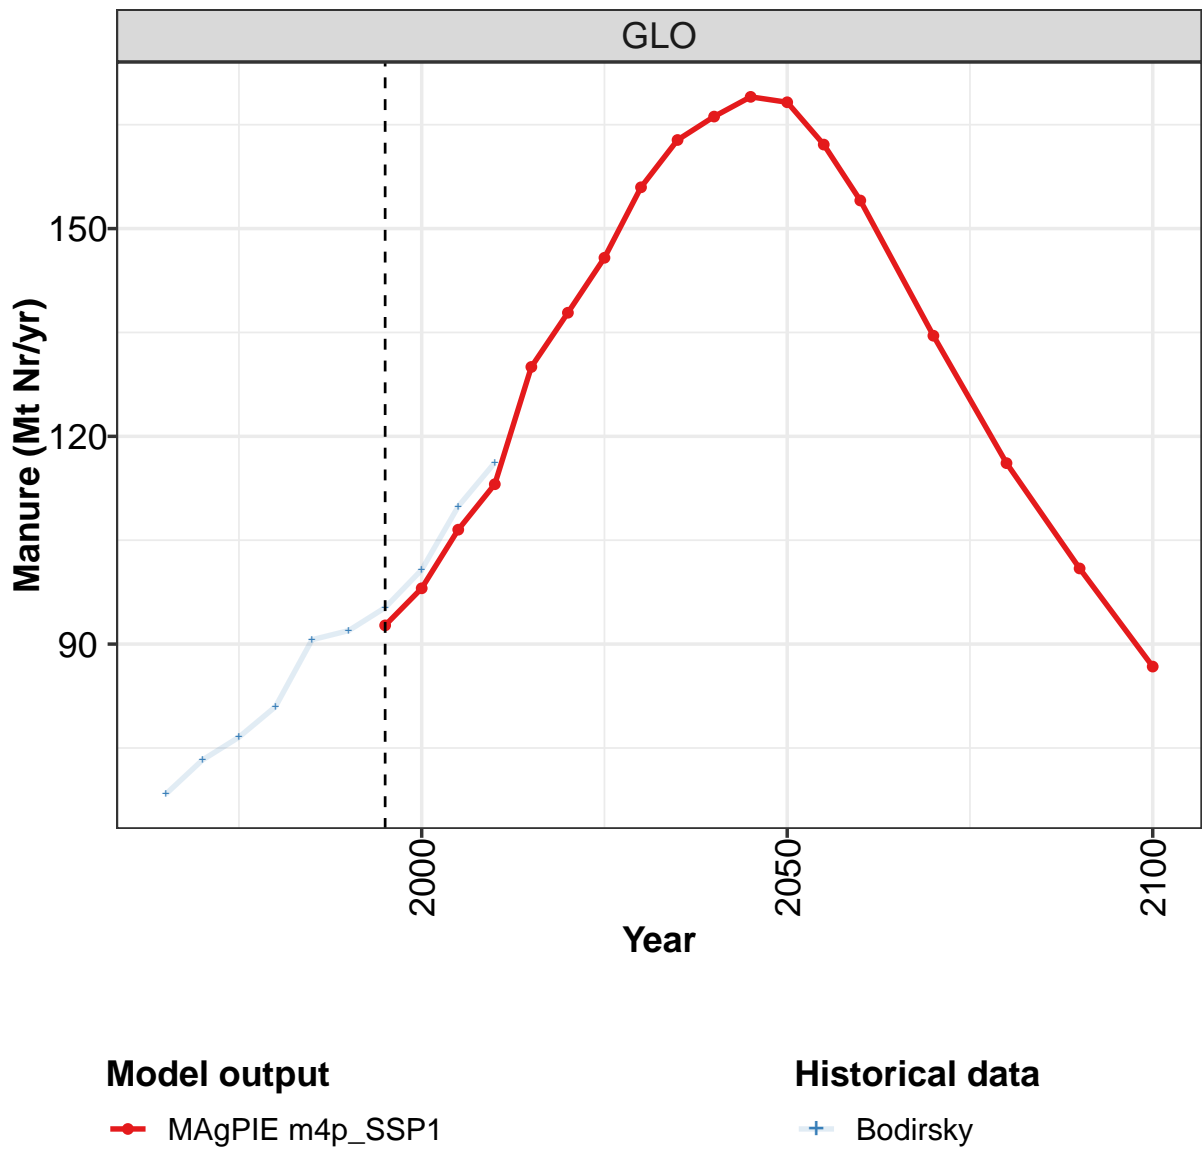

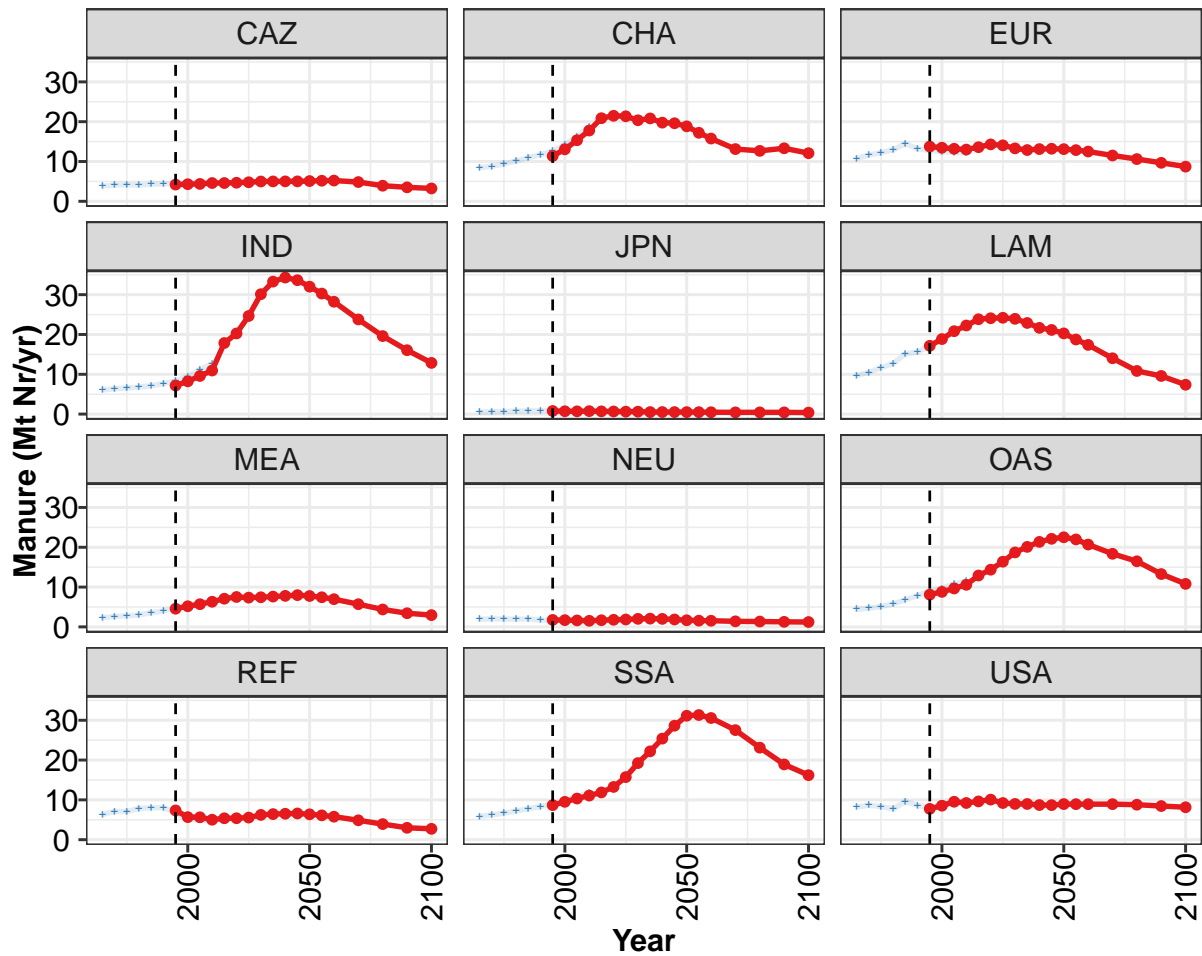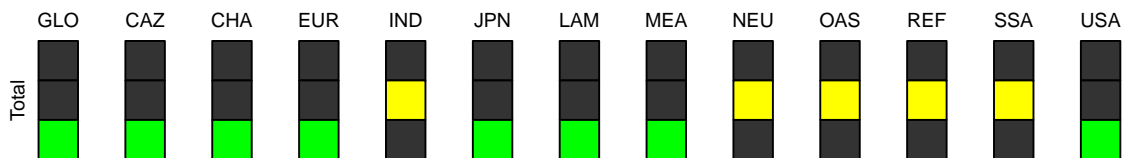

Figure 459: MAgPIE m4p\_SSP1 — Resources—Nitrogen—Manure (Mt Nr/yr)

|     | 1995 | 2000 | 2005 | 2010 | 2015 | 2020 | 2025 | 2030 | 2035 | 2040 | 2045 |
|-----|------|------|------|------|------|------|------|------|------|------|------|
| GLO | 93   | 98   | 107  | 113  | 130  | 138  | 146  | 156  | 163  | 166  | 169  |
| CAZ | 4    | 4    | 4    | 5    | 5    | 5    | 5    | 5    | 5    | 5    | 5    |
| CHA | 11   | 13   | 15   | 18   | 21   | 21   | 21   | 20   | 21   | 20   | 20   |
| EUR | 14   | 13   | 13   | 13   | 14   | 14   | 14   | 13   | 13   | 13   | 13   |
| IND | 7    | 8    | 10   | 11   | 18   | 20   | 25   | 30   | 33   | 34   | 34   |
| JPN | 1    | 1    | 1    | 1    | 1    | 1    | 1    | 1    | 1    | 1    | 1    |
| LAM | 17   | 19   | 21   | 22   | 24   | 24   | 24   | 24   | 23   | 22   | 21   |
| MEA | 5    | 5    | 6    | 6    | 7    | 8    | 7    | 7    | 8    | 8    | 8    |
| NEU | 2    | 2    | 2    | 2    | 2    | 2    | 2    | 2    | 2    | 2    | 2    |
| OAS | 8    | 9    | 10   | 11   | 13   | 14   | 16   | 19   | 20   | 21   | 22   |
| REF | 7    | 6    | 6    | 5    | 5    | 5    | 6    | 6    | 6    | 7    | 7    |
| SSA | 9    | 10   | 10   | 11   | 12   | 13   | 16   | 19   | 22   | 25   | 29   |
| USA | 8    | 9    | 10   | 9    | 10   | 10   | 9    | 9    | 9    | 9    | 9    |

Table 1768: MAgPIE m4p\_SSP1 — Resources—Nitrogen—Manure (Mt Nr/yr) [PART 1/2]

|     | 2050 | 2055 | 2060 | 2070 | 2080 | 2090 | 2100 |
|-----|------|------|------|------|------|------|------|
| GLO | 168  | 162  | 154  | 135  | 116  | 101  | 87   |
| CAZ | 5    | 5    | 5    | 5    | 4    | 4    | 3    |
| CHA | 19   | 17   | 16   | 13   | 13   | 13   | 12   |
| EUR | 13   | 13   | 13   | 12   | 11   | 10   | 9    |
| IND | 32   | 30   | 28   | 24   | 20   | 16   | 13   |
| JPN | 1    | 0    | 0    | 0    | 0    | 0    | 0    |
| LAM | 20   | 19   | 17   | 14   | 11   | 10   | 7    |
| MEA | 8    | 7    | 7    | 6    | 4    | 3    | 3    |
| NEU | 2    | 2    | 2    | 1    | 1    | 1    | 1    |
| OAS | 23   | 22   | 21   | 18   | 16   | 13   | 11   |
| REF | 6    | 6    | 6    | 5    | 4    | 3    | 3    |
| SSA | 31   | 31   | 31   | 28   | 23   | 19   | 16   |
| USA | 9    | 9    | 9    | 9    | 9    | 8    | 8    |

Table 1769: MAgPIE m4p\_SSP1 — Resources—Nitrogen—Manure (Mt Nr/yr) [PART 2/2]

|     | 1965 | 1970 | 1975 | 1980 | 1985 | 1990 | 1995 | 2000 | 2005 | 2010 |
|-----|------|------|------|------|------|------|------|------|------|------|
| GLO | 68   | 73   | 77   | 81   | 91   | 92   | 95   | 101  | 110  | 116  |
| CAZ | 4    | 4    | 4    | 4    | 4    | 4    | 5    | 5    | 5    | 5    |
| CHA | 8    | 9    | 9    | 10   | 11   | 12   | 13   | 14   | 16   | 19   |
| EUR | 11   | 12   | 12   | 13   | 15   | 13   | 13   | 12   | 12   | 12   |
| IND | 6    | 6    | 7    | 7    | 7    | 8    | 8    | 9    | 11   | 13   |
| JPN | 0    | 1    | 1    | 1    | 1    | 1    | 1    | 1    | 1    | 1    |
| LAM | 10   | 10   | 12   | 13   | 15   | 16   | 17   | 19   | 21   | 22   |
| MEA | 2    | 3    | 3    | 3    | 4    | 4    | 5    | 5    | 6    | 7    |
| NEU | 2    | 2    | 2    | 2    | 2    | 2    | 2    | 2    | 2    | 1    |
| OAS | 4    | 5    | 5    | 6    | 7    | 8    | 9    | 10   | 11   | 12   |
| REF | 6    | 7    | 7    | 8    | 8    | 8    | 7    | 5    | 5    | 5    |
| SSA | 6    | 6    | 7    | 7    | 8    | 8    | 9    | 10   | 11   | 12   |
| USA | 8    | 9    | 8    | 8    | 10   | 9    | 8    | 9    | 10   | 9    |

Table 1770: Bodirsky — Resources—Nitrogen—Manure (Mt Nr/yr)

56.2.1 Dairy

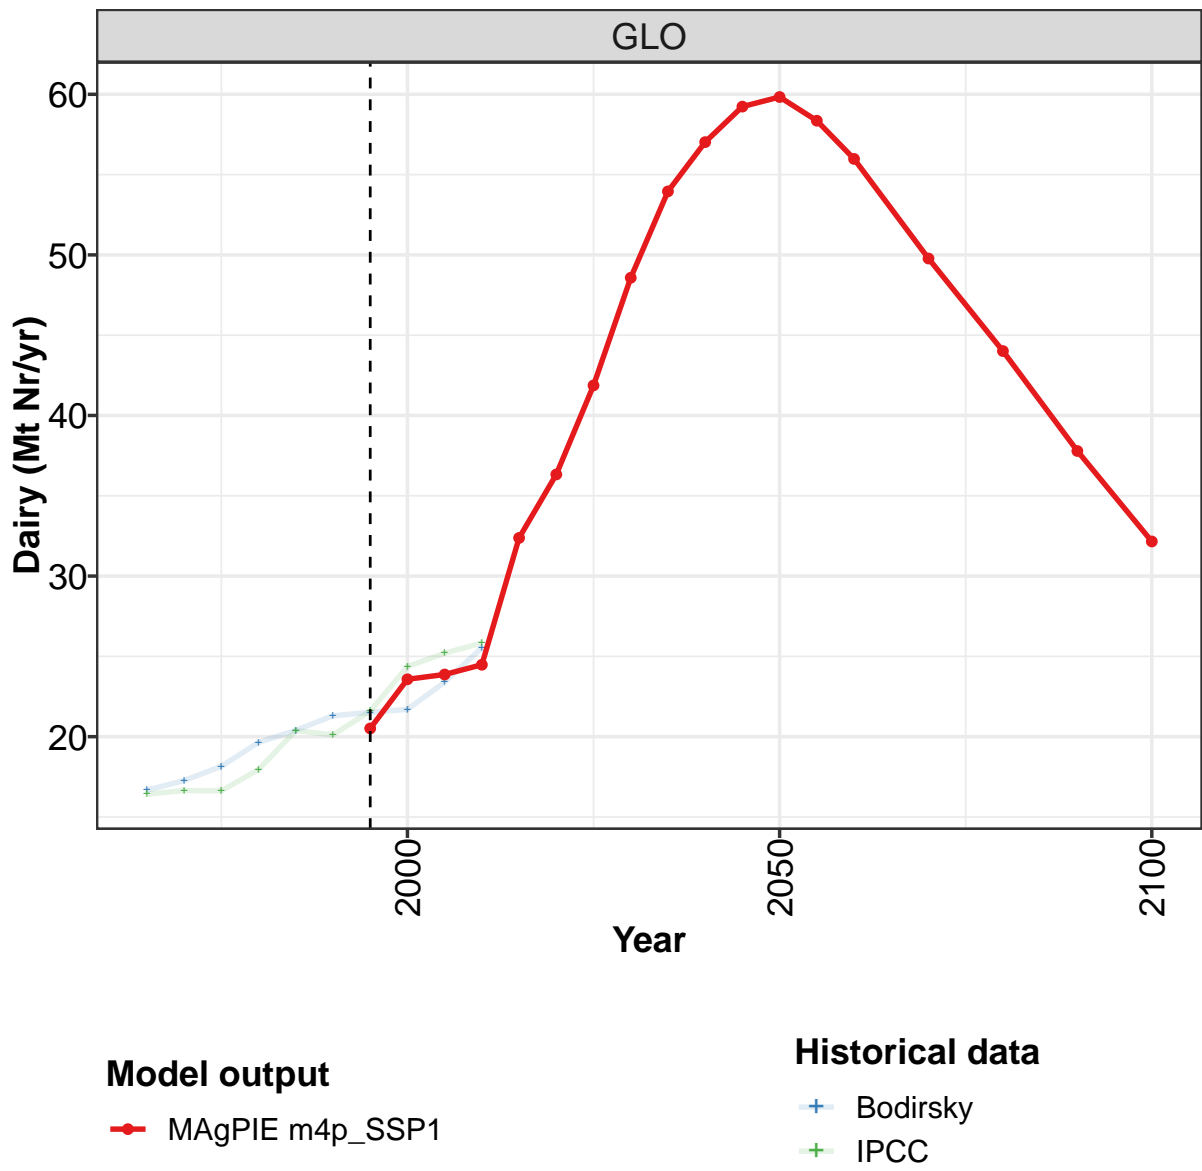

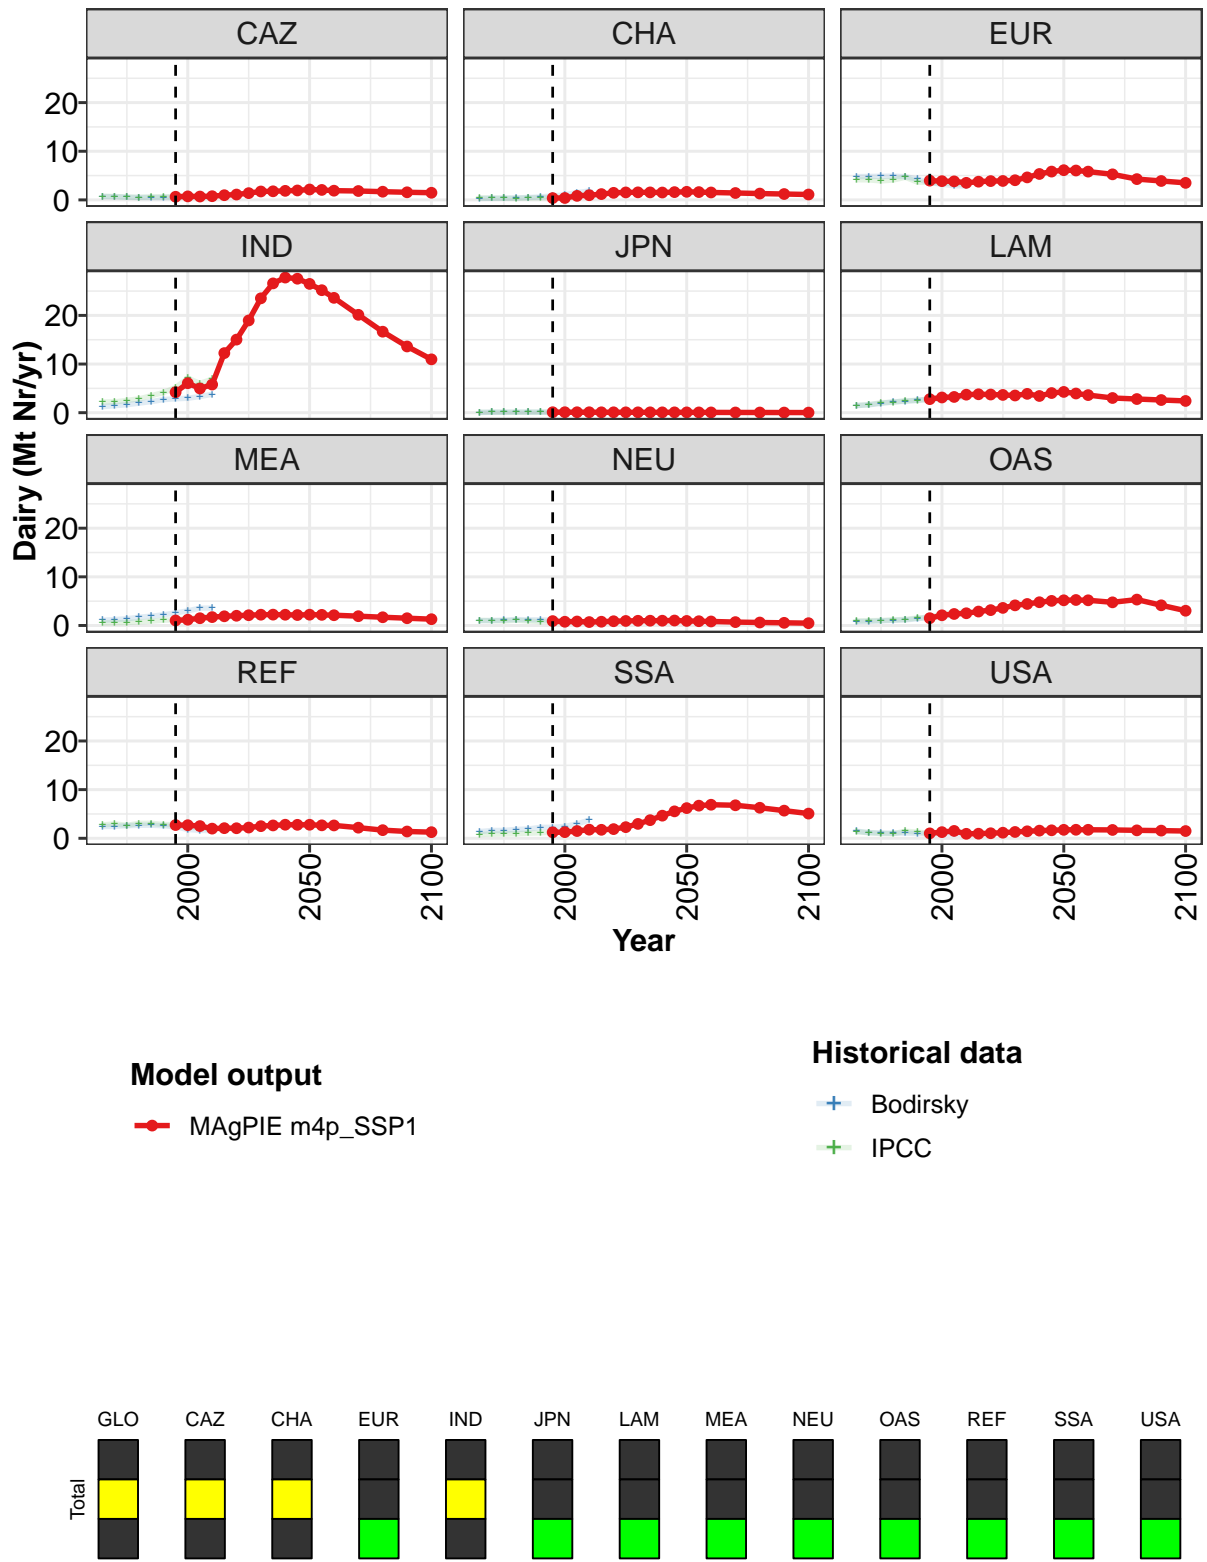

Figure 460: MAgPIE m4p\_SSP1 — Resources—Nitrogen—Manure—Dairy (Mt Nr/yr)

|     | 1995 | 2000 | 2005 | 2010 | 2015 | 2020 | 2025 | 2030 | 2035 | 2040 | 2045 |
|-----|------|------|------|------|------|------|------|------|------|------|------|
| GLO | 20.5 | 23.6 | 23.9 | 24.5 | 32.4 | 36.3 | 41.9 | 48.6 | 54.0 | 57.0 | 59.2 |
| CAZ | 0.6  | 0.7  | 0.7  | 0.8  | 1.0  | 1.1  | 1.4  | 1.7  | 1.8  | 1.9  | 1.9  |
| CHA | 0.4  | 0.4  | 0.8  | 1.0  | 1.2  | 1.5  | 1.5  | 1.6  | 1.5  | 1.5  | 1.6  |
| EUR | 4.0  | 3.9  | 3.8  | 3.5  | 3.8  | 3.9  | 3.9  | 4.1  | 4.6  | 5.3  | 5.8  |
| IND | 4.2  | 6.1  | 5.0  | 5.8  | 12.3 | 15.0 | 19.0 | 23.5 | 26.6 | 27.8 | 27.5 |
| JPN | 0.1  | 0.1  | 0.1  | 0.1  | 0.1  | 0.1  | 0.1  | 0.1  | 0.1  | 0.1  | 0.1  |
| LAM | 2.8  | 3.1  | 3.2  | 3.7  | 3.8  | 3.7  | 3.7  | 3.5  | 3.9  | 3.4  | 4.0  |
| MEA | 1.0  | 1.2  | 1.5  | 1.7  | 1.9  | 2.0  | 2.1  | 2.2  | 2.2  | 2.2  | 2.1  |
| NEU | 0.9  | 0.8  | 0.8  | 0.7  | 0.8  | 0.9  | 0.9  | 1.0  | 1.0  | 1.0  | 1.0  |
| OAS | 1.5  | 2.1  | 2.4  | 2.5  | 2.9  | 3.2  | 3.6  | 4.1  | 4.4  | 4.8  | 5.1  |
| REF | 2.7  | 2.7  | 2.5  | 2.0  | 2.1  | 2.1  | 2.2  | 2.5  | 2.6  | 2.8  | 2.8  |
| SSA | 1.2  | 1.3  | 1.5  | 1.8  | 1.7  | 1.9  | 2.3  | 3.0  | 3.7  | 4.7  | 5.5  |
| USA | 1.0  | 1.3  | 1.5  | 0.9  | 0.9  | 1.0  | 1.2  | 1.3  | 1.4  | 1.6  | 1.6  |

Table 1771: MAgPIE m4p\_SSP1 — Resources—Nitrogen—Manure—Dairy (Mt Nr/yr) [PART 1/2]

|     | 2050 | 2055 | 2060 | 2070 | 2080 | 2090 | 2100 |
|-----|------|------|------|------|------|------|------|
| GLO | 59.8 | 58.4 | 56.0 | 49.8 | 44.0 | 37.8 | 32.2 |
| CAZ | 2.1  | 2.1  | 1.9  | 1.8  | 1.7  | 1.6  | 1.5  |
| CHA | 1.7  | 1.6  | 1.5  | 1.4  | 1.3  | 1.2  | 1.1  |
| EUR | 6.1  | 6.0  | 5.8  | 5.3  | 4.3  | 3.9  | 3.5  |
| IND | 26.5 | 25.2 | 23.6 | 20.1 | 16.7 | 13.6 | 11.0 |
| JPN | 0.1  | 0.1  | 0.1  | 0.1  | 0.0  | 0.0  | 0.0  |
| LAM | 4.3  | 3.9  | 3.6  | 3.0  | 2.8  | 2.6  | 2.4  |
| MEA | 2.2  | 2.2  | 2.1  | 1.9  | 1.7  | 1.5  | 1.3  |
| NEU | 0.9  | 0.9  | 0.8  | 0.7  | 0.6  | 0.6  | 0.5  |
| OAS | 5.2  | 5.2  | 5.2  | 4.8  | 5.3  | 4.2  | 3.0  |
| REF | 2.8  | 2.7  | 2.6  | 2.2  | 1.7  | 1.4  | 1.3  |
| SSA | 6.2  | 6.7  | 6.9  | 6.8  | 6.3  | 5.7  | 5.1  |
| USA | 1.7  | 1.8  | 1.7  | 1.7  | 1.6  | 1.6  | 1.5  |

Table 1772: MAgPIE m4p\_SSP1 — Resources—Nitrogen—Manure—Dairy (Mt Nr/yr) [PART 2/2]

|     | 1965 | 1970 | 1975 | 1980 | 1985 | 1990 | 1995 | 2000 | 2005 | 2010 |
|-----|------|------|------|------|------|------|------|------|------|------|
| GLO | 16.7 | 17.3 | 18.2 | 19.6 | 20.4 | 21.3 | 21.5 | 21.7 | 23.4 | 25.5 |
| CAZ | 0.7  | 0.6  | 0.6  | 0.5  | 0.5  | 0.5  | 0.5  | 0.5  | 0.6  | 0.6  |
| CHA | 0.3  | 0.3  | 0.4  | 0.4  | 0.5  | 0.6  | 0.8  | 1.0  | 1.5  | 1.8  |
| EUR | 4.8  | 4.8  | 4.9  | 4.9  | 4.8  | 4.3  | 3.6  | 3.2  | 2.9  | 2.8  |
| IND | 1.2  | 1.4  | 1.6  | 2.0  | 2.3  | 2.7  | 2.9  | 3.0  | 3.3  | 3.8  |
| JPN | 0.1  | 0.1  | 0.1  | 0.1  | 0.1  | 0.1  | 0.1  | 0.1  | 0.1  | 0.1  |
| LAM | 1.5  | 1.6  | 1.9  | 2.3  | 2.3  | 2.6  | 2.8  | 2.8  | 3.1  | 3.2  |
| MEA | 1.1  | 1.2  | 1.4  | 1.7  | 1.9  | 2.2  | 2.6  | 3.0  | 3.6  | 3.6  |
| NEU | 1.0  | 1.0  | 1.1  | 1.2  | 1.2  | 1.2  | 1.1  | 0.9  | 0.7  | 0.7  |
| OAS | 0.8  | 0.8  | 0.9  | 1.1  | 1.1  | 1.4  | 1.6  | 1.9  | 2.1  | 2.7  |
| REF | 2.4  | 2.5  | 2.6  | 2.7  | 2.7  | 2.6  | 2.4  | 1.8  | 1.6  | 1.6  |
| SSA | 1.4  | 1.6  | 1.6  | 1.8  | 1.9  | 2.2  | 2.3  | 2.5  | 2.9  | 3.8  |
| USA | 1.5  | 1.2  | 1.1  | 1.0  | 1.1  | 1.0  | 0.9  | 0.9  | 0.9  | 0.9  |

Table 1773: IPCC — Resources—Nitrogen—Manure—Dairy (Mt Nr/yr)

|     | 1965 | 1970 | 1975 | 1980 | 1985 | 1990 | 1995 | 2000 | 2005 | 2010 |
|-----|------|------|------|------|------|------|------|------|------|------|
| GLO | 16.4 | 16.6 | 16.6 | 18.0 | 20.4 | 20.1 | 21.6 | 24.4 | 25.2 | 25.8 |
| CAZ | 0.7  | 0.7  | 0.6  | 0.5  | 0.6  | 0.6  | 0.7  | 0.8  | 0.8  | 0.9  |
| CHA | 0.4  | 0.4  | 0.3  | 0.3  | 0.4  | 0.4  | 0.4  | 0.5  | 1.0  | 1.2  |
| EUR | 4.1  | 4.1  | 3.9  | 4.1  | 4.7  | 3.6  | 3.6  | 3.5  | 3.4  | 3.1  |
| IND | 2.2  | 2.2  | 2.5  | 2.8  | 3.5  | 4.1  | 5.2  | 7.1  | 6.0  | 6.9  |
| JPN | 0.1  | 0.1  | 0.1  | 0.1  | 0.1  | 0.1  | 0.1  | 0.1  | 0.1  | 0.1  |
| LAM | 1.5  | 1.6  | 2.1  | 2.1  | 2.5  | 2.5  | 2.8  | 3.2  | 3.3  | 3.7  |
| MEA | 0.5  | 0.6  | 0.6  | 0.8  | 0.9  | 1.1  | 1.2  | 1.4  | 1.8  | 1.9  |
| NEU | 1.1  | 1.0  | 0.9  | 1.1  | 0.9  | 0.8  | 0.8  | 0.7  | 0.8  | 0.7  |
| OAS | 0.9  | 1.0  | 1.0  | 1.1  | 1.3  | 1.5  | 1.7  | 2.4  | 2.6  | 2.8  |
| REF | 2.7  | 3.0  | 2.7  | 3.1  | 3.1  | 2.8  | 2.8  | 2.3  | 2.3  | 1.7  |
| SSA | 0.8  | 0.9  | 0.9  | 0.9  | 1.0  | 1.1  | 1.2  | 1.3  | 1.6  | 2.0  |
| USA | 1.4  | 1.1  | 1.0  | 0.9  | 1.4  | 1.3  | 1.0  | 1.3  | 1.5  | 0.9  |

Table 1774: Bodirsky — Resources—Nitrogen—Manure—Dairy (Mt Nr/yr)

56.2.2 Eggs

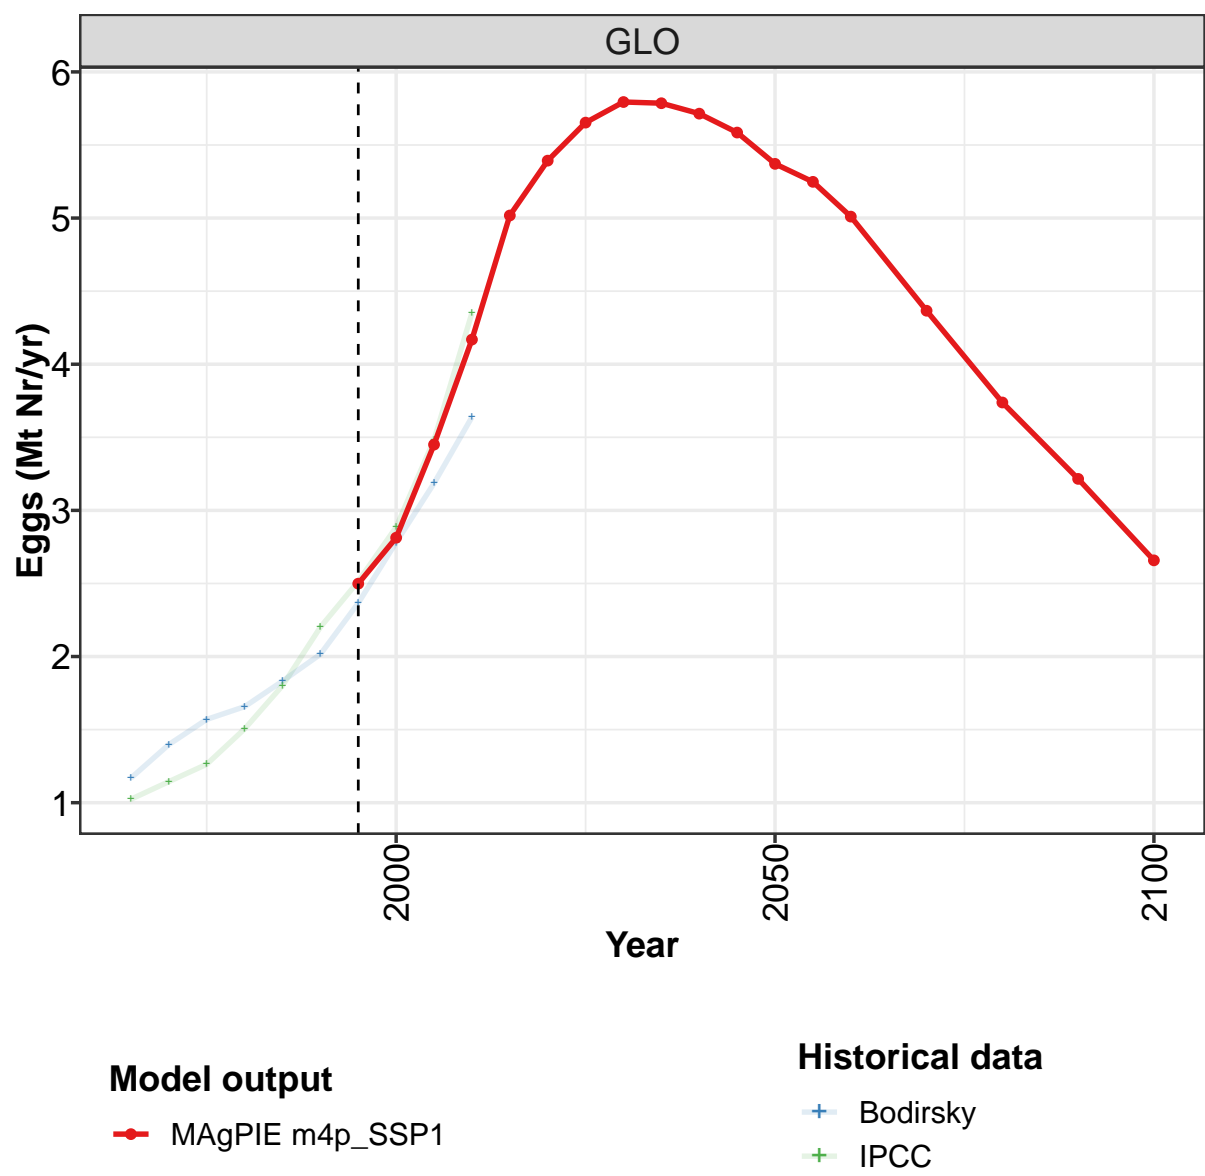



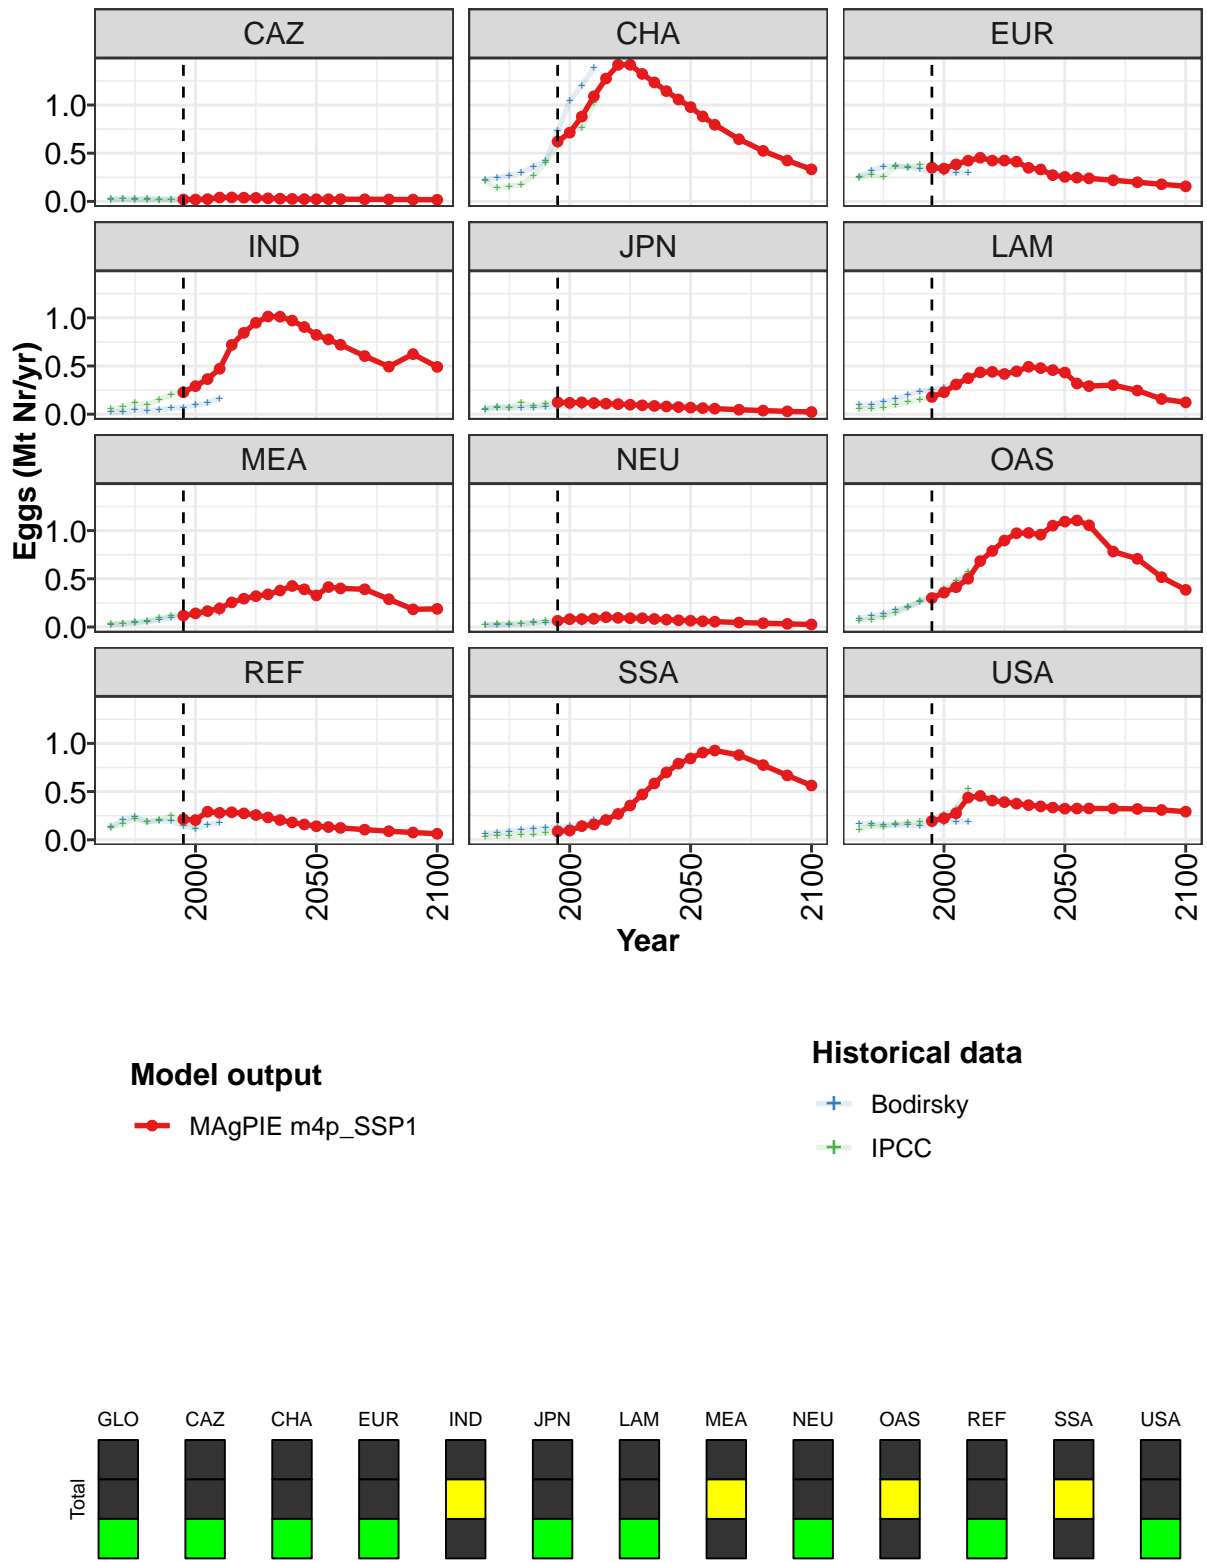

Figure 461: MAgPIE m4p\_SSP1 — Resources—Nitrogen—Manure—Eggs (Mt Nr/yr)

|     | 1995 | 2000 | 2005 | 2010 | 2015 | 2020 | 2025 | 2030 | 2035 | 2040 | 2045 |
|-----|------|------|------|------|------|------|------|------|------|------|------|
| GLO | 2.50 | 2.81 | 3.45 | 4.17 | 5.02 | 5.39 | 5.65 | 5.79 | 5.79 | 5.71 | 5.59 |
| CAZ | 0.02 | 0.02 | 0.02 | 0.04 | 0.04 | 0.04 | 0.04 | 0.03 | 0.03 | 0.03 | 0.02 |
| CHA | 0.62 | 0.71 | 0.88 | 1.09 | 1.28 | 1.42 | 1.42 | 1.32 | 1.23 | 1.14 | 1.06 |
| EUR | 0.35 | 0.34 | 0.38 | 0.42 | 0.45 | 0.42 | 0.42 | 0.41 | 0.35 | 0.33 | 0.27 |
| IND | 0.23 | 0.29 | 0.36 | 0.47 | 0.72 | 0.84 | 0.95 | 1.01 | 1.01 | 0.97 | 0.90 |
| JPN | 0.12 | 0.12 | 0.12 | 0.12 | 0.11 | 0.10 | 0.10 | 0.09 | 0.09 | 0.08 | 0.07 |
| LAM | 0.18 | 0.23 | 0.31 | 0.37 | 0.43 | 0.44 | 0.42 | 0.44 | 0.49 | 0.48 | 0.46 |
| MEA | 0.12 | 0.14 | 0.16 | 0.19 | 0.26 | 0.29 | 0.32 | 0.34 | 0.38 | 0.43 | 0.39 |
| NEU | 0.06 | 0.08 | 0.08 | 0.09 | 0.10 | 0.09 | 0.09 | 0.09 | 0.08 | 0.08 | 0.07 |
| OAS | 0.30 | 0.36 | 0.41 | 0.50 | 0.68 | 0.79 | 0.90 | 0.97 | 0.98 | 0.96 | 1.05 |
| REF | 0.21 | 0.20 | 0.29 | 0.28 | 0.29 | 0.27 | 0.26 | 0.23 | 0.20 | 0.18 | 0.16 |
| SSA | 0.09 | 0.10 | 0.14 | 0.16 | 0.21 | 0.27 | 0.36 | 0.47 | 0.58 | 0.70 | 0.79 |
| USA | 0.19 | 0.22 | 0.27 | 0.44 | 0.45 | 0.41 | 0.39 | 0.37 | 0.36 | 0.35 | 0.33 |

Table 1775: MAgPIE m4p\_SSP1 — Resources—Nitrogen—Manure—Eggs (Mt Nr/yr) [PART 1/2]

|     | 2050 | 2055 | 2060 | 2070 | 2080 | 2090 | 2100 |
|-----|------|------|------|------|------|------|------|
| GLO | 5.37 | 5.25 | 5.01 | 4.37 | 3.74 | 3.22 | 2.66 |
| CAZ | 0.02 | 0.02 | 0.02 | 0.02 | 0.02 | 0.02 | 0.02 |
| CHA | 0.98 | 0.88 | 0.79 | 0.65 | 0.52 | 0.42 | 0.33 |
| EUR | 0.25 | 0.25 | 0.24 | 0.22 | 0.20 | 0.18 | 0.16 |
| IND | 0.82 | 0.78 | 0.72 | 0.60 | 0.49 | 0.62 | 0.49 |
| JPN | 0.07 | 0.06 | 0.06 | 0.05 | 0.04 | 0.03 | 0.02 |
| LAM | 0.43 | 0.32 | 0.29 | 0.30 | 0.25 | 0.16 | 0.12 |
| MEA | 0.33 | 0.41 | 0.40 | 0.39 | 0.29 | 0.18 | 0.19 |
| NEU | 0.07 | 0.06 | 0.06 | 0.05 | 0.04 | 0.03 | 0.03 |
| OAS | 1.09 | 1.11 | 1.06 | 0.78 | 0.71 | 0.52 | 0.39 |
| REF | 0.14 | 0.13 | 0.12 | 0.11 | 0.09 | 0.08 | 0.06 |
| SSA | 0.84 | 0.90 | 0.93 | 0.88 | 0.78 | 0.67 | 0.56 |
| USA | 0.32 | 0.32 | 0.32 | 0.32 | 0.32 | 0.31 | 0.29 |

Table 1776: MAgPIE m4p\_SSP1 — Resources—Nitrogen—Manure—Eggs (Mt Nr/yr) [PART 2/2]

|     | 1965 | 1970 | 1975 | 1980 | 1985 | 1990 | 1995 | 2000 | 2005 | 2010 |
|-----|------|------|------|------|------|------|------|------|------|------|
| GLO | 1.17 | 1.40 | 1.57 | 1.66 | 1.83 | 2.02 | 2.37 | 2.78 | 3.19 | 3.64 |
| CAZ | 0.02 | 0.03 | 0.03 | 0.02 | 0.02 | 0.02 | 0.02 | 0.02 | 0.02 | 0.02 |
| CHA | 0.22 | 0.24 | 0.27 | 0.30 | 0.35 | 0.42 | 0.73 | 1.04 | 1.20 | 1.38 |
| EUR | 0.26 | 0.32 | 0.36 | 0.37 | 0.35 | 0.34 | 0.30 | 0.29 | 0.30 | 0.30 |
| IND | 0.02 | 0.03 | 0.04 | 0.04 | 0.04 | 0.06 | 0.07 | 0.09 | 0.12 | 0.16 |
| JPN | 0.05 | 0.06 | 0.06 | 0.07 | 0.07 | 0.07 | 0.08 | 0.08 | 0.07 | 0.08 |
| LAM | 0.09 | 0.10 | 0.13 | 0.15 | 0.20 | 0.24 | 0.26 | 0.28 | 0.32 | 0.38 |
| MEA | 0.03 | 0.03 | 0.04 | 0.05 | 0.07 | 0.10 | 0.12 | 0.12 | 0.15 | 0.15 |
| NEU | 0.02 | 0.02 | 0.03 | 0.03 | 0.04 | 0.05 | 0.05 | 0.05 | 0.05 | 0.05 |
| OAS | 0.09 | 0.11 | 0.13 | 0.18 | 0.21 | 0.26 | 0.32 | 0.37 | 0.45 | 0.55 |
| REF | 0.14 | 0.21 | 0.24 | 0.19 | 0.20 | 0.19 | 0.14 | 0.12 | 0.16 | 0.18 |
| SSA | 0.06 | 0.07 | 0.09 | 0.10 | 0.12 | 0.12 | 0.13 | 0.14 | 0.17 | 0.20 |
| USA | 0.16 | 0.17 | 0.15 | 0.16 | 0.15 | 0.15 | 0.16 | 0.18 | 0.19 | 0.19 |

Table 1777: IPCC — Resources—Nitrogen—Manure—Eggs (Mt Nr/yr)

|     | 1965 | 1970 | 1975 | 1980 | 1985 | 1990 | 1995 | 2000 | 2005 | 2010 |
|-----|------|------|------|------|------|------|------|------|------|------|
| GLO | 1.02 | 1.14 | 1.26 | 1.50 | 1.80 | 2.20 | 2.51 | 2.89 | 3.48 | 4.35 |
| CAZ | 0.02 | 0.02 | 0.02 | 0.02 | 0.02 | 0.02 | 0.02 | 0.02 | 0.02 | 0.04 |
| CHA | 0.21 | 0.14 | 0.16 | 0.18 | 0.27 | 0.40 | 0.58 | 0.73 | 0.76 | 1.02 |
| EUR | 0.24 | 0.28 | 0.26 | 0.36 | 0.36 | 0.38 | 0.37 | 0.34 | 0.39 | 0.44 |
| IND | 0.05 | 0.07 | 0.11 | 0.10 | 0.15 | 0.20 | 0.24 | 0.30 | 0.38 | 0.49 |
| JPN | 0.06 | 0.08 | 0.07 | 0.12 | 0.09 | 0.10 | 0.13 | 0.12 | 0.13 | 0.12 |
| LAM | 0.05 | 0.06 | 0.07 | 0.09 | 0.12 | 0.15 | 0.17 | 0.22 | 0.33 | 0.39 |
| MEA | 0.03 | 0.04 | 0.05 | 0.06 | 0.09 | 0.12 | 0.13 | 0.15 | 0.18 | 0.22 |
| NEU | 0.02 | 0.03 | 0.04 | 0.04 | 0.05 | 0.06 | 0.07 | 0.08 | 0.09 | 0.10 |
| OAS | 0.06 | 0.08 | 0.10 | 0.14 | 0.20 | 0.27 | 0.32 | 0.40 | 0.47 | 0.57 |
| REF | 0.12 | 0.17 | 0.21 | 0.19 | 0.21 | 0.24 | 0.17 | 0.16 | 0.25 | 0.27 |
| SSA | 0.03 | 0.04 | 0.04 | 0.05 | 0.06 | 0.07 | 0.10 | 0.10 | 0.15 | 0.17 |
| USA | 0.11 | 0.14 | 0.13 | 0.16 | 0.18 | 0.18 | 0.23 | 0.26 | 0.32 | 0.52 |

Table 1778: Bodirsky — Resources—Nitrogen—Manure—Eggs (Mt Nr/yr)

56.2.3 Manure Collected As Fuel

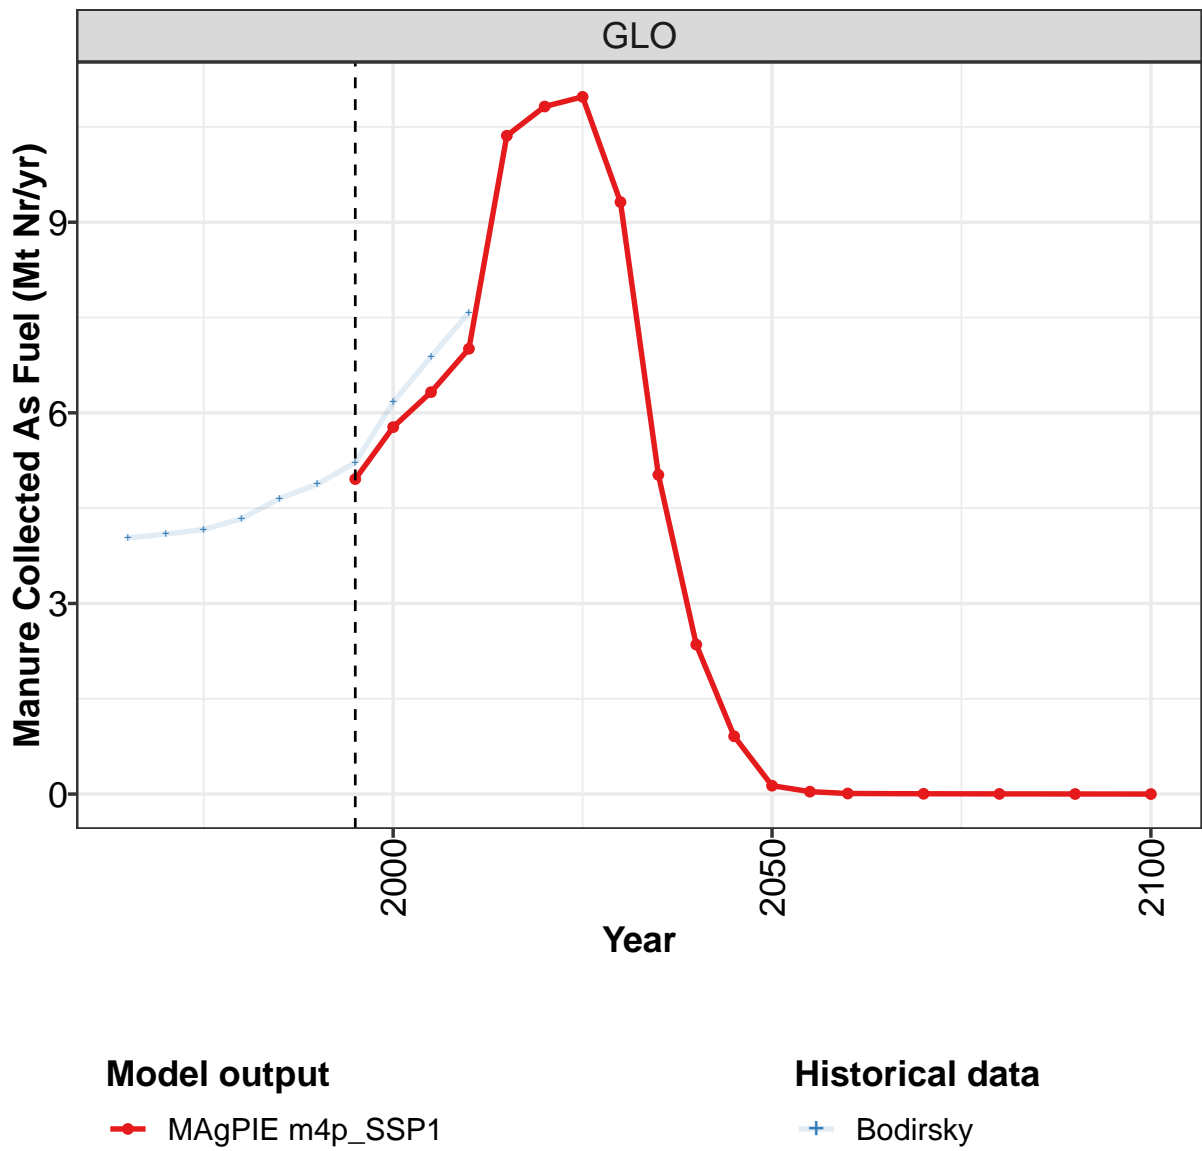

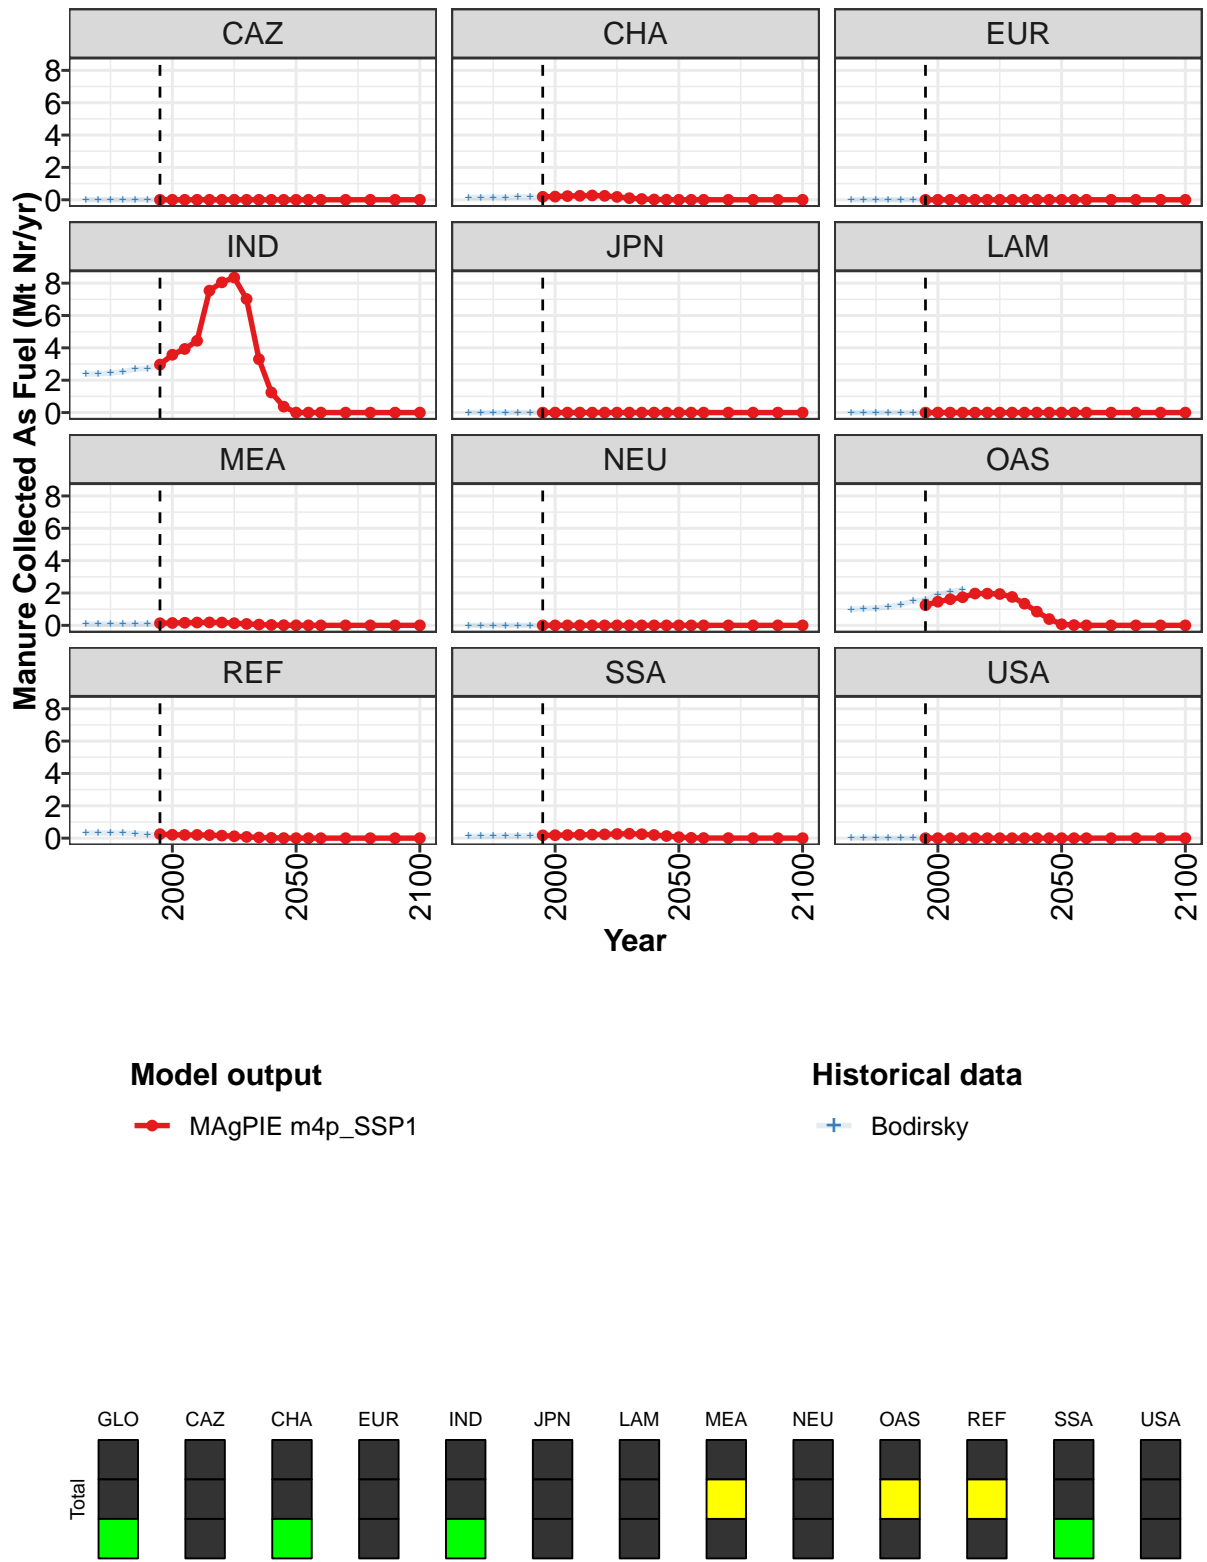

Figure 462: MAgPIE m4p\_SSP1 — Resources—Nitrogen—Manure—Manure Collected As Fuel (Mt Nr/yr)

|     | 1995 | 2000 | 2005 | 2010 | 2015 | 2020 | 2025 | 2030 | 2035 | 2040 | 2045 |
|-----|------|------|------|------|------|------|------|------|------|------|------|
| GLO | 5.0  | 5.8  | 6.3  | 7.0  | 10.4 | 10.8 | 11.0 | 9.3  | 5.0  | 2.4  | 0.9  |
| CAZ | 0.0  | 0.0  | 0.0  | 0.0  | 0.0  | 0.0  | 0.0  | 0.0  | 0.0  | 0.0  | 0.0  |
| CHA | 0.2  | 0.2  | 0.2  | 0.2  | 0.3  | 0.2  | 0.2  | 0.1  | 0.1  | 0.0  | 0.0  |
| EUR | 0.0  | 0.0  | 0.0  | 0.0  | 0.0  | 0.0  | 0.0  | 0.0  | 0.0  | 0.0  | 0.0  |
| IND | 3.0  | 3.6  | 3.9  | 4.4  | 7.5  | 8.1  | 8.3  | 7.0  | 3.3  | 1.2  | 0.4  |
| JPN | 0.0  | 0.0  | 0.0  | 0.0  | 0.0  | 0.0  | 0.0  | 0.0  | 0.0  | 0.0  | 0.0  |
| LAM | 0.0  | 0.0  | 0.0  | 0.0  | 0.0  | 0.0  | 0.0  | 0.0  | 0.0  | 0.0  | 0.0  |
| MEA | 0.1  | 0.1  | 0.2  | 0.2  | 0.2  | 0.2  | 0.1  | 0.1  | 0.1  | 0.0  | 0.0  |
| NEU | 0.0  | 0.0  | 0.0  | 0.0  | 0.0  | 0.0  | 0.0  | 0.0  | 0.0  | 0.0  | 0.0  |
| OAS | 1.2  | 1.5  | 1.6  | 1.7  | 2.0  | 2.0  | 1.9  | 1.8  | 1.3  | 0.8  | 0.4  |
| REF | 0.3  | 0.2  | 0.2  | 0.2  | 0.2  | 0.2  | 0.1  | 0.1  | 0.0  | 0.0  | 0.0  |
| SSA | 0.2  | 0.2  | 0.2  | 0.2  | 0.2  | 0.2  | 0.3  | 0.3  | 0.2  | 0.2  | 0.1  |
| USA | 0.0  | 0.0  | 0.0  | 0.0  | 0.0  | 0.0  | 0.0  | 0.0  | 0.0  | 0.0  | 0.0  |

Table 1779: MAgPIE m4p\_SSP1 — Resources—Nitrogen—Manure—Manure Collected As Fuel (Mt Nr/yr)  
[PART 1/2]

|     | 2050 | 2055 | 2060 | 2070 | 2080 | 2090 | 2100 |
|-----|------|------|------|------|------|------|------|
| GLO | 0.1  | 0.0  | 0.0  | 0.0  | 0.0  | 0.0  | 0.0  |
| CAZ | 0.0  | 0.0  | 0.0  | 0.0  | 0.0  | 0.0  | 0.0  |
| CHA | 0.0  | 0.0  | 0.0  | 0.0  | 0.0  | 0.0  | 0.0  |
| EUR | 0.0  | 0.0  | 0.0  | 0.0  | 0.0  | 0.0  | 0.0  |
| IND | 0.0  | 0.0  | 0.0  | 0.0  | 0.0  | 0.0  | 0.0  |
| JPN | 0.0  | 0.0  | 0.0  | 0.0  | 0.0  | 0.0  | 0.0  |
| LAM | 0.0  | 0.0  | 0.0  | 0.0  | 0.0  | 0.0  | 0.0  |
| MEA | 0.0  | 0.0  | 0.0  | 0.0  | 0.0  | 0.0  | 0.0  |
| NEU | 0.0  | 0.0  | 0.0  | 0.0  | 0.0  | 0.0  | 0.0  |
| OAS | 0.1  | 0.0  | 0.0  | 0.0  | 0.0  | 0.0  | 0.0  |
| REF | 0.0  | 0.0  | 0.0  | 0.0  | 0.0  | 0.0  | 0.0  |
| SSA | 0.1  | 0.0  | 0.0  | 0.0  | 0.0  | 0.0  | 0.0  |
| USA | 0.0  | 0.0  | 0.0  | 0.0  | 0.0  | 0.0  | 0.0  |

Table 1780: MAgPIE m4p\_SSP1 — Resources—Nitrogen—Manure—Manure Collected As Fuel (Mt Nr/yr)  
[PART 2/2]

|     | 1965 | 1970 | 1975 | 1980 | 1985 | 1990 | 1995 | 2000 | 2005 | 2010 |
|-----|------|------|------|------|------|------|------|------|------|------|
| GLO | 4.03 | 4.09 | 4.16 | 4.33 | 4.65 | 4.88 | 5.22 | 6.17 | 6.88 | 7.58 |
| CAZ | 0.00 | 0.00 | 0.00 | 0.00 | 0.00 | 0.00 | 0.00 | 0.00 | 0.00 | 0.00 |
| CHA | 0.13 | 0.15 | 0.15 | 0.14 | 0.17 | 0.18 | 0.19 | 0.20 | 0.23 | 0.24 |
| EUR | 0.00 | 0.00 | 0.00 | 0.00 | 0.00 | 0.00 | 0.00 | 0.00 | 0.00 | 0.00 |
| IND | 2.39 | 2.39 | 2.45 | 2.52 | 2.68 | 2.73 | 2.98 | 3.59 | 4.08 | 4.60 |
| JPN | 0.00 | 0.00 | 0.00 | 0.00 | 0.00 | 0.00 | 0.00 | 0.00 | 0.00 | 0.00 |
| LAM | 0.00 | 0.00 | 0.00 | 0.00 | 0.00 | 0.00 | 0.00 | 0.00 | 0.00 | 0.00 |
| MEA | 0.08 | 0.08 | 0.07 | 0.07 | 0.08 | 0.09 | 0.09 | 0.11 | 0.12 | 0.12 |
| NEU | 0.00 | 0.00 | 0.00 | 0.00 | 0.00 | 0.00 | 0.00 | 0.00 | 0.00 | 0.00 |
| OAS | 0.98 | 1.03 | 1.05 | 1.15 | 1.29 | 1.50 | 1.59 | 1.91 | 2.07 | 2.22 |
| REF | 0.32 | 0.32 | 0.31 | 0.32 | 0.29 | 0.23 | 0.19 | 0.17 | 0.18 | 0.19 |
| SSA | 0.12 | 0.12 | 0.13 | 0.14 | 0.15 | 0.16 | 0.17 | 0.18 | 0.20 | 0.21 |
| USA | 0.00 | 0.00 | 0.00 | 0.00 | 0.00 | 0.00 | 0.00 | 0.00 | 0.00 | 0.00 |

Table 1781: Bodirsky — Resources—Nitrogen—Manure—Manure Collected As Fuel (Mt Nr/yr)

56.2.4 Manure From Grazing

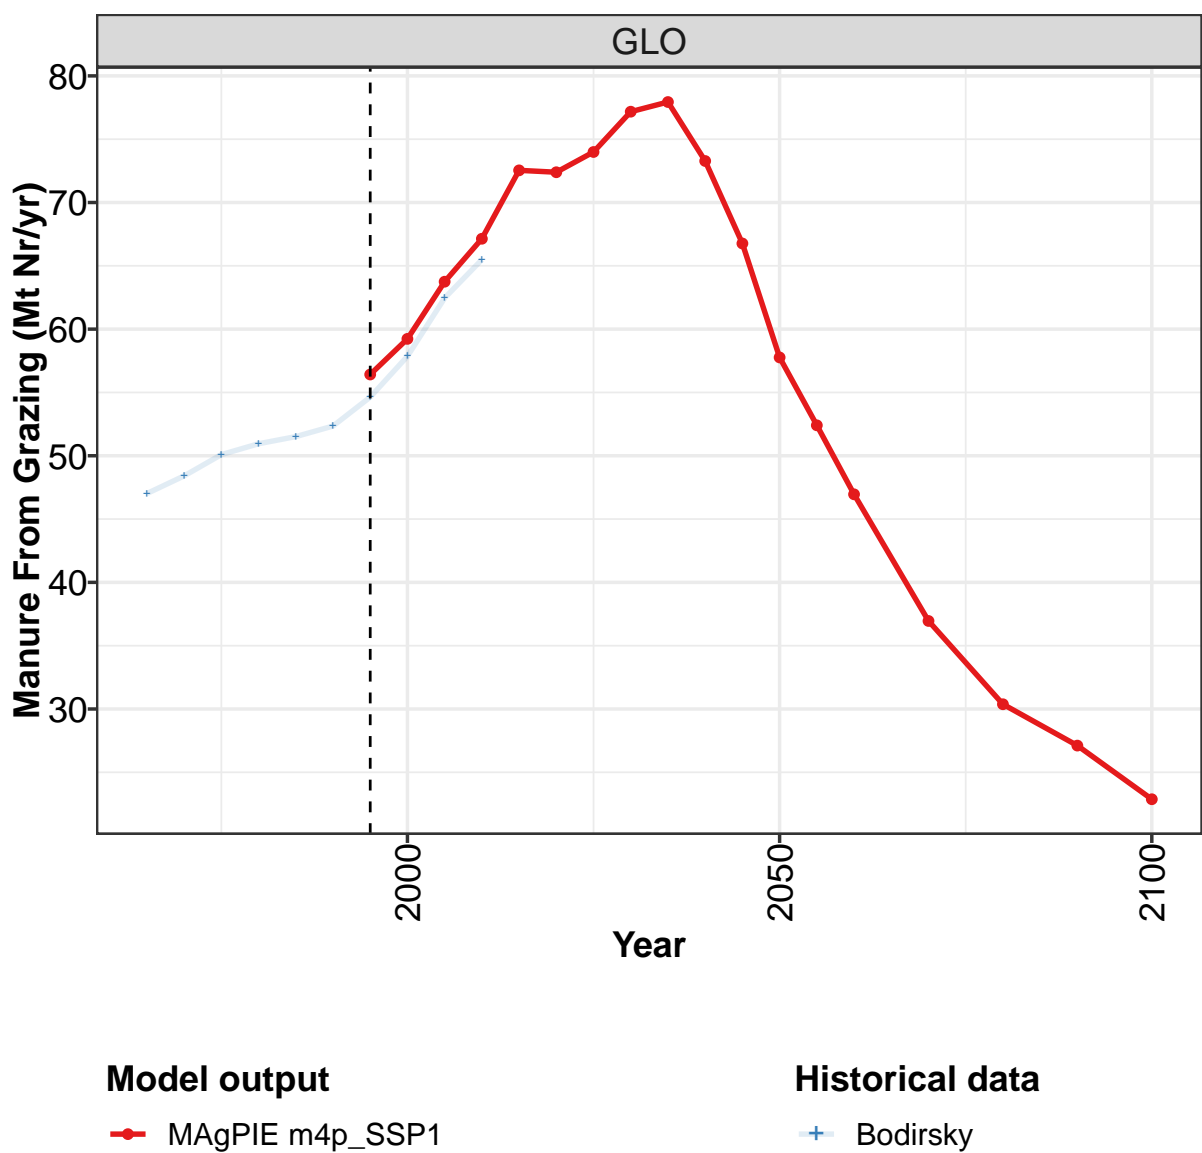

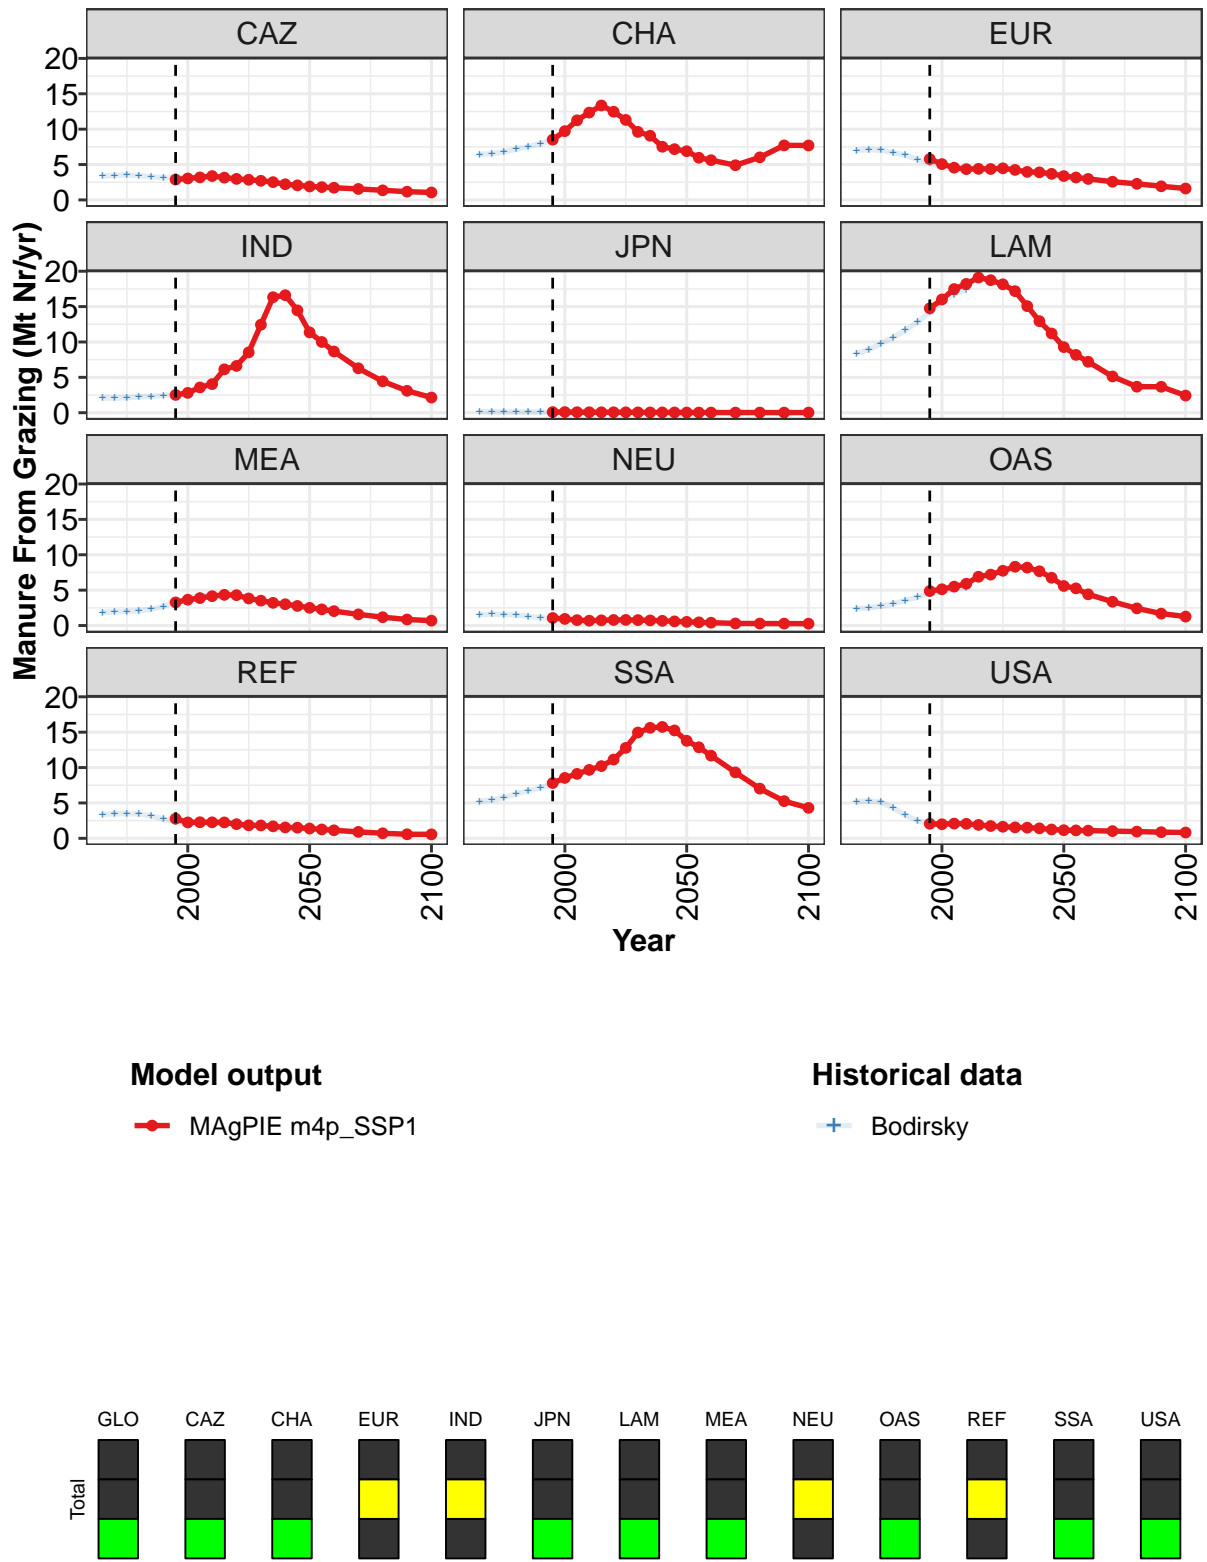

Figure 463: MAgPIE m4p\_SSP1 — Resources—Nitrogen—Manure—Manure From Grazing (Mt Nr/yr)



|     | 1995 | 2000 | 2005 | 2010 | 2015 | 2020 | 2025 | 2030 | 2035 | 2040 | 2045 |
|-----|------|------|------|------|------|------|------|------|------|------|------|
| GLO | 56.4 | 59.2 | 63.7 | 67.1 | 72.5 | 72.4 | 74.0 | 77.2 | 77.9 | 73.3 | 66.8 |
| CAZ | 2.9  | 3.0  | 3.2  | 3.4  | 3.2  | 3.0  | 2.9  | 2.7  | 2.5  | 2.2  | 2.1  |
| CHA | 8.5  | 9.7  | 11.3 | 12.3 | 13.4 | 12.5 | 11.3 | 9.6  | 9.1  | 7.5  | 7.2  |
| EUR | 5.8  | 5.1  | 4.6  | 4.4  | 4.4  | 4.4  | 4.5  | 4.2  | 4.0  | 3.9  | 3.7  |
| IND | 2.5  | 2.8  | 3.6  | 4.0  | 6.1  | 6.6  | 8.5  | 12.4 | 16.3 | 16.6 | 14.5 |
| JPN | 0.1  | 0.1  | 0.1  | 0.1  | 0.1  | 0.1  | 0.1  | 0.1  | 0.0  | 0.0  | 0.0  |
| LAM | 14.8 | 16.0 | 17.5 | 18.2 | 19.1 | 18.7 | 18.2 | 17.2 | 15.1 | 12.9 | 11.2 |
| MEA | 3.3  | 3.7  | 3.9  | 4.2  | 4.3  | 4.3  | 3.8  | 3.5  | 3.2  | 3.0  | 2.8  |
| NEU | 1.1  | 0.9  | 0.8  | 0.7  | 0.7  | 0.8  | 0.8  | 0.8  | 0.7  | 0.7  | 0.6  |
| OAS | 4.9  | 5.1  | 5.5  | 5.9  | 6.9  | 7.2  | 7.7  | 8.3  | 8.2  | 7.7  | 6.8  |
| REF | 2.8  | 2.2  | 2.3  | 2.3  | 2.2  | 2.0  | 1.8  | 1.8  | 1.7  | 1.5  | 1.5  |
| SSA | 7.8  | 8.5  | 9.1  | 9.7  | 10.2 | 11.1 | 12.8 | 15.0 | 15.6 | 15.7 | 15.3 |
| USA | 2.1  | 2.0  | 2.1  | 2.1  | 1.9  | 1.7  | 1.6  | 1.6  | 1.5  | 1.4  | 1.3  |

Table 1782: MAgPIE m4p\_SSP1 — Resources—Nitrogen—Manure—Manure From Grazing (Mt Nr/yr) [PART 1/2]

|     | 2050 | 2055 | 2060 | 2070 | 2080 | 2090 | 2100 |
|-----|------|------|------|------|------|------|------|
| GLO | 57.8 | 52.4 | 47.0 | 37.0 | 30.4 | 27.1 | 22.9 |
| CAZ | 1.9  | 1.8  | 1.7  | 1.6  | 1.4  | 1.2  | 1.1  |
| CHA | 6.9  | 6.0  | 5.6  | 4.9  | 6.0  | 7.7  | 7.7  |
| EUR | 3.4  | 3.2  | 3.0  | 2.6  | 2.3  | 1.9  | 1.6  |
| IND | 11.4 | 10.0 | 8.7  | 6.3  | 4.4  | 3.1  | 2.2  |
| JPN | 0.0  | 0.0  | 0.0  | 0.0  | 0.0  | 0.0  | 0.0  |
| LAM | 9.3  | 8.2  | 7.2  | 5.1  | 3.7  | 3.7  | 2.4  |
| MEA | 2.5  | 2.3  | 2.0  | 1.6  | 1.2  | 0.9  | 0.7  |
| NEU | 0.5  | 0.5  | 0.4  | 0.3  | 0.3  | 0.3  | 0.3  |
| OAS | 5.6  | 5.3  | 4.4  | 3.4  | 2.4  | 1.7  | 1.3  |
| REF | 1.4  | 1.3  | 1.1  | 0.9  | 0.7  | 0.6  | 0.6  |
| SSA | 13.8 | 12.9 | 11.7 | 9.3  | 7.0  | 5.3  | 4.3  |
| USA | 1.2  | 1.1  | 1.1  | 1.0  | 1.0  | 0.9  | 0.8  |

Table 1783: MAgPIE m4p\_SSP1 — Resources—Nitrogen—Manure—Manure From Grazing (Mt Nr/yr) [PART 2/2]

|     | 1965 | 1970 | 1975 | 1980 | 1985 | 1990 | 1995 | 2000 | 2005 | 2010 |
|-----|------|------|------|------|------|------|------|------|------|------|
| GLO | 47.0 | 48.4 | 50.1 | 50.9 | 51.5 | 52.3 | 54.6 | 57.9 | 62.5 | 65.5 |
| CAZ | 3.4  | 3.5  | 3.5  | 3.5  | 3.3  | 3.2  | 3.2  | 3.2  | 3.3  | 3.3  |
| CHA | 6.4  | 6.5  | 6.8  | 7.2  | 7.5  | 7.9  | 8.6  | 9.8  | 11.2 | 12.2 |
| EUR | 7.0  | 7.1  | 7.0  | 6.7  | 6.3  | 5.7  | 5.2  | 4.6  | 4.2  | 4.0  |
| IND | 2.1  | 2.1  | 2.1  | 2.3  | 2.3  | 2.4  | 2.5  | 2.8  | 3.8  | 4.3  |
| JPN | 0.1  | 0.1  | 0.1  | 0.1  | 0.1  | 0.1  | 0.1  | 0.1  | 0.1  | 0.1  |
| LAM | 8.4  | 8.9  | 9.8  | 10.6 | 11.7 | 12.8 | 14.2 | 15.6 | 16.7 | 17.4 |
| MEA | 1.9  | 1.9  | 2.0  | 2.1  | 2.3  | 2.7  | 3.3  | 3.8  | 4.2  | 4.4  |
| NEU | 1.6  | 1.6  | 1.6  | 1.5  | 1.3  | 1.1  | 1.0  | 0.8  | 0.7  | 0.6  |
| OAS | 2.4  | 2.5  | 2.7  | 3.1  | 3.5  | 4.0  | 4.5  | 4.7  | 5.1  | 5.4  |
| REF | 3.4  | 3.5  | 3.5  | 3.4  | 3.2  | 2.7  | 2.3  | 1.9  | 2.0  | 2.1  |
| SSA | 5.2  | 5.4  | 5.8  | 6.3  | 6.7  | 7.1  | 7.6  | 8.3  | 9.0  | 9.6  |
| USA | 5.2  | 5.3  | 5.1  | 4.3  | 3.3  | 2.5  | 2.1  | 2.0  | 2.1  | 2.1  |

Table 1784: Bodirsky — Resources—Nitrogen—Manure—Manure From Grazing (Mt Nr/yr)

56.2.5 Manure From Stubble Grazing

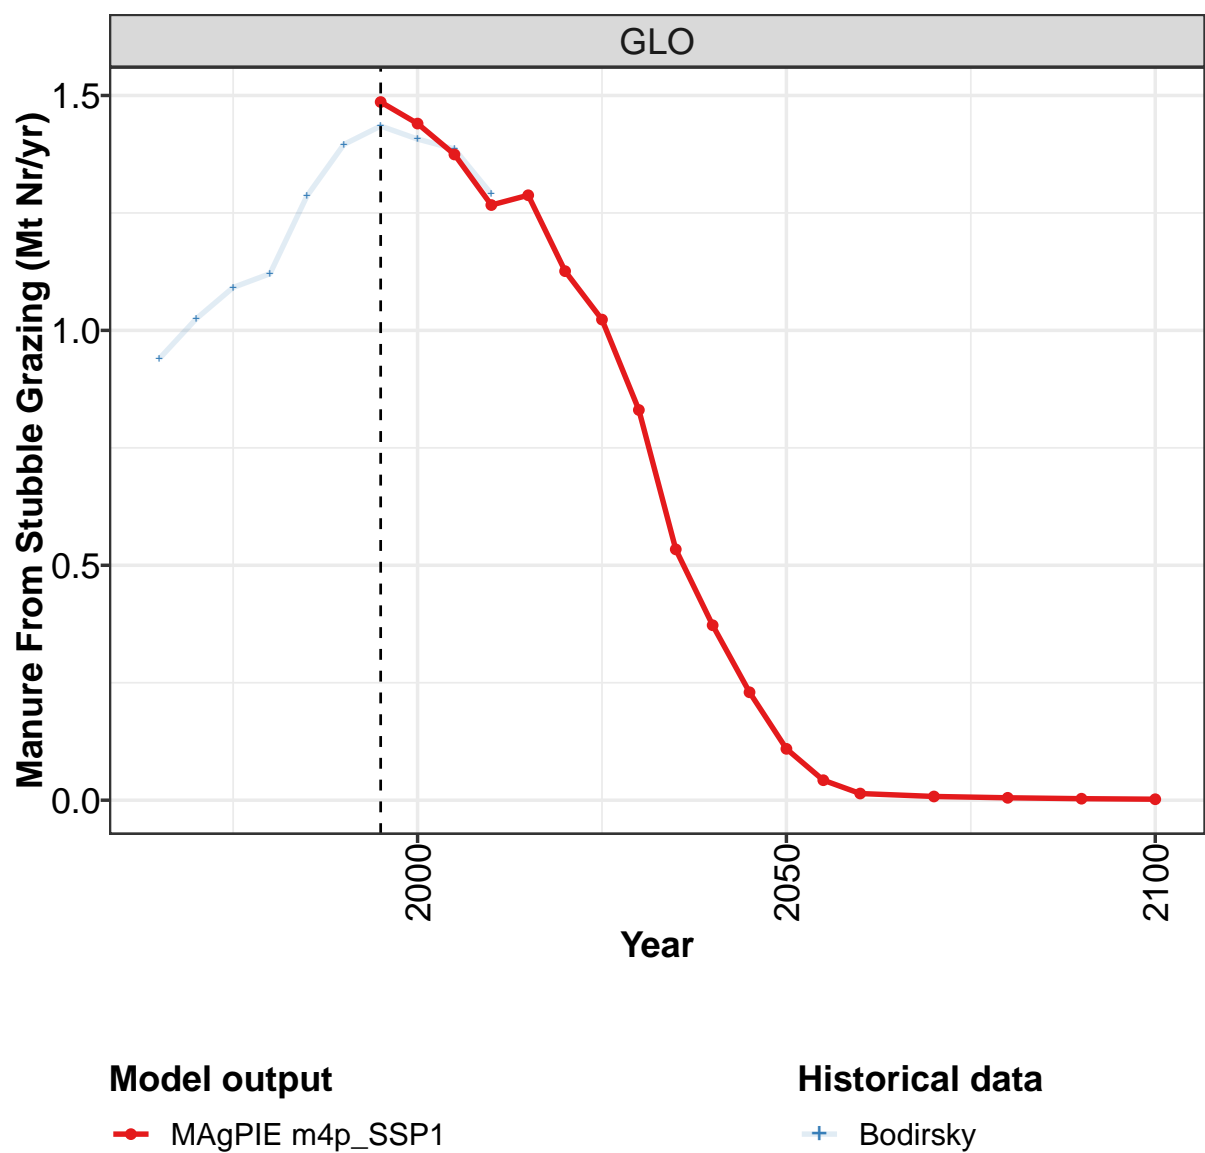

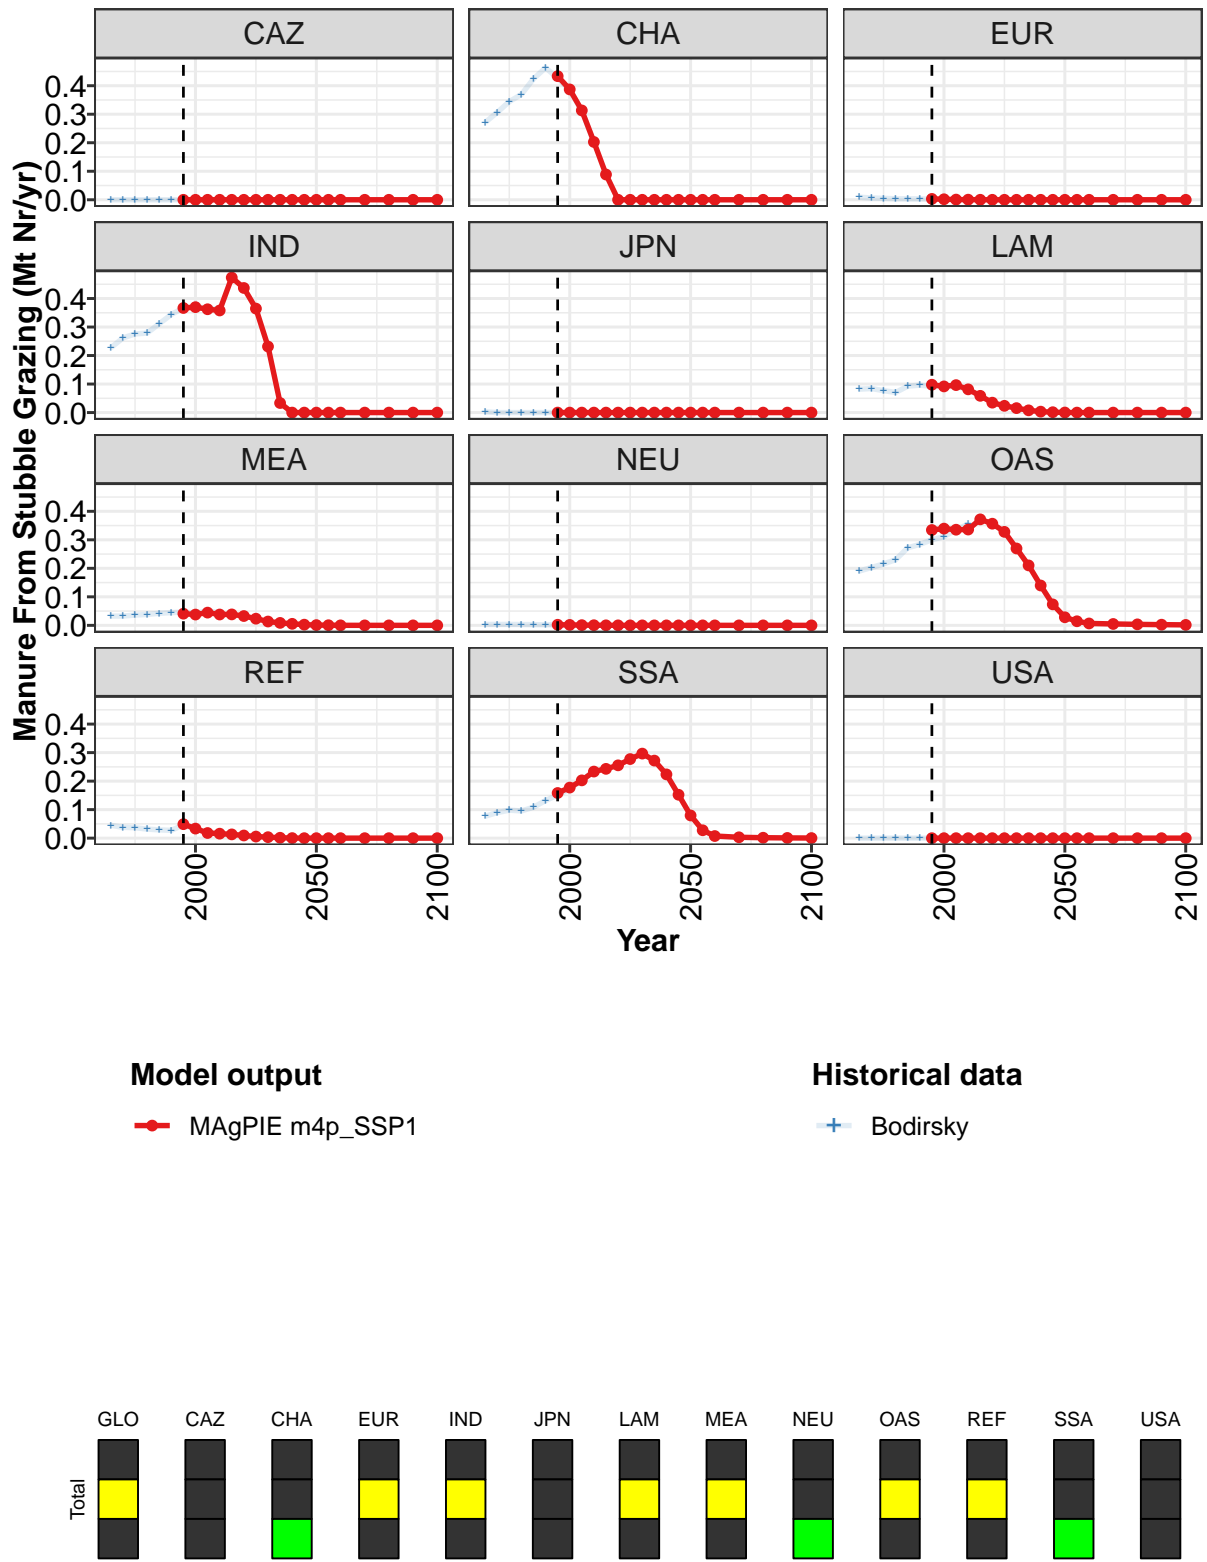

Figure 464: MAgPIE m4p\_SSP1 — Resources—Nitrogen—Manure—Manure From Stubble Grazing (Mt Nr/yr)

|     | 1995 | 2000 | 2005 | 2010 | 2015 | 2020 | 2025 | 2030 | 2035 | 2040 | 2045 |
|-----|------|------|------|------|------|------|------|------|------|------|------|
| GLO | 1.49 | 1.44 | 1.37 | 1.27 | 1.29 | 1.13 | 1.02 | 0.83 | 0.53 | 0.37 | 0.23 |
| CAZ | 0.00 | 0.00 | 0.00 | 0.00 | 0.00 | 0.00 | 0.00 | 0.00 | 0.00 | 0.00 | 0.00 |
| CHA | 0.43 | 0.39 | 0.31 | 0.20 | 0.09 | 0.00 | 0.00 | 0.00 | 0.00 | 0.00 | 0.00 |
| EUR | 0.00 | 0.00 | 0.00 | 0.00 | 0.00 | 0.00 | 0.00 | 0.00 | 0.00 | 0.00 | 0.00 |
| IND | 0.37 | 0.37 | 0.36 | 0.36 | 0.47 | 0.44 | 0.36 | 0.23 | 0.03 | 0.00 | 0.00 |
| JPN | 0.00 | 0.00 | 0.00 | 0.00 | 0.00 | 0.00 | 0.00 | 0.00 | 0.00 | 0.00 | 0.00 |
| LAM | 0.10 | 0.09 | 0.10 | 0.08 | 0.06 | 0.03 | 0.02 | 0.02 | 0.01 | 0.00 | 0.00 |
| MEA | 0.04 | 0.04 | 0.04 | 0.04 | 0.04 | 0.03 | 0.02 | 0.01 | 0.01 | 0.01 | 0.00 |
| NEU | 0.00 | 0.00 | 0.00 | 0.00 | 0.00 | 0.00 | 0.00 | 0.00 | 0.00 | 0.00 | 0.00 |
| OAS | 0.33 | 0.34 | 0.34 | 0.34 | 0.37 | 0.36 | 0.33 | 0.27 | 0.21 | 0.14 | 0.07 |
| REF | 0.05 | 0.03 | 0.02 | 0.02 | 0.01 | 0.01 | 0.01 | 0.00 | 0.00 | 0.00 | 0.00 |
| SSA | 0.16 | 0.18 | 0.20 | 0.23 | 0.24 | 0.26 | 0.28 | 0.30 | 0.27 | 0.22 | 0.15 |
| USA | 0.00 | 0.00 | 0.00 | 0.00 | 0.00 | 0.00 | 0.00 | 0.00 | 0.00 | 0.00 | 0.00 |

Table 1785: MAgPIE m4p\_SSP1 — Resources—Nitrogen—Manure—Manure From Stubble Grazing (Mt Nr/yr)  
[PART 1/2]

|     | 2050 | 2055 | 2060 | 2070 | 2080 | 2090 | 2100 |
|-----|------|------|------|------|------|------|------|
| GLO | 0.11 | 0.04 | 0.01 | 0.01 | 0.01 | 0.00 | 0.00 |
| CAZ | 0.00 | 0.00 | 0.00 | 0.00 | 0.00 | 0.00 | 0.00 |
| CHA | 0.00 | 0.00 | 0.00 | 0.00 | 0.00 | 0.00 | 0.00 |
| EUR | 0.00 | 0.00 | 0.00 | 0.00 | 0.00 | 0.00 | 0.00 |
| IND | 0.00 | 0.00 | 0.00 | 0.00 | 0.00 | 0.00 | 0.00 |
| JPN | 0.00 | 0.00 | 0.00 | 0.00 | 0.00 | 0.00 | 0.00 |
| LAM | 0.00 | 0.00 | 0.00 | 0.00 | 0.00 | 0.00 | 0.00 |
| MEA | 0.00 | 0.00 | 0.00 | 0.00 | 0.00 | 0.00 | 0.00 |
| NEU | 0.00 | 0.00 | 0.00 | 0.00 | 0.00 | 0.00 | 0.00 |
| OAS | 0.03 | 0.01 | 0.01 | 0.00 | 0.00 | 0.00 | 0.00 |
| REF | 0.00 | 0.00 | 0.00 | 0.00 | 0.00 | 0.00 | 0.00 |
| SSA | 0.08 | 0.03 | 0.01 | 0.00 | 0.00 | 0.00 | 0.00 |
| USA | 0.00 | 0.00 | 0.00 | 0.00 | 0.00 | 0.00 | 0.00 |

Table 1786: MAgPIE m4p\_SSP1 — Resources—Nitrogen—Manure—Manure From Stubble Grazing (Mt Nr/yr)  
[PART 2/2]

|     | 1965 | 1970 | 1975 | 1980 | 1985 | 1990 | 1995 | 2000 | 2005 | 2010 |
|-----|------|------|------|------|------|------|------|------|------|------|
| GLO | 0.94 | 1.02 | 1.09 | 1.12 | 1.29 | 1.40 | 1.43 | 1.41 | 1.39 | 1.29 |
| CAZ | 0.00 | 0.00 | 0.00 | 0.00 | 0.00 | 0.00 | 0.00 | 0.00 | 0.00 | 0.00 |
| CHA | 0.27 | 0.31 | 0.34 | 0.37 | 0.42 | 0.46 | 0.43 | 0.38 | 0.31 | 0.20 |
| EUR | 0.01 | 0.01 | 0.01 | 0.00 | 0.00 | 0.00 | 0.00 | 0.00 | 0.00 | 0.00 |
| IND | 0.23 | 0.26 | 0.28 | 0.28 | 0.31 | 0.34 | 0.37 | 0.37 | 0.37 | 0.36 |
| JPN | 0.00 | 0.00 | 0.00 | 0.00 | 0.00 | 0.00 | 0.00 | 0.00 | 0.00 | 0.00 |
| LAM | 0.08 | 0.08 | 0.08 | 0.07 | 0.09 | 0.10 | 0.09 | 0.09 | 0.10 | 0.08 |
| MEA | 0.03 | 0.03 | 0.04 | 0.04 | 0.04 | 0.04 | 0.05 | 0.04 | 0.05 | 0.04 |
| NEU | 0.00 | 0.00 | 0.00 | 0.00 | 0.00 | 0.00 | 0.00 | 0.00 | 0.00 | 0.00 |
| OAS | 0.19 | 0.20 | 0.22 | 0.23 | 0.27 | 0.28 | 0.30 | 0.31 | 0.34 | 0.35 |
| REF | 0.04 | 0.04 | 0.04 | 0.03 | 0.03 | 0.03 | 0.05 | 0.03 | 0.02 | 0.02 |
| SSA | 0.08 | 0.09 | 0.10 | 0.10 | 0.11 | 0.13 | 0.15 | 0.17 | 0.20 | 0.24 |
| USA | 0.00 | 0.00 | 0.00 | 0.00 | 0.00 | 0.00 | 0.00 | 0.00 | 0.00 | 0.00 |

Table 1787: Bodirsky — Resources—Nitrogen—Manure—Manure From Stubble Grazing (Mt Nr/yr)

56.2.6 Manure In Confinements

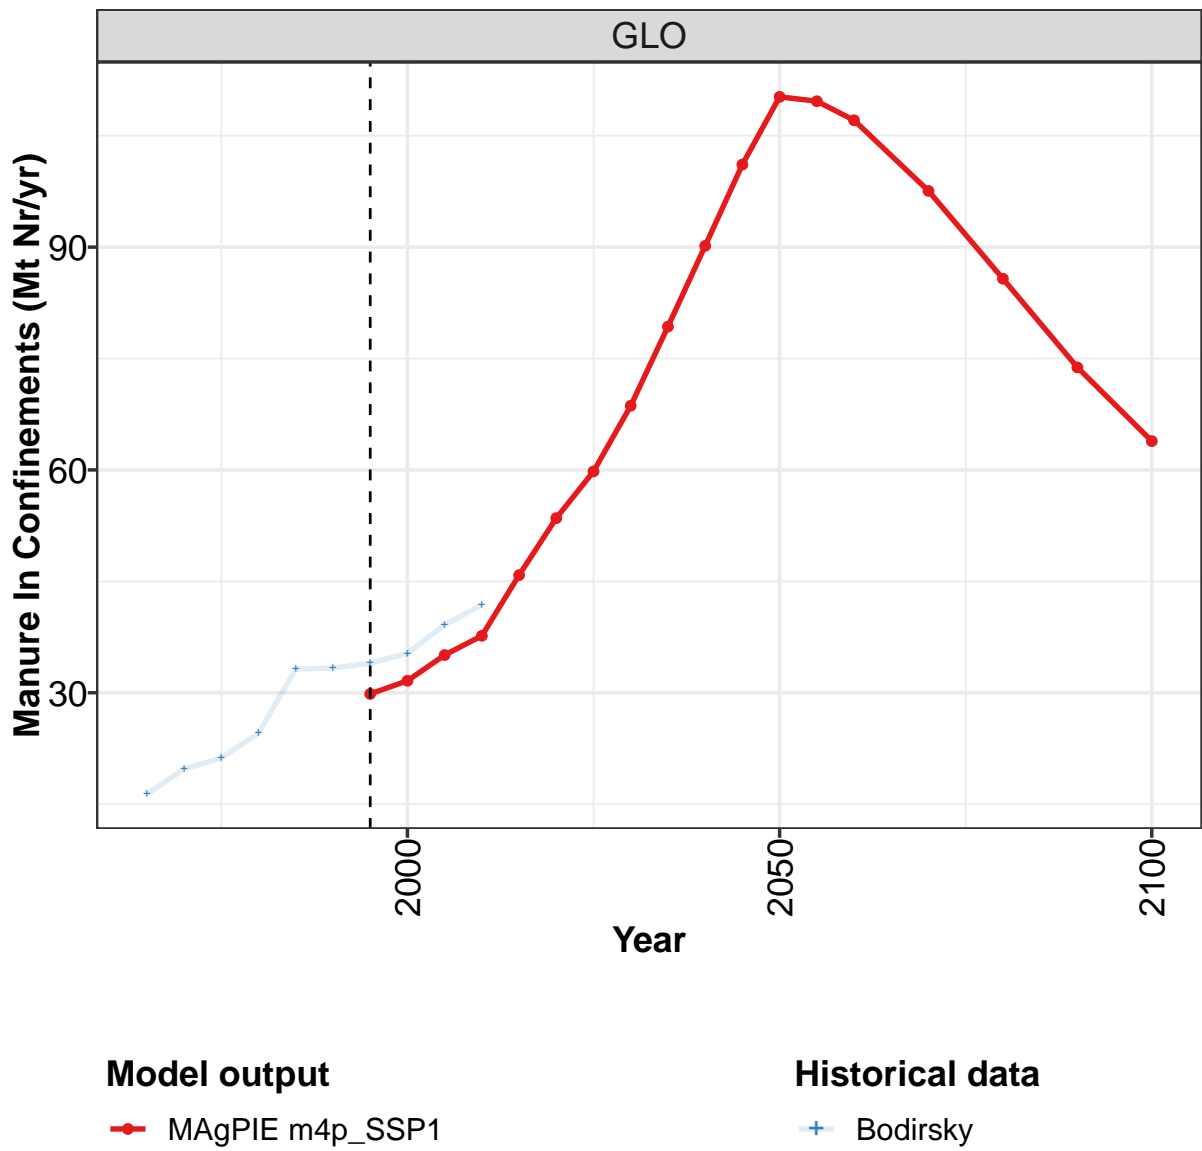

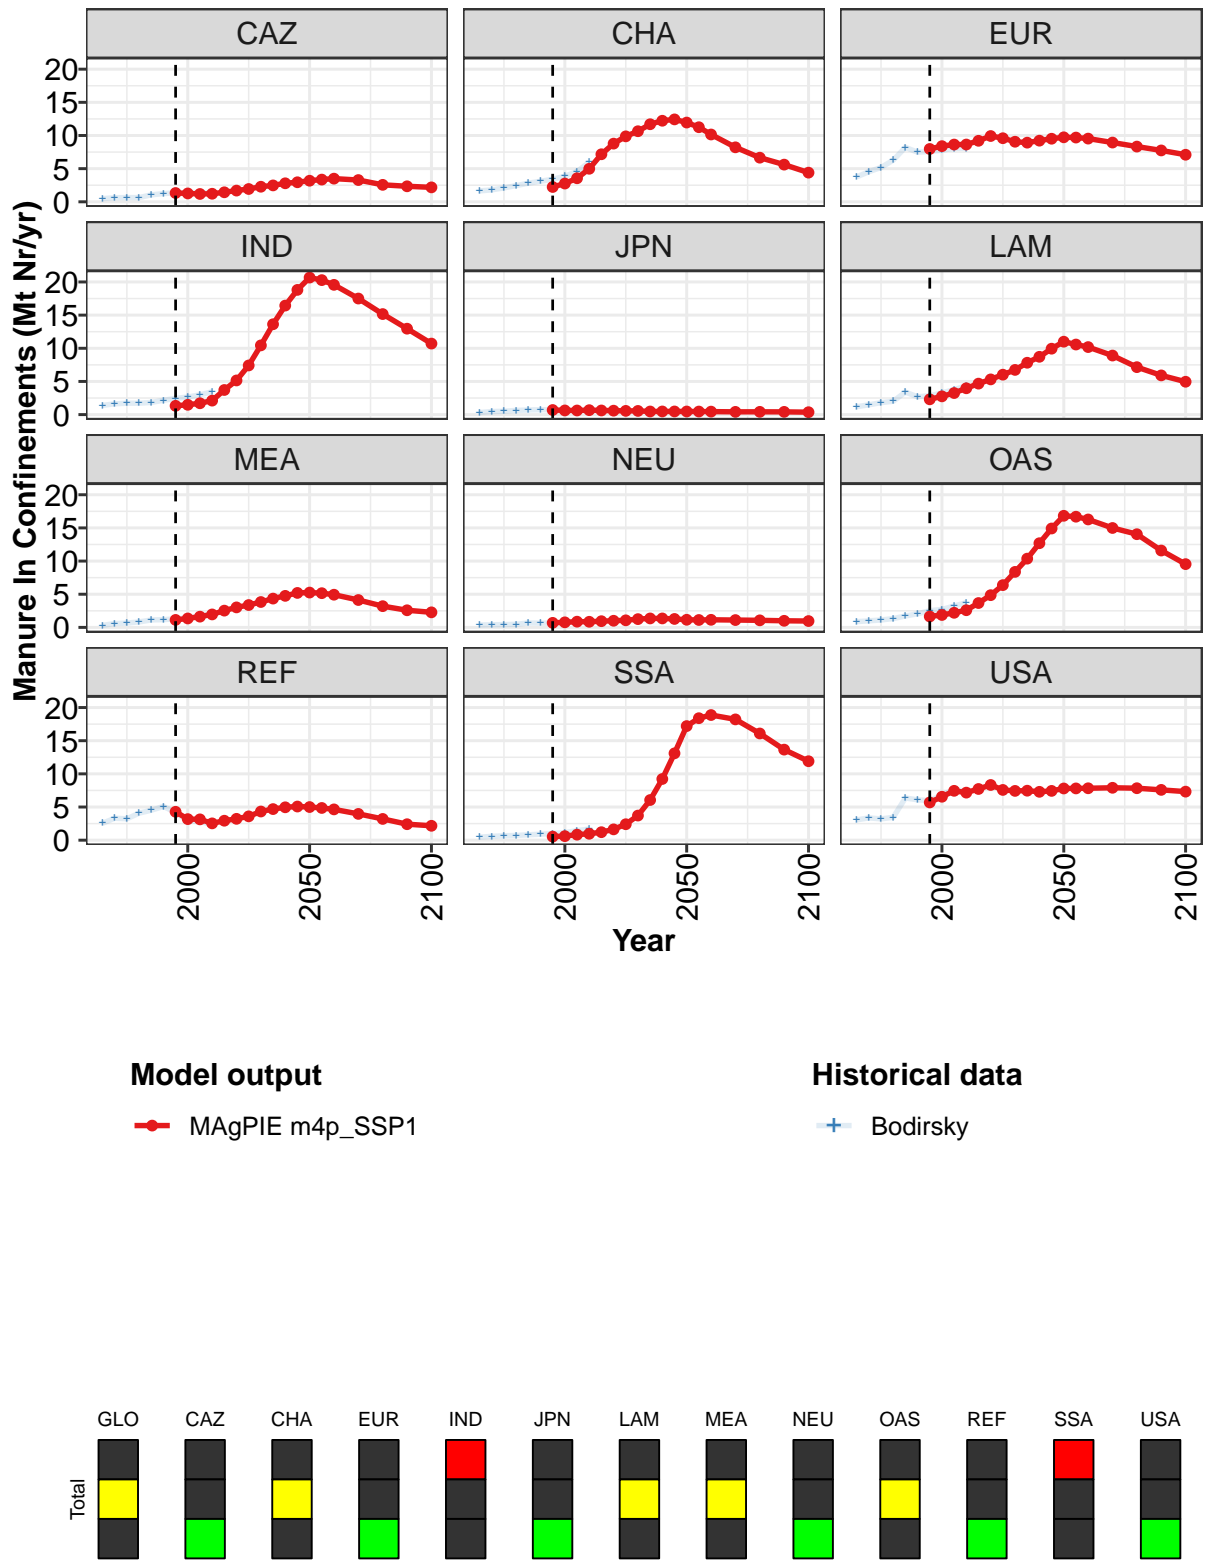

Figure 465: MAgPIE m4p\_SSP1 — Resources—Nitrogen—Manure—Manure In Confinements (Mt Nr/yr)

|     | 1995 | 2000 | 2005 | 2010 | 2015 | 2020 | 2025 | 2030 | 2035 | 2040 | 2045 |
|-----|------|------|------|------|------|------|------|------|------|------|------|
| GLO | 30   | 32   | 35   | 38   | 46   | 54   | 60   | 69   | 79   | 90   | 101  |
| CAZ | 1    | 1    | 1    | 1    | 1    | 2    | 2    | 2    | 2    | 3    | 3    |
| CHA | 2    | 3    | 4    | 5    | 7    | 9    | 10   | 11   | 12   | 12   | 12   |
| EUR | 8    | 8    | 9    | 9    | 9    | 10   | 10   | 9    | 9    | 9    | 10   |
| IND | 1    | 1    | 2    | 2    | 4    | 5    | 7    | 10   | 14   | 16   | 19   |
| JPN | 1    | 1    | 1    | 1    | 1    | 1    | 1    | 1    | 0    | 0    | 0    |
| LAM | 2    | 3    | 3    | 4    | 5    | 5    | 6    | 7    | 8    | 9    | 10   |
| MEA | 1    | 1    | 2    | 2    | 3    | 3    | 3    | 4    | 4    | 5    | 5    |
| NEU | 1    | 1    | 1    | 1    | 1    | 1    | 1    | 1    | 1    | 1    | 1    |
| OAS | 2    | 2    | 2    | 3    | 4    | 5    | 6    | 8    | 10   | 13   | 15   |
| REF | 4    | 3    | 3    | 3    | 3    | 3    | 4    | 4    | 5    | 5    | 5    |
| SSA | 1    | 1    | 1    | 1    | 1    | 2    | 2    | 4    | 6    | 9    | 13   |
| USA | 6    | 7    | 7    | 7    | 8    | 8    | 8    | 7    | 7    | 7    | 7    |

Table 1788: MAgPIE m4p\_SSP1 — Resources—Nitrogen—Manure—Manure In Confinements (Mt Nr/yr)  
[PART 1/2]

|     | 2050 | 2055 | 2060 | 2070 | 2080 | 2090 | 2100 |
|-----|------|------|------|------|------|------|------|
| GLO | 110  | 110  | 107  | 98   | 86   | 74   | 64   |
| CAZ | 3    | 3    | 3    | 3    | 3    | 2    | 2    |
| CHA | 12   | 11   | 10   | 8    | 7    | 6    | 4    |
| EUR | 10   | 10   | 10   | 9    | 8    | 8    | 7    |
| IND | 21   | 20   | 20   | 18   | 15   | 13   | 11   |
| JPN | 0    | 0    | 0    | 0    | 0    | 0    | 0    |
| LAM | 11   | 11   | 10   | 9    | 7    | 6    | 5    |
| MEA | 5    | 5    | 5    | 4    | 3    | 3    | 2    |
| NEU | 1    | 1    | 1    | 1    | 1    | 1    | 1    |
| OAS | 17   | 17   | 16   | 15   | 14   | 12   | 10   |
| REF | 5    | 5    | 5    | 4    | 3    | 2    | 2    |
| SSA | 17   | 18   | 19   | 18   | 16   | 14   | 12   |
| USA | 8    | 8    | 8    | 8    | 8    | 8    | 7    |

Table 1789: MAgPIE m4p\_SSP1 — Resources—Nitrogen—Manure—Manure In Confinements (Mt Nr/yr)  
[PART 2/2]

|     | 1965 | 1970 | 1975 | 1980 | 1985 | 1990 | 1995 | 2000 | 2005 | 2010 |
|-----|------|------|------|------|------|------|------|------|------|------|
| GLO | 16.4 | 19.7 | 21.2 | 24.6 | 33.2 | 33.3 | 34.0 | 35.3 | 39.2 | 41.8 |
| CAZ | 0.5  | 0.6  | 0.6  | 0.6  | 1.0  | 1.2  | 1.4  | 1.4  | 1.4  | 1.4  |
| CHA | 1.6  | 1.8  | 2.1  | 2.4  | 2.8  | 3.1  | 3.4  | 3.9  | 4.6  | 6.0  |
| EUR | 3.8  | 4.5  | 5.2  | 6.3  | 8.2  | 7.5  | 7.6  | 7.8  | 8.1  | 8.1  |
| IND | 1.4  | 1.6  | 1.7  | 1.7  | 1.8  | 2.2  | 2.4  | 2.7  | 3.0  | 3.4  |
| JPN | 0.3  | 0.5  | 0.5  | 0.6  | 0.7  | 0.7  | 0.7  | 0.6  | 0.6  | 0.7  |
| LAM | 1.2  | 1.5  | 1.8  | 2.0  | 3.4  | 2.7  | 2.8  | 3.3  | 3.8  | 4.4  |
| MEA | 0.3  | 0.6  | 0.7  | 0.8  | 1.1  | 1.2  | 1.3  | 1.5  | 1.7  | 2.1  |
| NEU | 0.4  | 0.4  | 0.4  | 0.5  | 0.7  | 0.6  | 0.7  | 0.7  | 0.8  | 0.8  |
| OAS | 0.9  | 1.0  | 1.1  | 1.3  | 1.7  | 2.0  | 2.5  | 2.7  | 3.2  | 3.7  |
| REF | 2.5  | 3.3  | 3.2  | 4.1  | 4.5  | 5.1  | 4.2  | 2.9  | 2.9  | 2.3  |
| SSA | 0.5  | 0.6  | 0.7  | 0.7  | 0.8  | 0.9  | 1.0  | 1.1  | 1.4  | 1.7  |
| USA | 3.1  | 3.4  | 3.2  | 3.4  | 6.4  | 6.1  | 6.0  | 6.8  | 7.6  | 7.4  |

Table 1790: Bodirsky — Resources—Nitrogen—Manure—Manure In Confinements (Mt Nr/yr)

56.2.7 Monogastric meat

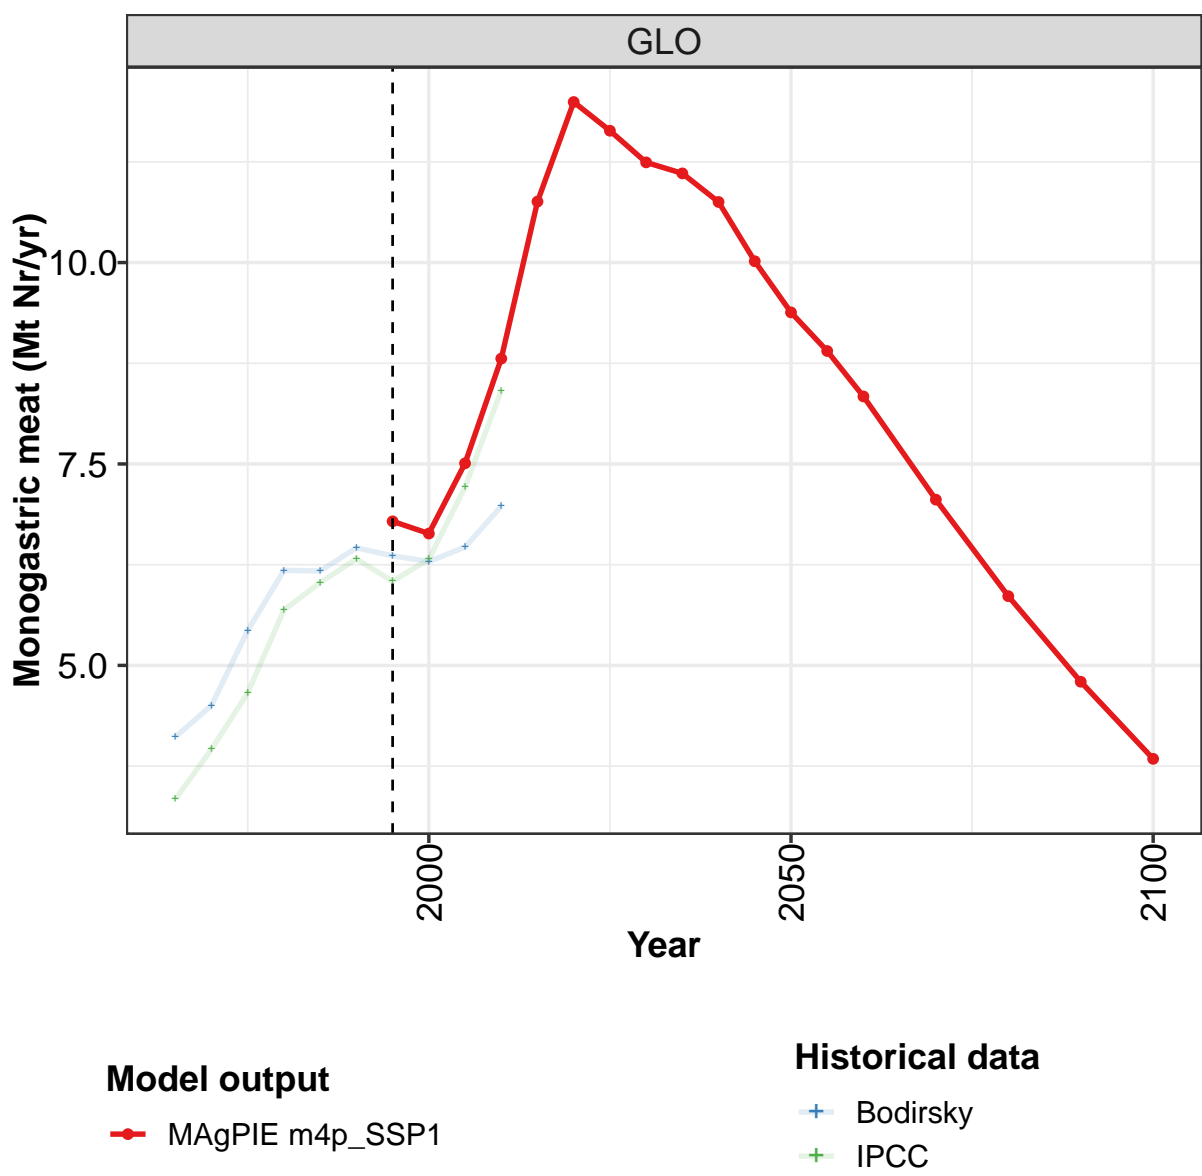



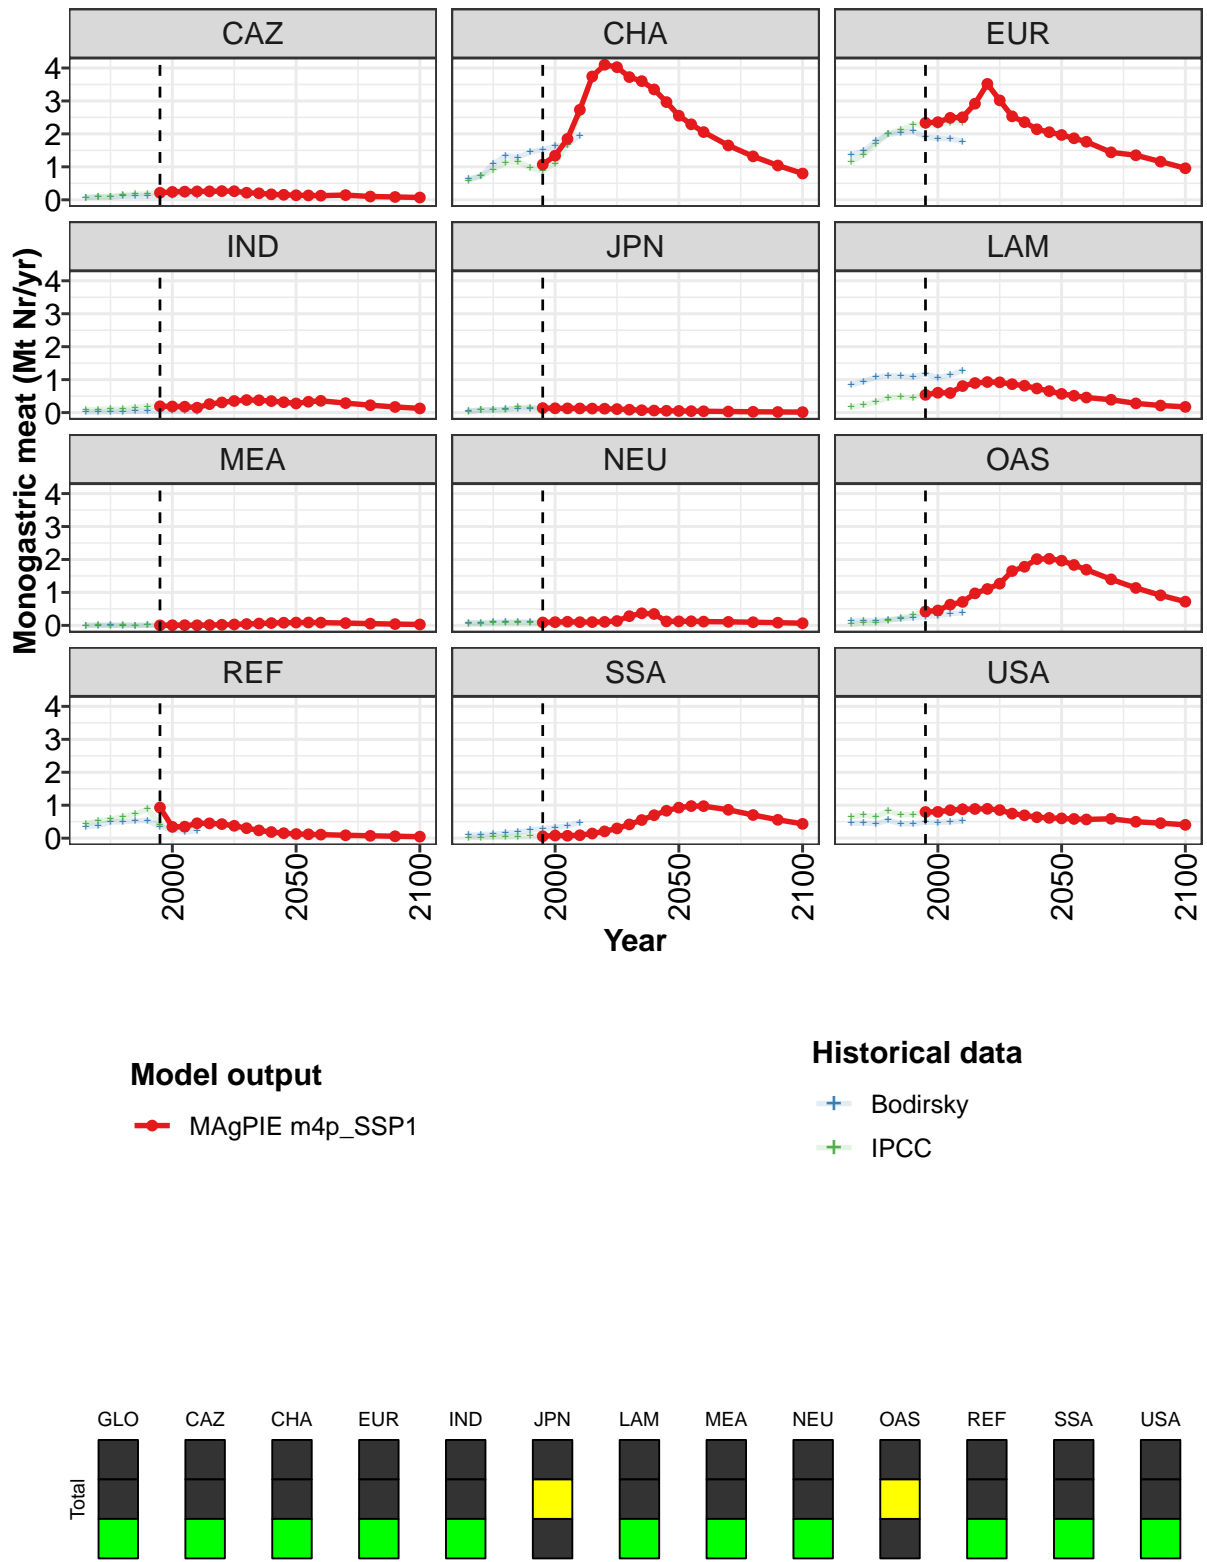

Figure 466: MAgPIE m4p\_SSP1 — Resources—Nitrogen—Manure—Monogastric meat (Mt Nr/yr)

|     | 1995 | 2000 | 2005 | 2010 | 2015 | 2020 | 2025 | 2030 | 2035 | 2040 | 2045 |
|-----|------|------|------|------|------|------|------|------|------|------|------|
| GLO | 6.8  | 6.6  | 7.5  | 8.8  | 10.8 | 12.0 | 11.6 | 11.2 | 11.1 | 10.8 | 10.0 |
| CAZ | 0.2  | 0.2  | 0.2  | 0.3  | 0.3  | 0.3  | 0.3  | 0.2  | 0.2  | 0.2  | 0.2  |
| CHA | 1.1  | 1.3  | 1.8  | 2.7  | 3.7  | 4.1  | 4.0  | 3.7  | 3.6  | 3.3  | 3.0  |
| EUR | 2.3  | 2.4  | 2.5  | 2.5  | 2.9  | 3.5  | 3.0  | 2.5  | 2.4  | 2.1  | 2.1  |
| IND | 0.2  | 0.2  | 0.2  | 0.1  | 0.3  | 0.3  | 0.4  | 0.4  | 0.4  | 0.4  | 0.3  |
| JPN | 0.1  | 0.1  | 0.1  | 0.1  | 0.1  | 0.1  | 0.1  | 0.1  | 0.1  | 0.1  | 0.1  |
| LAM | 0.5  | 0.6  | 0.6  | 0.8  | 0.9  | 0.9  | 0.9  | 0.9  | 0.8  | 0.7  | 0.7  |
| MEA | 0.0  | 0.0  | 0.0  | 0.0  | 0.0  | 0.0  | 0.0  | 0.0  | 0.1  | 0.1  | 0.1  |
| NEU | 0.1  | 0.1  | 0.1  | 0.1  | 0.1  | 0.1  | 0.1  | 0.3  | 0.4  | 0.3  | 0.1  |
| OAS | 0.4  | 0.5  | 0.6  | 0.7  | 1.0  | 1.1  | 1.3  | 1.6  | 1.8  | 2.0  | 2.0  |
| REF | 0.9  | 0.3  | 0.3  | 0.5  | 0.5  | 0.4  | 0.4  | 0.3  | 0.2  | 0.2  | 0.2  |
| SSA | 0.1  | 0.1  | 0.1  | 0.1  | 0.1  | 0.2  | 0.3  | 0.4  | 0.6  | 0.7  | 0.8  |
| USA | 0.8  | 0.8  | 0.8  | 0.9  | 0.9  | 0.9  | 0.9  | 0.7  | 0.7  | 0.6  | 0.6  |

Table 1791: MAgPIE m4p\_SSP1 — Resources—Nitrogen—Manure—Monogastric meat (Mt Nr/yr) [PART 1/2]

|     | 2050 | 2055 | 2060 | 2070 | 2080 | 2090 | 2100 |
|-----|------|------|------|------|------|------|------|
| GLO | 9.4  | 8.9  | 8.3  | 7.1  | 5.9  | 4.8  | 3.8  |
| CAZ | 0.1  | 0.1  | 0.1  | 0.1  | 0.1  | 0.1  | 0.1  |
| CHA | 2.6  | 2.3  | 2.1  | 1.6  | 1.3  | 1.0  | 0.8  |
| EUR | 2.0  | 1.9  | 1.8  | 1.4  | 1.4  | 1.2  | 1.0  |
| IND | 0.3  | 0.3  | 0.4  | 0.3  | 0.2  | 0.2  | 0.1  |
| JPN | 0.0  | 0.0  | 0.0  | 0.0  | 0.0  | 0.0  | 0.0  |
| LAM | 0.6  | 0.5  | 0.5  | 0.4  | 0.3  | 0.2  | 0.2  |
| MEA | 0.1  | 0.1  | 0.1  | 0.1  | 0.1  | 0.0  | 0.0  |
| NEU | 0.1  | 0.1  | 0.1  | 0.1  | 0.1  | 0.1  | 0.1  |
| OAS | 2.0  | 1.8  | 1.7  | 1.4  | 1.1  | 0.9  | 0.7  |
| REF | 0.1  | 0.1  | 0.1  | 0.1  | 0.1  | 0.1  | 0.0  |
| SSA | 0.9  | 1.0  | 1.0  | 0.9  | 0.7  | 0.6  | 0.4  |
| USA | 0.6  | 0.6  | 0.6  | 0.6  | 0.5  | 0.5  | 0.4  |

Table 1792: MAgPIE m4p\_SSP1 — Resources—Nitrogen—Manure—Monogastric meat (Mt Nr/yr) [PART 2/2]

|     | 1965 | 1970 | 1975 | 1980 | 1985 | 1990 | 1995 | 2000 | 2005 | 2010 |
|-----|------|------|------|------|------|------|------|------|------|------|
| GLO | 4.11 | 4.50 | 5.43 | 6.18 | 6.17 | 6.46 | 6.36 | 6.29 | 6.47 | 6.98 |
| CAZ | 0.07 | 0.09 | 0.08 | 0.11 | 0.12 | 0.12 | 0.12 | 0.14 | 0.15 | 0.13 |
| CHA | 0.64 | 0.72 | 1.08 | 1.34 | 1.29 | 1.45 | 1.52 | 1.63 | 1.67 | 1.96 |
| EUR | 1.36 | 1.48 | 1.78 | 1.99 | 2.04 | 2.09 | 1.90 | 1.86 | 1.86 | 1.78 |
| IND | 0.02 | 0.02 | 0.03 | 0.04 | 0.04 | 0.05 | 0.05 | 0.06 | 0.05 | 0.04 |
| JPN | 0.04 | 0.07 | 0.08 | 0.11 | 0.12 | 0.13 | 0.11 | 0.11 | 0.10 | 0.11 |
| LAM | 0.85 | 0.94 | 1.07 | 1.13 | 1.10 | 1.08 | 1.17 | 1.06 | 1.14 | 1.28 |
| MEA | 0.00 | 0.00 | 0.00 | 0.00 | 0.00 | 0.00 | 0.00 | 0.00 | 0.00 | 0.00 |
| NEU | 0.09 | 0.08 | 0.10 | 0.10 | 0.11 | 0.09 | 0.09 | 0.08 | 0.08 | 0.08 |
| OAS | 0.13 | 0.15 | 0.15 | 0.17 | 0.20 | 0.23 | 0.26 | 0.29 | 0.36 | 0.38 |
| REF | 0.36 | 0.38 | 0.49 | 0.50 | 0.53 | 0.53 | 0.35 | 0.26 | 0.19 | 0.22 |
| SSA | 0.09 | 0.11 | 0.12 | 0.15 | 0.18 | 0.25 | 0.29 | 0.33 | 0.37 | 0.47 |
| USA | 0.45 | 0.46 | 0.44 | 0.54 | 0.44 | 0.43 | 0.48 | 0.48 | 0.49 | 0.52 |

Table 1793: IPCC — Resources—Nitrogen—Manure—Monogastric meat (Mt Nr/yr)

|     | 1965 | 1970 | 1975 | 1980 | 1985 | 1990 | 1995 | 2000 | 2005 | 2010 |
|-----|------|------|------|------|------|------|------|------|------|------|
| GLO | 3.34 | 3.96 | 4.66 | 5.69 | 6.03 | 6.32 | 6.04 | 6.32 | 7.21 | 8.41 |
| CAZ | 0.07 | 0.10 | 0.10 | 0.15 | 0.17 | 0.19 | 0.24 | 0.28 | 0.30 | 0.26 |
| CHA | 0.58 | 0.72 | 0.91 | 1.14 | 1.15 | 0.98 | 0.87 | 1.10 | 1.68 | 2.59 |
| EUR | 1.16 | 1.36 | 1.70 | 2.02 | 2.12 | 2.29 | 2.25 | 2.26 | 2.35 | 2.35 |
| IND | 0.09 | 0.10 | 0.11 | 0.10 | 0.16 | 0.19 | 0.20 | 0.20 | 0.19 | 0.15 |
| JPN | 0.04 | 0.08 | 0.09 | 0.07 | 0.16 | 0.16 | 0.14 | 0.13 | 0.13 | 0.13 |
| LAM | 0.17 | 0.23 | 0.33 | 0.44 | 0.47 | 0.45 | 0.58 | 0.65 | 0.63 | 0.78 |
| MEA | 0.00 | 0.01 | 0.00 | 0.00 | 0.00 | 0.01 | 0.00 | 0.01 | 0.01 | 0.00 |
| NEU | 0.06 | 0.06 | 0.07 | 0.07 | 0.08 | 0.07 | 0.06 | 0.07 | 0.08 | 0.09 |
| OAS | 0.05 | 0.07 | 0.09 | 0.15 | 0.22 | 0.31 | 0.42 | 0.41 | 0.59 | 0.66 |
| REF | 0.45 | 0.52 | 0.58 | 0.65 | 0.73 | 0.89 | 0.42 | 0.32 | 0.30 | 0.38 |
| SSA | 0.02 | 0.03 | 0.04 | 0.05 | 0.06 | 0.08 | 0.06 | 0.09 | 0.07 | 0.09 |
| USA | 0.65 | 0.70 | 0.65 | 0.83 | 0.71 | 0.72 | 0.80 | 0.81 | 0.88 | 0.94 |

Table 1794: Bodirsky — Resources—Nitrogen—Manure—Monogastric meat (Mt Nr/yr)

56.2.8 Poultry meat

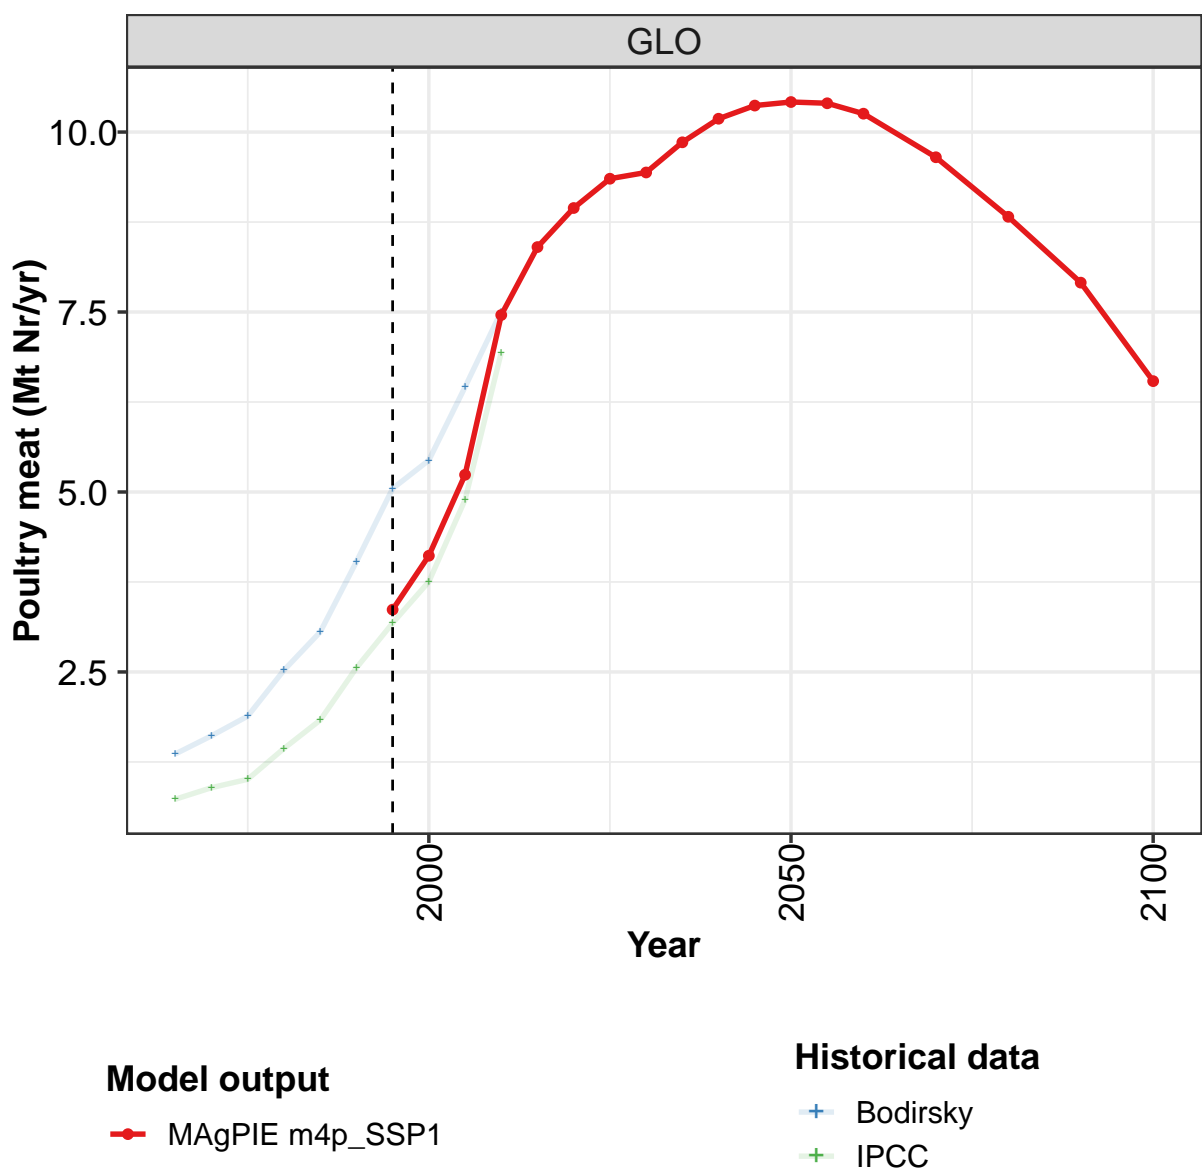

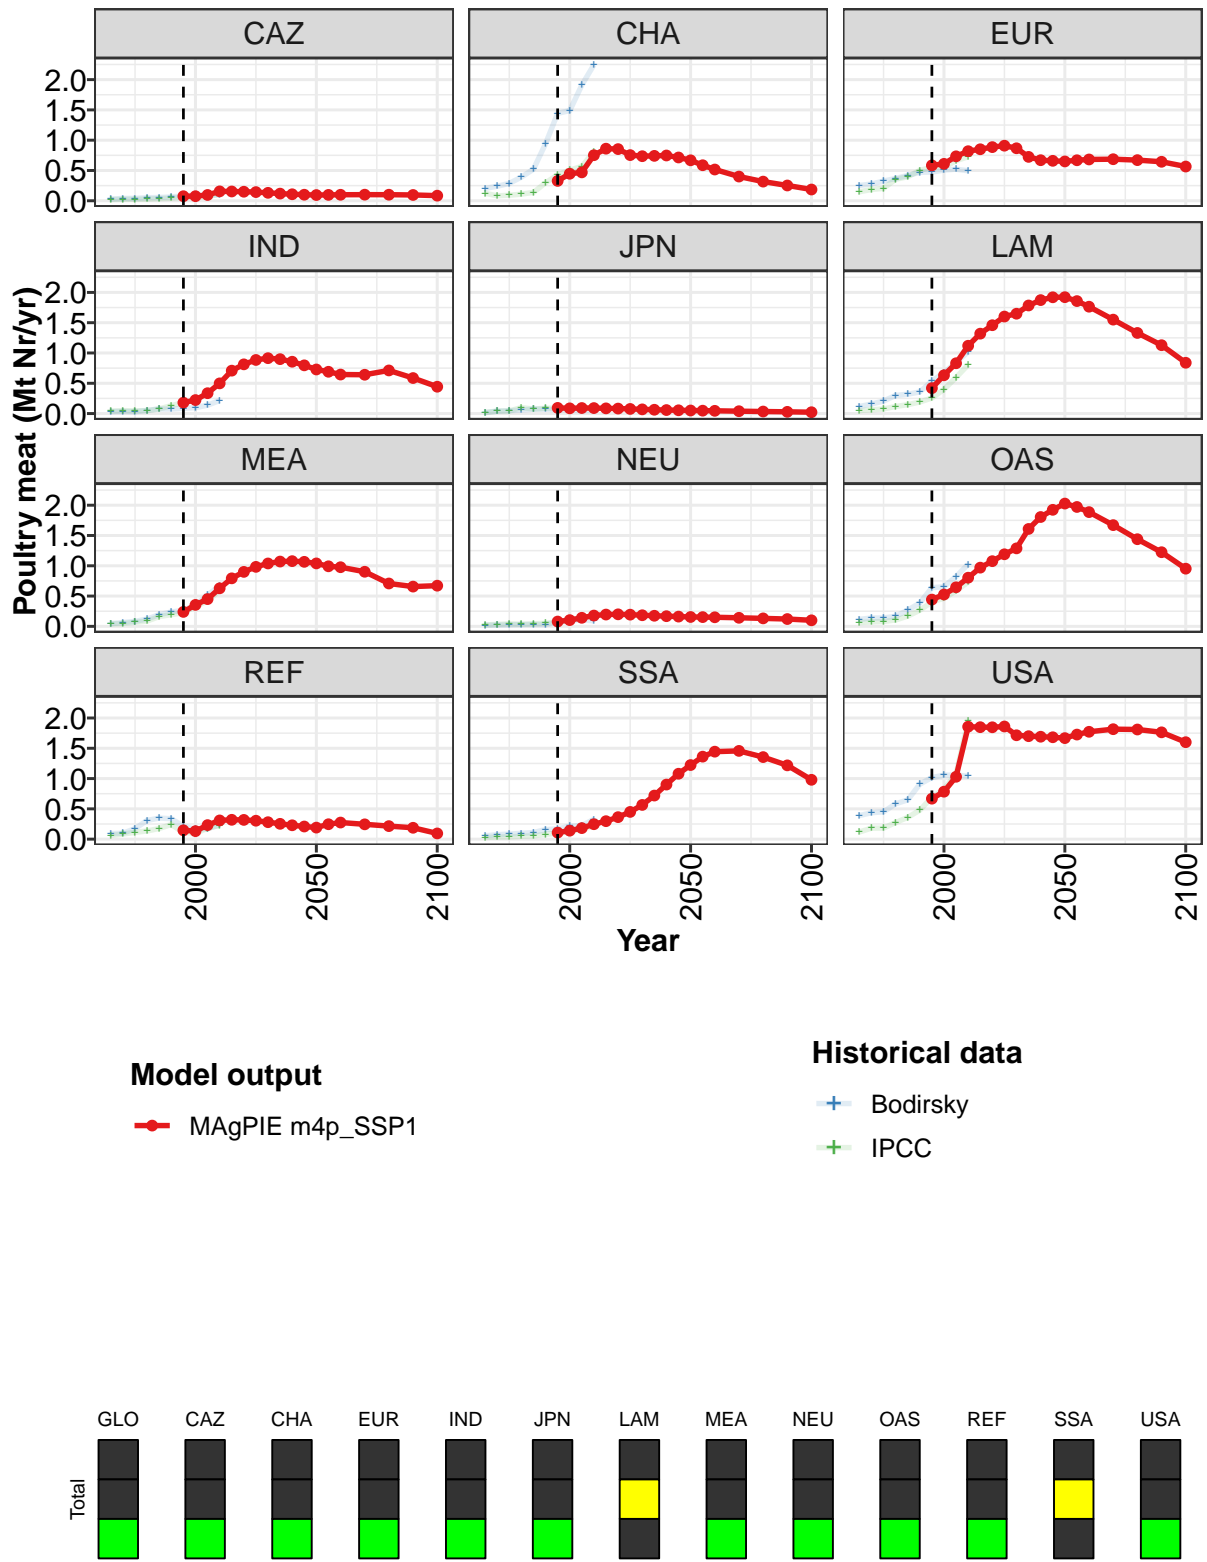

Figure 467: MAgPIE m4p\_SSP1 — Resources—Nitrogen—Manure—Poultry meat (Mt N/yr)

|     | 1995 | 2000 | 2005 | 2010 | 2015 | 2020 | 2025 | 2030 | 2035 | 2040 | 2045 |
|-----|------|------|------|------|------|------|------|------|------|------|------|
| GLO | 3.4  | 4.1  | 5.2  | 7.5  | 8.4  | 8.9  | 9.4  | 9.4  | 9.9  | 10.2 | 10.4 |
| CAZ | 0.1  | 0.1  | 0.1  | 0.2  | 0.2  | 0.1  | 0.1  | 0.1  | 0.1  | 0.1  | 0.1  |
| CHA | 0.3  | 0.4  | 0.5  | 0.8  | 0.9  | 0.9  | 0.8  | 0.7  | 0.7  | 0.7  | 0.7  |
| EUR | 0.6  | 0.6  | 0.7  | 0.8  | 0.9  | 0.9  | 0.9  | 0.9  | 0.7  | 0.7  | 0.7  |
| IND | 0.2  | 0.2  | 0.3  | 0.5  | 0.7  | 0.8  | 0.9  | 0.9  | 0.9  | 0.9  | 0.8  |
| JPN | 0.1  | 0.1  | 0.1  | 0.1  | 0.1  | 0.1  | 0.1  | 0.1  | 0.1  | 0.1  | 0.1  |
| LAM | 0.4  | 0.6  | 0.8  | 1.1  | 1.3  | 1.5  | 1.6  | 1.6  | 1.8  | 1.9  | 1.9  |
| MEA | 0.2  | 0.4  | 0.5  | 0.6  | 0.8  | 0.9  | 1.0  | 1.0  | 1.1  | 1.1  | 1.1  |
| NEU | 0.1  | 0.1  | 0.1  | 0.2  | 0.2  | 0.2  | 0.2  | 0.2  | 0.2  | 0.2  | 0.2  |
| OAS | 0.4  | 0.5  | 0.6  | 0.8  | 1.0  | 1.1  | 1.2  | 1.3  | 1.6  | 1.8  | 1.9  |
| REF | 0.1  | 0.1  | 0.2  | 0.3  | 0.3  | 0.3  | 0.3  | 0.3  | 0.3  | 0.2  | 0.2  |
| SSA | 0.1  | 0.1  | 0.2  | 0.2  | 0.3  | 0.4  | 0.4  | 0.6  | 0.7  | 0.9  | 1.1  |
| USA | 0.7  | 0.8  | 1.0  | 1.9  | 1.8  | 1.8  | 1.9  | 1.7  | 1.7  | 1.7  | 1.7  |

Table 1795: MAgPIE m4p\_SSP1 — Resources—Nitrogen—Manure—Poultry meat (Mt Nr/yr) [PART 1/2]

|     | 2050 | 2055 | 2060 | 2070 | 2080 | 2090 | 2100 |
|-----|------|------|------|------|------|------|------|
| GLO | 10.4 | 10.4 | 10.3 | 9.7  | 8.8  | 7.9  | 6.5  |
| CAZ | 0.1  | 0.1  | 0.1  | 0.1  | 0.1  | 0.1  | 0.1  |
| CHA | 0.7  | 0.6  | 0.5  | 0.4  | 0.3  | 0.3  | 0.2  |
| EUR | 0.6  | 0.7  | 0.7  | 0.7  | 0.7  | 0.6  | 0.6  |
| IND | 0.7  | 0.7  | 0.6  | 0.6  | 0.7  | 0.6  | 0.4  |
| JPN | 0.1  | 0.0  | 0.0  | 0.0  | 0.0  | 0.0  | 0.0  |
| LAM | 1.9  | 1.9  | 1.8  | 1.6  | 1.3  | 1.1  | 0.8  |
| MEA | 1.0  | 1.0  | 1.0  | 0.9  | 0.7  | 0.7  | 0.7  |
| NEU | 0.2  | 0.2  | 0.1  | 0.1  | 0.1  | 0.1  | 0.1  |
| OAS | 2.0  | 2.0  | 1.9  | 1.7  | 1.4  | 1.2  | 1.0  |
| REF | 0.2  | 0.2  | 0.3  | 0.2  | 0.2  | 0.2  | 0.1  |
| SSA | 1.2  | 1.4  | 1.4  | 1.5  | 1.4  | 1.2  | 1.0  |
| USA | 1.7  | 1.7  | 1.8  | 1.8  | 1.8  | 1.8  | 1.6  |

Table 1796: MAgPIE m4p\_SSP1 — Resources—Nitrogen—Manure—Poultry meat (Mt Nr/yr) [PART 2/2]

|     | 1965 | 1970 | 1975 | 1980 | 1985 | 1990 | 1995 | 2000 | 2005 | 2010 |
|-----|------|------|------|------|------|------|------|------|------|------|
| GLO | 1.36 | 1.61 | 1.89 | 2.52 | 3.06 | 4.03 | 5.05 | 5.44 | 6.46 | 7.51 |
| CAZ | 0.03 | 0.04 | 0.04 | 0.05 | 0.05 | 0.06 | 0.08 | 0.09 | 0.09 | 0.09 |
| CHA | 0.20 | 0.24 | 0.29 | 0.39 | 0.52 | 0.94 | 1.44 | 1.49 | 1.91 | 2.25 |
| EUR | 0.25 | 0.28 | 0.32 | 0.37 | 0.42 | 0.47 | 0.47 | 0.51 | 0.52 | 0.50 |
| IND | 0.03 | 0.04 | 0.03 | 0.05 | 0.08 | 0.07 | 0.09 | 0.10 | 0.14 | 0.22 |
| JPN | 0.02 | 0.04 | 0.05 | 0.06 | 0.07 | 0.07 | 0.06 | 0.06 | 0.05 | 0.05 |
| LAM | 0.12 | 0.16 | 0.21 | 0.30 | 0.32 | 0.36 | 0.53 | 0.67 | 0.84 | 1.02 |
| MEA | 0.04 | 0.06 | 0.08 | 0.12 | 0.19 | 0.24 | 0.26 | 0.35 | 0.51 | 0.67 |
| NEU | 0.02 | 0.02 | 0.02 | 0.03 | 0.03 | 0.03 | 0.07 | 0.09 | 0.11 | 0.09 |
| OAS | 0.12 | 0.14 | 0.14 | 0.17 | 0.27 | 0.39 | 0.64 | 0.65 | 0.82 | 1.02 |
| REF | 0.09 | 0.10 | 0.17 | 0.31 | 0.35 | 0.34 | 0.21 | 0.16 | 0.17 | 0.24 |
| SSA | 0.05 | 0.07 | 0.08 | 0.10 | 0.11 | 0.16 | 0.17 | 0.21 | 0.23 | 0.33 |
| USA | 0.39 | 0.44 | 0.45 | 0.58 | 0.65 | 0.91 | 1.02 | 1.06 | 1.06 | 1.04 |

Table 1797: IPCC — Resources—Nitrogen—Manure—Poultry meat (Mt Nr/yr)

|     | 1965 | 1970 | 1975 | 1980 | 1985 | 1990 | 1995 | 2000 | 2005 | 2010 |
|-----|------|------|------|------|------|------|------|------|------|------|
| GLO | 0.73 | 0.89 | 1.01 | 1.44 | 1.83 | 2.56 | 3.18 | 3.75 | 4.89 | 6.94 |
| CAZ | 0.02 | 0.02 | 0.02 | 0.03 | 0.04 | 0.04 | 0.06 | 0.05 | 0.07 | 0.12 |
| CHA | 0.12 | 0.08 | 0.09 | 0.11 | 0.14 | 0.30 | 0.43 | 0.51 | 0.57 | 0.81 |
| EUR | 0.15 | 0.19 | 0.21 | 0.35 | 0.40 | 0.50 | 0.55 | 0.55 | 0.66 | 0.73 |
| IND | 0.04 | 0.05 | 0.05 | 0.05 | 0.08 | 0.13 | 0.18 | 0.22 | 0.34 | 0.50 |
| JPN | 0.02 | 0.04 | 0.04 | 0.10 | 0.08 | 0.09 | 0.09 | 0.09 | 0.09 | 0.09 |
| LAM | 0.05 | 0.06 | 0.08 | 0.12 | 0.15 | 0.19 | 0.26 | 0.40 | 0.60 | 0.80 |
| MEA | 0.04 | 0.05 | 0.07 | 0.09 | 0.16 | 0.19 | 0.23 | 0.33 | 0.42 | 0.59 |
| NEU | 0.02 | 0.03 | 0.04 | 0.04 | 0.04 | 0.05 | 0.08 | 0.10 | 0.14 | 0.18 |
| OAS | 0.06 | 0.07 | 0.08 | 0.10 | 0.17 | 0.27 | 0.40 | 0.46 | 0.59 | 0.73 |
| REF | 0.06 | 0.08 | 0.11 | 0.13 | 0.18 | 0.24 | 0.11 | 0.10 | 0.18 | 0.23 |
| SSA | 0.03 | 0.04 | 0.04 | 0.05 | 0.05 | 0.08 | 0.10 | 0.12 | 0.17 | 0.21 |
| USA | 0.12 | 0.18 | 0.18 | 0.27 | 0.36 | 0.48 | 0.69 | 0.82 | 1.08 | 1.95 |

Table 1798: Bodirsky — Resources—Nitrogen—Manure—Poultry meat (Mt Nr/yr)

56.2.9 Ruminant meat

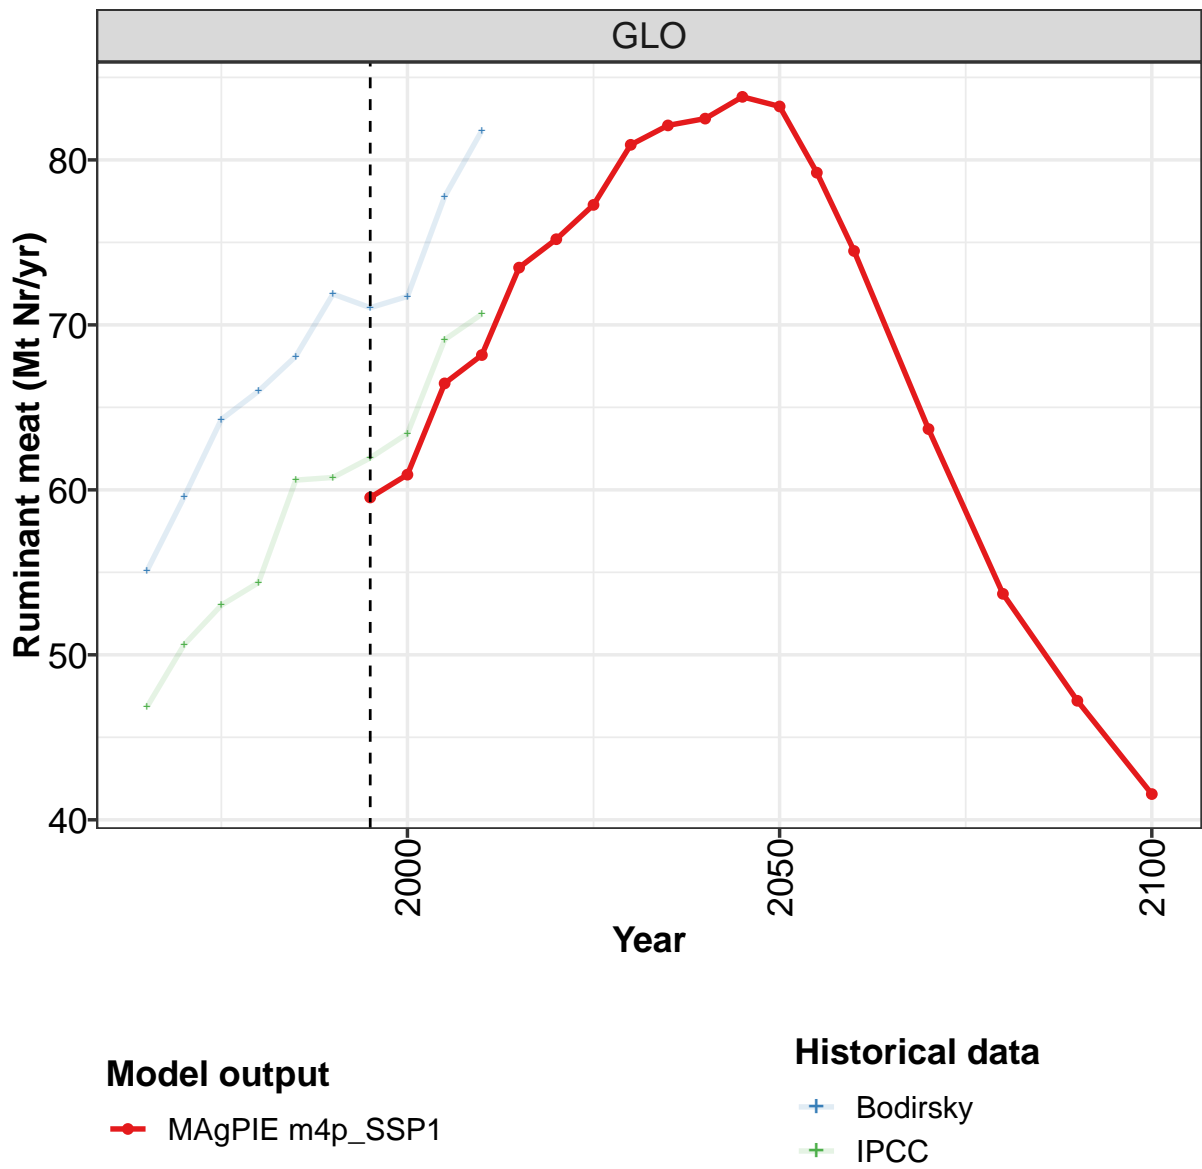



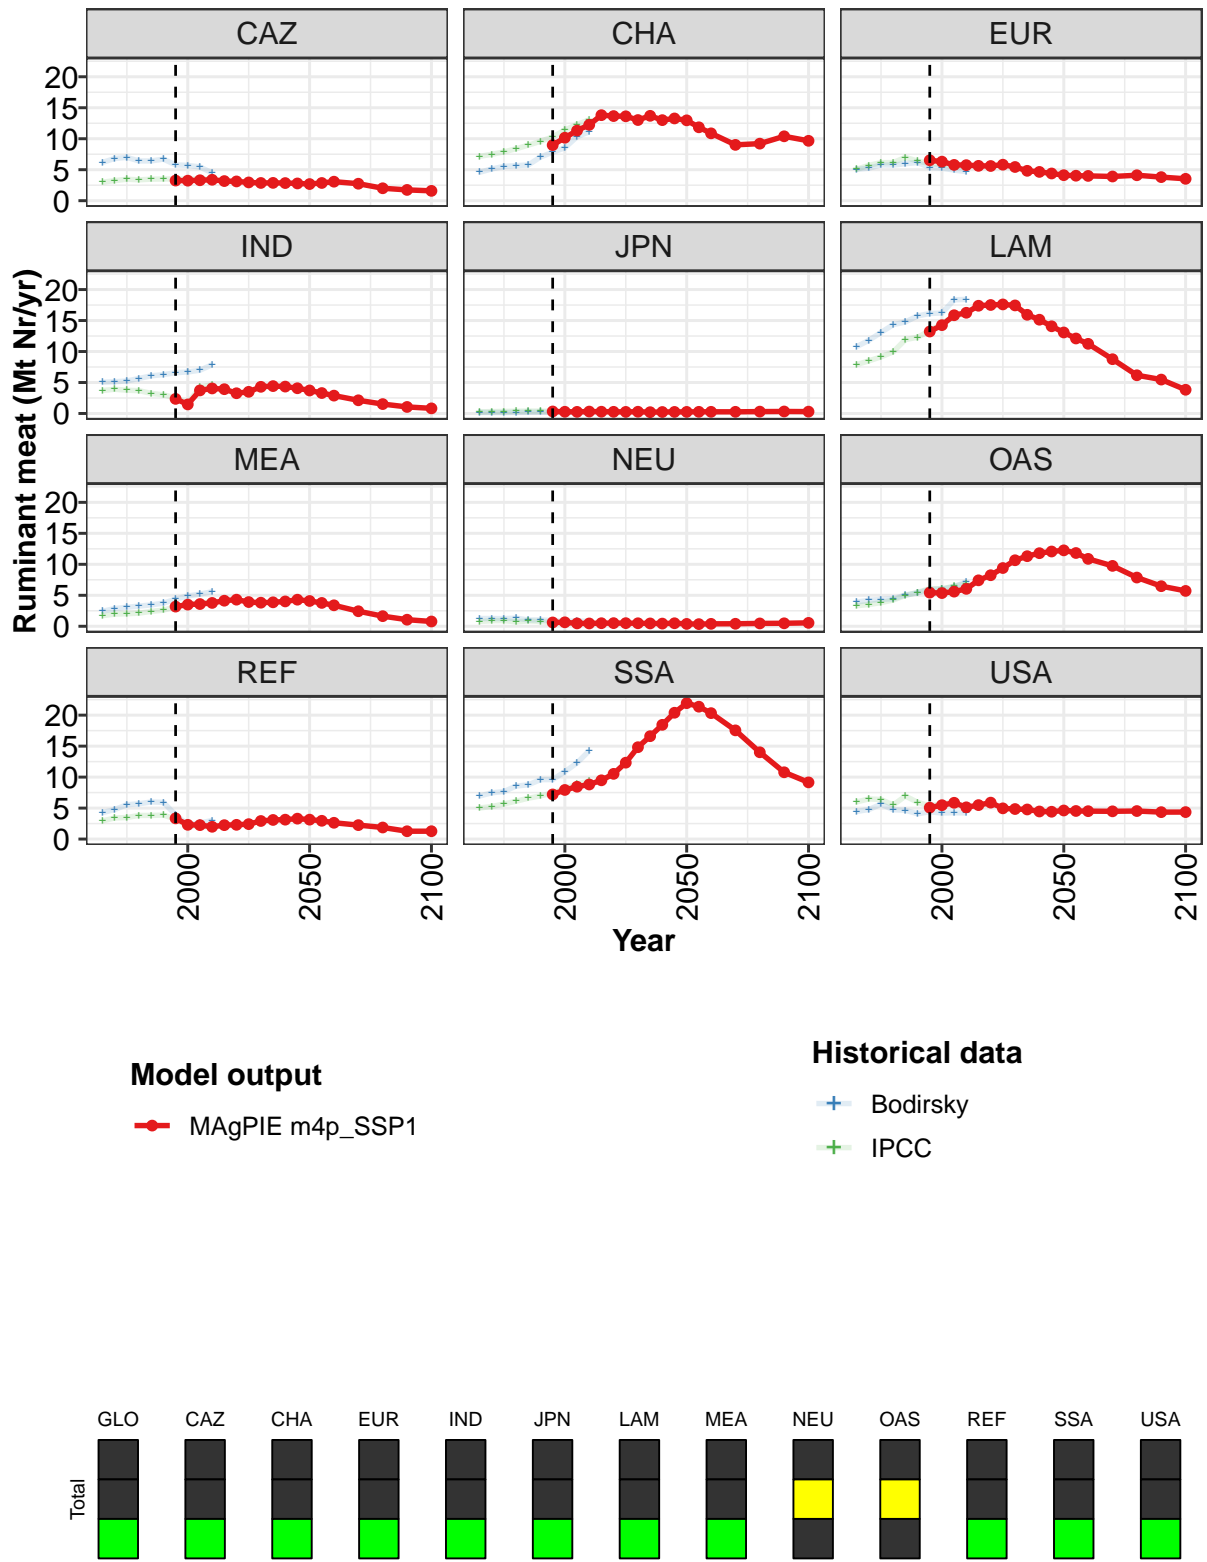

Figure 468: MAgPIE m4p\_SSP1 — Resources—Nitrogen—Manure—Ruminant meat (Mt Nr/yr)

|     | 1995 | 2000 | 2005 | 2010 | 2015 | 2020 | 2025 | 2030 | 2035 | 2040 | 2045 |
|-----|------|------|------|------|------|------|------|------|------|------|------|
| GLO | 59.5 | 60.9 | 66.5 | 68.2 | 73.5 | 75.2 | 77.3 | 80.9 | 82.1 | 82.5 | 83.8 |
| CAZ | 3.3  | 3.2  | 3.3  | 3.4  | 3.2  | 3.1  | 2.9  | 2.9  | 2.9  | 2.8  | 2.8  |
| CHA | 9.0  | 10.2 | 11.3 | 12.2 | 13.8 | 13.7 | 13.6 | 13.0 | 13.7 | 13.0 | 13.3 |
| EUR | 6.5  | 6.3  | 5.8  | 5.7  | 5.6  | 5.6  | 5.8  | 5.4  | 4.8  | 4.6  | 4.4  |
| IND | 2.4  | 1.5  | 3.7  | 4.0  | 3.9  | 3.3  | 3.5  | 4.3  | 4.4  | 4.3  | 4.1  |
| JPN | 0.3  | 0.3  | 0.3  | 0.3  | 0.3  | 0.3  | 0.3  | 0.3  | 0.2  | 0.2  | 0.3  |
| LAM | 13.2 | 14.3 | 15.9 | 16.3 | 17.4 | 17.5 | 17.6 | 17.4 | 15.9 | 15.1 | 14.1 |
| MEA | 3.2  | 3.5  | 3.6  | 3.8  | 4.1  | 4.3  | 3.9  | 3.8  | 3.9  | 4.0  | 4.3  |
| NEU | 0.6  | 0.6  | 0.5  | 0.5  | 0.5  | 0.5  | 0.5  | 0.5  | 0.5  | 0.4  | 0.5  |
| OAS | 5.4  | 5.4  | 5.6  | 6.0  | 7.4  | 8.2  | 9.4  | 10.7 | 11.3 | 11.8 | 12.1 |
| REF | 3.3  | 2.3  | 2.3  | 2.0  | 2.2  | 2.3  | 2.4  | 2.9  | 3.1  | 3.1  | 3.3  |
| SSA | 7.2  | 7.9  | 8.4  | 8.8  | 9.5  | 10.5 | 12.3 | 14.8 | 16.6 | 18.4 | 20.4 |
| USA | 5.1  | 5.5  | 5.9  | 5.1  | 5.5  | 5.9  | 5.0  | 4.8  | 4.8  | 4.5  | 4.4  |

Table 1799: MAgPIE m4p\_SSP1 — Resources—Nitrogen—Manure—Ruminant meat (Mt Nr/yr) [PART 1/2]

|     | 2050 | 2055 | 2060 | 2070 | 2080 | 2090 | 2100 |
|-----|------|------|------|------|------|------|------|
| GLO | 83.2 | 79.2 | 74.5 | 63.7 | 53.7 | 47.2 | 41.6 |
| CAZ | 2.7  | 2.9  | 3.1  | 2.7  | 2.0  | 1.7  | 1.6  |
| CHA | 13.0 | 11.8 | 10.9 | 9.0  | 9.2  | 10.4 | 9.7  |
| EUR | 4.1  | 4.0  | 4.0  | 3.9  | 4.1  | 3.8  | 3.5  |
| IND | 3.7  | 3.3  | 2.9  | 2.1  | 1.5  | 1.1  | 0.8  |
| JPN | 0.3  | 0.3  | 0.3  | 0.3  | 0.3  | 0.3  | 0.3  |
| LAM | 13.1 | 12.1 | 11.2 | 8.8  | 6.2  | 5.5  | 3.8  |
| MEA | 4.1  | 3.8  | 3.4  | 2.4  | 1.6  | 1.1  | 0.8  |
| NEU | 0.4  | 0.4  | 0.4  | 0.4  | 0.5  | 0.5  | 0.6  |
| OAS | 12.3 | 11.8 | 10.9 | 9.7  | 7.9  | 6.5  | 5.7  |
| REF | 3.1  | 3.0  | 2.6  | 2.3  | 1.9  | 1.3  | 1.3  |
| SSA | 21.9 | 21.4 | 20.3 | 17.5 | 14.0 | 10.8 | 9.2  |
| USA | 4.6  | 4.5  | 4.5  | 4.5  | 4.5  | 4.3  | 4.4  |

Table 1800: MAgPIE m4p\_SSP1 — Resources—Nitrogen—Manure—Ruminant meat (Mt Nr/yr) [PART 2/2]

|     | 1965 | 1970 | 1975 | 1980 | 1985 | 1990 | 1995 | 2000 | 2005 | 2010 |
|-----|------|------|------|------|------|------|------|------|------|------|
| GLO | 55.1 | 59.6 | 64.3 | 66.0 | 68.1 | 71.9 | 71.0 | 71.7 | 77.8 | 81.8 |
| CAZ | 6.2  | 6.8  | 7.0  | 6.4  | 6.4  | 6.7  | 5.8  | 5.7  | 5.4  | 4.5  |
| CHA | 4.6  | 5.1  | 5.5  | 5.7  | 5.8  | 7.1  | 7.8  | 8.5  | 10.3 | 11.1 |
| EUR | 5.1  | 5.2  | 5.8  | 5.7  | 6.0  | 6.2  | 5.4  | 5.3  | 4.9  | 4.7  |
| IND | 5.0  | 5.1  | 5.3  | 5.7  | 6.1  | 6.3  | 6.6  | 6.7  | 7.0  | 7.9  |
| JPN | 0.2  | 0.2  | 0.1  | 0.2  | 0.2  | 0.2  | 0.2  | 0.2  | 0.2  | 0.2  |
| LAM | 10.8 | 11.8 | 13.1 | 14.3 | 14.8 | 15.7 | 16.1 | 16.2 | 18.3 | 18.4 |
| MEA | 2.4  | 2.9  | 3.1  | 3.3  | 3.5  | 3.7  | 4.4  | 4.9  | 5.2  | 5.6  |
| NEU | 1.3  | 1.3  | 1.2  | 1.3  | 1.0  | 1.0  | 0.9  | 0.8  | 0.9  | 0.8  |
| OAS | 3.9  | 4.2  | 4.3  | 4.4  | 5.1  | 5.4  | 6.0  | 6.0  | 6.4  | 7.2  |
| REF | 4.3  | 4.8  | 5.5  | 5.7  | 6.0  | 5.9  | 3.9  | 2.3  | 2.6  | 3.0  |
| SSA | 7.0  | 7.5  | 7.7  | 8.6  | 8.8  | 9.6  | 9.6  | 10.9 | 12.3 | 14.3 |
| USA | 4.5  | 4.8  | 5.6  | 4.7  | 4.6  | 4.1  | 4.4  | 4.2  | 4.2  | 4.2  |

Table 1801: IPCC — Resources—Nitrogen—Manure—Ruminant meat (Mt Nr/yr)

|     | 1965 | 1970 | 1975 | 1980 | 1985 | 1990 | 1995 | 2000 | 2005 | 2010 |
|-----|------|------|------|------|------|------|------|------|------|------|
| GLO | 46.8 | 50.6 | 53.0 | 54.4 | 60.6 | 60.8 | 61.9 | 63.4 | 69.1 | 70.7 |
| CAZ | 3.0  | 3.2  | 3.5  | 3.4  | 3.5  | 3.5  | 3.5  | 3.5  | 3.5  | 3.4  |
| CHA | 7.2  | 7.5  | 7.9  | 8.4  | 9.0  | 9.6  | 10.3 | 11.4 | 12.3 | 13.0 |
| EUR | 5.1  | 5.7  | 6.1  | 6.2  | 7.0  | 6.4  | 6.0  | 5.8  | 5.4  | 5.5  |
| IND | 3.7  | 3.9  | 3.8  | 3.7  | 3.2  | 3.0  | 2.5  | 1.7  | 4.3  | 4.6  |
| JPN | 0.3  | 0.3  | 0.3  | 0.4  | 0.4  | 0.4  | 0.3  | 0.3  | 0.3  | 0.3  |
| LAM | 7.9  | 8.5  | 9.1  | 9.9  | 11.9 | 12.3 | 13.3 | 14.5 | 15.7 | 16.1 |
| MEA | 1.7  | 2.0  | 2.0  | 2.1  | 2.4  | 2.6  | 3.2  | 3.6  | 3.7  | 3.9  |
| NEU | 0.8  | 0.9  | 0.9  | 0.7  | 0.9  | 0.8  | 0.6  | 0.6  | 0.5  | 0.4  |
| OAS | 3.3  | 3.5  | 3.8  | 4.2  | 5.0  | 5.5  | 6.1  | 6.1  | 6.5  | 6.9  |
| REF | 2.9  | 3.4  | 3.5  | 3.8  | 3.8  | 3.9  | 3.2  | 2.2  | 2.0  | 2.0  |
| SSA | 5.0  | 5.3  | 5.7  | 6.1  | 6.6  | 7.0  | 7.4  | 8.2  | 8.9  | 9.3  |
| USA | 6.0  | 6.5  | 6.4  | 5.5  | 6.9  | 5.9  | 5.4  | 5.7  | 5.9  | 5.1  |

Table 1802: Bodirsky — Resources—Nitrogen—Manure—Ruminant meat (Mt Nr/yr)

56.3 Pasture Budget

56.3.1 Balance

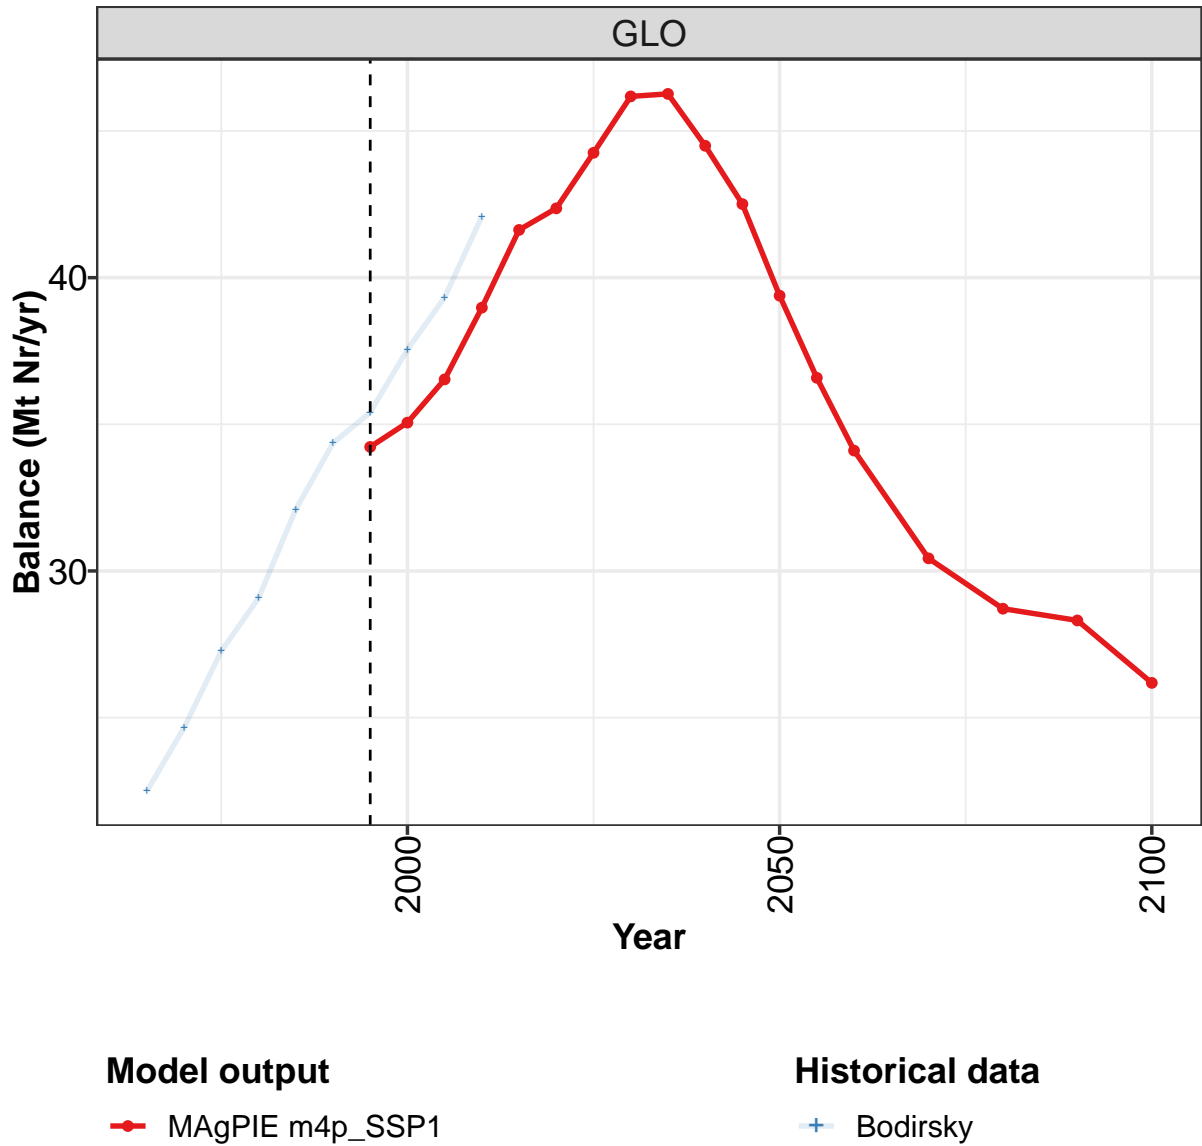

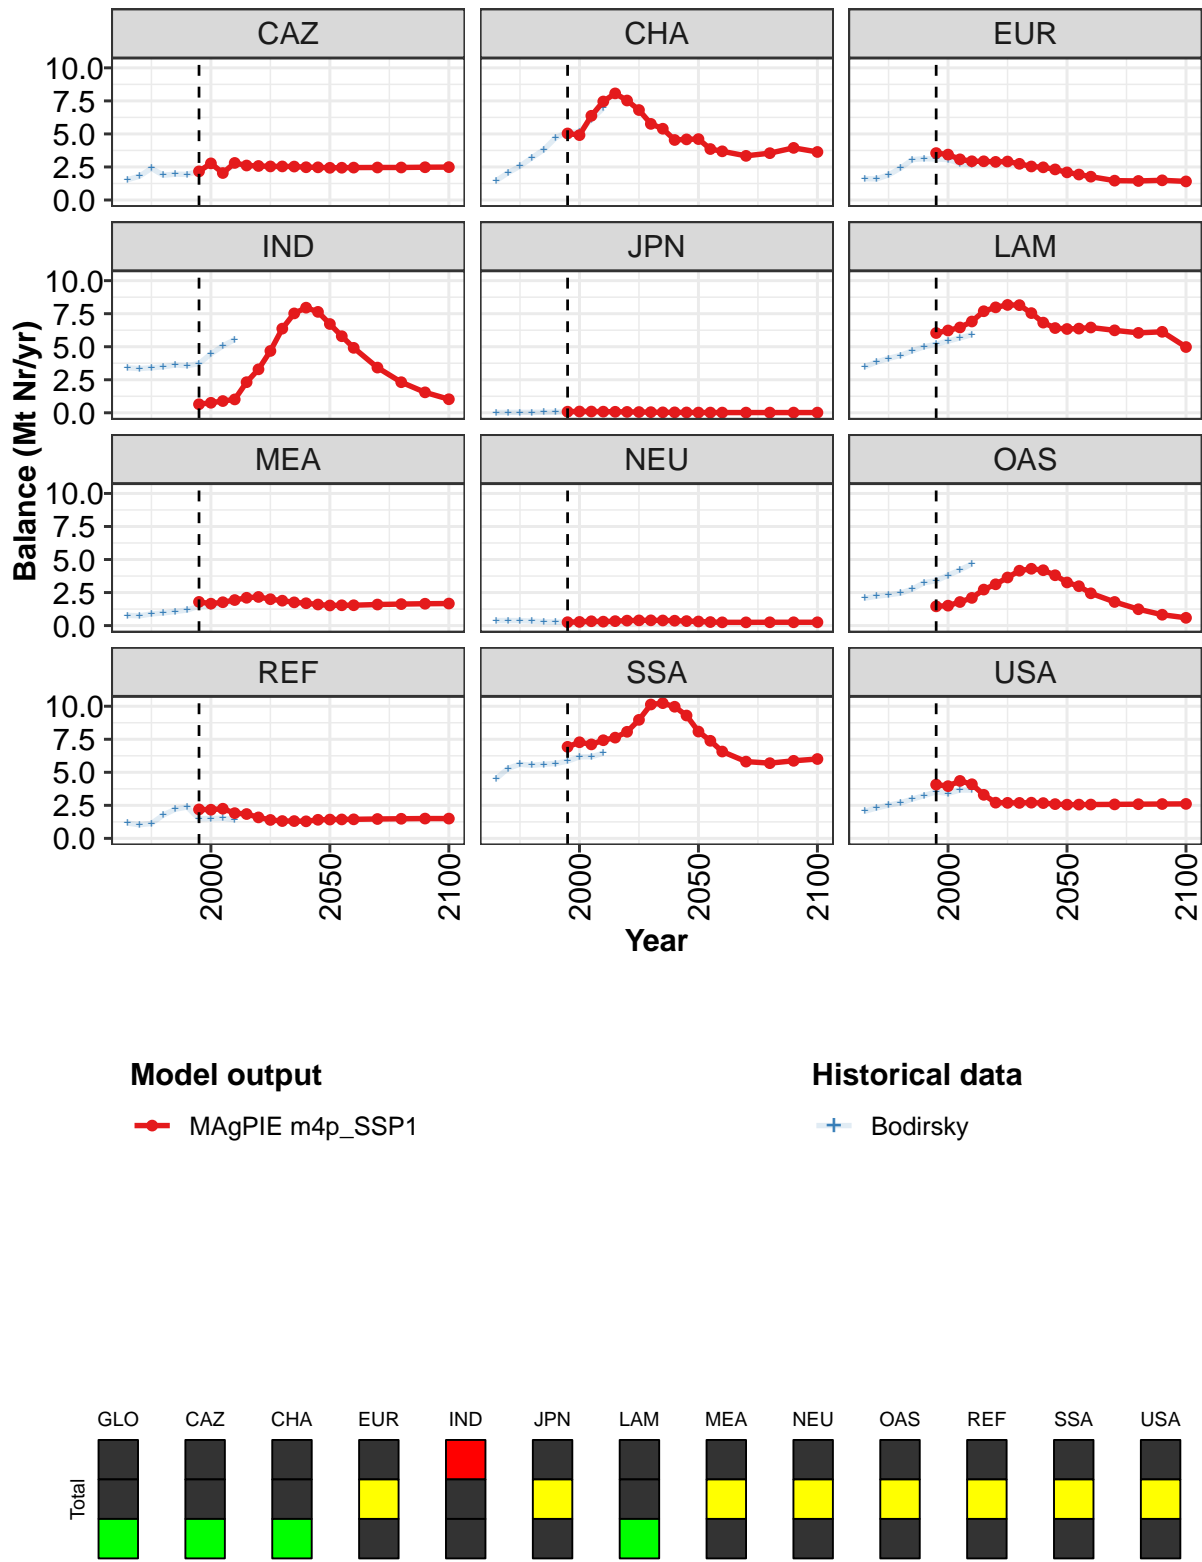

Figure 469: MAgPIE m4p\_SSP1 — Resources—Nitrogen—Pasture Budget—Balance (Mt Nr/yr)

|     | 1995 | 2000 | 2005 | 2010 | 2015 | 2020 | 2025 | 2030 | 2035 | 2040 | 2045 |
|-----|------|------|------|------|------|------|------|------|------|------|------|
| GLO | 34.2 | 35.1 | 36.5 | 39.0 | 41.6 | 42.4 | 44.3 | 46.2 | 46.3 | 44.5 | 42.5 |
| CAZ | 2.2  | 2.8  | 2.0  | 2.8  | 2.6  | 2.6  | 2.5  | 2.5  | 2.5  | 2.5  | 2.5  |
| CHA | 5.0  | 4.9  | 6.4  | 7.5  | 8.1  | 7.5  | 6.8  | 5.8  | 5.4  | 4.5  | 4.6  |
| EUR | 3.6  | 3.4  | 3.1  | 2.9  | 2.9  | 2.9  | 2.9  | 2.7  | 2.5  | 2.5  | 2.3  |
| IND | 0.6  | 0.8  | 0.9  | 1.0  | 2.3  | 3.3  | 4.7  | 6.4  | 7.5  | 8.0  | 7.6  |
| JPN | 0.1  | 0.1  | 0.1  | 0.1  | 0.1  | 0.1  | 0.1  | 0.0  | 0.0  | 0.0  | 0.0  |
| LAM | 6.0  | 6.2  | 6.5  | 6.9  | 7.7  | 8.0  | 8.2  | 8.1  | 7.5  | 6.8  | 6.4  |
| MEA | 1.8  | 1.7  | 1.8  | 1.9  | 2.1  | 2.2  | 2.0  | 1.9  | 1.8  | 1.7  | 1.6  |
| NEU | 0.3  | 0.3  | 0.3  | 0.3  | 0.3  | 0.4  | 0.4  | 0.4  | 0.4  | 0.4  | 0.3  |
| OAS | 1.5  | 1.5  | 1.8  | 2.1  | 2.7  | 3.1  | 3.6  | 4.2  | 4.3  | 4.2  | 3.8  |
| REF | 2.2  | 2.2  | 2.2  | 1.9  | 1.8  | 1.6  | 1.4  | 1.3  | 1.3  | 1.3  | 1.4  |
| SSA | 6.9  | 7.3  | 7.1  | 7.4  | 7.6  | 8.1  | 9.0  | 10.1 | 10.2 | 10.0 | 9.3  |
| USA | 4.1  | 4.0  | 4.4  | 4.1  | 3.3  | 2.7  | 2.7  | 2.7  | 2.7  | 2.7  | 2.6  |

Table 1803: MAgPIE m4p\_SSP1 — Resources—Nitrogen—Pasture Budget—Balance (Mt Nr/yr) [PART 1/2]

|     | 2050 | 2055 | 2060 | 2070 | 2080 | 2090 | 2100 |
|-----|------|------|------|------|------|------|------|
| GLO | 39.4 | 36.6 | 34.1 | 30.4 | 28.7 | 28.3 | 26.2 |
| CAZ | 2.4  | 2.4  | 2.5  | 2.5  | 2.5  | 2.5  | 2.5  |
| CHA | 4.6  | 3.9  | 3.7  | 3.3  | 3.5  | 3.9  | 3.6  |
| EUR | 2.1  | 1.9  | 1.8  | 1.5  | 1.4  | 1.5  | 1.4  |
| IND | 6.7  | 5.8  | 4.9  | 3.4  | 2.3  | 1.5  | 1.0  |
| JPN | 0.0  | 0.0  | 0.0  | 0.0  | 0.0  | 0.0  | 0.0  |
| LAM | 6.3  | 6.4  | 6.5  | 6.2  | 6.0  | 6.1  | 5.0  |
| MEA | 1.5  | 1.5  | 1.5  | 1.6  | 1.6  | 1.7  | 1.7  |
| NEU | 0.3  | 0.3  | 0.2  | 0.2  | 0.3  | 0.3  | 0.3  |
| OAS | 3.3  | 3.0  | 2.4  | 1.8  | 1.2  | 0.8  | 0.6  |
| REF | 1.4  | 1.4  | 1.4  | 1.5  | 1.5  | 1.5  | 1.5  |
| SSA | 8.1  | 7.4  | 6.6  | 5.8  | 5.7  | 5.9  | 6.0  |
| USA | 2.6  | 2.6  | 2.6  | 2.6  | 2.6  | 2.6  | 2.6  |

Table 1804: MAgPIE m4p\_SSP1 — Resources—Nitrogen—Pasture Budget—Balance (Mt Nr/yr) [PART 2/2]

|     | 1965 | 1970 | 1975 | 1980 | 1985 | 1990 | 1995 | 2000 | 2005 | 2010 |
|-----|------|------|------|------|------|------|------|------|------|------|
| GLO | 22.5 | 24.7 | 27.3 | 29.1 | 32.1 | 34.4 | 35.4 | 37.5 | 39.3 | 42.1 |
| CAZ | 1.5  | 1.8  | 2.4  | 1.9  | 2.0  | 1.9  | 2.2  | 2.7  | 2.1  | 2.7  |
| CHA | 1.5  | 2.1  | 2.6  | 3.2  | 3.8  | 4.7  | 5.2  | 5.1  | 6.1  | 7.0  |
| EUR | 1.6  | 1.6  | 1.9  | 2.4  | 3.1  | 3.1  | 3.1  | 3.1  | 2.8  | 2.6  |
| IND | 3.4  | 3.3  | 3.4  | 3.5  | 3.6  | 3.6  | 3.7  | 4.5  | 5.1  | 5.5  |
| JPN | 0.0  | 0.0  | 0.0  | 0.0  | 0.0  | 0.1  | 0.1  | 0.1  | 0.1  | 0.1  |
| LAM | 3.5  | 3.8  | 4.1  | 4.3  | 4.7  | 5.0  | 5.2  | 5.4  | 5.7  | 5.9  |
| MEA | 0.8  | 0.7  | 0.9  | 1.0  | 1.1  | 1.2  | 1.5  | 1.5  | 1.7  | 1.8  |
| NEU | 0.4  | 0.4  | 0.4  | 0.3  | 0.3  | 0.3  | 0.3  | 0.3  | 0.3  | 0.3  |
| OAS | 2.1  | 2.2  | 2.3  | 2.5  | 2.8  | 3.3  | 3.4  | 3.8  | 4.2  | 4.7  |
| REF | 1.2  | 1.0  | 1.1  | 1.8  | 2.2  | 2.4  | 1.5  | 1.5  | 1.5  | 1.4  |
| SSA | 4.5  | 5.3  | 5.6  | 5.5  | 5.6  | 5.7  | 5.8  | 6.2  | 6.2  | 6.4  |
| USA | 2.1  | 2.3  | 2.5  | 2.7  | 3.0  | 3.2  | 3.5  | 3.4  | 3.7  | 3.7  |

Table 1805: Bodirsky — Resources—Nitrogen—Pasture Budget—Balance (Mt Nr/yr)

56.3.2 Balance—Nutrient Surplus

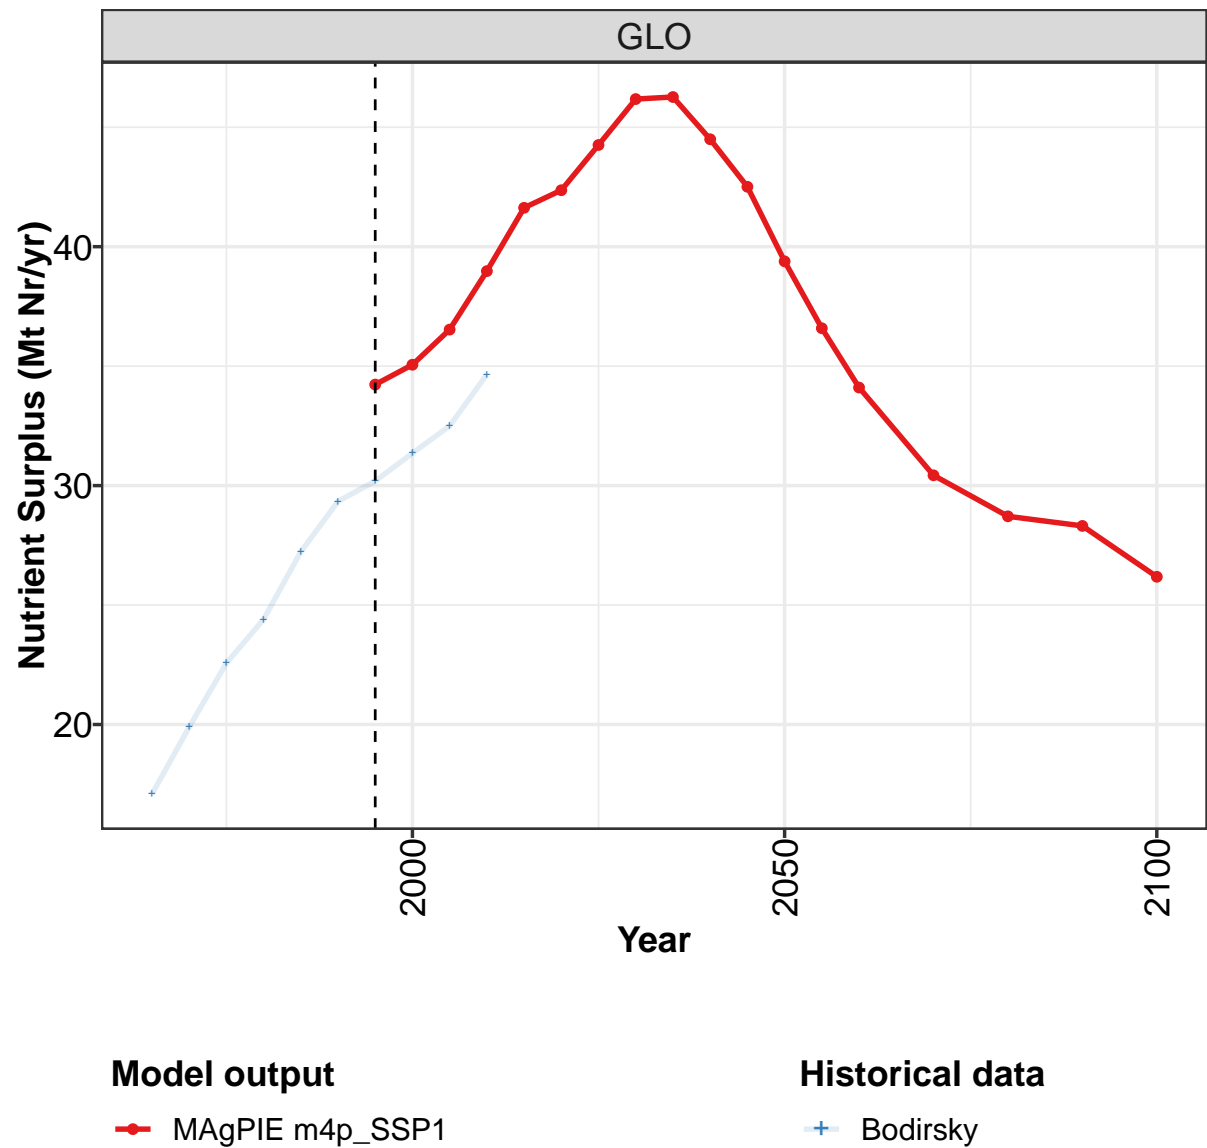

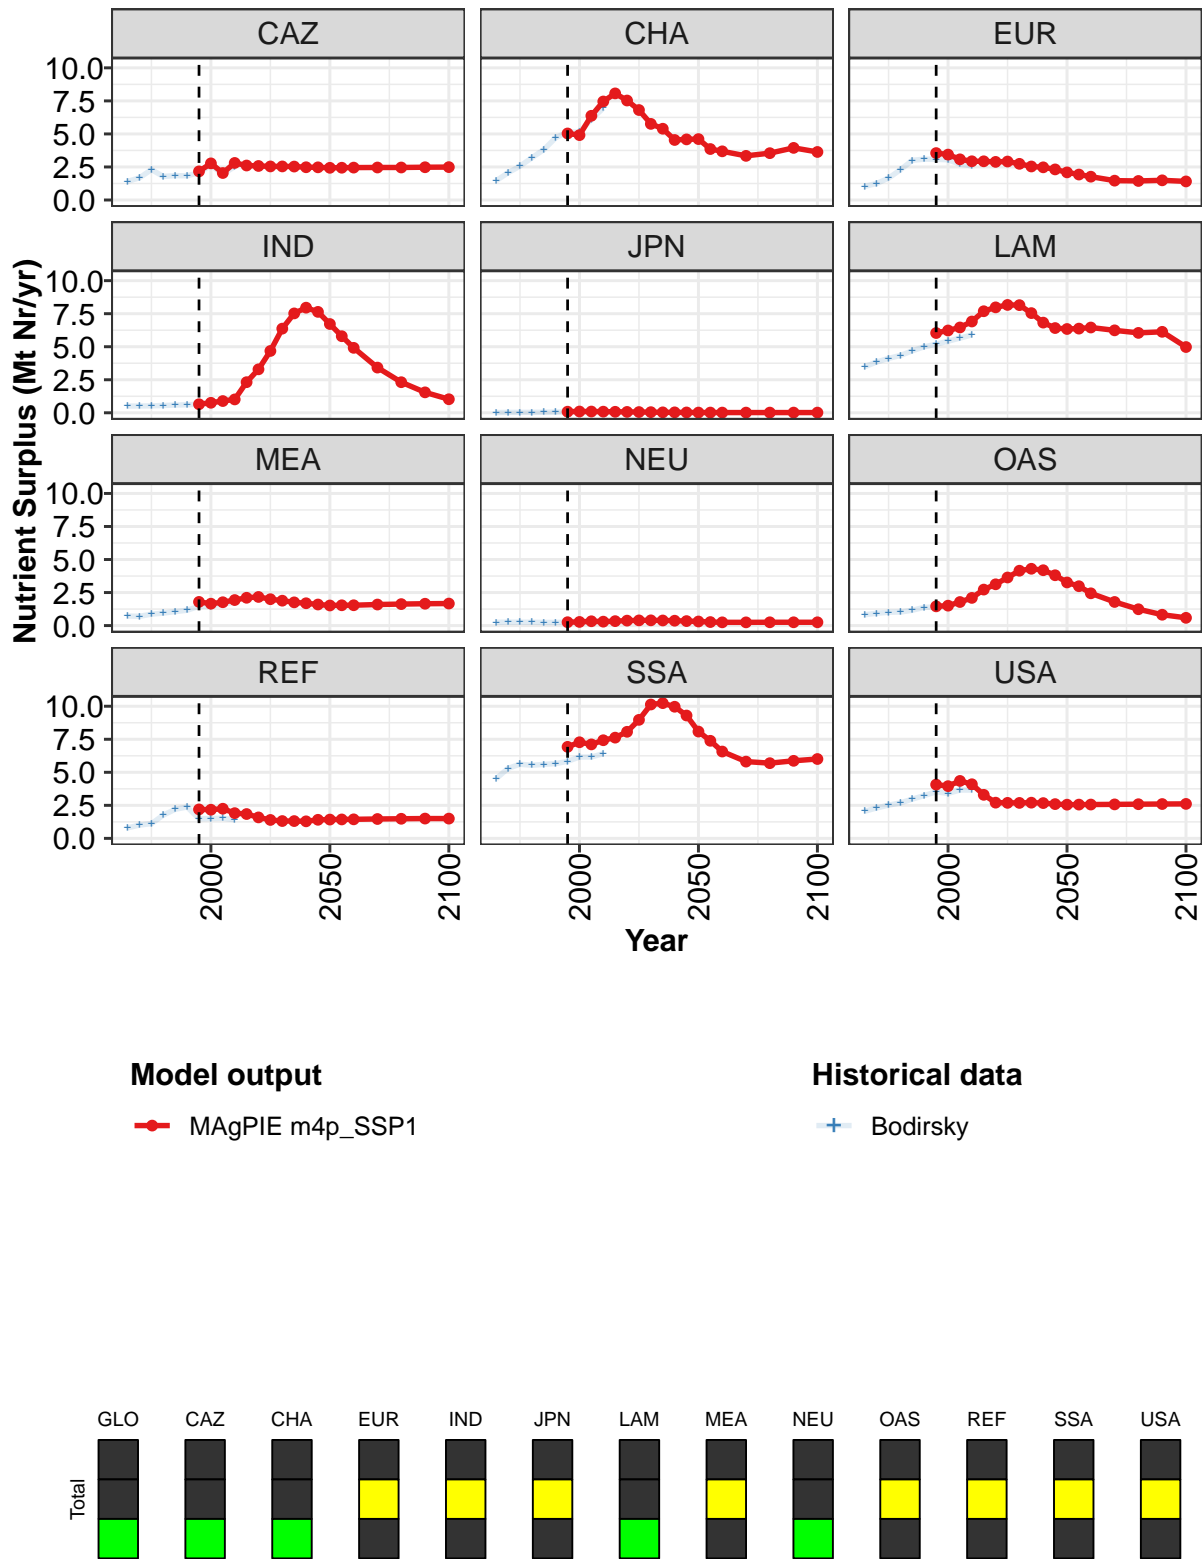

Figure 470: MAgPIE m4p\_SSP1 — Resources—Nitrogen—Pasture Budget—Balance—Nutrient Surplus (Mt Nr/yr)



|     | 1995 | 2000 | 2005 | 2010 | 2015 | 2020 | 2025 | 2030 | 2035 | 2040 | 2045 |
|-----|------|------|------|------|------|------|------|------|------|------|------|
| GLO | 34.2 | 35.1 | 36.5 | 39.0 | 41.6 | 42.4 | 44.3 | 46.2 | 46.3 | 44.5 | 42.5 |
| CAZ | 2.2  | 2.8  | 2.0  | 2.8  | 2.6  | 2.6  | 2.5  | 2.5  | 2.5  | 2.5  | 2.5  |
| CHA | 5.0  | 4.9  | 6.4  | 7.5  | 8.1  | 7.5  | 6.8  | 5.8  | 5.4  | 4.5  | 4.6  |
| EUR | 3.6  | 3.4  | 3.1  | 2.9  | 2.9  | 2.9  | 2.9  | 2.7  | 2.5  | 2.5  | 2.3  |
| IND | 0.6  | 0.8  | 0.9  | 1.0  | 2.3  | 3.3  | 4.7  | 6.4  | 7.5  | 8.0  | 7.6  |
| JPN | 0.1  | 0.1  | 0.1  | 0.1  | 0.1  | 0.1  | 0.1  | 0.0  | 0.0  | 0.0  | 0.0  |
| LAM | 6.0  | 6.2  | 6.5  | 6.9  | 7.7  | 8.0  | 8.2  | 8.1  | 7.5  | 6.8  | 6.4  |
| MEA | 1.8  | 1.7  | 1.8  | 1.9  | 2.1  | 2.2  | 2.0  | 1.9  | 1.8  | 1.7  | 1.6  |
| NEU | 0.3  | 0.3  | 0.3  | 0.3  | 0.3  | 0.4  | 0.4  | 0.4  | 0.4  | 0.4  | 0.3  |
| OAS | 1.5  | 1.5  | 1.8  | 2.1  | 2.7  | 3.1  | 3.6  | 4.2  | 4.3  | 4.2  | 3.8  |
| REF | 2.2  | 2.2  | 2.2  | 1.9  | 1.8  | 1.6  | 1.4  | 1.3  | 1.3  | 1.3  | 1.4  |
| SSA | 6.9  | 7.3  | 7.1  | 7.4  | 7.6  | 8.1  | 9.0  | 10.1 | 10.2 | 10.0 | 9.3  |
| USA | 4.1  | 4.0  | 4.4  | 4.1  | 3.3  | 2.7  | 2.7  | 2.7  | 2.7  | 2.7  | 2.6  |

Table 1806: MAgPIE m4p\_SSP1 — Resources—Nitrogen—Pasture Budget—Balance—Nutrient Surplus (Mt Nr/yr) [PART 1/2]

|     | 2050 | 2055 | 2060 | 2070 | 2080 | 2090 | 2100 |
|-----|------|------|------|------|------|------|------|
| GLO | 39.4 | 36.6 | 34.1 | 30.4 | 28.7 | 28.3 | 26.2 |
| CAZ | 2.4  | 2.4  | 2.5  | 2.5  | 2.5  | 2.5  | 2.5  |
| CHA | 4.6  | 3.9  | 3.7  | 3.3  | 3.5  | 3.9  | 3.6  |
| EUR | 2.1  | 1.9  | 1.8  | 1.5  | 1.4  | 1.5  | 1.4  |
| IND | 6.7  | 5.8  | 4.9  | 3.4  | 2.3  | 1.5  | 1.0  |
| JPN | 0.0  | 0.0  | 0.0  | 0.0  | 0.0  | 0.0  | 0.0  |
| LAM | 6.3  | 6.4  | 6.5  | 6.2  | 6.0  | 6.1  | 5.0  |
| MEA | 1.5  | 1.5  | 1.5  | 1.6  | 1.6  | 1.7  | 1.7  |
| NEU | 0.3  | 0.3  | 0.2  | 0.2  | 0.3  | 0.3  | 0.3  |
| OAS | 3.3  | 3.0  | 2.4  | 1.8  | 1.2  | 0.8  | 0.6  |
| REF | 1.4  | 1.4  | 1.4  | 1.5  | 1.5  | 1.5  | 1.5  |
| SSA | 8.1  | 7.4  | 6.6  | 5.8  | 5.7  | 5.9  | 6.0  |
| USA | 2.6  | 2.6  | 2.6  | 2.6  | 2.6  | 2.6  | 2.6  |

Table 1807: MAgPIE m4p\_SSP1 — Resources—Nitrogen—Pasture Budget—Balance—Nutrient Surplus (Mt Nr/yr) [PART 2/2]

|     | 1965 | 1970 | 1975 | 1980 | 1985 | 1990 | 1995 | 2000 | 2005 | 2010 |
|-----|------|------|------|------|------|------|------|------|------|------|
| GLO | 17.1 | 19.9 | 22.6 | 24.4 | 27.2 | 29.3 | 30.2 | 31.4 | 32.5 | 34.7 |
| CAZ | 1.4  | 1.7  | 2.3  | 1.8  | 1.8  | 1.8  | 2.1  | 2.6  | 1.9  | 2.5  |
| CHA | 1.5  | 2.1  | 2.6  | 3.2  | 3.8  | 4.7  | 5.2  | 5.1  | 6.1  | 7.0  |
| EUR | 1.0  | 1.3  | 1.7  | 2.3  | 3.0  | 3.1  | 3.1  | 3.0  | 2.7  | 2.6  |
| IND | 0.5  | 0.5  | 0.5  | 0.6  | 0.6  | 0.6  | 0.7  | 0.8  | 0.9  | 1.1  |
| JPN | 0.0  | 0.0  | 0.0  | 0.0  | 0.0  | 0.1  | 0.1  | 0.1  | 0.1  | 0.1  |
| LAM | 3.5  | 3.8  | 4.1  | 4.3  | 4.7  | 5.0  | 5.2  | 5.4  | 5.7  | 5.9  |
| MEA | 0.7  | 0.7  | 0.9  | 0.9  | 1.1  | 1.2  | 1.5  | 1.5  | 1.6  | 1.8  |
| NEU | 0.2  | 0.3  | 0.3  | 0.3  | 0.2  | 0.2  | 0.3  | 0.3  | 0.3  | 0.3  |
| OAS | 0.8  | 0.9  | 1.0  | 1.0  | 1.2  | 1.4  | 1.4  | 1.5  | 1.7  | 2.0  |
| REF | 0.8  | 1.0  | 1.1  | 1.8  | 2.2  | 2.4  | 1.5  | 1.5  | 1.5  | 1.4  |
| SSA | 4.5  | 5.3  | 5.6  | 5.5  | 5.6  | 5.7  | 5.8  | 6.2  | 6.2  | 6.4  |
| USA | 2.1  | 2.3  | 2.5  | 2.7  | 3.0  | 3.2  | 3.5  | 3.4  | 3.7  | 3.7  |

Table 1808: Bodirsky — Resources—Nitrogen—Pasture Budget—Balance—Nutrient Surplus (Mt Nr/yr)

56.3.3 Inputs

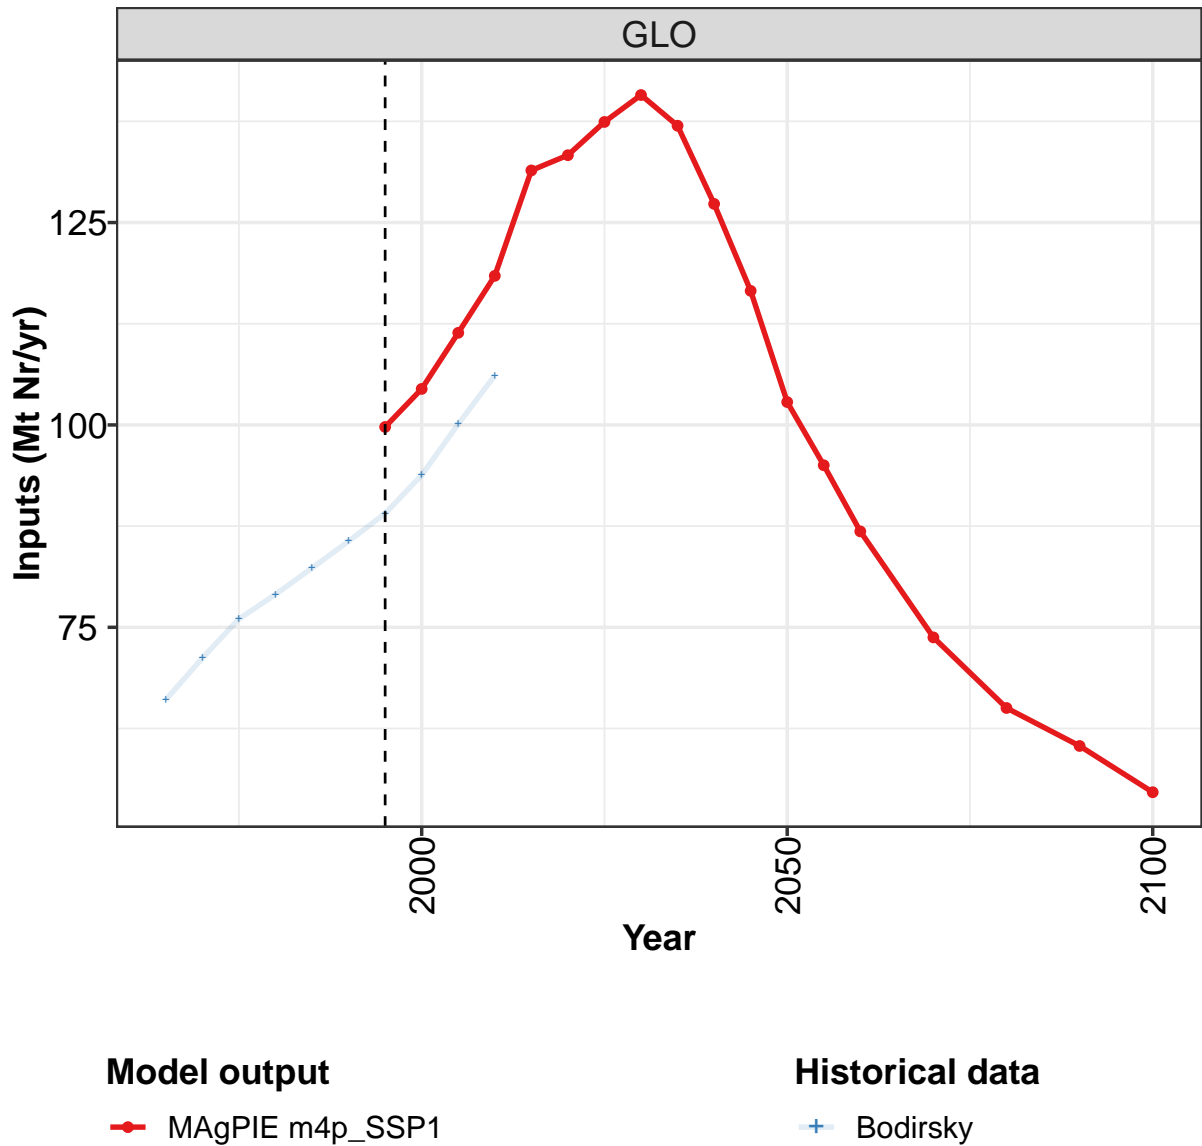

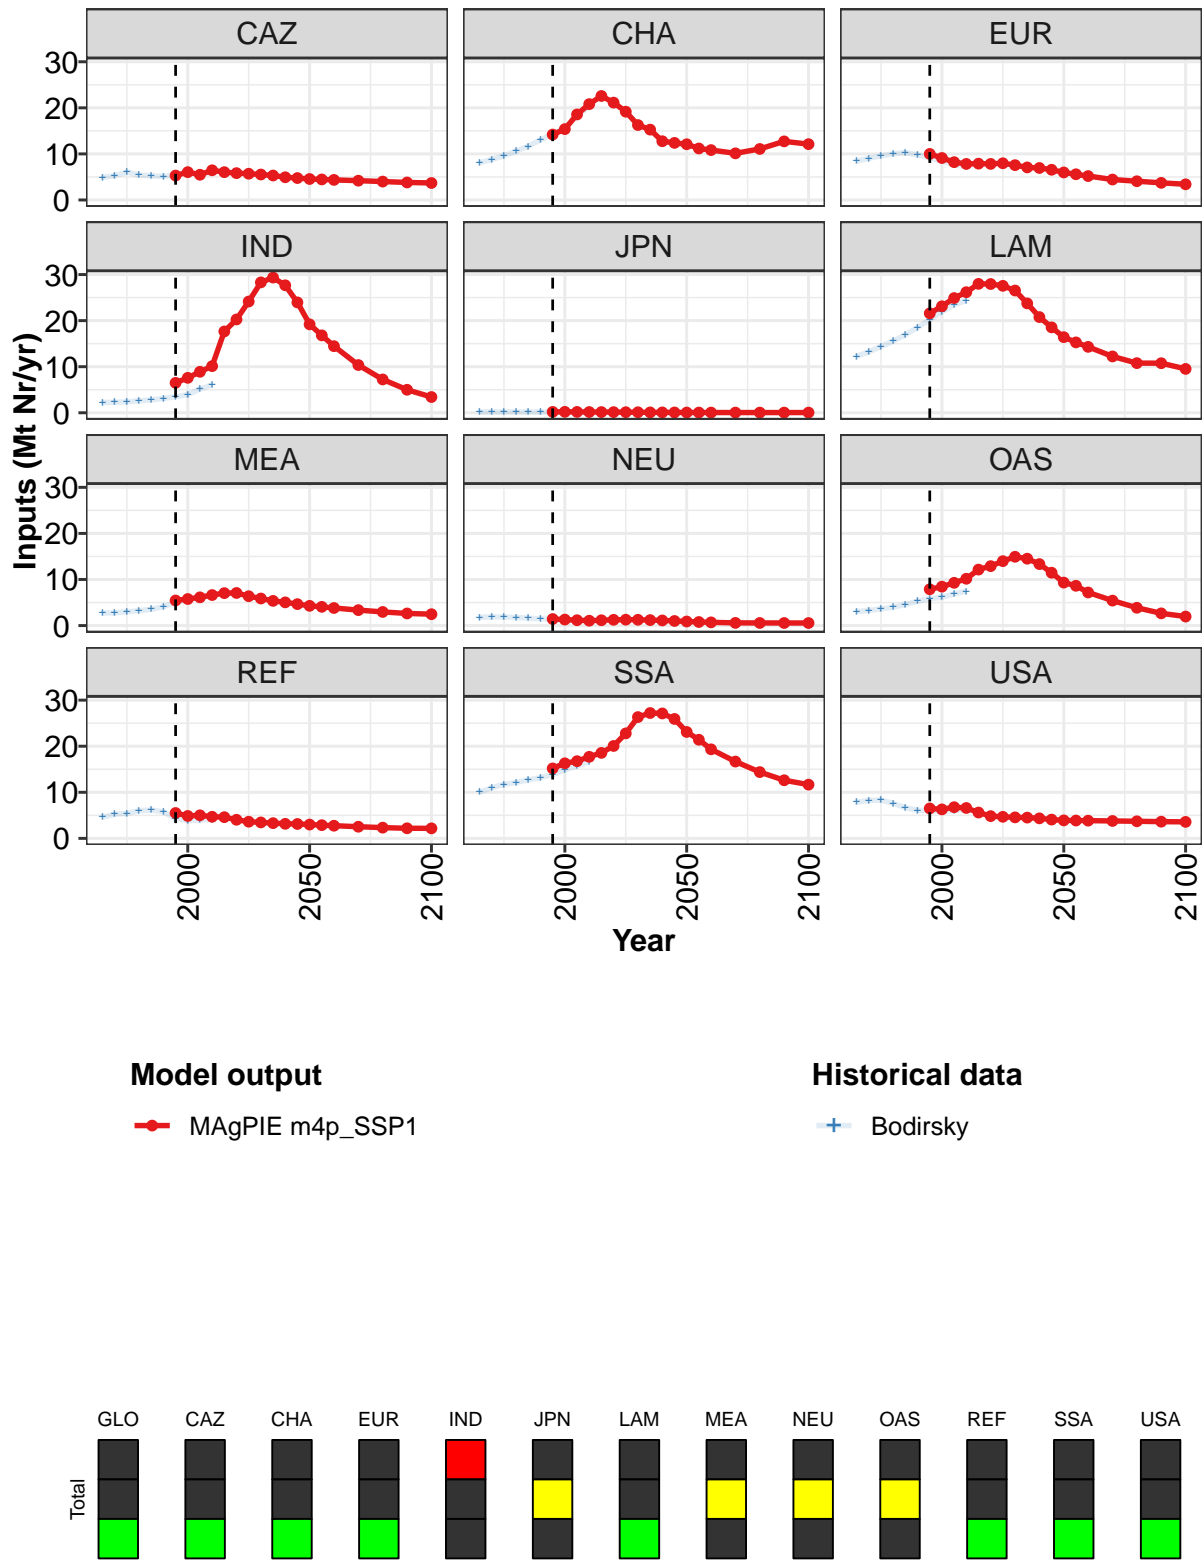

Figure 471: MAgPIE m4p\_SSP1 — Resources—Nitrogen—Pasture Budget—Inputs (Mt Nr/yr)

|     | 1995 | 2000 | 2005 | 2010 | 2015 | 2020 | 2025 | 2030 | 2035 | 2040 | 2045 |
|-----|------|------|------|------|------|------|------|------|------|------|------|
| GLO | 100  | 104  | 111  | 118  | 131  | 133  | 137  | 141  | 137  | 127  | 117  |
| CAZ | 5    | 6    | 5    | 6    | 6    | 6    | 6    | 6    | 5    | 5    | 5    |
| CHA | 14   | 15   | 19   | 21   | 23   | 21   | 19   | 16   | 15   | 13   | 12   |
| EUR | 10   | 9    | 8    | 8    | 8    | 8    | 8    | 8    | 7    | 7    | 7    |
| IND | 6    | 8    | 9    | 10   | 18   | 20   | 24   | 28   | 29   | 28   | 24   |
| JPN | 0    | 0    | 0    | 0    | 0    | 0    | 0    | 0    | 0    | 0    | 0    |
| LAM | 22   | 23   | 25   | 26   | 28   | 28   | 28   | 27   | 24   | 21   | 19   |
| MEA | 5    | 6    | 6    | 7    | 7    | 7    | 6    | 6    | 5    | 5    | 5    |
| NEU | 1    | 1    | 1    | 1    | 1    | 1    | 1    | 1    | 1    | 1    | 1    |
| OAS | 8    | 8    | 9    | 10   | 12   | 13   | 14   | 15   | 15   | 13   | 11   |
| REF | 6    | 5    | 5    | 5    | 5    | 4    | 4    | 3    | 3    | 3    | 3    |
| SSA | 15   | 16   | 17   | 18   | 19   | 20   | 23   | 26   | 27   | 27   | 26   |
| USA | 7    | 6    | 7    | 7    | 6    | 5    | 5    | 5    | 5    | 4    | 4    |

Table 1809: MAgPIE m4p\_SSP1 — Resources—Nitrogen—Pasture Budget—Inputs (Mt Nr/yr) [PART 1/2]

|     | 2050 | 2055 | 2060 | 2070 | 2080 | 2090 | 2100 |
|-----|------|------|------|------|------|------|------|
| GLO | 103  | 95   | 87   | 74   | 65   | 60   | 55   |
| CAZ | 5    | 4    | 4    | 4    | 4    | 4    | 4    |
| CHA | 12   | 11   | 11   | 10   | 11   | 13   | 12   |
| EUR | 6    | 6    | 5    | 4    | 4    | 4    | 3    |
| IND | 19   | 17   | 14   | 10   | 7    | 5    | 3    |
| JPN | 0    | 0    | 0    | 0    | 0    | 0    | 0    |
| LAM | 16   | 15   | 14   | 12   | 11   | 11   | 10   |
| MEA | 4    | 4    | 4    | 3    | 3    | 3    | 2    |
| NEU | 1    | 1    | 1    | 1    | 1    | 1    | 1    |
| OAS | 9    | 9    | 7    | 5    | 4    | 3    | 2    |
| REF | 3    | 3    | 3    | 3    | 2    | 2    | 2    |
| SSA | 23   | 21   | 19   | 17   | 14   | 13   | 12   |
| USA | 4    | 4    | 4    | 4    | 4    | 4    | 4    |

Table 1810: MAgPIE m4p\_SSP1 — Resources—Nitrogen—Pasture Budget—Inputs (Mt Nr/yr) [PART 2/2]

|     | 1965 | 1970 | 1975 | 1980 | 1985 | 1990 | 1995 | 2000 | 2005 | 2010 |
|-----|------|------|------|------|------|------|------|------|------|------|
| GLO | 66   | 71   | 76   | 79   | 82   | 86   | 89   | 94   | 100  | 106  |
| CAZ | 5    | 5    | 6    | 5    | 5    | 5    | 5    | 6    | 5    | 6    |
| CHA | 8    | 9    | 10   | 11   | 12   | 13   | 14   | 16   | 18   | 20   |
| EUR | 8    | 9    | 10   | 10   | 10   | 10   | 9    | 8    | 8    | 7    |
| IND | 2    | 2    | 2    | 3    | 3    | 3    | 3    | 4    | 5    | 6    |
| JPN | 0    | 0    | 0    | 0    | 0    | 0    | 0    | 0    | 0    | 0    |
| LAM | 12   | 13   | 14   | 16   | 17   | 19   | 20   | 22   | 23   | 24   |
| MEA | 3    | 3    | 3    | 3    | 4    | 4    | 5    | 6    | 6    | 6    |
| NEU | 2    | 2    | 2    | 2    | 2    | 1    | 1    | 1    | 1    | 1    |
| OAS | 3    | 3    | 4    | 4    | 5    | 5    | 6    | 6    | 7    | 7    |
| REF | 5    | 5    | 5    | 6    | 6    | 6    | 4    | 4    | 4    | 4    |
| SSA | 10   | 11   | 12   | 12   | 13   | 13   | 14   | 15   | 16   | 17   |
| USA | 8    | 8    | 8    | 8    | 7    | 6    | 6    | 6    | 6    | 6    |

Table 1811: Bodirsky — Resources—Nitrogen—Pasture Budget—Inputs (Mt Nr/yr)

56.3.4 Inputs—Atmospheric Deposition

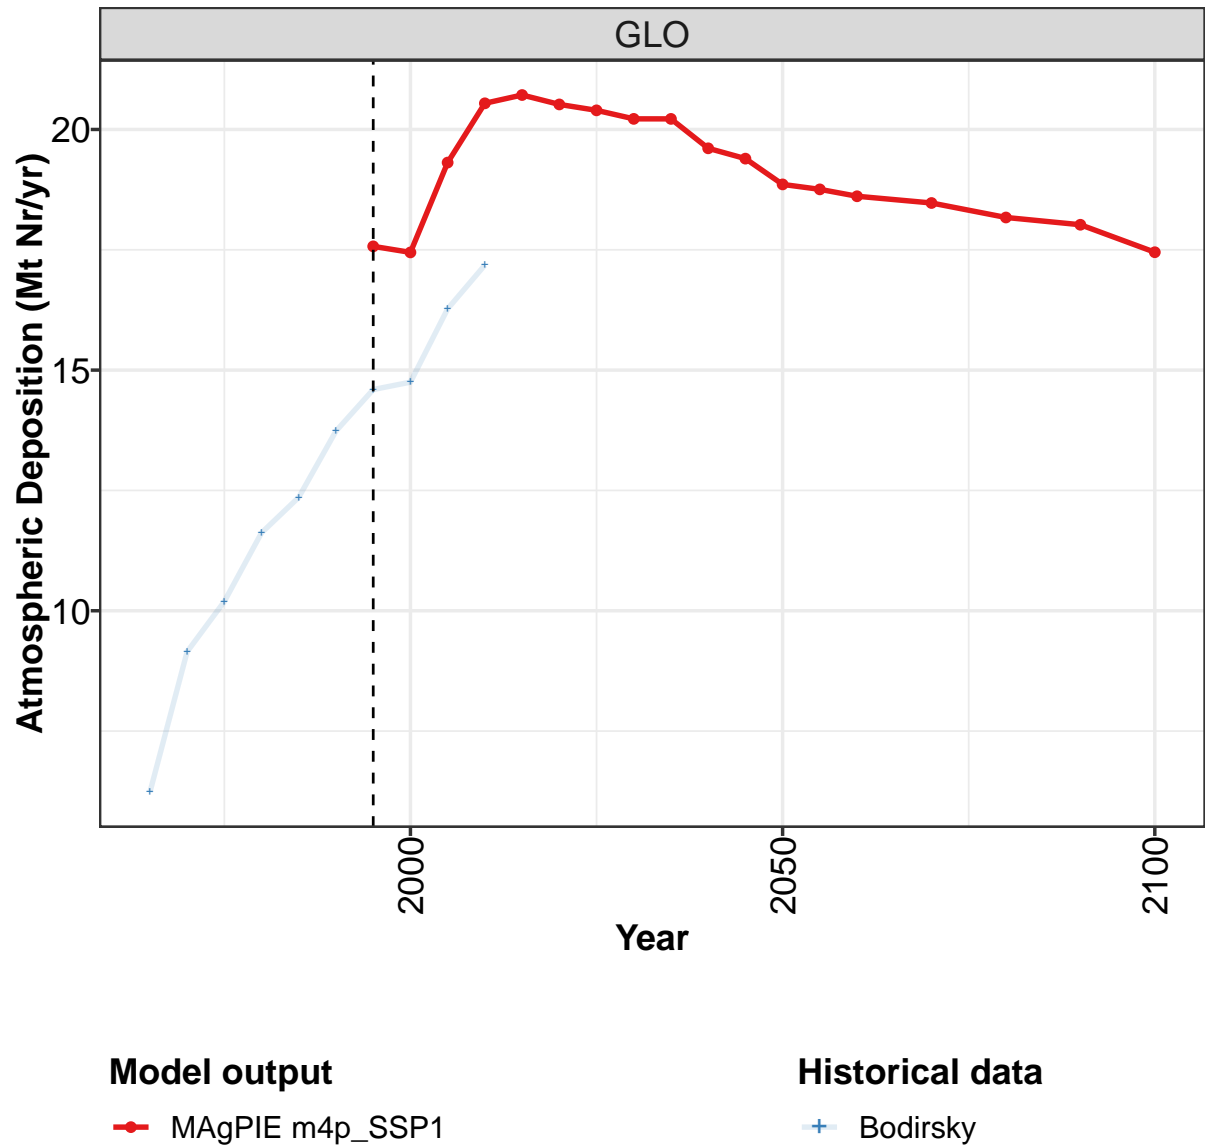

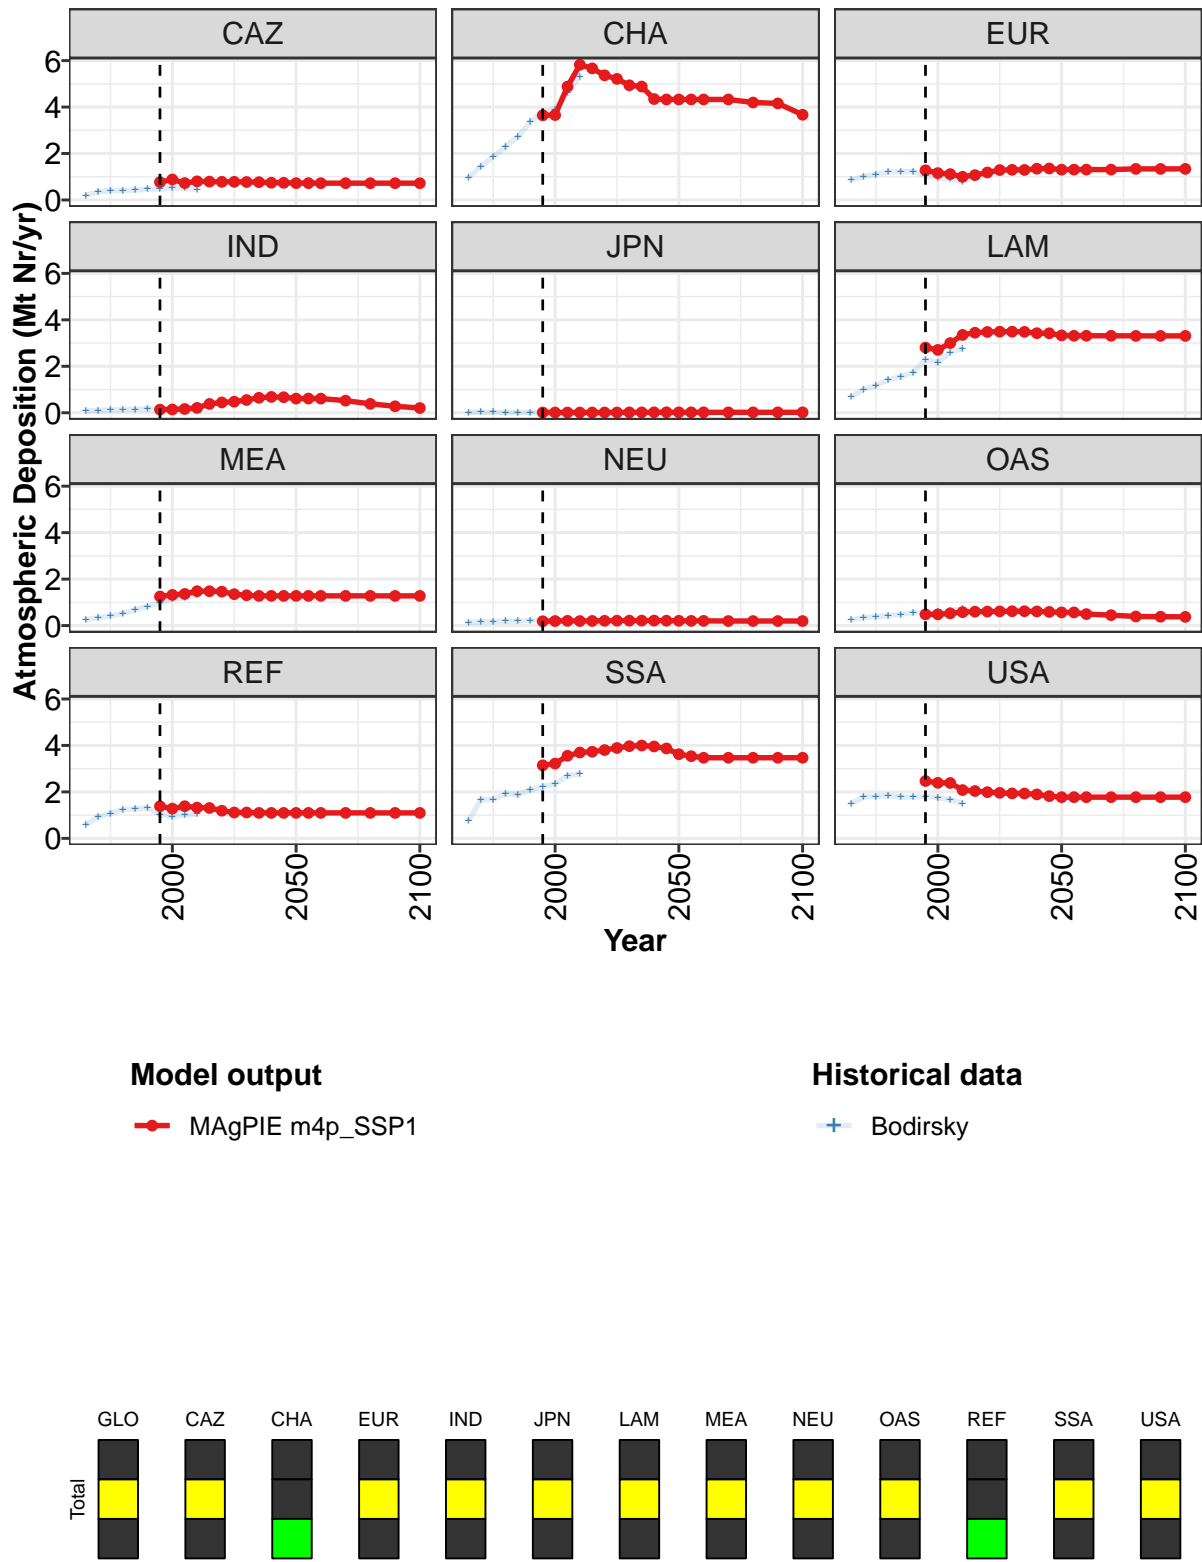

Figure 472: MAgPIE m4p\_SSP1 — Resources—Nitrogen—Pasture Budget—Inputs—Atmospheric Deposition (Mt Nr/yr)

|     | 1995 | 2000 | 2005 | 2010 | 2015 | 2020 | 2025 | 2030 | 2035 | 2040 | 2045 |
|-----|------|------|------|------|------|------|------|------|------|------|------|
| GLO | 17.6 | 17.4 | 19.3 | 20.5 | 20.7 | 20.5 | 20.4 | 20.2 | 20.2 | 19.6 | 19.4 |
| CAZ | 0.8  | 0.9  | 0.7  | 0.8  | 0.8  | 0.8  | 0.8  | 0.8  | 0.8  | 0.7  | 0.7  |
| CHA | 3.6  | 3.7  | 4.9  | 5.8  | 5.7  | 5.4  | 5.2  | 4.9  | 4.9  | 4.3  | 4.3  |
| EUR | 1.3  | 1.2  | 1.1  | 1.0  | 1.1  | 1.2  | 1.3  | 1.3  | 1.3  | 1.3  | 1.4  |
| IND | 0.1  | 0.1  | 0.2  | 0.2  | 0.4  | 0.4  | 0.5  | 0.6  | 0.6  | 0.7  | 0.7  |
| JPN | 0.0  | 0.0  | 0.0  | 0.0  | 0.0  | 0.0  | 0.0  | 0.0  | 0.0  | 0.0  | 0.0  |
| LAM | 2.8  | 2.7  | 3.0  | 3.4  | 3.4  | 3.5  | 3.5  | 3.5  | 3.5  | 3.4  | 3.4  |
| MEA | 1.3  | 1.3  | 1.4  | 1.5  | 1.5  | 1.5  | 1.3  | 1.3  | 1.3  | 1.3  | 1.3  |
| NEU | 0.2  | 0.2  | 0.2  | 0.2  | 0.2  | 0.2  | 0.2  | 0.2  | 0.2  | 0.2  | 0.2  |
| OAS | 0.5  | 0.5  | 0.5  | 0.6  | 0.6  | 0.6  | 0.6  | 0.6  | 0.6  | 0.6  | 0.6  |
| REF | 1.4  | 1.3  | 1.4  | 1.3  | 1.3  | 1.2  | 1.1  | 1.1  | 1.1  | 1.1  | 1.1  |
| SSA | 3.1  | 3.2  | 3.6  | 3.7  | 3.7  | 3.8  | 3.9  | 4.0  | 4.0  | 4.0  | 3.9  |
| USA | 2.5  | 2.4  | 2.4  | 2.1  | 2.0  | 2.0  | 2.0  | 1.9  | 1.9  | 1.9  | 1.8  |

Table 1812: MAgPIE m4p\_SSP1 — Resources—Nitrogen—Pasture Budget—Inputs—Atmospheric Deposition (Mt Nr/yr) [PART 1/2]

|     | 2050 | 2055 | 2060 | 2070 | 2080 | 2090 | 2100 |
|-----|------|------|------|------|------|------|------|
| GLO | 18.9 | 18.8 | 18.6 | 18.5 | 18.2 | 18.0 | 17.4 |
| CAZ | 0.7  | 0.7  | 0.7  | 0.7  | 0.7  | 0.7  | 0.7  |
| CHA | 4.3  | 4.3  | 4.3  | 4.3  | 4.2  | 4.2  | 3.7  |
| EUR | 1.3  | 1.3  | 1.3  | 1.3  | 1.3  | 1.3  | 1.3  |
| IND | 0.6  | 0.6  | 0.6  | 0.5  | 0.4  | 0.3  | 0.2  |
| JPN | 0.0  | 0.0  | 0.0  | 0.0  | 0.0  | 0.0  | 0.0  |
| LAM | 3.3  | 3.3  | 3.3  | 3.3  | 3.3  | 3.3  | 3.3  |
| MEA | 1.3  | 1.3  | 1.3  | 1.3  | 1.3  | 1.3  | 1.3  |
| NEU | 0.2  | 0.2  | 0.2  | 0.2  | 0.2  | 0.2  | 0.2  |
| OAS | 0.6  | 0.6  | 0.5  | 0.4  | 0.4  | 0.4  | 0.4  |
| REF | 1.1  | 1.1  | 1.1  | 1.1  | 1.1  | 1.1  | 1.1  |
| SSA | 3.6  | 3.5  | 3.5  | 3.5  | 3.5  | 3.5  | 3.5  |
| USA | 1.8  | 1.8  | 1.8  | 1.8  | 1.8  | 1.8  | 1.8  |

Table 1813: MAgPIE m4p\_SSP1 — Resources—Nitrogen—Pasture Budget—Inputs—Atmospheric Deposition (Mt Nr/yr) [PART 2/2]

|     | 1965 | 1970 | 1975 | 1980 | 1985 | 1990 | 1995 | 2000 | 2005 | 2010 |
|-----|------|------|------|------|------|------|------|------|------|------|
| GLO | 6.2  | 9.1  | 10.2 | 11.6 | 12.4 | 13.7 | 14.6 | 14.7 | 16.3 | 17.2 |
| CAZ | 0.2  | 0.4  | 0.4  | 0.4  | 0.4  | 0.5  | 0.5  | 0.5  | 0.5  | 0.5  |
| CHA | 1.0  | 1.4  | 1.9  | 2.3  | 2.7  | 3.4  | 3.8  | 3.9  | 4.6  | 5.3  |
| EUR | 0.9  | 1.0  | 1.1  | 1.2  | 1.2  | 1.2  | 1.0  | 1.0  | 0.9  | 0.8  |
| IND | 0.1  | 0.1  | 0.1  | 0.1  | 0.1  | 0.2  | 0.2  | 0.2  | 0.2  | 0.3  |
| JPN | 0.0  | 0.0  | 0.0  | 0.0  | 0.0  | 0.0  | 0.0  | 0.0  | 0.0  | 0.0  |
| LAM | 0.7  | 1.0  | 1.2  | 1.4  | 1.5  | 1.7  | 2.3  | 2.2  | 2.6  | 2.8  |
| MEA | 0.2  | 0.3  | 0.4  | 0.5  | 0.7  | 0.8  | 1.0  | 1.1  | 1.2  | 1.3  |
| NEU | 0.1  | 0.2  | 0.2  | 0.2  | 0.2  | 0.2  | 0.2  | 0.2  | 0.2  | 0.2  |
| OAS | 0.2  | 0.3  | 0.4  | 0.4  | 0.5  | 0.5  | 0.6  | 0.6  | 0.6  | 0.7  |
| REF | 0.6  | 0.9  | 1.1  | 1.2  | 1.3  | 1.3  | 1.0  | 0.9  | 1.0  | 1.0  |
| SSA | 0.8  | 1.7  | 1.7  | 1.9  | 1.9  | 2.1  | 2.2  | 2.3  | 2.7  | 2.8  |
| USA | 1.5  | 1.8  | 1.8  | 1.8  | 1.8  | 1.8  | 1.8  | 1.8  | 1.7  | 1.5  |

Table 1814: Bodirsky — Resources—Nitrogen—Pasture Budget—Inputs—Atmospheric Deposition (Mt Nr/yr)

56.3.5 Inputs—Biological Fixation Freelifving Microorganisms

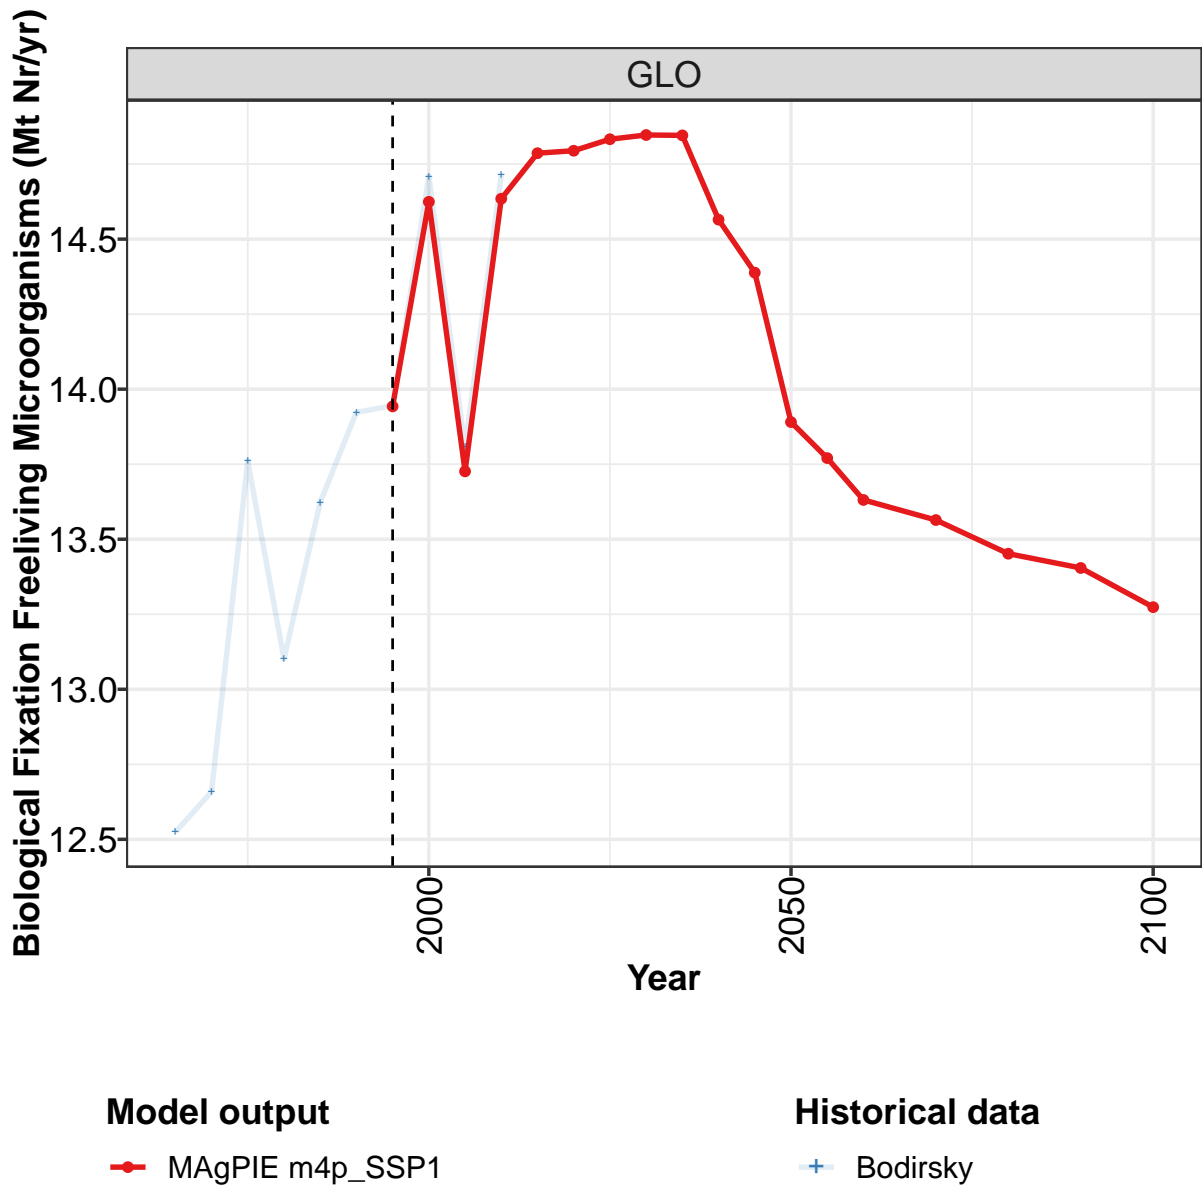



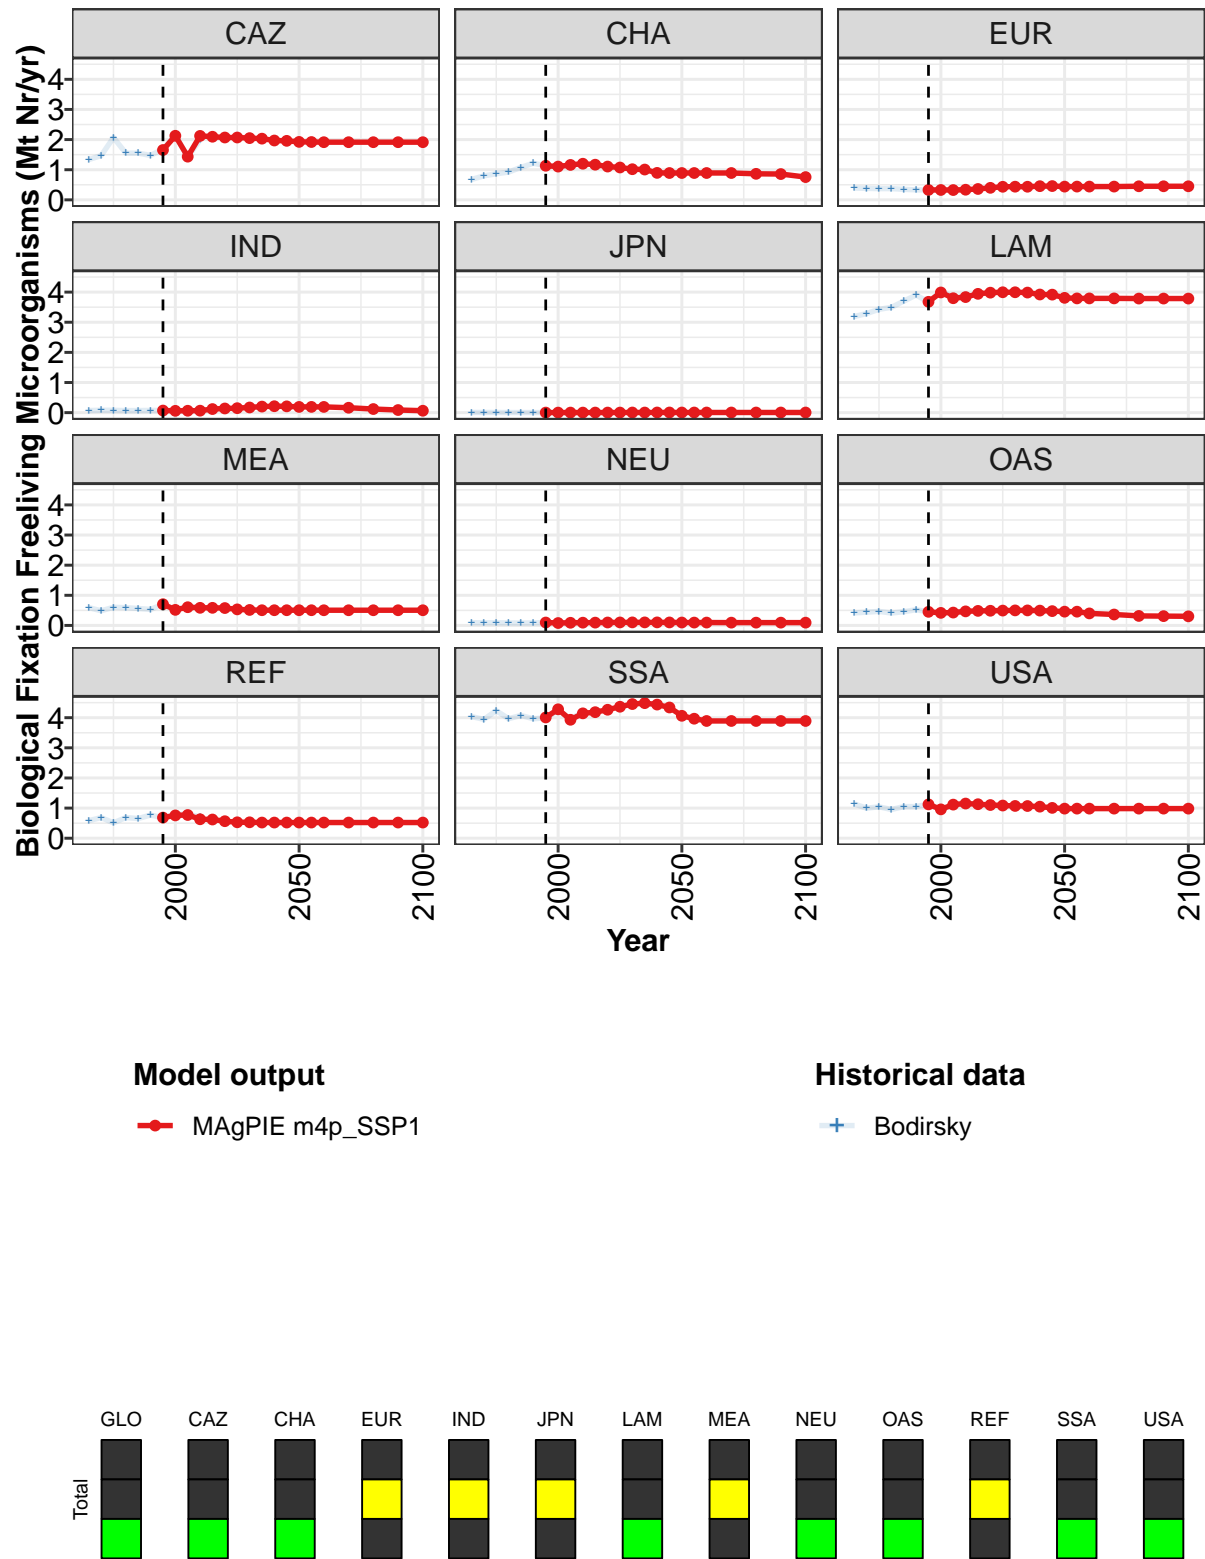

Figure 473: MAgPIE m4p\_SSP1 — Resources—Nitrogen—Pasture Budget—Inputs—Biological Fixation Free-living Microorganisms (Mt Nr/yr)

|     | 1995 | 2000 | 2005 | 2010 | 2015 | 2020 | 2025 | 2030 | 2035 | 2040 | 2045 |
|-----|------|------|------|------|------|------|------|------|------|------|------|
| GLO | 13.9 | 14.6 | 13.7 | 14.6 | 14.8 | 14.8 | 14.8 | 14.8 | 14.8 | 14.6 | 14.4 |
| CAZ | 1.7  | 2.1  | 1.4  | 2.1  | 2.1  | 2.1  | 2.1  | 2.0  | 2.0  | 2.0  | 2.0  |
| CHA | 1.1  | 1.1  | 1.2  | 1.2  | 1.2  | 1.1  | 1.1  | 1.0  | 1.0  | 0.9  | 0.9  |
| EUR | 0.3  | 0.3  | 0.3  | 0.3  | 0.4  | 0.4  | 0.4  | 0.4  | 0.4  | 0.5  | 0.5  |
| IND | 0.1  | 0.1  | 0.1  | 0.1  | 0.1  | 0.1  | 0.1  | 0.2  | 0.2  | 0.2  | 0.2  |
| JPN | 0.0  | 0.0  | 0.0  | 0.0  | 0.0  | 0.0  | 0.0  | 0.0  | 0.0  | 0.0  | 0.0  |
| LAM | 3.7  | 4.0  | 3.8  | 3.8  | 3.9  | 4.0  | 4.0  | 4.0  | 4.0  | 3.9  | 3.9  |
| MEA | 0.7  | 0.5  | 0.6  | 0.6  | 0.6  | 0.6  | 0.5  | 0.5  | 0.5  | 0.5  | 0.5  |
| NEU | 0.1  | 0.1  | 0.1  | 0.1  | 0.1  | 0.1  | 0.1  | 0.1  | 0.1  | 0.1  | 0.1  |
| OAS | 0.5  | 0.4  | 0.4  | 0.5  | 0.5  | 0.5  | 0.5  | 0.5  | 0.5  | 0.5  | 0.5  |
| REF | 0.7  | 0.8  | 0.8  | 0.6  | 0.6  | 0.6  | 0.5  | 0.5  | 0.5  | 0.5  | 0.5  |
| SSA | 4.0  | 4.3  | 3.9  | 4.1  | 4.2  | 4.3  | 4.4  | 4.5  | 4.5  | 4.4  | 4.3  |
| USA | 1.1  | 1.0  | 1.1  | 1.2  | 1.1  | 1.1  | 1.1  | 1.1  | 1.1  | 1.0  | 1.0  |

Table 1815: MAgPIE m4p\_SSP1 — Resources—Nitrogen—Pasture Budget—Inputs—Biological Fixation Free-living Microorganisms (Mt Nr/yr) [PART 1/2]

|     | 2050 | 2055 | 2060 | 2070 | 2080 | 2090 | 2100 |
|-----|------|------|------|------|------|------|------|
| GLO | 13.9 | 13.8 | 13.6 | 13.6 | 13.5 | 13.4 | 13.3 |
| CAZ | 1.9  | 1.9  | 1.9  | 1.9  | 1.9  | 1.9  | 1.9  |
| CHA | 0.9  | 0.9  | 0.9  | 0.9  | 0.9  | 0.9  | 0.8  |
| EUR | 0.4  | 0.4  | 0.4  | 0.4  | 0.5  | 0.5  | 0.5  |
| IND | 0.2  | 0.2  | 0.2  | 0.2  | 0.1  | 0.1  | 0.1  |
| JPN | 0.0  | 0.0  | 0.0  | 0.0  | 0.0  | 0.0  | 0.0  |
| LAM | 3.8  | 3.8  | 3.8  | 3.8  | 3.8  | 3.8  | 3.8  |
| MEA | 0.5  | 0.5  | 0.5  | 0.5  | 0.5  | 0.5  | 0.5  |
| NEU | 0.1  | 0.1  | 0.1  | 0.1  | 0.1  | 0.1  | 0.1  |
| OAS | 0.5  | 0.5  | 0.4  | 0.4  | 0.3  | 0.3  | 0.3  |
| REF | 0.5  | 0.5  | 0.5  | 0.5  | 0.5  | 0.5  | 0.5  |
| SSA | 4.1  | 4.0  | 3.9  | 3.9  | 3.9  | 3.9  | 3.9  |
| USA | 1.0  | 1.0  | 1.0  | 1.0  | 1.0  | 1.0  | 1.0  |

Table 1816: MAgPIE m4p\_SSP1 — Resources—Nitrogen—Pasture Budget—Inputs—Biological Fixation Free-living Microorganisms (Mt Nr/yr) [PART 2/2]

|     | 1965 | 1970 | 1975 | 1980 | 1985 | 1990 | 1995 | 2000 | 2005 | 2010 |
|-----|------|------|------|------|------|------|------|------|------|------|
| GLO | 12.5 | 12.7 | 13.8 | 13.1 | 13.6 | 13.9 | 13.9 | 14.7 | 13.8 | 14.7 |
| CAZ | 1.3  | 1.5  | 2.1  | 1.6  | 1.5  | 1.5  | 1.7  | 2.2  | 1.4  | 2.0  |
| CHA | 0.7  | 0.8  | 0.9  | 0.9  | 1.1  | 1.2  | 1.1  | 1.1  | 1.2  | 1.2  |
| EUR | 0.4  | 0.4  | 0.4  | 0.4  | 0.3  | 0.3  | 0.3  | 0.3  | 0.3  | 0.3  |
| IND | 0.1  | 0.1  | 0.1  | 0.1  | 0.1  | 0.1  | 0.1  | 0.1  | 0.1  | 0.1  |
| JPN | 0.0  | 0.0  | 0.0  | 0.0  | 0.0  | 0.0  | 0.0  | 0.0  | 0.0  | 0.0  |
| LAM | 3.2  | 3.3  | 3.4  | 3.5  | 3.7  | 3.9  | 3.7  | 4.0  | 3.8  | 3.9  |
| MEA | 0.6  | 0.5  | 0.6  | 0.6  | 0.6  | 0.5  | 0.7  | 0.5  | 0.6  | 0.6  |
| NEU | 0.1  | 0.1  | 0.1  | 0.1  | 0.1  | 0.1  | 0.1  | 0.1  | 0.1  | 0.1  |
| OAS | 0.4  | 0.4  | 0.5  | 0.4  | 0.5  | 0.5  | 0.5  | 0.4  | 0.4  | 0.5  |
| REF | 0.6  | 0.7  | 0.5  | 0.7  | 0.7  | 0.8  | 0.7  | 0.8  | 0.8  | 0.7  |
| SSA | 4.0  | 3.9  | 4.2  | 4.0  | 4.1  | 4.0  | 4.0  | 4.2  | 4.0  | 4.2  |
| USA | 1.1  | 1.0  | 1.0  | 1.0  | 1.0  | 1.1  | 1.1  | 1.0  | 1.1  | 1.2  |

Table 1817: Bodirsky — Resources—Nitrogen—Pasture Budget—Inputs—Biological Fixation Freelifving Microorganisms (Mt Nr/yr)

56.3.6 Inputs—Fertilizer

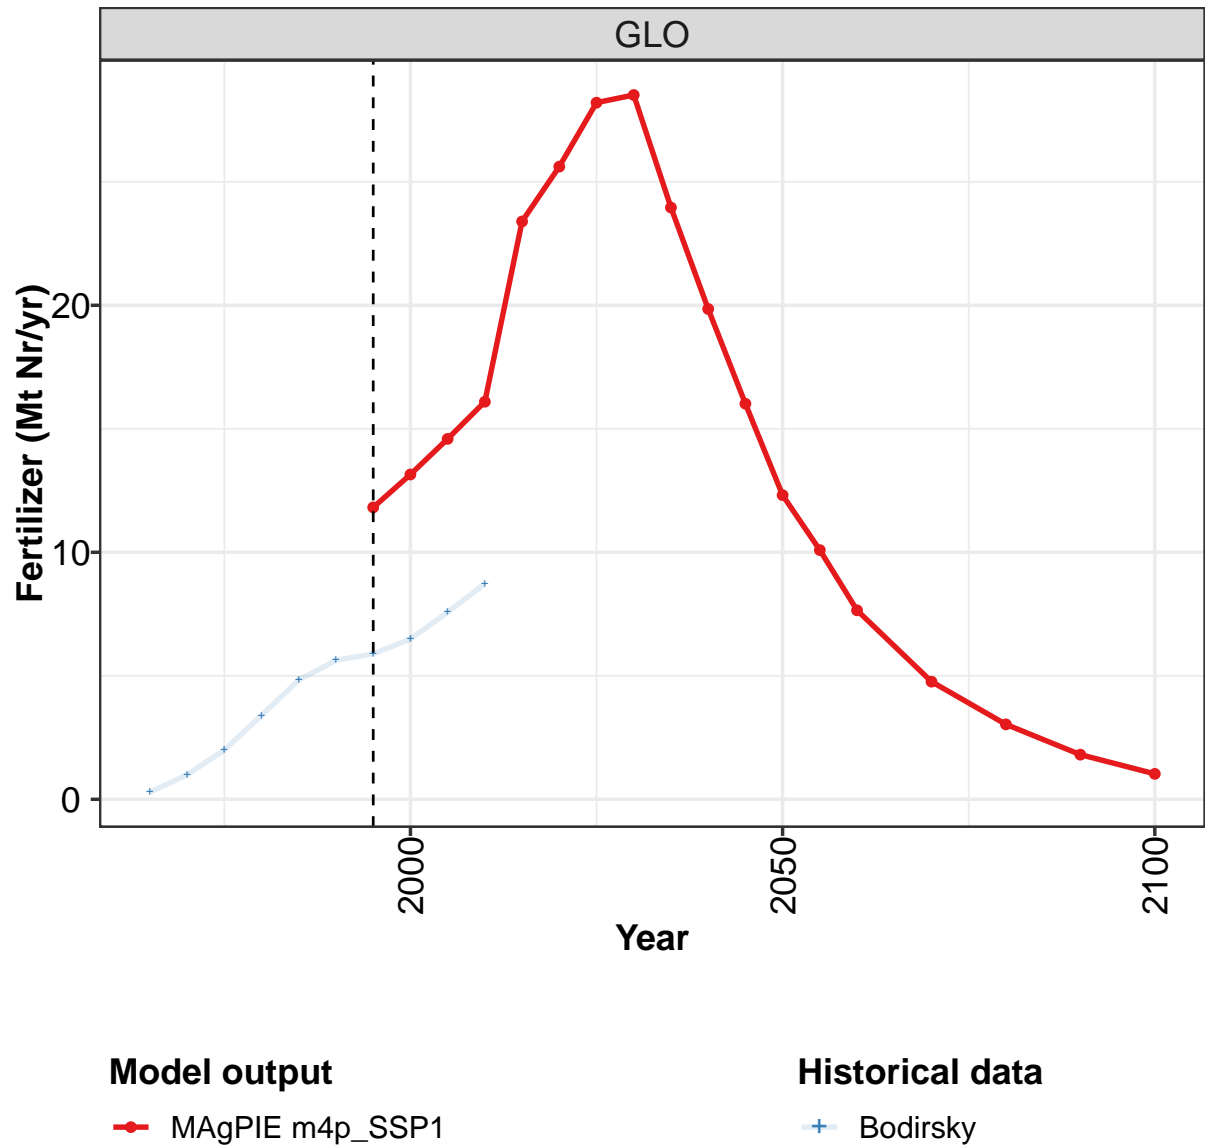

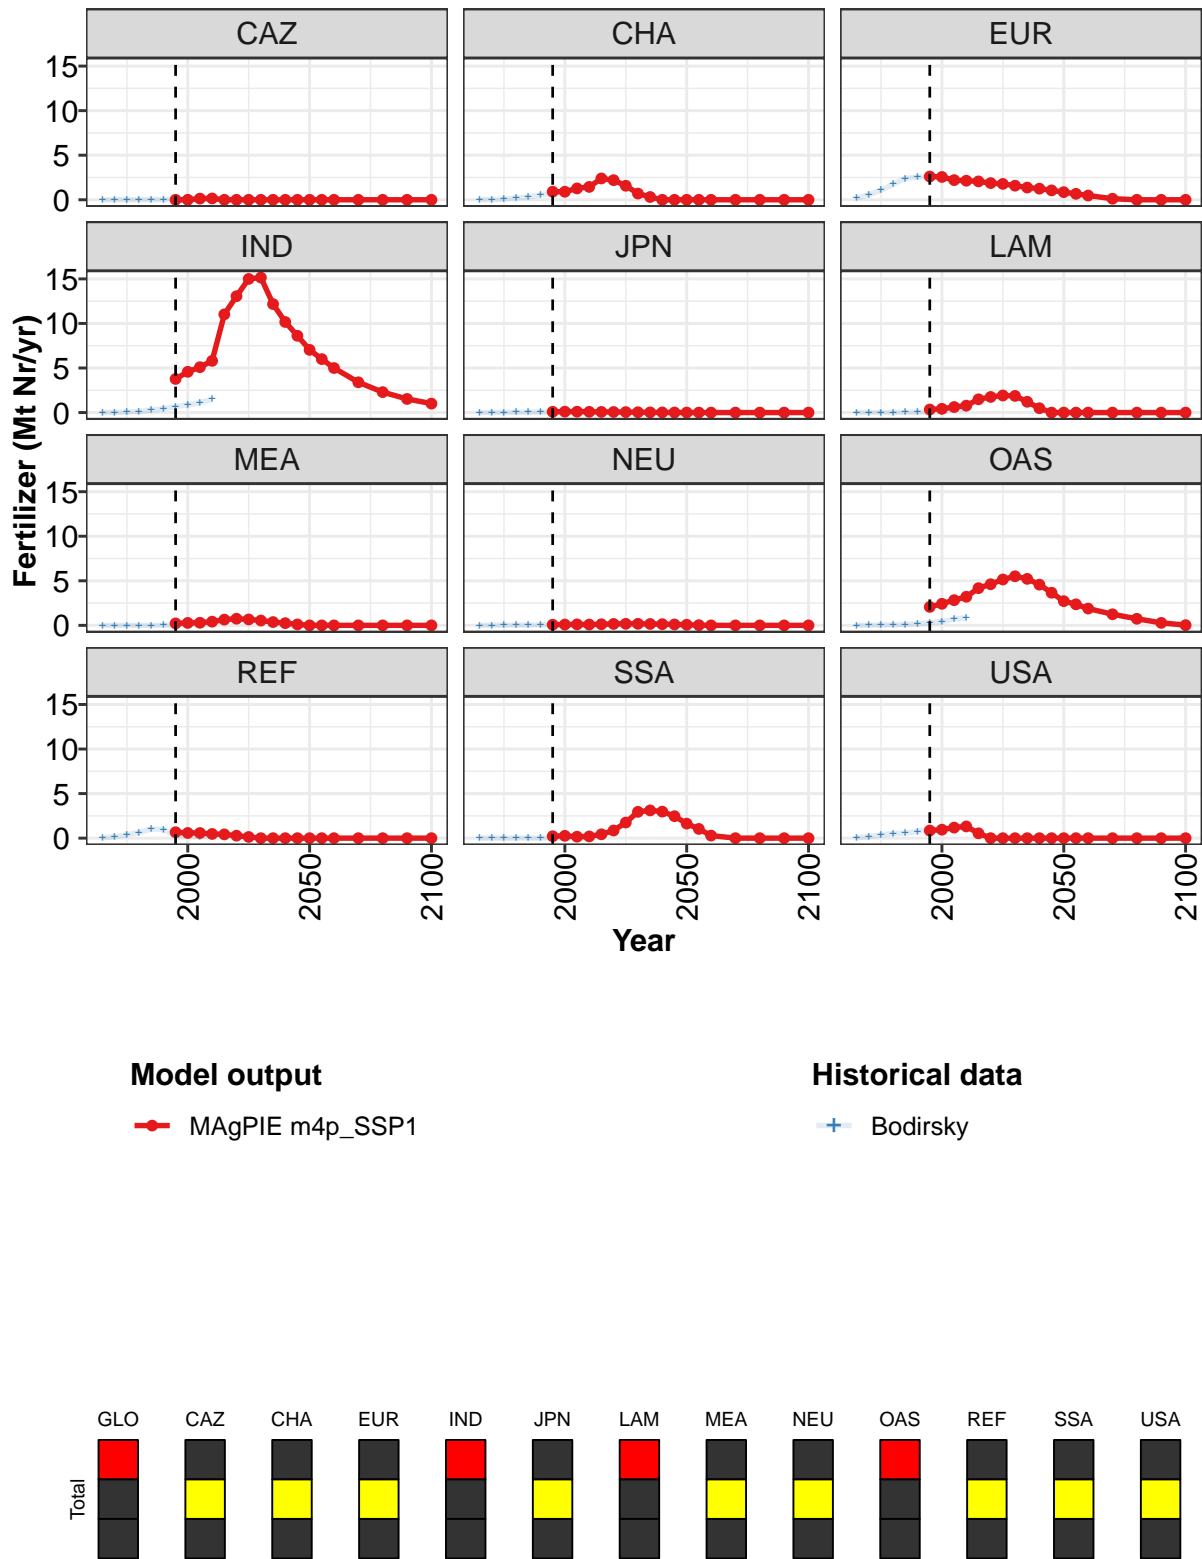

Figure 474: MAgPIE m4p\_SSP1 — Resources—Nitrogen—Pasture Budget—Inputs—Fertilizer (Mt Nr/yr)

|     | 1995 | 2000 | 2005 | 2010 | 2015 | 2020 | 2025 | 2030 | 2035 | 2040 | 2045 |
|-----|------|------|------|------|------|------|------|------|------|------|------|
| GLO | 11.8 | 13.2 | 14.6 | 16.1 | 23.4 | 25.6 | 28.2 | 28.5 | 24.0 | 19.9 | 16.0 |
| CAZ | 0.0  | 0.0  | 0.1  | 0.1  | 0.0  | 0.0  | 0.0  | 0.0  | 0.0  | 0.0  | 0.0  |
| CHA | 0.9  | 0.9  | 1.3  | 1.4  | 2.4  | 2.2  | 1.6  | 0.7  | 0.3  | 0.0  | 0.0  |
| EUR | 2.6  | 2.6  | 2.2  | 2.1  | 2.1  | 1.9  | 1.8  | 1.6  | 1.4  | 1.2  | 1.1  |
| IND | 3.8  | 4.6  | 5.1  | 5.8  | 11.0 | 13.1 | 15.0 | 15.1 | 12.2 | 10.2 | 8.6  |
| JPN | 0.1  | 0.1  | 0.1  | 0.1  | 0.1  | 0.1  | 0.1  | 0.0  | 0.0  | 0.0  | 0.0  |
| LAM | 0.3  | 0.4  | 0.6  | 0.8  | 1.5  | 1.8  | 1.9  | 1.9  | 1.2  | 0.5  | 0.0  |
| MEA | 0.2  | 0.3  | 0.3  | 0.4  | 0.6  | 0.7  | 0.7  | 0.5  | 0.4  | 0.2  | 0.1  |
| NEU | 0.1  | 0.1  | 0.1  | 0.1  | 0.1  | 0.2  | 0.2  | 0.2  | 0.2  | 0.1  | 0.1  |
| OAS | 2.1  | 2.4  | 2.8  | 3.2  | 4.2  | 4.6  | 5.1  | 5.5  | 5.2  | 4.6  | 3.7  |
| REF | 0.7  | 0.6  | 0.6  | 0.5  | 0.4  | 0.3  | 0.1  | 0.0  | 0.0  | 0.0  | 0.0  |
| SSA | 0.2  | 0.3  | 0.2  | 0.2  | 0.4  | 0.9  | 1.8  | 3.0  | 3.1  | 3.0  | 2.5  |
| USA | 0.9  | 1.0  | 1.2  | 1.3  | 0.5  | 0.0  | 0.0  | 0.0  | 0.0  | 0.0  | 0.0  |

Table 1818: MAgPIE m4p\_SSP1 — Resources—Nitrogen—Pasture Budget—Inputs—Fertilizer (Mt Nr/yr)  
[PART 1/2]

|     | 2050 | 2055 | 2060 | 2070 | 2080 | 2090 | 2100 |
|-----|------|------|------|------|------|------|------|
| GLO | 12.3 | 10.1 | 7.7  | 4.8  | 3.0  | 1.8  | 1.0  |
| CAZ | 0.0  | 0.0  | 0.0  | 0.0  | 0.0  | 0.0  | 0.0  |
| CHA | 0.0  | 0.0  | 0.0  | 0.0  | 0.0  | 0.0  | 0.0  |
| EUR | 0.9  | 0.7  | 0.5  | 0.1  | 0.0  | 0.0  | 0.0  |
| IND | 7.0  | 6.0  | 5.0  | 3.4  | 2.3  | 1.5  | 1.0  |
| JPN | 0.0  | 0.0  | 0.0  | 0.0  | 0.0  | 0.0  | 0.0  |
| LAM | 0.0  | 0.0  | 0.0  | 0.0  | 0.0  | 0.0  | 0.0  |
| MEA | 0.0  | 0.0  | 0.0  | 0.0  | 0.0  | 0.0  | 0.0  |
| NEU | 0.1  | 0.0  | 0.0  | 0.0  | 0.0  | 0.0  | 0.0  |
| OAS | 2.7  | 2.4  | 1.9  | 1.2  | 0.7  | 0.3  | 0.0  |
| REF | 0.0  | 0.0  | 0.0  | 0.0  | 0.0  | 0.0  | 0.0  |
| SSA | 1.6  | 1.0  | 0.3  | 0.0  | 0.0  | 0.0  | 0.0  |
| USA | 0.0  | 0.0  | 0.0  | 0.0  | 0.0  | 0.0  | 0.0  |

Table 1819: MAgPIE m4p\_SSP1 — Resources—Nitrogen—Pasture Budget—Inputs—Fertilizer (Mt Nr/yr)  
[PART 2/2]

|     | 1965 | 1970 | 1975 | 1980 | 1985 | 1990 | 1995 | 2000 | 2005 | 2010 |
|-----|------|------|------|------|------|------|------|------|------|------|
| GLO | 0.29 | 0.99 | 1.99 | 3.40 | 4.83 | 5.63 | 5.89 | 6.49 | 7.57 | 8.72 |
| CAZ | 0.00 | 0.00 | 0.00 | 0.01 | 0.01 | 0.02 | 0.08 | 0.16 | 0.25 | 0.30 |
| CHA | 0.01 | 0.03 | 0.07 | 0.21 | 0.31 | 0.54 | 0.77 | 0.86 | 1.28 | 1.53 |
| EUR | 0.17 | 0.56 | 1.07 | 1.74 | 2.40 | 2.53 | 2.57 | 2.53 | 2.15 | 2.10 |
| IND | 0.00 | 0.02 | 0.05 | 0.13 | 0.28 | 0.44 | 0.67 | 0.85 | 1.12 | 1.49 |
| JPN | 0.01 | 0.02 | 0.03 | 0.03 | 0.05 | 0.06 | 0.09 | 0.10 | 0.10 | 0.09 |
| LAM | 0.00 | 0.00 | 0.01 | 0.02 | 0.03 | 0.05 | 0.06 | 0.12 | 0.29 | 0.37 |
| MEA | 0.00 | 0.00 | 0.00 | 0.00 | 0.00 | 0.01 | 0.04 | 0.09 | 0.15 | 0.16 |
| NEU | 0.00 | 0.01 | 0.01 | 0.03 | 0.04 | 0.05 | 0.05 | 0.06 | 0.09 | 0.09 |
| OAS | 0.00 | 0.02 | 0.04 | 0.07 | 0.11 | 0.19 | 0.31 | 0.42 | 0.70 | 0.86 |
| REF | 0.04 | 0.16 | 0.37 | 0.63 | 1.03 | 0.98 | 0.26 | 0.21 | 0.20 | 0.26 |
| SSA | 0.00 | 0.00 | 0.00 | 0.00 | 0.00 | 0.00 | 0.01 | 0.03 | 0.03 | 0.03 |
| USA | 0.05 | 0.17 | 0.34 | 0.53 | 0.56 | 0.76 | 0.97 | 1.05 | 1.22 | 1.44 |

Table 1820: Bodirsky — Resources—Nitrogen—Pasture Budget—Inputs—Fertilizer (Mt Nr/yr)

56.3.7 Inputs—Manure From Grazing

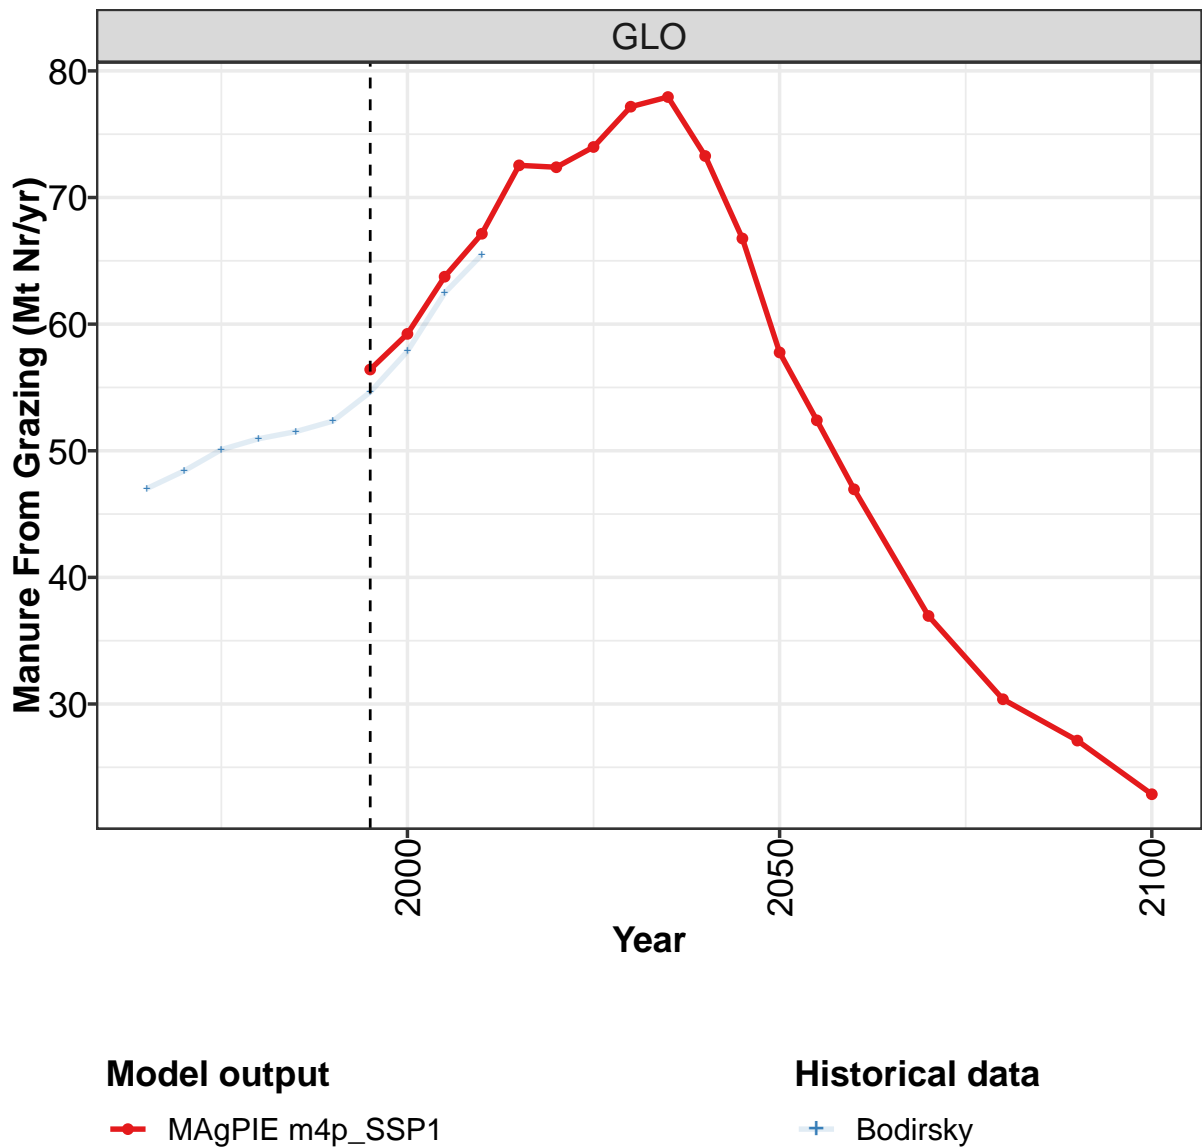

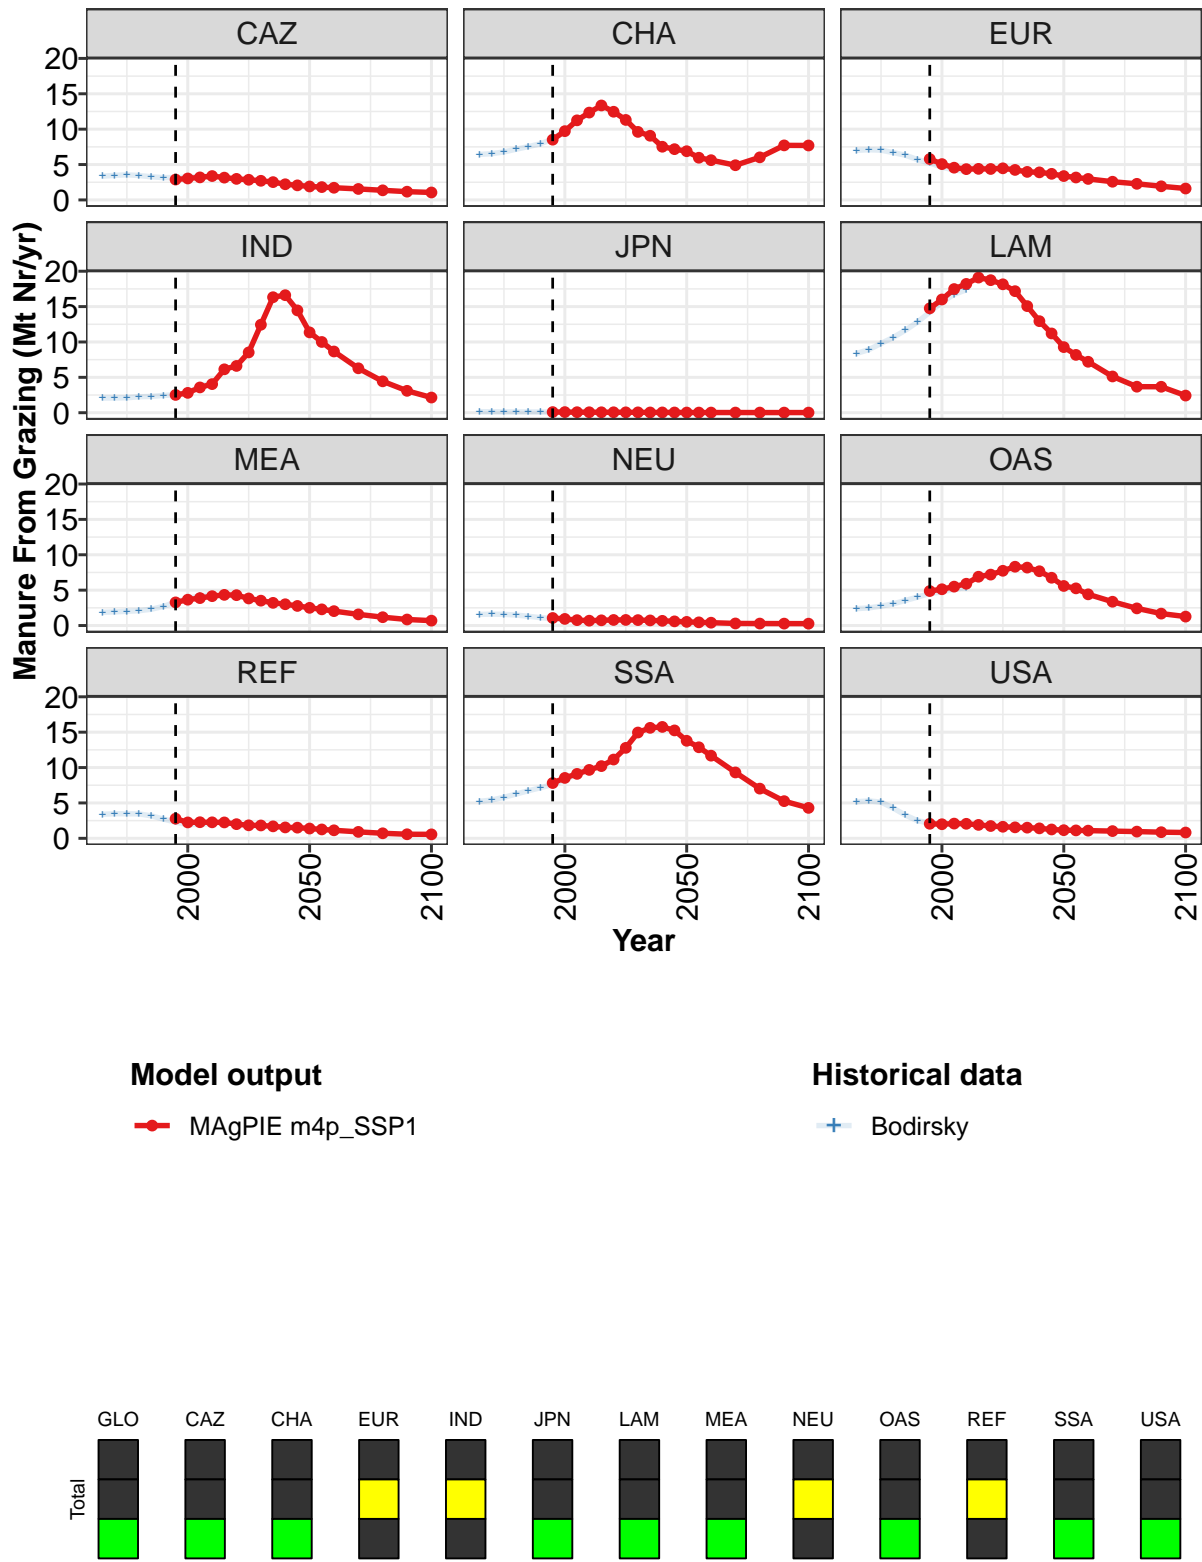

Figure 475: MAgPIE m4p\_SSP1 — Resources—Nitrogen—Pasture Budget—Inputs—Manure From Grazing (Mt Nr/yr)

|     | 1995 | 2000 | 2005 | 2010 | 2015 | 2020 | 2025 | 2030 | 2035 | 2040 | 2045 |
|-----|------|------|------|------|------|------|------|------|------|------|------|
| GLO | 56.4 | 59.2 | 63.7 | 67.1 | 72.5 | 72.4 | 74.0 | 77.2 | 77.9 | 73.3 | 66.8 |
| CAZ | 2.9  | 3.0  | 3.2  | 3.4  | 3.2  | 3.0  | 2.9  | 2.7  | 2.5  | 2.2  | 2.1  |
| CHA | 8.5  | 9.7  | 11.3 | 12.3 | 13.4 | 12.5 | 11.3 | 9.6  | 9.1  | 7.5  | 7.2  |
| EUR | 5.8  | 5.1  | 4.6  | 4.4  | 4.4  | 4.4  | 4.5  | 4.2  | 4.0  | 3.9  | 3.7  |
| IND | 2.5  | 2.8  | 3.6  | 4.0  | 6.1  | 6.6  | 8.5  | 12.4 | 16.3 | 16.6 | 14.5 |
| JPN | 0.1  | 0.1  | 0.1  | 0.1  | 0.1  | 0.1  | 0.1  | 0.1  | 0.0  | 0.0  | 0.0  |
| LAM | 14.8 | 16.0 | 17.5 | 18.2 | 19.1 | 18.7 | 18.2 | 17.2 | 15.1 | 12.9 | 11.2 |
| MEA | 3.3  | 3.7  | 3.9  | 4.2  | 4.3  | 4.3  | 3.8  | 3.5  | 3.2  | 3.0  | 2.8  |
| NEU | 1.1  | 0.9  | 0.8  | 0.7  | 0.7  | 0.8  | 0.8  | 0.8  | 0.7  | 0.7  | 0.6  |
| OAS | 4.9  | 5.1  | 5.5  | 5.9  | 6.9  | 7.2  | 7.7  | 8.3  | 8.2  | 7.7  | 6.8  |
| REF | 2.8  | 2.2  | 2.3  | 2.3  | 2.2  | 2.0  | 1.8  | 1.8  | 1.7  | 1.5  | 1.5  |
| SSA | 7.8  | 8.5  | 9.1  | 9.7  | 10.2 | 11.1 | 12.8 | 15.0 | 15.6 | 15.7 | 15.3 |
| USA | 2.1  | 2.0  | 2.1  | 2.1  | 1.9  | 1.7  | 1.6  | 1.6  | 1.5  | 1.4  | 1.3  |

Table 1821: MAgPIE m4p\_SSP1 — Resources—Nitrogen—Pasture Budget—Inputs—Manure From Grazing (Mt Nr/yr) [PART 1/2]

|     | 2050 | 2055 | 2060 | 2070 | 2080 | 2090 | 2100 |
|-----|------|------|------|------|------|------|------|
| GLO | 57.8 | 52.4 | 47.0 | 37.0 | 30.4 | 27.1 | 22.9 |
| CAZ | 1.9  | 1.8  | 1.7  | 1.6  | 1.4  | 1.2  | 1.1  |
| CHA | 6.9  | 6.0  | 5.6  | 4.9  | 6.0  | 7.7  | 7.7  |
| EUR | 3.4  | 3.2  | 3.0  | 2.6  | 2.3  | 1.9  | 1.6  |
| IND | 11.4 | 10.0 | 8.7  | 6.3  | 4.4  | 3.1  | 2.2  |
| JPN | 0.0  | 0.0  | 0.0  | 0.0  | 0.0  | 0.0  | 0.0  |
| LAM | 9.3  | 8.2  | 7.2  | 5.1  | 3.7  | 3.7  | 2.4  |
| MEA | 2.5  | 2.3  | 2.0  | 1.6  | 1.2  | 0.9  | 0.7  |
| NEU | 0.5  | 0.5  | 0.4  | 0.3  | 0.3  | 0.3  | 0.3  |
| OAS | 5.6  | 5.3  | 4.4  | 3.4  | 2.4  | 1.7  | 1.3  |
| REF | 1.4  | 1.3  | 1.1  | 0.9  | 0.7  | 0.6  | 0.6  |
| SSA | 13.8 | 12.9 | 11.7 | 9.3  | 7.0  | 5.3  | 4.3  |
| USA | 1.2  | 1.1  | 1.1  | 1.0  | 1.0  | 0.9  | 0.8  |

Table 1822: MAgPIE m4p\_SSP1 — Resources—Nitrogen—Pasture Budget—Inputs—Manure From Grazing (Mt Nr/yr) [PART 2/2]

|     | 1965 | 1970 | 1975 | 1980 | 1985 | 1990 | 1995 | 2000 | 2005 | 2010 |
|-----|------|------|------|------|------|------|------|------|------|------|
| GLO | 47.0 | 48.4 | 50.1 | 50.9 | 51.5 | 52.3 | 54.6 | 57.9 | 62.5 | 65.5 |
| CAZ | 3.4  | 3.5  | 3.5  | 3.5  | 3.3  | 3.2  | 3.2  | 3.2  | 3.3  | 3.3  |
| CHA | 6.4  | 6.5  | 6.8  | 7.2  | 7.5  | 7.9  | 8.6  | 9.8  | 11.2 | 12.2 |
| EUR | 7.0  | 7.1  | 7.0  | 6.7  | 6.3  | 5.7  | 5.2  | 4.6  | 4.2  | 4.0  |
| IND | 2.1  | 2.1  | 2.1  | 2.3  | 2.3  | 2.4  | 2.5  | 2.8  | 3.8  | 4.3  |
| JPN | 0.1  | 0.1  | 0.1  | 0.1  | 0.1  | 0.1  | 0.1  | 0.1  | 0.1  | 0.1  |
| LAM | 8.4  | 8.9  | 9.8  | 10.6 | 11.7 | 12.8 | 14.2 | 15.6 | 16.7 | 17.4 |
| MEA | 1.9  | 1.9  | 2.0  | 2.1  | 2.3  | 2.7  | 3.3  | 3.8  | 4.2  | 4.4  |
| NEU | 1.6  | 1.6  | 1.6  | 1.5  | 1.3  | 1.1  | 1.0  | 0.8  | 0.7  | 0.6  |
| OAS | 2.4  | 2.5  | 2.7  | 3.1  | 3.5  | 4.0  | 4.5  | 4.7  | 5.1  | 5.4  |
| REF | 3.4  | 3.5  | 3.5  | 3.4  | 3.2  | 2.7  | 2.3  | 1.9  | 2.0  | 2.1  |
| SSA | 5.2  | 5.4  | 5.8  | 6.3  | 6.7  | 7.1  | 7.6  | 8.3  | 9.0  | 9.6  |
| USA | 5.2  | 5.3  | 5.1  | 4.3  | 3.3  | 2.5  | 2.1  | 2.0  | 2.1  | 2.1  |

Table 1823: Bodirsky — Resources—Nitrogen—Pasture Budget—Inputs—Manure From Grazing (Mt Nr/yr)



56.3.8 Withdrawals

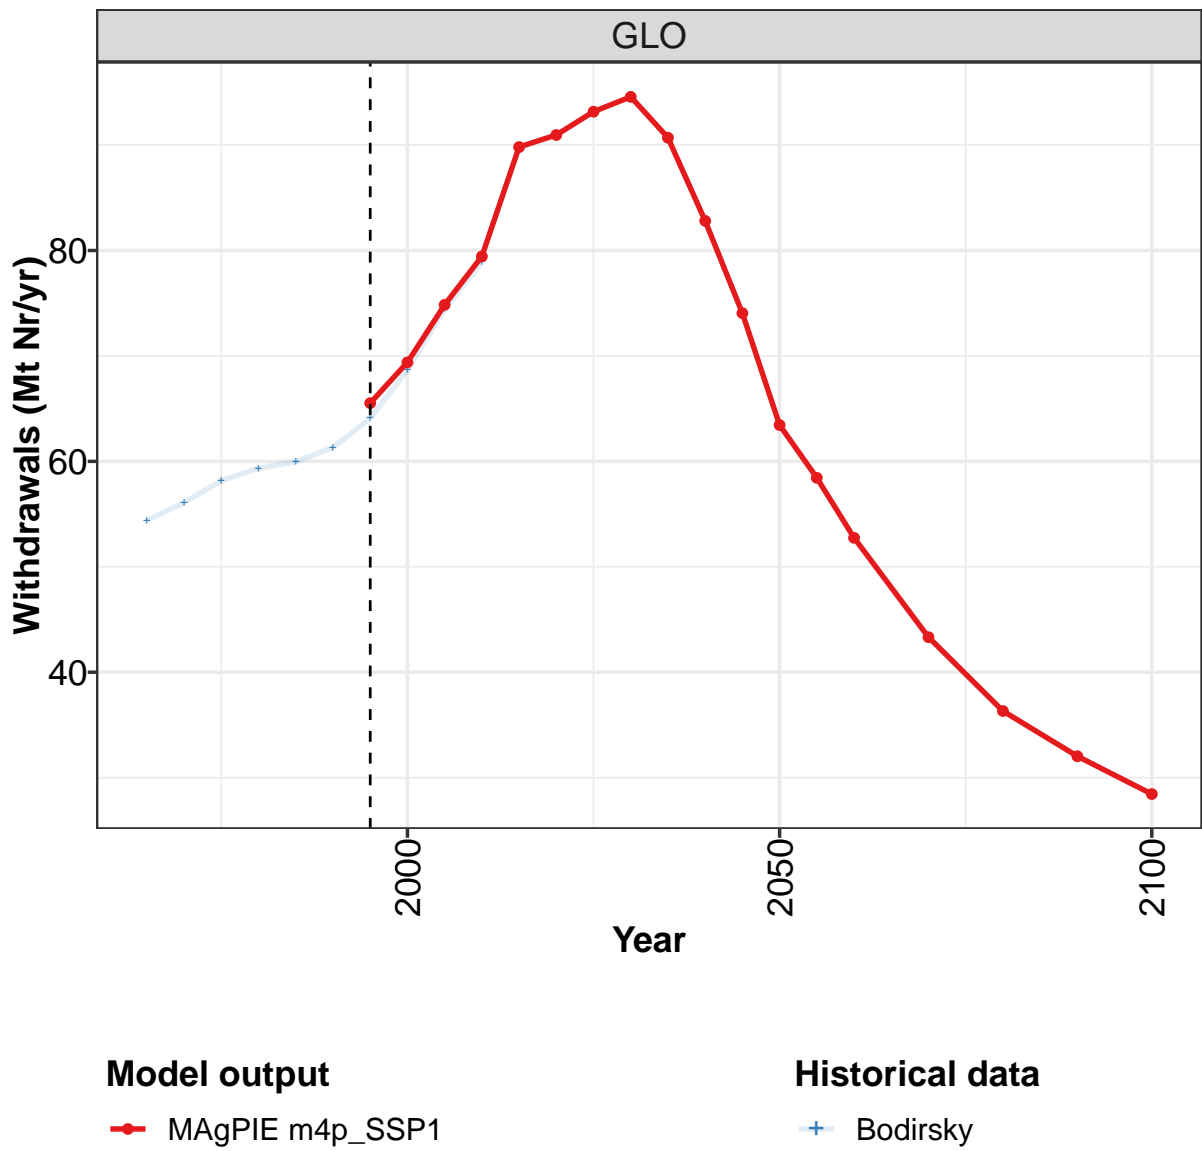

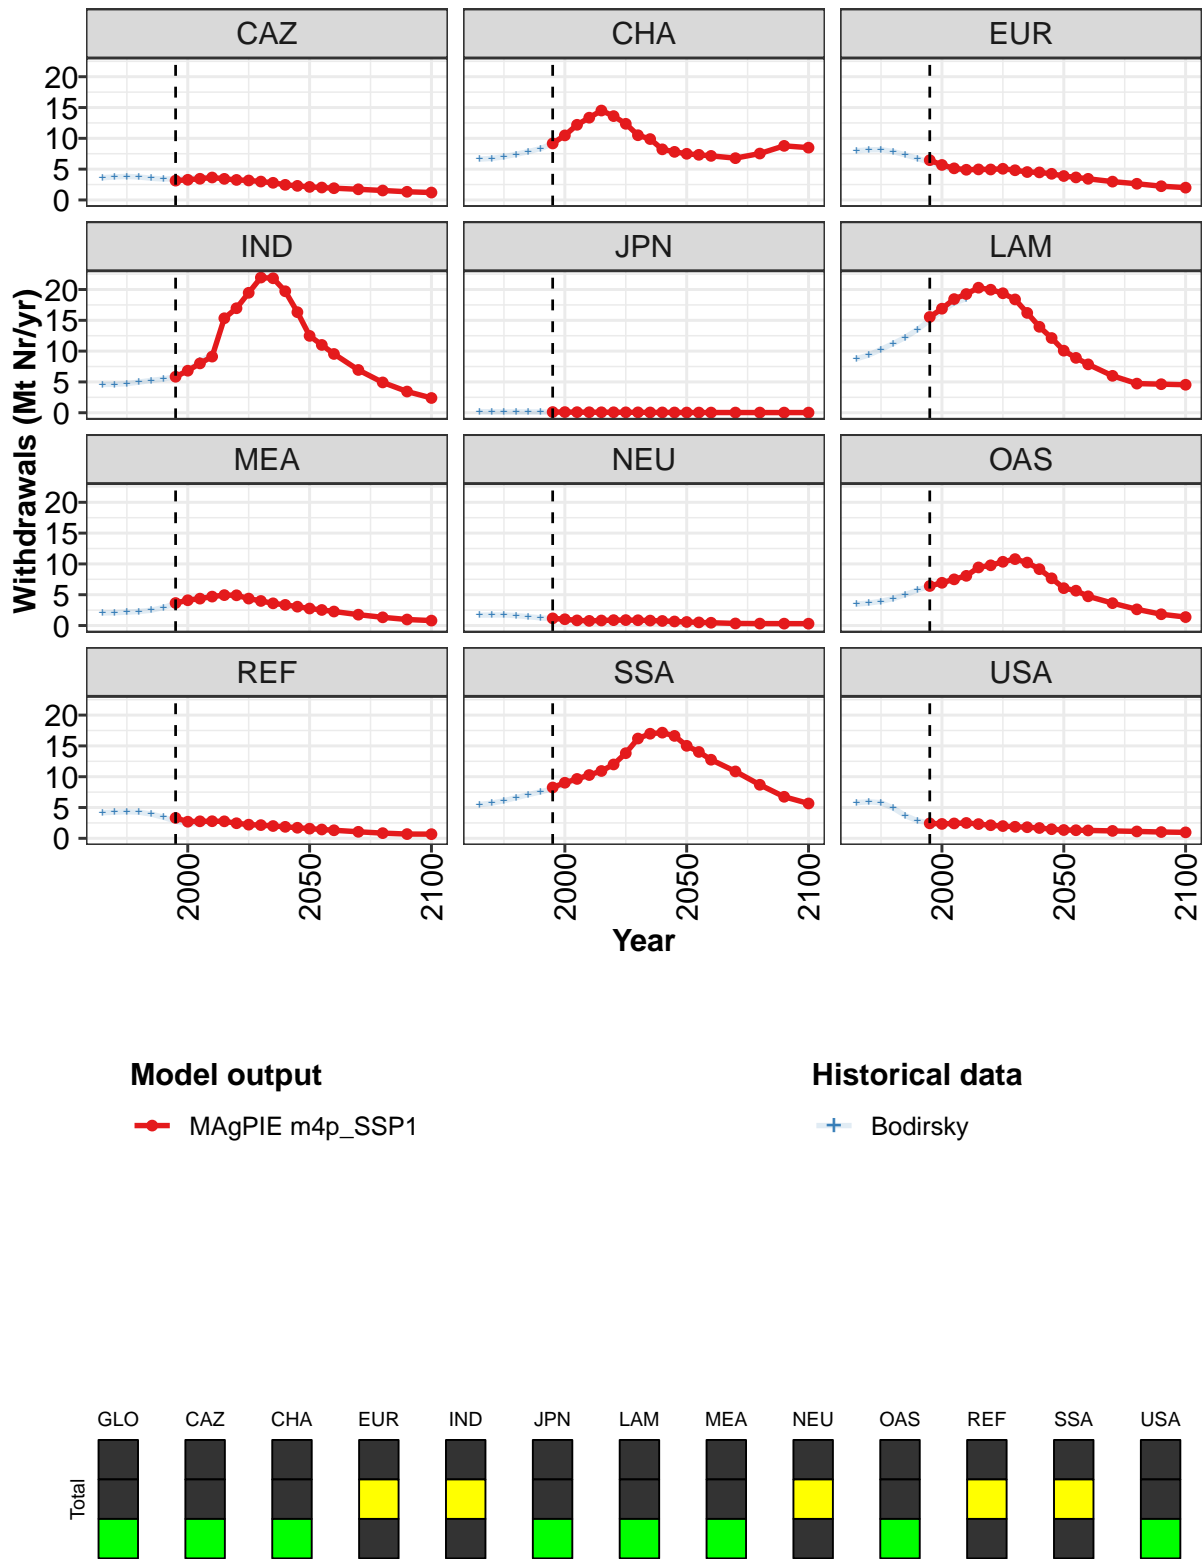

Figure 476: MAgPIE m4p\_SSP1 — Resources—Nitrogen—Pasture Budget—Withdrawals (Mt Nr/yr)

|     | 1995 | 2000 | 2005 | 2010 | 2015 | 2020 | 2025 | 2030 | 2035 | 2040 | 2045 |
|-----|------|------|------|------|------|------|------|------|------|------|------|
| GLO | 65.5 | 69.4 | 74.8 | 79.4 | 89.8 | 91.0 | 93.2 | 94.6 | 90.7 | 82.8 | 74.1 |
| CAZ | 3.1  | 3.3  | 3.4  | 3.6  | 3.4  | 3.3  | 3.2  | 3.0  | 2.8  | 2.5  | 2.3  |
| CHA | 9.2  | 10.5 | 12.2 | 13.4 | 14.5 | 13.6 | 12.4 | 10.5 | 9.9  | 8.2  | 7.8  |
| EUR | 6.5  | 5.7  | 5.1  | 4.9  | 5.0  | 4.9  | 5.1  | 4.8  | 4.5  | 4.5  | 4.2  |
| IND | 5.8  | 6.8  | 8.0  | 9.1  | 15.3 | 17.0 | 19.5 | 21.9 | 21.8 | 19.7 | 16.3 |
| JPN | 0.1  | 0.1  | 0.1  | 0.1  | 0.1  | 0.1  | 0.1  | 0.1  | 0.0  | 0.1  | 0.0  |
| LAM | 15.5 | 16.9 | 18.4 | 19.3 | 20.3 | 20.0 | 19.4 | 18.4 | 16.2 | 14.0 | 12.1 |
| MEA | 3.7  | 4.1  | 4.4  | 4.7  | 4.9  | 4.9  | 4.4  | 4.0  | 3.6  | 3.4  | 3.1  |
| NEU | 1.2  | 1.0  | 0.8  | 0.8  | 0.8  | 0.9  | 0.9  | 0.9  | 0.8  | 0.7  | 0.7  |
| OAS | 6.4  | 6.9  | 7.5  | 8.1  | 9.4  | 9.8  | 10.4 | 10.8 | 10.2 | 9.2  | 7.7  |
| REF | 3.3  | 2.7  | 2.8  | 2.8  | 2.8  | 2.5  | 2.2  | 2.1  | 2.0  | 1.9  | 1.7  |
| SSA | 8.3  | 9.0  | 9.6  | 10.3 | 10.9 | 12.0 | 13.8 | 16.2 | 17.0 | 17.2 | 16.6 |
| USA | 2.4  | 2.3  | 2.4  | 2.5  | 2.3  | 2.1  | 2.0  | 1.9  | 1.8  | 1.7  | 1.5  |

Table 1824: MAgPIE m4p\_SSP1 — Resources—Nitrogen—Pasture Budget—Withdrawals (Mt Nr/yr) [PART 1/2]

|     | 2050 | 2055 | 2060 | 2070 | 2080 | 2090 | 2100 |
|-----|------|------|------|------|------|------|------|
| GLO | 63.4 | 58.4 | 52.7 | 43.3 | 36.3 | 32.0 | 28.4 |
| CAZ | 2.1  | 2.0  | 1.9  | 1.7  | 1.5  | 1.3  | 1.2  |
| CHA | 7.5  | 7.3  | 7.2  | 6.8  | 7.5  | 8.8  | 8.5  |
| EUR | 3.9  | 3.7  | 3.4  | 3.0  | 2.6  | 2.2  | 2.0  |
| IND | 12.5 | 11.0 | 9.5  | 6.9  | 4.9  | 3.4  | 2.4  |
| JPN | 0.0  | 0.0  | 0.0  | 0.0  | 0.0  | 0.0  | 0.0  |
| LAM | 10.1 | 8.9  | 7.9  | 6.0  | 4.7  | 4.6  | 4.5  |
| MEA | 2.8  | 2.5  | 2.3  | 1.8  | 1.3  | 1.0  | 0.8  |
| NEU | 0.6  | 0.5  | 0.5  | 0.3  | 0.3  | 0.3  | 0.3  |
| OAS | 6.1  | 5.7  | 4.7  | 3.6  | 2.6  | 1.8  | 1.4  |
| REF | 1.6  | 1.4  | 1.3  | 1.1  | 0.8  | 0.7  | 0.7  |
| SSA | 15.0 | 14.0 | 12.8 | 10.9 | 8.7  | 6.7  | 5.7  |
| USA | 1.4  | 1.3  | 1.3  | 1.2  | 1.1  | 1.0  | 1.0  |

Table 1825: MAgPIE m4p\_SSP1 — Resources—Nitrogen—Pasture Budget—Withdrawals (Mt Nr/yr) [PART 2/2]

|     | 1965 | 1970 | 1975 | 1980 | 1985 | 1990 | 1995 | 2000 | 2005 | 2010 |
|-----|------|------|------|------|------|------|------|------|------|------|
| GLO | 54.4 | 56.1 | 58.2 | 59.3 | 60.0 | 61.3 | 64.1 | 68.6 | 74.4 | 78.9 |
| CAZ | 3.6  | 3.7  | 3.8  | 3.7  | 3.5  | 3.4  | 3.4  | 3.6  | 3.7  | 3.7  |
| CHA | 6.6  | 6.7  | 7.0  | 7.4  | 7.8  | 8.3  | 9.1  | 10.5 | 12.2 | 13.3 |
| EUR | 8.0  | 8.1  | 8.2  | 7.9  | 7.3  | 6.7  | 6.1  | 5.4  | 4.9  | 4.7  |
| IND | 4.6  | 4.6  | 4.7  | 5.0  | 5.3  | 5.5  | 5.9  | 6.9  | 8.4  | 9.5  |
| JPN | 0.2  | 0.2  | 0.1  | 0.1  | 0.1  | 0.1  | 0.1  | 0.1  | 0.1  | 0.1  |
| LAM | 8.8  | 9.4  | 10.3 | 11.2 | 12.2 | 13.5 | 15.0 | 16.5 | 17.8 | 18.5 |
| MEA | 2.0  | 2.1  | 2.2  | 2.3  | 2.5  | 2.9  | 3.6  | 4.2  | 4.6  | 4.7  |
| NEU | 1.7  | 1.7  | 1.7  | 1.6  | 1.4  | 1.2  | 1.1  | 0.9  | 0.8  | 0.8  |
| OAS | 3.5  | 3.6  | 3.9  | 4.4  | 5.0  | 5.8  | 6.4  | 7.0  | 7.6  | 8.0  |
| REF | 4.2  | 4.2  | 4.3  | 4.2  | 3.9  | 3.4  | 2.8  | 2.4  | 2.4  | 2.7  |
| SSA | 5.5  | 5.7  | 6.1  | 6.6  | 7.1  | 7.5  | 8.0  | 8.7  | 9.6  | 10.2 |
| USA | 5.8  | 5.9  | 5.8  | 4.9  | 3.7  | 2.8  | 2.5  | 2.4  | 2.4  | 2.6  |

Table 1826: Bodirsky — Resources—Nitrogen—Pasture Budget—Withdrawals (Mt Nr/yr)

56.3.9 Withdrawals—Harvested Crops

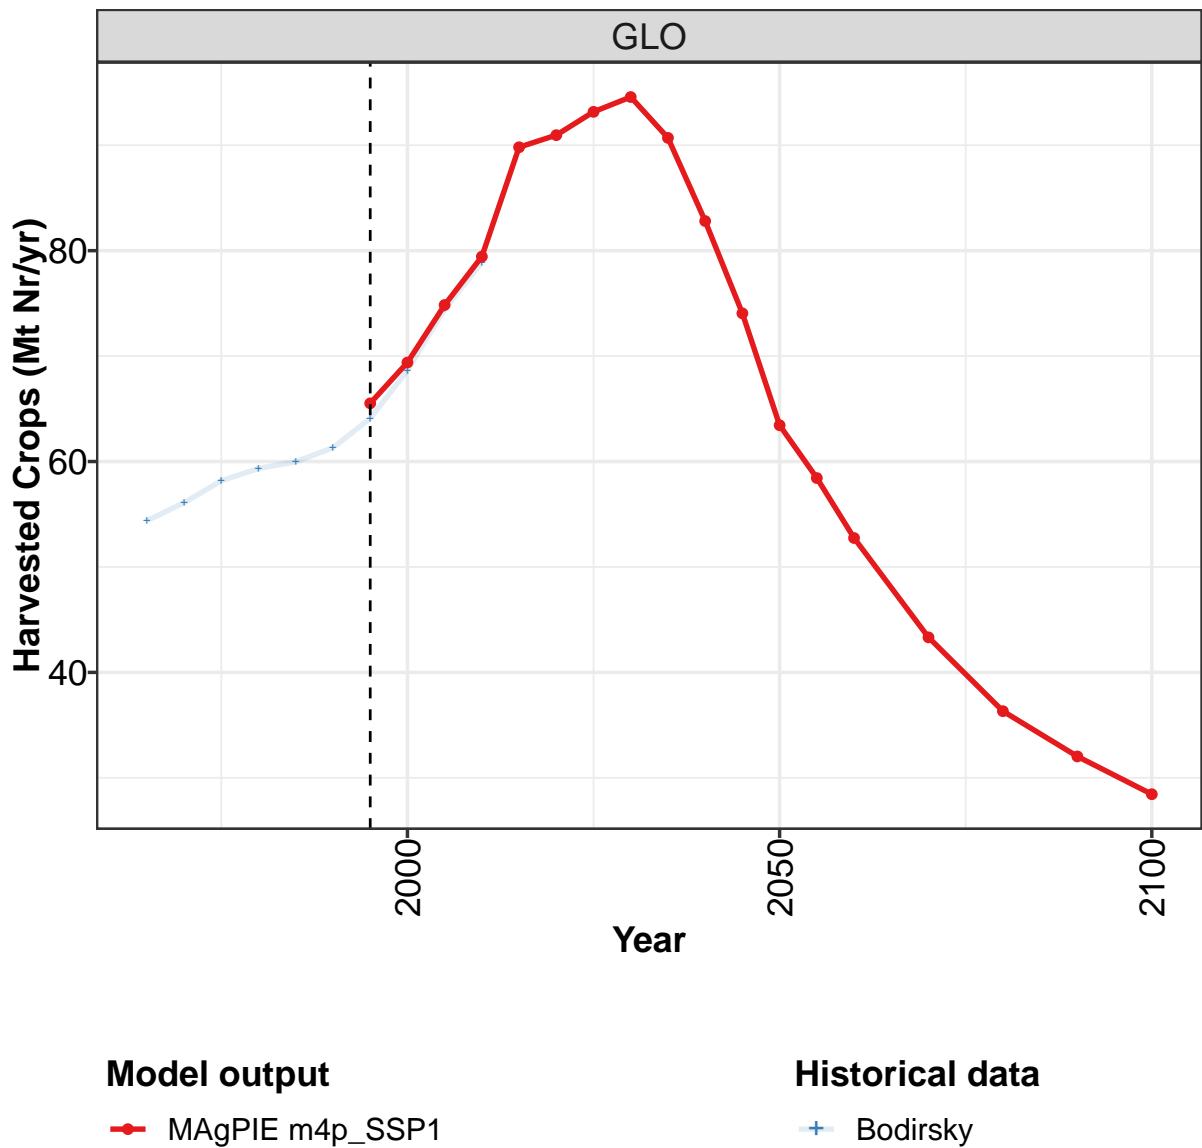

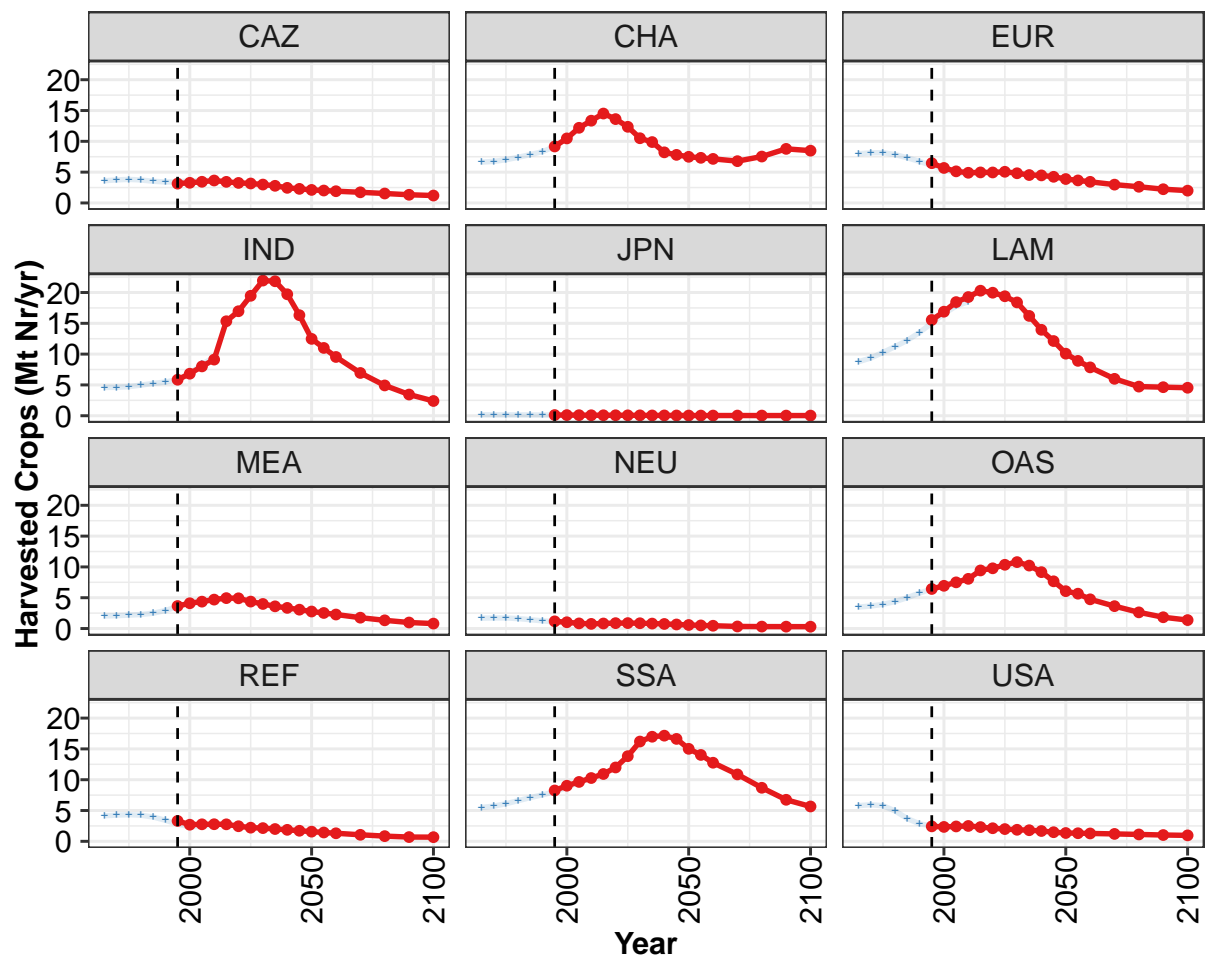

**Model output**

—●— MAgPIE m4p\_SSP1

**Historical data**

+ Bodirsky

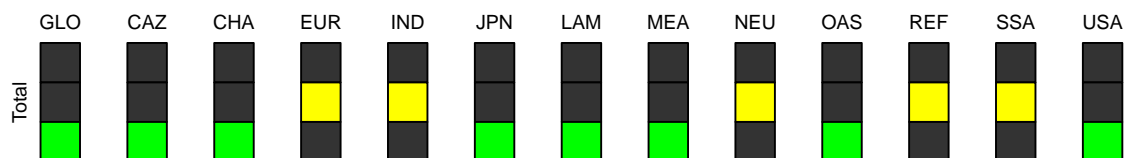

Figure 477: MAgPIE m4p\_SSP1 — Resources—Nitrogen—Pasture Budget—Withdrawals—Harvested Crops (Mt Nr/yr)

|     | 1995 | 2000 | 2005 | 2010 | 2015 | 2020 | 2025 | 2030 | 2035 | 2040 | 2045 |
|-----|------|------|------|------|------|------|------|------|------|------|------|
| GLO | 65.5 | 69.4 | 74.8 | 79.4 | 89.8 | 91.0 | 93.2 | 94.6 | 90.7 | 82.8 | 74.1 |
| CAZ | 3.1  | 3.3  | 3.4  | 3.6  | 3.4  | 3.3  | 3.2  | 3.0  | 2.8  | 2.5  | 2.3  |
| CHA | 9.2  | 10.5 | 12.2 | 13.4 | 14.5 | 13.6 | 12.4 | 10.5 | 9.9  | 8.2  | 7.8  |
| EUR | 6.5  | 5.7  | 5.1  | 4.9  | 5.0  | 4.9  | 5.1  | 4.8  | 4.5  | 4.5  | 4.2  |
| IND | 5.8  | 6.8  | 8.0  | 9.1  | 15.3 | 17.0 | 19.5 | 21.9 | 21.8 | 19.7 | 16.3 |
| JPN | 0.1  | 0.1  | 0.1  | 0.1  | 0.1  | 0.1  | 0.1  | 0.1  | 0.0  | 0.1  | 0.0  |
| LAM | 15.5 | 16.9 | 18.4 | 19.3 | 20.3 | 20.0 | 19.4 | 18.4 | 16.2 | 14.0 | 12.1 |
| MEA | 3.7  | 4.1  | 4.4  | 4.7  | 4.9  | 4.9  | 4.4  | 4.0  | 3.6  | 3.4  | 3.1  |
| NEU | 1.2  | 1.0  | 0.8  | 0.8  | 0.8  | 0.9  | 0.9  | 0.9  | 0.8  | 0.7  | 0.7  |
| OAS | 6.4  | 6.9  | 7.5  | 8.1  | 9.4  | 9.8  | 10.4 | 10.8 | 10.2 | 9.2  | 7.7  |
| REF | 3.3  | 2.7  | 2.8  | 2.8  | 2.8  | 2.5  | 2.2  | 2.1  | 2.0  | 1.9  | 1.7  |
| SSA | 8.3  | 9.0  | 9.6  | 10.3 | 10.9 | 12.0 | 13.8 | 16.2 | 17.0 | 17.2 | 16.6 |
| USA | 2.4  | 2.3  | 2.4  | 2.5  | 2.3  | 2.1  | 2.0  | 1.9  | 1.8  | 1.7  | 1.5  |

Table 1827: MAgPIE m4p\_SSP1 — Resources—Nitrogen—Pasture Budget—Withdrawals—Harvested Crops (Mt Nr/yr) [PART 1/2]

|     | 2050 | 2055 | 2060 | 2070 | 2080 | 2090 | 2100 |
|-----|------|------|------|------|------|------|------|
| GLO | 63.4 | 58.4 | 52.7 | 43.3 | 36.3 | 32.0 | 28.4 |
| CAZ | 2.1  | 2.0  | 1.9  | 1.7  | 1.5  | 1.3  | 1.2  |
| CHA | 7.5  | 7.3  | 7.2  | 6.8  | 7.5  | 8.8  | 8.5  |
| EUR | 3.9  | 3.7  | 3.4  | 3.0  | 2.6  | 2.2  | 2.0  |
| IND | 12.5 | 11.0 | 9.5  | 6.9  | 4.9  | 3.4  | 2.4  |
| JPN | 0.0  | 0.0  | 0.0  | 0.0  | 0.0  | 0.0  | 0.0  |
| LAM | 10.1 | 8.9  | 7.9  | 6.0  | 4.7  | 4.6  | 4.5  |
| MEA | 2.8  | 2.5  | 2.3  | 1.8  | 1.3  | 1.0  | 0.8  |
| NEU | 0.6  | 0.5  | 0.5  | 0.3  | 0.3  | 0.3  | 0.3  |
| OAS | 6.1  | 5.7  | 4.7  | 3.6  | 2.6  | 1.8  | 1.4  |
| REF | 1.6  | 1.4  | 1.3  | 1.1  | 0.8  | 0.7  | 0.7  |
| SSA | 15.0 | 14.0 | 12.8 | 10.9 | 8.7  | 6.7  | 5.7  |
| USA | 1.4  | 1.3  | 1.3  | 1.2  | 1.1  | 1.0  | 1.0  |

Table 1828: MAgPIE m4p\_SSP1 — Resources—Nitrogen—Pasture Budget—Withdrawals—Harvested Crops (Mt Nr/yr) [PART 2/2]

|     | 1965 | 1970 | 1975 | 1980 | 1985 | 1990 | 1995 | 2000 | 2005 | 2010 |
|-----|------|------|------|------|------|------|------|------|------|------|
| GLO | 54.4 | 56.1 | 58.2 | 59.3 | 60.0 | 61.3 | 64.1 | 68.6 | 74.4 | 78.9 |
| CAZ | 3.6  | 3.7  | 3.8  | 3.7  | 3.5  | 3.4  | 3.4  | 3.6  | 3.7  | 3.7  |
| CHA | 6.6  | 6.7  | 7.0  | 7.4  | 7.8  | 8.3  | 9.1  | 10.5 | 12.2 | 13.3 |
| EUR | 8.0  | 8.1  | 8.2  | 7.9  | 7.3  | 6.7  | 6.1  | 5.4  | 4.9  | 4.7  |
| IND | 4.6  | 4.6  | 4.7  | 5.0  | 5.3  | 5.5  | 5.9  | 6.9  | 8.4  | 9.5  |
| JPN | 0.2  | 0.2  | 0.1  | 0.1  | 0.1  | 0.1  | 0.1  | 0.1  | 0.1  | 0.1  |
| LAM | 8.8  | 9.4  | 10.3 | 11.2 | 12.2 | 13.5 | 15.0 | 16.5 | 17.8 | 18.5 |
| MEA | 2.0  | 2.1  | 2.2  | 2.3  | 2.5  | 2.9  | 3.6  | 4.2  | 4.6  | 4.7  |
| NEU | 1.7  | 1.7  | 1.7  | 1.6  | 1.4  | 1.2  | 1.1  | 0.9  | 0.8  | 0.8  |
| OAS | 3.5  | 3.6  | 3.9  | 4.4  | 5.0  | 5.8  | 6.4  | 7.0  | 7.6  | 8.0  |
| REF | 4.2  | 4.2  | 4.3  | 4.2  | 3.9  | 3.4  | 2.8  | 2.4  | 2.4  | 2.7  |
| SSA | 5.5  | 5.7  | 6.1  | 6.6  | 7.1  | 7.5  | 8.0  | 8.7  | 9.6  | 10.2 |
| USA | 5.8  | 5.9  | 5.8  | 4.9  | 3.7  | 2.8  | 2.5  | 2.4  | 2.4  | 2.6  |

Table 1829: Bodirsky — Resources—Nitrogen—Pasture Budget—Withdrawals—Harvested Crops (Mt Nr/yr)

## 57 Water

### 57.1 Withdrawal

#### 57.1.1 Agriculture

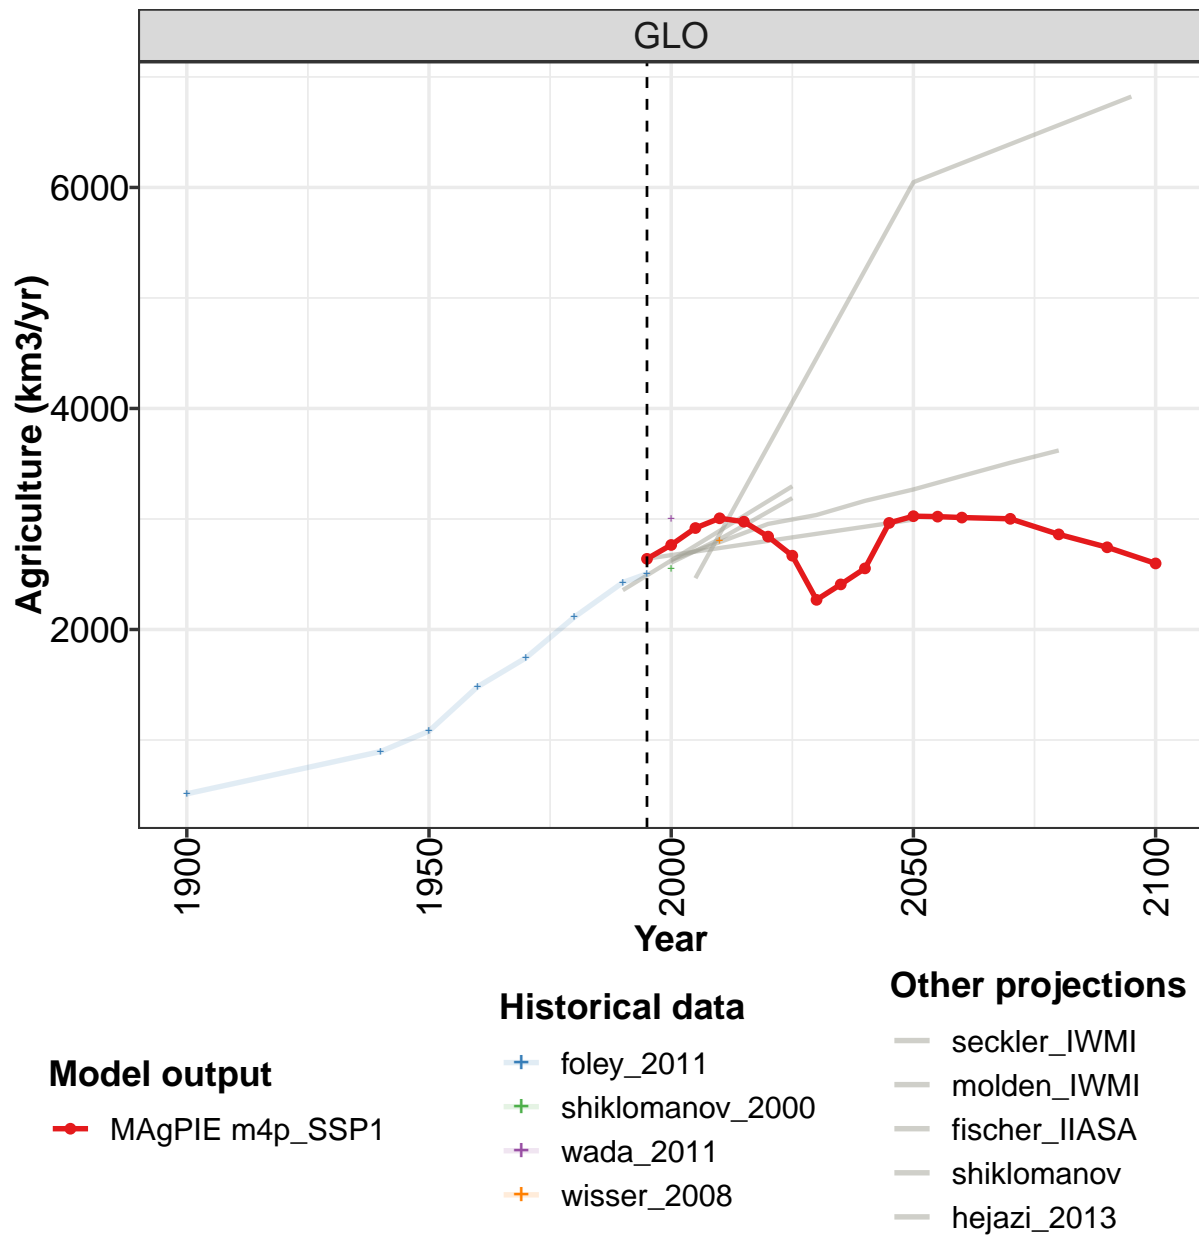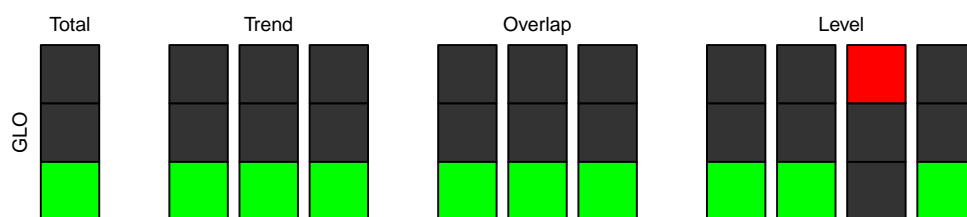

Figure 478: MAgPIE m4p\_SSP1 — Resources—Water—Withdrawal—Agriculture (km3/yr)

|     | 1995 | 2000 | 2005 | 2010 | 2015 | 2020 | 2025 | 2030 | 2035 | 2040 | 2045 |
|-----|------|------|------|------|------|------|------|------|------|------|------|
| GLO | 2639 | 2765 | 2918 | 3006 | 2975 | 2841 | 2668 | 2268 | 2408 | 2553 | 2964 |

Table 1830: MAgPIE m4p\_SSP1 — Resources—Water—Withdrawal—Agriculture (km3/yr) [PART 1/2]

|     | 2050 | 2055 | 2060 | 2070 | 2080 | 2090 | 2100 |
|-----|------|------|------|------|------|------|------|
| GLO | 3025 | 3021 | 3013 | 3002 | 2861 | 2744 | 2598 |

Table 1831: MAgPIE m4p\_SSP1 — Resources—Water—Withdrawal—Agriculture (km3/yr) [PART 2/2]

|     | 1900 | 1940 | 1950 | 1960 | 1970 | 1980 | 1990 | 1995 |
|-----|------|------|------|------|------|------|------|------|
| GLO | 513  | 895  | 1080 | 1481 | 1743 | 2112 | 2425 | 2504 |

Table 1832: shiklomanov\_2000 — Resources—Water—Withdrawal—Agriculture (km3/yr)

|     | 2000 |
|-----|------|
| GLO | 2548 |

Table 1833: wada\_2011 — Resources—Water—Withdrawal—Agriculture (km3/yr)

|     | 2000 |
|-----|------|
| GLO | 3000 |

Table 1834: wisser\_2008 — Resources—Water—Withdrawal—Agriculture (km3/yr)

|     | 2010 |
|-----|------|
| GLO | 2800 |

Table 1835: foley\_2011 — Resources—Water—Withdrawal—Agriculture (km3/yr)



## Part XV

## Trade

## 58 Net-Trade

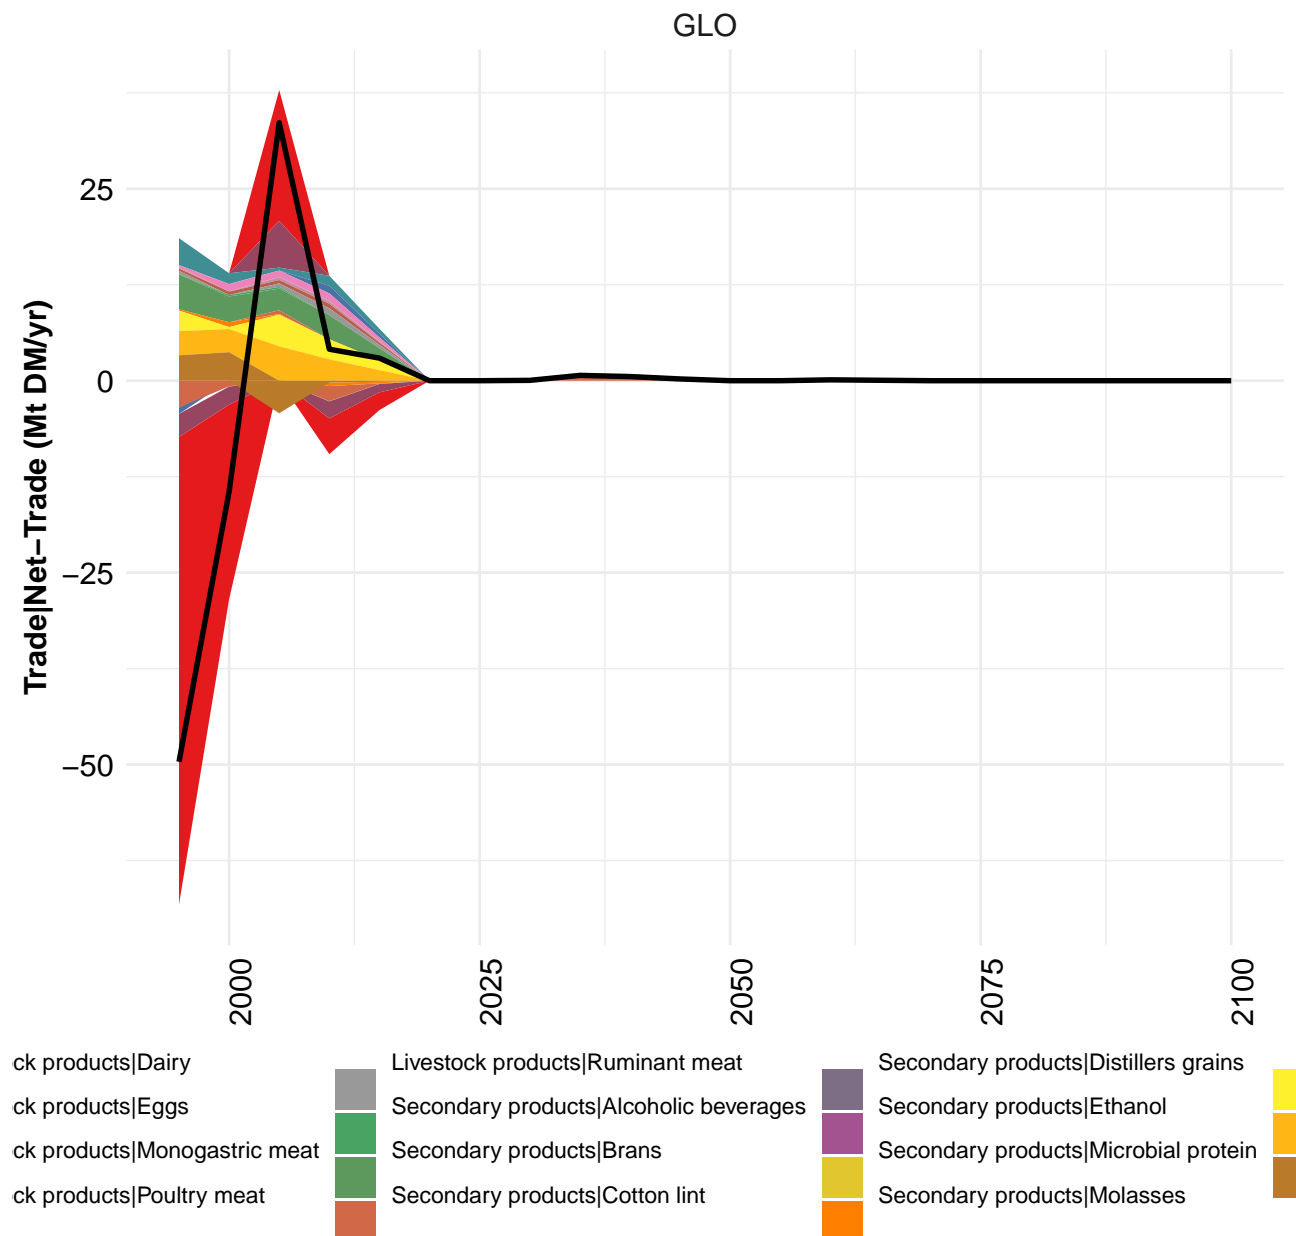

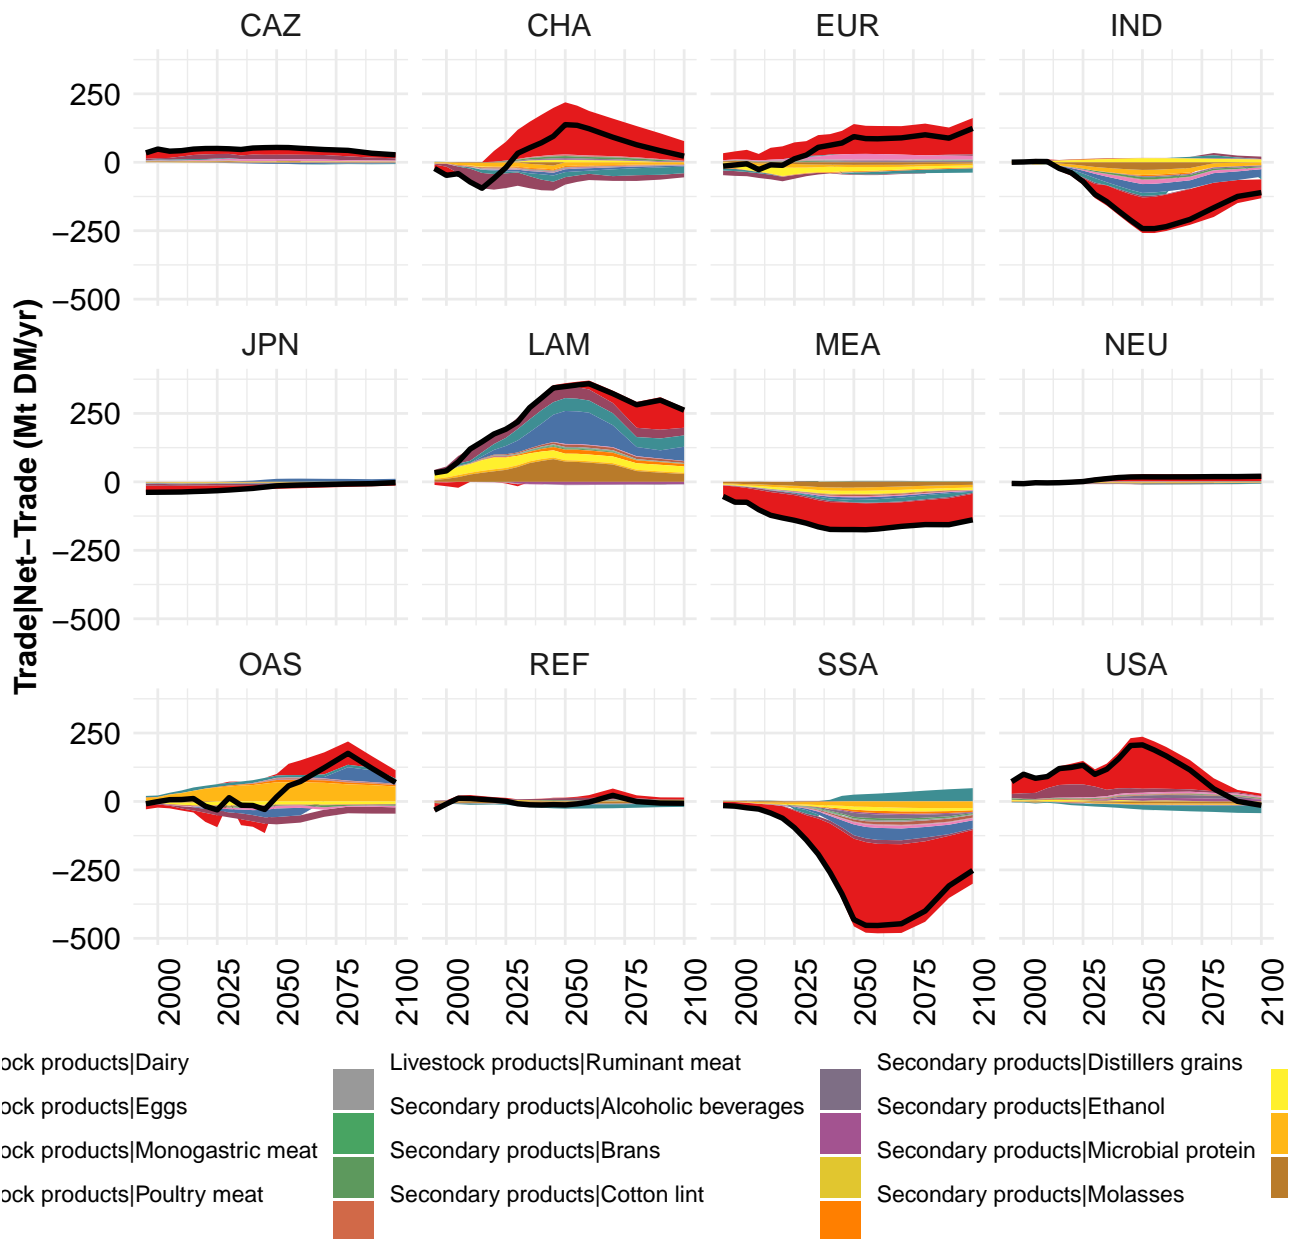

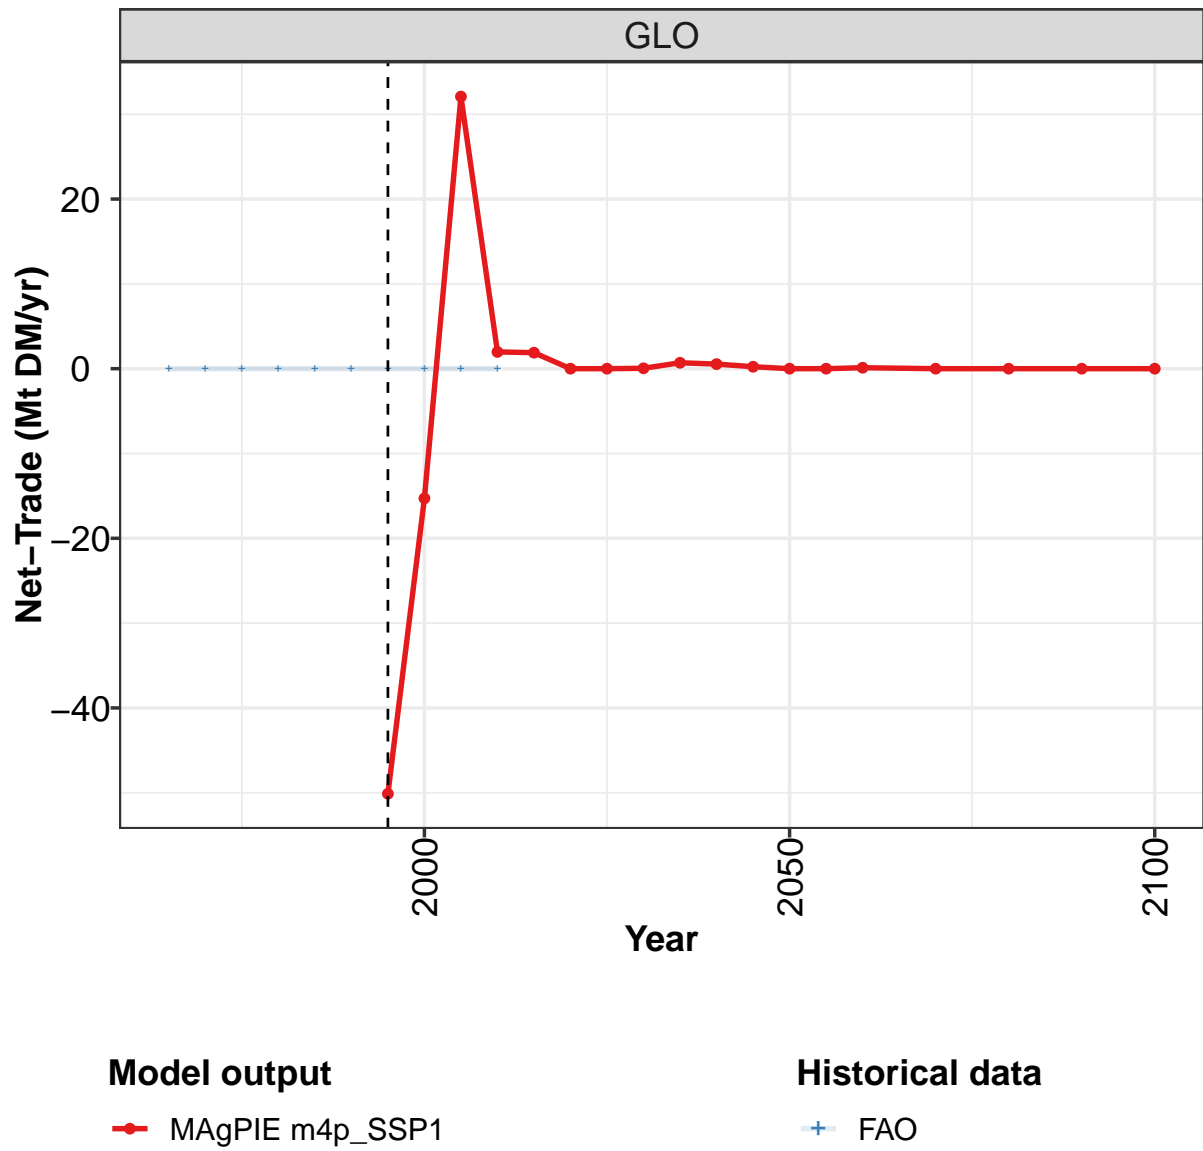

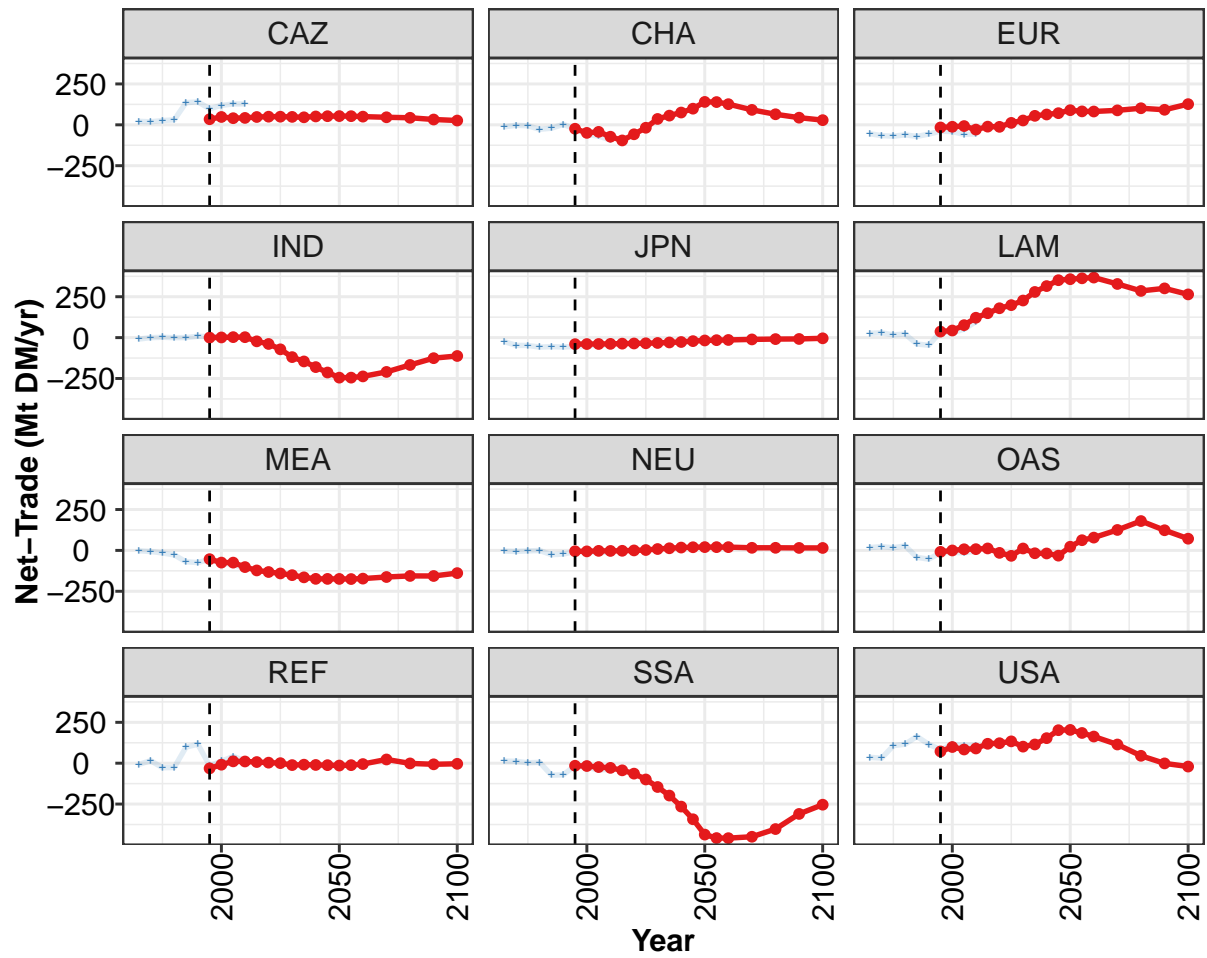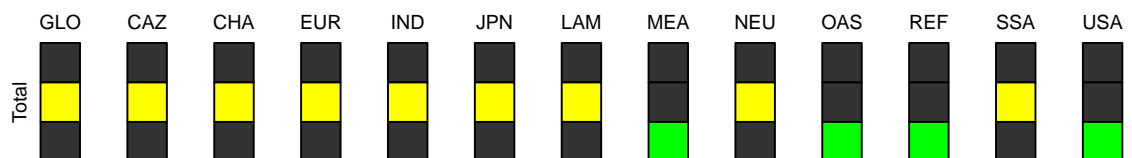

Figure 479: MAgPIE m4p\_SSP1 — Trade—Net-Trade (Mt DM/yr)

|     | 1995 | 2000 | 2005 | 2010 | 2015 | 2020 | 2025 | 2030 | 2035 | 2040 | 2045 |
|-----|------|------|------|------|------|------|------|------|------|------|------|
| GLO | -50  | -15  | 32   | 2    | 2    | -0   | 0    | 0    | 1    | 1    | 0    |
| CAZ | 34   | 48   | 41   | 42   | 48   | 50   | 50   | 49   | 46   | 51   | 53   |
| CHA | -24  | -49  | -43  | -73  | -95  | -58  | -18  | 36   | 56   | 75   | 99   |
| EUR | -16  | -12  | -8   | -29  | -11  | -12  | 12   | 27   | 55   | 63   | 71   |
| IND | 0    | 1    | 3    | 3    | -23  | -39  | -71  | -119 | -146 | -180 | -213 |
| JPN | -40  | -39  | -39  | -38  | -37  | -36  | -35  | -33  | -30  | -27  | -21  |
| LAM | 37   | 43   | 76   | 122  | 149  | 180  | 199  | 227  | 279  | 315  | 351  |
| MEA | -53  | -74  | -75  | -102 | -122 | -132 | -141 | -151 | -165 | -174 | -174 |
| NEU | -5   | -6   | -3   | -3   | -2   | -0   | 2    | 9    | 13   | 17   | 19   |
| OAS | -9   | -0   | 7    | 8    | 12   | -15  | -33  | 12   | -17  | -19  | -32  |
| REF | -32  | -9   | 11   | 11   | 7    | 3    | 0    | -11  | -9   | -11  | -12  |
| SSA | -15  | -17  | -23  | -28  | -44  | -64  | -99  | -145 | -198 | -265 | -343 |
| USA | 72   | 99   | 84   | 90   | 119  | 122  | 134  | 101  | 115  | 153  | 202  |

Table 1836: MAgPIE m4p\_SSP1 — Trade—Net-Trade (Mt DM/yr) [PART 1/2]

|     | 2050 | 2055 | 2060 | 2070 | 2080 | 2090 | 2100 |
|-----|------|------|------|------|------|------|------|
| GLO | -0   | -0   | 0    | 0    | -0   | -0   | 0    |
| CAZ | 53   | 53   | 50   | 46   | 43   | 33   | 26   |
| CHA | 140  | 139  | 127  | 91   | 65   | 44   | 29   |
| EUR | 90   | 82   | 82   | 89   | 102  | 92   | 127  |
| IND | -245 | -245 | -237 | -210 | -167 | -126 | -112 |
| JPN | -17  | -16  | -14  | -11  | -9   | -8   | -4   |
| LAM | 357  | 363  | 367  | 328  | 286  | 301  | 264  |
| MEA | -174 | -175 | -172 | -163 | -156 | -156 | -139 |
| NEU | 20   | 20   | 20   | 16   | 16   | 15   | 15   |
| OAS | 23   | 63   | 78   | 125  | 180  | 123  | 72   |
| REF | -14  | -12  | -5   | 23   | -1   | -7   | -4   |
| SSA | -437 | -458 | -458 | -450 | -403 | -310 | -254 |
| USA | 204  | 185  | 163  | 115  | 45   | -1   | -20  |

Table 1837: MAgPIE m4p\_SSP1 — Trade—Net-Trade (Mt DM/yr) [PART 2/2]

|     | 1965 | 1970 | 1975 | 1980 | 1985 | 1990 | 1995 | 2000 | 2005 | 2010 |
|-----|------|------|------|------|------|------|------|------|------|------|
| GLO | 0    | 0    | 0    | 0    | 0    | 0    | 0    | 0    | 0    | 0    |
| CAZ | 21   | 19   | 26   | 31   | 136  | 141  | 98   | 119  | 128  | 128  |
| CHA | -12  | -3   | -6   | -27  | -21  | 3    | -25  | -59  | -69  | -93  |
| EUR | -54  | -66  | -70  | -61  | -71  | -57  | -39  | -41  | -58  | -56  |
| IND | -9   | -0   | 2    | -0   | 0    | 8    | 6    | 3    | -1   | 3    |
| JPN | -24  | -47  | -48  | -58  | -55  | -58  | -54  | -50  | -47  | -42  |
| LAM | 26   | 30   | 17   | 22   | -39  | -47  | 35   | 29   | 52   | 97   |
| MEA | -2   | -7   | -16  | -28  | -69  | -74  | -56  | -80  | -85  | -111 |
| NEU | -4   | -6   | -3   | -1   | -26  | -23  | -6   | -10  | -13  | -11  |
| OAS | 17   | 23   | 16   | 28   | -42  | -53  | -14  | -12  | -15  | -3   |
| REF | -8   | 16   | -28  | -26  | 98   | 116  | -15  | 12   | 41   | 15   |
| SSA | 13   | 12   | 2    | 5    | -74  | -71  | -15  | -25  | -43  | -37  |
| USA | 36   | 31   | 107  | 116  | 163  | 115  | 84   | 113  | 109  | 109  |

Table 1838: FAO — Trade—Net-Trade (Mt DM/yr)

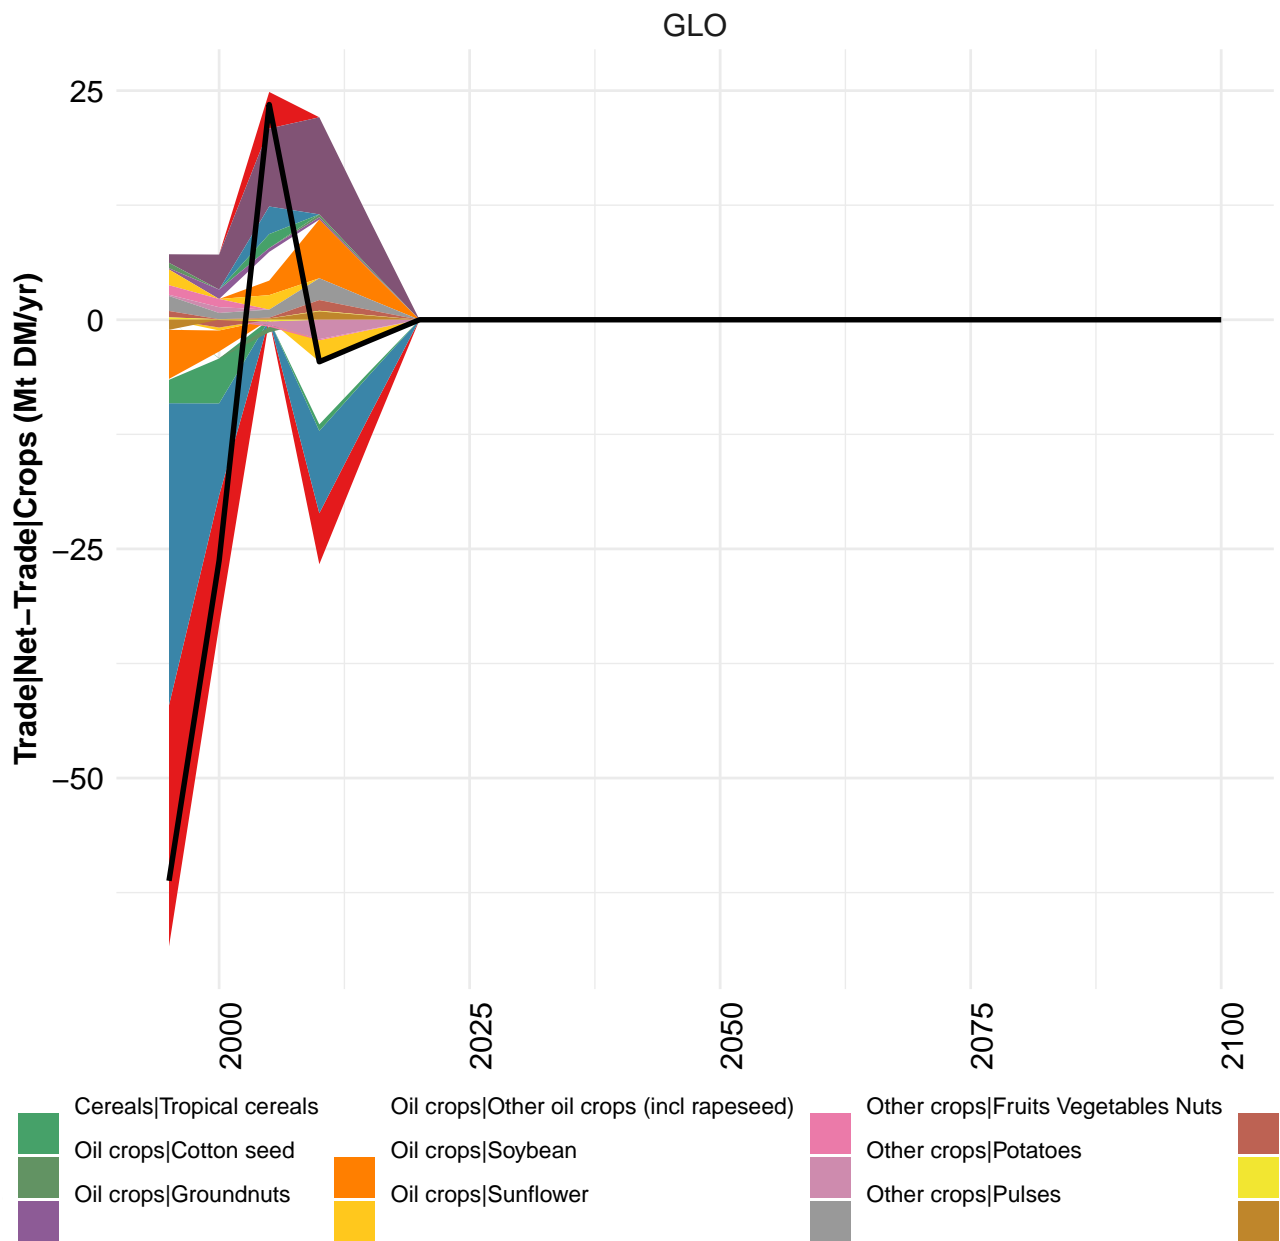

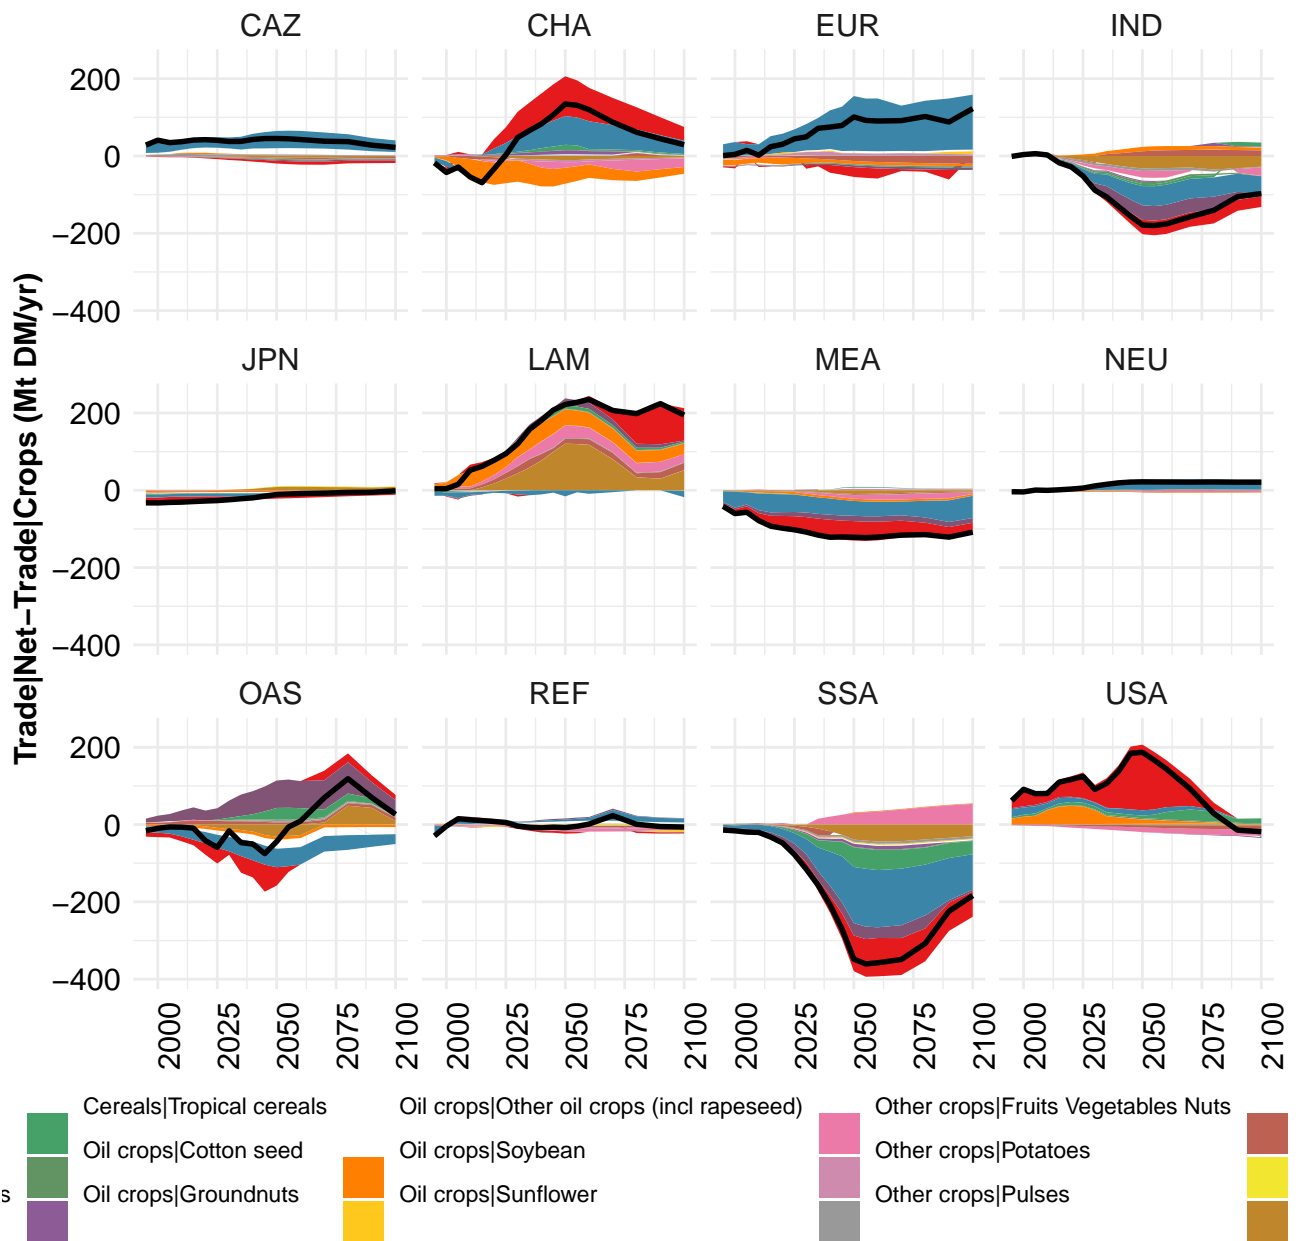

58.1 Crops

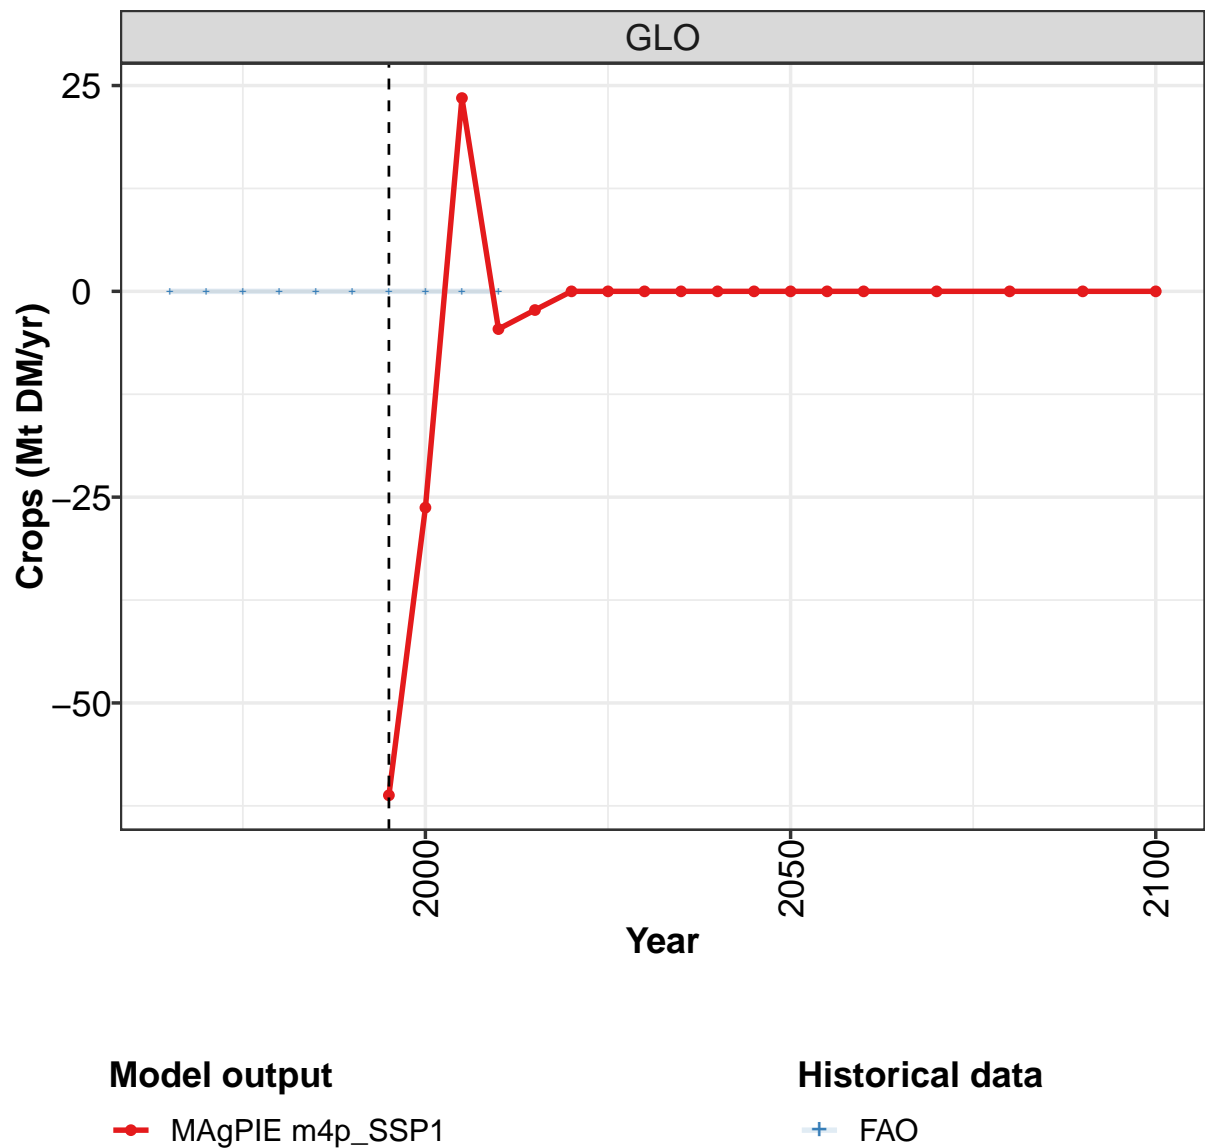



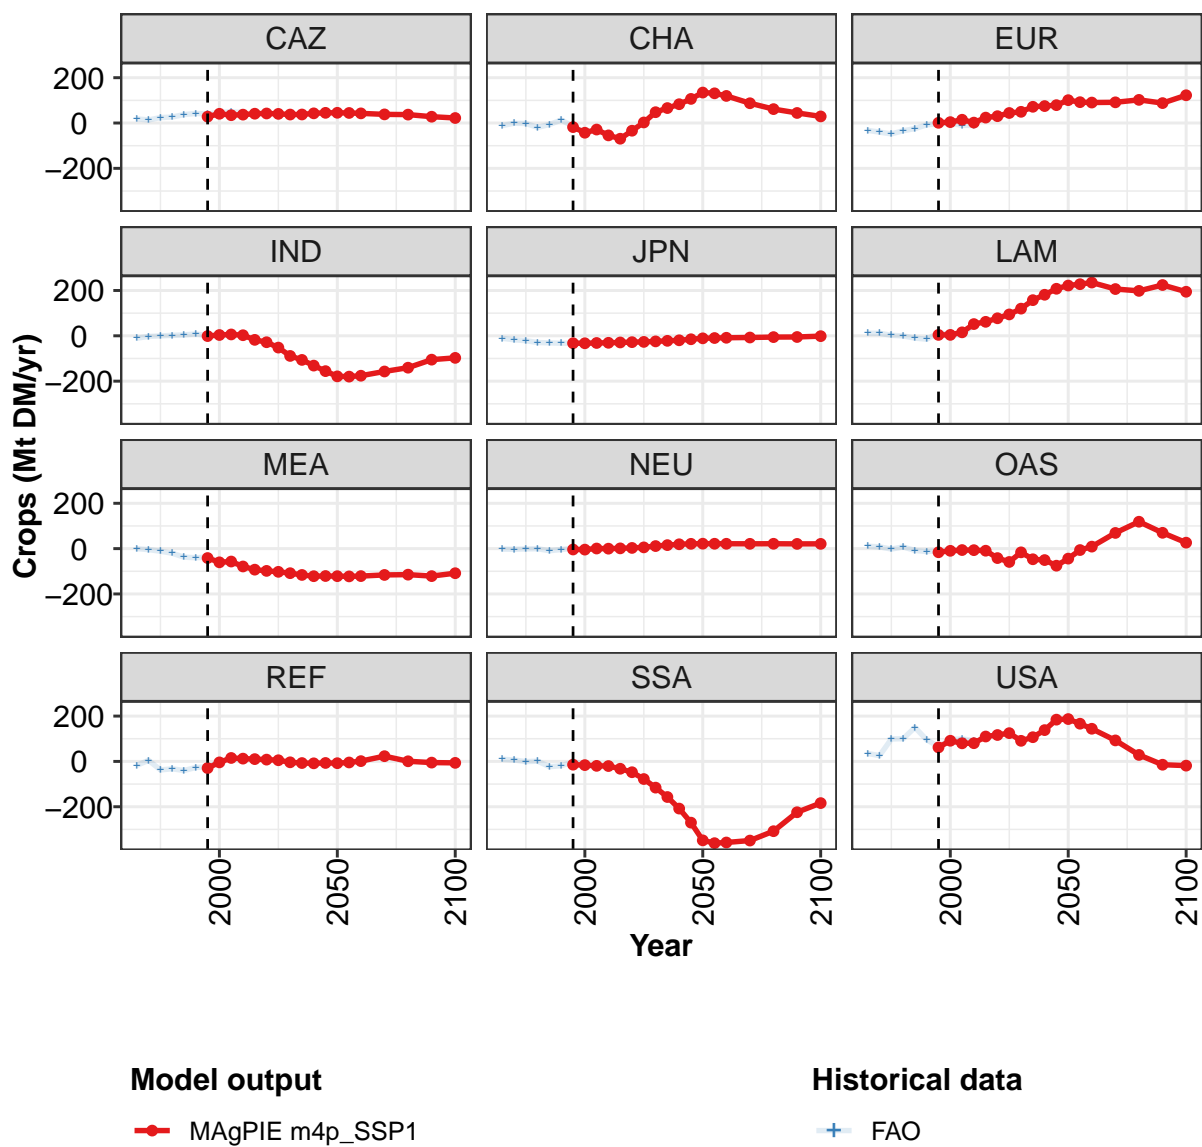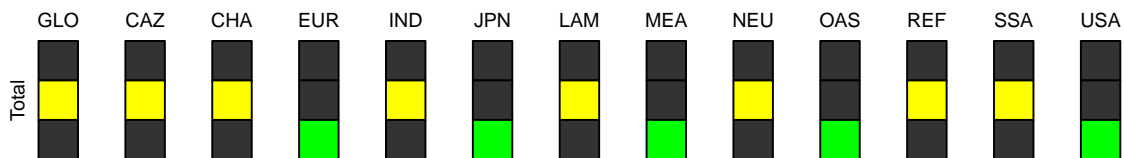

Figure 480: MAgPIE m4p\_SSP1 — Trade—Net-Trade—Crops (Mt DM/yr)

|     | 1995 | 2000 | 2005 | 2010 | 2015 | 2020 | 2025 | 2030 | 2035 | 2040 | 2045 |
|-----|------|------|------|------|------|------|------|------|------|------|------|
| GLO | -61  | -26  | 23   | -5   | -2   | 0    | -0   | 0    | 0    | -0   | -0   |
| CAZ | 28   | 41   | 35   | 37   | 41   | 42   | 40   | 38   | 38   | 43   | 45   |
| CHA | -18  | -43  | -29  | -54  | -69  | -34  | 3    | 48   | 66   | 83   | 107  |
| EUR | 1    | 4    | 15   | 2    | 24   | 30   | 44   | 50   | 72   | 75   | 79   |
| IND | -1   | 4    | 6    | 3    | -18  | -28  | -52  | -89  | -106 | -131 | -156 |
| JPN | -33  | -33  | -31  | -31  | -29  | -28  | -27  | -25  | -22  | -20  | -15  |
| LAM | 4    | 4    | 15   | 52   | 62   | 77   | 94   | 120  | 158  | 181  | 208  |
| MEA | -41  | -60  | -57  | -79  | -93  | -98  | -102 | -108 | -116 | -122 | -121 |
| NEU | -4   | -4   | 1    | -0   | 1    | 3    | 6    | 11   | 16   | 19   | 21   |
| OAS | -16  | -10  | -6   | -7   | -9   | -42  | -59  | -16  | -47  | -50  | -75  |
| REF | -29  | -4   | 15   | 12   | 10   | 8    | 5    | -4   | -7   | -8   | -7   |
| SSA | -14  | -16  | -20  | -20  | -32  | -48  | -78  | -116 | -157 | -208 | -270 |
| USA | 62   | 91   | 80   | 80   | 110  | 117  | 125  | 91   | 107  | 138  | 184  |

Table 1839: MAgPIE m4p\_SSP1 — Trade—Net-Trade—Crops (Mt DM/yr) [PART 1/2]

|     | 2050 | 2055 | 2060 | 2070 | 2080 | 2090 | 2100 |
|-----|------|------|------|------|------|------|------|
| GLO | -0   | 0    | 0    | 0    | -0   | -0   | 0    |
| CAZ | 45   | 44   | 43   | 38   | 37   | 28   | 22   |
| CHA | 135  | 131  | 120  | 87   | 62   | 45   | 29   |
| EUR | 101  | 92   | 90   | 91   | 102  | 88   | 123  |
| IND | -179 | -180 | -176 | -157 | -141 | -105 | -97  |
| JPN | -11  | -10  | -9   | -7   | -6   | -5   | -1   |
| LAM | 222  | 228  | 235  | 206  | 198  | 224  | 195  |
| MEA | -122 | -122 | -121 | -116 | -115 | -121 | -108 |
| NEU | 22   | 22   | 21   | 21   | 21   | 21   | 21   |
| OAS | -44  | -6   | 9    | 69   | 119  | 70   | 26   |
| REF | -8   | -5   | 1    | 23   | 1    | -5   | -6   |
| SSA | -348 | -361 | -358 | -349 | -308 | -224 | -184 |
| USA | 187  | 166  | 144  | 93   | 29   | -15  | -19  |

Table 1840: MAgPIE m4p\_SSP1 — Trade—Net-Trade—Crops (Mt DM/yr) [PART 2/2]

|     | 1965 | 1970 | 1975 | 1980 | 1985 | 1990 | 1995 | 2000 | 2005 | 2010 |
|-----|------|------|------|------|------|------|------|------|------|------|
| GLO | 0    | 0    | 0    | 0    | 0    | 0    | 0    | 0    | 0    | 0    |
| CAZ | 18   | 14   | 24   | 26   | 37   | 42   | 40   | 47   | 49   | 46   |
| CHA | -11  | -1   | -2   | -19  | -7   | 13   | -15  | -41  | -33  | -52  |
| EUR | -32  | -40  | -48  | -34  | -25  | -8   | -3   | -1   | -10  | -11  |
| IND | -10  | -3   | -1   | 2    | 4    | 8    | 1    | 6    | 5    | 6    |
| JPN | -11  | -18  | -21  | -30  | -31  | -33  | -32  | -33  | -32  | -31  |
| LAM | 12   | 11   | 2    | -1   | -10  | -15  | 14   | 6    | 4    | 47   |
| MEA | -0   | -5   | -12  | -20  | -38  | -40  | -37  | -58  | -59  | -80  |
| NEU | -3   | -3   | -2   | -1   | -9   | -4   | 2    | -2   | -2   | -2   |
| OAS | 10   | 8    | -2   | 7    | -8   | -13  | -9   | -8   | -13  | -6   |
| REF | -17  | 5    | -37  | -33  | -40  | -27  | -24  | -2   | 15   | 4    |
| SSA | 9    | 6    | -1   | 1    | -23  | -19  | -2   | -11  | -24  | -14  |
| USA | 35   | 26   | 99   | 100  | 150  | 95   | 65   | 97   | 99   | 92   |

Table 1841: FAO — Trade—Net-Trade—Crops (Mt DM/yr)

58.1.1 Cereals

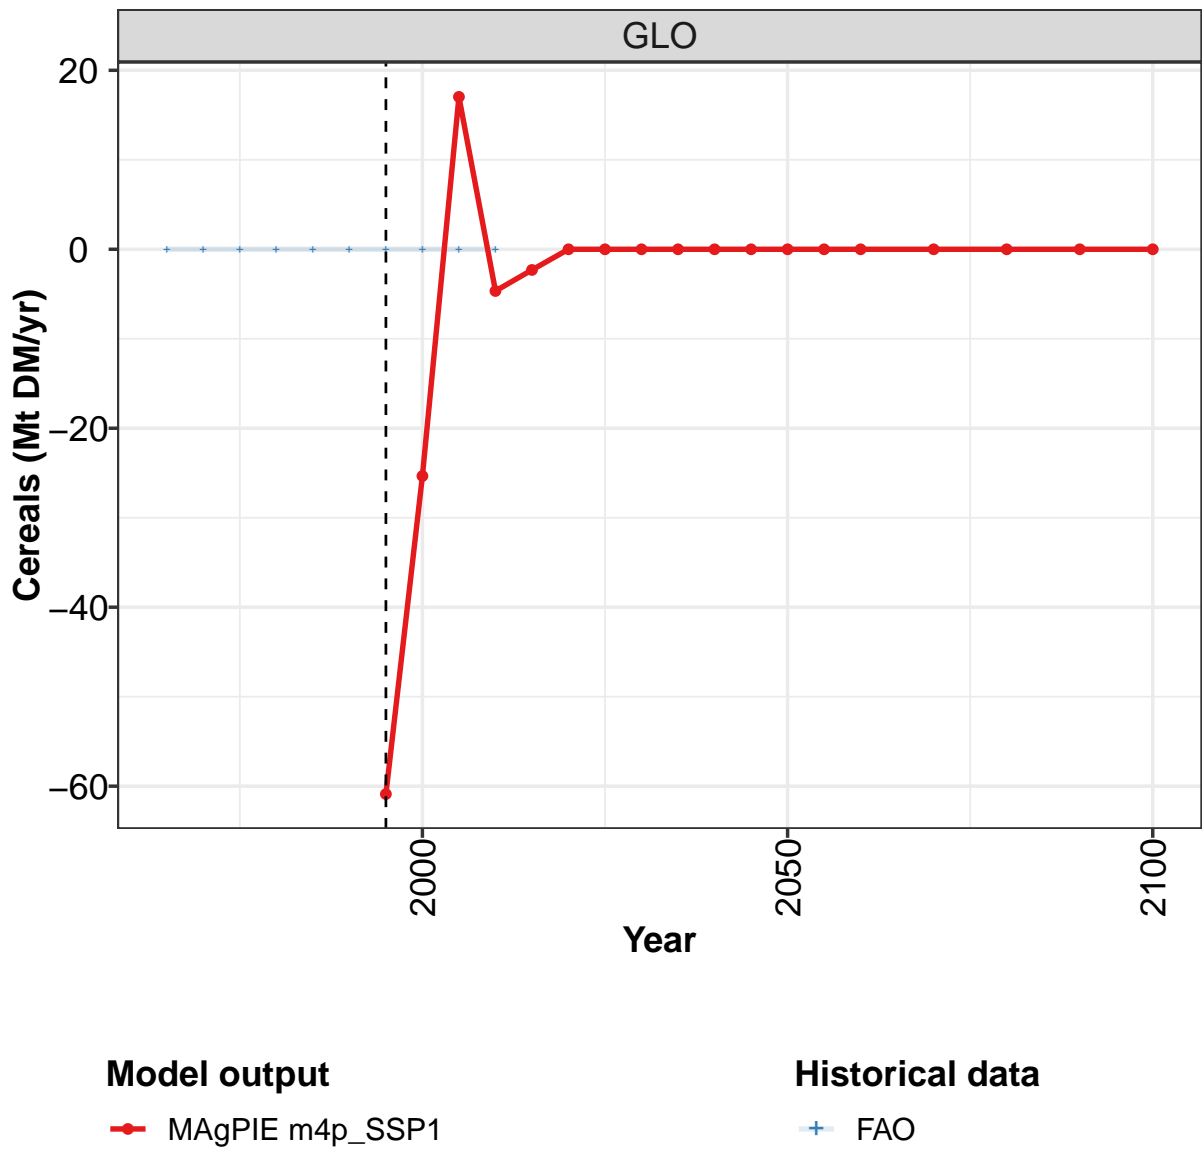

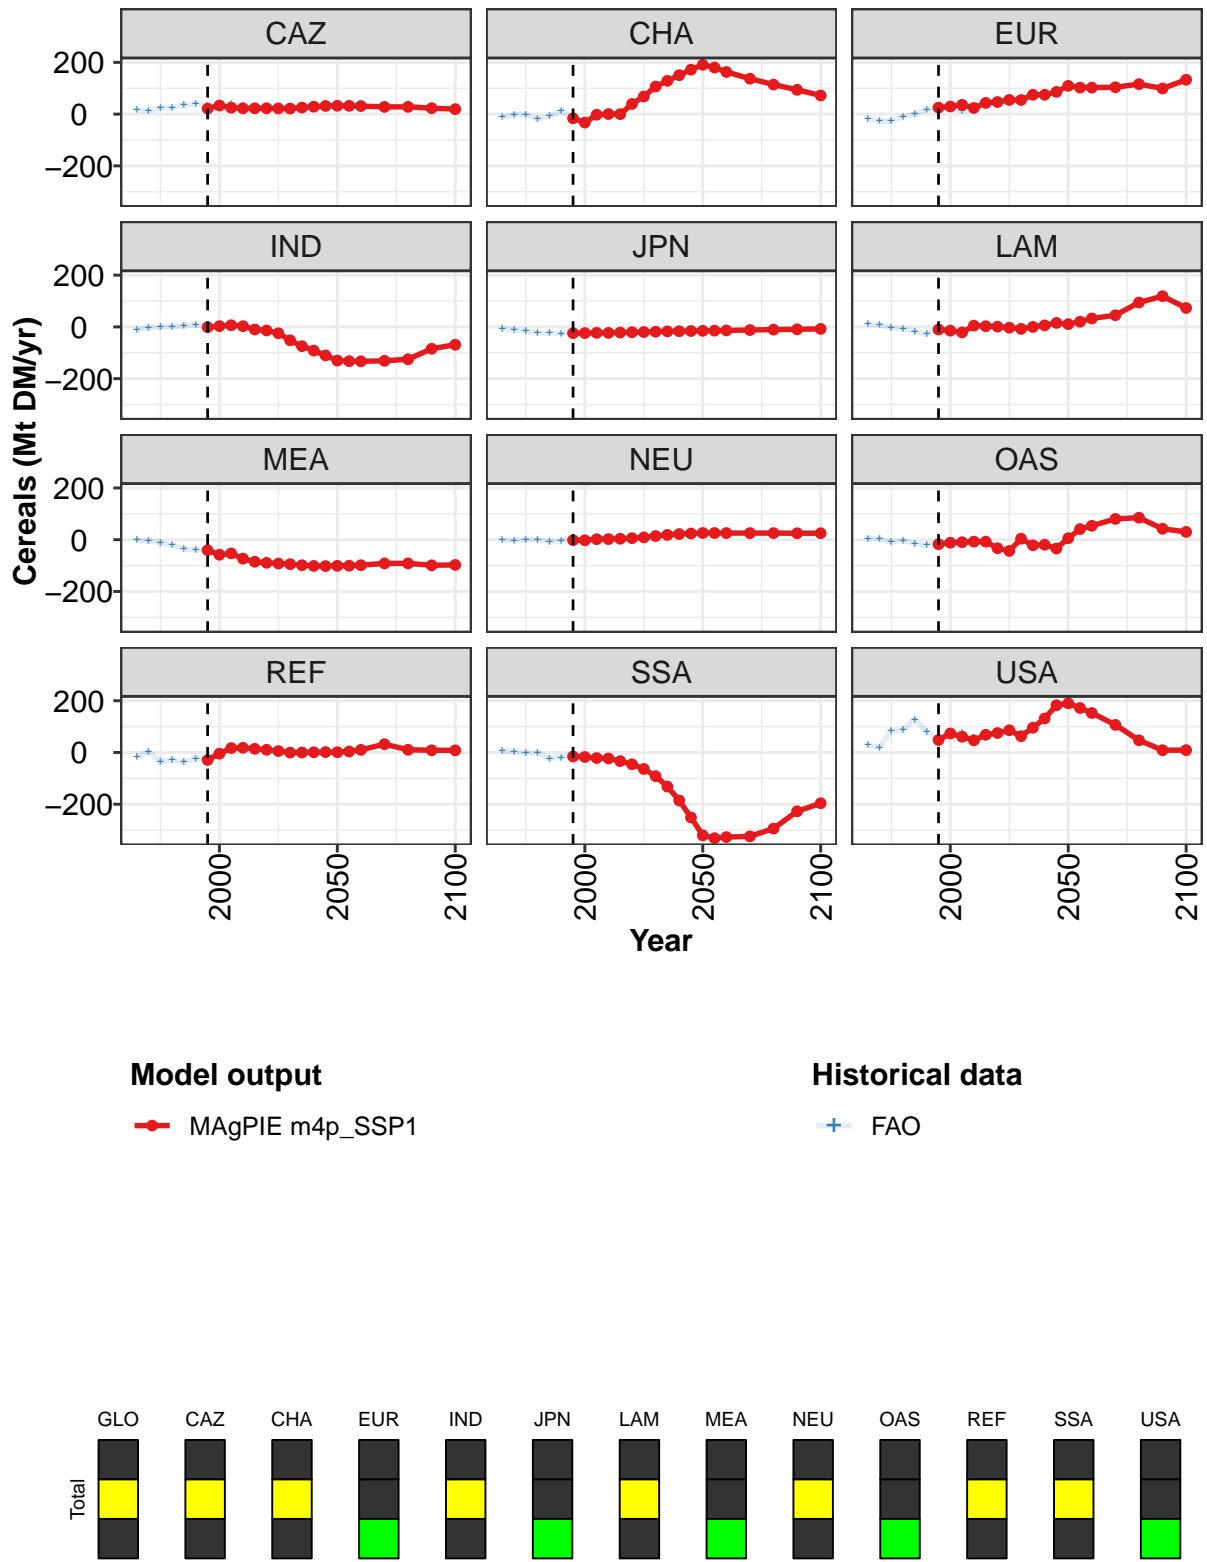

Figure 481: MAgPIE m4p\_SSP1 — Trade—Net-Trade—Crops—Cereals (Mt DM/yr)

|     | 1995 | 2000 | 2005 | 2010 | 2015 | 2020 | 2025 | 2030 | 2035 | 2040 | 2045 |
|-----|------|------|------|------|------|------|------|------|------|------|------|
| GLO | -61  | -25  | 17   | -5   | -2   | 0    | -0   | 0    | 0    | -0   | -0   |
| CAZ | 21   | 33   | 25   | 22   | 23   | 23   | 22   | 22   | 25   | 29   | 32   |
| CHA | -16  | -33  | -2   | 0    | 0    | 39   | 68   | 107  | 129  | 150  | 172  |
| EUR | 25   | 30   | 36   | 24   | 43   | 47   | 55   | 54   | 75   | 75   | 86   |
| IND | -1   | 3    | 7    | 3    | -10  | -14  | -24  | -52  | -74  | -91  | -110 |
| JPN | -24  | -24  | -23  | -23  | -22  | -21  | -20  | -19  | -17  | -17  | -16  |
| LAM | -10  | -14  | -21  | 5    | 3    | 1    | -3   | -8   | 0    | 6    | 16   |
| MEA | -41  | -58  | -53  | -73  | -85  | -89  | -92  | -94  | -99  | -101 | -102 |
| NEU | -2   | -2   | 2    | 2    | 4    | 6    | 9    | 14   | 19   | 22   | 24   |
| OAS | -18  | -12  | -10  | -8   | -7   | -33  | -43  | 4    | -22  | -19  | -34  |
| REF | -29  | -5   | 17   | 18   | 14   | 11   | 6    | -0   | 0    | 1    | 2    |
| SSA | -16  | -17  | -21  | -23  | -33  | -45  | -64  | -91  | -132 | -185 | -251 |
| USA | 48   | 74   | 61   | 47   | 68   | 75   | 86   | 63   | 96   | 131  | 182  |

Table 1842: MAgPIE m4p\_SSP1 — Trade—Net-Trade—Crops—Cereals (Mt DM/yr) [PART 1/2]

|     | 2050 | 2055 | 2060 | 2070 | 2080 | 2090 | 2100 |
|-----|------|------|------|------|------|------|------|
| GLO | -0   | 0    | 0    | 0    | -0   | -0   | 0    |
| CAZ | 32   | 32   | 31   | 28   | 28   | 23   | 19   |
| CHA | 191  | 180  | 163  | 137  | 114  | 94   | 72   |
| EUR | 109  | 103  | 103  | 104  | 116  | 99   | 133  |
| IND | -130 | -132 | -133 | -131 | -125 | -84  | -69  |
| JPN | -15  | -14  | -14  | -12  | -10  | -9   | -8   |
| LAM | 11   | 20   | 33   | 45   | 94   | 119  | 73   |
| MEA | -101 | -100 | -98  | -92  | -92  | -99  | -97  |
| NEU | 26   | 26   | 26   | 26   | 26   | 25   | 25   |
| OAS | 6    | 41   | 54   | 80   | 85   | 42   | 30   |
| REF | 1    | 4    | 10   | 32   | 11   | 9    | 8    |
| SSA | -320 | -331 | -327 | -324 | -294 | -227 | -196 |
| USA | 190  | 172  | 153  | 107  | 47   | 9    | 9    |

Table 1843: MAgPIE m4p\_SSP1 — Trade—Net-Trade—Crops—Cereals (Mt DM/yr) [PART 2/2]

|     | 1965 | 1970 | 1975 | 1980 | 1985 | 1990 | 1995 | 2000 | 2005 | 2010 |
|-----|------|------|------|------|------|------|------|------|------|------|
| GLO | 0    | 0    | 0    | 0    | 0    | 0    | 0    | 0    | 0    | 0    |
| CAZ | 18   | 12   | 23   | 26   | 35   | 39   | 34   | 38   | 39   | 32   |
| CHA | -11  | -2   | -1   | -18  | -8   | 12   | -13  | -31  | -8   | 3    |
| EUR | -20  | -27  | -27  | -9   | -0   | 18   | 22   | 26   | 12   | 11   |
| IND | -10  | -3   | -1   | 2    | 4    | 9    | 1    | 5    | 6    | 6    |
| JPN | -8   | -13  | -16  | -23  | -23  | -25  | -24  | -24  | -23  | -23  |
| LAM | 10   | 9    | -3   | -8   | -17  | -28  | 1    | -10  | -25  | -1   |
| MEA | -1   | -5   | -11  | -20  | -36  | -39  | -36  | -55  | -54  | -73  |
| NEU | -2   | -3   | -1   | -1   | -9   | -4   | 2    | -1   | -0   | 1    |
| OAS | 5    | 2    | -9   | -3   | -16  | -21  | -10  | -9   | -14  | -5   |
| REF | -17  | 4    | -34  | -30  | -37  | -23  | -27  | -3   | 16   | 9    |
| SSA | 7    | 4    | -3   | -1   | -23  | -20  | -3   | -12  | -24  | -19  |
| USA | 29   | 20   | 83   | 87   | 128  | 82   | 53   | 76   | 75   | 59   |

Table 1844: FAO — Trade—Net-Trade—Crops—Cereals (Mt DM/yr)

58.1.2 Cereals—Maize

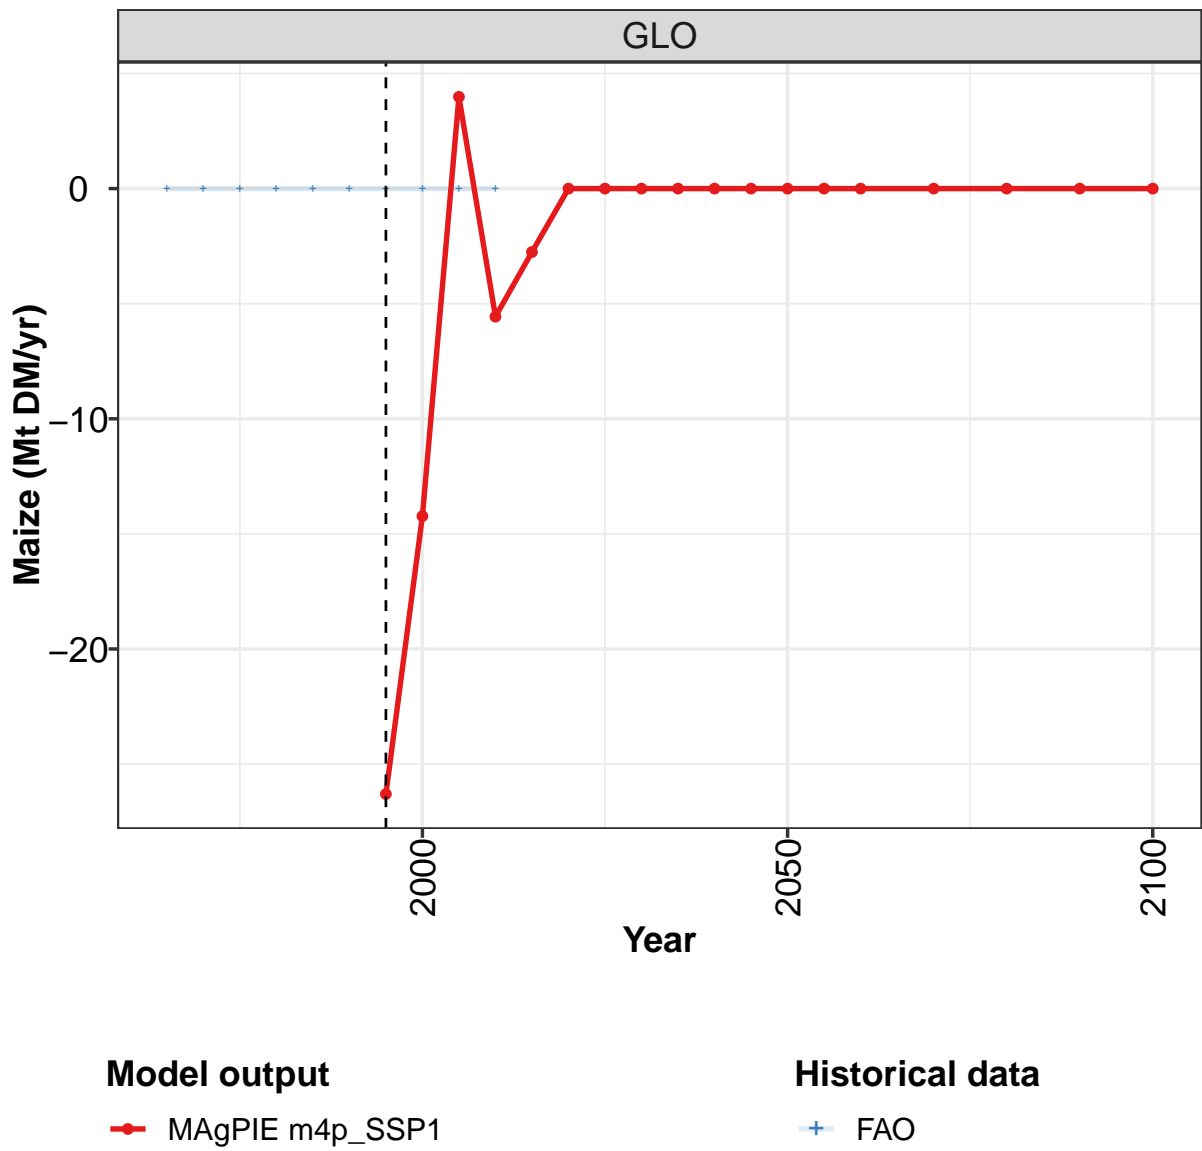

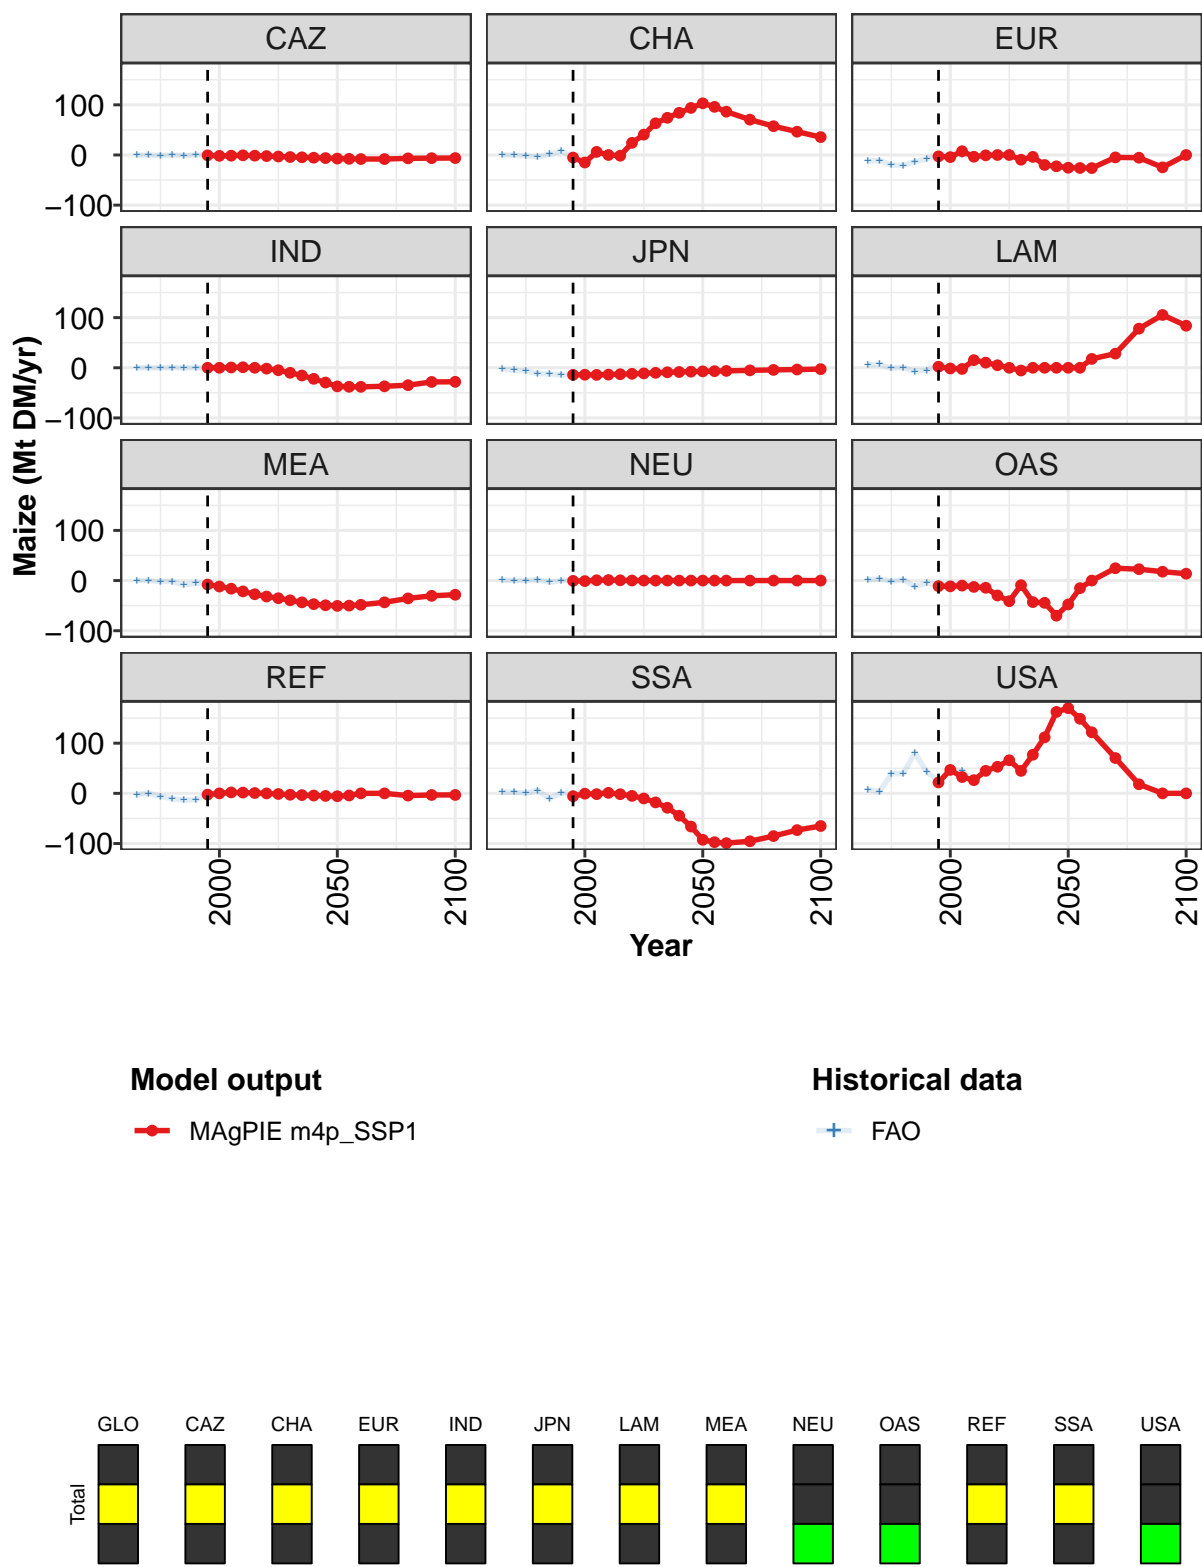

Figure 482: MAgPIE m4p\_SSP1 — Trade—Net-Trade—Crops—Cereals—Maize (Mt DM/yr)

|     | 1995 | 2000 | 2005 | 2010 | 2015 | 2020 | 2025 | 2030 | 2035 | 2040 | 2045 |
|-----|------|------|------|------|------|------|------|------|------|------|------|
| GLO | -26  | -14  | 4    | -6   | -3   | 0    | 0    | 0    | 0    | -0   | -0   |
| CAZ | -1   | -2   | -1   | -1   | -1   | -2   | -3   | -4   | -5   | -5   | -6   |
| CHA | -5   | -15  | 6    | 0    | -1   | 24   | 41   | 63   | 74   | 84   | 94   |
| EUR | -3   | -4   | 8    | -3   | -1   | 0    | 0    | -9   | -4   | -20  | -23  |
| IND | 0    | 0    | 1    | 1    | 0    | -2   | -5   | -10  | -15  | -22  | -29  |
| JPN | -14  | -14  | -14  | -14  | -13  | -12  | -11  | -10  | -9   | -8   | -8   |
| LAM | 2    | -1   | -2   | 15   | 10   | 5    | -0   | -5   | -0   | 0    | 0    |
| MEA | -8   | -12  | -16  | -22  | -27  | -32  | -35  | -39  | -43  | -47  | -49  |
| NEU | -1   | -1   | 1    | 1    | 1    | 0    | 0    | 0    | 0    | 0    | -0   |
| OAS | -11  | -11  | -10  | -13  | -14  | -30  | -41  | -9   | -43  | -44  | -70  |
| REF | -2   | 0    | 2    | 2    | 1    | -0   | -1   | -3   | -3   | -4   | -5   |
| SSA | -6   | -1   | -2   | 1    | -2   | -5   | -10  | -18  | -29  | -45  | -66  |
| USA | 22   | 47   | 33   | 26   | 45   | 53   | 66   | 45   | 77   | 112  | 162  |

Table 1845: MAgPIE m4p-SSP1 — Trade—Net-Trade—Crops—Cereals—Maize (Mt DM/yr) [PART 1/2]

|     | 2050 | 2055 | 2060 | 2070 | 2080 | 2090 | 2100 |
|-----|------|------|------|------|------|------|------|
| GLO | 0    | 0    | 0    | 0    | 0    | 0    | -0   |
| CAZ | -7   | -8   | -8   | -8   | -7   | -6   | -6   |
| CHA | 103  | 96   | 86   | 70   | 57   | 46   | 36   |
| EUR | -25  | -26  | -26  | -5   | -5   | -25  | 0    |
| IND | -37  | -38  | -38  | -37  | -35  | -28  | -28  |
| JPN | -7   | -7   | -6   | -5   | -4   | -3   | -3   |
| LAM | 0    | 0    | 18   | 28   | 78   | 105  | 84   |
| MEA | -50  | -50  | -48  | -43  | -36  | -30  | -28  |
| NEU | 0    | 0    | 0    | 0    | 0    | 0    | 0    |
| OAS | -48  | -15  | -0   | 25   | 23   | 18   | 14   |
| REF | -6   | -4   | -0   | 0    | -4   | -3   | -3   |
| SSA | -92  | -97  | -99  | -96  | -85  | -73  | -65  |
| USA | 170  | 149  | 122  | 71   | 18   | -0   | -0   |

Table 1846: MAgPIE m4p-SSP1 — Trade—Net-Trade—Crops—Cereals—Maize (Mt DM/yr) [PART 2/2]

|     | 1965  | 1970  | 1975  | 1980  | 1985  | 1990  | 1995  | 2000  | 2005  | 2010  |
|-----|-------|-------|-------|-------|-------|-------|-------|-------|-------|-------|
| GLO | 0.0   | 0.0   | 0.0   | 0.0   | 0.0   | 0.0   | 0.0   | 0.0   | 0.0   | 0.0   |
| CAZ | -0.3  | -0.3  | -0.9  | -0.2  | -1.1  | -0.1  | -0.1  | -1.5  | -1.6  | -0.6  |
| CHA | 0.1   | -0.6  | -1.6  | -4.2  | 1.7   | 7.7   | -4.6  | -14.7 | 1.1   | 2.2   |
| EUR | -12.2 | -11.2 | -19.7 | -20.8 | -13.1 | -8.4  | 1.0   | -2.1  | 0.3   | -2.7  |
| IND | -0.2  | 0.0   | -0.1  | 0.0   | -0.2  | 0.0   | 0.1   | 0.0   | 0.4   | 3.9   |
| JPN | -2.9  | -4.9  | -6.7  | -11.4 | -12.6 | -14.2 | -14.0 | -13.8 | -14.2 | -13.6 |
| LAM | 5.5   | 7.1   | -0.9  | 0.5   | -7.1  | -5.2  | 6.5   | 1.4   | -2.8  | 9.3   |
| MEA | 0.3   | 0.4   | -2.0  | -2.0  | -9.3  | -5.4  | -5.7  | -10.3 | -15.8 | -21.3 |
| NEU | 0.6   | 0.5   | 0.2   | 1.4   | -3.3  | -0.1  | 1.0   | -0.1  | -0.1  | 1.0   |
| OAS | 1.7   | 3.0   | -1.6  | 1.9   | -11.9 | -5.3  | -6.8  | -9.7  | -11.2 | -11.7 |
| REF | -3.0  | -0.0  | -6.3  | -10.5 | -13.4 | -12.9 | -1.5  | 0.9   | 1.7   | 0.4   |
| SSA | 2.6   | 2.4   | 0.6   | 5.9   | -10.4 | 1.1   | -0.4  | 2.2   | -2.4  | 5.3   |
| USA | 7.9   | 3.5   | 38.9  | 39.3  | 80.7  | 42.7  | 24.6  | 47.8  | 44.5  | 27.7  |

Table 1847: FAO — Trade—Net-Trade—Crops—Cereals—Maize (Mt DM/yr)



58.1.3 Cereals—Rice

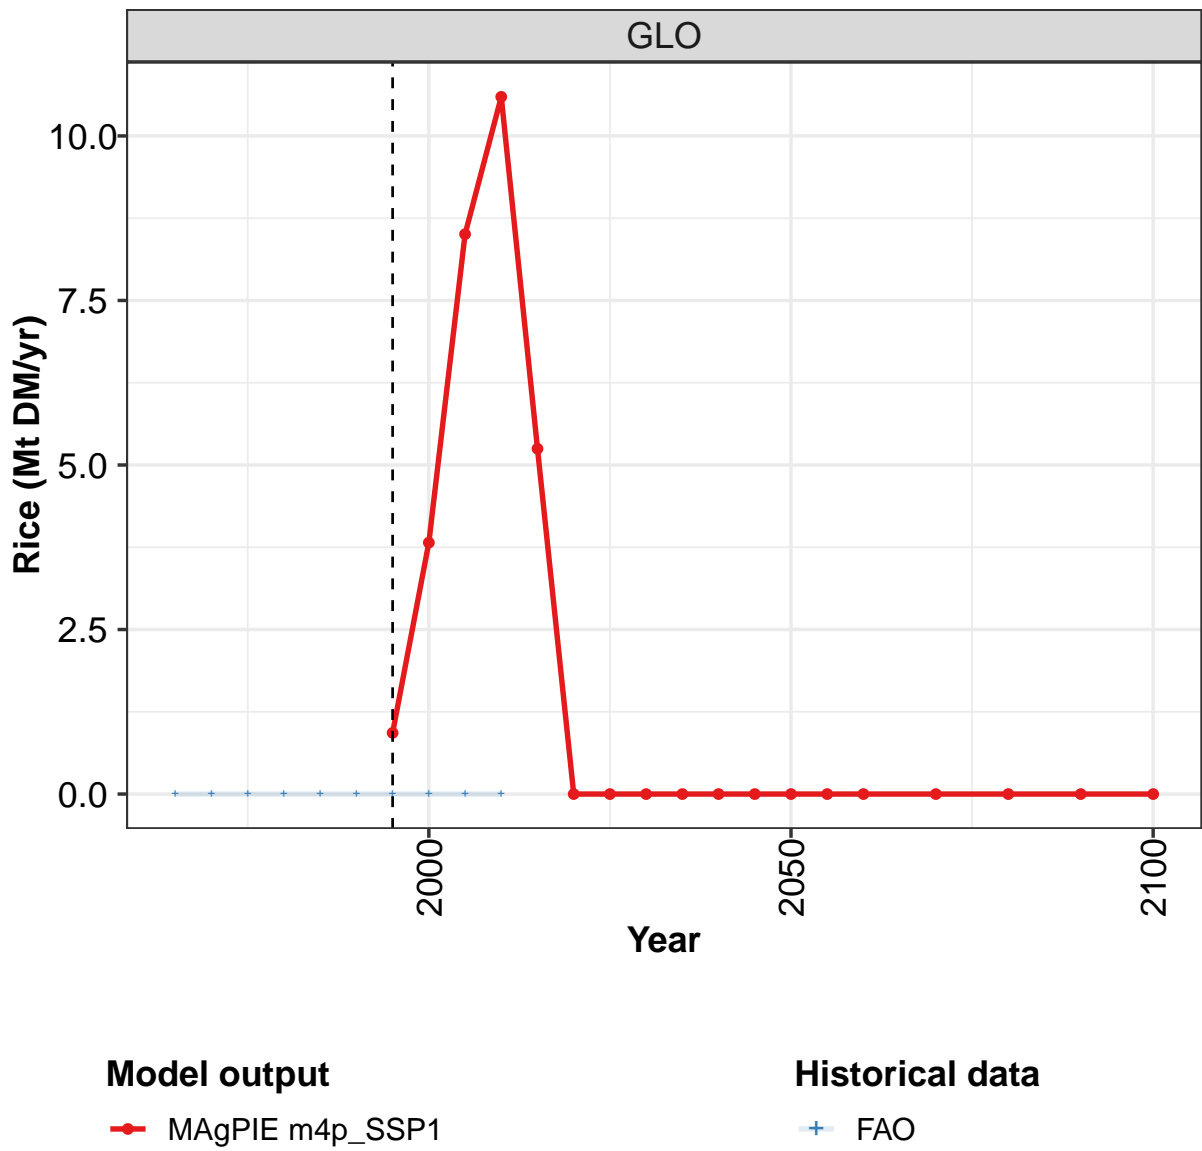

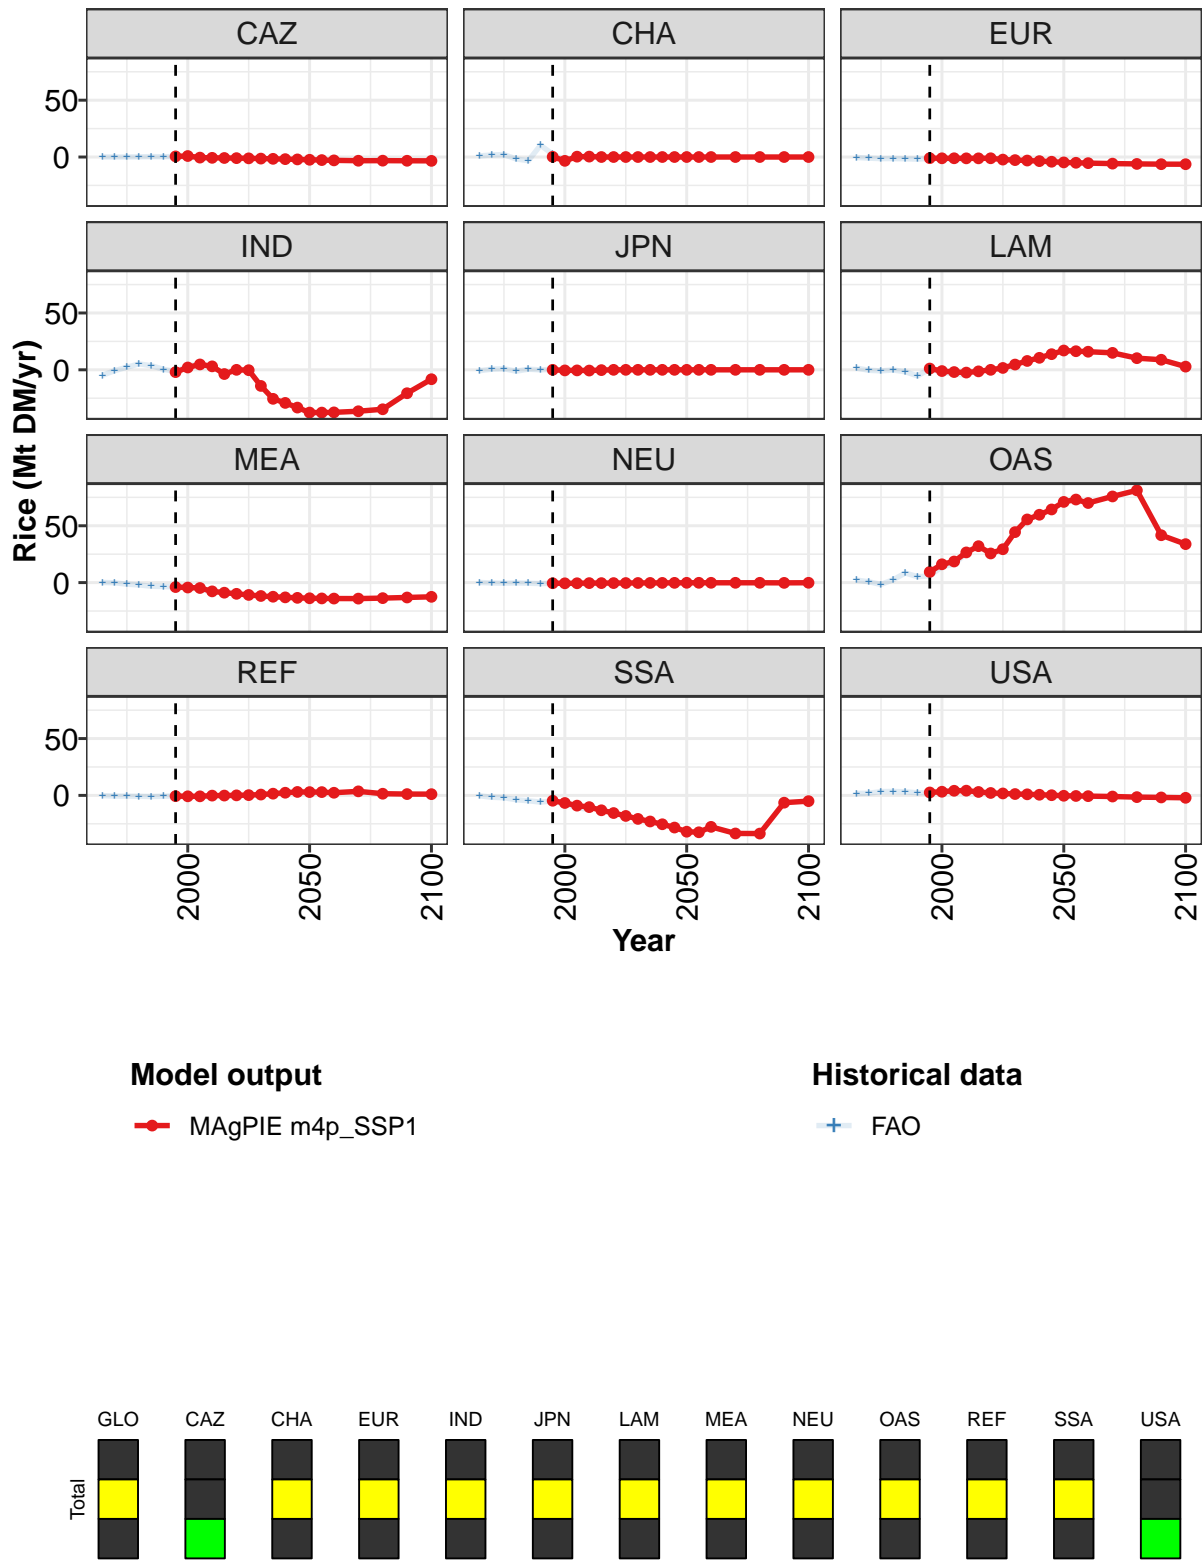

Figure 483: MAgPIE m4p\_SSP1 — Trade—Net-Trade—Crops—Cereals—Rice (Mt DM/yr)

|     | 1995 | 2000 | 2005 | 2010  | 2015  | 2020  | 2025  | 2030  | 2035  | 2040  | 2045  |
|-----|------|------|------|-------|-------|-------|-------|-------|-------|-------|-------|
| GLO | 0.9  | 3.8  | 8.5  | 10.6  | 5.2   | 0.0   | 0.0   | -0.0  | 0.0   | 0.0   | 0.0   |
| CAZ | 0.6  | 0.9  | -0.5 | -0.7  | -0.8  | -1.0  | -1.2  | -1.4  | -1.6  | -1.9  | -2.1  |
| CHA | 0.2  | -3.4 | 0.3  | 0.4   | 0.0   | 0.0   | 0.0   | 0.0   | 0.0   | 0.0   | 0.0   |
| EUR | -1.0 | -1.1 | -1.1 | -1.2  | -1.2  | -1.1  | -2.2  | -2.7  | -3.1  | -3.6  | -4.1  |
| IND | -2.0 | 2.1  | 4.7  | 3.0   | -3.7  | 0.0   | -0.3  | -14.2 | -25.5 | -29.1 | -33.2 |
| JPN | 0.0  | -0.5 | -0.5 | -0.6  | -0.3  | 0.0   | 0.0   | 0.0   | 0.0   | 0.0   | 0.0   |
| LAM | 1.1  | -1.1 | -2.0 | -2.4  | -1.4  | 0.0   | 1.6   | 4.6   | 7.8   | 10.6  | 13.8  |
| MEA | -3.9 | -4.3 | -4.7 | -7.7  | -8.9  | -9.9  | -10.8 | -11.8 | -12.4 | -13.0 | -13.4 |
| NEU | -0.5 | -0.6 | -0.6 | -0.4  | -0.4  | -0.4  | -0.4  | -0.3  | -0.3  | -0.3  | -0.2  |
| OAS | 9.4  | 16.1 | 18.6 | 26.6  | 32.1  | 25.7  | 29.4  | 44.4  | 55.6  | 59.7  | 64.4  |
| REF | -0.6 | -0.8 | -0.8 | -0.2  | -0.1  | 0.0   | 0.3   | 0.7   | 1.5   | 2.4   | 3.0   |
| SSA | -4.7 | -6.7 | -9.0 | -10.3 | -13.1 | -15.5 | -18.1 | -20.7 | -22.9 | -25.4 | -28.3 |
| USA | 2.6  | 3.2  | 4.1  | 4.2   | 3.0   | 2.2   | 1.7   | 1.2   | 1.0   | 0.6   | 0.2   |

Table 1848: MAgPIE m4p\_SSP1 — Trade—Net-Trade—Crops—Cereals—Rice (Mt DM/yr) [PART 1/2]

|     | 2050  | 2055  | 2060  | 2070  | 2080  | 2090  | 2100  |
|-----|-------|-------|-------|-------|-------|-------|-------|
| GLO | 0.0   | -0.0  | 0.0   | 0.0   | 0.0   | 0.0   | 0.0   |
| CAZ | -2.4  | -2.7  | -3.0  | -3.3  | -3.2  | -3.3  | -3.4  |
| CHA | 0.0   | 0.0   | 0.0   | 0.0   | 0.0   | 0.0   | 0.0   |
| EUR | -4.7  | -5.1  | -5.4  | -5.8  | -6.1  | -6.3  | -6.3  |
| IND | -37.6 | -37.6 | -37.5 | -36.5 | -34.7 | -20.6 | -8.3  |
| JPN | 0.0   | 0.0   | 0.0   | 0.0   | -0.0  | 0.0   | -0.0  |
| LAM | 17.0  | 16.4  | 15.9  | 14.9  | 10.3  | 8.9   | 2.8   |
| MEA | -13.8 | -13.9 | -14.0 | -14.1 | -13.7 | -13.1 | -12.5 |
| NEU | -0.2  | -0.2  | -0.2  | -0.2  | -0.2  | -0.2  | -0.1  |
| OAS | 71.0  | 73.1  | 70.0  | 75.8  | 81.2  | 41.7  | 33.9  |
| REF | 2.9   | 2.9   | 2.3   | 3.6   | 1.5   | 1.2   | 1.1   |
| SSA | -31.9 | -32.4 | -27.7 | -33.5 | -33.6 | -6.4  | -5.1  |
| USA | -0.3  | -0.5  | -0.7  | -1.0  | -1.5  | -1.8  | -2.1  |

Table 1849: MAgPIE m4p\_SSP1 — Trade—Net-Trade—Crops—Cereals—Rice (Mt DM/yr) [PART 2/2]

|     | 1965 | 1970 | 1975 | 1980 | 1985 | 1990 | 1995 | 2000 | 2005  | 2010  |
|-----|------|------|------|------|------|------|------|------|-------|-------|
| GLO | 0.0  | 0.0  | 0.0  | 0.0  | 0.0  | 0.0  | 0.0  | 0.0  | 0.0   | 0.0   |
| CAZ | 0.0  | -0.0 | 0.0  | 0.2  | 0.4  | 0.2  | 0.4  | 0.1  | -0.7  | -0.9  |
| CHA | 0.9  | 1.8  | 2.1  | -1.7 | -3.3 | 10.3 | 2.6  | -2.8 | 0.0   | -0.6  |
| EUR | -0.4 | -1.0 | -1.4 | -1.4 | -1.6 | -1.9 | -1.1 | -1.6 | -2.2  | -2.6  |
| IND | -4.8 | -0.8 | 2.3  | 5.1  | 3.6  | 0.4  | -1.5 | 3.3  | 5.3   | 2.2   |
| JPN | -0.8 | 0.6  | 0.9  | -1.2 | 0.5  | -0.0 | 0.3  | -0.5 | -0.6  | -0.7  |
| LAM | 1.5  | -0.4 | -1.0 | -0.2 | -1.8 | -5.4 | 0.8  | -2.0 | -3.7  | -4.6  |
| MEA | 0.1  | -0.2 | -1.4 | -2.1 | -3.2 | -3.5 | -4.0 | -4.7 | -5.5  | -8.6  |
| NEU | 0.1  | -0.4 | -0.6 | -0.3 | -0.6 | -0.9 | -0.6 | -0.9 | -1.1  | -1.1  |
| OAS | 2.2  | 0.7  | -1.6 | 2.6  | 8.4  | 5.2  | 6.0  | 14.0 | 16.2  | 25.9  |
| REF | -0.2 | -0.6 | -0.7 | -0.8 | -1.0 | -0.8 | -0.4 | -1.0 | -1.2  | -0.7  |
| SSA | -0.3 | -1.7 | -2.1 | -3.8 | -4.7 | -5.9 | -4.8 | -7.5 | -10.8 | -12.5 |
| USA | 1.7  | 1.9  | 3.3  | 3.5  | 3.2  | 2.2  | 2.4  | 3.5  | 4.4   | 4.2   |

Table 1850: FAO — Trade—Net-Trade—Crops—Cereals—Rice (Mt DM/yr)

58.1.4 Cereals—Temperate cereals

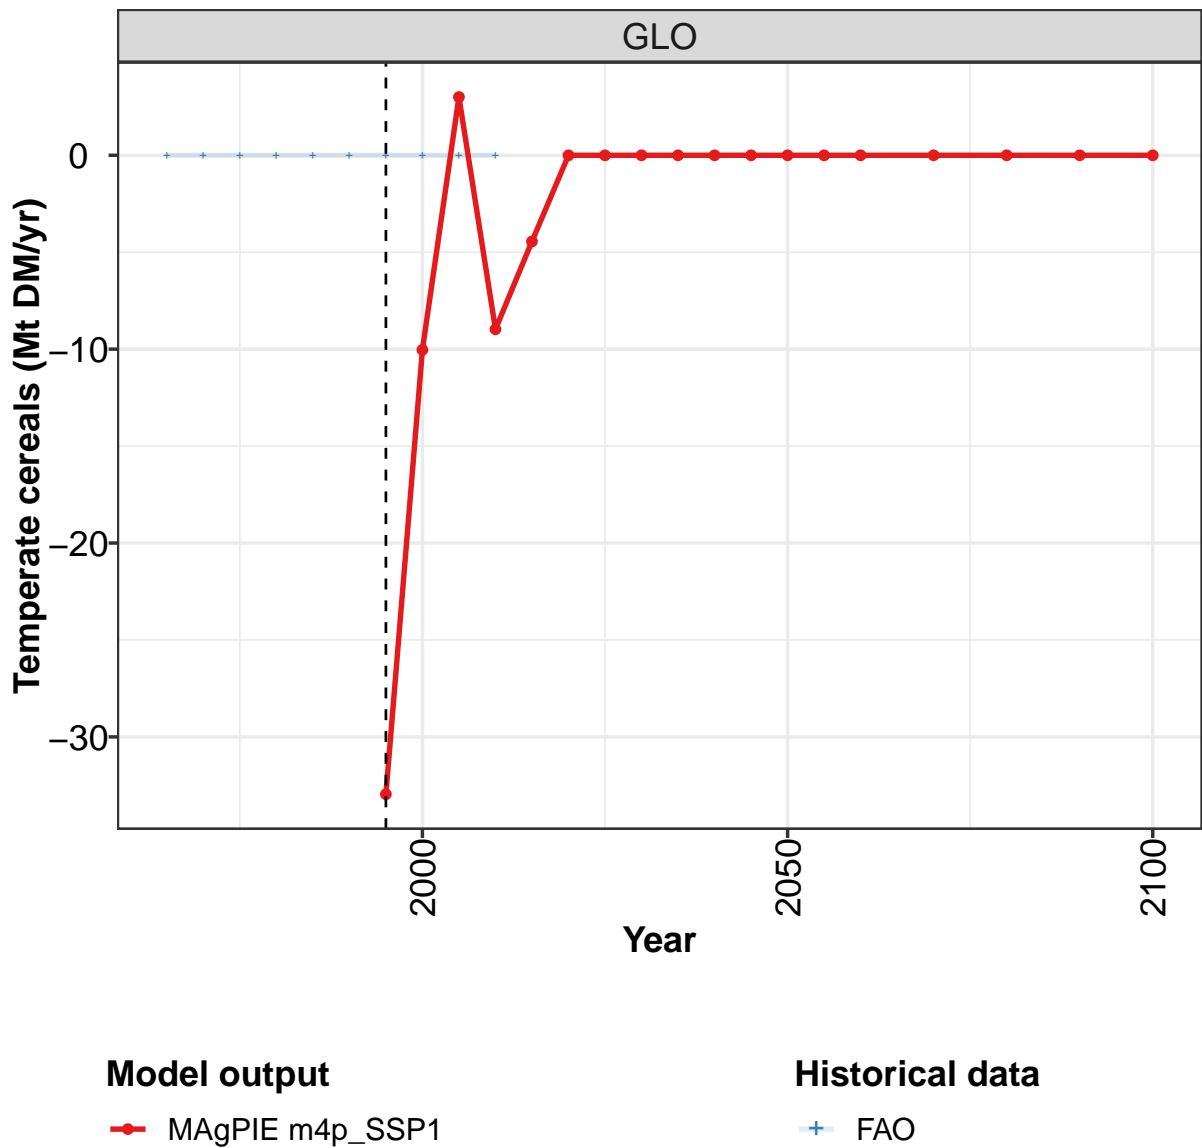

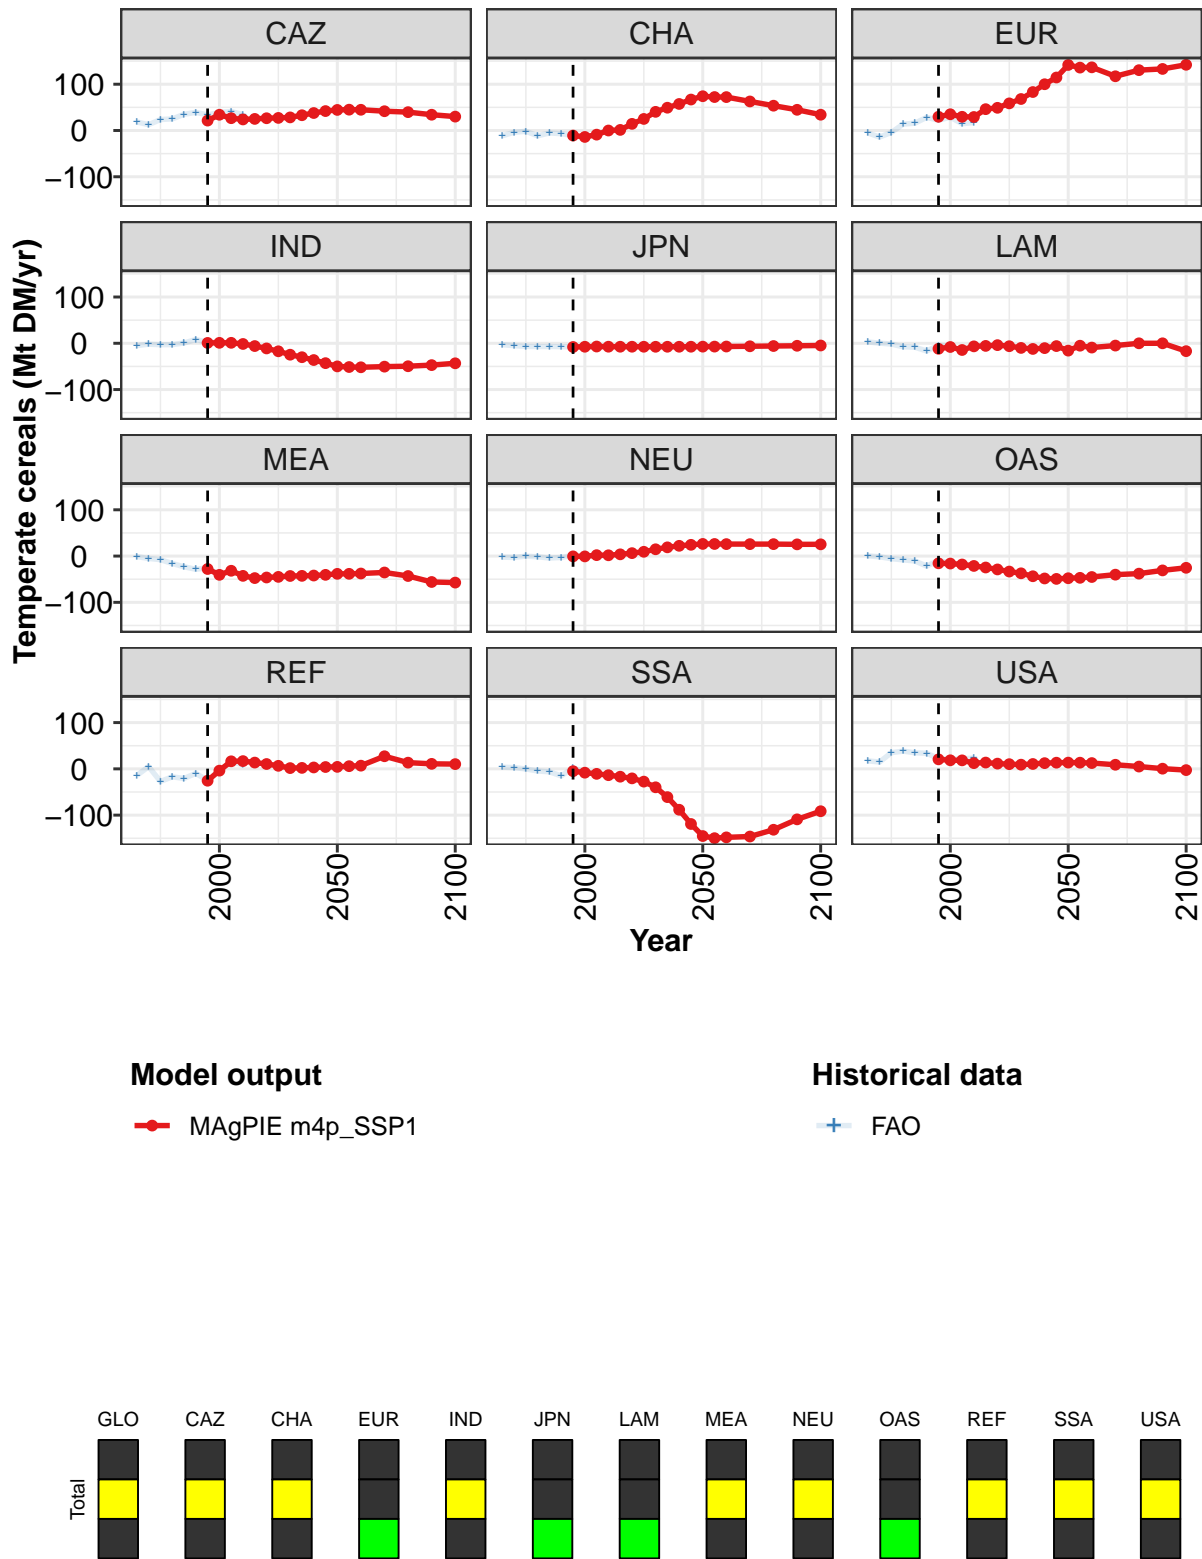

Figure 484: MAgPIE m4p\_SSP1 — Trade—Net-Trade—Crops—Cereals—Temperate cereals (Mt DM/yr)

|     | 1995 | 2000 | 2005 | 2010 | 2015 | 2020 | 2025 | 2030 | 2035 | 2040 | 2045 |
|-----|------|------|------|------|------|------|------|------|------|------|------|
| GLO | -33  | -10  | 3    | -9   | -4   | 0    | -0   | 0    | 0    | -0   | 0    |
| CAZ | 21   | 34   | 27   | 24   | 25   | 26   | 27   | 28   | 33   | 38   | 42   |
| CHA | -11  | -14  | -9   | -0   | 1    | 14   | 25   | 40   | 49   | 57   | 67   |
| EUR | 30   | 35   | 30   | 29   | 46   | 49   | 59   | 68   | 83   | 100  | 115  |
| IND | 1    | 1    | 1    | -1   | -6   | -11  | -17  | -25  | -30  | -36  | -43  |
| JPN | -8   | -7   | -7   | -7   | -7   | -7   | -7   | -8   | -7   | -7   | -7   |
| LAM | -12  | -8   | -14  | -7   | -6   | -4   | -6   | -10  | -12  | -10  | -6   |
| MEA | -28  | -41  | -32  | -43  | -48  | -46  | -45  | -43  | -43  | -42  | -41  |
| NEU | -1   | -1   | 2    | 2    | 4    | 6    | 9    | 15   | 19   | 22   | 24   |
| OAS | -16  | -16  | -18  | -21  | -25  | -29  | -33  | -37  | -44  | -48  | -49  |
| REF | -26  | -4   | 16   | 17   | 14   | 11   | 7    | 2    | 2    | 3    | 4    |
| SSA | -5   | -8   | -11  | -14  | -17  | -21  | -28  | -40  | -61  | -88  | -119 |
| USA | 21   | 19   | 18   | 12   | 14   | 11   | 10   | 9    | 11   | 12   | 13   |

Table 1851: MAgPIE m4p\_SSP1 — Trade—Net-Trade—Crops—Cereals—Temperate cereals (Mt DM/yr)  
[PART 1/2]

|     | 2050 | 2055 | 2060 | 2070 | 2080 | 2090 | 2100 |
|-----|------|------|------|------|------|------|------|
| GLO | 0    | 0    | 0    | 0    | -0   | -0   | 0    |
| CAZ | 44   | 45   | 45   | 42   | 40   | 34   | 30   |
| CHA | 74   | 72   | 72   | 63   | 54   | 45   | 34   |
| EUR | 142  | 136  | 137  | 117  | 130  | 133  | 142  |
| IND | -50  | -51  | -52  | -50  | -50  | -47  | -43  |
| JPN | -7   | -7   | -7   | -6   | -6   | -5   | -5   |
| LAM | -16  | -5   | -9   | -5   | 0    | 0    | -17  |
| MEA | -38  | -38  | -38  | -35  | -43  | -56  | -57  |
| NEU | 26   | 26   | 26   | 26   | 26   | 25   | 25   |
| OAS | -48  | -47  | -45  | -40  | -38  | -31  | -25  |
| REF | 4    | 6    | 7    | 27   | 13   | 11   | 10   |
| SSA | -145 | -150 | -148 | -146 | -132 | -109 | -92  |
| USA | 14   | 13   | 13   | 9    | 5    | 0    | -3   |

Table 1852: MAgPIE m4p\_SSP1 — Trade—Net-Trade—Crops—Cereals—Temperate cereals (Mt DM/yr)  
[PART 2/2]

|     | 1965  | 1970  | 1975  | 1980  | 1985  | 1990  | 1995  | 2000  | 2005  | 2010  |
|-----|-------|-------|-------|-------|-------|-------|-------|-------|-------|-------|
| GLO | 0.0   | 0.0   | 0.0   | 0.0   | 0.0   | 0.0   | 0.0   | 0.0   | 0.0   | 0.0   |
| CAZ | 18.4  | 12.5  | 23.7  | 25.0  | 34.9  | 39.2  | 33.6  | 39.1  | 40.9  | 34.4  |
| CHA | -11.4 | -3.9  | -1.8  | -11.5 | -5.4  | -6.9  | -10.9 | -13.5 | -8.8  | 1.7   |
| EUR | -5.3  | -14.2 | -4.3  | 13.6  | 15.8  | 28.4  | 22.1  | 28.8  | 14.7  | 17.1  |
| IND | -4.9  | -2.1  | -3.1  | -3.0  | 0.6   | 8.1   | 2.0   | 1.9   | -0.2  | -1.4  |
| JPN | -3.1  | -5.3  | -6.8  | -7.0  | -7.0  | -7.3  | -7.9  | -7.5  | -7.0  | -7.3  |
| LAM | 2.9   | 0.3   | -1.6  | -7.7  | -8.6  | -16.7 | -4.7  | -6.0  | -15.4 | -4.6  |
| MEA | -1.2  | -5.1  | -7.8  | -16.1 | -23.1 | -28.5 | -25.6 | -39.6 | -32.0 | -41.9 |
| NEU | -2.6  | -2.9  | -0.2  | -1.6  | -4.2  | -3.1  | 1.6   | 0.1   | 1.2   | 0.6   |
| OAS | 0.5   | -1.6  | -5.6  | -8.2  | -10.7 | -21.7 | -9.4  | -14.5 | -18.9 | -19.6 |
| REF | -14.1 | 4.8   | -27.1 | -17.3 | -20.7 | -9.8  | -25.0 | -3.5  | 15.3  | 9.1   |
| SSA | 3.6   | 2.8   | -0.3  | -4.6  | -6.5  | -15.2 | 1.8   | -6.1  | -11.4 | -11.8 |
| USA | 17.3  | 14.7  | 35.0  | 38.3  | 34.8  | 33.6  | 22.4  | 20.6  | 21.6  | 23.7  |

Table 1853: FAO — Trade—Net-Trade—Crops—Cereals—Temperate cereals (Mt DM/yr)

58.1.5 Cereals—Tropical cereals

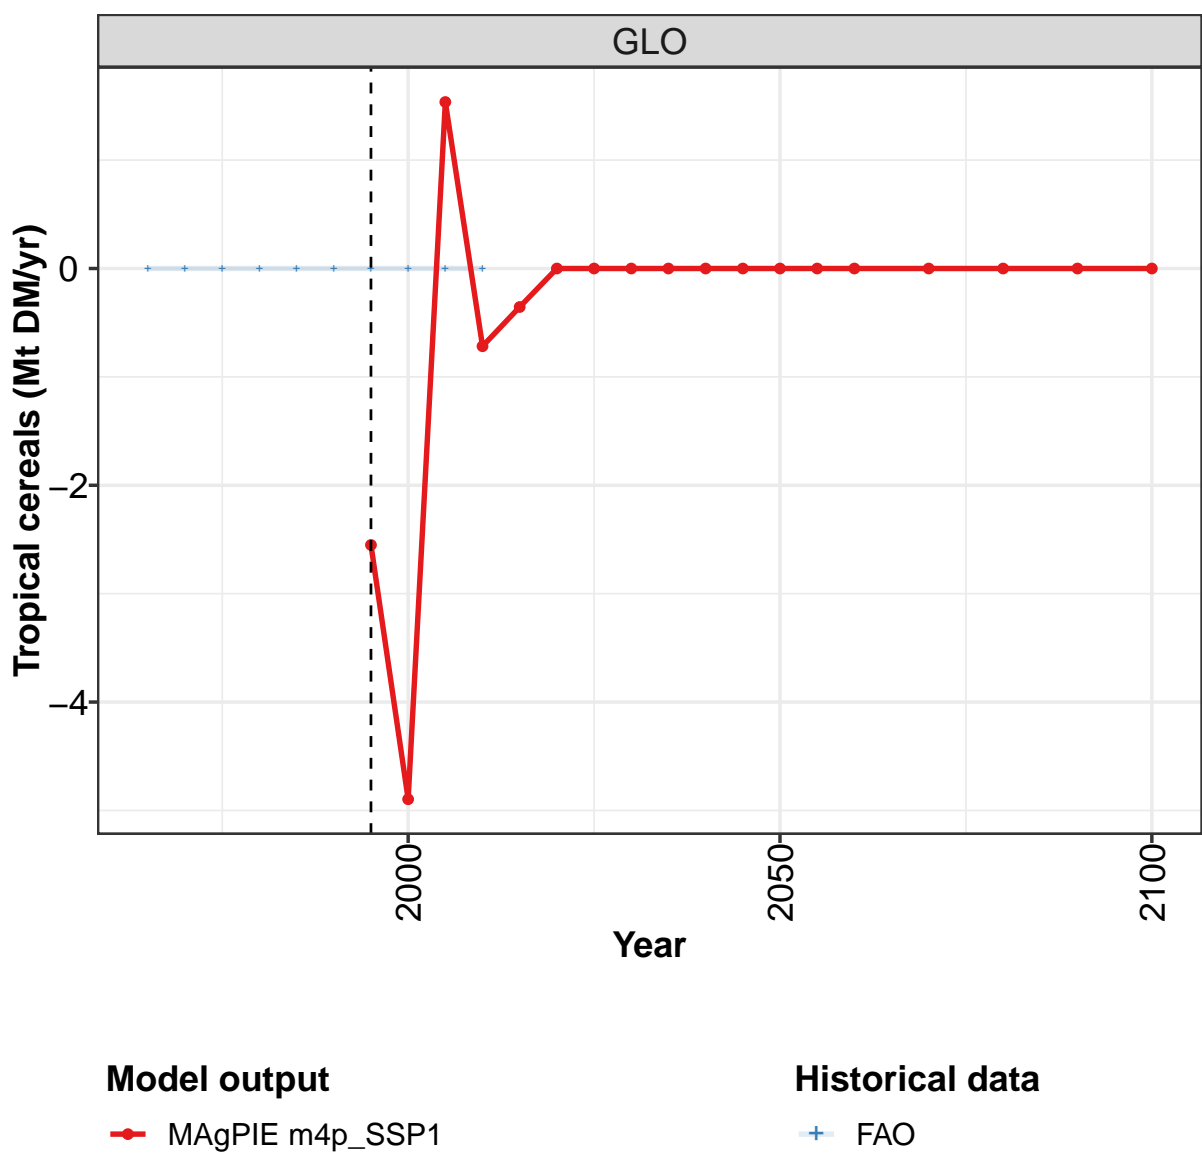

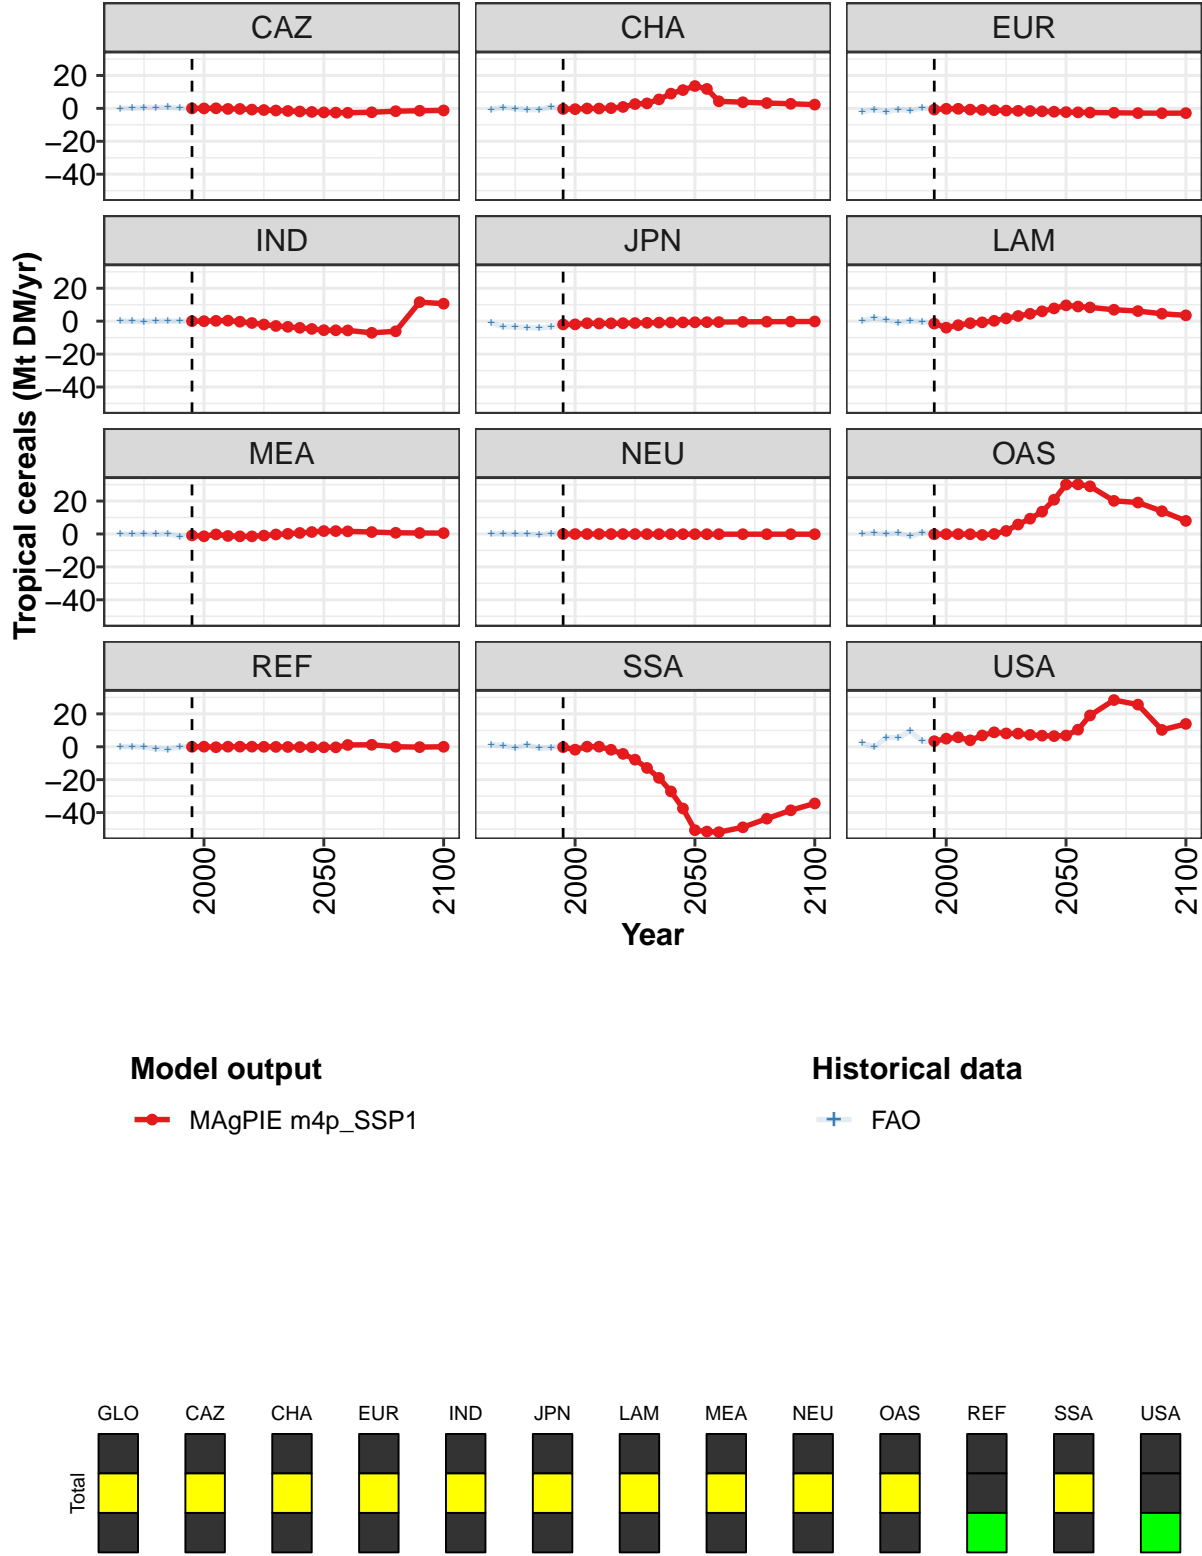

Figure 485: MAGPIE m4p\_SSP1 — Trade—Net-Trade—Crops—Cereals—Tropical cereals (Mt DM/yr)



|     | 1995 | 2000 | 2005 | 2010 | 2015 | 2020 | 2025 | 2030  | 2035  | 2040  | 2045  |
|-----|------|------|------|------|------|------|------|-------|-------|-------|-------|
| GLO | -2.6 | -4.9 | 1.5  | -0.7 | -0.4 | -0.0 | -0.0 | -0.0  | -0.0  | -0.0  | -0.0  |
| CAZ | 0.0  | 0.0  | 0.1  | -0.3 | -0.3 | -0.7 | -1.0 | -1.3  | -1.6  | -1.9  | -2.1  |
| CHA | -0.4 | -0.5 | -0.0 | -0.1 | 0.2  | 0.9  | 2.6  | 3.0   | 5.5   | 9.0   | 11.1  |
| EUR | -0.7 | -0.2 | -0.2 | -0.7 | -0.9 | -1.1 | -1.3 | -1.5  | -1.6  | -1.8  | -2.0  |
| IND | 0.0  | 0.0  | 0.2  | 0.3  | -0.3 | -1.1 | -2.0 | -2.9  | -3.4  | -4.0  | -4.7  |
| JPN | -2.0 | -1.9 | -1.2 | -1.4 | -1.3 | -1.2 | -1.1 | -1.0  | -0.9  | -0.8  | -0.7  |
| LAM | -1.5 | -3.9 | -2.4 | -1.2 | -0.7 | 0.2  | 1.7  | 3.2   | 4.5   | 6.0   | 7.8   |
| MEA | -0.9 | -1.4 | -0.3 | -1.2 | -1.4 | -1.4 | -1.0 | -0.3  | 0.1   | 0.6   | 1.2   |
| NEU | -0.0 | -0.1 | -0.0 | -0.0 | -0.0 | -0.0 | -0.1 | -0.1  | -0.1  | -0.1  | -0.1  |
| OAS | -0.2 | -0.1 | -0.1 | -0.1 | -0.6 | 0.0  | 1.9  | 5.8   | 9.3   | 13.6  | 20.8  |
| REF | -0.0 | 0.1  | -0.3 | 0.1  | 0.1  | 0.1  | 0.0  | -0.1  | -0.1  | -0.2  | -0.2  |
| SSA | -0.2 | -1.8 | 0.1  | 0.1  | -1.8 | -4.3 | -7.8 | -12.9 | -18.9 | -27.2 | -37.5 |
| USA | 3.4  | 4.9  | 5.7  | 3.9  | 6.9  | 8.8  | 8.1  | 8.0   | 7.2   | 6.8   | 6.5   |

Table 1854: MAgPIE m4p\_SSP1 — Trade—Net-Trade—Crops—Cereals—Tropical cereals (Mt DM/yr) [PART 1/2]

|     | 2050  | 2055  | 2060  | 2070  | 2080  | 2090  | 2100  |
|-----|-------|-------|-------|-------|-------|-------|-------|
| GLO | -0.0  | 0.0   | 0.0   | 0.0   | 0.0   | -0.0  | -0.0  |
| CAZ | -2.4  | -2.5  | -2.7  | -2.4  | -1.7  | -1.4  | -1.2  |
| CHA | 13.6  | 11.8  | 4.3   | 3.7   | 3.2   | 2.8   | 2.3   |
| EUR | -2.3  | -2.4  | -2.5  | -2.7  | -2.8  | -2.9  | -2.9  |
| IND | -5.5  | -5.5  | -5.6  | -7.1  | -6.1  | 11.6  | 10.6  |
| JPN | -0.7  | -0.6  | -0.5  | -0.4  | -0.3  | -0.3  | -0.2  |
| LAM | 9.6   | 8.9   | 8.4   | 7.0   | 6.2   | 4.5   | 3.5   |
| MEA | 1.8   | 1.8   | 1.6   | 1.2   | 0.7   | 0.6   | 0.5   |
| NEU | -0.1  | -0.1  | -0.1  | -0.1  | -0.1  | -0.1  | -0.1  |
| OAS | 30.1  | 30.2  | 29.0  | 20.1  | 19.1  | 13.8  | 8.0   |
| REF | -0.3  | -0.3  | 1.1   | 1.2   | 0.0   | -0.2  | 0.0   |
| SSA | -50.7 | -51.5 | -51.9 | -48.9 | -43.7 | -38.6 | -34.4 |
| USA | 6.8   | 10.4  | 19.0  | 28.4  | 25.6  | 10.2  | 13.9  |

Table 1855: MAgPIE m4p\_SSP1 — Trade—Net-Trade—Crops—Cereals—Tropical cereals (Mt DM/yr) [PART 2/2]

|     | 1965  | 1970  | 1975  | 1980  | 1985  | 1990  | 1995  | 2000  | 2005  | 2010  |
|-----|-------|-------|-------|-------|-------|-------|-------|-------|-------|-------|
| GLO | 0.00  | 0.00  | 0.00  | 0.00  | 0.00  | 0.00  | 0.00  | 0.00  | 0.00  | 0.00  |
| CAZ | 0.02  | 0.11  | 0.55  | 0.54  | 0.75  | 0.11  | 0.08  | 0.38  | 0.17  | -0.34 |
| CHA | -0.77 | 0.66  | -0.08 | -0.79 | -0.81 | 0.84  | -0.33 | -0.36 | -0.05 | -0.07 |
| EUR | -2.00 | -0.64 | -2.07 | -0.66 | -1.36 | 0.23  | -0.31 | 0.42  | -0.45 | -0.63 |
| IND | -0.04 | -0.02 | -0.18 | 0.00  | -0.01 | 0.03  | 0.03  | 0.03  | 0.12  | 1.57  |
| JPN | -1.25 | -3.26 | -3.51 | -3.75 | -4.22 | -3.32 | -1.99 | -1.91 | -1.25 | -1.41 |
| LAM | 0.34  | 2.07  | 0.70  | -0.85 | 0.30  | -0.57 | -1.08 | -3.21 | -2.82 | -1.11 |
| MEA | 0.03  | -0.16 | 0.03  | -0.18 | 0.05  | -1.57 | -0.68 | -0.85 | -0.40 | -1.17 |
| NEU | -0.03 | 0.09  | -0.15 | -0.13 | -0.45 | 0.28  | 0.12  | 0.26  | -0.12 | 0.03  |
| OAS | 0.19  | 0.43  | 0.12  | 0.46  | -1.35 | 1.00  | 0.40  | 0.91  | -0.37 | 0.01  |
| REF | 0.03  | 0.09  | -0.23 | -1.23 | -1.60 | 0.03  | 0.08  | 0.50  | -0.33 | 0.06  |
| SSA | 1.28  | 0.80  | -0.74 | 1.03  | -0.90 | -0.40 | 0.40  | -0.66 | 0.85  | 0.16  |
| USA | 2.21  | -0.16 | 5.57  | 5.55  | 9.59  | 3.34  | 3.29  | 4.47  | 4.65  | 2.90  |

Table 1856: FAO — Trade—Net-Trade—Crops—Cereals—Tropical cereals (Mt DM/yr)

58.1.6 Oil crops

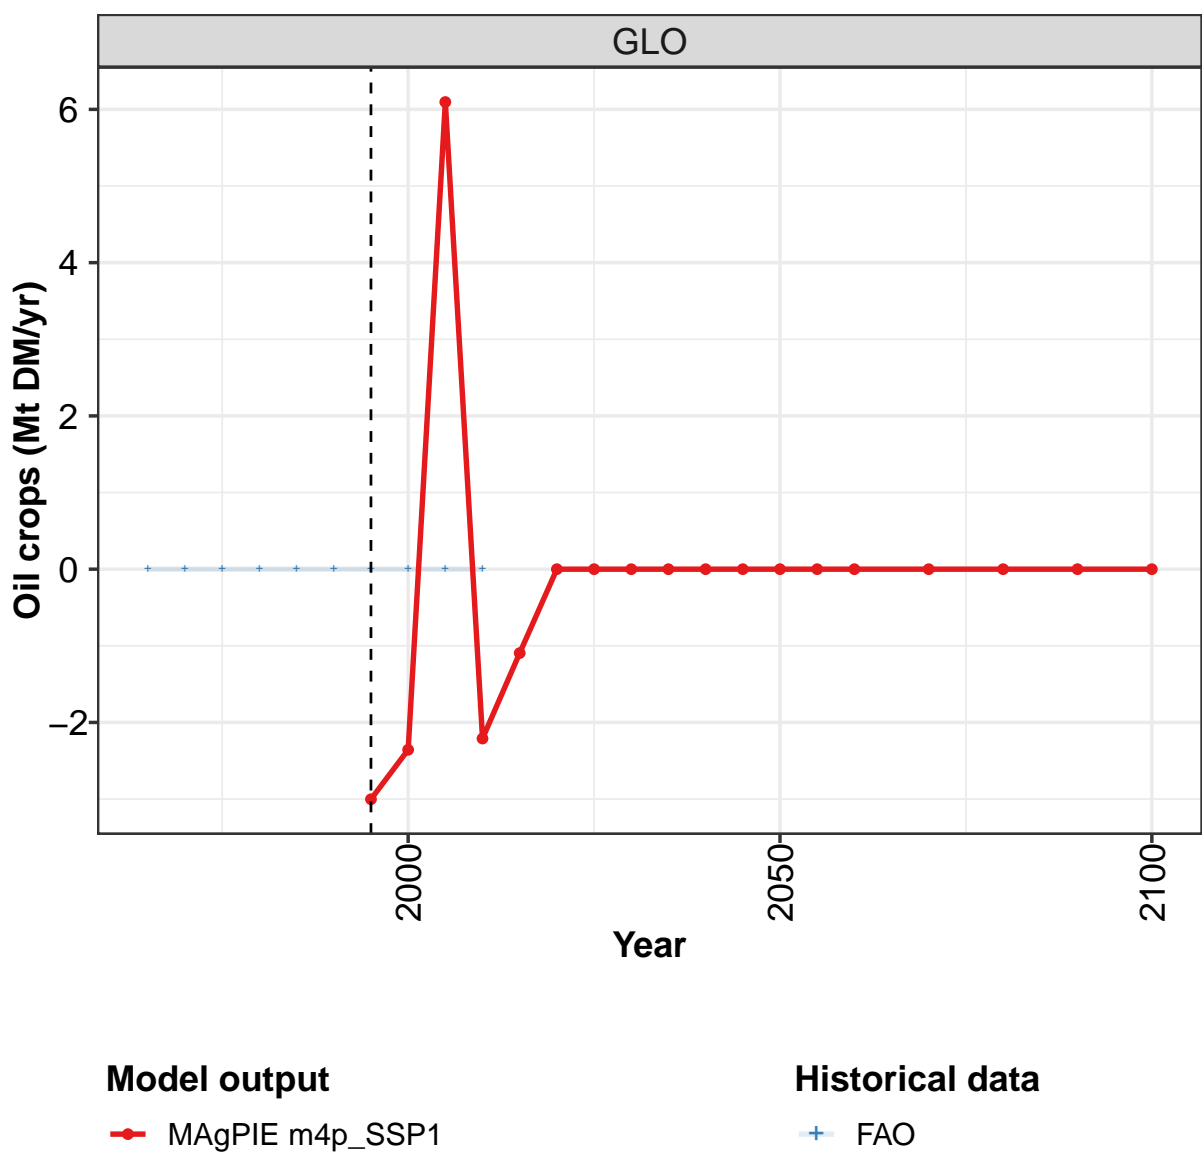

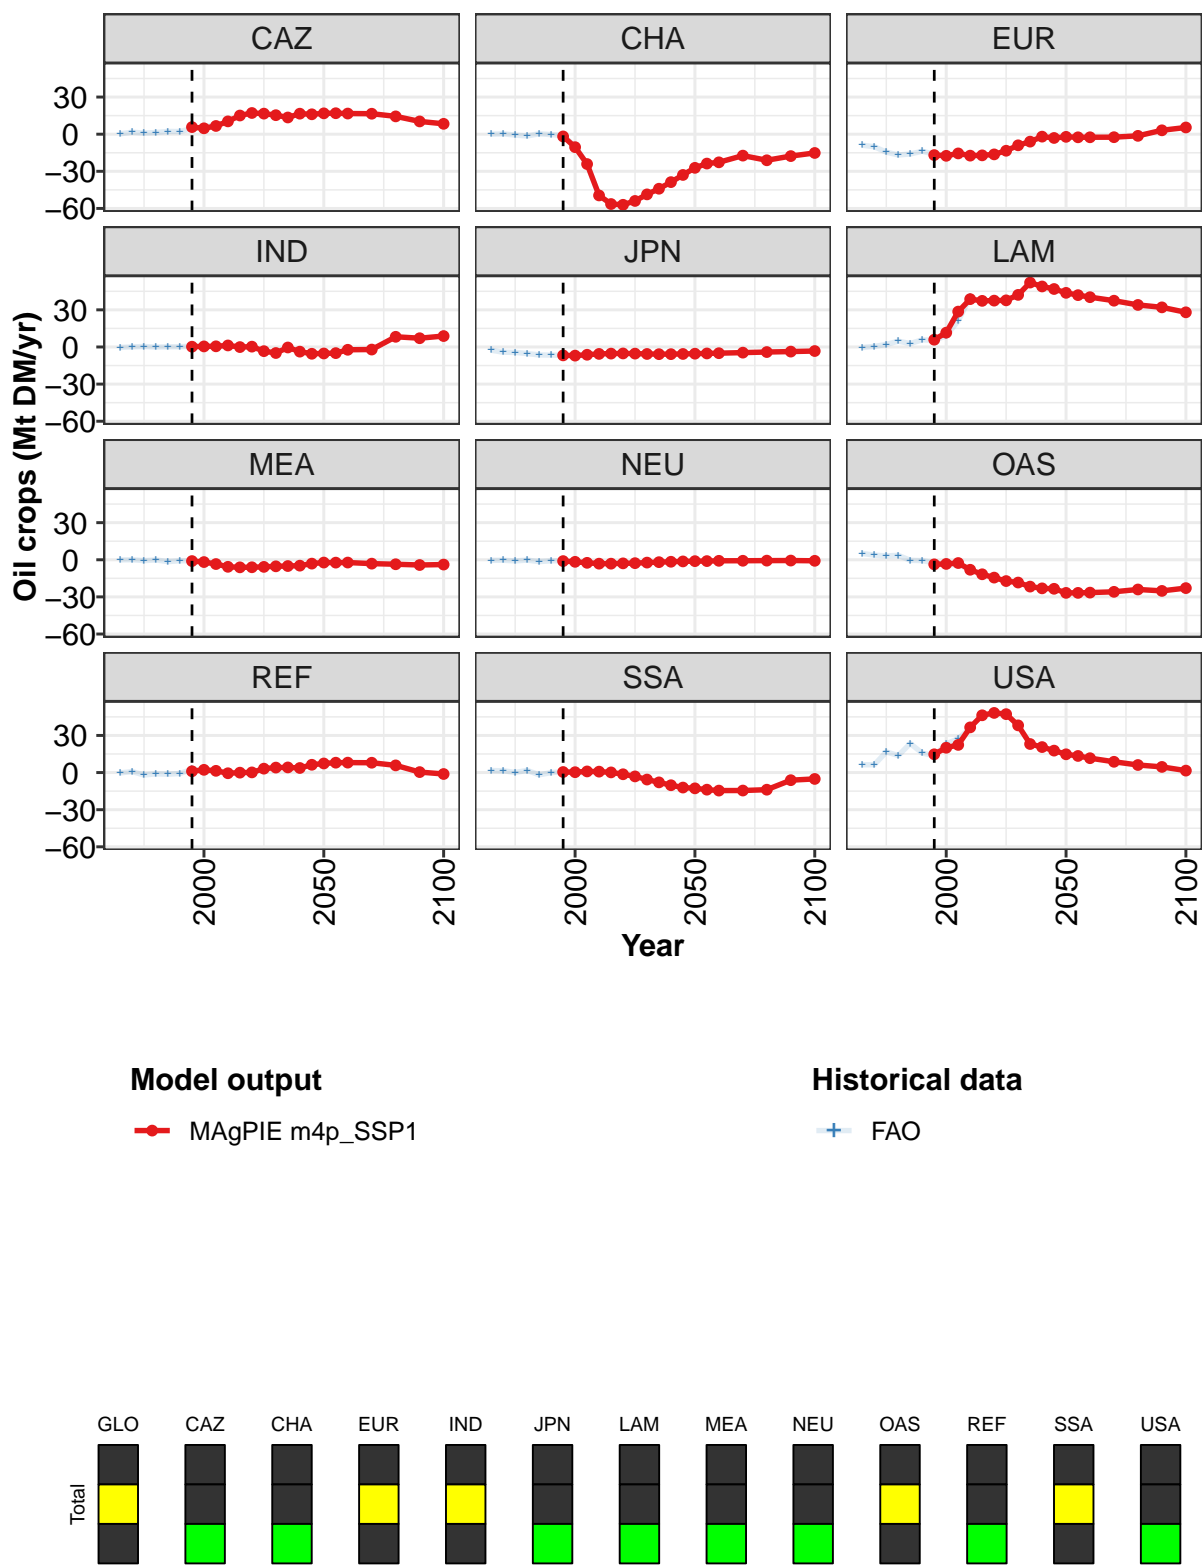

Figure 486: MAgPIE m4p\_SSP1 — Trade—Net-Trade—Crops—Oil crops (Mt DM/yr)

|     | 1995  | 2000  | 2005  | 2010  | 2015  | 2020  | 2025  | 2030  | 2035  | 2040  | 2045  |
|-----|-------|-------|-------|-------|-------|-------|-------|-------|-------|-------|-------|
| GLO | -3.0  | -2.4  | 6.1   | -2.2  | -1.1  | -0.0  | 0.0   | 0.0   | 0.0   | 0.0   | 0.0   |
| CAZ | 5.8   | 4.7   | 6.7   | 10.4  | 15.1  | 17.2  | 16.6  | 15.4  | 13.5  | 16.6  | 16.1  |
| CHA | -1.8  | -10.5 | -24.1 | -49.5 | -56.4 | -57.0 | -53.9 | -48.6 | -44.1 | -38.7 | -32.9 |
| EUR | -16.9 | -17.5 | -15.5 | -17.3 | -17.1 | -16.3 | -13.4 | -9.0  | -6.0  | -2.0  | -3.0  |
| IND | 0.2   | 0.5   | 0.5   | 1.2   | -0.1  | 0.3   | -3.4  | -4.9  | -0.4  | -3.7  | -5.5  |
| JPN | -6.8  | -7.0  | -6.3  | -5.6  | -5.3  | -5.2  | -5.3  | -5.6  | -5.8  | -5.8  | -5.6  |
| LAM | 5.9   | 11.6  | 28.6  | 38.7  | 37.3  | 37.5  | 37.7  | 42.1  | 52.1  | 48.9  | 46.9  |
| MEA | -1.0  | -1.8  | -3.4  | -5.7  | -6.1  | -6.0  | -5.7  | -5.3  | -5.1  | -4.7  | -3.1  |
| NEU | -1.0  | -1.7  | -2.4  | -3.1  | -3.1  | -2.9  | -2.7  | -2.3  | -1.9  | -1.6  | -1.3  |
| OAS | -3.7  | -3.3  | -2.6  | -8.1  | -11.7 | -14.4 | -17.2 | -18.4 | -21.7 | -23.1 | -23.4 |
| REF | 1.1   | 2.2   | 1.4   | -0.5  | -0.1  | 0.1   | 3.2   | 4.0   | 4.2   | 3.7   | 6.3   |
| SSA | 0.5   | 0.3   | 0.9   | 0.8   | 0.1   | -1.4  | -3.1  | -5.6  | -7.9  | -10.2 | -12.1 |
| USA | 14.8  | 20.1  | 22.4  | 36.5  | 46.3  | 48.2  | 47.2  | 38.2  | 23.1  | 20.6  | 17.8  |

Table 1857: MAgPIE m4p\_SSP1 — Trade—Net-Trade—Crops—Oil crops (Mt DM/yr) [PART 1/2]

|     | 2050  | 2055  | 2060  | 2070  | 2080  | 2090  | 2100  |
|-----|-------|-------|-------|-------|-------|-------|-------|
| GLO | -0.0  | 0.0   | -0.0  | 0.0   | -0.0  | -0.0  | -0.0  |
| CAZ | 16.9  | 17.0  | 16.7  | 16.5  | 14.4  | 10.3  | 8.4   |
| CHA | -27.2 | -23.7 | -22.7 | -17.3 | -21.1 | -17.7 | -15.2 |
| EUR | -2.1  | -2.5  | -2.5  | -2.4  | -1.3  | 3.2   | 5.4   |
| IND | -5.2  | -4.9  | -2.3  | -2.1  | 8.2   | 7.1   | 8.8   |
| JPN | -5.4  | -5.2  | -5.0  | -4.6  | -4.1  | -3.7  | -3.3  |
| LAM | 43.8  | 41.9  | 40.2  | 37.4  | 34.0  | 32.0  | 28.0  |
| MEA | -2.2  | -2.3  | -2.2  | -3.1  | -3.6  | -4.2  | -3.8  |
| NEU | -1.1  | -1.1  | -0.8  | -0.8  | -0.7  | -0.6  | -0.8  |
| OAS | -26.7 | -26.7 | -26.5 | -25.9 | -24.0 | -25.1 | -22.9 |
| REF | 7.4   | 8.0   | 8.0   | 7.9   | 5.8   | 0.4   | -1.1  |
| SSA | -12.7 | -13.8 | -14.5 | -14.5 | -13.8 | -6.2  | -5.1  |
| USA | 14.8  | 13.4  | 11.6  | 8.7   | 6.1   | 4.6   | 1.6   |

Table 1858: MAgPIE m4p\_SSP1 — Trade—Net-Trade—Crops—Oil crops (Mt DM/yr) [PART 2/2]

|     | 1965 | 1970  | 1975  | 1980  | 1985  | 1990  | 1995  | 2000  | 2005  | 2010  |
|-----|------|-------|-------|-------|-------|-------|-------|-------|-------|-------|
| GLO | 0.0  | 0.0   | 0.0   | 0.0   | 0.0   | 0.0   | 0.0   | 0.0   | 0.0   | 0.0   |
| CAZ | 0.3  | 1.6   | 0.9   | 1.3   | 2.2   | 2.1   | 4.7   | 6.0   | 7.4   | 9.6   |
| CHA | -0.0 | 0.3   | -0.7  | -1.4  | 0.3   | -0.4  | -1.0  | -9.8  | -24.5 | -49.7 |
| EUR | -8.9 | -10.2 | -14.5 | -16.8 | -16.0 | -13.8 | -16.2 | -17.3 | -16.0 | -16.8 |
| IND | -0.4 | 0.0   | 0.4   | -0.1  | 0.1   | 0.2   | 0.7   | 0.4   | 0.6   | 1.2   |
| JPN | -2.6 | -4.2  | -4.4  | -5.3  | -6.4  | -6.6  | -6.7  | -6.9  | -6.3  | -5.6  |
| LAM | -0.4 | 0.5   | 2.0   | 4.7   | 2.8   | 5.8   | 5.3   | 9.0   | 21.1  | 40.2  |
| MEA | -0.1 | 0.0   | -0.7  | -0.2  | -1.5  | -0.8  | -0.8  | -1.7  | -3.9  | -5.5  |
| NEU | -0.5 | -0.4  | -0.9  | -0.3  | -1.5  | -0.8  | -0.8  | -1.4  | -2.8  | -3.0  |
| OAS | 5.1  | 3.7   | 3.2   | 3.6   | -0.4  | -0.7  | -2.5  | -3.6  | -4.3  | -7.5  |
| REF | -0.3 | 0.8   | -2.0  | -1.0  | -1.4  | -0.7  | 2.7   | 1.4   | 1.7   | -0.5  |
| SSA | 1.6  | 1.5   | 0.1   | 1.7   | -1.8  | -0.1  | 0.8   | 0.8   | -0.6  | 1.7   |
| USA | 6.3  | 6.3   | 16.7  | 13.8  | 23.5  | 15.7  | 13.8  | 23.2  | 27.3  | 35.9  |

Table 1859: FAO — Trade—Net-Trade—Crops—Oil crops (Mt DM/yr)

58.1.7 Oil crops—Cotton seed

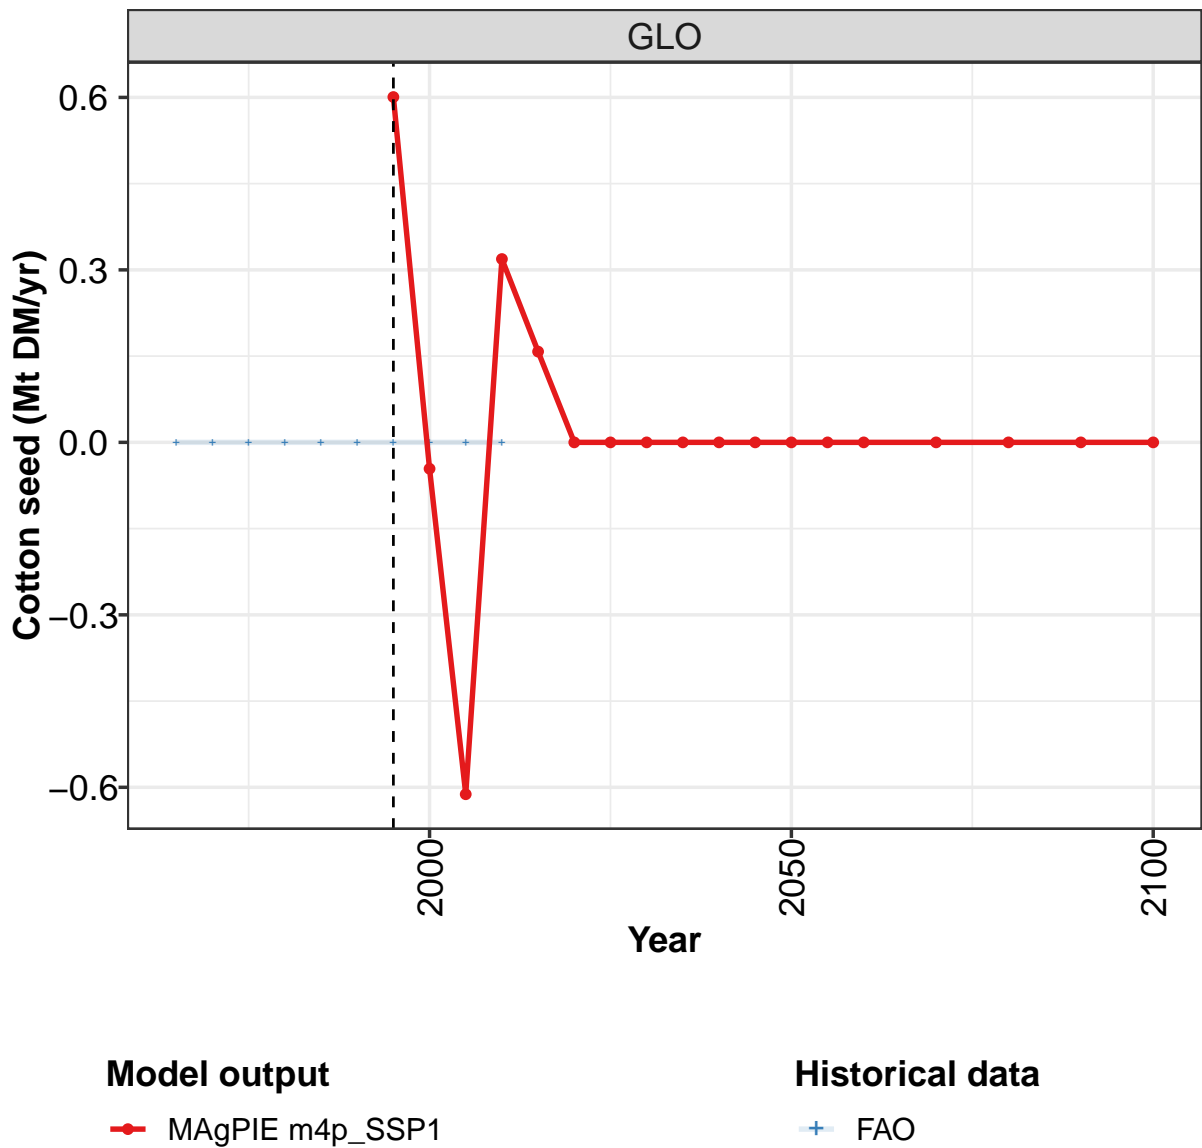

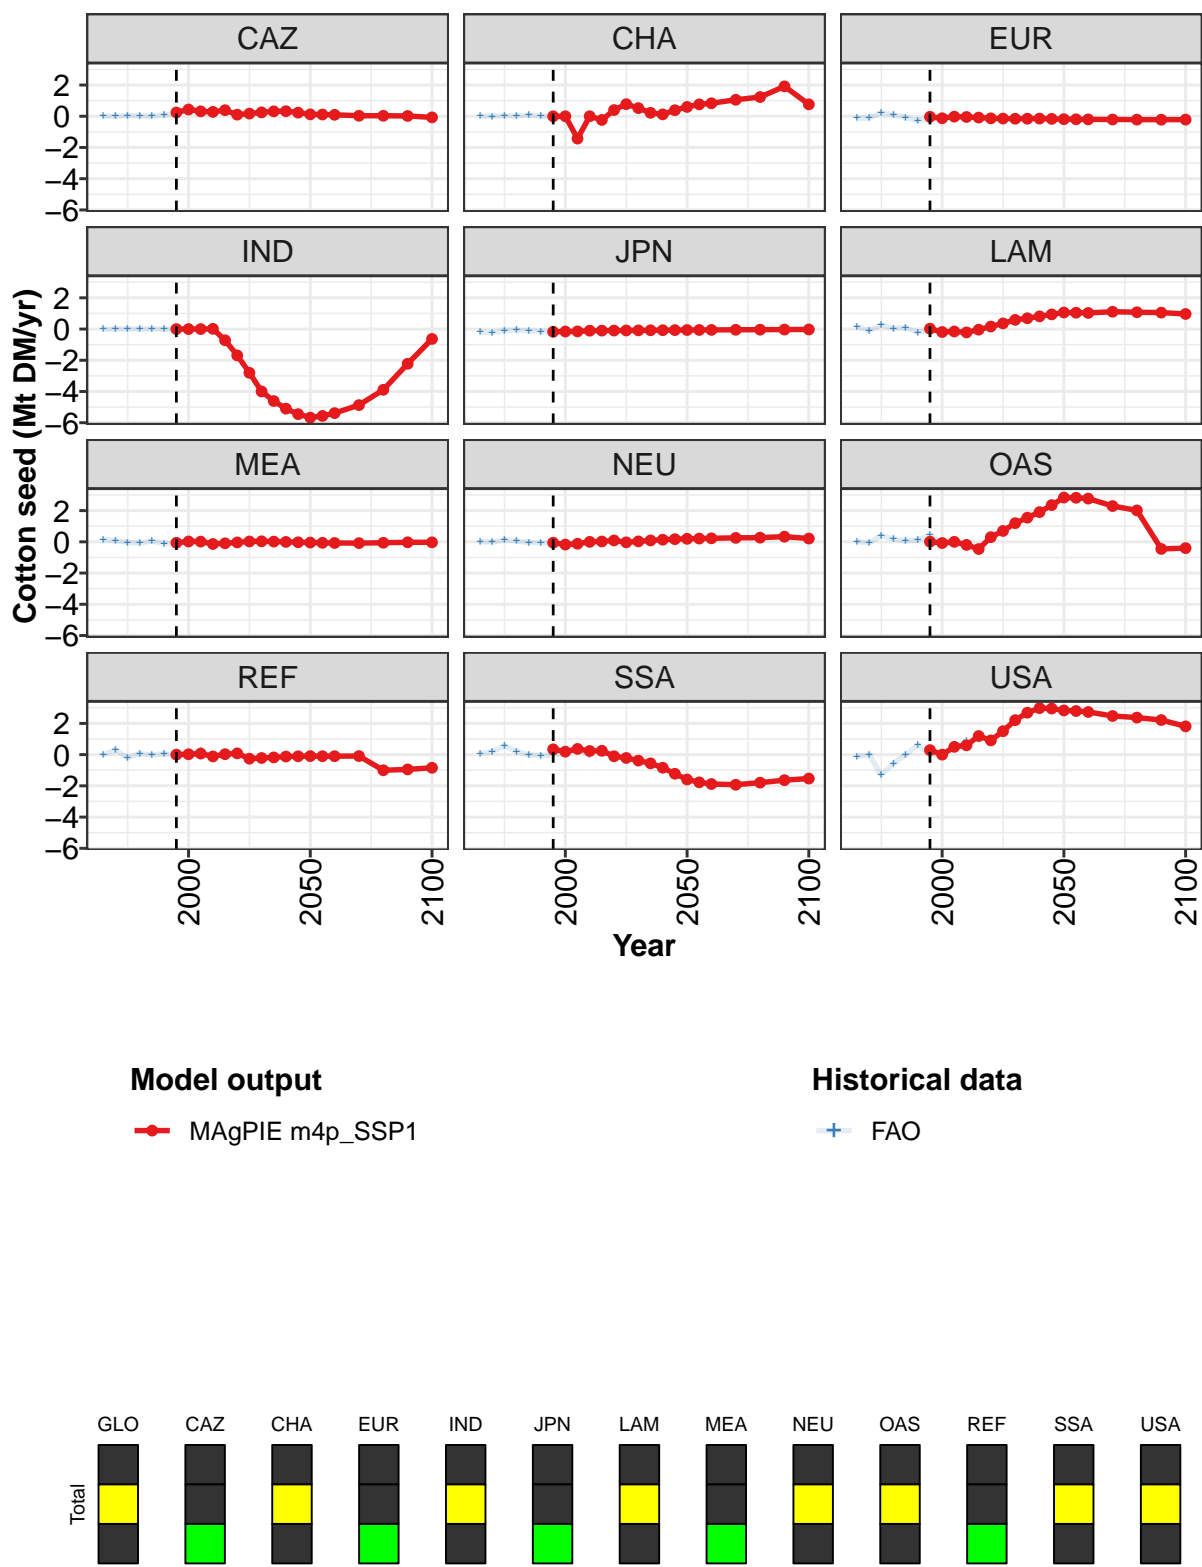

Figure 487: MAgPIE m4p\_SSP1 — Trade—Net-Trade—Crops—Oil crops—Cotton seed (Mt DM/yr)

|     | 1995  | 2000  | 2005  | 2010  | 2015  | 2020  | 2025  | 2030  | 2035  | 2040  | 2045  |
|-----|-------|-------|-------|-------|-------|-------|-------|-------|-------|-------|-------|
| GLO | 0.60  | -0.05 | -0.61 | 0.32  | 0.16  | 0.00  | -0.00 | -0.00 | -0.00 | 0.00  | 0.00  |
| CAZ | 0.24  | 0.43  | 0.32  | 0.28  | 0.39  | 0.10  | 0.17  | 0.25  | 0.31  | 0.33  | 0.23  |
| CHA | 0.00  | 0.00  | -1.43 | 0.00  | -0.23 | 0.40  | 0.78  | 0.52  | 0.22  | 0.12  | 0.39  |
| EUR | -0.03 | -0.13 | -0.02 | -0.05 | -0.08 | -0.13 | -0.15 | -0.16 | -0.15 | -0.15 | -0.17 |
| IND | 0.00  | -0.00 | -0.00 | 0.02  | -0.72 | -1.69 | -2.80 | -4.00 | -4.61 | -5.10 | -5.45 |
| JPN | -0.17 | -0.16 | -0.15 | -0.10 | -0.10 | -0.10 | -0.09 | -0.08 | -0.08 | -0.07 | -0.07 |
| LAM | 0.02  | -0.19 | -0.16 | -0.21 | -0.04 | 0.16  | 0.36  | 0.59  | 0.69  | 0.81  | 0.94  |
| MEA | -0.06 | 0.03  | 0.02  | -0.14 | -0.09 | -0.04 | 0.02  | 0.04  | 0.02  | -0.01 | -0.03 |
| NEU | -0.05 | -0.17 | -0.12 | 0.00  | 0.02  | 0.09  | -0.03 | 0.03  | 0.09  | 0.14  | 0.17  |
| OAS | 0.01  | -0.07 | 0.00  | -0.19 | -0.46 | 0.30  | 0.70  | 1.20  | 1.55  | 1.90  | 2.35  |
| REF | 0.00  | 0.03  | 0.07  | -0.11 | 0.03  | 0.08  | -0.26 | -0.21 | -0.18 | -0.12 | -0.11 |
| SSA | 0.34  | 0.19  | 0.37  | 0.24  | 0.25  | -0.10 | -0.21 | -0.38 | -0.56 | -0.84 | -1.22 |
| USA | 0.29  | 0.00  | 0.50  | 0.60  | 1.19  | 0.91  | 1.50  | 2.21  | 2.69  | 2.98  | 2.95  |

Table 1860: MAGPIE m4p\_SSP1 — Trade—Net-Trade—Crops—Oil crops—Cotton seed (Mt DM/yr) [PART 1/2]

|     | 2050  | 2055  | 2060  | 2070  | 2080  | 2090  | 2100  |
|-----|-------|-------|-------|-------|-------|-------|-------|
| GLO | -0.00 | -0.00 | 0.00  | 0.00  | -0.00 | -0.00 | 0.00  |
| CAZ | 0.12  | 0.11  | 0.09  | 0.03  | 0.03  | 0.02  | -0.07 |
| CHA | 0.60  | 0.76  | 0.83  | 1.06  | 1.23  | 1.92  | 0.76  |
| EUR | -0.19 | -0.19 | -0.20 | -0.21 | -0.22 | -0.22 | -0.21 |
| IND | -5.67 | -5.56 | -5.38 | -4.87 | -3.89 | -2.22 | -0.63 |
| JPN | -0.06 | -0.06 | -0.05 | -0.05 | -0.04 | -0.03 | -0.03 |
| LAM | 1.06  | 1.05  | 1.03  | 1.11  | 1.08  | 1.05  | 0.97  |
| MEA | -0.04 | -0.06 | -0.07 | -0.08 | -0.06 | -0.03 | -0.03 |
| NEU | 0.19  | 0.21  | 0.23  | 0.25  | 0.27  | 0.33  | 0.21  |
| OAS | 2.84  | 2.82  | 2.77  | 2.29  | 2.01  | -0.45 | -0.40 |
| REF | -0.09 | -0.10 | -0.10 | -0.09 | -1.00 | -0.95 | -0.84 |
| SSA | -1.59 | -1.77 | -1.88 | -1.93 | -1.79 | -1.63 | -1.53 |
| USA | 2.83  | 2.79  | 2.73  | 2.48  | 2.37  | 2.22  | 1.81  |

Table 1861: MAGPIE m4p\_SSP1 — Trade—Net-Trade—Crops—Oil crops—Cotton seed (Mt DM/yr) [PART 2/2]

|     | 1965   | 1970   | 1975   | 1980   | 1985   | 1990   | 1995   | 2000   | 2005   | 2010   |
|-----|--------|--------|--------|--------|--------|--------|--------|--------|--------|--------|
| GLO | 0.000  | 0.000  | 0.000  | 0.000  | 0.000  | 0.000  | 0.000  | 0.000  | 0.000  | 0.000  |
| CAZ | -0.002 | -0.002 | 0.044  | 0.018  | -0.000 | 0.105  | 0.110  | 0.566  | 0.226  | 0.113  |
| CHA | -0.002 | -0.006 | 0.033  | 0.014  | 0.083  | 0.007  | -0.011 | -0.001 | -1.367 | -0.020 |
| EUR | -0.120 | -0.108 | 0.206  | 0.113  | -0.093 | -0.279 | -0.113 | -0.120 | 0.057  | -0.088 |
| IND | -0.000 | -0.001 | 0.008  | 0.004  | -0.002 | -0.004 | 0.000  | 0.001  | 0.003  | 0.003  |
| JPN | -0.193 | -0.242 | -0.083 | -0.068 | -0.127 | -0.156 | -0.177 | -0.158 | -0.147 | -0.107 |
| LAM | 0.170  | -0.104 | 0.253  | 0.038  | 0.100  | -0.217 | -0.019 | -0.172 | -0.030 | -0.230 |
| MEA | 0.152  | 0.076  | -0.038 | -0.081 | 0.055  | -0.114 | -0.099 | 0.002  | 0.082  | -0.126 |
| NEU | 0.021  | -0.019 | 0.133  | 0.058  | -0.036 | -0.060 | -0.088 | -0.161 | -0.073 | -0.026 |
| OAS | 0.013  | -0.062 | 0.408  | 0.174  | 0.073  | 0.108  | 0.423  | -0.078 | 0.100  | -0.262 |
| REF | -0.001 | 0.295  | -0.217 | 0.077  | -0.027 | 0.064  | -0.018 | 0.024  | 0.245  | -0.119 |
| SSA | 0.075  | 0.192  | 0.550  | 0.216  | -0.016 | -0.058 | -0.016 | 0.086  | 0.457  | -0.034 |
| USA | -0.113 | -0.018 | -1.296 | -0.564 | -0.010 | 0.604  | 0.009  | 0.012  | 0.446  | 0.895  |

Table 1862: FAO — Trade—Net-Trade—Crops—Oil crops—Cotton seed (Mt DM/yr)

58.1.8 Oil crops—Groundnuts

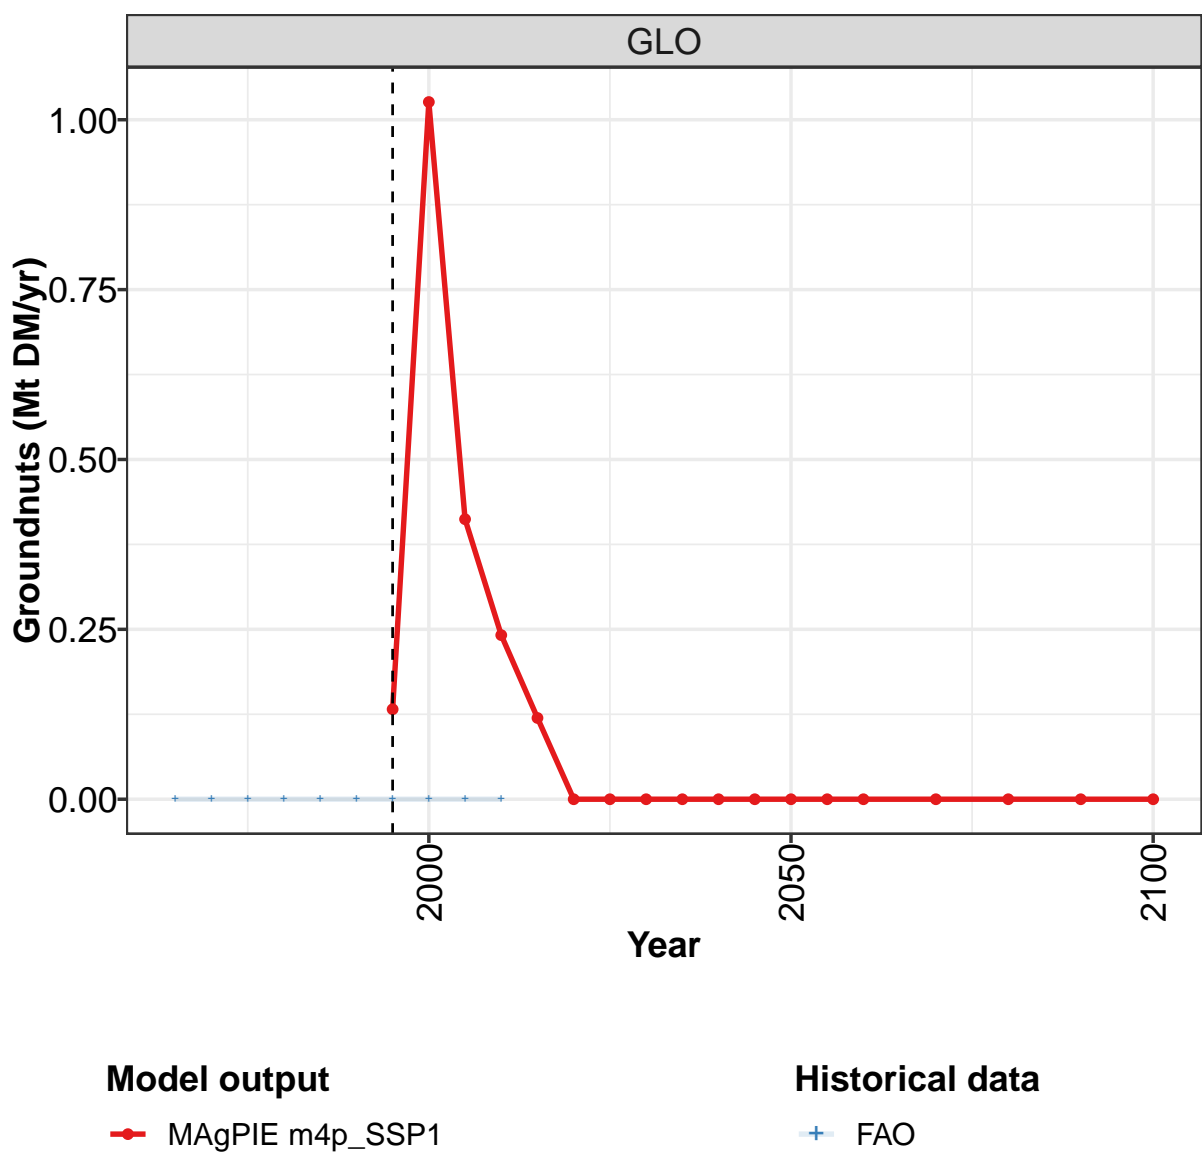



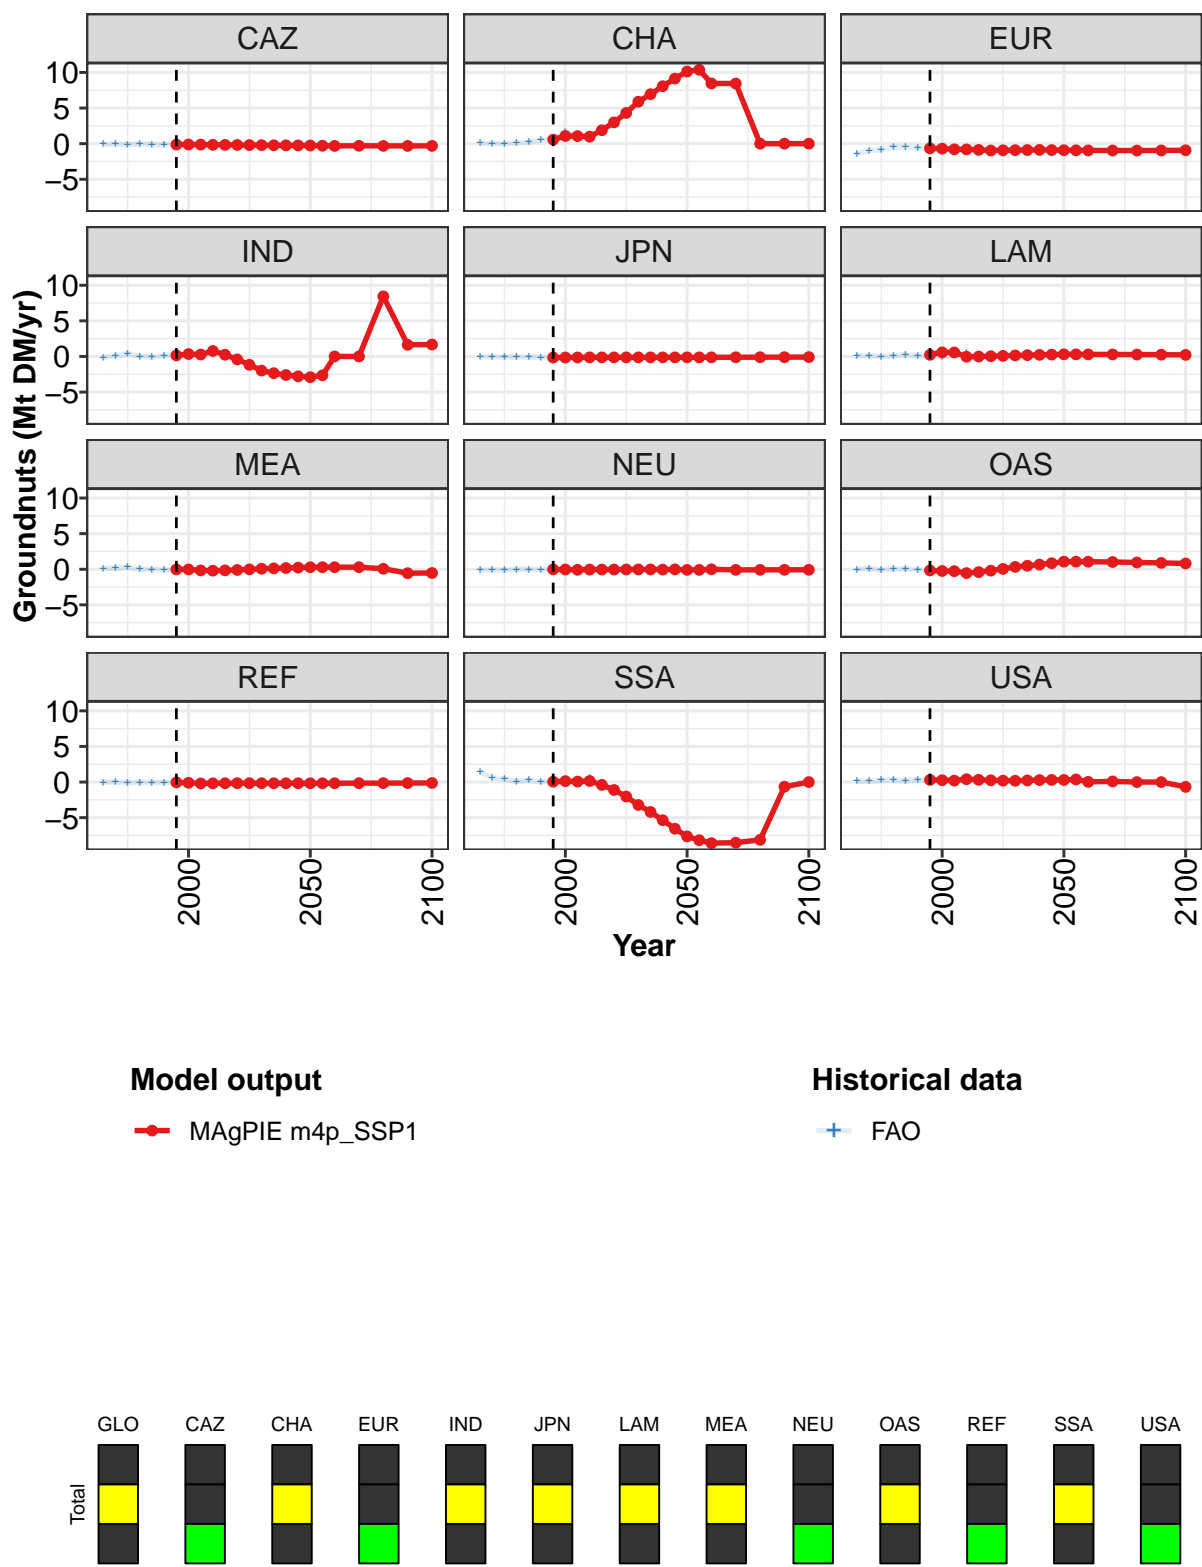

Figure 488: MAgPIE m4p\_SSP1 — Trade—Net-Trade—Crops—Oil crops—Groundnuts (Mt DM/yr)

|     | 1995 | 2000 | 2005 | 2010 | 2015 | 2020 | 2025 | 2030 | 2035 | 2040 | 2045 |
|-----|------|------|------|------|------|------|------|------|------|------|------|
| GLO | 0.1  | 1.0  | 0.4  | 0.2  | 0.1  | -0.0 | -0.0 | 0.0  | 0.0  | 0.0  | 0.0  |
| CAZ | -0.1 | -0.1 | -0.1 | -0.2 | -0.2 | -0.2 | -0.2 | -0.2 | -0.2 | -0.2 | -0.2 |
| CHA | 0.6  | 1.1  | 1.1  | 1.0  | 1.9  | 3.0  | 4.3  | 5.9  | 7.0  | 8.1  | 9.1  |
| EUR | -0.7 | -0.7 | -0.8 | -0.8 | -0.9 | -1.0 | -0.9 | -0.9 | -0.9 | -0.9 | -0.9 |
| IND | 0.1  | 0.3  | 0.3  | 0.8  | 0.2  | -0.4 | -1.2 | -2.0 | -2.3 | -2.6 | -2.8 |
| JPN | -0.2 | -0.1 | -0.1 | -0.1 | -0.1 | -0.1 | -0.1 | -0.1 | -0.1 | -0.1 | -0.1 |
| LAM | 0.2  | 0.6  | 0.6  | -0.0 | -0.0 | 0.0  | 0.1  | 0.1  | 0.2  | 0.2  | 0.3  |
| MEA | -0.0 | -0.0 | -0.2 | -0.2 | -0.2 | -0.1 | -0.0 | 0.1  | 0.1  | 0.2  | 0.2  |
| NEU | -0.0 | -0.0 | -0.1 | -0.0 | -0.0 | -0.0 | -0.0 | -0.0 | -0.0 | -0.0 | -0.0 |
| OAS | -0.2 | -0.2 | -0.3 | -0.5 | -0.4 | -0.2 | 0.1  | 0.3  | 0.5  | 0.7  | 0.9  |
| REF | -0.0 | -0.1 | -0.2 | -0.2 | -0.2 | -0.2 | -0.2 | -0.2 | -0.2 | -0.2 | -0.2 |
| SSA | 0.0  | 0.1  | 0.1  | 0.1  | -0.4 | -1.1 | -2.0 | -3.2 | -4.2 | -5.4 | -6.6 |
| USA | 0.3  | 0.3  | 0.2  | 0.4  | 0.3  | 0.2  | 0.2  | 0.2  | 0.2  | 0.3  | 0.3  |

Table 1863: MAgPIE m4p\_SSP1 — Trade—Net-Trade—Crops—Oil crops—Groundnuts (Mt DM/yr) [PART 1/2]

|     | 2050 | 2055 | 2060 | 2070 | 2080 | 2090 | 2100 |
|-----|------|------|------|------|------|------|------|
| GLO | 0.0  | 0.0  | 0.0  | 0.0  | -0.0 | 0.0  | -0.0 |
| CAZ | -0.3 | -0.3 | -0.3 | -0.3 | -0.3 | -0.3 | -0.3 |
| CHA | 10.1 | 10.4 | 8.5  | 8.4  | -0.0 | 0.0  | 0.0  |
| EUR | -0.9 | -0.9 | -0.9 | -1.0 | -1.0 | -1.0 | -0.9 |
| IND | -2.9 | -2.6 | -0.0 | -0.0 | 8.4  | 1.6  | 1.7  |
| JPN | -0.1 | -0.1 | -0.1 | -0.1 | -0.1 | -0.1 | -0.1 |
| LAM | 0.3  | 0.3  | 0.3  | 0.3  | 0.3  | 0.3  | 0.2  |
| MEA | 0.3  | 0.3  | 0.3  | 0.3  | 0.1  | -0.6 | -0.5 |
| NEU | -0.1 | -0.1 | -0.0 | -0.1 | -0.1 | -0.1 | -0.1 |
| OAS | 1.1  | 1.1  | 1.1  | 1.0  | 0.9  | 0.9  | 0.8  |
| REF | -0.2 | -0.2 | -0.2 | -0.2 | -0.2 | -0.1 | -0.1 |
| SSA | -7.6 | -8.2 | -8.6 | -8.5 | -8.1 | -0.7 | -0.0 |
| USA | 0.3  | 0.4  | 0.0  | 0.1  | 0.0  | 0.0  | -0.7 |

Table 1864: MAgPIE m4p\_SSP1 — Trade—Net-Trade—Crops—Oil crops—Groundnuts (Mt DM/yr) [PART 2/2]

|     | 1965  | 1970  | 1975  | 1980  | 1985  | 1990  | 1995  | 2000  | 2005  | 2010  |
|-----|-------|-------|-------|-------|-------|-------|-------|-------|-------|-------|
| GLO | 0.00  | 0.00  | 0.00  | 0.00  | 0.00  | 0.00  | 0.00  | 0.00  | 0.00  | 0.00  |
| CAZ | -0.09 | -0.07 | -0.10 | -0.06 | -0.11 | -0.13 | -0.13 | -0.14 | -0.14 | -0.16 |
| CHA | 0.08  | 0.01  | 0.01  | 0.10  | 0.21  | 0.55  | 0.63  | 1.64  | 0.96  | 0.49  |
| EUR | -1.46 | -0.96 | -0.88 | -0.48 | -0.49 | -0.60 | -0.67 | -0.84 | -0.84 | -0.83 |
| IND | -0.12 | 0.10  | 0.42  | 0.00  | -0.11 | 0.14  | 0.35  | 0.20  | 0.29  | 0.36  |
| JPN | -0.03 | -0.08 | -0.07 | -0.09 | -0.09 | -0.12 | -0.15 | -0.15 | -0.14 | -0.13 |
| LAM | 0.10  | 0.14  | -0.02 | 0.13  | 0.25  | 0.09  | 0.01  | -0.08 | 0.34  | 0.49  |
| MEA | 0.13  | 0.14  | 0.28  | 0.01  | -0.04 | -0.11 | -0.03 | -0.11 | -0.20 | -0.22 |
| NEU | -0.11 | -0.09 | -0.13 | -0.01 | -0.02 | -0.07 | -0.03 | -0.10 | -0.10 | -0.06 |
| OAS | -0.02 | 0.12  | -0.14 | 0.05  | 0.05  | -0.08 | -0.18 | -0.44 | -0.35 | -0.60 |
| REF | -0.04 | -0.01 | -0.08 | -0.04 | -0.07 | -0.08 | -0.05 | -0.15 | -0.21 | -0.19 |
| SSA | 1.44  | 0.58  | 0.44  | 0.09  | 0.26  | 0.03  | 0.07  | 0.01  | -0.04 | 0.60  |
| USA | 0.11  | 0.12  | 0.27  | 0.31  | 0.16  | 0.38  | 0.17  | 0.17  | 0.44  | 0.25  |

Table 1865: FAO — Trade—Net-Trade—Crops—Oil crops—Groundnuts (Mt DM/yr)

58.1.9 Oil crops—Other oil crops (incl rapeseed)

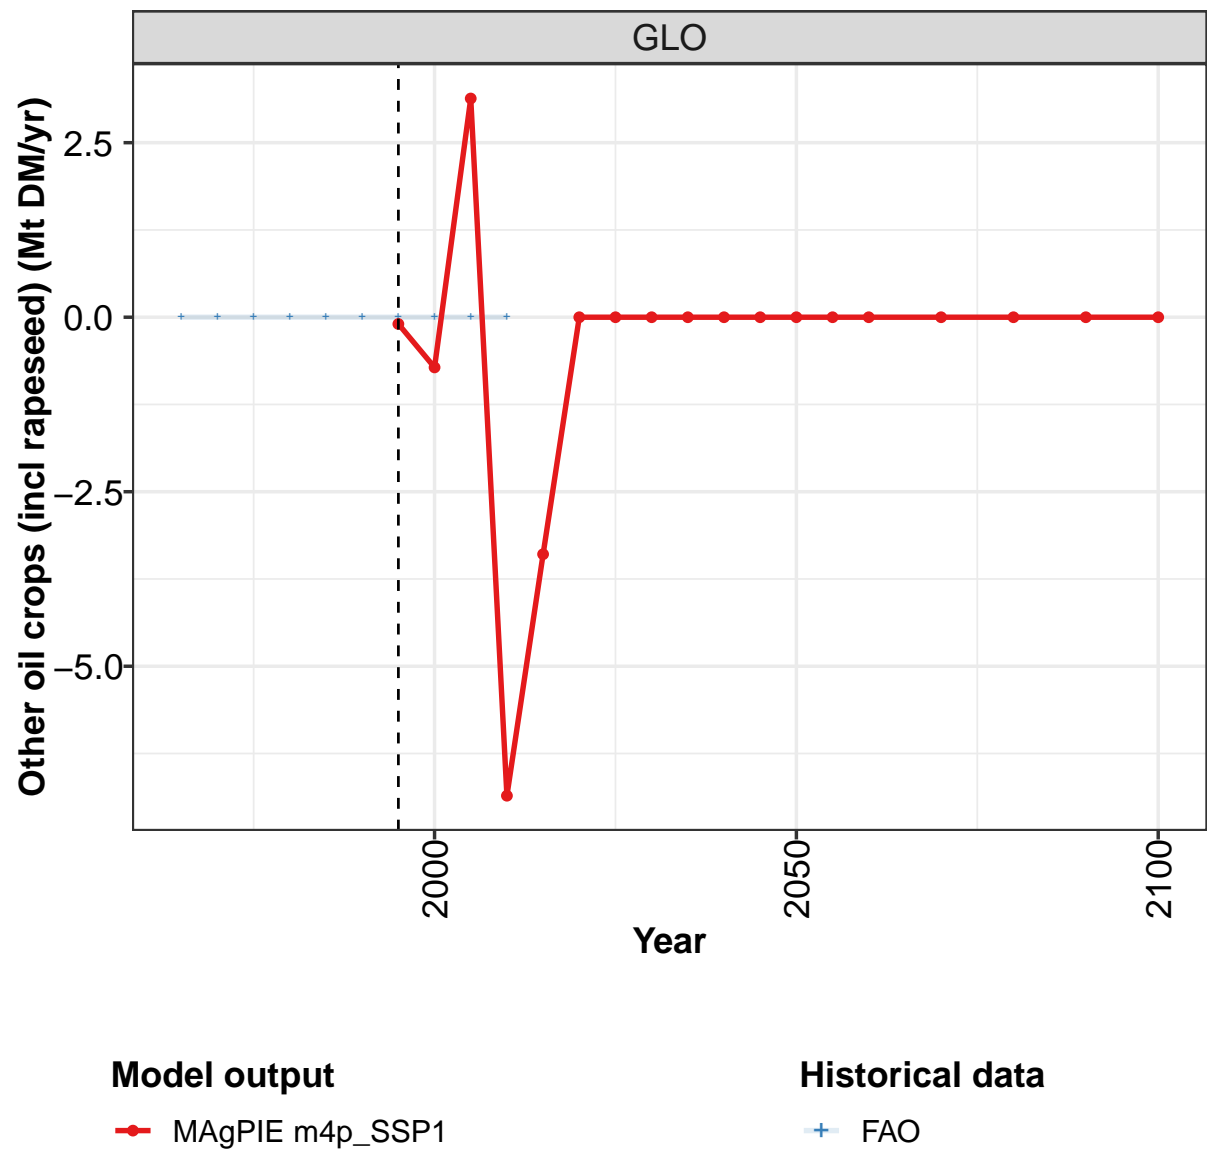

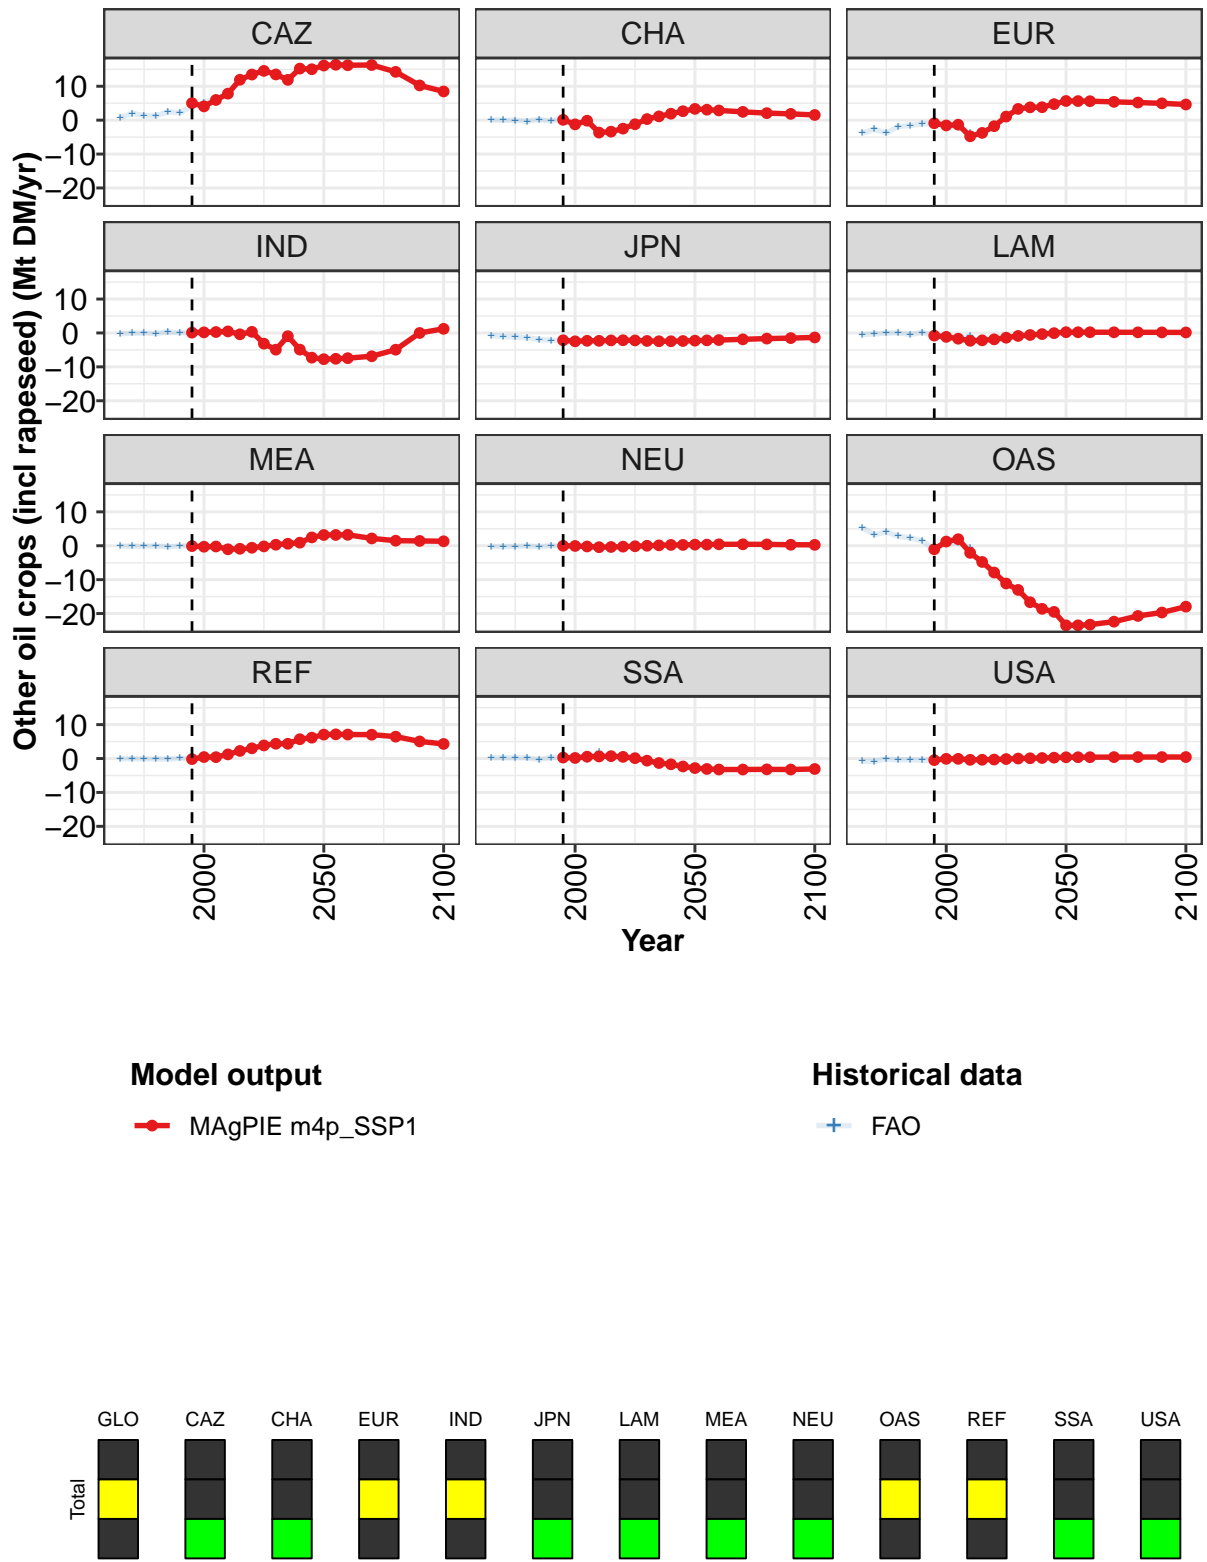

Figure 489: MAgPIE m4p\_SSP1 — Trade—Net-Trade—Crops—Oil crops—Other oil crops (incl rapeseed) (Mt DM/yr)

|     | 1995 | 2000 | 2005 | 2010 | 2015 | 2020 | 2025  | 2030  | 2035  | 2040  | 2045  |
|-----|------|------|------|------|------|------|-------|-------|-------|-------|-------|
| GLO | -0.1 | -0.7 | 3.1  | -6.9 | -3.4 | 0.0  | 0.0   | 0.0   | 0.0   | 0.0   | 0.0   |
| CAZ | 5.0  | 4.1  | 6.0  | 7.8  | 11.9 | 13.5 | 14.5  | 13.5  | 11.9  | 15.2  | 15.0  |
| CHA | 0.1  | -1.2 | -0.2 | -3.7 | -3.4 | -2.5 | -1.2  | 0.3   | 1.1   | 1.9   | 2.6   |
| EUR | -0.9 | -1.6 | -1.3 | -4.8 | -3.7 | -1.8 | 1.1   | 3.3   | 3.8   | 3.8   | 4.7   |
| IND | 0.1  | 0.2  | 0.3  | 0.5  | -0.4 | 0.3  | -3.2  | -4.9  | -1.0  | -4.9  | -7.3  |
| JPN | -2.2 | -2.5 | -2.3 | -2.3 | -2.2 | -2.1 | -2.2  | -2.4  | -2.4  | -2.4  | -2.4  |
| LAM | -0.8 | -1.2 | -1.7 | -2.3 | -2.2 | -1.9 | -1.4  | -0.9  | -0.6  | -0.3  | -0.1  |
| MEA | -0.1 | -0.3 | -0.2 | -1.0 | -0.9 | -0.6 | -0.2  | 0.3   | 0.6   | 0.9   | 2.5   |
| NEU | -0.0 | -0.1 | -0.2 | -0.4 | -0.4 | -0.3 | -0.1  | 0.0   | 0.1   | 0.2   | 0.3   |
| OAS | -1.0 | 1.2  | 1.9  | -2.1 | -4.8 | -7.9 | -11.1 | -13.0 | -16.7 | -18.6 | -19.5 |
| REF | -0.2 | 0.4  | 0.4  | 1.2  | 2.2  | 3.0  | 3.9   | 4.4   | 4.4   | 5.7   | 6.2   |
| SSA | 0.3  | 0.2  | 0.6  | 0.6  | 0.7  | 0.5  | 0.1   | -0.6  | -1.3  | -1.7  | -2.3  |
| USA | -0.5 | -0.1 | -0.1 | -0.4 | -0.4 | -0.3 | -0.2  | -0.0  | 0.1   | 0.2   | 0.3   |

Table 1866: MAgPIE m4p\_SSP1 — Trade—Net-Trade—Crops—Oil crops—Other oil crops (incl rapeseed) (Mt DM/yr) [PART 1/2]

|     | 2050  | 2055  | 2060  | 2070  | 2080  | 2090  | 2100  |
|-----|-------|-------|-------|-------|-------|-------|-------|
| GLO | 0.0   | 0.0   | 0.0   | 0.0   | 0.0   | 0.0   | 0.0   |
| CAZ | 16.1  | 16.3  | 16.2  | 16.3  | 14.2  | 10.2  | 8.5   |
| CHA | 3.3   | 3.1   | 2.9   | 2.4   | 2.1   | 1.9   | 1.5   |
| EUR | 5.7   | 5.6   | 5.6   | 5.4   | 5.2   | 5.0   | 4.6   |
| IND | -7.7  | -7.6  | -7.4  | -6.9  | -4.9  | 0.0   | 1.2   |
| JPN | -2.3  | -2.2  | -2.1  | -1.9  | -1.7  | -1.5  | -1.3  |
| LAM | 0.2   | 0.2   | 0.2   | 0.2   | 0.2   | 0.2   | 0.2   |
| MEA | 3.2   | 3.2   | 3.2   | 2.2   | 1.5   | 1.4   | 1.3   |
| NEU | 0.3   | 0.3   | 0.4   | 0.4   | 0.4   | 0.3   | 0.3   |
| OAS | -23.5 | -23.5 | -23.3 | -22.4 | -20.7 | -19.7 | -18.0 |
| REF | 7.1   | 7.1   | 7.1   | 7.0   | 6.5   | 5.1   | 4.3   |
| SSA | -2.8  | -3.1  | -3.2  | -3.2  | -3.2  | -3.2  | -3.1  |
| USA | 0.4   | 0.4   | 0.4   | 0.4   | 0.4   | 0.4   | 0.4   |

Table 1867: MAgPIE m4p\_SSP1 — Trade—Net-Trade—Crops—Oil crops—Other oil crops (incl rapeseed) (Mt DM/yr) [PART 2/2]

|     | 1965  | 1970  | 1975  | 1980  | 1985  | 1990  | 1995  | 2000  | 2005  | 2010  |
|-----|-------|-------|-------|-------|-------|-------|-------|-------|-------|-------|
| GLO | 0.00  | 0.00  | 0.00  | 0.00  | 0.00  | 0.00  | 0.00  | 0.00  | 0.00  | 0.00  |
| CAZ | 0.71  | 1.97  | 1.39  | 1.33  | 2.47  | 2.15  | 4.21  | 5.13  | 6.72  | 7.52  |
| CHA | 0.08  | -0.03 | -0.03 | -0.33 | 0.23  | -0.31 | 0.73  | -1.22 | -0.24 | -3.47 |
| EUR | -3.79 | -2.69 | -3.81 | -1.84 | -1.59 | -1.10 | -0.87 | -1.57 | -1.70 | -3.83 |
| IND | -0.24 | -0.08 | -0.05 | -0.14 | 0.31  | 0.06  | 0.27  | 0.22  | 0.29  | 0.68  |
| JPN | -0.79 | -1.08 | -1.19 | -1.44 | -1.91 | -2.20 | -2.15 | -2.44 | -2.32 | -2.28 |
| LAM | -0.49 | -0.28 | -0.05 | 0.02  | -0.45 | 0.17  | -0.73 | -0.95 | -2.36 | -0.76 |
| MEA | -0.08 | -0.14 | -0.11 | -0.08 | -0.32 | -0.07 | -0.09 | -0.24 | -0.48 | -0.47 |
| NEU | -0.22 | -0.24 | -0.20 | -0.07 | -0.24 | -0.04 | -0.01 | -0.01 | -0.41 | 0.02  |
| OAS | 5.37  | 3.24  | 4.08  | 2.84  | 2.31  | 1.45  | -0.97 | 0.67  | 0.84  | -0.58 |
| REF | -0.05 | -0.05 | -0.11 | -0.09 | -0.13 | 0.08  | -0.15 | 0.10  | 0.07  | 1.51  |
| SSA | 0.30  | 0.19  | 0.25  | 0.21  | -0.29 | 0.32  | 0.23  | 0.38  | -0.31 | 2.00  |
| USA | -0.80 | -0.83 | -0.18 | -0.40 | -0.39 | -0.51 | -0.47 | -0.08 | -0.10 | -0.34 |

Table 1868: FAO — Trade—Net-Trade—Crops—Oil crops—Other oil crops (incl rapeseed) (Mt DM/yr)

58.1.10 Oil crops—Soybean

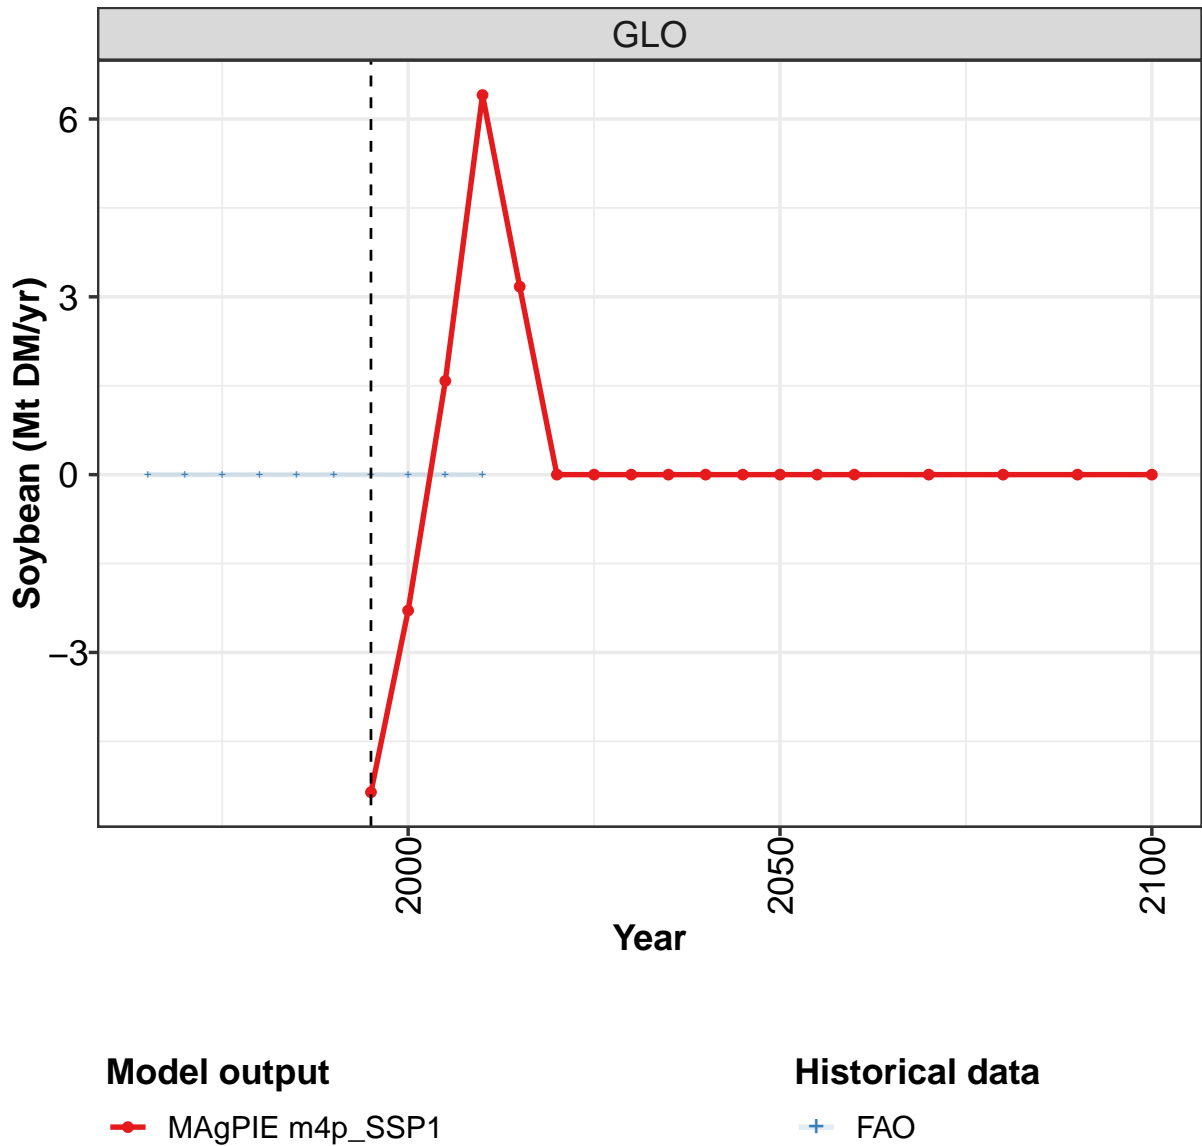

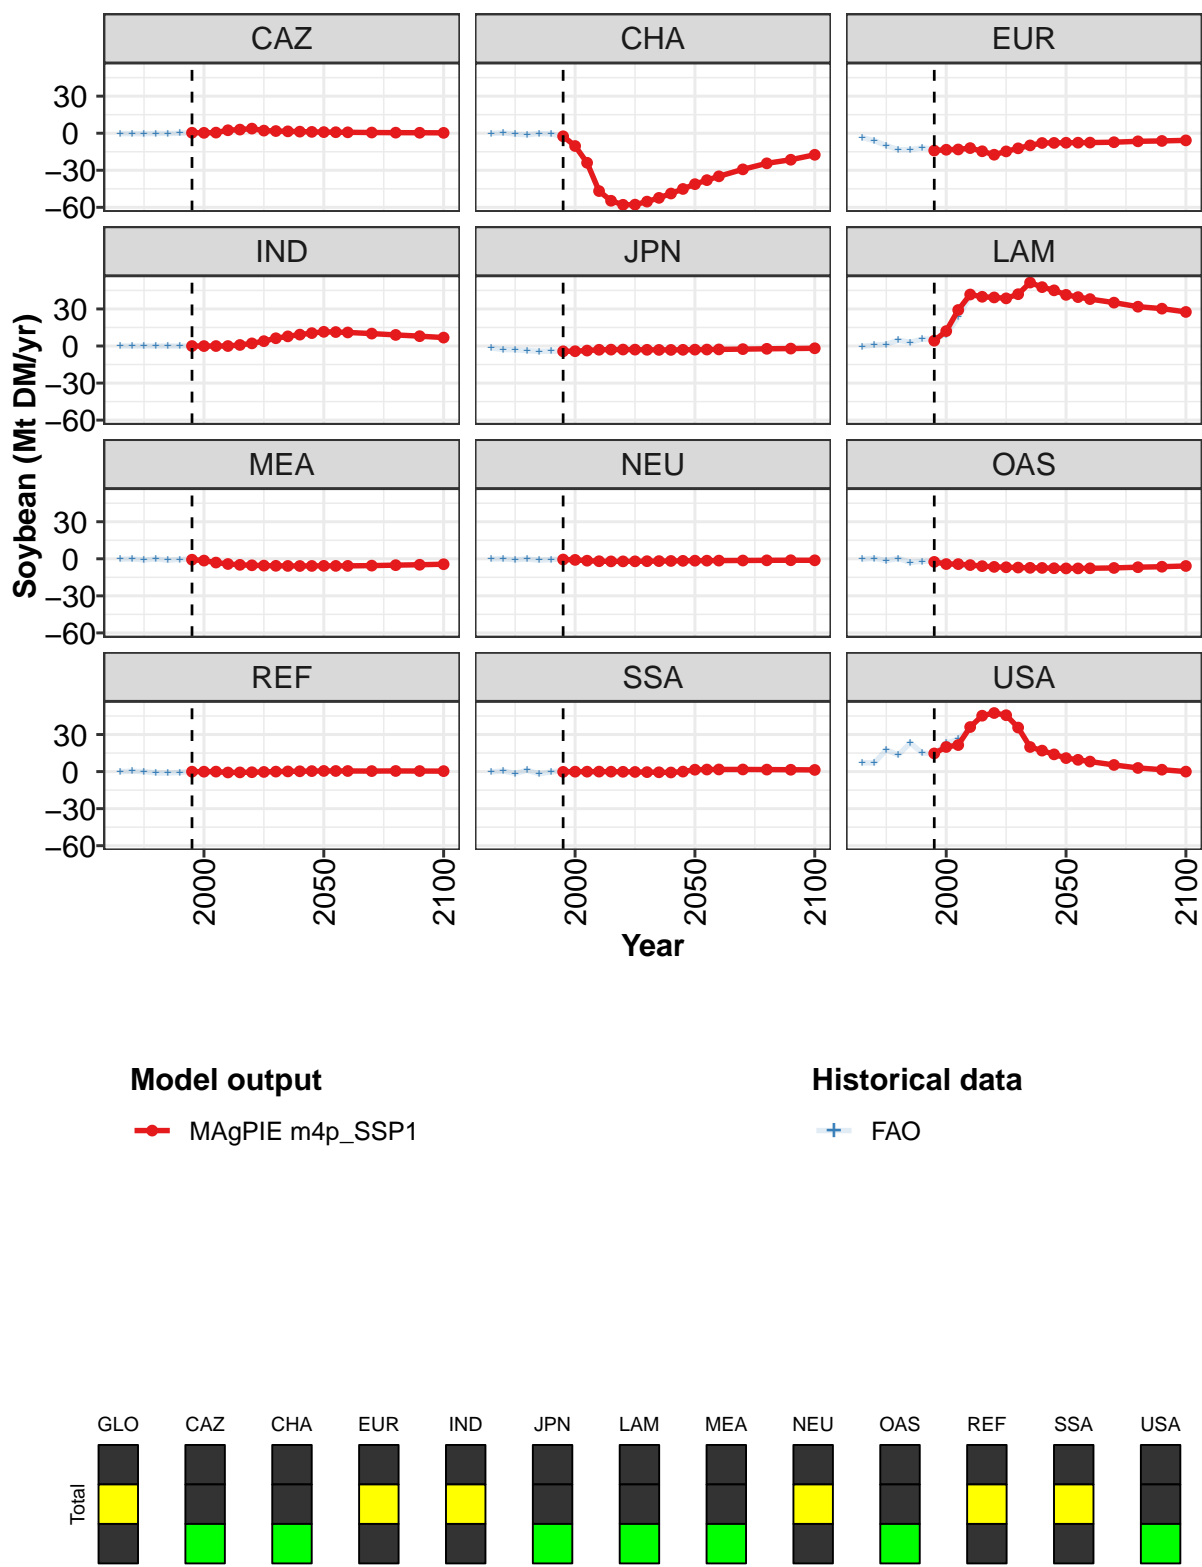

Figure 490: MAgPIE m4p\_SSP1 — Trade—Net-Trade—Crops—Oil crops—Soybean (Mt DM/yr)

|     | 1995  | 2000  | 2005  | 2010  | 2015  | 2020  | 2025  | 2030  | 2035  | 2040  | 2045  |
|-----|-------|-------|-------|-------|-------|-------|-------|-------|-------|-------|-------|
| GLO | -5.4  | -2.3  | 1.6   | 6.4   | 3.2   | -0.0  | 0.0   | 0.0   | 0.0   | 0.0   | 0.0   |
| CAZ | 0.4   | 0.3   | 0.5   | 2.4   | 2.9   | 3.7   | 2.1   | 1.8   | 1.5   | 1.3   | 1.1   |
| CHA | -2.5  | -10.4 | -23.9 | -46.8 | -54.7 | -57.9 | -57.8 | -55.4 | -52.3 | -48.8 | -45.1 |
| EUR | -14.0 | -13.4 | -13.1 | -12.0 | -14.6 | -17.4 | -14.7 | -12.2 | -9.9  | -7.9  | -7.8  |
| IND | 0.0   | -0.0  | 0.0   | 0.0   | 0.9   | 2.1   | 3.9   | 6.3   | 7.8   | 9.2   | 10.5  |
| JPN | -4.3  | -4.2  | -3.7  | -3.0  | -2.9  | -2.9  | -2.9  | -3.1  | -3.1  | -3.1  | -3.1  |
| LAM | 4.3   | 12.1  | 29.2  | 41.7  | 39.9  | 39.3  | 38.6  | 42.0  | 51.4  | 47.7  | 45.1  |
| MEA | -0.7  | -1.4  | -3.0  | -4.2  | -4.9  | -5.2  | -5.5  | -5.7  | -5.8  | -5.8  | -5.8  |
| NEU | -0.6  | -0.9  | -1.5  | -1.9  | -2.1  | -2.1  | -2.0  | -1.9  | -1.8  | -1.7  | -1.6  |
| OAS | -2.5  | -4.2  | -4.3  | -5.1  | -5.9  | -6.5  | -6.8  | -7.1  | -7.3  | -7.4  | -7.6  |
| REF | -0.1  | -0.1  | -0.0  | -0.7  | -0.6  | -0.5  | -0.3  | 0.0   | 0.1   | 0.3   | 0.4   |
| SSA | -0.2  | -0.1  | -0.0  | 0.0   | -0.1  | -0.1  | -0.3  | -0.4  | -0.5  | -0.7  | 0.0   |
| USA | 14.7  | 19.9  | 21.5  | 36.1  | 45.3  | 47.4  | 45.7  | 35.7  | 19.9  | 17.0  | 14.0  |

Table 1869: MAgPIE m4p\_SSP1 — Trade—Net-Trade—Crops—Oil crops—Soybean (Mt DM/yr) [PART 1/2]

|     | 2050  | 2055  | 2060  | 2070  | 2080  | 2090  | 2100  |
|-----|-------|-------|-------|-------|-------|-------|-------|
| GLO | -0.0  | 0.0   | -0.0  | 0.0   | 0.0   | -0.0  | -0.0  |
| CAZ | 0.9   | 0.8   | 0.7   | 0.6   | 0.5   | 0.4   | 0.3   |
| CHA | -41.2 | -38.0 | -34.9 | -29.3 | -24.4 | -21.5 | -17.5 |
| EUR | -7.7  | -7.7  | -7.6  | -7.3  | -6.6  | -6.2  | -5.8  |
| IND | 11.5  | 11.3  | 11.0  | 10.1  | 9.0   | 8.0   | 6.8   |
| JPN | -2.9  | -2.9  | -2.8  | -2.5  | -2.3  | -2.1  | -1.8  |
| LAM | 41.4  | 39.6  | 38.0  | 35.1  | 31.8  | 30.3  | 27.6  |
| MEA | -5.7  | -5.7  | -5.7  | -5.5  | -5.1  | -4.8  | -4.4  |
| NEU | -1.5  | -1.5  | -1.4  | -1.4  | -1.2  | -1.2  | -1.2  |
| OAS | -7.8  | -7.8  | -7.7  | -7.4  | -6.8  | -6.4  | -5.8  |
| REF | 0.5   | 0.5   | 0.5   | 0.4   | 0.5   | 0.5   | 0.4   |
| SSA | 1.6   | 1.7   | 1.7   | 1.7   | 1.6   | 1.5   | 1.4   |
| USA | 10.9  | 9.5   | 8.1   | 5.4   | 3.0   | 1.6   | 0.0   |

Table 1870: MAgPIE m4p\_SSP1 — Trade—Net-Trade—Crops—Oil crops—Soybean (Mt DM/yr) [PART 2/2]

|     | 1965 | 1970 | 1975  | 1980  | 1985  | 1990  | 1995  | 2000  | 2005  | 2010  |
|-----|------|------|-------|-------|-------|-------|-------|-------|-------|-------|
| GLO | 0.0  | 0.0  | 0.0   | 0.0   | 0.0   | 0.0   | 0.0   | 0.0   | 0.0   | 0.0   |
| CAZ | -0.3 | -0.3 | -0.5  | -0.2  | -0.2  | -0.0  | 0.5   | 0.4   | 0.6   | 2.1   |
| CHA | -0.2 | 0.3  | -0.8  | -1.2  | -0.2  | -0.6  | -2.4  | -10.3 | -23.9 | -46.8 |
| EUR | -3.5 | -6.1 | -10.0 | -13.3 | -13.4 | -11.8 | -13.1 | -13.1 | -13.0 | -12.6 |
| IND | -0.0 | 0.0  | -0.0  | 0.0   | -0.1  | -0.0  | 0.0   | -0.1  | -0.0  | 0.1   |
| JPN | -1.6 | -2.8 | -3.0  | -3.7  | -4.3  | -4.1  | -4.2  | -4.2  | -3.7  | -3.1  |
| LAM | -0.2 | 0.7  | 1.4   | 4.7   | 3.0   | 5.6   | 5.7   | 9.3   | 23.4  | 40.6  |
| MEA | -0.3 | -0.0 | -1.0  | -0.1  | -1.2  | -0.5  | -0.2  | -1.2  | -3.1  | -4.8  |
| NEU | -0.2 | -0.0 | -0.8  | -0.2  | -1.1  | -0.6  | -0.2  | -0.6  | -1.5  | -2.3  |
| OAS | -0.3 | 0.4  | -1.5  | 0.3   | -2.9  | -2.1  | -1.5  | -3.8  | -4.6  | -6.4  |
| REF | -0.0 | 0.3  | -0.0  | -1.0  | -1.2  | -0.6  | 0.2   | 0.1   | 0.1   | -1.0  |
| SSA | -0.3 | 0.5  | -1.4  | 1.1   | -1.7  | -0.3  | 0.9   | 0.4   | -0.4  | -1.1  |
| USA | 7.1  | 7.1  | 17.6  | 13.5  | 23.2  | 15.0  | 14.2  | 23.1  | 26.2  | 35.2  |

Table 1871: FAO — Trade—Net-Trade—Crops—Oil crops—Soybean (Mt DM/yr)



58.1.11 Oil crops—Sunflower

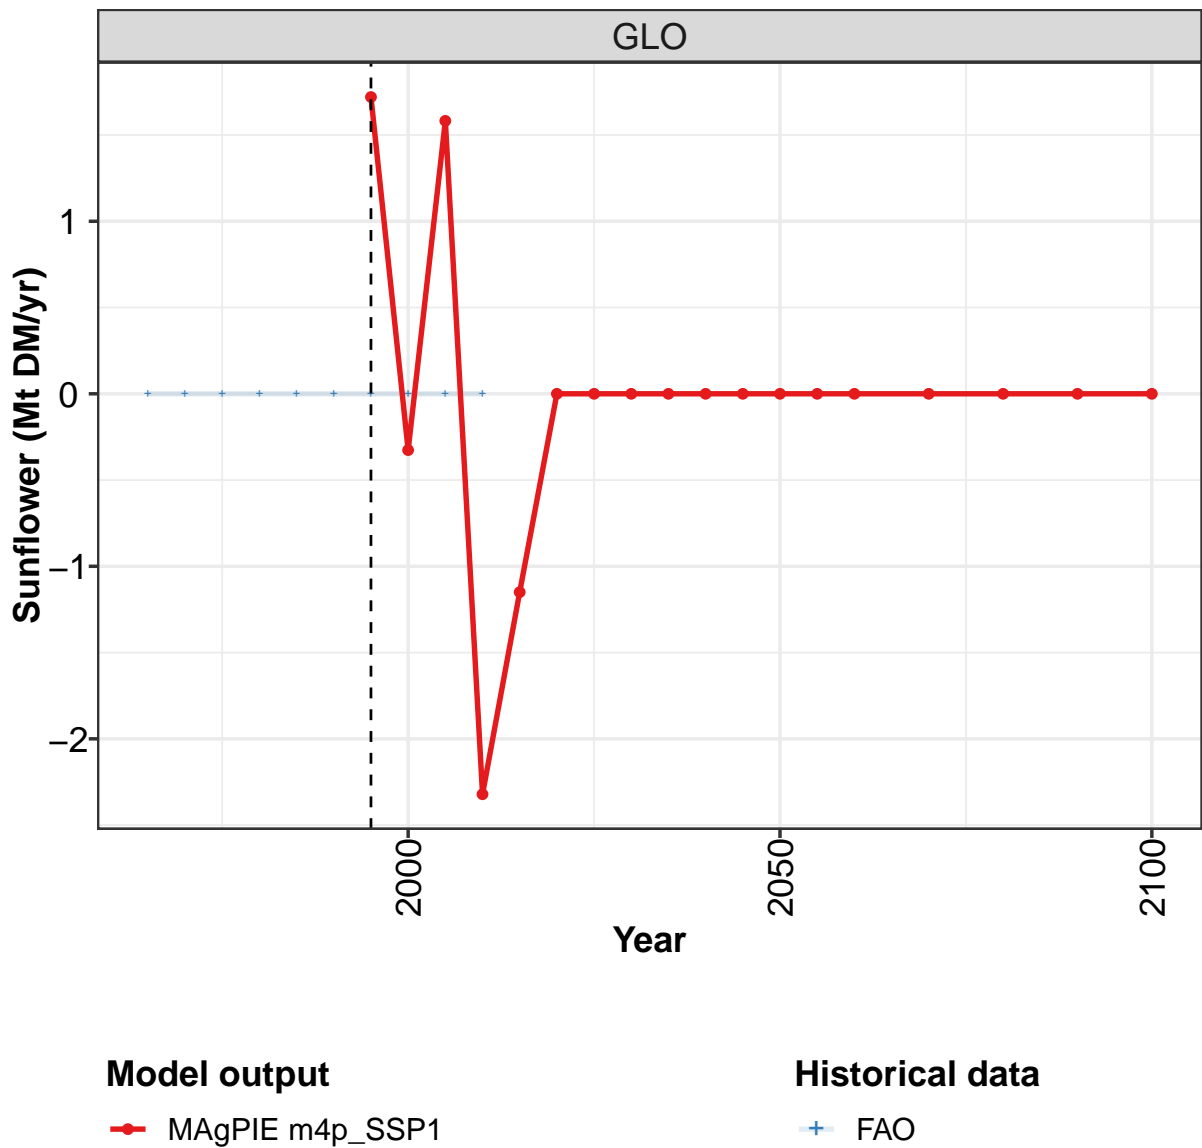

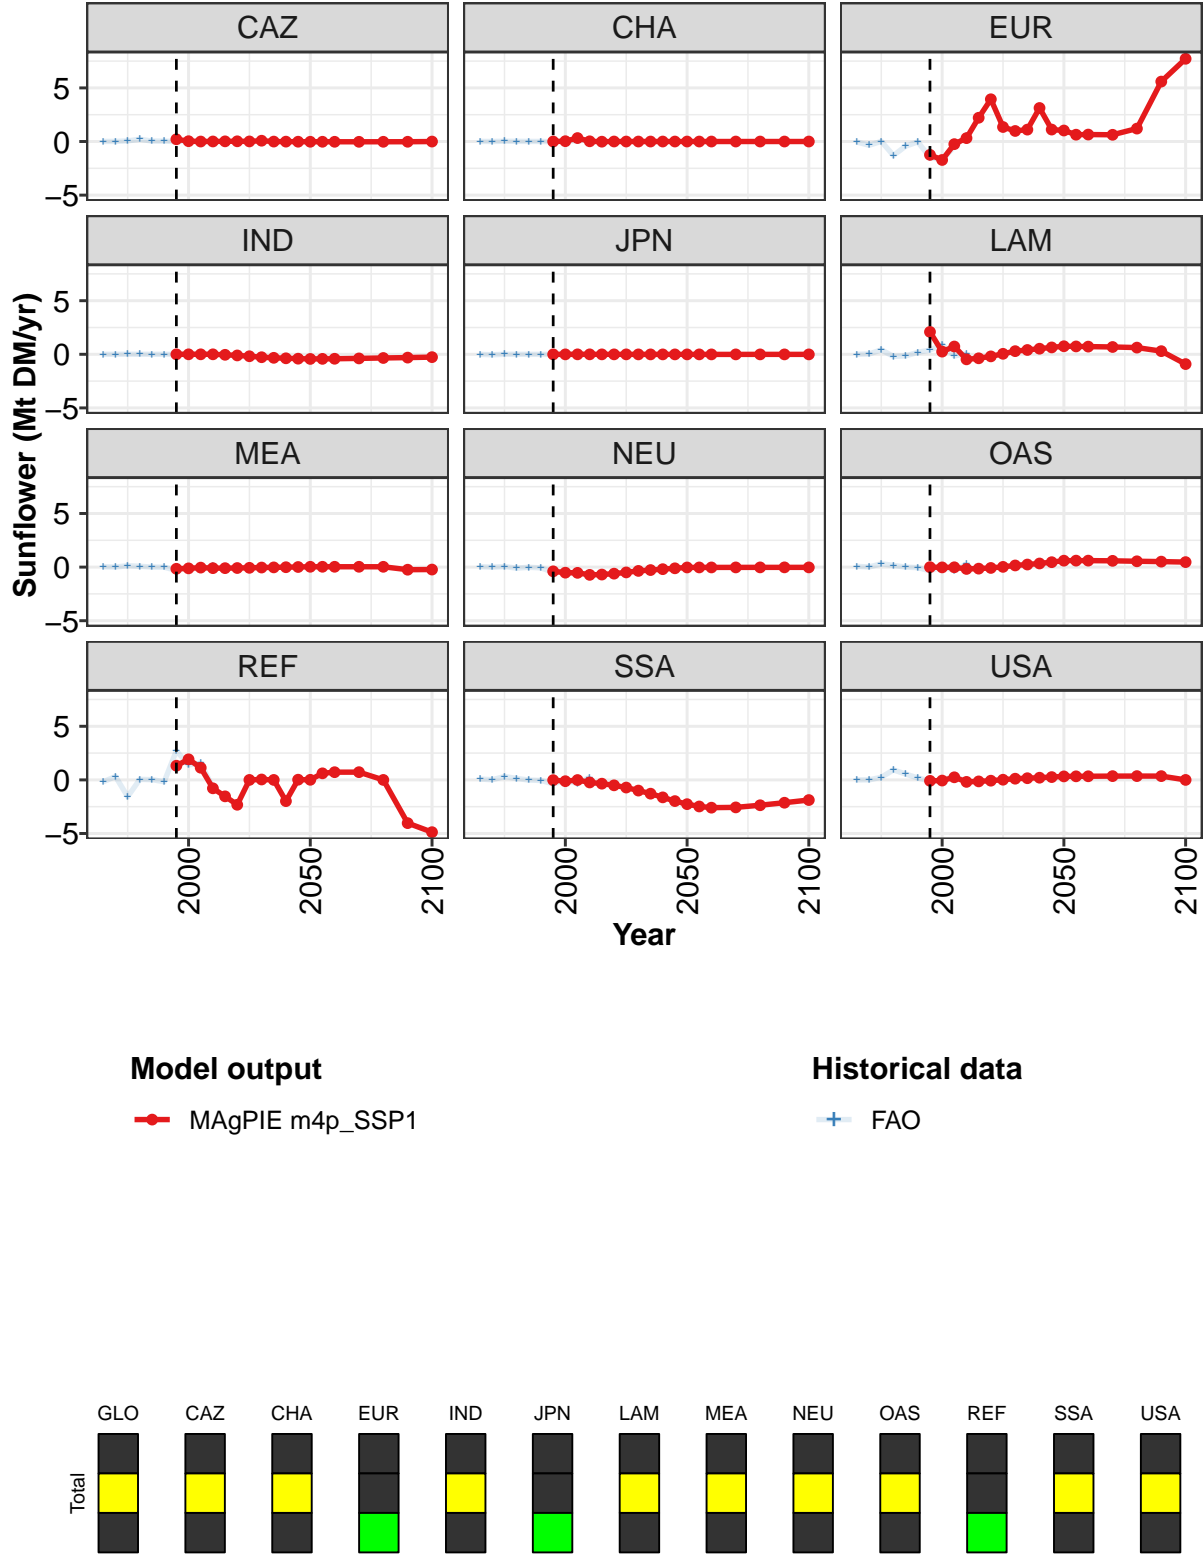

Figure 491: MAgPIE m4p\_SSP1 — Trade—Net-Trade—Crops—Oil crops—Sunflower (Mt DM/yr)

|     | 1995  | 2000  | 2005  | 2010  | 2015  | 2020  | 2025  | 2030  | 2035  | 2040  | 2045  |
|-----|-------|-------|-------|-------|-------|-------|-------|-------|-------|-------|-------|
| GLO | 1.72  | -0.33 | 1.58  | -2.32 | -1.15 | 0.00  | 0.00  | 0.00  | -0.00 | 0.00  | 0.00  |
| CAZ | 0.21  | 0.03  | 0.00  | 0.00  | 0.02  | 0.02  | 0.01  | 0.08  | -0.01 | -0.01 | -0.02 |
| CHA | 0.00  | 0.03  | 0.32  | 0.02  | -0.01 | 0.00  | 0.00  | 0.00  | -0.00 | 0.00  | -0.00 |
| EUR | -1.24 | -1.72 | -0.24 | 0.32  | 2.22  | 3.94  | 1.36  | 0.98  | 1.11  | 3.13  | 1.12  |
| IND | 0.00  | 0.00  | -0.00 | 0.00  | -0.04 | -0.10 | -0.18 | -0.27 | -0.32 | -0.37 | -0.41 |
| JPN | -0.00 | -0.00 | -0.00 | -0.00 | -0.00 | -0.00 | -0.01 | -0.01 | -0.01 | -0.01 | -0.01 |
| LAM | 2.09  | 0.25  | 0.73  | -0.47 | -0.37 | -0.19 | 0.05  | 0.30  | 0.41  | 0.52  | 0.64  |
| MEA | -0.16 | -0.12 | -0.05 | -0.10 | -0.10 | -0.08 | -0.06 | -0.04 | -0.02 | -0.01 | 0.01  |
| NEU | -0.39 | -0.52 | -0.53 | -0.72 | -0.69 | -0.61 | -0.49 | -0.35 | -0.27 | -0.19 | -0.11 |
| OAS | -0.00 | -0.03 | -0.01 | -0.17 | -0.14 | -0.08 | 0.02  | 0.15  | 0.24  | 0.34  | 0.46  |
| REF | 1.32  | 1.92  | 1.14  | -0.78 | -1.53 | -2.32 | -0.00 | 0.04  | 0.00  | -1.98 | 0.02  |
| SSA | -0.02 | -0.12 | -0.01 | -0.24 | -0.35 | -0.51 | -0.71 | -0.99 | -1.28 | -1.63 | -1.98 |
| USA | -0.09 | -0.06 | 0.24  | -0.18 | -0.14 | -0.07 | 0.02  | 0.11  | 0.16  | 0.20  | 0.26  |

Table 1872: MAgPIE m4p\_SSP1 — Trade—Net-Trade—Crops—Oil crops—Sunflower (Mt DM/yr) [PART 1/2]

|     | 2050  | 2055  | 2060  | 2070  | 2080  | 2090  | 2100  |
|-----|-------|-------|-------|-------|-------|-------|-------|
| GLO | 0.00  | 0.00  | 0.00  | -0.00 | 0.00  | 0.00  | 0.00  |
| CAZ | -0.02 | -0.02 | -0.02 | -0.03 | -0.02 | -0.02 | -0.00 |
| CHA | 0.00  | 0.00  | 0.00  | 0.00  | 0.00  | 0.00  | -0.00 |
| EUR | 1.03  | 0.64  | 0.65  | 0.63  | 1.21  | 5.59  | 7.72  |
| IND | -0.43 | -0.42 | -0.41 | -0.38 | -0.34 | -0.31 | -0.26 |
| JPN | -0.01 | -0.01 | -0.01 | -0.01 | -0.01 | -0.01 | -0.01 |
| LAM | 0.75  | 0.74  | 0.72  | 0.68  | 0.63  | 0.30  | -0.91 |
| MEA | 0.03  | 0.03  | 0.03  | 0.03  | 0.03  | -0.24 | -0.23 |
| NEU | -0.03 | -0.03 | -0.03 | -0.03 | -0.03 | -0.02 | -0.03 |
| OAS | 0.60  | 0.61  | 0.60  | 0.59  | 0.54  | 0.51  | 0.47  |
| REF | 0.01  | 0.61  | 0.72  | 0.72  | -0.00 | -4.03 | -4.87 |
| SSA | -2.26 | -2.48 | -2.59 | -2.56 | -2.36 | -2.13 | -1.88 |
| USA | 0.33  | 0.33  | 0.34  | 0.35  | 0.36  | 0.35  | 0.00  |

Table 1873: MAgPIE m4p\_SSP1 — Trade—Net-Trade—Crops—Oil crops—Sunflower (Mt DM/yr) [PART 2/2]

|     | 1965  | 1970  | 1975  | 1980  | 1985  | 1990  | 1995  | 2000  | 2005  | 2010  |
|-----|-------|-------|-------|-------|-------|-------|-------|-------|-------|-------|
| GLO | 0.00  | 0.00  | 0.00  | 0.00  | 0.00  | 0.00  | 0.00  | 0.00  | 0.00  | 0.00  |
| CAZ | 0.01  | 0.01  | 0.06  | 0.21  | 0.04  | 0.04  | -0.01 | 0.05  | -0.00 | 0.05  |
| CHA | 0.01  | 0.00  | 0.03  | 0.02  | 0.01  | 0.01  | -0.02 | 0.03  | 0.08  | 0.16  |
| EUR | -0.05 | -0.34 | 0.01  | -1.30 | -0.43 | -0.04 | -1.48 | -1.71 | -0.47 | 0.56  |
| IND | 0.00  | 0.00  | 0.01  | 0.00  | 0.00  | 0.00  | -0.01 | 0.00  | 0.09  | 0.01  |
| JPN | -0.00 | -0.05 | 0.00  | 0.00  | -0.00 | -0.00 | -0.01 | -0.00 | -0.01 | 0.01  |
| LAM | -0.00 | 0.03  | 0.42  | -0.20 | -0.15 | 0.18  | 0.40  | 0.89  | -0.16 | 0.05  |
| MEA | 0.03  | 0.01  | 0.13  | 0.08  | 0.00  | -0.01 | -0.30 | -0.09 | -0.18 | 0.10  |
| NEU | 0.04  | -0.01 | 0.05  | -0.10 | -0.02 | -0.08 | -0.48 | -0.48 | -0.62 | -0.57 |
| OAS | 0.07  | 0.01  | 0.31  | 0.16  | -0.00 | -0.05 | -0.34 | 0.04  | -0.32 | 0.28  |
| REF | -0.17 | 0.31  | -1.56 | 0.05  | 0.02  | -0.18 | 2.72  | 1.40  | 1.56  | -0.72 |
| SSA | 0.08  | 0.02  | 0.31  | 0.14  | -0.02 | -0.05 | -0.37 | -0.05 | -0.33 | 0.24  |
| USA | -0.00 | 0.00  | 0.24  | 0.93  | 0.55  | 0.18  | -0.09 | -0.06 | 0.37  | -0.17 |

Table 1874: FAO — Trade—Net-Trade—Crops—Oil crops—Sunflower (Mt DM/yr)

58.1.12 Other crops

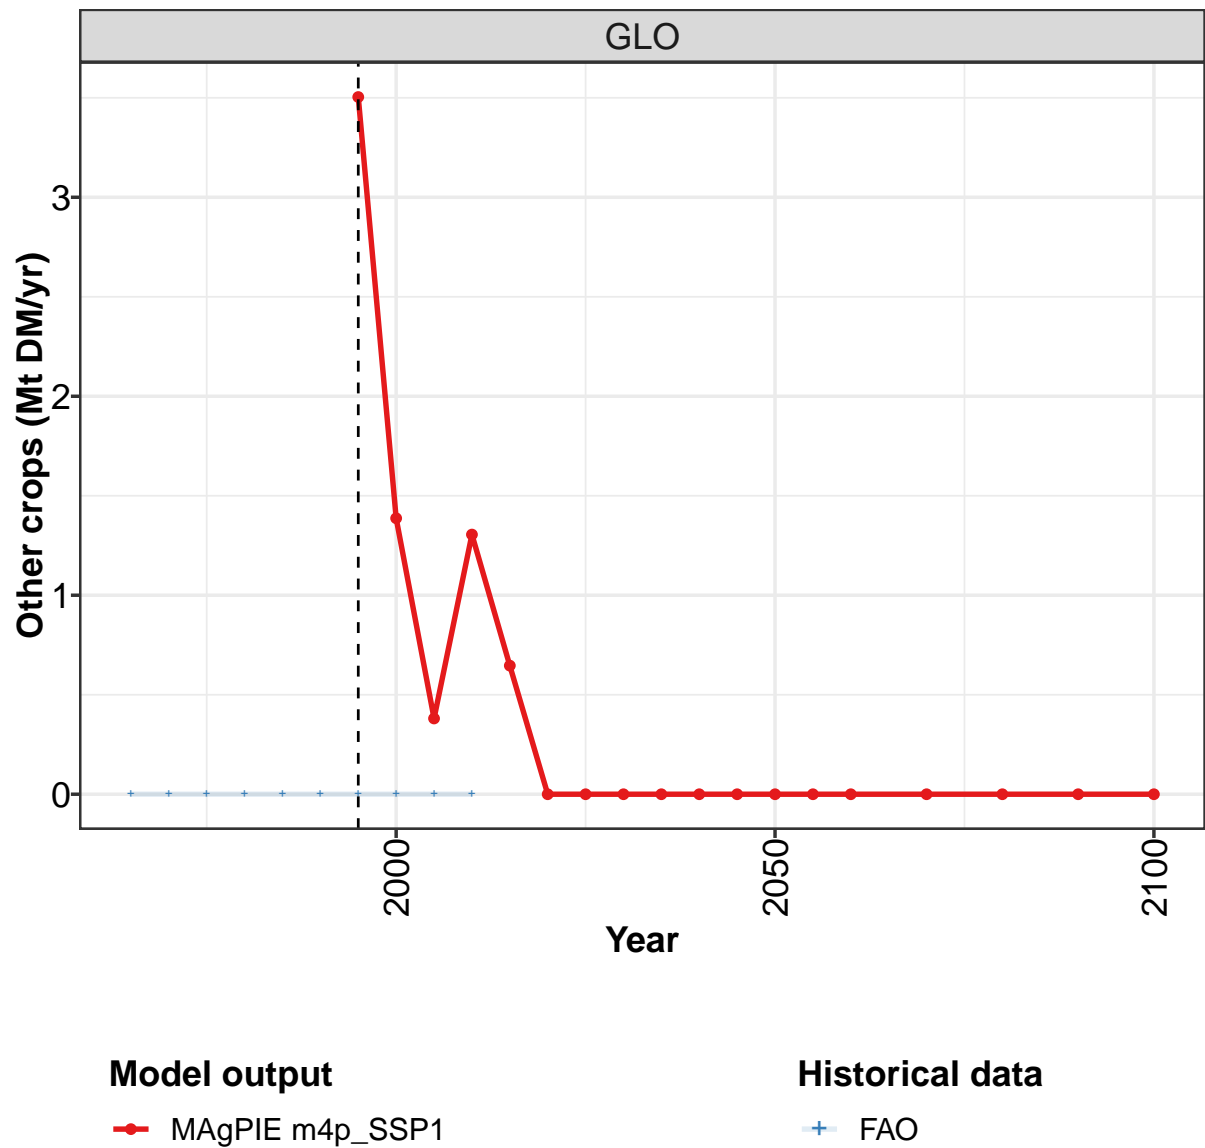

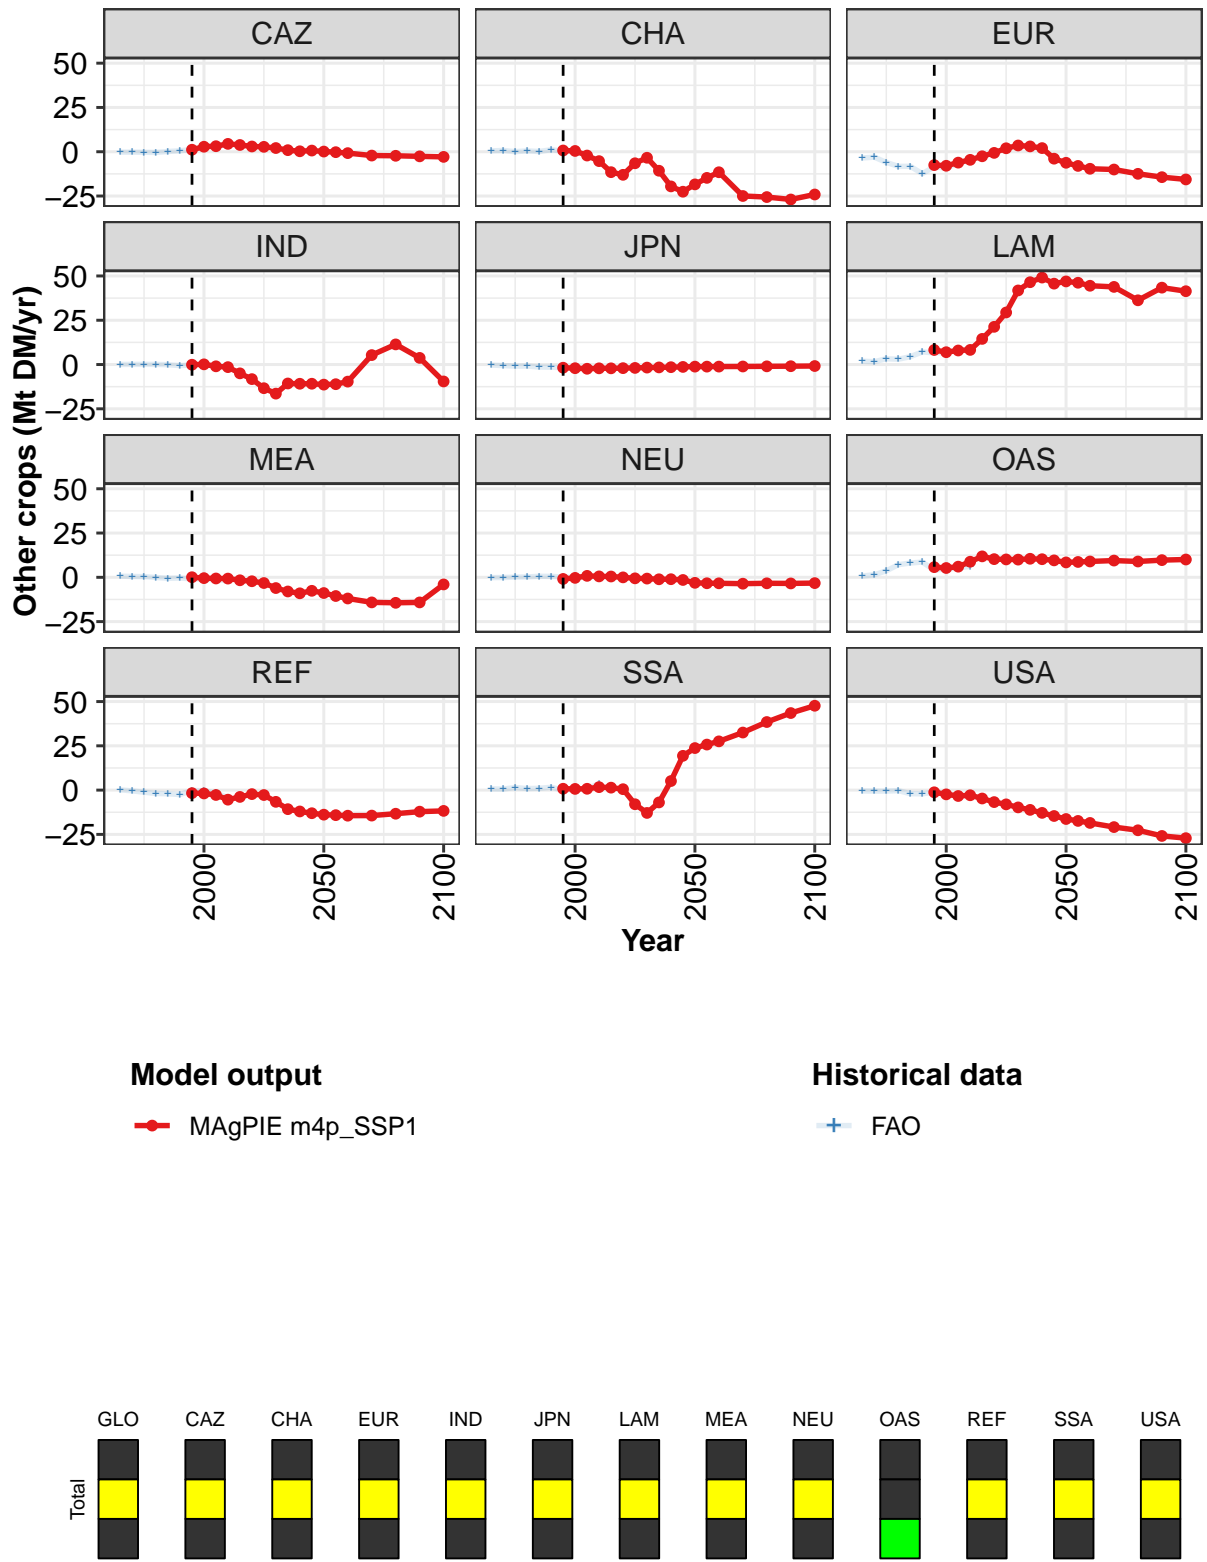

Figure 492: MAgPIE m4p\_SSP1 — Trade—Net-Trade—Crops—Other crops (Mt DM/yr)

|     | 1995 | 2000 | 2005 | 2010 | 2015  | 2020  | 2025  | 2030  | 2035  | 2040  | 2045  |
|-----|------|------|------|------|-------|-------|-------|-------|-------|-------|-------|
| GLO | 3.5  | 1.4  | 0.4  | 1.3  | 0.6   | 0.0   | -0.0  | -0.0  | 0.0   | 0.0   | -0.0  |
| CAZ | 1.2  | 2.8  | 3.1  | 4.4  | 3.8   | 3.0   | 2.8   | 2.1   | 0.9   | 0.3   | 0.7   |
| CHA | 0.7  | 0.5  | -2.1 | -5.3 | -11.5 | -13.0 | -6.5  | -3.4  | -10.7 | -19.6 | -22.6 |
| EUR | -7.5 | -7.9 | -6.1 | -4.6 | -2.5  | -0.6  | 2.0   | 3.5   | 3.0   | 2.1   | -3.9  |
| IND | -0.1 | 0.1  | -1.0 | -1.5 | -5.0  | -8.2  | -13.3 | -16.4 | -10.7 | -10.8 | -10.8 |
| JPN | -1.8 | -2.1 | -2.4 | -2.1 | -2.1  | -2.0  | -1.9  | -1.7  | -1.6  | -1.5  | -1.3  |
| LAM | 8.2  | 7.0  | 7.9  | 8.3  | 14.5  | 21.3  | 29.4  | 41.8  | 46.5  | 49.1  | 45.7  |
| MEA | 0.1  | -0.4 | -0.6 | -0.7 | -1.7  | -2.2  | -3.2  | -6.0  | -8.0  | -9.0  | -7.6  |
| NEU | -0.9 | -0.3 | 0.8  | 0.5  | 0.5   | -0.0  | -0.6  | -0.7  | -1.1  | -1.0  | -1.5  |
| OAS | 5.8  | 5.3  | 6.0  | 8.8  | 11.8  | 10.3  | 10.1  | 10.0  | 10.5  | 10.2  | 9.6   |
| REF | -1.7 | -1.9 | -2.7 | -5.4 | -3.8  | -2.2  | -2.8  | -6.6  | -10.7 | -12.0 | -13.0 |
| SSA | 0.8  | 0.7  | 0.8  | 1.7  | 1.4   | 0.5   | -8.0  | -12.9 | -6.9  | 5.1   | 19.4  |
| USA | -1.2 | -2.4 | -3.3 | -2.9 | -4.7  | -6.8  | -8.0  | -9.8  | -11.1 | -12.8 | -14.6 |

Table 1875: MAgPIE m4p\_SSP1 — Trade—Net-Trade—Crops—Other crops (Mt DM/yr) [PART 1/2]

|     | 2050  | 2055  | 2060  | 2070  | 2080  | 2090  | 2100  |
|-----|-------|-------|-------|-------|-------|-------|-------|
| GLO | 0.0   | -0.0  | 0.0   | 0.0   | 0.0   | 0.0   | 0.0   |
| CAZ | 0.1   | -0.2  | -0.8  | -2.1  | -2.3  | -2.6  | -2.9  |
| CHA | -18.4 | -14.8 | -11.6 | -25.0 | -25.6 | -26.9 | -24.1 |
| EUR | -6.2  | -8.0  | -9.6  | -10.0 | -12.5 | -14.3 | -15.6 |
| IND | -11.3 | -11.1 | -9.6  | 5.3   | 11.4  | 3.8   | -9.6  |
| JPN | -1.2  | -1.2  | -1.1  | -1.1  | -1.0  | -0.9  | -0.8  |
| LAM | 46.9  | 46.2  | 44.5  | 43.8  | 36.3  | 43.4  | 41.4  |
| MEA | -8.9  | -10.5 | -11.9 | -14.1 | -14.4 | -14.2 | -4.0  |
| NEU | -3.1  | -3.3  | -3.4  | -3.6  | -3.4  | -3.4  | -3.3  |
| OAS | 8.4   | 8.7   | 9.0   | 9.5   | 8.9   | 9.7   | 10.1  |
| REF | -13.9 | -14.1 | -14.4 | -14.4 | -13.3 | -12.2 | -11.7 |
| SSA | 23.8  | 25.7  | 27.5  | 32.5  | 38.5  | 43.5  | 47.6  |
| USA | -16.3 | -17.4 | -18.5 | -20.9 | -22.7 | -25.9 | -27.1 |

Table 1876: MAgPIE m4p\_SSP1 — Trade—Net-Trade—Crops—Other crops (Mt DM/yr) [PART 2/2]

|     | 1965  | 1970  | 1975  | 1980  | 1985  | 1990   | 1995  | 2000  | 2005  | 2010  |
|-----|-------|-------|-------|-------|-------|--------|-------|-------|-------|-------|
| GLO | 0.00  | 0.00  | 0.00  | 0.00  | 0.00  | 0.00   | 0.00  | 0.00  | 0.00  | 0.00  |
| CAZ | -0.23 | -0.24 | -0.31 | -0.38 | 0.15  | 0.54   | 1.28  | 3.02  | 3.20  | 3.91  |
| CHA | 0.50  | 0.72  | 0.05  | 0.48  | 0.12  | 1.12   | 0.32  | 0.11  | -1.87 | -5.13 |
| EUR | -3.50 | -3.06 | -6.01 | -8.25 | -8.22 | -12.35 | -8.48 | -9.26 | -6.43 | -4.81 |
| IND | 0.06  | 0.09  | 0.10  | 0.08  | -0.11 | -0.61  | -0.18 | 0.12  | -0.88 | -1.22 |
| JPN | -0.32 | -0.57 | -0.93 | -0.88 | -1.42 | -1.52  | -1.78 | -2.08 | -2.36 | -2.12 |
| LAM | 1.87  | 1.61  | 3.26  | 2.99  | 4.42  | 7.11   | 6.59  | 6.83  | 8.11  | 8.29  |
| MEA | 0.67  | 0.48  | 0.40  | -0.08 | -0.54 | -0.41  | -0.84 | -1.13 | -1.32 | -1.94 |
| NEU | -0.15 | -0.10 | 0.11  | 0.23  | 0.58  | 0.53   | 0.18  | -0.08 | 0.43  | 0.25  |
| OAS | 0.74  | 1.48  | 3.64  | 7.13  | 8.09  | 8.60   | 4.13  | 4.67  | 5.34  | 6.18  |
| REF | 0.17  | -0.43 | -1.19 | -1.90 | -2.08 | -2.50  | -0.15 | -0.37 | -1.66 | -4.26 |
| SSA | 0.69  | 0.59  | 1.47  | 0.87  | 1.03  | 1.59   | 0.03  | 0.33  | 0.62  | 3.74  |
| USA | -0.49 | -0.56 | -0.59 | -0.29 | -2.01 | -2.10  | -1.09 | -2.16 | -3.18 | -2.88 |

Table 1877: FAO — Trade—Net-Trade—Crops—Other crops (Mt DM/yr)

58.1.13 Other crops—Fruits Vegetables Nuts

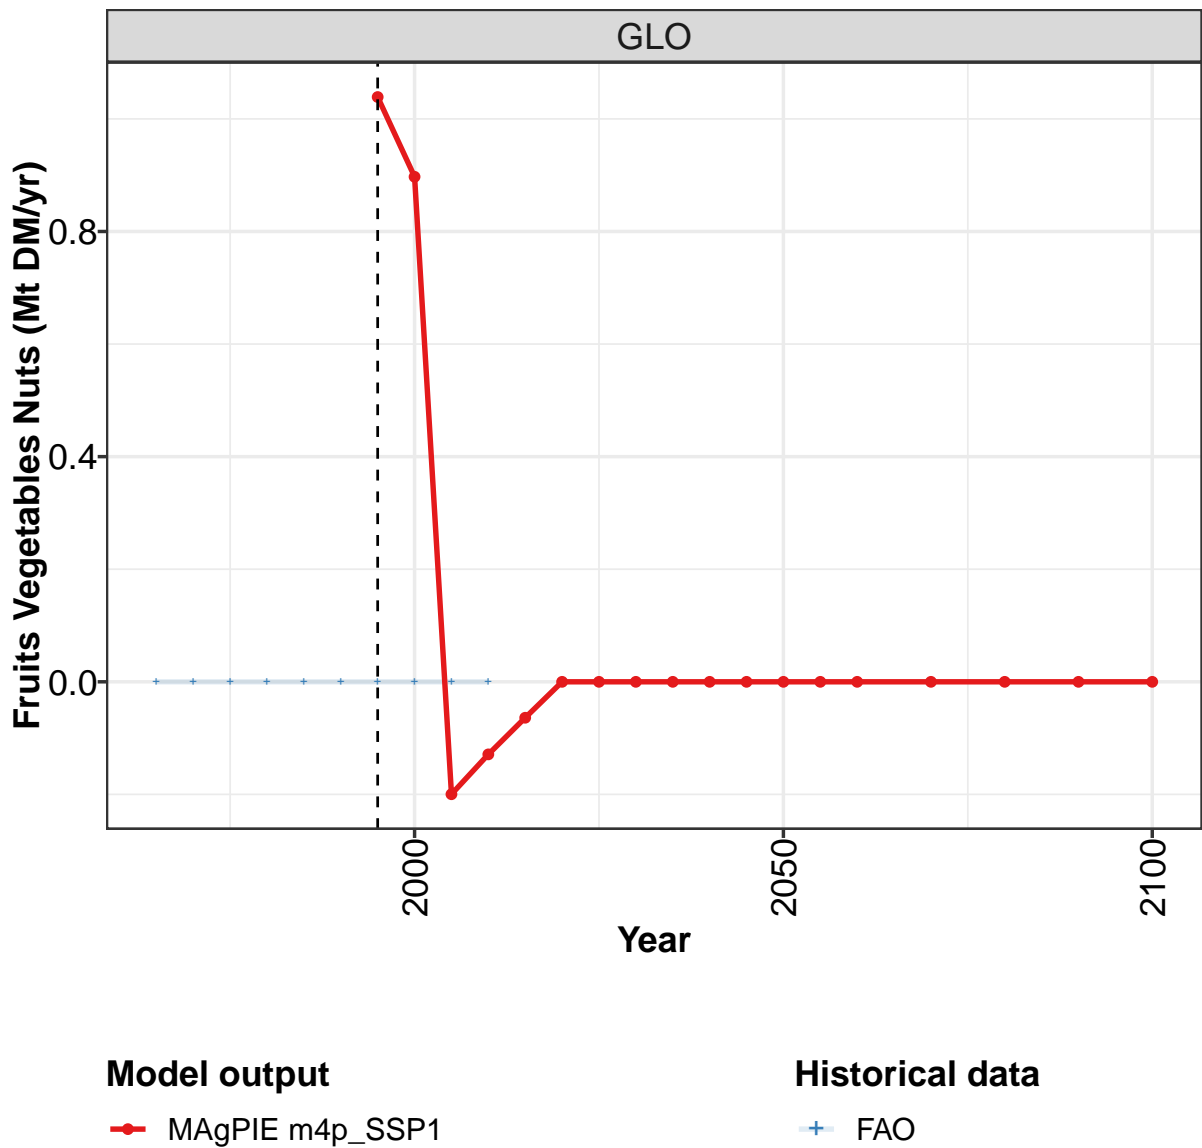

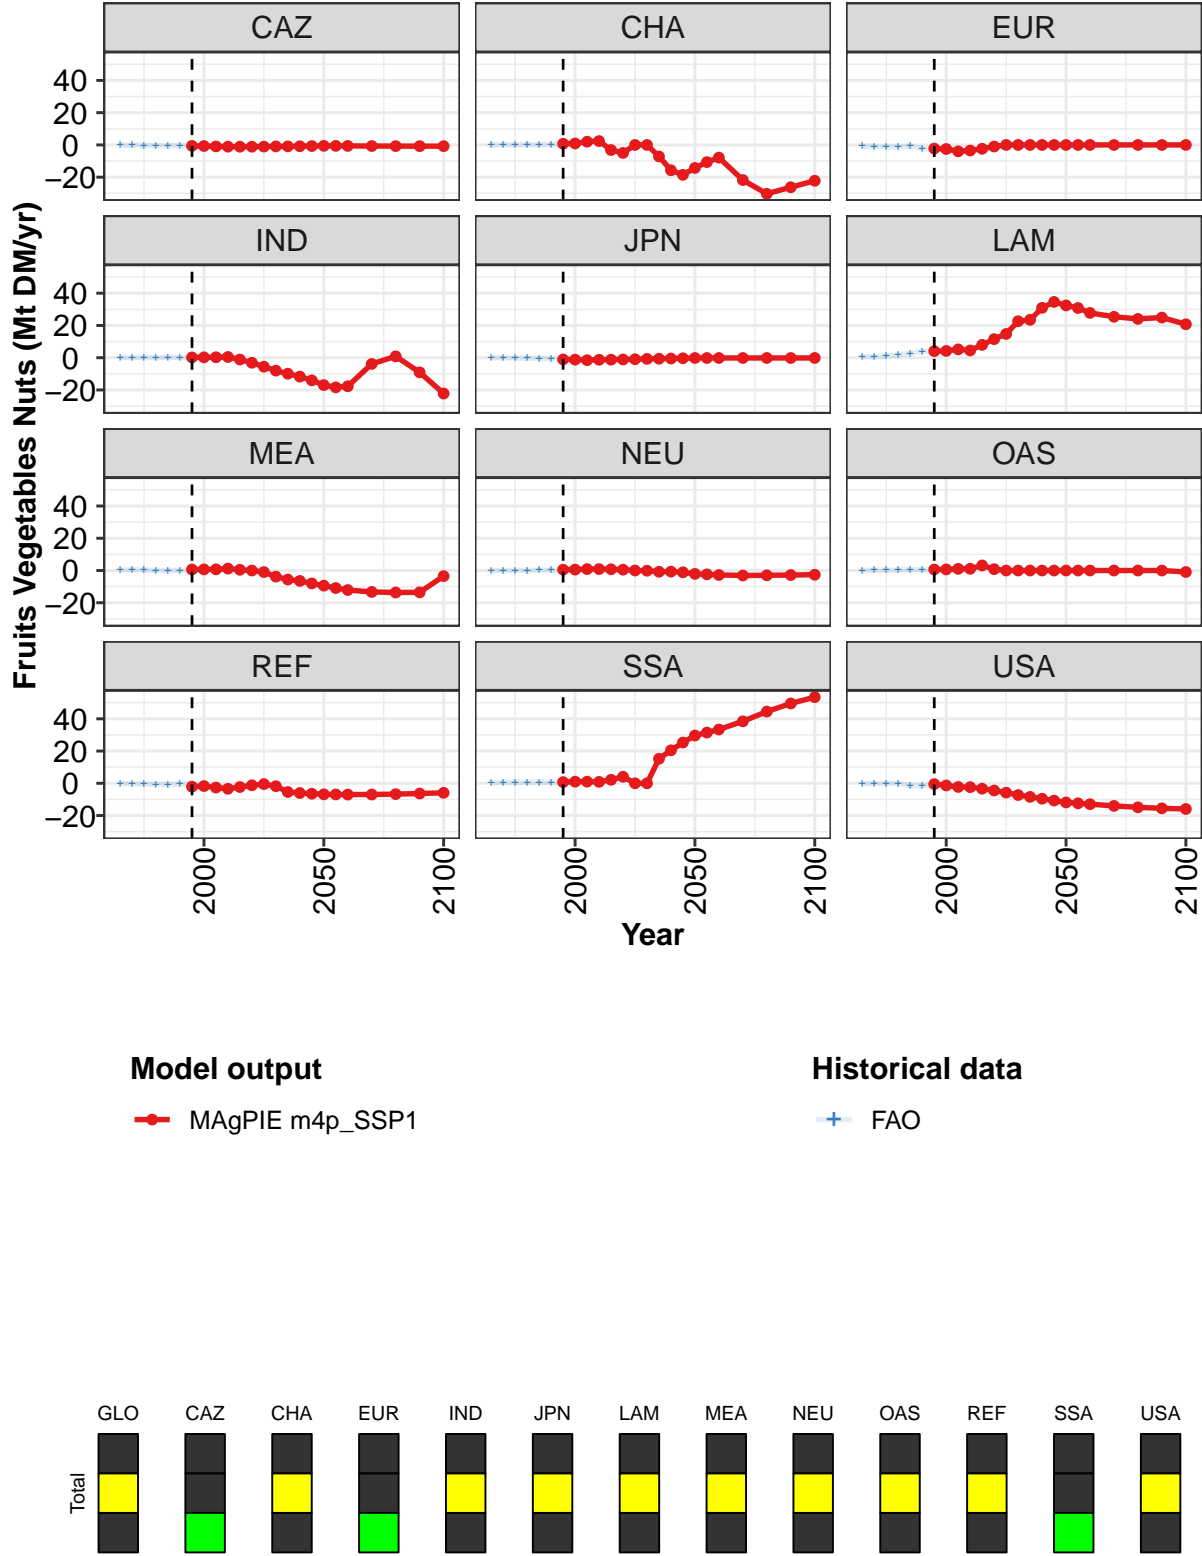

Figure 493: MAgPIE m4p\_SSP1 — Trade—Net-Trade—Crops—Other crops—Fruits Vegetables Nuts (Mt DM/yr)



|     | 1995 | 2000 | 2005 | 2010 | 2015 | 2020 | 2025 | 2030 | 2035 | 2040  | 2045  |
|-----|------|------|------|------|------|------|------|------|------|-------|-------|
| GLO | 1.0  | 0.9  | -0.2 | -0.1 | -0.1 | 0.0  | -0.0 | -0.0 | 0.0  | 0.0   | -0.0  |
| CAZ | -0.6 | -0.7 | -0.9 | -1.1 | -1.1 | -1.1 | -1.0 | -0.9 | -0.9 | -0.8  | -0.7  |
| CHA | 0.7  | 0.9  | 2.0  | 2.4  | -3.2 | -5.0 | 0.0  | -0.0 | -7.1 | -15.7 | -18.6 |
| EUR | -2.2 | -2.5 | -4.0 | -3.5 | -2.4 | -1.0 | 0.0  | 0.0  | 0.0  | 0.0   | 0.0   |
| IND | 0.2  | 0.2  | 0.3  | 0.5  | -1.1 | -3.1 | -5.6 | -8.0 | -9.9 | -11.7 | -14.0 |
| JPN | -1.1 | -1.2 | -1.5 | -1.3 | -1.2 | -1.1 | -0.9 | -0.7 | -0.6 | -0.5  | -0.3  |
| LAM | 4.1  | 4.2  | 5.2  | 4.5  | 8.0  | 11.5 | 14.8 | 22.6 | 23.5 | 30.9  | 34.6  |
| MEA | 0.6  | 0.7  | 0.7  | 1.2  | 0.5  | -0.0 | -1.0 | -3.8 | -5.6 | -6.5  | -8.0  |
| NEU | 0.5  | 0.6  | 0.9  | 0.9  | 0.8  | 0.5  | 0.0  | -0.1 | -0.8 | -0.7  | -1.1  |
| OAS | 0.6  | 0.7  | 1.0  | 1.1  | 3.2  | 0.8  | 0.0  | 0.0  | -0.0 | 0.0   | -0.0  |
| REF | -2.1 | -1.7 | -2.6 | -3.4 | -2.3 | -1.2 | -0.5 | -1.8 | -5.4 | -6.0  | -6.5  |
| SSA | 0.7  | 1.0  | 1.0  | 0.9  | 2.2  | 4.1  | 0.0  | 0.0  | 15.2 | 20.5  | 25.3  |
| USA | -0.5 | -1.3 | -2.3 | -2.4 | -3.3 | -4.5 | -5.8 | -7.3 | -8.4 | -9.6  | -10.7 |

Table 1878: MAgPIE m4p\_SSP1 — Trade—Net-Trade—Crops—Other crops—Fruits Vegetables Nuts (Mt DM/yr) [PART 1/2]

|     | 2050  | 2055  | 2060  | 2070  | 2080  | 2090  | 2100  |
|-----|-------|-------|-------|-------|-------|-------|-------|
| GLO | 0.0   | -0.0  | 0.0   | 0.0   | 0.0   | 0.0   | 0.0   |
| CAZ | -0.5  | -0.6  | -0.6  | -0.7  | -0.7  | -0.8  | -0.8  |
| CHA | -14.3 | -10.7 | -7.9  | -21.8 | -30.3 | -26.2 | -22.2 |
| EUR | 0.0   | 0.0   | 0.0   | 0.0   | 0.0   | -0.0  | -0.0  |
| IND | -17.0 | -18.4 | -17.7 | -3.8  | 0.9   | -9.1  | -22.2 |
| JPN | -0.2  | -0.2  | -0.2  | -0.2  | -0.2  | -0.2  | -0.2  |
| LAM | 32.4  | 30.8  | 27.8  | 25.4  | 24.1  | 24.9  | 20.7  |
| MEA | -9.4  | -10.9 | -12.1 | -13.3 | -13.6 | -13.5 | -3.5  |
| NEU | -2.1  | -2.4  | -2.8  | -3.1  | -3.0  | -2.8  | -2.6  |
| OAS | 0.0   | 0.0   | 0.0   | 0.0   | 0.0   | -0.0  | -0.9  |
| REF | -6.8  | -6.9  | -7.0  | -7.0  | -6.7  | -6.3  | -5.9  |
| SSA | 29.6  | 31.5  | 33.4  | 38.4  | 44.5  | 49.5  | 53.4  |
| USA | -11.9 | -12.4 | -12.9 | -14.0 | -14.9 | -15.5 | -15.9 |

Table 1879: MAgPIE m4p\_SSP1 — Trade—Net-Trade—Crops—Other crops—Fruits Vegetables Nuts (Mt DM/yr) [PART 2/2]

|     | 1965  | 1970  | 1975  | 1980  | 1985  | 1990  | 1995  | 2000  | 2005  | 2010  |
|-----|-------|-------|-------|-------|-------|-------|-------|-------|-------|-------|
| GLO | 0.00  | 0.00  | 0.00  | 0.00  | 0.00  | 0.00  | 0.00  | 0.00  | 0.00  | 0.00  |
| CAZ | -0.20 | -0.22 | -0.42 | -0.50 | -0.54 | -0.54 | -0.62 | -0.71 | -0.90 | -1.08 |
| CHA | 0.02  | 0.10  | 0.11  | 0.15  | 0.16  | 0.24  | 0.39  | 0.61  | 1.88  | 2.48  |
| EUR | -0.84 | -1.13 | -1.16 | -1.33 | -0.77 | -2.37 | -2.37 | -2.71 | -3.91 | -3.43 |
| IND | 0.05  | 0.06  | 0.09  | 0.13  | 0.16  | 0.12  | 0.18  | 0.21  | 0.38  | 0.60  |
| JPN | -0.03 | -0.09 | -0.19 | -0.31 | -0.41 | -0.63 | -1.05 | -1.18 | -1.49 | -1.23 |
| LAM | 0.69  | 0.61  | 1.07  | 1.71  | 2.58  | 3.91  | 3.79  | 4.27  | 5.48  | 5.18  |
| MEA | 0.35  | 0.48  | 0.35  | 0.05  | -0.05 | 0.05  | -0.06 | 0.05  | 0.09  | 0.16  |
| NEU | -0.11 | -0.01 | 0.02  | 0.00  | 0.19  | 0.15  | 0.18  | 0.35  | 0.61  | 0.71  |
| OAS | 0.04  | 0.18  | 0.18  | 0.28  | 0.34  | 0.43  | 0.21  | 0.33  | 0.53  | 0.27  |
| REF | -0.25 | -0.35 | -0.53 | -0.70 | -0.81 | -0.35 | -0.66 | -0.62 | -1.51 | -2.17 |
| SSA | 0.40  | 0.60  | 0.58  | 0.53  | 0.59  | 0.61  | 0.56  | 0.74  | 1.04  | 0.92  |
| USA | -0.13 | -0.23 | -0.09 | -0.02 | -1.43 | -1.61 | -0.55 | -1.33 | -2.19 | -2.41 |

Table 1880: FAO — Trade—Net-Trade—Crops—Other crops—Fruits Vegetables Nuts (Mt DM/yr)

58.1.14 Other crops—Potatoes

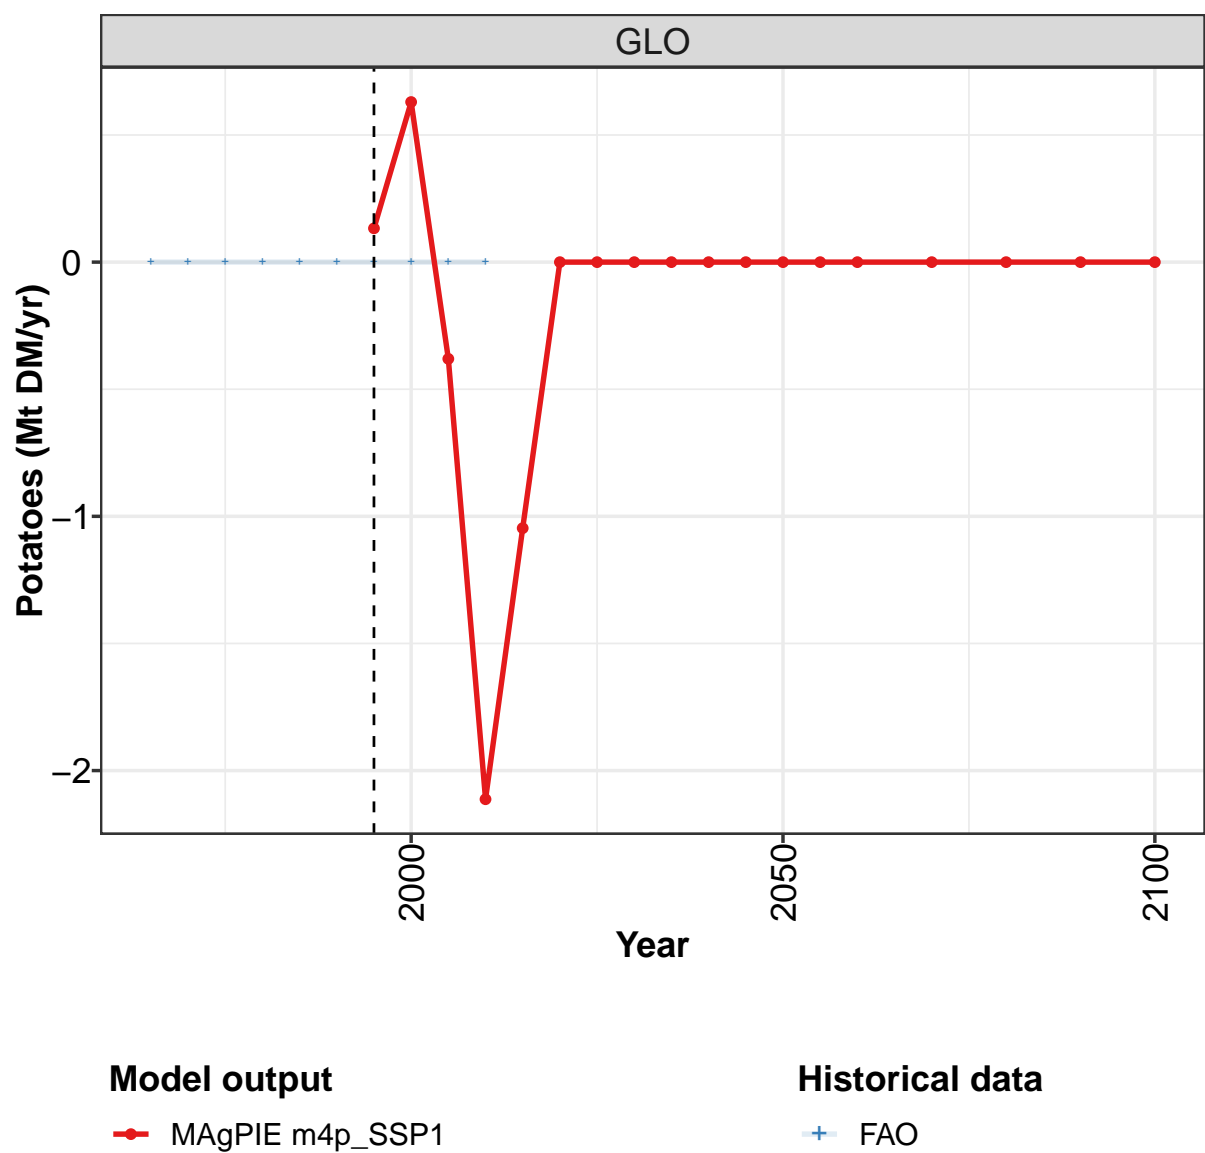

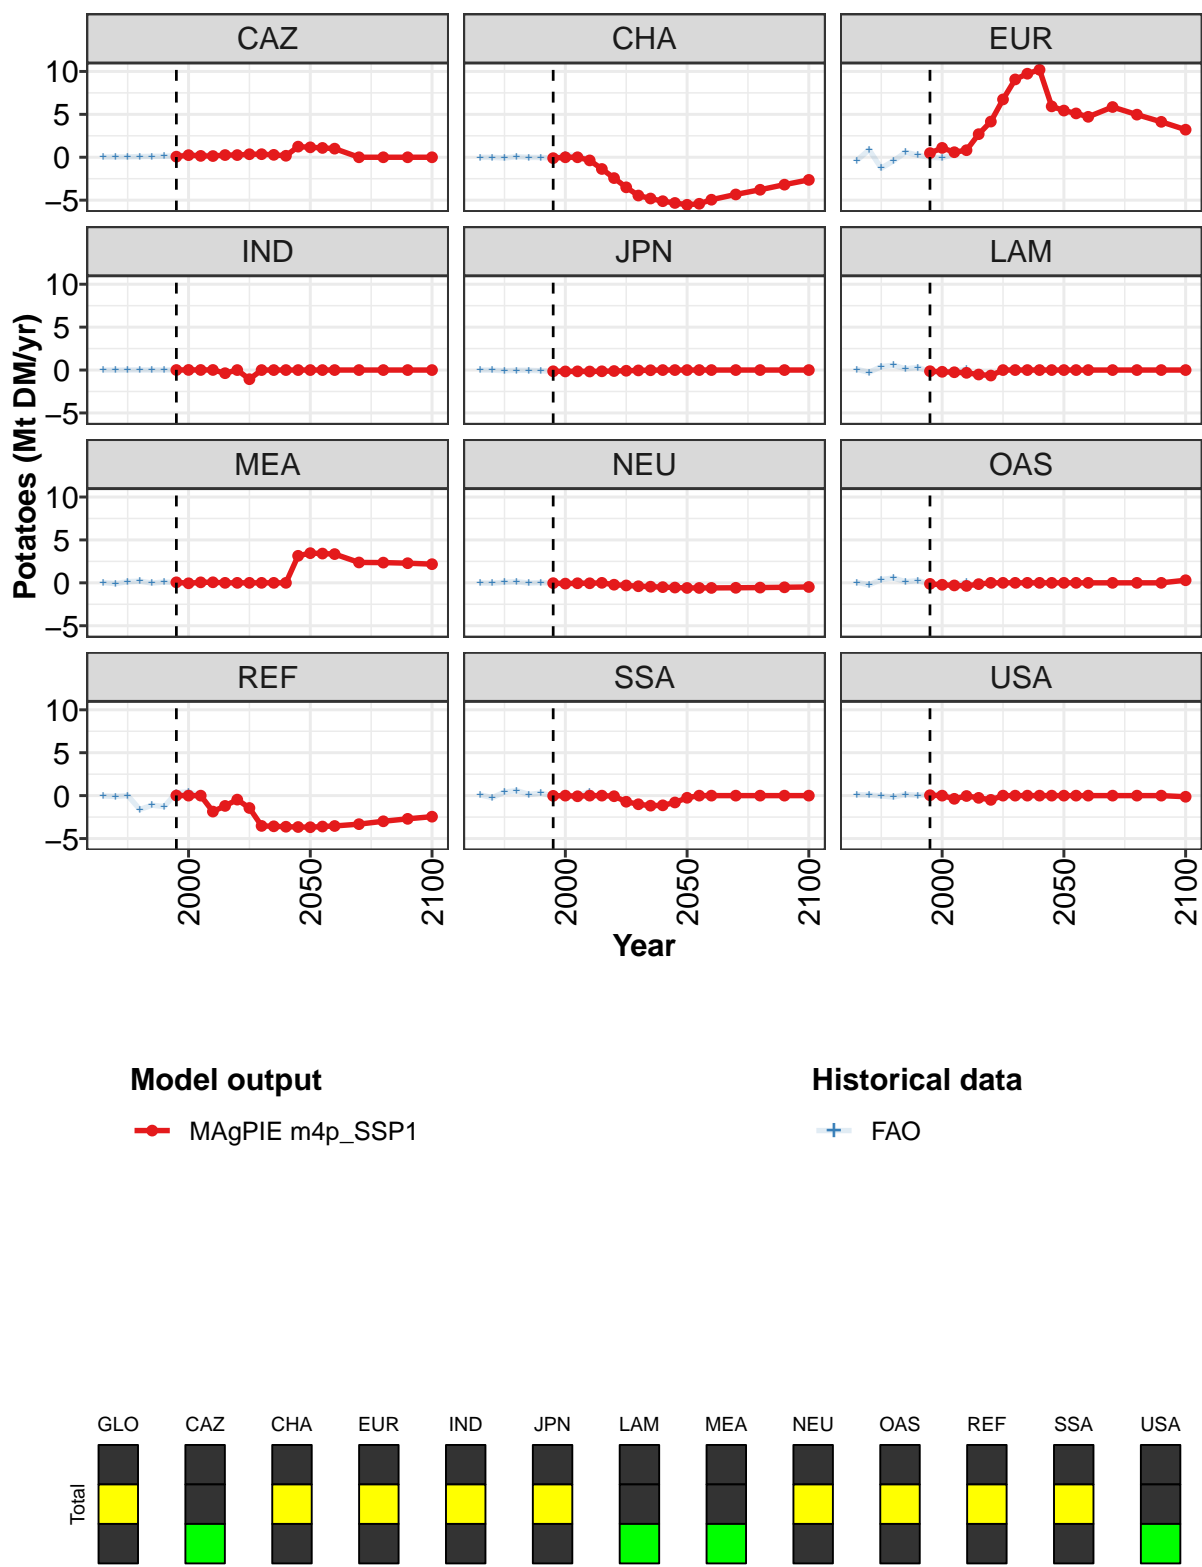

Figure 494: MAgPIE m4p\_SSP1 — Trade—Net-Trade—Crops—Other crops—Potatoes (Mt DM/yr)

|     | 1995 | 2000 | 2005 | 2010 | 2015 | 2020 | 2025 | 2030 | 2035 | 2040 | 2045 |
|-----|------|------|------|------|------|------|------|------|------|------|------|
| GLO | 0.1  | 0.6  | -0.4 | -2.1 | -1.0 | 0.0  | 0.0  | 0.0  | 0.0  | -0.0 | 0.0  |
| CAZ | 0.1  | 0.2  | 0.2  | 0.1  | 0.3  | 0.3  | 0.4  | 0.4  | 0.3  | 0.2  | 1.2  |
| CHA | -0.1 | 0.0  | 0.0  | -0.4 | -1.4 | -2.4 | -3.5 | -4.5 | -4.8 | -5.1 | -5.3 |
| EUR | 0.5  | 1.1  | 0.6  | 0.8  | 2.7  | 4.2  | 6.7  | 9.1  | 9.7  | 10.2 | 5.9  |
| IND | 0.0  | 0.0  | 0.0  | 0.0  | -0.4 | 0.0  | -1.1 | -0.0 | 0.0  | 0.0  | 0.0  |
| JPN | -0.1 | -0.2 | -0.2 | -0.2 | -0.1 | -0.1 | -0.1 | -0.0 | -0.0 | -0.0 | -0.0 |
| LAM | -0.1 | -0.2 | -0.3 | -0.3 | -0.5 | -0.6 | 0.0  | 0.0  | 0.0  | 0.0  | 0.0  |
| MEA | 0.1  | -0.0 | 0.1  | 0.1  | 0.0  | 0.0  | 0.0  | 0.0  | 0.0  | 0.0  | 3.2  |
| NEU | -0.0 | -0.1 | -0.0 | -0.0 | 0.0  | -0.2 | -0.3 | -0.4 | -0.4 | -0.5 | -0.5 |
| OAS | -0.1 | -0.2 | -0.3 | -0.4 | -0.1 | 0.0  | 0.0  | 0.0  | 0.0  | 0.0  | 0.0  |
| REF | 0.0  | -0.0 | 0.0  | -1.9 | -1.2 | -0.5 | -1.4 | -3.5 | -3.6 | -3.6 | -3.7 |
| SSA | -0.0 | 0.0  | -0.1 | 0.0  | -0.0 | -0.1 | -0.7 | -1.0 | -1.2 | -1.1 | -0.8 |
| USA | 0.0  | 0.0  | -0.4 | -0.0 | -0.3 | -0.5 | 0.0  | -0.0 | 0.0  | 0.0  | 0.0  |

Table 1881: MAgPIE m4p\_SSP1 — Trade—Net-Trade—Crops—Other crops—Potatoes (Mt DM/yr) [PART 1/2]

|     | 2050 | 2055 | 2060 | 2070 | 2080 | 2090 | 2100 |
|-----|------|------|------|------|------|------|------|
| GLO | 0.0  | 0.0  | 0.0  | 0.0  | 0.0  | 0.0  | -0.0 |
| CAZ | 1.2  | 1.1  | 1.0  | 0.0  | 0.0  | 0.0  | 0.0  |
| CHA | -5.5 | -5.4 | -4.9 | -4.3 | -3.8 | -3.2 | -2.6 |
| EUR | 5.4  | 5.1  | 4.7  | 5.9  | 5.0  | 4.1  | 3.2  |
| IND | 0.0  | 0.0  | 0.0  | 0.0  | 0.0  | 0.0  | 0.0  |
| JPN | 0.0  | 0.0  | 0.0  | 0.0  | 0.0  | 0.0  | 0.0  |
| LAM | 0.0  | 0.0  | 0.0  | 0.0  | 0.0  | 0.0  | 0.0  |
| MEA | 3.5  | 3.4  | 3.4  | 2.4  | 2.4  | 2.3  | 2.2  |
| NEU | -0.6 | -0.6 | -0.6 | -0.6 | -0.6 | -0.5 | -0.5 |
| OAS | 0.0  | 0.0  | 0.0  | 0.0  | 0.0  | 0.0  | 0.3  |
| REF | -3.7 | -3.6 | -3.5 | -3.3 | -3.0 | -2.7 | -2.5 |
| SSA | -0.2 | 0.0  | 0.0  | 0.0  | 0.0  | 0.0  | 0.0  |
| USA | 0.0  | 0.0  | 0.0  | 0.0  | 0.0  | 0.0  | -0.1 |

Table 1882: MAgPIE m4p\_SSP1 — Trade—Net-Trade—Crops—Other crops—Potatoes (Mt DM/yr) [PART 2/2]

|     | 1965  | 1970  | 1975  | 1980  | 1985  | 1990  | 1995  | 2000  | 2005  | 2010  |
|-----|-------|-------|-------|-------|-------|-------|-------|-------|-------|-------|
| GLO | 0.00  | 0.00  | 0.00  | 0.00  | 0.00  | 0.00  | 0.00  | 0.00  | 0.00  | 0.00  |
| CAZ | 0.02  | 0.03  | 0.04  | 0.08  | 0.10  | 0.11  | 0.18  | 0.31  | 0.29  | 0.26  |
| CHA | -0.01 | -0.01 | -0.09 | 0.06  | -0.01 | -0.03 | -0.08 | 0.29  | 0.20  | -0.28 |
| EUR | -0.36 | 0.87  | -1.27 | -0.42 | 0.58  | 0.23  | -0.00 | -0.07 | 0.35  | 1.02  |
| IND | 0.00  | -0.00 | 0.01  | 0.01  | 0.00  | 0.01  | 0.01  | 0.01  | 0.02  | 0.05  |
| JPN | 0.01  | -0.00 | -0.08 | -0.03 | -0.03 | -0.08 | -0.14 | -0.16 | -0.15 | -0.16 |
| LAM | 0.09  | -0.27 | 0.41  | 0.56  | 0.14  | 0.30  | -0.18 | -0.35 | -0.16 | 0.12  |
| MEA | 0.04  | -0.09 | 0.13  | 0.20  | -0.03 | 0.10  | 0.02  | -0.11 | 0.08  | 0.16  |
| NEU | -0.00 | -0.04 | 0.07  | 0.14  | -0.02 | 0.03  | -0.05 | -0.13 | -0.02 | 0.09  |
| OAS | 0.06  | -0.24 | 0.38  | 0.57  | 0.12  | 0.27  | -0.14 | -0.35 | -0.22 | 0.07  |
| REF | -0.04 | -0.09 | 0.01  | -1.61 | -1.12 | -1.27 | 0.33  | 0.46  | -0.04 | -1.76 |
| SSA | 0.09  | -0.23 | 0.41  | 0.59  | 0.14  | 0.30  | -0.05 | -0.13 | 0.01  | 0.47  |
| USA | 0.11  | 0.08  | -0.04 | -0.15 | 0.13  | 0.03  | 0.11  | 0.22  | -0.37 | -0.05 |

Table 1883: FAO — Trade—Net-Trade—Crops—Other crops—Potatoes (Mt DM/yr)

58.1.15 Other crops—Pulses

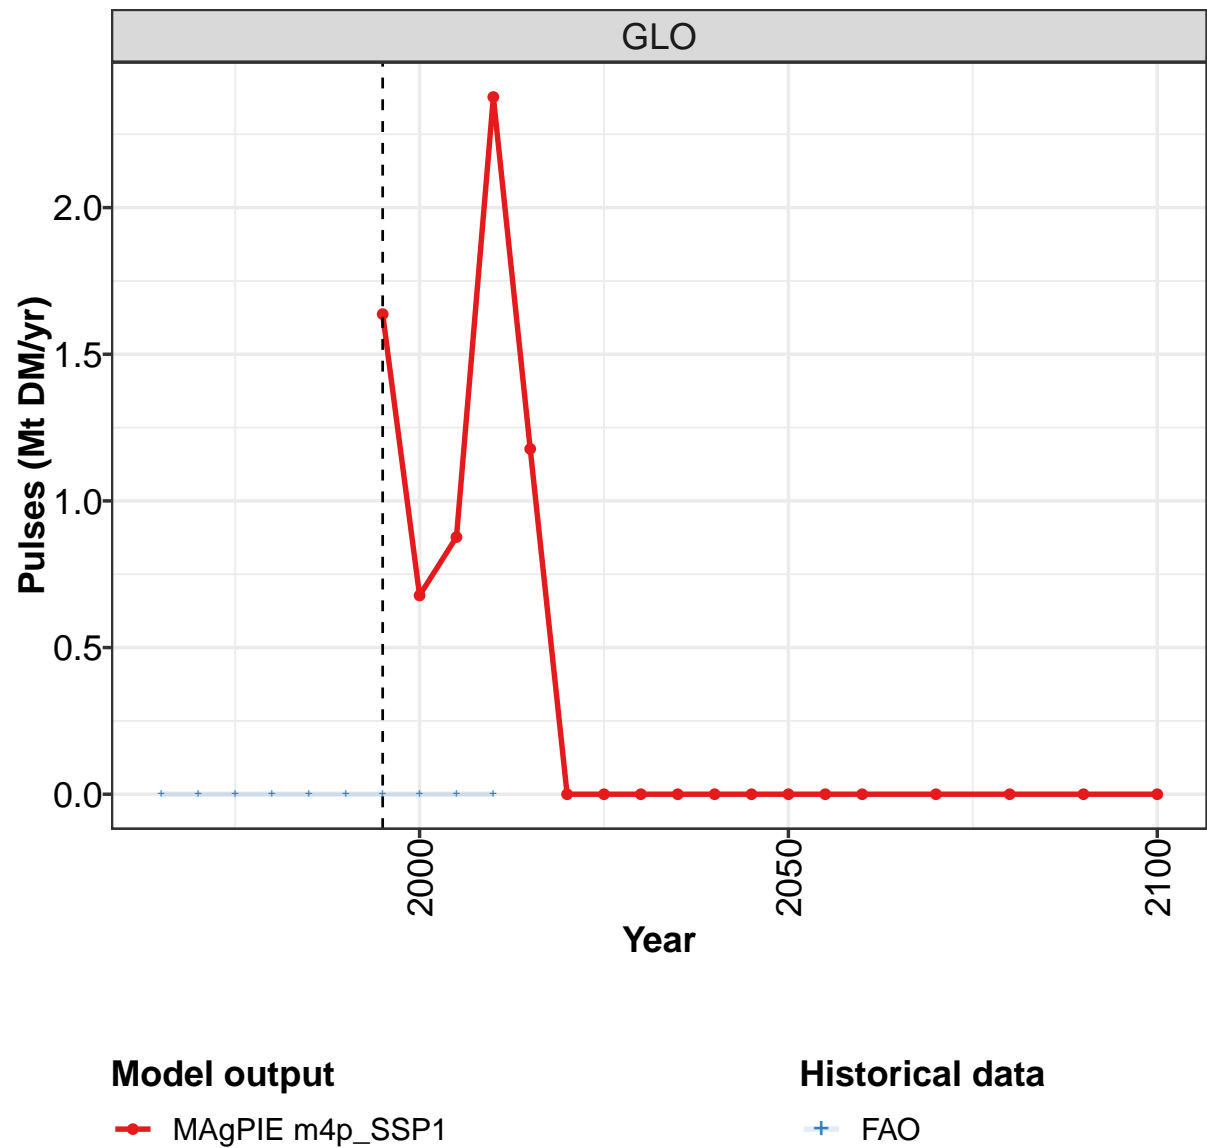

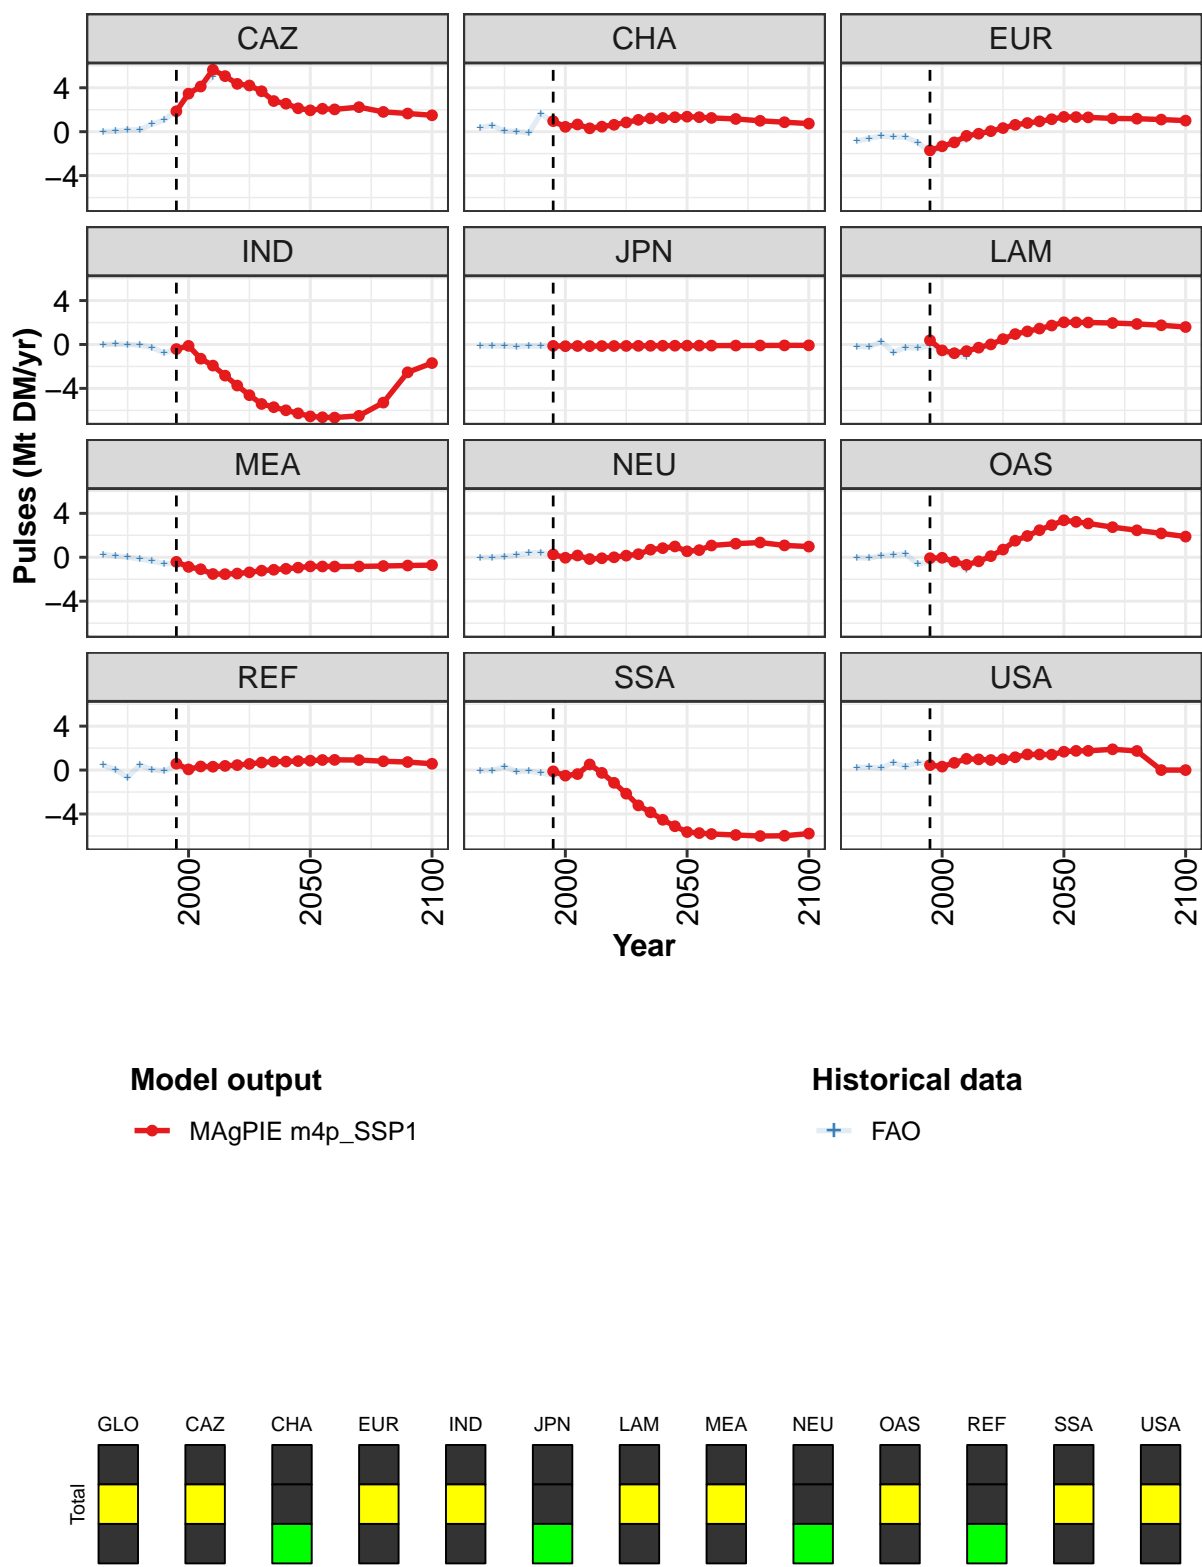

Figure 495: MAgPIE m4p\_SSP1 — Trade—Net-Trade—Crops—Other crops—Pulses (Mt DM/yr)

|     | 1995  | 2000  | 2005  | 2010  | 2015  | 2020  | 2025  | 2030  | 2035  | 2040  | 2045  |
|-----|-------|-------|-------|-------|-------|-------|-------|-------|-------|-------|-------|
| GLO | 1.64  | 0.68  | 0.88  | 2.38  | 1.18  | 0.00  | 0.00  | -0.00 | 0.00  | 0.00  | 0.00  |
| CAZ | 1.86  | 3.47  | 4.11  | 5.64  | 5.06  | 4.36  | 4.21  | 3.68  | 2.79  | 2.55  | 2.13  |
| CHA | 0.96  | 0.44  | 0.66  | 0.31  | 0.46  | 0.63  | 0.84  | 1.08  | 1.21  | 1.25  | 1.32  |
| EUR | -1.70 | -1.33 | -0.97 | -0.38 | -0.18 | 0.05  | 0.33  | 0.62  | 0.79  | 0.94  | 1.13  |
| IND | -0.42 | -0.13 | -1.29 | -1.92 | -2.83 | -3.74 | -4.62 | -5.42 | -5.71 | -5.99 | -6.27 |
| JPN | -0.13 | -0.15 | -0.14 | -0.15 | -0.14 | -0.14 | -0.13 | -0.12 | -0.12 | -0.11 | -0.11 |
| LAM | 0.39  | -0.53 | -0.79 | -0.60 | -0.29 | 0.01  | 0.49  | 0.95  | 1.19  | 1.45  | 1.73  |
| MEA | -0.42 | -0.87 | -1.09 | -1.52 | -1.54 | -1.48 | -1.37 | -1.22 | -1.14 | -1.05 | -0.95 |
| NEU | 0.26  | -0.04 | 0.16  | -0.16 | -0.09 | 0.00  | 0.15  | 0.28  | 0.69  | 0.83  | 0.99  |
| OAS | -0.08 | -0.05 | -0.40 | -0.69 | -0.37 | 0.10  | 0.70  | 1.51  | 1.94  | 2.46  | 2.92  |
| REF | 0.58  | 0.06  | 0.33  | 0.31  | 0.38  | 0.45  | 0.56  | 0.69  | 0.77  | 0.77  | 0.82  |
| SSA | -0.12 | -0.51 | -0.36 | 0.51  | -0.25 | -1.16 | -2.15 | -3.22 | -3.85 | -4.53 | -5.11 |
| USA | 0.45  | 0.32  | 0.66  | 1.03  | 0.98  | 0.92  | 0.99  | 1.17  | 1.42  | 1.42  | 1.40  |

Table 1884: MAgPIE m4p\_SSP1 — Trade—Net-Trade—Crops—Other crops—Pulses (Mt DM/yr) [PART 1/2]

|     | 2050  | 2055  | 2060  | 2070  | 2080  | 2090  | 2100  |
|-----|-------|-------|-------|-------|-------|-------|-------|
| GLO | -0.00 | 0.00  | -0.00 | 0.00  | -0.00 | 0.00  | 0.00  |
| CAZ | 1.95  | 2.09  | 2.03  | 2.24  | 1.80  | 1.65  | 1.49  |
| CHA | 1.37  | 1.32  | 1.25  | 1.16  | 0.99  | 0.86  | 0.74  |
| EUR | 1.35  | 1.33  | 1.31  | 1.21  | 1.18  | 1.10  | 1.01  |
| IND | -6.55 | -6.63 | -6.66 | -6.50 | -5.29 | -2.54 | -1.69 |
| JPN | -0.11 | -0.10 | -0.10 | -0.10 | -0.09 | -0.08 | -0.08 |
| LAM | 2.02  | 2.02  | 2.00  | 1.95  | 1.87  | 1.75  | 1.59  |
| MEA | -0.83 | -0.84 | -0.84 | -0.84 | -0.80 | -0.75 | -0.71 |
| NEU | 0.54  | 0.65  | 1.07  | 1.24  | 1.34  | 1.08  | 0.98  |
| OAS | 3.37  | 3.23  | 3.08  | 2.74  | 2.46  | 2.17  | 1.88  |
| REF | 0.86  | 0.92  | 0.93  | 0.91  | 0.80  | 0.73  | 0.58  |
| SSA | -5.64 | -5.74 | -5.83 | -5.91 | -6.01 | -5.98 | -5.78 |
| USA | 1.67  | 1.75  | 1.75  | 1.89  | 1.74  | 0.00  | 0.00  |

Table 1885: MAgPIE m4p\_SSP1 — Trade—Net-Trade—Crops—Other crops—Pulses (Mt DM/yr) [PART 2/2]

|     | 1965  | 1970  | 1975  | 1980  | 1985  | 1990  | 1995  | 2000  | 2005  | 2010  |
|-----|-------|-------|-------|-------|-------|-------|-------|-------|-------|-------|
| GLO | 0.00  | 0.00  | 0.00  | 0.00  | 0.00  | 0.00  | 0.00  | 0.00  | 0.00  | 0.00  |
| CAZ | 0.01  | 0.04  | 0.16  | 0.17  | 0.70  | 1.06  | 1.93  | 3.60  | 4.03  | 5.02  |
| CHA | 0.37  | 0.58  | 0.04  | 0.03  | -0.11 | 1.64  | 0.84  | 0.25  | 0.63  | 0.19  |
| EUR | -0.86 | -0.61 | -0.39 | -0.48 | -0.50 | -0.98 | -1.86 | -1.43 | -1.10 | -0.71 |
| IND | -0.00 | 0.03  | 0.00  | -0.07 | -0.28 | -0.78 | -0.41 | -0.10 | -1.29 | -1.89 |
| JPN | -0.15 | -0.12 | -0.16 | -0.20 | -0.15 | -0.16 | -0.13 | -0.16 | -0.14 | -0.16 |
| LAM | -0.19 | -0.22 | 0.28  | -0.72 | -0.26 | -0.33 | -0.12 | -0.66 | -0.99 | -1.12 |
| MEA | 0.26  | 0.12  | 0.01  | -0.15 | -0.34 | -0.58 | -0.56 | -0.93 | -1.15 | -1.72 |
| NEU | -0.03 | -0.00 | 0.07  | 0.20  | 0.38  | 0.43  | 0.17  | -0.09 | -0.01 | -0.31 |
| OAS | -0.03 | -0.09 | 0.16  | 0.20  | 0.31  | -0.63 | -0.39 | -0.16 | -0.51 | -1.15 |
| REF | 0.44  | 0.03  | -0.66 | 0.47  | 0.03  | -0.07 | 0.42  | -0.03 | 0.32  | 0.20  |
| SSA | -0.06 | -0.02 | 0.31  | -0.13 | -0.09 | -0.28 | -0.48 | -0.62 | -0.51 | 0.55  |
| USA | 0.23  | 0.26  | 0.19  | 0.68  | 0.32  | 0.68  | 0.58  | 0.33  | 0.72  | 1.08  |

Table 1886: FAO — Trade—Net-Trade—Crops—Other crops—Pulses (Mt DM/yr)

58.1.16 Other crops—Tropical roots

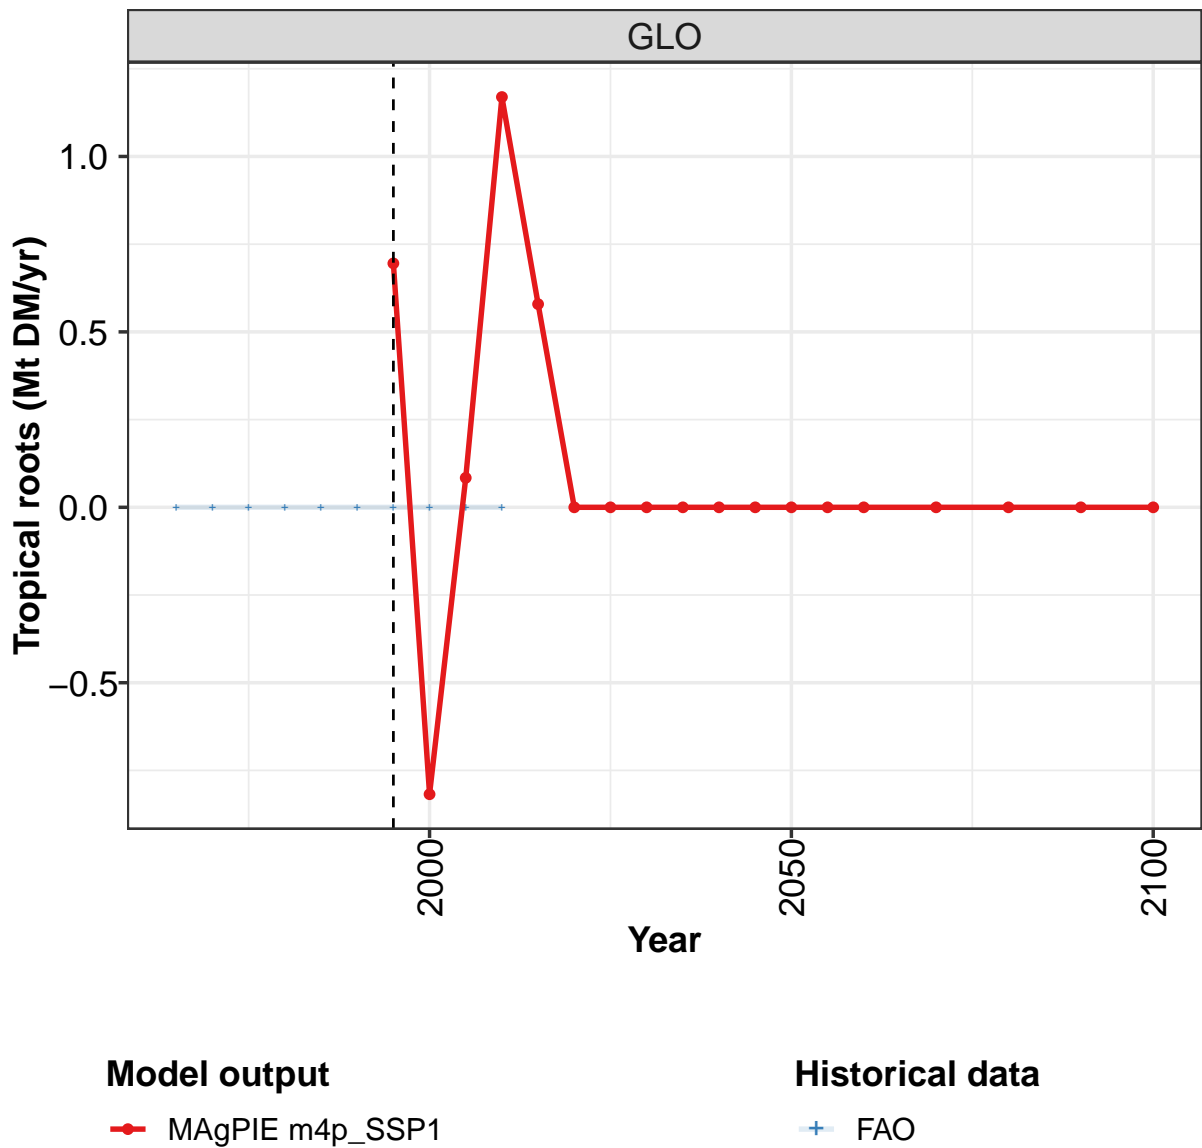



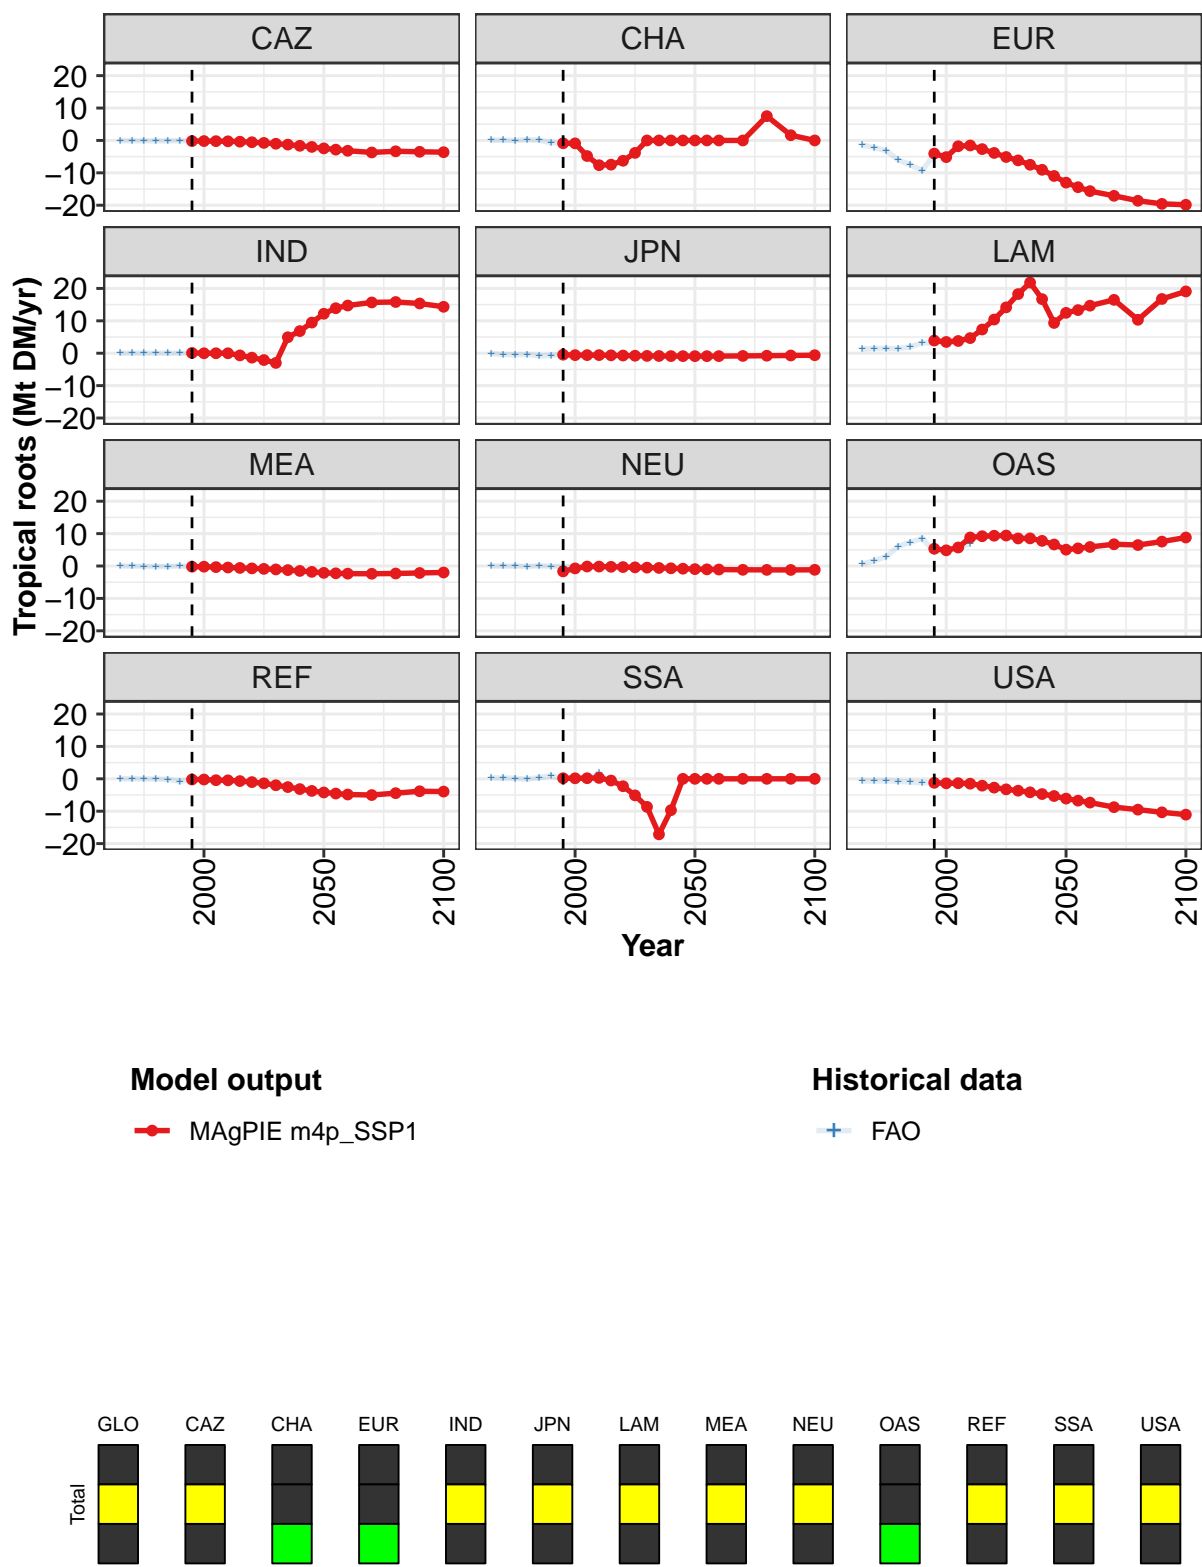

Figure 496: MAgPIE m4p\_SSP1 — Trade—Net-Trade—Crops—Other crops—Tropical roots (Mt DM/yr)

|     | 1995 | 2000 | 2005 | 2010 | 2015 | 2020 | 2025 | 2030 | 2035  | 2040 | 2045  |
|-----|------|------|------|------|------|------|------|------|-------|------|-------|
| GLO | 0.7  | -0.8 | 0.1  | 1.2  | 0.6  | -0.0 | 0.0  | -0.0 | 0.0   | 0.0  | 0.0   |
| CAZ | -0.2 | -0.2 | -0.2 | -0.3 | -0.4 | -0.5 | -0.8 | -1.0 | -1.3  | -1.6 | -2.0  |
| CHA | -0.9 | -0.9 | -4.8 | -7.6 | -7.5 | -6.3 | -3.8 | 0.0  | 0.0   | 0.0  | 0.0   |
| EUR | -4.0 | -5.1 | -1.8 | -1.5 | -2.7 | -3.8 | -5.1 | -6.2 | -7.5  | -9.1 | -11.0 |
| IND | 0.1  | 0.0  | 0.0  | 0.0  | -0.7 | -1.4 | -2.1 | -3.0 | 4.9   | 6.8  | 9.5   |
| JPN | -0.4 | -0.6 | -0.6 | -0.6 | -0.6 | -0.7 | -0.8 | -0.8 | -0.8  | -0.9 | -0.9  |
| LAM | 3.9  | 3.5  | 3.8  | 4.7  | 7.3  | 10.4 | 14.2 | 18.3 | 21.8  | 16.7 | 9.4   |
| MEA | -0.2 | -0.2 | -0.3 | -0.5 | -0.6 | -0.7 | -0.9 | -1.0 | -1.2  | -1.5 | -1.8  |
| NEU | -1.7 | -0.7 | -0.1 | -0.2 | -0.2 | -0.3 | -0.4 | -0.5 | -0.6  | -0.7 | -0.8  |
| OAS | 5.3  | 4.9  | 5.7  | 8.8  | 9.2  | 9.4  | 9.4  | 8.5  | 8.5   | 7.8  | 6.7   |
| REF | -0.2 | -0.2 | -0.4 | -0.5 | -0.7 | -1.0 | -1.4 | -2.0 | -2.5  | -3.2 | -3.7  |
| SSA | 0.2  | 0.2  | 0.2  | 0.3  | -0.5 | -2.3 | -5.1 | -8.6 | -17.1 | -9.7 | 0.0   |
| USA | -1.2 | -1.4 | -1.3 | -1.5 | -2.1 | -2.7 | -3.3 | -3.7 | -4.2  | -4.7 | -5.3  |

Table 1887: MAgPIE m4p\_SSP1 — Trade—Net-Trade—Crops—Other crops—Tropical roots (Mt DM/yr)  
[PART 1/2]

|     | 2050  | 2055  | 2060  | 2070  | 2080  | 2090  | 2100  |
|-----|-------|-------|-------|-------|-------|-------|-------|
| GLO | 0.0   | 0.0   | 0.0   | 0.0   | -0.0  | 0.0   | 0.0   |
| CAZ | -2.4  | -2.8  | -3.2  | -3.7  | -3.3  | -3.5  | -3.6  |
| CHA | 0.0   | 0.0   | -0.0  | 0.0   | 7.5   | 1.6   | 0.0   |
| EUR | -13.0 | -14.4 | -15.6 | -17.1 | -18.6 | -19.6 | -19.9 |
| IND | 12.2  | 13.9  | 14.7  | 15.7  | 15.8  | 15.4  | 14.3  |
| JPN | -0.9  | -0.9  | -0.9  | -0.8  | -0.8  | -0.7  | -0.6  |
| LAM | 12.5  | 13.3  | 14.7  | 16.5  | 10.3  | 16.8  | 19.1  |
| MEA | -2.1  | -2.2  | -2.3  | -2.4  | -2.3  | -2.1  | -2.0  |
| NEU | -0.9  | -1.0  | -1.1  | -1.2  | -1.2  | -1.2  | -1.2  |
| OAS | 5.1   | 5.5   | 5.9   | 6.7   | 6.5   | 7.5   | 8.8   |
| REF | -4.2  | -4.5  | -4.8  | -5.0  | -4.4  | -3.8  | -3.9  |
| SSA | 0.0   | 0.0   | 0.0   | 0.0   | -0.0  | 0.0   | 0.0   |
| USA | -6.1  | -6.7  | -7.3  | -8.7  | -9.5  | -10.3 | -11.0 |

Table 1888: MAgPIE m4p\_SSP1 — Trade—Net-Trade—Crops—Other crops—Tropical roots (Mt DM/yr)  
[PART 2/2]

|     | 1965  | 1970  | 1975  | 1980  | 1985  | 1990  | 1995  | 2000  | 2005  | 2010  |
|-----|-------|-------|-------|-------|-------|-------|-------|-------|-------|-------|
| GLO | 0.00  | 0.00  | 0.00  | 0.00  | 0.00  | 0.00  | 0.00  | 0.00  | 0.00  | 0.00  |
| CAZ | -0.06 | -0.09 | -0.09 | -0.13 | -0.11 | -0.09 | -0.21 | -0.18 | -0.22 | -0.29 |
| CHA | 0.11  | 0.06  | -0.01 | 0.25  | 0.09  | -0.72 | -0.82 | -1.03 | -4.58 | -7.52 |
| EUR | -1.44 | -2.19 | -3.19 | -6.02 | -7.53 | -9.24 | -4.26 | -5.06 | -1.77 | -1.70 |
| IND | 0.00  | 0.00  | 0.00  | -0.00 | 0.01  | 0.04  | 0.03  | 0.01  | 0.01  | 0.02  |
| JPN | -0.15 | -0.36 | -0.50 | -0.34 | -0.83 | -0.64 | -0.45 | -0.58 | -0.57 | -0.58 |
| LAM | 1.28  | 1.47  | 1.50  | 1.43  | 1.96  | 3.23  | 3.08  | 3.57  | 3.78  | 4.11  |
| MEA | 0.02  | -0.03 | -0.09 | -0.19 | -0.11 | 0.02  | -0.24 | -0.13 | -0.34 | -0.55 |
| NEU | -0.01 | -0.04 | -0.04 | -0.11 | 0.04  | -0.08 | -0.12 | -0.21 | -0.15 | -0.24 |
| OAS | 0.66  | 1.62  | 2.91  | 6.08  | 7.32  | 8.54  | 4.45  | 4.85  | 5.53  | 6.99  |
| REF | 0.01  | -0.01 | -0.00 | -0.06 | -0.18 | -0.80 | -0.23 | -0.17 | -0.42 | -0.52 |
| SSA | 0.26  | 0.24  | 0.16  | -0.12 | 0.39  | 0.95  | -0.01 | 0.32  | 0.08  | 1.79  |
| USA | -0.71 | -0.68 | -0.65 | -0.79 | -1.04 | -1.21 | -1.23 | -1.39 | -1.34 | -1.50 |

Table 1889: FAO — Trade—Net-Trade—Crops—Other crops—Tropical roots (Mt DM/yr)

58.1.17 Sugar crops

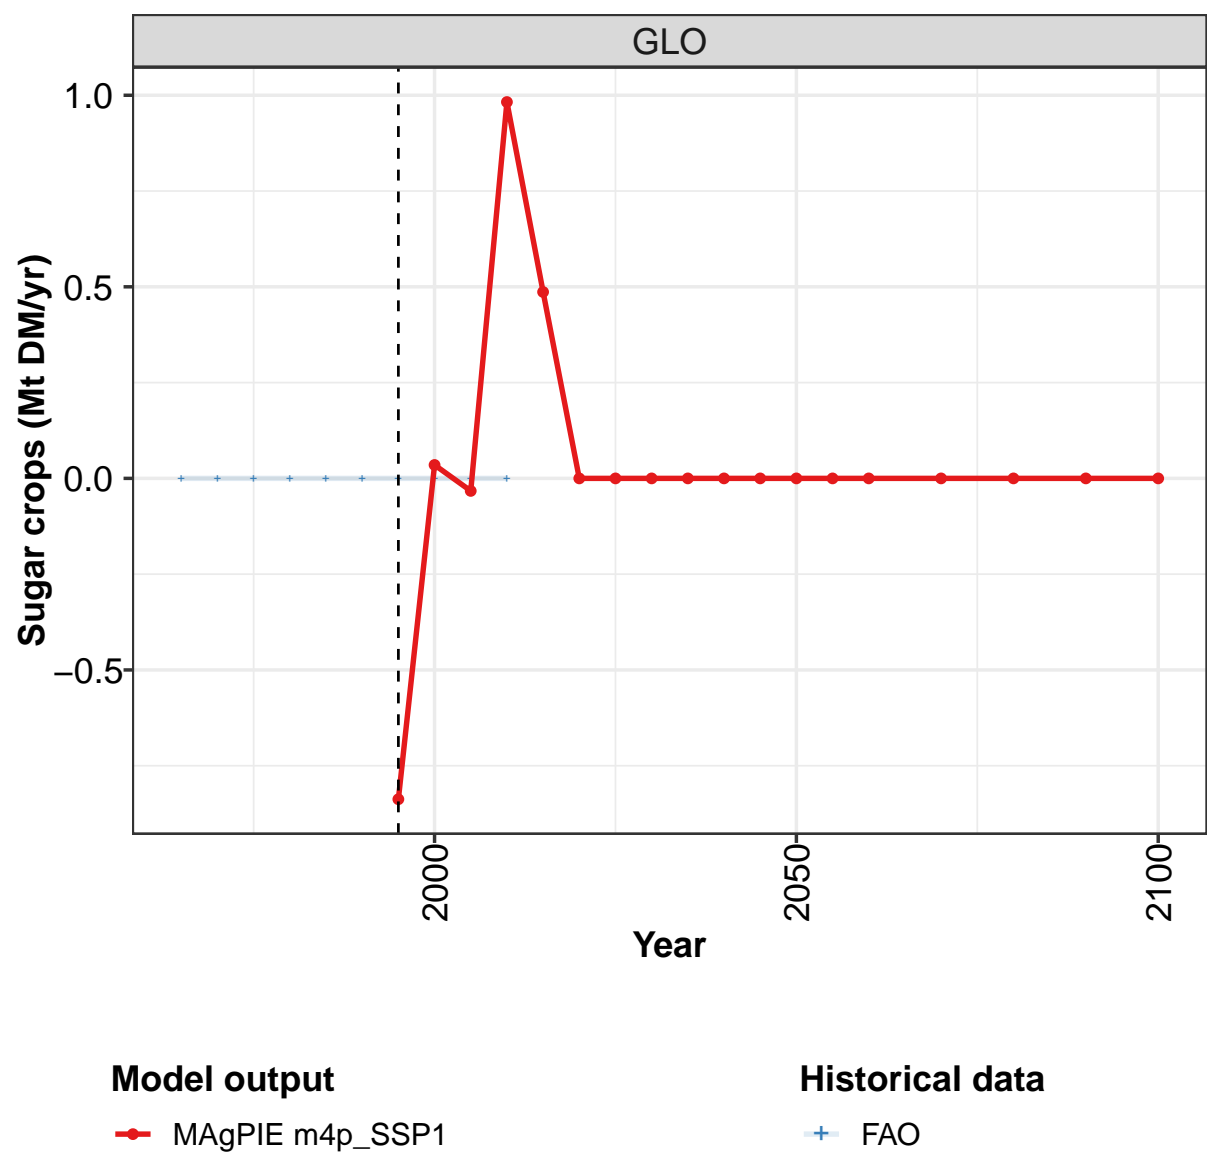

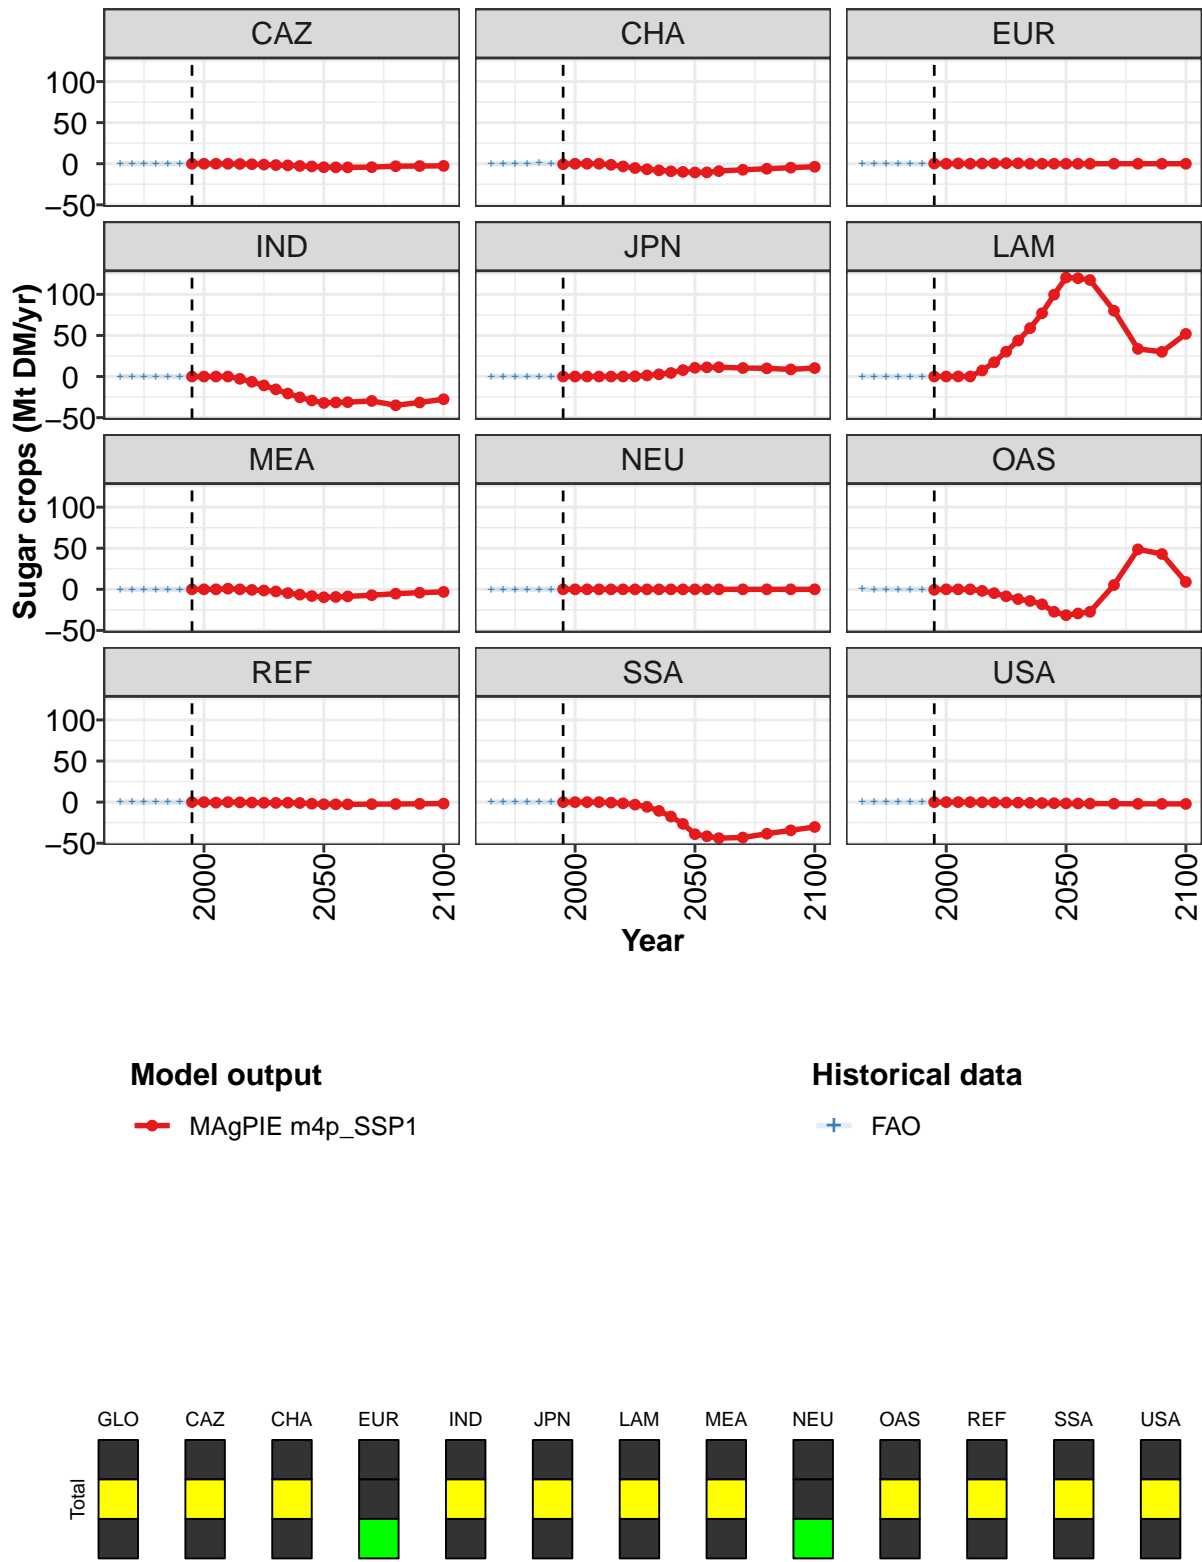

Figure 497: MAgPIE m4p\_SSP1 — Trade—Net-Trade—Crops—Sugar crops (Mt DM/yr)

|     | 1995 | 2000 | 2005 | 2010 | 2015 | 2020 | 2025 | 2030 | 2035 | 2040 | 2045 |
|-----|------|------|------|------|------|------|------|------|------|------|------|
| GLO | -1   | 0    | -0   | 1    | 0    | 0    | -0   | 0    | -0   | 0    | -0   |
| CAZ | 0    | -0   | -0   | -0   | -0   | -1   | -1   | -2   | -2   | -3   | -3   |
| CHA | -1   | 0    | 0    | 0    | -1   | -3   | -5   | -7   | -8   | -9   | -10  |
| EUR | 0    | -0   | 0    | 0    | 0    | 0    | 1    | 1    | -0   | -0   | -0   |
| IND | 0    | -0   | 0    | 0    | -3   | -6   | -11  | -16  | -21  | -25  | -29  |
| JPN | -0   | 0    | 0    | 0    | 0    | 0    | 0    | 1    | 3    | 4    | 8    |
| LAM | 0    | 0    | 0    | 0    | 7    | 17   | 30   | 44   | 59   | 77   | 100  |
| MEA | 0    | 0    | 0    | 1    | 0    | -1   | -1   | -3   | -5   | -6   | -8   |
| NEU | 0    | 0    | 0    | 0    | -0   | -0   | -0   | -0   | -0   | -0   | -0   |
| OAS | -1   | 0    | 0    | 0    | -2   | -5   | -8   | -12  | -14  | -18  | -27  |
| REF | 0    | 0    | -1   | 0    | -0   | -1   | -1   | -1   | -1   | -1   | -2   |
| SSA | 0    | -0   | 0    | 0    | -1   | -1   | -3   | -6   | -11  | -18  | -26  |
| USA | 0    | 0    | -0   | 0    | -0   | -0   | -1   | -1   | -1   | -1   | -1   |

Table 1890: MAgPIE m4p\_SSP1 — Trade—Net-Trade—Crops—Sugar crops (Mt DM/yr) [PART 1/2]

|     | 2050 | 2055 | 2060 | 2070 | 2080 | 2090 | 2100 |
|-----|------|------|------|------|------|------|------|
| GLO | 0    | 0    | -0   | 0    | 0    | 0    | 0    |
| CAZ | -4   | -4   | -4   | -4   | -3   | -3   | -3   |
| CHA | -11  | -10  | -9   | -7   | -6   | -5   | -4   |
| EUR | -0   | -0   | -0   | -0   | -0   | -0   | -0   |
| IND | -32  | -32  | -31  | -30  | -35  | -32  | -28  |
| JPN | 11   | 11   | 11   | 10   | 10   | 9    | 10   |
| LAM | 120  | 120  | 118  | 80   | 34   | 30   | 52   |
| MEA | -10  | -9   | -9   | -7   | -5   | -4   | -3   |
| NEU | -0   | -0   | -0   | -0   | -0   | -0   | -0   |
| OAS | -31  | -29  | -27  | 5    | 49   | 43   | 9    |
| REF | -3   | -3   | -3   | -2   | -2   | -2   | -2   |
| SSA | -39  | -42  | -44  | -43  | -39  | -34  | -30  |
| USA | -2   | -2   | -2   | -2   | -2   | -2   | -2   |

Table 1891: MAgPIE m4p\_SSP1 — Trade—Net-Trade—Crops—Sugar crops (Mt DM/yr) [PART 2/2]

|     | 1965   | 1970   | 1975   | 1980   | 1985   | 1990   | 1995   | 2000   | 2005   | 2010   |
|-----|--------|--------|--------|--------|--------|--------|--------|--------|--------|--------|
| GLO | 0.000  | 0.000  | 0.000  | 0.000  | 0.000  | 0.000  | 0.000  | 0.000  | 0.000  | 0.000  |
| CAZ | 0.004  | 0.000  | -0.001 | -0.002 | -0.016 | 0.000  | 0.017  | -0.001 | 0.001  | -0.020 |
| CHA | -0.269 | -0.002 | -0.003 | -0.002 | 0.715  | 0.406  | -0.526 | -0.001 | 0.784  | -0.016 |
| EUR | 0.091  | 0.001  | 0.014  | 0.036  | -0.093 | -0.304 | 0.235  | -0.080 | 0.106  | -0.236 |
| IND | 0.001  | 0.000  | -0.000 | -0.000 | -0.003 | 0.000  | 0.003  | 0.000  | 0.000  | -0.004 |
| JPN | 0.001  | 0.000  | -0.000 | -0.000 | -0.003 | 0.000  | 0.003  | -0.000 | 0.000  | -0.004 |
| LAM | 0.053  | 0.011  | 0.002  | -0.007 | -0.165 | 0.026  | 0.170  | 0.052  | -0.256 | -0.098 |
| MEA | 0.016  | -0.000 | -0.004 | -0.009 | -0.066 | 0.000  | 0.071  | -0.003 | 0.002  | -0.086 |
| NEU | 0.026  | 0.016  | 0.012  | 0.023  | -0.015 | 0.011  | 0.058  | -0.020 | 0.006  | 0.008  |
| OAS | 0.044  | -0.006 | 0.006  | -0.000 | -0.137 | -0.117 | -0.373 | -0.004 | 0.009  | 0.617  |
| REF | -0.007 | -0.018 | -0.017 | -0.023 | -0.056 | -0.019 | 0.177  | 0.062  | -0.658 | 0.056  |
| SSA | 0.039  | -0.000 | -0.008 | -0.018 | -0.159 | 0.000  | 0.172  | -0.009 | 0.007  | -0.202 |
| USA | 0.001  | 0.000  | -0.000 | 0.002  | -0.002 | -0.002 | -0.007 | 0.003  | -0.001 | -0.017 |

Table 1892: FAO — Trade—Net-Trade—Crops—Sugar crops (Mt DM/yr)

58.1.18 Sugar crops—Sugar beet

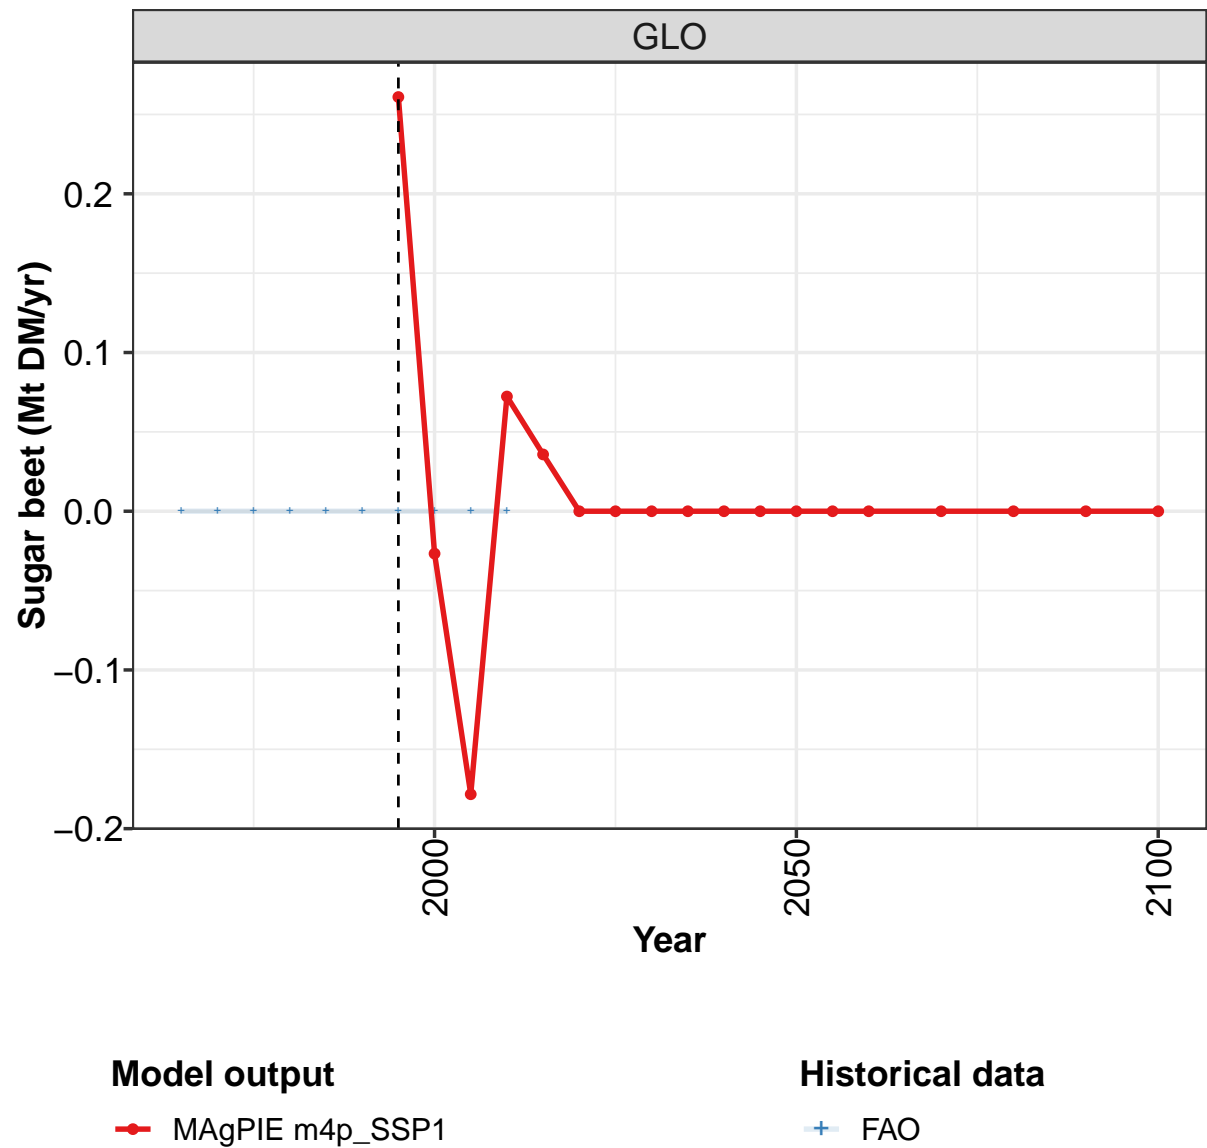

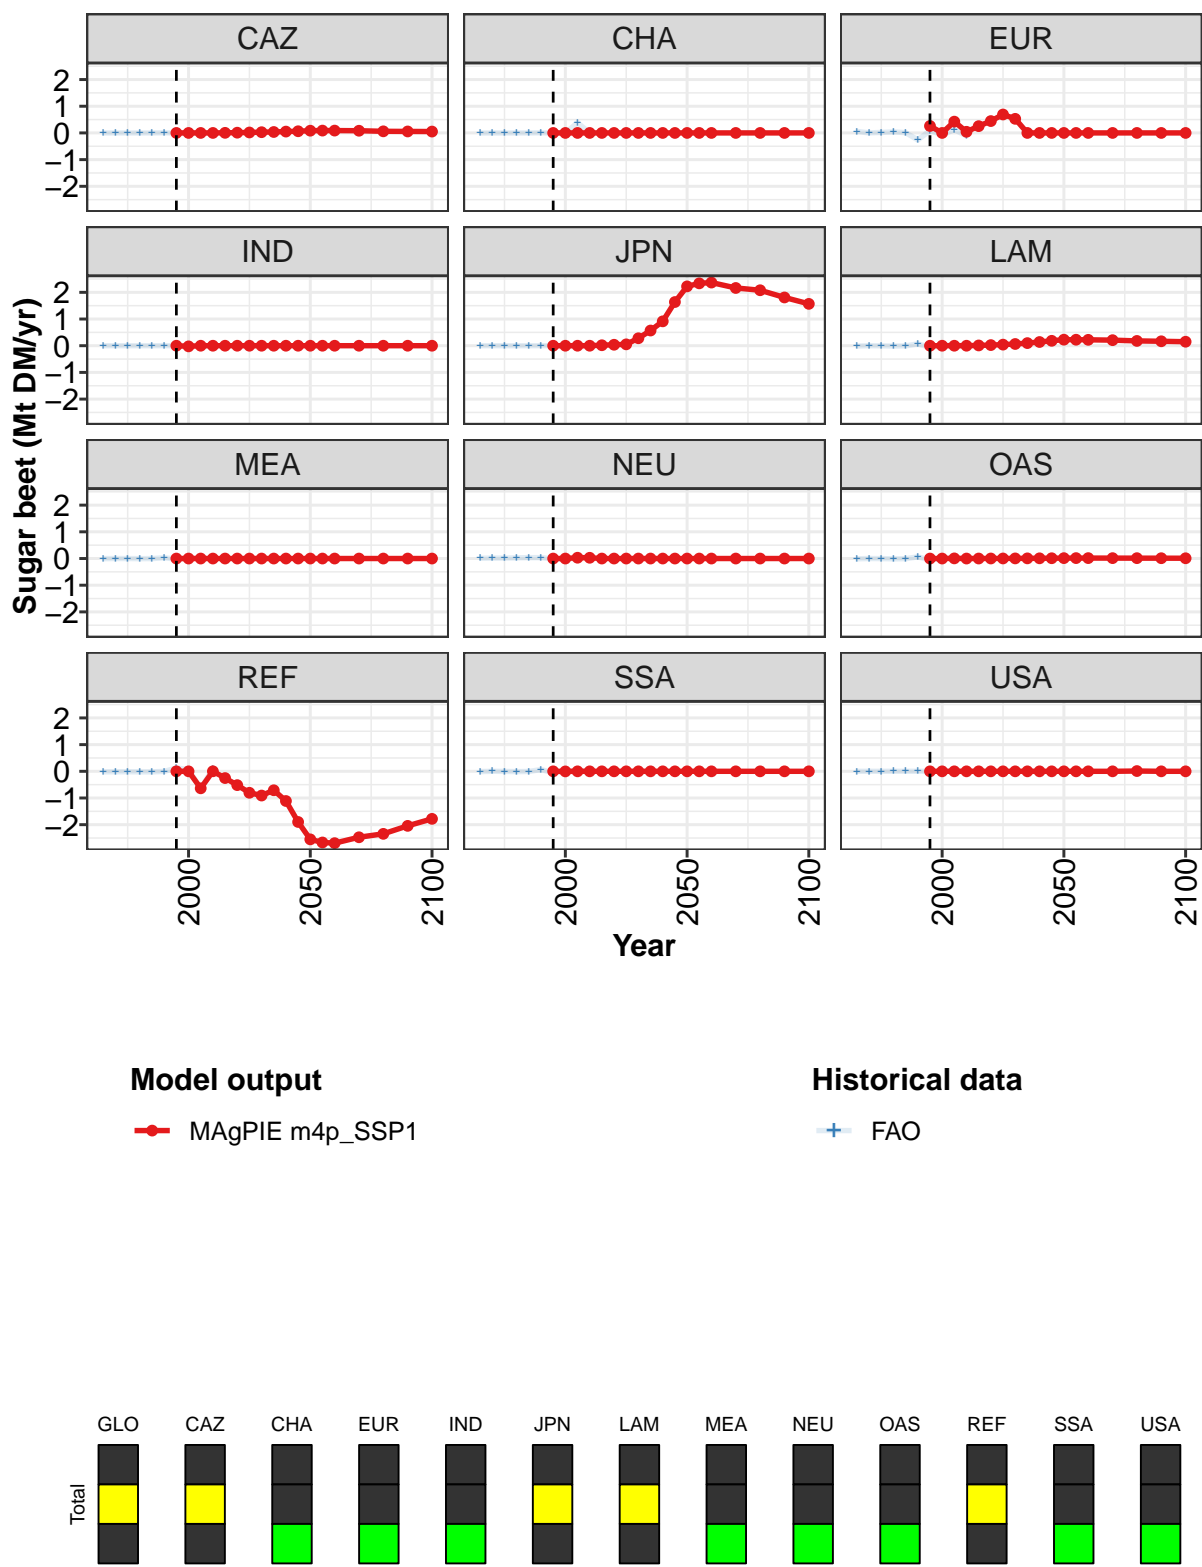

Figure 498: MAgPIE m4p\_SSP1 — Trade—Net-Trade—Crops—Sugar crops—Sugar beet (Mt DM/yr)

|     | 1995 | 2000  | 2005  | 2010  | 2015  | 2020  | 2025  | 2030  | 2035  | 2040  | 2045  |
|-----|------|-------|-------|-------|-------|-------|-------|-------|-------|-------|-------|
| GLO | 0.26 | -0.03 | -0.18 | 0.07  | 0.04  | 0.00  | -0.00 | 0.00  | 0.00  | 0.00  | -0.00 |
| CAZ | 0.00 | -0.00 | -0.00 | 0.00  | 0.00  | 0.01  | 0.02  | 0.03  | 0.04  | 0.05  | 0.06  |
| CHA | 0.00 | 0.00  | 0.00  | 0.00  | 0.00  | 0.00  | 0.00  | 0.00  | 0.00  | 0.00  | 0.00  |
| EUR | 0.26 | 0.00  | 0.42  | 0.04  | 0.25  | 0.45  | 0.69  | 0.53  | 0.00  | 0.00  | 0.00  |
| IND | 0.00 | -0.02 | 0.00  | 0.00  | 0.00  | 0.00  | 0.00  | 0.00  | 0.00  | 0.00  | 0.00  |
| JPN | 0.00 | 0.00  | 0.00  | 0.00  | 0.02  | 0.04  | 0.05  | 0.28  | 0.57  | 0.91  | 1.64  |
| LAM | 0.00 | 0.00  | 0.00  | 0.00  | 0.01  | 0.02  | 0.04  | 0.07  | 0.10  | 0.14  | 0.19  |
| MEA | 0.00 | 0.00  | 0.00  | -0.00 | 0.00  | 0.00  | 0.00  | -0.00 | 0.00  | 0.00  | 0.00  |
| NEU | 0.00 | 0.00  | 0.03  | 0.03  | 0.00  | 0.00  | 0.00  | 0.00  | 0.00  | -0.00 | -0.00 |
| OAS | 0.00 | 0.00  | 0.01  | 0.00  | 0.00  | 0.00  | 0.00  | 0.00  | 0.01  | 0.01  | 0.01  |
| REF | 0.00 | 0.00  | -0.64 | 0.00  | -0.25 | -0.52 | -0.80 | -0.91 | -0.71 | -1.11 | -1.90 |
| SSA | 0.00 | -0.00 | 0.00  | -0.00 | -0.00 | -0.00 | -0.00 | -0.00 | -0.00 | -0.00 | -0.00 |
| USA | 0.00 | 0.00  | 0.00  | 0.00  | 0.00  | -0.00 | 0.00  | 0.00  | 0.00  | 0.00  | -0.00 |

Table 1893: MAgPIE m4p\_SSP1 — Trade—Net-Trade—Crops—Sugar crops—Sugar beet (Mt DM/yr) [PART 1/2]

|     | 2050  | 2055  | 2060  | 2070  | 2080  | 2090  | 2100  |
|-----|-------|-------|-------|-------|-------|-------|-------|
| GLO | 0.00  | 0.00  | 0.00  | 0.00  | 0.00  | 0.00  | 0.00  |
| CAZ | 0.08  | 0.09  | 0.09  | 0.08  | 0.06  | 0.06  | 0.05  |
| CHA | 0.00  | 0.00  | 0.00  | 0.00  | 0.00  | -0.00 | 0.00  |
| EUR | 0.00  | -0.00 | -0.00 | 0.00  | 0.00  | 0.00  | 0.00  |
| IND | 0.00  | 0.00  | 0.00  | 0.00  | 0.00  | 0.00  | 0.00  |
| JPN | 2.22  | 2.34  | 2.37  | 2.16  | 2.08  | 1.81  | 1.57  |
| LAM | 0.23  | 0.23  | 0.22  | 0.21  | 0.18  | 0.17  | 0.15  |
| MEA | 0.00  | -0.00 | 0.00  | -0.00 | -0.00 | 0.00  | -0.00 |
| NEU | 0.00  | 0.00  | 0.00  | 0.00  | 0.00  | 0.00  | 0.00  |
| OAS | 0.02  | 0.02  | 0.02  | 0.01  | 0.01  | 0.01  | 0.01  |
| REF | -2.55 | -2.67 | -2.69 | -2.47 | -2.34 | -2.04 | -1.78 |
| SSA | -0.00 | -0.00 | -0.00 | -0.00 | -0.00 | -0.00 | -0.00 |
| USA | 0.00  | 0.00  | 0.00  | 0.00  | 0.01  | 0.00  | 0.00  |

Table 1894: MAgPIE m4p\_SSP1 — Trade—Net-Trade—Crops—Sugar crops—Sugar beet (Mt DM/yr) [PART 2/2]

|     | 1965   | 1970   | 1975   | 1980   | 1985   | 1990   | 1995   | 2000   | 2005   | 2010   |
|-----|--------|--------|--------|--------|--------|--------|--------|--------|--------|--------|
| GLO | 0.000  | 0.000  | 0.000  | 0.000  | 0.000  | 0.000  | 0.000  | 0.000  | 0.000  | 0.000  |
| CAZ | -0.001 | 0.000  | -0.000 | -0.001 | -0.001 | 0.006  | -0.005 | 0.000  | 0.004  | -0.001 |
| CHA | -0.004 | -0.003 | -0.003 | -0.001 | -0.001 | 0.005  | -0.005 | 0.001  | 0.382  | -0.001 |
| EUR | 0.057  | 0.001  | 0.018  | 0.040  | 0.009  | -0.262 | 0.086  | -0.072 | 0.123  | -0.110 |
| IND | -0.000 | 0.000  | -0.000 | -0.000 | -0.000 | 0.001  | -0.001 | 0.000  | 0.001  | -0.000 |
| JPN | -0.000 | 0.000  | -0.000 | -0.000 | -0.000 | 0.001  | -0.001 | 0.000  | 0.001  | -0.000 |
| LAM | -0.013 | 0.001  | -0.004 | -0.013 | -0.006 | 0.068  | -0.057 | 0.006  | 0.039  | -0.016 |
| MEA | -0.005 | 0.000  | -0.002 | -0.005 | -0.003 | 0.026  | -0.022 | 0.002  | 0.014  | -0.009 |
| NEU | 0.010  | 0.016  | 0.014  | 0.025  | 0.033  | 0.031  | -0.013 | -0.016 | 0.015  | 0.068  |
| OAS | -0.012 | 0.001  | -0.003 | -0.012 | -0.006 | 0.061  | -0.051 | 0.005  | 0.035  | -0.014 |
| REF | -0.019 | -0.018 | -0.016 | -0.021 | -0.020 | -0.004 | 0.124  | 0.065  | -0.651 | 0.100  |
| SSA | -0.012 | 0.001  | -0.004 | -0.013 | -0.006 | 0.064  | -0.053 | 0.005  | 0.036  | -0.015 |
| USA | -0.000 | 0.000  | -0.000 | 0.002  | 0.001  | 0.001  | -0.001 | 0.003  | 0.001  | 0.000  |

Table 1895: FAO — Trade—Net-Trade—Crops—Sugar crops—Sugar beet (Mt DM/yr)



58.1.19 Sugar crops—Sugar cane

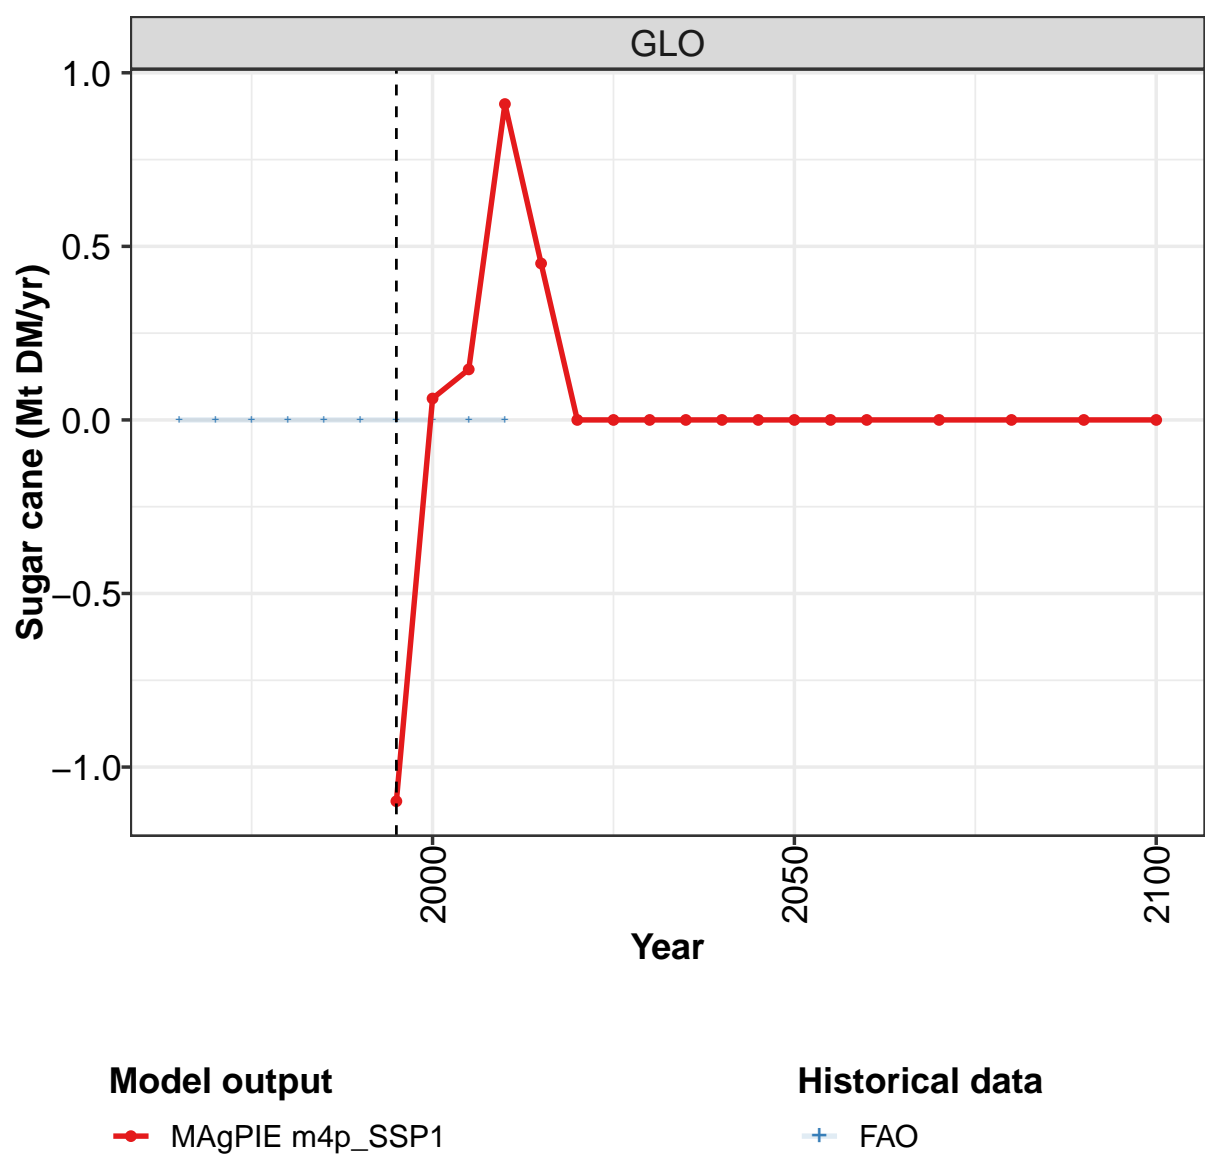

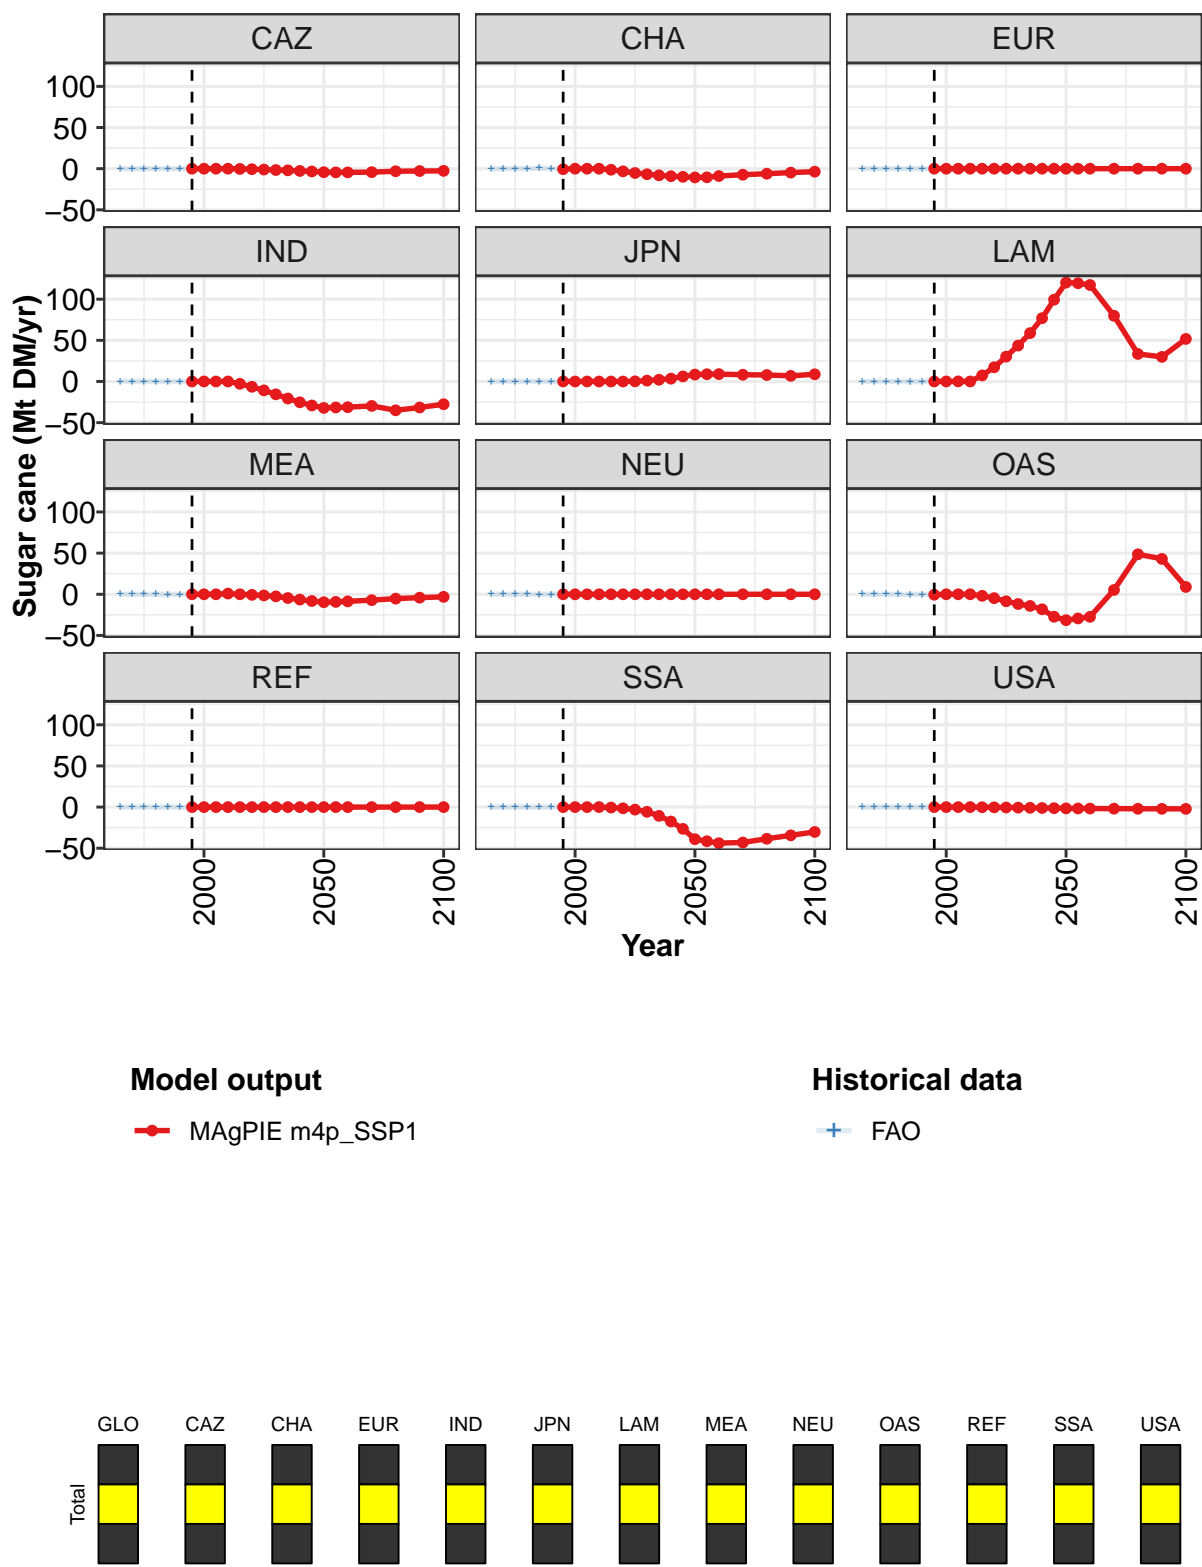

Figure 499: MAgPIE m4p\_SSP1 — Trade—Net-Trade—Crops—Sugar crops—Sugar cane (Mt DM/yr)

|     | 1995 | 2000 | 2005 | 2010 | 2015 | 2020 | 2025 | 2030 | 2035 | 2040 | 2045 |
|-----|------|------|------|------|------|------|------|------|------|------|------|
| GLO | -1   | 0    | 0    | 1    | 0    | 0    | 0    | 0    | -0   | 0    | 0    |
| CAZ | 0    | 0    | 0    | -0   | -0   | -1   | -1   | -2   | -2   | -3   | -3   |
| CHA | -1   | 0    | 0    | 0    | -1   | -3   | -5   | -7   | -8   | -9   | -10  |
| EUR | 0    | -0   | 0    | -0   | -0   | -0   | -0   | -0   | -0   | -0   | -0   |
| IND | 0    | 0    | 0    | 0    | -3   | -6   | -11  | -16  | -21  | -25  | -29  |
| JPN | -0   | 0    | 0    | 0    | -0   | -0   | 0    | 1    | 2    | 3    | 6    |
| LAM | 0    | 0    | 0    | 0    | 7    | 17   | 30   | 44   | 59   | 77   | 99   |
| MEA | 0    | 0    | 0    | 1    | 0    | -1   | -1   | -3   | -5   | -6   | -8   |
| NEU | 0    | 0    | 0    | -0   | -0   | -0   | -0   | -0   | -0   | -0   | -0   |
| OAS | -1   | 0    | 0    | 0    | -2   | -5   | -8   | -12  | -14  | -18  | -27  |
| REF | 0    | 0    | 0    | 0    | 0    | 0    | 0    | 0    | 0    | 0    | 0    |
| SSA | 0    | 0    | 0    | 0    | -1   | -1   | -3   | -6   | -11  | -18  | -26  |
| USA | 0    | 0    | -0   | 0    | -0   | -0   | -1   | -1   | -1   | -1   | -1   |

Table 1896: MAgPIE m4p\_SSP1 — Trade—Net-Trade—Crops—Sugar crops—Sugar cane (Mt DM/yr) [PART 1/2]

|     | 2050 | 2055 | 2060 | 2070 | 2080 | 2090 | 2100 |
|-----|------|------|------|------|------|------|------|
| GLO | 0    | 0    | -0   | 0    | 0    | 0    | 0    |
| CAZ | -4   | -4   | -4   | -4   | -3   | -3   | -3   |
| CHA | -11  | -10  | -9   | -7   | -6   | -5   | -4   |
| EUR | -0   | -0   | -0   | -0   | -0   | -0   | -0   |
| IND | -32  | -32  | -31  | -30  | -35  | -32  | -28  |
| JPN | 8    | 9    | 9    | 8    | 8    | 7    | 9    |
| LAM | 120  | 119  | 117  | 80   | 33   | 30   | 52   |
| MEA | -10  | -9   | -9   | -7   | -5   | -4   | -3   |
| NEU | -0   | -0   | -0   | -0   | -0   | -0   | -0   |
| OAS | -31  | -29  | -27  | 5    | 49   | 43   | 9    |
| REF | 0    | 0    | 0    | 0    | 0    | 0    | 0    |
| SSA | -39  | -42  | -44  | -43  | -39  | -34  | -30  |
| USA | -2   | -2   | -2   | -2   | -2   | -2   | -2   |

Table 1897: MAgPIE m4p\_SSP1 — Trade—Net-Trade—Crops—Sugar crops—Sugar cane (Mt DM/yr) [PART 2/2]

|     | 1965   | 1970   | 1975   | 1980   | 1985   | 1990   | 1995   | 2000   | 2005   | 2010   |
|-----|--------|--------|--------|--------|--------|--------|--------|--------|--------|--------|
| GLO | 0.000  | 0.000  | 0.000  | 0.000  | 0.000  | 0.000  | 0.000  | 0.000  | 0.000  | 0.000  |
| CAZ | 0.005  | -0.000 | -0.001 | -0.001 | -0.015 | -0.006 | 0.022  | -0.001 | -0.003 | -0.018 |
| CHA | -0.265 | 0.000  | -0.000 | -0.001 | 0.716  | 0.401  | -0.521 | -0.001 | 0.402  | -0.015 |
| EUR | 0.034  | -0.001 | -0.004 | -0.004 | -0.102 | -0.043 | 0.150  | -0.008 | -0.017 | -0.126 |
| IND | 0.001  | 0.000  | -0.000 | -0.000 | -0.003 | -0.001 | 0.004  | 0.000  | -0.001 | -0.004 |
| JPN | 0.001  | 0.000  | -0.000 | -0.000 | -0.003 | -0.001 | 0.004  | -0.000 | -0.001 | -0.004 |
| LAM | 0.066  | 0.010  | 0.005  | 0.007  | -0.158 | -0.042 | 0.227  | 0.046  | -0.294 | -0.082 |
| MEA | 0.021  | -0.001 | -0.002 | -0.004 | -0.063 | -0.026 | 0.093  | -0.005 | -0.012 | -0.076 |
| NEU | 0.016  | -0.000 | -0.002 | -0.002 | -0.048 | -0.020 | 0.071  | -0.004 | -0.009 | -0.059 |
| OAS | 0.056  | -0.007 | 0.009  | 0.012  | -0.131 | -0.179 | -0.322 | -0.009 | -0.026 | 0.631  |
| REF | 0.012  | -0.000 | -0.001 | -0.001 | -0.036 | -0.015 | 0.053  | -0.003 | -0.007 | -0.044 |
| SSA | 0.051  | -0.001 | -0.004 | -0.005 | -0.153 | -0.064 | 0.225  | -0.014 | -0.030 | -0.186 |
| USA | 0.001  | 0.000  | -0.000 | -0.000 | -0.003 | -0.003 | -0.006 | 0.000  | -0.002 | -0.017 |

Table 1898: FAO — Trade—Net-Trade—Crops—Sugar crops—Sugar cane (Mt DM/yr)

58.2
Fish

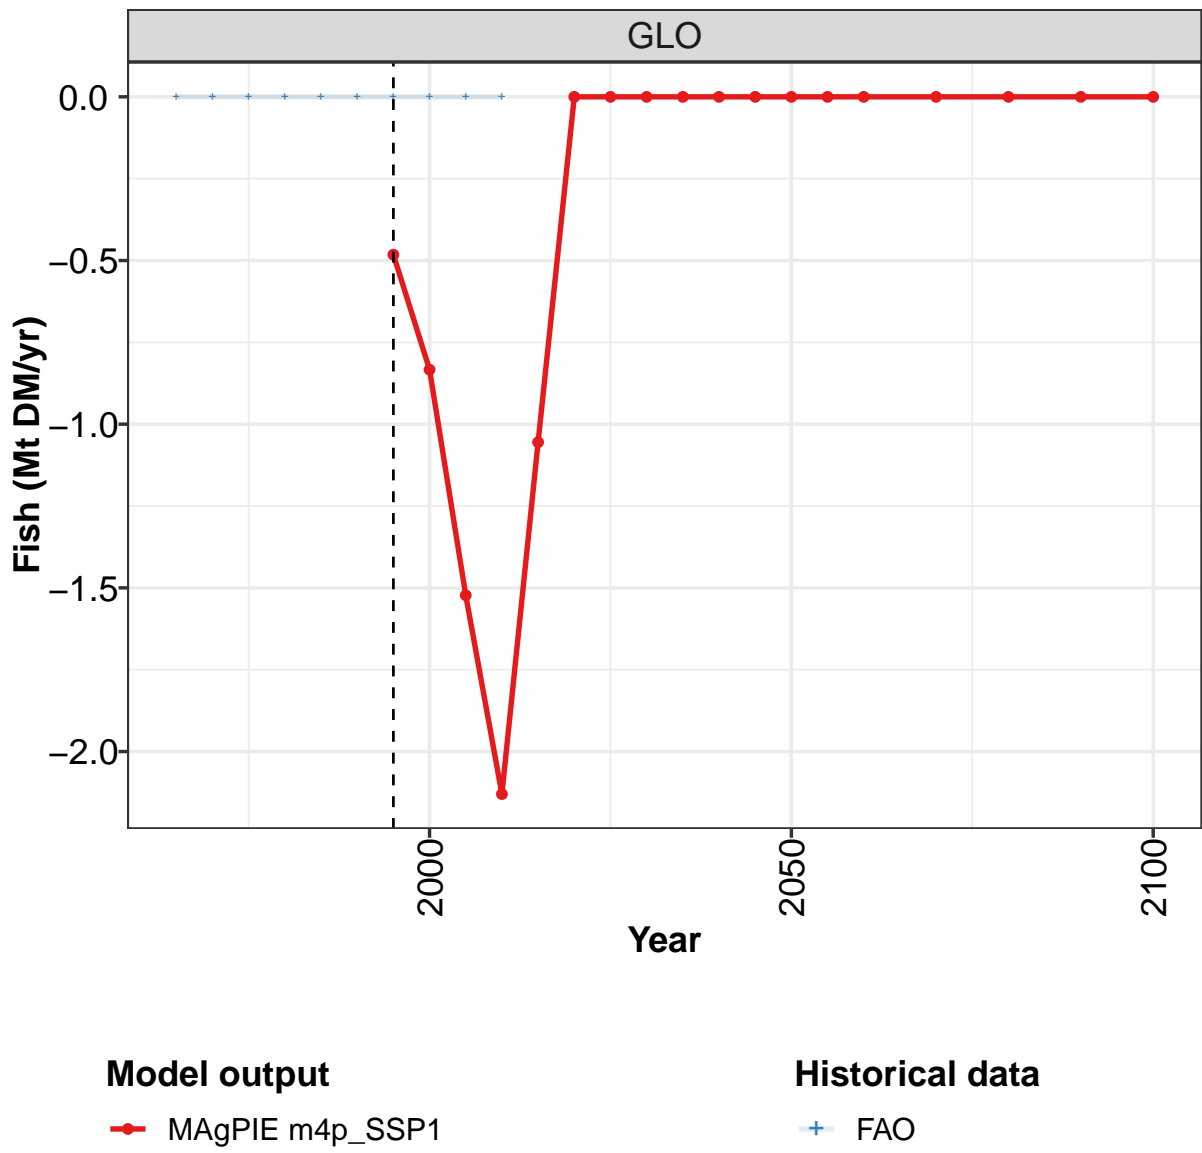

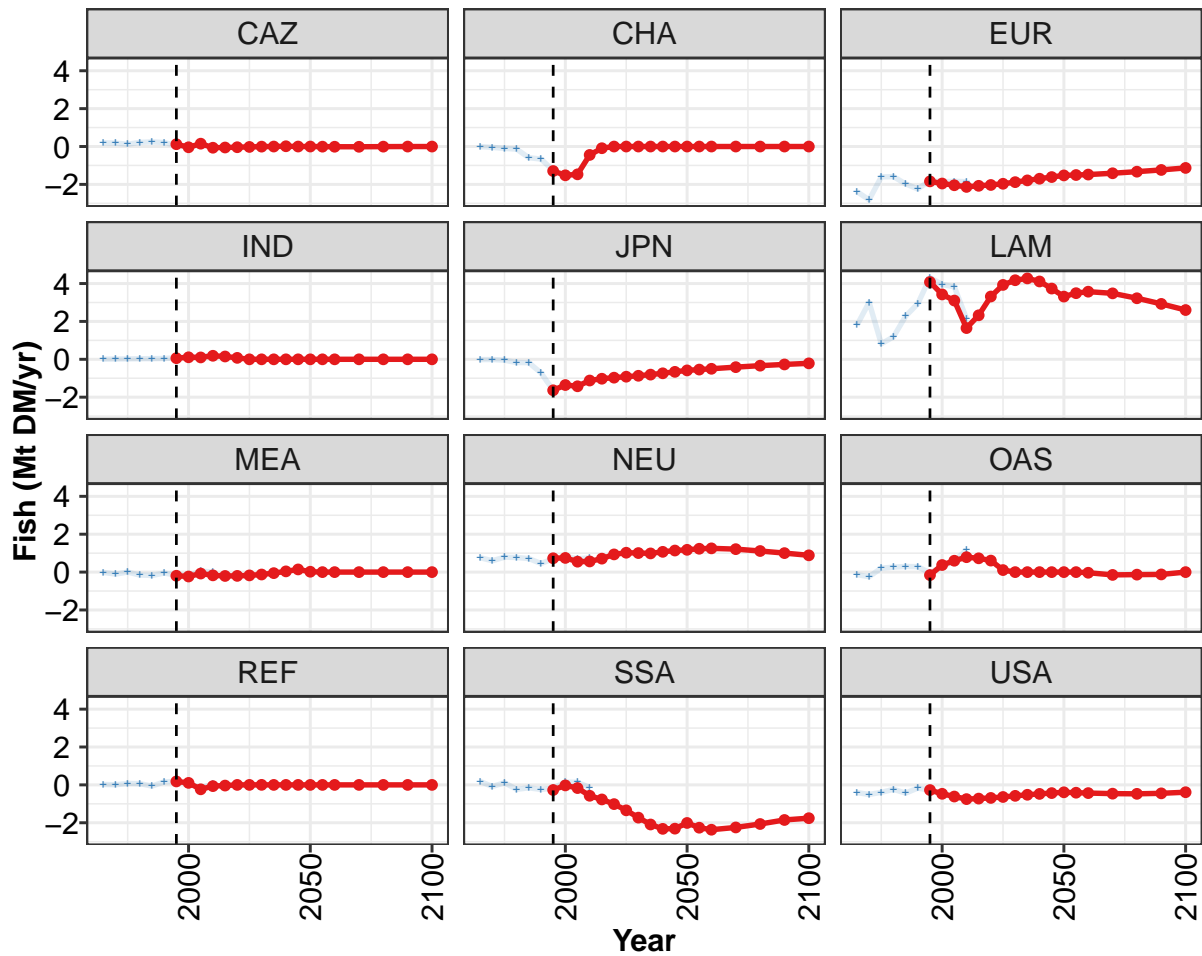

**Model output**  
—●— MAGPIE m4p\_SSP1

**Historical data**  
—+— FAO

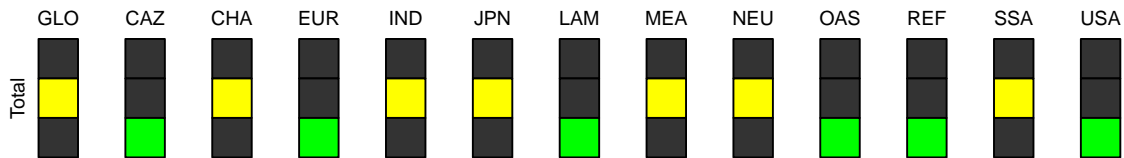

Figure 500: MAGPIE m4p\_SSP1 — Trade—Net-Trade—Fish (Mt DM/yr)

|     | 1995  | 2000  | 2005  | 2010  | 2015  | 2020  | 2025  | 2030  | 2035  | 2040  | 2045  |
|-----|-------|-------|-------|-------|-------|-------|-------|-------|-------|-------|-------|
| GLO | -0.48 | -0.83 | -1.52 | -2.13 | -1.05 | -0.00 | 0.00  | -0.00 | 0.00  | 0.00  | 0.00  |
| CAZ | 0.12  | -0.04 | 0.15  | -0.06 | -0.05 | -0.04 | -0.02 | -0.01 | 0.00  | 0.01  | 0.00  |
| CHA | -1.29 | -1.52 | -1.47 | -0.44 | -0.09 | 0.00  | 0.00  | 0.00  | 0.00  | 0.00  | 0.00  |
| EUR | -1.84 | -1.95 | -2.04 | -2.13 | -2.07 | -2.03 | -1.97 | -1.88 | -1.79 | -1.70 | -1.61 |
| IND | 0.06  | 0.11  | 0.10  | 0.19  | 0.15  | 0.08  | 0.00  | 0.00  | 0.00  | 0.00  | 0.00  |
| JPN | -1.64 | -1.36 | -1.42 | -1.12 | -1.03 | -0.97 | -0.92 | -0.87 | -0.81 | -0.74 | -0.66 |
| LAM | 4.08  | 3.43  | 3.10  | 1.65  | 2.32  | 3.32  | 3.93  | 4.18  | 4.27  | 4.11  | 3.74  |
| MEA | -0.19 | -0.23 | -0.08 | -0.17 | -0.20 | -0.20 | -0.17 | -0.13 | -0.05 | 0.04  | 0.14  |
| NEU | 0.73  | 0.75  | 0.55  | 0.56  | 0.71  | 0.93  | 1.02  | 1.01  | 0.99  | 1.07  | 1.14  |
| OAS | -0.16 | 0.37  | 0.60  | 0.79  | 0.73  | 0.61  | 0.11  | 0.00  | 0.00  | 0.00  | 0.00  |
| REF | 0.18  | 0.11  | -0.23 | -0.06 | -0.03 | 0.00  | 0.00  | 0.00  | 0.00  | 0.00  | 0.00  |
| SSA | -0.27 | -0.03 | -0.17 | -0.57 | -0.77 | -1.01 | -1.34 | -1.73 | -2.09 | -2.32 | -2.31 |
| USA | -0.27 | -0.47 | -0.61 | -0.75 | -0.72 | -0.69 | -0.64 | -0.58 | -0.52 | -0.48 | -0.43 |

Table 1899: MAgPIE m4p-SSP1 — Trade—Net-Trade—Fish (Mt DM/yr) [PART 1/2]

|     | 2050  | 2055  | 2060  | 2070  | 2080  | 2090  | 2100  |
|-----|-------|-------|-------|-------|-------|-------|-------|
| GLO | 0.00  | 0.00  | 0.00  | 0.00  | -0.00 | 0.00  | 0.00  |
| CAZ | 0.00  | -0.01 | -0.01 | -0.01 | -0.01 | -0.00 | -0.00 |
| CHA | 0.00  | 0.00  | 0.00  | -0.00 | 0.00  | 0.00  | 0.00  |
| EUR | -1.53 | -1.51 | -1.48 | -1.41 | -1.33 | -1.24 | -1.13 |
| IND | 0.00  | 0.00  | 0.00  | -0.00 | 0.00  | 0.00  | 0.00  |
| JPN | -0.58 | -0.54 | -0.50 | -0.41 | -0.34 | -0.27 | -0.21 |
| LAM | 3.31  | 3.49  | 3.57  | 3.48  | 3.22  | 2.93  | 2.60  |
| MEA | 0.02  | 0.00  | -0.00 | -0.00 | 0.00  | 0.00  | 0.00  |
| NEU | 1.18  | 1.23  | 1.25  | 1.21  | 1.11  | 1.00  | 0.89  |
| OAS | 0.00  | 0.00  | -0.03 | -0.15 | -0.13 | -0.12 | 0.00  |
| REF | 0.00  | 0.00  | 0.00  | -0.00 | 0.00  | 0.00  | 0.00  |
| SSA | -2.01 | -2.26 | -2.37 | -2.25 | -2.07 | -1.85 | -1.76 |
| USA | -0.39 | -0.41 | -0.43 | -0.46 | -0.47 | -0.45 | -0.39 |

Table 1900: MAgPIE m4p-SSP1 — Trade—Net-Trade—Fish (Mt DM/yr) [PART 2/2]

|     | 1965  | 1970  | 1975  | 1980  | 1985  | 1990  | 1995  | 2000  | 2005  | 2010  |
|-----|-------|-------|-------|-------|-------|-------|-------|-------|-------|-------|
| GLO | 0.00  | 0.00  | 0.00  | 0.00  | 0.00  | 0.00  | 0.00  | 0.00  | 0.00  | 0.00  |
| CAZ | 0.20  | 0.18  | 0.12  | 0.22  | 0.24  | 0.21  | 0.06  | -0.02 | 0.08  | -0.02 |
| CHA | -0.01 | -0.05 | -0.10 | -0.14 | -0.59 | -0.66 | -1.27 | -1.53 | -1.44 | -0.47 |
| EUR | -2.38 | -2.81 | -1.61 | -1.59 | -1.97 | -2.24 | -1.80 | -1.86 | -1.84 | -1.86 |
| IND | 0.01  | 0.01  | 0.02  | 0.03  | 0.03  | 0.04  | 0.08  | 0.14  | 0.12  | 0.25  |
| JPN | -0.02 | -0.01 | -0.05 | -0.17 | -0.18 | -0.72 | -1.64 | -1.35 | -1.42 | -1.10 |
| LAM | 1.80  | 3.01  | 0.82  | 1.18  | 2.28  | 2.94  | 4.32  | 3.95  | 3.83  | 2.15  |
| MEA | -0.02 | -0.11 | 0.00  | -0.16 | -0.18 | -0.05 | -0.16 | -0.17 | 0.05  | 0.01  |
| NEU | 0.76  | 0.60  | 0.79  | 0.77  | 0.71  | 0.45  | 0.71  | 0.82  | 0.70  | 0.75  |
| OAS | -0.14 | -0.24 | 0.21  | 0.26  | 0.30  | 0.28  | -0.04 | 0.28  | 0.59  | 1.17  |
| REF | 0.02  | 0.01  | 0.08  | 0.06  | -0.06 | 0.16  | 0.18  | 0.07  | -0.16 | 0.03  |
| SSA | 0.18  | -0.09 | 0.11  | -0.23 | -0.16 | -0.24 | -0.17 | 0.15  | 0.14  | -0.14 |
| USA | -0.41 | -0.50 | -0.39 | -0.24 | -0.43 | -0.17 | -0.28 | -0.49 | -0.63 | -0.78 |

Table 1901: FAO — Trade—Net-Trade—Fish (Mt DM/yr)

58.3 Livestock products

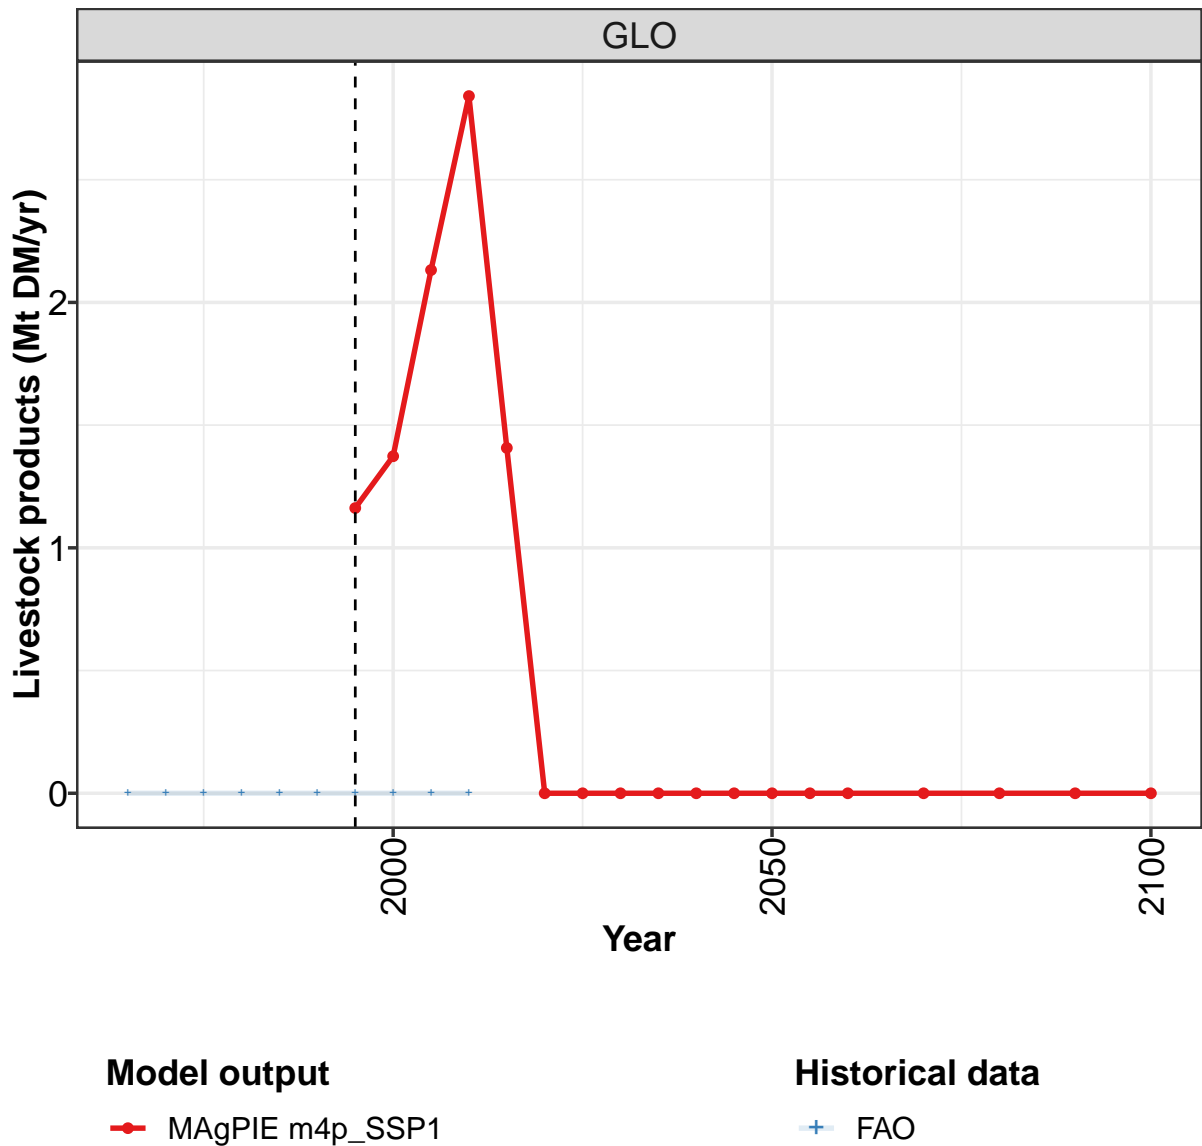

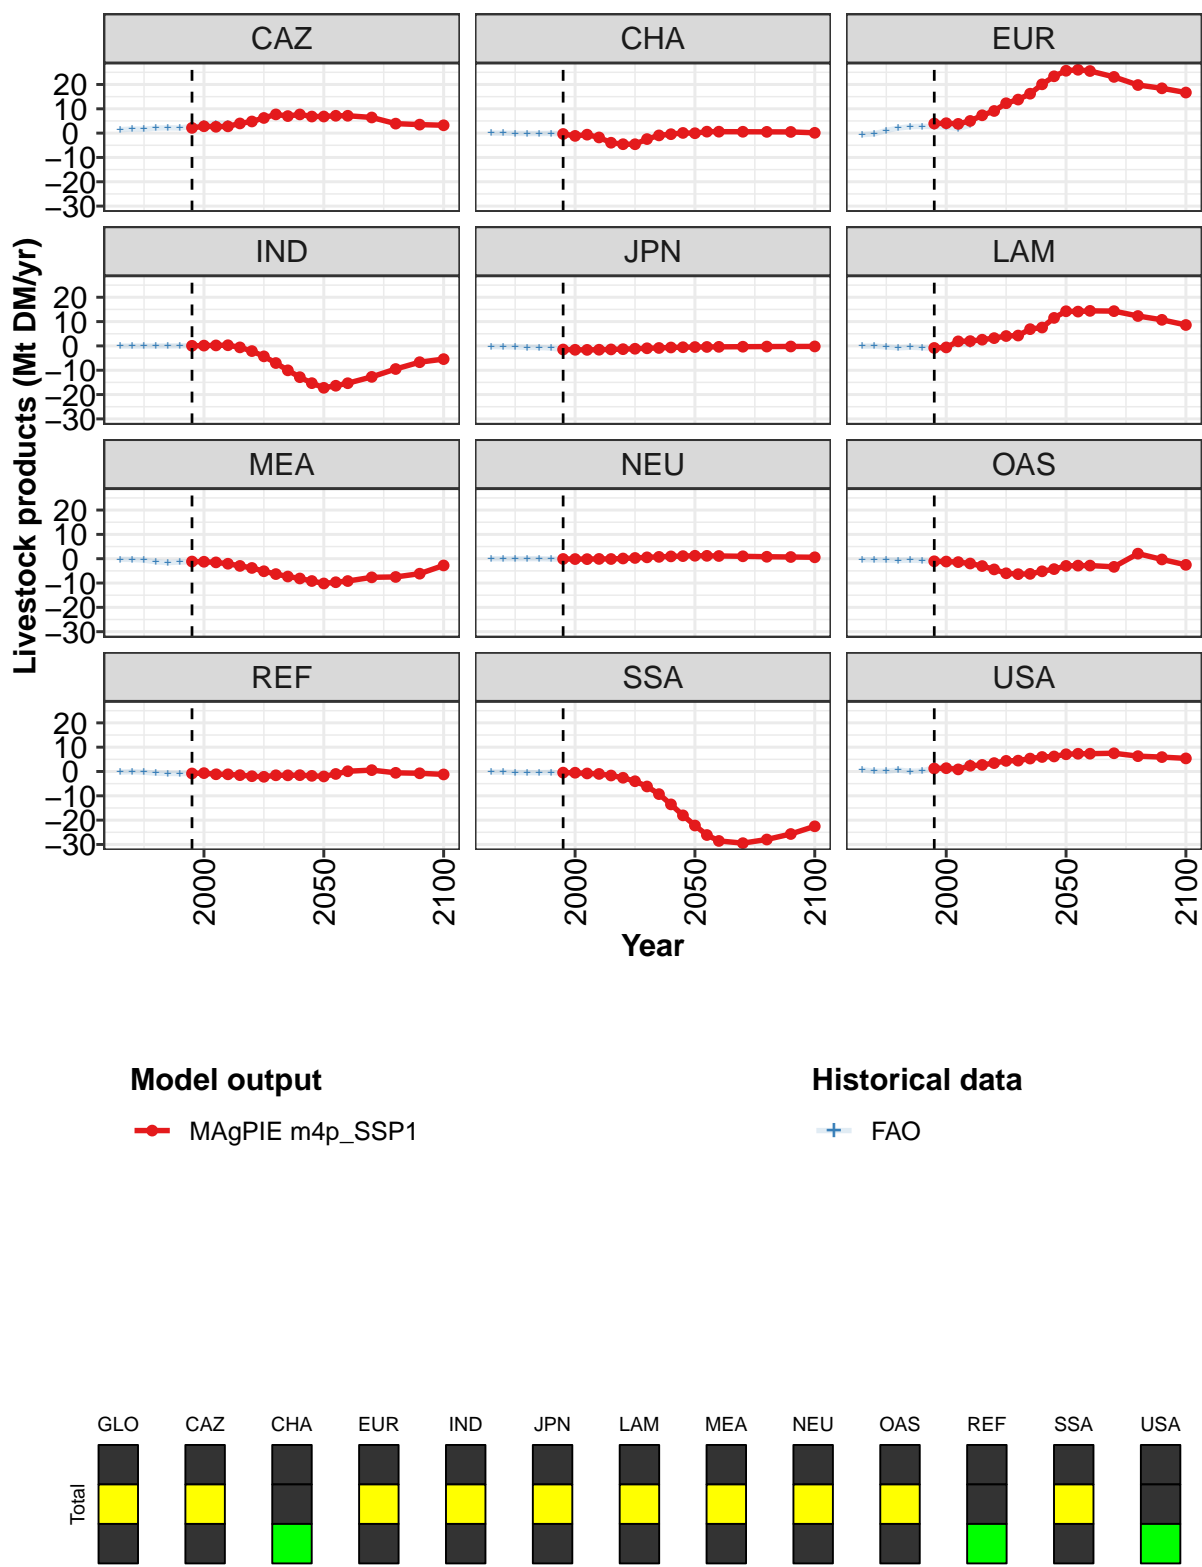

Figure 501: MAgPIE m4p\_SSP1 — Trade—Net-Trade—Livestock products (Mt DM/yr)



|     | 1995 | 2000 | 2005 | 2010 | 2015 | 2020 | 2025 | 2030 | 2035  | 2040  | 2045  |
|-----|------|------|------|------|------|------|------|------|-------|-------|-------|
| GLO | 1.2  | 1.4  | 2.1  | 2.8  | 1.4  | 0.0  | 0.0  | 0.0  | 0.0   | 0.0   | 0.0   |
| CAZ | 2.2  | 2.8  | 2.6  | 2.8  | 4.0  | 4.8  | 6.2  | 7.7  | 7.0   | 7.7   | 6.8   |
| CHA | -0.3 | -1.1 | -0.6 | -1.8 | -3.9 | -4.6 | -4.6 | -2.4 | -0.9  | -0.4  | 0.1   |
| EUR | 3.9  | 4.1  | 3.8  | 5.0  | 7.3  | 9.1  | 12.3 | 13.8 | 16.2  | 20.1  | 23.4  |
| IND | 0.1  | 0.1  | 0.2  | 0.3  | -0.6 | -2.1 | -4.3 | -7.0 | -10.0 | -12.9 | -15.3 |
| JPN | -1.5 | -1.6 | -1.6 | -1.6 | -1.4 | -1.3 | -1.2 | -1.0 | -0.8  | -0.6  | -0.5  |
| LAM | -0.8 | -0.6 | 1.9  | 2.0  | 2.6  | 3.2  | 4.1  | 4.3  | 6.9   | 7.6   | 11.5  |
| MEA | -1.2 | -1.3 | -1.5 | -2.1 | -3.0 | -3.8 | -5.1 | -6.3 | -7.3  | -8.1  | -9.2  |
| NEU | -0.1 | -0.1 | -0.2 | -0.1 | -0.1 | 0.1  | 0.3  | 0.6  | 0.8   | 1.0   | 1.1   |
| OAS | -1.1 | -1.2 | -1.4 | -2.0 | -3.0 | -4.4 | -6.0 | -6.3 | -6.2  | -5.2  | -4.3  |
| REF | -0.8 | -0.7 | -1.1 | -1.1 | -1.5 | -1.9 | -2.2 | -1.6 | -1.6  | -1.5  | -1.8  |
| SSA | -0.5 | -0.5 | -0.8 | -1.0 | -1.6 | -2.6 | -4.0 | -6.2 | -9.3  | -13.5 | -18.0 |
| USA | 1.2  | 1.4  | 0.9  | 2.3  | 2.7  | 3.5  | 4.4  | 4.5  | 5.3   | 6.0   | 6.2   |

Table 1902: MAgPIE m4p\_SSP1 — Trade—Net-Trade—Livestock products (Mt DM/yr) [PART 1/2]

|     | 2050  | 2055  | 2060  | 2070  | 2080  | 2090  | 2100  |
|-----|-------|-------|-------|-------|-------|-------|-------|
| GLO | -0.0  | -0.0  | -0.0  | 0.0   | -0.0  | -0.0  | -0.0  |
| CAZ | 6.8   | 7.1   | 7.1   | 6.4   | 3.9   | 3.5   | 3.2   |
| CHA | -0.0  | 0.6   | 0.6   | 0.6   | 0.5   | 0.5   | 0.1   |
| EUR | 25.6  | 26.1  | 25.5  | 23.1  | 19.8  | 18.4  | 16.7  |
| IND | -17.2 | -16.4 | -15.3 | -12.7 | -9.5  | -6.7  | -5.4  |
| JPN | -0.5  | -0.4  | -0.4  | -0.3  | -0.3  | -0.2  | -0.2  |
| LAM | 14.3  | 14.1  | 14.4  | 14.3  | 12.3  | 10.7  | 8.6   |
| MEA | -10.2 | -9.7  | -9.2  | -7.6  | -7.5  | -6.2  | -2.8  |
| NEU | 1.2   | 1.2   | 1.1   | 1.0   | 0.8   | 0.7   | 0.6   |
| OAS | -3.0  | -2.8  | -2.8  | -3.3  | 2.1   | -0.3  | -2.5  |
| REF | -2.0  | -1.0  | 0.1   | 0.6   | -0.5  | -0.7  | -1.2  |
| SSA | -22.2 | -26.1 | -28.5 | -29.5 | -28.0 | -25.7 | -22.5 |
| USA | 7.1   | 7.3   | 7.3   | 7.5   | 6.3   | 5.9   | 5.4   |

Table 1903: MAgPIE m4p\_SSP1 — Trade—Net-Trade—Livestock products (Mt DM/yr) [PART 2/2]

|     | 1965  | 1970  | 1975  | 1980  | 1985  | 1990  | 1995  | 2000  | 2005  | 2010  |
|-----|-------|-------|-------|-------|-------|-------|-------|-------|-------|-------|
| GLO | 0.00  | 0.00  | 0.00  | 0.00  | 0.00  | 0.00  | 0.00  | 0.00  | 0.00  | 0.00  |
| CAZ | 1.41  | 1.69  | 1.61  | 2.05  | 2.19  | 2.08  | 2.84  | 3.74  | 3.97  | 3.92  |
| CHA | 0.03  | -0.02 | -0.10 | -0.15 | -0.15 | -0.10 | -0.33 | -1.14 | -0.70 | -1.80 |
| EUR | -0.62 | -0.30 | 1.09  | 2.06  | 2.66  | 2.79  | 2.71  | 2.52  | 1.91  | 3.23  |
| IND | -0.08 | -0.07 | -0.05 | -0.03 | -0.03 | 0.03  | 0.07  | 0.17  | 0.34  | 0.38  |
| JPN | -0.24 | -0.34 | -0.43 | -0.61 | -0.65 | -0.90 | -1.46 | -1.59 | -1.63 | -1.56 |
| LAM | -0.13 | -0.04 | -0.43 | -0.79 | -0.54 | -0.71 | -1.18 | -1.02 | 1.16  | 0.57  |
| MEA | -0.24 | -0.30 | -0.58 | -1.25 | -1.64 | -1.36 | -1.25 | -1.39 | -1.73 | -2.29 |
| NEU | -0.01 | -0.03 | -0.00 | -0.01 | 0.03  | -0.14 | -0.21 | -0.22 | -0.30 | -0.28 |
| OAS | -0.39 | -0.47 | -0.55 | -0.69 | -0.64 | -0.68 | -1.29 | -1.47 | -1.84 | -2.49 |
| REF | -0.23 | -0.05 | -0.29 | -0.71 | -0.80 | -0.85 | -0.80 | -0.70 | -1.31 | -1.51 |
| SSA | -0.20 | -0.22 | -0.41 | -0.47 | -0.49 | -0.39 | -0.70 | -0.78 | -1.23 | -1.57 |
| USA | 0.70  | 0.15  | 0.15  | 0.61  | 0.05  | 0.24  | 1.60  | 1.89  | 1.37  | 3.41  |

Table 1904: FAO — Trade—Net-Trade—Livestock products (Mt DM/yr)

58.3.1 Dairy

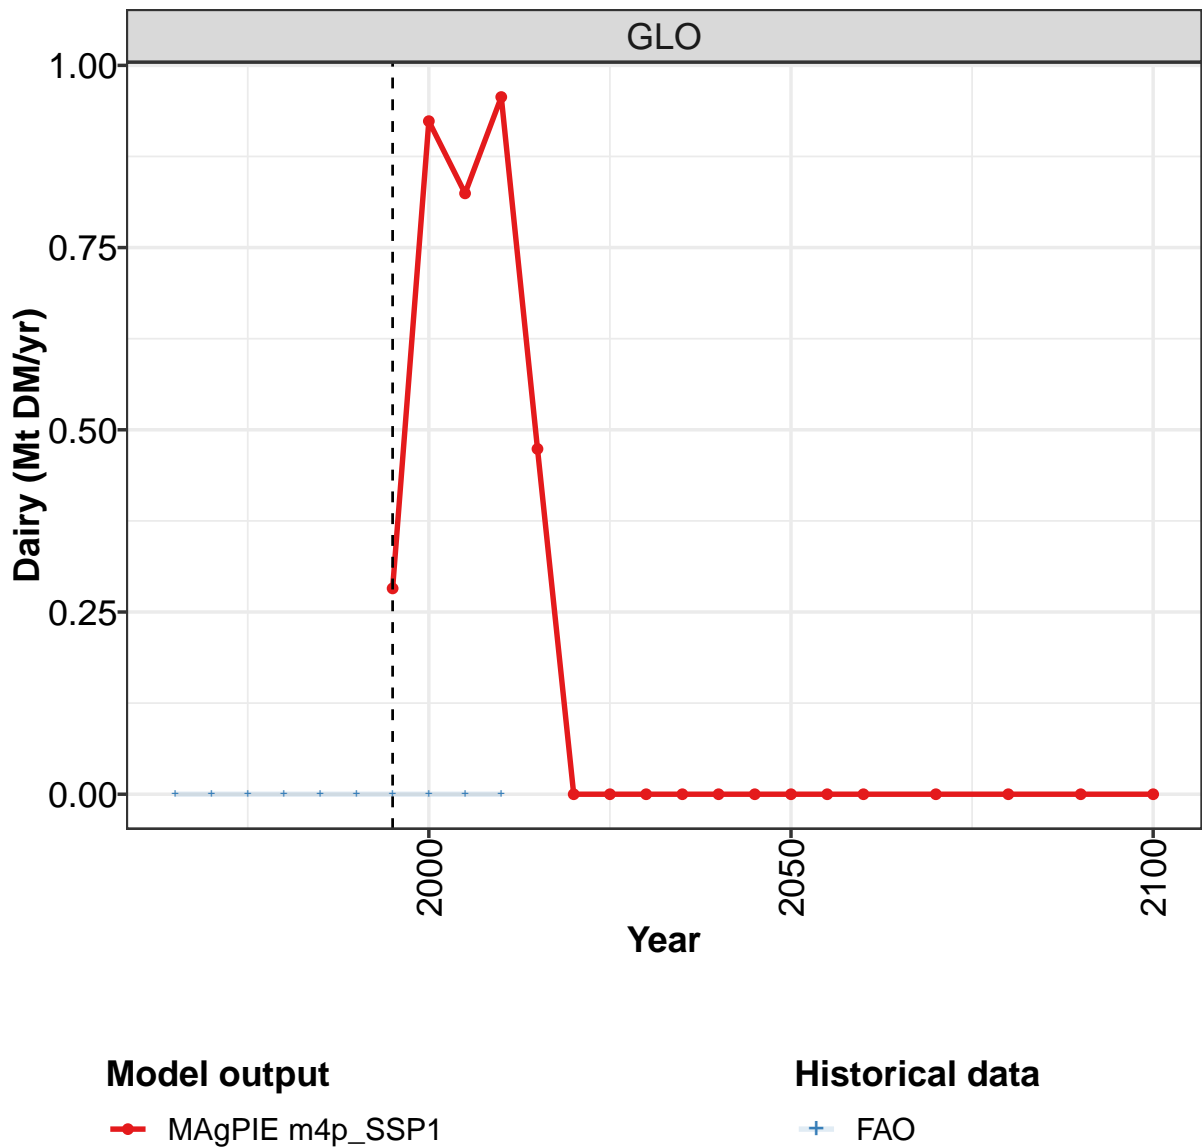

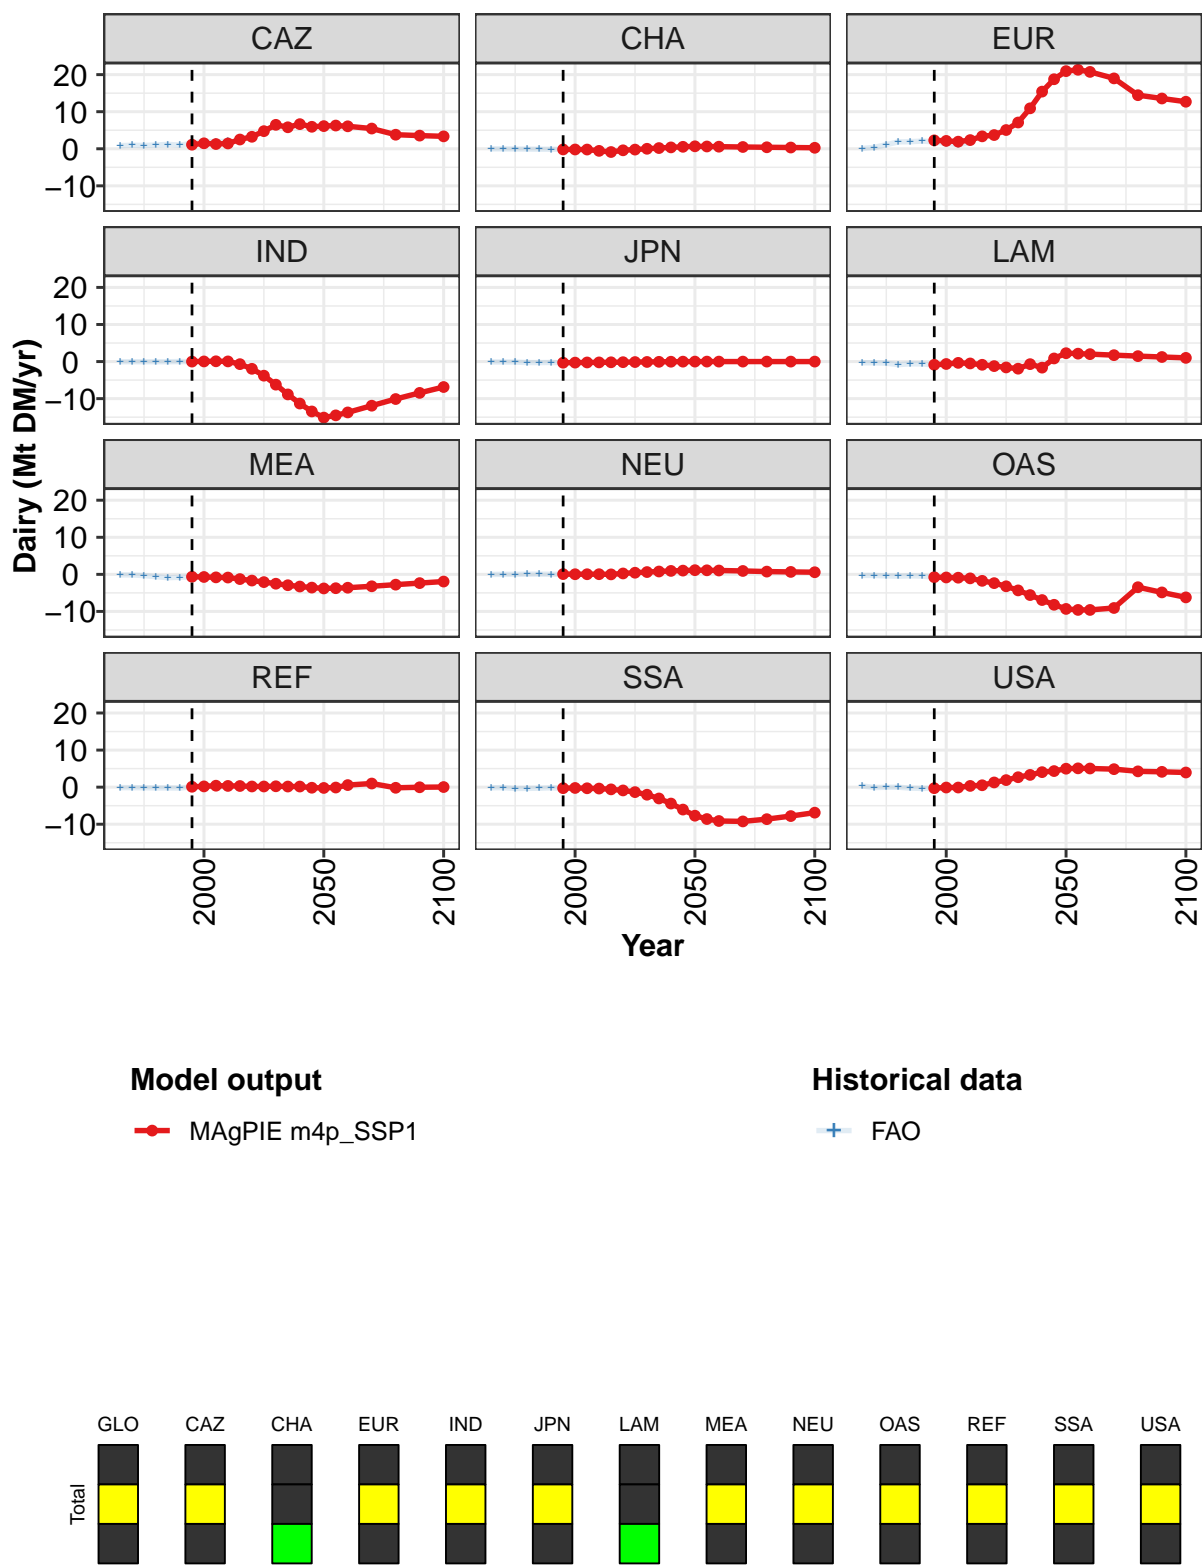

Figure 502: MAgPIE m4p\_SSP1 — Trade—Net-Trade—Livestock products—Dairy (Mt DM/yr)

|     | 1995 | 2000 | 2005 | 2010 | 2015 | 2020 | 2025 | 2030 | 2035 | 2040  | 2045  |
|-----|------|------|------|------|------|------|------|------|------|-------|-------|
| GLO | 0.3  | 0.9  | 0.8  | 1.0  | 0.5  | 0.0  | 0.0  | 0.0  | 0.0  | -0.0  | 0.0   |
| CAZ | 1.1  | 1.5  | 1.3  | 1.4  | 2.5  | 3.2  | 4.8  | 6.5  | 5.8  | 6.6   | 5.9   |
| CHA | -0.2 | -0.2 | -0.2 | -0.6 | -0.9 | -0.4 | -0.2 | 0.0  | 0.2  | 0.4   | 0.5   |
| EUR | 2.3  | 2.1  | 1.9  | 2.3  | 3.4  | 3.7  | 5.1  | 7.1  | 10.9 | 15.4  | 18.8  |
| IND | 0.0  | 0.0  | 0.1  | 0.0  | -0.7 | -1.9 | -3.8 | -6.2 | -8.9 | -11.3 | -13.5 |
| JPN | -0.3 | -0.3 | -0.2 | -0.2 | -0.2 | -0.2 | -0.1 | -0.1 | -0.1 | -0.0  | -0.0  |
| LAM | -0.9 | -0.7 | -0.3 | -0.5 | -0.9 | -1.2 | -1.6 | -1.9 | -0.7 | -1.6  | 0.8   |
| MEA | -0.6 | -0.7 | -0.8 | -0.9 | -1.3 | -1.7 | -2.1 | -2.5 | -2.9 | -3.3  | -3.6  |
| NEU | 0.1  | 0.0  | 0.0  | 0.0  | 0.0  | 0.2  | 0.4  | 0.6  | 0.8  | 0.9   | 1.0   |
| OAS | -0.8 | -0.8 | -0.9 | -1.1 | -1.7 | -2.4 | -3.2 | -4.3 | -5.6 | -6.9  | -8.2  |
| REF | 0.1  | 0.2  | 0.4  | 0.3  | 0.3  | 0.2  | 0.2  | 0.2  | 0.2  | 0.2   | -0.2  |
| SSA | -0.3 | -0.2 | -0.3 | -0.4 | -0.6 | -0.9 | -1.3 | -2.0 | -3.0 | -4.4  | -6.0  |
| USA | -0.3 | -0.1 | -0.1 | 0.3  | 0.5  | 1.3  | 1.9  | 2.7  | 3.3  | 4.1   | 4.3   |

Table 1905: MAgPIE m4p\_SSP1 — Trade—Net-Trade—Livestock products—Dairy (Mt DM/yr) [PART 1/2]

|     | 2050  | 2055  | 2060  | 2070  | 2080  | 2090 | 2100 |
|-----|-------|-------|-------|-------|-------|------|------|
| GLO | 0.0   | -0.0  | 0.0   | 0.0   | -0.0  | -0.0 | -0.0 |
| CAZ | 6.1   | 6.3   | 6.1   | 5.5   | 3.8   | 3.6  | 3.4  |
| CHA | 0.7   | 0.6   | 0.6   | 0.5   | 0.4   | 0.3  | 0.3  |
| EUR | 21.0  | 21.3  | 20.7  | 19.0  | 14.5  | 13.6 | 12.7 |
| IND | -15.1 | -14.5 | -13.7 | -11.9 | -10.1 | -8.4 | -6.9 |
| JPN | 0.0   | 0.0   | 0.0   | 0.0   | 0.0   | 0.0  | 0.0  |
| LAM | 2.3   | 2.1   | 2.0   | 1.7   | 1.5   | 1.2  | 1.0  |
| MEA | -3.8  | -3.7  | -3.6  | -3.2  | -2.8  | -2.4 | -1.9 |
| NEU | 1.1   | 1.1   | 1.0   | 0.9   | 0.8   | 0.7  | 0.6  |
| OAS | -9.3  | -9.6  | -9.6  | -9.1  | -3.5  | -4.9 | -6.2 |
| REF | -0.2  | -0.1  | 0.6   | 1.0   | -0.2  | -0.0 | 0.0  |
| SSA | -7.7  | -8.6  | -9.1  | -9.2  | -8.6  | -7.8 | -6.9 |
| USA | 5.0   | 5.1   | 5.0   | 4.9   | 4.3   | 4.1  | 4.0  |

Table 1906: MAgPIE m4p\_SSP1 — Trade—Net-Trade—Livestock products—Dairy (Mt DM/yr) [PART 2/2]

|     | 1965  | 1970  | 1975  | 1980  | 1985  | 1990  | 1995  | 2000  | 2005  | 2010  |
|-----|-------|-------|-------|-------|-------|-------|-------|-------|-------|-------|
| GLO | 0.00  | 0.00  | 0.00  | 0.00  | 0.00  | 0.00  | 0.00  | 0.00  | 0.00  | 0.00  |
| CAZ | 0.83  | 0.96  | 0.89  | 1.01  | 1.18  | 0.98  | 1.49  | 1.98  | 1.89  | 2.05  |
| CHA | -0.02 | -0.03 | -0.06 | -0.09 | -0.13 | -0.14 | -0.17 | -0.21 | -0.21 | -0.59 |
| EUR | 0.08  | 0.38  | 1.10  | 1.86  | 1.90  | 2.07  | 1.87  | 1.45  | 1.15  | 1.57  |
| IND | -0.05 | -0.04 | -0.05 | -0.04 | -0.05 | -0.00 | -0.00 | 0.04  | 0.12  | 0.04  |
| JPN | -0.10 | -0.10 | -0.13 | -0.27 | -0.27 | -0.24 | -0.31 | -0.27 | -0.24 | -0.22 |
| LAM | -0.33 | -0.34 | -0.44 | -0.84 | -0.61 | -0.63 | -0.94 | -0.82 | -0.49 | -0.67 |
| MEA | -0.14 | -0.16 | -0.34 | -0.64 | -0.89 | -0.80 | -0.68 | -0.79 | -0.90 | -0.92 |
| NEU | -0.03 | 0.01  | 0.00  | 0.05  | 0.06  | 0.01  | 0.02  | -0.01 | -0.01 | -0.02 |
| OAS | -0.28 | -0.30 | -0.42 | -0.50 | -0.40 | -0.47 | -0.82 | -1.03 | -1.06 | -1.23 |
| REF | -0.12 | -0.14 | -0.16 | -0.22 | -0.21 | -0.27 | 0.14  | 0.19  | 0.29  | 0.05  |
| SSA | -0.17 | -0.13 | -0.36 | -0.32 | -0.30 | -0.18 | -0.32 | -0.42 | -0.46 | -0.56 |
| USA | 0.32  | -0.10 | -0.03 | -0.01 | -0.28 | -0.34 | -0.29 | -0.10 | -0.08 | 0.50  |

Table 1907: FAO — Trade—Net-Trade—Livestock products—Dairy (Mt DM/yr)

58.3.2 Eggs

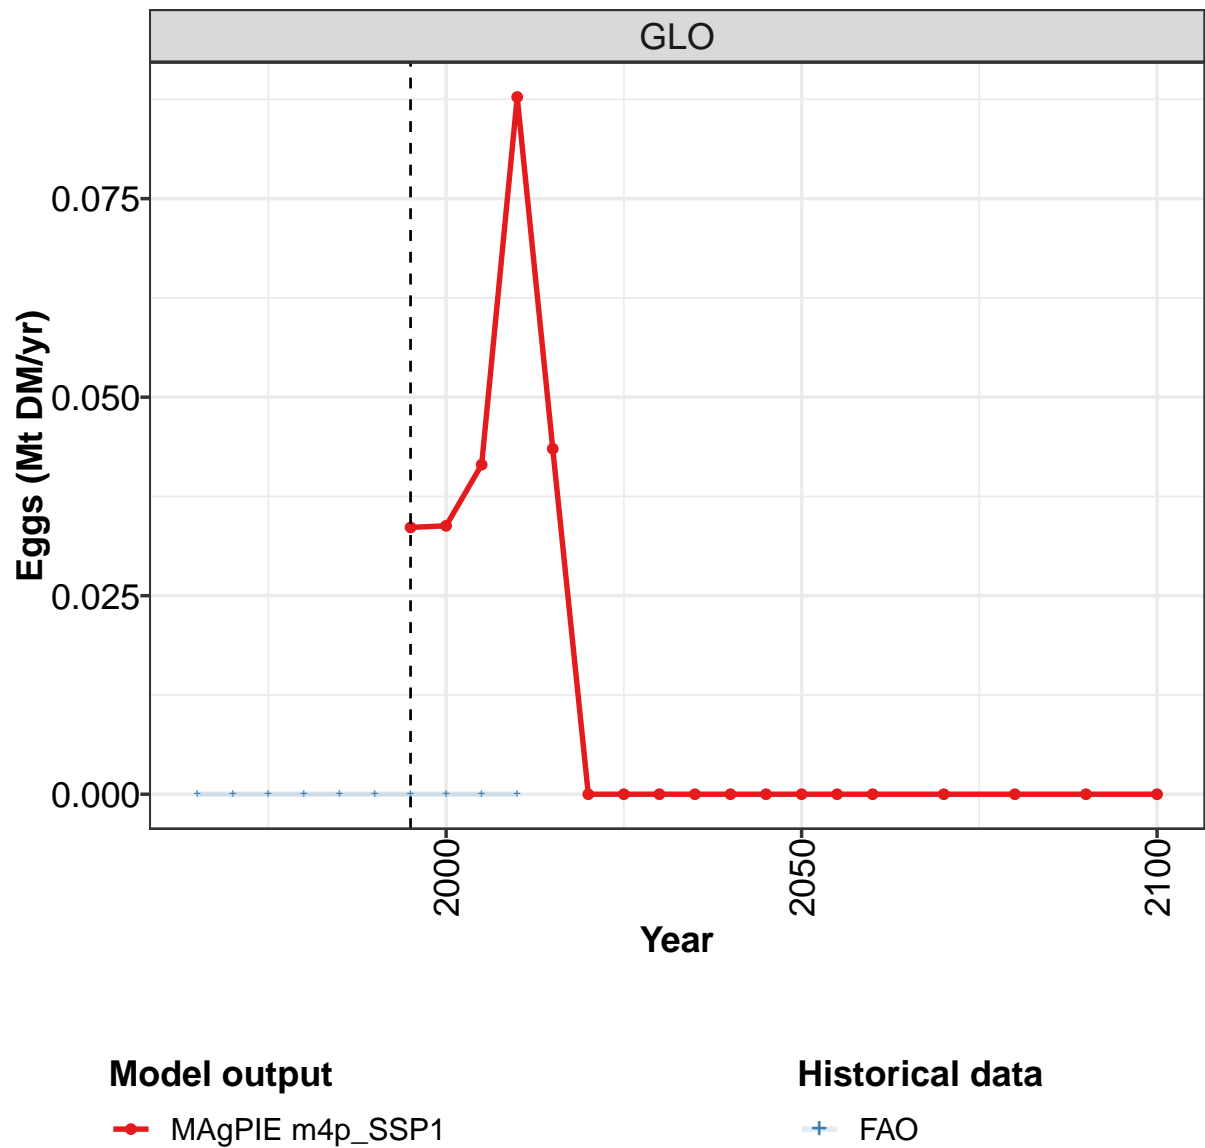

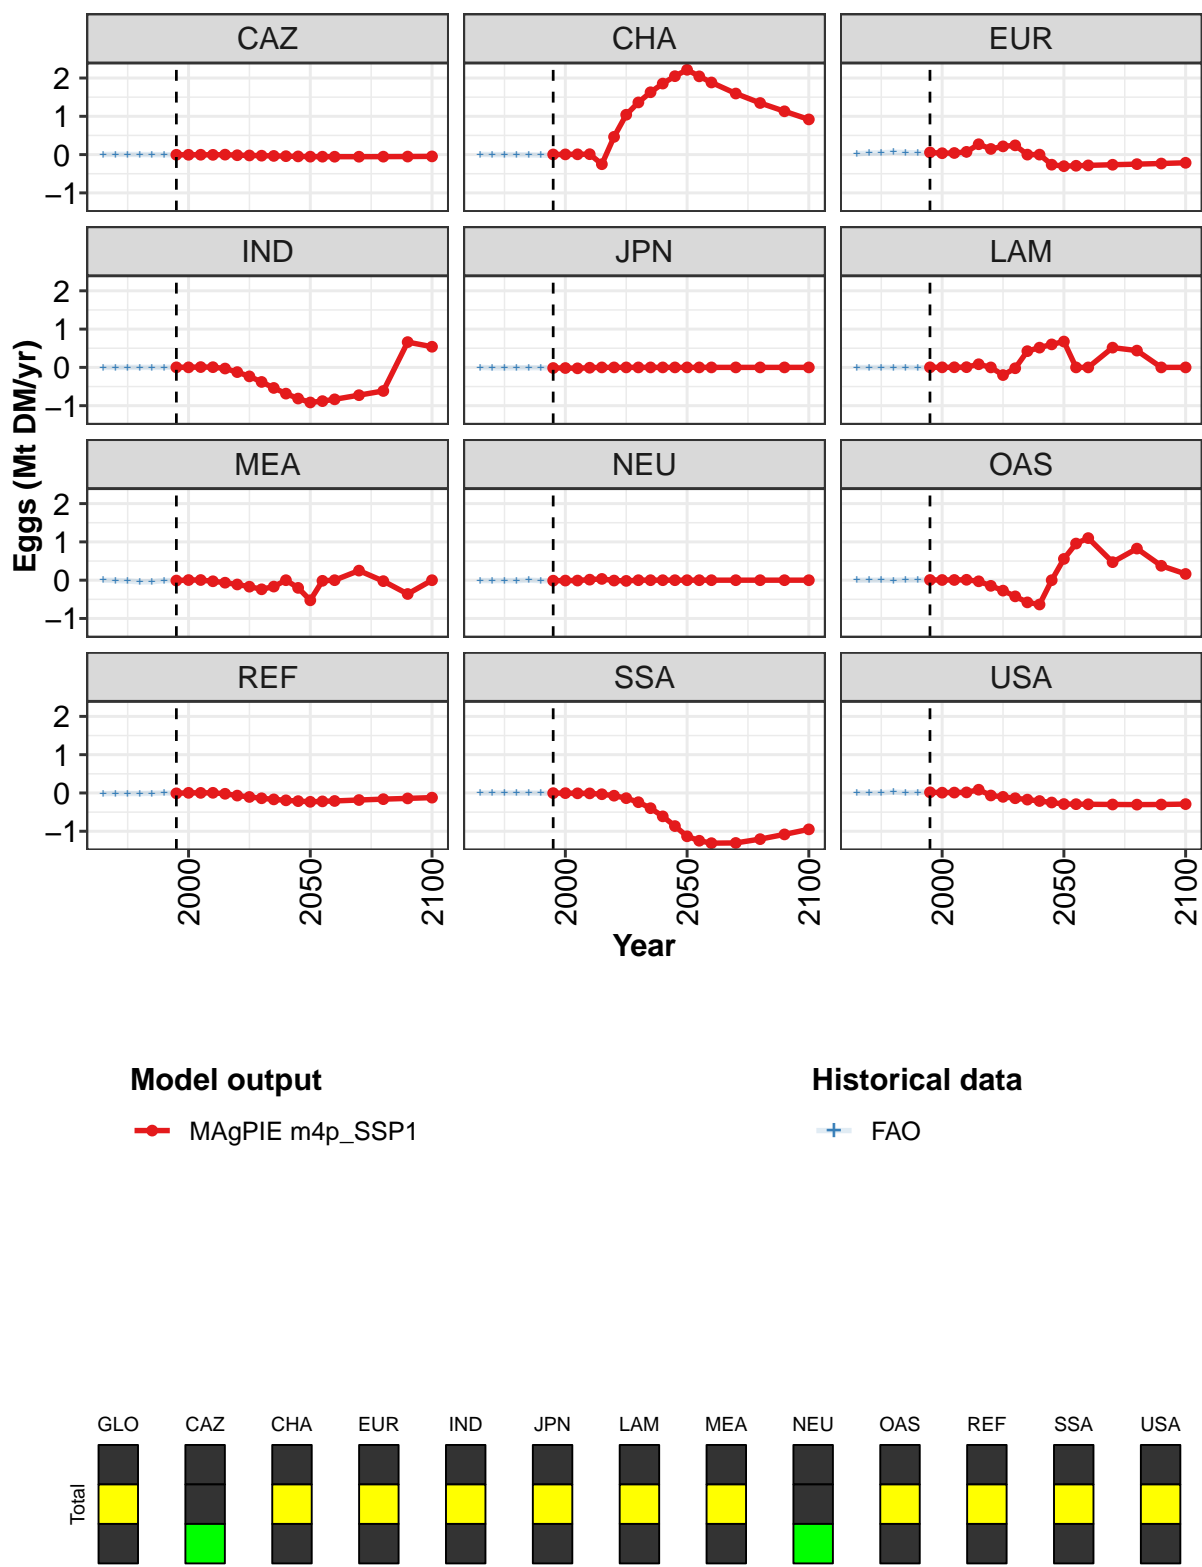

Figure 503: MAgPIE m4p\_SSP1 — Trade—Net-Trade—Livestock products—Eggs (Mt DM/yr)

|     | 1995  | 2000  | 2005  | 2010  | 2015  | 2020  | 2025  | 2030  | 2035  | 2040  | 2045  |
|-----|-------|-------|-------|-------|-------|-------|-------|-------|-------|-------|-------|
| GLO | 0.03  | 0.03  | 0.04  | 0.09  | 0.04  | 0.00  | -0.00 | 0.00  | -0.00 | -0.00 | 0.00  |
| CAZ | -0.00 | -0.00 | -0.00 | -0.01 | -0.00 | -0.02 | -0.02 | -0.03 | -0.03 | -0.04 | -0.05 |
| CHA | 0.00  | 0.01  | 0.01  | 0.01  | -0.25 | 0.46  | 1.04  | 1.36  | 1.63  | 1.86  | 2.05  |
| EUR | 0.06  | 0.04  | 0.04  | 0.07  | 0.27  | 0.15  | 0.21  | 0.24  | 0.00  | 0.00  | -0.26 |
| IND | 0.00  | 0.00  | 0.01  | 0.01  | -0.03 | -0.12 | -0.23 | -0.38 | -0.54 | -0.68 | -0.81 |
| JPN | -0.02 | -0.02 | -0.02 | -0.01 | 0.00  | 0.00  | 0.00  | 0.00  | 0.00  | 0.00  | 0.00  |
| LAM | 0.00  | 0.00  | 0.00  | 0.01  | 0.08  | 0.00  | -0.20 | -0.02 | 0.42  | 0.52  | 0.60  |
| MEA | -0.01 | 0.00  | 0.00  | -0.03 | -0.07 | -0.11 | -0.17 | -0.24 | -0.17 | 0.00  | -0.20 |
| NEU | -0.01 | -0.01 | -0.01 | 0.01  | 0.03  | -0.01 | -0.02 | 0.00  | 0.00  | 0.00  | 0.00  |
| OAS | 0.01  | 0.01  | 0.01  | 0.01  | -0.03 | -0.15 | -0.27 | -0.42 | -0.58 | -0.64 | 0.00  |
| REF | -0.01 | 0.00  | 0.00  | 0.00  | -0.02 | -0.07 | -0.10 | -0.14 | -0.17 | -0.19 | -0.21 |
| SSA | -0.00 | -0.00 | -0.01 | -0.01 | -0.03 | -0.07 | -0.14 | -0.24 | -0.40 | -0.61 | -0.86 |
| USA | 0.02  | 0.01  | 0.01  | 0.02  | 0.09  | -0.07 | -0.10 | -0.14 | -0.17 | -0.21 | -0.25 |

Table 1908: MAgPIE m4p-SSP1 — Trade—Net-Trade—Livestock products—Eggs (Mt DM/yr) [PART 1/2]

|     | 2050  | 2055  | 2060  | 2070  | 2080  | 2090  | 2100  |
|-----|-------|-------|-------|-------|-------|-------|-------|
| GLO | 0.00  | 0.00  | 0.00  | -0.00 | 0.00  | -0.00 | -0.00 |
| CAZ | -0.05 | -0.05 | -0.05 | -0.05 | -0.05 | -0.05 | -0.05 |
| CHA | 2.22  | 2.04  | 1.88  | 1.60  | 1.35  | 1.13  | 0.92  |
| EUR | -0.30 | -0.29 | -0.28 | -0.26 | -0.25 | -0.23 | -0.21 |
| IND | -0.92 | -0.88 | -0.83 | -0.73 | -0.62 | 0.66  | 0.54  |
| JPN | 0.00  | 0.00  | -0.00 | 0.00  | 0.00  | 0.00  | 0.00  |
| LAM | 0.68  | 0.00  | 0.00  | 0.52  | 0.44  | 0.00  | 0.00  |
| MEA | -0.52 | -0.02 | 0.00  | 0.25  | -0.02 | -0.36 | 0.00  |
| NEU | 0.00  | 0.00  | 0.00  | 0.00  | 0.00  | 0.00  | 0.00  |
| OAS | 0.56  | 0.96  | 1.10  | 0.47  | 0.83  | 0.38  | 0.16  |
| REF | -0.23 | -0.22 | -0.21 | -0.18 | -0.16 | -0.14 | -0.12 |
| SSA | -1.13 | -1.25 | -1.31 | -1.31 | -1.20 | -1.08 | -0.95 |
| USA | -0.29 | -0.29 | -0.29 | -0.30 | -0.30 | -0.30 | -0.29 |

Table 1909: MAgPIE m4p-SSP1 — Trade—Net-Trade—Livestock products—Eggs (Mt DM/yr) [PART 2/2]

|     | 1965    | 1970    | 1975    | 1980    | 1985    | 1990    | 1995    | 2000    | 2005    | 2010    |
|-----|---------|---------|---------|---------|---------|---------|---------|---------|---------|---------|
| GLO | 0.0000  | 0.0000  | 0.0000  | 0.0000  | 0.0000  | 0.0000  | 0.0000  | 0.0000  | 0.0000  | 0.0000  |
| CAZ | 0.0022  | 0.0067  | 0.0044  | 0.0028  | -0.0010 | -0.0037 | -0.0054 | -0.0055 | -0.0053 | -0.0094 |
| CHA | 0.0062  | -0.0003 | -0.0020 | -0.0028 | -0.0060 | -0.0145 | -0.0205 | -0.0071 | -0.0013 | 0.0000  |
| EUR | 0.0218  | 0.0422  | 0.0452  | 0.0647  | 0.0515  | 0.0447  | 0.0450  | 0.0191  | 0.0078  | 0.0076  |
| IND | 0.0000  | 0.0000  | -0.0001 | 0.0007  | 0.0000  | 0.0012  | 0.0054  | 0.0084  | 0.0285  | 0.0209  |
| JPN | -0.0003 | -0.0120 | -0.0127 | -0.0104 | -0.0069 | -0.0095 | -0.0129 | -0.0133 | -0.0245 | -0.0114 |
| LAM | -0.0036 | -0.0033 | -0.0003 | -0.0046 | -0.0003 | -0.0083 | -0.0098 | -0.0146 | -0.0121 | -0.0152 |
| MEA | 0.0007  | -0.0073 | -0.0212 | -0.0454 | -0.0413 | -0.0088 | -0.0112 | -0.0046 | -0.0060 | -0.0400 |
| NEU | -0.0100 | -0.0117 | -0.0091 | -0.0116 | 0.0032  | -0.0143 | -0.0159 | -0.0133 | -0.0136 | 0.0229  |
| OAS | -0.0023 | -0.0015 | 0.0016  | -0.0029 | 0.0043  | 0.0047  | 0.0027  | 0.0099  | 0.0091  | 0.0040  |
| REF | -0.0186 | -0.0116 | -0.0140 | -0.0151 | -0.0084 | 0.0010  | -0.0069 | 0.0007  | -0.0025 | 0.0012  |
| SSA | -0.0004 | 0.0004  | 0.0048  | -0.0021 | 0.0006  | -0.0057 | -0.0092 | -0.0113 | -0.0199 | -0.0325 |
| USA | 0.0044  | -0.0015 | 0.0034  | 0.0267  | 0.0041  | 0.0133  | 0.0387  | 0.0313  | 0.0399  | 0.0519  |

Table 1910: FAO — Trade—Net-Trade—Livestock products—Eggs (Mt DM/yr)

58.3.3 Monogastric meat

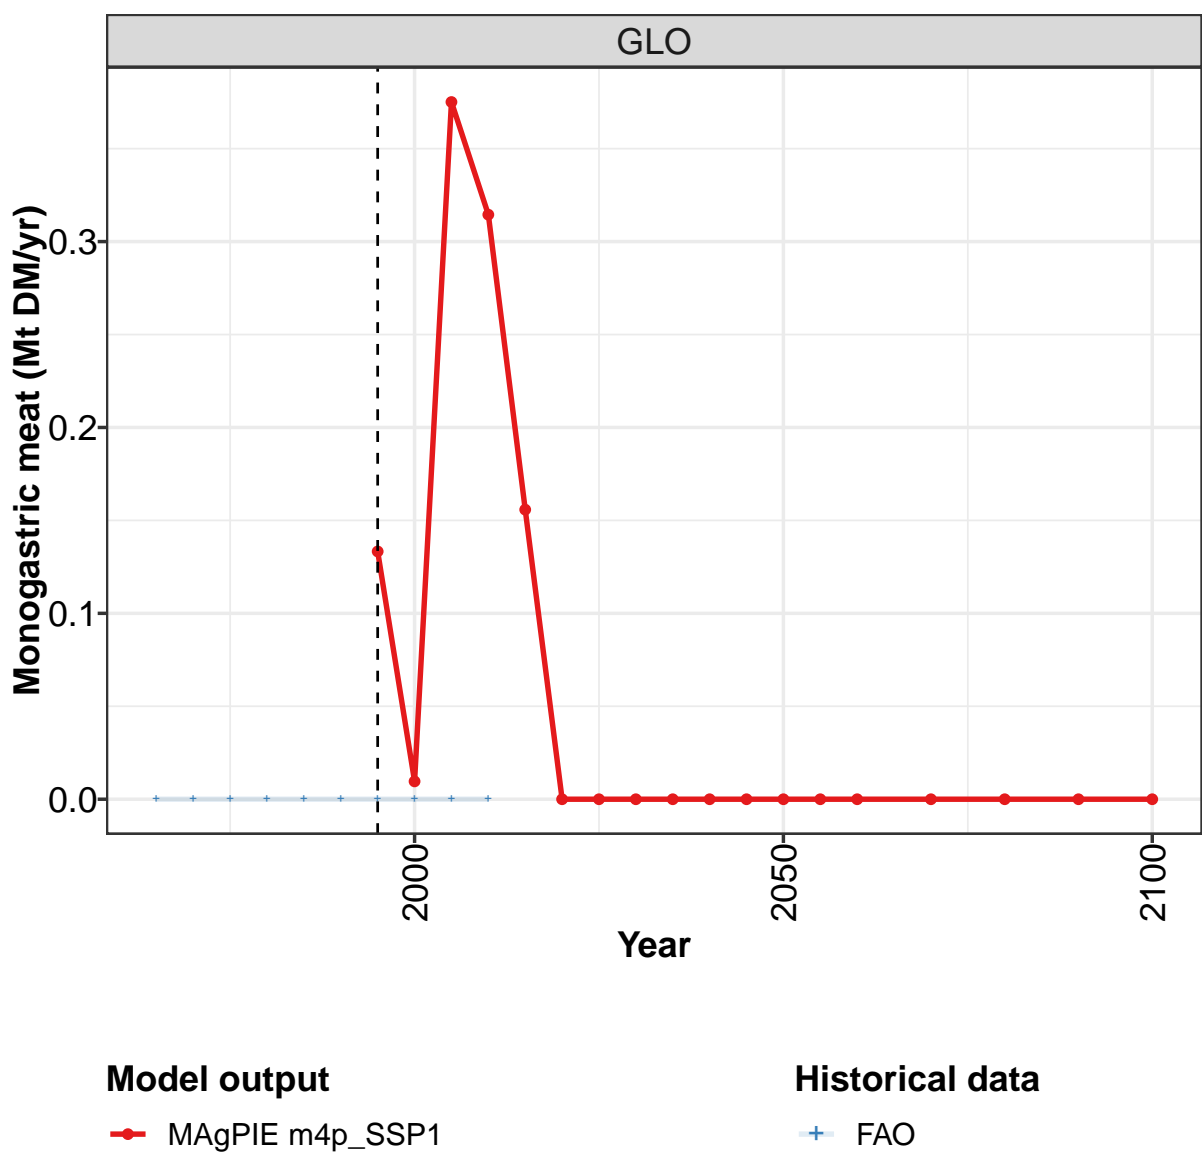



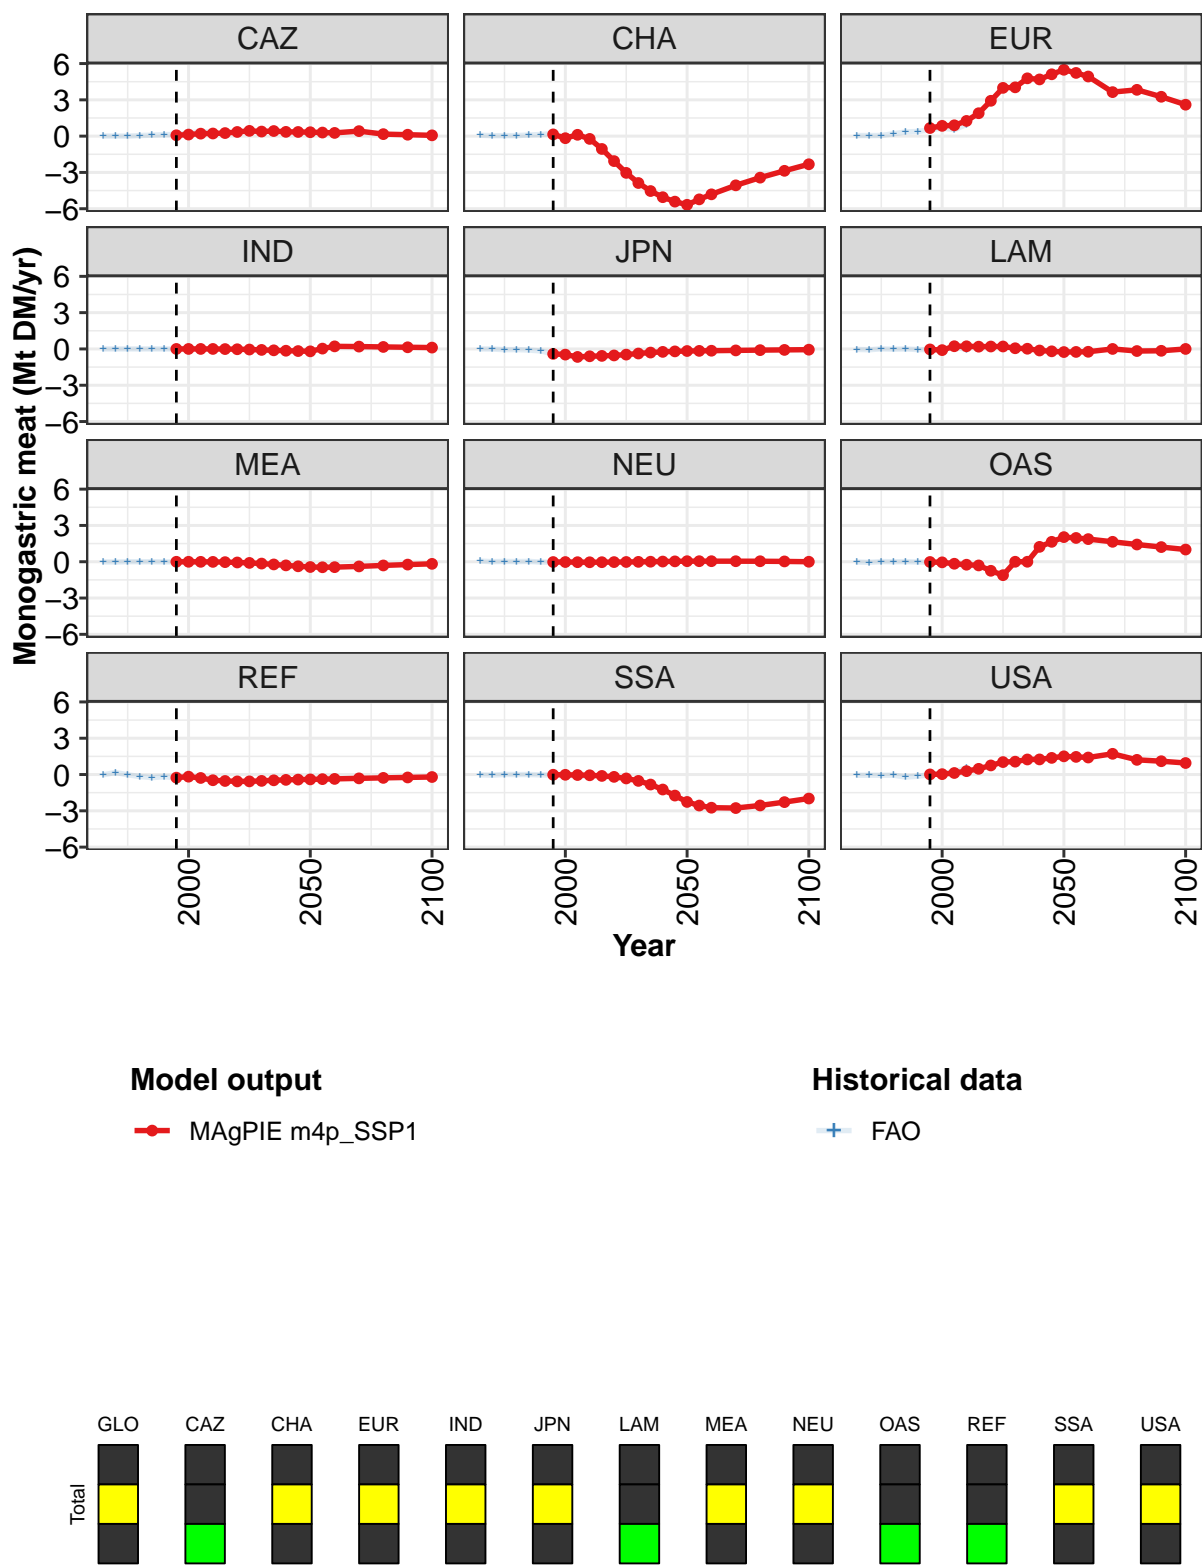

Figure 504: MAgPIE m4p\_SSP1 — Trade—Net-Trade—Livestock products—Monogastric meat (Mt DM/yr)

|     | 1995  | 2000  | 2005  | 2010  | 2015  | 2020  | 2025  | 2030  | 2035  | 2040  | 2045  |
|-----|-------|-------|-------|-------|-------|-------|-------|-------|-------|-------|-------|
| GLO | 0.13  | 0.01  | 0.38  | 0.31  | 0.16  | 0.00  | 0.00  | 0.00  | 0.00  | 0.00  | 0.00  |
| CAZ | 0.07  | 0.13  | 0.21  | 0.22  | 0.26  | 0.35  | 0.44  | 0.38  | 0.43  | 0.35  | 0.35  |
| CHA | 0.15  | -0.17 | 0.11  | -0.23 | -1.06 | -2.06 | -3.04 | -3.87 | -4.54 | -5.04 | -5.41 |
| EUR | 0.67  | 0.85  | 0.90  | 1.26  | 1.90  | 2.92  | 3.99  | 4.04  | 4.78  | 4.69  | 5.11  |
| IND | 0.00  | 0.00  | 0.00  | 0.00  | -0.01 | -0.02 | -0.05 | -0.08 | -0.11 | -0.15 | -0.17 |
| JPN | -0.41 | -0.47 | -0.66 | -0.61 | -0.57 | -0.54 | -0.47 | -0.38 | -0.30 | -0.24 | -0.20 |
| LAM | -0.04 | -0.10 | 0.22  | 0.22  | 0.19  | 0.20  | 0.20  | 0.06  | 0.02  | -0.13 | -0.19 |
| MEA | -0.00 | -0.00 | -0.01 | -0.01 | -0.03 | -0.06 | -0.10 | -0.15 | -0.22 | -0.30 | -0.38 |
| NEU | -0.02 | -0.02 | -0.04 | -0.04 | -0.04 | -0.03 | -0.02 | -0.01 | 0.00  | 0.02  | 0.03  |
| OAS | -0.02 | -0.05 | -0.17 | -0.24 | -0.30 | -0.75 | -1.11 | 0.00  | 0.00  | 1.23  | 1.64  |
| REF | -0.26 | -0.17 | -0.28 | -0.47 | -0.53 | -0.57 | -0.57 | -0.53 | -0.48 | -0.44 | -0.42 |
| SSA | -0.02 | -0.02 | -0.04 | -0.06 | -0.11 | -0.19 | -0.32 | -0.53 | -0.83 | -1.24 | -1.74 |
| USA | 0.01  | 0.03  | 0.13  | 0.28  | 0.47  | 0.75  | 1.03  | 1.06  | 1.25  | 1.25  | 1.38  |

Table 1911: MAgPIE m4p\_SSP1 — Trade—Net-Trade—Livestock products—Monogastric meat (Mt DM/yr)  
[PART 1/2]

|     | 2050  | 2055  | 2060  | 2070  | 2080  | 2090  | 2100  |
|-----|-------|-------|-------|-------|-------|-------|-------|
| GLO | -0.00 | -0.00 | -0.00 | -0.00 | -0.00 | 0.00  | -0.00 |
| CAZ | 0.33  | 0.30  | 0.27  | 0.42  | 0.17  | 0.12  | 0.07  |
| CHA | -5.67 | -5.22 | -4.81 | -4.06 | -3.43 | -2.87 | -2.32 |
| EUR | 5.49  | 5.23  | 4.93  | 3.64  | 3.83  | 3.26  | 2.60  |
| IND | -0.20 | 0.03  | 0.21  | 0.20  | 0.17  | 0.14  | 0.11  |
| JPN | -0.17 | -0.16 | -0.15 | -0.12 | -0.10 | -0.08 | -0.06 |
| LAM | -0.26 | -0.25 | -0.23 | 0.00  | -0.17 | -0.15 | 0.00  |
| MEA | -0.44 | -0.46 | -0.45 | -0.39 | -0.31 | -0.24 | -0.17 |
| NEU | 0.05  | 0.05  | 0.05  | 0.04  | 0.04  | 0.03  | 0.00  |
| OAS | 2.04  | 1.97  | 1.87  | 1.65  | 1.42  | 1.21  | 1.01  |
| REF | -0.40 | -0.38 | -0.36 | -0.32 | -0.28 | -0.24 | -0.21 |
| SSA | -2.26 | -2.56 | -2.74 | -2.77 | -2.56 | -2.28 | -1.98 |
| USA | 1.50  | 1.46  | 1.41  | 1.71  | 1.21  | 1.10  | 0.95  |

Table 1912: MAgPIE m4p\_SSP1 — Trade—Net-Trade—Livestock products—Monogastric meat (Mt DM/yr)  
[PART 2/2]

|     | 1965   | 1970   | 1975   | 1980   | 1985   | 1990   | 1995   | 2000   | 2005   | 2010   |
|-----|--------|--------|--------|--------|--------|--------|--------|--------|--------|--------|
| GLO | 0.000  | 0.000  | 0.000  | 0.000  | 0.000  | 0.000  | 0.000  | 0.000  | 0.000  | 0.000  |
| CAZ | 0.006  | 0.008  | -0.001 | 0.049  | 0.084  | 0.122  | 0.139  | 0.252  | 0.381  | 0.328  |
| CHA | 0.075  | 0.038  | 0.038  | 0.046  | 0.095  | 0.137  | 0.210  | -0.143 | 0.080  | -0.199 |
| EUR | 0.052  | 0.048  | 0.055  | 0.196  | 0.348  | 0.385  | 0.527  | 0.669  | 0.537  | 0.962  |
| IND | -0.001 | -0.001 | 0.000  | 0.000  | 0.000  | -0.000 | 0.000  | -0.000 | -0.001 | -0.001 |
| JPN | -0.001 | -0.009 | -0.061 | -0.054 | -0.093 | -0.167 | -0.405 | -0.469 | -0.658 | -0.605 |
| LAM | -0.039 | -0.068 | 0.005  | -0.023 | -0.003 | -0.051 | -0.064 | -0.087 | 0.168  | -0.048 |
| MEA | -0.012 | -0.023 | 0.003  | -0.002 | 0.001  | -0.011 | -0.014 | -0.005 | -0.038 | -0.037 |
| NEU | 0.051  | 0.006  | 0.024  | 0.012  | 0.027  | -0.032 | -0.034 | -0.024 | -0.061 | -0.064 |
| OAS | -0.025 | -0.052 | 0.010  | -0.001 | 0.006  | -0.024 | -0.047 | -0.056 | -0.229 | -0.290 |
| REF | -0.022 | 0.168  | -0.021 | -0.165 | -0.254 | -0.186 | -0.273 | -0.177 | -0.309 | -0.480 |
| SSA | -0.025 | -0.055 | 0.009  | -0.004 | 0.000  | -0.031 | -0.042 | -0.024 | -0.115 | -0.128 |
| USA | -0.061 | -0.060 | -0.062 | -0.053 | -0.211 | -0.144 | 0.003  | 0.063  | 0.244  | 0.562  |

Table 1913: FAO — Trade—Net-Trade—Livestock products—Monogastric meat (Mt DM/yr)

58.3.4 Poultry meat

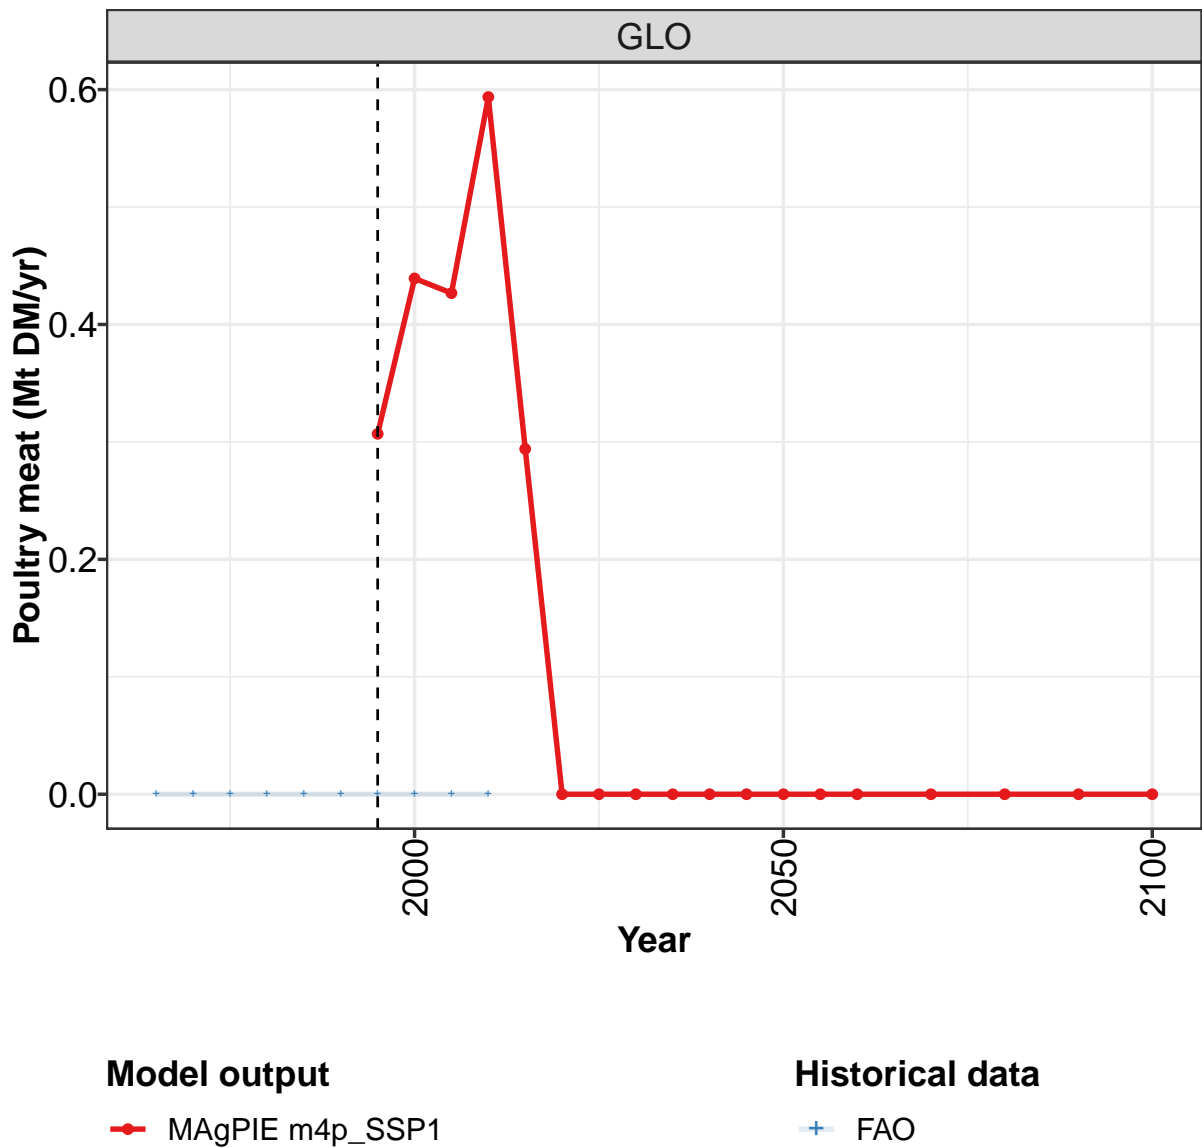

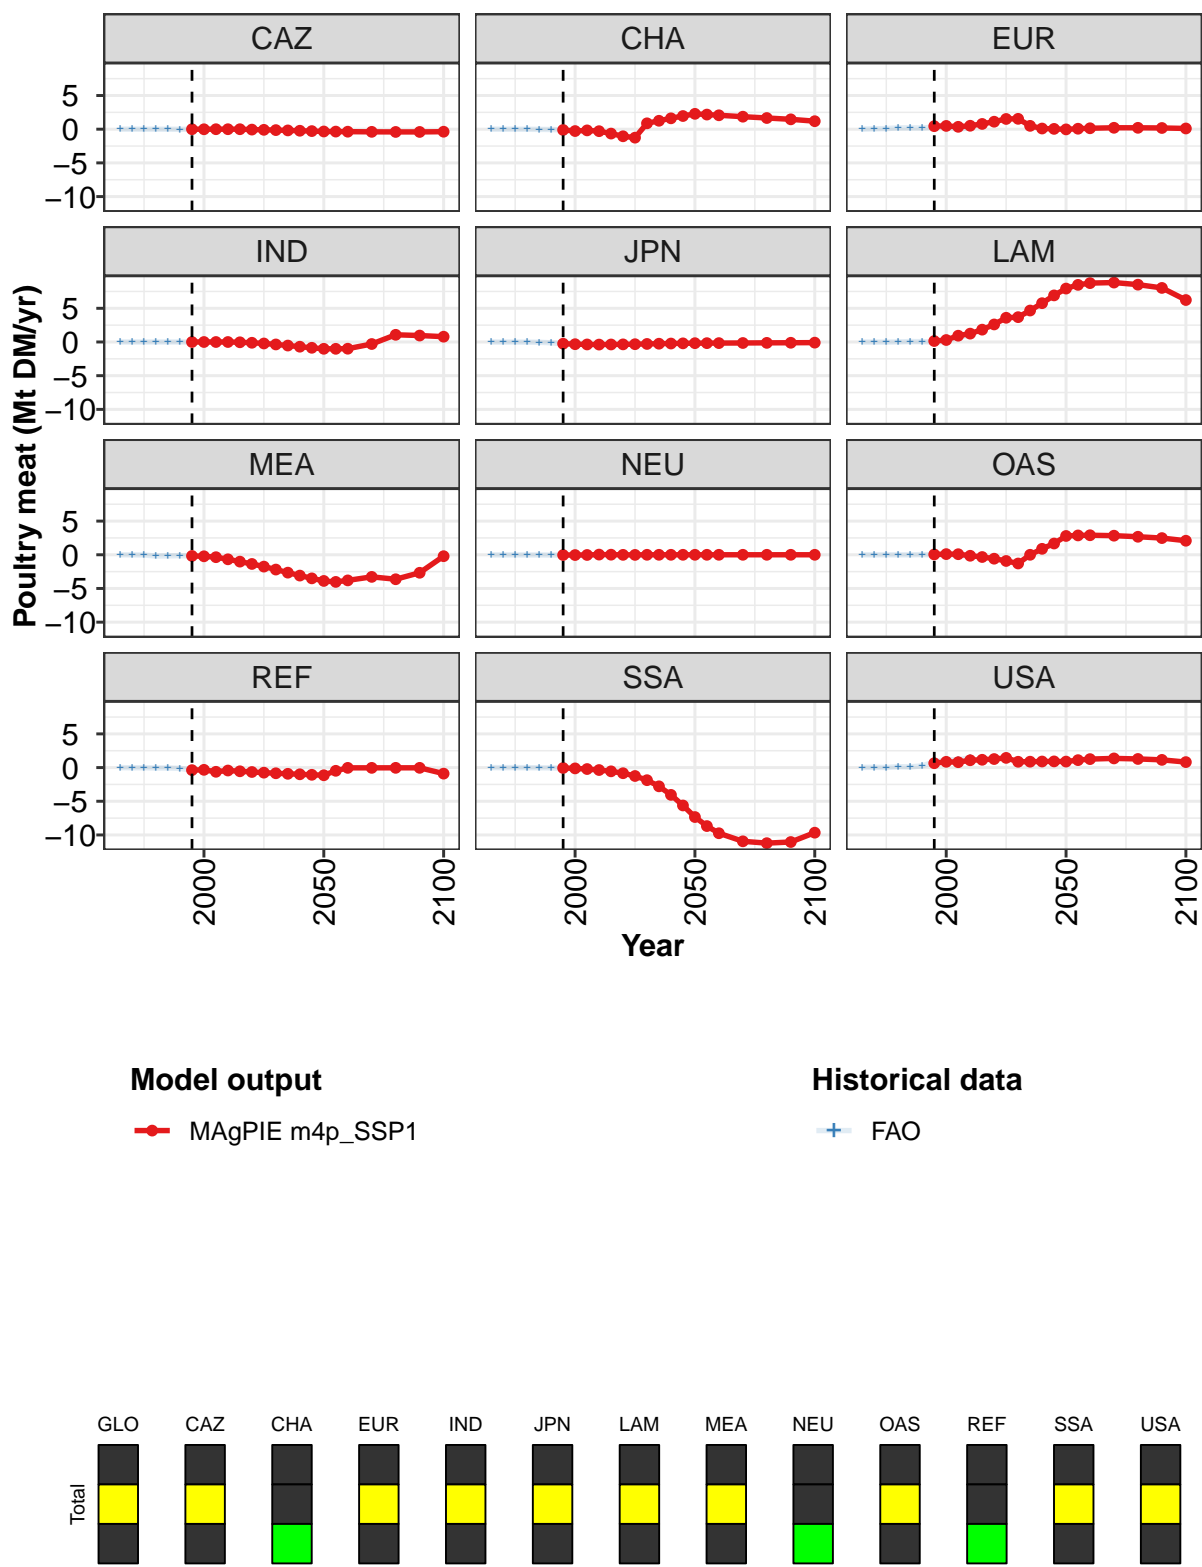

Figure 505: MAgPIE m4p\_SSP1 — Trade—Net-Trade—Livestock products—Poultry meat (Mt DM/yr)

|     | 1995  | 2000  | 2005  | 2010  | 2015  | 2020  | 2025  | 2030  | 2035  | 2040  | 2045  |
|-----|-------|-------|-------|-------|-------|-------|-------|-------|-------|-------|-------|
| GLO | 0.31  | 0.44  | 0.43  | 0.59  | 0.29  | -0.00 | -0.00 | 0.00  | 0.00  | 0.00  | 0.00  |
| CAZ | 0.00  | -0.01 | 0.00  | 0.00  | 0.00  | -0.06 | -0.09 | -0.13 | -0.18 | -0.22 | -0.28 |
| CHA | -0.11 | -0.27 | -0.18 | -0.29 | -0.65 | -1.05 | -1.25 | 0.87  | 1.25  | 1.62  | 1.96  |
| EUR | 0.45  | 0.49  | 0.36  | 0.51  | 0.78  | 1.11  | 1.52  | 1.54  | 0.50  | 0.10  | 0.05  |
| IND | 0.00  | 0.00  | 0.00  | 0.00  | -0.04 | -0.11 | -0.22 | -0.36 | -0.53 | -0.70 | -0.86 |
| JPN | -0.25 | -0.32 | -0.36 | -0.38 | -0.37 | -0.35 | -0.32 | -0.29 | -0.25 | -0.22 | -0.20 |
| LAM | 0.15  | 0.30  | 0.94  | 1.24  | 1.83  | 2.61  | 3.60  | 3.69  | 4.67  | 5.76  | 6.92  |
| MEA | -0.17 | -0.22 | -0.35 | -0.67 | -1.01 | -1.36 | -1.75 | -2.19 | -2.65 | -3.08 | -3.50 |
| NEU | -0.03 | -0.03 | -0.03 | 0.03  | 0.02  | -0.00 | -0.01 | 0.00  | 0.00  | 0.00  | 0.00  |
| OAS | 0.05  | 0.10  | 0.09  | -0.14 | -0.33 | -0.58 | -0.91 | -1.29 | 0.00  | 0.89  | 1.68  |
| REF | -0.38 | -0.33 | -0.62 | -0.43 | -0.55 | -0.65 | -0.75 | -0.84 | -0.92 | -1.00 | -1.07 |
| SSA | -0.06 | -0.12 | -0.22 | -0.36 | -0.56 | -0.83 | -1.25 | -1.87 | -2.78 | -4.05 | -5.62 |
| USA | 0.65  | 0.86  | 0.80  | 1.09  | 1.16  | 1.27  | 1.44  | 0.87  | 0.88  | 0.90  | 0.92  |

Table 1914: MAgPIE m4p\_SSP1 — Trade—Net-Trade—Livestock products—Poultry meat (Mt DM/yr) [PART 1/2]

|     | 2050  | 2055  | 2060  | 2070   | 2080   | 2090   | 2100  |
|-----|-------|-------|-------|--------|--------|--------|-------|
| GLO | -0.00 | 0.00  | -0.00 | -0.00  | 0.00   | 0.00   | 0.00  |
| CAZ | -0.34 | -0.35 | -0.37 | -0.39  | -0.40  | -0.40  | -0.37 |
| CHA | 2.28  | 2.17  | 2.07  | 1.86   | 1.66   | 1.47   | 1.19  |
| EUR | -0.02 | 0.07  | 0.14  | 0.21   | 0.21   | 0.18   | 0.11  |
| IND | -1.01 | -1.01 | -0.99 | -0.30  | 1.07   | 0.96   | 0.79  |
| JPN | -0.17 | -0.17 | -0.16 | -0.15  | -0.13  | -0.11  | -0.09 |
| LAM | 7.93  | 8.48  | 8.74  | 8.82   | 8.51   | 8.03   | 6.23  |
| MEA | -3.88 | -4.02 | -3.80 | -3.28  | -3.63  | -2.67  | -0.21 |
| NEU | 0.00  | 0.00  | 0.00  | 0.00   | 0.00   | 0.00   | 0.00  |
| OAS | 2.79  | 2.87  | 2.90  | 2.84   | 2.68   | 2.48   | 2.09  |
| REF | -1.14 | -0.47 | -0.04 | -0.04  | -0.04  | -0.04  | -0.90 |
| SSA | -7.34 | -8.68 | -9.74 | -10.94 | -11.22 | -11.04 | -9.66 |
| USA | 0.89  | 1.11  | 1.26  | 1.36   | 1.28   | 1.15   | 0.81  |

Table 1915: MAgPIE m4p\_SSP1 — Trade—Net-Trade—Livestock products—Poultry meat (Mt DM/yr) [PART 2/2]

|     | 1965  | 1970  | 1975  | 1980  | 1985  | 1990  | 1995  | 2000  | 2005  | 2010  |
|-----|-------|-------|-------|-------|-------|-------|-------|-------|-------|-------|
| GLO | 0.00  | 0.00  | 0.00  | 0.00  | 0.00  | 0.00  | 0.00  | 0.00  | 0.00  | 0.00  |
| CAZ | -0.00 | 0.00  | -0.01 | -0.00 | -0.01 | -0.01 | -0.01 | -0.01 | -0.00 | -0.02 |
| CHA | -0.00 | -0.01 | -0.00 | -0.01 | -0.03 | -0.05 | -0.11 | -0.28 | -0.16 | -0.27 |
| EUR | 0.00  | 0.06  | 0.09  | 0.19  | 0.20  | 0.18  | 0.30  | 0.30  | 0.01  | 0.22  |
| IND | 0.00  | -0.00 | 0.00  | -0.00 | -0.00 | -0.00 | -0.00 | -0.00 | -0.00 | -0.00 |
| JPN | -0.00 | -0.00 | -0.01 | -0.03 | -0.04 | -0.12 | -0.25 | -0.33 | -0.37 | -0.39 |
| LAM | -0.00 | -0.02 | -0.02 | 0.02  | 0.06  | 0.05  | -0.01 | 0.06  | 0.80  | 0.95  |
| MEA | -0.00 | -0.01 | -0.03 | -0.19 | -0.17 | -0.13 | -0.19 | -0.26 | -0.40 | -0.72 |
| NEU | -0.01 | -0.02 | -0.02 | -0.03 | -0.02 | -0.04 | -0.05 | -0.06 | -0.05 | -0.04 |
| OAS | -0.00 | -0.01 | -0.00 | -0.01 | -0.01 | 0.03  | -0.01 | -0.01 | -0.04 | -0.25 |
| REF | -0.01 | -0.03 | -0.02 | -0.07 | -0.06 | -0.12 | -0.39 | -0.35 | -0.64 | -0.46 |
| SSA | 0.00  | -0.01 | 0.00  | -0.02 | -0.03 | -0.05 | -0.12 | -0.21 | -0.30 | -0.48 |
| USA | 0.03  | 0.04  | 0.01  | 0.14  | 0.10  | 0.26  | 0.84  | 1.16  | 1.16  | 1.46  |

Table 1916: FAO — Trade—Net-Trade—Livestock products—Poultry meat (Mt DM/yr)

58.3.5 Ruminant meat

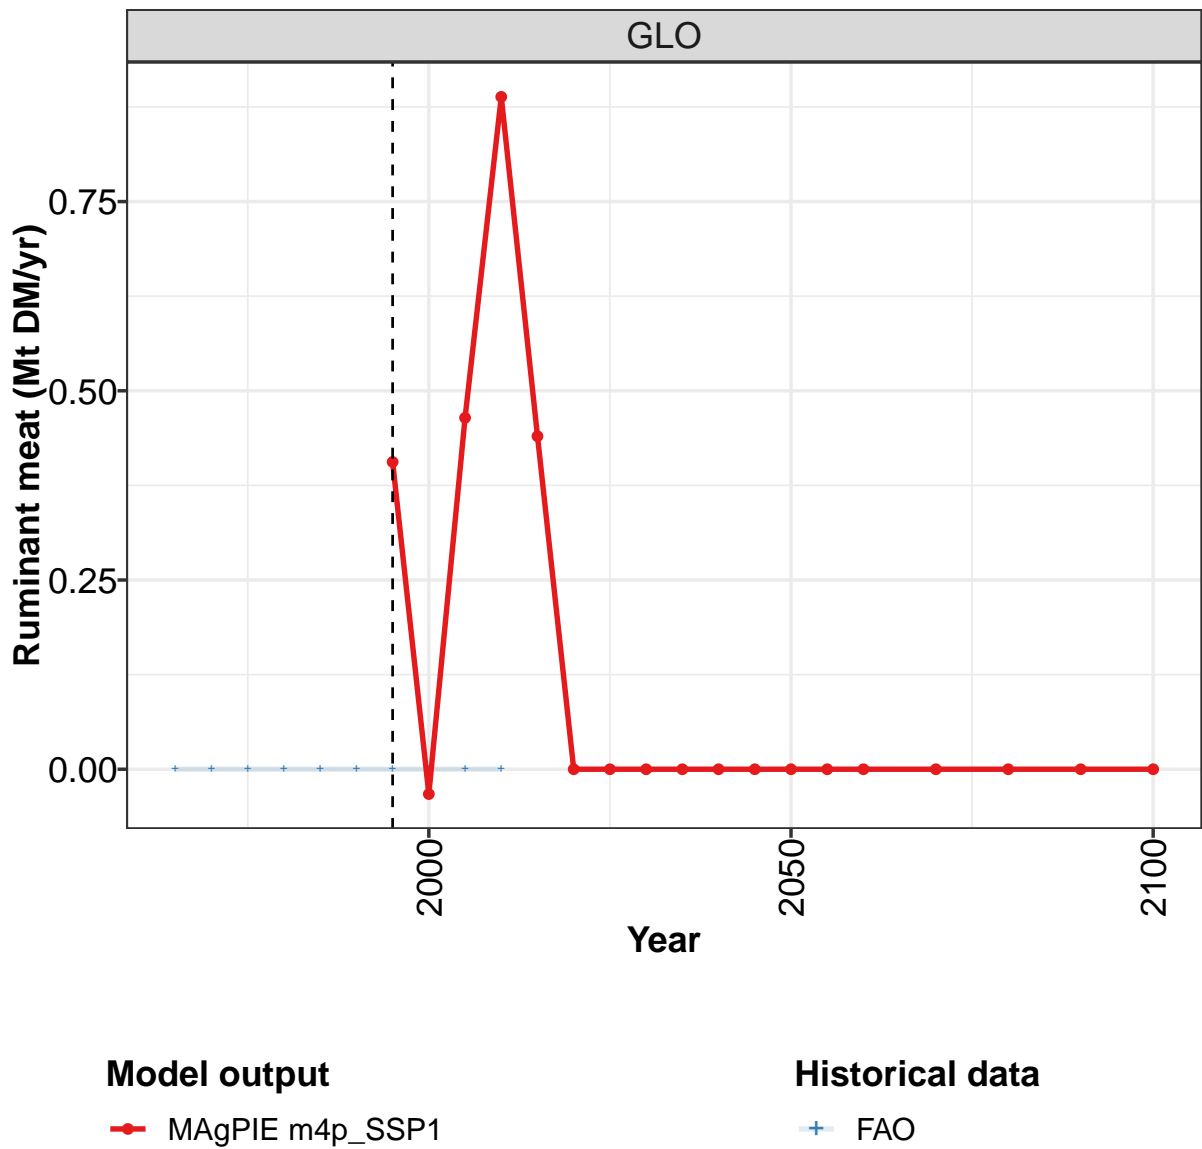

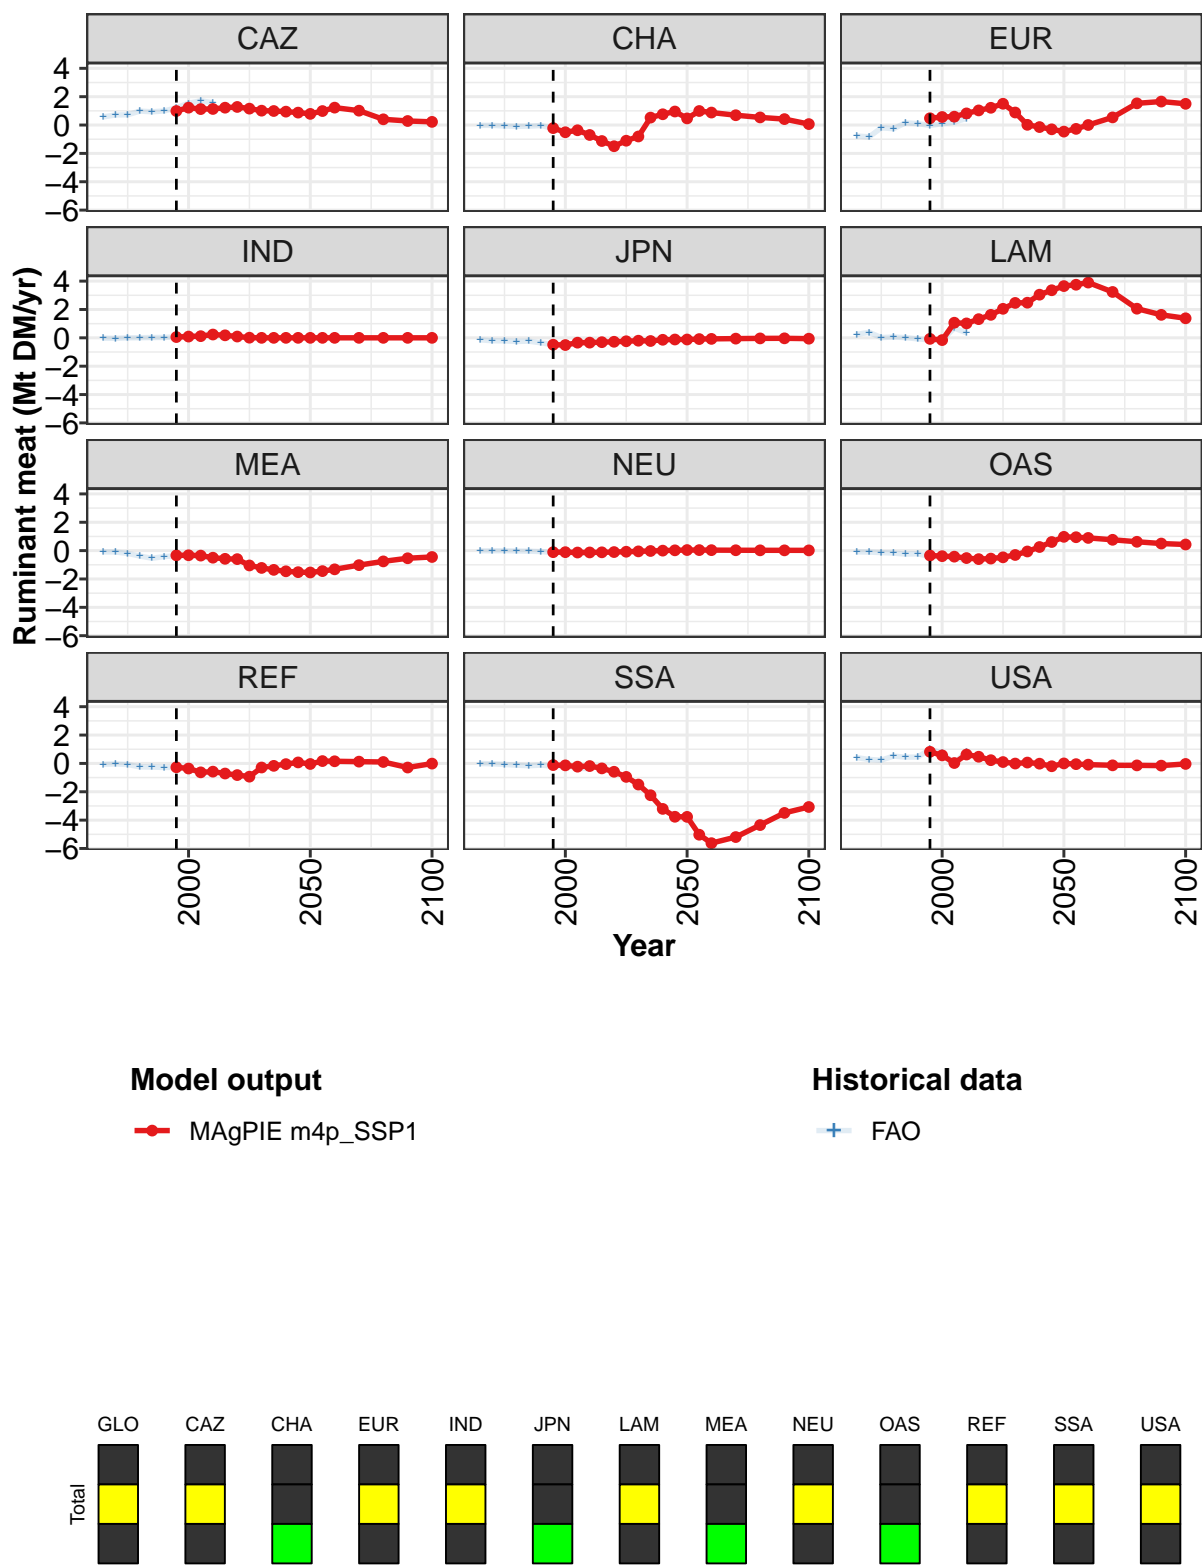

Figure 506: MAgPIE m4p\_SSP1 — Trade—Net-Trade—Livestock products—Ruminant meat (Mt DM/yr)

|     | 1995  | 2000  | 2005  | 2010  | 2015  | 2020  | 2025  | 2030  | 2035  | 2040  | 2045  |
|-----|-------|-------|-------|-------|-------|-------|-------|-------|-------|-------|-------|
| GLO | 0.41  | -0.03 | 0.46  | 0.89  | 0.44  | 0.00  | 0.00  | 0.00  | 0.00  | 0.00  | -0.00 |
| CAZ | 0.99  | 1.23  | 1.13  | 1.14  | 1.22  | 1.28  | 1.16  | 1.02  | 0.99  | 0.95  | 0.88  |
| CHA | -0.22 | -0.51 | -0.37 | -0.70 | -1.13 | -1.49 | -1.10 | -0.81 | 0.53  | 0.76  | 0.96  |
| EUR | 0.48  | 0.57  | 0.59  | 0.82  | 1.03  | 1.22  | 1.50  | 0.89  | 0.02  | -0.14 | -0.30 |
| IND | 0.06  | 0.09  | 0.12  | 0.23  | 0.18  | 0.09  | 0.01  | 0.00  | 0.00  | 0.00  | 0.00  |
| JPN | -0.48 | -0.51 | -0.34 | -0.34 | -0.31 | -0.28 | -0.24 | -0.20 | -0.22 | -0.14 | -0.12 |
| LAM | -0.07 | -0.16 | 1.07  | 1.02  | 1.32  | 1.62  | 2.05  | 2.46  | 2.48  | 3.04  | 3.36  |
| MEA | -0.33 | -0.32 | -0.35 | -0.50 | -0.58 | -0.60 | -1.04 | -1.22 | -1.36 | -1.46 | -1.52 |
| NEU | -0.11 | -0.11 | -0.13 | -0.13 | -0.12 | -0.10 | -0.08 | -0.05 | -0.02 | 0.00  | 0.02  |
| OAS | -0.34 | -0.39 | -0.42 | -0.52 | -0.60 | -0.56 | -0.47 | -0.31 | -0.06 | 0.26  | 0.61  |
| REF | -0.27 | -0.36 | -0.63 | -0.58 | -0.71 | -0.82 | -0.93 | -0.29 | -0.17 | -0.05 | 0.07  |
| SSA | -0.12 | -0.14 | -0.23 | -0.18 | -0.35 | -0.59 | -0.95 | -1.49 | -2.24 | -3.21 | -3.76 |
| USA | 0.82  | 0.57  | 0.03  | 0.63  | 0.47  | 0.23  | 0.10  | -0.01 | 0.06  | -0.02 | -0.20 |

Table 1917: MAgPIE m4p\_SSP1 — Trade—Net-Trade—Livestock products—Ruminant meat (Mt DM/yr)  
[PART 1/2]

|     | 2050  | 2055  | 2060  | 2070  | 2080  | 2090  | 2100  |
|-----|-------|-------|-------|-------|-------|-------|-------|
| GLO | -0.00 | -0.00 | -0.00 | 0.00  | 0.00  | 0.00  | 0.00  |
| CAZ | 0.79  | 0.99  | 1.23  | 1.01  | 0.40  | 0.29  | 0.23  |
| CHA | 0.47  | 0.99  | 0.88  | 0.69  | 0.54  | 0.42  | 0.07  |
| EUR | -0.46 | -0.27 | 0.00  | 0.54  | 1.53  | 1.66  | 1.50  |
| IND | 0.00  | 0.00  | 0.00  | 0.00  | 0.00  | 0.00  | 0.00  |
| JPN | -0.12 | -0.09 | -0.07 | -0.05 | -0.04 | -0.03 | -0.06 |
| LAM | 3.65  | 3.75  | 3.90  | 3.24  | 2.06  | 1.62  | 1.38  |
| MEA | -1.54 | -1.44 | -1.32 | -1.02 | -0.76 | -0.54 | -0.45 |
| NEU | 0.04  | 0.04  | 0.04  | 0.03  | 0.02  | 0.02  | 0.02  |
| OAS | 0.97  | 0.95  | 0.90  | 0.77  | 0.63  | 0.50  | 0.43  |
| REF | -0.04 | 0.17  | 0.15  | 0.13  | 0.10  | -0.29 | -0.01 |
| SSA | -3.77 | -5.03 | -5.62 | -5.19 | -4.35 | -3.49 | -3.07 |
| USA | 0.00  | -0.05 | -0.09 | -0.13 | -0.14 | -0.16 | -0.03 |

Table 1918: MAgPIE m4p\_SSP1 — Trade—Net-Trade—Livestock products—Ruminant meat (Mt DM/yr)  
[PART 2/2]

|     | 1965  | 1970  | 1975  | 1980  | 1985  | 1990  | 1995  | 2000  | 2005  | 2010  |
|-----|-------|-------|-------|-------|-------|-------|-------|-------|-------|-------|
| GLO | 0.00  | 0.00  | 0.00  | 0.00  | 0.00  | 0.00  | 0.00  | 0.00  | 0.00  | 0.00  |
| CAZ | 0.58  | 0.71  | 0.72  | 0.99  | 0.93  | 0.99  | 1.22  | 1.53  | 1.71  | 1.57  |
| CHA | -0.03 | -0.02 | -0.07 | -0.09 | -0.08 | -0.03 | -0.24 | -0.50 | -0.40 | -0.74 |
| EUR | -0.77 | -0.84 | -0.20 | -0.26 | 0.15  | 0.10  | -0.03 | 0.09  | 0.20  | 0.47  |
| IND | -0.02 | -0.03 | -0.00 | 0.01  | 0.02  | 0.03  | 0.07  | 0.12  | 0.19  | 0.32  |
| JPN | -0.14 | -0.21 | -0.22 | -0.25 | -0.23 | -0.35 | -0.48 | -0.51 | -0.34 | -0.34 |
| LAM | 0.25  | 0.39  | 0.02  | 0.06  | 0.02  | -0.07 | -0.15 | -0.16 | 0.69  | 0.35  |
| MEA | -0.09 | -0.10 | -0.20 | -0.39 | -0.54 | -0.42 | -0.36 | -0.32 | -0.38 | -0.57 |
| NEU | -0.01 | -0.01 | -0.00 | -0.03 | -0.04 | -0.07 | -0.14 | -0.10 | -0.16 | -0.19 |
| OAS | -0.09 | -0.10 | -0.14 | -0.18 | -0.25 | -0.22 | -0.42 | -0.39 | -0.52 | -0.72 |
| REF | -0.07 | -0.04 | -0.08 | -0.25 | -0.26 | -0.29 | -0.27 | -0.37 | -0.65 | -0.63 |
| SSA | -0.01 | -0.03 | -0.07 | -0.13 | -0.16 | -0.12 | -0.20 | -0.13 | -0.34 | -0.37 |
| USA | 0.41  | 0.28  | 0.23  | 0.52  | 0.44  | 0.45  | 1.00  | 0.73  | 0.01  | 0.84  |

Table 1919: FAO — Trade—Net-Trade—Livestock products—Ruminant meat (Mt DM/yr)



58.4 Secondary products

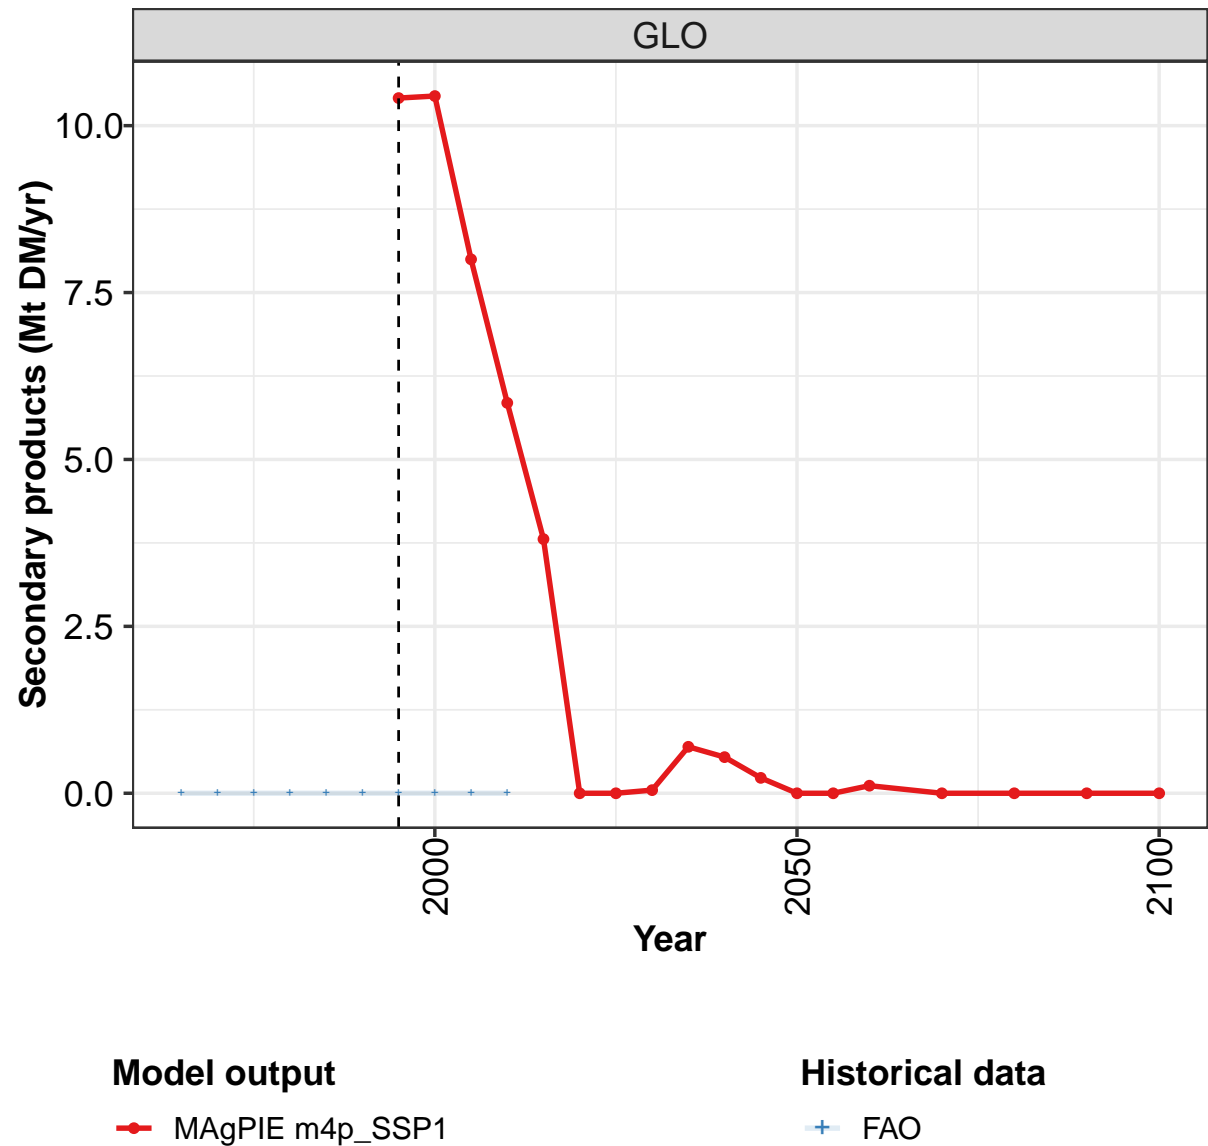

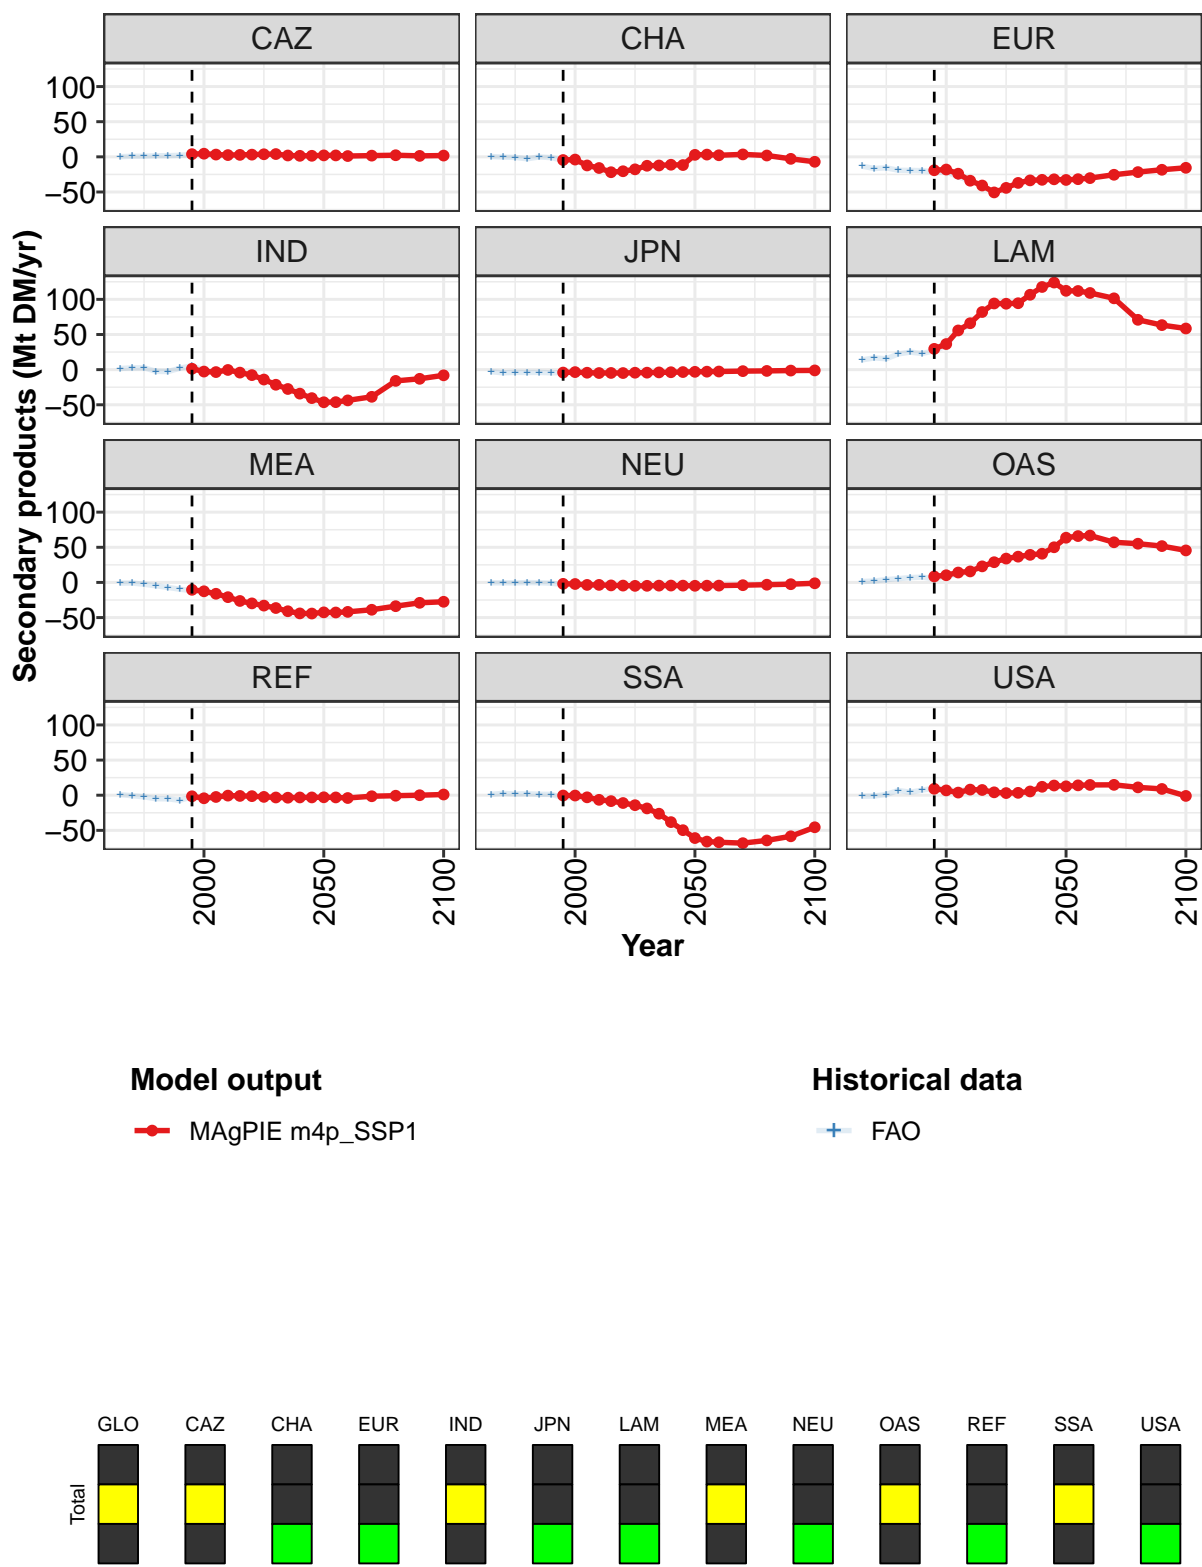

Figure 507: MAgPIE m4p\_SSP1 — Trade—Net-Trade—Secondary products (Mt DM/yr)

|     | 1995 | 2000 | 2005 | 2010 | 2015 | 2020 | 2025 | 2030 | 2035 | 2040 | 2045 |
|-----|------|------|------|------|------|------|------|------|------|------|------|
| GLO | 10   | 10   | 8    | 6    | 4    | -0   | -0   | 0    | 1    | 1    | 0    |
| CAZ | 4    | 4    | 3    | 3    | 3    | 3    | 4    | 4    | 2    | 1    | 2    |
| CHA | -4   | -4   | -12  | -16  | -22  | -20  | -18  | -13  | -12  | -11  | -12  |
| EUR | -19  | -18  | -24  | -34  | -41  | -51  | -44  | -37  | -33  | -33  | -32  |
| IND | 1    | -3   | -3   | -0   | -4   | -8   | -14  | -21  | -27  | -34  | -41  |
| JPN | -4   | -3   | -4   | -5   | -5   | -5   | -4   | -4   | -4   | -4   | -3   |
| LAM | 30   | 36   | 56   | 66   | 82   | 94   | 94   | 95   | 107  | 118  | 124  |
| MEA | -10  | -13  | -16  | -21  | -26  | -30  | -33  | -36  | -41  | -44  | -44  |
| NEU | -2   | -2   | -4   | -3   | -4   | -4   | -5   | -5   | -5   | -4   | -5   |
| OAS | 9    | 10   | 14   | 16   | 23   | 29   | 34   | 37   | 39   | 41   | 50   |
| REF | -1   | -4   | -2   | -1   | -1   | -1   | -2   | -3   | -4   | -3   | -3   |
| SSA | -0   | -0   | -3   | -7   | -8   | -11  | -14  | -19  | -26  | -38  | -50  |
| USA | 9    | 7    | 4    | 8    | 7    | 4    | 3    | 3    | 5    | 12   | 14   |

Table 1920: MAgPIE m4p-SSP1 — Trade—Net-Trade—Secondary products (Mt DM/yr) [PART 1/2]

|     | 2050 | 2055 | 2060 | 2070 | 2080 | 2090 | 2100 |
|-----|------|------|------|------|------|------|------|
| GLO | -0   | 0    | 0    | 0    | -0   | -0   | 0    |
| CAZ | 2    | 2    | 1    | 2    | 2    | 1    | 2    |
| CHA | 3    | 3    | 2    | 3    | 2    | -3   | -7   |
| EUR | -33  | -32  | -30  | -25  | -22  | -18  | -16  |
| IND | -46  | -46  | -44  | -39  | -16  | -13  | -8   |
| JPN | -3   | -3   | -3   | -2   | -2   | -1   | -1   |
| LAM | 112  | 112  | 109  | 101  | 71   | 63   | 59   |
| MEA | -43  | -43  | -42  | -39  | -34  | -29  | -27  |
| NEU | -5   | -5   | -4   | -4   | -3   | -2   | -1   |
| OAS | 64   | 66   | 67   | 57   | 55   | 52   | 46   |
| REF | -3   | -3   | -4   | -1   | -1   | 0    | 1    |
| SSA | -61  | -66  | -67  | -68  | -64  | -58  | -46  |
| USA | 13   | 14   | 15   | 15   | 11   | 9    | -1   |

Table 1921: MAgPIE m4p-SSP1 — Trade—Net-Trade—Secondary products (Mt DM/yr) [PART 2/2]

|     | 1965  | 1970  | 1975  | 1980  | 1985  | 1990  | 1995  | 2000  | 2005  | 2010  |
|-----|-------|-------|-------|-------|-------|-------|-------|-------|-------|-------|
| GLO | 0.0   | 0.0   | 0.0   | 0.0   | 0.0   | 0.0   | 0.0   | 0.0   | 0.0   | 0.0   |
| CAZ | 0.2   | 0.8   | 0.9   | 1.7   | 1.6   | 2.2   | 3.3   | 4.0   | 2.1   | 2.2   |
| CHA | 0.4   | -0.4  | -0.8  | -2.8  | -0.2  | -1.1  | -4.8  | -4.4  | -12.7 | -15.8 |
| EUR | -13.4 | -16.5 | -15.7 | -19.1 | -19.3 | -19.6 | -21.8 | -21.3 | -28.1 | -34.7 |
| IND | 1.7   | 2.5   | 2.7   | -2.4  | -2.8  | 2.1   | 5.5   | -1.1  | -3.8  | 0.0   |
| JPN | -3.0  | -4.6  | -3.9  | -4.0  | -4.0  | -4.5  | -4.2  | -3.6  | -4.4  | -4.8  |
| LAM | 13.9  | 16.7  | 15.5  | 22.3  | 24.9  | 23.0  | 26.9  | 33.6  | 57.7  | 62.8  |
| MEA | -1.1  | -0.8  | -2.6  | -4.7  | -7.1  | -9.7  | -11.8 | -13.7 | -16.8 | -21.8 |
| NEU | -0.6  | -0.6  | -0.6  | -0.3  | -0.4  | -1.2  | -2.8  | -3.2  | -3.9  | -3.9  |
| OAS | 1.3   | 2.0   | 4.0   | 5.4   | 6.9   | 7.6   | 5.1   | 8.6   | 12.0  | 15.7  |
| REF | 0.9   | -0.7  | -2.3  | -5.0  | -5.2  | -7.2  | -2.3  | -5.2  | -2.9  | -1.2  |
| SSA | 1.3   | 2.7   | 1.8   | 2.1   | 1.3   | 1.2   | -3.4  | -2.7  | -4.6  | -8.4  |
| USA | -1.4  | -1.1  | 1.1   | 6.8   | 4.2   | 7.2   | 10.1  | 8.9   | 5.4   | 10.0  |

Table 1922: FAO — Trade—Net-Trade—Secondary products (Mt DM/yr)

58.4.1 Alcoholic beverages

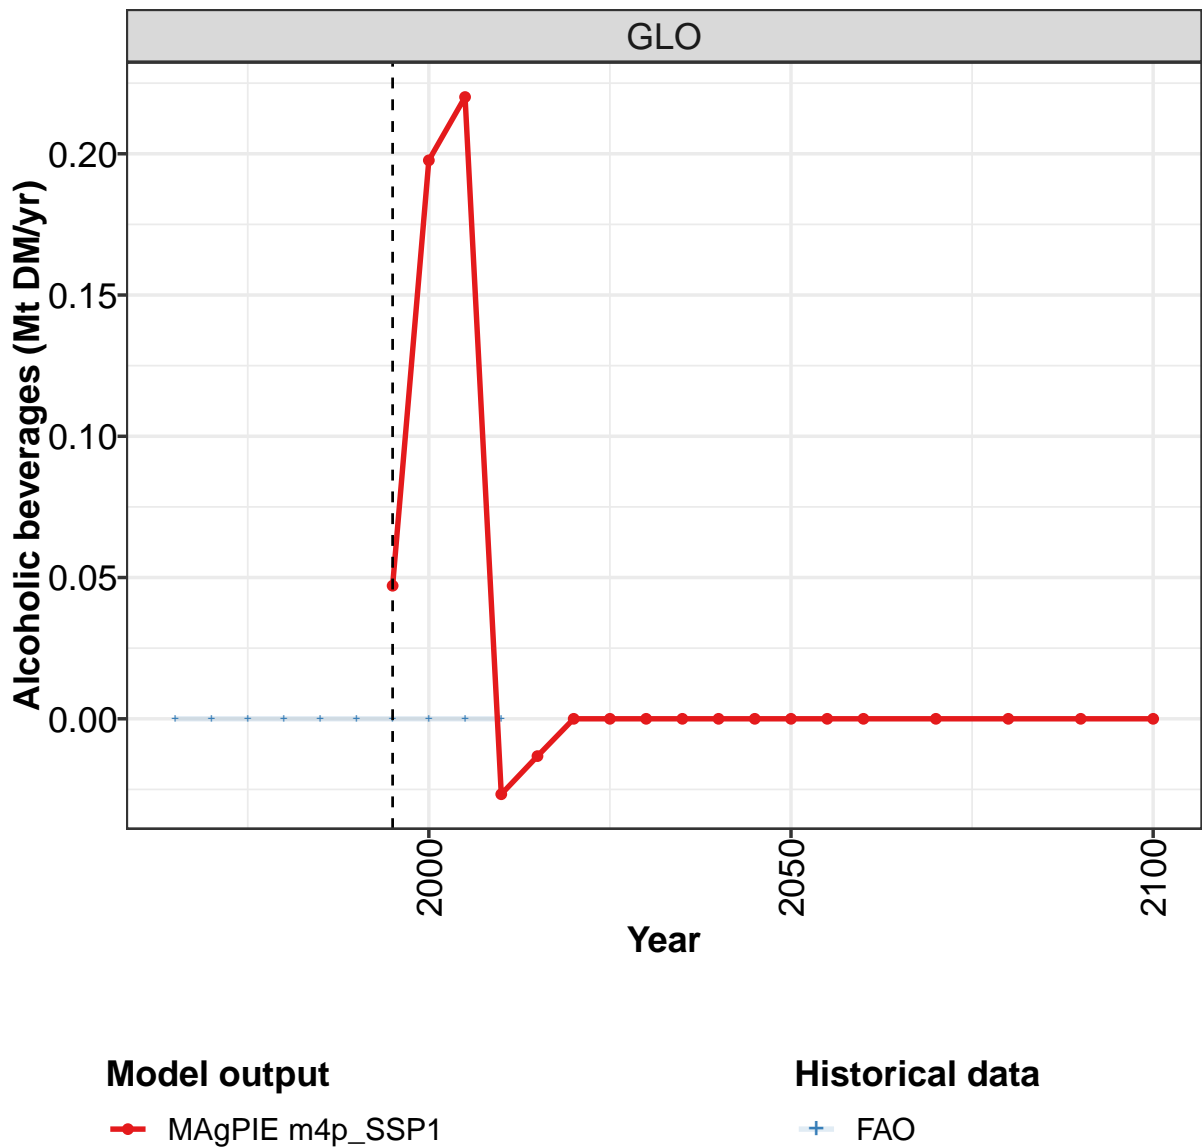

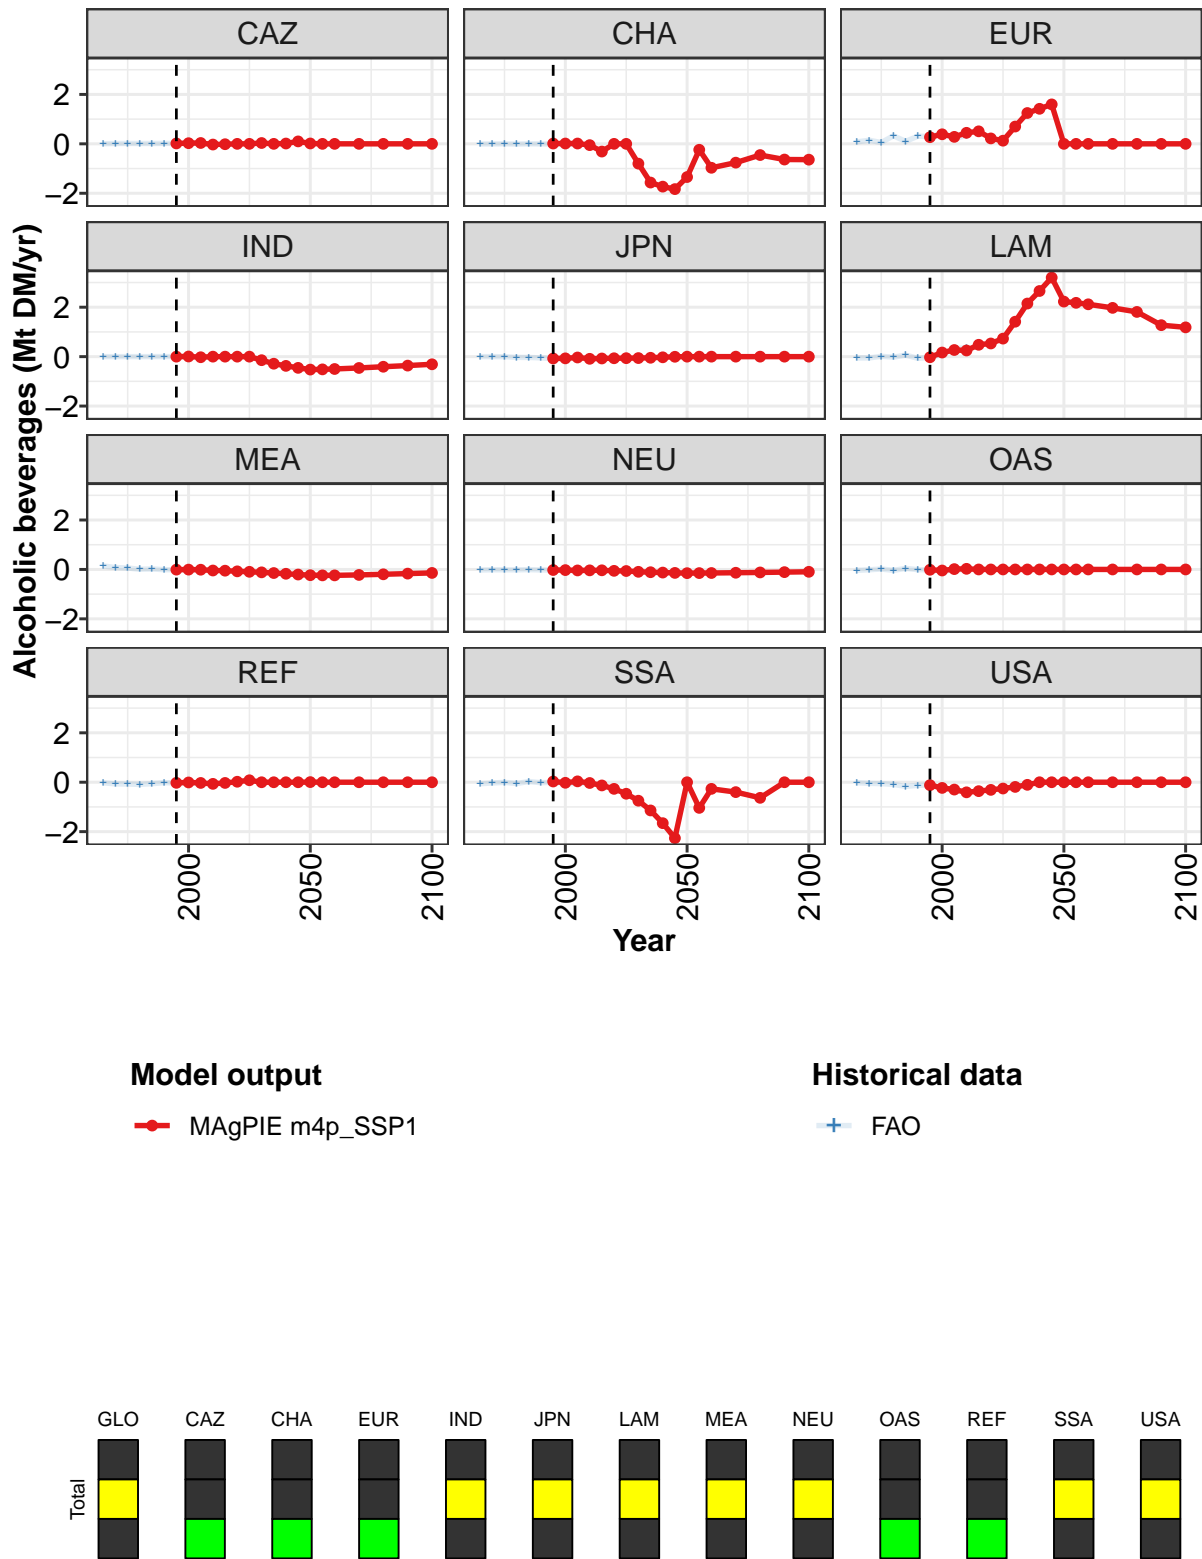

Figure 508: MAgPIE m4p\_SSP1 — Trade—Net-Trade—Secondary products—Alcoholic beverages (Mt DM/yr)

|     | 1995  | 2000  | 2005  | 2010  | 2015  | 2020  | 2025  | 2030  | 2035  | 2040  | 2045  |
|-----|-------|-------|-------|-------|-------|-------|-------|-------|-------|-------|-------|
| GLO | 0.05  | 0.20  | 0.22  | -0.03 | -0.01 | 0.00  | -0.00 | 0.00  | 0.00  | 0.00  | 0.00  |
| CAZ | 0.02  | 0.03  | 0.04  | -0.03 | -0.01 | 0.00  | 0.00  | 0.03  | 0.00  | 0.01  | 0.10  |
| CHA | 0.01  | 0.01  | 0.01  | -0.05 | -0.31 | 0.00  | 0.00  | -0.80 | -1.57 | -1.73 | -1.83 |
| EUR | 0.27  | 0.39  | 0.28  | 0.45  | 0.51  | 0.22  | 0.13  | 0.70  | 1.25  | 1.42  | 1.60  |
| IND | 0.00  | 0.01  | -0.02 | 0.00  | 0.00  | 0.00  | 0.00  | -0.14 | -0.29 | -0.37 | -0.45 |
| JPN | -0.07 | -0.07 | -0.03 | -0.09 | -0.07 | -0.06 | -0.06 | -0.06 | -0.05 | -0.03 | -0.00 |
| LAM | -0.02 | 0.17  | 0.27  | 0.25  | 0.48  | 0.53  | 0.73  | 1.41  | 2.15  | 2.66  | 3.20  |
| MEA | -0.01 | -0.01 | -0.01 | -0.04 | -0.05 | -0.08 | -0.10 | -0.12 | -0.14 | -0.18 | -0.21 |
| NEU | -0.02 | -0.03 | -0.04 | -0.04 | -0.03 | -0.06 | -0.06 | -0.10 | -0.11 | -0.13 | -0.14 |
| OAS | -0.01 | -0.04 | 0.01  | 0.03  | 0.00  | 0.00  | 0.00  | 0.00  | 0.00  | 0.00  | 0.00  |
| REF | -0.02 | -0.01 | -0.03 | -0.07 | -0.03 | 0.02  | 0.08  | 0.00  | 0.00  | 0.00  | 0.00  |
| SSA | 0.03  | -0.02 | 0.04  | -0.03 | -0.13 | -0.27 | -0.47 | -0.75 | -1.14 | -1.66 | -2.26 |
| USA | -0.12 | -0.23 | -0.30 | -0.41 | -0.36 | -0.31 | -0.25 | -0.19 | -0.10 | 0.00  | 0.00  |

Table 1923: MAgPIE m4p\_SSP1 — Trade—Net-Trade—Secondary products—Alcoholic beverages (Mt DM/yr)  
[PART 1/2]

|     | 2050  | 2055  | 2060  | 2070  | 2080  | 2090  | 2100  |
|-----|-------|-------|-------|-------|-------|-------|-------|
| GLO | 0.00  | 0.00  | -0.00 | -0.00 | 0.00  | 0.00  | 0.00  |
| CAZ | 0.02  | 0.00  | 0.00  | 0.00  | 0.00  | -0.00 | 0.00  |
| CHA | -1.34 | -0.24 | -0.97 | -0.76 | -0.45 | -0.63 | -0.64 |
| EUR | 0.00  | 0.00  | 0.00  | 0.00  | 0.00  | 0.00  | 0.00  |
| IND | -0.52 | -0.51 | -0.50 | -0.46 | -0.41 | -0.36 | -0.31 |
| JPN | 0.00  | 0.00  | 0.00  | -0.00 | 0.00  | 0.00  | 0.00  |
| LAM | 2.23  | 2.18  | 2.12  | 1.97  | 1.81  | 1.27  | 1.19  |
| MEA | -0.23 | -0.24 | -0.24 | -0.22 | -0.20 | -0.17 | -0.14 |
| NEU | -0.15 | -0.15 | -0.14 | -0.13 | -0.12 | -0.11 | -0.10 |
| OAS | 0.00  | 0.00  | 0.00  | 0.00  | 0.00  | 0.00  | 0.00  |
| REF | 0.01  | 0.00  | 0.00  | -0.00 | 0.00  | 0.00  | 0.00  |
| SSA | 0.00  | -1.04 | -0.27 | -0.40 | -0.63 | 0.00  | 0.00  |
| USA | 0.00  | 0.00  | 0.00  | 0.00  | 0.00  | 0.00  | 0.00  |

Table 1924: MAgPIE m4p\_SSP1 — Trade—Net-Trade—Secondary products—Alcoholic beverages (Mt DM/yr)  
[PART 2/2]

|     | 1965   | 1970   | 1975   | 1980   | 1985   | 1990   | 1995   | 2000   | 2005   | 2010   |
|-----|--------|--------|--------|--------|--------|--------|--------|--------|--------|--------|
| GLO | 0.000  | 0.000  | 0.000  | 0.000  | 0.000  | 0.000  | 0.000  | 0.000  | 0.000  | 0.000  |
| CAZ | 0.005  | 0.012  | 0.016  | 0.014  | 0.014  | 0.018  | 0.022  | 0.020  | 0.038  | -0.029 |
| CHA | -0.006 | -0.003 | -0.001 | -0.009 | 0.002  | -0.003 | -0.009 | -0.013 | -0.012 | -0.029 |
| EUR | 0.079  | 0.145  | 0.056  | 0.325  | 0.100  | 0.309  | 0.299  | 0.426  | 0.205  | 0.343  |
| IND | -0.001 | -0.000 | 0.000  | -0.001 | 0.001  | 0.002  | 0.001  | 0.006  | -0.023 | 0.000  |
| JPN | -0.001 | -0.001 | -0.004 | -0.030 | -0.031 | -0.053 | -0.078 | -0.069 | -0.033 | -0.089 |
| LAM | -0.054 | -0.054 | 0.012  | -0.022 | 0.062  | -0.066 | -0.036 | 0.088  | 0.318  | 0.364  |
| MEA | 0.141  | 0.077  | 0.057  | 0.007  | 0.020  | -0.010 | -0.011 | -0.023 | -0.030 | -0.041 |
| NEU | -0.025 | -0.014 | -0.014 | -0.016 | -0.008 | -0.021 | -0.026 | -0.038 | -0.054 | -0.034 |
| OAS | -0.037 | -0.014 | 0.016  | -0.037 | 0.042  | -0.010 | -0.020 | -0.082 | -0.018 | 0.001  |
| REF | -0.024 | -0.070 | -0.075 | -0.089 | -0.058 | -0.019 | -0.027 | -0.018 | -0.036 | -0.065 |
| SSA | -0.060 | -0.033 | -0.006 | -0.053 | 0.028  | -0.020 | -0.003 | -0.060 | -0.049 | -0.026 |
| USA | -0.019 | -0.046 | -0.057 | -0.088 | -0.171 | -0.126 | -0.112 | -0.237 | -0.305 | -0.396 |

Table 1925: FAO — Trade—Net-Trade—Secondary products—Alcoholic beverages (Mt DM/yr)

58.4.2 Brans

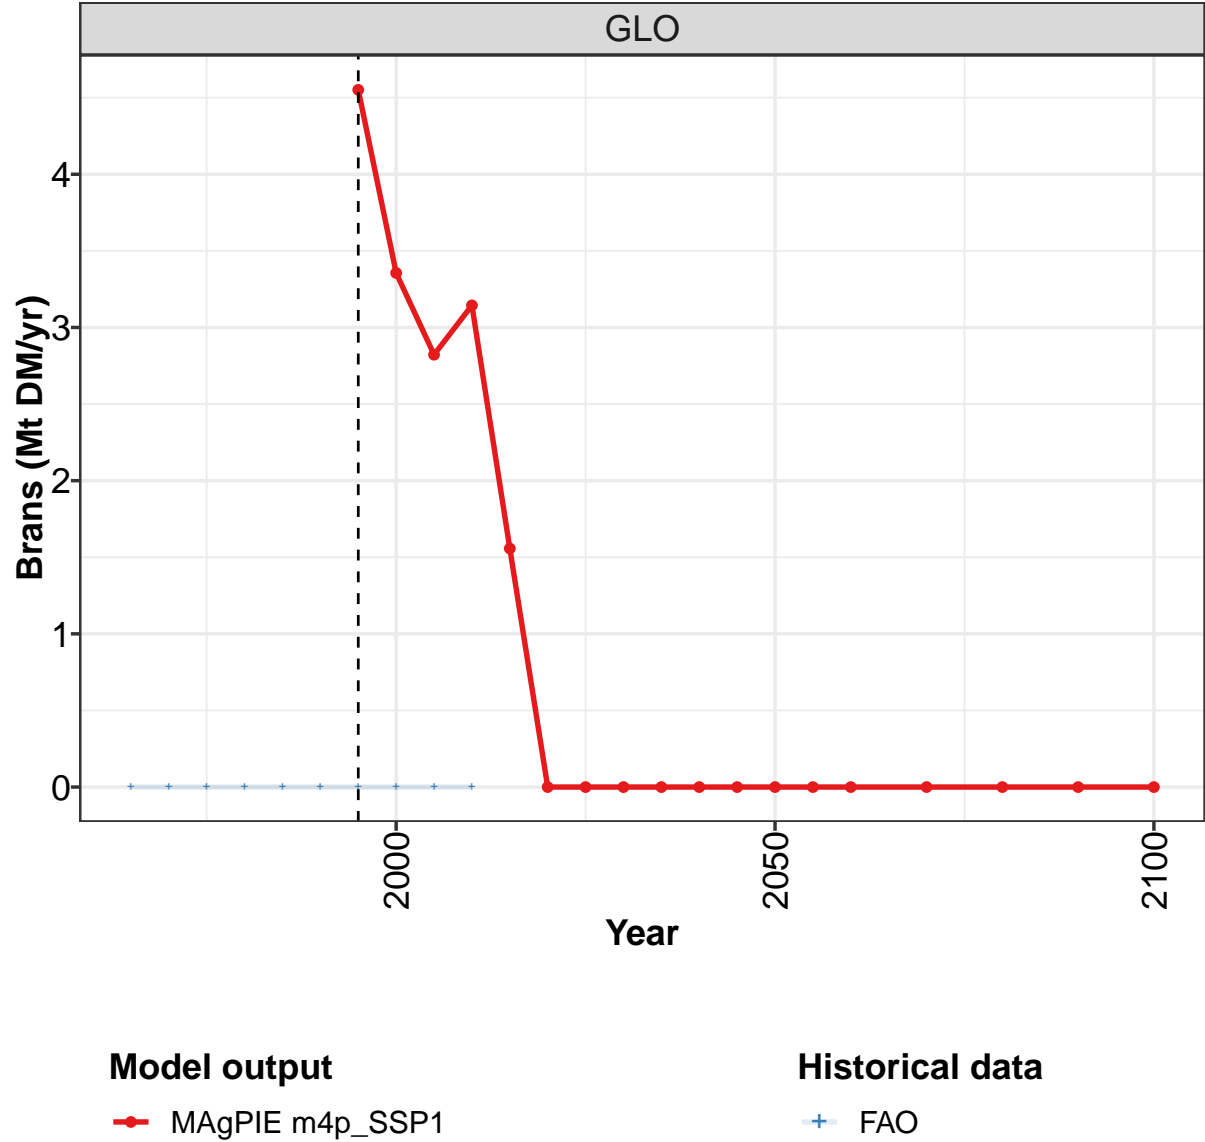

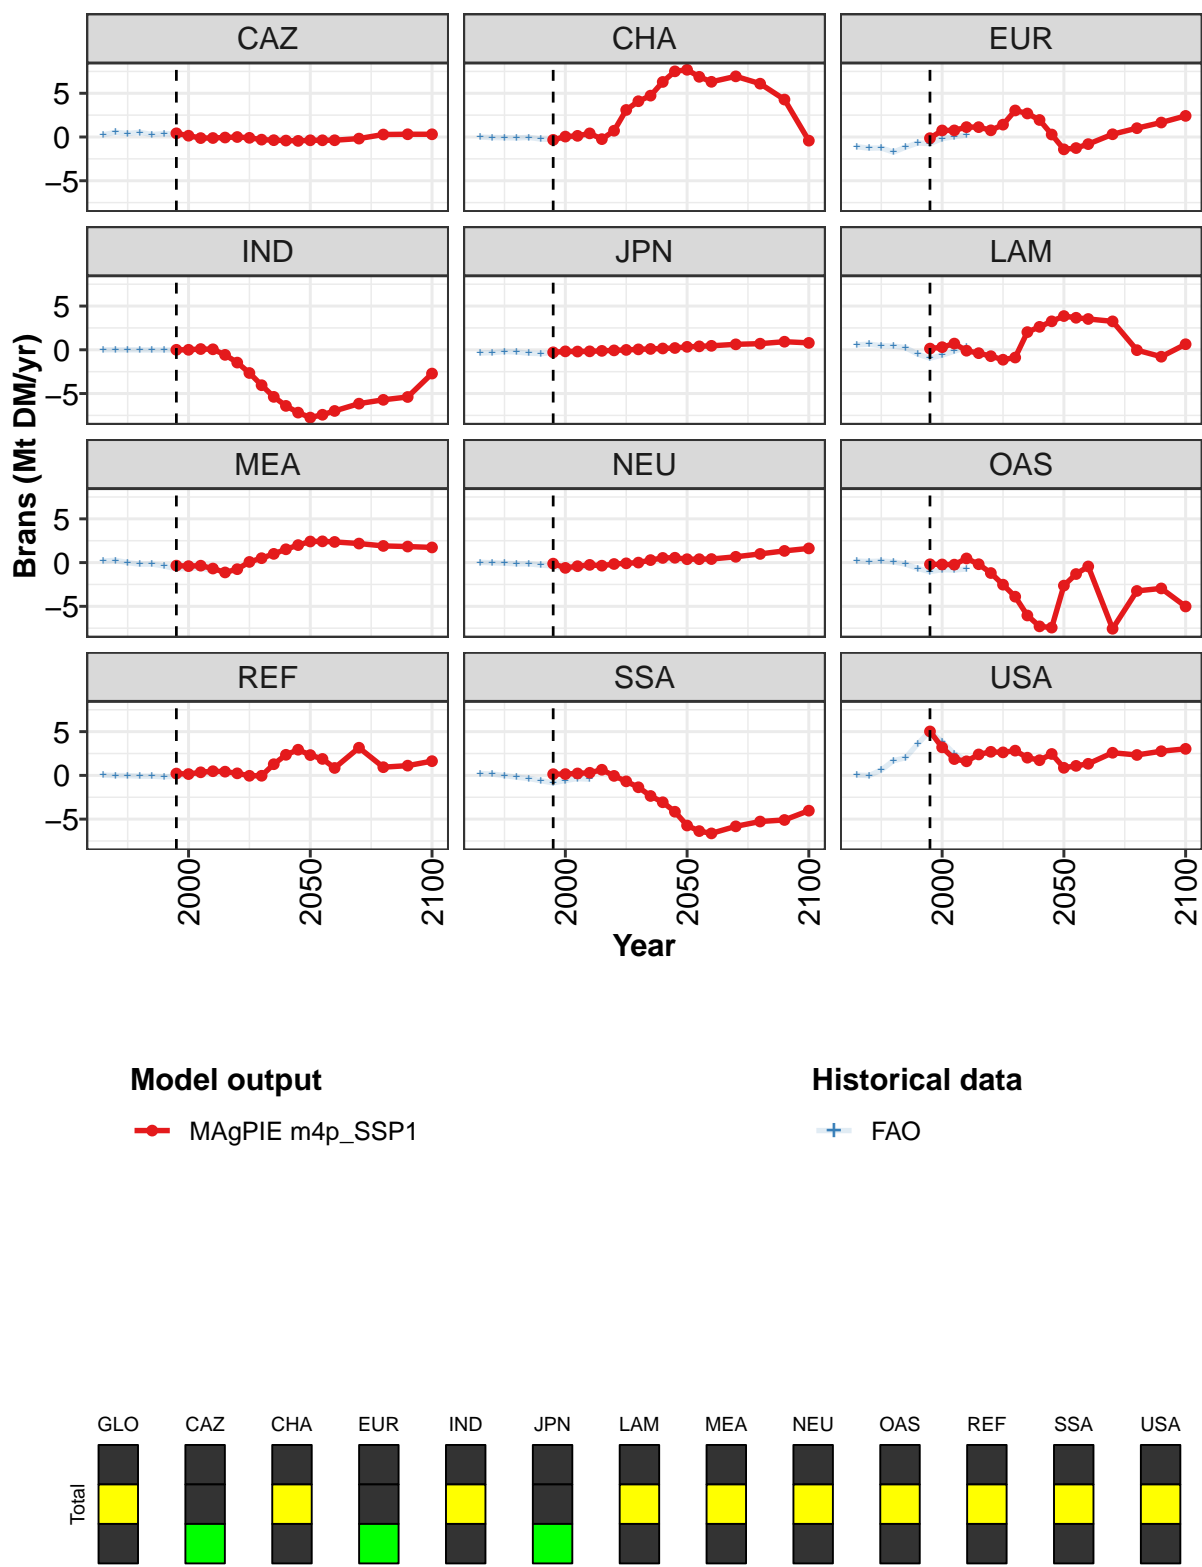

Figure 509: MAgPIE m4p\_SSP1 — Trade—Net-Trade—Secondary products—Brans (Mt DM/yr)



|     | 1995  | 2000  | 2005  | 2010  | 2015  | 2020  | 2025  | 2030  | 2035  | 2040  | 2045  |
|-----|-------|-------|-------|-------|-------|-------|-------|-------|-------|-------|-------|
| GLO | 4.55  | 3.36  | 2.82  | 3.14  | 1.56  | -0.00 | 0.00  | -0.00 | -0.00 | 0.00  | -0.00 |
| CAZ | 0.42  | 0.15  | -0.12 | -0.11 | -0.06 | 0.00  | -0.09 | -0.30 | -0.36 | -0.41 | -0.44 |
| CHA | -0.33 | 0.05  | 0.13  | 0.42  | -0.24 | 0.72  | 3.09  | 4.09  | 4.73  | 6.30  | 7.51  |
| EUR | -0.13 | 0.75  | 0.76  | 1.13  | 1.13  | 0.76  | 1.42  | 3.04  | 2.69  | 1.95  | 0.29  |
| IND | 0.00  | -0.00 | 0.09  | 0.06  | -0.58 | -1.46 | -2.65 | -4.05 | -5.38 | -6.41 | -7.18 |
| JPN | -0.29 | -0.18 | -0.20 | -0.17 | -0.12 | -0.07 | -0.01 | 0.05  | 0.10  | 0.15  | 0.21  |
| LAM | 0.14  | 0.30  | 0.71  | -0.10 | -0.38 | -0.73 | -1.13 | -0.88 | 2.03  | 2.63  | 3.26  |
| MEA | -0.34 | -0.40 | -0.35 | -0.68 | -1.12 | -0.75 | 0.08  | 0.51  | 1.00  | 1.52  | 2.00  |
| NEU | -0.12 | -0.60 | -0.41 | -0.26 | -0.35 | -0.16 | -0.08 | -0.00 | 0.29  | 0.54  | 0.56  |
| OAS | -0.19 | -0.21 | -0.23 | 0.48  | -0.19 | -1.19 | -2.52 | -3.90 | -6.04 | -7.29 | -7.43 |
| REF | 0.21  | 0.15  | 0.36  | 0.48  | 0.43  | 0.23  | -0.04 | -0.04 | 1.28  | 2.35  | 2.94  |
| SSA | 0.14  | 0.15  | 0.22  | 0.30  | 0.65  | -0.06 | -0.68 | -1.36 | -2.35 | -3.07 | -4.16 |
| USA | 5.03  | 3.20  | 1.87  | 1.61  | 2.40  | 2.70  | 2.63  | 2.83  | 2.03  | 1.74  | 2.45  |

Table 1926: MAgPIE m4p\_SSP1 — Trade—Net-Trade—Secondary products—Brans (Mt DM/yr) [PART 1/2]

|     | 2050  | 2055  | 2060  | 2070  | 2080  | 2090  | 2100  |
|-----|-------|-------|-------|-------|-------|-------|-------|
| GLO | -0.00 | 0.00  | 0.00  | 0.00  | -0.00 | -0.00 | 0.00  |
| CAZ | -0.37 | -0.37 | -0.37 | -0.18 | 0.29  | 0.32  | 0.31  |
| CHA | 7.69  | 6.88  | 6.31  | 6.94  | 6.10  | 4.29  | -0.42 |
| EUR | -1.41 | -1.26 | -0.81 | 0.32  | 1.01  | 1.66  | 2.42  |
| IND | -7.75 | -7.43 | -6.99 | -6.16 | -5.72 | -5.40 | -2.71 |
| JPN | 0.34  | 0.39  | 0.46  | 0.63  | 0.70  | 0.93  | 0.79  |
| LAM | 3.86  | 3.66  | 3.52  | 3.25  | -0.04 | -0.79 | 0.64  |
| MEA | 2.41  | 2.43  | 2.36  | 2.18  | 1.91  | 1.83  | 1.73  |
| NEU | 0.39  | 0.39  | 0.41  | 0.66  | 0.99  | 1.34  | 1.62  |
| OAS | -2.63 | -1.30 | -0.44 | -7.56 | -3.24 | -2.95 | -5.02 |
| REF | 2.32  | 1.88  | 0.85  | 3.16  | 0.94  | 1.11  | 1.63  |
| SSA | -5.73 | -6.37 | -6.63 | -5.83 | -5.28 | -5.10 | -4.03 |
| USA | 0.87  | 1.09  | 1.33  | 2.59  | 2.34  | 2.76  | 3.04  |

Table 1927: MAgPIE m4p\_SSP1 — Trade—Net-Trade—Secondary products—Brans (Mt DM/yr) [PART 2/2]

|     | 1965  | 1970  | 1975  | 1980  | 1985  | 1990  | 1995  | 2000  | 2005  | 2010  |
|-----|-------|-------|-------|-------|-------|-------|-------|-------|-------|-------|
| GLO | 0.00  | 0.00  | 0.00  | 0.00  | 0.00  | 0.00  | 0.00  | 0.00  | 0.00  | 0.00  |
| CAZ | 0.26  | 0.54  | 0.39  | 0.54  | 0.28  | 0.39  | 0.31  | 0.05  | -0.17 | -0.17 |
| CHA | -0.01 | -0.06 | -0.08 | -0.11 | -0.04 | -0.24 | -0.28 | -0.12 | 0.00  | 0.34  |
| EUR | -1.11 | -1.28 | -1.25 | -1.73 | -1.16 | -0.69 | -0.76 | -0.19 | 0.04  | 0.23  |
| IND | 0.00  | 0.01  | -0.00 | -0.01 | -0.02 | -0.02 | -0.02 | -0.00 | 0.10  | 0.04  |
| JPN | -0.37 | -0.32 | -0.19 | -0.25 | -0.39 | -0.44 | -0.30 | -0.20 | -0.21 | -0.19 |
| LAM | 0.57  | 0.64  | 0.47  | 0.42  | 0.25  | -0.51 | -0.95 | -0.61 | -0.16 | 0.29  |
| MEA | 0.18  | 0.26  | -0.00 | -0.19 | -0.17 | -0.40 | -0.71 | -0.67 | -0.61 | -0.97 |
| NEU | 0.03  | -0.02 | -0.07 | -0.14 | -0.14 | -0.29 | -0.39 | -0.73 | -0.57 | -0.46 |
| OAS | 0.17  | 0.12  | 0.17  | 0.09  | -0.18 | -0.67 | -1.03 | -0.81 | -0.85 | -0.73 |
| REF | 0.02  | -0.02 | -0.03 | -0.09 | -0.09 | -0.16 | -0.09 | 0.01  | 0.33  | 0.31  |
| SSA | 0.21  | 0.15  | -0.02 | -0.20 | -0.35 | -0.61 | -0.86 | -0.58 | -0.36 | -0.44 |
| USA | 0.04  | -0.02 | 0.61  | 1.68  | 2.02  | 3.61  | 5.07  | 3.86  | 2.46  | 1.75  |

Table 1928: FAO — Trade—Net-Trade—Secondary products—Brans (Mt DM/yr)

58.4.3 Cotton lint

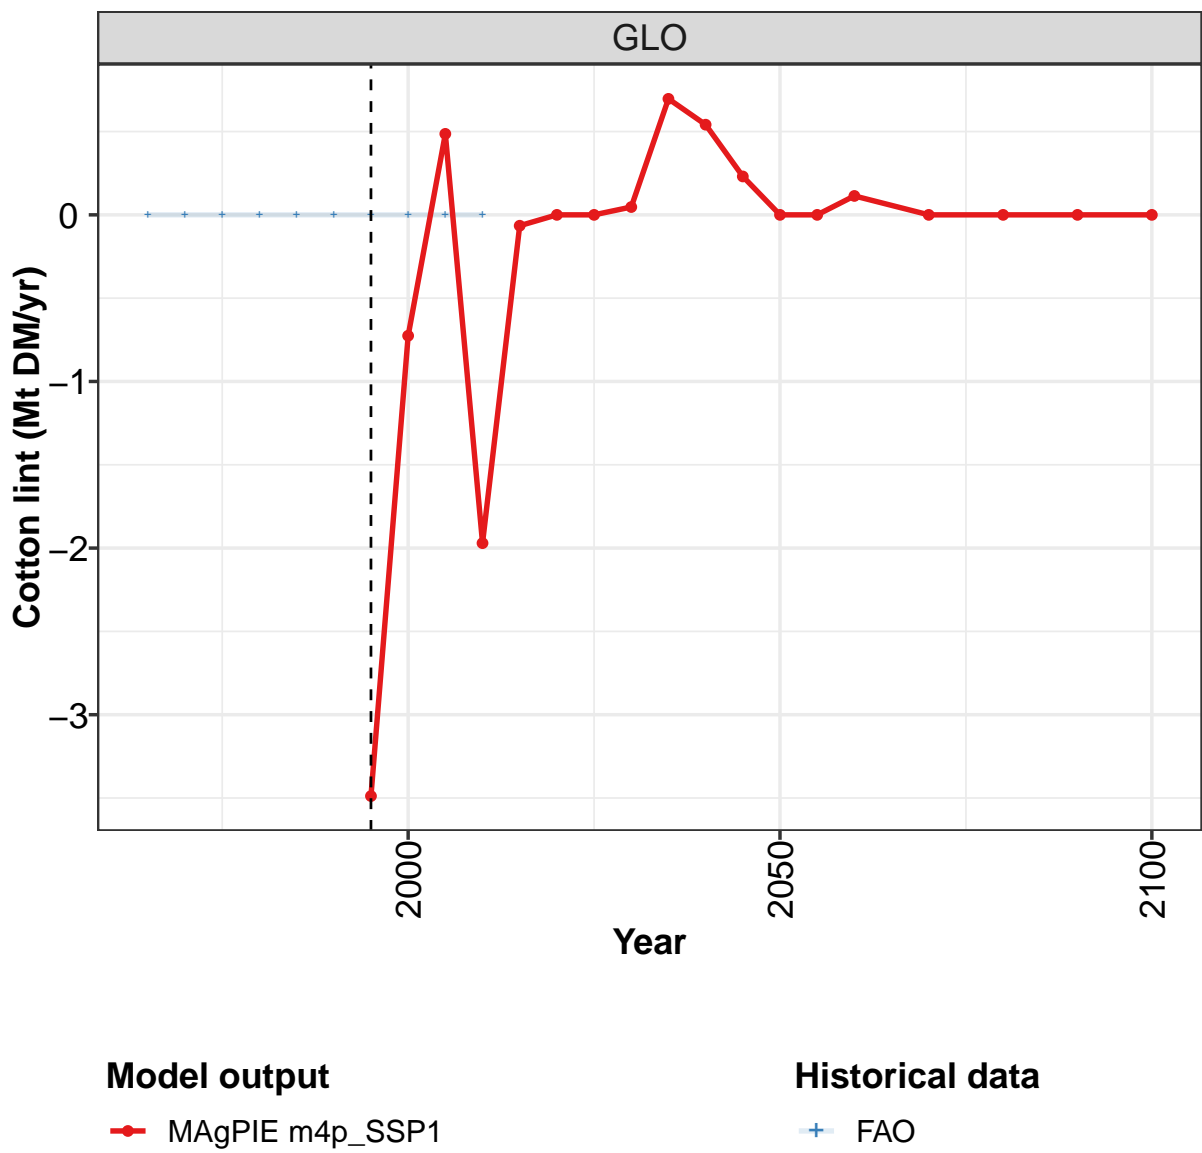

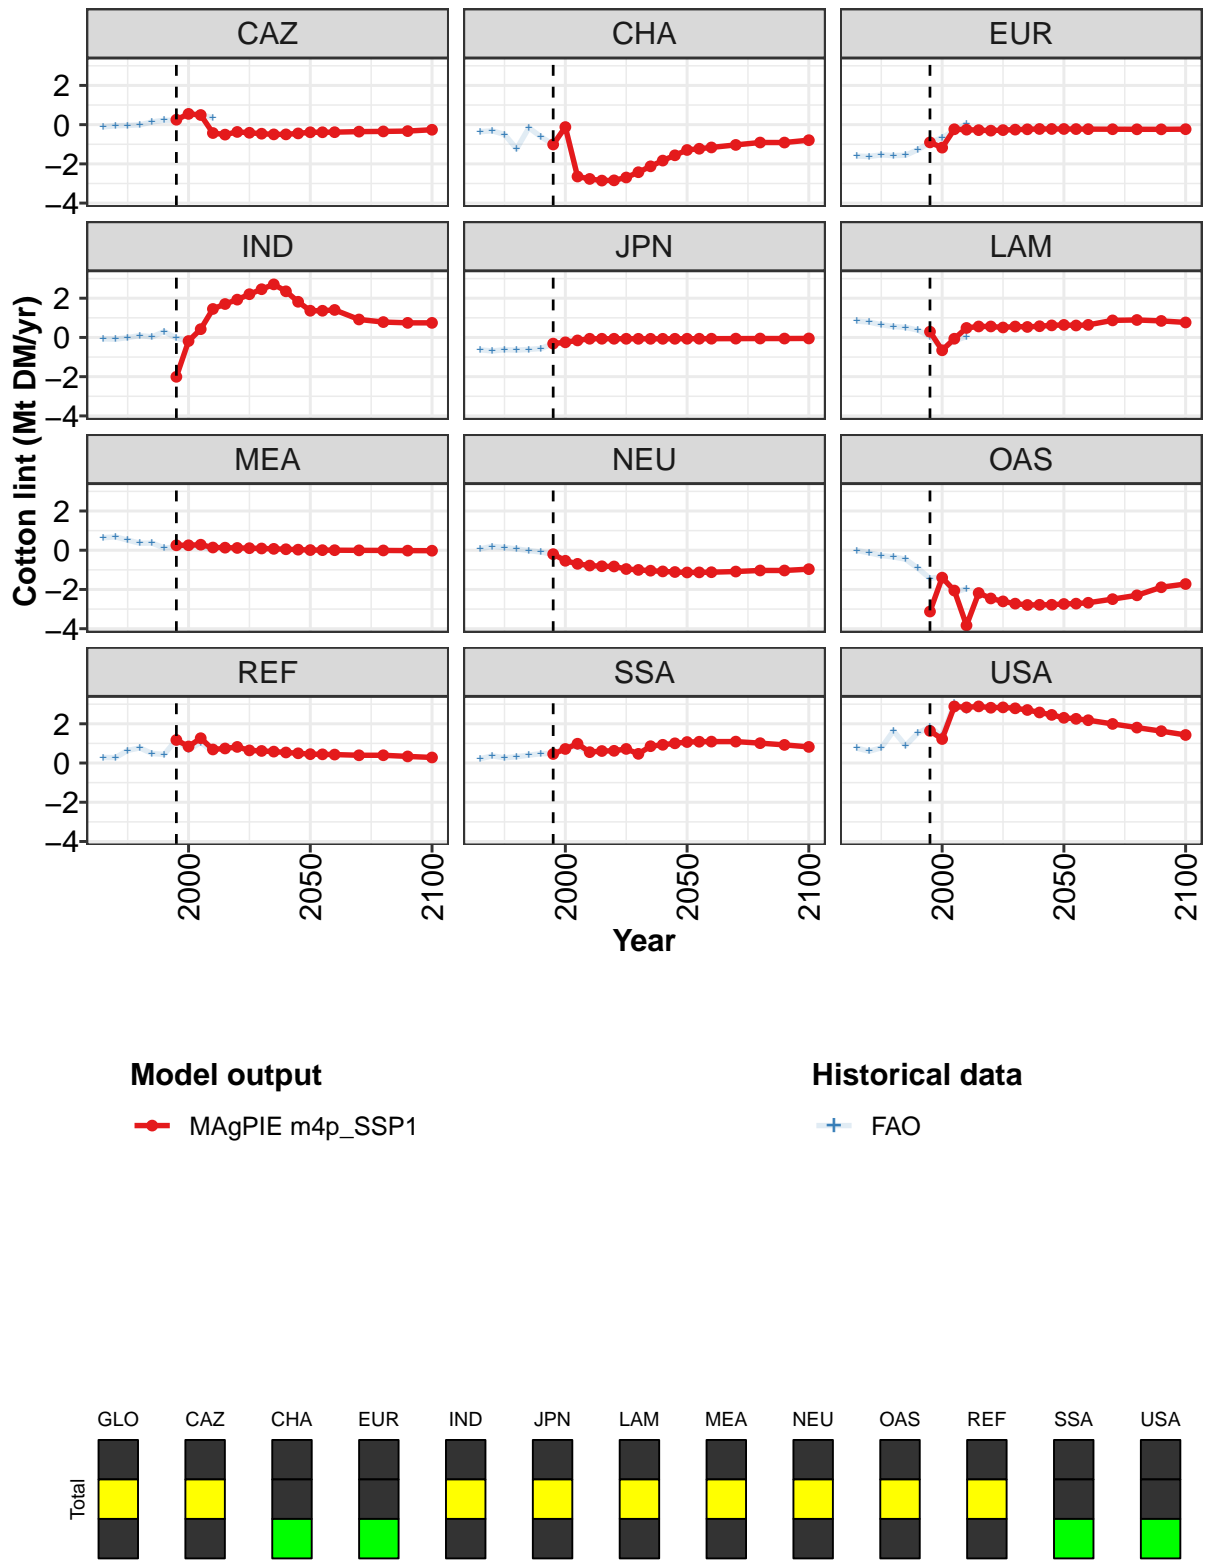

Figure 510: MAgPIE m4p\_SSP1 — Trade—Net-Trade—Secondary products—Cotton lint (Mt DM/yr)

|     | 1995  | 2000  | 2005  | 2010  | 2015  | 2020  | 2025  | 2030  | 2035  | 2040  | 2045  |
|-----|-------|-------|-------|-------|-------|-------|-------|-------|-------|-------|-------|
| GLO | -3.49 | -0.73 | 0.49  | -1.97 | -0.07 | -0.00 | 0.00  | 0.05  | 0.70  | 0.54  | 0.23  |
| CAZ | 0.25  | 0.55  | 0.49  | -0.43 | -0.51 | -0.37 | -0.41 | -0.46 | -0.50 | -0.50 | -0.45 |
| CHA | -1.01 | -0.12 | -2.64 | -2.77 | -2.85 | -2.84 | -2.69 | -2.42 | -2.12 | -1.83 | -1.56 |
| EUR | -0.90 | -1.17 | -0.24 | -0.26 | -0.28 | -0.30 | -0.28 | -0.25 | -0.24 | -0.22 | -0.22 |
| IND | -2.01 | -0.18 | 0.42  | 1.45  | 1.70  | 1.93  | 2.20  | 2.46  | 2.71  | 2.35  | 1.82  |
| JPN | -0.31 | -0.25 | -0.15 | -0.07 | -0.07 | -0.07 | -0.07 | -0.07 | -0.07 | -0.07 | -0.07 |
| LAM | 0.29  | -0.66 | -0.07 | 0.48  | 0.56  | 0.56  | 0.51  | 0.56  | 0.54  | 0.57  | 0.61  |
| MEA | 0.25  | 0.25  | 0.28  | 0.14  | 0.13  | 0.12  | 0.11  | 0.09  | 0.07  | 0.05  | 0.03  |
| NEU | -0.20 | -0.54 | -0.69 | -0.78 | -0.82 | -0.83 | -0.96 | -1.00 | -1.04 | -1.08 | -1.11 |
| OAS | -3.12 | -1.40 | -2.06 | -3.83 | -2.18 | -2.46 | -2.61 | -2.72 | -2.79 | -2.78 | -2.78 |
| REF | 1.18  | 0.84  | 1.27  | 0.69  | 0.74  | 0.82  | 0.64  | 0.62  | 0.58  | 0.54  | 0.50  |
| SSA | 0.46  | 0.72  | 0.98  | 0.55  | 0.61  | 0.62  | 0.72  | 0.47  | 0.86  | 0.93  | 1.00  |
| USA | 1.64  | 1.22  | 2.88  | 2.84  | 2.89  | 2.82  | 2.84  | 2.79  | 2.70  | 2.58  | 2.45  |

Table 1929: MAgPIE m4p\_SSP1 — Trade—Net-Trade—Secondary products—Cotton lint (Mt DM/yr) [PART 1/2]

|     | 2050  | 2055  | 2060  | 2070  | 2080  | 2090  | 2100  |
|-----|-------|-------|-------|-------|-------|-------|-------|
| GLO | 0.00  | -0.00 | 0.11  | -0.00 | 0.00  | 0.00  | 0.00  |
| CAZ | -0.39 | -0.39 | -0.38 | -0.36 | -0.34 | -0.33 | -0.26 |
| CHA | -1.29 | -1.23 | -1.16 | -1.03 | -0.91 | -0.91 | -0.79 |
| EUR | -0.22 | -0.23 | -0.23 | -0.23 | -0.24 | -0.24 | -0.23 |
| IND | 1.36  | 1.36  | 1.40  | 0.92  | 0.78  | 0.74  | 0.74  |
| JPN | -0.07 | -0.07 | -0.06 | -0.06 | -0.06 | -0.06 | -0.05 |
| LAM | 0.64  | 0.61  | 0.64  | 0.87  | 0.89  | 0.84  | 0.76  |
| MEA | 0.01  | 0.01  | 0.00  | -0.01 | -0.01 | -0.02 | -0.02 |
| NEU | -1.13 | -1.13 | -1.12 | -1.09 | -1.03 | -1.03 | -0.96 |
| OAS | -2.74 | -2.72 | -2.68 | -2.49 | -2.30 | -1.89 | -1.72 |
| REF | 0.45  | 0.44  | 0.43  | 0.40  | 0.40  | 0.34  | 0.28  |
| SSA | 1.07  | 1.09  | 1.09  | 1.09  | 1.01  | 0.92  | 0.82  |
| USA | 2.31  | 2.25  | 2.18  | 1.99  | 1.81  | 1.63  | 1.43  |

Table 1930: MAgPIE m4p\_SSP1 — Trade—Net-Trade—Secondary products—Cotton lint (Mt DM/yr) [PART 2/2]

|     | 1965  | 1970  | 1975  | 1980  | 1985  | 1990  | 1995  | 2000  | 2005  | 2010  |
|-----|-------|-------|-------|-------|-------|-------|-------|-------|-------|-------|
| GLO | 0.00  | 0.00  | 0.00  | 0.00  | 0.00  | 0.00  | 0.00  | 0.00  | 0.00  | 0.00  |
| CAZ | -0.12 | -0.05 | -0.04 | -0.01 | 0.14  | 0.23  | 0.22  | 0.58  | 0.51  | 0.35  |
| CHA | -0.36 | -0.32 | -0.50 | -1.23 | -0.16 | -0.62 | -1.02 | -0.12 | -2.62 | -2.76 |
| EUR | -1.60 | -1.62 | -1.54 | -1.58 | -1.56 | -1.27 | -0.92 | -0.66 | -0.30 | 0.04  |
| IND | -0.07 | -0.09 | -0.01 | 0.10  | 0.03  | 0.30  | -0.04 | -0.18 | 0.46  | 1.38  |
| JPN | -0.63 | -0.69 | -0.62 | -0.65 | -0.61 | -0.56 | -0.31 | -0.25 | -0.15 | -0.07 |
| LAM | 0.83  | 0.78  | 0.65  | 0.55  | 0.51  | 0.37  | 0.05  | -0.58 | -0.17 | 0.04  |
| MEA | 0.64  | 0.68  | 0.52  | 0.36  | 0.36  | 0.12  | 0.16  | 0.24  | 0.17  | 0.01  |
| NEU | 0.07  | 0.20  | 0.14  | 0.07  | -0.02 | -0.09 | -0.21 | -0.50 | -0.71 | -0.77 |
| OAS | -0.01 | -0.13 | -0.27 | -0.34 | -0.46 | -0.92 | -1.43 | -1.35 | -2.14 | -1.96 |
| REF | 0.28  | 0.28  | 0.64  | 0.77  | 0.48  | 0.44  | 1.20  | 0.66  | 1.05  | 0.57  |
| SSA | 0.22  | 0.37  | 0.26  | 0.32  | 0.40  | 0.48  | 0.48  | 0.80  | 0.85  | 0.50  |
| USA | 0.76  | 0.60  | 0.77  | 1.64  | 0.89  | 1.53  | 1.84  | 1.36  | 3.05  | 2.67  |

Table 1931: FAO — Trade—Net-Trade—Secondary products—Cotton lint (Mt DM/yr)

58.4.4 Molasses

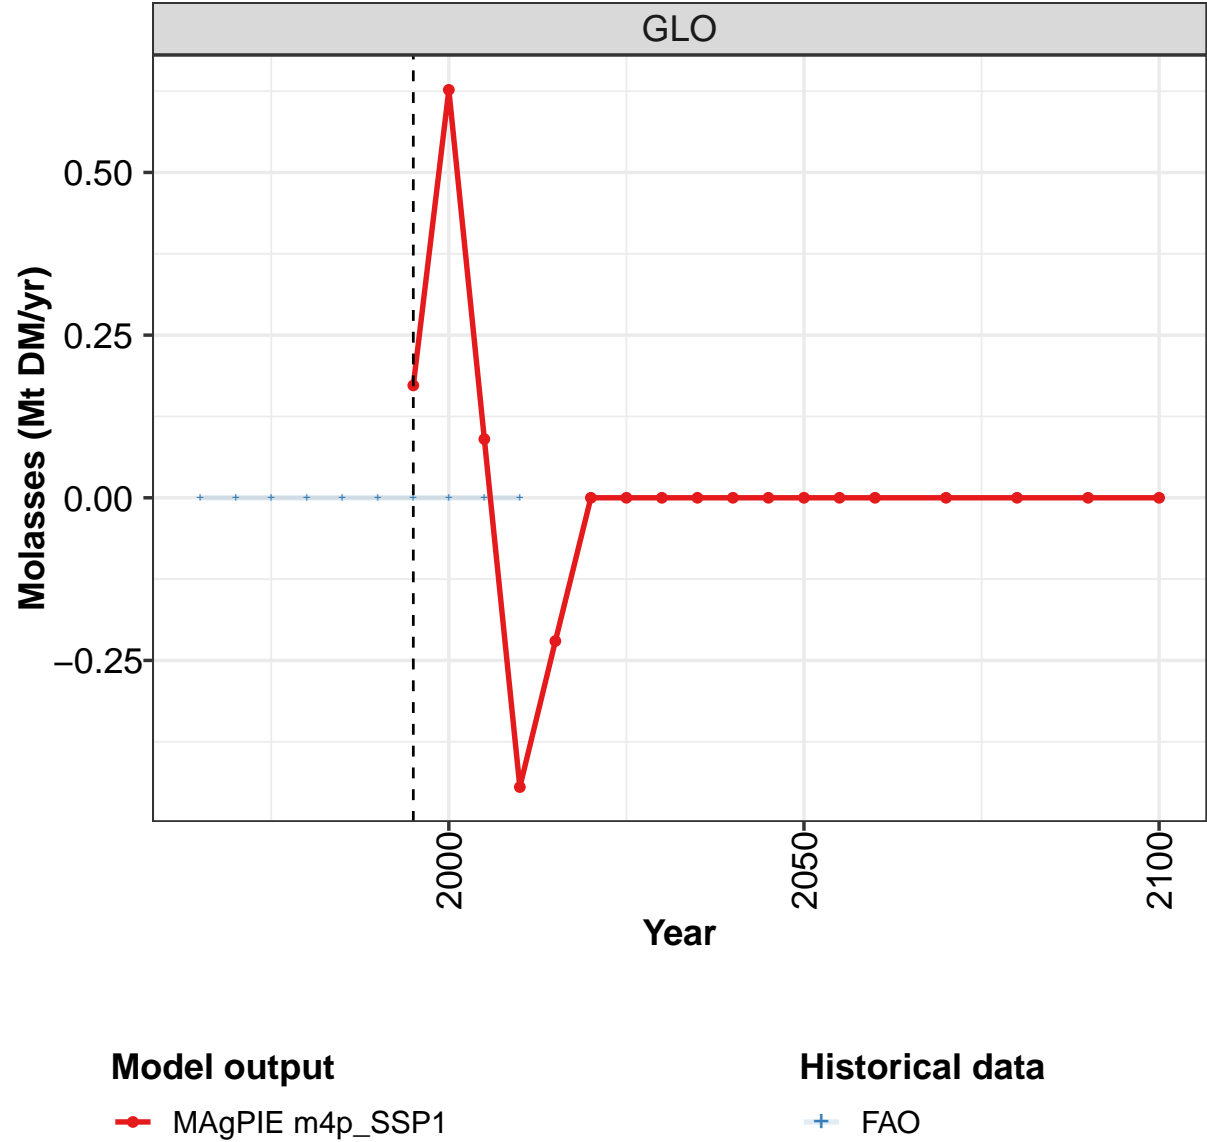

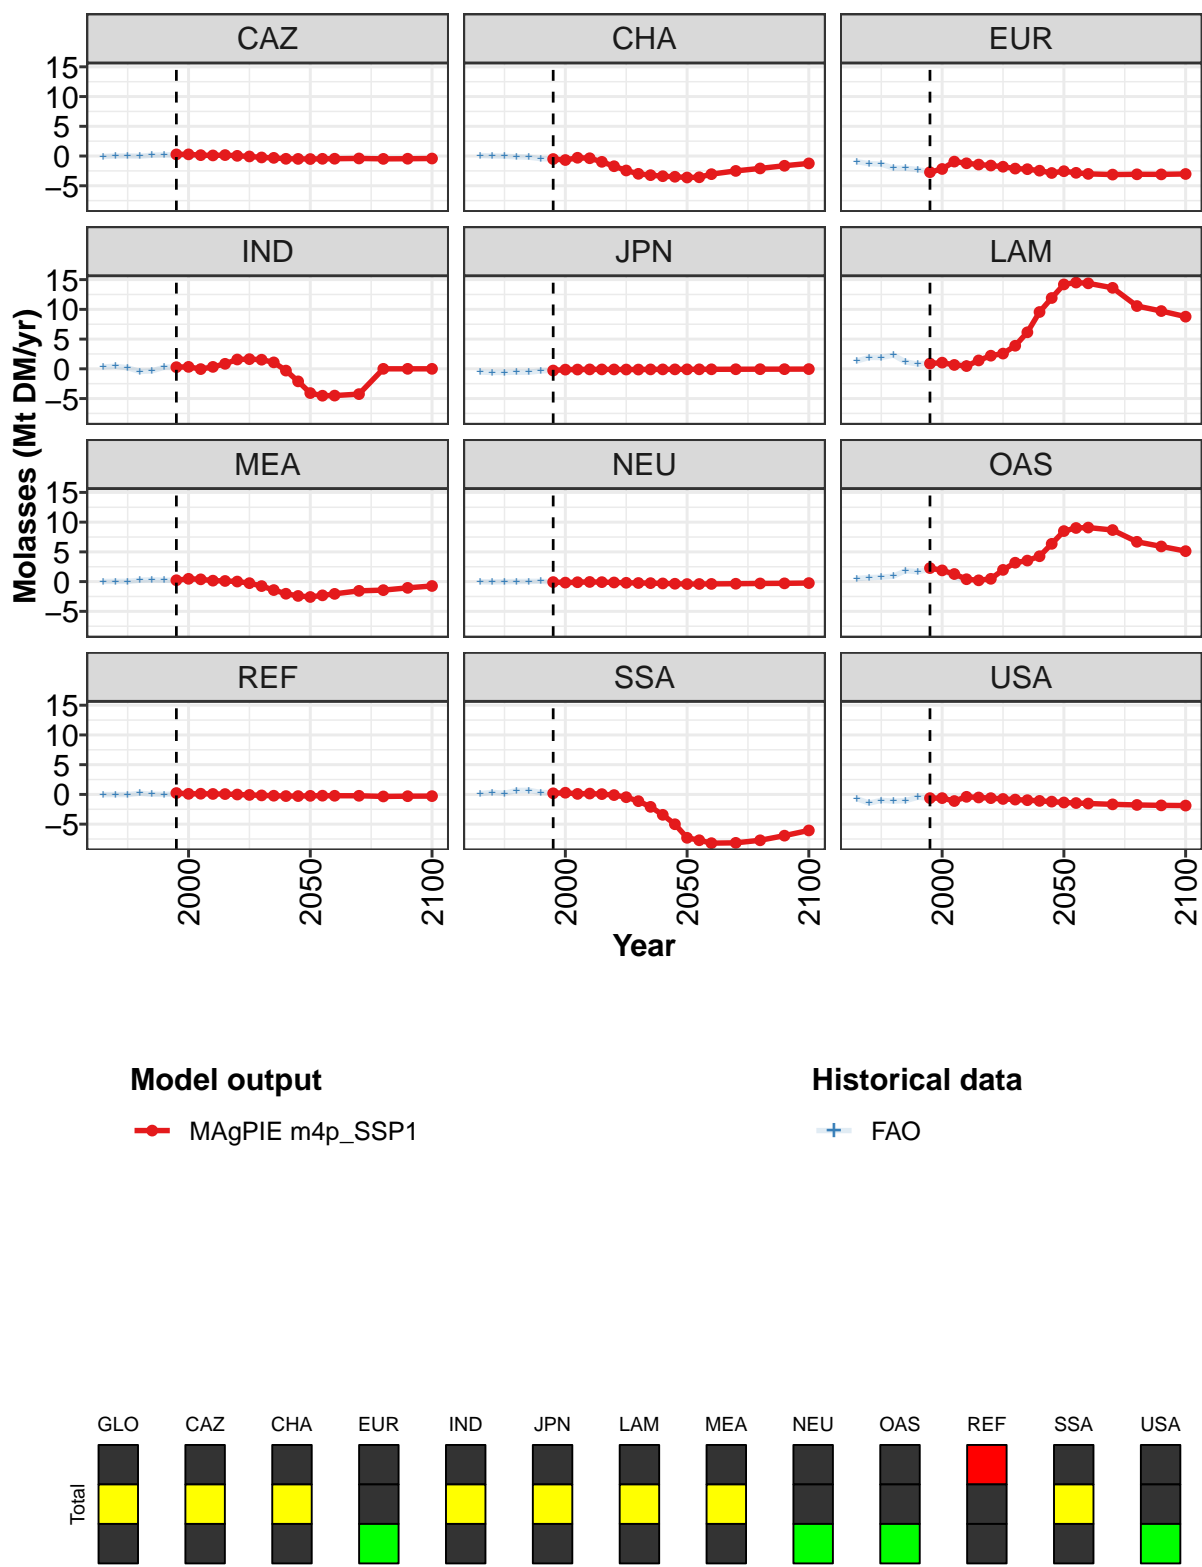

Figure 511: MAgPIE m4p\_SSP1 — Trade—Net-Trade—Secondary products—Molasses (Mt DM/yr)

|     | 1995 | 2000 | 2005 | 2010 | 2015 | 2020 | 2025 | 2030 | 2035 | 2040 | 2045 |
|-----|------|------|------|------|------|------|------|------|------|------|------|
| GLO | 0.2  | 0.6  | 0.1  | -0.4 | -0.2 | 0.0  | 0.0  | -0.0 | 0.0  | 0.0  | -0.0 |
| CAZ | 0.3  | 0.3  | 0.1  | 0.1  | 0.2  | 0.0  | -0.1 | -0.2 | -0.3 | -0.5 | -0.5 |
| CHA | -0.5 | -0.7 | -0.3 | -0.4 | -1.0 | -1.7 | -2.4 | -3.0 | -3.2 | -3.4 | -3.5 |
| EUR | -2.7 | -2.2 | -0.9 | -1.2 | -1.4 | -1.6 | -1.8 | -2.1 | -2.2 | -2.5 | -2.8 |
| IND | 0.3  | 0.3  | -0.0 | 0.3  | 0.8  | 1.6  | 1.6  | 1.5  | 1.1  | -0.3 | -2.1 |
| JPN | -0.3 | -0.1 | -0.1 | -0.1 | -0.1 | -0.1 | -0.1 | -0.1 | -0.1 | -0.1 | -0.1 |
| LAM | 0.9  | 1.0  | 0.7  | 0.5  | 1.4  | 2.2  | 2.6  | 3.9  | 6.1  | 9.6  | 11.9 |
| MEA | 0.2  | 0.5  | 0.4  | 0.2  | 0.1  | 0.0  | -0.3 | -0.7 | -1.4 | -2.0 | -2.4 |
| NEU | -0.1 | -0.2 | -0.1 | -0.1 | -0.1 | -0.1 | -0.2 | -0.2 | -0.3 | -0.3 | -0.4 |
| OAS | 2.3  | 1.9  | 1.3  | 0.4  | 0.2  | 0.5  | 2.0  | 3.2  | 3.5  | 4.3  | 6.4  |
| REF | 0.2  | 0.1  | 0.1  | 0.1  | 0.1  | -0.0 | -0.1 | -0.2 | -0.2 | -0.3 | -0.3 |
| SSA | 0.2  | 0.3  | 0.1  | 0.1  | 0.1  | -0.1 | -0.5 | -1.1 | -2.1 | -3.4 | -5.0 |
| USA | -0.6 | -0.6 | -1.1 | -0.4 | -0.5 | -0.6 | -0.8 | -0.9 | -1.0 | -1.1 | -1.2 |

Table 1932: MAgPIE m4p\_SSP1 — Trade—Net-Trade—Secondary products—Molasses (Mt DM/yr) [PART 1/2]

|     | 2050 | 2055 | 2060 | 2070 | 2080 | 2090 | 2100 |
|-----|------|------|------|------|------|------|------|
| GLO | 0.0  | 0.0  | -0.0 | 0.0  | 0.0  | 0.0  | 0.0  |
| CAZ | -0.5 | -0.5 | -0.4 | -0.4 | -0.5 | -0.5 | -0.4 |
| CHA | -3.6 | -3.6 | -3.0 | -2.5 | -2.1 | -1.6 | -1.2 |
| EUR | -2.5 | -2.8 | -3.0 | -3.1 | -3.1 | -3.1 | -3.0 |
| IND | -4.1 | -4.5 | -4.5 | -4.2 | 0.0  | 0.0  | 0.0  |
| JPN | -0.1 | -0.1 | -0.1 | -0.1 | -0.1 | -0.1 | -0.0 |
| LAM | 14.2 | 14.5 | 14.4 | 13.6 | 10.6 | 9.7  | 8.8  |
| MEA | -2.6 | -2.3 | -2.1 | -1.6 | -1.4 | -1.0 | -0.7 |
| NEU | -0.4 | -0.4 | -0.4 | -0.4 | -0.3 | -0.3 | -0.2 |
| OAS | 8.5  | 9.0  | 9.1  | 8.7  | 6.7  | 5.9  | 5.1  |
| REF | -0.2 | -0.2 | -0.2 | -0.2 | -0.3 | -0.3 | -0.3 |
| SSA | -7.3 | -7.7 | -8.2 | -8.1 | -7.7 | -6.9 | -6.1 |
| USA | -1.4 | -1.4 | -1.5 | -1.7 | -1.8 | -1.8 | -1.9 |

Table 1933: MAgPIE m4p\_SSP1 — Trade—Net-Trade—Secondary products—Molasses (Mt DM/yr) [PART 2/2]

|     | 1965  | 1970  | 1975  | 1980  | 1985  | 1990  | 1995  | 2000  | 2005  | 2010  |
|-----|-------|-------|-------|-------|-------|-------|-------|-------|-------|-------|
| GLO | 0.00  | 0.00  | 0.00  | 0.00  | 0.00  | 0.00  | 0.00  | 0.00  | 0.00  | 0.00  |
| CAZ | -0.08 | 0.01  | 0.02  | -0.03 | 0.13  | 0.21  | 0.17  | 0.08  | 0.09  | 0.04  |
| CHA | 0.08  | 0.01  | -0.03 | -0.13 | -0.19 | -0.44 | -0.51 | -0.69 | -0.30 | -0.37 |
| EUR | -0.97 | -1.27 | -1.36 | -2.02 | -2.05 | -2.27 | -2.66 | -2.14 | -0.87 | -1.15 |
| IND | 0.32  | 0.44  | 0.17  | -0.45 | -0.34 | 0.27  | 0.33  | 0.29  | -0.05 | 0.57  |
| JPN | -0.55 | -0.61 | -0.60 | -0.57 | -0.57 | -0.35 | -0.28 | -0.14 | -0.12 | -0.09 |
| LAM | 1.32  | 1.91  | 1.90  | 2.30  | 1.16  | 0.78  | 0.99  | 0.77  | 0.93  | 0.80  |
| MEA | 0.02  | 0.04  | 0.04  | 0.25  | 0.31  | 0.24  | 0.23  | 0.39  | 0.51  | 0.17  |
| NEU | -0.02 | -0.06 | -0.02 | 0.01  | 0.04  | 0.06  | -0.08 | -0.19 | -0.10 | -0.02 |
| OAS | 0.51  | 0.68  | 0.74  | 0.92  | 1.84  | 1.67  | 2.08  | 2.06  | 0.74  | 0.15  |
| REF | -0.03 | -0.03 | -0.04 | 0.20  | 0.03  | 0.00  | 0.06  | 0.01  | 0.17  | 0.17  |
| SSA | 0.12  | 0.34  | 0.19  | 0.66  | 0.69  | 0.31  | 0.31  | 0.17  | 0.10  | 0.16  |
| USA | -0.72 | -1.46 | -1.00 | -1.13 | -1.04 | -0.48 | -0.63 | -0.62 | -1.10 | -0.42 |

Table 1934: FAO — Trade—Net-Trade—Secondary products—Molasses (Mt DM/yr)

58.4.5 Oilcakes

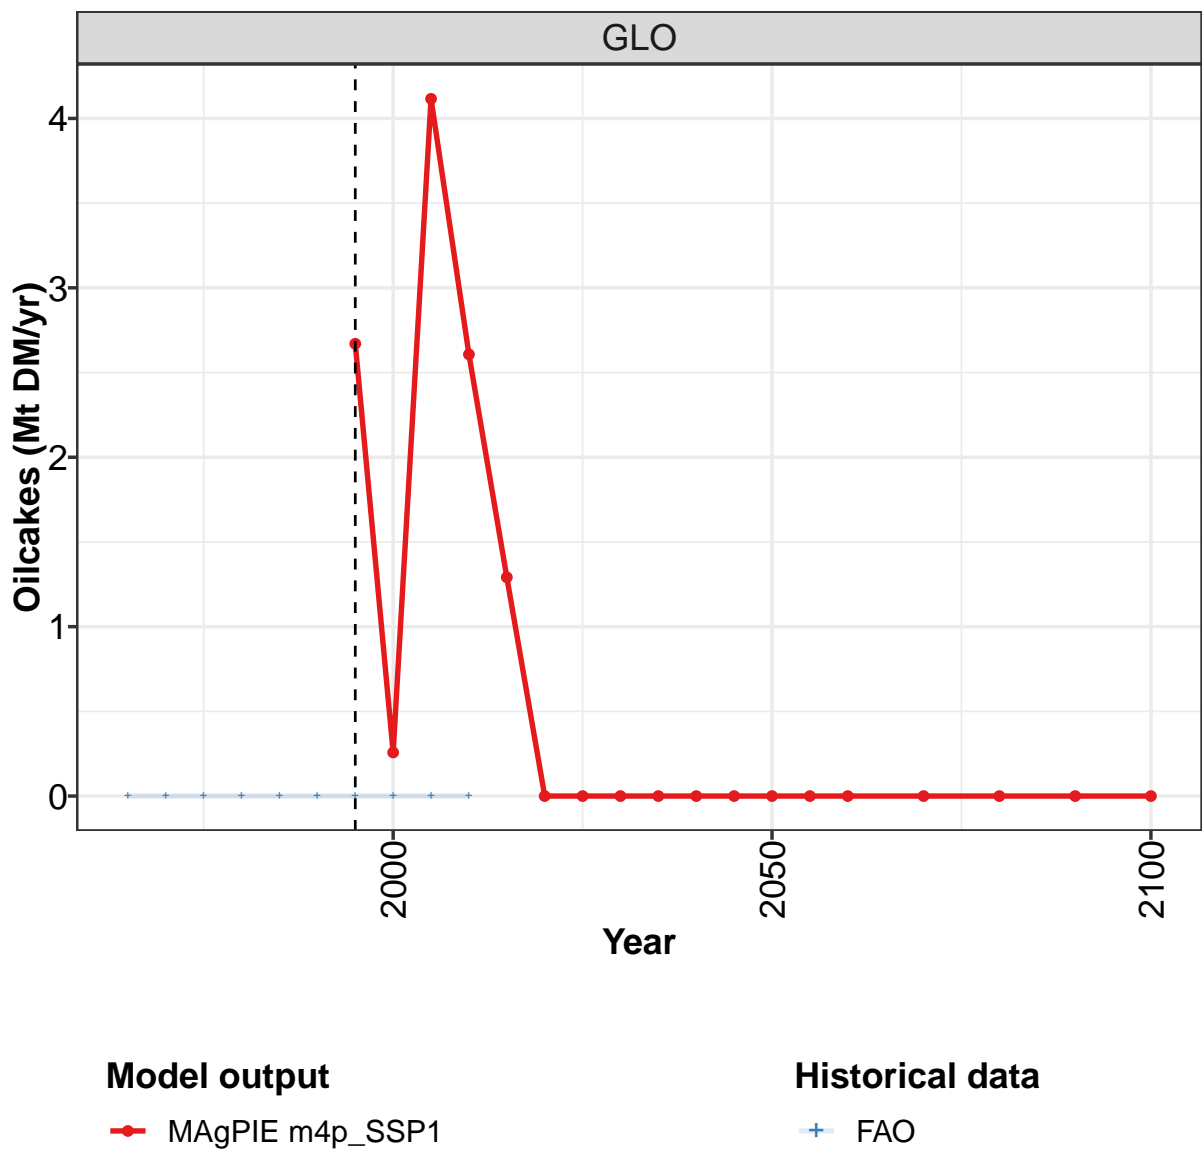



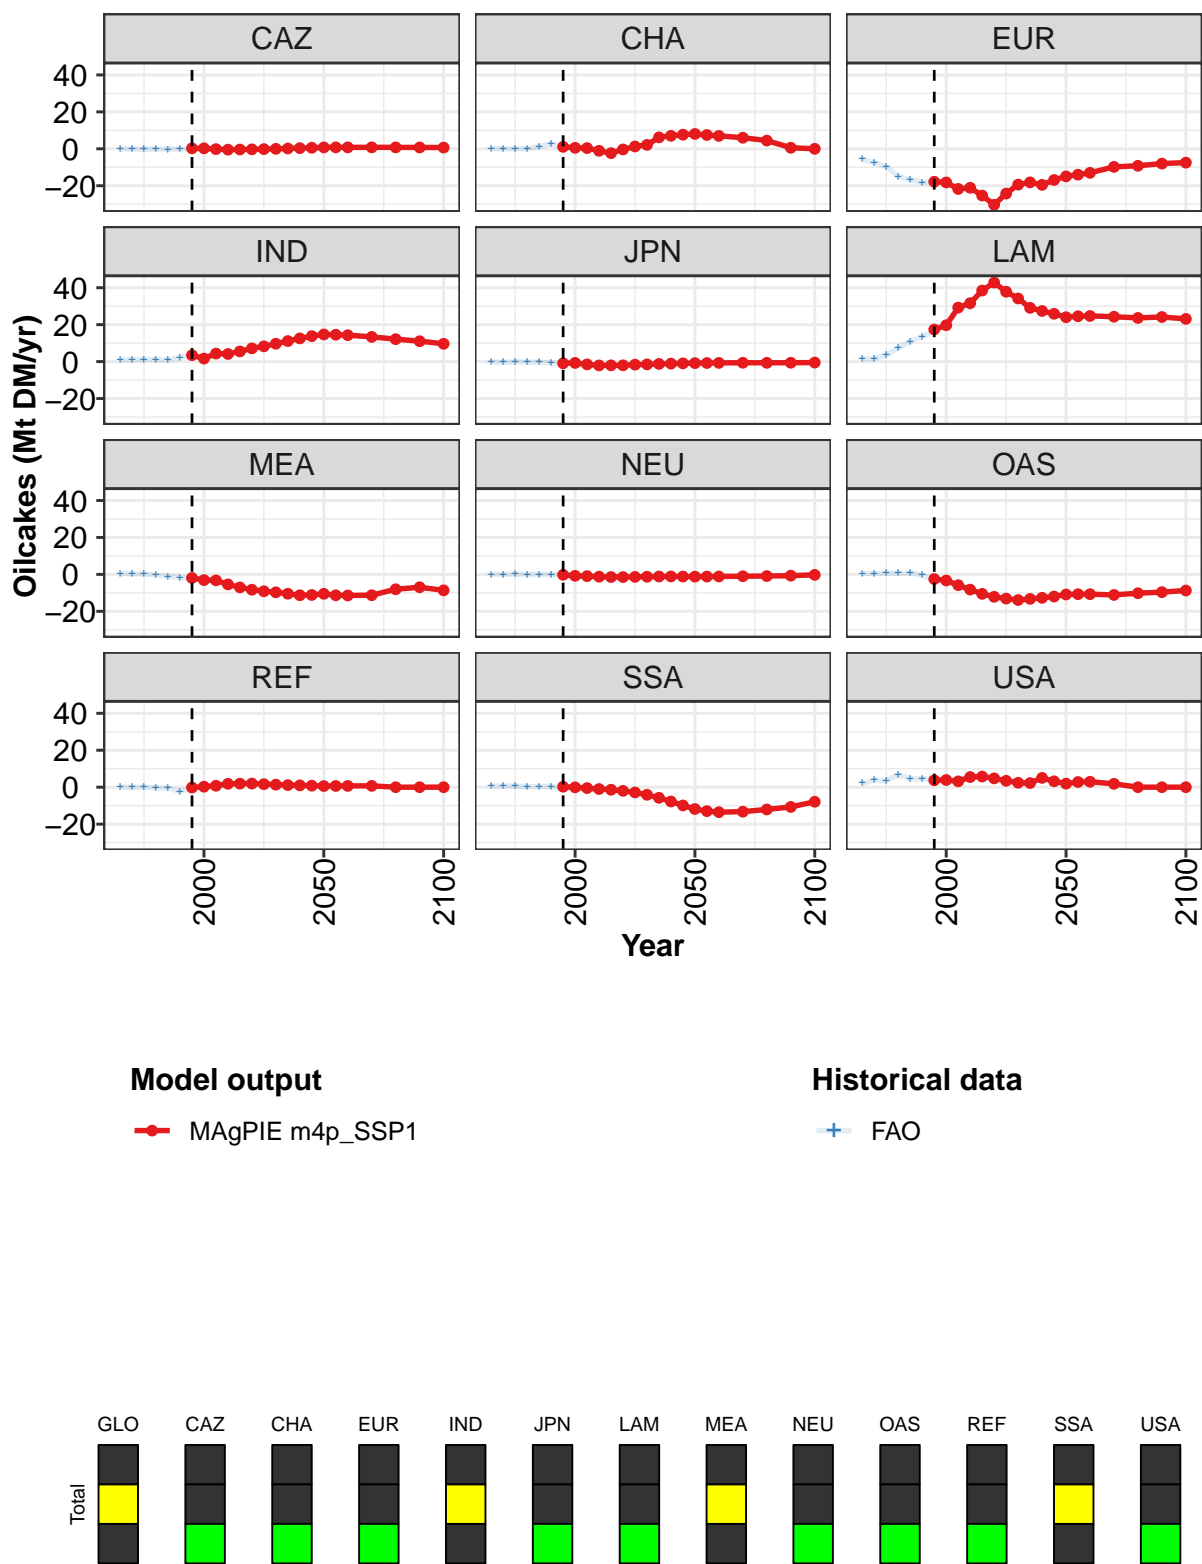

Figure 512: MAgPIE m4p\_SSP1 — Trade—Net-Trade—Secondary products—Oilcakes (Mt DM/yr)

|     | 1995  | 2000  | 2005  | 2010  | 2015  | 2020  | 2025  | 2030  | 2035  | 2040  | 2045  |
|-----|-------|-------|-------|-------|-------|-------|-------|-------|-------|-------|-------|
| GLO | 2.7   | 0.3   | 4.1   | 2.6   | 1.3   | 0.0   | 0.0   | 0.0   | 0.0   | 0.0   | -0.0  |
| CAZ | 0.3   | 0.3   | -0.2  | -0.5  | -0.4  | -0.3  | -0.2  | 0.0   | 0.2   | 0.4   | 0.6   |
| CHA | 1.1   | 0.6   | 0.4   | -1.1  | -2.4  | -0.3  | 1.3   | 2.1   | 6.2   | 7.0   | 7.7   |
| EUR | -17.8 | -18.2 | -21.7 | -21.1 | -25.3 | -30.3 | -24.2 | -19.4 | -18.2 | -19.5 | -16.9 |
| IND | 3.5   | 1.7   | 4.3   | 4.1   | 5.5   | 7.2   | 8.3   | 9.7   | 11.1  | 12.6  | 13.8  |
| JPN | -0.9  | -0.7  | -1.5  | -2.1  | -2.0  | -2.0  | -1.6  | -1.5  | -1.2  | -1.1  | -0.9  |
| LAM | 17.4  | 19.7  | 29.3  | 31.7  | 38.5  | 42.8  | 37.8  | 34.2  | 29.1  | 27.4  | 25.9  |
| MEA | -1.9  | -3.1  | -3.2  | -5.4  | -7.0  | -8.3  | -9.1  | -9.7  | -10.5 | -11.3 | -11.1 |
| NEU | -0.2  | -0.8  | -0.9  | -1.2  | -1.4  | -1.4  | -1.4  | -1.3  | -1.1  | -1.1  | -1.1  |
| OAS | -2.5  | -3.3  | -5.8  | -8.2  | -10.5 | -12.1 | -13.1 | -13.9 | -13.3 | -12.7 | -12.0 |
| REF | -0.2  | 0.3   | 0.8   | 1.8   | 1.9   | 2.0   | 1.6   | 1.4   | 1.1   | 1.0   | 0.8   |
| SSA | 0.3   | -0.1  | -0.5  | -1.0  | -1.4  | -2.0  | -2.8  | -4.1  | -5.7  | -7.7  | -9.9  |
| USA | 3.7   | 3.9   | 3.2   | 5.5   | 5.8   | 4.8   | 3.5   | 2.4   | 2.2   | 5.0   | 3.2   |

Table 1935: MAgPIE m4p\_SSP1 — Trade—Net-Trade—Secondary products—Oilcakes (Mt DM/yr) [PART 1/2]

|     | 2050  | 2055  | 2060  | 2070  | 2080  | 2090  | 2100 |
|-----|-------|-------|-------|-------|-------|-------|------|
| GLO | -0.0  | -0.0  | 0.0   | 0.0   | 0.0   | 0.0   | 0.0  |
| CAZ | 0.8   | 0.8   | 0.8   | 0.8   | 0.8   | 0.7   | 0.7  |
| CHA | 8.0   | 7.5   | 7.0   | 6.0   | 4.5   | 0.6   | 0.0  |
| EUR | -14.9 | -14.0 | -13.0 | -9.8  | -9.2  | -8.0  | -7.5 |
| IND | 14.7  | 14.6  | 14.3  | 13.4  | 12.1  | 11.1  | 9.7  |
| JPN | -0.8  | -0.8  | -0.7  | -0.6  | -0.7  | -0.6  | -0.5 |
| LAM | 24.0  | 24.6  | 24.7  | 24.3  | 23.7  | 24.2  | 23.1 |
| MEA | -10.5 | -11.3 | -11.4 | -11.3 | -8.1  | -7.0  | -8.6 |
| NEU | -1.2  | -1.2  | -1.1  | -1.0  | -0.9  | -0.7  | -0.2 |
| OAS | -10.9 | -10.7 | -10.7 | -11.1 | -10.2 | -9.6  | -8.7 |
| REF | 0.6   | 0.7   | 0.7   | 0.7   | 0.0   | 0.0   | 0.0  |
| SSA | -11.8 | -13.0 | -13.5 | -13.3 | -12.0 | -10.7 | -7.9 |
| USA | 1.9   | 2.8   | 2.9   | 1.8   | 0.0   | 0.0   | 0.0  |

Table 1936: MAgPIE m4p\_SSP1 — Trade—Net-Trade—Secondary products—Oilcakes (Mt DM/yr) [PART 2/2]

|     | 1965 | 1970 | 1975 | 1980  | 1985  | 1990  | 1995  | 2000  | 2005  | 2010  |
|-----|------|------|------|-------|-------|-------|-------|-------|-------|-------|
| GLO | 0.0  | 0.0  | 0.0  | 0.0   | 0.0   | 0.0   | 0.0   | 0.0   | 0.0   | 0.0   |
| CAZ | 0.0  | -0.1 | -0.2 | -0.1  | -0.3  | -0.2  | -0.0  | 0.3   | -0.2  | -0.5  |
| CHA | 0.0  | 0.0  | 0.0  | 0.0   | 1.3   | 2.7   | 0.8   | 0.3   | -0.0  | -1.0  |
| EUR | -5.6 | -7.7 | -9.7 | -15.0 | -16.6 | -18.2 | -18.0 | -18.2 | -22.0 | -21.1 |
| IND | 0.8  | 1.0  | 1.1  | 1.0   | 0.9   | 2.3   | 4.0   | 2.0   | 4.0   | 4.6   |
| JPN | -0.1 | -0.3 | -0.1 | -0.3  | -0.2  | -0.7  | -0.9  | -0.7  | -1.5  | -2.0  |
| LAM | 1.4  | 1.8  | 3.5  | 7.5   | 10.9  | 13.5  | 16.4  | 19.1  | 28.5  | 29.7  |
| MEA | 0.3  | 0.4  | 0.2  | -0.3  | -1.1  | -1.7  | -2.2  | -3.1  | -3.6  | -5.8  |
| NEU | -0.1 | 0.0  | 0.2  | -0.0  | 0.0   | -0.1  | -0.4  | -0.7  | -1.2  | -1.4  |
| OAS | 0.5  | 0.5  | 0.7  | 0.6   | 0.7   | -0.3  | -3.1  | -3.4  | -6.7  | -9.0  |
| REF | 0.0  | -0.0 | -0.0 | -0.4  | -0.4  | -2.3  | -0.3  | 0.2   | 0.5   | 1.6   |
| SSA | 0.6  | 0.7  | 0.6  | 0.3   | 0.3   | 0.4   | -0.5  | -0.1  | -1.3  | -1.5  |
| USA | 2.2  | 3.8  | 3.5  | 6.8   | 4.5   | 4.6   | 4.1   | 4.3   | 3.5   | 6.5   |

Table 1937: FAO — Trade—Net-Trade—Secondary products—Oilcakes (Mt DM/yr)

58.4.6 Oils

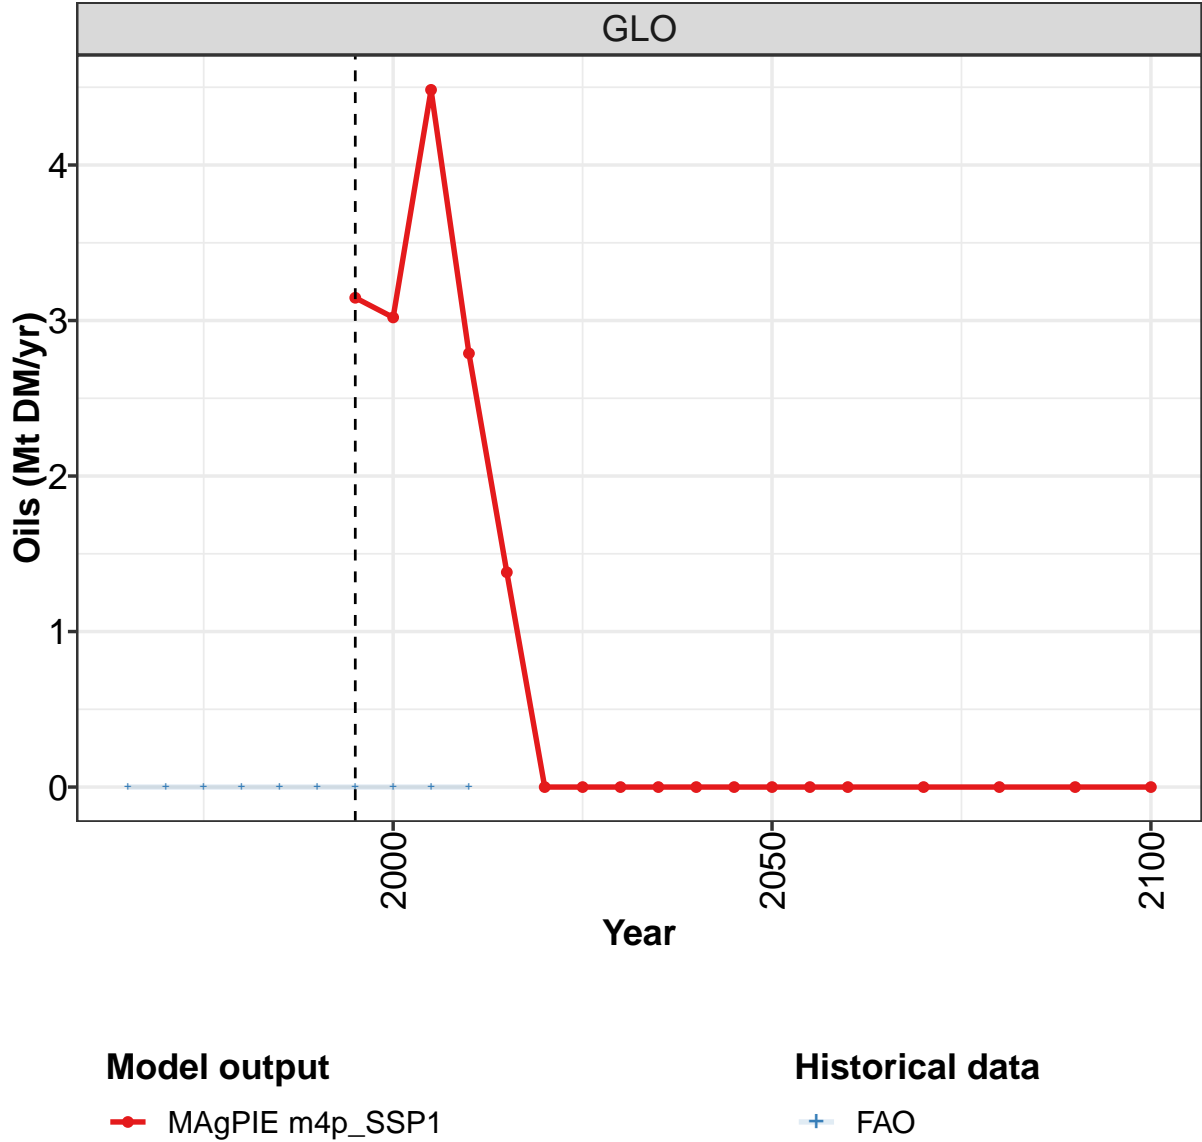

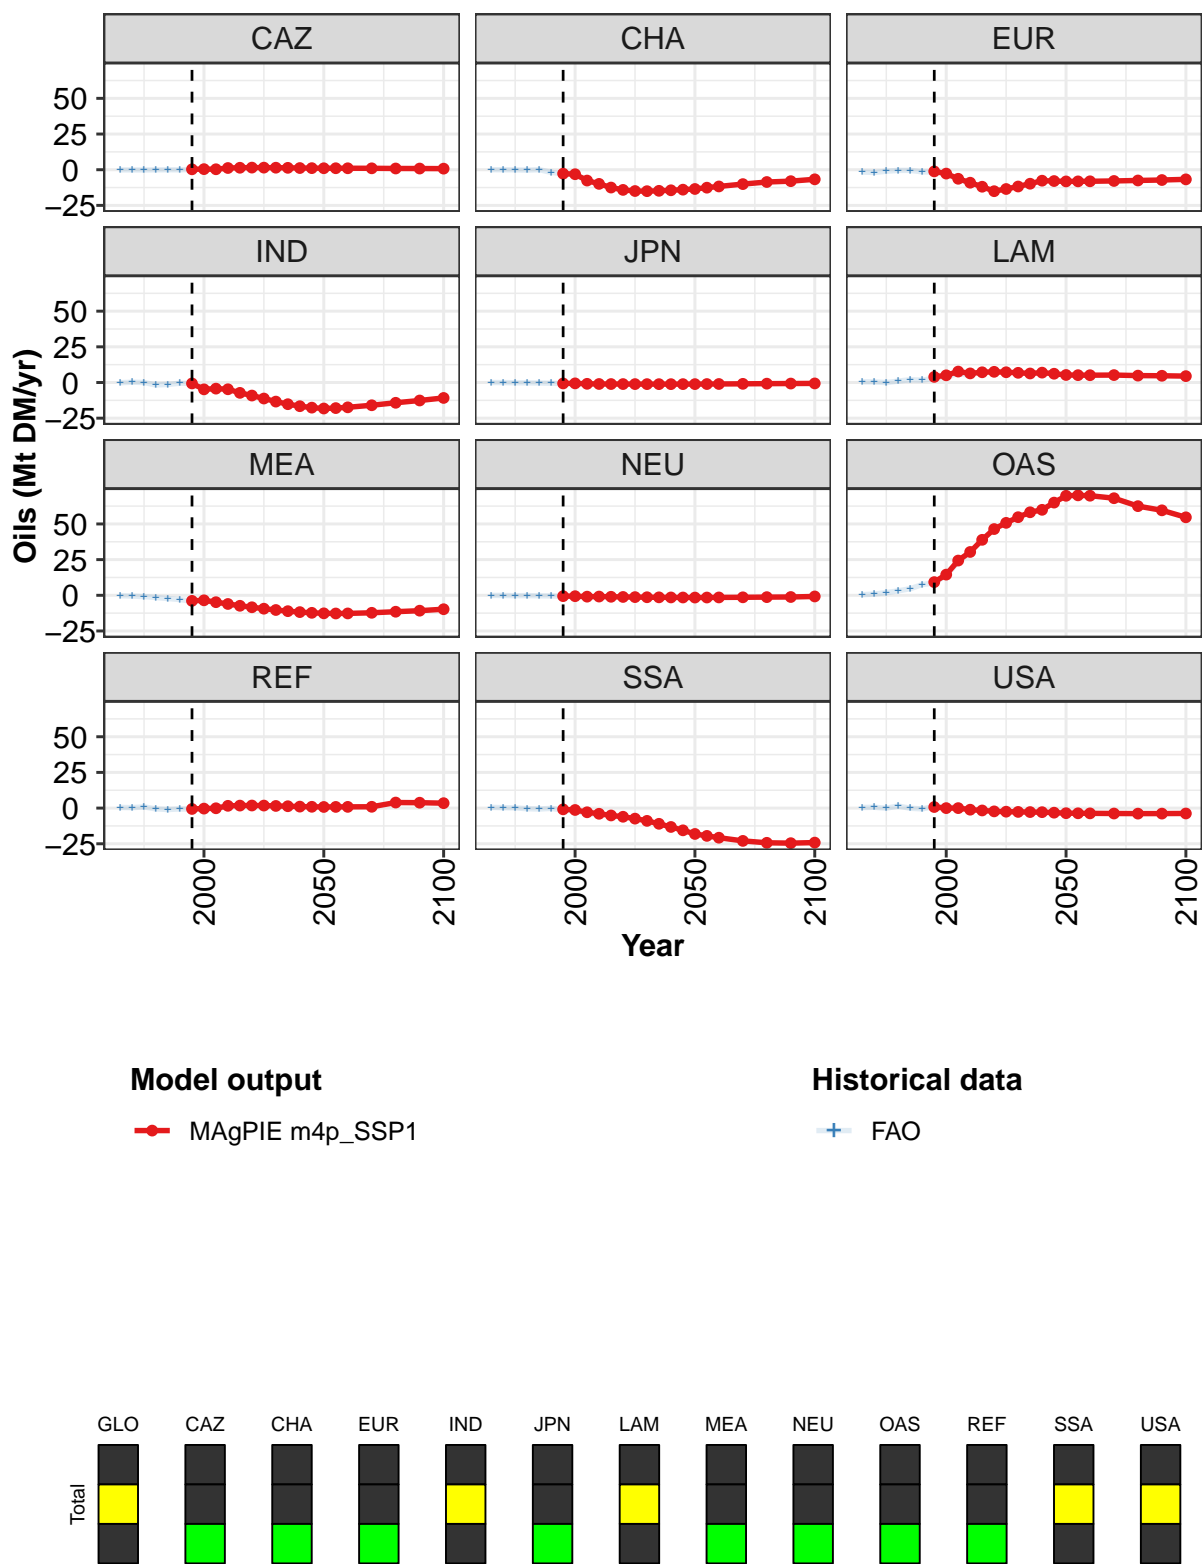

Figure 513: MAgPIE m4p\_SSP1 — Trade—Net-Trade—Secondary products—Oils (Mt DM/yr)

|     | 1995 | 2000 | 2005 | 2010 | 2015  | 2020  | 2025  | 2030  | 2035  | 2040  | 2045  |
|-----|------|------|------|------|-------|-------|-------|-------|-------|-------|-------|
| GLO | 3.1  | 3.0  | 4.5  | 2.8  | 1.4   | -0.0  | 0.0   | 0.0   | -0.0  | -0.0  | 0.0   |
| CAZ | 0.3  | 0.4  | 0.3  | 1.2  | 1.4   | 1.5   | 1.5   | 1.4   | 1.3   | 1.2   | 1.1   |
| CHA | -2.7 | -3.1 | -7.6 | -9.9 | -12.5 | -14.1 | -14.9 | -15.0 | -14.8 | -14.4 | -14.0 |
| EUR | -1.2 | -2.7 | -6.3 | -9.1 | -11.9 | -15.0 | -13.5 | -11.8 | -9.8  | -7.7  | -7.9  |
| IND | -0.7 | -4.8 | -4.3 | -4.7 | -7.2  | -9.1  | -11.2 | -13.4 | -15.2 | -16.6 | -17.6 |
| JPN | -0.7 | -0.6 | -0.9 | -1.0 | -1.1  | -1.1  | -1.1  | -1.1  | -1.1  | -1.1  | -1.1  |
| LAM | 3.9  | 5.0  | 7.7  | 6.4  | 7.2   | 7.5   | 7.2   | 6.8   | 6.3   | 6.9   | 6.2   |
| MEA | -3.9 | -3.5 | -4.8 | -6.1 | -7.3  | -8.4  | -9.4  | -10.3 | -11.1 | -11.8 | -12.3 |
| NEU | -0.6 | -0.6 | -0.9 | -0.9 | -1.0  | -1.1  | -1.3  | -1.3  | -1.4  | -1.5  | -1.5  |
| OAS | 9.3  | 14.5 | 24.4 | 30.4 | 38.9  | 46.4  | 50.8  | 54.7  | 58.2  | 59.9  | 65.0  |
| REF | -0.6 | -0.3 | -0.1 | 1.6  | 1.8   | 1.8   | 1.8   | 1.5   | 1.3   | 1.1   | 0.9   |
| SSA | -0.9 | -1.3 | -2.9 | -4.0 | -5.2  | -6.1  | -7.4  | -8.9  | -11.0 | -13.2 | -15.6 |
| USA | 0.8  | 0.0  | 0.0  | -1.1 | -1.7  | -2.3  | -2.5  | -2.7  | -2.8  | -2.9  | -3.2  |

Table 1938: MAgPIE m4p-SSP1 — Trade—Net-Trade—Secondary products—Oils (Mt DM/yr) [PART 1/2]

|     | 2050  | 2055  | 2060  | 2070  | 2080  | 2090  | 2100  |
|-----|-------|-------|-------|-------|-------|-------|-------|
| GLO | 0.0   | 0.0   | -0.0  | 0.0   | -0.0  | -0.0  | -0.0  |
| CAZ | 1.0   | 1.0   | 1.0   | 1.0   | 0.9   | 0.8   | 0.8   |
| CHA | -13.5 | -12.6 | -11.7 | -10.1 | -8.6  | -8.0  | -6.7  |
| EUR | -8.2  | -8.2  | -8.1  | -7.9  | -7.5  | -7.2  | -6.7  |
| IND | -18.2 | -17.9 | -17.4 | -15.9 | -14.2 | -12.6 | -10.8 |
| JPN | -1.1  | -1.1  | -1.0  | -0.9  | -0.8  | -0.7  | -0.6  |
| LAM | 5.3   | 5.2   | 5.1   | 5.2   | 4.8   | 4.7   | 4.5   |
| MEA | -12.6 | -12.7 | -12.7 | -12.2 | -11.5 | -10.8 | -9.7  |
| NEU | -1.6  | -1.5  | -1.5  | -1.4  | -1.3  | -1.2  | -0.8  |
| OAS | 69.7  | 70.0  | 69.8  | 68.1  | 62.5  | 59.6  | 54.7  |
| REF | 0.8   | 0.8   | 0.9   | 0.9   | 3.9   | 3.8   | 3.5   |
| SSA | -18.1 | -19.5 | -20.7 | -23.0 | -24.3 | -24.6 | -24.2 |
| USA | -3.6  | -3.6  | -3.7  | -3.8  | -3.9  | -3.8  | -3.8  |

Table 1939: MAgPIE m4p-SSP1 — Trade—Net-Trade—Secondary products—Oils (Mt DM/yr) [PART 2/2]

|     | 1965 | 1970 | 1975 | 1980 | 1985 | 1990 | 1995 | 2000 | 2005 | 2010 |
|-----|------|------|------|------|------|------|------|------|------|------|
| GLO | 0.0  | 0.0  | 0.0  | 0.0  | 0.0  | 0.0  | 0.0  | 0.0  | 0.0  | 0.0  |
| CAZ | -0.1 | -0.1 | -0.2 | -0.1 | -0.0 | -0.1 | 0.2  | 0.3  | 0.2  | 1.3  |
| CHA | 0.0  | -0.0 | -0.1 | -0.3 | 0.0  | -1.8 | -2.8 | -3.2 | -7.6 | -9.9 |
| EUR | -1.6 | -1.9 | -1.1 | -0.5 | -0.5 | -1.5 | -1.6 | -3.0 | -7.0 | -9.3 |
| IND | -0.2 | 0.2  | 0.0  | -1.7 | -1.3 | -0.5 | -0.6 | -4.8 | -4.3 | -4.8 |
| JPN | -0.0 | -0.0 | -0.2 | -0.2 | -0.3 | -0.5 | -0.7 | -0.6 | -0.9 | -1.0 |
| LAM | 0.5  | 0.4  | -0.1 | 1.0  | 1.9  | 1.7  | 2.9  | 3.5  | 6.4  | 4.7  |
| MEA | -0.3 | -0.5 | -0.9 | -1.5 | -2.3 | -3.0 | -4.2 | -3.8 | -5.2 | -6.3 |
| NEU | -0.1 | -0.1 | -0.3 | -0.2 | -0.4 | -0.4 | -0.8 | -0.8 | -1.2 | -1.1 |
| OAS | 0.4  | 0.9  | 1.9  | 3.2  | 4.6  | 7.5  | 8.6  | 14.0 | 23.3 | 30.7 |
| REF | 0.5  | 0.3  | 0.8  | -0.6 | -1.0 | -0.6 | -0.7 | -0.5 | -0.3 | 1.4  |
| SSA | 0.5  | 0.3  | 0.2  | -0.4 | -0.7 | -0.2 | -1.5 | -1.9 | -3.8 | -4.6 |
| USA | 0.4  | 0.6  | -0.0 | 1.5  | -0.1 | -0.5 | 1.2  | 0.7  | 0.5  | -1.1 |

Table 1940: FAO — Trade—Net-Trade—Secondary products—Oils (Mt DM/yr)

58.4.7 Sugar

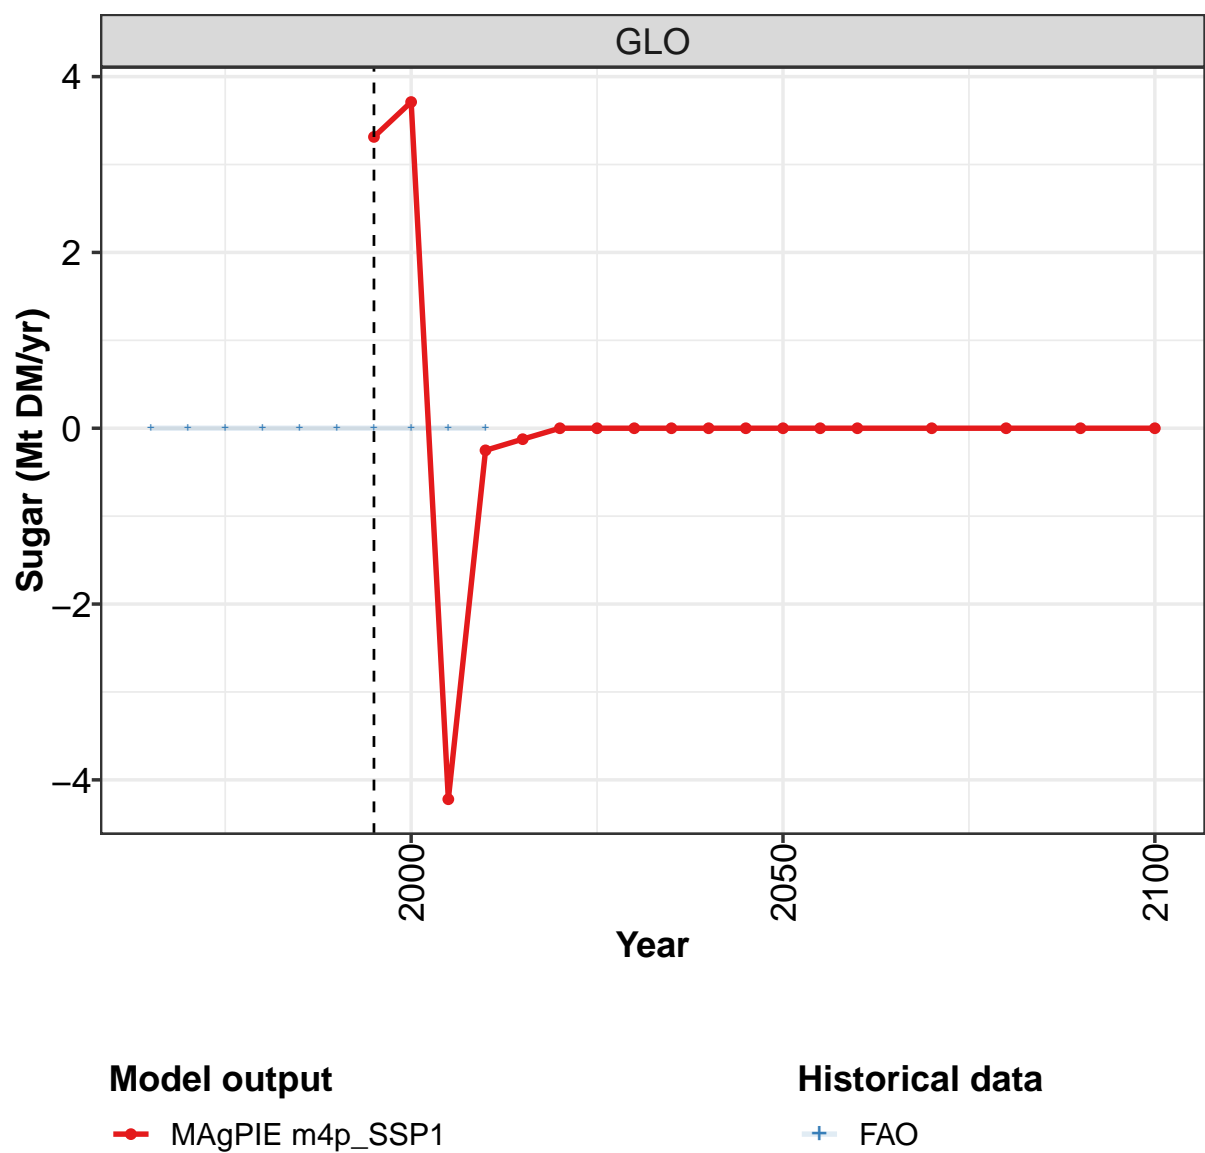

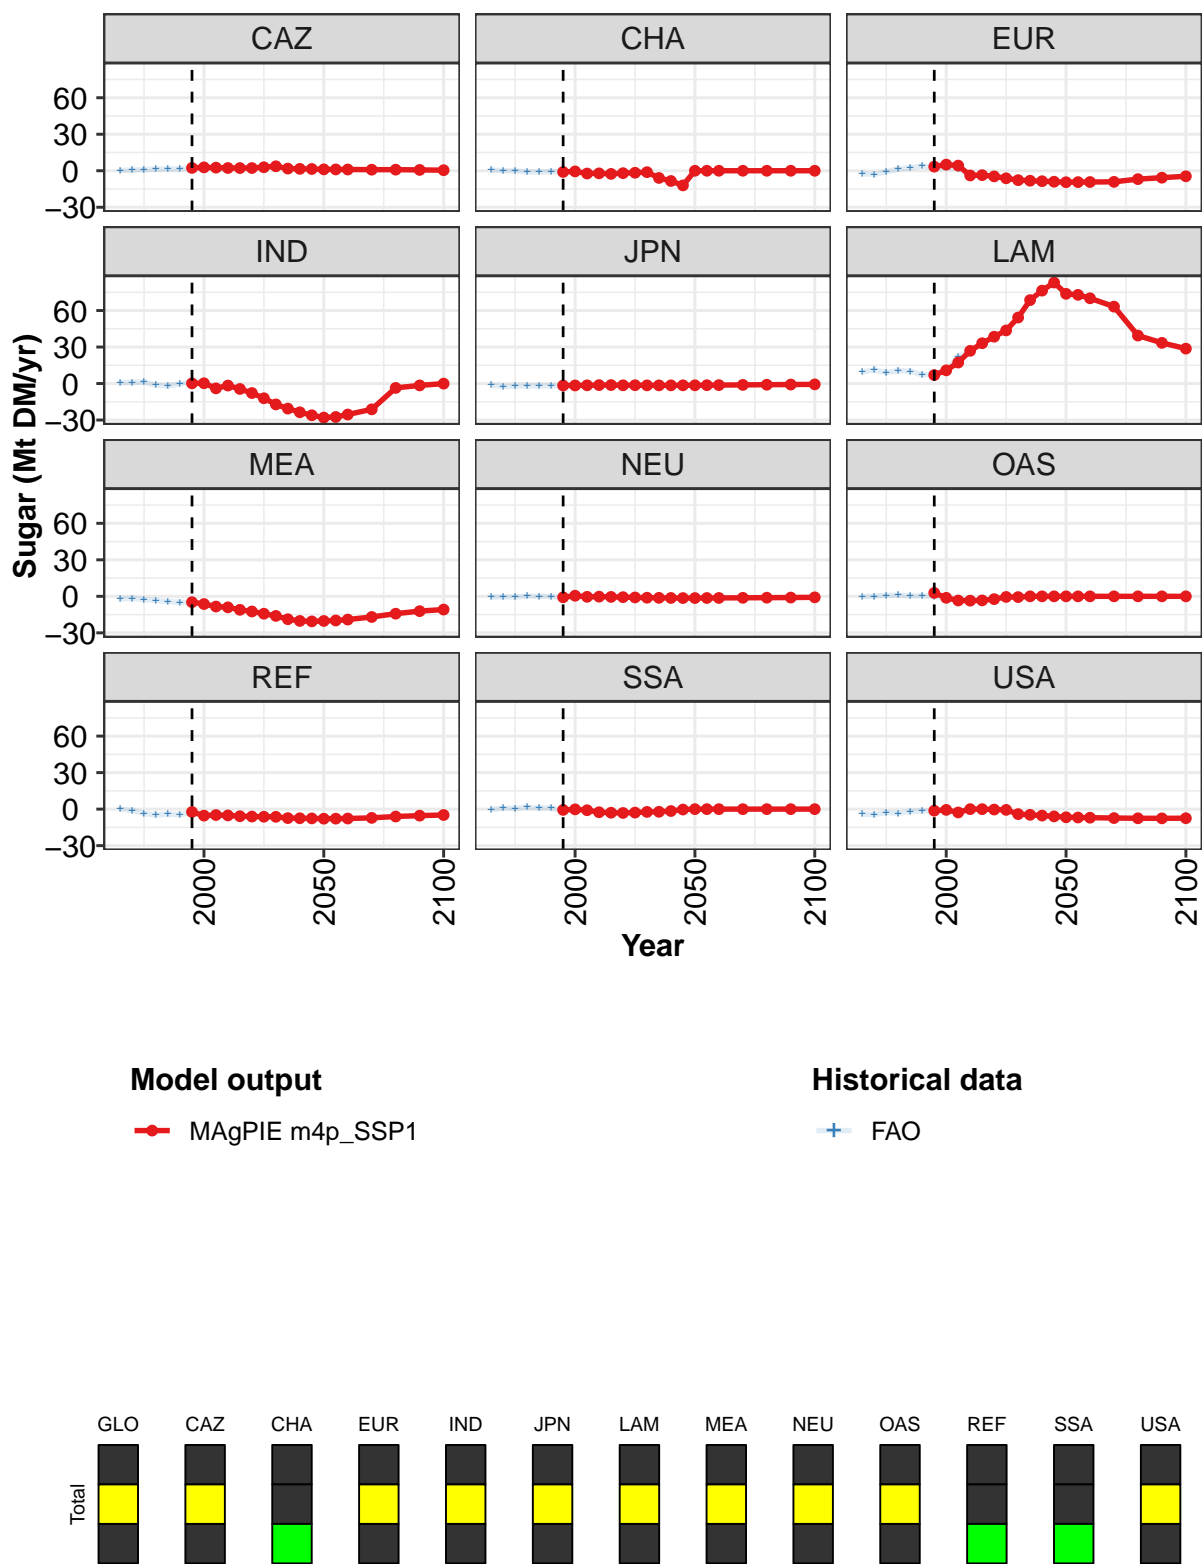

Figure 514: MAgPIE m4p\_SSP1 — Trade—Net-Trade—Secondary products—Sugar (Mt DM/yr)

|     | 1995 | 2000 | 2005 | 2010 | 2015  | 2020  | 2025  | 2030  | 2035  | 2040  | 2045  |
|-----|------|------|------|------|-------|-------|-------|-------|-------|-------|-------|
| GLO | 3.3  | 3.7  | -4.2 | -0.3 | -0.1  | -0.0  | -0.0  | 0.0   | 0.0   | 0.0   | 0.0   |
| CAZ | 2.3  | 2.8  | 2.5  | 2.3  | 2.2   | 2.2   | 2.9   | 3.7   | 1.8   | 1.6   | 1.5   |
| CHA | -1.0 | -0.5 | -2.3 | -2.1 | -2.6  | -2.0  | -1.6  | -1.2  | -5.9  | -8.4  | -12.0 |
| EUR | 3.4  | 5.1  | 4.2  | -3.9 | -3.6  | -4.6  | -6.2  | -7.7  | -8.2  | -8.6  | -9.0  |
| IND | 0.2  | 0.3  | -4.0 | -1.7 | -4.4  | -7.8  | -12.1 | -17.1 | -20.6 | -23.6 | -26.1 |
| JPN | -1.6 | -1.6 | -1.4 | -1.3 | -1.2  | -1.4  | -1.4  | -1.5  | -1.5  | -1.5  | -1.4  |
| LAM | 7.0  | 10.9 | 17.3 | 26.9 | 33.1  | 38.5  | 43.7  | 54.3  | 68.6  | 76.4  | 83.0  |
| MEA | -4.8 | -6.3 | -8.4 | -9.0 | -11.1 | -12.4 | -14.3 | -16.1 | -18.8 | -20.2 | -20.6 |
| NEU | -0.8 | 0.5  | -0.4 | -0.2 | -0.5  | -0.7  | -0.9  | -1.1  | -1.2  | -1.3  | -1.4  |
| OAS | 2.9  | -1.2 | -3.4 | -3.5 | -3.3  | -2.3  | -0.5  | -0.6  | 0.0   | 0.0   | 0.0   |
| REF | -2.3 | -5.3 | -4.9 | -5.2 | -5.8  | -6.1  | -6.2  | -6.3  | -7.4  | -7.5  | -7.6  |
| SSA | -0.6 | -0.2 | -0.9 | -2.5 | -3.0  | -3.1  | -2.8  | -2.3  | -2.2  | -1.6  | -0.3  |
| USA | -1.2 | -0.6 | -2.7 | 0.0  | 0.0   | -0.3  | -0.6  | -4.1  | -4.7  | -5.3  | -6.0  |

Table 1941: MAgPIE m4p\_SSP1 — Trade—Net-Trade—Secondary products—Sugar (Mt DM/yr) [PART 1/2]

|     | 2050  | 2055  | 2060  | 2070  | 2080  | 2090  | 2100  |
|-----|-------|-------|-------|-------|-------|-------|-------|
| GLO | 0.0   | 0.0   | 0.0   | -0.0  | 0.0   | 0.0   | 0.0   |
| CAZ | 1.2   | 1.1   | 1.0   | 0.9   | 0.9   | 0.7   | 0.5   |
| CHA | -0.0  | 0.0   | 0.0   | -0.0  | 0.0   | 0.0   | 0.0   |
| EUR | -9.4  | -9.3  | -9.2  | -9.1  | -6.9  | -5.7  | -4.5  |
| IND | -28.0 | -27.5 | -25.4 | -21.2 | -3.6  | -1.5  | -0.1  |
| JPN | -1.4  | -1.4  | -1.3  | -1.1  | -1.0  | -0.8  | -0.7  |
| LAM | 73.8  | 72.9  | 70.1  | 63.2  | 39.4  | 33.4  | 28.7  |
| MEA | -20.2 | -19.8 | -19.1 | -17.0 | -14.2 | -12.2 | -10.9 |
| NEU | -1.4  | -1.3  | -1.3  | -1.2  | -1.1  | -1.0  | -0.8  |
| OAS | 0.0   | 0.0   | 0.0   | 0.0   | 0.0   | 0.0   | 0.0   |
| REF | -7.8  | -7.8  | -7.7  | -7.2  | -6.1  | -5.4  | -4.8  |
| SSA | 0.0   | -0.0  | -0.0  | 0.0   | 0.0   | 0.0   | 0.0   |
| USA | -6.7  | -6.9  | -7.0  | -7.3  | -7.5  | -7.6  | -7.4  |

Table 1942: MAgPIE m4p\_SSP1 — Trade—Net-Trade—Secondary products—Sugar (Mt DM/yr) [PART 2/2]

|     | 1965 | 1970 | 1975 | 1980 | 1985 | 1990 | 1995 | 2000 | 2005 | 2010 |
|-----|------|------|------|------|------|------|------|------|------|------|
| GLO | 0.0  | 0.0  | 0.0  | 0.0  | 0.0  | 0.0  | 0.0  | 0.0  | 0.0  | 0.0  |
| CAZ | 0.2  | 0.6  | 0.9  | 1.3  | 1.4  | 1.6  | 2.4  | 2.6  | 1.7  | 1.2  |
| CHA | 0.7  | -0.1 | -0.1 | -1.0 | -1.1 | -0.6 | -1.0 | -0.6 | -2.2 | -2.1 |
| EUR | -2.5 | -2.9 | -0.8 | 1.5  | 2.4  | 4.1  | 1.9  | 2.4  | 1.9  | -3.8 |
| IND | 0.7  | 1.0  | 1.4  | -1.4 | -2.0 | -0.3 | 1.9  | 1.6  | -4.0 | -1.8 |
| JPN | -1.3 | -2.6 | -2.2 | -2.0 | -1.8 | -1.9 | -1.7 | -1.6 | -1.4 | -1.3 |
| LAM | 9.4  | 11.2 | 9.0  | 10.6 | 10.1 | 7.3  | 7.6  | 11.3 | 21.9 | 27.0 |
| MEA | -2.1 | -1.7 | -2.6 | -3.3 | -4.2 | -5.0 | -5.1 | -6.7 | -8.1 | -8.9 |
| NEU | -0.6 | -0.6 | -0.5 | 0.1  | 0.0  | -0.2 | -1.0 | -0.2 | -0.1 | -0.2 |
| OAS | -0.2 | 0.0  | 0.8  | 1.0  | 0.3  | 0.3  | 0.0  | -1.9 | -2.3 | -3.5 |
| REF | 0.1  | -1.2 | -3.6 | -4.8 | -4.1 | -4.6 | -2.4 | -5.6 | -4.6 | -5.2 |
| SSA | -0.4 | 0.8  | 0.6  | 1.6  | 1.0  | 0.9  | -1.3 | -1.0 | 0.0  | -2.5 |
| USA | -4.1 | -4.6 | -2.7 | -3.5 | -1.9 | -1.4 | -1.3 | -0.6 | -2.8 | 1.0  |

Table 1943: FAO — Trade—Net-Trade—Secondary products—Sugar (Mt DM/yr)



59 Self-sufficiency

59.1 Crops

59.1.1 Cereals

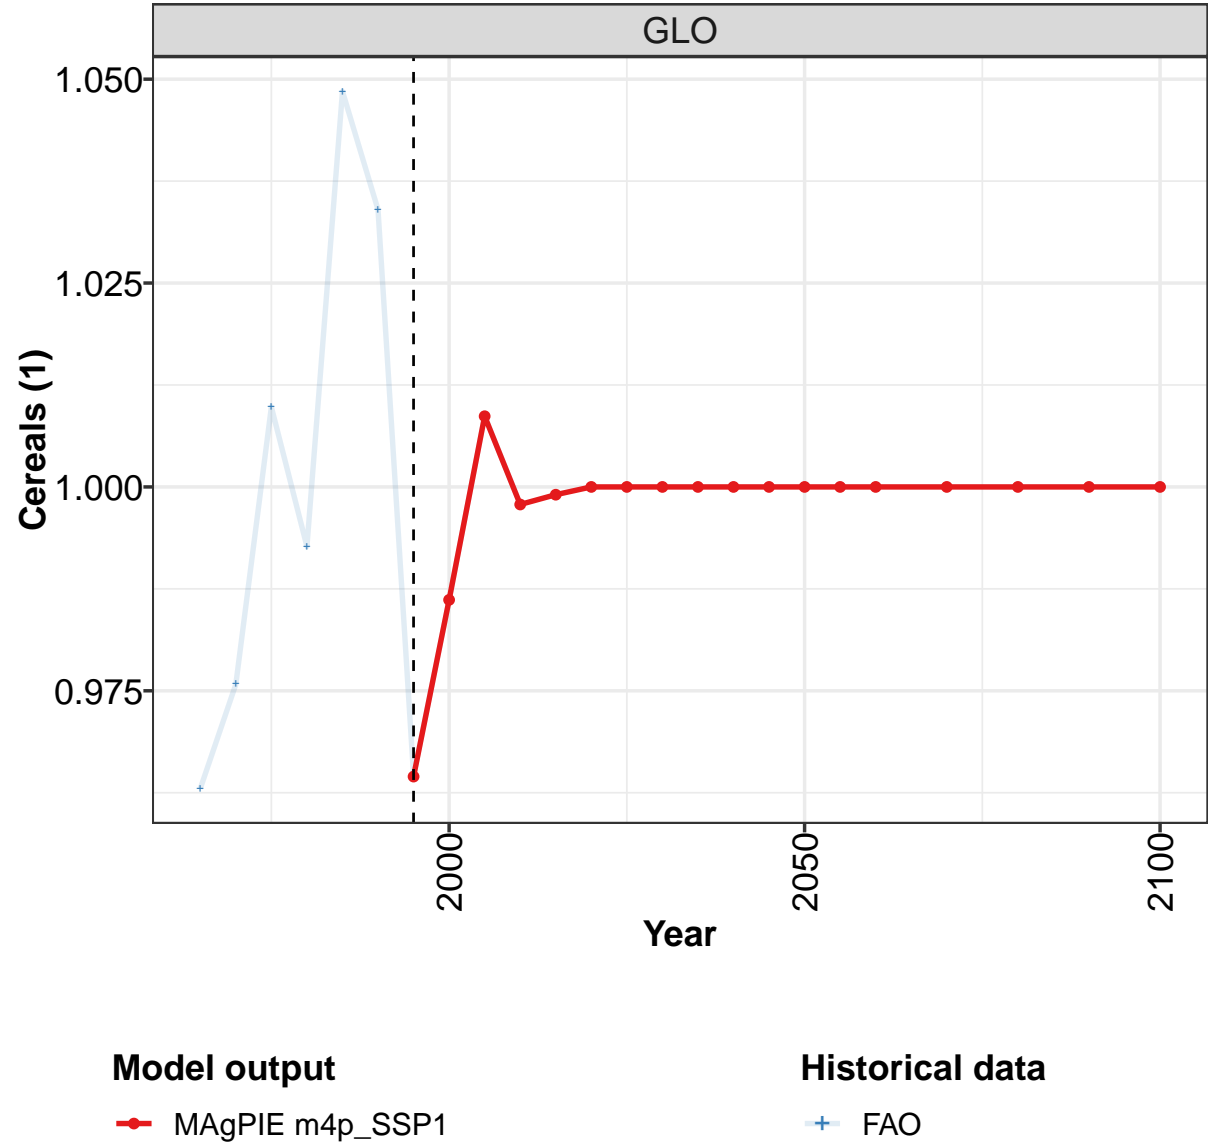

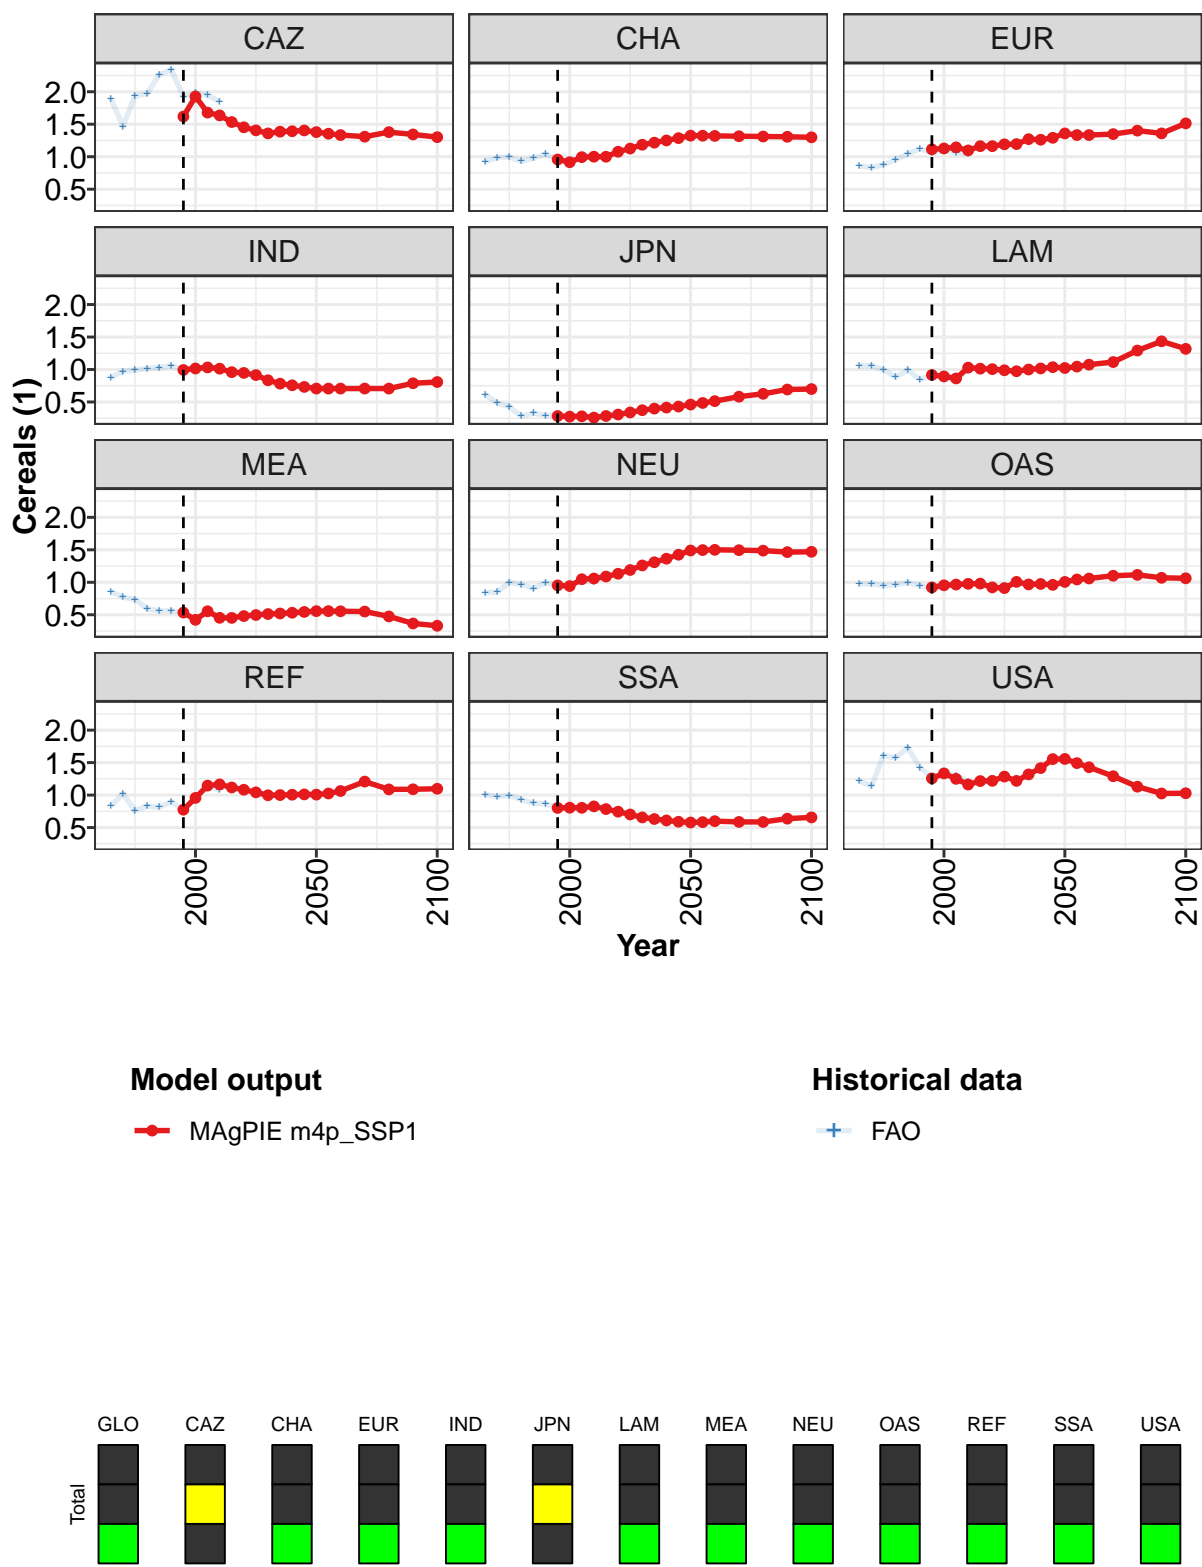

Figure 515: MAgPIE m4p\_SSP1 — Trade—Self-sufficiency—Crops—Cereals (1)

|     | 1995 | 2000 | 2005 | 2010 | 2015 | 2020 | 2025 | 2030 | 2035 | 2040 | 2045 |
|-----|------|------|------|------|------|------|------|------|------|------|------|
| GLO | 0.96 | 0.99 | 1.01 | 1.00 | 1.00 | 1.00 | 1.00 | 1.00 | 1.00 | 1.00 | 1.00 |
| CAZ | 1.62 | 1.93 | 1.68 | 1.64 | 1.53 | 1.45 | 1.41 | 1.36 | 1.39 | 1.39 | 1.40 |
| CHA | 0.96 | 0.92 | 0.99 | 1.00 | 1.00 | 1.08 | 1.13 | 1.18 | 1.22 | 1.25 | 1.29 |
| EUR | 1.11 | 1.13 | 1.14 | 1.10 | 1.16 | 1.16 | 1.19 | 1.19 | 1.27 | 1.26 | 1.29 |
| IND | 0.99 | 1.02 | 1.03 | 1.01 | 0.96 | 0.95 | 0.91 | 0.83 | 0.78 | 0.76 | 0.73 |
| JPN | 0.28 | 0.27 | 0.28 | 0.26 | 0.28 | 0.31 | 0.34 | 0.37 | 0.40 | 0.41 | 0.43 |
| LAM | 0.92 | 0.89 | 0.86 | 1.03 | 1.01 | 1.01 | 0.99 | 0.97 | 1.00 | 1.02 | 1.04 |
| MEA | 0.53 | 0.42 | 0.55 | 0.45 | 0.45 | 0.48 | 0.50 | 0.51 | 0.52 | 0.53 | 0.54 |
| NEU | 0.95 | 0.94 | 1.05 | 1.06 | 1.09 | 1.13 | 1.19 | 1.26 | 1.31 | 1.36 | 1.42 |
| OAS | 0.92 | 0.95 | 0.97 | 0.98 | 0.98 | 0.92 | 0.91 | 1.01 | 0.97 | 0.97 | 0.96 |
| REF | 0.78 | 0.96 | 1.15 | 1.16 | 1.12 | 1.08 | 1.04 | 1.00 | 1.00 | 1.01 | 1.01 |
| SSA | 0.80 | 0.81 | 0.80 | 0.83 | 0.78 | 0.74 | 0.70 | 0.66 | 0.63 | 0.61 | 0.59 |
| USA | 1.26 | 1.33 | 1.25 | 1.16 | 1.22 | 1.22 | 1.29 | 1.22 | 1.32 | 1.42 | 1.55 |

Table 1944: MAgPIE m4p-SSP1 — Trade—Self-sufficiency—Crops—Cereals (1) [PART 1/2]

|     | 2050 | 2055 | 2060 | 2070 | 2080 | 2090 | 2100 |
|-----|------|------|------|------|------|------|------|
| GLO | 1.00 | 1.00 | 1.00 | 1.00 | 1.00 | 1.00 | 1.00 |
| CAZ | 1.38 | 1.35 | 1.33 | 1.31 | 1.38 | 1.34 | 1.30 |
| CHA | 1.32 | 1.32 | 1.32 | 1.32 | 1.31 | 1.31 | 1.30 |
| EUR | 1.36 | 1.33 | 1.33 | 1.35 | 1.40 | 1.36 | 1.51 |
| IND | 0.71 | 0.71 | 0.71 | 0.71 | 0.71 | 0.79 | 0.81 |
| JPN | 0.46 | 0.49 | 0.51 | 0.58 | 0.63 | 0.69 | 0.70 |
| LAM | 1.02 | 1.04 | 1.07 | 1.11 | 1.29 | 1.43 | 1.32 |
| MEA | 0.56 | 0.56 | 0.55 | 0.55 | 0.47 | 0.37 | 0.33 |
| NEU | 1.49 | 1.50 | 1.50 | 1.49 | 1.49 | 1.46 | 1.47 |
| OAS | 1.01 | 1.04 | 1.06 | 1.10 | 1.11 | 1.07 | 1.06 |
| REF | 1.01 | 1.02 | 1.06 | 1.21 | 1.09 | 1.09 | 1.10 |
| SSA | 0.58 | 0.58 | 0.60 | 0.59 | 0.59 | 0.64 | 0.66 |
| USA | 1.56 | 1.49 | 1.43 | 1.29 | 1.13 | 1.03 | 1.03 |

Table 1945: MAgPIE m4p-SSP1 — Trade—Self-sufficiency—Crops—Cereals (1) [PART 2/2]

|     | 1965 | 1970 | 1975 | 1980 | 1985 | 1990 | 1995 | 2000 | 2005 | 2010 |
|-----|------|------|------|------|------|------|------|------|------|------|
| GLO | 0.96 | 0.98 | 1.01 | 0.99 | 1.05 | 1.03 | 0.96 | 0.99 | 1.01 | 1.00 |
| CAZ | 1.89 | 1.47 | 1.94 | 1.97 | 2.26 | 2.34 | 1.93 | 1.98 | 1.95 | 1.85 |
| CHA | 0.92 | 0.99 | 0.99 | 0.93 | 0.98 | 1.04 | 0.96 | 0.92 | 0.98 | 1.01 |
| EUR | 0.85 | 0.84 | 0.88 | 0.95 | 1.04 | 1.12 | 1.06 | 1.10 | 1.06 | 1.04 |
| IND | 0.87 | 0.97 | 0.99 | 1.02 | 1.03 | 1.05 | 1.00 | 1.03 | 1.03 | 1.03 |
| JPN | 0.62 | 0.48 | 0.42 | 0.28 | 0.33 | 0.29 | 0.29 | 0.27 | 0.28 | 0.26 |
| LAM | 1.06 | 1.06 | 1.00 | 0.88 | 0.99 | 0.85 | 0.90 | 0.89 | 0.86 | 0.99 |
| MEA | 0.86 | 0.77 | 0.74 | 0.59 | 0.56 | 0.56 | 0.53 | 0.42 | 0.56 | 0.46 |
| NEU | 0.84 | 0.85 | 1.00 | 0.97 | 0.91 | 0.99 | 0.95 | 0.94 | 1.02 | 1.01 |
| OAS | 0.98 | 0.98 | 0.95 | 0.96 | 0.99 | 0.95 | 0.90 | 0.94 | 0.96 | 0.98 |
| REF | 0.83 | 1.02 | 0.76 | 0.83 | 0.82 | 0.90 | 0.78 | 0.96 | 1.14 | 1.08 |
| SSA | 1.01 | 0.98 | 1.00 | 0.93 | 0.87 | 0.87 | 0.80 | 0.81 | 0.81 | 0.85 |
| USA | 1.22 | 1.14 | 1.61 | 1.57 | 1.73 | 1.43 | 1.27 | 1.34 | 1.30 | 1.20 |

Table 1946: FAO — Trade—Self-sufficiency—Crops—Cereals (1)

59.1.2 Cereals—Maize

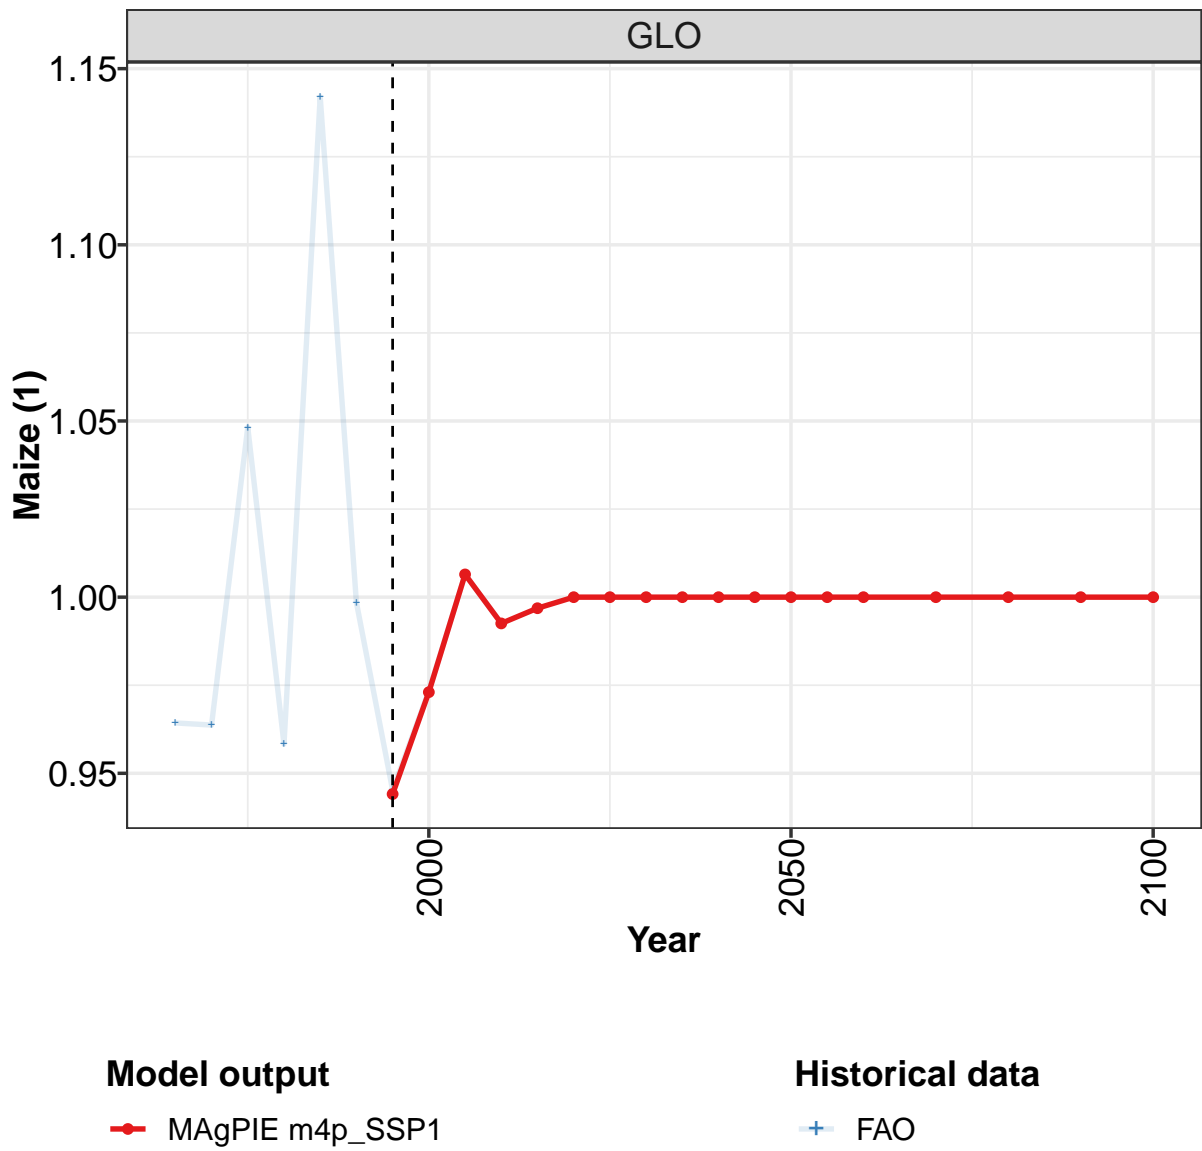

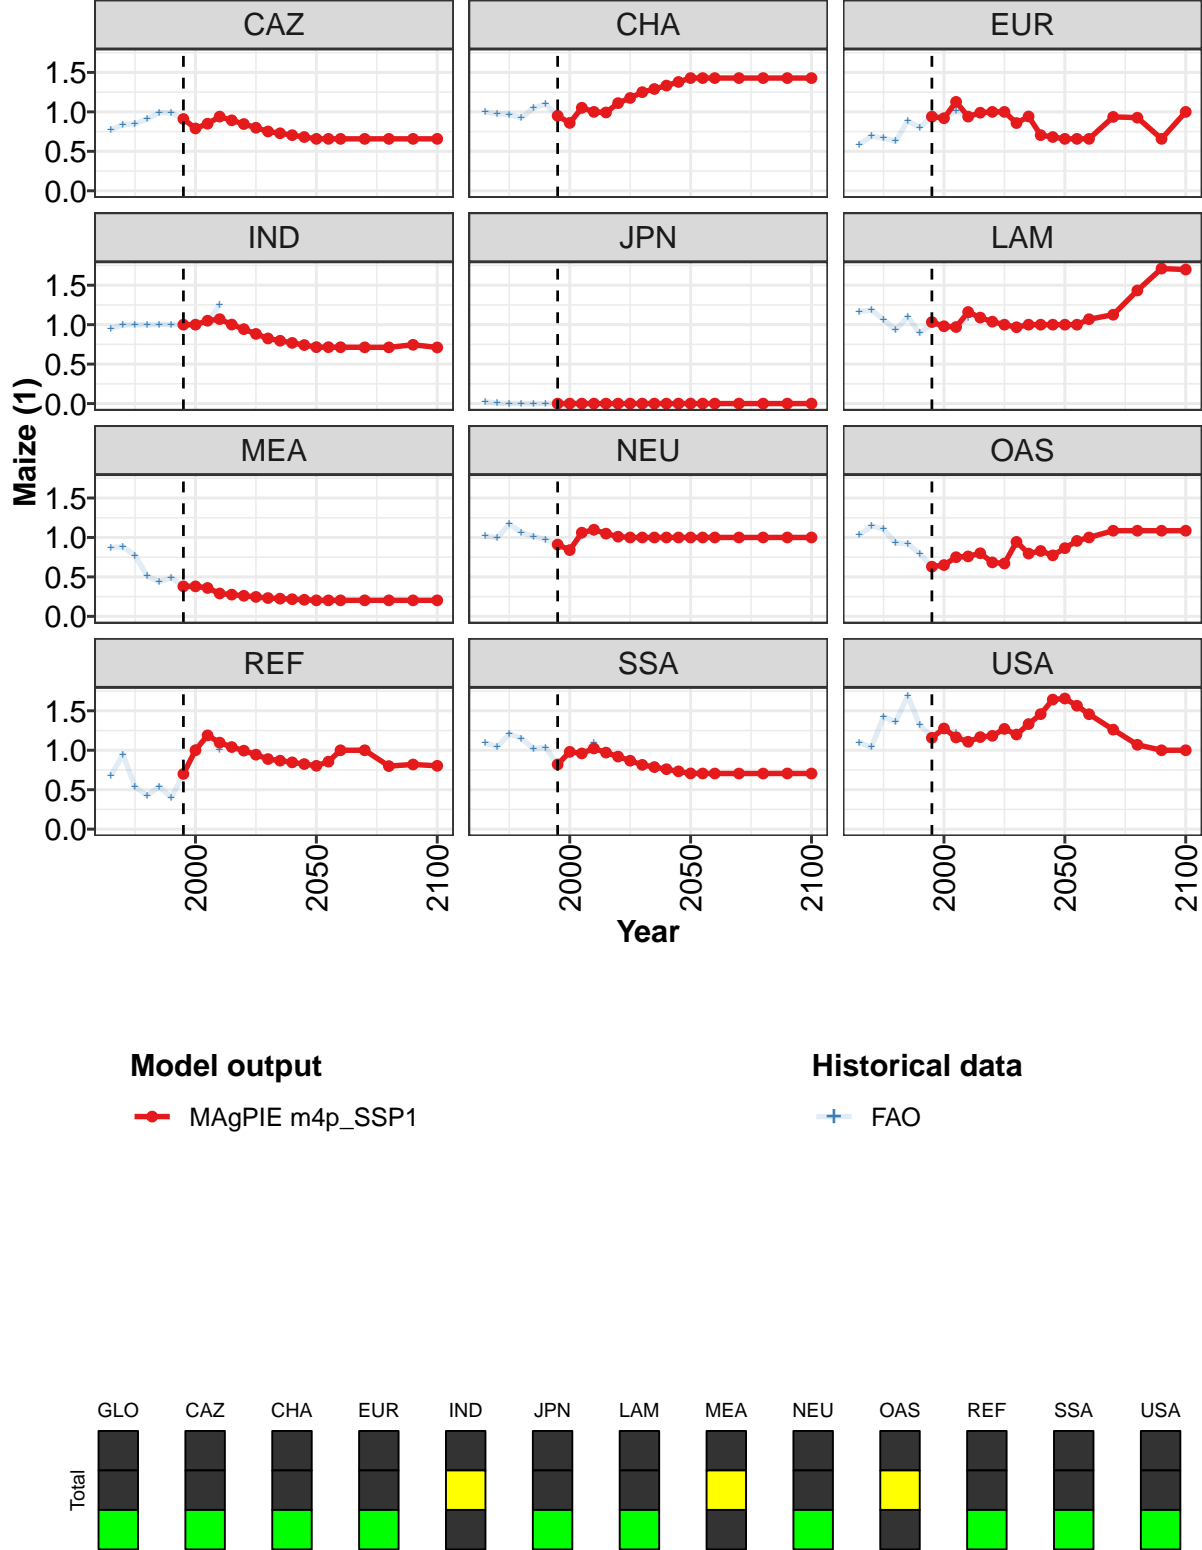

Figure 516: MAGPIE m4p\_SSP1 — Trade—Self-sufficiency—Crops—Cereals—Maize (1)

|     | 1995 | 2000 | 2005 | 2010 | 2015 | 2020 | 2025 | 2030 | 2035 | 2040 | 2045 |
|-----|------|------|------|------|------|------|------|------|------|------|------|
| GLO | 0.94 | 0.97 | 1.01 | 0.99 | 1.00 | 1.00 | 1.00 | 1.00 | 1.00 | 1.00 | 1.00 |
| CAZ | 0.91 | 0.79 | 0.85 | 0.94 | 0.89 | 0.85 | 0.80 | 0.75 | 0.73 | 0.71 | 0.68 |
| CHA | 0.95 | 0.86 | 1.05 | 1.00 | 0.99 | 1.11 | 1.18 | 1.25 | 1.29 | 1.33 | 1.38 |
| EUR | 0.94 | 0.92 | 1.13 | 0.94 | 0.99 | 1.00 | 1.00 | 0.86 | 0.94 | 0.70 | 0.68 |
| IND | 1.00 | 1.00 | 1.05 | 1.07 | 1.00 | 0.94 | 0.88 | 0.83 | 0.80 | 0.77 | 0.74 |
| JPN | 0.00 | 0.00 | 0.00 | 0.00 | 0.00 | 0.00 | 0.00 | 0.00 | 0.00 | 0.00 | 0.00 |
| LAM | 1.03 | 0.98 | 0.97 | 1.16 | 1.09 | 1.04 | 1.00 | 0.97 | 1.00 | 1.00 | 1.00 |
| MEA | 0.38 | 0.38 | 0.36 | 0.29 | 0.28 | 0.26 | 0.25 | 0.23 | 0.22 | 0.22 | 0.21 |
| NEU | 0.91 | 0.84 | 1.06 | 1.10 | 1.05 | 1.01 | 1.00 | 1.00 | 1.00 | 1.00 | 1.00 |
| OAS | 0.63 | 0.65 | 0.75 | 0.76 | 0.80 | 0.68 | 0.67 | 0.94 | 0.80 | 0.83 | 0.77 |
| REF | 0.70 | 1.00 | 1.19 | 1.10 | 1.04 | 0.99 | 0.94 | 0.89 | 0.87 | 0.85 | 0.82 |
| SSA | 0.82 | 0.98 | 0.96 | 1.02 | 0.97 | 0.92 | 0.87 | 0.81 | 0.79 | 0.76 | 0.73 |
| USA | 1.16 | 1.28 | 1.16 | 1.11 | 1.17 | 1.18 | 1.27 | 1.20 | 1.33 | 1.46 | 1.64 |

Table 1947: MAgPIE m4p\_SSP1 — Trade—Self-sufficiency—Crops—Cereals—Maize (1) [PART 1/2]

|     | 2050 | 2055 | 2060 | 2070 | 2080 | 2090 | 2100 |
|-----|------|------|------|------|------|------|------|
| GLO | 1.00 | 1.00 | 1.00 | 1.00 | 1.00 | 1.00 | 1.00 |
| CAZ | 0.66 | 0.66 | 0.66 | 0.66 | 0.66 | 0.66 | 0.66 |
| CHA | 1.43 | 1.43 | 1.43 | 1.43 | 1.43 | 1.43 | 1.43 |
| EUR | 0.66 | 0.66 | 0.66 | 0.94 | 0.93 | 0.66 | 1.00 |
| IND | 0.72 | 0.71 | 0.71 | 0.71 | 0.71 | 0.75 | 0.71 |
| JPN | 0.00 | 0.00 | 0.00 | 0.00 | 0.00 | 0.00 | 0.00 |
| LAM | 1.00 | 1.00 | 1.07 | 1.13 | 1.43 | 1.71 | 1.70 |
| MEA | 0.20 | 0.20 | 0.20 | 0.20 | 0.20 | 0.20 | 0.20 |
| NEU | 1.00 | 1.00 | 1.00 | 1.00 | 1.00 | 1.00 | 1.00 |
| OAS | 0.86 | 0.96 | 1.00 | 1.09 | 1.09 | 1.09 | 1.09 |
| REF | 0.80 | 0.86 | 1.00 | 1.00 | 0.80 | 0.82 | 0.80 |
| SSA | 0.71 | 0.71 | 0.71 | 0.71 | 0.71 | 0.71 | 0.70 |
| USA | 1.66 | 1.56 | 1.46 | 1.26 | 1.07 | 1.00 | 1.00 |

Table 1948: MAgPIE m4p\_SSP1 — Trade—Self-sufficiency—Crops—Cereals—Maize (1) [PART 2/2]

|     | 1965 | 1970 | 1975 | 1980 | 1985 | 1990 | 1995 | 2000 | 2005 | 2010 |
|-----|------|------|------|------|------|------|------|------|------|------|
| GLO | 0.96 | 0.96 | 1.05 | 0.96 | 1.14 | 1.00 | 0.95 | 0.97 | 1.01 | 0.99 |
| CAZ | 0.77 | 0.84 | 0.85 | 0.91 | 0.99 | 0.99 | 0.91 | 0.79 | 0.85 | 0.94 |
| CHA | 1.00 | 0.98 | 0.97 | 0.93 | 1.05 | 1.10 | 0.95 | 0.86 | 1.01 | 1.01 |
| EUR | 0.59 | 0.69 | 0.67 | 0.63 | 0.89 | 0.80 | 0.94 | 0.92 | 1.02 | 0.94 |
| IND | 0.95 | 1.00 | 1.00 | 1.00 | 1.00 | 1.00 | 1.00 | 1.00 | 1.03 | 1.25 |
| JPN | 0.02 | 0.01 | 0.00 | 0.00 | 0.00 | 0.00 | 0.00 | 0.00 | 0.00 | 0.00 |
| LAM | 1.16 | 1.18 | 1.07 | 0.93 | 1.10 | 0.89 | 1.01 | 0.98 | 0.97 | 1.09 |
| MEA | 0.87 | 0.88 | 0.77 | 0.51 | 0.44 | 0.49 | 0.38 | 0.38 | 0.36 | 0.29 |
| NEU | 1.02 | 1.00 | 1.17 | 1.06 | 1.01 | 0.97 | 0.91 | 0.84 | 1.02 | 1.06 |
| OAS | 1.03 | 1.15 | 1.10 | 0.93 | 0.92 | 0.79 | 0.63 | 0.65 | 0.75 | 0.76 |
| REF | 0.68 | 0.95 | 0.54 | 0.43 | 0.54 | 0.40 | 0.70 | 1.03 | 1.19 | 1.01 |
| SSA | 1.10 | 1.04 | 1.21 | 1.15 | 1.02 | 1.04 | 0.82 | 0.98 | 0.96 | 1.09 |
| USA | 1.09 | 1.04 | 1.43 | 1.36 | 1.69 | 1.32 | 1.17 | 1.27 | 1.22 | 1.11 |

Table 1949: FAO — Trade—Self-sufficiency—Crops—Cereals—Maize (1)

59.1.3 Cereals—Rice

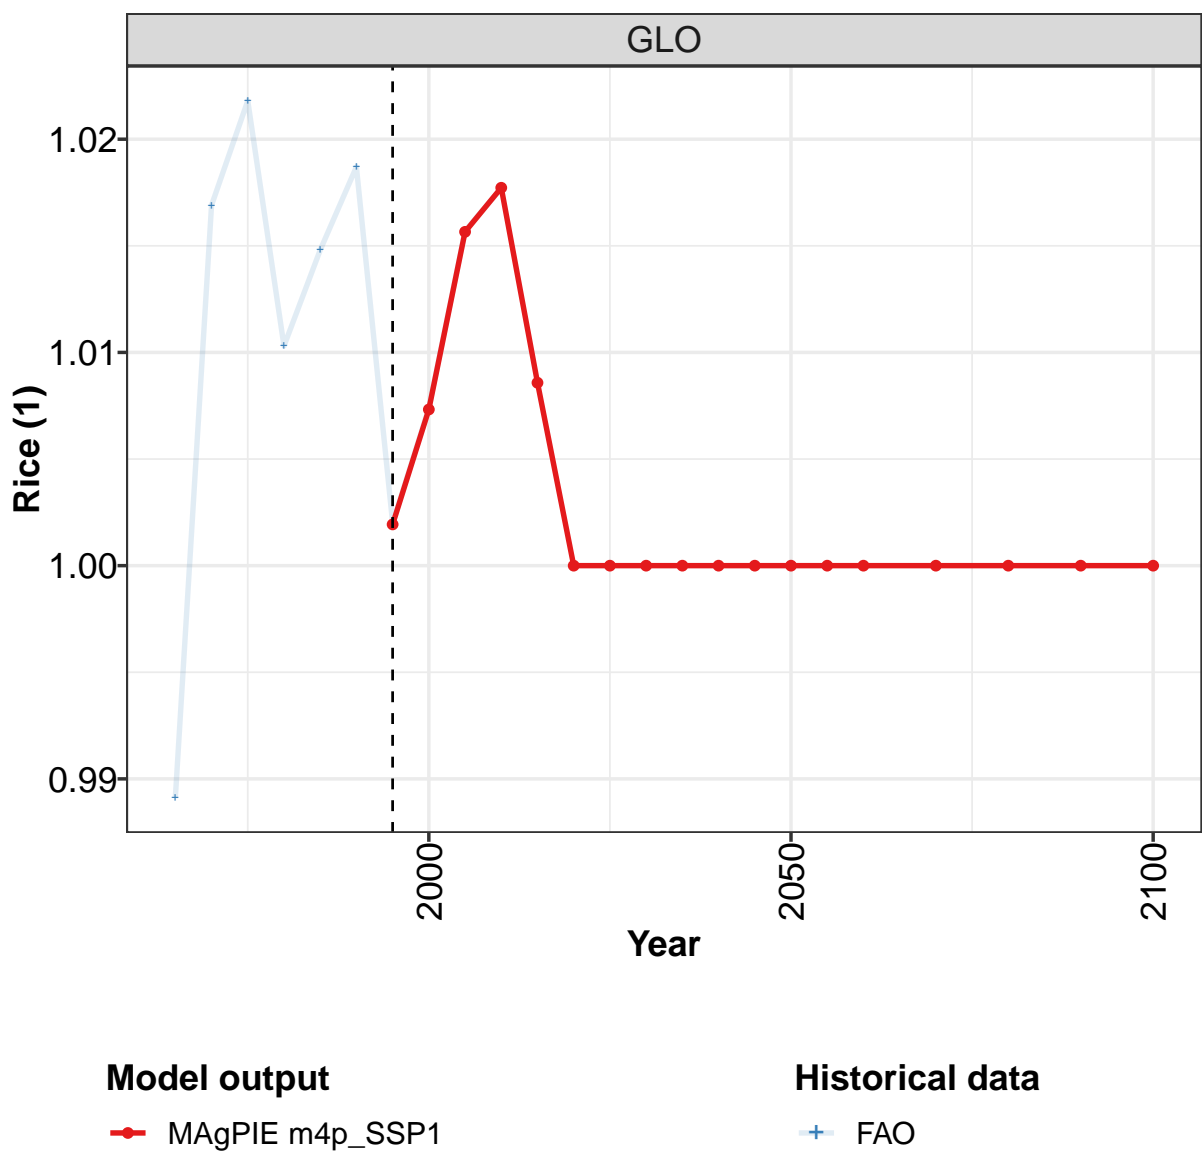

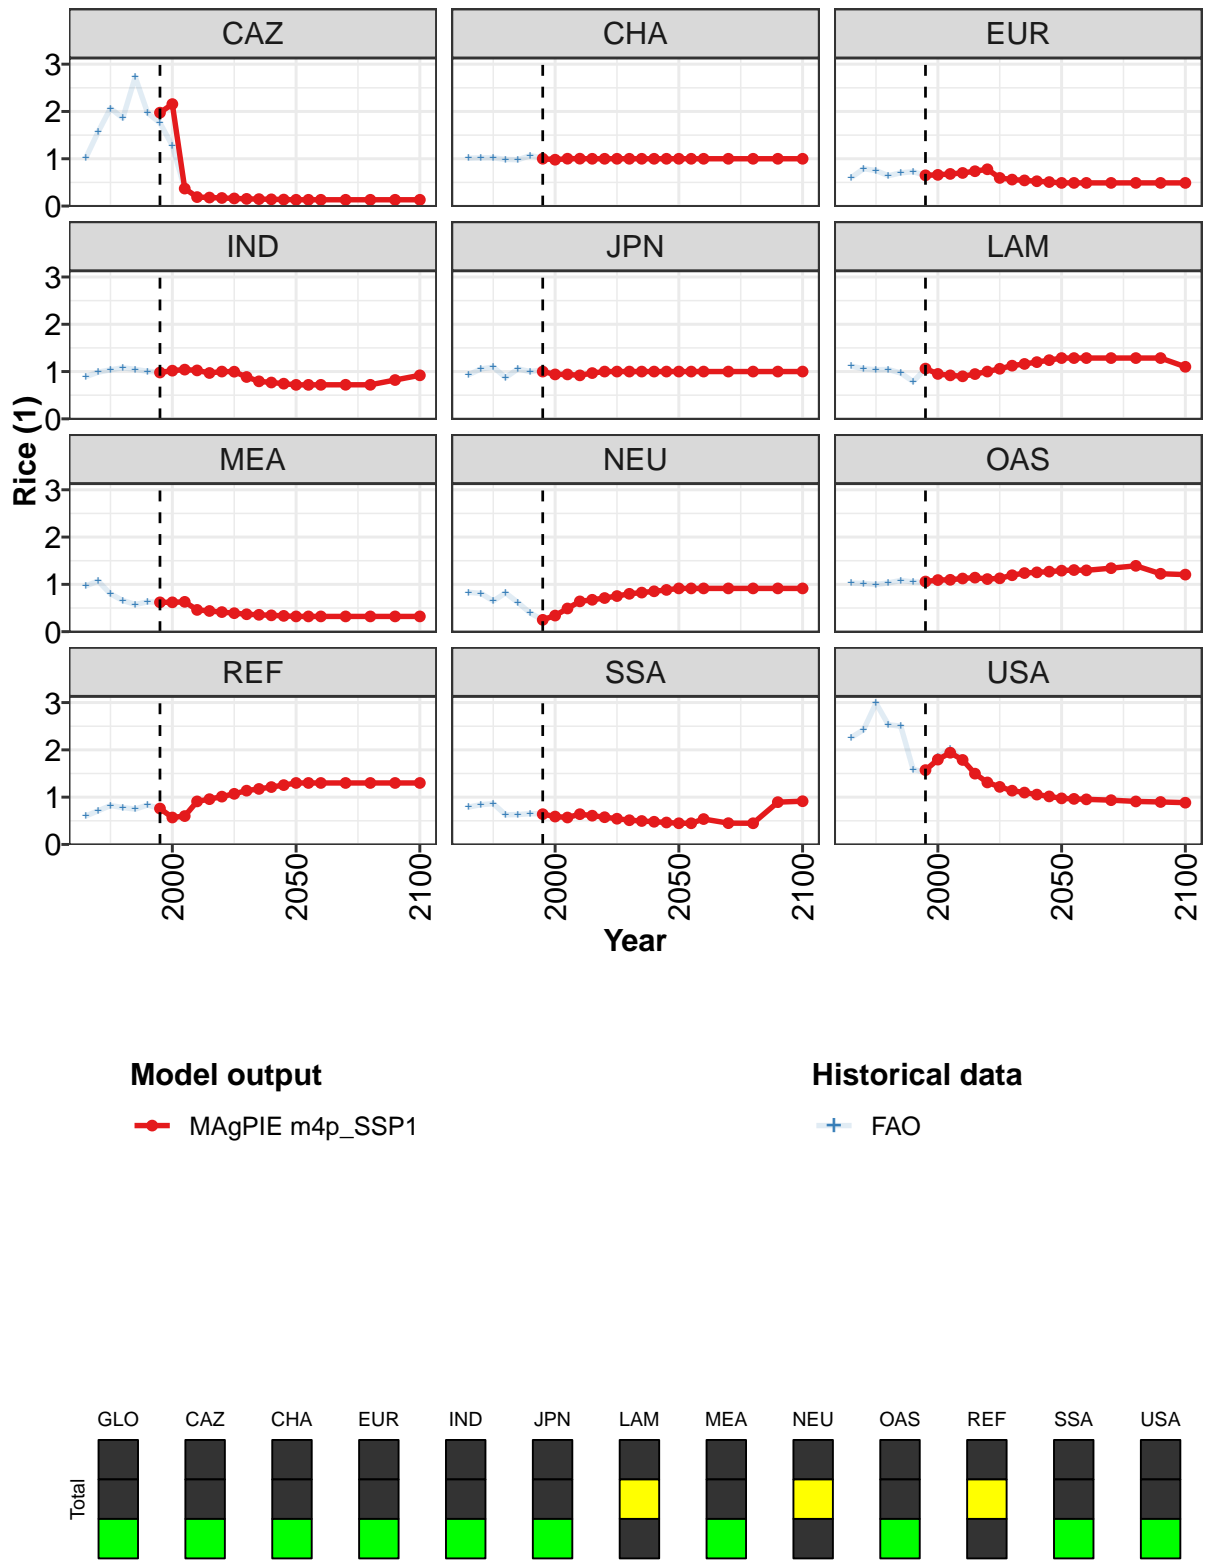

Figure 517: MAGPIE m4p\_SSP1 — Trade—Self-sufficiency—Crops—Cereals—Rice (1)



|     | 1995 | 2000 | 2005 | 2010 | 2015 | 2020 | 2025 | 2030 | 2035 | 2040 | 2045 |
|-----|------|------|------|------|------|------|------|------|------|------|------|
| GLO | 1.00 | 1.01 | 1.02 | 1.02 | 1.01 | 1.00 | 1.00 | 1.00 | 1.00 | 1.00 | 1.00 |
| CAZ | 1.97 | 2.16 | 0.37 | 0.19 | 0.18 | 0.17 | 0.16 | 0.15 | 0.15 | 0.14 | 0.14 |
| CHA | 1.00 | 0.98 | 1.00 | 1.00 | 1.00 | 1.00 | 1.00 | 1.00 | 1.00 | 1.00 | 1.00 |
| EUR | 0.65 | 0.66 | 0.68 | 0.70 | 0.74 | 0.78 | 0.60 | 0.56 | 0.54 | 0.52 | 0.51 |
| IND | 0.98 | 1.02 | 1.04 | 1.02 | 0.97 | 1.00 | 1.00 | 0.89 | 0.79 | 0.77 | 0.74 |
| JPN | 1.00 | 0.94 | 0.94 | 0.92 | 0.97 | 1.00 | 1.00 | 1.00 | 1.00 | 1.00 | 1.00 |
| LAM | 1.06 | 0.95 | 0.92 | 0.90 | 0.95 | 1.00 | 1.06 | 1.12 | 1.16 | 1.20 | 1.24 |
| MEA | 0.62 | 0.62 | 0.63 | 0.46 | 0.44 | 0.41 | 0.39 | 0.37 | 0.36 | 0.35 | 0.33 |
| NEU | 0.25 | 0.34 | 0.49 | 0.64 | 0.67 | 0.71 | 0.75 | 0.80 | 0.83 | 0.85 | 0.88 |
| OAS | 1.06 | 1.09 | 1.10 | 1.12 | 1.14 | 1.11 | 1.13 | 1.19 | 1.24 | 1.25 | 1.27 |
| REF | 0.76 | 0.57 | 0.60 | 0.91 | 0.96 | 1.01 | 1.07 | 1.14 | 1.17 | 1.21 | 1.26 |
| SSA | 0.64 | 0.59 | 0.57 | 0.64 | 0.61 | 0.58 | 0.54 | 0.51 | 0.50 | 0.48 | 0.46 |
| USA | 1.57 | 1.79 | 1.94 | 1.79 | 1.50 | 1.31 | 1.22 | 1.14 | 1.10 | 1.05 | 1.02 |

Table 1950: MAgPIE m4p\_SSP1 — Trade—Self-sufficiency—Crops—Cereals—Rice (1) [PART 1/2]

|     | 2050 | 2055 | 2060 | 2070 | 2080 | 2090 | 2100 |
|-----|------|------|------|------|------|------|------|
| GLO | 1.00 | 1.00 | 1.00 | 1.00 | 1.00 | 1.00 | 1.00 |
| CAZ | 0.13 | 0.13 | 0.13 | 0.13 | 0.13 | 0.13 | 0.13 |
| CHA | 1.00 | 1.00 | 1.00 | 1.00 | 1.00 | 1.00 | 1.00 |
| EUR | 0.49 | 0.49 | 0.49 | 0.49 | 0.49 | 0.49 | 0.49 |
| IND | 0.72 | 0.72 | 0.72 | 0.72 | 0.72 | 0.82 | 0.92 |
| JPN | 1.00 | 1.00 | 1.00 | 1.00 | 1.00 | 1.00 | 1.00 |
| LAM | 1.29 | 1.29 | 1.29 | 1.29 | 1.29 | 1.29 | 1.10 |
| MEA | 0.32 | 0.32 | 0.32 | 0.32 | 0.32 | 0.32 | 0.32 |
| NEU | 0.91 | 0.91 | 0.91 | 0.91 | 0.91 | 0.91 | 0.91 |
| OAS | 1.29 | 1.30 | 1.30 | 1.34 | 1.39 | 1.22 | 1.21 |
| REF | 1.30 | 1.30 | 1.30 | 1.30 | 1.30 | 1.30 | 1.30 |
| SSA | 0.45 | 0.45 | 0.54 | 0.45 | 0.45 | 0.89 | 0.91 |
| USA | 0.97 | 0.96 | 0.95 | 0.94 | 0.91 | 0.90 | 0.88 |

Table 1951: MAgPIE m4p\_SSP1 — Trade—Self-sufficiency—Crops—Cereals—Rice (1) [PART 2/2]

|     | 1965 | 1970 | 1975 | 1980 | 1985 | 1990 | 1995 | 2000 | 2005 | 2010 |
|-----|------|------|------|------|------|------|------|------|------|------|
| GLO | 0.99 | 1.02 | 1.02 | 1.01 | 1.01 | 1.02 | 1.00 | 1.01 | 1.02 | 1.02 |
| CAZ | 1.01 | 1.57 | 2.07 | 1.86 | 2.73 | 1.97 | 1.76 | 1.28 | 0.37 | 0.19 |
| CHA | 1.01 | 1.02 | 1.02 | 0.99 | 0.98 | 1.07 | 1.02 | 0.98 | 1.00 | 1.00 |
| EUR | 0.60 | 0.79 | 0.75 | 0.64 | 0.70 | 0.73 | 0.65 | 0.66 | 0.68 | 0.70 |
| IND | 0.89 | 0.99 | 1.04 | 1.08 | 1.05 | 1.00 | 0.98 | 1.03 | 1.05 | 1.02 |
| JPN | 0.93 | 1.06 | 1.09 | 0.87 | 1.06 | 1.00 | 1.04 | 0.94 | 0.94 | 0.92 |
| LAM | 1.11 | 1.06 | 1.04 | 1.04 | 0.97 | 0.79 | 1.06 | 0.95 | 0.92 | 0.90 |
| MEA | 0.97 | 1.07 | 0.80 | 0.66 | 0.58 | 0.63 | 0.62 | 0.62 | 0.63 | 0.46 |
| NEU | 0.83 | 0.81 | 0.65 | 0.82 | 0.62 | 0.39 | 0.25 | 0.34 | 0.49 | 0.64 |
| OAS | 1.03 | 1.02 | 1.00 | 1.03 | 1.08 | 1.05 | 1.04 | 1.09 | 1.09 | 1.13 |
| REF | 0.60 | 0.71 | 0.82 | 0.78 | 0.75 | 0.83 | 0.76 | 0.56 | 0.60 | 0.91 |
| SSA | 0.79 | 0.84 | 0.86 | 0.63 | 0.63 | 0.65 | 0.64 | 0.59 | 0.57 | 0.64 |
| USA | 2.26 | 2.43 | 2.99 | 2.53 | 2.50 | 1.59 | 1.53 | 1.85 | 2.02 | 1.80 |

Table 1952: FAO — Trade—Self-sufficiency—Crops—Cereals—Rice (1)

59.1.4 Cereals—Temperate cereals

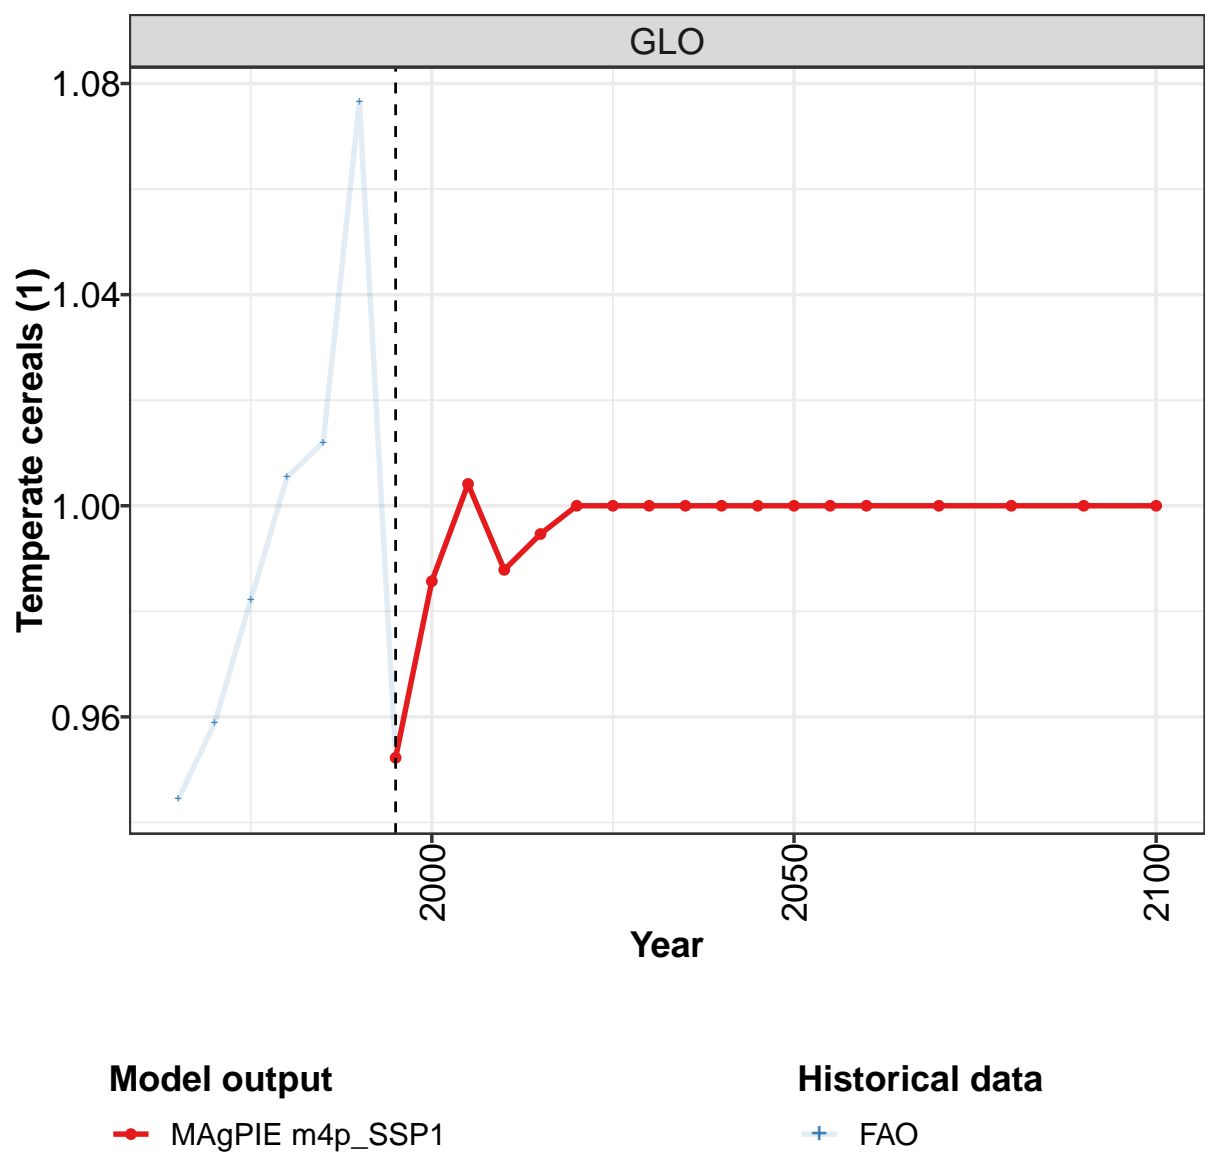

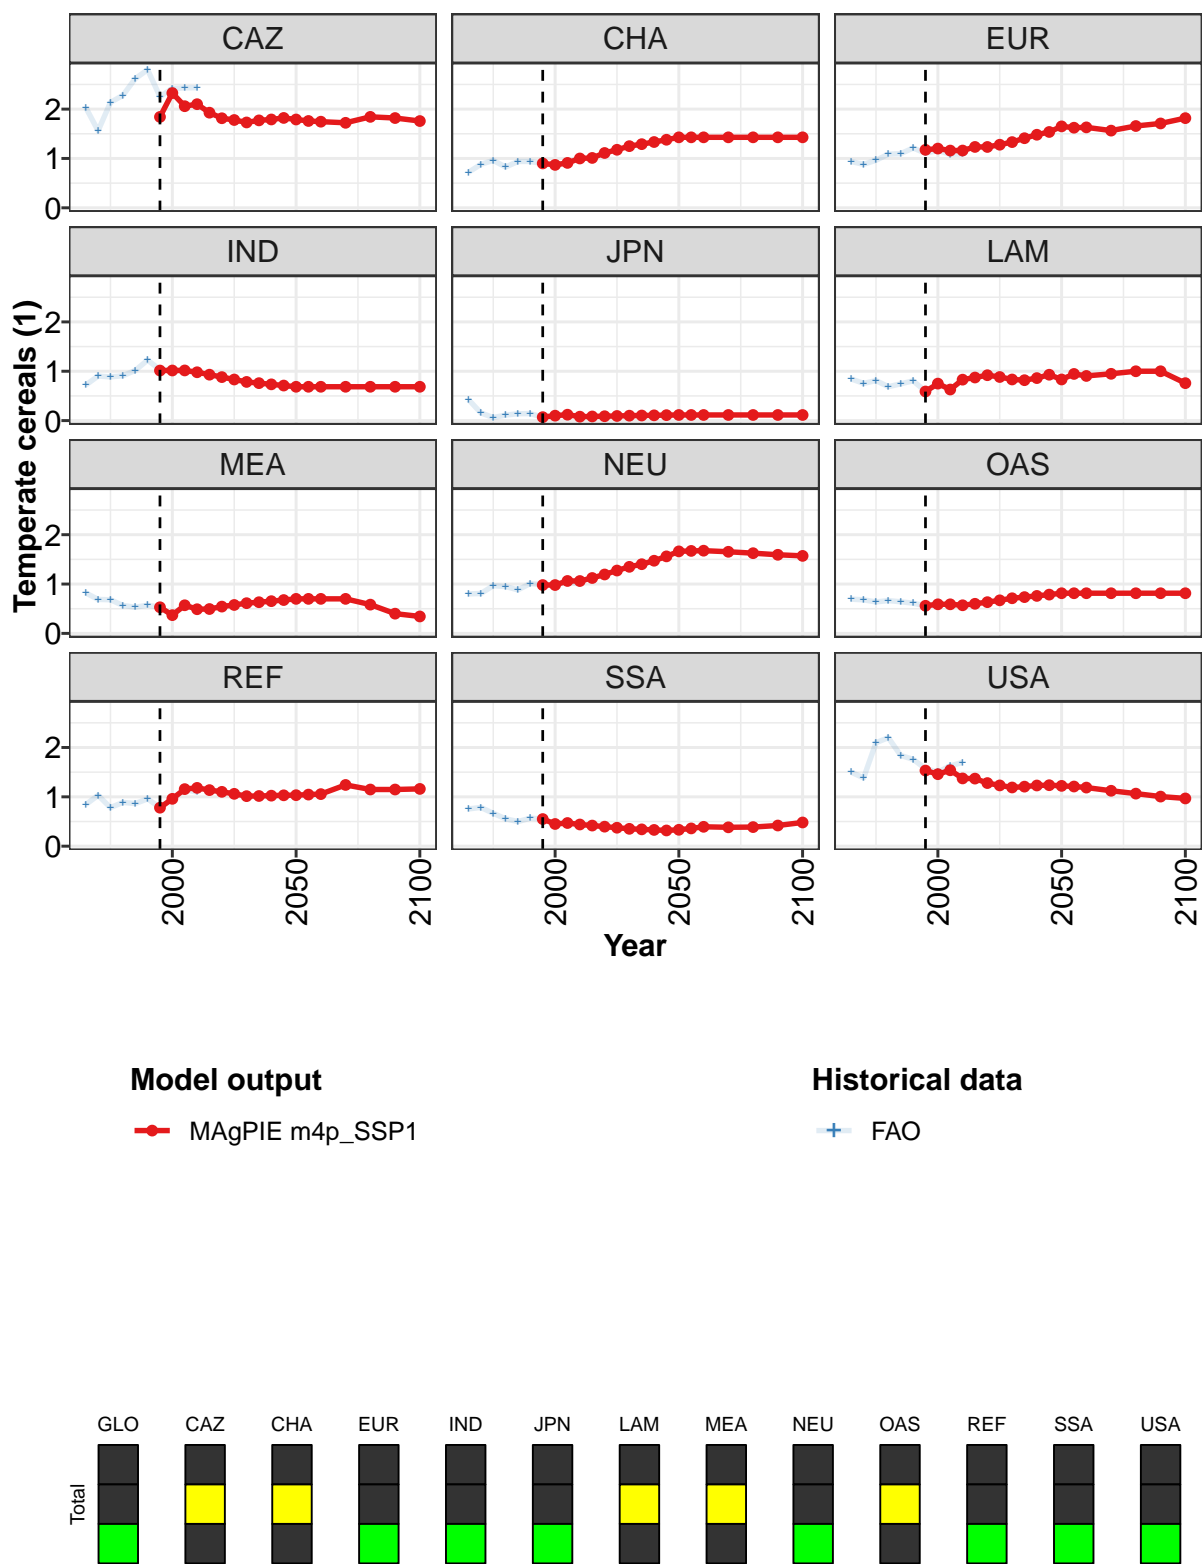

Figure 518: MAgPIE m4p\_SSP1 — Trade—Self-sufficiency—Crops—Cereals—Temperate cereals (1)

|     | 1995 | 2000 | 2005 | 2010 | 2015 | 2020 | 2025 | 2030 | 2035 | 2040 | 2045 |
|-----|------|------|------|------|------|------|------|------|------|------|------|
| GLO | 0.95 | 0.99 | 1.00 | 0.99 | 0.99 | 1.00 | 1.00 | 1.00 | 1.00 | 1.00 | 1.00 |
| CAZ | 1.84 | 2.33 | 2.06 | 2.10 | 1.93 | 1.82 | 1.78 | 1.73 | 1.77 | 1.79 | 1.82 |
| CHA | 0.90 | 0.87 | 0.91 | 1.00 | 1.01 | 1.11 | 1.18 | 1.25 | 1.29 | 1.33 | 1.38 |
| EUR | 1.18 | 1.20 | 1.16 | 1.16 | 1.23 | 1.23 | 1.28 | 1.33 | 1.41 | 1.48 | 1.54 |
| IND | 1.01 | 1.02 | 1.02 | 0.98 | 0.93 | 0.88 | 0.83 | 0.78 | 0.76 | 0.73 | 0.71 |
| JPN | 0.07 | 0.10 | 0.12 | 0.08 | 0.08 | 0.09 | 0.09 | 0.10 | 0.10 | 0.11 | 0.11 |
| LAM | 0.59 | 0.75 | 0.63 | 0.83 | 0.87 | 0.92 | 0.88 | 0.83 | 0.82 | 0.86 | 0.93 |
| MEA | 0.53 | 0.37 | 0.57 | 0.49 | 0.49 | 0.54 | 0.58 | 0.61 | 0.63 | 0.65 | 0.68 |
| NEU | 0.98 | 0.98 | 1.06 | 1.06 | 1.12 | 1.19 | 1.27 | 1.35 | 1.40 | 1.47 | 1.56 |
| OAS | 0.56 | 0.59 | 0.59 | 0.57 | 0.60 | 0.63 | 0.67 | 0.71 | 0.74 | 0.76 | 0.79 |
| REF | 0.78 | 0.96 | 1.16 | 1.18 | 1.14 | 1.10 | 1.06 | 1.01 | 1.02 | 1.02 | 1.03 |
| SSA | 0.55 | 0.45 | 0.47 | 0.44 | 0.42 | 0.40 | 0.37 | 0.35 | 0.34 | 0.33 | 0.32 |
| USA | 1.53 | 1.46 | 1.54 | 1.37 | 1.37 | 1.28 | 1.23 | 1.19 | 1.21 | 1.23 | 1.24 |

Table 1953: MAgPIE m4p\_SSP1 — Trade—Self-sufficiency—Crops—Cereals—Temperate cereals (1) [PART 1/2]

|     | 2050 | 2055 | 2060 | 2070 | 2080 | 2090 | 2100 |
|-----|------|------|------|------|------|------|------|
| GLO | 1.00 | 1.00 | 1.00 | 1.00 | 1.00 | 1.00 | 1.00 |
| CAZ | 1.79 | 1.76 | 1.75 | 1.72 | 1.84 | 1.82 | 1.76 |
| CHA | 1.43 | 1.43 | 1.43 | 1.43 | 1.43 | 1.43 | 1.43 |
| EUR | 1.65 | 1.62 | 1.63 | 1.56 | 1.66 | 1.71 | 1.82 |
| IND | 0.69 | 0.69 | 0.69 | 0.69 | 0.69 | 0.69 | 0.69 |
| JPN | 0.11 | 0.11 | 0.11 | 0.11 | 0.11 | 0.11 | 0.11 |
| LAM | 0.83 | 0.95 | 0.91 | 0.95 | 1.00 | 1.00 | 0.76 |
| MEA | 0.70 | 0.70 | 0.70 | 0.70 | 0.58 | 0.40 | 0.34 |
| NEU | 1.66 | 1.67 | 1.68 | 1.65 | 1.63 | 1.59 | 1.57 |
| OAS | 0.81 | 0.81 | 0.81 | 0.81 | 0.81 | 0.81 | 0.81 |
| REF | 1.03 | 1.05 | 1.06 | 1.24 | 1.15 | 1.15 | 1.16 |
| SSA | 0.33 | 0.36 | 0.39 | 0.38 | 0.39 | 0.42 | 0.48 |
| USA | 1.22 | 1.21 | 1.19 | 1.12 | 1.07 | 1.01 | 0.97 |

Table 1954: MAgPIE m4p\_SSP1 — Trade—Self-sufficiency—Crops—Cereals—Temperate cereals (1) [PART 2/2]

|     | 1965 | 1970 | 1975 | 1980 | 1985 | 1990 | 1995 | 2000 | 2005 | 2010 |
|-----|------|------|------|------|------|------|------|------|------|------|
| GLO | 0.94 | 0.96 | 0.98 | 1.01 | 1.01 | 1.08 | 0.95 | 0.99 | 1.00 | 0.99 |
| CAZ | 2.03 | 1.56 | 2.14 | 2.28 | 2.62 | 2.80 | 2.25 | 2.42 | 2.43 | 2.43 |
| CHA | 0.72 | 0.88 | 0.96 | 0.83 | 0.94 | 0.94 | 0.90 | 0.87 | 0.91 | 1.02 |
| EUR | 0.94 | 0.88 | 0.96 | 1.09 | 1.10 | 1.21 | 1.11 | 1.16 | 1.08 | 1.09 |
| IND | 0.72 | 0.90 | 0.89 | 0.91 | 1.02 | 1.23 | 1.03 | 1.03 | 1.00 | 0.98 |
| JPN | 0.43 | 0.16 | 0.06 | 0.11 | 0.14 | 0.14 | 0.07 | 0.10 | 0.12 | 0.08 |
| LAM | 0.84 | 0.75 | 0.81 | 0.69 | 0.74 | 0.81 | 0.59 | 0.75 | 0.63 | 0.83 |
| MEA | 0.82 | 0.69 | 0.68 | 0.57 | 0.53 | 0.57 | 0.53 | 0.37 | 0.57 | 0.49 |
| NEU | 0.80 | 0.81 | 0.97 | 0.95 | 0.88 | 1.01 | 0.98 | 0.98 | 1.04 | 1.00 |
| OAS | 0.69 | 0.68 | 0.64 | 0.66 | 0.64 | 0.61 | 0.56 | 0.59 | 0.59 | 0.57 |
| REF | 0.84 | 1.03 | 0.78 | 0.89 | 0.86 | 0.96 | 0.78 | 0.96 | 1.15 | 1.10 |
| SSA | 0.75 | 0.78 | 0.67 | 0.55 | 0.50 | 0.57 | 0.55 | 0.45 | 0.47 | 0.44 |
| USA | 1.50 | 1.38 | 2.10 | 2.20 | 1.84 | 1.76 | 1.57 | 1.50 | 1.63 | 1.70 |

Table 1955: FAO — Trade—Self-sufficiency—Crops—Cereals—Temperate cereals (1)

59.1.5 Cereals—Tropical cereals

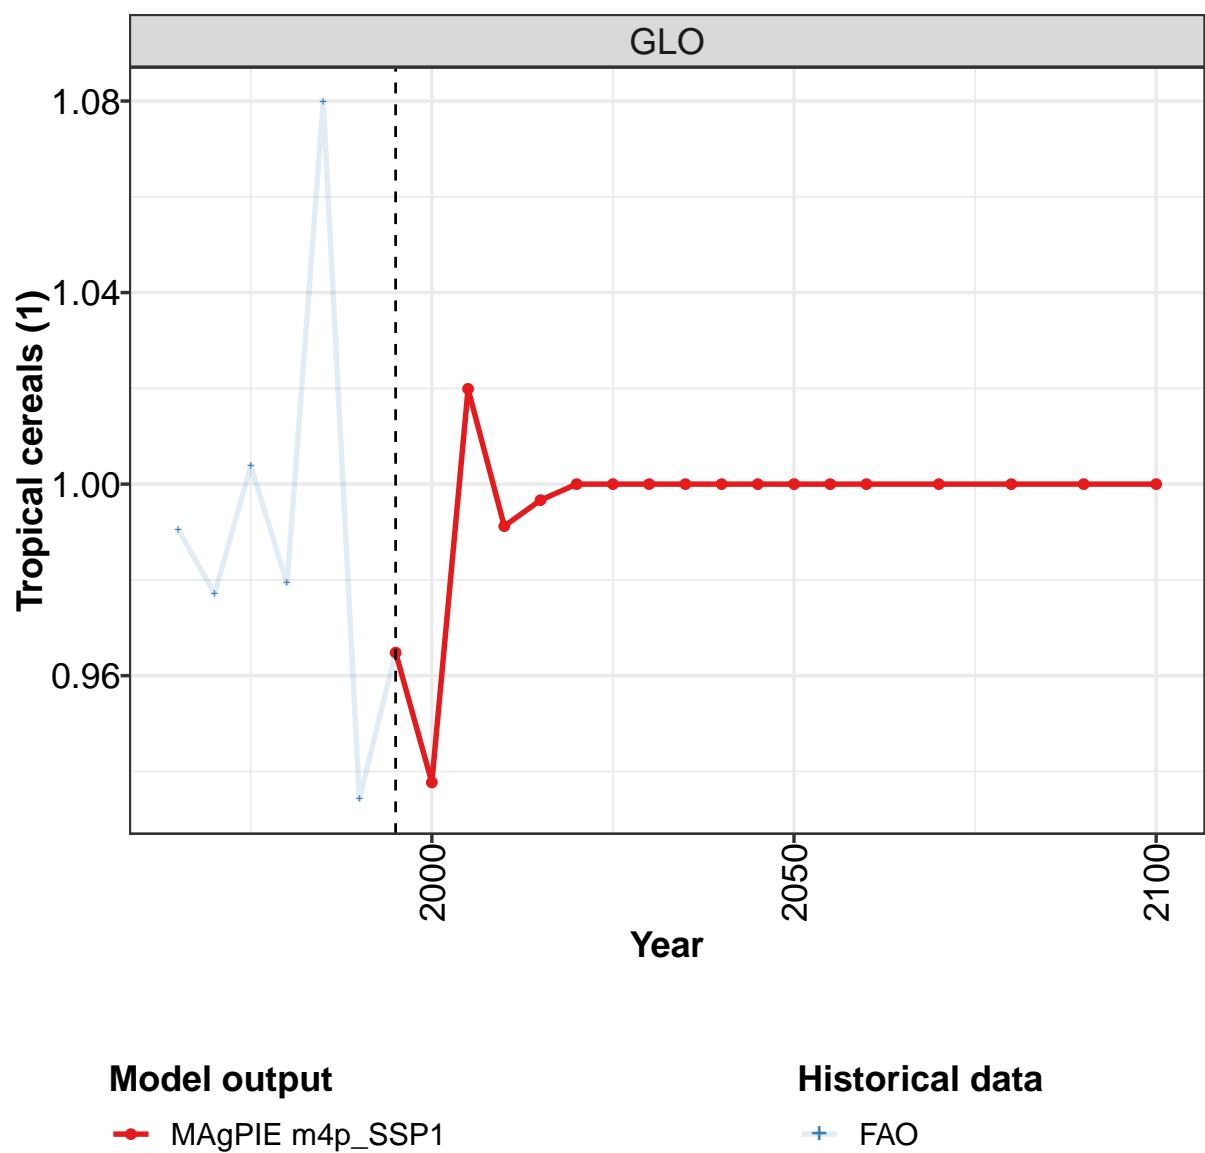

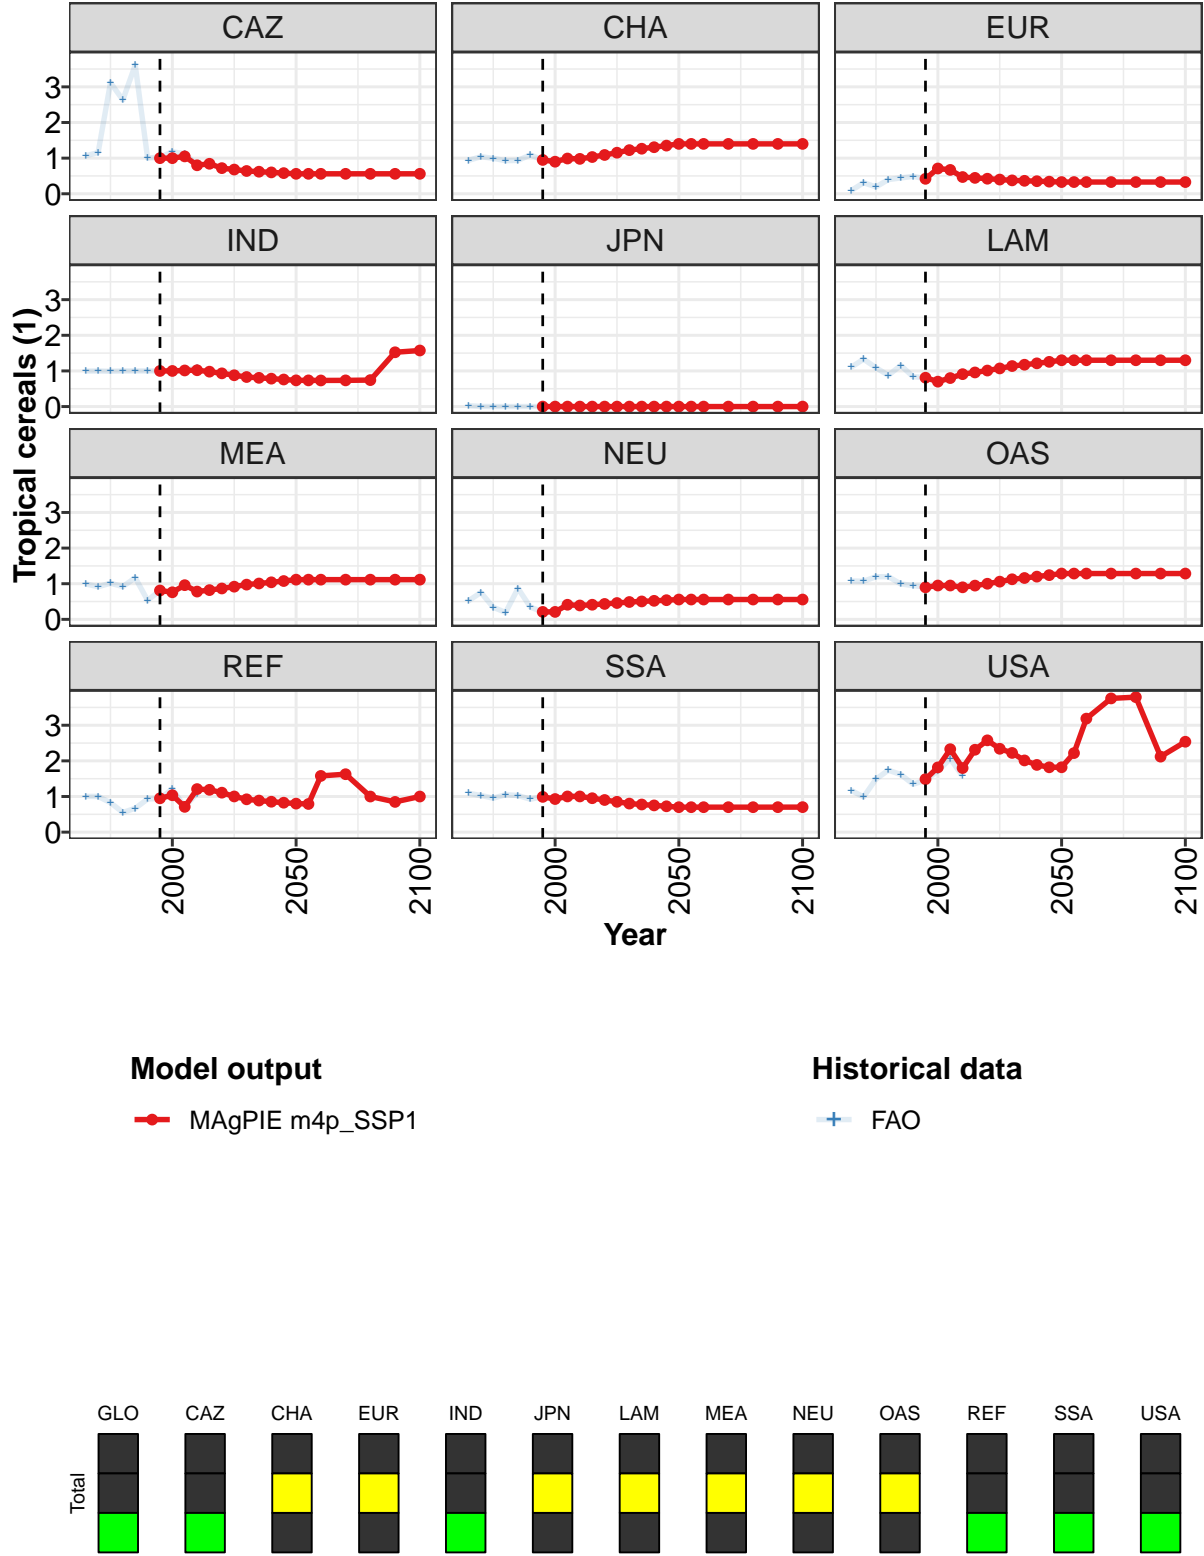

Figure 519: MAgPIE m4p\_SSP1 — Trade—Self-sufficiency—Crops—Cereals—Tropical cereals (1)

|     | 1995 | 2000 | 2005 | 2010 | 2015 | 2020 | 2025 | 2030 | 2035 | 2040 | 2045 |
|-----|------|------|------|------|------|------|------|------|------|------|------|
| GLO | 0.96 | 0.94 | 1.02 | 0.99 | 1.00 | 1.00 | 1.00 | 1.00 | 1.00 | 1.00 | 1.00 |
| CAZ | 1.00 | 1.00 | 1.05 | 0.80 | 0.84 | 0.72 | 0.68 | 0.64 | 0.62 | 0.60 | 0.58 |
| CHA | 0.95 | 0.90 | 0.99 | 0.98 | 1.03 | 1.09 | 1.15 | 1.23 | 1.26 | 1.31 | 1.35 |
| EUR | 0.42 | 0.71 | 0.67 | 0.47 | 0.45 | 0.42 | 0.40 | 0.38 | 0.36 | 0.35 | 0.34 |
| IND | 1.00 | 1.00 | 1.01 | 1.02 | 0.98 | 0.93 | 0.88 | 0.83 | 0.81 | 0.78 | 0.76 |
| JPN | 0.00 | 0.00 | 0.00 | 0.00 | 0.00 | 0.00 | 0.00 | 0.00 | 0.00 | 0.00 | 0.00 |
| LAM | 0.81 | 0.70 | 0.80 | 0.91 | 0.96 | 1.01 | 1.07 | 1.14 | 1.17 | 1.21 | 1.26 |
| MEA | 0.81 | 0.76 | 0.96 | 0.78 | 0.82 | 0.87 | 0.92 | 0.98 | 1.01 | 1.04 | 1.08 |
| NEU | 0.21 | 0.21 | 0.41 | 0.39 | 0.41 | 0.43 | 0.46 | 0.49 | 0.50 | 0.52 | 0.54 |
| OAS | 0.90 | 0.95 | 0.95 | 0.90 | 0.95 | 1.00 | 1.06 | 1.12 | 1.16 | 1.20 | 1.24 |
| REF | 0.95 | 1.04 | 0.71 | 1.21 | 1.19 | 1.11 | 1.00 | 0.92 | 0.89 | 0.85 | 0.83 |
| SSA | 0.99 | 0.93 | 1.00 | 1.00 | 0.95 | 0.90 | 0.85 | 0.80 | 0.78 | 0.75 | 0.73 |
| USA | 1.49 | 1.82 | 2.33 | 1.80 | 2.31 | 2.58 | 2.34 | 2.22 | 2.01 | 1.89 | 1.82 |

Table 1956: MAgPIE m4p\_SSP1 — Trade—Self-sufficiency—Crops—Cereals—Tropical cereals (1) [PART 1/2]

|     | 2050 | 2055 | 2060 | 2070 | 2080 | 2090 | 2100 |
|-----|------|------|------|------|------|------|------|
| GLO | 1.00 | 1.00 | 1.00 | 1.00 | 1.00 | 1.00 | 1.00 |
| CAZ | 0.56 | 0.56 | 0.56 | 0.56 | 0.56 | 0.56 | 0.56 |
| CHA | 1.40 | 1.40 | 1.40 | 1.40 | 1.40 | 1.40 | 1.40 |
| EUR | 0.33 | 0.33 | 0.33 | 0.33 | 0.33 | 0.33 | 0.33 |
| IND | 0.74 | 0.74 | 0.73 | 0.73 | 0.74 | 1.52 | 1.57 |
| JPN | 0.00 | 0.00 | 0.00 | 0.00 | 0.00 | 0.00 | 0.00 |
| LAM | 1.30 | 1.30 | 1.30 | 1.30 | 1.30 | 1.30 | 1.30 |
| MEA | 1.11 | 1.11 | 1.11 | 1.11 | 1.11 | 1.11 | 1.11 |
| NEU | 0.56 | 0.56 | 0.56 | 0.56 | 0.56 | 0.56 | 0.56 |
| OAS | 1.29 | 1.29 | 1.29 | 1.29 | 1.29 | 1.29 | 1.29 |
| REF | 0.80 | 0.79 | 1.58 | 1.63 | 1.00 | 0.85 | 1.00 |
| SSA | 0.70 | 0.70 | 0.70 | 0.70 | 0.70 | 0.70 | 0.70 |
| USA | 1.82 | 2.22 | 3.19 | 3.75 | 3.79 | 2.12 | 2.54 |

Table 1957: MAgPIE m4p\_SSP1 — Trade—Self-sufficiency—Crops—Cereals—Tropical cereals (1) [PART 2/2]

|     | 1965 | 1970 | 1975 | 1980 | 1985 | 1990 | 1995 | 2000 | 2005 | 2010 |
|-----|------|------|------|------|------|------|------|------|------|------|
| GLO | 0.99 | 0.98 | 1.00 | 0.98 | 1.08 | 0.93 | 0.96 | 0.94 | 1.02 | 0.99 |
| CAZ | 1.07 | 1.15 | 3.12 | 2.63 | 3.61 | 1.00 | 1.03 | 1.18 | 1.12 | 0.80 |
| CHA | 0.94 | 1.04 | 0.99 | 0.93 | 0.94 | 1.09 | 0.95 | 0.91 | 0.99 | 0.98 |
| EUR | 0.09 | 0.31 | 0.19 | 0.40 | 0.44 | 0.49 | 0.42 | 0.71 | 0.67 | 0.47 |
| IND | 1.00 | 1.00 | 0.99 | 1.00 | 1.00 | 1.00 | 1.00 | 1.00 | 1.01 | 1.10 |
| JPN | 0.02 | 0.00 | 0.00 | 0.00 | 0.00 | 0.00 | 0.00 | 0.00 | 0.00 | 0.00 |
| LAM | 1.11 | 1.33 | 1.09 | 0.88 | 1.15 | 0.84 | 0.81 | 0.70 | 0.80 | 0.91 |
| MEA | 0.99 | 0.92 | 1.01 | 0.92 | 1.17 | 0.53 | 0.81 | 0.76 | 0.96 | 0.78 |
| NEU | 0.52 | 0.75 | 0.34 | 0.19 | 0.87 | 0.34 | 0.21 | 0.21 | 0.41 | 0.39 |
| OAS | 1.08 | 1.07 | 1.20 | 1.20 | 0.99 | 0.95 | 0.90 | 0.95 | 0.95 | 0.90 |
| REF | 1.00 | 1.00 | 0.83 | 0.55 | 0.67 | 0.93 | 0.95 | 1.21 | 0.71 | 1.09 |
| SSA | 1.09 | 1.03 | 0.95 | 1.05 | 1.03 | 0.92 | 0.99 | 0.93 | 1.04 | 1.00 |
| USA | 1.17 | 0.99 | 1.49 | 1.74 | 1.62 | 1.34 | 1.46 | 1.72 | 2.06 | 1.57 |

Table 1958: FAO — Trade—Self-sufficiency—Crops—Cereals—Tropical cereals (1)

59.1.6 Other crops

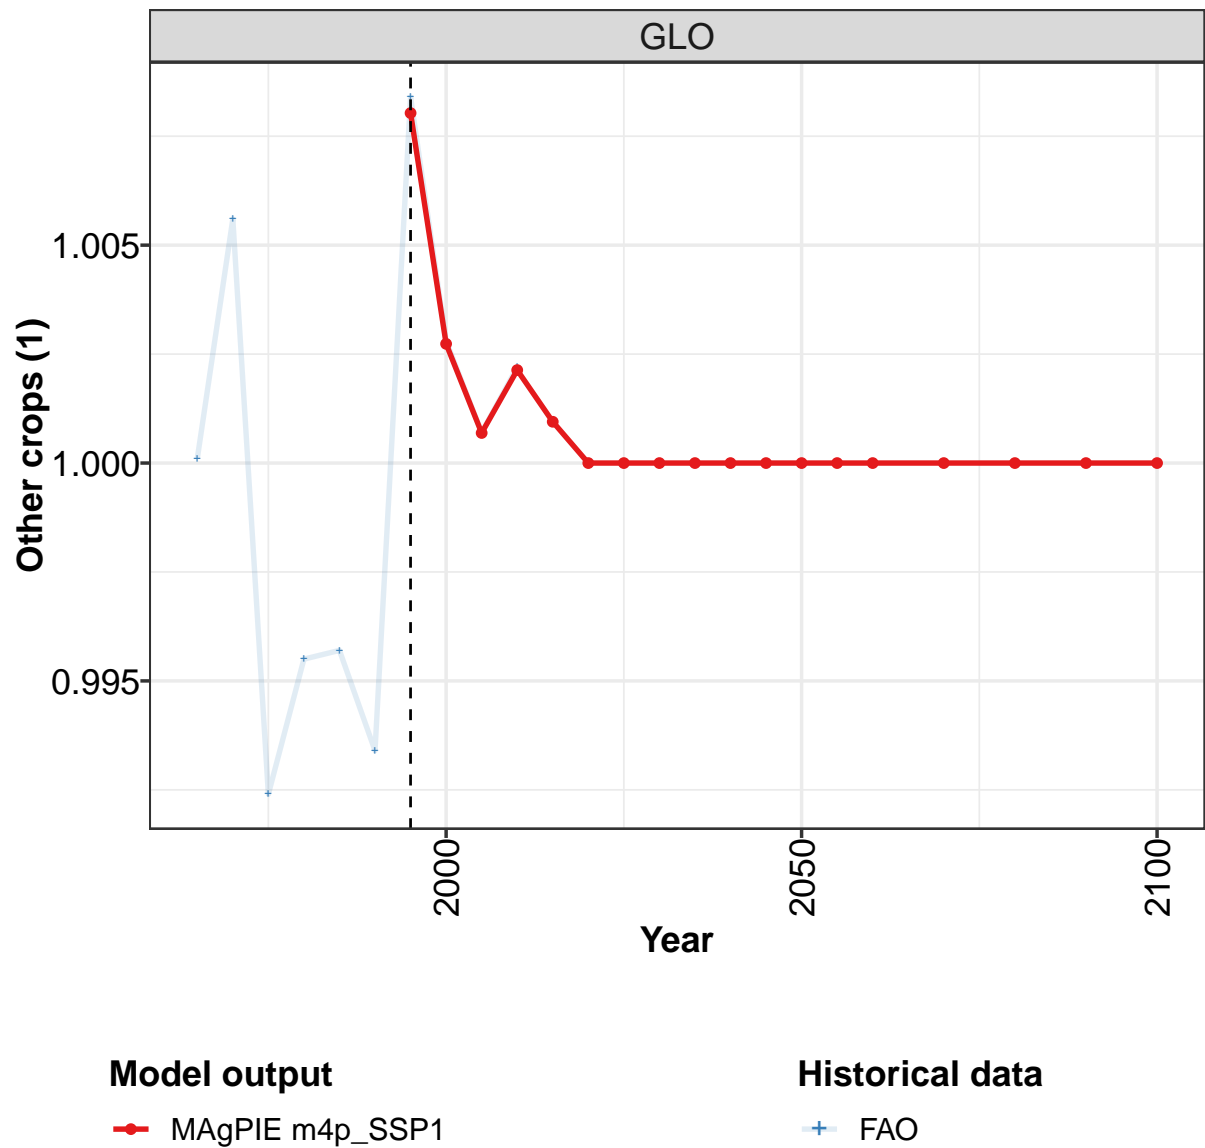



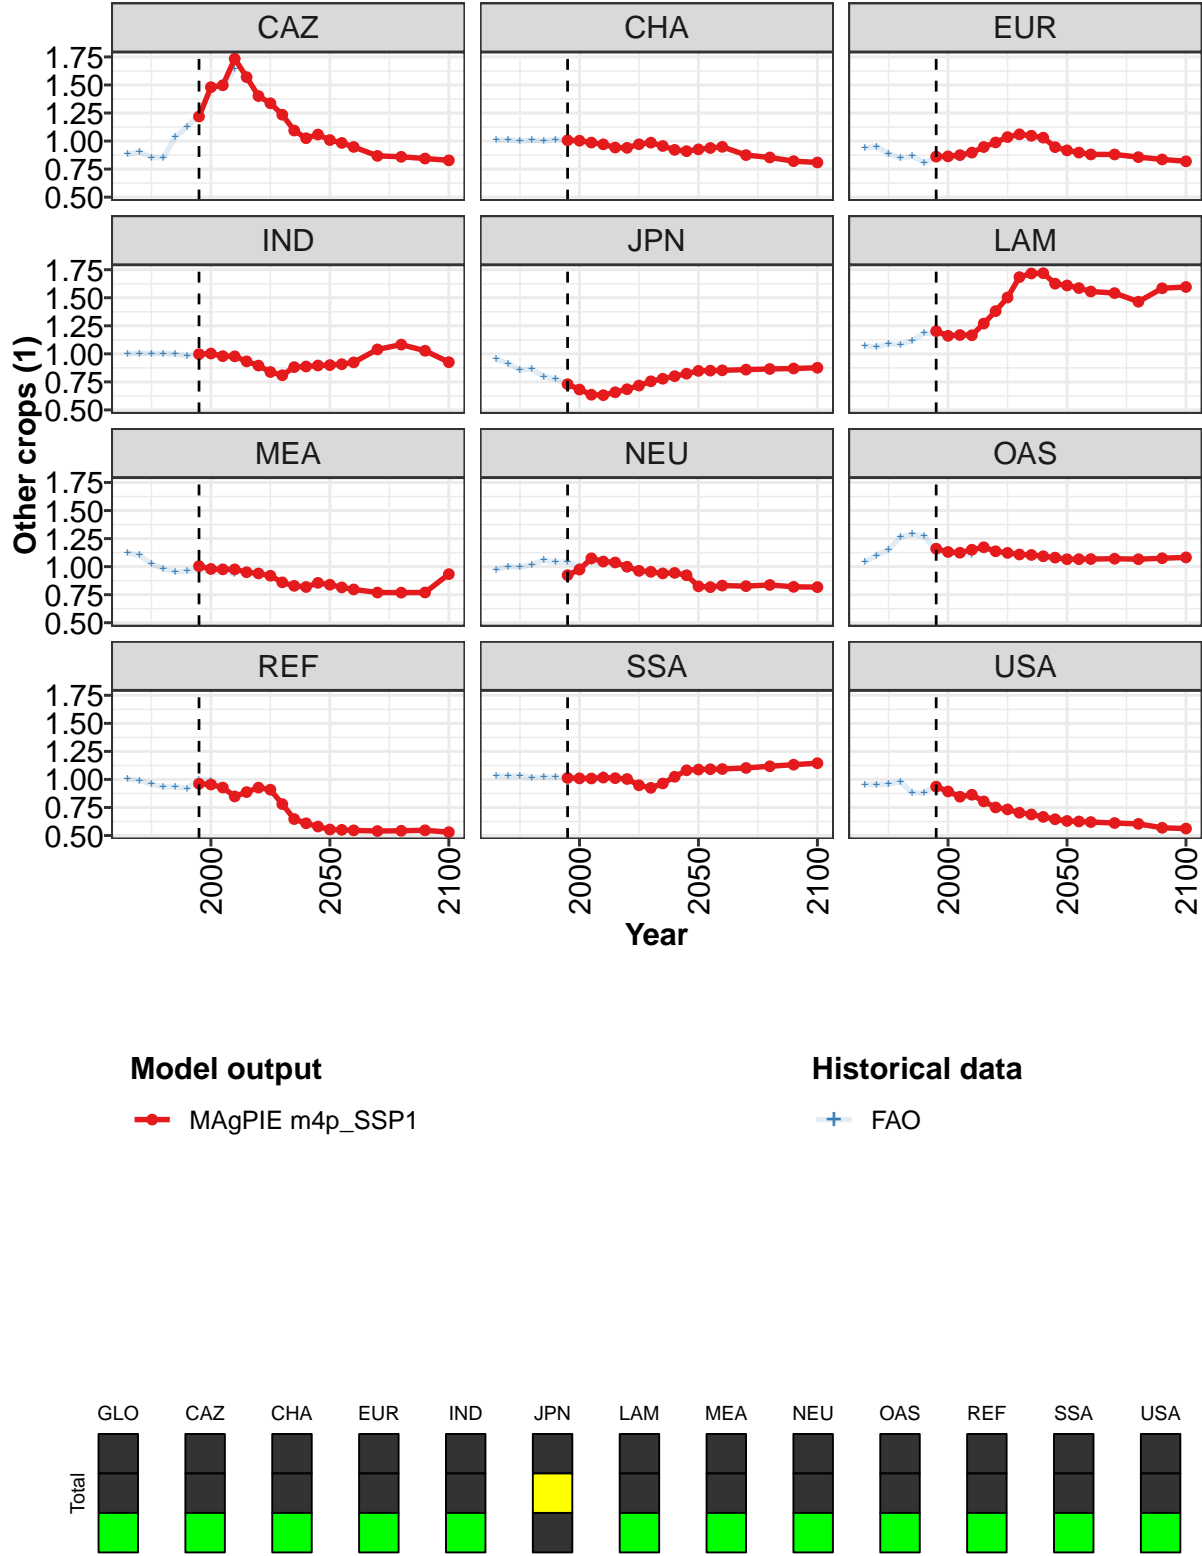

Figure 520: MAgPIE m4p\_SSP1 — Trade—Self-sufficiency—Crops—Other crops (1)

|     | 1995 | 2000 | 2005 | 2010 | 2015 | 2020 | 2025 | 2030 | 2035 | 2040 | 2045 |
|-----|------|------|------|------|------|------|------|------|------|------|------|
| GLO | 1.01 | 1.00 | 1.00 | 1.00 | 1.00 | 1.00 | 1.00 | 1.00 | 1.00 | 1.00 | 1.00 |
| CAZ | 1.22 | 1.48 | 1.50 | 1.73 | 1.57 | 1.40 | 1.34 | 1.23 | 1.09 | 1.03 | 1.06 |
| CHA | 1.01 | 1.00 | 0.99 | 0.97 | 0.94 | 0.94 | 0.97 | 0.99 | 0.96 | 0.92 | 0.91 |
| EUR | 0.86 | 0.86 | 0.87 | 0.90 | 0.95 | 0.99 | 1.04 | 1.06 | 1.05 | 1.03 | 0.95 |
| IND | 1.00 | 1.00 | 0.98 | 0.98 | 0.93 | 0.90 | 0.84 | 0.81 | 0.88 | 0.89 | 0.90 |
| JPN | 0.73 | 0.68 | 0.64 | 0.63 | 0.66 | 0.68 | 0.72 | 0.76 | 0.78 | 0.80 | 0.82 |
| LAM | 1.20 | 1.16 | 1.17 | 1.17 | 1.27 | 1.38 | 1.50 | 1.68 | 1.72 | 1.72 | 1.63 |
| MEA | 1.00 | 0.98 | 0.98 | 0.98 | 0.95 | 0.94 | 0.92 | 0.86 | 0.83 | 0.82 | 0.86 |
| NEU | 0.92 | 0.97 | 1.07 | 1.05 | 1.04 | 1.00 | 0.96 | 0.95 | 0.94 | 0.94 | 0.92 |
| OAS | 1.16 | 1.13 | 1.12 | 1.15 | 1.17 | 1.14 | 1.12 | 1.11 | 1.10 | 1.09 | 1.08 |
| REF | 0.96 | 0.95 | 0.93 | 0.85 | 0.89 | 0.93 | 0.91 | 0.78 | 0.65 | 0.61 | 0.58 |
| SSA | 1.01 | 1.01 | 1.01 | 1.02 | 1.01 | 1.00 | 0.95 | 0.92 | 0.96 | 1.02 | 1.08 |
| USA | 0.94 | 0.89 | 0.85 | 0.86 | 0.80 | 0.75 | 0.73 | 0.70 | 0.69 | 0.67 | 0.65 |

Table 1959: MAgPIE m4p\_SSP1 — Trade—Self-sufficiency—Crops—Other crops (1) [PART 1/2]

|     | 2050 | 2055 | 2060 | 2070 | 2080 | 2090 | 2100 |
|-----|------|------|------|------|------|------|------|
| GLO | 1.00 | 1.00 | 1.00 | 1.00 | 1.00 | 1.00 | 1.00 |
| CAZ | 1.01 | 0.98 | 0.95 | 0.87 | 0.86 | 0.84 | 0.83 |
| CHA | 0.93 | 0.94 | 0.95 | 0.88 | 0.85 | 0.82 | 0.81 |
| EUR | 0.92 | 0.90 | 0.88 | 0.88 | 0.86 | 0.84 | 0.82 |
| IND | 0.90 | 0.91 | 0.92 | 1.04 | 1.08 | 1.03 | 0.93 |
| JPN | 0.85 | 0.85 | 0.85 | 0.86 | 0.87 | 0.87 | 0.88 |
| LAM | 1.61 | 1.59 | 1.56 | 1.54 | 1.46 | 1.58 | 1.60 |
| MEA | 0.84 | 0.82 | 0.80 | 0.77 | 0.77 | 0.77 | 0.93 |
| NEU | 0.82 | 0.82 | 0.83 | 0.83 | 0.84 | 0.82 | 0.82 |
| OAS | 1.07 | 1.07 | 1.07 | 1.07 | 1.07 | 1.07 | 1.08 |
| REF | 0.55 | 0.55 | 0.55 | 0.54 | 0.54 | 0.55 | 0.53 |
| SSA | 1.09 | 1.09 | 1.09 | 1.10 | 1.12 | 1.13 | 1.14 |
| USA | 0.63 | 0.63 | 0.62 | 0.61 | 0.60 | 0.57 | 0.56 |

Table 1960: MAgPIE m4p\_SSP1 — Trade—Self-sufficiency—Crops—Other crops (1) [PART 2/2]

|     | 1965 | 1970 | 1975 | 1980 | 1985 | 1990 | 1995 | 2000 | 2005 | 2010 |
|-----|------|------|------|------|------|------|------|------|------|------|
| GLO | 1.00 | 1.01 | 0.99 | 1.00 | 1.00 | 0.99 | 1.01 | 1.00 | 1.00 | 1.00 |
| CAZ | 0.88 | 0.91 | 0.85 | 0.85 | 1.04 | 1.13 | 1.23 | 1.48 | 1.47 | 1.64 |
| CHA | 1.01 | 1.01 | 1.00 | 1.01 | 1.00 | 1.01 | 1.00 | 1.00 | 0.99 | 0.97 |
| EUR | 0.94 | 0.95 | 0.89 | 0.85 | 0.86 | 0.81 | 0.85 | 0.84 | 0.87 | 0.90 |
| IND | 1.00 | 1.00 | 1.00 | 1.00 | 1.00 | 0.98 | 1.00 | 1.00 | 0.98 | 0.98 |
| JPN | 0.95 | 0.91 | 0.86 | 0.86 | 0.80 | 0.78 | 0.73 | 0.68 | 0.64 | 0.63 |
| LAM | 1.07 | 1.06 | 1.09 | 1.08 | 1.12 | 1.18 | 1.18 | 1.16 | 1.17 | 1.17 |
| MEA | 1.12 | 1.10 | 1.03 | 0.98 | 0.95 | 0.96 | 0.97 | 0.95 | 0.95 | 0.94 |
| NEU | 0.97 | 1.00 | 1.00 | 1.02 | 1.06 | 1.04 | 1.04 | 1.00 | 1.04 | 1.03 |
| OAS | 1.04 | 1.10 | 1.15 | 1.26 | 1.29 | 1.27 | 1.14 | 1.12 | 1.11 | 1.11 |
| REF | 1.01 | 0.99 | 0.96 | 0.93 | 0.94 | 0.92 | 1.00 | 0.99 | 0.94 | 0.85 |
| SSA | 1.03 | 1.03 | 1.03 | 1.02 | 1.02 | 1.02 | 1.01 | 1.01 | 1.01 | 1.04 |
| USA | 0.96 | 0.96 | 0.96 | 0.98 | 0.88 | 0.88 | 0.94 | 0.90 | 0.85 | 0.86 |

Table 1961: FAO — Trade—Self-sufficiency—Crops—Other crops (1)

59.1.7 Other crops—Fruits Vegetables Nuts

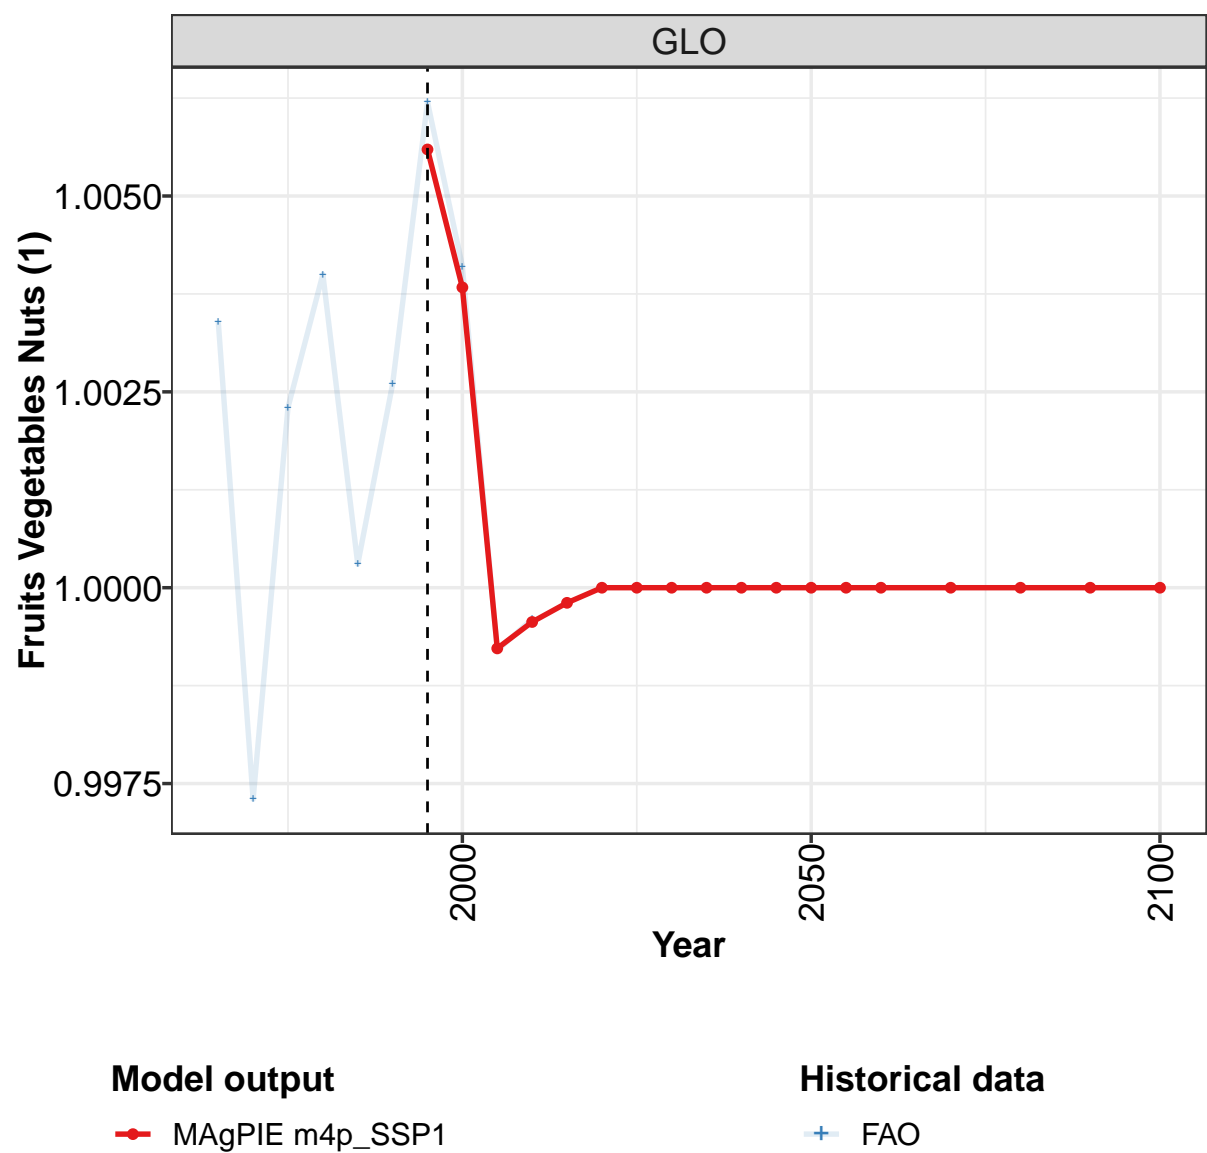

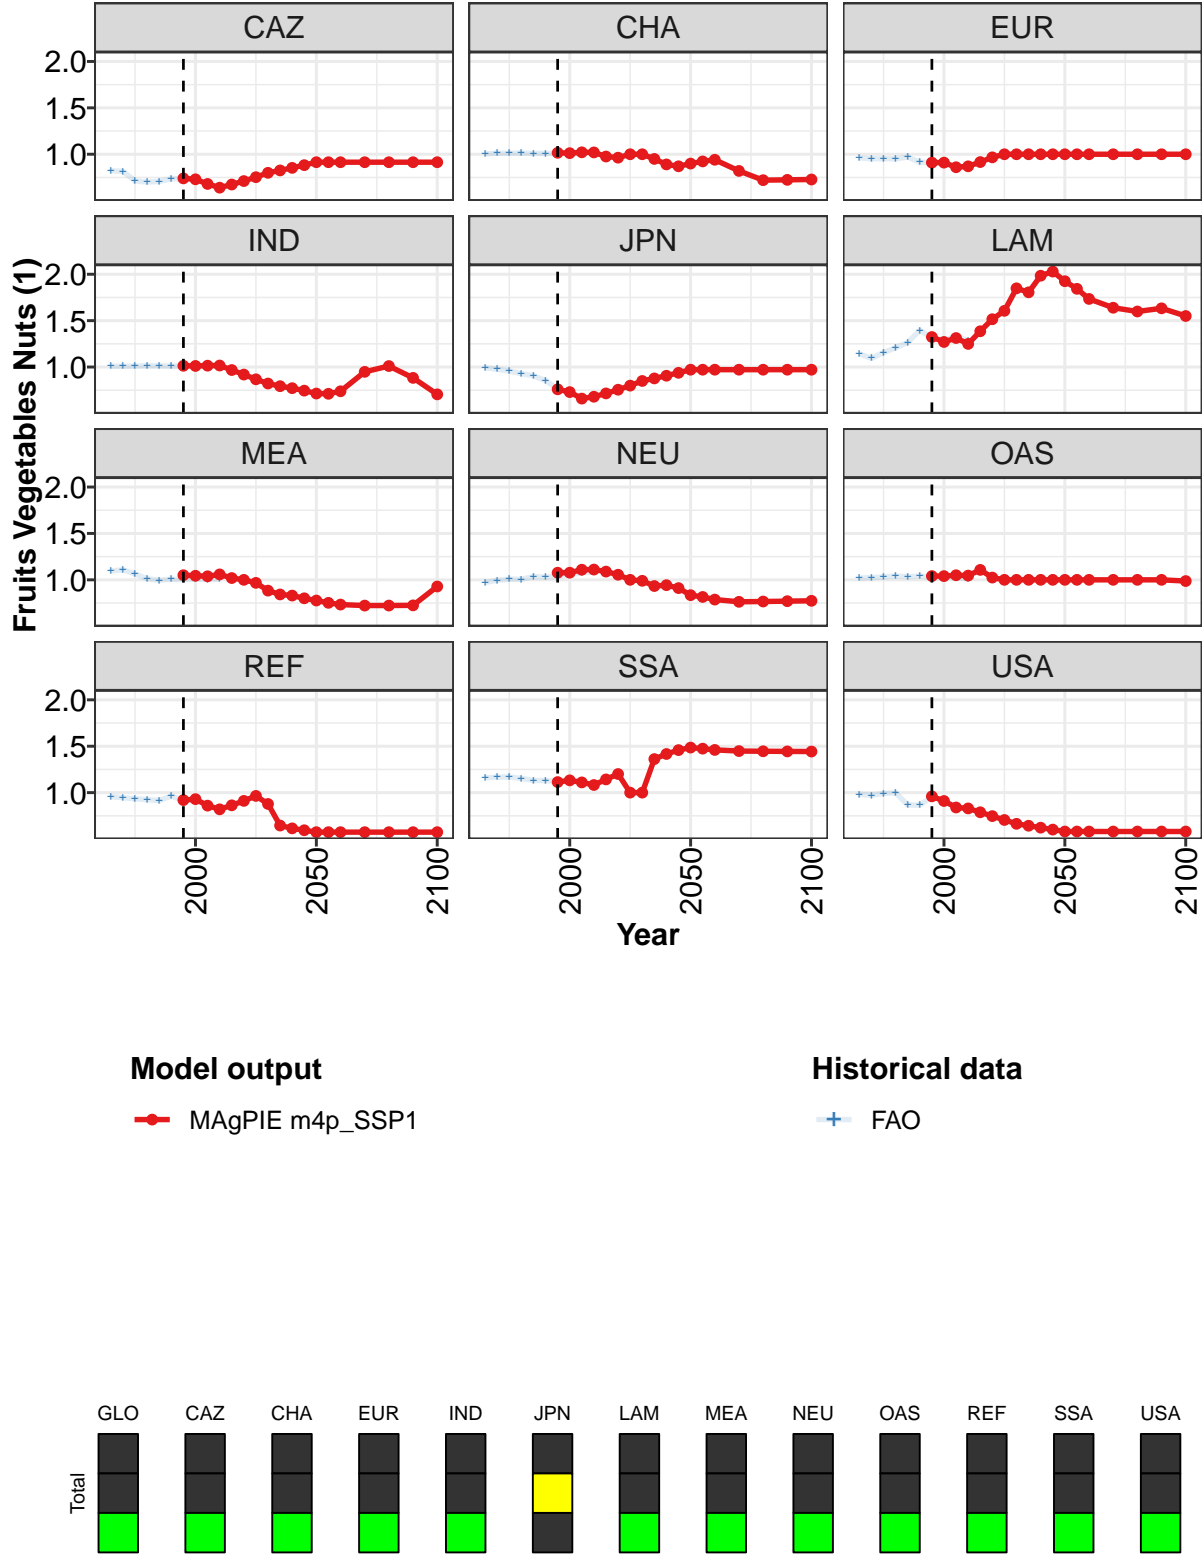

Figure 521: MAgPIE m4p\_SSP1 — Trade—Self-sufficiency—Crops—Other crops—Fruits Vegetables Nuts (1)

|     | 1995 | 2000 | 2005 | 2010 | 2015 | 2020 | 2025 | 2030 | 2035 | 2040 | 2045 |
|-----|------|------|------|------|------|------|------|------|------|------|------|
| GLO | 1.01 | 1.00 | 1.00 | 1.00 | 1.00 | 1.00 | 1.00 | 1.00 | 1.00 | 1.00 | 1.00 |
| CAZ | 0.74 | 0.73 | 0.68 | 0.64 | 0.67 | 0.71 | 0.75 | 0.80 | 0.83 | 0.85 | 0.88 |
| CHA | 1.02 | 1.01 | 1.02 | 1.02 | 0.98 | 0.96 | 1.00 | 1.00 | 0.95 | 0.89 | 0.87 |
| EUR | 0.91 | 0.91 | 0.86 | 0.87 | 0.92 | 0.97 | 1.00 | 1.00 | 1.00 | 1.00 | 1.00 |
| IND | 1.01 | 1.01 | 1.01 | 1.02 | 0.97 | 0.92 | 0.87 | 0.82 | 0.79 | 0.77 | 0.75 |
| JPN | 0.76 | 0.73 | 0.66 | 0.68 | 0.72 | 0.76 | 0.80 | 0.85 | 0.88 | 0.91 | 0.94 |
| LAM | 1.32 | 1.27 | 1.31 | 1.25 | 1.39 | 1.52 | 1.61 | 1.85 | 1.81 | 1.98 | 2.03 |
| MEA | 1.05 | 1.04 | 1.04 | 1.06 | 1.02 | 1.00 | 0.97 | 0.88 | 0.84 | 0.83 | 0.80 |
| NEU | 1.08 | 1.08 | 1.11 | 1.11 | 1.09 | 1.06 | 1.00 | 0.99 | 0.93 | 0.94 | 0.91 |
| OAS | 1.04 | 1.04 | 1.05 | 1.05 | 1.11 | 1.02 | 1.00 | 1.00 | 1.00 | 1.00 | 1.00 |
| REF | 0.92 | 0.93 | 0.86 | 0.82 | 0.86 | 0.91 | 0.96 | 0.88 | 0.65 | 0.61 | 0.59 |
| SSA | 1.11 | 1.13 | 1.11 | 1.08 | 1.14 | 1.20 | 1.00 | 1.00 | 1.36 | 1.42 | 1.46 |
| USA | 0.96 | 0.91 | 0.84 | 0.83 | 0.79 | 0.75 | 0.71 | 0.66 | 0.64 | 0.62 | 0.60 |

Table 1962: MAgPIE m4p\_SSP1 — Trade—Self-sufficiency—Crops—Other crops—Fruits Vegetables Nuts (1)  
[PART 1/2]

|     | 2050 | 2055 | 2060 | 2070 | 2080 | 2090 | 2100 |
|-----|------|------|------|------|------|------|------|
| GLO | 1.00 | 1.00 | 1.00 | 1.00 | 1.00 | 1.00 | 1.00 |
| CAZ | 0.91 | 0.91 | 0.91 | 0.91 | 0.91 | 0.91 | 0.91 |
| CHA | 0.90 | 0.92 | 0.94 | 0.82 | 0.72 | 0.72 | 0.73 |
| EUR | 1.00 | 1.00 | 1.00 | 1.00 | 1.00 | 1.00 | 1.00 |
| IND | 0.71 | 0.71 | 0.74 | 0.95 | 1.01 | 0.88 | 0.71 |
| JPN | 0.97 | 0.97 | 0.97 | 0.97 | 0.97 | 0.97 | 0.97 |
| LAM | 1.93 | 1.84 | 1.73 | 1.64 | 1.60 | 1.63 | 1.55 |
| MEA | 0.78 | 0.75 | 0.73 | 0.72 | 0.72 | 0.72 | 0.93 |
| NEU | 0.83 | 0.82 | 0.79 | 0.76 | 0.77 | 0.77 | 0.77 |
| OAS | 1.00 | 1.00 | 1.00 | 1.00 | 1.00 | 1.00 | 0.99 |
| REF | 0.57 | 0.57 | 0.57 | 0.57 | 0.57 | 0.57 | 0.57 |
| SSA | 1.49 | 1.47 | 1.46 | 1.45 | 1.45 | 1.44 | 1.44 |
| USA | 0.58 | 0.58 | 0.58 | 0.58 | 0.58 | 0.58 | 0.58 |

Table 1963: MAgPIE m4p\_SSP1 — Trade—Self-sufficiency—Crops—Other crops—Fruits Vegetables Nuts (1)  
[PART 2/2]

|     | 1965 | 1970 | 1975 | 1980 | 1985 | 1990 | 1995 | 2000 | 2005 | 2010 |
|-----|------|------|------|------|------|------|------|------|------|------|
| GLO | 1.00 | 1.00 | 1.00 | 1.00 | 1.00 | 1.00 | 1.01 | 1.00 | 1.00 | 1.00 |
| CAZ | 0.82 | 0.82 | 0.71 | 0.70 | 0.71 | 0.73 | 0.74 | 0.73 | 0.68 | 0.64 |
| CHA | 1.00 | 1.01 | 1.01 | 1.01 | 1.01 | 1.01 | 1.01 | 1.01 | 1.02 | 1.02 |
| EUR | 0.96 | 0.95 | 0.95 | 0.95 | 0.97 | 0.91 | 0.91 | 0.91 | 0.86 | 0.87 |
| IND | 1.01 | 1.01 | 1.01 | 1.01 | 1.01 | 1.01 | 1.01 | 1.01 | 1.02 | 1.02 |
| JPN | 0.99 | 0.98 | 0.96 | 0.93 | 0.91 | 0.85 | 0.76 | 0.73 | 0.66 | 0.68 |
| LAM | 1.14 | 1.09 | 1.16 | 1.21 | 1.26 | 1.40 | 1.32 | 1.29 | 1.33 | 1.28 |
| MEA | 1.09 | 1.11 | 1.06 | 1.01 | 0.99 | 1.01 | 1.00 | 1.01 | 1.00 | 1.01 |
| NEU | 0.97 | 0.99 | 1.01 | 1.01 | 1.03 | 1.03 | 1.04 | 1.06 | 1.08 | 1.09 |
| OAS | 1.02 | 1.02 | 1.03 | 1.04 | 1.03 | 1.04 | 1.03 | 1.03 | 1.02 | 1.01 |
| REF | 0.96 | 0.95 | 0.93 | 0.92 | 0.92 | 0.96 | 0.92 | 0.93 | 0.86 | 0.82 |
| SSA | 1.16 | 1.17 | 1.17 | 1.15 | 1.13 | 1.13 | 1.12 | 1.12 | 1.11 | 1.08 |
| USA | 0.98 | 0.97 | 0.99 | 1.00 | 0.87 | 0.86 | 0.96 | 0.91 | 0.84 | 0.83 |

Table 1964: FAO — Trade—Self-sufficiency—Crops—Other crops—Fruits Vegetables Nuts (1)

59.1.8 Other crops—Potatoes

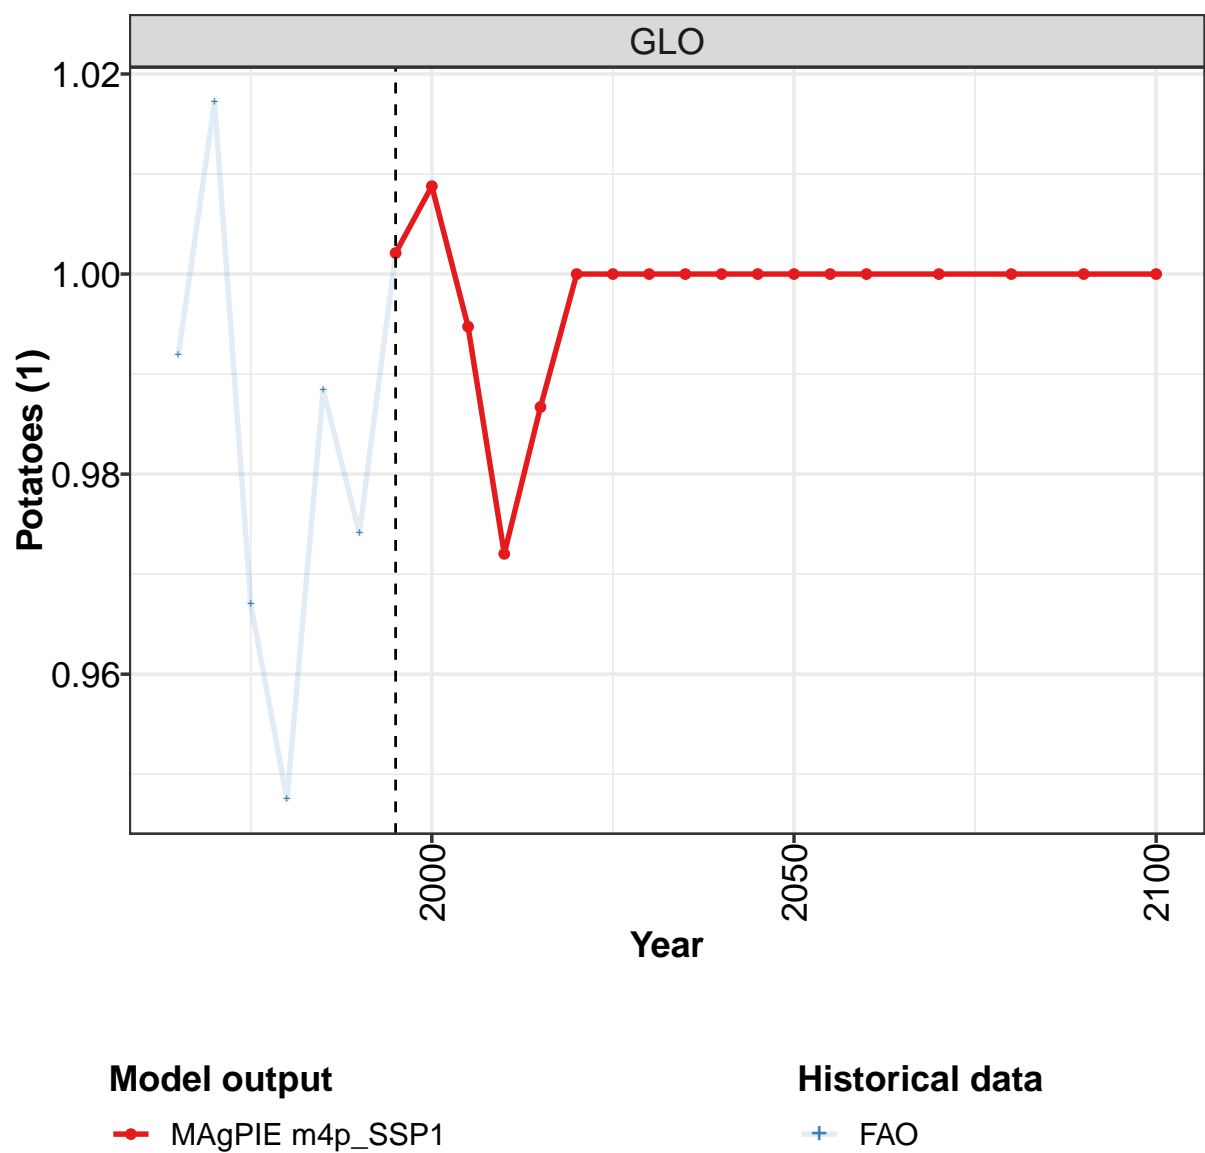

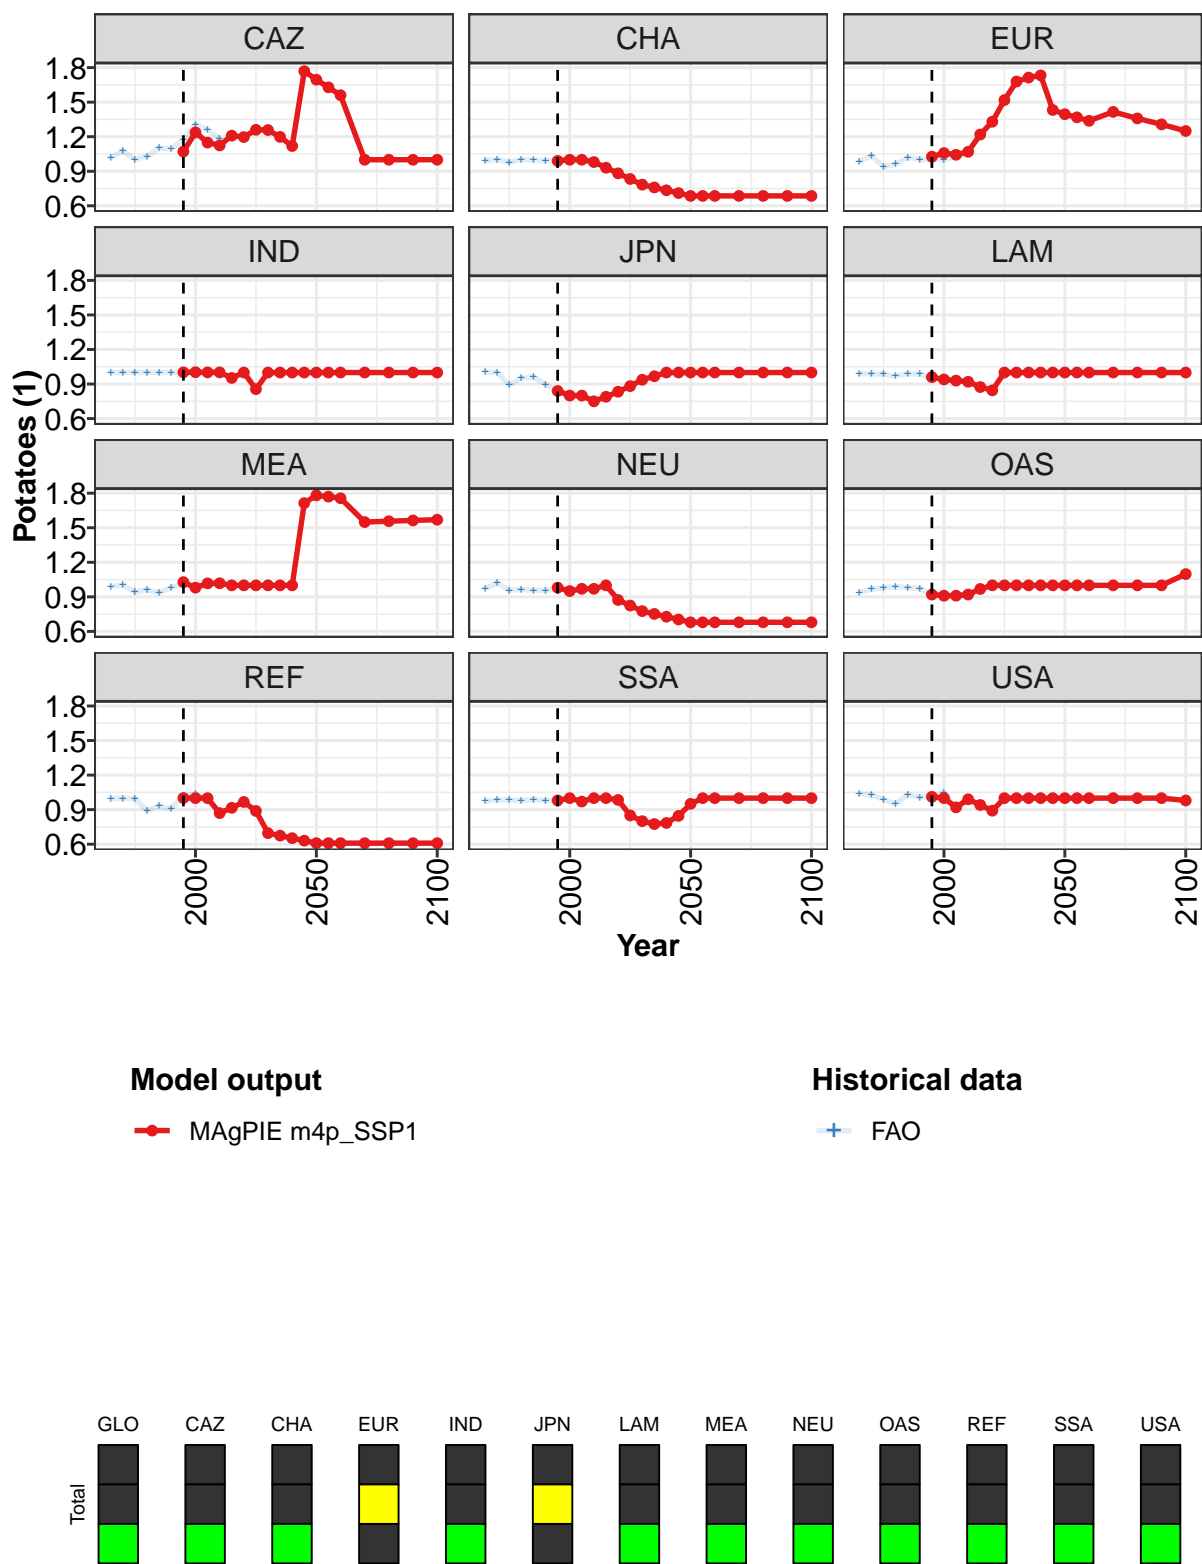

Figure 522: MAGPIE m4p\_SSP1 — Trade—Self-sufficiency—Crops—Other crops—Potatoes (1)

|     | 1995 | 2000 | 2005 | 2010 | 2015 | 2020 | 2025 | 2030 | 2035 | 2040 | 2045 |
|-----|------|------|------|------|------|------|------|------|------|------|------|
| GLO | 1.00 | 1.01 | 0.99 | 0.97 | 0.99 | 1.00 | 1.00 | 1.00 | 1.00 | 1.00 | 1.00 |
| CAZ | 1.07 | 1.24 | 1.15 | 1.12 | 1.21 | 1.20 | 1.26 | 1.26 | 1.20 | 1.12 | 1.77 |
| CHA | 0.99 | 1.00 | 1.00 | 0.98 | 0.93 | 0.88 | 0.83 | 0.78 | 0.76 | 0.73 | 0.71 |
| EUR | 1.03 | 1.06 | 1.04 | 1.07 | 1.22 | 1.33 | 1.52 | 1.68 | 1.71 | 1.73 | 1.43 |
| IND | 1.00 | 1.00 | 1.00 | 1.00 | 0.95 | 1.00 | 0.86 | 1.00 | 1.00 | 1.00 | 1.00 |
| JPN | 0.84 | 0.80 | 0.80 | 0.75 | 0.79 | 0.83 | 0.88 | 0.94 | 0.97 | 1.00 | 1.00 |
| LAM | 0.96 | 0.94 | 0.93 | 0.92 | 0.87 | 0.85 | 1.00 | 1.00 | 1.00 | 1.00 | 1.00 |
| MEA | 1.03 | 0.98 | 1.02 | 1.02 | 1.00 | 1.00 | 1.00 | 1.00 | 1.00 | 1.00 | 1.71 |
| NEU | 0.98 | 0.95 | 0.97 | 0.97 | 1.00 | 0.87 | 0.82 | 0.78 | 0.75 | 0.73 | 0.70 |
| OAS | 0.92 | 0.91 | 0.91 | 0.92 | 0.97 | 1.00 | 1.00 | 1.00 | 1.00 | 1.00 | 1.00 |
| REF | 1.00 | 1.00 | 1.00 | 0.87 | 0.92 | 0.97 | 0.89 | 0.70 | 0.67 | 0.65 | 0.63 |
| SSA | 0.98 | 1.00 | 0.97 | 1.00 | 1.00 | 0.98 | 0.85 | 0.80 | 0.78 | 0.78 | 0.85 |
| USA | 1.01 | 1.00 | 0.92 | 0.99 | 0.94 | 0.89 | 1.00 | 1.00 | 1.00 | 1.00 | 1.00 |

Table 1965: MAgPIE m4p\_SSP1 — Trade—Self-sufficiency—Crops—Other crops—Potatoes (1) [PART 1/2]

|     | 2050 | 2055 | 2060 | 2070 | 2080 | 2090 | 2100 |
|-----|------|------|------|------|------|------|------|
| GLO | 1.00 | 1.00 | 1.00 | 1.00 | 1.00 | 1.00 | 1.00 |
| CAZ | 1.70 | 1.63 | 1.56 | 1.00 | 1.00 | 1.00 | 1.00 |
| CHA | 0.69 | 0.69 | 0.69 | 0.69 | 0.69 | 0.69 | 0.69 |
| EUR | 1.40 | 1.37 | 1.34 | 1.42 | 1.36 | 1.31 | 1.25 |
| IND | 1.00 | 1.00 | 1.00 | 1.00 | 1.00 | 1.00 | 1.00 |
| JPN | 1.00 | 1.00 | 1.00 | 1.00 | 1.00 | 1.00 | 1.00 |
| LAM | 1.00 | 1.00 | 1.00 | 1.00 | 1.00 | 1.00 | 1.00 |
| MEA | 1.78 | 1.77 | 1.76 | 1.55 | 1.56 | 1.56 | 1.57 |
| NEU | 0.68 | 0.68 | 0.68 | 0.68 | 0.68 | 0.68 | 0.68 |
| OAS | 1.00 | 1.00 | 1.00 | 1.00 | 1.00 | 1.00 | 1.10 |
| REF | 0.61 | 0.61 | 0.61 | 0.61 | 0.61 | 0.61 | 0.61 |
| SSA | 0.95 | 1.00 | 1.00 | 1.00 | 1.00 | 1.00 | 1.00 |
| USA | 1.00 | 1.00 | 1.00 | 1.00 | 1.00 | 1.00 | 0.98 |

Table 1966: MAgPIE m4p\_SSP1 — Trade—Self-sufficiency—Crops—Other crops—Potatoes (1) [PART 2/2]

|     | 1965 | 1970 | 1975 | 1980 | 1985 | 1990 | 1995 | 2000 | 2005 | 2010 |
|-----|------|------|------|------|------|------|------|------|------|------|
| GLO | 0.99 | 1.02 | 0.97 | 0.95 | 0.99 | 0.97 | 1.00 | 1.01 | 0.99 | 0.97 |
| CAZ | 1.02 | 1.08 | 1.00 | 1.03 | 1.10 | 1.09 | 1.18 | 1.30 | 1.26 | 1.18 |
| CHA | 1.00 | 1.00 | 0.98 | 1.00 | 1.00 | 0.99 | 0.99 | 1.02 | 1.01 | 0.98 |
| EUR | 0.98 | 1.04 | 0.94 | 0.96 | 1.02 | 1.00 | 1.00 | 1.00 | 1.02 | 1.06 |
| IND | 1.00 | 1.00 | 1.00 | 1.00 | 1.00 | 1.00 | 1.00 | 1.00 | 1.00 | 1.01 |
| JPN | 1.00 | 1.00 | 0.89 | 0.95 | 0.96 | 0.90 | 0.84 | 0.80 | 0.80 | 0.75 |
| LAM | 0.99 | 0.99 | 0.99 | 0.97 | 0.99 | 0.99 | 0.96 | 0.94 | 0.93 | 0.92 |
| MEA | 0.99 | 1.00 | 0.94 | 0.96 | 0.94 | 0.98 | 1.01 | 0.98 | 1.01 | 1.00 |
| NEU | 0.97 | 1.02 | 0.95 | 0.96 | 0.96 | 0.96 | 0.98 | 0.95 | 0.97 | 0.97 |
| OAS | 0.94 | 0.97 | 0.98 | 0.99 | 0.98 | 0.97 | 0.92 | 0.91 | 0.91 | 0.92 |
| REF | 1.00 | 1.00 | 1.00 | 0.89 | 0.93 | 0.91 | 1.02 | 1.03 | 1.00 | 0.87 |
| SSA | 0.97 | 0.98 | 0.98 | 0.98 | 0.99 | 0.98 | 0.98 | 1.00 | 0.97 | 1.01 |
| USA | 1.04 | 1.03 | 0.99 | 0.95 | 1.03 | 1.01 | 1.02 | 1.05 | 0.92 | 0.99 |

Table 1967: FAO — Trade—Self-sufficiency—Crops—Other crops—Potatoes (1)



59.1.9 Other crops—Pulses

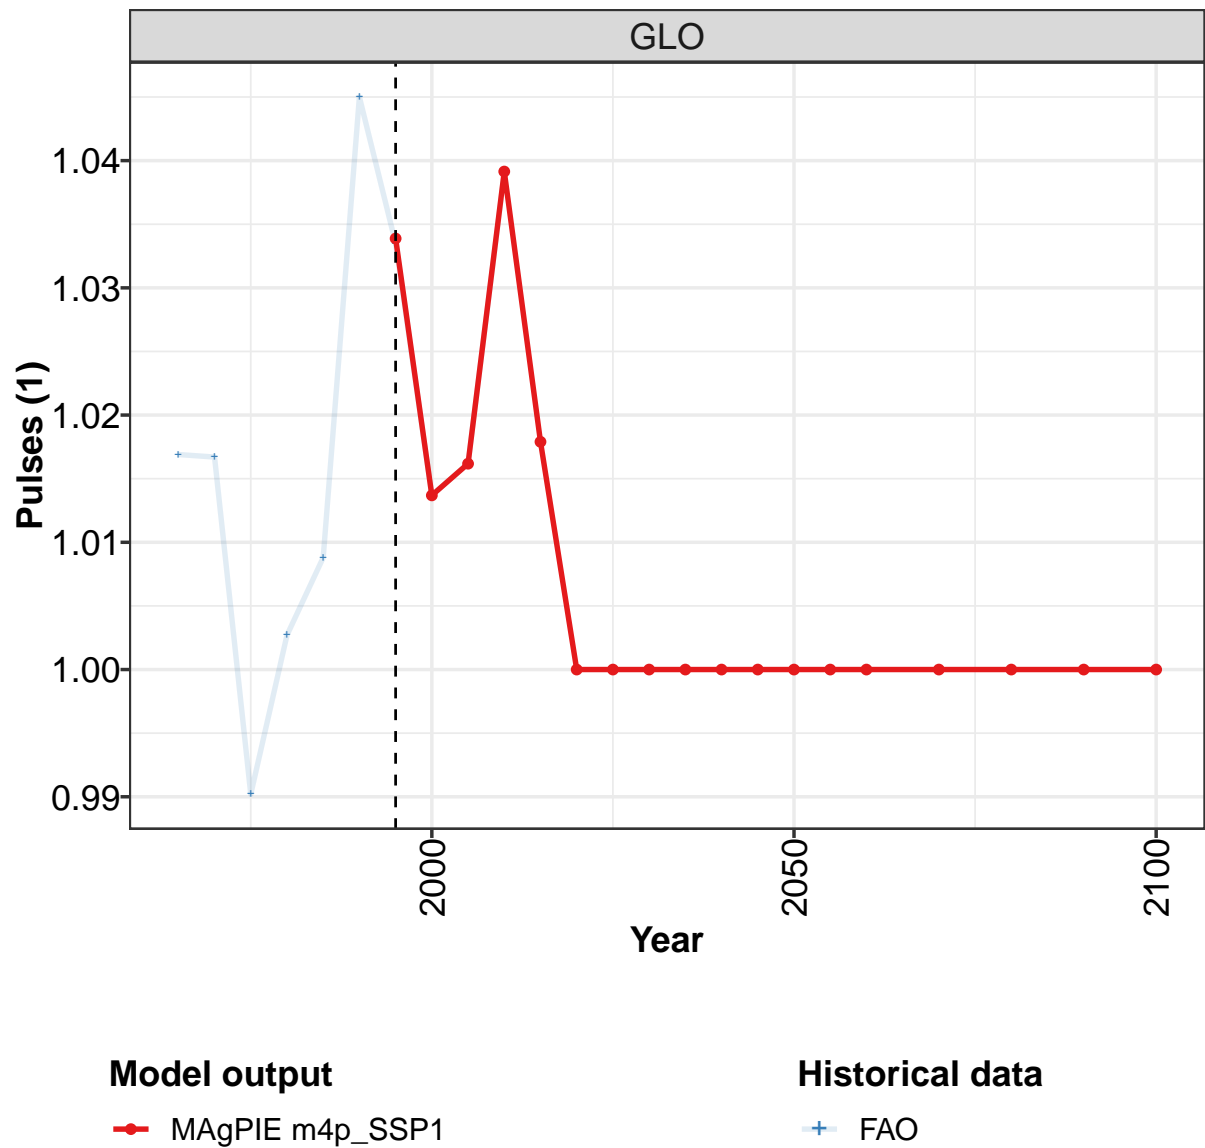

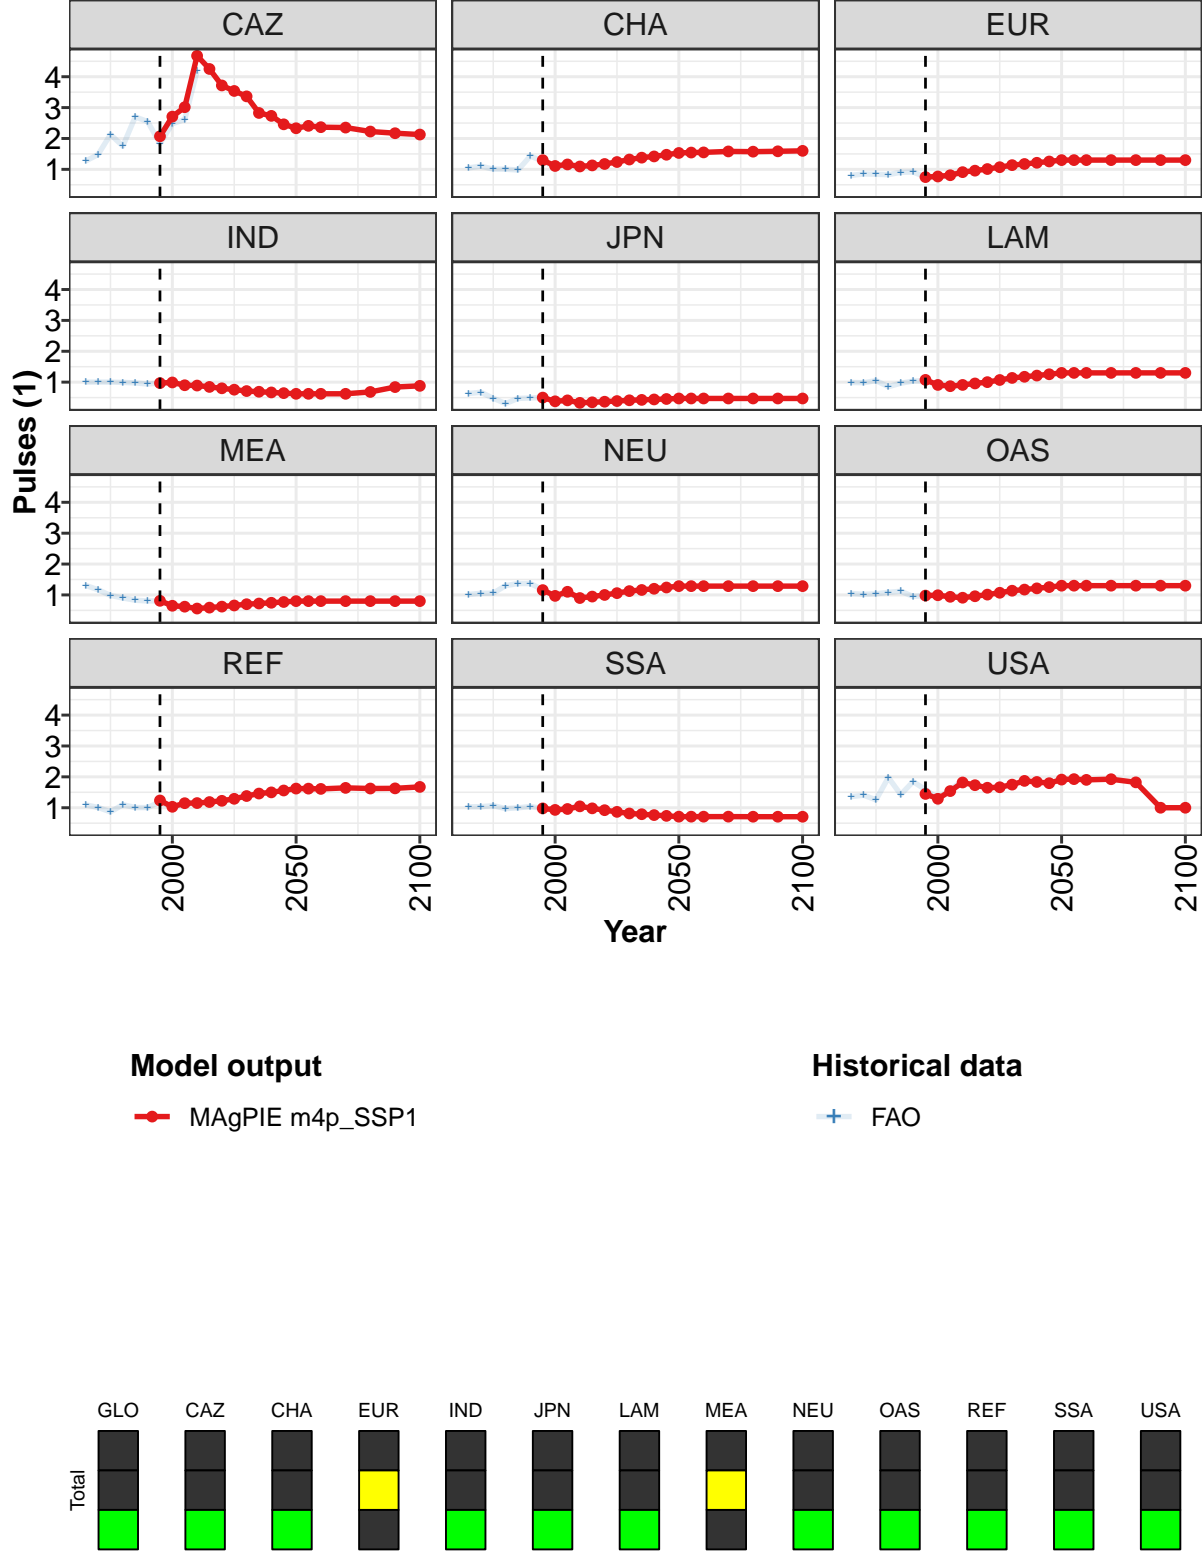

Figure 523: MAgPIE m4p\_SSP1 — Trade—Self-sufficiency—Crops—Other crops—Pulses (1)

|     | 1995 | 2000 | 2005 | 2010 | 2015 | 2020 | 2025 | 2030 | 2035 | 2040 | 2045 |
|-----|------|------|------|------|------|------|------|------|------|------|------|
| GLO | 1.03 | 1.01 | 1.02 | 1.04 | 1.02 | 1.00 | 1.00 | 1.00 | 1.00 | 1.00 | 1.00 |
| CAZ | 2.07 | 2.71 | 3.01 | 4.68 | 4.25 | 3.72 | 3.54 | 3.37 | 2.83 | 2.73 | 2.46 |
| CHA | 1.30 | 1.11 | 1.16 | 1.09 | 1.13 | 1.17 | 1.24 | 1.32 | 1.38 | 1.42 | 1.47 |
| EUR | 0.75 | 0.77 | 0.81 | 0.91 | 0.96 | 1.01 | 1.07 | 1.14 | 1.17 | 1.21 | 1.26 |
| IND | 0.97 | 0.99 | 0.90 | 0.89 | 0.85 | 0.80 | 0.76 | 0.71 | 0.69 | 0.67 | 0.65 |
| JPN | 0.50 | 0.38 | 0.41 | 0.33 | 0.35 | 0.37 | 0.39 | 0.41 | 0.43 | 0.44 | 0.46 |
| LAM | 1.07 | 0.91 | 0.87 | 0.91 | 0.96 | 1.00 | 1.07 | 1.14 | 1.17 | 1.21 | 1.26 |
| MEA | 0.81 | 0.65 | 0.62 | 0.56 | 0.59 | 0.62 | 0.66 | 0.70 | 0.72 | 0.75 | 0.77 |
| NEU | 1.16 | 0.97 | 1.10 | 0.90 | 0.95 | 1.00 | 1.06 | 1.12 | 1.16 | 1.20 | 1.24 |
| OAS | 0.98 | 0.99 | 0.94 | 0.91 | 0.96 | 1.01 | 1.07 | 1.14 | 1.17 | 1.21 | 1.26 |
| REF | 1.24 | 1.03 | 1.15 | 1.15 | 1.18 | 1.22 | 1.29 | 1.38 | 1.46 | 1.50 | 1.56 |
| SSA | 0.98 | 0.93 | 0.96 | 1.05 | 0.98 | 0.92 | 0.87 | 0.81 | 0.79 | 0.76 | 0.74 |
| USA | 1.45 | 1.29 | 1.54 | 1.82 | 1.73 | 1.65 | 1.66 | 1.75 | 1.87 | 1.83 | 1.80 |

Table 1968: MAgPIE m4p-SSP1 — Trade—Self-sufficiency—Crops—Other crops—Pulses (1) [PART 1/2]

|     | 2050 | 2055 | 2060 | 2070 | 2080 | 2090 | 2100 |
|-----|------|------|------|------|------|------|------|
| GLO | 1.00 | 1.00 | 1.00 | 1.00 | 1.00 | 1.00 | 1.00 |
| CAZ | 2.33 | 2.41 | 2.37 | 2.35 | 2.23 | 2.17 | 2.13 |
| CHA | 1.53 | 1.54 | 1.55 | 1.58 | 1.57 | 1.59 | 1.60 |
| EUR | 1.30 | 1.30 | 1.30 | 1.30 | 1.30 | 1.30 | 1.30 |
| IND | 0.62 | 0.62 | 0.62 | 0.62 | 0.68 | 0.84 | 0.88 |
| JPN | 0.47 | 0.47 | 0.47 | 0.47 | 0.47 | 0.47 | 0.47 |
| LAM | 1.30 | 1.30 | 1.30 | 1.30 | 1.30 | 1.30 | 1.30 |
| MEA | 0.80 | 0.80 | 0.80 | 0.80 | 0.80 | 0.80 | 0.80 |
| NEU | 1.29 | 1.29 | 1.29 | 1.29 | 1.29 | 1.29 | 1.29 |
| OAS | 1.30 | 1.30 | 1.30 | 1.30 | 1.30 | 1.30 | 1.30 |
| REF | 1.62 | 1.62 | 1.61 | 1.64 | 1.62 | 1.63 | 1.67 |
| SSA | 0.71 | 0.71 | 0.71 | 0.71 | 0.71 | 0.71 | 0.71 |
| USA | 1.91 | 1.93 | 1.90 | 1.92 | 1.82 | 1.00 | 1.00 |

Table 1969: MAgPIE m4p-SSP1 — Trade—Self-sufficiency—Crops—Other crops—Pulses (1) [PART 2/2]

|     | 1965 | 1970 | 1975 | 1980 | 1985 | 1990 | 1995 | 2000 | 2005 | 2010 |
|-----|------|------|------|------|------|------|------|------|------|------|
| GLO | 1.02 | 1.02 | 0.99 | 1.00 | 1.01 | 1.04 | 1.03 | 1.01 | 1.02 | 1.04 |
| CAZ | 1.27 | 1.48 | 2.13 | 1.75 | 2.70 | 2.55 | 1.84 | 2.48 | 2.62 | 4.19 |
| CHA | 1.05 | 1.10 | 1.01 | 1.00 | 0.98 | 1.43 | 1.27 | 1.06 | 1.16 | 1.07 |
| EUR | 0.81 | 0.85 | 0.84 | 0.83 | 0.90 | 0.91 | 0.75 | 0.77 | 0.81 | 0.91 |
| IND | 1.00 | 1.00 | 1.00 | 0.99 | 0.98 | 0.94 | 0.97 | 0.99 | 0.90 | 0.89 |
| JPN | 0.63 | 0.67 | 0.48 | 0.31 | 0.47 | 0.49 | 0.50 | 0.38 | 0.41 | 0.33 |
| LAM | 0.99 | 0.98 | 1.05 | 0.85 | 0.96 | 1.03 | 1.05 | 0.91 | 0.87 | 0.91 |
| MEA | 1.31 | 1.17 | 0.98 | 0.90 | 0.83 | 0.80 | 0.81 | 0.65 | 0.62 | 0.56 |
| NEU | 1.02 | 1.05 | 1.06 | 1.30 | 1.37 | 1.37 | 1.17 | 0.97 | 1.03 | 0.90 |
| OAS | 1.05 | 1.02 | 1.04 | 1.08 | 1.12 | 0.95 | 0.98 | 0.99 | 0.94 | 0.91 |
| REF | 1.09 | 1.01 | 0.87 | 1.10 | 1.01 | 1.00 | 1.19 | 1.00 | 1.15 | 1.15 |
| SSA | 1.03 | 1.03 | 1.07 | 0.97 | 1.00 | 1.04 | 0.98 | 0.93 | 0.96 | 1.09 |
| USA | 1.36 | 1.40 | 1.26 | 1.98 | 1.43 | 1.84 | 1.59 | 1.30 | 1.59 | 1.87 |

Table 1970: FAO — Trade—Self-sufficiency—Crops—Other crops—Pulses (1)

59.1.10 Other crops—Tropical roots

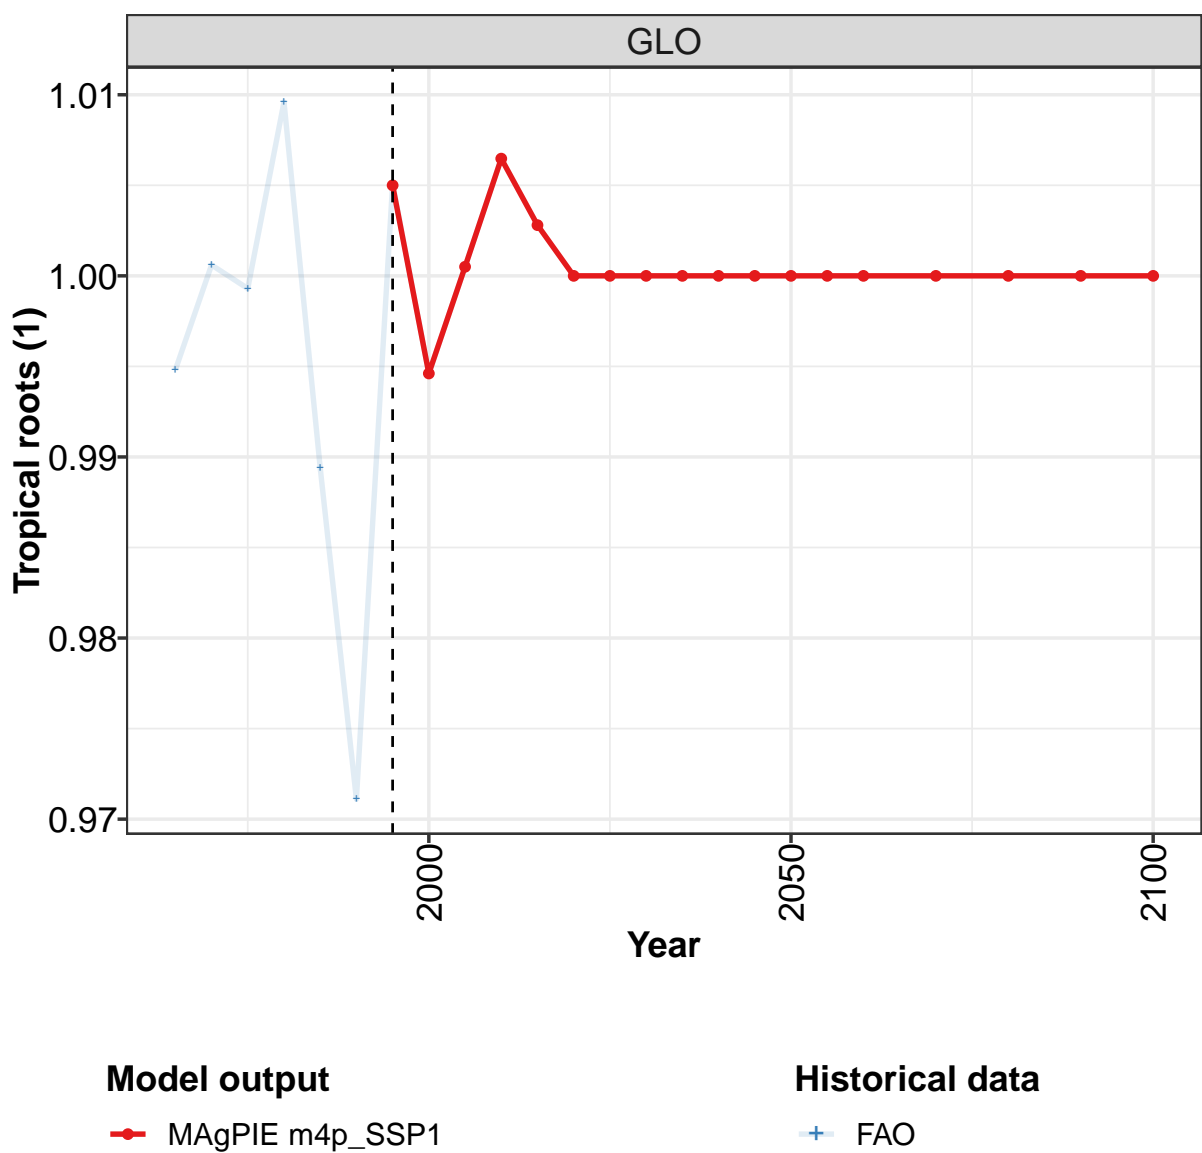

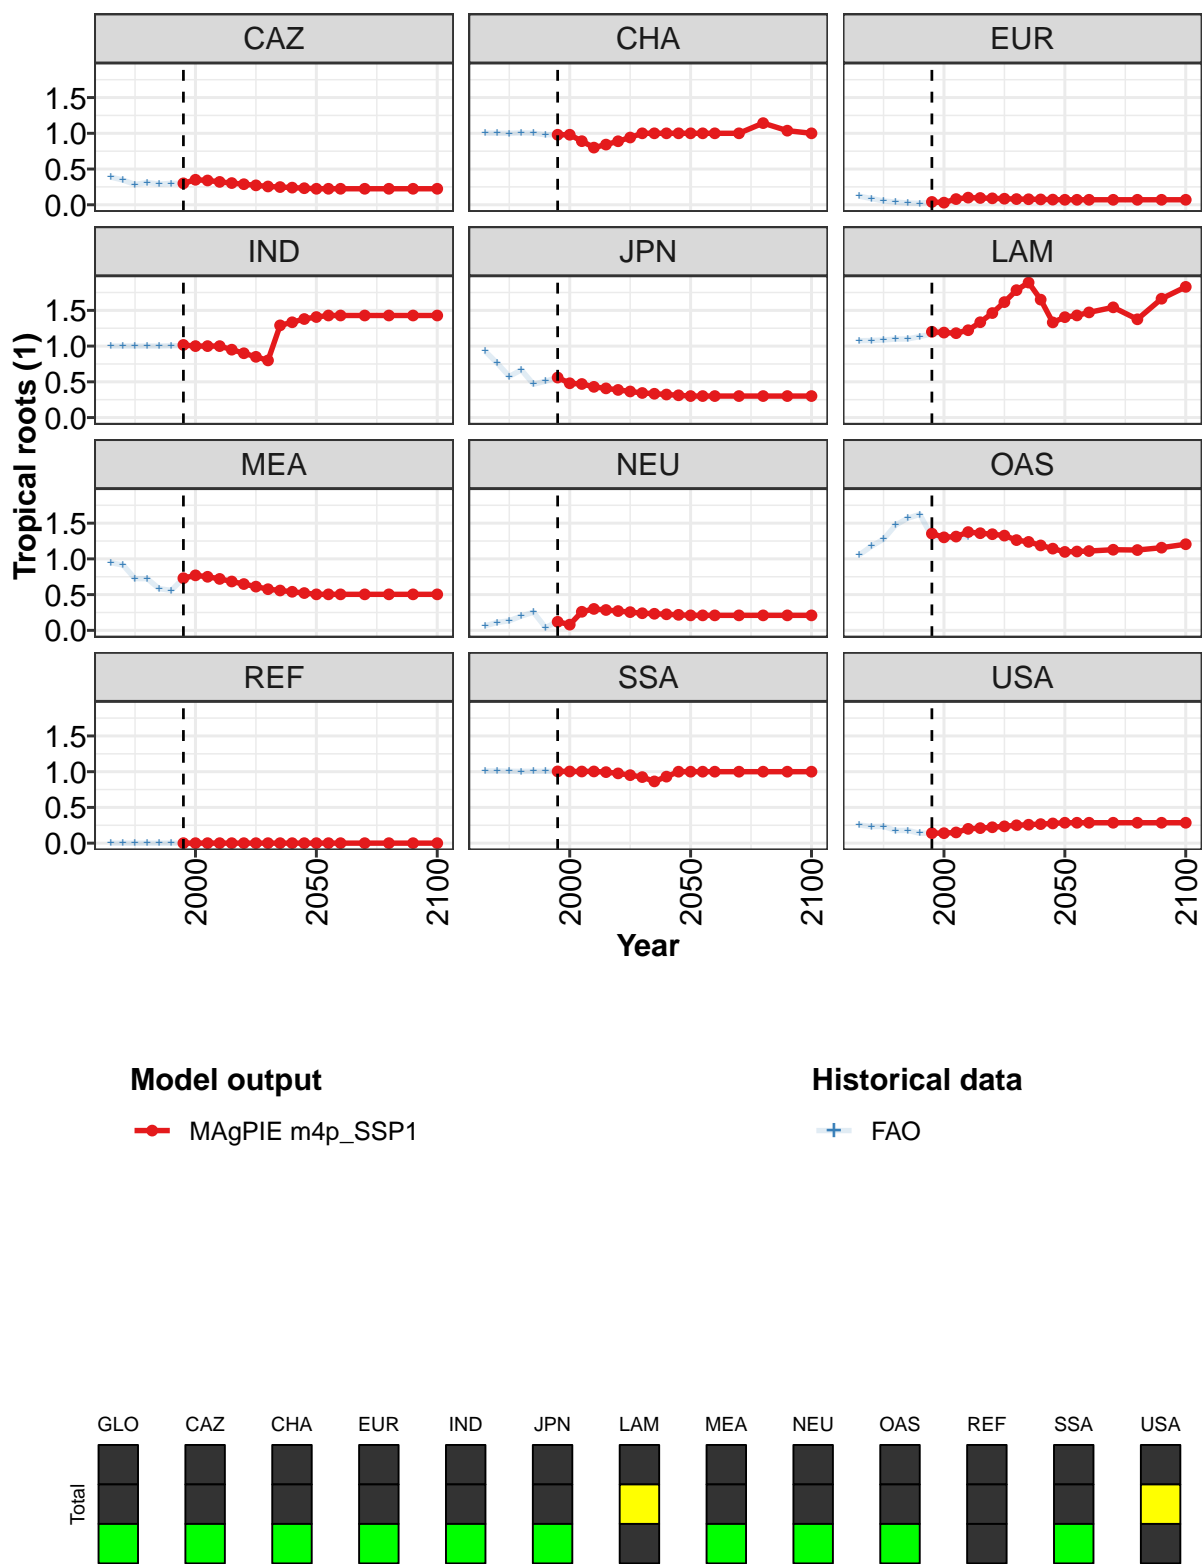

Figure 524: MAgPIE m4p\_SSP1 — Trade—Self-sufficiency—Crops—Other crops—Tropical roots (1)

|     | 1995 | 2000 | 2005 | 2010 | 2015 | 2020 | 2025 | 2030 | 2035 | 2040 | 2045 |
|-----|------|------|------|------|------|------|------|------|------|------|------|
| GLO | 1.00 | 0.99 | 1.00 | 1.01 | 1.00 | 1.00 | 1.00 | 1.00 | 1.00 | 1.00 | 1.00 |
| CAZ | 0.30 | 0.35 | 0.34 | 0.32 | 0.30 | 0.29 | 0.27 | 0.26 | 0.25 | 0.24 | 0.23 |
| CHA | 0.98 | 0.98 | 0.89 | 0.80 | 0.84 | 0.89 | 0.94 | 1.00 | 1.00 | 1.00 | 1.00 |
| EUR | 0.04 | 0.03 | 0.08 | 0.10 | 0.10 | 0.09 | 0.09 | 0.08 | 0.08 | 0.08 | 0.07 |
| IND | 1.02 | 1.00 | 1.00 | 1.00 | 0.95 | 0.90 | 0.85 | 0.80 | 1.29 | 1.33 | 1.38 |
| JPN | 0.56 | 0.48 | 0.47 | 0.43 | 0.41 | 0.39 | 0.37 | 0.34 | 0.33 | 0.32 | 0.31 |
| LAM | 1.20 | 1.19 | 1.18 | 1.22 | 1.33 | 1.46 | 1.62 | 1.78 | 1.89 | 1.65 | 1.33 |
| MEA | 0.73 | 0.77 | 0.75 | 0.72 | 0.68 | 0.65 | 0.61 | 0.58 | 0.56 | 0.54 | 0.52 |
| NEU | 0.12 | 0.08 | 0.26 | 0.30 | 0.28 | 0.27 | 0.25 | 0.24 | 0.23 | 0.23 | 0.22 |
| OAS | 1.35 | 1.30 | 1.31 | 1.38 | 1.36 | 1.35 | 1.33 | 1.26 | 1.24 | 1.19 | 1.14 |
| REF | 0.00 | 0.00 | 0.00 | 0.00 | 0.00 | 0.00 | 0.00 | 0.00 | 0.00 | 0.00 | 0.00 |
| SSA | 1.00 | 1.00 | 1.00 | 1.00 | 0.99 | 0.98 | 0.95 | 0.92 | 0.86 | 0.93 | 1.00 |
| USA | 0.14 | 0.14 | 0.15 | 0.20 | 0.21 | 0.22 | 0.24 | 0.25 | 0.26 | 0.27 | 0.28 |

Table 1971: MAgPIE m4p\_SSP1 — Trade—Self-sufficiency—Crops—Other crops—Tropical roots (1) [PART 1/2]

|     | 2050 | 2055 | 2060 | 2070 | 2080 | 2090 | 2100 |
|-----|------|------|------|------|------|------|------|
| GLO | 1.00 | 1.00 | 1.00 | 1.00 | 1.00 | 1.00 | 1.00 |
| CAZ | 0.22 | 0.22 | 0.22 | 0.22 | 0.22 | 0.22 | 0.22 |
| CHA | 1.00 | 1.00 | 1.00 | 1.00 | 1.14 | 1.04 | 1.00 |
| EUR | 0.07 | 0.07 | 0.07 | 0.07 | 0.07 | 0.07 | 0.07 |
| IND | 1.41 | 1.43 | 1.43 | 1.43 | 1.43 | 1.43 | 1.43 |
| JPN | 0.30 | 0.30 | 0.30 | 0.30 | 0.30 | 0.30 | 0.30 |
| LAM | 1.41 | 1.43 | 1.47 | 1.54 | 1.38 | 1.66 | 1.83 |
| MEA | 0.50 | 0.50 | 0.50 | 0.50 | 0.50 | 0.50 | 0.50 |
| NEU | 0.21 | 0.21 | 0.21 | 0.21 | 0.21 | 0.21 | 0.21 |
| OAS | 1.10 | 1.10 | 1.11 | 1.13 | 1.12 | 1.16 | 1.21 |
| REF | 0.00 | 0.00 | 0.00 | 0.00 | 0.00 | 0.00 | 0.00 |
| SSA | 1.00 | 1.00 | 1.00 | 1.00 | 1.00 | 1.00 | 1.00 |
| USA | 0.29 | 0.29 | 0.29 | 0.29 | 0.29 | 0.29 | 0.29 |

Table 1972: MAgPIE m4p\_SSP1 — Trade—Self-sufficiency—Crops—Other crops—Tropical roots (1) [PART 2/2]

|     | 1965 | 1970 | 1975 | 1980 | 1985 | 1990 | 1995 | 2000 | 2005 | 2010 |
|-----|------|------|------|------|------|------|------|------|------|------|
| GLO | 0.99 | 1.00 | 1.00 | 1.01 | 0.99 | 0.97 | 1.01 | 0.99 | 1.00 | 1.01 |
| CAZ | 0.39 | 0.35 | 0.28 | 0.31 | 0.29 | 0.30 | 0.30 | 0.35 | 0.34 | 0.32 |
| CHA | 1.00 | 1.00 | 1.00 | 1.01 | 1.00 | 0.98 | 0.98 | 0.98 | 0.89 | 0.80 |
| EUR | 0.12 | 0.09 | 0.05 | 0.04 | 0.03 | 0.02 | 0.04 | 0.03 | 0.08 | 0.10 |
| IND | 1.00 | 1.00 | 1.00 | 1.00 | 1.00 | 1.00 | 1.01 | 1.00 | 1.00 | 1.00 |
| JPN | 0.93 | 0.76 | 0.58 | 0.67 | 0.47 | 0.51 | 0.56 | 0.48 | 0.47 | 0.43 |
| LAM | 1.08 | 1.08 | 1.09 | 1.10 | 1.10 | 1.13 | 1.17 | 1.18 | 1.18 | 1.21 |
| MEA | 0.95 | 0.91 | 0.72 | 0.72 | 0.58 | 0.56 | 0.73 | 0.77 | 0.75 | 0.72 |
| NEU | 0.06 | 0.11 | 0.13 | 0.20 | 0.25 | 0.04 | 0.12 | 0.08 | 0.26 | 0.30 |
| OAS | 1.06 | 1.18 | 1.28 | 1.47 | 1.57 | 1.62 | 1.31 | 1.29 | 1.30 | 1.31 |
| REF | 0.00 | 0.00 | 0.00 | 0.00 | 0.00 | 0.00 | 0.00 | 0.00 | 0.00 | 0.00 |
| SSA | 1.01 | 1.01 | 1.01 | 1.00 | 1.01 | 1.01 | 1.00 | 1.00 | 1.00 | 1.03 |
| USA | 0.25 | 0.23 | 0.23 | 0.18 | 0.18 | 0.14 | 0.14 | 0.14 | 0.15 | 0.20 |

Table 1973: FAO — Trade—Self-sufficiency—Crops—Other crops—Tropical roots (1)

59.1.11 Sugar crops

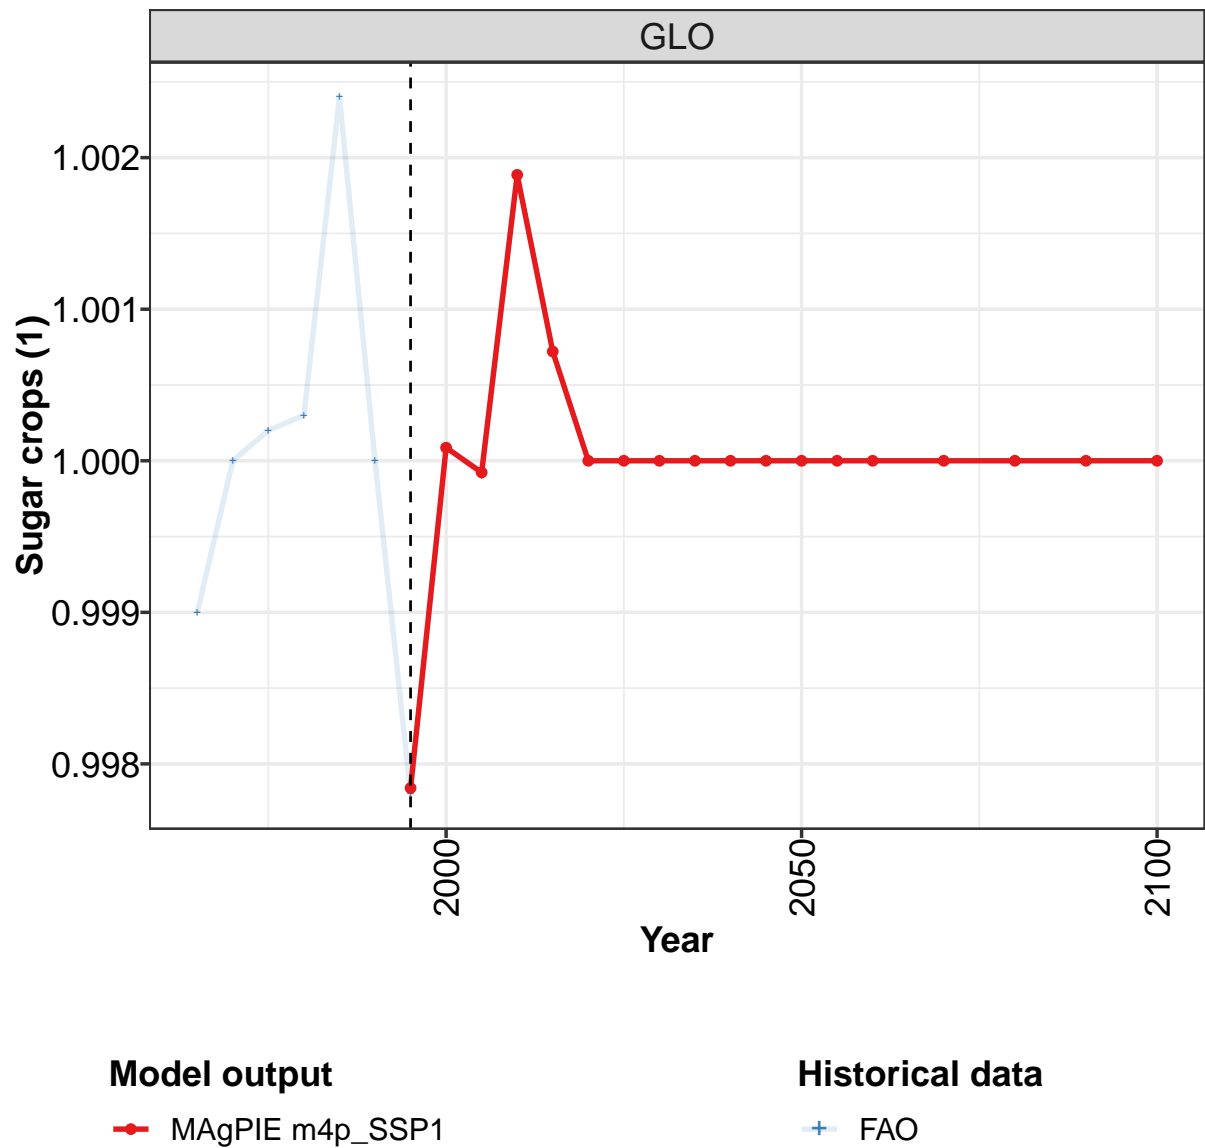

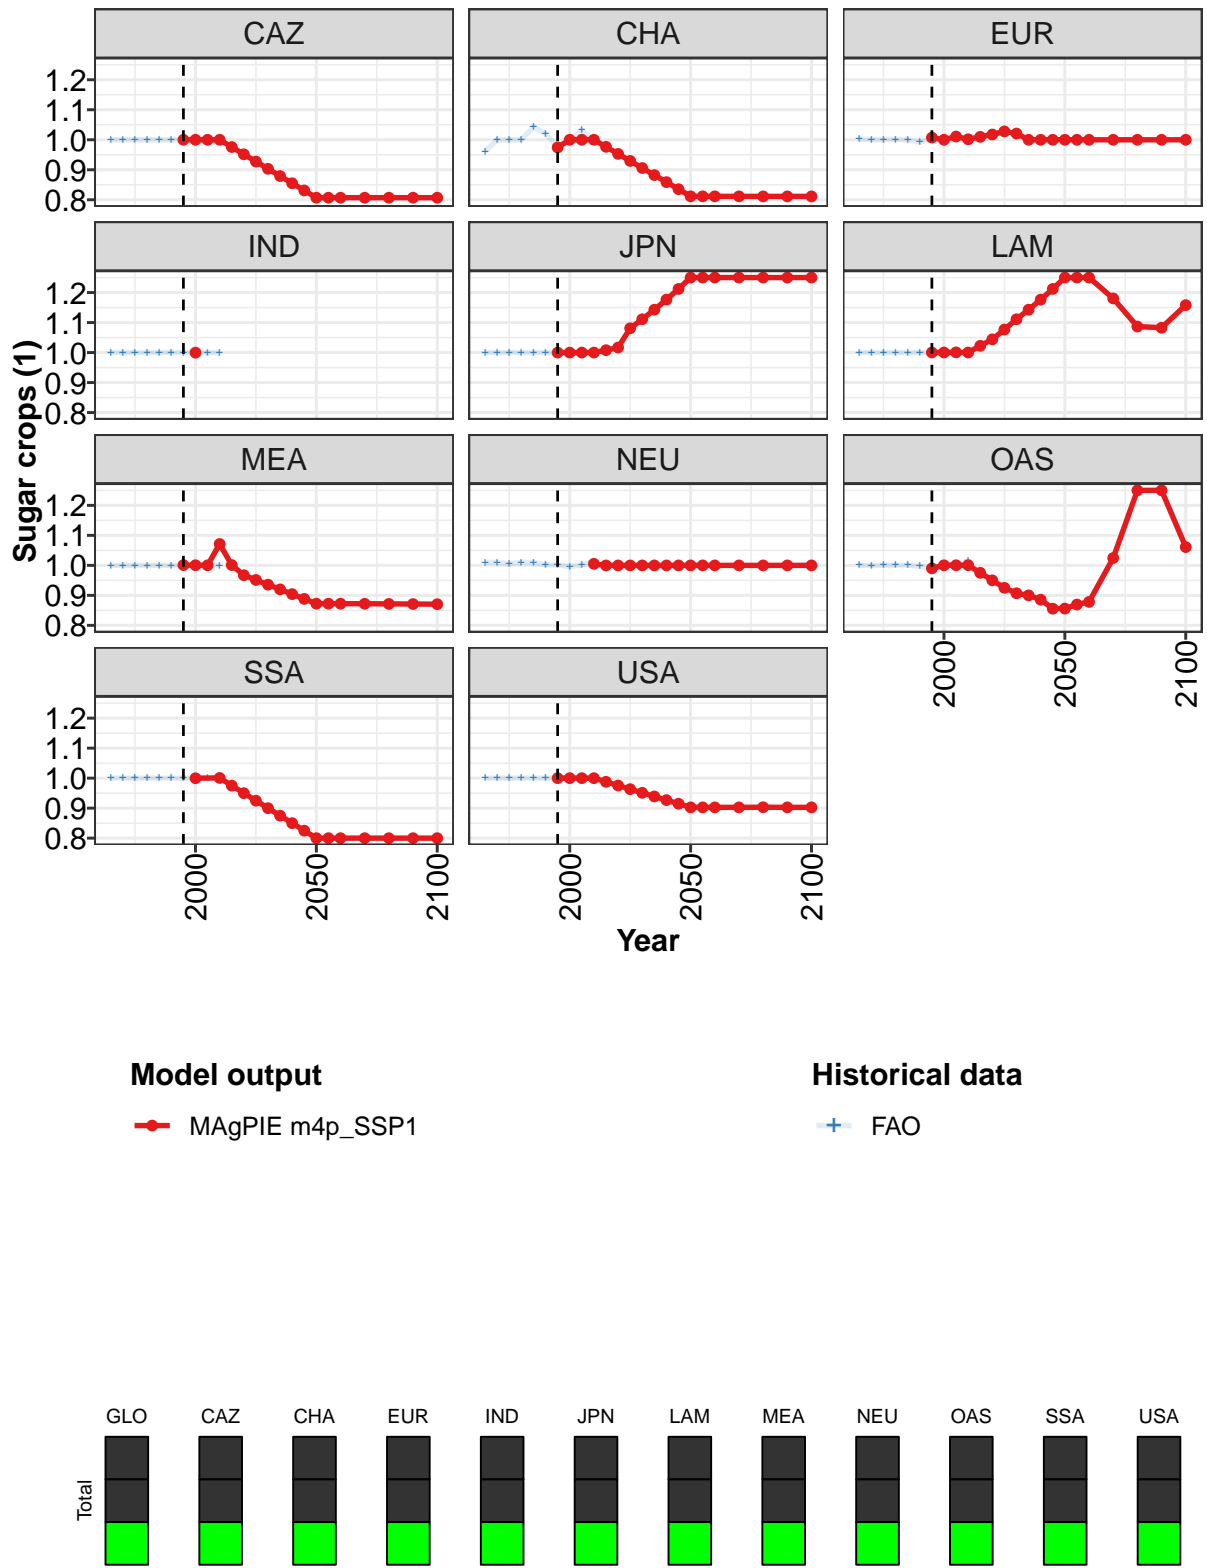

Figure 525: MAGPIE m4p\_SSP1 — Trade—Self-sufficiency—Crops—Sugar crops (1)



|     | 1995 | 2000 | 2005 | 2010 | 2015 | 2020 | 2025 | 2030 | 2035 | 2040 | 2045 |
|-----|------|------|------|------|------|------|------|------|------|------|------|
| GLO | 1    | 1    | 1    | 1    | 1    | 1    | 1    | 1    | 1    | 1    | 1    |
| CAZ | 1    | 1    | 1    | 1    | 1    | 1    | 1    | 1    | 1    | 1    | 1    |
| CHA | 1    | 1    | 1    | 1    | 1    | 1    | 1    | 1    | 1    | 1    | 1    |
| EUR | 1    | 1    | 1    | 1    | 1    | 1    | 1    | 1    | 1    | 1    | 1    |
| IND |      | 1    |      |      |      |      |      |      |      |      |      |
| JPN | 1    | 1    | 1    | 1    | 1    | 1    | 1    | 1    | 1    | 1    | 1    |
| LAM | 1    | 1    | 1    | 1    | 1    | 1    | 1    | 1    | 1    | 1    | 1    |
| MEA | 1    | 1    | 1    | 1    | 1    | 1    | 1    | 1    | 1    | 1    | 1    |
| NEU |      |      |      | 1    | 1    | 1    | 1    | 1    | 1    | 1    | 1    |
| OAS | 1    | 1    | 1    | 1    | 1    | 1    | 1    | 1    | 1    | 1    | 1    |
| SSA |      | 1    |      | 1    | 1    | 1    | 1    | 1    | 1    | 1    | 1    |
| USA | 1    | 1    | 1    | 1    | 1    | 1    | 1    | 1    | 1    | 1    | 1    |

Table 1974: MAgPIE m4p\_SSP1 — Trade—Self-sufficiency—Crops—Sugar crops (1) [PART 1/2]

|     | 2050 | 2055 | 2060 | 2070 | 2080 | 2090 | 2100 |
|-----|------|------|------|------|------|------|------|
| GLO | 1    | 1    | 1    | 1    | 1    | 1    | 1    |
| CAZ | 1    | 1    | 1    | 1    | 1    | 1    | 1    |
| CHA | 1    | 1    | 1    | 1    | 1    | 1    | 1    |
| EUR | 1    | 1    | 1    | 1    | 1    | 1    | 1    |
| IND |      |      |      |      |      |      |      |
| JPN | 1    | 1    | 1    | 1    | 1    | 1    | 1    |
| LAM | 1    | 1    | 1    | 1    | 1    | 1    | 1    |
| MEA | 1    | 1    | 1    | 1    | 1    | 1    | 1    |
| NEU | 1    | 1    | 1    | 1    | 1    | 1    | 1    |
| OAS | 1    | 1    | 1    | 1    | 1    | 1    | 1    |
| SSA | 1    | 1    | 1    | 1    | 1    | 1    | 1    |
| USA | 1    | 1    | 1    | 1    | 1    | 1    | 1    |

Table 1975: MAgPIE m4p\_SSP1 — Trade—Self-sufficiency—Crops—Sugar crops (1) [PART 2/2]

|     | 1965 | 1970 | 1975 | 1980 | 1985 | 1990 | 1995 | 2000 | 2005 | 2010 |
|-----|------|------|------|------|------|------|------|------|------|------|
| GLO | 1.00 | 1.00 | 1.00 | 1.00 | 1.00 | 1.00 | 1.00 | 1.00 | 1.00 | 1.00 |
| CAZ | 1.00 | 1.00 | 1.00 | 1.00 | 1.00 | 1.00 | 1.00 | 1.00 | 1.00 | 1.00 |
| CHA | 0.96 | 1.00 | 1.00 | 1.00 | 1.04 | 1.02 | 0.98 | 1.00 | 1.03 | 1.00 |
| EUR | 1.00 | 1.00 | 1.00 | 1.00 | 1.00 | 0.99 | 1.00 | 1.00 | 1.00 | 1.00 |
| IND | 1.00 | 1.00 | 1.00 | 1.00 | 1.00 | 1.00 | 1.00 | 1.00 | 1.00 | 1.00 |
| JPN | 1.00 | 1.00 | 1.00 | 1.00 | 1.00 | 1.00 | 1.00 | 1.00 | 1.00 | 1.00 |
| LAM | 1.00 | 1.00 | 1.00 | 1.00 | 1.00 | 1.00 | 1.00 | 1.00 | 1.00 | 1.00 |
| MEA | 1.00 | 1.00 | 1.00 | 1.00 | 1.00 | 1.00 | 1.00 | 1.00 | 1.00 | 1.00 |
| NEU | 1.01 | 1.01 | 1.01 | 1.01 | 1.01 | 1.00 | 1.00 | 1.00 | 1.00 | 1.01 |
| OAS | 1.00 | 1.00 | 1.00 | 1.00 | 1.00 | 1.00 | 0.99 | 1.00 | 1.00 | 1.01 |
| SSA | 1.00 | 1.00 | 1.00 | 1.00 | 1.00 | 1.00 | 1.00 | 1.00 | 1.00 | 1.00 |
| USA | 1.00 | 1.00 | 1.00 | 1.00 | 1.00 | 1.00 | 1.00 | 1.00 | 1.00 | 1.00 |

Table 1976: FAO — Trade—Self-sufficiency—Crops—Sugar crops (1)

59.1.12 Sugar crops—Sugar beet

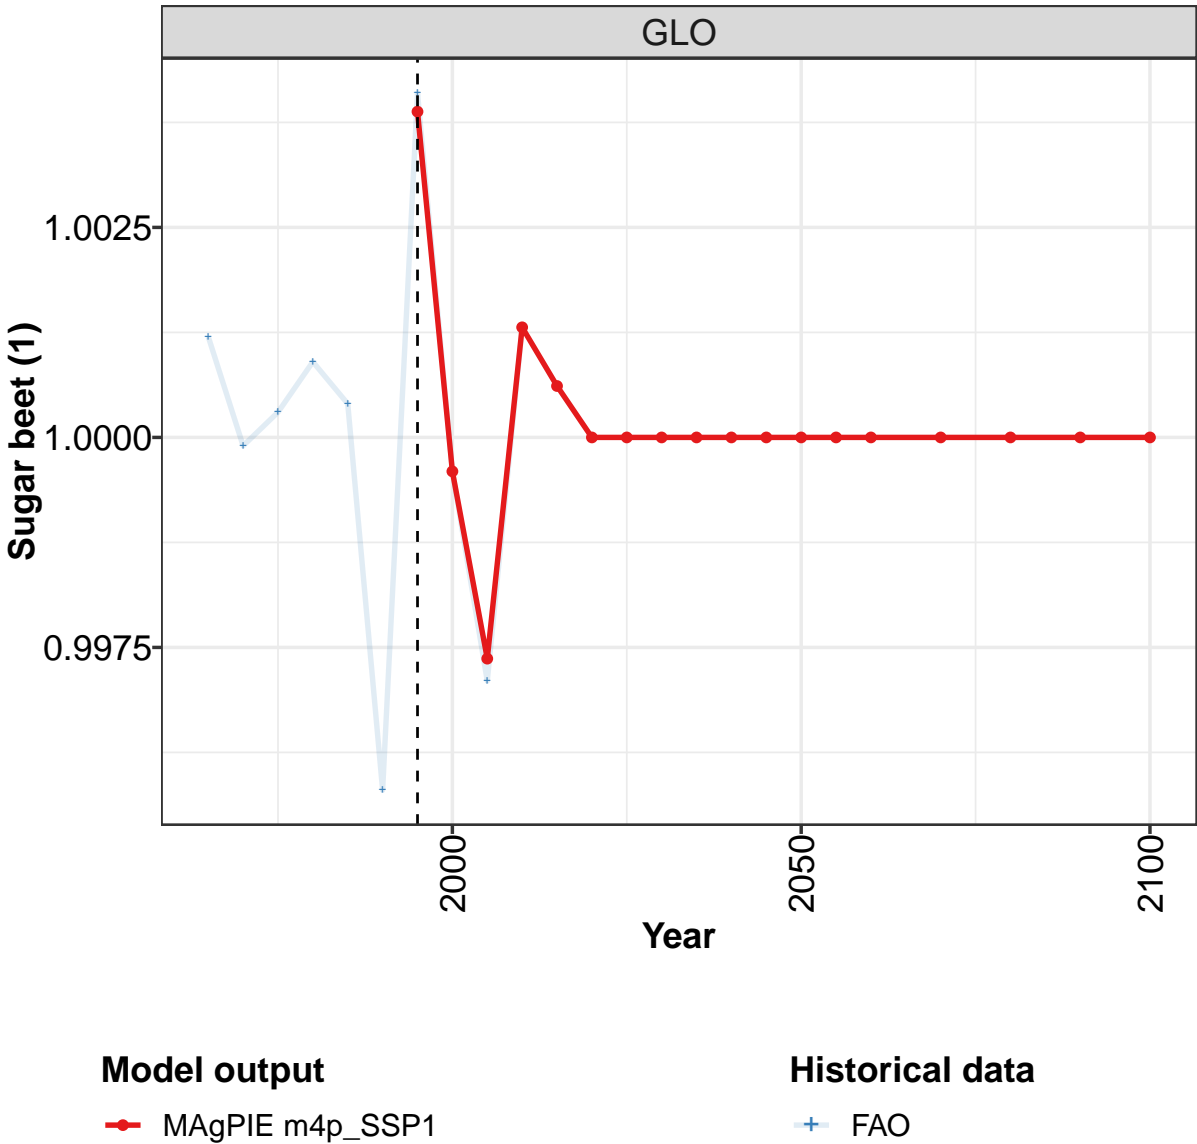

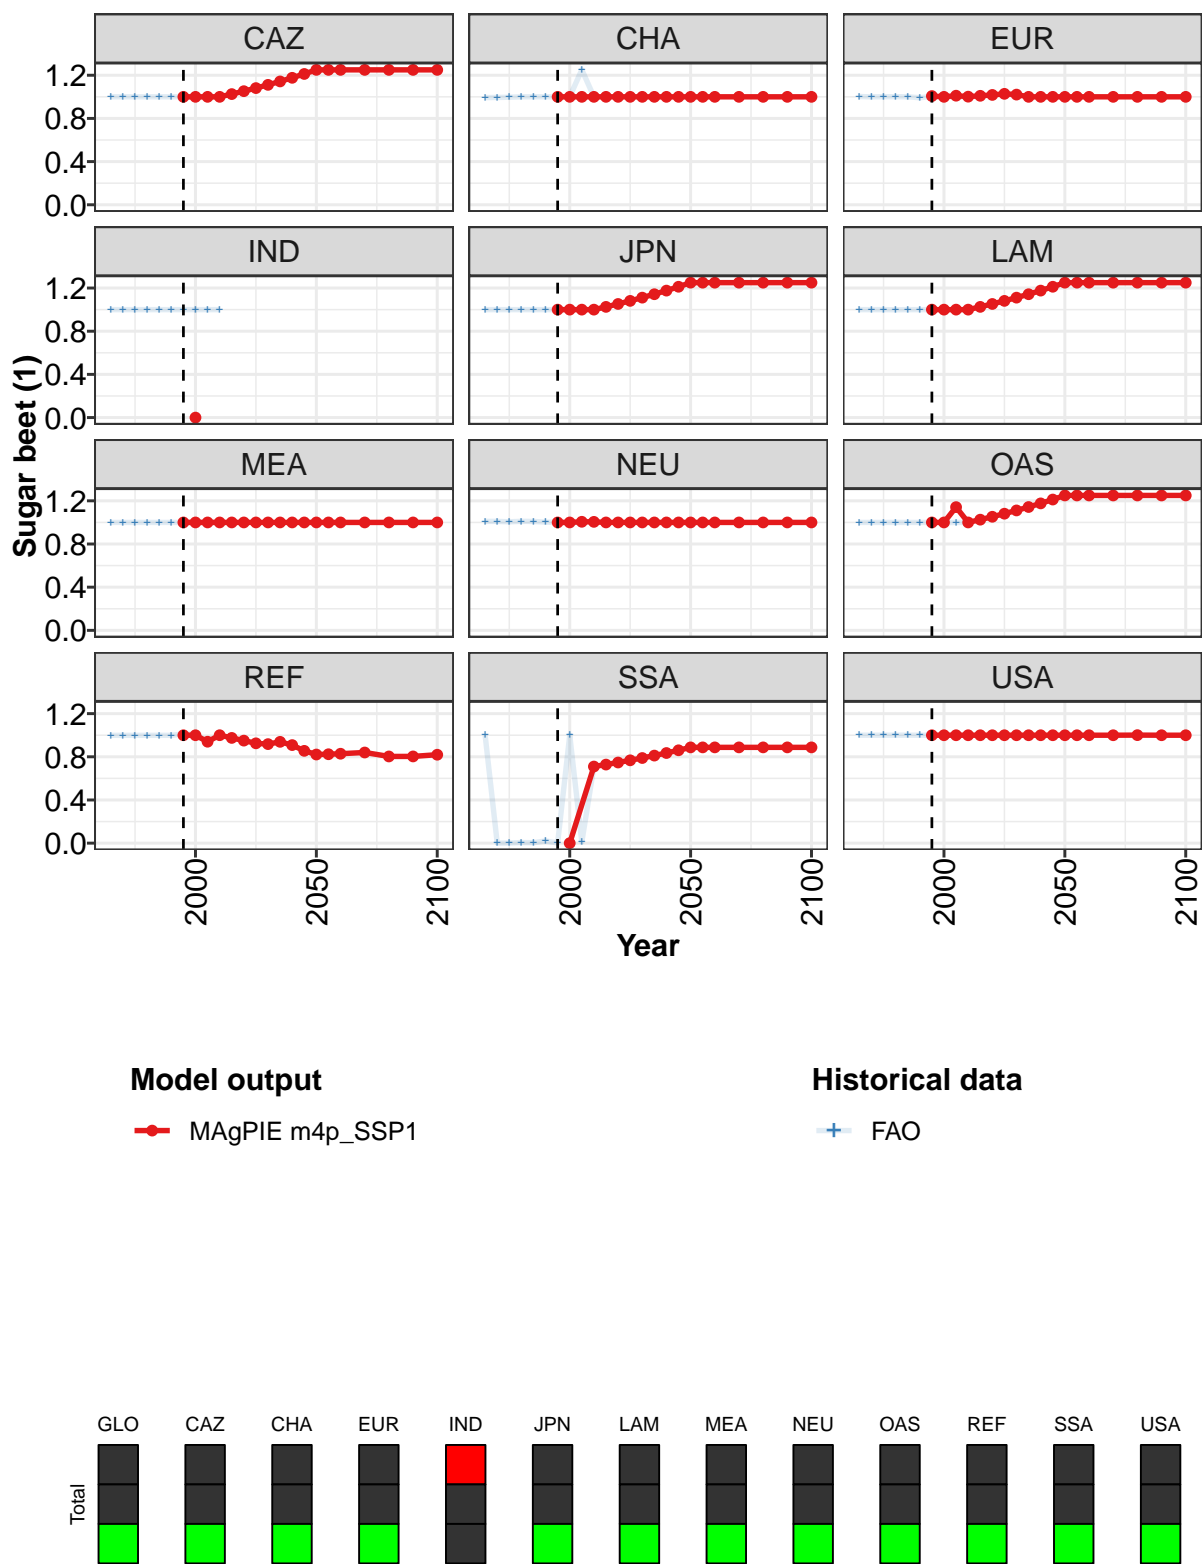

Figure 526: MAgPIE m4p\_SSP1 — Trade—Self-sufficiency—Crops—Sugar crops—Sugar beet (1)

|     | 1995 | 2000 | 2005 | 2010 | 2015 | 2020 | 2025 | 2030 | 2035 | 2040 | 2045 |
|-----|------|------|------|------|------|------|------|------|------|------|------|
| GLO | 1    | 1    | 1    | 1    | 1    | 1    | 1    | 1    | 1    | 1    | 1    |
| CAZ | 1    | 1    | 1    | 1    | 1    | 1    | 1    | 1    | 1    | 1    | 1    |
| CHA | 1    | 1    | 1    | 1    | 1    | 1    | 1    | 1    | 1    | 1    | 1    |
| EUR | 1    | 1    | 1    | 1    | 1    | 1    | 1    | 1    | 1    | 1    | 1    |
| IND |      | 0    |      |      |      |      |      |      |      |      |      |
| JPN | 1    | 1    | 1    | 1    | 1    | 1    | 1    | 1    | 1    | 1    | 1    |
| LAM | 1    | 1    | 1    | 1    | 1    | 1    | 1    | 1    | 1    | 1    | 1    |
| MEA | 1    | 1    | 1    | 1    | 1    | 1    | 1    | 1    | 1    | 1    | 1    |
| NEU | 1    | 1    | 1    | 1    | 1    | 1    | 1    | 1    | 1    | 1    | 1    |
| OAS | 1    | 1    | 1    | 1    | 1    | 1    | 1    | 1    | 1    | 1    | 1    |
| REF | 1    | 1    | 1    | 1    | 1    | 1    | 1    | 1    | 1    | 1    | 1    |
| SSA |      | 0    |      | 1    | 1    | 1    | 1    | 1    | 1    | 1    | 1    |
| USA | 1    | 1    | 1    | 1    | 1    | 1    | 1    | 1    | 1    | 1    | 1    |

Table 1977: MAgPIE m4p\_SSP1 — Trade—Self-sufficiency—Crops—Sugar crops—Sugar beet (1) [PART 1/2]

|     | 2050 | 2055 | 2060 | 2070 | 2080 | 2090 | 2100 |
|-----|------|------|------|------|------|------|------|
| GLO | 1    | 1    | 1    | 1    | 1    | 1    | 1    |
| CAZ | 1    | 1    | 1    | 1    | 1    | 1    | 1    |
| CHA | 1    | 1    | 1    | 1    | 1    | 1    | 1    |
| EUR | 1    | 1    | 1    | 1    | 1    | 1    | 1    |
| IND |      |      |      |      |      |      |      |
| JPN | 1    | 1    | 1    | 1    | 1    | 1    | 1    |
| LAM | 1    | 1    | 1    | 1    | 1    | 1    | 1    |
| MEA | 1    | 1    | 1    | 1    | 1    | 1    | 1    |
| NEU | 1    | 1    | 1    | 1    | 1    | 1    | 1    |
| OAS | 1    | 1    | 1    | 1    | 1    | 1    | 1    |
| REF | 1    | 1    | 1    | 1    | 1    | 1    | 1    |
| SSA | 1    | 1    | 1    | 1    | 1    | 1    | 1    |
| USA | 1    | 1    | 1    | 1    | 1    | 1    | 1    |

Table 1978: MAgPIE m4p\_SSP1 — Trade—Self-sufficiency—Crops—Sugar crops—Sugar beet (1) [PART 2/2]

|     | 1965 | 1970 | 1975 | 1980 | 1985 | 1990 | 1995 | 2000 | 2005 | 2010 |
|-----|------|------|------|------|------|------|------|------|------|------|
| GLO | 1.00 | 1.00 | 1.00 | 1.00 | 1.00 | 1.00 | 1.00 | 1.00 | 1.00 | 1.00 |
| CAZ | 1.00 | 1.00 | 1.00 | 1.00 | 1.00 | 1.00 | 1.00 | 1.00 | 1.00 | 1.00 |
| CHA | 0.99 | 0.99 | 1.00 | 1.00 | 1.00 | 1.00 | 1.00 | 1.00 | 1.25 | 1.00 |
| EUR | 1.00 | 1.00 | 1.00 | 1.00 | 1.00 | 0.99 | 1.00 | 1.00 | 1.00 | 1.00 |
| IND | 1.00 | 1.00 | 1.00 | 1.00 | 1.00 | 1.00 | 1.00 | 1.00 | 1.00 | 1.00 |
| JPN | 1.00 | 1.00 | 1.00 | 1.00 | 1.00 | 1.00 | 1.00 | 1.00 | 1.00 | 1.00 |
| LAM | 1.00 | 1.00 | 1.00 | 1.00 | 1.00 | 1.00 | 1.00 | 1.00 | 1.00 | 1.00 |
| MEA | 1.00 | 1.00 | 1.00 | 1.00 | 1.00 | 1.00 | 1.00 | 1.00 | 1.00 | 1.00 |
| NEU | 1.01 | 1.01 | 1.01 | 1.01 | 1.01 | 1.00 | 1.00 | 1.00 | 1.00 | 1.01 |
| OAS | 1.00 | 1.00 | 1.00 | 1.00 | 1.00 | 1.00 | 1.00 | 1.00 | 1.00 | 1.00 |
| REF | 1.00 | 1.00 | 1.00 | 1.00 | 1.00 | 1.00 | 1.01 | 1.01 | 0.94 | 1.01 |
| SSA | 1.00 | 0.00 | 0.00 | 0.01 | 0.00 | 0.02 | 0.00 | 1.00 | 0.01 | 0.71 |
| USA | 1.00 | 1.00 | 1.00 | 1.00 | 1.00 | 1.00 | 1.00 | 1.00 | 1.00 | 1.00 |

Table 1979: FAO — Trade—Self-sufficiency—Crops—Sugar crops—Sugar beet (1)

59.1.13 Sugar crops—Sugar cane

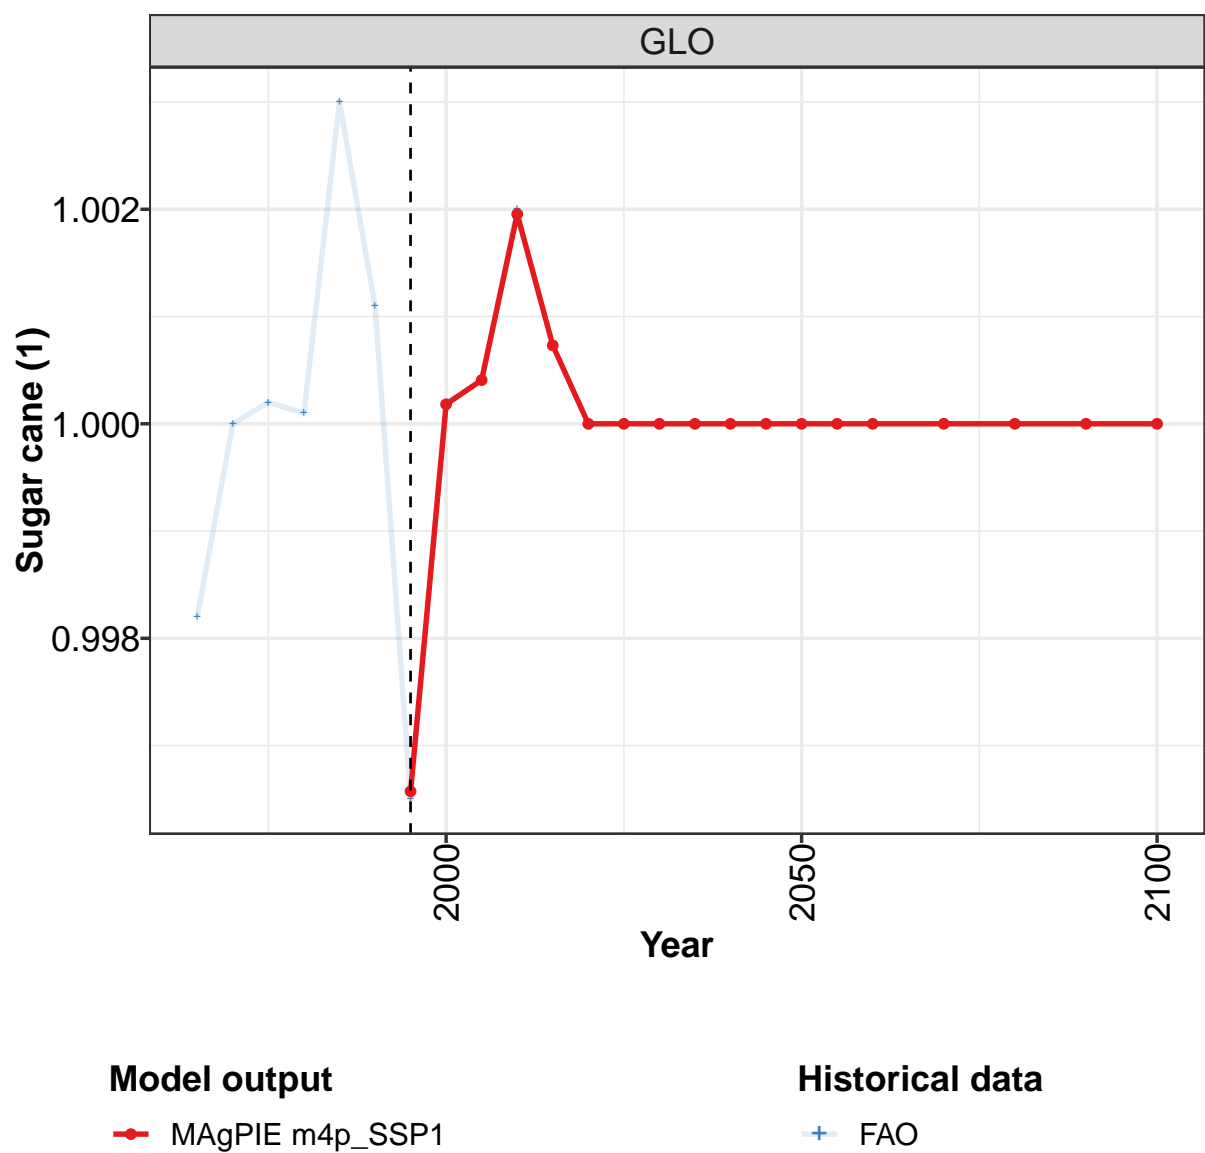

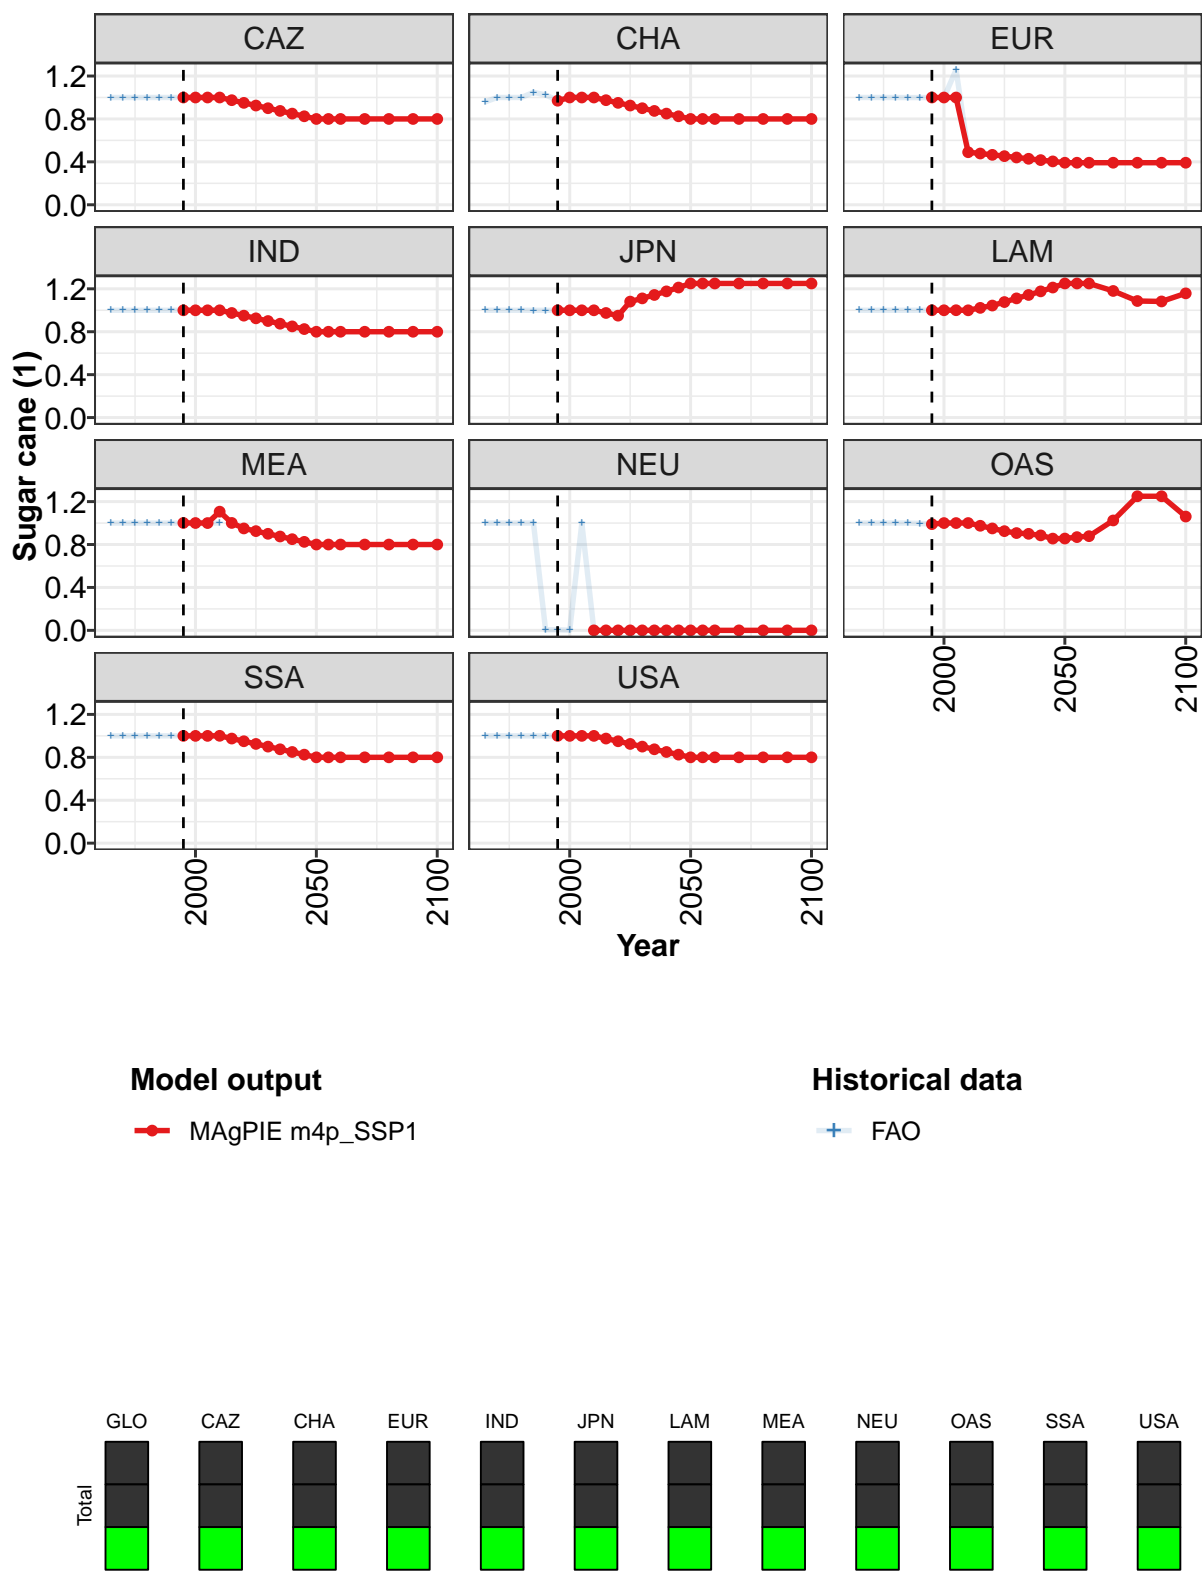

Figure 527: MAgPIE m4p\_SSP1 — Trade—Self-sufficiency—Crops—Sugar crops—Sugar cane (1)

|     | 1995 | 2000 | 2005 | 2010 | 2015 | 2020 | 2025 | 2030 | 2035 | 2040 | 2045 |
|-----|------|------|------|------|------|------|------|------|------|------|------|
| GLO | 1    | 1    | 1    | 1    | 1    | 1    | 1    | 1    | 1    | 1    | 1    |
| CAZ | 1    | 1    | 1    | 1    | 1    | 1    | 1    | 1    | 1    | 1    | 1    |
| CHA | 1    | 1    | 1    | 1    | 1    | 1    | 1    | 1    | 1    | 1    | 1    |
| EUR | 1    | 1    | 1    | 0    | 0    | 0    | 0    | 0    | 0    | 0    | 0    |
| IND | 1    | 1    | 1    | 1    | 1    | 1    | 1    | 1    | 1    | 1    | 1    |
| JPN | 1    | 1    | 1    | 1    | 1    | 1    | 1    | 1    | 1    | 1    | 1    |
| LAM | 1    | 1    | 1    | 1    | 1    | 1    | 1    | 1    | 1    | 1    | 1    |
| MEA | 1    | 1    | 1    | 1    | 1    | 1    | 1    | 1    | 1    | 1    | 1    |
| NEU |      |      |      | 0    | 0    | 0    | 0    | 0    | 0    | 0    | 0    |
| OAS | 1    | 1    | 1    | 1    | 1    | 1    | 1    | 1    | 1    | 1    | 1    |
| SSA | 1    | 1    | 1    | 1    | 1    | 1    | 1    | 1    | 1    | 1    | 1    |
| USA | 1    | 1    | 1    | 1    | 1    | 1    | 1    | 1    | 1    | 1    | 1    |

Table 1980: MAgPIE m4p\_SSP1 — Trade—Self-sufficiency—Crops—Sugar crops—Sugar cane (1) [PART 1/2]

|     | 2050 | 2055 | 2060 | 2070 | 2080 | 2090 | 2100 |
|-----|------|------|------|------|------|------|------|
| GLO | 1    | 1    | 1    | 1    | 1    | 1    | 1    |
| CAZ | 1    | 1    | 1    | 1    | 1    | 1    | 1    |
| CHA | 1    | 1    | 1    | 1    | 1    | 1    | 1    |
| EUR | 0    | 0    | 0    | 0    | 0    | 0    | 0    |
| IND | 1    | 1    | 1    | 1    | 1    | 1    | 1    |
| JPN | 1    | 1    | 1    | 1    | 1    | 1    | 1    |
| LAM | 1    | 1    | 1    | 1    | 1    | 1    | 1    |
| MEA | 1    | 1    | 1    | 1    | 1    | 1    | 1    |
| NEU | 0    | 0    | 0    | 0    | 0    | 0    | 0    |
| OAS | 1    | 1    | 1    | 1    | 1    | 1    | 1    |
| SSA | 1    | 1    | 1    | 1    | 1    | 1    | 1    |
| USA | 1    | 1    | 1    | 1    | 1    | 1    | 1    |

Table 1981: MAgPIE m4p\_SSP1 — Trade—Self-sufficiency—Crops—Sugar crops—Sugar cane (1) [PART 2/2]

|     | 1965 | 1970 | 1975 | 1980 | 1985 | 1990 | 1995 | 2000 | 2005 | 2010 |
|-----|------|------|------|------|------|------|------|------|------|------|
| GLO | 1.00 | 1.00 | 1.00 | 1.00 | 1.00 | 1.00 | 1.00 | 1.00 | 1.00 | 1.00 |
| CAZ | 1.00 | 1.00 | 1.00 | 1.00 | 1.00 | 1.00 | 1.00 | 1.00 | 1.00 | 1.00 |
| CHA | 0.96 | 1.00 | 1.00 | 1.00 | 1.05 | 1.02 | 0.97 | 1.00 | 1.02 | 1.00 |
| EUR | 1.00 | 1.00 | 1.00 | 1.00 | 1.00 | 1.00 | 1.00 | 1.00 | 1.26 | 0.49 |
| IND | 1.00 | 1.00 | 1.00 | 1.00 | 1.00 | 1.00 | 1.00 | 1.00 | 1.00 | 1.00 |
| JPN | 1.00 | 1.00 | 1.00 | 1.00 | 1.00 | 1.00 | 1.00 | 1.00 | 1.00 | 1.00 |
| LAM | 1.00 | 1.00 | 1.00 | 1.00 | 1.00 | 1.00 | 1.00 | 1.00 | 1.00 | 1.00 |
| MEA | 1.00 | 1.00 | 1.00 | 1.00 | 1.00 | 1.00 | 1.00 | 1.00 | 1.00 | 1.00 |
| NEU | 1.00 | 1.00 | 1.00 | 1.00 | 1.00 | 0.01 | 0.01 | 0.00 | 1.00 | 0.00 |
| OAS | 1.00 | 1.00 | 1.00 | 1.00 | 1.00 | 1.00 | 0.99 | 1.00 | 1.00 | 1.01 |
| SSA | 1.00 | 1.00 | 1.00 | 1.00 | 1.00 | 1.00 | 1.00 | 1.00 | 1.00 | 1.00 |
| USA | 1.00 | 1.00 | 1.00 | 1.00 | 1.00 | 1.00 | 1.00 | 1.00 | 1.00 | 1.00 |

Table 1982: FAO — Trade—Self-sufficiency—Crops—Sugar crops—Sugar cane (1)

59.2 Fish

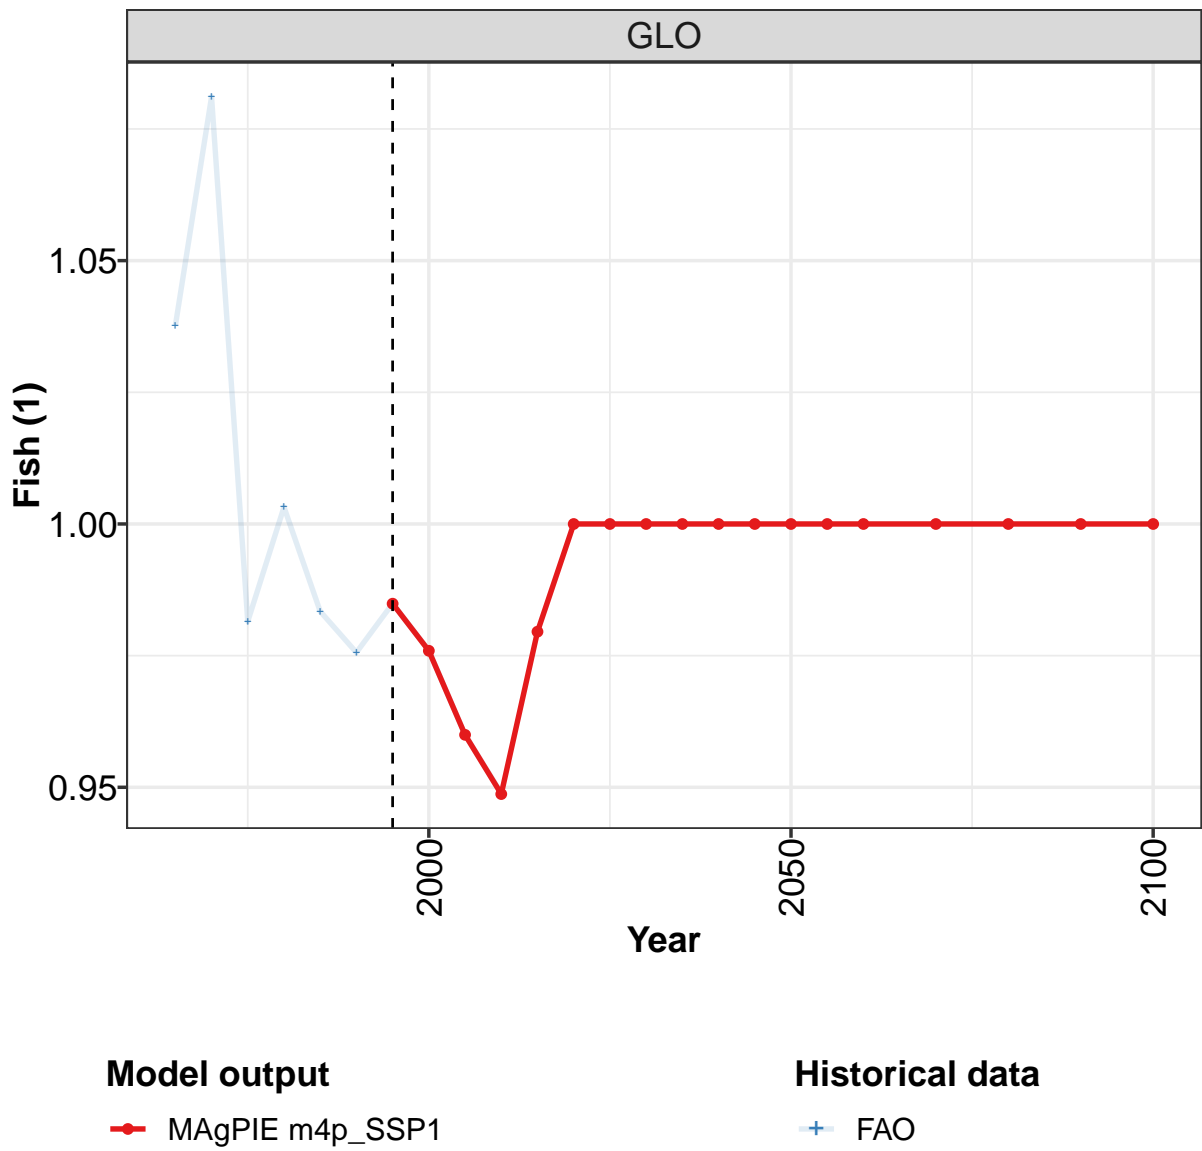



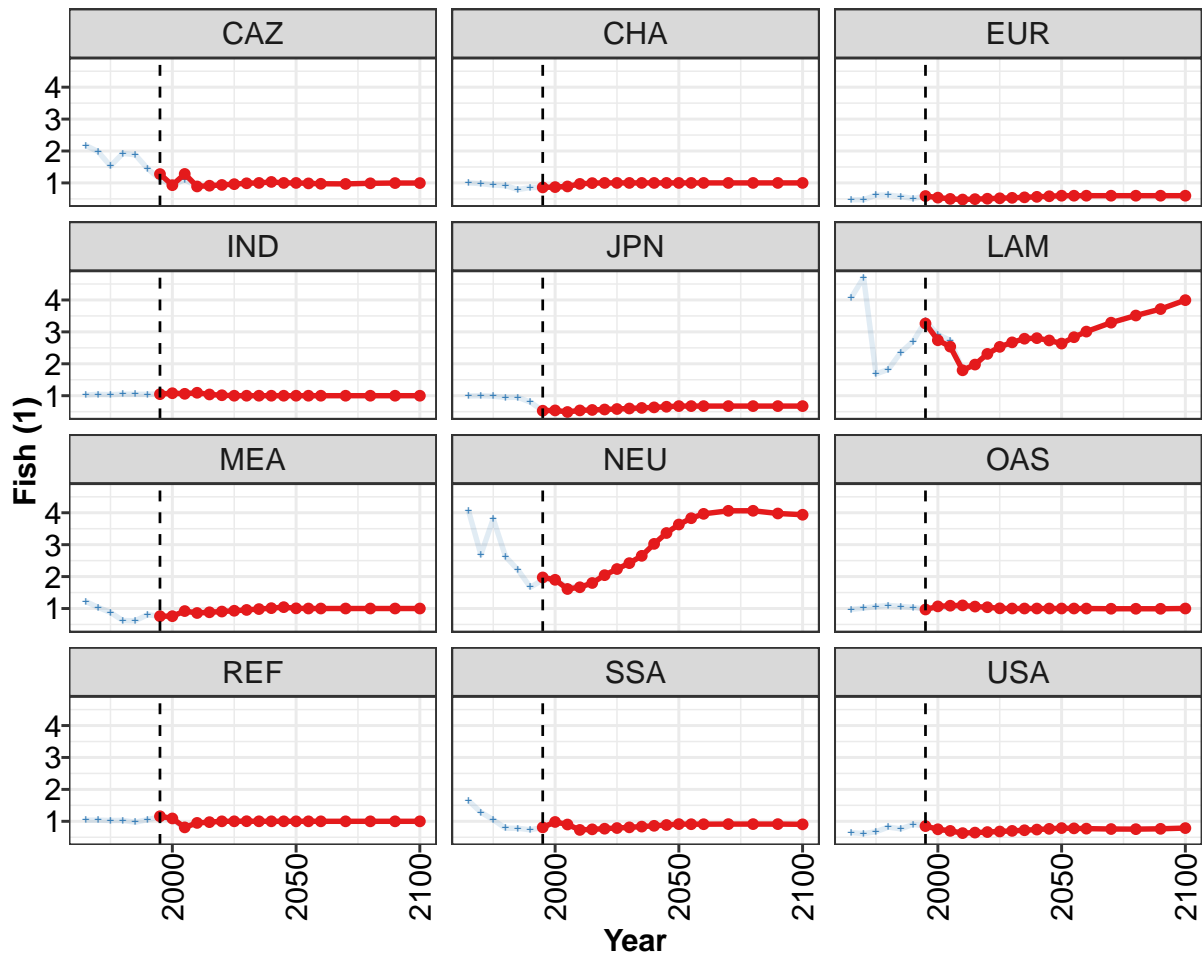

Model output

—●— MAGPIE m4p\_SSP1

Historical data

—+— FAO

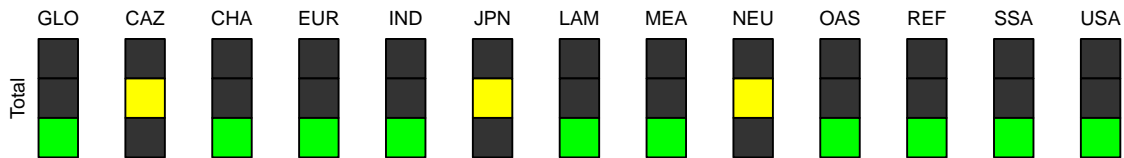

Figure 528: MAGPIE m4p\_SSP1 — Trade—Self-sufficiency—Fish (1)

|     | 1995 | 2000 | 2005 | 2010 | 2015 | 2020 | 2025 | 2030 | 2035 | 2040 | 2045 |
|-----|------|------|------|------|------|------|------|------|------|------|------|
| GLO | 0.98 | 0.98 | 0.96 | 0.95 | 0.98 | 1.00 | 1.00 | 1.00 | 1.00 | 1.00 | 1.00 |
| CAZ | 1.28 | 0.93 | 1.28 | 0.89 | 0.91 | 0.94 | 0.96 | 0.99 | 1.00 | 1.03 | 1.00 |
| CHA | 0.86 | 0.87 | 0.89 | 0.97 | 0.99 | 1.00 | 1.00 | 1.00 | 1.00 | 1.00 | 1.00 |
| EUR | 0.59 | 0.54 | 0.50 | 0.48 | 0.49 | 0.51 | 0.52 | 0.53 | 0.55 | 0.56 | 0.58 |
| IND | 1.05 | 1.08 | 1.06 | 1.09 | 1.04 | 1.02 | 1.00 | 1.00 | 1.00 | 1.00 | 1.00 |
| JPN | 0.53 | 0.54 | 0.49 | 0.54 | 0.55 | 0.57 | 0.58 | 0.60 | 0.62 | 0.64 | 0.65 |
| LAM | 3.26 | 2.74 | 2.54 | 1.80 | 1.98 | 2.31 | 2.53 | 2.67 | 2.79 | 2.80 | 2.73 |
| MEA | 0.76 | 0.76 | 0.92 | 0.86 | 0.88 | 0.91 | 0.93 | 0.96 | 0.98 | 1.01 | 1.04 |
| NEU | 1.97 | 1.90 | 1.61 | 1.67 | 1.80 | 2.05 | 2.24 | 2.42 | 2.65 | 3.03 | 3.37 |
| OAS | 0.97 | 1.07 | 1.09 | 1.10 | 1.06 | 1.04 | 1.01 | 1.00 | 1.00 | 1.00 | 1.00 |
| REF | 1.16 | 1.09 | 0.81 | 0.95 | 0.97 | 1.00 | 1.00 | 1.00 | 1.00 | 1.00 | 1.00 |
| SSA | 0.81 | 0.98 | 0.90 | 0.73 | 0.75 | 0.77 | 0.79 | 0.81 | 0.83 | 0.86 | 0.88 |
| USA | 0.85 | 0.75 | 0.70 | 0.63 | 0.65 | 0.66 | 0.68 | 0.70 | 0.72 | 0.74 | 0.76 |

Table 1983: MAgPIE m4p-SSP1 — Trade—Self-sufficiency—Fish (1) [PART 1/2]

|     | 2050 | 2055 | 2060 | 2070 | 2080 | 2090 | 2100 |
|-----|------|------|------|------|------|------|------|
| GLO | 1.00 | 1.00 | 1.00 | 1.00 | 1.00 | 1.00 | 1.00 |
| CAZ | 1.00 | 0.99 | 0.97 | 0.97 | 0.99 | 1.00 | 1.00 |
| CHA | 1.00 | 1.00 | 1.00 | 1.00 | 1.00 | 1.00 | 1.00 |
| EUR | 0.60 | 0.60 | 0.60 | 0.60 | 0.60 | 0.60 | 0.60 |
| IND | 1.00 | 1.00 | 1.00 | 1.00 | 1.00 | 1.00 | 1.00 |
| JPN | 0.68 | 0.68 | 0.68 | 0.67 | 0.67 | 0.68 | 0.68 |
| LAM | 2.63 | 2.83 | 3.01 | 3.29 | 3.51 | 3.72 | 3.99 |
| MEA | 1.01 | 1.00 | 1.00 | 1.00 | 1.00 | 1.00 | 1.00 |
| NEU | 3.63 | 3.83 | 3.97 | 4.06 | 4.06 | 3.98 | 3.94 |
| OAS | 1.00 | 1.00 | 1.00 | 0.99 | 0.99 | 0.99 | 1.00 |
| REF | 1.00 | 1.00 | 1.00 | 1.00 | 1.00 | 1.00 | 1.00 |
| SSA | 0.91 | 0.91 | 0.91 | 0.91 | 0.91 | 0.91 | 0.91 |
| USA | 0.79 | 0.78 | 0.77 | 0.76 | 0.75 | 0.76 | 0.79 |

Table 1984: MAgPIE m4p-SSP1 — Trade—Self-sufficiency—Fish (1) [PART 2/2]

|     | 1965 | 1970 | 1975 | 1980 | 1985 | 1990 | 1995 | 2000 | 2005 | 2010 |
|-----|------|------|------|------|------|------|------|------|------|------|
| GLO | 1.04 | 1.08 | 0.98 | 1.00 | 0.98 | 0.98 | 0.98 | 0.98 | 0.96 | 0.95 |
| CAZ | 2.18 | 1.98 | 1.53 | 1.92 | 1.88 | 1.45 | 1.12 | 0.93 | 1.10 | 0.89 |
| CHA | 1.00 | 0.98 | 0.93 | 0.92 | 0.79 | 0.85 | 0.86 | 0.87 | 0.89 | 0.97 |
| EUR | 0.47 | 0.47 | 0.62 | 0.62 | 0.57 | 0.51 | 0.59 | 0.54 | 0.50 | 0.48 |
| IND | 1.02 | 1.04 | 1.03 | 1.05 | 1.05 | 1.04 | 1.07 | 1.10 | 1.07 | 1.12 |
| JPN | 0.99 | 1.00 | 0.98 | 0.95 | 0.95 | 0.80 | 0.53 | 0.54 | 0.49 | 0.54 |
| LAM | 4.07 | 4.70 | 1.68 | 1.82 | 2.36 | 2.70 | 3.34 | 2.91 | 2.73 | 1.81 |
| MEA | 1.22 | 1.04 | 0.87 | 0.62 | 0.62 | 0.80 | 0.76 | 0.76 | 0.92 | 0.86 |
| NEU | 4.07 | 2.69 | 3.81 | 2.62 | 2.21 | 1.67 | 1.89 | 1.92 | 1.67 | 1.70 |
| OAS | 0.97 | 1.01 | 1.06 | 1.10 | 1.06 | 1.04 | 0.97 | 1.02 | 1.04 | 1.09 |
| REF | 1.04 | 1.04 | 1.02 | 1.03 | 0.97 | 1.05 | 1.14 | 1.03 | 0.81 | 0.95 |
| SSA | 1.65 | 1.28 | 1.05 | 0.78 | 0.78 | 0.73 | 0.81 | 0.98 | 0.90 | 0.73 |
| USA | 0.64 | 0.61 | 0.67 | 0.82 | 0.76 | 0.90 | 0.85 | 0.75 | 0.70 | 0.63 |

Table 1985: FAO — Trade—Self-sufficiency—Fish (1)

59.3 Livestock products

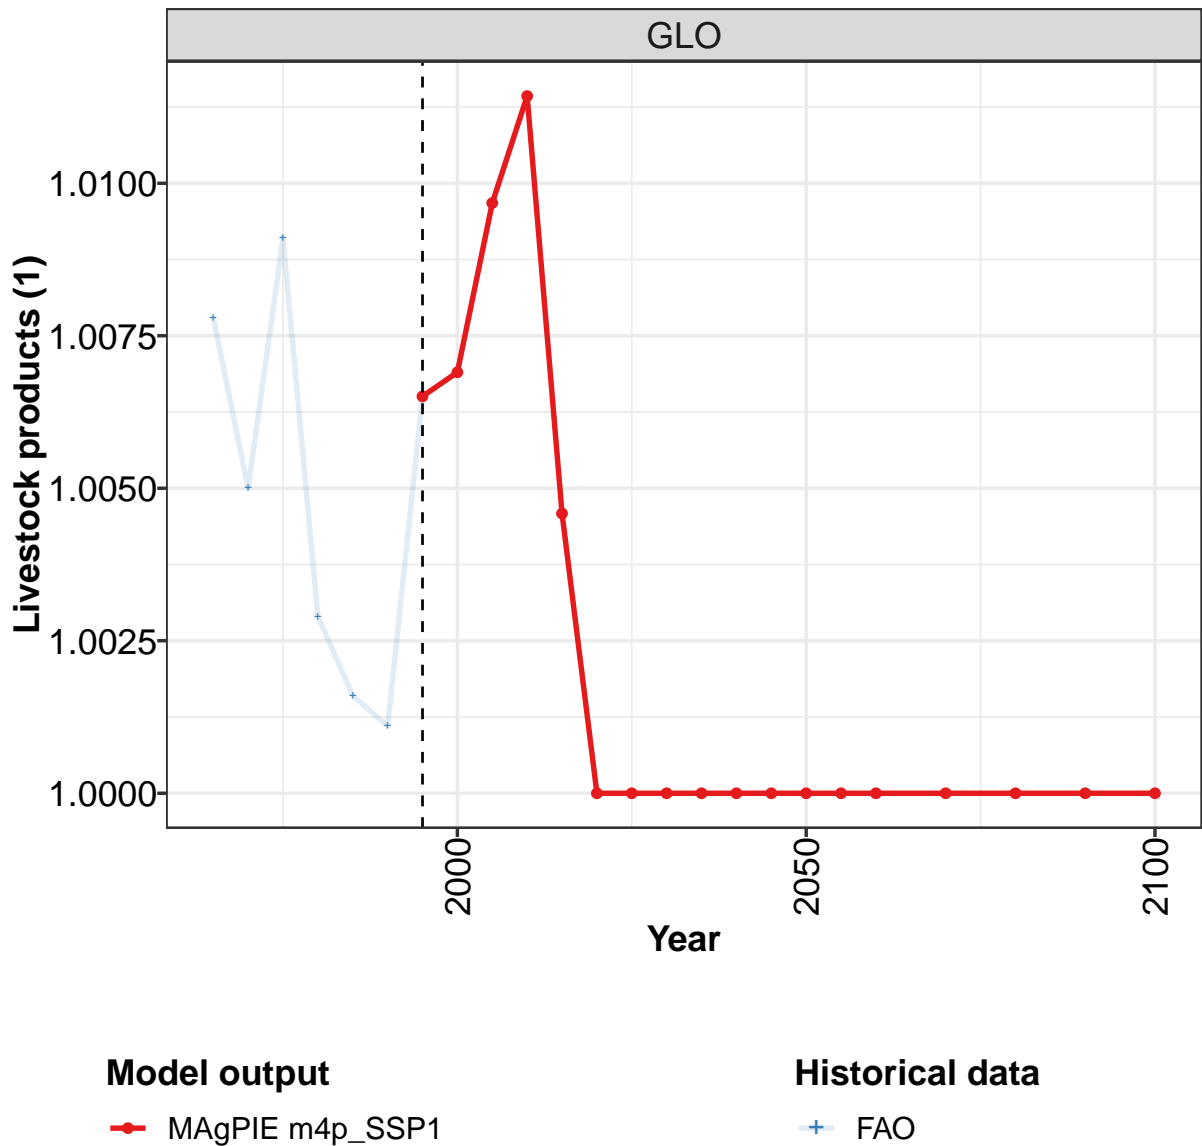

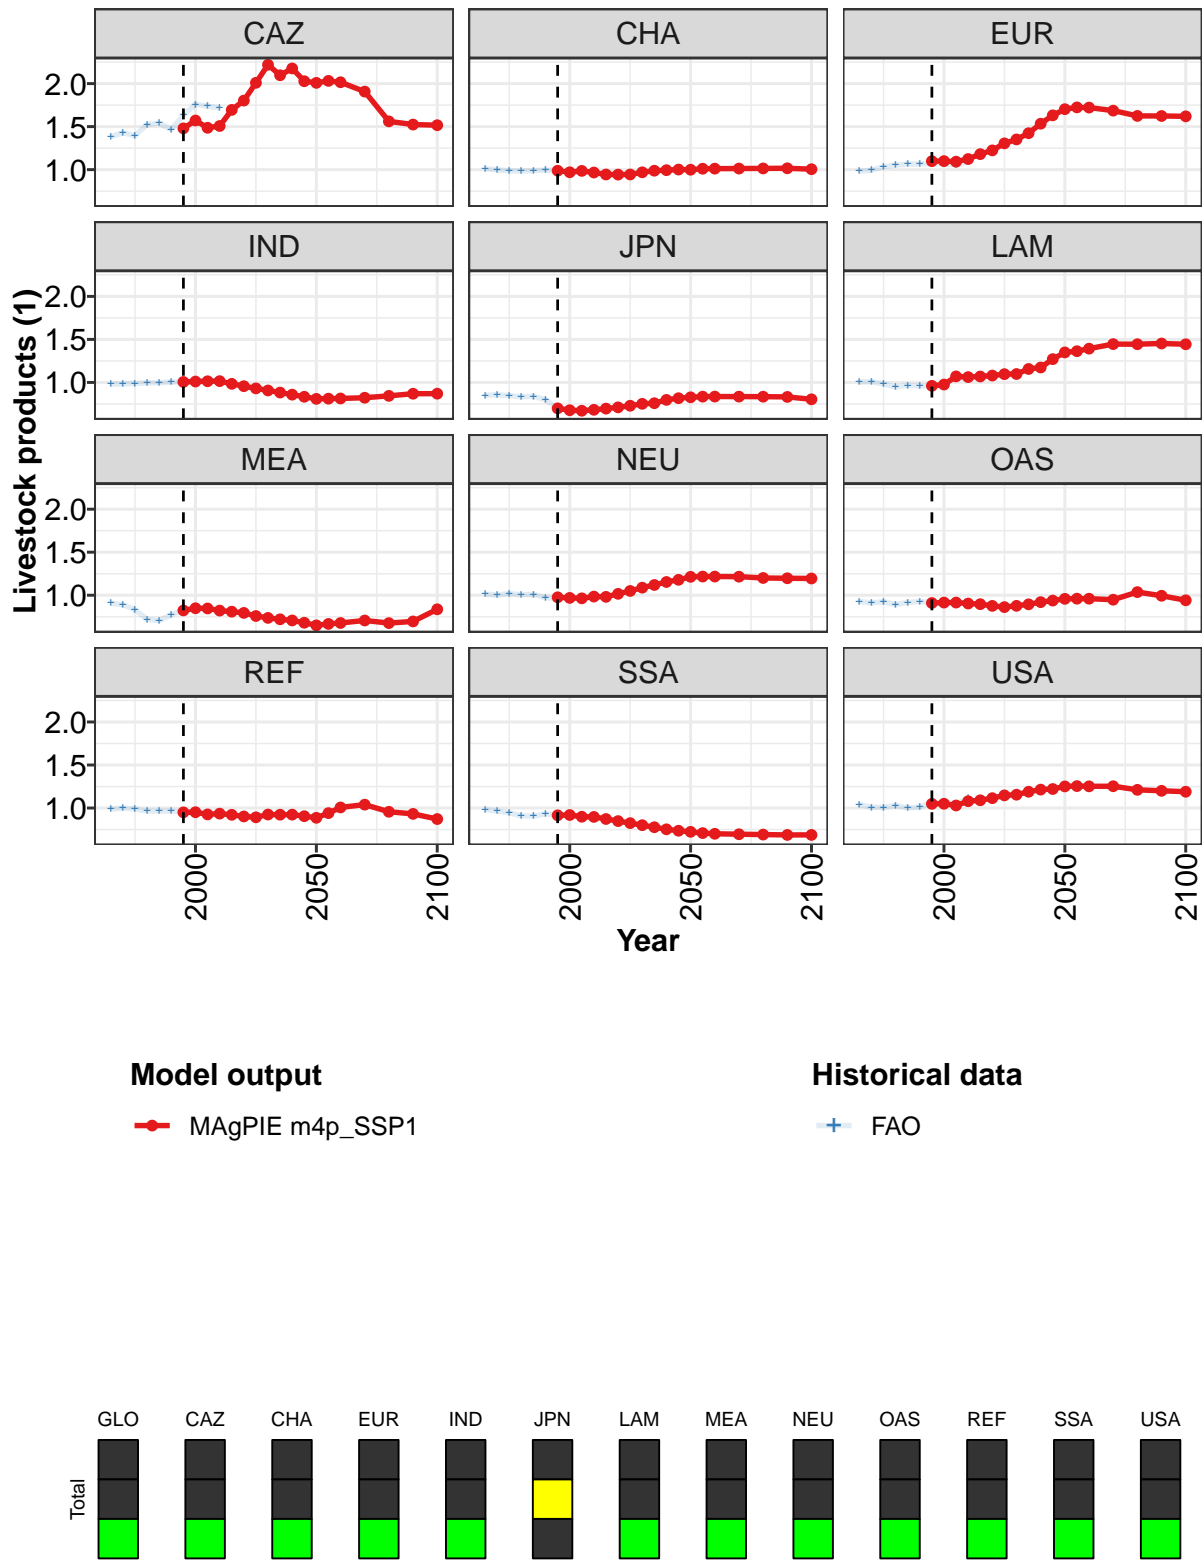

Figure 529: MAgPIE m4p\_SSP1 — Trade—Self-sufficiency—Livestock products (1)

|     | 1995 | 2000 | 2005 | 2010 | 2015 | 2020 | 2025 | 2030 | 2035 | 2040 | 2045 |
|-----|------|------|------|------|------|------|------|------|------|------|------|
| GLO | 1.01 | 1.01 | 1.01 | 1.01 | 1.00 | 1.00 | 1.00 | 1.00 | 1.00 | 1.00 | 1.00 |
| CAZ | 1.48 | 1.57 | 1.49 | 1.51 | 1.69 | 1.80 | 2.01 | 2.22 | 2.10 | 2.18 | 2.03 |
| CHA | 0.99 | 0.97 | 0.99 | 0.97 | 0.94 | 0.94 | 0.94 | 0.97 | 0.99 | 0.99 | 1.00 |
| EUR | 1.10 | 1.10 | 1.09 | 1.12 | 1.18 | 1.22 | 1.31 | 1.35 | 1.42 | 1.53 | 1.63 |
| IND | 1.01 | 1.01 | 1.01 | 1.02 | 0.98 | 0.96 | 0.93 | 0.91 | 0.88 | 0.86 | 0.83 |
| JPN | 0.70 | 0.68 | 0.67 | 0.68 | 0.70 | 0.71 | 0.73 | 0.75 | 0.76 | 0.80 | 0.82 |
| LAM | 0.96 | 0.98 | 1.07 | 1.06 | 1.07 | 1.08 | 1.10 | 1.10 | 1.16 | 1.17 | 1.27 |
| MEA | 0.82 | 0.85 | 0.85 | 0.82 | 0.81 | 0.79 | 0.76 | 0.74 | 0.72 | 0.71 | 0.68 |
| NEU | 0.98 | 0.97 | 0.96 | 0.98 | 0.98 | 1.02 | 1.05 | 1.09 | 1.12 | 1.15 | 1.18 |
| OAS | 0.91 | 0.91 | 0.91 | 0.90 | 0.90 | 0.88 | 0.86 | 0.88 | 0.89 | 0.92 | 0.94 |
| REF | 0.95 | 0.95 | 0.93 | 0.93 | 0.92 | 0.90 | 0.89 | 0.92 | 0.92 | 0.92 | 0.91 |
| SSA | 0.92 | 0.92 | 0.90 | 0.90 | 0.87 | 0.85 | 0.82 | 0.80 | 0.78 | 0.75 | 0.74 |
| USA | 1.05 | 1.05 | 1.03 | 1.08 | 1.09 | 1.11 | 1.15 | 1.15 | 1.19 | 1.21 | 1.22 |

Table 1986: MAgPIE m4p\_SSP1 — Trade—Self-sufficiency—Livestock products (1) [PART 1/2]

|     | 2050 | 2055 | 2060 | 2070 | 2080 | 2090 | 2100 |
|-----|------|------|------|------|------|------|------|
| GLO | 1.00 | 1.00 | 1.00 | 1.00 | 1.00 | 1.00 | 1.00 |
| CAZ | 2.01 | 2.03 | 2.02 | 1.91 | 1.56 | 1.52 | 1.52 |
| CHA | 1.00 | 1.01 | 1.01 | 1.01 | 1.01 | 1.02 | 1.01 |
| EUR | 1.70 | 1.72 | 1.72 | 1.69 | 1.62 | 1.62 | 1.62 |
| IND | 0.81 | 0.81 | 0.81 | 0.82 | 0.84 | 0.87 | 0.87 |
| JPN | 0.83 | 0.83 | 0.84 | 0.84 | 0.83 | 0.83 | 0.80 |
| LAM | 1.35 | 1.36 | 1.39 | 1.45 | 1.44 | 1.45 | 1.44 |
| MEA | 0.65 | 0.67 | 0.68 | 0.71 | 0.68 | 0.70 | 0.84 |
| NEU | 1.21 | 1.22 | 1.22 | 1.22 | 1.20 | 1.20 | 1.19 |
| OAS | 0.96 | 0.96 | 0.96 | 0.95 | 1.04 | 0.99 | 0.94 |
| REF | 0.89 | 0.94 | 1.01 | 1.04 | 0.96 | 0.93 | 0.87 |
| SSA | 0.72 | 0.71 | 0.70 | 0.70 | 0.69 | 0.69 | 0.69 |
| USA | 1.25 | 1.26 | 1.25 | 1.25 | 1.21 | 1.20 | 1.19 |

Table 1987: MAgPIE m4p\_SSP1 — Trade—Self-sufficiency—Livestock products (1) [PART 2/2]

|     | 1965 | 1970 | 1975 | 1980 | 1985 | 1990 | 1995 | 2000 | 2005 | 2010 |
|-----|------|------|------|------|------|------|------|------|------|------|
| GLO | 1.01 | 1.00 | 1.01 | 1.00 | 1.00 | 1.00 | 1.01 | 1.01 | 1.01 | 1.01 |
| CAZ | 1.38 | 1.43 | 1.40 | 1.52 | 1.54 | 1.47 | 1.63 | 1.76 | 1.74 | 1.72 |
| CHA | 1.01 | 1.00 | 0.99 | 0.98 | 0.99 | 0.99 | 0.99 | 0.97 | 0.98 | 0.97 |
| EUR | 0.98 | 0.99 | 1.03 | 1.05 | 1.06 | 1.07 | 1.07 | 1.07 | 1.05 | 1.09 |
| IND | 0.98 | 0.98 | 0.99 | 0.99 | 1.00 | 1.00 | 1.01 | 1.01 | 1.02 | 1.02 |
| JPN | 0.85 | 0.86 | 0.85 | 0.83 | 0.84 | 0.80 | 0.70 | 0.68 | 0.67 | 0.68 |
| LAM | 1.00 | 1.01 | 0.98 | 0.95 | 0.97 | 0.96 | 0.96 | 0.97 | 1.06 | 1.04 |
| MEA | 0.91 | 0.89 | 0.83 | 0.72 | 0.71 | 0.77 | 0.83 | 0.85 | 0.85 | 0.82 |
| NEU | 1.01 | 1.00 | 1.02 | 1.01 | 1.01 | 0.97 | 0.97 | 0.97 | 0.96 | 0.98 |
| OAS | 0.93 | 0.91 | 0.92 | 0.89 | 0.92 | 0.93 | 0.91 | 0.91 | 0.91 | 0.91 |
| REF | 0.99 | 1.00 | 0.99 | 0.97 | 0.96 | 0.97 | 0.95 | 0.95 | 0.92 | 0.92 |
| SSA | 0.98 | 0.97 | 0.94 | 0.91 | 0.91 | 0.93 | 0.92 | 0.92 | 0.90 | 0.90 |
| USA | 1.04 | 1.01 | 1.01 | 1.03 | 1.00 | 1.01 | 1.06 | 1.07 | 1.05 | 1.11 |

Table 1988: FAO — Trade—Self-sufficiency—Livestock products (1)

59.3.1 Dairy

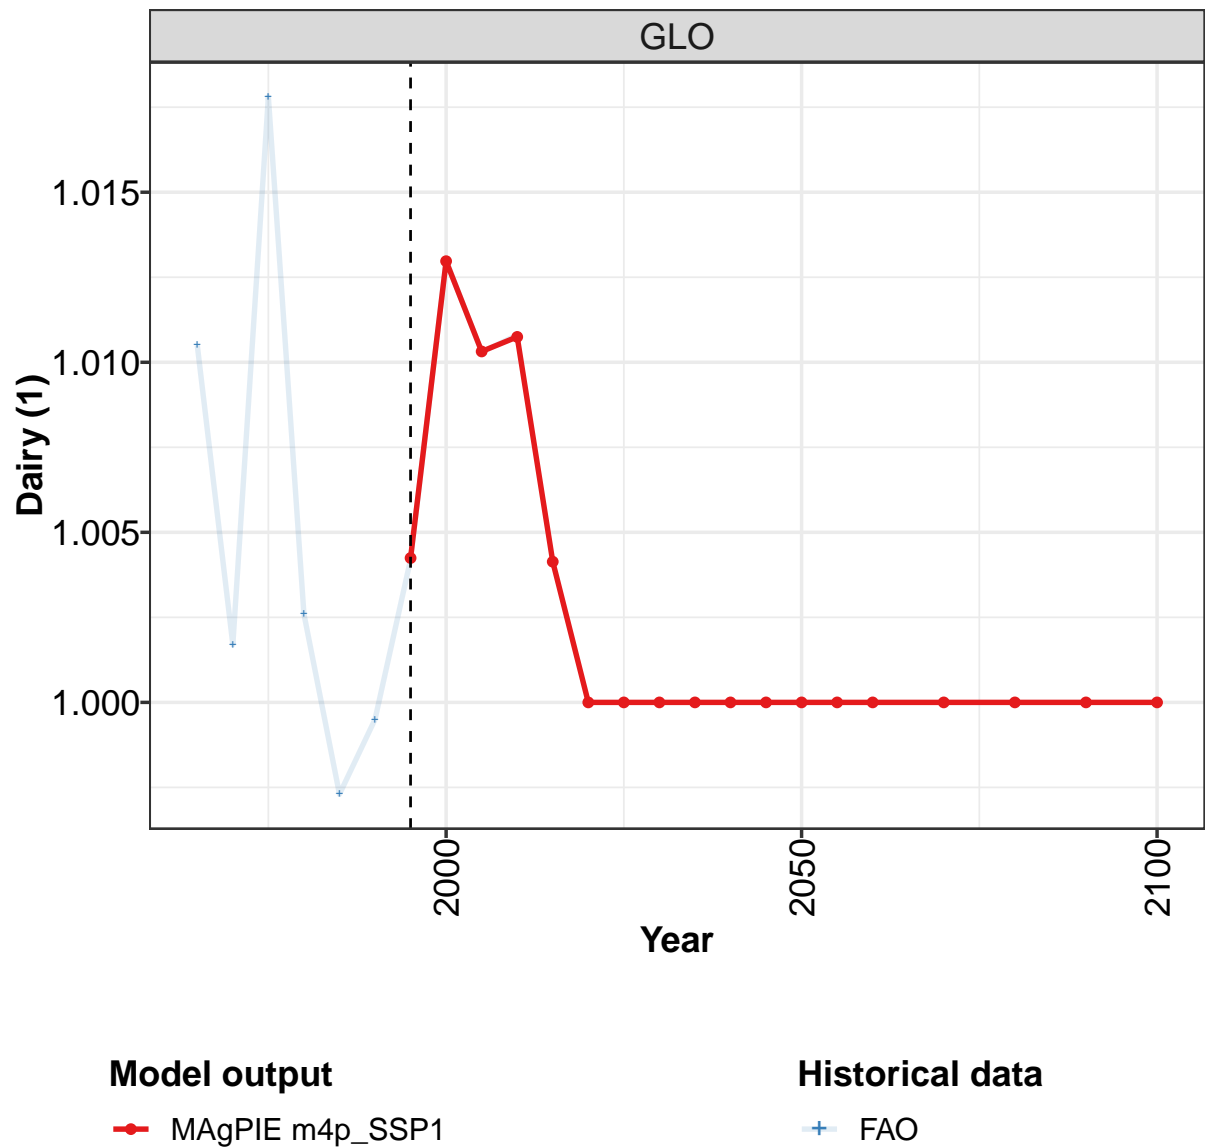

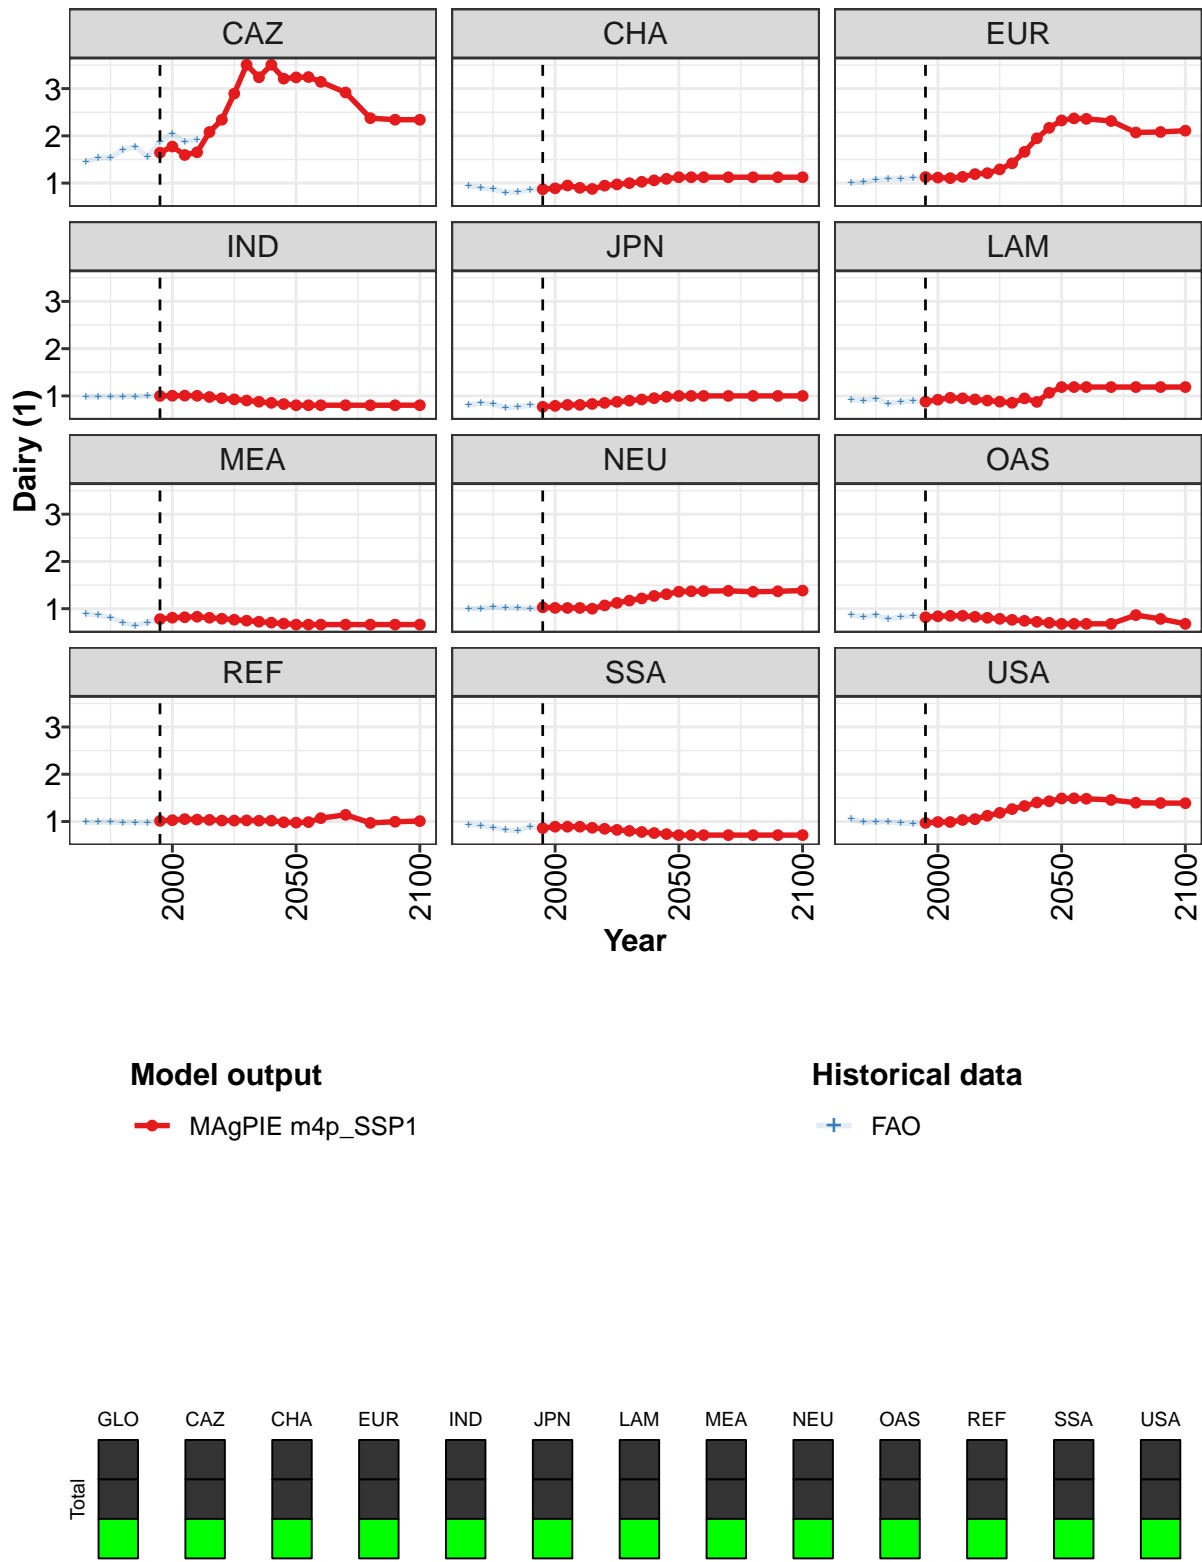

Figure 530: MAGPIE m4p\_SSP1 — Trade—Self-sufficiency—Livestock products—Dairy (1)

|     | 1995 | 2000 | 2005 | 2010 | 2015 | 2020 | 2025 | 2030 | 2035 | 2040 | 2045 |
|-----|------|------|------|------|------|------|------|------|------|------|------|
| GLO | 1.00 | 1.01 | 1.01 | 1.01 | 1.00 | 1.00 | 1.00 | 1.00 | 1.00 | 1.00 | 1.00 |
| CAZ | 1.64 | 1.77 | 1.60 | 1.65 | 2.08 | 2.34 | 2.89 | 3.50 | 3.24 | 3.50 | 3.21 |
| CHA | 0.87 | 0.89 | 0.95 | 0.90 | 0.88 | 0.95 | 0.97 | 1.00 | 1.03 | 1.06 | 1.09 |
| EUR | 1.13 | 1.12 | 1.11 | 1.13 | 1.19 | 1.21 | 1.29 | 1.42 | 1.66 | 1.95 | 2.17 |
| IND | 1.00 | 1.00 | 1.01 | 1.00 | 0.98 | 0.95 | 0.93 | 0.90 | 0.88 | 0.85 | 0.83 |
| JPN | 0.77 | 0.79 | 0.81 | 0.81 | 0.83 | 0.85 | 0.88 | 0.90 | 0.93 | 0.95 | 0.98 |
| LAM | 0.88 | 0.92 | 0.96 | 0.95 | 0.93 | 0.90 | 0.88 | 0.85 | 0.95 | 0.87 | 1.07 |
| MEA | 0.78 | 0.81 | 0.82 | 0.83 | 0.81 | 0.79 | 0.77 | 0.75 | 0.73 | 0.71 | 0.68 |
| NEU | 1.03 | 1.02 | 1.02 | 1.02 | 1.00 | 1.07 | 1.12 | 1.17 | 1.22 | 1.27 | 1.31 |
| OAS | 0.82 | 0.84 | 0.85 | 0.85 | 0.83 | 0.81 | 0.79 | 0.77 | 0.74 | 0.72 | 0.70 |
| REF | 1.01 | 1.03 | 1.05 | 1.04 | 1.03 | 1.02 | 1.02 | 1.02 | 1.02 | 1.02 | 0.98 |
| SSA | 0.86 | 0.89 | 0.89 | 0.89 | 0.87 | 0.85 | 0.82 | 0.80 | 0.78 | 0.76 | 0.73 |
| USA | 0.97 | 0.99 | 0.99 | 1.03 | 1.05 | 1.12 | 1.18 | 1.26 | 1.33 | 1.40 | 1.43 |

Table 1989: MAgPIE m4p\_SSP1 — Trade—Self-sufficiency—Livestock products—Dairy (1) [PART 1/2]

|     | 2050 | 2055 | 2060 | 2070 | 2080 | 2090 | 2100 |
|-----|------|------|------|------|------|------|------|
| GLO | 1.00 | 1.00 | 1.00 | 1.00 | 1.00 | 1.00 | 1.00 |
| CAZ | 3.24 | 3.24 | 3.14 | 2.92 | 2.38 | 2.34 | 2.34 |
| CHA | 1.12 | 1.12 | 1.12 | 1.12 | 1.12 | 1.12 | 1.12 |
| EUR | 2.33 | 2.37 | 2.36 | 2.31 | 2.07 | 2.08 | 2.11 |
| IND | 0.80 | 0.80 | 0.80 | 0.80 | 0.80 | 0.80 | 0.80 |
| JPN | 1.00 | 1.00 | 1.00 | 1.00 | 1.00 | 1.00 | 1.00 |
| LAM | 1.19 | 1.19 | 1.19 | 1.19 | 1.19 | 1.19 | 1.19 |
| MEA | 0.66 | 0.66 | 0.66 | 0.66 | 0.66 | 0.66 | 0.66 |
| NEU | 1.36 | 1.37 | 1.37 | 1.38 | 1.36 | 1.37 | 1.38 |
| OAS | 0.68 | 0.68 | 0.68 | 0.68 | 0.86 | 0.78 | 0.68 |
| REF | 0.98 | 0.99 | 1.07 | 1.14 | 0.97 | 0.99 | 1.01 |
| SSA | 0.71 | 0.71 | 0.71 | 0.71 | 0.71 | 0.71 | 0.71 |
| USA | 1.49 | 1.49 | 1.48 | 1.46 | 1.40 | 1.39 | 1.39 |

Table 1990: MAgPIE m4p\_SSP1 — Trade—Self-sufficiency—Livestock products—Dairy (1) [PART 2/2]

|     | 1965 | 1970 | 1975 | 1980 | 1985 | 1990 | 1995 | 2000 | 2005 | 2010 |
|-----|------|------|------|------|------|------|------|------|------|------|
| GLO | 1.01 | 1.00 | 1.02 | 1.00 | 1.00 | 1.00 | 1.00 | 1.01 | 1.01 | 1.01 |
| CAZ | 1.46 | 1.53 | 1.54 | 1.70 | 1.77 | 1.55 | 1.87 | 2.04 | 1.87 | 1.92 |
| CHA | 0.95 | 0.90 | 0.87 | 0.80 | 0.82 | 0.86 | 0.87 | 0.89 | 0.95 | 0.90 |
| EUR | 1.01 | 1.02 | 1.07 | 1.10 | 1.09 | 1.11 | 1.11 | 1.09 | 1.07 | 1.10 |
| IND | 0.98 | 0.99 | 0.99 | 0.99 | 0.99 | 1.00 | 1.00 | 1.00 | 1.01 | 1.00 |
| JPN | 0.81 | 0.85 | 0.82 | 0.75 | 0.77 | 0.80 | 0.77 | 0.79 | 0.81 | 0.81 |
| LAM | 0.92 | 0.90 | 0.94 | 0.84 | 0.88 | 0.89 | 0.88 | 0.92 | 0.96 | 0.95 |
| MEA | 0.90 | 0.86 | 0.82 | 0.70 | 0.65 | 0.71 | 0.78 | 0.81 | 0.82 | 0.83 |
| NEU | 1.00 | 1.01 | 1.03 | 1.03 | 1.02 | 1.00 | 1.02 | 1.02 | 1.02 | 1.02 |
| OAS | 0.87 | 0.83 | 0.86 | 0.78 | 0.83 | 0.85 | 0.82 | 0.84 | 0.85 | 0.85 |
| REF | 0.99 | 0.99 | 0.99 | 0.98 | 0.98 | 0.98 | 1.02 | 1.03 | 1.04 | 1.01 |
| SSA | 0.94 | 0.91 | 0.88 | 0.82 | 0.81 | 0.90 | 0.86 | 0.89 | 0.89 | 0.89 |
| USA | 1.05 | 0.98 | 1.00 | 1.00 | 0.97 | 0.96 | 0.97 | 0.99 | 0.99 | 1.05 |

Table 1991: FAO — Trade—Self-sufficiency—Livestock products—Dairy (1)



59.3.2 Eggs

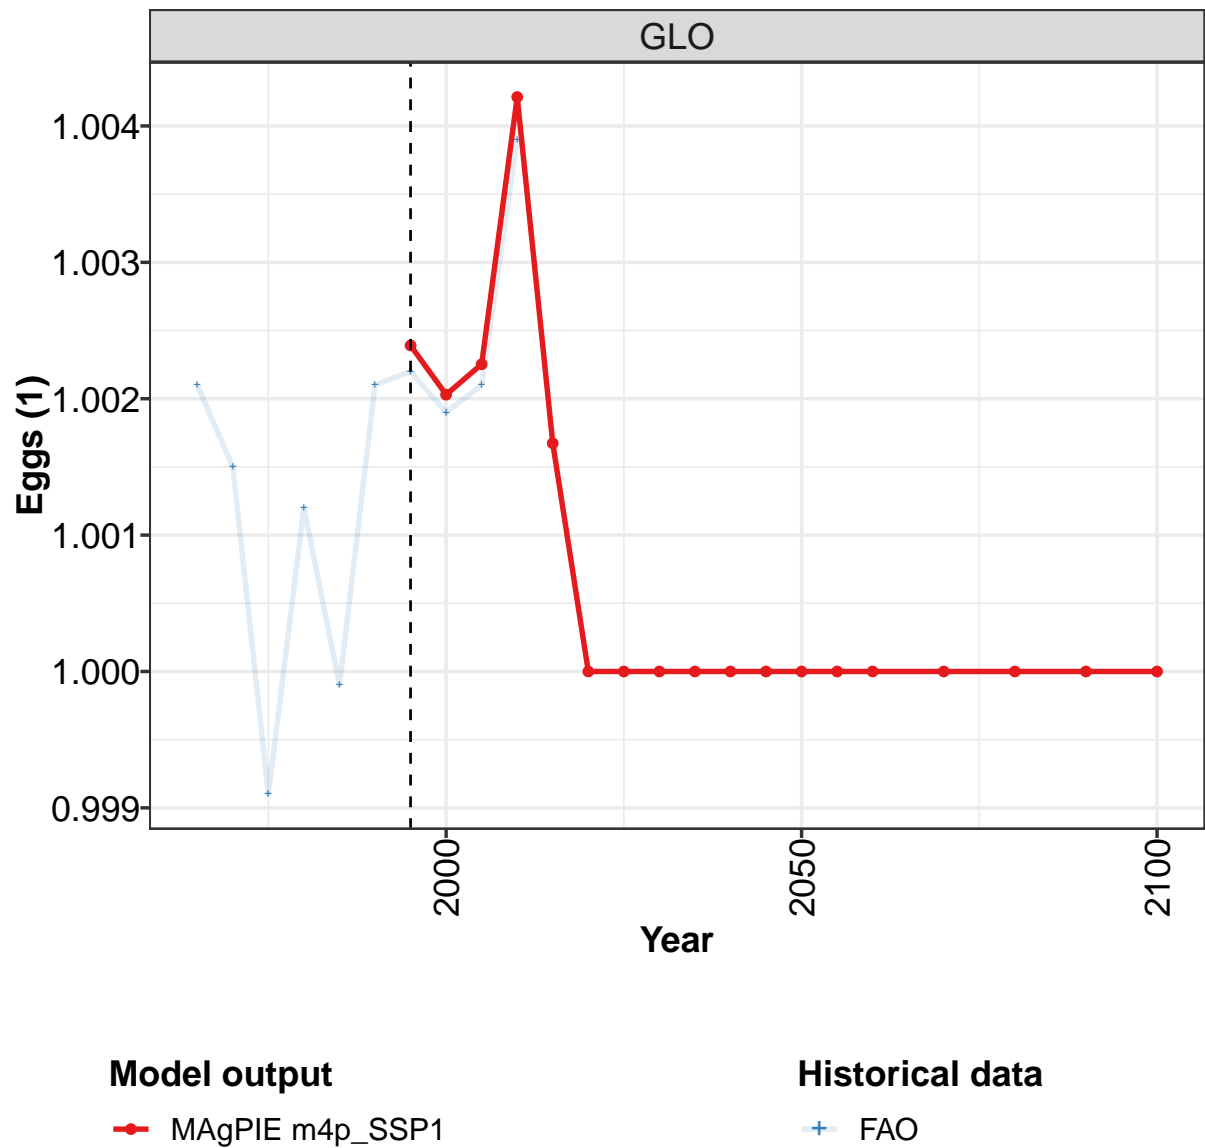

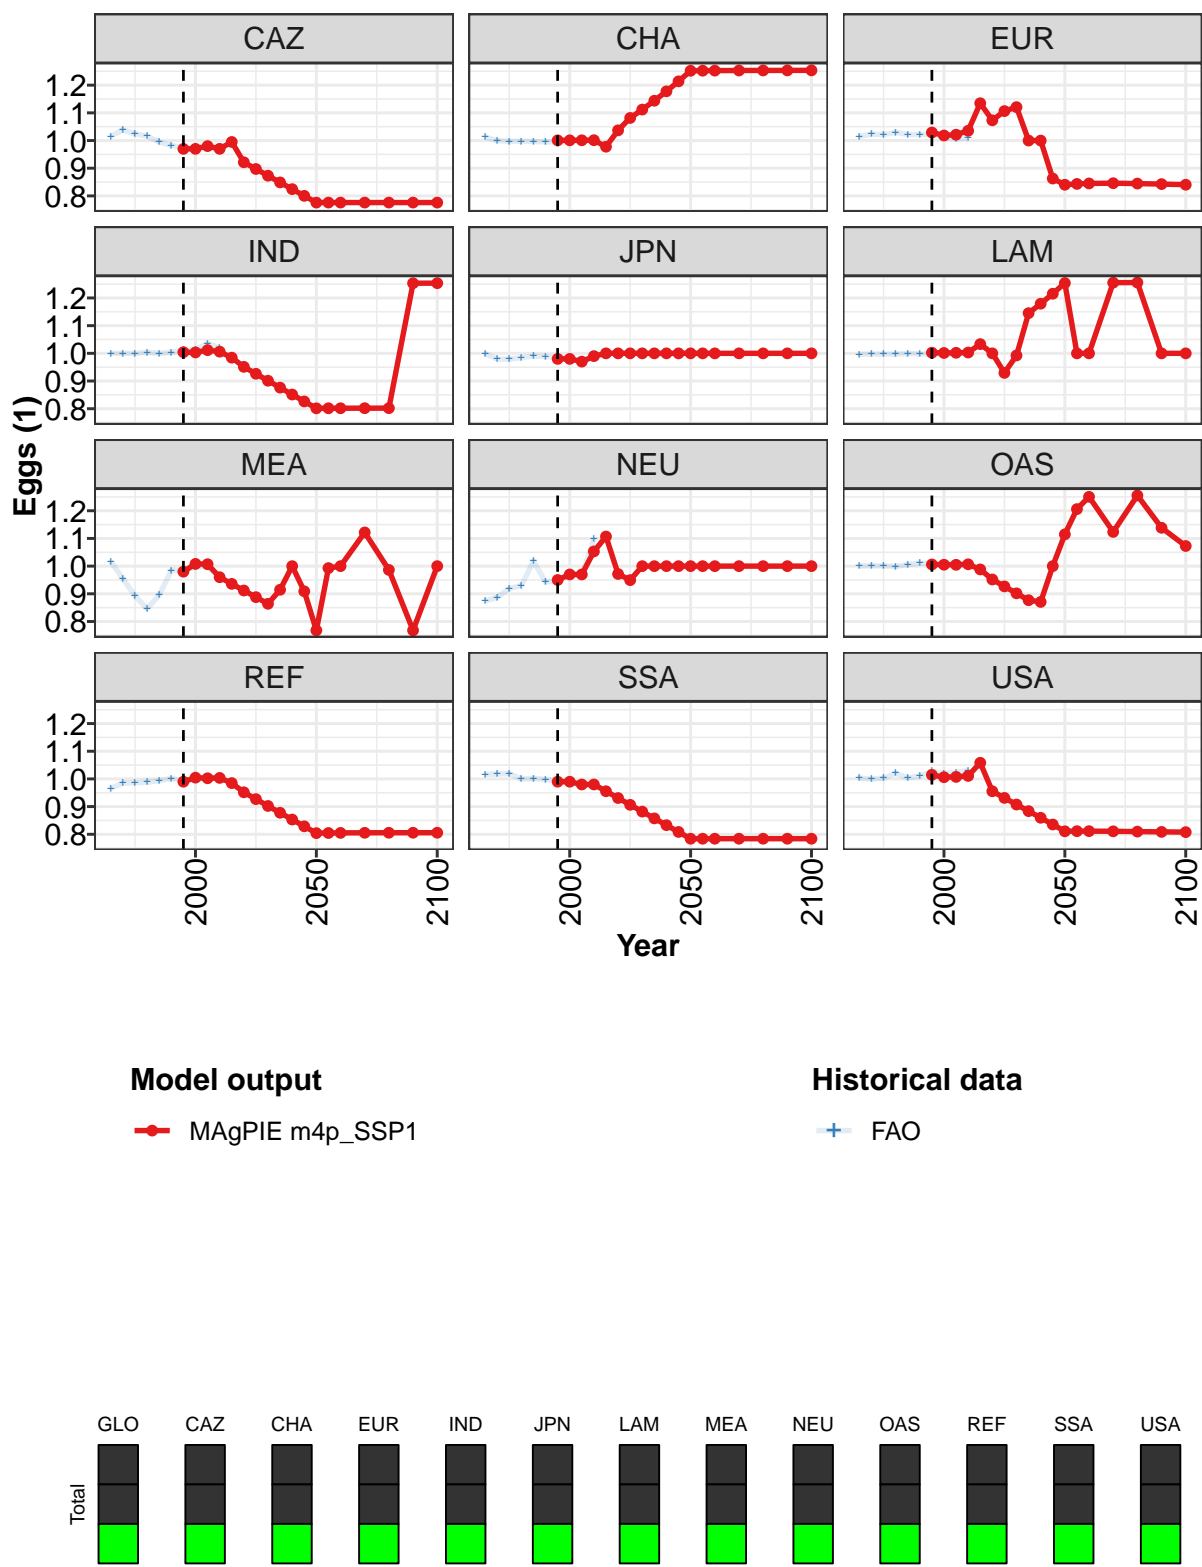

Figure 531: MAgPIE m4p\_SSP1 — Trade—Self-sufficiency—Livestock products—Eggs (1)

|     | 1995 | 2000 | 2005 | 2010 | 2015 | 2020 | 2025 | 2030 | 2035 | 2040 | 2045 |
|-----|------|------|------|------|------|------|------|------|------|------|------|
| GLO | 1.00 | 1.00 | 1.00 | 1.00 | 1.00 | 1.00 | 1.00 | 1.00 | 1.00 | 1.00 | 1.00 |
| CAZ | 0.97 | 0.97 | 0.98 | 0.97 | 0.99 | 0.92 | 0.90 | 0.87 | 0.85 | 0.82 | 0.80 |
| CHA | 1.00 | 1.00 | 1.00 | 1.00 | 0.98 | 1.04 | 1.08 | 1.11 | 1.14 | 1.18 | 1.21 |
| EUR | 1.03 | 1.02 | 1.02 | 1.04 | 1.13 | 1.07 | 1.11 | 1.12 | 1.00 | 1.00 | 0.86 |
| IND | 1.00 | 1.00 | 1.01 | 1.01 | 0.98 | 0.95 | 0.93 | 0.90 | 0.88 | 0.85 | 0.83 |
| JPN | 0.98 | 0.98 | 0.97 | 0.99 | 1.00 | 1.00 | 1.00 | 1.00 | 1.00 | 1.00 | 1.00 |
| LAM | 1.00 | 1.00 | 1.00 | 1.00 | 1.03 | 1.00 | 0.93 | 0.99 | 1.15 | 1.18 | 1.22 |
| MEA | 0.98 | 1.01 | 1.01 | 0.96 | 0.94 | 0.91 | 0.89 | 0.86 | 0.91 | 1.00 | 0.91 |
| NEU | 0.95 | 0.97 | 0.97 | 1.05 | 1.11 | 0.97 | 0.95 | 1.00 | 1.00 | 1.00 | 1.00 |
| OAS | 1.01 | 1.01 | 1.00 | 1.01 | 0.99 | 0.95 | 0.93 | 0.90 | 0.88 | 0.87 | 1.00 |
| REF | 0.99 | 1.00 | 1.00 | 1.00 | 0.98 | 0.95 | 0.93 | 0.90 | 0.88 | 0.85 | 0.83 |
| SSA | 0.99 | 0.99 | 0.98 | 0.98 | 0.96 | 0.93 | 0.91 | 0.88 | 0.86 | 0.83 | 0.81 |
| USA | 1.01 | 1.01 | 1.01 | 1.01 | 1.06 | 0.96 | 0.93 | 0.91 | 0.88 | 0.86 | 0.84 |

Table 1992: MAgPIE m4p\_SSP1 — Trade—Self-sufficiency—Livestock products—Eggs (1) [PART 1/2]

|     | 2050 | 2055 | 2060 | 2070 | 2080 | 2090 | 2100 |
|-----|------|------|------|------|------|------|------|
| GLO | 1.00 | 1.00 | 1.00 | 1.00 | 1.00 | 1.00 | 1.00 |
| CAZ | 0.78 | 0.78 | 0.78 | 0.78 | 0.78 | 0.78 | 0.78 |
| CHA | 1.25 | 1.25 | 1.25 | 1.25 | 1.25 | 1.25 | 1.25 |
| EUR | 0.84 | 0.84 | 0.85 | 0.85 | 0.84 | 0.84 | 0.84 |
| IND | 0.80 | 0.80 | 0.80 | 0.80 | 0.80 | 1.25 | 1.25 |
| JPN | 1.00 | 1.00 | 1.00 | 1.00 | 1.00 | 1.00 | 1.00 |
| LAM | 1.25 | 1.00 | 1.00 | 1.26 | 1.26 | 1.00 | 1.00 |
| MEA | 0.77 | 0.99 | 1.00 | 1.12 | 0.99 | 0.77 | 1.00 |
| NEU | 1.00 | 1.00 | 1.00 | 1.00 | 1.00 | 1.00 | 1.00 |
| OAS | 1.11 | 1.21 | 1.25 | 1.12 | 1.26 | 1.14 | 1.07 |
| REF | 0.80 | 0.80 | 0.81 | 0.81 | 0.81 | 0.81 | 0.81 |
| SSA | 0.78 | 0.78 | 0.78 | 0.78 | 0.78 | 0.78 | 0.78 |
| USA | 0.81 | 0.81 | 0.81 | 0.81 | 0.81 | 0.81 | 0.81 |

Table 1993: MAgPIE m4p\_SSP1 — Trade—Self-sufficiency—Livestock products—Eggs (1) [PART 2/2]

|     | 1965 | 1970 | 1975 | 1980 | 1985 | 1990 | 1995 | 2000 | 2005 | 2010 |
|-----|------|------|------|------|------|------|------|------|------|------|
| GLO | 1.00 | 1.00 | 1.00 | 1.00 | 1.00 | 1.00 | 1.00 | 1.00 | 1.00 | 1.00 |
| CAZ | 1.02 | 1.04 | 1.02 | 1.02 | 0.99 | 0.98 | 0.97 | 0.97 | 0.98 | 0.97 |
| CHA | 1.01 | 1.00 | 1.00 | 1.00 | 1.00 | 0.99 | 1.00 | 1.00 | 1.00 | 1.00 |
| EUR | 1.01 | 1.02 | 1.02 | 1.03 | 1.02 | 1.02 | 1.02 | 1.01 | 1.01 | 1.01 |
| IND | 1.00 | 1.00 | 1.00 | 1.00 | 1.00 | 1.00 | 1.01 | 1.01 | 1.04 | 1.02 |
| JPN | 1.00 | 0.98 | 0.98 | 0.98 | 0.99 | 0.99 | 0.98 | 0.98 | 0.97 | 0.99 |
| LAM | 1.00 | 1.00 | 1.00 | 1.00 | 1.00 | 1.00 | 1.00 | 1.00 | 1.00 | 1.00 |
| MEA | 1.02 | 0.95 | 0.89 | 0.85 | 0.90 | 0.98 | 0.98 | 1.00 | 1.00 | 0.96 |
| NEU | 0.87 | 0.89 | 0.92 | 0.93 | 1.02 | 0.94 | 0.95 | 0.97 | 0.97 | 1.10 |
| OAS | 1.00 | 1.00 | 1.00 | 1.00 | 1.01 | 1.01 | 1.01 | 1.01 | 1.01 | 1.01 |
| REF | 0.97 | 0.98 | 0.99 | 0.99 | 0.99 | 1.00 | 0.99 | 1.00 | 1.00 | 1.00 |
| SSA | 1.02 | 1.02 | 1.02 | 1.00 | 1.00 | 1.00 | 0.99 | 0.99 | 0.98 | 0.98 |
| USA | 1.00 | 1.00 | 1.00 | 1.02 | 1.00 | 1.01 | 1.03 | 1.02 | 1.02 | 1.03 |

Table 1994: FAO — Trade—Self-sufficiency—Livestock products—Eggs (1)

59.3.3 Monogastric meat

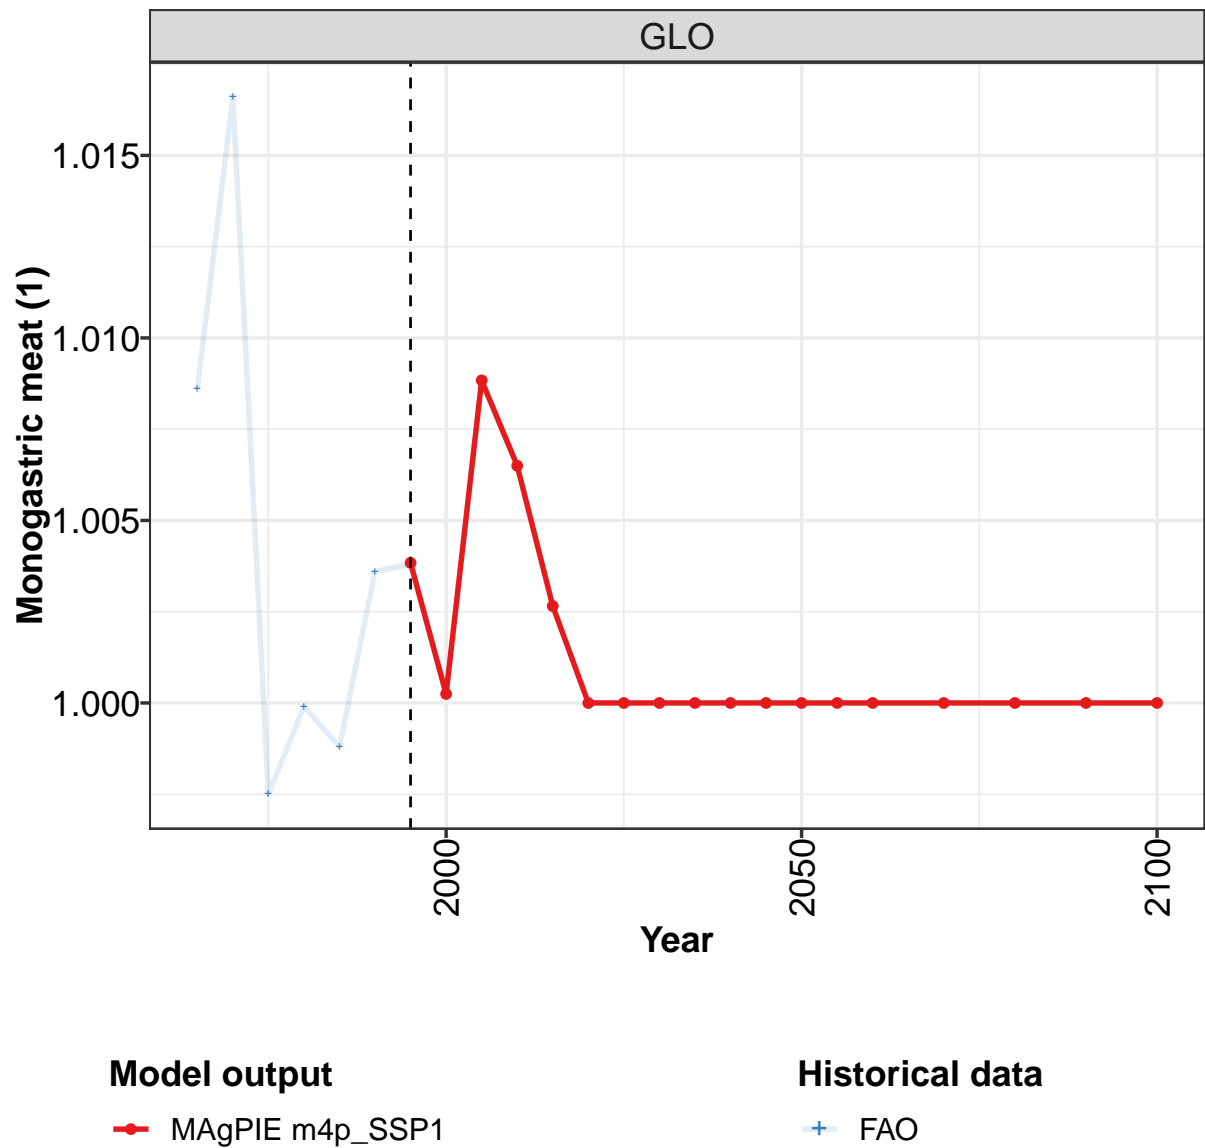

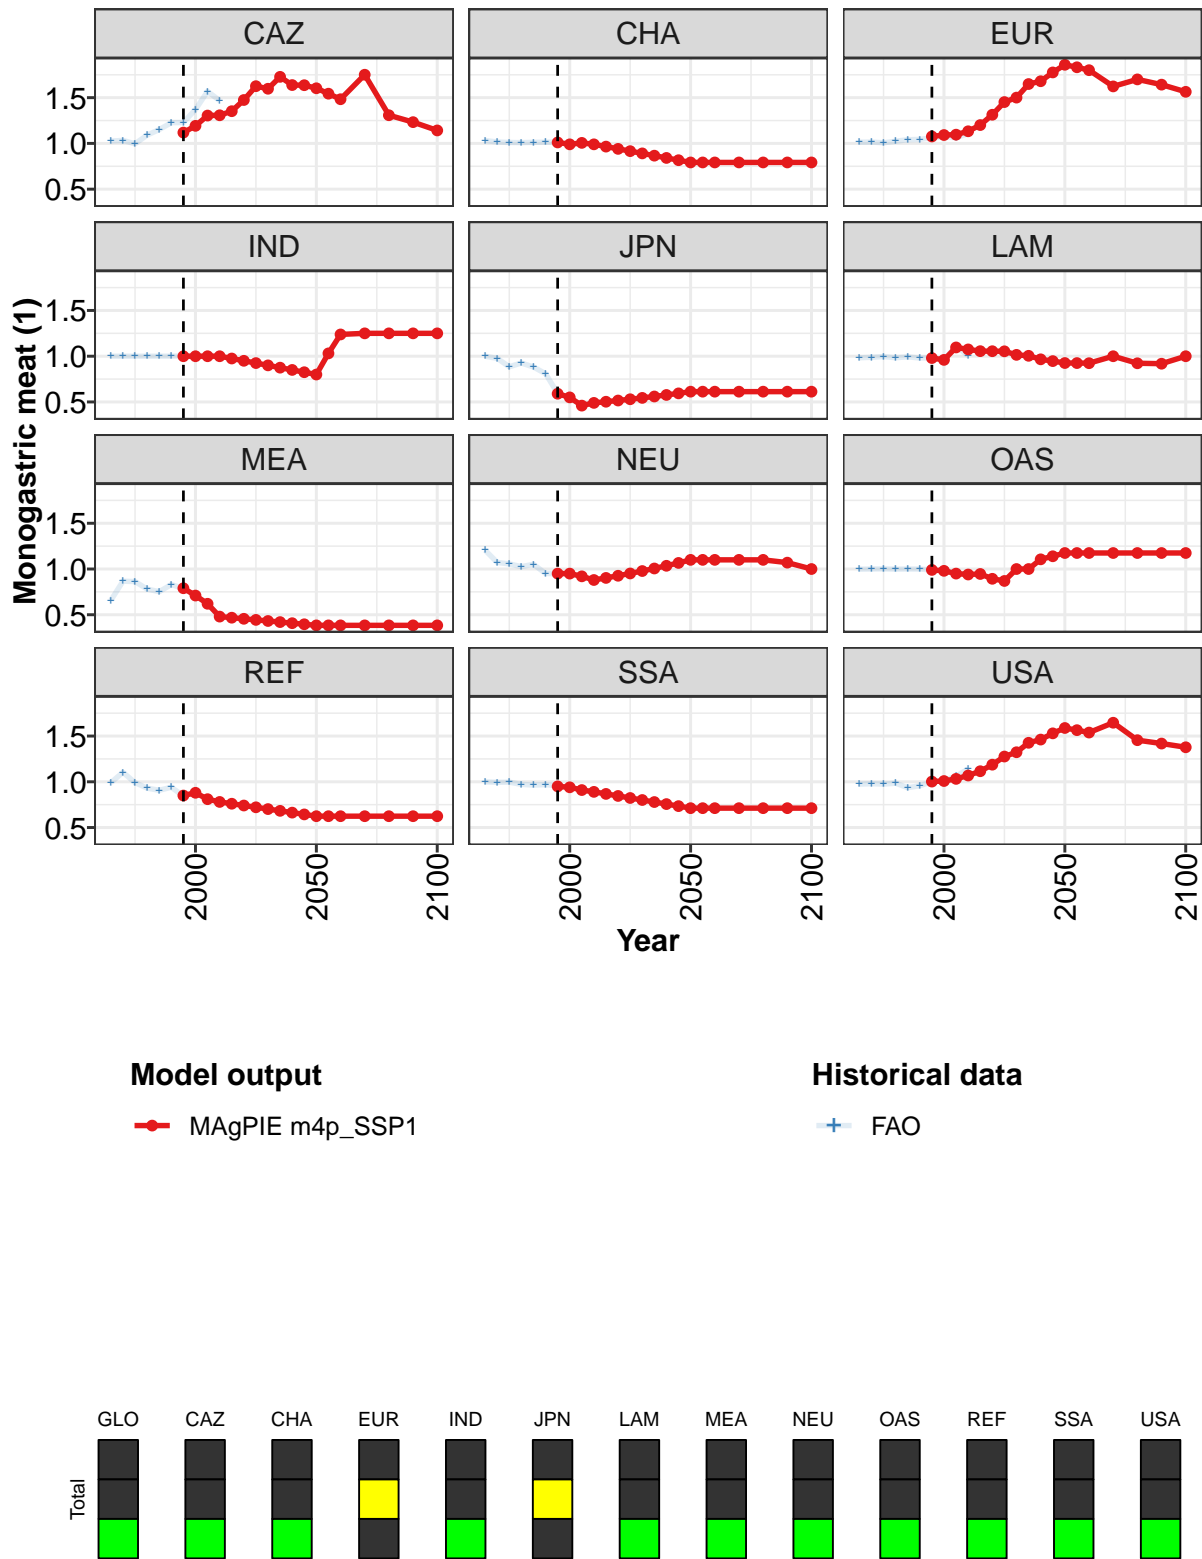

Figure 532: MAgPIE m4p\_SSP1 — Trade—Self-sufficiency—Livestock products—Monogastric meat (1)

|     | 1995 | 2000 | 2005 | 2010 | 2015 | 2020 | 2025 | 2030 | 2035 | 2040 | 2045 |
|-----|------|------|------|------|------|------|------|------|------|------|------|
| GLO | 1.00 | 1.00 | 1.01 | 1.01 | 1.00 | 1.00 | 1.00 | 1.00 | 1.00 | 1.00 | 1.00 |
| CAZ | 1.12 | 1.19 | 1.30 | 1.31 | 1.35 | 1.47 | 1.63 | 1.60 | 1.73 | 1.64 | 1.64 |
| CHA | 1.01 | 0.99 | 1.01 | 0.99 | 0.97 | 0.94 | 0.92 | 0.89 | 0.87 | 0.84 | 0.82 |
| EUR | 1.08 | 1.09 | 1.10 | 1.13 | 1.20 | 1.31 | 1.45 | 1.50 | 1.65 | 1.68 | 1.78 |
| IND | 1.00 | 1.00 | 1.00 | 1.00 | 0.97 | 0.95 | 0.93 | 0.90 | 0.88 | 0.85 | 0.82 |
| JPN | 0.59 | 0.55 | 0.46 | 0.49 | 0.50 | 0.52 | 0.53 | 0.54 | 0.56 | 0.58 | 0.59 |
| LAM | 0.98 | 0.96 | 1.10 | 1.07 | 1.06 | 1.05 | 1.05 | 1.02 | 1.00 | 0.97 | 0.95 |
| MEA | 0.79 | 0.71 | 0.62 | 0.48 | 0.47 | 0.46 | 0.44 | 0.43 | 0.42 | 0.41 | 0.40 |
| NEU | 0.95 | 0.95 | 0.92 | 0.88 | 0.90 | 0.93 | 0.95 | 0.98 | 1.01 | 1.04 | 1.07 |
| OAS | 0.99 | 0.98 | 0.95 | 0.94 | 0.95 | 0.89 | 0.87 | 1.00 | 1.00 | 1.11 | 1.14 |
| REF | 0.85 | 0.88 | 0.81 | 0.78 | 0.76 | 0.74 | 0.72 | 0.70 | 0.68 | 0.66 | 0.64 |
| SSA | 0.95 | 0.94 | 0.91 | 0.89 | 0.87 | 0.85 | 0.82 | 0.80 | 0.78 | 0.76 | 0.73 |
| USA | 1.00 | 1.01 | 1.03 | 1.07 | 1.12 | 1.19 | 1.28 | 1.32 | 1.43 | 1.46 | 1.53 |

Table 1995: MAgPIE m4p\_SSP1 — Trade—Self-sufficiency—Livestock products—Monogastric meat (1) [PART 1/2]

|     | 2050 | 2055 | 2060 | 2070 | 2080 | 2090 | 2100 |
|-----|------|------|------|------|------|------|------|
| GLO | 1.00 | 1.00 | 1.00 | 1.00 | 1.00 | 1.00 | 1.00 |
| CAZ | 1.60 | 1.54 | 1.48 | 1.75 | 1.31 | 1.23 | 1.14 |
| CHA | 0.79 | 0.79 | 0.79 | 0.79 | 0.79 | 0.79 | 0.79 |
| EUR | 1.86 | 1.83 | 1.80 | 1.62 | 1.70 | 1.64 | 1.56 |
| IND | 0.80 | 1.03 | 1.24 | 1.25 | 1.25 | 1.25 | 1.25 |
| JPN | 0.61 | 0.61 | 0.61 | 0.61 | 0.61 | 0.61 | 0.61 |
| LAM | 0.93 | 0.93 | 0.92 | 1.00 | 0.92 | 0.92 | 1.00 |
| MEA | 0.38 | 0.38 | 0.38 | 0.38 | 0.38 | 0.38 | 0.38 |
| NEU | 1.10 | 1.10 | 1.10 | 1.10 | 1.10 | 1.07 | 1.00 |
| OAS | 1.17 | 1.17 | 1.17 | 1.17 | 1.17 | 1.17 | 1.17 |
| REF | 0.62 | 0.62 | 0.62 | 0.62 | 0.62 | 0.62 | 0.62 |
| SSA | 0.71 | 0.71 | 0.71 | 0.71 | 0.71 | 0.71 | 0.71 |
| USA | 1.59 | 1.56 | 1.54 | 1.65 | 1.46 | 1.42 | 1.38 |

Table 1996: MAgPIE m4p\_SSP1 — Trade—Self-sufficiency—Livestock products—Monogastric meat (1) [PART 2/2]

|     | 1965 | 1970 | 1975 | 1980 | 1985 | 1990 | 1995 | 2000 | 2005 | 2010 |
|-----|------|------|------|------|------|------|------|------|------|------|
| GLO | 1.01 | 1.02 | 1.00 | 1.00 | 1.00 | 1.00 | 1.00 | 1.00 | 1.01 | 1.01 |
| CAZ | 1.03 | 1.03 | 1.00 | 1.09 | 1.15 | 1.23 | 1.23 | 1.37 | 1.57 | 1.47 |
| CHA | 1.03 | 1.02 | 1.01 | 1.01 | 1.01 | 1.01 | 1.02 | 0.99 | 1.00 | 0.99 |
| EUR | 1.01 | 1.01 | 1.01 | 1.02 | 1.04 | 1.04 | 1.06 | 1.07 | 1.06 | 1.11 |
| IND | 1.00 | 1.00 | 1.00 | 1.00 | 1.00 | 1.00 | 1.00 | 1.00 | 1.00 | 1.00 |
| JPN | 1.00 | 0.98 | 0.88 | 0.93 | 0.88 | 0.81 | 0.59 | 0.55 | 0.46 | 0.49 |
| LAM | 0.98 | 0.99 | 1.00 | 0.98 | 0.99 | 0.98 | 0.98 | 0.96 | 1.11 | 1.01 |
| MEA | 0.66 | 0.87 | 0.86 | 0.78 | 0.75 | 0.83 | 0.79 | 0.71 | 0.62 | 0.48 |
| NEU | 1.21 | 1.07 | 1.06 | 1.03 | 1.05 | 0.95 | 0.95 | 0.95 | 0.92 | 0.88 |
| OAS | 1.00 | 1.00 | 1.00 | 1.00 | 1.00 | 1.00 | 0.99 | 0.98 | 0.95 | 0.94 |
| REF | 0.99 | 1.10 | 0.99 | 0.93 | 0.91 | 0.94 | 0.85 | 0.88 | 0.81 | 0.78 |
| SSA | 1.00 | 0.99 | 1.00 | 0.97 | 0.96 | 0.97 | 0.95 | 0.94 | 0.91 | 0.89 |
| USA | 0.97 | 0.98 | 0.97 | 0.98 | 0.94 | 0.96 | 1.00 | 1.02 | 1.06 | 1.14 |

Table 1997: FAO — Trade—Self-sufficiency—Livestock products—Monogastric meat (1)

59.3.4 Poultry meat

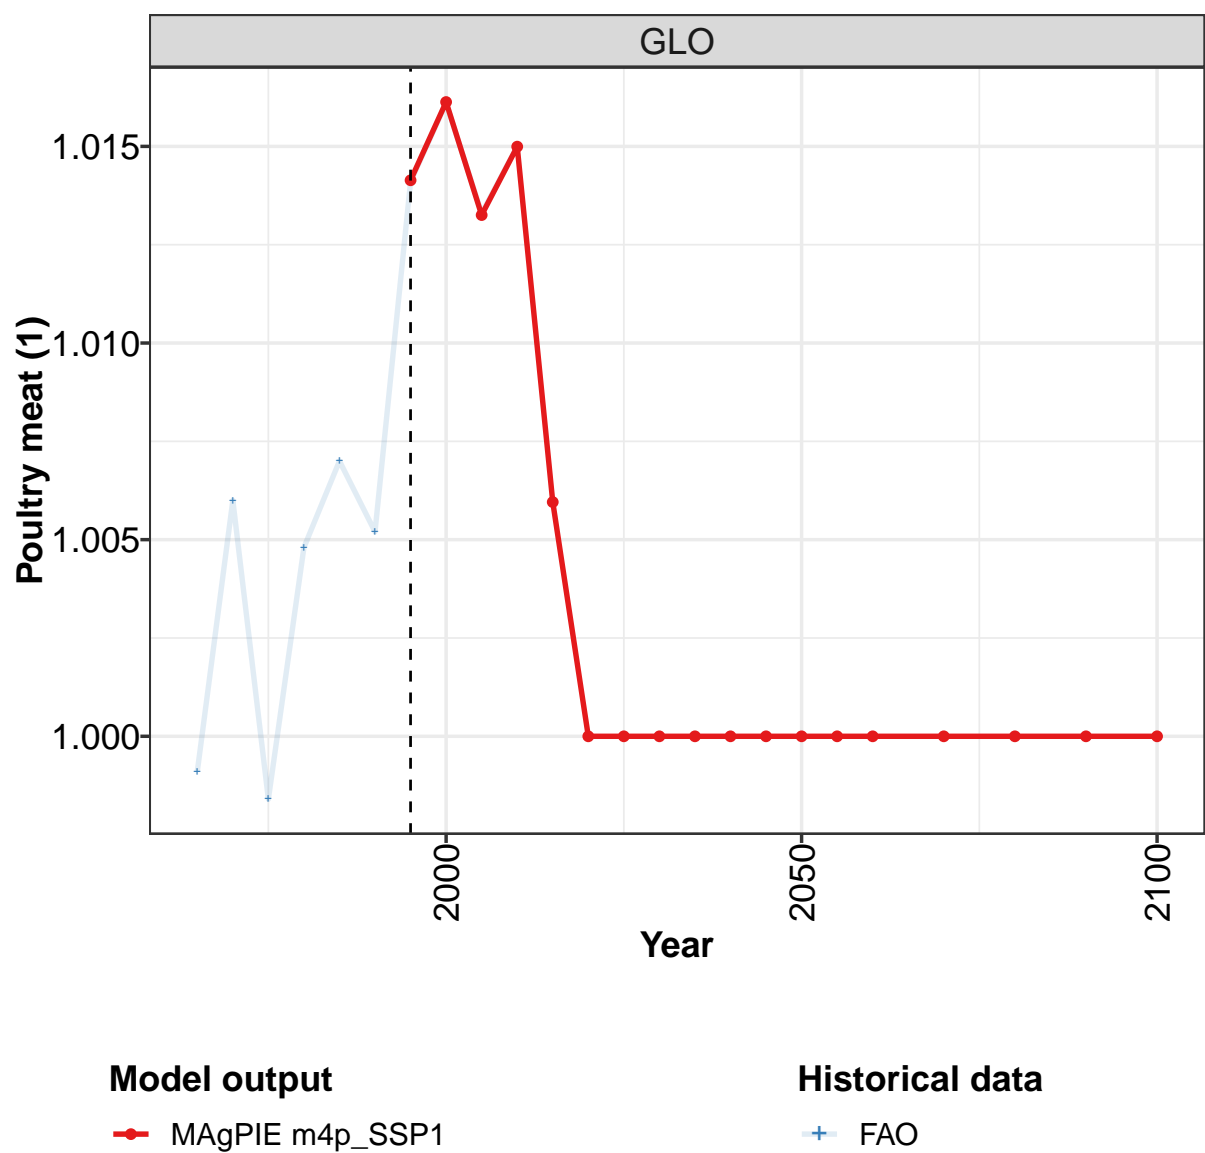

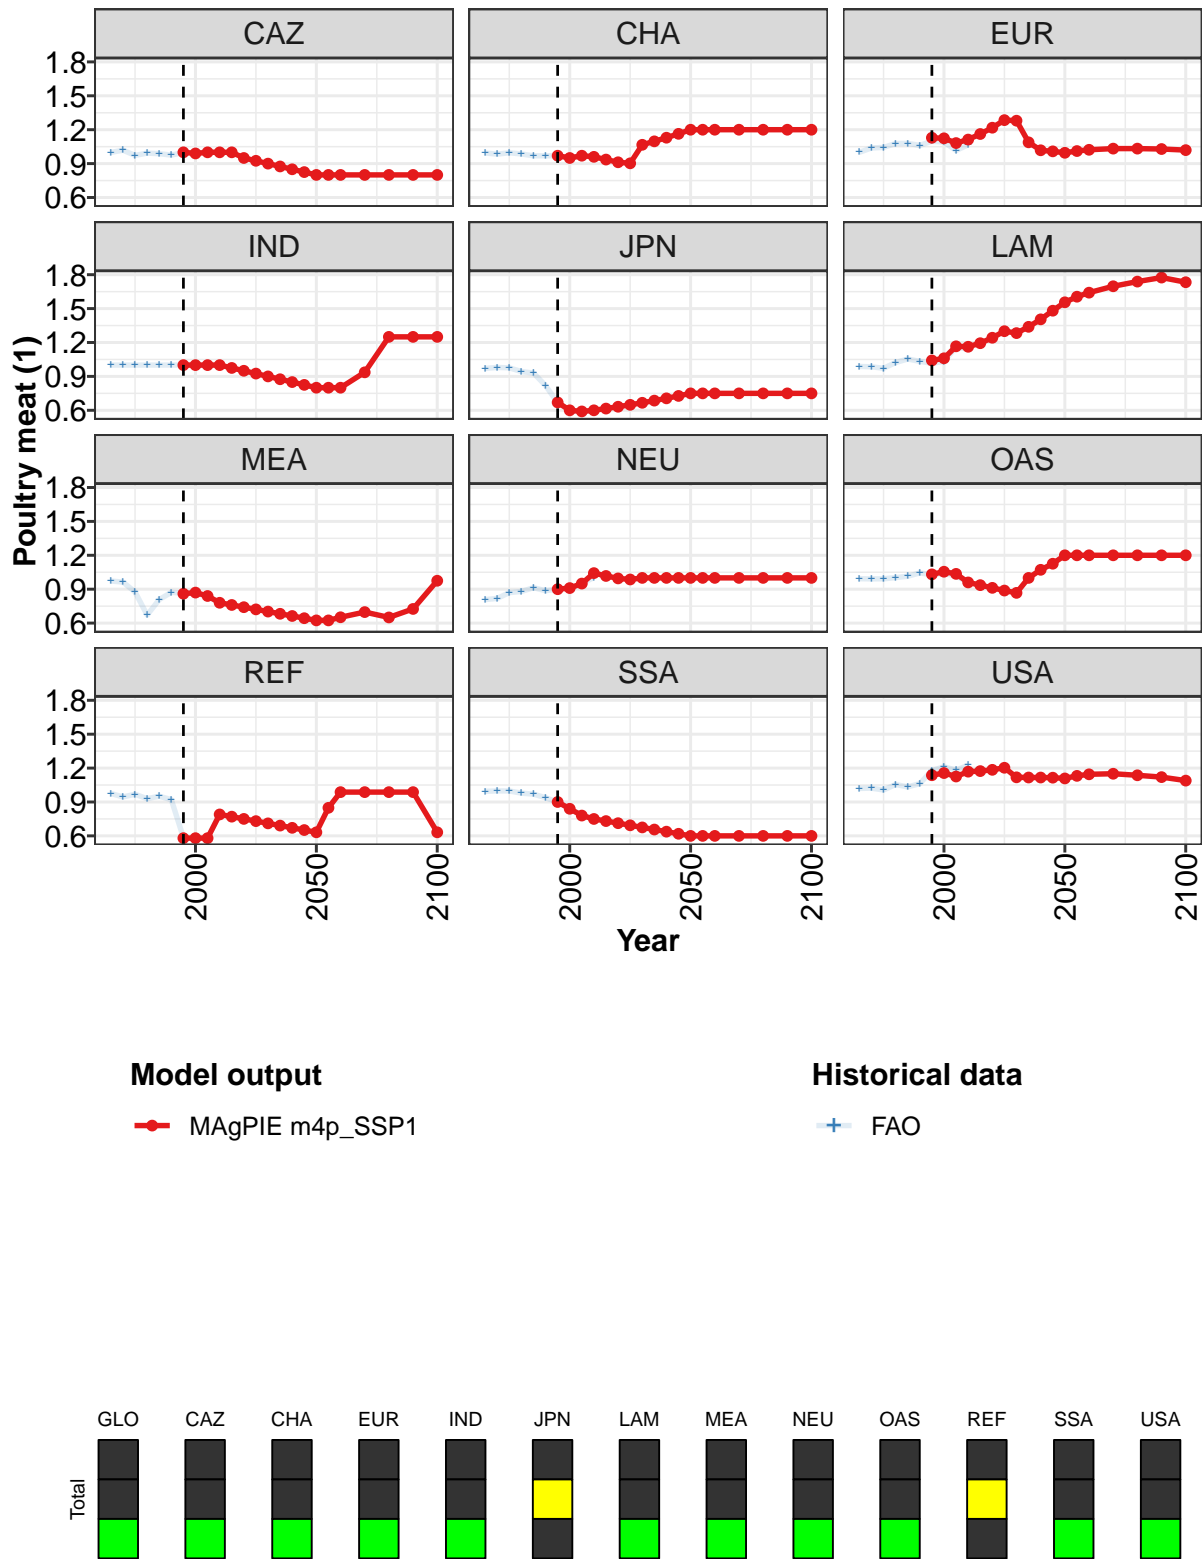

Figure 533: MAGPIE m4p\_SSP1 — Trade—Self-sufficiency—Livestock products—Poultry meat (1)



|     | 1995 | 2000 | 2005 | 2010 | 2015 | 2020 | 2025 | 2030 | 2035 | 2040 | 2045 |
|-----|------|------|------|------|------|------|------|------|------|------|------|
| GLO | 1.01 | 1.02 | 1.01 | 1.01 | 1.01 | 1.00 | 1.00 | 1.00 | 1.00 | 1.00 | 1.00 |
| CAZ | 1.00 | 0.99 | 1.00 | 1.00 | 1.00 | 0.95 | 0.93 | 0.90 | 0.87 | 0.85 | 0.83 |
| CHA | 0.97 | 0.95 | 0.97 | 0.96 | 0.94 | 0.91 | 0.90 | 1.07 | 1.10 | 1.13 | 1.16 |
| EUR | 1.13 | 1.12 | 1.08 | 1.11 | 1.16 | 1.22 | 1.28 | 1.28 | 1.09 | 1.02 | 1.01 |
| IND | 1.00 | 1.00 | 1.00 | 1.00 | 0.97 | 0.95 | 0.93 | 0.90 | 0.88 | 0.85 | 0.83 |
| JPN | 0.67 | 0.60 | 0.59 | 0.60 | 0.62 | 0.63 | 0.65 | 0.67 | 0.69 | 0.71 | 0.73 |
| LAM | 1.04 | 1.06 | 1.17 | 1.16 | 1.19 | 1.24 | 1.30 | 1.28 | 1.34 | 1.41 | 1.48 |
| MEA | 0.86 | 0.87 | 0.84 | 0.78 | 0.76 | 0.74 | 0.72 | 0.70 | 0.68 | 0.66 | 0.64 |
| NEU | 0.90 | 0.91 | 0.95 | 1.04 | 1.02 | 1.00 | 0.99 | 1.00 | 1.00 | 1.00 | 1.00 |
| OAS | 1.03 | 1.05 | 1.04 | 0.96 | 0.94 | 0.91 | 0.89 | 0.87 | 1.00 | 1.07 | 1.13 |
| REF | 0.58 | 0.58 | 0.58 | 0.79 | 0.77 | 0.75 | 0.73 | 0.71 | 0.69 | 0.67 | 0.65 |
| SSA | 0.90 | 0.84 | 0.78 | 0.75 | 0.73 | 0.71 | 0.69 | 0.68 | 0.66 | 0.64 | 0.62 |
| USA | 1.14 | 1.16 | 1.13 | 1.17 | 1.17 | 1.18 | 1.20 | 1.12 | 1.12 | 1.12 | 1.12 |

Table 1998: MAgPIE m4p\_SSP1 — Trade—Self-sufficiency—Livestock products—Poultry meat (1) [PART 1/2]

|     | 2050 | 2055 | 2060 | 2070 | 2080 | 2090 | 2100 |
|-----|------|------|------|------|------|------|------|
| GLO | 1.00 | 1.00 | 1.00 | 1.00 | 1.00 | 1.00 | 1.00 |
| CAZ | 0.80 | 0.80 | 0.80 | 0.80 | 0.80 | 0.80 | 0.80 |
| CHA | 1.20 | 1.20 | 1.20 | 1.20 | 1.20 | 1.20 | 1.20 |
| EUR | 1.00 | 1.01 | 1.02 | 1.03 | 1.03 | 1.03 | 1.02 |
| IND | 0.80 | 0.80 | 0.80 | 0.94 | 1.25 | 1.25 | 1.25 |
| JPN | 0.75 | 0.75 | 0.75 | 0.75 | 0.75 | 0.75 | 0.75 |
| LAM | 1.56 | 1.61 | 1.64 | 1.70 | 1.74 | 1.77 | 1.73 |
| MEA | 0.62 | 0.62 | 0.65 | 0.70 | 0.65 | 0.73 | 0.98 |
| NEU | 1.00 | 1.00 | 1.00 | 1.00 | 1.00 | 1.00 | 1.00 |
| OAS | 1.20 | 1.20 | 1.20 | 1.20 | 1.20 | 1.20 | 1.20 |
| REF | 0.63 | 0.85 | 0.99 | 0.99 | 0.99 | 0.99 | 0.63 |
| SSA | 0.60 | 0.60 | 0.60 | 0.60 | 0.60 | 0.60 | 0.60 |
| USA | 1.11 | 1.13 | 1.15 | 1.15 | 1.14 | 1.12 | 1.09 |

Table 1999: MAgPIE m4p\_SSP1 — Trade—Self-sufficiency—Livestock products—Poultry meat (1) [PART 2/2]

|     | 1965 | 1970 | 1975 | 1980 | 1985 | 1990 | 1995 | 2000 | 2005 | 2010 |
|-----|------|------|------|------|------|------|------|------|------|------|
| GLO | 1.00 | 1.01 | 1.00 | 1.00 | 1.01 | 1.01 | 1.01 | 1.02 | 1.01 | 1.01 |
| CAZ | 1.00 | 1.02 | 0.97 | 0.99 | 0.99 | 0.98 | 1.00 | 0.99 | 1.00 | 1.00 |
| CHA | 0.99 | 0.98 | 1.00 | 0.99 | 0.97 | 0.97 | 0.97 | 0.95 | 0.97 | 0.96 |
| EUR | 1.00 | 1.04 | 1.04 | 1.08 | 1.08 | 1.06 | 1.10 | 1.09 | 1.02 | 1.07 |
| IND | 1.00 | 1.00 | 1.00 | 1.00 | 1.00 | 1.00 | 1.00 | 1.00 | 1.00 | 1.00 |
| JPN | 0.97 | 0.98 | 0.98 | 0.94 | 0.93 | 0.82 | 0.67 | 0.60 | 0.58 | 0.60 |
| LAM | 0.99 | 0.98 | 0.97 | 1.02 | 1.05 | 1.03 | 1.02 | 1.03 | 1.16 | 1.14 |
| MEA | 0.97 | 0.96 | 0.88 | 0.67 | 0.81 | 0.87 | 0.86 | 0.87 | 0.84 | 0.78 |
| NEU | 0.81 | 0.82 | 0.87 | 0.88 | 0.91 | 0.89 | 0.90 | 0.91 | 0.95 | 1.00 |
| OAS | 0.99 | 0.99 | 0.99 | 1.00 | 1.01 | 1.04 | 1.03 | 1.04 | 1.02 | 0.96 |
| REF | 0.98 | 0.94 | 0.97 | 0.93 | 0.95 | 0.92 | 0.58 | 0.58 | 0.58 | 0.79 |
| SSA | 0.99 | 1.00 | 1.00 | 0.98 | 0.97 | 0.94 | 0.90 | 0.84 | 0.78 | 0.75 |
| USA | 1.02 | 1.02 | 1.01 | 1.05 | 1.03 | 1.06 | 1.18 | 1.21 | 1.18 | 1.23 |

Table 2000: FAO — Trade—Self-sufficiency—Livestock products—Poultry meat (1)

59.3.5 Ruminant meat

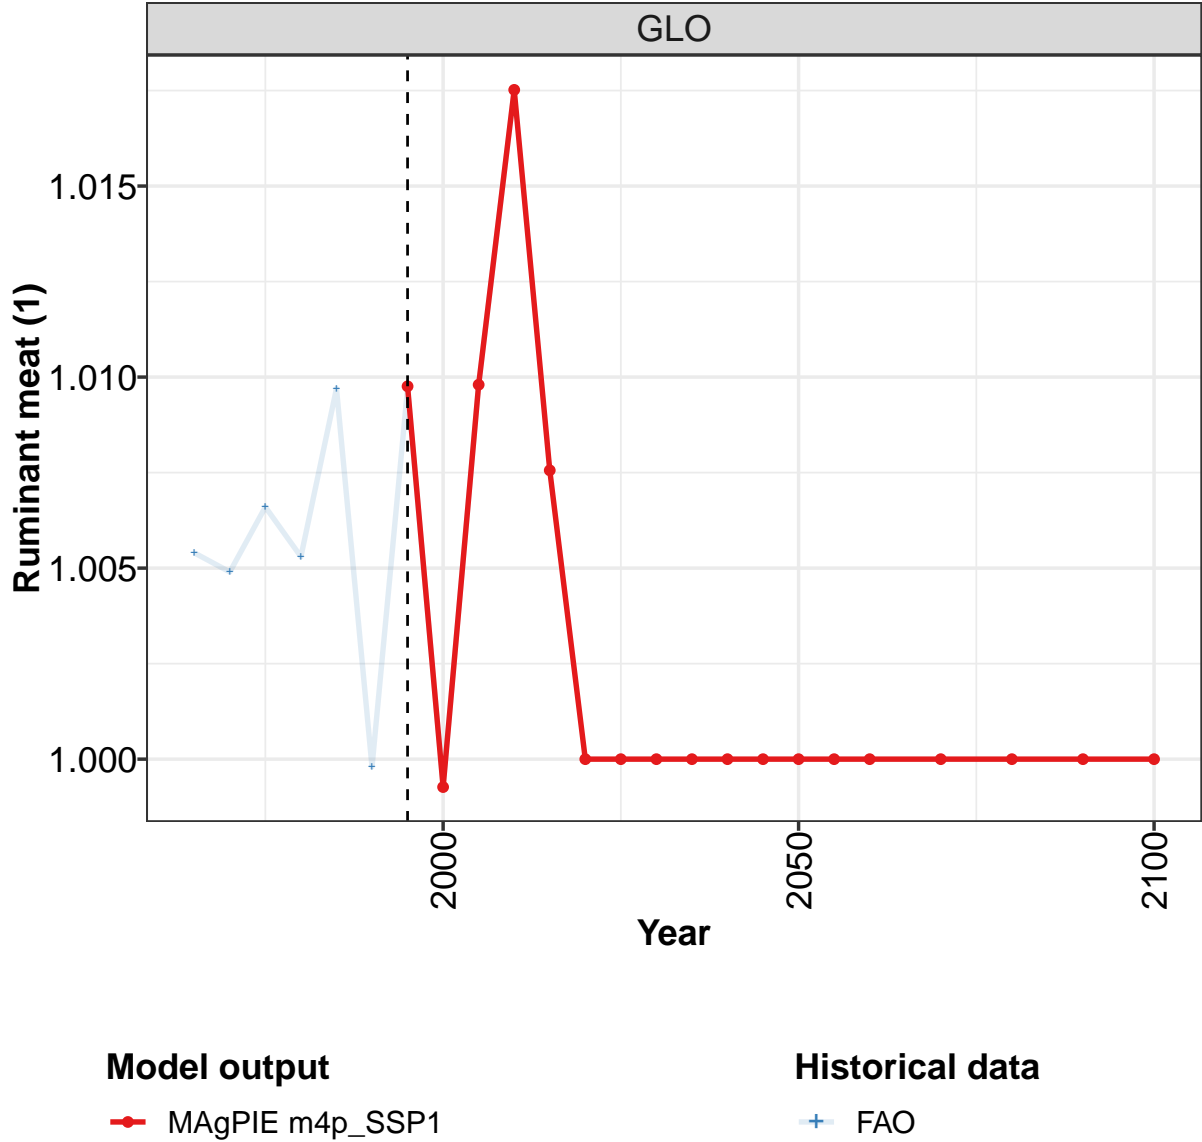

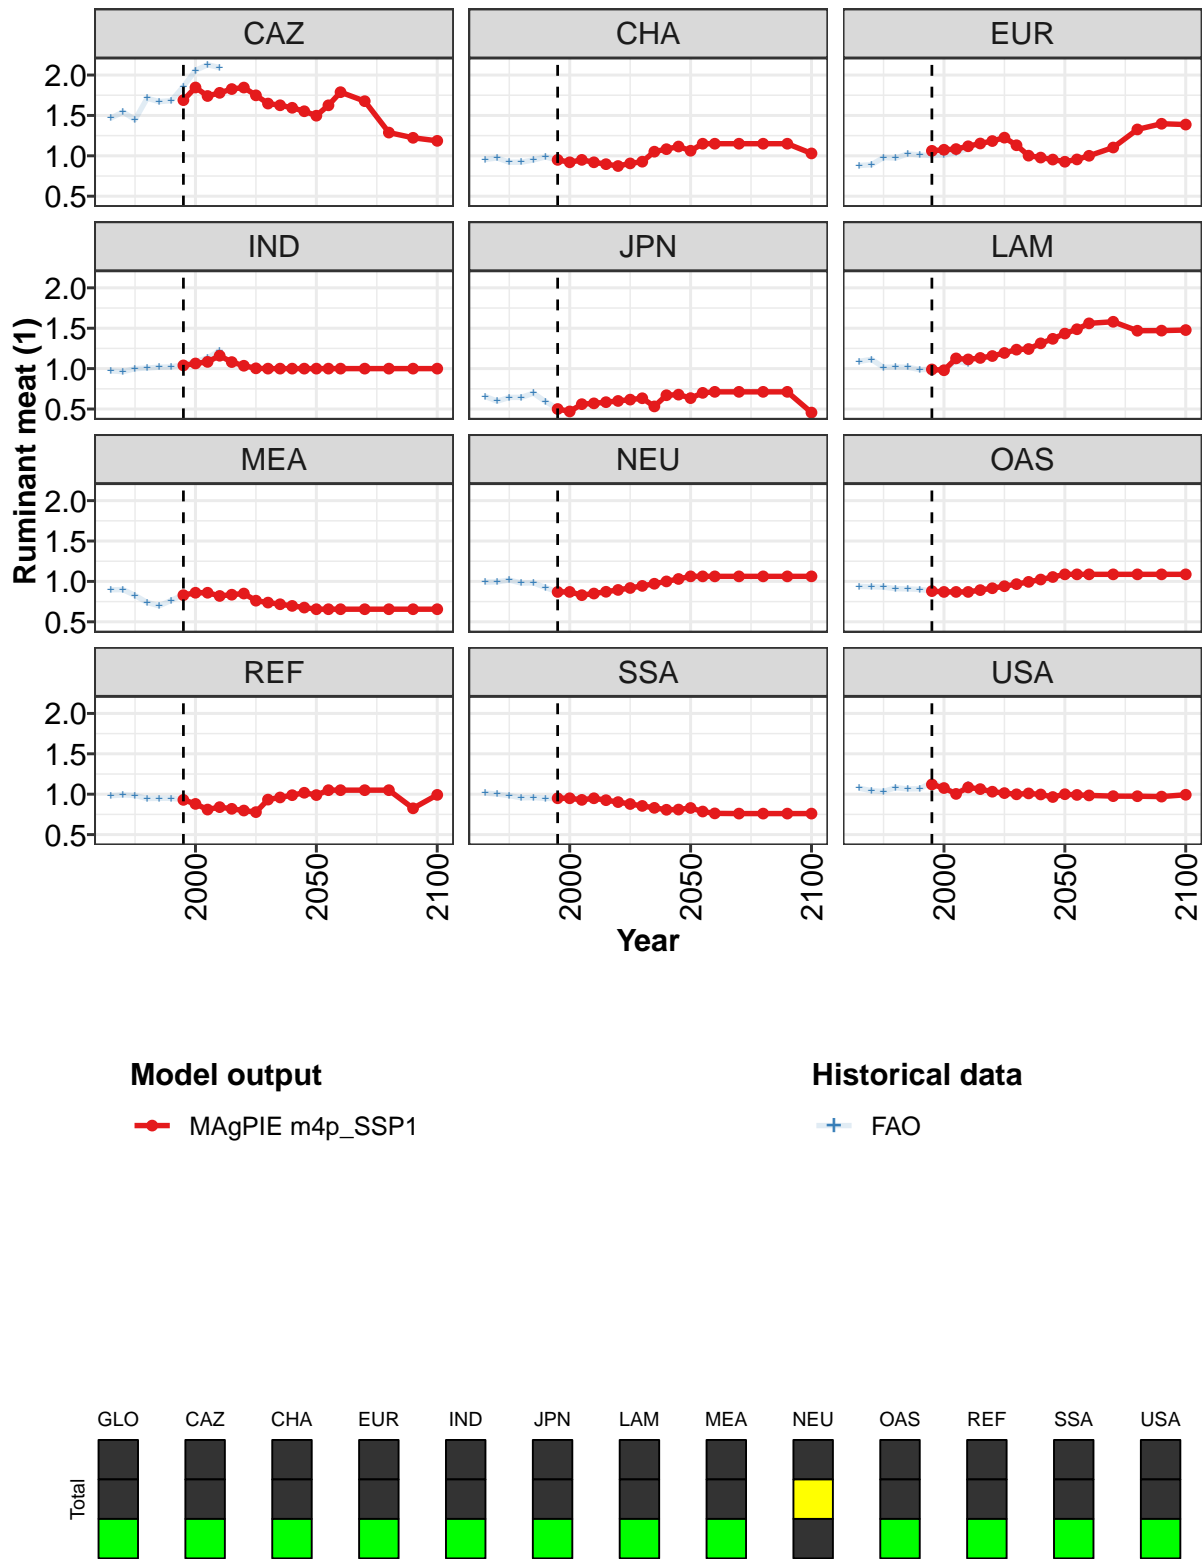

Figure 534: MAgPIE m4p\_SSP1 — Trade—Self-sufficiency—Livestock products—Ruminant meat (1)

|     | 1995 | 2000 | 2005 | 2010 | 2015 | 2020 | 2025 | 2030 | 2035 | 2040 | 2045 |
|-----|------|------|------|------|------|------|------|------|------|------|------|
| GLO | 1.01 | 1.00 | 1.01 | 1.02 | 1.01 | 1.00 | 1.00 | 1.00 | 1.00 | 1.00 | 1.00 |
| CAZ | 1.69 | 1.85 | 1.74 | 1.78 | 1.83 | 1.85 | 1.75 | 1.65 | 1.63 | 1.59 | 1.55 |
| CHA | 0.95 | 0.92 | 0.95 | 0.92 | 0.90 | 0.87 | 0.91 | 0.93 | 1.05 | 1.08 | 1.12 |
| EUR | 1.06 | 1.08 | 1.08 | 1.12 | 1.15 | 1.18 | 1.23 | 1.13 | 1.00 | 0.98 | 0.95 |
| IND | 1.04 | 1.06 | 1.08 | 1.16 | 1.08 | 1.04 | 1.00 | 1.00 | 1.00 | 1.00 | 1.00 |
| JPN | 0.50 | 0.47 | 0.56 | 0.57 | 0.58 | 0.60 | 0.62 | 0.63 | 0.53 | 0.67 | 0.68 |
| LAM | 0.99 | 0.98 | 1.13 | 1.11 | 1.13 | 1.16 | 1.19 | 1.23 | 1.24 | 1.31 | 1.37 |
| MEA | 0.83 | 0.86 | 0.86 | 0.82 | 0.84 | 0.85 | 0.76 | 0.74 | 0.72 | 0.70 | 0.68 |
| NEU | 0.87 | 0.87 | 0.83 | 0.85 | 0.87 | 0.89 | 0.92 | 0.94 | 0.97 | 1.00 | 1.03 |
| OAS | 0.88 | 0.87 | 0.87 | 0.87 | 0.89 | 0.92 | 0.94 | 0.97 | 0.99 | 1.02 | 1.05 |
| REF | 0.93 | 0.88 | 0.81 | 0.84 | 0.82 | 0.80 | 0.78 | 0.93 | 0.96 | 0.99 | 1.02 |
| SSA | 0.95 | 0.95 | 0.93 | 0.95 | 0.93 | 0.90 | 0.88 | 0.85 | 0.83 | 0.81 | 0.81 |
| USA | 1.12 | 1.08 | 1.00 | 1.08 | 1.06 | 1.03 | 1.01 | 1.00 | 1.01 | 1.00 | 0.97 |

Table 2001: MAgPIE m4p\_SSP1 — Trade—Self-sufficiency—Livestock products—Ruminant meat (1) [PART 1/2]

|     | 2050 | 2055 | 2060 | 2070 | 2080 | 2090 | 2100 |
|-----|------|------|------|------|------|------|------|
| GLO | 1.00 | 1.00 | 1.00 | 1.00 | 1.00 | 1.00 | 1.00 |
| CAZ | 1.50 | 1.63 | 1.79 | 1.68 | 1.29 | 1.22 | 1.19 |
| CHA | 1.06 | 1.15 | 1.15 | 1.15 | 1.15 | 1.15 | 1.03 |
| EUR | 0.93 | 0.96 | 1.00 | 1.10 | 1.33 | 1.40 | 1.39 |
| IND | 1.00 | 1.00 | 1.00 | 1.00 | 1.00 | 1.00 | 1.00 |
| JPN | 0.64 | 0.70 | 0.71 | 0.71 | 0.71 | 0.71 | 0.46 |
| LAM | 1.43 | 1.49 | 1.56 | 1.58 | 1.47 | 1.47 | 1.48 |
| MEA | 0.66 | 0.66 | 0.66 | 0.66 | 0.66 | 0.66 | 0.66 |
| NEU | 1.06 | 1.06 | 1.06 | 1.06 | 1.06 | 1.06 | 1.06 |
| OAS | 1.09 | 1.09 | 1.09 | 1.09 | 1.09 | 1.09 | 1.09 |
| REF | 0.99 | 1.05 | 1.05 | 1.05 | 1.05 | 0.83 | 0.99 |
| SSA | 0.83 | 0.79 | 0.76 | 0.76 | 0.76 | 0.76 | 0.76 |
| USA | 1.00 | 0.99 | 0.99 | 0.98 | 0.98 | 0.97 | 0.99 |

Table 2002: MAgPIE m4p\_SSP1 — Trade—Self-sufficiency—Livestock products—Ruminant meat (1) [PART 2/2]

|     | 1965 | 1970 | 1975 | 1980 | 1985 | 1990 | 1995 | 2000 | 2005 | 2010 |
|-----|------|------|------|------|------|------|------|------|------|------|
| GLO | 1.01 | 1.00 | 1.01 | 1.01 | 1.01 | 1.00 | 1.01 | 1.00 | 1.01 | 1.02 |
| CAZ | 1.47 | 1.54 | 1.45 | 1.71 | 1.67 | 1.68 | 1.86 | 2.06 | 2.13 | 2.09 |
| CHA | 0.96 | 0.97 | 0.92 | 0.92 | 0.95 | 0.99 | 0.95 | 0.92 | 0.95 | 0.92 |
| EUR | 0.88 | 0.89 | 0.98 | 0.97 | 1.02 | 1.01 | 1.00 | 1.01 | 1.04 | 1.08 |
| IND | 0.97 | 0.96 | 1.00 | 1.01 | 1.02 | 1.02 | 1.05 | 1.09 | 1.13 | 1.22 |
| JPN | 0.66 | 0.60 | 0.64 | 0.64 | 0.70 | 0.59 | 0.50 | 0.47 | 0.56 | 0.57 |
| LAM | 1.09 | 1.11 | 1.02 | 1.02 | 1.02 | 0.99 | 0.99 | 0.98 | 1.09 | 1.06 |
| MEA | 0.90 | 0.90 | 0.83 | 0.74 | 0.70 | 0.77 | 0.83 | 0.86 | 0.86 | 0.82 |
| NEU | 0.99 | 0.99 | 1.02 | 0.98 | 0.98 | 0.92 | 0.87 | 0.87 | 0.83 | 0.85 |
| OAS | 0.94 | 0.93 | 0.93 | 0.91 | 0.91 | 0.90 | 0.88 | 0.87 | 0.87 | 0.87 |
| REF | 0.98 | 0.99 | 0.98 | 0.95 | 0.95 | 0.95 | 0.93 | 0.88 | 0.81 | 0.84 |
| SSA | 1.01 | 1.00 | 0.98 | 0.96 | 0.96 | 0.95 | 0.95 | 0.95 | 0.93 | 0.95 |
| USA | 1.07 | 1.04 | 1.03 | 1.08 | 1.06 | 1.07 | 1.15 | 1.10 | 1.00 | 1.11 |

Table 2003: FAO — Trade—Self-sufficiency—Livestock products—Ruminant meat (1)

59.4 Secondary products

59.4.1 Alcoholic beverages

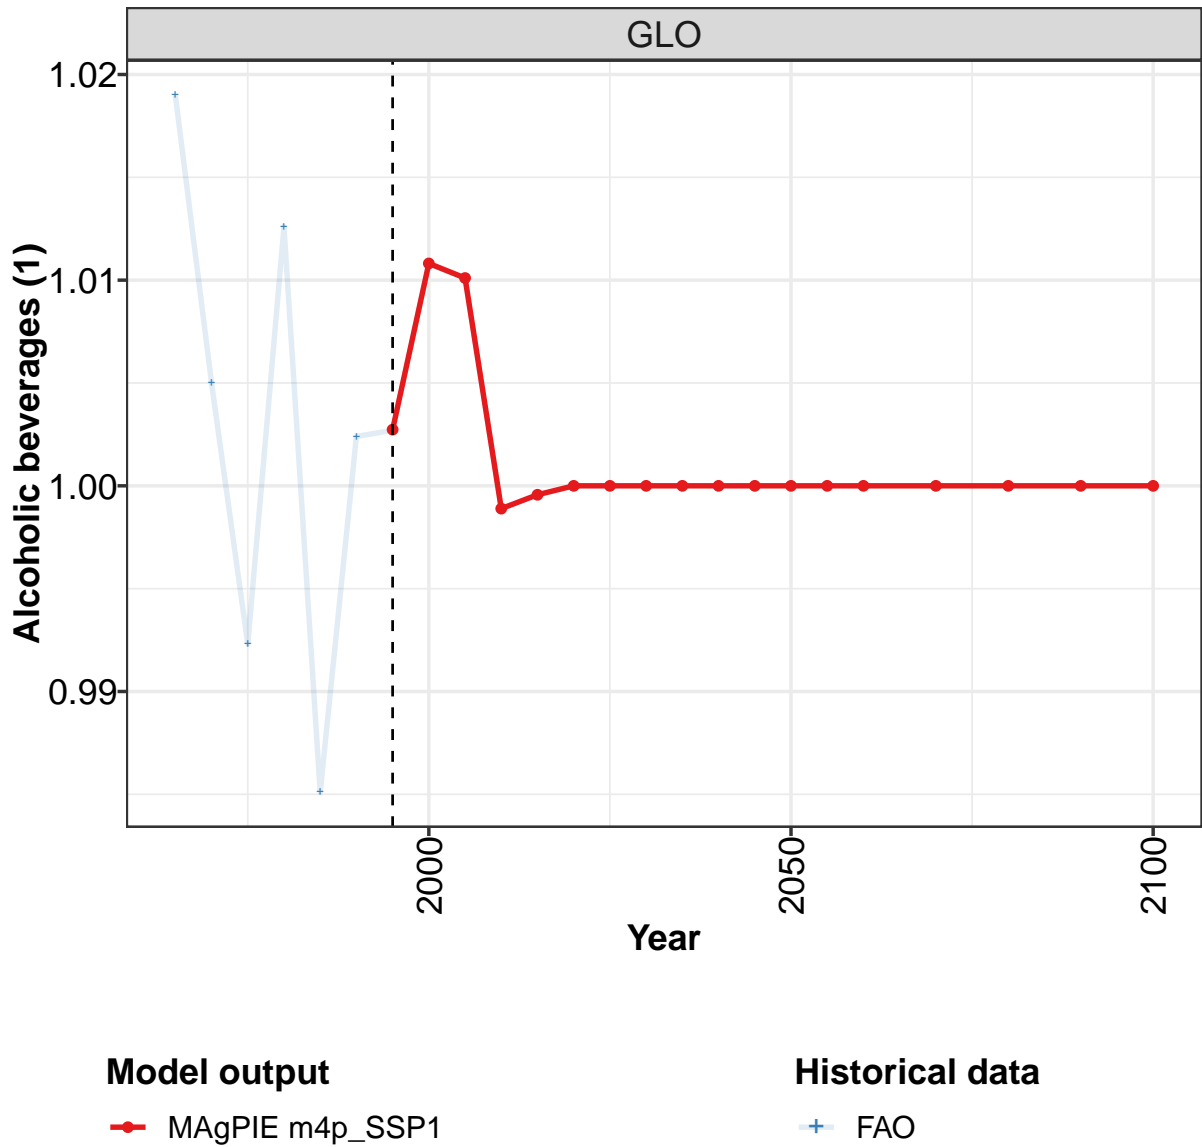

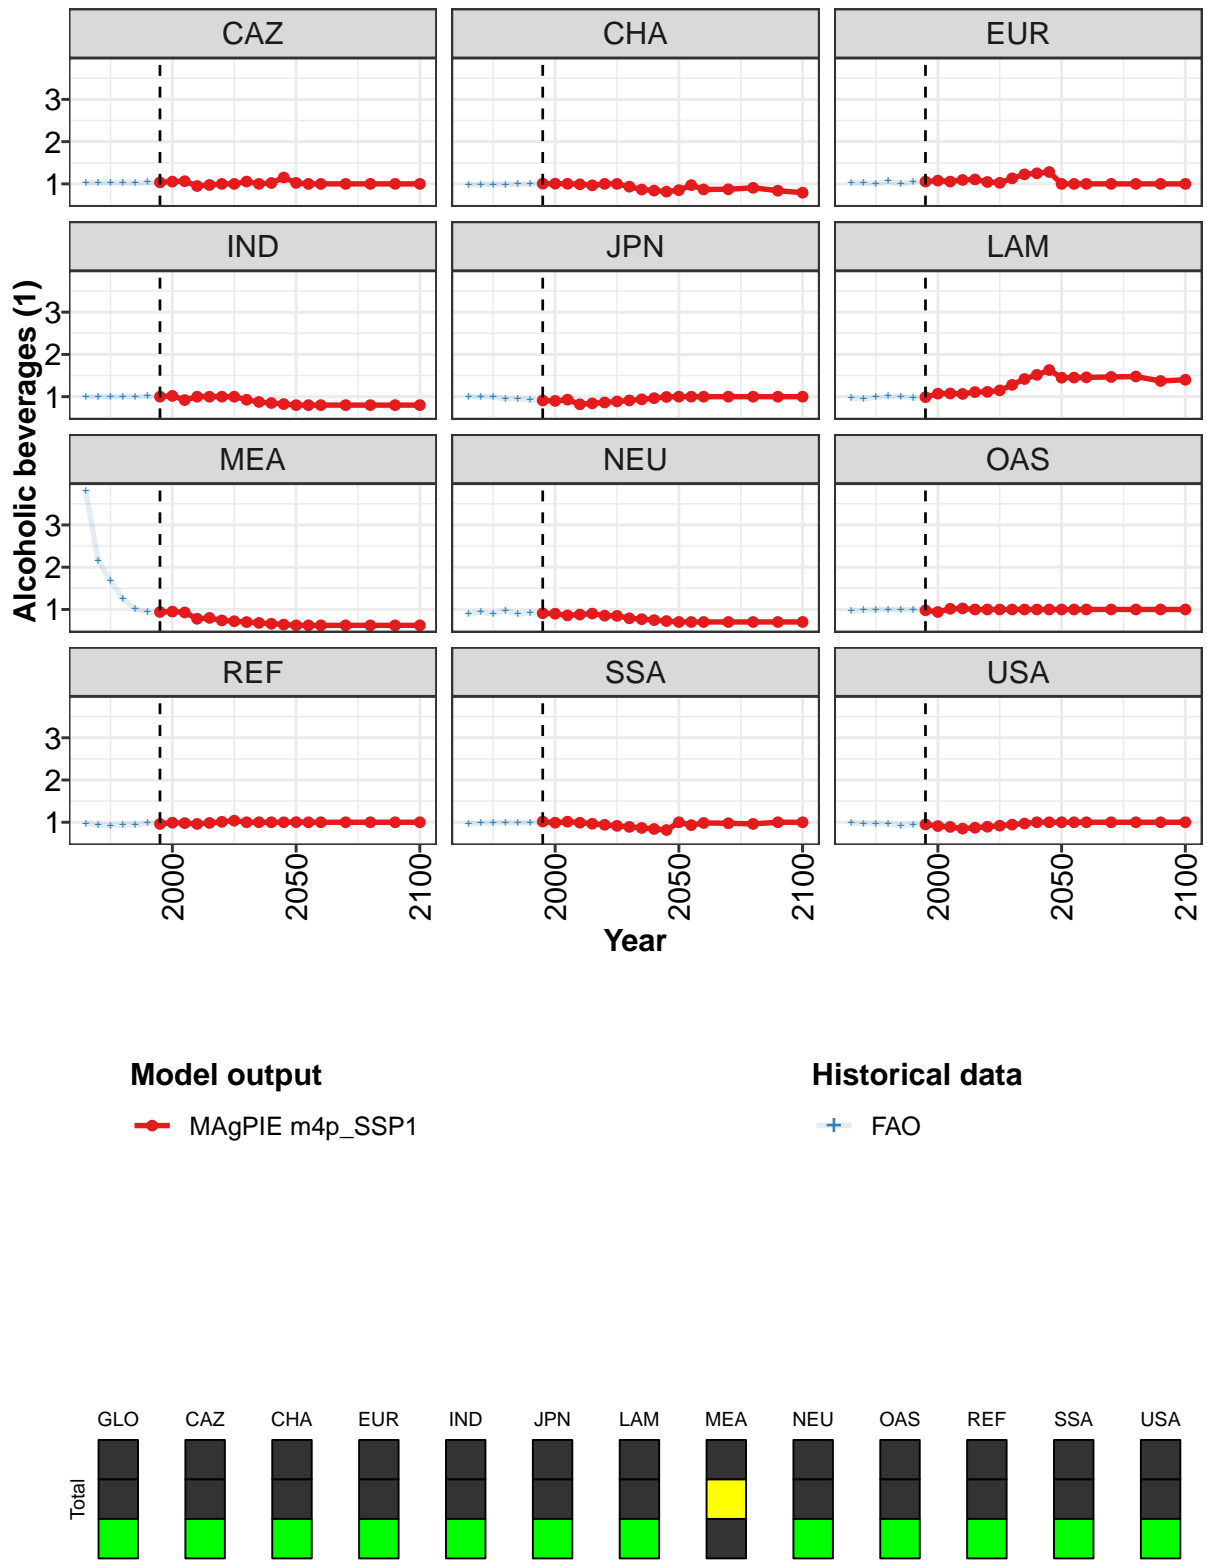

Figure 535: MAgPIE m4p\_SSP1 — Trade—Self-sufficiency—Secondary products—Alcoholic beverages (1)

|     | 1995 | 2000 | 2005 | 2010 | 2015 | 2020 | 2025 | 2030 | 2035 | 2040 | 2045 |
|-----|------|------|------|------|------|------|------|------|------|------|------|
| GLO | 1.00 | 1.01 | 1.01 | 1.00 | 1.00 | 1.00 | 1.00 | 1.00 | 1.00 | 1.00 | 1.00 |
| CAZ | 1.04 | 1.05 | 1.06 | 0.95 | 0.97 | 1.00 | 1.00 | 1.06 | 1.00 | 1.02 | 1.15 |
| CHA | 1.01 | 1.01 | 1.00 | 0.99 | 0.97 | 1.00 | 1.00 | 0.93 | 0.87 | 0.84 | 0.82 |
| EUR | 1.05 | 1.08 | 1.06 | 1.09 | 1.11 | 1.04 | 1.03 | 1.13 | 1.22 | 1.25 | 1.28 |
| IND | 1.00 | 1.02 | 0.92 | 1.00 | 1.00 | 1.00 | 1.00 | 0.93 | 0.88 | 0.85 | 0.82 |
| JPN | 0.91 | 0.90 | 0.93 | 0.82 | 0.84 | 0.86 | 0.89 | 0.91 | 0.94 | 0.96 | 0.99 |
| LAM | 0.99 | 1.07 | 1.08 | 1.06 | 1.11 | 1.11 | 1.15 | 1.28 | 1.42 | 1.52 | 1.63 |
| MEA | 0.94 | 0.95 | 0.93 | 0.78 | 0.80 | 0.74 | 0.72 | 0.70 | 0.68 | 0.66 | 0.64 |
| NEU | 0.91 | 0.90 | 0.86 | 0.88 | 0.90 | 0.85 | 0.85 | 0.79 | 0.77 | 0.75 | 0.73 |
| OAS | 0.98 | 0.94 | 1.02 | 1.02 | 1.00 | 1.00 | 1.00 | 1.00 | 1.00 | 1.00 | 1.00 |
| REF | 0.96 | 0.99 | 0.98 | 0.96 | 0.98 | 1.01 | 1.04 | 1.00 | 1.00 | 1.00 | 1.00 |
| SSA | 1.02 | 0.99 | 1.01 | 0.99 | 0.97 | 0.94 | 0.92 | 0.89 | 0.87 | 0.84 | 0.82 |
| USA | 0.95 | 0.91 | 0.89 | 0.85 | 0.87 | 0.89 | 0.92 | 0.94 | 0.97 | 1.00 | 1.00 |

Table 2004: MAgPIE m4p\_SSP1 — Trade—Self-sufficiency—Secondary products—Alcoholic beverages (1)  
[PART 1/2]

|     | 2050 | 2055 | 2060 | 2070 | 2080 | 2090 | 2100 |
|-----|------|------|------|------|------|------|------|
| GLO | 1.00 | 1.00 | 1.00 | 1.00 | 1.00 | 1.00 | 1.00 |
| CAZ | 1.02 | 1.00 | 1.00 | 1.00 | 1.00 | 1.00 | 1.00 |
| CHA | 0.85 | 0.97 | 0.87 | 0.87 | 0.91 | 0.84 | 0.79 |
| EUR | 1.00 | 1.00 | 1.00 | 1.00 | 1.00 | 1.00 | 1.00 |
| IND | 0.80 | 0.80 | 0.80 | 0.80 | 0.80 | 0.80 | 0.80 |
| JPN | 1.00 | 1.00 | 1.00 | 1.00 | 1.00 | 1.00 | 1.00 |
| LAM | 1.45 | 1.45 | 1.46 | 1.47 | 1.48 | 1.37 | 1.40 |
| MEA | 0.62 | 0.62 | 0.62 | 0.62 | 0.62 | 0.62 | 0.62 |
| NEU | 0.70 | 0.70 | 0.70 | 0.70 | 0.70 | 0.70 | 0.70 |
| OAS | 1.00 | 1.00 | 1.00 | 1.00 | 1.00 | 1.00 | 1.00 |
| REF | 1.00 | 1.00 | 1.00 | 1.00 | 1.00 | 1.00 | 1.00 |
| SSA | 1.00 | 0.93 | 0.98 | 0.98 | 0.96 | 1.00 | 1.00 |
| USA | 1.00 | 1.00 | 1.00 | 1.00 | 1.00 | 1.00 | 1.00 |

Table 2005: MAgPIE m4p\_SSP1 — Trade—Self-sufficiency—Secondary products—Alcoholic beverages (1)  
[PART 2/2]

|     | 1965 | 1970 | 1975 | 1980 | 1985 | 1990 | 1995 | 2000 | 2005 | 2010 |
|-----|------|------|------|------|------|------|------|------|------|------|
| GLO | 1.02 | 1.00 | 0.99 | 1.01 | 0.99 | 1.00 | 1.00 | 1.01 | 1.01 | 1.00 |
| CAZ | 1.03 | 1.04 | 1.03 | 1.04 | 1.02 | 1.04 | 1.05 | 1.05 | 1.08 | 0.95 |
| CHA | 0.97 | 0.98 | 0.99 | 0.99 | 1.00 | 1.00 | 1.00 | 1.00 | 1.00 | 0.99 |
| EUR | 1.02 | 1.03 | 1.01 | 1.06 | 1.01 | 1.06 | 1.06 | 1.09 | 1.05 | 1.07 |
| IND | 1.00 | 1.00 | 1.00 | 1.00 | 1.00 | 1.01 | 1.00 | 1.02 | 0.92 | 1.00 |
| JPN | 1.00 | 1.00 | 0.99 | 0.95 | 0.95 | 0.93 | 0.91 | 0.90 | 0.93 | 0.82 |
| LAM | 0.97 | 0.95 | 0.99 | 1.01 | 1.01 | 0.97 | 0.99 | 1.06 | 1.10 | 1.09 |
| MEA | 3.82 | 2.16 | 1.68 | 1.26 | 1.01 | 0.93 | 0.94 | 0.95 | 0.93 | 0.78 |
| NEU | 0.90 | 0.93 | 0.89 | 0.98 | 0.89 | 0.92 | 0.91 | 0.90 | 0.86 | 0.88 |
| OAS | 0.96 | 0.98 | 0.99 | 1.00 | 0.99 | 1.00 | 0.98 | 0.94 | 1.03 | 1.00 |
| REF | 0.98 | 0.93 | 0.93 | 0.93 | 0.94 | 0.98 | 0.96 | 0.99 | 0.98 | 0.96 |
| SSA | 0.97 | 0.98 | 0.98 | 0.99 | 0.99 | 0.99 | 1.00 | 0.99 | 1.00 | 0.99 |
| USA | 0.99 | 0.97 | 0.97 | 0.96 | 0.93 | 0.95 | 0.95 | 0.91 | 0.89 | 0.85 |

Table 2006: FAO — Trade—Self-sufficiency—Secondary products—Alcoholic beverages (1)

59.4.2 Brans

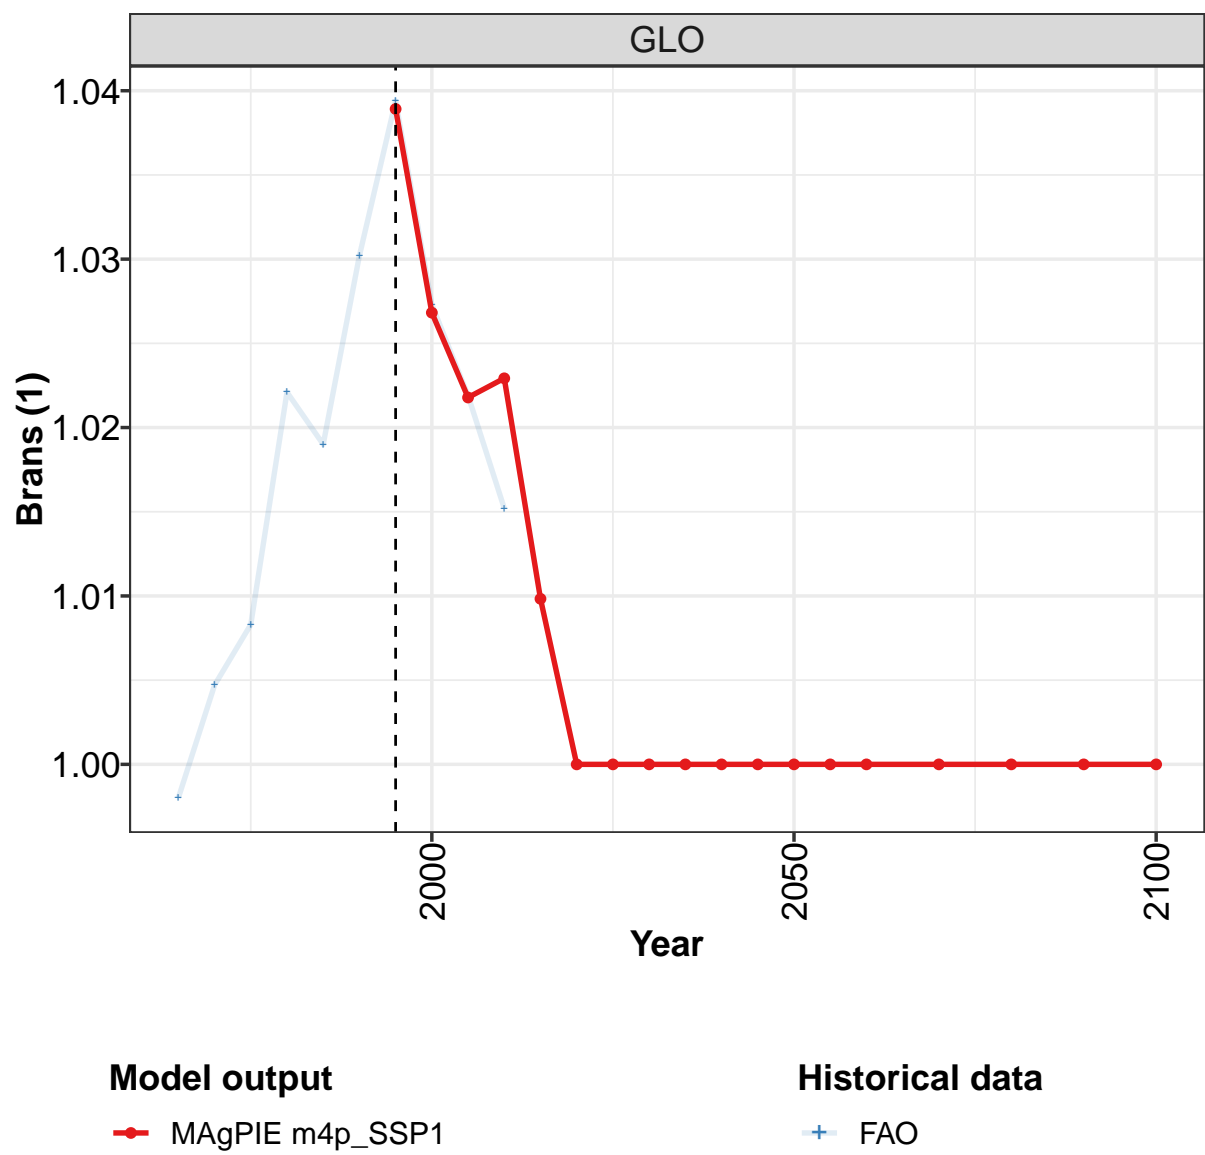



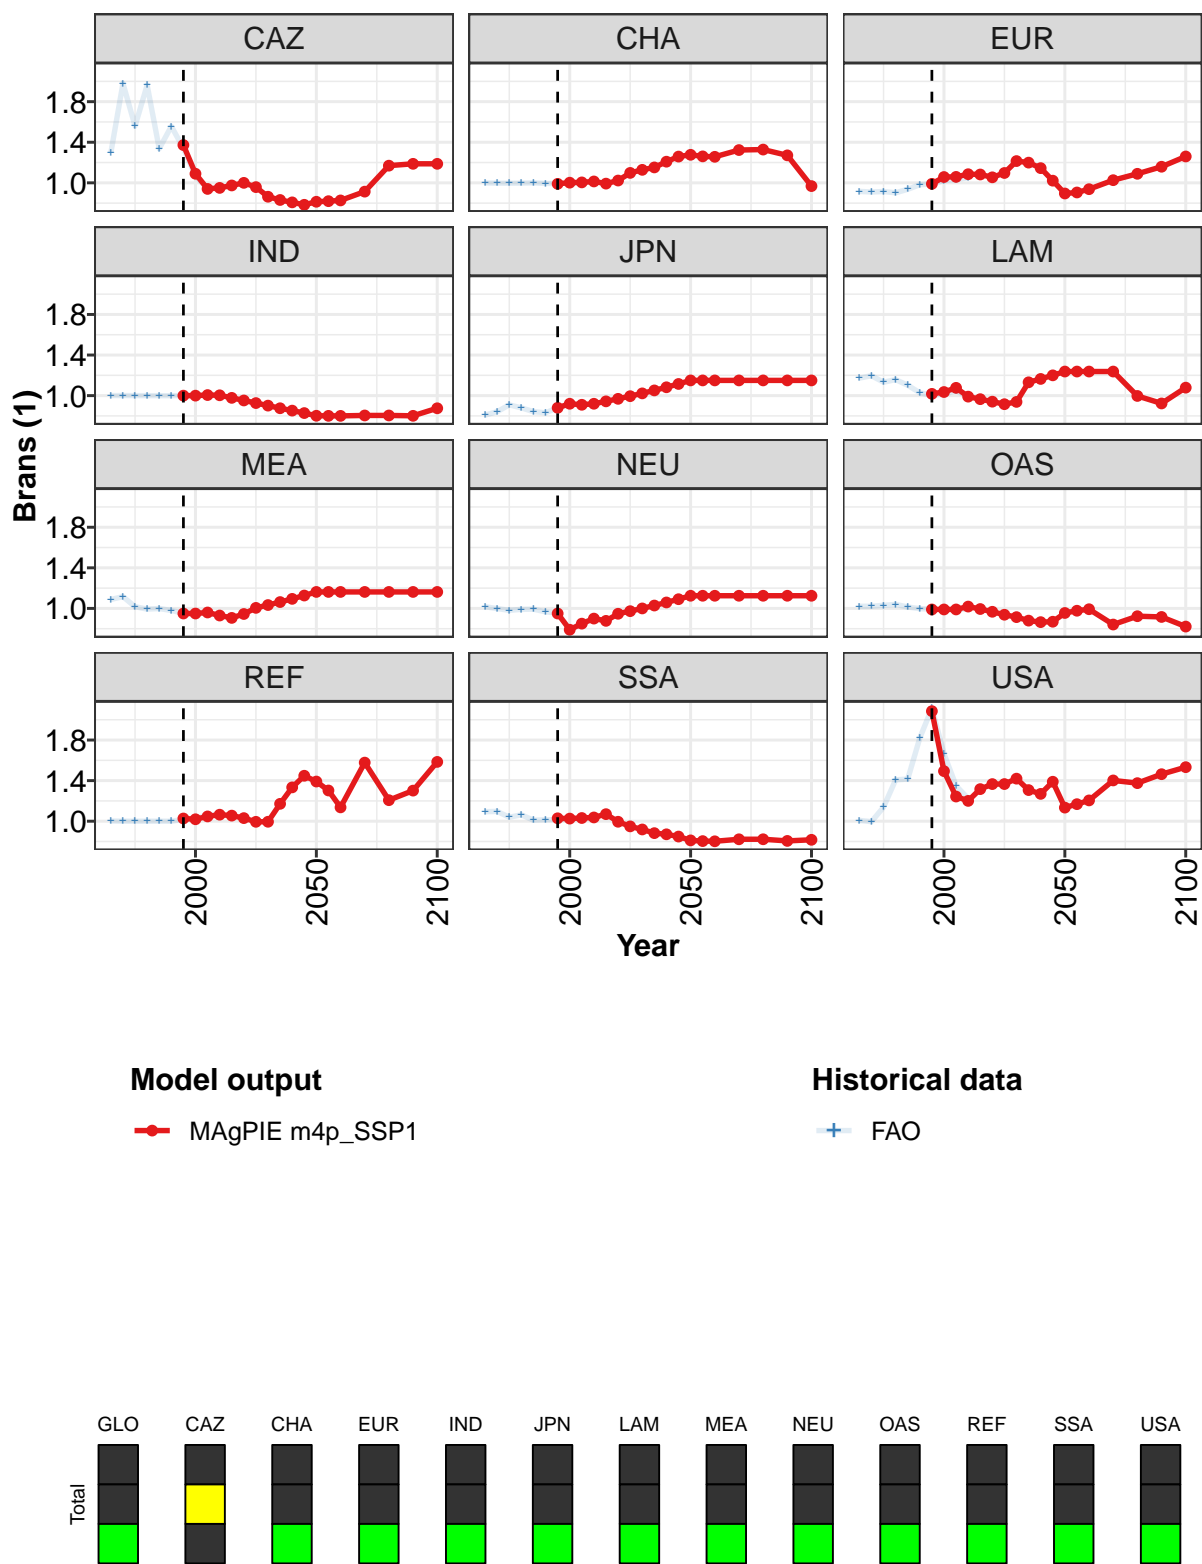

Figure 536: MAgPIE m4p\_SSP1 — Trade—Self-sufficiency—Secondary products—Brans (1)

|     | 1995 | 2000 | 2005 | 2010 | 2015 | 2020 | 2025 | 2030 | 2035 | 2040 | 2045 |
|-----|------|------|------|------|------|------|------|------|------|------|------|
| GLO | 1.04 | 1.03 | 1.02 | 1.02 | 1.01 | 1.00 | 1.00 | 1.00 | 1.00 | 1.00 | 1.00 |
| CAZ | 1.37 | 1.09 | 0.94 | 0.95 | 0.97 | 1.00 | 0.96 | 0.86 | 0.83 | 0.81 | 0.78 |
| CHA | 0.99 | 1.00 | 1.00 | 1.01 | 0.99 | 1.02 | 1.10 | 1.13 | 1.15 | 1.21 | 1.26 |
| EUR | 0.99 | 1.06 | 1.06 | 1.09 | 1.08 | 1.05 | 1.10 | 1.21 | 1.20 | 1.14 | 1.02 |
| IND | 1.00 | 1.00 | 1.01 | 1.00 | 0.98 | 0.95 | 0.93 | 0.90 | 0.88 | 0.85 | 0.83 |
| JPN | 0.88 | 0.92 | 0.91 | 0.92 | 0.94 | 0.97 | 0.99 | 1.02 | 1.05 | 1.08 | 1.12 |
| LAM | 1.02 | 1.04 | 1.08 | 0.99 | 0.97 | 0.94 | 0.92 | 0.94 | 1.13 | 1.16 | 1.20 |
| MEA | 0.95 | 0.95 | 0.96 | 0.93 | 0.91 | 0.95 | 1.01 | 1.03 | 1.06 | 1.09 | 1.13 |
| NEU | 0.95 | 0.79 | 0.85 | 0.90 | 0.88 | 0.95 | 0.97 | 1.00 | 1.03 | 1.06 | 1.09 |
| OAS | 0.99 | 0.99 | 0.99 | 1.02 | 0.99 | 0.97 | 0.94 | 0.91 | 0.88 | 0.86 | 0.87 |
| REF | 1.03 | 1.02 | 1.05 | 1.06 | 1.06 | 1.03 | 0.99 | 0.99 | 1.17 | 1.33 | 1.45 |
| SSA | 1.03 | 1.03 | 1.03 | 1.04 | 1.07 | 0.99 | 0.95 | 0.92 | 0.88 | 0.87 | 0.85 |
| USA | 2.08 | 1.49 | 1.24 | 1.20 | 1.32 | 1.37 | 1.37 | 1.42 | 1.31 | 1.27 | 1.39 |

Table 2007: MAgPIE m4p\_SSP1 — Trade—Self-sufficiency—Secondary products—Brans (1) [PART 1/2]

|     | 2050 | 2055 | 2060 | 2070 | 2080 | 2090 | 2100 |
|-----|------|------|------|------|------|------|------|
| GLO | 1.00 | 1.00 | 1.00 | 1.00 | 1.00 | 1.00 | 1.00 |
| CAZ | 0.81 | 0.82 | 0.83 | 0.91 | 1.17 | 1.19 | 1.19 |
| CHA | 1.28 | 1.26 | 1.26 | 1.32 | 1.33 | 1.27 | 0.97 |
| EUR | 0.89 | 0.90 | 0.94 | 1.03 | 1.09 | 1.16 | 1.26 |
| IND | 0.80 | 0.80 | 0.80 | 0.80 | 0.80 | 0.80 | 0.88 |
| JPN | 1.15 | 1.15 | 1.15 | 1.15 | 1.15 | 1.15 | 1.15 |
| LAM | 1.24 | 1.24 | 1.24 | 1.24 | 1.00 | 0.92 | 1.08 |
| MEA | 1.16 | 1.16 | 1.16 | 1.16 | 1.16 | 1.16 | 1.16 |
| NEU | 1.13 | 1.12 | 1.12 | 1.12 | 1.13 | 1.12 | 1.12 |
| OAS | 0.96 | 0.98 | 0.99 | 0.84 | 0.92 | 0.92 | 0.82 |
| REF | 1.39 | 1.30 | 1.14 | 1.58 | 1.21 | 1.30 | 1.58 |
| SSA | 0.81 | 0.80 | 0.80 | 0.82 | 0.82 | 0.81 | 0.82 |
| USA | 1.13 | 1.17 | 1.21 | 1.40 | 1.38 | 1.46 | 1.53 |

Table 2008: MAgPIE m4p\_SSP1 — Trade—Self-sufficiency—Secondary products—Brans (1) [PART 2/2]

|     | 1965 | 1970 | 1975 | 1980 | 1985 | 1990 | 1995 | 2000 | 2005 | 2010 |
|-----|------|------|------|------|------|------|------|------|------|------|
| GLO | 1.00 | 1.00 | 1.01 | 1.02 | 1.02 | 1.03 | 1.04 | 1.03 | 1.02 | 1.02 |
| CAZ | 1.30 | 1.98 | 1.56 | 1.96 | 1.34 | 1.56 | 1.34 | 1.07 | 0.94 | 0.95 |
| CHA | 1.00 | 1.00 | 1.00 | 1.00 | 1.00 | 0.99 | 0.99 | 1.00 | 1.00 | 1.01 |
| EUR | 0.92 | 0.91 | 0.91 | 0.90 | 0.94 | 0.98 | 0.99 | 1.02 | 1.03 | 1.05 |
| IND | 1.00 | 1.00 | 1.00 | 1.00 | 1.00 | 1.00 | 1.00 | 1.00 | 1.01 | 1.00 |
| JPN | 0.81 | 0.84 | 0.91 | 0.88 | 0.84 | 0.83 | 0.88 | 0.92 | 0.91 | 0.92 |
| LAM | 1.17 | 1.20 | 1.13 | 1.16 | 1.10 | 1.03 | 1.00 | 1.01 | 1.05 | 0.99 |
| MEA | 1.09 | 1.12 | 1.02 | 0.99 | 1.00 | 0.98 | 0.95 | 0.95 | 0.96 | 0.93 |
| NEU | 1.02 | 1.00 | 0.98 | 0.99 | 0.99 | 0.97 | 0.95 | 0.79 | 0.85 | 0.90 |
| OAS | 1.02 | 1.02 | 1.03 | 1.04 | 1.01 | 1.00 | 0.99 | 0.99 | 0.99 | 1.00 |
| REF | 1.00 | 1.00 | 1.00 | 1.00 | 1.00 | 1.00 | 1.02 | 1.02 | 1.06 | 1.06 |
| SSA | 1.09 | 1.10 | 1.04 | 1.06 | 1.01 | 1.01 | 1.02 | 1.02 | 1.03 | 1.03 |
| USA | 1.01 | 1.00 | 1.14 | 1.41 | 1.42 | 1.82 | 2.11 | 1.66 | 1.35 | 1.22 |

Table 2009: FAO — Trade—Self-sufficiency—Secondary products—Brans (1)

59.4.3 Cotton lint

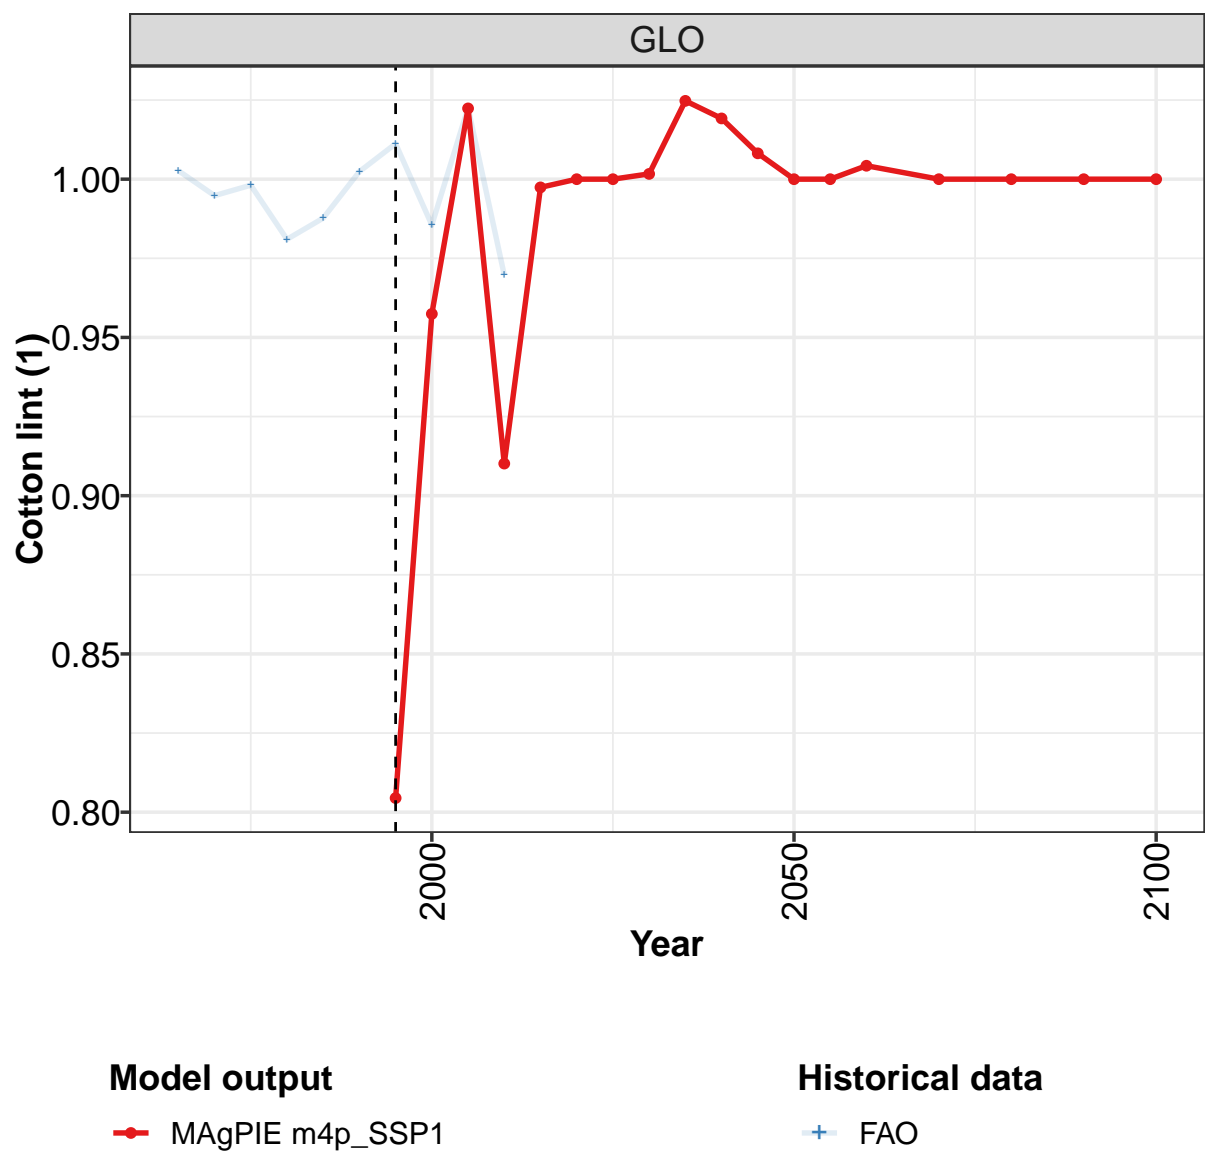

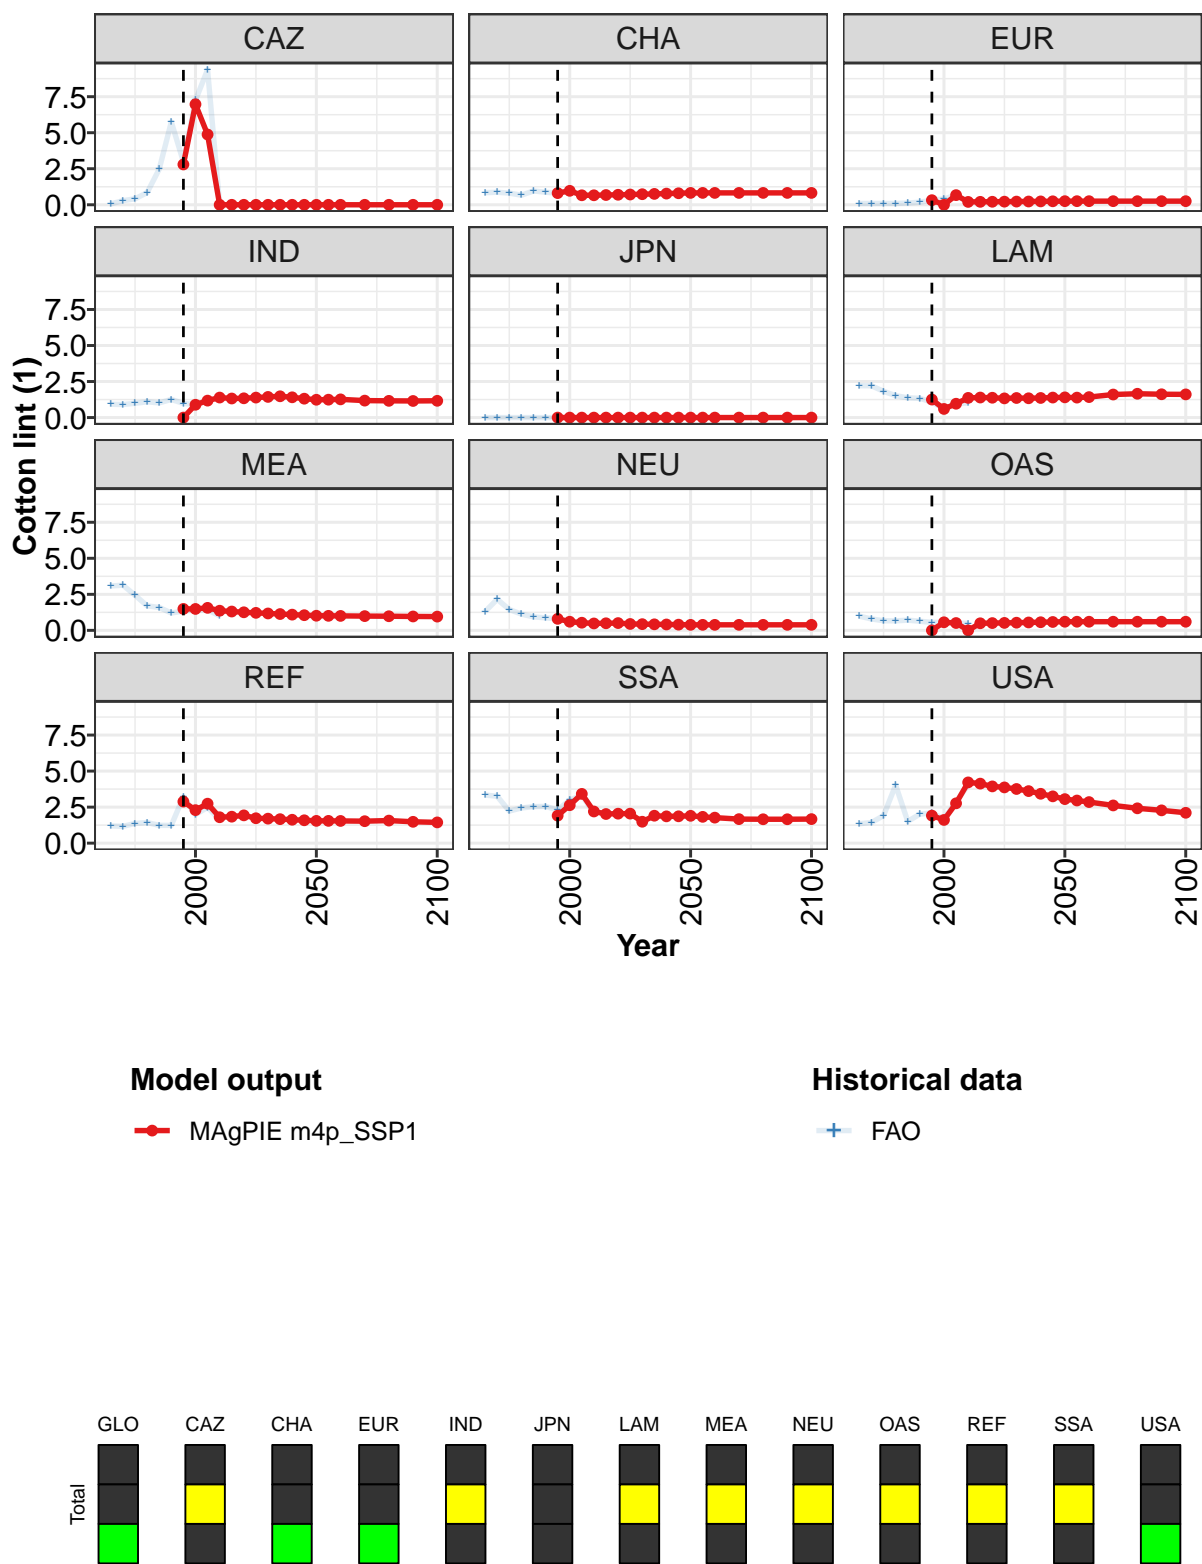

Figure 537: MAgPIE m4p\_SSP1 — Trade—Self-sufficiency—Secondary products—Cotton lint (1)

|     | 1995 | 2000 | 2005 | 2010 | 2015 | 2020 | 2025 | 2030 | 2035 | 2040 | 2045 |
|-----|------|------|------|------|------|------|------|------|------|------|------|
| GLO | 0.80 | 0.96 | 1.02 | 0.91 | 1.00 | 1.00 | 1.00 | 1.00 | 1.02 | 1.02 | 1.01 |
| CAZ | 2.80 | 6.97 | 4.88 | 0.00 | 0.00 | 0.00 | 0.00 | 0.00 | 0.00 | 0.00 | 0.00 |
| CHA | 0.81 | 0.97 | 0.66 | 0.66 | 0.68 | 0.69 | 0.71 | 0.73 | 0.75 | 0.78 | 0.80 |
| EUR | 0.32 | 0.00 | 0.67 | 0.20 | 0.21 | 0.21 | 0.22 | 0.22 | 0.23 | 0.24 | 0.24 |
| IND | 0.00 | 0.89 | 1.18 | 1.39 | 1.32 | 1.34 | 1.39 | 1.43 | 1.48 | 1.41 | 1.31 |
| JPN | 0.00 | 0.00 | 0.00 | 0.00 | 0.00 | 0.00 | 0.00 | 0.00 | 0.00 | 0.00 | 0.00 |
| LAM | 1.25 | 0.60 | 0.96 | 1.37 | 1.39 | 1.38 | 1.33 | 1.36 | 1.34 | 1.36 | 1.39 |
| MEA | 1.49 | 1.49 | 1.56 | 1.37 | 1.31 | 1.25 | 1.21 | 1.17 | 1.13 | 1.09 | 1.05 |
| NEU | 0.80 | 0.60 | 0.53 | 0.48 | 0.49 | 0.51 | 0.44 | 0.43 | 0.42 | 0.41 | 0.40 |
| OAS | 0.00 | 0.56 | 0.51 | 0.00 | 0.49 | 0.51 | 0.52 | 0.53 | 0.55 | 0.56 | 0.58 |
| REF | 2.88 | 2.29 | 2.74 | 1.80 | 1.84 | 1.93 | 1.73 | 1.70 | 1.67 | 1.63 | 1.59 |
| SSA | 1.91 | 2.63 | 3.42 | 2.20 | 2.02 | 2.05 | 2.05 | 1.49 | 1.90 | 1.86 | 1.86 |
| USA | 1.91 | 1.61 | 2.77 | 4.22 | 4.13 | 3.94 | 3.87 | 3.76 | 3.61 | 3.43 | 3.25 |

Table 2010: MAgPIE m4p\_SSP1 — Trade—Self-sufficiency—Secondary products—Cotton lint (1) [PART 1/2]

|     | 2050 | 2055 | 2060 | 2070 | 2080 | 2090 | 2100 |
|-----|------|------|------|------|------|------|------|
| GLO | 1.00 | 1.00 | 1.00 | 1.00 | 1.00 | 1.00 | 1.00 |
| CAZ | 0.00 | 0.00 | 0.00 | 0.00 | 0.00 | 0.00 | 0.00 |
| CHA | 0.83 | 0.83 | 0.83 | 0.83 | 0.83 | 0.83 | 0.83 |
| EUR | 0.25 | 0.25 | 0.25 | 0.25 | 0.25 | 0.25 | 0.25 |
| IND | 1.24 | 1.24 | 1.26 | 1.18 | 1.16 | 1.15 | 1.17 |
| JPN | 0.00 | 0.00 | 0.00 | 0.00 | 0.00 | 0.00 | 0.00 |
| LAM | 1.40 | 1.39 | 1.42 | 1.60 | 1.65 | 1.62 | 1.61 |
| MEA | 1.02 | 1.01 | 1.00 | 0.99 | 0.98 | 0.96 | 0.96 |
| NEU | 0.38 | 0.38 | 0.38 | 0.38 | 0.38 | 0.38 | 0.38 |
| OAS | 0.60 | 0.60 | 0.60 | 0.60 | 0.60 | 0.60 | 0.60 |
| REF | 1.55 | 1.55 | 1.54 | 1.52 | 1.57 | 1.48 | 1.44 |
| SSA | 1.90 | 1.83 | 1.77 | 1.67 | 1.66 | 1.66 | 1.67 |
| USA | 3.06 | 2.96 | 2.85 | 2.62 | 2.42 | 2.28 | 2.11 |

Table 2011: MAgPIE m4p\_SSP1 — Trade—Self-sufficiency—Secondary products—Cotton lint (1) [PART 2/2]

|     | 1965 | 1970 | 1975 | 1980 | 1985 | 1990 | 1995 | 2000 | 2005 | 2010 |
|-----|------|------|------|------|------|------|------|------|------|------|
| GLO | 1.00 | 0.99 | 1.00 | 0.98 | 0.99 | 1.00 | 1.01 | 0.99 | 1.02 | 0.97 |
| CAZ | 0.06 | 0.28 | 0.41 | 0.84 | 2.47 | 5.75 | 2.98 | 7.25 | 9.37 | 0.00 |
| CHA | 0.84 | 0.87 | 0.81 | 0.66 | 0.96 | 0.87 | 0.81 | 0.97 | 0.66 | 0.66 |
| EUR | 0.09 | 0.09 | 0.09 | 0.09 | 0.12 | 0.18 | 0.32 | 0.41 | 0.67 | 0.20 |
| IND | 0.92 | 0.90 | 0.99 | 1.09 | 1.02 | 1.25 | 0.98 | 0.89 | 1.20 | 1.37 |
| JPN | 0.00 | 0.00 | 0.00 | 0.00 | 0.00 | 0.00 | 0.00 | 0.00 | 0.00 | 0.00 |
| LAM | 2.21 | 2.20 | 1.82 | 1.52 | 1.37 | 1.33 | 1.08 | 0.60 | 0.96 | 1.01 |
| MEA | 3.08 | 3.13 | 2.44 | 1.70 | 1.59 | 1.20 | 1.34 | 1.41 | 1.43 | 1.00 |
| NEU | 1.31 | 2.16 | 1.45 | 1.13 | 0.94 | 0.87 | 0.80 | 0.60 | 0.53 | 0.48 |
| OAS | 0.99 | 0.79 | 0.67 | 0.66 | 0.71 | 0.63 | 0.55 | 0.56 | 0.51 | 0.48 |
| REF | 1.19 | 1.17 | 1.37 | 1.43 | 1.23 | 1.23 | 3.22 | 1.99 | 2.48 | 1.65 |
| SSA | 3.34 | 3.25 | 2.23 | 2.44 | 2.53 | 2.55 | 2.30 | 2.99 | 3.32 | 2.09 |
| USA | 1.35 | 1.43 | 1.91 | 4.02 | 1.51 | 2.01 | 2.10 | 1.68 | 2.88 | 4.02 |

Table 2012: FAO — Trade—Self-sufficiency—Secondary products—Cotton lint (1)

59.4.4 Distillers grains

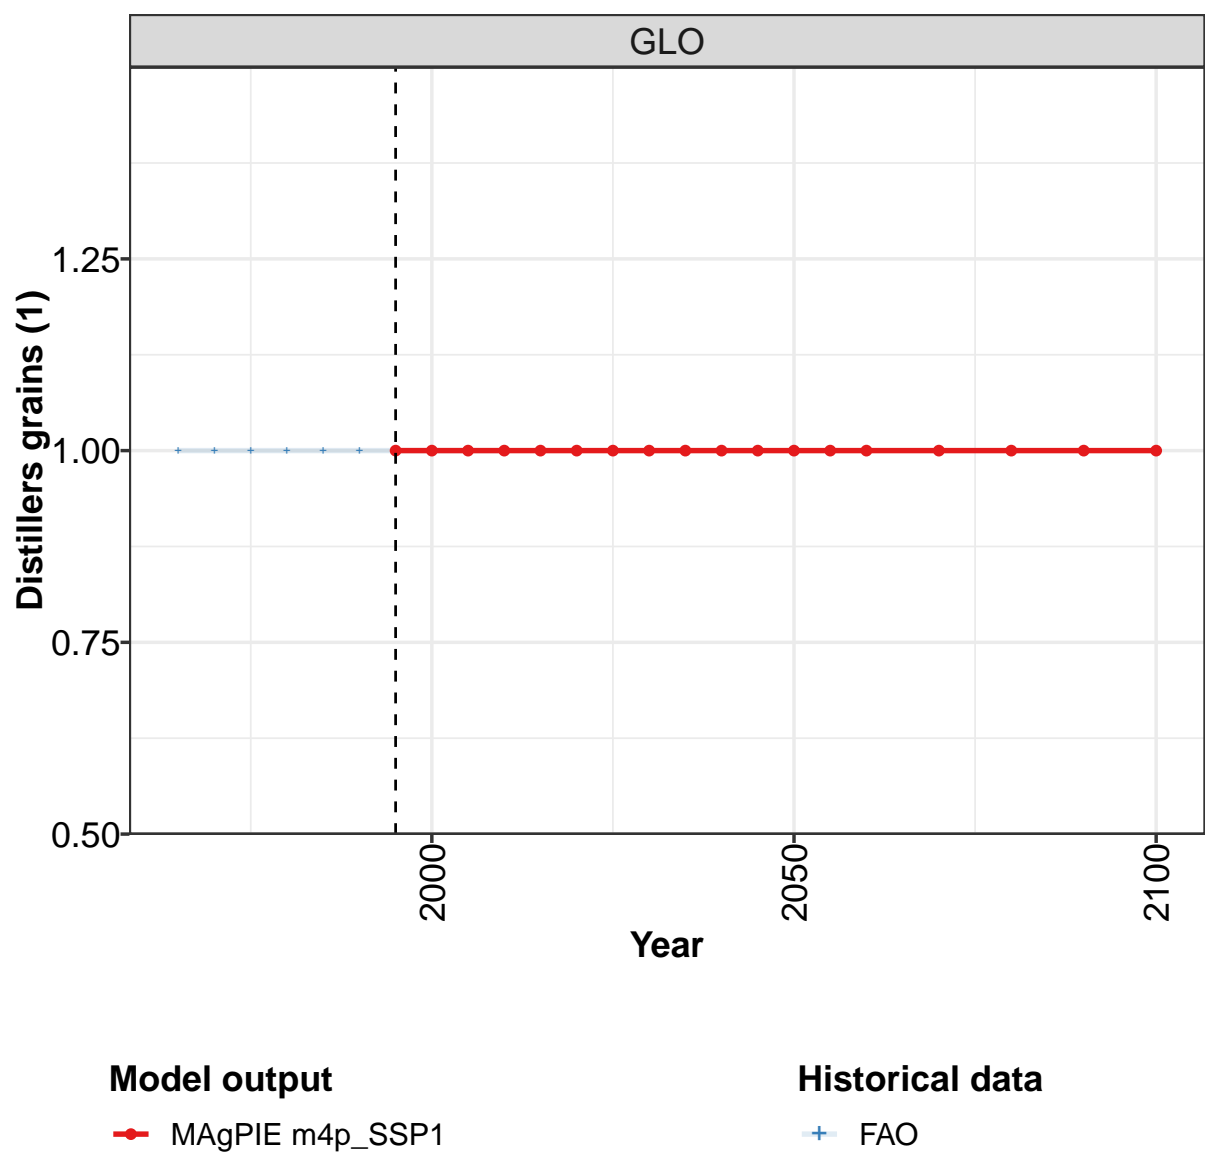

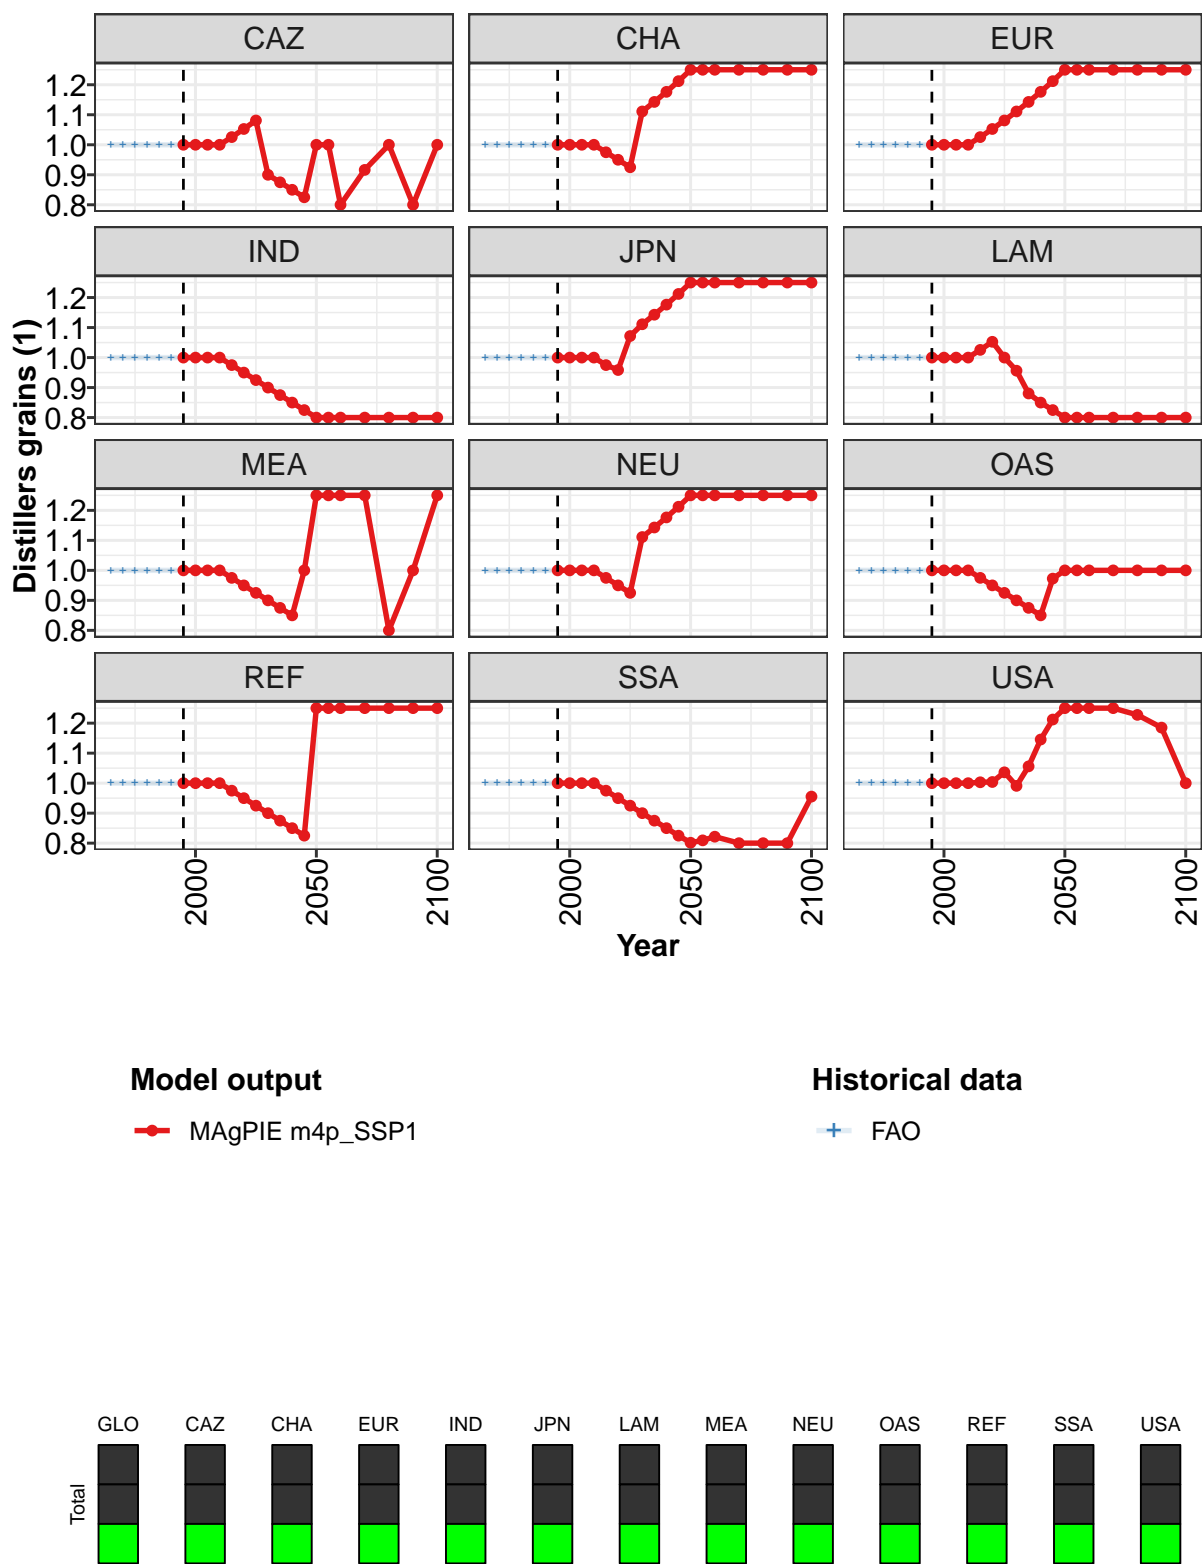

Figure 538: MAgPIE m4p\_SSP1 — Trade—Self-sufficiency—Secondary products—Distillers grains (1)

|     | 1995 | 2000 | 2005 | 2010 | 2015 | 2020 | 2025 | 2030 | 2035 | 2040 | 2045 |
|-----|------|------|------|------|------|------|------|------|------|------|------|
| GLO | 1.00 | 1.00 | 1.00 | 1.00 | 1.00 | 1.00 | 1.00 | 1.00 | 1.00 | 1.00 | 1.00 |
| CAZ | 1.00 | 1.00 | 1.00 | 1.00 | 1.03 | 1.05 | 1.08 | 0.90 | 0.88 | 0.85 | 0.82 |
| CHA | 1.00 | 1.00 | 1.00 | 1.00 | 0.98 | 0.95 | 0.93 | 1.11 | 1.14 | 1.18 | 1.21 |
| EUR | 1.00 | 1.00 | 1.00 | 1.00 | 1.03 | 1.05 | 1.08 | 1.11 | 1.14 | 1.18 | 1.21 |
| IND | 1.00 | 1.00 | 1.00 | 1.00 | 0.97 | 0.95 | 0.93 | 0.90 | 0.88 | 0.85 | 0.82 |
| JPN | 1.00 | 1.00 | 1.00 | 1.00 | 0.97 | 0.96 | 1.07 | 1.11 | 1.14 | 1.18 | 1.21 |
| LAM | 1.00 | 1.00 | 1.00 | 1.00 | 1.03 | 1.05 | 1.00 | 0.96 | 0.88 | 0.85 | 0.82 |
| MEA | 1.00 | 1.00 | 1.00 | 1.00 | 0.97 | 0.95 | 0.92 | 0.90 | 0.88 | 0.85 | 1.00 |
| NEU | 1.00 | 1.00 | 1.00 | 1.00 | 0.97 | 0.95 | 0.92 | 1.11 | 1.14 | 1.18 | 1.21 |
| OAS | 1.00 | 1.00 | 1.00 | 1.00 | 0.97 | 0.95 | 0.92 | 0.90 | 0.88 | 0.85 | 0.97 |
| REF | 1.00 | 1.00 | 1.00 | 1.00 | 0.97 | 0.95 | 0.93 | 0.90 | 0.87 | 0.85 | 0.82 |
| SSA | 1.00 | 1.00 | 1.00 | 1.00 | 0.97 | 0.95 | 0.93 | 0.90 | 0.88 | 0.85 | 0.83 |
| USA | 1.00 | 1.00 | 1.00 | 1.00 | 1.00 | 1.00 | 1.04 | 0.99 | 1.06 | 1.15 | 1.21 |

Table 2013: MAgPIE m4p\_SSP1 — Trade—Self-sufficiency—Secondary products—Distillers grains (1) [PART 1/2]

|     | 2050 | 2055 | 2060 | 2070 | 2080 | 2090 | 2100 |
|-----|------|------|------|------|------|------|------|
| GLO | 1.00 | 1.00 | 1.00 | 1.00 | 1.00 | 1.00 | 1.00 |
| CAZ | 1.00 | 1.00 | 0.80 | 0.92 | 1.00 | 0.80 | 1.00 |
| CHA | 1.25 | 1.25 | 1.25 | 1.25 | 1.25 | 1.25 | 1.25 |
| EUR | 1.25 | 1.25 | 1.25 | 1.25 | 1.25 | 1.25 | 1.25 |
| IND | 0.80 | 0.80 | 0.80 | 0.80 | 0.80 | 0.80 | 0.80 |
| JPN | 1.25 | 1.25 | 1.25 | 1.25 | 1.25 | 1.25 | 1.25 |
| LAM | 0.80 | 0.80 | 0.80 | 0.80 | 0.80 | 0.80 | 0.80 |
| MEA | 1.25 | 1.25 | 1.25 | 1.25 | 0.80 | 1.00 | 1.25 |
| NEU | 1.25 | 1.25 | 1.25 | 1.25 | 1.25 | 1.25 | 1.25 |
| OAS | 1.00 | 1.00 | 1.00 | 1.00 | 1.00 | 1.00 | 1.00 |
| REF | 1.25 | 1.25 | 1.25 | 1.25 | 1.25 | 1.25 | 1.25 |
| SSA | 0.80 | 0.81 | 0.82 | 0.80 | 0.80 | 0.80 | 0.96 |
| USA | 1.25 | 1.25 | 1.25 | 1.25 | 1.23 | 1.19 | 1.00 |

Table 2014: MAgPIE m4p\_SSP1 — Trade—Self-sufficiency—Secondary products—Distillers grains (1) [PART 2/2]

|     | 1965  | 1970  | 1975  | 1980  | 1985  | 1990  | 1995  | 2000  | 2005  | 2010  |
|-----|-------|-------|-------|-------|-------|-------|-------|-------|-------|-------|
| GLO | 1.000 | 1.000 | 1.000 | 1.000 | 1.000 | 1.000 | 1.000 | 1.000 | 1.000 | 1.000 |
| CAZ | 1.000 | 1.000 | 1.000 | 1.000 | 1.000 | 1.000 | 1.000 | 1.000 | 1.000 | 1.000 |
| CHA | 1.000 | 1.000 | 1.000 | 1.000 | 1.000 | 1.000 | 1.000 | 1.000 | 1.000 | 1.000 |
| EUR | 1.000 | 1.000 | 1.000 | 1.000 | 1.000 | 1.000 | 1.000 | 1.000 | 1.000 | 1.000 |
| IND | 1.000 | 1.000 | 1.000 | 1.000 | 1.000 | 1.000 | 1.000 | 1.000 | 1.000 | 1.000 |
| JPN | 1.000 | 1.000 | 1.000 | 1.000 | 1.000 | 1.000 | 1.000 | 1.000 | 1.000 | 1.000 |
| LAM | 1.000 | 1.000 | 1.000 | 1.000 | 1.000 | 1.000 | 1.000 | 1.000 | 1.000 | 1.000 |
| MEA | 1.000 | 1.000 | 1.000 | 1.000 | 1.000 | 1.000 | 1.000 | 1.000 | 1.000 | 1.000 |
| NEU | 1.000 | 1.000 | 1.000 | 1.000 | 1.000 | 1.000 | 1.000 | 1.000 | 1.000 | 1.000 |
| OAS | 1.000 | 1.000 | 1.000 | 1.000 | 1.000 | 1.000 | 1.000 | 1.000 | 1.000 | 1.000 |
| REF | 1.000 | 1.000 | 1.000 | 1.000 | 1.000 | 1.000 | 1.000 | 1.000 | 1.000 | 1.000 |
| SSA | 1.000 | 1.000 | 1.000 | 1.000 | 1.000 | 1.000 | 1.000 | 1.000 | 1.000 | 1.000 |
| USA | 1.000 | 1.000 | 1.000 | 1.000 | 1.000 | 1.000 | 1.000 | 1.000 | 1.000 | 1.000 |

Table 2015: FAO — Trade—Self-sufficiency—Secondary products—Distillers grains (1)



59.4.5 Ethanol

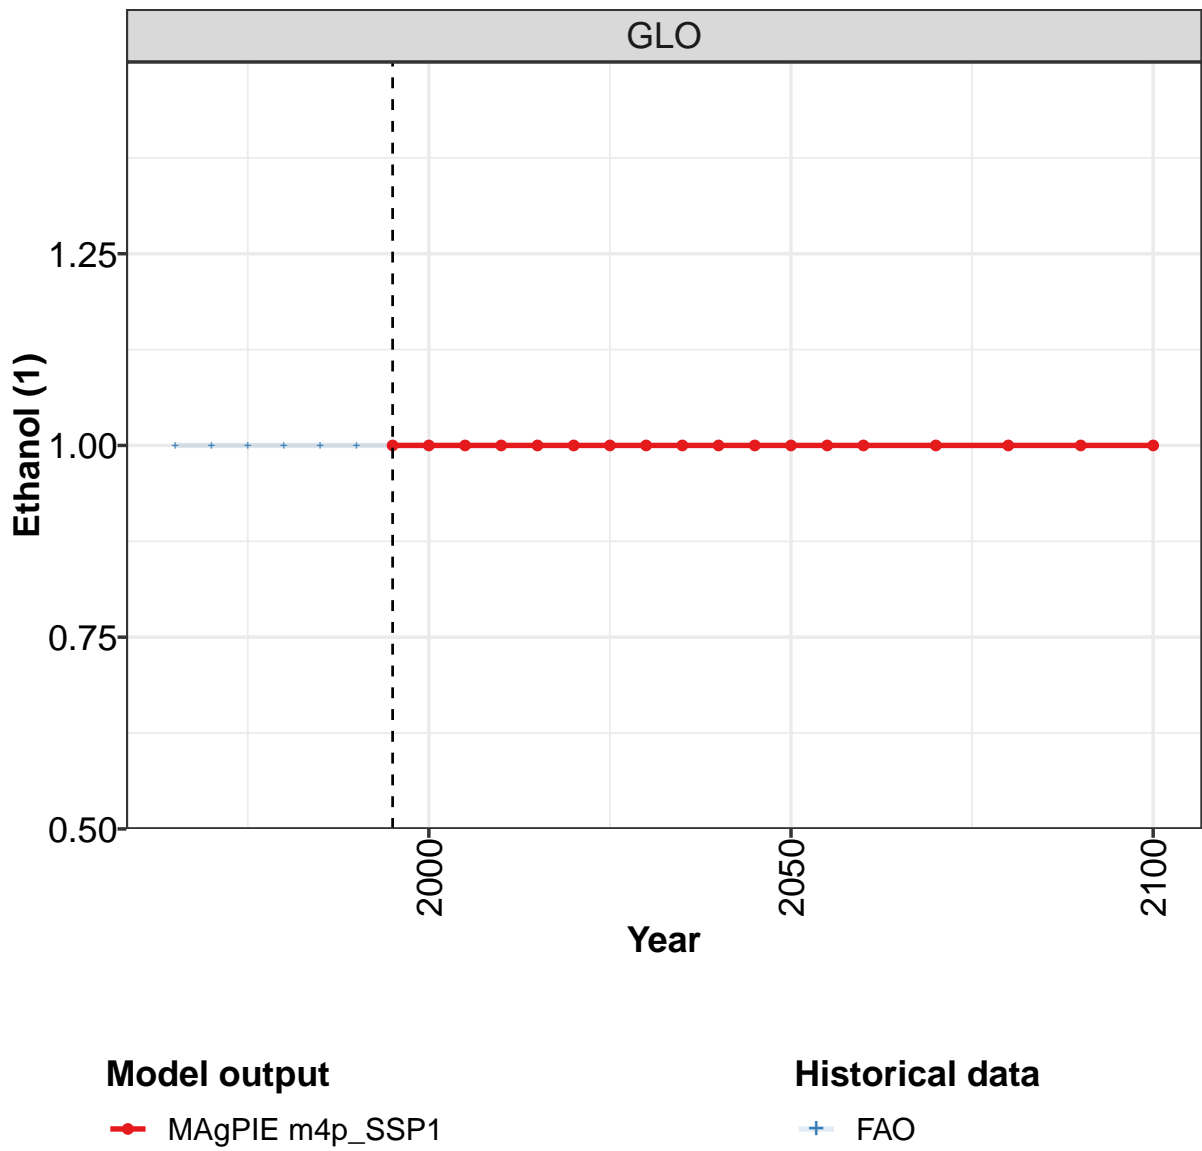

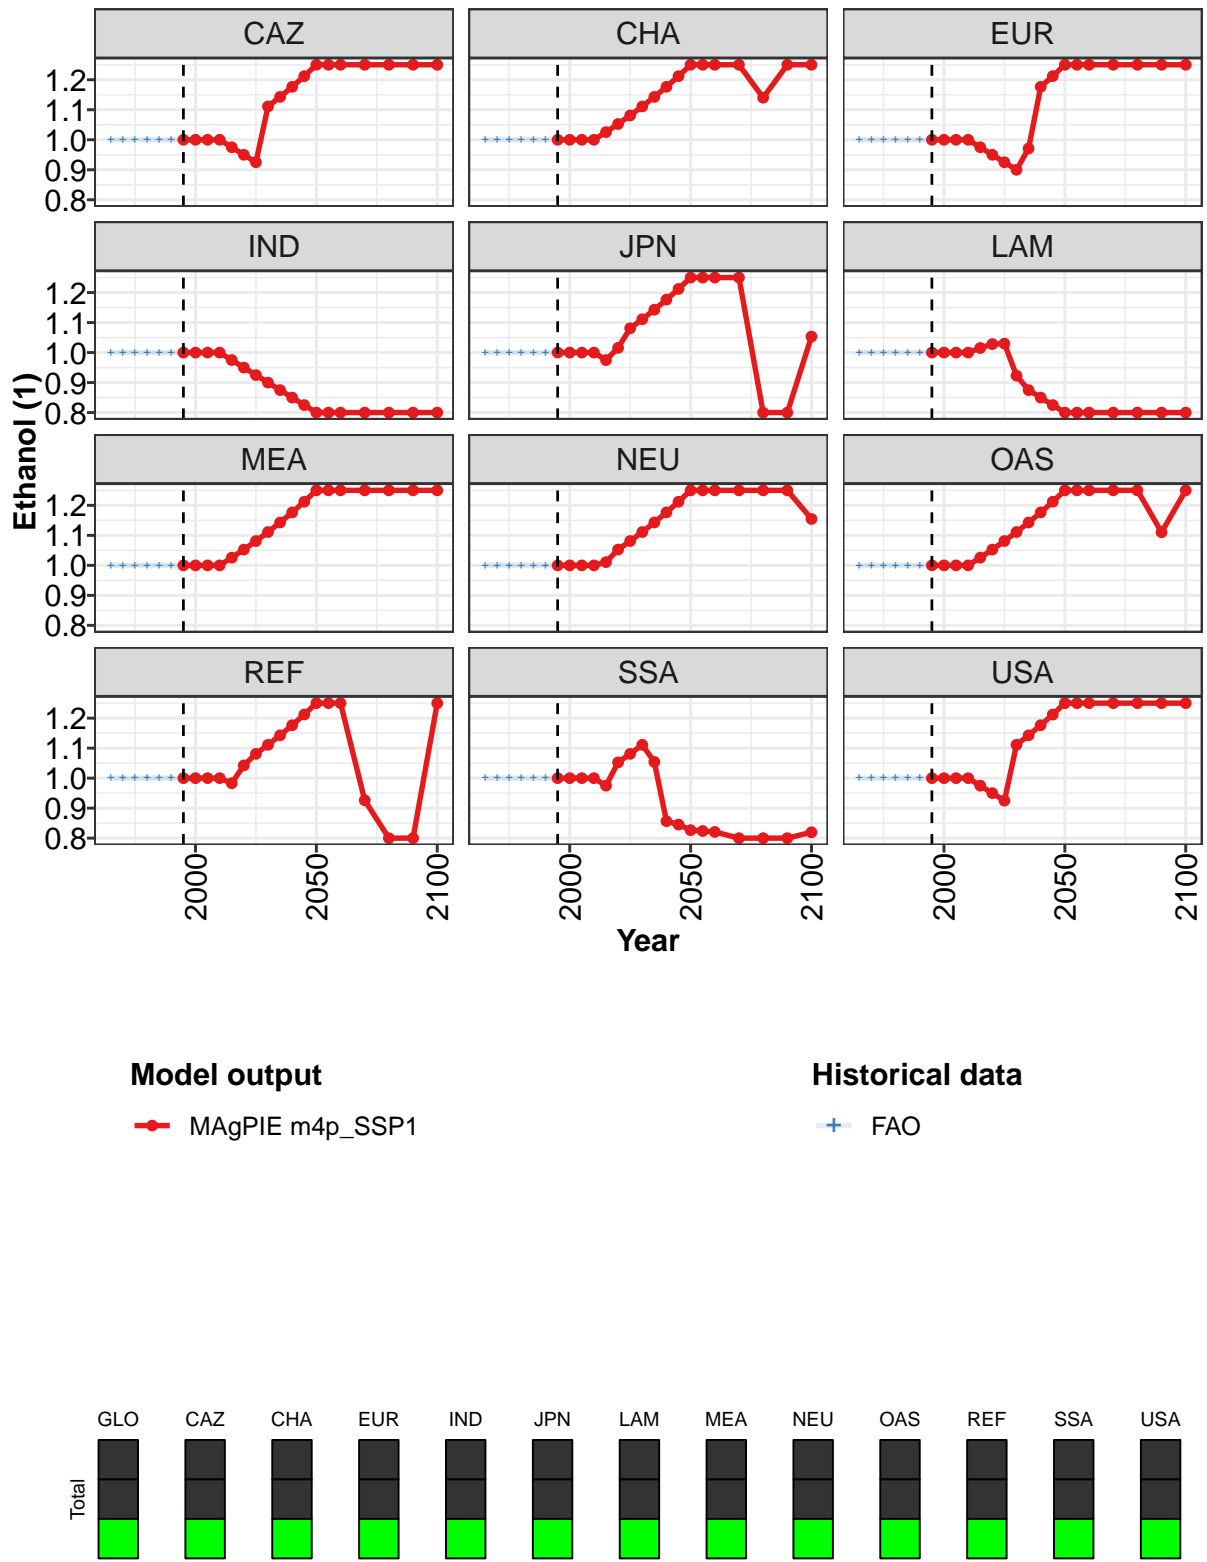

Figure 539: MAgPIE m4p\_SSP1 — Trade—Self-sufficiency—Secondary products—Ethanol (1)

|     | 1995 | 2000 | 2005 | 2010 | 2015 | 2020 | 2025 | 2030 | 2035 | 2040 | 2045 |
|-----|------|------|------|------|------|------|------|------|------|------|------|
| GLO | 1.00 | 1.00 | 1.00 | 1.00 | 1.00 | 1.00 | 1.00 | 1.00 | 1.00 | 1.00 | 1.00 |
| CAZ | 1.00 | 1.00 | 1.00 | 1.00 | 0.98 | 0.95 | 0.93 | 1.11 | 1.14 | 1.18 | 1.21 |
| CHA | 1.00 | 1.00 | 1.00 | 1.00 | 1.03 | 1.05 | 1.08 | 1.11 | 1.14 | 1.18 | 1.21 |
| EUR | 1.00 | 1.00 | 1.00 | 1.00 | 0.97 | 0.95 | 0.93 | 0.90 | 0.97 | 1.18 | 1.21 |
| IND | 1.00 | 1.00 | 1.00 | 1.00 | 0.97 | 0.95 | 0.93 | 0.90 | 0.87 | 0.85 | 0.82 |
| JPN | 1.00 | 1.00 | 1.00 | 1.00 | 0.97 | 1.02 | 1.08 | 1.11 | 1.14 | 1.18 | 1.21 |
| LAM | 1.00 | 1.00 | 1.00 | 1.00 | 1.02 | 1.03 | 1.03 | 0.92 | 0.88 | 0.85 | 0.82 |
| MEA | 1.00 | 1.00 | 1.00 | 1.00 | 1.03 | 1.05 | 1.08 | 1.11 | 1.14 | 1.18 | 1.21 |
| NEU | 1.00 | 1.00 | 1.00 | 1.00 | 1.01 | 1.05 | 1.08 | 1.11 | 1.14 | 1.18 | 1.21 |
| OAS | 1.00 | 1.00 | 1.00 | 1.00 | 1.03 | 1.05 | 1.08 | 1.11 | 1.14 | 1.18 | 1.21 |
| REF | 1.00 | 1.00 | 1.00 | 1.00 | 0.98 | 1.04 | 1.08 | 1.11 | 1.14 | 1.18 | 1.21 |
| SSA | 1.00 | 1.00 | 1.00 | 1.00 | 0.97 | 1.05 | 1.08 | 1.11 | 1.05 | 0.86 | 0.85 |
| USA | 1.00 | 1.00 | 1.00 | 1.00 | 0.97 | 0.95 | 0.93 | 1.11 | 1.14 | 1.18 | 1.21 |

Table 2016: MAgPIE m4p\_SSP1 — Trade—Self-sufficiency—Secondary products—Ethanol (1) [PART 1/2]

|     | 2050 | 2055 | 2060 | 2070 | 2080 | 2090 | 2100 |
|-----|------|------|------|------|------|------|------|
| GLO | 1.00 | 1.00 | 1.00 | 1.00 | 1.00 | 1.00 | 1.00 |
| CAZ | 1.25 | 1.25 | 1.25 | 1.25 | 1.25 | 1.25 | 1.25 |
| CHA | 1.25 | 1.25 | 1.25 | 1.25 | 1.14 | 1.25 | 1.25 |
| EUR | 1.25 | 1.25 | 1.25 | 1.25 | 1.25 | 1.25 | 1.25 |
| IND | 0.80 | 0.80 | 0.80 | 0.80 | 0.80 | 0.80 | 0.80 |
| JPN | 1.25 | 1.25 | 1.25 | 1.25 | 0.80 | 0.80 | 1.05 |
| LAM | 0.80 | 0.80 | 0.80 | 0.80 | 0.80 | 0.80 | 0.80 |
| MEA | 1.25 | 1.25 | 1.25 | 1.25 | 1.25 | 1.25 | 1.25 |
| NEU | 1.25 | 1.25 | 1.25 | 1.25 | 1.25 | 1.25 | 1.15 |
| OAS | 1.25 | 1.25 | 1.25 | 1.25 | 1.25 | 1.11 | 1.25 |
| REF | 1.25 | 1.25 | 1.25 | 0.93 | 0.80 | 0.80 | 1.25 |
| SSA | 0.83 | 0.82 | 0.82 | 0.80 | 0.80 | 0.80 | 0.82 |
| USA | 1.25 | 1.25 | 1.25 | 1.25 | 1.25 | 1.25 | 1.25 |

Table 2017: MAgPIE m4p\_SSP1 — Trade—Self-sufficiency—Secondary products—Ethanol (1) [PART 2/2]

|     | 1965  | 1970  | 1975  | 1980  | 1985  | 1990  | 1995  | 2000  | 2005  | 2010  |
|-----|-------|-------|-------|-------|-------|-------|-------|-------|-------|-------|
| GLO | 1.000 | 1.000 | 1.000 | 1.000 | 1.000 | 1.000 | 1.000 | 1.000 | 1.000 | 1.000 |
| CAZ | 1.000 | 1.000 | 1.000 | 1.000 | 1.000 | 1.000 | 1.000 | 1.000 | 1.000 | 1.000 |
| CHA | 1.000 | 1.000 | 1.000 | 1.000 | 1.000 | 1.000 | 1.000 | 1.000 | 1.000 | 1.000 |
| EUR | 1.000 | 1.000 | 1.000 | 1.000 | 1.000 | 1.000 | 1.000 | 1.000 | 1.000 | 1.000 |
| IND | 1.000 | 1.000 | 1.000 | 1.000 | 1.000 | 1.000 | 1.000 | 1.000 | 1.000 | 1.000 |
| JPN | 1.000 | 1.000 | 1.000 | 1.000 | 1.000 | 1.000 | 1.000 | 1.000 | 1.000 | 1.000 |
| LAM | 1.000 | 1.000 | 1.000 | 1.000 | 1.000 | 1.000 | 1.000 | 1.000 | 1.000 | 1.000 |
| MEA | 1.000 | 1.000 | 1.000 | 1.000 | 1.000 | 1.000 | 1.000 | 1.000 | 1.000 | 1.000 |
| NEU | 1.000 | 1.000 | 1.000 | 1.000 | 1.000 | 1.000 | 1.000 | 1.000 | 1.000 | 1.000 |
| OAS | 1.000 | 1.000 | 1.000 | 1.000 | 1.000 | 1.000 | 1.000 | 1.000 | 1.000 | 1.000 |
| REF | 1.000 | 1.000 | 1.000 | 1.000 | 1.000 | 1.000 | 1.000 | 1.000 | 1.000 | 1.000 |
| SSA | 1.000 | 1.000 | 1.000 | 1.000 | 1.000 | 1.000 | 1.000 | 1.000 | 1.000 | 1.000 |
| USA | 1.000 | 1.000 | 1.000 | 1.000 | 1.000 | 1.000 | 1.000 | 1.000 | 1.000 | 1.000 |

Table 2018: FAO — Trade—Self-sufficiency—Secondary products—Ethanol (1)

59.4.6 Molasses

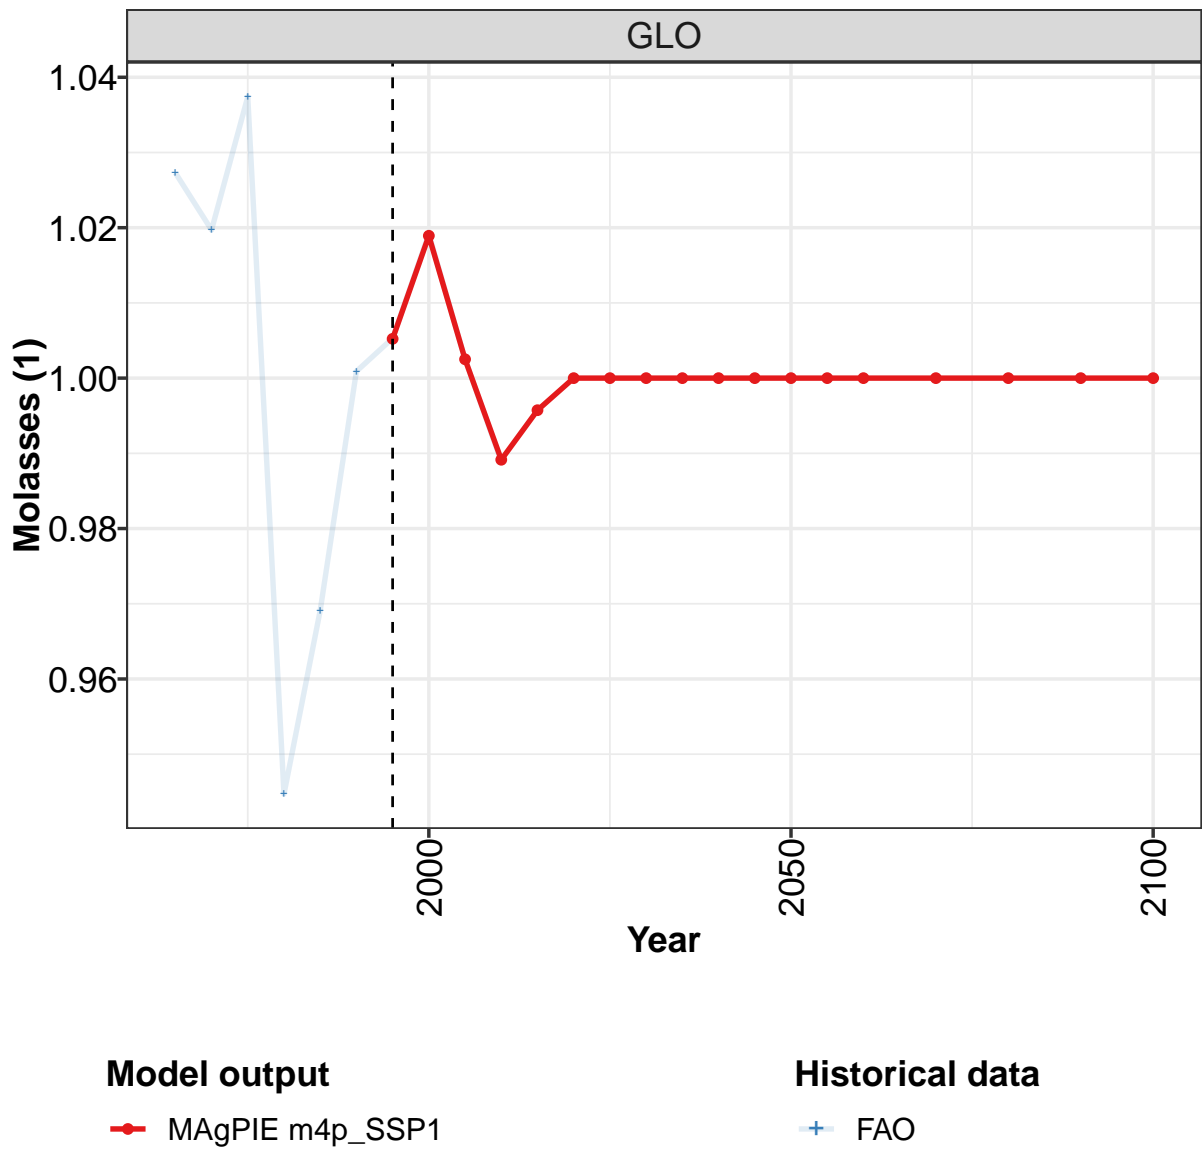

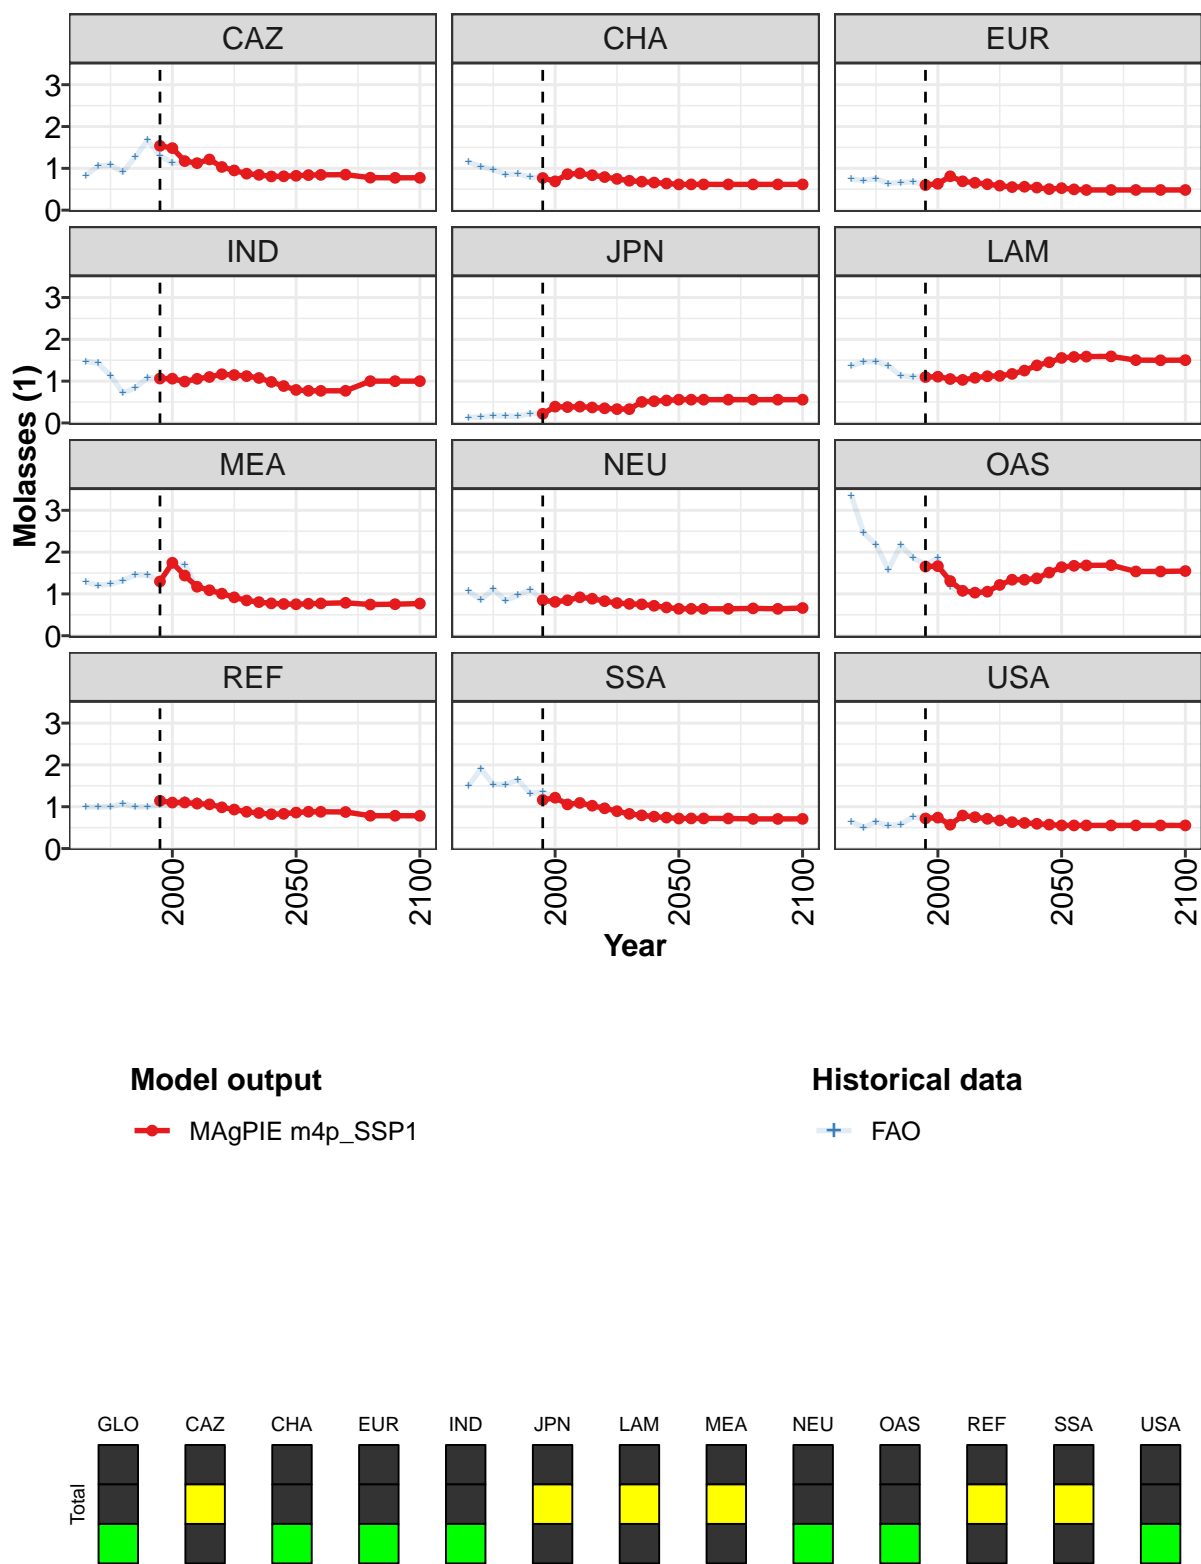

Figure 540: MAgPIE m4p\_SSP1 — Trade—Self-sufficiency—Secondary products—Molasses (1)

|     | 1995 | 2000 | 2005 | 2010 | 2015 | 2020 | 2025 | 2030 | 2035 | 2040 | 2045 |
|-----|------|------|------|------|------|------|------|------|------|------|------|
| GLO | 1.01 | 1.02 | 1.00 | 0.99 | 1.00 | 1.00 | 1.00 | 1.00 | 1.00 | 1.00 | 1.00 |
| CAZ | 1.54 | 1.48 | 1.17 | 1.12 | 1.21 | 1.03 | 0.95 | 0.87 | 0.84 | 0.81 | 0.81 |
| CHA | 0.77 | 0.69 | 0.86 | 0.88 | 0.84 | 0.79 | 0.75 | 0.70 | 0.68 | 0.66 | 0.64 |
| EUR | 0.60 | 0.63 | 0.81 | 0.69 | 0.66 | 0.62 | 0.59 | 0.55 | 0.56 | 0.54 | 0.50 |
| IND | 1.06 | 1.06 | 0.99 | 1.06 | 1.10 | 1.17 | 1.15 | 1.12 | 1.08 | 0.98 | 0.88 |
| JPN | 0.22 | 0.39 | 0.38 | 0.39 | 0.37 | 0.35 | 0.33 | 0.33 | 0.50 | 0.52 | 0.54 |
| LAM | 1.10 | 1.11 | 1.05 | 1.03 | 1.08 | 1.12 | 1.13 | 1.17 | 1.25 | 1.38 | 1.45 |
| MEA | 1.30 | 1.75 | 1.44 | 1.17 | 1.09 | 1.01 | 0.92 | 0.84 | 0.80 | 0.77 | 0.76 |
| NEU | 0.85 | 0.81 | 0.85 | 0.92 | 0.89 | 0.83 | 0.78 | 0.76 | 0.75 | 0.72 | 0.68 |
| OAS | 1.65 | 1.66 | 1.31 | 1.08 | 1.03 | 1.05 | 1.22 | 1.34 | 1.34 | 1.37 | 1.51 |
| REF | 1.14 | 1.10 | 1.10 | 1.07 | 1.06 | 0.99 | 0.93 | 0.88 | 0.85 | 0.82 | 0.83 |
| SSA | 1.16 | 1.22 | 1.06 | 1.09 | 1.02 | 0.96 | 0.89 | 0.83 | 0.79 | 0.76 | 0.74 |
| USA | 0.72 | 0.74 | 0.57 | 0.79 | 0.75 | 0.71 | 0.67 | 0.63 | 0.61 | 0.59 | 0.57 |

Table 2019: MAgPIE m4p\_SSP1 — Trade—Self-sufficiency—Secondary products—Molasses (1) [PART 1/2]

|     | 2050 | 2055 | 2060 | 2070 | 2080 | 2090 | 2100 |
|-----|------|------|------|------|------|------|------|
| GLO | 1.00 | 1.00 | 1.00 | 1.00 | 1.00 | 1.00 | 1.00 |
| CAZ | 0.82 | 0.84 | 0.84 | 0.85 | 0.78 | 0.77 | 0.77 |
| CHA | 0.62 | 0.62 | 0.62 | 0.62 | 0.62 | 0.62 | 0.62 |
| EUR | 0.53 | 0.50 | 0.48 | 0.48 | 0.48 | 0.48 | 0.48 |
| IND | 0.79 | 0.77 | 0.77 | 0.77 | 1.00 | 1.00 | 1.00 |
| JPN | 0.56 | 0.56 | 0.56 | 0.56 | 0.56 | 0.56 | 0.56 |
| LAM | 1.56 | 1.58 | 1.59 | 1.59 | 1.50 | 1.50 | 1.50 |
| MEA | 0.75 | 0.77 | 0.77 | 0.79 | 0.75 | 0.75 | 0.77 |
| NEU | 0.64 | 0.64 | 0.64 | 0.64 | 0.65 | 0.64 | 0.66 |
| OAS | 1.64 | 1.67 | 1.68 | 1.69 | 1.54 | 1.54 | 1.55 |
| REF | 0.86 | 0.88 | 0.88 | 0.87 | 0.78 | 0.78 | 0.78 |
| SSA | 0.72 | 0.72 | 0.72 | 0.72 | 0.71 | 0.71 | 0.71 |
| USA | 0.55 | 0.55 | 0.55 | 0.55 | 0.55 | 0.55 | 0.55 |

Table 2020: MAgPIE m4p\_SSP1 — Trade—Self-sufficiency—Secondary products—Molasses (1) [PART 2/2]

|     | 1965 | 1970 | 1975 | 1980 | 1985 | 1990 | 1995 | 2000 | 2005 | 2010 |
|-----|------|------|------|------|------|------|------|------|------|------|
| GLO | 1.03 | 1.02 | 1.04 | 0.94 | 0.97 | 1.00 | 1.01 | 1.02 | 1.00 | 0.99 |
| CAZ | 0.83 | 1.05 | 1.08 | 0.91 | 1.27 | 1.67 | 1.31 | 1.12 | 1.13 | 1.05 |
| CHA | 1.15 | 1.04 | 0.97 | 0.86 | 0.86 | 0.79 | 0.77 | 0.69 | 0.86 | 0.88 |
| EUR | 0.74 | 0.71 | 0.76 | 0.64 | 0.66 | 0.68 | 0.60 | 0.63 | 0.81 | 0.69 |
| IND | 1.47 | 1.43 | 1.13 | 0.72 | 0.84 | 1.08 | 1.08 | 1.05 | 0.99 | 1.10 |
| JPN | 0.13 | 0.14 | 0.17 | 0.17 | 0.16 | 0.22 | 0.22 | 0.39 | 0.38 | 0.39 |
| LAM | 1.37 | 1.46 | 1.47 | 1.37 | 1.13 | 1.10 | 1.11 | 1.09 | 1.07 | 1.05 |
| MEA | 1.29 | 1.20 | 1.24 | 1.31 | 1.46 | 1.45 | 1.31 | 1.67 | 1.70 | 1.14 |
| NEU | 1.07 | 0.85 | 1.11 | 0.84 | 0.97 | 1.10 | 0.85 | 0.81 | 0.85 | 0.92 |
| OAS | 3.36 | 2.46 | 2.18 | 1.58 | 2.16 | 1.86 | 1.70 | 1.85 | 1.18 | 1.01 |
| REF | 0.99 | 0.99 | 1.00 | 1.08 | 1.00 | 1.00 | 1.04 | 1.04 | 1.16 | 1.15 |
| SSA | 1.50 | 1.90 | 1.54 | 1.53 | 1.64 | 1.32 | 1.35 | 1.23 | 1.08 | 1.04 |
| USA | 0.64 | 0.51 | 0.63 | 0.55 | 0.58 | 0.75 | 0.72 | 0.74 | 0.57 | 0.79 |

Table 2021: FAO — Trade—Self-sufficiency—Secondary products—Molasses (1)

59.4.7 Oilcakes

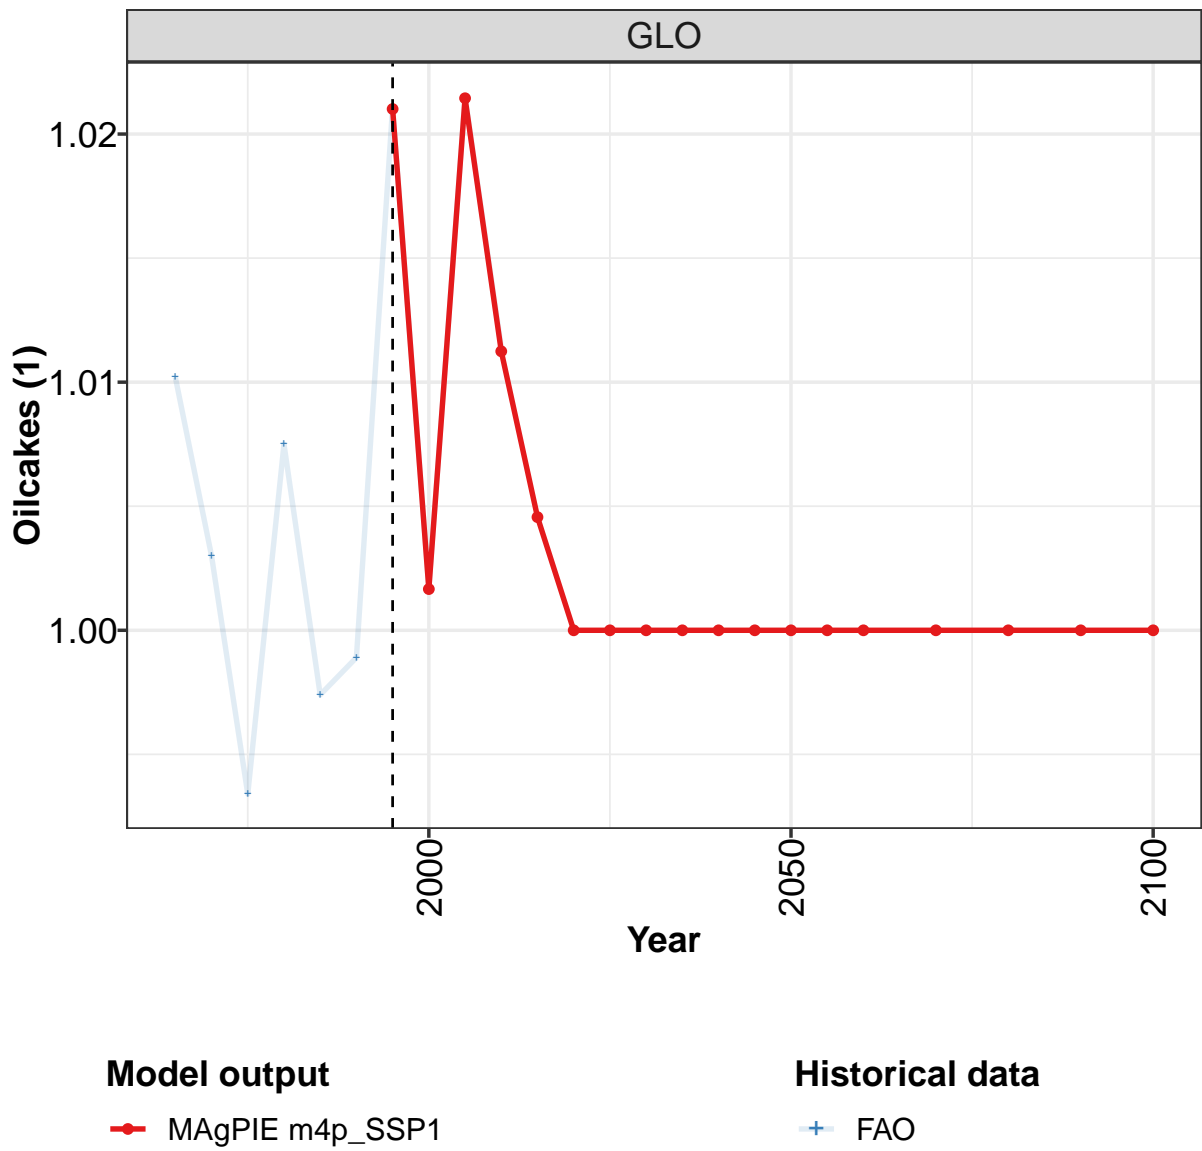

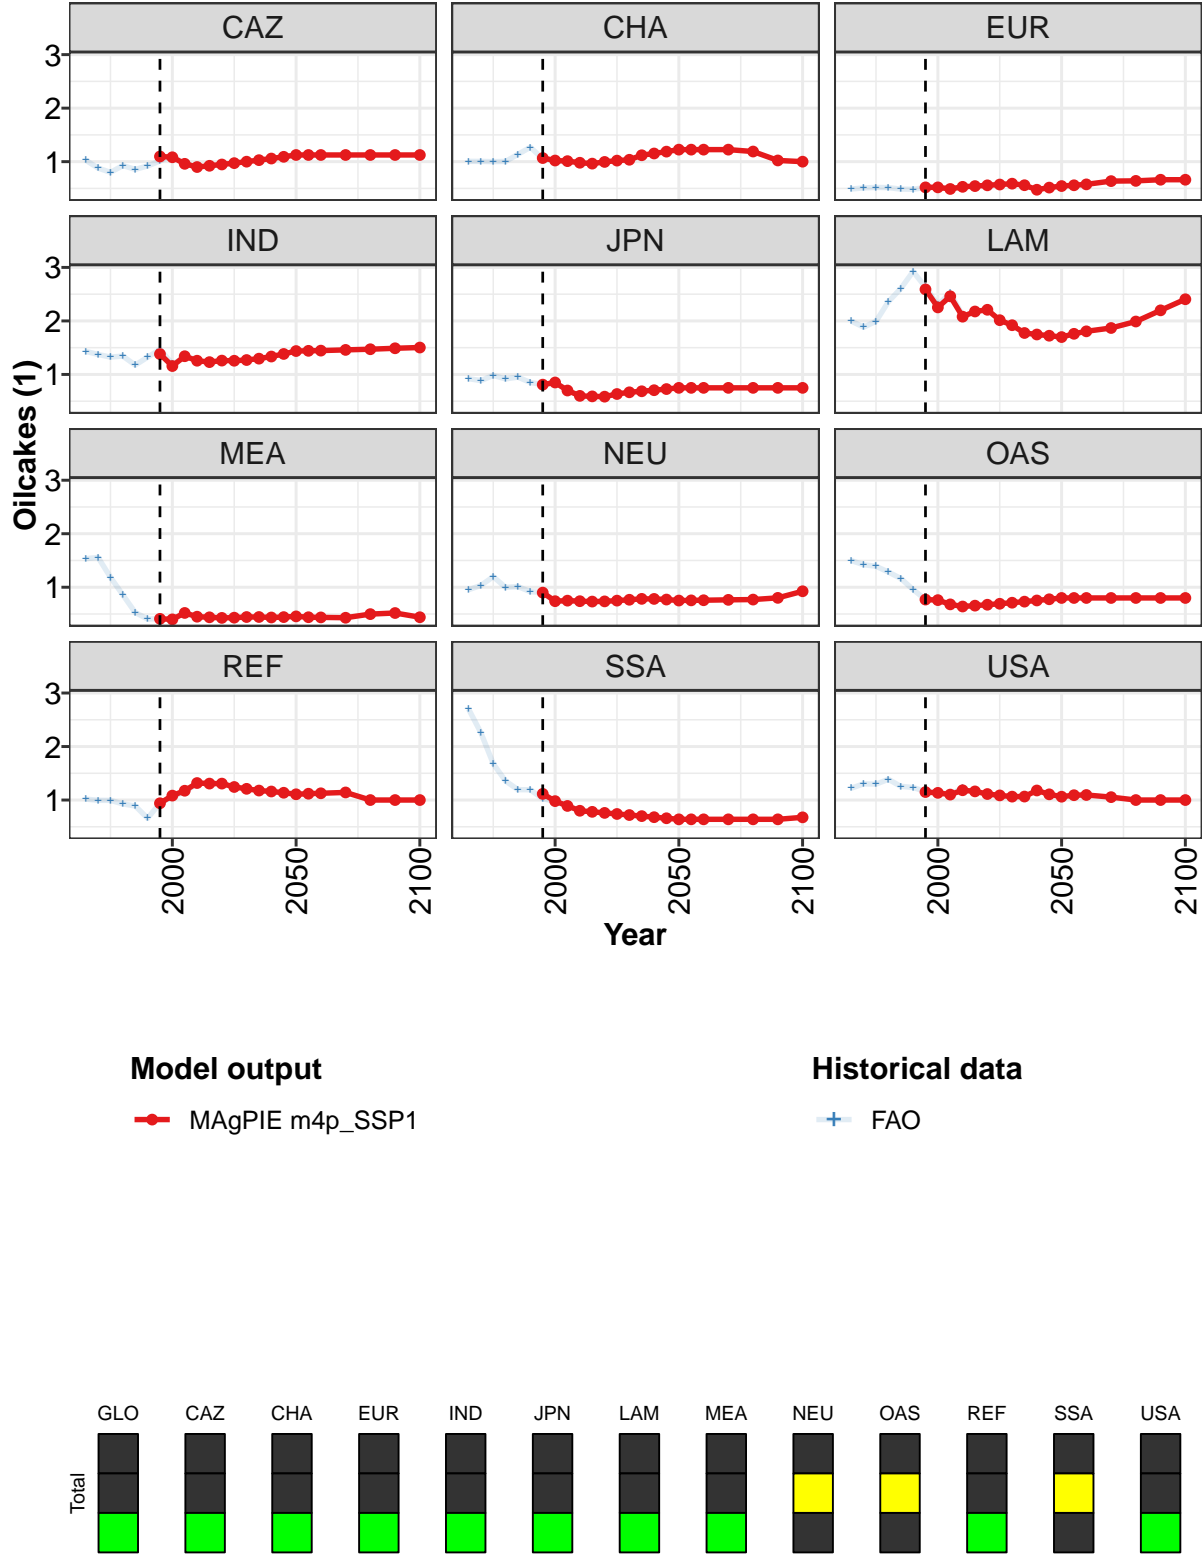

Figure 541: MAGPIE m4p\_SSP1 — Trade—Self-sufficiency—Secondary products—Oilcakes (1)



|     | 1995 | 2000 | 2005 | 2010 | 2015 | 2020 | 2025 | 2030 | 2035 | 2040 | 2045 |
|-----|------|------|------|------|------|------|------|------|------|------|------|
| GLO | 1.02 | 1.00 | 1.02 | 1.01 | 1.00 | 1.00 | 1.00 | 1.00 | 1.00 | 1.00 | 1.00 |
| CAZ | 1.10 | 1.08 | 0.96 | 0.90 | 0.92 | 0.95 | 0.97 | 1.00 | 1.03 | 1.06 | 1.09 |
| CHA | 1.07 | 1.02 | 1.01 | 0.98 | 0.96 | 1.00 | 1.02 | 1.04 | 1.12 | 1.15 | 1.19 |
| EUR | 0.52 | 0.52 | 0.49 | 0.53 | 0.54 | 0.56 | 0.57 | 0.59 | 0.56 | 0.48 | 0.52 |
| IND | 1.38 | 1.16 | 1.34 | 1.26 | 1.23 | 1.26 | 1.26 | 1.27 | 1.30 | 1.33 | 1.38 |
| JPN | 0.81 | 0.85 | 0.70 | 0.60 | 0.59 | 0.59 | 0.64 | 0.67 | 0.69 | 0.71 | 0.73 |
| LAM | 2.59 | 2.25 | 2.46 | 2.08 | 2.18 | 2.21 | 2.01 | 1.92 | 1.77 | 1.75 | 1.72 |
| MEA | 0.41 | 0.40 | 0.52 | 0.45 | 0.44 | 0.43 | 0.43 | 0.44 | 0.44 | 0.44 | 0.44 |
| NEU | 0.90 | 0.74 | 0.75 | 0.74 | 0.73 | 0.74 | 0.75 | 0.77 | 0.78 | 0.78 | 0.77 |
| OAS | 0.77 | 0.76 | 0.68 | 0.64 | 0.66 | 0.67 | 0.69 | 0.71 | 0.73 | 0.75 | 0.78 |
| REF | 0.94 | 1.08 | 1.17 | 1.32 | 1.31 | 1.31 | 1.24 | 1.21 | 1.18 | 1.16 | 1.14 |
| SSA | 1.12 | 0.98 | 0.89 | 0.80 | 0.78 | 0.76 | 0.74 | 0.72 | 0.70 | 0.68 | 0.66 |
| USA | 1.15 | 1.13 | 1.10 | 1.18 | 1.16 | 1.11 | 1.09 | 1.06 | 1.07 | 1.18 | 1.11 |

Table 2022: MAgPIE m4p\_SSP1 — Trade—Self-sufficiency—Secondary products—Oilcakes (1) [PART 1/2]

|     | 2050 | 2055 | 2060 | 2070 | 2080 | 2090 | 2100 |
|-----|------|------|------|------|------|------|------|
| GLO | 1.00 | 1.00 | 1.00 | 1.00 | 1.00 | 1.00 | 1.00 |
| CAZ | 1.13 | 1.12 | 1.12 | 1.12 | 1.13 | 1.12 | 1.12 |
| CHA | 1.23 | 1.23 | 1.23 | 1.23 | 1.19 | 1.02 | 1.00 |
| EUR | 0.54 | 0.56 | 0.58 | 0.64 | 0.64 | 0.66 | 0.66 |
| IND | 1.44 | 1.44 | 1.45 | 1.46 | 1.47 | 1.49 | 1.50 |
| JPN | 0.75 | 0.75 | 0.75 | 0.75 | 0.75 | 0.75 | 0.75 |
| LAM | 1.70 | 1.76 | 1.81 | 1.87 | 1.99 | 2.20 | 2.41 |
| MEA | 0.46 | 0.44 | 0.44 | 0.43 | 0.50 | 0.52 | 0.44 |
| NEU | 0.75 | 0.76 | 0.76 | 0.76 | 0.77 | 0.80 | 0.93 |
| OAS | 0.80 | 0.80 | 0.80 | 0.80 | 0.80 | 0.80 | 0.80 |
| REF | 1.11 | 1.12 | 1.13 | 1.14 | 1.00 | 1.00 | 1.00 |
| SSA | 0.64 | 0.64 | 0.64 | 0.64 | 0.64 | 0.64 | 0.68 |
| USA | 1.06 | 1.09 | 1.09 | 1.05 | 1.00 | 1.00 | 1.00 |

Table 2023: MAgPIE m4p\_SSP1 — Trade—Self-sufficiency—Secondary products—Oilcakes (1) [PART 2/2]

|     | 1965 | 1970 | 1975 | 1980 | 1985 | 1990 | 1995 | 2000 | 2005 | 2010 |
|-----|------|------|------|------|------|------|------|------|------|------|
| GLO | 1.01 | 1.00 | 0.99 | 1.01 | 1.00 | 1.00 | 1.02 | 1.00 | 1.02 | 1.01 |
| CAZ | 1.03 | 0.88 | 0.80 | 0.93 | 0.86 | 0.92 | 1.01 | 1.11 | 0.96 | 0.90 |
| CHA | 1.01 | 1.00 | 1.00 | 1.00 | 1.14 | 1.27 | 1.06 | 1.01 | 1.00 | 0.98 |
| EUR | 0.49 | 0.51 | 0.52 | 0.51 | 0.49 | 0.48 | 0.52 | 0.52 | 0.49 | 0.53 |
| IND | 1.43 | 1.37 | 1.32 | 1.34 | 1.18 | 1.32 | 1.47 | 1.20 | 1.31 | 1.29 |
| JPN | 0.92 | 0.89 | 0.98 | 0.92 | 0.95 | 0.85 | 0.81 | 0.85 | 0.70 | 0.60 |
| LAM | 2.00 | 1.88 | 1.99 | 2.36 | 2.60 | 2.92 | 2.63 | 2.30 | 2.52 | 2.10 |
| MEA | 1.53 | 1.56 | 1.19 | 0.86 | 0.53 | 0.41 | 0.41 | 0.40 | 0.52 | 0.45 |
| NEU | 0.95 | 1.03 | 1.20 | 1.00 | 1.01 | 0.92 | 0.90 | 0.74 | 0.75 | 0.74 |
| OAS | 1.50 | 1.42 | 1.39 | 1.28 | 1.16 | 0.96 | 0.77 | 0.76 | 0.68 | 0.64 |
| REF | 1.02 | 0.99 | 0.99 | 0.93 | 0.89 | 0.66 | 0.94 | 1.06 | 1.16 | 1.30 |
| SSA | 2.70 | 2.26 | 1.68 | 1.35 | 1.19 | 1.19 | 1.02 | 0.98 | 0.89 | 0.80 |
| USA | 1.22 | 1.30 | 1.30 | 1.39 | 1.26 | 1.23 | 1.16 | 1.14 | 1.11 | 1.22 |

Table 2024: FAO — Trade—Self-sufficiency—Secondary products—Oilcakes (1)

59.4.8 Oils

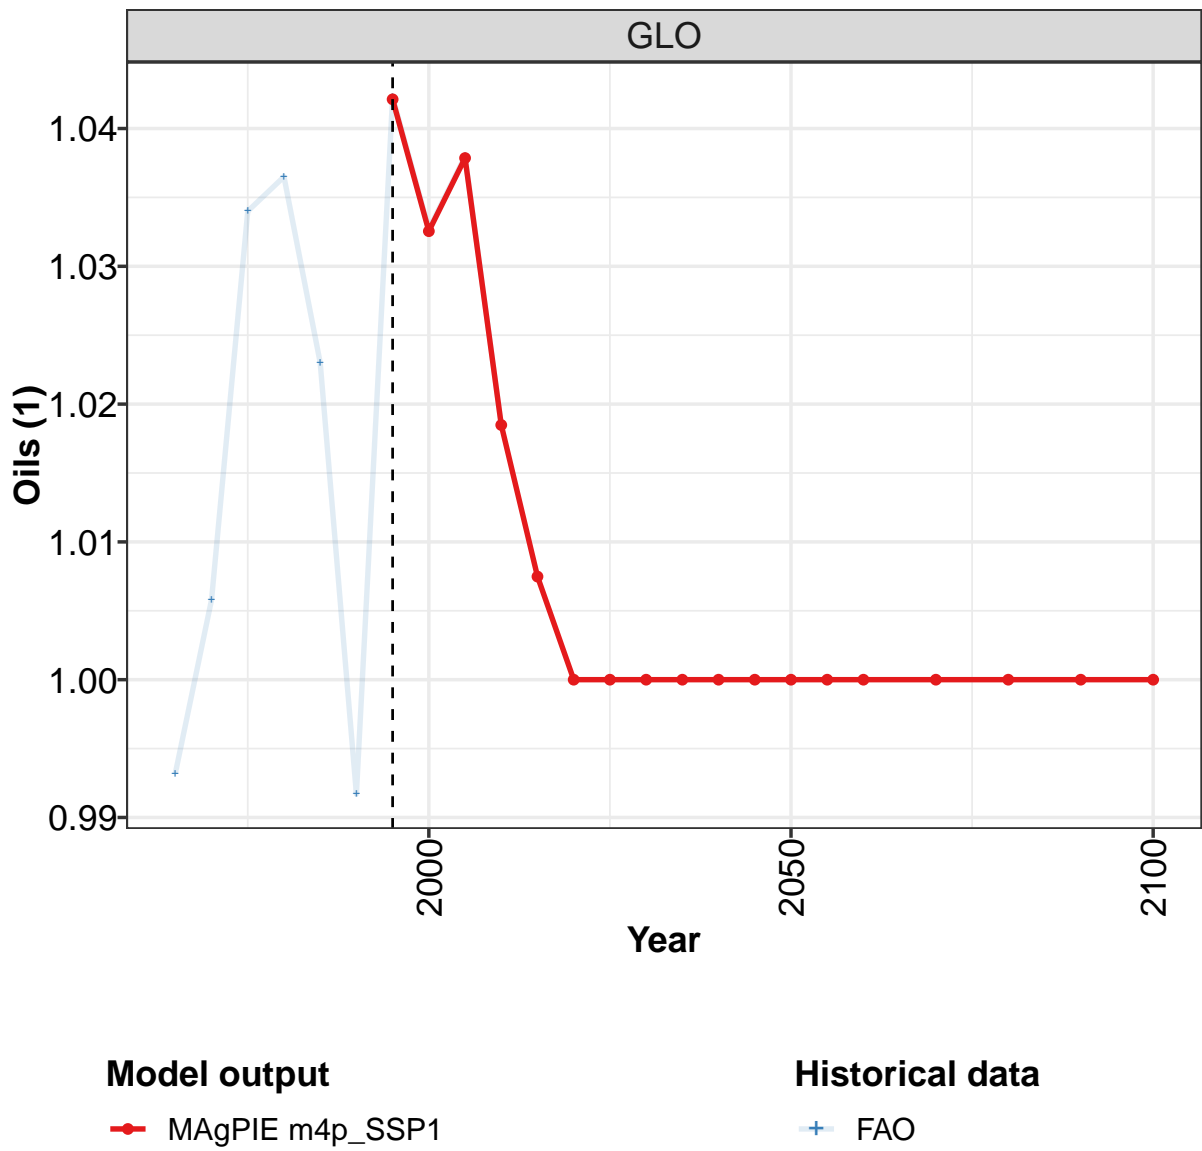

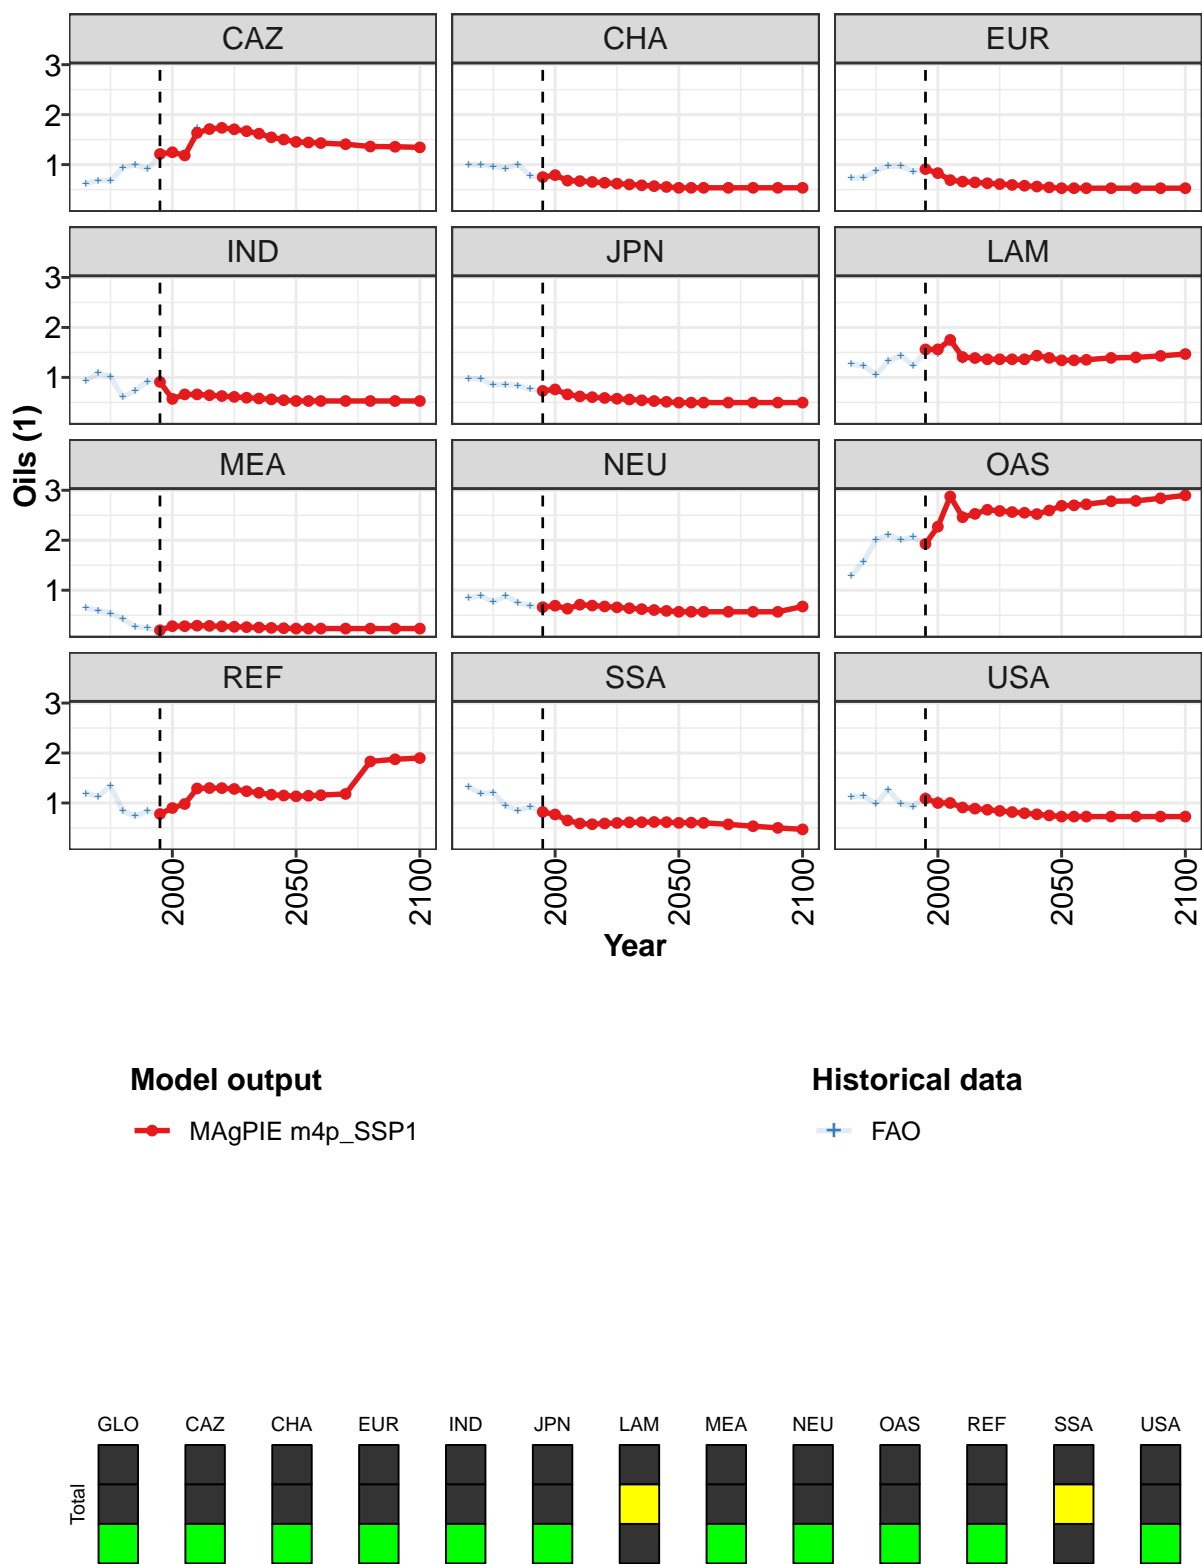

Figure 542: MAGPIE m4p\_SSP1 — Trade—Self-sufficiency—Secondary products—Oils (1)

|     | 1995 | 2000 | 2005 | 2010 | 2015 | 2020 | 2025 | 2030 | 2035 | 2040 | 2045 |
|-----|------|------|------|------|------|------|------|------|------|------|------|
| GLO | 1.04 | 1.03 | 1.04 | 1.02 | 1.01 | 1.00 | 1.00 | 1.00 | 1.00 | 1.00 | 1.00 |
| CAZ | 1.21 | 1.25 | 1.18 | 1.63 | 1.71 | 1.74 | 1.71 | 1.67 | 1.62 | 1.55 | 1.50 |
| CHA | 0.75 | 0.79 | 0.68 | 0.67 | 0.65 | 0.64 | 0.62 | 0.60 | 0.59 | 0.57 | 0.55 |
| EUR | 0.91 | 0.83 | 0.69 | 0.66 | 0.64 | 0.63 | 0.61 | 0.59 | 0.58 | 0.56 | 0.54 |
| IND | 0.91 | 0.57 | 0.66 | 0.66 | 0.64 | 0.63 | 0.61 | 0.59 | 0.58 | 0.56 | 0.54 |
| JPN | 0.73 | 0.76 | 0.66 | 0.62 | 0.60 | 0.59 | 0.57 | 0.56 | 0.54 | 0.53 | 0.51 |
| LAM | 1.56 | 1.56 | 1.75 | 1.41 | 1.39 | 1.36 | 1.36 | 1.36 | 1.36 | 1.44 | 1.39 |
| MEA | 0.20 | 0.28 | 0.28 | 0.29 | 0.29 | 0.28 | 0.27 | 0.26 | 0.25 | 0.25 | 0.24 |
| NEU | 0.66 | 0.69 | 0.63 | 0.71 | 0.69 | 0.67 | 0.66 | 0.64 | 0.62 | 0.60 | 0.59 |
| OAS | 1.93 | 2.27 | 2.88 | 2.46 | 2.53 | 2.61 | 2.59 | 2.56 | 2.55 | 2.52 | 2.60 |
| REF | 0.78 | 0.90 | 0.98 | 1.29 | 1.30 | 1.30 | 1.28 | 1.24 | 1.20 | 1.17 | 1.15 |
| SSA | 0.82 | 0.77 | 0.65 | 0.59 | 0.58 | 0.59 | 0.60 | 0.61 | 0.62 | 0.62 | 0.62 |
| USA | 1.09 | 1.00 | 1.00 | 0.91 | 0.89 | 0.86 | 0.84 | 0.82 | 0.80 | 0.77 | 0.75 |

Table 2025: MAgPIE m4p\_SSP1 — Trade—Self-sufficiency—Secondary products—Oils (1) [PART 1/2]

|     | 2050 | 2055 | 2060 | 2070 | 2080 | 2090 | 2100 |
|-----|------|------|------|------|------|------|------|
| GLO | 1.00 | 1.00 | 1.00 | 1.00 | 1.00 | 1.00 | 1.00 |
| CAZ | 1.45 | 1.44 | 1.43 | 1.41 | 1.36 | 1.36 | 1.35 |
| CHA | 0.54 | 0.54 | 0.54 | 0.54 | 0.54 | 0.54 | 0.54 |
| EUR | 0.53 | 0.53 | 0.53 | 0.53 | 0.53 | 0.53 | 0.53 |
| IND | 0.53 | 0.53 | 0.53 | 0.53 | 0.53 | 0.53 | 0.53 |
| JPN | 0.50 | 0.50 | 0.50 | 0.50 | 0.50 | 0.50 | 0.50 |
| LAM | 1.34 | 1.34 | 1.35 | 1.39 | 1.40 | 1.43 | 1.47 |
| MEA | 0.23 | 0.23 | 0.23 | 0.23 | 0.23 | 0.23 | 0.23 |
| NEU | 0.57 | 0.57 | 0.57 | 0.57 | 0.57 | 0.57 | 0.67 |
| OAS | 2.69 | 2.70 | 2.72 | 2.78 | 2.79 | 2.84 | 2.90 |
| REF | 1.13 | 1.14 | 1.16 | 1.18 | 1.83 | 1.88 | 1.90 |
| SSA | 0.60 | 0.61 | 0.60 | 0.57 | 0.53 | 0.50 | 0.47 |
| USA | 0.73 | 0.73 | 0.73 | 0.73 | 0.73 | 0.73 | 0.73 |

Table 2026: MAgPIE m4p\_SSP1 — Trade—Self-sufficiency—Secondary products—Oils (1) [PART 2/2]

|     | 1965 | 1970 | 1975 | 1980 | 1985 | 1990 | 1995 | 2000 | 2005 | 2010 |
|-----|------|------|------|------|------|------|------|------|------|------|
| GLO | 0.99 | 1.01 | 1.03 | 1.04 | 1.02 | 0.99 | 1.04 | 1.03 | 1.04 | 1.02 |
| CAZ | 0.62 | 0.69 | 0.68 | 0.94 | 1.00 | 0.91 | 1.19 | 1.21 | 1.14 | 1.75 |
| CHA | 1.00 | 0.99 | 0.97 | 0.93 | 1.01 | 0.77 | 0.75 | 0.79 | 0.68 | 0.67 |
| EUR | 0.73 | 0.74 | 0.88 | 0.97 | 0.97 | 0.86 | 0.91 | 0.83 | 0.69 | 0.66 |
| IND | 0.93 | 1.08 | 1.01 | 0.60 | 0.74 | 0.92 | 0.91 | 0.57 | 0.66 | 0.66 |
| JPN | 0.98 | 0.97 | 0.85 | 0.86 | 0.84 | 0.77 | 0.73 | 0.76 | 0.66 | 0.62 |
| LAM | 1.27 | 1.23 | 1.06 | 1.32 | 1.44 | 1.24 | 1.51 | 1.47 | 1.73 | 1.34 |
| MEA | 0.65 | 0.59 | 0.54 | 0.42 | 0.27 | 0.24 | 0.20 | 0.28 | 0.28 | 0.29 |
| NEU | 0.84 | 0.89 | 0.76 | 0.89 | 0.75 | 0.68 | 0.66 | 0.69 | 0.63 | 0.71 |
| OAS | 1.28 | 1.58 | 2.01 | 2.11 | 2.01 | 2.06 | 1.93 | 2.29 | 2.86 | 2.50 |
| REF | 1.19 | 1.13 | 1.34 | 0.84 | 0.74 | 0.84 | 0.78 | 0.90 | 0.98 | 1.27 |
| SSA | 1.33 | 1.19 | 1.21 | 0.95 | 0.85 | 0.92 | 0.82 | 0.77 | 0.65 | 0.59 |
| USA | 1.12 | 1.14 | 0.99 | 1.26 | 0.99 | 0.93 | 1.14 | 1.07 | 1.05 | 0.91 |

Table 2027: FAO — Trade—Self-sufficiency—Secondary products—Oils (1)

59.4.9 Sugar

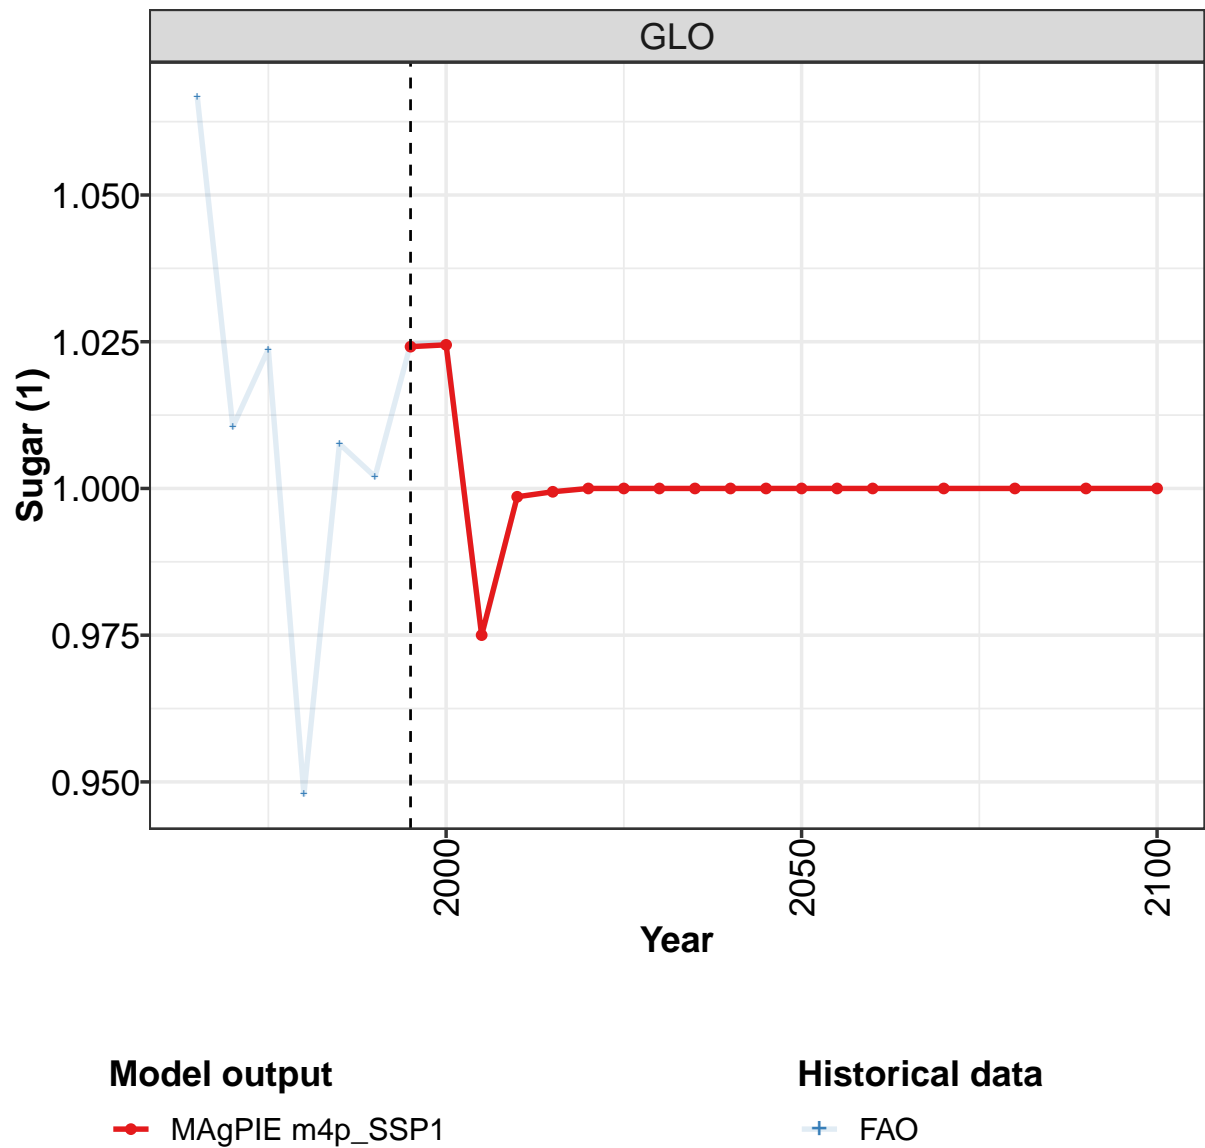

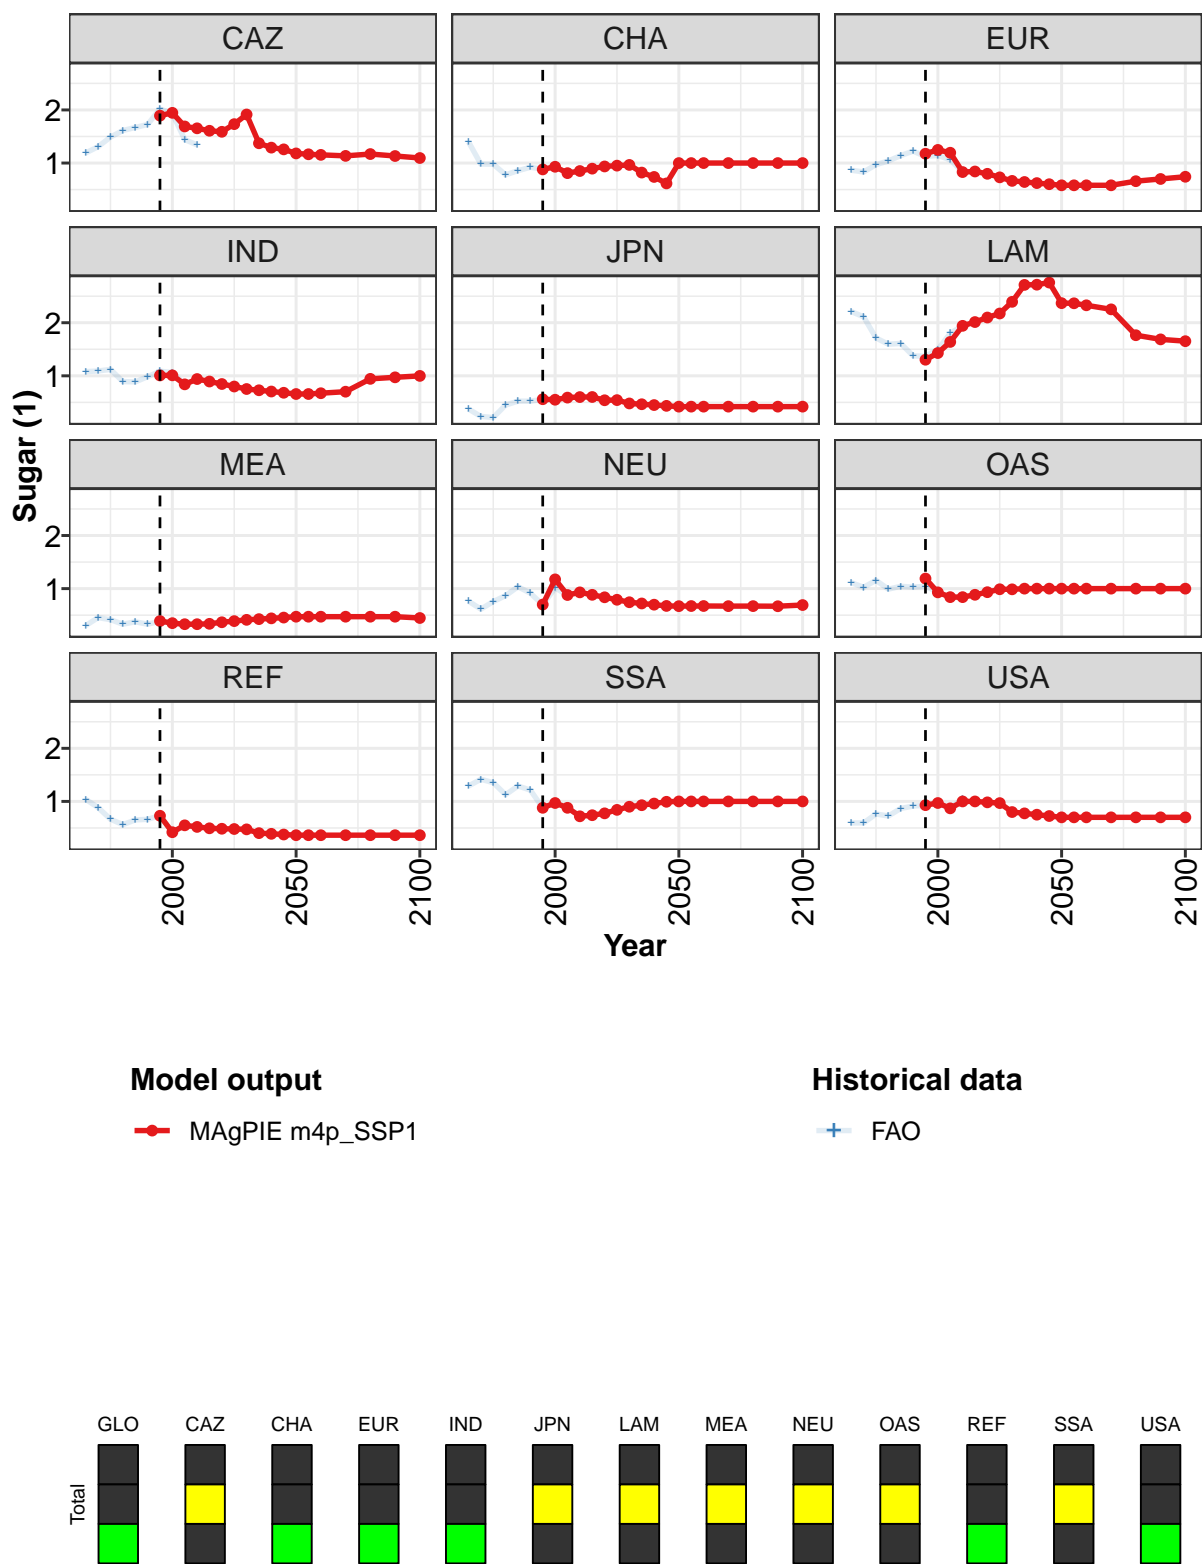

Figure 543: MAgPIE m4p\_SSP1 — Trade—Self-sufficiency—Secondary products—Sugar (1)

|     | 1995 | 2000 | 2005 | 2010 | 2015 | 2020 | 2025 | 2030 | 2035 | 2040 | 2045 |
|-----|------|------|------|------|------|------|------|------|------|------|------|
| GLO | 1.02 | 1.02 | 0.98 | 1.00 | 1.00 | 1.00 | 1.00 | 1.00 | 1.00 | 1.00 | 1.00 |
| CAZ | 1.89 | 1.95 | 1.69 | 1.65 | 1.61 | 1.59 | 1.73 | 1.91 | 1.37 | 1.29 | 1.26 |
| CHA | 0.88 | 0.93 | 0.81 | 0.85 | 0.89 | 0.94 | 0.95 | 0.96 | 0.82 | 0.74 | 0.62 |
| EUR | 1.18 | 1.25 | 1.19 | 0.83 | 0.84 | 0.80 | 0.73 | 0.66 | 0.64 | 0.62 | 0.60 |
| IND | 1.01 | 1.01 | 0.84 | 0.94 | 0.89 | 0.85 | 0.80 | 0.75 | 0.73 | 0.70 | 0.68 |
| JPN | 0.56 | 0.55 | 0.59 | 0.60 | 0.60 | 0.54 | 0.54 | 0.48 | 0.46 | 0.45 | 0.43 |
| LAM | 1.30 | 1.43 | 1.64 | 1.94 | 2.01 | 2.10 | 2.17 | 2.39 | 2.71 | 2.72 | 2.76 |
| MEA | 0.39 | 0.35 | 0.33 | 0.33 | 0.34 | 0.37 | 0.39 | 0.41 | 0.43 | 0.44 | 0.46 |
| NEU | 0.70 | 1.17 | 0.88 | 0.93 | 0.88 | 0.84 | 0.79 | 0.74 | 0.72 | 0.70 | 0.67 |
| OAS | 1.19 | 0.93 | 0.84 | 0.84 | 0.88 | 0.93 | 0.99 | 0.99 | 1.00 | 1.00 | 1.00 |
| REF | 0.73 | 0.42 | 0.55 | 0.52 | 0.49 | 0.49 | 0.48 | 0.47 | 0.40 | 0.39 | 0.38 |
| SSA | 0.88 | 0.97 | 0.88 | 0.72 | 0.74 | 0.78 | 0.84 | 0.90 | 0.93 | 0.96 | 0.99 |
| USA | 0.93 | 0.97 | 0.87 | 1.00 | 1.00 | 0.98 | 0.97 | 0.80 | 0.78 | 0.75 | 0.72 |

Table 2028: MAgPIE m4p-SSP1 — Trade—Self-sufficiency—Secondary products—Sugar (1) [PART 1/2]

|     | 2050 | 2055 | 2060 | 2070 | 2080 | 2090 | 2100 |
|-----|------|------|------|------|------|------|------|
| GLO | 1.00 | 1.00 | 1.00 | 1.00 | 1.00 | 1.00 | 1.00 |
| CAZ | 1.18 | 1.16 | 1.15 | 1.13 | 1.17 | 1.13 | 1.09 |
| CHA | 1.00 | 1.00 | 1.00 | 1.00 | 1.00 | 1.00 | 1.00 |
| EUR | 0.58 | 0.58 | 0.58 | 0.58 | 0.66 | 0.70 | 0.74 |
| IND | 0.66 | 0.66 | 0.67 | 0.70 | 0.94 | 0.97 | 1.00 |
| JPN | 0.42 | 0.42 | 0.42 | 0.42 | 0.42 | 0.42 | 0.42 |
| LAM | 2.37 | 2.37 | 2.33 | 2.25 | 1.77 | 1.69 | 1.65 |
| MEA | 0.47 | 0.47 | 0.47 | 0.47 | 0.47 | 0.47 | 0.45 |
| NEU | 0.67 | 0.67 | 0.67 | 0.67 | 0.67 | 0.67 | 0.69 |
| OAS | 1.00 | 1.00 | 1.00 | 1.00 | 1.00 | 1.00 | 1.00 |
| REF | 0.36 | 0.36 | 0.36 | 0.36 | 0.36 | 0.36 | 0.36 |
| SSA | 1.00 | 1.00 | 1.00 | 1.00 | 1.00 | 1.00 | 1.00 |
| USA | 0.70 | 0.70 | 0.70 | 0.70 | 0.70 | 0.70 | 0.70 |

Table 2029: MAgPIE m4p-SSP1 — Trade—Self-sufficiency—Secondary products—Sugar (1) [PART 2/2]

|     | 1965 | 1970 | 1975 | 1980 | 1985 | 1990 | 1995 | 2000 | 2005 | 2010 |
|-----|------|------|------|------|------|------|------|------|------|------|
| GLO | 1.07 | 1.01 | 1.02 | 0.95 | 1.01 | 1.00 | 1.02 | 1.02 | 0.97 | 1.00 |
| CAZ | 1.19 | 1.31 | 1.49 | 1.61 | 1.67 | 1.73 | 2.02 | 1.93 | 1.44 | 1.34 |
| CHA | 1.40 | 0.98 | 0.98 | 0.78 | 0.86 | 0.92 | 0.88 | 0.93 | 0.81 | 0.85 |
| EUR | 0.86 | 0.83 | 0.97 | 1.04 | 1.14 | 1.22 | 1.12 | 1.14 | 1.06 | 0.83 |
| IND | 1.08 | 1.09 | 1.12 | 0.89 | 0.89 | 0.98 | 1.09 | 1.06 | 0.84 | 0.94 |
| JPN | 0.38 | 0.24 | 0.21 | 0.45 | 0.52 | 0.52 | 0.56 | 0.55 | 0.59 | 0.60 |
| LAM | 2.21 | 2.11 | 1.71 | 1.60 | 1.61 | 1.38 | 1.37 | 1.50 | 1.80 | 1.94 |
| MEA | 0.30 | 0.45 | 0.42 | 0.33 | 0.38 | 0.33 | 0.39 | 0.35 | 0.33 | 0.33 |
| NEU | 0.76 | 0.61 | 0.76 | 0.87 | 1.04 | 0.91 | 0.70 | 1.01 | 0.88 | 0.93 |
| OAS | 1.11 | 1.03 | 1.16 | 0.99 | 1.04 | 1.03 | 1.04 | 0.93 | 0.84 | 0.84 |
| REF | 1.04 | 0.88 | 0.67 | 0.56 | 0.65 | 0.66 | 0.73 | 0.42 | 0.55 | 0.52 |
| SSA | 1.29 | 1.42 | 1.35 | 1.13 | 1.29 | 1.21 | 0.88 | 0.97 | 0.88 | 0.72 |
| USA | 0.59 | 0.60 | 0.76 | 0.73 | 0.87 | 0.91 | 0.93 | 0.97 | 0.87 | 1.05 |

Table 2030: FAO — Trade—Self-sufficiency—Secondary products—Sugar (1)

**Part XVI****Trade Value****60 Exports****61 Imports****62 Net-Exports**



## Part XVII

# Statistics

### 63 Traffic Lights

#### 63.1 Total

|          | green | yellow | red | NA. |
|----------|-------|--------|-----|-----|
| total    | 285   | 235    | 12  | 11  |
| relative | 52%   | 43%    | 2%  | 2%  |

Table 2031: Global

|          | green | yellow | red | NA. |
|----------|-------|--------|-----|-----|
| total    | 2965  | 2771   | 142 | 470 |
| relative | 47%   | 44%    | 2%  | 7%  |

Table 2032: Regional

#### 63.2 Trend

|          | green | yellow | red | NA. |
|----------|-------|--------|-----|-----|
| total    | 254   | 137    | 141 | 11  |
| relative | 47%   | 25%    | 26% | 2%  |

Table 2033: Global

|          | green | yellow | red  | NA. |
|----------|-------|--------|------|-----|
| total    | 2702  | 1516   | 1651 | 479 |
| relative | 43%   | 24%    | 26%  | 8%  |

Table 2034: Regional

#### 63.3 Overlap

|          | green | yellow | red | NA. |
|----------|-------|--------|-----|-----|
| total    | 480   | 49     | 3   | 11  |
| relative | 88%   | 9%     | 1%  | 2%  |

Table 2035: Global

|          | green | yellow | red | NA. |
|----------|-------|--------|-----|-----|
| total    | 5132  | 568    | 110 | 538 |
| relative | 81%   | 9%     | 2%  | 8%  |

Table 2036: Regional

#### 63.4 Level

|          | green | yellow | red | NA. |
|----------|-------|--------|-----|-----|
| total    | 313   | 130    | 83  | 17  |
| relative | 58%   | 24%    | 15% | 3%  |

Table 2037: Global

|          | green | yellow | red | NA. |
|----------|-------|--------|-----|-----|
| total    | 3000  | 1955   | 785 | 608 |
| relative | 47%   | 31%    | 12% | 10% |

Table 2038: Regional

## 64 Ignored data

Variables of data and validation data that only contain a mix of 0 and NA values and are ignored.

```
## Demand|Agricultural Supply Chain Loss|Crop residues (Mt DM/yr)
## Demand|Agricultural Supply Chain Loss|Crop residues|Non fibrous crop residues (Mt DM/yr)
## Demand|Agricultural Supply Chain Loss|Crop residues|Other fibrous crop residues (Mt DM/yr)
## Demand|Agricultural Supply Chain Loss|Crop residues|Straw (Mt DM/yr)
## Demand|Agricultural Supply Chain Loss|Crops|Oil crops|Oilpalms (Mt DM/yr)
## Demand|Agricultural Supply Chain Loss|Fish (Mt DM/yr)
## Demand|Agricultural Supply Chain Loss|Forage (Mt DM/yr)
## Demand|Agricultural Supply Chain Loss|Forest products (Mt DM/yr)
## Demand|Agricultural Supply Chain Loss|Forest products|Industrial roundwood (Mt DM/yr)
## Demand|Agricultural Supply Chain Loss|Forest products|Wood fuel (Mt DM/yr)
## Demand|Agricultural Supply Chain Loss|Pasture (Mt DM/yr)
## Demand|Agricultural Supply Chain Loss|Secondary products|Microbial protein (Mt DM/yr)
## Demand|Bioenergy|Crops (Mt DM/yr)
## Demand|Bioenergy|Crops|Cereals (Mt DM/yr)
## Demand|Bioenergy|Crops|Cereals|Maize (Mt DM/yr)
## Demand|Bioenergy|Crops|Cereals|Rice (Mt DM/yr)
## Demand|Bioenergy|Crops|Cereals|Temperate cereals (Mt DM/yr)
## Demand|Bioenergy|Crops|Cereals|Tropical cereals (Mt DM/yr)
## Demand|Bioenergy|Crops|Oil crops (Mt DM/yr)
## Demand|Bioenergy|Crops|Oil crops|Cotton seed (Mt DM/yr)
## Demand|Bioenergy|Crops|Oil crops|Groundnuts (Mt DM/yr)
## Demand|Bioenergy|Crops|Oil crops|Oilpalms (Mt DM/yr)
## Demand|Bioenergy|Crops|Oil crops|Other oil crops (incl rapeseed) (Mt DM/yr)
## Demand|Bioenergy|Crops|Oil crops|Soybean (Mt DM/yr)
## Demand|Bioenergy|Crops|Oil crops|Sunflower (Mt DM/yr)
## Demand|Bioenergy|Crops|Other crops (Mt DM/yr)
## Demand|Bioenergy|Crops|Other crops|Fruits Vegetables Nuts (Mt DM/yr)
## Demand|Bioenergy|Crops|Other crops|Potatoes (Mt DM/yr)
## Demand|Bioenergy|Crops|Other crops|Pulses (Mt DM/yr)
## Demand|Bioenergy|Crops|Other crops|Tropical roots (Mt DM/yr)
## Demand|Bioenergy|Crops|Sugar crops (Mt DM/yr)
## Demand|Bioenergy|Crops|Sugar crops|Sugar beet (Mt DM/yr)
## Demand|Bioenergy|Crops|Sugar crops|Sugar cane (Mt DM/yr)
## Demand|Bioenergy|Fish (Mt DM/yr)
## Demand|Bioenergy|Forage (Mt DM/yr)
## Demand|Bioenergy|Forest products (Mt DM/yr)
## Demand|Bioenergy|Forest products|Industrial roundwood (Mt DM/yr)
## Demand|Bioenergy|Forest products|Wood fuel (Mt DM/yr)
## Demand|Bioenergy|Livestock products (Mt DM/yr)
## Demand|Bioenergy|Livestock products|Dairy (Mt DM/yr)
## Demand|Bioenergy|Livestock products|Eggs (Mt DM/yr)
## Demand|Bioenergy|Livestock products|Monogastric meat (Mt DM/yr)
## Demand|Bioenergy|Livestock products|Poultry meat (Mt DM/yr)
## Demand|Bioenergy|Livestock products|Ruminant meat (Mt DM/yr)
## Demand|Bioenergy|Pasture (Mt DM/yr)
## Demand|Bioenergy|Secondary products|Alcoholic beverages (Mt DM/yr)
## Demand|Bioenergy|Secondary products|Brans (Mt DM/yr)
## Demand|Bioenergy|Secondary products|Cotton lint (Mt DM/yr)
## Demand|Bioenergy|Secondary products|Distillers grains (Mt DM/yr)
## Demand|Bioenergy|Secondary products|Microbial protein (Mt DM/yr)
```

```

## Demand|Bioenergy|Secondary products|Molasses (Mt DM/yr)
## Demand|Bioenergy|Secondary products|Oilcakes (Mt DM/yr)
## Demand|Bioenergy|Secondary products|Sugar (Mt DM/yr)
## Demand|Domestic Balanceflow|Bioenergy crops (Mt DM/yr)
## Demand|Domestic Balanceflow|Crop residues (Mt DM/yr)
## Demand|Domestic Balanceflow|Crop residues|Non fibrous crop residues (Mt DM/yr)
## Demand|Domestic Balanceflow|Crop residues|Other fibrous crop residues (Mt DM/yr)
## Demand|Domestic Balanceflow|Crop residues|Straw (Mt DM/yr)
## Demand|Domestic Balanceflow|Crops|Oil crops|Oilpalms (Mt DM/yr)
## Demand|Domestic Balanceflow|Forage (Mt DM/yr)
## Demand|Domestic Balanceflow|Forest products (Mt DM/yr)
## Demand|Domestic Balanceflow|Forest products|Industrial roundwood (Mt DM/yr)
## Demand|Domestic Balanceflow|Forest products|Wood fuel (Mt DM/yr)
## Demand|Domestic Balanceflow|Pasture (Mt DM/yr)
## Demand|Domestic Balanceflow|Secondary products|Distillers grains (Mt DM/yr)
## Demand|Domestic Balanceflow|Secondary products|Ethanol (Mt DM/yr)
## Demand|Domestic Balanceflow|Secondary products|Microbial protein (Mt DM/yr)
## Demand|Feed|Bioenergy crops (Mt DM/yr)
## Demand|Feed|Forest products (Mt DM/yr)
## Demand|Feed|Forest products|Industrial roundwood (Mt DM/yr)
## Demand|Feed|Forest products|Wood fuel (Mt DM/yr)
## Demand|Feed|Livestock products|Monogastric meat (Mt DM/yr)
## Demand|Feed|Secondary products|Alcoholic beverages (Mt DM/yr)
## Demand|Feed|Secondary products|Microbial protein (Mt DM/yr)
## Demand|Food|Bioenergy crops (Mt DM/yr)
## Demand|Food|Crop residues (Mt DM/yr)
## Demand|Food|Crop residues|Non fibrous crop residues (Mt DM/yr)
## Demand|Food|Crop residues|Other fibrous crop residues (Mt DM/yr)
## Demand|Food|Crop residues|Straw (Mt DM/yr)
## Demand|Food|Crops|Oil crops|Oilpalms (Mt DM/yr)
## Demand|Food|Forage (Mt DM/yr)
## Demand|Food|Forest products (Mt DM/yr)
## Demand|Food|Forest products|Industrial roundwood (Mt DM/yr)
## Demand|Food|Forest products|Wood fuel (Mt DM/yr)
## Demand|Food|Pasture (Mt DM/yr)
## Demand|Food|Secondary products|Cotton lint (Mt DM/yr)
## Demand|Food|Secondary products|Distillers grains (Mt DM/yr)
## Demand|Food|Secondary products|Ethanol (Mt DM/yr)
## Demand|Food|Secondary products|Microbial protein (Mt DM/yr)
## Demand|Food|Secondary products|Oilcakes (Mt DM/yr)
## Demand|Material|Bioenergy crops (Mt DM/yr)
## Demand|Material|Crop residues|Non fibrous crop residues (Mt DM/yr)
## Demand|Material|Crop residues|Other fibrous crop residues (Mt DM/yr)
## Demand|Material|Crops|Cereals|Maize (Mt DM/yr)
## Demand|Material|Crops|Cereals|Temperate cereals (Mt DM/yr)
## Demand|Material|Crops|Oil crops|Oilpalms (Mt DM/yr)
## Demand|Material|Crops|Sugar crops|Sugar cane (Mt DM/yr)
## Demand|Material|Forage (Mt DM/yr)
## Demand|Material|Pasture (Mt DM/yr)
## Demand|Material|Secondary products|Distillers grains (Mt DM/yr)
## Demand|Material|Secondary products|Microbial protein (Mt DM/yr)
## Demand|Processing|Bioenergy crops (Mt DM/yr)
## Demand|Processing|Crop residues (Mt DM/yr)
## Demand|Processing|Crop residues|Non fibrous crop residues (Mt DM/yr)
## Demand|Processing|Crop residues|Other fibrous crop residues (Mt DM/yr)
## Demand|Processing|Crop residues|Straw (Mt DM/yr)
## Demand|Processing|Crops|Other crops|Pulses (Mt DM/yr)
## Demand|Processing|Fish (Mt DM/yr)
## Demand|Processing|Forage (Mt DM/yr)
## Demand|Processing|Forest products (Mt DM/yr)

```

```

## Demand|Processing|Forest products|Industrial roundwood (Mt DM/yr)
## Demand|Processing|Forest products|Wood fuel (Mt DM/yr)
## Demand|Processing|Livestock products (Mt DM/yr)
## Demand|Processing|Livestock products|Dairy (Mt DM/yr)
## Demand|Processing|Livestock products|Eggs (Mt DM/yr)
## Demand|Processing|Livestock products|Monogastric meat (Mt DM/yr)
## Demand|Processing|Livestock products|Poultry meat (Mt DM/yr)
## Demand|Processing|Livestock products|Ruminant meat (Mt DM/yr)
## Demand|Processing|Pasture (Mt DM/yr)
## Demand|Processing|Secondary products|Alcoholic beverages (Mt DM/yr)
## Demand|Processing|Secondary products|Cotton lint (Mt DM/yr)
## Demand|Processing|Secondary products|Distillers grains (Mt DM/yr)
## Demand|Processing|Secondary products|Ethanol (Mt DM/yr)
## Demand|Processing|Secondary products|Microbial protein (Mt DM/yr)
## Demand|Processing|Secondary products|Oilcakes (Mt DM/yr)
## Demand|Seed|Crop residues (Mt DM/yr)
## Demand|Seed|Crop residues|Non fibrous crop residues (Mt DM/yr)
## Demand|Seed|Crop residues|Other fibrous crop residues (Mt DM/yr)
## Demand|Seed|Crop residues|Straw (Mt DM/yr)
## Demand|Seed|Crops|Oil crops|Oilpalms (Mt DM/yr)
## Demand|Seed|Crops|Sugar crops|Sugar beet (Mt DM/yr)
## Demand|Seed|Forage (Mt DM/yr)
## Demand|Seed|Forest products (Mt DM/yr)
## Demand|Seed|Forest products|Industrial roundwood (Mt DM/yr)
## Demand|Seed|Forest products|Wood fuel (Mt DM/yr)
## Demand|Seed|Pasture (Mt DM/yr)
## Demand|Seed|Secondary products (Mt DM/yr)
## Demand|Seed|Secondary products|Alcoholic beverages (Mt DM/yr)
## Demand|Seed|Secondary products|Brans (Mt DM/yr)
## Demand|Seed|Secondary products|Cotton lint (Mt DM/yr)
## Demand|Seed|Secondary products|Distillers grains (Mt DM/yr)
## Demand|Seed|Secondary products|Ethanol (Mt DM/yr)
## Demand|Seed|Secondary products|Microbial protein (Mt DM/yr)
## Demand|Seed|Secondary products|Molasses (Mt DM/yr)
## Demand|Seed|Secondary products|Oilcakes (Mt DM/yr)
## Demand|Seed|Secondary products|Oils (Mt DM/yr)
## Demand|Seed|Secondary products|Sugar (Mt DM/yr)
## Emissions|NH3|Land|Agriculture|Agricultural Soils|Decay of Crop Residues (Mt NH3/yr)
## Emissions|NH3|Land|Agriculture|Agricultural Soils|Soil Organic Matter Loss (Mt NH3/yr)
## Emissions|NO2|Land|Agriculture|Agricultural Soils|Decay of Crop Residues (Mt NO2/yr)
## Emissions|NO2|Land|Agriculture|Agricultural Soils|Soil Organic Matter Loss (Mt NO2/yr)
## Production|Secondary products|Microbial protein (Mt DM/yr)
## Trade|Net-Trade|Secondary products|Microbial protein (Mt DM/yr)

```

Data contains only a mix of 0 and NA values and is ignored, but validation data contains other values.

```

## Costs|MainSolve|GHG Emissions (million US$05/yr)
## Costs|MainSolve|P Fertilizer (million US$05/yr)
## Costs|MainSolve|Reward for Afforestation (million US$05/yr)
## Demand|Domestic Balanceflow|Crops|Sugar crops|Sugar cane (Mt DM/yr)
## Demand|Domestic Balanceflow|Secondary products|Molasses (Mt DM/yr)
## Demand|Feed|Livestock products|Poultry meat (Mt DM/yr)
## Demand|Food|Crops|Oil crops|Cotton seed (Mt DM/yr)
## Demand|Seed|Fish (Mt DM/yr)
## Demand|Seed|Livestock products (Mt DM/yr)
## Demand|Seed|Livestock products|Dairy (Mt DM/yr)
## Demand|Seed|Livestock products|Eggs (Mt DM/yr)
## Demand|Seed|Livestock products|Monogastric meat (Mt DM/yr)
## Demand|Seed|Livestock products|Poultry meat (Mt DM/yr)
## Demand|Seed|Livestock products|Ruminant meat (Mt DM/yr)

```

```

## Emissions|N2O|Land|Agriculture|Agricultural Soils|Soil Organic Matter Loss (Mt N2O/yr)
## Emissions|N03|Land|Agriculture|Agricultural Soils|Soil Organic Matter Loss (Mt N03-/yr)
## Food Consumption Value|Bioenergy crops (million US$05/yr)
## Food Consumption Value|Crop residues (million US$05/yr)
## Food Consumption Value|Forage (million US$05/yr)
## Food Consumption Value|Pasture (million US$05/yr)
## Food Expenditure Share|Bioenergy crops (% of GDP)
## Food Expenditure Share|Crop residues (% of GDP)
## Food Expenditure Share|Forage (% of GDP)
## Food Expenditure Share|Pasture (% of GDP)
## Prices|GHG Emission|CH4 (US$2005/tCH4)
## Prices|GHG Emission|CO2 (US$2005/tCO2)
## Prices|GHG Emission|N2O (US$2005/tN2O)
## Production|Forest products (Mt DM/yr)
## Production|Forest products|Industrial roundwood (Mt DM/yr)
## Production|Forest products|Wood fuel (Mt DM/yr)
## Resources|Land Cover|Cropland|Bioenergy crops|irrigated (million ha)
## Resources|Land Cover Change|Forest|Plantations|Forestry (million ha wrt 1995)
## Resources|Land Cover Change|Urban Area (million ha wrt 1995)
## Resources|Nitrogen|Cropland Budget|Balance|Soil Organic Matter Loss (Mt Nr/yr)

```

Validation data contains only a mix of 0 and NA values and is ignored, but data contains other values.

```

## Demand|Agricultural Supply Chain Loss|Bioenergy crops (Mt DM/yr)
## Demand|Agricultural Supply Chain Loss|Secondary products|Cotton lint (Mt DM/yr)
## Demand|Agricultural Supply Chain Loss|Secondary products|Distillers grains (Mt DM/yr)
## Demand|Agricultural Supply Chain Loss|Secondary products|Ethanol (Mt DM/yr)
## Demand|Agricultural Supply Chain Loss|Secondary products|Oilcakes (Mt DM/yr)
## Demand|Bioenergy|Bioenergy crops (Mt DM/yr)
## Demand|Feed|Crops|Oil crops|Oilpalms (Mt DM/yr)
## Demand|Feed|Secondary products|Cotton lint (Mt DM/yr)
## Demand|Feed|Secondary products|Ethanol (Mt DM/yr)
## Demand|Processing|Secondary products|Oils (Mt DM/yr)
## Demand|Seed|Bioenergy crops (Mt DM/yr)
## Production|Bioenergy crops (Mt DM/yr)
## Productivity|Yield|Bioenergy crops (t DM/ha)
## Trade|Net-Trade|Bioenergy crops (Mt DM/yr)
## Trade|Net-Trade|Secondary products|Distillers grains (Mt DM/yr)
## Trade|Net-Trade|Secondary products|Ethanol (Mt DM/yr)

```

## 65 Non-Matching Data

### 65.1 Model outputs

```

## Household Expenditure|Food|Food Expenditure Share (USD/USD)
## Resources|Land Cover|Forest|Plantations|Forestry (million ha)
## Resources|Land Cover|Forest|Plantations|Afforestation (million ha)
## Resources|Land Cover Change|Forest|Plantations|Forestry (million ha wrt 1995)
## Resources|Land Cover Change|Forest|Plantations|Afforestation (million ha wrt 1995)
## Resources|Land Cover|Forest|Natural Forest|Primary Forest|Protected (million ha)
## Resources|Land Cover|Forest|Natural Forest|Secondary Forest|Protected (million ha)
## Resources|Land Cover|Other Land|Protected (million ha)
## Resources|Land Cover|Cropland|Crops|rainfed (million ha)
## Resources|Land Cover|Cropland|Crops|irrigated (million ha)
## Resources|Land Cover|Cropland|Crops|Cereals|rainfed (million ha)
## Resources|Land Cover|Cropland|Crops|Cereals|irrigated (million ha)
## Resources|Land Cover|Cropland|Crops|Cereals|Maize|rainfed (million ha)
## Resources|Land Cover|Cropland|Crops|Cereals|Maize|irrigated (million ha)

```

```

## Resources|Land Cover|Cropland|Crops|Cereals|Rice|rainfed (million ha)
## Resources|Land Cover|Cropland|Crops|Cereals|Rice|irrigated (million ha)
## Resources|Land Cover|Cropland|Crops|Cereals|Temperate cereals|rainfed (million ha)
## Resources|Land Cover|Cropland|Crops|Cereals|Temperate cereals|irrigated (million ha)
## Resources|Land Cover|Cropland|Crops|Cereals|Tropical cereals|rainfed (million ha)
## Resources|Land Cover|Cropland|Crops|Cereals|Tropical cereals|irrigated (million ha)
## Resources|Land Cover|Cropland|Crops|Oil crops|rainfed (million ha)
## Resources|Land Cover|Cropland|Crops|Oil crops|irrigated (million ha)
## Resources|Land Cover|Cropland|Crops|Oil crops|Cotton seed|rainfed (million ha)
## Resources|Land Cover|Cropland|Crops|Oil crops|Cotton seed|irrigated (million ha)
## Resources|Land Cover|Cropland|Crops|Oil crops|Groundnuts|rainfed (million ha)
## Resources|Land Cover|Cropland|Crops|Oil crops|Groundnuts|irrigated (million ha)
## Resources|Land Cover|Cropland|Crops|Oil crops|Oilpalms|rainfed (million ha)
## Resources|Land Cover|Cropland|Crops|Oil crops|Oilpalms|irrigated (million ha)
## Resources|Land Cover|Cropland|Crops|Oil crops|Other oil crops (incl rapeseed)|rainfed (million ha)
## Resources|Land Cover|Cropland|Crops|Oil crops|Other oil crops (incl rapeseed)|irrigated (million ha)
## Resources|Land Cover|Cropland|Crops|Oil crops|Soybean|rainfed (million ha)
## Resources|Land Cover|Cropland|Crops|Oil crops|Soybean|irrigated (million ha)
## Resources|Land Cover|Cropland|Crops|Oil crops|Sunflower|rainfed (million ha)
## Resources|Land Cover|Cropland|Crops|Oil crops|Sunflower|irrigated (million ha)
## Resources|Land Cover|Cropland|Crops|Sugar crops|rainfed (million ha)
## Resources|Land Cover|Cropland|Crops|Sugar crops|irrigated (million ha)
## Resources|Land Cover|Cropland|Crops|Sugar crops|Sugar beet|rainfed (million ha)
## Resources|Land Cover|Cropland|Crops|Sugar crops|Sugar beet|irrigated (million ha)
## Resources|Land Cover|Cropland|Crops|Sugar crops|Sugar cane|rainfed (million ha)
## Resources|Land Cover|Cropland|Crops|Sugar crops|Sugar cane|irrigated (million ha)
## Resources|Land Cover|Cropland|Crops|Other crops|rainfed (million ha)
## Resources|Land Cover|Cropland|Crops|Other crops|irrigated (million ha)
## Resources|Land Cover|Cropland|Crops|Other crops|Tropical roots|rainfed (million ha)
## Resources|Land Cover|Cropland|Crops|Other crops|Tropical roots|irrigated (million ha)
## Resources|Land Cover|Cropland|Crops|Other crops|Fruits Vegetables Nuts|rainfed (million ha)
## Resources|Land Cover|Cropland|Crops|Other crops|Fruits Vegetables Nuts|irrigated (million ha)
## Resources|Land Cover|Cropland|Crops|Other crops|Potatoes|rainfed (million ha)
## Resources|Land Cover|Cropland|Crops|Other crops|Potatoes|irrigated (million ha)
## Resources|Land Cover|Cropland|Crops|Other crops|Pulses|rainfed (million ha)
## Resources|Land Cover|Cropland|Crops|Other crops|Pulses|irrigated (million ha)
## Resources|Land Cover|Cropland|Bioenergy crops|rainfed (million ha)
## Resources|Land Cover|Cropland|Bioenergy crops|irrigated (million ha)
## Resources|Land Cover|Cropland|Forage|rainfed (million ha)
## Resources|Land Cover|Cropland|Forage|irrigated (million ha)
## Resources|Nitrogen|Cropland Budget|Inputs|Manure From Stubble Grazing (Mt Nr/yr)
## Resources|Nitrogen|Manure|Manure In Confinements|Other Land (Mt Nr/yr)
## Resources|Nitrogen|Manure|Manure In Confinements|Anaerobic lagoon (Mt Nr/yr)
## Resources|Nitrogen|Manure|Manure In Confinements|Liquid slurry (Mt Nr/yr)
## Resources|Nitrogen|Manure|Manure In Confinements|Solid storage (Mt Nr/yr)
## Resources|Nitrogen|Manure|Manure In Confinements|Dry lot (Mt Nr/yr)
## Resources|Nitrogen|Manure|Manure In Confinements|Daily spread (Mt Nr/yr)
## Resources|Nitrogen|Manure|Manure In Confinements|Anaerobic digester (Mt Nr/yr)
## Resources|Nitrogen|Manure|Manure In Confinements|Pit storage longer than a month (Mt Nr/yr)
## Resources|Nitrogen|Manure|Manure In Confinements|Pit storage less than a month (Mt Nr/yr)
## Productivity|Yield|Crops|rainfed (t DM/ha)
## Productivity|Yield|Crops|irrigated (t DM/ha)
## Productivity|Yield|Crops|Cereals|rainfed (t DM/ha)
## Productivity|Yield|Crops|Cereals|irrigated (t DM/ha)
## Productivity|Yield|Crops|Cereals|Maize|rainfed (t DM/ha)
## Productivity|Yield|Crops|Cereals|Maize|irrigated (t DM/ha)
## Productivity|Yield|Crops|Cereals|Rice|rainfed (t DM/ha)
## Productivity|Yield|Crops|Cereals|Rice|irrigated (t DM/ha)
## Productivity|Yield|Crops|Cereals|Temperate cereals|rainfed (t DM/ha)
## Productivity|Yield|Crops|Cereals|Temperate cereals|irrigated (t DM/ha)

```

```

## Productivity|Yield|Crops|Cereals|Tropical cereals|rainfed (t DM/ha)
## Productivity|Yield|Crops|Cereals|Tropical cereals|irrigated (t DM/ha)
## Productivity|Yield|Crops|Oil crops|rainfed (t DM/ha)
## Productivity|Yield|Crops|Oil crops|irrigated (t DM/ha)
## Productivity|Yield|Crops|Oil crops|Cotton seed|rainfed (t DM/ha)
## Productivity|Yield|Crops|Oil crops|Cotton seed|irrigated (t DM/ha)
## Productivity|Yield|Crops|Oil crops|Groundnuts|rainfed (t DM/ha)
## Productivity|Yield|Crops|Oil crops|Groundnuts|irrigated (t DM/ha)
## Productivity|Yield|Crops|Oil crops|Oilpalms|rainfed (t DM/ha)
## Productivity|Yield|Crops|Oil crops|Oilpalms|irrigated (t DM/ha)
## Productivity|Yield|Crops|Oil crops|Other oil crops (incl rapeseed)|rainfed (t DM/ha)
## Productivity|Yield|Crops|Oil crops|Other oil crops (incl rapeseed)|irrigated (t DM/ha)
## Productivity|Yield|Crops|Oil crops|Soybean|rainfed (t DM/ha)
## Productivity|Yield|Crops|Oil crops|Soybean|irrigated (t DM/ha)
## Productivity|Yield|Crops|Oil crops|Sunflower|rainfed (t DM/ha)
## Productivity|Yield|Crops|Oil crops|Sunflower|irrigated (t DM/ha)
## Productivity|Yield|Crops|Sugar crops|rainfed (t DM/ha)
## Productivity|Yield|Crops|Sugar crops|irrigated (t DM/ha)
## Productivity|Yield|Crops|Sugar crops|Sugar beet|rainfed (t DM/ha)
## Productivity|Yield|Crops|Sugar crops|Sugar beet|irrigated (t DM/ha)
## Productivity|Yield|Crops|Sugar crops|Sugar cane|rainfed (t DM/ha)
## Productivity|Yield|Crops|Sugar crops|Sugar cane|irrigated (t DM/ha)
## Productivity|Yield|Crops|Other crops|rainfed (t DM/ha)
## Productivity|Yield|Crops|Other crops|irrigated (t DM/ha)
## Productivity|Yield|Crops|Other crops|Tropical roots|rainfed (t DM/ha)
## Productivity|Yield|Crops|Other crops|Tropical roots|irrigated (t DM/ha)
## Productivity|Yield|Crops|Other crops|Fruits Vegetables Nuts|rainfed (t DM/ha)
## Productivity|Yield|Crops|Other crops|Fruits Vegetables Nuts|irrigated (t DM/ha)
## Productivity|Yield|Crops|Other crops|Potatoes|rainfed (t DM/ha)
## Productivity|Yield|Crops|Other crops|Potatoes|irrigated (t DM/ha)
## Productivity|Yield|Crops|Other crops|Pulses|rainfed (t DM/ha)
## Productivity|Yield|Crops|Other crops|Pulses|irrigated (t DM/ha)
## Productivity|Yield|Bioenergy crops|rainfed (t DM/ha)
## Productivity|Yield|Forage|rainfed (t DM/ha)
## Productivity|Yield|Forage|irrigated (t DM/ha)
## Productivity|Yield-increasing technological change (%/yr)
## Emissions|CO2|Land (Mt CO2/yr)
## Emissions|CO2|Land|Land-use Change|Positive (Mt CO2/yr)
## Emissions|CO2|Land|Land-use Change|Negative (Mt CO2/yr)
## Emissions|CO2|Land|Climate Change (Mt CO2/yr)
## Emissions|CO2|Land|Cumulative (Gt CO2)
## Emissions|CO2|Land|Cumulative|Land-use Change (Gt CO2)
## Emissions|CO2|Land|Cumulative|Land-use Change|Positive (Gt CO2)
## Emissions|CO2|Land|Cumulative|Land-use Change|Negative (Gt CO2)
## Emissions|CO2|Land|Cumulative|Climate Change (Gt CO2)
## Emissions|CH4|Land|Agriculture|Enteric fermentation (Mt CH4/yr)
## Costs|MainSolve (million US$05/yr)
## Costs|MainSolve|Input Factors (million US$05/yr)
## Costs|MainSolve|Land Conversion (million US$05/yr)
## Costs|MainSolve|Transport (million US$05/yr)
## Costs|MainSolve|TC (million US$05/yr)
## Costs|MainSolve|N Fertilizer (million US$05/yr)
## Costs|MainSolve|P Fertilizer (million US$05/yr)
## Costs|MainSolve|GHG Emissions (million US$05/yr)
## Costs|MainSolve|Reward for Afforestation (million US$05/yr)
## Costs|MainSolve|MACCS (million US$05/yr)
## Costs|MainSolve|AEI (million US$05/yr)
## Costs|MainSolve|Trade (million US$05/yr)
## Costs|MainSolve|Forestry (million US$05/yr)
## Costs|MainSolve w/o GHG Emissions (million US$05/yr)

```

```

## Prices|Land|Cropland (US$05/ha)
## Prices|Water|Agriculture (Index 2005=100)
## Trade Value|Net-Exports|Crops|Cereals (million US$05/yr)
## Trade Value|Net-Exports|Crops|Sugar crops (million US$05/yr)
## Trade Value|Net-Exports|Crops|Other crops (million US$05/yr)
## Trade Value|Net-Exports|Bioenergy crops (million US$05/yr)
## Trade Value|Net-Exports|Secondary products (million US$05/yr)
## Trade Value|Net-Exports|Livestock products (million US$05/yr)
## Trade Value|Net-Exports|Fish (million US$05/yr)
## Trade Value|Exports|Crops|Cereals (million US$05/yr)
## Trade Value|Exports|Crops|Sugar crops (million US$05/yr)
## Trade Value|Exports|Crops|Other crops (million US$05/yr)
## Trade Value|Exports|Bioenergy crops (million US$05/yr)
## Trade Value|Exports|Secondary products (million US$05/yr)
## Trade Value|Exports|Livestock products (million US$05/yr)
## Trade Value|Exports|Fish (million US$05/yr)
## Trade Value|Imports|Crops|Cereals (million US$05/yr)
## Trade Value|Imports|Crops|Sugar crops (million US$05/yr)
## Trade Value|Imports|Crops|Other crops (million US$05/yr)
## Trade Value|Imports|Bioenergy crops (million US$05/yr)
## Trade Value|Imports|Secondary products (million US$05/yr)
## Trade Value|Imports|Livestock products (million US$05/yr)
## Trade Value|Imports|Fish (million US$05/yr)
## Food Consumption Value|Crops (million US$05/yr)
## Food Consumption Value|Crops|Cereals (million US$05/yr)
## Food Consumption Value|Crops|Oil crops (million US$05/yr)
## Food Consumption Value|Crops|Sugar crops (million US$05/yr)
## Food Consumption Value|Crops|Other crops (million US$05/yr)
## Food Consumption Value|Bioenergy crops (million US$05/yr)
## Food Consumption Value|Forage (million US$05/yr)
## Food Consumption Value|Pasture (million US$05/yr)
## Food Consumption Value|Secondary products (million US$05/yr)
## Food Consumption Value|Crop residues (million US$05/yr)
## Food Consumption Value|Livestock products (million US$05/yr)
## Food Consumption Value|Fish (million US$05/yr)
## Food Expenditure Share|Crops (% of GDP)
## Food Expenditure Share|Crops|Cereals (% of GDP)
## Food Expenditure Share|Crops|Oil crops (% of GDP)
## Food Expenditure Share|Crops|Sugar crops (% of GDP)
## Food Expenditure Share|Crops|Other crops (% of GDP)
## Food Expenditure Share|Bioenergy crops (% of GDP)
## Food Expenditure Share|Forage (% of GDP)
## Food Expenditure Share|Pasture (% of GDP)
## Food Expenditure Share|Secondary products (% of GDP)
## Food Expenditure Share|Crop residues (% of GDP)
## Food Expenditure Share|Livestock products (% of GDP)
## Food Expenditure Share|Fish (% of GDP)

```

## 65.2 Validation data

```

## Emissions|CH4|Land|Land-use Change (Mt CH4/yr)
## Emissions|CO2|Land|Agriculture (Mt CO2/yr)
## Emissions|N2O|Land|Land-use Change (Mt N2O/yr)
## Resources|Carbon Stocks|Litter Carbon (Mt C)
## Resources|Carbon Stocks|Soil Carbon in top 30 cm (Mt C)
## Resources|Carbon Stocks|Vegetation Carbon (Mt C)
## Income (US$05 MER/cap/yr)
## Income (million US$05 MER/yr)

```



```

## Income (million US$05 PPP/yr)
## Nutrition|Calorie Supply (NA)
## Nutrition|Calorie Supply|Bioenergy crops (NA)
## Nutrition|Calorie Supply|Crop residues (NA)
## Nutrition|Calorie Supply|Crops (NA)
## Nutrition|Calorie Supply|Fish (NA)
## Nutrition|Calorie Supply|Forage (NA)
## Nutrition|Calorie Supply|Forest products (NA)
## Nutrition|Calorie Supply|Livestock products (NA)
## Nutrition|Calorie Supply|Pasture (NA)
## Nutrition|Calorie Supply|Secondary products (NA)
## Nutrition|Calorie Supply|Crop residues|Non fibrous crop residues (NA)
## Nutrition|Calorie Supply|Crop residues|Other fibrous crop residues (NA)
## Nutrition|Calorie Supply|Crop residues|Straw (NA)
## Nutrition|Calorie Supply|Crops|Cereals (NA)
## Nutrition|Calorie Supply|Crops|Oil crops (NA)
## Nutrition|Calorie Supply|Crops|Other crops (NA)
## Nutrition|Calorie Supply|Crops|Sugar crops (NA)
## Nutrition|Calorie Supply|Crops|Cereals|Maize (NA)
## Nutrition|Calorie Supply|Crops|Cereals|Rice (NA)
## Nutrition|Calorie Supply|Crops|Cereals|Temperate cereals (NA)
## Nutrition|Calorie Supply|Crops|Cereals|Tropical cereals (NA)
## Nutrition|Calorie Supply|Crops|Oil crops|Cotton seed (NA)
## Nutrition|Calorie Supply|Crops|Oil crops|Groundnuts (NA)
## Nutrition|Calorie Supply|Crops|Oil crops|Oilpalms (NA)
## Nutrition|Calorie Supply|Crops|Oil crops|Other oil crops (incl rapeseed)
## Nutrition|Calorie Supply|Crops|Oil crops|Soybean (NA)
## Nutrition|Calorie Supply|Crops|Oil crops|Sunflower (NA)
## Nutrition|Calorie Supply|Crops|Other crops|Fruits Vegetables Nuts (NA)
## Nutrition|Calorie Supply|Crops|Other crops|Potatoes (NA)
## Nutrition|Calorie Supply|Crops|Other crops|Pulses (NA)
## Nutrition|Calorie Supply|Crops|Other crops|Tropical roots (NA)
## Nutrition|Calorie Supply|Crops|Sugar crops|Sugar beet (NA)
## Nutrition|Calorie Supply|Crops|Sugar crops|Sugar cane (NA)
## Nutrition|Calorie Supply|Forest products|Industrial roundwood (NA)
## Nutrition|Calorie Supply|Forest products|Wood fuel (NA)
## Nutrition|Calorie Supply|Livestock products|Dairy (NA)
## Nutrition|Calorie Supply|Livestock products|Eggs (NA)
## Nutrition|Calorie Supply|Livestock products|Monogastric meat (NA)
## Nutrition|Calorie Supply|Livestock products|Poultry meat (NA)
## Nutrition|Calorie Supply|Livestock products|Ruminant meat (NA)
## Nutrition|Calorie Supply|Secondary products|Alcoholic beverages (NA)
## Nutrition|Calorie Supply|Secondary products|Brans (NA)
## Nutrition|Calorie Supply|Secondary products|Cotton lint (NA)
## Nutrition|Calorie Supply|Secondary products|Distillers grains (NA)
## Nutrition|Calorie Supply|Secondary products|Ethanol (NA)
## Nutrition|Calorie Supply|Secondary products|Microbial protein (NA)
## Nutrition|Calorie Supply|Secondary products|Molasses (NA)
## Nutrition|Calorie Supply|Secondary products|Oilcakes (NA)
## Nutrition|Calorie Supply|Secondary products|Oils (NA)
## Nutrition|Calorie Supply|Secondary products|Sugar (NA)
## Resources|Carbon Stocks|Soil Carbon in top 30 cm|Cropland Soils (Mt C)
## Resources|Carbon Stocks|Soil Carbon in top 30 cm|Noncropland Soils (Mt C)
## Emissions|CH4|Land|Agriculture|Enteric Fermentation (Mt CH4/yr)
## Emissions|N2O|Agriculture (Mt N2O/yr)
## Emissions|N2O|Agriculture|Agricultural Soils (Mt N2O/yr)
## Emissions|N2O|Agriculture|Animal waste management (Mt N2O/yr)
## Emissions|N2O|Agriculture|Agricultural Soils|Decay of crop residues (Mt N2O/yr)
## Emissions|N2O|Agriculture|Agricultural Soils|Inorganic Fertilizers (Mt N2O/yr)
## Emissions|N2O|Agriculture|Agricultural Soils|Manure applied to Croplands (Mt N2O/yr)

```

```

## Emissions|N2O|Agriculture|Agricultural Soils|Pasture (Mt N2O/yr)
## Emissions|N2O|Agriculture|Agricultural Soils|Soil organic matter loss (Mt N2O/yr)
## Nutrition|Calorie Supply|Crops|Cereals|Maize (kcal/capita/day)
## Nutrition|Calorie Supply|Crops|Cereals|Rice (kcal/capita/day)
## Nutrition|Calorie Supply|Crops|Cereals|Temperate cereals (kcal/capita/day)
## Nutrition|Calorie Supply|Crops|Cereals|Tropical cereals (kcal/capita/day)
## Nutrition|Calorie Supply|Crops|Oil crops|Groundnuts (kcal/capita/day)
## Nutrition|Calorie Supply|Crops|Oil crops|Other oil crops (incl rapeseed) (kcal/capita/day)
## Nutrition|Calorie Supply|Crops|Oil crops|Soybean (kcal/capita/day)
## Nutrition|Calorie Supply|Crops|Oil crops|Sunflower (kcal/capita/day)
## Nutrition|Calorie Supply|Crops|Other crops|Fruits Vegetables Nuts (kcal/capita/day)
## Nutrition|Calorie Supply|Crops|Other crops|Potatoes (kcal/capita/day)
## Nutrition|Calorie Supply|Crops|Other crops|Pulses (kcal/capita/day)
## Nutrition|Calorie Supply|Crops|Other crops|Tropical roots (kcal/capita/day)
## Nutrition|Calorie Supply|Crops|Sugar crops|Sugar beet (kcal/capita/day)
## Nutrition|Calorie Supply|Crops|Sugar crops|Sugar cane (kcal/capita/day)
## Nutrition|Calorie Supply|Livestock products|Dairy (kcal/capita/day)
## Nutrition|Calorie Supply|Livestock products|Eggs (kcal/capita/day)
## Nutrition|Calorie Supply|Livestock products|Monogastric meat (kcal/capita/day)
## Nutrition|Calorie Supply|Livestock products|Poultry meat (kcal/capita/day)
## Nutrition|Calorie Supply|Livestock products|Ruminant meat (kcal/capita/day)
## Nutrition|Calorie Supply|Secondary products|Alcoholic beverages (kcal/capita/day)
## Nutrition|Calorie Supply|Secondary products|Brans (kcal/capita/day)
## Nutrition|Calorie Supply|Secondary products|Molasses (kcal/capita/day)
## Nutrition|Calorie Supply|Secondary products|Oils (kcal/capita/day)
## Nutrition|Calorie Supply|Secondary products|Sugar (kcal/capita/day)
## Nutrition|Dietary Composition|Vegetables Fruits and Nuts Share (kcal/kcal)
## Household Expenditure|Food|Expenditure Share (USD/USD)
## Household Expenditure|Food|Expenditure Share|Crops (USD/USD)
## Household Expenditure|Food|Expenditure Share|Crops|Cereals (USD/USD)
## Household Expenditure|Food|Expenditure Share|Crops|Oil crops (USD/USD)
## Household Expenditure|Food|Expenditure Share|Crops|Other crops (USD/USD)
## Household Expenditure|Food|Expenditure Share|Crops|Sugar crops (USD/USD)
## Household Expenditure|Food|Expenditure Share|Fish (USD/USD)
## Household Expenditure|Food|Expenditure Share|Livestock products (USD/USD)
## Household Expenditure|Food|Expenditure Share|Secondary products (USD/USD)
## Trade|Net-Trade|Crop residues (Mt DM/yr)
## Trade|Net-Trade|Forage (Mt DM/yr)
## Trade|Net-Trade|Forest products (Mt DM/yr)
## Trade|Net-Trade|Pasture (Mt DM/yr)
## Trade|Net-Trade|Crop residues|Non fibrous crop residues (Mt DM/yr)
## Trade|Net-Trade|Crop residues|Other fibrous crop residues (Mt DM/yr)
## Trade|Net-Trade|Crop residues|Straw (Mt DM/yr)
## Trade|Net-Trade|Crops|Oil crops|Oilpalms (Mt DM/yr)
## Trade|Net-Trade|Forest products|Industrial roundwood (Mt DM/yr)
## Trade|Net-Trade|Forest products|Wood fuel (Mt DM/yr)
## Trade|Self-sufficiency|Bioenergy crops (1)
## Trade|Self-sufficiency|Forest products (1)
## Trade|Self-sufficiency|Forest products|Industrial roundwood (1)
## Trade|Self-sufficiency|Forest products|Wood fuel (1)
## Trade|Self-sufficiency|Secondary products (1)
## Trade|Self-sufficiency|Secondary products|Microbial protein (1)
## Demand|Feed|Feed for Aquaculture (Mt DM/yr)
## Demand|Feed|Feed for Dairy (Mt DM/yr)
## Demand|Feed|Feed for Eggs (Mt DM/yr)
## Demand|Feed|Feed for Monogastric meat (Mt DM/yr)
## Demand|Feed|Feed for Poultry meat (Mt DM/yr)
## Demand|Feed|Feed for Ruminant meat (Mt DM/yr)
## Demand|Feed|Feed for Aquaculture|Bioenergy crops (Mt DM/yr)
## Demand|Feed|Feed for Aquaculture|Crop residues (Mt DM/yr)

```

```

## Demand|Feed|Feed for Aquaculture|Crops (Mt DM/yr)
## Demand|Feed|Feed for Aquaculture|Fish (Mt DM/yr)
## Demand|Feed|Feed for Aquaculture|Forage (Mt DM/yr)
## Demand|Feed|Feed for Aquaculture|Forest products (Mt DM/yr)
## Demand|Feed|Feed for Aquaculture|Livestock products (Mt DM/yr)
## Demand|Feed|Feed for Aquaculture|Pasture (Mt DM/yr)
## Demand|Feed|Feed for Aquaculture|Secondary products (Mt DM/yr)
## Demand|Feed|Feed for Aquaculture|Crop residues|Non fibrous crop residues (Mt DM/yr)
## Demand|Feed|Feed for Aquaculture|Crop residues|Other fibrous crop residues (Mt DM/yr)
## Demand|Feed|Feed for Aquaculture|Crop residues|Straw (Mt DM/yr)
## Demand|Feed|Feed for Aquaculture|Crops|Cereals (Mt DM/yr)
## Demand|Feed|Feed for Aquaculture|Crops|Oil crops (Mt DM/yr)
## Demand|Feed|Feed for Aquaculture|Crops|Other crops (Mt DM/yr)
## Demand|Feed|Feed for Aquaculture|Crops|Sugar crops (Mt DM/yr)
## Demand|Feed|Feed for Aquaculture|Crops|Cereals|Maize (Mt DM/yr)
## Demand|Feed|Feed for Aquaculture|Crops|Cereals|Rice (Mt DM/yr)
## Demand|Feed|Feed for Aquaculture|Crops|Cereals|Temperate cereals (Mt DM/yr)
## Demand|Feed|Feed for Aquaculture|Crops|Cereals|Tropical cereals (Mt DM/yr)
## Demand|Feed|Feed for Aquaculture|Crops|Oil crops|Cotton seed (Mt DM/yr)
## Demand|Feed|Feed for Aquaculture|Crops|Oil crops|Groundnuts (Mt DM/yr)
## Demand|Feed|Feed for Aquaculture|Crops|Oil crops|Oilpalms (Mt DM/yr)
## Demand|Feed|Feed for Aquaculture|Crops|Oil crops|Other oil crops (incl rapeseed) (Mt DM/yr)
## Demand|Feed|Feed for Aquaculture|Crops|Oil crops|Soybean (Mt DM/yr)
## Demand|Feed|Feed for Aquaculture|Crops|Oil crops|Sunflower (Mt DM/yr)
## Demand|Feed|Feed for Aquaculture|Crops|Other crops|Fruits Vegetables Nuts (Mt DM/yr)
## Demand|Feed|Feed for Aquaculture|Crops|Other crops|Potatoes (Mt DM/yr)
## Demand|Feed|Feed for Aquaculture|Crops|Other crops|Pulses (Mt DM/yr)
## Demand|Feed|Feed for Aquaculture|Crops|Other crops|Tropical roots (Mt DM/yr)
## Demand|Feed|Feed for Aquaculture|Crops|Sugar crops|Sugar beet (Mt DM/yr)
## Demand|Feed|Feed for Aquaculture|Crops|Sugar crops|Sugar cane (Mt DM/yr)
## Demand|Feed|Feed for Aquaculture|Forest products|Industrial roundwood (Mt DM/yr)
## Demand|Feed|Feed for Aquaculture|Forest products|Wood fuel (Mt DM/yr)
## Demand|Feed|Feed for Aquaculture|Livestock products|Dairy (Mt DM/yr)
## Demand|Feed|Feed for Aquaculture|Livestock products|Eggs (Mt DM/yr)
## Demand|Feed|Feed for Aquaculture|Livestock products|Monogastric meat (Mt DM/yr)
## Demand|Feed|Feed for Aquaculture|Livestock products|Poultry meat (Mt DM/yr)
## Demand|Feed|Feed for Aquaculture|Livestock products|Ruminant meat (Mt DM/yr)
## Demand|Feed|Feed for Aquaculture|Secondary products|Alcoholic beverages (Mt DM/yr)
## Demand|Feed|Feed for Aquaculture|Secondary products|Brans (Mt DM/yr)
## Demand|Feed|Feed for Aquaculture|Secondary products|Cotton lint (Mt DM/yr)
## Demand|Feed|Feed for Aquaculture|Secondary products|Distillers grains (Mt DM/yr)
## Demand|Feed|Feed for Aquaculture|Secondary products|Ethanol (Mt DM/yr)
## Demand|Feed|Feed for Aquaculture|Secondary products|Microbial protein (Mt DM/yr)
## Demand|Feed|Feed for Aquaculture|Secondary products|Molasses (Mt DM/yr)
## Demand|Feed|Feed for Aquaculture|Secondary products|Oilcakes (Mt DM/yr)
## Demand|Feed|Feed for Aquaculture|Secondary products|Oils (Mt DM/yr)
## Demand|Feed|Feed for Aquaculture|Secondary products|Sugar (Mt DM/yr)
## Demand|Feed|Feed for Dairy|Bioenergy crops (Mt DM/yr)
## Demand|Feed|Feed for Dairy|Crop residues (Mt DM/yr)
## Demand|Feed|Feed for Dairy|Crops (Mt DM/yr)
## Demand|Feed|Feed for Dairy|Fish (Mt DM/yr)
## Demand|Feed|Feed for Dairy|Forage (Mt DM/yr)
## Demand|Feed|Feed for Dairy|Forest products (Mt DM/yr)
## Demand|Feed|Feed for Dairy|Livestock products (Mt DM/yr)
## Demand|Feed|Feed for Dairy|Pasture (Mt DM/yr)
## Demand|Feed|Feed for Dairy|Secondary products (Mt DM/yr)
## Demand|Feed|Feed for Dairy|Crop residues|Non fibrous crop residues (Mt DM/yr)
## Demand|Feed|Feed for Dairy|Crop residues|Other fibrous crop residues (Mt DM/yr)
## Demand|Feed|Feed for Dairy|Crop residues|Straw (Mt DM/yr)
## Demand|Feed|Feed for Dairy|Crops|Cereals (Mt DM/yr)

```

```

## Demand|Feed|Feed for Dairy|Crops|Oil crops (Mt DM/yr)
## Demand|Feed|Feed for Dairy|Crops|Other crops (Mt DM/yr)
## Demand|Feed|Feed for Dairy|Crops|Sugar crops (Mt DM/yr)
## Demand|Feed|Feed for Dairy|Crops|Cereals|Maize (Mt DM/yr)
## Demand|Feed|Feed for Dairy|Crops|Cereals|Rice (Mt DM/yr)
## Demand|Feed|Feed for Dairy|Crops|Cereals|Temperate cereals (Mt DM/yr)
## Demand|Feed|Feed for Dairy|Crops|Cereals|Tropical cereals (Mt DM/yr)
## Demand|Feed|Feed for Dairy|Crops|Oil crops|Cotton seed (Mt DM/yr)
## Demand|Feed|Feed for Dairy|Crops|Oil crops|Groundnuts (Mt DM/yr)
## Demand|Feed|Feed for Dairy|Crops|Oil crops|Oilpalms (Mt DM/yr)
## Demand|Feed|Feed for Dairy|Crops|Oil crops|Other oil crops (incl rapeseed) (Mt DM/yr)
## Demand|Feed|Feed for Dairy|Crops|Oil crops|Soybean (Mt DM/yr)
## Demand|Feed|Feed for Dairy|Crops|Oil crops|Sunflower (Mt DM/yr)
## Demand|Feed|Feed for Dairy|Crops|Other crops|Fruits Vegetables Nuts (Mt DM/yr)
## Demand|Feed|Feed for Dairy|Crops|Other crops|Potatoes (Mt DM/yr)
## Demand|Feed|Feed for Dairy|Crops|Other crops|Pulses (Mt DM/yr)
## Demand|Feed|Feed for Dairy|Crops|Other crops|Tropical roots (Mt DM/yr)
## Demand|Feed|Feed for Dairy|Crops|Sugar crops|Sugar beet (Mt DM/yr)
## Demand|Feed|Feed for Dairy|Crops|Sugar crops|Sugar cane (Mt DM/yr)
## Demand|Feed|Feed for Dairy|Forest products|Industrial roundwood (Mt DM/yr)
## Demand|Feed|Feed for Dairy|Forest products|Wood fuel (Mt DM/yr)
## Demand|Feed|Feed for Dairy|Livestock products|Dairy (Mt DM/yr)
## Demand|Feed|Feed for Dairy|Livestock products|Eggs (Mt DM/yr)
## Demand|Feed|Feed for Dairy|Livestock products|Monogastric meat (Mt DM/yr)
## Demand|Feed|Feed for Dairy|Livestock products|Poultry meat (Mt DM/yr)
## Demand|Feed|Feed for Dairy|Livestock products|Ruminant meat (Mt DM/yr)
## Demand|Feed|Feed for Dairy|Secondary products|Alcoholic beverages (Mt DM/yr)
## Demand|Feed|Feed for Dairy|Secondary products|Brans (Mt DM/yr)
## Demand|Feed|Feed for Dairy|Secondary products|Cotton lint (Mt DM/yr)
## Demand|Feed|Feed for Dairy|Secondary products|Distillers grains (Mt DM/yr)
## Demand|Feed|Feed for Dairy|Secondary products|Ethanol (Mt DM/yr)
## Demand|Feed|Feed for Dairy|Secondary products|Microbial protein (Mt DM/yr)
## Demand|Feed|Feed for Dairy|Secondary products|Molasses (Mt DM/yr)
## Demand|Feed|Feed for Dairy|Secondary products|Oilcakes (Mt DM/yr)
## Demand|Feed|Feed for Dairy|Secondary products|Oils (Mt DM/yr)
## Demand|Feed|Feed for Dairy|Secondary products|Sugar (Mt DM/yr)
## Demand|Feed|Feed for Eggs|Bioenergy crops (Mt DM/yr)
## Demand|Feed|Feed for Eggs|Crop residues (Mt DM/yr)
## Demand|Feed|Feed for Eggs|Crops (Mt DM/yr)
## Demand|Feed|Feed for Eggs|Fish (Mt DM/yr)
## Demand|Feed|Feed for Eggs|Forage (Mt DM/yr)
## Demand|Feed|Feed for Eggs|Forest products (Mt DM/yr)
## Demand|Feed|Feed for Eggs|Livestock products (Mt DM/yr)
## Demand|Feed|Feed for Eggs|Pasture (Mt DM/yr)
## Demand|Feed|Feed for Eggs|Secondary products (Mt DM/yr)
## Demand|Feed|Feed for Eggs|Crop residues|Non fibrous crop residues (Mt DM/yr)
## Demand|Feed|Feed for Eggs|Crop residues|Other fibrous crop residues (Mt DM/yr)
## Demand|Feed|Feed for Eggs|Crop residues|Straw (Mt DM/yr)
## Demand|Feed|Feed for Eggs|Crops|Cereals (Mt DM/yr)
## Demand|Feed|Feed for Eggs|Crops|Oil crops (Mt DM/yr)
## Demand|Feed|Feed for Eggs|Crops|Other crops (Mt DM/yr)
## Demand|Feed|Feed for Eggs|Crops|Sugar crops (Mt DM/yr)
## Demand|Feed|Feed for Eggs|Crops|Cereals|Maize (Mt DM/yr)
## Demand|Feed|Feed for Eggs|Crops|Cereals|Rice (Mt DM/yr)
## Demand|Feed|Feed for Eggs|Crops|Cereals|Temperate cereals (Mt DM/yr)
## Demand|Feed|Feed for Eggs|Crops|Cereals|Tropical cereals (Mt DM/yr)
## Demand|Feed|Feed for Eggs|Crops|Oil crops|Cotton seed (Mt DM/yr)
## Demand|Feed|Feed for Eggs|Crops|Oil crops|Groundnuts (Mt DM/yr)
## Demand|Feed|Feed for Eggs|Crops|Oil crops|Oilpalms (Mt DM/yr)
## Demand|Feed|Feed for Eggs|Crops|Oil crops|Other oil crops (incl rapeseed) (Mt DM/yr)

```

```

## Demand|Feed|Feed for Eggs|Crops|Oil crops|Soybean (Mt DM/yr)
## Demand|Feed|Feed for Eggs|Crops|Oil crops|Sunflower (Mt DM/yr)
## Demand|Feed|Feed for Eggs|Crops|Other crops|Fruits Vegetables Nuts (Mt DM/yr)
## Demand|Feed|Feed for Eggs|Crops|Other crops|Potatoes (Mt DM/yr)
## Demand|Feed|Feed for Eggs|Crops|Other crops|Pulses (Mt DM/yr)
## Demand|Feed|Feed for Eggs|Crops|Other crops|Tropical roots (Mt DM/yr)
## Demand|Feed|Feed for Eggs|Crops|Sugar crops|Sugar beet (Mt DM/yr)
## Demand|Feed|Feed for Eggs|Crops|Sugar crops|Sugar cane (Mt DM/yr)
## Demand|Feed|Feed for Eggs|Forest products|Industrial roundwood (Mt DM/yr)
## Demand|Feed|Feed for Eggs|Forest products|Wood fuel (Mt DM/yr)
## Demand|Feed|Feed for Eggs|Livestock products|Dairy (Mt DM/yr)
## Demand|Feed|Feed for Eggs|Livestock products|Eggs (Mt DM/yr)
## Demand|Feed|Feed for Eggs|Livestock products|Monogastric meat (Mt DM/yr)
## Demand|Feed|Feed for Eggs|Livestock products|Poultry meat (Mt DM/yr)
## Demand|Feed|Feed for Eggs|Livestock products|Ruminant meat (Mt DM/yr)
## Demand|Feed|Feed for Eggs|Secondary products|Alcoholic beverages (Mt DM/yr)
## Demand|Feed|Feed for Eggs|Secondary products|Brans (Mt DM/yr)
## Demand|Feed|Feed for Eggs|Secondary products|Cotton lint (Mt DM/yr)
## Demand|Feed|Feed for Eggs|Secondary products|Distillers grains (Mt DM/yr)
## Demand|Feed|Feed for Eggs|Secondary products|Ethanol (Mt DM/yr)
## Demand|Feed|Feed for Eggs|Secondary products|Microbial protein (Mt DM/yr)
## Demand|Feed|Feed for Eggs|Secondary products|Molasses (Mt DM/yr)
## Demand|Feed|Feed for Eggs|Secondary products|Oilcakes (Mt DM/yr)
## Demand|Feed|Feed for Eggs|Secondary products|Oils (Mt DM/yr)
## Demand|Feed|Feed for Eggs|Secondary products|Sugar (Mt DM/yr)
## Demand|Feed|Feed for Monogastric meat|Bioenergy crops (Mt DM/yr)
## Demand|Feed|Feed for Monogastric meat|Crop residues (Mt DM/yr)
## Demand|Feed|Feed for Monogastric meat|Crops (Mt DM/yr)
## Demand|Feed|Feed for Monogastric meat|Fish (Mt DM/yr)
## Demand|Feed|Feed for Monogastric meat|Forage (Mt DM/yr)
## Demand|Feed|Feed for Monogastric meat|Forest products (Mt DM/yr)
## Demand|Feed|Feed for Monogastric meat|Livestock products (Mt DM/yr)
## Demand|Feed|Feed for Monogastric meat|Pasture (Mt DM/yr)
## Demand|Feed|Feed for Monogastric meat|Secondary products (Mt DM/yr)
## Demand|Feed|Feed for Monogastric meat|Crop residues|Non fibrous crop residues (Mt DM/yr)
## Demand|Feed|Feed for Monogastric meat|Crop residues|Other fibrous crop residues (Mt DM/yr)
## Demand|Feed|Feed for Monogastric meat|Crop residues|Straw (Mt DM/yr)
## Demand|Feed|Feed for Monogastric meat|Crops|Cereals (Mt DM/yr)
## Demand|Feed|Feed for Monogastric meat|Crops|Oil crops (Mt DM/yr)
## Demand|Feed|Feed for Monogastric meat|Crops|Other crops (Mt DM/yr)
## Demand|Feed|Feed for Monogastric meat|Crops|Sugar crops (Mt DM/yr)
## Demand|Feed|Feed for Monogastric meat|Crops|Cereals|Maize (Mt DM/yr)
## Demand|Feed|Feed for Monogastric meat|Crops|Cereals|Rice (Mt DM/yr)
## Demand|Feed|Feed for Monogastric meat|Crops|Cereals|Temperate cereals (Mt DM/yr)
## Demand|Feed|Feed for Monogastric meat|Crops|Cereals|Tropical cereals (Mt DM/yr)
## Demand|Feed|Feed for Monogastric meat|Crops|Oil crops|Cotton seed (Mt DM/yr)
## Demand|Feed|Feed for Monogastric meat|Crops|Oil crops|Groundnuts (Mt DM/yr)
## Demand|Feed|Feed for Monogastric meat|Crops|Oil crops|Oilpalms (Mt DM/yr)
## Demand|Feed|Feed for Monogastric meat|Crops|Oil crops|Other oil crops (incl rapeseed) (Mt DM/yr)
## Demand|Feed|Feed for Monogastric meat|Crops|Oil crops|Soybean (Mt DM/yr)
## Demand|Feed|Feed for Monogastric meat|Crops|Oil crops|Sunflower (Mt DM/yr)
## Demand|Feed|Feed for Monogastric meat|Crops|Other crops|Fruits Vegetables Nuts (Mt DM/yr)
## Demand|Feed|Feed for Monogastric meat|Crops|Other crops|Potatoes (Mt DM/yr)
## Demand|Feed|Feed for Monogastric meat|Crops|Other crops|Pulses (Mt DM/yr)
## Demand|Feed|Feed for Monogastric meat|Crops|Other crops|Tropical roots (Mt DM/yr)
## Demand|Feed|Feed for Monogastric meat|Crops|Sugar crops|Sugar beet (Mt DM/yr)
## Demand|Feed|Feed for Monogastric meat|Crops|Sugar crops|Sugar cane (Mt DM/yr)
## Demand|Feed|Feed for Monogastric meat|Forest products|Industrial roundwood (Mt DM/yr)
## Demand|Feed|Feed for Monogastric meat|Forest products|Wood fuel (Mt DM/yr)
## Demand|Feed|Feed for Monogastric meat|Livestock products|Dairy (Mt DM/yr)

```

```

## Demand|Feed|Feed for Monogastric meat|Livestock products|Eggs (Mt DM/yr)
## Demand|Feed|Feed for Monogastric meat|Livestock products|Monogastric meat (Mt DM/yr)
## Demand|Feed|Feed for Monogastric meat|Livestock products|Poultry meat (Mt DM/yr)
## Demand|Feed|Feed for Monogastric meat|Livestock products|Ruminant meat (Mt DM/yr)
## Demand|Feed|Feed for Monogastric meat|Secondary products|Alcoholic beverages (Mt DM/yr)
## Demand|Feed|Feed for Monogastric meat|Secondary products|Brans (Mt DM/yr)
## Demand|Feed|Feed for Monogastric meat|Secondary products|Cotton lint (Mt DM/yr)
## Demand|Feed|Feed for Monogastric meat|Secondary products|Distillers grains (Mt DM/yr)
## Demand|Feed|Feed for Monogastric meat|Secondary products|Ethanol (Mt DM/yr)
## Demand|Feed|Feed for Monogastric meat|Secondary products|Microbial protein (Mt DM/yr)
## Demand|Feed|Feed for Monogastric meat|Secondary products|Molasses (Mt DM/yr)
## Demand|Feed|Feed for Monogastric meat|Secondary products|Oilcakes (Mt DM/yr)
## Demand|Feed|Feed for Monogastric meat|Secondary products|Oils (Mt DM/yr)
## Demand|Feed|Feed for Monogastric meat|Secondary products|Sugar (Mt DM/yr)
## Demand|Feed|Feed for Poultry meat|Bioenergy crops (Mt DM/yr)
## Demand|Feed|Feed for Poultry meat|Crop residues (Mt DM/yr)
## Demand|Feed|Feed for Poultry meat|Crops (Mt DM/yr)
## Demand|Feed|Feed for Poultry meat|Fish (Mt DM/yr)
## Demand|Feed|Feed for Poultry meat|Forage (Mt DM/yr)
## Demand|Feed|Feed for Poultry meat|Forest products (Mt DM/yr)
## Demand|Feed|Feed for Poultry meat|Livestock products (Mt DM/yr)
## Demand|Feed|Feed for Poultry meat|Pasture (Mt DM/yr)
## Demand|Feed|Feed for Poultry meat|Secondary products (Mt DM/yr)
## Demand|Feed|Feed for Poultry meat|Crop residues|Non fibrous crop residues (Mt DM/yr)
## Demand|Feed|Feed for Poultry meat|Crop residues|Other fibrous crop residues (Mt DM/yr)
## Demand|Feed|Feed for Poultry meat|Crop residues|Straw (Mt DM/yr)
## Demand|Feed|Feed for Poultry meat|Crops|Cereals (Mt DM/yr)
## Demand|Feed|Feed for Poultry meat|Crops|Oil crops (Mt DM/yr)
## Demand|Feed|Feed for Poultry meat|Crops|Other crops (Mt DM/yr)
## Demand|Feed|Feed for Poultry meat|Crops|Sugar crops (Mt DM/yr)
## Demand|Feed|Feed for Poultry meat|Crops|Cereals|Maize (Mt DM/yr)
## Demand|Feed|Feed for Poultry meat|Crops|Cereals|Rice (Mt DM/yr)
## Demand|Feed|Feed for Poultry meat|Crops|Cereals|Temperate cereals (Mt DM/yr)
## Demand|Feed|Feed for Poultry meat|Crops|Cereals|Tropical cereals (Mt DM/yr)
## Demand|Feed|Feed for Poultry meat|Crops|Oil crops|Cotton seed (Mt DM/yr)
## Demand|Feed|Feed for Poultry meat|Crops|Oil crops|Groundnuts (Mt DM/yr)
## Demand|Feed|Feed for Poultry meat|Crops|Oil crops|Oilpalms (Mt DM/yr)
## Demand|Feed|Feed for Poultry meat|Crops|Oil crops|Other oil crops (incl rapeseed) (Mt DM/yr)
## Demand|Feed|Feed for Poultry meat|Crops|Oil crops|Soybean (Mt DM/yr)
## Demand|Feed|Feed for Poultry meat|Crops|Oil crops|Sunflower (Mt DM/yr)
## Demand|Feed|Feed for Poultry meat|Crops|Other crops|Fruits Vegetables Nuts (Mt DM/yr)
## Demand|Feed|Feed for Poultry meat|Crops|Other crops|Potatoes (Mt DM/yr)
## Demand|Feed|Feed for Poultry meat|Crops|Other crops|Pulses (Mt DM/yr)
## Demand|Feed|Feed for Poultry meat|Crops|Other crops|Tropical roots (Mt DM/yr)
## Demand|Feed|Feed for Poultry meat|Crops|Sugar crops|Sugar beet (Mt DM/yr)
## Demand|Feed|Feed for Poultry meat|Crops|Sugar crops|Sugar cane (Mt DM/yr)
## Demand|Feed|Feed for Poultry meat|Forest products|Industrial roundwood (Mt DM/yr)
## Demand|Feed|Feed for Poultry meat|Forest products|Wood fuel (Mt DM/yr)
## Demand|Feed|Feed for Poultry meat|Livestock products|Dairy (Mt DM/yr)
## Demand|Feed|Feed for Poultry meat|Livestock products|Eggs (Mt DM/yr)
## Demand|Feed|Feed for Poultry meat|Livestock products|Monogastric meat (Mt DM/yr)
## Demand|Feed|Feed for Poultry meat|Livestock products|Poultry meat (Mt DM/yr)
## Demand|Feed|Feed for Poultry meat|Livestock products|Ruminant meat (Mt DM/yr)
## Demand|Feed|Feed for Poultry meat|Secondary products|Alcoholic beverages (Mt DM/yr)
## Demand|Feed|Feed for Poultry meat|Secondary products|Brans (Mt DM/yr)
## Demand|Feed|Feed for Poultry meat|Secondary products|Cotton lint (Mt DM/yr)
## Demand|Feed|Feed for Poultry meat|Secondary products|Distillers grains (Mt DM/yr)
## Demand|Feed|Feed for Poultry meat|Secondary products|Ethanol (Mt DM/yr)
## Demand|Feed|Feed for Poultry meat|Secondary products|Microbial protein (Mt DM/yr)
## Demand|Feed|Feed for Poultry meat|Secondary products|Molasses (Mt DM/yr)

```

```

## Demand|Feed|Feed for Poultry meat|Secondary products|Oilcakes (Mt DM/yr)
## Demand|Feed|Feed for Poultry meat|Secondary products|Oils (Mt DM/yr)
## Demand|Feed|Feed for Poultry meat|Secondary products|Sugar (Mt DM/yr)
## Demand|Feed|Feed for Ruminant meat|Bioenergy crops (Mt DM/yr)
## Demand|Feed|Feed for Ruminant meat|Crop residues (Mt DM/yr)
## Demand|Feed|Feed for Ruminant meat|Crops (Mt DM/yr)
## Demand|Feed|Feed for Ruminant meat|Fish (Mt DM/yr)
## Demand|Feed|Feed for Ruminant meat|Forage (Mt DM/yr)
## Demand|Feed|Feed for Ruminant meat|Forest products (Mt DM/yr)
## Demand|Feed|Feed for Ruminant meat|Livestock products (Mt DM/yr)
## Demand|Feed|Feed for Ruminant meat|Pasture (Mt DM/yr)
## Demand|Feed|Feed for Ruminant meat|Secondary products (Mt DM/yr)
## Demand|Feed|Feed for Ruminant meat|Crop residues|Non fibrous crop residues (Mt DM/yr)
## Demand|Feed|Feed for Ruminant meat|Crop residues|Other fibrous crop residues (Mt DM/yr)
## Demand|Feed|Feed for Ruminant meat|Crop residues|Straw (Mt DM/yr)
## Demand|Feed|Feed for Ruminant meat|Crops|Cereals (Mt DM/yr)
## Demand|Feed|Feed for Ruminant meat|Crops|Oil crops (Mt DM/yr)
## Demand|Feed|Feed for Ruminant meat|Crops|Other crops (Mt DM/yr)
## Demand|Feed|Feed for Ruminant meat|Crops|Sugar crops (Mt DM/yr)
## Demand|Feed|Feed for Ruminant meat|Crops|Cereals|Maize (Mt DM/yr)
## Demand|Feed|Feed for Ruminant meat|Crops|Cereals|Rice (Mt DM/yr)
## Demand|Feed|Feed for Ruminant meat|Crops|Cereals|Temperate cereals (Mt DM/yr)
## Demand|Feed|Feed for Ruminant meat|Crops|Cereals|Tropical cereals (Mt DM/yr)
## Demand|Feed|Feed for Ruminant meat|Crops|Oil crops|Cotton seed (Mt DM/yr)
## Demand|Feed|Feed for Ruminant meat|Crops|Oil crops|Groundnuts (Mt DM/yr)
## Demand|Feed|Feed for Ruminant meat|Crops|Oil crops|Oilpalms (Mt DM/yr)
## Demand|Feed|Feed for Ruminant meat|Crops|Oil crops|Other oil crops (incl rapeseed) (Mt DM/yr)
## Demand|Feed|Feed for Ruminant meat|Crops|Oil crops|Soybean (Mt DM/yr)
## Demand|Feed|Feed for Ruminant meat|Crops|Oil crops|Sunflower (Mt DM/yr)
## Demand|Feed|Feed for Ruminant meat|Crops|Other crops|Fruits Vegetables Nuts (Mt DM/yr)
## Demand|Feed|Feed for Ruminant meat|Crops|Other crops|Potatoes (Mt DM/yr)
## Demand|Feed|Feed for Ruminant meat|Crops|Other crops|Pulses (Mt DM/yr)
## Demand|Feed|Feed for Ruminant meat|Crops|Other crops|Tropical roots (Mt DM/yr)
## Demand|Feed|Feed for Ruminant meat|Crops|Sugar crops|Sugar beet (Mt DM/yr)
## Demand|Feed|Feed for Ruminant meat|Crops|Sugar crops|Sugar cane (Mt DM/yr)
## Demand|Feed|Feed for Ruminant meat|Forest products|Industrial roundwood (Mt DM/yr)
## Demand|Feed|Feed for Ruminant meat|Forest products|Wood fuel (Mt DM/yr)
## Demand|Feed|Feed for Ruminant meat|Livestock products|Dairy (Mt DM/yr)
## Demand|Feed|Feed for Ruminant meat|Livestock products|Eggs (Mt DM/yr)
## Demand|Feed|Feed for Ruminant meat|Livestock products|Monogastric meat (Mt DM/yr)
## Demand|Feed|Feed for Ruminant meat|Livestock products|Poultry meat (Mt DM/yr)
## Demand|Feed|Feed for Ruminant meat|Livestock products|Ruminant meat (Mt DM/yr)
## Demand|Feed|Feed for Ruminant meat|Secondary products|Alcoholic beverages (Mt DM/yr)
## Demand|Feed|Feed for Ruminant meat|Secondary products|Brans (Mt DM/yr)
## Demand|Feed|Feed for Ruminant meat|Secondary products|Cotton lint (Mt DM/yr)
## Demand|Feed|Feed for Ruminant meat|Secondary products|Distillers grains (Mt DM/yr)
## Demand|Feed|Feed for Ruminant meat|Secondary products|Ethanol (Mt DM/yr)
## Demand|Feed|Feed for Ruminant meat|Secondary products|Microbial protein (Mt DM/yr)
## Demand|Feed|Feed for Ruminant meat|Secondary products|Molasses (Mt DM/yr)
## Demand|Feed|Feed for Ruminant meat|Secondary products|Oilcakes (Mt DM/yr)
## Demand|Feed|Feed for Ruminant meat|Secondary products|Oils (Mt DM/yr)
## Demand|Feed|Feed for Ruminant meat|Secondary products|Sugar (Mt DM/yr)
## Demand|Processing|Distiilling (Mt DM/yr)
## Demand|Processing|Extracting (Mt DM/yr)
## Demand|Processing|Fermentation (Mt DM/yr)
## Demand|Processing|Refining (Mt DM/yr)
## Demand|Processing|Distiilling|Crops (Mt DM/yr)
## Demand|Processing|Distiilling|Crops|Cereals (Mt DM/yr)
## Demand|Processing|Distiilling|Crops|Sugar crops (Mt DM/yr)
## Demand|Processing|Distiilling|Crops|Cereals|Maize (Mt DM/yr)

```

```

## Demand|Processing|Distiilling|Crops|Cereals|Temperate cereals (Mt DM/yr)
## Demand|Processing|Distiilling|Crops|Sugar crops|Sugar cane (Mt DM/yr)
## Demand|Processing|Extracting|Crops (Mt DM/yr)
## Demand|Processing|Extracting|Crops|Oil crops (Mt DM/yr)
## Demand|Processing|Extracting|Crops|Oil crops|Cotton seed (Mt DM/yr)
## Demand|Processing|Extracting|Crops|Oil crops|Groundnuts (Mt DM/yr)
## Demand|Processing|Extracting|Crops|Oil crops|Oilpalms (Mt DM/yr)
## Demand|Processing|Extracting|Crops|Oil crops|Other oil crops (incl rapeseed) (Mt DM/yr)
## Demand|Processing|Extracting|Crops|Oil crops|Soybean (Mt DM/yr)
## Demand|Processing|Extracting|Crops|Oil crops|Sunflower (Mt DM/yr)
## Demand|Processing|Fermentation|Crops (Mt DM/yr)
## Demand|Processing|Fermentation|Secondary products (Mt DM/yr)
## Demand|Processing|Fermentation|Crops|Cereals (Mt DM/yr)
## Demand|Processing|Fermentation|Crops|Other crops (Mt DM/yr)
## Demand|Processing|Fermentation|Crops|Cereals|Rice (Mt DM/yr)
## Demand|Processing|Fermentation|Crops|Cereals|Temperate cereals (Mt DM/yr)
## Demand|Processing|Fermentation|Crops|Cereals|Tropical cereals (Mt DM/yr)
## Demand|Processing|Fermentation|Crops|Other crops|Fruits Vegetables Nuts (Mt DM/yr)
## Demand|Processing|Fermentation|Crops|Other crops|Potatoes (Mt DM/yr)
## Demand|Processing|Fermentation|Crops|Other crops|Tropical roots (Mt DM/yr)
## Demand|Processing|Fermentation|Secondary products|Brans (Mt DM/yr)
## Demand|Processing|Fermentation|Secondary products|Molasses (Mt DM/yr)
## Demand|Processing|Fermentation|Secondary products|Sugar (Mt DM/yr)
## Demand|Processing|Refining|Crops (Mt DM/yr)
## Demand|Processing|Refining|Crops|Cereals (Mt DM/yr)
## Demand|Processing|Refining|Crops|Sugar crops (Mt DM/yr)
## Demand|Processing|Refining|Crops|Cereals|Maize (Mt DM/yr)
## Demand|Processing|Refining|Crops|Sugar crops|Sugar beet (Mt DM/yr)
## Demand|Processing|Refining|Crops|Sugar crops|Sugar cane (Mt DM/yr)
## Production|Secondary Products|Alcoholic beverages|Brans (Mt DM/yr)
## Production|Secondary Products|Alcoholic beverages|Fruits Vegetables Nuts (Mt DM/yr)
## Production|Secondary Products|Alcoholic beverages|Molasses (Mt DM/yr)
## Production|Secondary Products|Alcoholic beverages|Potatoes (Mt DM/yr)
## Production|Secondary Products|Alcoholic beverages|Rice (Mt DM/yr)
## Production|Secondary Products|Alcoholic beverages|Sugar (Mt DM/yr)
## Production|Secondary Products|Alcoholic beverages|Temperate cereals (Mt DM/yr)
## Production|Secondary Products|Alcoholic beverages|Tropical cereals (Mt DM/yr)
## Production|Secondary Products|Alcoholic beverages|Tropical roots (Mt DM/yr)
## Production|Secondary Products|Brans|Maize (Mt DM/yr)
## Production|Secondary Products|Brans|Rice (Mt DM/yr)
## Production|Secondary Products|Brans|Temperate cereals (Mt DM/yr)
## Production|Secondary Products|Brans|Tropical cereals (Mt DM/yr)
## Production|Secondary Products|Distillers grains|Maize (Mt DM/yr)
## Production|Secondary Products|Distillers grains|Temperate cereals (Mt DM/yr)
## Production|Secondary Products|Ethanol|Maize (Mt DM/yr)
## Production|Secondary Products|Ethanol|Sugar cane (Mt DM/yr)
## Production|Secondary Products|Ethanol|Temperate cereals (Mt DM/yr)
## Production|Secondary Products|Molasses|Sugar beet (Mt DM/yr)
## Production|Secondary Products|Molasses|Sugar cane (Mt DM/yr)
## Production|Secondary Products|Oilcakes|Cotton seed (Mt DM/yr)
## Production|Secondary Products|Oilcakes|Groundnuts (Mt DM/yr)
## Production|Secondary Products|Oilcakes|Oilpalms (Mt DM/yr)
## Production|Secondary Products|Oilcakes|Other oil crops (incl rapeseed) (Mt DM/yr)
## Production|Secondary Products|Oilcakes|Soybean (Mt DM/yr)
## Production|Secondary Products|Oilcakes|Sunflower (Mt DM/yr)
## Production|Secondary Products|Oils|Cotton seed (Mt DM/yr)
## Production|Secondary Products|Oils|Groundnuts (Mt DM/yr)
## Production|Secondary Products|Oils|Maize (Mt DM/yr)
## Production|Secondary Products|Oils|Oilpalms (Mt DM/yr)
## Production|Secondary Products|Oils|Other oil crops (incl rapeseed) (Mt DM/yr)

```



```

## Production|Secondary Products|Oils|Rice (Mt DM/yr)
## Production|Secondary Products|Oils|Soybean (Mt DM/yr)
## Production|Secondary Products|Oils|Sunflower (Mt DM/yr)
## Production|Secondary Products|Sugar|Maize (Mt DM/yr)
## Production|Secondary Products|Sugar|Sugar beet (Mt DM/yr)
## Production|Secondary Products|Sugar|Sugar cane (Mt DM/yr)
## Resources|Land Cover (million ha wrt 1995)
## Resources|Nitrogen|Cropland Budget|Inputs|Manure From Grazing (Mt Nr/yr)
## Resources|Nitrogen|Pasture Budget|Balance|Balanceflow (Mt Nr/yr)
## Resources|Nitrogen|Manure|Manure Collected As Fuel|Dairy (Mt Nr/yr)
## Resources|Nitrogen|Manure|Manure Collected As Fuel|Eggs (Mt Nr/yr)
## Resources|Nitrogen|Manure|Manure Collected As Fuel|Monogastric meat (Mt Nr/yr)
## Resources|Nitrogen|Manure|Manure Collected As Fuel|Poultry meat (Mt Nr/yr)
## Resources|Nitrogen|Manure|Manure Collected As Fuel|Ruminant meat (Mt Nr/yr)
## Resources|Nitrogen|Manure|Manure From Grazing|Dairy (Mt Nr/yr)
## Resources|Nitrogen|Manure|Manure From Grazing|Eggs (Mt Nr/yr)
## Resources|Nitrogen|Manure|Manure From Grazing|Monogastric meat (Mt Nr/yr)
## Resources|Nitrogen|Manure|Manure From Grazing|Poultry meat (Mt Nr/yr)
## Resources|Nitrogen|Manure|Manure From Grazing|Ruminant meat (Mt Nr/yr)
## Resources|Nitrogen|Manure|Manure From Stubble Grazing|Dairy (Mt Nr/yr)
## Resources|Nitrogen|Manure|Manure From Stubble Grazing|Eggs (Mt Nr/yr)
## Resources|Nitrogen|Manure|Manure From Stubble Grazing|Monogastric meat (Mt Nr/yr)
## Resources|Nitrogen|Manure|Manure From Stubble Grazing|Poultry meat (Mt Nr/yr)
## Resources|Nitrogen|Manure|Manure From Stubble Grazing|Ruminant meat (Mt Nr/yr)
## Resources|Nitrogen|Manure|Manure In Confinements|Dairy (Mt Nr/yr)
## Resources|Nitrogen|Manure|Manure In Confinements|Eggs (Mt Nr/yr)
## Resources|Nitrogen|Manure|Manure In Confinements|Monogastric meat (Mt Nr/yr)
## Resources|Nitrogen|Manure|Manure In Confinements|Poultry meat (Mt Nr/yr)
## Resources|Nitrogen|Manure|Manure In Confinements|Ruminant meat (Mt Nr/yr)
## Emissions|BC|Land| (Mt BC/yr)
## Emissions|BC|Land|Agriculture (Mt BC/yr)
## Emissions|BC|Land|Biomass Burning (Mt BC/yr)
## Emissions|BC|Land|Agriculture|Agricultural Soils (Mt BC/yr)
## Emissions|BC|Land|Agriculture|Animal Waste Management (Mt BC/yr)
## Emissions|BC|Land|Agriculture|Enteric Fermentation (Mt BC/yr)
## Emissions|BC|Land|Agriculture|Other (Mt BC/yr)
## Emissions|BC|Land|Agriculture|Rice (Mt BC/yr)
## Emissions|BC|Land|Biomass Burning|Agricultural Waste Burning (Mt BC/yr)
## Emissions|BC|Land|Biomass Burning|Deforestation Fires (Mt BC/yr)
## Emissions|BC|Land|Biomass Burning|Forest Fires (Mt BC/yr)
## Emissions|BC|Land|Biomass Burning|Peat Fires (Mt BC/yr)
## Emissions|BC|Land|Biomass Burning|Savannah Fires (Mt BC/yr)
## Emissions|CO|Land| (Mt CO/yr)
## Emissions|CO|Land|Agriculture (Mt CO/yr)
## Emissions|CO|Land|Biomass Burning (Mt CO/yr)
## Emissions|CO|Land|Agriculture|Agricultural Soils (Mt CO/yr)
## Emissions|CO|Land|Agriculture|Animal Waste Management (Mt CO/yr)
## Emissions|CO|Land|Agriculture|Enteric Fermentation (Mt CO/yr)
## Emissions|CO|Land|Agriculture|Other (Mt CO/yr)
## Emissions|CO|Land|Agriculture|Rice (Mt CO/yr)
## Emissions|CO|Land|Biomass Burning|Agricultural Waste Burning (Mt CO/yr)
## Emissions|CO|Land|Biomass Burning|Deforestation Fires (Mt CO/yr)
## Emissions|CO|Land|Biomass Burning|Forest Fires (Mt CO/yr)
## Emissions|CO|Land|Biomass Burning|Peat Fires (Mt CO/yr)
## Emissions|CO|Land|Biomass Burning|Savannah Fires (Mt CO/yr)
## Emissions|NH3-N|Land| (Mt NH3-N/yr)
## Emissions|NH3-N|Land|Agriculture (Mt NH3-N/yr)
## Emissions|NH3-N|Land|Biomass Burning (Mt NH3-N/yr)
## Emissions|NH3-N|Land|Agriculture|Agricultural Soils (Mt NH3-N/yr)
## Emissions|NH3-N|Land|Agriculture|Animal Waste Management (Mt NH3-N/yr)

```

```

## Emissions|NH3-N|Land|Agriculture|Enteric Fermentation (Mt NH3-N/yr)
## Emissions|NH3-N|Land|Agriculture|Other (Mt NH3-N/yr)
## Emissions|NH3-N|Land|Agriculture|Rice (Mt NH3-N/yr)
## Emissions|NH3-N|Land|Biomass Burning|Agricultural Waste Burning (Mt NH3-N/yr)
## Emissions|NH3-N|Land|Biomass Burning|Deforestation Fires (Mt NH3-N/yr)
## Emissions|NH3-N|Land|Biomass Burning|Forest Fires (Mt NH3-N/yr)
## Emissions|NH3-N|Land|Biomass Burning|Peat Fires (Mt NH3-N/yr)
## Emissions|NH3-N|Land|Biomass Burning|Savannah Fires (Mt NH3-N/yr)
## Emissions|NH3|Land| (Mt NH3/yr)
## Emissions|NH3|Land|Biomass Burning (Mt NH3/yr)
## Emissions|NH3|Land|Agriculture|Enteric Fermentation (Mt NH3/yr)
## Emissions|NH3|Land|Agriculture|Other (Mt NH3/yr)
## Emissions|NH3|Land|Agriculture|Rice (Mt NH3/yr)
## Emissions|NH3|Land|Biomass Burning|Agricultural Waste Burning (Mt NH3/yr)
## Emissions|NH3|Land|Biomass Burning|Deforestation Fires (Mt NH3/yr)
## Emissions|NH3|Land|Biomass Burning|Forest Fires (Mt NH3/yr)
## Emissions|NH3|Land|Biomass Burning|Peat Fires (Mt NH3/yr)
## Emissions|NH3|Land|Biomass Burning|Savannah Fires (Mt NH3/yr)
## Emissions|NMHC|Land| (Mt NMHC/yr)
## Emissions|NMHC|Land|Agriculture (Mt NMHC/yr)
## Emissions|NMHC|Land|Biomass Burning (Mt NMHC/yr)
## Emissions|NMHC|Land|Agriculture|Agricultural Soils (Mt NMHC/yr)
## Emissions|NMHC|Land|Agriculture|Animal Waste Management (Mt NMHC/yr)
## Emissions|NMHC|Land|Agriculture|Enteric Fermentation (Mt NMHC/yr)
## Emissions|NMHC|Land|Agriculture|Other (Mt NMHC/yr)
## Emissions|NMHC|Land|Agriculture|Rice (Mt NMHC/yr)
## Emissions|NMHC|Land|Biomass Burning|Agricultural Waste Burning (Mt NMHC/yr)
## Emissions|NMHC|Land|Biomass Burning|Deforestation Fires (Mt NMHC/yr)
## Emissions|NMHC|Land|Biomass Burning|Forest Fires (Mt NMHC/yr)
## Emissions|NMHC|Land|Biomass Burning|Peat Fires (Mt NMHC/yr)
## Emissions|NMHC|Land|Biomass Burning|Savannah Fires (Mt NMHC/yr)
## Emissions|NO2-N|Land| (Mt NO2-N/yr)
## Emissions|NO2-N|Land|Agriculture (Mt NO2-N/yr)
## Emissions|NO2-N|Land|Biomass Burning (Mt NO2-N/yr)
## Emissions|NO2-N|Land|Agriculture|Agricultural Soils (Mt NO2-N/yr)
## Emissions|NO2-N|Land|Agriculture|Animal Waste Management (Mt NO2-N/yr)
## Emissions|NO2-N|Land|Agriculture|Enteric Fermentation (Mt NO2-N/yr)
## Emissions|NO2-N|Land|Agriculture|Other (Mt NO2-N/yr)
## Emissions|NO2-N|Land|Agriculture|Rice (Mt NO2-N/yr)
## Emissions|NO2-N|Land|Biomass Burning|Agricultural Waste Burning (Mt NO2-N/yr)
## Emissions|NO2-N|Land|Biomass Burning|Deforestation Fires (Mt NO2-N/yr)
## Emissions|NO2-N|Land|Biomass Burning|Forest Fires (Mt NO2-N/yr)
## Emissions|NO2-N|Land|Biomass Burning|Peat Fires (Mt NO2-N/yr)
## Emissions|NO2-N|Land|Biomass Burning|Savannah Fires (Mt NO2-N/yr)
## Emissions|NO2|Land| (Mt NO2/yr)
## Emissions|NO2|Land|Biomass Burning (Mt NO2/yr)
## Emissions|NO2|Land|Agriculture|Enteric Fermentation (Mt NO2/yr)
## Emissions|NO2|Land|Agriculture|Other (Mt NO2/yr)
## Emissions|NO2|Land|Agriculture|Rice (Mt NO2/yr)
## Emissions|NO2|Land|Biomass Burning|Agricultural Waste Burning (Mt NO2/yr)
## Emissions|NO2|Land|Biomass Burning|Deforestation Fires (Mt NO2/yr)
## Emissions|NO2|Land|Biomass Burning|Forest Fires (Mt NO2/yr)
## Emissions|NO2|Land|Biomass Burning|Peat Fires (Mt NO2/yr)
## Emissions|NO2|Land|Biomass Burning|Savannah Fires (Mt NO2/yr)
## Emissions|NO3-N|Land| (Mt NO3-N/yr)
## Emissions|NO3-N|Land|Agriculture (Mt NO3-N/yr)
## Emissions|NO3-N|Land|Biomass Burning (Mt NO3-N/yr)
## Emissions|NO3-N|Land|Agriculture|Agricultural Soils (Mt NO3-N/yr)
## Emissions|NO3-N|Land|Agriculture|Animal Waste Management (Mt NO3-N/yr)
## Emissions|NO3-N|Land|Agriculture|Enteric Fermentation (Mt NO3-N/yr)

```

```

## Emissions|N03-N|Land|Agriculture|Other (Mt N03-N/yr)
## Emissions|N03-N|Land|Agriculture|Rice (Mt N03-N/yr)
## Emissions|N03-N|Land|Biomass Burning|Agricultural Waste Burning (Mt N03-N/yr)
## Emissions|N03-N|Land|Biomass Burning|Deforestation Fires (Mt N03-N/yr)
## Emissions|N03-N|Land|Biomass Burning|Forest Fires (Mt N03-N/yr)
## Emissions|N03-N|Land|Biomass Burning|Peat Fires (Mt N03-N/yr)
## Emissions|N03-N|Land|Biomass Burning|Savannah Fires (Mt N03-N/yr)
## Emissions|N03Land| (Mt N03-/yr)
## Emissions|N03Land|Biomass Burning (Mt N03-/yr)
## Emissions|N03Land|Agriculture|Enteric Fermentation (Mt N03-/yr)
## Emissions|N03Land|Agriculture|Other (Mt N03-/yr)
## Emissions|N03Land|Agriculture|Rice (Mt N03-/yr)
## Emissions|N03Land|Biomass Burning|Agricultural Waste Burning (Mt N03-/yr)
## Emissions|N03Land|Biomass Burning|Deforestation Fires (Mt N03-/yr)
## Emissions|N03Land|Biomass Burning|Forest Fires (Mt N03-/yr)
## Emissions|N03Land|Biomass Burning|Peat Fires (Mt N03-/yr)
## Emissions|N03Land|Biomass Burning|Savannah Fires (Mt N03-/yr)
## Emissions|OC|Land| (Mt OC/yr)
## Emissions|OC|Land|Agriculture (Mt OC/yr)
## Emissions|OC|Land|Biomass Burning (Mt OC/yr)
## Emissions|OC|Land|Agriculture|Agricultural Soils (Mt OC/yr)
## Emissions|OC|Land|Agriculture|Animal Waste Management (Mt OC/yr)
## Emissions|OC|Land|Agriculture|Enteric Fermentation (Mt OC/yr)
## Emissions|OC|Land|Agriculture|Other (Mt OC/yr)
## Emissions|OC|Land|Agriculture|Rice (Mt OC/yr)
## Emissions|OC|Land|Biomass Burning|Agricultural Waste Burning (Mt OC/yr)
## Emissions|OC|Land|Biomass Burning|Deforestation Fires (Mt OC/yr)
## Emissions|OC|Land|Biomass Burning|Forest Fires (Mt OC/yr)
## Emissions|OC|Land|Biomass Burning|Peat Fires (Mt OC/yr)
## Emissions|OC|Land|Biomass Burning|Savannah Fires (Mt OC/yr)
## Emissions|S02|Land| (Mt S02/yr)
## Emissions|S02|Land|Agriculture (Mt S02/yr)
## Emissions|S02|Land|Biomass Burning (Mt S02/yr)
## Emissions|S02|Land|Agriculture|Agricultural Soils (Mt S02/yr)
## Emissions|S02|Land|Agriculture|Animal Waste Management (Mt S02/yr)
## Emissions|S02|Land|Agriculture|Enteric Fermentation (Mt S02/yr)
## Emissions|S02|Land|Agriculture|Other (Mt S02/yr)
## Emissions|S02|Land|Agriculture|Rice (Mt S02/yr)
## Emissions|S02|Land|Biomass Burning|Agricultural Waste Burning (Mt S02/yr)
## Emissions|S02|Land|Biomass Burning|Deforestation Fires (Mt S02/yr)
## Emissions|S02|Land|Biomass Burning|Forest Fires (Mt S02/yr)
## Emissions|S02|Land|Biomass Burning|Peat Fires (Mt S02/yr)
## Emissions|S02|Land|Biomass Burning|Savannah Fires (Mt S02/yr)
## Emissions|N20|Land|Land Use Change (Mt N20/yr)
## Emissions|NH3|Land|Land Use Change (Mt NH3/yr)
## Emissions|NO2|Land|Land Use Change (Mt NO2/yr)
## Emissions|N03Land|Land Use Change (Mt N03-/yr)
## Emissions|CO2|Land|Land Use Change (Mt CO2/yr)
## Resources|Land Cover|Other Natural Land (million ha)
## Resources|Land Cover|Forest|Forestry|Harvested Area (million ha)
## Resources|Land Cover|Other Arable Land (million ha)
## Resources|Land Cover (million ha wrt 2005)
## Resources|Land Cover Change|Cropland (million ha wrt 2005)
## Resources|Land Cover Change|Forest (million ha wrt 2005)
## Resources|Land Cover Change|Other Land (million ha wrt 2005)
## Resources|Land Cover Change|Pastures and Rangelands (million ha wrt 2005)
## Resources|Land Cover Change|Cropland|Bioenergy crops (million ha wrt 2005)
## Resources|Land Cover Change|Forest|Managed Forest (million ha wrt 2005)
## Resources|Land Cover Change|Forest|Natural Forest (million ha wrt 2005)
## Resources|Land Cover Change|Other Natural Land (million ha wrt 2005)

```

```
## Resources|Land Cover Change|Urban Area (million ha wrt 2005)
## Resources|Land Cover Change|Forest|Forestry|Harvested Area (million ha wrt 2005)
## Resources|Land Cover Change|Other Arable Land (million ha wrt 2005)
## Prices|Agriculture|Microbial protein (US$05/tDM)
## Prices|Agriculture|Industrial roundwood (US$05/tDM)
## Prices|Agriculture|Short rotation trees (US$05/tDM)
## Prices|Agriculture|Wood fuel (US$05/tDM)
```

## Part XVIII

# Run Information

## 66 Calibration

### 66.1 Yield calibration factors

|         | CAZ  | CHA  | EUR  | IND  | JPN  | LAM  | MEA  | NEU  | OAS  | REF  | SSA  | USA  |
|---------|------|------|------|------|------|------|------|------|------|------|------|------|
| crops   | 0.32 | 0.86 | 0.73 | 0.84 | 0.83 | 0.57 | 0.66 | 0.72 | 0.70 | 0.85 | 0.63 | 0.60 |
| pasture | 0.96 | 1.00 | 1.06 | 0.96 | 0.99 | 1.03 | 1.01 | 1.07 | 1.00 | 1.17 | 1.02 | 0.98 |

### 66.2 Land use change in 1995 (reshuffling)

Table 2039: Land use change cropland 1995 (Mio. ha)

|               | CAZ   | CHA   | EUR    | IND   | JPN   | LAM    | MEA    | NEU   | OAS    | REF   | SSA   | USA   | GLO    |
|---------------|-------|-------|--------|-------|-------|--------|--------|-------|--------|-------|-------|-------|--------|
| expansion     | 6.10  | 1.54  | 9.78   | 3.62  | 0.00  | 11.50  | 0.02   | 0.00  | 12.19  | 0.00  | 0.00  | 1.90  | 46.64  |
| contraction   | -6.31 | -5.09 | -23.96 | -4.37 | -0.57 | -12.52 | -15.38 | -3.31 | -15.78 | -0.40 | -0.24 | -3.97 | -91.89 |
| net changes   | -0.22 | -3.56 | -14.18 | -0.75 | -0.57 | -1.02  | -15.36 | -3.31 | -3.60  | -0.40 | -0.24 | -2.07 | -45.25 |
| gross changes | 12.41 | 6.63  | 33.74  | 8.00  | 0.57  | 24.01  | 15.39  | 3.31  | 27.97  | 0.40  | 0.24  | 5.87  | 138.53 |

## 67 Model settings

### 67.1 Code settings

```
## ### GIT revision ###
## 9a5e1b3d6ec7db76820f503de06ebcda9e4dd6cc
##
## ### Modifications ###
##
## On branch magpie4paper
## Your branch is up-to-date with jpd/magpie4paper.
##
## Changes not staged for commit:
##
##   (use "git add <file>..." to update what will be committed)
##
##   (use "git checkout -- <file>..." to discard changes in working directory)
##
##
## modified:   main.gms
## modified:   modules/09_drivers/aug17/input.gms
##
## modified:   modules/12_interest_rate/glo_jan16/input.gms
##
## modified:   modules/12_interest_rate/reg_feb18/input.gms
```

```

##
## modified:   modules/15_food/anthropometrics_jan18/input.gms
##
## modified:   modules/21_trade/selfsuff_reduced/input.gms
##
## modified:   modules/42_water_demand/agr_sector_aug13/input.gms
##
## modified:   modules/42_water_demand/all_sectors_aug13/input.gms
##
## modified:   modules/50_nr_soil_budget/excoeff_aug16/input.gms
##
## modified:   modules/60_bioenergy/standard_flexreg_may17/input.gms
##
## modified:   modules/70_livestock/fbask_jan16/input.gms
##
## Untracked files:
##
##   (use "git add <file>..." to include in what will be committed)
##
##
## log_out-11157596.err
## log_out-11157597.err
##
##
## no changes added to commit (use "git add" and/or "git commit -a")
##
##
## ### MODULE SETUP ###
## $setglobal drivers aug17
## $setglobal land feb15
##
## $setglobal costs default
## $setglobal interest_rate reg_feb18
##
## $setglobal tc endo_jun18
## $setglobal yields dynamic_aug18
##
## $setglobal food anthropometrics_jan18
## $setglobal demand sector_may15
##
## $setglobal production flexreg_apr16
## $setglobal residues flexreg_apr16
##
## $setglobal processing coupleproducts_feb17
## $setglobal trade selfsuff_reduced
##
## $setglobal crop endo_jun13
## $setglobal past endo_jun13
##
## $setglobal forestry affore_vegc_dec16
## $setglobal urban static
##
## $setglobal natveg dynamic_may18
## $setglobal factor_costs mixed_feb17
##
## $setglobal landconversion global_static_aug18
## $setglobal transport gtap_nov12
##
## $setglobal area_equipped_for_irrigation endo_apr13

```

```

##
## $setglobal water_demand agr_sector_aug13
##
## $setglobal water_availability total_water_aug13
## $setglobal climate static
##
## $setglobal nr_soil_budget exoeff_aug16
## $setglobal nitrogen ipcc2006_sep16
##
## $setglobal carbon normal_dec17
## $setglobal methane ipcc2006_flexreg_apr16
##
## $setglobal phosphorus off
## $setglobal awms ipcc2006_aug16
##
## $setglobal ghg_policy price_sep16
## $setglobal maccs on_sep16
##
## $setglobal carbon_removal off_sep16
## $setglobal som off
##
## $setglobal bioenergy standard_flexreg_may17
## $setglobal material exo_flexreg_apr16
##
## $setglobal livestock fbask_jan16
## $setglobal disag_lvst foragebased_aug18
##
## $setglobal optimization nlp_apr17

```

## 67.2 Dataset

```

##
##
## Used data set: isimip_rcp-IPSL_CM5A_LR-rcp2p6-co2_rev34_c200_690d3718e151be1b450b394c1064b1c5.tgz
##
## md5sum: b88ddae2ac42d76603bd988337115c64
##
## Repository: /p/projects/landuse/data/input/archive
##
##
## Used data set: rev4.14_690d3718e151be1b450b394c1064b1c5_magpie.tgz
##
## md5sum: a049d482a1a9766c843b671a1b69b9f1
##
## Repository: /p/projects/rd3mod/inputdata/output
##
##
## Used data set: rev4.14_690d3718e151be1b450b394c1064b1c5_validation.tgz
##
## md5sum: 9d67c5c2f80429f00967e9a2e6d9c34f
##
## Repository: /p/projects/rd3mod/inputdata/output
##
##
## Used data set: additional_data_rev3.58.tgz
## md5sum: 75798c6d2670497a92ae2a3fb5a7e6ee
##
## Repository: /p/projects/landuse/data/input/archive
##

```

```

##
## Used data set: calibration_H12_c200_12Sep18.tgz
##
## md5sum: 0a7d88e902918eb6a5263faaf066cc5d
##
## Repository: /p/projects/landuse/data/input/calibration
##
## Low resolution: c200
##
## High resolution: 0.5
##
## Total number of cells: 200
##
## Number of cells per region:
##
##   CAZ  CHA  EUR  IND  JPN  LAM  MEA  NEU  OAS  REF  SSA  USA
##
##    28   24   10    7    3   53   17    8   22    7   11   10
##
##
## Regionscode: 690d3718e151be1b450b394c1064b1c5
##
## Regions data revision: 4.14
##
##
## lpj2magpie settings:
##
## * LPJmL data folder: /p/projects/landuse/data/input/lpj_input/isimip_rcp/IPSL_CM5A_LR/rcp2p6/co2
##
## * Additional input folder: /p/projects/landuse/data/input/other/rev34
## * Revision: 34
##
## * Call: lpj2magpie(input_folder = path(cfg$lpj_input_folder, gsub("-", "/", cfg$input)), input2_
##
##
## aggregation settings:
## * Input resolution: 0.5
## * Output resolution: c200
##
## * Input file: /p/projects/landuse/data/input/archive/isimip_rcp-IPSL_CM5A_LR-rcp2p6-co2_rev34_0.5.tg
##
## * Output file: /p/projects/landuse/data/input/archive/isimip_rcp-IPSL_CM5A_LR-rcp2p6-co2_rev34_c200_
##
## * Regionscode: 690d3718e151be1b450b394c1064b1c5
## * (clustering) n-repeat: 5
##
## * (clustering) n-redistribute: 0
##
## * Call: aggregation(input_file = lpj2magpie_file, regionmapping = paste0("../", cfg$regionmappin
##
##
##
## Last modification (input data): Tue Oct 16 16:46:11 2018

```

## 67.3 R Information

```
## R version 3.3.2 (2016-10-31)
## Platform: x86_64-pc-linux-gnu (64-bit)
## Running under: SUSE Linux Enterprise Server 12 SP2
##
## locale:
## [1] C
##
## attached base packages:
## [1] methods    grid      stats      graphics  grDevices  utils      datasets  base
##
## other attached packages:
## [1] luscale_2.13.1  lucode_2.136.0  magclass_4.87.9
##
## loaded via a namespace (and not attached):
## [1] spam_1.4-0      tidyselect_0.2.4  Rook_1.1-1      purrr_0.2.4
## [5] reshape2_1.4.3  colorspace_1.3-2  htmltools_0.3.6  viridisLite_0.3.0
## [9] XML_3.98-1.5    rlang_0.2.0       pillar_1.2.3     glue_1.2.0
## [13] RColorBrewer_1.1-2 bindrcpp_0.2.2    bindr_0.1.1      plyr_1.8.4
## [17] stringr_1.3.1    munsell_0.4.3     gtable_0.2.0     data.tree_0.7.4
## [21] visNetwork_2.0.4 htmlwidgets_1.2    httpuv_1.3.5     DiagrammeR_1.0.0
## [25] curl_2.3         Rcpp_0.12.18      xtable_1.8-2     readr_1.1.1
## [29] scales_0.5.0     jsonlite_1.5       abind_1.4-5      rgefx_0.15.3
## [33] mime_0.5         gridExtra_2.2.1    brew_1.0-6       ggplot2_3.0.0
## [37] hms_0.4.2        digest_0.6.15      stringi_1.2.2    dplyr_0.7.6
## [41] shiny_1.0.5       influenceR_0.1.0   tools_3.3.2      magrittr_1.5
## [45] lazyeval_0.2.1    tibble_1.4.2       tidyr_0.8.1      pkgconfig_2.0.1
## [49] data.table_1.11.4 downloader_0.4     assertthat_0.2.0 rstudioapi_0.7
## [53] viridis_0.5.1     R6_2.2.2           igraph_1.2.1

## [1] "/p/projects/rd3mod/R/libraries/main"
## [2] "/p/system/packages/R/3.3.2/lib64/R/library"
```

|    |             |               |              |                   |
|----|-------------|---------------|--------------|-------------------|
| ## | BBmisc      | BH            | BatchJobs    | BiocInstaller     |
| ## | "1.11"      | "1.66.0-1"    | "1.6"        | "1.24.0"          |
| ## | CVST        | DBI           | DEoptimR     | DRR               |
| ## | "0.2-1"     | "1.0.0"       | "1.0-8"      | "0.0.3"           |
| ## | DT          | DiagrammeR    | EnvStats     | FNN               |
| ## | "0.4"       | "1.0.0"       | "2.3.0"      | "1.1"             |
| ## | FactoMineR  | Formula       | GGally       | Gmisc             |
| ## | "1.36"      | "1.2-3"       | "1.4.0"      | "1.4.1"           |
| ## | Hmisc       | IDPmisc       | ISOcodes     | Lahman            |
| ## | "4.0-2"     | "1.1.18"      | "2018.06.29" | "6.0-0"           |
| ## | LandMark    | LearnBayes    | Lmoments     | MASS              |
| ## | "1.1.0"     | "2.15.1"      | "1.2-3"      | "7.3-50"          |
| ## | NLP         | NMF           | PIKTools     | R.matlab          |
| ## | "0.1-10"    | "0.20.6"      | "1.1"        | "3.6.1"           |
| ## | R.methodsS3 | R.oo          | R.utils      | R6                |
| ## | "1.7.1"     | "1.21.0"      | "2.5.0"      | "2.2.2"           |
| ## | RANN        | RCurl         | RISmed       | RJSONIO           |
| ## | "2.5.1"     | "1.95-4.8"    | "2.1.7"      | "1.3-0"           |
| ## | RSQLite     | RSpectra      | RandomFields | RandomFieldsUtils |
| ## | "2.1.1"     | "0.13-1"      | "3.1.50"     | "0.3.25"          |
| ## | Rcpp        | RcppArmadillo | RcppOctave   | RcppParallel      |
| ## | "0.12.18"   | "0.7.700.0.0" | "0.18.1"     | "4.3.20"          |
| ## | RcppRoll    | Rook          | Rtsne        | Rttrf2pt1         |



|    |               |                |               |            |
|----|---------------|----------------|---------------|------------|
| ## | "0.2.2"       | "1.1-1"        | "0.13"        | "1.3.7"    |
| ## | SDMTools      | SPEI           | SQUAREM       | SnowballC  |
| ## | "1.1-221"     | "1.6"          | "2017.10-1"   | "0.5.1"    |
| ## | SpatialPack   | TH.data        | WDI           | XML        |
| ## | "0.3"         | "1.0-8"        | "2.5"         | "3.98-1.5" |
| ## | abind         | aqfig          | ar5data       | areaplot   |
| ## | "1.4-5"       | "0.8"          | "1.7.1"       | "1.2-0"    |
| ## | arm           | assertr        | assertthat    | automap    |
| ## | "1.9-3"       | "2.5"          | "0.2.0"       | "1.0-14"   |
| ## | backports     | bfast          | bibliometrix  | bibtex     |
| ## | "1.1.2"       | "1.5.7"        | "2.0.0"       | "0.4.2"    |
| ## | bindr         | bindrcpp       | bit64         | blob       |
| ## | "0.1.1"       | "0.2.2"        | "0.9-7"       | "1.1.1"    |
| ## | brew          | broom          | burdensharing | callr      |
| ## | "1.0-6"       | "0.4.2"        | "1.4.25"      | "1.0.0"    |
| ## | caret         | cellranger     | citation      | classInt   |
| ## | "6.0-80"      | "1.1.0"        | "0.2.1"       | "0.1-23"   |
| ## | cli           | clipr          | coda          | coin       |
| ## | "1.0.0"       | "0.4.0"        | "0.19-1"      | "1.2-2"    |
| ## | colorRamps    | commonmark     | compare       | corpcor    |
| ## | "2.3"         | "1.5"          | "0.2-6"       | "1.6.9"    |
| ## | corrplot      | countrycode    | covr          | cowplot    |
| ## | "0.84"        | "1.00.0"       | "3.1.0"       | "0.9.2"    |
| ## | cowsay        | crayon         | crosstalk     | curl       |
| ## | "0.6.0"       | "1.3.4"        | "1.0.0"       | "2.3"      |
| ## | d3Network     | data.table     | data.tree     | dbplyr     |
| ## | "0.5.2.1"     | "1.11.4"       | "0.7.4"       | "1.2.1"    |
| ## | ddalpha       | deldir         | demystas      | dendextend |
| ## | "1.3.3"       | "0.1-15"       | "1.3.5"       | "1.5.2"    |
| ## | desc          | devtools       | digest        | dimRed     |
| ## | "1.2.0"       | "1.13.3"       | "0.6.15"      | "0.1.0"    |
| ## | diptest       | doMC           | doMPI         | doSNOW     |
| ## | "0.75-7"      | "1.3.5"        | "0.2.2"       | "1.0.16"   |
| ## | dotCall64     | downloader     | dplyr         | dtplyr     |
| ## | "0.9-5.2"     | "0.4"          | "0.7.6"       | "0.0.2"    |
| ## | dummies       | e1071          | easyNCDF      | ellipse    |
| ## | "1.5.6"       | "1.6-8"        | "0.0.4"       | "0.4.1"    |
| ## | estimability  | evaluate       | expm          | extrafont  |
| ## | "1.3"         | "0.10.1"       | "0.999-2"     | "0.17"     |
| ## | extrafontdb   | factoextra     | fail          | faodata    |
| ## | "1.0"         | "1.0.4"        | "1.3"         | "1.09"     |
| ## | fdrtool       | fields         | fitdistrplus  | flashClust |
| ## | "1.2.15"      | "8.10"         | "1.0-9"       | "1.01-2"   |
| ## | flexmix       | forcats        | forecast      | forestplot |
| ## | "2.3-14"      | "0.2.0"        | "8.0"         | "1.7.2"    |
| ## | formatR       | fortunes       | fpc           | fracdiff   |
| ## | "1.5"         | "1.5-4"        | "2.1-10"      | "1.4-2"    |
| ## | futile.logger | futile.options | gclus         | gdata      |
| ## | "1.4.3"       | "1.0.1"        | "1.3.1"       | "2.18.0"   |
| ## | gdistance     | gdx            | gdxrrw        | geoR       |
| ## | "1.2-2"       | "1.49.0"       | "1.0.2"       | "1.7-5.2"  |
| ## | geodata       | geometry       | geosphere     | ggforce    |
| ## | "1.56"        | "0.3-6"        | "1.5-7"       | "0.1.3"    |
| ## | ggm           | ggplot2        | ggpubr        | ggraph     |
| ## | "2.3"         | "3.0.0"        | "0.1.4"       | "1.0.2"    |
| ## | ggrepel       | ggsci          | ggsignif      | git2r      |
| ## | "0.8.0"       | "2.9"          | "0.4.0"       | "0.21.0"   |
| ## | givemeall     | glasso         | glodato       | glue       |
| ## | "0.02"        | "1.8"          | "1.12"        | "1.2.0"    |
| ## | gmodels       | gmp            | goftest       | gower      |

|    |              |              |            |                |
|----|--------------|--------------|------------|----------------|
| ## | "2.16.2"     | "0.5-13.1"   | "1.1-1"    | "0.1.2"        |
| ## | goxygen      | gplots       | gridBase   | gstat          |
| ## | "0.21.2"     | "3.0.1"      | "0.4-7"    | "1.1-5"        |
| ## | gsx          | guidr        | gvlma      | haven          |
| ## | "1.0-5"      | "0.0.5.0000" | "1.0.0.2"  | "1.1.0"        |
| ## | hms          | htmlTable    | htmltools  | htmlwidgets    |
| ## | "0.4.2"      | "1.12"       | "0.3.6"    | "1.2"          |
| ## | httpuv       | httr         | huge       | hydroGOF       |
| ## | "1.3.5"      | "1.3.1"      | "1.2.7"    | "0.3-10"       |
| ## | hydroTSM     | iamc         | igraph     | influenceR     |
| ## | "0.5-1"      | "0.24.0"     | "1.2.1"    | "0.1.0"        |
| ## | intervals    | inum         | ipred      | irlba          |
| ## | "0.15.1"     | "1.0-0"      | "0.9-6"    | "2.3.2"        |
| ## | jpeg         | jsonlite     | kernlab    | knitr          |
| ## | "0.1-8"      | "1.5"        | "0.9-26"   | "1.20"         |
| ## | ks           | lambda.r     | later      | lattice        |
| ## | "1.11.2"     | "1.1.9"      | "0.7.2"    | "0.20-35"      |
| ## | lava         | lavaan       | lazyeval   | leaflet        |
| ## | "1.6.1"      | "0.6-1"      | "0.2.1"    | "1.1.0"        |
| ## | leaps        | libcoin      | limes      | lme4           |
| ## | "3.0"        | "1.0-1"      | "0.3.60"   | "1.1-17"       |
| ## | lmomco       | lmtest       | lpSolve    | lpjclass       |
| ## | "2.2.7"      | "0.9-36"     | "5.6.13"   | "1.13"         |
| ## | lsmeans      | lubase       | lubridate  | lucode         |
| ## | "2.25-5"     | "1.06"       | "1.7.1"    | "2.136.0"      |
| ## | ludata       | luplayground | luplot     | luscale        |
| ## | "1.43.3"     | "1.05"       | "3.49.0"   | "2.13.1"       |
| ## | lusweave     | mFilter      | madrat     | magclass       |
| ## | "1.45.0"     | "0.1-3"      | "1.52.0"   | "4.87.9"       |
| ## | magic        | magpie       | magpie4    | magpieflexreg  |
| ## | "1.5-8"      | "0.2266.1"   | "1.26.0"   | "0.0036"       |
| ## | magpiesets   | magrittr     | mapdata    | markdown       |
| ## | "0.33.3"     | "1.5"        | "2.3.0"    | "0.8"          |
| ## | matlab       | matrixcalc   | mclust     | memoise        |
| ## | "1.0.2"      | "1.0-3"      | "5.3"      | "1.0.0"        |
| ## | mgcv         | mi           | mice       | microbenchmark |
| ## | "1.8-23"     | "1.0"        | "2.30"     | "1.4-4"        |
| ## | mip          | misc3d       | mlapi      | mnormt         |
| ## | "0.108.0"    | "0.8-4"      | "0.1.0"    | "1.5-5"        |
| ## | modelr       | modeltools   | moinput    | mrfood         |
| ## | "0.1.1"      | "0.2-21"     | "9.137.0"  | "0.7.3"        |
| ## | mrregression | mrvalidation | multcomp   | multicool      |
| ## | "3.11.0"     | "1.31.0"     | "1.4-8"    | "0.1-10"       |
| ## | mvtnorm      | ncdf4        | network    | nitrogen       |
| ## | "1.0-7"      | "1.15"       | "1.13.0"   | "1.0.3"        |
| ## | nleqslv      | nnls         | nonparaeff | nortest        |
| ## | "3.3.2"      | "1.4"        | "0.5-8"    | "1.0-4"        |
| ## | numDeriv     | nycflights13 | oce        | openssl        |
| ## | "2016.8-1"   | "0.2.2"      | "0.9-23"   | "0.9.6"        |
| ## | openxlsx     | osmar        | pROC       | pan            |
| ## | "4.0.0"      | "1.1-7"      | "1.12.1"   | "1.4"          |
| ## | pander       | party        | partykit   | pastecs        |
| ## | "0.6.0"      | "1.2-4"      | "1.2-0"    | "1.3-18"       |
| ## | pbapply      | pbivnorm     | piam       | pikcluster     |
| ## | "1.3-4"      | "0.6.0"      | "0.8.2"    | "0.04"         |
| ## | pillar       | pkgconfig    | pkgmaker   | plogr          |
| ## | "1.2.3"      | "2.0.1"      | "0.22"     | "0.2.0"        |
| ## | plot3D       | plotly       | plotrix    | png            |
| ## | "1.1"        | "4.5.6"      | "3.6-4"    | "0.1-7"        |
| ## | polspline    | polyclip     | prabclus   | prettyunits    |

|    |                 |               |                |                       |
|----|-----------------|---------------|----------------|-----------------------|
| ## | "1.1.12"        | "1.6-1"       | "2.2-6"        | "1.0.2"               |
| ## | processx        | prodlim       | profvis        | progress              |
| ## | "3.1.0"         | "2018.04.18"  | "0.3.3"        | "1.1.2"               |
| ## | proto           | pse           | psych          | purrr                 |
| ## | "1.0.0"         | "0.4.7"       | "1.6.12"       | "0.2.4"               |
| ## | pwt             | qgraph        | quadprog       | qualV                 |
| ## | "7.1-1"         | "1.4.2"       | "1.5-5"        | "0.3-2"               |
| ## | quanteda        | quitte        | randomForest   | randomForestExplainer |
| ## | "1.3.4"         | "0.3072.0"    | "4.6-14"       | "0.9"                 |
| ## | raster          | rasterVis     | readr          | readstata13           |
| ## | "2.5-8"         | "0.41"        | "1.1.1"        | "0.9.0"               |
| ## | readxl          | recipes       | registry       | rematch               |
| ## | "1.0.0"         | "0.1.2"       | "0.3"          | "1.0.1"               |
| ## | remind          | remulator     | reprex         | reshape               |
| ## | "36.55.0"       | "1.15.0"      | "0.1.1"        | "0.8.7"               |
| ## | reshape2        | reticulate    | rfPermute      | rgdal                 |
| ## | "1.4.3"         | "1.10"        | "2.1.5"        | "1.2-5"               |
| ## | rgenoud         | rgeos         | rgexf          | rhdf5                 |
| ## | "5.7-12.4"      | "0.3-17"      | "0.15.3"       | "2.18.0"              |
| ## | rjson           | rlang         | rmarkdown      | rms                   |
| ## | "0.2.15"        | "0.2.0"       | "1.9"          | "5.1-0"               |
| ## | rmsfact         | rngtools      | robustbase     | rootSolve             |
| ## | "0.0.3"         | "1.2.4"       | "0.92-7"       | "1.7"                 |
| ## | roxygen2        | rpart         | rpart.plot     | rprojroot             |
| ## | "6.0.1"         | "4.1-13"      | "2.1.2"        | "1.3-2"               |
| ## | rscopus         | rsm           | rstudioapi     | rvest                 |
| ## | "0.5.11"        | "2.8"         | "0.7"          | "0.3.2"               |
| ## | rworldmap       | rworldxtra    | sandwich       | satellite             |
| ## | "1.3-6"         | "1.01"        | "2.4-0"        | "0.2.0"               |
| ## | scales          | scatterplot3d | selectr        | sem                   |
| ## | "0.5.0"         | "0.3-38"      | "0.3-1"        | "3.1-8"               |
| ## | sendmailR       | sensitivity   | sfsmisc        | shiny                 |
| ## | "1.2-1"         | "1.15.0"      | "1.1-2"        | "1.0.5"               |
| ## | shinycssloaders | shinyresults  | shinythemes    | slam                  |
| ## | "0.2.0"         | "0.16.0"      | "1.1.1"        | "0.1-40"              |
| ## | sna             | snow          | soiltexture    | sourcetools           |
| ## | "2.4"           | "0.4-2"       | "1.4.1"        | "0.1.5"               |
| ## | spData          | spacetime     | spacyr         | spam                  |
| ## | "0.2.8.3"       | "1.2-0"       | "0.9.91"       | "1.4-0"               |
| ## | sparsepp        | spatstat      | spatstat.data  | spatstat.utils        |
| ## | "0.2.0"         | "1.55-1"      | "1.2-0"        | "1.8-0"               |
| ## | spdep           | splanCS       | statnet.common | stopwords             |
| ## | "0.6-11"        | "2.01-40"     | "3.3.0"        | "0.9.0"               |
| ## | stringdist      | stringi       | stringr        | strucchange           |
| ## | "0.9.4.4"       | "1.2.2"       | "1.3.1"        | "1.5-1"               |
| ## | swfscMisc       | tensor        | testthat       | text2vec              |
| ## | "1.2"           | "1.5"         | "2.0.0"        | "0.4.0"               |
| ## | tibble          | tidyr         | tidyselect     | tidyverse             |
| ## | "1.4.2"         | "0.8.1"       | "0.2.4"        | "1.2.1"               |
| ## | tiff            | timeDate      | tinytex        | tm                    |
| ## | "0.1-5"         | "3012.100"    | "0.5"          | "0.7-1"               |
| ## | trafficlight    | trefoil       | trimcluster    | tseries               |
| ## | "1.11.1"        | "0.01"        | "0.1-2"        | "0.10-38"             |
| ## | tweenr          | txtplot       | udunits2       | units                 |
| ## | "0.1.5"         | "1.0-3"       | "0.13"         | "0.6-1"               |
| ## | urca            | uroot         | utf8           | validation            |
| ## | "1.3-0"         | "2.0-9"       | "1.1.4"        | "1.195"               |
| ## | vcd             | viridis       | viridisLite    | visNetwork            |
| ## | "1.4-3"         | "0.5.1"       | "0.3.0"        | "2.0.4"               |
| ## | webshot         | weights       | whisker        | withr                 |

|    |               |              |              |               |
|----|---------------|--------------|--------------|---------------|
| ## | "0.4.0"       | "0.85"       | "0.3-2"      | "2.1.2"       |
| ## | xml2          | xtable       | xts          | yaImpute      |
| ## | "1.1.1"       | "1.8-2"      | "0.9-7"      | "1.0-29"      |
| ## | yaml          | zip          | zlibbioc     | zoo           |
| ## | "2.1.19"      | "1.0.0"      | "1.20.0"     | "1.8-1"       |
| ## | BH            | Formula      | KernSmooth   | MASS          |
| ## | "1.62.0-1"    | "1.2-1"      | "2.23-15"    | "7.3-45"      |
| ## | Matrix        | MatrixModels | ModelMetrics | R6            |
| ## | "1.2-8"       | "0.4-1"      | "1.1.0"      | "2.2.0"       |
| ## | RColorBrewer  | Rcpp         | RcppEigen    | Rmpi          |
| ## | "1.1-2"       | "0.12.10"    | "0.3.2.9.1"  | "0.6-6"       |
| ## | SparseM       | TH.data      | abind        | acepack       |
| ## | "1.76"        | "1.0-8"      | "1.4-5"      | "1.4.1"       |
| ## | assertthat    | backports    | base         | base64enc     |
| ## | "0.1"         | "1.0.5"      | "3.3.2"      | "0.1-3"       |
| ## | bdsmatrix     | bit          | bitops       | boot          |
| ## | "1.3-2"       | "1.1-12"     | "1.0-6"      | "1.3-18"      |
| ## | caTools       | car          | cffdrs       | checkmate     |
| ## | "1.17.1"      | "2.1-4"      | "1.7.5"      | "1.8.2"       |
| ## | chron         | class        | cluster      | codetools     |
| ## | "2.3-50"      | "7.3-14"     | "2.0.6"      | "0.2-15"      |
| ## | colorspace    | compiler     | crayon       | data.table    |
| ## | "1.3-2"       | "3.3.2"      | "1.3.2"      | "1.10.4"      |
| ## | datasets      | dichromat    | digest       | doMPI         |
| ## | "3.3.2"       | "2.0-0"      | "0.6.12"     | "0.2.1"       |
| ## | doParallel    | evaluate     | fastmatch    | foreach       |
| ## | "1.0.10"      | "0.10"       | "1.1-0"      | "1.4.3"       |
| ## | foreign       | fwi.fbp      | gdtools      | ggplot2movies |
| ## | "0.8-67"      | "1.7"        | "0.1.4"      | "0.0.1"       |
| ## | grDevices     | graphics     | grid         | gridExtra     |
| ## | "3.3.2"       | "3.3.2"      | "3.3.2"      | "2.2.1"       |
| ## | gtable        | gtools       | hexbin       | highr         |
| ## | "0.2.0"       | "3.5.0"      | "1.27.1"     | "0.6"         |
| ## | htmlTable     | htmltools    | htmlwidgets  | iterators     |
| ## | "1.9"         | "0.3.5"      | "0.8"        | "1.0.8"       |
| ## | jsonlite      | knitr        | labeling     | lattice       |
| ## | "1.3"         | "1.15.1"     | "0.3"        | "0.20-35"     |
| ## | latticeExtra  | lazyeval     | lme4         | magrittr      |
| ## | "0.6-28"      | "0.2.0"      | "1.1-12"     | "1.5"         |
| ## | mapproj       | maps         | maptools     | markdown      |
| ## | "1.2-4"       | "3.1.1"      | "0.9-2"      | "0.7.7"       |
| ## | methods       | mgcv         | mime         | minqa         |
| ## | "3.3.2"       | "1.8-17"     | "0.5"        | "1.2.4"       |
| ## | mlbench       | mmap         | multcomp     | munsell       |
| ## | "2.1-1"       | "0.6-12"     | "1.4-6"      | "0.4.3"       |
| ## | mvtnorm       | ncdf4        | nlme         | nloptr        |
| ## | "1.0-6"       | "1.15"       | "3.1-131"    | "1.0.4"       |
| ## | nnet          | parallel     | pbkrtest     | plyr          |
| ## | "7.3-12"      | "3.3.2"      | "0.4-7"      | "1.8.4"       |
| ## | praise        | quantreg     | raster       | reshape2      |
| ## | "1.0.0"       | "5.29"       | "2.5-8"      | "1.4.2"       |
| ## | rex           | rmarkdown    | rpart        | rprojroot     |
| ## | "1.1.1"       | "1.4"        | "4.1-10"     | "1.2"         |
| ## | sandwich      | scales       | sp           | spatial       |
| ## | "2.3-4"       | "0.4.1"      | "1.2-4"      | "7.3-11"      |
| ## | spatial.tools | splines      | stats        | stats4        |
| ## | "1.4.8"       | "3.3.2"      | "3.3.2"      | "3.3.2"       |
| ## | stringi       | stringr      | survival     | svglite       |
| ## | "1.1.3"       | "1.2.0"      | "2.41-2"     | "1.2.0"       |
| ## | tcltk         | testthat     | tibble       | tools         |

|    |         |         |          |          |
|----|---------|---------|----------|----------|
| ## | "3.3.2" | "1.0.2" | "1.3.0"  | "3.3.2"  |
| ## | utils   | withr   | yaml     | zoo      |
| ## | "3.3.2" | "1.0.2" | "2.1.14" | "1.7-14" |

**start\_functions**

```
## R version 3.3.2 (2016-10-31)
## Platform: x86_64-pc-linux-gnu (64-bit)
## Running under: SUSE Linux Enterprise Server 12 SP2
##
## locale:
## [1] C
##
## attached base packages:
## [1] grid      methods  stats      graphics  grDevices  utils      datasets  base
##
## other attached packages:
## [1] magpie4_1.26.0  gdx_1.49.0      gdxrrw_1.0.2    lrcode_2.136.0  magclass_4.87.9
##
## loaded via a namespace (and not attached):
## [1] viridis_0.5.1      httr_1.3.1        maps_3.1.1        tidyr_0.8.1
## [5] jsonlite_1.5       viridisLite_0.3.0  splines_3.3.2     Formula_1.2-3
## [9] shiny_1.0.5        assertthat_0.2.0   sp_1.2-4          rworldmap_1.3-6
## [13] latticeExtra_0.6-28  lusweave_1.45.0    nonparaeff_0.5-8  qualV_0.3-2
## [17] pillar_1.2.3       backports_1.1.2    lattice_0.20-35   downloader_0.4
## [21] glue_1.2.0         luscale_2.13.1     digest_0.6.15     RColorBrewer_1.1-2
## [25] checkmate_1.8.2     colorspace_1.3-2   htmltools_0.3.6   httpuv_1.3.5
## [29] Matrix_1.2-8        plyr_1.8.4         XML_3.98-1.5      pkgconfig_2.0.1
## [33] DiagrammeR_1.0.0    trafficlight_1.11.1  purrr_0.2.4       xtable_1.8-2
## [37] scales_0.5.0        brew_1.0-6         htmlTable_1.12    tibble_1.4.2
## [41] ggplot2_3.0.0       influenceR_0.1.0    nnet_7.3-12       lazyeval_0.2.1
## [45] rgexf_0.15.3        survival_2.41-2     magrittr_1.5       mime_0.5
## [49] maptools_0.9-2      data.tree_0.7.4     xml2_1.1.1        foreign_0.8-67
## [53] mip_0.108.0         Rook_1.1-1         tools_3.3.2       data.table_1.11.4
## [57] hms_0.4.2           stringr_1.3.1       plotly_4.5.6       munsell_0.4.3
## [61] cluster_2.0.6        bindrcpp_0.2.2      luplot_3.49.0      rlang_0.2.0
## [65] quitte_0.3072.0      rstudioapi_0.7      visNetwork_2.0.4   htmlwidgets_1.2
## [69] spam_1.4-0           igraph_1.2.1        base64enc_0.1-3    gtable_0.2.0
## [73] reshape2_1.4.3       R6_2.2.2            gridExtra_2.2.1    knitr_1.20
## [77] dplyr_0.7.6          magpiesets_0.33.3    bindr_0.1.1        Hmisc_4.0-2
## [81] readr_1.1.1          KernSmooth_2.23-15  stringi_1.2.2      Rcpp_0.12.18
## [85] fields_8.10          rpart_4.1-13        acepack_1.4.1      tidyselect_0.2.4
```

```
## [1] "/p/projects/rd3mod/R/libraries/main"
## [2] "/p/system/packages/R/3.3.2/lib64/R/library"
```

|    |            |            |           |               |
|----|------------|------------|-----------|---------------|
| ## | BBmisc     | BH         | BatchJobs | BiocInstaller |
| ## | "1.11"     | "1.66.0-1" | "1.6"     | "1.24.0"      |
| ## | CVST       | DBI        | DEoptimR  | DRR           |
| ## | "0.2-1"    | "1.0.0"    | "1.0-8"   | "0.0.3"       |
| ## | DT         | DiagrammeR | EnvStats  | FNN           |
| ## | "0.4"      | "1.0.0"    | "2.3.0"   | "1.1"         |
| ## | FactoMineR | Formula    | GGally    | Gmisc         |
| ## | "1.36"     | "1.2-3"    | "1.4.0"   | "1.4.1"       |

|    |              |               |               |                   |
|----|--------------|---------------|---------------|-------------------|
| ## | Hmisc        | IDPmisc       | ISOcodes      | Lahman            |
| ## | "4.0-2"      | "1.1.18"      | "2018.06.29"  | "6.0-0"           |
| ## | LandMark     | LearnBayes    | Lmoments      | MASS              |
| ## | "1.1.0"      | "2.15.1"      | "1.2-3"       | "7.3-50"          |
| ## | NLP          | NMF           | PIKTools      | R.matlab          |
| ## | "0.1-10"     | "0.20.6"      | "1.1"         | "3.6.1"           |
| ## | R.methodsS3  | R.oo          | R.utils       | R6                |
| ## | "1.7.1"      | "1.21.0"      | "2.5.0"       | "2.2.2"           |
| ## | RANN         | RCurl         | RISmed        | RJSONIO           |
| ## | "2.5.1"      | "1.95-4.8"    | "2.1.7"       | "1.3-0"           |
| ## | RSQLite      | RSpectra      | RandomFields  | RandomFieldsUtils |
| ## | "2.1.1"      | "0.13-1"      | "3.1.50"      | "0.3.25"          |
| ## | Rcpp         | RcppArmadillo | RcppOctave    | RcppParallel      |
| ## | "0.12.18"    | "0.7.700.0.0" | "0.18.1"      | "4.3.20"          |
| ## | RcppRoll     | Rook          | Rtsne         | Rttf2pt1          |
| ## | "0.2.2"      | "1.1-1"       | "0.13"        | "1.3.7"           |
| ## | SDMTools     | SPEI          | SQUAREM       | SnowballC         |
| ## | "1.1-221"    | "1.6"         | "2017.10-1"   | "0.5.1"           |
| ## | SpatialPack  | TH.data       | WDI           | XML               |
| ## | "0.3"        | "1.0-8"       | "2.5"         | "3.98-1.5"        |
| ## | abind        | aqfig         | ar5data       | areaplot          |
| ## | "1.4-5"      | "0.8"         | "1.7.1"       | "1.2-0"           |
| ## | arm          | assertr       | assertthat    | automap           |
| ## | "1.9-3"      | "2.5"         | "0.2.0"       | "1.0-14"          |
| ## | backports    | bfast         | bibliometrix  | bibtex            |
| ## | "1.1.2"      | "1.5.7"       | "2.0.0"       | "0.4.2"           |
| ## | bindr        | bindrcpp      | bit64         | blob              |
| ## | "0.1.1"      | "0.2.2"       | "0.9-7"       | "1.1.1"           |
| ## | brew         | broom         | burdensharing | callr             |
| ## | "1.0-6"      | "0.4.2"       | "1.4.25"      | "1.0.0"           |
| ## | caret        | cellranger    | citation      | classInt          |
| ## | "6.0-80"     | "1.1.0"       | "0.2.1"       | "0.1-23"          |
| ## | cli          | clipr         | coda          | coin              |
| ## | "1.0.0"      | "0.4.0"       | "0.19-1"      | "1.2-2"           |
| ## | colorRamps   | commonmark    | compare       | corpcor           |
| ## | "2.3"        | "1.5"         | "0.2-6"       | "1.6.9"           |
| ## | corrplot     | countrycode   | covr          | cowplot           |
| ## | "0.84"       | "1.00.0"      | "3.1.0"       | "0.9.2"           |
| ## | cowsay       | crayon        | crosstalk     | curl              |
| ## | "0.6.0"      | "1.3.4"       | "1.0.0"       | "2.3"             |
| ## | d3Network    | data.table    | data.tree     | dbplyr            |
| ## | "0.5.2.1"    | "1.11.4"      | "0.7.4"       | "1.2.1"           |
| ## | ddalpha      | deldir        | demystas      | dendextend        |
| ## | "1.3.3"      | "0.1-15"      | "1.3.5"       | "1.5.2"           |
| ## | desc         | devtools      | digest        | dimRed            |
| ## | "1.2.0"      | "1.13.3"      | "0.6.15"      | "0.1.0"           |
| ## | diptest      | doMC          | doMPI         | doSNOW            |
| ## | "0.75-7"     | "1.3.5"       | "0.2.2"       | "1.0.16"          |
| ## | dotCall64    | downloader    | dplyr         | dtplyr            |
| ## | "0.9-5.2"    | "0.4"         | "0.7.6"       | "0.0.2"           |
| ## | dummies      | e1071         | easyNCDF      | ellipse           |
| ## | "1.5.6"      | "1.6-8"       | "0.0.4"       | "0.4.1"           |
| ## | estimability | evaluate      | expm          | extrafont         |
| ## | "1.3"        | "0.10.1"      | "0.999-2"     | "0.17"            |
| ## | extrafontdb  | factoextra    | fail          | faodata           |
| ## | "1.0"        | "1.0.4"       | "1.3"         | "1.09"            |
| ## | fdrtool      | fields        | fitdistrplus  | flashClust        |
| ## | "1.2.15"     | "8.10"        | "1.0-9"       | "1.01-2"          |
| ## | flexmix      | forcats       | forecast      | forestplot        |
| ## | "2.3-14"     | "0.2.0"       | "8.0"         | "1.7.2"           |

|    |               |                |           |                |
|----|---------------|----------------|-----------|----------------|
| ## | formatR       | fortunes       | fpc       | fracdiff       |
| ## | "1.5"         | "1.5-4"        | "2.1-10"  | "1.4-2"        |
| ## | futile.logger | futile.options | gclus     | gdata          |
| ## | "1.4.3"       | "1.0.1"        | "1.3.1"   | "2.18.0"       |
| ## | gdistance     | gdx            | gdxrrw    | geoR           |
| ## | "1.2-2"       | "1.49.0"       | "1.0.2"   | "1.7-5.2"      |
| ## | geodata       | geometry       | geosphere | ggforce        |
| ## | "1.56"        | "0.3-6"        | "1.5-7"   | "0.1.3"        |
| ## | ggm           | ggplot2        | ggpubr    | ggraph         |
| ## | "2.3"         | "3.0.0"        | "0.1.4"   | "1.0.2"        |
| ## | ggrepel       | ggsci          | ggsignif  | git2r          |
| ## | "0.8.0"       | "2.9"          | "0.4.0"   | "0.21.0"       |
| ## | givemeall     | glasso         | glodato   | glue           |
| ## | "0.02"        | "1.8"          | "1.12"    | "1.2.0"        |
| ## | gmodels       | gmp            | goftest   | gower          |
| ## | "2.16.2"      | "0.5-13.1"     | "1.1-1"   | "0.1.2"        |
| ## | goxygen       | gplots         | gridBase  | gstat          |
| ## | "0.21.2"      | "3.0.1"        | "0.4-7"   | "1.1-5"        |
| ## | gsw           | guidr          | gvlma     | haven          |
| ## | "1.0-5"       | "0.0.5.0000"   | "1.0.0.2" | "1.1.0"        |
| ## | hms           | htmlTable      | htmltools | htmlwidgets    |
| ## | "0.4.2"       | "1.12"         | "0.3.6"   | "1.2"          |
| ## | httpuv        | httr           | huge      | hydroGOF       |
| ## | "1.3.5"       | "1.3.1"        | "1.2.7"   | "0.3-10"       |
| ## | hydroTSM      | iamc           | igraph    | influenceR     |
| ## | "0.5-1"       | "0.24.0"       | "1.2.1"   | "0.1.0"        |
| ## | intervals     | inum           | ipred     | irlba          |
| ## | "0.15.1"      | "1.0-0"        | "0.9-6"   | "2.3.2"        |
| ## | jpeg          | jsonlite       | kernlab   | knitr          |
| ## | "0.1-8"       | "1.5"          | "0.9-26"  | "1.20"         |
| ## | ks            | lambda.r       | later     | lattice        |
| ## | "1.11.2"      | "1.1.9"        | "0.7.2"   | "0.20-35"      |
| ## | lava          | lavaan         | lazyeval  | leaflet        |
| ## | "1.6.1"       | "0.6-1"        | "0.2.1"   | "1.1.0"        |
| ## | leaps         | libcoin        | limes     | lme4           |
| ## | "3.0"         | "1.0-1"        | "0.3.60"  | "1.1-17"       |
| ## | lmomco        | lmtest         | lpSolve   | lpjclass       |
| ## | "2.2.7"       | "0.9-36"       | "5.6.13"  | "1.13"         |
| ## | lsmeans       | lubase         | lubridate | lucode         |
| ## | "2.25-5"      | "1.06"         | "1.7.1"   | "2.136.0"      |
| ## | ludata        | luplayground   | luplot    | luscale        |
| ## | "1.43.3"      | "1.05"         | "3.49.0"  | "2.13.1"       |
| ## | lusweave      | mFilter        | madrat    | magclass       |
| ## | "1.45.0"      | "0.1-3"        | "1.52.0"  | "4.87.9"       |
| ## | magic         | magpie         | magpie4   | magpieflexreg  |
| ## | "1.5-8"       | "0.2266.1"     | "1.26.0"  | "0.0036"       |
| ## | magpiesets    | magrittr       | mapdata   | markdown       |
| ## | "0.33.3"      | "1.5"          | "2.3.0"   | "0.8"          |
| ## | matlab        | matrixcalc     | mclust    | memoise        |
| ## | "1.0.2"       | "1.0-3"        | "5.3"     | "1.0.0"        |
| ## | mgcv          | mi             | mice      | microbenchmark |
| ## | "1.8-23"      | "1.0"          | "2.30"    | "1.4-4"        |
| ## | mip           | misc3d         | mlapi     | mnormt         |
| ## | "0.108.0"     | "0.8-4"        | "0.1.0"   | "1.5-5"        |
| ## | modelr        | modeltools     | moinput   | mrfood         |
| ## | "0.1.1"       | "0.2-21"       | "9.137.0" | "0.7.3"        |
| ## | mrregression  | mrvalidation   | multcomp  | multicool      |
| ## | "3.11.0"      | "1.31.0"       | "1.4-8"   | "0.1-10"       |
| ## | mvtnorm       | ncdf4          | network   | nitrogen       |
| ## | "1.0-7"       | "1.15"         | "1.13.0"  | "1.0.3"        |

```

##      nleqslv          nnls          nonparaeff          noritest
##      "3.3.2"          "1.4"          "0.5-8"          "1.0-4"
##      numDeriv      nycflights13          oce          openssl
##      "2016.8-1"      "0.2.2"          "0.9-23"          "0.9.6"
##      openxlsx          osmar          pROC          pan
##      "4.0.0"          "1.1-7"          "1.12.1"          "1.4"
##      pander          party          partykit          pastecs
##      "0.6.0"          "1.2-4"          "1.2-0"          "1.3-18"
##      pbapply          pbivnorm          piam          pikcluster
##      "1.3-4"          "0.6.0"          "0.8.2"          "0.04"
##      pillar          pkgconfig          pkgmaker          plogr
##      "1.2.3"          "2.0.1"          "0.22"          "0.2.0"
##      plot3D          plotly          plotrix          png
##      "1.1"          "4.5.6"          "3.6-4"          "0.1-7"
##      polyspline          polyclip          prabclus          prettyunits
##      "1.1.12"          "1.6-1"          "2.2-6"          "1.0.2"
##      processx          prodlim          profvis          progress
##      "3.1.0"          "2018.04.18"          "0.3.3"          "1.1.2"
##      proto          pse          psych          purrr
##      "1.0.0"          "0.4.7"          "1.6.12"          "0.2.4"
##      pwt          qgraph          quadprog          qualV
##      "7.1-1"          "1.4.2"          "1.5-5"          "0.3-2"
##      quanteda          quitte          randomForest randomForestExplainer
##      "1.3.4"          "0.3072.0"          "4.6-14"          "0.9"
##      raster          rasterVis          readr          readstata13
##      "2.5-8"          "0.41"          "1.1.1"          "0.9.0"
##      readxl          recipes          registry          rematch
##      "1.0.0"          "0.1.2"          "0.3"          "1.0.1"
##      remind          remulator          reprex          reshape
##      "36.55.0"          "1.15.0"          "0.1.1"          "0.8.7"
##      reshape2          reticulate          rfPermute          rgdal
##      "1.4.3"          "1.10"          "2.1.5"          "1.2-5"
##      rgenoud          rgeos          rgexf          rhdf5
##      "5.7-12.4"          "0.3-17"          "0.15.3"          "2.18.0"
##      rjson          rlang          rmarkdown          rms
##      "0.2.15"          "0.2.0"          "1.9"          "5.1-0"
##      rmsfact          rngtools          robustbase          rootSolve
##      "0.0.3"          "1.2.4"          "0.92-7"          "1.7"
##      roxygen2          rpart          rpart.plot          rprojroot
##      "6.0.1"          "4.1-13"          "2.1.2"          "1.3-2"
##      rscopus          rsm          rstudioapi          rvest
##      "0.5.11"          "2.8"          "0.7"          "0.3.2"
##      rworldmap          rworldextra          sandwich          satellite
##      "1.3-6"          "1.01"          "2.4-0"          "0.2.0"
##      scales          scatterplot3d          selectr          sem
##      "0.5.0"          "0.3-38"          "0.3-1"          "3.1-8"
##      sendmailR          sensitivity          sfsmisc          shiny
##      "1.2-1"          "1.15.0"          "1.1-2"          "1.0.5"
##      shinycssloaders          shinyresults          shinythemes          slam
##      "0.2.0"          "0.16.0"          "1.1.1"          "0.1-40"
##      sna          snow          soiltexture          sourcetools
##      "2.4"          "0.4-2"          "1.4.1"          "0.1.5"
##      spData          spacetime          spacyr          spam
##      "0.2.8.3"          "1.2-0"          "0.9.91"          "1.4-0"
##      sparsepp          spatstat          spatstat.data          spatstat.utils
##      "0.2.0"          "1.55-1"          "1.2-0"          "1.8-0"
##      spdep          splancs          statnet.common          stopwords
##      "0.6-11"          "2.01-40"          "3.3.0"          "0.9.0"
##      stringdist          stringi          stringr          strucchange
##      "0.9.4.4"          "1.2.2"          "1.3.1"          "1.5-1"

```



|    |              |              |              |               |
|----|--------------|--------------|--------------|---------------|
| ## | swfscMisc    | tensor       | testthat     | text2vec      |
| ## | "1.2"        | "1.5"        | "2.0.0"      | "0.4.0"       |
| ## | tibble       | tidyr        | tidyselect   | tidyverse     |
| ## | "1.4.2"      | "0.8.1"      | "0.2.4"      | "1.2.1"       |
| ## | tiff         | timeDate     | tinytex      | tm            |
| ## | "0.1-5"      | "3012.100"   | "0.5"        | "0.7-1"       |
| ## | trafficlight | trefoil      | trimcluster  | tseries       |
| ## | "1.11.1"     | "0.01"       | "0.1-2"      | "0.10-38"     |
| ## | tweenr       | txtplot      | udunits2     | units         |
| ## | "0.1.5"      | "1.0-3"      | "0.13"       | "0.6-1"       |
| ## | urca         | uroot        | utf8         | validation    |
| ## | "1.3-0"      | "2.0-9"      | "1.1.4"      | "1.195"       |
| ## | vcd          | viridis      | viridisLite  | visNetwork    |
| ## | "1.4-3"      | "0.5.1"      | "0.3.0"      | "2.0.4"       |
| ## | webshot      | weights      | whisker      | withr         |
| ## | "0.4.0"      | "0.85"       | "0.3-2"      | "2.1.2"       |
| ## | xml2         | xtable       | xts          | yaImpute      |
| ## | "1.1.1"      | "1.8-2"      | "0.9-7"      | "1.0-29"      |
| ## | yaml         | zip          | zlibbioc     | zoo           |
| ## | "2.1.19"     | "1.0.0"      | "1.20.0"     | "1.8-1"       |
| ## | BH           | Formula      | KernSmooth   | MASS          |
| ## | "1.62.0-1"   | "1.2-1"      | "2.23-15"    | "7.3-45"      |
| ## | Matrix       | MatrixModels | ModelMetrics | R6            |
| ## | "1.2-8"      | "0.4-1"      | "1.1.0"      | "2.2.0"       |
| ## | RColorBrewer | Rcpp         | RcppEigen    | Rmpi          |
| ## | "1.1-2"      | "0.12.10"    | "0.3.2.9.1"  | "0.6-6"       |
| ## | SparseM      | TH.data      | abind        | acepack       |
| ## | "1.76"       | "1.0-8"      | "1.4-5"      | "1.4.1"       |
| ## | assertthat   | backports    | base         | base64enc     |
| ## | "0.1"        | "1.0.5"      | "3.3.2"      | "0.1-3"       |
| ## | bdsmatrix    | bit          | bitops       | boot          |
| ## | "1.3-2"      | "1.1-12"     | "1.0-6"      | "1.3-18"      |
| ## | caTools      | car          | cffdrs       | checkmate     |
| ## | "1.17.1"     | "2.1-4"      | "1.7.5"      | "1.8.2"       |
| ## | chron        | class        | cluster      | codetools     |
| ## | "2.3-50"     | "7.3-14"     | "2.0.6"      | "0.2-15"      |
| ## | colorspace   | compiler     | crayon       | data.table    |
| ## | "1.3-2"      | "3.3.2"      | "1.3.2"      | "1.10.4"      |
| ## | datasets     | dichromat    | digest       | doMPI         |
| ## | "3.3.2"      | "2.0-0"      | "0.6.12"     | "0.2.1"       |
| ## | doParallel   | evaluate     | fastmatch    | foreach       |
| ## | "1.0.10"     | "0.10"       | "1.1-0"      | "1.4.3"       |
| ## | foreign      | fwi.fbp      | gdtools      | ggplot2movies |
| ## | "0.8-67"     | "1.7"        | "0.1.4"      | "0.0.1"       |
| ## | grDevices    | graphics     | grid         | gridExtra     |
| ## | "3.3.2"      | "3.3.2"      | "3.3.2"      | "2.2.1"       |
| ## | gtable       | gtools       | hexbin       | highr         |
| ## | "0.2.0"      | "3.5.0"      | "1.27.1"     | "0.6"         |
| ## | htmlTable    | htmltools    | htmlwidgets  | iterators     |
| ## | "1.9"        | "0.3.5"      | "0.8"        | "1.0.8"       |
| ## | jsonlite     | knitr        | labeling     | lattice       |
| ## | "1.3"        | "1.15.1"     | "0.3"        | "0.20-35"     |
| ## | latticeExtra | lazyeval     | lme4         | magrittr      |
| ## | "0.6-28"     | "0.2.0"      | "1.1-12"     | "1.5"         |
| ## | mapproj      | maps         | maptools     | markdown      |
| ## | "1.2-4"      | "3.1.1"      | "0.9-2"      | "0.7.7"       |
| ## | methods      | mgcv         | mime         | minqa         |
| ## | "3.3.2"      | "1.8-17"     | "0.5"        | "1.2.4"       |
| ## | mlbench      | mmap         | multcomp     | munsell       |
| ## | "2.1-1"      | "0.6-12"     | "1.4-6"      | "0.4.3"       |

|    |               |           |           |           |
|----|---------------|-----------|-----------|-----------|
| ## | mvtnorm       | ncdf4     | nlme      | nloptr    |
| ## | "1.0-6"       | "1.15"    | "3.1-131" | "1.0.4"   |
| ## | nnet          | parallel  | pbkrtest  | plyr      |
| ## | "7.3-12"      | "3.3.2"   | "0.4-7"   | "1.8.4"   |
| ## | praise        | quantreg  | raster    | reshape2  |
| ## | "1.0.0"       | "5.29"    | "2.5-8"   | "1.4.2"   |
| ## | rex           | rmarkdown | rpart     | rprojroot |
| ## | "1.1.1"       | "1.4"     | "4.1-10"  | "1.2"     |
| ## | sandwich      | scales    | sp        | spatial   |
| ## | "2.3-4"       | "0.4.1"   | "1.2-4"   | "7.3-11"  |
| ## | spatial.tools | splines   | stats     | stats4    |
| ## | "1.4.8"       | "3.3.2"   | "3.3.2"   | "3.3.2"   |
| ## | stringi       | stringr   | survival  | svglite   |
| ## | "1.1.3"       | "1.2.0"   | "2.41-2"  | "1.2.0"   |
| ## | tcltk         | testthat  | tibble    | tools     |
| ## | "3.3.2"       | "1.0.2"   | "1.3.0"   | "3.3.2"   |
| ## | utils         | withr     | yaml      | zoo       |
| ## | "3.3.2"       | "1.0.2"   | "2.1.14"  | "1.7-14"  |

model\_run

## 68 Runtime information

```
## magpie.gms      : 0h 30m 35s
```
